# Supplementary material
Source: PubMed Central journal article supplement (PMC4446190)
Supplement: NIHMS665545-supplement-01.pdf [file NIHMS665545-supplement-01.pdf]

Supp Fig 1.

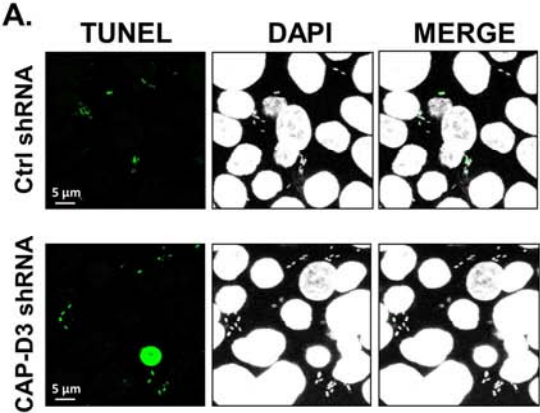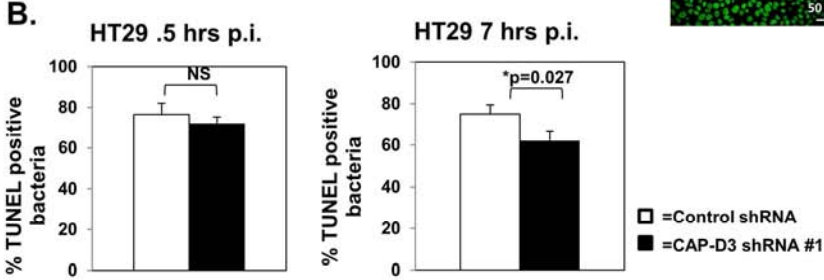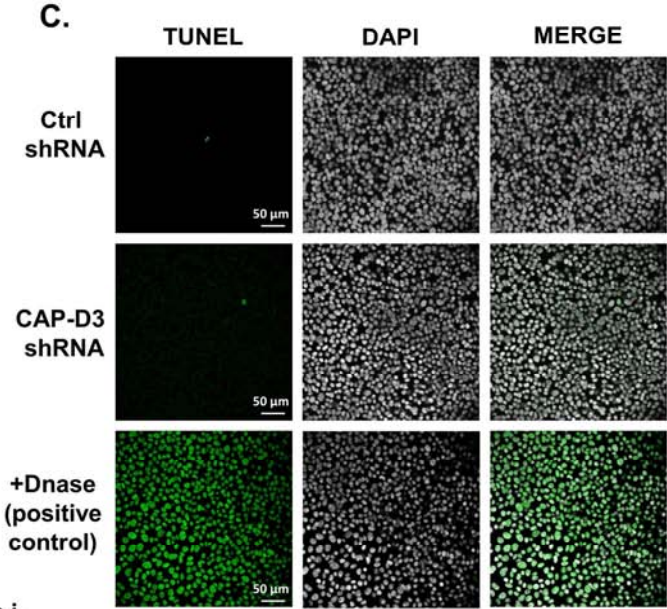

Supp Fig 2.

**A.** 0-0.5 hrs pi

| Gene   | Log Fold Change<br>Control shRNA | Log Fold Change<br>CAP-D3 shRNA |
|--------|----------------------------------|---------------------------------|
| EGR1   | 2.5009                           | 1.90937                         |
| FOS    | 2.08343                          | 1.36452                         |
| CXCL2  | 1.66624                          | 2.09502                         |
| CTGF   | 1.66399                          | 1.78975                         |
| EGR3   | 1.61502                          | 1.08075                         |
| JUNB   | 1.19796                          | 1.15471                         |
| TXNP   | 1.10235                          | 1.18333                         |
| ARRDC4 | 1.08908                          | 1.0538                          |
| IER2   | 1.04466                          | 0.816562                        |
| FOSB   | 0.986284                         | 0.916318                        |
| ITPRIP | 0.985241                         | 1.04217                         |
| DUSP2  | 0.85761                          | 0.858135                        |
| ASNS   | 0.850531                         | 1.20222                         |

**B.** 0.5-7 hrs pi

| Gene   | Log Fold Change<br>Control shRNA | Log Fold Change<br>CAP-D3 shRNA |
|--------|----------------------------------|---------------------------------|
| EGR1   | -2.25992                         | -1.82555                        |
| FOS    | -1.57959                         | -0.731901                       |
| CXCL2  | -1.78142                         | -2.02922                        |
| CTGF   | -3.29013                         | -3.30836                        |
| EGR3   | -0.349069                        | 0.0437428                       |
| JUNB   | -0.212554                        | -0.199953                       |
| TXNP   | -0.245706                        | -0.033916                       |
| ARRDC4 | 0.566189                         | 0.585689                        |
| IER2   | -0.412884                        | -0.322957                       |
| FOSB   | -0.612801                        | -0.538566                       |
| ITPRIP | -1.06642                         | -1.15099                        |
| DUSP2  | -0.302869                        | -0.344885                       |
| ASNS   | -1.70796                         | -2.16043                        |

**C.**

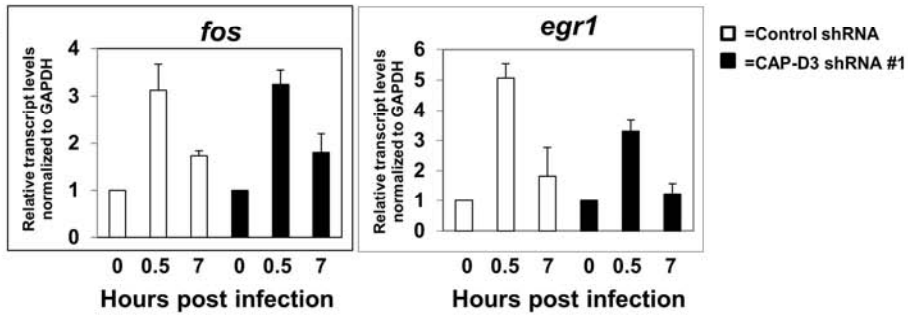

Supp Fig 3.

**A.**

| Category      | Term                                                                     | Benjamini   |
|---------------|--------------------------------------------------------------------------|-------------|
| GOTERM_MF_FAT | GO:0015175-neutral amino acid transmembrane transporter activity         | 3.20E-05    |
| GOTERM_MF_FAT | GO:0015171-amino acid transmembrane transporter activity                 | 0.001135244 |
| GOTERM_MF_FAT | GO:0005275-amine transmembrane transporter activity                      | 0.00186038  |
| GOTERM_MF_FAT | GO:0016876-ligase activity, forming aminoacyl-tRNA and related compounds | 0.008632781 |
| GOTERM_MF_FAT | GO:0016875-ligase activity, forming carbon-oxygen bonds                  | 0.008632781 |
| GOTERM_BP_FAT | GO:0006865-amino acid transport                                          | 0.010735462 |
| GOTERM_BP_FAT | GO:0015837-amine transport                                               | 0.015305194 |
| GOTERM_BP_FAT | GO:0043038-amino acid activation                                         | 0.019978293 |
| GOTERM_BP_FAT | GO:0006418-tRNA aminoacylation for protein translation                   | 0.019978293 |
| GOTERM_BP_FAT | GO:0043039-tRNA aminoacylation                                           | 0.019978293 |
| GOTERM_BP_FAT | GO:0015849-organic acid transport                                        | 0.024090739 |
| GOTERM_BP_FAT | GO:0046942-carboxylic acid transport                                     | 0.02811932  |
| GOTERM_MF_FAT | GO:0008483-transaminase activity                                         | 0.037515306 |
| GOTERM_CC_FAT | GO:0000786-nucleosome                                                    | 0.040208544 |
| GOTERM_BP_FAT | GO:0034728-nucleosome organization                                       | 0.046658528 |
| GOTERM_BP_FAT | GO:0031497-chromatin assembly                                            | 0.048088516 |
| GOTERM_BP_FAT | GO:0065004-protein-DNA complex assembly                                  | 0.048648079 |
| GOTERM_CC_FAT | GO:0032993-protein-DNA complex                                           | 0.049478584 |
| GOTERM_BP_FAT | GO:0006334-nucleosome assembly                                           | 0.04961637  |

**B. 0-0.5 hrs pi**

| Gene   | Log Fold Change Control shRNA | Log Fold Change CAP-D3 shRNA |
|--------|-------------------------------|------------------------------|
| SLC7A5 | 0.448212                      | 1.24271                      |
| SLC1A5 | 0.333181                      | 0.933635                     |
| SLC3A2 | 0.364393                      | 0.898739                     |
| SLC4A5 | 0.518368                      | 0.808481                     |

**C. 0.5-7 hrs pi**

| Gene   | Log Fold Change Control shRNA | Log Fold Change CAP-D3 shRNA |
|--------|-------------------------------|------------------------------|
| SLC7A5 | 0.0135855                     | -0.620134                    |
| SLC1A5 | -0.221535                     | -0.88444                     |
| SLC3A2 | -0.61404                      | -1.13978                     |
| SLC4A5 | -0.280255                     | -0.574911                    |

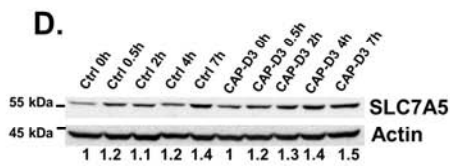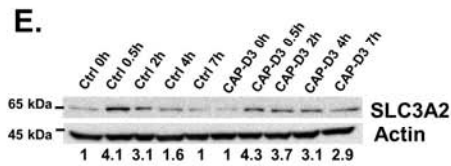

Supp Fig 4.

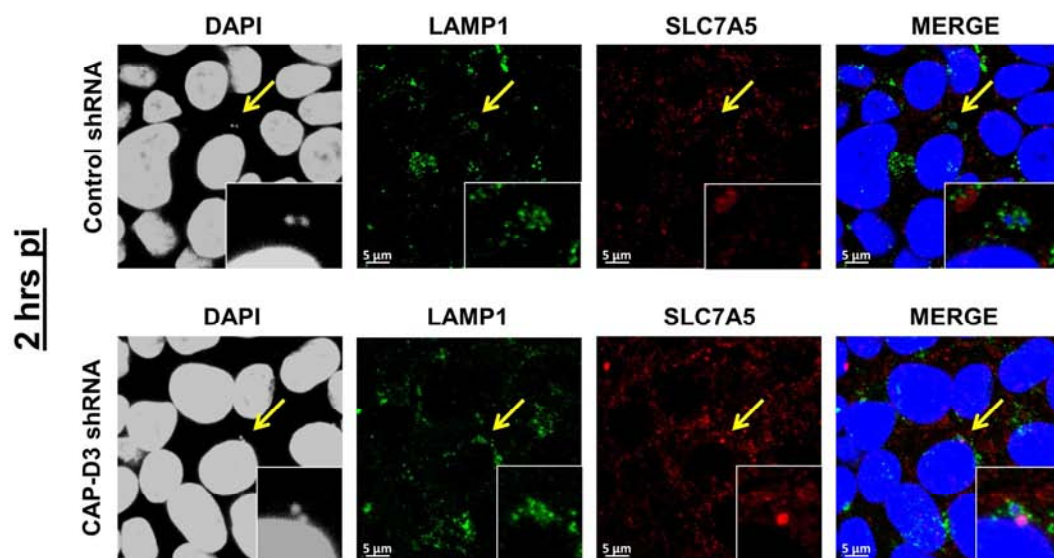



Supp Fig 5.

A.

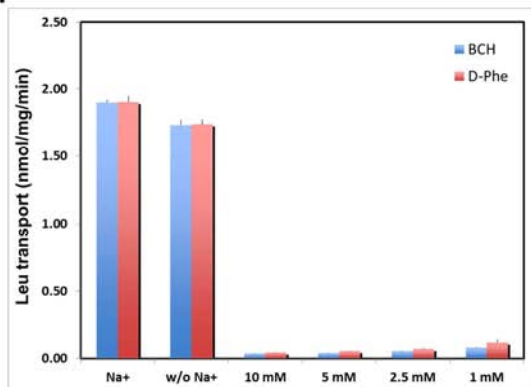

B.

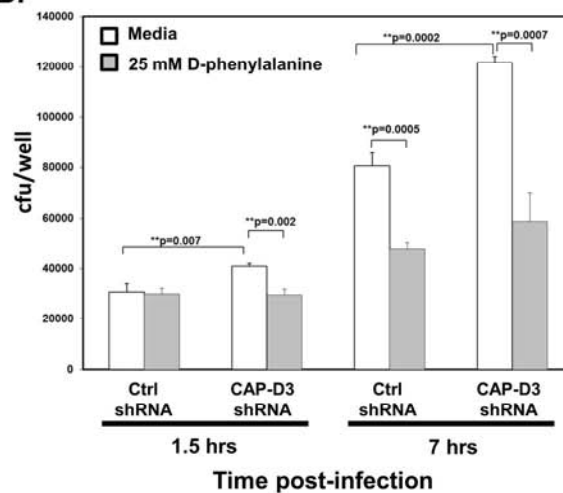

Supp Fig 6.

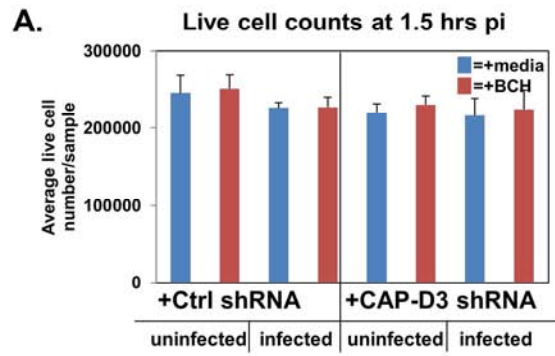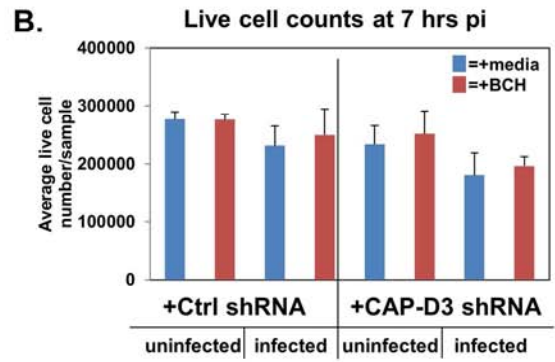

## Supplemental Materials and Methods

### Lentiviral transduction

Lentivirus transduction was performed in HT-29 and Caco-2 cells using custom viral particles produced with the pLKO-puro-IPTG-3xLacO vector (Sigma). Briefly, cells were plated to 80% confluency in a 12-well plate in 1mL of media/well and incubated at 37°C overnight. Growth medium was prepared with 8µg/ml of polybrene and added to each well the following day. Non-target (control)( pLKO-puro-IPTG-3xLacO Non-Target Control) or CAP-D3 shRNA (TRCN0000286630 (TRC1) or TRCN0000286632 (TRC2)) lentiviral particles (50µl, 1000U/µl) were added to each well, gently mixed and incubated for 8 hours. After incubation, the polybrene containing media was changed to normal growth media. Seventy-two hours after transduction, cells were puromycin selected to make stable lines. In the absence of the lactose analog, IPTG (isopropyl-β-D-thio-galactoside) (Sigma), the LacI repressor binds to LacO preventing expression of the shRNA. In the presence of IPTG, LacI changes conformation, releasing itself from the lacO modified human U6 promoter, and subsequently allows expression of the shRNA.

### TUNEL assay

Confluent, IPTG treated cells were grown and infected with *S. typhimurium* on coverslips in 6 well dishes. Epithelial cell and bacterial cell death was measured using the DeadEnd Fluorometric TUNEL System (Promega). Quantification of TUNEL assays was performed by dividing the number of TUNEL positive bacteria by the total number of bacteria in one frame and then averaging the percentages of 5 frames. Experiments were repeated three times.

### Characterization of isolated epithelial cells from resected colon tissues

Briefly, resected colon tissues were cut into strips and washed (gently stirred) in Hank's Balanced Salt Solution (HBSS) with 150mM DTT for 1 hour at room temperature (RT), and then washed multiple times in HBSS with 1 mM EDTA. Following the second wash, epithelial cells were pelleted, washed with PBS, and equally separated to isolate RNA and protein.

### AIEC LF82 infection assays

Cells were infected with early-log phase adherent-invasive *Escherichia coli* LF82 (gift of Arlette Darfeuille-Michaud, University of Clermont, France) at an MOI of 10. Cells were centrifuged for 10 minutes at 1000 rpm, followed by incubation at 37°C for a maximum of 3h. To assess viable intracellular bacteria, media containing gentamycin (50 µg/mL) was added to the cells for the last 30 minutes of the infection. Cells were then washed twice with PBS and lysed in 50µL

lysis buffer (PBS/0.1% Triton X-100) on ice for 10 minutes, diluted in LB and plated onto LB plates in duplicate. Plates were incubated overnight at 37°C to determine viable colony forming units (CFU). Experiments were performed at least three times with at least two replicates for each condition/timepoint included in every experiment.

### Processing of RNA-seq raw data files

Samples were evaluated for quality and trimmed of adapters and low-quality bases using Trim Galore! v.0.3.3 ([http://www.bioinformatics.babraham.ac.uk/projects/trim\\_galore/](http://www.bioinformatics.babraham.ac.uk/projects/trim_galore/)) with default settings to produce FastQC plots and trimmed read files. Trimmed reads were then aligned and quantified using TopHat (v.2.0.8) and Cufflinks (v2.2.0). Human genome (hg19) sequences and annotations were downloaded 14 May 2014 from the Illumina iGenome server ([ftp://igenome:G3nom3s4u@ussd-ftp.illumina.com/Homo\\_sapiens/UCSC/hg19/Homo\\_sapiens\\_UCSC\\_hg19.tar.gz](ftp://igenome:G3nom3s4u@ussd-ftp.illumina.com/Homo_sapiens/UCSC/hg19/Homo_sapiens_UCSC_hg19.tar.gz)). The Cufflinks work flow was followed using default settings but with Tophat set to "sensitive" mode (--b2-sensitive) with inner mate pair distance and standard deviation set to 100 and 30, respectively (-r 100 --mate-std-dev 30), based on library parameters. Cuffdiff was used to assess differential expression. An adjusted P-value < 0.05 and a fold change >1.75 was deemed significant<sup>1,2</sup>. Raw data files from RNA-sequencing experiments have been deposited under the NCBI GEO accession number GSE62520.

### qRT-PCR primer sequences used:

|                    |                         |
|--------------------|-------------------------|
| <i>hcap-d3</i> fwd | ATGCAGATGTGGCCGGGACG    |
| <i>hcap-d3</i> rev | GCTGGCTCACGGCAGGTGAC    |
| <i>fosb</i> fwd    | GCTCCCGGTGTAGCTCATCA    |
| <i>fosb</i> rev    | CTGAAGATCCTGGCTGGTTGTG  |
| <i>egr1</i> fwd    | CTTCAACCCTCAGGCGGACA    |
| <i>egr1</i> rev    | GTTTGGCTGGGGTAACTGGT    |
| <i>slc7a5</i> fwd  | GATCCTGCTGGGCTTCGT      |
| <i>slc7a5</i> rev  | AGTTTGGTGCCTTCAAATGAGAA |
| <i>slc3a2</i> fwd  | AGCATCCGTGTCATTCTG      |
| <i>slc3a2</i> rev  | GAGCATCCTTCACCTTGG      |
| <i>gapdh</i> fwd   | AGCCTCCCGCTTCGCTCTCT    |
| <i>gapdh</i> rev   | CCAGGCGCCCAATACGACCA    |

## **Immunoblotting**

Cells were lysed with RIPA Buffer (10mM Tris-HCl, 150 mM NaCl, 1% deoxycholic acid, 1% NP-40, 0.1% SDS, 1% Triton X-100, 0.1mM EDTA, 0.1mM Na<sub>3</sub>VO<sub>4</sub>, 1 complete Mini, EDTA-free Protease inhibitor cocktail tablet (Roche)) and incubated 15 minutes on ice. Samples were centrifuged at 13000 rpm for 5 minutes at 4°C and supernatant was collected. Protein was quantitated by Bradford Assay and lysates were boiled for 5 minutes (lysates intended for immunoblotting for amino acid transporters were incubated at 37°C for 10 minutes), separated by SDS-PAGE, and transferred onto a nitrocellulose membrane. The membrane was blocked in PBS containing 0.1% Tween-20 (PBST) and 5% milk powder or BSA and incubated in primary antibody in block buffer. The membrane was washed three times with PBST and incubated in species specific secondary antibody diluted in block buffer for 1 hour. ECL Western Blotting Substrate (Pierce) was applied. Densitometry analysis was performed using the ChemiDoc XRS+ with ImageLab Software (BioRad). Each experiment was performed at least three times. Antibodies used: CAP-D3 (Bethyl Labs, A300-604A) at 1:200, LC3B (Cell Signaling, 2775) at 1:1000, CD98 (AbCAM, ab108300) at 1:1000, SLC7A5 (LSBio, LS-C136957) at 1:1000, β-Tubulin (Cell Signaling, 2146) at 1:1000, and Villin-1 (Cell Signaling, 2369) at 1:1000.

## **immunofluorescence**

Cells on glass coverslips were washed with PBS, fixed in 4% formaldehyde in PBS for 10min, then washed in PBS for 5min. Coverslips were incubated in 0.1% Triton X-100 for 10min, washed twice, and incubated in blocking buffer (0.5% NP-40, 1% BSA, PBS) for 30min. Histochoice-fixed, paraffin-embedded colonic tissue sections were deparaffinized by submergence twice in ClearRite (Fisher) for 3min, twice in Flex100 for 1min and 2min sequentially, twice in Flex95 for 1min and 2min sequentially, rinsed in H<sub>2</sub>O and blocked with 2% bovine serum (BSA) in HBSS for 30min. Primary antibody diluted in blocking buffer was added to the coverslips which were incubated overnight at 4°C. Coverslips were washed with PBS 3x 5min with gentle shaking. Secondary antibody in block buffer was added to coverslips and incubated for 2h at RT away from light. Following three PBS washes, coverslips were mounted on slides with Vectashield with DAPI (Vector Labs). Images were obtained using the Leica DM 6000 CFS microscope outfitted with a Leica TCS SP5 II scan head using LAS AF (Leica Application Suite Advanced Fluorescence v 2.6.0) software. All images shown are the maximum projection of z-stacks. Five fields of view containing an average number of 20-25 bacteria were examined for each timepoint in each cell line. Experiments were repeated three times.

Antibodies used: Anti-*Salmonella* antibody, clone 5D12A (AbD Serotec) at 1:500, SLC7A5 (Abcam ab85226) at 1:200, LAMP-1 (DSHB, H4A3) at 1:200, mTOR (Cell Signalling, 2983) at 1:100, s100A12 (Abcam ab118044) at 1:1000, and CAP-D3 (Abgent, AT2610a) at 1:100.

## Leucine transport assay

Experiments were performed as described in <sup>3</sup>. Specifically, cells were incubated with 10 $\mu$ M Leu (4  $\mu$ Ci per ml) at 37°C for 2 minutes, either in Earle's balanced salt solution (EBSS) for sodium dependent assays or EBSS with NaCl replaced by choline chloride for sodium independent assays. All radiochemicals were from Perkin Elmer.

1. Kim D, Pertea G, Trapnell C, et al. TopHat2: accurate alignment of transcriptomes in the presence of insertions, deletions and gene fusions. *Genome Biol* 2013;14:R36.
2. Trapnell C, Hendrickson DG, Sauvageau M, et al. Differential analysis of gene regulation at transcript resolution with RNA-seq. *Nat Biotechnol* 2013;31:46-53.
3. Krokowski D, Han J, Saikia M, et al. A self-defeating anabolic program leads to beta-cell apoptosis in endoplasmic reticulum stress-induced diabetes via regulation of amino acid flux. *J Biol Chem* 2013;288:17202-13.

Supplementary Table 1. Information on de-identified patient tissues from which epithelial cells were isolated.

| Group   | Donor/Diagnosis                  | Age | Sex | Used for:                                |
|---------|----------------------------------|-----|-----|------------------------------------------|
| Control | A- Diverticulitis                | 65  | M   | CAP-D3 Immunblot                         |
| Control | B- Diverticulitis                | 59  | F   | CAP-D3 Immunblot                         |
| Control | C- Diverticulitis                | 54  | M   | CAP-D3 Immunblot                         |
| Control | D- Diverticulitis                | 62  | F   | CAP-D3 Immunblot, aa transporter qRT-PCR |
| Control | E-Diverticulitis                 | 41  | M   | CAP-D3 Immunblot                         |
| Control | F-Diverticulitis                 | 50  | M   | CAP-D3 Immunblot                         |
| Control | G-Diverticulitis                 | 69  | M   | CAP-D3 Immunblot                         |
| Control | H-Diverticulitis                 | 77  | M   | CAP-D3 Immunblot                         |
| Control | I-Diverticulitis and Fistula     | 87  | M   | CAP-D3 Immunblot                         |
| Control | J-Diverticulitis                 | 76  | F   | CAP-D3 Immunblot                         |
| Control | K-Constipation                   | 32  | F   | CAP-D3 Immunblot                         |
| Control | L-Fistula                        | 42  | M   | CAP-D3 Immunblot, aa transporter qRT-PCR |
| Control | M-Constipation and Endometriosis | 35  | F   | CAP-D3 Immunblot, aa transporter qRT-PCR |
| Control | N-Volvulus                       | 47  | F   | CAP-D3 Immunblot, aa transporter qRT-PCR |
|         |                                  |     |     |                                          |
| CD      | A- inactive Crohn's Disease      | 33  | M   | CAP-D3 Immunblot                         |
| CD      | B- inactive Crohn's Disease      | 32  | M   | CAP-D3 Immunblot                         |
| CD      | C- inactive Crohn's Disease      | 34  | M   | CAP-D3 Immunblot                         |
| CD      | D-active Crohn's Disease         | 60  | F   | CAP-D3 Immunblot                         |
| CD      | E-active Crohn's Disease         | 29  | F   | CAP-D3 Immunblot                         |
| CD      | F-active Crohn's Disease         | 30  | M   | CAP-D3 Immunblot                         |
| CD      | G-active Crohn's Disease         | 61  | F   | CAP-D3 Immunblot                         |
|         |                                  |     |     |                                          |
| UC      | A-inactive ulcerative colitis    | 45  | M   | CAP-D3 Immunblot, aa transporter qRT-PCR |
| UC      | B-inactive ulcerative colitis    | 55  | F   | CAP-D3 Immunblot, aa transporter qRT-PCR |
| UC      | C-inactive ulcerative colitis    | 25  | M   | CAP-D3 Immunblot, aa transporter qRT-PCR |
| UC      | D-inactive ulcerative colitis    | 28  | M   | CAP-D3 Immunblot, aa transporter qRT-PCR |
| UC      | E-inactive ulcerative colitis    | 19  | F   | CAP-D3 Immunblot, aa transporter qRT-PCR |
| UC      | F-active ulcerative colitis      | 31  | F   | CAP-D3 Immunblot, aa transporter qRT-PCR |
| UC      | G-active ulcerative colitis      | 37  | F   | CAP-D3 Immunblot                         |
| UC      | H-active ulcerative colitis      | 25  | M   | CAP-D3 Immunblot, aa transporter qRT-PCR |
| UC      | I-active ulcerative colitis      | 55  | M   | CAP-D3 Immunblot, aa transporter qRT-PCR |
| UC      | J-active ulcerative colitis      | 57  | F   | aa transporter qRT-PCR                   |

Supplemental Table 2. Analysis of differentially expressed genes in uninfected control shRNA and CAP-D3 shRNA expressing HT-29 cells.

| test_id     | gene_id     | gene                      | locus                     | cap-d3/ctrl<br>log2(fold_change) | q_value   |
|-------------|-------------|---------------------------|---------------------------|----------------------------------|-----------|
| XLOC_007741 | XLOC_007741 | RPS17L                    | chr15:83205503-83209208   | -7.95849                         | 0.0123281 |
| XLOC_023085 | XLOC_023085 | ENG                       | chr9:130577290-130617047  | -2.53242                         | 0.0123281 |
| XLOC_024027 | XLOC_024027 | IL13RA2                   | chrX:114238537-114252207  | -2.30821                         | 0.0123281 |
| XLOC_004636 | XLOC_004636 | NCAPD3                    | chr11:134022336-134094426 | -1.84469                         | 0.0123281 |
| XLOC_018679 | XLOC_018679 | HIST1H1C                  | chr6:26055967-26056699    | -1.51086                         | 0.0123281 |
| XLOC_015898 | XLOC_015898 | HCLS1                     | chr3:121350245-121379791  | -1.35537                         | 0.0438333 |
| XLOC_003926 | XLOC_003926 | JAM3                      | chr11:133938819-134021652 | -1.336                           | 0.0123281 |
| XLOC_001792 | XLOC_001792 | HIST2H2BE                 | chr1:149856009-149858232  | -1.28968                         | 0.0123281 |
| XLOC_009911 | XLOC_009911 | ICAM2                     | chr17:62075710-62097994   | -1.10226                         | 0.0123281 |
| XLOC_009826 | XLOC_009826 | HOXB13                    | chr17:46802126-46806111   | -1.03019                         | 0.0123281 |
| XLOC_003329 | XLOC_003329 | ADM                       | chr11:10326641-10328923   | -0.825143                        | 0.0123281 |
| XLOC_006506 | XLOC_006506 | IFI27                     | chr14:94577078-94583033   | -0.797034                        | 0.0123281 |
| XLOC_016139 | XLOC_016139 | TFRC                      | chr3:195776154-195809032  | -0.769816                        | 0.0123281 |
| XLOC_018558 | XLOC_018558 | AKAP12                    | chr6:151561133-151679694  | -0.738465                        | 0.0123281 |
| XLOC_022336 | XLOC_022336 | CA9                       | chr9:35673914-35681154    | -0.731957                        | 0.0123281 |
| XLOC_020767 | XLOC_020767 | CALD1                     | chr7:134464163-134655480  | -0.709175                        | 0.0123281 |
| XLOC_013219 | XLOC_013219 | STK39                     | chr2:168810529-169104105  | -0.664014                        | 0.0123281 |
| XLOC_000846 | XLOC_000846 | RGS4                      | chr1:163038395-163046592  | -0.640208                        | 0.0123281 |
| XLOC_018695 | XLOC_018695 | HIST1H2BK                 | chr6:27106071-27114637    | -0.636693                        | 0.02367   |
| XLOC_021506 | XLOC_021506 | C8orf58                   | chr8:22457113-22461662    | -0.623157                        | 0.0123281 |
| XLOC_016388 | XLOC_016388 | FAM47E,FAM47E-STBD1,STBD1 | chr4:77135192-77232283    | -0.597361                        | 0.02367   |
| XLOC_001315 | XLOC_001315 | IFFO2                     | chr1:19230773-19282826    | -0.584278                        | 0.0123281 |
| XLOC_017283 | XLOC_017283 | SRFBP1                    | chr5:121297655-121364295  | 0.563312                         | 0.0123281 |
| XLOC_003795 | XLOC_003795 | AASDHPPT                  | chr11:105921824-105969419 | 0.575222                         | 0.0123281 |
| XLOC_017579 | XLOC_017579 | CMBL                      | chr5:10277706-10308168    | 0.577618                         | 0.0123281 |
| XLOC_010664 | XLOC_010664 | KLF2                      | chr19:16435650-16438339   | 0.618256                         | 0.0341394 |
| XLOC_012805 | XLOC_012805 | WDR35                     | chr2:20110028-20189884    | 0.63378                          | 0.0123281 |
| XLOC_010394 | XLOC_010394 | VPS4B                     | chr18:61056424-61089752   | 0.651054                         | 0.0123281 |
| XLOC_015373 | XLOC_015373 | ZBTB38                    | chr3:141043054-141168632  | 0.652328                         | 0.0123281 |
| XLOC_014530 | XLOC_014530 | HMOX1                     | chr22:35777059-35790207   | 0.657063                         | 0.0123281 |
| XLOC_022078 | XLOC_022078 | RMDN1                     | chr8:87484577-87521009    | 0.679414                         | 0.0123281 |
| XLOC_006973 | XLOC_006973 | WARS                      | chr14:100800124-100842680 | 0.681329                         | 0.0123281 |
| XLOC_013272 | XLOC_013272 | TFPI                      | chr2:188328957-188419219  | 0.683032                         | 0.0123281 |
| XLOC_020427 | XLOC_020427 | GARS                      | chr7:30634180-30673648    | 0.683721                         | 0.0123281 |
| XLOC_021181 | XLOC_021181 | ASNS                      | chr7:97481428-97501854    | 0.701295                         | 0.0438333 |
| XLOC_023090 | XLOC_023090 | PIP5KL1                   | chr9:130683807-130693076  | 0.719684                         | 0.0123281 |
| XLOC_006979 | XLOC_006979 | MOK                       | chr14:102690833-102771537 | 0.734119                         | 0.0123281 |
| XLOC_023533 | XLOC_023533 | NGFRAP1                   | chrX:102631267-102633001  | 0.73618                          | 0.0123281 |
| XLOC_009472 | XLOC_009472 | ALOXE3                    | chr17:7999217-8022234     | 0.740742                         | 0.0123281 |
| XLOC_021873 | XLOC_021873 | FAM86B1                   | chr8:12039612-12051624    | 0.765563                         | 0.0123281 |
| XLOC_010285 | XLOC_010285 | LAMA1                     | chr18:6941742-7117813     | 0.803094                         | 0.0123281 |
| XLOC_022825 | XLOC_022825 | HINT2                     | chr9:35812956-35815042    | 0.871984                         | 0.0123281 |
| XLOC_020448 | XLOC_020448 | STARD3NL                  | chr7:38217807-38270272    | 0.897921                         | 0.0123281 |
| XLOC_001856 | XLOC_001856 | S100A2                    | chr1:153533584-153538306  | 0.912386                         | 0.0123281 |
| XLOC_002835 | XLOC_002835 | CUBN                      | chr10:16865964-17171816   | 0.923783                         | 0.0123281 |
| XLOC_014469 | XLOC_014469 | SNRPD3                    | chr22:24951617-24968509   | 0.93163                          | 0.0123281 |
| XLOC_018005 | XLOC_018005 | GFPT2                     | chr5:179727699-179780315  | 0.952026                         | 0.0123281 |
| XLOC_010990 | XLOC_010990 | ZNF114                    | chr19:48774653-48790863   | 0.961842                         | 0.0123281 |
| XLOC_000443 | XLOC_000443 | SGIP1                     | chr1:66999824-67210768    | 1.02045                          | 0.0123281 |
| XLOC_014830 | XLOC_014830 | NPTXR                     | chr22:39214455-39240017   | 1.0792                           | 0.0341394 |
| XLOC_011733 | XLOC_011733 | KCNN4                     | chr19:44270684-44285409   | 1.10237                          | 0.0123281 |
| XLOC_008877 | XLOC_008877 | TRPV2                     | chr17:16318855-16340317   | 1.38657                          | 0.0123281 |
| XLOC_015408 | XLOC_015408 | RAP2B                     | chr3:152880028-152886263  | 1.4378                           | 0.0123281 |
| XLOC_007737 | XLOC_007737 | RPS17                     | chr15:82821160-82824865   | #NAME?                           | 0.0123281 |
| XLOC_001780 | XLOC_001780 | NBPF11,NBPF24             | chr1:147574322-147624601  | -4.14005                         | 1         |
| XLOC_021890 | XLOC_021890 | MTUS1                     | chr8:17501302-17658426    | -3.98668                         | 1         |
| XLOC_004623 | XLOC_004623 | KCNJ1                     | chr11:128707908-128737268 | -3.4462                          | 1         |
| XLOC_012710 | XLOC_012710 | EFHD1                     | chr2:233470766-233547491  | -3.35982                         | 1         |
| XLOC_013834 | XLOC_013834 | SIGLEC1                   | chr20:3667616-3687775     | -3.1649                          | 1         |
| XLOC_013608 | XLOC_013608 | C20orf144                 | chr20:32244892-32262264   | -3.09133                         | 0.999791  |
| XLOC_001262 | XLOC_001262 | MASP2                     | chr1:11086579-11107296    | -3.07722                         | 1         |
| XLOC_006891 | XLOC_006891 | SYNDIG1L                  | chr14:74872595-74892805   | -3.07477                         | 1         |
| XLOC_007227 | XLOC_007227 | CGNL1                     | chr15:57668702-57842925   | -3.07256                         | 1         |
| XLOC_023530 | XLOC_023530 | BEX4                      | chrX:102470019-102472128  | -3.04431                         | 1         |
| XLOC_023321 | XLOC_023321 | CXorf30                   | chrX:36246895-36403434    | -3.03473                         | 1         |
| XLOC_014151 | XLOC_014151 | LINC00649                 | chr21:35303515-35343487   | -2.95533                         | 1         |
| XLOC_018437 | XLOC_018437 | LINC00222                 | chr6:109072856-109091145  | -2.88778                         | 1         |
| XLOC_004851 | XLOC_004851 | SCN8A                     | chr12:51985019-52206648   | -2.86119                         | 1         |
| XLOC_004624 | XLOC_004624 | C11orf45                  | chr11:128761312-128787951 | -2.82897                         | 1         |
| XLOC_016717 | XLOC_016717 | RBM47                     | chr4:40425271-40631883    | -2.71728                         | 1         |
| XLOC_022265 | XLOC_022265 | KCNV2                     | chr9:2717525-2730037      | -2.71                            | 1         |
| XLOC_022424 | XLOC_022424 | NXNL2                     | chr9:91150015-91190704    | -2.65296                         | 1         |
| XLOC_021464 | XLOC_021464 | C8orf12,TDH               | chr8:11197145-11324276    | -2.6379                          | 1         |
| XLOC_011518 | XLOC_011518 | USHBP1                    | chr19:17360848-17375544   | -2.58478                         | 1         |
| XLOC_000325 | XLOC_000325 | LOC100129924              | chr1:43253660-43263901    | -2.56815                         | 1         |



|             |             |                |                           |          |          |
|-------------|-------------|----------------|---------------------------|----------|----------|
| XLOC_023911 | XLOC_023911 | EDA2R          | chrX:65815481-65859140    | -2.56769 | 1        |
| XLOC_015018 | XLOC_015018 | DLEC1          | chr3:38080695-38178733    | -2.54545 | 1        |
| XLOC_023599 | XLOC_023599 | GRIA3          | chrX:122318095-122624766  | -2.54305 | 1        |
| XLOC_009231 | XLOC_009231 | C17orf72       | chr17:62075710-62097994   | -2.54019 | 1        |
| XLOC_011656 | XLOC_011656 | FBXO17         | chr19:39432041-39466380   | -2.47288 | 1        |
| XLOC_004692 | XLOC_004692 | PTPN6          | chr12:7055739-7070479     | -2.44938 | 1        |
| XLOC_010997 | XLOC_010997 | SULT2B1        | chr19:49055428-49102684   | -2.44707 | 1        |
| XLOC_001557 | XLOC_001557 | GLIS1          | chr1:53971905-54199877    | -2.44639 | 1        |
| XLOC_003794 | XLOC_003794 | GRIA4          | chr1:105480799-105852819  | -2.43928 | 1        |
| XLOC_004732 | XLOC_004732 | BCL2L14        | chr12:12223877-12252627   | -2.42082 | 1        |
| XLOC_000328 | XLOC_000328 | SLC2A1-AS1     | chr1:43391045-43449029    | -2.37383 | 1        |
| XLOC_002977 | XLOC_002977 | PRF1           | chr10:72357103-72362531   | -2.36734 | 1        |
| XLOC_018829 | XLOC_018829 | TCP11          | chr6:35085848-35109187    | -2.36297 | 1        |
| XLOC_012495 | XLOC_012495 | NOSTRIN        | chr2:169643048-169721849  | -2.35464 | 1        |
| XLOC_002613 | XLOC_002613 | C10orf131      | chr10:97471535-97849992   | -2.35194 | 1        |
| XLOC_013982 | XLOC_013982 | RIMS4          | chr20:43374487-43438979   | -2.35052 | 1        |
| XLOC_015250 | XLOC_015250 | CD96           | chr3:111260925-111371206  | -2.35049 | 1        |
| XLOC_015445 | XLOC_015445 | CLDN11         | chr3:170136652-170152479  | -2.34823 | 1        |
| XLOC_021362 | XLOC_021362 | TRPV6          | chr7:142568959-142583490  | -2.3327  | 1        |
| XLOC_004665 | XLOC_004665 | KCNA6          | chr12:4918341-4960278     | -2.31365 | 1        |
| XLOC_022626 | XLOC_022626 | BARHL1         | chr9:135457992-135465640  | -2.30894 | 1        |
| XLOC_008613 | XLOC_008613 | RRAD           | chr16:66955581-66959439   | -2.25807 | 0.668574 |
| XLOC_019142 | XLOC_019142 | RAET1L         | chr6:150341265-150346668  | -2.25721 | 1        |
| XLOC_006062 | XLOC_006062 | ZAR1L          | chr13:32877907-32886091   | -2.24093 | 1        |
| XLOC_011991 | XLOC_011991 | ZNF772         | chr19:57980953-57988938   | -2.20697 | 1        |
| XLOC_013687 | XLOC_013687 | WFDC13         | chr20:44313289-44337456   | -2.20415 | 1        |
| XLOC_018566 | XLOC_018566 | TIAM2          | chr6:155411422-155635617  | -2.1965  | 1        |
| XLOC_022121 | XLOC_022121 | SNX31          | chr8:101585111-101661893  | -2.19429 | 1        |
| XLOC_013159 | XLOC_013159 | ANKRD30BL      | chr2:132905163-133015542  | -2.18647 | 1        |
| XLOC_018420 | XLOC_018420 | KLHL32         | chr6:97372495-97862283    | -2.1788  | 1        |
| XLOC_015073 | XLOC_015073 | CXCR6          | chr3:45959390-46037316    | -2.16955 | 1        |
| XLOC_018284 | XLOC_018284 | APOBEC2        | chr6:41020939-41032630    | -2.169   | 1        |
| XLOC_011227 | XLOC_011227 | ZNF549         | chr19:58038692-58052244   | -2.1547  | 1        |
| XLOC_020740 | XLOC_020740 | FLNC           | chr7:128470482-128499328  | -2.14983 | 1        |
| XLOC_004316 | XLOC_004316 | NAALADL1       | chr11:64808375-64826009   | -2.14123 | 1        |
| XLOC_002608 | XLOC_002608 | CYP2C18        | chr10:96443250-96495947   | -2.12858 | 1        |
| XLOC_009568 | XLOC_009568 | VTN            | chr17:26694298-26697373   | -2.10674 | 1        |
| XLOC_015954 | XLOC_015954 | CPNE4          | chr3:131253576-131753844  | -2.08519 | 1        |
| XLOC_007714 | XLOC_007714 | LOC91450       | chr15:78285574-78286567   | -2.08213 | 1        |
| XLOC_001948 | XLOC_001948 | C1orf204,VSIG8 | chr1:159796478-159832447  | -2.07747 | 1        |
| XLOC_011198 | XLOC_011198 | NLRP4          | chr19:56296762-56393220   | -2.06305 | 1        |
| XLOC_014153 | XLOC_014153 | LINC00310      | chr21:35552977-35562220   | -2.0552  | 1        |
| XLOC_011633 | XLOC_011633 | ZNF569         | chr19:37902059-37958339   | -2.0246  | 1        |
| XLOC_011346 | XLOC_011346 | FUT5           | chr19:5865836-5870551     | -2.02138 | 1        |
| XLOC_021393 | XLOC_021393 | GIMAP6         | chr7:150322463-150329736  | -2.01685 | 1        |
| XLOC_004605 | XLOC_004605 | VSIG2          | chr11:124617369-124622109 | -2.011   | 1        |
| XLOC_022457 | XLOC_022457 | LOC100507346   | chr9:98205263-98279247    | -1.98599 | 1        |
| XLOC_008610 | XLOC_008610 | CCDC79         | chr16:66788878-66835523   | -1.98076 | 1        |
| XLOC_011287 | XLOC_011287 | CSNK1G2-AS1    | chr19:1941160-1981336     | -1.95723 | 1        |
| XLOC_022135 | XLOC_022135 | ABRA           | chr8:107771710-107782472  | -1.92667 | 1        |
| XLOC_006007 | XLOC_006007 | GAS6-AS1       | chr13:114518582-114567046 | -1.92334 | 1        |
| XLOC_016818 | XLOC_016818 | TMEM150C       | chr4:83405603-83483126    | -1.92031 | 1        |
| XLOC_014874 | XLOC_014874 | SCUBE1         | chr22:43599228-43739394   | -1.91288 | 1        |
| XLOC_020793 | XLOC_020793 | TAS2R3         | chr7:141463896-141464997  | -1.89951 | 1        |
| XLOC_003573 | XLOC_003573 | RARRES3        | chr1:163014620-63330855   | -1.89671 | 1        |
| XLOC_003148 | XLOC_003148 | C10orf82       | chr10:118423206-118429481 | -1.89024 | 1        |
| XLOC_021177 | XLOC_021177 | LOC100506136   | chr7:96250968-96293650    | -1.89018 | 1        |
| XLOC_022353 | XLOC_022353 | FRMPD1         | chr9:37651051-37746901    | -1.87144 | 1        |
| XLOC_016075 | XLOC_016075 | PEX5L          | chr3:179512746-179754841  | -1.86978 | 1        |
| XLOC_012075 | XLOC_012075 | FAM228A        | chr2:24397971-24414567    | -1.86516 | 1        |
| XLOC_001666 | XLOC_001666 | DPYD           | chr1:97543299-98386615    | -1.85929 | 1        |
| XLOC_005499 | XLOC_005499 | NFE2           | chr12:54685890-54694821   | -1.85203 | 1        |
| XLOC_021070 | XLOC_021070 | SEPT14         | chr7:55861236-55930482    | -1.84978 | 1        |
| XLOC_012851 | XLOC_012851 | LOC100505716   | chr2:28004265-28561767    | -1.8457  | 1        |
| XLOC_010253 | XLOC_010253 | LOC284276      | chr18:74240611-74271784   | -1.84395 | 1        |
| XLOC_020755 | XLOC_020755 | CPA4           | chr7:129932973-129964020  | -1.82594 | 1        |
| XLOC_016305 | XLOC_016305 | SLC10A4        | chr4:48485359-48491541    | -1.81472 | 1        |
| XLOC_014183 | XLOC_014183 | MX2            | chr21:42733949-42780869   | -1.80959 | 1        |
| XLOC_022183 | XLOC_022183 | KCNQ3          | chr8:133133104-133493004  | -1.79778 | 1        |
| XLOC_005577 | XLOC_005577 | LOC100130075   | chr12:69198216-69199274   | -1.79387 | 1        |
| XLOC_011361 | XLOC_011361 | C3             | chr19:6677845-6720662     | -1.7919  | 1        |
| XLOC_007396 | XLOC_007396 | MESP2          | chr15:90319588-90321982   | -1.76981 | 1        |
| XLOC_023754 | XLOC_023754 | GPR143         | chrX:9693452-9734005      | -1.76322 | 1        |
| XLOC_015571 | XLOC_015571 | ATP2B2         | chr3:10365706-10547268    | -1.76046 | 1        |
| XLOC_021923 | XLOC_021923 | ADRA1A         | chr8:26605666-26722922    | -1.7561  | 1        |
| XLOC_001205 | XLOC_001205 | TMEM240        | chr1:1470157-1475740      | -1.72688 | 1        |
| XLOC_021564 | XLOC_021564 | IDO1           | chr8:39771327-39786309    | -1.71658 | 1        |
| XLOC_000274 | XLOC_000274 | GJB3           | chr1:35246789-35251967    | -1.71269 | 1        |
| XLOC_016465 | XLOC_016465 | RRH            | chr4:110749149-110765861  | -1.70376 | 1        |

|             |             |              |                           |          |          |
|-------------|-------------|--------------|---------------------------|----------|----------|
| XLOC_021028 | XLOC_021028 | LOC100506895 | chr7:43152197-43602938    | -1.70041 | 1        |
| XLOC_005992 | XLOC_005992 | TEX29        | chr13:111973014-111996594 | -1.70007 | 0.999791 |
| XLOC_004105 | XLOC_004105 | IGSF22       | chr11:18720350-18747777   | -1.69671 | 1        |
| XLOC_007785 | XLOC_007785 | LOC100144604 | chr15:93111047-93115493   | -1.69491 | 1        |
| XLOC_001379 | XLOC_001379 | NR0B2        | chr1:27237974-27240567    | -1.69335 | 1        |
| XLOC_016127 | XLOC_016127 | GP5          | chr3:194115549-194119995  | -1.68186 | 1        |
| XLOC_000421 | XLOC_000421 | HOOK1        | chr1:60280532-60342050    | -1.67962 | 1        |
| XLOC_003626 | XLOC_003626 | OVOL1        | chr11:65554504-65564690   | -1.66074 | 1        |
| XLOC_023739 | XLOC_023739 | LINC00102    | chrX:2527305-2575270      | -1.65667 | 1        |
| XLOC_012281 | XLOC_012281 | ATOH8        | chr2:85980908-86018506    | -1.65653 | 1        |
| XLOC_017007 | XLOC_017007 | GPM6A        | chr4:176554087-176923842  | -1.64829 | 1        |
| XLOC_010064 | XLOC_010064 | ZNF750       | chr17:80709939-80901062   | -1.64072 | 1        |
| XLOC_018682 | XLOC_018682 | HIST1H4D     | chr6:26188937-26189304    | -1.62059 | 0.999791 |
| XLOC_001022 | XLOC_001022 | LOC148696    | chr1:207991723-207995941  | -1.61515 | 1        |
| XLOC_010326 | XLOC_010326 | KLHL14       | chr18:30252633-30352974   | -1.61468 | 1        |
| XLOC_014740 | XLOC_014740 | MN1          | chr22:28144264-28197486   | -1.60988 | 1        |
| XLOC_020717 | XLOC_020717 | CPED1        | chr7:120628750-120937498  | -1.60965 | 1        |
| XLOC_015894 | XLOC_015894 | FSTL1        | chr3:120113060-120169918  | -1.60551 | 1        |
| XLOC_018694 | XLOC_018694 | HIST1H2BJ    | chr6:27100094-27100575    | -1.60523 | 0.253607 |
| XLOC_012398 | XLOC_012398 | LOC440900    | chr2:114735245-114764887  | -1.60093 | 1        |
| XLOC_010526 | XLOC_010526 | VAV1         | chr19:6772678-6857377     | -1.59925 | 1        |
| XLOC_008540 | XLOC_008540 | ZNF843       | chr16:31446884-31454348   | -1.59311 | 1        |
| XLOC_002259 | XLOC_002259 | GNG4         | chr1:235710984-235814054  | -1.59075 | 1        |
| XLOC_018794 | XLOC_018794 | HLA-DRB5     | chr6:32485153-32489006    | -1.58998 | 1        |
| XLOC_004997 | XLOC_004997 | GLIPR1L1     | chr12:75728462-75764169   | -1.58495 | 1        |
| XLOC_008537 | XLOC_008537 | PYGARD       | chr16:31212806-31214097   | -1.5839  | 1        |
| XLOC_005129 | XLOC_005129 | SRRM4        | chr12:119419299-119600856 | -1.57614 | 1        |
| XLOC_003849 | XLOC_003849 | TMEM25       | chr11:118401802-118436791 | -1.57456 | 1        |
| XLOC_013523 | XLOC_013523 | BMP2         | chr20:6748744-6760910     | -1.57113 | 1        |
| XLOC_001247 | XLOC_001247 | TNFRSF9      | chr1:7975930-8003225      | -1.57019 | 1        |
| XLOC_006181 | XLOC_006181 | DCT          | chr13:95091840-95131936   | -1.57009 | 1        |
| XLOC_006350 | XLOC_006350 | LINC00640    | chr14:51800110-51832275   | -1.5699  | 1        |
| XLOC_023457 | XLOC_023457 | GDPD2        | chrX:69642880-69653241    | -1.56741 | 1        |
| XLOC_016389 | XLOC_016389 | SHROOM3      | chr4:77356252-77704405    | -1.56718 | 1        |
| XLOC_009219 | XLOC_009219 | MRC2         | chr17:60704761-60770962   | -1.55761 | 1        |
| XLOC_023939 | XLOC_023939 | MAP2K4P1     | chrX:72744110-72782921    | -1.55384 | 1        |
| XLOC_003122 | XLOC_003122 | CALHM1       | chr10:105213143-105218648 | -1.54941 | 1        |
| XLOC_001362 | XLOC_001362 | RCAN3AS      | chr1:24822822-24863510    | -1.54842 | 0.999791 |
| XLOC_013920 | XLOC_013920 | TSPY26P      | chr20:30776948-30778163   | -1.54771 | 1        |
| XLOC_017285 | XLOC_017285 | LOC100505841 | chr5:121495870-121518358  | -1.54687 | 0.993188 |
| XLOC_012419 | XLOC_012419 | MYO7B        | chr2:128293377-128395303  | -1.54618 | 1        |
| XLOC_022803 | XLOC_022803 | ARID3C       | chr9:34621454-34628011    | -1.54361 | 1        |
| XLOC_011879 | XLOC_011879 | KLK15        | chr19:51328544-51334779   | -1.54309 | 1        |
| XLOC_005276 | XLOC_005276 | A2M          | chr12:9217772-9268558     | -1.53661 | 1        |
| XLOC_000451 | XLOC_000451 | LRRC7        | chr1:70225857-70589171    | -1.53582 | 1        |
| XLOC_004625 | XLOC_004625 | TP53AIP1     | chr11:128804626-128813294 | -1.53557 | 1        |
| XLOC_002483 | XLOC_002483 | MYPN         | chr10:69865873-69971773   | -1.53225 | 1        |
| XLOC_019192 | XLOC_019192 | C6orf123     | chr6:168185218-168197539  | -1.53159 | 1        |
| XLOC_001445 | XLOC_001445 | COL8A2       | chr1:36560843-36565850    | -1.52985 | 1        |
| XLOC_022305 | XLOC_022305 | LOC100506422 | chr9:26066672-26118406    | -1.52439 | 1        |
| XLOC_003080 | XLOC_003080 | LOXL4        | chr10:100007442-100028007 | -1.52217 | 1        |
| XLOC_023116 | XLOC_023116 | FNBP1        | chr9:132649465-132805473  | -1.52087 | 1        |
| XLOC_015284 | XLOC_015284 | STXBPL5L     | chr3:120627049-121143608  | -1.52072 | 1        |
| XLOC_023555 | XLOC_023555 | VSIG1        | chrX:107288199-107322414  | -1.51183 | 1        |
| XLOC_001252 | XLOC_001252 | SLC2A5       | chr1:9097004-9129887      | -1.50846 | 1        |
| XLOC_019173 | XLOC_019173 | AGPAT4-IT1   | chr6:161551056-161695107  | -1.50694 | 1        |
| XLOC_022791 | XLOC_022791 | PTENP1       | chr7:33673501-33677418    | -1.50437 | 1        |
| XLOC_021045 | XLOC_021045 | MYO1G        | chr7:45002259-45018704    | -1.49189 | 1        |
| XLOC_015989 | XLOC_015989 | SLC9A9       | chr3:142984063-143567373  | -1.48749 | 1        |
| XLOC_022827 | XLOC_022827 | OR13J1       | chr9:35869459-35870398    | -1.47263 | 1        |
| XLOC_018132 | XLOC_018132 | HIST1H2BN    | chr6:27806439-27806888    | -1.46798 | 0.727853 |
| XLOC_021615 | XLOC_021615 | DNAJC5B      | chr8:66933790-67012755    | -1.46567 | 1        |
| XLOC_021296 | XLOC_021296 | GRM8         | chr7:126078651-126892428  | -1.46556 | 1        |
| XLOC_016017 | XLOC_016017 | ARHGFE26-AS1 | chr3:153742189-153975616  | -1.46447 | 1        |
| XLOC_003652 | XLOC_003652 | SYT12        | chr11:66790189-66818334   | -1.462   | 1        |
| XLOC_002968 | XLOC_002968 | TACR2        | chr10:71163957-71176674   | -1.4612  | 1        |
| XLOC_021814 | XLOC_021814 | C8orf42      | chr8:439789-495781        | -1.46106 | 1        |
| XLOC_014958 | XLOC_014958 | LINC00620    | chr3:13692220-13788132    | -1.45643 | 1        |
| XLOC_021634 | XLOC_021634 | STAU2-AS1    | chr8:74332308-74659943    | -1.45144 | 1        |
| XLOC_003696 | XLOC_003696 | FOLR3        | chr11:71846770-71850934   | -1.45108 | 1        |
| XLOC_000668 | XLOC_000668 | BOLA1        | chr1:149871154-149872348  | -1.45106 | 1        |
| XLOC_004442 | XLOC_004442 | DLG2         | chr11:83166055-85338314   | -1.45084 | 1        |
| XLOC_010875 | XLOC_010875 | CYP2F1       | chr19:41620352-41634281   | -1.44432 | 1        |
| XLOC_009482 | XLOC_009482 | LOC100128288 | chr17:8261730-8263859     | -1.43135 | 1        |
| XLOC_017996 | XLOC_017996 | CBY3         | chr5:179105558-179107975  | -1.42929 | 1        |
| XLOC_002614 | XLOC_002614 | CC2D2B       | chr10:97471535-97849992   | -1.42903 | 1        |
| XLOC_008298 | XLOC_008298 | DPEP1        | chr16:89679715-89704839   | -1.42879 | 0.3419   |
| XLOC_022415 | XLOC_022415 | LOC100506834 | chr9:89563612-89616948    | -1.42877 | 1        |
| XLOC_011898 | XLOC_011898 | LOC147646    | chr19:51891542-51893828   | -1.42637 | 1        |

|             |             |                 |                           |          |          |
|-------------|-------------|-----------------|---------------------------|----------|----------|
| XLOC_014475 | XLOC_014475 | CRYBB3          | chr22:25595816-25603326   | -1.42054 | 1        |
| XLOC_011100 | XLOC_011100 | ZNF813          | chr19:53970988-53997546   | -1.41902 | 1        |
| XLOC_021356 | XLOC_021356 | PRSS37          | chr7:141536077-141541221  | -1.41599 | 1        |
| XLOC_015864 | XLOC_015864 | PVRL3-AS1       | chr3:110764162-110788806  | -1.41508 | 1        |
| XLOC_016699 | XLOC_016699 | LGI2            | chr4:25000470-25032414    | -1.41472 | 1        |
| XLOC_006414 | XLOC_006414 | ACTN1-AS1       | chr14:69446398-69454180   | -1.40891 | 1        |
| XLOC_001483 | XLOC_001483 | COL9A2          | chr1:40766162-40782939    | -1.40634 | 1        |
| XLOC_009134 | XLOC_009134 | EFCAB13         | chr17:45401326-45518677   | -1.4063  | 1        |
| XLOC_008599 | XLOC_008599 | SNORA46         | chr16:58549382-58663790   | -1.4032  | 0.999791 |
| XLOC_015031 | XLOC_015031 | SNORA6          | chr3:39448203-39454032    | -1.40243 | 0.999791 |
| XLOC_005558 | XLOC_005558 | FAM19A2         | chr12:62102028-62586620   | -1.40123 | 1        |
| XLOC_010421 | XLOC_010421 | MADCAM1         | chr19:496489-505343       | -1.39764 | 1        |
| XLOC_022179 | XLOC_022179 | ASAP1-IT1       | chr8:131064350-131455906  | -1.39467 | 1        |
| XLOC_022937 | XLOC_022937 | ECM2            | chr9:95059639-95432547    | -1.38223 | 1        |
| XLOC_005122 | XLOC_005122 | LINC00173       | chr12:116971226-116974318 | -1.38079 | 0.999791 |
| XLOC_015393 | XLOC_015393 | WWTR1-AS1       | chr3:149235021-149421060  | -1.37753 | 1        |
| XLOC_007373 | XLOC_007373 | LOC100506874    | chr15:85070426-85123412   | -1.37389 | 1        |
| XLOC_009198 | XLOC_009198 | PPM1E           | chr17:56833229-57184266   | -1.37089 | 1        |
| XLOC_015914 | XLOC_015914 | MUC13           | chr3:124624288-124653595  | -1.36801 | 1        |
| XLOC_008032 | XLOC_008032 | SPN             | chr16:29674270-29681823   | -1.36544 | 1        |
| XLOC_005562 | XLOC_005562 | DPY19L2         | chr12:63952692-64062354   | -1.36262 | 1        |
| XLOC_018104 | XLOC_018104 | HIST1H3E        | chr6:26225382-26225844    | -1.35738 | 0.999791 |
| XLOC_008397 | XLOC_008397 | CDIP1           | chr16:4560676-4588816     | -1.35418 | 1        |
| XLOC_009728 | XLOC_009728 | KRT17           | chr17:39775691-39780882   | -1.34751 | 1        |
| XLOC_004646 | XLOC_004646 | WNT5B           | chr12:1726221-1756378     | -1.3427  | 1        |
| XLOC_012734 | XLOC_012734 | KLHL30          | chr2:239047362-239061547  | -1.3391  | 1        |
| XLOC_005738 | XLOC_005738 | PLA2G1B         | chr12:120759913-120765592 | -1.33778 | 1        |
| XLOC_008802 | XLOC_008802 | ALOX12          | chr17:6888441-6915653     | -1.33608 | 1        |
| XLOC_014885 | XLOC_014885 | SMC1B           | chr22:45739944-45809500   | -1.33582 | 1        |
| XLOC_001103 | XLOC_001103 | TRIM67          | chr1:231298673-231357314  | -1.33053 | 1        |
| XLOC_004826 | XLOC_004826 | PRPH            | chr12:49688908-49692481   | -1.32874 | 1        |
| XLOC_007128 | XLOC_007128 | ANP32AP1        | chr15:35529526-35530264   | -1.3284  | 1        |
| XLOC_010620 | XLOC_010620 | DAND5           | chr19:13080431-13085567   | -1.32784 | 1        |
| XLOC_022381 | XLOC_022381 | FOXD4L3         | chr9:70917782-70920000    | -1.32308 | 1        |
| XLOC_011591 | XLOC_011591 | SCGB1B2P        | chr19:35067637-35068596   | -1.31987 | 0.934472 |
| XLOC_009722 | XLOC_009722 | KRT15           | chr17:39669996-39675270   | -1.31671 | 1        |
| XLOC_006367 | XLOC_006367 | RPL13AP3        | chr14:56232962-56234435   | -1.31327 | 1        |
| XLOC_015501 | XLOC_015501 | MIR1248,SNORA81 | chr3:186501360-186524484  | -1.31228 | 0.999791 |
| XLOC_023285 | XLOC_023285 | CDKL5           | chrX:18443724-18690223    | -1.3109  | 1        |
| XLOC_009632 | XLOC_009632 | CCL3            | chr17:34415602-34417506   | -1.30618 | 1        |
| XLOC_003918 | XLOC_003918 | TMEM45B         | chr11:129685740-129729898 | -1.3059  | 1        |
| XLOC_014319 | XLOC_014319 | CLDN14          | chr21:37832919-37948867   | -1.30169 | 1        |
| XLOC_005273 | XLOC_005273 | MFAP5           | chr12:8798539-8815433     | -1.29899 | 1        |
| XLOC_000819 | XLOC_000819 | KLHDC9          | chr1:161068150-161070138  | -1.29843 | 1        |
| XLOC_002436 | XLOC_002436 | FAM35BP         | chr10:46897640-46939145   | -1.29746 | 1        |
| XLOC_011094 | XLOC_011094 | VN1R2           | chr19:53761544-53762855   | -1.29577 | 1        |
| XLOC_012998 | XLOC_012998 | M1AP            | chr2:74785009-74875164    | -1.28768 | 1        |
| XLOC_016604 | XLOC_016604 | KLKB1           | chr4:187148671-187179625  | -1.28625 | 1        |
| XLOC_002829 | XLOC_002829 | PPIAP30         | chr10:15147770-15210695   | -1.2809  | 1        |
| XLOC_013552 | XLOC_013552 | RIN2            | chr20:19867164-19983103   | -1.27768 | 1        |
| XLOC_016467 | XLOC_016467 | EGF             | chr4:110834039-110934118  | -1.27753 | 1        |
| XLOC_002131 | XLOC_002131 | KISS1           | chr1:204159468-204165619  | -1.27689 | 1        |
| XLOC_022648 | XLOC_022648 | COL5A1          | chr9:137533651-137736688  | -1.27392 | 1        |
| XLOC_016240 | XLOC_016240 | DEFB131         | chr4:9446259-9452240      | -1.27286 | 1        |
| XLOC_001041 | XLOC_001041 | FAM71A          | chr1:212797788-212800120  | -1.26987 | 1        |
| XLOC_005401 | XLOC_005401 | SLC38A4         | chr12:47158543-47219780   | -1.26557 | 1        |
| XLOC_007236 | XLOC_007236 | GCNT3           | chr15:59903981-59912210   | -1.26187 | 1        |
| XLOC_018498 | XLOC_018498 | ENPP3           | chr6:131958441-132068550  | -1.25571 | 1        |
| XLOC_002478 | XLOC_002478 | JMJD1C-AS1      | chr10:64926987-65226322   | -1.25557 | 0.999791 |
| XLOC_007972 | XLOC_007972 | C16orf62        | chr16:19566736-19712485   | -1.25521 | 1        |
| XLOC_023937 | XLOC_023937 | NAP1L6          | chrX:72345875-72347919    | -1.25424 | 1        |
| XLOC_014340 | XLOC_014340 | RIPK4           | chr21:43159528-43187249   | -1.2499  | 1        |
| XLOC_001471 | XLOC_001471 | RHBDL2          | chr1:39351478-39407456    | -1.24837 | 1        |
| XLOC_023512 | XLOC_023512 | SRPX2           | chrX:99899162-99926296    | -1.23901 | 1        |
| XLOC_018134 | XLOC_018134 | HIST1H2BO       | chr6:27861202-27861669    | -1.23824 | 0.973876 |
| XLOC_011809 | XLOC_011809 | FAM83E          | chr19:49103856-49116694   | -1.23588 | 0.886909 |
| XLOC_022948 | XLOC_022948 | FBP2            | chr9:97321002-97356075    | -1.23186 | 1        |
| XLOC_008538 | XLOC_008538 | PYDC1           | chr16:31225341-31236510   | -1.23096 | 0.999791 |
| XLOC_005938 | XLOC_005938 | C13orf45        | chr13:76445173-76457948   | -1.22685 | 1        |
| XLOC_003689 | XLOC_003689 | KRTAP5-10       | chr11:71276608-71277666   | -1.22659 | 1        |
| XLOC_017180 | XLOC_017180 | MAP1B           | chr5:71403117-71505397    | -1.22564 | 1        |
| XLOC_010865 | XLOC_010865 | SPTBN4          | chr19:40973125-41082365   | -1.22515 | 1        |
| XLOC_003821 | XLOC_003821 | BCO2            | chr11:112046207-112089649 | -1.21959 | 1        |
| XLOC_018220 | XLOC_018220 | C4A,C4B_2       | chr6:31982571-32003195    | -1.21942 | 1        |
| XLOC_015022 | XLOC_015022 | SLC22A14        | chr3:38347444-38359859    | -1.21878 | 1        |
| XLOC_007327 | XLOC_007327 | SH2D7           | chr15:78384926-78396393   | -1.21697 | 1        |
| XLOC_006953 | XLOC_006953 | SERPINA1        | chr14:94843083-94857029   | -1.21575 | 1        |
| XLOC_010008 | XLOC_010008 | LOC100653515    | chr17:76849058-76921472   | -1.21351 | 1        |
| XLOC_020729 | XLOC_020729 | SND1-IT1        | chr7:127292201-127732659  | -1.21119 | 1        |

|             |             |                 |                           |          |          |
|-------------|-------------|-----------------|---------------------------|----------|----------|
| XLOC_017090 | XLOC_017090 | LOC643401       | chr5:27472398-27496508    | -1.20911 | 1        |
| XLOC_022625 | XLOC_022625 | C9orf171        | chr9:135285610-135448675  | -1.20275 | 1        |
| XLOC_014196 | XLOC_014196 | LINC00319       | chr21:44869903-44873771   | -1.19823 | 1        |
| XLOC_023777 | XLOC_023777 | RS1             | chrX:18443724-18690223    | -1.19354 | 1        |
| XLOC_022087 | XLOC_022087 | RUNX1T1         | chr8:92967194-93115454    | -1.19272 | 1        |
| XLOC_006186 | XLOC_006186 | DZIP1           | chr13:96085852-96296960   | -1.19232 | 1        |
| XLOC_022932 | XLOC_022932 | MIR3651,SNORA84 | chr9:94972489-95056038    | -1.18845 | 0.999791 |
| XLOC_024045 | XLOC_024045 | TMEM255A        | chrX:119392504-119445391  | -1.18504 | 1        |
| XLOC_009699 | XLOC_009699 | KRTAP2-4        | chr17:39221367-39222131   | -1.18395 | 1        |
| XLOC_011535 | XLOC_011535 | LRRC25          | chr19:18501953-18508415   | -1.17759 | 1        |
| XLOC_022260 | XLOC_022260 | DMRT1           | chr9:841689-969090        | -1.17694 | 1        |
| XLOC_006038 | XLOC_006038 | TPTE2P1         | chr13:25502892-25542607   | -1.17266 | 1        |
| XLOC_006913 | XLOC_006913 | ISM2            | chr14:77940737-77965210   | -1.1696  | 1        |
| XLOC_017826 | XLOC_017826 | SMAD5-AS1       | chr5:135465202-135518422  | -1.16913 | 1        |
| XLOC_009084 | XLOC_009084 | AOC4            | chr17:41019161-41021234   | -1.16598 | 1        |
| XLOC_022772 | XLOC_022772 | EQTN            | chr9:27284653-27297137    | -1.16535 | 1        |
| XLOC_010690 | XLOC_010690 | KCNN1           | chr19:18062110-18109930   | -1.16526 | 1        |
| XLOC_017504 | XLOC_017504 | CDHR2           | chr5:175969511-176022769  | -1.16083 | 1        |
| XLOC_010977 | XLOC_010977 | CRX             | chr19:48325098-48346586   | -1.15745 | 1        |
| XLOC_016924 | XLOC_016924 | CETN4P          | chr4:123651343-123653613  | -1.15284 | 1        |
| XLOC_020625 | XLOC_020625 | MYH16           | chr7:98870923-98895594    | -1.15261 | 1        |
| XLOC_005631 | XLOC_005631 | TMCC3           | chr12:94960899-95044324   | -1.15123 | 1        |
| XLOC_005336 | XLOC_005336 | ARHGDI8         | chr12:15094949-15114562   | -1.14837 | 1        |
| XLOC_010232 | XLOC_010232 | SERPINB7        | chr18:61420280-61472610   | -1.14803 | 1        |
| XLOC_010836 | XLOC_010836 | RYR1            | chr19:38924339-39078204   | -1.14366 | 1        |
| XLOC_000855 | XLOC_000855 | MAEL            | chr1:166958518-166991447  | -1.14275 | 1        |
| XLOC_016177 | XLOC_016177 | NAT8L           | chr4:2061238-2070816      | -1.1418  | 1        |
| XLOC_002764 | XLOC_002764 | JAKMIP3         | chr10:133918312-133998313 | -1.14097 | 1        |
| XLOC_005296 | XLOC_005296 | STYK1           | chr12:10771537-10826891   | -1.13948 | 1        |
| XLOC_016838 | XLOC_016838 | HSD17B13        | chr4:88224940-88244056    | -1.13752 | 1        |
| XLOC_021048 | XLOC_021048 | NACAD           | chr7:45120035-45128493    | -1.13307 | 1        |
| XLOC_010248 | XLOC_010248 | CNDP1           | chr18:72201691-72252261   | -1.13215 | 1        |
| XLOC_016931 | XLOC_016931 | PCDH18          | chr4:138440073-138453629  | -1.13169 | 1        |
| XLOC_000679 | XLOC_000679 | LINC00568       | chr1:150488232-150490508  | -1.1313  | 1        |
| XLOC_014303 | XLOC_014303 | LOC100288432    | chr21:34637936-34638565   | -1.12974 | 0.999791 |
| XLOC_013232 | XLOC_013232 | RAPGEF4-AS1     | chr2:173587917-173917620  | -1.12882 | 1        |
| XLOC_018159 | XLOC_018159 | HLA-G           | chr6:29794755-29798899    | -1.12725 | 1        |
| XLOC_010348 | XLOC_010348 | ST8SIA5         | chr18:44259080-44337039   | -1.12649 | 1        |
| XLOC_003154 | XLOC_003154 | EMX2OS          | chr10:119243803-119309057 | -1.12459 | 1        |
| XLOC_010667 | XLOC_010667 | NWD1            | chr19:16830786-16928774   | -1.12392 | 1        |
| XLOC_012256 | XLOC_012256 | TLX2            | chr2:74741595-74744275    | -1.12146 | 1        |
| XLOC_018127 | XLOC_018127 | LOC100131289    | chr6:27729522-27730966    | -1.12074 | 0.624111 |
| XLOC_000985 | XLOC_000985 | PRELP           | chr1:203444882-203460479  | -1.11899 | 1        |
| XLOC_020480 | XLOC_020480 | C7orf57         | chr7:48075107-48100894    | -1.11113 | 1        |
| XLOC_004989 | XLOC_004989 | LGR5            | chr12:71833812-71978621   | -1.11032 | 1        |
| XLOC_014566 | XLOC_014566 | POBEC3G         | chr22:39473009-39483748   | -1.10919 | 1        |
| XLOC_016965 | XLOC_016965 | TIGD4           | chr4:153690505-153700916  | -1.10455 | 1        |
| XLOC_018321 | XLOC_018321 | C6orf223        | chr6:43968336-43973694    | -1.10435 | 1        |
| XLOC_021731 | XLOC_021731 | HAS2-AS1        | chr8:122625270-122657564  | -1.10188 | 1        |
| XLOC_012231 | XLOC_012231 | ANKRD53         | chr2:71205574-71212629    | -1.09702 | 1        |
| XLOC_021582 | XLOC_021582 | LOC100287846    | chr8:48100929-48104439    | -1.09508 | 1        |
| XLOC_017451 | XLOC_017451 | LOC285626       | chr5:158758525-158789842  | -1.09471 | 1        |
| XLOC_009942 | XLOC_009942 | LINC00511       | chr17:70594179-70636611   | -1.0934  | 1        |
| XLOC_016885 | XLOC_016885 | RPL34-AS1       | chr4:109459345-109541613  | -1.0896  | 1        |
| XLOC_014465 | XLOC_014465 | POM121L9P       | chr22:24647588-24661492   | -1.08767 | 1        |
| XLOC_022717 | XLOC_022717 | RLN1            | chr9:5334931-5339873      | -1.08737 | 1        |
| XLOC_019067 | XLOC_019067 | STL             | chr6:125229391-125284173  | -1.08332 | 1        |
| XLOC_013506 | XLOC_013506 | HSPA12B         | chr20:37133136-3733758    | -1.07925 | 1        |
| XLOC_008479 | XLOC_008479 | LOC100506655    | chr16:25123046-25189551   | -1.07782 | 1        |
| XLOC_008831 | XLOC_008831 | EFNB3           | chr17:7608519-7614693     | -1.07495 | 1        |
| XLOC_016762 | XLOC_016762 | GNRHR           | chr4:68603098-68621804    | -1.07494 | 1        |
| XLOC_016733 | XLOC_016733 | CNGA1           | chr4:47937993-48014961    | -1.07125 | 1        |
| XLOC_004763 | XLOC_004763 | SLCO1C1         | chr12:20848288-20906320   | -1.07067 | 1        |
| XLOC_011600 | XLOC_011600 | KRTDAP          | chr19:35978225-35981433   | -1.06971 | 0.999791 |
| XLOC_007179 | XLOC_007179 | CKMT1A          | chr15:43985083-43991420   | -1.06966 | 1        |
| XLOC_020517 | XLOC_020517 | SNORA22         | chr7:65111923-65235797    | -1.06139 | 0.999791 |
| XLOC_005652 | XLOC_005652 | SYCP3           | chr12:102091416-102133250 | -1.06037 | 1        |
| XLOC_008250 | XLOC_008250 | LOC100129617    | chr16:81478774-81745367   | -1.05981 | 1        |
| XLOC_005468 | XLOC_005468 | KRT5            | chr12:52908358-52914243   | -1.05977 | 1        |
| XLOC_011720 | XLOC_011720 | PSG5            | chr19:43671894-43690688   | -1.05834 | 1        |
| XLOC_015662 | XLOC_015662 | SLC6A20         | chr3:45796940-45838035    | -1.05522 | 1        |
| XLOC_004981 | XLOC_004981 | LYZ             | chr12:69742133-69748013   | -1.0543  | 1        |
| XLOC_007766 | XLOC_007766 | HAPLN3          | chr15:89420518-89438770   | -1.05404 | 0.519035 |
| XLOC_020559 | XLOC_020559 | STAG3L1         | chr7:74988428-74996914    | -1.05364 | 1        |
| XLOC_021620 | XLOC_021620 | C8orf46         | chr8:67405490-67430759    | -1.05186 | 1        |
| XLOC_000093 | XLOC_000093 | TNFRSF1B        | chr1:12227059-12269277    | -1.05094 | 1        |
| XLOC_003493 | XLOC_003493 | SERPING1        | chr11:57365026-57382326   | -1.04909 | 1        |
| XLOC_021080 | XLOC_021080 | ZNF733P         | chr7:62751669-62764434    | -1.04811 | 1        |
| XLOC_012284 | XLOC_012284 | SNORD94         | chr2:86333304-86369280    | -1.04408 | 0.999791 |

|             |             |                           |                           |           |          |
|-------------|-------------|---------------------------|---------------------------|-----------|----------|
| XLOC_001240 | XLOC_001240 | HES2                      | chr1:6475293-6479979      | -1.0418   | 1        |
| XLOC_006936 | XLOC_006936 | TC2N                      | chr14:92246266-92333880   | -1.04148  | 1        |
| XLOC_020515 | XLOC_020515 | INTS4L2                   | chr7:65111923-65235797    | -1.04095  | 1        |
| XLOC_008278 | XLOC_008278 | JPH3                      | chr16:87635440-87731761   | -1.03948  | 1        |
| XLOC_004479 | XLOC_004479 | MAML2                     | chr1:195711439-96076344   | -1.03835  | 1        |
| XLOC_016120 | XLOC_016120 | ATP13A4                   | chr3:193119865-193272696  | -1.03745  | 1        |
| XLOC_023174 | XLOC_023174 | LCN10                     | chr9:139632618-139637411  | -1.03669  | 1        |
| XLOC_010704 | XLOC_010704 | TMEM59L                   | chr19:18723681-18731849   | -1.03567  | 1        |
| XLOC_009797 | XLOC_009797 | ARL17A,ARL17B             | chr17:44372496-44439163   | -1.0353   | 1        |
| XLOC_019110 | XLOC_019110 | PBOV1                     | chr6:138483052-138665800  | -1.03356  | 1        |
| XLOC_008225 | XLOC_008225 | HP                        | chr16:72088507-72094955   | -1.03122  | 1        |
| XLOC_005578 | XLOC_005578 | CPM                       | chr12:69244955-69357020   | -1.03099  | 1        |
| XLOC_008498 | XLOC_008498 | SLC7A5P1                  | chr16:29624423-29625038   | -1.03019  | 0.999791 |
| XLOC_003815 | XLOC_003815 | C11orf52,HSPB2            | chr11:111783459-111797595 | -1.0295   | 1        |
| XLOC_018957 | XLOC_018957 | OOEP                      | chr6:74078279-74079515    | -1.02948  | 1        |
| XLOC_017565 | XLOC_017565 | FLJ33360                  | chr5:6310553-6337405      | -1.02921  | 1        |
| XLOC_005157 | XLOC_005157 | B3GNT4                    | chr12:122688227-122682084 | -1.02531  | 0.230376 |
| XLOC_007723 | XLOC_007723 | RASGRF1                   | chr15:79252288-79383215   | -1.02195  | 1        |
| XLOC_002632 | XLOC_002632 | GOLGA7B                   | chr10:99609994-99790585   | -1.01931  | 1        |
| XLOC_003319 | XLOC_003319 | SNORA45                   | chr11:8703994-8711419     | -1.01869  | 0.999791 |
| XLOC_017112 | XLOC_017112 | PTGER4                    | chr5:40680031-40693837    | -1.01785  | 1        |
| XLOC_013432 | XLOC_013432 | ARL4C                     | chr2:235401685-235405693  | -1.01739  | 1        |
| XLOC_018135 | XLOC_018135 | OR2B6                     | chr6:27925018-27925960    | -1.01643  | 1        |
| XLOC_002157 | XLOC_002157 | PIGR                      | chr1:207101866-207119811  | -1.0147   | 1        |
| XLOC_014817 | XLOC_014817 | SLC16A8                   | chr22:38474143-38479170   | -1.0111   | 1        |
| XLOC_004211 | XLOC_004211 | PRG2                      | chr11:57154833-57158130   | -1.00951  | 1        |
| XLOC_020537 | XLOC_020537 | FKBP6                     | chr7:72742154-72772641    | -1.00504  | 1        |
| XLOC_023975 | XLOC_023975 | XKRX                      | chrX:100168430-100183898  | -1.00233  | 1        |
| XLOC_002765 | XLOC_002765 | DPYSL4                    | chr10:134000413-134019280 | -1.00226  | 1        |
| XLOC_005388 | XLOC_005388 | PRICKLE1                  | chr12:42852139-42983572   | -1.00165  | 1        |
| XLOC_022963 | XLOC_022963 | HIATL2                    | chr9:99708326-99775862    | -0.998079 | 0.867056 |
| XLOC_004846 | XLOC_004846 | METTL7A                   | chr12:51318533-51326300   | -0.992461 | 1        |
| XLOC_000175 | XLOC_000175 | MDS2                      | chr1:23953823-23967056    | -0.992047 | 1        |
| XLOC_002433 | XLOC_002433 | ALOX5                     | chr10:45869623-45941567   | -0.991281 | 1        |
| XLOC_001854 | XLOC_001854 | S100A4                    | chr1:153516094-153518282  | -0.989525 | 0.999791 |
| XLOC_021550 | XLOC_021550 | GPR124                    | chr8:37654400-37707431    | -0.9852   | 1        |
| XLOC_015453 | XLOC_015453 | KCNMB2-IT1                | chr3:178136988-178175093  | -0.984945 | 1        |
| XLOC_012510 | XLOC_012510 | CYBRD1                    | chr2:172378756-172414643  | -0.983856 | 1        |
| XLOC_011878 | XLOC_011878 | KLK1                      | chr19:51322403-51327043   | -0.983522 | 1        |
| XLOC_020809 | XLOC_020809 | TMEM139                   | chr7:142982039-142985141  | -0.981733 | 1        |
| XLOC_018376 | XLOC_018376 | RIMS1                     | chr6:72596405-73112845    | -0.981406 | 1        |
| XLOC_011532 | XLOC_011532 | KIAA1683                  | chr19:18367905-18385319   | -0.978921 | 1        |
| XLOC_003287 | XLOC_003287 | TRIM34,TRIM6,TRIM6-TRIM34 | chr11:5617330-5665625     | -0.978832 | 0.274877 |
| XLOC_007429 | XLOC_007429 | SYNM                      | chr15:99645285-99675800   | -0.97697  | 1        |
| XLOC_012505 | XLOC_012505 | SP5                       | chr2:171571856-171574498  | -0.976061 | 0.654702 |
| XLOC_003921 | XLOC_003921 | ST14                      | chr11:130029681-130080257 | -0.973525 | 1        |
| XLOC_011997 | XLOC_011997 | FKBP1AP1                  | chr19:58336666-58338830   | -0.972455 | 1        |
| XLOC_002228 | XLOC_002228 | TRIM17                    | chr1:228595635-228604583  | -0.969007 | 1        |
| XLOC_010436 | XLOC_010436 | ELANE                     | chr19:852290-856246       | -0.966673 | 1        |
| XLOC_013287 | XLOC_013287 | DNAH7                     | chr2:196602426-196933536  | -0.966294 | 1        |
| XLOC_009025 | XLOC_009025 | LRRC37A11P                | chr17:37186158-37209458   | -0.966262 | 1        |
| XLOC_011066 | XLOC_011066 | CD33                      | chr19:51728334-51734274   | -0.964877 | 1        |
| XLOC_022905 | XLOC_022905 | SLC28A3                   | chr9:86890764-86983413    | -0.96345  | 1        |
| XLOC_022864 | XLOC_022864 | FOXD4L6                   | chr9:69199479-69202204    | -0.963344 | 1        |
| XLOC_006313 | XLOC_006313 | COCH                      | chr14:31343740-31359822   | -0.963134 | 1        |
| XLOC_017988 | XLOC_017988 | COL23A1                   | chr5:177664616-178017566  | -0.961498 | 1        |
| XLOC_009714 | XLOC_009714 | KRT34                     | chr17:39533920-39538636   | -0.959248 | 1        |
| XLOC_003174 | XLOC_003174 | CPXM2                     | chr10:125505151-125651500 | -0.957857 | 1        |
| XLOC_004686 | XLOC_004686 | RPL13P5                   | chr12:6993144-6993768     | -0.95662  | 0.934472 |
| XLOC_012717 | XLOC_012717 | SCARNA6                   | chr2:234160216-234204320  | -0.954761 | 1        |
| XLOC_021867 | XLOC_021867 | DEFB134                   | chr8:11851488-11853760    | -0.954515 | 1        |
| XLOC_019149 | XLOC_019149 | RGS17                     | chr6:153332031-153452389  | -0.953584 | 1        |
| XLOC_018733 | XLOC_018733 | RNF39                     | chr6:30034931-30043628    | -0.952787 | 1        |
| XLOC_022869 | XLOC_022869 | PGM5-AS1                  | chr9:70970108-71145977    | -0.952538 | 1        |
| XLOC_010154 | XLOC_010154 | HRH4                      | chr18:22040592-22059921   | -0.952422 | 1        |
| XLOC_013630 | XLOC_013630 | CNBD2                     | chr20:34556528-34618622   | -0.948673 | 1        |
| XLOC_015434 | XLOC_015434 | SERPINI1                  | chr3:167453431-167543357  | -0.947928 | 1        |
| XLOC_006996 | XLOC_006996 | GPR132                    | chr14:105515736-105531754 | -0.947335 | 1        |
| XLOC_002732 | XLOC_002732 | BTBD16                    | chr10:124030820-124097676 | -0.947126 | 1        |
| XLOC_018839 | XLOC_018839 | PXT1                      | chr6:36358328-36458315    | -0.944153 | 1        |
| XLOC_001970 | XLOC_001970 | PVRL4                     | chr1:161040780-161059385  | -0.941278 | 1        |
| XLOC_020953 | XLOC_020953 | MACC1                     | chr7:20174278-20257013    | -0.940452 | 1        |
| XLOC_006691 | XLOC_006691 | NDRG2                     | chr14:21484921-21493935   | -0.938089 | 1        |
| XLOC_015301 | XLOC_015301 | KALRN                     | chr3:123813557-124440036  | -0.932423 | 1        |
| XLOC_009266 | XLOC_009266 | GPRC5C                    | chr17:72427666-72443658   | -0.928788 | 0.886909 |
| XLOC_017398 | XLOC_017398 | SH3RF2                    | chr5:145316125-145442879  | -0.928117 | 0.190205 |
| XLOC_012618 | XLOC_012618 | IDH1-AS1                  | chr2:209119956-209120918  | -0.925264 | 0.999791 |
| XLOC_001359 | XLOC_001359 | IL22RA1                   | chr1:24446260-24469775    | -0.922569 | 0.246563 |
| XLOC_018870 | XLOC_018870 | USP49                     | chr6:41765382-41863099    | -0.921888 | 1        |

|             |             |                     |                           |           |           |
|-------------|-------------|---------------------|---------------------------|-----------|-----------|
| XLOC_004707 | XLOC_004707 | ZNF705A             | chr12:8325149-8332642     | -0.921212 | 1         |
| XLOC_004893 | XLOC_004893 | PDE1B               | chr12:54943176-54973023   | -0.92094  | 1         |
| XLOC_018099 | XLOC_018099 | HIST1H2BD           | chr6:26158348-26171576    | -0.915476 | 0.0760821 |
| XLOC_014154 | XLOC_014154 | KCNE2               | chr21:35736322-35743440   | -0.915048 | 1         |
| XLOC_014730 | XLOC_014730 | POM121L10P          | chr22:25028881-25055114   | -0.914955 | 1         |
| XLOC_021306 | XLOC_021306 | OPN1SW              | chr7:128379345-128415844  | -0.913811 | 1         |
| XLOC_003980 | XLOC_003980 | SNORA54             | chr11:2965659-3013607     | -0.912304 | 0.999791  |
| XLOC_017766 | XLOC_017766 | NREP                | chr5:110834021-111353003  | -0.911599 | 1         |
| XLOC_005815 | XLOC_005815 | C1QTNF9             | chr13:24883715-24896669   | -0.910741 | 1         |
| XLOC_005838 | XLOC_005838 | ALOX5AP             | chr13:31287614-31338565   | -0.908163 | 1         |
| XLOC_020543 | XLOC_020543 | CLDN4               | chr7:73245192-73247015    | -0.906079 | 1         |
| XLOC_009788 | XLOC_009788 | SPATA32             | chr17:43325302-43394414   | -0.905923 | 1         |
| XLOC_005457 | XLOC_005457 | KRT80               | chr12:52562779-52585784   | -0.905877 | 0.0760821 |
| XLOC_003064 | XLOC_003064 | LOC728558           | chr10:97471535-97494992   | -0.90305  | 1         |
| XLOC_012685 | XLOC_012685 | DAW1                | chr2:228736326-228789026  | -0.901969 | 1         |
| XLOC_012532 | XLOC_012532 | HOXD1               | chr2:177037923-177055635  | -0.901808 | 1         |
| XLOC_008908 | XLOC_008908 | EPN2-IT1            | chr17:19140689-19240028   | -0.901458 | 1         |
| XLOC_018737 | XLOC_018737 | HCG17               | chr6:30201815-30314635    | -0.900292 | 1         |
| XLOC_005320 | XLOC_005320 | LOH12CR2            | chr12:12508341-12510001   | -0.89916  | 1         |
| XLOC_013663 | XLOC_013663 | SGK2                | chr20:42187634-42214273   | -0.898942 | 1         |
| XLOC_016747 | XLOC_016747 | SRD5A3-AS1          | chr4:56212387-56251747    | -0.898905 | 1         |
| XLOC_005904 | XLOC_005904 | SERPINE3            | chr13:51915167-52022725   | -0.89615  | 1         |
| XLOC_021955 | XLOC_021955 | LOC728024           | chr8:37594096-37615319    | -0.896015 | 1         |
| XLOC_007346 | XLOC_007346 | KIAA1199            | chr15:81071711-81243999   | -0.895008 | 1         |
| XLOC_003046 | XLOC_003046 | ANKRD1              | chr10:92671856-92681032   | -0.894979 | 0.64943   |
| XLOC_020813 | XLOC_020813 | EPHA1-AS1           | chr7:143078359-143220540  | -0.894553 | 1         |
| XLOC_006421 | XLOC_006421 | SMOC1               | chr14:70346113-70499083   | -0.890514 | 1         |
| XLOC_020633 | XLOC_020633 | LOC100289187        | chr7:99195901-99208456    | -0.889677 | 0.372926  |
| XLOC_017624 | XLOC_017624 | DAB2                | chr5:39371775-39425335    | -0.888408 | 1         |
| XLOC_008342 | XLOC_008342 | IGFALS              | chr16:1840413-1844909     | -0.888078 | 1         |
| XLOC_018685 | XLOC_018685 | HIST1H1D            | chr6:26234439-26235216    | -0.887659 | 0.886909  |
| XLOC_022158 | XLOC_022158 | LOC100131726        | chr8:124194751-124222318  | -0.887393 | 1         |
| XLOC_023076 | XLOC_023076 | NRON                | chr9:129089122-129269320  | -0.883231 | 1         |
| XLOC_015847 | XLOC_015847 | IMPG2               | chr3:100941389-101039419  | -0.880513 | 1         |
| XLOC_006304 | XLOC_006304 | NFATC4              | chr14:24836144-24848810   | -0.878336 | 0.28478   |
| XLOC_014437 | XLOC_014437 | TMEM191C            | chr22:21821458-21824224   | -0.877566 | 0.999791  |
| XLOC_020409 | XLOC_020409 | HOXA-AS3            | chr7:27179982-27196296    | -0.877293 | 1         |
| XLOC_002197 | XLOC_002197 | HHIPL2              | chr1:222695601-222721444  | -0.876527 | 1         |
| XLOC_016914 | XLOC_016914 | NDNF                | chr4:121956781-121993673  | -0.87491  | 1         |
| XLOC_013636 | XLOC_013636 | C20orf118           | chr20:35504569-35580246   | -0.873775 | 1         |
| XLOC_020553 | XLOC_020553 | NCF1                | chr7:74188308-74203659    | -0.872159 | 1         |
| XLOC_016749 | XLOC_016749 | PDCL2               | chr4:56422691-56458379    | -0.871613 | 1         |
| XLOC_005392 | XLOC_005392 | NELL2               | chr12:44902057-45307711   | -0.87085  | 1         |
| XLOC_004511 | XLOC_004511 | SLN                 | chr11:107578100-107582787 | -0.869092 | 1         |
| XLOC_003562 | XLOC_003562 | SNORA57             | chr11:62430288-62441162   | -0.868128 | 0.999791  |
| XLOC_013618 | XLOC_013618 | MAP1LC3A            | chr20:33134687-33148149   | -0.867108 | 1         |
| XLOC_022737 | XLOC_022737 | SCARNA8             | chr9:19053134-19102940    | -0.865996 | 0.999791  |
| XLOC_015554 | XLOC_015554 | SSUH2               | chr3:8661085-8693764      | -0.865453 | 1         |
| XLOC_000895 | XLOC_000895 | GPR52               | chr1:174128551-174964445  | -0.861542 | 1         |
| XLOC_004468 | XLOC_004468 | SNORA18             | chr11:93466631-93466763   | -0.860753 | 0.999791  |
| XLOC_012540 | XLOC_012540 | TTN-AS1             | chr2:179059207-179672150  | -0.860511 | 1         |
| XLOC_006290 | XLOC_006290 | DHRS4L1             | chr14:24505709-24520580   | -0.860177 | 1         |
| XLOC_012439 | XLOC_012439 | TUBA3D              | chr2:132202795-132360468  | -0.858824 | 1         |
| XLOC_021463 | XLOC_021463 | SLC35G5             | chr8:11188494-11189695    | -0.857802 | 1         |
| XLOC_014505 | XLOC_014505 | TCN2                | chr22:31003069-31023047   | -0.857404 | 1         |
| XLOC_017237 | XLOC_017237 | FAM81B              | chr5:94727047-94786144    | -0.856961 | 1         |
| XLOC_018681 | XLOC_018681 | HIST1H2BC           | chr6:26123694-26124132    | -0.855989 | 0.999791  |
| XLOC_015291 | XLOC_015291 | CSTA                | chr3:122044010-122060815  | -0.855185 | 0.999791  |
| XLOC_010778 | XLOC_010778 | FXYD7               | chr19:35634153-35645205   | -0.85431  | 1         |
| XLOC_011870 | XLOC_011870 | ASPDH               | chr19:51014856-51017947   | -0.853334 | 1         |
| XLOC_018218 | XLOC_018218 | CYP21A2             | chr6:31973358-31981050    | -0.853031 | 1         |
| XLOC_020657 | XLOC_020657 | EPO                 | chr7:100318422-100321323  | -0.845694 | 1         |
| XLOC_001204 | XLOC_001204 | ANKRD65             | chr1:1353799-1356824      | -0.844822 | 1         |
| XLOC_017776 | XLOC_017776 | CDO1                | chr5:115140429-115152405  | -0.844684 | 1         |
| XLOC_014089 | XLOC_014089 | ZNF512B             | chr20:62571181-62601223   | -0.842165 | 1         |
| XLOC_011831 | XLOC_011831 | KCNA7               | chr19:49570674-49576198   | -0.841019 | 1         |
| XLOC_011867 | XLOC_011867 | NAPSA               | chr19:50861733-50868931   | -0.840785 | 1         |
| XLOC_011620 | XLOC_011620 | LINC00665           | chr19:36803962-36822620   | -0.839919 | 1         |
| XLOC_012299 | XLOC_012299 | GGT8P               | chr2:91963367-91970153    | -0.837257 | 1         |
| XLOC_006008 | XLOC_006008 | LOC100506394        | chr13:114567149-114569805 | -0.837096 | 1         |
| XLOC_011794 | XLOC_011794 | SLC8A2              | chr19:47931278-47975307   | -0.836046 | 1         |
| XLOC_005114 | XLOC_005114 | OAS2                | chr12:113416273-113449528 | -0.835562 | 1         |
| XLOC_014746 | XLOC_014746 | ZNRF3-AS1           | chr22:29279754-29453476   | -0.835311 | 1         |
| XLOC_023181 | XLOC_023181 | CLIC3               | chr9:139889059-139891024  | -0.834011 | 1         |
| XLOC_024207 | XLOC_024207 | CLIC2               | chrX:154505499-154563986  | -0.833342 | 1         |
| XLOC_008087 | XLOC_008087 | FLJ26245, RNA5SP411 | chr16:34980893-34990995   | -0.830022 | 1         |
| XLOC_018456 | XLOC_018456 | TPH1P3              | chr6:116262692-116381921  | -0.826971 | 1         |
| XLOC_021339 | XLOC_021339 | ATP6V0A4            | chr7:138391038-138490769  | -0.826062 | 1         |
| XLOC_018707 | XLOC_018707 | HIST1H2AM           | chr6:27860476-27860963    | -0.825903 | 0.790746  |

|             |             |                    |                           |           |          |
|-------------|-------------|--------------------|---------------------------|-----------|----------|
| XLOC_000980 | XLOC_000980 | LOC148709          | chr1:202830881-202844369  | -0.825878 | 1        |
| XLOC_005165 | XLOC_005165 | LOC100507091       | chr12:123468026-123594975 | -0.82417  | 1        |
| XLOC_006639 | XLOC_006639 | EXOC3L4            | chr14:103566480-103576894 | -0.823541 | 1        |
| XLOC_003048 | XLOC_003048 | LOC100188947       | chr10:93066718-93371217   | -0.822005 | 1        |
| XLOC_009887 | XLOC_009887 | LOC645638          | chr17:58160926-58165828   | -0.821102 | 1        |
| XLOC_021819 | XLOC_021819 | ANGPT2             | chr8:6264112-6501140      | -0.818291 | 1        |
| XLOC_006838 | XLOC_006838 | RTN1               | chr14:60062693-60337557   | -0.818268 | 1        |
| XLOC_008556 | XLOC_008556 | MYLK3              | chr16:46736193-46782221   | -0.81683  | 1        |
| XLOC_017366 | XLOC_017366 | VTRNA1-3           | chr5:140105743-140105831  | -0.816469 | 0.999791 |
| XLOC_013800 | XLOC_013800 | LINC00266-1        | chr20:62921737-62934707   | -0.814722 | 1        |
| XLOC_017893 | XLOC_017893 | PDGFRB             | chr5:149493401-149535422  | -0.814082 | 1        |
| XLOC_015094 | XLOC_015094 | FBXW12             | chr3:48413708-48436190    | -0.810761 | 1        |
| XLOC_016330 | XLOC_016330 | ARL9               | chr4:57371374-57390058    | -0.810481 | 1        |
| XLOC_010362 | XLOC_010362 | SNORD58C           | chr18:47007547-47018935   | -0.810173 | 0.999791 |
| XLOC_006501 | XLOC_006501 | COX8C              | chr14:93799564-94173689   | -0.809394 | 1        |
| XLOC_009463 | XLOC_009463 | SOX15              | chr17:7466964-7493488     | -0.807921 | 0.999791 |
| XLOC_011610 | XLOC_011610 | NPHS1              | chr19:36316273-36342895   | -0.807738 | 1        |
| XLOC_008454 | XLOC_008454 | ACSM1              | chr16:20634558-20702578   | -0.807248 | 1        |
| XLOC_004009 | XLOC_004009 | HBBP1              | chr11:5263184-5264822     | -0.806341 | 1        |
| XLOC_008962 | XLOC_008962 | SH3GL1P2           | chr17:28903482-28964484   | -0.806283 | 1        |
| XLOC_020645 | XLOC_020645 | PVRIG              | chr7:99775537-99869855    | -0.806046 | 1        |
| XLOC_011833 | XLOC_011833 | HRC                | chr19:49654455-49658681   | -0.805382 | 1        |
| XLOC_008182 | XLOC_008182 | C16orf86           | chr16:67700716-67702661   | -0.804811 | 0.999791 |
| XLOC_004715 | XLOC_004715 | A2M-AS1            | chr12:9217772-9268558     | -0.803306 | 1        |
| XLOC_023427 | XLOC_023427 | PAGE2B             | chrX:55101488-55105336    | -0.802424 | 1        |
| XLOC_021327 | XLOC_021327 | AKR1B1             | chr7:134127106-134143888  | -0.801383 | 1        |
| XLOC_007902 | XLOC_007902 | LOC100128770       | chr16:3077867-3089133     | -0.800784 | 1        |
| XLOC_010960 | XLOC_010960 | DACT3-AS1          | chr19:47150868-47220384   | -0.800674 | 1        |
| XLOC_021991 | XLOC_021991 | OPRK1              | chr8:54138275-54164194    | -0.799848 | 1        |
| XLOC_023255 | XLOC_023255 | WWC3               | chrX:9983794-10112518     | -0.798245 | 1        |
| XLOC_014823 | XLOC_014823 | KCNJ4              | chr22:38822332-38851205   | -0.797836 | 1        |
| XLOC_007735 | XLOC_007735 | GOLGA6L10          | chr15:82633122-82641706   | -0.795681 | 1        |
| XLOC_016950 | XLOC_016950 | HHIP-AS1           | chr4:145564067-145659881  | -0.794368 | 1        |
| XLOC_011649 | XLOC_011649 | LGALS4             | chr19:39292310-39303740   | -0.79347  | 1        |
| XLOC_017335 | XLOC_017335 | TGFBI              | chr5:135364583-135399507  | -0.791806 | 1        |
| XLOC_013918 | XLOC_013918 | DUSP15             | chr20:30448869-30458479   | -0.786519 | 1        |
| XLOC_015882 | XLOC_015882 | ZBTB20             | chr3:114056946-114866127  | -0.783909 | 1        |
| XLOC_011829 | XLOC_011829 | CGB7               | chr19:49557530-49558997   | -0.782347 | 0.999791 |
| XLOC_003974 | XLOC_003974 | TRPM5              | chr11:2425745-2444275     | -0.781079 | 1        |
| XLOC_004407 | XLOC_004407 | LIPT2              | chr11:74202922-74204755   | -0.780091 | 0.886909 |
| XLOC_021283 | XLOC_021283 | FEZF1              | chr7:121941447-121950131  | -0.777927 | 1        |
| XLOC_003352 | XLOC_003352 | MRGPRX3            | chr11:18142501-18160027   | -0.77776  | 1        |
| XLOC_017094 | XLOC_017094 | PDZD2              | chr5:31799030-32111038    | -0.77161  | 1        |
| XLOC_004530 | XLOC_004530 | C11orf34           | chr11:112118875-112131583 | -0.771167 | 1        |
| XLOC_000833 | XLOC_000833 | FCGR2B             | chr1:161632904-161648444  | -0.770394 | 1        |
| XLOC_000848 | XLOC_000848 | PBX1               | chr1:164528596-164821060  | -0.767643 | 1        |
| XLOC_011529 | XLOC_011529 | RAB3A              | chr19:18307610-18314874   | -0.76764  | 0.266483 |
| XLOC_018728 | XLOC_018728 | HLA-F-AS1          | chr6:29691116-29716826    | -0.767318 | 0.999791 |
| XLOC_009063 | XLOC_009063 | KLHL10             | chr17:39994042-40004599   | -0.766117 | 1        |
| XLOC_013915 | XLOC_013915 | HM13-AS1           | chr20:30102240-30161066   | -0.764488 | 1        |
| XLOC_023527 | XLOC_023527 | BHLHB9             | chrX:101975641-102007369  | -0.764137 | 1        |
| XLOC_014361 | XLOC_014361 | LRRC3-AS1          | chr21:45870868-45875167   | -0.763403 | 1        |
| XLOC_002539 | XLOC_002539 | BEND3P3            | chr10:81442730-81448650   | -0.762901 | 1        |
| XLOC_018121 | XLOC_018121 | HIST1H2AH          | chr6:27114860-27115341    | -0.762392 | 0.999791 |
| XLOC_008276 | XLOC_008276 | FOXL1              | chr16:86612114-86615304   | -0.761928 | 1        |
| XLOC_009233 | XLOC_009233 | SNORA76            | chr17:62223698-62228331   | -0.761642 | 0.999791 |
| XLOC_003788 | XLOC_003788 | BIRC3              | chr11:102188180-102210135 | -0.759101 | 0.207365 |
| XLOC_004150 | XLOC_004150 | LOC100507300       | chr11:43902356-43942494   | -0.758999 | 1        |
| XLOC_008661 | XLOC_008661 | TAT                | chr16:71600753-71610998   | -0.758912 | 1        |
| XLOC_005835 | XLOC_005835 | MTUS2              | chr13:29598747-30080084   | -0.757174 | 1        |
| XLOC_007377 | XLOC_007377 | ALPK3              | chr15:85359910-85416713   | -0.754027 | 1        |
| XLOC_008910 | XLOC_008910 | RNF112             | chr17:19314490-19320589   | -0.751531 | 0.873023 |
| XLOC_010646 | XLOC_010646 | SYDE1              | chr19:15218213-15236577   | -0.748532 | 1        |
| XLOC_012666 | XLOC_012666 | ASIC4              | chr2:220378891-220403494  | -0.748003 | 1        |
| XLOC_001487 | XLOC_001487 | SLFNL1             | chr1:41480261-41707815    | -0.747653 | 1        |
| XLOC_021135 | XLOC_021135 | MAGI2              | chr7:77646373-79100524    | -0.747098 | 1        |
| XLOC_022866 | XLOC_022866 | FOXD4L5            | chr9:70175706-70178815    | -0.747051 | 1        |
| XLOC_008923 | XLOC_008923 | MTRNR2L1           | chr17:22022436-22023991   | -0.744745 | 0.648523 |
| XLOC_014589 | XLOC_014589 | CSDC2              | chr22:41957013-41972670   | -0.743336 | 1        |
| XLOC_021286 | XLOC_021286 | RNF148             | chr7:121958477-122526813  | -0.742897 | 1        |
| XLOC_023577 | XLOC_023577 | LUZP4              | chrX:114524291-114542121  | -0.742179 | 1        |
| XLOC_001195 | XLOC_001195 | FAM132A            | chr11:1177825-1182102     | -0.742175 | 0.999791 |
| XLOC_015288 | XLOC_015288 | SLC15A2            | chr3:121613170-121663034  | -0.741789 | 1        |
| XLOC_018683 | XLOC_018683 | HIST1H2AD,HIST1H3D | chr6:26197011-26199521    | -0.741509 | 0.900068 |
| XLOC_007813 | XLOC_007813 | HBA2               | chr16:222845-223709       | -0.741435 | 0.999791 |
| XLOC_018516 | XLOC_018516 | PDE7B              | chr6:136172833-136516709  | -0.740799 | 1        |
| XLOC_010274 | XLOC_010274 | LOC727896          | chr18:2916991-3011945     | -0.738992 | 1        |
| XLOC_009843 | XLOC_009843 | COL1A1             | chr17:48261456-48279000   | -0.737375 | 1        |
| XLOC_007701 | XLOC_007701 | CSPG4              | chr15:75966662-76005189   | -0.735724 | 1        |

|             |             |              |                          |           |          |
|-------------|-------------|--------------|--------------------------|-----------|----------|
| XLOC_021271 | XLOC_021271 | GPR85        | chr7:112720467-112727833 | -0.735202 | 1        |
| XLOC_023955 | XLOC_023955 | PGAM4        | chrX:77166193-77305892   | -0.73489  | 1        |
| XLOC_007278 | XLOC_007278 | LOC145837    | chr15:69854058-69863779  | -0.731349 | 1        |
| XLOC_005309 | XLOC_005309 | TAS2R46      | chr12:10998447-11328619  | -0.728311 | 1        |
| XLOC_003777 | XLOC_003777 | ENDOD1       | chr11:94822973-94865815  | -0.727889 | 0.439127 |
| XLOC_023286 | XLOC_023286 | PPEF1        | chrX:18709044-18846034   | -0.724202 | 1        |
| XLOC_002168 | XLOC_002168 | SERTAD4-AS1  | chr1:210404803-210416440 | -0.722682 | 0.598908 |
| XLOC_002954 | XLOC_002954 | RHOBTB1      | chr10:62629197-62761198  | -0.718456 | 0.244149 |
| XLOC_016798 | XLOC_016798 | PPEF2        | chr4:76781025-76823681   | -0.716967 | 1        |
| XLOC_013265 | XLOC_013265 | CERKL        | chr2:182321618-182521834 | -0.715542 | 1        |
| XLOC_002980 | XLOC_002980 | UNC5B-AS1    | chr10:72972291-73062635  | -0.714911 | 0.999791 |
| XLOC_006153 | XLOC_006153 | DACH1        | chr13:72012097-72441330  | -0.711274 | 1        |
| XLOC_004097 | XLOC_004097 | TPH1         | chr11:18042083-18062335  | -0.712535 | 1        |
| XLOC_011805 | XLOC_011805 | CCDC114      | chr19:48799708-48823332  | -0.712443 | 1        |
| XLOC_006814 | XLOC_006814 | FERMT2       | chr14:53323988-53417815  | -0.711056 | 1        |
| XLOC_008562 | XLOC_008562 | ABCC11       | chr16:48200821-48269088  | -0.709292 | 1        |
| XLOC_000642 | XLOC_000642 | ITGA10       | chr1:145524989-145543868 | -0.707827 | 1        |
| XLOC_018826 | XLOC_018826 | SPDEF        | chr6:34505578-34524110   | -0.70734  | 1        |
| XLOC_009162 | XLOC_009162 | TMEM92       | chr17:48348766-48358846  | -0.70501  | 1        |
| XLOC_010338 | XLOC_010338 | LINC00669    | chr18:36786887-37331959  | -0.702927 | 0.680311 |
| XLOC_011345 | XLOC_011345 | FUT3         | chr19:5842898-5851485    | -0.697604 | 1        |
| XLOC_011724 | XLOC_011724 | LYPD3        | chr19:43964945-43969831  | -0.696817 | 0.999791 |
| XLOC_003229 | XLOC_003229 | EPS8L2       | chr11:706119-727727      | -0.695444 | 0.420675 |
| XLOC_022433 | XLOC_022433 | LOC100128076 | chr9:94895115-94900911   | -0.695069 | 1        |
| XLOC_009257 | XLOC_009257 | SSTR2        | chr17:71161159-71168062  | -0.69424  | 1        |
| XLOC_013213 | XLOC_013213 | GALNT3       | chr2:166604312-166650803 | -0.694222 | 1        |
| XLOC_001253 | XLOC_001253 | GPR157       | chr1:9164475-9189229     | -0.689132 | 1        |
| XLOC_011881 | XLOC_011881 | KLK4         | chr19:51409607-51413994  | -0.688827 | 1        |
| XLOC_021725 | XLOC_021725 | COLEC10      | chr8:120079423-120119202 | -0.688818 | 1        |
| XLOC_021193 | XLOC_021193 | CYP3A5       | chr7:99245812-99277621   | -0.688628 | 1        |
| XLOC_022770 | XLOC_022770 | LRRC19       | chr9:26903367-27062931   | -0.688085 | 1        |
| XLOC_010267 | XLOC_010267 | C18orf56     | chr18:596997-712662      | -0.687849 | 0.999791 |
| XLOC_006118 | XLOC_006118 | LINC00441    | chr13:48870648-48877797  | -0.684398 | 1        |
| XLOC_000137 | XLOC_000137 | PADI3        | chr1:17575592-17610727   | -0.684066 | 1        |
| XLOC_022508 | XLOC_022508 | KIAA1958     | chr9:115249247-115422706 | -0.683933 | 0.624111 |
| XLOC_004463 | XLOC_004463 | SNORA32      | chr11:93464144-93464265  | -0.683916 | 0.999791 |
| XLOC_015637 | XLOC_015637 | SCN11A       | chr3:38887259-38992052   | -0.683846 | 1        |
| XLOC_005308 | XLOC_005308 | TAS2R31      | chr12:10998447-11328619  | -0.683521 | 1        |
| XLOC_013369 | XLOC_013369 | IHH          | chr2:219919141-219925238 | -0.682914 | 1        |
| XLOC_011365 | XLOC_011365 | FLJ25758     | chr19:7004963-7006426    | -0.682873 | 1        |
| XLOC_007879 | XLOC_007879 | ABCA17P      | chr16:2390922-2476700    | -0.682043 | 1        |
| XLOC_004041 | XLOC_004041 | GVINP1       | chr11:6734380-6743110    | -0.68078  | 1        |
| XLOC_013227 | XLOC_013227 | LOC440925    | chr2:171568948-171571077 | -0.680654 | 1        |
| XLOC_018162 | XLOC_018162 | HCG9         | chr6:29942891-29946177   | -0.680359 | 1        |
| XLOC_004777 | XLOC_004777 | SSPN         | chr12:26348268-26387708  | -0.678888 | 1        |
| XLOC_015237 | XLOC_015237 | ZPLD1        | chr3:102153858-102198685 | -0.678325 | 1        |
| XLOC_001793 | XLOC_001793 | HIST2H2AB    | chr1:149859018-149859466 | -0.677607 | 1        |
| XLOC_004681 | XLOC_004681 | GPR162       | chr12:6930962-6936583    | -0.677396 | 0.304629 |
| XLOC_006355 | XLOC_006355 | PTGER2       | chr14:52781015-52795322  | -0.676255 | 1        |
| XLOC_017765 | XLOC_017765 | STARD4       | chr5:110834021-111353003 | -0.67625  | 0.266089 |
| XLOC_021368 | XLOC_021368 | EPHA1        | chr7:143078359-143220540 | -0.674918 | 1        |
| XLOC_012454 | XLOC_012454 | HNMT         | chr2:138721807-138773934 | -0.673563 | 1        |
| XLOC_011891 | XLOC_011891 | KLK14        | chr19:51581153-51587502  | -0.672627 | 1        |
| XLOC_015870 | XLOC_015870 | CCDC80       | chr3:112323408-112359977 | -0.672508 | 0.202441 |
| XLOC_002899 | XLOC_002899 | C10orf10     | chr10:45455218-45490172  | -0.672392 | 1        |
| XLOC_014354 | XLOC_014354 | LINC00313    | chr21:44881973-44898103  | -0.672123 | 1        |
| XLOC_008078 | XLOC_008078 | SLC5A2       | chr16:31494438-31519706  | -0.671498 | 1        |
| XLOC_017837 | XLOC_017837 | GFRA3        | chr5:137588068-137610253 | -0.671489 | 1        |
| XLOC_009550 | XLOC_009550 | SLC47A2      | chr17:19581627-19620043  | -0.669566 | 1        |
| XLOC_002143 | XLOC_002143 | LEMD1        | chr1:205342379-205391214 | -0.668872 | 1        |
| XLOC_012641 | XLOC_012641 | C2orf62      | chr2:219221578-219232817 | -0.667222 | 1        |
| XLOC_018120 | XLOC_018120 | HIST1H4I     | chr6:27106071-27114637   | -0.666445 | 0.999791 |
| XLOC_018141 | XLOC_018141 | NKAPL        | chr6:28227074-28228736   | -0.666182 | 1        |
| XLOC_000425 | XLOC_000425 | L1TD1        | chr1:62660473-62678001   | -0.665768 | 1        |
| XLOC_017454 | XLOC_017454 | FABP6        | chr5:159614373-159665729 | -0.665392 | 0.216036 |
| XLOC_014533 | XLOC_014533 | APOL6        | chr22:36044423-36064456  | -0.665203 | 1        |
| XLOC_018213 | XLOC_018213 | C2           | chr6:31865561-31913449   | -0.665154 | 1        |
| XLOC_012050 | XLOC_012050 | ATP6V1C2     | chr2:10861774-10952960   | -0.663094 | 1        |
| XLOC_011526 | XLOC_011526 | INSL3        | chr19:17927321-17932383  | -0.662357 | 1        |
| XLOC_004158 | XLOC_004158 | CHRM4        | chr1:46406639-46408107   | -0.65996  | 1        |
| XLOC_008825 | XLOC_008825 | SNORD10      | chr17:7465308-7482324    | -0.658524 | 0.999791 |
| XLOC_000755 | XLOC_000755 | TRIM46       | chr1:155146262-155157447 | -0.658183 | 1        |
| XLOC_003015 | XLOC_003015 | ZMIZ1-AS1    | chr10:80703082-80827205  | -0.658083 | 1        |
| XLOC_012664 | XLOC_012664 | SPEG         | chr2:220299699-220358354 | -0.657934 | 1        |
| XLOC_010310 | XLOC_010310 | OSBPL1A      | chr18:21742010-21977833  | -0.657237 | 0.06575  |
| XLOC_000977 | XLOC_000977 | PPP1R12B     | chr1:202317829-202557697 | -0.657193 | 0.445803 |
| XLOC_019080 | XLOC_019080 | CTAGE9       | chr6:131958441-132068550 | -0.656806 | 1        |
| XLOC_016626 | XLOC_016626 | SLC26A1      | chr4:972862-998317       | -0.656582 | 0.999791 |
| XLOC_020816 | XLOC_020816 | CTAGE15P     | chr7:143268893-143271480 | -0.656467 | 1        |



|             |             |                     |                           |           |          |
|-------------|-------------|---------------------|---------------------------|-----------|----------|
| XLOC_007520 | XLOC_007520 | EXD1                | chr15:41474930-41522895   | -0.656399 | 1        |
| XLOC_017388 | XLOC_017388 | PCDHGB8P            | chr5:140710251-140892548  | -0.656157 | 1        |
| XLOC_014080 | XLOC_014080 | SRMS                | chr20:62172162-62178857   | -0.655926 | 1        |
| XLOC_021945 | XLOC_021945 | LOC100128750        | chr8:30239634-30429734    | -0.655515 | 0.999791 |
| XLOC_011235 | XLOC_011235 | ZNF586              | chr19:58281019-58291984   | -0.65425  | 0.891812 |
| XLOC_015649 | XLOC_015649 | CCDC13              | chr3:42749873-42814745    | -0.653693 | 1        |
| XLOC_017373 | XLOC_017373 | PCDHB6              | chr5:140529838-140532868  | -0.653193 | 1        |
| XLOC_001696 | XLOC_001696 | GNAT2               | chr1:110145888-110155705  | -0.652246 | 1        |
| XLOC_015066 | XLOC_015066 | TGM4                | chr3:44916097-44956088    | -0.652089 | 1        |
| XLOC_021809 | XLOC_021809 | TMED10P1            | chr8:146198974-146231432  | -0.651621 | 1        |
| XLOC_010523 | XLOC_010523 | CRB3                | chr19:6464259-6481798     | -0.649667 | 0.999791 |
| XLOC_007106 | XLOC_007106 | WHAMMP2             | chr15:28982728-29003508   | -0.648127 | 1        |
| XLOC_020360 | XLOC_020360 | ANKRD61             | chr7:6048881-6098860      | -0.64757  | 1        |
| XLOC_003197 | XLOC_003197 | TCERG1L             | chr10:132890654-133109984 | -0.647324 | 1        |
| XLOC_002409 | XLOC_002409 | LOC100129055        | chr10:38464598-38503273   | -0.647275 | 1        |
| XLOC_013309 | XLOC_013309 | ALS2CR12            | chr2:202153146-202222101  | -0.647216 | 1        |
| XLOC_018776 | XLOC_018776 | SLC44A4             | chr6:31830969-31846823    | -0.642731 | 1        |
| XLOC_000157 | XLOC_000157 | LOC100506801        | chr1:21543739-21672034    | -0.642563 | 1        |
| XLOC_018470 | XLOC_018470 | BRD7P3              | chr6:118781934-119031238  | -0.642227 | 1        |
| XLOC_013466 | XLOC_013466 | BOK-AS1             | chr2:242483800-242513553  | -0.64092  | 1        |
| XLOC_013108 | XLOC_013108 | FLJ42351            | chr2:113399406-113401757  | -0.640252 | 0.999791 |
| XLOC_007830 | XLOC_007830 | WFIKN1              | chr16:681011-684116       | -0.640194 | 1        |
| XLOC_001646 | XLOC_001646 | FLJ27354            | chr1:90090407-90098453    | -0.63945  | 0.999791 |
| XLOC_006770 | XLOC_006770 | PTCSC3              | chr14:36539632-36645857   | -0.638867 | 1        |
| XLOC_018948 | XLOC_018948 | B3GAT2              | chr6:71377478-71666788    | -0.636466 | 0.999791 |
| XLOC_011360 | XLOC_011360 | TNFSF14             | chr19:6663147-6670599     | -0.636162 | 1        |
| XLOC_002313 | XLOC_002313 | PRR26               | chr10:320129-735608       | -0.634407 | 1        |
| XLOC_018551 | XLOC_018551 | LOC100652739        | chr6:150139893-150244214  | -0.631535 | 1        |
| XLOC_017211 | XLOC_017211 | CMYA5               | chr5:78985658-79096049    | -0.630983 | 1        |
| XLOC_012105 | XLOC_012105 | GCKR                | chr2:27719705-27746550    | -0.630375 | 1        |
| XLOC_020975 | XLOC_020975 | HOXA2               | chr7:27139972-27142394    | -0.627562 | 1        |
| XLOC_014727 | XLOC_014727 | ADORA2A-AS1         | chr22:24823529-24890783   | -0.625839 | 1        |
| XLOC_002052 | XLOC_002052 | RASAL2-AS1          | chr1:178060642-178448648  | -0.625574 | 1        |
| XLOC_007845 | XLOC_007845 | CACNA1H             | chr16:1203240-1275254     | -0.625291 | 1        |
| XLOC_010817 | XLOC_010817 | ZNF790-AS1          | chr19:37288451-37407193   | -0.624934 | 1        |
| XLOC_019193 | XLOC_019193 | MLLT4-AS1           | chr6:168224569-168227476  | -0.624364 | 1        |
| XLOC_011017 | XLOC_011017 | DKKL1               | chr19:49866986-49878373   | -0.623172 | 0.999791 |
| XLOC_014208 | XLOC_014208 | C21orf90            | chr21:45917774-46131495   | -0.623088 | 0.999791 |
| XLOC_019124 | XLOC_019124 | LOC285740           | chr6:143875466-143890476  | -0.62073  | 1        |
| XLOC_007746 | XLOC_007746 | FSD2                | chr15:83428023-83474806   | -0.619832 | 1        |
| XLOC_009592 | XLOC_009592 | CORO6               | chr17:27920526-27948441   | -0.619658 | 1        |
| XLOC_017242 | XLOC_017242 | C5orf27             | chr5:95187935-95195836    | -0.619605 | 1        |
| XLOC_013906 | XLOC_013906 | NCOR1P1             | chr20:26084051-26094677   | -0.619581 | 1        |
| XLOC_020711 | XLOC_020711 | ST7-OT4             | chr7:116592500-116870075  | -0.619337 | 1        |
| XLOC_023551 | XLOC_023551 | CLDN2               | chrX:106143292-106174091  | -0.618671 | 1        |
| XLOC_000265 | XLOC_000265 | HPCA                | chr1:33352097-33366953    | -0.618238 | 1        |
| XLOC_007434 | XLOC_007434 | ALDH1A3             | chr15:101420008-101456830 | -0.618199 | 1        |
| XLOC_023183 | XLOC_023183 | FUT7                | chr9:139901685-139931234  | -0.617329 | 1        |
| XLOC_001787 | XLOC_001787 | HIST2H3D            | chr1:149784779-149785236  | -0.613766 | 0.999791 |
| XLOC_000883 | XLOC_000883 | DNM3                | chr1:171810620-172381857  | -0.613208 | 1        |
| XLOC_008008 | XLOC_008008 | AQP8                | chr16:25228284-25240253   | -0.612649 | 1        |
| XLOC_017449 | XLOC_017449 | LSM11               | chr5:157170754-157183746  | -0.611729 | 0.404265 |
| XLOC_012032 | XLOC_012032 | COLEC11             | chr2:3642421-3692234      | -0.611404 | 0.967815 |
| XLOC_003137 | XLOC_003137 | RPL13AP6            | chr10:112679300-112773425 | -0.610752 | 0.999791 |
| XLOC_012639 | XLOC_012639 | GPBAR1              | chr2:219125737-219128582  | -0.610541 | 1        |
| XLOC_018123 | XLOC_018123 | PRSS16              | chr6:27215501-27224399    | -0.609842 | 0.28478  |
| XLOC_011872 | XLOC_011872 | SYT3                | chr19:51125233-51143092   | -0.609287 | 1        |
| XLOC_016278 | XLOC_016278 | PTTG2               | chr4:37892704-38140796    | -0.608854 | 1        |
| XLOC_001759 | XLOC_001759 | LINC00623,LOC728875 | chr1:144300511-144341755  | -0.608594 | 0.999791 |
| XLOC_009031 | XLOC_009031 | TCAP                | chr17:37821598-37822807   | -0.6085   | 1        |
| XLOC_023755 | XLOC_023755 | MID1                | chrX:10413349-10851809    | -0.607022 | 1        |
| XLOC_020334 | XLOC_020334 | GPR146              | chr7:1036622-1177893      | -0.606999 | 0.999791 |
| XLOC_002137 | XLOC_002137 | LRRN2               | chr1:204586302-204654597  | -0.606783 | 1        |
| XLOC_001655 | XLOC_001655 | FAM69A              | chr1:93297593-93427079    | -0.605483 | 0.999791 |
| XLOC_000547 | XLOC_000547 | LOC100129138        | chr1:104615644-104619693  | -0.604992 | 1        |
| XLOC_018155 | XLOC_018155 | OR2H2               | chr6:29555682-29556745    | -0.604871 | 1        |
| XLOC_018684 | XLOC_018684 | HIST1H2BG           | chr6:26216427-26216872    | -0.60461  | 0.999791 |
| XLOC_014419 | XLOC_014419 | LOC729444           | chr22:20325589-20350461   | -0.604438 | 1        |
| XLOC_011046 | XLOC_011046 | SIGLEC16            | chr19:50472911-50479076   | -0.604229 | 1        |
| XLOC_007733 | XLOC_007733 | MEX3B               | chr15:82334118-82338484   | -0.603639 | 0.676574 |
| XLOC_014573 | XLOC_014573 | CACNA11             | chr22:39966757-40085740   | -0.603351 | 1        |
| XLOC_004173 | XLOC_004173 | RAPSN               | chr11:47459307-47470730   | -0.602698 | 1        |
| XLOC_013028 | XLOC_013028 | PLGLB2              | chr2:87140934-87248973    | -0.602103 | 1        |
| XLOC_016315 | XLOC_016315 | RASL11B             | chr4:53728494-53733002    | -0.600947 | 1        |
| XLOC_023537 | XLOC_023537 | MORF4L2-AS1         | chrX:102930425-102947484  | -0.600586 | 1        |
| XLOC_018098 | XLOC_018098 | HIST1H1E            | chr6:26156558-26157343    | -0.599378 | 0.999791 |
| XLOC_015723 | XLOC_015723 | UBA7                | chr3:49842637-49851391    | -0.598941 | 1        |
| XLOC_001870 | XLOC_001870 | C1orf189            | chr1:154171561-154178841  | -0.598818 | 1        |
| XLOC_014998 | XLOC_014998 | ZNF860              | chr3:31702316-32033228    | -0.597714 | 1        |

|             |             |              |                           |           |           |
|-------------|-------------|--------------|---------------------------|-----------|-----------|
| XLOC_018158 | XLOC_018158 | LOC554223    | chr6:29758807-29765584    | -0.597371 | 1         |
| XLOC_023005 | XLOC_023005 | SVEP1        | chr9:113127528-113342160  | -0.594923 | 1         |
| XLOC_022188 | XLOC_022188 | NDRG1        | chr8:134249413-134309547  | -0.594891 | 0.149432  |
| XLOC_008938 | XLOC_008938 | SPAG5-AS1    | chr17:26926150-26927177   | -0.5941   | 0.999791  |
| XLOC_000020 | XLOC_000020 | TAS1R3       | chr11:1266725-1269844     | -0.593334 | 1         |
| XLOC_000457 | XLOC_000457 | ZRANB2-AS2   | chr1:71547006-71703406    | -0.59321  | 1         |
| XLOC_000671 | XLOC_000671 | CA14         | chr1:150230217-150237480  | -0.592702 | 1         |
| XLOC_008378 | XLOC_008378 | ZSCAN10      | chr16:3138894-3142861     | -0.592375 | 1         |
| XLOC_023062 | XLOC_023062 | ZBTB26       | chr9:125680377-125693779  | -0.592034 | 0.857467  |
| XLOC_017895 | XLOC_017895 | ARSI         | chr5:149675908-149682525  | -0.591719 | 1         |
| XLOC_001428 | XLOC_001428 | FNDC5        | chr1:33327868-33338082    | -0.590259 | 1         |
| XLOC_012714 | XLOC_012714 | INPP5D       | chr2:233925035-234116549  | -0.590075 | 1         |
| XLOC_008771 | XLOC_008771 | SPNS2        | chr17:4402128-4458681     | -0.589767 | 0.999791  |
| XLOC_017676 | XLOC_017676 | ADAMTS6      | chr5:64444562-64777704    | -0.588617 | 1         |
| XLOC_007839 | XLOC_007839 | MSLN         | chr16:810764-818865       | -0.588389 | 1         |
| XLOC_002130 | XLOC_002130 | REN          | chr1:204123943-204135465  | -0.586896 | 1         |
| XLOC_022892 | XLOC_022892 | PRUNE2       | chr9:79226291-79521003    | -0.586822 | 1         |
| XLOC_003392 | XLOC_003392 | CSTF3-AS1    | chr11:33183202-33213142   | -0.586747 | 1         |
| XLOC_008379 | XLOC_008379 | ZNF205-AS1   | chr16:3160460-3170518     | -0.584838 | 1         |
| XLOC_010925 | XLOC_010925 | BCL3         | chr19:45251977-45263301   | -0.584134 | 0.215182  |
| XLOC_014406 | XLOC_014406 | DGCR10       | chr22:19010136-19011063   | -0.58327  | 1         |
| XLOC_023935 | XLOC_023935 | FAM226A      | chrX:72161567-72163589    | -0.582103 | 0.999791  |
| XLOC_009227 | XLOC_009227 | LOC729683    | chr17:61777697-61780045   | -0.582079 | 0.999791  |
| XLOC_022052 | XLOC_022052 | IL7          | chr8:79645006-79717758    | -0.581032 | 0.993188  |
| XLOC_001924 | XLOC_001924 | ETV3         | chr1:157094458-157108383  | -0.580627 | 0.999791  |
| XLOC_022156 | XLOC_022156 | HAS2         | chr8:122625270-122657564  | -0.578856 | 0.993188  |
| XLOC_021734 | XLOC_021734 | FAM83A       | chr8:124194751-124222318  | -0.578167 | 1         |
| XLOC_005490 | XLOC_005490 | NPFF         | chr12:53900473-53901422   | -0.577897 | 0.999791  |
| XLOC_007685 | XLOC_007685 | SEMA7A       | chr15:74701629-74726299   | -0.577794 | 1         |
| XLOC_021724 | XLOC_021724 | SAMD12-AS1   | chr8:119201694-119738306  | -0.577052 | 1         |
| XLOC_021110 | XLOC_021110 | CLDN3        | chr7:73183326-73184600    | -0.576913 | 0.999791  |
| XLOC_008882 | XLOC_008882 | USP32P1      | chr17:16690205-16707819   | -0.576856 | 1         |
| XLOC_017197 | XLOC_017197 | IQGAP2       | chr5:75699148-76003957    | -0.576855 | 1         |
| XLOC_001982 | XLOC_001982 | OLFML2B      | chr1:161952981-161993644  | -0.576796 | 0.999791  |
| XLOC_007739 | XLOC_007739 | GOLGA6L10    | chr15:83009406-83018198   | -0.575751 | 1         |
| XLOC_018093 | XLOC_018093 | HIST1H4A     | chr6:26021906-26022278    | -0.575423 | 0.999791  |
| XLOC_003758 | XLOC_003758 | NAALAD2      | chr1:89867817-89925779    | -0.572955 | 1         |
| XLOC_012845 | XLOC_012845 | FTH1P3       | chr2:27604065-27632550    | -0.572341 | 1         |
| XLOC_021284 | XLOC_021284 | CADPS2       | chr7:121958477-122526813  | -0.572019 | 0.519646  |
| XLOC_001190 | XLOC_001190 | RNF223       | chr1:1007125-1009687      | -0.570496 | 1         |
| XLOC_005576 | XLOC_005576 | LOC100507250 | chr12:69068150-69080639   | -0.570026 | 1         |
| XLOC_017699 | XLOC_017699 | GCNT4        | chr5:74323288-74326724    | -0.569747 | 1         |
| XLOC_020687 | XLOC_020687 | CDHR3        | chr7:105603656-105676877  | -0.569415 | 1         |
| XLOC_001152 | XLOC_001152 | TRIM58       | chr1:248020500-248043438  | -0.568686 | 1         |
| XLOC_020615 | XLOC_020615 | DYNC111      | chr7:95401817-95727736    | -0.568633 | 1         |
| XLOC_013981 | XLOC_013981 | LOC79015     | chr20:43285091-43300380   | -0.568334 | 1         |
| XLOC_022323 | XLOC_022323 | DNAI1        | chr9:34458810-34520982    | -0.56735  | 1         |
| XLOC_009957 | XLOC_009957 | GRIN2C       | chr17:72838167-72856007   | -0.566159 | 1         |
| XLOC_003044 | XLOC_003044 | FLJ37201     | chr10:91451056-91457685   | -0.566101 | 1         |
| XLOC_011842 | XLOC_011842 | RRAS         | chr19:50138551-50143400   | -0.565988 | 0.0961594 |
| XLOC_012288 | XLOC_012288 | ANAPC1P1     | chr2:87042459-87122165    | -0.565928 | 1         |
| XLOC_017723 | XLOC_017723 | SSBP2        | chr5:80256507-81047072    | -0.565162 | 0.999791  |
| XLOC_009170 | XLOC_009170 | CACNA1G      | chr17:48633567-48704832   | -0.564374 | 1         |
| XLOC_003006 | XLOC_003006 | C10orf55     | chr10:75669726-75682535   | -0.564144 | 1         |
| XLOC_011602 | XLOC_011602 | SBSN         | chr19:36014268-36019253   | -0.563573 | 1         |
| XLOC_002902 | XLOC_002902 | OR13A1       | chr10:45798101-45811056   | -0.563426 | 1         |
| XLOC_011077 | XLOC_011077 | FPR3         | chr19:52298410-52329334   | -0.563105 | 1         |
| XLOC_018103 | XLOC_018103 | HIST1H2AE    | chr6:26217147-26217711    | -0.56106  | 0.891812  |
| XLOC_006629 | XLOC_006629 | LINC00239    | chr14:102196773-102198862 | -0.557452 | 1         |
| XLOC_008508 | XLOC_008508 | GDPD3        | chr16:30116130-30124878   | -0.557028 | 0.999791  |
| XLOC_007717 | XLOC_007717 | ACSBG1       | chr15:78463186-78527049   | -0.55562  | 1         |
| XLOC_021240 | XLOC_021240 | RPL19P12     | chr7:102715327-102789569  | -0.554824 | 1         |
| XLOC_017020 | XLOC_017020 | ENPP6        | chr4:185009858-185139114  | -0.55376  | 1         |
| XLOC_022678 | XLOC_022678 | LCN12        | chr9:139846767-139849949  | -0.553543 | 1         |
| XLOC_001333 | XLOC_001333 | KIF17        | chr1:20990506-21044317    | -0.553423 | 0.956701  |
| XLOC_016618 | XLOC_016618 | ZNF732       | chr4:264463-289944        | -0.553009 | 1         |
| XLOC_022139 | XLOC_022139 | TMEM74       | chr8:109795345-109799770  | -0.551755 | 1         |
| XLOC_016028 | XLOC_016028 | LOC730091    | chr3:156465131-156534851  | -0.551676 | 1         |
| XLOC_012272 | XLOC_012272 | TCF7L1       | chr2:85360582-85537511    | -0.550481 | 1         |
| XLOC_004546 | XLOC_004546 | APOA1        | chr11:116706468-116708338 | -0.550462 | 1         |
| XLOC_005712 | XLOC_005712 | IQCD         | chr12:113633245-113658880 | -0.550118 | 1         |
| XLOC_004439 | XLOC_004439 | RAB30        | chr11:82692477-82782884   | -0.549275 | 1         |
| XLOC_021099 | XLOC_021099 | SPDYEBP      | chr7:72476588-72519691    | -0.549001 | 1         |
| XLOC_015812 | XLOC_015812 | LMOD3        | chr3:69156038-69171746    | -0.547989 | 1         |
| XLOC_008689 | XLOC_008689 | MAF          | chr16:79627744-79634622   | -0.547686 | 1         |
| XLOC_007323 | XLOC_007323 | PSTPIP1      | chr15:77287464-77329671   | -0.547626 | 1         |
| XLOC_009800 | XLOC_009800 | RPRML        | chr17:45055521-45056614   | -0.547502 | 1         |
| XLOC_012033 | XLOC_012033 | ALLC         | chr2:3705785-3750260      | -0.546598 | 1         |
| XLOC_003211 | XLOC_003211 | SYCE1        | chr10:135367403-135383462 | -0.545945 | 1         |

|             |             |                 |                           |           |           |
|-------------|-------------|-----------------|---------------------------|-----------|-----------|
| XLOC_000432 | XLOC_000432 | DLEU2L          | chr1:63989012-64038364    | -0.545495 | 1         |
| XLOC_015287 | XLOC_015287 | EAF2            | chr3:121554033-121605373  | -0.545208 | 0.956701  |
| XLOC_021171 | XLOC_021171 | PON3            | chr7:94989183-95025687    | -0.544702 | 0.999791  |
| XLOC_019185 | XLOC_019185 | RPS6KA2         | chr6:166822853-167275771  | -0.54424  | 1         |
| XLOC_007554 | XLOC_007554 | PIN4P1          | chr15:44165729-44487429   | -0.543348 | 1         |
| XLOC_000962 | XLOC_000962 | C1orf106        | chr1:200860626-200884864  | -0.542711 | 1         |
| XLOC_016599 | XLOC_016599 | ANKRD37         | chr4:186317839-186347139  | -0.5421   | 0.999791  |
| XLOC_003227 | XLOC_003227 | DRD4            | chr11:637304-640705       | -0.541882 | 0.999791  |
| XLOC_011989 | XLOC_011989 | DUXA            | chr19:57663093-57678856   | -0.541276 | 1         |
| XLOC_016494 | XLOC_016494 | SPRY1           | chr4:124317949-124324915  | -0.540585 | 0.4471    |
| XLOC_004385 | XLOC_004385 | ALG1L9P         | chr11:71498556-71524905   | -0.540528 | 1         |
| XLOC_007378 | XLOC_007378 | SLC28A1         | chr15:85427912-85489027   | -0.539885 | 1         |
| XLOC_022690 | XLOC_022690 | SLC34A3         | chr9:140125208-140131006  | -0.538961 | 1         |
| XLOC_000065 | XLOC_000065 | ENO1-AS1        | chr1:8921058-8939943      | -0.538226 | 0.999791  |
| XLOC_014318 | XLOC_014318 | CBR3-AS1        | chr21:37504064-37528606   | -0.537529 | 0.999791  |
| XLOC_017888 | XLOC_017888 | IL17B           | chr5:148753829-148758838  | -0.53644  | 1         |
| XLOC_021337 | XLOC_021337 | CREB3L2         | chr7:137559724-137688847  | -0.53636  | 0.64943   |
| XLOC_007702 | XLOC_007702 | DNM1P35         | chr15:76016318-76032418   | -0.536124 | 1         |
| XLOC_001576 | XLOC_001576 | TACSTD2         | chr1:59041094-59043166    | -0.535831 | 1         |
| XLOC_001708 | XLOC_001708 | DENND2D         | chr1:11728590-11747160    | -0.535432 | 1         |
| XLOC_015515 | XLOC_015515 | IL1RAP          | chr3:190231839-190374986  | -0.534656 | 0.501099  |
| XLOC_009299 | XLOC_009299 | PRCD            | chr17:74523429-74541458   | -0.533732 | 1         |
| XLOC_017384 | XLOC_017384 | PCDHB18         | chr5:140613937-140617101  | -0.533501 | 1         |
| XLOC_018641 | XLOC_018641 | C6orf52         | chr6:10671650-10695030    | -0.532319 | 0.999791  |
| XLOC_014944 | XLOC_014944 | IRAK2           | chr3:10206562-10285427    | -0.532213 | 0.854021  |
| XLOC_000838 | XLOC_000838 | NOS1AP          | chr1:162039580-162339813  | -0.531606 | 1         |
| XLOC_010272 | XLOC_010272 | CBX3P2          | chr18:2652168-2655394     | -0.531462 | 0.999791  |
| XLOC_004749 | XLOC_004749 | C12orf60        | chr12:14956505-14976791   | -0.530629 | 0.999791  |
| XLOC_010179 | XLOC_010179 | FHOD3           | chr18:33877701-34805288   | -0.530555 | 1         |
| XLOC_022974 | XLOC_022974 | GABBR2          | chr9:101050363-101471479  | -0.530544 | 1         |
| XLOC_018303 | XLOC_018303 | GNMT            | chr6:42928499-42946981    | -0.530454 | 1         |
| XLOC_020698 | XLOC_020698 | LRRN3           | chr7:110303105-111202573  | -0.530166 | 1         |
| XLOC_022534 | XLOC_022534 | MORN5           | chr9:124922189-124962367  | -0.529903 | 1         |
| XLOC_004080 | XLOC_004080 | DKK3            | chr11:11984542-12030917   | -0.529896 | 1         |
| XLOC_022580 | XLOC_022580 | LCN2            | chr9:130911731-130915734  | -0.529746 | 1         |
| XLOC_021032 | XLOC_021032 | RASA4CP         | chr7:44068485-44083895    | -0.529694 | 1         |
| XLOC_016468 | XLOC_016468 | ENPEP           | chr4:111397228-111484493  | -0.529034 | 1         |
| XLOC_000189 | XLOC_000189 | RHD             | chr1:25598980-25656936    | -0.528909 | 1         |
| XLOC_012121 | XLOC_012121 | CLIP4           | chr2:29338307-29406679    | -0.528683 | 1         |
| XLOC_020878 | XLOC_020878 | INSIG1          | chr7:155089485-155101945  | -0.527212 | 0.059175  |
| XLOC_010957 | XLOC_010957 | HIF3A           | chr19:46720994-46846690   | -0.524689 | 1         |
| XLOC_003420 | XLOC_003420 | CD82            | chr11:44587140-44641315   | -0.524627 | 0.910882  |
| XLOC_013271 | XLOC_013271 | CALCRL          | chr2:188206689-188313021  | -0.524479 | 1         |
| XLOC_011914 | XLOC_011914 | ZNF841          | chr19:52567718-52599018   | -0.524311 | 0.28478   |
| XLOC_008927 | XLOC_008927 | LGALS9          | chr17:25958173-25976586   | -0.524176 | 1         |
| XLOC_018945 | XLOC_018945 | EYS             | chr6:64429875-66417118    | -0.524098 | 1         |
| XLOC_018769 | XLOC_018769 | DDAH2           | chr6:31694816-31698039    | -0.523948 | 0.0879628 |
| XLOC_018097 | XLOC_018097 | HIST1H2AC       | chr6:26124372-26124918    | -0.523729 | 0.999791  |
| XLOC_014719 | XLOC_014719 | DERL3           | chr22:24129149-24181199   | -0.522228 | 0.999791  |
| XLOC_023892 | XLOC_023892 | MTRNR2L10       | chrX:55207823-55208944    | -0.521654 | 0.999791  |
| XLOC_000319 | XLOC_000319 | RIMKLA          | chr1:42846467-42889900    | -0.520105 | 0.119609  |
| XLOC_009572 | XLOC_009572 | ALDOC           | chr17:26900132-26903951   | -0.519895 | 0.114315  |
| XLOC_012148 | XLOC_012148 | ARHGEF33        | chr2:39146503-39202590    | -0.517666 | 1         |
| XLOC_023281 | XLOC_023281 | REPS2           | chrX:16964813-17171403    | -0.517135 | 0.891812  |
| XLOC_018654 | XLOC_018654 | ATXN1           | chr6:16299342-16761721    | -0.515799 | 1         |
| XLOC_023982 | XLOC_023982 | ARMCX2          | chrX:100910267-100914863  | -0.515066 | 1         |
| XLOC_011971 | XLOC_011971 | SHISA7          | chr19:55940104-55954230   | -0.513812 | 1         |
| XLOC_007441 | XLOC_007441 | HERC2P3         | chr15:20613649-20711433   | -0.513265 | 0.956701  |
| XLOC_002879 | XLOC_002879 | NRP1            | chr10:33466418-33623833   | -0.513248 | 0.993188  |
| XLOC_007736 | XLOC_007736 | AGSK1_LOC727849 | chr15:82753446-82798352   | -0.510099 | 1         |
| XLOC_016793 | XLOC_016793 | CXCL2           | chr4:74962753-74964997    | -0.509985 | 0.999791  |
| XLOC_003687 | XLOC_003687 | KRTAP5-8        | chr11:71249070-71250253   | -0.509666 | 1         |
| XLOC_001397 | XLOC_001397 | SNORA44         | chr1:28879528-28908366    | -0.508453 | 0.999791  |
| XLOC_005284 | XLOC_005284 | CLEC2B          | chr12:10004967-10022458   | -0.508446 | 1         |
| XLOC_003942 | XLOC_003942 | MIR210HG        | chr11:565656-568457       | -0.508432 | 0.0934342 |
| XLOC_006063 | XLOC_006063 | N4BP2L1         | chr13:32974859-33002315   | -0.508248 | 0.999791  |
| XLOC_006911 | XLOC_006911 | NOXRRED1        | chr14:77860364-77889399   | -0.508198 | 1         |
| XLOC_001790 | XLOC_001790 | HIST2H2BC       | chr1:149821758-149822340  | -0.507656 | 0.999791  |
| XLOC_018972 | XLOC_018972 | FAM46A          | chr6:82455446-82462428    | -0.507518 | 0.993188  |
| XLOC_001221 | XLOC_001221 | LOC115110       | chr1:2481358-2484284      | -0.50505  | 0.999791  |
| XLOC_003944 | XLOC_003944 | LOC143666       | chr11:573807-575885       | -0.50407  | 0.999791  |
| XLOC_020389 | XLOC_020389 | DNAH11          | chr7:21582832-21985542    | -0.501195 | 1         |
| XLOC_006528 | XLOC_006528 | CYP46A1         | chr14:100150754-100193638 | -0.501395 | 1         |
| XLOC_023074 | XLOC_023074 | HSPA5           | chr9:127997126-128003666  | -0.501184 | 0.274877  |
| XLOC_007431 | XLOC_007431 | HSP90B2P        | chr15:99791651-99926498   | -0.50095  | 1         |
| XLOC_012113 | XLOC_012113 | FOSL2           | chr2:28615778-28637516    | -0.500677 | 0.253607  |
| XLOC_000713 | XLOC_000713 | LCE1E           | chr1:152758752-152760901  | -0.500082 | 1         |
| XLOC_014420 | XLOC_014420 | TMEM191B        | chr22:20377668-20380440   | -0.499751 | 0.999791  |
| XLOC_005258 | XLOC_005258 | RBP5            | chr12:7276279-7281466     | -0.499716 | 1         |

|             |             |                 |                           |           |           |
|-------------|-------------|-----------------|---------------------------|-----------|-----------|
| XLOC_001985 | XLOC_001985 | C1orf110        | chr1:162824086-162838605  | -0.499481 | 1         |
| XLOC_011294 | XLOC_011294 | JSRP1           | chr19:2252249-2256422     | -0.498951 | 0.216036  |
| XLOC_004120 | XLOC_004120 | SLC5A12         | chr11:26688565-26743574   | -0.498648 | 1         |
| XLOC_022291 | XLOC_022291 | ADAMTSL1        | chr9:18474078-18910947    | -0.498266 | 0.999791  |
| XLOC_008816 | XLOC_008816 | C17orf74        | chr17:7328934-7330886     | -0.498003 | 0.999791  |
| XLOC_022232 | XLOC_022232 | PARP10          | chr8:145051319-145060635  | -0.49739  | 0.372926  |
| XLOC_020707 | XLOC_020707 | CAV1            | chr7:116164838-116201239  | -0.495698 | 0.244149  |
| XLOC_010264 | XLOC_010264 | PARD6G-AS1      | chr18:77905806-78005397   | -0.495501 | 0.999791  |
| XLOC_007791 | XLOC_007791 | PGPEP1L         | chr15:99511458-99551024   | -0.495116 | 1         |
| XLOC_020862 | XLOC_020862 | ASIC3           | chr7:150745378-150749843  | -0.4949   | 0.999791  |
| XLOC_007976 | XLOC_007976 | ACSM3           | chr16:20775311-20860990   | -0.494507 | 0.999791  |
| XLOC_022274 | XLOC_022274 | CD274           | chr9:5450502-5470567      | -0.49355  | 0.873899  |
| XLOC_011992 | XLOC_011992 | ZNF550          | chr19:58058342-58067725   | -0.491782 | 1         |
| XLOC_000427 | XLOC_000427 | ANGPTL3         | chr1:62920396-63154039    | -0.491497 | 1         |
| XLOC_014596 | XLOC_014596 | LINC00634       | chr22:42348190-42354946   | -0.49111  | 1         |
| XLOC_016794 | XLOC_016794 | BTC             | chr4:75671447-75719882    | -0.490862 | 1         |
| XLOC_001147 | XLOC_001147 | NLRP3           | chr1:247579457-247612406  | -0.490389 | 1         |
| XLOC_023264 | XLOC_023264 | TMSB4X          | chrX:12993225-12995346    | -0.490344 | 0.0879628 |
| XLOC_019146 | XLOC_019146 | SYNE1           | chr6:152442818-152958534  | -0.490297 | 1         |
| XLOC_018217 | XLOC_018217 | C4A,C4B         | chr6:31949833-31970458    | -0.490083 | 1         |
| XLOC_008080 | XLOC_008080 | CLUHP3          | chr16:31711933-31718745   | -0.489909 | 0.999791  |
| XLOC_008535 | XLOC_008535 | PRSS8           | chr16:31142753-31147151   | -0.489359 | 0.999791  |
| XLOC_016815 | XLOC_016815 | RASGEF1B        | chr4:82348218-82393061    | -0.487743 | 1         |
| XLOC_003719 | XLOC_003719 | SNORD15B        | chr11:75110534-75133345   | -0.487543 | 0.999791  |
| XLOC_003324 | XLOC_003324 | SNORA23         | chr11:9406168-9469674     | -0.487443 | 0.999791  |
| XLOC_010196 | XLOC_010196 | LIPG            | chr18:47088426-47119278   | -0.48742  | 1         |
| XLOC_002848 | XLOC_002848 | LOC100499489    | chr10:22724353-22726858   | -0.48714  | 0.993188  |
| XLOC_005444 | XLOC_005444 | CERS5           | chr12:50523580-50561097   | -0.486276 | 0.111388  |
| XLOC_019172 | XLOC_019172 | AGPAT4          | chr6:161551056-161695107  | -0.486071 | 0.910882  |
| XLOC_014712 | XLOC_014712 | ZDHHC8P1        | chr22:23732791-23744799   | -0.485457 | 0.999791  |
| XLOC_017246 | XLOC_017246 | LNPEP           | chr5:96271345-96365115    | -0.485386 | 0.978746  |
| XLOC_021131 | XLOC_021131 | FGL2            | chr7:76751933-76924521    | -0.485134 | 1         |
| XLOC_004015 | XLOC_004015 | OR51B5          | chr11:5362112-5526882     | -0.484935 | 0.999791  |
| XLOC_001120 | XLOC_001120 | EDARADD         | chr1:236557679-236648008  | -0.484767 | 0.999791  |
| XLOC_004059 | XLOC_004059 | C11orf16        | chr11:8932700-8954553     | -0.484643 | 1         |
| XLOC_005597 | XLOC_005597 | CSRP2           | chr12:77252495-77272799   | -0.483426 | 0.210623  |
| XLOC_021140 | XLOC_021140 | CACNA2D1        | chr7:81579417-82073031    | -0.48221  | 1         |
| XLOC_015343 | XLOC_015343 | CCRL1           | chr3:132276981-132593050  | -0.482082 | 1         |
| XLOC_022936 | XLOC_022936 | ASPN            | chr9:95059639-95432547    | -0.481643 | 1         |
| XLOC_018693 | XLOC_018693 | LOC100270746    | chr6:26924771-26991753    | -0.480985 | 0.999791  |
| XLOC_011295 | XLOC_011295 | C19orf35        | chr19:2274630-2282181     | -0.479317 | 1         |
| XLOC_012327 | XLOC_012327 | C2orf15         | chr2:99613723-99711187    | -0.479187 | 0.999791  |
| XLOC_008290 | XLOC_008290 | LINC00304       | chr16:89225627-89230083   | -0.478824 | 1         |
| XLOC_002134 | XLOC_002134 | LINC00628       | chr1:204337557-204338847  | -0.478559 | 1         |
| XLOC_012839 | XLOC_012839 | UCN             | chr2:27505296-27531130    | -0.478251 | 0.999791  |
| XLOC_007553 | XLOC_007553 | FRMD5           | chr15:44165729-44487429   | -0.477632 | 0.910882  |
| XLOC_018514 | XLOC_018514 | MYB             | chr6:135502452-135540311  | -0.47605  | 0.929173  |
| XLOC_000695 | XLOC_000695 | TUFT1           | chr1:151512780-151556059  | -0.475989 | 0.155119  |
| XLOC_002864 | XLOC_002864 | MPP7            | chr10:28339922-28571067   | -0.475911 | 1         |
| XLOC_023437 | XLOC_023437 | FAAH2           | chrX:57313109-57515629    | -0.475804 | 0.999791  |
| XLOC_011338 | XLOC_011338 | TINCR           | chr19:5558177-5568005     | -0.475681 | 1         |
| XLOC_005323 | XLOC_005323 | GPRC5D          | chr12:13093708-13103318   | -0.475028 | 0.999791  |
| XLOC_007356 | XLOC_007356 | AGSK1,LOC727849 | chr15:82944792-82986427   | -0.474978 | 1         |
| XLOC_014297 | XLOC_014297 | TCP10L          | chr21:33947150-33957845   | -0.474941 | 0.999791  |
| XLOC_000683 | XLOC_000683 | ANXA9           | chr1:150954498-150986114  | -0.474567 | 0.999791  |
| XLOC_002619 | XLOC_002619 | C10orf12        | chr10:98741040-98745585   | -0.474216 | 0.966897  |
| XLOC_014377 | XLOC_014377 | LINC00162       | chr21:46419126-46424642   | -0.473887 | 1         |
| XLOC_000602 | XLOC_000602 | MAGI3           | chr1:113933474-114228545  | -0.472212 | 0.956701  |
| XLOC_003056 | XLOC_003056 | PIPSL           | chr10:95717896-95721672   | -0.471851 | 1         |
| XLOC_006927 | XLOC_006927 | FOXP3           | chr14:89622515-90085494   | -0.47171  | 0.292222  |
| XLOC_004361 | XLOC_004361 | DOC2G2          | chr11:67380994-67383135   | -0.47105  | 1         |
| XLOC_018846 | XLOC_018846 | CCDC167         | chr6:37450696-37467700    | -0.470969 | 0.439127  |
| XLOC_012401 | XLOC_012401 | INSIG2          | chr2:118846049-118867597  | -0.470953 | 0.212044  |
| XLOC_013746 | XLOC_013746 | TUBB1           | chr20:57594308-57601709   | -0.470359 | 1         |
| XLOC_020974 | XLOC_020974 | HOXA1           | chr7:27132613-27135625    | -0.470238 | 0.956701  |
| XLOC_001949 | XLOC_001949 | CCDC19          | chr1:159842153-159869906  | -0.469842 | 1         |
| XLOC_002041 | XLOC_002041 | SERPINC1        | chr1:173872941-173886516  | -0.469259 | 1         |
| XLOC_006971 | XLOC_006971 | DEGS2           | chr14:100612752-100626012 | -0.469171 | 1         |
| XLOC_003730 | XLOC_003730 | MYO7A           | chr11:76839309-76926286   | -0.469169 | 1         |
| XLOC_004020 | XLOC_004020 | TRIM5           | chr11:5684424-5706339     | -0.468545 | 0.688035  |
| XLOC_018519 | XLOC_018519 | TNFAIP3         | chr6:138144806-138204451  | -0.468447 | 0.999791  |
| XLOC_015336 | XLOC_015336 | COL6A6          | chr3:130279177-130395888  | -0.46812  | 1         |
| XLOC_001663 | XLOC_001663 | F3              | chr1:94994731-95007413    | -0.468097 | 0.66929   |
| XLOC_016909 | XLOC_016909 | FABP2           | chr4:120238404-120243316  | -0.465726 | 1         |
| XLOC_002747 | XLOC_002747 | LHPP            | chr10:126150340-126302710 | -0.465679 | 0.467171  |
| XLOC_021627 | XLOC_021627 | LOC286190       | chr8:71520811-71581447    | -0.463967 | 1         |
| XLOC_001891 | XLOC_001891 | PKLR            | chr1:155247217-155271225  | -0.462913 | 0.999791  |
| XLOC_021061 | XLOC_021061 | DDC             | chr7:50526133-50633154    | -0.462503 | 1         |
| XLOC_000450 | XLOC_000450 | NGG12-AS1       | chr1:68167148-68698284    | -0.462364 | 1         |

|             |             |                      |                           |           |          |
|-------------|-------------|----------------------|---------------------------|-----------|----------|
| XLOC_014623 | XLOC_014623 | LOC730668            | chr22:46402495-46406657   | -0.461396 | 1        |
| XLOC_009516 | XLOC_009516 | CDRT1                | chr17:15491976-15523018   | -0.460918 | 1        |
| XLOC_002497 | XLOC_002497 | TSPAN15              | chr10:71211225-71267423   | -0.460277 | 0.640692 |
| XLOC_001950 | XLOC_001950 | TAGLN2               | chr1:159887902-159895284  | -0.459508 | 0.205826 |
| XLOC_015689 | XLOC_015689 | PFKFB4               | chr3:48555116-48594227    | -0.458717 | 0.274603 |
| XLOC_013809 | XLOC_013809 | ANGPT4               | chr20:853296-896960       | -0.458645 | 1        |
| XLOC_008351 | XLOC_008351 | SNORA64              | chr16:2012061-2014827     | -0.458339 | 0.999791 |
| XLOC_001747 | XLOC_001747 | LINC00622            | chr1:120140324-120141914  | -0.458009 | 1        |
| XLOC_018701 | XLOC_018701 | HIST1H4K             | chr6:27798951-27799305    | -0.457538 | 1        |
| XLOC_016682 | XLOC_016682 | PROM1                | chr4:15969848-16085623    | -0.457341 | 1        |
| XLOC_017896 | XLOC_017896 | CD74                 | chr5:149781199-149792499  | -0.45715  | 1        |
| XLOC_014522 | XLOC_014522 | LOC339666            | chr22:32772650-32780329   | -0.456514 | 1        |
| XLOC_018645 | XLOC_018645 | ERVFRD-1             | chr6:11094265-11138969    | -0.456443 | 1        |
| XLOC_000572 | XLOC_000572 | GSTM1                | chr1:110230417-110236367  | -0.456128 | 0.292267 |
| XLOC_008166 | XLOC_008166 | CES4A                | chr16:67022491-67043659   | -0.455896 | 1        |
| XLOC_004117 | XLOC_004117 | SVIP                 | chr11:22843597-22851382   | -0.45556  | 0.638821 |
| XLOC_006669 | XLOC_006669 | TMEM121              | chr14:105992952-105996539 | -0.454706 | 0.999791 |
| XLOC_010793 | XLOC_010793 | ETV2                 | chr19:36132646-36135773   | -0.454654 | 0.999791 |
| XLOC_008997 | XLOC_008997 | C17orf50             | chr17:34087915-34092098   | -0.454575 | 1        |
| XLOC_021129 | XLOC_021129 | FDPSSL2A             | chr7:76090971-76135312    | -0.453299 | 1        |
| XLOC_021307 | XLOC_021307 | KCP                  | chr7:128516918-128550773  | -0.453    | 1        |
| XLOC_015534 | XLOC_015534 | LRRC33               | chr3:196366655-196388874  | -0.452432 | 1        |
| XLOC_013627 | XLOC_013627 | SPAG4                | chr20:34203808-34208965   | -0.452015 | 0.339093 |
| XLOC_011510 | XLOC_011510 | CALR3                | chr19:16589867-16607003   | -0.451358 | 1        |
| XLOC_003931 | XLOC_003931 | LOC283177            | chr11:134306375-134375555 | -0.451156 | 1        |
| XLOC_020733 | XLOC_020733 | HILPDA               | chr7:128095883-128098472  | -0.450977 | 0.244149 |
| XLOC_018324 | XLOC_018324 | SLC29A1              | chr6:44187241-44201888    | -0.45056  | 0.159317 |
| XLOC_001269 | XLOC_001269 | NPPA                 | chr1:11845786-11907840    | -0.449813 | 1        |
| XLOC_016072 | XLOC_016072 | KCNMB3               | chr3:178957536-178984838  | -0.449412 | 0.999791 |
| XLOC_015616 | XLOC_015616 | NEK10                | chr3:27257096-27410912    | -0.448385 | 1        |
| XLOC_002736 | XLOC_002736 | HTRA1                | chr10:124221040-124274424 | -0.448242 | 0.999791 |
| XLOC_001762 | XLOC_001762 | PFN1P2               | chr1:144610814-144612727  | -0.447748 | 0.999791 |
| XLOC_015587 | XLOC_015587 | GRIP2                | chr3:14444105-14583588    | -0.447258 | 1        |
| XLOC_012249 | XLOC_012249 | BOLA3-AS1            | chr2:74375107-74379516    | -0.446901 | 0.999791 |
| XLOC_006127 | XLOC_006127 | DLEU2                | chr13:50556687-50699677   | -0.446263 | 1        |
| XLOC_021370 | XLOC_021370 | LOC154761            | chr7:143509060-14353810   | -0.446038 | 0.978746 |
| XLOC_002640 | XLOC_002640 | SCD                  | chr10:102106771-102124588 | -0.44602  | 0.467171 |
| XLOC_011629 | XLOC_011629 | ZNF829               | chr19:37288451-37407193   | -0.445942 | 1        |
| XLOC_015206 | XLOC_015206 | ARL6                 | chr3:97483594-97517373    | -0.445832 | 0.999791 |
| XLOC_022436 | XLOC_022436 | LOC100128361         | chr9:95059639-95432547    | -0.444174 | 0.999791 |
| XLOC_004566 | XLOC_004566 | RPL23AP64            | chr11:118868851-118889057 | -0.443283 | 1        |
| XLOC_022911 | XLOC_022911 | GAS1                 | chr9:89559276-89562104    | -0.443222 | 0.999791 |
| XLOC_008039 | XLOC_008039 | LOC440356            | chr16:29875003-29879374   | -0.442698 | 1        |
| XLOC_020416 | XLOC_020416 | CREB5                | chr7:28338939-28865511    | -0.4425   | 0.304629 |
| XLOC_002751 | XLOC_002751 | LOC283038            | chr10:127371811-127408062 | -0.442403 | 1        |
| XLOC_016708 | XLOC_016708 | TLR1                 | chr4:38797875-38806412    | -0.442372 | 1        |
| XLOC_023784 | XLOC_023784 | MAP7D2               | chrX:20024830-20135114    | -0.441876 | 1        |
| XLOC_009011 | XLOC_009011 | C17orf78             | chr17:35441926-35766902   | -0.441146 | 1        |
| XLOC_009104 | XLOC_009104 | RUNDC3A              | chr17:42385926-42396038   | -0.440898 | 0.999791 |
| XLOC_023949 | XLOC_023949 | ZDHHC15              | chrX:74588261-74743337    | -0.440086 | 1        |
| XLOC_003358 | XLOC_003358 | LDHC                 | chr11:18433852-18472793   | -0.440063 | 1        |
| XLOC_010703 | XLOC_010703 | LOC100505738,MIR4458 | chr5:8457799-8463209      | -0.43997  | 0.999791 |
| XLOC_009529 | XLOC_009529 | RASD1                | chr17:17397752-17399709   | -0.439808 | 1        |
| XLOC_016303 | XLOC_016303 | NIPAL1               | chr4:48018790-48039080    | -0.43956  | 1        |
| XLOC_017051 | XLOC_017051 | PLEKHG4B             | chr5:140372-190087        | -0.439204 | 1        |
| XLOC_010777 | XLOC_010777 | FXYD1                | chr19:35629731-35633954   | -0.439119 | 0.999791 |
| XLOC_006347 | XLOC_006347 | ATL1                 | chr14:50999799-51099784   | -0.438874 | 0.999791 |
| XLOC_005012 | XLOC_005012 | TMTC2                | chr12:83080933-83528067   | -0.438238 | 1        |
| XLOC_004507 | XLOC_004507 | KBTBD3               | chr11:105921824-105969419 | -0.437996 | 0.999791 |
| XLOC_000388 | XLOC_000388 | CDKN2C               | chr1:51434366-51440309    | -0.437929 | 0.482072 |
| XLOC_016986 | XLOC_016986 | MARCH1               | chr4:164445449-165304407  | -0.437466 | 1        |
| XLOC_011241 | XLOC_011241 | ZNF274               | chr19:58694395-58724927   | -0.437379 | 1        |
| XLOC_000636 | XLOC_000636 | HFE2                 | chr1:145413190-145417545  | -0.437208 | 1        |
| XLOC_008623 | XLOC_008623 | TPPP3                | chr16:67423711-67427421   | -0.436939 | 1        |
| XLOC_007316 | XLOC_007316 | SNX33                | chr15:75941347-75950968   | -0.436758 | 0.248943 |
| XLOC_001647 | XLOC_001647 | GEMIN8P4             | chr1:90458823-90460525    | -0.436514 | 0.999791 |
| XLOC_023598 | XLOC_023598 | GLUD2                | chrX:120181461-120183796  | -0.436498 | 1        |
| XLOC_014773 | XLOC_014773 | PLA2G3               | chr22:31530792-31536469   | -0.436003 | 1        |
| XLOC_012393 | XLOC_012393 | FOXDL1               | chr2:114256660-114258727  | -0.435343 | 0.999791 |
| XLOC_022272 | XLOC_022272 | JAK2                 | chr9:4985244-5128183      | -0.434925 | 0.999791 |
| XLOC_014965 | XLOC_014965 | C3orf20              | chr3:14716605-14814543    | -0.434887 | 1        |
| XLOC_002274 | XLOC_002274 | MAP1LC3C             | chr1:242158791-242162385  | -0.434866 | 0.999791 |
| XLOC_011551 | XLOC_011551 | TSSK6                | chr19:19625027-19626469   | -0.434822 | 0.999791 |
| XLOC_018688 | XLOC_018688 | HIST1H3G             | chr6:26271145-26271612    | -0.434817 | 0.999791 |
| XLOC_016245 | XLOC_016245 | CPEB2                | chr4:15004297-15007177    | -0.434743 | 1        |
| XLOC_003837 | XLOC_003837 | TAGLN                | chr11:117049938-117075508 | -0.434626 | 0.910882 |
| XLOC_012914 | XLOC_012914 | RTN4                 | chr2:55199326-55277734    | -0.434598 | 0.216036 |
| XLOC_008158 | XLOC_008158 | BEAN1                | chr16:66461199-66527432   | -0.433473 | 1        |
| XLOC_006222 | XLOC_006222 | RAB20                | chr13:111175412-111214071 | -0.433154 | 0.373258 |

|             |             |              |                           |           |          |
|-------------|-------------|--------------|---------------------------|-----------|----------|
| XLOC_018072 | XLOC_018072 | RNF144B      | chr6:18387580-18469105    | -0.43143  | 1        |
| XLOC_022288 | XLOC_022288 | CCDC171      | chr9:15553096-15971897    | -0.431303 | 0.999791 |
| XLOC_023043 | XLOC_023043 | PHF19        | chr9:123617930-123639606  | -0.430518 | 0.790746 |
| XLOC_019140 | XLOC_019140 | RAET1G       | chr6:150139893-150244214  | -0.428497 | 0.999791 |
| XLOC_008156 | XLOC_008156 | CDH5         | chr16:66400524-66438689   | -0.42762  | 1        |
| XLOC_007231 | XLOC_007231 | FAM63B       | chr15:59063392-59149734   | -0.426626 | 0.999791 |
| XLOC_009874 | XLOC_009874 | SEPT4        | chr17:56597610-56618179   | -0.426423 | 0.999791 |
| XLOC_018243 | XLOC_018243 | PHF1         | chr6:33378772-33384230    | -0.426278 | 0.266089 |
| XLOC_016911 | XLOC_016911 | PDE5A        | chr4:120375937-120549981  | -0.425874 | 0.999791 |
| XLOC_016592 | XLOC_016592 | ING2         | chr4:184426219-184432249  | -0.425468 | 0.66929  |
| XLOC_007303 | XLOC_007303 | CLK3         | chr15:74900712-74922542   | -0.425179 | 0.304629 |
| XLOC_020871 | XLOC_020871 | FABP5P3      | chr7:152133979-152140100  | -0.424935 | 1        |
| XLOC_020347 | XLOC_020347 | AMZ1         | chr7:2719162-2755069      | -0.42484  | 1        |
| XLOC_003714 | XLOC_003714 | NEU3         | chr11:74699949-74718743   | -0.424748 | 0.999791 |
| XLOC_020411 | XLOC_020411 | HOXA11-AS    | chr7:27225026-27228912    | -0.424403 | 0.999791 |
| XLOC_021144 | XLOC_021144 | SEMA3D       | chr7:84624871-84751247    | -0.42439  | 0.319958 |
| XLOC_018010 | XLOC_018010 | HEIH         | chr5:180256953-180262726  | -0.424013 | 1        |
| XLOC_023189 | XLOC_023189 | LRRC26       | chr9:140033608-140064491  | -0.423908 | 0.999791 |
| XLOC_003393 | XLOC_003393 | HIPK3        | chr11:33279167-33375939   | -0.423686 | 0.999791 |
| XLOC_018130 | XLOC_018130 | HIST1H2BM    | chr6:27782821-27783267    | -0.423209 | 1        |
| XLOC_021862 | XLOC_021862 | XKR6         | chr8:10753656-11058875    | -0.423134 | 1        |
| XLOC_015123 | XLOC_015123 | MANF         | chr3:51422691-51426828    | -0.42303  | 0.244149 |
| XLOC_000045 | XLOC_000045 | SMIM1        | chr1:3689351-3692546      | -0.421483 | 0.999791 |
| XLOC_022429 | XLOC_022429 | GADD45G      | chr9:92219926-92221469    | -0.421366 | 0.999791 |
| XLOC_000863 | XLOC_000863 | TBX19        | chr1:168250277-168283664  | -0.421207 | 0.999791 |
| XLOC_014467 | XLOC_014467 | ADORA2A      | chr22:24823529-24890783   | -0.420479 | 0.999791 |
| XLOC_000673 | XLOC_000673 | C1orf51      | chr1:150255228-150259501  | -0.420022 | 0.999791 |
| XLOC_017760 | XLOC_017760 | EFNA5        | chr5:106712589-107006596  | -0.419891 | 0.987316 |
| XLOC_003894 | XLOC_003894 | NRGN         | chr11:124609828-124617102 | -0.419592 | 0.811106 |
| XLOC_004212 | XLOC_004212 | SLC43A3      | chr1:57174426-57195053    | -0.419563 | 1        |
| XLOC_018796 | XLOC_018796 | HLA-DRB1     | chr6:32546546-32557613    | -0.418466 | 1        |
| XLOC_016796 | XLOC_016796 | CDKL2        | chr4:76501703-76555721    | -0.418357 | 1        |
| XLOC_009755 | XLOC_009755 | LINC00671    | chr17:41026690-41050751   | -0.417991 | 1        |
| XLOC_016536 | XLOC_016536 | FAM160A1     | chr4:152330397-152584784  | -0.417738 | 0.910882 |
| XLOC_001389 | XLOC_001389 | IFI6         | chr1:27992571-27998724    | -0.417667 | 0.999791 |
| XLOC_008217 | XLOC_008217 | IL34         | chr16:70613797-70694585   | -0.417271 | 1        |
| XLOC_011616 | XLOC_011616 | THAP8        | chr19:36525886-36545664   | -0.4171   | 0.999791 |
| XLOC_016622 | XLOC_016622 | LOC100129917 | chr4:773936-775636        | -0.417075 | 1        |
| XLOC_005762 | XLOC_005762 | HCAR2        | chr12:123185839-123187904 | -0.41704  | 1        |
| XLOC_009109 | XLOC_009109 | ADAM11       | chr17:42836567-42859214   | -0.416667 | 0.774655 |
| XLOC_003958 | XLOC_003958 | DUSP8        | chr11:1490684-1785501     | -0.415476 | 0.999791 |
| XLOC_005893 | XLOC_005893 | CDADC1       | chr13:49822046-49867622   | -0.414002 | 0.999791 |
| XLOC_001978 | XLOC_001978 | C1orf192     | chr1:161284165-161337673  | -0.413717 | 1        |
| XLOC_015463 | XLOC_015463 | SOX2-OT      | chr3:180774467-181460013  | -0.413114 | 0.999791 |
| XLOC_022878 | XLOC_022878 | KLF9         | chr9:72999512-73029573    | -0.412604 | 0.956701 |
| XLOC_015621 | XLOC_015621 | OSBPL10      | chr3:31702316-32033228    | -0.412445 | 0.438059 |
| XLOC_003336 | XLOC_003336 | MICALCL      | chr1:12308446-12308691    | -0.412152 | 1        |
| XLOC_013297 | XLOC_013297 | RFTN2        | chr2:198435526-198540584  | -0.411687 | 1        |
| XLOC_000256 | XLOC_000256 | FAM167B      | chr1:32712817-32714461    | -0.411637 | 0.999791 |
| XLOC_006850 | XLOC_006850 | SGPP1        | chr14:64150934-64194756   | -0.411014 | 0.64943  |
| XLOC_015890 | XLOC_015890 | COX17        | chr3:119388371-119396243  | -0.410824 | 0.420675 |
| XLOC_012640 | XLOC_012640 | PNKD         | chr2:219135114-219211516  | -0.410639 | 0.999791 |
| XLOC_013398 | XLOC_013398 | IRS1         | chr2:227596032-227663506  | -0.410134 | 0.999791 |
| XLOC_015750 | XLOC_015750 | LINC00696    | chr3:52096109-52099128    | -0.409895 | 1        |
| XLOC_022798 | XLOC_022798 | FAM219A      | chr9:34398181-34458568    | -0.409439 | 0.430859 |
| XLOC_022340 | XLOC_022340 | TMEM8B       | chr9:35829221-35854844    | -0.408944 | 0.949191 |
| XLOC_007268 | XLOC_007268 | PIAS1        | chr15:68346571-68480404   | -0.40887  | 0.774655 |
| XLOC_024015 | XLOC_024015 | KCNE1L       | chrX:108866928-108868393  | -0.408675 | 0.999791 |
| XLOC_004741 | XLOC_004741 | GPRC5A       | chr12:13043955-13066600   | -0.408508 | 0.603585 |
| XLOC_002232 | XLOC_002232 | ACTA1        | chr1:229566992-229569843  | -0.408452 | 0.999791 |
| XLOC_014603 | XLOC_014603 | SERHL        | chr22:42896584-42915829   | -0.408261 | 1        |
| XLOC_014691 | XLOC_014691 | RIMBP3       | chr22:20455993-20461786   | -0.4077   | 1        |
| XLOC_018631 | XLOC_018631 | NRN1         | chr6:5998232-6007633      | -0.407381 | 0.373258 |
| XLOC_008734 | XLOC_008734 | VPS9D1       | chr16:89773540-89883065   | -0.407324 | 0.999791 |
| XLOC_014525 | XLOC_014525 | LOC100506195 | chr22:33669061-34316416   | -0.407311 | 1        |
| XLOC_022397 | XLOC_022397 | PCSK5        | chr9:78505559-78977255    | -0.407218 | 0.999791 |
| XLOC_005634 | XLOC_005634 | FGD6         | chr12:95470524-95611240   | -0.407177 | 1        |
| XLOC_004131 | XLOC_004131 | PAX6         | chr11:31806339-31908587   | -0.40717  | 1        |
| XLOC_018690 | XLOC_018690 | LOC285819    | chr6:26458152-26482737    | -0.407153 | 1        |
| XLOC_000472 | XLOC_000472 | DNAJB4       | chr1:78470635-78482995    | -0.406602 | 0.910882 |
| XLOC_013018 | XLOC_013018 | SFTPB        | chr2:85884439-85895864    | -0.405895 | 1        |
| XLOC_016313 | XLOC_016313 | SNORA26      | chr4:53578620-53580305    | -0.405775 | 0.999791 |
| XLOC_001761 | XLOC_001761 | LOC728875    | chr1:144480745-144521969  | -0.405677 | 1        |
| XLOC_015117 | XLOC_015117 | C3orf45      | chr3:50316517-50330026    | -0.405465 | 1        |
| XLOC_020491 | XLOC_020491 | EGFR         | chr7:55086724-55275031    | -0.405464 | 0.993188 |
| XLOC_023160 | XLOC_023160 | LHX3         | chr9:139088095-139096955  | -0.405246 | 0.999791 |
| XLOC_020562 | XLOC_020562 | SPDYE5       | chr7:75124298-75133628    | -0.405028 | 1        |
| XLOC_015407 | XLOC_015407 | P2RY1        | chr3:152552735-152555843  | -0.404087 | 1        |
| XLOC_014624 | XLOC_014624 | LOC150381    | chr22:46446338-46454402   | -0.403628 | 0.999791 |

|             |             |           |                           |           |          |
|-------------|-------------|-----------|---------------------------|-----------|----------|
| XLOC_020977 | XLOC_020977 | HOXA4     | chr7:27168125-27170399    | -0.403483 | 0.993188 |
| XLOC_000089 | XLOC_000089 | PLOD1     | chr11:11994723-12035599   | -0.402562 | 0.437026 |
| XLOC_009474 | XLOC_009474 | PER1      | chr17:8043787-8055753     | -0.402385 | 0.670785 |
| XLOC_013268 | XLOC_013268 | FRZB      | chr2:183698004-183731498  | -0.402065 | 1        |
| XLOC_019170 | XLOC_019170 | LPAL2     | chr6:160887586-160932156  | -0.401696 | 1        |
| XLOC_021138 | XLOC_021138 | SEMA3C    | chr7:80371853-80548667    | -0.401147 | 1        |
| XLOC_004798 | XLOC_004798 | FGD4      | chr12:32655040-32798984   | -0.400897 | 1        |
| XLOC_009749 | XLOC_009749 | PLEKHH3   | chr17:40819931-40829048   | -0.400808 | 0.735322 |
| XLOC_021143 | XLOC_021143 | SEMA3A    | chr7:83587658-83824217    | -0.400036 | 0.811106 |
| XLOC_000844 | XLOC_000844 | DDR2      | chr1:162602227-162750247  | -0.399981 | 1        |
| XLOC_021092 | XLOC_021092 | PMS2P4    | chr7:667411117-66767429   | -0.399164 | 0.999791 |
| XLOC_016906 | XLOC_016906 | PRSS12    | chr4:119201192-119273922  | -0.399084 | 0.910882 |
| XLOC_012530 | XLOC_012530 | HOXD4     | chr2:177016112-177017949  | -0.398692 | 0.999791 |
| XLOC_016174 | XLOC_016174 | WHSC1     | chr4:1873122-1983934      | -0.398097 | 0.373258 |
| XLOC_018831 | XLOC_018831 | TULP1     | chr6:35465650-35480647    | -0.397534 | 1        |
| XLOC_007984 | XLOC_007984 | OTOA      | chr16:21689834-21772050   | -0.397403 | 1        |
| XLOC_006880 | XLOC_006880 | MAP3K9    | chr14:71194853-71275888   | -0.39737  | 0.999791 |
| XLOC_009014 | XLOC_009014 | TBC1D3    | chr17:36283959-36295098   | -0.396778 | 1        |
| XLOC_003297 | XLOC_003297 | CNGA4     | chr11:6260321-6265707     | -0.396185 | 1        |
| XLOC_015718 | XLOC_015718 | MST1      | chr3:49721379-49726196    | -0.396052 | 0.999791 |
| XLOC_021147 | XLOC_021147 | TP53TG1   | chr7:86954663-86974808    | -0.395131 | 0.999791 |
| XLOC_008666 | XLOC_008666 | ZNF821    | chr16:71893582-719181093  | -0.395014 | 0.934472 |
| XLOC_006348 | XLOC_006348 | ABHD12B   | chr14:51338877-51371688   | -0.394662 | 1        |
| XLOC_022741 | XLOC_022741 | MLL3      | chr9:20344967-20622514    | -0.394644 | 0.774655 |
| XLOC_023354 | XLOC_023354 | ARAF      | chrX:47420498-47479256    | -0.394635 | 0.999791 |
| XLOC_008955 | XLOC_008955 | EFCAB5    | chr17:27952964-28435470   | -0.394425 | 1        |
| XLOC_010088 | XLOC_010088 | ROCK1P1   | chr18:109064-122222       | -0.394151 | 0.999791 |
| XLOC_015447 | XLOC_015447 | FNDC3B    | chr3:171757417-172118492  | -0.393901 | 0.66929  |
| XLOC_012090 | XLOC_012090 | MAPRE3    | chr2:27193524-27250087    | -0.393894 | 0.999791 |
| XLOC_013233 | XLOC_013233 | MLK7-AS1  | chr2:173940564-174146764  | -0.393651 | 1        |
| XLOC_018066 | XLOC_018066 | GMPR      | chr6:16238810-16295780    | -0.393331 | 0.638821 |
| XLOC_011443 | XLOC_011443 | ZNF878    | chr19:12154619-12163782   | -0.392951 | 1        |
| XLOC_006897 | XLOC_006897 | PGF       | chr14:75408532-75422467   | -0.392825 | 0.640692 |
| XLOC_011388 | XLOC_011388 | ZNF414    | chr19:8575461-8579048     | -0.391673 | 0.993188 |
| XLOC_012463 | XLOC_012463 | MBD5      | chr2:148602569-149271044  | -0.391093 | 1        |
| XLOC_008730 | XLOC_008730 | SLC22A31  | chr16:89262168-89266529   | -0.390881 | 1        |
| XLOC_016907 | XLOC_016907 | SEC24D    | chr4:119643977-119757326  | -0.390495 | 0.747879 |
| XLOC_017884 | XLOC_017884 | SPINK1    | chr5:147204142-147211260  | -0.39023  | 1        |
| XLOC_009024 | XLOC_009024 | LINC00672 | chr17:37081420-37085637   | -0.389972 | 1        |
| XLOC_003874 | XLOC_003874 | TECTA     | chr11:120973374-121061615 | -0.389234 | 1        |
| XLOC_008915 | XLOC_008915 | CCDC144C  | chr17:20224486-20305504   | -0.388949 | 1        |
| XLOC_008549 | XLOC_008549 | LINC00273 | chr16:33961051-33962503   | -0.388561 | 1        |
| XLOC_016588 | XLOC_016588 | TENM3     | chr4:183245136-183724177  | -0.38856  | 1        |
| XLOC_000241 | XLOC_000241 | MATN1-AS1 | chr1:31184123-31199593    | -0.387836 | 0.999791 |
| XLOC_009668 | XLOC_009668 | GSDMB     | chr17:38060847-38074903   | -0.387499 | 0.999791 |
| XLOC_000762 | XLOC_000762 | ASH1L-AS1 | chr1:155305051-155533735  | -0.387329 | 0.999791 |
| XLOC_017778 | XLOC_017778 | SEMA6A    | chr5:115779250-115910551  | -0.386793 | 1        |
| XLOC_010235 | XLOC_010235 | HMSD      | chr18:61616587-61627645   | -0.386613 | 0.999791 |
| XLOC_017762 | XLOC_017762 | HP07349   | chr5:108063525-108063962  | -0.386473 | 0.999791 |
| XLOC_015068 | XLOC_015068 | CLEC3B    | chr3:45067758-45077563    | -0.386442 | 0.999791 |
| XLOC_021505 | XLOC_021505 | PDLIM2    | chr8:22436253-22455538    | -0.386421 | 0.41737  |
| XLOC_023344 | XLOC_023344 | CHST7     | chrX:46433191-46457838    | -0.386002 | 0.999791 |
| XLOC_007263 | XLOC_007263 | SMAD3     | chr15:67358194-67487533   | -0.385921 | 0.567498 |
| XLOC_002357 | XLOC_002357 | QLAH      | chr10:15085894-15115851   | -0.385394 | 1        |
| XLOC_010001 | XLOC_010001 | TK1       | chr17:76170159-76183285   | -0.384567 | 0.420675 |
| XLOC_005255 | XLOC_005255 | LPCAT3    | chr12:7085346-7125842     | -0.38447  | 0.735322 |
| XLOC_011626 | XLOC_011626 | ZNF461    | chr19:37128282-37157739   | -0.383412 | 0.999791 |
| XLOC_007613 | XLOC_007613 | RORA      | chr15:60780482-61521502   | -0.383121 | 0.670785 |
| XLOC_012643 | XLOC_012643 | CTDSP1    | chr2:219263060-219270664  | -0.382934 | 0.399431 |
| XLOC_015520 | XLOC_015520 | HRASLS    | chr3:192958916-192988644  | -0.382708 | 1        |
| XLOC_001838 | XLOC_001838 | LCE1C     | chr1:152777310-152779107  | -0.382383 | 1        |
| XLOC_012708 | XLOC_012708 | CHRNA     | chr2:233404436-233411038  | -0.382214 | 1        |
| XLOC_011644 | XLOC_011644 | GGN       | chr19:38874991-38878668   | -0.381826 | 0.999791 |
| XLOC_006811 | XLOC_006811 | TXNDC16   | chr14:52897307-53019301   | -0.381821 | 0.999791 |
| XLOC_005360 | XLOC_005360 | BHLHE41   | chr12:26272958-26278003   | -0.381671 | 0.886909 |
| XLOC_002485 | XLOC_002485 | TET1      | chr10:70320116-70454239   | -0.381484 | 1        |
| XLOC_002028 | XLOC_002028 | ANKRD45   | chr1:173577474-173639001  | -0.381397 | 1        |
| XLOC_023548 | XLOC_023548 | CXorf57   | chrX:105855159-105922673  | -0.378943 | 0.999791 |
| XLOC_006830 | XLOC_006830 | C14orf105 | chr14:57936594-57960576   | -0.378808 | 1        |
| XLOC_004628 | XLOC_004628 | PRDM10    | chr11:129769600-129875381 | -0.378038 | 0.999791 |
| XLOC_015039 | XLOC_015039 | ZNF620    | chr3:40547529-40559712    | -0.377498 | 0.999791 |
| XLOC_006937 | XLOC_006937 | FBLN5     | chr14:92335754-92414046   | -0.37682  | 0.999791 |
| XLOC_004331 | XLOC_004331 | EFEMP2    | chr11:65627871-65640405   | -0.376725 | 0.999791 |
| XLOC_009285 | XLOC_009285 | LLGL2     | chr17:73521782-73571290   | -0.376654 | 0.770214 |
| XLOC_010635 | XLOC_010635 | LOC113230 | chr19:14183820-14185874   | -0.376239 | 0.999791 |
| XLOC_017795 | XLOC_017795 | P4HA2     | chr5:131528303-131563556  | -0.375742 | 0.495654 |
| XLOC_019141 | XLOC_019141 | RAET1K    | chr6:150319154-150326280  | -0.37528  | 0.999791 |
| XLOC_023962 | XLOC_023962 | HMGNA5    | chrX:80369199-80554046    | -0.375125 | 0.999791 |
| XLOC_014078 | XLOC_014078 | EEF1A2    | chr20:62119364-62130668   | -0.375034 | 1        |

|             |             |              |                           |           |          |
|-------------|-------------|--------------|---------------------------|-----------|----------|
| XLOC_011778 | XLOC_011778 | PPP5D1       | chr19:46984044-47104457   | -0.374839 | 1        |
| XLOC_005543 | XLOC_005543 | STAC3        | chr12:57637241-57644969   | -0.374357 | 0.999791 |
| XLOC_020964 | XLOC_020964 | DFNA5        | chr7:24737973-24797639    | -0.374189 | 1        |
| XLOC_003782 | XLOC_003782 | ARHGAP42     | chr11:100558406-100861656 | -0.374137 | 1        |
| XLOC_001184 | XLOC_001184 | LINC00115    | chr1:761585-762902        | -0.373939 | 0.999791 |
| XLOC_012730 | XLOC_012730 | RBM44        | chr2:238707387-238751451  | -0.373921 | 1        |
| XLOC_011994 | XLOC_011994 | ZNF154       | chr19:58211809-58220579   | -0.373865 | 1        |
| XLOC_018702 | XLOC_018702 | HIST1H2AK    | chr6:27805657-27806117    | -0.373664 | 1        |
| XLOC_021953 | XLOC_021953 | RNF122       | chr8:33405272-33424643    | -0.373611 | 0.999791 |
| XLOC_010022 | XLOC_010022 | AATK         | chr17:79008946-79156964   | -0.373173 | 0.999791 |
| XLOC_011811 | XLOC_011811 | DBP          | chr19:49133816-49140639   | -0.372788 | 0.891812 |
| XLOC_000904 | XLOC_000904 | RALGPS2      | chr1:178694299-178889237  | -0.372231 | 0.790746 |
| XLOC_000908 | XLOC_000908 | AXDND1       | chr1:179334854-179545084  | -0.371766 | 0.999791 |
| XLOC_005259 | XLOC_005259 | CD163L1      | chr12:7507556-7596749     | -0.370987 | 1        |
| XLOC_022663 | XLOC_022663 | C9orf163     | chr9:139334547-139380519  | -0.370755 | 0.999791 |
| XLOC_006196 | XLOC_006196 | GPR18        | chr13:99848627-100058554  | -0.37066  | 1        |
| XLOC_010520 | XLOC_010520 | ACSBG2       | chr19:6135709-6193112     | -0.36997  | 1        |
| XLOC_005663 | XLOC_005663 | C12orf73     | chr12:104343980-104350993 | -0.369947 | 0.999791 |
| XLOC_002008 | XLOC_002008 | C1orf114     | chr1:169337193-169396670  | -0.369814 | 1        |
| XLOC_012228 | XLOC_012228 | PCYOX1       | chr2:70485230-70508317    | -0.369727 | 0.638821 |
| XLOC_010091 | XLOC_010091 | CLUL1        | chr18:596997-712662       | -0.369194 | 1        |
| XLOC_018128 | XLOC_018128 | HIST1H2AI    | chr6:27775976-27776445    | -0.368967 | 0.999791 |
| XLOC_005432 | XLOC_005432 | LMBR1L       | chr12:49490922-49504680   | -0.368897 | 0.771522 |
| XLOC_024152 | XLOC_024152 | LOC100131434 | chrX:148609131-148621312  | -0.368896 | 1        |
| XLOC_005536 | XLOC_005536 | RDH16        | chr12:57345215-57351418   | -0.368136 | 1        |
| XLOC_015731 | XLOC_015731 | HYAL1        | chr3:50337319-50349812    | -0.36799  | 1        |
| XLOC_011808 | XLOC_011808 | LMTK3        | chr19:48988527-49016446   | -0.367779 | 0.999791 |
| XLOC_005567 | XLOC_005567 | RPSAP52      | chr12:66151799-66360071   | -0.367714 | 0.999791 |
| XLOC_000599 | XLOC_000599 | FAM19A3      | chr1:113263188-113269856  | -0.36753  | 0.999791 |
| XLOC_003415 | XLOC_003415 | SEC14L1P1    | chr11:43902356-43942494   | -0.366838 | 1        |
| XLOC_008929 | XLOC_008929 | PYY2         | chr17:26553588-26555085   | -0.366691 | 0.999791 |
| XLOC_013842 | XLOC_013842 | RASSF2       | chr20:4760668-4804291     | -0.366245 | 1        |
| XLOC_022964 | XLOC_022964 | CTSL2        | chr9:99791958-99801925    | -0.365883 | 0.895959 |
| XLOC_020366 | XLOC_020366 | PMS2CL       | chr7:6774935-6791232      | -0.3658   | 0.999791 |
| XLOC_000339 | XLOC_000339 | ARTN         | chr1:44398991-44402912    | -0.365563 | 1        |
| XLOC_018697 | XLOC_018697 | ZNF204P      | chr6:27325601-27343153    | -0.365332 | 0.999791 |
| XLOC_015358 | XLOC_015358 | IL20RB       | chr3:136676706-136729926  | -0.365194 | 1        |
| XLOC_003728 | XLOC_003728 | CAPN5        | chr11:76777991-76837198   | -0.365192 | 0.774655 |
| XLOC_015249 | XLOC_015249 | PVRL3        | chr3:110790605-110913016  | -0.364874 | 0.993188 |
| XLOC_000519 | XLOC_000519 | SLC44A3      | chr1:95285897-95360803    | -0.364811 | 0.999791 |
| XLOC_012456 | XLOC_012456 | YY1P2        | chr2:139654893-139656744  | -0.364352 | 1        |
| XLOC_023878 | XLOC_023878 | IQSEC2       | chrX:53262057-53350522    | -0.364149 | 0.999791 |
| XLOC_017739 | XLOC_017739 | FLJ42709     | chr5:92745064-92917003    | -0.363993 | 0.999791 |
| XLOC_004675 | XLOC_004675 | SCARNA10     | chr12:6603297-6641132     | -0.363281 | 0.999791 |
| XLOC_015823 | XLOC_015823 | ZNF717       | chr3:75786028-75834255    | -0.36328  | 1        |
| XLOC_004350 | XLOC_004350 | PC           | chr11:66615996-66725847   | -0.362925 | 0.999791 |
| XLOC_003428 | XLOC_003428 | MAPK8IP1     | chr11:45907046-45928016   | -0.362787 | 0.999791 |
| XLOC_001811 | XLOC_001811 | LYSMD1       | chr1:151129104-151148547  | -0.362702 | 0.999791 |
| XLOC_003302 | XLOC_003302 | ILK          | chr11:6624963-6633475     | -0.362683 | 0.957042 |
| XLOC_007398 | XLOC_007398 | SEMA4B       | chr15:90728151-90728292   | -0.362492 | 0.62859  |
| XLOC_001506 | XLOC_001506 | TMEM53       | chr1:45119500-45140099    | -0.362462 | 0.999791 |
| XLOC_011259 | XLOC_011259 | MIER2        | chr19:305574-344791       | -0.362305 | 0.774655 |
| XLOC_018387 | XLOC_018387 | SH3BGR2      | chr6:80340999-80413369    | -0.361943 | 0.993188 |
| XLOC_006235 | XLOC_006235 | LINC00565    | chr13:114629486-114631964 | -0.361541 | 0.999791 |
| XLOC_020371 | XLOC_020371 | GLCC1        | chr7:8008373-8128709      | -0.360587 | 0.999791 |
| XLOC_005933 | XLOC_005933 | KLF5         | chr13:73633141-73651676   | -0.359927 | 0.999791 |
| XLOC_007731 | XLOC_007731 | STAR5        | chr15:81489218-81616524   | -0.359261 | 0.999791 |
| XLOC_021453 | XLOC_021453 | CLDN23       | chr8:8559665-8561617      | -0.359249 | 0.999791 |
| XLOC_008865 | XLOC_008865 | HS3ST3B1     | chr17:14204505-14249492   | -0.359221 | 1        |
| XLOC_010661 | XLOC_010661 | HS2D         | chr19:16244837-16269377   | -0.35862  | 0.999791 |
| XLOC_004645 | XLOC_004645 | LOC100292680 | chr12:1609656-1613590     | -0.358464 | 1        |
| XLOC_016714 | XLOC_016714 | SMIM14       | chr4:39529458-39640481    | -0.358372 | 0.999791 |
| XLOC_018743 | XLOC_018743 | NRM          | chr6:30655823-30659197    | -0.357031 | 0.774655 |
| XLOC_017844 | XLOC_017844 | SLC23A1      | chr5:138677518-138719039  | -0.356654 | 1        |
| XLOC_004383 | XLOC_004383 | DHCR7        | chr1:71145456-71159477    | -0.356277 | 0.547369 |
| XLOC_021626 | XLOC_021626 | SULF1        | chr8:70378858-70573147    | -0.356177 | 1        |
| XLOC_004304 | XLOC_004304 | PYGM         | chr11:64513860-64528187   | -0.356041 | 1        |
| XLOC_013730 | XLOC_013730 | FAM209A      | chr20:55043646-55101208   | -0.355399 | 1        |
| XLOC_002410 | XLOC_002410 | HSD17B7P2    | chr10:38645307-38667433   | -0.354911 | 0.999791 |
| XLOC_000787 | XLOC_000787 | KIRREL       | chr1:157963062-158065844  | -0.35474  | 0.999791 |
| XLOC_011424 | XLOC_011424 | AP1M2        | chr19:10683346-10697991   | -0.35399  | 0.999791 |
| XLOC_016466 | XLOC_016466 | LRI3         | chr4:110769357-110793471  | -0.35349  | 1        |
| XLOC_000978 | XLOC_000978 | KDM5B-AS1    | chr1:202780073-202781041  | -0.352917 | 0.999791 |
| XLOC_008263 | XLOC_008263 | KLHL36       | chr16:84682130-84695916   | -0.352495 | 0.949191 |
| XLOC_014784 | XLOC_014784 | RFPL3S       | chr22:32750871-32767063   | -0.352266 | 0.999791 |
| XLOC_012046 | XLOC_012046 | KLF11        | chr2:10183681-10194963    | -0.351801 | 0.999791 |
| XLOC_004704 | XLOC_004704 | FOXJ2        | chr12:8185358-8208118     | -0.351504 | 0.949191 |
| XLOC_000252 | XLOC_000252 | CCDC28B      | chr1:32666201-32670991    | -0.351202 | 0.999791 |
| XLOC_010992 | XLOC_010992 | SYNGR4       | chr19:48867650-48879634   | -0.350854 | 1        |



|             |             |                     |                           |           |          |
|-------------|-------------|---------------------|---------------------------|-----------|----------|
| XLOC_013058 | XLOC_013058 | ANKRD36B            | chr2:98121260-98206428    | -0.350658 | 0.999791 |
| XLOC_006299 | XLOC_006299 | REC8                | chr14:24641233-24658124   | -0.350515 | 0.999791 |
| XLOC_004888 | XLOC_004888 | LOC400043           | chr12:54519854-54526626   | -0.350198 | 1        |
| XLOC_014692 | XLOC_014692 | SCARF2              | chr22:20778873-20792146   | -0.350144 | 0.999791 |
| XLOC_012136 | XLOC_012136 | RASGRP3             | chr2:33661415-33789798    | -0.349848 | 1        |
| XLOC_012086 | XLOC_012086 | KCNK3               | chr2:26915580-26954066    | -0.349183 | 1        |
| XLOC_013062 | XLOC_013062 | MGAT4A              | chr2:99235568-99347589    | -0.348838 | 0.999791 |
| XLOC_011606 | XLOC_011606 | IGFLR1              | chr19:36230150-36233351   | -0.348745 | 0.999791 |
| XLOC_016735 | XLOC_016735 | TEC                 | chr4:48137799-48271814    | -0.348597 | 0.999791 |
| XLOC_000938 | XLOC_000938 | PLA2G4A             | chr1:186798031-186958113  | -0.347959 | 0.999791 |
| XLOC_001092 | XLOC_001092 | OBSO1               | chr1:228391206-228566575  | -0.347841 | 0.993188 |
| XLOC_013927 | XLOC_013927 | SNTA1               | chr20:31995762-32031698   | -0.347684 | 0.886909 |
| XLOC_021605 | XLOC_021605 | CLVS1               | chr8:62200524-62627199    | -0.347647 | 1        |
| XLOC_011734 | XLOC_011734 | LYPD5               | chr19:44300078-44324808   | -0.34758  | 0.999791 |
| XLOC_008866 | XLOC_008866 | MGC12916            | chr17:14204505-14249492   | -0.346773 | 0.999791 |
| XLOC_002826 | XLOC_002826 | ACBD7               | chr10:15117473-15130775   | -0.346412 | 0.999791 |
| XLOC_012048 | XLOC_012048 | C2orf48             | chr2:10281980-10350942    | -0.346231 | 0.999791 |
| XLOC_002138 | XLOC_002138 | TMEM81              | chr1:205052256-205053588  | -0.346152 | 0.999791 |
| XLOC_001863 | XLOC_001863 | CRTC2               | chr1:153920147-153931132  | -0.34591  | 0.754004 |
| XLOC_018235 | XLOC_018235 | HSD17B8             | chr6:33172413-33174608    | -0.34573  | 0.999791 |
| XLOC_001881 | XLOC_001881 | LOC100505666        | chr1:155006281-155042029  | -0.345068 | 0.999791 |
| XLOC_023029 | XLOC_023029 | DFNB31              | chr9:117164359-117267736  | -0.344974 | 0.870405 |
| XLOC_006461 | XLOC_006461 | ESRRB               | chr14:76837689-76968180   | -0.344582 | 1        |
| XLOC_000216 | XLOC_000216 | WDTC1               | chr1:27561006-27635124    | -0.344574 | 0.999791 |
| XLOC_012621 | XLOC_012621 | MAP2                | chr2:210288770-210598834  | -0.344203 | 1        |
| XLOC_014955 | XLOC_014955 | CAND2               | chr3:12838170-12876313    | -0.344188 | 1        |
| XLOC_018110 | XLOC_018110 | BTN3A1              | chr6:26402464-26415444    | -0.344156 | 0.999791 |
| XLOC_015867 | XLOC_015867 | SLC9C1              | chr3:111859751-112013074  | -0.343793 | 1        |
| XLOC_008280 | XLOC_008280 | ZNF469              | chr16:88493878-88507165   | -0.3436   | 1        |
| XLOC_007191 | XLOC_007191 | DUOX1               | chr15:45422191-45457774   | -0.343067 | 1        |
| XLOC_012658 | XLOC_012658 | ZFAND2B             | chr2:220071505-220074373  | -0.342887 | 0.870405 |
| XLOC_004334 | XLOC_004334 | C11orf68            | chr11:65684282-65686531   | -0.342832 | 0.648523 |
| XLOC_020817 | XLOC_020817 | FAM115C             | chr7:143318044-143427173  | -0.342724 | 0.999791 |
| XLOC_012506 | XLOC_012506 | LOC100505695        | chr2:171627603-171634757  | -0.342574 | 0.999791 |
| XLOC_013695 | XLOC_013695 | PCIF1               | chr20:44563316-44576662   | -0.341712 | 0.873023 |
| XLOC_013513 | XLOC_013513 | LOC728228           | chr20:4173736-4176600     | -0.34152  | 1        |
| XLOC_018238 | XLOC_018238 | HCG25               | chr6:33217312-33239662    | -0.341481 | 1        |
| XLOC_021728 | XLOC_021728 | DEPTOR              | chr8:120885899-121063157  | -0.341447 | 0.999791 |
| XLOC_008464 | XLOC_008464 | SFLT4A5P2           | chr16:21529229-21531765   | -0.341364 | 0.999791 |
| XLOC_002519 | XLOC_002519 | FUT11               | chr10:75532048-75535976   | -0.340596 | 0.999791 |
| XLOC_001124 | XLOC_001124 | RYR2                | chr1:237205701-237997288  | -0.340591 | 1        |
| XLOC_001246 | XLOC_001246 | UTS2                | chr1:7907671-7913551      | -0.34056  | 0.999791 |
| XLOC_011708 | XLOC_011708 | LIPE                | chr19:42901299-43156507   | -0.339899 | 0.999791 |
| XLOC_012712 | XLOC_012712 | C2orf82             | chr2:233734993-233741107  | -0.339817 | 0.999791 |
| XLOC_020930 | XLOC_020930 | LOC100131257        | chr7:7115400-71136417     | -0.339704 | 1        |
| XLOC_002464 | XLOC_002464 | MTRNR2L5            | chr10:57358749-57360487   | -0.339468 | 1        |
| XLOC_012787 | XLOC_012787 | SNORA80B            | chr2:10580507-10588453    | -0.339086 | 0.999791 |
| XLOC_009781 | XLOC_009781 | GJC1                | chr17:42875815-42908179   | -0.338674 | 0.748784 |
| XLOC_023027 | XLOC_023027 | KIF12               | chr9:116853917-116861337  | -0.338609 | 0.999791 |
| XLOC_020614 | XLOC_020614 | ASB4                | chr7:95115212-95169543    | -0.338373 | 1        |
| XLOC_002772 | XLOC_002772 | KNDC1               | chr10:134973970-135039916 | -0.337897 | 0.999791 |
| XLOC_007150 | XLOC_007150 | GCHFR               | chr15:41056284-41059911   | -0.337404 | 0.861897 |
| XLOC_011363 | XLOC_011363 | SH2D3A              | chr19:6752172-6767523     | -0.336995 | 0.999791 |
| XLOC_020937 | XLOC_020937 | ETV1                | chr7:13930855-14031050    | -0.336719 | 0.999791 |
| XLOC_014971 | XLOC_014971 | BTD                 | chr3:15643254-15687325    | -0.336694 | 0.999791 |
| XLOC_014440 | XLOC_014440 | SDF2L1              | chr22:21996541-21998588   | -0.336102 | 0.832462 |
| XLOC_011275 | XLOC_011275 | GAMT                | chr19:1397024-1401569     | -0.336024 | 1        |
| XLOC_001671 | XLOC_001671 | FRRS1               | chr1:100111430-100231349  | -0.335742 | 0.999791 |
| XLOC_018289 | XLOC_018289 | FOXP4               | chr6:41514163-41570122    | -0.335633 | 0.777779 |
| XLOC_013163 | XLOC_013163 | TMEM163             | chr2:135213329-135476571  | -0.335413 | 1        |
| XLOC_023954 | XLOC_023954 | MAGT1               | chrX:77081861-77151065    | -0.335186 | 0.774655 |
| XLOC_007153 | XLOC_007153 | SPINT1              | chr15:41136245-41149853   | -0.33494  | 0.71528  |
| XLOC_005837 | XLOC_005837 | USPL1               | chr13:31191829-31233686   | -0.334639 | 0.993188 |
| XLOC_012270 | XLOC_012270 | TMSB10              | chr2:85132762-85133799    | -0.334624 | 0.999791 |
| XLOC_001808 | XLOC_001808 | FAM63A              | chr1:150969300-150980854  | -0.334564 | 0.999791 |
| XLOC_021483 | XLOC_021483 | PDGFRL              | chr8:17433941-17500642    | -0.334564 | 0.999791 |
| XLOC_007759 | XLOC_007759 | KLHL25              | chr15:86302558-86338189   | -0.33422  | 0.999791 |
| XLOC_001503 | XLOC_001503 | KDMAA-AS1           | chr1:44115796-44173012    | -0.333813 | 0.999791 |
| XLOC_023382 | XLOC_023382 | PPP1R3F             | chrX:49126305-49144555    | -0.333665 | 0.999791 |
| XLOC_015752 | XLOC_015752 | TLR9                | chr3:52255095-52260179    | -0.333091 | 1        |
| XLOC_011349 | XLOC_011349 | RFX2                | chr19:5978413-6110664     | -0.33302  | 0.999791 |
| XLOC_003597 | XLOC_003597 | SLC22A11            | chr1:64323097-64338999    | -0.332756 | 1        |
| XLOC_021683 | XLOC_021683 | LOC100616530        | chr8:96257140-96822371    | -0.332615 | 1        |
| XLOC_009306 | XLOC_009306 | MGAT5B              | chr17:74864797-74946471   | -0.332579 | 0.999791 |
| XLOC_003945 | XLOC_003945 | IRF7                | chr1:612554-615999        | -0.332488 | 1        |
| XLOC_018398 | XLOC_018398 | NT5E                | chr6:86159301-86205509    | -0.332171 | 0.999791 |
| XLOC_014207 | XLOC_014207 | LRRC3               | chr21:45875392-45878739   | -0.332127 | 0.999791 |
| XLOC_018520 | XLOC_018520 | KIAA1244            | chr6:138483052-138665800  | -0.332126 | 0.790746 |
| XLOC_020352 | XLOC_020352 | RBAK,RBAK-LOC389458 | chr7:5085451-5112854      | -0.331575 | 0.999791 |

|             |             |              |                           |           |          |
|-------------|-------------|--------------|---------------------------|-----------|----------|
| XLOC_022287 | XLOC_022287 | SNAPC3       | chr9:15422781-15461627    | -0.331526 | 0.999791 |
| XLOC_017199 | XLOC_017199 | F2R          | chr5:76011867-76031595    | -0.331348 | 0.999791 |
| XLOC_002447 | XLOC_002447 | ZNF488       | chr10:48355088-48373866   | -0.331001 | 1        |
| XLOC_007269 | XLOC_007269 | FEM1B        | chr15:68570140-68583640   | -0.33051  | 0.999791 |
| XLOC_014687 | XLOC_014687 | RTN4R        | chr22:20228937-20255816   | -0.330448 | 0.993188 |
| XLOC_012775 | XLOC_012775 | CMPK2        | chr2:6980683-7006766      | -0.329978 | 0.999791 |
| XLOC_012507 | XLOC_012507 | GAD1         | chr2:171673199-171717659  | -0.329926 | 0.999791 |
| XLOC_003051 | XLOC_003051 | CPEB3        | chr10:93808396-94050875   | -0.329836 | 1        |
| XLOC_021880 | XLOC_021880 | LONRF1       | chr8:12579405-12612992    | -0.329629 | 0.999791 |
| XLOC_010226 | XLOC_010226 | ZCCHC2       | chr18:60190657-60245818   | -0.329562 | 0.999791 |
| XLOC_016395 | XLOC_016395 | FRAS1        | chr4:78978723-79465423    | -0.329298 | 0.966897 |
| XLOC_010914 | XLOC_010914 | ZNF284       | chr19:44576296-44591623   | -0.329085 | 0.999791 |
| XLOC_017480 | XLOC_017480 | FGF18        | chr5:170846666-170884630  | -0.329037 | 0.999791 |
| XLOC_022341 | XLOC_022341 | FP588        | chr9:35860270-35865515    | -0.328783 | 1        |
| XLOC_010995 | XLOC_010995 | KCNJ14       | chr19:48958963-48969367   | -0.328773 | 0.999791 |
| XLOC_004606 | XLOC_004606 | ESAM         | chr11:124623018-124632223 | -0.328477 | 0.999791 |
| XLOC_002963 | XLOC_002963 | ATOH7        | chr10:69990351-69991870   | -0.328475 | 1        |
| XLOC_020424 | XLOC_020424 | ZNRF2        | chr7:30323922-30407308    | -0.328448 | 0.999791 |
| XLOC_004359 | XLOC_004359 | CDK2AP2      | chr1:67273960-67276199    | -0.328323 | 0.891812 |
| XLOC_002071 | XLOC_002071 | ARPC5        | chr1:183595327-183605076  | -0.328188 | 0.774655 |
| XLOC_000226 | XLOC_000226 | SMPDL3B      | chr1:28261503-28285663    | -0.328187 | 0.999791 |
| XLOC_013477 | XLOC_013477 | NRSN2        | chr20:327369-335512       | -0.328039 | 1        |
| XLOC_017969 | XLOC_017969 | HK3          | chr5:176237559-176326333  | -0.32787  | 1        |
| XLOC_009361 | XLOC_009361 | FLJ43681     | chr17:81174665-81188573   | -0.32778  | 0.999791 |
| XLOC_007981 | XLOC_007981 | CRYM-AS1     | chr16:21269838-21329912   | -0.327449 | 1        |
| XLOC_023357 | XLOC_023357 | LOC100133957 | chrX:47511190-47519776    | -0.32742  | 0.999791 |
| XLOC_003220 | XLOC_003220 | IFITM1       | chr1:313990-315272        | -0.32721  | 0.999791 |
| XLOC_016187 | XLOC_016187 | RGS12        | chr4:3315873-3441640      | -0.327199 | 0.999791 |
| XLOC_020539 | XLOC_020539 | VPS37D       | chr7:73082173-73086440    | -0.326295 | 0.978746 |
| XLOC_018112 | XLOC_018112 | BTN3A3       | chr6:26440699-26453643    | -0.326062 | 0.999791 |
| XLOC_004110 | XLOC_004110 | E2F8         | chr11:19245609-19263202   | -0.325858 | 0.999791 |
| XLOC_004728 | XLOC_004728 | PRH2         | chr12:10998447-11328619   | -0.325656 | 1        |
| XLOC_014980 | XLOC_014980 | SGOL1-AS1    | chr3:20202084-20227919    | -0.325463 | 0.999791 |
| XLOC_012392 | XLOC_012392 | CBWD2        | chr2:114195267-114253781  | -0.325313 | 0.999791 |
| XLOC_012188 | XLOC_012188 | PRORS1P      | chr2:55509454-55511607    | -0.32514  | 0.999791 |
| XLOC_002129 | XLOC_002129 | ETNK2        | chr1:204100189-204121307  | -0.324838 | 0.999791 |
| XLOC_017348 | XLOC_017348 | SNORA74A     | chr5:138609440-138667366  | -0.324798 | 0.999791 |
| XLOC_008810 | XLOC_008810 | ACAP1        | chr17:7239847-7254793     | -0.324681 | 0.999791 |
| XLOC_004745 | XLOC_004745 | KIAA1467     | chr12:13197314-13236383   | -0.3246   | 0.999791 |
| XLOC_008045 | XLOC_008045 | ALDOA        | chr16:30064410-30081741   | -0.324316 | 0.999791 |
| XLOC_000287 | XLOC_000287 | SH3D21       | chr1:36771993-36786948    | -0.323986 | 0.999791 |
| XLOC_007767 | XLOC_007767 | MFGE8        | chr15:89441913-89456663   | -0.32382  | 0.93499  |
| XLOC_010768 | XLOC_010768 | WTIP         | chr19:34972879-34992085   | -0.323713 | 0.999791 |
| XLOC_009042 | XLOC_009042 | THRA         | chr17:38218445-38256978   | -0.323575 | 0.999791 |
| XLOC_001479 | XLOC_001479 | OXCT2        | chr1:40204516-40254533    | -0.323412 | 0.999791 |
| XLOC_001701 | XLOC_001701 | SLC16A4      | chr1:110905472-110933704  | -0.323313 | 1        |
| XLOC_000520 | XLOC_000520 | LOC729970    | chr1:95393583-95428826    | -0.322998 | 0.999791 |
| XLOC_011845 | XLOC_011845 | FUZ          | chr19:50270179-50316567   | -0.322775 | 0.999791 |
| XLOC_002996 | XLOC_002996 | MSS51        | chr10:75183336-75193319   | -0.322396 | 0.999791 |
| XLOC_005357 | XLOC_005357 | IFLTD1       | chr12:25629015-25801496   | -0.322286 | 1        |
| XLOC_011533 | XLOC_011533 | JUND         | chr19:18390562-18392432   | -0.322247 | 0.844649 |
| XLOC_008335 | XLOC_008335 | CCDC154      | chr16:1484388-1494490     | -0.322083 | 0.999791 |
| XLOC_016154 | XLOC_016154 | LOC220729    | chr3:197340897-197354752  | -0.321887 | 0.999791 |
| XLOC_008265 | XLOC_008265 | CRISPLD2     | chr16:84853586-84943116   | -0.321825 | 1        |
| XLOC_016568 | XLOC_016568 | MSMO1        | chr4:166248817-166264314  | -0.321623 | 0.842042 |
| XLOC_002495 | XLOC_002495 | HKDC1        | chr10:70980058-71027315   | -0.321537 | 0.999791 |
| XLOC_023326 | XLOC_023326 | CYBB         | chrX:37639269-37672714    | -0.320544 | 1        |
| XLOC_023986 | XLOC_023986 | BEX5         | chrX:101408678-101410986  | -0.320151 | 0.999791 |
| XLOC_011056 | XLOC_011056 | C19orf81     | chr19:51152701-51162567   | -0.320098 | 0.999791 |
| XLOC_003611 | XLOC_003611 | TIGD3        | chr11:65122281-65125082   | -0.31966  | 0.999791 |
| XLOC_004445 | XLOC_004445 | SYTL2        | chr11:85405264-85522178   | -0.319499 | 0.999791 |
| XLOC_009893 | XLOC_009893 | BRIP1        | chr17:59756546-59940920   | -0.319209 | 0.999791 |
| XLOC_016578 | XLOC_016578 | SAP30        | chr4:174292092-174298683  | -0.319082 | 0.910882 |
| XLOC_011701 | XLOC_011701 | POU2F2       | chr19:42590261-42636625   | -0.318716 | 1        |
| XLOC_008682 | XLOC_008682 | TMEM170A     | chr16:75480922-75498584   | -0.318364 | 0.999791 |
| XLOC_002581 | XLOC_002581 | IFIT3        | chr10:91087601-91100725   | -0.31791  | 1        |
| XLOC_013519 | XLOC_013519 | C20orf196    | chr20:5731042-5844559     | -0.317541 | 0.999791 |
| XLOC_021976 | XLOC_021976 | PLAT         | chr8:42032235-42065194    | -0.317409 | 0.999791 |
| XLOC_009986 | XLOC_009986 | RNF157       | chr17:74132414-74236390   | -0.317316 | 0.999791 |
| XLOC_003050 | XLOC_003050 | FGFBP3       | chr10:93666344-93669258   | -0.316953 | 0.999791 |
| XLOC_008122 | XLOC_008122 | MT1JP        | chr16:56669650-56670998   | -0.3168   | 0.999791 |
| XLOC_016926 | XLOC_016926 | ANKRD50      | chr4:125585203-125633887  | -0.316575 | 0.999791 |
| XLOC_005644 | XLOC_005644 | TMPO-AS1     | chr12:98906750-98944157   | -0.316238 | 0.999791 |
| XLOC_009465 | XLOC_009465 | SAT2         | chr17:7494547-7536700     | -0.316214 | 0.999791 |
| XLOC_008744 | XLOC_008744 | DBIL5P       | chr17:655572-658576       | -0.316078 | 1        |
| XLOC_016750 | XLOC_016750 | NMU          | chr4:564611397-56502465   | -0.315643 | 0.999791 |
| XLOC_009542 | XLOC_009542 | TBC1D28      | chr17:18538841-18547740   | -0.31556  | 1        |
| XLOC_005959 | XLOC_005959 | DNAJC3       | chr13:96329392-96447243   | -0.315537 | 0.886909 |
| XLOC_000092 | XLOC_000092 | TNFRSF8      | chr1:12123433-12204264    | -0.315372 | 1        |

|             |             |              |                           |           |          |
|-------------|-------------|--------------|---------------------------|-----------|----------|
| XLOC_000845 | XLOC_000845 | HSD17B7      | chr1:162760495-162782608  | -0.315102 | 0.999791 |
| XLOC_018710 | XLOC_018710 | ZKSCAN4      | chr6:28212489-28220002    | -0.314939 | 0.999791 |
| XLOC_015207 | XLOC_015207 | CRYBG3       | chr3:97540883-97691295    | -0.314751 | 1        |
| XLOC_010151 | XLOC_010151 | CABYR        | chr18:21718954-21741564   | -0.314743 | 0.999791 |
| XLOC_001535 | XLOC_001535 | TRABD2B      | chr1:48226199-48462562    | -0.314738 | 1        |
| XLOC_001040 | XLOC_001040 | ATF3         | chr1:212738675-212794119  | -0.314573 | 0.963707 |
| XLOC_020845 | XLOC_020845 | ATP6V0E2     | chr7:149564782-149577787  | -0.31456  | 1        |
| XLOC_003491 | XLOC_003491 | RTN4RL2      | chr11:57228338-57244384   | -0.314473 | 0.999791 |
| XLOC_001497 | XLOC_001497 | SLC2A1       | chr1:43391045-43449029    | -0.314464 | 0.924846 |
| XLOC_021383 | XLOC_021383 | PDIA4        | chr7:148700153-148725782  | -0.314357 | 0.910882 |
| XLOC_015138 | XLOC_015138 | PHF7         | chr3:52444526-52457657    | -0.314052 | 0.999791 |
| XLOC_023855 | XLOC_023855 | SYP          | chrX:49044264-49056661    | -0.313802 | 1        |
| XLOC_009844 | XLOC_009844 | MRPL27       | chr17:48445227-48450562   | -0.313701 | 0.896633 |
| XLOC_008815 | XLOC_008815 | SPEM1        | chr17:7323678-7324951     | -0.313503 | 0.999791 |
| XLOC_005636 | XLOC_005636 | NTN4         | chr12:96043030-96184536   | -0.313272 | 0.999791 |
| XLOC_017796 | XLOC_017796 | LOC553103    | chr5:131630144-131731306  | -0.312841 | 1        |
| XLOC_002108 | XLOC_002108 | PHLDA3       | chr1:201434606-201438299  | -0.312733 | 0.910882 |
| XLOC_014594 | XLOC_014594 | SREBF2       | chr22:42229105-42302375   | -0.312505 | 0.870313 |
| XLOC_009406 | XLOC_009406 | ITGAE        | chr17:3617918-3704537     | -0.312379 | 0.999791 |
| XLOC_010928 | XLOC_010928 | PVRL2        | chr19:45349392-45392485   | -0.312256 | 0.891812 |
| XLOC_020356 | XLOC_020356 | ZNF815P      | chr7:5862790-5894066      | -0.312092 | 0.999791 |
| XLOC_020851 | XLOC_020851 | LOC728743    | chr7:150102839-150109558  | -0.311715 | 0.999791 |
| XLOC_001695 | XLOC_001695 | AMIGO1       | chr1:110049445-110052336  | -0.311522 | 0.999791 |
| XLOC_002332 | XLOC_002332 | PFKFB3       | chr10:6186842-6277507     | -0.311454 | 0.886909 |
| XLOC_000516 | XLOC_000516 | LOC100129046 | chr1:94027342-94312706    | -0.31141  | 1        |
| XLOC_001770 | XLOC_001770 | GPR89A       | chr1:145764594-145827103  | -0.310862 | 0.999791 |
| XLOC_009338 | XLOC_009338 | TSPAN10      | chr17:79609348-79615779   | -0.310544 | 0.999791 |
| XLOC_012642 | XLOC_012642 | SLC11A1      | chr2:219246751-219261617  | -0.309911 | 1        |
| XLOC_003231 | XLOC_003231 | NS3BP        | chr1:1779453-780755       | -0.309281 | 0.999791 |
| XLOC_005982 | XLOC_005982 | LINC00460    | chr13:107028910-107030142 | -0.309217 | 0.999791 |
| XLOC_017277 | XLOC_017277 | DMXL1        | chr5:118407083-118584822  | -0.308907 | 0.999791 |
| XLOC_000359 | XLOC_000359 | LOC400752    | chr1:45769581-45771291    | -0.308863 | 0.999791 |
| XLOC_008722 | XLOC_008722 | SNAI3        | chr16:88729780-88753594   | -0.308724 | 0.999791 |
| XLOC_002278 | XLOC_002278 | AKT3         | chr1:243419306-244006886  | -0.308482 | 0.999791 |
| XLOC_005849 | XLOC_005849 | STAR13-AS    | chr13:33677271-34250932   | -0.308303 | 1        |
| XLOC_010131 | XLOC_010131 | LDLRAD4      | chr18:13218728-13652753   | -0.308075 | 1        |
| XLOC_018867 | XLOC_018867 | TFEB         | chr6:41651715-41703997    | -0.30792  | 0.999791 |
| XLOC_005201 | XLOC_005201 | LOC100130238 | chr12:132680916-132905905 | -0.307863 | 1        |
| XLOC_021784 | XLOC_021784 | BREA2        | chr8:144779284-144780583  | -0.307697 | 0.999791 |
| XLOC_006457 | XLOC_006457 | FLVCR2       | chr14:76044939-76114512   | -0.307672 | 0.999791 |
| XLOC_014862 | XLOC_014862 | NFAM1        | chr22:42776413-42828401   | -0.307592 | 1        |
| XLOC_015292 | XLOC_015292 | FAM162A      | chr3:122103022-122128961  | -0.307383 | 0.969721 |
| XLOC_010801 | XLOC_010801 | ARHGAP33     | chr19:36266416-36279724   | -0.307376 | 0.999791 |
| XLOC_018660 | XLOC_018660 | MBOAT1       | chr6:20099915-20212695    | -0.30736  | 0.999791 |
| XLOC_015958 | XLOC_015958 | RAB6B        | chr3:133543079-133614691  | -0.307226 | 0.999791 |
| XLOC_014357 | XLOC_014357 | LOC284837    | chr21:45225638-45232448   | -0.307125 | 1        |
| XLOC_021769 | XLOC_021769 | PSCA         | chr8:143751725-143764145  | -0.307035 | 0.999791 |
| XLOC_020794 | XLOC_020794 | TAS2R4       | chr7:141478288-141479188  | -0.306342 | 1        |
| XLOC_018499 | XLOC_018499 | ENPP1        | chr6:132129155-132216295  | -0.306184 | 0.999791 |
| XLOC_021188 | XLOC_021188 | KPNA7        | chr7:98771196-98805089    | -0.306183 | 1        |
| XLOC_003225 | XLOC_003225 | RASSF7       | chr1:1560970-564025       | -0.306179 | 0.949191 |
| XLOC_022886 | XLOC_022886 | TRPM6        | chr9:77337410-77503010    | -0.30592  | 1        |
| XLOC_018537 | XLOC_018537 | STX11        | chr6:144471653-144513076  | -0.305502 | 1        |
| XLOC_024117 | XLOC_024117 | MCF2         | chrX:138663929-138790381  | -0.305225 | 1        |
| XLOC_021125 | XLOC_021125 | TMEM120A     | chr7:75544419-75623992    | -0.305094 | 0.999791 |
| XLOC_006274 | XLOC_006274 | ABHD4        | chr14:23067146-23081265   | -0.305075 | 0.999791 |
| XLOC_003348 | XLOC_003348 | NUCB2        | chr11:17298285-17353070   | -0.304578 | 0.993188 |
| XLOC_007637 | XLOC_007637 | PARP16       | chr15:65550436-65579018   | -0.304531 | 0.999791 |
| XLOC_005267 | XLOC_005267 | POU5F1P3     | chr12:8276227-8291203     | -0.304467 | 1        |
| XLOC_000601 | XLOC_000601 | LRIG2        | chr1:113615830-113667342  | -0.304081 | 0.999791 |
| XLOC_023480 | XLOC_023480 | JPX          | chrX:73164158-73513409    | -0.303406 | 0.999791 |
| XLOC_017126 | XLOC_017126 | ITGA1,PELO   | chr5:52083773-52249485    | -0.303094 | 0.934472 |
| XLOC_000637 | XLOC_000637 | TXNIP        | chr1:145438461-145442628  | -0.303066 | 0.957042 |
| XLOC_020830 | XLOC_020830 | ARHGFE5      | chr7:144052488-144077725  | -0.302798 | 0.999791 |
| XLOC_003551 | XLOC_003551 | FADS2        | chr1:161595712-61634825   | -0.302404 | 0.999791 |
| XLOC_013929 | XLOC_013929 | E2F1         | chr20:32263291-32274210   | -0.302086 | 0.973489 |
| XLOC_013828 | XLOC_013828 | PROSAP1P1    | chr20:3143272-3149207     | -0.302024 | 0.999791 |
| XLOC_010575 | XLOC_010575 | ICAM4        | chr19:10397642-10399260   | -0.302026 | 1        |
| XLOC_008749 | XLOC_008749 | PITPNA-AS1   | chr17:1420212-1466110     | -0.301978 | 0.999791 |
| XLOC_009766 | XLOC_009766 | MPP2         | chr17:41952726-41985113   | -0.301958 | 0.999791 |
| XLOC_000779 | XLOC_000779 | HAPLN2       | chr1:156589085-156595517  | -0.301914 | 1        |
| XLOC_004570 | XLOC_004570 | H2AFX        | chr1:118964584-118966177  | -0.301875 | 0.891812 |
| XLOC_009683 | XLOC_009683 | KRT10        | chr17:38974368-38992526   | -0.301829 | 0.999791 |
| XLOC_022719 | XLOC_022719 | ERMP1        | chr9:5784571-5833081      | -0.301806 | 0.993188 |
| XLOC_002196 | XLOC_002196 | DUSP10       | chr1:221874763-221915516  | -0.301601 | 0.999791 |
| XLOC_022980 | XLOC_022980 | BAAT         | chr9:104122698-104147287  | -0.301582 | 1        |
| XLOC_003099 | XLOC_003099 | PDZD7        | chr10:102756863-102790914 | -0.301553 | 0.999791 |
| XLOC_006781 | XLOC_006781 | TRAPPC6B     | chr14:39617014-39639634   | -0.301545 | 0.999791 |
| XLOC_022330 | XLOC_022330 | UNC13B       | chr9:35161988-35405332    | -0.301497 | 0.999791 |

|             |             |              |                           |           |          |
|-------------|-------------|--------------|---------------------------|-----------|----------|
| XLOC_010618 | XLOC_010618 | CALR         | chr19:13049413-13055304   | -0.301329 | 0.999791 |
| XLOC_018817 | XLOC_018817 | MNF1         | chr6:33664537-33679528    | -0.301312 | 0.949191 |
| XLOC_010915 | XLOC_010915 | ZNF224       | chr19:44598481-44617336   | -0.301259 | 1        |
| XLOC_024032 | XLOC_024032 | SLC25A5-AS1  | chrX:118599995-118605359  | -0.300825 | 1        |
| XLOC_004672 | XLOC_004672 | CD27         | chr12:6548166-6560884     | -0.300459 | 1        |
| XLOC_022973 | XLOC_022973 | TBC1D2       | chr9:100961279-101018003  | -0.300408 | 0.999791 |
| XLOC_013665 | XLOC_013665 | MYBL2        | chr20:42295708-42345122   | -0.300386 | 0.934472 |
| XLOC_015642 | XLOC_015642 | E1F1B-AS1    | chr3:39851302-40353915    | -0.299997 | 1        |
| XLOC_024228 | XLOC_024228 | PCDH11Y      | chrY:4868266-5610264      | -0.29972  | 1        |
| XLOC_018302 | XLOC_018302 | CNPY3        | chr6:42896859-42907008    | -0.299527 | 0.914868 |
| XLOC_013205 | XLOC_013205 | IFIH1        | chr2:163123588-163175218  | -0.29942  | 0.999791 |
| XLOC_005638 | XLOC_005638 | HAL          | chr12:96366439-96390143   | -0.299213 | 1        |
| XLOC_010012 | XLOC_010012 | RBFOX3       | chr17:77085426-77478563   | -0.298823 | 1        |
| XLOC_007262 | XLOC_007262 | SMAD6        | chr15:66994673-67074337   | -0.298777 | 0.999791 |
| XLOC_013634 | XLOC_013634 | MYL9         | chr20:35169886-35178226   | -0.29874  | 0.91464  |
| XLOC_017737 | XLOC_017737 | LYSM2        | chr5:89811444-89825401    | -0.298526 | 0.999791 |
| XLOC_012569 | XLOC_012569 | SLC39A10     | chr2:196521531-196602426  | -0.298522 | 0.999791 |
| XLOC_009189 | XLOC_009189 | MSI2         | chr17:55333930-55757299   | -0.298379 | 0.999791 |
| XLOC_022536 | XLOC_022536 | PTGS1        | chr9:125132808-125157982  | -0.29762  | 1        |
| XLOC_018382 | XLOC_018382 | LOC100506804 | chr6:75994729-76001580    | -0.297452 | 1        |
| XLOC_013972 | XLOC_013972 | EMILIN3      | chr20:39969559-39995498   | -0.297285 | 0.999791 |
| XLOC_004012 | XLOC_004012 | HBE1         | chr11:5289579-5291373     | -0.297225 | 0.978746 |
| XLOC_009486 | XLOC_009486 | MYH10        | chr17:8377522-8534079     | -0.297192 | 1        |
| XLOC_015814 | XLOC_015814 | FOXP1        | chr3:71003864-71633140    | -0.297192 | 0.999791 |
| XLOC_017763 | XLOC_017763 | PJA2         | chr5:108670409-108745675  | -0.297183 | 0.999791 |
| XLOC_005684 | XLOC_005684 | USP30-AS1    | chr12:109489845-109525831 | -0.296955 | 1        |
| XLOC_017247 | XLOC_017247 | RGMB         | chr5:98104998-98132198    | -0.296265 | 0.993188 |
| XLOC_008681 | XLOC_008681 | CFDP1        | chr16:75327607-75467387   | -0.296076 | 0.957042 |
| XLOC_021935 | XLOC_021935 | FBXO16       | chr8:28285925-28347835    | -0.295914 | 0.999791 |
| XLOC_011329 | XLOC_011329 | PLIN5        | chr19:4522543-4535208     | -0.295781 | 0.999791 |
| XLOC_000606 | XLOC_000606 | OLFML3       | chr11:114522029-114524875 | -0.295648 | 1        |
| XLOC_014446 | XLOC_014446 | LOC648691    | chr22:22901755-22909007   | -0.295479 | 1        |
| XLOC_022641 | XLOC_022641 | CACFD1       | chr9:136325086-136335909  | -0.294966 | 0.999791 |
| XLOC_008410 | XLOC_008410 | CARHSP1      | chr16:8946801-8962863     | -0.294809 | 0.969721 |
| XLOC_014063 | XLOC_014063 | CABLES2      | chr20:60963685-60982339   | -0.294355 | 0.999791 |
| XLOC_006826 | XLOC_006826 | KTN1-AS1     | chr14:56042874-56046810   | -0.294112 | 0.999791 |
| XLOC_017386 | XLOC_017386 | PCDHB15      | chr5:140625146-140627801  | -0.294036 | 1        |
| XLOC_011427 | XLOC_011427 | TMED1        | chr19:10943113-10946983   | -0.293806 | 0.999791 |
| XLOC_002103 | XLOC_002103 | ASCL5        | chr11:201083080-201084500 | -0.293582 | 0.999791 |
| XLOC_017430 | XLOC_017430 | GPX3         | chr5:150399998-150408554  | -0.293565 | 1        |
| XLOC_015374 | XLOC_015374 | RASA2        | chr3:141205925-141331197  | -0.293387 | 0.999791 |
| XLOC_006295 | XLOC_006295 | FITM1        | chr14:24600674-24602058   | -0.293379 | 0.999791 |
| XLOC_022895 | XLOC_022895 | GNAQ         | chr9:80335190-80646219    | -0.293182 | 0.999791 |
| XLOC_018374 | XLOC_018374 | SMAP1        | chr6:71377478-71666788    | -0.293163 | 0.999791 |
| XLOC_011416 | XLOC_011416 | RAVER1       | chr19:10426888-10444314   | -0.292968 | 0.956701 |
| XLOC_021369 | XLOC_021369 | CTAGE6P      | chr7:143452181-143454843  | -0.29291  | 1        |
| XLOC_013934 | XLOC_013934 | NCOA6        | chr20:33302577-33413433   | -0.292799 | 0.999791 |
| XLOC_004962 | XLOC_004962 | SRGAP1       | chr12:64238540-64541613   | -0.292746 | 0.999791 |
| XLOC_008640 | XLOC_008640 | SMPD3        | chr16:68392229-68482409   | -0.29257  | 0.999791 |
| XLOC_002522 | XLOC_002522 | PLAU         | chr10:75669726-75682535   | -0.292372 | 0.956701 |
| XLOC_022042 | XLOC_022042 | SBSPON       | chr8:73976777-74005507    | -0.292323 | 1        |
| XLOC_011607 | XLOC_011607 | U2AF1L4      | chr19:36233427-36236336   | -0.29209  | 0.999791 |
| XLOC_008516 | XLOC_008516 | SEPT1        | chr16:30389453-30411429   | -0.292032 | 0.999791 |
| XLOC_001291 | XLOC_001291 | UQCRHL       | chr1:16133656-16134194    | -0.291777 | 0.999791 |
| XLOC_000987 | XLOC_000987 | ATP2B4       | chr11:203595914-203713209 | -0.290835 | 0.999791 |
| XLOC_005972 | XLOC_005972 | ZIC2         | chr13:100634025-100639019 | -0.290495 | 0.999791 |
| XLOC_010136 | XLOC_010136 | ANKRD20A5P   | chr18:14179095-14227049   | -0.290256 | 1        |
| XLOC_012762 | XLOC_012762 | FAM110C      | chr2:38813-46588          | -0.290223 | 0.999791 |
| XLOC_012286 | XLOC_012286 | KDM3A        | chr2:86668270-86719839    | -0.290108 | 0.988021 |
| XLOC_023162 | XLOC_023162 | DKFZP434A062 | chr9:139216997-139221779  | -0.289958 | 1        |
| XLOC_006837 | XLOC_006837 | CCDC175      | chr14:59951160-60043549   | -0.289879 | 0.999791 |
| XLOC_018639 | XLOC_018639 | TFAP2A       | chr6:10396915-10419797    | -0.289558 | 0.999791 |
| XLOC_017278 | XLOC_017278 | TNFAIP8      | chr5:118604417-118730294  | -0.289465 | 0.999791 |
| XLOC_011621 | XLOC_011621 | ZFP14        | chr19:36825354-36870105   | -0.289412 | 1        |
| XLOC_011909 | XLOC_011909 | ZNF649       | chr19:52392487-52408305   | -0.289357 | 1        |
| XLOC_010772 | XLOC_010772 | ZNF30        | chr19:35417806-35436076   | -0.28896  | 0.999791 |
| XLOC_022057 | XLOC_022057 | PAG1         | chr8:81880045-82024303    | -0.287902 | 1        |
| XLOC_007158 | XLOC_007158 | OIP5-AS1     | chr15:41576200-41591795   | -0.287894 | 0.999791 |
| XLOC_001002 | XLOC_001002 | LOC284581    | chr11:205831206-205865215 | -0.287583 | 1        |
| XLOC_000627 | XLOC_000627 | FAM72B       | chr11:120839004-120855681 | -0.287463 | 0.999791 |
| XLOC_004849 | XLOC_004849 | DAZAP2       | chr12:51632507-51664202   | -0.287428 | 0.999791 |
| XLOC_011553 | XLOC_011553 | LPAR2        | chr19:19734465-19739039   | -0.28702  | 0.999791 |
| XLOC_008678 | XLOC_008678 | LDHD         | chr16:75145757-75150670   | -0.286933 | 0.999791 |
| XLOC_017875 | XLOC_017875 | PRELID2      | chr5:145138581-145214899  | -0.286882 | 0.999791 |
| XLOC_008119 | XLOC_008119 | MT1L         | chr16:56651372-56652730   | -0.286741 | 0.999617 |
| XLOC_006417 | XLOC_006417 | SLC39A9      | chr14:69865095-69929107   | -0.286452 | 0.999791 |
| XLOC_023814 | XLOC_023814 | BCOR         | chrX:39910498-40036582    | -0.286437 | 0.999791 |
| XLOC_001740 | XLOC_001740 | IGSF3        | chr11:117117030-117210314 | -0.286297 | 0.999791 |
| XLOC_017744 | XLOC_017744 | TTC37        | chr5:94799598-94890709    | -0.286191 | 0.999791 |

|             |             |              |                           |           |          |
|-------------|-------------|--------------|---------------------------|-----------|----------|
| XLOC_007916 | XLOC_007916 | DNASE1       | chr16:3702939-3767598     | -0.28608  | 0.999791 |
| XLOC_019131 | XLOC_019131 | STXBPS-AS1   | chr6:147162524-147711612  | -0.286068 | 1        |
| XLOC_008169 | XLOC_008169 | FBXL8,HSF4   | chr16:67193890-67203848   | -0.286061 | 0.999791 |
| XLOC_003326 | XLOC_003326 | WEE1         | chr11:9595227-9611313     | -0.286055 | 0.9731   |
| XLOC_011679 | XLOC_011679 | HIPK4        | chr19:40885177-40896094   | -0.286024 | 1        |
| XLOC_001302 | XLOC_001302 | NBPF1        | chr1:16890411-16939982    | -0.285848 | 0.999791 |
| XLOC_012847 | XLOC_012847 | FNDC4        | chr2:27714749-27718126    | -0.285826 | 0.999791 |
| XLOC_014775 | XLOC_014775 | PIK3IP1      | chr22:31677578-31688520   | -0.2858   | 0.999791 |
| XLOC_016955 | XLOC_016955 | SLC10A7      | chr4:147175136-147443123  | -0.285574 | 0.999791 |
| XLOC_022310 | XLOC_022310 | LOC100129250 | chr9:32540541-32553015    | -0.285559 | 0.999791 |
| XLOC_010409 | XLOC_010409 | CYB5A        | chr18:71920526-71959251   | -0.284929 | 0.999791 |
| XLOC_009479 | XLOC_009479 | LINC00324    | chr17:8123947-8127361     | -0.284362 | 0.999791 |
| XLOC_014229 | XLOC_014229 | DIP2A-IT1    | chr21:47878861-47989926   | -0.284276 | 1        |
| XLOC_001003 | XLOC_001003 | FAM72A       | chr1:206138910-206155074  | -0.284111 | 0.999791 |
| XLOC_015125 | XLOC_015125 | RAD54L2      | chr3:51575595-51697612    | -0.283771 | 1        |
| XLOC_005251 | XLOC_005251 | CDCA3        | chr12:6957971-6960456     | -0.28359  | 0.999791 |
| XLOC_016524 | XLOC_016524 | MMAA         | chr4:146540539-146681187  | -0.283211 | 0.999791 |
| XLOC_013024 | XLOC_013024 | REEP1        | chr2:86441119-86565206    | -0.283177 | 0.999791 |
| XLOC_006340 | XLOC_006340 | FANCM        | chr14:45605135-45670093   | -0.283071 | 0.999791 |
| XLOC_022284 | XLOC_022284 | LURAP1L      | chr9:12775011-12823059    | -0.282326 | 0.999791 |
| XLOC_004390 | XLOC_004390 | ANAPC15      | chr11:71709957-71823822   | -0.282218 | 0.999791 |
| XLOC_021133 | XLOC_021133 | RSBN1L-AS1   | chr7:77313167-77409120    | -0.282205 | 0.999791 |
| XLOC_009665 | XLOC_009665 | PGAP3        | chr17:37827374-37844310   | -0.282041 | 0.999791 |
| XLOC_002523 | XLOC_002523 | VCL          | chr10:75757871-75879914   | -0.281932 | 0.982326 |
| XLOC_000751 | XLOC_000751 | EFNA4        | chr1:155006281-155042029  | -0.281915 | 0.999791 |
| XLOC_023375 | XLOC_023375 | HDAC6        | chrX:48660486-48683380    | -0.281813 | 0.999791 |
| XLOC_010275 | XLOC_010275 | MYOM1        | chr18:3066804-3220106     | -0.281701 | 1        |
| XLOC_003990 | XLOC_003990 | RHOG         | chr11:3848207-3862213     | -0.281437 | 0.999791 |
| XLOC_017955 | XLOC_017955 | NKX2-5       | chr5:172659106-172662315  | -0.281106 | 0.999791 |
| XLOC_012977 | XLOC_012977 | RAB11FIP5    | chr2:73300509-73340146    | -0.280886 | 0.993188 |
| XLOC_009088 | XLOC_009088 | IFI35        | chr17:41158741-41166476   | -0.280882 | 0.999791 |
| XLOC_022991 | XLOC_022991 | ABCA1        | chr9:107543283-107690527  | -0.280826 | 1        |
| XLOC_014587 | XLOC_014587 | TEF          | chr22:41763336-41795332   | -0.280521 | 0.999791 |
| XLOC_002444 | XLOC_002444 | AGAP9        | chr10:48215723-48237508   | -0.280421 | 1        |
| XLOC_014660 | XLOC_014660 | CECR6        | chr22:17597188-17602257   | -0.280337 | 0.999791 |
| XLOC_003325 | XLOC_003325 | ZNF143       | chr1:9482511-9550071      | -0.280099 | 0.999791 |
| XLOC_004682 | XLOC_004682 | LEPREL2      | chr12:6937571-6949018     | -0.28001  | 0.999791 |
| XLOC_004687 | XLOC_004687 | DSTNP2       | chr12:6993845-6994950     | -0.279845 | 0.999791 |
| XLOC_000085 | XLOC_000085 | FBXO6        | chr1:11724149-11734409    | -0.279804 | 0.999791 |
| XLOC_014402 | XLOC_014402 | USP18        | chr22:18632757-18660162   | -0.279658 | 0.999791 |
| XLOC_008794 | XLOC_008794 | FAM64A       | chr17:6347734-6354385     | -0.279651 | 0.999791 |
| XLOC_002169 | XLOC_002169 | KCNH1        | chr1:210851656-211307457  | -0.279648 | 1        |
| XLOC_009573 | XLOC_009573 | SPAG5        | chr17:26904582-26926056   | -0.279602 | 0.993188 |
| XLOC_008828 | XLOC_008828 | SHBG         | chr17:7494547-7536700     | -0.279517 | 0.999791 |
| XLOC_007267 | XLOC_007267 | SKOR1        | chr15:68112041-68126174   | -0.279479 | 0.999791 |
| XLOC_006111 | XLOC_006111 | LCP1         | chr13:46700057-46756459   | -0.279309 | 0.999791 |
| XLOC_015996 | XLOC_015996 | HLTF         | chr3:148747903-148820610  | -0.278765 | 1        |
| XLOC_009226 | XLOC_009226 | MAP3K3       | chr17:61699800-61777519   | -0.278737 | 0.999791 |
| XLOC_012094 | XLOC_012094 | KHK          | chr2:27309610-27341995    | -0.278638 | 0.999791 |
| XLOC_022811 | XLOC_022811 | FANCG        | chr9:35073834-35080013    | -0.27827  | 0.999791 |
| XLOC_022993 | XLOC_022993 | KLF4         | chr9:110247132-110252047  | -0.278139 | 0.999791 |
| XLOC_023846 | XLOC_023846 | PIM2         | chrX:48770458-48776413    | -0.278067 | 0.999791 |
| XLOC_000944 | XLOC_000944 | RGS2         | chr1:192778168-192781407  | -0.277908 | 0.999791 |
| XLOC_010007 | XLOC_010007 | TIMP2        | chr17:76849058-76921472   | -0.277625 | 0.999791 |
| XLOC_009492 | XLOC_009492 | STX8         | chr17:9153787-9479275     | -0.27742  | 0.999791 |
| XLOC_001271 | XLOC_001271 | KIAA2013     | chr1:11979644-11986485    | -0.27733  | 0.993188 |
| XLOC_008417 | XLOC_008417 | SOCS1        | chr16:11348273-11350039   | -0.277005 | 0.999791 |
| XLOC_016392 | XLOC_016392 | CCNG2        | chr4:78078356-78091213    | -0.276998 | 0.999791 |
| XLOC_008435 | XLOC_008435 | KIAA0430     | chr16:15688225-15737023   | -0.276929 | 0.999791 |
| XLOC_009912 | XLOC_009912 | ERN1         | chr17:62120389-62207502   | -0.276923 | 1        |
| XLOC_000758 | XLOC_000758 | HCN3         | chr1:155247217-155271225  | -0.276761 | 0.999791 |
| XLOC_008554 | XLOC_008554 | SHCBP1       | chr16:46614467-46655311   | -0.276707 | 0.999791 |
| XLOC_022619 | XLOC_022619 | PPAPDC3      | chr9:134165080-134184649  | -0.276678 | 1        |
| XLOC_021347 | XLOC_021347 | JHDM1D       | chr7:139784545-139876741  | -0.276591 | 0.999791 |
| XLOC_002231 | XLOC_002231 | CCSAP        | chr1:229456751-229478688  | -0.276475 | 0.999791 |
| XLOC_006719 | XLOC_006719 | PPP1R3E      | chr14:23765111-23772057   | -0.276421 | 0.999791 |
| XLOC_005701 | XLOC_005701 | MYL2         | chr12:111348623-111358404 | -0.276164 | 1        |
| XLOC_011317 | XLOC_011317 | DAPK3        | chr19:3958451-3969826     | -0.275979 | 0.999791 |
| XLOC_003906 | XLOC_003906 | HYLS1        | chr11:125753508-125773116 | -0.275572 | 0.999791 |
| XLOC_007510 | XLOC_007510 | PLCB2        | chr15:40580097-40600174   | -0.275548 | 1        |
| XLOC_004550 | XLOC_004550 | BACE1        | chr11:117103403-117186972 | -0.275406 | 0.999791 |
| XLOC_015150 | XLOC_015150 | CACNA1D      | chr3:53529075-53846492    | -0.275309 | 1        |
| XLOC_010005 | XLOC_010005 | CYTH1        | chr17:76670129-76778376   | -0.275305 | 0.999791 |
| XLOC_023275 | XLOC_023275 | CA5B         | chrX:15756411-15805748    | -0.275244 | 0.999791 |
| XLOC_011832 | XLOC_011832 | C19orf73     | chr19:49617617-49622397   | -0.275106 | 0.999791 |
| XLOC_004038 | XLOC_004038 | TPP1         | chr1:6633996-6640692      | -0.275101 | 0.993188 |
| XLOC_018182 | XLOC_018182 | DPCR1        | chr6:30908776-30921998    | -0.274883 | 1        |
| XLOC_021495 | XLOC_021495 | FGF17        | chr8:21900427-21906319    | -0.274755 | 0.999791 |
| XLOC_002587 | XLOC_002587 | RPP30        | chr10:92631708-92668312   | -0.274709 | 0.999791 |

|             |             |            |                           |           |          |
|-------------|-------------|------------|---------------------------|-----------|----------|
| XLOC_010935 | XLOC_010935 | RELB       | chr19:45504706-45541456   | -0.274702 | 0.999791 |
| XLOC_014476 | XLOC_014476 | CRYBB2     | chr22:25615611-25627836   | -0.274318 | 0.999791 |
| XLOC_000598 | XLOC_000598 | MOV10      | chr1:113217047-113243368  | -0.274259 | 0.993188 |
| XLOC_008181 | XLOC_008181 | PARD6A     | chr16:67694850-67696681   | -0.27405  | 0.999791 |
| XLOC_007175 | XLOC_007175 | TUBGCP4    | chr15:43663312-43910998   | -0.273991 | 0.999791 |
| XLOC_020601 | XLOC_020601 | AKAP9      | chr7:91570188-91739987    | -0.273841 | 0.999791 |
| XLOC_011977 | XLOC_011977 | ZNF784     | chr19:56132106-56135941   | -0.273577 | 0.999791 |
| XLOC_020588 | XLOC_020588 | CROT       | chr7:86974950-87029112    | -0.273414 | 0.999791 |
| XLOC_017520 | XLOC_017520 | N4BP3      | chr5:177540555-177553107  | -0.273355 | 0.999791 |
| XLOC_014182 | XLOC_014182 | FAM3B      | chr21:42688660-42729654   | -0.273258 | 1        |
| XLOC_015377 | XLOC_015377 | ATP1B3     | chr3:141595469-141645382  | -0.27325  | 0.999791 |
| XLOC_017582 | XLOC_017582 | DNAH5      | chr5:13690436-13944589    | -0.273199 | 1        |
| XLOC_023433 | XLOC_023433 | RRAGB      | chrX:55744109-55785207    | -0.273131 | 0.999791 |
| XLOC_009076 | XLOC_009076 | CNTNAP1    | chr17:40834631-40852011   | -0.273075 | 0.999791 |
| XLOC_002064 | XLOC_002064 | RNASEL     | chr1:182542768-182558394  | -0.27287  | 0.999791 |
| XLOC_023378 | XLOC_023378 | CCDC120    | chrX:48910960-48927510    | -0.272744 | 1        |
| XLOC_016722 | XLOC_016722 | ATP8A1     | chr4:42410391-42659122    | -0.272734 | 1        |
| XLOC_016902 | XLOC_016902 | CAMK2D     | chr4:114372187-114683083  | -0.272694 | 0.999791 |
| XLOC_012973 | XLOC_012973 | PAIP2B     | chr2:71409867-71454233    | -0.272593 | 0.999791 |
| XLOC_008507 | XLOC_008507 | YPEL3      | chr16:30103634-30107537   | -0.272447 | 0.999791 |
| XLOC_003586 | XLOC_003586 | FKBP2      | chr11:64008412-64011607   | -0.272403 | 0.999791 |
| XLOC_022110 | XLOC_022110 | SNORA72    | chr8:99053937-99057818    | -0.272362 | 0.999791 |
| XLOC_001548 | XLOC_001548 | ORC1       | chr1:52838500-52870143    | -0.272074 | 0.999791 |
| XLOC_014407 | XLOC_014407 | TSSK2      | chr22:19117791-19132190   | -0.271957 | 0.999791 |
| XLOC_001914 | XLOC_001914 | NES        | chr1:156638555-156647189  | -0.271853 | 0.999791 |
| XLOC_012252 | XLOC_012252 | WDR54      | chr2:74648884-74652882    | -0.271616 | 0.999791 |
| XLOC_022480 | XLOC_022480 | MURC       | chr9:103340335-103350173  | -0.271538 | 1        |
| XLOC_002641 | XLOC_002641 | LINC00263  | chr10:102133332-102148111 | -0.27142  | 0.999791 |
| XLOC_016027 | XLOC_016027 | TIPARP-AS1 | chr3:156390959-156424557  | -0.271255 | 1        |
| XLOC_011725 | XLOC_011725 | PHLDB3     | chr19:43979254-44008985   | -0.27071  | 0.999791 |
| XLOC_002545 | XLOC_002545 | DYDC2      | chr10:82095860-82127829   | -0.270622 | 1        |
| XLOC_017999 | XLOC_017999 | C5orf45    | chr5:179224597-179285840  | -0.270528 | 0.999791 |
| XLOC_003631 | XLOC_003631 | DRAP1      | chr1:65688672-65689048    | -0.270506 | 0.999791 |
| XLOC_000902 | XLOC_000902 | C1orf220   | chr1:178511930-178518024  | -0.270369 | 1        |
| XLOC_017016 | XLOC_017016 | CLDN22     | chr4:184020462-184241929  | -0.270166 | 0.999791 |
| XLOC_003144 | XLOC_003144 | C10orf118  | chr10:115881973-115934364 | -0.2696   | 1        |
| XLOC_010880 | XLOC_010880 | TMEM91     | chr19:41860321-41889987   | -0.269356 | 0.999791 |
| XLOC_002239 | XLOC_002239 | TTC13      | chr1:231041986-231114618  | -0.269234 | 0.999791 |
| XLOC_019081 | XLOC_019081 | CTGF       | chr6:132269316-132272518  | -0.268922 | 0.999791 |
| XLOC_009667 | XLOC_009667 | IKZF3      | chr17:37913967-38020441   | -0.268719 | 1        |
| XLOC_000574 | XLOC_000574 | CSF1       | chr1:110453232-110473616  | -0.268672 | 0.999791 |
| XLOC_022977 | XLOC_022977 | LOC441461  | chr9:102648599-102668883  | -0.268622 | 0.999791 |
| XLOC_007116 | XLOC_007116 | HERC2P10   | chr15:31110238-31119986   | -0.268236 | 1        |
| XLOC_015696 | XLOC_015696 | NCKIPSD    | chr3:48711277-48723334    | -0.268222 | 0.999791 |
| XLOC_001609 | XLOC_001609 | LRRIQ3     | chr1:74491701-74663871    | -0.268079 | 1        |
| XLOC_006360 | XLOC_006360 | CGRF1      | chr14:54976586-55005334   | -0.26807  | 0.999791 |
| XLOC_018827 | XLOC_018827 | C6orf106   | chr6:34555065-34664625    | -0.267743 | 0.999791 |
| XLOC_012824 | XLOC_012824 | DNMT3A     | chr2:25455829-25565459    | -0.267541 | 0.999791 |
| XLOC_006902 | XLOC_006902 | C14orf1    | chr14:76117232-76127538   | -0.267386 | 0.999791 |
| XLOC_014546 | XLOC_014546 | LGALS1     | chr22:38071612-38075809   | -0.267174 | 0.999791 |
| XLOC_001804 | XLOC_001804 | CTSS       | chr1:150702671-150738433  | -0.26717  | 1        |
| XLOC_014545 | XLOC_014545 | PDXP       | chr22:38054736-38062939   | -0.266934 | 0.999791 |
| XLOC_010807 | XLOC_010807 | WDR62      | chr19:36545782-36596012   | -0.266927 | 0.999791 |
| XLOC_000886 | XLOC_000886 | SUCO       | chr1:172502259-172580973  | -0.266896 | 0.999791 |
| XLOC_012615 | XLOC_012615 | CREB1      | chr2:208394615-208470284  | -0.266671 | 0.999791 |
| XLOC_000959 | XLOC_000959 | NR5A2      | chr1:199996729-200146550  | -0.266666 | 1        |
| XLOC_006714 | XLOC_006714 | CDH24      | chr14:23516269-23526747   | -0.266623 | 0.999791 |
| XLOC_009585 | XLOC_009585 | DHRS13     | chr17:27224798-27230089   | -0.266581 | 0.999791 |
| XLOC_008669 | XLOC_008669 | PMFBP1     | chr16:72152995-72206349   | -0.266417 | 1        |
| XLOC_023767 | XLOC_023767 | FIGF_PIR   | chrX:15363712-15511711    | -0.266339 | 0.999791 |
| XLOC_021804 | XLOC_021804 | GPT        | chr8:145729464-145732555  | -0.265925 | 1        |
| XLOC_015624 | XLOC_015624 | GLB1_TMPPE | chr3:33038099-33138694    | -0.265764 | 0.999791 |
| XLOC_003987 | XLOC_003987 | ART5       | chr11:3659735-3663546     | -0.265744 | 0.999791 |
| XLOC_023106 | XLOC_023106 | CCBL1      | chr9:131595391-131644354  | -0.265664 | 0.999791 |
| XLOC_005256 | XLOC_005256 | C1R        | chr12:7187514-7245043     | -0.265517 | 0.999791 |
| XLOC_002907 | XLOC_002907 | BMS1P5     | chr10:46737612-46762892   | -0.265363 | 1        |
| XLOC_014550 | XLOC_014550 | GCAT       | chr22:38203911-38213183   | -0.265362 | 0.999791 |
| XLOC_011663 | XLOC_011663 | PAF1       | chr19:39876269-39881835   | -0.264845 | 0.999791 |
| XLOC_009118 | XLOC_009118 | CRHR1      | chr17:43697709-43913194   | -0.264608 | 0.999791 |
| XLOC_005710 | XLOC_005710 | RASAL1     | chr12:113536623-113574044 | -0.264457 | 1        |
| XLOC_020826 | XLOC_020826 | CTAGE4     | chr7:143880547-143883173  | -0.264358 | 1        |
| XLOC_003583 | XLOC_003583 | NUDT22     | chr1:63993729-63997488    | -0.264295 | 0.999791 |
| XLOC_005646 | XLOC_005646 | ANKS1B     | chr12:99039077-100378432  | -0.264086 | 0.999791 |
| XLOC_020354 | XLOC_020354 | SLC29A4    | chr7:5322560-5343704      | -0.264062 | 0.999791 |
| XLOC_014683 | XLOC_014683 | ARVCF      | chr22:19863039-20004309   | -0.26402  | 0.999791 |
| XLOC_001796 | XLOC_001796 | MTMR11     | chr1:149900542-149908791  | -0.263828 | 0.999791 |
| XLOC_020419 | XLOC_020419 | PRR15      | chr7:29603426-29606911    | -0.263726 | 0.999791 |
| XLOC_010729 | XLOC_010729 | LOC400680  | chr19:21666516-21686040   | -0.263528 | 0.999791 |
| XLOC_004256 | XLOC_004256 | RAB31L1    | chr11:61664767-61687741   | -0.263405 | 0.999791 |

|             |             |                     |                           |           |          |
|-------------|-------------|---------------------|---------------------------|-----------|----------|
| XLOC_009278 | XLOC_009278 | ARMC7               | chr17:73106081-73127890   | -0.263395 | 0.999791 |
| XLOC_023632 | XLOC_023632 | FHL1                | chrX:135228860-135293518  | -0.263339 | 1        |
| XLOC_021174 | XLOC_021174 | SLC25A13            | chr7:95749531-95951459    | -0.263305 | 0.999791 |
| XLOC_005842 | XLOC_005842 | B3GALTL             | chr13:31774111-31906411   | -0.263279 | 0.999791 |
| XLOC_007274 | XLOC_007274 | GLCE                | chr15:69116302-69564544   | -0.263279 | 0.999791 |
| XLOC_002886 | XLOC_002886 | ZNF33BP1            | chr10:38065453-38147012   | -0.262906 | 1        |
| XLOC_008415 | XLOC_008415 | TVP23A              | chr16:10837697-10912621   | -0.262829 | 1        |
| XLOC_001805 | XLOC_001805 | CTSK                | chr1:150768683-150780917  | -0.262815 | 0.999791 |
| XLOC_002908 | XLOC_002908 | SYT15               | chr10:46955443-46970601   | -0.262806 | 0.999791 |
| XLOC_023367 | XLOC_023367 | EBP                 | chrX:48380163-48387104    | -0.262806 | 0.999791 |
| XLOC_023048 | XLOC_023048 | GGTA1P              | chr9:124217318-124262306  | -0.262296 | 1        |
| XLOC_014820 | XLOC_014820 | TMEM184B            | chr22:38615297-38669040   | -0.261985 | 0.999791 |
| XLOC_022978 | XLOC_022978 | ERP44               | chr9:102741462-102861330  | -0.261743 | 0.999791 |
| XLOC_004880 | XLOC_004880 | HOXC10              | chr12:54378945-54384062   | -0.261714 | 0.999791 |
| XLOC_017738 | XLOC_017738 | ARRDC3              | chr5:90664540-90716532    | -0.261671 | 0.999791 |
| XLOC_010952 | XLOC_010952 | CCDC61              | chr19:46498718-46521874   | -0.261582 | 0.999791 |
| XLOC_021377 | XLOC_021377 | CTAGE4              | chr7:143955788-143983096  | -0.261338 | 1        |
| XLOC_016093 | XLOC_016093 | EHHADH              | chr3:184880688-184971886  | -0.261212 | 0.999791 |
| XLOC_015015 | XLOC_015015 | CTDSPL              | chr3:37903668-38025960    | -0.260953 | 0.999791 |
| XLOC_003077 | XLOC_003077 | AVP11               | chr10:99437180-99447015   | -0.260892 | 0.999791 |
| XLOC_006865 | XLOC_006865 | RDH11               | chr14:68143518-68162510   | -0.260879 | 0.999791 |
| XLOC_004145 | XLOC_004145 | TRAF6               | chr11:36505316-36531863   | -0.260516 | 0.999791 |
| XLOC_009523 | XLOC_009523 | ZNF624              | chr17:16524047-16557167   | -0.26047  | 0.999791 |
| XLOC_012833 | XLOC_012833 | OST4                | chr2:27274490-27294567    | -0.260358 | 0.999791 |
| XLOC_003916 | XLOC_003916 | KCNJ5               | chr11:128761312-128787951 | -0.260333 | 1        |
| XLOC_000694 | XLOC_000694 | CGN                 | chr1:151483861-151511167  | -0.260199 | 0.999791 |
| XLOC_008273 | XLOC_008273 | FOXF1               | chr16:86544132-86548070   | -0.260099 | 0.999791 |
| XLOC_006225 | XLOC_006225 | ANKRD10             | chr13:111530886-111567416 | -0.260014 | 0.999791 |
| XLOC_014859 | XLOC_014859 | CYP2D6              | chr22:42522500-42526883   | -0.259905 | 0.999791 |
| XLOC_023490 | XLOC_023490 | PGK1                | chrX:77359665-77382324    | -0.259479 | 0.999791 |
| XLOC_020799 | XLOC_020799 | MTRNR2L6            | chr7:142374130-142375525  | -0.259258 | 0.999791 |
| XLOC_021295 | XLOC_021295 | POT1                | chr7:124462439-124570037  | -0.259254 | 0.999791 |
| XLOC_002827 | XLOC_002827 | C10orf111           | chr10:15137383-15146256   | -0.259191 | 1        |
| XLOC_012559 | XLOC_012559 | ANKAR               | chr2:190540710-190611376  | -0.258942 | 1        |
| XLOC_022335 | XLOC_022335 | CCDC107             | chr9:35658286-35665278    | -0.258937 | 0.999791 |
| XLOC_008376 | XLOC_008376 | HCFC1R1             | chr16:3072625-3077756     | -0.258793 | 0.999791 |
| XLOC_018492 | XLOC_018492 | LAMA2               | chr6:129204285-129837710  | -0.258632 | 1        |
| XLOC_000570 | XLOC_000570 | GSTM4               | chr1:110198697-110208123  | -0.258523 | 0.999791 |
| XLOC_002624 | XLOC_002624 | UBTD1               | chr10:99258767-99330960   | -0.258501 | 0.999791 |
| XLOC_010126 | XLOC_010126 | TUBB6               | chr18:12308256-12326568   | -0.2583   | 0.999791 |
| XLOC_021534 | XLOC_021534 | HMBOX1              | chr8:28747910-28910242    | -0.258224 | 0.999791 |
| XLOC_017310 | XLOC_017310 | SLC22A4             | chr5:131630144-131731306  | -0.258149 | 1        |
| XLOC_008751 | XLOC_008751 | SERPINF2            | chr17:1646129-1658559     | -0.257955 | 1        |
| XLOC_018192 | XLOC_018192 | MICB                | chr6:31465854-31478901    | -0.257901 | 0.999791 |
| XLOC_021557 | XLOC_021557 | PLEKHA2             | chr8:38758752-38831430    | -0.257652 | 0.999791 |
| XLOC_018483 | XLOC_018483 | LOC643623           | chr6:125995498-126041364  | -0.257614 | 1        |
| XLOC_000369 | XLOC_000369 | RAD54L              | chr1:46713366-46769038    | -0.25761  | 0.999791 |
| XLOC_007752 | XLOC_007752 | LOC388152.LOC642423 | chr15:84860599-84889820   | -0.257474 | 0.999791 |
| XLOC_021056 | XLOC_021056 | PKD1L1              | chr7:47814249-47988071    | -0.257284 | 1        |
| XLOC_008382 | XLOC_008382 | TIGD7               | chr16:3348807-3368576     | -0.257168 | 1        |
| XLOC_022683 | XLOC_022683 | UAP1L1              | chr9:139971952-139978990  | -0.256807 | 0.999791 |
| XLOC_009995 | XLOC_009995 | JMJD6               | chr17:74708913-74722881   | -0.256663 | 0.999791 |
| XLOC_001400 | XLOC_001400 | TMEM200B            | chr1:29213602-29450421    | -0.256662 | 0.999791 |
| XLOC_012011 | XLOC_012011 | SLC27A5             | chr19:59009699-59023432   | -0.256264 | 0.999791 |
| XLOC_007317 | XLOC_007317 | ODF3L1              | chr15:76016318-76032418   | -0.256103 | 1        |
| XLOC_009616 | XLOC_009616 | SLC35G3             | chr17:33519538-33521412   | -0.256024 | 1        |
| XLOC_024044 | XLOC_024044 | NKAPP1              | chrX:119370308-119379122  | -0.255832 | 1        |
| XLOC_001423 | XLOC_001423 | FAM229A             | chr1:32826870-32827844    | -0.255713 | 0.999791 |
| XLOC_004813 | XLOC_004813 | SLC48A1             | chr12:48166966-48213763   | -0.255595 | 0.999791 |
| XLOC_017801 | XLOC_017801 | SEPT8               | chr5:132083136-132113561  | -0.255448 | 0.999791 |
| XLOC_007775 | XLOC_007775 | MESP1               | chr15:90293097-90294540   | -0.255389 | 0.999791 |
| XLOC_003425 | XLOC_003425 | DKFZp779M0652       | chr11:45792982-45793909   | -0.255251 | 0.999791 |
| XLOC_022927 | XLOC_022927 | NFIL3               | chr9:94171326-94186144    | -0.255158 | 0.999791 |
| XLOC_004924 | XLOC_004924 | ESYT1               | chr12:56521985-56538460   | -0.255101 | 0.999791 |
| XLOC_000629 | XLOC_000629 | SRGAP2D             | chr1:121107151-121129827  | -0.255075 | 1        |
| XLOC_022509 | XLOC_022509 | SNX30               | chr9:115513133-115637267  | -0.254986 | 0.999791 |
| XLOC_022744 | XLOC_022744 | PTPLAD2             | chr9:21006364-21031635    | -0.254947 | 1        |
| XLOC_004609 | XLOC_004609 | HEPACAM             | chr11:124789145-124806308 | -0.254936 | 1        |
| XLOC_018605 | XLOC_018605 | LINC00574           | chr6:170188885-170202969  | -0.254765 | 1        |
| XLOC_020464 | XLOC_020464 | SPDYE1              | chr7:43966034-44058748    | -0.254575 | 1        |
| XLOC_016869 | XLOC_016869 | SLC39A8             | chr4:103172197-103266655  | -0.254305 | 0.999791 |
| XLOC_016908 | XLOC_016908 | C4orf3              | chr4:120217573-120225600  | -0.254099 | 0.999791 |
| XLOC_010843 | XLOC_010843 | PAK4                | chr19:39616419-39670046   | -0.253909 | 0.999791 |
| XLOC_012318 | XLOC_012318 | ANKRD36             | chr2:97779232-97930257    | -0.253904 | 1        |
| XLOC_017694 | XLOC_017694 | FOXD1               | chr5:72742084-72744352    | -0.253857 | 0.999791 |
| XLOC_001882 | XLOC_001882 | DPM3                | chr1:155112366-155112996  | -0.253834 | 0.999791 |
| XLOC_023886 | XLOC_023886 | WNK3                | chrX:54219255-54384438    | -0.253801 | 1        |
| XLOC_005375 | XLOC_005375 | AMN1                | chr12:31824070-31882108   | -0.253785 | 0.999791 |
| XLOC_014734 | XLOC_014734 | LRP5L               | chr22:25747384-25777544   | -0.253647 | 0.999791 |

|             |             |              |                           |           |          |
|-------------|-------------|--------------|---------------------------|-----------|----------|
| XLOC_013127 | XLOC_013127 | TFCP2L1      | chr2:121974163-122042778  | -0.253608 | 0.999791 |
| XLOC_000651 | XLOC_000651 | BCL9         | chr1:147013181-147098015  | -0.253409 | 0.999791 |
| XLOC_002867 | XLOC_002867 | SVIL         | chr10:29746276-30024730   | -0.25338  | 0.999791 |
| XLOC_000615 | XLOC_000615 | PTGFRN       | chr1:117452688-117532972  | -0.253107 | 0.999791 |
| XLOC_013255 | XLOC_013255 | PDE11A       | chr2:178487976-178973066  | -0.253071 | 1        |
| XLOC_009023 | XLOC_009023 | LASP1        | chr17:37026111-37078023   | -0.253021 | 0.999791 |
| XLOC_021524 | XLOC_021524 | DPYSL2       | chr8:26371708-26515693    | -0.252997 | 0.999791 |
| XLOC_022731 | XLOC_022731 | TTC39B       | chr9:15170841-15307358    | -0.252824 | 0.999791 |
| XLOC_021418 | XLOC_021418 | MNX1         | chr7:156797546-156803347  | -0.252781 | 0.999791 |
| XLOC_006812 | XLOC_006812 | ERO1L        | chr14:53108604-53162419   | -0.252757 | 0.999791 |
| XLOC_018102 | XLOC_018102 | HIST1H4E     | chr6:26204872-26205249    | -0.252627 | 0.999791 |
| XLOC_015683 | XLOC_015683 | CDC25A       | chr3:48198667-48229801    | -0.252538 | 0.999791 |
| XLOC_012619 | XLOC_012619 | PIKFYVE      | chr2:209130990-209223475  | -0.252406 | 0.999791 |
| XLOC_001558 | XLOC_001558 | TMEM48       | chr1:54231133-54304225    | -0.252202 | 0.999791 |
| XLOC_002885 | XLOC_002885 | ZNF248       | chr10:38065453-38147012   | -0.252059 | 0.999791 |
| XLOC_017341 | XLOC_017341 | KIF20A       | chr5:137514416-137549032  | -0.251973 | 0.999791 |
| XLOC_014828 | XLOC_014828 | SUN2         | chr22:39130718-39152024   | -0.251568 | 0.999791 |
| XLOC_000088 | XLOC_000088 | CLCN6        | chr1:11845786-11907840    | -0.251551 | 0.999791 |
| XLOC_021215 | XLOC_021215 | SAP25        | chr7:100169852-100171270  | -0.251517 | 0.999791 |
| XLOC_006257 | XLOC_006257 | ANG_RNASE4   | chr14:21152335-21168758   | -0.251451 | 0.999791 |
| XLOC_012515 | XLOC_012515 | ITGA6        | chr2:173292313-173371181  | -0.251419 | 0.999791 |
| XLOC_019160 | XLOC_019160 | OSTCP1       | chr6:159262157-159278664  | -0.251373 | 1        |
| XLOC_020395 | XLOC_020395 | GNPMB        | chr7:23286315-23314729    | -0.251194 | 1        |
| XLOC_012177 | XLOC_012177 | FOXN2        | chr2:48541794-48606434    | -0.251055 | 0.999791 |
| XLOC_010752 | XLOC_010752 | RGS9BP       | chr19:33166312-33169206   | -0.25104  | 1        |
| XLOC_015518 | XLOC_015518 | CCDC50       | chr3:190984943-191116459  | -0.250696 | 0.999791 |
| XLOC_004325 | XLOC_004325 | KCNK7        | chr11:65360325-65363467   | -0.249987 | 0.999791 |
| XLOC_004658 | XLOC_004658 | PRMT8        | chr12:3490514-3703138     | -0.249379 | 0.999791 |
| XLOC_003663 | XLOC_003663 | CABP4        | chr11:67222817-67229245   | -0.249344 | 1        |
| XLOC_004814 | XLOC_004814 | TMEM106C     | chr12:48357329-48362661   | -0.249203 | 0.999791 |
| XLOC_019092 | XLOC_019092 | SLC2A12      | chr6:134308718-134373789  | -0.248873 | 0.999791 |
| XLOC_010049 | XLOC_010049 | MYADML2      | chr17:79897520-79905109   | -0.248548 | 1        |
| XLOC_001186 | XLOC_001186 | LOC100130417 | chr1:852952-854817        | -0.248307 | 1        |
| XLOC_021668 | XLOC_021668 | NECAB1       | chr8:91803920-91997485    | -0.248298 | 1        |
| XLOC_017981 | XLOC_017981 | FAM193B      | chr5:176946789-176981548  | -0.248277 | 0.999791 |
| XLOC_001496 | XLOC_001496 | CCDC23       | chr1:43272722-43310660    | -0.248119 | 0.999791 |
| XLOC_001620 | XLOC_001620 | TTLL7        | chr1:84259597-84464833    | -0.247917 | 1        |
| XLOC_007456 | XLOC_007456 | HERC2P2      | chr15:23282264-23378259   | -0.247864 | 0.999791 |
| XLOC_001877 | XLOC_001877 | PBXIP1       | chr1:154916558-154928567  | -0.247748 | 0.999791 |
| XLOC_017245 | XLOC_017245 | ERAP2        | chr5:96211643-96255406    | -0.247642 | 0.999791 |
| XLOC_009810 | XLOC_009810 | CBX1         | chr17:46147413-46178883   | -0.247614 | 0.999791 |
| XLOC_015941 | XLOC_015941 | H1FX         | chr3:129033613-129043412  | -0.247566 | 0.999791 |
| XLOC_017636 | XLOC_017636 | ANXA2R       | chr5:43039181-43040447    | -0.247566 | 0.999791 |
| XLOC_003553 | XLOC_003553 | INCENP       | chr11:61891444-61920635   | -0.247392 | 0.999791 |
| XLOC_006853 | XLOC_006853 | ZBTB25       | chr14:64953554-64970554   | -0.24729  | 0.999791 |
| XLOC_023661 | XLOC_023661 | CXorf40A     | chrX:148622518-148632086  | -0.246691 | 0.999791 |
| XLOC_006170 | XLOC_006170 | SPRY2        | chr13:80910111-80915086   | -0.246639 | 0.999791 |
| XLOC_009040 | XLOC_009040 | CSF3         | chr17:38171613-38174066   | -0.246638 | 1        |
| XLOC_014565 | XLOC_014565 | POBEC3F      | chr22:39436672-39451975   | -0.246616 | 0.999791 |
| XLOC_008457 | XLOC_008457 | DCUN1D3      | chr16:20869395-20936328   | -0.246175 | 0.999791 |
| XLOC_024188 | XLOC_024188 | MECP2        | chrX:153287263-153363188  | -0.245909 | 0.999791 |
| XLOC_007291 | XLOC_007291 | NEO1         | chr15:73344824-73597547   | -0.245839 | 0.999791 |
| XLOC_005764 | XLOC_005764 | HCAR1        | chr12:123212152-123215129 | -0.245834 | 1        |
| XLOC_000064 | XLOC_000064 | SLC45A1      | chr1:8384389-8404227      | -0.245681 | 0.999791 |
| XLOC_016831 | XLOC_016831 | WDFY3        | chr4:85590692-85887544    | -0.245426 | 0.999791 |
| XLOC_012789 | XLOC_012789 | PDIA6        | chr2:10861774-10952960    | -0.245365 | 0.999791 |
| XLOC_008721 | XLOC_008721 | MVD          | chr16:88718347-88729495   | -0.245145 | 0.999791 |
| XLOC_016889 | XLOC_016889 | CASP6        | chr4:110609784-110624629  | -0.245075 | 0.999791 |
| XLOC_002606 | XLOC_002606 | TBC1D12      | chr10:96162185-96296089   | -0.245073 | 0.999791 |
| XLOC_010966 | XLOC_010966 | CCDC9        | chr19:47759730-47775210   | -0.244977 | 0.999791 |
| XLOC_005706 | XLOC_005706 | TMEM116      | chr12:112369086-112451023 | -0.244554 | 0.999791 |
| XLOC_017685 | XLOC_017685 | GUSBP3       | chr5:68935289-69006272    | -0.244445 | 1        |
| XLOC_020368 | XLOC_020368 | C1GALT1      | chr7:7222245-7288280      | -0.244426 | 0.999791 |
| XLOC_011432 | XLOC_011432 | RAB3D        | chr19:11406823-11450344   | -0.244288 | 0.999791 |
| XLOC_022178 | XLOC_022178 | LOC100507117 | chr8:131064350-131455906  | -0.244268 | 1        |
| XLOC_004837 | XLOC_004837 | AQP6         | chr12:50366619-50370922   | -0.24425  | 1        |
| XLOC_010639 | XLOC_010639 | TECR         | chr19:14640354-14676792   | -0.244203 | 0.999791 |
| XLOC_003585 | XLOC_003585 | VEGFB        | chr11:64002055-64006736   | -0.243954 | 0.999791 |
| XLOC_018165 | XLOC_018165 | PPP1R11      | chr6:30034931-30043628    | -0.243897 | 0.999791 |
| XLOC_005990 | XLOC_005990 | ING1         | chr13:111364969-111373421 | -0.243891 | 0.999791 |
| XLOC_007691 | XLOC_007691 | SCAMP2       | chr15:75137196-75165670   | -0.243862 | 0.999791 |
| XLOC_015594 | XLOC_015594 | COLQ         | chr3:15491639-15563258    | -0.243793 | 0.999791 |
| XLOC_020766 | XLOC_020766 | BPGM         | chr7:134331530-134364567  | -0.243751 | 0.999791 |
| XLOC_004731 | XLOC_004731 | ETV6         | chr12:11802787-12079107   | -0.243674 | 0.999791 |
| XLOC_000174 | XLOC_000174 | C1orf213     | chr1:23685940-23698330    | -0.243645 | 0.999791 |
| XLOC_018400 | XLOC_018400 | ZNF292       | chr6:87865268-87973406    | -0.243628 | 0.999791 |
| XLOC_016870 | XLOC_016870 | MANBA        | chr4:103552642-103682151  | -0.243524 | 0.999791 |
| XLOC_014459 | XLOC_014459 | MIF          | chr22:24235896-24241117   | -0.243393 | 0.999791 |
| XLOC_021145 | XLOC_021145 | KIAA1324L    | chr7:86506222-86689014    | -0.243377 | 1        |



|             |             |              |                           |           |          |
|-------------|-------------|--------------|---------------------------|-----------|----------|
| XLOC_012301 | XLOC_012301 | TEKT4        | chr2:95534429-95613087    | -0.243224 | 0.999791 |
| XLOC_017798 | XLOC_017798 | IRF1         | chr5:131817300-131826465  | -0.243183 | 0.999791 |
| XLOC_018538 | XLOC_018538 | UTRN         | chr6:144612872-145174170  | -0.243131 | 0.999791 |
| XLOC_007507 | XLOC_007507 | BMF          | chr15:40380090-40401085   | -0.242933 | 0.999791 |
| XLOC_004519 | XLOC_004519 | C11orf92     | chr11:111164113-111179460 | -0.242611 | 1        |
| XLOC_004036 | XLOC_004036 | RRP8         | chr11:6621143-6624880     | -0.242395 | 0.999791 |
| XLOC_018761 | XLOC_018761 | BAG6         | chr6:31606804-31625987    | -0.242317 | 0.999791 |
| XLOC_023770 | XLOC_023770 | INE2         | chrX:15756411-15805748    | -0.242294 | 0.999791 |
| XLOC_011290 | XLOC_011290 | MOB3A        | chr19:2071034-2096269     | -0.242272 | 0.999791 |
| XLOC_023811 | XLOC_023811 | SRPX         | chrX:38008587-38080177    | -0.241914 | 0.999791 |
| XLOC_022624 | XLOC_022624 | NTNG2        | chr9:135037333-135118220  | -0.241795 | 0.999791 |
| XLOC_021676 | XLOC_021676 | PDP1         | chr8:94929082-94938296    | -0.241766 | 0.999791 |
| XLOC_008737 | XLOC_008737 | DBNDD1       | chr16:90071278-90085937   | -0.241614 | 0.999791 |
| XLOC_008909 | XLOC_008909 | MAPK7        | chr17:19240866-19290532   | -0.2413   | 0.999791 |
| XLOC_016894 | XLOC_016894 | TIFA         | chr4:113196781-113207059  | -0.24093  | 0.999791 |
| XLOC_016826 | XLOC_016826 | COQ2         | chr4:84184976-84206067    | -0.240734 | 0.999791 |
| XLOC_015818 | XLOC_015818 | RYBP         | chr3:72423743-72495774    | -0.240444 | 0.999791 |
| XLOC_014933 | XLOC_014933 | BRPF1        | chr3:9773433-9789699      | -0.240181 | 0.999791 |
| XLOC_012966 | XLOC_012966 | TGFA         | chr2:70674411-70781147    | -0.239158 | 0.999791 |
| XLOC_012055 | XLOC_012055 | GREB1        | chr2:11674241-11782912    | -0.239133 | 1        |
| XLOC_005413 | XLOC_005413 | ZNF641       | chr12:48733792-48745029   | -0.239118 | 0.999791 |
| XLOC_015410 | XLOC_015410 | ARHGEF26     | chr3:153742189-153975616  | -0.23901  | 1        |
| XLOC_018762 | XLOC_018762 | C6orf47      | chr6:31626074-31628549    | -0.238981 | 0.999791 |
| XLOC_017033 | XLOC_017033 | CCDC110      | chr4:186350544-186392913  | -0.238861 | 1        |
| XLOC_013052 | XLOC_013052 | ANKRD23      | chr2:97503650-97509758    | -0.238785 | 0.999791 |
| XLOC_018590 | XLOC_018590 | MAP3K4       | chr6:161412821-161538417  | -0.238743 | 0.999791 |
| XLOC_014551 | XLOC_014551 | GALR3        | chr22:38219388-38221502   | -0.238691 | 0.999791 |
| XLOC_017487 | XLOC_017487 | CREBRF       | chr5:172483354-172566291  | -0.238388 | 0.999791 |
| XLOC_008279 | XLOC_008279 | BANP         | chr16:87985037-88110924   | -0.238153 | 0.999791 |
| XLOC_011683 | XLOC_011683 | BLVRB        | chr19:40953690-40971725   | -0.238128 | 0.999791 |
| XLOC_015738 | XLOC_015738 | CACNA2D2     | chr3:50400230-50540892    | -0.238128 | 1        |
| XLOC_011788 | XLOC_011788 | AP2S1        | chr19:47341422-47354203   | -0.237832 | 0.999791 |
| XLOC_014504 | XLOC_014504 | MTFP1        | chr22:30821610-30825041   | -0.237823 | 0.999791 |
| XLOC_000043 | XLOC_000043 | TP73         | chr1:3569128-3663937      | -0.237812 | 0.999791 |
| XLOC_018496 | XLOC_018496 | AKAP7        | chr6:131456825-131604675  | -0.237719 | 0.999791 |
| XLOC_002600 | XLOC_002600 | CEP55        | chr10:95256368-95288849   | -0.237334 | 0.999791 |
| XLOC_020708 | XLOC_020708 | MET          | chr7:116312458-116438440  | -0.237247 | 0.999791 |
| XLOC_002676 | XLOC_002676 | TAF5         | chr10:105127723-105156270 | -0.237075 | 0.999791 |
| XLOC_006156 | XLOC_006156 | KLF12        | chr13:74260148-74708066   | -0.236973 | 0.999791 |
| XLOC_017370 | XLOC_017370 | PCDHB3       | chr5:140480233-140483406  | -0.23693  | 1        |
| XLOC_010546 | XLOC_010546 | MAP2K7       | chr19:7968764-7979363     | -0.236877 | 0.999791 |
| XLOC_008125 | XLOC_008125 | MT1B         | chr16:56685810-56687116   | -0.236757 | 1        |
| XLOC_003643 | XLOC_003643 | PEL13        | chr11:66233797-66244808   | -0.236015 | 0.999791 |
| XLOC_003599 | XLOC_003599 | PPP2R5B      | chr11:64692142-64703360   | -0.235929 | 0.999791 |
| XLOC_003578 | XLOC_003578 | COX8A        | chr11:63742078-63744015   | -0.235866 | 0.999791 |
| XLOC_022673 | XLOC_022673 | PHPT1        | chr9:139743255-139745490  | -0.235788 | 0.999791 |
| XLOC_023922 | XLOC_023922 | BCYRN1       | chrX:70430034-70948962    | -0.235715 | 0.999791 |
| XLOC_012551 | XLOC_012551 | ITGAV        | chr2:187454789-187545628  | -0.235418 | 0.999791 |
| XLOC_021578 | XLOC_021578 | SGK196       | chr8:42948656-42978323    | -0.235311 | 0.999791 |
| XLOC_013377 | XLOC_013377 | TUBA4A       | chr2:220110191-220136910  | -0.235236 | 0.999791 |
| XLOC_000158 | XLOC_000158 | NBPF3        | chr1:21766620-21811393    | -0.235155 | 0.999791 |
| XLOC_018109 | XLOC_018109 | BTN2A2       | chr6:26383323-26395100    | -0.235095 | 0.999791 |
| XLOC_004626 | XLOC_004626 | ARHGAP32     | chr11:128834954-129062093 | -0.23503  | 0.999791 |
| XLOC_013529 | XLOC_013529 | SLX4IP       | chr20:10415950-10604027   | -0.234979 | 1        |
| XLOC_018168 | XLOC_018168 | HLA-L        | chr6:30201815-30314635    | -0.23496  | 1        |
| XLOC_004300 | XLOC_004300 | BAD          | chr11:64037299-64056972   | -0.234936 | 0.999791 |
| XLOC_009608 | XLOC_009608 | MYO1D        | chr17:30819627-31203902   | -0.23493  | 0.999791 |
| XLOC_016711 | XLOC_016711 | RFC1         | chr4:39289068-39368001    | -0.234919 | 0.999791 |
| XLOC_018901 | XLOC_018901 | ENPP5        | chr6:46127761-46138717    | -0.234793 | 0.999791 |
| XLOC_014887 | XLOC_014887 | LOC100271722 | chr22:46435786-46440748   | -0.234782 | 0.999791 |
| XLOC_001534 | XLOC_001534 | FOXD2-AS1    | chr1:47897806-47900313    | -0.234571 | 0.999791 |
| XLOC_000382 | XLOC_000382 | LINC00853    | chr1:47644921-47646011    | -0.234493 | 0.999791 |
| XLOC_002109 | XLOC_002109 | CSRP1        | chr1:201452657-201476387  | -0.234438 | 0.999791 |
| XLOC_006312 | XLOC_006312 | SCFD1        | chr14:31091459-31205033   | -0.234254 | 0.999791 |
| XLOC_014841 | XLOC_014841 | MKL1         | chr22:40766594-41032690   | -0.233752 | 0.999791 |
| XLOC_004093 | XLOC_004093 | KCNJ11       | chr11:17406795-17410878   | -0.233554 | 0.999791 |
| XLOC_006344 | XLOC_006344 | KLHDC2       | chr14:50234786-50249856   | -0.233473 | 0.999791 |
| XLOC_023093 | XLOC_023093 | NAIF1        | chr9:130823511-130829599  | -0.233405 | 0.999791 |
| XLOC_001911 | XLOC_001911 | MEF2D        | chr1:156433512-156470634  | -0.23329  | 0.999791 |
| XLOC_021069 | XLOC_021069 | FKBP9L       | chr7:55748766-55772260    | -0.233074 | 0.999791 |
| XLOC_009105 | XLOC_009105 | GRN          | chr17:42422490-42430470   | -0.233015 | 0.999791 |
| XLOC_013035 | XLOC_013035 | EIF2AK3      | chr2:88856258-88927094    | -0.232993 | 0.999791 |
| XLOC_018962 | XLOC_018962 | COX7A2       | chr6:75947390-75953644    | -0.232802 | 0.999791 |
| XLOC_003492 | XLOC_003492 | SMTNL1       | chr11:57310113-57317747   | -0.232711 | 1        |
| XLOC_003745 | XLOC_003745 | PRSS23       | chr11:86511490-86522273   | -0.232556 | 0.999791 |
| XLOC_014898 | XLOC_014898 | ALG12        | chr22:50296853-50312106   | -0.232456 | 0.999791 |
| XLOC_022089 | XLOC_022089 | TRIQK        | chr8:93895757-93978372    | -0.232228 | 0.999791 |
| XLOC_018783 | XLOC_018783 | TNXB         | chr6:32006092-32077151    | -0.232109 | 1        |
| XLOC_000373 | XLOC_000373 | LOC729041    | chr1:46899498-46911374    | -0.232023 | 0.999791 |

|             |             |                         |                           |           |          |
|-------------|-------------|-------------------------|---------------------------|-----------|----------|
| XLOC_013851 | XLOC_013851 | LRRN4                   | chr20:6021191-6034726     | -0.231994 | 0.999791 |
| XLOC_008090 | XLOC_008090 | PHKB                    | chr16:47495209-47735434   | -0.231877 | 0.999791 |
| XLOC_001047 | XLOC_001047 | PROX1                   | chr1:214161277-214214847  | -0.231815 | 1        |
| XLOC_011522 | XLOC_011522 | BST2                    | chr19:17513754-17516384   | -0.231696 | 0.999791 |
| XLOC_022862 | XLOC_022862 | PGM5P2                  | chr9:69080243-69147854    | -0.231655 | 1        |
| XLOC_009107 | XLOC_009107 | C17orf104               | chr17:42733761-42753165   | -0.231419 | 1        |
| XLOC_001140 | XLOC_001140 | COX20                   | chr1:244998638-245010243  | -0.231356 | 0.999791 |
| XLOC_014722 | XLOC_014722 | DDT                     | chr22:24309025-24322019   | -0.231175 | 0.999791 |
| XLOC_009164 | XLOC_009164 | EME1                    | chr17:48450580-48474914   | -0.231102 | 0.999791 |
| XLOC_013907 | XLOC_013907 | LOC284801               | chr20:26167654-26189869   | -0.231006 | 1        |
| XLOC_002419 | XLOC_002419 | ZNF487P                 | chr10:43932573-43978007   | -0.230951 | 1        |
| XLOC_000486 | XLOC_000486 | CYR61                   | chr1:86046443-86049648    | -0.230635 | 0.999791 |
| XLOC_012092 | XLOC_012092 | AGBL5                   | chr2:27274490-27294567    | -0.230634 | 0.999791 |
| XLOC_007374 | XLOC_007374 | ZSCAN2                  | chr15:85144248-85166947   | -0.23057  | 0.999791 |
| XLOC_014968 | XLOC_014968 | CAPN7                   | chr3:15247732-15294423    | -0.230463 | 0.999791 |
| XLOC_022822 | XLOC_022822 | GBA2                    | chr9:35697333-35749225    | -0.230446 | 0.999791 |
| XLOC_010522 | XLOC_010522 | ALKBH7                  | chr19:6372443-6375261     | -0.230385 | 0.999791 |
| XLOC_014068 | XLOC_014068 | LINC00659               | chr20:61405472-61408208   | -0.230218 | 0.999791 |
| XLOC_000346 | XLOC_000346 | DMAP1                   | chr1:44679124-44686351    | -0.230004 | 0.999791 |
| XLOC_015695 | XLOC_015695 | CELSR3                  | chr3:48673895-48700348    | -0.229812 | 0.999791 |
| XLOC_015691 | XLOC_015691 | COL7A1                  | chr3:48601505-48632593    | -0.22973  | 0.999791 |
| XLOC_008247 | XLOC_008247 | GAN                     | chr16:81348570-81413803   | -0.22949  | 1        |
| XLOC_022821 | XLOC_022821 | TLN1                    | chr9:35697333-35749225    | -0.229255 | 0.999791 |
| XLOC_011222 | XLOC_011222 | ZNF548                  | chr19:57901217-57913919   | -0.229252 | 0.999791 |
| XLOC_015423 | XLOC_015423 | IQCJ,IQCJ-SCHIP1,SCHIP1 | chr3:158787040-159615155  | -0.229192 | 0.999791 |
| XLOC_016890 | XLOC_016890 | PLA2G12A                | chr4:110631144-110651242  | -0.229169 | 0.999791 |
| XLOC_021527 | XLOC_021527 | SCARA3                  | chr8:27491576-27534286    | -0.228925 | 0.999791 |
| XLOC_011817 | XLOC_011817 | FUT1                    | chr19:49251267-49258647   | -0.228799 | 0.999791 |
| XLOC_006447 | XLOC_006447 | ISCA2                   | chr14:74960422-74962271   | -0.22873  | 0.999791 |
| XLOC_003248 | XLOC_003248 | TNNI2                   | chr11:1860232-1862910     | -0.228655 | 1        |
| XLOC_016501 | XLOC_016501 | PLK4                    | chr4:128802015-128820377  | -0.22863  | 0.999791 |
| XLOC_015892 | XLOC_015892 | GPR156                  | chr3:119884327-119963142  | -0.228358 | 1        |
| XLOC_010580 | XLOC_010580 | SLC44A2                 | chr19:10713120-10755235   | -0.228192 | 0.999791 |
| XLOC_009946 | XLOC_009946 | CDC42EP4                | chr17:71279762-71308143   | -0.228165 | 0.999791 |
| XLOC_018744 | XLOC_018744 | MDC1                    | chr6:30667583-30685458    | -0.227866 | 0.999791 |
| XLOC_020984 | XLOC_020984 | HOXA13                  | chr7:27236498-27239725    | -0.227866 | 0.999791 |
| XLOC_002160 | XLOC_002160 | YOD1                    | chr1:207217193-207226325  | -0.227827 | 0.999791 |
| XLOC_008633 | XLOC_008633 | PSMB10                  | chr16:67968406-67970780   | -0.227695 | 0.999791 |
| XLOC_014921 | XLOC_014921 | ITPR1                   | chr3:4535031-4889524      | -0.227434 | 0.999791 |
| XLOC_012313 | XLOC_012313 | ARID5A                  | chr2:972002463-97218371   | -0.227431 | 0.999791 |
| XLOC_013244 | XLOC_013244 | KIAA1715                | chr2:176790409-176867018  | -0.227305 | 0.999791 |
| XLOC_013786 | XLOC_013786 | LIME1                   | chr20:62367977-62370460   | -0.227287 | 0.999791 |
| XLOC_010607 | XLOC_010607 | ZNF844                  | chr19:12175545-12188626   | -0.227196 | 0.999791 |
| XLOC_021523 | XLOC_021523 | BNIP3L                  | chr8:26240522-26270644    | -0.227155 | 0.999791 |
| XLOC_007404 | XLOC_007404 | CRTC3                   | chr15:91073117-91188577   | -0.226953 | 0.999791 |
| XLOC_005656 | XLOC_005656 | PMCH                    | chr12:102513955-102591614 | -0.226914 | 0.999791 |
| XLOC_004326 | XLOC_004326 | MAP3K11                 | chr11:65365225-65381720   | -0.22681  | 0.999791 |
| XLOC_004793 | XLOC_004793 | FLJ13224                | chr12:31433519-31479159   | -0.22677  | 1        |
| XLOC_007640 | XLOC_007640 | DPP8                    | chr15:65737997-65810035   | -0.226708 | 0.999791 |
| XLOC_015601 | XLOC_015601 | TBC1D5                  | chr3:17198653-17784240    | -0.226629 | 0.999791 |
| XLOC_018275 | XLOC_018275 | TBC1D22B                | chr6:37179953-37300746    | -0.226385 | 0.999791 |
| XLOC_009202 | XLOC_009202 | YPEL2                   | chr17:57409052-57479095   | -0.226376 | 0.999791 |
| XLOC_005591 | XLOC_005591 | CAPS2                   | chr12:75669758-75723836   | -0.226231 | 1        |
| XLOC_009743 | XLOC_009743 | GHDC                    | chr17:40341104-40346550   | -0.226073 | 0.999791 |
| XLOC_004685 | XLOC_004685 | TP11                    | chr12:6976583-6982521     | -0.225946 | 0.999791 |
| XLOC_005527 | XLOC_005527 | GLS2                    | chr12:56862300-56882181   | -0.225764 | 0.999791 |
| XLOC_005063 | XLOC_005063 | HSP90B1                 | chr12:104324111-104341708 | -0.225732 | 0.999791 |
| XLOC_018895 | XLOC_018895 | NFKBIE                  | chr6:44225902-44233525    | -0.225562 | 0.999791 |
| XLOC_000227 | XLOC_000227 | XKR8                    | chr1:28286503-28294604    | -0.225551 | 0.999791 |
| XLOC_021771 | XLOC_021771 | THEM6                   | chr8:143808620-143818350  | -0.225496 | 0.999791 |
| XLOC_013959 | XLOC_013959 | BLCAP                   | chr20:36145818-36156333   | -0.225354 | 0.999791 |
| XLOC_011423 | XLOC_011423 | CDKN2D                  | chr19:10677137-10679655   | -0.225129 | 0.999791 |
| XLOC_002252 | XLOC_002252 | IRF2BP2                 | chr1:234740014-234745271  | -0.225037 | 0.999791 |
| XLOC_011012 | XLOC_011012 | SNRNP70                 | chr19:49588464-49611870   | -0.224864 | 0.999791 |
| XLOC_002339 | XLOC_002339 | TAF3                    | chr10:7860466-8057016     | -0.2246   | 0.999791 |
| XLOC_001219 | XLOC_001219 | PANK4                   | chr1:2439974-2458035      | -0.224405 | 0.999791 |
| XLOC_015509 | XLOC_015509 | LPP                     | chr3:187868993-188608460  | -0.224382 | 0.999791 |
| XLOC_002001 | XLOC_002001 | MPC2                    | chr1:167885912-168045083  | -0.224375 | 0.999791 |
| XLOC_004743 | XLOC_004743 | LOC100506314            | chr12:13127798-13153243   | -0.224227 | 0.999791 |
| XLOC_014851 | XLOC_014851 | PMM1                    | chr22:41972889-41985871   | -0.224164 | 0.999791 |
| XLOC_017205 | XLOC_017205 | PDE8B                   | chr5:76506705-76724080    | -0.224141 | 1        |
| XLOC_005085 | XLOC_005085 | USP30                   | chr12:109489845-109525831 | -0.224059 | 0.999791 |
| XLOC_009221 | XLOC_009221 | TANC2                   | chr17:60778674-61505067   | -0.224044 | 0.999791 |
| XLOC_018326 | XLOC_018326 | TMEM151B                | chr6:44238479-44247182    | -0.223675 | 1        |
| XLOC_002701 | XLOC_002701 | CASP7                   | chr10:115438920-115490668 | -0.2236   | 0.999791 |
| XLOC_014146 | XLOC_014146 | IL10RB                  | chr21:34638664-34669539   | -0.22352  | 0.999791 |
| XLOC_004615 | XLOC_004615 | CDON                    | chr11:125826712-125933187 | -0.223519 | 1        |
| XLOC_010180 | XLOC_010180 | KIAA1328                | chr18:33877701-34805288   | -0.223496 | 0.999791 |
| XLOC_006771 | XLOC_006771 | MBIP                    | chr14:36767763-36789882   | -0.22344  | 0.999791 |

|             |             |              |                           |           |          |
|-------------|-------------|--------------|---------------------------|-----------|----------|
| XLOC_018609 | XLOC_018609 | EXOC2        | chr6:485137-693141        | -0.22337  | 0.999791 |
| XLOC_014800 | XLOC_014800 | IFT27        | chr22:37154245-37172177   | -0.223237 | 0.999791 |
| XLOC_004956 | XLOC_004956 | XRCC6BP1     | chr12:58335444-58351052   | -0.222906 | 0.999791 |
| XLOC_018189 | XLOC_018189 | MICA         | chr6:31367560-31383090    | -0.222848 | 0.999791 |
| XLOC_005881 | XLOC_005881 | TPT1-AS1     | chr13:45915479-45965618   | -0.22267  | 0.999791 |
| XLOC_018209 | XLOC_018209 | HSPA1B       | chr6:31795511-31798031    | -0.222642 | 0.999791 |
| XLOC_003561 | XLOC_003561 | METTL12      | chr11:62430288-62441162   | -0.222446 | 0.999791 |
| XLOC_009666 | XLOC_009666 | MIEN1        | chr17:37885408-37886788   | -0.222171 | 0.999791 |
| XLOC_017989 | XLOC_017989 | CLK4         | chr5:178029664-178054054  | -0.222163 | 0.999791 |
| XLOC_010765 | XLOC_010765 | GPI          | chr19:34855644-34893318   | -0.222161 | 0.999791 |
| XLOC_003391 | XLOC_003391 | LINC00294    | chr11:33097695-33101000   | -0.222151 | 0.999791 |
| XLOC_000620 | XLOC_000620 | FAM46C       | chr11:118148603-118171011 | -0.222111 | 1        |
| XLOC_016446 | XLOC_016446 | FLJ20021     | chr4:102268933-102270040  | -0.222104 | 0.999791 |
| XLOC_022900 | XLOC_022900 | GKAP1        | chr9:86354335-86432752    | -0.2219   | 0.999791 |
| XLOC_013719 | XLOC_013719 | PARDB6B      | chr20:49348080-49370278   | -0.221859 | 0.999791 |
| XLOC_005553 | XLOC_005553 | AVIL         | chr12:58176527-58209852   | -0.221776 | 1        |
| XLOC_011630 | XLOC_011630 | ZNF585A      | chr19:37641000-37663615   | -0.221734 | 0.999791 |
| XLOC_014082 | XLOC_014082 | GMEB2        | chr20:62218954-62258381   | -0.221685 | 0.999791 |
| XLOC_003736 | XLOC_003736 | LOC100506233 | chr11:82783107-82784754   | -0.221405 | 0.999791 |
| XLOC_010318 | XLOC_010318 | DSC3         | chr18:28570051-28622781   | -0.221295 | 1        |
| XLOC_020706 | XLOC_020706 | CAV2         | chr7:116139654-116148595  | -0.221292 | 0.999791 |
| XLOC_015396 | XLOC_015396 | TSC22D2      | chr3:150126787-150177615  | -0.221109 | 0.999791 |
| XLOC_018531 | XLOC_018531 | GPR126       | chr6:142623055-142767403  | -0.220989 | 0.999791 |
| XLOC_021399 | XLOC_021399 | TMUB1        | chr7:150778171-150780620  | -0.220983 | 0.999791 |
| XLOC_001966 | XLOC_001966 | F11R         | chr11:160965000-160991133 | -0.220918 | 0.999791 |
| XLOC_020571 | XLOC_020571 | DTX2         | chr7:76090971-76135312    | -0.220876 | 0.999791 |
| XLOC_017431 | XLOC_017431 | GM2A         | chr5:150632612-150649953  | -0.220734 | 0.999791 |
| XLOC_005087 | XLOC_005087 | ACACB        | chr12:109577201-109706030 | -0.220733 | 0.999791 |
| XLOC_016450 | XLOC_016450 | TET2         | chr4:106067031-106200960  | -0.22055  | 0.999791 |
| XLOC_015109 | XLOC_015109 | FAM212A      | chr3:49840686-49842463    | -0.220499 | 0.999791 |
| XLOC_007015 | XLOC_007015 | GOLGA8S      | chr15:23599894-23613471   | -0.220268 | 1        |
| XLOC_014710 | XLOC_014710 | RTDR1        | chr22:23401592-23484241   | -0.220073 | 1        |
| XLOC_017962 | XLOC_017962 | KIAA1191     | chr5:175773065-175788809  | -0.220036 | 0.999791 |
| XLOC_006436 | XLOC_006436 | ACOT4        | chr14:74058409-74062470   | -0.219968 | 1        |
| XLOC_022051 | XLOC_022051 | PEX2         | chr8:77892493-77913280    | -0.219926 | 0.999791 |
| XLOC_012960 | XLOC_012960 | ASPRV1       | chr2:70187223-70314147    | -0.219885 | 0.999791 |
| XLOC_021763 | XLOC_021763 | DENND3       | chr8:142138719-142205900  | -0.219818 | 0.999791 |
| XLOC_009457 | XLOC_009457 | CLDN7        | chr17:7155371-7166512     | -0.21973  | 1        |
| XLOC_010590 | XLOC_010590 | LDLR         | chr19:11200037-11244505   | -0.219717 | 0.999791 |
| XLOC_012260 | XLOC_012260 | HK2          | chr2:75059781-75120481    | -0.219562 | 0.999791 |
| XLOC_012659 | XLOC_012659 | ANKZF1       | chr2:220094478-220101391  | -0.219494 | 0.999791 |
| XLOC_011653 | XLOC_011653 | SIRT2        | chr19:39369194-39399534   | -0.219187 | 0.999791 |
| XLOC_011557 | XLOC_011557 | LINC00663    | chr19:19867180-19887222   | -0.218902 | 0.999791 |
| XLOC_005719 | XLOC_005719 | MED13L       | chr12:116396380-116714991 | -0.218889 | 0.999791 |
| XLOC_001090 | XLOC_001090 | GJC2         | chr1:228337414-228347527  | -0.218813 | 1        |
| XLOC_007754 | XLOC_007754 | UBE2Q2P1     | chr15:85070426-85123412   | -0.218731 | 1        |
| XLOC_004431 | XLOC_004431 | GAB2         | chr11:77926335-78128868   | -0.218721 | 0.999791 |
| XLOC_006889 | XLOC_006889 | ALDH6A1      | chr14:74486058-74551196   | -0.218566 | 0.999791 |
| XLOC_004040 | XLOC_004040 | MRPL17       | chr11:6701615-6704632     | -0.218536 | 0.999791 |
| XLOC_010444 | XLOC_010444 | HMHA1        | chr19:1065921-1095391     | -0.218487 | 0.999791 |
| XLOC_022490 | XLOC_022490 | NIPSNAP3B    | chr9:107526450-107536291  | -0.218358 | 0.999791 |
| XLOC_018186 | XLOC_018186 | PSORS1C1     | chr6:31082607-31107869    | -0.21834  | 0.999791 |
| XLOC_023722 | XLOC_023722 | FUNDC2       | chrX:154255063-154285191  | -0.218251 | 0.999791 |
| XLOC_021068 | XLOC_021068 | VOPP1        | chr7:55538305-55640200    | -0.21808  | 0.999791 |
| XLOC_001250 | XLOC_001250 | ENO1         | chr1:8921058-8939943      | -0.218062 | 0.999791 |
| XLOC_007565 | XLOC_007565 | CEP152       | chr15:49030134-49103343   | -0.218041 | 0.999791 |
| XLOC_009420 | XLOC_009420 | CHRNE        | chr17:4736634-4806369     | -0.218002 | 0.999791 |
| XLOC_017139 | XLOC_017139 | MAP3K1       | chr5:56110899-56191978    | -0.217984 | 0.999791 |
| XLOC_018242 | XLOC_018242 | KIFC1        | chr6:33359312-33377699    | -0.217957 | 0.999791 |
| XLOC_024025 | XLOC_024025 | AMOT         | chrX:112018104-112084043  | -0.217908 | 1        |
| XLOC_014296 | XLOC_014296 | SNORA80      | chr21:33664123-33765312   | -0.217893 | 0.999791 |
| XLOC_018960 | XLOC_018960 | SLC17A5      | chr6:74303101-74363737    | -0.217824 | 0.999791 |
| XLOC_005155 | XLOC_005155 | MLXIP        | chr12:122516651-122628967 | -0.217815 | 0.999791 |
| XLOC_013374 | XLOC_013374 | ABCB6        | chr2:220074487-220083712  | -0.217689 | 0.999791 |
| XLOC_011352 | XLOC_011352 | PSPN         | chr19:6375304-6375860     | -0.217535 | 0.999791 |
| XLOC_018828 | XLOC_018828 | TAF11        | chr6:34845554-34855848    | -0.217445 | 0.999791 |
| XLOC_011372 | XLOC_011372 | PCP2         | chr19:7694670-7698634     | -0.217382 | 0.999791 |
| XLOC_010113 | XLOC_010113 | ANKRD12      | chr18:9136750-9285983     | -0.217351 | 0.999791 |
| XLOC_014422 | XLOC_014422 | MED15        | chr22:20861885-20941919   | -0.217342 | 0.999791 |
| XLOC_010387 | XLOC_010387 | LMAN1        | chr18:56995055-57026508   | -0.217141 | 0.999791 |
| XLOC_009570 | XLOC_009570 | UNC119       | chr17:26873724-26879646   | -0.217037 | 0.999791 |
| XLOC_018085 | XLOC_018085 | GMNN         | chr6:24775158-24786325    | -0.21696  | 0.999791 |
| XLOC_012404 | XLOC_012404 | DBI          | chr2:120124503-120130122  | -0.216729 | 0.999791 |
| XLOC_003955 | XLOC_003955 | MUC6         | chr11:1012823-1036706     | -0.216197 | 1        |
| XLOC_006336 | XLOC_006336 | C14orf28     | chr14:45366506-45376460   | -0.216168 | 0.999791 |
| XLOC_018452 | XLOC_018452 | FAM229B      | chr6:112391859-112423993  | -0.216138 | 0.999791 |
| XLOC_012078 | XLOC_012078 | DNAJC27-AS1  | chr2:25194980-25262563    | -0.216098 | 1        |
| XLOC_013811 | XLOC_013811 | TMEM74B      | chr20:1161214-1165117     | -0.215887 | 0.999791 |
| XLOC_014690 | XLOC_014690 | PI4KAP1      | chr22:20383730-20398695   | -0.215836 | 0.999791 |

|             |             |                     |                           |           |          |
|-------------|-------------|---------------------|---------------------------|-----------|----------|
| XLOC_020880 | XLOC_020880 | RBM33               | chr7:155437202-155574179  | -0.215812 | 0.999791 |
| XLOC_001065 | XLOC_001065 | BROX                | chr1:222885905-222906106  | -0.215621 | 0.999791 |
| XLOC_022773 | XLOC_022773 | MOB3B               | chr9:27325206-27529850    | -0.215615 | 0.999791 |
| XLOC_004010 | XLOC_004010 | HBG1                | chr11:5269501-5271087     | -0.215495 | 1        |
| XLOC_013099 | XLOC_013099 | LOC151009.LOC440894 | chr2:111132685-111142113  | -0.215495 | 0.999791 |
| XLOC_002947 | XLOC_002947 | IPMK                | chr10:59951277-60027694   | -0.215424 | 0.999791 |
| XLOC_021150 | XLOC_021150 | SLC25A40            | chr7:87463813-87538856    | -0.2154   | 0.999791 |
| XLOC_022276 | XLOC_022276 | KIAA1432            | chr9:5629118-5776556      | -0.215303 | 0.999791 |
| XLOC_017238 | XLOC_017238 | ARSK                | chr5:94890824-94940806    | -0.215193 | 0.999791 |
| XLOC_015521 | XLOC_015521 | MGC2889             | chr3:192958916-192988644  | -0.215155 | 1        |
| XLOC_005819 | XLOC_005819 | PABPC3              | chr13:25670275-25672704   | -0.215142 | 1        |
| XLOC_018581 | XLOC_018581 | ACAT2               | chr6:160181290-160210735  | -0.215122 | 0.999791 |
| XLOC_001894 | XLOC_001894 | YY1AP1              | chr1:155629232-155658823  | -0.214967 | 0.999791 |
| XLOC_015848 | XLOC_015848 | SENP7               | chr3:101043117-101232085  | -0.214917 | 0.999791 |
| XLOC_000573 | XLOC_000573 | GSTM5               | chr1:110254863-110260890  | -0.214652 | 1        |
| XLOC_007206 | XLOC_007206 | NDUFAF4P1           | chr15:49447975-49913118   | -0.214578 | 1        |
| XLOC_016189 | XLOC_016189 | DOK7                | chr4:3465032-3496209      | -0.214488 | 1        |
| XLOC_022830 | XLOC_022830 | RNF38               | chr9:36336398-36401195    | -0.214454 | 0.999791 |
| XLOC_001802 | XLOC_001802 | GOLPH3L             | chr1:150618700-150669672  | -0.214426 | 0.999791 |
| XLOC_010524 | XLOC_010524 | TNFSF9              | chr19:6531009-6535939     | -0.21436  | 0.999791 |
| XLOC_016903 | XLOC_016903 | AR5J                | chr4:114821439-114900878  | -0.214296 | 0.999791 |
| XLOC_020406 | XLOC_020406 | LOC441204           | chr7:26443107-26535986    | -0.214279 | 1        |
| XLOC_008509 | XLOC_008509 | MAPK3               | chr16:30125425-30134630   | -0.214268 | 0.999791 |
| XLOC_002335 | XLOC_002335 | PRKCQ-AS1           | chr10:6622386-6627323     | -0.214212 | 0.999791 |
| XLOC_002510 | XLOC_002510 | DDIT4               | chr10:74033676-74035797   | -0.213982 | 0.999791 |
| XLOC_009987 | XLOC_009987 | QRICH2              | chr17:74270129-74303761   | -0.2138   | 0.999791 |
| XLOC_005073 | XLOC_005073 | TCP11L2             | chr12:106696580-106740792 | -0.213756 | 0.999791 |
| XLOC_014674 | XLOC_014674 | SLC25A1             | chr22:19163087-19166338   | -0.21367  | 0.999791 |
| XLOC_010605 | XLOC_010605 | ZNF700              | chr19:12035882-12061588   | -0.213642 | 0.999791 |
| XLOC_021305 | XLOC_021305 | IMPDH1              | chr7:128032330-128050036  | -0.213512 | 0.999791 |
| XLOC_017318 | XLOC_017318 | UQCRCQ              | chr5:132202318-132204536  | -0.21331  | 0.999791 |
| XLOC_014460 | XLOC_014460 | DDTL                | chr22:24309025-24322019   | -0.213252 | 0.999791 |
| XLOC_022403 | XLOC_022403 | CEP78               | chr9:80850990-80881983    | -0.212934 | 0.999791 |
| XLOC_008231 | XLOC_008231 | ZNRF1               | chr16:75032914-75144892   | -0.212892 | 0.999791 |
| XLOC_011283 | XLOC_011283 | ATP8B3              | chr19:1782073-1812275     | -0.21285  | 0.999791 |
| XLOC_011218 | XLOC_011218 | ZNF460              | chr19:57791852-57805436   | -0.212821 | 0.999791 |
| XLOC_012040 | XLOC_012040 | ID2                 | chr2:8822112-8824583      | -0.212748 | 0.999791 |
| XLOC_000659 | XLOC_000659 | LOC388692           | chr1:149279475-149291742  | -0.212605 | 0.999791 |
| XLOC_018560 | XLOC_018560 | CCDC170             | chr6:151815174-151942328  | -0.212552 | 1        |
| XLOC_005546 | XLOC_005546 | DDIT3               | chr12:57881735-57914300   | -0.212481 | 0.999791 |
| XLOC_010796 | XLOC_010796 | ZBTB32              | chr19:36203829-36207940   | -0.212475 | 1        |
| XLOC_018187 | XLOC_018187 | TCF19               | chr6:31126302-31131992    | -0.212382 | 0.999791 |
| XLOC_003664 | XLOC_003664 | AIP                 | chr11:67250504-67258579   | -0.212269 | 0.999791 |
| XLOC_022086 | XLOC_022086 | TMEM55A             | chr8:92006501-92053203    | -0.212114 | 0.999791 |
| XLOC_015115 | XLOC_015115 | GNAI2               | chr3:50273646-50296786    | -0.21207  | 0.999791 |
| XLOC_002810 | XLOC_002810 | SFTA1P              | chr10:10826401-10836877   | -0.211941 | 0.999791 |
| XLOC_008893 | XLOC_008893 | ALKBH5              | chr17:18086866-18113267   | -0.211909 | 0.999791 |
| XLOC_000658 | XLOC_000658 | LOC645166           | chr1:148928285-148953054  | -0.211871 | 0.999791 |
| XLOC_007593 | XLOC_007593 | RAB27A              | chr15:55495163-55582013   | -0.211805 | 0.999791 |
| XLOC_022302 | XLOC_022302 | CDKN2B-AS1          | chr9:21994789-22121093    | -0.211745 | 1        |
| XLOC_006465 | XLOC_006465 | TMEM63C             | chr14:77648101-77725838   | -0.211735 | 0.999791 |
| XLOC_003747 | XLOC_003747 | TMEM135             | chr11:86748885-87039876   | -0.211719 | 0.999791 |
| XLOC_022566 | XLOC_022566 | ZBTB34              | chr9:129622943-129648156  | -0.21149  | 0.999791 |
| XLOC_015360 | XLOC_015360 | CLDN18              | chr3:137717657-137752494  | -0.211419 | 1        |
| XLOC_010507 | XLOC_010507 | FEM1A               | chr19:4791727-4795571     | -0.211215 | 0.999791 |
| XLOC_016879 | XLOC_016879 | INTS12              | chr4:106603784-106629881  | -0.211114 | 0.999791 |
| XLOC_015614 | XLOC_015614 | NGLY1               | chr3:25760434-25831530    | -0.211022 | 0.999791 |
| XLOC_001560 | XLOC_001560 | HSPB11              | chr1:54387233-54411288    | -0.210955 | 0.999791 |
| XLOC_000212 | XLOC_000212 | ZDHHC18             | chr1:27153200-27182211    | -0.210938 | 0.999791 |
| XLOC_017461 | XLOC_017461 | CCNG1               | chr5:162864576-162872022  | -0.210842 | 0.999791 |
| XLOC_001665 | XLOC_001665 | ALG14               | chr1:95448278-95538507    | -0.210754 | 0.999791 |
| XLOC_003192 | XLOC_003192 | MKI67               | chr10:129894924-129924468 | -0.210627 | 0.999791 |
| XLOC_001383 | XLOC_001383 | MAP3K6              | chr1:27681669-27693337    | -0.210318 | 0.999791 |
| XLOC_000433 | XLOC_000433 | PGM1                | chr1:64058946-64125916    | -0.210247 | 0.999791 |
| XLOC_006375 | XLOC_006375 | ARID4A              | chr14:58765221-58840451   | -0.209746 | 0.999791 |
| XLOC_022818 | XLOC_022818 | RMRP                | chr9:35657747-35658015    | -0.209635 | 0.999791 |
| XLOC_023827 | XLOC_023827 | ZNF674              | chrX:46357159-46404892    | -0.209622 | 0.999791 |
| XLOC_010301 | XLOC_010301 | ROCK1               | chr18:18529702-18691812   | -0.209413 | 0.999791 |
| XLOC_016839 | XLOC_016839 | HSD17B11            | chr4:88257690-88312455    | -0.209233 | 0.999791 |
| XLOC_012455 | XLOC_012455 | SPOPL               | chr2:139259349-139330805  | -0.209025 | 0.999791 |
| XLOC_004274 | XLOC_004274 | STX5                | chr11:62574331-62599563   | -0.208923 | 0.999791 |
| XLOC_021249 | XLOC_021249 | LOC100216545        | chr7:104650988-104654588  | -0.208915 | 0.999791 |
| XLOC_004953 | XLOC_004953 | MARCH9              | chr12:58148880-58154193   | -0.208909 | 0.999791 |
| XLOC_008819 | XLOC_008819 | CHRN1               | chr17:7348405-7360932     | -0.208896 | 0.999791 |
| XLOC_018200 | XLOC_018200 | SNORA38             | chr6:31588449-31605554    | -0.208889 | 0.999791 |
| XLOC_008655 | XLOC_008655 | MTSS1L              | chr16:70695106-70719954   | -0.208874 | 0.999791 |
| XLOC_015469 | XLOC_015469 | YEATS2              | chr3:183415605-183530413  | -0.208873 | 0.999791 |
| XLOC_010536 | XLOC_010536 | CAMSAP3             | chr19:7660787-7683196     | -0.208847 | 0.999791 |
| XLOC_008469 | XLOC_008469 | RRN3P3              | chr16:22430866-22503541   | -0.208768 | 0.999791 |

|             |             |                       |                           |           |          |
|-------------|-------------|-----------------------|---------------------------|-----------|----------|
| XLOC_021879 | XLOC_021879 | LOC729732             | chr8:12294521-12523120    | -0.208668 | 0.999791 |
| XLOC_006057 | XLOC_006057 | KATNAL1               | chr13:30776766-30881624   | -0.208567 | 1        |
| XLOC_017159 | XLOC_017159 | MAST4                 | chr5:65892175-66465423    | -0.20852  | 0.999791 |
| XLOC_017932 | XLOC_017932 | CCNJL                 | chr5:159678670-159739573  | -0.208513 | 0.999791 |
| XLOC_000441 | XLOC_000441 | LEPR,LEPROT           | chr1:65886130-66103176    | -0.208443 | 0.999791 |
| XLOC_017706 | XLOC_017706 | WDR41                 | chr5:76728068-76788332    | -0.208413 | 0.999791 |
| XLOC_018940 | XLOC_018940 | DST                   | chr6:56137688-56615138    | -0.208398 | 0.999791 |
| XLOC_006854 | XLOC_006854 | SPTB                  | chr14:65213000-65289866   | -0.208394 | 0.999791 |
| XLOC_012308 | XLOC_012308 | FAHD2CP               | chr2:96676298-96700727    | -0.208215 | 0.999791 |
| XLOC_018157 | XLOC_018157 | HLA-F                 | chr6:29691116-29716826    | -0.207992 | 0.999791 |
| XLOC_013878 | XLOC_013878 | RALGAPA2              | chr20:20370271-20693266   | -0.207979 | 0.999791 |
| XLOC_014160 | XLOC_014160 | CBR3                  | chr21:37504064-37528606   | -0.207862 | 0.999791 |
| XLOC_022616 | XLOC_022616 | LAMC3                 | chr9:133884503-133968446  | -0.207768 | 1        |
| XLOC_021066 | XLOC_021066 | SEC61G                | chr7:54819939-54826939    | -0.207742 | 0.999791 |
| XLOC_020351 | XLOC_020351 | RNF216P1              | chr7:5013615-5037800      | -0.207724 | 0.999791 |
| XLOC_014512 | XLOC_014512 | INPP5J                | chr22:31518960-31530683   | -0.207579 | 0.999791 |
| XLOC_002956 | XLOC_002956 | RTKN2                 | chr10:63952952-64028466   | -0.207512 | 1        |
| XLOC_023686 | XLOC_023686 | ZNF185                | chrX:152082985-152124025  | -0.207504 | 1        |
| XLOC_009326 | XLOC_009326 | SLC26A11              | chr17:78194199-78227308   | -0.207502 | 0.999791 |
| XLOC_017062 | XLOC_017062 | C5orf38               | chr5:2752261-2755511      | -0.207479 | 0.999791 |
| XLOC_016518 | XLOC_016518 | GAB1                  | chr4:144257982-144395718  | -0.207425 | 1        |
| XLOC_003036 | XLOC_003036 | ACTA2                 | chr10:90694830-90775542   | -0.207402 | 0.999791 |
| XLOC_018208 | XLOC_018208 | HSPA1A                | chr6:31783290-31785719    | -0.207322 | 0.999791 |
| XLOC_009871 | XLOC_009871 | RNF43                 | chr17:56378587-56494931   | -0.207179 | 1        |
| XLOC_002678 | XLOC_002678 | NEURL                 | chr10:105253734-105352309 | -0.207101 | 0.999791 |
| XLOC_022148 | XLOC_022148 | EXT1                  | chr8:118811601-119124058  | -0.206989 | 0.999791 |
| XLOC_013304 | XLOC_013304 | CLK1                  | chr2:201717731-201729467  | -0.206971 | 0.999791 |
| XLOC_013698 | XLOC_013698 | CD40                  | chr20:44746905-44758384   | -0.206907 | 0.999791 |
| XLOC_002547 | XLOC_002547 | TSPAN14               | chr10:82214037-82282391   | -0.206838 | 0.999791 |
| XLOC_004926 | XLOC_004926 | MYL6                  | chr12:56552044-56555366   | -0.206798 | 0.999791 |
| XLOC_017638 | XLOC_017638 | HMGCS1                | chr5:43287571-43313614    | -0.20673  | 0.999791 |
| XLOC_004536 | XLOC_004536 | USP28                 | chr11:113668596-113746256 | -0.206631 | 0.999791 |
| XLOC_016088 | XLOC_016088 | CAMK2N2               | chr3:183967444-184010819  | -0.206571 | 0.999791 |
| XLOC_005491 | XLOC_005491 | ATF7                  | chr12:53901639-54020199   | -0.206269 | 0.999791 |
| XLOC_018274 | XLOC_018274 | PIM1                  | chr6:37137921-37143204    | -0.206147 | 0.999791 |
| XLOC_016167 | XLOC_016167 | FGFR1                 | chr4:1005609-1020686      | -0.206102 | 0.999791 |
| XLOC_018552 | XLOC_018552 | ULBP2                 | chr6:150263135-150270368  | -0.206081 | 0.999791 |
| XLOC_011588 | XLOC_011588 | SLC7A10               | chr19:33685598-33716756   | -0.206004 | 1        |
| XLOC_020872 | XLOC_020872 | LOC100128822          | chr7:152161208-152162630  | -0.205909 | 0.999791 |
| XLOC_004294 | XLOC_004294 | ATL3                  | chr11:63396436-63439083   | -0.205837 | 0.999791 |
| XLOC_020643 | XLOC_020643 | LAMTOR4               | chr7:99746529-99751833    | -0.205792 | 0.999791 |
| XLOC_018969 | XLOC_018969 | LCA5                  | chr6:80194707-80247147    | -0.205713 | 1        |
| XLOC_009771 | XLOC_009771 | HDAC5                 | chr17:42154120-42201014   | -0.205615 | 0.999791 |
| XLOC_011514 | XLOC_011514 | SMIM7                 | chr19:16756958-16770968   | -0.205441 | 0.999791 |
| XLOC_005363 | XLOC_005363 | TM7SF3                | chr12:27124505-27167339   | -0.205439 | 0.999791 |
| XLOC_007527 | XLOC_007527 | EHD4                  | chr15:42191638-42264755   | -0.205195 | 0.999791 |
| XLOC_011939 | XLOC_011939 | LENG1                 | chr19:54641435-54663446   | -0.205146 | 0.999791 |
| XLOC_015164 | XLOC_015164 | PTPRG                 | chr3:61547242-62304622    | -0.204962 | 0.999791 |
| XLOC_011050 | XLOC_011050 | NR1H2                 | chr19:50879679-50886285   | -0.204671 | 0.999791 |
| XLOC_011268 | XLOC_011268 | MED16                 | chr19:867961-893218       | -0.204549 | 0.999791 |
| XLOC_021422 | XLOC_021422 | NCAPG2                | chr7:158424002-158497520  | -0.204472 | 0.999791 |
| XLOC_024082 | XLOC_024082 | GPC4                  | chrX:132435063-132549205  | -0.204288 | 0.999791 |
| XLOC_021102 | XLOC_021102 | TRIM50                | chr7:72726534-72742085    | -0.20427  | 1        |
| XLOC_014593 | XLOC_014593 | CCDC134               | chr22:42196677-42222303   | -0.204224 | 0.999791 |
| XLOC_022941 | XLOC_022941 | ZNF484                | chr9:95607312-95640320    | -0.204191 | 0.999791 |
| XLOC_023359 | XLOC_023359 | ZNF81                 | chrX:47696300-47781655    | -0.204087 | 1        |
| XLOC_010371 | XLOC_010371 | MEX3C                 | chr18:48700919-48724051   | -0.20405  | 0.999791 |
| XLOC_001955 | XLOC_001955 | IGSF8                 | chr1:160061128-160068618  | -0.204049 | 0.999791 |
| XLOC_017933 | XLOC_017933 | C1QTNF2               | chr5:159774774-159797648  | -0.204035 | 0.999791 |
| XLOC_011429 | XLOC_011429 | SPC24                 | chr19:11257830-11266484   | -0.204033 | 0.999791 |
| XLOC_006981 | XLOC_006981 | ANKRD9                | chr14:102973197-102976128 | -0.203831 | 0.999791 |
| XLOC_023854 | XLOC_023854 | PRICKLE3              | chrX:49031905-49042776    | -0.203801 | 0.999791 |
| XLOC_000983 | XLOC_000983 | ADORA1                | chr1:203096835-203136533  | -0.2037   | 0.999791 |
| XLOC_013659 | XLOC_013659 | PLCG1                 | chr20:39766160-39804357   | -0.203651 | 0.999791 |
| XLOC_012570 | XLOC_012570 | CCDC150               | chr2:197504355-197597530  | -0.203501 | 0.999791 |
| XLOC_022820 | XLOC_022820 | TPM2                  | chr9:35681989-35690053    | -0.203484 | 0.999791 |
| XLOC_014699 | XLOC_014699 | PI4KAP2               | chr22:21827286-21871780   | -0.203382 | 0.999791 |
| XLOC_005812 | XLOC_005812 | C1QTNF9B-AS1          | chr13:24304327-24471125   | -0.203292 | 1        |
| XLOC_000580 | XLOC_000580 | RBM15                 | chr1:110881944-110889303  | -0.203241 | 0.999791 |
| XLOC_000773 | XLOC_000773 | BGLAP,PMF1,PMF1-BGLAP | chr1:156182778-156217908  | -0.203201 | 0.999791 |
| XLOC_000984 | XLOC_000984 | BTG2                  | chr1:203274663-203278729  | -0.203067 | 0.999791 |
| XLOC_006892 | XLOC_006892 | NPC2                  | chr14:74946642-74960084   | -0.203027 | 0.999791 |
| XLOC_004957 | XLOC_004957 | SLC16A7               | chr12:59989820-60183635   | -0.202952 | 1        |
| XLOC_009113 | XLOC_009113 | ACBD4                 | chr17:43209966-43221543   | -0.202789 | 0.999791 |
| XLOC_018391 | XLOC_018391 | TPBG                  | chr6:83072922-83077133    | -0.2027   | 0.999791 |
| XLOC_007161 | XLOC_007161 | ITPKA                 | chr15:41786055-41795757   | -0.202694 | 0.999791 |
| XLOC_023766 | XLOC_023766 | PIGA                  | chrX:15337572-15353676    | -0.202632 | 0.999791 |
| XLOC_010349 | XLOC_010349 | PIAS2                 | chr18:44390022-44497495   | -0.202576 | 0.999791 |
| XLOC_003335 | XLOC_003335 | MICAL2                | chr11:12132137-12285331   | -0.202484 | 0.999791 |

|             |             |                           |                           |           |          |
|-------------|-------------|---------------------------|---------------------------|-----------|----------|
| XLOC_004920 | XLOC_004920 | ERBB3                     | chr12:56473808-56497291   | -0.202312 | 0.999791 |
| XLOC_011738 | XLOC_011738 | LOC100379224              | chr19:44598481-44617336   | -0.202187 | 0.999791 |
| XLOC_000678 | XLOC_000678 | ECM1                      | chr1:150480486-150486265  | -0.202013 | 0.999791 |
| XLOC_009855 | XLOC_009855 | MMD                       | chr17:53469973-53499341   | -0.201891 | 0.999791 |
| XLOC_014939 | XLOC_014939 | CRELD1                    | chr3:9975523-9987097      | -0.201864 | 0.999791 |
| XLOC_003407 | XLOC_003407 | RAG1                      | chr1:136589562-36601310   | -0.201779 | 1        |
| XLOC_009017 | XLOC_009017 | ARHGAP23                  | chr17:36584719-36668628   | -0.201747 | 0.999791 |
| XLOC_001973 | XLOC_001973 | B4GALT3                   | chr1:161141099-161147758  | -0.201662 | 0.999791 |
| XLOC_002931 | XLOC_002931 | ERCC6.PGBD3               | chr10:50664490-50747147   | -0.201646 | 0.999791 |
| XLOC_018436 | XLOC_018436 | FOXO3                     | chr6:108881025-109005971  | -0.201557 | 0.999791 |
| XLOC_016504 | XLOC_016504 | PHF17                     | chr4:129730778-129796379  | -0.201551 | 0.999791 |
| XLOC_009186 | XLOC_009186 | SCPEP1                    | chr17:55055467-55084129   | -0.201457 | 0.999791 |
| XLOC_009355 | XLOC_009355 | NARF                      | chr17:80416059-80446143   | -0.20145  | 0.999791 |
| XLOC_020620 | XLOC_020620 | BHLHA15                   | chr7:97841565-97842271    | -0.201181 | 0.999791 |
| XLOC_004822 | XLOC_004822 | CACNB3                    | chr12:49208214-49222726   | -0.201143 | 0.999791 |
| XLOC_002429 | XLOC_002429 | RASSF4                    | chr10:45455218-45490172   | -0.201064 | 0.999791 |
| XLOC_021372 | XLOC_021372 | ARHGEF35                  | chr7:143883175-143892791  | -0.201057 | 0.999791 |
| XLOC_014549 | XLOC_014549 | H1FO                      | chr22:38201113-38203443   | -0.200901 | 0.999791 |
| XLOC_000424 | XLOC_000424 | INADL                     | chr1:62208148-62629591    | -0.200892 | 0.999791 |
| XLOC_000604 | XLOC_000604 | DCLRE1B                   | chr1:114447914-114456708  | -0.200757 | 0.999791 |
| XLOC_003427 | XLOC_003427 | CRY2                      | chr1:45868668-45904799    | -0.200536 | 0.999791 |
| XLOC_004951 | XLOC_004951 | LOC100130776              | chr12:58118075-58135944   | -0.200214 | 0.999791 |
| XLOC_005241 | XLOC_005241 | IFFO1                     | chr12:6648693-6665249     | -0.200028 | 1        |
| XLOC_005451 | XLOC_005451 | POUF1                     | chr12:51580718-51611477   | -0.199952 | 0.999791 |
| XLOC_017130 | XLOC_017130 | NDUFS4                    | chr5:52856464-52979171    | -0.199931 | 0.999791 |
| XLOC_008126 | XLOC_008126 | MT1F                      | chr16:56691854-56693215   | -0.19986  | 0.999791 |
| XLOC_002671 | XLOC_002671 | WBP1L                     | chr10:104503726-104576021 | -0.199854 | 0.999791 |
| XLOC_003071 | XLOC_003071 | ARHGAP19.SLIT1            | chr10:98757794-99052430   | -0.199842 | 0.999791 |
| XLOC_008490 | XLOC_008490 | SULT1A2                   | chr16:28603263-28608391   | -0.199763 | 1        |
| XLOC_009437 | XLOC_009437 | PITPNM3                   | chr17:6354582-6459877     | -0.199707 | 1        |
| XLOC_005702 | XLOC_005702 | FAM109A                   | chr12:111798454-111806925 | -0.199703 | 0.999791 |
| XLOC_011791 | XLOC_011791 | BBC3                      | chr19:47724078-47736023   | -0.199591 | 0.999791 |
| XLOC_003299 | XLOC_003299 | SMPD1                     | chr1:6411643-6416228      | -0.199547 | 0.999791 |
| XLOC_002990 | XLOC_002990 | P4HA1                     | chr10:74766979-74856732   | -0.199436 | 0.999791 |
| XLOC_002282 | XLOC_002282 | SMYD3                     | chr1:245912641-246670644  | -0.199431 | 0.999791 |
| XLOC_023484 | XLOC_023484 | UPRT                      | chrX:74493893-74524732    | -0.199405 | 0.999791 |
| XLOC_018586 | XLOC_018586 | LOC729603                 | chr6:160390130-160527583  | -0.199377 | 1        |
| XLOC_005584 | XLOC_005584 | PTPRR                     | chr12:71031852-71314584   | -0.199359 | 1        |
| XLOC_009467 | XLOC_009467 | LSMD1                     | chr17:7760002-7765600     | -0.199217 | 0.999791 |
| XLOC_013361 | XLOC_013361 | USP37                     | chr2:219314973-219433084  | -0.19896  | 0.999791 |
| XLOC_021601 | XLOC_021601 | UBXN2B                    | chr8:59323822-59364060    | -0.198886 | 0.999791 |
| XLOC_021750 | XLOC_021750 | PVT1                      | chr8:128902873-129113499  | -0.19881  | 0.999791 |
| XLOC_015293 | XLOC_015293 | DTX3L                     | chr3:122246759-122294049  | -0.19879  | 0.999791 |
| XLOC_001691 | XLOC_001691 | PSRC1                     | chr1:109822175-109825790  | -0.198759 | 0.999791 |
| XLOC_009378 | XLOC_009378 | RILP                      | chr17:1549444-1553392     | -0.198686 | 0.999791 |
| XLOC_020420 | XLOC_020420 | DPY19L2P3                 | chr7:29685537-29727859    | -0.198686 | 1        |
| XLOC_005411 | XLOC_005411 | ASB8                      | chr12:48541571-48551377   | -0.198629 | 0.999791 |
| XLOC_002623 | XLOC_002623 | ZDHHC16                   | chr10:99205929-99217127   | -0.198539 | 0.999791 |
| XLOC_010488 | XLOC_010488 | TJP3                      | chr19:3708334-3761673     | -0.198424 | 0.999791 |
| XLOC_022972 | XLOC_022972 | CORO2A                    | chr9:100883256-100954956  | -0.197659 | 0.999791 |
| XLOC_005744 | XLOC_005744 | POP5                      | chr12:121016847-121019201 | -0.197656 | 0.999791 |
| XLOC_010537 | XLOC_010537 | PET100                    | chr19:7694670-7698634     | -0.197482 | 0.999791 |
| XLOC_000036 | XLOC_000036 | TNFRSF14                  | chr1:2487207-2495267      | -0.197428 | 0.999791 |
| XLOC_016489 | XLOC_016489 | KIAA1109                  | chr4:123091757-123283914  | -0.197369 | 0.999791 |
| XLOC_011599 | XLOC_011599 | FAM187B                   | chr19:35715703-35719628   | -0.197315 | 1        |
| XLOC_012296 | XLOC_012296 | RPIA                      | chr2:88991175-89050452    | -0.197231 | 0.999791 |
| XLOC_009784 | XLOC_009784 | KIF18B                    | chr17:43002078-43025079   | -0.197207 | 0.999791 |
| XLOC_003357 | XLOC_003357 | LDHA                      | chr1:18415935-18429765    | -0.197084 | 0.999791 |
| XLOC_009857 | XLOC_009857 | C17orf67                  | chr17:54869273-54911256   | -0.19703  | 0.999791 |
| XLOC_020654 | XLOC_020654 | MOSPD3                    | chr7:100209724-100213000  | -0.197025 | 0.999791 |
| XLOC_022623 | XLOC_022623 | POMT1                     | chr9:134378288-134406662  | -0.197009 | 0.999791 |
| XLOC_006876 | XLOC_006876 | COX16.SYNJ2BP.SYNJ2BP-COX | chr14:70791797-70883807   | -0.196965 | 0.999791 |
| XLOC_002334 | XLOC_002334 | LOC399715                 | chr10:6319649-6377937     | -0.196831 | 0.999791 |
| XLOC_018129 | XLOC_018129 | HIST1H3H                  | chr6:27777841-27778314    | -0.196823 | 0.999791 |
| XLOC_017004 | XLOC_017004 | FBXO8                     | chr4:175157809-175254531  | -0.196777 | 0.999791 |
| XLOC_019073 | XLOC_019073 | PTPRK                     | chr6:128289923-128841870  | -0.196632 | 0.999791 |
| XLOC_004540 | XLOC_004540 | CADM1                     | chr1:115044344-115375241  | -0.196569 | 0.999791 |
| XLOC_011634 | XLOC_011634 | ZNF571                    | chr19:38039850-38105079   | -0.196534 | 0.999791 |
| XLOC_017455 | XLOC_017455 | PTTG1                     | chr5:159848864-159855746  | -0.196511 | 0.999791 |
| XLOC_020473 | XLOC_020473 | CCM2                      | chr7:45039344-45116069    | -0.196484 | 0.999791 |
| XLOC_017979 | XLOC_017979 | DOK3                      | chr5:176928905-176937427  | -0.196431 | 0.999791 |
| XLOC_013184 | XLOC_013184 | STAM2                     | chr2:152973314-153032506  | -0.196336 | 0.999791 |
| XLOC_010689 | XLOC_010689 | CCDC124                   | chr19:18043823-18054794   | -0.196266 | 0.999791 |
| XLOC_003442 | XLOC_003442 | MADD                      | chr11:47290926-47351582   | -0.196241 | 0.999791 |
| XLOC_015838 | XLOC_015838 | CLDND1                    | chr3:98234316-98241910    | -0.196235 | 0.999791 |
| XLOC_003340 | XLOC_003340 | ARNTL                     | chr1:13299324-13408812    | -0.196232 | 0.999791 |
| XLOC_011990 | XLOC_011990 | VN1R1                     | chr19:57966541-57968107   | -0.196215 | 1        |
| XLOC_021057 | XLOC_021057 | HUS1                      | chr7:48002884-48019222    | -0.196211 | 0.999791 |
| XLOC_018136 | XLOC_018136 | ZNF165                    | chr6:28048481-28057340    | -0.195798 | 0.999791 |

|             |             |                       |                           |           |          |
|-------------|-------------|-----------------------|---------------------------|-----------|----------|
| XLOC_001183 | XLOC_001183 | LOC100288069          | chr1:700244-714068        | -0.195722 | 0.999791 |
| XLOC_013196 | XLOC_013196 | CD302.LY75.LY75-CD302 | chr2:160625138-160761267  | -0.195689 | 0.999791 |
| XLOC_018787 | XLOC_018787 | LOC100507547          | chr6:32120578-32145888    | -0.195679 | 0.999791 |
| XLOC_023423 | XLOC_023423 | MAGED2                | chrX:54834170-54842445    | -0.195619 | 0.999791 |
| XLOC_015694 | XLOC_015694 | SLC26A6               | chr3:48663155-48672926    | -0.195584 | 0.999791 |
| XLOC_008198 | XLOC_008198 | HAS3                  | chr16:69139466-69166493   | -0.195577 | 0.999791 |
| XLOC_007834 | XLOC_007834 | RHBDL1                | chr16:726074-728267       | -0.195501 | 0.999791 |
| XLOC_016099 | XLOC_016099 | DGKG                  | chr3:185864989-186080023  | -0.195496 | 0.999791 |
| XLOC_012124 | XLOC_012124 | LCLAT1                | chr2:30670122-30867091    | -0.195333 | 0.999791 |
| XLOC_014865 | XLOC_014865 | POLDIP3               | chr22:42979726-43010962   | -0.194994 | 0.999791 |
| XLOC_018309 | XLOC_018309 | SRF                   | chr6:43138919-43149244    | -0.194992 | 0.999791 |
| XLOC_004152 | XLOC_004152 | TP53I1                | chr1:144785975-44972857   | -0.19496  | 0.999791 |
| XLOC_023272 | XLOC_023272 | MOSPD2                | chrX:14891526-14939459    | -0.1949   | 0.999791 |
| XLOC_005886 | XLOC_005886 | NUDT15                | chr13:48611702-48621282   | -0.194884 | 0.999791 |
| XLOC_003602 | XLOC_003602 | ZFPL1                 | chr1:164851693-64856542   | -0.194803 | 0.999791 |
| XLOC_013109 | XLOC_013109 | CKAP2L                | chr2:113495443-113522254  | -0.194702 | 0.999791 |
| XLOC_021155 | XLOC_021155 | CYP51A1               | chr7:91741462-91764059    | -0.1947   | 0.999791 |
| XLOC_002905 | XLOC_002905 | AGAP4                 | chr10:46321049-46342921   | -0.1946   | 0.999791 |
| XLOC_011438 | XLOC_011438 | ECSIT.ZNF653          | chr19:11594241-11639987   | -0.194586 | 0.999791 |
| XLOC_013462 | XLOC_013462 | MTERFD2               | chr2:241938254-242041747  | -0.194584 | 0.999791 |
| XLOC_006317 | XLOC_006317 | AKAP6                 | chr14:32798478-33302268   | -0.194515 | 1        |
| XLOC_005820 | XLOC_005820 | NUPL1                 | chr13:25875665-25916561   | -0.194336 | 0.999791 |
| XLOC_010780 | XLOC_010780 | LSR                   | chr19:35739558-35758867   | -0.194282 | 0.999791 |
| XLOC_020418 | XLOC_020418 | CHN2                  | chr7:29234120-29553944    | -0.194247 | 0.999791 |
| XLOC_017749 | XLOC_017749 | ERAP1                 | chr5:95997740-96149848    | -0.194123 | 0.999791 |
| XLOC_015632 | XLOC_015632 | PLCD1                 | chr3:38048986-38071154    | -0.194059 | 0.999791 |
| XLOC_015772 | XLOC_015772 | SELK                  | chr3:53919225-53925989    | -0.193996 | 0.999791 |
| XLOC_007621 | XLOC_007621 | DAPK2                 | chr15:64199234-64338521   | -0.193952 | 0.999791 |
| XLOC_009145 | XLOC_009145 | HOBX-AS3              | chr17:46667822-46683774   | -0.193849 | 0.999791 |
| XLOC_011753 | XLOC_011753 | PPP1R13L              | chr19:45882891-45927177   | -0.193716 | 0.999791 |
| XLOC_012110 | XLOC_012110 | MRPL33                | chr2:27994583-28002608    | -0.19349  | 0.999791 |
| XLOC_000210 | XLOC_000210 | ARID1A                | chr1:27022521-27108601    | -0.193479 | 0.999791 |
| XLOC_007700 | XLOC_007700 | IMP3                  | chr15:75931425-75932664   | -0.193442 | 0.999791 |
| XLOC_020550 | XLOC_020550 | CLIP2                 | chr7:73703804-73820273    | -0.193322 | 0.999791 |
| XLOC_020787 | XLOC_020787 | ADCK2                 | chr7:140372952-140394908  | -0.193252 | 0.999791 |
| XLOC_001420 | XLOC_001420 | TMEM234               | chr1:32681797-32687926    | -0.193137 | 0.999791 |
| XLOC_016411 | XLOC_016411 | CDS1                  | chr4:85504056-85572493    | -0.193089 | 0.999791 |
| XLOC_001414 | XLOC_001414 | PEF1                  | chr1:32095462-32110838    | -0.192992 | 0.999791 |
| XLOC_009312 | XLOC_009312 | TMC8                  | chr17:76108998-76139049   | -0.192819 | 1        |
| XLOC_003617 | XLOC_003617 | SCYL1                 | chr1:165292547-65325699   | -0.192726 | 0.999791 |
| XLOC_014494 | XLOC_014494 | GAS2L1                | chr22:29702996-29708774   | -0.192723 | 0.999791 |
| XLOC_008811 | XLOC_008811 | KCTD11                | chr17:7255207-7258262     | -0.192655 | 0.999791 |
| XLOC_013209 | XLOC_013209 | COBLL1                | chr2:165541257-165697928  | -0.192628 | 1        |
| XLOC_022445 | XLOC_022445 | PTPDC1                | chr9:96793075-96872138    | -0.192563 | 0.999791 |
| XLOC_021170 | XLOC_021170 | PON1                  | chr7:94927668-94953884    | -0.192457 | 1        |
| XLOC_007605 | XLOC_007605 | HSP90AB4P             | chr15:58888509-59042177   | -0.192373 | 1        |
| XLOC_016155 | XLOC_016155 | KIAA0226              | chr3:197398258-197511317  | -0.192314 | 0.999791 |
| XLOC_023658 | XLOC_023658 | FMR1                  | chrX:146990948-147032647  | -0.192198 | 0.999791 |
| XLOC_013693 | XLOC_013693 | ZSWIM1                | chr20:44509847-44513905   | -0.192124 | 0.999791 |
| XLOC_020584 | XLOC_020584 | GNAI1                 | chr7:79764139-79848725    | -0.192031 | 0.999791 |
| XLOC_001299 | XLOC_001299 | FBXO42                | chr1:16576558-16678948    | -0.191911 | 0.999791 |
| XLOC_001658 | XLOC_001658 | BCAR3                 | chr1:94027342-94312706    | -0.191899 | 0.999791 |
| XLOC_005124 | XLOC_005124 | RNFT2                 | chr12:117176095-117291436 | -0.191888 | 0.999791 |
| XLOC_011467 | XLOC_011467 | GADD45GIP1            | chr19:13064969-13068068   | -0.191766 | 0.999791 |
| XLOC_002673 | XLOC_002673 | CNNM2                 | chr10:104678074-104838344 | -0.191761 | 0.999791 |
| XLOC_021934 | XLOC_021934 | ZNF395                | chr8:28203101-28243977    | -0.191695 | 0.999791 |
| XLOC_022018 | XLOC_022018 | PDE7A                 | chr8:66626568-66753969    | -0.19169  | 0.999791 |
| XLOC_021688 | XLOC_021688 | LAPTM4B               | chr8:98787808-98864830    | -0.191631 | 0.999791 |
| XLOC_010442 | XLOC_010442 | CNN2                  | chr19:1026297-1039064     | -0.19151  | 0.999791 |
| XLOC_024155 | XLOC_024155 | TMEM185A              | chrX:148678215-148713487  | -0.191465 | 0.999791 |
| XLOC_005666 | XLOC_005666 | SLC41A2               | chr12:105197274-105322472 | -0.191356 | 0.999791 |
| XLOC_001332 | XLOC_001332 | DDOST                 | chr1:20978259-20988037    | -0.190956 | 0.999791 |
| XLOC_004865 | XLOC_004865 | SOAT2                 | chr12:53497273-53518323   | -0.19095  | 1        |
| XLOC_021504 | XLOC_021504 | SORBS3                | chr8:22409250-22433008    | -0.190927 | 0.999791 |
| XLOC_004674 | XLOC_004674 | NCAPD2                | chr12:6603297-6641132     | -0.190717 | 0.999791 |
| XLOC_023303 | XLOC_023303 | PKD3                  | chrX:24483343-24568583    | -0.190653 | 0.999791 |
| XLOC_009591 | XLOC_009591 | GIT1                  | chr17:27900486-27916610   | -0.19061  | 0.999791 |
| XLOC_021855 | XLOC_021855 | PPP1R3B               | chr8:8993763-9009152      | -0.190439 | 0.999791 |
| XLOC_010302 | XLOC_010302 | ESCO1                 | chr18:19109261-19180693   | -0.190387 | 0.999791 |
| XLOC_022281 | XLOC_022281 | UHRF2                 | chr9:6413150-6507051      | -0.190157 | 0.999791 |
| XLOC_001896 | XLOC_001896 | RIT1                  | chr1:155867598-155881193  | -0.190128 | 0.999791 |
| XLOC_012370 | XLOC_012370 | LOC440894             | chr2:110744556-110752858  | -0.190082 | 0.999791 |
| XLOC_014569 | XLOC_014569 | TAB1                  | chr22:39795758-39833133   | -0.190038 | 0.999791 |
| XLOC_017747 | XLOC_017747 | ELL2                  | chr5:95220801-95297775    | -0.189812 | 0.999791 |
| XLOC_017190 | XLOC_017190 | ARHGEF28              | chr5:72921982-73237818    | -0.189795 | 0.999791 |
| XLOC_004371 | XLOC_004371 | MTL5                  | chr11:68474907-68518988   | -0.189731 | 0.999791 |
| XLOC_012674 | XLOC_012674 | ACSL3                 | chr2:223725731-223808119  | -0.189651 | 0.999791 |
| XLOC_004328 | XLOC_004328 | RNASEH2C              | chr11:65479472-65488409   | -0.189625 | 0.999791 |
| XLOC_020382 | XLOC_020382 | AHR                   | chr7:17338275-17385775    | -0.189556 | 1        |

|             |             |                            |                           |           |          |
|-------------|-------------|----------------------------|---------------------------|-----------|----------|
| XLOC_016006 | XLOC_016006 | SIAH2                      | chr3:150458909-150481263  | -0.189501 | 0.999791 |
| XLOC_023919 | XLOC_023919 | SNX12                      | chrX:70279096-70293276    | -0.189283 | 0.999791 |
| XLOC_007745 | XLOC_007745 | LOC283693                  | chr15:83394649-83408532   | -0.189273 | 1        |
| XLOC_022738 | XLOC_022738 | PLIN2                      | chr9:19115758-19127604    | -0.189219 | 0.999791 |
| XLOC_023891 | XLOC_023891 | FAM104B                    | chrX:55169534-55187628    | -0.189169 | 0.999791 |
| XLOC_024110 | XLOC_024110 | ARHGEF6                    | chrX:135747711-135863503  | -0.189158 | 0.999791 |
| XLOC_007747 | XLOC_007747 | HOMER2                     | chr15:83517728-83621476   | -0.189128 | 1        |
| XLOC_014869 | XLOC_014869 | ARFGAP3                    | chr22:43192531-43253408   | -0.189081 | 0.999791 |
| XLOC_007607 | XLOC_007607 | MYO1E                      | chr15:59428167-59665071   | -0.189002 | 0.999791 |
| XLOC_021235 | XLOC_021235 | POLR2J3                    | chr7:102178365-102213068  | -0.188717 | 0.999791 |
| XLOC_009311 | XLOC_009311 | TNRC6C                     | chr17:76000317-76107880   | -0.188709 | 0.999791 |
| XLOC_014386 | XLOC_014386 | LSS                        | chr21:47608359-47648738   | -0.188666 | 0.999791 |
| XLOC_002077 | XLOC_002077 | IVNS1ABP                   | chr1:185265521-185286461  | -0.188618 | 0.999791 |
| XLOC_014427 | XLOC_014427 | CRKL                       | chr22:21271713-21308037   | -0.188517 | 0.999791 |
| XLOC_021213 | XLOC_021213 | C7orf61                    | chr7:100054237-100061894  | -0.188505 | 0.999791 |
| XLOC_002430 | XLOC_002430 | ZNF22                      | chr10:45493145-45500777   | -0.188456 | 0.999791 |
| XLOC_011834 | XLOC_011834 | SLC6A16                    | chr19:49792891-49828474   | -0.188386 | 1        |
| XLOC_021163 | XLOC_021163 | HEPACAM2                   | chr7:92817898-92855782    | -0.18833  | 1        |
| XLOC_016327 | XLOC_016327 | KIAA1211                   | chr4:57036360-57196890    | -0.188219 | 0.999791 |
| XLOC_012715 | XLOC_012715 | ATG16L1                    | chr2:234160216-234204320  | -0.188149 | 0.999791 |
| XLOC_007311 | XLOC_007311 | C15orf39                   | chr15:75494220-75504510   | -0.188001 | 0.999791 |
| XLOC_008221 | XLOC_008221 | MARVELD3                   | chr16:71660055-71675868   | -0.187733 | 0.999791 |
| XLOC_012978 | XLOC_012978 | PRADC1                     | chr2:73455133-73460356    | -0.187701 | 0.999791 |
| XLOC_009030 | XLOC_009030 | STARD3                     | chr17:37793332-37820454   | -0.187682 | 0.999791 |
| XLOC_012077 | XLOC_012077 | CENPO                      | chr2:25013135-25142055    | -0.187628 | 0.999791 |
| XLOC_021409 | XLOC_021409 | MLL3                       | chr7:151832009-152133090  | -0.187615 | 0.999791 |
| XLOC_001213 | XLOC_001213 | TMEM52                     | chr1:1849028-1850740      | -0.187516 | 0.999791 |
| XLOC_012038 | XLOC_012038 | RNF144A                    | chr2:7052406-7184309      | -0.187504 | 0.999791 |
| XLOC_000552 | XLOC_000552 | FAM102B                    | chr1:109102970-109181949  | -0.187447 | 0.999791 |
| XLOC_010560 | XLOC_010560 | ORD7D                      | chr19:9296269-9299493     | -0.187438 | 1        |
| XLOC_011984 | XLOC_011984 | ZNF582                     | chr19:56894647-56904889   | -0.187411 | 1        |
| XLOC_015265 | XLOC_015265 | GRAMD1C                    | chr3:113557680-113666021  | -0.187341 | 0.999791 |
| XLOC_000656 | XLOC_000656 | NBPF16                     | chr1:148739441-148758311  | -0.187332 | 0.999791 |
| XLOC_010574 | XLOC_010574 | ICAM1                      | chr19:10381516-10397291   | -0.187302 | 0.999791 |
| XLOC_006730 | XLOC_006730 | EMC9                       | chr14:24605377-24610797   | -0.187271 | 0.999791 |
| XLOC_003440 | XLOC_003440 | DDB2                       | chr11:47236492-47260769   | -0.187258 | 0.999791 |
| XLOC_021987 | XLOC_021987 | PCMTD1                     | chr8:52730139-52811735    | -0.187188 | 0.999791 |
| XLOC_006886 | XLOC_006886 | ELMSAN1                    | chr14:74181824-74253896   | -0.18717  | 0.999791 |
| XLOC_007697 | XLOC_007697 | SIN3A                      | chr15:75661719-75748124   | -0.187101 | 0.999791 |
| XLOC_015064 | XLOC_015064 | KIF15                      | chr3:44803208-44894748    | -0.187039 | 0.999791 |
| XLOC_000060 | XLOC_000060 | CAMTA1                     | chr1:6845383-7829766      | -0.186991 | 0.999791 |
| XLOC_018650 | XLOC_018650 | GFOD1                      | chr6:13363586-13487869    | -0.186986 | 0.999791 |
| XLOC_007275 | XLOC_007275 | PAQR5                      | chr15:69591293-69699976   | -0.186955 | 0.999791 |
| XLOC_005144 | XLOC_005144 | ACADS                      | chr12:121163570-121177811 | -0.186839 | 0.999791 |
| XLOC_018408 | XLOC_018408 | PNRC1                      | chr6:89790428-89794879    | -0.186835 | 0.999791 |
| XLOC_017217 | XLOC_017217 | RASGRF2                    | chr5:80256507-81047072    | -0.186717 | 1        |
| XLOC_001566 | XLOC_001566 | FAM151A                    | chr1:55013806-55100417    | -0.186655 | 1        |
| XLOC_013631 | XLOC_013631 | EPB41L1                    | chr20:34679425-34820721   | -0.186653 | 0.999791 |
| XLOC_004176 | XLOC_004176 | C1QTNF4                    | chr11:47611215-47615961   | -0.186616 | 0.999791 |
| XLOC_015887 | XLOC_015887 | TMEM39A                    | chr3:119147806-119182529  | -0.1865   | 0.999791 |
| XLOC_023627 | XLOC_023627 | DDX26B                     | chrX:134654554-134716460  | -0.186411 | 0.999791 |
| XLOC_009805 | XLOC_009805 | SCRN2                      | chr17:45908992-45918699   | -0.186262 | 0.999791 |
| XLOC_020363 | XLOC_020363 | ZDHHC4                     | chr7:6617064-6628610      | -0.186221 | 0.999791 |
| XLOC_013690 | XLOC_013690 | UBE2C                      | chr20:44441254-44445596   | -0.186193 | 0.999791 |
| XLOC_005252 | XLOC_005252 | SPSB2                      | chr12:6976583-6982521     | -0.186179 | 0.999791 |
| XLOC_014228 | XLOC_014228 | DIP2A                      | chr21:47878861-47989926   | -0.186157 | 0.999791 |
| XLOC_004438 | XLOC_004438 | PRCP                       | chr11:82535408-82611557   | -0.186105 | 0.999791 |
| XLOC_003654 | XLOC_003654 | KDM2A                      | chr11:66886739-67025550   | -0.186072 | 0.999791 |
| XLOC_012156 | XLOC_012156 | LOC100129726               | chr2:43454349-43455994    | -0.18596  | 1        |
| XLOC_013949 | XLOC_013949 | SCAND1                     | chr20:34541538-34543281   | -0.185925 | 0.999791 |
| XLOC_005148 | XLOC_005148 | RNF34                      | chr12:121837885-121862155 | -0.185905 | 0.999791 |
| XLOC_016426 | XLOC_016426 | HERC3                      | chr4:89513573-89629693    | -0.185868 | 0.999791 |
| XLOC_010062 | XLOC_010062 | WDR45B                     | chr17:80572437-80606411   | -0.185847 | 0.999791 |
| XLOC_021382 | XLOC_021382 | EZH2                       | chr7:148504463-148581441  | -0.18578  | 0.999791 |
| XLOC_016928 | XLOC_016928 | PGRMC2                     | chr4:129190391-129209984  | -0.185595 | 0.999791 |
| XLOC_007248 | XLOC_007248 | SNX22                      | chr15:64443915-64455354   | -0.185575 | 0.999791 |
| XLOC_010051 | XLOC_010051 | STRA13                     | chr17:79976578-79980785   | -0.18555  | 0.999791 |
| XLOC_014114 | XLOC_014114 | MIR155,MIR155HG            | chr21:26934456-26947480   | -0.185125 | 0.999791 |
| XLOC_005306 | XLOC_005306 | TAS2R20                    | chr12:10998447-11328619   | -0.184953 | 1        |
| XLOC_020526 | XLOC_020526 | STAG3L4                    | chr7:66767624-66786513    | -0.184922 | 0.999791 |
| XLOC_015825 | XLOC_015825 | GBE1                       | chr3:81538849-81810950    | -0.184852 | 0.999791 |
| XLOC_010797 | XLOC_010797 | MLL4                       | chr19:36208920-36229779   | -0.184845 | 0.999791 |
| XLOC_000208 | XLOC_000208 | RPS6KA1                    | chr1:26856248-26901520    | -0.184813 | 0.999791 |
| XLOC_002622 | XLOC_002622 | PGAM1                      | chr10:99186026-99193198   | -0.184581 | 0.999791 |
| XLOC_010889 | XLOC_010889 | CD79A                      | chr19:42381189-42385439   | -0.184555 | 0.999791 |
| XLOC_000784 | XLOC_000784 | PEAR1                      | chr1:156863522-156886226  | -0.184478 | 0.999791 |
| XLOC_008822 | XLOC_008822 | TNFSF12,TNFSF12-TNFSF13,TN | chr17:7452374-7464925     | -0.184463 | 0.999791 |
| XLOC_016185 | XLOC_016185 | HTT                        | chr4:3076407-3245687      | -0.184458 | 0.999791 |
| XLOC_006269 | XLOC_006269 | ARHGEF40                   | chr14:21538526-21558036   | -0.184454 | 0.999791 |



|             |             |              |                           |           |          |
|-------------|-------------|--------------|---------------------------|-----------|----------|
| XLOC_017649 | XLOC_017649 | ARL15        | chr5:53180613-53606403    | -0.184376 | 0.999791 |
| XLOC_006804 | XLOC_006804 | SAV1         | chr14:51100297-51135071   | -0.184283 | 0.999791 |
| XLOC_004252 | XLOC_004252 | TMEM258      | chr11:61556601-61560085   | -0.184279 | 0.999791 |
| XLOC_000304 | XLOC_000304 | RLF          | chr1:40627040-40706593    | -0.184232 | 0.999791 |
| XLOC_020381 | XLOC_020381 | TSPAN13      | chr7:16793350-16824161    | -0.184157 | 0.999791 |
| XLOC_001257 | XLOC_001257 | CTNNBIP1     | chr1:99083333-9970316     | -0.184147 | 0.999791 |
| XLOC_023744 | XLOC_023744 | LOC389906    | chrX:3735575-3761935      | -0.184083 | 0.999791 |
| XLOC_011868 | XLOC_011868 | FAM71E1      | chr19:50970044-50986608   | -0.183985 | 0.999791 |
| XLOC_012261 | XLOC_012261 | POLE4        | chr2:75185774-75196859    | -0.18392  | 0.999791 |
| XLOC_019004 | XLOC_019004 | MMS22L       | chr6:97372495-97862283    | -0.18391  | 0.999791 |
| XLOC_011783 | XLOC_011783 | PRKD2        | chr19:47150868-47220384   | -0.183771 | 0.999791 |
| XLOC_009286 | XLOC_009286 | MYO15B       | chr17:73584138-73663269   | -0.18376  | 0.999791 |
| XLOC_003221 | XLOC_003221 | B4GALNT4     | chr11:369794-382117       | -0.183587 | 0.999791 |
| XLOC_014259 | XLOC_014259 | LTN1         | chr21:30300465-30365277   | -0.183442 | 0.999791 |
| XLOC_007293 | XLOC_007293 | CD276        | chr15:73976621-74006859   | -0.183419 | 0.999791 |
| XLOC_015590 | XLOC_015590 | ZFYVE20      | chr3:15111579-15140655    | -0.183404 | 0.999791 |
| XLOC_022000 | XLOC_022000 | PLAG1        | chr8:57073467-57123859    | -0.183373 | 0.999791 |
| XLOC_007180 | XLOC_007180 | PDIA3        | chr15:44038589-44094769   | -0.183323 | 0.999791 |
| XLOC_002583 | XLOC_002583 | IFIT1        | chr10:91152302-91166244   | -0.183303 | 1        |
| XLOC_002244 | XLOC_002244 | EGLN1        | chr1:231499496-231560790  | -0.183292 | 0.999791 |
| XLOC_005227 | XLOC_005227 | FOXN1        | chr12:2945981-2998691     | -0.183292 | 0.999791 |
| XLOC_003565 | XLOC_003565 | TTC9C        | chr11:62495951-62506108   | -0.183225 | 0.999791 |
| XLOC_009925 | XLOC_009925 | AXIN2        | chr17:63524682-63557740   | -0.183191 | 0.999791 |
| XLOC_022190 | XLOC_022190 | ZFAT         | chr8:135490030-135725292  | -0.182944 | 0.999791 |
| XLOC_005776 | XLOC_005776 | NCOR2        | chr12:124808956-125052010 | -0.182913 | 0.999791 |
| XLOC_010544 | XLOC_010544 | EVISL        | chr19:7895160-7929862     | -0.182831 | 0.999791 |
| XLOC_006777 | XLOC_006777 | FOXA1        | chr14:38058756-38064325   | -0.182771 | 0.999791 |
| XLOC_008862 | XLOC_008862 | ARHGAP44     | chr17:12692828-12921381   | -0.182619 | 0.999791 |
| XLOC_020868 | XLOC_020868 | PRKAG2-AS1   | chr7:151253200-151576308  | -0.182607 | 0.999791 |
| XLOC_018237 | XLOC_018237 | RING1        | chr6:33176285-33180499    | -0.1826   | 0.999791 |
| XLOC_009327 | XLOC_009327 | RNF213       | chr17:78234659-78411884   | -0.182395 | 0.999791 |
| XLOC_010913 | XLOC_010913 | ZNF223       | chr19:44556163-44572142   | -0.182298 | 0.999791 |
| XLOC_002792 | XLOC_002792 | KLF6         | chr10:3818187-3827473     | -0.182297 | 0.999791 |
| XLOC_022166 | XLOC_022166 | TMEM65       | chr8:125323158-125384940  | -0.182215 | 0.999791 |
| XLOC_011793 | XLOC_011793 | MEIS3        | chr19:47906374-47922785   | -0.182056 | 0.999791 |
| XLOC_008694 | XLOC_008694 | PKD1L2       | chr16:81134483-81253975   | -0.182009 | 1        |
| XLOC_001341 | XLOC_001341 | WNT4         | chr1:22443797-22469519    | -0.1817   | 0.999791 |
| XLOC_011768 | XLOC_011768 | IRF2BP1      | chr19:46386865-46389376   | -0.181698 | 0.999791 |
| XLOC_023088 | XLOC_023088 | ST6GALNAC6   | chr9:130647600-130661871  | -0.18145  | 0.999791 |
| XLOC_006922 | XLOC_006922 | SEL1L        | chr14:81937890-82000205   | -0.181423 | 0.999791 |
| XLOC_001562 | XLOC_001562 | TMEM59       | chr1:54497348-54519111    | -0.181344 | 0.999791 |
| XLOC_010701 | XLOC_010701 | KXD1         | chr19:18668571-18680197   | -0.181285 | 0.999791 |
| XLOC_014979 | XLOC_014979 | KAT2B        | chr3:20081523-20195896    | -0.180909 | 0.999791 |
| XLOC_018342 | XLOC_018342 | C6orf1141    | chr6:49518112-49519808    | -0.180868 | 0.999791 |
| XLOC_012741 | XLOC_012741 | GPC1         | chr2:241375114-241407495  | -0.180462 | 0.999791 |
| XLOC_023956 | XLOC_023956 | TAF9B        | chrX:77385244-77395179    | -0.180434 | 0.999791 |
| XLOC_011332 | XLOC_011332 | C19orf10     | chr19:4657556-46700415    | -0.180415 | 0.999791 |
| XLOC_015966 | XLOC_015966 | STAG1        | chr3:136055998-136471245  | -0.180316 | 0.999791 |
| XLOC_002069 | XLOC_002069 | SMG7-AS1     | chr1:183430010-183441117  | -0.180312 | 1        |
| XLOC_001367 | XLOC_001367 | LOC646471    | chr1:26146396-26159433    | -0.180269 | 1        |
| XLOC_014403 | XLOC_014403 | DGCR6        | chr22:18893735-18899601   | -0.180046 | 0.999791 |
| XLOC_004936 | XLOC_004936 | LRP1         | chr12:57522281-57607125   | -0.179991 | 0.999791 |
| XLOC_005423 | XLOC_005423 | RND1         | chr12:49250915-49259653   | -0.179937 | 0.999791 |
| XLOC_021805 | XLOC_021805 | MFSD3        | chr8:145734551-145736589  | -0.179917 | 0.999791 |
| XLOC_012091 | XLOC_012091 | TMEM214      | chr2:27255773-27264565    | -0.179884 | 0.999791 |
| XLOC_004975 | XLOC_004975 | DYRK2        | chr12:68042511-68056444   | -0.179869 | 0.999791 |
| XLOC_017437 | XLOC_017437 | SAP30L       | chr5:153825516-153840613  | -0.179447 | 0.999791 |
| XLOC_004827 | XLOC_004827 | TROAP        | chr12:49716970-49725514   | -0.179423 | 0.999791 |
| XLOC_013549 | XLOC_013549 | LOC100270804 | chr20:18768614-18776709   | -0.179311 | 0.999791 |
| XLOC_021686 | XLOC_021686 | CPQ          | chr8:97657498-98155722    | -0.17924  | 0.999791 |
| XLOC_006415 | XLOC_006415 | EXD2         | chr14:69658193-69710737   | -0.179239 | 0.999791 |
| XLOC_010895 | XLOC_010895 | PRR19        | chr19:42801184-42814973   | -0.179235 | 0.999791 |
| XLOC_002002 | XLOC_002002 | GPR161       | chr1:168048779-168106905  | -0.179177 | 0.999791 |
| XLOC_013231 | XLOC_013231 | DLX2         | chr2:172964165-172967478  | -0.179173 | 0.999791 |
| XLOC_006025 | XLOC_006025 | LATS2        | chr13:21547175-21635722   | -0.179032 | 0.999791 |
| XLOC_023837 | XLOC_023837 | ZNF630       | chrX:47917566-47931025    | -0.178961 | 0.999791 |
| XLOC_015012 | XLOC_015012 | GOLGA4       | chr3:37284681-37408370    | -0.178946 | 0.999791 |
| XLOC_018271 | XLOC_018271 | C6orf89      | chr6:36853639-36896740    | -0.178935 | 0.999791 |
| XLOC_009103 | XLOC_009103 | TMUB2        | chr17:42264353-42269099   | -0.178904 | 0.999791 |
| XLOC_010710 | XLOC_010710 | SLC25A42     | chr19:19174802-19223841   | -0.178893 | 0.999791 |
| XLOC_015769 | XLOC_015769 | DCP1A        | chr3:53317444-53381654    | -0.178892 | 0.999791 |
| XLOC_021185 | XLOC_021185 | BAIAP2L1     | chr7:97910978-98030427    | -0.178867 | 0.999791 |
| XLOC_002775 | XLOC_002775 | ZNF511       | chr10:135092133-135126666 | -0.178781 | 0.999791 |
| XLOC_010015 | XLOC_010015 | CBX4         | chr17:77806954-77813213   | -0.178561 | 0.999791 |
| XLOC_021963 | XLOC_021963 | WHSC1L1      | chr8:38132560-38239790    | -0.178527 | 0.999791 |
| XLOC_010190 | XLOC_010190 | C18orf25     | chr18:43753987-43846955   | -0.178506 | 0.999791 |
| XLOC_022569 | XLOC_022569 | SLC2A8       | chr9:130159416-130170170  | -0.178375 | 0.999791 |
| XLOC_018176 | XLOC_018176 | C6orf136     | chr6:30614815-30640830    | -0.178343 | 0.999791 |
| XLOC_001477 | XLOC_001477 | GPCAL4       | chr1:40144644-40157089    | -0.178247 | 0.999791 |

|             |             |                     |                           |           |          |
|-------------|-------------|---------------------|---------------------------|-----------|----------|
| XLOC_001338 | XLOC_001338 | RAP1GAP             | chr1:21922707-21995856    | -0.178217 | 0.999791 |
| XLOC_013036 | XLOC_013036 | LOC654342           | chr2:91824708-91847975    | -0.178171 | 0.999791 |
| XLOC_014491 | XLOC_014491 | KREMEN1             | chr22:29469065-29564321   | -0.178055 | 0.999791 |
| XLOC_011755 | XLOC_011755 | RTN2                | chr19:45988545-46000313   | -0.177955 | 0.999791 |
| XLOC_009602 | XLOC_009602 | EVI2B               | chr17:29421944-29704695   | -0.177788 | 1        |
| XLOC_013329 | XLOC_013329 | FZD5                | chr2:208627309-208634143  | -0.17759  | 0.999791 |
| XLOC_003952 | XLOC_003952 | PIDD                | chr11:799178-805250       | -0.177568 | 0.999791 |
| XLOC_004915 | XLOC_004915 | CDK2                | chr12:56360555-56366568   | -0.177504 | 0.999791 |
| XLOC_022940 | XLOC_022940 | BICD2               | chr9:95473644-95527083    | -0.177478 | 0.999791 |
| XLOC_017559 | XLOC_017559 | LOC728613           | chr5:1597671-1634120      | -0.177442 | 0.999791 |
| XLOC_003726 | XLOC_003726 | ACER3               | chr11:76571916-76734850   | -0.177401 | 0.999791 |
| XLOC_022840 | XLOC_022840 | SHB                 | chr9:37915894-38069210    | -0.177399 | 0.999791 |
| XLOC_015669 | XLOC_015669 | ALS2CL              | chr3:46710484-46735194    | -0.177368 | 0.999791 |
| XLOC_022248 | XLOC_022248 | C8orf82,LRRC24      | chr8:145743348-145754458  | -0.177236 | 0.999791 |
| XLOC_011041 | XLOC_011041 | PTOV1               | chr19:50341902-50363999   | -0.177205 | 0.999791 |
| XLOC_009291 | XLOC_009291 | UNK                 | chr17:73780919-73821886   | -0.176953 | 0.999791 |
| XLOC_021160 | XLOC_021160 | CDK6                | chr7:92234234-92465941    | -0.176871 | 0.999791 |
| XLOC_004548 | XLOC_004548 | LOC100652768        | chr11:117049938-117075508 | -0.176791 | 0.999791 |
| XLOC_010483 | XLOC_010483 | FZR1                | chr19:3506294-3536755     | -0.176766 | 0.999791 |
| XLOC_009886 | XLOC_009886 | HEATR6              | chr17:58120551-58156292   | -0.176764 | 0.999791 |
| XLOC_007966 | XLOC_007966 | COQ7                | chr16:19078916-19091417   | -0.176715 | 0.999791 |
| XLOC_013787 | XLOC_013787 | SLC2A4RG            | chr20:62371210-62436856   | -0.176626 | 0.999791 |
| XLOC_000744 | XLOC_000744 | CKS1B               | chr1:154947117-154951725  | -0.176538 | 0.999791 |
| XLOC_004168 | XLOC_004168 | PACSIN3             | chr11:47199072-47208010   | -0.176503 | 0.999791 |
| XLOC_004067 | XLOC_004067 | LOC644656           | chr1:19481102-9482245     | -0.176471 | 0.999791 |
| XLOC_007405 | XLOC_007405 | BLM                 | chr15:91260578-91358686   | -0.176388 | 0.999791 |
| XLOC_021533 | XLOC_021533 | EXTL3               | chr8:28558989-28611207    | -0.176365 | 0.999791 |
| XLOC_002639 | XLOC_002639 | RAB1B               | chr11:66036055-66044963   | -0.176294 | 0.999791 |
| XLOC_004370 | XLOC_004370 | C11orf24            | chr11:68028802-68039469   | -0.176267 | 0.999791 |
| XLOC_013318 | XLOC_013318 | RAPH1               | chr2:204298538-204400058  | -0.176144 | 0.999791 |
| XLOC_022290 | XLOC_022290 | SH3GL2              | chr9:17578952-17797122    | -0.176108 | 1        |
| XLOC_002988 | XLOC_002988 | MICU1               | chr10:74119697-74385949   | -0.175999 | 0.999791 |
| XLOC_006231 | XLOC_006231 | DCUN1D2             | chr13:114110133-114145023 | -0.175825 | 0.999791 |
| XLOC_011279 | XLOC_011279 | MEX3D               | chr19:1554667-1568057     | -0.17582  | 0.999791 |
| XLOC_010866 | XLOC_010866 | SHKBP1              | chr19:41082756-41097305   | -0.175688 | 0.999791 |
| XLOC_020697 | XLOC_020697 | DNAJB9              | chr7:108210188-108215294  | -0.175675 | 0.999791 |
| XLOC_018922 | XLOC_018922 | MCM3                | chr6:52128811-52149679    | -0.175642 | 0.999791 |
| XLOC_008953 | XLOC_008953 | TP53I13             | chr17:27895738-27900175   | -0.175375 | 0.999791 |
| XLOC_001774 | XLOC_001774 | PRKAB2              | chr1:146626684-146644129  | -0.175353 | 0.999791 |
| XLOC_004726 | XLOC_004726 | GABARAPL1           | chr12:10365488-10375724   | -0.175293 | 0.999791 |
| XLOC_017774 | XLOC_017774 | FEM1C               | chr5:114856607-114880591  | -0.175169 | 0.999791 |
| XLOC_023104 | XLOC_023104 | ZER1                | chr9:131486740-131534213  | -0.175167 | 0.999791 |
| XLOC_014860 | XLOC_014860 | CYP2D7P1            | chr22:42536213-42540575   | -0.175094 | 0.999791 |
| XLOC_008683 | XLOC_008683 | CHST6               | chr16:75507021-75528926   | -0.175074 | 1        |
| XLOC_010728 | XLOC_010728 | ZNF493              | chr19:21579920-21610296   | -0.175035 | 0.999791 |
| XLOC_012273 | XLOC_012273 | ELMOD3              | chr2:85581842-85618875    | -0.174904 | 0.999791 |
| XLOC_011500 | XLOC_011500 | AKAP8L              | chr19:15490858-15529833   | -0.174902 | 0.999791 |
| XLOC_017786 | XLOC_017786 | MARCH3              | chr5:126203405-126366440  | -0.174901 | 1        |
| XLOC_008054 | XLOC_008054 | PRR14               | chr16:30662240-30667734   | -0.174727 | 0.999791 |
| XLOC_002605 | XLOC_002605 | PLCE1               | chr10:95753745-96088148   | -0.174683 | 1        |
| XLOC_015442 | XLOC_015442 | GPR160              | chr3:169755734-169803183  | -0.174641 | 0.999791 |
| XLOC_012942 | XLOC_012942 | SERTAD2             | chr2:64858754-64881046    | -0.174612 | 0.999791 |
| XLOC_011442 | XLOC_011442 | ZNF433              | chr19:12125531-12146525   | -0.174611 | 0.999791 |
| XLOC_016407 | XLOC_016407 | THAP9               | chr4:83814604-83841284    | -0.174568 | 0.999791 |
| XLOC_022727 | XLOC_022727 | NFIB                | chr9:14081841-14398982    | -0.174544 | 0.999791 |
| XLOC_005624 | XLOC_005624 | BTG1,LOC256021      | chr12:92378751-92539673   | -0.174412 | 0.999791 |
| XLOC_019139 | XLOC_019139 | RAET1E              | chr6:150139893-150244214  | -0.174383 | 1        |
| XLOC_010261 | XLOC_010261 | HSBP1L1             | chr18:77724581-77730822   | -0.174379 | 0.999791 |
| XLOC_002707 | XLOC_002707 | FAM160B1            | chr10:116581502-116659586 | -0.174348 | 0.999791 |
| XLOC_014499 | XLOC_014499 | UOCR10              | chr22:30163357-30166402   | -0.174302 | 0.999791 |
| XLOC_022242 | XLOC_022242 | SLC39A4             | chr8:145637797-145642273  | -0.174294 | 0.999791 |
| XLOC_021555 | XLOC_021555 | LETM2               | chr8:38243958-38266062    | -0.174293 | 0.999791 |
| XLOC_011838 | XLOC_011838 | SLC17A7             | chr19:49932654-49944808   | -0.174182 | 0.999791 |
| XLOC_017805 | XLOC_017805 | ZCCHC10             | chr5:132332677-132362240  | -0.174033 | 0.999791 |
| XLOC_013660 | XLOC_013660 | LPIN3               | chr20:39969559-39995498   | -0.173996 | 0.999791 |
| XLOC_014478 | XLOC_014478 | CRYBB2P1            | chr22:25844053-25857645   | -0.173943 | 0.999791 |
| XLOC_011257 | XLOC_011257 | FLJ45445            | chr19:197015-202209       | -0.173922 | 1        |
| XLOC_016304 | XLOC_016304 | SLAIN2              | chr4:48343612-48428215    | -0.173874 | 0.999791 |
| XLOC_012869 | XLOC_012869 | EIF2AK2             | chr2:37332283-37384190    | -0.173801 | 0.999791 |
| XLOC_017271 | XLOC_017271 | AP3S1               | chr5:115177618-115249778  | -0.17371  | 0.999791 |
| XLOC_019046 | XLOC_019046 | HDAC2               | chr6:114257319-114292359  | -0.173684 | 0.999791 |
| XLOC_004698 | XLOC_004698 | CLSTN3              | chr12:7282966-7311530     | -0.173683 | 0.999791 |
| XLOC_007623 | XLOC_007623 | PPIB                | chr15:64443915-64455354   | -0.173654 | 0.999791 |
| XLOC_008543 | XLOC_008543 | HERC2P4             | chr16:32162608-32163874   | -0.173377 | 0.999791 |
| XLOC_023953 | XLOC_023953 | ATRX                | chrX:76760355-77041719    | -0.173299 | 0.999791 |
| XLOC_013037 | XLOC_013037 | ANKRD20A8P,LOC90499 | chr2:95421070-95522820    | -0.173191 | 1        |
| XLOC_016913 | XLOC_016913 | PRDM5               | chr4:121615928-121844013  | -0.173147 | 0.999791 |
| XLOC_006394 | XLOC_006394 | SYNE2               | chr14:64319682-64693167   | -0.173143 | 0.999791 |
| XLOC_011803 | XLOC_011803 | LIG1                | chr19:48618702-48673560   | -0.173093 | 0.999791 |

|             |             |              |                           |           |          |
|-------------|-------------|--------------|---------------------------|-----------|----------|
| XLOC_009873 | XLOC_009873 | MTMR4        | chr17:56566892-56595251   | -0.173045 | 0.999791 |
| XLOC_004415 | XLOC_004415 | GDPD5        | chr11:75145684-75236599   | -0.172962 | 0.999791 |
| XLOC_002060 | XLOC_002060 | STX6         | chr1:180942175-180992046  | -0.172927 | 0.999791 |
| XLOC_010364 | XLOC_010364 | ACAA2        | chr18:47309873-47340251   | -0.172845 | 0.999791 |
| XLOC_021765 | XLOC_021765 | PTP4A3       | chr8:142432006-142441620  | -0.172579 | 0.999791 |
| XLOC_004157 | XLOC_004157 | PHF21A       | chr11:45950869-46142985   | -0.172499 | 0.999791 |
| XLOC_007308 | XLOC_007308 | MPI          | chr15:75182409-75190565   | -0.172476 | 0.999791 |
| XLOC_023371 | XLOC_023371 | WAS          | chrX:48542185-48549817    | -0.172455 | 1        |
| XLOC_023020 | XLOC_023020 | CDC26        | chr9:116029289-116037869  | -0.172445 | 0.999791 |
| XLOC_013480 | XLOC_013480 | FAM110A      | chr20:814355-826922       | -0.172379 | 0.999791 |
| XLOC_006411 | XLOC_006411 | ARG2         | chr14:68086578-68141602   | -0.172366 | 0.999791 |
| XLOC_021308 | XLOC_021308 | TNPO3        | chr7:128594233-128695227  | -0.172338 | 0.999791 |
| XLOC_004537 | XLOC_004537 | C11orf71     | chr11:114262169-114271272 | -0.172074 | 0.999791 |
| XLOC_021021 | XLOC_021021 | VPS41        | chr7:38763542-38948800    | -0.171969 | 0.999791 |
| XLOC_021134 | XLOC_021134 | TMEM60       | chr7:77423044-77427747    | -0.171958 | 0.999791 |
| XLOC_018354 | XLOC_018354 | LRRC1        | chr6:53659777-53788919    | -0.171896 | 0.999791 |
| XLOC_015832 | XLOC_015832 | CGGBP1       | chr3:88101099-88207115    | -0.171871 | 0.999791 |
| XLOC_000515 | XLOC_000515 | FNBP1L       | chr1:93913687-94020218    | -0.171816 | 0.999791 |
| XLOC_016990 | XLOC_016990 | GK3P         | chr4:166128769-166244308  | -0.171743 | 1        |
| XLOC_009043 | XLOC_009043 | MSL1         | chr17:38278789-38293045   | -0.17129  | 0.999791 |
| XLOC_006648 | XLOC_006648 | LINC00637    | chr14:104314057-104324386 | -0.171258 | 1        |
| XLOC_004841 | XLOC_004841 | COX14        | chr12:50505763-50514240   | -0.171245 | 0.999791 |
| XLOC_015315 | XLOC_015315 | ABTB1        | chr3:127391780-127399769  | -0.17112  | 0.999791 |
| XLOC_008203 | XLOC_008203 | CYB5B        | chr16:69458497-69500167   | -0.171083 | 0.999791 |
| XLOC_011078 | XLOC_011078 | ZNF613       | chr19:52430687-52449011   | -0.171066 | 0.999791 |
| XLOC_001986 | XLOC_001986 | RGS5         | chr1:163112088-163291581  | -0.17077  | 0.999791 |
| XLOC_009020 | XLOC_009020 | CISD3        | chr17:36886509-36904558   | -0.170765 | 0.999791 |
| XLOC_014411 | XLOC_014411 | TBX1         | chr22:19744225-19771112   | -0.170736 | 0.999791 |
| XLOC_002687 | XLOC_002687 | ADD3         | chr10:111705316-111895323 | -0.170471 | 0.999791 |
| XLOC_000530 | XLOC_000530 | AGL          | chr1:100315639-100389579  | -0.170377 | 0.999791 |
| XLOC_003534 | XLOC_003534 | TMEM132A     | chr11:60691912-60719257   | -0.170339 | 0.999791 |
| XLOC_006832 | XLOC_006832 | C14orf37     | chr14:58470807-58618847   | -0.170263 | 0.999791 |
| XLOC_009422 | XLOC_009422 | PFN1         | chr17:4848944-4852381     | -0.170257 | 0.999791 |
| XLOC_016919 | XLOC_016919 | CCNA2        | chr4:122722471-122745088  | -0.170158 | 0.999791 |
| XLOC_002873 | XLOC_002873 | ZNF438       | chr10:31133564-31320866   | -0.170086 | 0.999791 |
| XLOC_002531 | XLOC_002531 | DLG5-AS1     | chr10:79686569-79689583   | -0.170075 | 0.999791 |
| XLOC_004368 | XLOC_004368 | CHKA         | chr11:67820325-67888858   | -0.170035 | 0.999791 |
| XLOC_004096 | XLOC_004096 | SERGEF       | chr11:17809596-18034637   | -0.169836 | 0.999791 |
| XLOC_023912 | XLOC_023912 | OPHN1        | chrX:67262185-67653299    | -0.169834 | 0.999791 |
| XLOC_020640 | XLOC_020640 | AP4M1        | chr7:99690403-99723128    | -0.169743 | 0.999791 |
| XLOC_002393 | XLOC_002393 | MASTL        | chr10:27443752-27475848   | -0.169707 | 0.999791 |
| XLOC_015530 | XLOC_015530 | MUC20        | chr3:195447752-195464540  | -0.169662 | 1        |
| XLOC_010034 | XLOC_010034 | ACTG1        | chr17:79476996-79479892   | -0.169603 | 0.999791 |
| XLOC_014647 | XLOC_014647 | NCAPH2       | chr22:50946644-50968514   | -0.169602 | 0.999791 |
| XLOC_009279 | XLOC_009279 | NUP85        | chr17:73201596-73231854   | -0.169598 | 0.999791 |
| XLOC_020720 | XLOC_020720 | FEZF1-AS1    | chr7:121941447-121950131  | -0.169443 | 0.999791 |
| XLOC_014597 | XLOC_014597 | SEPT3        | chr22:42372930-42394225   | -0.169391 | 0.999791 |
| XLOC_014090 | XLOC_014090 | SAMD10       | chr20:62605465-62610995   | -0.169304 | 0.999791 |
| XLOC_006934 | XLOC_006934 | SMEK1        | chr14:91923955-91976644   | -0.169213 | 0.999791 |
| XLOC_004144 | XLOC_004144 | COMMD9       | chr11:36293841-36310999   | -0.169189 | 0.999791 |
| XLOC_020438 | XLOC_020438 | BBS9         | chr7:33169151-33645680    | -0.169178 | 0.999791 |
| XLOC_005089 | XLOC_005089 | UBE3B        | chr12:109915427-109974510 | -0.169175 | 0.999791 |
| XLOC_003288 | XLOC_003288 | TRIM22       | chr11:5710816-5732093     | -0.169031 | 1        |
| XLOC_018812 | XLOC_018812 | TAPBP,ZBTB22 | chr6:33267471-33285719    | -0.168978 | 0.999791 |
| XLOC_012994 | XLOC_012994 | PCGF1        | chr2:74724643-74734821    | -0.168955 | 0.999791 |
| XLOC_022887 | XLOC_022887 | C9orf40      | chr9:77561498-77567802    | -0.16891  | 0.999791 |
| XLOC_004330 | XLOC_004330 | CFL1         | chr11:65622284-65625804   | -0.168902 | 0.999791 |
| XLOC_008515 | XLOC_008515 | TBC1D10B     | chr16:30368421-30381522   | -0.168758 | 0.999791 |
| XLOC_014492 | XLOC_014492 | EMID1        | chr22:29601900-29655586   | -0.168709 | 0.999791 |
| XLOC_012598 | XLOC_012598 | NBEAL1       | chr2:203879601-204082717  | -0.168688 | 1        |
| XLOC_020370 | XLOC_020370 | LOC729852    | chr7:7676574-7918851      | -0.168584 | 0.999791 |
| XLOC_005997 | XLOC_005997 | MCF2L        | chr13:113623534-113754053 | -0.168571 | 0.999791 |
| XLOC_015720 | XLOC_015720 | GMPPB        | chr3:49726949-49761384    | -0.168496 | 0.999791 |
| XLOC_020595 | XLOC_020595 | STEAP2       | chr7:89840999-89866992    | -0.16839  | 0.999791 |
| XLOC_009348 | XLOC_009348 | LRRC45       | chr17:79981279-79989027   | -0.168354 | 0.999791 |
| XLOC_013146 | XLOC_013146 | CCDC74B      | chr2:130887195-130902707  | -0.16827  | 0.999791 |
| XLOC_022946 | XLOC_022946 | MIRLET7DHG   | chr9:96938851-96966848    | -0.168213 | 0.999791 |
| XLOC_002203 | XLOC_002203 | TP53BP2      | chr1:223967594-224033674  | -0.168021 | 0.999791 |
| XLOC_016540 | XLOC_016540 | TRIM2        | chr4:154074269-154260474  | -0.167909 | 0.999791 |
| XLOC_001806 | XLOC_001806 | ARNT         | chr1:150782180-150849244  | -0.167908 | 0.999791 |
| XLOC_004629 | XLOC_004629 | ZBTB44       | chr11:130096573-130184607 | -0.167895 | 0.999791 |
| XLOC_002482 | XLOC_002482 | SIRT1        | chr10:69644426-69678147   | -0.167879 | 0.999791 |
| XLOC_007817 | XLOC_007817 | ARHGDI3      | chr16:330605-333003       | -0.16777  | 0.999791 |
| XLOC_012865 | XLOC_012865 | LOC100288911 | chr2:36581891-36582713    | -0.167752 | 0.999791 |
| XLOC_014811 | XLOC_014811 | CARD10       | chr22:37886399-37915210   | -0.167571 | 0.999791 |
| XLOC_017376 | XLOC_017376 | PCDHB8       | chr5:140557370-140560081  | -0.167469 | 0.999791 |
| XLOC_011334 | XLOC_011334 | TICAM1       | chr19:4815935-4831754     | -0.167363 | 0.999791 |
| XLOC_022669 | XLOC_022669 | KIAA1984     | chr9:139690789-139735639  | -0.167245 | 1        |
| XLOC_020341 | XLOC_020341 | NUDT1        | chr7:2281856-2290780      | -0.167132 | 0.999791 |

|             |             |           |                          |           |          |
|-------------|-------------|-----------|--------------------------|-----------|----------|
| XLOC_014081 | XLOC_014081 | HELZ2     | chr20:62189438-62205592  | -0.167123 | 0.999791 |
| XLOC_008322 | XLOC_008322 | FBXL16    | chr16:742499-755825      | -0.167064 | 0.999791 |
| XLOC_011756 | XLOC_011756 | OPA3      | chr19:46031024-46088122  | -0.167044 | 0.999791 |
| XLOC_012128 | XLOC_012128 | YIPF4     | chr2:32502957-32531658   | -0.166958 | 0.999791 |
| XLOC_017512 | XLOC_017512 | RGS14     | chr5:176784843-176799599 | -0.166885 | 0.999791 |
| XLOC_005833 | XLOC_005833 | PAN3      | chr13:28710979-28869475  | -0.166809 | 0.999791 |
| XLOC_012552 | XLOC_012552 | FAM171B   | chr2:187558788-187628512 | -0.166572 | 1        |
| XLOC_015708 | XLOC_015708 | LAMB2     | chr3:49158546-49170599   | -0.166498 | 0.999791 |
| XLOC_021513 | XLOC_021513 | R3HCC1    | chr8:23145611-23153792   | -0.16645  | 0.999791 |
| XLOC_023483 | XLOC_023483 | SLC16A2   | chrX:73641327-73753764   | -0.166314 | 0.999791 |
| XLOC_005265 | XLOC_005265 | SLC2A3    | chr12:8071823-8088892    | -0.166257 | 0.999791 |
| XLOC_022859 | XLOC_022859 | AQP7P1    | chr9:67270214-67289492   | -0.166252 | 1        |
| XLOC_004759 | XLOC_004759 | PLEKHA5   | chr12:19282625-19529333  | -0.166063 | 0.999791 |
| XLOC_012088 | XLOC_012088 | CENPA     | chr2:27008881-27017455   | -0.166021 | 0.999791 |
| XLOC_009652 | XLOC_009652 | PIP4K2B   | chr17:36921943-36956158  | -0.166    | 0.999791 |
| XLOC_001074 | XLOC_001074 | DNAH14    | chr1:225117355-225586996 | -0.165833 | 0.999791 |
| XLOC_006423 | XLOC_006423 | TTC9      | chr14:71108503-71142077  | -0.165803 | 0.999791 |
| XLOC_013140 | XLOC_013140 | SAP130    | chr2:128698790-128784869 | -0.165787 | 0.999791 |
| XLOC_022321 | XLOC_022321 | UBAP1     | chr9:34179002-34329198   | -0.165753 | 0.999791 |
| XLOC_011284 | XLOC_011284 | REXO1     | chr19:1815244-1848452    | -0.165707 | 0.999791 |
| XLOC_015981 | XLOC_015981 | NMNAT3    | chr3:139279022-139396885 | -0.165446 | 0.999791 |
| XLOC_016485 | XLOC_016485 | USP53     | chr4:120133781-120216673 | -0.165357 | 0.999791 |
| XLOC_013755 | XLOC_013755 | CDH4      | chr20:59827481-60515673  | -0.165314 | 1        |
| XLOC_002136 | XLOC_002136 | PIK3C2B   | chr1:204391757-204459474 | -0.165289 | 0.999791 |
| XLOC_001039 | XLOC_001039 | NENF      | chr1:212606228-212619721 | -0.165181 | 0.999791 |
| XLOC_021205 | XLOC_021205 | TAF6      | chr7:99690403-99723128   | -0.165018 | 0.999791 |
| XLOC_023804 | XLOC_023804 | TAB3      | chrX:30845558-30907511   | -0.164929 | 0.999791 |
| XLOC_011355 | XLOC_011355 | SLC25A41  | chr19:6426047-6433790    | -0.164928 | 0.999791 |
| XLOC_010803 | XLOC_010803 | APLP1     | chr19:36359400-36370699  | -0.164895 | 0.999791 |
| XLOC_006505 | XLOC_006505 | IFI27L1   | chr14:94547638-94569060  | -0.16486  | 0.999791 |
| XLOC_014443 | XLOC_014443 | PPIL2     | chr22:22020272-22090071  | -0.16485  | 0.999791 |
| XLOC_008311 | XLOC_008311 | RHBDF1    | chr16:108057-122629      | -0.16483  | 0.999791 |
| XLOC_022246 | XLOC_022246 | FOXH1     | chr8:145691737-145701718 | -0.164693 | 0.999791 |
| XLOC_012353 | XLOC_012353 | NCK2      | chr2:106361519-106510730 | -0.164674 | 0.999791 |
| XLOC_020895 | XLOC_020895 | C7orf50   | chr7:1036622-1177893     | -0.164672 | 0.999791 |
| XLOC_010150 | XLOC_010150 | TTC39C    | chr18:21572736-217115574 | -0.16465  | 0.999791 |
| XLOC_011585 | XLOC_011585 | SLC7A9    | chr19:33321418-33360683  | -0.164644 | 1        |
| XLOC_022516 | XLOC_022516 | RGS3      | chr9:116207008-116360023 | -0.164638 | 0.999791 |
| XLOC_011819 | XLOC_011819 | HSD17B14  | chr19:49316273-49339934  | -0.164607 | 0.999791 |
| XLOC_010967 | XLOC_010967 | PRR24     | chr19:47777658-47778980  | -0.164573 | 0.999791 |
| XLOC_017752 | XLOC_017752 | FLJ35946  | chr5:98104998-98132198   | -0.164527 | 1        |
| XLOC_003940 | XLOC_003940 | HRAS      | chr11:532241-535550      | -0.164413 | 0.999791 |
| XLOC_017714 | XLOC_017714 | MTX3      | chr5:79272538-79287088   | -0.164306 | 0.999791 |
| XLOC_023350 | XLOC_023350 | CDK16     | chrX:47077527-47089394   | -0.164293 | 0.999791 |
| XLOC_007696 | XLOC_007696 | MAN2C1    | chr15:75648132-75660968  | -0.164201 | 0.999791 |
| XLOC_008494 | XLOC_008494 | RABEP2    | chr16:28889808-28936532  | -0.164185 | 0.999791 |
| XLOC_017516 | XLOC_017516 | TMED9     | chr5:177019212-177023099 | -0.164029 | 0.999791 |
| XLOC_013260 | XLOC_013260 | SESTD1    | chr2:179966418-180129350 | -0.163907 | 0.999791 |
| XLOC_022294 | XLOC_022294 | DENND4C   | chr9:19230762-19374137   | -0.163894 | 0.999791 |
| XLOC_011101 | XLOC_011101 | ZNF331    | chr19:54024176-5403523   | -0.163883 | 0.999791 |
| XLOC_002291 | XLOC_002291 | ZNF496    | chr1:247463621-247495045 | -0.163866 | 0.999791 |
| XLOC_018448 | XLOC_018448 | SLC16A10  | chr6:111408780-111544606 | -0.163855 | 0.999791 |
| XLOC_009989 | XLOC_009989 | UBE2O     | chr17:74385612-74449288  | -0.163808 | 0.999791 |
| XLOC_000322 | XLOC_000322 | PIIH      | chr1:43124047-43142429   | -0.163684 | 0.999791 |
| XLOC_010027 | XLOC_010027 | ENTHD2    | chr17:79202076-79212891  | -0.163645 | 0.999791 |
| XLOC_014557 | XLOC_014557 | MAFF      | chr22:38597938-38612517  | -0.163629 | 0.999791 |
| XLOC_008591 | XLOC_008591 | CCDC102A  | chr16:57546089-57570477  | -0.163468 | 0.999791 |
| XLOC_013181 | XLOC_013181 | NEB       | chr2:152341852-152591001 | -0.163464 | 1        |
| XLOC_005229 | XLOC_005229 | PARP11    | chr12:3918026-3982608    | -0.163441 | 0.999791 |
| XLOC_015984 | XLOC_015984 | XRN1      | chr3:142025448-142166853 | -0.163344 | 0.999791 |
| XLOC_001484 | XLOC_001484 | RIMS3     | chr1:41086351-41131324   | -0.163165 | 0.999791 |
| XLOC_022823 | XLOC_022823 | MSMP      | chr9:35749276-35754274   | -0.16315  | 0.999791 |
| XLOC_004396 | XLOC_004396 | STARD10   | chr11:72465773-72504750  | -0.163115 | 0.999791 |
| XLOC_024069 | XLOC_024069 | ELF4      | chrX:129198894-129244688 | -0.163111 | 0.999791 |
| XLOC_022693 | XLOC_022693 | NELFB     | chr9:140149758-140168000 | -0.16296  | 0.999791 |
| XLOC_003040 | XLOC_003040 | LIPA      | chr10:90973325-91011660  | -0.162907 | 0.999791 |
| XLOC_015282 | XLOC_015282 | NDUFB4    | chr3:120315127-120321258 | -0.162822 | 0.999791 |
| XLOC_020917 | XLOC_020917 | ACTB      | chr7:5566778-5570232     | -0.162712 | 0.999791 |
| XLOC_009519 | XLOC_009519 | NCOR1     | chr17:15933407-16118874  | -0.162619 | 0.999791 |
| XLOC_009342 | XLOC_009342 | SLC25A10  | chr17:79679265-79688046  | -0.162603 | 0.999791 |
| XLOC_008969 | XLOC_008969 | RAB11FIP4 | chr17:29718641-29865232  | -0.162542 | 0.999791 |
| XLOC_016559 | XLOC_016559 | RAPGEF2   | chr4:160188997-160281301 | -0.162524 | 0.999791 |
| XLOC_013029 | XLOC_013029 | LOC285074 | chr2:87257797-87303536   | -0.162498 | 0.999791 |
| XLOC_011769 | XLOC_011769 | MYPOP     | chr19:46393280-46405862  | -0.162444 | 0.999791 |
| XLOC_008676 | XLOC_008676 | FA2H      | chr16:74746855-74808729  | -0.162403 | 0.999791 |
| XLOC_012599 | XLOC_012599 | CYP20A1   | chr2:204103163-204170563 | -0.162385 | 0.999791 |
| XLOC_015709 | XLOC_015709 | LAMB2P1   | chr3:49190291-49191834   | -0.16229  | 0.999791 |
| XLOC_009930 | XLOC_009930 | C17orf58  | chr17:65987216-65989765  | -0.162275 | 0.999791 |
| XLOC_007152 | XLOC_007152 | ZFYVE19   | chr15:41060066-41106767  | -0.162213 | 0.999791 |

|             |             |              |                           |           |          |
|-------------|-------------|--------------|---------------------------|-----------|----------|
| XLOC_021162 | XLOC_021162 | SAMD9L       | chr7:92759367-92777680    | -0.162204 | 1        |
| XLOC_011975 | XLOC_011975 | ZNF579       | chr19:56088890-56092211   | -0.162158 | 0.999791 |
| XLOC_018363 | XLOC_018363 | ZNF451       | chr6:56954807-57035098    | -0.161868 | 0.999791 |
| XLOC_008729 | XLOC_008729 | CBFA2T3      | chr16:88941262-89043504   | -0.16176  | 0.999791 |
| XLOC_022247 | XLOC_022247 | RECQL4       | chr8:145736666-145743210  | -0.161703 | 0.999791 |
| XLOC_006945 | XLOC_006945 | BTBD7        | chr14:93703895-93799385   | -0.161681 | 0.999791 |
| XLOC_015327 | XLOC_015327 | H1FX-AS1     | chr3:129033613-129043412  | -0.161611 | 0.999791 |
| XLOC_019144 | XLOC_019144 | ZBTB2        | chr6:151685249-151712677  | -0.161395 | 0.999791 |
| XLOC_021083 | XLOC_021083 | ZNF680       | chr7:63980254-64023505    | -0.161378 | 0.999791 |
| XLOC_017902 | XLOC_017902 | TNIP1        | chr5:150409503-150467221  | -0.161296 | 0.999791 |
| XLOC_003861 | XLOC_003861 | HINFP        | chr11:118992232-119005765 | -0.16127  | 0.999791 |
| XLOC_016128 | XLOC_016128 | ATP13A3      | chr3:194123402-194188968  | -0.161117 | 0.999791 |
| XLOC_018819 | XLOC_018819 | LEMD2        | chr6:33738989-33756906    | -0.161126 | 0.999791 |
| XLOC_000280 | XLOC_000280 | AGO4         | chr1:36273827-36323490    | -0.161083 | 0.999791 |
| XLOC_009753 | XLOC_009753 | COA3         | chr17:40949635-40950743   | -0.160908 | 0.999791 |
| XLOC_021053 | XLOC_021053 | SEPT7P2      | chr7:45763385-45808617    | -0.160885 | 0.999791 |
| XLOC_001892 | XLOC_001892 | RUSC1-AS1    | chr1:155278538-155300909  | -0.160854 | 0.999791 |
| XLOC_015510 | XLOC_015510 | FLJ42393     | chr3:187868993-188608460  | -0.160648 | 1        |
| XLOC_008011 | XLOC_008011 | KDM8         | chr16:27214806-27233089   | -0.160584 | 0.999791 |
| XLOC_006727 | XLOC_006727 | AP1G2_JPH4   | chr14:23980968-24048009   | -0.16045  | 0.999791 |
| XLOC_022505 | XLOC_022505 | UGCG         | chr9:114659205-114695433  | -0.160353 | 0.999791 |
| XLOC_014471 | XLOC_014471 | BCRP3        | chr22:25028881-25055114   | -0.160308 | 1        |
| XLOC_004236 | XLOC_004236 | PATL1        | chr1:59404191-59436511    | -0.160291 | 0.999791 |
| XLOC_005126 | XLOC_005126 | RFC5         | chr12:118454505-118470042 | -0.160287 | 0.999791 |
| XLOC_012258 | XLOC_012258 | DOK1         | chr2:74753774-74784678    | -0.160252 | 0.999791 |
| XLOC_006895 | XLOC_006895 | PROX2        | chr14:75319735-75330537   | -0.160085 | 1        |
| XLOC_014548 | XLOC_014548 | TRIOBP       | chr22:38092994-38172563   | -0.160042 | 0.999791 |
| XLOC_006654 | XLOC_006654 | INF2         | chr14:105155942-105185947 | -0.159793 | 0.999791 |
| XLOC_008161 | XLOC_008161 | CMTM3        | chr16:66637934-66647795   | -0.159762 | 0.999791 |
| XLOC_006027 | XLOC_006027 | ZDHHC20      | chr13:21872263-22033508   | -0.159736 | 0.999791 |
| XLOC_011682 | XLOC_011682 | SERTAD3      | chr19:40946747-40950282   | -0.159734 | 0.999791 |
| XLOC_004104 | XLOC_004104 | SPTY2D1      | chr11:18621350-18656020   | -0.159703 | 0.999791 |
| XLOC_006666 | XLOC_006666 | CRIP2        | chr14:105939274-105946507 | -0.159702 | 0.999791 |
| XLOC_022605 | XLOC_022605 | NTMT1        | chr9:132388434-132404448  | -0.159675 | 0.999791 |
| XLOC_021001 | XLOC_021001 | DPY19L1P1    | chr7:32535175-32758780    | -0.159647 | 0.999791 |
| XLOC_005321 | XLOC_005321 | DUSP16       | chr12:12626215-127115448  | -0.159586 | 0.999791 |
| XLOC_001753 | XLOC_001753 | NOTCH2       | chr1:120454175-120612317  | -0.159574 | 0.999791 |
| XLOC_012828 | XLOC_012828 | KIF3C        | chr2:26149454-26205443    | -0.159487 | 0.999791 |
| XLOC_018687 | XLOC_018687 | HIST1H3F     | chr6:26250369-26250835    | -0.159374 | 0.999791 |
| XLOC_015946 | XLOC_015946 | PLXND1       | chr3:129274055-129325582  | -0.159217 | 0.999791 |
| XLOC_014223 | XLOC_014223 | COL6A1       | chr21:47401662-47424963   | -0.159112 | 0.999791 |
| XLOC_022011 | XLOC_022011 | GGH          | chr8:63927638-63951610    | -0.159104 | 0.999791 |
| XLOC_020655 | XLOC_020655 | GNB2         | chr7:100271362-100276792  | -0.159062 | 0.999791 |
| XLOC_012409 | XLOC_012409 | EPB41L5      | chr2:120770603-120936697  | -0.158973 | 0.999791 |
| XLOC_006359 | XLOC_006359 | CDKN3        | chr14:54863672-54886934   | -0.158928 | 0.999791 |
| XLOC_023136 | XLOC_023136 | SURF4        | chr9:136228339-136242970  | -0.158909 | 0.999791 |
| XLOC_018930 | XLOC_018930 | ICK          | chr6:52866097-52926600    | -0.158846 | 0.999791 |
| XLOC_007168 | XLOC_007168 | CAPN3        | chr15:42651697-42704515   | -0.158808 | 0.999791 |
| XLOC_018320 | XLOC_018320 | LOC100132354 | chr6:43858764-43905944    | -0.158691 | 1        |
| XLOC_016953 | XLOC_016953 | ZNF827       | chr4:146681887-146859607  | -0.158656 | 1        |
| XLOC_003623 | XLOC_003623 | SIPA1        | chr1:165405577-65418391   | -0.158652 | 0.999791 |
| XLOC_014464 | XLOC_014464 | SUSD2        | chr22:24577443-24585074   | -0.158625 | 1        |
| XLOC_000442 | XLOC_000442 | PDE4B        | chr1:66258192-66840262    | -0.158612 | 0.999791 |
| XLOC_013382 | XLOC_013382 | CHPF         | chr2:220403668-220408487  | -0.15856  | 0.999791 |
| XLOC_007408 | XLOC_007408 | MAN2A2       | chr15:91447419-91465815   | -0.1585   | 0.999791 |
| XLOC_015593 | XLOC_015593 | METTL6       | chr3:15451376-15469042    | -0.158457 | 0.999791 |
| XLOC_008468 | XLOC_008468 | CDR2         | chr16:22357256-22385938   | -0.158323 | 0.999791 |
| XLOC_016267 | XLOC_016267 | C4orf52      | chr4:25915813-25931501    | -0.158223 | 0.999791 |
| XLOC_024097 | XLOC_024097 | FAM122B      | chrX:133903595-133988641  | -0.158209 | 0.999791 |
| XLOC_000052 | XLOC_000052 | KCNAB2       | chr1:5922869-6161253      | -0.158203 | 0.999791 |
| XLOC_020551 | XLOC_020551 | GTF2IRD1     | chr7:73868119-74016920    | -0.158078 | 0.999791 |
| XLOC_001915 | XLOC_001915 | CRABP2       | chr1:156669399-156675608  | -0.158052 | 0.999791 |
| XLOC_001272 | XLOC_001272 | DHRS3        | chr1:12627938-12677820    | -0.158051 | 1        |
| XLOC_015654 | XLOC_015654 | ANO10        | chr3:43407817-43663560    | -0.158032 | 0.999791 |
| XLOC_012246 | XLOC_012246 | ACTG2        | chr2:74120092-74146780    | -0.158028 | 1        |
| XLOC_014904 | XLOC_014904 | MAPK11       | chr22:50702141-50708779   | -0.157849 | 0.999791 |
| XLOC_004425 | XLOC_004425 | RSF1         | chr11:77377273-77531880   | -0.157671 | 0.999791 |
| XLOC_013610 | XLOC_013610 | ZNF341       | chr20:32319807-32380075   | -0.157601 | 0.999791 |
| XLOC_005847 | XLOC_005847 | PDS5B        | chr13:33160563-33352158   | -0.157443 | 0.999791 |
| XLOC_005195 | XLOC_005195 | ULK1         | chr12:132379278-132407707 | -0.157366 | 0.999791 |
| XLOC_004451 | XLOC_004451 | CTSC         | chr11:88026759-88070941   | -0.157354 | 0.999791 |
| XLOC_014433 | XLOC_014433 | BCRP2        | chr22:21457304-21476575   | -0.157323 | 0.999791 |
| XLOC_017274 | XLOC_017274 | COMMD10      | chr5:115420726-115628978  | -0.157321 | 0.999791 |
| XLOC_015334 | XLOC_015334 | COL6A4P2     | chr3:129931662-129992649  | -0.157229 | 1        |
| XLOC_009970 | XLOC_009970 | CASKIN2      | chr17:73452663-73511627   | -0.157202 | 0.999791 |
| XLOC_014930 | XLOC_014930 | SETD5        | chr3:9439402-9519838      | -0.157155 | 0.999791 |
| XLOC_020802 | XLOC_020802 | EPHB6        | chr7:142552791-142568847  | -0.157153 | 1        |
| XLOC_005159 | XLOC_005159 | KNTC1        | chr12:123011808-123110947 | -0.157033 | 0.999791 |
| XLOC_010949 | XLOC_010949 | QPCTL        | chr19:46195740-46207248   | -0.156786 | 0.999791 |

|             |             |              |                           |           |          |
|-------------|-------------|--------------|---------------------------|-----------|----------|
| XLOC_008170 | XLOC_008170 | NOL3         | chr16:67204399-67217883   | -0.156711 | 0.999791 |
| XLOC_008634 | XLOC_008634 | LCAT,SLC12A4 | chr16:67973786-68002597   | -0.156689 | 0.999791 |
| XLOC_008964 | XLOC_008964 | ATAD5        | chr17:29159022-29222295   | -0.1566   | 0.999791 |
| XLOC_001521 | XLOC_001521 | PIK3R3       | chr1:46505811-46598708    | -0.156599 | 0.999791 |
| XLOC_010037 | XLOC_010037 | PDE6G        | chr17:79617488-79623607   | -0.156493 | 1        |
| XLOC_005142 | XLOC_005142 | MLEC         | chr12:121124948-121139667 | -0.156451 | 0.999791 |
| XLOC_002120 | XLOC_002120 | CYB5R1       | chr1:202931000-202936404  | -0.156435 | 0.999791 |
| XLOC_016978 | XLOC_016978 | C4orf46      | chr4:159587830-159593202  | -0.156397 | 0.999791 |
| XLOC_008846 | XLOC_008846 | RANGRF       | chr17:8191081-8198170     | -0.156293 | 0.999791 |
| XLOC_009964 | XLOC_009964 | HN1          | chr17:73131343-73150775   | -0.156275 | 0.999791 |
| XLOC_022908 | XLOC_022908 | C9orf153     | chr9:88835179-88874572    | -0.15626  | 1        |
| XLOC_000558 | XLOC_000558 | TMEM167B     | chr1:109633402-109639554  | -0.156184 | 0.999791 |
| XLOC_000557 | XLOC_000557 | GPSM2        | chr1:109419602-109506111  | -0.156127 | 0.999791 |
| XLOC_016262 | XLOC_016262 | LOC285540    | chr4:25162293-25200127    | -0.156051 | 1        |
| XLOC_018064 | XLOC_018064 | MYLIP        | chr6:16129316-16148478    | -0.155993 | 0.999791 |
| XLOC_007145 | XLOC_007145 | BAHD1        | chr15:40733410-40760441   | -0.155916 | 0.999791 |
| XLOC_022799 | XLOC_022799 | ENHO         | chr9:34521039-34523037    | -0.155909 | 0.999791 |
| XLOC_011680 | XLOC_011680 | PRX          | chr19:40899670-40919271   | -0.155762 | 0.999791 |
| XLOC_017939 | XLOC_017939 | NUDCD2       | chr5:162880585-162887143  | -0.155758 | 0.999791 |
| XLOC_000195 | XLOC_000195 | MTFR1L       | chr1:26146396-26159433    | -0.155642 | 0.999791 |
| XLOC_022849 | XLOC_022849 | MGC21881     | chr9:41952398-41955076    | -0.155601 | 0.999791 |
| XLOC_008121 | XLOC_008121 | MT1M         | chr16:56666533-56667898   | -0.155562 | 0.999791 |
| XLOC_010496 | XLOC_010496 | CCDC94       | chr19:4247110-4269085     | -0.155537 | 0.999791 |
| XLOC_015311 | XLOC_015311 | CHCHD6       | chr3:126423062-126679263  | -0.155306 | 0.999791 |
| XLOC_006306 | XLOC_006306 | KHNYN        | chr14:24899140-24912007   | -0.155256 | 0.999791 |
| XLOC_012320 | XLOC_012320 | COX5B        | chr2:98262520-98264657    | -0.155252 | 0.999791 |
| XLOC_018385 | XLOC_018385 | IRAK1BP1     | chr6:79577188-79608320    | -0.15517  | 0.999791 |
| XLOC_022333 | XLOC_022333 | TESK1        | chr9:35605280-35618424    | -0.155147 | 0.999791 |
| XLOC_001076 | XLOC_001076 | EPHX1        | chr1:225997796-226070420  | -0.155098 | 0.999791 |
| XLOC_004734 | XLOC_004734 | LOH12CR1     | chr12:12510019-12619838   | -0.154957 | 0.999791 |
| XLOC_005000 | XLOC_005000 | ZDHHC17      | chr12:77157853-77247474   | -0.154942 | 0.999791 |
| XLOC_002439 | XLOC_002439 | FAM35DP      | chr10:47379719-47421238   | -0.154941 | 1        |
| XLOC_011398 | XLOC_011398 | ZNF699       | chr19:9405985-9415795     | -0.154907 | 1        |
| XLOC_009899 | XLOC_009899 | LIMD2        | chr17:61699800-61777519   | -0.15483  | 0.999791 |
| XLOC_009344 | XLOC_009344 | ANAPC11      | chr17:79849598-79858363   | -0.154807 | 0.999791 |
| XLOC_002787 | XLOC_002787 | ID1I         | chr10:1064846-1095061     | -0.15474  | 0.999791 |
| XLOC_004621 | XLOC_004621 | ETS1         | chr11:128328655-128457453 | -0.154691 | 0.999791 |
| XLOC_008300 | XLOC_008300 | CDK10        | chr16:89753075-89768121   | -0.154687 | 0.999791 |
| XLOC_005817 | XLOC_005817 | ATP12A       | chr13:25254548-25285923   | -0.154644 | 1        |
| XLOC_014907 | XLOC_014907 | SBF1         | chr22:50781745-50913464   | -0.154539 | 0.999791 |
| XLOC_013691 | XLOC_013691 | SNX21        | chr20:44462469-44486048   | -0.154354 | 0.999791 |
| XLOC_003116 | XLOC_003116 | ARL3         | chr10:104433483-104474190 | -0.154321 | 0.999791 |
| XLOC_022582 | XLOC_022582 | DNM1         | chr9:130928343-131017527  | -0.154292 | 0.999791 |
| XLOC_002646 | XLOC_002646 | SEMA4G       | chr10:102732285-102747272 | -0.154282 | 0.999791 |
| XLOC_001322 | XLOC_001322 | CAPZB        | chr1:19665266-19812066    | -0.154279 | 0.999791 |
| XLOC_016461 | XLOC_016461 | OSTC         | chr4:109571740-109588978  | -0.154278 | 0.999791 |
| XLOC_009527 | XLOC_009527 | FLCN         | chr17:17115526-17140502   | -0.154217 | 0.999791 |
| XLOC_016529 | XLOC_016529 | TMEM184C     | chr4:148538538-148556672  | -0.154188 | 0.999791 |
| XLOC_017240 | XLOC_017240 | RFESD        | chr5:94982480-94992849    | -0.154115 | 0.999791 |
| XLOC_011486 | XLOC_011486 | DNAJB1       | chr19:14625581-14629201   | -0.1541   | 0.999791 |
| XLOC_020850 | XLOC_020850 | ZNF775       | chr7:150076405-150095719  | -0.154074 | 0.999791 |
| XLOC_001293 | XLOC_001293 | ZBTB17       | chr1:16268363-16302627    | -0.153723 | 0.999791 |
| XLOC_008069 | XLOC_008069 | BCKDK        | chr16:31119614-31124112   | -0.153703 | 0.999791 |
| XLOC_005600 | XLOC_005600 | PPP1R12A     | chr12:80167342-80329235   | -0.153676 | 0.999791 |
| XLOC_022449 | XLOC_022449 | ZNF169       | chr9:97021577-97065291    | -0.153629 | 0.999791 |
| XLOC_022065 | XLOC_022065 | SNX16        | chr8:82711817-82754521    | -0.153458 | 0.999791 |
| XLOC_012662 | XLOC_012662 | DNAJB2       | chr2:220144039-220115622  | -0.153352 | 0.999791 |
| XLOC_012657 | XLOC_012657 | FAM134A      | chr2:220042938-220050197  | -0.153332 | 0.999791 |
| XLOC_006431 | XLOC_006431 | PSEN1        | chr14:73603142-73690399   | -0.153254 | 0.999791 |
| XLOC_022332 | XLOC_022332 | RUSC2        | chr9:35490006-35563896    | -0.153142 | 0.999791 |
| XLOC_006000 | XLOC_006000 | PROZ         | chr13:113812967-113826698 | -0.153136 | 1        |
| XLOC_015583 | XLOC_015583 | NUP210       | chr3:13357736-13461809    | -0.153108 | 0.999791 |
| XLOC_017440 | XLOC_017440 | MRPL22       | chr5:154320632-154348971  | -0.153037 | 0.999791 |
| XLOC_006809 | XLOC_006809 | FRMD6-AS1    | chr14:51921229-52197444   | -0.152929 | 1        |
| XLOC_023625 | XLOC_023625 | ZNF449       | chrX:134478695-134497338  | -0.152864 | 0.999791 |
| XLOC_009807 | XLOC_009807 | PRR15L       | chr17:46029333-46035243   | -0.152859 | 1        |
| XLOC_014724 | XLOC_014724 | GSTT1        | chr22:24376138-24384284   | -0.152816 | 0.999791 |
| XLOC_010445 | XLOC_010445 | GPX4         | chr19:1103935-1106787     | -0.152671 | 0.999791 |
| XLOC_001559 | XLOC_001559 | YIPF1        | chr1:54317391-54355487    | -0.152555 | 0.999791 |
| XLOC_001139 | XLOC_001139 | DES12        | chr1:244816351-244872334  | -0.152546 | 0.999791 |
| XLOC_000071 | XLOC_000071 | PIK3CD       | chr1:9711789-9884550      | -0.152478 | 0.999791 |
| XLOC_012867 | XLOC_012867 | STRN         | chr2:37064840-37193615    | -0.152397 | 0.999791 |
| XLOC_013956 | XLOC_013956 | RBL1         | chr20:35626177-35724410   | -0.152379 | 0.999791 |
| XLOC_021596 | XLOC_021596 | CHCHD7       | chr8:57124314-57131176    | -0.152339 | 0.999791 |
| XLOC_013633 | XLOC_013633 | DLGAP4       | chr20:34995443-35157040   | -0.152224 | 0.999791 |
| XLOC_007598 | XLOC_007598 | NEDD4        | chr15:56119121-56285835   | -0.152183 | 0.999791 |
| XLOC_023083 | XLOC_023083 | TOR2A        | chr9:130478357-130497628  | -0.152073 | 0.999791 |
| XLOC_020454 | XLOC_020454 | LINC00265    | chr7:39773166-39834222    | -0.151993 | 0.999791 |
| XLOC_021423 | XLOC_021423 | ESYT2        | chr7:158523688-158622319  | -0.151948 | 0.999791 |

|             |             |                            |                           |           |          |
|-------------|-------------|----------------------------|---------------------------|-----------|----------|
| XLOC_015425 | XLOC_015425 | IL12A                      | chr3:159706622-159713806  | -0.151936 | 0.999791 |
| XLOC_006926 | XLOC_006926 | EMLS                       | chr14:89081173-89259096   | -0.151888 | 1        |
| XLOC_011187 | XLOC_011187 | ZNF628                     | chr19:55987698-55995854   | -0.151883 | 0.999791 |
| XLOC_019101 | XLOC_019101 | MAP7                       | chr6:136663418-136871957  | -0.151709 | 0.999791 |
| XLOC_005705 | XLOC_005705 | MAPKAPK5-AS1               | chr12:112277572-112331228 | -0.151558 | 0.999791 |
| XLOC_018814 | XLOC_018814 | CUTA                       | chr6:33384318-33386065    | -0.151538 | 0.999791 |
| XLOC_017255 | XLOC_017255 | MAN2A1                     | chr5:109025155-109203429  | -0.151515 | 0.999791 |
| XLOC_012146 | XLOC_012146 | GEMIN6                     | chr2:39005326-39009106    | -0.151445 | 0.999791 |
| XLOC_007656 | XLOC_007656 | CALML4                     | chr15:68483042-68498448   | -0.151418 | 0.999791 |
| XLOC_003218 | XLOC_003218 | ATHL1                      | chr11:289137-295688       | -0.15137  | 0.999791 |
| XLOC_022055 | XLOC_022055 | TPD52                      | chr8:80947104-81083836    | -0.15131  | 0.999791 |
| XLOC_021282 | XLOC_021282 | AASS                       | chr7:121713597-121784344  | -0.151233 | 0.999791 |
| XLOC_007440 | XLOC_007440 | WASH3P                     | chr15:102501015-102519296 | -0.151131 | 0.999791 |
| XLOC_013441 | XLOC_013441 | PER2                       | chr2:239152678-239197207  | -0.151012 | 0.999791 |
| XLOC_005361 | XLOC_005361 | ITPR2                      | chr12:26488284-26986131   | -0.150985 | 0.999791 |
| XLOC_023978 | XLOC_023978 | TIMM8A                     | chrX:100600643-100603957  | -0.150811 | 0.999791 |
| XLOC_009316 | XLOC_009316 | BIRC5                      | chr17:76210276-76221716   | -0.150765 | 0.999791 |
| XLOC_010430 | XLOC_010430 | C19orf21                   | chr19:751145-764318       | -0.150584 | 0.999791 |
| XLOC_011615 | XLOC_011615 | CLIP3                      | chr19:36505561-36523797   | -0.15054  | 1        |
| XLOC_023446 | XLOC_023446 | EFNB1                      | chrX:68048839-68062006    | -0.150436 | 0.999791 |
| XLOC_021351 | XLOC_021351 | NDUFB2-AS1                 | chr7:140395135-140406446  | -0.150321 | 0.999791 |
| XLOC_004832 | XLOC_004832 | PRPF40B                    | chr12:50017196-50101197   | -0.150234 | 0.999791 |
| XLOC_014424 | XLOC_014424 | TMEM191A                   | chr22:21055401-21058891   | -0.150203 | 0.999791 |
| XLOC_004689 | XLOC_004689 | ENO2                       | chr12:7023613-7032859     | -0.150156 | 0.999791 |
| XLOC_012442 | XLOC_012442 | C2orf27A                   | chr2:132480063-132524977  | -0.150139 | 1        |
| XLOC_007901 | XLOC_007901 | THOC6                      | chr16:3072625-3077756     | -0.15007  | 0.999791 |
| XLOC_022835 | XLOC_022835 | ZBTB5                      | chr9:37438099-37465407    | -0.149965 | 0.999791 |
| XLOC_010603 | XLOC_010603 | ZNF439                     | chr19:11976843-11980306   | -0.149878 | 0.999791 |
| XLOC_004736 | XLOC_004736 | CDKN1B                     | chr12:12870301-12875305   | -0.14974  | 0.999791 |
| XLOC_019138 | XLOC_019138 | LRP11                      | chr6:150139893-150244214  | -0.149503 | 0.999791 |
| XLOC_002350 | XLOC_002350 | OPTN                       | chr10:13142081-13180276   | -0.149489 | 0.999791 |
| XLOC_008791 | XLOC_008791 | MIS12                      | chr17:5389693-5394130     | -0.149432 | 0.999791 |
| XLOC_000185 | XLOC_000185 | RCAN3                      | chr1:24822822-24863510    | -0.149413 | 0.999791 |
| XLOC_011325 | XLOC_011325 | STAP2                      | chr19:4324039-4338847     | -0.149382 | 0.999791 |
| XLOC_018020 | XLOC_018020 | IRF4                       | chr6:391738-411443        | -0.1493   | 1        |
| XLOC_000670 | XLOC_000670 | PLEKHO1                    | chr1:150122169-150131825  | -0.149255 | 0.999791 |
| XLOC_010497 | XLOC_010497 | SHD                        | chr19:4278597-4290720     | -0.149185 | 0.999791 |
| XLOC_015739 | XLOC_015739 | C3orf18                    | chr3:50595455-50622421    | -0.149174 | 0.999791 |
| XLOC_002448 | XLOC_002448 | GLUD1P7                    | chr10:48954404-48958083   | -0.149173 | 1        |
| XLOC_002752 | XLOC_002752 | C10orf137                  | chr10:127408083-127452712 | -0.149172 | 0.999791 |
| XLOC_003313 | XLOC_003313 | PPFIBP2                    | chr11:7534995-7674996     | -0.149087 | 0.999791 |
| XLOC_014975 | XLOC_014975 | PLCL2                      | chr3:16926451-17132098    | -0.148907 | 0.999791 |
| XLOC_018612 | XLOC_018612 | GMDS                       | chr6:1624034-2245868      | -0.148888 | 0.999791 |
| XLOC_004673 | XLOC_004673 | TAPBPL                     | chr12:6561176-6579843     | -0.148736 | 0.999791 |
| XLOC_009992 | XLOC_009992 | ST6GALNAC2                 | chr17:74561460-74582145   | -0.148711 | 1        |
| XLOC_000436 | XLOC_000436 | CACHD1                     | chr1:64936475-65158741    | -0.148485 | 0.999791 |
| XLOC_014556 | XLOC_014556 | PICK1                      | chr22:38453261-38471708   | -0.148457 | 0.999791 |
| XLOC_015726 | XLOC_015726 | MST1R                      | chr3:49924435-49941306    | -0.148434 | 0.999791 |
| XLOC_009836 | XLOC_009836 | FAM117A                    | chr17:47787686-47841518   | -0.148385 | 0.999791 |
| XLOC_022004 | XLOC_022004 | IMPAD1                     | chr8:57870487-57906430    | -0.148347 | 0.999791 |
| XLOC_001797 | XLOC_001797 | QTUD7B                     | chr1:149912231-149982686  | -0.148308 | 0.999791 |
| XLOC_013517 | XLOC_013517 | CDS2                       | chr20:5107406-51178533    | -0.148261 | 0.999791 |
| XLOC_004627 | XLOC_004627 | NFRKB                      | chr11:129733669-129765490 | -0.14812  | 0.999791 |
| XLOC_018585 | XLOC_018585 | IGF2R                      | chr6:160390130-160527583  | -0.148061 | 0.999791 |
| XLOC_021558 | XLOC_021558 | HTRA4                      | chr8:38831667-38846181    | -0.148036 | 1        |
| XLOC_006012 | XLOC_006012 | ANKRD20A9P                 | chr13:19408542-19446109   | -0.147985 | 1        |
| XLOC_022149 | XLOC_022149 | SAMD12                     | chr8:119201694-119738306  | -0.14791  | 0.999791 |
| XLOC_021547 | XLOC_021547 | ZNF703                     | chr8:37553300-37556396    | -0.147896 | 0.999791 |
| XLOC_003713 | XLOC_003713 | SPCS2                      | chr11:74660291-74690076   | -0.147889 | 0.999791 |
| XLOC_015886 | XLOC_015886 | B4GALT4                    | chr3:118930588-118959752  | -0.147883 | 0.999791 |
| XLOC_022144 | XLOC_022144 | TRPS1                      | chr8:116420723-116681228  | -0.147627 | 0.999791 |
| XLOC_000611 | XLOC_000611 | MAB21L3                    | chr1:116654375-116677861  | -0.14753  | 1        |
| XLOC_014702 | XLOC_014702 | YPEL1                      | chr22:22020272-22090071   | -0.147406 | 0.999791 |
| XLOC_014625 | XLOC_014625 | MIR4763,MIRLET7A3,MIRLET7B | chr22:46481876-46509808   | -0.147396 | 0.999791 |
| XLOC_007246 | XLOC_007246 | FBXL22                     | chr15:63796709-63894620   | -0.147392 | 1        |
| XLOC_008946 | XLOC_008946 | TRAF4                      | chr17:27071022-27077976   | -0.147371 | 0.999791 |
| XLOC_010908 | XLOC_010908 | ZNF283                     | chr19:44331472-44353050   | -0.147361 | 0.999791 |
| XLOC_009461 | XLOC_009461 | PLSCR3,TMEM256             | chr17:7284292-7307450     | -0.147304 | 0.999791 |
| XLOC_003419 | XLOC_003419 | EXT2                       | chr1:144117098-44266980   | -0.14721  | 0.999791 |
| XLOC_003959 | XLOC_003959 | KRTAP5-1                   | chr11:1490684-1785501     | -0.146891 | 1        |
| XLOC_000454 | XLOC_000454 | HHLA3                      | chr1:70820492-70833705    | -0.146859 | 0.999791 |
| XLOC_012723 | XLOC_012723 | SH3BP4                     | chr2:235860627-235964358  | -0.146712 | 0.999791 |
| XLOC_011850 | XLOC_011850 | SIGLEC11                   | chr19:50452249-50464429   | -0.146698 | 1        |
| XLOC_011296 | XLOC_011296 | LINGO3                     | chr19:2289773-2308156     | -0.146668 | 1        |
| XLOC_016739 | XLOC_016739 | SGCB                       | chr4:52886860-52904485    | -0.146666 | 0.999791 |
| XLOC_012744 | XLOC_012744 | RNPEPL1                    | chr2:241508003-241518149  | -0.146625 | 0.999791 |
| XLOC_018138 | XLOC_018138 | ZSCAN16                    | chr6:28092386-28097856    | -0.146522 | 0.999791 |
| XLOC_023771 | XLOC_023771 | AP1S2                      | chrX:15843928-15873137    | -0.14648  | 0.999791 |
| XLOC_006226 | XLOC_006226 | TUBGCP3                    | chr13:113139327-113242481 | -0.146466 | 0.999791 |

|             |             |               |                           |           |          |
|-------------|-------------|---------------|---------------------------|-----------|----------|
| XLOC_012861 | XLOC_012861 | DPY30         | chr2:32248971-32264844    | -0.146435 | 0.999791 |
| XLOC_005379 | XLOC_005379 | PKP2          | chr12:32943679-33049780   | -0.146355 | 0.999791 |
| XLOC_001502 | XLOC_001502 | HY1           | chr1:43855555-43919918    | -0.146155 | 0.999791 |
| XLOC_002226 | XLOC_002226 | C1orf145      | chr1:228391206-228566575  | -0.146147 | 0.999791 |
| XLOC_005050 | XLOC_005050 | SCYL2         | chr12:100661548-100733914 | -0.146138 | 0.999791 |
| XLOC_002459 | XLOC_002459 | FAM21A,FAM21B | chr10:51827683-51893269   | -0.146082 | 0.999791 |
| XLOC_010553 | XLOC_010553 | RAB11B        | chr19:8439259-8469317     | -0.146047 | 0.999791 |
| XLOC_021644 | XLOC_021644 | ZFHx4         | chr8:77523113-77779521    | -0.145991 | 1        |
| XLOC_018845 | XLOC_018845 | TMEM217       | chr6:37179953-37300746    | -0.145976 | 1        |
| XLOC_023877 | XLOC_023877 | KDM5C         | chrX:53220502-53254604    | -0.145959 | 0.999791 |
| XLOC_020897 | XLOC_020897 | ZFAND2A       | chr7:1192542-1199855      | -0.1459   | 0.999791 |
| XLOC_018946 | XLOC_018946 | LMBRD1        | chr6:70385640-70507049    | -0.14586  | 0.999791 |
| XLOC_011544 | XLOC_011544 | SUGP2         | chr19:19101696-19144380   | -0.145851 | 0.999791 |
| XLOC_005985 | XLOC_005985 | ABHD13        | chr13:108870762-108886603 | -0.145843 | 0.999791 |
| XLOC_010972 | XLOC_010972 | GLTSCR1       | chr19:48111452-48206534   | -0.145831 | 0.999791 |
| XLOC_005554 | XLOC_005554 | CTDSP2        | chr12:58213709-58240747   | -0.14547  | 0.999791 |
| XLOC_012015 | XLOC_012015 | MZF1          | chr19:59070552-59086164   | -0.145457 | 0.999791 |
| XLOC_004959 | XLOC_004959 | MON2          | chr12:62860596-62991363   | -0.145386 | 0.999791 |
| XLOC_009924 | XLOC_009924 | GNA13         | chr17:63005406-63052920   | -0.145144 | 0.999791 |
| XLOC_017486 | XLOC_017486 | SNORA74B      | chr5:172410762-172461900  | -0.145134 | 0.999791 |
| XLOC_018547 | XLOC_018547 | TAB2          | chr6:149639435-149732747  | -0.145104 | 0.999791 |
| XLOC_009806 | XLOC_009806 | SP6           | chr17:45922279-45933240   | -0.145087 | 0.999791 |
| XLOC_005374 | XLOC_005374 | DENND5B       | chr12:31535156-31768285   | -0.145061 | 0.999791 |
| XLOC_014576 | XLOC_014576 | LOC100130899  | chr22:40428335-40432581   | -0.145059 | 0.999791 |
| XLOC_000774 | XLOC_000774 | TMEM79        | chr1:156252703-156262234  | -0.144962 | 0.999791 |
| XLOC_014694 | XLOC_014694 | PI4KA         | chr22:21061978-21213100   | -0.144877 | 0.999791 |
| XLOC_021917 | XLOC_021917 | STC1          | chr8:23699433-23712320    | -0.144759 | 1        |
| XLOC_023182 | XLOC_023182 | ABCA2         | chr9:139901685-139931234  | -0.144724 | 0.999791 |
| XLOC_018840 | XLOC_018840 | STK38         | chr6:36461668-36515247    | -0.144698 | 0.999791 |
| XLOC_008768 | XLOC_008768 | GS2           | chr17:3617918-3704537     | -0.144683 | 0.999791 |
| XLOC_015238 | XLOC_015238 | ALCAM         | chr3:105085556-105295757  | -0.144469 | 0.999791 |
| XLOC_014861 | XLOC_014861 | TCF20         | chr22:42556018-42611445   | -0.144385 | 0.999791 |
| XLOC_006525 | XLOC_006525 | CCNK          | chr14:99947738-100070727  | -0.144266 | 0.999791 |
| XLOC_018711 | XLOC_018711 | ZSCAN31       | chr6:28292514-28304152    | -0.144232 | 0.999791 |
| XLOC_000301 | XLOC_000301 | PPIE          | chr1:40204516-40254533    | -0.144137 | 0.999791 |
| XLOC_004653 | XLOC_004653 | LOC100507424  | chr12:2945981-2998691     | -0.144099 | 0.999791 |
| XLOC_023253 | XLOC_023253 | SHROOM2       | chrX:9754495-9917481      | -0.144089 | 0.999791 |
| XLOC_006899 | XLOC_006899 | ACYP1         | chr14:75519927-75530736   | -0.143976 | 0.999791 |
| XLOC_015913 | XLOC_015913 | ITGB5         | chr3:124481794-124606144  | -0.143934 | 0.999791 |
| XLOC_001365 | XLOC_001365 | C1orf63       | chr1:25568739-25573985    | -0.143916 | 0.999791 |
| XLOC_020579 | XLOC_020579 | PHTF2         | chr7:77428108-77586821    | -0.14383  | 0.999791 |
| XLOC_015456 | XLOC_015456 | ZNF639        | chr3:179041550-179053320  | -0.143772 | 0.999791 |
| XLOC_005751 | XLOC_005751 | KDM2B         | chr12:121866899-122018920 | -0.143638 | 0.999791 |
| XLOC_014539 | XLOC_014539 | MPST          | chr22:37406899-37425863   | -0.143568 | 0.999791 |
| XLOC_021233 | XLOC_021233 | ALKBH4        | chr7:102073976-102105321  | -0.143532 | 0.999791 |
| XLOC_013241 | XLOC_013241 | ATF2          | chr2:175936977-176032934  | -0.143321 | 0.999791 |
| XLOC_008244 | XLOC_008244 | CENPN         | chr16:81009698-81066709   | -0.143299 | 0.999791 |
| XLOC_015178 | XLOC_015178 | SLC25A26      | chr3:66119284-66550845    | -0.143286 | 0.999791 |
| XLOC_017804 | XLOC_017804 | AFF4          | chr5:132211070-132299354  | -0.143214 | 0.999791 |
| XLOC_004714 | XLOC_004714 | KLRG1         | chr12:9142220-9163340     | -0.143184 | 1        |
| XLOC_020393 | XLOC_020393 | KLHL7         | chr7:23145352-23215038    | -0.143179 | 0.999791 |
| XLOC_015925 | XLOC_015925 | KLF15         | chr3:126061477-126076236  | -0.143162 | 0.999791 |
| XLOC_015095 | XLOC_015095 | TMA7          | chr3:48481685-48485537    | -0.143055 | 0.999791 |
| XLOC_017815 | XLOC_017815 | PITX1         | chr5:134363423-134369964  | -0.143042 | 0.999791 |
| XLOC_004718 | XLOC_004718 | LOC374443     | chr12:9769879-9811010     | -0.142947 | 0.999791 |
| XLOC_004477 | XLOC_004477 | FAM76B        | chr11:95502105-95522954   | -0.14292  | 0.999791 |
| XLOC_001697 | XLOC_001697 | GSTM3         | chr1:110276553-110283660  | -0.142894 | 0.999791 |
| XLOC_006379 | XLOC_006379 | DAAM1         | chr14:59655380-59838123   | -0.142841 | 0.999791 |
| XLOC_007626 | XLOC_007626 | OAZ2          | chr15:64979772-64995462   | -0.142796 | 0.999791 |
| XLOC_022684 | XLOC_022684 | MAN1B1        | chr9:139981378-140003639  | -0.142762 | 0.999791 |
| XLOC_007370 | XLOC_007370 | LOC440300     | chr15:84860599-84898920   | -0.142749 | 1        |
| XLOC_000426 | XLOC_000426 | USP1          | chr1:62901974-62917475    | -0.142718 | 0.999791 |
| XLOC_005741 | XLOC_005741 | SRSF9         | chr12:120884240-120907558 | -0.14271  | 0.999791 |
| XLOC_007764 | XLOC_007764 | DET1          | chr15:89055713-89089912   | -0.142584 | 0.999791 |
| XLOC_012882 | XLOC_012882 | MAP4K3        | chr2:39476406-39664453    | -0.142575 | 0.999791 |
| XLOC_017903 | XLOC_017903 | ANXA6         | chr5:150480266-150537443  | -0.142559 | 0.999791 |
| XLOC_010250 | XLOC_010250 | TSHZ1         | chr18:72922709-73001905   | -0.142529 | 0.999791 |
| XLOC_018172 | XLOC_018172 | ABCF1         | chr6:30539169-30559309    | -0.142431 | 0.999791 |
| XLOC_004354 | XLOC_004354 | PTPRCAP       | chr11:67202980-67205153   | -0.142385 | 0.999791 |
| XLOC_008617 | XLOC_008617 | KIAA0895L     | chr16:67204399-67217883   | -0.142181 | 0.999791 |
| XLOC_003740 | XLOC_003740 | TMEM126A      | chr11:85358962-85367597   | -0.142147 | 0.999791 |
| XLOC_018549 | XLOC_018549 | GINM1         | chr6:149887527-149912067  | -0.142134 | 0.999791 |
| XLOC_011196 | XLOC_011196 | EPN1          | chr19:56186560-56207133   | -0.142066 | 0.999791 |
| XLOC_015707 | XLOC_015707 | USP19         | chr3:49145478-49158371    | -0.142034 | 0.999791 |
| XLOC_000648 | XLOC_000648 | HYDIN2        | chr1:146310551-146334210  | -0.14203  | 1        |
| XLOC_024212 | XLOC_024212 | TMLHE         | chrX:154696200-154842622  | -0.141955 | 0.999791 |
| XLOC_010313 | XLOC_010313 | KCTD1         | chr18:24034873-24237365   | -0.141833 | 0.999791 |
| XLOC_010864 | XLOC_010864 | PLD3          | chr19:40826966-40884390   | -0.141812 | 0.999791 |
| XLOC_016480 | XLOC_016480 | SNORA24       | chr4:119199916-119200978  | -0.141791 | 0.999791 |



|             |             |               |                            |           |          |
|-------------|-------------|---------------|----------------------------|-----------|----------|
| XLOC_014682 | XLOC_014682 | TXNRD2        | chr22:19863039-20004309    | -0.141671 | 0.999791 |
| XLOC_003847 | XLOC_003847 | MLL           | chr11:118307204-118397539  | -0.141629 | 0.999791 |
| XLOC_012199 | XLOC_012199 | COMMD1        | chr2:62132802-62363205     | -0.141603 | 0.999791 |
| XLOC_008341 | XLOC_008341 | SPSB3         | chr16:1826712-1832581      | -0.141581 | 0.999791 |
| XLOC_004829 | XLOC_004829 | SPATS2        | chr12:49760687-49921207    | -0.141475 | 0.999791 |
| XLOC_002260 | XLOC_002260 | LYST          | chr1:235824344-236030220   | -0.141411 | 1        |
| XLOC_005072 | XLOC_005072 | C12orf75      | chr12:105724413-105765296  | -0.141397 | 0.999791 |
| XLOC_021512 | XLOC_021512 | CHMP7         | chr8:23101149-23119512     | -0.141226 | 0.999791 |
| XLOC_003090 | XLOC_003090 | ERLIN1        | chr10:101909846-101945814  | -0.141224 | 0.999791 |
| XLOC_021270 | XLOC_021270 | C7orf60       | chr7:112459201-112579932   | -0.141206 | 0.999791 |
| XLOC_008190 | XLOC_008190 | NFATC3        | chr16:68119268-68270136    | -0.141188 | 0.999791 |
| XLOC_001714 | XLOC_001714 | FAM212B       | chr1:112264685-112310199   | -0.141095 | 0.999791 |
| XLOC_017032 | XLOC_017032 | UFSP2         | chr4:186317839-186347139   | -0.141057 | 0.999791 |
| XLOC_005964 | XLOC_005964 | FARP1         | chr13:98795433-99102023    | -0.140891 | 0.999791 |
| XLOC_003563 | XLOC_003563 | C11orf83      | chr11:62430288-62441162    | -0.140579 | 0.999791 |
| XLOC_004034 | XLOC_004034 | TRIM3         | chr11:6469842-6495689      | -0.140471 | 0.999791 |
| XLOC_005338 | XLOC_005338 | EPS8          | chr12:15773074-15942510    | -0.14045  | 0.999791 |
| XLOC_000906 | XLOC_000906 | TOR3A         | chr1:179051111-179065129   | -0.140332 | 0.999791 |
| XLOC_013375 | XLOC_013375 | ATG9A         | chr2:220084101-220094361   | -0.140262 | 0.999791 |
| XLOC_004138 | XLOC_004138 | LMO2          | chr11:33880122-33913836    | -0.14019  | 0.999791 |
| XLOC_008184 | XLOC_008184 | THAP11        | chr16:67862059-67905219    | -0.14019  | 0.999791 |
| XLOC_000634 | XLOC_000634 | NOTCH2NL      | chr1:145209110-145285912   | -0.140126 | 0.999791 |
| XLOC_003866 | XLOC_003866 | RNF26         | chr11:119205209-119208024  | -0.139926 | 0.999791 |
| XLOC_008151 | XLOC_008151 | MMP15         | chr16:58059281-58080804    | -0.139921 | 0.999791 |
| XLOC_008390 | XLOC_008390 | CREBBP        | chr16:3775055-3930121      | -0.139884 | 0.999791 |
| XLOC_003836 | XLOC_003836 | SIDT2         | chr11:117049938-117075508  | -0.139816 | 0.999791 |
| XLOC_015783 | XLOC_015783 | HESX1         | chr3:57231943-57234280     | -0.139778 | 0.999791 |
| XLOC_004410 | XLOC_004410 | XRRA1         | chr11:74459912-74660232    | -0.139559 | 0.999791 |
| XLOC_021279 | XLOC_021279 | CTTNBP2       | chr7:117350705-117513561   | -0.139552 | 0.999791 |
| XLOC_011157 | XLOC_011157 | NDUFA3        | chr19:54606159-54610281    | -0.13953  | 0.999791 |
| XLOC_000584 | XLOC_000584 | CEPT1         | chr11:11659953-111727724   | -0.139516 | 0.999791 |
| XLOC_018230 | XLOC_018230 | LOC100294145  | chr6:32861952-32871535     | -0.139483 | 0.999791 |
| XLOC_016875 | XLOC_016875 | CENPE         | chr4:104026962-104119566   | -0.139472 | 0.999791 |
| XLOC_008874 | XLOC_008874 | PIGL          | chr17:16120508-16229573    | -0.139434 | 0.999791 |
| XLOC_013891 | XLOC_013891 | CST3          | chr20:23614293-23618574    | -0.139412 | 0.999791 |
| XLOC_005028 | XLOC_005028 | LOC144486     | chr12:94853778-94856344    | -0.139244 | 1        |
| XLOC_023782 | XLOC_023782 | CXorf23       | chrX:19930979-19988382     | -0.139139 | 0.999791 |
| XLOC_013019 | XLOC_013019 | ST3GAL5       | chr2:86066270-86116157     | -0.139093 | 0.999791 |
| XLOC_014744 | XLOC_014744 | CHEK2         | chr22:29083730-29137822    | -0.139084 | 0.999791 |
| XLOC_022558 | XLOC_022558 | WDR38         | chr9:127615695-127624240   | -0.139069 | 1        |
| XLOC_002311 | XLOC_002311 | ZNF692        | chr1:249144202-249153315   | -0.138907 | 0.999791 |
| XLOC_017502 | XLOC_017502 | HIGD2A        | chr5:175815783-175816751   | -0.138848 | 0.999791 |
| XLOC_002286 | XLOC_002286 | ZNF670,ZNF695 | chr1:247108848-247242115   | -0.138807 | 0.999791 |
| XLOC_010626 | XLOC_010626 | C19orf53      | chr19:13885256-13889586    | -0.138791 | 0.999791 |
| XLOC_005113 | XLOC_005113 | OAS3          | chr12:113376248-1134111054 | -0.13878  | 0.999791 |
| XLOC_017362 | XLOC_017362 | HARS2         | chr5:140053489-140078890   | -0.13873  | 0.999791 |
| XLOC_023980 | XLOC_023980 | GLA           | chrX:100645877-100669128   | -0.138709 | 0.999791 |
| XLOC_000193 | XLOC_000193 | MAN1C1        | chr1:25943958-26111258     | -0.138686 | 1        |
| XLOC_011292 | XLOC_011292 | PLEKHJ1       | chr19:2233154-2236328      | -0.138641 | 0.999791 |
| XLOC_014528 | XLOC_014528 | TOM1          | chr22:35695267-35743987    | -0.13863  | 0.999791 |
| XLOC_008996 | XLOC_008996 | RASL10B       | chr17:34058678-34070540    | -0.138628 | 0.999791 |
| XLOC_013574 | XLOC_013574 | FRG1B         | chr20:29611878-29634007    | -0.138626 | 0.999791 |
| XLOC_003082 | XLOC_003082 | HPS1          | chr10:100175954-100206704  | -0.138472 | 0.999791 |
| XLOC_023916 | XLOC_023916 | PDZD11        | chrX:69506210-69509798     | -0.138392 | 0.999791 |
| XLOC_004136 | XLOC_004136 | CD59          | chr11:33724555-33758025    | -0.13836  | 0.999791 |
| XLOC_003634 | XLOC_003634 | BANF1         | chr11:65764015-65771617    | -0.138255 | 0.999791 |
| XLOC_000249 | XLOC_000249 | TMEM39B       | chr1:32538502-32568467     | -0.138225 | 0.999791 |
| XLOC_021411 | XLOC_021411 | PAXIP1        | chr7:154720226-154794682   | -0.138225 | 0.999791 |
| XLOC_008213 | XLOC_008213 | FUK           | chr16:70488497-70514177    | -0.138195 | 0.999791 |
| XLOC_005807 | XLOC_005807 | MIPEPP3       | chr13:21872263-22033508    | -0.138113 | 0.999791 |
| XLOC_017250 | XLOC_017250 | PAM           | chr5:102201526-102366808   | -0.138033 | 0.999791 |
| XLOC_017377 | XLOC_017377 | PCDHB16       | chr5:140560979-140565796   | -0.137981 | 0.999791 |
| XLOC_002595 | XLOC_002595 | KIF11         | chr10:94352824-94415152    | -0.137952 | 0.999791 |
| XLOC_003720 | XLOC_003720 | SERPINH1      | chr11:75273100-75283849    | -0.13795  | 0.999791 |
| XLOC_002777 | XLOC_002777 | PAOX          | chr10:135192740-135205198  | -0.137911 | 0.999791 |
| XLOC_003659 | XLOC_003659 | RAD9A         | chr11:67159422-67169376    | -0.137806 | 0.999791 |
| XLOC_022532 | XLOC_022532 | GSN           | chr9:124030379-124095120   | -0.137782 | 0.999791 |
| XLOC_023194 | XLOC_023194 | RNF208        | chr9:140114698-140115775   | -0.137779 | 0.999791 |
| XLOC_017052 | XLOC_017052 | LRRC14B       | chr5:191625-195468         | -0.137752 | 1        |
| XLOC_011596 | XLOC_011596 | ZNF792        | chr19:35447257-35454953    | -0.137714 | 0.999791 |
| XLOC_009662 | XLOC_009662 | FBXL20        | chr17:37408896-37557909    | -0.137712 | 0.999791 |
| XLOC_002846 | XLOC_002846 | DNAJC1        | chr10:22045476-22292650    | -0.137685 | 0.999791 |
| XLOC_012350 | XLOC_012350 | MRPS9         | chr2:105654482-105716418   | -0.137657 | 0.999791 |
| XLOC_003222 | XLOC_003222 | PKP3          | chr11:394216-404908        | -0.137602 | 0.999791 |
| XLOC_010894 | XLOC_010894 | CIC           | chr19:42788816-42799949    | -0.137588 | 0.999791 |
| XLOC_017857 | XLOC_017857 | NDUFA2        | chr5:140019011-140027370   | -0.137483 | 0.999791 |
| XLOC_011650 | XLOC_011650 | ECH1          | chr19:39306061-39322497    | -0.137466 | 0.999791 |
| XLOC_009988 | XLOC_009988 | PRPSAP1       | chr17:74306867-74350230    | -0.13743  | 0.999791 |
| XLOC_006882 | XLOC_006882 | ZFYVE1        | chr14:73436158-73493920    | -0.137414 | 0.999791 |

|             |             |                           |                           |           |          |
|-------------|-------------|---------------------------|---------------------------|-----------|----------|
| XLOC_022116 | XLOC_022116 | COX6C                     | chr8:100890222-100906242  | -0.137286 | 0.999791 |
| XLOC_018084 | XLOC_018084 | ACOT13                    | chr6:24667262-24719403    | -0.137268 | 0.999791 |
| XLOC_002511 | XLOC_002511 | MCU                       | chr10:74451888-74647452   | -0.137233 | 0.999791 |
| XLOC_012487 | XLOC_012487 | GCA                       | chr2:163200582-163219148  | -0.137197 | 0.999791 |
| XLOC_003693 | XLOC_003693 | RNF121                    | chr1:71639767-71708643    | -0.137127 | 0.999791 |
| XLOC_022910 | XLOC_022910 | ZCCHC6                    | chr9:88902647-88969402    | -0.137063 | 0.999791 |
| XLOC_000147 | XLOC_000147 | C1orf151-NBL1,MINOS1,NBL1 | chr1:19923470-19984949    | -0.137058 | 0.999791 |
| XLOC_014905 | XLOC_014905 | PLXNB2                    | chr22:50713407-50746001   | -0.137043 | 0.999791 |
| XLOC_009314 | XLOC_009314 | SYNGR2                    | chr17:76164670-76169009   | -0.136935 | 0.999791 |
| XLOC_003858 | XLOC_003858 | VPS11                     | chr11:118938492-118952688 | -0.136822 | 0.999791 |
| XLOC_000203 | XLOC_000203 | SH3BGRL3                  | chr1:26606212-26608013    | -0.136798 | 0.999791 |
| XLOC_006512 | XLOC_006512 | DICER1-AS1                | chr14:95624024-95646270   | -0.136768 | 0.999791 |
| XLOC_011478 | XLOC_011478 | PALM3                     | chr19:14164178-14169971   | -0.136756 | 0.999791 |
| XLOC_010416 | XLOC_010416 | MBP                       | chr18:74690788-74844774   | -0.13675  | 0.999791 |
| XLOC_008359 | XLOC_008359 | CASKIN1                   | chr16:2205798-2246465     | -0.136732 | 0.999791 |
| XLOC_021744 | XLOC_021744 | NSMCE2                    | chr8:126104082-126379367  | -0.136696 | 0.999791 |
| XLOC_001492 | XLOC_001492 | FOXJ3                     | chr1:42642209-42801548    | -0.136647 | 0.999791 |
| XLOC_022601 | XLOC_022601 | DOLPP1                    | chr9:131843382-131852717  | -0.136549 | 0.999791 |
| XLOC_000913 | XLOC_000913 | QSOX1                     | chr1:180123967-180169859  | -0.136308 | 0.999791 |
| XLOC_012553 | XLOC_012553 | GULP1                     | chr2:189156395-189460652  | -0.136291 | 0.999791 |
| XLOC_001249 | XLOC_001249 | RERE                      | chr1:8412463-8877699      | -0.136275 | 0.999791 |
| XLOC_018653 | XLOC_018653 | DTNBP1                    | chr6:15523031-15663289    | -0.136221 | 0.999791 |
| XLOC_017394 | XLOC_017394 | ARHGAP26                  | chr5:142150291-142608572  | -0.136104 | 0.999791 |
| XLOC_008070 | XLOC_008070 | KAT8                      | chr16:31128984-31142714   | -0.135951 | 0.999791 |
| XLOC_019136 | XLOC_019136 | LATS1                     | chr6:149979288-150039392  | -0.135949 | 0.999791 |
| XLOC_015141 | XLOC_015141 | SMIM4                     | chr3:52570620-52574586    | -0.135939 | 0.999791 |
| XLOC_017369 | XLOC_017369 | PCDHB2                    | chr5:140474236-140476964  | -0.135935 | 0.999791 |
| XLOC_012522 | XLOC_012522 | SCRN3                     | chr2:175260456-175294303  | -0.135918 | 0.999791 |
| XLOC_010538 | XLOC_010538 | STXBP2                    | chr19:7701986-7712760     | -0.135914 | 0.999791 |
| XLOC_003136 | XLOC_003136 | BBIP1                     | chr10:112631552-112679124 | -0.135828 | 0.999791 |
| XLOC_006663 | XLOC_006663 | PACS2                     | chr14:105675622-105864484 | -0.135743 | 0.999791 |
| XLOC_018627 | XLOC_018627 | ECI2                      | chr6:4068592-4135831      | -0.135688 | 0.999791 |
| XLOC_013053 | XLOC_013053 | ANKRD39                   | chr2:97513723-97523756    | -0.135685 | 0.999791 |
| XLOC_009143 | XLOC_009143 | NFE2L1                    | chr17:46125685-46138907   | -0.135554 | 0.999791 |
| XLOC_008796 | XLOC_008796 | C17orf100                 | chr17:6555058-6556617     | -0.135528 | 0.999791 |
| XLOC_015243 | XLOC_015243 | HHLA2                     | chr3:108021331-108097126  | -0.135495 | 1        |
| XLOC_001687 | XLOC_001687 | CLCC1                     | chr1:109419602-109506111  | -0.135494 | 0.999791 |
| XLOC_013591 | XLOC_013591 | TM9SF4                    | chr20:30697308-30755061   | -0.135475 | 0.999791 |
| XLOC_003115 | XLOC_003115 | ACTR1A                    | chr10:104238985-104262512 | -0.135389 | 0.999791 |
| XLOC_001719 | XLOC_001719 | PPM1J                     | chr1:113252615-113257950  | -0.135378 | 0.999791 |
| XLOC_013115 | XLOC_013115 | RPL23AP7                  | chr2:114368815-114384715  | -0.135243 | 0.999791 |
| XLOC_017168 | XLOC_017168 | OCLN                      | chr5:68788118-68853931    | -0.1352   | 0.999791 |
| XLOC_007490 | XLOC_007490 | GOLGA8A                   | chr15:34671269-34729667   | -0.135109 | 0.999791 |
| XLOC_009991 | XLOC_009991 | CYGB                      | chr17:74523429-74541458   | -0.135096 | 1        |
| XLOC_012352 | XLOC_012352 | C2orf49                   | chr2:105954012-105961984  | -0.13509  | 0.999791 |
| XLOC_017558 | XLOC_017558 | SDHAP3                    | chr5:1572072-1594646      | -0.135005 | 0.999791 |
| XLOC_014845 | XLOC_014845 | DNAJB7                    | chr22:41253084-41328823   | -0.134989 | 1        |
| XLOC_016402 | XLOC_016402 | PRDM8                     | chr4:81106423-81125482    | -0.134855 | 0.999791 |
| XLOC_002530 | XLOC_002530 | C10orf11                  | chr10:77542518-78317126   | -0.134824 | 0.999791 |
| XLOC_011789 | XLOC_011789 | TMEM160                   | chr19:47549166-47551882   | -0.134815 | 0.999791 |
| XLOC_004912 | XLOC_004912 | ORMDL2                    | chr12:56211805-56236767   | -0.134708 | 0.999791 |
| XLOC_004843 | XLOC_004843 | DIP2B                     | chr12:50898767-51142450   | -0.134702 | 0.999791 |
| XLOC_012975 | XLOC_012975 | EXOC6B                    | chr2:72406443-73053177    | -0.134666 | 0.999791 |
| XLOC_014514 | XLOC_014514 | LIMK2                     | chr22:31608249-31676066   | -0.134606 | 0.999791 |
| XLOC_000783 | XLOC_000783 | NTRK1                     | chr1:156776034-156851642  | -0.134561 | 1        |
| XLOC_023478 | XLOC_023478 | CHIC1                     | chrX:72782983-72906937    | -0.134529 | 0.999791 |
| XLOC_010595 | XLOC_010595 | SWSAP1                    | chr19:11485382-11487627   | -0.1345   | 0.999791 |
| XLOC_018304 | XLOC_018304 | PPP2R5D                   | chr6:42952236-42981618    | -0.134483 | 0.999791 |
| XLOC_021312 | XLOC_021312 | UBE2H                     | chr7:129470572-129592800  | -0.134274 | 0.999791 |
| XLOC_013957 | XLOC_013957 | MROH8                     | chr20:35729628-35870025   | -0.134256 | 1        |
| XLOC_023035 | XLOC_023035 | ASTN2                     | chr9:119187503-120177317  | -0.134106 | 0.999791 |
| XLOC_014962 | XLOC_014962 | LSM3                      | chr3:14220227-14239869    | -0.134095 | 0.999791 |
| XLOC_011428 | XLOC_011428 | YIPF2                     | chr19:10982252-11039357   | -0.134061 | 0.999791 |
| XLOC_014934 | XLOC_014934 | OGG1                      | chr3:9791627-9811668      | -0.133995 | 0.999791 |
| XLOC_013516 | XLOC_013516 | PCNA-AS1                  | chr20:5095598-5107268     | -0.133979 | 0.999791 |
| XLOC_010976 | XLOC_010976 | SEPW1                     | chr19:48281841-48287943   | -0.133956 | 0.999791 |
| XLOC_018169 | XLOC_018169 | RPP21,TRIM39,TRIM39-RPP21 | chr6:30201815-30314635    | -0.133735 | 0.999791 |
| XLOC_008317 | XLOC_008317 | TMEM8A                    | chr16:420775-431950       | -0.133609 | 0.999791 |
| XLOC_021469 | XLOC_021469 | FDFT1                     | chr8:11660189-11696818    | -0.133518 | 0.999791 |
| XLOC_007146 | XLOC_007146 | CHST14                    | chr15:40763159-40765357   | -0.133458 | 0.999791 |
| XLOC_000130 | XLOC_000130 | SZRD1                     | chr1:16693524-16724643    | -0.133442 | 0.999791 |
| XLOC_005163 | XLOC_005163 | OGFOD2                    | chr12:123459353-123464588 | -0.133336 | 0.999791 |
| XLOC_023834 | XLOC_023834 | ELK1                      | chrX:47494918-47510003    | -0.133252 | 0.999791 |
| XLOC_021919 | XLOC_021919 | GNRH1                     | chr8:25276773-25282556    | -0.133163 | 0.999791 |
| XLOC_008487 | XLOC_008487 | CLN3                      | chr16:28488599-28503623   | -0.133162 | 0.999791 |
| XLOC_014661 | XLOC_014661 | CECR5                     | chr22:17618409-17646335   | -0.133115 | 0.999791 |
| XLOC_007670 | XLOC_007670 | PKM                       | chr15:72491369-72523727   | -0.133113 | 0.999791 |
| XLOC_013199 | XLOC_013199 | RBMS1                     | chr2:161128661-161350318  | -0.133108 | 1        |
| XLOC_002833 | XLOC_002833 | C1QL3                     | chr10:16478941-16564004   | -0.133051 | 1        |

|             |             |                        |                           |           |          |
|-------------|-------------|------------------------|---------------------------|-----------|----------|
| XLOC_006158 | XLOC_006158 | TBC1D4                 | chr13:75858808-76056250   | -0.133012 | 0.999791 |
| XLOC_001037 | XLOC_001037 | PPP2R5A                | chr1:212458878-212535205  | -0.132993 | 0.999791 |
| XLOC_022384 | XLOC_022384 | FAM122A                | chr9:71320615-71624091    | -0.132975 | 0.999791 |
| XLOC_015151 | XLOC_015151 | IL17RB                 | chr3:53880576-53899827    | -0.132968 | 0.999791 |
| XLOC_013784 | XLOC_013784 | RTEL1,TNFRSF6B         | chr20:62289162-62367494   | -0.132918 | 0.999791 |
| XLOC_013845 | XLOC_013845 | PCNA                   | chr20:5095598-5107268     | -0.132746 | 0.999791 |
| XLOC_009961 | XLOC_009961 | HID1                   | chr17:72946838-72968900   | -0.132693 | 0.999791 |
| XLOC_000405 | XLOC_000405 | LRRC42                 | chr1:54411998-54433841    | -0.132691 | 0.999791 |
| XLOC_023835 | XLOC_023835 | UXT                    | chrX:47511190-47519776    | -0.132677 | 0.999791 |
| XLOC_018881 | XLOC_018881 | MEA1                   | chr6:42952236-42981618    | -0.132674 | 0.999791 |
| XLOC_013977 | XLOC_013977 | C20orf111              | chr20:42824580-42839546   | -0.132633 | 0.999791 |
| XLOC_012939 | XLOC_012939 | VPS54                  | chr2:64119666-64246214    | -0.132598 | 0.999791 |
| XLOC_006822 | XLOC_006822 | WDHD1                  | chr14:55405655-55493819   | -0.132489 | 0.999791 |
| XLOC_022952 | XLOC_022952 | PTCH1                  | chr9:98205263-98279247    | -0.132453 | 0.999791 |
| XLOC_002382 | XLOC_002382 | OTUD1                  | chr10:23728197-23731310   | -0.132443 | 0.999791 |
| XLOC_002805 | XLOC_002805 | PRKCQ                  | chr10:6469104-6622254     | -0.132384 | 0.999791 |
| XLOC_016705 | XLOC_016705 | RELL1                  | chr4:37455551-37687999    | -0.132317 | 0.999791 |
| XLOC_023961 | XLOC_023961 | BRWD3                  | chrX:79924986-80065233    | -0.132316 | 0.999791 |
| XLOC_013612 | XLOC_013612 | RALY                   | chr20:32581457-32670991   | -0.132282 | 0.999791 |
| XLOC_011326 | XLOC_011326 | SH3GL1                 | chr19:4360363-4400565     | -0.132272 | 0.999791 |
| XLOC_018852 | XLOC_018852 | SAYS1                  | chr6:39071839-39082865    | -0.132219 | 0.999791 |
| XLOC_008638 | XLOC_008638 | ESRP2                  | chr16:68119268-68270136   | -0.132147 | 0.999791 |
| XLOC_010225 | XLOC_010225 | TNFRSF11A              | chr18:59992519-60054943   | -0.132139 | 0.999791 |
| XLOC_020619 | XLOC_020619 | LMTK2                  | chr7:97736196-97838944    | -0.132125 | 0.999791 |
| XLOC_010336 | XLOC_010336 | TPGS2                  | chr18:33877701-34805288   | -0.132122 | 0.999791 |
| XLOC_006941 | XLOC_006941 | LGMN                   | chr14:93170151-93215047   | -0.132059 | 0.999791 |
| XLOC_017973 | XLOC_017973 | LMAN2                  | chr5:176758562-176778885  | -0.131996 | 0.999791 |
| XLOC_015676 | XLOC_015676 | SETD2                  | chr3:47057897-47205467    | -0.131967 | 0.999791 |
| XLOC_008326 | XLOC_008326 | GNG13                  | chr16:838621-850733       | -0.131932 | 1        |
| XLOC_008307 | XLOC_008307 | DEFB                   | chr16:90015138-90034468   | -0.131883 | 0.999791 |
| XLOC_004542 | XLOC_004542 | BUD13                  | chr11:116618885-116643714 | -0.131842 | 0.999791 |
| XLOC_013594 | XLOC_013594 | ASXL1                  | chr20:30946146-31027122   | -0.131732 | 0.999791 |
| XLOC_023994 | XLOC_023994 | RAB40A                 | chrX:102754680-102774417  | -0.131718 | 0.999791 |
| XLOC_010295 | XLOC_010295 | FAM210A                | chr18:13663345-13726591   | -0.131616 | 0.999791 |
| XLOC_011306 | XLOC_011306 | AES                    | chr19:3052907-3062964     | -0.131576 | 0.999791 |
| XLOC_018488 | XLOC_018488 | CENPW                  | chr6:126661252-126669754  | -0.131544 | 0.999791 |
| XLOC_010042 | XLOC_010042 | P4HB                   | chr17:79801033-79818544   | -0.131526 | 0.999791 |
| XLOC_001267 | XLOC_001267 | MAD2L2                 | chr1:11734536-11751678    | -0.131509 | 0.999791 |
| XLOC_007235 | XLOC_007235 | FAM81A                 | chr15:59730371-59815751   | -0.1315   | 0.999791 |
| XLOC_011957 | XLOC_011957 | TNNT1                  | chr19:55644160-55660606   | -0.131497 | 0.999791 |
| XLOC_012057 | XLOC_012057 | TRIB2                  | chr2:12856997-12882858    | -0.131493 | 0.999791 |
| XLOC_000616 | XLOC_000616 | CD101                  | chr1:117544371-117579173  | -0.131472 | 0.999791 |
| XLOC_003902 | XLOC_003902 | CHEK1                  | chr11:125495030-125550793 | -0.131465 | 0.999791 |
| XLOC_008108 | XLOC_008108 | LPCAT2                 | chr16:55542912-55620582   | -0.131459 | 0.999791 |
| XLOC_005319 | XLOC_005319 | MANSC1                 | chr12:12482217-12503169   | -0.131457 | 0.999791 |
| XLOC_016483 | XLOC_016483 | SYNPO2                 | chr4:119809995-119982402  | -0.131329 | 1        |
| XLOC_018882 | XLOC_018882 | CUL7                   | chr6:43005354-43021683    | -0.131295 | 0.999791 |
| XLOC_007186 | XLOC_007186 | B2M                    | chr15:45003684-45010357   | -0.131285 | 0.999791 |
| XLOC_014523 | XLOC_014523 | FBXO7                  | chr22:32870706-32894818   | -0.131147 | 0.999791 |
| XLOC_003953 | XLOC_003953 | POLR2L                 | chr11:839720-842529       | -0.131118 | 0.999791 |
| XLOC_001006 | XLOC_001006 | SRGAP2,SRGAP2C,SRGAP2D | chr1:206516199-206637783  | -0.13111  | 0.999791 |
| XLOC_010863 | XLOC_010863 | MAP3K10                | chr19:40697650-40721482   | -0.131092 | 0.999791 |
| XLOC_018000 | XLOC_018000 | TBC1D9B                | chr5:179289070-179334856  | -0.130995 | 0.999791 |
| XLOC_000336 | XLOC_000336 | PTPRF                  | chr1:43996546-44089343    | -0.130921 | 0.999791 |
| XLOC_011883 | XLOC_011883 | KLK6                   | chr19:51461886-51472929   | -0.130885 | 1        |
| XLOC_009292 | XLOC_009292 | CDK3,TEN1              | chr17:73937588-74002080   | -0.130855 | 0.999791 |
| XLOC_022189 | XLOC_022189 | ST3GAL1                | chr8:134467090-134584183  | -0.13085  | 0.999791 |
| XLOC_015499 | XLOC_015499 | EIF4A2                 | chr3:186501360-186524484  | -0.130829 | 0.999791 |
| XLOC_000918 | XLOC_000918 | IER5                   | chr1:181057637-181059979  | -0.130775 | 0.999791 |
| XLOC_005937 | XLOC_005937 | LMO7                   | chr13:76194569-76434006   | -0.130766 | 0.999791 |
| XLOC_009963 | XLOC_009963 | NT5C                   | chr17:73106081-73127890   | -0.130693 | 0.999791 |
| XLOC_001319 | XLOC_001319 | AKR7A3                 | chr1:19609056-19615280    | -0.130688 | 0.999791 |
| XLOC_018844 | XLOC_018844 | MTCH1                  | chr6:36935910-36954327    | -0.130626 | 0.999791 |
| XLOC_016731 | XLOC_016731 | CORIN                  | chr4:47596017-47840059    | -0.130599 | 1        |
| XLOC_022563 | XLOC_022563 | MVB12B                 | chr9:129089122-129269320  | -0.130587 | 0.999791 |
| XLOC_021493 | XLOC_021493 | XPO7                   | chr8:21777179-21864096    | -0.130577 | 0.999791 |
| XLOC_003397 | XLOC_003397 | CAT                    | chr11:34460471-34493607   | -0.130565 | 0.999791 |
| XLOC_014299 | XLOC_014299 | SYNJ1                  | chr21:34001068-34100351   | -0.130486 | 0.999791 |
| XLOC_020788 | XLOC_020788 | NDUFB2                 | chr7:140395135-140406446  | -0.130455 | 0.999791 |
| XLOC_012447 | XLOC_012447 | CCNT2                  | chr2:135676391-135716915  | -0.130446 | 0.999791 |
| XLOC_021214 | XLOC_021214 | TSC22D4                | chr7:100064141-100076902  | -0.130444 | 0.999791 |
| XLOC_023051 | XLOC_023051 | NDUFA8                 | chr9:124906337-124922098  | -0.130417 | 0.999791 |
| XLOC_017036 | XLOC_017036 | FLJ38576               | chr4:187110185-187112644  | -0.130409 | 1        |
| XLOC_005077 | XLOC_005077 | C12orf23               | chr12:107349543-107367813 | -0.130376 | 0.999791 |
| XLOC_021773 | XLOC_021773 | LY6E                   | chr8:144099901-144103827  | -0.130307 | 0.999791 |
| XLOC_011029 | XLOC_011029 | FCGRT                  | chr19:50015535-50029685   | -0.130167 | 0.999791 |
| XLOC_001651 | XLOC_001651 | TGFBR3                 | chr1:92145899-92371559    | -0.130118 | 0.999791 |
| XLOC_012278 | XLOC_012278 | RNF181                 | chr2:85822836-85824831    | -0.130117 | 0.999791 |
| XLOC_014922 | XLOC_014922 | BHLHE40                | chr3:5021096-5026865      | -0.130117 | 0.999791 |

|             |             |              |                           |           |          |
|-------------|-------------|--------------|---------------------------|-----------|----------|
| XLOC_021120 | XLOC_021120 | POM121C      | chr7:75039623-75115568    | -0.130053 | 0.999791 |
| XLOC_004923 | XLOC_004923 | ZC3H10       | chr12:56512029-56516278   | -0.130047 | 0.999791 |
| XLOC_010148 | XLOC_010148 | C18orf8      | chr18:21083433-21166581   | -0.130044 | 0.999791 |
| XLOC_022958 | XLOC_022958 | ZNF367       | chr9:99148224-99180669    | -0.129967 | 0.999791 |
| XLOC_013249 | XLOC_013249 | LOC375295    | chr2:177494308-177502302  | -0.129941 | 0.999791 |
| XLOC_015488 | XLOC_015488 | VPS8         | chr3:184529930-184770402  | -0.129802 | 0.999791 |
| XLOC_009163 | XLOC_009163 | XYLT2        | chr17:48423392-48438512   | -0.129782 | 0.999791 |
| XLOC_003256 | XLOC_003256 | TSSC4        | chr11:2423522-2425106     | -0.129778 | 0.999791 |
| XLOC_000832 | XLOC_000832 | HSPA7        | chr1:161575848-161578341  | -0.129622 | 1        |
| XLOC_018308 | XLOC_018308 | PTK7         | chr6:43044005-43129458    | -0.129612 | 0.999791 |
| XLOC_007427 | XLOC_007427 | IGF1R        | chr15:99192760-99507759   | -0.129611 | 0.999791 |
| XLOC_005236 | XLOC_005236 | TNFRSF1A     | chr12:6437922-6451283     | -0.129573 | 0.999791 |
| XLOC_023013 | XLOC_023013 | SUSD1        | chr9:114758831-115112545  | -0.129527 | 0.999791 |
| XLOC_022477 | XLOC_022477 | STX17        | chr9:102668914-102736818  | -0.129485 | 0.999791 |
| XLOC_013940 | XLOC_013940 | EDEM2        | chr20:33703159-33735161   | -0.129477 | 0.999791 |
| XLOC_012835 | XLOC_012835 | PREB         | chr2:27346656-27357542    | -0.129369 | 0.999791 |
| XLOC_014737 | XLOC_014737 | TPST2        | chr22:26921713-26986089   | -0.129349 | 0.999791 |
| XLOC_008432 | XLOC_008432 | NTAN1        | chr16:15131709-15149936   | -0.129328 | 0.999791 |
| XLOC_009889 | XLOC_009889 | USP32        | chr17:58254690-58469586   | -0.129326 | 0.999791 |
| XLOC_014996 | XLOC_014996 | STT3B        | chr3:31574490-31677556    | -0.129302 | 0.999791 |
| XLOC_020443 | XLOC_020443 | EEPD1        | chr7:36192835-36341152    | -0.129295 | 0.999791 |
| XLOC_014544 | XLOC_014544 | SH3BP1       | chr22:38035683-38052050   | -0.129274 | 0.999791 |
| XLOC_000149 | XLOC_000149 | OTUD3        | chr1:20208887-20239437    | -0.129232 | 0.999791 |
| XLOC_010534 | XLOC_010534 | MCOLN1       | chr19:7587495-7598895     | -0.129187 | 0.999791 |
| XLOC_006504 | XLOC_006504 | OTUB2        | chr14:94492723-94515276   | -0.129177 | 0.999791 |
| XLOC_007182 | XLOC_007182 | WDR76        | chr15:44119111-44160617   | -0.129166 | 0.999791 |
| XLOC_001864 | XLOC_001864 | SLC39A1      | chr1:153931574-153950451  | -0.129096 | 0.999791 |
| XLOC_020671 | XLOC_020671 | SH2B2        | chr7:101928404-101962178  | -0.129052 | 0.999791 |
| XLOC_011090 | XLOC_011090 | ZNF137P      | chr19:53099936-53103405   | -0.129011 | 1        |
| XLOC_000643 | XLOC_000643 | ANKRD35      | chr1:145549208-145568526  | -0.128994 | 1        |
| XLOC_014497 | XLOC_014497 | NF2          | chr22:29999544-30094589   | -0.128991 | 0.999791 |
| XLOC_014483 | XLOC_014483 | SRRD         | chr22:26879849-26908437   | -0.128848 | 0.999791 |
| XLOC_001132 | XLOC_001132 | EXO1         | chr1:242011492-242053241  | -0.128796 | 0.999791 |
| XLOC_022861 | XLOC_022861 | LOC642236    | chr9:68427782-68454375    | -0.128777 | 1        |
| XLOC_018698 | XLOC_018698 | ZNF184       | chr6:27418520-27440897    | -0.128682 | 0.999791 |
| XLOC_005528 | XLOC_005528 | BAZZA        | chr12:56915608-57030163   | -0.128653 | 0.999791 |
| XLOC_011013 | XLOC_011013 | LIN7B        | chr19:49617617-49622397   | -0.128648 | 0.999791 |
| XLOC_024047 | XLOC_024047 | CUL4B        | chrX:119658445-119709684  | -0.128638 | 0.999791 |
| XLOC_001486 | XLOC_001486 | CITED4       | chr1:41326727-41328018    | -0.128558 | 0.999791 |
| XLOC_016668 | XLOC_016668 | WDR1         | chr4:10075962-10118573    | -0.128558 | 0.999791 |
| XLOC_005065 | XLOC_005065 | HCFC2        | chr12:104458235-104500304 | -0.128533 | 0.999791 |
| XLOC_008026 | XLOC_008026 | SPNS1        | chr16:28986095-28995869   | -0.128512 | 0.999791 |
| XLOC_022812 | XLOC_022812 | PIGO         | chr9:35088684-35096598    | -0.128456 | 0.999791 |
| XLOC_002607 | XLOC_002607 | HELLS        | chr10:96305573-96361856   | -0.128393 | 0.999791 |
| XLOC_010505 | XLOC_010505 | MIR7-3HG     | chr19:47699116-4772568    | -0.128341 | 1        |
| XLOC_013666 | XLOC_013666 | TOX2         | chr20:42543491-42698254   | -0.128341 | 0.999791 |
| XLOC_013647 | XLOC_013647 | SNHG11       | chr20:37075296-37079564   | -0.128325 | 0.999791 |
| XLOC_001541 | XLOC_001541 | FAF1         | chr1:50906934-51425936    | -0.128282 | 0.999791 |
| XLOC_023110 | XLOC_023110 | IER5L        | chr9:131937830-131940540  | -0.128187 | 0.999791 |
| XLOC_005517 | XLOC_005517 | PME1         | chr12:56347888-56360496   | -0.128166 | 0.999791 |
| XLOC_016640 | XLOC_016640 | MFSD10       | chr4:2932287-2936586      | -0.128073 | 0.999791 |
| XLOC_015575 | XLOC_015575 | VGLL4        | chr3:11314009-11762220    | -0.128061 | 0.999791 |
| XLOC_015891 | XLOC_015891 | GSK3B        | chr3:119540801-119813264  | -0.128028 | 0.999791 |
| XLOC_014745 | XLOC_014745 | XBP1         | chr22:29190547-29196560   | -0.127938 | 0.999791 |
| XLOC_016277 | XLOC_016277 | TBC1D1       | chr4:37892704-38140796    | -0.127852 | 0.999791 |
| XLOC_020685 | XLOC_020685 | MLL5         | chr7:104654636-104754532  | -0.127817 | 0.999791 |
| XLOC_006960 | XLOC_006960 | CLMN         | chr14:95648275-95786245   | -0.127747 | 0.999791 |
| XLOC_003732 | XLOC_003732 | AAMDC        | chr11:77532207-77583398   | -0.127734 | 0.999791 |
| XLOC_012271 | XLOC_012271 | KCMF1        | chr2:85198230-85286595    | -0.127621 | 0.999791 |
| XLOC_016284 | XLOC_016284 | KLB          | chr4:39408472-39453153    | -0.127597 | 1        |
| XLOC_009928 | XLOC_009928 | HELZ         | chr17:65066553-65241319   | -0.127451 | 0.999791 |
| XLOC_010403 | XLOC_010403 | RTTN         | chr18:67671042-67872962   | -0.127326 | 0.999791 |
| XLOC_008924 | XLOC_008924 | WSB1         | chr17:25621105-25640645   | -0.127311 | 0.999791 |
| XLOC_012195 | XLOC_012195 | PEX13        | chr2:61167547-61279125    | -0.127237 | 0.999791 |
| XLOC_007314 | XLOC_007314 | COMMD4       | chr15:75628373-75632614   | -0.127222 | 0.999791 |
| XLOC_016182 | XLOC_016182 | ADD1         | chr4:2845583-2931802      | -0.127133 | 0.999791 |
| XLOC_007923 | XLOC_007923 | NUDT16L1     | chr16:4743693-4745860     | -0.127112 | 0.999791 |
| XLOC_011286 | XLOC_011286 | FAM108A1     | chr19:1876974-1885518     | -0.127085 | 0.999791 |
| XLOC_005767 | XLOC_005767 | PITPNM2      | chr12:123468026-123594975 | -0.126964 | 0.999791 |
| XLOC_017268 | XLOC_017268 | DCP2         | chr5:112312406-112824527  | -0.126849 | 0.999791 |
| XLOC_008614 | XLOC_008614 | FAM96B       | chr16:66965957-66968326   | -0.126824 | 0.999791 |
| XLOC_018234 | XLOC_018234 | SLC39A7      | chr6:33168602-33172214    | -0.126731 | 0.999791 |
| XLOC_000499 | XLOC_000499 | LRRC8C       | chr1:90098643-90185094    | -0.126694 | 0.999791 |
| XLOC_018140 | XLOC_018140 | ZSCAN9       | chr6:28193028-28201264    | -0.126624 | 0.999791 |
| XLOC_018024 | XLOC_018024 | LOC100508120 | chr6:2245986-2413825      | -0.126569 | 0.999791 |
| XLOC_016294 | XLOC_016294 | LIMCH1       | chr4:41362803-41702061    | -0.126552 | 0.999791 |
| XLOC_003699 | XLOC_003699 | INPL1        | chr11:71935881-71955220   | -0.126439 | 0.999791 |
| XLOC_014728 | XLOC_014728 | GUCD1        | chr22:24936405-24951275   | -0.126438 | 0.999791 |
| XLOC_001387 | XLOC_001387 | AHDC1        | chr1:27860755-27930143    | -0.126337 | 0.999791 |

|             |             |                              |                           |           |          |
|-------------|-------------|------------------------------|---------------------------|-----------|----------|
| XLOC_015805 | XLOC_015805 | LRIG1                        | chr3:66119284-66550845    | -0.126316 | 0.999791 |
| XLOC_024174 | XLOC_024174 | HAUS7                        | chrX:152713122-152775004  | -0.126271 | 0.999791 |
| XLOC_012761 | XLOC_012761 | LOC728323                    | chr2:243030843-243102469  | -0.126217 | 1        |
| XLOC_015229 | XLOC_015229 | FAM172BP                     | chr3:101237710-101242731  | -0.126194 | 1        |
| XLOC_005802 | XLOC_005802 | ZMYM2                        | chr13:20532809-20665968   | -0.126117 | 0.999791 |
| XLOC_011495 | XLOC_011495 | ILVBL                        | chr19:15218213-15236577   | -0.126114 | 0.999791 |
| XLOC_002042 | XLOC_002042 | RC3H1                        | chr1:173900351-173962210  | -0.126109 | 0.999791 |
| XLOC_023706 | XLOC_023706 | EMD                          | chrX:153607596-153609883  | -0.126073 | 0.999791 |
| XLOC_010774 | XLOC_010774 | SCN1B                        | chr19:35521591-35531353   | -0.126032 | 0.999791 |
| XLOC_005090 | XLOC_005090 | MVK                          | chr12:110011499-110035071 | -0.12603  | 0.999791 |
| XLOC_004740 | XLOC_004740 | RPL13AP20                    | chr12:13028410-13029070   | -0.125979 | 0.999791 |
| XLOC_015824 | XLOC_015824 | ROBO1                        | chr3:78646387-79817059    | -0.125964 | 0.999791 |
| XLOC_020864 | XLOC_020864 | AGAP3                        | chr7:150783825-150841523  | -0.125963 | 0.999791 |
| XLOC_023001 | XLOC_023001 | PTPN3                        | chr9:112137973-112260593  | -0.125931 | 0.999791 |
| XLOC_007802 | XLOC_007802 | SNRPA1                       | chr15:101821714-101835460 | -0.125735 | 0.999791 |
| XLOC_010548 | XLOC_010548 | SNAPC2                       | chr19:7985193-7988136     | -0.125441 | 0.999791 |
| XLOC_022443 | XLOC_022443 | PHF2                         | chr9:96338908-96441869    | -0.125403 | 0.999791 |
| XLOC_021799 | XLOC_021799 | HSF1                         | chr8:145515269-145550567  | -0.125393 | 0.999791 |
| XLOC_023192 | XLOC_023192 | TPRN                         | chr9:140086068-140095163  | -0.125324 | 0.999791 |
| XLOC_001000 | XLOC_001000 | CDK18                        | chr1:205473683-205501921  | -0.125318 | 0.999791 |
| XLOC_007166 | XLOC_007166 | JMJD7, JMJD7-PLA2G4B, PLA2G4 | chr15:42120282-42186275   | -0.125231 | 0.999791 |
| XLOC_011962 | XLOC_011962 | TMEM86B                      | chr19:55738001-55740632   | -0.125202 | 0.999791 |
| XLOC_008313 | XLOC_008313 | LUC7L                        | chr16:238969-279449       | -0.125154 | 0.999791 |
| XLOC_019106 | XLOC_019106 | IFNGR1                       | chr6:137518620-137540567  | -0.125097 | 0.999791 |
| XLOC_000847 | XLOC_000847 | NUF2                         | chr1:163291722-163325553  | -0.124956 | 0.999791 |
| XLOC_008105 | XLOC_008105 | IRX5                         | chr16:54965110-54968395   | -0.124909 | 0.999791 |
| XLOC_004327 | XLOC_004327 | RELA                         | chr11:65421066-65430443   | -0.124887 | 0.999791 |
| XLOC_013098 | XLOC_013098 | LINC00116                    | chr2:110969105-110980517  | -0.124802 | 0.999791 |
| XLOC_011217 | XLOC_011217 | ZNF805                       | chr19:57752052-57774106   | -0.12478  | 0.999791 |
| XLOC_022613 | XLOC_022613 | PRDM12                       | chr9:133539980-133558384  | -0.124617 | 0.999791 |
| XLOC_021178 | XLOC_021178 | SHFM1                        | chr7:96318078-96339203    | -0.124616 | 0.999791 |
| XLOC_000960 | XLOC_000960 | CAMSAP2                      | chr1:200708685-200829831  | -0.124551 | 0.999791 |
| XLOC_000644 | XLOC_000644 | PIAS3                        | chr1:145575987-145589435  | -0.124493 | 0.999791 |
| XLOC_004338 | XLOC_004338 | YIF1A                        | chr1:166052050-66056638   | -0.124361 | 0.999791 |
| XLOC_007140 | XLOC_007140 | BUB1B, PAK6                  | chr15:40453209-40569688   | -0.12429  | 0.999791 |
| XLOC_003982 | XLOC_003982 | OSBPL5                       | chr11:3108345-3186582     | -0.124271 | 0.999791 |
| XLOC_013628 | XLOC_013628 | ROMO1                        | chr20:34256609-34288902   | -0.12424  | 0.999791 |
| XLOC_007866 | XLOC_007866 | SYNGR3                       | chr16:2039945-2044276     | -0.124222 | 0.999791 |
| XLOC_004524 | XLOC_004524 | ALG9                         | chr11:111652918-111742305 | -0.124211 | 0.999791 |
| XLOC_013924 | XLOC_013924 | COMMD7                       | chr20:31290492-31331814   | -0.124211 | 0.999791 |
| XLOC_012819 | XLOC_012819 | ITSN2                        | chr2:24425734-24583397    | -0.124128 | 0.999791 |
| XLOC_005433 | XLOC_005433 | TUBA1B                       | chr12:49521566-49525304   | -0.124126 | 0.999791 |
| XLOC_012694 | XLOC_012694 | C2orf72                      | chr2:231902280-231914427  | -0.124095 | 0.999791 |
| XLOC_010202 | XLOC_010202 | SMAD4                        | chr18:48556582-48611411   | -0.123996 | 0.999791 |
| XLOC_023199 | XLOC_023199 | ENTPD8                       | chr9:140317846-140335901  | -0.123931 | 1        |
| XLOC_012667 | XLOC_012667 | TMEM198                      | chr2:220408744-220415317  | -0.123885 | 0.999791 |
| XLOC_020735 | XLOC_020735 | FLJ45340                     | chr7:128281294-128301052  | -0.123856 | 0.999791 |
| XLOC_016936 | XLOC_016936 | NDUFC1                       | chr4:140211070-140311935  | -0.123712 | 0.999791 |
| XLOC_010487 | XLOC_010487 | CACTIN-AS1                   | chr19:3607244-3626813     | -0.123628 | 1        |
| XLOC_017530 | XLOC_017530 | MAML1                        | chr5:179159850-179204287  | -0.123582 | 0.999791 |
| XLOC_001062 | XLOC_001062 | MARC1                        | chr1:220960038-220987741  | -0.12358  | 0.999791 |
| XLOC_002999 | XLOC_002999 | MYOZ1                        | chr10:75391369-75401515   | -0.123551 | 1        |
| XLOC_002662 | XLOC_002662 | GBF1                         | chr10:104005254-104142656 | -0.123546 | 0.999791 |
| XLOC_005845 | XLOC_005845 | FRY                          | chr13:32605436-32870776   | -0.123538 | 1        |
| XLOC_002248 | XLOC_002248 | SIPA1L2                      | chr1:232533711-232651243  | -0.123427 | 1        |
| XLOC_015126 | XLOC_015126 | TEX264                       | chr3:51705221-51738339    | -0.123418 | 0.999791 |
| XLOC_008480 | XLOC_008480 | ZKSCAN2                      | chr16:25247321-25268855   | -0.123249 | 0.999791 |
| XLOC_021033 | XLOC_021033 | PGAM2                        | chr7:44102325-44105186    | -0.123178 | 0.999791 |
| XLOC_022583 | XLOC_022583 | SWI5                         | chr9:131038424-131051268  | -0.123147 | 0.999791 |
| XLOC_001995 | XLOC_001995 | TADA1                        | chr1:166825748-166845654  | -0.123144 | 0.999791 |
| XLOC_018113 | XLOC_018113 | BTN2A1                       | chr6:26458152-26482737    | -0.122982 | 0.999791 |
| XLOC_008814 | XLOC_008814 | NLGN2                        | chr17:7311501-7323179     | -0.122901 | 0.999791 |
| XLOC_015787 | XLOC_015787 | DENND6A                      | chr3:57611180-57678816    | -0.122804 | 0.999791 |
| XLOC_002881 | XLOC_002881 | PARD3                        | chr10:34398487-35104253   | -0.1228   | 0.999791 |
| XLOC_003016 | XLOC_003016 | ZCCHC24                      | chr10:81142082-81205383   | -0.122695 | 0.999791 |
| XLOC_018872 | XLOC_018872 | CCND3                        | chr6:41902670-42016610    | -0.122612 | 0.999791 |
| XLOC_014677 | XLOC_014677 | C22orf39                     | chr22:19428409-19435755   | -0.122538 | 0.999791 |
| XLOC_002276 | XLOC_002276 | LOC731275                    | chr1:243219615-243265046  | -0.122532 | 0.999791 |
| XLOC_016597 | XLOC_016597 | SLC25A4                      | chr4:186064416-186071538  | -0.122491 | 0.999791 |
| XLOC_008043 | XLOC_008043 | INO80E                       | chr16:30007530-30022401   | -0.122474 | 0.999791 |
| XLOC_011871 | XLOC_011871 | LRRC4B                       | chr19:51020149-51071302   | -0.122422 | 0.999791 |
| XLOC_008281 | XLOC_008281 | ZFPF1                        | chr16:88520013-88601574   | -0.122307 | 0.999791 |
| XLOC_023709 | XLOC_023709 | TAZ                          | chrX:153626570-153650063  | -0.122244 | 0.999791 |
| XLOC_009895 | XLOC_009895 | MED13                        | chr17:60019965-60142643   | -0.122241 | 0.999791 |
| XLOC_010356 | XLOC_010356 | SMAD2                        | chr18:45359465-45457517   | -0.122229 | 0.999791 |
| XLOC_009433 | XLOC_009433 | DERL2                        | chr17:5377612-5389494     | -0.122213 | 0.999791 |
| XLOC_008497 | XLOC_008497 | LOC440354                    | chr16:29538928-295757540  | -0.122182 | 1        |
| XLOC_008191 | XLOC_008191 | PLA2G15                      | chr16:68279246-68294961   | -0.122089 | 0.999791 |
| XLOC_000619 | XLOC_000619 | MAN1A2                       | chr1:117910084-118068320  | -0.122085 | 0.999791 |

|             |             |                               |                           |           |          |
|-------------|-------------|-------------------------------|---------------------------|-----------|----------|
| XLOC_015354 | XLOC_015354 | PPP2R3A                       | chr3:135684514-135866752  | -0.122074 | 0.999791 |
| XLOC_021996 | XLOC_021996 | TMEM68                        | chr8:56651319-56738005    | -0.122068 | 0.999791 |
| XLOC_006711 | XLOC_006711 | AJUBA                         | chr14:23440409-23451848   | -0.121993 | 0.999791 |
| XLOC_021122 | XLOC_021122 | HIP1                          | chr7:75162618-75368283    | -0.121922 | 0.999791 |
| XLOC_000342 | XLOC_000342 | ATP6V0B                       | chr1:44440601-44443972    | -0.121892 | 0.999791 |
| XLOC_015253 | XLOC_015253 | TAGLN3                        | chr3:111717585-111732735  | -0.121878 | 1        |
| XLOC_000027 | XLOC_000027 | MIB2                          | chr1:1550794-1565990      | -0.121755 | 0.999791 |
| XLOC_010345 | XLOC_010345 | PSTPIP2                       | chr18:43563501-43652250   | -0.121749 | 1        |
| XLOC_015116 | XLOC_015116 | SEMA3B                        | chr3:50305039-50314572    | -0.121744 | 0.999791 |
| XLOC_010850 | XLOC_010850 | PLEKHG2                       | chr19:39903749-39919055   | -0.12173  | 0.999791 |
| XLOC_014627 | XLOC_014627 | PPARA                         | chr22:46546498-46639653   | -0.121708 | 0.999791 |
| XLOC_017863 | XLOC_017863 | HDAC3                         | chr5:141000442-141016423  | -0.121659 | 0.999791 |
| XLOC_015199 | XLOC_015199 | ZNF654                        | chr3:88101099-88207115    | -0.121603 | 0.999791 |
| XLOC_011021 | XLOC_011021 | FLT3LG                        | chr19:49977465-49989488   | -0.121558 | 0.999791 |
| XLOC_018572 | XLOC_018572 | SYNJ2                         | chr6:158402887-158520207  | -0.121558 | 0.999791 |
| XLOC_003635 | XLOC_003635 | CST6                          | chr11:65779461-65780976   | -0.121521 | 1        |
| XLOC_016143 | XLOC_016143 | UBXN7                         | chr3:196080368-196159345  | -0.121424 | 0.999791 |
| XLOC_011678 | XLOC_011678 | C19orf47                      | chr19:40826966-40884390   | -0.121393 | 0.999791 |
| XLOC_012807 | XLOC_012807 | LAPTM4A                       | chr2:20232410-20251789    | -0.121388 | 0.999791 |
| XLOC_010806 | XLOC_010806 | SDHAF1                        | chr19:36486089-36487220   | -0.121378 | 0.999791 |
| XLOC_010061 | XLOC_010061 | C17orf62                      | chr17:80347085-80408707   | -0.121268 | 0.999791 |
| XLOC_014241 | XLOC_014241 | NRIP1                         | chr21:16333555-16437126   | -0.121247 | 0.999791 |
| XLOC_006869 | XLOC_006869 | DCAF5                         | chr14:69517636-69619914   | -0.121223 | 0.999791 |
| XLOC_014410 | XLOC_014410 | GP1BB,SEPT5                   | chr22:19701986-19712297   | -0.121223 | 0.999791 |
| XLOC_004069 | XLOC_004069 | SBF2                          | chr11:9776316-10315754    | -0.121008 | 0.999791 |
| XLOC_004298 | XLOC_004298 | TRPT1                         | chr11:63974151-63993726   | -0.121007 | 0.999791 |
| XLOC_012013 | XLOC_012013 | CHMP2A                        | chr19:59062932-59066486   | -0.120998 | 0.999791 |
| XLOC_014253 | XLOC_014253 | APP                           | chr21:27252860-27543446   | -0.12097  | 0.999791 |
| XLOC_007710 | XLOC_007710 | PEAK1                         | chr15:77400497-77712446   | -0.120949 | 0.999791 |
| XLOC_007584 | XLOC_007584 | GNB5                          | chr15:52413122-52483565   | -0.120769 | 0.999791 |
| XLOC_001084 | XLOC_001084 | SNAP47                        | chr1:227916239-227968932  | -0.120647 | 0.999791 |
| XLOC_002171 | XLOC_002171 | SLC30A1                       | chr1:211748380-211752099  | -0.120639 | 0.999791 |
| XLOC_014970 | XLOC_014970 | EAF1                          | chr3:15469063-15484120    | -0.12058  | 0.999791 |
| XLOC_012500 | XLOC_012500 | PPIG                          | chr2:170440849-170494254  | -0.120559 | 0.999791 |
| XLOC_001083 | XLOC_001083 | LOC100130093                  | chr1:227916239-227968932  | -0.120447 | 0.999791 |
| XLOC_009737 | XLOC_009737 | ZNF385C                       | chr17:40118758-40190044   | -0.120287 | 1        |
| XLOC_010870 | XLOC_010870 | EGLN2,MIA,RAB4B               | chr19:41281081-41314346   | -0.120258 | 0.999791 |
| XLOC_014600 | XLOC_014600 | C22orf32                      | chr22:42475694-42480288   | -0.120215 | 0.999791 |
| XLOC_012669 | XLOC_012669 | STK11IP                       | chr2:220462595-220481173  | -0.12017  | 0.999791 |
| XLOC_022951 | XLOC_022951 | FANCC                         | chr9:97861335-98079991    | -0.12008  | 0.999791 |
| XLOC_022126 | XLOC_022126 | RRM2B                         | chr8:103216728-103251346  | -0.120056 | 0.999791 |
| XLOC_013635 | XLOC_013635 | C20orf24,TGIF2,TGIF2-C20orf24 | chr20:35201875-35274619   | -0.119995 | 0.999791 |
| XLOC_013979 | XLOC_013979 | SERINC3                       | chr20:43124863-43150726   | -0.119989 | 0.999791 |
| XLOC_009127 | XLOC_009127 | LRRC37A2                      | chr17:44590075-44657088   | -0.119983 | 1        |
| XLOC_016515 | XLOC_016515 | ZNF330                        | chr4:142142048-142155850  | -0.119905 | 0.999791 |
| XLOC_001185 | XLOC_001185 | FAM41C                        | chr1:803450-812182        | -0.11986  | 0.999791 |
| XLOC_016505 | XLOC_016505 | C4orf33                       | chr4:130014828-130033843  | -0.119755 | 0.999791 |
| XLOC_014457 | XLOC_014457 | SMARCB1                       | chr22:24129149-24181199   | -0.119734 | 0.999791 |
| XLOC_016101 | XLOC_016101 | CRYGS                         | chr3:186256231-186262167  | -0.119579 | 0.999791 |
| XLOC_005556 | XLOC_005556 | LOC100506844                  | chr12:58325231-58329947   | -0.119568 | 0.999791 |
| XLOC_007979 | XLOC_007979 | TMEM159                       | chr16:20944475-21191937   | -0.119478 | 0.999791 |
| XLOC_007729 | XLOC_007729 | MESDC2                        | chr15:81268094-81282205   | -0.119398 | 0.999791 |
| XLOC_003823 | XLOC_003823 | NCAM1                         | chr11:112831968-113149158 | -0.119388 | 1        |
| XLOC_008446 | XLOC_008446 | GDE1                          | chr16:19513014-19533450   | -0.119287 | 0.999791 |
| XLOC_022996 | XLOC_022996 | CTNNAL1                       | chr9:111704850-111775764  | -0.119243 | 0.999791 |
| XLOC_001993 | XLOC_001993 | FAM78B                        | chr1:166039255-166135958  | -0.119207 | 0.999791 |
| XLOC_014924 | XLOC_014924 | EDEM1                         | chr3:52293358-5261650     | -0.119179 | 0.999791 |
| XLOC_005166 | XLOC_005166 | C12orf65                      | chr12:123717843-123742506 | -0.119163 | 0.999791 |
| XLOC_001096 | XLOC_001096 | RHOU                          | chr1:228780393-228882416  | -0.119137 | 1        |
| XLOC_018062 | XLOC_018062 | CD83                          | chr6:14117486-14137148    | -0.119116 | 0.999791 |
| XLOC_019099 | XLOC_019099 | MTFR2                         | chr6:136552167-136571449  | -0.119108 | 0.999791 |
| XLOC_003430 | XLOC_003430 | CREB3L1                       | chr11:46299227-46342972   | -0.119104 | 1        |
| XLOC_003668 | XLOC_003668 | NDUFS8                        | chr11:67798083-67804114   | -0.119063 | 0.999791 |
| XLOC_002240 | XLOC_002240 | FAM89A                        | chr1:231154703-231175995  | -0.119006 | 0.999791 |
| XLOC_012333 | XLOC_012333 | NPAS2                         | chr2:101436612-101613287  | -0.118968 | 0.999791 |
| XLOC_002501 | XLOC_002501 | EIF4EBP2                      | chr10:72163860-72188374   | -0.118954 | 0.999791 |
| XLOC_002859 | XLOC_002859 | ACBD5                         | chr10:27484142-27531068   | -0.118924 | 0.999791 |
| XLOC_016585 | XLOC_016585 | NEIL3                         | chr4:178230990-178284092  | -0.118921 | 0.999791 |
| XLOC_012170 | XLOC_012170 | LOC388948                     | chr2:47043806-47049799    | -0.118904 | 1        |
| XLOC_006413 | XLOC_006413 | RAD51B                        | chr14:68286495-69062738   | -0.118862 | 0.999791 |
| XLOC_021911 | XLOC_021911 | TNFRSF10D                     | chr8:22993100-23021543    | -0.11881  | 0.999791 |
| XLOC_009066 | XLOC_009066 | NKIRAS2                       | chr17:40118758-40190044   | -0.118794 | 0.999791 |
| XLOC_020602 | XLOC_020602 | ANKIB1                        | chr7:91875547-92030698    | -0.118773 | 0.999791 |
| XLOC_001378 | XLOC_001378 | GPATCH3                       | chr1:27216978-27226962    | -0.118748 | 0.999791 |
| XLOC_015972 | XLOC_015972 | PIK3CB                        | chr3:138371539-138478201  | -0.118649 | 0.999791 |
| XLOC_016217 | XLOC_016217 | CPZ                           | chr4:8594386-8621488      | -0.118536 | 0.999791 |
| XLOC_018863 | XLOC_018863 | TREM2                         | chr6:41126243-41130924    | -0.118507 | 1        |
| XLOC_010096 | XLOC_010096 | EMILIN2                       | chr18:2847027-2914090     | -0.118478 | 1        |
| XLOC_005565 | XLOC_005565 | GNS                           | chr12:65107221-65153226   | -0.11844  | 0.999791 |

|             |             |              |                           |           |          |
|-------------|-------------|--------------|---------------------------|-----------|----------|
| XLOC_008560 | XLOC_008560 | ITFG1        | chr16:47189297-47495015   | -0.118421 | 0.999791 |
| XLOC_008974 | XLOC_008974 | LRR37B       | chr17:30348154-30380519   | -0.118375 | 0.999791 |
| XLOC_022814 | XLOC_022814 | FAM214B      | chr9:35104117-35115893    | -0.118244 | 0.999791 |
| XLOC_004084 | XLOC_004084 | RRAS2        | chr11:14299465-14386052   | -0.1182   | 0.999791 |
| XLOC_023045 | XLOC_023045 | C5           | chr9:123714613-123812554  | -0.118158 | 1        |
| XLOC_001514 | XLOC_001514 | TESK2        | chr1:45794913-45956840    | -0.117986 | 0.999791 |
| XLOC_007332 | XLOC_007332 | AGPHD1       | chr15:78799905-78829715   | -0.117888 | 0.999791 |
| XLOC_003447 | XLOC_003447 | PTPRJ        | chr11:48002109-48192394   | -0.117872 | 0.999791 |
| XLOC_005439 | XLOC_005439 | NCKAP5L      | chr12:50184928-50222208   | -0.117844 | 0.999791 |
| XLOC_022881 | XLOC_022881 | TMEM2        | chr9:74298281-74383800    | -0.117738 | 0.999791 |
| XLOC_004663 | XLOC_004663 | NDUFA9       | chr12:4758263-4796720     | -0.11769  | 0.999791 |
| XLOC_016164 | XLOC_016164 | PCGF3        | chr4:699572-764427        | -0.11749  | 0.999791 |
| XLOC_015259 | XLOC_015259 | GTPBP8       | chr3:112709799-112720221  | -0.117457 | 0.999791 |
| XLOC_005772 | XLOC_005772 | RILPL2       | chr12:123899935-123921264 | -0.117423 | 0.999791 |
| XLOC_002975 | XLOC_002975 | LRR20        | chr10:72058728-72142382   | -0.117404 | 0.999791 |
| XLOC_009658 | XLOC_009658 | PLXDC1       | chr17:37213271-37307902   | -0.117335 | 1        |
| XLOC_003704 | XLOC_003704 | ARHGEP17     | chr11:73019662-73080425   | -0.117304 | 0.999791 |
| XLOC_001615 | XLOC_001615 | ZZZ3         | chr1:78030189-78148343    | -0.117259 | 0.999791 |
| XLOC_010937 | XLOC_010937 | GEMIN7       | chr19:45582517-45594782   | -0.117215 | 0.999791 |
| XLOC_009216 | XLOC_009216 | EFCAB3       | chr17:60447578-60493839   | -0.11719  | 0.999791 |
| XLOC_013281 | XLOC_013281 | HIBCH        | chr2:191069359-191184771  | -0.117134 | 0.999791 |
| XLOC_021930 | XLOC_021930 | PBK          | chr8:27667137-27695349    | -0.117099 | 0.999791 |
| XLOC_001569 | XLOC_001569 | DHCR24       | chr1:55315299-55352921    | -0.117055 | 0.999791 |
| XLOC_003873 | XLOC_003873 | TBCEL        | chr11:120894802-120960354 | -0.117055 | 0.999791 |
| XLOC_005137 | XLOC_005137 | COX6A1       | chr12:120875892-120878545 | -0.117043 | 0.999791 |
| XLOC_006658 | XLOC_006658 | LINC00638    | chr14:105287537-105290055 | -0.117041 | 1        |
| XLOC_008133 | XLOC_008133 | HERPUD1      | chr16:56965747-56977793   | -0.117038 | 0.999791 |
| XLOC_009748 | XLOC_009748 | FAM134C      | chr17:40731525-40767256   | -0.116961 | 0.999791 |
| XLOC_013922 | XLOC_013922 | C20orf112    | chr20:31030861-31172875   | -0.116945 | 0.999791 |
| XLOC_007233 | XLOC_007233 | CCNB2        | chr15:59397283-59417244   | -0.116812 | 0.999791 |
| XLOC_010481 | XLOC_010481 | CELF5        | chr19:3224700-3297073     | -0.116809 | 0.999791 |
| XLOC_023073 | XLOC_023073 | PPP6C        | chr9:127908851-127952218  | -0.116763 | 0.999791 |
| XLOC_005449 | XLOC_005449 | CSRNP2       | chr12:51454987-51477454   | -0.116737 | 0.999791 |
| XLOC_021946 | XLOC_021946 | GTF2E2       | chr8:30436030-30515738    | -0.116719 | 0.999791 |
| XLOC_009802 | XLOC_009802 | MRPL45P2     | chr17:45527592-45569986   | -0.116715 | 0.999791 |
| XLOC_007562 | XLOC_007562 | SLC30A4      | chr15:45774679-45848928   | -0.116713 | 1        |
| XLOC_010243 | XLOC_010243 | SOCS6        | chr18:67956136-67997434   | -0.116679 | 0.999791 |
| XLOC_008852 | XLOC_008852 | USP43        | chr17:9548853-9633003     | -0.116633 | 0.999791 |
| XLOC_004405 | XLOC_004405 | PGM2L1       | chr11:74041360-74109502   | -0.116614 | 0.999791 |
| XLOC_020812 | XLOC_020812 | ZYX          | chr7:143078359-143220540  | -0.116535 | 0.999791 |
| XLOC_023705 | XLOC_023705 | TKTL1        | chrX:153524026-153558713  | -0.116483 | 1        |
| XLOC_000291 | XLOC_000291 | CDCA8        | chr1:38158072-38175391    | -0.116469 | 0.999791 |
| XLOC_009368 | XLOC_009368 | NXN          | chr17:702552-882998       | -0.116457 | 0.999791 |
| XLOC_001889 | XLOC_001889 | SCAMP3       | chr1:155225769-155232176  | -0.116442 | 0.999791 |
| XLOC_003257 | XLOC_003257 | KCNQ1        | chr11:2466220-2870340     | -0.116433 | 0.999791 |
| XLOC_017001 | XLOC_017001 | HMGB2        | chr4:174252526-174255595  | -0.11636  | 0.999791 |
| XLOC_004179 | XLOC_004179 | FNBP4        | chr11:477380668-47788993  | -0.116357 | 0.999791 |
| XLOC_022377 | XLOC_022377 | LOC100132352 | chr9:68726540-68748372    | -0.116346 | 0.999791 |
| XLOC_010877 | XLOC_010877 | AXL          | chr19:41725107-41767671   | -0.116336 | 0.999791 |
| XLOC_017503 | XLOC_017503 | FAF2         | chr5:175875355-175937075  | -0.116331 | 0.999791 |
| XLOC_018439 | XLOC_018439 | CEP57L1      | chr6:109416355-109485115  | -0.116323 | 0.999791 |
| XLOC_017249 | XLOC_017249 | FAM174A      | chr5:99871123-99922440    | -0.116293 | 0.999791 |
| XLOC_015785 | XLOC_015785 | DNAH12       | chr3:5732726-57530071     | -0.116239 | 1        |
| XLOC_007232 | XLOC_007232 | RNF111       | chr15:59279864-59389618   | -0.116173 | 0.999791 |
| XLOC_022196 | XLOC_022196 | TRAPPC9      | chr8:140742585-141468678  | -0.116168 | 0.999791 |
| XLOC_000126 | XLOC_000126 | SPEN         | chr1:16160709-16266950    | -0.116156 | 0.999791 |
| XLOC_008975 | XLOC_008975 | SH3GL1P1     | chr17:30348154-30380519   | -0.116148 | 1        |
| XLOC_019074 | XLOC_019074 | ARHGAP18     | chr6:129898239-130031370  | -0.116138 | 0.999791 |
| XLOC_007224 | XLOC_007224 | TEX9         | chr15:56657643-56757335   | -0.116079 | 0.999791 |
| XLOC_014070 | XLOC_014070 | DIDO1        | chr20:61509089-61569304   | -0.115938 | 0.999791 |
| XLOC_011392 | XLOC_011392 | ZNF558       | chr19:8920381-8933565     | -0.115856 | 0.999791 |
| XLOC_013054 | XLOC_013054 | SEMA4C       | chr2:97525472-97535735    | -0.115678 | 0.999791 |
| XLOC_006998 | XLOC_006998 | NUDT14       | chr14:105639273-105647660 | -0.11566  | 0.999791 |
| XLOC_015464 | XLOC_015464 | SOX2         | chr3:180774467-181460013  | -0.115649 | 1        |
| XLOC_011542 | XLOC_011542 | COPE         | chr19:19010322-19030199   | -0.115619 | 0.999791 |
| XLOC_016690 | XLOC_016690 | KCNIP4       | chr4:20730238-21950374    | -0.115612 | 1        |
| XLOC_006467 | XLOC_006467 | GSTZ1        | chr14:77787229-77797940   | -0.115421 | 0.999791 |
| XLOC_020546 | XLOC_020546 | LIMK1        | chr7:73498106-73536855    | -0.115332 | 0.999791 |
| XLOC_013049 | XLOC_013049 | NEURL3       | chr2:97163382-97173846    | -0.115271 | 1        |
| XLOC_021920 | XLOC_021920 | KCTD9        | chr8:25285363-25315984    | -0.115213 | 0.999791 |
| XLOC_012691 | XLOC_012691 | ITM2C        | chr2:231729620-231743963  | -0.115159 | 0.999791 |
| XLOC_021614 | XLOC_021614 | MTFR1        | chr8:66556887-66622798    | -0.115159 | 0.999791 |
| XLOC_024192 | XLOC_024192 | LAGE3        | chrX:153705240-153707596  | -0.115013 | 0.999791 |
| XLOC_009296 | XLOC_009296 | UBALD2       | chr17:74261285-74267379   | -0.115    | 0.999791 |
| XLOC_003670 | XLOC_003670 | TCIRG1       | chr11:67806461-67818366   | -0.114962 | 0.999791 |
| XLOC_017354 | XLOC_017354 | IGIP         | chr5:139505520-139508391  | -0.114915 | 0.999791 |
| XLOC_011577 | XLOC_011577 | HAVCR1P1     | chr19:24344994-24346249   | -0.114873 | 1        |
| XLOC_013051 | XLOC_013051 | LMAN2L       | chr2:97371666-97405813    | -0.114864 | 0.999791 |
| XLOC_020377 | XLOC_020377 | ARL4A        | chr7:12726451-12730558    | -0.114814 | 0.999791 |

|             |             |              |                           |           |          |
|-------------|-------------|--------------|---------------------------|-----------|----------|
| XLOC_012964 | XLOC_012964 | SNRPG        | chr2:70508505-70520869    | -0.114765 | 0.999791 |
| XLOC_016134 | XLOC_016134 | PPP1R2       | chr3:195241220-195270224  | -0.114754 | 0.999791 |
| XLOC_007239 | XLOC_007239 | TLN2         | chr15:62939509-63136829   | -0.114725 | 0.999791 |
| XLOC_023276 | XLOC_023276 | ZRSR2        | chrX:15808573-15841382    | -0.114706 | 0.999791 |
| XLOC_000207 | XLOC_000207 | HMG2         | chr1:26798901-26803133    | -0.114677 | 0.999791 |
| XLOC_012137 | XLOC_012137 | CRIM1        | chr2:36583369-36778278    | -0.114666 | 0.999791 |
| XLOC_007625 | XLOC_007625 | KIAA0101     | chr15:64657210-64673702   | -0.114643 | 0.999791 |
| XLOC_001469 | XLOC_001469 | RRAGC        | chr1:39303868-39325495    | -0.114618 | 0.999791 |
| XLOC_015296 | XLOC_015296 | DIRC2        | chr3:122513900-122599986  | -0.114524 | 0.999791 |
| XLOC_012315 | XLOC_012315 | CNNM4        | chr2:97426638-97477628    | -0.114465 | 0.999791 |
| XLOC_012516 | XLOC_012516 | PKD1         | chr2:173420778-173463862  | -0.114446 | 0.999791 |
| XLOC_003856 | XLOC_003856 | CCDC84       | chr11:118868851-118889057 | -0.114391 | 0.999791 |
| XLOC_003242 | XLOC_003242 | BRSK2        | chr11:1411128-1483919     | -0.114364 | 0.999791 |
| XLOC_018770 | XLOC_018770 | CLIC1        | chr6:31698357-31704341    | -0.114333 | 0.999791 |
| XLOC_005888 | XLOC_005888 | ITM2B        | chr13:48807273-48836232   | -0.114291 | 0.999791 |
| XLOC_017971 | XLOC_017971 | RAB24        | chr5:176728198-176730744  | -0.114273 | 0.999791 |
| XLOC_021961 | XLOC_021961 | LSM1         | chr8:38020838-38070819    | -0.114236 | 0.999791 |
| XLOC_021538 | XLOC_021538 | RBPMS        | chr8:30239634-30429734    | -0.114221 | 0.999791 |
| XLOC_013050 | XLOC_013050 | KANSL3       | chr2:97258891-97304116    | -0.114212 | 0.999791 |
| XLOC_015042 | XLOC_015042 | TRAK1        | chr3:42132745-42267382    | -0.114206 | 0.999791 |
| XLOC_023844 | XLOC_023844 | TIMM17B      | chrX:48750729-48760422    | -0.114096 | 0.999791 |
| XLOC_013978 | XLOC_013978 | FITM2        | chr20:42935196-42939889   | -0.114082 | 0.999791 |
| XLOC_010881 | XLOC_010881 | BCKDHA       | chr19:41903693-41930910   | -0.113945 | 0.999791 |
| XLOC_018368 | XLOC_018368 | LOC441155    | chr6:64429875-66417118    | -0.113916 | 1        |
| XLOC_007722 | XLOC_007722 | CTSH         | chr15:79214091-79237420   | -0.113909 | 0.999791 |
| XLOC_004296 | XLOC_004296 | RCOR2        | chr11:63678692-63684316   | -0.113898 | 0.999791 |
| XLOC_011190 | XLOC_011190 | ZNF524       | chr19:56111729-56114504   | -0.113783 | 0.999791 |
| XLOC_005168 | XLOC_005168 | SNRNP35      | chr12:123942650-123950941 | -0.113774 | 0.999791 |
| XLOC_002148 | XLOC_002148 | NUCKS1       | chr1:205681946-205719372  | -0.11375  | 0.999791 |
| XLOC_000391 | XLOC_000391 | OSBPL9       | chr1:52082545-52344609    | -0.113749 | 0.999791 |
| XLOC_023103 | XLOC_023103 | ZDHHC12      | chr9:131464801-131486408  | -0.113717 | 0.999791 |
| XLOC_012626 | XLOC_012626 | SPAG16       | chr2:214149102-215275225  | -0.113711 | 0.999791 |
| XLOC_009558 | XLOC_009558 | TMEM11       | chr17:21101262-21117908   | -0.113709 | 0.999791 |
| XLOC_023018 | XLOC_023018 | FAM225B      | chr9:115867002-115873957  | -0.113696 | 0.999791 |
| XLOC_011916 | XLOC_011916 | ZNF836       | chr19:52658124-52674896   | -0.11367  | 0.999791 |
| XLOC_009923 | XLOC_009923 | AMZ2P1       | chr17:62962667-62971703   | -0.113598 | 0.999791 |
| XLOC_007620 | XLOC_007620 | HERC1        | chr15:63900816-64126147   | -0.113563 | 0.999791 |
| XLOC_003911 | XLOC_003911 | DCPS         | chr11:126173646-126225482 | -0.113531 | 0.999791 |
| XLOC_005324 | XLOC_005324 | HEBP1        | chr12:13127798-13153243   | -0.113463 | 0.999791 |
| XLOC_018386 | XLOC_018386 | LOC100288198 | chr6:79910961-79946517    | -0.113414 | 0.999791 |
| XLOC_007243 | XLOC_007243 | RAB8B        | chr15:63481727-63559973   | -0.113402 | 0.999791 |
| XLOC_003327 | XLOC_003327 | SWAP70       | chr11:9685627-9774507     | -0.113401 | 0.999791 |
| XLOC_018405 | XLOC_018405 | SLC35A1      | chr6:88182642-8822057     | -0.113388 | 0.999791 |
| XLOC_014304 | XLOC_014304 | TMEM50B      | chr21:34775201-34852316   | -0.113371 | 0.999791 |
| XLOC_021216 | XLOC_021216 | LRCH4        | chr7:100171633-100183776  | -0.113327 | 0.999791 |
| XLOC_003110 | XLOC_003110 | LDB1         | chr10:103867324-103880210 | -0.113279 | 0.999791 |
| XLOC_015528 | XLOC_015528 | SDHAP2       | chr3:195384909-195415735  | -0.113238 | 0.999791 |
| XLOC_002347 | XLOC_002347 | CAMK1D       | chr10:12391582-12871733   | -0.113208 | 0.999791 |
| XLOC_010757 | XLOC_010757 | WDR88        | chr19:33622997-33666703   | -0.113059 | 1        |
| XLOC_009966 | XLOC_009966 | GGA3         | chr17:73232693-73267311   | -0.113053 | 0.999791 |
| XLOC_015579 | XLOC_015579 | RAF1         | chr3:12598512-12705700    | -0.113034 | 0.999791 |
| XLOC_011487 | XLOC_011487 | NDUFB7       | chr19:14676889-14682889   | -0.112997 | 0.999791 |
| XLOC_021865 | XLOC_021865 | CTSB         | chr8:11700033-11725646    | -0.112975 | 0.999791 |
| XLOC_012303 | XLOC_012303 | ZNF2         | chr2:95831182-95850064    | -0.112949 | 0.999791 |
| XLOC_005898 | XLOC_005898 | KCNRG,TRIM13 | chr13:50556687-50699677   | -0.112798 | 0.999791 |
| XLOC_003685 | XLOC_003685 | NADSYN1      | chr11:71164216-71212581   | -0.112737 | 0.999791 |
| XLOC_016512 | XLOC_016512 | MGST2        | chr4:140586921-141075233  | -0.112731 | 0.999791 |
| XLOC_013538 | XLOC_013538 | DSTN         | chr20:17550598-17588652   | -0.112724 | 0.999791 |
| XLOC_019163 | XLOC_019163 | SOD2         | chr6:160100148-160114353  | -0.112702 | 0.999791 |
| XLOC_022816 | XLOC_022816 | CD72         | chr9:35605280-35618424    | -0.112651 | 0.999791 |
| XLOC_021086 | XLOC_021086 | GUSB         | chr7:65425672-65447301    | -0.112605 | 0.999791 |
| XLOC_005991 | XLOC_005991 | ARHGEF7      | chr13:111767623-111958081 | -0.112465 | 0.999791 |
| XLOC_021221 | XLOC_021221 | EPHB4        | chr7:100400186-100425143  | -0.112455 | 0.999791 |
| XLOC_023902 | XLOC_023902 | ARHGEF9      | chrX:62854847-63005426    | -0.112437 | 0.999791 |
| XLOC_014913 | XLOC_014913 | ARSA         | chr22:51061181-51066601   | -0.112391 | 0.999791 |
| XLOC_010916 | XLOC_010916 | ZNF225       | chr19:44617547-44637255   | -0.112346 | 0.999791 |
| XLOC_021572 | XLOC_021572 | POLB         | chr8:42195972-42229331    | -0.112168 | 0.999791 |
| XLOC_004299 | XLOC_004299 | PPP1R14B     | chr11:64011950-64014413   | -0.112127 | 0.999791 |
| XLOC_010805 | XLOC_010805 | LRFN3        | chr19:36428021-36436097   | -0.112089 | 0.999791 |
| XLOC_004264 | XLOC_004264 | B3GAT3       | chr11:62382767-62389647   | -0.112062 | 0.999791 |
| XLOC_008968 | XLOC_008968 | NF1          | chr17:29421944-29704695   | -0.11201  | 0.999791 |
| XLOC_010939 | XLOC_010939 | BLOC1S3      | chr19:45682002-45685058   | -0.111978 | 0.999791 |
| XLOC_004991 | XLOC_004991 | TMEM19       | chr12:72079877-72097839   | -0.111957 | 0.999791 |
| XLOC_023172 | XLOC_023172 | AGPAT2       | chr9:139567594-139581911  | -0.111948 | 0.999791 |
| XLOC_002434 | XLOC_002434 | FAM21C       | chr10:46222647-46288412   | -0.111905 | 0.999791 |
| XLOC_013278 | XLOC_013278 | OSGEPL1      | chr2:190611385-190627924  | -0.111889 | 0.999791 |
| XLOC_004450 | XLOC_004450 | RAB38        | chr11:87846414-87908635   | -0.111837 | 0.999791 |
| XLOC_011525 | XLOC_011525 | UNC13A       | chr19:17712136-17799008   | -0.111792 | 1        |
| XLOC_003630 | XLOC_003630 | CCDC85B      | chr11:65657874-65659106   | -0.111772 | 0.999791 |



|             |             |                 |                           |           |          |
|-------------|-------------|-----------------|---------------------------|-----------|----------|
| XLOC_011619 | XLOC_011619 | ZNF565          | chr19:36673186-36729675   | -0.111675 | 0.999791 |
| XLOC_021255 | XLOC_021255 | NAMPT           | chr7:105888731-105925638  | -0.111612 | 0.999791 |
| XLOC_019028 | XLOC_019028 | SESN1           | chr6:109307639-109415708  | -0.111604 | 0.999791 |
| XLOC_015226 | XLOC_015226 | TMEM45A         | chr3:100211462-100296285  | -0.111587 | 0.999791 |
| XLOC_021783 | XLOC_021783 | ZNF707          | chr8:144766621-144777555  | -0.111587 | 0.999791 |
| XLOC_023440 | XLOC_023440 | MSN             | chrX:64887510-64961793    | -0.111564 | 1        |
| XLOC_010535 | XLOC_010535 | PNPLA6          | chr19:7599037-7626653     | -0.111548 | 0.999791 |
| XLOC_018550 | XLOC_018550 | PCMT1           | chr6:150070830-150132557  | -0.111536 | 0.999791 |
| XLOC_010973 | XLOC_010973 | EHD2            | chr19:48216600-48246391   | -0.111529 | 0.999791 |
| XLOC_017782 | XLOC_017782 | PPIC            | chr5:122359077-122372425  | -0.111417 | 0.999791 |
| XLOC_004353 | XLOC_004353 | PPP1CA          | chr1:167159422-67169376   | -0.111337 | 0.999791 |
| XLOC_022438 | XLOC_022438 | FGD3            | chr9:95709600-95798518    | -0.111297 | 0.999791 |
| XLOC_001369 | XLOC_001369 | PAQR7           | chr1:26187974-26197744    | -0.111266 | 0.999791 |
| XLOC_000653 | XLOC_000653 | GPR89B,GPR89C   | chr1:147400505-147465755  | -0.111242 | 1        |
| XLOC_013234 | XLOC_013234 | SP3             | chr2:174771186-174830430  | -0.111218 | 0.999791 |
| XLOC_015599 | XLOC_015599 | RFTN1           | chr3:16357351-16555222    | -0.111169 | 1        |
| XLOC_014313 | XLOC_014313 | RUNX1           | chr21:36160097-36421595   | -0.111161 | 0.999791 |
| XLOC_005511 | XLOC_005511 | ITGA7           | chr12:56075329-56106089   | -0.111156 | 0.999791 |
| XLOC_022668 | XLOC_022668 | TMEM141         | chr9:139685776-139687769  | -0.111097 | 0.999791 |
| XLOC_009026 | XLOC_009026 | LOC100131347    | chr17:37213271-37307902   | -0.111076 | 1        |
| XLOC_010738 | XLOC_010738 | ZNF254          | chr19:24269975-24312654   | -0.111051 | 0.999791 |
| XLOC_023169 | XLOC_023169 | NOTCH1          | chr9:139388895-139440238  | -0.110973 | 0.999791 |
| XLOC_022962 | XLOC_022962 | ZNF782          | chr9:99579272-99616389    | -0.110963 | 0.999791 |
| XLOC_003075 | XLOC_003075 | MMS19           | chr10:99218080-99258366   | -0.110893 | 0.999791 |
| XLOC_006769 | XLOC_006769 | RALGAPA1        | chr14:36007557-36278432   | -0.11087  | 0.999791 |
| XLOC_008287 | XLOC_008287 | CDT1            | chr16:88870185-88875666   | -0.110847 | 0.999791 |
| XLOC_020778 | XLOC_020778 | TRIM24          | chr7:138145078-138270332  | -0.11076  | 0.999791 |
| XLOC_012200 | XLOC_012200 | B3GNT2          | chr2:62423261-62451866    | -0.110624 | 0.999791 |
| XLOC_018163 | XLOC_018163 | HLA-J           | chr6:29968787-30028961    | -0.110577 | 0.999791 |
| XLOC_013802 | XLOC_013802 | C20orf96        | chr20:251503-271419       | -0.110544 | 0.999791 |
| XLOC_016634 | XLOC_016634 | LETM1           | chr4:1813205-1857974      | -0.110515 | 0.999791 |
| XLOC_012600 | XLOC_012600 | ABI2            | chr2:204193002-204296892  | -0.1105   | 0.999791 |
| XLOC_008813 | XLOC_008813 | TNK1            | chr17:7284292-7307450     | -0.110387 | 0.999791 |
| XLOC_010478 | XLOC_010478 | GNA15           | chr19:3136190-3163766     | -0.110385 | 0.999791 |
| XLOC_023459 | XLOC_023459 | FOXO4           | chrX:70315998-70323384    | -0.110354 | 0.999791 |
| XLOC_005140 | XLOC_005140 | RNF10           | chr12:120972131-121015397 | -0.110351 | 0.999791 |
| XLOC_017997 | XLOC_017997 | MGAT4B          | chr5:179224597-179285840  | -0.110307 | 0.999791 |
| XLOC_007618 | XLOC_007618 | CA12            | chr15:63615729-63674075   | -0.110288 | 0.999791 |
| XLOC_015118 | XLOC_015118 | CYB561D2        | chr3:50384918-50391496    | -0.110277 | 0.999791 |
| XLOC_008803 | XLOC_008803 | C17orf49,RNASEK | chr17:6915735-6922973     | -0.110255 | 0.999791 |
| XLOC_005204 | XLOC_005204 | PXMP2           | chr12:133264191-133281577 | -0.110161 | 0.999791 |
| XLOC_009588 | XLOC_009588 | MYO18A,TIAF1    | chr17:27400527-27507407   | -0.110141 | 0.999791 |
| XLOC_003735 | XLOC_003735 | C11orf82        | chr11:82612736-82645699   | -0.11009  | 0.999791 |
| XLOC_008808 | XLOC_008808 | SLC2A4          | chr17:7185053-7191367     | -0.110088 | 0.999791 |
| XLOC_005416 | XLOC_005416 | MIR1291,SNORA34 | chr12:49046994-49076035   | -0.110025 | 0.999791 |
| XLOC_008438 | XLOC_008438 | ABCC6           | chr16:16243421-16317328   | -0.109823 | 0.999791 |
| XLOC_009462 | XLOC_009462 | ZBTB4           | chr17:7362684-7387568     | -0.109765 | 0.999791 |
| XLOC_022570 | XLOC_022570 | ZNF79           | chr9:130186652-130207651  | -0.109756 | 0.999791 |
| XLOC_010332 | XLOC_010332 | INO80C          | chr18:33048290-33077955   | -0.109715 | 0.999791 |
| XLOC_015059 | XLOC_015059 | ZNF660          | chr3:44626455-44637557    | -0.109696 | 1        |
| XLOC_006645 | XLOC_006645 | APOPT1          | chr14:104029298-104057236 | -0.109669 | 0.999791 |
| XLOC_008340 | XLOC_008340 | MRPS34          | chr16:1821895-1823140     | -0.109667 | 0.999791 |
| XLOC_016176 | XLOC_016176 | C4orf48         | chr4:2043719-2045697      | -0.109661 | 0.999791 |
| XLOC_016089 | XLOC_016089 | CLCN2           | chr3:184053716-184079439  | -0.109614 | 0.999791 |
| XLOC_018876 | XLOC_018876 | TRERF1          | chr6:42192668-42419783    | -0.109603 | 0.999791 |
| XLOC_005247 | XLOC_005247 | ING4            | chr12:6759703-6772308     | -0.109561 | 0.999791 |
| XLOC_007580 | XLOC_007580 | DMXL2           | chr15:51739920-51914967   | -0.109528 | 0.999791 |
| XLOC_000926 | XLOC_000926 | LAMC1           | chr1:182992594-183114727  | -0.109505 | 0.999791 |
| XLOC_022594 | XLOC_022594 | LOC100506100    | chr9:131486740-131534213  | -0.109453 | 0.999791 |
| XLOC_007708 | XLOC_007708 | SCAPER          | chr15:76640526-77176217   | -0.109424 | 0.999791 |
| XLOC_009455 | XLOC_009455 | GABARAP         | chr17:7143737-7145753     | -0.109392 | 0.999791 |
| XLOC_014033 | XLOC_014033 | ZFP64           | chr20:50700549-50808524   | -0.109319 | 0.999791 |
| XLOC_000813 | XLOC_000813 | SUMO1P3         | chr1:160258376-160328742  | -0.109301 | 1        |
| XLOC_003388 | XLOC_003388 | QSER1           | chr11:32914791-33001814   | -0.109301 | 0.999791 |
| XLOC_006214 | XLOC_006214 | EFNB2           | chr13:107142078-107187388 | -0.109279 | 0.999791 |
| XLOC_012873 | XLOC_012873 | CDC42EP3        | chr2:37869024-37899678    | -0.109276 | 0.999791 |
| XLOC_012810 | XLOC_012810 | HS1BP3          | chr2:20817563-20850864    | -0.109232 | 0.999791 |
| XLOC_005215 | XLOC_005215 | KDM5A           | chr12:389222-551806       | -0.109226 | 0.999791 |
| XLOC_010098 | XLOC_010098 | MYL12B          | chr18:3262110-3278282     | -0.109072 | 0.999791 |
| XLOC_001587 | XLOC_001587 | ITGB3BP         | chr1:63906440-63988944    | -0.108865 | 0.999791 |
| XLOC_022396 | XLOC_022396 | OSTF1           | chr9:77703397-77762114    | -0.108693 | 0.999791 |
| XLOC_021275 | XLOC_021275 | ST7-AS1         | chr7:116592500-116870075  | -0.108668 | 0.999791 |
| XLOC_005400 | XLOC_005400 | SLC38A2         | chr12:46751970-46766645   | -0.108595 | 0.999791 |
| XLOC_014513 | XLOC_014513 | RNF185          | chr22:31556137-31603005   | -0.10859  | 0.999791 |
| XLOC_008178 | XLOC_008178 | FAM65A          | chr16:67562716-67580691   | -0.108477 | 0.999791 |
| XLOC_009016 | XLOC_009016 | SOCS7           | chr17:36508006-36561846   | -0.108406 | 0.999791 |
| XLOC_000084 | XLOC_000084 | FBXO44          | chr1:11708417-11723384    | -0.108395 | 0.999791 |
| XLOC_019143 | XLOC_019143 | ULBP3           | chr6:150385742-150390202  | -0.108307 | 0.999791 |
| XLOC_016996 | XLOC_016996 | NEK1            | chr4:170314420-170533778  | -0.108294 | 0.999791 |

|             |             |              |                           |           |          |
|-------------|-------------|--------------|---------------------------|-----------|----------|
| XLOC_014434 | XLOC_014434 | POM121L8P    | chr22:21636713-21652015   | -0.108286 | 1        |
| XLOC_005031 | XLOC_005031 | VEZT         | chr12:95611521-95696566   | -0.108283 | 0.999791 |
| XLOC_010726 | XLOC_010726 | ZNF431       | chr19:21324839-21368805   | -0.108255 | 0.999791 |
| XLOC_005254 | XLOC_005254 | SCARNA12     | chr12:7074514-7079916     | -0.108025 | 0.999791 |
| XLOC_016999 | XLOC_016999 | MFAP3L       | chr4:170907747-170947429  | -0.108001 | 1        |
| XLOC_006383 | XLOC_006383 | PPM1A        | chr14:60712469-60765805   | -0.107954 | 0.999791 |
| XLOC_018118 | XLOC_018118 | LINC00240    | chr6:26924771-26991753    | -0.10789  | 0.999791 |
| XLOC_021234 | XLOC_021234 | POLR2J       | chr7:102105389-102119381  | -0.107858 | 0.999791 |
| XLOC_007181 | XLOC_007181 | HYPK.SERF2   | chr15:44038589-44094769   | -0.107848 | 0.999791 |
| XLOC_015317 | XLOC_015317 | SEC61A1      | chr3:127771211-127790526  | -0.107778 | 0.999791 |
| XLOC_014760 | XLOC_014760 | TBC1D10A     | chr22:30687978-30722955   | -0.107761 | 0.999791 |
| XLOC_023694 | XLOC_023694 | SLC6A8       | chrX:152953751-152962048  | -0.107758 | 0.999791 |
| XLOC_011614 | XLOC_011614 | ALKBH6       | chr19:36500021-36505141   | -0.107602 | 0.999791 |
| XLOC_012991 | XLOC_012991 | MOGS         | chr2:74688183-74692537    | -0.107561 | 0.999791 |
| XLOC_008627 | XLOC_008627 | ACD          | chr16:67679029-67694718   | -0.107541 | 0.999791 |
| XLOC_015565 | XLOC_015565 | EMC3         | chr3:10005635-10028522    | -0.107521 | 0.999791 |
| XLOC_003917 | XLOC_003917 | BARX2        | chr11:129245880-129322174 | -0.107466 | 1        |
| XLOC_005328 | XLOC_005328 | PLBD1        | chr12:14656596-14720791   | -0.107462 | 0.999791 |
| XLOC_011160 | XLOC_011160 | TSEN34       | chr19:54694118-54698394   | -0.107419 | 0.999791 |
| XLOC_002585 | XLOC_002585 | KIF20B       | chr10:91461366-91534700   | -0.107373 | 0.999791 |
| XLOC_023848 | XLOC_023848 | KCND1        | chrX:48818638-48828251    | -0.10737  | 0.999791 |
| XLOC_011052 | XLOC_011052 | SPIB         | chr19:50922194-50934309   | -0.107292 | 1        |
| XLOC_004992 | XLOC_004992 | RAB21        | chr12:72148657-72181150   | -0.107244 | 0.999791 |
| XLOC_010292 | XLOC_010292 | CEP76        | chr18:12658737-12725739   | -0.107233 | 0.999791 |
| XLOC_010227 | XLOC_010227 | PHLPP1       | chr18:60382671-60647676   | -0.10723  | 0.999791 |
| XLOC_011453 | XLOC_011453 | MAN2B1       | chr19:12757321-12777591   | -0.107229 | 0.999791 |
| XLOC_009593 | XLOC_009593 | SSH2         | chr17:27952964-28435470   | -0.107142 | 0.999791 |
| XLOC_001060 | XLOC_001060 | C1orf115     | chr1:220863627-220872499  | -0.107129 | 0.999791 |
| XLOC_008324 | XLOC_008324 | NARFL        | chr16:779768-790997       | -0.107113 | 0.999791 |
| XLOC_013060 | XLOC_013060 | TMEM131      | chr2:98372800-98612354    | -0.107109 | 0.999791 |
| XLOC_023778 | XLOC_023778 | PHKA2        | chrX:18908413-19002480    | -0.107099 | 0.999791 |
| XLOC_011730 | XLOC_011730 | CADM4        | chr19:44126521-44143991   | -0.107095 | 0.999791 |
| XLOC_007203 | XLOC_007203 | DUT          | chr15:48623620-48635570   | -0.107076 | 0.999791 |
| XLOC_005550 | XLOC_005550 | CDK4         | chr12:58138783-58146230   | -0.107064 | 0.999791 |
| XLOC_018525 | XLOC_018525 | ABRACL       | chr6:139349818-139364439  | -0.107045 | 0.999791 |
| XLOC_014629 | XLOC_014629 | GTSE1        | chr22:46692637-46726707   | -0.106877 | 0.999791 |
| XLOC_012259 | XLOC_012259 | SEMA4F       | chr2:74881354-74910981    | -0.106824 | 0.999791 |
| XLOC_018223 | XLOC_018223 | RNF5         | chr6:32146161-32148570    | -0.106778 | 0.999791 |
| XLOC_002679 | XLOC_002679 | LOC100505839 | chr10:105353783-105615164 | -0.106768 | 1        |
| XLOC_023455 | XLOC_023455 | RAB41        | chrX:69502021-69504852    | -0.106703 | 1        |
| XLOC_008232 | XLOC_008232 | ZFP1         | chr16:75182420-75206132   | -0.106638 | 0.999791 |
| XLOC_006497 | XLOC_006497 | ITPK1-AS1    | chr14:93403258-93582263   | -0.106599 | 1        |
| XLOC_000841 | XLOC_000841 | C1orf226     | chr1:162348695-162356608  | -0.10659  | 0.999791 |
| XLOC_007934 | XLOC_007934 | C16orf72     | chr16:9185536-9213555     | -0.106455 | 0.999791 |
| XLOC_011368 | XLOC_011368 | INSR         | chr19:7112265-7294011     | -0.106448 | 0.999791 |
| XLOC_022906 | XLOC_022906 | AGTPBP1      | chr9:88161453-88356944    | -0.106392 | 0.999791 |
| XLOC_015784 | XLOC_015784 | ASB14        | chr3:57261764-57326710    | -0.106352 | 1        |
| XLOC_020452 | XLOC_020452 | LOC646999    | chr7:39649085-39651687    | -0.106347 | 1        |
| XLOC_022343 | XLOC_022343 | LOC158376    | chr9:35909479-35911617    | -0.106236 | 1        |
| XLOC_005773 | XLOC_005773 | RILPL1       | chr12:123955908-124018265 | -0.106221 | 0.999791 |
| XLOC_016863 | XLOC_016863 | DNAJB14      | chr4:100820709-100867879  | -0.106218 | 0.999791 |
| XLOC_015160 | XLOC_015160 | ABHD6        | chr3:58223258-58280461    | -0.1061   | 0.999791 |
| XLOC_001114 | XLOC_001114 | COA6         | chr1:234509213-234519795  | -0.106025 | 0.999791 |
| XLOC_009351 | XLOC_009351 | SLC16A3      | chr17:80186281-80197375   | -0.106006 | 0.999791 |
| XLOC_016213 | XLOC_016213 | SH3TC1       | chr4:8201059-8242830      | -0.105995 | 0.999791 |
| XLOC_009816 | XLOC_009816 | HOXB4        | chr17:46652868-46655743   | -0.105969 | 0.999791 |
| XLOC_023195 | XLOC_023195 | FAM166A      | chr9:140135710-140142222  | -0.105893 | 0.999791 |
| XLOC_008040 | XLOC_008040 | ASPHD1       | chr16:29912146-29917377   | -0.105848 | 0.999791 |
| XLOC_022441 | XLOC_022441 | WNK2         | chr9:95947211-96108696    | -0.105805 | 0.999791 |
| XLOC_014695 | XLOC_014695 | THAP7        | chr22:21354060-21368576   | -0.105744 | 0.999791 |
| XLOC_018967 | XLOC_018967 | PHIP         | chr6:79644135-79788011    | -0.105603 | 0.999791 |
| XLOC_008292 | XLOC_008292 | CDH15        | chr16:89238162-89261900   | -0.105579 | 0.999791 |
| XLOC_004863 | XLOC_004863 | TENC1        | chr12:53436972-53473204   | -0.10547  | 0.999791 |
| XLOC_017687 | XLOC_017687 | GUSBP9.SMA5  | chr5:69776869-69881549    | -0.10545  | 0.999791 |
| XLOC_019151 | XLOC_019151 | CNKSR3       | chr6:154726432-154831753  | -0.105441 | 0.999791 |
| XLOC_004306 | XLOC_004306 | MAP4K2       | chr11:64556608-64570713   | -0.105432 | 0.999791 |
| XLOC_004809 | XLOC_004809 | ANO6         | chr12:45566816-45834187   | -0.105126 | 0.999791 |
| XLOC_021914 | XLOC_021914 | ENTPD4       | chr8:23286664-23315244    | -0.104996 | 0.999791 |
| XLOC_015591 | XLOC_015591 | COL6A4P1     | chr3:15206868-15247466    | -0.104987 | 1        |
| XLOC_000514 | XLOC_000514 | DR1          | chr1:93811477-93828148    | -0.10495  | 0.999791 |
| XLOC_005583 | XLOC_005583 | PTPRB        | chr12:70910631-71031220   | -0.104879 | 1        |
| XLOC_011641 | XLOC_011641 | DPF1         | chr19:38701648-38720317   | -0.104867 | 0.999791 |
| XLOC_018194 | XLOC_018194 | NFKBIL1      | chr6:31514627-31526606    | -0.104695 | 0.999791 |
| XLOC_009451 | XLOC_009451 | DLG4         | chr17:7093209-7128586     | -0.104653 | 0.999791 |
| XLOC_018764 | XLOC_018764 | LY6G5C       | chr6:31644460-31648150    | -0.104648 | 0.999791 |
| XLOC_004950 | XLOC_004950 | OS9          | chr12:58087737-58115340   | -0.104633 | 0.999791 |
| XLOC_011184 | XLOC_011184 | SUV420H2     | chr19:55851220-55859489   | -0.10456  | 0.999791 |
| XLOC_012493 | XLOC_012493 | CERS6        | chr2:169312758-169642939  | -0.104554 | 0.999791 |
| XLOC_003193 | XLOC_003193 | EBF3         | chr10:131633485-131762091 | -0.104516 | 1        |

|             |             |              |                           |           |          |
|-------------|-------------|--------------|---------------------------|-----------|----------|
| XLOC_005318 | XLOC_005318 | LRP6         | chr12:12268960-12419811   | -0.104494 | 0.999791 |
| XLOC_022802 | XLOC_022802 | DCTN3        | chr9:34613547-34620496    | -0.104304 | 0.999791 |
| XLOC_013378 | XLOC_013378 | PTPRN        | chr2:220154344-220174295  | -0.104292 | 1        |
| XLOC_014671 | XLOC_014671 | DGCR2        | chr22:19023794-19109967   | -0.10428  | 0.999791 |
| XLOC_002733 | XLOC_002733 | PLEKHA1      | chr10:124134093-124191871 | -0.104173 | 0.999791 |
| XLOC_018307 | XLOC_018307 | KLC4         | chr6:43027371-43042833    | -0.104101 | 0.999791 |
| XLOC_016740 | XLOC_016740 | USP46        | chr4:53457126-53525502    | -0.104067 | 0.999791 |
| XLOC_005732 | XLOC_005732 | CIT          | chr12:120123594-120315095 | -0.104029 | 0.999791 |
| XLOC_024157 | XLOC_024157 | CD99L2       | chrX:149934808-150067289  | -0.103922 | 0.999791 |
| XLOC_015486 | XLOC_015486 | CHRD         | chr3:184097860-184107617  | -0.103913 | 0.999791 |
| XLOC_006905 | XLOC_006905 | ANGEL1       | chr14:77253585-77279283   | -0.103872 | 0.999791 |
| XLOC_021720 | XLOC_021720 | RAD21-AS1    | chr8:117858172-117889107  | -0.103858 | 1        |
| XLOC_019083 | XLOC_019083 | STX7         | chr6:132778662-132834337  | -0.103764 | 0.999791 |
| XLOC_014198 | XLOC_014198 | PDXK         | chr21:45138977-45182188   | -0.103756 | 0.999791 |
| XLOC_002375 | XLOC_002375 | MLLT10       | chr10:21823100-22032559   | -0.103754 | 0.999791 |
| XLOC_015088 | XLOC_015088 | PTPN23       | chr3:47422490-47454931    | -0.103685 | 0.999791 |
| XLOC_016557 | XLOC_016557 | FNIP2        | chr4:159690181-159956333  | -0.103606 | 1        |
| XLOC_013133 | XLOC_013133 | MAP3K2       | chr2:128056244-128100805  | -0.103597 | 0.999791 |
| XLOC_022796 | XLOC_022796 | KIAA1161     | chr9:34368906-34376894    | -0.103559 | 0.999791 |
| XLOC_023180 | XLOC_023180 | FBXW5        | chr9:139834884-139839206  | -0.103542 | 0.999791 |
| XLOC_009863 | XLOC_009863 | VEZF1        | chr17:56048909-56065615   | -0.103539 | 0.999791 |
| XLOC_004690 | XLOC_004690 | ATN1         | chr12:7033625-7051484     | -0.103522 | 0.999791 |
| XLOC_009283 | XLOC_009283 | KIAA0195     | chr17:73452663-73511627   | -0.103365 | 0.999791 |
| XLOC_012206 | XLOC_012206 | LGALS1       | chr2:64681326-64688517    | -0.103342 | 0.999791 |
| XLOC_021964 | XLOC_021964 | FGFR1        | chr8:38268655-38326352    | -0.103304 | 0.999791 |
| XLOC_018869 | XLOC_018869 | FRS3         | chr6:41737913-41747630    | -0.10329  | 0.999791 |
| XLOC_002520 | XLOC_002520 | CHCHD1       | chr10:75541807-75543406   | -0.103269 | 0.999791 |
| XLOC_008238 | XLOC_008238 | MON1B,SYCE1L | chr16:77224835-77246976   | -0.103245 | 0.999791 |
| XLOC_006017 | XLOC_006017 | ZMYM5        | chr13:20397623-20437776   | -0.103234 | 0.999791 |
| XLOC_015558 | XLOC_015558 | SETD5-AS1    | chr3:9430536-9439174      | -0.103201 | 0.999791 |
| XLOC_006951 | XLOC_006951 | SERPINA10    | chr14:94749649-94759608   | -0.103122 | 1        |
| XLOC_009576 | XLOC_009576 | SDF2         | chr17:26975373-26989207   | -0.103058 | 0.999791 |
| XLOC_016824 | XLOC_016824 | LIN54        | chr4:83845755-83934040    | -0.10302  | 0.999791 |
| XLOC_011895 | XLOC_011895 | CLDND2       | chr19:51870351-51872257   | -0.103017 | 1        |
| XLOC_021800 | XLOC_021800 | SLC52A2      | chr8:145582216-145584948  | -0.103009 | 0.999791 |
| XLOC_005128 | XLOC_005128 | SUDS3        | chr12:118814357-118855840 | -0.102909 | 0.999791 |
| XLOC_009328 | XLOC_009328 | ENDOV        | chr17:78234659-78411884   | -0.102879 | 0.999791 |
| XLOC_004657 | XLOC_004657 | TSPAN9       | chr12:3186520-3395730     | -0.102697 | 0.999791 |
| XLOC_015105 | XLOC_015105 | DAG1         | chr3:49506135-49573051    | -0.102696 | 0.999791 |
| XLOC_015701 | XLOC_015701 | DALRD3       | chr3:49044636-49060926    | -0.10267  | 0.999791 |
| XLOC_003813 | XLOC_003813 | SIK2         | chr11:111473169-111637169 | -0.102601 | 0.999791 |
| XLOC_006768 | XLOC_006768 | NFKBIA       | chr14:35870715-35873960   | -0.102537 | 0.999791 |
| XLOC_000285 | XLOC_000285 | MAP7D1       | chr1:36621802-36646441    | -0.102507 | 0.999791 |
| XLOC_017081 | XLOC_017081 | TRIO         | chr5:14143828-14509458    | -0.102365 | 0.999791 |
| XLOC_007159 | XLOC_007159 | NUSAP1       | chr15:41624891-41673248   | -0.10225  | 0.999791 |
| XLOC_014445 | XLOC_014445 | LOC96610     | chr22:22652462-22677324   | -0.102228 | 0.999791 |
| XLOC_009821 | XLOC_009821 | HOXB8        | chr17:46689707-46692301   | -0.102175 | 0.999791 |
| XLOC_007829 | XLOC_007829 | RAB40C       | chr16:639356-679273       | -0.10212  | 0.999791 |
| XLOC_005384 | XLOC_005384 | SLC2A13      | chr12:40148822-40499661   | -0.102116 | 0.999791 |
| XLOC_023931 | XLOC_023931 | HDAC8        | chrX:71549365-71792953    | -0.102105 | 0.999791 |
| XLOC_014772 | XLOC_014772 | SELM         | chr22:31500762-31503551   | -0.102074 | 0.999791 |
| XLOC_001495 | XLOC_001495 | LEPRE1       | chr1:43212005-43232755    | -0.102065 | 0.999791 |
| XLOC_020986 | XLOC_020986 | JAZF1        | chr7:27870192-28280996    | -0.102052 | 0.999791 |
| XLOC_014839 | XLOC_014839 | RPS19BP1     | chr22:39925097-39928860   | -0.102023 | 0.999791 |
| XLOC_023670 | XLOC_023670 | MTMR1        | chrX:149861868-149933575  | -0.101952 | 0.999791 |
| XLOC_014500 | XLOC_014500 | MTMR3        | chr22:30279157-30426857   | -0.101895 | 0.999791 |
| XLOC_003936 | XLOC_003936 | IFITM3       | chr11:319672-320914       | -0.10185  | 0.999791 |
| XLOC_004245 | XLOC_004245 | VPS37C       | chr11:60897727-60928916   | -0.101844 | 0.999791 |
| XLOC_010095 | XLOC_010095 | SMCHD1       | chr18:2655885-2805015     | -0.101843 | 0.999791 |
| XLOC_015137 | XLOC_015137 | DNAH1        | chr3:52350334-52434513    | -0.101843 | 1        |
| XLOC_001683 | XLOC_001683 | SLC25A24     | chr1:108677343-108742980  | -0.101706 | 0.999791 |
| XLOC_004779 | XLOC_004779 | MED21        | chr12:27175454-27183606   | -0.101571 | 0.999791 |
| XLOC_017621 | XLOC_017621 | RICTOR       | chr5:38938021-39074501    | -0.10153  | 0.999791 |
| XLOC_004082 | XLOC_004082 | BTBD10       | chr11:13409555-13484838   | -0.101522 | 0.999791 |
| XLOC_022293 | XLOC_022293 | RRAGA        | chr9:19049371-19051021    | -0.101475 | 0.999791 |
| XLOC_018351 | XLOC_018351 | TMEM14A      | chr6:52535883-52551385    | -0.101367 | 0.999791 |
| XLOC_013964 | XLOC_013964 | LOC388796    | chr20:37049238-37064018   | -0.10134  | 0.999791 |
| XLOC_008016 | XLOC_008016 | SBK1         | chr16:28303839-28335170   | -0.101338 | 0.999791 |
| XLOC_018177 | XLOC_018177 | TUBB         | chr6:30688156-30693195    | -0.101337 | 0.999791 |
| XLOC_009745 | XLOC_009745 | STAT3        | chr17:40465342-40540513   | -0.101284 | 0.999791 |
| XLOC_014938 | XLOC_014938 | IL17RC       | chr3:9958757-9975305      | -0.101283 | 0.999791 |
| XLOC_009074 | XLOC_009074 | TUBG1        | chr17:40731525-40767256   | -0.101241 | 0.999791 |
| XLOC_016620 | XLOC_016620 | ATP5I        | chr4:666224-668127        | -0.101235 | 0.999791 |
| XLOC_014946 | XLOC_014946 | LINC00852    | chr3:10290176-10335133    | -0.101211 | 0.999791 |
| XLOC_012700 | XLOC_012700 | PTMA         | chr2:232573234-232578250  | -0.101144 | 0.999791 |
| XLOC_011477 | XLOC_011477 | RFX1         | chr19:14072341-14117134   | -0.101114 | 0.999791 |
| XLOC_016590 | XLOC_016590 | WWC2         | chr4:184020462-184241929  | -0.101078 | 0.999791 |
| XLOC_008423 | XLOC_008423 | TXNDC11      | chr16:11762288-11836648   | -0.101016 | 0.999791 |
| XLOC_020726 | XLOC_020726 | ARF5         | chr7:127228405-127231759  | -0.100962 | 0.999791 |

|             |             |                |                           |            |          |
|-------------|-------------|----------------|---------------------------|------------|----------|
| XLOC_010115 | XLOC_010115 | RALBP1         | chr18:9475529-9538106     | -0.100905  | 0.999791 |
| XLOC_022426 | XLOC_022426 | CKS2           | chr9:91926112-91931618    | -0.100887  | 0.999791 |
| XLOC_016556 | XLOC_016556 | ETFDH          | chr4:159593276-159629841  | -0.100868  | 0.999791 |
| XLOC_004910 | XLOC_004910 | BLOC1S1,RDH5   | chr12:56109817-56118526   | -0.100849  | 0.999791 |
| XLOC_009280 | XLOC_009280 | MRPS7          | chr17:73232693-73267311   | -0.10082   | 0.999791 |
| XLOC_017769 | XLOC_017769 | MCC            | chr5:112312406-112824527  | -0.10068   | 1        |
| XLOC_010792 | XLOC_010792 | RBM42          | chr19:36119979-36128587   | -0.100597  | 0.999791 |
| XLOC_007853 | XLOC_007853 | CRAMP1L        | chr16:1664640-1727909     | -0.100586  | 0.999791 |
| XLOC_018086 | XLOC_018086 | LRRC16A        | chr6:25279655-25620758    | -0.100527  | 0.999791 |
| XLOC_013175 | XLOC_013175 | ORC4           | chr2:148602569-149271044  | -0.100441  | 0.999791 |
| XLOC_016896 | XLOC_016896 | C4orf21        | chr4:113460488-113578748  | -0.100402  | 0.999791 |
| XLOC_020569 | XLOC_020569 | HSPB1          | chr7:75931874-75933614    | -0.100357  | 0.999791 |
| XLOC_007914 | XLOC_007914 | NAA60          | chr16:3493667-3536963     | -0.100356  | 0.999791 |
| XLOC_013465 | XLOC_013465 | STK25          | chr2:242295663-242448987  | -0.100348  | 0.999791 |
| XLOC_017070 | XLOC_017070 | PAPD7          | chr5:6714717-6757161      | -0.100324  | 0.999791 |
| XLOC_009552 | XLOC_009552 | ULK2           | chr17:19674142-19771239   | -0.10022   | 0.999791 |
| XLOC_013785 | XLOC_013785 | ZGPAT          | chr20:62289162-62367494   | -0.100178  | 0.999791 |
| XLOC_021237 | XLOC_021237 | POLR2J2,UPK3BL | chr7:102277194-102312176  | -0.100168  | 0.999791 |
| XLOC_006744 | XLOC_006744 | SDR39U1        | chr14:24899140-24912007   | -0.100147  | 0.999791 |
| XLOC_023270 | XLOC_023270 | OFD1           | chrX:13752831-13787480    | -0.100092  | 0.999791 |
| XLOC_014793 | XLOC_014793 | APOL4          | chr22:36585175-36600879   | -0.10009   | 1        |
| XLOC_022215 | XLOC_022215 | RHPN1-AS1      | chr8:144448792-144450805  | -0.100036  | 0.999791 |
| XLOC_002242 | XLOC_002242 | C1orf131       | chr1:231359508-231413719  | -0.100015  | 0.999791 |
| XLOC_022385 | XLOC_022385 | FXN            | chr9:71650478-71715094    | -0.100009  | 0.999791 |
| XLOC_015438 | XLOC_015438 | MYNN           | chr3:169490852-169507504  | -0.100003  | 0.999791 |
| XLOC_023830 | XLOC_023830 | NDUFB11        | chrX:47001614-47004609    | -0.0999616 | 0.999791 |
| XLOC_010683 | XLOC_010683 | MAP1S          | chr19:17830302-17845324   | -0.0998664 | 0.999791 |
| XLOC_013637 | XLOC_013637 | RPN2           | chr20:357296283-35870025  | -0.0997904 | 0.999791 |
| XLOC_005889 | XLOC_005889 | RB1            | chr13:48877882-49056026   | -0.0997662 | 0.999791 |
| XLOC_022675 | XLOC_022675 | TRAF2          | chr9:139780964-139821067  | -0.0995836 | 0.999791 |
| XLOC_001418 | XLOC_001418 | SPOCD1         | chr1:32256024-32281580    | -0.099439  | 0.999791 |
| XLOC_011479 | XLOC_011479 | SAMD1          | chr19:14199228-14201232   | -0.0993448 | 0.999791 |
| XLOC_009466 | XLOC_009466 | TP53           | chr17:7571719-7606820     | -0.0993261 | 0.999791 |
| XLOC_003102 | XLOC_003102 | POLL           | chr10:103338638-103348027 | -0.0992986 | 0.999791 |
| XLOC_022096 | XLOC_022096 | FSBP,RAD54B    | chr8:95384187-95487343    | -0.0992531 | 0.999791 |
| XLOC_023044 | XLOC_023044 | TRAF1          | chr9:123664670-123691451  | -0.0991754 | 0.999791 |
| XLOC_021549 | XLOC_021549 | PROSC          | chr8:37620100-37637286    | -0.0991614 | 0.999791 |
| XLOC_010110 | XLOC_010110 | RAB12          | chr18:8609442-8639380     | -0.0991188 | 0.999791 |
| XLOC_000187 | XLOC_000187 | SRRM1          | chr1:24969593-24999772    | -0.0990546 | 0.999791 |
| XLOC_011362 | XLOC_011362 | GPR108         | chr19:6729924-6737633     | -0.0990202 | 0.999791 |
| XLOC_010137 | XLOC_010137 | CYP4F35P       | chr18:14337421-14342523   | -0.0989543 | 1        |
| XLOC_000131 | XLOC_000131 | NECAP2         | chr1:16767166-16786584    | -0.0989142 | 0.999791 |
| XLOC_010391 | XLOC_010391 | PIGN           | chr18:59711457-59854289   | -0.0989021 | 0.999791 |
| XLOC_021043 | XLOC_021043 | H2AFV          | chr7:44866487-44887725    | -0.0988684 | 0.999791 |
| XLOC_007301 | XLOC_007301 | LOC440288      | chr15:74753605-74773633   | -0.098864  | 0.999791 |
| XLOC_013373 | XLOC_013373 | CNPPD1         | chr2:220036618-220041702  | -0.098848  | 0.999791 |
| XLOC_013953 | XLOC_013953 | DSN1           | chr20:35380193-35402230   | -0.098831  | 0.999791 |
| XLOC_005669 | XLOC_005669 | NUAK1          | chr12:106457124-106533811 | -0.0987971 | 0.999791 |
| XLOC_003707 | XLOC_003707 | MRPL48         | chr11:73498916-73575656   | -0.0987827 | 0.999791 |
| XLOC_010297 | XLOC_010297 | ZNF519         | chr18:14075988-14132489   | -0.0987756 | 0.999791 |
| XLOC_003005 | XLOC_003005 | CAMK2G         | chr10:75572258-75634349   | -0.0987163 | 0.999791 |
| XLOC_015171 | XLOC_015171 | PSMD6-AS2      | chr3:63989697-64009686    | -0.0987069 | 1        |
| XLOC_013476 | XLOC_013476 | SOX12          | chr20:306214-310872       | -0.0986443 | 0.999791 |
| XLOC_022348 | XLOC_022348 | MELK           | chr9:36572858-36677680    | -0.0986065 | 0.999791 |
| XLOC_005248 | XLOC_005248 | ZNF384         | chr12:6775642-6798738     | -0.0985623 | 0.999791 |
| XLOC_002649 | XLOC_002649 | LZTS2          | chr10:102756863-102790914 | -0.0985421 | 0.999791 |
| XLOC_017207 | XLOC_017207 | BHMT2          | chr5:78365546-78385897    | -0.0984026 | 1        |
| XLOC_013215 | XLOC_013215 | TTC21B         | chr2:166729871-166810348  | -0.0983519 | 0.999791 |
| XLOC_014735 | XLOC_014735 | HPS4           | chr22:26846848-26879829   | -0.0983495 | 0.999791 |
| XLOC_002651 | XLOC_002651 | KAZALD1        | chr10:102820998-102825351 | -0.0983106 | 0.999791 |
| XLOC_004892 | XLOC_004892 | NCKAP1L        | chr12:54891494-54936899   | -0.0982005 | 1        |
| XLOC_011512 | XLOC_011512 | SLC35E1        | chr19:16660647-16683193   | -0.0981781 | 0.999791 |
| XLOC_022631 | XLOC_022631 | CEL            | chr9:135937364-135947250  | -0.0981734 | 0.999791 |
| XLOC_011425 | XLOC_011425 | ILF3-AS1       | chr19:10762537-10764548   | -0.0981675 | 0.999791 |
| XLOC_011892 | XLOC_011892 | CTU1           | chr19:51600862-51611647   | -0.0981237 | 0.999791 |
| XLOC_008673 | XLOC_008673 | GLG1           | chr16:74481325-74641042   | -0.0980754 | 0.999791 |
| XLOC_005649 | XLOC_005649 | DEPDC4         | chr12:100646041-100660857 | -0.0980752 | 1        |
| XLOC_007489 | XLOC_007489 | LPCAT4         | chr15:34651088-34659395   | -0.0980699 | 0.999791 |
| XLOC_014054 | XLOC_014054 | ATP5E,SLMO2    | chr20:57603732-57617901   | -0.0980355 | 0.999791 |
| XLOC_005687 | XLOC_005687 | KCTD10         | chr12:109886459-109915155 | -0.0980221 | 0.999791 |
| XLOC_005149 | XLOC_005149 | ORAI1          | chr12:122064454-122079946 | -0.0979674 | 0.999791 |
| XLOC_000263 | XLOC_000263 | KIAA1522       | chr1:33207511-33240571    | -0.0979628 | 0.999791 |
| XLOC_024178 | XLOC_024178 | IDH3G          | chrX:153051220-153063967  | -0.0977747 | 0.999791 |
| XLOC_008021 | XLOC_008021 | SH2B1          | chr16:28875077-28885534   | -0.0977721 | 0.999791 |
| XLOC_006875 | XLOC_006875 | ADAM21P1       | chr14:70712469-70714518   | -0.0976987 | 1        |
| XLOC_022383 | XLOC_022383 | PIP5K1B        | chr9:71320615-71624091    | -0.0976741 | 1        |
| XLOC_016280 | XLOC_016280 | FAM114A1       | chr4:38869353-38947365    | -0.0976622 | 0.999791 |
| XLOC_001381 | XLOC_001381 | FAM46B         | chr1:27331510-27339333    | -0.0976491 | 0.999791 |
| XLOC_003625 | XLOC_003625 | KAT5           | chr11:65479472-65488409   | -0.0976077 | 0.999791 |

|             |             |           |                           |            |          |
|-------------|-------------|-----------|---------------------------|------------|----------|
| XLOC_009944 | XLOC_009944 | FAM104A   | chr17:71189172-71228533   | -0.0975825 | 0.999791 |
| XLOC_015241 | XLOC_015241 | BBX       | chr3:107241782-107530176  | -0.0975407 | 0.999791 |
| XLOC_014230 | XLOC_014230 | PRMT2     | chr21:48055506-48085155   | -0.0975248 | 0.999791 |
| XLOC_011376 | XLOC_011376 | FLJ22184  | chr19:7933604-7939326     | -0.0974995 | 0.999791 |
| XLOC_003098 | XLOC_003098 | MRPL43    | chr10:102732285-102747272 | -0.0974856 | 0.999791 |
| XLOC_021328 | XLOC_021328 | C7orf49   | chr7:134832765-134855578  | -0.097438  | 0.999791 |
| XLOC_006987 | XLOC_006987 | PPP1R13B  | chr14:104200087-104313927 | -0.0973479 | 0.999791 |
| XLOC_015920 | XLOC_015920 | OSBPL11   | chr3:125247701-125314381  | -0.0973133 | 0.999791 |
| XLOC_014252 | XLOC_014252 | ATP5J     | chr21:27096790-27144771   | -0.0972048 | 0.999791 |
| XLOC_003265 | XLOC_003265 | STIM1     | chr11:3876932-4114440     | -0.097114  | 0.999791 |
| XLOC_005116 | XLOC_005116 | CCDC42B   | chr12:113587662-113623284 | -0.0971136 | 1        |
| XLOC_012097 | XLOC_012097 | ATRAID    | chr2:27242454-27440046    | -0.0970936 | 0.999791 |
| XLOC_004935 | XLOC_004935 | NAB2      | chr12:57482676-57505196   | -0.0970432 | 0.999791 |
| XLOC_003731 | XLOC_003731 | AQP11     | chr11:77300679-77321401   | -0.0970127 | 0.999791 |
| XLOC_003722 | XLOC_003722 | DGAT2     | chr11:75479777-75512581   | -0.0969627 | 0.999791 |
| XLOC_013766 | XLOC_013766 | MRGBP     | chr20:61427804-61431945   | -0.0968278 | 0.999791 |
| XLOC_000936 | XLOC_000936 | C1orf27   | chr1:185703682-186446655  | -0.0968259 | 0.999791 |
| XLOC_018276 | XLOC_018276 | RNF8      | chr6:37321747-37362514    | -0.0967991 | 0.999791 |
| XLOC_001321 | XLOC_001321 | AKR7A2    | chr1:19629201-19638640    | -0.0967948 | 0.999791 |
| XLOC_017777 | XLOC_017777 | ATG12     | chr5:115163893-115177548  | -0.0966896 | 0.999791 |
| XLOC_006856 | XLOC_006856 | RAB15     | chr14:65381078-65569413   | -0.0966077 | 0.999791 |
| XLOC_002783 | XLOC_002783 | DIP2C     | chr10:320129-735608       | -0.0965812 | 0.999791 |
| XLOC_010993 | XLOC_010993 | GRIN2D    | chr19:48898131-48948188   | -0.0965686 | 0.999791 |
| XLOC_000306 | XLOC_000306 | ZMPSTE24  | chr1:40723721-40759856    | -0.0964513 | 0.999791 |
| XLOC_001401 | XLOC_001401 | SRSF4     | chr1:29474249-29508637    | -0.0964306 | 0.999791 |
| XLOC_021982 | XLOC_021982 | CEBPD     | chr8:48649475-48650726    | -0.0963572 | 0.999791 |
| XLOC_007406 | XLOC_007406 | FURIN     | chr15:91411884-91426687   | -0.0963551 | 0.999791 |
| XLOC_005962 | XLOC_005962 | RAP2A     | chr13:98086474-98120252   | -0.0962446 | 0.999791 |
| XLOC_022466 | XLOC_022466 | TDRD7     | chr9:100174301-100258405  | -0.0961628 | 0.999791 |
| XLOC_006693 | XLOC_006693 | ZNF219    | chr14:21558204-21572863   | -0.0961254 | 0.999791 |
| XLOC_014155 | XLOC_014155 | SMIM11    | chr21:35747748-35761452   | -0.0960311 | 0.999791 |
| XLOC_023201 | XLOC_023201 | PNPLA7    | chr9:140354404-140444986  | -0.0959403 | 0.999791 |
| XLOC_001441 | XLOC_001441 | KIAA0319L | chr1:35899090-36023037    | -0.0958906 | 0.999791 |
| XLOC_014796 | XLOC_014796 | TXN2      | chr22:36863092-36877687   | -0.0958476 | 0.999791 |
| XLOC_013166 | XLOC_013166 | ZRANB3    | chr2:135957573-136288806  | -0.095784  | 0.999791 |
| XLOC_002100 | XLOC_002100 | DDX59     | chr1:200613164-200639126  | -0.0957726 | 0.999791 |
| XLOC_000981 | XLOC_000981 | TMEM183A  | chr1:202976533-202993197  | -0.0957609 | 0.999791 |
| XLOC_022325 | XLOC_022325 | GALT      | chr9:34646585-34650595    | -0.0957543 | 0.999791 |
| XLOC_008222 | XLOC_008222 | ATXN1L    | chr16:71879893-71891236   | -0.0957384 | 0.999791 |
| XLOC_023713 | XLOC_023713 | PLXNA3    | chrX:153686622-153701985  | -0.0957111 | 0.999791 |
| XLOC_012517 | XLOC_012517 | RAPGEF4   | chr2:173587917-173917620  | -0.0956028 | 1        |
| XLOC_007820 | XLOC_007820 | NME4      | chr16:447191-450754       | -0.0955754 | 0.999791 |
| XLOC_023128 | XLOC_023128 | TSC1      | chr9:135766734-135820020  | -0.0955355 | 0.999791 |
| XLOC_022467 | XLOC_022467 | TMOD1     | chr9:100263461-100436029  | -0.0955083 | 0.999791 |
| XLOC_017957 | XLOC_017957 | BOD1      | chr5:173034147-173043666  | -0.0954116 | 0.999791 |
| XLOC_018975 | XLOC_018975 | PGM3      | chr6:83777384-83906256    | -0.0954063 | 0.999791 |
| XLOC_016809 | XLOC_016809 | CNOT6L    | chr4:78634540-78740544    | -0.095402  | 0.999791 |
| XLOC_007831 | XLOC_007831 | FAM195A   | chr16:691848-698474       | -0.0953879 | 0.999791 |
| XLOC_016325 | XLOC_016325 | EXOC1     | chr4:56719815-56771244    | -0.0953847 | 0.999791 |
| XLOC_015378 | XLOC_015378 | PLS1      | chr3:142315228-142432505  | -0.0952693 | 0.999791 |
| XLOC_002399 | XLOC_002399 | PTCHD3P1  | chr10:29698500-29711299   | -0.0952576 | 0.999791 |
| XLOC_020839 | XLOC_020839 | ZNF212    | chr7:148936741-148952700  | -0.0951602 | 0.999791 |
| XLOC_007782 | XLOC_007782 | HDDC3     | chr15:91473409-91497323   | -0.0951305 | 0.999791 |
| XLOC_014322 | XLOC_014322 | DSCR3     | chr21:38595725-38639833   | -0.0950846 | 0.999791 |
| XLOC_012841 | XLOC_012841 | GTF3C2    | chr2:27548715-27579901    | -0.0950592 | 0.999791 |
| XLOC_011706 | XLOC_011706 | PAFAH1B3  | chr19:42801184-42814973   | -0.0950514 | 0.999791 |
| XLOC_013617 | XLOC_013617 | DYNLRB1   | chr20:33104203-33128762   | -0.0950395 | 0.999791 |
| XLOC_004638 | XLOC_004638 | B3GAT1    | chr11:134248397-134281812 | -0.0950357 | 0.999791 |
| XLOC_008757 | XLOC_008757 | SGSM2     | chr17:2240805-2284348     | -0.0949343 | 0.999791 |
| XLOC_008118 | XLOC_008118 | MT2A      | chr16:56642477-56643409   | -0.0949255 | 0.999791 |
| XLOC_003210 | XLOC_003210 | SPRN      | chr10:135207620-135238121 | -0.0949084 | 0.999791 |
| XLOC_021462 | XLOC_021462 | MTMR9     | chr8:11141999-11185654    | -0.0948938 | 0.999791 |
| XLOC_007880 | XLOC_007880 | CCNF      | chr16:2479394-2508859     | -0.0948407 | 0.999791 |
| XLOC_008354 | XLOC_008354 | NTHL1     | chr16:2089815-2097867     | -0.0947014 | 0.999791 |
| XLOC_022503 | XLOC_022503 | ZNF483    | chr9:114287446-114362135  | -0.0946433 | 1        |
| XLOC_010594 | XLOC_010594 | LPPR2     | chr19:11466061-11476374   | -0.0946321 | 0.999791 |
| XLOC_013065 | XLOC_013065 | MITD1     | chr2:99785725-99797492    | -0.0946306 | 0.999791 |
| XLOC_010703 | XLOC_010703 | C19orf60  | chr19:18699494-18703147   | -0.0945888 | 0.999791 |
| XLOC_013796 | XLOC_013796 | TCEA2     | chr20:62688438-62703700   | -0.0945416 | 1        |
| XLOC_014678 | XLOC_014678 | UFD1L     | chr22:19437463-19466738   | -0.0945205 | 0.999791 |
| XLOC_018161 | XLOC_018161 | HLA-A     | chr6:29910246-29913661    | -0.0944817 | 0.999791 |
| XLOC_013638 | XLOC_013638 | MANBAL    | chr20:35918050-35945663   | -0.0944813 | 0.999791 |
| XLOC_012254 | XLOC_012254 | TTC31     | chr2:74699084-74721691    | -0.0944787 | 0.999791 |
| XLOC_006706 | XLOC_006706 | DAD1      | chr14:23033806-23058143   | -0.0944447 | 0.999791 |
| XLOC_005973 | XLOC_005973 | PCCA      | chr13:100741268-101241046 | -0.0944303 | 0.999791 |
| XLOC_008662 | XLOC_008662 | PHLPP2    | chr16:71678851-71748704   | -0.0943952 | 0.999791 |
| XLOC_006863 | XLOC_006863 | PIGH      | chr14:68000007-68067017   | -0.0943636 | 0.999791 |
| XLOC_017605 | XLOC_017605 | AGXT2     | chr5:34998205-35048240    | -0.0943535 | 1        |
| XLOC_015930 | XLOC_015930 | TPRA1     | chr3:127291906-127309602  | -0.0943524 | 0.999791 |

|             |             |            |                           |            |          |
|-------------|-------------|------------|---------------------------|------------|----------|
| XLOC_005713 | XLOC_005713 | SLC24A6    | chr12:113736570-113772925 | -0.0943469 | 0.999791 |
| XLOC_010263 | XLOC_010263 | ADNP2      | chr18:77866914-77898228   | -0.0943361 | 0.999791 |
| XLOC_018375 | XLOC_018375 | OGFRL1     | chr6:71998476-72011973    | -0.0943346 | 0.999791 |
| XLOC_002044 | XLOC_002044 | KIAA0040   | chr1:175126122-175162229  | -0.0942981 | 0.999791 |
| XLOC_004317 | XLOC_004317 | CDCA5      | chr1:164844926-64851615   | -0.0942777 | 0.999791 |
| XLOC_001702 | XLOC_001702 | LAMTOR5    | chr1:110943876-110950546  | -0.0941555 | 0.999791 |
| XLOC_007617 | XLOC_007617 | RPS27L     | chr15:63445538-63449741   | -0.0941429 | 0.999791 |
| XLOC_004430 | XLOC_004430 | KCTD21     | chr11:77882297-77899664   | -0.0940925 | 0.999791 |
| XLOC_000850 | XLOC_000850 | MGST3      | chr1:165600109-165625372  | -0.0940565 | 0.999791 |
| XLOC_020376 | XLOC_020376 | SCIN       | chr7:12610202-12693228    | -0.0940113 | 1        |
| XLOC_003413 | XLOC_003413 | HSD17B12   | chr11:43702142-43878169   | -0.0939859 | 0.999791 |
| XLOC_013305 | XLOC_013305 | PPIL3      | chr2:201735678-201753849  | -0.0939458 | 0.999791 |
| XLOC_004719 | XLOC_004719 | CLEC2D     | chr12:9822303-9852151     | -0.0939272 | 0.999791 |
| XLOC_020332 | XLOC_020332 | GET4       | chr7:916190-936071        | -0.0938779 | 0.999791 |
| XLOC_016598 | XLOC_016598 | SNX25      | chr4:186131283-186300152  | -0.0938643 | 0.999791 |
| XLOC_000366 | XLOC_000366 | MAST2      | chr1:46269284-46501796    | -0.0938495 | 0.999791 |
| XLOC_012184 | XLOC_012184 | SPTBN1     | chr2:54683453-54898583    | -0.0938393 | 0.999791 |
| XLOC_015005 | XLOC_015005 | CRTAP      | chr3:33155449-33189265    | -0.0937822 | 0.999791 |
| XLOC_003769 | XLOC_003769 | ANKRD49    | chr11:94227152-94232744   | -0.0936892 | 0.999791 |
| XLOC_010308 | XLOC_010308 | NPC1       | chr18:21083433-21166581   | -0.09368   | 0.999791 |
| XLOC_015761 | XLOC_015761 | PBRM1      | chr3:52579367-52719866    | -0.0936601 | 0.999791 |
| XLOC_014926 | XLOC_014926 | LMCD1      | chr3:8543510-8609806      | -0.0936596 | 1        |
| XLOC_022686 | XLOC_022686 | SSNA1      | chr9:140069235-140084822  | -0.09357   | 0.999791 |
| XLOC_006852 | XLOC_006852 | TEX21P     | chr14:64812190-64814329   | -0.0934437 | 1        |
| XLOC_005568 | XLOC_005568 | LLPH       | chr12:66516848-66524533   | -0.0933854 | 0.999791 |
| XLOC_014902 | XLOC_014902 | HDAC10     | chr22:50683612-50689834   | -0.0933441 | 0.999791 |
| XLOC_011380 | XLOC_011380 | ELAVL1     | chr19:8023456-8070529     | -0.0932773 | 0.999791 |
| XLOC_001901 | XLOC_001901 | SSR2       | chr1:155978838-155990758  | -0.0932673 | 0.999791 |
| XLOC_015852 | XLOC_015852 | CBLB       | chr3:105377108-105587887  | -0.0931858 | 0.999791 |
| XLOC_015252 | XLOC_015252 | ABHD10     | chr3:111697722-111712215  | -0.0931831 | 0.999791 |
| XLOC_013694 | XLOC_013694 | CTSA       | chr20:44517110-44541003   | -0.0931617 | 0.999791 |
| XLOC_008931 | XLOC_008931 | TMEM97     | chr17:26646120-26662515   | -0.0930829 | 0.999791 |
| XLOC_010220 | XLOC_010220 | SEC11C     | chr18:56807124-56826063   | -0.0930771 | 0.999791 |
| XLOC_009761 | XLOC_009761 | ETV4       | chr17:41605210-41623800   | -0.0930707 | 0.999791 |
| XLOC_011282 | XLOC_011282 | TCF3       | chr19:1609288-1652328     | -0.0930201 | 0.999791 |
| XLOC_016532 | XLOC_016532 | DCLK2      | chr4:150999425-1511178608 | -0.0929043 | 0.999791 |
| XLOC_011038 | XLOC_011038 | CPT1C      | chr19:50194364-50216988   | -0.0928478 | 0.999791 |
| XLOC_010193 | XLOC_010193 | CTIF       | chr18:46065426-46389586   | -0.0928128 | 0.999791 |
| XLOC_011455 | XLOC_011455 | DHPS       | chr19:12777617-12792701   | -0.0927848 | 0.999791 |
| XLOC_011761 | XLOC_011761 | SNRPD2     | chr19:46190711-46195443   | -0.0927773 | 0.999791 |
| XLOC_022494 | XLOC_022494 | FKTN       | chr9:108320410-108403399  | -0.0927725 | 0.999791 |
| XLOC_015318 | XLOC_015318 | EEFSEC     | chr3:127872312-128127489  | -0.0927384 | 0.999791 |
| XLOC_002479 | XLOC_002479 | REEP3      | chr10:65281122-65384883   | -0.0927255 | 0.999791 |
| XLOC_003912 | XLOC_003912 | ST3GAL4    | chr11:126225539-126284536 | -0.0926979 | 0.999791 |
| XLOC_001316 | XLOC_001316 | UBR4       | chr1:19400999-19536746    | -0.0926499 | 0.999791 |
| XLOC_003020 | XLOC_003020 | ANXA11     | chr10:81914879-81965328   | -0.0926443 | 0.999791 |
| XLOC_008773 | XLOC_008773 | ARRB2      | chr17:4613788-4624795     | -0.0925685 | 0.999791 |
| XLOC_004446 | XLOC_004446 | PICALM     | chr11:85668213-85780923   | -0.0925509 | 0.999791 |
| XLOC_005226 | XLOC_005226 | NRIP2      | chr12:2934513-2944221     | -0.0925041 | 1        |
| XLOC_012811 | XLOC_012811 | C2orf43    | chr2:20884817-21022827    | -0.0924263 | 0.999791 |
| XLOC_023084 | XLOC_023084 | SH2D3C     | chr9:130500595-130541048  | -0.0924047 | 1        |
| XLOC_006272 | XLOC_006272 | TOX4       | chr14:21945334-21979457   | -0.0924003 | 0.999791 |
| XLOC_005570 | XLOC_005570 | GRIP1      | chr12:66741210-67072925   | -0.0923144 | 0.999791 |
| XLOC_000931 | XLOC_000931 | C1orf21    | chr1:184356149-184598155  | -0.0922933 | 0.999791 |
| XLOC_023583 | XLOC_023583 | DOCK11     | chrX:117629871-117820123  | -0.0922605 | 0.999791 |
| XLOC_022819 | XLOC_022819 | ARHGEF39   | chr9:35658286-35665278    | -0.0921996 | 0.999791 |
| XLOC_015255 | XLOC_015255 | C3orf52    | chr3:111805181-111837073  | -0.0921766 | 0.999791 |
| XLOC_014373 | XLOC_014373 | PTTG1IP    | chr21:46269499-46293818   | -0.0921749 | 0.999791 |
| XLOC_012665 | XLOC_012665 | GMPPA      | chr2:220363586-220371718  | -0.0921555 | 0.999791 |
| XLOC_006122 | XLOC_006122 | CAB39L     | chr13:49882785-50018221   | -0.0921455 | 0.999791 |
| XLOC_023284 | XLOC_023284 | SCML1      | chrX:17755591-17773105    | -0.0921337 | 0.999791 |
| XLOC_015065 | XLOC_015065 | TMEM42     | chr3:44903379-44907154    | -0.0920969 | 0.999791 |
| XLOC_006498 | XLOC_006498 | TMEM251    | chr14:93651295-93653431   | -0.0919849 | 0.999791 |
| XLOC_015258 | XLOC_015258 | SLC35A5    | chr3:112280856-112303284  | -0.0919174 | 0.999791 |
| XLOC_011004 | XLOC_011004 | NUCB1      | chr19:49403306-49426540   | -0.0918755 | 0.999791 |
| XLOC_007409 | XLOC_007409 | UNC45A     | chr15:91473409-91497323   | -0.0918625 | 0.999791 |
| XLOC_018968 | XLOC_018968 | HMGN3      | chr6:79910961-79946517    | -0.0918256 | 0.999791 |
| XLOC_017702 | XLOC_017702 | POCS       | chr5:74970023-75013313    | -0.0917884 | 0.999791 |
| XLOC_011969 | XLOC_011969 | TMEM238    | chr19:55890611-55895627   | -0.0917726 | 0.999791 |
| XLOC_001718 | XLOC_001718 | RHOC       | chr1:113243748-113250025  | -0.0917625 | 0.999791 |
| XLOC_004676 | XLOC_004676 | GAPDH      | chr12:6643584-6647537     | -0.0917592 | 0.999791 |
| XLOC_011183 | XLOC_011183 | BRSK1      | chr19:55795533-55823903   | -0.0916121 | 0.999791 |
| XLOC_005178 | XLOC_005178 | BRI3BP     | chr12:125478193-125510349 | -0.0914596 | 0.999791 |
| XLOC_002280 | XLOC_002280 | HNRNPU-AS1 | chr1:244998638-245010243  | -0.0914305 | 0.999791 |
| XLOC_023639 | XLOC_023639 | CD40LG     | chrX:135730335-135742549  | -0.0914    | 1        |
| XLOC_008303 | XLOC_008303 | SPIRE2     | chr16:89894906-89937727   | -0.0913947 | 0.999791 |
| XLOC_016834 | XLOC_016834 | C4orf36    | chr4:87797357-87813575    | -0.0913179 | 1        |
| XLOC_014797 | XLOC_014797 | FOXRED2    | chr22:36883232-36903148   | -0.0911705 | 0.999791 |
| XLOC_014717 | XLOC_014717 | VPREB3     | chr22:24094929-24096630   | -0.0911684 | 0.999791 |

|             |             |                    |                           |            |          |
|-------------|-------------|--------------------|---------------------------|------------|----------|
| XLOC_016137 | XLOC_016137 | TNK2               | chr3:195590235-195635880  | -0.0910746 | 0.999791 |
| XLOC_003705 | XLOC_003705 | RELT               | chr11:73087404-73108519   | -0.0910454 | 0.999791 |
| XLOC_021802 | XLOC_021802 | KIFC2              | chr8:145691737-145701718  | -0.0910199 | 0.999791 |
| XLOC_017529 | XLOC_017529 | CANX               | chr5:179125929-179158639  | -0.0910143 | 0.999791 |
| XLOC_002176 | XLOC_002176 | BATF3              | chr1:212859758-212873327  | -0.0910134 | 0.999791 |
| XLOC_019184 | XLOC_019184 | MPC1               | chr6:166778407-166796501  | -0.0909581 | 0.999791 |
| XLOC_014450 | XLOC_014450 | GNAZ               | chr22:23401592-23484241   | -0.0908984 | 0.999791 |
| XLOC_004838 | XLOC_004838 | ASIC1              | chr12:50451419-50477405   | -0.0908919 | 0.999791 |
| XLOC_007769 | XLOC_007769 | POLG               | chr15:89787193-89878026   | -0.0908559 | 0.999791 |
| XLOC_008234 | XLOC_008234 | GABARAPL2          | chr16:75600248-75611779   | -0.0908526 | 0.999791 |
| XLOC_001033 | XLOC_001033 | TRAF5              | chr1:211499956-211548286  | -0.0907885 | 0.999791 |
| XLOC_021212 | XLOC_021212 | PPP1R35            | chr7:100032911-100034094  | -0.0907725 | 0.999791 |
| XLOC_000221 | XLOC_000221 | FAM76A             | chr1:28052489-28089423    | -0.0907622 | 0.999791 |
| XLOC_020343 | XLOC_020343 | CHST12             | chr7:2443194-2474216      | -0.090759  | 0.999791 |
| XLOC_021715 | XLOC_021715 | ENY2               | chr8:110346551-110358189  | -0.0907442 | 0.999791 |
| XLOC_007134 | XLOC_007134 | FAM98B             | chr15:38746327-38777063   | -0.0907329 | 0.999791 |
| XLOC_005688 | XLOC_005688 | MMAB               | chr12:109991520-110011358 | -0.0906914 | 0.999791 |
| XLOC_009270 | XLOC_009270 | SLC9A3R1           | chr17:72744750-72765499   | -0.0906763 | 0.999791 |
| XLOC_002351 | XLOC_002351 | MCM10              | chr10:13203553-13253104   | -0.0906637 | 0.999791 |
| XLOC_003927 | XLOC_003927 | VPS26B             | chr11:134094560-134117686 | -0.090644  | 0.999791 |
| XLOC_020923 | XLOC_020923 | CYTH3              | chr7:6201411-6312242      | -0.0905869 | 0.999791 |
| XLOC_011742 | XLOC_011742 | ZNF229             | chr19:44930425-44952665   | -0.0905607 | 1        |
| XLOC_006331 | XLOC_006331 | GEMIN2             | chr14:39583487-39606177   | -0.0905383 | 0.999791 |
| XLOC_022045 | XLOC_022045 | STAU2              | chr8:74332308-74659943    | -0.0904844 | 0.999791 |
| XLOC_016424 | XLOC_016424 | HERC6              | chr4:89298980-89364249    | -0.0904643 | 0.999791 |
| XLOC_000562 | XLOC_000562 | CELSR2             | chr1:109792640-109818378  | -0.0904404 | 0.999791 |
| XLOC_009574 | XLOC_009574 | SGK494             | chr17:26926150-26972177   | -0.090433  | 0.999791 |
| XLOC_007198 | XLOC_007198 | SQRDL              | chr15:45923345-45983492   | -0.0904078 | 0.999791 |
| XLOC_006117 | XLOC_006117 | MED4               | chr13:48649863-48669277   | -0.0903214 | 0.999791 |
| XLOC_012872 | XLOC_012872 | PRKD3              | chr2:37477645-37544222    | -0.0902844 | 0.999791 |
| XLOC_013484 | XLOC_013484 | SNPH               | chr20:1246959-1289971     | -0.0901883 | 0.999791 |
| XLOC_017421 | XLOC_017421 | HMGXB3             | chr5:149372685-149432706  | -0.0901148 | 0.999791 |
| XLOC_012328 | XLOC_012328 | LIPT1              | chr2:99771417-99779613    | -0.090104  | 0.999791 |
| XLOC_004918 | XLOC_004918 | IKZF4              | chr12:56414688-56432219   | -0.090079  | 0.999791 |
| XLOC_007228 | XLOC_007228 | GCOM1,MYZAP,POLR2M | chr15:57884101-58009755   | -0.0900537 | 0.999791 |
| XLOC_002518 | XLOC_002518 | SEC24C             | chr10:75504130-75531933   | -0.090039  | 0.999791 |
| XLOC_002934 | XLOC_002934 | AGAP8              | chr10:51026324-51371331   | -0.0899635 | 0.999791 |
| XLOC_015922 | XLOC_015922 | ALG1L              | chr3:125635443-125655887  | -0.0899616 | 0.999791 |
| XLOC_020435 | XLOC_020435 | ZNRF2P1            | chr7:32767561-32769595    | -0.0899366 | 0.999791 |
| XLOC_020958 | XLOC_020958 | TOMM7              | chr7:22852250-22862471    | -0.0899309 | 0.999791 |
| XLOC_021210 | XLOC_021210 | PMS2P1             | chr7:99905324-99965454    | -0.0899008 | 0.999791 |
| XLOC_012996 | XLOC_012996 | AUP1               | chr2:74753774-74784678    | -0.0898963 | 0.999791 |
| XLOC_014031 | XLOC_014031 | ATP9A              | chr20:50213313-50384908   | -0.089829  | 0.999791 |
| XLOC_016482 | XLOC_016482 | METT14             | chr4:119606573-119632077  | -0.0897655 | 0.999791 |
| XLOC_007871 | XLOC_007871 | RAB26              | chr16:2198650-2204141     | -0.0897281 | 0.999791 |
| XLOC_013303 | XLOC_013303 | LOC100507140       | chr2:201560445-201658941  | -0.0896916 | 1        |
| XLOC_003576 | XLOC_003576 | MARK2              | chr1:63606399-63678492    | -0.0896612 | 0.999791 |
| XLOC_002371 | XLOC_002371 | ARL5B              | chr10:18948312-18966940   | -0.0896177 | 0.999791 |
| XLOC_019109 | XLOC_019109 | PERP               | chr6:138409641-138428660  | -0.0896114 | 0.999791 |
| XLOC_020838 | XLOC_020838 | ZNF282             | chr7:148892576-148923339  | -0.0895895 | 0.999791 |
| XLOC_022035 | XLOC_022035 | NCOA2              | chr8:71024266-71316020    | -0.089569  | 1        |
| XLOC_020690 | XLOC_020690 | HBP1               | chr7:106809405-107218968  | -0.0895283 | 0.999791 |
| XLOC_006950 | XLOC_006950 | IFI27L2            | chr14:94594117-94595957   | -0.089491  | 0.999791 |
| XLOC_005599 | XLOC_005599 | PAWR               | chr12:79985744-80084790   | -0.0894635 | 0.999791 |
| XLOC_006037 | XLOC_006037 | CENPJ              | chr13:25456411-25497027   | -0.089453  | 0.999791 |
| XLOC_001726 | XLOC_001726 | AP4B1              | chr1:114356432-114447741  | -0.0894333 | 0.999791 |
| XLOC_006227 | XLOC_006227 | MCF2L-AS1          | chr13:113621797-113622952 | -0.0894099 | 0.999791 |
| XLOC_001890 | XLOC_001890 | CLK2               | chr1:155232658-155243281  | -0.0893661 | 0.999791 |
| XLOC_005070 | XLOC_005070 | C12orf45           | chr12:105380097-105388505 | -0.0893379 | 0.999791 |
| XLOC_015462 | XLOC_015462 | FXR1               | chr3:180630233-180700539  | -0.0893368 | 0.999791 |
| XLOC_015705 | XLOC_015705 | QRICH1             | chr3:49067141-49131504    | -0.0893277 | 0.999791 |
| XLOC_024017 | XLOC_024017 | AMMECR1            | chrX:109437413-109699562  | -0.0892951 | 0.999791 |
| XLOC_012165 | XLOC_012165 | EPAS1              | chr2:46524540-46613842    | -0.0892886 | 0.999791 |
| XLOC_001746 | XLOC_001746 | WARS2              | chr1:119573838-119683295  | -0.0892724 | 0.999791 |
| XLOC_016503 | XLOC_016503 | LARP1B             | chr4:128982502-129132289  | -0.0892555 | 0.999791 |
| XLOC_013486 | XLOC_013486 | SIRPA              | chr20:1874812-1920540     | -0.089196  | 0.999791 |
| XLOC_001545 | XLOC_001545 | RAB3B              | chr1:52373627-52456436    | -0.0891616 | 0.999791 |
| XLOC_003406 | XLOC_003406 | PRR5L              | chr11:36317724-36486754   | -0.0891005 | 0.999791 |
| XLOC_006933 | XLOC_006933 | CCDC88C            | chr14:91737666-91884188   | -0.0890965 | 0.999791 |
| XLOC_017096 | XLOC_017096 | NPR3               | chr5:32710742-32791830    | -0.0890493 | 1        |
| XLOC_002210 | XLOC_002210 | TMEM63A            | chr1:225997796-226070420  | -0.0890468 | 0.999791 |
| XLOC_010217 | XLOC_010217 | MALT1              | chr18:56338617-56417370   | -0.0890066 | 0.999791 |
| XLOC_009814 | XLOC_009814 | HOXB2              | chr17:46620018-46622393   | -0.0888844 | 0.999791 |
| XLOC_007699 | XLOC_007699 | SNUPN              | chr15:75890423-75918719   | -0.0887045 | 0.999791 |
| XLOC_015264 | XLOC_015264 | ATP6V1A            | chr3:113465865-113530905  | -0.0886743 | 0.999791 |
| XLOC_013868 | XLOC_013868 | RRBP1              | chr20:17594322-17662928   | -0.0886645 | 0.999791 |
| XLOC_000397 | XLOC_000397 | ZYG11B             | chr1:53192130-53293013    | -0.0886649 | 0.999791 |
| XLOC_002580 | XLOC_002580 | IFIT2              | chr10:91061705-91069033   | -0.0885978 | 1        |
| XLOC_022157 | XLOC_022157 | DERL1              | chr8:124025403-124054663  | -0.0885612 | 0.999791 |

|             |             |                             |                           |            |          |
|-------------|-------------|-----------------------------|---------------------------|------------|----------|
| XLOC_010562 | XLOC_010562 | ZNF177,ZNF559,ZNF559-ZNF177 | chr19:9434447-9493293     | -0.0884413 | 0.999791 |
| XLOC_005692 | XLOC_005692 | GIT2                        | chr12:110367606-110434194 | -0.0884296 | 0.999791 |
| XLOC_010564 | XLOC_010564 | UBL5                        | chr19:9938555-9940797     | -0.0883294 | 0.999791 |
| XLOC_018813 | XLOC_018813 | DAXX                        | chr6:33286334-33290793    | -0.0882806 | 0.999791 |
| XLOC_008780 | XLOC_008780 | MINK1                       | chr17:4736634-4806369     | -0.0882746 | 0.999791 |
| XLOC_018091 | XLOC_018091 | TRIM38                      | chr6:25962916-25987557    | -0.088264  | 0.999791 |
| XLOC_010215 | XLOC_010215 | NEDD4L                      | chr18:55711609-56068772   | -0.0882582 | 0.999791 |
| XLOC_023204 | XLOC_023204 | C9orf37                     | chr9:140500095-140513308  | -0.0882461 | 0.999791 |
| XLOC_015494 | XLOC_015494 | DNAJB11                     | chr3:186288466-186303589  | -0.0882077 | 0.999791 |
| XLOC_007780 | XLOC_007780 | CIB1                        | chr15:90773476-90777279   | -0.0881649 | 0.999791 |
| XLOC_012237 | XLOC_012237 | SPR                         | chr2:73114511-73119289    | -0.0881116 | 0.999791 |
| XLOC_023795 | XLOC_023795 | KLHL15                      | chrX:24001832-24045303    | -0.088098  | 0.999791 |
| XLOC_021603 | XLOC_021603 | RAB2A                       | chr8:61429468-61536203    | -0.0880757 | 0.999791 |
| XLOC_023394 | XLOC_023394 | CLCN5                       | chrX:49687224-49683892    | -0.0880688 | 0.999791 |
| XLOC_004070 | XLOC_004070 | MTRNR2L8                    | chr11:10529433-10530723   | -0.0880648 | 0.999791 |
| XLOC_015721 | XLOC_015721 | IP6K1                       | chr3:49761727-49823973    | -0.0879729 | 0.999791 |
| XLOC_011015 | XLOC_011015 | TRPM4                       | chr19:49661015-49715098   | -0.0879193 | 0.999791 |
| XLOC_017488 | XLOC_017488 | BNIP1                       | chr5:172571444-172591390  | -0.0878664 | 0.999791 |
| XLOC_005632 | XLOC_005632 | NDUFA12                     | chr12:95365103-95397489   | -0.0878503 | 0.999791 |
| XLOC_015688 | XLOC_015688 | SHISA5                      | chr3:48509196-48542259    | -0.087847  | 0.999791 |
| XLOC_005891 | XLOC_005891 | FNDC3A                      | chr13:49550047-49783915   | -0.0876535 | 0.999791 |
| XLOC_022485 | XLOC_022485 | SMC2                        | chr9:106856540-106903700  | -0.0875868 | 0.999791 |
| XLOC_019023 | XLOC_019023 | PDSS2                       | chr6:107473760-107780779  | -0.0875851 | 0.999791 |
| XLOC_007151 | XLOC_007151 | C15orf62                    | chr15:41060066-41106767   | -0.0875589 | 1        |
| XLOC_009423 | XLOC_009423 | SPAG7                       | chr17:4862520-4871132     | -0.087552  | 0.999791 |
| XLOC_006878 | XLOC_006878 | ADAM20                      | chr14:70989077-71001732   | -0.0874916 | 1        |
| XLOC_017300 | XLOC_017300 | ISOC1                       | chr5:128430441-128449719  | -0.0874844 | 0.999791 |
| XLOC_008050 | XLOC_008050 | ZNF48                       | chr16:30389453-30411429   | -0.0874796 | 0.999791 |
| XLOC_016085 | XLOC_016085 | PARL                        | chr3:183547172-183602693  | -0.0873017 | 0.999791 |
| XLOC_014579 | XLOC_014579 | SGSM3                       | chr22:40766594-41032690   | -0.0872658 | 0.999791 |
| XLOC_017230 | XLOC_017230 | TMEM161B-AS1                | chr5:87564698-87732491    | -0.0872634 | 0.999791 |
| XLOC_018963 | XLOC_018963 | TMEM30A                     | chr6:75962637-75994632    | -0.0871422 | 0.999791 |
| XLOC_005788 | XLOC_005788 | STX2                        | chr12:131274144-131323819 | -0.0871377 | 0.999791 |
| XLOC_021553 | XLOC_021553 | BAG4                        | chr8:38020838-38070819    | -0.0871297 | 0.999791 |
| XLOC_018582 | XLOC_018582 | MRPL18                      | chr6:160211491-160219461  | -0.087106  | 0.999791 |
| XLOC_016663 | XLOC_016663 | ABLIM2                      | chr4:7967036-8160559      | -0.087104  | 0.999791 |
| XLOC_009477 | XLOC_009477 | C17orf59                    | chr17:8091650-8093564     | -0.0870663 | 0.999791 |
| XLOC_011297 | XLOC_011297 | LSM7                        | chr19:2321519-2328614     | -0.0870596 | 0.999791 |
| XLOC_022639 | XLOC_022639 | C9orf96                     | chr9:136243283-136324508  | -0.0870595 | 1        |
| XLOC_001664 | XLOC_001664 | CNN3                        | chr1:953262506-95392735   | -0.0869932 | 0.999791 |
| XLOC_009639 | XLOC_009639 | MYO19                       | chr17:34842472-34891305   | -0.0869389 | 0.999791 |
| XLOC_007779 | XLOC_007779 | IDH2                        | chr15:90627211-90645708   | -0.086931  | 0.999791 |
| XLOC_012279 | XLOC_012279 | USP39                       | chr2:85829964-85876407    | -0.0869115 | 0.999791 |
| XLOC_004655 | XLOC_004655 | TULP3                       | chr12:3000032-3050306     | -0.0868304 | 0.999791 |
| XLOC_023689 | XLOC_023689 | ZNF275                      | chrX:152599612-152618384  | -0.0867897 | 0.999791 |
| XLOC_000533 | XLOC_000533 | TRMT13                      | chr1:100598705-100643829  | -0.0867651 | 0.999791 |
| XLOC_019188 | XLOC_019188 | RNASET2                     | chr6:167343003-167370077  | -0.0867535 | 0.999791 |
| XLOC_013782 | XLOC_013782 | PPDPF                       | chr20:62152132-62153524   | -0.0867514 | 0.999791 |
| XLOC_019034 | XLOC_019034 | WASF1                       | chr6:110421021-110501207  | -0.08669   | 0.999791 |
| XLOC_020932 | XLOC_020932 | RPA3                        | chr7:7676574-7918851      | -0.0866739 | 0.999791 |
| XLOC_003774 | XLOC_003774 | KDM4D                       | chr11:94706844-94732676   | -0.0866435 | 0.999791 |
| XLOC_013619 | XLOC_013619 | TP53INP2                    | chr20:33292147-33301237   | -0.0866288 | 0.999791 |
| XLOC_009108 | XLOC_009108 | DBF4B                       | chr17:42785975-42829636   | -0.0866184 | 0.999791 |
| XLOC_003109 | XLOC_003109 | C10orf76                    | chr10:103605355-103815932 | -0.0866106 | 0.999791 |
| XLOC_018974 | XLOC_018974 | UBE3D                       | chr6:83602185-83775545    | -0.0865736 | 0.999791 |
| XLOC_015781 | XLOC_015781 | ARHGEF3                     | chr3:56761445-57113336    | -0.0864883 | 0.999791 |
| XLOC_005448 | XLOC_005448 | SLC11A2                     | chr12:51373565-51422058   | -0.0864831 | 0.999791 |
| XLOC_011676 | XLOC_011676 | AKT2                        | chr19:40736223-40791302   | -0.0864601 | 0.999791 |
| XLOC_005637 | XLOC_005637 | CCDC38                      | chr12:96260825-96336428   | -0.086459  | 1        |
| XLOC_018811 | XLOC_018811 | RGL2                        | chr6:33259430-33267165    | -0.0864351 | 0.999791 |
| XLOC_008321 | XLOC_008321 | WDR24                       | chr16:734701-740400       | -0.0864261 | 0.999791 |
| XLOC_017604 | XLOC_017604 | RAD1                        | chr5:34905365-34915780    | -0.0864071 | 0.999791 |
| XLOC_021349 | XLOC_021349 | MKRN1                       | chr7:140152839-140179369  | -0.086345  | 0.999791 |
| XLOC_000491 | XLOC_000491 | SH3GLB1                     | chr1:87170252-87213867    | -0.086338  | 0.999791 |
| XLOC_009757 | XLOC_009757 | VAT1                        | chr17:41166621-41174459   | -0.0863293 | 0.999791 |
| XLOC_021762 | XLOC_021762 | CHRAC1                      | chr8:141521396-141527252  | -0.0863157 | 0.999791 |
| XLOC_002498 | XLOC_002498 | C10orf35                    | chr10:71390002-71393355   | -0.0863142 | 0.999791 |
| XLOC_012449 | XLOC_012449 | R3HDM1                      | chr2:136289082-136482839  | -0.0862991 | 0.999791 |
| XLOC_013194 | XLOC_013194 | WDSUB1                      | chr2:160092303-160143236  | -0.0862711 | 0.999791 |
| XLOC_018450 | XLOC_018450 | TRAF3IP2-AS1                | chr6:111804674-111927477  | -0.0862696 | 0.999791 |
| XLOC_015325 | XLOC_015325 | COPG1                       | chr3:128968452-128996616  | -0.086227  | 0.999791 |
| XLOC_021263 | XLOC_021263 | PNPLA8                      | chr7:108110865-108168605  | -0.0862255 | 0.999791 |
| XLOC_017108 | XLOC_017108 | NIPBL                       | chr5:36876860-37065921    | -0.0861525 | 0.999791 |
| XLOC_007837 | XLOC_007837 | FAM173A                     | chr16:771141-776473       | -0.0861417 | 0.999791 |
| XLOC_017523 | XLOC_017523 | ZNF354B                     | chr5:178286953-178311424  | -0.0861363 | 0.999791 |
| XLOC_001143 | XLOC_001143 | CNST                        | chr1:246729638-246831884  | -0.0861289 | 0.999791 |
| XLOC_011382 | XLOC_011382 | CD320                       | chr19:8367010-8373240     | -0.0860992 | 0.999791 |
| XLOC_023743 | XLOC_023743 | PRKX                        | chrX:3522383-3631675      | -0.0859487 | 0.999791 |
| XLOC_008007 | XLOC_008007 | LCMT1                       | chr16:25123046-25189551   | -0.085944  | 0.999791 |



|             |             |              |                           |            |          |
|-------------|-------------|--------------|---------------------------|------------|----------|
| XLOC_006442 | XLOC_006442 | COQ6         | chr14:74399694-74429813   | -0.0859305 | 0.999791 |
| XLOC_000605 | XLOC_000605 | HIPK1        | chr1:114471995-114520491  | -0.0857956 | 0.999791 |
| XLOC_018293 | XLOC_018293 | TOMM6        | chr6:41755180-41757634    | -0.0857947 | 0.999791 |
| XLOC_013481 | XLOC_013481 | PSMF1        | chr20:1093905-1148426     | -0.0857919 | 0.999791 |
| XLOC_016500 | XLOC_016500 | HSPA4L       | chr4:128703452-128754526  | -0.0857521 | 0.999791 |
| XLOC_006984 | XLOC_006984 | CKB          | chr14:103985994-103989196 | -0.0856837 | 0.999791 |
| XLOC_018902 | XLOC_018902 | RCAN2        | chr6:46188466-46459804    | -0.0856121 | 1        |
| XLOC_000310 | XLOC_000310 | EXO5         | chr1:40974432-4098214     | -0.0855587 | 0.999791 |
| XLOC_022781 | XLOC_022781 | NDUFB6       | chr9:32553523-32573182    | -0.0855682 | 0.999791 |
| XLOC_001089 | XLOC_001089 | GUK1         | chr1:228327784-228336655  | -0.0854717 | 0.999791 |
| XLOC_003831 | XLOC_003831 | RBM7         | chr11:114271383-114279635 | -0.0854516 | 0.999791 |
| XLOC_018331 | XLOC_018331 | ENPP4        | chr6:46097700-46114436    | -0.0854385 | 0.999791 |
| XLOC_018454 | XLOC_018454 | MARCKS       | chr6:114178526-114184652  | -0.0853276 | 0.999791 |
| XLOC_011955 | XLOC_011955 | RDH13        | chr19:55555691-55580914   | -0.0853213 | 0.999791 |
| XLOC_016057 | XLOC_016057 | PHC3         | chr3:169805367-169899537  | -0.0852932 | 0.999791 |
| XLOC_014653 | XLOC_014653 | RPL23AP82    | chr22:51195513-51238065   | -0.0851728 | 0.999791 |
| XLOC_019164 | XLOC_019164 | LOC100129518 | chr6:160181290-160210735  | -0.0851663 | 1        |
| XLOC_011937 | XLOC_011937 | OSCAR        | chr19:54597932-54604148   | -0.085145  | 0.999791 |
| XLOC_015367 | XLOC_015367 | MRPS22       | chr3:139062860-139075887  | -0.0850505 | 0.999791 |
| XLOC_023452 | XLOC_023452 | DGAT2L6      | chrX:69397335-69425553    | -0.085037  | 1        |
| XLOC_001109 | XLOC_001109 | KIAA1804     | chr1:233463513-233520894  | -0.0850218 | 0.999791 |
| XLOC_018871 | XLOC_018871 | MED20        | chr6:41873091-41888877    | -0.0849848 | 0.999791 |
| XLOC_015936 | XLOC_015936 | RPN1         | chr3:128338812-128369719  | -0.0849521 | 0.999791 |
| XLOC_011537 | XLOC_011537 | ELL          | chr19:18553472-18632937   | -0.0849377 | 0.999791 |
| XLOC_004443 | XLOC_004443 | CREBZF       | chr1:85368607-85376182    | -0.0849256 | 0.999791 |
| XLOC_018240 | XLOC_018240 | B3GALT4      | chr6:33244916-33244602    | -0.0849122 | 1        |
| XLOC_013825 | XLOC_013825 | PCED1A       | chr20:2815960-3019315     | -0.0848536 | 0.999791 |
| XLOC_002023 | XLOC_002023 | PIGC         | chr1:172389827-172437969  | -0.0848285 | 0.999791 |
| XLOC_002489 | XLOC_002489 | DDX50        | chr10:70661033-70706603   | -0.0848171 | 0.999791 |
| XLOC_007671 | XLOC_007671 | PARP6        | chr15:72533521-72563628   | -0.0847569 | 0.999791 |
| XLOC_005239 | XLOC_005239 | VAMP1        | chr12:6561176-6579843     | -0.0846394 | 0.999791 |
| XLOC_006708 | XLOC_006708 | RBM23        | chr14:23369853-23388396   | -0.0845963 | 0.999791 |
| XLOC_016109 | XLOC_016109 | BCL6         | chr3:187416046-187463513  | -0.0845909 | 0.999791 |
| XLOC_022874 | XLOC_022874 | PTAR1        | chr9:72324437-72374876    | -0.0845428 | 0.999791 |
| XLOC_016686 | XLOC_016686 | QDPR         | chr4:17488015-17513857    | -0.0845231 | 0.999791 |
| XLOC_011054 | XLOC_011054 | EMC10        | chr19:50970044-50986608   | -0.0845121 | 0.999791 |
| XLOC_006980 | XLOC_006980 | CINP         | chr14:102814618-102829253 | -0.0844677 | 0.999791 |
| XLOC_013521 | XLOC_013521 | MCM8         | chr20:5931297-5975831     | -0.0843739 | 0.999791 |
| XLOC_022617 | XLOC_022617 | AIF1L        | chr9:133971862-133998539  | -0.0843636 | 0.999791 |
| XLOC_000165 | XLOC_000165 | ZBTB40       | chr1:22778343-22857650    | -0.0843485 | 0.999791 |
| XLOC_008863 | XLOC_008863 | CDRT15P1     | chr17:13927814-13928915   | -0.0843443 | 1        |
| XLOC_017993 | XLOC_017993 | ADAMTS2      | chr5:178537851-178772431  | -0.0843381 | 1        |
| XLOC_023907 | XLOC_023907 | ZC4H2        | chrX:64135681-64254624    | -0.084279  | 0.999791 |
| XLOC_019027 | XLOC_019027 | SNX3         | chr6:108532716-108582464  | -0.0842733 | 0.999791 |
| XLOC_020924 | XLOC_020924 | FAM220A      | chr7:6369039-6388590      | -0.0842482 | 0.999791 |
| XLOC_016993 | XLOC_016993 | DDX60L       | chr4:169277885-169401638  | -0.0842032 | 1        |
| XLOC_005708 | XLOC_005708 | HECTD4       | chr12:112597991-112819896 | -0.0840597 | 0.999791 |
| XLOC_022258 | XLOC_022258 | DOCK8        | chr9:213107-465259        | -0.0840295 | 0.999791 |
| XLOC_002065 | XLOC_002065 | RGS16        | chr1:182567757-182573548  | -0.0840273 | 0.999791 |
| XLOC_003601 | XLOC_003601 | SAC3D1       | chr1:64808375-64826009    | -0.0840246 | 0.999791 |
| XLOC_007241 | XLOC_007241 | TPM1         | chr15:63334837-63364113   | -0.0838644 | 0.999791 |
| XLOC_007171 | XLOC_007171 | STAR09       | chr15:42867856-43013196   | -0.0838299 | 0.999791 |
| XLOC_014360 | XLOC_014360 | C21orf2      | chr21:45748826-45759285   | -0.0838267 | 0.999791 |
| XLOC_003566 | XLOC_003566 | POLR2G       | chr11:62529010-62534187   | -0.0837624 | 0.999791 |
| XLOC_010392 | XLOC_010392 | BCL2         | chr18:60790578-60986613   | -0.0837347 | 0.999791 |
| XLOC_018305 | XLOC_018305 | KLHDC3       | chr6:42981840-42989036    | -0.0836947 | 0.999791 |
| XLOC_021653 | XLOC_021653 | LRRC1        | chr8:86019322-86058314    | -0.0836931 | 0.999791 |
| XLOC_022021 | XLOC_022021 | MYBL1        | chr8:67474409-67525480    | -0.083604  | 0.999791 |
| XLOC_011339 | XLOC_011339 | SAFB2        | chr19:5587009-5622938     | -0.0835548 | 0.999791 |
| XLOC_017469 | XLOC_017469 | SPDL1        | chr5:169010637-169031781  | -0.0835133 | 0.999791 |
| XLOC_009006 | XLOC_009006 | DHRS11       | chr17:34948225-34957233   | -0.083495  | 0.999791 |
| XLOC_008952 | XLOC_008952 | TAOK1        | chr17:27717942-27878921   | -0.083493  | 0.999791 |
| XLOC_008795 | XLOC_008795 | TXNDC17      | chr17:6481644-6554954     | -0.0834774 | 0.999791 |
| XLOC_000569 | XLOC_000569 | AMPD2        | chr1:110162434-110174677  | -0.0834474 | 0.999791 |
| XLOC_019168 | XLOC_019168 | AIRN         | chr6:160390130-160527583  | -0.0834048 | 1        |
| XLOC_012650 | XLOC_012650 | TTL4         | chr2:219575567-219620138  | -0.083404  | 0.999791 |
| XLOC_000935 | XLOC_000935 | PRG4         | chr1:185703682-186446655  | -0.0833968 | 1        |
| XLOC_017510 | XLOC_017510 | NSD1         | chr5:176560079-176727214  | -0.0833421 | 0.999791 |
| XLOC_016081 | XLOC_016081 | LAMP3        | chr3:182840002-182880667  | -0.0832952 | 0.999791 |
| XLOC_015899 | XLOC_015899 | GOLGB1       | chr3:121382045-121468614  | -0.0832188 | 0.999791 |
| XLOC_014163 | XLOC_014163 | CHAF1B       | chr21:37757688-37789125   | -0.0831638 | 0.999791 |
| XLOC_017500 | XLOC_017500 | SIMC1        | chr5:175665369-175772990  | -0.08313   | 0.999791 |
| XLOC_009538 | XLOC_009538 | SHMT1        | chr17:18218593-18266856   | -0.0830913 | 0.999791 |
| XLOC_004271 | XLOC_004271 | ZBTB3        | chr11:62518434-62521656   | -0.0830367 | 0.999791 |
| XLOC_009750 | XLOC_009750 | CCR10        | chr17:40831419-40833845   | -0.0830015 | 0.999791 |
| XLOC_014417 | XLOC_014417 | ZDHHC8       | chr22:20119363-20135530   | -0.0829718 | 0.999791 |
| XLOC_015730 | XLOC_015730 | HYAL3,NAT6   | chr3:50330258-50336899    | -0.0829445 | 0.999791 |
| XLOC_005330 | XLOC_005330 | HIST4H4      | chr12:14923653-14924065   | -0.0828739 | 0.999791 |
| XLOC_015768 | XLOC_015768 | TKT          | chr3:53258722-53290130    | -0.0828531 | 0.999791 |

|             |             |           |                           |            |          |
|-------------|-------------|-----------|---------------------------|------------|----------|
| XLOC_008339 | XLOC_008339 | NME3      | chr16:1820320-1821710     | -0.082816  | 0.999791 |
| XLOC_017669 | XLOC_017669 | DEPDC1B   | chr5:59892738-59995993    | -0.0828116 | 0.999791 |
| XLOC_017785 | XLOC_017785 | ALDH7A1   | chr5:125877532-125931082  | -0.0827575 | 0.999791 |
| XLOC_000778 | XLOC_000778 | APOA1BP   | chr1:156561557-156564091  | -0.0827537 | 0.999791 |
| XLOC_002091 | XLOC_002091 | ZBTB41    | chr1:197122813-197169672  | -0.0827036 | 0.999791 |
| XLOC_003680 | XLOC_003680 | PPFIA1    | chr1:70116805-70230607    | -0.0827016 | 0.999791 |
| XLOC_003394 | XLOC_003394 | KIAA1549L | chr1:33563876-33695646    | -0.0826718 | 0.999791 |
| XLOC_008932 | XLOC_008932 | TNFAIP1   | chr17:26662547-26684603   | -0.0825806 | 0.999791 |
| XLOC_009627 | XLOC_009627 | RDM1      | chr17:34245084-34257780   | -0.0825645 | 0.999791 |
| XLOC_010213 | XLOC_010213 | ONECUT2   | chr18:55102916-55158530   | -0.0825635 | 1        |
| XLOC_018277 | XLOC_018277 | FTSJD2    | chr6:37400906-37449284    | -0.0825511 | 0.999791 |
| XLOC_001813 | XLOC_001813 | VPS72     | chr1:151148775-151162689  | -0.0825106 | 0.999791 |
| XLOC_019133 | XLOC_019133 | ZC3H12D   | chr6:149768765-149806148  | -0.0824997 | 1        |
| XLOC_009663 | XLOC_009663 | MED1      | chr17:37560537-37607527   | -0.0824254 | 0.999791 |
| XLOC_020577 | XLOC_020577 | PTPN12    | chr7:77166772-77269398    | -0.0824173 | 0.999791 |
| XLOC_021900 | XLOC_021900 | NUDT18    | chr8:21964382-21966932    | -0.0823665 | 0.999791 |
| XLOC_023142 | XLOC_023142 | VAV2      | chr9:136627015-136857446  | -0.0823589 | 0.999791 |
| XLOC_001688 | XLOC_001688 | WDR47     | chr1:109512837-109584850  | -0.0823578 | 0.999791 |
| XLOC_002112 | XLOC_002112 | ARL8A     | chr1:202102531-202113871  | -0.0823244 | 0.999791 |
| XLOC_010435 | XLOC_010435 | PRTN3     | chr19:840984-848175       | -0.0823144 | 1        |
| XLOC_023516 | XLOC_023516 | CENPI     | chrX:100354797-100417978  | -0.0822111 | 0.999791 |
| XLOC_012706 | XLOC_012706 | PRSS56    | chr2:233385172-233390425  | -0.0822    | 1        |
| XLOC_000192 | XLOC_000192 | LDLRAP1   | chr1:25870075-25895377    | -0.0821658 | 0.999791 |
| XLOC_012122 | XLOC_012122 | YPEL5     | chr2:30369749-30383339    | -0.0821469 | 0.999791 |
| XLOC_002970 | XLOC_002970 | AIFM2     | chr10:71812356-71892690   | -0.0821385 | 0.999791 |
| XLOC_020653 | XLOC_020653 | PCOLCE    | chr7:100183955-100205798  | -0.0821332 | 0.999791 |
| XLOC_010619 | XLOC_010619 | RAD23A    | chr19:13056627-13064457   | -0.0819346 | 0.999791 |
| XLOC_009787 | XLOC_009787 | PLCD3     | chr17:43189007-43209891   | -0.0818968 | 0.999791 |
| XLOC_005745 | XLOC_005745 | SPPL3     | chr12:121200312-121342155 | -0.0818942 | 0.999791 |
| XLOC_011043 | XLOC_011043 | TBC1D17   | chr19:50380681-50392007   | -0.0818832 | 0.999791 |
| XLOC_009224 | XLOC_009224 | DCAF7     | chr17:61627795-61671642   | -0.0818463 | 0.999791 |
| XLOC_000879 | XLOC_000879 | FMO4      | chr1:171283485-171311223  | -0.0818251 | 0.999791 |
| XLOC_010942 | XLOC_010942 | CD3EAP    | chr19:45882891-45927177   | -0.0817921 | 0.999791 |
| XLOC_021023 | XLOC_021023 | MPLKIP    | chr7:40172341-40174251    | -0.081717  | 0.999791 |
| XLOC_017191 | XLOC_017191 | HEXB      | chr5:73980968-74072737    | -0.0816318 | 0.999791 |
| XLOC_006490 | XLOC_006490 | C14orf159 | chr14:91580356-91691703   | -0.0815393 | 0.999791 |
| XLOC_011343 | XLOC_011343 | DUS3L     | chr19:5785152-5791249     | -0.0813999 | 0.999791 |
| XLOC_002509 | XLOC_002509 | ANAPC16   | chr10:73855789-73995618   | -0.0813853 | 0.999791 |
| XLOC_002668 | XLOC_002668 | SUFU      | chr10:104263718-104393214 | -0.0813646 | 0.999791 |
| XLOC_010476 | XLOC_010476 | TLE6      | chr19:2977535-2995182     | -0.0813142 | 0.999791 |
| XLOC_022267 | XLOC_022267 | SLC1A1    | chr9:4490426-4587469      | -0.0812944 | 0.999791 |
| XLOC_007706 | XLOC_007706 | ETFA      | chr15:76508628-76603810   | -0.081294  | 0.999791 |
| XLOC_010835 | XLOC_010835 | FAM98C    | chr19:38893774-38916945   | -0.0812507 | 0.999791 |
| XLOC_014858 | XLOC_014858 | NDUFA6    | chr22:42481529-42486888   | -0.0812073 | 0.999791 |
| XLOC_001741 | XLOC_001741 | TRIM45    | chr1:117653676-117664411  | -0.0810264 | 0.999791 |
| XLOC_020522 | XLOC_020522 | KCTD7     | chr7:66093867-66108216    | -0.0810253 | 0.999791 |
| XLOC_005487 | XLOC_005487 | AAAS      | chr12:53701239-53715412   | -0.0810131 | 0.999791 |
| XLOC_013569 | XLOC_013569 | ENTPD6    | chr20:25176338-25207360   | -0.0810113 | 0.999791 |
| XLOC_007585 | XLOC_007585 | MYO5C     | chr15:52484514-52587995   | -0.0809185 | 0.999791 |
| XLOC_021416 | XLOC_021416 | C7orf13   | chr7:156431059-156433348  | -0.0808948 | 0.999791 |
| XLOC_000019 | XLOC_000019 | GLTPD1    | chr1:1260142-1264276      | -0.0808434 | 0.999791 |
| XLOC_016725 | XLOC_016725 | GNPDA2    | chr4:44703811-44728651    | -0.0807603 | 0.999791 |
| XLOC_016689 | XLOC_016689 | LCORL     | chr4:17812435-18023483    | -0.0807319 | 0.999791 |
| XLOC_003619 | XLOC_003619 | FAM89B    | chr1:165339819-85341669   | -0.0806682 | 0.999791 |
| XLOC_008980 | XLOC_008980 | CDK5R1    | chr17:30814104-30818271   | -0.0806289 | 0.999791 |
| XLOC_022048 | XLOC_022048 | JPH1      | chr8:75146938-75233562    | -0.0806151 | 0.999791 |
| XLOC_018893 | XLOC_018893 | MRPL14    | chr6:44081372-44095191    | -0.0805677 | 0.999791 |
| XLOC_011097 | XLOC_011097 | ZNF525    | chr19:53868967-53889841   | -0.0805591 | 0.999791 |
| XLOC_009197 | XLOC_009197 | RAD51C    | chr17:56769962-56811692   | -0.0805539 | 0.999791 |
| XLOC_020578 | XLOC_020578 | RSBN1L    | chr7:77313167-77409120    | -0.0804323 | 0.999791 |
| XLOC_006939 | XLOC_006939 | ATXN3     | chr14:92524895-92572965   | -0.0804078 | 0.999791 |
| XLOC_017975 | XLOC_017975 | F12       | chr5:176829138-176836577  | -0.0803111 | 0.999791 |
| XLOC_016822 | XLOC_016822 | SEC31A    | chr4:83739813-83812419    | -0.0802532 | 0.999791 |
| XLOC_014754 | XLOC_014754 | NIPSNAP1  | chr22:29950797-29977326   | -0.0802358 | 0.999791 |
| XLOC_000059 | XLOC_000059 | THAP3     | chr1:6684924-6761966      | -0.0802317 | 0.999791 |
| XLOC_007985 | XLOC_007985 | UQCRC2    | chr16:21964608-21994668   | -0.0802045 | 0.999791 |
| XLOC_004492 | XLOC_004492 | MMP1      | chr11:102654406-102714342 | -0.0801893 | 1        |
| XLOC_021151 | XLOC_021151 | SRI       | chr7:87834431-87856308    | -0.0801039 | 0.999791 |
| XLOC_011693 | XLOC_011693 | ATP5SL    | chr19:41937222-41945843   | -0.0799804 | 0.999791 |
| XLOC_011096 | XLOC_011096 | ZNF845    | chr19:53837001-53858122   | -0.0799681 | 0.999791 |
| XLOC_018978 | XLOC_018978 | KIAA1009  | chr6:84833959-84937335    | -0.0799461 | 1        |
| XLOC_014000 | XLOC_014000 | ACOT8     | chr20:44462469-44486048   | -0.0799226 | 0.999791 |
| XLOC_012304 | XLOC_012304 | PROM2     | chr2:95940200-95957055    | -0.0799132 | 1        |
| XLOC_023923 | XLOC_023923 | ZMYM3     | chrX:70430034-70948962    | -0.0799091 | 0.999791 |
| XLOC_016635 | XLOC_016635 | NELFA     | chr4:1984440-2010962      | -0.079827  | 0.999791 |
| XLOC_004387 | XLOC_004387 | NUMA1     | chr1:171709957-171823822  | -0.0797754 | 0.999791 |
| XLOC_012160 | XLOC_012160 | PPM1B     | chr2:44395999-44461742    | -0.0797433 | 0.999791 |
| XLOC_000156 | XLOC_000156 | PINK1     | chr1:20959947-20978004    | -0.0796976 | 0.999791 |
| XLOC_007950 | XLOC_007950 | BFAR      | chr16:14726667-14763093   | -0.0796787 | 0.999791 |

|             |             |                       |                           |            |          |
|-------------|-------------|-----------------------|---------------------------|------------|----------|
| XLOC_007629 | XLOC_007629 | PIF1                  | chr15:65107832-65117838   | -0.0796748 | 0.999791 |
| XLOC_008347 | XLOC_008347 | MSRB1                 | chr16:1988233-1993294     | -0.0796332 | 0.999791 |
| XLOC_022489 | XLOC_022489 | NIPSNAP3A             | chr9:107509968-107522403  | -0.0796295 | 0.999791 |
| XLOC_004037 | XLOC_004037 | TAF10                 | chr11:6624963-6633475     | -0.079615  | 0.999791 |
| XLOC_008159 | XLOC_008159 | CKLF,CKLF-CMTM1,CMTM1 | chr16:66586465-66613038   | -0.0794812 | 0.999791 |
| XLOC_008990 | XLOC_008990 | LIG3                  | chr17:33307516-33332088   | -0.079465  | 0.999791 |
| XLOC_020398 | XLOC_020398 | CCDC126               | chr7:23636997-23684327    | -0.0794559 | 0.999791 |
| XLOC_013177 | XLOC_013177 | RND3                  | chr2:151324706-151344209  | -0.079413  | 0.999791 |
| XLOC_022943 | XLOC_022943 | C9orf129              | chr9:95947211-96108696    | -0.0793924 | 0.999791 |
| XLOC_010941 | XLOC_010941 | KLC3                  | chr19:45843997-45873845   | -0.0793771 | 0.999791 |
| XLOC_014756 | XLOC_014756 | ASCC2                 | chr22:30184596-30234293   | -0.0792763 | 0.999791 |
| XLOC_010123 | XLOC_010123 | IMPA2                 | chr18:11981426-12030885   | -0.0792482 | 0.999791 |
| XLOC_004993 | XLOC_004993 | TBC1D15               | chr12:72233486-72320629   | -0.0792344 | 0.999791 |
| XLOC_013650 | XLOC_013650 | RALGAPB               | chr20:37101485-37207504   | -0.0791984 | 0.999791 |
| XLOC_012181 | XLOC_012181 | ERLEC1                | chr2:53897116-54087170    | -0.0791662 | 0.999791 |
| XLOC_008388 | XLOC_008388 | SLX4                  | chr16:3631183-3661585     | -0.0791594 | 0.999791 |
| XLOC_010092 | XLOC_010092 | TYMS                  | chr18:596997-712662       | -0.0791303 | 0.999791 |
| XLOC_001526 | XLOC_001526 | MOB3C                 | chr1:47073386-47082563    | -0.0791229 | 0.999791 |
| XLOC_002703 | XLOC_002703 | NHLRC2                | chr10:115614390-115672265 | -0.0791185 | 0.999791 |
| XLOC_016639 | XLOC_016639 | TNIP2                 | chr4:2743386-2758103      | -0.0790281 | 0.999791 |
| XLOC_012462 | XLOC_012462 | ACVR2A                | chr2:148602569-149271044  | -0.0789998 | 0.999791 |
| XLOC_004866 | XLOC_004866 | ZNF740                | chr12:53551446-53584654   | -0.0789425 | 0.999791 |
| XLOC_017517 | XLOC_017517 | B4GALT7               | chr5:177027118-177037346  | -0.07894   | 0.999791 |
| XLOC_024104 | XLOC_024104 | ZNF75D                | chrX:134419722-134429965  | -0.0787266 | 0.999791 |
| XLOC_015299 | XLOC_015299 | SEC22A                | chr3:12920773-122992982   | -0.0786107 | 0.999791 |
| XLOC_000654 | XLOC_000654 | NBPF15,NBPF16         | chr1:148558187-148596267  | -0.0786083 | 0.999791 |
| XLOC_008649 | XLOC_008649 | LOC100506060          | chr16:70253483-70259936   | -0.0785934 | 0.999791 |
| XLOC_020514 | XLOC_020514 | ZNF92                 | chr7:64838767-64865998    | -0.0785925 | 0.999791 |
| XLOC_017022 | XLOC_017022 | IRF2                  | chr4:185308875-185395726  | -0.0785899 | 0.999791 |
| XLOC_017287 | XLOC_017287 | SNX2                  | chr5:122110749-122165802  | -0.0785808 | 0.999791 |
| XLOC_014795 | XLOC_014795 | MYH9                  | chr22:36677322-36784063   | -0.0785471 | 0.999791 |
| XLOC_015652 | XLOC_015652 | GTDC2                 | chr3:43120720-43147575    | -0.0785387 | 0.999791 |
| XLOC_017768 | XLOC_017768 | REEP5                 | chr5:112196884-112258031  | -0.078535  | 0.999791 |
| XLOC_000123 | XLOC_000123 | SLC25A34              | chr1:16062808-16067884    | -0.0785333 | 1        |
| XLOC_001264 | XLOC_001264 | EXOSC10               | chr1:11126675-11159938    | -0.0784699 | 0.999791 |
| XLOC_022185 | XLOC_022185 | LRRRC6                | chr8:133584200-133687863  | -0.0784573 | 0.999791 |
| XLOC_022326 | XLOC_022326 | IL11RA                | chr9:34652181-34662689    | -0.0784531 | 0.999791 |
| XLOC_000061 | XLOC_000061 | VAMP3                 | chr1:7831328-7841492      | -0.0784302 | 0.999791 |
| XLOC_016709 | XLOC_016709 | TLR6                  | chr4:38825328-38858438    | -0.0784115 | 0.999791 |
| XLOC_000526 | XLOC_000526 | SNX7                  | chr1:99127235-99226056    | -0.0783674 | 0.999791 |
| XLOC_003724 | XLOC_003724 | C11orf30              | chr11:76156068-76262589   | -0.0782326 | 0.999791 |
| XLOC_013128 | XLOC_013128 | CLASP1                | chr2:122095351-122407052  | -0.0782179 | 0.999791 |
| XLOC_008564 | XLOC_008564 | N4BP1                 | chr16:48572636-48644120   | -0.0781747 | 0.999791 |
| XLOC_018651 | XLOC_018651 | RANBP9                | chr6:13621729-137111796   | -0.0780715 | 0.999791 |
| XLOC_022610 | XLOC_022610 | NCS1                  | chr9:132934856-132999583  | -0.0780589 | 0.999791 |
| XLOC_016439 | XLOC_016439 | METAP1                | chr4:99916787-99983960    | -0.0779481 | 0.999791 |
| XLOC_016382 | XLOC_016382 | PARM1                 | chr4:75858284-75975325    | -0.0779438 | 0.999791 |
| XLOC_011673 | XLOC_011673 | ZNF780A               | chr19:40575058-40596845   | -0.0779363 | 0.999791 |
| XLOC_017904 | XLOC_017904 | CCDC69                | chr5:150560612-150603654  | -0.0777766 | 0.999791 |
| XLOC_001100 | XLOC_001100 | COG2                  | chr1:230778201-230829731  | -0.0776325 | 0.999791 |
| XLOC_002090 | XLOC_002090 | ASPM                  | chr1:197053256-197115824  | -0.0775148 | 0.999791 |
| XLOC_018788 | XLOC_018788 | AGPAT1                | chr6:32120578-32145888    | -0.0775103 | 0.999791 |
| XLOC_016053 | XLOC_016053 | ACTRT3                | chr3:169484710-169487683  | -0.0775024 | 0.999791 |
| XLOC_023129 | XLOC_023129 | RALGDS                | chr9:135973106-136024607  | -0.0774525 | 0.999791 |
| XLOC_006765 | XLOC_006765 | CFL2                  | chr14:35179587-35184029   | -0.0774425 | 0.999791 |
| XLOC_008060 | XLOC_008060 | RNF40                 | chr16:30759619-30787628   | -0.0774058 | 0.999791 |
| XLOC_018809 | XLOC_018809 | VPS52                 | chr6:33217312-33239662    | -0.0774046 | 0.999791 |
| XLOC_002043 | XLOC_002043 | MRPS14                | chr1:174982093-174992591  | -0.0773987 | 0.999791 |
| XLOC_017625 | XLOC_017625 | TTC33                 | chr5:40711677-40756072    | -0.0773855 | 0.999791 |
| XLOC_010565 | XLOC_010565 | PIN1                  | chr19:9945882-9960365     | -0.0773767 | 0.999791 |
| XLOC_014604 | XLOC_014604 | SERHL2                | chr22:42949924-42978017   | -0.0772991 | 1        |
| XLOC_019007 | XLOC_019007 | COQ3                  | chr6:99817347-99842082    | -0.0772979 | 0.999791 |
| XLOC_003644 | XLOC_003644 | DPP3                  | chr11:66247483-66277130   | -0.0772926 | 0.999791 |
| XLOC_022706 | XLOC_022706 | FOXD4                 | chr9:116230-118417        | -0.0772882 | 0.999791 |
| XLOC_014857 | XLOC_014857 | NAGA                  | chr22:42454337-42466846   | -0.0772738 | 0.999791 |
| XLOC_009480 | XLOC_009480 | CTC1                  | chr17:8128138-8151413     | -0.0771016 | 0.999791 |
| XLOC_013656 | XLOC_013656 | FAM83D                | chr20:37554954-37581703   | -0.0770697 | 0.999791 |
| XLOC_009046 | XLOC_009046 | WIPF2                 | chr17:38375573-38438439   | -0.0770541 | 0.999791 |
| XLOC_024007 | XLOC_024007 | RBM41                 | chrX:106305117-106362057  | -0.0769931 | 0.999791 |
| XLOC_021743 | XLOC_021743 | SQLC                  | chr8:126010719-126034525  | -0.0769723 | 0.999791 |
| XLOC_020743 | XLOC_020743 | IRF5                  | chr7:128577993-128590088  | -0.0769237 | 0.999791 |
| XLOC_009358 | XLOC_009358 | FN3K                  | chr17:80693451-80709073   | -0.0768666 | 0.999791 |
| XLOC_012880 | XLOC_012880 | SOS1                  | chr2:39208689-39347604    | -0.0768268 | 0.999791 |
| XLOC_000973 | XLOC_000973 | ELF3                  | chr1:201979689-201986315  | -0.0767408 | 1        |
| XLOC_007119 | XLOC_007119 | CHRNA7                | chr15:32322685-32462384   | -0.0767285 | 0.999791 |
| XLOC_019005 | XLOC_019005 | FBXL4                 | chr6:99321600-99395849    | -0.0767262 | 0.999791 |
| XLOC_007376 | XLOC_007376 | ZNF592                | chr15:85291817-85349663   | -0.076672  | 0.999791 |
| XLOC_015110 | XLOC_015110 | RBM6                  | chr3:49977476-50114685    | -0.0766481 | 0.999791 |
| XLOC_018773 | XLOC_018773 | LSM2                  | chr6:31765168-31774761    | -0.0766397 | 0.999791 |

|             |             |                            |                           |            |          |
|-------------|-------------|----------------------------|---------------------------|------------|----------|
| XLOC_001432 | XLOC_001432 | TRIM62                     | chr1:33611002-33647671    | -0.0766371 | 0.999791 |
| XLOC_003235 | XLOC_003235 | EFCAB4A                    | chr11:827584-831991       | -0.0766345 | 0.999791 |
| XLOC_023380 | XLOC_023380 | PLP2                       | chrX:49028183-49031468    | -0.0765976 | 0.999791 |
| XLOC_018390 | XLOC_018390 | BCKDHB                     | chr6:80816343-81055987    | -0.0765955 | 0.999791 |
| XLOC_017726 | XLOC_017726 | SCARNA18                   | chr5:82348664-82373272    | -0.0765895 | 0.999791 |
| XLOC_013990 | XLOC_013990 | SDC4                       | chr20:43953928-43977064   | -0.0765784 | 0.999791 |
| XLOC_015816 | XLOC_015816 | EIF4E3                     | chr3:71728439-71804328    | -0.0765171 | 0.999791 |
| XLOC_013039 | XLOC_013039 | MRPS5                      | chr2:95752951-95787754    | -0.0764922 | 0.999791 |
| XLOC_002330 | XLOC_002330 | FBXO18                     | chr10:5903688-5979558     | -0.076492  | 0.999791 |
| XLOC_008839 | XLOC_008839 | CNTROB                     | chr17:7835441-7853237     | -0.0763695 | 0.999791 |
| XLOC_010485 | XLOC_010485 | HMG20B                     | chr19:3572942-3579081     | -0.0763436 | 0.999791 |
| XLOC_007010 | XLOC_007010 | TUBGCP5                    | chr15:22833394-22873891   | -0.0763413 | 0.999791 |
| XLOC_009962 | XLOC_009962 | ATP5H                      | chr17:73034954-73043074   | -0.076317  | 0.999791 |
| XLOC_018568 | XLOC_018568 | ARID1B                     | chr6:157099063-157531913  | -0.0763113 | 0.999791 |
| XLOC_007125 | XLOC_007125 | PGBD4                      | chr15:34394273-34396591   | -0.0762671 | 0.999791 |
| XLOC_017931 | XLOC_017931 | PWWP2A                     | chr5:159502891-159546452  | -0.076237  | 0.999791 |
| XLOC_015468 | XLOC_015468 | KLHL24                     | chr3:183353410-183402304  | -0.0762359 | 0.999791 |
| XLOC_011270 | XLOC_011270 | TMEM259                    | chr19:1000436-1021141     | -0.0762288 | 0.999791 |
| XLOC_020481 | XLOC_020481 | UPP1                       | chr7:48128354-48148330    | -0.0762048 | 0.999791 |
| XLOC_008316 | XLOC_008316 | MRPL28                     | chr16:417383-420569       | -0.0761966 | 0.999791 |
| XLOC_012403 | XLOC_012403 | STEAP3                     | chr2:119981383-120023227  | -0.0761552 | 0.999791 |
| XLOC_022492 | XLOC_022492 | SLC44A1                    | chr9:108006928-108153682  | -0.0761308 | 0.999791 |
| XLOC_021983 | XLOC_021983 | PRKDC                      | chr8:48685668-48872743    | -0.0761303 | 0.999791 |
| XLOC_021792 | XLOC_021792 | MAF1                       | chr8:145159304-145162515  | -0.0760468 | 0.999791 |
| XLOC_001238 | XLOC_001238 | GPR153                     | chr1:6307405-6321035      | -0.0759557 | 0.999791 |
| XLOC_022691 | XLOC_022691 | TUBB4B                     | chr9:140135710-140142222  | -0.0759254 | 0.999791 |
| XLOC_010450 | XLOC_010450 | C19orf24                   | chr19:1275519-1279243     | -0.0759138 | 0.999791 |
| XLOC_017378 | XLOC_017378 | PCDH89                     | chr5:140566892-140571111  | -0.0759051 | 0.999791 |
| XLOC_003441 | XLOC_003441 | NR1H3                      | chr11:47260852-47290584   | -0.0758632 | 0.999791 |
| XLOC_017740 | XLOC_017740 | FAM172A                    | chr5:92919042-93447404    | -0.0758495 | 0.999791 |
| XLOC_012850 | XLOC_012850 | RBKS                       | chr2:28004265-28561767    | -0.0758083 | 0.999791 |
| XLOC_023372 | XLOC_023372 | SUV39H1                    | chrX:48555130-48567406    | -0.0757724 | 0.999791 |
| XLOC_013280 | XLOC_013280 | MSTN                       | chr2:190920425-190927455  | -0.0756405 | 1        |
| XLOC_004954 | XLOC_004954 | METTL21B                   | chr12:58166382-58176324   | -0.0755413 | 0.999791 |
| XLOC_012068 | XLOC_012068 | RHOB                       | chr2:20646834-20649201    | -0.0754958 | 0.999791 |
| XLOC_003574 | XLOC_003574 | RTN3                       | chr11:63448921-63527363   | -0.0754883 | 0.999791 |
| XLOC_005882 | XLOC_005882 | COG3                       | chr13:46039029-46110833   | -0.0754877 | 0.999791 |
| XLOC_006919 | XLOC_006919 | GTF2A1                     | chr14:81641795-81687575   | -0.0754856 | 0.999791 |
| XLOC_011536 | XLOC_011536 | ISYNA1                     | chr19:18530145-18549111   | -0.0754585 | 0.999791 |
| XLOC_011039 | XLOC_011039 | AP2A1                      | chr19:50270179-50316567   | -0.0754563 | 0.999791 |
| XLOC_015714 | XLOC_015714 | GPX1                       | chr3:49394608-49395791    | -0.0754463 | 0.999791 |
| XLOC_015475 | XLOC_015475 | DVL3                       | chr3:183873283-183891314  | -0.0753639 | 0.999791 |
| XLOC_014986 | XLOC_014986 | NR1D2                      | chr3:23986750-24022109    | -0.0753318 | 0.999791 |
| XLOC_024205 | XLOC_024205 | CMC4,MTCP1                 | chrX:154289899-154299547  | -0.0753025 | 0.999791 |
| XLOC_000928 | XLOC_000928 | SMG7                       | chr1:183441505-183523328  | -0.0752333 | 0.999791 |
| XLOC_016600 | XLOC_016600 | C4orf47                    | chr4:186350544-186392913  | -0.0752232 | 0.999791 |
| XLOC_018749 | XLOC_018749 | CDSN                       | chr6:31082607-31107869    | -0.0752107 | 1        |
| XLOC_022168 | XLOC_022168 | MTSS1                      | chr8:125563027-125740730  | -0.0751434 | 0.999791 |
| XLOC_002135 | XLOC_002135 | PPP1R15B                   | chr1:204372491-204380944  | -0.0751389 | 0.999791 |
| XLOC_014720 | XLOC_014720 | LOC284889                  | chr22:24235896-24241117   | -0.0750887 | 0.999791 |
| XLOC_000297 | XLOC_000297 | NDUFS5                     | chr1:39491966-39500308    | -0.0750751 | 0.999791 |
| XLOC_006662 | XLOC_006662 | BTBD6                      | chr14:105675622-105864484 | -0.0750105 | 0.999791 |
| XLOC_015357 | XLOC_015357 | NCK1                       | chr3:136581049-136667968  | -0.0749634 | 0.999791 |
| XLOC_018785 | XLOC_018785 | FKBP1                      | chr6:32096483-32098067    | -0.0749594 | 0.999791 |
| XLOC_016805 | XLOC_016805 | SCARB2                     | chr4:77079891-77135052    | -0.0749409 | 0.999791 |
| XLOC_016302 | XLOC_016302 | ATP10D                     | chr4:47487409-47595503    | -0.0749308 | 0.999791 |
| XLOC_021735 | XLOC_021735 | WDYHV1                     | chr8:124428964-124454260  | -0.0748721 | 0.999791 |
| XLOC_005024 | XLOC_005024 | MRPL42                     | chr12:93861265-93897548   | -0.0747974 | 0.999791 |
| XLOC_001662 | XLOC_001662 | ARHGAP29                   | chr1:94634462-94703307    | -0.0747874 | 0.999791 |
| XLOC_005136 | XLOC_005136 | SIRT4                      | chr12:120740123-120751045 | -0.0747713 | 0.999791 |
| XLOC_011399 | XLOC_011399 | ZNF266                     | chr19:9523101-9546254     | -0.0747519 | 0.999791 |
| XLOC_014824 | XLOC_014824 | DDX17                      | chr22:38864082-38902345   | -0.0747506 | 0.999791 |
| XLOC_021723 | XLOC_021723 | MED30                      | chr8:118532964-118552501  | -0.0747136 | 0.999791 |
| XLOC_007420 | XLOC_007420 | MCTP2                      | chr15:94841429-95027181   | -0.0747115 | 0.999791 |
| XLOC_021656 | XLOC_021656 | CA3                        | chr8:86351055-86361267    | -0.0746775 | 0.999791 |
| XLOC_010934 | XLOC_010934 | CLPTM1                     | chr19:45457841-45496604   | -0.0746589 | 0.999791 |
| XLOC_014856 | XLOC_014856 | CENPM                      | chr22:42334740-42343148   | -0.0746337 | 0.999791 |
| XLOC_003725 | XLOC_003725 | TSKU                       | chr1:176493356-76509198   | -0.0746301 | 0.999791 |
| XLOC_021268 | XLOC_021268 | DOCK4                      | chr7:111366163-111846462  | -0.0746233 | 0.999791 |
| XLOC_008064 | XLOC_008064 | ORAI3                      | chr16:30960404-30966259   | -0.0745455 | 0.999791 |
| XLOC_006400 | XLOC_006400 | PLEKHG3                    | chr14:65171192-65211060   | -0.0744917 | 0.999791 |
| XLOC_009165 | XLOC_009165 | ACSF2                      | chr17:48503518-48552200   | -0.0743892 | 0.999791 |
| XLOC_023518 | XLOC_023518 | HNRNP2, RPL36A, RPL36A-HNF | chrX:100645877-100669128  | -0.0743855 | 0.999791 |
| XLOC_012391 | XLOC_012391 | LOC654433                  | chr2:113973573-114036498  | -0.0743818 | 0.999791 |
| XLOC_006161 | XLOC_006161 | FBXL3                      | chr13:77579388-77601331   | -0.0743328 | 0.999791 |
| XLOC_014102 | XLOC_014102 | USP25                      | chr21:17102495-17252377   | -0.0743291 | 0.999791 |
| XLOC_000912 | XLOC_000912 | CEP350                     | chr1:179923907-180084015  | -0.0742888 | 0.999791 |
| XLOC_004389 | XLOC_004389 | LAMTOR1                    | chr1:171709957-71823822   | -0.074273  | 0.999791 |
| XLOC_021281 | XLOC_021281 | FAM3C                      | chr7:120988904-121036422  | -0.0742418 | 0.999791 |

|             |             |              |                           |            |          |
|-------------|-------------|--------------|---------------------------|------------|----------|
| XLOC_006940 | XLOC_006940 | NDUFB1       | chr14:92582467-92588153   | -0.0742153 | 0.999791 |
| XLOC_009444 | XLOC_009444 | MIR497HG     | chr17:6915735-6922973     | -0.0740959 | 0.999791 |
| XLOC_008436 | XLOC_008436 | MYH11        | chr16:15737123-15950887   | -0.0740479 | 1        |
| XLOC_014004 | XLOC_014004 | ZNF335       | chr20:44577291-44600833   | -0.0740003 | 0.999791 |
| XLOC_001007 | XLOC_001007 | IKBKE        | chr1:206643585-206670223  | -0.0739909 | 0.999791 |
| XLOC_015809 | XLOC_015809 | TMF1         | chr3:69068977-69101484    | -0.0739246 | 0.999791 |
| XLOC_017485 | XLOC_017485 | ATP6V0E1     | chr5:172410762-172461900  | -0.0737996 | 0.999791 |
| XLOC_011513 | XLOC_011513 | MED26        | chr19:16685717-16739015   | -0.0737252 | 0.999791 |
| XLOC_010615 | XLOC_010615 | RNASEH2A     | chr19:12917427-12924462   | -0.0736862 | 0.999791 |
| XLOC_022531 | XLOC_022531 | CNTRL        | chr9:123850573-123939886  | -0.0736621 | 0.999791 |
| XLOC_003173 | XLOC_003173 | IKZF5        | chr10:124750321-124768366 | -0.0736383 | 0.999791 |
| XLOC_007601 | XLOC_007601 | ZNF280D      | chr15:56922373-57025787   | -0.0736136 | 0.999791 |
| XLOC_014147 | XLOC_014147 | IFNAR1       | chr21:34697213-34732128   | -0.0735585 | 0.999791 |
| XLOC_019065 | XLOC_019065 | SERINC1      | chr6:122764492-122792952  | -0.0735093 | 0.999791 |
| XLOC_009182 | XLOC_009182 | PCTP         | chr17:53828339-53854748   | -0.0735082 | 0.999791 |
| XLOC_007362 | XLOC_007362 | WHAMM        | chr15:83477972-83503613   | -0.0734843 | 0.999791 |
| XLOC_017864 | XLOC_017864 | FCHSD1       | chr5:141016516-141030986  | -0.0734445 | 0.999791 |
| XLOC_002327 | XLOC_002327 | NET1         | chr10:5454513-5501019     | -0.0734227 | 0.999791 |
| XLOC_015633 | XLOC_015633 | ACAA1        | chr3:38080695-38178733    | -0.0734005 | 0.999791 |
| XLOC_012309 | XLOC_012309 | LOC285033    | chr2:96850602-96908362    | -0.0733788 | 0.999791 |
| XLOC_003134 | XLOC_003134 | SMNDC1       | chr10:112052797-112064707 | -0.0733774 | 0.999791 |
| XLOC_001031 | XLOC_001031 | HHAT         | chr1:210501595-210849638  | -0.0733484 | 0.999791 |
| XLOC_013009 | XLOC_013009 | SUCLG1       | chr2:84650646-8468586     | -0.073312  | 0.999791 |
| XLOC_008413 | XLOC_008413 | EMP2         | chr16:10622278-10674539   | -0.0732848 | 0.999791 |
| XLOC_008858 | XLOC_008858 | MAP2K4       | chr17:11924134-12047051   | -0.0732787 | 0.999791 |
| XLOC_005145 | XLOC_005145 | HNF1A        | chr12:121416548-121440314 | -0.0732751 | 0.999791 |
| XLOC_021432 | XLOC_021432 | ARHGEF10     | chr8:1772148-1906807      | -0.0732619 | 0.999791 |
| XLOC_008296 | XLOC_008296 | RPL13        | chr16:89627064-89633237   | -0.0732487 | 0.999791 |
| XLOC_010414 | XLOC_010414 | ZNF516       | chr18:74069636-74207146   | -0.07321   | 0.999791 |
| XLOC_004342 | XLOC_004342 | B3GNT1       | chr11:66112842-66115161   | -0.0731982 | 0.999791 |
| XLOC_014618 | XLOC_014618 | FAM118A      | chr22:45705080-45737836   | -0.0731916 | 0.999791 |
| XLOC_015692 | XLOC_015692 | UQCRC1       | chr3:48636431-48647098    | -0.0731716 | 0.999791 |
| XLOC_008471 | XLOC_008471 | USP31        | chr16:23072727-23160591   | -0.0731409 | 0.999791 |
| XLOC_005135 | XLOC_005135 | PXN-AS1      | chr12:120639093-120703574 | -0.0730697 | 0.999791 |
| XLOC_010829 | XLOC_010829 | SPINT2       | chr19:38755097-38783254   | -0.073042  | 0.999791 |
| XLOC_003937 | XLOC_003937 | SIGIRR       | chr11:405715-417397       | -0.0730141 | 0.999791 |
| XLOC_009779 | XLOC_009779 | GPATCH8      | chr17:42472644-42580957   | -0.0729992 | 0.999791 |
| XLOC_017160 | XLOC_017160 | PIK3R1       | chr5:67511583-67597649    | -0.0729807 | 0.999791 |
| XLOC_021768 | XLOC_021768 | BAI1         | chr8:143545376-143626368  | -0.0729577 | 0.999791 |
| XLOC_005425 | XLOC_005425 | ARF3         | chr12:49329991-49351252   | -0.0729442 | 0.999791 |
| XLOC_017382 | XLOC_017382 | PCDHB13      | chr5:140593508-140596993  | -0.0729429 | 0.999791 |
| XLOC_017439 | XLOC_017439 | CNOT8        | chr5:154238197-154256352  | -0.0729187 | 0.999791 |
| XLOC_008396 | XLOC_008396 | NMRAL1       | chr16:4511694-4560348     | -0.0728994 | 0.999791 |
| XLOC_001515 | XLOC_001515 | CCDC163P     | chr1:45959597-45965751    | -0.0728059 | 0.999791 |
| XLOC_003994 | XLOC_003994 | TRIM68       | chr11:4619901-4629489     | -0.0728007 | 0.999791 |
| XLOC_017966 | XLOC_017966 | GPRIN1       | chr5:176022802-176037131  | -0.0727854 | 0.999791 |
| XLOC_004639 | XLOC_004639 | LOC100288778 | chr12:87983-91263         | -0.0727764 | 0.999791 |
| XLOC_008041 | XLOC_008041 | TMEM219      | chr16:29973350-29984373   | -0.0726646 | 0.999791 |
| XLOC_009965 | XLOC_009965 | SUMO2        | chr17:73163824-73179098   | -0.0726508 | 0.999791 |
| XLOC_011159 | XLOC_011159 | CNOT3        | chr19:54641435-54663446   | -0.0726242 | 0.999791 |
| XLOC_005164 | XLOC_005164 | ARL6IP4      | chr12:123464879-123467460 | -0.0726403 | 0.999791 |
| XLOC_000993 | XLOC_000993 | SNRPE        | chr1:203830739-203840280  | -0.0725914 | 0.999791 |
| XLOC_006495 | XLOC_006495 | GOLGA5       | chr14:93260649-93306304   | -0.072548  | 0.999791 |
| XLOC_002117 | XLOC_002117 | RABIF        | chr1:202847409-202858385  | -0.0724855 | 0.999791 |
| XLOC_012427 | XLOC_012427 | PTPN18       | chr2:131113579-131132982  | -0.0724768 | 0.999791 |
| XLOC_001348 | XLOC_001348 | RANBP3       | chr19:5914192-5978320     | -0.0724678 | 0.999791 |
| XLOC_009818 | XLOC_009818 | HOXB5        | chr17:46667822-46683774   | -0.0724565 | 0.999791 |
| XLOC_014945 | XLOC_014945 | TATDN2       | chr3:10290176-10335133    | -0.0724236 | 0.999791 |
| XLOC_021280 | XLOC_021280 | TSPAN12      | chr7:120427373-120498177  | -0.0723945 | 0.999791 |
| XLOC_000074 | XLOC_000074 | UBE4B        | chr1:10093040-10241296    | -0.0723827 | 0.999791 |
| XLOC_018526 | XLOC_018526 | HECA         | chr6:139456248-139501946  | -0.0723097 | 0.999791 |
| XLOC_022734 | XLOC_022734 | BNC2         | chr9:16409500-16870786    | -0.0722043 | 0.999791 |
| XLOC_009969 | XLOC_009969 | GRB2         | chr17:73314156-73401790   | -0.0721412 | 0.999791 |
| XLOC_009747 | XLOC_009747 | PSMC3IP      | chr17:40719077-40729849   | -0.0721312 | 0.999791 |
| XLOC_002009 | XLOC_002009 | SLC19A2      | chr1:169433148-169455208  | -0.0721297 | 0.999791 |
| XLOC_000748 | XLOC_000748 | ZBTB7B       | chr1:154975105-154991001  | -0.0720184 | 0.999791 |
| XLOC_004166 | XLOC_004166 | LRP4         | chr11:46867961-46940173   | -0.0719999 | 0.999791 |
| XLOC_021049 | XLOC_021049 | TBRG4        | chr7:45139698-45151346    | -0.0719499 | 0.999791 |
| XLOC_017252 | XLOC_017252 | C5orf30      | chr5:102594441-102614361  | -0.0719428 | 0.999791 |
| XLOC_000196 | XLOC_000196 | EXTL1        | chr1:26348270-26362954    | -0.0719427 | 1        |
| XLOC_007753 | XLOC_007753 | GOLGA6L5     | chr15:85045805-85060078   | -0.0718983 | 1        |
| XLOC_008529 | XLOC_008529 | BCL7C        | chr16:30899115-30905399   | -0.0718684 | 0.999791 |
| XLOC_010254 | XLOC_010254 | ZNF236       | chr18:74536115-74682682   | -0.0718641 | 0.999791 |
| XLOC_007905 | XLOC_007905 | ZNF205       | chr16:3160460-3170518     | -0.0718587 | 0.999791 |
| XLOC_010758 | XLOC_010758 | LRP3         | chr19:33685598-33716756   | -0.0718486 | 0.999791 |
| XLOC_004234 | XLOC_004234 | OSBP         | chr11:59341870-59383617   | -0.0717961 | 0.999791 |
| XLOC_021477 | XLOC_021477 | C8orf48      | chr8:13424351-13425797    | -0.0717424 | 0.999791 |
| XLOC_023948 | XLOC_023948 | ABC7         | chrX:74273006-74376175    | -0.0717268 | 0.999791 |
| XLOC_021121 | XLOC_021121 | PMS2P3       | chr7:75137068-75157453    | -0.0717053 | 0.999791 |

|             |             |                           |                           |            |          |
|-------------|-------------|---------------------------|---------------------------|------------|----------|
| XLOC_010578 | XLOC_010578 | ATG4D                     | chr19:10654646-10676702   | -0.0716937 | 0.999791 |
| XLOC_012426 | XLOC_012426 | IMP4                      | chr2:131100488-131104197  | -0.0716731 | 0.999791 |
| XLOC_008933 | XLOC_008933 | TMEM199                   | chr17:26684686-26689089   | -0.0716708 | 0.999791 |
| XLOC_015485 | XLOC_015485 | POLR2H                    | chr3:184081193-184086363  | -0.0716691 | 0.999791 |
| XLOC_004969 | XLOC_004969 | LEMD3                     | chr12:65563350-65642141   | -0.0716383 | 0.999791 |
| XLOC_018624 | XLOC_018624 | SLC22A23                  | chr6:3269206-3456793      | -0.0716378 | 0.999791 |
| XLOC_012102 | XLOC_012102 | SNX17                     | chr2:27593362-27603611    | -0.0715777 | 0.999791 |
| XLOC_014992 | XLOC_014992 | ZCWPW2                    | chr3:28431986-28566632    | -0.0715402 | 1        |
| XLOC_015686 | XLOC_015686 | PLXNB1                    | chr3:48445260-48471460    | -0.0713968 | 0.999791 |
| XLOC_003140 | XLOC_003140 | ZDHHC6                    | chr10:114190057-114206672 | -0.0713565 | 0.999791 |
| XLOC_017083 | XLOC_017083 | FAM105B                   | chr5:14664782-14699842    | -0.0712036 | 0.999791 |
| XLOC_017691 | XLOC_017691 | GUSBP9                    | chr5:70516052-70555122    | -0.0712036 | 1        |
| XLOC_016629 | XLOC_016629 | SPON2                     | chr4:1160720-1202750      | -0.0711827 | 0.999791 |
| XLOC_010510 | XLOC_010510 | KDM4B                     | chr19:4969123-5153608     | -0.0711752 | 0.999791 |
| XLOC_016737 | XLOC_016737 | OCIAD2                    | chr4:48887404-48908815    | -0.0711615 | 0.999791 |
| XLOC_018063 | XLOC_018063 | JARID2                    | chr6:15246205-15522273    | -0.0711456 | 0.999791 |
| XLOC_000078 | XLOC_000078 | PEX14                     | chr1:10535002-10690815    | -0.0710532 | 0.999791 |
| XLOC_012481 | XLOC_012481 | TANC1                     | chr2:159825145-160089170  | -0.0710513 | 0.999791 |
| XLOC_000770 | XLOC_000770 | LMNA                      | chr1:156052368-156109880  | -0.0710392 | 0.999791 |
| XLOC_015762 | XLOC_015762 | GLT8D1                    | chr3:52719935-52742197    | -0.0710012 | 0.999791 |
| XLOC_009475 | XLOC_009475 | VAMP2                     | chr17:8062464-8066293     | -0.0709792 | 0.999791 |
| XLOC_016022 | XLOC_016022 | C3orf33                   | chr3:155480400-155524055  | -0.0709761 | 0.999791 |
| XLOC_001725 | XLOC_001725 | BCL2L15                   | chr1:114356432-114447741  | -0.0709003 | 1        |
| XLOC_022504 | XLOC_022504 | DNAJC25,DNAJC25-GNG10,GNC | chr9:114393631-114432526  | -0.0708792 | 0.999791 |
| XLOC_012604 | XLOC_012604 | PARD3B                    | chr2:205410515-206484886  | -0.0708733 | 1        |
| XLOC_001191 | XLOC_001191 | C1orf159                  | chr1:1017197-1051736      | -0.0707575 | 0.999791 |
| XLOC_001118 | XLOC_001118 | TBCE                      | chr1:235530727-235667781  | -0.0707086 | 0.999791 |
| XLOC_023403 | XLOC_023403 | CCNB3                     | chrX:50027539-50094911    | -0.0706815 | 0.999791 |
| XLOC_022177 | XLOC_022177 | ASAP1                     | chr8:131064350-131455906  | -0.0706257 | 0.999791 |
| XLOC_017141 | XLOC_017141 | GPBP1                     | chr5:56469774-56560506    | -0.0706163 | 0.999791 |
| XLOC_009284 | XLOC_009284 | TSEN54                    | chr17:73512608-73520820   | -0.0705681 | 0.999791 |
| XLOC_011563 | XLOC_011563 | ZNF737                    | chr19:20720797-20748626   | -0.0705577 | 0.999791 |
| XLOC_001614 | XLOC_001614 | PIGK                      | chr1:77554666-77685132    | -0.0705056 | 0.999791 |
| XLOC_021584 | XLOC_021584 | MCM4                      | chr8:48872762-48890719    | -0.0704738 | 0.999791 |
| XLOC_015734 | XLOC_015734 | RASSF1                    | chr3:50367216-50378367    | -0.070464  | 0.999791 |
| XLOC_013454 | XLOC_013454 | MYEOV2                    | chr2:241065979-241075764  | -0.070439  | 0.999791 |
| XLOC_003092 | XLOC_003092 | CWF19L1                   | chr10:101992054-102027437 | -0.0703406 | 0.999791 |
| XLOC_009571 | XLOC_009571 | PIGS                      | chr17:26880405-26889887   | -0.0703185 | 0.999791 |
| XLOC_004830 | XLOC_004830 | LOC100335030              | chr12:49760687-49921207   | -0.070295  | 1        |
| XLOC_002589 | XLOC_002589 | PCGF5                     | chr10:92922768-93044088   | -0.0702586 | 0.999791 |
| XLOC_010268 | XLOC_010268 | ENOSF1                    | chr18:596997-712662       | -0.0701696 | 0.999791 |
| XLOC_001728 | XLOC_001728 | TRIM33                    | chr1:114935398-115053781  | -0.070089  | 0.999791 |
| XLOC_008143 | XLOC_008143 | POLR2C                    | chr16:57496550-57520385   | -0.0700583 | 0.999791 |
| XLOC_000091 | XLOC_000091 | MIIP                      | chr1:12079298-12092106    | -0.0700331 | 0.999791 |
| XLOC_006780 | XLOC_006780 | SEC23A                    | chr14:39501122-39572437   | -0.0699718 | 0.999791 |
| XLOC_013102 | XLOC_013102 | BUB1                      | chr2:111395408-111435684  | -0.0698952 | 0.999791 |
| XLOC_009021 | XLOC_009021 | PSMB3                     | chr17:36909001-36920478   | -0.0698679 | 0.999791 |
| XLOC_011242 | XLOC_011242 | ZNF544                    | chr19:58740069-58775008   | -0.0698445 | 0.999791 |
| XLOC_000230 | XLOC_000230 | MED18                     | chr1:28655512-28662478    | -0.0697716 | 0.999791 |
| XLOC_013258 | XLOC_013258 | TTN                       | chr2:179059207-179672150  | -0.0697529 | 1        |
| XLOC_023710 | XLOC_023710 | ATP6AP1                   | chrX:153656977-153664862  | -0.0697175 | 0.999791 |
| XLOC_009211 | XLOC_009211 | PPM1D                     | chr17:58677543-58743640   | -0.0697107 | 0.999791 |
| XLOC_006159 | XLOC_006159 | COMMD6                    | chr13:76099349-76111991   | -0.0696959 | 0.999791 |
| XLOC_012561 | XLOC_012561 | C2orf88                   | chr2:191002485-191068210  | -0.0696893 | 0.999791 |
| XLOC_011785 | XLOC_011785 | STRN4                     | chr19:47222767-47261832   | -0.0696657 | 0.999791 |
| XLOC_006311 | XLOC_006311 | G2E3                      | chr14:31028328-31089046   | -0.0696469 | 0.999791 |
| XLOC_002851 | XLOC_002851 | ARHGAP21                  | chr10:24872537-25012597   | -0.0695563 | 0.999791 |
| XLOC_009425 | XLOC_009425 | INCA1                     | chr17:4891424-4900905     | -0.0695398 | 0.999791 |
| XLOC_022435 | XLOC_022435 | CENPP                     | chr9:95059639-95432547    | -0.0695337 | 0.999791 |
| XLOC_005948 | XLOC_005948 | NDFIP2                    | chr13:80051498-80130212   | -0.0695006 | 0.999791 |
| XLOC_010559 | XLOC_010559 | ZNF317                    | chr19:9251055-9274091     | -0.0694844 | 0.999791 |
| XLOC_021267 | XLOC_021267 | IMMP2L                    | chr7:110303105-111202573  | -0.0694129 | 0.999791 |
| XLOC_000307 | XLOC_000307 | SMAP2                     | chr1:40839377-40888998    | -0.0693632 | 0.999791 |
| XLOC_007205 | XLOC_007205 | GALK2                     | chr15:49447975-49913118   | -0.0693462 | 0.999791 |
| XLOC_007926 | XLOC_007926 | UBN1                      | chr16:4897911-4932363     | -0.0693378 | 0.999791 |
| XLOC_007472 | XLOC_007472 | NDNL2                     | chr15:29412454-29862927   | -0.0693359 | 0.999791 |
| XLOC_004398 | XLOC_004398 | FAM168A                   | chr11:73117027-73309228   | -0.0693066 | 0.999791 |
| XLOC_011538 | XLOC_011538 | FKBP8                     | chr19:18642567-18654383   | -0.0692347 | 0.999791 |
| XLOC_004844 | XLOC_004844 | ATF1                      | chr12:51157788-51214943   | -0.0692295 | 0.999791 |
| XLOC_007931 | XLOC_007931 | METTL22                   | chr16:8715526-8740079     | -0.0691993 | 0.999791 |
| XLOC_020988 | XLOC_020988 | CPVL                      | chr7:29019582-29186153    | -0.0691004 | 0.999791 |
| XLOC_010821 | XLOC_010821 | ZNF383                    | chr19:37717365-37734574   | -0.0690541 | 0.999791 |
| XLOC_007012 | XLOC_007012 | GOLGA8I                   | chr15:23255241-23262743   | -0.0690403 | 1        |
| XLOC_016168 | XLOC_016168 | CTBP1-AS1                 | chr4:1243227-1246795      | -0.0690074 | 0.999791 |
| XLOC_009160 | XLOC_009160 | PKD2                      | chr17:48172100-48207246   | -0.0689885 | 0.999791 |
| XLOC_003349 | XLOC_003349 | NCR3LG1                   | chr11:17373308-17398868   | -0.0689471 | 1        |
| XLOC_016391 | XLOC_016391 | SEPT11                    | chr4:77870894-77959768    | -0.0689093 | 0.999791 |
| XLOC_023818 | XLOC_023818 | CASK                      | chrX:41374188-41782287    | -0.0689016 | 0.999791 |
| XLOC_011795 | XLOC_011795 | KPTN                      | chr19:47978399-47987521   | -0.0688972 | 0.999791 |

|             |             |                               |                           |            |          |
|-------------|-------------|-------------------------------|---------------------------|------------|----------|
| XLOC_015655 | XLOC_015655 | ZNF445                        | chr3:44481261-44519162    | -0.0688875 | 0.999791 |
| XLOC_003503 | XLOC_003503 | CNTF,ZFP91                    | chr11:58346586-58393205   | -0.0688738 | 0.999791 |
| XLOC_018108 | XLOC_018108 | BTN3A2                        | chr6:26365397-26378548    | -0.0688867 | 0.999791 |
| XLOC_017229 | XLOC_017229 | RASA1                         | chr5:86564069-86687743    | -0.0688056 | 0.999791 |
| XLOC_013727 | XLOC_013727 | CSTF1                         | chr20:54967426-54979582   | -0.0687165 | 0.999791 |
| XLOC_010632 | XLOC_010632 | DCAF15                        | chr19:14041999-14072256   | -0.0686989 | 0.999791 |
| XLOC_010437 | XLOC_010437 | CFD                           | chr19:859664-863610       | -0.068694  | 0.999791 |
| XLOC_004857 | XLOC_004857 | C12orf44                      | chr12:52463757-52471279   | -0.0686652 | 0.999791 |
| XLOC_014356 | XLOC_014356 | CSTB                          | chr21:45193545-45196256   | -0.0686474 | 0.999791 |
| XLOC_007349 | XLOC_007349 | IL16                          | chr15:81489218-81616524   | -0.0685961 | 1        |
| XLOC_012205 | XLOC_012205 | UGP2                          | chr2:64068097-64118696    | -0.0685956 | 0.999791 |
| XLOC_012204 | XLOC_012204 | MDH1                          | chr2:63348534-63834330    | -0.0685872 | 0.999791 |
| XLOC_016200 | XLOC_016200 | WFS1                          | chr4:6271576-6304992      | -0.0685751 | 0.999791 |
| XLOC_014542 | XLOC_014542 | CDC42EP1                      | chr22:37956470-37965410   | -0.0685593 | 0.999791 |
| XLOC_014956 | XLOC_014956 | HDAC11                        | chr3:13521714-13547924    | -0.0685573 | 0.999791 |
| XLOC_017934 | XLOC_017934 | C5orf54                       | chr5:159820154-159827060  | -0.0684894 | 0.999791 |
| XLOC_005806 | XLOC_005806 | MRP63                         | chr13:2127733-21753220    | -0.0684607 | 0.999791 |
| XLOC_014558 | XLOC_014558 | KDELRL3                       | chr22:38864082-38902345   | -0.0684541 | 0.999791 |
| XLOC_012590 | XLOC_012590 | FZD7                          | chr2:202899309-202903160  | -0.0684132 | 0.999791 |
| XLOC_022338 | XLOC_022338 | RGP1                          | chr9:35749276-35754274    | -0.068358  | 0.999791 |
| XLOC_005829 | XLOC_005829 | POLR1D                        | chr13:28194879-28241559   | -0.0683337 | 0.999791 |
| XLOC_016804 | XLOC_016804 | NUP54                         | chr4:77035816-77069655    | -0.0682918 | 0.999791 |
| XLOC_003587 | XLOC_003587 | PLCB3                         | chr1:164018994-64036924   | -0.06823   | 0.999791 |
| XLOC_006363 | XLOC_006363 | MAPK1IP1L                     | chr14:55518361-55536912   | -0.0682063 | 0.999791 |
| XLOC_020782 | XLOC_020782 | C7orf55,C7orf55-LUC7L2,LUC7L3 | chr7:139025104-139112272  | -0.0681394 | 0.999791 |
| XLOC_013426 | XLOC_013426 | NGEF                          | chr2:233743395-233877951  | -0.0681335 | 0.999791 |
| XLOC_001784 | XLOC_001784 | NBPF14                        | chr1:148003641-148025848  | -0.0681065 | 0.999791 |
| XLOC_002669 | XLOC_002669 | TRIM8                         | chr10:104404251-104418076 | -0.0680595 | 0.999791 |
| XLOC_013424 | XLOC_013424 | TIGD1                         | chr2:233412778-233415283  | -0.0680385 | 0.999791 |
| XLOC_004932 | XLOC_004932 | RBMS2                         | chr12:56915608-57030163   | -0.0679771 | 0.999791 |
| XLOC_000692 | XLOC_000692 | ZNF687                        | chr1:151254790-151300191  | -0.0679552 | 0.999791 |
| XLOC_008670 | XLOC_008670 | ZFH3                          | chr16:72816785-73092534   | -0.0679506 | 0.999791 |
| XLOC_016584 | XLOC_016584 | SPCS3                         | chr4:177241089-177253396  | -0.067837  | 0.999791 |
| XLOC_015939 | XLOC_015939 | ISY1,ISY1-RAB43,RAB43         | chr3:128806411-128880073  | -0.0678231 | 0.999791 |
| XLOC_001640 | XLOC_001640 | GBP3                          | chr1:89472359-89488549    | -0.0677852 | 0.999791 |
| XLOC_008735 | XLOC_008735 | FANCA                         | chr16:89773540-89883065   | -0.0677472 | 0.999791 |
| XLOC_004983 | XLOC_004983 | FRS2                          | chr12:69864128-69973562   | -0.0677178 | 0.999791 |
| XLOC_022720 | XLOC_022720 | KIAA2026                      | chr9:5919007-6008003      | -0.0676685 | 0.999791 |
| XLOC_020346 | XLOC_020346 | TTYH3                         | chr7:2671602-2704436      | -0.0676229 | 0.999791 |
| XLOC_009560 | XLOC_009560 | C17orf51                      | chr17:21431570-21454941   | -0.0676224 | 0.999791 |
| XLOC_000563 | XLOC_000563 | SYPL2                         | chr1:110009099-110024764  | -0.0676202 | 1        |
| XLOC_006656 | XLOC_006656 | SIVA1                         | chr14:105219469-105225996 | -0.0676069 | 0.999791 |
| XLOC_009070 | XLOC_009070 | NAGLU                         | chr17:40687950-40696466   | -0.0675131 | 0.999791 |
| XLOC_021712 | XLOC_021712 | OXR1                          | chr8:107282405-107764921  | -0.0674587 | 0.999791 |
| XLOC_018075 | XLOC_018075 | E2F3                          | chr6:20402136-20493945    | -0.0674518 | 0.999791 |
| XLOC_012390 | XLOC_012390 | LOC654433                     | chr2:113973573-114036498  | -0.0674502 | 0.999791 |
| XLOC_014453 | XLOC_014453 | FBXW4P1                       | chr22:23522551-23660224   | -0.067368  | 1        |
| XLOC_005673 | XLOC_005673 | MTERFD3                       | chr12:107371068-107380944 | -0.0672955 | 0.999791 |
| XLOC_014152 | XLOC_014152 | MRPS6,SLC5A3                  | chr21:35445822-35515334   | -0.067264  | 0.999791 |
| XLOC_016000 | XLOC_016000 | WWTR1                         | chr3:149235021-149421060  | -0.0672605 | 0.999791 |
| XLOC_009044 | XLOC_009044 | CASC3                         | chr17:38296506-38328431   | -0.0671785 | 0.999791 |
| XLOC_018545 | XLOC_018545 | SASH1                         | chr6:148663728-148873184  | -0.0671626 | 0.999791 |
| XLOC_003515 | XLOC_003515 | STX3                          | chr1:59522531-59573355    | -0.0670833 | 0.999791 |
| XLOC_016643 | XLOC_016643 | LRPAP1                        | chr4:3505323-3534224      | -0.067078  | 0.999791 |
| XLOC_010583 | XLOC_010583 | DNM2                          | chr19:10828728-10942586   | -0.067066  | 0.999791 |
| XLOC_003764 | XLOC_003764 | C11orf54                      | chr1:93474792-93496247    | -0.0670446 | 0.999791 |
| XLOC_008966 | XLOC_008966 | RNF135                        | chr17:29297955-29326929   | -0.0670388 | 0.999791 |
| XLOC_014292 | XLOC_014292 | SCAF4                         | chr21:33043312-33104431   | -0.0670319 | 0.999791 |
| XLOC_020738 | XLOC_020738 | CALU                          | chr7:128379345-128415844  | -0.0669379 | 0.999791 |
| XLOC_015570 | XLOC_015570 | SEC13                         | chr3:10342614-10362858    | -0.0669344 | 0.999791 |
| XLOC_007533 | XLOC_007533 | TMEM87A                       | chr15:42502725-42565755   | -0.0667247 | 0.999791 |
| XLOC_001010 | XLOC_001010 | MAPKAPK2                      | chr1:206858364-206907630  | -0.0667233 | 0.999791 |
| XLOC_018046 | XLOC_018046 | LOC100130275                  | chr6:10396915-10419797    | -0.0666973 | 0.999791 |
| XLOC_012733 | XLOC_012733 | ESPNL                         | chr2:239008950-239041928  | -0.0666676 | 1        |
| XLOC_008590 | XLOC_008590 | DOK4                          | chr16:57496550-57520385   | -0.0666648 | 0.999791 |
| XLOC_002667 | XLOC_002667 | TMEM180                       | chr10:104221169-104236802 | -0.0666005 | 0.999791 |
| XLOC_023122 | XLOC_023122 | RAPGEF1                       | chr9:134452156-134612925  | -0.0665675 | 0.999791 |
| XLOC_022602 | XLOC_022602 | PPP2R4                        | chr9:131873227-131911225  | -0.0665626 | 0.999791 |
| XLOC_004929 | XLOC_004929 | COQ10A                        | chr12:56660641-56664750   | -0.0665149 | 0.999791 |
| XLOC_010693 | XLOC_010693 | PIK3R2                        | chr19:18263987-18281343   | -0.0664636 | 0.999791 |
| XLOC_020388 | XLOC_020388 | SP4                           | chr7:21467688-21554151    | -0.0664614 | 0.999791 |
| XLOC_009225 | XLOC_009225 | TACO1                         | chr17:61678230-61685725   | -0.0663996 | 0.999791 |
| XLOC_020670 | XLOC_020670 | CUX1                          | chr7:101459183-101927250  | -0.0663386 | 0.999791 |
| XLOC_023973 | XLOC_023973 | SYTL4                         | chrX:99929488-99987135    | -0.0663342 | 0.999791 |
| XLOC_016071 | XLOC_016071 | ZMAT3                         | chr3:178735010-178789656  | -0.0663096 | 0.999791 |
| XLOC_008534 | XLOC_008534 | VKORC1                        | chr16:31102174-31106276   | -0.0662902 | 0.999791 |
| XLOC_017907 | XLOC_017907 | FAT2                          | chr5:150883652-150948505  | -0.0662504 | 1        |
| XLOC_012056 | XLOC_012056 | LPIN1                         | chr2:11817704-11967533    | -0.0662051 | 0.999791 |
| XLOC_023721 | XLOC_023721 | F8A1                          | chrX:154064063-154250998  | -0.0661205 | 0.999791 |

|             |             |                       |                           |            |          |
|-------------|-------------|-----------------------|---------------------------|------------|----------|
| XLOC_020570 | XLOC_020570 | ZP3                   | chr7:76018645-76071388    | -0.0660212 | 0.999791 |
| XLOC_003004 | XLOC_003004 | NDST2                 | chr10:75561668-75571589   | -0.0660188 | 0.999791 |
| XLOC_012440 | XLOC_012440 | LOC150776             | chr2:132202795-132360468  | -0.0660008 | 0.999791 |
| XLOC_005370 | XLOC_005370 | IPO8                  | chr12:30781914-30848929   | -0.0659953 | 0.999791 |
| XLOC_006972 | XLOC_006972 | SLC25A29              | chr14:100757452-100772860 | -0.0659407 | 0.999791 |
| XLOC_007890 | XLOC_007890 | SRRM2                 | chr16:2787076-2821413     | -0.0658947 | 0.999791 |
| XLOC_001449 | XLOC_001449 | LSM10                 | chr1:36859030-36863493    | -0.065864  | 0.999791 |
| XLOC_003694 | XLOC_003694 | IL18BP                | chr11:71709957-71823822   | -0.0658406 | 0.999791 |
| XLOC_005429 | XLOC_005429 | MLL2                  | chr12:49412757-49449107   | -0.0658262 | 0.999791 |
| XLOC_001072 | XLOC_001072 | CNIH4                 | chr1:224544594-224563695  | -0.0658156 | 0.999791 |
| XLOC_002951 | XLOC_002951 | CCDC6                 | chr10:61548505-61666414   | -0.0657928 | 0.999791 |
| XLOC_013952 | XLOC_013952 | NDRG3                 | chr20:35280168-35374541   | -0.0657702 | 0.999791 |
| XLOC_002496 | XLOC_002496 | HK1                   | chr10:71029755-71161637   | -0.0657531 | 0.999791 |
| XLOC_021112 | XLOC_021112 | RFC2                  | chr7:73645831-73668738    | -0.0657112 | 0.999791 |
| XLOC_011281 | XLOC_011281 | UQCR11                | chr19:1597153-1605483     | -0.0656978 | 0.999791 |
| XLOC_002571 | XLOC_002571 | PTEN                  | chr10:89623194-89728532   | -0.0656935 | 0.999791 |
| XLOC_000122 | XLOC_000122 | PLEKHM2               | chr1:16010826-16061264    | -0.0656698 | 0.999791 |
| XLOC_016326 | XLOC_016326 | CEP135                | chr4:56814973-56899529    | -0.0656276 | 0.999791 |
| XLOC_010715 | XLOC_010715 | NDUFA13               | chr19:19627018-19639013   | -0.0655797 | 0.999791 |
| XLOC_018034 | XLOC_018034 | CDYL                  | chr6:4706392-4955778      | -0.0655475 | 0.999791 |
| XLOC_010911 | XLOC_010911 | ZNF230                | chr19:44507076-44518072   | -0.0655426 | 0.999791 |
| XLOC_003941 | XLOC_003941 | C11orf35              | chr11:537521-560779       | -0.0655151 | 0.999791 |
| XLOC_017719 | XLOC_017719 | DHFR                  | chr5:79922044-80172634    | -0.0654719 | 0.999791 |
| XLOC_008755 | XLOC_008755 | HIC1                  | chr17:1958392-1962981     | -0.0654646 | 0.999791 |
| XLOC_017970 | XLOC_017970 | UIMC1                 | chr5:176332005-176433795  | -0.0654418 | 0.999791 |
| XLOC_017436 | XLOC_017436 | GALNT10               | chr5:153570294-153825382  | -0.0654213 | 0.999791 |
| XLOC_010419 | XLOC_010419 | PARD6G                | chr18:77905806-78005397   | -0.0654024 | 0.999791 |
| XLOC_014168 | XLOC_014168 | DYRK1A                | chr21:38739858-38887679   | -0.06537   | 0.999791 |
| XLOC_017563 | XLOC_017563 | IRX2                  | chr5:2746278-2751769      | -0.0653455 | 0.999791 |
| XLOC_012546 | XLOC_012546 | DUSP19                | chr2:183943286-183964722  | -0.0653304 | 0.999791 |
| XLOC_020993 | XLOC_020993 | NOD1                  | chr7:30464142-30518393    | -0.0653187 | 0.999791 |
| XLOC_011276 | XLOC_011276 | C19orf25              | chr19:1450147-1479228     | -0.0652928 | 0.999791 |
| XLOC_004671 | XLOC_004671 | LTBR                  | chr12:6456008-6500737     | -0.0652924 | 0.999791 |
| XLOC_008257 | XLOC_008257 | OSGIN1                | chr16:83986826-83999937   | -0.0652785 | 0.999791 |
| XLOC_019126 | XLOC_019126 | SF3B5                 | chr6:144416017-144416754  | -0.0652785 | 0.999791 |
| XLOC_010906 | XLOC_010906 | SRRM5                 | chr19:44111375-44124014   | -0.065264  | 0.999791 |
| XLOC_013319 | XLOC_013319 | INO80D                | chr2:206858444-20695906   | -0.0652547 | 0.999791 |
| XLOC_008051 | XLOC_008051 | ZNF771                | chr16:30418734-30429916   | -0.0652048 | 0.999791 |
| XLOC_015713 | XLOC_015713 | USP4                  | chr3:49314576-49377536    | -0.0651756 | 0.999791 |
| XLOC_010679 | XLOC_010679 | SLC27A1               | chr19:17581299-17616977   | -0.065113  | 0.999791 |
| XLOC_001598 | XLOC_001598 | WLS                   | chr1:68167148-68698284    | -0.0650658 | 0.999791 |
| XLOC_008205 | XLOC_008205 | WWP2                  | chr16:69796186-69975644   | -0.065032  | 0.999791 |
| XLOC_009091 | XLOC_009091 | NBR1                  | chr17:41322497-41363707   | -0.0649984 | 0.999791 |
| XLOC_001386 | XLOC_001386 | WASF2                 | chr1:27730733-27816678    | -0.0649954 | 0.999791 |
| XLOC_005761 | XLOC_005761 | RSRC2                 | chr12:122989189-123011560 | -0.0649943 | 0.999791 |
| XLOC_017838 | XLOC_017838 | CDC25C                | chr5:137620958-137667516  | -0.0649467 | 0.999791 |
| XLOC_018898 | XLOC_018898 | SUPT3H                | chr6:44794466-45518819    | -0.0649412 | 0.999791 |
| XLOC_005046 | XLOC_005046 | APAF1                 | chr12:99039077-100378432  | -0.0649208 | 0.999791 |
| XLOC_009379 | XLOC_009379 | PRPF8                 | chr17:1553922-1588176     | -0.0649018 | 0.999791 |
| XLOC_009478 | XLOC_009478 | AURKB                 | chr17:8108048-8113944     | -0.0648395 | 0.999791 |
| XLOC_010554 | XLOC_010554 | MARCH2                | chr19:8478186-8503899     | -0.0647482 | 0.999791 |
| XLOC_010359 | XLOC_010359 | DYM                   | chr18:46570171-46987079   | -0.0647217 | 0.999791 |
| XLOC_021782 | XLOC_021782 | ZNF623                | chr8:144718182-144735900  | -0.064713  | 0.999791 |
| XLOC_011454 | XLOC_011454 | WDR83OS               | chr19:1277617-12792701    | -0.0647099 | 0.999791 |
| XLOC_009404 | XLOC_009404 | SHPK,TRPV1            | chr17:3468739-3539616     | -0.0646862 | 0.999791 |
| XLOC_003771 | XLOC_003771 | FUT4                  | chr11:94277016-94283064   | -0.0646777 | 0.999791 |
| XLOC_016677 | XLOC_016677 | BOD1L1                | chr4:13570365-13629328    | -0.0646676 | 0.999791 |
| XLOC_012797 | XLOC_012797 | NBAS                  | chr2:15307031-15701472    | -0.0646026 | 0.999791 |
| XLOC_005695 | XLOC_005695 | ARPC3                 | chr12:110872705-110888158 | -0.0645927 | 0.999791 |
| XLOC_018252 | XLOC_018252 | ANKS1A                | chr6:34857037-35059190    | -0.0645815 | 0.999791 |
| XLOC_003175 | XLOC_003175 | CHST15                | chr10:125767181-125853123 | -0.0645703 | 0.999791 |
| XLOC_011049 | XLOC_011049 | MYH14                 | chr19:50706884-50813801   | -0.0645353 | 0.999791 |
| XLOC_015035 | XLOC_015035 | EIF1B                 | chr3:39851302-40353915    | -0.0645316 | 0.999791 |
| XLOC_014588 | XLOC_014588 | ACO2                  | chr22:41865128-41940479   | -0.0645039 | 0.999791 |
| XLOC_000512 | XLOC_000512 | MTF2                  | chr1:93544791-93604638    | -0.0644967 | 0.999791 |
| XLOC_014643 | XLOC_014643 | SELO                  | chr22:50639407-50656045   | -0.0644796 | 0.999791 |
| XLOC_021939 | XLOC_021939 | DUSP4                 | chr8:29190578-29208267    | -0.0644433 | 0.999791 |
| XLOC_008305 | XLOC_008305 | MC1R                  | chr16:89984286-89987385   | -0.0644017 | 0.999791 |
| XLOC_010742 | XLOC_010742 | POP4                  | chr19:30097169-30108162   | -0.0643826 | 0.999791 |
| XLOC_011335 | XLOC_011335 | PLIN3                 | chr19:4838345-4867780     | -0.0643751 | 0.999791 |
| XLOC_006735 | XLOC_006735 | MDP1,NEED8,NEED8-MDP1 | chr14:24683142-24701576   | -0.0643378 | 0.999791 |
| XLOC_003205 | XLOC_003205 | TUBGCP2               | chr10:135092133-135126666 | -0.0643323 | 0.999791 |
| XLOC_018790 | XLOC_018790 | PBX2                  | chr6:32152509-32157963    | -0.0642589 | 0.999791 |
| XLOC_016751 | XLOC_016751 | AASDH                 | chr4:57204456-57253638    | -0.06424   | 0.999791 |
| XLOC_011729 | XLOC_011729 | ZNF428                | chr19:44111375-44124014   | -0.0642063 | 0.999791 |
| XLOC_018726 | XLOC_018726 | GABBR1                | chr6:29570004-29600962    | -0.0642003 | 0.999791 |
| XLOC_015746 | XLOC_015746 | PCBP4                 | chr3:51989329-52001482    | -0.0641791 | 0.999791 |
| XLOC_020846 | XLOC_020846 | LRRC61                | chr7:149944300-150035245  | -0.0641149 | 0.999791 |
| XLOC_003976 | XLOC_003976 | CDKN1C                | chr11:2904447-2906995     | -0.0640484 | 0.999791 |



|             |             |             |                           |            |          |
|-------------|-------------|-------------|---------------------------|------------|----------|
| XLOC_017792 | XLOC_017792 | RAPGEF6     | chr5:130759613-130970929  | -0.0639952 | 0.999791 |
| XLOC_010818 | XLOC_010818 | ZNF345      | chr19:37288451-37407193   | -0.0639898 | 0.999791 |
| XLOC_021039 | XLOC_021039 | NUDCD3      | chr7:44421964-44530385    | -0.0639332 | 0.999791 |
| XLOC_000565 | XLOC_000565 | CYB561D1    | chr1:110036657-110043063  | -0.0639317 | 0.999791 |
| XLOC_022354 | XLOC_022354 | TRMT10B     | chr9:37753801-37778969    | -0.0639078 | 0.999791 |
| XLOC_000780 | XLOC_000780 | BCAN        | chr1:156611739-156629324  | -0.0638679 | 0.999791 |
| XLOC_001905 | XLOC_001905 | SMG5        | chr1:156219014-156252620  | -0.0638566 | 0.999791 |
| XLOC_012410 | XLOC_012410 | RALB        | chr2:121010413-121052286  | -0.0638327 | 0.999791 |
| XLOC_009411 | XLOC_009411 | ZZEF1       | chr17:3907738-4046253     | -0.0638119 | 0.999791 |
| XLOC_022785 | XLOC_022785 | B4GALT1     | chr9:33110638-33167356    | -0.063765  | 0.999791 |
| XLOC_021330 | XLOC_021330 | CNOT4       | chr7:135046546-135194875  | -0.0637234 | 0.999791 |
| XLOC_008269 | XLOC_008269 | GSE1        | chr16:85645028-85709812   | -0.0637159 | 0.999791 |
| XLOC_021376 | XLOC_021376 | OR2A7       | chr7:143955788-143983096  | -0.0637088 | 0.999791 |
| XLOC_022474 | XLOC_022474 | TGFBR1      | chr9:101867411-101916473  | -0.0636777 | 0.999791 |
| XLOC_009521 | XLOC_009521 | FAM211A     | chr17:16342300-16395505   | -0.0636611 | 0.999791 |
| XLOC_010660 | XLOC_010660 | RAB8A       | chr19:16222489-16244445   | -0.0636391 | 0.999791 |
| XLOC_013971 | XLOC_013971 | ZHX3        | chr20:39807088-39928739   | -0.0636128 | 0.999791 |
| XLOC_002830 | XLOC_002830 | FAM171A1    | chr10:15253643-15413058   | -0.0635477 | 0.999791 |
| XLOC_001873 | XLOC_001873 | UBE2Q1      | chr1:154521050-154531120  | -0.0635412 | 0.999791 |
| XLOC_021106 | XLOC_021106 | MLXIPL      | chr7:73007523-73038870    | -0.063459  | 0.999791 |
| XLOC_006707 | XLOC_006707 | SLC7A7      | chr14:23242431-23289020   | -0.0633348 | 1        |
| XLOC_003410 | XLOC_003410 | TTC17       | chr11:43380434-43516483   | -0.0632832 | 0.999791 |
| XLOC_008185 | XLOC_008185 | NUTF2       | chr16:67862059-67905219   | -0.063233  | 0.999791 |
| XLOC_014435 | XLOC_014435 | RIMBP3C     | chr22:21737662-21743455   | -0.0632253 | 1        |
| XLOC_009669 | XLOC_009669 | ORMDL3      | chr17:38077295-38083884   | -0.0632008 | 0.999791 |
| XLOC_011350 | XLOC_011350 | MLLT1       | chr19:6210391-6279959     | -0.0631258 | 0.999791 |
| XLOC_006434 | XLOC_006434 | ACOT1       | chr14:73945188-74025651   | -0.0631142 | 0.999791 |
| XLOC_014561 | XLOC_014561 | GTPBP1      | chr22:39101806-39129592   | -0.0630739 | 0.999791 |
| XLOC_023023 | XLOC_023023 | HDHD3       | chr9:116135697-116138341  | -0.0630549 | 0.999791 |
| XLOC_022723 | XLOC_022723 | C9orf123    | chr9:7796490-7799799      | -0.0630115 | 0.999791 |
| XLOC_004351 | XLOC_004351 | POLD4       | chr11:67085309-67159158   | -0.0629819 | 0.999791 |
| XLOC_010697 | XLOC_010697 | PGPEP1      | chr19:18451407-18480763   | -0.0629718 | 0.999791 |
| XLOC_003010 | XLOC_003010 | COMTD1      | chr10:76993728-76995770   | -0.0629375 | 0.999791 |
| XLOC_021427 | XLOC_021427 | FBXO25      | chr8:356807-419875        | -0.0629206 | 0.999791 |
| XLOC_010959 | XLOC_010959 | CALM3       | chr19:47104511-47114039   | -0.0628991 | 0.999791 |
| XLOC_018077 | XLOC_018077 | SOX4        | chr6:21593971-21598849    | -0.06287   | 0.999791 |
| XLOC_010888 | XLOC_010888 | RPS19       | chr19:42363987-42375484   | -0.0628378 | 0.999791 |
| XLOC_001547 | XLOC_001547 | CC2D1B      | chr1:52816264-52831877    | -0.0627474 | 0.999791 |
| XLOC_010355 | XLOC_010355 | IER3IP1     | chr18:44681389-44702745   | -0.0626799 | 0.999791 |
| XLOC_017659 | XLOC_017659 | PPAP2A      | chr5:54603575-54830873    | -0.0625814 | 0.999791 |
| XLOC_019123 | XLOC_019123 | FUCA2       | chr6:143815948-143833020  | -0.062517  | 0.999791 |
| XLOC_005127 | XLOC_005127 | PEBP1       | chr12:118573869-118583390 | -0.0624963 | 0.999791 |
| XLOC_009822 | XLOC_009822 | HOXB9       | chr17:46698518-46703835   | -0.0624408 | 0.999791 |
| XLOC_003435 | XLOC_003435 | ATG13       | chr11:46638825-46697568   | -0.0623939 | 0.999791 |
| XLOC_016820 | XLOC_016820 | SCD5        | chr4:83550689-83720010    | -0.0623781 | 0.999791 |
| XLOC_016150 | XLOC_016150 | MF12        | chr3:196728611-196756687  | -0.0623487 | 0.999791 |
| XLOC_000114 | XLOC_000114 | TMEM51      | chr1:15479027-15546974    | -0.0623145 | 0.999791 |
| XLOC_018574 | XLOC_018574 | GTF2H5      | chr6:158589378-158620376  | -0.0622779 | 0.999791 |
| XLOC_003938 | XLOC_003938 | ANO9        | chr11:417929-442011       | -0.062252  | 1        |
| XLOC_009835 | XLOC_009835 | SLC35B1     | chr17:47778689-47785282   | -0.0622414 | 0.999791 |
| XLOC_001551 | XLOC_001551 | ECHDC2      | chr1:53361581-53387446    | -0.0622269 | 0.999791 |
| XLOC_013683 | XLOC_013683 | DBNDD2.SYS1 | chr20:43990576-44039250   | -0.0622143 | 0.999791 |
| XLOC_017077 | XLOC_017077 | MARCB6      | chr5:10353750-10440500    | -0.0622039 | 0.999791 |
| XLOC_007940 | XLOC_007940 | RM12        | chr16:11439310-11445617   | -0.0621502 | 0.999791 |
| XLOC_005027 | XLOC_005027 | PLXNC1      | chr12:94542498-94701451   | -0.0621319 | 0.999791 |
| XLOC_001707 | XLOC_001707 | DRAM2       | chr1:111659953-111727724  | -0.0621249 | 0.999791 |
| XLOC_021571 | XLOC_021571 | IKKBK       | chr8:42128819-42190171    | -0.0621136 | 0.999791 |
| XLOC_010477 | XLOC_010477 | GNA11       | chr19:3094407-3121454     | -0.0621106 | 0.999791 |
| XLOC_022095 | XLOC_022095 | GEM         | chr8:95261484-95274547    | -0.0620859 | 0.999791 |
| XLOC_023500 | XLOC_023500 | APOOL       | chrX:84258897-84363974    | -0.0620689 | 0.999791 |
| XLOC_013256 | XLOC_013256 | PRKRA       | chr2:179059207-179672150  | -0.0620662 | 0.999791 |
| XLOC_019010 | XLOC_019010 | CCNC        | chr6:99990262-100016690   | -0.0620166 | 0.999791 |
| XLOC_006126 | XLOC_006126 | SPRYD7      | chr13:50486841-50510625   | -0.062008  | 0.999791 |
| XLOC_022328 | XLOC_022328 | DNAJB5      | chr9:34989637-34998430    | -0.0620073 | 0.999791 |
| XLOC_004647 | XLOC_004647 | ADIPOR2     | chr12:1800246-1897845     | -0.0619883 | 0.999791 |
| XLOC_014409 | XLOC_014409 | CDC45       | chr22:19467413-19508135   | -0.0619839 | 0.999791 |
| XLOC_016161 | XLOC_016161 | PIGG        | chr4:419223-533320        | -0.0619794 | 0.999791 |
| XLOC_003879 | XLOC_003879 | C11orf63    | chr11:122753472-122830430 | -0.0619742 | 0.999791 |
| XLOC_020744 | XLOC_020744 | TP1P2       | chr7:128695276-128697293  | -0.061974  | 1        |
| XLOC_016329 | XLOC_016329 | SRP72       | chr4:57333761-57369847    | -0.0619584 | 0.999791 |
| XLOC_004423 | XLOC_004423 | PAK1        | chr11:77033059-77185108   | -0.0619388 | 0.999791 |
| XLOC_018775 | XLOC_018775 | NEU1        | chr6:31826828-31830709    | -0.0619293 | 0.999791 |
| XLOC_006864 | XLOC_006864 | VTI1B       | chr14:68086578-68141602   | -0.0618885 | 0.999791 |
| XLOC_004340 | XLOC_004340 | RIN1        | chr11:66099541-66104000   | -0.0618529 | 0.999791 |
| XLOC_012701 | XLOC_012701 | COPS7B      | chr2:232651161-232673434  | -0.0618407 | 0.999791 |
| XLOC_012749 | XLOC_012749 | SNED1       | chr2:241938254-242041747  | -0.0618278 | 0.999791 |
| XLOC_019058 | XLOC_019058 | CEP85L      | chr6:118781934-119031238  | -0.0618217 | 0.999791 |
| XLOC_008913 | XLOC_008913 | ALDH3A2     | chr17:19552063-19580908   | -0.0618065 | 0.999791 |
| XLOC_009095 | XLOC_009095 | DHX8        | chr17:41561333-41601680   | -0.0617857 | 0.999791 |

|             |             |              |                           |            |          |
|-------------|-------------|--------------|---------------------------|------------|----------|
| XLOC_011921 | XLOC_011921 | ZNF468       | chr19:53341784-53360902   | -0.0617599 | 0.999791 |
| XLOC_000754 | XLOC_000754 | SLC50A1      | chr1:155108287-155111334  | -0.0616838 | 0.999791 |
| XLOC_016983 | XLOC_016983 | NAF1         | chr4:164047859-164088073  | -0.0616532 | 0.999791 |
| XLOC_009274 | XLOC_009274 | CDR2L        | chr17:72983726-73001892   | -0.0615643 | 0.999791 |
| XLOC_010962 | XLOC_010962 | ARHGAP35     | chr19:47421932-47508333   | -0.0615598 | 0.999791 |
| XLOC_005445 | XLOC_005445 | LIMA1        | chr12:50569562-50677353   | -0.0614585 | 0.999791 |
| XLOC_012332 | XLOC_012332 | PDCL3        | chr2:101179417-101193201  | -0.0614098 | 0.999791 |
| XLOC_003665 | XLOC_003665 | GSTP1        | chr11:67351065-67354124   | -0.0614031 | 0.999791 |
| XLOC_014396 | XLOC_014396 | CECR2        | chr22:17956627-18033845   | -0.0613837 | 1        |
| XLOC_013813 | XLOC_013813 | NSFL1C       | chr20:1422806-1448337     | -0.0613822 | 0.999791 |
| XLOC_008869 | XLOC_008869 | TBC1D26      | chr17:15635590-15648098   | -0.0613485 | 1        |
| XLOC_012780 | XLOC_012780 | MBOAT2       | chr2:8996700-9143876      | -0.0613108 | 0.999791 |
| XLOC_004367 | XLOC_004367 | UNC93B1      | chr11:67758574-67771593   | -0.0612804 | 0.999791 |
| XLOC_011527 | XLOC_011527 | JAK3         | chr19:17935592-17958841   | -0.0612478 | 0.999791 |
| XLOC_004861 | XLOC_004861 | KRT18        | chr12:53290970-53346685   | -0.0612465 | 0.999791 |
| XLOC_000814 | XLOC_000814 | NCSTN        | chr1:160258376-160328742  | -0.0612155 | 0.999791 |
| XLOC_020561 | XLOC_020561 | NSUN5P1      | chr7:75039623-75115568    | -0.0611902 | 0.999791 |
| XLOC_009470 | XLOC_009470 | TRAPPC1      | chr17:7833662-7835317     | -0.0611374 | 0.999791 |
| XLOC_018295 | XLOC_018295 | TAF8         | chr6:42018250-42048644    | -0.0611368 | 0.999791 |
| XLOC_014086 | XLOC_014086 | UCKL1        | chr20:62571181-62601223   | -0.0611068 | 0.999791 |
| XLOC_003579 | XLOC_003579 | OTUB1        | chr11:63753324-63765892   | -0.0610941 | 0.999791 |
| XLOC_010465 | XLOC_010465 | SF3A2        | chr19:2236815-2248678     | -0.0610455 | 0.999791 |
| XLOC_010431 | XLOC_010431 | PTBP1        | chr19:797391-812327       | -0.061032  | 0.999791 |
| XLOC_004242 | XLOC_004242 | PTGDR2       | chr11:60609428-60623444   | -0.0609825 | 0.999791 |
| XLOC_000140 | XLOC_000140 | ARHGEF10L    | chr1:17866329-18024370    | -0.060972  | 0.999791 |
| XLOC_015957 | XLOC_015957 | TOPBP1       | chr3:133319448-133380737  | -0.0609456 | 0.999791 |
| XLOC_001972 | XLOC_001972 | DEDD         | chr1:161070345-161102478  | -0.0609131 | 0.999791 |
| XLOC_006441 | XLOC_006441 | ZNF410       | chr14:74353317-74398991   | -0.0609087 | 0.999791 |
| XLOC_023040 | XLOC_023040 | MEGF9        | chr9:123363195-123476765  | -0.0608647 | 0.999791 |
| XLOC_020762 | XLOC_020762 | EXOC4        | chr7:132937822-133750513  | -0.0607165 | 0.999791 |
| XLOC_015159 | XLOC_015159 | FLNB         | chr3:57994126-58157982    | -0.0606955 | 0.999791 |
| XLOC_023456 | XLOC_023456 | KIF4A        | chrX:69509878-69640774    | -0.0606695 | 0.999791 |
| XLOC_008691 | XLOC_008691 | CMC2         | chr16:81009698-81066709   | -0.0606753 | 0.999791 |
| XLOC_013829 | XLOC_013829 | DDRKG1       | chr20:3171011-3185295     | -0.0606676 | 0.999791 |
| XLOC_013034 | XLOC_013034 | FOXI3        | chr2:88747725-88752053    | -0.0606514 | 1        |
| XLOC_010849 | XLOC_010849 | ZFP36        | chr19:39897486-39900052   | -0.0606395 | 0.999791 |
| XLOC_008157 | XLOC_008157 | LOC100505865 | chr16:66442426-66444803   | -0.0605993 | 1        |
| XLOC_010358 | XLOC_010358 | SMAD7        | chr18:46446222-46477081   | -0.0605792 | 0.999791 |
| XLOC_010147 | XLOC_010147 | RIOK3        | chr18:21032786-21063099   | -0.0605266 | 0.999791 |
| XLOC_017193 | XLOC_017193 | HMGCR        | chr5:74632992-74657926    | -0.0605176 | 0.999791 |
| XLOC_007917 | XLOC_007917 | GLIS2        | chr16:4382224-4389598     | -0.0604564 | 0.999791 |
| XLOC_015101 | XLOC_015101 | KLHDC8B      | chr3:49209017-49213919    | -0.0604202 | 0.999791 |
| XLOC_007675 | XLOC_007675 | ADPGK        | chr15:73043707-73090540   | -0.060373  | 0.999791 |
| XLOC_007609 | XLOC_007609 | GTF2A2       | chr15:59930260-59949737   | -0.0603629 | 0.999791 |
| XLOC_020408 | XLOC_020408 | HOTAIRM1     | chr7:27135712-27139877    | -0.0603595 | 0.999791 |
| XLOC_005778 | XLOC_005778 | UBC          | chr12:125396191-125399587 | -0.060343  | 0.999791 |
| XLOC_008785 | XLOC_008785 | KIF1C        | chr17:4901242-4931694     | -0.0603119 | 0.999791 |
| XLOC_016962 | XLOC_016962 | FBXW7        | chr4:153242409-153456393  | -0.0603057 | 0.999791 |
| XLOC_022244 | XLOC_022244 | TONSL        | chr8:145654162-145669812  | -0.0602909 | 0.999791 |
| XLOC_017972 | XLOC_017972 | MXD3         | chr5:176730762-176739292  | -0.060285  | 0.999791 |
| XLOC_017192 | XLOC_017192 | NSA2         | chr5:73980968-74072737    | -0.0602194 | 0.999791 |
| XLOC_004214 | XLOC_004214 | TIMM10       | chr11:57295935-57298232   | -0.0602051 | 0.999791 |
| XLOC_020532 | XLOC_020532 | POM121       | chr7:72349935-72425302    | -0.0602005 | 0.999791 |
| XLOC_008827 | XLOC_008827 | MPDU1        | chr17:7486964-7493488     | -0.0601345 | 0.999791 |
| XLOC_002224 | XLOC_002224 | C1orf35      | chr1:228288427-228291022  | -0.0600088 | 0.999791 |
| XLOC_012781 | XLOC_012781 | ITGB1BP1     | chr2:9545814-9563643      | -0.0599982 | 0.999791 |
| XLOC_014759 | XLOC_014759 | GATSL3       | chr22:30681106-30685616   | -0.0599584 | 0.999791 |
| XLOC_011976 | XLOC_011976 | FIZ1         | chr19:56102736-56110893   | -0.0599542 | 0.999791 |
| XLOC_008255 | XLOC_008255 | HSBP1        | chr16:83841507-83846607   | -0.0598853 | 0.999791 |
| XLOC_021340 | XLOC_021340 | KIAA1549     | chr7:138516126-138666064  | -0.0598825 | 0.999791 |
| XLOC_003739 | XLOC_003739 | TMEM126B     | chr11:85339616-85347583   | -0.0598781 | 0.999791 |
| XLOC_004656 | XLOC_004656 | TEAD4        | chr12:3068477-3149842     | -0.0598599 | 0.999791 |
| XLOC_008501 | XLOC_008501 | SEZ6L2       | chr16:29882479-29910585   | -0.0598116 | 0.999791 |
| XLOC_006141 | XLOC_006141 | MRPS31P5     | chr13:52741844-52768602   | -0.0597704 | 0.999791 |
| XLOC_008743 | XLOC_008743 | FAM57A       | chr17:635846-646075       | -0.0596873 | 0.999791 |
| XLOC_011558 | XLOC_011558 | ZNF506       | chr19:19903519-19932560   | -0.0596531 | 0.999791 |
| XLOC_004911 | XLOC_004911 | GDF11        | chr12:56137063-56211540   | -0.0595991 | 0.999791 |
| XLOC_014162 | XLOC_014162 | MORC3        | chr21:37692486-37748944   | -0.0595188 | 0.999791 |
| XLOC_023072 | XLOC_023072 | SCAI         | chr9:127704887-127905838  | -0.0594848 | 0.999791 |
| XLOC_008004 | XLOC_008004 | TNRC6A       | chr16:24741048-24837547   | -0.0594483 | 0.999791 |
| XLOC_008703 | XLOC_008703 | COTL1        | chr16:84599203-84651669   | -0.0594379 | 0.999791 |
| XLOC_007881 | XLOC_007881 | C16orf59     | chr16:2510114-2514964     | -0.0594202 | 0.999791 |
| XLOC_002638 | XLOC_002638 | ABCC2        | chr10:101542462-101611662 | -0.0593956 | 1        |
| XLOC_014413 | XLOC_014413 | TANGO2       | chr22:20008630-20053447   | -0.0593413 | 0.999791 |
| XLOC_007838 | XLOC_007838 | HAGHL        | chr16:777265-779711       | -0.0592943 | 0.999791 |
| XLOC_000082 | XLOC_000082 | UBIAD1       | chr1:11333254-11348491    | -0.0592666 | 0.999791 |
| XLOC_008940 | XLOC_008940 | RPL23A       | chr17:27046999-27053949   | -0.0592434 | 0.999791 |
| XLOC_001439 | XLOC_001439 | ZMYM6        | chr1:35451766-35497569    | -0.0592197 | 0.999791 |
| XLOC_008124 | XLOC_008124 | MT1DP        | chr16:56677598-56678853   | -0.0591475 | 0.999791 |

|             |             |                           |                           |            |          |
|-------------|-------------|---------------------------|---------------------------|------------|----------|
| XLOC_013571 | XLOC_013571 | GINS1                     | chr20:25388322-25429191   | -0.0591175 | 0.999791 |
| XLOC_003337 | XLOC_003337 | PARVA                     | chr11:12399025-12556903   | -0.0590533 | 0.999791 |
| XLOC_008961 | XLOC_008961 | LRRC37BP1                 | chr17:28903482-28964484   | -0.059033  | 0.999791 |
| XLOC_004854 | XLOC_004854 | ACVR1B                    | chr12:52345450-52390863   | -0.0590177 | 0.999791 |
| XLOC_004301 | XLOC_004301 | TRMT112                   | chr11:64073043-64085033   | -0.0590127 | 0.999791 |
| XLOC_010514 | XLOC_010514 | RPL36                     | chr19:5690271-5691678     | -0.059008  | 0.999791 |
| XLOC_006829 | XLOC_006829 | EXOC5                     | chr14:57669193-57756797   | -0.058991  | 0.999791 |
| XLOC_014908 | XLOC_014908 | LMF2                      | chr22:50941375-50946135   | -0.0588053 | 0.999791 |
| XLOC_007391 | XLOC_007391 | FANCI                     | chr15:89787193-89878026   | -0.0587812 | 0.999791 |
| XLOC_003859 | XLOC_003859 | HMBS                      | chr11:118955586-118964259 | -0.0587477 | 0.999791 |
| XLOC_013059 | XLOC_013059 | ACTR1B                    | chr2:98272401-98280561    | -0.0587338 | 0.999791 |
| XLOC_014582 | XLOC_014582 | RBX1                      | chr22:41347350-41369019   | -0.0587329 | 0.999791 |
| XLOC_017106 | XLOC_017106 | SKP2                      | chr5:36152144-36184142    | -0.0586213 | 0.999791 |
| XLOC_021913 | XLOC_021913 | LOXL2                     | chr8:23154409-23261722    | -0.0586005 | 0.999791 |
| XLOC_023592 | XLOC_023592 | NDUFA1                    | chrX:119004494-119010629  | -0.0585916 | 0.999791 |
| XLOC_016129 | XLOC_016129 | TMEM44                    | chr3:194304996-194354150  | -0.0585776 | 0.999791 |
| XLOC_015412 | XLOC_015412 | GMPS                      | chr3:155588324-155655520  | -0.0585551 | 0.999791 |
| XLOC_004914 | XLOC_004914 | DGKA                      | chr12:56324945-56347807   | -0.0585544 | 0.999791 |
| XLOC_001588 | XLOC_001588 | JAK1                      | chr1:65210777-65432187    | -0.0585384 | 0.999791 |
| XLOC_008754 | XLOC_008754 | DPH1,OVCA2                | chr17:1933430-1946725     | -0.0584964 | 0.999791 |
| XLOC_018878 | XLOC_018878 | TBCC                      | chr6:42712233-42713884    | -0.058396  | 0.999791 |
| XLOC_009994 | XLOC_009994 | MXRA7                     | chr17:74671808-74707056   | -0.0583368 | 0.999791 |
| XLOC_010516 | XLOC_010516 | NRTN                      | chr19:5823817-5828335     | -0.058301  | 0.999791 |
| XLOC_011534 | XLOC_011534 | LSM4                      | chr19:18417039-18434001   | -0.0582916 | 0.999791 |
| XLOC_003251 | XLOC_003251 | MRPL23                    | chr11:1968501-1978739     | -0.0582856 | 0.999791 |
| XLOC_008485 | XLOC_008485 | XPO6                      | chr16:28109297-28223239   | -0.0582776 | 0.999791 |
| XLOC_010046 | XLOC_010046 | SIRT7                     | chr17:79869814-79876058   | -0.0582657 | 0.999791 |
| XLOC_001370 | XLOC_001370 | STMN1                     | chr1:26210676-26233368    | -0.0582656 | 0.999791 |
| XLOC_017583 | XLOC_017583 | ANKH                      | chr5:14704908-14871887    | -0.0582268 | 0.999791 |
| XLOC_002395 | XLOC_002395 | WAC                       | chr10:28821421-28912041   | -0.0582146 | 0.999791 |
| XLOC_018517 | XLOC_018517 | PEX7                      | chr6:137143701-137235072  | -0.0581778 | 0.999791 |
| XLOC_007654 | XLOC_007654 | AGAB                      | chr15:67493012-67819641   | -0.0581575 | 0.999791 |
| XLOC_003649 | XLOC_003649 | C11orf80,RCE1             | chr11:66512206-66614003   | -0.0581521 | 0.999791 |
| XLOC_012566 | XLOC_012566 | MYO1B                     | chr2:192110106-192290115  | -0.058086  | 0.999791 |
| XLOC_002726 | XLOC_002726 | SEC23IP                   | chr10:121652084-121704170 | -0.058084  | 0.999791 |
| XLOC_018076 | XLOC_018076 | CDKAL1                    | chr6:20534687-21232634    | -0.0580248 | 0.999791 |
| XLOC_011415 | XLOC_011415 | FDX1L                     | chr19:10420890-10426691   | -0.058019  | 0.999791 |
| XLOC_007854 | XLOC_007854 | HN1L                      | chr16:1728277-1752073     | -0.058014  | 0.999791 |
| XLOC_018018 | XLOC_018018 | TRIM52                    | chr5:180683385-180688119  | -0.0579834 | 0.999791 |
| XLOC_004335 | XLOC_004335 | EIF1AD                    | chr11:65764015-65771617   | -0.0579053 | 0.999791 |
| XLOC_011647 | XLOC_011647 | CAPN12                    | chr19:39138266-39235114   | -0.0577587 | 0.999791 |
| XLOC_014892 | XLOC_014892 | CELSR1                    | chr22:46756730-46933067   | -0.0577497 | 1        |
| XLOC_007900 | XLOC_007900 | TNFRSF12A                 | chr16:3070312-3072383     | -0.0576834 | 0.999791 |
| XLOC_006371 | XLOC_006371 | AP5M1                     | chr14:57669193-57756797   | -0.0576557 | 0.999791 |
| XLOC_004683 | XLOC_004683 | GNB3                      | chr12:6949374-6956557     | -0.0576308 | 0.999791 |
| XLOC_018751 | XLOC_018751 | CCHCR1                    | chr6:31110215-31126015    | -0.057535  | 0.999791 |
| XLOC_011470 | XLOC_011470 | STX10                     | chr19:13254871-13261188   | -0.0575328 | 0.999791 |
| XLOC_008790 | XLOC_008790 | RPAIN                     | chr17:5289345-5342471     | -0.0575028 | 0.999791 |
| XLOC_009322 | XLOC_009322 | CBX2                      | chr17:77751976-77761449   | -0.0574361 | 0.999791 |
| XLOC_007302 | XLOC_007302 | ARID3B                    | chr15:74833547-74890472   | -0.0574343 | 0.999791 |
| XLOC_006823 | XLOC_006823 | DLGAP5                    | chr14:55614833-55658396   | -0.0574049 | 0.999791 |
| XLOC_001061 | XLOC_001061 | MARC2                     | chr1:220921675-220957596  | -0.0574004 | 0.999791 |
| XLOC_010369 | XLOC_010369 | CXXC1                     | chr18:47808712-47814692   | -0.0573792 | 0.999791 |
| XLOC_011807 | XLOC_011807 | KDELRL1                   | chr19:48885826-48894810   | -0.0573171 | 0.999791 |
| XLOC_004873 | XLOC_004873 | PRR13                     | chr12:53835432-53840427   | -0.0573112 | 0.999791 |
| XLOC_014159 | XLOC_014159 | CBR1                      | chr21:37441939-37498938   | -0.0572906 | 0.999791 |
| XLOC_019008 | XLOC_019008 | PNISR                     | chr6:99847840-99873207    | -0.057259  | 0.999791 |
| XLOC_017588 | XLOC_017588 | MYO10                     | chr5:16662015-16936385    | -0.0572478 | 0.999791 |
| XLOC_022595 | XLOC_022595 | TBC1D13                   | chr9:131549509-131572711  | -0.0572461 | 0.999791 |
| XLOC_022571 | XLOC_022571 | LRSAM1                    | chr9:130213764-130265780  | -0.0572282 | 0.999791 |
| XLOC_002986 | XLOC_002986 | DNAJB12                   | chr10:74092587-74114907   | -0.0571597 | 0.999791 |
| XLOC_006949 | XLOC_006949 | DDX24                     | chr14:94517267-94547558   | -0.0571593 | 0.999791 |
| XLOC_020469 | XLOC_020469 | YKT6                      | chr7:44240577-44253893    | -0.057152  | 0.999791 |
| XLOC_015533 | XLOC_015533 | FBXO45                    | chr3:196295724-196315930  | -0.0571441 | 0.999791 |
| XLOC_007435 | XLOC_007435 | LRRK1                     | chr15:101459459-101610317 | -0.0571388 | 0.999791 |
| XLOC_021156 | XLOC_021156 | LRRD1                     | chr7:91774197-91794590    | -0.0571371 | 1        |
| XLOC_022627 | XLOC_022627 | GTFC3C4                   | chr9:135469675-135565470  | -0.0571081 | 0.999791 |
| XLOC_004238 | XLOC_004238 | MRPL16                    | chr11:59573607-59578345   | -0.0570788 | 0.999791 |
| XLOC_002146 | XLOC_002146 | ELK4                      | chr1:205577070-205602000  | -0.0570689 | 0.999791 |
| XLOC_017445 | XLOC_017445 | CYFIP2                    | chr5:156693090-156822606  | -0.0570008 | 0.999791 |
| XLOC_014755 | XLOC_014755 | ZMAT5                     | chr22:30116343-30162969   | -0.0569713 | 0.999791 |
| XLOC_000253 | XLOC_000253 | IQCC                      | chr1:32671235-32674288    | -0.0569405 | 0.999791 |
| XLOC_000217 | XLOC_000217 | TMEM222                   | chr1:27648635-27662891    | -0.0569374 | 0.999791 |
| XLOC_006801 | XLOC_006801 | L2HGDH                    | chr14:50709151-50778947   | -0.0569372 | 0.999791 |
| XLOC_021621 | XLOC_021621 | C8orf44,C8orf44-SGK3,SGK3 | chr8:67579786-67774257    | -0.0569247 | 0.999791 |
| XLOC_012770 | XLOC_012770 | ADI1                      | chr2:3501689-3523350      | -0.0568698 | 0.999791 |
| XLOC_004321 | XLOC_004321 | SYVN1                     | chr11:64888098-64902003   | -0.0568441 | 0.999791 |
| XLOC_000752 | XLOC_000752 | EFNA3                     | chr1:155051347-155060014  | -0.0568371 | 0.999791 |
| XLOC_010265 | XLOC_010265 | THOC1                     | chr18:214519-268059       | -0.0567952 | 0.999791 |

|             |             |                             |                           |            |          |
|-------------|-------------|-----------------------------|---------------------------|------------|----------|
| XLOC_006234 | XLOC_006234 | GAS6                        | chr13:114518582-114567046 | -0.0567893 | 0.999791 |
| XLOC_010532 | XLOC_010532 | C19orf45                    | chr19:7562444-7573336     | -0.0567781 | 0.999791 |
| XLOC_000439 | XLOC_000439 | AK4                         | chr1:65613231-65697828    | -0.0567619 | 0.999791 |
| XLOC_022337 | XLOC_022337 | CREB3                       | chr9:35697333-35749225    | -0.0567463 | 0.999791 |
| XLOC_011371 | XLOC_011371 | XAB2                        | chr19:7684410-7694439     | -0.0567023 | 0.999791 |
| XLOC_010157 | XLOC_010157 | TAF4B                       | chr18:23806408-23971650   | -0.0566747 | 0.999791 |
| XLOC_023191 | XLOC_023191 | ANAPC2                      | chr9:140069235-140084822  | -0.0566547 | 0.999791 |
| XLOC_015427 | XLOC_015427 | SMC4                        | chr3:160117429-160152741  | -0.0566029 | 0.999791 |
| XLOC_010945 | XLOC_010945 | VASP                        | chr19:46010687-46030240   | -0.0565413 | 0.999791 |
| XLOC_006097 | XLOC_006097 | ENOX1                       | chr13:43787665-44361116   | -0.0565376 | 1        |
| XLOC_015841 | XLOC_015841 | DCBLD2                      | chr3:98514813-98620533    | -0.0565347 | 0.999791 |
| XLOC_001189 | XLOC_001189 | HES4                        | chr1:934341-935552        | -0.0565167 | 0.999791 |
| XLOC_023323 | XLOC_023323 | PRRG1                       | chrX:37208527-37316548    | -0.0564998 | 0.999791 |
| XLOC_008759 | XLOC_008759 | RAP1GAP2                    | chr17:2699731-2941035     | -0.0564908 | 0.999791 |
| XLOC_007680 | XLOC_007680 | STOML1                      | chr15:74275558-74286963   | -0.0564596 | 0.999791 |
| XLOC_003965 | XLOC_003965 | CTSD                        | chr11:1490684-1785501     | -0.0564406 | 0.999791 |
| XLOC_003992 | XLOC_003992 | TRIM21                      | chr11:4406126-4414926     | -0.0564154 | 0.999791 |
| XLOC_004534 | XLOC_004534 | TMPRSS5                     | chr11:113558267-113577068 | -0.0564005 | 0.999791 |
| XLOC_020437 | XLOC_020437 | FKBP9                       | chr7:32997004-33046543    | -0.0563962 | 0.999791 |
| XLOC_001350 | XLOC_001350 | E2F2                        | chr1:23832919-23857712    | -0.0563    | 0.999791 |
| XLOC_011001 | XLOC_011001 | FUT2                        | chr19:49199227-49209191   | -0.0563162 | 1        |
| XLOC_003636 | XLOC_003636 | SF3B2                       | chr1:65819815-65836382    | -0.0562949 | 0.999791 |
| XLOC_021682 | XLOC_021682 | PLEKHF2                     | chr8:96145948-96168913    | -0.056293  | 0.999791 |
| XLOC_011441 | XLOC_011441 | ZNF823                      | chr19:11832079-11849760   | -0.0562593 | 0.999791 |
| XLOC_003208 | XLOC_003208 | ECHS1                       | chr10:135175986-135186908 | -0.0561229 | 0.999791 |
| XLOC_004944 | XLOC_004944 | MBD6                        | chr12:57916658-57941114   | -0.0561092 | 0.999791 |
| XLOC_023112 | XLOC_023112 | ASB6                        | chr9:132388434-132404448  | -0.0560729 | 0.999791 |
| XLOC_016172 | XLOC_016172 | TACCC3                      | chr4:1723216-1746905      | -0.056054  | 0.999791 |
| XLOC_008575 | XLOC_008575 | AKTIP                       | chr16:53468350-53537170   | -0.0559758 | 0.999791 |
| XLOC_023108 | XLOC_023108 | SH3GLB2                     | chr9:131770312-131790579  | -0.0559738 | 0.999791 |
| XLOC_015490 | XLOC_015490 | MAP3K13                     | chr3:185000728-185206882  | -0.0557851 | 0.999791 |
| XLOC_015375 | XLOC_015375 | RNF7                        | chr3:141457050-141465645  | -0.0557748 | 0.999791 |
| XLOC_023773 | XLOC_023773 | RBBP7                       | chrX:16862774-16888534    | -0.0557675 | 0.999791 |
| XLOC_003584 | XLOC_003584 | DNAJC4                      | chr1:63997752-64001753    | -0.0557489 | 0.999791 |
| XLOC_015087 | XLOC_015087 | KLHL18                      | chr3:47205859-47388306    | -0.055731  | 0.999791 |
| XLOC_005372 | XLOC_005372 | DDX11-AS1                   | chr12:31173696-31257275   | -0.0557182 | 0.999791 |
| XLOC_003838 | XLOC_003838 | RNF214                      | chr11:117103403-117186972 | -0.0556958 | 0.999791 |
| XLOC_011356 | XLOC_011356 | SLC25A23                    | chr19:6440074-6459781     | -0.0556867 | 0.999791 |
| XLOC_005777 | XLOC_005777 | SCARB1                      | chr12:125262173-125348519 | -0.0556573 | 0.999791 |
| XLOC_008654 | XLOC_008654 | COG4                        | chr16:70514471-70557457   | -0.0556461 | 0.999791 |
| XLOC_009734 | XLOC_009734 | KLHL11                      | chr17:40009798-40021629   | -0.0556364 | 0.999791 |
| XLOC_002173 | XLOC_002173 | LPGAT1                      | chr1:211916798-212004114  | -0.0556302 | 0.999791 |
| XLOC_007523 | XLOC_007523 | LTK                         | chr15:41795839-41806085   | -0.0556007 | 0.999791 |
| XLOC_024151 | XLOC_024151 | IDS                         | chrX:148560294-148586884  | -0.0555926 | 0.999791 |
| XLOC_008165 | XLOC_008165 | CES3                        | chr16:66995131-67009052   | -0.0555872 | 0.999791 |
| XLOC_004670 | XLOC_004670 | PLEKHG6                     | chr12:6419601-6437672     | -0.055493  | 1        |
| XLOC_010045 | XLOC_010045 | PCYT2                       | chr17:79860071-79869340   | -0.05549   | 0.999791 |
| XLOC_016601 | XLOC_016601 | TLR3                        | chr4:186990308-187006252  | -0.0554878 | 1        |
| XLOC_009641 | XLOC_009641 | SYNRG                       | chr17:35874899-35969486   | -0.0554853 | 0.999791 |
| XLOC_021397 | XLOC_021397 | CDK5                        | chr7:150750898-150755052  | -0.0554366 | 0.999791 |
| XLOC_014703 | XLOC_014703 | MAPK1                       | chr22:22113946-22221970   | -0.0554097 | 0.999791 |
| XLOC_010114 | XLOC_010114 | TWSG1                       | chr18:9334764-9402418     | -0.0554083 | 0.999791 |
| XLOC_018389 | XLOC_018389 | TTK                         | chr6:80714321-80752244    | -0.0553989 | 0.999791 |
| XLOC_016638 | XLOC_016638 | ZFYVE28                     | chr4:2271323-2420370      | -0.0553798 | 0.999791 |
| XLOC_014379 | XLOC_014379 | POFUT2                      | chr21:46683842-46707811   | -0.0553768 | 0.999791 |
| XLOC_004652 | XLOC_004652 | ITFG2                       | chr12:2921786-2934237     | -0.0553436 | 0.999791 |
| XLOC_014961 | XLOC_014961 | TMEM43                      | chr3:14166439-14185180    | -0.0553203 | 0.999791 |
| XLOC_011152 | XLOC_011152 | MYADM                       | chr19:54369610-54379689   | -0.0553081 | 0.999791 |
| XLOC_008671 | XLOC_008671 | LOC283922                   | chr16:74366303-74402153   | -0.0553001 | 0.999791 |
| XLOC_009212 | XLOC_009212 | BCAS3                       | chr17:58755171-59470199   | -0.0552982 | 0.999791 |
| XLOC_001814 | XLOC_001814 | PI4KB                       | chr1:151254790-151300191  | -0.0552674 | 0.999791 |
| XLOC_013732 | XLOC_013732 | TFAP2C                      | chr20:55204357-55214338   | -0.0552525 | 0.999791 |
| XLOC_021395 | XLOC_021395 | KCNH2                       | chr7:150642043-150675402  | -0.0552342 | 0.999791 |
| XLOC_001433 | XLOC_001433 | PHC2                        | chr1:33789223-33841194    | -0.0552238 | 0.999791 |
| XLOC_004787 | XLOC_004787 | CCDC91                      | chr12:28410132-28703099   | -0.0551272 | 0.999791 |
| XLOC_018431 | XLOC_018431 | QRSL1                       | chr6:107077440-107116292  | -0.055124  | 0.999791 |
| XLOC_011315 | XLOC_011315 | MATK                        | chr19:3777966-3801810     | -0.0550935 | 0.999791 |
| XLOC_011333 | XLOC_011333 | DPP9                        | chr19:4675243-4723855     | -0.0550183 | 0.999791 |
| XLOC_008727 | XLOC_008727 | GALNS                       | chr16:88880141-88923374   | -0.0549901 | 0.999791 |
| XLOC_022471 | XLOC_022471 | NANS                        | chr9:100818958-100881488  | -0.0549785 | 0.999791 |
| XLOC_008588 | XLOC_008588 | PLLP                        | chr16:57290008-57318584   | -0.0549781 | 0.999791 |
| XLOC_014901 | XLOC_014901 | TUBGCP6                     | chr22:50656117-50683400   | -0.0549732 | 0.999791 |
| XLOC_017053 | XLOC_017053 | SDHA                        | chr5:218355-256814        | -0.0549429 | 0.999791 |
| XLOC_014743 | XLOC_014743 | TTC28                       | chr22:28315363-29075853   | -0.0548418 | 0.999791 |
| XLOC_005723 | XLOC_005723 | HRK                         | chr12:117298224-117319232 | -0.0548199 | 0.999791 |
| XLOC_000689 | XLOC_000689 | SCNM1,TNFAIP8L2,TNFAIP8L2-1 | chr1:151129104-151148547  | -0.0548055 | 0.999791 |
| XLOC_014989 | XLOC_014989 | OXSM                        | chr3:25831562-25836025    | -0.0547854 | 0.999791 |
| XLOC_008648 | XLOC_008648 | PDXDC2P                     | chr16:70010201-70099851   | -0.0547743 | 0.999791 |
| XLOC_005422 | XLOC_005422 | DDX23                       | chr12:49223538-49245957   | -0.0547609 | 0.999791 |

|             |             |              |                           |            |          |
|-------------|-------------|--------------|---------------------------|------------|----------|
| XLOC_017791 | XLOC_017791 | HINT1        | chr5:130494975-130501041  | -0.0547575 | 0.999791 |
| XLOC_010617 | XLOC_010617 | GCDH         | chr19:13001973-130300086  | -0.0547471 | 0.999791 |
| XLOC_021004 | XLOC_021004 | RP9P         | chr7:32956426-32982782    | -0.0547339 | 0.999791 |
| XLOC_015135 | XLOC_015135 | PPM1M        | chr3:52279808-52284615    | -0.0546758 | 0.999791 |
| XLOC_009033 | XLOC_009033 | ERBB2        | chr17:37844392-37884915   | -0.0546516 | 0.999791 |
| XLOC_003637 | XLOC_003637 | PACS1        | chr11:65837823-66012218   | -0.0546465 | 0.999791 |
| XLOC_003216 | XLOC_003216 | PSMD13       | chr11:236807-252984       | -0.0546151 | 0.999791 |
| XLOC_021687 | XLOC_021687 | MTDH         | chr8:98656406-98742488    | -0.0546149 | 0.999791 |
| XLOC_002561 | XLOC_002561 | ADIRF,AGAP11 | chr10:88728187-88769960   | -0.0546086 | 0.999791 |
| XLOC_009789 | XLOC_009789 | MAP3K14      | chr17:43325302-43394414   | -0.0545759 | 0.999791 |
| XLOC_010905 | XLOC_010905 | ZNF576       | chr19:44100543-44104587   | -0.0545599 | 0.999791 |
| XLOC_000543 | XLOC_000543 | ACTG1P4      | chr1:104068577-104122149  | -0.0545495 | 1        |
| XLOC_000740 | XLOC_000740 | ATP8B2       | chr1:154298035-154323780  | -0.0544826 | 0.999791 |
| XLOC_020934 | XLOC_020934 | NDUFA4       | chr7:10971579-10979813    | -0.0544459 | 0.999791 |
| XLOC_015480 | XLOC_015480 | ECE2         | chr3:183967444-184010819  | -0.0544373 | 0.999791 |
| XLOC_003444 | XLOC_003444 | PTPMT1       | chr11:47586981-47606115   | -0.054418  | 0.999791 |
| XLOC_014963 | XLOC_014963 | SLC6A6       | chr3:14444105-14583588    | -0.0543804 | 0.999791 |
| XLOC_011763 | XLOC_011763 | SIX5         | chr19:46268042-46272497   | -0.0543486 | 0.999791 |
| XLOC_013729 | XLOC_013729 | RTFDC1       | chr20:55043646-55101208   | -0.0543232 | 0.999791 |
| XLOC_011331 | XLOC_011331 | SEMA6B       | chr19:4542599-4559771     | -0.0543033 | 0.999791 |
| XLOC_012583 | XLOC_012583 | NIF3L1       | chr2:201754049-201768655  | -0.0542977 | 0.999791 |
| XLOC_005865 | XLOC_005865 | WBP4         | chr13:41635696-41658139   | -0.0542805 | 0.999791 |
| XLOC_012820 | XLOC_012820 | PTRHD1       | chr2:25013135-25142055    | -0.0541931 | 0.999791 |
| XLOC_017532 | XLOC_017532 | SQSTM1       | chr5:179224597-179285840  | -0.0541787 | 0.999791 |
| XLOC_015724 | XLOC_015724 | TRAIP        | chr3:49866027-49893992    | -0.0541652 | 0.999791 |
| XLOC_018319 | XLOC_018319 | VEGFA        | chr6:43737945-43754223    | -0.0541541 | 0.999791 |
| XLOC_005779 | XLOC_005779 | DHX37        | chr12:125431369-125473667 | -0.0541518 | 0.999791 |
| XLOC_022959 | XLOC_022959 | CDC14B       | chr9:99262394-99382112    | -0.0541206 | 0.999791 |
| XLOC_016538 | XLOC_016538 | ARFIP1       | chr4:153701111-153833063  | -0.0541113 | 0.999791 |
| XLOC_009206 | XLOC_009206 | VMP1         | chr17:57784862-57917952   | -0.0541004 | 0.999791 |
| XLOC_001136 | XLOC_001136 | ZBTB18       | chr1:244214560-244220778  | -0.0540443 | 0.999791 |
| XLOC_000363 | XLOC_000363 | AKR1A1       | chr1:46016454-46035723    | -0.054019  | 0.999791 |
| XLOC_023426 | XLOC_023426 | APEX2        | chrX:55026755-55034306    | -0.0539998 | 0.999791 |
| XLOC_008142 | XLOC_008142 | COQ9         | chr16:57462086-57495187   | -0.053941  | 0.999791 |
| XLOC_001509 | XLOC_001509 | PTCH2        | chr1:45285515-45308616    | -0.0539035 | 1        |
| XLOC_009453 | XLOC_009453 | DVL2         | chr17:7128660-7137863     | -0.0538311 | 0.999791 |
| XLOC_018239 | XLOC_018239 | RPS18        | chr6:33239851-33244281    | -0.0538136 | 0.999791 |
| XLOC_021299 | XLOC_021299 | GCC1         | chr7:127220681-127225654  | -0.0538058 | 0.999791 |
| XLOC_016736 | XLOC_016736 | FRYL         | chr4:48499379-48782316    | -0.0537645 | 0.999791 |
| XLOC_005654 | XLOC_005654 | CCDC53       | chr12:102406716-102455899 | -0.0536519 | 0.999791 |
| XLOC_009386 | XLOC_009386 | SMG6         | chr17:1963132-2207069     | -0.0536364 | 0.999791 |
| XLOC_011434 | XLOC_011434 | EPOR         | chr19:11487880-11495018   | -0.0536044 | 0.999791 |
| XLOC_016828 | XLOC_016828 | HELQ         | chr4:84328498-84377025    | -0.05354   | 0.999791 |
| XLOC_004077 | XLOC_004077 | GALNT18      | chr11:11292420-11643561   | -0.0535182 | 0.999791 |
| XLOC_005793 | XLOC_005793 | ANKLE2       | chr12:133302253-133338451 | -0.0535006 | 0.999791 |
| XLOC_001035 | XLOC_001035 | DTL          | chr1:212113740-212278187  | -0.0534795 | 0.999791 |
| XLOC_023535 | XLOC_023535 | TCEAL3       | chrX:102862833-102864855  | -0.0534438 | 0.999791 |
| XLOC_006901 | XLOC_006901 | TMED10       | chr14:75598170-75643349   | -0.0534218 | 0.999791 |
| XLOC_022109 | XLOC_022109 | RPL30        | chr8:99053937-99057818    | -0.0534214 | 0.999791 |
| XLOC_001438 | XLOC_001438 | ZMYM6NB      | chr1:35447126-35450948    | -0.0533824 | 0.999791 |
| XLOC_014372 | XLOC_014372 | SUMO3        | chr21:46225531-46238044   | -0.0533634 | 0.999791 |
| XLOC_011087 | XLOC_011087 | ZNF578       | chr19:52956828-53020131   | -0.0533418 | 0.999791 |
| XLOC_013857 | XLOC_013857 | MKKS         | chr20:10385427-10414887   | -0.0532385 | 0.999791 |
| XLOC_015942 | XLOC_015942 | RPL32P3      | chr3:129101676-129118282  | -0.0531569 | 0.999791 |
| XLOC_006736 | XLOC_006736 | TINF2        | chr14:24708850-24711880   | -0.0531431 | 0.999791 |
| XLOC_002568 | XLOC_002568 | MINPP1       | chr10:89264222-89313218   | -0.0531314 | 0.999791 |
| XLOC_015370 | XLOC_015370 | SLC25A36     | chr3:140660661-140698785  | -0.0530891 | 0.999791 |
| XLOC_003118 | XLOC_003118 | NT5C2        | chr10:104847773-104953063 | -0.0530631 | 0.999791 |
| XLOC_021298 | XLOC_021298 | ZNF800       | chr7:127010353-127032767  | -0.0530443 | 0.999791 |
| XLOC_008504 | XLOC_008504 | DOC2A        | chr16:30007530-30022401   | -0.0530324 | 0.999791 |
| XLOC_008500 | XLOC_008500 | CDIPT        | chr16:29869677-29874578   | -0.0530106 | 0.999791 |
| XLOC_009614 | XLOC_009614 | RAD51D,RFLL  | chr17:33336130-33448541   | -0.0529707 | 0.999791 |
| XLOC_001457 | XLOC_001457 | SNIP1        | chr1:38000049-38019945    | -0.0529521 | 0.999791 |
| XLOC_022123 | XLOC_022123 | YWHAZ        | chr8:101930803-101965623  | -0.0529282 | 0.999791 |
| XLOC_006883 | XLOC_006883 | NUMB         | chr14:73741917-73925286   | -0.0528306 | 0.999791 |
| XLOC_000854 | XLOC_000854 | POGK         | chr1:166808723-166823709  | -0.0527968 | 0.999791 |
| XLOC_003436 | XLOC_003436 | ZNF408       | chr11:46722316-46727466   | -0.0527672 | 0.999791 |
| XLOC_016417 | XLOC_016417 | NUDT9        | chr4:88343727-88380606    | -0.0527401 | 0.999791 |
| XLOC_014920 | XLOC_014920 | SETMAR       | chr3:4344987-4358949      | -0.0527058 | 0.999791 |
| XLOC_004575 | XLOC_004575 | USP2         | chr11:119225924-119252436 | -0.0526893 | 0.999791 |
| XLOC_009967 | XLOC_009967 | MIF4GD       | chr17:73232693-73267311   | -0.0526715 | 0.999791 |
| XLOC_010599 | XLOC_010599 | ZNF833P      | chr19:11784812-11797384   | -0.0526546 | 0.999791 |
| XLOC_022465 | XLOC_022465 | C9orf174     | chr9:100000707-100139577  | -0.0526339 | 0.999791 |
| XLOC_006522 | XLOC_006522 | PAPOLA       | chr14:96968712-97033453   | -0.0526255 | 0.999791 |
| XLOC_016823 | XLOC_016823 | THAP9-AS1    | chr4:83814604-83841284    | -0.0526168 | 0.999791 |
| XLOC_012985 | XLOC_012985 | BOLA3        | chr2:74362527-74375039    | -0.0525895 | 0.999791 |
| XLOC_006710 | XLOC_006710 | HAUS4        | chr14:23415436-23426351   | -0.0525585 | 0.999791 |
| XLOC_001756 | XLOC_001756 | LOC100286793 | chr1:143718512-143744587  | -0.0525725 | 0.999791 |
| XLOC_001879 | XLOC_001879 | SHC1         | chr1:154934773-154946959  | -0.0525507 | 0.999791 |

|             |             |              |                           |            |          |
|-------------|-------------|--------------|---------------------------|------------|----------|
| XLOC_011407 | XLOC_011407 | FBXL12       | chr19:9920942-9929731     | -0.0525231 | 0.999791 |
| XLOC_013444 | XLOC_013444 | HDAC4        | chr2:239969863-240322643  | -0.0525109 | 0.999791 |
| XLOC_021042 | XLOC_021042 | TMED4        | chr7:44618761-44621827    | -0.0525028 | 0.999791 |
| XLOC_021250 | XLOC_021250 | SRPK2        | chr7:104756822-105029341  | -0.0524607 | 0.999791 |
| XLOC_007951 | XLOC_007951 | NOMO1        | chr16:14927642-14990014   | -0.0524248 | 0.999791 |
| XLOC_016862 | XLOC_016862 | LAMTOR3      | chr4:100799494-100815703  | -0.0524212 | 0.999791 |
| XLOC_020641 | XLOC_020641 | CNPY4        | chr7:99690403-99723128    | -0.0524012 | 0.999791 |
| XLOC_005757 | XLOC_005757 | DIABLO       | chr12:122692208-122712068 | -0.0523448 | 0.999791 |
| XLOC_000757 | XLOC_000757 | MTX1         | chr1:155178489-155197325  | -0.0523031 | 0.999791 |
| XLOC_011810 | XLOC_011810 | RPL18        | chr19:49118583-49133663   | -0.0522214 | 0.999791 |
| XLOC_010009 | XLOC_010009 | LGALS3BP     | chr17:76967334-76976061   | -0.0522171 | 0.999791 |
| XLOC_008758 | XLOC_008758 | PAFAH1B1     | chr17:2496922-2588909     | -0.0521174 | 0.999791 |
| XLOC_005851 | XLOC_005851 | NBEA         | chr13:35516423-36705514   | -0.0520811 | 1        |
| XLOC_007411 | XLOC_007411 | LOC100507118 | chr15:91509267-91537881   | -0.0519697 | 0.999791 |
| XLOC_012689 | XLOC_012689 | SP100        | chr2:231280870-231410317  | -0.0519584 | 0.999791 |
| XLOC_011552 | XLOC_011552 | PBX4         | chr19:19672515-19729725   | -0.0519374 | 0.999791 |
| XLOC_001194 | XLOC_001194 | SDF4         | chr1:1152287-1167447      | -0.0519187 | 0.999791 |
| XLOC_008003 | XLOC_008003 | RBBP6        | chr16:24550907-24584183   | -0.0518041 | 0.999791 |
| XLOC_003219 | XLOC_003219 | IFITM2       | chr11:308106-309410       | -0.0517565 | 0.999791 |
| XLOC_021029 | XLOC_021029 | COA1         | chr7:43670750-43769140    | -0.0517418 | 0.999791 |
| XLOC_016730 | XLOC_016730 | COMMD8       | chr4:47452810-47465676    | -0.0517119 | 0.999791 |
| XLOC_009580 | XLOC_009580 | FAM222B      | chr17:27082995-27169841   | -0.0517048 | 0.999791 |
| XLOC_016060 | XLOC_016060 | EIF5A2       | chr3:170606203-170626426  | -0.0516567 | 0.999791 |
| XLOC_022836 | XLOC_022836 | FBXO10       | chr9:37510888-37576250    | -0.0516326 | 0.999791 |
| XLOC_000869 | XLOC_000869 | C1orf112     | chr1:169764549-169863100  | -0.0516325 | 0.999791 |
| XLOC_000697 | XLOC_000697 | SNX27        | chr1:151584661-151671559  | -0.0516259 | 0.999791 |
| XLOC_014995 | XLOC_014995 | TGFBR2       | chr3:30647993-30735633    | -0.0515857 | 0.999791 |
| XLOC_003496 | XLOC_003496 | ZDHHC5       | chr1:157435473-157468659  | -0.0515762 | 0.999791 |
| XLOC_015419 | XLOC_015419 | RSRC1        | chr3:157827840-158262624  | -0.0515439 | 0.999791 |
| XLOC_002116 | XLOC_002116 | KDM5B        | chr1:202696531-202777549  | -0.0515367 | 0.999791 |
| XLOC_004461 | XLOC_004461 | C11orf75     | chr1:193211638-93276546   | -0.0514769 | 0.999791 |
| XLOC_009360 | XLOC_009360 | METRNL       | chr17:81037566-81052591   | -0.0513981 | 0.999791 |
| XLOC_008707 | XLOC_008707 | GINS2        | chr16:85711279-85722588   | -0.0513841 | 0.999791 |
| XLOC_000982 | XLOC_000982 | PPFIA4       | chr1:203020310-203047864  | -0.05135   | 1        |
| XLOC_018367 | XLOC_018367 | PHF3         | chr6:64356430-64424405    | -0.051347  | 0.999791 |
| XLOC_010823 | XLOC_010823 | ZNF527       | chr19:37862058-37883966   | -0.0512468 | 0.999791 |
| XLOC_020748 | XLOC_020748 | AHCYL2       | chr7:128864854-129070052  | -0.0512016 | 0.999791 |
| XLOC_015606 | XLOC_015606 | SGOL1        | chr3:20202084-20227919    | -0.0511963 | 0.999791 |
| XLOC_005345 | XLOC_005345 | GYS2         | chr12:21689122-21757781   | -0.0511827 | 1        |
| XLOC_008522 | XLOC_008522 | ZNF688       | chr16:30581018-30583728   | -0.0511459 | 0.999791 |
| XLOC_001064 | XLOC_001064 | MIA3         | chr1:222791443-222841351  | -0.0511404 | 0.999791 |
| XLOC_001523 | XLOC_001523 | LRRC41       | chr1:46713366-46769038    | -0.0510994 | 0.999791 |
| XLOC_013939 | XLOC_013939 | TRPC4AP      | chr20:33543703-33680618   | -0.0510858 | 0.999791 |
| XLOC_009473 | XLOC_009473 | HES7         | chr17:8023907-8027410     | -0.0510733 | 0.999791 |
| XLOC_008077 | XLOC_008077 | TGFB11       | chr16:31483475-31489281   | -0.0510706 | 0.999791 |
| XLOC_021951 | XLOC_021951 | FUT10        | chr8:33228343-33330664    | -0.0510566 | 0.999791 |
| XLOC_017216 | XLOC_017216 | MSH3         | chr5:79922044-80172634    | -0.0510409 | 0.999791 |
| XLOC_023556 | XLOC_023556 | ATG4A        | chrX:107334898-107397901  | -0.0510152 | 0.999791 |
| XLOC_012719 | XLOC_012719 | DGKD         | chr2:234263152-234380743  | -0.0509999 | 0.999791 |
| XLOC_014912 | XLOC_014912 | CHKB,CPT1B   | chr22:51007289-51021428   | -0.0509922 | 0.999791 |
| XLOC_017342 | XLOC_017342 | FAM53C       | chr5:137673223-137685418  | -0.0509686 | 0.999791 |
| XLOC_009434 | XLOC_009434 | LOC728392    | chr17:5402746-5404319     | -0.0509235 | 0.999791 |
| XLOC_007296 | XLOC_007296 | PML          | chr15:74287013-74340155   | -0.0509167 | 0.999791 |
| XLOC_000240 | XLOC_000240 | PTPRU        | chr1:29563027-29653325    | -0.0509121 | 0.999791 |
| XLOC_014238 | XLOC_014238 | HSPA13       | chr21:15743436-15755509   | -0.0509024 | 0.999791 |
| XLOC_013137 | XLOC_013137 | WDR33        | chr2:128461807-128568761  | -0.0508976 | 0.999791 |
| XLOC_000532 | XLOC_000532 | HIAT1        | chr1:100503788-100548929  | -0.0508534 | 0.999791 |
| XLOC_002813 | XLOC_002813 | USP6NL       | chr10:11502508-11653679   | -0.0508208 | 0.999791 |
| XLOC_005885 | XLOC_005885 | LRCH1        | chr13:47127295-47327175   | -0.0508075 | 0.999791 |
| XLOC_015024 | XLOC_015024 | ACVR2B       | chr3:38492517-38534633    | -0.0507501 | 0.999791 |
| XLOC_006349 | XLOC_006349 | TMX1         | chr14:51706885-51724372   | -0.0507485 | 0.999791 |
| XLOC_019199 | XLOC_019199 | PHF10        | chr6:170102256-170124106  | -0.0507044 | 0.999791 |
| XLOC_007937 | XLOC_007937 | NUBP1        | chr16:10837697-10912621   | -0.0506591 | 0.999791 |
| XLOC_009106 | XLOC_009106 | FZD2         | chr17:42634811-42638630   | -0.0506431 | 0.999791 |
| XLOC_016338 | XLOC_016338 | LOC550112    | chr4:68566995-68588222    | -0.0506144 | 0.999791 |
| XLOC_012253 | XLOC_012253 | INO80B,WBP1  | chr2:74682149-74688018    | -0.0505811 | 0.999791 |
| XLOC_000915 | XLOC_000915 | XPR1         | chr1:180601145-180859415  | -0.0505662 | 0.999791 |
| XLOC_015678 | XLOC_015678 | SCAP         | chr3:47455183-47517445    | -0.0505096 | 0.999791 |
| XLOC_011843 | XLOC_011843 | IRF3         | chr19:50162825-50177173   | -0.0505021 | 0.999791 |
| XLOC_007173 | XLOC_007173 | CCNDBP1      | chr15:43477465-43489375   | -0.0504968 | 0.999791 |
| XLOC_003910 | XLOC_003910 | TIRAP        | chr11:126152981-126164828 | -0.050488  | 0.999791 |
| XLOC_003835 | XLOC_003835 | PAFAH1B2     | chr1:117014999-117047592  | -0.0504822 | 0.999791 |
| XLOC_009764 | XLOC_009764 | DUSP3        | chr17:41843488-41856368   | -0.0504379 | 0.999791 |
| XLOC_007801 | XLOC_007801 | VIMP         | chr15:101811213-101817700 | -0.0504312 | 0.999791 |
| XLOC_011764 | XLOC_011764 | DMPK         | chr19:46272975-46285815   | -0.0504259 | 0.999791 |
| XLOC_001807 | XLOC_001807 | CERS2        | chr1:150937648-150947479  | -0.0504223 | 0.999791 |
| XLOC_013371 | XLOC_013371 | NHEJ1        | chr2:219940045-220025587  | -0.0503858 | 0.999791 |
| XLOC_003105 | XLOC_003105 | FGF8         | chr10:103529886-103540126 | -0.0503846 | 0.999791 |
| XLOC_015697 | XLOC_015697 | IP6K2        | chr3:48725435-48754711    | -0.0503678 | 0.999791 |

|             |             |                          |                           |            |          |
|-------------|-------------|--------------------------|---------------------------|------------|----------|
| XLOC_022318 | XLOC_022318 | PRSS3                    | chr9:33750463-33799229    | -0.0502733 | 0.999791 |
| XLOC_014486 | XLOC_014486 | TTC28-AS1                | chr22:28315363-29075853   | -0.0502654 | 0.999791 |
| XLOC_013228 | XLOC_013228 | TLK1                     | chr2:171847332-172087824  | -0.0502623 | 0.999791 |
| XLOC_018909 | XLOC_018909 | MUT                      | chr6:49398072-49431041    | -0.0501309 | 0.999791 |
| XLOC_004175 | XLOC_004175 | KBTBD4                   | chr1:47586981-47606115    | -0.0501131 | 0.999791 |
| XLOC_019019 | XLOC_019019 | ATG5                     | chr6:106632351-106773695  | -0.0500932 | 0.999791 |
| XLOC_023061 | XLOC_023061 | ZBTB6                    | chr9:125670334-125675607  | -0.050034  | 0.999791 |
| XLOC_000303 | XLOC_000303 | CAP1                     | chr1:40506254-40538321    | -0.0500322 | 0.999791 |
| XLOC_020808 | XLOC_020808 | GSTK1                    | chr7:142960521-142966222  | -0.0500199 | 0.999791 |
| XLOC_015422 | XLOC_015422 | MFSD1                    | chr3:158519714-158547508  | -0.0499944 | 0.999791 |
| XLOC_009297 | XLOC_009297 | SPHK1                    | chr17:74380689-74383941   | -0.049962  | 0.999791 |
| XLOC_016868 | XLOC_016868 | PPP3CA                   | chr4:101944586-102268628  | -0.0499543 | 0.999791 |
| XLOC_021585 | XLOC_021585 | UBE2V2                   | chr8:48920994-48974454    | -0.049914  | 0.999791 |
| XLOC_002230 | XLOC_002230 | HIST3H2A                 | chr1:228645064-228645560  | -0.0498779 | 0.999791 |
| XLOC_022024 | XLOC_022024 | SNHG6                    | chr8:67782983-67837777    | -0.0498405 | 0.999791 |
| XLOC_017648 | XLOC_017648 | MOCS2                    | chr5:52393894-52405598    | -0.049788  | 0.999791 |
| XLOC_022518 | XLOC_022518 | COL27A1                  | chr9:116918230-117072975  | -0.0497699 | 0.999791 |
| XLOC_015592 | XLOC_015592 | SH3BP5                   | chr3:15295690-15382901    | -0.0495587 | 0.999791 |
| XLOC_022476 | XLOC_022476 | NR4A3                    | chr9:102584136-102629173  | -0.049481  | 1        |
| XLOC_007998 | XLOC_007998 | DCTN5                    | chr16:23652686-23685068   | -0.0494733 | 0.999791 |
| XLOC_023525 | XLOC_023525 | ARMCX5,ARMCX5-GPRASP2,GF | chrX:101854095-101972661  | -0.0494694 | 0.999791 |
| XLOC_000350 | XLOC_000350 | KIF2C                    | chr1:45205489-45233438    | -0.0494403 | 0.999791 |
| XLOC_015337 | XLOC_015337 | ATP2C1                   | chr3:130569368-130745646  | -0.0494057 | 0.999791 |
| XLOC_018467 | XLOC_018467 | DCBLD1                   | chr6:117803819-117923705  | -0.0493605 | 0.999791 |
| XLOC_011496 | XLOC_011496 | NOTCH3                   | chr19:15270443-15311792   | -0.0493551 | 1        |
| XLOC_000893 | XLOC_000893 | ZBTB37                   | chr1:173837492-173855774  | -0.0493424 | 1        |
| XLOC_010287 | XLOC_010287 | PPP4R1                   | chr18:9546788-9614605     | -0.0493154 | 0.999791 |
| XLOC_017547 | XLOC_017547 | TPPP                     | chr5:659976-693510        | -0.0492786 | 0.999791 |
| XLOC_004760 | XLOC_004760 | AEBP2                    | chr12:19592607-19675173   | -0.0492683 | 0.999791 |
| XLOC_023063 | XLOC_023063 | MIR600HG                 | chr9:125871772-125877756  | -0.0492457 | 0.999791 |
| XLOC_004509 | XLOC_004509 | CWF19L2                  | chr11:107197071-107328572 | -0.0492441 | 0.999791 |
| XLOC_000685 | XLOC_000685 | BNIP1                    | chr1:151009028-151020076  | -0.0492137 | 1        |
| XLOC_006135 | XLOC_006135 | INTS6                    | chr13:51915167-52027275   | -0.049198  | 0.999791 |
| XLOC_013508 | XLOC_013508 | AP5S1                    | chr20:3801170-3805954     | -0.049192  | 0.999791 |
| XLOC_013607 | XLOC_013607 | CBFA2T2                  | chr20:32077927-32237837   | -0.049171  | 0.999791 |
| XLOC_023473 | XLOC_023473 | PIN4                     | chrX:71401525-71483814    | -0.049169  | 0.999791 |
| XLOC_013933 | XLOC_013933 | PIGU                     | chr20:33148345-33265089   | -0.0491597 | 0.999791 |
| XLOC_017324 | XLOC_017324 | PHF15                    | chr5:133861797-133918918  | -0.0491506 | 0.999791 |
| XLOC_006401 | XLOC_006401 | CHURC1,CHURC1-FNTB,FNTB  | chr14:65381078-65569413   | -0.0491192 | 0.999791 |
| XLOC_004030 | XLOC_004030 | FAM160A2                 | chr11:6232563-6255941     | -0.0490554 | 0.999791 |
| XLOC_002256 | XLOC_002256 | ARID4B                   | chr1:235330209-235491532  | -0.0490127 | 0.999791 |
| XLOC_013756 | XLOC_013756 | LSM14B                   | chr20:60697516-60710434   | -0.0490126 | 0.999791 |
| XLOC_000258 | XLOC_000258 | HDAC1                    | chr1:32757707-32799224    | -0.0489815 | 0.999791 |
| XLOC_000446 | XLOC_000446 | MIER1                    | chr1:67390577-67454302    | -0.0489787 | 0.999791 |
| XLOC_021952 | XLOC_021952 | TTI2                     | chr8:33342684-33370703    | -0.0489493 | 0.999791 |
| XLOC_011188 | XLOC_011188 | NAT14                    | chr19:55996556-55998935   | -0.0488859 | 0.999791 |
| XLOC_003013 | XLOC_003013 | DLG5                     | chr10:79550548-79686348   | -0.0488829 | 0.999791 |
| XLOC_008211 | XLOC_008211 | DDX19B                   | chr16:70323669-70380650   | -0.0488791 | 0.999791 |
| XLOC_006815 | XLOC_006815 | DDHD1                    | chr14:53503457-53620046   | -0.048826  | 0.999791 |
| XLOC_013839 | XLOC_013839 | RNF24                    | chr20:3912068-3996216     | -0.0488102 | 0.999791 |
| XLOC_012875 | XLOC_012875 | ATL2                     | chr2:38522028-38604432    | -0.0487933 | 0.999791 |
| XLOC_017306 | XLOC_017306 | CDC42SE2                 | chr5:130599701-130730382  | -0.0487487 | 0.999791 |
| XLOC_017720 | XLOC_017720 | MTRNR2L2                 | chr5:79922044-80172634    | -0.048724  | 0.999791 |
| XLOC_007403 | XLOC_007403 | IQGAP1                   | chr15:90931472-91045475   | -0.0487179 | 0.999791 |
| XLOC_001810 | XLOC_001810 | SEMA6C                   | chr1:151104162-151119140  | -0.0486659 | 0.999791 |
| XLOC_020771 | XLOC_020771 | NUP205                   | chr7:135242661-135333499  | -0.0486446 | 0.999791 |
| XLOC_010940 | XLOC_010940 | MARK4                    | chr19:45754515-45808541   | -0.0486406 | 0.999791 |
| XLOC_009746 | XLOC_009746 | PTRF                     | chr17:40554466-40575338   | -0.0486374 | 0.999791 |
| XLOC_006424 | XLOC_006424 | PCNX                     | chr14:71374121-71582099   | -0.0486216 | 0.999791 |
| XLOC_007686 | XLOC_007686 | UBL7                     | chr15:74738317-74753529   | -0.0485802 | 0.999791 |
| XLOC_014309 | XLOC_014309 | ATP5O                    | chr21:35275756-35288158   | -0.0485426 | 0.999791 |
| XLOC_016861 | XLOC_016861 | TRMT10A                  | chr4:100467863-100485189  | -0.0485069 | 0.999791 |
| XLOC_015965 | XLOC_015965 | MSL2                     | chr3:135867759-135914688  | -0.0483613 | 0.999791 |
| XLOC_018861 | XLOC_018861 | OARD1                    | chr6:41034530-41040188    | -0.0483385 | 0.999791 |
| XLOC_004032 | XLOC_004032 | APBB1                    | chr11:6416354-6440644     | -0.0483139 | 0.999791 |
| XLOC_022437 | XLOC_022437 | ANKRD19P                 | chr9:95571892-95600739    | -0.0483133 | 0.999791 |
| XLOC_005718 | XLOC_005718 | TBX3                     | chr12:115108058-115121969 | -0.0482663 | 0.999791 |
| XLOC_007204 | XLOC_007204 | EID1                     | chr15:49115933-49255641   | -0.0482131 | 0.999791 |
| XLOC_022620 | XLOC_022620 | PRRC2B                   | chr9:134305476-134375575  | -0.0481421 | 0.999791 |
| XLOC_023842 | XLOC_023842 | SLC38A5                  | chrX:48316926-48328644    | -0.0481051 | 0.999791 |
| XLOC_016051 | XLOC_016051 | MECOM                    | chr3:168801286-169381563  | -0.0480682 | 0.999791 |
| XLOC_018691 | XLOC_018691 | ZNF322                   | chr6:26634610-26659980    | -0.0480473 | 0.999791 |
| XLOC_021457 | XLOC_021457 | TNKS                     | chr8:9413444-9639856      | -0.0480421 | 0.999791 |
| XLOC_000261 | XLOC_000261 | ZBTB8A                   | chr1:33004771-33071542    | -0.0480195 | 0.999791 |
| XLOC_016191 | XLOC_016191 | ADRA2C                   | chr4:3768295-3770253      | -0.0479837 | 0.999791 |
| XLOC_007506 | XLOC_007506 | SRP14                    | chr15:40327890-40331389   | -0.0478183 | 0.999791 |
| XLOC_024184 | XLOC_024184 | HCFC1                    | chrX:153213007-153236819  | -0.0478012 | 0.999791 |
| XLOC_022204 | XLOC_022204 | JRK                      | chr8:143738873-143751401  | -0.0477859 | 0.999791 |
| XLOC_021159 | XLOC_021159 | FAM133B                  | chr7:92190071-92219706    | -0.0476255 | 0.999791 |

|             |             |                          |                           |            |          |
|-------------|-------------|--------------------------|---------------------------|------------|----------|
| XLOC_015631 | XLOC_015631 | LRRFIP2                  | chr3:37094116-37217851    | -0.0476191 | 0.999791 |
| XLOC_013362 | XLOC_013362 | ZNF142                   | chr2:219502639-219524355  | -0.0476176 | 0.999791 |
| XLOC_012842 | XLOC_012842 | EIF2B4                   | chr2:27587218-27593324    | -0.0475809 | 0.999791 |
| XLOC_008173 | XLOC_008173 | TMEM208                  | chr16:67261015-67263182   | -0.0475156 | 0.999791 |
| XLOC_018742 | XLOC_018742 | PPP1R18                  | chr6:30644165-30655672    | -0.0474803 | 0.999791 |
| XLOC_015186 | XLOC_015186 | GXYLT2                   | chr3:72937384-73024522    | -0.047389  | 0.999791 |
| XLOC_001104 | XLOC_001104 | GNPAT                    | chr1:231359508-231413719  | -0.0473633 | 0.999791 |
| XLOC_009834 | XLOC_009834 | SPOP                     | chr17:47676245-47755525   | -0.0473513 | 0.999791 |
| XLOC_011684 | XLOC_011684 | NUMBL                    | chr19:41171811-41196556   | -0.0473263 | 0.999791 |
| XLOC_013541 | XLOC_013541 | CSRP2BP,PET117           | chr20:18118498-18169031   | -0.0473066 | 0.999791 |
| XLOC_021975 | XLOC_021975 | KAT6A                    | chr8:41786996-41909505    | -0.0472671 | 0.999791 |
| XLOC_007991 | XLOC_007991 | LOC100132247             | chr16:22524843-22547841   | -0.0472567 | 0.999791 |
| XLOC_013954 | XLOC_013954 | SOGA1                    | chr20:35405844-35492087   | -0.0472497 | 0.999791 |
| XLOC_010946 | XLOC_010946 | LOC100287177             | chr19:46112657-46148775   | -0.0471717 | 0.999791 |
| XLOC_010890 | XLOC_010890 | ARHGFE1                  | chr19:42387266-42411604   | -0.0471576 | 0.999791 |
| XLOC_002526 | XLOC_002526 | SAMD8                    | chr10:76871392-76941881   | -0.0471518 | 0.999791 |
| XLOC_007537 | XLOC_007537 | TTBK2                    | chr15:43036541-43213007   | -0.047133  | 1        |
| XLOC_015474 | XLOC_015474 | EIF2B5                   | chr3:183852809-183863099  | -0.0471119 | 0.999791 |
| XLOC_009340 | XLOC_009340 | HGS                      | chr17:79650961-79669151   | -0.0470797 | 0.999791 |
| XLOC_000502 | XLOC_000502 | CDC7                     | chr1:91966403-91991321    | -0.0470696 | 0.999791 |
| XLOC_007936 | XLOC_007936 | ATF7IP2                  | chr16:10479911-10577495   | -0.0469756 | 0.999791 |
| XLOC_018880 | XLOC_018880 | PEX6                     | chr6:42928499-42946981    | -0.0469453 | 0.999791 |
| XLOC_013330 | XLOC_013330 | PLEKHM3                  | chr2:208686011-208890284  | -0.046887  | 1        |
| XLOC_014516 | XLOC_014516 | SFI1                     | chr22:31892124-32026810   | -0.0468461 | 0.999791 |
| XLOC_023714 | XLOC_023714 | IKBK2                    | chrX:153759605-153793261  | -0.0467995 | 0.999791 |
| XLOC_008472 | XLOC_008472 | COG7                     | chr16:23399813-23464512   | -0.0467942 | 0.999791 |
| XLOC_011651 | XLOC_011651 | HNRNPL                   | chr19:39327027-39342979   | -0.0467768 | 0.999791 |
| XLOC_007906 | XLOC_007906 | ZNF213                   | chr16:3185056-3192805     | -0.0467732 | 0.999791 |
| XLOC_016580 | XLOC_016580 | CEP44                    | chr4:175157809-175254531  | -0.0467363 | 0.999791 |
| XLOC_013475 | XLOC_013475 | ZCCHC3                   | chr20:278203-280963       | -0.0467132 | 0.999791 |
| XLOC_006193 | XLOC_006193 | DOCK9                    | chr13:99445740-99738660   | -0.0466642 | 0.999791 |
| XLOC_008631 | XLOC_008631 | CENPT                    | chr16:67862059-67905219   | -0.0466335 | 0.999791 |
| XLOC_005371 | XLOC_005371 | CAPRIN2                  | chr12:30862485-30907448   | -0.046618  | 0.999791 |
| XLOC_012682 | XLOC_012682 | MFF                      | chr2:228192227-228222549  | -0.0465283 | 0.999791 |
| XLOC_013512 | XLOC_013512 | SMOX                     | chr20:4129425-4168394     | -0.0464378 | 0.999791 |
| XLOC_008067 | XLOC_008067 | STX4                     | chr16:31044415-31051488   | -0.0464281 | 0.999791 |
| XLOC_016537 | XLOC_016537 | DKFZP43410714            | chr4:153457415-153460415  | -0.0463975 | 0.999791 |
| XLOC_014923 | XLOC_014923 | ARL8B                    | chr3:5163929-5222601      | -0.0463047 | 0.999791 |
| XLOC_005139 | XLOC_005139 | DYNLL1                   | chr12:120907659-120936298 | -0.0462759 | 0.999791 |
| XLOC_007954 | XLOC_007954 | NPIP                     | chr16:15031299-15045931   | -0.0462655 | 0.999791 |
| XLOC_015869 | XLOC_015869 | ATG3                     | chr3:112251358-112280485  | -0.046239  | 0.999791 |
| XLOC_017808 | XLOC_017808 | Sorf15                   | chr5:133291197-133304406  | -0.0462369 | 0.999791 |
| XLOC_005754 | XLOC_005754 | LOC338799                | chr12:122233172-122241390 | -0.0461975 | 0.999791 |
| XLOC_011431 | XLOC_011431 | DOCK6                    | chr19:11309968-11373168   | -0.0461715 | 0.999791 |
| XLOC_008503 | XLOC_008503 | HIRIP3                   | chr16:30003641-30007417   | -0.0460504 | 0.999791 |
| XLOC_008519 | XLOC_008519 | ZNF768                   | chr16:30535321-30537910   | -0.0459799 | 0.999791 |
| XLOC_001861 | XLOC_001861 | GATAD2B                  | chr1:153777202-153895451  | -0.0459356 | 0.999791 |
| XLOC_011310 | XLOC_011310 | TBXA2R                   | chr19:3594503-3606831     | -0.0459243 | 0.999791 |
| XLOC_016541 | XLOC_016541 | MND1                     | chr4:154265800-154336247  | -0.0459241 | 0.999791 |
| XLOC_016526 | XLOC_016526 | LSM6                     | chr4:147096834-147111213  | -0.0459036 | 0.999791 |
| XLOC_006320 | XLOC_006320 | SRP54                    | chr14:35452103-35498773   | -0.0458948 | 0.999791 |
| XLOC_013901 | XLOC_013901 | ABHD1                    | chr20:25228705-25371618   | -0.0458837 | 0.999791 |
| XLOC_013105 | XLOC_013105 | ANAPC1                   | chr2:112525213-112641741  | -0.0457949 | 0.999791 |
| XLOC_009983 | XLOC_009983 | SRP68                    | chr17:74034855-74068607   | -0.045757  | 0.999791 |
| XLOC_000946 | XLOC_000946 | CDC73                    | chr1:193091087-193223942  | -0.0457034 | 0.999791 |
| XLOC_021084 | XLOC_021084 | ERV3-1,ZNF117            | chr7:64434829-64467124    | -0.0456565 | 0.999791 |
| XLOC_010099 | XLOC_010099 | TGIF1                    | chr18:3412071-3458406     | -0.0456527 | 0.999791 |
| XLOC_000284 | XLOC_000284 | ADPRHL2                  | chr1:36554452-36559533    | -0.045627  | 0.999791 |
| XLOC_005961 | XLOC_005961 | MBNL2                    | chr13:97874549-98046374   | -0.0456017 | 0.999791 |
| XLOC_010923 | XLOC_010923 | CEACAM19                 | chr19:45174723-45187627   | -0.0455903 | 0.999791 |
| XLOC_002725 | XLOC_002725 | INPP5F                   | chr10:121485558-121588662 | -0.045575  | 0.999791 |
| XLOC_020943 | XLOC_020943 | ANKMY2                   | chr7:16639400-16685442    | -0.0455576 | 0.999791 |
| XLOC_014615 | XLOC_014615 | ARHGAP8,PRR5,PRR5-ARHGAP | chr22:45064426-45258664   | -0.0455205 | 0.999791 |
| XLOC_020926 | XLOC_020926 | KDELR2                   | chr7:6500711-6523849      | -0.0455133 | 0.999791 |
| XLOC_021104 | XLOC_021104 | BCL7B                    | chr7:72950682-72972065    | -0.0454305 | 0.999791 |
| XLOC_012623 | XLOC_012623 | RPE                      | chr2:210867351-2111036051 | -0.0454056 | 0.999791 |
| XLOC_009651 | XLOC_009651 | PCGF2                    | chr17:36886509-36904558   | -0.0453602 | 0.999791 |
| XLOC_020746 | XLOC_020746 | TSPAN33                  | chr7:128784711-128809534  | -0.04535   | 0.999791 |
| XLOC_004996 | XLOC_004996 | ATXN7L3B                 | chr12:74931550-74935232   | -0.0453483 | 0.999791 |
| XLOC_023458 | XLOC_023458 | DLG3                     | chrX:69664704-69725339    | -0.0453279 | 0.999791 |
| XLOC_013525 | XLOC_013525 | PLCB4                    | chr20:9049700-9461462     | -0.0452814 | 0.999791 |
| XLOC_007549 | XLOC_007549 | ELL3                     | chr15:44038589-44094769   | -0.0452565 | 0.999791 |
| XLOC_013858 | XLOC_013858 | JAG1                     | chr20:10618331-10654694   | -0.0452423 | 0.999791 |
| XLOC_018595 | XLOC_018595 | FGFR1OP                  | chr6:167412815-167454066  | -0.0452393 | 0.999791 |
| XLOC_021157 | XLOC_021157 | KRIT1                    | chr7:91828282-91875414    | -0.0452214 | 0.999791 |
| XLOC_020331 | XLOC_020331 | SUN1                     | chr7:855193-914557        | -0.0451135 | 0.999791 |
| XLOC_013673 | XLOC_013673 | PKIG                     | chr20:43160435-43247678   | -0.0451129 | 0.999791 |
| XLOC_023408 | XLOC_023408 | MAGED1                   | chrX:51546154-51645450    | -0.0450772 | 0.999791 |
| XLOC_012746 | XLOC_012746 | GPR35                    | chr2:241544824-241570676  | -0.0450593 | 0.999791 |



|             |             |             |                           |            |          |
|-------------|-------------|-------------|---------------------------|------------|----------|
| XLOC_023099 | XLOC_023099 | GOLGA2      | chr9:131018107-131038268  | -0.044999  | 0.999791 |
| XLOC_013013 | XLOC_013013 | CAPG        | chr2:85621870-85641197    | -0.0449909 | 0.999791 |
| XLOC_005775 | XLOC_005775 | CCDC92      | chr12:124420954-124457163 | -0.0449509 | 0.999791 |
| XLOC_011254 | XLOC_011254 | MGC2752     | chr19:59086765-59095762   | -0.0449302 | 0.999791 |
| XLOC_018739 | XLOC_018739 | GNL1        | chr6:30509154-30532473    | -0.0449092 | 0.999791 |
| XLOC_021031 | XLOC_021031 | POLR2J4     | chr7:43966034-44058748    | -0.044897  | 0.999791 |
| XLOC_005513 | XLOC_005513 | SARNP       | chr12:56137063-56211540   | -0.0448362 | 0.999791 |
| XLOC_011246 | XLOC_011246 | RPS5        | chr19:58898635-58906171   | -0.0447254 | 0.999791 |
| XLOC_022926 | XLOC_022926 | AUH         | chr9:93976096-94124206    | -0.0446405 | 0.999791 |
| XLOC_000220 | XLOC_000220 | GPR3        | chr1:27719147-27722317    | -0.0446382 | 0.999791 |
| XLOC_000733 | XLOC_000733 | INTS3       | chr1:153700566-153746555  | -0.0446304 | 0.999791 |
| XLOC_022664 | XLOC_022664 | EGFL7       | chr9:139553307-139567130  | -0.0445091 | 0.999791 |
| XLOC_013381 | XLOC_013381 | DNPEP       | chr2:220238179-220252662  | -0.0444882 | 0.999791 |
| XLOC_009772 | XLOC_009772 | ASB16-AS1   | chr17:42248073-42264085   | -0.044461  | 0.999791 |
| XLOC_011280 | XLOC_011280 | MBD3        | chr19:1576677-1592652     | -0.0443956 | 0.999791 |
| XLOC_016408 | XLOC_016408 | COPS4       | chr4:83956238-83996971    | -0.0443952 | 0.999791 |
| XLOC_010878 | XLOC_010878 | HNRNPUL1    | chr19:41768390-41813811   | -0.0443559 | 0.999791 |
| XLOC_010417 | XLOC_010417 | PQLC1       | chr18:77662419-77711653   | -0.0443472 | 0.999791 |
| XLOC_020973 | XLOC_020973 | SKAP2       | chr7:26706687-26904341    | -0.0443093 | 0.999791 |
| XLOC_005966 | XLOC_005966 | UBAC2       | chr13:99848627-100058554  | -0.0442808 | 0.999791 |
| XLOC_000282 | XLOC_000282 | AGO3        | chr1:36396682-36522063    | -0.0442738 | 0.999791 |
| XLOC_006076 | XLOC_006076 | SUPT20H     | chr13:37574677-37633850   | -0.0442478 | 0.999791 |
| XLOC_022106 | XLOC_022106 | UQCRB       | chr8:97238903-97247862    | -0.0442409 | 0.999791 |
| XLOC_001256 | XLOC_001256 | CLSTN1      | chr1:9711789-9884550      | -0.0442169 | 0.999791 |
| XLOC_011919 | XLOC_011919 | ZNF600      | chr19:53268747-53290034   | -0.0442066 | 0.999791 |
| XLOC_001429 | XLOC_001429 | TMEM54      | chr1:33352097-33366953    | -0.0441693 | 0.999791 |
| XLOC_001968 | XLOC_001968 | USF1        | chr1:161009040-161015769  | -0.044169  | 0.999791 |
| XLOC_015585 | XLOC_015585 | CHCHD4      | chr3:14153576-14166371    | -0.044141  | 0.999791 |
| XLOC_003964 | XLOC_003964 | IFITM10     | chr11:1490684-1785501     | -0.0441404 | 0.999791 |
| XLOC_004392 | XLOC_004392 | CLPB        | chr11:72003469-72145724   | -0.0441257 | 0.999791 |
| XLOC_017783 | XLOC_017783 | CEP120      | chr5:122680578-122759286  | -0.0441246 | 0.999791 |
| XLOC_002506 | XLOC_002506 | SLC29A3     | chr10:73079009-73123147   | -0.0441165 | 0.999791 |
| XLOC_005909 | XLOC_005909 | CKAP2       | chr13:53029494-53050763   | -0.0441139 | 0.999791 |
| XLOC_013684 | XLOC_013684 | PIGT        | chr20:44044706-44054885   | -0.0441076 | 0.999791 |
| XLOC_004035 | XLOC_004035 | ARFIP2      | chr11:6495912-6505911     | -0.0441024 | 0.999791 |
| XLOC_001533 | XLOC_001533 | STIL        | chr1:47715810-47779819    | -0.0440696 | 0.999791 |
| XLOC_011960 | XLOC_011960 | SYT5        | chr19:55684468-55691720   | -0.0440529 | 1        |
| XLOC_003846 | XLOC_003846 | ATPSL       | chr11:118230295-118289530 | -0.0440463 | 0.999791 |
| XLOC_009075 | XLOC_009075 | TUBG2       | chr17:40811265-40819024   | -0.0439415 | 0.999791 |
| XLOC_020590 | XLOC_020590 | DBF4        | chr7:87463813-87538856    | -0.0439295 | 0.999791 |
| XLOC_015659 | XLOC_015659 | TMEM158     | chr3:45265955-45267814    | -0.0438795 | 0.999791 |
| XLOC_006754 | XLOC_006754 | STRN3       | chr14:31363004-31365656   | -0.0438402 | 0.999791 |
| XLOC_017185 | XLOC_017185 | FCHO2       | chr5:72251807-72386349    | -0.043805  | 0.999791 |
| XLOC_018490 | XLOC_018490 | RNF146      | chr6:127587826-127609705  | -0.0437765 | 0.999791 |
| XLOC_003533 | XLOC_003533 | TMEM109     | chr11:60681370-60690915   | -0.0437499 | 0.999791 |
| XLOC_022357 | XLOC_022357 | FAM201A     | chr9:38621084-38623277    | -0.0437438 | 0.999791 |
| XLOC_021694 | XLOC_021694 | VPS13B      | chr8:100025493-100889814  | -0.0437212 | 0.999791 |
| XLOC_003653 | XLOC_003653 | RHOD        | chr11:66824288-66839488   | -0.0437047 | 0.999791 |
| XLOC_001360 | XLOC_001360 | IFNLR1      | chr1:24480646-24513765    | -0.043655  | 0.999791 |
| XLOC_001817 | XLOC_001817 | POGZ        | chr1:151375199-151431941  | -0.0435985 | 0.999791 |
| XLOC_021371 | XLOC_021371 | FAM115A     | chr7:143548460-143599278  | -0.0435828 | 0.999791 |
| XLOC_013499 | XLOC_013499 | PTPRA,VPS16 | chr20:2815960-3019315     | -0.0435498 | 0.999791 |
| XLOC_022697 | XLOC_022697 | ARRDC1      | chr9:140500095-140513308  | -0.0434734 | 0.999791 |
| XLOC_018750 | XLOC_018750 | PSORS1C2    | chr6:31082607-31107869    | -0.043438  | 1        |
| XLOC_022896 | XLOC_022896 | TLE1        | chr9:84198597-84303596    | -0.0433969 | 0.999791 |
| XLOC_008365 | XLOC_008365 | CEMP1       | chr16:2570362-2581409     | -0.0433133 | 0.999791 |
| XLOC_008756 | XLOC_008756 | SRR         | chr17:2207247-2240678     | -0.0432973 | 0.999791 |
| XLOC_015372 | XLOC_015372 | ACPL2       | chr3:140950681-141013486  | -0.0432876 | 0.999791 |
| XLOC_013467 | XLOC_013467 | THAP4       | chr2:242523819-242576725  | -0.0432634 | 0.999791 |
| XLOC_004523 | XLOC_004523 | PPP2R1B     | chr11:111473169-111637169 | -0.0432365 | 0.999791 |
| XLOC_016195 | XLOC_016195 | MSX1        | chr4:4861391-4865660      | -0.0430949 | 0.999791 |
| XLOC_009984 | XLOC_009984 | EXOC7       | chr17:74075262-74099868   | -0.0430594 | 0.999791 |
| XLOC_007868 | XLOC_007868 | SLC9A3R2    | chr16:2076868-2089027     | -0.0430584 | 0.999791 |
| XLOC_022533 | XLOC_022533 | DAB2IP      | chr9:124329398-124547809  | -0.0430571 | 0.999791 |
| XLOC_021980 | XLOC_021980 | THAP1       | chr8:42691816-42698474    | -0.0430552 | 0.999791 |
| XLOC_000385 | XLOC_000385 | FOXD2       | chr1:47901688-47906363    | -0.0429557 | 0.999791 |
| XLOC_017859 | XLOC_017859 | HARS        | chr5:140053489-140078890  | -0.0429521 | 0.999791 |
| XLOC_012840 | XLOC_012840 | MPV17       | chr2:27532359-27545969    | -0.0429114 | 0.999791 |
| XLOC_020781 | XLOC_020781 | UBN2        | chr7:138916230-138992982  | -0.042867  | 0.999791 |
| XLOC_004612 | XLOC_004612 | ACRV1       | chr11:125495030-125550793 | -0.0428126 | 1        |
| XLOC_013437 | XLOC_013437 | RAB17       | chr2:238482964-238499769  | -0.0428062 | 1        |
| XLOC_004792 | XLOC_004792 | DDX11       | chr12:311173696-31257725  | -0.0427798 | 0.999791 |
| XLOC_007851 | XLOC_007851 | TELO2       | chr16:1543351-1662109     | -0.0427246 | 0.999791 |
| XLOC_022062 | XLOC_022062 | IMPA1       | chr8:82569150-82598589    | -0.0427043 | 0.999791 |
| XLOC_003920 | XLOC_003920 | APLP2       | chr11:129939715-130014706 | -0.0426774 | 0.999791 |
| XLOC_017266 | XLOC_017266 | APC         | chr5:112043201-112181936  | -0.0426555 | 0.999791 |
| XLOC_016624 | XLOC_016624 | GAK         | chr4:843064-926174        | -0.0426048 | 0.999791 |
| XLOC_001178 | XLOC_001178 | WASH7P      | chr1:11873-29370          | -0.0425897 | 0.999791 |
| XLOC_023102 | XLOC_023102 | WDR34       | chr9:131314836-131419129  | -0.0425768 | 0.999791 |

|             |             |                            |                          |            |          |
|-------------|-------------|----------------------------|--------------------------|------------|----------|
| XLOC_012709 | XLOC_012709 | EIF4E2                     | chr2:233415356-233433920 | -0.0425242 | 0.999791 |
| XLOC_023381 | XLOC_023381 | CCDC22                     | chrX:49091926-49121288   | -0.0425177 | 0.999791 |
| XLOC_002119 | XLOC_002119 | ADIPOR1                    | chr1:202909959-202927700 | -0.0425019 | 0.999791 |
| XLOC_013761 | XLOC_013761 | RPS21                      | chr20:60962120-60963576  | -0.0424725 | 0.999791 |
| XLOC_019032 | XLOC_019032 | ZBTB24                     | chr6:109783718-109804440 | -0.0424719 | 0.999791 |
| XLOC_014353 | XLOC_014353 | SIK1                       | chr21:44834397-44847002  | -0.0424272 | 0.999791 |
| XLOC_000070 | XLOC_000070 | TMEM201                    | chr1:9648931-9674935     | -0.0424251 | 0.999791 |
| XLOC_012513 | XLOC_012513 | METAP1D                    | chr2:172864803-172945587 | -0.0423914 | 0.999791 |
| XLOC_007734 | XLOC_007734 | EFTUD1                     | chr15:82422560-82555104  | -0.0423907 | 0.999791 |
| XLOC_019041 | XLOC_019041 | TRAF3IP2                   | chr6:111804674-111927477 | -0.0423545 | 0.999791 |
| XLOC_008774 | XLOC_008774 | MED11                      | chr17:4634722-4643223    | -0.0423393 | 0.999791 |
| XLOC_008059 | XLOC_008059 | PHKG2                      | chr16:30759619-30787628  | -0.0423162 | 0.999791 |
| XLOC_019077 | XLOC_019077 | EPB41L2                    | chr6:131160487-131384462 | -0.0422824 | 0.999791 |
| XLOC_022479 | XLOC_022479 | MSANTD3,MSANTD3-TMEFF1,TI  | chr9:103189494-103339918 | -0.0422622 | 0.999791 |
| XLOC_017357 | XLOC_017357 | ANKHD1,ANKHD1-EIF4EBP3,EIF | chr5:139781398-139929163 | -0.0422544 | 0.999791 |
| XLOC_021146 | XLOC_021146 | TMEM243                    | chr7:86781676-86849031   | -0.0422388 | 0.999791 |
| XLOC_021990 | XLOC_021990 | RB1CC1                     | chr8:53535017-53627026   | -0.0422277 | 0.999791 |
| XLOC_009943 | XLOC_009943 | SLC39A11                   | chr17:70642084-71088853  | -0.0421123 | 0.999791 |
| XLOC_017965 | XLOC_017965 | RNF44                      | chr5:175953699-175964421 | -0.0420681 | 0.999791 |
| XLOC_004348 | XLOC_004348 | RBM4B                      | chr11:66384052-66445275  | -0.0420631 | 0.999791 |
| XLOC_011300 | XLOC_011300 | GNP7                       | chr19:2511217-2702746    | -0.0420435 | 0.999791 |
| XLOC_012972 | XLOC_012972 | MCEE                       | chr2:71336805-71357394   | -0.0419782 | 0.999791 |
| XLOC_008632 | XLOC_008632 | CTRL                       | chr16:67927174-67965778  | -0.0419413 | 0.999791 |
| XLOC_014415 | XLOC_014415 | DGCR8                      | chr22:20067754-20104818  | -0.0419038 | 0.999791 |
| XLOC_007380 | XLOC_007380 | AKAP13                     | chr15:85923846-86292589  | -0.0418554 | 0.999791 |
| XLOC_009218 | XLOC_009218 | TLK2                       | chr17:60556385-60692841  | -0.0417672 | 0.999791 |
| XLOC_010259 | XLOC_010259 | CTDP1                      | chr18:77439800-77514510  | -0.0417573 | 0.999791 |
| XLOC_006316 | XLOC_006316 | ARHGAP5                    | chr14:32546494-32628934  | -0.0417394 | 0.999791 |
| XLOC_003633 | XLOC_003633 | SART1                      | chr11:65729159-65747607  | -0.0417384 | 0.999791 |
| XLOC_007165 | XLOC_007165 | MAPKBP1                    | chr15:42066631-42120053  | -0.0417345 | 0.999791 |
| XLOC_012109 | XLOC_012109 | SLC4A1AP                   | chr2:27848505-27917847   | -0.0417267 | 0.999791 |
| XLOC_008398 | XLOC_008398 | UBALD1                     | chr16:4658883-4664927    | -0.0416807 | 0.999791 |
| XLOC_021190 | XLOC_021190 | ATP5J2,ATP5J2-PTCD1,PTCD1  | chr7:99006600-99063824   | -0.0416289 | 0.999791 |
| XLOC_005434 | XLOC_005434 | TUBA1A                     | chr12:49578577-49583107  | -0.0416185 | 0.999791 |
| XLOC_015770 | XLOC_015770 | CHDH                       | chr3:53850323-53880420   | -0.0416098 | 0.999791 |
| XLOC_022942 | XLOC_022942 | NINJ1                      | chr9:95883770-95896570   | -0.0415515 | 0.999791 |
| XLOC_006834 | XLOC_006834 | TIMMS9                     | chr14:58862643-59015549  | -0.0415127 | 0.999791 |
| XLOC_009217 | XLOC_009217 | METTL2A                    | chr17:60501245-60527454  | -0.0414507 | 0.999791 |
| XLOC_001564 | XLOC_001564 | CYB5RL                     | chr1:54638026-54665746   | -0.0414351 | 0.999791 |
| XLOC_021774 | XLOC_021774 | C8orf31                    | chr8:144120678-144135720 | -0.0413807 | 0.999791 |
| XLOC_020785 | XLOC_020785 | LOC100134229               | chr7:139877060-139879440 | -0.0413568 | 0.999791 |
| XLOC_022600 | XLOC_022600 | FAM73B                     | chr9:131799252-131834351 | -0.0412963 | 0.999791 |
| XLOC_007387 | XLOC_007387 | AEN                        | chr15:89164526-89175512  | -0.0412573 | 0.999791 |
| XLOC_007783 | XLOC_007783 | PRC1                       | chr15:91509267-91537881  | -0.0412181 | 0.999791 |
| XLOC_023096 | XLOC_023096 | CIZ1                       | chr9:130928343-131017527 | -0.0412106 | 0.999791 |
| XLOC_011698 | XLOC_011698 | RABAC1                     | chr19:42460832-42463528  | -0.0411841 | 0.999791 |
| XLOC_007524 | XLOC_007524 | RPAP1                      | chr15:41809374-41836464  | -0.0411726 | 0.999791 |
| XLOC_023134 | XLOC_023134 | MED22                      | chr9:136207754-136214972 | -0.0411644 | 0.999791 |
| XLOC_017980 | XLOC_017980 | DDX41                      | chr5:176938577-176943967 | -0.0411167 | 0.999791 |
| XLOC_013771 | XLOC_013771 | SLC17A9                    | chr20:61583998-61599949  | -0.0410605 | 0.999791 |
| XLOC_018825 | XLOC_018825 | NUDT3,RPS10,RPS10-NUDT3    | chr6:34254972-34393902   | -0.0410592 | 0.999791 |
| XLOC_015057 | XLOC_015057 | TCAIM                      | chr3:44379610-44450940   | -0.0410464 | 0.999791 |
| XLOC_004341 | XLOC_004341 | BRMS1                      | chr11:66104803-66112582  | -0.0410446 | 0.999791 |
| XLOC_014883 | XLOC_014883 | KIAA0930                   | chr22:45588122-45636650  | -0.0409201 | 0.999791 |
| XLOC_014307 | XLOC_014307 | DONSON                     | chr21:34949858-34961014  | -0.0408348 | 0.999791 |
| XLOC_018393 | XLOC_018393 | RWDD2A                     | chr6:83777384-83906256   | -0.0408229 | 0.999791 |
| XLOC_020918 | XLOC_020918 | RNF216                     | chr7:5659671-5821361     | -0.0408166 | 0.999791 |
| XLOC_017177 | XLOC_017177 | BDP1                       | chr5:70751441-70863649   | -0.040798  | 0.999791 |
| XLOC_009760 | XLOC_009760 | LOC100130581               | chr17:41447212-41466266  | -0.0407963 | 0.999791 |
| XLOC_004922 | XLOC_004922 | RPL41                      | chr12:56510373-56511616  | -0.0407894 | 0.999791 |
| XLOC_010525 | XLOC_010525 | TRIP10                     | chr19:6739706-6751529    | -0.0407541 | 0.999791 |
| XLOC_006182 | XLOC_006182 | TGDS                       | chr13:95226307-95248511  | -0.0407486 | 0.999791 |
| XLOC_014870 | XLOC_014870 | PACSIN2                    | chr22:43265771-43411184  | -0.040719  | 0.999791 |
| XLOC_003763 | XLOC_003763 | SCARNA9                    | chr11:93394815-93463522  | -0.0406562 | 0.999791 |
| XLOC_020739 | XLOC_020739 | CCDC136                    | chr7:128431463-128462187 | -0.0406258 | 0.999791 |
| XLOC_023711 | XLOC_023711 | GDI1                       | chrX:153665258-153671814 | -0.0406256 | 0.999791 |
| XLOC_021419 | XLOC_021419 | PTPRN2                     | chr7:157331749-158380482 | -0.0405936 | 0.999791 |
| XLOC_017890 | XLOC_017890 | PDE6A                      | chr5:149237518-149324356 | -0.0405259 | 1        |
| XLOC_019042 | XLOC_019042 | FYN                        | chr6:111981534-112194655 | -0.0405257 | 0.999791 |
| XLOC_017157 | XLOC_017157 | ERBB2IP                    | chr5:65222381-65376851   | -0.0405035 | 0.999791 |
| XLOC_001308 | XLOC_001308 | ATP13A2                    | chr1:17312452-17338423   | -0.0404619 | 0.999791 |
| XLOC_022460 | XLOC_022460 | HABP4                      | chr9:99212413-99253618   | -0.0404571 | 0.999791 |
| XLOC_007126 | XLOC_007126 | EMC4                       | chr15:34517244-34630265  | -0.0404506 | 0.999791 |
| XLOC_018802 | XLOC_018802 | TAP1                       | chr6:32808493-32821748   | -0.0404492 | 0.999791 |
| XLOC_015313 | XLOC_015313 | MCM2                       | chr3:127317199-127341278 | -0.0404056 | 0.999791 |
| XLOC_010289 | XLOC_010289 | MPPE1                      | chr18:11689013-11908796  | -0.0403867 | 0.999791 |
| XLOC_018594 | XLOC_018594 | LOC100289495               | chr6:166756118-166764957 | -0.0403437 | 1        |
| XLOC_022440 | XLOC_022440 | C9orf89                    | chr9:95858449-95875565   | -0.0403204 | 0.999791 |
| XLOC_009484 | XLOC_009484 | RPL26                      | chr17:8280833-8286565    | -0.0402686 | 0.999791 |

|             |             |              |                           |            |          |
|-------------|-------------|--------------|---------------------------|------------|----------|
| XLOC_008896 | XLOC_008896 | SMCR8        | chr17:18218593-18266856   | -0.0402678 | 0.999791 |
| XLOC_003674 | XLOC_003674 | IGHMBP2      | chr11:68671318-68708069   | -0.0402407 | 0.999791 |
| XLOC_018316 | XLOC_018316 | POLH         | chr6:43543877-43596936    | -0.0402293 | 0.999791 |
| XLOC_009237 | XLOC_009237 | PRKCA        | chr17:64298925-64806862   | -0.0401913 | 0.999791 |
| XLOC_013596 | XLOC_013596 | DNMT3B       | chr20:31350190-31397162   | -0.0401336 | 0.999791 |
| XLOC_016265 | XLOC_016265 | ANAPC4       | chr4:25378847-25420120    | -0.0401238 | 0.999791 |
| XLOC_011403 | XLOC_011403 | ZNF561       | chr19:9718001-9731916     | -0.0400524 | 0.999791 |
| XLOC_004272 | XLOC_004272 | TMEM223      | chr11:62554873-62559486   | -0.0400425 | 0.999791 |
| XLOC_009346 | XLOC_009346 | MAFG-AS1     | chr17:79885704-79888629   | -0.040013  | 0.999791 |
| XLOC_015875 | XLOC_015875 | SPICE1       | chr3:113161564-113234034  | -0.0400095 | 0.999791 |
| XLOC_006385 | XLOC_006385 | MNAT1        | chr14:61201458-61435398   | -0.0399766 | 0.999791 |
| XLOC_009242 | XLOC_009242 | PITPNC1      | chr17:65373396-65693379   | -0.0399719 | 0.999791 |
| XLOC_018231 | XLOC_018231 | BRD2         | chr6:32936436-32949282    | -0.0399541 | 0.999791 |
| XLOC_009972 | XLOC_009972 | GALK1        | chr17:73754017-73761280   | -0.0399152 | 0.999791 |
| XLOC_009653 | XLOC_009653 | CWC25        | chr17:36956686-36981603   | -0.0399131 | 0.999791 |
| XLOC_020600 | XLOC_020600 | FZD1         | chr7:90893782-90898132    | -0.0398954 | 0.999791 |
| XLOC_007535 | XLOC_007535 | LRRC57       | chr15:42834719-42841002   | -0.0398947 | 0.999791 |
| XLOC_002319 | XLOC_002319 | PFKP         | chr10:3109711-3178997     | -0.0398846 | 0.999791 |
| XLOC_004087 | XLOC_004087 | CYP2R1       | chr11:14899555-14913751   | -0.0398765 | 0.999791 |
| XLOC_021530 | XLOC_021530 | ELP3         | chr8:27950583-28048669    | -0.0398693 | 0.999791 |
| XLOC_021541 | XLOC_021541 | WRN          | chr8:30853320-31031277    | -0.03986   | 0.999791 |
| XLOC_014665 | XLOC_014665 | BID          | chr22:18216905-18257431   | -0.0398542 | 0.999791 |
| XLOC_005109 | XLOC_005109 | TRAFD1       | chr12:112563348-112591408 | -0.0398344 | 0.999791 |
| XLOC_014827 | XLOC_014827 | JOSD1        | chr22:39081547-39096459   | -0.0398133 | 0.999791 |
| XLOC_017525 | XLOC_017525 | ZNF454       | chr5:178368193-178393218  | -0.0397845 | 1        |
| XLOC_004572 | XLOC_004572 | CCDC153      | chr11:19060962-19066584   | -0.0397416 | 1        |
| XLOC_016449 | XLOC_016449 | CISD2        | chr4:103790134-103940896  | -0.039698  | 0.999791 |
| XLOC_009586 | XLOC_009586 | PHF12        | chr17:27232270-27278508   | -0.0396562 | 0.999791 |
| XLOC_018119 | XLOC_018119 | HIST1H2AG    | chr6:27100816-27101314    | -0.0396073 | 0.999791 |
| XLOC_010423 | XLOC_010423 | CDC34        | chr19:531732-542087       | -0.0395869 | 0.999791 |
| XLOC_015969 | XLOC_015969 | DBR1         | chr3:137879829-137893791  | -0.0395467 | 0.999791 |
| XLOC_012834 | XLOC_012834 | CGREF1       | chr2:27309610-27341995    | -0.0395015 | 0.999791 |
| XLOC_016322 | XLOC_016322 | SRD5A3       | chr4:56212387-56251747    | -0.0394908 | 0.999791 |
| XLOC_002633 | XLOC_002633 | R3HCC1L      | chr10:99894380-100004654  | -0.0394041 | 0.999791 |
| XLOC_015876 | XLOC_015876 | KIAA2018     | chr3:113367232-113415493  | -0.0394018 | 0.999791 |
| XLOC_005436 | XLOC_005436 | MCRS1        | chr12:49952085-49961911   | -0.0393389 | 0.999791 |
| XLOC_011869 | XLOC_011869 | JOSD2        | chr19:51009253-51014612   | -0.0393361 | 0.999791 |
| XLOC_012563 | XLOC_012563 | MFSD6        | chr2:191273080-191367041  | -0.0393283 | 0.999791 |
| XLOC_002645 | XLOC_002645 | FAM178A      | chr10:102672325-102724891 | -0.0393221 | 0.999791 |
| XLOC_001570 | XLOC_001570 | USP24        | chr1:55532031-55681039    | -0.0393201 | 0.999791 |
| XLOC_003939 | XLOC_003939 | RNH1         | chr11:494511-507283       | -0.0392723 | 0.999791 |
| XLOC_012576 | XLOC_012576 | C2orf69      | chr2:200775978-200792996  | -0.0392635 | 0.999791 |
| XLOC_011670 | XLOC_011670 | FBL          | chr19:40325092-40337054   | -0.0392355 | 0.999791 |
| XLOC_014161 | XLOC_014161 | DOPEY2       | chr21:37536838-37666572   | -0.0392142 | 0.999791 |
| XLOC_000734 | XLOC_000734 | SLC27A3      | chr1:153747767-153752633  | -0.0391993 | 0.999791 |
| XLOC_005700 | XLOC_005700 | PPP1CC       | chr12:111157612-111180783 | -0.0391774 | 0.999791 |
| XLOC_018634 | XLOC_018634 | SSR1         | chr6:7281287-7313541      | -0.0391653 | 0.999791 |
| XLOC_005017 | XLOC_005017 | TMTC3        | chr12:88536072-88593664   | -0.0391462 | 0.999791 |
| XLOC_007250 | XLOC_007250 | ZNF609       | chr15:64791618-64978266   | -0.0390675 | 0.999791 |
| XLOC_023196 | XLOC_023196 | LOC100129722 | chr9:140144670-140147949  | -0.0390152 | 0.999791 |
| XLOC_024156 | XLOC_024156 | CXorf40B     | chrX:149100414-149106716  | -0.0389981 | 0.999791 |
| XLOC_015029 | XLOC_015029 | SLC25A38     | chr3:39424814-39438819    | -0.0388616 | 0.999791 |
| XLOC_000933 | XLOC_000933 | SWT1         | chr1:185087217-185260913  | -0.0388571 | 0.999791 |
| XLOC_001295 | XLOC_001295 | FAM131C      | chr1:16384263-16400127    | -0.0388197 | 0.999791 |
| XLOC_013468 | XLOC_013468 | DTYMK        | chr2:242615156-242626383  | -0.0387833 | 0.999791 |
| XLOC_011849 | XLOC_011849 | IL4I1_NUP62  | chr19:50392912-50437193   | -0.038752  | 0.999791 |
| XLOC_015197 | XLOC_015197 | CHMP2B       | chr3:87276412-87304698    | -0.0387507 | 0.999791 |
| XLOC_002877 | XLOC_002877 | EPC1         | chr10:32556643-32667726   | -0.0387401 | 0.999791 |
| XLOC_010508 | XLOC_010508 | UHRF1        | chr19:4909509-4962165     | -0.0387342 | 0.999791 |
| XLOC_022920 | XLOC_022920 | SEMA4D       | chr9:91975705-92094611    | -0.0387028 | 0.999791 |
| XLOC_004393 | XLOC_004393 | PDE2A        | chr11:72287183-72385497   | -0.0386963 | 1        |
| XLOC_013017 | XLOC_013017 | C2orf68      | chr2:85829964-85876407    | -0.038659  | 0.999791 |
| XLOC_002875 | XLOC_002875 | ARHGAP12     | chr10:32094325-32217804   | -0.0386472 | 0.999791 |
| XLOC_020463 | XLOC_020463 | UBE2D4       | chr7:43966034-44058748    | -0.0385997 | 0.999791 |
| XLOC_021818 | XLOC_021818 | LOC100287015 | chr8:6261076-6264069      | -0.0385577 | 0.999791 |
| XLOC_023421 | XLOC_023421 | TSR2         | chrX:54466852-54471731    | -0.038544  | 0.999791 |
| XLOC_000518 | XLOC_000518 | ABCD3        | chr1:94883932-94984219    | -0.0385311 | 0.999791 |
| XLOC_013301 | XLOC_013301 | TYW5         | chr2:200793633-200828847  | -0.0385101 | 0.999791 |
| XLOC_008609 | XLOC_008609 | DYNC1L12     | chr16:66754798-66785525   | -0.038479  | 0.999791 |
| XLOC_001391 | XLOC_001391 | EYA3         | chr1:28296854-28415148    | -0.038473  | 0.999791 |
| XLOC_001331 | XLOC_001331 | MUL1         | chr1:20825940-20834674    | -0.0384114 | 0.999791 |
| XLOC_022227 | XLOC_022227 | PUF60        | chr8:144898513-144911556  | -0.0383085 | 0.999791 |
| XLOC_005058 | XLOC_005058 | CHPT1        | chr12:102091416-102133250 | -0.0383034 | 0.999791 |
| XLOC_008750 | XLOC_008750 | WDR81        | chr17:1619816-1641893     | -0.0383033 | 0.999791 |
| XLOC_011554 | XLOC_011554 | GMIP         | chr19:19740284-19754455   | -0.0382749 | 0.999791 |
| XLOC_018004 | XLOC_018004 | MAPK9        | chr5:179660594-179719071  | -0.0382352 | 0.999791 |
| XLOC_018736 | XLOC_018736 | TRIM26       | chr6:30152231-30181271    | -0.038234  | 0.999791 |
| XLOC_017862 | XLOC_017862 | DIAPH1       | chr5:140894587-140998622  | -0.0382211 | 0.999791 |
| XLOC_005214 | XLOC_005214 | SLC6A13      | chr12:329786-372039       | -0.0381942 | 0.999791 |

|             |             |                        |                           |            |          |
|-------------|-------------|------------------------|---------------------------|------------|----------|
| XLOC_002249 | XLOC_002249 | PCNXL2                 | chr1:233119881-233431459  | -0.038155  | 0.999791 |
| XLOC_002014 | XLOC_002014 | METTL18                | chr1:169761669-169764061  | -0.03815   | 0.999791 |
| XLOC_001110 | XLOC_001110 | KCNK1                  | chr1:233749749-233808258  | -0.0381449 | 0.999791 |
| XLOC_011981 | XLOC_011981 | ZNF787                 | chr19:56598731-56632649   | -0.0381438 | 0.999791 |
| XLOC_017375 | XLOC_017375 | PCDHB7                 | chr5:140552242-140555957  | -0.0381102 | 0.999791 |
| XLOC_015751 | XLOC_015751 | POC1A                  | chr3:52109248-52188706    | -0.0381008 | 0.999791 |
| XLOC_003723 | XLOC_003723 | UVRAG                  | chr11:75526211-75855282   | -0.0380903 | 0.999791 |
| XLOC_004125 | XLOC_004125 | KIF18A                 | chr11:28042162-28129746   | -0.0380814 | 0.999791 |
| XLOC_012750 | XLOC_012750 | PPP1R7                 | chr2:242089901-242122439  | -0.0380609 | 0.999791 |
| XLOC_020967 | XLOC_020967 | C7orf31                | chr7:25174315-25219817    | -0.038018  | 0.999791 |
| XLOC_015170 | XLOC_015170 | ATXN7                  | chr3:63850232-63989136    | -0.0379835 | 0.999791 |
| XLOC_021736 | XLOC_021736 | FAM91A1                | chr8:124780881-124827690  | -0.0379668 | 0.999791 |
| XLOC_020456 | XLOC_020456 | C7orf10                | chr7:40174574-40900366    | -0.0379574 | 1        |
| XLOC_005728 | XLOC_005728 | WSB2                   | chr12:118470491-118498951 | -0.0379299 | 0.999791 |
| XLOC_018396 | XLOC_018396 | CYB5R4                 | chr6:84569369-84670146    | -0.0378304 | 0.999791 |
| XLOC_017843 | XLOC_017843 | SIL1                   | chr5:138282409-138534065  | -0.0378126 | 0.999791 |
| XLOC_011762 | XLOC_011762 | FBXO46                 | chr19:46213886-46234151   | -0.0378059 | 0.999791 |
| XLOC_007197 | XLOC_007197 | BLOC1S6                | chr15:45879416-45901909   | -0.0377708 | 0.999791 |
| XLOC_006045 | XLOC_006045 | MTIF3                  | chr13:27998680-28024739   | -0.0377495 | 0.999791 |
| XLOC_021398 | XLOC_021398 | FASTK                  | chr7:150773707-150777970  | -0.037716  | 0.999791 |
| XLOC_012763 | XLOC_012763 | SH3YL1                 | chr2:218135-264068        | -0.0376945 | 0.999791 |
| XLOC_006792 | XLOC_006792 | RPS29                  | chr14:50044041-50053094   | -0.0376484 | 0.999791 |
| XLOC_022146 | XLOC_022146 | EIF3H                  | chr8:117657054-117768062  | -0.0375411 | 0.999791 |
| XLOC_013522 | XLOC_013522 | CRLS1                  | chr20:5986738-6020697     | -0.037535  | 0.999791 |
| XLOC_016874 | XLOC_016874 | BDH2                   | chr4:103988781-104021024  | -0.0374301 | 0.999791 |
| XLOC_016842 | XLOC_016842 | PPM1K                  | chr4:89178760-89205983    | -0.0374276 | 0.999791 |
| XLOC_012006 | XLOC_012006 | A1BG                   | chr19:58858171-58874214   | -0.0373435 | 0.999791 |
| XLOC_012634 | XLOC_012634 | RPL37A                 | chr2:21736319-217366188   | -0.0373376 | 0.999791 |
| XLOC_024195 | XLOC_024195 | FAM3A                  | chrX:153733326-153744566  | -0.0373327 | 0.999791 |
| XLOC_022084 | XLOC_022084 | TMEM64                 | chr8:91634222-91658133    | -0.0373267 | 0.999791 |
| XLOC_020648 | XLOC_020648 | PILRA                  | chr7:99971067-99997722    | -0.0373231 | 0.999791 |
| XLOC_008036 | XLOC_008036 | MAZ                    | chr16:29817416-29822504   | -0.0373144 | 0.999791 |
| XLOC_020875 | XLOC_020875 | LOC100132707           | chr7:154720226-154794682  | -0.0373141 | 0.999791 |
| XLOC_000190 | XLOC_000190 | TMEM50A                | chr1:25664788-25747363    | -0.0372814 | 0.999791 |
| XLOC_012081 | XLOC_012081 | GAREML                 | chr2:26395959-26412532    | -0.0372439 | 0.999791 |
| XLOC_003606 | XLOC_003606 | CAPN1                  | chr1:64948685-64979477    | -0.0371886 | 0.999791 |
| XLOC_014763 | XLOC_014763 | RNF215                 | chr22:30774802-30783302   | -0.0371815 | 0.999791 |
| XLOC_004856 | XLOC_004856 | NR4A1                  | chr12:52416615-52453291   | -0.0371086 | 0.999791 |
| XLOC_010224 | XLOC_010224 | KIAA1468               | chr18:59854523-59974355   | -0.0370938 | 0.999791 |
| XLOC_004293 | XLOC_004293 | PLA2G16                | chr1:63341943-63381941    | -0.037091  | 0.999791 |
| XLOC_022103 | XLOC_022103 | C8orf37                | chr8:96257140-96822371    | -0.0370611 | 0.999791 |
| XLOC_011643 | XLOC_011643 | YIF1B                  | chr19:38794199-38806606   | -0.0370402 | 0.999791 |
| XLOC_010014 | XLOC_010014 | CBX8                   | chr17:77768175-77770915   | -0.0369829 | 0.999791 |
| XLOC_020574 | XLOC_020574 | DTX2P1-UPK3BP1-PMS2P11 | chr7:76610138-76653076    | -0.0369021 | 0.999791 |
| XLOC_011057 | XLOC_011057 | CLEC11A                | chr19:51226604-51228981   | -0.0367776 | 0.999791 |
| XLOC_001032 | XLOC_001032 | RCOR3                  | chr1:211432707-211489725  | -0.0367441 | 0.999791 |
| XLOC_015477 | XLOC_015477 | ABCF3                  | chr3:183903862-183911795  | -0.0366835 | 0.999791 |
| XLOC_023528 | XLOC_023528 | LINC00630              | chrX:102024094-102140338  | -0.0366518 | 1        |
| XLOC_010804 | XLOC_010804 | HCST                   | chr19:36393381-36395173   | -0.0366202 | 0.999791 |
| XLOC_023887 | XLOC_023887 | FGD1                   | chrX:54471886-54522599    | -0.0366161 | 0.999791 |
| XLOC_013562 | XLOC_013562 | GZF1                   | chr20:23345020-23353683   | -0.0365759 | 0.999791 |
| XLOC_005207 | XLOC_005207 | ZNF84                  | chr12:133613877-133639885 | -0.0365194 | 0.999791 |
| XLOC_022997 | XLOC_022997 | TMEM245                | chr9:111777414-111882225  | -0.0365165 | 0.999791 |
| XLOC_022197 | XLOC_022197 | AGO2                   | chr8:141541263-141645646  | -0.0363867 | 0.999791 |
| XLOC_003814 | XLOC_003814 | C11orf1                | chr11:111744779-111754797 | -0.0363613 | 0.999791 |
| XLOC_013713 | XLOC_013713 | RNF114                 | chr20:48552913-48570422   | -0.0363141 | 0.999791 |
| XLOC_017124 | XLOC_017124 | PARP8                  | chr5:49961732-50142356    | -0.0362406 | 0.999791 |
| XLOC_014689 | XLOC_014689 | DGCR6L                 | chr22:20301760-20307628   | -0.0362066 | 0.999791 |
| XLOC_007555 | XLOC_007555 | LOC645212              | chr15:44826702-44829121   | -0.0361916 | 0.999791 |
| XLOC_013306 | XLOC_013306 | ORC2                   | chr2:201774893-201828424  | -0.0361651 | 0.999791 |
| XLOC_022134 | XLOC_022134 | LRP12                  | chr8:105501458-105601252  | -0.0361463 | 0.999791 |
| XLOC_001347 | XLOC_001347 | ZNF436                 | chr1:23685940-23698330    | -0.0361042 | 0.999791 |
| XLOC_008186 | XLOC_008186 | EDC4                   | chr16:67906925-67918417   | -0.0361037 | 0.999791 |
| XLOC_010043 | XLOC_010043 | ARHGDI1A               | chr17:79825596-79829282   | -0.0360831 | 0.999791 |
| XLOC_014226 | XLOC_014226 | YBEY                   | chr21:47706266-47717665   | -0.0360762 | 0.999791 |
| XLOC_006294 | XLOC_006294 | DCAF11                 | chr14:24583905-24594451   | -0.0360631 | 0.999791 |
| XLOC_005123 | XLOC_005123 | MAP1LC3B2              | chr12:116997185-117014425 | -0.0360469 | 0.999791 |
| XLOC_021060 | XLOC_021060 | FIGLN1                 | chr7:50511831-50518088    | -0.0360163 | 0.999791 |
| XLOC_011243 | XLOC_011243 | ZNF8                   | chr19:58790317-58807254   | -0.0359948 | 0.999791 |
| XLOC_007822 | XLOC_007822 | RAB11FIP3              | chr16:475667-572481       | -0.0359903 | 0.999791 |
| XLOC_013237 | XLOC_013237 | GPR155                 | chr2:175296299-175351816  | -0.0359892 | 1        |
| XLOC_013919 | XLOC_013919 | PDRG1                  | chr20:30532757-30539883   | -0.0358917 | 0.999791 |
| XLOC_000531 | XLOC_000531 | SLC35A3                | chr1:100435344-100492534  | -0.0358823 | 0.999791 |
| XLOC_016864 | XLOC_016864 | H2AFZ                  | chr4:100869243-100871512  | -0.0358596 | 0.999791 |
| XLOC_021602 | XLOC_021602 | SDCBP                  | chr8:59465727-59495419    | -0.035859  | 0.999791 |
| XLOC_022653 | XLOC_022653 | PPP1R26                | chr9:138371647-138380739  | -0.0358495 | 0.999791 |
| XLOC_008817 | XLOC_008817 | TMEM102                | chr17:7338761-7340998     | -0.0357834 | 0.999791 |
| XLOC_011665 | XLOC_011665 | RPS16                  | chr19:39923846-39926618   | -0.0357765 | 0.999791 |
| XLOC_020355 | XLOC_020355 | FSCN1                  | chr7:5632435-5646287      | -0.0357701 | 0.999791 |

|             |             |                          |                           |            |          |
|-------------|-------------|--------------------------|---------------------------|------------|----------|
| XLOC_000699 | XLOC_000699 | OAZ3                     | chr1:151732122-151743806  | -0.0357533 | 0.999791 |
| XLOC_018041 | XLOC_018041 | SNRNP48                  | chr6:7590431-7612200      | -0.0357265 | 0.999791 |
| XLOC_012501 | XLOC_012501 | KLHL23,PHOSPHO2,PHOSPHO2 | chr2:170550963-170608396  | -0.0356914 | 0.999791 |
| XLOC_007260 | XLOC_007260 | MAP2K1                   | chr15:66679210-66790146   | -0.0356887 | 0.999791 |
| XLOC_013561 | XLOC_013561 | NXT1                     | chr20:23331372-23335408   | -0.0356739 | 0.999791 |
| XLOC_001737 | XLOC_001737 | NHLH2                    | chr1:116378998-116383747  | -0.0356051 | 0.999791 |
| XLOC_016365 | XLOC_016365 | MOB1B                    | chr4:71768056-71853891    | -0.0355581 | 0.999791 |
| XLOC_008174 | XLOC_008174 | SLC9A5                   | chr16:67282854-67306094   | -0.0355192 | 0.999791 |
| XLOC_001288 | XLOC_001288 | TMEM51-AS1               | chr1:14925212-15478960    | -0.0355057 | 1        |
| XLOC_011271 | XLOC_011271 | POLR2E                   | chr19:1065921-1095391     | -0.0354838 | 0.999791 |
| XLOC_002198 | XLOC_002198 | TAF1A                    | chr1:222731243-222763275  | -0.0354802 | 0.999791 |
| XLOC_006278 | XLOC_006278 | LRP10                    | chr14:23340959-23347291   | -0.0354775 | 0.999791 |
| XLOC_022654 | XLOC_022654 | MRPS2                    | chr9:138392476-138396519  | -0.0354451 | 0.999791 |
| XLOC_016138 | XLOC_016138 | SDHAP1                   | chr3:195686791-195717150  | -0.0353665 | 0.999791 |
| XLOC_003186 | XLOC_003186 | DHX32                    | chr10:127512103-127569884 | -0.0353424 | 0.999791 |
| XLOC_014929 | XLOC_014929 | THUMPD3                  | chr3:9404716-9428475      | -0.035296  | 0.999791 |
| XLOC_014436 | XLOC_014436 | HIC2                     | chr22:21771692-21805700   | -0.0352612 | 0.999791 |
| XLOC_011575 | XLOC_011575 | ZNF675                   | chr19:23835707-23870017   | -0.0352534 | 0.999791 |
| XLOC_017383 | XLOC_017383 | PCDHB14                  | chr5:140603077-140605860  | -0.035246  | 0.999791 |
| XLOC_010512 | XLOC_010512 | SAFB                     | chr19:5623045-5668489     | -0.0351788 | 0.999791 |
| XLOC_004871 | XLOC_004871 | SP1                      | chr12:53773978-53810226   | -0.035123  | 0.999791 |
| XLOC_014231 | XLOC_014231 | TEKT4P2                  | chr21:9907188-9968593     | -0.0350906 | 0.999791 |
| XLOC_020860 | XLOC_020860 | NOS3                     | chr7:150688143-150721586  | -0.0350655 | 0.999791 |
| XLOC_021209 | XLOC_021209 | GATS                     | chr7:99775537-99869855    | -0.0350323 | 0.999791 |
| XLOC_000408 | XLOC_000408 | MRPL37                   | chr1:54665839-54684056    | -0.0350152 | 0.999791 |
| XLOC_013011 | XLOC_013011 | TGOLN2                   | chr2:85545140-85555419    | -0.03501   | 0.999791 |
| XLOC_003232 | XLOC_003232 | RPLP2                    | chr11:809935-812876       | -0.0349951 | 0.999791 |
| XLOC_000828 | XLOC_000828 | SDHC                     | chr1:161284165-161337673  | -0.0349478 | 0.999791 |
| XLOC_018142 | XLOC_018142 | ZSCAN26                  | chr6:28234787-28245980    | -0.0349267 | 0.999791 |
| XLOC_022315 | XLOC_022315 | NFX1                     | chr9:33290417-33371155    | -0.0349211 | 0.999791 |
| XLOC_007244 | XLOC_007244 | APH1B                    | chr15:63569748-63601325   | -0.0348681 | 0.999791 |
| XLOC_010134 | XLOC_010134 | RNMT                     | chr18:13726703-13764554   | -0.0348418 | 0.999791 |
| XLOC_008422 | XLOC_008422 | LITAF                    | chr16:11641577-11681322   | -0.0347823 | 0.999791 |
| XLOC_009421 | XLOC_009421 | SLC25A11                 | chr17:4840425-4843462     | -0.0347632 | 0.999791 |
| XLOC_010443 | XLOC_010443 | ABCA7                    | chr19:1040101-1065570     | -0.0347501 | 0.999791 |
| XLOC_010809 | XLOC_010809 | TBCB                     | chr19:36602104-36616849   | -0.0347195 | 0.999791 |
| XLOC_009553 | XLOC_009553 | AKAP10                   | chr17:19807764-19881169   | -0.0346974 | 0.999791 |
| XLOC_017269 | XLOC_017269 | YTHDC2                   | chr5:112849390-112930984  | -0.034684  | 0.999791 |
| XLOC_009891 | XLOC_009891 | APPBP2                   | chr17:58520519-58603580   | -0.0346255 | 0.999791 |
| XLOC_011691 | XLOC_011691 | EXOSC5                   | chr19:41892275-41903256   | -0.0346237 | 0.999791 |
| XLOC_005350 | XLOC_005350 | C2CD5                    | chr12:22601517-22697452   | -0.0346216 | 0.999791 |
| XLOC_001049 | XLOC_001049 | CENPF                    | chr1:214776531-214837914  | -0.0346199 | 0.999791 |
| XLOC_014438 | XLOC_014438 | UBE2L3                   | chr22:21899957-21978323   | -0.0346038 | 0.999791 |
| XLOC_000690 | XLOC_000690 | PIP5K1A                  | chr1:151171020-151222007  | -0.0345913 | 0.999791 |
| XLOC_000068 | XLOC_000068 | SPSB1                    | chr1:9352940-9429590      | -0.0345701 | 0.999791 |
| XLOC_022839 | XLOC_022839 | SLC25A51                 | chr9:37877571-37904350    | -0.034521  | 0.999791 |
| XLOC_009456 | XLOC_009456 | CTDNBP1                  | chr17:7146905-7155259     | -0.034486  | 0.999791 |
| XLOC_012503 | XLOC_012503 | UBR3                     | chr2:170684017-170940639  | -0.0344807 | 0.999791 |
| XLOC_005438 | XLOC_005438 | FMNL3                    | chr12:50017196-50101197   | -0.0344667 | 0.999791 |
| XLOC_004875 | XLOC_004875 | TARBP2                   | chr12:53894704-53900215   | -0.0344541 | 0.999791 |
| XLOC_011340 | XLOC_011340 | C19orf70                 | chr19:5678432-5688534     | -0.0344386 | 0.999791 |
| XLOC_007372 | XLOC_007372 | DNM1P41                  | chr15:85045805-85060078   | -0.034378  | 1        |
| XLOC_020709 | XLOC_020709 | CAPZA2                   | chr7:116502562-116559313  | -0.0343571 | 0.999791 |
| XLOC_018332 | XLOC_018332 | SLC25A27                 | chr6:46620651-46645927    | -0.0343355 | 0.999791 |
| XLOC_013642 | XLOC_013642 | CTNBNL1                  | chr20:36322433-36500520   | -0.0342373 | 0.999791 |
| XLOC_014205 | XLOC_014205 | PFKL                     | chr21:45719924-45747261   | -0.0342233 | 0.999791 |
| XLOC_018265 | XLOC_018265 | BRPF3                    | chr6:36164549-36200567    | -0.0341956 | 0.999791 |
| XLOC_010799 | XLOC_010799 | LIN37                    | chr19:36239261-36245420   | -0.0341856 | 0.999791 |
| XLOC_000456 | XLOC_000456 | ZRANB2-AS1               | chr1:71318035-71546972    | -0.034178  | 1        |
| XLOC_020396 | XLOC_020396 | MALSU1                   | chr7:23338939-23349180    | -0.0341735 | 0.999791 |
| XLOC_000351 | XLOC_000351 | RPS8                     | chr1:45241245-45244412    | -0.0341721 | 0.999791 |
| XLOC_009315 | XLOC_009315 | AFMID                    | chr17:76183397-76203782   | -0.0341381 | 0.999791 |
| XLOC_008598 | XLOC_008598 | CNOT1                    | chr16:58549382-58663790   | -0.0341286 | 0.999791 |
| XLOC_000202 | XLOC_000202 | CEP85                    | chr1:26560692-26605299    | -0.0341276 | 0.999791 |
| XLOC_006733 | XLOC_006733 | TM9SF1                   | chr14:24658352-24664882   | -0.0341048 | 0.999791 |
| XLOC_012541 | XLOC_012541 | UBE2E3                   | chr2:181845111-181928150  | -0.0341004 | 0.999791 |
| XLOC_021948 | XLOC_021948 | PPP2CB                   | chr8:30643125-30670352    | -0.0340592 | 0.999791 |
| XLOC_021435 | XLOC_021435 | MCPH1                    | chr8:6264112-6501140      | -0.0340322 | 0.999791 |
| XLOC_016845 | XLOC_016845 | FAM13A                   | chr4:89630939-89978346    | -0.0340183 | 0.999791 |
| XLOC_023972 | XLOC_023972 | TSPAN6                   | chrX:99883794-99891794    | -0.034012  | 0.999791 |
| XLOC_014681 | XLOC_014681 | C22orf29,GNB1L           | chr22:19775933-19842462   | -0.0340087 | 0.999791 |
| XLOC_013293 | XLOC_013293 | PGAP1                    | chr2:197697727-197791454  | -0.033991  | 0.999791 |
| XLOC_022269 | XLOC_022269 | CDC37L1                  | chr9:4679565-4706594      | -0.0339509 | 0.999791 |
| XLOC_018849 | XLOC_018849 | BTBD9                    | chr6:38136226-38607924    | -0.0339468 | 0.999791 |
| XLOC_015111 | XLOC_015111 | RBM5                     | chr3:50126340-50156397    | -0.0339361 | 0.999791 |
| XLOC_020647 | XLOC_020647 | PILRB                    | chr7:99905324-99965454    | -0.0339347 | 0.999791 |
| XLOC_017254 | XLOC_017254 | FER                      | chr5:108083522-108523373  | -0.0339275 | 0.999791 |
| XLOC_021329 | XLOC_021329 | WDR91                    | chr7:134868589-134896316  | -0.0338688 | 0.999791 |
| XLOC_007172 | XLOC_007172 | TMEM62                   | chr15:43425721-43477341   | -0.0338333 | 0.999791 |

|             |             |                          |                           |            |          |
|-------------|-------------|--------------------------|---------------------------|------------|----------|
| XLOC_010273 | XLOC_010273 | LPIN2                    | chr18:2916991-3011945     | -0.0337725 | 0.999791 |
| XLOC_022593 | XLOC_022593 | PKN3                     | chr9:131464801-131486408  | -0.0337706 | 0.999791 |
| XLOC_023124 | XLOC_023124 | SETX                     | chr9:135136826-135230372  | -0.0337675 | 0.999791 |
| XLOC_013247 | XLOC_013247 | HOXD-AS1                 | chr2:177037923-177055635  | -0.0337221 | 0.999791 |
| XLOC_010145 | XLOC_010145 | RBBP8                    | chr18:20513294-20606449   | -0.0336813 | 0.999791 |
| XLOC_015406 | XLOC_015406 | MBNL1                    | chr3:151980404-152183569  | -0.0335805 | 0.999791 |
| XLOC_007599 | XLOC_007599 | RFX7                     | chr15:56382730-56535483   | -0.0335218 | 0.999791 |
| XLOC_007756 | XLOC_007756 | NMB                      | chr15:85198359-85201802   | -0.0335057 | 0.999791 |
| XLOC_002499 | XLOC_002499 | COL13A1                  | chr10:71561643-71718904   | -0.0334404 | 0.999791 |
| XLOC_011225 | XLOC_011225 | ZNF419                   | chr19:57999078-58006048   | -0.0334306 | 0.999791 |
| XLOC_011546 | XLOC_011546 | MEF2B,MEF2BNB,MEF2BNB-ME | chr19:19256375-19314238   | -0.0334086 | 0.999791 |
| XLOC_021937 | XLOC_021937 | INTS9                    | chr8:28625174-28747698    | -0.0334012 | 0.999791 |
| XLOC_002015 | XLOC_002015 | SCYL3                    | chr1:169764549-169863100  | -0.0333229 | 0.999791 |
| XLOC_009137 | XLOC_009137 | TBKBP1                   | chr17:45772629-45789429   | -0.0332974 | 0.999791 |
| XLOC_020716 | XLOC_020716 | ING3                     | chr7:120590816-120615711  | -0.0332939 | 0.999791 |
| XLOC_000970 | XLOC_000970 | SHISA4                   | chr1:201857796-201861715  | -0.0332486 | 0.999791 |
| XLOC_003255 | XLOC_003255 | CD81                     | chr11:2398546-2418649     | -0.0332343 | 0.999791 |
| XLOC_012791 | XLOC_012791 | ROCK2                    | chr2:11321777-11484711    | -0.0332345 | 0.999791 |
| XLOC_016715 | XLOC_016715 | PDS5A                    | chr4:39824482-39979576    | -0.0332341 | 0.999791 |
| XLOC_001501 | XLOC_001501 | MED8                     | chr1:43849578-43855483    | -0.0332281 | 0.999791 |
| XLOC_003778 | XLOC_003778 | CEP57                    | chr11:95523624-95568587   | -0.0332228 | 0.999791 |
| XLOC_014305 | XLOC_014305 | DNAJC28                  | chr21:34860237-34864023   | -0.033215  | 1        |
| XLOC_001424 | XLOC_001424 | BSDC1                    | chr1:32830704-32860062    | -0.033209  | 0.999791 |
| XLOC_004810 | XLOC_004810 | ARID2                    | chr12:46123619-46301819   | -0.0331763 | 0.999791 |
| XLOC_010879 | XLOC_010879 | CCDC97                   | chr19:41816093-41830788   | -0.0331656 | 0.999791 |
| XLOC_013288 | XLOC_013288 | STK17B                   | chr2:196998306-197036336  | -0.033161  | 0.999791 |
| XLOC_023707 | XLOC_023707 | RPL10                    | chrX:153626570-153650063  | -0.0331158 | 0.999791 |
| XLOC_008167 | XLOC_008167 | CBFB                     | chr16:67063049-67134958   | -0.0330992 | 0.999791 |
| XLOC_012827 | XLOC_012827 | ASXL2                    | chr2:25962252-26101312    | -0.0330652 | 0.999791 |
| XLOC_000176 | XLOC_000176 | RPL11                    | chr1:24018268-24022915    | -0.0330565 | 0.999791 |
| XLOC_005082 | XLOC_005082 | FICD                     | chr12:108909050-108913380 | -0.0330427 | 0.999791 |
| XLOC_018228 | XLOC_018228 | LOC100507463             | chr6:32808493-32821748    | -0.0330421 | 0.999791 |
| XLOC_009418 | XLOC_009418 | CXCL16                   | chr17:4634722-4643223     | -0.0330309 | 0.999791 |
| XLOC_013980 | XLOC_013980 | ADA                      | chr20:43248162-43280376   | -0.0330247 | 0.999791 |
| XLOC_014705 | XLOC_014705 | TOP3B                    | chr22:22311402-22337147   | -0.0330018 | 0.999791 |
| XLOC_014341 | XLOC_014341 | PRDM15                   | chr21:143218384-143299591 | -0.0329157 | 0.999791 |
| XLOC_005697 | XLOC_005697 | VPS29                    | chr12:110929329-110939916 | -0.032877  | 0.999791 |
| XLOC_010974 | XLOC_010974 | GLTSCR2                  | chr19:48248792-48260323   | -0.0328661 | 0.999791 |
| XLOC_009739 | XLOC_009739 | KAT2A                    | chr17:40265128-40273382   | -0.0328647 | 0.999791 |
| XLOC_016023 | XLOC_016023 | SLC33A1                  | chr3:155544300-155572248  | -0.0328431 | 0.999791 |
| XLOC_023046 | XLOC_023046 | RAB14                    | chr9:123940414-123964365  | -0.0327941 | 0.999791 |
| XLOC_006264 | XLOC_006264 | METTL17                  | chr14:21457964-21465194   | -0.0327789 | 0.999791 |
| XLOC_009819 | XLOC_009819 | H0XB6                    | chr17:46667822-46683774   | -0.0327125 | 0.999791 |
| XLOC_008473 | XLOC_008473 | GGA2                     | chr16:23474862-23521815   | -0.0326813 | 0.999791 |
| XLOC_018675 | XLOC_018675 | HIST1H4B                 | chr6:26027123-26027480    | -0.0326496 | 0.999791 |
| XLOC_008659 | XLOC_008659 | ZNF23                    | chr16:71481502-71496117   | -0.0326224 | 0.999791 |
| XLOC_018990 | XLOC_018990 | RNGTT                    | chr6:89319988-89673348    | -0.0325776 | 0.999791 |
| XLOC_018546 | XLOC_018546 | UST                      | chr6:149068270-149398126  | -0.0325378 | 0.999791 |
| XLOC_013149 | XLOC_013149 | CCDC115                  | chr2:131095815-131099922  | -0.0325245 | 0.999791 |
| XLOC_024037 | XLOC_024037 | RPL39                    | chrX:118920468-118925606  | -0.0325101 | 0.999791 |
| XLOC_018462 | XLOC_018462 | RWDD1                    | chr6:116892582-116914436  | -0.0325032 | 0.999791 |
| XLOC_001426 | XLOC_001426 | SYNC                     | chr1:33116748-33168361    | -0.0324467 | 0.999791 |
| XLOC_006712 | XLOC_006712 | C14orf93                 | chr14:23456109-23479360   | -0.0324166 | 0.999791 |
| XLOC_012395 | XLOC_012395 | WASH2P                   | chr2:114341229-114361294  | -0.0324016 | 0.999791 |
| XLOC_003867 | XLOC_003867 | LOC100499227             | chr11:119252487-119369944 | -0.0323555 | 0.999791 |
| XLOC_010725 | XLOC_010725 | ZNF714                   | chr19:21264952-21307883   | -0.0323521 | 0.999791 |
| XLOC_006094 | XLOC_006094 | MTRF1                    | chr13:41790515-41837713   | -0.0323519 | 0.999791 |
| XLOC_016179 | XLOC_016179 | RNF4                     | chr4:2470794-2517586      | -0.0323389 | 0.999791 |
| XLOC_022100 | XLOC_022100 | TP53INP1                 | chr8:95938199-95961615    | -0.0322898 | 0.999791 |
| XLOC_005899 | XLOC_005899 | DLEU1                    | chr13:50556687-50699677   | -0.0322851 | 0.999791 |
| XLOC_022944 | XLOC_022944 | FAM120AOS                | chr9:96208781-96328397    | -0.0322782 | 0.999791 |
| XLOC_017170 | XLOC_017170 | SERF1A                   | chr5:69321071-69338940    | -0.0322574 | 1        |
| XLOC_019204 | XLOC_019204 | PSMB1                    | chr6:170844203-170862417  | -0.0322406 | 0.999791 |
| XLOC_019203 | XLOC_019203 | DLL1                     | chr6:170591293-170599697  | -0.0322379 | 0.999791 |
| XLOC_007898 | XLOC_007898 | LINC00514                | chr16:3039054-3044510     | -0.0322285 | 1        |
| XLOC_012983 | XLOC_012983 | TPRKB                    | chr2:73956956-73964517    | -0.0322238 | 0.999791 |
| XLOC_014092 | XLOC_014092 | RGS19                    | chr20:62704534-62711324   | -0.032135  | 0.999791 |
| XLOC_014935 | XLOC_014935 | ARPC4,ARPC4-TLL3,TLL3    | chr3:9821653-9878040      | -0.0320631 | 0.999791 |
| XLOC_022047 | XLOC_022047 | TCEB1                    | chr8:74857372-74884522    | -0.0320631 | 0.999791 |
| XLOC_007167 | XLOC_007167 | GANC                     | chr15:42566365-42645864   | -0.0320512 | 0.999791 |
| XLOC_001121 | XLOC_001121 | LGALS8                   | chr1:236681513-236767841  | -0.0320361 | 0.999791 |
| XLOC_002903 | XLOC_002903 | MARCB8                   | chr10:45952816-46090354   | -0.0320317 | 0.999791 |
| XLOC_011327 | XLOC_011327 | UBXN6                    | chr19:4445002-4457791     | -0.0320036 | 0.999791 |
| XLOC_006970 | XLOC_006970 | CCDC85C                  | chr14:99947738-100070727  | -0.0319494 | 0.999791 |
| XLOC_014942 | XLOC_014942 | BRK1                     | chr3:10157332-10168874    | -0.0319142 | 0.999791 |
| XLOC_009309 | XLOC_009309 | SEPT9                    | chr17:75277491-75496678   | -0.0318954 | 0.999791 |
| XLOC_017548 | XLOC_017548 | ZDHHC11                  | chr5:795719-851101        | -0.0318858 | 0.999791 |
| XLOC_009345 | XLOC_009345 | NPB                      | chr17:79860071-79869340   | -0.0318056 | 0.999791 |
| XLOC_010173 | XLOC_010173 | ZNF271                   | chr18:32870235-32890730   | -0.0317706 | 0.999791 |

|             |             |                |                           |            |          |
|-------------|-------------|----------------|---------------------------|------------|----------|
| XLOC_009271 | XLOC_009271 | TMEM104        | chr17:72772621-72835922   | -0.0317438 | 0.999791 |
| XLOC_016472 | XLOC_016472 | LARP7          | chr4:113460488-113578748  | -0.0317035 | 0.999791 |
| XLOC_021239 | XLOC_021239 | NAPEPLD        | chr7:102715327-102789569  | -0.0316745 | 0.999791 |
| XLOC_018522 | XLOC_018522 | FLJ46906       | chr6:139012804-139018425  | -0.0316596 | 0.999791 |
| XLOC_023377 | XLOC_023377 | PQBP1          | chrX:48750729-48760422    | -0.0316298 | 0.999791 |
| XLOC_023900 | XLOC_023900 | SPIN4          | chrX:62567106-62571218    | -0.0316265 | 0.999791 |
| XLOC_022252 | XLOC_022252 | RPL8           | chr8:146015153-146017805  | -0.0316256 | 0.999791 |
| XLOC_020511 | XLOC_020511 | ZNF138         | chr7:64254765-64314178    | -0.0316255 | 0.999791 |
| XLOC_005076 | XLOC_005076 | RIC8B          | chr12:106751435-107283094 | -0.0316243 | 0.999791 |
| XLOC_007848 | XLOC_007848 | UBE2I          | chr16:1359153-1377019     | -0.0316093 | 0.999791 |
| XLOC_017743 | XLOC_017743 | MCTP1          | chr5:94042288-94620279    | -0.0315916 | 0.999791 |
| XLOC_011461 | XLOC_011461 | PRDX2          | chr19:12907633-12912694   | -0.0315392 | 0.999791 |
| XLOC_005525 | XLOC_005525 | TIMELESS       | chr12:56810156-56843200   | -0.0315305 | 0.999791 |
| XLOC_003569 | XLOC_003569 | SLC3A2         | chr11:62623483-62656355   | -0.0315232 | 0.999791 |
| XLOC_009878 | XLOC_009878 | SKA2           | chr17:57187307-57232800   | -0.0315138 | 0.999791 |
| XLOC_008445 | XLOC_008445 | SMG1           | chr16:18816174-18937726   | -0.0314783 | 0.999791 |
| XLOC_012595 | XLOC_012595 | BMPR2          | chr2:203241049-203432474  | -0.0314767 | 0.999791 |
| XLOC_008370 | XLOC_008370 | TCEB2          | chr16:2821414-2827297     | -0.0314565 | 0.999791 |
| XLOC_004877 | XLOC_004877 | HOXC13         | chr12:54329111-54340328   | -0.0314493 | 1        |
| XLOC_005117 | XLOC_005117 | C12orf52       | chr12:113623554-113630119 | -0.0314205 | 0.999791 |
| XLOC_017084 | XLOC_017084 | LOC100130744   | chr5:14704908-14871887    | -0.031366  | 0.999791 |
| XLOC_007277 | XLOC_007277 | RPLP1          | chr15:69745158-69747884   | -0.0313657 | 0.999791 |
| XLOC_003365 | XLOC_003365 | HTATIP2        | chr11:20385230-20405329   | -0.0313036 | 0.999791 |
| XLOC_023981 | XLOC_023981 | ARMCX6         | chrX:100870107-100872991  | -0.0312855 | 0.999791 |
| XLOC_022169 | XLOC_022169 | KIAA0196       | chr8:126036502-126104061  | -0.0312849 | 0.999791 |
| XLOC_022497 | XLOC_022497 | ZNF462         | chr9:109625377-109848716  | -0.0310843 | 0.999791 |
| XLOC_018373 | XLOC_018373 | C6orf57        | chr6:71276624-71298606    | -0.0310707 | 0.999791 |
| XLOC_022995 | XLOC_022995 | IKBKAP         | chr9:111629799-111696608  | -0.0310663 | 0.999791 |
| XLOC_012108 | XLOC_012108 | GPN1           | chr2:27848505-27917847    | -0.0310569 | 0.999791 |
| XLOC_023521 | XLOC_023521 | ARMCX3         | chrX:100878119-100882831  | -0.031002  | 0.999791 |
| XLOC_022236 | XLOC_022236 | DGAT1          | chr8:145515269-145550567  | -0.0309945 | 0.999791 |
| XLOC_011796 | XLOC_011796 | NAPA           | chr19:47987538-48018515   | -0.0309647 | 0.999791 |
| XLOC_001862 | XLOC_001862 | DENND4B        | chr1:153901976-153919154  | -0.0309599 | 0.999791 |
| XLOC_020922 | XLOC_020922 | EIF2AK1        | chr7:6048881-6098860      | -0.0309301 | 0.999791 |
| XLOC_016062 | XLOC_016062 | TNIK           | chr3:170780291-171178197  | -0.0308954 | 0.999791 |
| XLOC_004916 | XLOC_004916 | RAB5B          | chr12:56367696-56390467   | -0.0308942 | 0.999791 |
| XLOC_016748 | XLOC_016748 | CLOCK          | chr4:56294067-56413076    | -0.0308655 | 0.999791 |
| XLOC_010017 | XLOC_010017 | EIF4A3         | chr17:78109012-78120982   | -0.0308215 | 0.999791 |
| XLOC_022567 | XLOC_022567 | RALGPS1        | chr9:129677052-129985445  | -0.0307938 | 0.999791 |
| XLOC_006369 | XLOC_006369 | C14orf101      | chr14:57046510-57116232   | -0.0307592 | 0.999791 |
| XLOC_015858 | XLOC_015858 | KIAA1524       | chr3:108268717-108413693  | -0.0307505 | 0.999791 |
| XLOC_001303 | XLOC_001303 | CROCCP2        | chr1:16944750-16957401    | -0.0307403 | 0.999791 |
| XLOC_004397 | XLOC_004397 | FCHSD2         | chr11:72547789-72853143   | -0.0306944 | 0.999791 |
| XLOC_007417 | XLOC_007417 | LOC100507217   | chr15:93426072-93441977   | -0.030619  | 0.999791 |
| XLOC_015664 | XLOC_015664 | FYCO1          | chr3:45959390-46037316    | -0.0306175 | 0.999791 |
| XLOC_002114 | XLOC_002114 | UBE2T          | chr1:202300784-202311094  | -0.030601  | 0.999791 |
| XLOC_009604 | XLOC_009604 | COPRS          | chr17:30178883-30186326   | -0.0305721 | 0.999791 |
| XLOC_009670 | XLOC_009670 | MED24          | chr17:38175349-38210889   | -0.0305694 | 0.999791 |
| XLOC_018257 | XLOC_018257 | FANCE          | chr6:35420137-35434881    | -0.0305488 | 0.999791 |
| XLOC_010500 | XLOC_010500 | CHAF1A         | chr19:4402659-4443394     | -0.0305314 | 0.999791 |
| XLOC_020444 | XLOC_020444 | ANLN           | chr7:36363758-36493400    | -0.0305283 | 0.999791 |
| XLOC_009305 | XLOC_009305 | MFS11          | chr17:74730196-74775336   | -0.0305208 | 0.999791 |
| XLOC_010489 | XLOC_010489 | MRPL54         | chr19:3762664-3767563     | -0.0303212 | 0.999791 |
| XLOC_015267 | XLOC_015267 | QTRTD1         | chr3:113775581-113807268  | -0.0303171 | 0.999791 |
| XLOC_008889 | XLOC_008889 | LRRRC48        | chr17:17876126-17920189   | -0.0302232 | 1        |
| XLOC_015020 | XLOC_015020 | OXS1           | chr3:38207025-38296979    | -0.0302091 | 0.999791 |
| XLOC_002983 | XLOC_002983 | PSAP           | chr10:73576054-73611082   | -0.0301791 | 0.999791 |
| XLOC_016248 | XLOC_016248 | FAM200B        | chr4:15683351-15692070    | -0.0301331 | 0.999791 |
| XLOC_000164 | XLOC_000164 | CDC42          | chr1:22379119-22419436    | -0.030112  | 0.999791 |
| XLOC_005274 | XLOC_005274 | M6PR           | chr12:9067315-9102357     | -0.0300881 | 0.999791 |
| XLOC_005443 | XLOC_005443 | RACGAP1        | chr12:50382944-50419307   | -0.0300664 | 0.999791 |
| XLOC_001425 | XLOC_001425 | ZBTB80S        | chr1:33087306-33116185    | -0.0300564 | 0.999791 |
| XLOC_012670 | XLOC_012670 | SLC4A3         | chr2:220492291-220506702  | -0.0300479 | 0.999791 |
| XLOC_010686 | XLOC_010686 | RPL18A         | chr19:17970686-17974133   | -0.0300115 | 0.999791 |
| XLOC_003934 | XLOC_003934 | SIRT3          | chr11:208529-236362       | -0.0299465 | 0.999791 |
| XLOC_013279 | XLOC_013279 | ORMDL1         | chr2:190634992-190742355  | -0.0299378 | 0.999791 |
| XLOC_009958 | XLOC_009958 | FDXR           | chr17:72858613-72869156   | -0.0299347 | 0.999791 |
| XLOC_009626 | XLOC_009626 | CCL5           | chr17:34198495-34207377   | -0.029879  | 0.999791 |
| XLOC_003710 | XLOC_003710 | PPME1          | chr11:73882107-73965748   | -0.0298106 | 0.999791 |
| XLOC_010163 | XLOC_010163 | DSG2           | chr18:29078026-29136874   | -0.0297982 | 0.999791 |
| XLOC_006090 | XLOC_006090 | SUGT1P3,TPT2P5 | chr13:41363546-41495910   | -0.0297849 | 1        |
| XLOC_004395 | XLOC_004395 | ARAP1          | chr11:72396113-72463434   | -0.0297593 | 0.999791 |
| XLOC_002858 | XLOC_002858 | YME1L1         | chr10:27399039-27443349   | -0.0297377 | 0.999791 |
| XLOC_005039 | XLOC_005039 | NEDD1          | chr12:97301000-97347469   | -0.0296859 | 0.999791 |
| XLOC_011959 | XLOC_011959 | DNAAF3         | chr19:55670028-55678090   | -0.0296459 | 0.999791 |
| XLOC_008517 | XLOC_008517 | DCTPP1         | chr16:30435018-30441373   | -0.0295941 | 0.999791 |
| XLOC_016311 | XLOC_016311 | DANCR          | chr4:53578620-53580305    | -0.0295571 | 0.999791 |
| XLOC_005626 | XLOC_005626 | EEA1           | chr12:93166284-93323107   | -0.0295234 | 0.999791 |
| XLOC_001407 | XLOC_001407 | PUM1           | chr1:31404352-31538564    | -0.0294882 | 0.999791 |

|             |             |               |                           |            |          |
|-------------|-------------|---------------|---------------------------|------------|----------|
| XLOC_009320 | XLOC_009320 | ENGASE        | chr17:77071018-77084685   | -0.029478  | 0.999791 |
| XLOC_015460 | XLOC_015460 | USP13         | chr3:179370932-179507189  | -0.0294731 | 0.999791 |
| XLOC_023014 | XLOC_023014 | INIP          | chr9:115448790-115480387  | -0.0294577 | 0.999791 |
| XLOC_014003 | XLOC_014003 | PLTP          | chr20:44517110-44541003   | -0.0294186 | 0.999791 |
| XLOC_000239 | XLOC_000239 | EPB41         | chr1:29213602-29450421    | -0.0294079 | 0.999791 |
| XLOC_011323 | XLOC_011323 | SIRT6         | chr19:4174105-4182596     | -0.0294058 | 0.999791 |
| XLOC_012076 | XLOC_012076 | NCOA1         | chr2:24807345-24993570    | -0.0293748 | 0.999791 |
| XLOC_009050 | XLOC_009050 | TMEM99        | chr17:38974368-38992526   | -0.02937   | 0.999791 |
| XLOC_004952 | XLOC_004952 | TSPAN31       | chr12:58138783-58146230   | -0.0293647 | 0.999791 |
| XLOC_018521 | XLOC_018521 | HEBP2         | chr6:138725335-138734582  | -0.0292911 | 0.999791 |
| XLOC_013542 | XLOC_013542 | ZNF133        | chr20:18269120-18297640   | -0.0292908 | 0.999791 |
| XLOC_008343 | XLOC_008343 | HAGH          | chr16:1859103-1877195     | -0.0292763 | 0.999791 |
| XLOC_009596 | XLOC_009596 | BLMH          | chr17:28575212-28619184   | -0.0292521 | 0.999791 |
| XLOC_000842 | XLOC_000842 | UHMK1         | chr1:162466963-162499419  | -0.0292445 | 0.999791 |
| XLOC_006325 | XLOC_006325 | BRMS1L        | chr14:36295596-36341169   | -0.0292129 | 0.999791 |
| XLOC_009149 | XLOC_009149 | UBE2Z         | chr17:46985730-47006422   | -0.0291909 | 0.999791 |
| XLOC_004332 | XLOC_004332 | FIBP          | chr11:65647283-65656010   | -0.0291672 | 0.999791 |
| XLOC_017725 | XLOC_017725 | TMEM167A      | chr5:82348664-82373272    | -0.0291419 | 0.999791 |
| XLOC_002650 | XLOC_002650 | SFXN3         | chr10:102790995-102800998 | -0.0291392 | 0.999791 |
| XLOC_004091 | XLOC_004091 | RPS13         | chr11:17095938-17099220   | -0.0290963 | 0.999791 |
| XLOC_008046 | XLOC_008046 | PPP4C         | chr16:30087383-30096695   | -0.0290831 | 0.999791 |
| XLOC_022640 | XLOC_022640 | ADAMTS13      | chr9:136243283-136324508  | -0.0290608 | 0.999791 |
| XLOC_001451 | XLOC_001451 | MRPS15        | chr1:36921361-36930040    | -0.0290557 | 0.999791 |
| XLOC_014022 | XLOC_014022 | SPATA2        | chr20:48519928-48532080   | -0.0290277 | 0.999791 |
| XLOC_013430 | XLOC_013430 | HJURP         | chr2:234745485-234763212  | -0.0289745 | 0.999791 |
| XLOC_017960 | XLOC_017960 | THOC3         | chr5:175386533-175395545  | -0.0288679 | 0.999791 |
| XLOC_012930 | XLOC_012930 | USP34         | chr2:61404554-61697849    | -0.0288593 | 0.999791 |
| XLOC_001622 | XLOC_001622 | GN5           | chr1:84944919-84972262    | -0.028856  | 0.999791 |
| XLOC_010791 | XLOC_010791 | HAUS5         | chr19:36103645-36116251   | -0.0288556 | 0.999791 |
| XLOC_007521 | XLOC_007521 | OIP5          | chr15:41601465-41624819   | -0.0288364 | 0.999791 |
| XLOC_016989 | XLOC_016989 | TMEM192       | chr4:165997229-166034024  | -0.0288075 | 0.999791 |
| XLOC_018449 | XLOC_018449 | KIAA1919      | chr6:111580481-111590261  | -0.0288006 | 0.999791 |
| XLOC_000579 | XLOC_000579 | KCNC4         | chr1:110753335-110776674  | -0.0287486 | 0.999791 |
| XLOC_017164 | XLOC_017164 | MRPS36        | chr5:68513572-68525985    | -0.0286874 | 0.999791 |
| XLOC_001488 | XLOC_001488 | SCMH1         | chr1:41480261-41707815    | -0.0286714 | 0.999791 |
| XLOC_017148 | XLOC_017148 | KIF2A         | chr5:61601988-61683011    | -0.0286525 | 0.999791 |
| XLOC_016567 | XLOC_016567 | KLHL2         | chr4:166128769-166244308  | -0.0286441 | 0.999791 |
| XLOC_013176 | XLOC_013176 | MMADHC        | chr2:150426146-150444330  | -0.0285436 | 0.999791 |
| XLOC_016937 | XLOC_016937 | SETD7         | chr4:140427191-140477577  | -0.0284843 | 0.999791 |
| XLOC_018934 | XLOC_018934 | GCLC          | chr6:53362139-53409927    | -0.0284622 | 0.999791 |
| XLOC_008192 | XLOC_008192 | SLC7A6        | chr16:68298418-68344868   | -0.0284067 | 0.999791 |
| XLOC_014630 | XLOC_014630 | TRMU          | chr22:46731297-46753237   | -0.028406  | 0.999791 |
| XLOC_002074 | XLOC_002074 | EDEM3         | chr1:184659624-184724041  | -0.0282958 | 0.999791 |
| XLOC_013156 | XLOC_013156 | MZT2A         | chr2:132202795-132360468  | -0.0282726 | 0.999791 |
| XLOC_002590 | XLOC_002590 | HECTD2        | chr10:93066718-93371217   | -0.0282704 | 0.999791 |
| XLOC_001652 | XLOC_001652 | GLMN          | chr1:92711954-92853732    | -0.0282541 | 0.999791 |
| XLOC_003549 | XLOC_003549 | MYRF          | chr1:161520120-161555989  | -0.0282205 | 0.999791 |
| XLOC_012376 | XLOC_012376 | TMEM87B       | chr2:112812799-112876895  | -0.0281587 | 0.999791 |
| XLOC_011027 | XLOC_011027 | RPS11         | chr19:4999621-50002969    | -0.0281478 | 0.999791 |
| XLOC_022498 | XLOC_022498 | RAD23B        | chr9:110045516-110094475  | -0.0281425 | 0.999791 |
| XLOC_013294 | XLOC_013294 | ANKRD44       | chr2:197851385-198175521  | -0.0281378 | 0.999791 |
| XLOC_013123 | XLOC_013123 | C2orf76       | chr2:120060019-120124258  | -0.0281283 | 0.999791 |
| XLOC_023156 | XLOC_023156 | CAMSAP1       | chr9:138700332-138799005  | -0.0280999 | 0.999791 |
| XLOC_000991 | XLOC_000991 | ZC3H11A       | chr1:203764750-203823256  | -0.0280922 | 0.999791 |
| XLOC_003588 | XLOC_003588 | GPR137        | chr1:64037299-64056972    | -0.0280469 | 0.999791 |
| XLOC_006643 | XLOC_006643 | MARK3         | chr14:103851700-103970166 | -0.0280008 | 0.999791 |
| XLOC_001812 | XLOC_001812 | TMOD4         | chr1:151129104-151148547  | -0.0279724 | 1        |
| XLOC_016202 | XLOC_016202 | MRFAP1        | chr4:6641817-6644470      | -0.0278958 | 0.999791 |
| XLOC_016761 | XLOC_016761 | UBA6          | chr4:68481478-68566889    | -0.0278085 | 0.999791 |
| XLOC_014053 | XLOC_014053 | CTS3          | chr20:57570241-57582309   | -0.0277719 | 0.999791 |
| XLOC_003030 | XLOC_003030 | LOC728190     | chr10:88998423-89103331   | -0.0277251 | 0.999791 |
| XLOC_012129 | XLOC_012129 | BIRC6         | chr2:32582095-32843965    | -0.0276901 | 0.999791 |
| XLOC_011925 | XLOC_011925 | ZNF160        | chr19:53569866-53606687   | -0.0276587 | 0.999791 |
| XLOC_023109 | XLOC_023109 | CRAT          | chr9:131857072-131873070  | -0.0276469 | 0.999791 |
| XLOC_021496 | XLOC_021496 | EPB49         | chr8:21911080-21940036    | -0.0276312 | 0.999791 |
| XLOC_001082 | XLOC_001082 | ZNF678        | chr1:227751219-227850164  | -0.0276306 | 0.999791 |
| XLOC_002206 | XLOC_002206 | WDR26         | chr1:224572844-224622001  | -0.0275985 | 0.999791 |
| XLOC_014527 | XLOC_014527 | HMGXB4        | chr22:35653444-35691800   | -0.0275975 | 0.999791 |
| XLOC_009405 | XLOC_009405 | P2RX5,TAX1BP3 | chr17:3539761-3599698     | -0.0275687 | 0.999791 |
| XLOC_023252 | XLOC_023252 | TBL1X         | chrX:9431334-9687780      | -0.0275603 | 0.999791 |
| XLOC_005722 | XLOC_005722 | C12orf49      | chr12:117153595-117175843 | -0.0275236 | 0.999791 |
| XLOC_000370 | XLOC_000370 | UQCRH         | chr1:46769379-46782447    | -0.0274821 | 0.999791 |
| XLOC_015855 | XLOC_015855 | CD47          | chr3:107761940-107809935  | -0.0274171 | 0.999791 |
| XLOC_013337 | XLOC_013337 | KANSL1L       | chr2:210867351-211036051  | -0.0273766 | 0.999791 |
| XLOC_007162 | XLOC_007162 | TYRO3         | chr15:41851219-41871536   | -0.0273465 | 0.999791 |
| XLOC_023853 | XLOC_023853 | GPKOW         | chrX:48969021-48980079    | -0.0273145 | 0.999791 |
| XLOC_018013 | XLOC_018013 | TRIM7         | chr5:180620923-180632177  | -0.0272795 | 0.999791 |
| XLOC_002200 | XLOC_002200 | TLR5          | chr1:223282747-223316624  | -0.0272583 | 1        |
| XLOC_004796 | XLOC_004796 | KIAA1551      | chr12:32112352-32146043   | -0.0272182 | 0.999791 |



|             |             |              |                           |            |          |
|-------------|-------------|--------------|---------------------------|------------|----------|
| XLOC_018600 | XLOC_018600 | MLLT4        | chr6:168227670-168372700  | -0.0271849 | 0.999791 |
| XLOC_011192 | XLOC_011192 | ZNF580       | chr19:56152391-56154836   | -0.0271725 | 0.999791 |
| XLOC_006061 | XLOC_006061 | HSPH1        | chr13:31710762-31736117   | -0.0271156 | 0.999791 |
| XLOC_010462 | XLOC_010462 | CSNK1G2      | chr19:1941160-1981336     | -0.0270959 | 0.999791 |
| XLOC_023105 | XLOC_023105 | C9orf114     | chr9:131580778-131592100  | -0.0270768 | 0.999791 |
| XLOC_001967 | XLOC_001967 | TSTD1        | chr1:161007421-161008774  | -0.0270613 | 0.999791 |
| XLOC_012366 | XLOC_012366 | SH3RF3       | chr2:109743783-110262207  | -0.0270152 | 0.999791 |
| XLOC_003403 | XLOC_003403 | TRIM44       | chr11:35684352-35830930   | -0.0270117 | 0.999791 |
| XLOC_011752 | XLOC_011752 | ERCC2        | chr19:45843997-45873845   | -0.0270095 | 0.999791 |
| XLOC_002643 | XLOC_002643 | HIF1AN       | chr10:102295640-102313681 | -0.0270085 | 0.999791 |
| XLOC_013689 | XLOC_013689 | DNMTTIP1     | chr20:44420575-44440066   | -0.0269932 | 0.999791 |
| XLOC_010175 | XLOC_010175 | GALNT1       | chr18:33234532-33291798   | -0.0269763 | 0.999791 |
| XLOC_018655 | XLOC_018655 | NUP153       | chr6:17615268-17706818    | -0.026971  | 0.999791 |
| XLOC_000822 | XLOC_000822 | USP21        | chr1:161129253-161135516  | -0.0269707 | 0.999791 |
| XLOC_022216 | XLOC_022216 | MAFA         | chr8:144510229-144512602  | -0.0269168 | 0.999791 |
| XLOC_009087 | XLOC_009087 | RPL27        | chr17:41150445-41154971   | -0.0268689 | 0.999791 |
| XLOC_007265 | XLOC_007265 | C15orf61     | chr15:67493012-67819641   | -0.0267704 | 0.999791 |
| XLOC_015063 | XLOC_015063 | ZNF501       | chr3:44771097-44778575    | -0.0267591 | 0.999791 |
| XLOC_004577 | XLOC_004577 | PVRL1        | chr11:119508807-119599435 | -0.0267277 | 0.999791 |
| XLOC_010035 | XLOC_010035 | C17orf70     | chr17:79506910-79519429   | -0.0266873 | 0.999791 |
| XLOC_003657 | XLOC_003657 | SSH3         | chr11:67070918-67080078   | -0.0266792 | 0.999791 |
| XLOC_011079 | XLOC_011079 | PPP2R1A      | chr19:52693054-52729678   | -0.0266767 | 0.999791 |
| XLOC_012103 | XLOC_012103 | NRBP1        | chr2:27651472-27665124    | -0.0266456 | 0.999791 |
| XLOC_022199 | XLOC_022199 | SLC45A4      | chr8:142220869-142238673  | -0.0266227 | 0.999791 |
| XLOC_006715 | XLOC_006715 | ACIN1        | chr14:23527773-23569665   | -0.026622  | 0.999791 |
| XLOC_014978 | XLOC_014978 | RAB5A        | chr3:19988571-20053765    | -0.0266017 | 0.999791 |
| XLOC_009083 | XLOC_009083 | AOC3         | chr17:41003200-41010140   | -0.0265787 | 0.999791 |
| XLOC_007903 | XLOC_007903 | MMP25        | chr16:3096681-3110724     | -0.026575  | 0.999791 |
| XLOC_007673 | XLOC_007673 | HEXA         | chr15:72635777-72671129   | -0.0265032 | 0.999791 |
| XLOC_005647 | XLOC_005647 | UHRF1BP1L    | chr12:100430862-100536642 | -0.0264489 | 0.999791 |
| XLOC_018973 | XLOC_018973 | IBTK         | chr6:82879955-82957448    | -0.0264443 | 0.999791 |
| XLOC_002471 | XLOC_002471 | CDK1         | chr10:62538088-62554610   | -0.0263436 | 0.999791 |
| XLOC_003604 | XLOC_003604 | MRPL49       | chr1:64888098-64902003    | -0.0263279 | 0.999791 |
| XLOC_023554 | XLOC_023554 | MID2         | chrX:107069083-107174867  | -0.0262466 | 0.999791 |
| XLOC_022491 | XLOC_022491 | LOC286367    | chr9:107536632-107540045  | -0.0262126 | 0.999791 |
| XLOC_013010 | XLOC_013010 | TRABD2A      | chr2:85048795-85108252    | -0.0261688 | 0.999791 |
| XLOC_004513 | XLOC_004513 | NPAT         | chr11:108028118-108093365 | -0.0261346 | 0.999791 |
| XLOC_003900 | XLOC_003900 | EI24         | chr11:125439297-125454575 | -0.0261221 | 0.999791 |
| XLOC_016153 | XLOC_016153 | BDH1         | chr3:197236653-197300194  | -0.0261106 | 0.999791 |
| XLOC_010630 | XLOC_010630 | NANOS3       | chr19:13988062-13991571   | -0.0261085 | 0.999791 |
| XLOC_009537 | XLOC_009537 | TOP3A        | chr17:18177234-18218321   | -0.0260972 | 0.999791 |
| XLOC_009770 | XLOC_009770 | LSM12        | chr17:421122002-42144987  | -0.0260908 | 0.999791 |
| XLOC_001352 | XLOC_001352 | LOC100506963 | chr1:24069855-24104787    | -0.026076  | 0.999791 |
| XLOC_005094 | XLOC_005094 | ANKRD13A     | chr12:110437234-110477235 | -0.0260679 | 0.999791 |
| XLOC_022696 | XLOC_022696 | MRPL41       | chr9:140446308-140447007  | -0.0260589 | 0.999791 |
| XLOC_007247 | XLOC_007247 | SNX1         | chr15:64388082-64436433   | -0.0260445 | 0.999791 |
| XLOC_004800 | XLOC_004800 | ALG10        | chr12:34175215-34181236   | -0.0260085 | 0.999791 |
| XLOC_018784 | XLOC_018784 | ATF6B        | chr6:32083044-32096017    | -0.0259681 | 0.999791 |
| XLOC_004961 | XLOC_004961 | TMEM5        | chr12:64173636-64202887   | -0.0259555 | 0.999791 |
| XLOC_013547 | XLOC_013547 | LINC00493    | chr20:18548072-18550203   | -0.0258954 | 0.999791 |
| XLOC_010706 | XLOC_010706 | CRTC1        | chr19:18794424-18893143   | -0.0258424 | 0.999791 |
| XLOC_022214 | XLOC_022214 | TOP1MT       | chr8:144391496-144442147  | -0.0257924 | 0.999791 |
| XLOC_000860 | XLOC_000860 | DCAF6        | chr1:167885912-168045083  | -0.0257328 | 0.999791 |
| XLOC_000334 | XLOC_000334 | CDC20        | chr1:43824625-43828873    | -0.0257166 | 0.999791 |
| XLOC_004244 | XLOC_004244 | SLC15A3      | chr1:60691912-60719257    | -0.0256785 | 0.999791 |
| XLOC_000222 | XLOC_000222 | STX12        | chr1:28099693-28150963    | -0.025678  | 0.999791 |
| XLOC_022245 | XLOC_022245 | CYHR1        | chr8:145675314-145691031  | -0.0256169 | 0.999791 |
| XLOC_013120 | XLOC_013120 | CCDC93       | chr2:118673053-118771739  | -0.0255957 | 0.999791 |
| XLOC_000593 | XLOC_000593 | DDX20        | chr1:112264685-112310199  | -0.0255641 | 0.999791 |
| XLOC_010503 | XLOC_010503 | TNFAIP8L1    | chr19:4639526-4655580     | -0.0254539 | 0.999791 |
| XLOC_016719 | XLOC_016719 | APBB2        | chr4:40812043-41216635    | -0.0254447 | 0.999791 |
| XLOC_014474 | XLOC_014474 | KIAA1671     | chr22:25423940-25593415   | -0.0254216 | 0.999791 |
| XLOC_007289 | XLOC_007289 | BBS4         | chr15:72978519-73030817   | -0.0254028 | 0.999791 |
| XLOC_018608 | XLOC_018608 | TBP          | chr6:170863420-170881958  | -0.025398  | 0.999791 |
| XLOC_018486 | XLOC_018486 | HINT3        | chr6:126277860-126301389  | -0.0253796 | 0.999791 |
| XLOC_000264 | XLOC_000264 | S100PBP      | chr1:33240839-33324480    | -0.0253679 | 0.999791 |
| XLOC_009119 | XLOC_009119 | CRHR1-IT1    | chr17:43697709-43913194   | -0.0253668 | 0.999791 |
| XLOC_000364 | XLOC_000364 | NASP         | chr1:46049659-46084578    | -0.0253412 | 0.999791 |
| XLOC_014718 | XLOC_014718 | CHCHD10      | chr22:24105207-24110141   | -0.0253064 | 0.999791 |
| XLOC_024046 | XLOC_024046 | LAMP2        | chrX:119560002-119603204  | -0.0252869 | 0.999791 |
| XLOC_017227 | XLOC_017227 | COX7C        | chr5:85913783-85916583    | -0.0252481 | 0.999791 |
| XLOC_013346 | XLOC_013346 | BARD1        | chr2:215593274-215674428  | -0.0252142 | 1        |
| XLOC_011830 | XLOC_011830 | NTF4         | chr19:49564396-49567124   | -0.0251839 | 0.999791 |
| XLOC_018222 | XLOC_018222 | EGFL8,PPT2   | chr6:32120578-32145888    | -0.025115  | 0.999791 |
| XLOC_008049 | XLOC_008049 | MYLPF        | chr16:30386122-30389310   | -0.0250991 | 1        |
| XLOC_001335 | XLOC_001335 | HP1BP3       | chr1:21069170-21113181    | -0.0250874 | 0.999791 |
| XLOC_021938 | XLOC_021938 | KIF13B       | chr8:28924794-29120610    | -0.0250807 | 0.999791 |
| XLOC_013926 | XLOC_013926 | CDK5RAP1     | chr20:31946644-31989337   | -0.0250632 | 0.999791 |
| XLOC_018160 | XLOC_018160 | HLA-H        | chr6:29855382-29858856    | -0.0250382 | 0.999791 |

|             |             |                 |                           |            |          |
|-------------|-------------|-----------------|---------------------------|------------|----------|
| XLOC_017343 | XLOC_017343 | KDM3B           | chr5:137688284-137772716  | -0.0250358 | 0.999791 |
| XLOC_006738 | XLOC_006738 | RABGGTA         | chr14:24734743-24740833   | -0.0250196 | 0.999791 |
| XLOC_016957 | XLOC_016957 | PRMT10          | chr4:148559533-148605280  | -0.024962  | 0.999791 |
| XLOC_013226 | XLOC_013226 | METTL5          | chr2:170655321-170681353  | -0.024911  | 0.999791 |
| XLOC_021003 | XLOC_021003 | KBTBD2          | chr7:32907777-32931468    | -0.0248939 | 0.999791 |
| XLOC_016925 | XLOC_016925 | NUDT6           | chr4:123747862-123844159  | -0.0248741 | 0.999791 |
| XLOC_014200 | XLOC_014200 | AGPAT3          | chr21:45285115-45407475   | -0.0248667 | 0.999791 |
| XLOC_010702 | XLOC_010702 | UBA52           | chr19:18682613-18688270   | -0.0248365 | 0.999791 |
| XLOC_018215 | XLOC_018215 | SKIV2L          | chr6:31919863-31937532    | -0.0248073 | 0.999791 |
| XLOC_015581 | XLOC_015581 | RPL32           | chr3:12876443-12883081    | -0.0247188 | 0.999791 |
| XLOC_012871 | XLOC_012871 | CEBPZ           | chr2:37423634-37458740    | -0.0246968 | 0.999791 |
| XLOC_021187 | XLOC_021187 | SMURF1          | chr7:98625057-98741743    | -0.0246437 | 0.999791 |
| XLOC_005501 | XLOC_005501 | ZNF385A         | chr12:54762919-54785083   | -0.0245862 | 0.999791 |
| XLOC_005795 | XLOC_005795 | CHFR            | chr12:133416937-133464204 | -0.0245837 | 1        |
| XLOC_006296 | XLOC_006296 | PSME1           | chr14:24605377-24610797   | -0.0244823 | 0.999791 |
| XLOC_004123 | XLOC_004123 | LIN7C           | chr11:27515964-27528326   | -0.0244524 | 0.999791 |
| XLOC_022355 | XLOC_022355 | DCAF10          | chr9:37800789-37867665    | -0.0244492 | 0.999791 |
| XLOC_008995 | XLOC_008995 | AP2B1           | chr17:33914281-34053436   | -0.0244383 | 0.999791 |
| XLOC_008013 | XLOC_008013 | IL4R            | chr16:27325229-27376099   | -0.0244288 | 0.999791 |
| XLOC_000506 | XLOC_000506 | KIAA1107        | chr1:92632608-92650280    | -0.0244269 | 1        |
| XLOC_004677 | XLOC_004677 | COPS7A          | chr12:6833149-6841041     | -0.0244223 | 0.999791 |
| XLOC_014721 | XLOC_014721 | GSTT2           | chr22:24299600-24303393   | -0.0244084 | 0.999791 |
| XLOC_015139 | XLOC_015139 | NISCH           | chr3:52489523-52527088    | -0.0244032 | 0.999791 |
| XLOC_003575 | XLOC_003575 | C11orf84        | chr11:63580922-63595190   | -0.0243676 | 0.999791 |
| XLOC_015040 | XLOC_015040 | ZNF621          | chr3:40566375-40581043    | -0.0243513 | 0.999791 |
| XLOC_003158 | XLOC_003158 | CACUL1          | chr10:120440493-120514758 | -0.0243413 | 0.999791 |
| XLOC_023881 | XLOC_023881 | HUWE1           | chrX:53559056-53713697    | -0.0242524 | 0.999791 |
| XLOC_012779 | XLOC_012779 | KIDINS220       | chr2:8868986-8977755      | -0.0241778 | 0.999791 |
| XLOC_011430 | XLOC_011430 | KANK2           | chr19:11274942-11308243   | -0.0241459 | 0.999791 |
| XLOC_017358 | XLOC_017358 | SLC35A4         | chr5:139944419-139948683  | -0.0241349 | 0.999791 |
| XLOC_010492 | XLOC_010492 | PIAS4           | chr19:4007748-4038067     | -0.0241102 | 0.999791 |
| XLOC_002250 | XLOC_002250 | TARBP1          | chr1:234527058-234614849  | -0.0240938 | 0.999791 |
| XLOC_006380 | XLOC_006380 | JKAMP           | chr14:59951160-60043549   | -0.0240869 | 0.999791 |
| XLOC_015539 | XLOC_015539 | MF12-AS1        | chr3:196728611-196756687  | -0.0240736 | 0.999791 |
| XLOC_023488 | XLOC_023488 | COX7B           | chrX:77154960-77160881    | -0.0240469 | 0.999791 |
| XLOC_022118 | XLOC_022118 | FBXO43          | chr8:101145587-1011158099 | -0.0240334 | 1        |
| XLOC_009476 | XLOC_009476 | TMEM107         | chr17:8076296-8079714     | -0.0240294 | 0.999791 |
| XLOC_005792 | XLOC_005792 | POLE            | chr12:133200347-133263945 | -0.0240036 | 0.999791 |
| XLOC_011927 | XLOC_011927 | ZNF347          | chr19:53641956-53662322   | -0.0240034 | 1        |
| XLOC_003107 | XLOC_003107 | MGEA5           | chr10:103544199-103578222 | -0.0239948 | 0.999791 |
| XLOC_000135 | XLOC_000135 | CROCC           | chr1:17248444-17299474    | -0.0238149 | 0.999791 |
| XLOC_003672 | XLOC_003672 | PPP6R3          | chr11:68228185-68382801   | -0.0238022 | 0.999791 |
| XLOC_012176 | XLOC_012176 | MSH6            | chr2:48010220-48132932    | -0.0237909 | 0.999791 |
| XLOC_001206 | XLOC_001206 | SSU72           | chr1:1477052-1510262      | -0.0237855 | 0.999791 |
| XLOC_017869 | XLOC_017869 | GNPDA1          | chr5:141380233-141392620  | -0.0237583 | 0.999791 |
| XLOC_020928 | XLOC_020928 | ZNF12           | chr7:6728063-6746566      | -0.0237219 | 0.999791 |
| XLOC_021525 | XLOC_021525 | PTK2B           | chr8:27168998-27316908    | -0.0237218 | 0.999791 |
| XLOC_008726 | XLOC_008726 | APRT            | chr16:88875876-88878342   | -0.0237203 | 0.999791 |
| XLOC_002403 | XLOC_002403 | CREM            | chr10:35415768-35501886   | -0.0237124 | 0.999791 |
| XLOC_011191 | XLOC_011191 | ZNF865          | chr19:56124958-56129907   | -0.0236668 | 0.999791 |
| XLOC_007850 | XLOC_007850 | GNPTG           | chr16:1401899-1464705     | -0.0236183 | 0.999791 |
| XLOC_009144 | XLOC_009144 | SNX11           | chr17:46184919-46200105   | -0.0235724 | 0.999791 |
| XLOC_018482 | XLOC_018482 | TPD52L1         | chr6:125474878-125584644  | -0.0235508 | 0.999791 |
| XLOC_008521 | XLOC_008521 | ZNF764          | chr16:30565084-30569642   | -0.0235265 | 0.999791 |
| XLOC_021947 | XLOC_021947 | GSR             | chr8:30535579-30585486    | -0.0235139 | 0.999791 |
| XLOC_000891 | XLOC_000891 | DARS2           | chr1:173793796-173827682  | -0.0234668 | 0.999791 |
| XLOC_023913 | XLOC_023913 | PJA1            | chrX:68380580-68385365    | -0.0234144 | 0.999791 |
| XLOC_002504 | XLOC_002504 | SGPL1           | chr10:72575703-72640932   | -0.0234004 | 0.999791 |
| XLOC_003236 | XLOC_003236 | CD151           | chr11:832951-838835       | -0.0233696 | 0.999791 |
| XLOC_009565 | XLOC_009565 | IFT20           | chr17:26646120-26662515   | -0.0233377 | 0.999791 |
| XLOC_004418 | XLOC_004418 | WNT11           | chr11:75897369-75917574   | -0.0232807 | 0.999791 |
| XLOC_008594 | XLOC_008594 | ZNF319          | chr16:58028572-58033762   | -0.0232411 | 0.999791 |
| XLOC_012944 | XLOC_012944 | RAB1A           | chr2:65283494-65357435    | -0.0232358 | 0.999791 |
| XLOC_017495 | XLOC_017495 | SFXN1           | chr5:174905513-174955621  | -0.023201  | 0.999791 |
| XLOC_008584 | XLOC_008584 | NUDT21          | chr16:56463047-56485261   | -0.0231994 | 0.999791 |
| XLOC_009065 | XLOC_009065 | CNP             | chr17:40118758-40190044   | -0.0231776 | 0.999791 |
| XLOC_020668 | XLOC_020668 | ZNHIT1          | chr7:100849257-100867471  | -0.0231392 | 0.999791 |
| XLOC_015044 | XLOC_015044 | SS18L2          | chr3:42589458-42690233    | -0.0230742 | 0.999791 |
| XLOC_014873 | XLOC_014873 | TTLL12          | chr22:43562627-43583137   | -0.0230705 | 0.999791 |
| XLOC_023601 | XLOC_023601 | STAG2           | chrX:123094474-123236505  | -0.0230677 | 0.999791 |
| XLOC_001999 | XLOC_001999 | CREG1           | chr1:167510250-167523056  | -0.0230351 | 0.999791 |
| XLOC_003007 | XLOC_003007 | AP3M1           | chr10:75880014-75910826   | -0.0230195 | 0.999791 |
| XLOC_007884 | XLOC_007884 | ATP6VOC         | chr16:2563726-2570224     | -0.0229991 | 0.999791 |
| XLOC_023876 | XLOC_023876 | FAM156A,FAM156B | chrX:52976463-53024651    | -0.0229873 | 0.999791 |
| XLOC_008778 | XLOC_008778 | PSMB6           | chr17:4699438-4701798     | -0.0229228 | 0.999791 |
| XLOC_002349 | XLOC_002349 | LOC283070       | chr10:12875132-12877545   | -0.0229151 | 0.999791 |
| XLOC_012407 | XLOC_012407 | TMEM177         | chr2:120436742-120439694  | -0.0229057 | 0.999791 |
| XLOC_009528 | XLOC_009528 | COPS3           | chr17:17149937-17184617   | -0.0228784 | 0.999791 |
| XLOC_016031 | XLOC_016031 | CCNL1           | chr3:156865585-156878482  | -0.0228694 | 0.999791 |

|             |             |                      |                           |            |          |
|-------------|-------------|----------------------|---------------------------|------------|----------|
| XLOC_001769 | XLOC_001769 | CD160                | chr1:145695797-145715565  | -0.0228067 | 1        |
| XLOC_015900 | XLOC_015900 | IQCB1                | chr3:121488609-121553926  | -0.0227947 | 0.999791 |
| XLOC_012745 | XLOC_012745 | CAPN10               | chr2:241526132-241538526  | -0.0227719 | 0.999791 |
| XLOC_006884 | XLOC_006884 | HEATR4               | chr14:73945188-74025651   | -0.0227656 | 1        |
| XLOC_023565 | XLOC_023565 | ALG13                | chrX:110924345-111003875  | -0.0227436 | 0.999791 |
| XLOC_016458 | XLOC_016458 | HADH                 | chr4:108910869-108956331  | -0.0227317 | 0.999791 |
| XLOC_012397 | XLOC_012397 | ACTR3                | chr2:114647536-114716167  | -0.0226979 | 0.999791 |
| XLOC_015619 | XLOC_015619 | AZI2                 | chr3:28363843-28390618    | -0.0226761 | 0.999791 |
| XLOC_003671 | XLOC_003671 | LRP5                 | chr1:168080107-68216743   | -0.022653  | 0.999791 |
| XLOC_002856 | XLOC_002856 | LINC00202-1          | chr10:27220134-27230930   | -0.0226257 | 1        |
| XLOC_004567 | XLOC_004567 | RPS25                | chr11:118868851-118889057 | -0.0226213 | 0.999791 |
| XLOC_013623 | XLOC_013623 | PROCR                | chr20:33759773-33765165   | -0.0226209 | 0.999791 |
| XLOC_011703 | XLOC_011703 | DEDD2                | chr19:42702744-42724304   | -0.022559  | 0.999791 |
| XLOC_010971 | XLOC_010971 | NAPA-AS1             | chr19:47987538-48018515   | -0.0224368 | 0.999791 |
| XLOC_010551 | XLOC_010551 | RPS28                | chr19:8386383-8387280     | -0.0224109 | 0.999791 |
| XLOC_017899 | XLOC_017899 | DCTN4                | chr5:150088308-150138657  | -0.0223765 | 0.999791 |
| XLOC_006925 | XLOC_006925 | PTPN21               | chr14:88932121-89021123   | -0.0223503 | 0.999791 |
| XLOC_022767 | XLOC_022767 | TUSC1                | chr9:25676386-25678856    | -0.0223357 | 0.999791 |
| XLOC_011637 | XLOC_011637 | ZNF607               | chr19:38187263-38210691   | -0.0222899 | 0.999791 |
| XLOC_006329 | XLOC_006329 | MIPOL1               | chr14:37667117-38020464   | -0.0222819 | 1        |
| XLOC_005395 | XLOC_005395 | PLEKHA8P1            | chr12:45566816-45834187   | -0.0222604 | 0.999791 |
| XLOC_014637 | XLOC_014637 | ZBED4                | chr22:50247496-50283726   | -0.0222483 | 0.999791 |
| XLOC_010627 | XLOC_010627 | ZSWIM4               | chr19:13906273-13943044   | -0.0222454 | 0.999791 |
| XLOC_009543 | XLOC_009543 | ZNF286B              | chr17:18561741-18585572   | -0.0222404 | 0.999791 |
| XLOC_003315 | XLOC_003315 | EIF3F                | chr11:8008866-8017719     | -0.0222266 | 0.999791 |
| XLOC_002563 | XLOC_002563 | FAM35A               | chr10:88854952-88951222   | -0.0221808 | 0.999791 |
| XLOC_001311 | XLOC_001311 | RCC2                 | chr11:17733250-17766250   | -0.0221453 | 0.999791 |
| XLOC_020673 | XLOC_020673 | LOC100289561_PRRKIP1 | chr7:102004307-102067129  | -0.0221322 | 0.999791 |
| XLOC_000495 | XLOC_000495 | PKN2                 | chr1:89149921-89301938    | -0.0220939 | 0.999791 |
| XLOC_007786 | XLOC_007786 | FAM174B              | chr15:93160678-93199031   | -0.0220265 | 0.999791 |
| XLOC_004925 | XLOC_004925 | MYL6B                | chr12:56546203-56551771   | -0.0220235 | 0.999791 |
| XLOC_018894 | XLOC_018894 | SLC35B2              | chr6:44221837-44225283    | -0.0219978 | 0.999791 |
| XLOC_002133 | XLOC_002133 | PLEKHA6              | chr1:204187978-204329057  | -0.0219801 | 0.999791 |
| XLOC_010673 | XLOC_010673 | BABAM1               | chr19:17378231-17390162   | -0.0219736 | 0.999791 |
| XLOC_009507 | XLOC_009507 | ZNF18                | chr17:11880761-11900689   | -0.0219708 | 0.999791 |
| XLOC_006783 | XLOC_006783 | FBXO33               | chr14:39865576-39901704   | -0.02194   | 0.999791 |
| XLOC_019183 | XLOC_019183 | SFT2D1               | chr6:166733516-166755991  | -0.021919  | 0.999791 |
| XLOC_022022 | XLOC_022022 | VCPIP1               | chr8:67542487-67579452    | -0.0219077 | 0.999791 |
| XLOC_006229 | XLOC_006229 | GRTP1                | chr13:113978504-114018463 | -0.0218978 | 0.999791 |
| XLOC_000372 | XLOC_000372 | FAAH                 | chr1:46859938-46879520    | -0.021852  | 0.999791 |
| XLOC_008227 | XLOC_008227 | DHX38                | chr16:72118755-72146811   | -0.0218133 | 0.999791 |
| XLOC_022609 | XLOC_022609 | GPR107               | chr9:132815984-132902448  | -0.0218125 | 0.999791 |
| XLOC_011435 | XLOC_011435 | RGL3                 | chr19:11504731-11530018   | -0.0217799 | 0.999791 |
| XLOC_006404 | XLOC_006404 | FUT8                 | chr14:65877309-66210839   | -0.0217698 | 0.999791 |
| XLOC_014552 | XLOC_014552 | EIF3L                | chr22:38245378-38284789   | -0.0217446 | 0.999791 |
| XLOC_007716 | XLOC_007716 | CIB2                 | chr15:78396947-78423877   | -0.0217038 | 0.999791 |
| XLOC_007624 | XLOC_007624 | CSNK1G1              | chr15:64457715-64648442   | -0.0216611 | 0.999791 |
| XLOC_003655 | XLOC_003655 | ADRBK1               | chr11:67033904-67054029   | -0.0216461 | 0.999791 |
| XLOC_000179 | XLOC_000179 | LYPLA2               | chr1:24117645-24122029    | -0.0216301 | 0.999791 |
| XLOC_016706 | XLOC_016706 | FLJ13197             | chr4:38614321-38703129    | -0.0216095 | 1        |
| XLOC_011418 | XLOC_011418 | TYK2                 | chr19:10461203-10491248   | -0.0216075 | 0.999791 |
| XLOC_014060 | XLOC_014060 | PSMA7                | chr20:60711782-60718514   | -0.0216069 | 0.999791 |
| XLOC_021787 | XLOC_021787 | GRINA                | chr8:145064225-145067583  | -0.021574  | 0.999791 |
| XLOC_012676 | XLOC_012676 | MRPL44               | chr2:224822120-224832431  | -0.0215678 | 0.999791 |
| XLOC_001996 | XLOC_001996 | ILDR2                | chr1:166882440-166944561  | -0.0215652 | 0.999791 |
| XLOC_014563 | XLOC_014563 | APOBEC3C             | chr22:39410264-39414825   | -0.0215626 | 0.999791 |
| XLOC_000969 | XLOC_000969 | IPO9                 | chr1:201798287-201853422  | -0.0215499 | 0.999791 |
| XLOC_008826 | XLOC_008826 | CD68                 | chr17:7482804-7485429     | -0.0215413 | 0.999791 |
| XLOC_006138 | XLOC_006138 | ATP7B                | chr13:52506805-52585630   | -0.0215369 | 0.999791 |
| XLOC_022431 | XLOC_022431 | SYK                  | chr9:93564011-93660842    | -0.0214961 | 0.999791 |
| XLOC_014079 | XLOC_014079 | PTK6                 | chr20:62159775-62168723   | -0.0214838 | 0.999791 |
| XLOC_001956 | XLOC_001956 | DCAF8                | chr1:160185504-160232350  | -0.0214257 | 0.999791 |
| XLOC_023532 | XLOC_023532 | WBP5                 | chrX:102611379-102613397  | -0.02141   | 0.999791 |
| XLOC_014750 | XLOC_014750 | AP1B1                | chr22:29723668-29784572   | -0.0213891 | 0.999791 |
| XLOC_015634 | XLOC_015634 | ACVR2B-AS1           | chr3:38492517-38534633    | -0.0213652 | 0.999791 |
| XLOC_017710 | XLOC_017710 | LHFPL2               | chr5:77781037-77944648    | -0.021285  | 0.999791 |
| XLOC_002559 | XLOC_002559 | BMPR1A               | chr10:88516395-88684945   | -0.0212391 | 0.999791 |
| XLOC_003542 | XLOC_003542 | TMEM216              | chr11:61159831-61166335   | -0.0212242 | 0.999791 |
| XLOC_001232 | XLOC_001232 | C1orf174             | chr1:3805696-3816857      | -0.021182  | 0.999791 |
| XLOC_016488 | XLOC_016488 | EXOSC9               | chr4:122722471-122745088  | -0.0211303 | 0.999791 |
| XLOC_009208 | XLOC_009208 | RPS6KB1              | chr17:57970406-58027786   | -0.0210977 | 0.999791 |
| XLOC_001339 | XLOC_001339 | USP48                | chr1:22004791-22109688    | -0.0210968 | 0.999791 |
| XLOC_012912 | XLOC_012912 | PSME4                | chr2:54091203-54197977    | -0.021083  | 0.999791 |
| XLOC_022413 | XLOC_022413 | LOC389765            | chr9:88420916-88457794    | -0.0210065 | 0.999791 |
| XLOC_020513 | XLOC_020513 | CCT6P3               | chr7:64498731-64535091    | -0.0209992 | 0.999791 |
| XLOC_023393 | XLOC_023393 | USP27X               | chrX:49644469-49647168    | -0.0209647 | 0.999791 |
| XLOC_000213 | XLOC_000213 | SFN                  | chr1:27189632-27190947    | -0.0209503 | 0.999791 |
| XLOC_006974 | XLOC_006974 | BEGAIN               | chr14:101003483-101036131 | -0.0209218 | 0.999791 |
| XLOC_012584 | XLOC_012584 | NDUF3B               | chr2:201936461-201950473  | -0.0208592 | 0.999791 |

|             |             |           |                           |            |          |
|-------------|-------------|-----------|---------------------------|------------|----------|
| XLOC_004590 | XLOC_004590 | ZNF202    | chr11:123594996-123612363 | -0.0208441 | 0.999791 |
| XLOC_014577 | XLOC_014577 | TNRC6B    | chr22:40440820-40731812   | -0.020759  | 0.999791 |
| XLOC_007955 | XLOC_007955 | PDXDC1    | chr16:15068832-15131552   | -0.0207541 | 0.999791 |
| XLOC_008704 | XLOC_008704 | ZDHC7     | chr16:85008066-85045141   | -0.0207411 | 0.999791 |
| XLOC_016853 | XLOC_016853 | ADH5      | chr4:99992129-100009931   | -0.0207187 | 0.999791 |
| XLOC_003032 | XLOC_003032 | ATAD1     | chr10:89512874-89577917   | -0.0207078 | 0.999791 |
| XLOC_015918 | XLOC_015918 | ZNF148    | chr3:124944512-125094198  | -0.0206188 | 0.999791 |
| XLOC_002692 | XLOC_002692 | PCDC4     | chr10:112631552-112679124 | -0.0206084 | 0.999791 |
| XLOC_000243 | XLOC_000243 | SERINC2   | chr1:31882411-31907527    | -0.0205972 | 0.999791 |
| XLOC_015228 | XLOC_015228 | TFG       | chr3:100428133-100467811  | -0.020595  | 0.999791 |
| XLOC_018478 | XLOC_018478 | SMPDL3A   | chr6:123109970-123130864  | -0.020545  | 0.999791 |
| XLOC_011420 | XLOC_011420 | KEAP1     | chr19:10596795-10614054   | -0.0205432 | 0.999791 |
| XLOC_000406 | XLOC_000406 | TCEANC2   | chr1:54519273-54565416    | -0.0204683 | 0.999791 |
| XLOC_001764 | XLOC_001764 | PDE4DIP   | chr1:144851423-145076186  | -0.0204377 | 0.999791 |
| XLOC_009841 | XLOC_009841 | PPP1R9B   | chr17:48211100-48227877   | -0.0203668 | 0.999791 |
| XLOC_013764 | XLOC_013764 | SLCO4A1   | chr20:61273796-61303647   | -0.0203402 | 0.999791 |
| XLOC_009579 | XLOC_009579 | TLCD1     | chr17:27046999-27053949   | -0.0202783 | 0.999791 |
| XLOC_010171 | XLOC_010171 | MAPRE2    | chr18:32556891-32723432   | -0.0202692 | 0.999791 |
| XLOC_020666 | XLOC_020666 | AP1S1     | chr7:100797685-100804557  | -0.0202643 | 0.999791 |
| XLOC_017511 | XLOC_017511 | PRELID1   | chr5:176730762-176739292  | -0.0202538 | 0.999791 |
| XLOC_018830 | XLOC_018830 | TEAD3     | chr6:35441373-35464861    | -0.0202424 | 0.999791 |
| XLOC_000058 | XLOC_000058 | PHF13     | chr1:6673755-6684093      | -0.0202235 | 0.999791 |
| XLOC_003862 | XLOC_003862 | ABCG4     | chr11:119019749-119033374 | -0.0201874 | 0.999791 |
| XLOC_008979 | XLOC_008979 | PSMD11    | chr17:30771480-30810337   | -0.0201333 | 0.999791 |
| XLOC_016951 | XLOC_016951 | ANAPC10   | chr4:145915726-146050676  | -0.0201144 | 0.999791 |
| XLOC_023436 | XLOC_023436 | LOC550643 | chrX:56755717-56844004    | -0.0200954 | 0.999791 |
| XLOC_010271 | XLOC_010271 | METTL4    | chr18:2537523-2571489     | -0.0200809 | 0.999791 |
| XLOC_010912 | XLOC_010912 | ZNF222    | chr19:44529493-44537262   | -0.0200678 | 0.999791 |
| XLOC_003146 | XLOC_003146 | ABLIM1    | chr10:116190868-116444414 | -0.0200473 | 0.999791 |
| XLOC_012900 | XLOC_012900 | ATP6V1E2  | chr2:46738985-46747096    | -0.0200024 | 0.999791 |
| XLOC_013505 | XLOC_013505 | ATRN      | chr20:3451664-3631769     | -0.0199737 | 0.999791 |
| XLOC_021776 | XLOC_021776 | ZFP41     | chr8:144328990-144344875  | -0.0199112 | 0.999791 |
| XLOC_009350 | XLOC_009350 | GPS1      | chr17:80009762-80015346   | -0.0199041 | 0.999791 |
| XLOC_018366 | XLOC_018366 | PTP4A1    | chr6:64281919-64293489    | -0.0198728 | 0.999791 |
| XLOC_003742 | XLOC_003742 | EED       | chr11:85955805-85989785   | -0.0198714 | 0.999791 |
| XLOC_014761 | XLOC_014761 | SF3A1     | chr22:30727976-30773894   | -0.0197672 | 0.999791 |
| XLOC_005387 | XLOC_005387 | ZCRB1     | chr12:42705887-42719932   | -0.019683  | 0.999791 |
| XLOC_016186 | XLOC_016186 | MSANTD1   | chr4:3250766-3258342      | -0.0195966 | 1        |
| XLOC_011654 | XLOC_011654 | LOC643669 | chr19:39399619-39402798   | -0.019563  | 0.999791 |
| XLOC_008361 | XLOC_008361 | PGP       | chr16:2261602-2264822     | -0.0194931 | 0.999791 |
| XLOC_014616 | XLOC_014616 | NUP50     | chr22:45559725-45583890   | -0.0194244 | 0.999791 |
| XLOC_003165 | XLOC_003165 | MCMBP     | chr10:121588915-121633140 | -0.0193651 | 0.999791 |
| XLOC_016462 | XLOC_016462 | SEC24B    | chr4:110351118-110461615  | -0.01936   | 0.999791 |
| XLOC_017772 | XLOC_017772 | PGGT1B    | chr5:114546526-114598569  | -0.0192963 | 0.999791 |
| XLOC_012801 | XLOC_012801 | SMC6      | chr2:17845078-17935096    | -0.0192853 | 0.999791 |
| XLOC_007861 | XLOC_007861 | SNHG9     | chr16:2014996-2015505     | -0.0192697 | 0.999791 |
| XLOC_010453 | XLOC_010453 | NDUFS7    | chr19:1383882-1395588     | -0.0192581 | 0.999791 |
| XLOC_003153 | XLOC_003153 | PDZD8     | chr10:119042605-119134937 | -0.0192527 | 0.999791 |
| XLOC_005729 | XLOC_005729 | VSIG10    | chr12:118501397-118541810 | -0.0192312 | 0.999791 |
| XLOC_001309 | XLOC_001309 | SDHB      | chr1:17345224-17380665    | -0.0192242 | 0.999791 |
| XLOC_015314 | XLOC_015314 | PODXL2    | chr3:127348001-127391653  | -0.0192099 | 0.999791 |
| XLOC_015789 | XLOC_015789 | PDHB      | chr3:58413356-58419579    | -0.0192068 | 0.999791 |
| XLOC_018580 | XLOC_018580 | WTAP      | chr6:160148029-160177352  | -0.0191637 | 0.999791 |
| XLOC_010521 | XLOC_010521 | CLPP      | chr19:6361462-6368915     | -0.0191547 | 0.999791 |
| XLOC_010597 | XLOC_010597 | CNN1      | chr19:11649578-11661138   | -0.0191272 | 1        |
| XLOC_015757 | XLOC_015757 | BAP1      | chr3:52435024-52444009    | -0.0190986 | 0.999791 |
| XLOC_008976 | XLOC_008976 | RHOT1     | chr17:30469472-30552746   | -0.0190936 | 0.999791 |
| XLOC_016373 | XLOC_016373 | IL8       | chr4:74606222-74609433    | -0.0190677 | 1        |
| XLOC_018083 | XLOC_018083 | ALDH5A1   | chr6:24495196-24537435    | -0.0190373 | 0.999791 |
| XLOC_007336 | XLOC_007336 | MORF4L1   | chr15:79165122-79190081   | -0.0190369 | 0.999791 |
| XLOC_013307 | XLOC_013307 | FAM126B   | chr2:201838440-201936392  | -0.0189723 | 0.999791 |
| XLOC_003381 | XLOC_003381 | DNAJC24   | chr11:31391376-31531169   | -0.0189096 | 0.999791 |
| XLOC_017580 | XLOC_017580 | DAP       | chr5:10679341-10761387    | -0.0188614 | 0.999791 |
| XLOC_012926 | XLOC_012926 | BCL11A    | chr2:60678301-60780633    | -0.018781  | 0.999791 |
| XLOC_001447 | XLOC_001447 | EVA1B     | chr1:36787631-36789755    | -0.0187758 | 0.999791 |
| XLOC_000324 | XLOC_000324 | C1orf50   | chr1:43232915-43241413    | -0.0187607 | 0.999791 |
| XLOC_007324 | XLOC_007324 | HMG20A    | chr15:77713242-77777945   | -0.0187518 | 0.999791 |
| XLOC_022630 | XLOC_022630 | GTF3C5    | chr9:135906061-135933890  | -0.0187245 | 0.999791 |
| XLOC_011707 | XLOC_011707 | CNFN      | chr19:42891170-42894444   | -0.0187117 | 0.999791 |
| XLOC_011963 | XLOC_011963 | PPP6R1    | chr19:55741146-55770038   | -0.0186952 | 0.999791 |
| XLOC_016851 | XLOC_016851 | TSPAN5    | chr4:99391517-99579812    | -0.0186342 | 0.999791 |
| XLOC_006002 | XLOC_006002 | LAMP1     | chr13:113951468-113977741 | -0.0186012 | 0.999791 |
| XLOC_011913 | XLOC_011913 | ZNF432    | chr19:52536676-52552073   | -0.0185468 | 0.999791 |
| XLOC_008283 | XLOC_008283 | ZC3H18    | chr16:88636788-88698372   | -0.0184686 | 0.999791 |
| XLOC_016912 | XLOC_016912 | MAD2L1    | chr4:120980578-120988013  | -0.0184022 | 0.999791 |
| XLOC_010837 | XLOC_010837 | EIF3K     | chr19:39109721-39127595   | -0.0183286 | 0.999791 |
| XLOC_018199 | XLOC_018199 | PRRC2A    | chr6:31588449-31605554    | -0.0183233 | 0.999791 |
| XLOC_000677 | XLOC_000677 | TARS2     | chr1:150459839-150480085  | -0.0182707 | 0.999791 |
| XLOC_011051 | XLOC_011051 | POLD1     | chr19:50887579-50921275   | -0.0182528 | 0.999791 |

|             |             |           |                           |            |          |
|-------------|-------------|-----------|---------------------------|------------|----------|
| XLOC_015099 | XLOC_015099 | WDR6      | chr3:49044636-49060926    | -0.0182311 | 0.999791 |
| XLOC_002344 | XLOC_002344 | DHTKD1    | chr10:12110933-12165224   | -0.0182214 | 0.999791 |
| XLOC_000736 | XLOC_000736 | RPS27     | chr1:153963238-153964631  | -0.0182194 | 0.999791 |
| XLOC_008592 | XLOC_008592 | KIFC3     | chr16:57792128-57836439   | -0.01818   | 0.999791 |
| XLOC_015836 | XLOC_015836 | MINA      | chr3:97540883-97691295    | -0.0181534 | 0.999791 |
| XLOC_008616 | XLOC_008616 | TRADD     | chr16:67188088-67193812   | -0.0181068 | 0.999791 |
| XLOC_010624 | XLOC_010624 | CCDC130   | chr19:13858752-13874106   | -0.0180933 | 0.999791 |
| XLOC_002749 | XLOC_002749 | ZRANB1    | chr10:126630691-126676005 | -0.0180676 | 0.999791 |
| XLOC_003155 | XLOC_003155 | RAB11FIP2 | chr10:119764426-119806114 | -0.0180526 | 0.999791 |
| XLOC_008864 | XLOC_008864 | COX10     | chr17:13932608-14111996   | -0.018023  | 0.999791 |
| XLOC_020626 | XLOC_020626 | ARPC1A    | chr7:98923495-98963885    | -0.0180076 | 0.999791 |
| XLOC_000680 | XLOC_000680 | ADAMTSL4  | chr1:150521897-150533412  | -0.017993  | 0.999791 |
| XLOC_017551 | XLOC_017551 | SLC12A7   | chr5:1050488-1112172      | -0.0179667 | 0.999791 |
| XLOC_000564 | XLOC_000564 | ATXN7L2   | chr1:110026560-110035420  | -0.0179464 | 0.999791 |
| XLOC_009003 | XLOC_009003 | ZNHIT3    | chr17:34842472-34891305   | -0.0179365 | 0.999791 |
| XLOC_003816 | XLOC_003816 | DIXDC1    | chr11:111797867-111893307 | -0.0178825 | 0.999791 |
| XLOC_013139 | XLOC_013139 | AMMECR1L  | chr2:128619206-128643514  | -0.0178672 | 0.999791 |
| XLOC_002243 | XLOC_002243 | EXOC8     | chr1:231468481-231473578  | -0.0178387 | 0.999791 |
| XLOC_018038 | XLOC_018038 | RREB1     | chr6:7107829-7252213      | -0.0178011 | 0.999791 |
| XLOC_002945 | XLOC_002945 | ZWINT     | chr10:58117198-58121034   | -0.0177834 | 0.999791 |
| XLOC_021576 | XLOC_021576 | HOOK3     | chr8:42752032-42885682    | -0.0177491 | 0.999791 |
| XLOC_010446 | XLOC_010446 | STK11     | chr19:1205797-1228434     | -0.0177465 | 0.999791 |
| XLOC_014599 | XLOC_014599 | FAM109B   | chr22:42470254-42475442   | -0.0177462 | 0.999791 |
| XLOC_021290 | XLOC_021290 | NDUFA5    | chr7:123181082-123197958  | -0.0177356 | 0.999791 |
| XLOC_004781 | XLOC_004781 | ARNTL2    | chr12:27485786-27578746   | -0.0176973 | 0.999791 |
| XLOC_006162 | XLOC_006162 | MYCBP2    | chr13:77618791-77901177   | -0.017671  | 0.999791 |
| XLOC_015001 | XLOC_015001 | CMTM7     | chr3:32433162-32496333    | -0.017638  | 0.999791 |
| XLOC_004568 | XLOC_004568 | SLC37A4   | chr11:118895060-118901616 | -0.0176123 | 0.999791 |
| XLOC_007531 | XLOC_007531 | VPS39     | chr15:42450898-42500502   | -0.0176086 | 0.999791 |
| XLOC_003498 | XLOC_003498 | C11orf31  | chr11:57479994-57586652   | -0.017606  | 0.999791 |
| XLOC_001904 | XLOC_001904 | PAQR6     | chr1:156182778-156217908  | -0.0176006 | 0.999791 |
| XLOC_012472 | XLOC_012472 | ARL6IP6   | chr2:153574406-153617767  | -0.0175935 | 0.999791 |
| XLOC_007804 | XLOC_007804 | TM2D3     | chr15:102182048-102192594 | -0.0175872 | 0.999791 |
| XLOC_016574 | XLOC_016574 | CLCN3     | chr4:170541671-170644338  | -0.017578  | 0.999791 |
| XLOC_022036 | XLOC_022036 | TRAM1     | chr8:71485452-71520694    | -0.0175633 | 0.999791 |
| XLOC_015007 | XLOC_015007 | PDCD6IP   | chr3:33840062-33911199    | -0.0175194 | 0.999791 |
| XLOC_013372 | XLOC_013372 | SLC23A3   | chr2:220026180-220034817  | -0.0174681 | 0.999791 |
| XLOC_017670 | XLOC_017670 | ELOVL7    | chr5:60047615-60140101    | -0.0174639 | 0.999791 |
| XLOC_006868 | XLOC_006868 | ACTN1     | chr14:69340839-69446083   | -0.0174595 | 0.999791 |
| XLOC_002887 | XLOC_002887 | ZNF25     | chr10:38238794-38265453   | -0.0174296 | 0.999791 |
| XLOC_009373 | XLOC_009373 | MYO1C     | chr17:1367479-1396001     | -0.0174186 | 0.999791 |
| XLOC_014191 | XLOC_014191 | SLC37A1   | chr21:43919741-44001550   | -0.0174158 | 0.999791 |
| XLOC_015561 | XLOC_015561 | TADA3     | chr3:9821653-9878040      | -0.0173093 | 0.999791 |
| XLOC_016448 | XLOC_016448 | NFKB1     | chr4:103422485-103538459  | -0.0172909 | 0.999791 |
| XLOC_010425 | XLOC_010425 | BSG       | chr19:571276-583493       | -0.017287  | 0.999791 |
| XLOC_007925 | XLOC_007925 | LOC440335 | chr16:4827614-4846492     | -0.0172743 | 1        |
| XLOC_011448 | XLOC_011448 | ZNF799    | chr19:12500827-12512088   | -0.017274  | 0.999791 |
| XLOC_000693 | XLOC_000693 | PSMB4     | chr1:151372040-151374412  | -0.0172724 | 0.999791 |
| XLOC_008474 | XLOC_008474 | EARS2     | chr16:23533333-23568696   | -0.0172565 | 0.999791 |
| XLOC_023496 | XLOC_023496 | SH3BGR1   | chrX:80369199-80554046    | -0.0172465 | 0.999791 |
| XLOC_003850 | XLOC_003850 | ARCN1     | chr11:118443101-118473747 | -0.0172394 | 0.999791 |
| XLOC_012381 | XLOC_012381 | CHCHD5    | chr2:113342035-113346617  | -0.0172094 | 0.999791 |
| XLOC_013759 | XLOC_013759 | OSBP12    | chr20:60813579-60871269   | -0.0172018 | 0.999791 |
| XLOC_006802 | XLOC_006802 | CDKL1     | chr14:50796719-50862617   | -0.0171192 | 0.999791 |
| XLOC_019064 | XLOC_019064 | C6orf170  | chr6:121400626-121655644  | -0.0171157 | 1        |
| XLOC_015560 | XLOC_015560 | CAMK1     | chr3:9791627-9811668      | -0.0170624 | 0.999791 |
| XLOC_021740 | XLOC_021740 | NDUFB9    | chr8:125551342-125562227  | -0.0169471 | 0.999791 |
| XLOC_010616 | XLOC_010616 | MAST1     | chr19:12949258-12985766   | -0.016928  | 0.999791 |
| XLOC_011221 | XLOC_011221 | ZNF547    | chr19:57874878-57890925   | -0.0168819 | 0.999791 |
| XLOC_007184 | XLOC_007184 | CTDSP12   | chr15:44719578-44819429   | -0.0168498 | 0.999791 |
| XLOC_002828 | XLOC_002828 | NMT2      | chr10:15147770-15210695   | -0.0168384 | 0.999791 |
| XLOC_006842 | XLOC_006842 | SIX4      | chr14:61176255-61190852   | -0.0167553 | 0.999791 |
| XLOC_006142 | XLOC_006142 | THSD1     | chr13:52951302-52980629   | -0.0167085 | 0.999791 |
| XLOC_003895 | XLOC_003895 | ROBO3     | chr11:124735304-124751370 | -0.0166179 | 0.999791 |
| XLOC_002352 | XLOC_002352 | PRPF18    | chr10:13628938-13672868   | -0.0166031 | 0.999791 |
| XLOC_007564 | XLOC_007564 | FBN1      | chr15:48700502-48937985   | -0.0166016 | 1        |
| XLOC_001550 | XLOC_001550 | SELRC1    | chr1:53152013-53164038    | -0.0165588 | 0.999791 |
| XLOC_022147 | XLOC_022147 | RAD21     | chr8:117858172-117889107  | -0.0165547 | 0.999791 |
| XLOC_017296 | XLOC_017296 | PRRC1     | chr5:126853308-126890780  | -0.0165391 | 0.999791 |
| XLOC_023368 | XLOC_023368 | TBC1D25   | chrX:48398074-48420997    | -0.0164796 | 0.999791 |
| XLOC_015849 | XLOC_015849 | ZBTB11    | chr3:101368282-101398057  | -0.0164284 | 0.999791 |
| XLOC_017855 | XLOC_017855 | APBB3     | chr5:139937852-139944189  | -0.0164156 | 0.999791 |
| XLOC_007883 | XLOC_007883 | TBC1D24   | chr16:2525146-2555734     | -0.0163222 | 0.999791 |
| XLOC_000945 | XLOC_000945 | TROVE2    | chr1:192981495-193060906  | -0.0162071 | 0.999791 |
| XLOC_011040 | XLOC_011040 | MED25     | chr19:50321535-50340237   | -0.0161713 | 0.999791 |
| XLOC_016103 | XLOC_016103 | RFC4      | chr3:186501360-186524484  | -0.0161355 | 0.999791 |
| XLOC_017900 | XLOC_017900 | ZNF300    | chr5:150273953-150284545  | -0.0160974 | 0.999791 |
| XLOC_018178 | XLOC_018178 | DDR1      | chr6:30851860-30867933    | -0.0160392 | 0.999791 |
| XLOC_002972 | XLOC_002972 | SAR1A     | chr10:71909960-71930285   | -0.0160343 | 0.999791 |

|             |             |                             |                           |            |          |
|-------------|-------------|-----------------------------|---------------------------|------------|----------|
| XLOC_011305 | XLOC_011305 | TLE2                        | chr19:2997635-3047633     | -0.015985  | 0.999791 |
| XLOC_015889 | XLOC_015889 | POPDC2                      | chr3:119360907-119379404  | -0.0159407 | 1        |
| XLOC_021794 | XLOC_021794 | FAM203A                     | chr8:145192671-145195620  | -0.0159395 | 0.999791 |
| XLOC_011298 | XLOC_011298 | TIMM13                      | chr19:2389783-2427875     | -0.0158946 | 0.999791 |
| XLOC_008585 | XLOC_008585 | BBS2                        | chr16:56518258-56554008   | -0.0158769 | 0.999791 |
| XLOC_004475 | XLOC_004475 | CWC15                       | chr11:94695786-94706776   | -0.0157333 | 0.999791 |
| XLOC_014181 | XLOC_014181 | BACE2                       | chr21:42539727-42648524   | -0.0156969 | 0.999791 |
| XLOC_003567 | XLOC_003567 | TAF6L                       | chr11:62538774-62554813   | -0.0156818 | 0.999791 |
| XLOC_016673 | XLOC_016673 | RAB28                       | chr4:13369346-13485989    | -0.0155722 | 0.999791 |
| XLOC_003988 | XLOC_003988 | CHRNA10                     | chr11:3686816-3692614     | -0.0155503 | 0.999791 |
| XLOC_003204 | XLOC_003204 | ADAM8                       | chr10:135075919-135090407 | -0.0155304 | 0.999791 |
| XLOC_006644 | XLOC_006644 | TRMT61A                     | chr14:103995508-104003410 | -0.0155091 | 0.999791 |
| XLOC_010053 | XLOC_010053 | RFNG                        | chr17:80005777-80009650   | -0.0155018 | 0.999791 |
| XLOC_009740 | XLOC_009740 | RAB5C                       | chr17:40276993-40307062   | -0.0154964 | 0.999791 |
| XLOC_007343 | XLOC_007343 | FAH                         | chr15:80445232-80478924   | -0.015477  | 0.999791 |
| XLOC_022390 | XLOC_022390 | SMC5                        | chr9:72873877-72969789    | -0.0153973 | 0.999791 |
| XLOC_000194 | XLOC_000194 | SEPN1                       | chr1:26126666-26144713    | -0.0153931 | 0.999791 |
| XLOC_020629 | XLOC_020629 | CPSF4                       | chr7:99006600-99063824    | -0.0153855 | 0.999791 |
| XLOC_017515 | XLOC_017515 | PRR7                        | chr5:176853686-176883287  | -0.0153409 | 0.999791 |
| XLOC_024001 | XLOC_024001 | LOC286437                   | chrX:103139054-103401708  | -0.0153303 | 1        |
| XLOC_012997 | XLOC_012997 | LOXL3                       | chr2:74753774-74784678    | -0.015303  | 0.999791 |
| XLOC_007855 | XLOC_007855 | MAPK8IP3                    | chr16:1756220-1820318     | -0.0152685 | 0.999791 |
| XLOC_010533 | XLOC_010533 | ZNF358                      | chr19:7581003-7585911     | -0.0152337 | 0.999791 |
| XLOC_010344 | XLOC_010344 | EPG5                        | chr18:43427573-43547305   | -0.0151917 | 0.999791 |
| XLOC_009777 | XLOC_009777 | FAM171A2                    | chr17:42431100-42441235   | -0.0151829 | 0.999791 |
| XLOC_015476 | XLOC_015476 | AP2M1                       | chr3:183892633-183901879  | -0.0151622 | 0.999791 |
| XLOC_006833 | XLOC_006833 | FLJ31306                    | chr14:58711522-58764855   | -0.0151395 | 0.999791 |
| XLOC_022512 | XLOC_022512 | SLC31A1                     | chr9:115983807-116026772  | -0.0151227 | 0.999791 |
| XLOC_016959 | XLOC_016959 | LRBA                        | chr4:151185810-151936649  | -0.0150981 | 0.999791 |
| XLOC_021569 | XLOC_021569 | AGPAT6                      | chr8:41435706-41482520    | -0.0150559 | 0.999791 |
| XLOC_006986 | XLOC_006986 | XRCC3                       | chr14:104095524-104181823 | -0.0150372 | 0.999791 |
| XLOC_006785 | XLOC_006785 | KLHL28                      | chr14:45393526-45431179   | -0.0150171 | 0.999791 |
| XLOC_006100 | XLOC_006100 | TSC22D1                     | chr13:45006278-45154568   | -0.014984  | 0.999791 |
| XLOC_016534 | XLOC_016534 | RPS3A                       | chr4:152020724-152025804  | -0.0149702 | 0.999791 |
| XLOC_022783 | XLOC_022783 | APTX                        | chr9:32972603-33001639    | -0.0149598 | 0.999791 |
| XLOC_008319 | XLOC_008319 | C16orf13                    | chr16:684428-686347       | -0.0149247 | 0.999791 |
| XLOC_000146 | XLOC_000146 | PQLC2                       | chr1:19638739-19655794    | -0.0149111 | 0.999791 |
| XLOC_011182 | XLOC_011182 | EPS8L1                      | chr19:55587220-55599291   | -0.0148834 | 0.999791 |
| XLOC_010040 | XLOC_010040 | FAM195B                     | chr17:79780292-79791167   | -0.0148594 | 0.999791 |
| XLOC_004427 | XLOC_004427 | KCTD14,NDUFC2,NDUFC2-KCTD14 | chr11:77726760-77850699   | -0.0148302 | 0.999791 |
| XLOC_010197 | XLOC_010197 | SCARNA17                    | chr18:47340392-47340813   | -0.0147907 | 0.999791 |
| XLOC_009073 | XLOC_009073 | MLX                         | chr17:40719077-40729849   | -0.0147853 | 0.999791 |
| XLOC_004320 | XLOC_004320 | FAU                         | chr11:64888098-64902003   | -0.0147694 | 0.999791 |
| XLOC_001611 | XLOC_001611 | CRYZ                        | chr1:75171171-75232360    | -0.0147546 | 0.999791 |
| XLOC_020455 | XLOC_020455 | CDK13                       | chr7:39989958-40136733    | -0.0147446 | 0.999791 |
| XLOC_006341 | XLOC_006341 | LRR1                        | chr14:50065414-50081390   | -0.0146842 | 0.999791 |
| XLOC_007309 | XLOC_007309 | SCAMP5                      | chr15:75287875-75313836   | -0.014615  | 0.999791 |
| XLOC_002763 | XLOC_002763 | PPP2R2D                     | chr10:133747959-133770053 | -0.0145921 | 0.999791 |
| XLOC_022960 | XLOC_022960 | AAED1                       | chr9:99403532-99417599    | -0.0145909 | 0.999791 |
| XLOC_018886 | XLOC_018886 | ZNF318                      | chr6:43303807-43337181    | -0.0145612 | 0.999791 |
| XLOC_005420 | XLOC_005420 | ADCY6                       | chr12:49159974-49182820   | -0.0145161 | 0.999791 |
| XLOC_013820 | XLOC_013820 | SNRPB                       | chr20:2442280-2451499     | -0.0144874 | 0.999791 |
| XLOC_003096 | XLOC_003096 | SEC31B                      | chr10:102246402-102279595 | -0.0144453 | 0.999791 |
| XLOC_023123 | XLOC_023123 | MED27                       | chr9:134735496-134955274  | -0.0144204 | 0.999791 |
| XLOC_017321 | XLOC_017321 | TCF7                        | chr5:133450401-133483920  | -0.0144035 | 0.999791 |
| XLOC_013928 | XLOC_013928 | NECAB3                      | chr20:32244892-32262264   | -0.0143766 | 0.999791 |
| XLOC_020623 | XLOC_020623 | TRRAP                       | chr7:98476112-98610866    | -0.0143758 | 0.999791 |
| XLOC_008363 | XLOC_008363 | RNPS1                       | chr16:2303099-2318413     | -0.0143667 | 0.999791 |
| XLOC_015653 | XLOC_015653 | SNRK-AS1                    | chr3:43328003-43393454    | -0.0142674 | 1        |
| XLOC_003543 | XLOC_003543 | SDHAF2                      | chr11:61197596-61214239   | -0.0141914 | 0.999791 |
| XLOC_006068 | XLOC_006068 | STARD13                     | chr13:33677271-34250932   | -0.0141754 | 0.999791 |
| XLOC_009039 | XLOC_009039 | PSMD3                       | chr17:38137020-38154213   | -0.0141642 | 0.999791 |
| XLOC_012317 | XLOC_012317 | CNNM3                       | chr2:97481990-97501121    | -0.0141282 | 0.999791 |
| XLOC_020904 | XLOC_020904 | FTSJ2                       | chr7:2273925-2281833      | -0.0141216 | 0.999791 |
| XLOC_015165 | XLOC_015165 | C3orf14                     | chr3:62305395-62319320    | -0.0141115 | 1        |
| XLOC_009850 | XLOC_009850 | TOB1                        | chr17:48939586-48945732   | -0.0140724 | 0.999791 |
| XLOC_007345 | XLOC_007345 | FAM108C1                    | chr15:80987651-81047962   | -0.0140345 | 0.999791 |
| XLOC_013744 | XLOC_013744 | GNAS                        | chr20:57393972-57486250   | -0.0140236 | 0.999791 |
| XLOC_016276 | XLOC_016276 | PGM2                        | chr4:37828281-37864559    | -0.0139837 | 0.999791 |
| XLOC_021352 | XLOC_021352 | BRAF                        | chr7:140433812-140624564  | -0.0139366 | 0.999791 |
| XLOC_020462 | XLOC_020462 | BLVRA                       | chr7:43798271-43846941    | -0.01389   | 0.999791 |
| XLOC_023042 | XLOC_023042 | PSMD5                       | chr9:123578331-123605299  | -0.0138883 | 0.999791 |
| XLOC_009258 | XLOC_009258 | COG1                        | chr17:71189172-71228533   | -0.0138797 | 0.999791 |
| XLOC_020567 | XLOC_020567 | MDH2                        | chr7:75677392-75695930    | -0.0138745 | 0.999791 |
| XLOC_002465 | XLOC_002465 | CISD1                       | chr10:60028861-60049019   | -0.0138655 | 0.999791 |
| XLOC_006698 | XLOC_006698 | CHD8                        | chr14:21853352-21905457   | -0.0138455 | 0.999791 |
| XLOC_013611 | XLOC_013611 | CHMP4B                      | chr20:32399109-32442173   | -0.0138193 | 0.999791 |
| XLOC_018889 | XLOC_018889 | YIPF3                       | chr6:43479564-43484728    | -0.0137831 | 0.999791 |
| XLOC_008732 | XLOC_008732 | CHMP1A                      | chr16:89710838-89736866   | -0.0137801 | 0.999791 |

|             |             |                           |                           |            |          |
|-------------|-------------|---------------------------|---------------------------|------------|----------|
| XLOC_023788 | XLOC_023788 | RPS6KA3                   | chrX:20168028-20284750    | -0.0137621 | 0.999791 |
| XLOC_005171 | XLOC_005171 | DDX55                     | chr12:124086671-124105482 | -0.0137232 | 0.999791 |
| XLOC_022561 | XLOC_022561 | GAPVD1                    | chr9:128024110-128127290  | -0.0137012 | 0.999791 |
| XLOC_013122 | XLOC_013122 | C1QL2                     | chr2:119913818-119916471  | -0.0136905 | 1        |
| XLOC_010460 | XLOC_010460 | LOC100288123              | chr19:1815244-1848452     | -0.0136771 | 1        |
| XLOC_003628 | XLOC_003628 | MUS81                     | chr11:65627871-65640405   | -0.0136695 | 0.999791 |
| XLOC_017861 | XLOC_017861 | TAF7                      | chr5:140698056-140700351  | -0.0136307 | 0.999791 |
| XLOC_018808 | XLOC_018808 | RXR8                      | chr6:33161361-33168473    | -0.0136177 | 0.999791 |
| XLOC_004159 | XLOC_004159 | AMBRA1                    | chr11:46417961-46615619   | -0.0135998 | 0.999791 |
| XLOC_003702 | XLOC_003702 | P2RY2                     | chr11:72929343-72947395   | -0.0135782 | 0.999791 |
| XLOC_010530 | XLOC_010530 | ZNF557                    | chr19:7069470-7087978     | -0.013512  | 0.999791 |
| XLOC_008466 | XLOC_008466 | RRN3P1                    | chr16:21807950-21830495   | -0.0134883 | 0.999791 |
| XLOC_012240 | XLOC_012240 | SMYD5                     | chr2:73441365-73454355    | -0.0134802 | 0.999791 |
| XLOC_011410 | XLOC_011410 | ANGPTL6                   | chr19:10196805-10213425   | -0.0134066 | 0.999791 |
| XLOC_016309 | XLOC_016309 | DCUN1D4                   | chr4:52709275-52783003    | -0.0133961 | 0.999791 |
| XLOC_006201 | XLOC_006201 | TMTC4                     | chr13:101256089-101327103 | -0.0133427 | 0.999791 |
| XLOC_024203 | XLOC_024203 | F8                        | chrX:154064063-154250998  | -0.0133367 | 0.999791 |
| XLOC_010719 | XLOC_010719 | ZNF253                    | chr19:19976713-20004293   | -0.0132685 | 0.999791 |
| XLOC_016786 | XLOC_016786 | ANKRD17                   | chr4:73940501-74124502    | -0.0132312 | 0.999791 |
| XLOC_009517 | XLOC_009517 | TRIM16                    | chr17:15531279-15586193   | -0.0131992 | 0.999791 |
| XLOC_010631 | XLOC_010631 | CC2D1A                    | chr19:14016955-14041693   | -0.0131855 | 0.999791 |
| XLOC_008991 | XLOC_008991 | FNDC8                     | chr17:33448630-3345751    | -0.0131434 | 0.999791 |
| XLOC_020876 | XLOC_020876 | LOC202781                 | chr7:154795142-154797413  | -0.0131405 | 0.999791 |
| XLOC_013310 | XLOC_013310 | TRAK2                     | chr2:202241929-202316319  | -0.0130978 | 0.999791 |
| XLOC_006680 | XLOC_006680 | CENB1IP1                  | chr14:20779526-20801471   | -0.0130005 | 0.999791 |
| XLOC_016126 | XLOC_016126 | LRRC15                    | chr3:194075975-194090472  | -0.0129736 | 1        |
| XLOC_010206 | XLOC_010206 | C18orf54                  | chr18:51885170-51908404   | -0.0129709 | 0.999791 |
| XLOC_005931 | XLOC_005931 | BORA                      | chr13:73302041-73590591   | -0.012951  | 0.999791 |
| XLOC_019053 | XLOC_019053 | ZUFSP                     | chr6:116956780-116989973  | -0.0129313 | 0.999791 |
| XLOC_021552 | XLOC_021552 | ASH2L                     | chr8:37963010-37997598    | -0.0128853 | 0.999791 |
| XLOC_022511 | XLOC_022511 | SLC31A2                   | chr9:115913237-115926422  | -0.0128757 | 0.999791 |
| XLOC_014762 | XLOC_014762 | KIAA1656                  | chr22:30727976-30773894   | -0.0128568 | 0.999791 |
| XLOC_022716 | XLOC_022716 | RLN2                      | chr9:5299865-5304611      | -0.0128476 | 1        |
| XLOC_022588 | XLOC_022588 | CERCAM                    | chr9:131182758-131199630  | -0.012832  | 0.999791 |
| XLOC_006322 | XLOC_006322 | KIAA0391                  | chr14:35591526-35743284   | -0.0128139 | 0.999791 |
| XLOC_003610 | XLOC_003610 | DPF2                      | chr11:65101224-65120451   | -0.0127369 | 0.999791 |
| XLOC_008720 | XLOC_008720 | CYBA                      | chr16:88709696-88717492   | -0.0127043 | 0.999791 |
| XLOC_016577 | XLOC_016577 | GALNT7                    | chr4:174089903-174245118  | -0.0126982 | 0.999791 |
| XLOC_000018 | XLOC_000018 | PUSL1                     | chr11:1243993-1260067     | -0.0126806 | 0.999791 |
| XLOC_015183 | XLOC_015183 | MITF                      | chr3:69788585-70017488    | -0.0126057 | 0.999791 |
| XLOC_010418 | XLOC_010418 | TXNL4A                    | chr18:77732866-77748532   | -0.0125711 | 0.999791 |
| XLOC_009158 | XLOC_009158 | DLX4                      | chr17:48046561-48052323   | -0.0125652 | 0.999791 |
| XLOC_009069 | XLOC_009069 | ATP6V0A1                  | chr17:40610861-40674597   | -0.0125276 | 0.999791 |
| XLOC_014644 | XLOC_014644 | PPP6R2                    | chr22:50781745-50913464   | -0.0125179 | 0.999791 |
| XLOC_009773 | XLOC_009773 | ATXN7L3                   | chr17:42269172-42275529   | -0.0125106 | 0.999791 |
| XLOC_008399 | XLOC_008399 | ANKS3                     | chr16:4746510-4799397     | -0.0124977 | 0.999791 |
| XLOC_013973 | XLOC_013973 | CHD6                      | chr20:40031169-40247133   | -0.0124916 | 0.999791 |
| XLOC_022229 | XLOC_022229 | EPPK1                     | chr8:144939911-144947434  | -0.0124765 | 1        |
| XLOC_000281 | XLOC_000281 | AGO1                      | chr1:36348809-36389899    | -0.0124748 | 0.999791 |
| XLOC_013243 | XLOC_013243 | ATP5G3                    | chr2:176040985-176046490  | -0.0124643 | 0.999791 |
| XLOC_021407 | XLOC_021407 | RHEB                      | chr7:151163097-151217010  | -0.0124302 | 0.999791 |
| XLOC_005502 | XLOC_005502 | ITGA5                     | chr12:54789044-54813050   | -0.0124257 | 0.999791 |
| XLOC_000900 | XLOC_000900 | RASAL2                    | chr1:178060642-178448648  | -0.0124074 | 0.999791 |
| XLOC_015597 | XLOC_015597 | ANKRD28                   | chr3:15708743-15901053    | -0.0123638 | 0.999791 |
| XLOC_008018 | XLOC_008018 | CCDC101                   | chr16:28565248-28603111   | -0.0123501 | 0.999791 |
| XLOC_020442 | XLOC_020442 | SEPT7                     | chr7:35840595-35946715    | -0.0122846 | 0.999791 |
| XLOC_015782 | XLOC_015782 | IL17RD                    | chr3:57124009-57199403    | -0.0122685 | 0.999791 |
| XLOC_014890 | XLOC_014890 | PKDREJ                    | chr22:46651559-46659219   | -0.0121219 | 1        |
| XLOC_017061 | XLOC_017061 | NDUFS6                    | chr5:1801495-1816167      | -0.0121681 | 0.999791 |
| XLOC_000542 | XLOC_000542 | AMY2B,RNPC3               | chr1:104068577-104122149  | -0.0121231 | 0.999791 |
| XLOC_005617 | XLOC_005617 | GALNT4,POC1B,POC1B-GALNT4 | chr12:89813497-89920039   | -0.0121047 | 0.999791 |
| XLOC_018652 | XLOC_018652 | CCDC90A                   | chr6:13786780-13814792    | -0.0120581 | 0.999791 |
| XLOC_012533 | XLOC_012533 | MTX2                      | chr2:177134122-177202753  | -0.0120578 | 0.999791 |
| XLOC_017897 | XLOC_017897 | RPS14                     | chr5:149823791-149829319  | -0.0120061 | 0.999791 |
| XLOC_006198 | XLOC_006198 | ZIC5                      | chr13:100615274-100624178 | -0.0119938 | 0.999791 |
| XLOC_013236 | XLOC_013236 | CIR1                      | chr2:175212877-175260443  | -0.0119823 | 0.999791 |
| XLOC_003662 | XLOC_003662 | RPS6KB2                   | chr11:67195934-67202879   | -0.011889  | 0.999791 |
| XLOC_007329 | XLOC_007329 | DNAJA4                    | chr15:78556486-78574538   | -0.0118718 | 0.999791 |
| XLOC_017951 | XLOC_017951 | UBTD2                     | chr5:171636649-171710795  | -0.011851  | 0.999791 |
| XLOC_004086 | XLOC_004086 | PSMA1                     | chr11:14526421-14665180   | -0.0118258 | 0.999791 |
| XLOC_005941 | XLOC_005941 | CLN5                      | chr13:77566058-77576652   | -0.0117938 | 0.999791 |
| XLOC_001422 | XLOC_001422 | MARCKSL1                  | chr1:32799429-32801840    | -0.0117891 | 0.999791 |
| XLOC_009751 | XLOC_009751 | EZH1                      | chr17:40852292-40897071   | -0.0117502 | 0.999791 |
| XLOC_022829 | XLOC_022829 | GNE                       | chr9:36214438-36277053    | -0.0117305 | 0.999791 |
| XLOC_007212 | XLOC_007212 | USP8                      | chr15:50716578-50838902   | -0.0116813 | 0.999791 |
| XLOC_020524 | XLOC_020524 | TMEM248                   | chr7:66386202-66423538    | -0.0116574 | 0.999791 |
| XLOC_013770 | XLOC_013770 | GID8                      | chr20:61569440-61579827   | -0.0116372 | 0.999791 |
| XLOC_017167 | XLOC_017167 | MARVELD2                  | chr5:68710938-68737890    | -0.0116151 | 0.999791 |
| XLOC_011303 | XLOC_011303 | SGTA                      | chr19:2754711-2783354     | -0.0115973 | 0.999791 |

|             |             |                         |                           |             |          |
|-------------|-------------|-------------------------|---------------------------|-------------|----------|
| XLOC_008894 | XLOC_008894 | LLGL1                   | chr17:18128935-18162230   | -0.0115835  | 0.999791 |
| XLOC_011822 | XLOC_011822 | GYS1                    | chr19:49471381-49496610   | -0.0115157  | 0.999791 |
| XLOC_017848 | XLOC_017848 | DNAJC18                 | chr5:138745891-138775214  | -0.0114635  | 0.999791 |
| XLOC_006682 | XLOC_006682 | RPPH1                   | chr14:20811229-20811570   | -0.0114353  | 0.999791 |
| XLOC_011273 | XLOC_011273 | C19orf26                | chr19:1229946-1237990     | -0.0114153  | 0.999791 |
| XLOC_018143 | XLOC_018143 | PGBD1                   | chr6:28249313-28270326    | -0.0113651  | 0.999791 |
| XLOC_017428 | XLOC_017428 | SMIM3                   | chr5:150157507-150176298  | -0.0113628  | 0.999791 |
| XLOC_009114 | XLOC_009114 | HEXIM1                  | chr17:43224683-43229468   | -0.01133    | 0.999791 |
| XLOC_001292 | XLOC_001292 | FLJ37453                | chr1:16160709-16266950    | -0.0112813  | 0.999791 |
| XLOC_009413 | XLOC_009413 | UBE2G1                  | chr17:4172511-4269969     | -0.0112041  | 0.999791 |
| XLOC_021325 | XLOC_021325 | CHCHD3                  | chr7:132469622-132766828  | -0.0112014  | 0.999791 |
| XLOC_023578 | XLOC_023578 | PLS3                    | chrX:114795176-114885179  | -0.0111557  | 0.999791 |
| XLOC_004265 | XLOC_004265 | GANAB                   | chr11:62392297-62414104   | -0.0111044  | 0.999791 |
| XLOC_003317 | XLOC_003317 | RPL27A                  | chr11:8703994-8711419     | -0.0110618  | 0.999791 |
| XLOC_022983 | XLOC_022983 | TMEM246                 | chr9:104237607-104249475  | -0.0110503  | 0.999791 |
| XLOC_010502 | XLOC_010502 | HDFGRP2                 | chr19:4472254-4517716     | -0.0109918  | 0.999791 |
| XLOC_007410 | XLOC_007410 | RCCD1                   | chr15:91498105-91506355   | -0.0109659  | 0.999791 |
| XLOC_015675 | XLOC_015675 | CCDC12                  | chr3:66963230-47051194    | -0.0109591  | 0.999791 |
| XLOC_023024 | XLOC_023024 | ALAD                    | chr9:116148591-116163618  | -0.0109477  | 0.999791 |
| XLOC_004987 | XLOC_004987 | CNOT2                   | chr12:70636773-70748773   | -0.0109288  | 0.999791 |
| XLOC_003093 | XLOC_003093 | SNORA12                 | chr10:101992054-102027437 | -0.0109128  | 0.999791 |
| XLOC_001826 | XLOC_001826 | S100A10                 | chr1:151955385-151966714  | -0.010842   | 0.999791 |
| XLOC_003143 | XLOC_003143 | DCLRE1A                 | chr10:115594482-115614163 | -0.0108045  | 0.999791 |
| XLOC_015019 | XLOC_015019 | MYD88                   | chr3:38179968-38184512    | -0.0107202  | 0.999791 |
| XLOC_012588 | XLOC_012588 | STRADB                  | chr2:202316391-202345574  | -0.0106977  | 0.999791 |
| XLOC_005197 | XLOC_005197 | EP400                   | chr12:132434464-132565011 | -0.0106919  | 0.999791 |
| XLOC_009926 | XLOC_009926 | CEP112                  | chr17:63631657-64188212   | -0.0106762  | 0.999791 |
| XLOC_014062 | XLOC_014062 | LAMA5                   | chr20:60884120-60942368   | -0.010624   | 0.999791 |
| XLOC_005036 | XLOC_005036 | SNRPF                   | chr12:96252708-96260238   | -0.0106219  | 0.999791 |
| XLOC_000343 | XLOC_000343 | B4GALT2                 | chr1:44444873-44456843    | -0.0106122  | 0.999791 |
| XLOC_012187 | XLOC_012187 | RPS27A                  | chr2:55399686-55462989    | -0.0105772  | 0.999791 |
| XLOC_000077 | XLOC_000077 | APITD1,APITD1-CORT,CORT | chr1:10490158-10512060    | -0.0105709  | 0.999791 |
| XLOC_023597 | XLOC_023597 | MCTS1                   | chrX:119737743-119755016  | -0.0104834  | 0.999791 |
| XLOC_010378 | XLOC_010378 | TXNL1                   | chr18:54270052-54305920   | -0.0104543  | 0.999791 |
| XLOC_017251 | XLOC_017251 | PPIP5K2                 | chr5:102455957-102539224  | -0.0103712  | 0.999791 |
| XLOC_008315 | XLOC_008315 | AXIN1                   | chr16:337439-402676       | -0.0103635  | 0.999791 |
| XLOC_013946 | XLOC_013946 | CPNE1,RBM12             | chr20:34213952-34252878   | -0.0103532  | 0.999791 |
| XLOC_011961 | XLOC_011961 | PTPRH                   | chr19:55692614-55720874   | -0.010351   | 0.999791 |
| XLOC_003822 | XLOC_003822 | PTS                     | chr11:112097087-112104695 | -0.0103349  | 0.999791 |
| XLOC_016144 | XLOC_016144 | RNF168                  | chr3:196195656-196230639  | -0.0102882  | 0.999791 |
| XLOC_008288 | XLOC_008288 | TRAPPC2L                | chr16:88923505-88927520   | -0.010285   | 0.999791 |
| XLOC_005518 | XLOC_005518 | SMARCC2                 | chr12:56555635-56583351   | -0.0102205  | 0.999791 |
| XLOC_015467 | XLOC_015467 | LOC100505687            | chr3:183165395-183173800  | -0.0101474  | 0.999791 |
| XLOC_014490 | XLOC_014490 | ZNRF3                   | chr22:29279754-29453476   | -0.0100876  | 0.999791 |
| XLOC_017514 | XLOC_017514 | GRK6                    | chr5:176853686-176883287  | -0.0100761  | 0.999791 |
| XLOC_012475 | XLOC_012475 | GPD2                    | chr2:157291964-157442915  | -0.0100614  | 0.999791 |
| XLOC_009318 | XLOC_009318 | PGS1                    | chr17:76374734-76573476   | -0.0100295  | 0.999791 |
| XLOC_004637 | XLOC_004637 | THYN1                   | chr11:134118172-134123260 | -0.0100093  | 0.999791 |
| XLOC_010638 | XLOC_010638 | PKN1                    | chr19:14544165-14582679   | -0.00996811 | 0.999791 |
| XLOC_008699 | XLOC_008699 | HSDL1                   | chr16:84155743-84178800   | -0.00992519 | 0.999791 |
| XLOC_009921 | XLOC_009921 | MIR4315-1,PLEKHM1P      | chr17:62780958-62833302   | -0.00990717 | 0.999791 |
| XLOC_017183 | XLOC_017183 | TNPO1                   | chr5:72112417-72210215    | -0.00990353 | 0.999791 |
| XLOC_012918 | XLOC_012918 | SMEK2                   | chr2:55775513-55844796    | -0.00987095 | 0.999791 |
| XLOC_012014 | XLOC_012014 | UBE2M                   | chr19:59067078-59070343   | -0.0098642  | 0.999791 |
| XLOC_005740 | XLOC_005740 | TRIAP1                  | chr12:120881763-120884215 | -0.0098264  | 0.999791 |
| XLOC_005633 | XLOC_005633 | NR2C1                   | chr12:95414004-95467404   | -0.00981063 | 0.999791 |
| XLOC_009851 | XLOC_009851 | SPAG9                   | chr17:49039534-49198226   | -0.00980717 | 0.999791 |
| XLOC_000228 | XLOC_000228 | ATPIF1                  | chr1:28562601-28564616    | -0.00976544 | 0.999791 |
| XLOC_017289 | XLOC_017289 | PRDM6                   | chr5:122424840-122523745  | -0.00973066 | 1        |
| XLOC_001478 | XLOC_001478 | BMP8B                   | chr1:40204516-40254533    | -0.00970027 | 0.999791 |
| XLOC_012193 | XLOC_012193 | PAPOLG                  | chr2:60983364-61029221    | -0.00969225 | 0.999791 |
| XLOC_008024 | XLOC_008024 | NFATC2IP                | chr16:28962317-28977767   | -0.0096153  | 0.999791 |
| XLOC_013779 | XLOC_013779 | ARFGAP1                 | chr20:61904164-61921142   | -0.00958056 | 0.999791 |
| XLOC_014638 | XLOC_014638 | CRELD2                  | chr22:50312282-50321186   | -0.00954751 | 0.999791 |
| XLOC_001434 | XLOC_001434 | CSMD2                   | chr1:33979608-34631443    | -0.00953948 | 1        |
| XLOC_018444 | XLOC_018444 | CDC40                   | chr6:110501623-110553422  | -0.00951458 | 0.999791 |
| XLOC_015446 | XLOC_015446 | TMEM212                 | chr3:171561138-171577108  | -0.0095112  | 1        |
| XLOC_014067 | XLOC_014067 | LOC100127888            | chr20:61273796-61303647   | -0.00951093 | 0.999791 |
| XLOC_009882 | XLOC_009882 | TUBD1                   | chr17:57936840-57970306   | -0.00949271 | 0.999791 |
| XLOC_005999 | XLOC_005999 | F10                     | chr13:113777112-113803843 | -0.00945943 | 1        |
| XLOC_000032 | XLOC_000032 | PRKCZ                   | chr1:1981908-2144159      | -0.00944476 | 0.999791 |
| XLOC_000231 | XLOC_000231 | PHACTR4                 | chr1:28696092-28826881    | -0.00942685 | 0.999791 |
| XLOC_001215 | XLOC_001215 | C1orf86                 | chr1:1981908-2144159      | -0.00941904 | 0.999791 |
| XLOC_022254 | XLOC_022254 | ZNF250                  | chr8:146102335-146126846  | -0.00938842 | 0.999791 |
| XLOC_002546 | XLOC_002546 | FAM213A                 | chr10:82167584-82192753   | -0.00934909 | 0.999791 |
| XLOC_007567 | XLOC_007567 | SECISBP2L               | chr15:49280834-49338760   | -0.00932808 | 0.999791 |
| XLOC_021227 | XLOC_021227 | PLOD3                   | chr7:100849257-100867471  | -0.00929738 | 0.999791 |
| XLOC_000750 | XLOC_000750 | ADAM15                  | chr1:155006281-155042029  | -0.00925974 | 0.999791 |
| XLOC_011501 | XLOC_011501 | WIZ                     | chr19:15532317-15560762   | -0.00924628 | 0.999791 |



|             |             |              |                           |             |          |
|-------------|-------------|--------------|---------------------------|-------------|----------|
| XLOC_020434 | XLOC_020434 | AVL9         | chr7:32535175-32758780    | -0.00919744 | 0.999791 |
| XLOC_022739 | XLOC_022739 | RPS6         | chr9:19376253-19380235    | -0.009161   | 0.999791 |
| XLOC_023065 | XLOC_023065 | DENND1A      | chr9:126141932-126692417  | -0.00912831 | 0.999791 |
| XLOC_010810 | XLOC_010810 | CAPNS1       | chr19:36630917-36641255   | -0.00912719 | 0.999791 |
| XLOC_022309 | XLOC_022309 | ACO1         | chr9:32384600-32450832    | -0.00909035 | 0.999791 |
| XLOC_007897 | XLOC_007897 | PAQR4        | chr16:3019341-3030540     | -0.0090504  | 0.999791 |
| XLOC_006451 | XLOC_006451 | EIF2B2       | chr14:75469611-75476294   | -0.00904874 | 0.999791 |
| XLOC_006003 | XLOC_006003 | TMCO3        | chr13:114145307-114204544 | -0.0090128  | 0.999791 |
| XLOC_018180 | XLOC_018180 | GTF2H4       | chr6:30875976-30881880    | -0.00900738 | 0.999791 |
| XLOC_006361 | XLOC_006361 | SAMD4A       | chr14:55034329-55260033   | -0.00900427 | 0.999791 |
| XLOC_009584 | XLOC_009584 | FLOT2        | chr17:27206356-27224715   | -0.0089921  | 0.999791 |
| XLOC_007455 | XLOC_007455 | WHAMMP3      | chr15:23187728-23208357   | -0.00895103 | 1        |
| XLOC_021006 | XLOC_021006 | RP9          | chr7:33134409-33149002    | -0.00893177 | 0.999791 |
| XLOC_005569 | XLOC_005569 | TMBIM4       | chr12:66530716-66563807   | -0.00891398 | 0.999791 |
| XLOC_003550 | XLOC_003550 | FEN1         | chr11:61560108-61564714   | -0.00888292 | 0.999791 |
| XLOC_007155 | XLOC_007155 | DLL4         | chr15:41221530-41231258   | -0.00887862 | 0.999791 |
| XLOC_002177 | XLOC_002177 | NSL1         | chr1:212899494-212965139  | -0.00884624 | 0.999791 |
| XLOC_012906 | XLOC_012906 | FBXO11       | chr2:48010220-48132932    | -0.00876144 | 0.999791 |
| XLOC_011970 | XLOC_011970 | UBE2S        | chr19:55912649-55919325   | -0.00874804 | 0.999791 |
| XLOC_005801 | XLOC_005801 | MPHOSPH8     | chr13:20207787-20247599   | -0.00872841 | 0.999791 |
| XLOC_014664 | XLOC_014664 | ATP6V1E1     | chr22:18074902-18111588   | -0.00872417 | 0.999791 |
| XLOC_004705 | XLOC_004705 | NECAP1       | chr12:8234806-8250373     | -0.00871753 | 0.999791 |
| XLOC_005887 | XLOC_005887 | MED4-AS1     | chr13:48649863-48669277   | -0.00870323 | 0.999791 |
| XLOC_023467 | XLOC_023467 | ACRC         | chrX:70430034-70948962    | -0.00869107 | 1        |
| XLOC_011617 | XLOC_011617 | POLR2I       | chr19:36602104-36616849   | -0.00865131 | 0.999791 |
| XLOC_012868 | XLOC_012868 | HEATR5B      | chr2:37208152-37311485    | -0.00863078 | 0.999791 |
| XLOC_023612 | XLOC_023612 | RBMX2        | chrX:129535942-129547317  | -0.00860337 | 0.999791 |
| XLOC_015149 | XLOC_015149 | PRKCD        | chr3:53195222-53226733    | -0.00854901 | 0.999791 |
| XLOC_016208 | XLOC_016208 | TADA2B       | chr4:6911170-7059677      | -0.0085418  | 0.999791 |
| XLOC_002404 | XLOC_002404 | CCNY         | chr10:35535952-35860847   | -0.0085349  | 0.999791 |
| XLOC_013153 | XLOC_013153 | FAM168B      | chr2:131805448-131851004  | -0.00848882 | 0.999791 |
| XLOC_015971 | XLOC_015971 | CEP70        | chr3:138213186-138313129  | -0.0084856  | 0.999791 |
| XLOC_008383 | XLOC_008383 | MTRNR2L4     | chr16:3421052-3422283     | -0.00844328 | 1        |
| XLOC_016530 | XLOC_016530 | ARHGAP10     | chr4:148653452-148993927  | -0.00844057 | 0.999791 |
| XLOC_002150 | XLOC_002150 | SLC41A1      | chr1:205758220-205782161  | -0.0084343  | 0.999791 |
| XLOC_010662 | XLOC_010662 | FAM32A       | chr19:16296234-16302857   | -0.00835151 | 0.999791 |
| XLOC_018512 | XLOC_018512 | TBPL1        | chr6:134273307-134308638  | -0.00831531 | 0.999791 |
| XLOC_003801 | XLOC_003801 | ATM          | chr11:108093558-108239826 | -0.00830696 | 0.999791 |
| XLOC_017537 | XLOC_017537 | BTNL9        | chr5:180467224-180488523  | -0.00830066 | 0.999791 |
| XLOC_023059 | XLOC_023059 | RC3H2        | chr9:125611731-125667562  | -0.00829261 | 0.999791 |
| XLOC_007904 | XLOC_007904 | IL32         | chr16:3115312-3119668     | -0.00822404 | 0.999791 |
| XLOC_007913 | XLOC_007913 | ZNF174       | chr16:3451189-3459364     | -0.00819136 | 0.999791 |
| XLOC_010896 | XLOC_010896 | TMEM145      | chr19:42817476-42829214   | -0.00817828 | 0.999791 |
| XLOC_000041 | XLOC_000041 | ARHGEF16     | chr1:3371146-3397677      | -0.00816855 | 0.999791 |
| XLOC_016038 | XLOC_016038 | KPNA4        | chr3:160212782-160283376  | -0.00815258 | 0.999791 |
| XLOC_014141 | XLOC_014141 | PAXBP1-AS1   | chr21:34100424-34144169   | -0.00807644 | 1        |
| XLOC_007784 | XLOC_007784 | VPS33B       | chr15:91541773-91565833   | -0.00801796 | 0.999791 |
| XLOC_001081 | XLOC_001081 | ADCK3        | chr1:227127937-227175246  | -0.00799165 | 0.999791 |
| XLOC_008716 | XLOC_008716 | ZCCHC14      | chr16:87439851-87525460   | -0.00798089 | 0.999791 |
| XLOC_003179 | XLOC_003179 | METTL10      | chr10:126447405-126480439 | -0.00795317 | 0.999791 |
| XLOC_006839 | XLOC_006839 | DHRS7        | chr14:60611499-60632211   | -0.00790798 | 0.999791 |
| XLOC_013141 | XLOC_013141 | HS6ST1       | chr2:129023053-129076171  | -0.00788313 | 0.999791 |
| XLOC_008095 | XLOC_008095 | CNEP1R1      | chr16:50059188-50070999   | -0.00785072 | 0.999791 |
| XLOC_004713 | XLOC_004713 | PHC1         | chr12:9067315-9102357     | -0.00772672 | 0.999791 |
| XLOC_000539 | XLOC_000539 | SLC30A7      | chr1:101361631-101447311  | -0.00770934 | 0.999791 |
| XLOC_022322 | XLOC_022322 | NUDT2        | chr9:34329503-34343711    | -0.00767866 | 0.999791 |
| XLOC_018487 | XLOC_018487 | TRMT11       | chr6:126307575-126360420  | -0.00761968 | 0.999791 |
| XLOC_012940 | XLOC_012940 | PEL1I        | chr2:64319785-64371605    | -0.00757457 | 0.999791 |
| XLOC_014452 | XLOC_014452 | BCR          | chr22:23522551-23660224   | -0.00755648 | 0.999791 |
| XLOC_002026 | XLOC_002026 | LOC100506023 | chr1:173204198-173446294  | -0.00753613 | 1        |
| XLOC_003334 | XLOC_003334 | USP47        | chr11:11862969-11980872   | -0.00752388 | 0.999791 |
| XLOC_010165 | XLOC_010165 | RNF125       | chr18:29598444-29653154   | -0.00750379 | 0.999791 |
| XLOC_016755 | XLOC_016755 | NOA1         | chr4:57829515-57843826    | -0.00749004 | 0.999791 |
| XLOC_010831 | XLOC_010831 | KCNK6        | chr19:38810483-38819649   | -0.00747589 | 0.999791 |
| XLOC_021677 | XLOC_021677 | ESRP1        | chr8:95653363-95719694    | -0.00745615 | 1        |
| XLOC_016094 | XLOC_016094 | TMEM41A      | chr3:185207388-185216845  | -0.00742663 | 0.999791 |
| XLOC_017244 | XLOC_017244 | CAST         | chr5:95997740-96149848    | -0.00737989 | 0.999791 |
| XLOC_019111 | XLOC_019111 | NHSL1        | chr6:138743180-138893668  | -0.00737132 | 0.999791 |
| XLOC_014352 | XLOC_014352 | U2AF1        | chr21:44513065-44527688   | -0.00735564 | 0.999791 |
| XLOC_012482 | XLOC_012482 | MARCH7       | chr2:160569009-160625084  | -0.00730877 | 0.999791 |
| XLOC_012154 | XLOC_012154 | EML4         | chr2:42396489-42559688    | -0.00728327 | 0.999791 |
| XLOC_010464 | XLOC_010464 | DOT1L        | chr19:2164147-2232577     | -0.00722636 | 0.999791 |
| XLOC_003178 | XLOC_003178 | FAM53B       | chr10:126307862-126432930 | -0.00711937 | 0.999791 |
| XLOC_017598 | XLOC_017598 | GOLPH3       | chr5:32124823-32174425    | -0.00709857 | 0.999791 |
| XLOC_004780 | XLOC_004780 | STK38L       | chr12:27397077-27478890   | -0.00706907 | 0.999791 |
| XLOC_012932 | XLOC_012932 | XPO1         | chr2:61705068-61765418    | -0.00706477 | 0.999791 |
| XLOC_004571 | XLOC_004571 | DPAGT1       | chr11:118967212-118972785 | -0.00703804 | 0.999791 |
| XLOC_002253 | XLOC_002253 | TOMM20       | chr1:235272657-235292256  | -0.00698925 | 0.999791 |
| XLOC_023749 | XLOC_023749 | PNPLA4       | chrX:7866803-7895780      | -0.00692442 | 0.999791 |

|             |             |                |                           |             |          |
|-------------|-------------|----------------|---------------------------|-------------|----------|
| XLOC_012938 | XLOC_012938 | WDPCP          | chr2:63348534-63834330    | -0.00692417 | 0.999791 |
| XLOC_005989 | XLOC_005989 | CARKD          | chr13:111267806-111292342 | -0.00686962 | 0.999791 |
| XLOC_004553 | XLOC_004553 | TMPRSS13       | chr11:117771355-117800168 | -0.00684465 | 1        |
| XLOC_002449 | XLOC_002449 | MAPK8          | chr10:49609686-49643183   | -0.00683979 | 0.999791 |
| XLOC_002164 | XLOC_002164 | PLXNA2         | chr1:208195587-208417665  | -0.00670444 | 0.999791 |
| XLOC_006860 | XLOC_006860 | ATP6V1D        | chr14:67804580-67826720   | -0.00661826 | 0.999791 |
| XLOC_024191 | XLOC_024191 | DNASE1L1       | chrX:153626570-153650063  | -0.00660152 | 0.999791 |
| XLOC_023017 | XLOC_023017 | ZFP37          | chr9:115804173-115818996  | -0.00657941 | 0.999791 |
| XLOC_007178 | XLOC_007178 | CKMT1B         | chr15:43663312-43910998   | -0.00654428 | 0.999791 |
| XLOC_021499 | XLOC_021499 | BMP1           | chr8:22022652-22069840    | -0.00653682 | 0.999791 |
| XLOC_018001 | XLOC_018001 | RNF130         | chr5:179382473-179499109  | -0.00652194 | 0.999791 |
| XLOC_015083 | XLOC_015083 | PTH1R          | chr3:46919235-46945289    | -0.00651127 | 0.999791 |
| XLOC_011749 | XLOC_011749 | TRAPPC6A       | chr19:45666185-45681501   | -0.0064781  | 0.999791 |
| XLOC_004965 | XLOC_004965 | RASSF3         | chr12:65004292-65091347   | -0.00643571 | 0.999791 |
| XLOC_019001 | XLOC_019001 | GPR63          | chr6:97241997-97285353    | -0.00638736 | 0.999791 |
| XLOC_010840 | XLOC_010840 | NFKBIB         | chr19:39369194-39399534   | -0.0063209  | 0.999791 |
| XLOC_018202 | XLOC_018202 | CSNK2B         | chr6:31629005-31637843    | -0.00627999 | 0.999791 |
| XLOC_010596 | XLOC_010596 | PRKCSH         | chr19:11546268-11561782   | -0.0062294  | 0.999791 |
| XLOC_002118 | XLOC_002118 | KLHL12         | chr1:202860229-202896371  | -0.00620044 | 0.999791 |
| XLOC_013417 | XLOC_013417 | LINC00471      | chr2:232373136-232379050  | -0.00617927 | 1        |
| XLOC_005730 | XLOC_005730 | TAKO3          | chr12:118587605-118810750 | -0.00616196 | 0.999791 |
| XLOC_013169 | XLOC_013169 | DARS           | chr2:136664253-136743222  | -0.00613497 | 0.999791 |
| XLOC_017835 | XLOC_017835 | BRD8           | chr5:137475458-137514358  | -0.00597178 | 0.999791 |
| XLOC_004739 | XLOC_004739 | DDX47          | chr12:12966279-12982914   | -0.00596243 | 0.999791 |
| XLOC_018617 | XLOC_018617 | MGC39372       | chr6:2854890-2876744      | -0.00586454 | 0.999791 |
| XLOC_005193 | XLOC_005193 | SFSWAP         | chr12:132195631-132284283 | -0.0058415  | 0.999791 |
| XLOC_008524 | XLOC_008524 | ZNF689         | chr16:30613878-30622096   | -0.00580272 | 0.999791 |
| XLOC_022909 | XLOC_022909 | ISCA1          | chr9:88879462-88897490    | -0.0058026  | 0.999791 |
| XLOC_006230 | XLOC_006230 | ADPRHL1        | chr13:114076259-114107839 | -0.00579074 | 0.999791 |
| XLOC_018676 | XLOC_018676 | HIST1H3B       | chr6:26031816-26032288    | -0.00573436 | 0.999791 |
| XLOC_009018 | XLOC_009018 | MLLT6          | chr17:36861872-36886056   | -0.00568441 | 0.999791 |
| XLOC_004691 | XLOC_004691 | C12orf57       | chr12:7053202-7055165     | -0.0056471  | 0.999791 |
| XLOC_011956 | XLOC_011956 | PPP1R12C       | chr19:55602280-55628968   | -0.00564638 | 0.999791 |
| XLOC_011601 | XLOC_011601 | DMKN           | chr19:35988118-36004560   | -0.00563447 | 0.999791 |
| XLOC_007687 | XLOC_007687 | EDC3           | chr15:74922898-74988386   | -0.00559991 | 0.999791 |
| XLOC_005685 | XLOC_005685 | ALKBH2         | chr12:109525992-109531293 | -0.0055687  | 0.999791 |
| XLOC_018292 | XLOC_018292 | PRICKLE4       | chr6:41748499-41755110    | -0.00555159 | 0.999791 |
| XLOC_007809 | XLOC_007809 | SNRNP25        | chr16:103828-107669       | -0.00552451 | 0.999791 |
| XLOC_023619 | XLOC_023619 | PHF6           | chrX:133507341-133562822  | -0.0054992  | 0.999791 |
| XLOC_005540 | XLOC_005540 | TMEM194A       | chr12:57449425-57472574   | -0.00548771 | 0.999791 |
| XLOC_014736 | XLOC_014736 | TFIP11         | chr22:26879849-26908437   | -0.00546637 | 0.999791 |
| XLOC_011941 | XLOC_011941 | MBOAT7         | chr19:54677105-54693733   | -0.0053773  | 0.999791 |
| XLOC_001210 | XLOC_001210 | SLC35E2        | chr1:1656276-1677438      | -0.005352   | 0.999791 |
| XLOC_007577 | XLOC_007577 | SPPL2A         | chr15:50999736-51057910   | -0.00534474 | 0.999791 |
| XLOC_008608 | XLOC_008608 | CMTM4          | chr16:66648652-66730610   | -0.00531821 | 0.999791 |
| XLOC_013720 | XLOC_013720 | BCAS4          | chr20:49411466-49493714   | -0.00530233 | 0.999791 |
| XLOC_011655 | XLOC_011655 | SARS2          | chr19:39405903-39423659   | -0.00529637 | 0.999791 |
| XLOC_007485 | XLOC_007485 | EMC7           | chr15:34376223-34394053   | -0.00525463 | 0.999791 |
| XLOC_010495 | XLOC_010495 | EBI3           | chr19:4229539-4237524     | -0.00524996 | 0.999791 |
| XLOC_017978 | XLOC_017978 | PDLIM7         | chr5:176910394-176924602  | -0.0051877  | 0.999791 |
| XLOC_005766 | XLOC_005766 | ABC9B          | chr12:123405497-123451056 | -0.00518013 | 0.999791 |
| XLOC_017259 | XLOC_017259 | WDR36          | chr5:110427869-110466200  | -0.00515772 | 0.999791 |
| XLOC_014463 | XLOC_014463 | CABIN1         | chr22:24407764-24574596   | -0.00514501 | 0.999791 |
| XLOC_016636 | XLOC_016636 | HAUS3_POLN     | chr4:2073644-2243860      | -0.00509388 | 0.999791 |
| XLOC_006010 | XLOC_006010 | UPF3A          | chr13:115047058-115071291 | -0.00508296 | 0.999791 |
| XLOC_022608 | XLOC_022608 | USP20          | chr9:132597695-132644117  | -0.00504508 | 0.999791 |
| XLOC_012924 | XLOC_012924 | FANCL          | chr2:58273776-58468515    | -0.00500094 | 0.999791 |
| XLOC_016770 | XLOC_016770 | YTHDC1         | chr4:69176104-69215824    | -0.00498083 | 0.999791 |
| XLOC_023698 | XLOC_023698 | SSR4           | chrX:153051220-153063967  | -0.00491564 | 0.999791 |
| XLOC_022029 | XLOC_022029 | ARFGEF1        | chr8:68109883-68255912    | -0.00484505 | 0.999791 |
| XLOC_015053 | XLOC_015053 | SNRK           | chr3:43328003-43393454    | -0.00483496 | 0.999791 |
| XLOC_015457 | XLOC_015457 | MFN1           | chr3:179065479-179111008  | -0.00481894 | 0.999791 |
| XLOC_011545 | XLOC_011545 | TMEM161A       | chr19:19230424-19249310   | -0.00474768 | 0.999791 |
| XLOC_022674 | XLOC_022674 | MAMDC4         | chr9:139746818-139755251  | -0.00468423 | 0.999791 |
| XLOC_000567 | XLOC_000567 | GNAI3          | chr1:110091185-110138454  | -0.00463177 | 0.999791 |
| XLOC_002724 | XLOC_002724 | BAG3           | chr10:121410881-121437329 | -0.00462361 | 0.999791 |
| XLOC_012965 | XLOC_012965 | FAM136A        | chr2:70523107-70529220    | -0.0046218  | 0.999791 |
| XLOC_004842 | XLOC_004842 | LARP4          | chr12:50794591-50873788   | -0.00459689 | 0.999791 |
| XLOC_023163 | XLOC_023163 | DNLZ           | chr9:139256351-139258263  | -0.00457236 | 0.999791 |
| XLOC_012992 | XLOC_012992 | CCDC142_MRPL53 | chr2:74699084-74721691    | -0.00454456 | 0.999791 |
| XLOC_015562 | XLOC_015562 | RPUSD3         | chr3:9879532-9885702      | -0.00450909 | 0.999791 |
| XLOC_003445 | XLOC_003445 | NDUFS3         | chr11:47586981-47606115   | -0.004501   | 0.999791 |
| XLOC_000390 | XLOC_000390 | RNF11          | chr1:51701944-51739119    | -0.00449725 | 0.999791 |
| XLOC_002658 | XLOC_002658 | HPS6           | chr10:103825123-103827795 | -0.00439409 | 0.999791 |
| XLOC_003989 | XLOC_003989 | NUP98          | chr11:3696239-3847601     | -0.00437399 | 0.999791 |
| XLOC_000523 | XLOC_000523 | PTBP2          | chr1:97187174-97280605    | -0.00435519 | 0.999791 |
| XLOC_017803 | XLOC_017803 | GDF9           | chr5:132196877-132200477  | -0.00434738 | 1        |
| XLOC_017793 | XLOC_017793 | FNIP1          | chr5:130977406-131132756  | -0.00433796 | 0.999791 |
| XLOC_002597 | XLOC_002597 | EXOC6          | chr10:94594469-94819251   | -0.00433305 | 0.999791 |

|             |             |              |                           |             |          |
|-------------|-------------|--------------|---------------------------|-------------|----------|
| XLOC_010146 | XLOC_010146 | CABLES1      | chr18:20714527-20840434   | -0.00431125 | 0.999791 |
| XLOC_012508 | XLOC_012508 | GORASP2      | chr2:171784947-171823643  | -0.00430333 | 0.999791 |
| XLOC_000010 | XLOC_000010 | AGRN         | chr1:955502-991499        | -0.00422337 | 0.999791 |
| XLOC_004343 | XLOC_004343 | SLC29A2      | chr1:66129991-66139291    | -0.00409371 | 0.999791 |
| XLOC_017039 | XLOC_017039 | FAT1         | chr4:187508936-187644987  | -0.00409218 | 0.999791 |
| XLOC_016827 | XLOC_016827 | HPSE         | chr4:84213613-84256306    | -0.00409056 | 0.999791 |
| XLOC_000825 | XLOC_000825 | FCER1G       | chr1:161185086-161189038  | -0.00408769 | 0.999791 |
| XLOC_013431 | XLOC_013431 | MSL3P1       | chr2:234774089-234777055  | -0.00401076 | 0.999791 |
| XLOC_018534 | XLOC_018534 | PHACTR2      | chr6:143929316-144152322  | -0.00387542 | 0.999791 |
| XLOC_021508 | XLOC_021508 | RHOBTB2      | chr8:22844929-22941132    | -0.0038723  | 0.999791 |
| XLOC_013948 | XLOC_013948 | RBM39        | chr20:34291530-34330258   | -0.00387021 | 0.999791 |
| XLOC_021927 | XLOC_021927 | CLU          | chr8:27454433-27472328    | -0.00384689 | 0.999791 |
| XLOC_015491 | XLOC_015491 | SENP2        | chr3:185304030-185348885  | -0.00381142 | 0.999791 |
| XLOC_001603 | XLOC_001603 | ANKRD13C     | chr1:70724684-70820417    | -0.00378305 | 0.999791 |
| XLOC_023297 | XLOC_023297 | PRDX4        | chrX:23685644-23704514    | -0.00369645 | 0.999791 |
| XLOC_002832 | XLOC_002832 | FAM188A      | chr10:15820174-15902519   | -0.00368152 | 0.999791 |
| XLOC_006969 | XLOC_006969 | SETD3        | chr14:99864082-99947226   | -0.00366888 | 0.999791 |
| XLOC_021997 | XLOC_021997 | RPS20        | chr8:56980738-56987140    | -0.00364211 | 0.999791 |
| XLOC_024061 | XLOC_024061 | THOC2        | chrX:122734411-122866904  | -0.00358638 | 0.999791 |
| XLOC_006916 | XLOC_006916 | SNW1         | chr14:78183943-78236085   | -0.00357386 | 0.999791 |
| XLOC_016263 | XLOC_016263 | PI4K2B       | chr4:25235652-25280831    | -0.00354469 | 0.999791 |
| XLOC_005560 | XLOC_005560 | PPM1H        | chr12:63037762-63328665   | -0.00351529 | 0.999791 |
| XLOC_004174 | XLOC_004174 | CELF1        | chr11:47487488-47574792   | -0.00350949 | 0.999791 |
| XLOC_021661 | XLOC_021661 | WWP1         | chr8:87354993-87480178    | -0.0034598  | 0.999791 |
| XLOC_011894 | XLOC_011894 | ETFB         | chr19:51848408-51869672   | -0.00344447 | 0.999791 |
| XLOC_007149 | XLOC_007149 | RAD51        | chr15:40987326-41024356   | -0.00342717 | 0.999791 |
| XLOC_016201 | XLOC_016201 | MAN2B2       | chr4:6576901-6624188      | -0.00342355 | 0.999791 |
| XLOC_011252 | XLOC_011252 | TRIM28       | chr19:59055835-59062082   | -0.0033274  | 0.999791 |
| XLOC_013743 | XLOC_013743 | NPEPL1,STX16 | chr20:57226308-57290900   | -0.0033164  | 0.999791 |
| XLOC_012518 | XLOC_012518 | ZAK          | chr2:173940564-174146764  | -0.00328225 | 0.999791 |
| XLOC_004927 | XLOC_004927 | NABP2        | chr12:56618124-56623638   | -0.00327234 | 0.999791 |
| XLOC_009382 | XLOC_009382 | SMYD4        | chr17:1682828-1733175     | -0.00319676 | 0.999791 |
| XLOC_001235 | XLOC_001235 | CHD5         | chr1:6161846-6240194      | -0.00314608 | 1        |
| XLOC_004076 | XLOC_004076 | ZBED5        | chr11:10874250-10879620   | -0.00313271 | 0.999791 |
| XLOC_015297 | XLOC_015297 | LOC100129550 | chr3:122605359-122611263  | -0.00312604 | 0.999791 |
| XLOC_006386 | XLOC_006386 | SLC38A6      | chr14:61447831-61550451   | -0.00312017 | 0.999791 |
| XLOC_009790 | XLOC_009790 | ARHGAP27     | chr17:43471267-43503012   | -0.00307668 | 0.999791 |
| XLOC_006276 | XLOC_006276 | MRPL52       | chr14:23299091-23304246   | -0.00306193 | 0.999791 |
| XLOC_002855 | XLOC_002855 | ABI1         | chr10:26986594-27150016   | -0.00303306 | 0.999791 |
| XLOC_011737 | XLOC_011737 | ZNF45        | chr19:44416775-44439411   | -0.00302201 | 0.999791 |
| XLOC_010936 | XLOC_010936 | CLASRP       | chr19:45542297-45574214   | -0.00300577 | 0.999791 |
| XLOC_003967 | XLOC_003967 | MRPL23-AS1   | chr11:2004438-2011150     | -0.00293306 | 1        |
| XLOC_014778 | XLOC_014778 | PISD         | chr22:31892124-32026810   | -0.00286595 | 0.999791 |
| XLOC_012635 | XLOC_012635 | IGFBP2       | chr2:217498126-217529158  | -0.00285634 | 0.999791 |
| XLOC_024041 | XLOC_024041 | NKAP         | chrX:119059012-11907735   | -0.00284623 | 0.999791 |
| XLOC_001768 | XLOC_001768 | POLR3C       | chr1:145592604-145610884  | -0.00281277 | 0.999791 |
| XLOC_002104 | XLOC_002104 | TMEM9        | chr1:201103899-201123632  | -0.00280757 | 0.999791 |
| XLOC_009968 | XLOC_009968 | SLC25A19     | chr17:73267379-73285530   | -0.00280371 | 0.999791 |
| XLOC_017173 | XLOC_017173 | LOC441081    | chr5:69776869-69881549    | -0.00277863 | 1        |
| XLOC_018689 | XLOC_018689 | HIST1H4H     | chr6:26285353-26285727    | -0.00276751 | 0.999791 |
| XLOC_008901 | XLOC_008901 | TRIM16L      | chr17:18625401-18639431   | -0.00276137 | 0.999791 |
| XLOC_003968 | XLOC_003968 | H19,MIR675   | chr11:2016405-2019065     | -0.002753   | 0.999791 |
| XLOC_012168 | XLOC_012168 | CRIP1        | chr2:46844324-46852881    | -0.00270233 | 0.999791 |
| XLOC_015146 | XLOC_015146 | SPCS1        | chr3:52719935-52742197    | -0.00268829 | 0.999791 |
| XLOC_005866 | XLOC_005866 | NAA16        | chr13:41885340-41951166   | -0.00264663 | 0.999791 |
| XLOC_018765 | XLOC_018765 | ABHD16A      | chr6:31654725-31671137    | -0.00263232 | 0.999791 |
| XLOC_012047 | XLOC_012047 | RRM2         | chr2:10262694-10271546    | -0.00261013 | 0.999791 |
| XLOC_001801 | XLOC_001801 | ENSA         | chr11:150594598-150602098 | -0.00257443 | 0.999791 |
| XLOC_018603 | XLOC_018603 | C6orf120     | chr6:170102256-170124106  | -0.00255242 | 0.999791 |
| XLOC_001553 | XLOC_001553 | C1orf123     | chr1:53662100-53686289    | -0.00254237 | 0.999791 |
| XLOC_023451 | XLOC_023451 | IGBP1        | chrX:69353317-69386173    | -0.00249125 | 0.999791 |
| XLOC_008188 | XLOC_008188 | PSKH1        | chr16:67927174-67965778   | -0.00247726 | 0.999791 |
| XLOC_022017 | XLOC_022017 | ARMC1        | chr8:66514690-66546452    | -0.00247062 | 0.999791 |
| XLOC_003081 | XLOC_003081 | PYROXD2      | chr10:100143321-100174978 | -0.00243589 | 1        |
| XLOC_008557 | XLOC_008557 | C16orf87     | chr16:46835958-46865074   | -0.00242336 | 0.999791 |
| XLOC_005250 | XLOC_005250 | MLF2         | chr12:6857157-6862636     | -0.00240548 | 0.999791 |
| XLOC_023587 | XLOC_023587 | PGRMC1       | chrX:118370210-118378429  | -0.00240488 | 0.999791 |
| XLOC_000430 | XLOC_000430 | ALG6         | chr1:63833260-63904233    | -0.00239475 | 0.999791 |
| XLOC_006074 | XLOC_006074 | SMAD9        | chr13:37418967-37494409   | -0.00235618 | 0.999791 |
| XLOC_007757 | XLOC_007757 | SEC11A       | chr15:85212767-85259691   | -0.00234842 | 0.999791 |
| XLOC_021485 | XLOC_021485 | NAT1         | chr8:18027970-18081198    | -0.00222304 | 0.999791 |
| XLOC_012445 | XLOC_012445 | MGAT5        | chr2:135011829-135212192  | -0.00215501 | 0.999791 |
| XLOC_018745 | XLOC_018745 | FLOT1        | chr6:30695510-30710453    | -0.00214695 | 0.999791 |
| XLOC_021703 | XLOC_021703 | ATP6V1C1     | chr8:104033247-104085285  | -0.00213443 | 0.999791 |
| XLOC_002979 | XLOC_002979 | PCBD1        | chr10:72643266-72648541   | -0.0021299  | 0.999791 |
| XLOC_002422 | XLOC_002422 | ZNF32-AS1    | chr10:44124264-44170147   | -0.00212176 | 0.999791 |
| XLOC_001884 | XLOC_001884 | MUC1         | chr1:155158299-155162706  | -0.00208789 | 0.999791 |
| XLOC_011033 | XLOC_011033 | SCAF1        | chr19:50145381-50161906   | -0.00207061 | 0.999791 |
| XLOC_017587 | XLOC_017587 | FAM134B      | chr5:16473146-16617167    | -0.00205908 | 0.999791 |

|             |             |                    |                           |              |          |
|-------------|-------------|--------------------|---------------------------|--------------|----------|
| XLOC_003957 | XLOC_003957 | MOB2               | chr11:1490684-1785501     | -0.0020456   | 0.999791 |
| XLOC_018752 | XLOC_018752 | POU5F1             | chr6:31132113-31138451    | -0.00204477  | 1        |
| XLOC_010346 | XLOC_010346 | ATP5A1             | chr18:43664109-43684199   | -0.00203971  | 0.999791 |
| XLOC_022253 | XLOC_022253 | COMMD5             | chr8:146075550-146078932  | -0.00203781  | 0.999791 |
| XLOC_006124 | XLOC_006124 | EBPL               | chr13:50234809-50265623   | -0.00198699  | 0.999791 |
| XLOC_014194 | XLOC_014194 | PKNOX1             | chr21:44394642-44453688   | -0.00196438  | 0.999791 |
| XLOC_006513 | XLOC_006513 | GLRX5              | chr14:96001322-96011055   | -0.00189779  | 0.999791 |
| XLOC_018039 | XLOC_018039 | RIOK1              | chr6:7390061-7418270      | -0.00186126  | 0.999791 |
| XLOC_023631 | XLOC_023631 | SLC9A6             | chrX:135067582-135129428  | -0.00183654  | 0.999791 |
| XLOC_008035 | XLOC_008035 | KIF22              | chr16:29802033-29816706   | -0.00183401  | 0.999791 |
| XLOC_021573 | XLOC_021573 | VDAC3              | chr8:42249278-42263455    | -0.00175644  | 0.999791 |
| XLOC_018923 | XLOC_018923 | TRAM2              | chr6:52362199-52441862    | -0.00174191  | 0.999791 |
| XLOC_005645 | XLOC_005645 | IKBIP              | chr12:99007181-99038829   | -0.00167046  | 0.999791 |
| XLOC_016406 | XLOC_016406 | ENOPH1             | chr4:83351725-83382244    | -0.00166251  | 0.999791 |
| XLOC_003431 | XLOC_003431 | DGKZ               | chr1:46354454-46402104    | -0.00164324  | 0.999791 |
| XLOC_001510 | XLOC_001510 | EIF2B3             | chr1:45316193-45452394    | -0.00159581  | 0.999791 |
| XLOC_018380 | XLOC_018380 | MTO1               | chr6:74171453-74211179    | -0.00159487  | 0.999791 |
| XLOC_000662 | XLOC_000662 | FAM91A2,LINC00623  | chr1:149576261-149672733  | -0.00156629  | 0.999791 |
| XLOC_022961 | XLOC_022961 | ZNF510             | chr9:99518146-99540328    | -0.00156338  | 0.999791 |
| XLOC_002721 | XLOC_002721 | FAM45A             | chr10:120863610-120897376 | -0.00156006  | 0.999791 |
| XLOC_008918 | XLOC_008918 | DHRS7B             | chr17:21030240-21095285   | -0.00150579  | 0.999791 |
| XLOC_008652 | XLOC_008652 | LOC100506083       | chr16:70323669-70380650   | -0.00148605  | 1        |
| XLOC_009156 | XLOC_009156 | KAT7               | chr17:47865980-47906458   | -0.00148586  | 0.999791 |
| XLOC_011433 | XLOC_011433 | TMEM205            | chr19:11453451-11456981   | -0.00148392  | 0.999791 |
| XLOC_022375 | XLOC_022375 | PTGER4P2-CDK2AP2P2 | chr9:66494268-66503030    | -0.00146617  | 1        |
| XLOC_000428 | XLOC_000428 | ATG4C              | chr1:63249776-63330941    | -0.00146405  | 0.999791 |
| XLOC_008416 | XLOC_008416 | DEXI               | chr16:11022747-11036257   | -0.00143494  | 0.999791 |
| XLOC_012638 | XLOC_012638 | ARPC2              | chr2:219081873-219119071  | -0.00141716  | 0.999791 |
| XLOC_012726 | XLOC_012726 | COPS8              | chr2:237994083-238007489  | -0.00140447  | 0.999791 |
| XLOC_012731 | XLOC_012731 | RAMP1              | chr2:238768186-238820755  | -0.00139782  | 0.999791 |
| XLOC_008541 | XLOC_008541 | C16orf58           | chr16:31494438-31519706   | -0.00138662  | 0.999791 |
| XLOC_008022 | XLOC_008022 | ATP2A1             | chr16:28889808-28936532   | -0.00135147  | 0.999791 |
| XLOC_005861 | XLOC_005861 | NHLRC3             | chr13:39612447-39624244   | -0.00134898  | 0.999791 |
| XLOC_017847 | XLOC_017847 | SPATA24            | chr5:138732455-138739776  | -0.00133625  | 0.999791 |
| XLOC_017521 | XLOC_017521 | RMND5B             | chr5:177558027-17755479   | -0.00128274  | 0.999791 |
| XLOC_013854 | XLOC_013854 | TMX4               | chr20:7961715-8000393     | -0.00127989  | 0.999791 |
| XLOC_014776 | XLOC_014776 | PATZ1              | chr22:31721789-31742249   | -0.00122256  | 0.999791 |
| XLOC_014294 | XLOC_014294 | MIS18A             | chr21:33640529-33651376   | -0.00118847  | 0.999791 |
| XLOC_003390 | XLOC_003390 | TCP11L1            | chr1:33060962-33095109    | -0.00115819  | 0.999791 |
| XLOC_023815 | XLOC_023815 | CXorf38            | chrX:40486172-40506819    | -0.00112362  | 0.999791 |
| XLOC_012408 | XLOC_012408 | PTPN4              | chr2:120517206-120742474  | -0.00104044  | 0.999791 |
| XLOC_005481 | XLOC_005481 | KRT8               | chr12:53290970-53346685   | -0.00102936  | 0.999791 |
| XLOC_006494 | XLOC_006494 | RIN3               | chr14:92980124-93155334   | -0.00100196  | 0.999791 |
| XLOC_015312 | XLOC_015312 | PLXNA1             | chr3:126707436-126756235  | -0.000978561 | 0.999791 |
| XLOC_004249 | XLOC_004249 | CPSF7              | chr1:61170119-61197464    | -0.00094691  | 0.999791 |
| XLOC_006701 | XLOC_006701 | RAB2B              | chr14:21927178-21945132   | -0.000907384 | 0.999791 |
| XLOC_007666 | XLOC_007666 | THAP10             | chr15:71173680-71184772   | -0.000907284 | 0.999791 |
| XLOC_012227 | XLOC_012227 | PCBP1              | chr2:70314584-70316334    | -0.000878515 | 0.999791 |
| XLOC_003592 | XLOC_003592 | PRDX5              | chr11:64085559-64089295   | -0.000873212 | 0.999791 |
| XLOC_018504 | XLOC_018504 | RPS12              | chr6:133135707-133138703  | -0.000780079 | 0.999791 |
| XLOC_012809 | XLOC_012809 | PUM2               | chr2:20448452-20527144    | -0.000718351 | 0.999791 |
| XLOC_002527 | XLOC_002527 | VDAC2              | chr10:76969911-76991207   | -0.000694783 | 0.999791 |
| XLOC_010636 | XLOC_010636 | LOC100507373       | chr19:14247963-14316997   | -0.000682205 | 0.999791 |
| XLOC_013708 | XLOC_013708 | ZFAS1              | chr20:47862438-47905795   | -0.000645154 | 0.999791 |
| XLOC_013745 | XLOC_013745 | NELFCD             | chr20:57556262-57570188   | -0.000644661 | 0.999791 |
| XLOC_020520 | XLOC_020520 | CRCP               | chr7:65579804-65619553    | -0.000612156 | 0.999791 |
| XLOC_012849 | XLOC_012849 | SUPT7L             | chr2:27848505-27917847    | -0.00060722  | 0.999791 |
| XLOC_023991 | XLOC_023991 | TCEAL8             | chrX:102507922-102510121  | -0.000568365 | 0.999791 |
| XLOC_007251 | XLOC_007251 | PLEKHO2            | chr15:65134081-65160201   | -0.000551786 | 0.999791 |
| XLOC_018285 | XLOC_018285 | NFYA               | chr6:41040706-41108573    | -0.000488552 | 0.999791 |
| XLOC_017166 | XLOC_017166 | RAD17              | chr5:68647552-68710630    | -0.000488418 | 0.999791 |
| XLOC_009245 | XLOC_009245 | BPTF               | chr17:65821779-65980494   | -0.000486573 | 0.999791 |
| XLOC_017411 | XLOC_017411 | FBXO38             | chr5:147763497-147822399  | -0.000466049 | 0.999791 |
| XLOC_018336 | XLOC_018336 | CD2AP              | chr6:47445524-47594996    | -0.00041905  | 0.999791 |
| XLOC_020564 | XLOC_020564 | POR                | chr7:75544419-75623992    | -0.000331709 | 0.999791 |
| XLOC_012225 | XLOC_012225 | SNRNP27            | chr2:70121074-70132368    | -0.000319497 | 0.999791 |
| XLOC_005908 | XLOC_005908 | ALG11,UTP14C       | chr13:52586522-52607736   | -0.000229176 | 0.999791 |
| XLOC_008249 | XLOC_008249 | CMIP               | chr16:81478774-81745367   | -0.000145677 | 0.999803 |
| XLOC_003871 | XLOC_003871 | ARHGEF12           | chr11:120207617-120360645 | -0.000143359 | 0.999803 |
| XLOC_005963 | XLOC_005963 | IPO5               | chr13:98605928-98676550   | -0.000134918 | 0.999803 |
| XLOC_001632 | XLOC_001632 | DDAH1              | chr1:85784167-86044046    | -0.000112196 | 0.999791 |
| XLOC_000861 | XLOC_000861 | TIPRL              | chr1:168148170-168171351  | -0.000110743 | 0.999869 |
| XLOC_014866 | XLOC_014866 | CYB5R3             | chr22:43013845-43045405   | -9.41E-05    | 0.999803 |
| XLOC_006958 | XLOC_006958 | DICER1             | chr14:95552564-95623759   | -4.15E-05    | 0.99995  |
| XLOC_010918 | XLOC_010918 | ZNF226             | chr19:446669214-44681838  | -3.08E-05    | 0.999934 |
| XLOC_010756 | XLOC_010756 | GPATCH1            | chr19:33571785-33621318   | -1.46E-05    | 0.999791 |
| XLOC_016141 | XLOC_016141 | PCYT1A             | chr3:195965252-196014584  | -2.79E-06    | 0.999791 |
| XLOC_000002 | XLOC_000002 | OR4F5              | chr1:69090-70008          | 0            | 1        |
| XLOC_000004 | XLOC_000004 | OR4F3              | chr1:367658-368597        | 0            | 1        |

|             |             |                   |                        |   |   |
|-------------|-------------|-------------------|------------------------|---|---|
| XLOC_000011 | XLOC_000011 | LOC254099         | chr1:1072396-1079434   | 0 | 1 |
| XLOC_000012 | XLOC_000012 | MIR200B           | chr1:1102483-1102578   | 0 | 1 |
| XLOC_000013 | XLOC_000013 | MIR200A           | chr1:1103242-1103332   | 0 | 1 |
| XLOC_000014 | XLOC_000014 | MIR429            | chr1:1104384-1104467   | 0 | 1 |
| XLOC_000015 | XLOC_000015 | TTL10             | chr1:1109285-1133313   | 0 | 1 |
| XLOC_000022 | XLOC_000022 | TMEM88B           | chr1:1361507-1363167   | 0 | 1 |
| XLOC_000029 | XLOC_000029 | MMP23A            | chr1:1571099-1655791   | 0 | 1 |
| XLOC_000031 | XLOC_000031 | GABRD             | chr1:1950767-1962192   | 0 | 1 |
| XLOC_000038 | XLOC_000038 | ACTRT2            | chr1:2938045-2939467   | 0 | 1 |
| XLOC_000040 | XLOC_000040 | MIR4251           | chr1:2985741-3355185   | 0 | 1 |
| XLOC_000044 | XLOC_000044 | CCDC27            | chr1:3668964-3688209   | 0 | 1 |
| XLOC_000048 | XLOC_000048 | LOC728716         | chr1:4000671-4012643   | 0 | 1 |
| XLOC_000049 | XLOC_000049 | LOC284661         | chr1:4472110-4484744   | 0 | 1 |
| XLOC_000050 | XLOC_000050 | AJAP1             | chr1:4715104-4843851   | 0 | 1 |
| XLOC_000051 | XLOC_000051 | MIR4417           | chr1:5624130-5624203   | 0 | 1 |
| XLOC_000054 | XLOC_000054 | HES3              | chr1:6304251-6305638   | 0 | 1 |
| XLOC_000066 | XLOC_000066 | CA6               | chr1:9005892-9035148   | 0 | 1 |
| XLOC_000080 | XLOC_000080 | MTOR-AS1          | chr1:11166587-11322608 | 0 | 1 |
| XLOC_000081 | XLOC_000081 | ANGPTL7           | chr1:11166587-11322608 | 0 | 1 |
| XLOC_000083 | XLOC_000083 | PTCHD2            | chr1:11539294-11597640 | 0 | 1 |
| XLOC_000086 | XLOC_000086 | DRAXIN            | chr1:11751780-11780336 | 0 | 1 |
| XLOC_000095 | XLOC_000095 | SNORA59A          | chr1:12290112-12572098 | 0 | 1 |
| XLOC_000096 | XLOC_000096 | AADACL4           | chr1:12704565-12727097 | 0 | 1 |
| XLOC_000097 | XLOC_000097 | AADACL3           | chr1:12776117-12788726 | 0 | 1 |
| XLOC_000098 | XLOC_000098 | C1orf158          | chr1:12806162-12821102 | 0 | 1 |
| XLOC_000099 | XLOC_000099 | PRAMEF12          | chr1:12834983-12838048 | 0 | 1 |
| XLOC_000100 | XLOC_000100 | PRAMEF1           | chr1:12851545-12856777 | 0 | 1 |
| XLOC_000101 | XLOC_000101 | PRAMEF2           | chr1:12916940-12921764 | 0 | 1 |
| XLOC_000102 | XLOC_000102 | PRAMEF7,PRAMEF8   | chr1:12976449-12980568 | 0 | 1 |
| XLOC_000103 | XLOC_000103 | PRAMEF22          | chr1:13035542-13038381 | 0 | 1 |
| XLOC_000104 | XLOC_000104 | PRAMEF5           | chr1:13359818-13369057 | 0 | 1 |
| XLOC_000105 | XLOC_000105 | PRAMEF9           | chr1:13421175-13428191 | 0 | 1 |
| XLOC_000106 | XLOC_000106 | PRAMEF16          | chr1:13495253-13498259 | 0 | 1 |
| XLOC_000107 | XLOC_000107 | PRAMEF20,PRAMEF21 | chr1:13516065-13526943 | 0 | 1 |
| XLOC_000108 | XLOC_000108 | PRAMEF9           | chr1:13641972-13648988 | 0 | 1 |
| XLOC_000109 | XLOC_000109 | PRAMEF17          | chr1:13716087-13719064 | 0 | 1 |
| XLOC_000110 | XLOC_000110 | PRAMEF20,PRAMEF21 | chr1:13736906-13747803 | 0 | 1 |
| XLOC_000111 | XLOC_000111 | PDPN              | chr1:13910251-13944452 | 0 | 1 |
| XLOC_000118 | XLOC_000118 | CELA2A            | chr1:15783222-15798586 | 0 | 1 |
| XLOC_000119 | XLOC_000119 | CELA2B            | chr1:15802595-15817895 | 0 | 1 |
| XLOC_000124 | XLOC_000124 | TMEM82            | chr1:16068986-16074292 | 0 | 1 |
| XLOC_000127 | XLOC_000127 | C1orf64           | chr1:16330730-16333184 | 0 | 1 |
| XLOC_000129 | XLOC_000129 | CLCNKB            | chr1:16370230-16383821 | 0 | 1 |
| XLOC_000132 | XLOC_000132 | MIR3675           | chr1:16875408-16875482 | 0 | 1 |
| XLOC_000134 | XLOC_000134 | MIR3675           | chr1:17007749-17007823 | 0 | 1 |
| XLOC_000139 | XLOC_000139 | PADI6             | chr1:17698740-17728195 | 0 | 1 |
| XLOC_000142 | XLOC_000142 | IGSF21            | chr1:18434239-18704977 | 0 | 1 |
| XLOC_000143 | XLOC_000143 | KLHDC7A           | chr1:18807423-18812480 | 0 | 1 |
| XLOC_000144 | XLOC_000144 | PAX7              | chr1:18957499-19075360 | 0 | 1 |
| XLOC_000148 | XLOC_000148 | HTR6              | chr1:19991779-20006055 | 0 | 1 |
| XLOC_000150 | XLOC_000150 | PLA2G5            | chr1:20396700-20418394 | 0 | 1 |
| XLOC_000151 | XLOC_000151 | PLA2G2F           | chr1:20465822-20476879 | 0 | 1 |
| XLOC_000152 | XLOC_000152 | UBXN10            | chr1:20512577-20519942 | 0 | 1 |
| XLOC_000154 | XLOC_000154 | FAM43B            | chr1:20878931-20881513 | 0 | 1 |
| XLOC_000161 | XLOC_000161 | CELA3B            | chr1:22303417-22315847 | 0 | 1 |
| XLOC_000162 | XLOC_000162 | CELA3A            | chr1:22328148-22339035 | 0 | 1 |
| XLOC_000167 | XLOC_000167 | C1QA              | chr1:22963117-22966175 | 0 | 1 |
| XLOC_000168 | XLOC_000168 | C1QC              | chr1:22970117-22974603 | 0 | 1 |
| XLOC_000169 | XLOC_000169 | C1QB              | chr1:22979681-22988029 | 0 | 1 |
| XLOC_000171 | XLOC_000171 | MIR4684           | chr1:23037330-23241823 | 0 | 1 |
| XLOC_000173 | XLOC_000173 | MIR3115           | chr1:23345940-23410184 | 0 | 1 |
| XLOC_000180 | XLOC_000180 | MIR378F           | chr1:24255559-24255637 | 0 | 1 |
| XLOC_000182 | XLOC_000182 | LOC284632         | chr1:24526729-24538180 | 0 | 1 |
| XLOC_000201 | XLOC_000201 | CATSPER4          | chr1:26517118-26529033 | 0 | 1 |
| XLOC_000209 | XLOC_000209 | MIR1976           | chr1:26856248-26901520 | 0 | 1 |
| XLOC_000234 | XLOC_000234 | RAB42             | chr1:28918711-28921088 | 0 | 1 |
| XLOC_000238 | XLOC_000238 | OPRD1             | chr1:29138653-29190208 | 0 | 1 |
| XLOC_000244 | XLOC_000244 | LOC149086         | chr1:31971838-31974167 | 0 | 1 |
| XLOC_000245 | XLOC_000245 | LOC284551         | chr1:31984035-31989846 | 0 | 1 |
| XLOC_000257 | XLOC_000257 | LCK               | chr1:32716839-32751766 | 0 | 1 |
| XLOC_000260 | XLOC_000260 | ZBTB8B            | chr1:32930657-32953459 | 0 | 1 |
| XLOC_000269 | XLOC_000269 | HMGB4             | chr1:33979608-34631443 | 0 | 1 |
| XLOC_000270 | XLOC_000270 | LOC402779         | chr1:33979608-34631443 | 0 | 1 |
| XLOC_000271 | XLOC_000271 | C1orf94           | chr1:34632623-34684731 | 0 | 1 |
| XLOC_000273 | XLOC_000273 | GJB4              | chr1:35225341-35229325 | 0 | 1 |
| XLOC_000275 | XLOC_000275 | GJA4              | chr1:35258598-35261348 | 0 | 1 |
| XLOC_000288 | XLOC_000288 | MIR4255           | chr1:37627163-37627235 | 0 | 1 |
| XLOC_000295 | XLOC_000295 | MIR3659           | chr1:38554902-38555001 | 0 | 1 |
| XLOC_000313 | XLOC_000313 | MIR30E            | chr1:41154751-41237275 | 0 | 1 |

|             |             |              |                          |   |   |
|-------------|-------------|--------------|--------------------------|---|---|
| XLOC_000314 | XLOC_000314 | MIR30C1      | chr1:41154751-41237275   | 0 | 1 |
| XLOC_000318 | XLOC_000318 | GUCA2B       | chr1:42619091-42621495   | 0 | 1 |
| XLOC_000329 | XLOC_000329 | FAM183A      | chr1:43613593-43622067   | 0 | 1 |
| XLOC_000331 | XLOC_000331 | TMEM125      | chr1:43735664-43739673   | 0 | 1 |
| XLOC_000345 | XLOC_000345 | KLF17        | chr1:44584521-44600809   | 0 | 1 |
| XLOC_000348 | XLOC_000348 | MIR5584      | chr1:44870959-45117396   | 0 | 1 |
| XLOC_000354 | XLOC_000354 | SNORD38A     | chr1:45241245-45244412   | 0 | 1 |
| XLOC_000355 | XLOC_000355 | SNORD38B     | chr1:45241245-45244412   | 0 | 1 |
| XLOC_000377 | XLOC_000377 | EFCAB14-AS1  | chr1:47139707-47184736   | 0 | 1 |
| XLOC_000378 | XLOC_000378 | CYP4B1       | chr1:47264669-47285021   | 0 | 1 |
| XLOC_000379 | XLOC_000379 | CYP4X1       | chr1:47489239-47516423   | 0 | 1 |
| XLOC_000380 | XLOC_000380 | CYP4Z1       | chr1:47533159-47583992   | 0 | 1 |
| XLOC_000381 | XLOC_000381 | CYP4A22      | chr1:47603106-47614526   | 0 | 1 |
| XLOC_000386 | XLOC_000386 | SLC5A9       | chr1:48688356-48714316   | 0 | 1 |
| XLOC_000387 | XLOC_000387 | ELAVL4       | chr1:50513685-50667540   | 0 | 1 |
| XLOC_000389 | XLOC_000389 | C1orf185     | chr1:51567905-51613754   | 0 | 1 |
| XLOC_000400 | XLOC_000400 | PODN         | chr1:53527723-53551174   | 0 | 1 |
| XLOC_000403 | XLOC_000403 | DMRTB1       | chr1:53925071-53933158   | 0 | 1 |
| XLOC_000407 | XLOC_000407 | MIR47B1      | chr1:54519273-54565416   | 0 | 1 |
| XLOC_000411 | XLOC_000411 | C1orf177     | chr1:55271735-55307937   | 0 | 1 |
| XLOC_000416 | XLOC_000416 | MIR4422      | chr1:55691313-55691396   | 0 | 1 |
| XLOC_000418 | XLOC_000418 | C8A          | chr1:57320442-57383894   | 0 | 1 |
| XLOC_000423 | XLOC_000423 | MGC34796     | chr1:62119913-62121800   | 0 | 1 |
| XLOC_000435 | XLOC_000435 | UBE2U        | chr1:64669489-64710027   | 0 | 1 |
| XLOC_000437 | XLOC_000437 | MIR4794      | chr1:64936475-65158741   | 0 | 1 |
| XLOC_000444 | XLOC_000444 | MIR3117      | chr1:66999824-67210768   | 0 | 1 |
| XLOC_000445 | XLOC_000445 | TCTEX1D1     | chr1:67218139-67244730   | 0 | 1 |
| XLOC_000452 | XLOC_000452 | PIN1P1       | chr1:70225857-70589171   | 0 | 1 |
| XLOC_000460 | XLOC_000460 | LHX8         | chr1:75594118-75627218   | 0 | 1 |
| XLOC_000463 | XLOC_000463 | SNORD45C     | chr1:76251878-76260775   | 0 | 1 |
| XLOC_000464 | XLOC_000464 | SNORD45A     | chr1:76251878-76260775   | 0 | 1 |
| XLOC_000465 | XLOC_000465 | SNORD45B     | chr1:76251878-76260775   | 0 | 1 |
| XLOC_000468 | XLOC_000468 | ST6GALNAC5   | chr1:77333185-77529737   | 0 | 1 |
| XLOC_000469 | XLOC_000469 | AK5          | chr1:77747661-78025654   | 0 | 1 |
| XLOC_000474 | XLOC_000474 | MGC27382     | chr1:78695282-78835147   | 0 | 1 |
| XLOC_000475 | XLOC_000475 | PTGFR        | chr1:78956727-79006386   | 0 | 1 |
| XLOC_000476 | XLOC_000476 | IFI44L       | chr1:79086087-79111830   | 0 | 1 |
| XLOC_000478 | XLOC_000478 | LPHN2        | chr1:82266081-82458107   | 0 | 1 |
| XLOC_000479 | XLOC_000479 | PRKACB       | chr1:84543744-84704181   | 0 | 1 |
| XLOC_000484 | XLOC_000484 | MIR4423      | chr1:85599476-85599566   | 0 | 1 |
| XLOC_000489 | XLOC_000489 | CLCA4        | chr1:87012758-87046432   | 0 | 1 |
| XLOC_000490 | XLOC_000490 | CLCA3P       | chr1:87099958-87121059   | 0 | 1 |
| XLOC_000496 | XLOC_000496 | GBP6         | chr1:89829435-89853719   | 0 | 1 |
| XLOC_000497 | XLOC_000497 | GBP1P1       | chr1:89873237-89890493   | 0 | 1 |
| XLOC_000503 | XLOC_000503 | BRDT         | chr1:92414927-92479985   | 0 | 1 |
| XLOC_000507 | XLOC_000507 | C1orf146     | chr1:92683572-92711367   | 0 | 1 |
| XLOC_000511 | XLOC_000511 | SNORA66      | chr1:93297593-93427079   | 0 | 1 |
| XLOC_000517 | XLOC_000517 | MIR760       | chr1:94027342-94312706   | 0 | 1 |
| XLOC_000524 | XLOC_000524 | DPYD-AS1     | chr1:97543299-98386615   | 0 | 1 |
| XLOC_000525 | XLOC_000525 | LOC729987    | chr1:98676266-98738214   | 0 | 1 |
| XLOC_000527 | XLOC_000527 | LOC100129620 | chr1:99355800-99614408   | 0 | 1 |
| XLOC_000528 | XLOC_000528 | LPPR4        | chr1:99729847-99775138   | 0 | 1 |
| XLOC_000529 | XLOC_000529 | PALMD        | chr1:100111430-100231349 | 0 | 1 |
| XLOC_000535 | XLOC_000535 | MIR553       | chr1:100731713-100758325 | 0 | 1 |
| XLOC_000537 | XLOC_000537 | GPR88        | chr1:101003727-101007583 | 0 | 1 |
| XLOC_000538 | XLOC_000538 | VCAM1        | chr1:101185195-101204601 | 0 | 1 |
| XLOC_000540 | XLOC_000540 | S1PR1        | chr1:101702304-101707076 | 0 | 1 |
| XLOC_000541 | XLOC_000541 | DNAJA1P5     | chr1:102268126-102462790 | 0 | 1 |
| XLOC_000544 | XLOC_000544 | AMY2A        | chr1:104159998-104168400 | 0 | 1 |
| XLOC_000545 | XLOC_000545 | AMY1A        | chr1:104198140-104207173 | 0 | 1 |
| XLOC_000546 | XLOC_000546 | AMY1A        | chr1:104292278-104301311 | 0 | 1 |
| XLOC_000549 | XLOC_000549 | NTNG1        | chr1:107682628-108024475 | 0 | 1 |
| XLOC_000550 | XLOC_000550 | VAV3-AS1     | chr1:108113781-108537229 | 0 | 1 |
| XLOC_000551 | XLOC_000551 | NBPF6        | chr1:108992903-109013260 | 0 | 1 |
| XLOC_000568 | XLOC_000568 | MIR197       | chr1:110141514-110141589 | 0 | 1 |
| XLOC_000582 | XLOC_000582 | CYMP         | chr1:111023387-111033891 | 0 | 1 |
| XLOC_000583 | XLOC_000583 | CD53         | chr1:111413820-111442558 | 0 | 1 |
| XLOC_000585 | XLOC_000585 | CHI3L2       | chr1:111770280-111786062 | 0 | 1 |
| XLOC_000587 | XLOC_000587 | CHIA         | chr1:111833473-111863188 | 0 | 1 |
| XLOC_000588 | XLOC_000588 | PIFO         | chr1:111889194-111895639 | 0 | 1 |
| XLOC_000607 | XLOC_000607 | SYCP1        | chr1:115397454-115537990 | 0 | 1 |
| XLOC_000608 | XLOC_000608 | TSHB         | chr1:115572414-115576941 | 0 | 1 |
| XLOC_000613 | XLOC_000613 | MIR320B1     | chr1:117214370-117214449 | 0 | 1 |
| XLOC_000614 | XLOC_000614 | CD2          | chr1:117297085-117311851 | 0 | 1 |
| XLOC_000618 | XLOC_000618 | MIR942       | chr1:117602948-117645491 | 0 | 1 |
| XLOC_000622 | XLOC_000622 | HAQ2         | chr1:119911401-119936751 | 0 | 1 |
| XLOC_000624 | XLOC_000624 | HSD3B1       | chr1:120049825-120057681 | 0 | 1 |
| XLOC_000628 | XLOC_000628 | HIST2H2BA    | chr1:120906033-120914842 | 0 | 1 |
| XLOC_000630 | XLOC_000630 | EMBP1        | chr1:121260909-121313686 | 0 | 1 |

|             |             |              |                          |   |   |
|-------------|-------------|--------------|--------------------------|---|---|
| XLOC_000647 | XLOC_000647 | GPR89C       | chr1:145883867-145924049 | 0 | 1 |
| XLOC_000652 | XLOC_000652 | GJA8         | chr1:147374945-147381395 | 0 | 1 |
| XLOC_000655 | XLOC_000655 | PPIAL4E      | chr1:148644010-148644795 | 0 | 1 |
| XLOC_000657 | XLOC_000657 | PPIAL4D      | chr1:148806014-148806799 | 0 | 1 |
| XLOC_000660 | XLOC_000660 | FCGR1C       | chr1:149369293-149378297 | 0 | 1 |
| XLOC_000661 | XLOC_000661 | PPIAL4B      | chr1:149553002-149553787 | 0 | 1 |
| XLOC_000663 | XLOC_000663 | FCGR1A       | chr1:149754244-149783928 | 0 | 1 |
| XLOC_000664 | XLOC_000664 | HIST2H4B     | chr1:149804220-149804616 | 0 | 1 |
| XLOC_000665 | XLOC_000665 | HIST2H2AA3   | chr1:149822627-149823161 | 0 | 1 |
| XLOC_000666 | XLOC_000666 | HIST2H3C     | chr1:149824180-149824687 | 0 | 1 |
| XLOC_000681 | XLOC_000681 | MIR4257      | chr1:150521897-150533412 | 0 | 1 |
| XLOC_000696 | XLOC_000696 | MIR554       | chr1:151512780-151556059 | 0 | 1 |
| XLOC_000698 | XLOC_000698 | RIAD1        | chr1:151694012-151702082 | 0 | 1 |
| XLOC_000700 | XLOC_000700 | LOC100132111 | chr1:151810338-151816641 | 0 | 1 |
| XLOC_000701 | XLOC_000701 | LCE5A        | chr1:152483319-152484653 | 0 | 1 |
| XLOC_000702 | XLOC_000702 | CRCT1        | chr1:152486977-152488481 | 0 | 1 |
| XLOC_000703 | XLOC_000703 | LCE3C        | chr1:152573137-152573562 | 0 | 1 |
| XLOC_000704 | XLOC_000704 | LCE3B        | chr1:152586286-152586574 | 0 | 1 |
| XLOC_000705 | XLOC_000705 | LCE2D        | chr1:152635886-152637135 | 0 | 1 |
| XLOC_000706 | XLOC_000706 | LCE2C        | chr1:152647790-152649049 | 0 | 1 |
| XLOC_000707 | XLOC_000707 | LCE2B        | chr1:152658598-152659876 | 0 | 1 |
| XLOC_000708 | XLOC_000708 | LCE2A        | chr1:152670839-152671918 | 0 | 1 |
| XLOC_000709 | XLOC_000709 | LCE4A        | chr1:152681522-152681910 | 0 | 1 |
| XLOC_000710 | XLOC_000710 | C1orf68      | chr1:152691997-152692905 | 0 | 1 |
| XLOC_000711 | XLOC_000711 | KPRP         | chr1:152730505-152734529 | 0 | 1 |
| XLOC_000716 | XLOC_000716 | LCE1A        | chr1:152799948-152800573 | 0 | 1 |
| XLOC_000717 | XLOC_000717 | LCE6A        | chr1:152815329-152816459 | 0 | 1 |
| XLOC_000718 | XLOC_000718 | SMCP         | chr1:152850797-152857523 | 0 | 1 |
| XLOC_000719 | XLOC_000719 | IVL          | chr1:152881038-152884362 | 0 | 1 |
| XLOC_000720 | XLOC_000720 | SPRR4        | chr1:152943127-152945069 | 0 | 1 |
| XLOC_000721 | XLOC_000721 | SPRR1A       | chr1:152956563-152958290 | 0 | 1 |
| XLOC_000722 | XLOC_000722 | SPRR3        | chr1:152974222-152976332 | 0 | 1 |
| XLOC_000723 | XLOC_000723 | SPRR1B       | chr1:153003678-153005376 | 0 | 1 |
| XLOC_000724 | XLOC_000724 | LELP1        | chr1:153175905-153177601 | 0 | 1 |
| XLOC_000726 | XLOC_000726 | LOR          | chr1:153232178-153234600 | 0 | 1 |
| XLOC_000727 | XLOC_000727 | S100A9       | chr1:153330329-153333503 | 0 | 1 |
| XLOC_000728 | XLOC_000728 | S100A7A      | chr1:153388999-153395701 | 0 | 1 |
| XLOC_000739 | XLOC_000739 | AQP10        | chr1:154293591-154297801 | 0 | 1 |
| XLOC_000745 | XLOC_000745 | MIR4258      | chr1:154947117-154951725 | 0 | 1 |
| XLOC_000756 | XLOC_000756 | MIR92B       | chr1:155164967-155165063 | 0 | 1 |
| XLOC_000777 | XLOC_000777 | TTC24        | chr1:156549518-156556562 | 0 | 1 |
| XLOC_000786 | XLOC_000786 | CYCSP52      | chr1:157094458-157108383 | 0 | 1 |
| XLOC_000788 | XLOC_000788 | CD1D         | chr1:158149736-158156216 | 0 | 1 |
| XLOC_000789 | XLOC_000789 | CD1A         | chr1:158223926-158228058 | 0 | 1 |
| XLOC_000790 | XLOC_000790 | CD1C         | chr1:158259562-158264564 | 0 | 1 |
| XLOC_000791 | XLOC_000791 | CD1E         | chr1:158323485-158327343 | 0 | 1 |
| XLOC_000792 | XLOC_000792 | OR10K1       | chr1:158435351-158436293 | 0 | 1 |
| XLOC_000793 | XLOC_000793 | OR10R2       | chr1:158449667-158450675 | 0 | 1 |
| XLOC_000794 | XLOC_000794 | OR10Z1       | chr1:158576228-158577170 | 0 | 1 |
| XLOC_000795 | XLOC_000795 | OR6K6        | chr1:158724605-158725637 | 0 | 1 |
| XLOC_000796 | XLOC_000796 | MNDA         | chr1:158801167-158819270 | 0 | 1 |
| XLOC_000797 | XLOC_000797 | PYHIN1       | chr1:158901336-158946849 | 0 | 1 |
| XLOC_000799 | XLOC_000799 | CADM3        | chr1:159141376-159172932 | 0 | 1 |
| XLOC_000800 | XLOC_000800 | DARC         | chr1:159173802-159176290 | 0 | 1 |
| XLOC_000801 | XLOC_000801 | FCER1A       | chr1:159259503-159278014 | 0 | 1 |
| XLOC_000802 | XLOC_000802 | OR10J1       | chr1:159409511-159410600 | 0 | 1 |
| XLOC_000803 | XLOC_000803 | APCS         | chr1:159557615-159558661 | 0 | 1 |
| XLOC_000805 | XLOC_000805 | FCRL6        | chr1:159772172-159786047 | 0 | 1 |
| XLOC_000807 | XLOC_000807 | LOC100505633 | chr1:159931013-159948876 | 0 | 1 |
| XLOC_000809 | XLOC_000809 | ATP1A2       | chr1:160085519-160113374 | 0 | 1 |
| XLOC_000810 | XLOC_000810 | ATP1A4       | chr1:160121351-160156767 | 0 | 1 |
| XLOC_000818 | XLOC_000818 | LY9          | chr1:160765863-160798045 | 0 | 1 |
| XLOC_000827 | XLOC_000827 | PCP4L1       | chr1:161228516-161255240 | 0 | 1 |
| XLOC_000839 | XLOC_000839 | MIR4654      | chr1:162039580-162339813 | 0 | 1 |
| XLOC_000840 | XLOC_000840 | MIR556       | chr1:162039580-162339813 | 0 | 1 |
| XLOC_000849 | XLOC_000849 | LRRCS2       | chr1:165446078-165551341 | 0 | 1 |
| XLOC_000851 | XLOC_000851 | LOC440700    | chr1:165667986-165679199 | 0 | 1 |
| XLOC_000853 | XLOC_000853 | FMO9P        | chr1:166573152-166594473 | 0 | 1 |
| XLOC_000856 | XLOC_000856 | DUSP27       | chr1:167064086-167098402 | 0 | 1 |
| XLOC_000864 | XLOC_000864 | MIR557       | chr1:168344761-168344859 | 0 | 1 |
| XLOC_000865 | XLOC_000865 | XCL1         | chr1:168545710-168551315 | 0 | 1 |
| XLOC_000866 | XLOC_000866 | LINC00626    | chr1:168756178-168762126 | 0 | 1 |
| XLOC_000870 | XLOC_000870 | METTL11B     | chr1:170115187-170136923 | 0 | 1 |
| XLOC_000872 | XLOC_000872 | PRRX1        | chr1:170633312-170708541 | 0 | 1 |
| XLOC_000873 | XLOC_000873 | MROH9        | chr1:170904611-171033906 | 0 | 1 |
| XLOC_000874 | XLOC_000874 | FMO3         | chr1:171060017-171086959 | 0 | 1 |
| XLOC_000875 | XLOC_000875 | MIR1295B     | chr1:171060017-171086959 | 0 | 1 |
| XLOC_000876 | XLOC_000876 | FMO6P        | chr1:171106878-171130702 | 0 | 1 |
| XLOC_000877 | XLOC_000877 | FMO2         | chr1:171154387-171181822 | 0 | 1 |

|             |             |              |                          |   |   |
|-------------|-------------|--------------|--------------------------|---|---|
| XLOC_000878 | XLOC_000878 | FMO1         | chr1:171217662-171255113 | 0 | 1 |
| XLOC_000884 | XLOC_000884 | MIR3120      | chr1:171810620-172381857 | 0 | 1 |
| XLOC_000885 | XLOC_000885 | C1orf105     | chr1:172389827-172437969 | 0 | 1 |
| XLOC_000887 | XLOC_000887 | FASLG        | chr1:172628184-172636012 | 0 | 1 |
| XLOC_000889 | XLOC_000889 | LOC730159    | chr1:173577474-173639001 | 0 | 1 |
| XLOC_000897 | XLOC_000897 | TNN          | chr1:175036993-175117202 | 0 | 1 |
| XLOC_000899 | XLOC_000899 | FAM5B        | chr1:177140632-177251558 | 0 | 1 |
| XLOC_000901 | XLOC_000901 | TEX35        | chr1:178482211-178492635 | 0 | 1 |
| XLOC_000903 | XLOC_000903 | MIR4424      | chr1:178646883-178646969 | 0 | 1 |
| XLOC_000919 | XLOC_000919 | GM140        | chr1:181205523-181207740 | 0 | 1 |
| XLOC_000920 | XLOC_000920 | CACNA1E      | chr1:181452685-181775921 | 0 | 1 |
| XLOC_000921 | XLOC_000921 | LINC00272    | chr1:182376755-182383948 | 0 | 1 |
| XLOC_000922 | XLOC_000922 | RGSL1        | chr1:182419255-182529732 | 0 | 1 |
| XLOC_000923 | XLOC_000923 | LOC284648    | chr1:182584274-182585764 | 0 | 1 |
| XLOC_000934 | XLOC_000934 | HMCN1        | chr1:185703682-186446655 | 0 | 1 |
| XLOC_000939 | XLOC_000939 | LOC440704    | chr1:190594019-190770788 | 0 | 1 |
| XLOC_000940 | XLOC_000940 | RGS18        | chr1:192127591-192154945 | 0 | 1 |
| XLOC_000941 | XLOC_000941 | RGS21        | chr1:192286121-192336414 | 0 | 1 |
| XLOC_000942 | XLOC_000942 | RGS1         | chr1:192544856-192549159 | 0 | 1 |
| XLOC_000943 | XLOC_000943 | RGS13        | chr1:192605267-192629440 | 0 | 1 |
| XLOC_000947 | XLOC_000947 | MIR1278      | chr1:193091087-193223942 | 0 | 1 |
| XLOC_000948 | XLOC_000948 | CFH          | chr1:196621007-196716634 | 0 | 1 |
| XLOC_000949 | XLOC_000949 | CFHR3        | chr1:196743929-196763203 | 0 | 1 |
| XLOC_000951 | XLOC_000951 | CFHR4        | chr1:196857143-196887843 | 0 | 1 |
| XLOC_000952 | XLOC_000952 | CFHR2        | chr1:196912933-196928356 | 0 | 1 |
| XLOC_000953 | XLOC_000953 | CFHR5        | chr1:196946666-196978803 | 0 | 1 |
| XLOC_000956 | XLOC_000956 | LHX9         | chr1:197881634-197899273 | 0 | 1 |
| XLOC_000967 | XLOC_000967 | MIR5191      | chr1:201617449-201796102 | 0 | 1 |
| XLOC_000968 | XLOC_000968 | MIR1231      | chr1:201617449-201796102 | 0 | 1 |
| XLOC_000974 | XLOC_000974 | GPR37L1      | chr1:202092028-202098634 | 0 | 1 |
| XLOC_000986 | XLOC_000986 | OPTC         | chr1:203463270-203478077 | 0 | 1 |
| XLOC_001004 | XLOC_001004 | AVPR1B       | chr1:206224282-206231482 | 0 | 1 |
| XLOC_001005 | XLOC_001005 | CTSE         | chr1:206317458-206332104 | 0 | 1 |
| XLOC_001012 | XLOC_001012 | IL20         | chr1:207039153-207042568 | 0 | 1 |
| XLOC_001015 | XLOC_001015 | C4BPB        | chr1:207262211-207273337 | 0 | 1 |
| XLOC_001016 | XLOC_001016 | C4BPA        | chr1:207277606-207318317 | 0 | 1 |
| XLOC_001018 | XLOC_001018 | CR2          | chr1:207627644-207663240 | 0 | 1 |
| XLOC_001020 | XLOC_001020 | CR1L         | chr1:207818457-207897036 | 0 | 1 |
| XLOC_001023 | XLOC_001023 | MIR205HG     | chr1:209602167-209605892 | 0 | 1 |
| XLOC_001029 | XLOC_001029 | SYT14        | chr1:210111518-210337633 | 0 | 1 |
| XLOC_001030 | XLOC_001030 | SERTAD4      | chr1:210404803-210416440 | 0 | 1 |
| XLOC_001036 | XLOC_001036 | MIR3122      | chr1:212113740-212278187 | 0 | 1 |
| XLOC_001038 | XLOC_001038 | SNORA16B     | chr1:212458878-212535205 | 0 | 1 |
| XLOC_001050 | XLOC_001050 | KCNK2        | chr1:215178884-215410436 | 0 | 1 |
| XLOC_001053 | XLOC_001053 | LINC00210    | chr1:218066241-218094146 | 0 | 1 |
| XLOC_001057 | XLOC_001057 | RNU5F-1      | chr1:220046618-220321383 | 0 | 1 |
| XLOC_001059 | XLOC_001059 | MARK1        | chr1:220701567-220837799 | 0 | 1 |
| XLOC_001068 | XLOC_001068 | C1orf65      | chr1:223566714-223568812 | 0 | 1 |
| XLOC_001085 | XLOC_001085 | PRSS38       | chr1:228003417-228034171 | 0 | 1 |
| XLOC_001086 | XLOC_001086 | WNT3A        | chr1:228194722-228248972 | 0 | 1 |
| XLOC_001088 | XLOC_001088 | MIR3620      | chr1:228270360-228286913 | 0 | 1 |
| XLOC_001094 | XLOC_001094 | MIR4666A     | chr1:228649774-228649853 | 0 | 1 |
| XLOC_001101 | XLOC_001101 | CAPN9        | chr1:230883129-230937749 | 0 | 1 |
| XLOC_001107 | XLOC_001107 | MAP10        | chr1:232940637-232946092 | 0 | 1 |
| XLOC_001111 | XLOC_001111 | MIR4427      | chr1:233749749-233808258 | 0 | 1 |
| XLOC_001113 | XLOC_001113 | MIR4671      | chr1:234040678-234460262 | 0 | 1 |
| XLOC_001122 | XLOC_001122 | ACTN2        | chr1:236849769-236927558 | 0 | 1 |
| XLOC_001125 | XLOC_001125 | LOC100130331 | chr1:238025474-238091619 | 0 | 1 |
| XLOC_001127 | XLOC_001127 | RPS7P5       | chr1:240170823-240176560 | 0 | 1 |
| XLOC_001128 | XLOC_001128 | FMN2         | chr1:240255184-240638489 | 0 | 1 |
| XLOC_001129 | XLOC_001129 | MIR3123      | chr1:240938816-241520478 | 0 | 1 |
| XLOC_001131 | XLOC_001131 | WDR64        | chr1:241815579-241965434 | 0 | 1 |
| XLOC_001134 | XLOC_001134 | MIR4677      | chr1:243419306-244006886 | 0 | 1 |
| XLOC_001135 | XLOC_001135 | LOC339529    | chr1:244080703-244210619 | 0 | 1 |
| XLOC_001137 | XLOC_001137 | C1orf100     | chr1:244515936-244552388 | 0 | 1 |
| XLOC_001148 | XLOC_001148 | OR2W5        | chr1:247654369-247655711 | 0 | 1 |
| XLOC_001149 | XLOC_001149 | GCSAML       | chr1:247712450-247739848 | 0 | 1 |
| XLOC_001150 | XLOC_001150 | OR2G2        | chr1:247751661-247752615 | 0 | 1 |
| XLOC_001151 | XLOC_001151 | OR2G3        | chr1:247768887-247769817 | 0 | 1 |
| XLOC_001153 | XLOC_001153 | OR2W3        | chr1:248058888-248059833 | 0 | 1 |
| XLOC_001154 | XLOC_001154 | OR2T8        | chr1:248084319-248085258 | 0 | 1 |
| XLOC_001155 | XLOC_001155 | OR2L13       | chr1:248100492-248264224 | 0 | 1 |
| XLOC_001156 | XLOC_001156 | OR2L8        | chr1:248100492-248264224 | 0 | 1 |
| XLOC_001157 | XLOC_001157 | OR2AK2       | chr1:248100492-248264224 | 0 | 1 |
| XLOC_001158 | XLOC_001158 | OR2L1P       | chr1:248100492-248264224 | 0 | 1 |
| XLOC_001159 | XLOC_001159 | OR2L5        | chr1:248100492-248264224 | 0 | 1 |
| XLOC_001160 | XLOC_001160 | OR2L2        | chr1:248100492-248264224 | 0 | 1 |
| XLOC_001161 | XLOC_001161 | OR2L3        | chr1:248100492-248264224 | 0 | 1 |
| XLOC_001162 | XLOC_001162 | OR2M1P       | chr1:248285437-248286082 | 0 | 1 |



|             |             |                    |                          |   |   |
|-------------|-------------|--------------------|--------------------------|---|---|
| XLOC_001163 | XLOC_001163 | OR2M5              | chr1:248308449-248309388 | 0 | 1 |
| XLOC_001164 | XLOC_001164 | OR2M2              | chr1:248343287-248344331 | 0 | 1 |
| XLOC_001165 | XLOC_001165 | OR2M3              | chr1:248366369-248367308 | 0 | 1 |
| XLOC_001166 | XLOC_001166 | OR2M4              | chr1:248402230-248403166 | 0 | 1 |
| XLOC_001167 | XLOC_001167 | OR14C36            | chr1:248512076-248513015 | 0 | 1 |
| XLOC_001168 | XLOC_001168 | OR2T4              | chr1:248524882-248525929 | 0 | 1 |
| XLOC_001169 | XLOC_001169 | OR2T6              | chr1:248550909-248551836 | 0 | 1 |
| XLOC_001170 | XLOC_001170 | OR2T1              | chr1:248569295-248570405 | 0 | 1 |
| XLOC_001171 | XLOC_001171 | OR2T2              | chr1:248616098-248617073 | 0 | 1 |
| XLOC_001172 | XLOC_001172 | OR2T3              | chr1:248636651-248637608 | 0 | 1 |
| XLOC_001173 | XLOC_001173 | OR2T5              | chr1:248651889-248652837 | 0 | 1 |
| XLOC_001174 | XLOC_001174 | OR2G6              | chr1:248684947-248685898 | 0 | 1 |
| XLOC_001175 | XLOC_001175 | MIR3124            | chr1:249120575-249120642 | 0 | 1 |
| XLOC_001179 | XLOC_001179 | FAM138F            | chr1:34610-36081         | 0 | 1 |
| XLOC_001181 | XLOC_001181 | OR4F3              | chr1:621095-622034       | 0 | 1 |
| XLOC_001192 | XLOC_001192 | TNFRSF18           | chr1:1138887-1142089     | 0 | 1 |
| XLOC_001220 | XLOC_001220 | HES5               | chr1:2460183-2461684     | 0 | 1 |
| XLOC_001227 | XLOC_001227 | MIR551A            | chr1:3404505-3528059     | 0 | 1 |
| XLOC_001233 | XLOC_001233 | MIR4689            | chr1:5922731-5922801     | 0 | 1 |
| XLOC_001241 | XLOC_001241 | MIR4252            | chr1:6484847-6521004     | 0 | 1 |
| XLOC_001254 | XLOC_001254 | MIR34A             | chr1:9211726-9211836     | 0 | 1 |
| XLOC_001255 | XLOC_001255 | C1orf200           | chr1:9711789-9884550     | 0 | 1 |
| XLOC_001261 | XLOC_001261 | C1orf127           | chr1:11006529-11042094   | 0 | 1 |
| XLOC_001273 | XLOC_001273 | PRAMEF11           | chr1:1288467-12891264    | 0 | 1 |
| XLOC_001274 | XLOC_001274 | HNRNPCL1,LOC649330 | chr1:12907235-12908578   | 0 | 1 |
| XLOC_001275 | XLOC_001275 | PRAMEF4            | chr1:12939032-12946025   | 0 | 1 |
| XLOC_001276 | XLOC_001276 | PRAMEF10           | chr1:12952726-12958094   | 0 | 1 |
| XLOC_001277 | XLOC_001277 | PRAMEF6            | chr1:12998301-13007406   | 0 | 1 |
| XLOC_001278 | XLOC_001278 | PRAMEF5            | chr1:13108513-13117751   | 0 | 1 |
| XLOC_001279 | XLOC_001279 | LOC440563          | chr1:13182959-13184326   | 0 | 1 |
| XLOC_001280 | XLOC_001280 | PRAMEF3            | chr1:13328195-13331692   | 0 | 1 |
| XLOC_001281 | XLOC_001281 | PRAMEF8            | chr1:13386646-13390765   | 0 | 1 |
| XLOC_001282 | XLOC_001282 | PRAMEF13,PRAMEF14  | chr1:13447413-13452656   | 0 | 1 |
| XLOC_001283 | XLOC_001283 | PRAMEF18           | chr1:13474052-13477569   | 0 | 1 |
| XLOC_001284 | XLOC_001284 | PRAMEF7,PRAMEF8    | chr1:13607430-13611550   | 0 | 1 |
| XLOC_001285 | XLOC_001285 | PRAMEF14           | chr1:13668268-13673511   | 0 | 1 |
| XLOC_001286 | XLOC_001286 | PRAMEF18           | chr1:13694888-13698405   | 0 | 1 |
| XLOC_001287 | XLOC_001287 | LRRC38             | chr1:13801444-13804242   | 0 | 1 |
| XLOC_001294 | XLOC_001294 | HSPB7              | chr1:16340522-16345285   | 0 | 1 |
| XLOC_001304 | XLOC_001304 | ESPNP              | chr1:17017712-17046652   | 0 | 1 |
| XLOC_001306 | XLOC_001306 | MIR3675            | chr1:17185443-17185516   | 0 | 1 |
| XLOC_001310 | XLOC_001310 | PADI2              | chr1:17393255-17445948   | 0 | 1 |
| XLOC_001312 | XLOC_001312 | TAS1R2             | chr1:19166092-19186155   | 0 | 1 |
| XLOC_001314 | XLOC_001314 | MIR4695            | chr1:19197923-19229293   | 0 | 1 |
| XLOC_001324 | XLOC_001324 | RNF186             | chr1:20140521-20141771   | 0 | 1 |
| XLOC_001325 | XLOC_001325 | PLA2G2E            | chr1:20246799-20250110   | 0 | 1 |
| XLOC_001326 | XLOC_001326 | PLA2G2A            | chr1:20301923-20306932   | 0 | 1 |
| XLOC_001328 | XLOC_001328 | PLA2G2C            | chr1:20490483-20501687   | 0 | 1 |
| XLOC_001342 | XLOC_001342 | MIR4253            | chr1:23037330-23241823   | 0 | 1 |
| XLOC_001356 | XLOC_001356 | CNR2               | chr1:24200459-24239817   | 0 | 1 |
| XLOC_001372 | XLOC_001372 | SLC30A2            | chr1:26364513-26372604   | 0 | 1 |
| XLOC_001373 | XLOC_001373 | TRIM63             | chr1:26377795-26394125   | 0 | 1 |
| XLOC_001375 | XLOC_001375 | AIM1L              | chr1:26648349-26680621   | 0 | 1 |
| XLOC_001376 | XLOC_001376 | ZNF683             | chr1:26688124-26699266   | 0 | 1 |
| XLOC_001385 | XLOC_001385 | CD164L2            | chr1:27705595-27709805   | 0 | 1 |
| XLOC_001388 | XLOC_001388 | FGR                | chr1:27938800-27961727   | 0 | 1 |
| XLOC_001395 | XLOC_001395 | SNORD99            | chr1:28879528-28908366   | 0 | 1 |
| XLOC_001405 | XLOC_001405 | MIR4420            | chr1:31205314-31230683   | 0 | 1 |
| XLOC_001408 | XLOC_001408 | SNORD103A          | chr1:31404352-31538564   | 0 | 1 |
| XLOC_001409 | XLOC_001409 | SNORD103A          | chr1:31404352-31538564   | 0 | 1 |
| XLOC_001410 | XLOC_001410 | SNORD85            | chr1:31404352-31538564   | 0 | 1 |
| XLOC_001417 | XLOC_001417 | MIR4254            | chr1:32192717-32229648   | 0 | 1 |
| XLOC_001452 | XLOC_001452 | CSF3R              | chr1:36931643-36948915   | 0 | 1 |
| XLOC_001453 | XLOC_001453 | GRIK3              | chr1:37261127-37499844   | 0 | 1 |
| XLOC_001456 | XLOC_001456 | MIR5581            | chr1:37955560-37980420   | 0 | 1 |
| XLOC_001459 | XLOC_001459 | RSPO1              | chr1:38076950-38100595   | 0 | 1 |
| XLOC_001468 | XLOC_001468 | LOC339442          | chr1:38674705-38680439   | 0 | 1 |
| XLOC_001474 | XLOC_001474 | SNORA55            | chr1:40026484-40042521   | 0 | 1 |
| XLOC_001476 | XLOC_001476 | NT5C1A             | chr1:40124792-40137710   | 0 | 1 |
| XLOC_001491 | XLOC_001491 | GUCA2A             | chr1:42628361-42630395   | 0 | 1 |
| XLOC_001494 | XLOC_001494 | CLDN19             | chr1:43198763-43205925   | 0 | 1 |
| XLOC_001524 | XLOC_001524 | KNCN               | chr1:47004367-47069966   | 0 | 1 |
| XLOC_001529 | XLOC_001529 | CYP4Z2P            | chr1:47308766-47366147   | 0 | 1 |
| XLOC_001531 | XLOC_001531 | PDZK1IP1           | chr1:47649260-47655771   | 0 | 1 |
| XLOC_001536 | XLOC_001536 | SKINTL             | chr1:48567386-48648100   | 0 | 1 |
| XLOC_001538 | XLOC_001538 | AGBL4              | chr1:48998526-50489626   | 0 | 1 |
| XLOC_001539 | XLOC_001539 | BEND5              | chr1:48998526-50489626   | 0 | 1 |
| XLOC_001556 | XLOC_001556 | SLC25A3P1          | chr1:53904042-53905693   | 0 | 1 |
| XLOC_001561 | XLOC_001561 | LDLRAD1            | chr1:54472970-54483859   | 0 | 1 |

|             |             |                 |                           |   |   |
|-------------|-------------|-----------------|---------------------------|---|---|
| XLOC_001568 | XLOC_001568 | TTC22           | chr1:55246751-55266941    | 0 | 1 |
| XLOC_001572 | XLOC_001572 | C1orf168        | chr1:57184476-57285369    | 0 | 1 |
| XLOC_001573 | XLOC_001573 | C8B             | chr1:57394882-57431688    | 0 | 1 |
| XLOC_001574 | XLOC_001574 | DAB1            | chr1:57463578-58716211    | 0 | 1 |
| XLOC_001580 | XLOC_001580 | MIR4711         | chr1:59762624-60228402    | 0 | 1 |
| XLOC_001581 | XLOC_001581 | CYP2J2          | chr1:60358979-60392423    | 0 | 1 |
| XLOC_001582 | XLOC_001582 | C1orf87         | chr1:60456065-60539442    | 0 | 1 |
| XLOC_001584 | XLOC_001584 | KANK4           | chr1:62701836-62785083    | 0 | 1 |
| XLOC_001589 | XLOC_001589 | MIR3671         | chr1:65523437-65523525    | 0 | 1 |
| XLOC_001590 | XLOC_001590 | MIR101-1        | chr1:65524116-65524191    | 0 | 1 |
| XLOC_001599 | XLOC_001599 | MIR1262         | chr1:68167148-68698284    | 0 | 1 |
| XLOC_001600 | XLOC_001600 | RPE65           | chr1:68894506-68915642    | 0 | 1 |
| XLOC_001606 | XLOC_001606 | MIR186          | chr1:71318035-71546972    | 0 | 1 |
| XLOC_001607 | XLOC_001607 | NEGR1           | chr1:71868624-72748277    | 0 | 1 |
| XLOC_001608 | XLOC_001608 | NEGR1-IT1       | chr1:71868624-72748277    | 0 | 1 |
| XLOC_001610 | XLOC_001610 | C1orf173        | chr1:75033794-75139422    | 0 | 1 |
| XLOC_001612 | XLOC_001612 | SLC44A5         | chr1:75667815-76076799    | 0 | 1 |
| XLOC_001613 | XLOC_001613 | ASB17           | chr1:76384557-76398116    | 0 | 1 |
| XLOC_001618 | XLOC_001618 | ELTD1           | chr1:79355448-79472495    | 0 | 1 |
| XLOC_001619 | XLOC_001619 | MIR548AP        | chr1:84259597-84464833    | 0 | 1 |
| XLOC_001637 | XLOC_001637 | LOC100505768    | chr1:87819209-87837338    | 0 | 1 |
| XLOC_001643 | XLOC_001643 | GBP7            | chr1:89597433-89641723    | 0 | 1 |
| XLOC_001645 | XLOC_001645 | GBP5            | chr1:89724633-89738544    | 0 | 1 |
| XLOC_001648 | XLOC_001648 | BARHL2          | chr1:91177578-91182794    | 0 | 1 |
| XLOC_001650 | XLOC_001650 | HFM1            | chr1:91726322-91870426    | 0 | 1 |
| XLOC_001667 | XLOC_001667 | MIR137,MIR137HG | chr1:98453555-98515249    | 0 | 1 |
| XLOC_001668 | XLOC_001668 | MIR2682         | chr1:98453555-98515249    | 0 | 1 |
| XLOC_001669 | XLOC_001669 | LPPR5           | chr1:99355800-99614408    | 0 | 1 |
| XLOC_001675 | XLOC_001675 | LOC100128787    | chr1:101092605-101112560  | 0 | 1 |
| XLOC_001678 | XLOC_001678 | RNU6-6          | chr1:101806424-101806451  | 0 | 1 |
| XLOC_001679 | XLOC_001679 | OLFM3           | chr1:102268126-102462790  | 0 | 1 |
| XLOC_001680 | XLOC_001680 | COL11A1         | chr1:103342022-103574052  | 0 | 1 |
| XLOC_001681 | XLOC_001681 | AMY1A           | chr1:104230039-104239073  | 0 | 1 |
| XLOC_001682 | XLOC_001682 | VAV3            | chr1:108113781-108537229  | 0 | 1 |
| XLOC_001684 | XLOC_001684 | NBPF4           | chr1:108765962-108786703  | 0 | 1 |
| XLOC_001685 | XLOC_001685 | HENMT1          | chr1:109190909-109204148  | 0 | 1 |
| XLOC_001698 | XLOC_001698 | EPS8L3          | chr1:110292701-110306644  | 0 | 1 |
| XLOC_001703 | XLOC_001703 | KCNA10          | chr1:111059838-1111061797 | 0 | 1 |
| XLOC_001704 | XLOC_001704 | KCNA2           | chr1:111136201-111174096  | 0 | 1 |
| XLOC_001705 | XLOC_001705 | KCNA3           | chr1:111214309-111217655  | 0 | 1 |
| XLOC_001709 | XLOC_001709 | PGCP1           | chr1:111927140-111932473  | 0 | 1 |
| XLOC_001716 | XLOC_001716 | MIR4256         | chr1:113004391-113004455  | 0 | 1 |
| XLOC_001721 | XLOC_001721 | LOC643441       | chr1:113739403-113748875  | 0 | 1 |
| XLOC_001727 | XLOC_001727 | SYT6            | chr1:114631913-114696472  | 0 | 1 |
| XLOC_001730 | XLOC_001730 | DENND2C         | chr1:115127195-115212732  | 0 | 1 |
| XLOC_001734 | XLOC_001734 | TSPAN2          | chr1:115590632-115632121  | 0 | 1 |
| XLOC_001735 | XLOC_001735 | NGF             | chr1:115828536-115880857  | 0 | 1 |
| XLOC_001744 | XLOC_001744 | SPAG17          | chr1:118472371-118727848  | 0 | 1 |
| XLOC_001749 | XLOC_001749 | HMGCS2          | chr1:120290618-120311555  | 0 | 1 |
| XLOC_001752 | XLOC_001752 | ADAM30          | chr1:120436155-120439147  | 0 | 1 |
| XLOC_001760 | XLOC_001760 | PPIAL4B         | chr1:144363461-144364246  | 0 | 1 |
| XLOC_001763 | XLOC_001763 | LOC653513       | chr1:144614958-144828810  | 0 | 1 |
| XLOC_001771 | XLOC_001771 | PDZK1P1         | chr1:145924387-145942619  | 0 | 1 |
| XLOC_001779 | XLOC_001779 | PDZK1P1         | chr1:147466093-147484331  | 0 | 1 |
| XLOC_001781 | XLOC_001781 | MIR5087         | chr1:147806602-147806678  | 0 | 1 |
| XLOC_001782 | XLOC_001782 | FLJ39739        | chr1:147906021-147931980  | 0 | 1 |
| XLOC_001783 | XLOC_001783 | PPIAL4B         | chr1:147954634-147955419  | 0 | 1 |
| XLOC_001785 | XLOC_001785 | PPIAL4D         | chr1:148201751-148202536  | 0 | 1 |
| XLOC_001788 | XLOC_001788 | HIST2H3A        | chr1:149812258-149812765  | 0 | 1 |
| XLOC_001789 | XLOC_001789 | HIST2H2AA3      | chr1:149813784-149814318  | 0 | 1 |
| XLOC_001791 | XLOC_001791 | HIST2H4A        | chr1:149832329-149832725  | 0 | 1 |
| XLOC_001803 | XLOC_001803 | HORMAD1         | chr1:150670534-150693364  | 0 | 1 |
| XLOC_001816 | XLOC_001816 | SELENBP1        | chr1:151336777-151345210  | 0 | 1 |
| XLOC_001821 | XLOC_001821 | LINGO4          | chr1:151772764-151777882  | 0 | 1 |
| XLOC_001823 | XLOC_001823 | C2CD4D          | chr1:151810338-151816641  | 0 | 1 |
| XLOC_001824 | XLOC_001824 | THEM5           | chr1:151819576-151826173  | 0 | 1 |
| XLOC_001828 | XLOC_001828 | TCHHL1          | chr1:152056619-152061540  | 0 | 1 |
| XLOC_001829 | XLOC_001829 | TCHH            | chr1:152078792-152087930  | 0 | 1 |
| XLOC_001830 | XLOC_001830 | RPTN            | chr1:152126070-152131704  | 0 | 1 |
| XLOC_001833 | XLOC_001833 | FLG2            | chr1:152321212-152332482  | 0 | 1 |
| XLOC_001834 | XLOC_001834 | CRNN            | chr1:152381718-152386750  | 0 | 1 |
| XLOC_001835 | XLOC_001835 | LCE3E           | chr1:152538174-152539229  | 0 | 1 |
| XLOC_001836 | XLOC_001836 | LCE3D           | chr1:152551859-152552980  | 0 | 1 |
| XLOC_001837 | XLOC_001837 | LCE3A           | chr1:152595309-152595579  | 0 | 1 |
| XLOC_001839 | XLOC_001839 | SPRR2D          | chr1:153012200-153013594  | 0 | 1 |
| XLOC_001840 | XLOC_001840 | SPRR2A          | chr1:153028595-153029988  | 0 | 1 |
| XLOC_001841 | XLOC_001841 | SPRR2B          | chr1:153042717-153044084  | 0 | 1 |
| XLOC_001842 | XLOC_001842 | SPRR2E          | chr1:153065610-153067001  | 0 | 1 |
| XLOC_001843 | XLOC_001843 | SPRR2F          | chr1:153084612-153085989  | 0 | 1 |

|             |             |              |                          |   |   |
|-------------|-------------|--------------|--------------------------|---|---|
| XLOC_001844 | XLOC_001844 | SPRR2C       | chr1:153112593-153113969 | 0 | 1 |
| XLOC_001845 | XLOC_001845 | SPRR2G       | chr1:153122057-153123427 | 0 | 1 |
| XLOC_001846 | XLOC_001846 | PGLYRP3      | chr1:153270337-153283194 | 0 | 1 |
| XLOC_001847 | XLOC_001847 | PGLYRP4      | chr1:153302596-153321022 | 0 | 1 |
| XLOC_001848 | XLOC_001848 | S100A12      | chr1:153346183-153348075 | 0 | 1 |
| XLOC_001849 | XLOC_001849 | S100A8       | chr1:153362507-153363664 | 0 | 1 |
| XLOC_001850 | XLOC_001850 | S100A7L2     | chr1:153409470-153412503 | 0 | 1 |
| XLOC_001851 | XLOC_001851 | S100A7       | chr1:153430219-153433137 | 0 | 1 |
| XLOC_001869 | XLOC_001869 | MIR190B      | chr1:154166140-154166219 | 0 | 1 |
| XLOC_001898 | XLOC_001898 | SNORA42      | chr1:155882835-155904188 | 0 | 1 |
| XLOC_001907 | XLOC_001907 | VHLL         | chr1:156268414-156269428 | 0 | 1 |
| XLOC_001910 | XLOC_001910 | MIR9-1       | chr1:156374054-156399184 | 0 | 1 |
| XLOC_001920 | XLOC_001920 | INSRR        | chr1:156776034-156851642 | 0 | 1 |
| XLOC_001922 | XLOC_001922 | MIR765       | chr1:156904631-157015162 | 0 | 1 |
| XLOC_001923 | XLOC_001923 | ETV3L        | chr1:157061834-157069600 | 0 | 1 |
| XLOC_001925 | XLOC_001925 | FCRL5        | chr1:157483166-157522310 | 0 | 1 |
| XLOC_001926 | XLOC_001926 | FCRL4        | chr1:157543538-157567870 | 0 | 1 |
| XLOC_001927 | XLOC_001927 | FCRL3        | chr1:157647977-157670647 | 0 | 1 |
| XLOC_001928 | XLOC_001928 | FCRL2        | chr1:157715522-157746922 | 0 | 1 |
| XLOC_001929 | XLOC_001929 | FCRL1        | chr1:157764193-157789940 | 0 | 1 |
| XLOC_001930 | XLOC_001930 | CD5L         | chr1:157800703-157811634 | 0 | 1 |
| XLOC_001931 | XLOC_001931 | LOC646268    | chr1:158101833-158110430 | 0 | 1 |
| XLOC_001932 | XLOC_001932 | CD1B         | chr1:158297739-158301321 | 0 | 1 |
| XLOC_001933 | XLOC_001933 | OR10T2       | chr1:158368311-158369256 | 0 | 1 |
| XLOC_001934 | XLOC_001934 | OR10K2       | chr1:158389717-158390656 | 0 | 1 |
| XLOC_001935 | XLOC_001935 | OR6Y1        | chr1:158516917-158517895 | 0 | 1 |
| XLOC_001936 | XLOC_001936 | OR6P1        | chr1:158532440-158533394 | 0 | 1 |
| XLOC_001937 | XLOC_001937 | OR10X1       | chr1:158548708-158549689 | 0 | 1 |
| XLOC_001938 | XLOC_001938 | SPTA1        | chr1:158580495-158656506 | 0 | 1 |
| XLOC_001939 | XLOC_001939 | OR6K2        | chr1:158669467-158670442 | 0 | 1 |
| XLOC_001940 | XLOC_001940 | OR6K3        | chr1:158686957-158687905 | 0 | 1 |
| XLOC_001941 | XLOC_001941 | OR6N1        | chr1:158735533-158736472 | 0 | 1 |
| XLOC_001942 | XLOC_001942 | OR6N2        | chr1:158746471-158747425 | 0 | 1 |
| XLOC_001943 | XLOC_001943 | AIM2         | chr1:159032274-159046647 | 0 | 1 |
| XLOC_001944 | XLOC_001944 | LOC100131825 | chr1:159141376-159172932 | 0 | 1 |
| XLOC_001945 | XLOC_001945 | OR10J3       | chr1:159283459-159284449 | 0 | 1 |
| XLOC_001946 | XLOC_001946 | OR10J5       | chr1:159504867-159505797 | 0 | 1 |
| XLOC_001947 | XLOC_001947 | CRP          | chr1:159682078-159684379 | 0 | 1 |
| XLOC_001951 | XLOC_001951 | IGSF9        | chr1:159896828-159915386 | 0 | 1 |
| XLOC_001952 | XLOC_001952 | SLAMF9       | chr1:159921281-159924044 | 0 | 1 |
| XLOC_001959 | XLOC_001959 | SLAMF6       | chr1:160454819-160493052 | 0 | 1 |
| XLOC_001961 | XLOC_001961 | SLAMF1       | chr1:160579890-160617081 | 0 | 1 |
| XLOC_001962 | XLOC_001962 | CD48         | chr1:160648535-160681641 | 0 | 1 |
| XLOC_001963 | XLOC_001963 | CD244        | chr1:160799949-160832692 | 0 | 1 |
| XLOC_001964 | XLOC_001964 | ITLN1        | chr1:160846329-160885490 | 0 | 1 |
| XLOC_001965 | XLOC_001965 | ITLN2        | chr1:160914815-160924589 | 0 | 1 |
| XLOC_001977 | XLOC_001977 | MPZ          | chr1:161274524-161279762 | 0 | 1 |
| XLOC_001980 | XLOC_001980 | FCGR3B       | chr1:161592987-161601753 | 0 | 1 |
| XLOC_001984 | XLOC_001984 | SH2D1B       | chr1:162365055-162381928 | 0 | 1 |
| XLOC_001987 | XLOC_001987 | LOC100505795 | chr1:164528596-164821060 | 0 | 1 |
| XLOC_001988 | XLOC_001988 | LMX1A        | chr1:165171103-165325952 | 0 | 1 |
| XLOC_001989 | XLOC_001989 | XRXG         | chr1:165370158-165414592 | 0 | 1 |
| XLOC_001994 | XLOC_001994 | MIR921       | chr1:166039255-166135958 | 0 | 1 |
| XLOC_002000 | XLOC_002000 | ADCY10       | chr1:167778624-167883453 | 0 | 1 |
| XLOC_002005 | XLOC_002005 | XCL2         | chr1:168510002-168513235 | 0 | 1 |
| XLOC_002006 | XLOC_002006 | DPT          | chr1:168664694-168698442 | 0 | 1 |
| XLOC_002011 | XLOC_002011 | SELP         | chr1:169558087-169599377 | 0 | 1 |
| XLOC_002017 | XLOC_002017 | MIR3119-1    | chr1:170115187-170136923 | 0 | 1 |
| XLOC_002018 | XLOC_002018 | LOC284688    | chr1:170240545-170253349 | 0 | 1 |
| XLOC_002019 | XLOC_002019 | MIR1295A     | chr1:171060017-171086959 | 0 | 1 |
| XLOC_002020 | XLOC_002020 | MYOC         | chr1:171604556-171621773 | 0 | 1 |
| XLOC_002022 | XLOC_002022 | DNM3OS       | chr1:171810620-172381857 | 0 | 1 |
| XLOC_002024 | XLOC_002024 | TNFSF18      | chr1:173010359-173020103 | 0 | 1 |
| XLOC_002027 | XLOC_002027 | SLC9C2       | chr1:173469603-173572233 | 0 | 1 |
| XLOC_002031 | XLOC_002031 | SNORD81      | chr1:173832385-173837125 | 0 | 1 |
| XLOC_002033 | XLOC_002033 | SNORD80      | chr1:173832385-173837125 | 0 | 1 |
| XLOC_002034 | XLOC_002034 | SNORD79      | chr1:173832385-173837125 | 0 | 1 |
| XLOC_002035 | XLOC_002035 | SNORD78      | chr1:173832385-173837125 | 0 | 1 |
| XLOC_002036 | XLOC_002036 | SNORD44      | chr1:173832385-173837125 | 0 | 1 |
| XLOC_002037 | XLOC_002037 | SNORD77      | chr1:173832385-173837125 | 0 | 1 |
| XLOC_002039 | XLOC_002039 | SNORD75      | chr1:173832385-173837125 | 0 | 1 |
| XLOC_002040 | XLOC_002040 | SNORD74      | chr1:173832385-173837125 | 0 | 1 |
| XLOC_002045 | XLOC_002045 | TNR          | chr1:175291934-175712752 | 0 | 1 |
| XLOC_002049 | XLOC_002049 | MIR488       | chr1:176830202-177134024 | 0 | 1 |
| XLOC_002051 | XLOC_002051 | LOC730102    | chr1:177975274-178007142 | 0 | 1 |
| XLOC_002059 | XLOC_002059 | MIR3121      | chr1:180257351-180472022 | 0 | 1 |
| XLOC_002066 | XLOC_002066 | RGS8         | chr1:182615791-182642067 | 0 | 1 |
| XLOC_002067 | XLOC_002067 | SHCBP1L      | chr1:182868999-182922553 | 0 | 1 |
| XLOC_002070 | XLOC_002070 | NCF2         | chr1:183524696-183560056 | 0 | 1 |

|             |             |                 |                          |   |   |
|-------------|-------------|-----------------|--------------------------|---|---|
| XLOC_002078 | XLOC_002078 | LOC100288079    | chr1:185292978-185304171 | 0 | 1 |
| XLOC_002079 | XLOC_002079 | MIR548F1        | chr1:185703682-186446655 | 0 | 1 |
| XLOC_002082 | XLOC_002082 | PTGS2           | chr1:186640943-186649559 | 0 | 1 |
| XLOC_002083 | XLOC_002083 | FAM5C           | chr1:190066796-190446759 | 0 | 1 |
| XLOC_002087 | XLOC_002087 | KCNT2           | chr1:196194912-196577499 | 0 | 1 |
| XLOC_002088 | XLOC_002088 | MIR4735         | chr1:196194912-196577499 | 0 | 1 |
| XLOC_002092 | XLOC_002092 | DENND1B         | chr1:197473878-197744623 | 0 | 1 |
| XLOC_002093 | XLOC_002093 | ATP6V1G3        | chr1:198492351-198510075 | 0 | 1 |
| XLOC_002095 | XLOC_002095 | MIR181B1        | chr1:198777131-198906558 | 0 | 1 |
| XLOC_002096 | XLOC_002096 | MIR181A1        | chr1:198777131-198906558 | 0 | 1 |
| XLOC_002102 | XLOC_002102 | CACNA1S         | chr1:201008639-201081694 | 0 | 1 |
| XLOC_002105 | XLOC_002105 | TNNT2           | chr1:201328135-201346828 | 0 | 1 |
| XLOC_002106 | XLOC_002106 | LAD1            | chr1:201349965-201368669 | 0 | 1 |
| XLOC_002107 | XLOC_002107 | TNNI1           | chr1:201372894-201390874 | 0 | 1 |
| XLOC_002110 | XLOC_002110 | RNU6-79         | chr1:201617449-201796102 | 0 | 1 |
| XLOC_002121 | XLOC_002121 | LOC401980       | chr1:202955579-202976393 | 0 | 1 |
| XLOC_002123 | XLOC_002123 | MYBPH           | chr1:203136938-203144942 | 0 | 1 |
| XLOC_002124 | XLOC_002124 | CHI3L1          | chr1:203148058-203155922 | 0 | 1 |
| XLOC_002125 | XLOC_002125 | CHIT1           | chr1:203185206-203198880 | 0 | 1 |
| XLOC_002127 | XLOC_002127 | FMOD            | chr1:203309751-203320289 | 0 | 1 |
| XLOC_002128 | XLOC_002128 | LINC00303       | chr1:204001574-204010392 | 0 | 1 |
| XLOC_002142 | XLOC_002142 | KLHDC8A         | chr1:205305192-205326218 | 0 | 1 |
| XLOC_002144 | XLOC_002144 | MIR135B         | chr1:205417429-205417526 | 0 | 1 |
| XLOC_002151 | XLOC_002151 | PM20D1          | chr1:205797149-205819276 | 0 | 1 |
| XLOC_002152 | XLOC_002152 | SLC26A9         | chr1:205882176-205912588 | 0 | 1 |
| XLOC_002153 | XLOC_002153 | C1orf186        | chr1:206238881-206288236 | 0 | 1 |
| XLOC_002156 | XLOC_002156 | FAIM3           | chr1:207070787-207095378 | 0 | 1 |
| XLOC_002158 | XLOC_002158 | FCAMR           | chr1:207131311-207143970 | 0 | 1 |
| XLOC_002162 | XLOC_002162 | MIR29B2         | chr1:207975787-207975868 | 0 | 1 |
| XLOC_002183 | XLOC_002183 | ESRRG           | chr1:216676587-217311097 | 0 | 1 |
| XLOC_002185 | XLOC_002185 | LOC728463       | chr1:218517537-218617961 | 0 | 1 |
| XLOC_002187 | XLOC_002187 | SLC30A10        | chr1:220046618-220321383 | 0 | 1 |
| XLOC_002190 | XLOC_002190 | MIR215          | chr1:220046618-220321383 | 0 | 1 |
| XLOC_002191 | XLOC_002191 | MIR194-1        | chr1:220046618-220321383 | 0 | 1 |
| XLOC_002193 | XLOC_002193 | MIR664,SNORA36B | chr1:220321609-220445843 | 0 | 1 |
| XLOC_002195 | XLOC_002195 | C1orf140        | chr1:221503269-221509638 | 0 | 1 |
| XLOC_002205 | XLOC_002205 | MIR320B2        | chr1:224415035-224517891 | 0 | 1 |
| XLOC_002207 | XLOC_002207 | MIR4742         | chr1:224572844-224622001 | 0 | 1 |
| XLOC_002211 | XLOC_002211 | LEFTY1          | chr1:226073981-226076846 | 0 | 1 |
| XLOC_002213 | XLOC_002213 | LEFTY2          | chr1:226124297-226129083 | 0 | 1 |
| XLOC_002220 | XLOC_002220 | ZNF847P         | chr1:227884732-227885408 | 0 | 1 |
| XLOC_002222 | XLOC_002222 | WNT9A           | chr1:228109164-228135676 | 0 | 1 |
| XLOC_002223 | XLOC_002223 | MIR5008         | chr1:228109164-228135676 | 0 | 1 |
| XLOC_002229 | XLOC_002229 | HIST3H3         | chr1:228612545-228613026 | 0 | 1 |
| XLOC_002236 | XLOC_002236 | PGBD5           | chr1:230457391-230561674 | 0 | 1 |
| XLOC_002241 | XLOC_002241 | LOC149373       | chr1:231298673-231357314 | 0 | 1 |
| XLOC_002245 | XLOC_002245 | SNRPD2P2        | chr1:231611509-231612271 | 0 | 1 |
| XLOC_002246 | XLOC_002246 | LINC00582       | chr1:231664398-232177019 | 0 | 1 |
| XLOC_002257 | XLOC_002257 | MIR4753         | chr1:235330209-235491532 | 0 | 1 |
| XLOC_002261 | XLOC_002261 | MIR1537         | chr1:235824344-236030220 | 0 | 1 |
| XLOC_002262 | XLOC_002262 | NID1            | chr1:236139131-236228481 | 0 | 1 |
| XLOC_002266 | XLOC_002266 | MT1P2           | chr1:237167402-237167718 | 0 | 1 |
| XLOC_002267 | XLOC_002267 | ZP4             | chr1:238025474-238091619 | 0 | 1 |
| XLOC_002268 | XLOC_002268 | LOC339535       | chr1:238643683-238649317 | 0 | 1 |
| XLOC_002269 | XLOC_002269 | GREM2           | chr1:240652872-240775462 | 0 | 1 |
| XLOC_002270 | XLOC_002270 | RGS7            | chr1:240938816-241520478 | 0 | 1 |
| XLOC_002275 | XLOC_002275 | PLD5            | chr1:242251688-242687998 | 0 | 1 |
| XLOC_002283 | XLOC_002283 | LOC255654       | chr1:246679340-246687589 | 0 | 1 |
| XLOC_002290 | XLOC_002290 | MIR3916         | chr1:247365268-247365362 | 0 | 1 |
| XLOC_002292 | XLOC_002292 | OR2B11          | chr1:247614330-247615284 | 0 | 1 |
| XLOC_002293 | XLOC_002293 | OR2C3           | chr1:247687980-247697141 | 0 | 1 |
| XLOC_002294 | XLOC_002294 | OR13G1          | chr1:247835419-247836343 | 0 | 1 |
| XLOC_002295 | XLOC_002295 | OR6F1           | chr1:247875130-247876057 | 0 | 1 |
| XLOC_002296 | XLOC_002296 | OR1C1           | chr1:247920763-247921708 | 0 | 1 |
| XLOC_002297 | XLOC_002297 | OR14A16         | chr1:247978101-247979031 | 0 | 1 |
| XLOC_002298 | XLOC_002298 | OR11L1          | chr1:248004229-248005198 | 0 | 1 |
| XLOC_002299 | XLOC_002299 | OR2T33          | chr1:248436153-248437116 | 0 | 1 |
| XLOC_002300 | XLOC_002300 | OR2T12          | chr1:248457917-248458880 | 0 | 1 |
| XLOC_002301 | XLOC_002301 | OR2M7           | chr1:248486931-248487870 | 0 | 1 |
| XLOC_002302 | XLOC_002302 | OR2T29          | chr1:248721844-248722792 | 0 | 1 |
| XLOC_002303 | XLOC_002303 | OR2T34          | chr1:248737101-248738058 | 0 | 1 |
| XLOC_002304 | XLOC_002304 | OR2T10          | chr1:248756130-248757069 | 0 | 1 |
| XLOC_002305 | XLOC_002305 | OR2T11          | chr1:248789478-248790429 | 0 | 1 |
| XLOC_002306 | XLOC_002306 | OR2T35          | chr1:248801587-248802559 | 0 | 1 |
| XLOC_002307 | XLOC_002307 | OR2T27          | chr1:248813231-248814185 | 0 | 1 |
| XLOC_002308 | XLOC_002308 | OR14I1          | chr1:248844669-248845605 | 0 | 1 |
| XLOC_002309 | XLOC_002309 | LYPD8           | chr1:248902716-248903151 | 0 | 1 |
| XLOC_002317 | XLOC_002317 | LINC00200       | chr10:1205707-1210612    | 0 | 1 |
| XLOC_002318 | XLOC_002318 | ADARB2-AS1      | chr10:1223252-1779670    | 0 | 1 |

|             |             |                    |                         |   |   |
|-------------|-------------|--------------------|-------------------------|---|---|
| XLOC_002321 | XLOC_002321 | LINC00705          | chr10:4692376-4720262   | 0 | 1 |
| XLOC_002322 | XLOC_002322 | AKR1E2             | chr10:4868368-4890251   | 0 | 1 |
| XLOC_002323 | XLOC_002323 | AKR1C1             | chr10:5005453-5020158   | 0 | 1 |
| XLOC_002325 | XLOC_002325 | AKR1C4             | chr10:5238797-5260910   | 0 | 1 |
| XLOC_002326 | XLOC_002326 | UCN3               | chr10:5406975-5416169   | 0 | 1 |
| XLOC_002328 | XLOC_002328 | CALML3             | chr10:5566923-5568225   | 0 | 1 |
| XLOC_002333 | XLOC_002333 | MIR3155A           | chr10:6186842-6277507   | 0 | 1 |
| XLOC_002342 | XLOC_002342 | ECHDC3             | chr10:11784355-11806065 | 0 | 1 |
| XLOC_002348 | XLOC_002348 | MIR4480            | chr10:12391582-12871733 | 0 | 1 |
| XLOC_002353 | XLOC_002353 | MIR1265            | chr10:14478574-14478660 | 0 | 1 |
| XLOC_002361 | XLOC_002361 | ST8SIA6-AS1        | chr10:17362675-17496254 | 0 | 1 |
| XLOC_002365 | XLOC_002365 | MIR511-1           | chr10:17851361-17953178 | 0 | 1 |
| XLOC_002367 | XLOC_002367 | MRC1               | chr10:18098351-18200091 | 0 | 1 |
| XLOC_002368 | XLOC_002368 | MIR511-2           | chr10:18098351-18200091 | 0 | 1 |
| XLOC_002369 | XLOC_002369 | SLC39A12           | chr10:18240767-18332221 | 0 | 1 |
| XLOC_002372 | XLOC_002372 | PLXDC2             | chr10:20105371-20569115 | 0 | 1 |
| XLOC_002373 | XLOC_002373 | MIR4675            | chr10:20840898-20840975 | 0 | 1 |
| XLOC_002374 | XLOC_002374 | NEBL-AS1           | chr10:21068902-21463852 | 0 | 1 |
| XLOC_002376 | XLOC_002376 | LOC100130992       | chr10:22541000-22547477 | 0 | 1 |
| XLOC_002379 | XLOC_002379 | ARMC3              | chr10:23216953-23326514 | 0 | 1 |
| XLOC_002381 | XLOC_002381 | PTF1A              | chr10:23481459-23483181 | 0 | 1 |
| XLOC_002384 | XLOC_002384 | MIR603             | chr10:23983674-24836772 | 0 | 1 |
| XLOC_002387 | XLOC_002387 | MYO3A              | chr10:26223001-26501465 | 0 | 1 |
| XLOC_002388 | XLOC_002388 | GAD2               | chr10:26505235-26593491 | 0 | 1 |
| XLOC_002389 | XLOC_002389 | APBB1IP            | chr10:26727265-26856732 | 0 | 1 |
| XLOC_002391 | XLOC_002391 | LINC00202-2        | chr10:26932036-26942383 | 0 | 1 |
| XLOC_002396 | XLOC_002396 | MIR5586            | chr10:28821421-28912041 | 0 | 1 |
| XLOC_002398 | XLOC_002398 | LYZL1              | chr10:29577989-29600158 | 0 | 1 |
| XLOC_002406 | XLOC_002406 | ANKRD30A           | chr10:37414784-37521495 | 0 | 1 |
| XLOC_002412 | XLOC_002412 | ACTR3BP5           | chr10:38989726-38991371 | 0 | 1 |
| XLOC_002415 | XLOC_002415 | MIR5100            | chr10:43493010-43493129 | 0 | 1 |
| XLOC_002424 | XLOC_002424 | LINC00619          | chr10:44340753-44346070 | 0 | 1 |
| XLOC_002425 | XLOC_002425 | LINC00840          | chr10:44354858-44390881 | 0 | 1 |
| XLOC_002426 | XLOC_002426 | LINC00841          | chr10:44404751-44465355 | 0 | 1 |
| XLOC_002427 | XLOC_002427 | LOC100130539       | chr10:44788197-44790097 | 0 | 1 |
| XLOC_002428 | XLOC_002428 | TMEM72             | chr10:45306471-45455137 | 0 | 1 |
| XLOC_002431 | XLOC_002431 | ANKRD30BP3         | chr10:45650109-45681489 | 0 | 1 |
| XLOC_002432 | XLOC_002432 | MIR3156-1          | chr10:45650109-45681489 | 0 | 1 |
| XLOC_002438 | XLOC_002438 | PPYR1              | chr10:47083533-47088320 | 0 | 1 |
| XLOC_002440 | XLOC_002440 | ANXA8L2            | chr10:47746919-47763040 | 0 | 1 |
| XLOC_002443 | XLOC_002443 | BMS1P2             | chr10:48185838-48203780 | 0 | 1 |
| XLOC_002445 | XLOC_002445 | FAM25C             | chr10:48247661-48252125 | 0 | 1 |
| XLOC_002446 | XLOC_002446 | ANXA8              | chr10:48255203-48271368 | 0 | 1 |
| XLOC_002451 | XLOC_002451 | FAM170B-AS1        | chr10:50329883-50359592 | 0 | 1 |
| XLOC_002452 | XLOC_002452 | C10orf71           | chr10:50507186-50535537 | 0 | 1 |
| XLOC_002453 | XLOC_002453 | CHAT               | chr10:50817140-50873150 | 0 | 1 |
| XLOC_002454 | XLOC_002454 | SLC18A3            | chr10:50817140-50873150 | 0 | 1 |
| XLOC_002455 | XLOC_002455 | C10orf53           | chr10:50887683-50916956 | 0 | 1 |
| XLOC_002461 | XLOC_002461 | PRKG1              | chr10:52750910-54073888 | 0 | 1 |
| XLOC_002462 | XLOC_002462 | MIR605             | chr10:52750910-54073888 | 0 | 1 |
| XLOC_002463 | XLOC_002463 | DKK1               | chr10:54074040-54077417 | 0 | 1 |
| XLOC_002468 | XLOC_002468 | BICC1              | chr10:60272903-60588845 | 0 | 1 |
| XLOC_002470 | XLOC_002470 | PHYHIPL            | chr10:60936347-61122661 | 0 | 1 |
| XLOC_002472 | XLOC_002472 | C10orf107          | chr10:63422718-63526091 | 0 | 1 |
| XLOC_002474 | XLOC_002474 | MIR548AV           | chr10:63661012-63856707 | 0 | 1 |
| XLOC_002480 | XLOC_002480 | ANXA2P3            | chr10:66585284-66586634 | 0 | 1 |
| XLOC_002481 | XLOC_002481 | LRRTM3             | chr10:67679724-69455949 | 0 | 1 |
| XLOC_002487 | XLOC_002487 | SNORD98            | chr10:70480970-70551309 | 0 | 1 |
| XLOC_002492 | XLOC_002492 | SRGN               | chr10:70847827-70864567 | 0 | 1 |
| XLOC_002508 | XLOC_002508 | CHST3              | chr10:73724119-73773322 | 0 | 1 |
| XLOC_002512 | XLOC_002512 | MIR4676            | chr10:74451888-74647452 | 0 | 1 |
| XLOC_002513 | XLOC_002513 | OIT3               | chr10:74653338-74692787 | 0 | 1 |
| XLOC_002528 | XLOC_002528 | ZNF503-AS1         | chr10:77056140-77121436 | 0 | 1 |
| XLOC_002533 | XLOC_002533 | LINC00856          | chr10:80008381-80012402 | 0 | 1 |
| XLOC_002538 | XLOC_002538 | SFTPA1             | chr10:81370694-81375199 | 0 | 1 |
| XLOC_002541 | XLOC_002541 | LOC100288974.MBL1P | chr10:81664653-81691557 | 0 | 1 |
| XLOC_002543 | XLOC_002543 | PLAC9              | chr10:81892257-81904784 | 0 | 1 |
| XLOC_002549 | XLOC_002549 | NRG3               | chr10:83635069-84746935 | 0 | 1 |
| XLOC_002551 | XLOC_002551 | C10orf99           | chr10:85933553-85945050 | 0 | 1 |
| XLOC_002552 | XLOC_002552 | CDHR1              | chr10:85954411-85979376 | 0 | 1 |
| XLOC_002553 | XLOC_002553 | RGR                | chr10:86004808-86018944 | 0 | 1 |
| XLOC_002554 | XLOC_002554 | LINC00858          | chr10:86039735-86054415 | 0 | 1 |
| XLOC_002556 | XLOC_002556 | GRID1-AS1          | chr10:87337487-88126250 | 0 | 1 |
| XLOC_002562 | XLOC_002562 | FAM25A             | chr10:88780045-88784487 | 0 | 1 |
| XLOC_002567 | XLOC_002567 | MIR4678            | chr10:89263637-89263711 | 0 | 1 |
| XLOC_002572 | XLOC_002572 | LIPJ               | chr10:90346518-90366733 | 0 | 1 |
| XLOC_002573 | XLOC_002573 | LIPF               | chr10:90424145-90438572 | 0 | 1 |
| XLOC_002574 | XLOC_002574 | LIPK               | chr10:90484300-90512513 | 0 | 1 |
| XLOC_002575 | XLOC_002575 | LIPN               | chr10:90521162-90537999 | 0 | 1 |

|             |             |                  |                           |   |   |
|-------------|-------------|------------------|---------------------------|---|---|
| XLOC_002576 | XLOC_002576 | LIPM             | chr10:90562486-90611732   | 0 | 1 |
| XLOC_002579 | XLOC_002579 | MIR4679-1        | chr10:90823091-90823168   | 0 | 1 |
| XLOC_002582 | XLOC_002582 | IFIT1B           | chr10:91137812-91144962   | 0 | 1 |
| XLOC_002586 | XLOC_002586 | LOC643529        | chr10:91589249-91600618   | 0 | 1 |
| XLOC_002588 | XLOC_002588 | LINC00502        | chr10:92805564-92821916   | 0 | 1 |
| XLOC_002596 | XLOC_002596 | HHEX             | chr10:94449680-94455408   | 0 | 1 |
| XLOC_002598 | XLOC_002598 | CYP26C1          | chr10:94821020-94828454   | 0 | 1 |
| XLOC_002602 | XLOC_002602 | PDE6C            | chr10:95372344-95425429   | 0 | 1 |
| XLOC_002603 | XLOC_002603 | LG1              | chr10:95517565-95557916   | 0 | 1 |
| XLOC_002611 | XLOC_002611 | C10orf129        | chr10:96953956-96988686   | 0 | 1 |
| XLOC_002617 | XLOC_002617 | DNTT             | chr10:98064084-98098321   | 0 | 1 |
| XLOC_002620 | XLOC_002620 | LOC100505540     | chr10:98757794-99052430   | 0 | 1 |
| XLOC_002625 | XLOC_002625 | ANKRD2           | chr10:99332255-99343641   | 0 | 1 |
| XLOC_002628 | XLOC_002628 | MIR5692C2        | chr10:99344101-99372555   | 0 | 1 |
| XLOC_002635 | XLOC_002635 | NKX2-3           | chr10:101292689-101296280 | 0 | 1 |
| XLOC_002647 | XLOC_002647 | MIR608           | chr10:102732285-102747272 | 0 | 1 |
| XLOC_002653 | XLOC_002653 | FLJ41350         | chr10:102989350-102998616 | 0 | 1 |
| XLOC_002665 | XLOC_002665 | MIR146B          | chr10:104196268-104196341 | 0 | 1 |
| XLOC_002674 | XLOC_002674 | LOC729020        | chr10:105005643-105007773 | 0 | 1 |
| XLOC_002675 | XLOC_002675 | INA              | chr10:105036919-105050108 | 0 | 1 |
| XLOC_002685 | XLOC_002685 | SORCS3           | chr10:106400858-107024993 | 0 | 1 |
| XLOC_002686 | XLOC_002686 | RNU6-53          | chr10:110930414-110999490 | 0 | 1 |
| XLOC_002691 | XLOC_002691 | RBM20            | chr10:112404154-112599227 | 0 | 1 |
| XLOC_002695 | XLOC_002695 | TECTB            | chr10:114043492-114063070 | 0 | 1 |
| XLOC_002698 | XLOC_002698 | MIR4295          | chr10:114206755-114578504 | 0 | 1 |
| XLOC_002705 | XLOC_002705 | TDRD1            | chr10:115939028-115992063 | 0 | 1 |
| XLOC_002706 | XLOC_002706 | VWA2             | chr10:115999012-116054259 | 0 | 1 |
| XLOC_002709 | XLOC_002709 | ATRNL1           | chr10:116853123-117708496 | 0 | 1 |
| XLOC_002710 | XLOC_002710 | CCDC172          | chr10:118083939-118139541 | 0 | 1 |
| XLOC_002711 | XLOC_002711 | PNLIPRP3         | chr10:118187423-118237468 | 0 | 1 |
| XLOC_002712 | XLOC_002712 | PNLIP            | chr10:118305427-118327367 | 0 | 1 |
| XLOC_002716 | XLOC_002716 | KCNK18           | chr10:118956999-118969810 | 0 | 1 |
| XLOC_002718 | XLOC_002718 | EMX2             | chr10:119243803-119309057 | 0 | 1 |
| XLOC_002723 | XLOC_002723 | MIR4681          | chr10:120967196-121215131 | 0 | 1 |
| XLOC_002727 | XLOC_002727 | MIR4682          | chr10:121718024-121718104 | 0 | 1 |
| XLOC_002728 | XLOC_002728 | PPAPDC1A         | chr10:122216465-122806858 | 0 | 1 |
| XLOC_002729 | XLOC_002729 | MIR5694          | chr10:122216465-122806858 | 0 | 1 |
| XLOC_002734 | XLOC_002734 | MIR3941          | chr10:124134093-124191871 | 0 | 1 |
| XLOC_002740 | XLOC_002740 | FAM24A           | chr10:124670216-124672627 | 0 | 1 |
| XLOC_002744 | XLOC_002744 | HMX2             | chr10:124907637-124910188 | 0 | 1 |
| XLOC_002746 | XLOC_002746 | GPR26            | chr10:125425870-125456913 | 0 | 1 |
| XLOC_002750 | XLOC_002750 | LOC100169752     | chr10:127262939-127267014 | 0 | 1 |
| XLOC_002757 | XLOC_002757 | NPS              | chr10:129347612-129350935 | 0 | 1 |
| XLOC_002758 | XLOC_002758 | FOXI2            | chr10:129535537-129539450 | 0 | 1 |
| XLOC_002770 | XLOC_002770 | LOC399829        | chr10:134779037-134790001 | 0 | 1 |
| XLOC_002771 | XLOC_002771 | GPR123           | chr10:134901408-134945179 | 0 | 1 |
| XLOC_002773 | XLOC_002773 | UTF1             | chr10:135043777-135045062 | 0 | 1 |
| XLOC_002781 | XLOC_002781 | DUX2,DUX4,DUX4L2 | chr10:135480367-135498492 | 0 | 1 |
| XLOC_002784 | XLOC_002784 | MIR5699          | chr10:320129-735608       | 0 | 1 |
| XLOC_002788 | XLOC_002788 | ADARB2           | chr10:1223252-1779670     | 0 | 1 |
| XLOC_002789 | XLOC_002789 | LINC00700        | chr10:2047666-2056542     | 0 | 1 |
| XLOC_002790 | XLOC_002790 | LINC00701        | chr10:2342512-2357268     | 0 | 1 |
| XLOC_002794 | XLOC_002794 | AKR1C6P          | chr10:4913858-4958465     | 0 | 1 |
| XLOC_002795 | XLOC_002795 | AKR1C2           | chr10:5029967-5060225     | 0 | 1 |
| XLOC_002796 | XLOC_002796 | AKR1CL1          | chr10:5196654-5227150     | 0 | 1 |
| XLOC_002798 | XLOC_002798 | CALML5           | chr10:5540657-5541533     | 0 | 1 |
| XLOC_002803 | XLOC_002803 | IL2RA            | chr10:6052656-6104333     | 0 | 1 |
| XLOC_002804 | XLOC_002804 | MIR3155B         | chr10:6186842-6277507     | 0 | 1 |
| XLOC_002809 | XLOC_002809 | GATA3-AS1        | chr10:8092412-8095447     | 0 | 1 |
| XLOC_002811 | XLOC_002811 | LINC00710        | chr10:10976902-10994126   | 0 | 1 |
| XLOC_002812 | XLOC_002812 | CELF2-AS2        | chr10:11047258-11378672   | 0 | 1 |
| XLOC_002818 | XLOC_002818 | UCMA             | chr10:13263766-13276328   | 0 | 1 |
| XLOC_002831 | XLOC_002831 | ITGA8            | chr10:15559087-15761770   | 0 | 1 |
| XLOC_002839 | XLOC_002839 | LOC100129213     | chr10:18240767-18332221   | 0 | 1 |
| XLOC_002842 | XLOC_002842 | C10orf113        | chr10:210668902-21463852  | 0 | 1 |
| XLOC_002844 | XLOC_002844 | MIR1915          | chr10:21783420-21786213   | 0 | 1 |
| XLOC_002847 | XLOC_002847 | EBLN1            | chr10:22497742-22498912   | 0 | 1 |
| XLOC_002850 | XLOC_002850 | C10orf67         | chr10:23605519-23633772   | 0 | 1 |
| XLOC_002854 | XLOC_002854 | GPR158-AS1       | chr10:25447000-25891157   | 0 | 1 |
| XLOC_002861 | XLOC_002861 | PTCHD3           | chr10:27687116-27703297   | 0 | 1 |
| XLOC_002862 | XLOC_002862 | MKX              | chr10:27961802-28034778   | 0 | 1 |
| XLOC_002866 | XLOC_002866 | LINC00837        | chr10:29078239-29084979   | 0 | 1 |
| XLOC_002868 | XLOC_002868 | MIR604           | chr10:29746276-30024730   | 0 | 1 |
| XLOC_002869 | XLOC_002869 | MIR938           | chr10:29746276-30024730   | 0 | 1 |
| XLOC_002870 | XLOC_002870 | KIAA1462         | chr10:30301728-30348488   | 0 | 1 |
| XLOC_002872 | XLOC_002872 | LYZL2            | chr10:30900707-30918647   | 0 | 1 |
| XLOC_002880 | XLOC_002880 | LINC00838        | chr10:34048640-34061608   | 0 | 1 |
| XLOC_002884 | XLOC_002884 | MTRNR2L7         | chr10:37890365-37891859   | 0 | 1 |
| XLOC_002897 | XLOC_002897 | CXCL12           | chr10:44865604-44880545   | 0 | 1 |

|             |             |                 |                           |   |   |
|-------------|-------------|-----------------|---------------------------|---|---|
| XLOC_002898 | XLOC_002898 | TMEM72-AS1      | chr10:45306471-45455137   | 0 | 1 |
| XLOC_002901 | XLOC_002901 | RSU1P2          | chr10:45594923-45650044   | 0 | 1 |
| XLOC_002904 | XLOC_002904 | ZFAND4          | chr10:46111038-46168251   | 0 | 1 |
| XLOC_002906 | XLOC_002906 | PTPN20A,PTPN20B | chr10:46550122-46641003   | 0 | 1 |
| XLOC_002912 | XLOC_002912 | FAM25C          | chr10:47177221-47181688   | 0 | 1 |
| XLOC_002913 | XLOC_002913 | AGAP9           | chr10:47191843-47213626   | 0 | 1 |
| XLOC_002917 | XLOC_002917 | GDF10           | chr10:48425787-48439138   | 0 | 1 |
| XLOC_002918 | XLOC_002918 | PTPN20A,PTPN20B | chr10:48737041-48827924   | 0 | 1 |
| XLOC_002919 | XLOC_002919 | FRMPD2P1        | chr10:48844035-48862688   | 0 | 1 |
| XLOC_002921 | XLOC_002921 | FAM25C          | chr10:49203372-49207825   | 0 | 1 |
| XLOC_002925 | XLOC_002925 | LRRC18          | chr10:49893517-50191001   | 0 | 1 |
| XLOC_002926 | XLOC_002926 | MIR4294         | chr10:50193556-50193632   | 0 | 1 |
| XLOC_002928 | XLOC_002928 | FAM170B         | chr10:50329883-50359592   | 0 | 1 |
| XLOC_002929 | XLOC_002929 | C10orf128       | chr10:50363890-50396407   | 0 | 1 |
| XLOC_002930 | XLOC_002930 | DRGX            | chr10:50574160-50604062   | 0 | 1 |
| XLOC_002932 | XLOC_002932 | OGDHL           | chr10:50942686-50970425   | 0 | 1 |
| XLOC_002942 | XLOC_002942 | PRKG1-AS1       | chr10:52750910-54073888   | 0 | 1 |
| XLOC_002943 | XLOC_002943 | MBL2            | chr10:54525139-54531460   | 0 | 1 |
| XLOC_002944 | XLOC_002944 | PCDH15          | chr10:55562532-56561051   | 0 | 1 |
| XLOC_002946 | XLOC_002946 | MIR3924         | chr10:59064238-59064319   | 0 | 1 |
| XLOC_002950 | XLOC_002950 | M1              | chr10:61496747-61513203   | 0 | 1 |
| XLOC_002952 | XLOC_002952 | C10orf40        | chr10:61717974-61720671   | 0 | 1 |
| XLOC_002955 | XLOC_002955 | TMEM26          | chr10:63166400-63213208   | 0 | 1 |
| XLOC_002959 | XLOC_002959 | MIR1296         | chr10:64926987-65226322   | 0 | 1 |
| XLOC_002960 | XLOC_002960 | CTNNA3          | chr10:67679724-69455949   | 0 | 1 |
| XLOC_002969 | XLOC_002969 | NEUROG3         | chr10:71331790-71333210   | 0 | 1 |
| XLOC_002974 | XLOC_002974 | NPFFR1          | chr10:72014712-72043450   | 0 | 1 |
| XLOC_002978 | XLOC_002978 | TBATA           | chr10:72530994-72545157   | 0 | 1 |
| XLOC_002981 | XLOC_002981 | C10orf105       | chr10:73156690-73575704   | 0 | 1 |
| XLOC_002982 | XLOC_002982 | C10orf54        | chr10:73156690-73575704   | 0 | 1 |
| XLOC_002987 | XLOC_002987 | MIR1256         | chr10:74119697-74385949   | 0 | 1 |
| XLOC_003008 | XLOC_003008 | DUPD1           | chr10:76797593-76818272   | 0 | 1 |
| XLOC_003018 | XLOC_003018 | SFTPD           | chr10:81697495-81708861   | 0 | 1 |
| XLOC_003023 | XLOC_003023 | LRIT2           | chr10:85980248-85985284   | 0 | 1 |
| XLOC_003024 | XLOC_003024 | LRIT1           | chr10:85991275-86001217   | 0 | 1 |
| XLOC_003026 | XLOC_003026 | MIR346          | chr10:87337487-88126250   | 0 | 1 |
| XLOC_003031 | XLOC_003031 | LOC728218       | chr10:89156330-89167457   | 0 | 1 |
| XLOC_003034 | XLOC_003034 | RNLS            | chr10:90033620-90343082   | 0 | 1 |
| XLOC_003035 | XLOC_003035 | ANKRD22         | chr10:90562486-90611732   | 0 | 1 |
| XLOC_003038 | XLOC_003038 | MIR4679-2       | chr10:90823091-90823168   | 0 | 1 |
| XLOC_003039 | XLOC_003039 | CH25H           | chr10:90965693-90967071   | 0 | 1 |
| XLOC_003041 | XLOC_003041 | SLC16A12        | chr10:91190050-91295313   | 0 | 1 |
| XLOC_003043 | XLOC_003043 | MIR107          | chr10:91339253-91405329   | 0 | 1 |
| XLOC_003045 | XLOC_003045 | HTR7            | chr10:92500575-92617671   | 0 | 1 |
| XLOC_003049 | XLOC_003049 | PPP1R3C         | chr10:93388196-93392858   | 0 | 1 |
| XLOC_003054 | XLOC_003054 | RBP4            | chr10:95351592-95360993   | 0 | 1 |
| XLOC_003057 | XLOC_003057 | LOC100128054    | chr10:95753745-96088148   | 0 | 1 |
| XLOC_003059 | XLOC_003059 | CYP2C8          | chr10:96796528-96829254   | 0 | 1 |
| XLOC_003060 | XLOC_003060 | PDLIM1          | chr10:96997324-97050905   | 0 | 1 |
| XLOC_003065 | XLOC_003065 | MIR3157         | chr10:97471535-97849992   | 0 | 1 |
| XLOC_003067 | XLOC_003067 | OPALIN          | chr10:98102974-98119092   | 0 | 1 |
| XLOC_003078 | XLOC_003078 | SFRP5           | chr10:99526507-99531756   | 0 | 1 |
| XLOC_003083 | XLOC_003083 | MIR4685         | chr10:100175954-100206704 | 0 | 1 |
| XLOC_003084 | XLOC_003084 | HPSE2           | chr10:100216833-100995632 | 0 | 1 |
| XLOC_003095 | XLOC_003095 | PKD2L1          | chr10:102047902-102090243 | 0 | 1 |
| XLOC_003100 | XLOC_003100 | TLX1NB          | chr10:102849077-102890903 | 0 | 1 |
| XLOC_003101 | XLOC_003101 | LBX1            | chr10:102986732-102988717 | 0 | 1 |
| XLOC_003103 | XLOC_003103 | MIR3158-2       | chr10:103348088-103369410 | 0 | 1 |
| XLOC_003111 | XLOC_003111 | PITX3           | chr10:103989945-104001231 | 0 | 1 |
| XLOC_003128 | XLOC_003128 | MIR609          | chr10:105889645-105992120 | 0 | 1 |
| XLOC_003129 | XLOC_003129 | MIR4482-1       | chr10:106028093-106028163 | 0 | 1 |
| XLOC_003131 | XLOC_003131 | SORCS1          | chr10:108333420-108924466 | 0 | 1 |
| XLOC_003139 | XLOC_003139 | GUCY2GP         | chr10:114067935-114116353 | 0 | 1 |
| XLOC_003142 | XLOC_003142 | MIR4483         | chr10:115511212-115542192 | 0 | 1 |
| XLOC_003151 | XLOC_003151 | VAX1            | chr10:118888031-118897812 | 0 | 1 |
| XLOC_003152 | XLOC_003152 | MIR3663         | chr10:118927188-118927285 | 0 | 1 |
| XLOC_003157 | XLOC_003157 | PRLHR           | chr10:120352915-120355160 | 0 | 1 |
| XLOC_003160 | XLOC_003160 | SNORA19         | chr10:120794540-120840334 | 0 | 1 |
| XLOC_003170 | XLOC_003170 | C10orf120       | chr10:124457224-124459338 | 0 | 1 |
| XLOC_003177 | XLOC_003177 | NKX1-2          | chr10:126135997-126138550 | 0 | 1 |
| XLOC_003181 | XLOC_003181 | MIR4296         | chr10:126676417-126849624 | 0 | 1 |
| XLOC_003182 | XLOC_003182 | TEX36           | chr10:127344262-127371713 | 0 | 1 |
| XLOC_003187 | XLOC_003187 | ADAM12          | chr10:127702901-128077127 | 0 | 1 |
| XLOC_003188 | XLOC_003188 | LINC00601       | chr10:128102437-128110448 | 0 | 1 |
| XLOC_003189 | XLOC_003189 | C10orf90        | chr10:128113573-128210010 | 0 | 1 |
| XLOC_003191 | XLOC_003191 | CLRN3           | chr10:129676113-129691211 | 0 | 1 |
| XLOC_003194 | XLOC_003194 | MIR4297         | chr10:131633495-131762091 | 0 | 1 |
| XLOC_003196 | XLOC_003196 | MIR378C         | chr10:132760850-132760931 | 0 | 1 |
| XLOC_003201 | XLOC_003201 | NKX6-2          | chr10:134598319-134599537 | 0 | 1 |

|             |             |               |                           |   |   |
|-------------|-------------|---------------|---------------------------|---|---|
| XLOC_003202 | XLOC_003202 | TTC40         | chr10:134621895-134756089 | 0 | 1 |
| XLOC_003203 | XLOC_003203 | MIR202        | chr10:135061014-135061124 | 0 | 1 |
| XLOC_003206 | XLOC_003206 | CALY          | chr10:135138927-135150475 | 0 | 1 |
| XLOC_003207 | XLOC_003207 | FUOM          | chr10:135168657-135171529 | 0 | 1 |
| XLOC_003209 | XLOC_003209 | MIR3944       | chr10:135175986-135186908 | 0 | 1 |
| XLOC_003212 | XLOC_003212 | FRG2B         | chr10:135438602-135440299 | 0 | 1 |
| XLOC_003213 | XLOC_003213 | SCGB1C1       | chr11:193079-194573       | 0 | 1 |
| XLOC_003214 | XLOC_003214 | ODF3          | chr11:196760-200258       | 0 | 1 |
| XLOC_003239 | XLOC_003239 | MUC2          | chr11:1074874-1104417     | 0 | 1 |
| XLOC_003244 | XLOC_003244 | KRTAP5-5      | chr11:1490684-1785501     | 0 | 1 |
| XLOC_003245 | XLOC_003245 | FAM99A        | chr11:1490684-1785501     | 0 | 1 |
| XLOC_003247 | XLOC_003247 | SYT8          | chr11:1855673-1858750     | 0 | 1 |
| XLOC_003250 | XLOC_003250 | TNNT3         | chr11:1940798-1959936     | 0 | 1 |
| XLOC_003252 | XLOC_003252 | IGF2-AS       | chr11:2150341-2182439     | 0 | 1 |
| XLOC_003253 | XLOC_003253 | MIR4686       | chr11:2194292-2194368     | 0 | 1 |
| XLOC_003254 | XLOC_003254 | TSPAN32       | chr11:2323242-2339430     | 0 | 1 |
| XLOC_003260 | XLOC_003260 | MRGPRG-AS1    | chr11:3239173-3244361     | 0 | 1 |
| XLOC_003268 | XLOC_003268 | OR52K2        | chr11:4470524-4471591     | 0 | 1 |
| XLOC_003269 | XLOC_003269 | OR52K1        | chr11:4510108-4511138     | 0 | 1 |
| XLOC_003270 | XLOC_003270 | OR52M1        | chr11:4566420-4567374     | 0 | 1 |
| XLOC_003271 | XLOC_003271 | OR52I2        | chr11:4608020-4609135     | 0 | 1 |
| XLOC_003273 | XLOC_003273 | OR51D1        | chr11:4660944-4662068     | 0 | 1 |
| XLOC_003274 | XLOC_003274 | OR51E1        | chr11:4665155-4676716     | 0 | 1 |
| XLOC_003275 | XLOC_003275 | OR51F2        | chr11:4842615-4843644     | 0 | 1 |
| XLOC_003276 | XLOC_003276 | OR51T1        | chr11:4903048-4904113     | 0 | 1 |
| XLOC_003277 | XLOC_003277 | OR51A7        | chr11:4928599-4929538     | 0 | 1 |
| XLOC_003278 | XLOC_003278 | MMP26         | chr11:5009423-5013659     | 0 | 1 |
| XLOC_003279 | XLOC_003279 | OR51L1        | chr11:5020212-5021160     | 0 | 1 |
| XLOC_003280 | XLOC_003280 | OR52J3        | chr11:5067755-5068691     | 0 | 1 |
| XLOC_003281 | XLOC_003281 | OR51B6        | chr11:5362112-5526882     | 0 | 1 |
| XLOC_003282 | XLOC_003282 | OR51M1        | chr11:5362112-5526882     | 0 | 1 |
| XLOC_003283 | XLOC_003283 | OR51Q1        | chr11:5362112-5526882     | 0 | 1 |
| XLOC_003289 | XLOC_003289 | OR56B1        | chr11:5757677-5758768     | 0 | 1 |
| XLOC_003290 | XLOC_003290 | OR52N4        | chr11:5775922-5776959     | 0 | 1 |
| XLOC_003291 | XLOC_003291 | OR52N2        | chr11:5841565-5842531     | 0 | 1 |
| XLOC_003292 | XLOC_003292 | OR52E4        | chr11:5905522-5906461     | 0 | 1 |
| XLOC_003293 | XLOC_003293 | OR56A3        | chr11:5968576-5969524     | 0 | 1 |
| XLOC_003295 | XLOC_003295 | OR52W1        | chr11:6220453-6221416     | 0 | 1 |
| XLOC_003298 | XLOC_003298 | CKKBR         | chr11:6280903-6293357     | 0 | 1 |
| XLOC_003303 | XLOC_003303 | OR2AG1        | chr11:6806247-6807245     | 0 | 1 |
| XLOC_003304 | XLOC_003304 | OR10A5        | chr11:6866913-6867867     | 0 | 1 |
| XLOC_003314 | XLOC_003314 | OR5E1P        | chr11:7870597-7871118     | 0 | 1 |
| XLOC_003316 | XLOC_003316 | TUB           | chr11:8060179-8190590     | 0 | 1 |
| XLOC_003322 | XLOC_003322 | KRT8P41       | chr11:9115909-9117737     | 0 | 1 |
| XLOC_003339 | XLOC_003339 | RASSF10       | chr11:13030969-13033653   | 0 | 1 |
| XLOC_003350 | XLOC_003350 | MYOD1         | chr11:17741109-17743678   | 0 | 1 |
| XLOC_003353 | XLOC_003353 | MRGPRX4       | chr11:18194383-18195827   | 0 | 1 |
| XLOC_003355 | XLOC_003355 | SAA1          | chr11:18287807-18291523   | 0 | 1 |
| XLOC_003364 | XLOC_003364 | MIR4486       | chr11:19372270-20143147   | 0 | 1 |
| XLOC_003367 | XLOC_003367 | SLC6A5        | chr11:20620945-20676610   | 0 | 1 |
| XLOC_003368 | XLOC_003368 | NELL1         | chr11:20691116-21597229   | 0 | 1 |
| XLOC_003369 | XLOC_003369 | ANO5          | chr11:22214721-22304913   | 0 | 1 |
| XLOC_003370 | XLOC_003370 | SLC17A6       | chr11:22359666-22401046   | 0 | 1 |
| XLOC_003372 | XLOC_003372 | LUZP2         | chr11:24518515-25104186   | 0 | 1 |
| XLOC_003373 | XLOC_003373 | ANO3          | chr11:26353677-26684836   | 0 | 1 |
| XLOC_003374 | XLOC_003374 | FIBIN         | chr11:27015627-27018632   | 0 | 1 |
| XLOC_003375 | XLOC_003375 | BBOX1         | chr11:27062508-27149354   | 0 | 1 |
| XLOC_003377 | XLOC_003377 | MIR610        | chr11:28042162-28129746   | 0 | 1 |
| XLOC_003383 | XLOC_003383 | DKFZp686K1684 | chr11:31806339-31908587   | 0 | 1 |
| XLOC_003385 | XLOC_003385 | WT1-AS        | chr11:32457284-32461620   | 0 | 1 |
| XLOC_003398 | XLOC_003398 | EHF           | chr11:34642587-34684834   | 0 | 1 |
| XLOC_003400 | XLOC_003400 | MIR1343       | chr11:34903842-35017675   | 0 | 1 |
| XLOC_003405 | XLOC_003405 | MIR3973       | chr11:35965611-36252841   | 0 | 1 |
| XLOC_003411 | XLOC_003411 | MIR670        | chr11:43581205-43581303   | 0 | 1 |
| XLOC_003412 | XLOC_003412 | MIR129-2      | chr11:43602943-43603033   | 0 | 1 |
| XLOC_003417 | XLOC_003417 | ACCSL         | chr11:44069530-44081527   | 0 | 1 |
| XLOC_003424 | XLOC_003424 | LOC100507384  | chr11:45743857-45746106   | 0 | 1 |
| XLOC_003432 | XLOC_003432 | MIR4688       | chr11:46354454-46402104   | 0 | 1 |
| XLOC_003434 | XLOC_003434 | MIR3160-2     | chr11:46417961-46615619   | 0 | 1 |
| XLOC_003448 | XLOC_003448 | OR4B1         | chr11:48238361-48239291   | 0 | 1 |
| XLOC_003449 | XLOC_003449 | OR4X2         | chr11:48266655-48267567   | 0 | 1 |
| XLOC_003450 | XLOC_003450 | OR4X1         | chr11:48285412-48286330   | 0 | 1 |
| XLOC_003451 | XLOC_003451 | OR4S1         | chr11:48327774-48328704   | 0 | 1 |
| XLOC_003452 | XLOC_003452 | OR4C3         | chr11:48346492-48347482   | 0 | 1 |
| XLOC_003453 | XLOC_003453 | OR4A47        | chr11:48510344-48511274   | 0 | 1 |
| XLOC_003454 | XLOC_003454 | TRIM49B       | chr11:49053151-49059529   | 0 | 1 |
| XLOC_003455 | XLOC_003455 | LOC440040     | chr11:49580079-49831969   | 0 | 1 |
| XLOC_003456 | XLOC_003456 | OR4C13        | chr11:49973942-49974971   | 0 | 1 |
| XLOC_003457 | XLOC_003457 | LOC646813     | chr11:50368317-50379802   | 0 | 1 |



|             |             |             |                         |   |   |
|-------------|-------------|-------------|-------------------------|---|---|
| XLOC_003458 | XLOC_003458 | OR4C46      | chr11:51515281-51516211 | 0 | 1 |
| XLOC_003459 | XLOC_003459 | TRIM48      | chr11:55029657-55038595 | 0 | 1 |
| XLOC_003460 | XLOC_003460 | OR4A16      | chr11:55110676-55111663 | 0 | 1 |
| XLOC_003461 | XLOC_003461 | OR4A15      | chr11:55135359-55136394 | 0 | 1 |
| XLOC_003462 | XLOC_003462 | OR4C15      | chr11:55321782-55322895 | 0 | 1 |
| XLOC_003463 | XLOC_003463 | OR4C16      | chr11:55339603-55340536 | 0 | 1 |
| XLOC_003464 | XLOC_003464 | OR4P4       | chr11:55405833-55406772 | 0 | 1 |
| XLOC_003465 | XLOC_003465 | OR4S2       | chr11:55418379-55419315 | 0 | 1 |
| XLOC_003466 | XLOC_003466 | OR4C6       | chr11:55432642-55433572 | 0 | 1 |
| XLOC_003467 | XLOC_003467 | OR5D13      | chr11:55540913-55541858 | 0 | 1 |
| XLOC_003468 | XLOC_003468 | OR5D14      | chr11:55563031-55563976 | 0 | 1 |
| XLOC_003469 | XLOC_003469 | OR5L1       | chr11:55578942-55579878 | 0 | 1 |
| XLOC_003470 | XLOC_003470 | OR5D18      | chr11:55587105-55588047 | 0 | 1 |
| XLOC_003471 | XLOC_003471 | OR5L2       | chr11:55594694-55595630 | 0 | 1 |
| XLOC_003472 | XLOC_003472 | OR5D16      | chr11:55606227-55607214 | 0 | 1 |
| XLOC_003473 | XLOC_003473 | TRIM51      | chr11:55650772-55659284 | 0 | 1 |
| XLOC_003474 | XLOC_003474 | OR5AS1      | chr11:55797894-55798869 | 0 | 1 |
| XLOC_003475 | XLOC_003475 | OR8I2       | chr11:55860783-55861716 | 0 | 1 |
| XLOC_003476 | XLOC_003476 | OR8H2       | chr11:55872518-55873457 | 0 | 1 |
| XLOC_003477 | XLOC_003477 | OR8H3       | chr11:55889848-55890787 | 0 | 1 |
| XLOC_003478 | XLOC_003478 | OR5J2       | chr11:55944093-55945032 | 0 | 1 |
| XLOC_003479 | XLOC_003479 | OR5T3       | chr11:56019675-56020698 | 0 | 1 |
| XLOC_003480 | XLOC_003480 | OR5T1       | chr11:56043114-56044095 | 0 | 1 |
| XLOC_003481 | XLOC_003481 | OR8K3       | chr11:56085782-56086721 | 0 | 1 |
| XLOC_003482 | XLOC_003482 | OR8K1       | chr11:56113514-56114474 | 0 | 1 |
| XLOC_003483 | XLOC_003483 | OR8J1       | chr11:56127690-56128764 | 0 | 1 |
| XLOC_003484 | XLOC_003484 | OR8U1,OR8U8 | chr11:56143099-56508560 | 0 | 1 |
| XLOC_003485 | XLOC_003485 | OR5AR1      | chr11:56143099-56508560 | 0 | 1 |
| XLOC_003486 | XLOC_003486 | OR9G9       | chr11:56143099-56508560 | 0 | 1 |
| XLOC_003487 | XLOC_003487 | OR5AK2      | chr11:56756388-56757318 | 0 | 1 |
| XLOC_003488 | XLOC_003488 | OR5AK4P     | chr11:56805008-56805935 | 0 | 1 |
| XLOC_003489 | XLOC_003489 | LRRC55      | chr11:56949220-56959188 | 0 | 1 |
| XLOC_003490 | XLOC_003490 | P2RX3       | chr11:57105840-57137549 | 0 | 1 |
| XLOC_003494 | XLOC_003494 | MIR130A     | chr11:57408670-57408759 | 0 | 1 |
| XLOC_003499 | XLOC_003499 | OR9Q1       | chr11:57791352-57949038 | 0 | 1 |
| XLOC_003500 | XLOC_003500 | OR6Q1       | chr11:57791352-57949038 | 0 | 1 |
| XLOC_003501 | XLOC_003501 | OR9Q2       | chr11:57957905-57958990 | 0 | 1 |
| XLOC_003502 | XLOC_003502 | OR1S1       | chr11:57982216-57983194 | 0 | 1 |
| XLOC_003504 | XLOC_003504 | GLYATL1     | chr11:58695101-58825925 | 0 | 1 |
| XLOC_003508 | XLOC_003508 | OR5AN1      | chr11:59131931-59132867 | 0 | 1 |
| XLOC_003509 | XLOC_003509 | OR5A1       | chr11:59210641-59211589 | 0 | 1 |
| XLOC_003510 | XLOC_003510 | OR4D6       | chr11:59224433-59225378 | 0 | 1 |
| XLOC_003511 | XLOC_003511 | OR4D10      | chr11:59244902-59245838 | 0 | 1 |
| XLOC_003512 | XLOC_003512 | OR4D11      | chr11:59271048-59271984 | 0 | 1 |
| XLOC_003513 | XLOC_003513 | OR4D9       | chr11:59282385-59283330 | 0 | 1 |
| XLOC_003516 | XLOC_003516 | PLAC1L      | chr11:59807747-59815516 | 0 | 1 |
| XLOC_003517 | XLOC_003517 | MS4A3       | chr11:59824100-59838588 | 0 | 1 |
| XLOC_003518 | XLOC_003518 | MS4A2       | chr11:59856136-59865940 | 0 | 1 |
| XLOC_003519 | XLOC_003519 | MS4A4A      | chr11:60048013-60076445 | 0 | 1 |
| XLOC_003520 | XLOC_003520 | MS4A6E      | chr11:60102354-60108441 | 0 | 1 |
| XLOC_003522 | XLOC_003522 | MS4A14      | chr11:60163486-60185228 | 0 | 1 |
| XLOC_003523 | XLOC_003523 | MS4A5       | chr11:60197061-60215265 | 0 | 1 |
| XLOC_003524 | XLOC_003524 | MS4A1       | chr11:60223281-60238225 | 0 | 1 |
| XLOC_003525 | XLOC_003525 | MS4A12      | chr11:60260250-60274901 | 0 | 1 |
| XLOC_003526 | XLOC_003526 | MS4A13      | chr11:60282885-60310191 | 0 | 1 |
| XLOC_003527 | XLOC_003527 | LINC00301   | chr11:60383223-60454621 | 0 | 1 |
| XLOC_003528 | XLOC_003528 | MS4A8B      | chr11:60467046-60483285 | 0 | 1 |
| XLOC_003529 | XLOC_003529 | MS4A15      | chr11:60524339-60544204 | 0 | 1 |
| XLOC_003537 | XLOC_003537 | PGA3        | chr11:60970983-60980350 | 0 | 1 |
| XLOC_003538 | XLOC_003538 | PGA4        | chr11:60989820-60999179 | 0 | 1 |
| XLOC_003539 | XLOC_003539 | PGA5        | chr11:61008643-61018929 | 0 | 1 |
| XLOC_003545 | XLOC_003545 | MIR4488     | chr11:61276067-61276129 | 0 | 1 |
| XLOC_003546 | XLOC_003546 | LRRC10B     | chr11:61276271-61278490 | 0 | 1 |
| XLOC_003554 | XLOC_003554 | SCGB1D1     | chr11:61957709-61961009 | 0 | 1 |
| XLOC_003555 | XLOC_003555 | SCGB2A1     | chr11:61976139-61981411 | 0 | 1 |
| XLOC_003556 | XLOC_003556 | SCGB1D2     | chr11:62009723-62012280 | 0 | 1 |
| XLOC_003557 | XLOC_003557 | SCGB2A2     | chr11:62037629-62040628 | 0 | 1 |
| XLOC_003559 | XLOC_003559 | SCGB1A1     | chr11:62186506-62190678 | 0 | 1 |
| XLOC_003572 | XLOC_003572 | LGALS12     | chr11:63014620-63330855 | 0 | 1 |
| XLOC_003595 | XLOC_003595 | MIR1237     | chr11:64126624-64139687 | 0 | 1 |
| XLOC_003598 | XLOC_003598 | SLC22A12    | chr11:64358281-64369825 | 0 | 1 |
| XLOC_003605 | XLOC_003605 | SPDYC       | chr11:64937706-64940688 | 0 | 1 |
| XLOC_003616 | XLOC_003616 | MIR548AR    | chr11:65282807-65282828 | 0 | 1 |
| XLOC_003622 | XLOC_003622 | MIR4690     | chr11:65383782-65404910 | 0 | 1 |
| XLOC_003624 | XLOC_003624 | MIR4489     | chr11:65405577-65418391 | 0 | 1 |
| XLOC_003642 | XLOC_003642 | NPAS4       | chr11:66188474-66194177 | 0 | 1 |
| XLOC_003669 | XLOC_003669 | MIR4691     | chr11:67798083-67804114 | 0 | 1 |
| XLOC_003678 | XLOC_003678 | ANO1        | chr11:69924407-70035652 | 0 | 1 |
| XLOC_003681 | XLOC_003681 | MIR548K     | chr11:70116805-70230607 | 0 | 1 |

|             |             |                     |                           |   |   |
|-------------|-------------|---------------------|---------------------------|---|---|
| XLOC_003691 | XLOC_003691 | DEFB108B            | chr11:71544245-71548608   | 0 | 1 |
| XLOC_003697 | XLOC_003697 | FOLR1               | chr11:71900601-71907367   | 0 | 1 |
| XLOC_003698 | XLOC_003698 | FOLR2               | chr11:71927818-71932994   | 0 | 1 |
| XLOC_003700 | XLOC_003700 | MIR4692             | chr11:72465773-72504750   | 0 | 1 |
| XLOC_003715 | XLOC_003715 | SLCO2B1             | chr11:74862031-74917445   | 0 | 1 |
| XLOC_003716 | XLOC_003716 | TPBGL               | chr11:74951949-74954749   | 0 | 1 |
| XLOC_003721 | XLOC_003721 | MOGAT2              | chr11:75428933-75442331   | 0 | 1 |
| XLOC_003729 | XLOC_003729 | OMP                 | chr11:76777991-76837198   | 0 | 1 |
| XLOC_003733 | XLOC_003733 | THRSP               | chr11:77726760-77850699   | 0 | 1 |
| XLOC_003741 | XLOC_003741 | CCDC83              | chr11:85566143-85631051   | 0 | 1 |
| XLOC_003748 | XLOC_003748 | GRM5-AS1            | chr11:88237743-88796816   | 0 | 1 |
| XLOC_003749 | XLOC_003749 | TYR                 | chr11:88911039-89028927   | 0 | 1 |
| XLOC_003750 | XLOC_003750 | FOLH1B              | chr11:89392464-89431886   | 0 | 1 |
| XLOC_003751 | XLOC_003751 | TRIM77              | chr11:89443466-89451040   | 0 | 1 |
| XLOC_003752 | XLOC_003752 | MIR5692A1           | chr11:89570045-89673722   | 0 | 1 |
| XLOC_003753 | XLOC_003753 | TRIM53AP            | chr11:89570045-89673722   | 0 | 1 |
| XLOC_003754 | XLOC_003754 | TRIM49D1P,TRIM49D2P | chr11:89570045-89673722   | 0 | 1 |
| XLOC_003755 | XLOC_003755 | TRIM64              | chr11:89701671-89707240   | 0 | 1 |
| XLOC_003756 | XLOC_003756 | TRIM49C             | chr11:89764273-89775193   | 0 | 1 |
| XLOC_003757 | XLOC_003757 | UBTFL1              | chr11:89819117-89820299   | 0 | 1 |
| XLOC_003760 | XLOC_003760 | MTNR1B              | chr11:92702788-92715948   | 0 | 1 |
| XLOC_003761 | XLOC_003761 | CCDC67              | chr11:93063882-93171636   | 0 | 1 |
| XLOC_003770 | XLOC_003770 | LOC643037           | chr11:94245694-94265289   | 0 | 1 |
| XLOC_003775 | XLOC_003775 | KDM4E               | chr11:94758421-94760760   | 0 | 1 |
| XLOC_003779 | XLOC_003779 | MIR1260B            | chr11:95711439-96076344   | 0 | 1 |
| XLOC_003781 | XLOC_003781 | CNTN5               | chr11:98891705-100229616  | 0 | 1 |
| XLOC_003784 | XLOC_003784 | LOC101054525        | chr11:100900354-101030001 | 0 | 1 |
| XLOC_003790 | XLOC_003790 | WTAPP1              | chr11:102654406-102714342 | 0 | 1 |
| XLOC_003792 | XLOC_003792 | MIR4693             | chr11:103720633-103720708 | 0 | 1 |
| XLOC_003793 | XLOC_003793 | DDI1                | chr11:103777913-104035027 | 0 | 1 |
| XLOC_003797 | XLOC_003797 | LOC643923           | chr11:107461816-107537505 | 0 | 1 |
| XLOC_003798 | XLOC_003798 | RAB39A              | chr11:107799276-107834208 | 0 | 1 |
| XLOC_003803 | XLOC_003803 | C11orf87            | chr11:109292845-109299893 | 0 | 1 |
| XLOC_003808 | XLOC_003808 | MIR4491             | chr11:111218481-111218547 | 0 | 1 |
| XLOC_003809 | XLOC_003809 | MIR34B              | chr11:111383662-111383746 | 0 | 1 |
| XLOC_003810 | XLOC_003810 | MIR34C              | chr11:111384163-111384240 | 0 | 1 |
| XLOC_003811 | XLOC_003811 | C11orf88            | chr11:111385509-111407756 | 0 | 1 |
| XLOC_003812 | XLOC_003812 | LAYN                | chr11:111411232-111432470 | 0 | 1 |
| XLOC_003826 | XLOC_003826 | CLDN25              | chr11:113650517-113651207 | 0 | 1 |
| XLOC_003827 | XLOC_003827 | HTR3B               | chr11:113775517-113817283 | 0 | 1 |
| XLOC_003828 | XLOC_003828 | HTR3A               | chr11:113845796-113861034 | 0 | 1 |
| XLOC_003829 | XLOC_003829 | ZBTB16              | chr11:113930430-114121397 | 0 | 1 |
| XLOC_003833 | XLOC_003833 | NXPE2               | chr11:114549199-114577652 | 0 | 1 |
| XLOC_003834 | XLOC_003834 | APOC3               | chr11:116700623-116703787 | 0 | 1 |
| XLOC_003842 | XLOC_003842 | TMPRSS4             | chr11:117886486-117990556 | 0 | 1 |
| XLOC_003843 | XLOC_003843 | CD3E                | chr11:118175294-118186890 | 0 | 1 |
| XLOC_003853 | XLOC_003853 | MIR4492             | chr11:118754474-118781613 | 0 | 1 |
| XLOC_003855 | XLOC_003855 | FOXR1               | chr11:118842416-118851995 | 0 | 1 |
| XLOC_003876 | XLOC_003876 | SORL1               | chr11:121322911-121504471 | 0 | 1 |
| XLOC_003880 | XLOC_003880 | LOC341056           | chr11:122888273-122890319 | 0 | 1 |
| XLOC_003882 | XLOC_003882 | OR8D4               | chr11:123777138-123778083 | 0 | 1 |
| XLOC_003883 | XLOC_003883 | OR4D5               | chr11:123810323-123811280 | 0 | 1 |
| XLOC_003884 | XLOC_003884 | OR10G4              | chr11:123886281-123887217 | 0 | 1 |
| XLOC_003885 | XLOC_003885 | OR10G9              | chr11:123893719-123894655 | 0 | 1 |
| XLOC_003886 | XLOC_003886 | OR10G8              | chr11:123900329-123901265 | 0 | 1 |
| XLOC_003888 | XLOC_003888 | OR8G2               | chr11:124095397-124096312 | 0 | 1 |
| XLOC_003889 | XLOC_003889 | OR8G1,OR8G5         | chr11:124120422-124135763 | 0 | 1 |
| XLOC_003890 | XLOC_003890 | OR8A1               | chr11:124439964-124440945 | 0 | 1 |
| XLOC_003896 | XLOC_003896 | HEPN1               | chr11:124789145-124806308 | 0 | 1 |
| XLOC_003899 | XLOC_003899 | PKNOX2              | chr11:125034558-125303285 | 0 | 1 |
| XLOC_003903 | XLOC_003903 | PATE1               | chr11:125616187-125619743 | 0 | 1 |
| XLOC_003904 | XLOC_003904 | PATE3               | chr11:125658005-125661495 | 0 | 1 |
| XLOC_003905 | XLOC_003905 | PATE4               | chr11:125703210-125709967 | 0 | 1 |
| XLOC_003913 | XLOC_003913 | KIRREL3-AS2         | chr11:126293395-126870766 | 0 | 1 |
| XLOC_003914 | XLOC_003914 | KIRREL3-AS3         | chr11:126872804-126875953 | 0 | 1 |
| XLOC_003923 | XLOC_003923 | C11orf44            | chr11:130542850-130587247 | 0 | 1 |
| XLOC_003943 | XLOC_003943 | MIR210              | chr11:5656566-568457      | 0 | 1 |
| XLOC_003961 | XLOC_003961 | KRTAP5-3            | chr11:1490684-1785501     | 0 | 1 |
| XLOC_003962 | XLOC_003962 | KRTAP5-4            | chr11:1490684-1785501     | 0 | 1 |
| XLOC_003963 | XLOC_003963 | FAM99B              | chr11:1490684-1785501     | 0 | 1 |
| XLOC_003966 | XLOC_003966 | MIR4298             | chr11:1874199-1913493     | 0 | 1 |
| XLOC_003970 | XLOC_003970 | MIR483              | chr11:2150341-2182439     | 0 | 1 |
| XLOC_003971 | XLOC_003971 | TH                  | chr11:2185158-2193035     | 0 | 1 |
| XLOC_003972 | XLOC_003972 | ASCL2               | chr11:2289727-2292182     | 0 | 1 |
| XLOC_003973 | XLOC_003973 | C11orf21            | chr11:2317506-2323143     | 0 | 1 |
| XLOC_003983 | XLOC_003983 | MRGPRG              | chr11:3239173-3244361     | 0 | 1 |
| XLOC_003984 | XLOC_003984 | MRGPRE              | chr11:3249040-3253616     | 0 | 1 |
| XLOC_003991 | XLOC_003991 | OR52B4              | chr11:4388492-4389616     | 0 | 1 |
| XLOC_003993 | XLOC_003993 | C11orf40            | chr11:4592652-4599050     | 0 | 1 |

|             |             |                       |                         |   |   |
|-------------|-------------|-----------------------|-------------------------|---|---|
| XLOC_003995 | XLOC_003995 | OR51E2                | chr11:4701400-4719076   | 0 | 1 |
| XLOC_003996 | XLOC_003996 | OR51F1                | chr11:4790208-4791147   | 0 | 1 |
| XLOC_003997 | XLOC_003997 | OR52R1                | chr11:4824662-4825610   | 0 | 1 |
| XLOC_003998 | XLOC_003998 | OR51S1                | chr11:4869466-4870438   | 0 | 1 |
| XLOC_003999 | XLOC_003999 | OR51G2                | chr11:4935948-4936893   | 0 | 1 |
| XLOC_004000 | XLOC_004000 | OR51G1                | chr11:4944603-4945569   | 0 | 1 |
| XLOC_004001 | XLOC_004001 | OR51A4                | chr11:4967388-4968330   | 0 | 1 |
| XLOC_004002 | XLOC_004002 | OR51A2                | chr11:4976001-4976943   | 0 | 1 |
| XLOC_004003 | XLOC_004003 | OR52E2                | chr11:5079879-5080857   | 0 | 1 |
| XLOC_004004 | XLOC_004004 | OR52A5                | chr11:5152921-5153872   | 0 | 1 |
| XLOC_004005 | XLOC_004005 | OR52A1                | chr11:5172660-5173599   | 0 | 1 |
| XLOC_004006 | XLOC_004006 | OR51V1                | chr11:5220964-5221930   | 0 | 1 |
| XLOC_004014 | XLOC_004014 | OR51B2                | chr11:5344527-5345582   | 0 | 1 |
| XLOC_004016 | XLOC_004016 | OR51I1                | chr11:5362112-5526882   | 0 | 1 |
| XLOC_004017 | XLOC_004017 | UBQLN3                | chr11:5528529-5531153   | 0 | 1 |
| XLOC_004019 | XLOC_004019 | OR52H1                | chr11:5565790-5566753   | 0 | 1 |
| XLOC_004021 | XLOC_004021 | OR52N5                | chr11:5798863-5799897   | 0 | 1 |
| XLOC_004022 | XLOC_004022 | OR52N1                | chr11:5809083-5810046   | 0 | 1 |
| XLOC_004023 | XLOC_004023 | OR52E6                | chr11:5862185-5863127   | 0 | 1 |
| XLOC_004024 | XLOC_004024 | OR52E8                | chr11:5877978-5878932   | 0 | 1 |
| XLOC_004025 | XLOC_004025 | OR56A5                | chr11:5988782-5989724   | 0 | 1 |
| XLOC_004026 | XLOC_004026 | OR52L1                | chr11:6007121-6008215   | 0 | 1 |
| XLOC_004027 | XLOC_004027 | OR56A4                | chr11:6023280-6024378   | 0 | 1 |
| XLOC_004028 | XLOC_004028 | OR56A1                | chr11:6047900-6048971   | 0 | 1 |
| XLOC_004029 | XLOC_004029 | OR52B2                | chr11:6190584-6191556   | 0 | 1 |
| XLOC_004046 | XLOC_004046 | CYB5R2                | chr11:7686325-7694821   | 0 | 1 |
| XLOC_004047 | XLOC_004047 | OVCH2                 | chr11:7710668-7727941   | 0 | 1 |
| XLOC_004048 | XLOC_004048 | OR5P2                 | chr11:7817520-7818489   | 0 | 1 |
| XLOC_004049 | XLOC_004049 | OR5P3                 | chr11:7846583-7847519   | 0 | 1 |
| XLOC_004051 | XLOC_004051 | OR10A6                | chr11:7949264-7950209   | 0 | 1 |
| XLOC_004052 | XLOC_004052 | OR10A3                | chr11:7960122-7961067   | 0 | 1 |
| XLOC_004053 | XLOC_004053 | NLRP10                | chr11:7981155-7985059   | 0 | 1 |
| XLOC_004054 | XLOC_004054 | RIC3                  | chr11:8060179-8190590   | 0 | 1 |
| XLOC_004055 | XLOC_004055 | LMO1                  | chr11:8245850-8290182   | 0 | 1 |
| XLOC_004064 | XLOC_004064 | MIR5691               | chr11:9041046-9113150   | 0 | 1 |
| XLOC_004072 | XLOC_004072 | LYVE1                 | chr11:10562782-10715535 | 0 | 1 |
| XLOC_004073 | XLOC_004073 | MRV11                 | chr11:10562782-10715535 | 0 | 1 |
| XLOC_004079 | XLOC_004079 | MIR4299               | chr11:11678197-11678269 | 0 | 1 |
| XLOC_004083 | XLOC_004083 | PTH                   | chr11:13513600-13517567 | 0 | 1 |
| XLOC_004088 | XLOC_004088 | CALCA                 | chr11:14988214-14993832 | 0 | 1 |
| XLOC_004094 | XLOC_004094 | ABCC8                 | chr11:17414431-17498449 | 0 | 1 |
| XLOC_004099 | XLOC_004099 | SAA3P                 | chr11:18134018-18137679 | 0 | 1 |
| XLOC_004100 | XLOC_004100 | SAA2, SAA2-SAA4, SAA4 | chr11:18252901-18270221 | 0 | 1 |
| XLOC_004107 | XLOC_004107 | MRGPRX1               | chr11:18955359-18956549 | 0 | 1 |
| XLOC_004108 | XLOC_004108 | MRGPRX2               | chr11:19076002-19082228 | 0 | 1 |
| XLOC_004109 | XLOC_004109 | CSRP3                 | chr11:19203576-19232118 | 0 | 1 |
| XLOC_004111 | XLOC_004111 | NAV2-AS5              | chr11:19372270-20143147 | 0 | 1 |
| XLOC_004112 | XLOC_004112 | NAV2-AS4              | chr11:19372270-20143147 | 0 | 1 |
| XLOC_004114 | XLOC_004114 | MIR4694               | chr11:19372270-20143147 | 0 | 1 |
| XLOC_004115 | XLOC_004115 | DBX1                  | chr11:20177759-20181870 | 0 | 1 |
| XLOC_004118 | XLOC_004118 | CCDC179               | chr11:22868467-22881972 | 0 | 1 |
| XLOC_004126 | XLOC_004126 | KCNA4                 | chr11:30031287-30038577 | 0 | 1 |
| XLOC_004127 | XLOC_004127 | MPPED2                | chr11:30406039-30607930 | 0 | 1 |
| XLOC_004132 | XLOC_004132 | WT1                   | chr11:32409321-32457081 | 0 | 1 |
| XLOC_004142 | XLOC_004142 | SLC1A2                | chr11:35272751-35441610 | 0 | 1 |
| XLOC_004147 | XLOC_004147 | LRRC4C                | chr11:40135750-41481186 | 0 | 1 |
| XLOC_004148 | XLOC_004148 | LOC100507205          | chr11:42209292-42275240 | 0 | 1 |
| XLOC_004149 | XLOC_004149 | HNRNP KP3             | chr11:43283053-43290919 | 0 | 1 |
| XLOC_004154 | XLOC_004154 | CHST1                 | chr11:45669238-45687206 | 0 | 1 |
| XLOC_004155 | XLOC_004155 | C11orf94              | chr11:45928085-45928833 | 0 | 1 |
| XLOC_004160 | XLOC_004160 | MIR3160-1             | chr11:46417961-46615619 | 0 | 1 |
| XLOC_004164 | XLOC_004164 | MIR5582               | chr11:46765083-46867859 | 0 | 1 |
| XLOC_004165 | XLOC_004165 | SNORD67               | chr11:46765083-46867859 | 0 | 1 |
| XLOC_004181 | XLOC_004181 | OR4C45                | chr11:48366899-48373999 | 0 | 1 |
| XLOC_004182 | XLOC_004182 | TRIM64C               | chr11:49075265-49080664 | 0 | 1 |
| XLOC_004183 | XLOC_004183 | FOLH1                 | chr11:49168186-49230222 | 0 | 1 |
| XLOC_004184 | XLOC_004184 | OR4C12                | chr11:50003008-50004071 | 0 | 1 |
| XLOC_004185 | XLOC_004185 | LOC441601             | chr11:50238998-50257633 | 0 | 1 |
| XLOC_004186 | XLOC_004186 | OR4A5                 | chr11:51411377-51412448 | 0 | 1 |
| XLOC_004187 | XLOC_004187 | TRIM51HP              | chr11:55061178-55065708 | 0 | 1 |
| XLOC_004188 | XLOC_004188 | OR4C11                | chr11:55370829-55371874 | 0 | 1 |
| XLOC_004189 | XLOC_004189 | OR5W2                 | chr11:55681125-55682058 | 0 | 1 |
| XLOC_004190 | XLOC_004190 | OR5I1                 | chr11:55702931-55703876 | 0 | 1 |
| XLOC_004191 | XLOC_004191 | OR10AG1               | chr11:55735033-55735939 | 0 | 1 |
| XLOC_004192 | XLOC_004192 | OR7ESP                | chr11:55746178-55753881 | 0 | 1 |
| XLOC_004193 | XLOC_004193 | OR5F1                 | chr11:55761156-55762101 | 0 | 1 |
| XLOC_004194 | XLOC_004194 | OR8J3                 | chr11:55904246-55905194 | 0 | 1 |
| XLOC_004195 | XLOC_004195 | OR8K5                 | chr11:55926869-55927793 | 0 | 1 |
| XLOC_004196 | XLOC_004196 | OR5T2                 | chr11:55995581-56000661 | 0 | 1 |

|             |             |           |                         |   |   |
|-------------|-------------|-----------|-------------------------|---|---|
| XLOC_004197 | XLOC_004197 | OR8H1     | chr11:56057602-56058538 | 0 | 1 |
| XLOC_004198 | XLOC_004198 | OR5R1     | chr11:56143099-56508560 | 0 | 1 |
| XLOC_004199 | XLOC_004199 | OR5M9     | chr11:56143099-56508560 | 0 | 1 |
| XLOC_004200 | XLOC_004200 | OR5M3     | chr11:56143099-56508560 | 0 | 1 |
| XLOC_004201 | XLOC_004201 | OR5M8     | chr11:56143099-56508560 | 0 | 1 |
| XLOC_004202 | XLOC_004202 | OR5M11    | chr11:56143099-56508560 | 0 | 1 |
| XLOC_004203 | XLOC_004203 | OR5M10    | chr11:56143099-56508560 | 0 | 1 |
| XLOC_004204 | XLOC_004204 | OR5M1     | chr11:56143099-56508560 | 0 | 1 |
| XLOC_004205 | XLOC_004205 | OR5AP2    | chr11:56143099-56508560 | 0 | 1 |
| XLOC_004206 | XLOC_004206 | OR9G4     | chr11:56510303-56511287 | 0 | 1 |
| XLOC_004207 | XLOC_004207 | APLNR     | chr11:57001051-57004927 | 0 | 1 |
| XLOC_004210 | XLOC_004210 | PRG3      | chr11:57144241-57148623 | 0 | 1 |
| XLOC_004219 | XLOC_004219 | OR9I1     | chr11:57791352-57949038 | 0 | 1 |
| XLOC_004220 | XLOC_004220 | OR1S2     | chr11:57970675-57971653 | 0 | 1 |
| XLOC_004221 | XLOC_004221 | OR10Q1    | chr11:57995353-57996390 | 0 | 1 |
| XLOC_004222 | XLOC_004222 | OR10W1    | chr11:58034263-58035732 | 0 | 1 |
| XLOC_004223 | XLOC_004223 | OR5B17    | chr11:58125597-58126542 | 0 | 1 |
| XLOC_004224 | XLOC_004224 | OR5B3     | chr11:58169937-58170882 | 0 | 1 |
| XLOC_004225 | XLOC_004225 | OR5B2     | chr11:58189737-58190786 | 0 | 1 |
| XLOC_004226 | XLOC_004226 | OR5B12    | chr11:58206592-58207646 | 0 | 1 |
| XLOC_004227 | XLOC_004227 | OR5B21    | chr11:58274648-58275578 | 0 | 1 |
| XLOC_004229 | XLOC_004229 | GLYAT     | chr11:58476229-58499447 | 0 | 1 |
| XLOC_004230 | XLOC_004230 | GLYATL2   | chr11:58601539-58611997 | 0 | 1 |
| XLOC_004231 | XLOC_004231 | LOC283194 | chr11:58695101-58825925 | 0 | 1 |
| XLOC_004232 | XLOC_004232 | MPEG1     | chr11:58939811-58980494 | 0 | 1 |
| XLOC_004233 | XLOC_004233 | OR5A2     | chr11:59189451-59190426 | 0 | 1 |
| XLOC_004235 | XLOC_004235 | MIR3162   | chr11:59341870-59383617 | 0 | 1 |
| XLOC_004237 | XLOC_004237 | OR10V1    | chr11:59480388-59481318 | 0 | 1 |
| XLOC_004239 | XLOC_004239 | GIF       | chr11:59596745-59612974 | 0 | 1 |
| XLOC_004240 | XLOC_004240 | TCN1      | chr11:59620280-59634041 | 0 | 1 |
| XLOC_004241 | XLOC_004241 | MS4A6A    | chr11:59939079-59952139 | 0 | 1 |
| XLOC_004254 | XLOC_004254 | MIR1908   | chr11:61567096-61584529 | 0 | 1 |
| XLOC_004258 | XLOC_004258 | SCGB1D4   | chr11:62063753-62066536 | 0 | 1 |
| XLOC_004279 | XLOC_004279 | SNORD30   | chr11:62619459-62623360 | 0 | 1 |
| XLOC_004281 | XLOC_004281 | SNORD28   | chr11:62619459-62623360 | 0 | 1 |
| XLOC_004282 | XLOC_004282 | SNORD27   | chr11:62619459-62623360 | 0 | 1 |
| XLOC_004283 | XLOC_004283 | SNORD26   | chr11:62619459-62623360 | 0 | 1 |
| XLOC_004284 | XLOC_004284 | SNORD25   | chr11:62619459-62623360 | 0 | 1 |
| XLOC_004286 | XLOC_004286 | SLC22A6   | chr11:62744068-62752495 | 0 | 1 |
| XLOC_004287 | XLOC_004287 | SLC22A8   | chr11:62760295-62783317 | 0 | 1 |
| XLOC_004288 | XLOC_004288 | SLC22A24  | chr11:62847411-62911693 | 0 | 1 |
| XLOC_004289 | XLOC_004289 | SLC22A25  | chr11:62931295-62997124 | 0 | 1 |
| XLOC_004290 | XLOC_004290 | MIR3680-2 | chr11:63014620-63330855 | 0 | 1 |
| XLOC_004291 | XLOC_004291 | HRASLS5   | chr11:63014620-63330855 | 0 | 1 |
| XLOC_004310 | XLOC_004310 | MIR192    | chr11:64658608-64658718 | 0 | 1 |
| XLOC_004311 | XLOC_004311 | MIR194-2  | chr11:64658826-64658911 | 0 | 1 |
| XLOC_004313 | XLOC_004313 | GPHA2     | chr11:64692142-64703360 | 0 | 1 |
| XLOC_004314 | XLOC_004314 | C11orf85  | chr11:64705928-64727609 | 0 | 1 |
| XLOC_004339 | XLOC_004339 | CD248     | chr11:66081957-66084515 | 0 | 1 |
| XLOC_004346 | XLOC_004346 | CTSF      | chr11:66330934-66336047 | 0 | 1 |
| XLOC_004356 | XLOC_004356 | GPR152    | chr11:67218771-67220200 | 0 | 1 |
| XLOC_004360 | XLOC_004360 | CABP2     | chr11:67286417-67290899 | 0 | 1 |
| XLOC_004365 | XLOC_004365 | ALDH3B2   | chr11:67429632-67448685 | 0 | 1 |
| XLOC_004375 | XLOC_004375 | MRGPRF    | chr11:68771861-68780850 | 0 | 1 |
| XLOC_004377 | XLOC_004377 | FGF19     | chr11:69513005-69519106 | 0 | 1 |
| XLOC_004378 | XLOC_004378 | FGF4      | chr11:69587796-69590171 | 0 | 1 |
| XLOC_004379 | XLOC_004379 | FGF3      | chr11:69624735-69634192 | 0 | 1 |
| XLOC_004381 | XLOC_004381 | MIR3664   | chr11:70313960-70935808 | 0 | 1 |
| XLOC_004384 | XLOC_004384 | KRTAP5-11 | chr11:71292900-71293921 | 0 | 1 |
| XLOC_004388 | XLOC_004388 | MIR3165   | chr11:71709957-71823822 | 0 | 1 |
| XLOC_004394 | XLOC_004394 | MIR139    | chr11:72287183-72385497 | 0 | 1 |
| XLOC_004406 | XLOC_004406 | KCNE3     | chr11:74165885-74178600 | 0 | 1 |
| XLOC_004408 | XLOC_004408 | CHRD12    | chr11:74407473-74442186 | 0 | 1 |
| XLOC_004409 | XLOC_004409 | MIR4696   | chr11:74407473-74442186 | 0 | 1 |
| XLOC_004411 | XLOC_004411 | OR2AT4    | chr11:74799795-74800758 | 0 | 1 |
| XLOC_004413 | XLOC_004413 | MIR326    | chr11:74971165-75062875 | 0 | 1 |
| XLOC_004417 | XLOC_004417 | LOC283214 | chr11:75469499-75479692 | 0 | 1 |
| XLOC_004420 | XLOC_004420 | LRRC32    | chr11:76368567-76381791 | 0 | 1 |
| XLOC_004421 | XLOC_004421 | GUCY2EP   | chr11:76391209-76432833 | 0 | 1 |
| XLOC_004422 | XLOC_004422 | GDPD4     | chr11:76927602-76998463 | 0 | 1 |
| XLOC_004428 | XLOC_004428 | RNU6-83   | chr11:77726760-77850699 | 0 | 1 |
| XLOC_004434 | XLOC_004434 | MIR708    | chr11:78364327-79151695 | 0 | 1 |
| XLOC_004435 | XLOC_004435 | MIR5579   | chr11:78364327-79151695 | 0 | 1 |
| XLOC_004436 | XLOC_004436 | MIR4300   | chr11:81601782-81601878 | 0 | 1 |
| XLOC_004437 | XLOC_004437 | FAM181B   | chr11:82443045-82444906 | 0 | 1 |
| XLOC_004440 | XLOC_004440 | SNORA70E  | chr11:82692477-82782884 | 0 | 1 |
| XLOC_004444 | XLOC_004444 | CCDC89    | chr11:85394892-85397320 | 0 | 1 |
| XLOC_004448 | XLOC_004448 | OR7E2P    | chr11:86567972-86568996 | 0 | 1 |
| XLOC_004452 | XLOC_004452 | GRM5      | chr11:88237743-88796816 | 0 | 1 |

|             |             |                         |                           |   |   |
|-------------|-------------|-------------------------|---------------------------|---|---|
| XLOC_004454 | XLOC_004454 | TRIM49                  | chr11:89530822-89541743   | 0 | 1 |
| XLOC_004455 | XLOC_004455 | TRIM64B                 | chr11:89570045-89673722   | 0 | 1 |
| XLOC_004456 | XLOC_004456 | TRIM49D1P,TRIM49D2P     | chr11:89570045-89673722   | 0 | 1 |
| XLOC_004457 | XLOC_004457 | TRIM53AP                | chr11:89726708-89735676   | 0 | 1 |
| XLOC_004459 | XLOC_004459 | MIR4490                 | chr11:90288941-90289025   | 0 | 1 |
| XLOC_004467 | XLOC_004467 | SNORD5                  | chr11:93466393-93466466   | 0 | 1 |
| XLOC_004469 | XLOC_004469 | MIR1304                 | chr11:93466839-93466930   | 0 | 1 |
| XLOC_004481 | XLOC_004481 | JRKL-AS1                | chr11:96176445-96240041   | 0 | 1 |
| XLOC_004482 | XLOC_004482 | PGR                     | chr11:100900354-101030001 | 0 | 1 |
| XLOC_004484 | XLOC_004484 | MIR3920                 | chr11:101322294-101454659 | 0 | 1 |
| XLOC_004488 | XLOC_004488 | MMP20                   | chr11:102447565-102496063 | 0 | 1 |
| XLOC_004489 | XLOC_004489 | MMP27                   | chr11:102562414-102576468 | 0 | 1 |
| XLOC_004490 | XLOC_004490 | MMP8                    | chr11:102582525-102595685 | 0 | 1 |
| XLOC_004494 | XLOC_004494 | MMP12                   | chr11:102733463-102745764 | 0 | 1 |
| XLOC_004495 | XLOC_004495 | MMP13                   | chr11:102813720-102826463 | 0 | 1 |
| XLOC_004497 | XLOC_004497 | PDGFD                   | chr11:103777913-104035027 | 0 | 1 |
| XLOC_004498 | XLOC_004498 | CASP12                  | chr11:104756444-104769397 | 0 | 1 |
| XLOC_004499 | XLOC_004499 | LOC643733               | chr11:104772275-104788902 | 0 | 1 |
| XLOC_004504 | XLOC_004504 | CARD17                  | chr11:104963195-104972158 | 0 | 1 |
| XLOC_004505 | XLOC_004505 | CARD18                  | chr11:105008447-105010461 | 0 | 1 |
| XLOC_004518 | XLOC_004518 | ARHGAP20                | chr11:10447758-110583912  | 0 | 1 |
| XLOC_004521 | XLOC_004521 | LOC100132078            | chr11:111284966-111288911 | 0 | 1 |
| XLOC_004522 | XLOC_004522 | BTG4                    | chr11:111338255-111383079 | 0 | 1 |
| XLOC_004529 | XLOC_004529 | IL18                    | chr11:112013973-112034840 | 0 | 1 |
| XLOC_004531 | XLOC_004531 | LOC100288346            | chr11:112831968-113149158 | 0 | 1 |
| XLOC_004532 | XLOC_004532 | DRD2                    | chr11:113280316-113346001 | 0 | 1 |
| XLOC_004533 | XLOC_004533 | MIR4301                 | chr11:113280316-113346001 | 0 | 1 |
| XLOC_004538 | XLOC_004538 | NXPE1                   | chr11:114392436-114430580 | 0 | 1 |
| XLOC_004539 | XLOC_004539 | NXPE4                   | chr11:114441312-114466484 | 0 | 1 |
| XLOC_004541 | XLOC_004541 | LOC283143               | chr11:115626050-115630918 | 0 | 1 |
| XLOC_004544 | XLOC_004544 | APOA5                   | chr11:116660085-116663136 | 0 | 1 |
| XLOC_004545 | XLOC_004545 | APOA4                   | chr11:116691417-116694011 | 0 | 1 |
| XLOC_004551 | XLOC_004551 | DSCAML1                 | chr11:117298488-117667976 | 0 | 1 |
| XLOC_004552 | XLOC_004552 | FXYD2,FXYD6,FXYD6-FXYD2 | chr11:117690789-117748201 | 0 | 1 |
| XLOC_004554 | XLOC_004554 | TMPRSS4-AS1             | chr11:117886486-117990556 | 0 | 1 |
| XLOC_004574 | XLOC_004574 | MFRP                    | chr11:119209651-119217383 | 0 | 1 |
| XLOC_004578 | XLOC_004578 | TRIM29                  | chr11:119981993-120008863 | 0 | 1 |
| XLOC_004579 | XLOC_004579 | LOC649133               | chr11:120107348-120190653 | 0 | 1 |
| XLOC_004581 | XLOC_004581 | MIR125B1                | chr11:121959810-122073770 | 0 | 1 |
| XLOC_004582 | XLOC_004582 | BLID                    | chr11:121959810-122073770 | 0 | 1 |
| XLOC_004583 | XLOC_004583 | MIRLET7A2               | chr11:121959810-122073770 | 0 | 1 |
| XLOC_004584 | XLOC_004584 | MIR100                  | chr11:121959810-122073770 | 0 | 1 |
| XLOC_004585 | XLOC_004585 | BSX                     | chr11:122848356-122852379 | 0 | 1 |
| XLOC_004588 | XLOC_004588 | MIR4493                 | chr11:123252147-123252220 | 0 | 1 |
| XLOC_004591 | XLOC_004591 | OR6X1                   | chr11:123624287-123625226 | 0 | 1 |
| XLOC_004592 | XLOC_004592 | OR6M1                   | chr11:123676115-123677057 | 0 | 1 |
| XLOC_004593 | XLOC_004593 | TMEM225                 | chr11:123753632-123756340 | 0 | 1 |
| XLOC_004594 | XLOC_004594 | OR6T1                   | chr11:123813573-123814545 | 0 | 1 |
| XLOC_004595 | XLOC_004595 | OR10S1                  | chr11:123847402-123848398 | 0 | 1 |
| XLOC_004596 | XLOC_004596 | OR10G7                  | chr11:123908772-123909708 | 0 | 1 |
| XLOC_004597 | XLOC_004597 | OR8D1                   | chr11:124179735-124180662 | 0 | 1 |
| XLOC_004598 | XLOC_004598 | OR8D2                   | chr11:124189157-124190093 | 0 | 1 |
| XLOC_004599 | XLOC_004599 | OR8B2                   | chr11:124252297-124253239 | 0 | 1 |
| XLOC_004600 | XLOC_004600 | OR8B3                   | chr11:124266305-124267247 | 0 | 1 |
| XLOC_004601 | XLOC_004601 | OR8B4                   | chr11:124293837-124294767 | 0 | 1 |
| XLOC_004602 | XLOC_004602 | OR8B8                   | chr11:124310045-124310981 | 0 | 1 |
| XLOC_004603 | XLOC_004603 | OR8B12                  | chr11:124412617-124413550 | 0 | 1 |
| XLOC_004620 | XLOC_004620 | MIR3167                 | chr11:126293395-126870766 | 0 | 1 |
| XLOC_004622 | XLOC_004622 | FLI1-AS1                | chr11:128556429-128683162 | 0 | 1 |
| XLOC_004633 | XLOC_004633 | SPATA19                 | chr11:133710516-133715392 | 0 | 1 |
| XLOC_004640 | XLOC_004640 | IQSEC3                  | chr12:176048-287625       | 0 | 1 |
| XLOC_004650 | XLOC_004650 | CACNA1C-IT3             | chr12:2162415-2807115     | 0 | 1 |
| XLOC_004666 | XLOC_004666 | KCNA1                   | chr12:5019072-5027422     | 0 | 1 |
| XLOC_004667 | XLOC_004667 | KCNA5                   | chr12:5153084-5155954     | 0 | 1 |
| XLOC_004668 | XLOC_004668 | NTF3                    | chr12:5541279-5604465     | 0 | 1 |
| XLOC_004693 | XLOC_004693 | MIR200C                 | chr12:7072861-7072929     | 0 | 1 |
| XLOC_004694 | XLOC_004694 | MIR141                  | chr12:7073259-7073354     | 0 | 1 |
| XLOC_004700 | XLOC_004700 | ACSM4                   | chr12:7456927-7480969     | 0 | 1 |
| XLOC_004701 | XLOC_004701 | DPPA3                   | chr12:7864088-7870152     | 0 | 1 |
| XLOC_004702 | XLOC_004702 | NANOGNB                 | chr12:7917811-7926717     | 0 | 1 |
| XLOC_004709 | XLOC_004709 | CLEC6A                  | chr12:8608590-8630926     | 0 | 1 |
| XLOC_004720 | XLOC_004720 | KLRF1                   | chr12:9980076-9997603     | 0 | 1 |
| XLOC_004721 | XLOC_004721 | KLRF2                   | chr12:10034087-10048432   | 0 | 1 |
| XLOC_004722 | XLOC_004722 | CLEC12A                 | chr12:10103914-10138194   | 0 | 1 |
| XLOC_004723 | XLOC_004723 | CLEC12B                 | chr12:10163230-10171399   | 0 | 1 |
| XLOC_004724 | XLOC_004724 | CLEC9A                  | chr12:10183275-10218565   | 0 | 1 |
| XLOC_004725 | XLOC_004725 | TMEM52B                 | chr12:10331556-10344403   | 0 | 1 |
| XLOC_004727 | XLOC_004727 | KLRD1                   | chr12:10457049-10469850   | 0 | 1 |
| XLOC_004733 | XLOC_004733 | MIR1244-2               | chr12:12264885-12264967   | 0 | 1 |

|             |             |                |                           |   |   |
|-------------|-------------|----------------|---------------------------|---|---|
| XLOC_004738 | XLOC_004738 | MIR613         | chr12:12878850-12944399   | 0 | 1 |
| XLOC_004742 | XLOC_004742 | MIR614         | chr12:13068762-13068852   | 0 | 1 |
| XLOC_004748 | XLOC_004748 | H2AFJ          | chr12:14927269-14930936   | 0 | 1 |
| XLOC_004750 | XLOC_004750 | PDE6H          | chr12:15125955-15134799   | 0 | 1 |
| XLOC_004751 | XLOC_004751 | PTPRO          | chr12:15475190-15751265   | 0 | 1 |
| XLOC_004755 | XLOC_004755 | SKP1P2         | chr12:17141680-17143562   | 0 | 1 |
| XLOC_004756 | XLOC_004756 | MIR3974        | chr12:17826232-17826328   | 0 | 1 |
| XLOC_004757 | XLOC_004757 | PIK3C2G        | chr12:18414473-18801352   | 0 | 1 |
| XLOC_004758 | XLOC_004758 | CAPZA3         | chr12:18891044-18892122   | 0 | 1 |
| XLOC_004761 | XLOC_004761 | LOC100506393   | chr12:20167618-20251802   | 0 | 1 |
| XLOC_004762 | XLOC_004762 | PDE3A          | chr12:20522178-20837041   | 0 | 1 |
| XLOC_004773 | XLOC_004773 | MIR920         | chr12:23685230-24715383   | 0 | 1 |
| XLOC_004774 | XLOC_004774 | LRMP           | chr12:25205180-25348094   | 0 | 1 |
| XLOC_004789 | XLOC_004789 | LOC101055625   | chr12:29542226-29650619   | 0 | 1 |
| XLOC_004802 | XLOC_004802 | C12orf40       | chr12:40019971-40115720   | 0 | 1 |
| XLOC_004803 | XLOC_004803 | LRRK2          | chr12:40618812-40763086   | 0 | 1 |
| XLOC_004804 | XLOC_004804 | CNTN1          | chr12:41086243-41466213   | 0 | 1 |
| XLOC_004811 | XLOC_004811 | MIR4698        | chr12:47581594-47581674   | 0 | 1 |
| XLOC_004816 | XLOC_004816 | C12orf68       | chr12:48577365-48579709   | 0 | 1 |
| XLOC_004818 | XLOC_004818 | ANP32D         | chr12:48866447-48866843   | 0 | 1 |
| XLOC_004819 | XLOC_004819 | C12orf54       | chr12:48876285-48890297   | 0 | 1 |
| XLOC_004824 | XLOC_004824 | WNT1           | chr12:49372235-49376396   | 0 | 1 |
| XLOC_004835 | XLOC_004835 | AQP2           | chr12:50344523-50352664   | 0 | 1 |
| XLOC_004836 | XLOC_004836 | AQP5           | chr12:50355278-50359465   | 0 | 1 |
| XLOC_004845 | XLOC_004845 | TMPRSS12       | chr12:51236700-51281663   | 0 | 1 |
| XLOC_004847 | XLOC_004847 | HIGD1C         | chr12:51347781-51364289   | 0 | 1 |
| XLOC_004852 | XLOC_004852 | ANKRD33        | chr12:52281792-52285505   | 0 | 1 |
| XLOC_004878 | XLOC_004878 | HOXC12         | chr12:54348713-54350350   | 0 | 1 |
| XLOC_004881 | XLOC_004881 | MIR196A2       | chr12:54385521-54385631   | 0 | 1 |
| XLOC_004885 | XLOC_004885 | MIR615         | chr12:54410641-54449814   | 0 | 1 |
| XLOC_004891 | XLOC_004891 | MIR148B        | chr12:54718873-54745635   | 0 | 1 |
| XLOC_004894 | XLOC_004894 | MUCL1          | chr12:55248298-55252174   | 0 | 1 |
| XLOC_004895 | XLOC_004895 | NEUROD4        | chr12:55413728-55423801   | 0 | 1 |
| XLOC_004896 | XLOC_004896 | OR9K2          | chr12:55523552-55524560   | 0 | 1 |
| XLOC_004897 | XLOC_004897 | OR10A7         | chr12:55614808-55615759   | 0 | 1 |
| XLOC_004898 | XLOC_004898 | OR6C74         | chr12:55641071-55642010   | 0 | 1 |
| XLOC_004899 | XLOC_004899 | OR6C1          | chr12:55714383-55715322   | 0 | 1 |
| XLOC_004900 | XLOC_004900 | OR6C3          | chr12:55725484-55726420   | 0 | 1 |
| XLOC_004901 | XLOC_004901 | OR6C75         | chr12:55758894-55759833   | 0 | 1 |
| XLOC_004902 | XLOC_004902 | OR6C65         | chr12:55794312-55795251   | 0 | 1 |
| XLOC_004903 | XLOC_004903 | OR6C76         | chr12:55820037-55820976   | 0 | 1 |
| XLOC_004904 | XLOC_004904 | OR6C2          | chr12:55845997-55846936   | 0 | 1 |
| XLOC_004905 | XLOC_004905 | OR6C68         | chr12:55886161-55887100   | 0 | 1 |
| XLOC_004906 | XLOC_004906 | OR6C4          | chr12:55945010-55945940   | 0 | 1 |
| XLOC_004907 | XLOC_004907 | OR2AP1         | chr12:55968198-55969128   | 0 | 1 |
| XLOC_004908 | XLOC_004908 | OR10P1         | chr12:56030675-56031617   | 0 | 1 |
| XLOC_004937 | XLOC_004937 | MIR1228        | chr12:57522281-57607125   | 0 | 1 |
| XLOC_004947 | XLOC_004947 | DTX3           | chr12:57998603-58003583   | 0 | 1 |
| XLOC_004949 | XLOC_004949 | SLC26A10       | chr12:58013692-58027022   | 0 | 1 |
| XLOC_004960 | XLOC_004960 | MIRLET7I       | chr12:62997465-62997549   | 0 | 1 |
| XLOC_004966 | XLOC_004966 | MIR548C        | chr12:65004292-65091347   | 0 | 1 |
| XLOC_004968 | XLOC_004968 | FLJ41278       | chr12:65277553-65371302   | 0 | 1 |
| XLOC_004984 | XLOC_004984 | MIR3913-2      | chr12:69978501-69978603   | 0 | 1 |
| XLOC_004994 | XLOC_004994 | TPH2           | chr12:72332625-72426221   | 0 | 1 |
| XLOC_004995 | XLOC_004995 | TRHDE          | chr12:72647286-73059422   | 0 | 1 |
| XLOC_005003 | XLOC_005003 | MIR1252        | chr12:79257772-79845788   | 0 | 1 |
| XLOC_005004 | XLOC_005004 | MIR5692B       | chr12:79850650-79852440   | 0 | 1 |
| XLOC_005006 | XLOC_005006 | PTPRQ          | chr12:80838125-81073968   | 0 | 1 |
| XLOC_005007 | XLOC_005007 | MYF6           | chr12:81101407-81103256   | 0 | 1 |
| XLOC_005008 | XLOC_005008 | MYF5           | chr12:81110707-81113447   | 0 | 1 |
| XLOC_005009 | XLOC_005009 | ACSS3          | chr12:81471808-81649582   | 0 | 1 |
| XLOC_005010 | XLOC_005010 | MIR4699        | chr12:81471808-81649582   | 0 | 1 |
| XLOC_005013 | XLOC_005013 | LRRIQ1         | chr12:85430098-85638883   | 0 | 1 |
| XLOC_005014 | XLOC_005014 | ALX1           | chr12:85674035-85695561   | 0 | 1 |
| XLOC_005015 | XLOC_005015 | NTS            | chr12:86268072-86276770   | 0 | 1 |
| XLOC_005019 | XLOC_005019 | LINC00615      | chr12:91311799-91342446   | 0 | 1 |
| XLOC_005020 | XLOC_005020 | CLUU1          | chr12:92813869-92824778   | 0 | 1 |
| XLOC_005021 | XLOC_005021 | C12orf74       | chr12:93096618-93102325   | 0 | 1 |
| XLOC_005029 | XLOC_005029 | MIR5700        | chr12:94955564-94955635   | 0 | 1 |
| XLOC_005030 | XLOC_005030 | KRT19P2,MIR492 | chr12:95228173-95228804   | 0 | 1 |
| XLOC_005032 | XLOC_005032 | MIR331         | chr12:95702195-95702289   | 0 | 1 |
| XLOC_005033 | XLOC_005033 | MIR3685        | chr12:95703698-95703760   | 0 | 1 |
| XLOC_005035 | XLOC_005035 | PGAM1P5        | chr12:96043030-96184536   | 0 | 1 |
| XLOC_005040 | XLOC_005040 | RMST           | chr12:97858798-97927544   | 0 | 1 |
| XLOC_005041 | XLOC_005041 | MIR1251        | chr12:97858798-97927544   | 0 | 1 |
| XLOC_005042 | XLOC_005042 | MIR135A2       | chr12:97957589-97957689   | 0 | 1 |
| XLOC_005047 | XLOC_005047 | FAM71C         | chr12:99039077-100378432  | 0 | 1 |
| XLOC_005048 | XLOC_005048 | MIR1827        | chr12:100583661-100583727 | 0 | 1 |
| XLOC_005051 | XLOC_005051 | SLC17A8        | chr12:100750856-100815837 | 0 | 1 |

|             |             |                         |                           |   |   |
|-------------|-------------|-------------------------|---------------------------|---|---|
| XLOC_005052 | XLOC_005052 | NR1H4                   | chr12:100867550-100957645 | 0 | 1 |
| XLOC_005054 | XLOC_005054 | ANO4                    | chr12:101188373-101522419 | 0 | 1 |
| XLOC_005056 | XLOC_005056 | SPIC                    | chr12:101871334-101880775 | 0 | 1 |
| XLOC_005057 | XLOC_005057 | MYBPC1                  | chr12:101988708-102079658 | 0 | 1 |
| XLOC_005061 | XLOC_005061 | ASCL1                   | chr12:103351451-103354294 | 0 | 1 |
| XLOC_005069 | XLOC_005069 | MIR3922                 | chr12:104850691-105155792 | 0 | 1 |
| XLOC_005075 | XLOC_005075 | RFX4                    | chr12:106751435-107283094 | 0 | 1 |
| XLOC_005080 | XLOC_005080 | ASCL4                   | chr12:108168161-108170421 | 0 | 1 |
| XLOC_005081 | XLOC_005081 | WSCD2                   | chr12:108523510-108644313 | 0 | 1 |
| XLOC_005084 | XLOC_005084 | DAO                     | chr12:109273856-109294710 | 0 | 1 |
| XLOC_005092 | XLOC_005092 | MIR4497                 | chr12:110220891-110271241 | 0 | 1 |
| XLOC_005100 | XLOC_005100 | CCDC63                  | chr12:111284810-111345338 | 0 | 1 |
| XLOC_005101 | XLOC_005101 | LOC100131138            | chr12:111374405-111375250 | 0 | 1 |
| XLOC_005121 | XLOC_005121 | TBX5-AS1                | chr12:114791734-114850637 | 0 | 1 |
| XLOC_005130 | XLOC_005130 | HSPB8                   | chr12:119616594-119632551 | 0 | 1 |
| XLOC_005131 | XLOC_005131 | CCDC60                  | chr12:119772516-119978852 | 0 | 1 |
| XLOC_005132 | XLOC_005132 | TMEM233                 | chr12:120031263-120079363 | 0 | 1 |
| XLOC_005146 | XLOC_005146 | P2RX7                   | chr12:121570621-121624354 | 0 | 1 |
| XLOC_005177 | XLOC_005177 | MIR5188                 | chr12:125400092-125400205 | 0 | 1 |
| XLOC_005181 | XLOC_005181 | LOC100128554            | chr12:126927026-126957331 | 0 | 1 |
| XLOC_005185 | XLOC_005185 | TMEM132C                | chr12:128751947-129192460 | 0 | 1 |
| XLOC_005186 | XLOC_005186 | MIR3612                 | chr12:128751947-129192460 | 0 | 1 |
| XLOC_005188 | XLOC_005188 | FZD10                   | chr12:130647003-130650285 | 0 | 1 |
| XLOC_005189 | XLOC_005189 | PIWIL1                  | chr12:130822432-130856877 | 0 | 1 |
| XLOC_005194 | XLOC_005194 | MMP17                   | chr12:132312940-132336316 | 0 | 1 |
| XLOC_005211 | XLOC_005211 | FAM138D                 | chr12:147945-149412       | 0 | 1 |
| XLOC_005212 | XLOC_005212 | LOC574538               | chr12:176048-287625       | 0 | 1 |
| XLOC_005219 | XLOC_005219 | MIR3649                 | chr12:1769480-1769546     | 0 | 1 |
| XLOC_005223 | XLOC_005223 | CACNA1C-AS4             | chr12:2162415-2807115     | 0 | 1 |
| XLOC_005224 | XLOC_005224 | CACNA1C-AS1             | chr12:2162415-2807115     | 0 | 1 |
| XLOC_005225 | XLOC_005225 | LOC283440               | chr12:2870365-2880835     | 0 | 1 |
| XLOC_005230 | XLOC_005230 | FGF23                   | chr12:4477392-4488894     | 0 | 1 |
| XLOC_005231 | XLOC_005231 | FGF6                    | chr12:4543307-4554780     | 0 | 1 |
| XLOC_005244 | XLOC_005244 | SCARNA11                | chr12:6679247-6716551     | 0 | 1 |
| XLOC_005260 | XLOC_005260 | CD163                   | chr12:7623411-7656414     | 0 | 1 |
| XLOC_005261 | XLOC_005261 | POBEC1                  | chr12:7801955-7818502     | 0 | 1 |
| XLOC_005262 | XLOC_005262 | GDF3                    | chr12:7842380-7848360     | 0 | 1 |
| XLOC_005263 | XLOC_005263 | CLEC4C                  | chr12:7882010-7902069     | 0 | 1 |
| XLOC_005271 | XLOC_005271 | CLEC4E                  | chr12:8685900-8693558     | 0 | 1 |
| XLOC_005277 | XLOC_005277 | PZP                     | chr12:9301435-9360966     | 0 | 1 |
| XLOC_005278 | XLOC_005278 | A2MP1                   | chr12:9381128-9386803     | 0 | 1 |
| XLOC_005279 | XLOC_005279 | MIR1244-1               | chr12:9392065-9392147     | 0 | 1 |
| XLOC_005281 | XLOC_005281 | KLRB1                   | chr12:9747869-9760497     | 0 | 1 |
| XLOC_005283 | XLOC_005283 | CD69                    | chr12:9905081-9913497     | 0 | 1 |
| XLOC_005285 | XLOC_005285 | CLEC2A                  | chr12:10065825-10084980   | 0 | 1 |
| XLOC_005286 | XLOC_005286 | CLEC1B                  | chr12:10145661-10151899   | 0 | 1 |
| XLOC_005287 | XLOC_005287 | CLEC1A                  | chr12:10223079-10251605   | 0 | 1 |
| XLOC_005289 | XLOC_005289 | OLR1                    | chr12:10310898-10324790   | 0 | 1 |
| XLOC_005290 | XLOC_005290 | KLRC4,KLRC4-KLRK1,KLRK1 | chr12:10524951-10562745   | 0 | 1 |
| XLOC_005291 | XLOC_005291 | KLRC3                   | chr12:10564913-10573194   | 0 | 1 |
| XLOC_005293 | XLOC_005293 | KLRC1                   | chr12:10598637-10607215   | 0 | 1 |
| XLOC_005298 | XLOC_005298 | TAS2R7                  | chr12:10954130-10955226   | 0 | 1 |
| XLOC_005299 | XLOC_005299 | TAS2R8                  | chr12:10958649-10959579   | 0 | 1 |
| XLOC_005300 | XLOC_005300 | TAS2R9                  | chr12:10961692-10962767   | 0 | 1 |
| XLOC_005312 | XLOC_005312 | TAS2R42                 | chr12:11338598-11339543   | 0 | 1 |
| XLOC_005314 | XLOC_005314 | PRB4                    | chr12:11460014-11463369   | 0 | 1 |
| XLOC_005315 | XLOC_005315 | PRB1                    | chr12:11504756-11508524   | 0 | 1 |
| XLOC_005316 | XLOC_005316 | PRB2                    | chr12:11544473-11548498   | 0 | 1 |
| XLOC_005317 | XLOC_005317 | RNU6-19                 | chr12:11802787-12079107   | 0 | 1 |
| XLOC_005326 | XLOC_005326 | C12orf36                | chr12:13523604-13529679   | 0 | 1 |
| XLOC_005327 | XLOC_005327 | GRIN2B                  | chr12:13714409-14133022   | 0 | 1 |
| XLOC_005333 | XLOC_005333 | ART4                    | chr12:14982244-14996413   | 0 | 1 |
| XLOC_005334 | XLOC_005334 | MGP                     | chr12:15034114-15038853   | 0 | 1 |
| XLOC_005335 | XLOC_005335 | ERP27                   | chr12:15066975-15091463   | 0 | 1 |
| XLOC_005337 | XLOC_005337 | RERG                    | chr12:15260715-15374411   | 0 | 1 |
| XLOC_005339 | XLOC_005339 | SLC15A5                 | chr12:16341418-16430619   | 0 | 1 |
| XLOC_005340 | XLOC_005340 | LMO3                    | chr12:16701305-16761148   | 0 | 1 |
| XLOC_005341 | XLOC_005341 | RERGL                   | chr12:18233802-18243114   | 0 | 1 |
| XLOC_005342 | XLOC_005342 | PLCZ1                   | chr12:18836109-18890993   | 0 | 1 |
| XLOC_005347 | XLOC_005347 | KCNJ8                   | chr12:21917888-21927755   | 0 | 1 |
| XLOC_005351 | XLOC_005351 | SOX5                    | chr12:23685230-24715383   | 0 | 1 |
| XLOC_005352 | XLOC_005352 | LINC00477               | chr12:24719897-24737102   | 0 | 1 |
| XLOC_005354 | XLOC_005354 | C12orf77                | chr12:25146364-25150373   | 0 | 1 |
| XLOC_005358 | XLOC_005358 | MIR4302                 | chr12:26026952-26027012   | 0 | 1 |
| XLOC_005359 | XLOC_005359 | LOC100506451            | chr12:26107587-26232825   | 0 | 1 |
| XLOC_005365 | XLOC_005365 | MANSC4                  | chr12:27915598-27924209   | 0 | 1 |
| XLOC_005368 | XLOC_005368 | OVCH1                   | chr12:29542226-29650619   | 0 | 1 |
| XLOC_005369 | XLOC_005369 | TMTC1                   | chr12:29653745-29937692   | 0 | 1 |
| XLOC_005377 | XLOC_005377 | RNU6-78                 | chr12:32146772-32146802   | 0 | 1 |

|             |             |              |                           |   |   |
|-------------|-------------|--------------|---------------------------|---|---|
| XLOC_005380 | XLOC_005380 | SYT10        | chr12:33528347-33592754   | 0 | 1 |
| XLOC_005381 | XLOC_005381 | CPNE8        | chr12:39046001-39299420   | 0 | 1 |
| XLOC_005383 | XLOC_005383 | ABCD2        | chr12:39945021-40013843   | 0 | 1 |
| XLOC_005389 | XLOC_005389 | ADAMTS20     | chr12:43748011-43945724   | 0 | 1 |
| XLOC_005393 | XLOC_005393 | DBX2         | chr12:45408538-45444882   | 0 | 1 |
| XLOC_005396 | XLOC_005396 | RNY5         | chr12:45566816-45834187   | 0 | 1 |
| XLOC_005402 | XLOC_005402 | AMIGO2       | chr12:47469489-47473734   | 0 | 1 |
| XLOC_005403 | XLOC_005403 | PCED1B-AS1   | chr12:47602202-47630443   | 0 | 1 |
| XLOC_005412 | XLOC_005412 | OR10AD1      | chr12:48596121-48597075   | 0 | 1 |
| XLOC_005421 | XLOC_005421 | MIR4701      | chr12:49159974-49182820   | 0 | 1 |
| XLOC_005435 | XLOC_005435 | C1QL4        | chr12:49726199-49730971   | 0 | 1 |
| XLOC_005442 | XLOC_005442 | LOC283332    | chr12:50302665-50305646   | 0 | 1 |
| XLOC_005446 | XLOC_005446 | MIR1293      | chr12:50569562-50677353   | 0 | 1 |
| XLOC_005456 | XLOC_005456 | FIGLN2       | chr12:52211675-52225701   | 0 | 1 |
| XLOC_005462 | XLOC_005462 | KRT84        | chr12:52771595-52779417   | 0 | 1 |
| XLOC_005463 | XLOC_005463 | KRT82        | chr12:52787734-52800176   | 0 | 1 |
| XLOC_005464 | XLOC_005464 | KRT75        | chr12:52817853-52828110   | 0 | 1 |
| XLOC_005465 | XLOC_005465 | KRT6B        | chr12:52840434-52845910   | 0 | 1 |
| XLOC_005466 | XLOC_005466 | KRT6C        | chr12:52862299-52867569   | 0 | 1 |
| XLOC_005467 | XLOC_005467 | KRT6A        | chr12:52880957-52887181   | 0 | 1 |
| XLOC_005469 | XLOC_005469 | KRT71        | chr12:52937692-52946931   | 0 | 1 |
| XLOC_005470 | XLOC_005470 | KRT74        | chr12:52959602-52967609   | 0 | 1 |
| XLOC_005471 | XLOC_005471 | KRT72        | chr12:52979372-52985322   | 0 | 1 |
| XLOC_005473 | XLOC_005473 | KRT2         | chr12:53038341-53045959   | 0 | 1 |
| XLOC_005475 | XLOC_005475 | KRT77        | chr12:53083410-53097247   | 0 | 1 |
| XLOC_005476 | XLOC_005476 | KRT76        | chr12:53161938-53171129   | 0 | 1 |
| XLOC_005477 | XLOC_005477 | KRT3         | chr12:53183468-53189892   | 0 | 1 |
| XLOC_005480 | XLOC_005480 | KRT78        | chr12:53232745-53242778   | 0 | 1 |
| XLOC_005494 | XLOC_005494 | HOXC-AS5     | chr12:54329111-54340328   | 0 | 1 |
| XLOC_005503 | XLOC_005503 | GTSF1        | chr12:54849735-54867386   | 0 | 1 |
| XLOC_005504 | XLOC_005504 | PPP1R1A      | chr12:54973023-54982443   | 0 | 1 |
| XLOC_005505 | XLOC_005505 | GLYCAM1      | chr12:55001970-55004246   | 0 | 1 |
| XLOC_005506 | XLOC_005506 | LACRT        | chr12:55024622-55028663   | 0 | 1 |
| XLOC_005508 | XLOC_005508 | TESPA1       | chr12:55342086-55378530   | 0 | 1 |
| XLOC_005509 | XLOC_005509 | OR6C6        | chr12:55688071-55689016   | 0 | 1 |
| XLOC_005510 | XLOC_005510 | OR6C70       | chr12:55862983-55863922   | 0 | 1 |
| XLOC_005530 | XLOC_005530 | SNORD59B     | chr12:57031958-57039852   | 0 | 1 |
| XLOC_005531 | XLOC_005531 | SNORD59A     | chr12:57031958-57039852   | 0 | 1 |
| XLOC_005538 | XLOC_005538 | TAC3         | chr12:57403780-57410344   | 0 | 1 |
| XLOC_005548 | XLOC_005548 | B4GALNT1     | chr12:58013692-58027022   | 0 | 1 |
| XLOC_005555 | XLOC_005555 | MIR26A2      | chr12:58213709-58240747   | 0 | 1 |
| XLOC_005561 | XLOC_005561 | AVPR1A       | chr12:63536538-63546590   | 0 | 1 |
| XLOC_005564 | XLOC_005564 | C12orf56     | chr12:646660762-64784345  | 0 | 1 |
| XLOC_005566 | XLOC_005566 | WIF1         | chr12:65444403-65515346   | 0 | 1 |
| XLOC_005571 | XLOC_005571 | IFNG         | chr12:68548549-68553521   | 0 | 1 |
| XLOC_005572 | XLOC_005572 | IL26         | chr12:68595128-68619571   | 0 | 1 |
| XLOC_005573 | XLOC_005573 | IL22         | chr12:68642024-68647281   | 0 | 1 |
| XLOC_005575 | XLOC_005575 | SNORA70G     | chr12:69004618-69054385   | 0 | 1 |
| XLOC_005579 | XLOC_005579 | MIR1279      | chr12:69633316-69668138   | 0 | 1 |
| XLOC_005580 | XLOC_005580 | MIR3913-1    | chr12:69978501-69978603   | 0 | 1 |
| XLOC_005585 | XLOC_005585 | TSPAN8       | chr12:71518876-71551779   | 0 | 1 |
| XLOC_005588 | XLOC_005588 | TRHDE-AS1    | chr12:72647286-73059422   | 0 | 1 |
| XLOC_005589 | XLOC_005589 | LOC100507377 | chr12:74526955-74686411   | 0 | 1 |
| XLOC_005590 | XLOC_005590 | KCNC2        | chr12:75433857-75603528   | 0 | 1 |
| XLOC_005601 | XLOC_005601 | LIN7A        | chr12:81191170-81331694   | 0 | 1 |
| XLOC_005602 | XLOC_005602 | MIR617       | chr12:81191170-81331694   | 0 | 1 |
| XLOC_005603 | XLOC_005603 | MIR618       | chr12:81191170-81331694   | 0 | 1 |
| XLOC_005604 | XLOC_005604 | PPFIA2       | chr12:81652044-82153109   | 0 | 1 |
| XLOC_005606 | XLOC_005606 | SLC6A15      | chr12:85253266-85306608   | 0 | 1 |
| XLOC_005607 | XLOC_005607 | TSPAN19      | chr12:85408093-85430055   | 0 | 1 |
| XLOC_005608 | XLOC_005608 | RASSF9       | chr12:86198330-86230318   | 0 | 1 |
| XLOC_005609 | XLOC_005609 | MGAT4C       | chr12:86373036-87232681   | 0 | 1 |
| XLOC_005610 | XLOC_005610 | MIR548AL     | chr12:86373036-87232681   | 0 | 1 |
| XLOC_005611 | XLOC_005611 | MKRN9P       | chr12:88176662-88178488   | 0 | 1 |
| XLOC_005619 | XLOC_005619 | CCER1        | chr12:91345991-91348953   | 0 | 1 |
| XLOC_005620 | XLOC_005620 | EPYC         | chr12:91357455-91398803   | 0 | 1 |
| XLOC_005621 | XLOC_005621 | KERA         | chr12:91444270-91452131   | 0 | 1 |
| XLOC_005622 | XLOC_005622 | LUM          | chr12:91497231-91505542   | 0 | 1 |
| XLOC_005623 | XLOC_005623 | DCN          | chr12:91539034-91576806   | 0 | 1 |
| XLOC_005625 | XLOC_005625 | CLLU1OS      | chr12:92813869-92824778   | 0 | 1 |
| XLOC_005627 | XLOC_005627 | LOC643339    | chr12:93397533-93771512   | 0 | 1 |
| XLOC_005641 | XLOC_005641 | MIR4303      | chr12:98389160-98389226   | 0 | 1 |
| XLOC_005642 | XLOC_005642 | SLC9A7P1     | chr12:98847618-98850923   | 0 | 1 |
| XLOC_005650 | XLOC_005650 | SLC5A8       | chr12:101549993-101604016 | 0 | 1 |
| XLOC_005659 | XLOC_005659 | PAH          | chr12:103232103-103311381 | 0 | 1 |
| XLOC_005660 | XLOC_005660 | C12orf42     | chr12:103695732-103889749 | 0 | 1 |
| XLOC_005671 | XLOC_005671 | LOC100287944 | chr12:106751435-107283094 | 0 | 1 |
| XLOC_005676 | XLOC_005676 | LOC728739    | chr12:108296926-108297548 | 0 | 1 |
| XLOC_005715 | XLOC_005715 | LHX5         | chr12:113900693-113909877 | 0 | 1 |



|             |             |              |                           |   |   |
|-------------|-------------|--------------|---------------------------|---|---|
| XLOC_005717 | XLOC_005717 | TBX5         | chr12:114791734-114850637 | 0 | 1 |
| XLOC_005720 | XLOC_005720 | MIR620       | chr12:116396380-116714991 | 0 | 1 |
| XLOC_005721 | XLOC_005721 | MIR4472-2    | chr12:116866056-116866123 | 0 | 1 |
| XLOC_005727 | XLOC_005727 | KSR2         | chr12:117890816-118406028 | 0 | 1 |
| XLOC_005731 | XLOC_005731 | LOC144742    | chr12:119721629-119741185 | 0 | 1 |
| XLOC_005735 | XLOC_005735 | MIR4498      | chr12:120565013-120632513 | 0 | 1 |
| XLOC_005752 | XLOC_005752 | MORN3        | chr12:122089292-122107560 | 0 | 1 |
| XLOC_005756 | XLOC_005756 | IL31         | chr12:122652265-122688018 | 0 | 1 |
| XLOC_005768 | XLOC_005768 | MIR4304      | chr12:123468026-123594975 | 0 | 1 |
| XLOC_005780 | XLOC_005780 | LOC400084    | chr12:126443233-126467920 | 0 | 1 |
| XLOC_005782 | XLOC_005782 | LOC440117    | chr12:127354039-127359236 | 0 | 1 |
| XLOC_005784 | XLOC_005784 | TMEM132D     | chr12:129556270-130388212 | 0 | 1 |
| XLOC_005785 | XLOC_005785 | LOC100190940 | chr12:130518356-130526887 | 0 | 1 |
| XLOC_005786 | XLOC_005786 | FLJ31485     | chr12:130636137-130646223 | 0 | 1 |
| XLOC_005791 | XLOC_005791 | LRCOL1       | chr12:133179735-133187037 | 0 | 1 |
| XLOC_005797 | XLOC_005797 | ANHX         | chr12:133794897-133812422 | 0 | 1 |
| XLOC_005798 | XLOC_005798 | LINC00442    | chr13:19582398-19586774   | 0 | 1 |
| XLOC_005799 | XLOC_005799 | RNU6-52      | chr13:19717121-19717217   | 0 | 1 |
| XLOC_005800 | XLOC_005800 | LINC00421    | chr13:19919188-19920889   | 0 | 1 |
| XLOC_005810 | XLOC_005810 | LINC00327    | chr13:24043650-24061603   | 0 | 1 |
| XLOC_005811 | XLOC_005811 | TNFRSF19     | chr13:24144508-24250244   | 0 | 1 |
| XLOC_005814 | XLOC_005814 | MIR2276      | chr13:24734860-24881212   | 0 | 1 |
| XLOC_005818 | XLOC_005818 | RNF17        | chr13:25338300-25454058   | 0 | 1 |
| XLOC_005821 | XLOC_005821 | ATP8A2       | chr13:25946208-26595420   | 0 | 1 |
| XLOC_005825 | XLOC_005825 | SNORD102     | chr13:27825691-27830702   | 0 | 1 |
| XLOC_005830 | XLOC_005830 | GSX1         | chr13:28366779-28368089   | 0 | 1 |
| XLOC_005836 | XLOC_005836 | LINC00544    | chr13:30510667-30524625   | 0 | 1 |
| XLOC_005839 | XLOC_005839 | LINC00398    | chr13:31377342-31384782   | 0 | 1 |
| XLOC_005840 | XLOC_005840 | MEDAG        | chr13:31456971-31506745   | 0 | 1 |
| XLOC_005841 | XLOC_005841 | TEX26        | chr13:31506833-31549153   | 0 | 1 |
| XLOC_005844 | XLOC_005844 | EEF1DP3      | chr13:32420919-32533721   | 0 | 1 |
| XLOC_005848 | XLOC_005848 | KL           | chr13:33590570-33640282   | 0 | 1 |
| XLOC_005852 | XLOC_005852 | SPG200S      | chr13:36875774-36944317   | 0 | 1 |
| XLOC_005853 | XLOC_005853 | CCNA1        | chr13:37005966-37017019   | 0 | 1 |
| XLOC_005854 | XLOC_005854 | SERTM1       | chr13:37248048-37271975   | 0 | 1 |
| XLOC_005857 | XLOC_005857 | LINC00547    | chr13:38109076-38125673   | 0 | 1 |
| XLOC_005859 | XLOC_005859 | LINC00366    | chr13:39141860-39153653   | 0 | 1 |
| XLOC_005863 | XLOC_005863 | LINC00332    | chr13:40755945-40763167   | 0 | 1 |
| XLOC_005868 | XLOC_005868 | RGCC         | chr13:42031541-42045013   | 0 | 1 |
| XLOC_005872 | XLOC_005872 | TNFSF11      | chr13:43136871-43182149   | 0 | 1 |
| XLOC_005873 | XLOC_005873 | FAM216B      | chr13:43355685-43365685   | 0 | 1 |
| XLOC_005874 | XLOC_005874 | DNAJC15      | chr13:43597361-43683306   | 0 | 1 |
| XLOC_005876 | XLOC_005876 | LINC00284    | chr13:44596470-44604599   | 0 | 1 |
| XLOC_005877 | XLOC_005877 | SERP2        | chr13:44947977-44971850   | 0 | 1 |
| XLOC_005890 | XLOC_005890 | CYSLTR2      | chr13:49280950-49283498   | 0 | 1 |
| XLOC_005896 | XLOC_005896 | ARL11        | chr13:50202434-50208008   | 0 | 1 |
| XLOC_005905 | XLOC_005905 | MIR4703      | chr13:52126724-52126803   | 0 | 1 |
| XLOC_005913 | XLOC_005913 | MIR759       | chr13:53384184-53384275   | 0 | 1 |
| XLOC_005914 | XLOC_005914 | OLFM4        | chr13:53602875-53626196   | 0 | 1 |
| XLOC_005915 | XLOC_005915 | LINC00558    | chr13:54389553-54450254   | 0 | 1 |
| XLOC_005916 | XLOC_005916 | MIR5007      | chr13:55748588-55748683   | 0 | 1 |
| XLOC_005917 | XLOC_005917 | PRR20B       | chr13:57715051-57718073   | 0 | 1 |
| XLOC_005918 | XLOC_005918 | PRR20D       | chr13:57721621-57724643   | 0 | 1 |
| XLOC_005919 | XLOC_005919 | PRR20E       | chr13:57728194-57731216   | 0 | 1 |
| XLOC_005920 | XLOC_005920 | PRR20A       | chr13:57734765-57737787   | 0 | 1 |
| XLOC_005921 | XLOC_005921 | PRR20A       | chr13:57741330-57744352   | 0 | 1 |
| XLOC_005922 | XLOC_005922 | PCDH17       | chr13:58205788-58303065   | 0 | 1 |
| XLOC_005923 | XLOC_005923 | DIAPH3-AS1   | chr13:60239720-60738119   | 0 | 1 |
| XLOC_005924 | XLOC_005924 | DIAPH3-AS2   | chr13:60239720-60738119   | 0 | 1 |
| XLOC_005927 | XLOC_005927 | PCDH9-AS2    | chr13:66876965-67804468   | 0 | 1 |
| XLOC_005928 | XLOC_005928 | PCDH9-AS3    | chr13:66876965-67804468   | 0 | 1 |
| XLOC_005929 | XLOC_005929 | ATXN8OS      | chr13:70274724-70713885   | 0 | 1 |
| XLOC_005930 | XLOC_005930 | LINC00348    | chr13:71589272-71742549   | 0 | 1 |
| XLOC_005934 | XLOC_005934 | LINC00381    | chr13:74993309-75009296   | 0 | 1 |
| XLOC_005935 | XLOC_005935 | LINC00347    | chr13:75126979-75131257   | 0 | 1 |
| XLOC_005939 | XLOC_005939 | BTF3P11      | chr13:77502584-77503224   | 0 | 1 |
| XLOC_005940 | XLOC_005940 | IRG1         | chr13:77526623-77532776   | 0 | 1 |
| XLOC_005942 | XLOC_005942 | MYCBP2-AS1   | chr13:77618791-77901177   | 0 | 1 |
| XLOC_005943 | XLOC_005943 | SCEL         | chr13:78109808-78219398   | 0 | 1 |
| XLOC_005944 | XLOC_005944 | SLAIN1       | chr13:78271988-78338377   | 0 | 1 |
| XLOC_005945 | XLOC_005945 | LINC00446    | chr13:78587017-78627730   | 0 | 1 |
| XLOC_005949 | XLOC_005949 | LINC00333    | chr13:84714736-85180903   | 0 | 1 |
| XLOC_005950 | XLOC_005950 | LINC00351    | chr13:85937737-86118797   | 0 | 1 |
| XLOC_005951 | XLOC_005951 | SLITRK5      | chr13:88324869-88331870   | 0 | 1 |
| XLOC_005952 | XLOC_005952 | LINC00433    | chr13:89193083-89197764   | 0 | 1 |
| XLOC_005953 | XLOC_005953 | MIR622       | chr13:90883435-90883531   | 0 | 1 |
| XLOC_005956 | XLOC_005956 | GPC6         | chr13:93879077-95060273   | 0 | 1 |
| XLOC_005958 | XLOC_005958 | CLDN10       | chr13:96085852-96296960   | 0 | 1 |
| XLOC_005960 | XLOC_005960 | HS6ST3       | chr13:96743092-97491816   | 0 | 1 |

|             |             |                           |                           |   |   |
|-------------|-------------|---------------------------|---------------------------|---|---|
| XLOC_005965 | XLOC_005965 | MIR3170                   | chr13:98795433-99102023   | 0 | 1 |
| XLOC_005967 | XLOC_005967 | FKSG29                    | chr13:99848627-100058554  | 0 | 1 |
| XLOC_005968 | XLOC_005968 | MIR623                    | chr13:99848627-100058554  | 0 | 1 |
| XLOC_005971 | XLOC_005971 | MIR4306                   | chr13:100258918-100549388 | 0 | 1 |
| XLOC_005975 | XLOC_005975 | ITGBL1                    | chr13:102104943-103054124 | 0 | 1 |
| XLOC_005976 | XLOC_005976 | FGF14-AS2                 | chr13:102104943-103054124 | 0 | 1 |
| XLOC_005980 | XLOC_005980 | DAOA                      | chr13:106111405-106158030 | 0 | 1 |
| XLOC_005981 | XLOC_005981 | LINC00343                 | chr13:106359217-106414143 | 0 | 1 |
| XLOC_005983 | XLOC_005983 | LINC00551                 | chr13:107270157-107284006 | 0 | 1 |
| XLOC_005984 | XLOC_005984 | LINC00443                 | chr13:107306227-107324528 | 0 | 1 |
| XLOC_005993 | XLOC_005993 | SOX1                      | chr13:112721912-112726020 | 0 | 1 |
| XLOC_005994 | XLOC_005994 | SPACA7                    | chr13:113030650-113089009 | 0 | 1 |
| XLOC_005995 | XLOC_005995 | C13orf35                  | chr13:113301357-113338811 | 0 | 1 |
| XLOC_006005 | XLOC_006005 | GRK1                      | chr13:114321596-114438637 | 0 | 1 |
| XLOC_006006 | XLOC_006006 | TMEM255B                  | chr13:114462215-114514899 | 0 | 1 |
| XLOC_006013 | XLOC_006013 | TUBA3C                    | chr13:19747909-19755992   | 0 | 1 |
| XLOC_006014 | XLOC_006014 | ANKRD26P3                 | chr13:19836939-19919113   | 0 | 1 |
| XLOC_006019 | XLOC_006019 | GJB2                      | chr13:20761603-20767114   | 0 | 1 |
| XLOC_006020 | XLOC_006020 | GJB6                      | chr13:20796100-20806534   | 0 | 1 |
| XLOC_006022 | XLOC_006022 | MIR4499                   | chr13:20977805-21100012   | 0 | 1 |
| XLOC_006029 | XLOC_006029 | LINC00424                 | chr13:22446934-22452299   | 0 | 1 |
| XLOC_006030 | XLOC_006030 | BASP1P1                   | chr13:23471168-23472320   | 0 | 1 |
| XLOC_006035 | XLOC_006035 | SPATA13-AS1               | chr13:24734860-24881212   | 0 | 1 |
| XLOC_006039 | XLOC_006039 | AMER2                     | chr13:25742671-25745857   | 0 | 1 |
| XLOC_006041 | XLOC_006041 | SHISA2                    | chr13:26618734-26625198   | 0 | 1 |
| XLOC_006048 | XLOC_006048 | PRHONB                    | chr13:28552242-28562774   | 0 | 1 |
| XLOC_006049 | XLOC_006049 | FLT3                      | chr13:28577410-28674729   | 0 | 1 |
| XLOC_006056 | XLOC_006056 | LINC00297                 | chr13:30446749-30462542   | 0 | 1 |
| XLOC_006060 | XLOC_006060 | TEX26-AS1                 | chr13:31456971-31506745   | 0 | 1 |
| XLOC_006067 | XLOC_006067 | LINC00423                 | chr13:33383327-33485790   | 0 | 1 |
| XLOC_006069 | XLOC_006069 | LINC00457                 | chr13:35009590-35214822   | 0 | 1 |
| XLOC_006070 | XLOC_006070 | MAB21L1                   | chr13:35516423-36705514   | 0 | 1 |
| XLOC_006071 | XLOC_006071 | DCLK1                     | chr13:35516423-36705514   | 0 | 1 |
| XLOC_006072 | XLOC_006072 | CCDC169,CCDC169-SOHLH2,SC | chr13:36742344-36871992   | 0 | 1 |
| XLOC_006073 | XLOC_006073 | SPG20                     | chr13:36875774-36944317   | 0 | 1 |
| XLOC_006077 | XLOC_006077 | CSNK1A1L                  | chr13:37677396-37679801   | 0 | 1 |
| XLOC_006078 | XLOC_006078 | POSTN                     | chr13:38136718-38172981   | 0 | 1 |
| XLOC_006079 | XLOC_006079 | TRPC4                     | chr13:38210772-38443939   | 0 | 1 |
| XLOC_006081 | XLOC_006081 | STOML3                    | chr13:39540061-39564996   | 0 | 1 |
| XLOC_006083 | XLOC_006083 | LHFP                      | chr13:39917028-40177356   | 0 | 1 |
| XLOC_006084 | XLOC_006084 | MIR4305                   | chr13:40229763-40365802   | 0 | 1 |
| XLOC_006085 | XLOC_006085 | LINC00548                 | chr13:40768645-40794639   | 0 | 1 |
| XLOC_006088 | XLOC_006088 | MIR320D1                  | chr13:41301963-41302011   | 0 | 1 |
| XLOC_006096 | XLOC_006096 | EPST11                    | chr13:43460523-43566407   | 0 | 1 |
| XLOC_006099 | XLOC_006099 | SMIM2-IT1                 | chr13:44720605-44732358   | 0 | 1 |
| XLOC_006107 | XLOC_006107 | FAM194B                   | chr13:46115431-46189874   | 0 | 1 |
| XLOC_006113 | XLOC_006113 | KIAA0226L                 | chr13:46916136-46961635   | 0 | 1 |
| XLOC_006115 | XLOC_006115 | HTR2A                     | chr13:47405676-47471211   | 0 | 1 |
| XLOC_006121 | XLOC_006121 | LINC00462                 | chr13:49151109-49155037   | 0 | 1 |
| XLOC_006128 | XLOC_006128 | MIR3613                   | chr13:50556687-50699677   | 0 | 1 |
| XLOC_006129 | XLOC_006129 | MIR16-1                   | chr13:50556687-50699677   | 0 | 1 |
| XLOC_006130 | XLOC_006130 | MIR15A                    | chr13:50556687-50699677   | 0 | 1 |
| XLOC_006132 | XLOC_006132 | RNASEH2B-AS1              | chr13:51456514-51544596   | 0 | 1 |
| XLOC_006133 | XLOC_006133 | GUCY1B2                   | chr13:51568646-51640293   | 0 | 1 |
| XLOC_006134 | XLOC_006134 | MIR5693                   | chr13:51915167-52027275   | 0 | 1 |
| XLOC_006146 | XLOC_006146 | MIR1297                   | chr13:54886106-54886183   | 0 | 1 |
| XLOC_006148 | XLOC_006148 | MIR3169                   | chr13:61773931-61774014   | 0 | 1 |
| XLOC_006149 | XLOC_006149 | PCDH20                    | chr13:61983818-61989655   | 0 | 1 |
| XLOC_006150 | XLOC_006150 | PCDH9                     | chr13:66876965-67804468   | 0 | 1 |
| XLOC_006151 | XLOC_006151 | LINC00550                 | chr13:69435416-69459457   | 0 | 1 |
| XLOC_006152 | XLOC_006152 | KLHL1                     | chr13:70274724-70713885   | 0 | 1 |
| XLOC_006157 | XLOC_006157 | CTAGE11P                  | chr13:75811888-75814517   | 0 | 1 |
| XLOC_006163 | XLOC_006163 | MIR3665                   | chr13:78271988-78338377   | 0 | 1 |
| XLOC_006164 | XLOC_006164 | EDNRB                     | chr13:78469615-78549674   | 0 | 1 |
| XLOC_006167 | XLOC_006167 | LINC00331                 | chr13:79361453-79414160   | 0 | 1 |
| XLOC_006169 | XLOC_006169 | NDFIP2-AS1                | chr13:80051498-80130212   | 0 | 1 |
| XLOC_006171 | XLOC_006171 | SLITRK1                   | chr13:84451342-84456528   | 0 | 1 |
| XLOC_006172 | XLOC_006172 | SLITRK6                   | chr13:86366921-86373483   | 0 | 1 |
| XLOC_006173 | XLOC_006173 | MIR4500HG                 | chr13:88096241-88323218   | 0 | 1 |
| XLOC_006174 | XLOC_006174 | MIR4500                   | chr13:88096241-88323218   | 0 | 1 |
| XLOC_006175 | XLOC_006175 | LINC00353                 | chr13:90201047-90216667   | 0 | 1 |
| XLOC_006176 | XLOC_006176 | LINC00559                 | chr13:90712500-90771971   | 0 | 1 |
| XLOC_006178 | XLOC_006178 | LINC00379                 | chr13:91779866-91863952   | 0 | 1 |
| XLOC_006179 | XLOC_006179 | GPC5-AS1                  | chr13:92050934-93519487   | 0 | 1 |
| XLOC_006180 | XLOC_006180 | GPC6-AS2                  | chr13:93879077-95060273   | 0 | 1 |
| XLOC_006183 | XLOC_006183 | SOX21                     | chr13:95361878-95364389   | 0 | 1 |
| XLOC_006185 | XLOC_006185 | CLDN10-AS1                | chr13:96085852-96296960   | 0 | 1 |
| XLOC_006188 | XLOC_006188 | LINC00359                 | chr13:97593534-97636426   | 0 | 1 |
| XLOC_006189 | XLOC_006189 | OXGR1                     | chr13:97637972-97646604   | 0 | 1 |

|             |             |              |                           |   |   |
|-------------|-------------|--------------|---------------------------|---|---|
| XLOC_006190 | XLOC_006190 | RNF113B      | chr13:98795433-99102023   | 0 | 1 |
| XLOC_006195 | XLOC_006195 | MIR548AN     | chr13:99848627-100058554  | 0 | 1 |
| XLOC_006199 | XLOC_006199 | PCCA-AS1     | chr13:100741268-101241046 | 0 | 1 |
| XLOC_006202 | XLOC_006202 | NALCN        | chr13:101360578-102068813 | 0 | 1 |
| XLOC_006203 | XLOC_006203 | FGF14        | chr13:102104943-103054124 | 0 | 1 |
| XLOC_006204 | XLOC_006204 | MIR2681      | chr13:102104943-103054124 | 0 | 1 |
| XLOC_006205 | XLOC_006205 | MIR4705      | chr13:102104943-103054124 | 0 | 1 |
| XLOC_006206 | XLOC_006206 | FGF14-IT1    | chr13:102104943-103054124 | 0 | 1 |
| XLOC_006207 | XLOC_006207 | METTL21C     | chr13:103338096-103346871 | 0 | 1 |
| XLOC_006208 | XLOC_006208 | CCDC168      | chr13:103381716-103411422 | 0 | 1 |
| XLOC_006211 | XLOC_006211 | SLC10A2      | chr13:103696347-103719196 | 0 | 1 |
| XLOC_006212 | XLOC_006212 | MIR548AS     | chr13:103934828-103934848 | 0 | 1 |
| XLOC_006213 | XLOC_006213 | DAOA-AS1     | chr13:106111405-106158030 | 0 | 1 |
| XLOC_006216 | XLOC_006216 | FAM155A      | chr13:107820878-108519460 | 0 | 1 |
| XLOC_006218 | XLOC_006218 | MYO16-AS1    | chr13:109248499-109860355 | 0 | 1 |
| XLOC_006221 | XLOC_006221 | COL4A2-AS1   | chr13:110959630-111165373 | 0 | 1 |
| XLOC_006232 | XLOC_006232 | ATP4B        | chr13:114303121-114312513 | 0 | 1 |
| XLOC_006233 | XLOC_006233 | LINC00552    | chr13:114451483-11445062  | 0 | 1 |
| XLOC_006237 | XLOC_006237 | OR11H12      | chr14:19377593-19378574   | 0 | 1 |
| XLOC_006238 | XLOC_006238 | POTEG        | chr14:19553364-19584942   | 0 | 1 |
| XLOC_006239 | XLOC_006239 | LOC101101776 | chr14:19894368-19904572   | 0 | 1 |
| XLOC_006240 | XLOC_006240 | OR4Q3        | chr14:20215586-20216528   | 0 | 1 |
| XLOC_006241 | XLOC_006241 | OR4M1        | chr14:20248481-20249423   | 0 | 1 |
| XLOC_006242 | XLOC_006242 | OR4N2        | chr14:20295607-20296531   | 0 | 1 |
| XLOC_006243 | XLOC_006243 | OR4K2        | chr14:20344426-20345371   | 0 | 1 |
| XLOC_006244 | XLOC_006244 | OR4K5        | chr14:20388765-20389737   | 0 | 1 |
| XLOC_006245 | XLOC_006245 | OR4K1        | chr14:20403766-20404842   | 0 | 1 |
| XLOC_006246 | XLOC_006246 | OR4K15       | chr14:20443677-20444724   | 0 | 1 |
| XLOC_006247 | XLOC_006247 | OR4L1        | chr14:20528203-20529142   | 0 | 1 |
| XLOC_006248 | XLOC_006248 | OR4K17       | chr14:20585565-20586597   | 0 | 1 |
| XLOC_006249 | XLOC_006249 | OR4N5        | chr14:20611894-20612821   | 0 | 1 |
| XLOC_006250 | XLOC_006250 | OR11G2       | chr14:20665494-20666532   | 0 | 1 |
| XLOC_006251 | XLOC_006251 | OR11H6       | chr14:20691868-20692861   | 0 | 1 |
| XLOC_006256 | XLOC_006256 | RNASE10      | chr14:20978630-20979281   | 0 | 1 |
| XLOC_006258 | XLOC_006258 | EDDM3A       | chr14:21214098-21216539   | 0 | 1 |
| XLOC_006259 | XLOC_006259 | EDDM3B       | chr14:21236585-21239107   | 0 | 1 |
| XLOC_006260 | XLOC_006260 | RNASE6       | chr14:21249209-21250626   | 0 | 1 |
| XLOC_006266 | XLOC_006266 | TPPP2        | chr14:21498344-21500332   | 0 | 1 |
| XLOC_006268 | XLOC_006268 | RNASE8       | chr14:21526051-21526516   | 0 | 1 |
| XLOC_006273 | XLOC_006273 | OR4E2        | chr14:22133296-22134238   | 0 | 1 |
| XLOC_006280 | XLOC_006280 | PSMB11       | chr14:23511375-23513269   | 0 | 1 |
| XLOC_006283 | XLOC_006283 | IL25         | chr14:23842017-23845612   | 0 | 1 |
| XLOC_006284 | XLOC_006284 | CMTM5        | chr14:23846016-23848981   | 0 | 1 |
| XLOC_006292 | XLOC_006292 | CPNE6        | chr14:24540755-24547296   | 0 | 1 |
| XLOC_006307 | XLOC_006307 | MIR4307      | chr14:27377847-27377931   | 0 | 1 |
| XLOC_006308 | XLOC_006308 | LINC00645    | chr14:28081793-28108842   | 0 | 1 |
| XLOC_006309 | XLOC_006309 | FOXG1        | chr14:29236277-29239483   | 0 | 1 |
| XLOC_006319 | XLOC_006319 | IGBP1P1      | chr14:35409127-35409702   | 0 | 1 |
| XLOC_006326 | XLOC_006326 | LINC00609    | chr14:36539632-36645857   | 0 | 1 |
| XLOC_006333 | XLOC_006333 | MIA2         | chr14:39703124-39722575   | 0 | 1 |
| XLOC_006335 | XLOC_006335 | LRFN5        | chr14:42076763-42373752   | 0 | 1 |
| XLOC_006339 | XLOC_006339 | SNORD127     | chr14:45553301-45603732   | 0 | 1 |
| XLOC_006352 | XLOC_006352 | GNG2         | chr14:52327021-52436518   | 0 | 1 |
| XLOC_006354 | XLOC_006354 | PTGDR        | chr14:52734430-52743442   | 0 | 1 |
| XLOC_006370 | XLOC_006370 | OTX2-AS1     | chr14:57279900-57397550   | 0 | 1 |
| XLOC_006381 | XLOC_006381 | LRRC9        | chr14:60386430-60530277   | 0 | 1 |
| XLOC_006384 | XLOC_006384 | SIX6         | chr14:60975937-60978525   | 0 | 1 |
| XLOC_006388 | XLOC_006388 | FLJ22447     | chr14:62037257-62121431   | 0 | 1 |
| XLOC_006391 | XLOC_006391 | SYT16        | chr14:62462540-62568427   | 0 | 1 |
| XLOC_006392 | XLOC_006392 | LINC00643    | chr14:62584074-62600903   | 0 | 1 |
| XLOC_006393 | XLOC_006393 | RHOJ         | chr14:63671101-63760230   | 0 | 1 |
| XLOC_006402 | XLOC_006402 | MIR4706      | chr14:65381078-65569413   | 0 | 1 |
| XLOC_006407 | XLOC_006407 | FAM71D       | chr14:67656109-67695267   | 0 | 1 |
| XLOC_006425 | XLOC_006425 | SNORD56B     | chr14:71865053-71865124   | 0 | 1 |
| XLOC_006428 | XLOC_006428 | RGS6         | chr14:72398816-73033238   | 0 | 1 |
| XLOC_006439 | XLOC_006439 | MIR4505      | chr14:74181824-74253896   | 0 | 1 |
| XLOC_006445 | XLOC_006445 | VSX2         | chr14:74706174-74729441   | 0 | 1 |
| XLOC_006446 | XLOC_006446 | VRTN         | chr14:74815165-74826711   | 0 | 1 |
| XLOC_006456 | XLOC_006456 | BATF         | chr14:75988783-76013334   | 0 | 1 |
| XLOC_006463 | XLOC_006463 | C14orf166B   | chr14:77292724-77336645   | 0 | 1 |
| XLOC_006466 | XLOC_006466 | MIR1260A     | chr14:77731833-77737655   | 0 | 1 |
| XLOC_006474 | XLOC_006474 | DIO2-AS1     | chr14:80663867-80921810   | 0 | 1 |
| XLOC_006475 | XLOC_006475 | TSHR         | chr14:81421868-81612646   | 0 | 1 |
| XLOC_006476 | XLOC_006476 | FLRT2        | chr14:85996487-86094270   | 0 | 1 |
| XLOC_006477 | XLOC_006477 | LOC283585    | chr14:87372121-87389099   | 0 | 1 |
| XLOC_006486 | XLOC_006486 | KCNK13       | chr14:90528107-90652195   | 0 | 1 |
| XLOC_006489 | XLOC_006489 | LINC00642    | chr14:90921573-90925249   | 0 | 1 |
| XLOC_006502 | XLOC_006502 | FAM181A      | chr14:94371075-94395954   | 0 | 1 |
| XLOC_006503 | XLOC_006503 | LINC00521    | chr14:94463615-94478041   | 0 | 1 |

|             |             |             |                           |   |   |
|-------------|-------------|-------------|---------------------------|---|---|
| XLOC_006508 | XLOC_006508 | SERPINA4    | chr14:95027782-95036243   | 0 | 1 |
| XLOC_006509 | XLOC_006509 | SERPINA5    | chr14:95047705-95059457   | 0 | 1 |
| XLOC_006511 | XLOC_006511 | SERPINA13P  | chr14:95107061-95113331   | 0 | 1 |
| XLOC_006514 | XLOC_006514 | TCL6        | chr14:96117514-96139789   | 0 | 1 |
| XLOC_006515 | XLOC_006515 | TCL1B       | chr14:96152753-96158980   | 0 | 1 |
| XLOC_006516 | XLOC_006516 | LINC00617   | chr14:96343108-96391908   | 0 | 1 |
| XLOC_006517 | XLOC_006517 | C14orf132   | chr14:96505660-96560226   | 0 | 1 |
| XLOC_006518 | XLOC_006518 | BDKRB2      | chr14:96671134-96710666   | 0 | 1 |
| XLOC_006519 | XLOC_006519 | BDKRB1      | chr14:96722546-96731100   | 0 | 1 |
| XLOC_006524 | XLOC_006524 | C14orf177   | chr14:99177949-99184103   | 0 | 1 |
| XLOC_006527 | XLOC_006527 | MIR5698     | chr14:100111479-100143011 | 0 | 1 |
| XLOC_006529 | XLOC_006529 | EML1        | chr14:100259744-100408395 | 0 | 1 |
| XLOC_006530 | XLOC_006530 | EVL         | chr14:100531750-100610573 | 0 | 1 |
| XLOC_006532 | XLOC_006532 | MIR345      | chr14:100774195-100774293 | 0 | 1 |
| XLOC_006533 | XLOC_006533 | SLC25A47    | chr14:100789678-100796715 | 0 | 1 |
| XLOC_006535 | XLOC_006535 | LINC00523   | chr14:101123604-101139081 | 0 | 1 |
| XLOC_006536 | XLOC_006536 | DLK1        | chr14:101193201-101201467 | 0 | 1 |
| XLOC_006537 | XLOC_006537 | MIR2392     | chr14:101280827-101280911 | 0 | 1 |
| XLOC_006538 | XLOC_006538 | MEG3,MIR770 | chr14:101292444-101327360 | 0 | 1 |
| XLOC_006539 | XLOC_006539 | MIR493      | chr14:101335396-101335485 | 0 | 1 |
| XLOC_006540 | XLOC_006540 | MIR337      | chr14:101340829-101340922 | 0 | 1 |
| XLOC_006541 | XLOC_006541 | MIR665      | chr14:101341369-101341441 | 0 | 1 |
| XLOC_006542 | XLOC_006542 | MIR431      | chr14:101346991-101351184 | 0 | 1 |
| XLOC_006543 | XLOC_006543 | MIR433      | chr14:101346991-101351184 | 0 | 1 |
| XLOC_006544 | XLOC_006544 | MIR127      | chr14:101346991-101351184 | 0 | 1 |
| XLOC_006545 | XLOC_006545 | MIR432      | chr14:101346991-101351184 | 0 | 1 |
| XLOC_006546 | XLOC_006546 | MIR136      | chr14:101346991-101351184 | 0 | 1 |
| XLOC_006547 | XLOC_006547 | MEG8        | chr14:101361106-101373305 | 0 | 1 |
| XLOC_006548 | XLOC_006548 | SNORD113-1  | chr14:101391157-101391227 | 0 | 1 |
| XLOC_006549 | XLOC_006549 | SNORD113-2  | chr14:101393678-101393749 | 0 | 1 |
| XLOC_006550 | XLOC_006550 | SNORD113-4  | chr14:101402827-101402901 | 0 | 1 |
| XLOC_006551 | XLOC_006551 | SNORD113-5  | chr14:101404523-101404600 | 0 | 1 |
| XLOC_006552 | XLOC_006552 | SNORD113-6  | chr14:101405892-101405966 | 0 | 1 |
| XLOC_006553 | XLOC_006553 | SNORD113-7  | chr14:101407462-101407538 | 0 | 1 |
| XLOC_006554 | XLOC_006554 | SNORD113-9  | chr14:101411985-101412056 | 0 | 1 |
| XLOC_006555 | XLOC_006555 | SNORD114-1  | chr14:101416169-101416240 | 0 | 1 |
| XLOC_006556 | XLOC_006556 | SNORD114-2  | chr14:101418192-101418269 | 0 | 1 |
| XLOC_006557 | XLOC_006557 | SNORD114-3  | chr14:101419685-101419759 | 0 | 1 |
| XLOC_006558 | XLOC_006558 | SNORD114-4  | chr14:101420680-101420784 | 0 | 1 |
| XLOC_006559 | XLOC_006559 | SNORD114-5  | chr14:101421706-101421775 | 0 | 1 |
| XLOC_006560 | XLOC_006560 | SNORD114-6  | chr14:101423502-101423573 | 0 | 1 |
| XLOC_006561 | XLOC_006561 | SNORD114-7  | chr14:101429390-101429466 | 0 | 1 |
| XLOC_006562 | XLOC_006562 | SNORD114-8  | chr14:101431117-101431188 | 0 | 1 |
| XLOC_006563 | XLOC_006563 | SNORD114-9  | chr14:101432365-101432436 | 0 | 1 |
| XLOC_006564 | XLOC_006564 | SNORD114-10 | chr14:101433388-101433459 | 0 | 1 |
| XLOC_006565 | XLOC_006565 | SNORD114-11 | chr14:101434447-101434521 | 0 | 1 |
| XLOC_006566 | XLOC_006566 | SNORD114-12 | chr14:101435284-101435358 | 0 | 1 |
| XLOC_006567 | XLOC_006567 | SNORD114-13 | chr14:101436215-101436288 | 0 | 1 |
| XLOC_006568 | XLOC_006568 | SNORD114-14 | chr14:101438439-101438513 | 0 | 1 |
| XLOC_006569 | XLOC_006569 | SNORD114-15 | chr14:101439006-101439077 | 0 | 1 |
| XLOC_006570 | XLOC_006570 | SNORD114-16 | chr14:101439931-101440000 | 0 | 1 |
| XLOC_006571 | XLOC_006571 | SNORD114-17 | chr14:101441142-101441216 | 0 | 1 |
| XLOC_006572 | XLOC_006572 | SNORD114-18 | chr14:101442161-101442232 | 0 | 1 |
| XLOC_006573 | XLOC_006573 | SNORD114-19 | chr14:101442813-101442887 | 0 | 1 |
| XLOC_006574 | XLOC_006574 | SNORD114-20 | chr14:101447340-101447411 | 0 | 1 |
| XLOC_006575 | XLOC_006575 | SNORD114-21 | chr14:101448311-101448382 | 0 | 1 |
| XLOC_006576 | XLOC_006576 | SNORD114-22 | chr14:101449262-101449333 | 0 | 1 |
| XLOC_006577 | XLOC_006577 | SNORD114-23 | chr14:101450212-101450283 | 0 | 1 |
| XLOC_006578 | XLOC_006578 | SNORD114-24 | chr14:101451113-101451184 | 0 | 1 |
| XLOC_006579 | XLOC_006579 | SNORD114-25 | chr14:101452393-101452464 | 0 | 1 |
| XLOC_006580 | XLOC_006580 | SNORD114-26 | chr14:101453382-101453453 | 0 | 1 |
| XLOC_006581 | XLOC_006581 | SNORD114-27 | chr14:101454497-101454568 | 0 | 1 |
| XLOC_006582 | XLOC_006582 | SNORD114-28 | chr14:101455466-101455537 | 0 | 1 |
| XLOC_006583 | XLOC_006583 | SNORD114-29 | chr14:101456427-101456498 | 0 | 1 |
| XLOC_006584 | XLOC_006584 | SNORD114-30 | chr14:101458255-101458326 | 0 | 1 |
| XLOC_006585 | XLOC_006585 | SNORD114-31 | chr14:101459572-101459643 | 0 | 1 |
| XLOC_006586 | XLOC_006586 | MIR379      | chr14:101488402-101488469 | 0 | 1 |
| XLOC_006587 | XLOC_006587 | MIR411      | chr14:101489661-101489757 | 0 | 1 |
| XLOC_006588 | XLOC_006588 | MIR299      | chr14:101490130-101490193 | 0 | 1 |
| XLOC_006589 | XLOC_006589 | MIR380      | chr14:101491353-101491414 | 0 | 1 |
| XLOC_006590 | XLOC_006590 | MIR1197     | chr14:101491900-101491988 | 0 | 1 |
| XLOC_006591 | XLOC_006591 | MIR323A     | chr14:101492068-101492154 | 0 | 1 |
| XLOC_006592 | XLOC_006592 | MIR758      | chr14:101492356-101492444 | 0 | 1 |
| XLOC_006593 | XLOC_006593 | MIR329-1    | chr14:101493121-101493201 | 0 | 1 |
| XLOC_006594 | XLOC_006594 | MIR329-2    | chr14:101493436-101493520 | 0 | 1 |
| XLOC_006595 | XLOC_006595 | MIR494      | chr14:101495970-101496051 | 0 | 1 |
| XLOC_006596 | XLOC_006596 | MIR1193     | chr14:101496388-101496466 | 0 | 1 |
| XLOC_006597 | XLOC_006597 | MIR543      | chr14:101498323-101498401 | 0 | 1 |
| XLOC_006598 | XLOC_006598 | MIR495      | chr14:101500091-101500173 | 0 | 1 |

|             |             |              |                           |   |   |
|-------------|-------------|--------------|---------------------------|---|---|
| XLOC_006599 | XLOC_006599 | MIR376C      | chr14:101506026-101506092 | 0 | 1 |
| XLOC_006600 | XLOC_006600 | MIR376A2     | chr14:101506405-101506485 | 0 | 1 |
| XLOC_006601 | XLOC_006601 | MIR654       | chr14:101506555-101506636 | 0 | 1 |
| XLOC_006602 | XLOC_006602 | MIR376B      | chr14:101506772-101506872 | 0 | 1 |
| XLOC_006603 | XLOC_006603 | MIR376A1     | chr14:101507118-101507186 | 0 | 1 |
| XLOC_006604 | XLOC_006604 | MIR300       | chr14:101507699-101507781 | 0 | 1 |
| XLOC_006605 | XLOC_006605 | MIR1185-1    | chr14:101509313-101509398 | 0 | 1 |
| XLOC_006606 | XLOC_006606 | MIR1185-2    | chr14:101510534-101510619 | 0 | 1 |
| XLOC_006607 | XLOC_006607 | MIR381       | chr14:101512256-101512331 | 0 | 1 |
| XLOC_006608 | XLOC_006608 | MIR487B      | chr14:101512791-101512875 | 0 | 1 |
| XLOC_006609 | XLOC_006609 | MIR539       | chr14:101513657-101513735 | 0 | 1 |
| XLOC_006610 | XLOC_006610 | MIR889       | chr14:101514237-101514316 | 0 | 1 |
| XLOC_006611 | XLOC_006611 | MIR655       | chr14:101515886-101515983 | 0 | 1 |
| XLOC_006612 | XLOC_006612 | MIR487A      | chr14:101518782-101518862 | 0 | 1 |
| XLOC_006613 | XLOC_006613 | MIR382       | chr14:101520642-101520718 | 0 | 1 |
| XLOC_006614 | XLOC_006614 | MIR134       | chr14:101521023-101521096 | 0 | 1 |
| XLOC_006615 | XLOC_006615 | MIR668       | chr14:101521594-101521660 | 0 | 1 |
| XLOC_006616 | XLOC_006616 | MIR485       | chr14:101521755-101521828 | 0 | 1 |
| XLOC_006617 | XLOC_006617 | MIR323B      | chr14:101522555-101522637 | 0 | 1 |
| XLOC_006618 | XLOC_006618 | MIR154       | chr14:101526091-101526175 | 0 | 1 |
| XLOC_006619 | XLOC_006619 | MIR496       | chr14:101526909-101527011 | 0 | 1 |
| XLOC_006620 | XLOC_006620 | MIR377       | chr14:101528386-101528455 | 0 | 1 |
| XLOC_006621 | XLOC_006621 | MIR541       | chr14:101530831-101530915 | 0 | 1 |
| XLOC_006622 | XLOC_006622 | MIR409       | chr14:101531636-101531715 | 0 | 1 |
| XLOC_006623 | XLOC_006623 | MIR412       | chr14:101531783-101531874 | 0 | 1 |
| XLOC_006624 | XLOC_006624 | MIR369       | chr14:101531934-101532004 | 0 | 1 |
| XLOC_006625 | XLOC_006625 | MIR410       | chr14:101532248-101532328 | 0 | 1 |
| XLOC_006626 | XLOC_006626 | MIR656       | chr14:101533060-101533138 | 0 | 1 |
| XLOC_006627 | XLOC_006627 | MEG9         | chr14:101536247-101539273 | 0 | 1 |
| XLOC_006628 | XLOC_006628 | DIO3         | chr14:102027687-102029789 | 0 | 1 |
| XLOC_006635 | XLOC_006635 | MIR4309      | chr14:103005980-103006063 | 0 | 1 |
| XLOC_006650 | XLOC_006650 | ASPG         | chr14:104552022-104579046 | 0 | 1 |
| XLOC_006651 | XLOC_006651 | MIR203       | chr14:104583741-104583851 | 0 | 1 |
| XLOC_006670 | XLOC_006670 | KIAA0125     | chr14:106383837-106398502 | 0 | 1 |
| XLOC_006671 | XLOC_006671 | LINC00226    | chr14:106744268-106744966 | 0 | 1 |
| XLOC_006672 | XLOC_006672 | LINC00221    | chr14:106938454-106951529 | 0 | 1 |
| XLOC_006673 | XLOC_006673 | LOC642426    | chr14:19407014-19410111   | 0 | 1 |
| XLOC_006674 | XLOC_006674 | LOC101101776 | chr14:19670791-19681016   | 0 | 1 |
| XLOC_006675 | XLOC_006675 | POTEM        | chr14:19983953-20020272   | 0 | 1 |
| XLOC_006677 | XLOC_006677 | OR4K14       | chr14:20482419-20483352   | 0 | 1 |
| XLOC_006678 | XLOC_006678 | OR4K13       | chr14:20502002-20502917   | 0 | 1 |
| XLOC_006681 | XLOC_006681 | SNORD126     | chr14:20779526-20801471   | 0 | 1 |
| XLOC_006687 | XLOC_006687 | RNASE9       | chr14:21024251-21029090   | 0 | 1 |
| XLOC_006689 | XLOC_006689 | OR6S1        | chr14:21108854-21109850   | 0 | 1 |
| XLOC_006690 | XLOC_006690 | RNASE1       | chr14:21269514-21271036   | 0 | 1 |
| XLOC_006692 | XLOC_006692 | RNASE13      | chr14:21500978-21502944   | 0 | 1 |
| XLOC_006694 | XLOC_006694 | OR5AU1       | chr14:21623095-21624184   | 0 | 1 |
| XLOC_006703 | XLOC_006703 | SALL2        | chr14:21989231-22005337   | 0 | 1 |
| XLOC_006704 | XLOC_006704 | OR10G3       | chr14:22037933-22038875   | 0 | 1 |
| XLOC_006705 | XLOC_006705 | OR10G2       | chr14:22102065-22102998   | 0 | 1 |
| XLOC_006716 | XLOC_006716 | CEBPE        | chr14:23586514-23588820   | 0 | 1 |
| XLOC_006717 | XLOC_006717 | SLC7A8       | chr14:23594503-23652869   | 0 | 1 |
| XLOC_006720 | XLOC_006720 | SLC22A17     | chr14:23815526-23822080   | 0 | 1 |
| XLOC_006721 | XLOC_006721 | EFS          | chr14:23825610-23834842   | 0 | 1 |
| XLOC_006723 | XLOC_006723 | MIR208A      | chr14:23851198-23877486   | 0 | 1 |
| XLOC_006724 | XLOC_006724 | MYH7         | chr14:23881946-23904870   | 0 | 1 |
| XLOC_006725 | XLOC_006725 | MIR208B      | chr14:23881946-23904870   | 0 | 1 |
| XLOC_006742 | XLOC_006742 | RIPK3        | chr14:24805226-24809242   | 0 | 1 |
| XLOC_006745 | XLOC_006745 | CMA1         | chr14:24974711-24977471   | 0 | 1 |
| XLOC_006746 | XLOC_006746 | CTSG         | chr14:25042723-25045466   | 0 | 1 |
| XLOC_006747 | XLOC_006747 | GZMH         | chr14:25075685-25078926   | 0 | 1 |
| XLOC_006748 | XLOC_006748 | GZMB         | chr14:25100160-25103432   | 0 | 1 |
| XLOC_006750 | XLOC_006750 | NOVA1        | chr14:26915088-27066960   | 0 | 1 |
| XLOC_006751 | XLOC_006751 | MIR548A1     | chr14:29896116-30396899   | 0 | 1 |
| XLOC_006755 | XLOC_006755 | MIR624       | chr14:31363004-31565656   | 0 | 1 |
| XLOC_006759 | XLOC_006759 | GPR33        | chr14:31952149-31957151   | 0 | 1 |
| XLOC_006772 | XLOC_006772 | SFTA3        | chr14:36942493-36982990   | 0 | 1 |
| XLOC_006773 | XLOC_006773 | NKX2-1       | chr14:36985603-36989430   | 0 | 1 |
| XLOC_006774 | XLOC_006774 | NKX2-8       | chr14:37049215-37051786   | 0 | 1 |
| XLOC_006776 | XLOC_006776 | MIR4503      | chr14:37147125-37642998   | 0 | 1 |
| XLOC_006778 | XLOC_006778 | CLEC14A      | chr14:38723204-38725575   | 0 | 1 |
| XLOC_006779 | XLOC_006779 | LINC00639    | chr14:39218542-39386086   | 0 | 1 |
| XLOC_006784 | XLOC_006784 | FSCB         | chr14:44973353-44976499   | 0 | 1 |
| XLOC_006788 | XLOC_006788 | RPL10L       | chr14:47120219-47121028   | 0 | 1 |
| XLOC_006789 | XLOC_006789 | MDGA2        | chr14:47308827-48144157   | 0 | 1 |
| XLOC_006790 | XLOC_006790 | MIR548Y      | chr14:48230197-48230307   | 0 | 1 |
| XLOC_006791 | XLOC_006791 | LINC00648    | chr14:48234155-48264217   | 0 | 1 |
| XLOC_006808 | XLOC_006808 | FRMD6-AS2    | chr14:51921229-52197444   | 0 | 1 |
| XLOC_006816 | XLOC_006816 | MIR5580      | chr14:54415144-54415202   | 0 | 1 |

|             |             |              |                           |   |   |
|-------------|-------------|--------------|---------------------------|---|---|
| XLOC_006821 | XLOC_006821 | MIR4308      | chr14:55308723-55369542   | 0 | 1 |
| XLOC_006840 | XLOC_006840 | C14orf39     | chr14:60902673-60952764   | 0 | 1 |
| XLOC_006844 | XLOC_006844 | TMEM30B      | chr14:61744088-61748530   | 0 | 1 |
| XLOC_006846 | XLOC_006846 | KCNH5        | chr14:63173944-63568584   | 0 | 1 |
| XLOC_006847 | XLOC_006847 | GPHB5        | chr14:63779548-63785593   | 0 | 1 |
| XLOC_006858 | XLOC_006858 | MIR4708      | chr14:65801835-65801901   | 0 | 1 |
| XLOC_006871 | XLOC_006871 | CCDC177      | chr14:70036530-70041600   | 0 | 1 |
| XLOC_006874 | XLOC_006874 | SLC8A3       | chr14:70510933-70655787   | 0 | 1 |
| XLOC_006904 | XLOC_006904 | RNU6-6       | chr14:76737449-76737476   | 0 | 1 |
| XLOC_006907 | XLOC_006907 | ZDHHC22      | chr14:77597612-77608134   | 0 | 1 |
| XLOC_006908 | XLOC_006908 | NGB          | chr14:77731833-77737655   | 0 | 1 |
| XLOC_006923 | XLOC_006923 | GALC         | chr14:88399357-88460009   | 0 | 1 |
| XLOC_006924 | XLOC_006924 | KCNK10       | chr14:88646451-88793256   | 0 | 1 |
| XLOC_006930 | XLOC_006930 | TTC7B        | chr14:91006931-91282761   | 0 | 1 |
| XLOC_006935 | XLOC_006935 | CATSPERB     | chr14:92047117-92198413   | 0 | 1 |
| XLOC_006946 | XLOC_006946 | PRIMA1       | chr14:94184643-94254766   | 0 | 1 |
| XLOC_006947 | XLOC_006947 | FAM181A-AS1  | chr14:94371075-94395954   | 0 | 1 |
| XLOC_006948 | XLOC_006948 | ASB2         | chr14:94400498-94443076   | 0 | 1 |
| XLOC_006952 | XLOC_006952 | SERPINA6     | chr14:94770584-94789688   | 0 | 1 |
| XLOC_006954 | XLOC_006954 | SERPINA11    | chr14:94908800-94919122   | 0 | 1 |
| XLOC_006955 | XLOC_006955 | SERPINA9     | chr14:94929057-94942670   | 0 | 1 |
| XLOC_006956 | XLOC_006956 | SERPINA12    | chr14:94953619-94984181   | 0 | 1 |
| XLOC_006957 | XLOC_006957 | GSC          | chr14:95234559-95236499   | 0 | 1 |
| XLOC_006959 | XLOC_006959 | MIR3173      | chr14:95552564-95623759   | 0 | 1 |
| XLOC_006962 | XLOC_006962 | SYNE3        | chr14:95883830-95942173   | 0 | 1 |
| XLOC_006964 | XLOC_006964 | TCL1A        | chr14:96176303-96180533   | 0 | 1 |
| XLOC_006966 | XLOC_006966 | LOC100129345 | chr14:98098983-98152995   | 0 | 1 |
| XLOC_006967 | XLOC_006967 | C14orf64     | chr14:98391946-98444461   | 0 | 1 |
| XLOC_006975 | XLOC_006975 | RTL1         | chr14:101346991-101351184 | 0 | 1 |
| XLOC_006976 | XLOC_006976 | DIO3OS       | chr14:102018559-102022013 | 0 | 1 |
| XLOC_006977 | XLOC_006977 | MIR1247      | chr14:102026623-102026759 | 0 | 1 |
| XLOC_006983 | XLOC_006983 | LINC00605    | chr14:103653557-103655365 | 0 | 1 |
| XLOC_006989 | XLOC_006989 | RD3L         | chr14:104394816-104519004 | 0 | 1 |
| XLOC_006990 | XLOC_006990 | MIR3545      | chr14:104583741-104583851 | 0 | 1 |
| XLOC_006991 | XLOC_006991 | TMEM179      | chr14:105060419-105071097 | 0 | 1 |
| XLOC_006992 | XLOC_006992 | MIR4710      | chr14:105144030-105144086 | 0 | 1 |
| XLOC_007000 | XLOC_007000 | ELK2AP       | chr14:106135913-106139144 | 0 | 1 |
| XLOC_007001 | XLOC_007001 | ADAM6        | chr14:106435818-106438358 | 0 | 1 |
| XLOC_007002 | XLOC_007002 | CHEK2P2      | chr15:20487996-20496811   | 0 | 1 |
| XLOC_007003 | XLOC_007003 | GOLGA8CP     | chr15:20767673-20781026   | 0 | 1 |
| XLOC_007004 | XLOC_007004 | CT60         | chr15:21145766-21198633   | 0 | 1 |
| XLOC_007005 | XLOC_007005 | OR4M2        | chr15:22278031-22371088   | 0 | 1 |
| XLOC_007006 | XLOC_007006 | OR4N4        | chr15:22382472-22383815   | 0 | 1 |
| XLOC_007007 | XLOC_007007 | OR4N3P       | chr15:22413461-22414395   | 0 | 1 |
| XLOC_007008 | XLOC_007008 | REREP3       | chr15:22546564-22570831   | 0 | 1 |
| XLOC_007009 | XLOC_007009 | GOLGA6L1     | chr15:22736245-22746002   | 0 | 1 |
| XLOC_007016 | XLOC_007016 | MKRN3        | chr15:23810453-23813166   | 0 | 1 |
| XLOC_007017 | XLOC_007017 | PWRN1        | chr15:24803303-24832926   | 0 | 1 |
| XLOC_007022 | XLOC_007022 | SNORD109A    | chr15:25287120-25287187   | 0 | 1 |
| XLOC_007023 | XLOC_007023 | SNORD116-1   | chr15:25296622-25296719   | 0 | 1 |
| XLOC_007024 | XLOC_007024 | SNORD116-2   | chr15:25299355-25299452   | 0 | 1 |
| XLOC_007025 | XLOC_007025 | SNORD116-9   | chr15:25302005-25302102   | 0 | 1 |
| XLOC_007026 | XLOC_007026 | SNORD116-4   | chr15:25304683-25304781   | 0 | 1 |
| XLOC_007027 | XLOC_007027 | SNORD116-5   | chr15:25307478-25307575   | 0 | 1 |
| XLOC_007028 | XLOC_007028 | SNORD116-6   | chr15:25310171-25310269   | 0 | 1 |
| XLOC_007029 | XLOC_007029 | SNORD116-7   | chr15:25312933-25313030   | 0 | 1 |
| XLOC_007030 | XLOC_007030 | SNORD116-8   | chr15:25315577-25315674   | 0 | 1 |
| XLOC_007031 | XLOC_007031 | SNORD116-9   | chr15:25318252-25318349   | 0 | 1 |
| XLOC_007032 | XLOC_007032 | SNORD116-10  | chr15:25319259-25319363   | 0 | 1 |
| XLOC_007033 | XLOC_007033 | SNORD116-11  | chr15:25321074-25321168   | 0 | 1 |
| XLOC_007034 | XLOC_007034 | SNORD116-12  | chr15:25322196-25322290   | 0 | 1 |
| XLOC_007035 | XLOC_007035 | SNORD116-13  | chr15:25324203-25324297   | 0 | 1 |
| XLOC_007036 | XLOC_007036 | SNORD116-14  | chr15:25325287-25325381   | 0 | 1 |
| XLOC_007037 | XLOC_007037 | SNORD116-15  | chr15:25326432-25326526   | 0 | 1 |
| XLOC_007038 | XLOC_007038 | SNORD116-16  | chr15:25327913-25328007   | 0 | 1 |
| XLOC_007039 | XLOC_007039 | SNORD116-17  | chr15:25328733-25328827   | 0 | 1 |
| XLOC_007040 | XLOC_007040 | SNORD116-18  | chr15:25330530-25330624   | 0 | 1 |
| XLOC_007041 | XLOC_007041 | SNORD116-19  | chr15:25331672-25331766   | 0 | 1 |
| XLOC_007042 | XLOC_007042 | SNORD116-20  | chr15:25332807-25332901   | 0 | 1 |
| XLOC_007043 | XLOC_007043 | SNORD116-21  | chr15:25333949-25334043   | 0 | 1 |
| XLOC_007044 | XLOC_007044 | SNORD116-22  | chr15:25335068-25335162   | 0 | 1 |
| XLOC_007045 | XLOC_007045 | SNORD116-23  | chr15:25336931-25337025   | 0 | 1 |
| XLOC_007046 | XLOC_007046 | SNORD116-24  | chr15:25339182-25339276   | 0 | 1 |
| XLOC_007047 | XLOC_007047 | SNORD116-25  | chr15:25342808-25342902   | 0 | 1 |
| XLOC_007048 | XLOC_007048 | SNORD116-26  | chr15:25344644-25344742   | 0 | 1 |
| XLOC_007049 | XLOC_007049 | SNORD116-27  | chr15:25346720-25346814   | 0 | 1 |
| XLOC_007050 | XLOC_007050 | SNORD116-28  | chr15:25349787-25349880   | 0 | 1 |
| XLOC_007051 | XLOC_007051 | SNORD116-29  | chr15:25351666-25351751   | 0 | 1 |
| XLOC_007052 | XLOC_007052 | IPW          | chr15:25361691-25367623   | 0 | 1 |

|             |             |                            |                         |   |   |
|-------------|-------------|----------------------------|-------------------------|---|---|
| XLOC_007053 | XLOC_007053 | PAR1                       | chr15:25380788-25383200 | 0 | 1 |
| XLOC_007054 | XLOC_007054 | SNORD115-1                 | chr15:25415869-25415951 | 0 | 1 |
| XLOC_007055 | XLOC_007055 | SNORD115-2                 | chr15:25417781-25417863 | 0 | 1 |
| XLOC_007056 | XLOC_007056 | SNORD115-3                 | chr15:25420073-25420155 | 0 | 1 |
| XLOC_007057 | XLOC_007057 | SNORD115-4                 | chr15:25421978-25422060 | 0 | 1 |
| XLOC_007058 | XLOC_007058 | SNORD115-5                 | chr15:25423884-25423966 | 0 | 1 |
| XLOC_007059 | XLOC_007059 | SNORD115-6                 | chr15:25425643-25425725 | 0 | 1 |
| XLOC_007060 | XLOC_007060 | SNORD115-7                 | chr15:25427531-25427613 | 0 | 1 |
| XLOC_007061 | XLOC_007061 | SNORD115-8                 | chr15:25429452-25429534 | 0 | 1 |
| XLOC_007062 | XLOC_007062 | SNORD115-9                 | chr15:25430777-25430859 | 0 | 1 |
| XLOC_007063 | XLOC_007063 | SNORD115-10                | chr15:25432682-25432763 | 0 | 1 |
| XLOC_007064 | XLOC_007064 | SNORD115-43                | chr15:25434560-25434642 | 0 | 1 |
| XLOC_007065 | XLOC_007065 | SNORD115-10                | chr15:25436562-25436644 | 0 | 1 |
| XLOC_007066 | XLOC_007066 | SNORD115-13                | chr15:25438467-25438549 | 0 | 1 |
| XLOC_007067 | XLOC_007067 | SNORD115-14                | chr15:25440067-25440148 | 0 | 1 |
| XLOC_007068 | XLOC_007068 | SNORD115-16                | chr15:25444594-25444676 | 0 | 1 |
| XLOC_007069 | XLOC_007069 | SNORD115-18                | chr15:25446469-25446551 | 0 | 1 |
| XLOC_007070 | XLOC_007070 | SNORD115-18                | chr15:25448373-25448455 | 0 | 1 |
| XLOC_007071 | XLOC_007071 | SNORD115-17                | chr15:25449503-25449585 | 0 | 1 |
| XLOC_007072 | XLOC_007072 | SNORD115-15,SNORD115-20,Sh | chr15:25451408-25477615 | 0 | 1 |
| XLOC_007073 | XLOC_007073 | SNORD115-22                | chr15:25451408-25477615 | 0 | 1 |
| XLOC_007074 | XLOC_007074 | PAR4                       | chr15:25451408-25477615 | 0 | 1 |
| XLOC_007075 | XLOC_007075 | SNORD115-24                | chr15:25451408-25477615 | 0 | 1 |
| XLOC_007076 | XLOC_007076 | SNORD115-25                | chr15:25451408-25477615 | 0 | 1 |
| XLOC_007077 | XLOC_007077 | SNORD115-26                | chr15:25451408-25477615 | 0 | 1 |
| XLOC_007078 | XLOC_007078 | SNORD115-27                | chr15:25451408-25477615 | 0 | 1 |
| XLOC_007079 | XLOC_007079 | SNORD115-28                | chr15:25451408-25477615 | 0 | 1 |
| XLOC_007080 | XLOC_007080 | SNORD115-11                | chr15:25451408-25477615 | 0 | 1 |
| XLOC_007081 | XLOC_007081 | SNORD115-30                | chr15:25451408-25477615 | 0 | 1 |
| XLOC_007082 | XLOC_007082 | SNORD115-31                | chr15:25451408-25477615 | 0 | 1 |
| XLOC_007083 | XLOC_007083 | SNORD115-32                | chr15:25451408-25477615 | 0 | 1 |
| XLOC_007084 | XLOC_007084 | SNORD115-33                | chr15:25451408-25477615 | 0 | 1 |
| XLOC_007085 | XLOC_007085 | SNORD115-35                | chr15:25479393-25479475 | 0 | 1 |
| XLOC_007086 | XLOC_007086 | SNORD115-11                | chr15:25481231-25481313 | 0 | 1 |
| XLOC_007087 | XLOC_007087 | SNORD115-37                | chr15:25483132-25483214 | 0 | 1 |
| XLOC_007088 | XLOC_007088 | SNORD115-38                | chr15:25484984-25485066 | 0 | 1 |
| XLOC_007089 | XLOC_007089 | SNORD115-39                | chr15:25486892-25486974 | 0 | 1 |
| XLOC_007090 | XLOC_007090 | SNORD115-40                | chr15:25488760-25488842 | 0 | 1 |
| XLOC_007091 | XLOC_007091 | SNORD115-41                | chr15:25490624-25490706 | 0 | 1 |
| XLOC_007092 | XLOC_007092 | SNORD115-10                | chr15:25492491-25492573 | 0 | 1 |
| XLOC_007093 | XLOC_007093 | SNORD115-11                | chr15:25494344-25494426 | 0 | 1 |
| XLOC_007094 | XLOC_007094 | SNORD115-44                | chr15:25496005-25496087 | 0 | 1 |
| XLOC_007095 | XLOC_007095 | SNORD115-45                | chr15:25509673-25509726 | 0 | 1 |
| XLOC_007096 | XLOC_007096 | SNORD115-47                | chr15:25513663-25513696 | 0 | 1 |
| XLOC_007097 | XLOC_007097 | SNORD115-48                | chr15:25514929-25515005 | 0 | 1 |
| XLOC_007098 | XLOC_007098 | SNORD109B                  | chr15:25523489-25523556 | 0 | 1 |
| XLOC_007099 | XLOC_007099 | LOC100128714               | chr15:26147506-26298267 | 0 | 1 |
| XLOC_007100 | XLOC_007100 | LOC503519                  | chr15:26360959-26378184 | 0 | 1 |
| XLOC_007101 | XLOC_007101 | GABRA5                     | chr15:27111865-27194357 | 0 | 1 |
| XLOC_007102 | XLOC_007102 | GABRG3                     | chr15:27216428-2778373  | 0 | 1 |
| XLOC_007103 | XLOC_007103 | GOLGA8F,GOLGA8G            | chr15:28623783-28637171 | 0 | 1 |
| XLOC_007104 | XLOC_007104 | MIR4509-1                  | chr15:28671636-28671730 | 0 | 1 |
| XLOC_007107 | XLOC_007107 | LOC100289656               | chr15:29033388-29034538 | 0 | 1 |
| XLOC_007110 | XLOC_007110 | ULK4P3                     | chr15:30395934-30423948 | 0 | 1 |
| XLOC_007113 | XLOC_007113 | ULK4P2                     | chr15:30864757-30892911 | 0 | 1 |
| XLOC_007122 | XLOC_007122 | GREM1                      | chr15:33010204-33026870 | 0 | 1 |
| XLOC_007130 | XLOC_007130 | MIR4510                    | chr15:36219056-36219124 | 0 | 1 |
| XLOC_007132 | XLOC_007132 | TMCO5A                     | chr15:38227456-38243623 | 0 | 1 |
| XLOC_007135 | XLOC_007135 | C15orf53                   | chr15:38988798-38992239 | 0 | 1 |
| XLOC_007136 | XLOC_007136 | C15orf54                   | chr15:39542884-39547048 | 0 | 1 |
| XLOC_007137 | XLOC_007137 | THBS1                      | chr15:39873279-39889668 | 0 | 1 |
| XLOC_007141 | XLOC_007141 | PHGR1                      | chr15:40643233-40648634 | 0 | 1 |
| XLOC_007164 | XLOC_007164 | MIR626                     | chr15:41952609-42062141 | 0 | 1 |
| XLOC_007174 | XLOC_007174 | ADAL                       | chr15:43622871-43646096 | 0 | 1 |
| XLOC_007176 | XLOC_007176 | RNU6-28                    | chr15:43663312-43910998 | 0 | 1 |
| XLOC_007188 | XLOC_007188 | C15orf43                   | chr15:45248899-45271421 | 0 | 1 |
| XLOC_007190 | XLOC_007190 | DUOXA2                     | chr15:45406522-45422075 | 0 | 1 |
| XLOC_007199 | XLOC_007199 | SEMA6D                     | chr15:47476402-48066420 | 0 | 1 |
| XLOC_007200 | XLOC_007200 | SLC24A5                    | chr15:48413168-48470558 | 0 | 1 |
| XLOC_007201 | XLOC_007201 | CTXN2                      | chr15:48483866-48495951 | 0 | 1 |
| XLOC_007202 | XLOC_007202 | SLC12A1                    | chr15:48498497-48596275 | 0 | 1 |
| XLOC_007211 | XLOC_007211 | MIR4712                    | chr15:50652525-50652607 | 0 | 1 |
| XLOC_007215 | XLOC_007215 | MIR4713                    | chr15:51500253-51630795 | 0 | 1 |
| XLOC_007216 | XLOC_007216 | GLDN                       | chr15:51633712-51700209 | 0 | 1 |
| XLOC_007221 | XLOC_007221 | UNC13C                     | chr15:54305100-54920806 | 0 | 1 |
| XLOC_007229 | XLOC_007229 | AQP9                       | chr15:58430407-58478110 | 0 | 1 |
| XLOC_007230 | XLOC_007230 | LIPC                       | chr15:58724174-58861073 | 0 | 1 |
| XLOC_007237 | XLOC_007237 | FOXB1                      | chr15:60296420-60298142 | 0 | 1 |
| XLOC_007240 | XLOC_007240 | MIR190A                    | chr15:62939509-63136829 | 0 | 1 |

|             |             |                   |                           |   |   |
|-------------|-------------|-------------------|---------------------------|---|---|
| XLOC_007254 | XLOC_007254 | KBTBD13           | chr15:65369153-65372276   | 0 | 1 |
| XLOC_007258 | XLOC_007258 | MIR4311           | chr15:66187633-66546075   | 0 | 1 |
| XLOC_007271 | XLOC_007271 | MIR548H4          | chr15:69116302-69564544   | 0 | 1 |
| XLOC_007272 | XLOC_007272 | NOX5.SPESP1       | chr15:69116302-69564544   | 0 | 1 |
| XLOC_007273 | XLOC_007273 | LINC00277         | chr15:69116302-69564544   | 0 | 1 |
| XLOC_007279 | XLOC_007279 | LINC00593         | chr15:70127572-70135306   | 0 | 1 |
| XLOC_007285 | XLOC_007285 | TMEM202           | chr15:72690667-72700708   | 0 | 1 |
| XLOC_007287 | XLOC_007287 | MIR630            | chr15:72879557-72879654   | 0 | 1 |
| XLOC_007288 | XLOC_007288 | GOLGA6B           | chr15:72947037-72959738   | 0 | 1 |
| XLOC_007292 | XLOC_007292 | C15orf60          | chr15:73735498-73925753   | 0 | 1 |
| XLOC_007294 | XLOC_007294 | TBC1D21           | chr15:74165967-74181556   | 0 | 1 |
| XLOC_007297 | XLOC_007297 | ISLR2             | chr15:74421714-74429143   | 0 | 1 |
| XLOC_007298 | XLOC_007298 | ISLR              | chr15:74466086-74469212   | 0 | 1 |
| XLOC_007299 | XLOC_007299 | CCDC33            | chr15:74528629-74628482   | 0 | 1 |
| XLOC_007313 | XLOC_007313 | GOLGA6D           | chr15:75575181-75588148   | 0 | 1 |
| XLOC_007325 | XLOC_007325 | LOC253044         | chr15:77934105-77941581   | 0 | 1 |
| XLOC_007326 | XLOC_007326 | MIR5003           | chr15:78375874-78375901   | 0 | 1 |
| XLOC_007330 | XLOC_007330 | CRABP1            | chr15:78632665-78640572   | 0 | 1 |
| XLOC_007337 | XLOC_007337 | MIR184            | chr15:79484048-79590581   | 0 | 1 |
| XLOC_007338 | XLOC_007338 | ANKRD34C          | chr15:79484048-79590581   | 0 | 1 |
| XLOC_007351 | XLOC_007351 | LOC390660         | chr15:82585620-82626915   | 0 | 1 |
| XLOC_007352 | XLOC_007352 | UBE2Q2P2,UBE2Q2P3 | chr15:82647285-82708204   | 0 | 1 |
| XLOC_007353 | XLOC_007353 | GOLGA6L9          | chr15:82722184-82731586   | 0 | 1 |
| XLOC_007354 | XLOC_007354 | LOC440297         | chr15:82753446-82798352   | 0 | 1 |
| XLOC_007355 | XLOC_007355 | LOC390660         | chr15:82882945-82924242   | 0 | 1 |
| XLOC_007359 | XLOC_007359 | LOC440297         | chr15:83130032-83182930   | 0 | 1 |
| XLOC_007360 | XLOC_007360 | LOC283692         | chr15:83211950-83378635   | 0 | 1 |
| XLOC_007361 | XLOC_007361 | SCARNA15          | chr15:83424696-83424823   | 0 | 1 |
| XLOC_007364 | XLOC_007364 | MIR4515           | chr15:83685180-83736167   | 0 | 1 |
| XLOC_007365 | XLOC_007365 | TM6SF1            | chr15:83776323-83806111   | 0 | 1 |
| XLOC_007367 | XLOC_007367 | ADAMTSL3          | chr15:84322837-84708593   | 0 | 1 |
| XLOC_007368 | XLOC_007368 | EFTUD1P1          | chr15:84748938-84795353   | 0 | 1 |
| XLOC_007381 | XLOC_007381 | AGBL1             | chr15:86685241-87572283   | 0 | 1 |
| XLOC_007382 | XLOC_007382 | LINC00052         | chr15:88120159-88122917   | 0 | 1 |
| XLOC_007383 | XLOC_007383 | NTRK3-AS1         | chr15:88419987-88814297   | 0 | 1 |
| XLOC_007385 | XLOC_007385 | MIR1179           | chr15:89151337-89151428   | 0 | 1 |
| XLOC_007386 | XLOC_007386 | MIR7-2            | chr15:89155055-89155165   | 0 | 1 |
| XLOC_007389 | XLOC_007389 | ACAN              | chr15:89346673-89418585   | 0 | 1 |
| XLOC_007392 | XLOC_007392 | MIR9-3            | chr15:89911247-89911337   | 0 | 1 |
| XLOC_007393 | XLOC_007393 | LOC254559         | chr15:89921272-89941718   | 0 | 1 |
| XLOC_007414 | XLOC_007414 | ST8SIA2           | chr15:92937139-93011958   | 0 | 1 |
| XLOC_007415 | XLOC_007415 | C15orf32          | chr15:93014906-93044347   | 0 | 1 |
| XLOC_007419 | XLOC_007419 | MIR3175           | chr15:93443550-93571237   | 0 | 1 |
| XLOC_007424 | XLOC_007424 | MIR1469           | chr15:96869156-96883492   | 0 | 1 |
| XLOC_007425 | XLOC_007425 | SPATA8            | chr15:97326678-97328845   | 0 | 1 |
| XLOC_007428 | XLOC_007428 | MIR4714           | chr15:99192760-99507759   | 0 | 1 |
| XLOC_007436 | XLOC_007436 | OR4F6             | chr15:102345922-102346861 | 0 | 1 |
| XLOC_007437 | XLOC_007437 | OR4F15            | chr15:102358389-102359328 | 0 | 1 |
| XLOC_007438 | XLOC_007438 | OR4F13P           | chr15:102382321-102390527 | 0 | 1 |
| XLOC_007439 | XLOC_007439 | FAM138E           | chr15:102495087-102496558 | 0 | 1 |
| XLOC_007442 | XLOC_007442 | GOLGA6L6          | chr15:20737093-20747114   | 0 | 1 |
| XLOC_007444 | XLOC_007444 | POTEB             | chr15:21040700-21071977   | 0 | 1 |
| XLOC_007445 | XLOC_007445 | NF1P2             | chr15:21122020-21134625   | 0 | 1 |
| XLOC_007447 | XLOC_007447 | CXADRP2           | chr15:22014419-22016878   | 0 | 1 |
| XLOC_007448 | XLOC_007448 | POTEB             | chr15:22051852-22083137   | 0 | 1 |
| XLOC_007449 | XLOC_007449 | NF1P2             | chr15:22133180-22145802   | 0 | 1 |
| XLOC_007450 | XLOC_007450 | MIR4509-3         | chr15:22675147-22675241   | 0 | 1 |
| XLOC_007457 | XLOC_007457 | LOC440243         | chr15:23569671-23579379   | 0 | 1 |
| XLOC_007458 | XLOC_007458 | MIR4508           | chr15:23807208-23807278   | 0 | 1 |
| XLOC_007459 | XLOC_007459 | MAGEL2            | chr15:23888695-23892993   | 0 | 1 |
| XLOC_007460 | XLOC_007460 | NDN               | chr15:23930553-23932450   | 0 | 1 |
| XLOC_007461 | XLOC_007461 | PWRN2             | chr15:24409925-24415053   | 0 | 1 |
| XLOC_007463 | XLOC_007463 | ATP10A            | chr15:25923859-26108349   | 0 | 1 |
| XLOC_007464 | XLOC_007464 | MIR4715           | chr15:25923859-26108349   | 0 | 1 |
| XLOC_007468 | XLOC_007468 | MIR4509-1         | chr15:28735897-28735991   | 0 | 1 |
| XLOC_007469 | XLOC_007469 | GOLGA8F,GOLGA8G   | chr15:28764756-28778143   | 0 | 1 |
| XLOC_007470 | XLOC_007470 | GOLGA6L7P         | chr15:29034979-29101720   | 0 | 1 |
| XLOC_007471 | XLOC_007471 | FAM189A1          | chr15:29412454-29862927   | 0 | 1 |
| XLOC_007476 | XLOC_007476 | TRPM1             | chr15:31293263-31453476   | 0 | 1 |
| XLOC_007477 | XLOC_007477 | MIR211            | chr15:31293263-31453476   | 0 | 1 |
| XLOC_007478 | XLOC_007478 | LOC283710         | chr15:31514970-31523050   | 0 | 1 |
| XLOC_007483 | XLOC_007483 | TMCO5B            | chr15:33528676-33539756   | 0 | 1 |
| XLOC_007491 | XLOC_007491 | MIR1233-2         | chr15:34671269-34729667   | 0 | 1 |
| XLOC_007493 | XLOC_007493 | MIR1233-1         | chr15:34817483-34875771   | 0 | 1 |
| XLOC_007494 | XLOC_007494 | GJD2              | chr15:35044641-35046782   | 0 | 1 |
| XLOC_007499 | XLOC_007499 | MIR3942           | chr15:35663169-36151202   | 0 | 1 |
| XLOC_007501 | XLOC_007501 | LOC145845         | chr15:37156643-37178734   | 0 | 1 |
| XLOC_007526 | XLOC_007526 | MIR4310           | chr15:42120282-42186275   | 0 | 1 |
| XLOC_007530 | XLOC_007530 | PLA2G4F           | chr15:42433331-42448839   | 0 | 1 |



|             |             |           |                           |   |   |
|-------------|-------------|-----------|---------------------------|---|---|
| XLOC_007532 | XLOC_007532 | MIR627    | chr15:42450898-42500502   | 0 | 1 |
| XLOC_007539 | XLOC_007539 | EPB42     | chr15:43489425-43513323   | 0 | 1 |
| XLOC_007540 | XLOC_007540 | TGM5      | chr15:43524792-43559055   | 0 | 1 |
| XLOC_007541 | XLOC_007541 | TGM7      | chr15:43568478-43594453   | 0 | 1 |
| XLOC_007542 | XLOC_007542 | LCMT2     | chr15:43619973-43622820   | 0 | 1 |
| XLOC_007569 | XLOC_007569 | MIR4716   | chr15:49447975-49913118   | 0 | 1 |
| XLOC_007579 | XLOC_007579 | CYP19A1   | chr15:51500253-51630795   | 0 | 1 |
| XLOC_007586 | XLOC_007586 | MIR1266   | chr15:52484514-52587995   | 0 | 1 |
| XLOC_007591 | XLOC_007591 | WDR72     | chr15:53805937-54051859   | 0 | 1 |
| XLOC_007595 | XLOC_007595 | MIR628    | chr15:55611132-55800432   | 0 | 1 |
| XLOC_007596 | XLOC_007596 | PYGO1     | chr15:55838220-55881050   | 0 | 1 |
| XLOC_007597 | XLOC_007597 | PRTG      | chr15:55903738-56035177   | 0 | 1 |
| XLOC_007603 | XLOC_007603 | ALDH1A2   | chr15:58245621-58358121   | 0 | 1 |
| XLOC_007608 | XLOC_007608 | MIR2116   | chr15:59428167-59665071   | 0 | 1 |
| XLOC_007615 | XLOC_007615 | C2CD4B    | chr15:62455736-62457482   | 0 | 1 |
| XLOC_007616 | XLOC_007616 | MGC15885  | chr15:62929370-62937380   | 0 | 1 |
| XLOC_007628 | XLOC_007628 | MIR1272   | chr15:65032094-65067770   | 0 | 1 |
| XLOC_007632 | XLOC_007632 | RASL12    | chr15:65337707-65360388   | 0 | 1 |
| XLOC_007643 | XLOC_007643 | MIR4511   | chr15:65952956-66084631   | 0 | 1 |
| XLOC_007649 | XLOC_007649 | SNORD18C  | chr15:66791652-66797193   | 0 | 1 |
| XLOC_007650 | XLOC_007650 | SNORD18B  | chr15:66791652-66797193   | 0 | 1 |
| XLOC_007651 | XLOC_007651 | SNORD16   | chr15:66791652-66797193   | 0 | 1 |
| XLOC_007652 | XLOC_007652 | SNORD18A  | chr15:66791652-66797193   | 0 | 1 |
| XLOC_007660 | XLOC_007660 | MIR4312   | chr15:69070874-69113261   | 0 | 1 |
| XLOC_007663 | XLOC_007663 | MIR629    | chr15:70340542-70390256   | 0 | 1 |
| XLOC_007665 | XLOC_007665 | LARP6     | chr15:71123888-71146498   | 0 | 1 |
| XLOC_007667 | XLOC_007667 | CT62      | chr15:71402582-71407839   | 0 | 1 |
| XLOC_007669 | XLOC_007669 | GRAMD2    | chr15:72452146-72490136   | 0 | 1 |
| XLOC_007676 | XLOC_007676 | HCN4      | chr15:73612199-73661605   | 0 | 1 |
| XLOC_007678 | XLOC_007678 | C15orf59  | chr15:74032140-74043816   | 0 | 1 |
| XLOC_007681 | XLOC_007681 | GOLGA6A   | chr15:74362197-74374891   | 0 | 1 |
| XLOC_007684 | XLOC_007684 | CYP11A1   | chr15:74630102-74660081   | 0 | 1 |
| XLOC_007689 | XLOC_007689 | MIR4513   | chr15:75074424-75095539   | 0 | 1 |
| XLOC_007695 | XLOC_007695 | MIR631    | chr15:75639330-75647592   | 0 | 1 |
| XLOC_007703 | XLOC_007703 | MIR4313   | chr15:76054555-76054656   | 0 | 1 |
| XLOC_007712 | XLOC_007712 | LINGO1    | chr15:77905368-77924709   | 0 | 1 |
| XLOC_007713 | XLOC_007713 | LOC645752 | chr15:78206558-78219188   | 0 | 1 |
| XLOC_007720 | XLOC_007720 | CHRN4     | chr15:78916635-78933587   | 0 | 1 |
| XLOC_007721 | XLOC_007721 | ADAMTS7   | chr15:79051544-79103773   | 0 | 1 |
| XLOC_007724 | XLOC_007724 | LOC729911 | chr15:79484048-79590581   | 0 | 1 |
| XLOC_007727 | XLOC_007727 | LOC283688 | chr15:80555409-80634147   | 0 | 1 |
| XLOC_007728 | XLOC_007728 | MIR549    | chr15:81071711-81243999   | 0 | 1 |
| XLOC_007730 | XLOC_007730 | MIR4514   | chr15:81289757-81289814   | 0 | 1 |
| XLOC_007738 | XLOC_007738 | LOC440297 | chr15:82944792-82986427   | 0 | 1 |
| XLOC_007743 | XLOC_007743 | AP3B2     | chr15:83211950-83378635   | 0 | 1 |
| XLOC_007750 | XLOC_007750 | HGFRP3    | chr15:83806803-83876770   | 0 | 1 |
| XLOC_007751 | XLOC_007751 | BNC1      | chr15:83924654-83953468   | 0 | 1 |
| XLOC_007758 | XLOC_007758 | LOC642423 | chr15:85747906-85748518   | 0 | 1 |
| XLOC_007760 | XLOC_007760 | MIR1276   | chr15:86302558-86338189   | 0 | 1 |
| XLOC_007761 | XLOC_007761 | LOC727915 | chr15:86685241-87572283   | 0 | 1 |
| XLOC_007762 | XLOC_007762 | NTRK3     | chr15:88419987-88814297   | 0 | 1 |
| XLOC_007765 | XLOC_007765 | MIR3529   | chr15:89155055-89155165   | 0 | 1 |
| XLOC_007768 | XLOC_007768 | RLBP1     | chr15:89753097-89764922   | 0 | 1 |
| XLOC_007770 | XLOC_007770 | RHCG      | chr15:90014637-90039799   | 0 | 1 |
| XLOC_007771 | XLOC_007771 | LOC283761 | chr15:90048160-90067265   | 0 | 1 |
| XLOC_007778 | XLOC_007778 | MIR5094   | chr15:90373830-90456222   | 0 | 1 |
| XLOC_007781 | XLOC_007781 | GABARAPL3 | chr15:90889762-90892679   | 0 | 1 |
| XLOC_007787 | XLOC_007787 | RGMA      | chr15:93586635-93632443   | 0 | 1 |
| XLOC_007788 | XLOC_007788 | LOC400456 | chr15:95822518-95870329   | 0 | 1 |
| XLOC_007790 | XLOC_007790 | FAM169B   | chr15:98980390-99057611   | 0 | 1 |
| XLOC_007794 | XLOC_007794 | DNM1P46   | chr15:100330360-100347132 | 0 | 1 |
| XLOC_007806 | XLOC_007806 | OR4F4     | chr15:102462344-102463262 | 0 | 1 |
| XLOC_007807 | XLOC_007807 | DDX11L9   | chr15:102501015-102519296 | 0 | 1 |
| XLOC_007808 | XLOC_007808 | DDX11L10  | chr16:61554-64090         | 0 | 1 |
| XLOC_007812 | XLOC_007812 | HBM       | chr16:215972-216767       | 0 | 1 |
| XLOC_007815 | XLOC_007815 | HBQ1      | chr16:230332-231178       | 0 | 1 |
| XLOC_007824 | XLOC_007824 | MIR5587   | chr16:577855-604636       | 0 | 1 |
| XLOC_007825 | XLOC_007825 | MIR3176   | chr16:577855-604636       | 0 | 1 |
| XLOC_007840 | XLOC_007840 | MIR662    | chr16:820182-820277       | 0 | 1 |
| XLOC_007846 | XLOC_007846 | TPSAB1    | chr16:1290677-1292555     | 0 | 1 |
| XLOC_007847 | XLOC_007847 | TPSD1     | chr16:1306272-1308494     | 0 | 1 |
| XLOC_007856 | XLOC_007856 | MIR3177   | chr16:1756220-1820318     | 0 | 1 |
| XLOC_007863 | XLOC_007863 | RNF151    | chr16:2016874-2018976     | 0 | 1 |
| XLOC_007870 | XLOC_007870 | MIR4516   | chr16:2097989-2185899     | 0 | 1 |
| XLOC_007876 | XLOC_007876 | MIR3677   | chr16:2320713-2320773     | 0 | 1 |
| XLOC_007877 | XLOC_007877 | MIR940    | chr16:2321747-2321841     | 0 | 1 |
| XLOC_007878 | XLOC_007878 | MIR4717   | chr16:2324620-2324692     | 0 | 1 |
| XLOC_007882 | XLOC_007882 | NTN3      | chr16:2521499-2524146     | 0 | 1 |
| XLOC_007891 | XLOC_007891 | PRSS41    | chr16:2848485-2855133     | 0 | 1 |

|             |             |                     |                         |   |   |
|-------------|-------------|---------------------|-------------------------|---|---|
| XLOC_007892 | XLOC_007892 | PRSS21              | chr16:2867163-2871723   | 0 | 1 |
| XLOC_007893 | XLOC_007893 | ZG16B               | chr16:2880172-2882285   | 0 | 1 |
| XLOC_007907 | XLOC_007907 | OR1F1               | chr16:3254246-3255185   | 0 | 1 |
| XLOC_007908 | XLOC_007908 | OR1F2P              | chr16:3265561-3266546   | 0 | 1 |
| XLOC_007912 | XLOC_007912 | OR2C1               | chr16:3405888-3406924   | 0 | 1 |
| XLOC_007930 | XLOC_007930 | RBFOX1              | chr16:6069131-7763340   | 0 | 1 |
| XLOC_007935 | XLOC_007935 | MIR548X             | chr16:9328773-9328803   | 0 | 1 |
| XLOC_007944 | XLOC_007944 | MIR4718             | chr16:12753655-12897744 | 0 | 1 |
| XLOC_007948 | XLOC_007948 | MIR193B             | chr16:14397823-14397906 | 0 | 1 |
| XLOC_007949 | XLOC_007949 | MIR365A             | chr16:14403141-14403228 | 0 | 1 |
| XLOC_007952 | XLOC_007952 | MIR3179-3           | chr16:14995364-14995448 | 0 | 1 |
| XLOC_007953 | XLOC_007953 | MIR3180-3           | chr16:15005076-15005170 | 0 | 1 |
| XLOC_007961 | XLOC_007961 | MIR3179-1           | chr16:16394015-16394099 | 0 | 1 |
| XLOC_007962 | XLOC_007962 | MIR3180-1           | chr16:16403731-16403825 | 0 | 1 |
| XLOC_007964 | XLOC_007964 | ABCC6P1             | chr16:18582569-18609607 | 0 | 1 |
| XLOC_007969 | XLOC_007969 | CLEC19A             | chr16:19297104-19322269 | 0 | 1 |
| XLOC_007975 | XLOC_007975 | ACSM2A              | chr16:20462858-20498991 | 0 | 1 |
| XLOC_007993 | XLOC_007993 | MIR548D2            | chr16:22729602-22803363 | 0 | 1 |
| XLOC_007995 | XLOC_007995 | SCNN1G              | chr16:23194039-23228200 | 0 | 1 |
| XLOC_007996 | XLOC_007996 | SCNN1B              | chr16:23313590-23392620 | 0 | 1 |
| XLOC_008000 | XLOC_008000 | CHP2                | chr16:23765947-23770256 | 0 | 1 |
| XLOC_008002 | XLOC_008002 | CACNG3              | chr16:24266873-24373737 | 0 | 1 |
| XLOC_008009 | XLOC_008009 | HS3ST4              | chr16:25703346-26149009 | 0 | 1 |
| XLOC_008010 | XLOC_008010 | C16orf82            | chr16:27078218-27080487 | 0 | 1 |
| XLOC_008025 | XLOC_008025 | MIR4517             | chr16:28962317-28977767 | 0 | 1 |
| XLOC_008030 | XLOC_008030 | LOC606724           | chr16:29460665-29461236 | 0 | 1 |
| XLOC_008031 | XLOC_008031 | SLX1A,SLX1B,SULT1A3 | chr16:29464913-29478899 | 0 | 1 |
| XLOC_008034 | XLOC_008034 | ZG16                | chr16:29789560-29792969 | 0 | 1 |
| XLOC_008044 | XLOC_008044 | C16orf92            | chr16:30034654-30042186 | 0 | 1 |
| XLOC_008053 | XLOC_008053 | MIR4518             | chr16:30483982-30534506 | 0 | 1 |
| XLOC_008079 | XLOC_008079 | AHSP                | chr16:31539202-31540124 | 0 | 1 |
| XLOC_008083 | XLOC_008083 | TP53TG3D            | chr16:32264649-32267243 | 0 | 1 |
| XLOC_008084 | XLOC_008084 | TP53TG3,TP53TG3B    | chr16:33205584-33208179 | 0 | 1 |
| XLOC_008085 | XLOC_008085 | TP53TG3,TP53TG3B    | chr16:33262119-33264719 | 0 | 1 |
| XLOC_008086 | XLOC_008086 | LOC283914           | chr16:34597786-34626084 | 0 | 1 |
| XLOC_008091 | XLOC_008091 | MIR548AE2           | chr16:48274602-48420559 | 0 | 1 |
| XLOC_008094 | XLOC_008094 | C16orf78            | chr16:49407807-49433319 | 0 | 1 |
| XLOC_008107 | XLOC_008107 | MMP2                | chr16:55513080-55540586 | 0 | 1 |
| XLOC_008110 | XLOC_008110 | SLC6A2              | chr16:55689541-55740104 | 0 | 1 |
| XLOC_008111 | XLOC_008111 | CES1P2              | chr16:55758836-55784123 | 0 | 1 |
| XLOC_008112 | XLOC_008112 | CES1P1              | chr16:55794510-55808826 | 0 | 1 |
| XLOC_008114 | XLOC_008114 | MIR3935             | chr16:56225250-56391356 | 0 | 1 |
| XLOC_008116 | XLOC_008116 | MT4                 | chr16:56598960-56602869 | 0 | 1 |
| XLOC_008117 | XLOC_008117 | MT3                 | chr16:56623266-56625000 | 0 | 1 |
| XLOC_008131 | XLOC_008131 | MIR138-2            | chr16:56892429-56892513 | 0 | 1 |
| XLOC_008132 | XLOC_008132 | SLC12A3             | chr16:56899118-56949762 | 0 | 1 |
| XLOC_008134 | XLOC_008134 | CETP                | chr16:56995834-57017756 | 0 | 1 |
| XLOC_008140 | XLOC_008140 | CX3CL1              | chr16:57406413-57418956 | 0 | 1 |
| XLOC_008141 | XLOC_008141 | CCL17               | chr16:57438678-57449974 | 0 | 1 |
| XLOC_008149 | XLOC_008149 | TEPP                | chr16:58010338-58022017 | 0 | 1 |
| XLOC_008176 | XLOC_008176 | LRRC36              | chr16:67360746-67419109 | 0 | 1 |
| XLOC_008196 | XLOC_008196 | CDH1                | chr16:68771194-68869444 | 0 | 1 |
| XLOC_008206 | XLOC_008206 | MIR140              | chr16:69796186-69975644 | 0 | 1 |
| XLOC_008208 | XLOC_008208 | MIR1972-2           | chr16:70010201-70099851 | 0 | 1 |
| XLOC_008215 | XLOC_008215 | SNORD111B           | chr16:70557690-70611571 | 0 | 1 |
| XLOC_008216 | XLOC_008216 | SNORD111            | chr16:70557690-70611571 | 0 | 1 |
| XLOC_008220 | XLOC_008220 | CHST4               | chr16:71560022-71572493 | 0 | 1 |
| XLOC_008226 | XLOC_008226 | HPR                 | chr16:72097124-72111145 | 0 | 1 |
| XLOC_008228 | XLOC_008228 | HTA                 | chr16:73126247-73127672 | 0 | 1 |
| XLOC_008229 | XLOC_008229 | LOC100506172        | chr16:73420703-73455295 | 0 | 1 |
| XLOC_008233 | XLOC_008233 | CTRB1               | chr16:75252883-75258822 | 0 | 1 |
| XLOC_008236 | XLOC_008236 | CNTNAP4             | chr16:76311175-76593135 | 0 | 1 |
| XLOC_008237 | XLOC_008237 | MIR4719             | chr16:76902832-76902916 | 0 | 1 |
| XLOC_008241 | XLOC_008241 | CLEC3A              | chr16:78056442-78066001 | 0 | 1 |
| XLOC_008243 | XLOC_008243 | DYNLRB2             | chr16:80574853-80584541 | 0 | 1 |
| XLOC_008246 | XLOC_008246 | BCMO1               | chr16:81272295-81324747 | 0 | 1 |
| XLOC_008248 | XLOC_008248 | MIR4720             | chr16:81418622-81418698 | 0 | 1 |
| XLOC_008252 | XLOC_008252 | HSD17B2             | chr16:82068857-82132139 | 0 | 1 |
| XLOC_008254 | XLOC_008254 | MIR3182             | chr16:82660398-83830215 | 0 | 1 |
| XLOC_008260 | XLOC_008260 | ADAD2               | chr16:84224722-84230772 | 0 | 1 |
| XLOC_008261 | XLOC_008261 | WFDC1               | chr16:84328400-84363450 | 0 | 1 |
| XLOC_008267 | XLOC_008267 | LOC400548           | chr16:85170755-85183049 | 0 | 1 |
| XLOC_008271 | XLOC_008271 | IRF8                | chr16:85932773-85956211 | 0 | 1 |
| XLOC_008272 | XLOC_008272 | LOC146513           | chr16:86320036-86326995 | 0 | 1 |
| XLOC_008282 | XLOC_008282 | MIR5189             | chr16:88520013-88601574 | 0 | 1 |
| XLOC_008330 | XLOC_008330 | TPSG1               | chr16:1203240-1275254   | 0 | 1 |
| XLOC_008331 | XLOC_008331 | TPSB2               | chr16:1278335-1280185   | 0 | 1 |
| XLOC_008345 | XLOC_008345 | LINC00254           | chr16:1928285-1934232   | 0 | 1 |
| XLOC_008346 | XLOC_008346 | HS3ST6              | chr16:1961464-1968231   | 0 | 1 |

|             |             |              |                         |   |   |
|-------------|-------------|--------------|-------------------------|---|---|
| XLOC_008356 | XLOC_008356 | MIR1225      | chr16:2097989-2185899   | 0 | 1 |
| XLOC_008357 | XLOC_008357 | MIR3180-5    | chr16:2185977-2186130   | 0 | 1 |
| XLOC_008358 | XLOC_008358 | SNORD60      | chr16:2205023-2205106   | 0 | 1 |
| XLOC_008366 | XLOC_008366 | MIR3178      | chr16:2581922-2582006   | 0 | 1 |
| XLOC_008386 | XLOC_008386 | C16orf90     | chr16:3543483-3545421   | 0 | 1 |
| XLOC_008408 | XLOC_008408 | TMEM114      | chr16:8619501-8622226   | 0 | 1 |
| XLOC_008412 | XLOC_008412 | GRIN2A       | chr16:9847264-10276611  | 0 | 1 |
| XLOC_008418 | XLOC_008418 | TNP2         | chr16:11361713-11363160 | 0 | 1 |
| XLOC_008419 | XLOC_008419 | PRM3         | chr16:11367143-11367452 | 0 | 1 |
| XLOC_008420 | XLOC_008420 | PRM2         | chr16:11369492-11370337 | 0 | 1 |
| XLOC_008421 | XLOC_008421 | PRM1         | chr16:11374692-11375192 | 0 | 1 |
| XLOC_008431 | XLOC_008431 | ABCC6P2      | chr16:14916288-14918559 | 0 | 1 |
| XLOC_008434 | XLOC_008434 | MIR3180-4    | chr16:15248706-15248859 | 0 | 1 |
| XLOC_008440 | XLOC_008440 | MIR3180-1    | chr16:18496034-18496128 | 0 | 1 |
| XLOC_008441 | XLOC_008441 | MIR3179-1    | chr16:18505750-18505834 | 0 | 1 |
| XLOC_008448 | XLOC_008448 | GPRC5B       | chr16:19870292-19896151 | 0 | 1 |
| XLOC_008449 | XLOC_008449 | GPR139       | chr16:20043042-20085100 | 0 | 1 |
| XLOC_008450 | XLOC_008450 | GP2          | chr16:20321810-20338835 | 0 | 1 |
| XLOC_008451 | XLOC_008451 | UMOD         | chr16:20344372-20364037 | 0 | 1 |
| XLOC_008452 | XLOC_008452 | PDILT        | chr16:20370491-20416033 | 0 | 1 |
| XLOC_008453 | XLOC_008453 | ACSM2B       | chr16:20548082-20587695 | 0 | 1 |
| XLOC_008459 | XLOC_008459 | ZP2          | chr16:21208772-21222868 | 0 | 1 |
| XLOC_008465 | XLOC_008465 | IGSF6        | chr16:21610855-21668792 | 0 | 1 |
| XLOC_008470 | XLOC_008470 | MIR548AA2    | chr16:22729602-22803363 | 0 | 1 |
| XLOC_008488 | XLOC_008488 | IL27         | chr16:28510682-28518155 | 0 | 1 |
| XLOC_008495 | XLOC_008495 | BOLA2B       | chr16:29464913-29478899 | 0 | 1 |
| XLOC_008496 | XLOC_008496 | LOC388242    | chr16:29464913-29478899 | 0 | 1 |
| XLOC_008510 | XLOC_008510 | BOLA2B       | chr16:30204255-30218248 | 0 | 1 |
| XLOC_008528 | XLOC_008528 | MIR4519      | chr16:30886586-30886644 | 0 | 1 |
| XLOC_008539 | XLOC_008539 | COX6A2       | chr16:31439051-31439749 | 0 | 1 |
| XLOC_008544 | XLOC_008544 | LOC390705    | chr16:32300867-32301302 | 0 | 1 |
| XLOC_008545 | XLOC_008545 | TP53TG3      | chr16:32684848-32687448 | 0 | 1 |
| XLOC_008547 | XLOC_008547 | LOC390705    | chr16:33298267-33298702 | 0 | 1 |
| XLOC_008548 | XLOC_008548 | RNU6-76      | chr16:33463506-33563243 | 0 | 1 |
| XLOC_008551 | XLOC_008551 | LOC146481    | chr16:34711784-34714967 | 0 | 1 |
| XLOC_008552 | XLOC_008552 | LOC100130700 | chr16:34739458-34740840 | 0 | 1 |
| XLOC_008561 | XLOC_008561 | ABCC12       | chr16:48116883-48180681 | 0 | 1 |
| XLOC_008565 | XLOC_008565 | CBLN1        | chr16:49311828-49315742 | 0 | 1 |
| XLOC_008569 | XLOC_008569 | SALL1        | chr16:51169885-51185183 | 0 | 1 |
| XLOC_008570 | XLOC_008570 | C16orf97     | chr16:52060263-52107847 | 0 | 1 |
| XLOC_008571 | XLOC_008571 | LOC100505619 | chr16:52116976-52119021 | 0 | 1 |
| XLOC_008572 | XLOC_008572 | TOX3         | chr16:52471917-52581714 | 0 | 1 |
| XLOC_008573 | XLOC_008573 | LOC643714    | chr16:52585998-52640887 | 0 | 1 |
| XLOC_008574 | XLOC_008574 | LOC643802    | chr16:53403273-53405041 | 0 | 1 |
| XLOC_008577 | XLOC_008577 | IRX3         | chr16:54317211-54320378 | 0 | 1 |
| XLOC_008579 | XLOC_008579 | CES1         | chr16:55836763-55867075 | 0 | 1 |
| XLOC_008580 | XLOC_008580 | CES5A        | chr16:55880065-55989943 | 0 | 1 |
| XLOC_008581 | XLOC_008581 | LOC283856    | chr16:56126898-56225006 | 0 | 1 |
| XLOC_008582 | XLOC_008582 | DKFZP434H168 | chr16:56225250-56391356 | 0 | 1 |
| XLOC_008603 | XLOC_008603 | LOC644649    | chr16:59788044-59789095 | 0 | 1 |
| XLOC_008604 | XLOC_008604 | CDH8         | chr16:61685914-62070739 | 0 | 1 |
| XLOC_008612 | XLOC_008612 | CDH16        | chr16:66942024-66952887 | 0 | 1 |
| XLOC_008619 | XLOC_008619 | MIR328       | chr16:67233027-67237927 | 0 | 1 |
| XLOC_008626 | XLOC_008626 | AGRP         | chr16:67516473-67517716 | 0 | 1 |
| XLOC_008635 | XLOC_008635 | DPEP3        | chr16:68009565-68014452 | 0 | 1 |
| XLOC_008645 | XLOC_008645 | MIR1538      | chr16:69599710-69599771 | 0 | 1 |
| XLOC_008663 | XLOC_008663 | SNORA70D     | chr16:71678851-71748704 | 0 | 1 |
| XLOC_008665 | XLOC_008665 | SNORD71      | chr16:71762904-71842976 | 0 | 1 |
| XLOC_008679 | XLOC_008679 | CTRB2        | chr16:75237993-75241072 | 0 | 1 |
| XLOC_008688 | XLOC_008688 | ADAMTS18     | chr16:77316024-77469011 | 0 | 1 |
| XLOC_008695 | XLOC_008695 | SDR42E1      | chr16:82031250-82045093 | 0 | 1 |
| XLOC_008701 | XLOC_008701 | KCNG4        | chr16:84254740-84273356 | 0 | 1 |
| XLOC_008705 | XLOC_008705 | FAM92B       | chr16:85131964-85146114 | 0 | 1 |
| XLOC_008706 | XLOC_008706 | MIR5093      | chr16:85339831-85339931 | 0 | 1 |
| XLOC_008709 | XLOC_008709 | MIR1910      | chr16:85741123-85784689 | 0 | 1 |
| XLOC_008711 | XLOC_008711 | LOC732275    | chr16:86365455-86379285 | 0 | 1 |
| XLOC_008719 | XLOC_008719 | CA5A         | chr16:87921624-87970112 | 0 | 1 |
| XLOC_008725 | XLOC_008725 | MIR4722      | chr16:88772890-88851372 | 0 | 1 |
| XLOC_008741 | XLOC_008741 | LOC100506388 | chr17:62179-202633      | 0 | 1 |
| XLOC_008747 | XLOC_008747 | BHLHA9       | chr17:1173857-1174565   | 0 | 1 |
| XLOC_008760 | XLOC_008760 | OR1A2        | chr17:3100812-3101742   | 0 | 1 |
| XLOC_008761 | XLOC_008761 | OR1A1        | chr17:3118914-3119844   | 0 | 1 |
| XLOC_008762 | XLOC_008762 | OR1D4        | chr17:3143969-3144559   | 0 | 1 |
| XLOC_008763 | XLOC_008763 | OR3A4P       | chr17:3213538-3214740   | 0 | 1 |
| XLOC_008764 | XLOC_008764 | OR3A3        | chr17:3323861-3324827   | 0 | 1 |
| XLOC_008765 | XLOC_008765 | ASPA         | chr17:3377403-3402700   | 0 | 1 |
| XLOC_008776 | XLOC_008776 | TM4SF5       | chr17:4675186-4686506   | 0 | 1 |
| XLOC_008788 | XLOC_008788 | LOC100130950 | chr17:5095378-5138931   | 0 | 1 |
| XLOC_008793 | XLOC_008793 | WSCD1        | chr17:5973933-6027747   | 0 | 1 |

|             |             |              |                         |   |   |
|-------------|-------------|--------------|-------------------------|---|---|
| XLOC_008797 | XLOC_008797 | MIR4520B     | chr17:6558758-6558828   | 0 | 1 |
| XLOC_008798 | XLOC_008798 | ALOX15P1     | chr17:6561037-6564701   | 0 | 1 |
| XLOC_008800 | XLOC_008800 | FBXO39       | chr17:6679551-6690965   | 0 | 1 |
| XLOC_008801 | XLOC_008801 | ALOX12P2     | chr17:6756894-6803668   | 0 | 1 |
| XLOC_008812 | XLOC_008812 | TMEM95       | chr17:7258496-7260538   | 0 | 1 |
| XLOC_008833 | XLOC_008833 | RPL29P2      | chr17:7623038-7737058   | 0 | 1 |
| XLOC_008838 | XLOC_008838 | SCARNA21     | chr17:7788122-7816075   | 0 | 1 |
| XLOC_008842 | XLOC_008842 | MIR4314      | chr17:7991373-7991465   | 0 | 1 |
| XLOC_008843 | XLOC_008843 | MIR4521      | chr17:8090262-8090322   | 0 | 1 |
| XLOC_008844 | XLOC_008844 | MIR3676      | chr17:8090492-8090577   | 0 | 1 |
| XLOC_008847 | XLOC_008847 | ARHGEF15     | chr17:8213555-8225834   | 0 | 1 |
| XLOC_008848 | XLOC_008848 | ODF4         | chr17:8243187-8249363   | 0 | 1 |
| XLOC_008853 | XLOC_008853 | GLP2R        | chr17:9729380-9793022   | 0 | 1 |
| XLOC_008855 | XLOC_008855 | TMEM220-AS1  | chr17:10616638-10718481 | 0 | 1 |
| XLOC_008856 | XLOC_008856 | SHISA6       | chr17:11144739-11467380 | 0 | 1 |
| XLOC_008859 | XLOC_008859 | MIR744       | chr17:11924134-12047051 | 0 | 1 |
| XLOC_008860 | XLOC_008860 | LINC00670    | chr17:12453284-12540504 | 0 | 1 |
| XLOC_008861 | XLOC_008861 | MYOCD        | chr17:12569206-12670651 | 0 | 1 |
| XLOC_008867 | XLOC_008867 | CDRT7        | chr17:14934291-14935274 | 0 | 1 |
| XLOC_008870 | XLOC_008870 | CDRT15P2     | chr17:15668016-15669003 | 0 | 1 |
| XLOC_008875 | XLOC_008875 | MIR1288      | chr17:16120508-16229573 | 0 | 1 |
| XLOC_008879 | XLOC_008879 | SNORD49A     | chr17:16342300-16395505 | 0 | 1 |
| XLOC_008886 | XLOC_008886 | SMCR9        | chr17:17322657-17326728 | 0 | 1 |
| XLOC_008897 | XLOC_008897 | EVPLL        | chr17:18281078-18292960 | 0 | 1 |
| XLOC_008898 | XLOC_008898 | LOC339240    | chr17:18325494-18328647 | 0 | 1 |
| XLOC_008900 | XLOC_008900 | LGALS9C      | chr17:18380098-18398259 | 0 | 1 |
| XLOC_008911 | XLOC_008911 | SLC47A1      | chr17:19437166-19482346 | 0 | 1 |
| XLOC_008912 | XLOC_008912 | SNORA59B     | chr17:19437166-19482346 | 0 | 1 |
| XLOC_008916 | XLOC_008916 | CDRT15L2     | chr17:20483036-20484224 | 0 | 1 |
| XLOC_008921 | XLOC_008921 | FAM27L       | chr17:21825369-21826499 | 0 | 1 |
| XLOC_008922 | XLOC_008922 | FLJ36000     | chr17:21904061-21913070 | 0 | 1 |
| XLOC_008925 | XLOC_008925 | TBC1D3P5     | chr17:25745030-25758649 | 0 | 1 |
| XLOC_008930 | XLOC_008930 | PPY2         | chr17:26574469-26575315 | 0 | 1 |
| XLOC_008934 | XLOC_008934 | MIR4723      | chr17:26684686-26689089 | 0 | 1 |
| XLOC_008936 | XLOC_008936 | SLC13A2      | chr17:26800663-26824798 | 0 | 1 |
| XLOC_008937 | XLOC_008937 | FOXN1        | chr17:26850958-26865175 | 0 | 1 |
| XLOC_008941 | XLOC_008941 | SNORD42B     | chr17:27046999-27053949 | 0 | 1 |
| XLOC_008942 | XLOC_008942 | SNORD4A      | chr17:27046999-27053949 | 0 | 1 |
| XLOC_008943 | XLOC_008943 | SNORD42A     | chr17:27046999-27053949 | 0 | 1 |
| XLOC_008948 | XLOC_008948 | MIR451B      | chr17:27188386-27188458 | 0 | 1 |
| XLOC_008957 | XLOC_008957 | MIR423       | chr17:28443824-28513493 | 0 | 1 |
| XLOC_008960 | XLOC_008960 | TBC1D29      | chr17:28886583-28890509 | 0 | 1 |
| XLOC_008970 | XLOC_008970 | MIR193A      | chr17:29887014-29887102 | 0 | 1 |
| XLOC_008971 | XLOC_008971 | MIR4725      | chr17:29902287-29902377 | 0 | 1 |
| XLOC_008972 | XLOC_008972 | MIR365B      | chr17:29902429-29902540 | 0 | 1 |
| XLOC_008983 | XLOC_008983 | CCL2         | chr17:32582295-32584220 | 0 | 1 |
| XLOC_008984 | XLOC_008984 | CCL7         | chr17:32597234-32599261 | 0 | 1 |
| XLOC_008985 | XLOC_008985 | CCL11        | chr17:32612686-32615199 | 0 | 1 |
| XLOC_008986 | XLOC_008986 | CCL8         | chr17:32646065-32648421 | 0 | 1 |
| XLOC_008987 | XLOC_008987 | CCL13        | chr17:32683470-32685629 | 0 | 1 |
| XLOC_008988 | XLOC_008988 | TMEM132E     | chr17:32907767-32966337 | 0 | 1 |
| XLOC_008994 | XLOC_008994 | SNORD7       | chr17:33900675-33900772 | 0 | 1 |
| XLOC_008999 | XLOC_008999 | CCL18        | chr17:34391642-34398841 | 0 | 1 |
| XLOC_009000 | XLOC_009000 | CCL4         | chr17:34431219-34433014 | 0 | 1 |
| XLOC_009001 | XLOC_009001 | CCL4L1       | chr17:34538467-34540274 | 0 | 1 |
| XLOC_009002 | XLOC_009002 | CCL4L2       | chr17:34640033-34641840 | 0 | 1 |
| XLOC_009010 | XLOC_009010 | MIR2909      | chr17:35306174-35414171 | 0 | 1 |
| XLOC_009019 | XLOC_009019 | MIR4726      | chr17:36861872-36886056 | 0 | 1 |
| XLOC_009022 | XLOC_009022 | MIR4727      | chr17:36982090-36982145 | 0 | 1 |
| XLOC_009029 | XLOC_009029 | PPP1R1B      | chr17:37783176-37792878 | 0 | 1 |
| XLOC_009032 | XLOC_009032 | PNMT         | chr17:37824233-37826728 | 0 | 1 |
| XLOC_009034 | XLOC_009034 | MIR4728      | chr17:37844392-37884915 | 0 | 1 |
| XLOC_009036 | XLOC_009036 | ZBPBP2       | chr17:38024454-38034149 | 0 | 1 |
| XLOC_009037 | XLOC_009037 | LRRC3C       | chr17:38097726-38100987 | 0 | 1 |
| XLOC_009041 | XLOC_009041 | SNORD124     | chr17:38175349-38210889 | 0 | 1 |
| XLOC_009053 | XLOC_009053 | KRTAP9-1     | chr17:39346138-39346891 | 0 | 1 |
| XLOC_009054 | XLOC_009054 | KRTAP9-2     | chr17:39382899-39383904 | 0 | 1 |
| XLOC_009055 | XLOC_009055 | KRTAP9-3     | chr17:39388714-39389706 | 0 | 1 |
| XLOC_009056 | XLOC_009056 | KRTAP9-8     | chr17:39394269-39395256 | 0 | 1 |
| XLOC_009057 | XLOC_009057 | KRTAP9-4     | chr17:39405938-39406905 | 0 | 1 |
| XLOC_009058 | XLOC_009058 | KRTAP9-9     | chr17:39411635-39412616 | 0 | 1 |
| XLOC_009059 | XLOC_009059 | LOC100505782 | chr17:39558667-39568840 | 0 | 1 |
| XLOC_009061 | XLOC_009061 | GAST         | chr17:39868577-39872221 | 0 | 1 |
| XLOC_009077 | XLOC_009077 | RAMP2        | chr17:40905946-40915060 | 0 | 1 |
| XLOC_009094 | XLOC_009094 | MIR2117      | chr17:41522173-41522253 | 0 | 1 |
| XLOC_009096 | XLOC_009096 | C17orf105    | chr17:41857802-41862054 | 0 | 1 |
| XLOC_009120 | XLOC_009120 | SPPL2C       | chr17:43920721-44105699 | 0 | 1 |
| XLOC_009122 | XLOC_009122 | MAPT-IT1     | chr17:43920721-44105699 | 0 | 1 |
| XLOC_009123 | XLOC_009123 | STH          | chr17:43920721-44105699 | 0 | 1 |

|             |             |              |                         |   |   |
|-------------|-------------|--------------|-------------------------|---|---|
| XLOC_009126 | XLOC_009126 | NSFP1        | chr17:44450178-44500463 | 0 | 1 |
| XLOC_009129 | XLOC_009129 | WNT9B        | chr17:44928967-44954437 | 0 | 1 |
| XLOC_009131 | XLOC_009131 | MIR5089      | chr17:45050382-45050466 | 0 | 1 |
| XLOC_009133 | XLOC_009133 | ITGB3        | chr17:45331207-45390077 | 0 | 1 |
| XLOC_009138 | XLOC_009138 | TBX21        | chr17:45810609-45823485 | 0 | 1 |
| XLOC_009151 | XLOC_009151 | B4GALNT2     | chr17:47209821-47247351 | 0 | 1 |
| XLOC_009153 | XLOC_009153 | FLJ40194     | chr17:47325604-47336027 | 0 | 1 |
| XLOC_009161 | XLOC_009161 | SGCA         | chr17:48243365-48253293 | 0 | 1 |
| XLOC_009171 | XLOC_009171 | ABCC3        | chr17:48712217-48769063 | 0 | 1 |
| XLOC_009173 | XLOC_009173 | WFIKKN2      | chr17:48912604-48919709 | 0 | 1 |
| XLOC_009177 | XLOC_009177 | C17orf112    | chr17:51062879-51065012 | 0 | 1 |
| XLOC_009178 | XLOC_009178 | KIF2B        | chr17:51900238-51902573 | 0 | 1 |
| XLOC_009184 | XLOC_009184 | NOG          | chr17:54671059-54672951 | 0 | 1 |
| XLOC_009187 | XLOC_009187 | RNF126P1     | chr17:55122838-55124156 | 0 | 1 |
| XLOC_009191 | XLOC_009191 | OR4D1        | chr17:56232514-56233447 | 0 | 1 |
| XLOC_009192 | XLOC_009192 | MSX2P1       | chr17:56234319-56236480 | 0 | 1 |
| XLOC_009193 | XLOC_009193 | OR4D2        | chr17:56247016-56247940 | 0 | 1 |
| XLOC_009195 | XLOC_009195 | LPO          | chr17:56315786-56345879 | 0 | 1 |
| XLOC_009203 | XLOC_009203 | MIR4729      | chr17:57409052-57479095 | 0 | 1 |
| XLOC_009207 | XLOC_009207 | MIR21        | chr17:57918626-57918698 | 0 | 1 |
| XLOC_009209 | XLOC_009209 | CA4          | chr17:58227301-58236906 | 0 | 1 |
| XLOC_009215 | XLOC_009215 | TBX4         | chr17:59533806-59561664 | 0 | 1 |
| XLOC_009220 | XLOC_009220 | MIR548W      | chr17:60778674-61505067 | 0 | 1 |
| XLOC_009238 | XLOC_009238 | MIR634       | chr17:64298925-64806862 | 0 | 1 |
| XLOC_009239 | XLOC_009239 | CACNG5       | chr17:64873390-64881395 | 0 | 1 |
| XLOC_009252 | XLOC_009252 | MIR4524B     | chr17:67074846-67138015 | 0 | 1 |
| XLOC_009253 | XLOC_009253 | MAP2K6       | chr17:67410837-67538470 | 0 | 1 |
| XLOC_009254 | XLOC_009254 | KCNJ16       | chr17:68071365-68131746 | 0 | 1 |
| XLOC_009255 | XLOC_009255 | KCNJ2        | chr17:68165675-68176183 | 0 | 1 |
| XLOC_009260 | XLOC_009260 | LOC400620    | chr17:71745408-71824676 | 0 | 1 |
| XLOC_009263 | XLOC_009263 | DNAI2        | chr17:72270385-72311023 | 0 | 1 |
| XLOC_009264 | XLOC_009264 | KIF19        | chr17:72322350-72351959 | 0 | 1 |
| XLOC_009265 | XLOC_009265 | GPR142       | chr17:72363644-72368739 | 0 | 1 |
| XLOC_009268 | XLOC_009268 | C17orf77     | chr17:72576110-72590348 | 0 | 1 |
| XLOC_009273 | XLOC_009273 | OTOP3        | chr17:72931896-72946087 | 0 | 1 |
| XLOC_009282 | XLOC_009282 | MIR3678      | chr17:73402149-73402243 | 0 | 1 |
| XLOC_009295 | XLOC_009295 | RNF157-AS1   | chr17:74132414-74236390 | 0 | 1 |
| XLOC_009301 | XLOC_009301 | SNORD1C      | chr17:74553845-74561430 | 0 | 1 |
| XLOC_009302 | XLOC_009302 | SNORD1B      | chr17:74553845-74561430 | 0 | 1 |
| XLOC_009303 | XLOC_009303 | SNORD1A      | chr17:74553845-74561430 | 0 | 1 |
| XLOC_009310 | XLOC_009310 | LOC100507351 | chr17:75543022-75561103 | 0 | 1 |
| XLOC_009313 | XLOC_009313 | C17orf99     | chr17:76142433-76162364 | 0 | 1 |
| XLOC_009317 | XLOC_009317 | TMEM235      | chr17:76227390-76237068 | 0 | 1 |
| XLOC_009321 | XLOC_009321 | ENPP7        | chr17:77704881-77716021 | 0 | 1 |
| XLOC_009329 | XLOC_009329 | MIR4730      | chr17:78234659-78411884 | 0 | 1 |
| XLOC_009333 | XLOC_009333 | MIR3065      | chr17:79008946-79156964 | 0 | 1 |
| XLOC_009334 | XLOC_009334 | AATK-AS1     | chr17:79008946-79156964 | 0 | 1 |
| XLOC_009343 | XLOC_009343 | GCGR         | chr17:79762009-79771889 | 0 | 1 |
| XLOC_009353 | XLOC_009353 | UTS2R        | chr17:80332200-80333370 | 0 | 1 |
| XLOC_009370 | XLOC_009370 | MIR3183      | chr17:906757-1090616    | 0 | 1 |
| XLOC_009383 | XLOC_009383 | RTN4RL1      | chr17:1837970-1928178   | 0 | 1 |
| XLOC_009384 | XLOC_009384 | MIR132       | chr17:1953201-1953302   | 0 | 1 |
| XLOC_009385 | XLOC_009385 | MIR212       | chr17:1953564-1953674   | 0 | 1 |
| XLOC_009388 | XLOC_009388 | SNORD91B     | chr17:2207247-2240678   | 0 | 1 |
| XLOC_009389 | XLOC_009389 | SNORD91A     | chr17:2207247-2240678   | 0 | 1 |
| XLOC_009394 | XLOC_009394 | MIR1253      | chr17:2651371-2651476   | 0 | 1 |
| XLOC_009395 | XLOC_009395 | OR1D5        | chr17:2965962-2966901   | 0 | 1 |
| XLOC_009396 | XLOC_009396 | OR1D2        | chr17:2995351-2996290   | 0 | 1 |
| XLOC_009397 | XLOC_009397 | OR1G1        | chr17:3029903-3030845   | 0 | 1 |
| XLOC_009398 | XLOC_009398 | OR3A2        | chr17:3181183-3182268   | 0 | 1 |
| XLOC_009399 | XLOC_009399 | OR3A1        | chr17:3194928-3195876   | 0 | 1 |
| XLOC_009400 | XLOC_009400 | OR1E1        | chr17:3300759-3301704   | 0 | 1 |
| XLOC_009401 | XLOC_009401 | OR1E2        | chr17:3336163-3337135   | 0 | 1 |
| XLOC_009402 | XLOC_009402 | SPATA22      | chr17:3343305-3375142   | 0 | 1 |
| XLOC_009403 | XLOC_009403 | TRPV3        | chr17:3413795-3461289   | 0 | 1 |
| XLOC_009416 | XLOC_009416 | ALOX15       | chr17:4534213-4544960   | 0 | 1 |
| XLOC_009428 | XLOC_009428 | ZNF594       | chr17:5082830-5095178   | 0 | 1 |
| XLOC_009429 | XLOC_009429 | SCIMP        | chr17:5095378-5138931   | 0 | 1 |
| XLOC_009440 | XLOC_009440 | MIR4520A     | chr17:6558758-6558828   | 0 | 1 |
| XLOC_009445 | XLOC_009445 | MIR195       | chr17:6915735-6922973   | 0 | 1 |
| XLOC_009446 | XLOC_009446 | MIR497       | chr17:6915735-6922973   | 0 | 1 |
| XLOC_009448 | XLOC_009448 | CLEC10A      | chr17:6977855-6983600   | 0 | 1 |
| XLOC_009449 | XLOC_009449 | ASGR2        | chr17:7004640-7018130   | 0 | 1 |
| XLOC_009452 | XLOC_009452 | MIR324       | chr17:7093209-7128586   | 0 | 1 |
| XLOC_009488 | XLOC_009488 | SPDYE4       | chr17:8656423-8661877   | 0 | 1 |
| XLOC_009489 | XLOC_009489 | MFS6L        | chr17:8700427-8702667   | 0 | 1 |
| XLOC_009490 | XLOC_009490 | PIK3R6       | chr17:8706054-8770994   | 0 | 1 |
| XLOC_009493 | XLOC_009493 | DHRSTC       | chr17:9674750-9694614   | 0 | 1 |
| XLOC_009494 | XLOC_009494 | RCVRN        | chr17:9801026-9808684   | 0 | 1 |

|             |             |             |                         |   |   |
|-------------|-------------|-------------|-------------------------|---|---|
| XLOC_009496 | XLOC_009496 | MYH13       | chr17:10204182-10276322 | 0 | 1 |
| XLOC_009497 | XLOC_009497 | MYH8        | chr17:10293641-10325267 | 0 | 1 |
| XLOC_009498 | XLOC_009498 | MYH4        | chr17:10346607-10372876 | 0 | 1 |
| XLOC_009500 | XLOC_009500 | MYH2        | chr17:10424464-10453017 | 0 | 1 |
| XLOC_009505 | XLOC_009505 | LINC00675   | chr17:10616638-10718481 | 0 | 1 |
| XLOC_009506 | XLOC_009506 | PIRT        | chr17:10725791-10741418 | 0 | 1 |
| XLOC_009509 | XLOC_009509 | HS3ST3A1    | chr17:13399005-13505244 | 0 | 1 |
| XLOC_009513 | XLOC_009513 | MIR4731     | chr17:15133095-15168644 | 0 | 1 |
| XLOC_009524 | XLOC_009524 | KRT16P2     | chr17:16733796-16736147 | 0 | 1 |
| XLOC_009525 | XLOC_009525 | TNFRSF13B   | chr17:16842397-16875402 | 0 | 1 |
| XLOC_009533 | XLOC_009533 | MIR33B      | chr17:17584786-17740325 | 0 | 1 |
| XLOC_009548 | XLOC_009548 | MIR1180     | chr17:19240866-19290532 | 0 | 1 |
| XLOC_009551 | XLOC_009551 | ALDH3A1     | chr17:19641297-19651746 | 0 | 1 |
| XLOC_009554 | XLOC_009554 | LGALS9B     | chr17:20353175-20370848 | 0 | 1 |
| XLOC_009556 | XLOC_009556 | CCDC144NL   | chr17:20766707-20799453 | 0 | 1 |
| XLOC_009561 | XLOC_009561 | MIR4522     | chr17:25620935-25621022 | 0 | 1 |
| XLOC_009567 | XLOC_009567 | SEBOX       | chr17:26691289-26692265 | 0 | 1 |
| XLOC_009581 | XLOC_009581 | MIR451A     | chr17:27188386-27188458 | 0 | 1 |
| XLOC_009582 | XLOC_009582 | MIR144      | chr17:27188550-27188636 | 0 | 1 |
| XLOC_009583 | XLOC_009583 | MIR4732     | chr17:27188672-27188748 | 0 | 1 |
| XLOC_009594 | XLOC_009594 | MIR3184     | chr17:28443824-28513493 | 0 | 1 |
| XLOC_009597 | XLOC_009597 | TMIGD1      | chr17:28643365-28661065 | 0 | 1 |
| XLOC_009600 | XLOC_009600 | MIR4733     | chr17:29421367-29421443 | 0 | 1 |
| XLOC_009609 | XLOC_009609 | ASIC2       | chr17:31340105-32483825 | 0 | 1 |
| XLOC_009610 | XLOC_009610 | AA06        | chr17:31340105-32483825 | 0 | 1 |
| XLOC_009611 | XLOC_009611 | CCL1        | chr17:32687398-32690252 | 0 | 1 |
| XLOC_009612 | XLOC_009612 | C17orf102   | chr17:32901141-32906388 | 0 | 1 |
| XLOC_009617 | XLOC_009617 | SLFN11      | chr17:33677328-33700720 | 0 | 1 |
| XLOC_009618 | XLOC_009618 | SLFN12      | chr17:33738080-33759543 | 0 | 1 |
| XLOC_009620 | XLOC_009620 | SLFN12L     | chr17:33801941-33814758 | 0 | 1 |
| XLOC_009624 | XLOC_009624 | MMP28       | chr17:34092875-34122640 | 0 | 1 |
| XLOC_009628 | XLOC_009628 | LYZL6       | chr17:34261522-34270703 | 0 | 1 |
| XLOC_009629 | XLOC_009629 | CCL16       | chr17:34303534-34308523 | 0 | 1 |
| XLOC_009630 | XLOC_009630 | CCL14,CCL15 | chr17:34310691-34329084 | 0 | 1 |
| XLOC_009631 | XLOC_009631 | CCL23       | chr17:34340096-34345005 | 0 | 1 |
| XLOC_009636 | XLOC_009636 | CCL3L1      | chr17:34623841-34625730 | 0 | 1 |
| XLOC_009645 | XLOC_009645 | TBC1D3      | chr17:36337527-36348666 | 0 | 1 |
| XLOC_009650 | XLOC_009650 | MIR4734     | chr17:36858514-36858584 | 0 | 1 |
| XLOC_009657 | XLOC_009657 | FBXO47      | chr17:37092684-37123655 | 0 | 1 |
| XLOC_009659 | XLOC_009659 | ARL5C       | chr17:37313146-37322414 | 0 | 1 |
| XLOC_009675 | XLOC_009675 | CCR7        | chr17:38710021-38721736 | 0 | 1 |
| XLOC_009678 | XLOC_009678 | KRT24       | chr17:38854242-38860002 | 0 | 1 |
| XLOC_009679 | XLOC_009679 | KRT25       | chr17:38904272-38911584 | 0 | 1 |
| XLOC_009680 | XLOC_009680 | KRT26       | chr17:38922489-38928411 | 0 | 1 |
| XLOC_009681 | XLOC_009681 | KRT27       | chr17:38933059-38938786 | 0 | 1 |
| XLOC_009682 | XLOC_009682 | KRT28       | chr17:38948447-38956211 | 0 | 1 |
| XLOC_009686 | XLOC_009686 | KRT23       | chr17:39078951-39093836 | 0 | 1 |
| XLOC_009687 | XLOC_009687 | KRT39       | chr17:39114668-39123144 | 0 | 1 |
| XLOC_009688 | XLOC_009688 | KRT40       | chr17:39133967-39143387 | 0 | 1 |
| XLOC_009691 | XLOC_009691 | KRTAP3-1    | chr17:39164773-39165366 | 0 | 1 |
| XLOC_009692 | XLOC_009692 | KRTAP1-5    | chr17:39182278-39183454 | 0 | 1 |
| XLOC_009693 | XLOC_009693 | KRTAP1-4    | chr17:39185928-39186377 | 0 | 1 |
| XLOC_009694 | XLOC_009694 | KRTAP1-3    | chr17:39190136-39191107 | 0 | 1 |
| XLOC_009702 | XLOC_009702 | KRTAP4-12   | chr17:39279344-39280419 | 0 | 1 |
| XLOC_009705 | XLOC_009705 | KRTAP4-4    | chr17:39315905-39316983 | 0 | 1 |
| XLOC_009706 | XLOC_009706 | KRTAP4-3    | chr17:39323482-39324424 | 0 | 1 |
| XLOC_009707 | XLOC_009707 | KRTAP4-2    | chr17:39333697-39334460 | 0 | 1 |
| XLOC_009708 | XLOC_009708 | KRTAP4-1    | chr17:39340351-39341147 | 0 | 1 |
| XLOC_009709 | XLOC_009709 | KRTAP29-1   | chr17:39458077-39459103 | 0 | 1 |
| XLOC_009710 | XLOC_009710 | KRTAP16-1   | chr17:39463951-39465505 | 0 | 1 |
| XLOC_009711 | XLOC_009711 | KRTAP17-1   | chr17:39471168-39471947 | 0 | 1 |
| XLOC_009712 | XLOC_009712 | KRT33A      | chr17:39502344-39507064 | 0 | 1 |
| XLOC_009713 | XLOC_009713 | KRT33B      | chr17:39519745-39526052 | 0 | 1 |
| XLOC_009715 | XLOC_009715 | KRT31       | chr17:39549976-39553844 | 0 | 1 |
| XLOC_009716 | XLOC_009716 | KRT37       | chr17:39576808-39580822 | 0 | 1 |
| XLOC_009717 | XLOC_009717 | KRT38       | chr17:39592620-39597596 | 0 | 1 |
| XLOC_009718 | XLOC_009718 | KRT32       | chr17:39615764-39623638 | 0 | 1 |
| XLOC_009719 | XLOC_009719 | KRT35       | chr17:39632940-39637392 | 0 | 1 |
| XLOC_009720 | XLOC_009720 | KRT36       | chr17:39642387-39646116 | 0 | 1 |
| XLOC_009721 | XLOC_009721 | KRT13       | chr17:39657232-39661865 | 0 | 1 |
| XLOC_009724 | XLOC_009724 | LOC147093   | chr17:39705857-39710747 | 0 | 1 |
| XLOC_009725 | XLOC_009725 | KRT9        | chr17:39722093-39728310 | 0 | 1 |
| XLOC_009726 | XLOC_009726 | KRT14       | chr17:39738530-39743147 | 0 | 1 |
| XLOC_009730 | XLOC_009730 | HAP1        | chr17:39878890-39880898 | 0 | 1 |
| XLOC_009741 | XLOC_009741 | KCNH4       | chr17:40308909-40333296 | 0 | 1 |
| XLOC_009763 | XLOC_009763 | SOST        | chr17:41831098-41836156 | 0 | 1 |
| XLOC_009785 | XLOC_009785 | C1QL1       | chr17:43037060-43045644 | 0 | 1 |
| XLOC_009794 | XLOC_009794 | LOC644172   | chr17:43677490-43679748 | 0 | 1 |
| XLOC_009795 | XLOC_009795 | MAPT-AS1    | chr17:43920721-44105699 | 0 | 1 |

|             |             |              |                         |   |   |
|-------------|-------------|--------------|-------------------------|---|---|
| XLOC_009809 | XLOC_009809 | MIR152       | chr17:46103532-46115152 | 0 | 1 |
| XLOC_009811 | XLOC_009811 | SKAP1        | chr17:46210801-46507594 | 0 | 1 |
| XLOC_009812 | XLOC_009812 | MIR1203      | chr17:46210801-46507594 | 0 | 1 |
| XLOC_009813 | XLOC_009813 | HOXB1        | chr17:46606806-46608272 | 0 | 1 |
| XLOC_009817 | XLOC_009817 | MIR10A       | chr17:46657199-46657309 | 0 | 1 |
| XLOC_009823 | XLOC_009823 | MIR196A1     | chr17:46709851-46709921 | 0 | 1 |
| XLOC_009824 | XLOC_009824 | PRAC         | chr17:46799081-46799882 | 0 | 1 |
| XLOC_009825 | XLOC_009825 | MIR3185      | chr17:46800541-46802119 | 0 | 1 |
| XLOC_009829 | XLOC_009829 | GIP          | chr17:47035917-47045955 | 0 | 1 |
| XLOC_009830 | XLOC_009830 | GNGT2        | chr17:47283595-47300587 | 0 | 1 |
| XLOC_009842 | XLOC_009842 | HILS1        | chr17:48243365-48253293 | 0 | 1 |
| XLOC_009849 | XLOC_009849 | LINC00483    | chr17:48838394-48844876 | 0 | 1 |
| XLOC_009853 | XLOC_009853 | CA10         | chr17:49707673-50237377 | 0 | 1 |
| XLOC_009856 | XLOC_009856 | TMEM100      | chr17:53796987-53809482 | 0 | 1 |
| XLOC_009858 | XLOC_009858 | MTVR2        | chr17:54961462-54962274 | 0 | 1 |
| XLOC_009866 | XLOC_009866 | MPO          | chr17:56347216-56358296 | 0 | 1 |
| XLOC_009867 | XLOC_009867 | BZRAP1       | chr17:56378587-56494931 | 0 | 1 |
| XLOC_009868 | XLOC_009868 | MIR142       | chr17:56378587-56494931 | 0 | 1 |
| XLOC_009869 | XLOC_009869 | MIR4736      | chr17:56378587-56494931 | 0 | 1 |
| XLOC_009879 | XLOC_009879 | MIR454       | chr17:57187307-57232800 | 0 | 1 |
| XLOC_009880 | XLOC_009880 | MIR301A      | chr17:57187307-57232800 | 0 | 1 |
| XLOC_009885 | XLOC_009885 | MIR4737      | chr17:58120385-58120466 | 0 | 1 |
| XLOC_009897 | XLOC_009897 | MARCH10      | chr17:60778674-61505067 | 0 | 1 |
| XLOC_009904 | XLOC_009904 | CSH2         | chr17:61949371-61951089 | 0 | 1 |
| XLOC_009905 | XLOC_009905 | GH2          | chr17:61957571-61959302 | 0 | 1 |
| XLOC_009906 | XLOC_009906 | CSH1         | chr17:61972267-61974021 | 0 | 1 |
| XLOC_009907 | XLOC_009907 | CSHL1        | chr17:61986964-61988618 | 0 | 1 |
| XLOC_009908 | XLOC_009908 | GH1          | chr17:61994562-61996198 | 0 | 1 |
| XLOC_009914 | XLOC_009914 | PEGAM1       | chr17:62396776-62407083 | 0 | 1 |
| XLOC_009927 | XLOC_009927 | APOH         | chr17:64208146-64225556 | 0 | 1 |
| XLOC_009933 | XLOC_009933 | MIR635       | chr17:66417421-66453653 | 0 | 1 |
| XLOC_009935 | XLOC_009935 | ABCA8        | chr17:66863430-66951533 | 0 | 1 |
| XLOC_009937 | XLOC_009937 | ABCA6        | chr17:67074846-67138015 | 0 | 1 |
| XLOC_009938 | XLOC_009938 | MIR4524A     | chr17:67074846-67138015 | 0 | 1 |
| XLOC_009940 | XLOC_009940 | KCNJ2-AS1    | chr17:68163101-68165543 | 0 | 1 |
| XLOC_009948 | XLOC_009948 | LINC00469    | chr17:71745408-71824676 | 0 | 1 |
| XLOC_009951 | XLOC_009951 | CD300LB      | chr17:72517312-72527613 | 0 | 1 |
| XLOC_009953 | XLOC_009953 | CD300LD      | chr17:72576110-72590348 | 0 | 1 |
| XLOC_009955 | XLOC_009955 | CD300LF      | chr17:72667255-72743474 | 0 | 1 |
| XLOC_009959 | XLOC_009959 | FADS6        | chr17:72873472-72889705 | 0 | 1 |
| XLOC_009974 | XLOC_009974 | MIR4738      | chr17:73780601-73780688 | 0 | 1 |
| XLOC_009993 | XLOC_009993 | ST6GALNAC1   | chr17:74620844-74639894 | 0 | 1 |
| XLOC_009997 | XLOC_009997 | MIR4316      | chr17:75277491-75496678 | 0 | 1 |
| XLOC_010011 | XLOC_010011 | LOC100507410 | chr17:77015290-77045870 | 0 | 1 |
| XLOC_010013 | XLOC_010013 | MIR4739      | chr17:77680984-77681058 | 0 | 1 |
| XLOC_010023 | XLOC_010023 | MIR657       | chr17:79008946-79156964 | 0 | 1 |
| XLOC_010024 | XLOC_010024 | MIR338       | chr17:79008946-79156964 | 0 | 1 |
| XLOC_010025 | XLOC_010025 | MIR1250      | chr17:79008946-79156964 | 0 | 1 |
| XLOC_010030 | XLOC_010030 | TMEM105      | chr17:79285071-79304474 | 0 | 1 |
| XLOC_010032 | XLOC_010032 | MIR4740      | chr17:79373539-79433358 | 0 | 1 |
| XLOC_010033 | XLOC_010033 | MIR3186      | chr17:79373539-79433358 | 0 | 1 |
| XLOC_010090 | XLOC_010090 | CETN1        | chr18:580368-581524     | 0 | 1 |
| XLOC_010093 | XLOC_010093 | ADCYAP1      | chr18:904943-912173     | 0 | 1 |
| XLOC_010101 | XLOC_010101 | DLGAP1-AS3   | chr18:3496029-4455266   | 0 | 1 |
| XLOC_010102 | XLOC_010102 | DLGAP1-AS5   | chr18:3496029-4455266   | 0 | 1 |
| XLOC_010104 | XLOC_010104 | LOC645355    | chr18:5748817-5795900   | 0 | 1 |
| XLOC_010105 | XLOC_010105 | MIR3976      | chr18:5840693-5840832   | 0 | 1 |
| XLOC_010106 | XLOC_010106 | LOC100130480 | chr18:6511414-6590652   | 0 | 1 |
| XLOC_010107 | XLOC_010107 | ARHGAP28     | chr18:6834431-6915712   | 0 | 1 |
| XLOC_010108 | XLOC_010108 | LRRC30       | chr18:7231136-7232042   | 0 | 1 |
| XLOC_010116 | XLOC_010116 | RAB31        | chr18:9708227-9862553   | 0 | 1 |
| XLOC_010117 | XLOC_010117 | TXNDC2       | chr18:9885722-9888156   | 0 | 1 |
| XLOC_010119 | XLOC_010119 | APCDD1       | chr18:10454624-10488698 | 0 | 1 |
| XLOC_010124 | XLOC_010124 | C18orf61     | chr18:12200777-12224709 | 0 | 1 |
| XLOC_010125 | XLOC_010125 | CIDEA        | chr18:12254317-12277594 | 0 | 1 |
| XLOC_010132 | XLOC_010132 | MIR5190      | chr18:13218728-13652753 | 0 | 1 |
| XLOC_010133 | XLOC_010133 | MIR4526      | chr18:13218728-13652753 | 0 | 1 |
| XLOC_010135 | XLOC_010135 | MC5R         | chr18:13825542-13826861 | 0 | 1 |
| XLOC_010138 | XLOC_010138 | ANKRD30B     | chr18:14748238-14852737 | 0 | 1 |
| XLOC_010139 | XLOC_010139 | MIR3156-2    | chr18:14748238-14852737 | 0 | 1 |
| XLOC_010142 | XLOC_010142 | MIR320C1     | chr18:19230857-19284766 | 0 | 1 |
| XLOC_010149 | XLOC_010149 | LAMA3        | chr18:21269561-21535029 | 0 | 1 |
| XLOC_010152 | XLOC_010152 | MIR320C2     | chr18:21742010-21977833 | 0 | 1 |
| XLOC_010155 | XLOC_010155 | LOC729950    | chr18:22208145-22242162 | 0 | 1 |
| XLOC_010156 | XLOC_010156 | PSMA8        | chr18:23713815-23773319 | 0 | 1 |
| XLOC_010159 | XLOC_010159 | MIR302F      | chr18:27878875-27878926 | 0 | 1 |
| XLOC_010160 | XLOC_010160 | DSG1         | chr18:28898051-28937393 | 0 | 1 |
| XLOC_010161 | XLOC_010161 | DSG4         | chr18:28956739-28993880 | 0 | 1 |
| XLOC_010164 | XLOC_010164 | TTR          | chr18:29171729-29178986 | 0 | 1 |

|             |             |              |                         |   |   |
|-------------|-------------|--------------|-------------------------|---|---|
| XLOC_010169 | XLOC_010169 | ASXL3        | chr18:31158540-31327399 | 0 | 1 |
| XLOC_010170 | XLOC_010170 | DTNA         | chr18:32073253-32471808 | 0 | 1 |
| XLOC_010174 | XLOC_010174 | MIR3975      | chr18:33171700-33171770 | 0 | 1 |
| XLOC_010181 | XLOC_010181 | MIR4318      | chr18:35237097-35237178 | 0 | 1 |
| XLOC_010182 | XLOC_010182 | MIR5583-1    | chr18:36786887-37331959 | 0 | 1 |
| XLOC_010194 | XLOC_010194 | MIR4743      | chr18:46065426-46389586 | 0 | 1 |
| XLOC_010195 | XLOC_010195 | MIR1539      | chr18:47007547-47018935 | 0 | 1 |
| XLOC_010199 | XLOC_010199 | MAPK4        | chr18:48086483-48258196 | 0 | 1 |
| XLOC_010203 | XLOC_010203 | LOC100287225 | chr18:48918411-49088839 | 0 | 1 |
| XLOC_010204 | XLOC_010204 | DCC          | chr18:49866541-51062273 | 0 | 1 |
| XLOC_010207 | XLOC_010207 | DYNAP        | chr18:52258389-52266724 | 0 | 1 |
| XLOC_010209 | XLOC_010209 | MIR4529      | chr18:52889561-53303188 | 0 | 1 |
| XLOC_010211 | XLOC_010211 | BOD1L2       | chr18:54814292-54817639 | 0 | 1 |
| XLOC_010216 | XLOC_010216 | MIR122       | chr18:56118305-56118390 | 0 | 1 |
| XLOC_010219 | XLOC_010219 | OACYLP       | chr18:56702970-56720446 | 0 | 1 |
| XLOC_010221 | XLOC_010221 | GRP          | chr18:56887399-56898002 | 0 | 1 |
| XLOC_010229 | XLOC_010229 | SERPINB12    | chr18:61223392-61234244 | 0 | 1 |
| XLOC_010230 | XLOC_010230 | SERPINB13    | chr18:61254533-61266433 | 0 | 1 |
| XLOC_010231 | XLOC_010231 | SERPINB11    | chr18:61370193-61391122 | 0 | 1 |
| XLOC_010234 | XLOC_010234 | SERPINB10    | chr18:61582744-61602476 | 0 | 1 |
| XLOC_010237 | XLOC_010237 | LOC284294    | chr18:61747242-62090827 | 0 | 1 |
| XLOC_010238 | XLOC_010238 | CDH7         | chr18:63417487-63548175 | 0 | 1 |
| XLOC_010239 | XLOC_010239 | MIR5011      | chr18:64748820-64748923 | 0 | 1 |
| XLOC_010240 | XLOC_010240 | LOC643542    | chr18:65173818-65566856 | 0 | 1 |
| XLOC_010242 | XLOC_010242 | DOK6         | chr18:67068283-67516322 | 0 | 1 |
| XLOC_010246 | XLOC_010246 | C18orf63     | chr18:71983109-72026422 | 0 | 1 |
| XLOC_010251 | XLOC_010251 | LOC339298    | chr18:73834952-73857210 | 0 | 1 |
| XLOC_010255 | XLOC_010255 | GALR1        | chr18:74962007-74982096 | 0 | 1 |
| XLOC_010256 | XLOC_010256 | SALL3        | chr18:76740274-76758969 | 0 | 1 |
| XLOC_010260 | XLOC_010260 | KCNQ2        | chr18:77623667-77659816 | 0 | 1 |
| XLOC_010266 | XLOC_010266 | COLEC12      | chr18:319354-500729     | 0 | 1 |
| XLOC_010277 | XLOC_010277 | C18orf42     | chr18:5143671-5197255   | 0 | 1 |
| XLOC_010280 | XLOC_010280 | EPB41L3      | chr18:5392387-5543986   | 0 | 1 |
| XLOC_010281 | XLOC_010281 | TMEM200C     | chr18:5890183-5892103   | 0 | 1 |
| XLOC_010282 | XLOC_010282 | L3MBTL4      | chr18:5954704-6414910   | 0 | 1 |
| XLOC_010283 | XLOC_010283 | MIR4317      | chr18:5954704-6414910   | 0 | 1 |
| XLOC_010284 | XLOC_010284 | LINC00668    | chr18:6925472-6929868   | 0 | 1 |
| XLOC_010286 | XLOC_010286 | LOC100192426 | chr18:7567313-8406859   | 0 | 1 |
| XLOC_010288 | XLOC_010288 | PIEZO2       | chr18:10670243-11148761 | 0 | 1 |
| XLOC_010294 | XLOC_010294 | LOC100288122 | chr18:13218728-13652753 | 0 | 1 |
| XLOC_010298 | XLOC_010298 | CXADRP3      | chr18:14477953-14498705 | 0 | 1 |
| XLOC_010299 | XLOC_010299 | POTEC        | chr18:14511736-14543599 | 0 | 1 |
| XLOC_010300 | XLOC_010300 | LOC644669    | chr18:15313554-15325918 | 0 | 1 |
| XLOC_010304 | XLOC_010304 | MIR133A1     | chr18:19321544-19450912 | 0 | 1 |
| XLOC_010305 | XLOC_010305 | MIR1-2       | chr18:19321544-19450912 | 0 | 1 |
| XLOC_010306 | XLOC_010306 | CTAGE1       | chr18:19993563-19997878 | 0 | 1 |
| XLOC_010309 | XLOC_010309 | ANKRD29      | chr18:21179977-21242849 | 0 | 1 |
| XLOC_010314 | XLOC_010314 | LOC728606    | chr18:24267584-24283602 | 0 | 1 |
| XLOC_010315 | XLOC_010315 | AQP4         | chr18:24432007-24765302 | 0 | 1 |
| XLOC_010316 | XLOC_010316 | CHST9        | chr18:24432007-24765302 | 0 | 1 |
| XLOC_010319 | XLOC_010319 | DSC2         | chr18:28645941-28682388 | 0 | 1 |
| XLOC_010320 | XLOC_010320 | DSC1         | chr18:28709213-28742819 | 0 | 1 |
| XLOC_010327 | XLOC_010327 | CCDC178      | chr18:30517365-31020685 | 0 | 1 |
| XLOC_010328 | XLOC_010328 | NOL4         | chr18:31431063-31803515 | 0 | 1 |
| XLOC_010331 | XLOC_010331 | ZNF396       | chr18:32946660-32957301 | 0 | 1 |
| XLOC_010333 | XLOC_010333 | MIR187       | chr18:33484780-33484889 | 0 | 1 |
| XLOC_010339 | XLOC_010339 | MIR5583-2    | chr18:36786887-37331959 | 0 | 1 |
| XLOC_010340 | XLOC_010340 | KC6          | chr18:39060235-39100561 | 0 | 1 |
| XLOC_010341 | XLOC_010341 | RIT2         | chr18:40323182-40695657 | 0 | 1 |
| XLOC_010342 | XLOC_010342 | SYT4         | chr18:40847856-40857615 | 0 | 1 |
| XLOC_010343 | XLOC_010343 | MIR4319      | chr18:42260137-42648475 | 0 | 1 |
| XLOC_010347 | XLOC_010347 | LOXHD1       | chr18:44056934-44236996 | 0 | 1 |
| XLOC_010350 | XLOC_010350 | TCEB3CL2     | chr18:44526786-44628614 | 0 | 1 |
| XLOC_010351 | XLOC_010351 | TCEB3CL2     | chr18:44526786-44628614 | 0 | 1 |
| XLOC_010352 | XLOC_010352 | TCEB3C       | chr18:44526786-44628614 | 0 | 1 |
| XLOC_010353 | XLOC_010353 | TCEB3B       | chr18:44526786-44628614 | 0 | 1 |
| XLOC_010357 | XLOC_010357 | ZBTB7C       | chr18:45553638-45663680 | 0 | 1 |
| XLOC_010360 | XLOC_010360 | MIR4744      | chr18:46570171-46987079 | 0 | 1 |
| XLOC_010366 | XLOC_010366 | MIR4320      | chr18:47349155-47721451 | 0 | 1 |
| XLOC_010374 | XLOC_010374 | STARDB6      | chr18:51851061-51880943 | 0 | 1 |
| XLOC_010375 | XLOC_010375 | CCDC68       | chr18:52568739-52626739 | 0 | 1 |
| XLOC_010376 | XLOC_010376 | TCF4         | chr18:52889561-53303188 | 0 | 1 |
| XLOC_010377 | XLOC_010377 | LOC100505474 | chr18:53750586-53804767 | 0 | 1 |
| XLOC_010383 | XLOC_010383 | MIR3591      | chr18:56118305-56118390 | 0 | 1 |
| XLOC_010385 | XLOC_010385 | RAX          | chr18:56934266-56940625 | 0 | 1 |
| XLOC_010386 | XLOC_010386 | CPLX4        | chr18:56962635-56985881 | 0 | 1 |
| XLOC_010389 | XLOC_010389 | MC4R         | chr18:58038563-58040001 | 0 | 1 |
| XLOC_010395 | XLOC_010395 | SERPINB4     | chr18:61304492-61311502 | 0 | 1 |
| XLOC_010396 | XLOC_010396 | SERPINB3     | chr18:61322430-61329197 | 0 | 1 |



|             |             |               |                         |   |   |
|-------------|-------------|---------------|-------------------------|---|---|
| XLOC_010397 | XLOC_010397 | LINC00305     | chr18:61747242-62090827 | 0 | 1 |
| XLOC_010398 | XLOC_010398 | LOC400654     | chr18:61747242-62090827 | 0 | 1 |
| XLOC_010399 | XLOC_010399 | CDH19         | chr18:64168423-64271375 | 0 | 1 |
| XLOC_010404 | XLOC_010404 | LOC100505776  | chr18:69187199-69246192 | 0 | 1 |
| XLOC_010405 | XLOC_010405 | CBLN2         | chr18:70203914-70211723 | 0 | 1 |
| XLOC_010406 | XLOC_010406 | NETO1         | chr18:70409548-70534810 | 0 | 1 |
| XLOC_010407 | XLOC_010407 | LOC400655     | chr18:70821292-70931733 | 0 | 1 |
| XLOC_010410 | XLOC_010410 | FAM69C        | chr18:72102962-72124503 | 0 | 1 |
| XLOC_010413 | XLOC_010413 | C18orf62      | chr18:73121826-73139589 | 0 | 1 |
| XLOC_010420 | XLOC_010420 | OR4F17        | chr19:110678-111596     | 0 | 1 |
| XLOC_010427 | XLOC_010427 | FGF22         | chr19:639925-643604     | 0 | 1 |
| XLOC_010429 | XLOC_010429 | PALM          | chr19:708952-748330     | 0 | 1 |
| XLOC_010432 | XLOC_010432 | MIR4745       | chr19:797391-812327     | 0 | 1 |
| XLOC_010433 | XLOC_010433 | MIR3187       | chr19:812487-821952     | 0 | 1 |
| XLOC_010438 | XLOC_010438 | KISS1R        | chr19:917341-921015     | 0 | 1 |
| XLOC_010459 | XLOC_010459 | ONECUT3       | chr19:1753661-1775444   | 0 | 1 |
| XLOC_010486 | XLOC_010486 | GIPC3         | chr19:3585568-3593539   | 0 | 1 |
| XLOC_010491 | XLOC_010491 | NMRK2         | chr19:3933100-3942414   | 0 | 1 |
| XLOC_010501 | XLOC_010501 | MIR4746       | chr19:4445002-4457791   | 0 | 1 |
| XLOC_010506 | XLOC_010506 | MIR7-3        | chr19:4769116-4772568   | 0 | 1 |
| XLOC_010509 | XLOC_010509 | MIR4747       | chr19:4909509-4962165   | 0 | 1 |
| XLOC_010511 | XLOC_010511 | ZNRF4         | chr19:5455425-5456867   | 0 | 1 |
| XLOC_010515 | XLOC_010515 | CATSPERD      | chr19:5720687-5778742   | 0 | 1 |
| XLOC_010528 | XLOC_010528 | MBD3L5        | chr19:7030593-7033022   | 0 | 1 |
| XLOC_010529 | XLOC_010529 | MBD3L2        | chr19:7049350-7051746   | 0 | 1 |
| XLOC_010539 | XLOC_010539 | RETN          | chr19:7733971-7735340   | 0 | 1 |
| XLOC_010549 | XLOC_010549 | CCL25         | chr19:8117645-8127547   | 0 | 1 |
| XLOC_010550 | XLOC_010550 | CERS4         | chr19:8274216-8327304   | 0 | 1 |
| XLOC_010556 | XLOC_010556 | OR2Z1         | chr19:8841390-8842335   | 0 | 1 |
| XLOC_010557 | XLOC_010557 | MBD3L1        | chr19:8953268-8954016   | 0 | 1 |
| XLOC_010558 | XLOC_010558 | OR1M1         | chr19:9203920-9204862   | 0 | 1 |
| XLOC_010561 | XLOC_010561 | OR7E24        | chr19:9361719-9362739   | 0 | 1 |
| XLOC_010566 | XLOC_010566 | RDH8          | chr19:10123924-10132954 | 0 | 1 |
| XLOC_010567 | XLOC_010567 | C3P1          | chr19:10152031-10184813 | 0 | 1 |
| XLOC_010570 | XLOC_010570 | SNORD105      | chr19:10216898-10230599 | 0 | 1 |
| XLOC_010571 | XLOC_010571 | SNORD105B     | chr19:10216898-10230599 | 0 | 1 |
| XLOC_010572 | XLOC_010572 | MIR4322       | chr19:10332108-10341948 | 0 | 1 |
| XLOC_010579 | XLOC_010579 | MIR1238       | chr19:10654646-10676702 | 0 | 1 |
| XLOC_010584 | XLOC_010584 | MIR638        | chr19:10828728-10942586 | 0 | 1 |
| XLOC_010585 | XLOC_010585 | MIR4748       | chr19:10828728-10942586 | 0 | 1 |
| XLOC_010592 | XLOC_010592 | TSPAN16       | chr19:11406823-11450344 | 0 | 1 |
| XLOC_010613 | XLOC_010613 | BEST2         | chr19:12863406-12869271 | 0 | 1 |
| XLOC_010628 | XLOC_010628 | MIR181C       | chr19:13985512-13985622 | 0 | 1 |
| XLOC_010642 | XLOC_010642 | OR7C2         | chr19:15052300-15053260 | 0 | 1 |
| XLOC_010643 | XLOC_010643 | CCDC105       | chr19:15121538-15134083 | 0 | 1 |
| XLOC_010645 | XLOC_010645 | OR111         | chr19:15197876-15198944 | 0 | 1 |
| XLOC_010647 | XLOC_010647 | MIR1470       | chr19:15532317-15560762 | 0 | 1 |
| XLOC_010648 | XLOC_010648 | CYP4F22       | chr19:15619335-15663128 | 0 | 1 |
| XLOC_010649 | XLOC_010649 | CYP4F8        | chr19:15726028-15740447 | 0 | 1 |
| XLOC_010651 | XLOC_010651 | CYP4F12       | chr19:15783827-15807984 | 0 | 1 |
| XLOC_010652 | XLOC_010652 | OR10H2        | chr19:15838833-15839862 | 0 | 1 |
| XLOC_010653 | XLOC_010653 | OR10H3        | chr19:15852202-15853153 | 0 | 1 |
| XLOC_010654 | XLOC_010654 | OR10H5        | chr19:15904858-15905806 | 0 | 1 |
| XLOC_010656 | XLOC_010656 | OR10H4        | chr19:16059817-16060768 | 0 | 1 |
| XLOC_010657 | XLOC_010657 | LINC00661     | chr19:16126443-16138272 | 0 | 1 |
| XLOC_010658 | XLOC_010658 | FLJ25328      | chr19:16144522-16152918 | 0 | 1 |
| XLOC_010685 | XLOC_010685 | B3GNT3        | chr19:17905918-17924385 | 0 | 1 |
| XLOC_010696 | XLOC_010696 | MIR3188       | chr19:18392886-18392971 | 0 | 1 |
| XLOC_010699 | XLOC_010699 | MIR3189       | chr19:18496967-18499986 | 0 | 1 |
| XLOC_010732 | XLOC_010732 | ZNF257        | chr19:22235265-22273903 | 0 | 1 |
| XLOC_010733 | XLOC_010733 | ZNF729        | chr19:22469251-22499978 | 0 | 1 |
| XLOC_010734 | XLOC_010734 | LOC440518     | chr19:22779058-22786352 | 0 | 1 |
| XLOC_010737 | XLOC_010737 | ZNF726        | chr19:24097683-24116769 | 0 | 1 |
| XLOC_010739 | XLOC_010739 | LOC148145     | chr19:29456037-29460055 | 0 | 1 |
| XLOC_010740 | XLOC_010740 | LOC100505835  | chr19:29493461-29504862 | 0 | 1 |
| XLOC_010741 | XLOC_010741 | VSTM2B        | chr19:30017490-30055226 | 0 | 1 |
| XLOC_010746 | XLOC_010746 | ZNF536        | chr19:30863327-31048965 | 0 | 1 |
| XLOC_010747 | XLOC_010747 | DKFZp566F0947 | chr19:31640782-31641311 | 0 | 1 |
| XLOC_010748 | XLOC_010748 | THEG5         | chr19:32083186-32083945 | 0 | 1 |
| XLOC_010761 | XLOC_010761 | CHST8         | chr19:34112860-34264414 | 0 | 1 |
| XLOC_010769 | XLOC_010769 | SCGB2B3P      | chr19:35136777-35136957 | 0 | 1 |
| XLOC_010775 | XLOC_010775 | HPN           | chr19:35531409-35597208 | 0 | 1 |
| XLOC_010783 | XLOC_010783 | MAG           | chr19:35782988-35804709 | 0 | 1 |
| XLOC_010785 | XLOC_010785 | FFAR1         | chr19:35842444-35843367 | 0 | 1 |
| XLOC_010786 | XLOC_010786 | FFAR3         | chr19:35849487-35851389 | 0 | 1 |
| XLOC_010787 | XLOC_010787 | LOC100128682  | chr19:35896508-35907742 | 0 | 1 |
| XLOC_010802 | XLOC_010802 | KIRREL2       | chr19:36347809-36358048 | 0 | 1 |
| XLOC_010812 | XLOC_010812 | LOC100134317  | chr19:36802244-36803570 | 0 | 1 |
| XLOC_010839 | XLOC_010839 | LGALS7B       | chr19:39279849-39282394 | 0 | 1 |

|             |             |               |                         |   |   |
|-------------|-------------|---------------|-------------------------|---|---|
| XLOC_010845 | XLOC_010845 | IFNL2         | chr19:39759156-39760732 | 0 | 1 |
| XLOC_010846 | XLOC_010846 | IFNL1         | chr19:39786964-39789312 | 0 | 1 |
| XLOC_010854 | XLOC_010854 | SELV          | chr19:40005752-40011326 | 0 | 1 |
| XLOC_010855 | XLOC_010855 | LGALS13       | chr19:40093168-40098114 | 0 | 1 |
| XLOC_010857 | XLOC_010857 | LGALS16       | chr19:40146557-40151287 | 0 | 1 |
| XLOC_010858 | XLOC_010858 | LGALS17A      | chr19:40170013-40177013 | 0 | 1 |
| XLOC_010859 | XLOC_010859 | LGALS14       | chr19:40194945-40200088 | 0 | 1 |
| XLOC_010860 | XLOC_010860 | LEUTX         | chr19:40267233-40276775 | 0 | 1 |
| XLOC_010872 | XLOC_010872 | CYP2B7P1      | chr19:41430169-41456565 | 0 | 1 |
| XLOC_010873 | XLOC_010873 | CYP2B6        | chr19:41497203-41524301 | 0 | 1 |
| XLOC_010874 | XLOC_010874 | CYP2A13       | chr19:41594355-41602100 | 0 | 1 |
| XLOC_010882 | XLOC_010882 | C19orf69      | chr19:41949062-41950670 | 0 | 1 |
| XLOC_010883 | XLOC_010883 | CEACAM21      | chr19:42082530-42093197 | 0 | 1 |
| XLOC_010884 | XLOC_010884 | CEACAM5       | chr19:42212529-42234437 | 0 | 1 |
| XLOC_010885 | XLOC_010885 | CEACAM6       | chr19:42259397-42276113 | 0 | 1 |
| XLOC_010886 | XLOC_010886 | CEACAM3       | chr19:42300533-42315591 | 0 | 1 |
| XLOC_010887 | XLOC_010887 | DMRTC2        | chr19:42349085-42356397 | 0 | 1 |
| XLOC_010899 | XLOC_010899 | LOC100289650  | chr19:43326014-43331030 | 0 | 1 |
| XLOC_010900 | XLOC_010900 | PRG1          | chr19:43853207-43853700 | 0 | 1 |
| XLOC_010901 | XLOC_010901 | CD177         | chr19:43857824-43867480 | 0 | 1 |
| XLOC_010924 | XLOC_010924 | CEACAM16      | chr19:45202420-45213986 | 0 | 1 |
| XLOC_010926 | XLOC_010926 | CBLC          | chr19:45281125-45303903 | 0 | 1 |
| XLOC_010948 | XLOC_010948 | MIR642A       | chr19:46171501-46185717 | 0 | 1 |
| XLOC_010953 | XLOC_010953 | MIR769        | chr19:46522189-46522307 | 0 | 1 |
| XLOC_010955 | XLOC_010955 | DKFZp434J0226 | chr19:46713498-46718094 | 0 | 1 |
| XLOC_010956 | XLOC_010956 | IGFL1         | chr19:46720994-46846690 | 0 | 1 |
| XLOC_010965 | XLOC_010965 | MIR3190       | chr19:47724078-47736023 | 0 | 1 |
| XLOC_010975 | XLOC_010975 | SNORD23       | chr19:48248792-48260323 | 0 | 1 |
| XLOC_010978 | XLOC_010978 | SNAR-A13      | chr19:48410934-48411056 | 0 | 1 |
| XLOC_010979 | XLOC_010979 | SNAR-C2       | chr19:48416307-48416427 | 0 | 1 |
| XLOC_010980 | XLOC_010980 | SNAR-A2       | chr19:48421685-48421807 | 0 | 1 |
| XLOC_010981 | XLOC_010981 | SNAR-A8       | chr19:48427035-48427156 | 0 | 1 |
| XLOC_010982 | XLOC_010982 | SNAR-C5       | chr19:48432074-48432194 | 0 | 1 |
| XLOC_010983 | XLOC_010983 | SNAR-A2       | chr19:48437437-48437559 | 0 | 1 |
| XLOC_010984 | XLOC_010984 | SNAR-C4       | chr19:48442797-48442917 | 0 | 1 |
| XLOC_010985 | XLOC_010985 | SNAR-A13      | chr19:48448178-48448300 | 0 | 1 |
| XLOC_010986 | XLOC_010986 | SNAR-C3       | chr19:48453552-48453671 | 0 | 1 |
| XLOC_010987 | XLOC_010987 | SNAR-C5       | chr19:48458938-48459058 | 0 | 1 |
| XLOC_010988 | XLOC_010988 | ELSPBP1       | chr19:48497907-48528410 | 0 | 1 |
| XLOC_011010 | XLOC_011010 | SNAR-G1       | chr19:49540276-49540404 | 0 | 1 |
| XLOC_011023 | XLOC_011023 | SNORD32A      | chr19:49990810-49995564 | 0 | 1 |
| XLOC_011025 | XLOC_011025 | SNORD34       | chr19:49990810-49995564 | 0 | 1 |
| XLOC_011028 | XLOC_011028 | SNORD35B      | chr19:49999621-50002969 | 0 | 1 |
| XLOC_011036 | XLOC_011036 | MIR5088       | chr19:50180408-50191707 | 0 | 1 |
| XLOC_011042 | XLOC_011042 | MIR4749       | chr19:50341902-50363999 | 0 | 1 |
| XLOC_011044 | XLOC_011044 | MIR4750       | chr19:50380681-50392007 | 0 | 1 |
| XLOC_011062 | XLOC_011062 | KLK2          | chr19:51376688-51383823 | 0 | 1 |
| XLOC_011065 | XLOC_011065 | SIGLEC17P     | chr19:51670584-51676780 | 0 | 1 |
| XLOC_011067 | XLOC_011067 | SIGLECL1      | chr19:51760963-51772582 | 0 | 1 |
| XLOC_011070 | XLOC_011070 | CEACAM18      | chr19:51979837-51986611 | 0 | 1 |
| XLOC_011072 | XLOC_011072 | MIR99B        | chr19:52195864-52195934 | 0 | 1 |
| XLOC_011073 | XLOC_011073 | MIRLET7E      | chr19:52196038-52196117 | 0 | 1 |
| XLOC_011074 | XLOC_011074 | MIR125A       | chr19:52196506-52196592 | 0 | 1 |
| XLOC_011076 | XLOC_011076 | FPR2          | chr19:52264452-52273779 | 0 | 1 |
| XLOC_011081 | XLOC_011081 | MIR643        | chr19:52772823-52795976 | 0 | 1 |
| XLOC_011086 | XLOC_011086 | ZNF534        | chr19:52934666-52942699 | 0 | 1 |
| XLOC_011092 | XLOC_011092 | ERVV-2        | chr19:53547990-53554380 | 0 | 1 |
| XLOC_011095 | XLOC_011095 | FAM90A27P     | chr19:53785542-53787602 | 0 | 1 |
| XLOC_011102 | XLOC_011102 | DPRX          | chr19:54135309-54140263 | 0 | 1 |
| XLOC_011103 | XLOC_011103 | MIR512-2      | chr19:54169926-54170024 | 0 | 1 |
| XLOC_011104 | XLOC_011104 | MIR512-2      | chr19:54172410-54172508 | 0 | 1 |
| XLOC_011105 | XLOC_011105 | MIR1323       | chr19:54175221-54175294 | 0 | 1 |
| XLOC_011106 | XLOC_011106 | MIR498        | chr19:54177450-54177574 | 0 | 1 |
| XLOC_011107 | XLOC_011107 | MIR520E       | chr19:54178964-54179051 | 0 | 1 |
| XLOC_011108 | XLOC_011108 | MIR515-2      | chr19:54182256-54182339 | 0 | 1 |
| XLOC_011109 | XLOC_011109 | MIR519E       | chr19:54183193-54183277 | 0 | 1 |
| XLOC_011110 | XLOC_011110 | MIR520F       | chr19:54185412-54185499 | 0 | 1 |
| XLOC_011111 | XLOC_011111 | MIR515-1      | chr19:54188262-54188345 | 0 | 1 |
| XLOC_011112 | XLOC_011112 | MIR519C       | chr19:54189722-54189809 | 0 | 1 |
| XLOC_011113 | XLOC_011113 | MIR1283-1     | chr19:54191734-54191821 | 0 | 1 |
| XLOC_011114 | XLOC_011114 | MIR520A       | chr19:54194134-54194219 | 0 | 1 |
| XLOC_011115 | XLOC_011115 | MIR526B       | chr19:54197646-54197729 | 0 | 1 |
| XLOC_011116 | XLOC_011116 | MIR519B       | chr19:54198466-54198547 | 0 | 1 |
| XLOC_011117 | XLOC_011117 | MIR525        | chr19:54200786-54200871 | 0 | 1 |
| XLOC_011118 | XLOC_011118 | MIR523        | chr19:54201638-54201725 | 0 | 1 |
| XLOC_011119 | XLOC_011119 | MIR518F       | chr19:54203268-54203355 | 0 | 1 |
| XLOC_011120 | XLOC_011120 | MIR520B       | chr19:54204480-54204541 | 0 | 1 |
| XLOC_011121 | XLOC_011121 | MIR518B       | chr19:54205990-54206073 | 0 | 1 |
| XLOC_011122 | XLOC_011122 | MIR526A1      | chr19:54209505-54209590 | 0 | 1 |

|             |             |                      |                         |   |   |
|-------------|-------------|----------------------|-------------------------|---|---|
| XLOC_011123 | XLOC_011123 | MIR520C              | chr19:54210706-54210793 | 0 | 1 |
| XLOC_011124 | XLOC_011124 | MIR518C              | chr19:54211988-54212089 | 0 | 1 |
| XLOC_011125 | XLOC_011125 | MIR524               | chr19:54214255-54214342 | 0 | 1 |
| XLOC_011126 | XLOC_011126 | MIR517A              | chr19:54215521-54215608 | 0 | 1 |
| XLOC_011127 | XLOC_011127 | MIR519D              | chr19:54216600-54216688 | 0 | 1 |
| XLOC_011128 | XLOC_011128 | MIR521-2             | chr19:54219847-54219934 | 0 | 1 |
| XLOC_011129 | XLOC_011129 | MIR520D              | chr19:54223349-54223436 | 0 | 1 |
| XLOC_011130 | XLOC_011130 | MIR517B              | chr19:54224329-54224396 | 0 | 1 |
| XLOC_011131 | XLOC_011131 | MIR520G              | chr19:54225419-54225509 | 0 | 1 |
| XLOC_011132 | XLOC_011132 | MIR516B2             | chr19:54228695-54228780 | 0 | 1 |
| XLOC_011133 | XLOC_011133 | MIR526A2             | chr19:54230175-54230240 | 0 | 1 |
| XLOC_011134 | XLOC_011134 | MIR518E              | chr19:54233091-54233179 | 0 | 1 |
| XLOC_011135 | XLOC_011135 | MIR518A1             | chr19:54234259-54234344 | 0 | 1 |
| XLOC_011136 | XLOC_011136 | MIR518D              | chr19:54238130-54238217 | 0 | 1 |
| XLOC_011137 | XLOC_011137 | MIR516B1             | chr19:54240098-54240188 | 0 | 1 |
| XLOC_011138 | XLOC_011138 | MIR518A2             | chr19:54242586-54242673 | 0 | 1 |
| XLOC_011139 | XLOC_011139 | MIR517C              | chr19:54244566-54244661 | 0 | 1 |
| XLOC_011140 | XLOC_011140 | MIR520H              | chr19:54245765-54245853 | 0 | 1 |
| XLOC_011141 | XLOC_011141 | MIR521-1             | chr19:54251889-54251976 | 0 | 1 |
| XLOC_011142 | XLOC_011142 | MIR522               | chr19:54254464-54254551 | 0 | 1 |
| XLOC_011143 | XLOC_011143 | MIR519A1             | chr19:54255650-54255735 | 0 | 1 |
| XLOC_011144 | XLOC_011144 | MIR527               | chr19:54257271-54257356 | 0 | 1 |
| XLOC_011145 | XLOC_011145 | MIR516A1             | chr19:54259994-54260084 | 0 | 1 |
| XLOC_011146 | XLOC_011146 | MIR1283-2            | chr19:54261485-54261572 | 0 | 1 |
| XLOC_011147 | XLOC_011147 | MIR516A2             | chr19:54264386-54264476 | 0 | 1 |
| XLOC_011148 | XLOC_011148 | MIR519A2             | chr19:54265597-54265684 | 0 | 1 |
| XLOC_011149 | XLOC_011149 | MIR371A              | chr19:54290928-54290996 | 0 | 1 |
| XLOC_011150 | XLOC_011150 | MIR372               | chr19:54291143-54291210 | 0 | 1 |
| XLOC_011151 | XLOC_011151 | MIR373               | chr19:54291958-54292027 | 0 | 1 |
| XLOC_011162 | XLOC_011162 | MIR4752              | chr19:54785963-54786035 | 0 | 1 |
| XLOC_011166 | XLOC_011166 | KIR3DX1              | chr19:55043908-55055195 | 0 | 1 |
| XLOC_011168 | XLOC_011168 | LILRA1               | chr19:55105040-55113687 | 0 | 1 |
| XLOC_011170 | XLOC_011170 | LILRB4               | chr19:55174123-55179846 | 0 | 1 |
| XLOC_011171 | XLOC_011171 | LILRP2               | chr19:55219600-55224887 | 0 | 1 |
| XLOC_011172 | XLOC_011172 | KIR3DL3              | chr19:55235983-55248003 | 0 | 1 |
| XLOC_011173 | XLOC_011173 | KIR2DL3              | chr19:55249973-55264504 | 0 | 1 |
| XLOC_011174 | XLOC_011174 | KIR2DL1              | chr19:55281264-55295778 | 0 | 1 |
| XLOC_011175 | XLOC_011175 | KIR2DL4,LOC100287534 | chr19:55304499-55325972 | 0 | 1 |
| XLOC_011176 | XLOC_011176 | KIR3DL1              | chr19:55327892-55342233 | 0 | 1 |
| XLOC_011177 | XLOC_011177 | KIR2DS4              | chr19:55344173-55360023 | 0 | 1 |
| XLOC_011178 | XLOC_011178 | KIR3DL2              | chr19:55361897-55378670 | 0 | 1 |
| XLOC_011180 | XLOC_011180 | NCR1                 | chr19:55417507-55424439 | 0 | 1 |
| XLOC_011181 | XLOC_011181 | NLRP2                | chr19:55476651-55512510 | 0 | 1 |
| XLOC_011200 | XLOC_011200 | NLRP5                | chr19:56511091-56573174 | 0 | 1 |
| XLOC_011202 | XLOC_011202 | GALP                 | chr19:56687388-56697144 | 0 | 1 |
| XLOC_011206 | XLOC_011206 | LOC100128252         | chr19:56989242-57006805 | 0 | 1 |
| XLOC_011207 | XLOC_011207 | ZNF471               | chr19:57019211-57040269 | 0 | 1 |
| XLOC_011209 | XLOC_011209 | ZNF470               | chr19:57078889-57094262 | 0 | 1 |
| XLOC_011212 | XLOC_011212 | PEG3-AS1             | chr19:57285922-57352097 | 0 | 1 |
| XLOC_011213 | XLOC_011213 | MIMT1                | chr19:57352269-57359922 | 0 | 1 |
| XLOC_011229 | XLOC_011229 | ZNF530               | chr19:58111252-58119637 | 0 | 1 |
| XLOC_011230 | XLOC_011230 | ZNF134               | chr19:58125829-58133636 | 0 | 1 |
| XLOC_011232 | XLOC_011232 | ZSCAN4               | chr19:58180302-58190520 | 0 | 1 |
| XLOC_011238 | XLOC_011238 | LOC100128398         | chr19:58488440-58518574 | 0 | 1 |
| XLOC_011239 | XLOC_011239 | ZSCAN1               | chr19:58545433-58565999 | 0 | 1 |
| XLOC_011240 | XLOC_011240 | ZNF135               | chr19:58570606-58581110 | 0 | 1 |
| XLOC_011247 | XLOC_011247 | LOC646862            | chr19:58907456-58908446 | 0 | 1 |
| XLOC_011256 | XLOC_011256 | FAM138A              | chr19:76219-77690       | 0 | 1 |
| XLOC_011260 | XLOC_011260 | THEG                 | chr19:362056-376013     | 0 | 1 |
| XLOC_011267 | XLOC_011267 | LPPR3                | chr19:812487-821952     | 0 | 1 |
| XLOC_011293 | XLOC_011293 | MIR1227              | chr19:2233154-2236328   | 0 | 1 |
| XLOC_011314 | XLOC_011314 | RAX2                 | chr19:3769088-3772219   | 0 | 1 |
| XLOC_011320 | XLOC_011320 | SNORD37              | chr19:3976053-3985461   | 0 | 1 |
| XLOC_011336 | XLOC_011336 | ARRDC5               | chr19:4890448-4902879   | 0 | 1 |
| XLOC_011366 | XLOC_011366 | MBD3L4               | chr19:7037754-7040184   | 0 | 1 |
| XLOC_011374 | XLOC_011374 | CLEC4G               | chr19:7793842-7797057   | 0 | 1 |
| XLOC_011375 | XLOC_011375 | CD209                | chr19:7804880-7812464   | 0 | 1 |
| XLOC_011377 | XLOC_011377 | LOC388499            | chr19:7943516-7945117   | 0 | 1 |
| XLOC_011386 | XLOC_011386 | MIR4999              | chr19:8439259-8469317   | 0 | 1 |
| XLOC_011390 | XLOC_011390 | ADAMTS10             | chr19:8645125-8675588   | 0 | 1 |
| XLOC_011391 | XLOC_011391 | ACTL9                | chr19:8807750-8809172   | 0 | 1 |
| XLOC_011393 | XLOC_011393 | MUC16                | chr19:8959519-9092018   | 0 | 1 |
| XLOC_011394 | XLOC_011394 | OR7G2                | chr19:9212944-9213982   | 0 | 1 |
| XLOC_011395 | XLOC_011395 | OR7G1                | chr19:9225503-9226439   | 0 | 1 |
| XLOC_011396 | XLOC_011396 | OR7G3                | chr19:9236687-9237626   | 0 | 1 |
| XLOC_011397 | XLOC_011397 | OR7D4                | chr19:9324525-9325547   | 0 | 1 |
| XLOC_011400 | XLOC_011400 | ZNF560               | chr19:9377030-9609279   | 0 | 1 |
| XLOC_011405 | XLOC_011405 | ZNF812               | chr19:9800813-9811493   | 0 | 1 |
| XLOC_011421 | XLOC_011421 | S1PR5                | chr19:10623417-10628668 | 0 | 1 |

|             |             |              |                         |   |   |
|-------------|-------------|--------------|-------------------------|---|---|
| XLOC_011426 | XLOC_011426 | MIR199A1     | chr19:10828728-10942586 | 0 | 1 |
| XLOC_011458 | XLOC_011458 | SNORD41      | chr19:12810007-12834810 | 0 | 1 |
| XLOC_011473 | XLOC_011473 | MIR27A       | chr19:13947253-13947331 | 0 | 1 |
| XLOC_011474 | XLOC_011474 | MIR23A       | chr19:13947400-13947473 | 0 | 1 |
| XLOC_011488 | XLOC_011488 | EMR3         | chr19:14730050-14785730 | 0 | 1 |
| XLOC_011490 | XLOC_011490 | ORTC1        | chr19:14909985-14910948 | 0 | 1 |
| XLOC_011491 | XLOC_011491 | ORTA5        | chr19:14937138-14939276 | 0 | 1 |
| XLOC_011492 | XLOC_011492 | ORTA10       | chr19:14951759-14952689 | 0 | 1 |
| XLOC_011493 | XLOC_011493 | ORTA17       | chr19:14991237-14992167 | 0 | 1 |
| XLOC_011502 | XLOC_011502 | RASAL3       | chr19:15562437-15575382 | 0 | 1 |
| XLOC_011503 | XLOC_011503 | PGLYRP2      | chr19:15579456-15590315 | 0 | 1 |
| XLOC_011504 | XLOC_011504 | CYP4F24P     | chr19:15870143-15890798 | 0 | 1 |
| XLOC_011528 | XLOC_011528 | IL12RB1      | chr19:18170370-18197697 | 0 | 1 |
| XLOC_011531 | XLOC_011531 | LOC729966    | chr19:18360759-18366229 | 0 | 1 |
| XLOC_011540 | XLOC_011540 | COMP         | chr19:18893582-18902114 | 0 | 1 |
| XLOC_011548 | XLOC_011548 | HAPLN4       | chr19:19366451-19373596 | 0 | 1 |
| XLOC_011560 | XLOC_011560 | MIR1270-2    | chr19:20510080-20510163 | 0 | 1 |
| XLOC_011561 | XLOC_011561 | ZNF826P      | chr19:20578625-20607771 | 0 | 1 |
| XLOC_011562 | XLOC_011562 | MIR1270-2    | chr19:20578625-20607771 | 0 | 1 |
| XLOC_011569 | XLOC_011569 | ZNF676       | chr19:22361902-22379753 | 0 | 1 |
| XLOC_011570 | XLOC_011570 | ZNF98        | chr19:22573898-22605148 | 0 | 1 |
| XLOC_011572 | XLOC_011572 | ZNF728       | chr19:23157684-23186010 | 0 | 1 |
| XLOC_011580 | XLOC_011580 | LOC284395    | chr19:29777917-30016659 | 0 | 1 |
| XLOC_011582 | XLOC_011582 | TSHZ3        | chr19:31765850-31840190 | 0 | 1 |
| XLOC_011592 | XLOC_011592 | SCGB2B2      | chr19:35084345-35085490 | 0 | 1 |
| XLOC_011594 | XLOC_011594 | LOC400685    | chr19:35307057-35323773 | 0 | 1 |
| XLOC_011595 | XLOC_011595 | LOC100652909 | chr19:35382932-35389847 | 0 | 1 |
| XLOC_011597 | XLOC_011597 | LOC100128675 | chr19:35531409-35597208 | 0 | 1 |
| XLOC_011612 | XLOC_011612 | TYROBP       | chr19:36395302-36399211 | 0 | 1 |
| XLOC_011639 | XLOC_011639 | LOC100631378 | chr19:38308050-38345836 | 0 | 1 |
| XLOC_011642 | XLOC_011642 | PPP1R14A     | chr19:38741876-38747231 | 0 | 1 |
| XLOC_011648 | XLOC_011648 | LGALS7       | chr19:39261607-39264157 | 0 | 1 |
| XLOC_011658 | XLOC_011658 | SYCN         | chr19:39693561-39694906 | 0 | 1 |
| XLOC_011659 | XLOC_011659 | IFNL3        | chr19:39734271-39735611 | 0 | 1 |
| XLOC_011660 | XLOC_011660 | IFNL4        | chr19:39736953-39739496 | 0 | 1 |
| XLOC_011664 | XLOC_011664 | MIR4530      | chr19:39900262-39900318 | 0 | 1 |
| XLOC_011668 | XLOC_011668 | CLC          | chr19:40221892-40228669 | 0 | 1 |
| XLOC_011677 | XLOC_011677 | MIR641       | chr19:40736223-40791302 | 0 | 1 |
| XLOC_011688 | XLOC_011688 | CYP2A7       | chr19:41381343-41388657 | 0 | 1 |
| XLOC_011694 | XLOC_011694 | LOC100505495 | chr19:41960073-42006554 | 0 | 1 |
| XLOC_011695 | XLOC_011695 | CEACAM4      | chr19:42125343-42133442 | 0 | 1 |
| XLOC_011696 | XLOC_011696 | CEACAM7      | chr19:42177234-42192096 | 0 | 1 |
| XLOC_011697 | XLOC_011697 | LYPD4        | chr19:42341149-42348508 | 0 | 1 |
| XLOC_011702 | XLOC_011702 | MIR4323      | chr19:42636780-42641251 | 0 | 1 |
| XLOC_011713 | XLOC_011713 | PSG8         | chr19:43256838-43269831 | 0 | 1 |
| XLOC_011714 | XLOC_011714 | PSG10P       | chr19:43341148-43359870 | 0 | 1 |
| XLOC_011715 | XLOC_011715 | PSG1         | chr19:43370612-43383871 | 0 | 1 |
| XLOC_011716 | XLOC_011716 | PSG6         | chr19:43406233-43422076 | 0 | 1 |
| XLOC_011717 | XLOC_011717 | PSG7         | chr19:43428283-43441330 | 0 | 1 |
| XLOC_011719 | XLOC_011719 | PSG2         | chr19:43568361-43586893 | 0 | 1 |
| XLOC_011722 | XLOC_011722 | LOC284344    | chr19:43715942-43752798 | 0 | 1 |
| XLOC_011744 | XLOC_011744 | CEACAM20     | chr19:45010210-45033548 | 0 | 1 |
| XLOC_011746 | XLOC_011746 | MIR4531      | chr19:45147097-45169428 | 0 | 1 |
| XLOC_011759 | XLOC_011759 | MIR330       | chr19:46112657-46148775 | 0 | 1 |
| XLOC_011760 | XLOC_011760 | MIR642B      | chr19:46171501-46185717 | 0 | 1 |
| XLOC_011770 | XLOC_011770 | NANOS2       | chr19:46416472-46418036 | 0 | 1 |
| XLOC_011771 | XLOC_011771 | NOVA2        | chr19:46442770-46476657 | 0 | 1 |
| XLOC_011774 | XLOC_011774 | IGFL3        | chr19:46623327-46627931 | 0 | 1 |
| XLOC_011775 | XLOC_011775 | RNU6-66      | chr19:46720994-46846690 | 0 | 1 |
| XLOC_011776 | XLOC_011776 | CCDC8        | chr19:46913585-46916919 | 0 | 1 |
| XLOC_011779 | XLOC_011779 | PNMAL2       | chr19:46984044-47104457 | 0 | 1 |
| XLOC_011784 | XLOC_011784 | MIR320E      | chr19:47150868-47220384 | 0 | 1 |
| XLOC_011787 | XLOC_011787 | SNAR-E       | chr19:47333841-47333961 | 0 | 1 |
| XLOC_011797 | XLOC_011797 | ZNF541       | chr19:48023946-48059113 | 0 | 1 |
| XLOC_011798 | XLOC_011798 | TPRX1        | chr19:48304499-48306861 | 0 | 1 |
| XLOC_011799 | XLOC_011799 | SULT2A1      | chr19:48373722-48389654 | 0 | 1 |
| XLOC_011800 | XLOC_011800 | BSPH1        | chr19:48471302-48495427 | 0 | 1 |
| XLOC_011826 | XLOC_011826 | SNAR-G2      | chr19:49534925-49535044 | 0 | 1 |
| XLOC_011827 | XLOC_011827 | CGB1         | chr19:49538825-49540191 | 0 | 1 |
| XLOC_011835 | XLOC_011835 | MIR4324      | chr19:49792891-49828474 | 0 | 1 |
| XLOC_011840 | XLOC_011840 | MIR150       | chr19:50004041-50004125 | 0 | 1 |
| XLOC_011844 | XLOC_011844 | TSKS         | chr19:50243010-50266515 | 0 | 1 |
| XLOC_011852 | XLOC_011852 | SNAR-A8      | chr19:50595745-50595866 | 0 | 1 |
| XLOC_011853 | XLOC_011853 | SNAR-A4      | chr19:50601082-50601203 | 0 | 1 |
| XLOC_011854 | XLOC_011854 | SNAR-A10     | chr19:50604147-50604268 | 0 | 1 |
| XLOC_011855 | XLOC_011855 | SNAR-A7      | chr19:50607211-50607332 | 0 | 1 |
| XLOC_011856 | XLOC_011856 | SNAR-A14     | chr19:50610270-50610391 | 0 | 1 |
| XLOC_011857 | XLOC_011857 | SNAR-A3      | chr19:50615624-50615745 | 0 | 1 |
| XLOC_011858 | XLOC_011858 | SNAR-A6      | chr19:50620976-50621097 | 0 | 1 |

|             |             |              |                         |   |   |
|-------------|-------------|--------------|-------------------------|---|---|
| XLOC_011859 | XLOC_011859 | SNAR-A10     | chr19:50626330-50626451 | 0 | 1 |
| XLOC_011860 | XLOC_011860 | SNAR-A8      | chr19:50631658-50631779 | 0 | 1 |
| XLOC_011861 | XLOC_011861 | SNAR-B1      | chr19:50637001-50637121 | 0 | 1 |
| XLOC_011862 | XLOC_011862 | SNAR-B2      | chr19:50642374-50642494 | 0 | 1 |
| XLOC_011863 | XLOC_011863 | SNAR-D       | chr19:50643458-50643577 | 0 | 1 |
| XLOC_011864 | XLOC_011864 | IZUMO2       | chr19:50655804-50666538 | 0 | 1 |
| XLOC_011865 | XLOC_011865 | KCNC3        | chr19:50818764-50832634 | 0 | 1 |
| XLOC_011866 | XLOC_011866 | NAPSB        | chr19:50837056-50848005 | 0 | 1 |
| XLOC_011875 | XLOC_011875 | SNORD88B     | chr19:51300960-51307974 | 0 | 1 |
| XLOC_011876 | XLOC_011876 | SNORD88A     | chr19:51300960-51307974 | 0 | 1 |
| XLOC_011877 | XLOC_011877 | SNORD88C     | chr19:51300960-51307974 | 0 | 1 |
| XLOC_011882 | XLOC_011882 | KLK5         | chr19:51446558-51456344 | 0 | 1 |
| XLOC_011885 | XLOC_011885 | KLK8         | chr19:51499263-51504958 | 0 | 1 |
| XLOC_011886 | XLOC_011886 | KLK9         | chr19:51505768-51512890 | 0 | 1 |
| XLOC_011887 | XLOC_011887 | KLK10        | chr19:51515999-51529431 | 0 | 1 |
| XLOC_011888 | XLOC_011888 | KLK11        | chr19:51525486-51531290 | 0 | 1 |
| XLOC_011889 | XLOC_011889 | KLK12        | chr19:51532347-51538148 | 0 | 1 |
| XLOC_011890 | XLOC_011890 | KLK13        | chr19:51559462-51568367 | 0 | 1 |
| XLOC_011900 | XLOC_011900 | SIGLEC8      | chr19:51954250-51961708 | 0 | 1 |
| XLOC_011901 | XLOC_011901 | SIGLEC12     | chr19:51994612-52005043 | 0 | 1 |
| XLOC_011902 | XLOC_011902 | SIGLEC6      | chr19:52022783-52035110 | 0 | 1 |
| XLOC_011907 | XLOC_011907 | FPR1         | chr19:52249022-52255150 | 0 | 1 |
| XLOC_011926 | XLOC_011926 | ZNF415       | chr19:53611131-53636173 | 0 | 1 |
| XLOC_011930 | XLOC_011930 | VN1R4        | chr19:53770012-53770918 | 0 | 1 |
| XLOC_011931 | XLOC_011931 | BIRC8        | chr19:53792853-53794875 | 0 | 1 |
| XLOC_011933 | XLOC_011933 | MIR371B      | chr19:54290928-54290996 | 0 | 1 |
| XLOC_011936 | XLOC_011936 | TARM1        | chr19:54573200-54584634 | 0 | 1 |
| XLOC_011944 | XLOC_011944 | LILRB5       | chr19:54754269-54761167 | 0 | 1 |
| XLOC_011945 | XLOC_011945 | LILRB2       | chr19:54777674-54785033 | 0 | 1 |
| XLOC_011946 | XLOC_011946 | LILRA3       | chr19:54799854-54804265 | 0 | 1 |
| XLOC_011948 | XLOC_011948 | LILRA4       | chr19:54844691-54850421 | 0 | 1 |
| XLOC_011952 | XLOC_011952 | NLRP7        | chr19:55434876-55458873 | 0 | 1 |
| XLOC_011953 | XLOC_011953 | RNU6-64      | chr19:55471012-55471043 | 0 | 1 |
| XLOC_011967 | XLOC_011967 | FAM71E2      | chr19:55866275-55874620 | 0 | 1 |
| XLOC_011973 | XLOC_011973 | SBK2         | chr19:56041099-56048435 | 0 | 1 |
| XLOC_011974 | XLOC_011974 | SGK110       | chr19:56052022-56056909 | 0 | 1 |
| XLOC_011980 | XLOC_011980 | NLRP13       | chr19:56407310-56443702 | 0 | 1 |
| XLOC_011988 | XLOC_011988 | ZIM3         | chr19:57645463-57656570 | 0 | 1 |
| XLOC_012000 | XLOC_012000 | ZNF418       | chr19:58433251-58446740 | 0 | 1 |
| XLOC_012001 | XLOC_012001 | ZNF256       | chr19:58452200-58459077 | 0 | 1 |
| XLOC_012002 | XLOC_012002 | C19orf18     | chr19:58469804-58485902 | 0 | 1 |
| XLOC_012003 | XLOC_012003 | ZNF606       | chr19:58488440-58518574 | 0 | 1 |
| XLOC_012009 | XLOC_012009 | MIR4754      | chr19:58898136-58898225 | 0 | 1 |
| XLOC_012027 | XLOC_012027 | TPO          | chr2:1417232-1546499    | 0 | 1 |
| XLOC_012028 | XLOC_012028 | LOC730811    | chr2:1792884-2335045    | 0 | 1 |
| XLOC_012034 | XLOC_012034 | SOX11        | chr2:5832798-5841517    | 0 | 1 |
| XLOC_012035 | XLOC_012035 | LOC150622    | chr2:6072818-6120350    | 0 | 1 |
| XLOC_012036 | XLOC_012036 | LOC400940    | chr2:6122109-6128364    | 0 | 1 |
| XLOC_012051 | XLOC_012051 | KCNF1        | chr2:11052062-11054351  | 0 | 1 |
| XLOC_012058 | XLOC_012058 | MIR3125      | chr2:12856997-12882858  | 0 | 1 |
| XLOC_012061 | XLOC_012061 | MYCN         | chr2:16080019-16087129  | 0 | 1 |
| XLOC_012064 | XLOC_012064 | MSGN1        | chr2:17997785-17998367  | 0 | 1 |
| XLOC_012065 | XLOC_012065 | KCNS3        | chr2:18059944-18114225  | 0 | 1 |
| XLOC_012066 | XLOC_012066 | MIR4757      | chr2:19548189-19548266  | 0 | 1 |
| XLOC_012067 | XLOC_012067 | FLJ12334     | chr2:20068614-20084808  | 0 | 1 |
| XLOC_012069 | XLOC_012069 | GDF7         | chr2:20866423-20871250  | 0 | 1 |
| XLOC_012085 | XLOC_012085 | C2orf70      | chr2:26785480-26802395  | 0 | 1 |
| XLOC_012096 | XLOC_012096 | TCF23        | chr2:27371944-27375819  | 0 | 1 |
| XLOC_012099 | XLOC_012099 | DNAJC5G      | chr2:27498288-27504296  | 0 | 1 |
| XLOC_012112 | XLOC_012112 | MIR4263      | chr2:28004265-28561767  | 0 | 1 |
| XLOC_012118 | XLOC_012118 | SNORD92      | chr2:29117532-29171080  | 0 | 1 |
| XLOC_012119 | XLOC_012119 | SNORD53      | chr2:29117532-29171080  | 0 | 1 |
| XLOC_012125 | XLOC_012125 | EHD3         | chr2:31456879-31491260  | 0 | 1 |
| XLOC_012130 | XLOC_012130 | MIR558       | chr2:32582095-32843965  | 0 | 1 |
| XLOC_012132 | XLOC_012132 | MIR4765      | chr2:32853086-33046118  | 0 | 1 |
| XLOC_012133 | XLOC_012133 | LINC00486    | chr2:33050509-33171202  | 0 | 1 |
| XLOC_012134 | XLOC_012134 | LOC100271832 | chr2:33050509-33171202  | 0 | 1 |
| XLOC_012138 | XLOC_012138 | VIT          | chr2:36923832-37041937  | 0 | 1 |
| XLOC_012144 | XLOC_012144 | CYP11B1-AS1  | chr2:38358246-38408993  | 0 | 1 |
| XLOC_012151 | XLOC_012151 | SLC8A1-AS1   | chr2:40144773-40739575  | 0 | 1 |
| XLOC_012152 | XLOC_012152 | LOC388942    | chr2:42104694-42121186  | 0 | 1 |
| XLOC_012159 | XLOC_012159 | ABCG8        | chr2:44066102-44105605  | 0 | 1 |
| XLOC_012173 | XLOC_012173 | EPCAM        | chr2:47596286-47614167  | 0 | 1 |
| XLOC_012174 | XLOC_012174 | MIR559       | chr2:47596286-47614167  | 0 | 1 |
| XLOC_012190 | XLOC_012190 | CCDC85A      | chr2:56411257-56613309  | 0 | 1 |
| XLOC_012192 | XLOC_012192 | FLJ30838     | chr2:58747887-59290901  | 0 | 1 |
| XLOC_012201 | XLOC_012201 | MIR5192      | chr2:62423261-62451866  | 0 | 1 |
| XLOC_012208 | XLOC_012208 | MIR4434      | chr2:64751438-64820138  | 0 | 1 |
| XLOC_012209 | XLOC_012209 | LOC339807    | chr2:64834445-64843616  | 0 | 1 |

|             |             |                  |                           |   |   |
|-------------|-------------|------------------|---------------------------|---|---|
| XLOC_012216 | XLOC_012216 | PLEK             | chr2:68592321-68624585    | 0 | 1 |
| XLOC_012218 | XLOC_012218 | PROKR1           | chr2:68872953-68882708    | 0 | 1 |
| XLOC_012220 | XLOC_012220 | GKN1             | chr2:69201704-69208112    | 0 | 1 |
| XLOC_012221 | XLOC_012221 | ANTXR1           | chr2:69240275-69476459    | 0 | 1 |
| XLOC_012222 | XLOC_012222 | MIR3126          | chr2:69240275-69476459    | 0 | 1 |
| XLOC_012232 | XLOC_012232 | OR7E91P          | chr2:71251204-71257060    | 0 | 1 |
| XLOC_012238 | XLOC_012238 | EMX1             | chr2:73144603-73162020    | 0 | 1 |
| XLOC_012239 | XLOC_012239 | NOTO             | chr2:73429385-73438340    | 0 | 1 |
| XLOC_012251 | XLOC_012251 | DCTN1-AS1        | chr2:74588280-74621008    | 0 | 1 |
| XLOC_012262 | XLOC_012262 | MIR5000          | chr2:75273589-75426645    | 0 | 1 |
| XLOC_012264 | XLOC_012264 | REG3G            | chr2:79252811-79255630    | 0 | 1 |
| XLOC_012265 | XLOC_012265 | REG1A            | chr2:79347583-79350545    | 0 | 1 |
| XLOC_012267 | XLOC_012267 | LOC1720          | chr2:83083926-83084893    | 0 | 1 |
| XLOC_012268 | XLOC_012268 | FUNDC2P2         | chr2:84517805-84519324    | 0 | 1 |
| XLOC_012289 | XLOC_012289 | RGPD1_RGPD2      | chr2:87140934-87248973    | 0 | 1 |
| XLOC_012291 | XLOC_012291 | MIR4435-1        | chr2:87929273-87929353    | 0 | 1 |
| XLOC_012293 | XLOC_012293 | SMYD1            | chr2:88367298-88412902    | 0 | 1 |
| XLOC_012294 | XLOC_012294 | THNSL2           | chr2:88469813-88486156    | 0 | 1 |
| XLOC_012295 | XLOC_012295 | TEX37            | chr2:88824168-88829103    | 0 | 1 |
| XLOC_012298 | XLOC_012298 | MIR4436A         | chr2:89111883-89111968    | 0 | 1 |
| XLOC_012300 | XLOC_012300 | ACTR3BP2         | chr2:92129158-92130496    | 0 | 1 |
| XLOC_012302 | XLOC_012302 | MAL              | chr2:95691399-95719737    | 0 | 1 |
| XLOC_012307 | XLOC_012307 | TRIM43           | chr2:96257765-96265469    | 0 | 1 |
| XLOC_012316 | XLOC_012316 | MIR3127          | chr2:97426638-97477628    | 0 | 1 |
| XLOC_012323 | XLOC_012323 | VWA3B            | chr2:98703594-98929410    | 0 | 1 |
| XLOC_012324 | XLOC_012324 | CNGA3            | chr2:98962617-99015064    | 0 | 1 |
| XLOC_012331 | XLOC_012331 | NMS              | chr2:101086943-101099742  | 0 | 1 |
| XLOC_012336 | XLOC_012336 | MIR5696          | chr2:101925911-101925996  | 0 | 1 |
| XLOC_012338 | XLOC_012338 | IL1R2            | chr2:102608305-102644884  | 0 | 1 |
| XLOC_012340 | XLOC_012340 | IL1RL2           | chr2:102803432-102855811  | 0 | 1 |
| XLOC_012344 | XLOC_012344 | MIR4772          | chr2:103035253-103069024  | 0 | 1 |
| XLOC_012348 | XLOC_012348 | LOC150568        | chr2:105050804-105129215  | 0 | 1 |
| XLOC_012349 | XLOC_012349 | POU3F3           | chr2:105471968-105473471  | 0 | 1 |
| XLOC_012355 | XLOC_012355 | PLGLA            | chr2:106998569-107007851  | 0 | 1 |
| XLOC_012357 | XLOC_012357 | SLC5A7           | chr2:108602994-108630443  | 0 | 1 |
| XLOC_012358 | XLOC_012358 | SULT1C3          | chr2:108863650-108881807  | 0 | 1 |
| XLOC_012359 | XLOC_012359 | SULT1C2          | chr2:108905094-108926371  | 0 | 1 |
| XLOC_012360 | XLOC_012360 | SULT1C2P1        | chr2:108938693-108970254  | 0 | 1 |
| XLOC_012361 | XLOC_012361 | SULT1C4          | chr2:108994420-109004270  | 0 | 1 |
| XLOC_012369 | XLOC_012369 | LIMS3L           | chr2:110656008-110726149  | 0 | 1 |
| XLOC_012371 | XLOC_012371 | LOC100507334     | chr2:111003214-1111024135 | 0 | 1 |
| XLOC_012372 | XLOC_012372 | MIR4436B2        | chr2:111042429-111042520  | 0 | 1 |
| XLOC_012373 | XLOC_012373 | ACOXL            | chr2:111490149-111875799  | 0 | 1 |
| XLOC_012385 | XLOC_012385 | IL36A            | chr2:113763448-113765621  | 0 | 1 |
| XLOC_012386 | XLOC_012386 | IL36RN           | chr2:113816214-113822320  | 0 | 1 |
| XLOC_012387 | XLOC_012387 | IL1F10           | chr2:113825546-113833427  | 0 | 1 |
| XLOC_012388 | XLOC_012388 | IL1RN            | chr2:113875469-113891593  | 0 | 1 |
| XLOC_012394 | XLOC_012394 | FAM138B          | chr2:114334958-114336429  | 0 | 1 |
| XLOC_012399 | XLOC_012399 | DPP10            | chr2:115199898-116602326  | 0 | 1 |
| XLOC_012402 | XLOC_012402 | MARCO            | chr2:119699744-119752236  | 0 | 1 |
| XLOC_012406 | XLOC_012406 | PCDP1            | chr2:120302007-120414237  | 0 | 1 |
| XLOC_012412 | XLOC_012412 | GLI2             | chr2:121554866-121750229  | 0 | 1 |
| XLOC_012416 | XLOC_012416 | CNTNAP5          | chr2:124782863-125672863  | 0 | 1 |
| XLOC_012417 | XLOC_012417 | GYPC             | chr2:127413510-127454251  | 0 | 1 |
| XLOC_012420 | XLOC_012420 | GPR17            | chr2:128395995-128439360  | 0 | 1 |
| XLOC_012428 | XLOC_012428 | CFC1B            | chr2:131278666-131285565  | 0 | 1 |
| XLOC_012429 | XLOC_012429 | LOC646743.TISP43 | chr2:131328401-131341734  | 0 | 1 |
| XLOC_012430 | XLOC_012430 | CYP4F30P         | chr2:131437622-131443435  | 0 | 1 |
| XLOC_012431 | XLOC_012431 | GPR148           | chr2:131486642-131487909  | 0 | 1 |
| XLOC_012435 | XLOC_012435 | POTEE            | chr2:131975923-132022416  | 0 | 1 |
| XLOC_012436 | XLOC_012436 | LOC440910        | chr2:132036862-132057392  | 0 | 1 |
| XLOC_012437 | XLOC_012437 | LOC389043        | chr2:132160473-132165801  | 0 | 1 |
| XLOC_012438 | XLOC_012438 | RNU6-81          | chr2:132202795-132360468  | 0 | 1 |
| XLOC_012444 | XLOC_012444 | MIR3679          | chr2:134884695-134884763  | 0 | 1 |
| XLOC_012446 | XLOC_012446 | ACMSD            | chr2:135596185-135676176  | 0 | 1 |
| XLOC_012450 | XLOC_012450 | MIR128-1         | chr2:136289082-136482839  | 0 | 1 |
| XLOC_012452 | XLOC_012452 | LOC100507600     | chr2:136545414-136594750  | 0 | 1 |
| XLOC_012453 | XLOC_012453 | THSD7B           | chr2:137748461-138435287  | 0 | 1 |
| XLOC_012458 | XLOC_012458 | ARHGAP15         | chr2:143886898-144525921  | 0 | 1 |
| XLOC_012459 | XLOC_012459 | ZEB2-AS1         | chr2:145141941-145278465  | 0 | 1 |
| XLOC_012460 | XLOC_012460 | DKFZp686O1327    | chr2:145425533-145834291  | 0 | 1 |
| XLOC_012466 | XLOC_012466 | LYPD6B           | chr2:149894980-150071772  | 0 | 1 |
| XLOC_012468 | XLOC_012468 | TNFAIP6          | chr2:152214105-152236562  | 0 | 1 |
| XLOC_012469 | XLOC_012469 | MIR4773-1        | chr2:152214105-152236562  | 0 | 1 |
| XLOC_012473 | XLOC_012473 | GALNT13          | chr2:154728425-155313950  | 0 | 1 |
| XLOC_012476 | XLOC_012476 | GALNT5           | chr2:158114339-158167913  | 0 | 1 |
| XLOC_012478 | XLOC_012478 | CCDC148-AS1      | chr2:159023161-159313265  | 0 | 1 |
| XLOC_012480 | XLOC_012480 | DAPL1            | chr2:159651828-159672496  | 0 | 1 |
| XLOC_012485 | XLOC_012485 | TBR1             | chr2:162272619-162281573  | 0 | 1 |

|             |             |                           |                          |   |   |
|-------------|-------------|---------------------------|--------------------------|---|---|
| XLOC_012489 | XLOC_012489 | CSRNP3                    | chr2:166326156-166545917 | 0 | 1 |
| XLOC_012491 | XLOC_012491 | XIRP2                     | chr2:167744996-168116261 | 0 | 1 |
| XLOC_012494 | XLOC_012494 | MIR4774                   | chr2:169312758-169642939 | 0 | 1 |
| XLOC_012496 | XLOC_012496 | G6PC2                     | chr2:169757749-169766510 | 0 | 1 |
| XLOC_012504 | XLOC_012504 | MYO3B                     | chr2:171034654-171511674 | 0 | 1 |
| XLOC_012520 | XLOC_012520 | LOC285084                 | chr2:175190754-175195370 | 0 | 1 |
| XLOC_012521 | XLOC_012521 | SP9                       | chr2:175199820-175202268 | 0 | 1 |
| XLOC_012524 | XLOC_012524 | HOXD12                    | chr2:176964529-176965488 | 0 | 1 |
| XLOC_012525 | XLOC_012525 | HOXD11                    | chr2:176972083-176974316 | 0 | 1 |
| XLOC_012526 | XLOC_012526 | HOXD10                    | chr2:176981491-176984670 | 0 | 1 |
| XLOC_012529 | XLOC_012529 | MIR10B                    | chr2:177015030-177015140 | 0 | 1 |
| XLOC_012537 | XLOC_012537 | OSBPL6                    | chr2:179059207-179672150 | 0 | 1 |
| XLOC_012542 | XLOC_012542 | ITGA4                     | chr2:182321618-182521834 | 0 | 1 |
| XLOC_012544 | XLOC_012544 | PPP1R1C                   | chr2:182818967-182996109 | 0 | 1 |
| XLOC_012548 | XLOC_012548 | ZNF804A                   | chr2:185463092-185804214 | 0 | 1 |
| XLOC_012554 | XLOC_012554 | MIR561                    | chr2:189156395-189460652 | 0 | 1 |
| XLOC_012555 | XLOC_012555 | COL3A1                    | chr2:189839098-189877472 | 0 | 1 |
| XLOC_012556 | XLOC_012556 | MIR1245A                  | chr2:189839098-189877472 | 0 | 1 |
| XLOC_012568 | XLOC_012568 | PCGEM1                    | chr2:193614570-193641625 | 0 | 1 |
| XLOC_012574 | XLOC_012574 | PLCL1                     | chr2:198669425-199014608 | 0 | 1 |
| XLOC_012589 | XLOC_012589 | CDK15                     | chr2:202671151-202760273 | 0 | 1 |
| XLOC_012592 | XLOC_012592 | SNORD70                   | chr2:203130514-203168384 | 0 | 1 |
| XLOC_012593 | XLOC_012593 | SNORD11B                  | chr2:203130514-203168384 | 0 | 1 |
| XLOC_012594 | XLOC_012594 | SNORD11                   | chr2:203130514-203168384 | 0 | 1 |
| XLOC_012601 | XLOC_012601 | CD28                      | chr2:204571197-204603636 | 0 | 1 |
| XLOC_012603 | XLOC_012603 | ICOS                      | chr2:204801470-204826298 | 0 | 1 |
| XLOC_012607 | XLOC_012607 | SNORD51                   | chr2:207024317-207027653 | 0 | 1 |
| XLOC_012610 | XLOC_012610 | ADAM23                    | chr2:207308367-207482679 | 0 | 1 |
| XLOC_012611 | XLOC_012611 | LOC200726                 | chr2:207507141-207514173 | 0 | 1 |
| XLOC_012613 | XLOC_012613 | MIR3130-2                 | chr2:207630111-207660911 | 0 | 1 |
| XLOC_012617 | XLOC_012617 | LOC100507443              | chr2:208983852-209021486 | 0 | 1 |
| XLOC_012620 | XLOC_012620 | PTH2R                     | chr2:209224568-209359231 | 0 | 1 |
| XLOC_012622 | XLOC_012622 | UNC80                     | chr2:210636716-210864024 | 0 | 1 |
| XLOC_012625 | XLOC_012625 | CPS1-IT1                  | chr2:211342405-211543831 | 0 | 1 |
| XLOC_012627 | XLOC_012627 | VWC2L                     | chr2:215276460-215440653 | 0 | 1 |
| XLOC_012628 | XLOC_012628 | VWC2L-IT1                 | chr2:215276460-215440653 | 0 | 1 |
| XLOC_012644 | XLOC_012644 | MIR26B                    | chr2:219263060-219270664 | 0 | 1 |
| XLOC_012645 | XLOC_012645 | VIL1                      | chr2:219283837-219314248 | 0 | 1 |
| XLOC_012652 | XLOC_012652 | WNT6                      | chr2:219724545-219738954 | 0 | 1 |
| XLOC_012654 | XLOC_012654 | CDK5R2                    | chr2:219824349-219826877 | 0 | 1 |
| XLOC_012655 | XLOC_012655 | LINC00608                 | chr2:219841005-219842644 | 0 | 1 |
| XLOC_012656 | XLOC_012656 | LOC100129175              | chr2:219866936-219906245 | 0 | 1 |
| XLOC_012671 | XLOC_012671 | CCDC140                   | chr2:223064605-223169936 | 0 | 1 |
| XLOC_012673 | XLOC_012673 | MOGAT1                    | chr2:223536456-223574649 | 0 | 1 |
| XLOC_012675 | XLOC_012675 | KCNE4                     | chr2:223916647-223920357 | 0 | 1 |
| XLOC_012677 | XLOC_012677 | NYAP2                     | chr2:226265601-226518734 | 0 | 1 |
| XLOC_012678 | XLOC_012678 | MIR548AR                  | chr2:226628160-226628181 | 0 | 1 |
| XLOC_012679 | XLOC_012679 | LOC646736                 | chr2:227007509-227044778 | 0 | 1 |
| XLOC_012684 | XLOC_012684 | CCL20                     | chr2:228678557-228682280 | 0 | 1 |
| XLOC_012693 | XLOC_012693 | SPATA3                    | chr2:231860838-231871999 | 0 | 1 |
| XLOC_012697 | XLOC_012697 | MIR4777                   | chr2:232063293-232238606 | 0 | 1 |
| XLOC_012699 | XLOC_012699 | C2orf57                   | chr2:232457574-232458994 | 0 | 1 |
| XLOC_012703 | XLOC_012703 | ALPP                      | chr2:233243347-233247599 | 0 | 1 |
| XLOC_012704 | XLOC_012704 | ALPPL2                    | chr2:233271551-233275424 | 0 | 1 |
| XLOC_012705 | XLOC_012705 | ALPI                      | chr2:233320832-233324742 | 0 | 1 |
| XLOC_012713 | XLOC_012713 | NEU2                      | chr2:233897381-233899767 | 0 | 1 |
| XLOC_012720 | XLOC_012720 | UGT1A1,UGT1A10,UGT1A3,UGT | chr2:234526290-234681951 | 0 | 1 |
| XLOC_012721 | XLOC_012721 | TRPM8                     | chr2:234826042-234928166 | 0 | 1 |
| XLOC_012722 | XLOC_012722 | SPP2                      | chr2:234959345-234985776 | 0 | 1 |
| XLOC_012725 | XLOC_012725 | CXCR7                     | chr2:237478379-237490994 | 0 | 1 |
| XLOC_012727 | XLOC_012727 | MLPH                      | chr2:238395877-238463961 | 0 | 1 |
| XLOC_012728 | XLOC_012728 | PRLH                      | chr2:238475216-238475818 | 0 | 1 |
| XLOC_012738 | XLOC_012738 | TWIST2                    | chr2:239756672-239832237 | 0 | 1 |
| XLOC_012739 | XLOC_012739 | MIR4269                   | chr2:239969863-240322643 | 0 | 1 |
| XLOC_012740 | XLOC_012740 | LOC150935                 | chr2:240684553-240722356 | 0 | 1 |
| XLOC_012742 | XLOC_012742 | MIR149                    | chr2:241375114-241407495 | 0 | 1 |
| XLOC_012758 | XLOC_012758 | GAL3ST2                   | chr2:242716239-242743702 | 0 | 1 |
| XLOC_012760 | XLOC_012760 | CXXC11                    | chr2:242811885-242815482 | 0 | 1 |
| XLOC_012764 | XLOC_012764 | FAM150B                   | chr2:279560-288308       | 0 | 1 |
| XLOC_012766 | XLOC_012766 | LOC339822                 | chr2:779836-864112       | 0 | 1 |
| XLOC_012768 | XLOC_012768 | MYT1L                     | chr2:1792884-2335045     | 0 | 1 |
| XLOC_012772 | XLOC_012772 | LOC100505964              | chr2:4005244-4021622     | 0 | 1 |
| XLOC_012773 | XLOC_012773 | LOC727982                 | chr2:4675807-4703812     | 0 | 1 |
| XLOC_012774 | XLOC_012774 | LINC00487                 | chr2:6869299-6910442     | 0 | 1 |
| XLOC_012777 | XLOC_012777 | LOC339788                 | chr2:8062555-8116945     | 0 | 1 |
| XLOC_012778 | XLOC_012778 | LINC00299                 | chr2:8147900-8468549     | 0 | 1 |
| XLOC_012785 | XLOC_012785 | MIR4261                   | chr2:10281980-10350942   | 0 | 1 |
| XLOC_012790 | XLOC_012790 | FLJ33534                  | chr2:11239976-11272302   | 0 | 1 |
| XLOC_012793 | XLOC_012793 | MIR4429                   | chr2:11674241-11782912   | 0 | 1 |

|             |             |               |                          |   |   |
|-------------|-------------|---------------|--------------------------|---|---|
| XLOC_012794 | XLOC_012794 | NTSR2         | chr2:11798303-11810329   | 0 | 1 |
| XLOC_012795 | XLOC_012795 | MIR4262       | chr2:11977058-11977112   | 0 | 1 |
| XLOC_012796 | XLOC_012796 | LOC100506474  | chr2:13106907-13147138   | 0 | 1 |
| XLOC_012798 | XLOC_012798 | MYCNOS        | chr2:16080019-16087129   | 0 | 1 |
| XLOC_012800 | XLOC_012800 | RAD51AP2      | chr2:17691985-17699702   | 0 | 1 |
| XLOC_012803 | XLOC_012803 | OSR1          | chr2:19551245-19558372   | 0 | 1 |
| XLOC_012812 | XLOC_012812 | APOB          | chr2:21224300-21266945   | 0 | 1 |
| XLOC_012823 | XLOC_012823 | POMC          | chr2:25383721-25391559   | 0 | 1 |
| XLOC_012825 | XLOC_012825 | MIR1301       | chr2:25455829-25565459   | 0 | 1 |
| XLOC_012836 | XLOC_012836 | C2orf53       | chr2:27359714-27362332   | 0 | 1 |
| XLOC_012838 | XLOC_012838 | SLC30A3       | chr2:27477439-27485960   | 0 | 1 |
| XLOC_012853 | XLOC_012853 | C2orf71       | chr2:29284555-29297127   | 0 | 1 |
| XLOC_012854 | XLOC_012854 | ALK           | chr2:29415639-30144477   | 0 | 1 |
| XLOC_012855 | XLOC_012855 | CAPN13        | chr2:30945637-31030311   | 0 | 1 |
| XLOC_012856 | XLOC_012856 | GALNT14       | chr2:31133330-31361592   | 0 | 1 |
| XLOC_012857 | XLOC_012857 | CAPN14        | chr2:31395921-31440411   | 0 | 1 |
| XLOC_012859 | XLOC_012859 | SRD5A2        | chr2:31749655-31806040   | 0 | 1 |
| XLOC_012870 | XLOC_012870 | SULT6B1       | chr2:37394962-37415690   | 0 | 1 |
| XLOC_012879 | XLOC_012879 | LOC375196     | chr2:39146503-39202590   | 0 | 1 |
| XLOC_012884 | XLOC_012884 | SLC8A1        | chr2:40144773-40739575   | 0 | 1 |
| XLOC_012887 | XLOC_012887 | KCNG3         | chr2:42669156-42721237   | 0 | 1 |
| XLOC_012889 | XLOC_012889 | HAAO          | chr2:42994228-43019751   | 0 | 1 |
| XLOC_012892 | XLOC_012892 | LOC728819     | chr2:43864438-43995126   | 0 | 1 |
| XLOC_012896 | XLOC_012896 | MIR548AD      | chr2:44589042-44999731   | 0 | 1 |
| XLOC_012897 | XLOC_012897 | SIX2          | chr2:45232323-45236542   | 0 | 1 |
| XLOC_012903 | XLOC_012903 | C2orf61       | chr2:47314129-47382517   | 0 | 1 |
| XLOC_012905 | XLOC_012905 | KCNK12        | chr2:47747914-47797470   | 0 | 1 |
| XLOC_012907 | XLOC_012907 | LHCGR         | chr2:48757063-49003656   | 0 | 1 |
| XLOC_012908 | XLOC_012908 | FSHR          | chr2:49189295-49381666   | 0 | 1 |
| XLOC_012909 | XLOC_012909 | NRXN1         | chr2:50145642-51259674   | 0 | 1 |
| XLOC_012911 | XLOC_012911 | MIR3682       | chr2:53897116-54087170   | 0 | 1 |
| XLOC_012920 | XLOC_012920 | EFEMP1        | chr2:56093096-56151298   | 0 | 1 |
| XLOC_012921 | XLOC_012921 | MIR217        | chr2:56210101-56210211   | 0 | 1 |
| XLOC_012922 | XLOC_012922 | MIR216A       | chr2:56216084-56216194   | 0 | 1 |
| XLOC_012923 | XLOC_012923 | MIR216B       | chr2:56227848-56227930   | 0 | 1 |
| XLOC_012925 | XLOC_012925 | MIR4432       | chr2:60614496-60614580   | 0 | 1 |
| XLOC_012929 | XLOC_012929 | LOC339803     | chr2:61368726-61372110   | 0 | 1 |
| XLOC_012931 | XLOC_012931 | SNORA70B      | chr2:61404554-61697849   | 0 | 1 |
| XLOC_012941 | XLOC_012941 | LINC00309     | chr2:64412212-64432619   | 0 | 1 |
| XLOC_012946 | XLOC_012946 | MIR4778       | chr2:66585380-66585460   | 0 | 1 |
| XLOC_012947 | XLOC_012947 | MEIS1-AS3     | chr2:66650474-66660602   | 0 | 1 |
| XLOC_012948 | XLOC_012948 | LOC644838     | chr2:67350488-67442451   | 0 | 1 |
| XLOC_012952 | XLOC_012952 | CNRI1         | chr2:68511302-68547183   | 0 | 1 |
| XLOC_012954 | XLOC_012954 | BMP10         | chr2:69092612-69098649   | 0 | 1 |
| XLOC_012955 | XLOC_012955 | GKN2          | chr2:69172363-69180102   | 0 | 1 |
| XLOC_012968 | XLOC_012968 | FIGLA         | chr2:71004441-71017775   | 0 | 1 |
| XLOC_012969 | XLOC_012969 | CLEC4F        | chr2:71035775-71047732   | 0 | 1 |
| XLOC_012980 | XLOC_012980 | EGR4          | chr2:73518056-73520829   | 0 | 1 |
| XLOC_012981 | XLOC_012981 | NAT8          | chr2:73867849-73869537   | 0 | 1 |
| XLOC_012982 | XLOC_012982 | NAT8B         | chr2:73927635-73928467   | 0 | 1 |
| XLOC_013000 | XLOC_013000 | EVA1A         | chr2:75719443-75796848   | 0 | 1 |
| XLOC_013002 | XLOC_013002 | LRRTM4        | chr2:76974849-77749502   | 0 | 1 |
| XLOC_013003 | XLOC_013003 | SNAR-H        | chr2:78182032-78182152   | 0 | 1 |
| XLOC_013004 | XLOC_013004 | REG1B         | chr2:79312148-79315150   | 0 | 1 |
| XLOC_013005 | XLOC_013005 | REG1P         | chr2:79362628-79365553   | 0 | 1 |
| XLOC_013007 | XLOC_013007 | MIR4264       | chr2:79740059-80875988   | 0 | 1 |
| XLOC_013008 | XLOC_013008 | LRRTM1        | chr2:79740059-80875988   | 0 | 1 |
| XLOC_013023 | XLOC_013023 | MIR4779       | chr2:86371054-86422893   | 0 | 1 |
| XLOC_013027 | XLOC_013027 | CD8B          | chr2:87042459-87122165   | 0 | 1 |
| XLOC_013032 | XLOC_013032 | MIR4780       | chr2:88367298-88412902   | 0 | 1 |
| XLOC_013041 | XLOC_013041 | TRIM43B       | chr2:96142714-96150479   | 0 | 1 |
| XLOC_013055 | XLOC_013055 | FAM178B       | chr2:97541618-97652301   | 0 | 1 |
| XLOC_013072 | XLOC_013072 | CHST10        | chr2:101008321-101034130 | 0 | 1 |
| XLOC_013076 | XLOC_013076 | CREG2         | chr2:101964815-102003965 | 0 | 1 |
| XLOC_013077 | XLOC_013077 | RFX8          | chr2:102013822-102091165 | 0 | 1 |
| XLOC_013079 | XLOC_013079 | LOC100287010  | chr2:104995307-105024790 | 0 | 1 |
| XLOC_013080 | XLOC_013080 | LOC284998     | chr2:105363094-105374177 | 0 | 1 |
| XLOC_013081 | XLOC_013081 | LOC100506421  | chr2:105421882-105467934 | 0 | 1 |
| XLOC_013084 | XLOC_013084 | LOC285000     | chr2:106209553-106227016 | 0 | 1 |
| XLOC_013091 | XLOC_013091 | MIR4265       | chr2:109743783-110262207 | 0 | 1 |
| XLOC_013092 | XLOC_013092 | MIR4266       | chr2:109743783-110262207 | 0 | 1 |
| XLOC_013094 | XLOC_013094 | MIR4267       | chr2:110827537-110827619 | 0 | 1 |
| XLOC_013096 | XLOC_013096 | MIR4436B1     | chr2:110841446-110874143 | 0 | 1 |
| XLOC_013100 | XLOC_013100 | LIMS3         | chr2:111160495-111230652 | 0 | 1 |
| XLOC_013101 | XLOC_013101 | RGPD5, RGPDP6 | chr2:111271378-111336309 | 0 | 1 |
| XLOC_013103 | XLOC_013103 | MIR4435-1     | chr2:112078588-112078668 | 0 | 1 |
| XLOC_013111 | XLOC_013111 | IL1B          | chr2:113587336-113594356 | 0 | 1 |
| XLOC_013112 | XLOC_013112 | IL36B         | chr2:113779667-113810440 | 0 | 1 |
| XLOC_013117 | XLOC_013117 | MIR4782       | chr2:114471932-114514400 | 0 | 1 |



|             |             |                  |                          |   |   |
|-------------|-------------|------------------|--------------------------|---|---|
| XLOC_013118 | XLOC_013118 | LOC100499194     | chr2:114735245-114764887 | 0 | 1 |
| XLOC_013119 | XLOC_013119 | LOC389023        | chr2:115199898-116602326 | 0 | 1 |
| XLOC_013121 | XLOC_013121 | EN1              | chr2:119599746-119605759 | 0 | 1 |
| XLOC_013124 | XLOC_013124 | SCTR             | chr2:120197418-120282028 | 0 | 1 |
| XLOC_013126 | XLOC_013126 | LOC84931         | chr2:121221910-121223925 | 0 | 1 |
| XLOC_013131 | XLOC_013131 | CYP27C1          | chr2:127941411-127963343 | 0 | 1 |
| XLOC_013134 | XLOC_013134 | MIR4783          | chr2:128175995-128186822 | 0 | 1 |
| XLOC_013142 | XLOC_013142 | LOC389033        | chr2:130680434-130691890 | 0 | 1 |
| XLOC_013143 | XLOC_013143 | LOC100131320     | chr2:130724164-130740311 | 0 | 1 |
| XLOC_013144 | XLOC_013144 | LOC440905        | chr2:130783571-130808704 | 0 | 1 |
| XLOC_013145 | XLOC_013145 | POTEF            | chr2:130831107-130886795 | 0 | 1 |
| XLOC_013151 | XLOC_013151 | LOC646743,TISP43 | chr2:131294142-131307488 | 0 | 1 |
| XLOC_013152 | XLOC_013152 | CFC1,CFC1B       | chr2:131349737-131357251 | 0 | 1 |
| XLOC_013157 | XLOC_013157 | MIR4784          | chr2:132202795-132360468 | 0 | 1 |
| XLOC_013158 | XLOC_013158 | C2orf27B         | chr2:132552533-132559234 | 0 | 1 |
| XLOC_013160 | XLOC_013160 | MIR663B          | chr2:132905163-133015542 | 0 | 1 |
| XLOC_013162 | XLOC_013162 | NCKAP5           | chr2:133429371-134326031 | 0 | 1 |
| XLOC_013165 | XLOC_013165 | MAP3K19          | chr2:135722272-135782248 | 0 | 1 |
| XLOC_013170 | XLOC_013170 | CXCR4            | chr2:136871918-136875725 | 0 | 1 |
| XLOC_013171 | XLOC_013171 | NXP2             | chr2:139426726-139537811 | 0 | 1 |
| XLOC_013172 | XLOC_013172 | LRP1B            | chr2:140988995-142889270 | 0 | 1 |
| XLOC_013174 | XLOC_013174 | ZEB2             | chr2:145141941-145278465 | 0 | 1 |
| XLOC_013186 | XLOC_013186 | RPRM             | chr2:154333851-154335322 | 0 | 1 |
| XLOC_013189 | XLOC_013189 | ERMN             | chr2:158175124-158184146 | 0 | 1 |
| XLOC_013190 | XLOC_013190 | CYTIP            | chr2:158271130-158300604 | 0 | 1 |
| XLOC_013197 | XLOC_013197 | PLA2R1           | chr2:160797259-160919126 | 0 | 1 |
| XLOC_013198 | XLOC_013198 | ITGB6            | chr2:160958232-161056590 | 0 | 1 |
| XLOC_013200 | XLOC_013200 | MIR4785          | chr2:161128661-161350318 | 0 | 1 |
| XLOC_013202 | XLOC_013202 | DPP4             | chr2:162848754-162931052 | 0 | 1 |
| XLOC_013203 | XLOC_013203 | GCG              | chr2:162999378-163008914 | 0 | 1 |
| XLOC_013204 | XLOC_013204 | FAP              | chr2:163027199-163100045 | 0 | 1 |
| XLOC_013206 | XLOC_013206 | KCNH7            | chr2:163227916-163695257 | 0 | 1 |
| XLOC_013207 | XLOC_013207 | FIGN             | chr2:164464117-164592513 | 0 | 1 |
| XLOC_013208 | XLOC_013208 | GRB14            | chr2:165349322-165478360 | 0 | 1 |
| XLOC_013210 | XLOC_013210 | SNORA70F         | chr2:165541257-165697928 | 0 | 1 |
| XLOC_013211 | XLOC_013211 | SLC38A11         | chr2:165754708-165812035 | 0 | 1 |
| XLOC_013216 | XLOC_013216 | SCN1A            | chr2:166845669-167005642 | 0 | 1 |
| XLOC_013217 | XLOC_013217 | SCN9A            | chr2:167051696-167232497 | 0 | 1 |
| XLOC_013218 | XLOC_013218 | SCN7A            | chr2:167260082-167343481 | 0 | 1 |
| XLOC_013222 | XLOC_013222 | ABCB11           | chr2:169779448-169887833 | 0 | 1 |
| XLOC_013223 | XLOC_013223 | LRP2             | chr2:169983618-170219122 | 0 | 1 |
| XLOC_013238 | XLOC_013238 | WIPF1            | chr2:175424301-175547627 | 0 | 1 |
| XLOC_013239 | XLOC_013239 | CHRNA1           | chr2:175612322-175629200 | 0 | 1 |
| XLOC_013242 | XLOC_013242 | MIR933           | chr2:175936977-176032934 | 0 | 1 |
| XLOC_013245 | XLOC_013245 | EVX2             | chr2:176944834-176948690 | 0 | 1 |
| XLOC_013248 | XLOC_013248 | MIR1246          | chr2:177465707-177465780 | 0 | 1 |
| XLOC_013251 | XLOC_013251 | MIR3128          | chr2:178095030-178129859 | 0 | 1 |
| XLOC_013262 | XLOC_013262 | MIR1258          | chr2:180306710-180726232 | 0 | 1 |
| XLOC_013264 | XLOC_013264 | MIR4437          | chr2:182170319-182170379 | 0 | 1 |
| XLOC_013267 | XLOC_013267 | PDE1A            | chr2:183004761-183387572 | 0 | 1 |
| XLOC_013270 | XLOC_013270 | ZSWIM2           | chr2:187692206-187713897 | 0 | 1 |
| XLOC_013273 | XLOC_013273 | DIRC1            | chr2:189598464-189654831 | 0 | 1 |
| XLOC_013274 | XLOC_013274 | MIR1245B         | chr2:189839098-18987472  | 0 | 1 |
| XLOC_013276 | XLOC_013276 | MIR3129          | chr2:189896640-190044605 | 0 | 1 |
| XLOC_013277 | XLOC_013277 | SLC40A1          | chr2:190425315-190445537 | 0 | 1 |
| XLOC_013285 | XLOC_013285 | SDPR             | chr2:192699031-192712006 | 0 | 1 |
| XLOC_013286 | XLOC_013286 | TMEFF2           | chr2:192814746-193059644 | 0 | 1 |
| XLOC_013298 | XLOC_013298 | BOLL             | chr2:198591602-198650938 | 0 | 1 |
| XLOC_013323 | XLOC_013323 | DYTN             | chr2:207516344-207583120 | 0 | 1 |
| XLOC_013327 | XLOC_013327 | MIR2355          | chr2:207938861-208031970 | 0 | 1 |
| XLOC_013331 | XLOC_013331 | CRYGD            | chr2:208983852-209021486 | 0 | 1 |
| XLOC_013332 | XLOC_013332 | CRYGC            | chr2:208983852-209021486 | 0 | 1 |
| XLOC_013333 | XLOC_013333 | CRYGB            | chr2:208983852-209021486 | 0 | 1 |
| XLOC_013334 | XLOC_013334 | CRYGA            | chr2:209025463-209028297 | 0 | 1 |
| XLOC_013335 | XLOC_013335 | C2orf80          | chr2:209030070-209054773 | 0 | 1 |
| XLOC_013338 | XLOC_013338 | ACADL            | chr2:211052715-211090215 | 0 | 1 |
| XLOC_013339 | XLOC_013339 | MYL1             | chr2:211154867-211179895 | 0 | 1 |
| XLOC_013342 | XLOC_013342 | MIR548F2         | chr2:212240441-213403352 | 0 | 1 |
| XLOC_013343 | XLOC_013343 | MIR4776-2        | chr2:213790980-213791060 | 0 | 1 |
| XLOC_013349 | XLOC_013349 | LINC00607        | chr2:216476285-216708259 | 0 | 1 |
| XLOC_013353 | XLOC_013353 | IGFBP5           | chr2:217536827-217560272 | 0 | 1 |
| XLOC_013354 | XLOC_013354 | TNP1             | chr2:217724181-217724782 | 0 | 1 |
| XLOC_013357 | XLOC_013357 | CXCR2P1          | chr2:218899656-218955304 | 0 | 1 |
| XLOC_013364 | XLOC_013364 | PRKAG3           | chr2:219687105-219696512 | 0 | 1 |
| XLOC_013366 | XLOC_013366 | CRYBA2           | chr2:219854911-219858127 | 0 | 1 |
| XLOC_013367 | XLOC_013367 | MIR375           | chr2:219866366-219866430 | 0 | 1 |
| XLOC_013370 | XLOC_013370 | MIR3131          | chr2:219919141-219925238 | 0 | 1 |
| XLOC_013379 | XLOC_013379 | MIR153-1         | chr2:220154344-220174295 | 0 | 1 |
| XLOC_013380 | XLOC_013380 | RESP18           | chr2:220192130-220197899 | 0 | 1 |

|             |             |              |                          |   |   |
|-------------|-------------|--------------|--------------------------|---|---|
| XLOC_013383 | XLOC_013383 | MIR3132      | chr2:220408744-220415317 | 0 | 1 |
| XLOC_013385 | XLOC_013385 | MIR4268      | chr2:220771222-220771286 | 0 | 1 |
| XLOC_013387 | XLOC_013387 | PAX3         | chr2:223064605-223169936 | 0 | 1 |
| XLOC_013395 | XLOC_013395 | DOCK10       | chr2:225629806-225907330 | 0 | 1 |
| XLOC_013396 | XLOC_013396 | MIR4439      | chr2:225629806-225907330 | 0 | 1 |
| XLOC_013397 | XLOC_013397 | MIR5702      | chr2:227523425-227523509 | 0 | 1 |
| XLOC_013401 | XLOC_013401 | C2orf83      | chr2:228474805-228498036 | 0 | 1 |
| XLOC_013403 | XLOC_013403 | SPHKAP       | chr2:228844669-229046361 | 0 | 1 |
| XLOC_013404 | XLOC_013404 | PID1         | chr2:229888688-230136057 | 0 | 1 |
| XLOC_013405 | XLOC_013405 | DNER         | chr2:230222344-230579286 | 0 | 1 |
| XLOC_013415 | XLOC_013415 | SNORD20      | chr2:232319458-232329205 | 0 | 1 |
| XLOC_013416 | XLOC_013416 | SNORD82      | chr2:232319458-232329205 | 0 | 1 |
| XLOC_013420 | XLOC_013420 | MIR1471      | chr2:232756951-232757008 | 0 | 1 |
| XLOC_013421 | XLOC_013421 | NPPC         | chr2:232786804-232791038 | 0 | 1 |
| XLOC_013422 | XLOC_013422 | ECEL1P2      | chr2:233250459-233251754 | 0 | 1 |
| XLOC_013423 | XLOC_013423 | ECEL1        | chr2:233344536-233352532 | 0 | 1 |
| XLOC_013428 | XLOC_013428 | DNAJB3       | chr2:234526290-234681951 | 0 | 1 |
| XLOC_013429 | XLOC_013429 | LOC100286922 | chr2:234526290-234681951 | 0 | 1 |
| XLOC_013433 | XLOC_013433 | GBX2         | chr2:237074306-237076652 | 0 | 1 |
| XLOC_013434 | XLOC_013434 | ASB18        | chr2:237103514-237172988 | 0 | 1 |
| XLOC_013435 | XLOC_013435 | IQCA1        | chr2:237232789-237416178 | 0 | 1 |
| XLOC_013439 | XLOC_013439 | LOC1511174   | chr2:239133753-239140318 | 0 | 1 |
| XLOC_013443 | XLOC_013443 | FLJ43879     | chr2:239840997-239847965 | 0 | 1 |
| XLOC_013446 | XLOC_013446 | MIR4441      | chr2:239969863-240322643 | 0 | 1 |
| XLOC_013448 | XLOC_013448 | MIR2467      | chr2:239969863-240322643 | 0 | 1 |
| XLOC_013449 | XLOC_013449 | MIR4786      | chr2:240882431-240882511 | 0 | 1 |
| XLOC_013451 | XLOC_013451 | OR6B2        | chr2:240968907-240969846 | 0 | 1 |
| XLOC_013452 | XLOC_013452 | PRR21        | chr2:240981229-240982399 | 0 | 1 |
| XLOC_013453 | XLOC_013453 | OR6B3        | chr2:240984493-240985489 | 0 | 1 |
| XLOC_013458 | XLOC_013458 | AQP12B       | chr2:241615834-241622317 | 0 | 1 |
| XLOC_013459 | XLOC_013459 | KIF1A        | chr2:241653180-241759725 | 0 | 1 |
| XLOC_013461 | XLOC_013461 | LOC200772    | chr2:241894035-241906868 | 0 | 1 |
| XLOC_013470 | XLOC_013470 | DEFB125      | chr20:68350-77296        | 0 | 1 |
| XLOC_013471 | XLOC_013471 | DEFB126      | chr20:123251-126392      | 0 | 1 |
| XLOC_013472 | XLOC_013472 | DEFB127      | chr20:138110-139804      | 0 | 1 |
| XLOC_013473 | XLOC_013473 | DEFB129      | chr20:207898-210527      | 0 | 1 |
| XLOC_013474 | XLOC_013474 | DEFB132      | chr20:238376-241736      | 0 | 1 |
| XLOC_013488 | XLOC_013488 | TGM3         | chr20:2276612-2321725    | 0 | 1 |
| XLOC_013489 | XLOC_013489 | TGM6         | chr20:2361553-2413399    | 0 | 1 |
| XLOC_013493 | XLOC_013493 | SNORA51      | chr20:2633177-2639039    | 0 | 1 |
| XLOC_013494 | XLOC_013494 | SNORD56      | chr20:2633177-2639039    | 0 | 1 |
| XLOC_013495 | XLOC_013495 | SNORD57      | chr20:2633177-2639039    | 0 | 1 |
| XLOC_013497 | XLOC_013497 | C20orf141    | chr20:2795632-2796476    | 0 | 1 |
| XLOC_013498 | XLOC_013498 | TMEM239      | chr20:2796975-2797804    | 0 | 1 |
| XLOC_013511 | XLOC_013511 | MIR103A2     | chr20:3869485-3904502    | 0 | 1 |
| XLOC_013515 | XLOC_013515 | PRND         | chr20:4702555-4709106    | 0 | 1 |
| XLOC_013524 | XLOC_013524 | PLCB1        | chr20:8113295-8865547    | 0 | 1 |
| XLOC_013526 | XLOC_013526 | LAMP5        | chr20:9495004-9511171    | 0 | 1 |
| XLOC_013527 | XLOC_013527 | ANKF1        | chr20:10004459-10288066  | 0 | 1 |
| XLOC_013531 | XLOC_013531 | SPTLC3       | chr20:12989626-13147411  | 0 | 1 |
| XLOC_013539 | XLOC_013539 | BANF2        | chr20:17674319-17716517  | 0 | 1 |
| XLOC_013543 | XLOC_013543 | LINC00851    | chr20:18359692-18362127  | 0 | 1 |
| XLOC_013545 | XLOC_013545 | MIR3192      | chr20:18448032-18465286  | 0 | 1 |
| XLOC_013550 | XLOC_013550 | SCP2D1       | chr20:18790371-18810839  | 0 | 1 |
| XLOC_013558 | XLOC_013558 | PAX1         | chr20:21686296-21699124  | 0 | 1 |
| XLOC_013559 | XLOC_013559 | LOC100270679 | chr20:22034727-22055292  | 0 | 1 |
| XLOC_013560 | XLOC_013560 | SSTR4        | chr20:23016056-23017314  | 0 | 1 |
| XLOC_013563 | XLOC_013563 | CSTL1        | chr20:23420321-23425567  | 0 | 1 |
| XLOC_013564 | XLOC_013564 | CST8         | chr20:23471765-23476655  | 0 | 1 |
| XLOC_013565 | XLOC_013565 | CST13P       | chr20:23499782-23522655  | 0 | 1 |
| XLOC_013566 | XLOC_013566 | FLJ33581     | chr20:24180402-24205224  | 0 | 1 |
| XLOC_013567 | XLOC_013567 | SYNDIG1      | chr20:24449834-24647167  | 0 | 1 |
| XLOC_013575 | XLOC_013575 | DEFB115      | chr20:29845466-29847435  | 0 | 1 |
| XLOC_013576 | XLOC_013576 | DEFB118      | chr20:29956420-29961705  | 0 | 1 |
| XLOC_013577 | XLOC_013577 | DEFB123      | chr20:30028410-30038060  | 0 | 1 |
| XLOC_013578 | XLOC_013578 | REM1         | chr20:30063104-30072708  | 0 | 1 |
| XLOC_013579 | XLOC_013579 | LINC00028    | chr20:30073580-30075377  | 0 | 1 |
| XLOC_013583 | XLOC_013583 | MIR3193      | chr20:30194988-30195043  | 0 | 1 |
| XLOC_013584 | XLOC_013584 | COX4I2       | chr20:30225690-30232800  | 0 | 1 |
| XLOC_013587 | XLOC_013587 | TTLL9        | chr20:30458504-30530858  | 0 | 1 |
| XLOC_013588 | XLOC_013588 | XKR7         | chr20:30555804-30586256  | 0 | 1 |
| XLOC_013595 | XLOC_013595 | LOC149950    | chr20:31175280-31196694  | 0 | 1 |
| XLOC_013598 | XLOC_013598 | BPIFB2       | chr20:31595383-31611515  | 0 | 1 |
| XLOC_013599 | XLOC_013599 | BPIFB6       | chr20:31619453-31631853  | 0 | 1 |
| XLOC_013600 | XLOC_013600 | BPIFB3       | chr20:31643229-31661434  | 0 | 1 |
| XLOC_013601 | XLOC_013601 | BPIFB4       | chr20:31669317-31699557  | 0 | 1 |
| XLOC_013602 | XLOC_013602 | BPIFA2       | chr20:31755959-31769223  | 0 | 1 |
| XLOC_013603 | XLOC_013603 | BPIFA4P      | chr20:31781410-31798268  | 0 | 1 |
| XLOC_013604 | XLOC_013604 | BPIFA3       | chr20:31805134-31815559  | 0 | 1 |

|             |             |                            |                         |   |   |
|-------------|-------------|----------------------------|-------------------------|---|---|
| XLOC_013605 | XLOC_013605 | BPIFA1                     | chr20:31823801-31831115 | 0 | 1 |
| XLOC_013606 | XLOC_013606 | BPIFB1                     | chr20:31870940-31897684 | 0 | 1 |
| XLOC_013613 | XLOC_013613 | MIR4755                    | chr20:32581457-32670991 | 0 | 1 |
| XLOC_013616 | XLOC_013616 | MIR644A                    | chr20:32951040-33099198 | 0 | 1 |
| XLOC_013622 | XLOC_013622 | MIR499A                    | chr20:33543703-33680618 | 0 | 1 |
| XLOC_013645 | XLOC_013645 | BPI                        | chr20:36932551-36965905 | 0 | 1 |
| XLOC_013649 | XLOC_013649 | SNORA60                    | chr20:37075296-37079564 | 0 | 1 |
| XLOC_013651 | XLOC_013651 | ADIG                       | chr20:37209837-37217104 | 0 | 1 |
| XLOC_013655 | XLOC_013655 | PPP1R16B                   | chr20:37434347-37551667 | 0 | 1 |
| XLOC_013669 | XLOC_013669 | R3HDML                     | chr20:42965625-42979875 | 0 | 1 |
| XLOC_013671 | XLOC_013671 | MIR3646                    | chr20:42984440-43061485 | 0 | 1 |
| XLOC_013680 | XLOC_013680 | SEMG1                      | chr20:43835637-43838414 | 0 | 1 |
| XLOC_013681 | XLOC_013681 | SEMG2                      | chr20:43850009-43853099 | 0 | 1 |
| XLOC_013688 | XLOC_013688 | SPINT4                     | chr20:44350987-44354335 | 0 | 1 |
| XLOC_013696 | XLOC_013696 | MMP9                       | chr20:44637546-44645200 | 0 | 1 |
| XLOC_013700 | XLOC_013700 | EYA2                       | chr20:45523262-45817492 | 0 | 1 |
| XLOC_013701 | XLOC_013701 | MIR3616                    | chr20:45523262-45817492 | 0 | 1 |
| XLOC_013709 | XLOC_013709 | SNORD12C                   | chr20:47862438-47905795 | 0 | 1 |
| XLOC_013710 | XLOC_013710 | SNORD12B                   | chr20:47862438-47905795 | 0 | 1 |
| XLOC_013711 | XLOC_013711 | SNORD12                    | chr20:47862438-47905795 | 0 | 1 |
| XLOC_013718 | XLOC_013718 | MIR645                     | chr20:49202322-49202416 | 0 | 1 |
| XLOC_013722 | XLOC_013722 | TSHZ2                      | chr20:51588945-52111869 | 0 | 1 |
| XLOC_013724 | XLOC_013724 | DOK5                       | chr20:53092265-53267710 | 0 | 1 |
| XLOC_013725 | XLOC_013725 | MC3R                       | chr20:54823787-54824871 | 0 | 1 |
| XLOC_013733 | XLOC_013733 | SPO11                      | chr20:55904830-55998278 | 0 | 1 |
| XLOC_013734 | XLOC_013734 | MIR5095                    | chr20:55904830-55998278 | 0 | 1 |
| XLOC_013737 | XLOC_013737 | PCK1                       | chr20:56136136-56141513 | 0 | 1 |
| XLOC_013738 | XLOC_013738 | MIR4532                    | chr20:56470449-56470500 | 0 | 1 |
| XLOC_013739 | XLOC_013739 | C20orf85                   | chr20:56725982-56736183 | 0 | 1 |
| XLOC_013747 | XLOC_013747 | ZNF831                     | chr20:57766074-57834167 | 0 | 1 |
| XLOC_013748 | XLOC_013748 | EDN3                       | chr20:57875498-57901047 | 0 | 1 |
| XLOC_013749 | XLOC_013749 | PHACTR3                    | chr20:58152563-58422766 | 0 | 1 |
| XLOC_013752 | XLOC_013752 | C20orf197                  | chr20:58630979-58648008 | 0 | 1 |
| XLOC_013754 | XLOC_013754 | MIR4533                    | chr20:59053168-59053239 | 0 | 1 |
| XLOC_013762 | XLOC_013762 | C20orf166                  | chr20:61141437-61167971 | 0 | 1 |
| XLOC_013763 | XLOC_013763 | MIR1-1                     | chr20:61141437-61167971 | 0 | 1 |
| XLOC_013774 | XLOC_013774 | HAR1A                      | chr20:61726844-61735737 | 0 | 1 |
| XLOC_013775 | XLOC_013775 | MIR124-3                   | chr20:61809851-61809938 | 0 | 1 |
| XLOC_013777 | XLOC_013777 | MIR3196                    | chr20:61867275-61871854 | 0 | 1 |
| XLOC_013778 | XLOC_013778 | FLJ16779                   | chr20:61872135-61892967 | 0 | 1 |
| XLOC_013780 | XLOC_013780 | MIR4326                    | chr20:61904164-61921142 | 0 | 1 |
| XLOC_013791 | XLOC_013791 | MIR941-1,MIR941-3,MIR941-4 | chr20:62526454-62567384 | 0 | 1 |
| XLOC_013792 | XLOC_013792 | MIR941-2,MIR941-3,MIR941-4 | chr20:62526454-62567384 | 0 | 1 |
| XLOC_013801 | XLOC_013801 | DEFB128                    | chr20:168526-170264     | 0 | 1 |
| XLOC_013805 | XLOC_013805 | TCF15                      | chr20:584636-590910     | 0 | 1 |
| XLOC_013807 | XLOC_013807 | SCRT2                      | chr20:642239-656823     | 0 | 1 |
| XLOC_013814 | XLOC_013814 | SIRPB2                     | chr20:1455235-1472233   | 0 | 1 |
| XLOC_013815 | XLOC_013815 | SIRPD                      | chr20:1514896-1538343   | 0 | 1 |
| XLOC_013816 | XLOC_013816 | SIRPB1                     | chr20:1545028-1600689   | 0 | 1 |
| XLOC_013817 | XLOC_013817 | SIRPG                      | chr20:1609797-1638425   | 0 | 1 |
| XLOC_013818 | XLOC_013818 | LOC100289473               | chr20:1754010-1760392   | 0 | 1 |
| XLOC_013819 | XLOC_013819 | PDYN                       | chr20:1959401-1974931   | 0 | 1 |
| XLOC_013821 | XLOC_013821 | SNORD119                   | chr20:2442280-2451499   | 0 | 1 |
| XLOC_013824 | XLOC_013824 | CPXM1                      | chr20:2774714-2781292   | 0 | 1 |
| XLOC_013826 | XLOC_013826 | AVP                        | chr20:3063201-3065370   | 0 | 1 |
| XLOC_013831 | XLOC_013831 | C20orf194                  | chr20:3229947-3388309   | 0 | 1 |
| XLOC_013833 | XLOC_013833 | ADAM33                     | chr20:3648619-3662738   | 0 | 1 |
| XLOC_013838 | XLOC_013838 | MIR103B2                   | chr20:3869485-3904502   | 0 | 1 |
| XLOC_013840 | XLOC_013840 | ADRA1D                     | chr20:4201277-4229659   | 0 | 1 |
| XLOC_013841 | XLOC_013841 | PRNT                       | chr20:4711927-4721314   | 0 | 1 |
| XLOC_013846 | XLOC_013846 | PROKR2                     | chr20:5282685-5295510   | 0 | 1 |
| XLOC_013853 | XLOC_013853 | HAO1                       | chr20:7863630-7921093   | 0 | 1 |
| XLOC_013855 | XLOC_013855 | PAK7                       | chr20:9518036-9819687   | 0 | 1 |
| XLOC_013856 | XLOC_013856 | SNAP25-AS1                 | chr20:10004459-10288066 | 0 | 1 |
| XLOC_013859 | XLOC_013859 | LOC339593                  | chr20:11247306-11254031 | 0 | 1 |
| XLOC_013860 | XLOC_013860 | ISM1-AS1                   | chr20:13202417-13281297 | 0 | 1 |
| XLOC_013863 | XLOC_013863 | SEL1L2                     | chr20:13830043-13975979 | 0 | 1 |
| XLOC_013864 | XLOC_013864 | FLRT3                      | chr20:13976145-16033841 | 0 | 1 |
| XLOC_013865 | XLOC_013865 | MACROD2-AS1                | chr20:13976145-16033841 | 0 | 1 |
| XLOC_013875 | XLOC_013875 | C20orf78                   | chr20:18790371-18810839 | 0 | 1 |
| XLOC_013876 | XLOC_013876 | LOC100130264               | chr20:19193289-19703541 | 0 | 1 |
| XLOC_013879 | XLOC_013879 | NKX2-4                     | chr20:21376004-21378047 | 0 | 1 |
| XLOC_013880 | XLOC_013880 | NKX2-2                     | chr20:21491659-21494664 | 0 | 1 |
| XLOC_013881 | XLOC_013881 | LOC284788                  | chr20:22380970-22401281 | 0 | 1 |
| XLOC_013882 | XLOC_013882 | LINC00261                  | chr20:22541191-22559280 | 0 | 1 |
| XLOC_013883 | XLOC_013883 | FOXA2                      | chr20:22561641-22566101 | 0 | 1 |
| XLOC_013884 | XLOC_013884 | THBD                       | chr20:23026269-23030301 | 0 | 1 |
| XLOC_013886 | XLOC_013886 | LINC00656                  | chr20:23105704-23113273 | 0 | 1 |
| XLOC_013888 | XLOC_013888 | CST11                      | chr20:23431040-23433482 | 0 | 1 |

|             |             |                         |                         |   |   |
|-------------|-------------|-------------------------|-------------------------|---|---|
| XLOC_013889 | XLOC_013889 | CST9L                   | chr20:23545369-23549386 | 0 | 1 |
| XLOC_013890 | XLOC_013890 | CST9                    | chr20:23583046-23586610 | 0 | 1 |
| XLOC_013892 | XLOC_013892 | CST4                    | chr20:23666276-23669662 | 0 | 1 |
| XLOC_013893 | XLOC_013893 | CST1                    | chr20:23728189-23731574 | 0 | 1 |
| XLOC_013894 | XLOC_013894 | CST2                    | chr20:23804403-23807312 | 0 | 1 |
| XLOC_013895 | XLOC_013895 | CST5                    | chr20:23856571-23860380 | 0 | 1 |
| XLOC_013899 | XLOC_013899 | VSX1                    | chr20:25051520-25063015 | 0 | 1 |
| XLOC_013900 | XLOC_013900 | LOC284798               | chr20:25121433-25129426 | 0 | 1 |
| XLOC_013910 | XLOC_013910 | DEFB116                 | chr20:29891014-29896388 | 0 | 1 |
| XLOC_013911 | XLOC_013911 | DEFB119                 | chr20:29964965-29978452 | 0 | 1 |
| XLOC_013912 | XLOC_013912 | DEFB121                 | chr20:29992647-30000641 | 0 | 1 |
| XLOC_013913 | XLOC_013913 | DEFB122                 | chr20:30009241-30016983 | 0 | 1 |
| XLOC_013914 | XLOC_013914 | DEFB124                 | chr20:30053308-30060816 | 0 | 1 |
| XLOC_013925 | XLOC_013925 | SUN5                    | chr20:31571580-31592239 | 0 | 1 |
| XLOC_013936 | XLOC_013936 | GGT7                    | chr20:33432522-33460661 | 0 | 1 |
| XLOC_013938 | XLOC_013938 | MIR499B                 | chr20:33543703-33680618 | 0 | 1 |
| XLOC_013945 | XLOC_013945 | C20orf173               | chr20:34108569-34117481 | 0 | 1 |
| XLOC_013960 | XLOC_013960 | LINC00489               | chr20:36247699-36251521 | 0 | 1 |
| XLOC_013969 | XLOC_013969 | LOC339568               | chr20:37842423-37853391 | 0 | 1 |
| XLOC_013974 | XLOC_013974 | PTPRT                   | chr20:40701391-41818557 | 0 | 1 |
| XLOC_013987 | XLOC_013987 | WFDC12                  | chr20:43752066-43753106 | 0 | 1 |
| XLOC_013988 | XLOC_013988 | SLPI                    | chr20:43880878-43883206 | 0 | 1 |
| XLOC_013992 | XLOC_013992 | SPINT3                  | chr20:44141100-44144264 | 0 | 1 |
| XLOC_013993 | XLOC_013993 | EPPIN,EPPIN-WFDC6,WFDC6 | chr20:44162835-44176065 | 0 | 1 |
| XLOC_013994 | XLOC_013994 | WFDC8                   | chr20:44179790-44207965 | 0 | 1 |
| XLOC_013995 | XLOC_013995 | WFDC9                   | chr20:44236577-44259907 | 0 | 1 |
| XLOC_013996 | XLOC_013996 | WFDC11                  | chr20:44277201-44298878 | 0 | 1 |
| XLOC_014006 | XLOC_014006 | CDH22                   | chr20:44802371-44937137 | 0 | 1 |
| XLOC_014009 | XLOC_014009 | ZNF663                  | chr20:45085131-45086282 | 0 | 1 |
| XLOC_014010 | XLOC_014010 | MKRN7P                  | chr20:45092298-45093931 | 0 | 1 |
| XLOC_014011 | XLOC_014011 | ZNF334                  | chr20:45128268-45142198 | 0 | 1 |
| XLOC_014012 | XLOC_014012 | OCSTAMP                 | chr20:45169669-45179213 | 0 | 1 |
| XLOC_014019 | XLOC_014019 | KCNB1                   | chr20:47988504-48099181 | 0 | 1 |
| XLOC_014023 | XLOC_014023 | LINC00651               | chr20:48657243-48658166 | 0 | 1 |
| XLOC_014028 | XLOC_014028 | KCNG1                   | chr20:49620192-49639675 | 0 | 1 |
| XLOC_014030 | XLOC_014030 | MIR3194                 | chr20:50003493-50179370 | 0 | 1 |
| XLOC_014032 | XLOC_014032 | SALL4                   | chr20:50400582-50419048 | 0 | 1 |
| XLOC_014035 | XLOC_014035 | SUMO1P1                 | chr20:52491039-52492248 | 0 | 1 |
| XLOC_014037 | XLOC_014037 | MIR4756                 | chr20:52560078-52687304 | 0 | 1 |
| XLOC_014038 | XLOC_014038 | CYP24A1                 | chr20:52769987-52790516 | 0 | 1 |
| XLOC_014039 | XLOC_014039 | CBLN4                   | chr20:54572412-54580528 | 0 | 1 |
| XLOC_014043 | XLOC_014043 | MIR4325                 | chr20:55896557-55896647 | 0 | 1 |
| XLOC_014045 | XLOC_014045 | CTCFL                   | chr20:56071020-56100708 | 0 | 1 |
| XLOC_014046 | XLOC_014046 | ZBP1                    | chr20:56178901-56195632 | 0 | 1 |
| XLOC_014049 | XLOC_014049 | APCDD1L                 | chr20:57034425-57089949 | 0 | 1 |
| XLOC_014050 | XLOC_014050 | MIR296                  | chr20:57392669-57392749 | 0 | 1 |
| XLOC_014051 | XLOC_014051 | MIR298                  | chr20:57393280-57393368 | 0 | 1 |
| XLOC_014052 | XLOC_014052 | GNAS-AS1                | chr20:57393972-57486250 | 0 | 1 |
| XLOC_014055 | XLOC_014055 | LOC100506384            | chr20:58152563-58422766 | 0 | 1 |
| XLOC_014058 | XLOC_014058 | MIR1257                 | chr20:60528601-60528718 | 0 | 1 |
| XLOC_014061 | XLOC_014061 | HRH3                    | chr20:60790016-60795323 | 0 | 1 |
| XLOC_014064 | XLOC_014064 | RBBP8NL                 | chr20:60985292-61002629 | 0 | 1 |
| XLOC_014065 | XLOC_014065 | GATA5                   | chr20:61038552-61051026 | 0 | 1 |
| XLOC_014066 | XLOC_014066 | C20orf166-AS1           | chr20:61141437-61167971 | 0 | 1 |
| XLOC_014071 | XLOC_014071 | BHLHE23                 | chr20:61637330-61638387 | 0 | 1 |
| XLOC_014073 | XLOC_014073 | HAR1B                   | chr20:61726844-61735737 | 0 | 1 |
| XLOC_014075 | XLOC_014075 | NKAIN4                  | chr20:61872135-61892967 | 0 | 1 |
| XLOC_014076 | XLOC_014076 | CHRNA4                  | chr20:61974661-61992748 | 0 | 1 |
| XLOC_014087 | XLOC_014087 | MIR1914                 | chr20:62571181-62601223 | 0 | 1 |
| XLOC_014088 | XLOC_014088 | MIR647                  | chr20:62571181-62601223 | 0 | 1 |
| XLOC_014091 | XLOC_014091 | SOX18                   | chr20:62679078-62680979 | 0 | 1 |
| XLOC_014093 | XLOC_014093 | C20orf201               | chr20:62711470-62731996 | 0 | 1 |
| XLOC_014094 | XLOC_014094 | NPBWR2                  | chr20:62737182-62738184 | 0 | 1 |
| XLOC_014096 | XLOC_014096 | MIR3687                 | chr21:9826202-9826263   | 0 | 1 |
| XLOC_014098 | XLOC_014098 | POTED                   | chr21:14982497-15013906 | 0 | 1 |
| XLOC_014099 | XLOC_014099 | RBM11                   | chr21:15588465-15600693 | 0 | 1 |
| XLOC_014101 | XLOC_014101 | SAMS1-AS1               | chr21:15857548-16015428 | 0 | 1 |
| XLOC_014103 | XLOC_014103 | LINC00478               | chr21:17442841-17982094 | 0 | 1 |
| XLOC_014104 | XLOC_014104 | MIR99A                  | chr21:17442841-17982094 | 0 | 1 |
| XLOC_014105 | XLOC_014105 | MIRLET7C                | chr21:17442841-17982094 | 0 | 1 |
| XLOC_014106 | XLOC_014106 | MIR125B2                | chr21:17442841-17982094 | 0 | 1 |
| XLOC_014107 | XLOC_014107 | C21orf37                | chr21:18811207-18821503 | 0 | 1 |
| XLOC_014110 | XLOC_014110 | NCAM2                   | chr21:22370632-22912517 | 0 | 1 |
| XLOC_014111 | XLOC_014111 | RNU6-67                 | chr21:22370632-22912517 | 0 | 1 |
| XLOC_014112 | XLOC_014112 | LINC00308               | chr21:23470935-23488847 | 0 | 1 |
| XLOC_014113 | XLOC_014113 | LOC339622               | chr21:26212863-26430056 | 0 | 1 |
| XLOC_014117 | XLOC_014117 | MIR4759                 | chr21:28290230-28339439 | 0 | 1 |
| XLOC_014118 | XLOC_014118 | LINC00113               | chr21:28659821-29283529 | 0 | 1 |
| XLOC_014119 | XLOC_014119 | LINC00314               | chr21:29385681-29395528 | 0 | 1 |

|             |             |                        |                         |   |   |
|-------------|-------------|------------------------|-------------------------|---|---|
| XLOC_014127 | XLOC_014127 | KRTAP13-1              | chr21:31768391-31769138 | 0 | 1 |
| XLOC_014128 | XLOC_014128 | KRTAP13-4              | chr21:31802593-31803076 | 0 | 1 |
| XLOC_014129 | XLOC_014129 | KRTAP15-1              | chr21:31812645-31813098 | 0 | 1 |
| XLOC_014130 | XLOC_014130 | KRTAP6-3               | chr21:31964758-31965374 | 0 | 1 |
| XLOC_014131 | XLOC_014131 | KRTAP22-1              | chr21:31973439-31973586 | 0 | 1 |
| XLOC_014132 | XLOC_014132 | KRTAP20-1              | chr21:31988773-31988944 | 0 | 1 |
| XLOC_014133 | XLOC_014133 | KRTAP20-4              | chr21:31992945-31993169 | 0 | 1 |
| XLOC_014134 | XLOC_014134 | KRTAP20-2              | chr21:32007582-32007780 | 0 | 1 |
| XLOC_014135 | XLOC_014135 | KRTAP20-3              | chr21:32015182-32015455 | 0 | 1 |
| XLOC_014143 | XLOC_014143 | OLIG2                  | chr21:34398215-34401503 | 0 | 1 |
| XLOC_014144 | XLOC_014144 | OLIG1                  | chr21:34442449-34444728 | 0 | 1 |
| XLOC_014156 | XLOC_014156 | CLIC6                  | chr21:36041687-36090519 | 0 | 1 |
| XLOC_014158 | XLOC_014158 | MIR802                 | chr21:37093012-37093106 | 0 | 1 |
| XLOC_014170 | XLOC_014170 | DSCR10                 | chr21:39578249-39580738 | 0 | 1 |
| XLOC_014173 | XLOC_014173 | BRWD1-AS1              | chr21:40687632-40695144 | 0 | 1 |
| XLOC_014178 | XLOC_014178 | PCP4                   | chr21:41239346-41301322 | 0 | 1 |
| XLOC_014179 | XLOC_014179 | DSCAM-AS1              | chr21:41384342-42219039 | 0 | 1 |
| XLOC_014180 | XLOC_014180 | MIR3197                | chr21:42539483-42539556 | 0 | 1 |
| XLOC_014185 | XLOC_014185 | LINC00111              | chr21:43099461-43117496 | 0 | 1 |
| XLOC_014186 | XLOC_014186 | LINC00112              | chr21:43136595-43137742 | 0 | 1 |
| XLOC_014188 | XLOC_014188 | UMODL1                 | chr21:43483067-43563105 | 0 | 1 |
| XLOC_014190 | XLOC_014190 | UBASH3A                | chr21:43823970-43867790 | 0 | 1 |
| XLOC_014192 | XLOC_014192 | PDE9A                  | chr21:44073861-44195618 | 0 | 1 |
| XLOC_014195 | XLOC_014195 | CRYAA                  | chr21:44589140-44592913 | 0 | 1 |
| XLOC_014204 | XLOC_014204 | AIRE                   | chr21:45705720-45718102 | 0 | 1 |
| XLOC_014206 | XLOC_014206 | TRPM2                  | chr21:45773483-45862964 | 0 | 1 |
| XLOC_014209 | XLOC_014209 | KRTAP10-4              | chr21:45917774-46131495 | 0 | 1 |
| XLOC_014210 | XLOC_014210 | KRTAP10-7              | chr21:45917774-46131495 | 0 | 1 |
| XLOC_014211 | XLOC_014211 | KRTAP10-8              | chr21:45917774-46131495 | 0 | 1 |
| XLOC_014212 | XLOC_014212 | KRTAP10-9              | chr21:45917774-46131495 | 0 | 1 |
| XLOC_014213 | XLOC_014213 | KRTAP10-10             | chr21:45917774-46131495 | 0 | 1 |
| XLOC_014214 | XLOC_014214 | KRTAP10-11             | chr21:45917774-46131495 | 0 | 1 |
| XLOC_014215 | XLOC_014215 | KRTAP12-3              | chr21:45917774-46131495 | 0 | 1 |
| XLOC_014216 | XLOC_014216 | KRTAP10-12             | chr21:45917774-46131495 | 0 | 1 |
| XLOC_014232 | XLOC_014232 | TPTE                   | chr21:10906742-10990920 | 0 | 1 |
| XLOC_014233 | XLOC_014233 | BAGE,BAGE3,BAGE4,BAGE5 | chr21:11020841-11098937 | 0 | 1 |
| XLOC_014234 | XLOC_014234 | MIR3156-3              | chr21:14778704-14778781 | 0 | 1 |
| XLOC_014236 | XLOC_014236 | ANKRD20A11P            | chr21:15316095-15352765 | 0 | 1 |
| XLOC_014237 | XLOC_014237 | LIPI                   | chr21:15481134-15579254 | 0 | 1 |
| XLOC_014239 | XLOC_014239 | SAMSN1                 | chr21:15857548-16015428 | 0 | 1 |
| XLOC_014240 | XLOC_014240 | LOC388813              | chr21:15857548-16015428 | 0 | 1 |
| XLOC_014244 | XLOC_014244 | CHODL-AS1              | chr21:19207988-19257925 | 0 | 1 |
| XLOC_014245 | XLOC_014245 | TMPRSS15               | chr21:19641432-19775970 | 0 | 1 |
| XLOC_014246 | XLOC_014246 | LINC00320              | chr21:22114912-22175426 | 0 | 1 |
| XLOC_014247 | XLOC_014247 | LINC00317              | chr21:23095612-23109639 | 0 | 1 |
| XLOC_014248 | XLOC_014248 | D21S2088E              | chr21:24733425-24751156 | 0 | 1 |
| XLOC_014254 | XLOC_014254 | CYYR1                  | chr21:27838527-27945581 | 0 | 1 |
| XLOC_014255 | XLOC_014255 | ADAMTS1                | chr21:28208605-28217728 | 0 | 1 |
| XLOC_014257 | XLOC_014257 | MIR5009                | chr21:28659821-29283529 | 0 | 1 |
| XLOC_014263 | XLOC_014263 | CLDN17                 | chr21:31538240-31538971 | 0 | 1 |
| XLOC_014264 | XLOC_014264 | LINC00307              | chr21:31581468-31584101 | 0 | 1 |
| XLOC_014265 | XLOC_014265 | CLDN8                  | chr21:31586323-31588469 | 0 | 1 |
| XLOC_014266 | XLOC_014266 | KRTAP24-1              | chr21:31653626-31655276 | 0 | 1 |
| XLOC_014267 | XLOC_014267 | KRTAP25-1              | chr21:31661462-31661832 | 0 | 1 |
| XLOC_014268 | XLOC_014268 | KRTAP26-1              | chr21:31691449-31692607 | 0 | 1 |
| XLOC_014269 | XLOC_014269 | KRTAP27-1              | chr21:31709330-31710012 | 0 | 1 |
| XLOC_014270 | XLOC_014270 | KRTAP23-1              | chr21:31720716-31720924 | 0 | 1 |
| XLOC_014271 | XLOC_014271 | KRTAP13-2              | chr21:31743708-31744557 | 0 | 1 |
| XLOC_014272 | XLOC_014272 | MIR4327                | chr21:31747611-31747696 | 0 | 1 |
| XLOC_014273 | XLOC_014273 | KRTAP13-3              | chr21:31797710-31798230 | 0 | 1 |
| XLOC_014274 | XLOC_014274 | KRTAP19-1              | chr21:31852363-31852636 | 0 | 1 |
| XLOC_014275 | XLOC_014275 | KRTAP19-2              | chr21:31859508-31859667 | 0 | 1 |
| XLOC_014276 | XLOC_014276 | KRTAP19-3              | chr21:31863781-31864275 | 0 | 1 |
| XLOC_014277 | XLOC_014277 | KRTAP19-4              | chr21:31869173-31869428 | 0 | 1 |
| XLOC_014278 | XLOC_014278 | KRTAP19-5              | chr21:31874189-31874408 | 0 | 1 |
| XLOC_014279 | XLOC_014279 | KRTAP19-6              | chr21:31913853-31914181 | 0 | 1 |
| XLOC_014280 | XLOC_014280 | KRTAP19-7              | chr21:31933416-31933608 | 0 | 1 |
| XLOC_014281 | XLOC_014281 | KRTAP22-2              | chr21:31962423-31962716 | 0 | 1 |
| XLOC_014282 | XLOC_014282 | KRTAP6-2               | chr21:31971004-31971193 | 0 | 1 |
| XLOC_014283 | XLOC_014283 | KRTAP6-1               | chr21:31986004-31986223 | 0 | 1 |
| XLOC_014284 | XLOC_014284 | KRTAP21-3              | chr21:32090842-32091095 | 0 | 1 |
| XLOC_014285 | XLOC_014285 | KRTAP21-2              | chr21:32119268-32119520 | 0 | 1 |
| XLOC_014286 | XLOC_014286 | KRTAP21-1              | chr21:32127456-32127696 | 0 | 1 |
| XLOC_014287 | XLOC_014287 | KRTAP8-1               | chr21:32185014-32185570 | 0 | 1 |
| XLOC_014288 | XLOC_014288 | KRTAP7-1               | chr21:32201357-32202051 | 0 | 1 |
| XLOC_014289 | XLOC_014289 | KRTAP11-1              | chr21:32252963-32253874 | 0 | 1 |
| XLOC_014290 | XLOC_014290 | KRTAP19-8              | chr21:32410477-32410795 | 0 | 1 |
| XLOC_014293 | XLOC_014293 | LINC00159              | chr21:33452793-33458608 | 0 | 1 |
| XLOC_014302 | XLOC_014302 | C21orf54               | chr21:34537775-34542541 | 0 | 1 |

|             |             |              |                         |   |   |
|-------------|-------------|--------------|-------------------------|---|---|
| XLOC_014312 | XLOC_014312 | LINC00160    | chr21:36096104-36109479 | 0 | 1 |
| XLOC_014315 | XLOC_014315 | LOC100506403 | chr21:36744804-36953062 | 0 | 1 |
| XLOC_014323 | XLOC_014323 | KCNJ6        | chr21:38996784-39288741 | 0 | 1 |
| XLOC_014324 | XLOC_014324 | DSCR4        | chr21:39426312-39493454 | 0 | 1 |
| XLOC_014325 | XLOC_014325 | ERG          | chr21:39739182-40033704 | 0 | 1 |
| XLOC_014326 | XLOC_014326 | LINC00114    | chr21:40110878-40145401 | 0 | 1 |
| XLOC_014332 | XLOC_014332 | C21orf88     | chr21:40969074-40984749 | 0 | 1 |
| XLOC_014333 | XLOC_014333 | DSCAM        | chr21:41384342-42219039 | 0 | 1 |
| XLOC_014334 | XLOC_014334 | MIR4760      | chr21:41384342-42219039 | 0 | 1 |
| XLOC_014335 | XLOC_014335 | DSCAM-IT1    | chr21:41384342-42219039 | 0 | 1 |
| XLOC_014336 | XLOC_014336 | LINC00323    | chr21:42513426-42519991 | 0 | 1 |
| XLOC_014338 | XLOC_014338 | TMPRSS2      | chr21:42836477-42880085 | 0 | 1 |
| XLOC_014344 | XLOC_014344 | C21orf128    | chr21:43483067-43563105 | 0 | 1 |
| XLOC_014345 | XLOC_014345 | TFF3         | chr21:43731776-43735706 | 0 | 1 |
| XLOC_014346 | XLOC_014346 | TFF2         | chr21:43766466-43771208 | 0 | 1 |
| XLOC_014347 | XLOC_014347 | TFF1         | chr21:43782390-43786644 | 0 | 1 |
| XLOC_014348 | XLOC_014348 | TMPRSS3      | chr21:43791995-43816955 | 0 | 1 |
| XLOC_014365 | XLOC_014365 | KRTAP10-3    | chr21:45917774-46131495 | 0 | 1 |
| XLOC_014366 | XLOC_014366 | KRTAP10-5    | chr21:45917774-46131495 | 0 | 1 |
| XLOC_014367 | XLOC_014367 | KRTAP10-6    | chr21:45917774-46131495 | 0 | 1 |
| XLOC_014368 | XLOC_014368 | KRTAP12-4    | chr21:45917774-46131495 | 0 | 1 |
| XLOC_014369 | XLOC_014369 | KRTAP12-2    | chr21:45917774-46131495 | 0 | 1 |
| XLOC_014370 | XLOC_014370 | KRTAP12-1    | chr21:45917774-46131495 | 0 | 1 |
| XLOC_014383 | XLOC_014383 | LOC100129027 | chr21:47247754-47256333 | 0 | 1 |
| XLOC_014389 | XLOC_014389 | S100B        | chr21:48018530-48025035 | 0 | 1 |
| XLOC_014391 | XLOC_014391 | TPTEP1       | chr22:17082800-17129720 | 0 | 1 |
| XLOC_014392 | XLOC_014392 | HSFY1P1      | chr22:17308363-17310225 | 0 | 1 |
| XLOC_014399 | XLOC_014399 | FLJ41941     | chr22:18512150-18520734 | 0 | 1 |
| XLOC_014414 | XLOC_014414 | MIR185       | chr22:20008630-20053447 | 0 | 1 |
| XLOC_014423 | XLOC_014423 | POM121L4P    | chr22:21043842-21046009 | 0 | 1 |
| XLOC_014441 | XLOC_014441 | MIR301B      | chr22:22007269-22007347 | 0 | 1 |
| XLOC_014442 | XLOC_014442 | MIR130B      | chr22:22007592-22007674 | 0 | 1 |
| XLOC_014444 | XLOC_014444 | VPREB1       | chr22:22599199-22599926 | 0 | 1 |
| XLOC_014448 | XLOC_014448 | MIR650       | chr22:23165269-23165365 | 0 | 1 |
| XLOC_014449 | XLOC_014449 | IGLL5        | chr22:23229959-23238013 | 0 | 1 |
| XLOC_014455 | XLOC_014455 | C22orf15     | chr22:24105207-24110141 | 0 | 1 |
| XLOC_014472 | XLOC_014472 | TOP1P2       | chr22:25115000-25170687 | 0 | 1 |
| XLOC_014477 | XLOC_014477 | IGLL3P       | chr22:25714223-25716193 | 0 | 1 |
| XLOC_014481 | XLOC_014481 | SEZ6L        | chr22:26565439-26779563 | 0 | 1 |
| XLOC_014487 | XLOC_014487 | MIR3199-2    | chr22:28315363-29075853 | 0 | 1 |
| XLOC_014501 | XLOC_014501 | HORMAD2      | chr22:30476452-30573062 | 0 | 1 |
| XLOC_014508 | XLOC_014508 | MIR3200      | chr22:31090792-31303811 | 0 | 1 |
| XLOC_014520 | XLOC_014520 | AP1B1P1      | chr22:32517963-32529456 | 0 | 1 |
| XLOC_014524 | XLOC_014524 | TIMP3        | chr22:32908539-33454377 | 0 | 1 |
| XLOC_014526 | XLOC_014526 | ISX          | chr22:35462129-35483380 | 0 | 1 |
| XLOC_014529 | XLOC_014529 | MIR3909      | chr22:35695267-35743987 | 0 | 1 |
| XLOC_014534 | XLOC_014534 | APOL5        | chr22:36113918-36125529 | 0 | 1 |
| XLOC_014538 | XLOC_014538 | LOC100506241 | chr22:37361288-37364213 | 0 | 1 |
| XLOC_014555 | XLOC_014555 | MIR4534      | chr22:38384800-38384860 | 0 | 1 |
| XLOC_014568 | XLOC_014568 | SYNGR1       | chr22:39745953-39781593 | 0 | 1 |
| XLOC_014580 | XLOC_014580 | MCHR1        | chr22:41075181-41078818 | 0 | 1 |
| XLOC_014583 | XLOC_014583 | MIR1281      | chr22:41488516-41488570 | 0 | 1 |
| XLOC_014595 | XLOC_014595 | MIR33A       | chr22:42229105-42302375 | 0 | 1 |
| XLOC_014608 | XLOC_014608 | MPPED1       | chr22:43808019-43902800 | 0 | 1 |
| XLOC_014609 | XLOC_014609 | EFCAB6-AS1   | chr22:43912133-44208217 | 0 | 1 |
| XLOC_014614 | XLOC_014614 | LINC00207    | chr22:44965219-44968329 | 0 | 1 |
| XLOC_014617 | XLOC_014617 | UPK3A        | chr22:45680867-45691755 | 0 | 1 |
| XLOC_014620 | XLOC_014620 | FBLN1        | chr22:45898718-45997014 | 0 | 1 |
| XLOC_014622 | XLOC_014622 | MIR4762      | chr22:46067677-46241187 | 0 | 1 |
| XLOC_014626 | XLOC_014626 | MIR3619      | chr22:46481876-46509808 | 0 | 1 |
| XLOC_014633 | XLOC_014633 | MIR3201      | chr22:48670175-48670227 | 0 | 1 |
| XLOC_014634 | XLOC_014634 | FAM19A5      | chr22:48885287-49147744 | 0 | 1 |
| XLOC_014635 | XLOC_014635 | MIR4535      | chr22:49176106-49176165 | 0 | 1 |
| XLOC_014636 | XLOC_014636 | LOC100128946 | chr22:49262581-49294198 | 0 | 1 |
| XLOC_014641 | XLOC_014641 | PANX2        | chr22:50609159-50618724 | 0 | 1 |
| XLOC_014646 | XLOC_014646 | MIOX         | chr22:50925212-50928750 | 0 | 1 |
| XLOC_014654 | XLOC_014654 | POTEH        | chr22:16256331-16287937 | 0 | 1 |
| XLOC_014655 | XLOC_014655 | OR11H1       | chr22:16448823-16449804 | 0 | 1 |
| XLOC_014656 | XLOC_014656 | CCT8L2       | chr22:17071647-17073700 | 0 | 1 |
| XLOC_014659 | XLOC_014659 | GAB4         | chr22:17442826-17489112 | 0 | 1 |
| XLOC_014663 | XLOC_014663 | CECR3        | chr22:17737749-17747623 | 0 | 1 |
| XLOC_014666 | XLOC_014666 | MIR3198-1    | chr22:18216905-18257431 | 0 | 1 |
| XLOC_014673 | XLOC_014673 | GSC2         | chr22:19136503-19137796 | 0 | 1 |
| XLOC_014680 | XLOC_014680 | LOC150185    | chr22:19553652-19554362 | 0 | 1 |
| XLOC_014685 | XLOC_014685 | LOC388849    | chr22:20136108-20137431 | 0 | 1 |
| XLOC_014688 | XLOC_014688 | MIR1286      | chr22:20228937-20255816 | 0 | 1 |
| XLOC_014697 | XLOC_014697 | SLC7A4       | chr22:21383006-21386847 | 0 | 1 |
| XLOC_014698 | XLOC_014698 | P2RX6P       | chr22:21396680-21398538 | 0 | 1 |
| XLOC_014706 | XLOC_014706 | ZNF280B      | chr22:22838771-22863505 | 0 | 1 |

|             |             |              |                         |   |   |
|-------------|-------------|--------------|-------------------------|---|---|
| XLOC_014713 | XLOC_014713 | IGLL1        | chr22:23915312-23922495 | 0 | 1 |
| XLOC_014726 | XLOC_014726 | GGT5         | chr22:24615621-24641110 | 0 | 1 |
| XLOC_014731 | XLOC_014731 | PIWIL3       | chr22:25115000-25170687 | 0 | 1 |
| XLOC_014738 | XLOC_014738 | MIR548J      | chr22:26921713-26986089 | 0 | 1 |
| XLOC_014739 | XLOC_014739 | CRYBB1       | chr22:26995361-27013991 | 0 | 1 |
| XLOC_014742 | XLOC_014742 | MIR3199-1    | chr22:28315363-29075853 | 0 | 1 |
| XLOC_014747 | XLOC_014747 | C22orf31     | chr22:29454659-29457907 | 0 | 1 |
| XLOC_014751 | XLOC_014751 | MIR3653      | chr22:29723668-29784572 | 0 | 1 |
| XLOC_014767 | XLOC_014767 | SEC14L6      | chr22:30920916-30942669 | 0 | 1 |
| XLOC_014774 | XLOC_014774 | MIR3928      | chr22:31556047-31556105 | 0 | 1 |
| XLOC_014781 | XLOC_014781 | C22orf42     | chr22:32545518-32555243 | 0 | 1 |
| XLOC_014786 | XLOC_014786 | BPIFC        | chr22:32809833-32853373 | 0 | 1 |
| XLOC_014789 | XLOC_014789 | MIR4764      | chr22:33669061-34316416 | 0 | 1 |
| XLOC_014790 | XLOC_014790 | MB           | chr22:36002810-36019401 | 0 | 1 |
| XLOC_014792 | XLOC_014792 | APOL3        | chr22:36536370-36562225 | 0 | 1 |
| XLOC_014799 | XLOC_014799 | CACNG2       | chr22:36956915-37098690 | 0 | 1 |
| XLOC_014801 | XLOC_014801 | PVALB        | chr22:37196744-37215517 | 0 | 1 |
| XLOC_014802 | XLOC_014802 | TEX33        | chr22:37387159-37403877 | 0 | 1 |
| XLOC_014805 | XLOC_014805 | IL2RB        | chr22:37521879-37545962 | 0 | 1 |
| XLOC_014807 | XLOC_014807 | SSTR3        | chr22:37602244-37608353 | 0 | 1 |
| XLOC_014809 | XLOC_014809 | ELFN2        | chr22:37763999-37823505 | 0 | 1 |
| XLOC_014812 | XLOC_014812 | LGALS2       | chr22:37966252-37976024 | 0 | 1 |
| XLOC_014814 | XLOC_014814 | MIR659       | chr22:38243684-38243781 | 0 | 1 |
| XLOC_014836 | XLOC_014836 | SNORD83A     | chr22:39708886-39715670 | 0 | 1 |
| XLOC_014837 | XLOC_014837 | RNU86        | chr22:39708886-39715670 | 0 | 1 |
| XLOC_014838 | XLOC_014838 | SNORD43      | chr22:39708886-39715670 | 0 | 1 |
| XLOC_014840 | XLOC_014840 | ENTHD1       | chr22:40139048-40289794 | 0 | 1 |
| XLOC_014843 | XLOC_014843 | MIR4766      | chr22:41165638-41215392 | 0 | 1 |
| XLOC_014876 | XLOC_014876 | SULT4A1      | chr22:44220386-44258378 | 0 | 1 |
| XLOC_014877 | XLOC_014877 | PNPLA5       | chr22:44275557-44287893 | 0 | 1 |
| XLOC_014880 | XLOC_014880 | LINC00229    | chr22:45002207-45021299 | 0 | 1 |
| XLOC_014881 | XLOC_014881 | PHF21B       | chr22:45277042-45405809 | 0 | 1 |
| XLOC_014884 | XLOC_014884 | MIR1249      | chr22:45588122-45636650 | 0 | 1 |
| XLOC_014894 | XLOC_014894 | FLJ46257     | chr22:48016791-48027318 | 0 | 1 |
| XLOC_014895 | XLOC_014895 | LOC284933    | chr22:48885287-49147744 | 0 | 1 |
| XLOC_014915 | XLOC_014915 | CHL1         | chr3:238278-451097      | 0 | 1 |
| XLOC_014916 | XLOC_014916 | CNTN6        | chr3:1134628-1445278    | 0 | 1 |
| XLOC_014919 | XLOC_014919 | LRRN1        | chr3:3841120-3889387    | 0 | 1 |
| XLOC_014925 | XLOC_014925 | GRM7         | chr3:6902801-7783218    | 0 | 1 |
| XLOC_014928 | XLOC_014928 | CAV3         | chr3:8775485-8788451    | 0 | 1 |
| XLOC_014947 | XLOC_014947 | SLC6A11      | chr3:10857916-10980146  | 0 | 1 |
| XLOC_014951 | XLOC_014951 | SYN2         | chr3:12045861-12233532  | 0 | 1 |
| XLOC_014952 | XLOC_014952 | PPARG        | chr3:12329348-12475855  | 0 | 1 |
| XLOC_014959 | XLOC_014959 | FGD5P1       | chr3:13974552-13978444  | 0 | 1 |
| XLOC_014972 | XLOC_014972 | MIR563       | chr3:15915277-15915356  | 0 | 1 |
| XLOC_014976 | XLOC_014976 | LOC339862    | chr3:18004063-18310410  | 0 | 1 |
| XLOC_014981 | XLOC_014981 | VENTXP7      | chr3:21447217-21448177  | 0 | 1 |
| XLOC_014982 | XLOC_014982 | UBE2E2       | chr3:23244783-23648882  | 0 | 1 |
| XLOC_014983 | XLOC_014983 | MIR548AC     | chr3:23244783-23648882  | 0 | 1 |
| XLOC_014987 | XLOC_014987 | THRB-AS1     | chr3:24158644-24541502  | 0 | 1 |
| XLOC_014990 | XLOC_014990 | LRRC3B       | chr3:26664299-26752265  | 0 | 1 |
| XLOC_014993 | XLOC_014993 | LINC00693    | chr3:28616768-28799828  | 0 | 1 |
| XLOC_014994 | XLOC_014994 | RBMS3        | chr3:29322802-30051886  | 0 | 1 |
| XLOC_014997 | XLOC_014997 | OSBPL10-AS1  | chr3:31702316-32033228  | 0 | 1 |
| XLOC_015003 | XLOC_015003 | TRIM71       | chr3:32859509-32933771  | 0 | 1 |
| XLOC_015004 | XLOC_015004 | CCR4         | chr3:32993065-32996403  | 0 | 1 |
| XLOC_015008 | XLOC_015008 | ARPP21       | chr3:35680665-35835988  | 0 | 1 |
| XLOC_015009 | XLOC_015009 | MIR128-2     | chr3:35680665-35835988  | 0 | 1 |
| XLOC_015010 | XLOC_015010 | STAC         | chr3:36422096-36589496  | 0 | 1 |
| XLOC_015016 | XLOC_015016 | MIR26A1      | chr3:37903668-38025960  | 0 | 1 |
| XLOC_015028 | XLOC_015028 | CCR8         | chr3:39371196-39375171  | 0 | 1 |
| XLOC_015036 | XLOC_015036 | ENTPD3       | chr3:40428672-40494799  | 0 | 1 |
| XLOC_015047 | XLOC_015047 | KLHL40       | chr3:42727010-42733938  | 0 | 1 |
| XLOC_015048 | XLOC_015048 | CCDC13-AS1   | chr3:42749873-42814745  | 0 | 1 |
| XLOC_015051 | XLOC_015051 | KRBOX1       | chr3:42977833-42984283  | 0 | 1 |
| XLOC_015055 | XLOC_015055 | MIR138-1     | chr3:44155703-44155802  | 0 | 1 |
| XLOC_015056 | XLOC_015056 | TOPAZ1       | chr3:44283377-44373590  | 0 | 1 |
| XLOC_015074 | XLOC_015074 | CCR3         | chr3:46283871-46308197  | 0 | 1 |
| XLOC_015075 | XLOC_015075 | CCR2         | chr3:46395234-46402413  | 0 | 1 |
| XLOC_015078 | XLOC_015078 | RTP3         | chr3:46539484-46542439  | 0 | 1 |
| XLOC_015079 | XLOC_015079 | LRRC2-AS1    | chr3:46556877-46608040  | 0 | 1 |
| XLOC_015080 | XLOC_015080 | TDGF1        | chr3:46616044-46623952  | 0 | 1 |
| XLOC_015081 | XLOC_015081 | LOC100132146 | chr3:46653924-46668033  | 0 | 1 |
| XLOC_015090 | XLOC_015090 | MIR1226      | chr3:47844398-47891686  | 0 | 1 |
| XLOC_015091 | XLOC_015091 | MIR4443      | chr3:48238053-48238106  | 0 | 1 |
| XLOC_015092 | XLOC_015092 | CAMP         | chr3:48264836-48266981  | 0 | 1 |
| XLOC_015103 | XLOC_015103 | MIR4271      | chr3:49306029-49314508  | 0 | 1 |
| XLOC_015121 | XLOC_015121 | MIR4787      | chr3:50712510-50712594  | 0 | 1 |
| XLOC_015128 | XLOC_015128 | IQCF4        | chr3:51851618-51853651  | 0 | 1 |

|             |             |              |                          |   |   |
|-------------|-------------|--------------|--------------------------|---|---|
| XLOC_015129 | XLOC_015129 | IQCF3        | chr3:51860898-51864874   | 0 | 1 |
| XLOC_015130 | XLOC_015130 | IQCF2        | chr3:51895644-51897440   | 0 | 1 |
| XLOC_015143 | XLOC_015143 | SNORD19      | chr3:52719935-52742197   | 0 | 1 |
| XLOC_015144 | XLOC_015144 | SNORD19B     | chr3:52719935-52742197   | 0 | 1 |
| XLOC_015145 | XLOC_015145 | SNORD69      | chr3:52719935-52742197   | 0 | 1 |
| XLOC_015152 | XLOC_015152 | CACNA2D3     | chr3:54156692-55108584   | 0 | 1 |
| XLOC_015154 | XLOC_015154 | ARHGFB3-AS1  | chr3:56761445-57113336   | 0 | 1 |
| XLOC_015166 | XLOC_015166 | LINC00698    | chr3:63088363-63110737   | 0 | 1 |
| XLOC_015167 | XLOC_015167 | SYNPR        | chr3:63263913-63602597   | 0 | 1 |
| XLOC_015168 | XLOC_015168 | SNTN         | chr3:63638343-63650891   | 0 | 1 |
| XLOC_015172 | XLOC_015172 | PRICKLE2-AS1 | chr3:64053639-64211131   | 0 | 1 |
| XLOC_015173 | XLOC_015173 | PRICKLE2-AS2 | chr3:64053639-64211131   | 0 | 1 |
| XLOC_015175 | XLOC_015175 | ADAMTS9-AS2  | chr3:64501330-64997143   | 0 | 1 |
| XLOC_015176 | XLOC_015176 | MIR548A2     | chr3:64501330-64997143   | 0 | 1 |
| XLOC_015177 | XLOC_015177 | MAG11-AS1    | chr3:65339905-66024509   | 0 | 1 |
| XLOC_015180 | XLOC_015180 | MIR4272      | chr3:67275887-67275951   | 0 | 1 |
| XLOC_015181 | XLOC_015181 | FAM19A1      | chr3:68040733-68594771   | 0 | 1 |
| XLOC_015184 | XLOC_015184 | GPR27        | chr3:71728439-71804328   | 0 | 1 |
| XLOC_015185 | XLOC_015185 | LOC201617    | chr3:72200407-72223490   | 0 | 1 |
| XLOC_015189 | XLOC_015189 | MIR4444-1    | chr3:75263626-75263699   | 0 | 1 |
| XLOC_015190 | XLOC_015190 | MIR1324      | chr3:75679913-75680009   | 0 | 1 |
| XLOC_015193 | XLOC_015193 | MIR4273      | chr3:75786028-75834255   | 0 | 1 |
| XLOC_015194 | XLOC_015194 | ROBO2        | chr3:77089293-77699114   | 0 | 1 |
| XLOC_015195 | XLOC_015195 | CADM2        | chr3:85008132-86123579   | 0 | 1 |
| XLOC_015196 | XLOC_015196 | MIR5688      | chr3:85008132-86123579   | 0 | 1 |
| XLOC_015198 | XLOC_015198 | HTR1F        | chr3:88031725-88042919   | 0 | 1 |
| XLOC_015204 | XLOC_015204 | LOC255025    | chr3:94657106-94710169   | 0 | 1 |
| XLOC_015205 | XLOC_015205 | EPHA6        | chr3:96533424-97467786   | 0 | 1 |
| XLOC_015208 | XLOC_015208 | OR5AC2       | chr3:97806016-97806946   | 0 | 1 |
| XLOC_015209 | XLOC_015209 | OR5H1        | chr3:97851541-97852483   | 0 | 1 |
| XLOC_015210 | XLOC_015210 | OR5H14       | chr3:97868229-97869162   | 0 | 1 |
| XLOC_015211 | XLOC_015211 | OR5H15       | chr3:97887543-97888485   | 0 | 1 |
| XLOC_015212 | XLOC_015212 | OR5H6        | chr3:97983128-97984106   | 0 | 1 |
| XLOC_015213 | XLOC_015213 | OR5H2        | chr3:98001731-98002676   | 0 | 1 |
| XLOC_015214 | XLOC_015214 | OR5K4        | chr3:98072697-98073663   | 0 | 1 |
| XLOC_015215 | XLOC_015215 | OR5K3        | chr3:98109509-98110475   | 0 | 1 |
| XLOC_015216 | XLOC_015216 | OR5K1        | chr3:98188420-98189372   | 0 | 1 |
| XLOC_015218 | XLOC_015218 | GPR15        | chr3:98250742-98251994   | 0 | 1 |
| XLOC_015220 | XLOC_015220 | COL8A1       | chr3:99273152-99897476   | 0 | 1 |
| XLOC_015227 | XLOC_015227 | GPR128       | chr3:100328432-100414323 | 0 | 1 |
| XLOC_015245 | XLOC_015245 | TRAT1        | chr3:108541630-108573714 | 0 | 1 |
| XLOC_015246 | XLOC_015246 | FLJ22763     | chr3:108855560-108868951 | 0 | 1 |
| XLOC_015247 | XLOC_015247 | LINC00488    | chr3:108897011-108904108 | 0 | 1 |
| XLOC_015248 | XLOC_015248 | FLJ25363     | chr3:109128836-109214014 | 0 | 1 |
| XLOC_015256 | XLOC_015256 | MIR567       | chr3:111805181-111837073 | 0 | 1 |
| XLOC_015261 | XLOC_015261 | WDR52-AS1    | chr3:112931374-113160361 | 0 | 1 |
| XLOC_015263 | XLOC_015263 | MIR4446      | chr3:113251217-113348422 | 0 | 1 |
| XLOC_015268 | XLOC_015268 | TIGIT        | chr3:114012832-114029135 | 0 | 1 |
| XLOC_015269 | XLOC_015269 | ZBTB20-AS1   | chr3:114056946-114866127 | 0 | 1 |
| XLOC_015270 | XLOC_015270 | GAP43        | chr3:115342150-115440334 | 0 | 1 |
| XLOC_015271 | XLOC_015271 | LSAMP-AS3    | chr3:116428634-116435887 | 0 | 1 |
| XLOC_015272 | XLOC_015272 | IGSF11-AS1   | chr3:118619478-118864898 | 0 | 1 |
| XLOC_015273 | XLOC_015273 | C3orf30      | chr3:118864996-118870302 | 0 | 1 |
| XLOC_015279 | XLOC_015279 | PLA1A        | chr3:119316694-119348658 | 0 | 1 |
| XLOC_015280 | XLOC_015280 | MAATS1       | chr3:119421868-119485949 | 0 | 1 |
| XLOC_015289 | XLOC_015289 | CD86         | chr3:121774208-121839988 | 0 | 1 |
| XLOC_015290 | XLOC_015290 | CASR         | chr3:121902529-122005344 | 0 | 1 |
| XLOC_015302 | XLOC_015302 | MIR5002      | chr3:123813557-124440036 | 0 | 1 |
| XLOC_015305 | XLOC_015305 | ROPN1B       | chr3:125688027-125702296 | 0 | 1 |
| XLOC_015306 | XLOC_015306 | ALDH1L1-AS1  | chr3:125822403-125929011 | 0 | 1 |
| XLOC_015307 | XLOC_015307 | ALDH1L1-AS2  | chr3:125822403-125929011 | 0 | 1 |
| XLOC_015310 | XLOC_015310 | NUP210P1     | chr3:126380923-126390782 | 0 | 1 |
| XLOC_015319 | XLOC_015319 | DNAJB8-AS1   | chr3:128181274-128191160 | 0 | 1 |
| XLOC_015320 | XLOC_015320 | LOC90246     | chr3:128226677-128229429 | 0 | 1 |
| XLOC_015323 | XLOC_015323 | EFCC1        | chr3:128720471-128759585 | 0 | 1 |
| XLOC_015324 | XLOC_015324 | GP9          | chr3:128779644-128781253 | 0 | 1 |
| XLOC_015329 | XLOC_015329 | RHO          | chr3:129247481-129254187 | 0 | 1 |
| XLOC_015330 | XLOC_015330 | H1FOO        | chr3:129262056-129270204 | 0 | 1 |
| XLOC_015335 | XLOC_015335 | COL6A5       | chr3:130064358-130203688 | 0 | 1 |
| XLOC_015341 | XLOC_015341 | ACPP         | chr3:132036210-132087146 | 0 | 1 |
| XLOC_015345 | XLOC_015345 | NPHP3-AS1    | chr3:132276981-132593050 | 0 | 1 |
| XLOC_015346 | XLOC_015346 | TMEM108      | chr3:132757170-133116619 | 0 | 1 |
| XLOC_015347 | XLOC_015347 | BFSP2        | chr3:133118789-133194056 | 0 | 1 |
| XLOC_015351 | XLOC_015351 | MIR4788      | chr3:134156668-134156748 | 0 | 1 |
| XLOC_015353 | XLOC_015353 | EPHB1        | chr3:134514098-134979307 | 0 | 1 |
| XLOC_015359 | XLOC_015359 | SOX14        | chr3:137483133-137485172 | 0 | 1 |
| XLOC_015366 | XLOC_015366 | BPESC1       | chr3:138823026-138844005 | 0 | 1 |
| XLOC_015368 | XLOC_015368 | CLSTN2       | chr3:139654026-140286919 | 0 | 1 |
| XLOC_015369 | XLOC_015369 | TRIM42       | chr3:140396865-140419992 | 0 | 1 |



|             |             |              |                          |   |   |
|-------------|-------------|--------------|--------------------------|---|---|
| XLOC_015371 | XLOC_015371 | SPSB4        | chr3:140770742-140867453 | 0 | 1 |
| XLOC_015380 | XLOC_015380 | LOC100507389 | chr1:142645516-142661378 | 0 | 1 |
| XLOC_015382 | XLOC_015382 | CHST2        | chr3:142838617-142842856 | 0 | 1 |
| XLOC_015383 | XLOC_015383 | SLC9A9-AS1   | chr3:142984063-143567373 | 0 | 1 |
| XLOC_015385 | XLOC_015385 | ZIC1         | chr3:147127180-147134506 | 0 | 1 |
| XLOC_015386 | XLOC_015386 | AGTR1        | chr3:148415657-148460790 | 0 | 1 |
| XLOC_015387 | XLOC_015387 | CPB1         | chr3:148545587-148579772 | 0 | 1 |
| XLOC_015388 | XLOC_015388 | CPA3         | chr3:148583042-148614872 | 0 | 1 |
| XLOC_015390 | XLOC_015390 | HLTF-AS1     | chr3:148747903-148820610 | 0 | 1 |
| XLOC_015392 | XLOC_015392 | TM4SF4       | chr3:149192367-149221181 | 0 | 1 |
| XLOC_015399 | XLOC_015399 | CLRN1-AS1    | chr3:150643949-150797617 | 0 | 1 |
| XLOC_015400 | XLOC_015400 | MED12L       | chr3:150804675-151176497 | 0 | 1 |
| XLOC_015401 | XLOC_015401 | MIR548H2     | chr3:151347319-151546276 | 0 | 1 |
| XLOC_015402 | XLOC_015402 | AADACL2      | chr3:151347319-151546276 | 0 | 1 |
| XLOC_015403 | XLOC_015403 | LOC201651    | chr3:151347319-151546276 | 0 | 1 |
| XLOC_015404 | XLOC_015404 | AADAC        | chr3:151347319-151546276 | 0 | 1 |
| XLOC_015405 | XLOC_015405 | SUCNR1       | chr3:151591430-151599876 | 0 | 1 |
| XLOC_015411 | XLOC_015411 | MME          | chr3:154797435-154901518 | 0 | 1 |
| XLOC_015416 | XLOC_015416 | LOC100498859 | chr3:156799455-156840791 | 0 | 1 |
| XLOC_015417 | XLOC_015417 | PTX3         | chr3:156977531-157221415 | 0 | 1 |
| XLOC_015418 | XLOC_015418 | C3orf55      | chr3:157261132-157319021 | 0 | 1 |
| XLOC_015420 | XLOC_015420 | MLF1         | chr3:158288952-158324249 | 0 | 1 |
| XLOC_015424 | XLOC_015424 | MIR3919      | chr3:158787040-159615155 | 0 | 1 |
| XLOC_015428 | XLOC_015428 | MIR15B       | chr3:160117429-160152741 | 0 | 1 |
| XLOC_015429 | XLOC_015429 | MIR16-2      | chr3:160117429-160152741 | 0 | 1 |
| XLOC_015433 | XLOC_015433 | OTOL1        | chr3:161214595-161221730 | 0 | 1 |
| XLOC_015435 | XLOC_015435 | LOC646168    | chr3:167613735-167641797 | 0 | 1 |
| XLOC_015437 | XLOC_015437 | MIR551B      | chr3:167967309-168548374 | 0 | 1 |
| XLOC_015440 | XLOC_015440 | SAMD7        | chr3:169629481-169656948 | 0 | 1 |
| XLOC_015449 | XLOC_015449 | NLGN1        | chr3:173116243-174001116 | 0 | 1 |
| XLOC_015450 | XLOC_015450 | NAALADL2     | chr3:174577110-175523428 | 0 | 1 |
| XLOC_015451 | XLOC_015451 | MIR4789      | chr3:174577110-175523428 | 0 | 1 |
| XLOC_015470 | XLOC_015470 | ABCC5-AS1    | chr3:183637723-183735727 | 0 | 1 |
| XLOC_015471 | XLOC_015471 | HTR3D        | chr3:183749331-183757157 | 0 | 1 |
| XLOC_015472 | XLOC_015472 | HTR3C        | chr3:183770834-183778461 | 0 | 1 |
| XLOC_015473 | XLOC_015473 | HTR3E        | chr3:183814851-183824783 | 0 | 1 |
| XLOC_015479 | XLOC_015479 | MIR1224      | chr3:183948316-183967313 | 0 | 1 |
| XLOC_015483 | XLOC_015483 | SNORD66      | chr3:184032282-184053146 | 0 | 1 |
| XLOC_015489 | XLOC_015489 | EHHADH-AS1   | chr3:184880688-184971886 | 0 | 1 |
| XLOC_015493 | XLOC_015493 | LOC344887    | chr3:185677757-185696655 | 0 | 1 |
| XLOC_015497 | XLOC_015497 | HRG          | chr3:186383797-186396023 | 0 | 1 |
| XLOC_015498 | XLOC_015498 | KNG1         | chr3:186435097-186462199 | 0 | 1 |
| XLOC_015500 | XLOC_015500 | SNORD2       | chr3:186501360-186524484 | 0 | 1 |
| XLOC_015506 | XLOC_015506 | RTP1         | chr3:186915273-186919253 | 0 | 1 |
| XLOC_015507 | XLOC_015507 | RTP4         | chr3:187086167-187089369 | 0 | 1 |
| XLOC_015508 | XLOC_015508 | LOC100131635 | chr3:187416046-187463513 | 0 | 1 |
| XLOC_015512 | XLOC_015512 | TP63         | chr3:189349215-189615068 | 0 | 1 |
| XLOC_015513 | XLOC_015513 | MIR944       | chr3:189349215-189615068 | 0 | 1 |
| XLOC_015516 | XLOC_015516 | SNAR-I       | chr3:190595718-190595839 | 0 | 1 |
| XLOC_015517 | XLOC_015517 | OSTN         | chr3:190930321-190967910 | 0 | 1 |
| XLOC_015519 | XLOC_015519 | PYDC2        | chr3:191178951-191179245 | 0 | 1 |
| XLOC_015529 | XLOC_015529 | MIR570       | chr3:195426271-195426368 | 0 | 1 |
| XLOC_015531 | XLOC_015531 | LOC401109    | chr3:195869506-195887761 | 0 | 1 |
| XLOC_015545 | XLOC_015545 | FAM157A      | chr3:197879236-197907728 | 0 | 1 |
| XLOC_015546 | XLOC_015546 | CNTN4-AS2    | chr3:2140549-3099645     | 0 | 1 |
| XLOC_015547 | XLOC_015547 | IL5RA        | chr3:3108007-3152058     | 0 | 1 |
| XLOC_015552 | XLOC_015552 | MIR4790      | chr3:5291861-5291940     | 0 | 1 |
| XLOC_015563 | XLOC_015563 | CIDEA        | chr3:9908393-9921938     | 0 | 1 |
| XLOC_015572 | XLOC_015572 | MIR885       | chr3:10365706-10547268   | 0 | 1 |
| XLOC_015573 | XLOC_015573 | LINC00606    | chr3:10801168-10805877   | 0 | 1 |
| XLOC_015574 | XLOC_015574 | SLC6A1-AS1   | chr3:11034419-11080935   | 0 | 1 |
| XLOC_015577 | XLOC_015577 | TIMP4        | chr3:12045861-12233532   | 0 | 1 |
| XLOC_015584 | XLOC_015584 | WNT7A        | chr3:13860081-13921618   | 0 | 1 |
| XLOC_015595 | XLOC_015595 | MIR4270      | chr3:15491639-15563258   | 0 | 1 |
| XLOC_015603 | XLOC_015603 | MIR4791      | chr3:19190016-19577135   | 0 | 1 |
| XLOC_015607 | XLOC_015607 | ZNF385D      | chr3:21462489-21792816   | 0 | 1 |
| XLOC_015609 | XLOC_015609 | LINC00691    | chr3:24141464-24144738   | 0 | 1 |
| XLOC_015611 | XLOC_015611 | MIR4792      | chr3:24562852-24562926   | 0 | 1 |
| XLOC_015613 | XLOC_015613 | MIR4442      | chr3:25706363-25706430   | 0 | 1 |
| XLOC_015615 | XLOC_015615 | LINC00692    | chr3:25900022-25915186   | 0 | 1 |
| XLOC_015618 | XLOC_015618 | EOMES        | chr3:27757885-27763785   | 0 | 1 |
| XLOC_015620 | XLOC_015620 | GADL1        | chr3:30767691-30936153   | 0 | 1 |
| XLOC_015628 | XLOC_015628 | DCLK3        | chr3:36753912-36781352   | 0 | 1 |
| XLOC_015635 | XLOC_015635 | SCN5A        | chr3:38589552-38691164   | 0 | 1 |
| XLOC_015636 | XLOC_015636 | SCN10A       | chr3:38738836-38835501   | 0 | 1 |
| XLOC_015645 | XLOC_015645 | CKK          | chr3:42299317-42307662   | 0 | 1 |
| XLOC_015646 | XLOC_015646 | LYZL4        | chr3:42438574-42452065   | 0 | 1 |
| XLOC_015648 | XLOC_015648 | HHATL        | chr3:42734154-42744319   | 0 | 1 |
| XLOC_015651 | XLOC_015651 | CYP8B1       | chr3:42913683-42917633   | 0 | 1 |

|             |             |              |                          |   |   |
|-------------|-------------|--------------|--------------------------|---|---|
| XLOC_015666 | XLOC_015666 | CCR1         | chr3:46243199-46249832   | 0 | 1 |
| XLOC_015667 | XLOC_015667 | LTF          | chr3:46477495-46506598   | 0 | 1 |
| XLOC_015671 | XLOC_015671 | PRSS46       | chr3:46761072-4677921    | 0 | 1 |
| XLOC_015672 | XLOC_015672 | PRSS45       | chr3:46783580-46786245   | 0 | 1 |
| XLOC_015673 | XLOC_015673 | PRSS42       | chr3:46871893-46875585   | 0 | 1 |
| XLOC_015674 | XLOC_015674 | MYL3         | chr3:46899356-46904973   | 0 | 1 |
| XLOC_015702 | XLOC_015702 | MIR425       | chr3:49044636-49060926   | 0 | 1 |
| XLOC_015703 | XLOC_015703 | MIR191       | chr3:49044636-49060926   | 0 | 1 |
| XLOC_015711 | XLOC_015711 | LOC646498    | chr3:49215068-49229291   | 0 | 1 |
| XLOC_015717 | XLOC_015717 | BSN-AS2      | chr3:49586738-49591799   | 0 | 1 |
| XLOC_015722 | XLOC_015722 | CDHR4        | chr3:49828166-49837254   | 0 | 1 |
| XLOC_015725 | XLOC_015725 | CAMKV        | chr3:49895421-49907369   | 0 | 1 |
| XLOC_015742 | XLOC_015742 | IQCF6        | chr3:51812576-51813203   | 0 | 1 |
| XLOC_015743 | XLOC_015743 | IQCF5        | chr3:51907736-51909600   | 0 | 1 |
| XLOC_015755 | XLOC_015755 | MIRLET7G     | chr3:52288437-52312659   | 0 | 1 |
| XLOC_015756 | XLOC_015756 | MIR135A1     | chr3:52321835-52329272   | 0 | 1 |
| XLOC_015774 | XLOC_015774 | CACNA2D3-AS1 | chr3:54156692-55108584   | 0 | 1 |
| XLOC_015775 | XLOC_015775 | LRTM1        | chr3:54156692-55108584   | 0 | 1 |
| XLOC_015776 | XLOC_015776 | WNT5A        | chr3:55499742-55521670   | 0 | 1 |
| XLOC_015778 | XLOC_015778 | ERC2-IT1     | chr3:55542335-56502391   | 0 | 1 |
| XLOC_015779 | XLOC_015779 | MIR3938      | chr3:55542335-56502391   | 0 | 1 |
| XLOC_015792 | XLOC_015792 | FAM3D        | chr3:58619669-58652561   | 0 | 1 |
| XLOC_015793 | XLOC_015793 | C3orf67      | chr3:58727736-59035715   | 0 | 1 |
| XLOC_015796 | XLOC_015796 | FEZF2        | chr3:62355346-62359190   | 0 | 1 |
| XLOC_015798 | XLOC_015798 | SYNPR-AS1    | chr3:63263913-63602597   | 0 | 1 |
| XLOC_015801 | XLOC_015801 | LOC100287879 | chr3:64053639-64211131   | 0 | 1 |
| XLOC_015802 | XLOC_015802 | PRICKLE2     | chr3:64053639-64211131   | 0 | 1 |
| XLOC_015807 | XLOC_015807 | FAM19A4      | chr3:68780914-68981761   | 0 | 1 |
| XLOC_015810 | XLOC_015810 | MIR3136      | chr3:69068977-69101484   | 0 | 1 |
| XLOC_015815 | XLOC_015815 | MIR1284      | chr3:71003864-71633140   | 0 | 1 |
| XLOC_015817 | XLOC_015817 | PROK2        | chr3:71820805-71834357   | 0 | 1 |
| XLOC_015820 | XLOC_015820 | PDZRN3       | chr3:73431651-73674072   | 0 | 1 |
| XLOC_015821 | XLOC_015821 | CNTN3        | chr3:74311721-74570343   | 0 | 1 |
| XLOC_015826 | XLOC_015826 | LOC440970    | chr3:84687555-84918726   | 0 | 1 |
| XLOC_015827 | XLOC_015827 | CADM2-AS2    | chr3:85008132-86123579   | 0 | 1 |
| XLOC_015828 | XLOC_015828 | RNU6-69      | chr3:86490313-86490361   | 0 | 1 |
| XLOC_015829 | XLOC_015829 | VGLL3        | chr3:86987122-87040257   | 0 | 1 |
| XLOC_015830 | XLOC_015830 | MIR4795      | chr3:87275338-87275427   | 0 | 1 |
| XLOC_015831 | XLOC_015831 | POU1F1       | chr3:87308782-87325737   | 0 | 1 |
| XLOC_015837 | XLOC_015837 | GABRR3       | chr3:97705526-97754148   | 0 | 1 |
| XLOC_015840 | XLOC_015840 | ST3GAL6-AS1  | chr3:98433176-98514689   | 0 | 1 |
| XLOC_015842 | XLOC_015842 | MIR548G      | chr3:99273152-99897476   | 0 | 1 |
| XLOC_015844 | XLOC_015844 | MIR3921      | chr3:99273152-99897476   | 0 | 1 |
| XLOC_015851 | XLOC_015851 | MIR548A3     | chr3:103903475-103946105 | 0 | 1 |
| XLOC_015854 | XLOC_015854 | LINC00635    | chr3:107560508-107596915 | 0 | 1 |
| XLOC_015859 | XLOC_015859 | RETNLB       | chr3:108474485-108476130 | 0 | 1 |
| XLOC_015860 | XLOC_015860 | GUCA1C       | chr3:108626641-108672677 | 0 | 1 |
| XLOC_015861 | XLOC_015861 | MORC1        | chr3:108677086-108836993 | 0 | 1 |
| XLOC_015862 | XLOC_015862 | DPPA2        | chr3:109012634-109035364 | 0 | 1 |
| XLOC_015863 | XLOC_015863 | DPPA4        | chr3:109044987-109056419 | 0 | 1 |
| XLOC_015865 | XLOC_015865 | ZBED2        | chr3:111260925-111371206 | 0 | 1 |
| XLOC_015871 | XLOC_015871 | CD200R1L     | chr3:112534555-112564797 | 0 | 1 |
| XLOC_015879 | XLOC_015879 | DRD3         | chr3:113847556-113897899 | 0 | 1 |
| XLOC_015881 | XLOC_015881 | MIR568       | chr3:114035321-114035416 | 0 | 1 |
| XLOC_015883 | XLOC_015883 | MIR4796      | chr3:114056946-114866127 | 0 | 1 |
| XLOC_015888 | XLOC_015888 | CD80         | chr3:119243139-119278481 | 0 | 1 |
| XLOC_015901 | XLOC_015901 | ILDR1        | chr3:121706169-121741127 | 0 | 1 |
| XLOC_015907 | XLOC_015907 | SEMA5B       | chr3:122628039-122747452 | 0 | 1 |
| XLOC_015912 | XLOC_015912 | ROPN1        | chr3:123687878-123710199 | 0 | 1 |
| XLOC_015917 | XLOC_015917 | MIR5092      | chr3:124801479-124931609 | 0 | 1 |
| XLOC_015921 | XLOC_015921 | MIR548I1     | chr3:125509246-125509395 | 0 | 1 |
| XLOC_015928 | XLOC_015928 | C3orf22      | chr3:126268518-126277758 | 0 | 1 |
| XLOC_015935 | XLOC_015935 | C3orf27      | chr3:128290842-128294929 | 0 | 1 |
| XLOC_015938 | XLOC_015938 | KIAA1257     | chr3:128689781-128712986 | 0 | 1 |
| XLOC_015955 | XLOC_015955 | MIR5704      | chr3:131253576-131753844 | 0 | 1 |
| XLOC_015959 | XLOC_015959 | C3orf36      | chr3:133646989-133648656 | 0 | 1 |
| XLOC_015960 | XLOC_015960 | SLCO2A1      | chr3:133651539-133748920 | 0 | 1 |
| XLOC_015973 | XLOC_015973 | FOXL2        | chr3:138663065-138665982 | 0 | 1 |
| XLOC_015975 | XLOC_015975 | PRR23B       | chr3:138737872-138739768 | 0 | 1 |
| XLOC_015977 | XLOC_015977 | PISRT1       | chr3:138951833-138952364 | 0 | 1 |
| XLOC_015979 | XLOC_015979 | RBP2         | chr3:139171725-139195352 | 0 | 1 |
| XLOC_015980 | XLOC_015980 | RBP1         | chr3:139236275-139258671 | 0 | 1 |
| XLOC_015986 | XLOC_015986 | PCOLCE2      | chr3:142536701-142608045 | 0 | 1 |
| XLOC_015987 | XLOC_015987 | PAQR9        | chr3:142680073-142682178 | 0 | 1 |
| XLOC_015990 | XLOC_015990 | PLOD2        | chr3:145787227-145879282 | 0 | 1 |
| XLOC_015994 | XLOC_015994 | PLSCR5       | chr3:146303624-146324003 | 0 | 1 |
| XLOC_015995 | XLOC_015995 | ZIC4         | chr3:147103834-147124596 | 0 | 1 |
| XLOC_015998 | XLOC_015998 | TM4SF18      | chr3:149036284-149051548 | 0 | 1 |
| XLOC_016002 | XLOC_016002 | ANKUB1       | chr3:149478889-149510610 | 0 | 1 |

|             |             |              |                          |   |   |
|-------------|-------------|--------------|--------------------------|---|---|
| XLOC_016008 | XLOC_016008 | GPR171       | chr3:150804675-151176497 | 0 | 1 |
| XLOC_016009 | XLOC_016009 | P2RY14       | chr3:150804675-151176497 | 0 | 1 |
| XLOC_016011 | XLOC_016011 | P2RY13       | chr3:150804675-151176497 | 0 | 1 |
| XLOC_016012 | XLOC_016012 | P2RY12       | chr3:150804675-151176497 | 0 | 1 |
| XLOC_016013 | XLOC_016013 | IGSF10       | chr3:150804675-151176497 | 0 | 1 |
| XLOC_016014 | XLOC_016014 | MIR5186      | chr3:151283663-151283783 | 0 | 1 |
| XLOC_016019 | XLOC_016019 | GPR149       | chr3:154055460-154147504 | 0 | 1 |
| XLOC_016024 | XLOC_016024 | KCNAB1-AS2   | chr3:155838336-156256927 | 0 | 1 |
| XLOC_016025 | XLOC_016025 | KCNAB1-AS1   | chr3:155838336-156256927 | 0 | 1 |
| XLOC_016041 | XLOC_016041 | SPTSSB       | chr3:161062579-161089871 | 0 | 1 |
| XLOC_016042 | XLOC_016042 | CT64         | chr3:162895030-163021089 | 0 | 1 |
| XLOC_016043 | XLOC_016043 | SI           | chr3:164696685-164796283 | 0 | 1 |
| XLOC_016044 | XLOC_016044 | SLITRK3      | chr3:164904507-164914469 | 0 | 1 |
| XLOC_016045 | XLOC_016045 | BCHE         | chr3:165490691-165555253 | 0 | 1 |
| XLOC_016046 | XLOC_016046 | ZBBX         | chr3:166958076-167098085 | 0 | 1 |
| XLOC_016055 | XLOC_016055 | LRRC31       | chr3:169557028-169587660 | 0 | 1 |
| XLOC_016061 | XLOC_016061 | SLC2A2       | chr3:170714136-170744768 | 0 | 1 |
| XLOC_016063 | XLOC_016063 | MIR569       | chr3:170780291-171178197 | 0 | 1 |
| XLOC_016065 | XLOC_016065 | GHSR         | chr3:172161080-172166246 | 0 | 1 |
| XLOC_016066 | XLOC_016066 | TNFSF10      | chr3:172223297-172241297 | 0 | 1 |
| XLOC_016069 | XLOC_016069 | NAALADL2-AS3 | chr3:174577110-175523428 | 0 | 1 |
| XLOC_016078 | XLOC_016078 | FLJ46066     | chr3:182164757-182204150 | 0 | 1 |
| XLOC_016100 | XLOC_016100 | LOC253573    | chr3:186172769-186211450 | 0 | 1 |
| XLOC_016104 | XLOC_016104 | ADIPOQ-AS1   | chr3:186560462-186576252 | 0 | 1 |
| XLOC_016105 | XLOC_016105 | RPL39L       | chr3:186838740-186857263 | 0 | 1 |
| XLOC_016106 | XLOC_016106 | MASP1        | chr3:186933872-187009810 | 0 | 1 |
| XLOC_016107 | XLOC_016107 | SST          | chr3:187386693-187388201 | 0 | 1 |
| XLOC_016108 | XLOC_016108 | RTP2         | chr3:187416046-187463513 | 0 | 1 |
| XLOC_016113 | XLOC_016113 | CLDN1        | chr3:190023489-190040235 | 0 | 1 |
| XLOC_016114 | XLOC_016114 | TMEM207      | chr3:190146443-190167665 | 0 | 1 |
| XLOC_016115 | XLOC_016115 | GMNC         | chr3:190570525-190580465 | 0 | 1 |
| XLOC_016117 | XLOC_016117 | FGF12        | chr3:191857181-192445388 | 0 | 1 |
| XLOC_016122 | XLOC_016122 | LOC647323    | chr3:193675160-193721448 | 0 | 1 |
| XLOC_016123 | XLOC_016123 | DPPA2P3      | chr3:193675160-193721448 | 0 | 1 |
| XLOC_016125 | XLOC_016125 | CPN2         | chr3:194060493-194072057 | 0 | 1 |
| XLOC_016133 | XLOC_016133 | MIR5692C1    | chr3:195208644-195208667 | 0 | 1 |
| XLOC_016135 | XLOC_016135 | APOD         | chr3:195295572-195311076 | 0 | 1 |
| XLOC_016152 | XLOC_016152 | MIR4797      | chr3:196769430-197030621 | 0 | 1 |
| XLOC_016160 | XLOC_016160 | ZNF141       | chr4:331595-367691       | 0 | 1 |
| XLOC_016190 | XLOC_016190 | FLJ35424     | chr4:3578595-3592712     | 0 | 1 |
| XLOC_016196 | XLOC_016196 | STK32B       | chr4:5053526-5502725     | 0 | 1 |
| XLOC_016199 | XLOC_016199 | LOC285484    | chr4:6202459-6235663     | 0 | 1 |
| XLOC_016210 | XLOC_016210 | MIR4798      | chr4:7194373-7744564     | 0 | 1 |
| XLOC_016211 | XLOC_016211 | MIR4274      | chr4:7194373-7744564     | 0 | 1 |
| XLOC_016214 | XLOC_016214 | HTRA3        | chr4:8271488-8308838     | 0 | 1 |
| XLOC_016216 | XLOC_016216 | GPR78        | chr4:8581963-8591750     | 0 | 1 |
| XLOC_016218 | XLOC_016218 | LOC650293    | chr4:8951476-8952127     | 0 | 1 |
| XLOC_016219 | XLOC_016219 | USP17L10     | chr4:9212382-9213975     | 0 | 1 |
| XLOC_016220 | XLOC_016220 | USP17L18     | chr4:9217130-9218723     | 0 | 1 |
| XLOC_016221 | XLOC_016221 | USP17L21     | chr4:9221877-9223470     | 0 | 1 |
| XLOC_016222 | XLOC_016222 | USP17L13     | chr4:9226621-9228214     | 0 | 1 |
| XLOC_016223 | XLOC_016223 | USP17L15     | chr4:9236110-9238060     | 0 | 1 |
| XLOC_016224 | XLOC_016224 | USP17L17     | chr4:9245604-9247197     | 0 | 1 |
| XLOC_016225 | XLOC_016225 | USP17L18     | chr4:9250355-9251948     | 0 | 1 |
| XLOC_016226 | XLOC_016226 | USP17L19     | chr4:9255103-9256696     | 0 | 1 |
| XLOC_016227 | XLOC_016227 | USP17L22     | chr4:9259849-9261442     | 0 | 1 |
| XLOC_016228 | XLOC_016228 | USP17L12     | chr4:9264597-9266190     | 0 | 1 |
| XLOC_016229 | XLOC_016229 | USP17L22     | chr4:9269344-9270937     | 0 | 1 |
| XLOC_016230 | XLOC_016230 | USP17L28     | chr4:9326890-9328483     | 0 | 1 |
| XLOC_016231 | XLOC_016231 | USP17L26     | chr4:9331636-9333229     | 0 | 1 |
| XLOC_016232 | XLOC_016232 | USP17L24     | chr4:9336383-9337976     | 0 | 1 |
| XLOC_016233 | XLOC_016233 | USP17L28     | chr4:9341128-9342721     | 0 | 1 |
| XLOC_016234 | XLOC_016234 | USP17L25     | chr4:9345873-9347466     | 0 | 1 |
| XLOC_016235 | XLOC_016235 | USP17L30     | chr4:9350618-9352211     | 0 | 1 |
| XLOC_016236 | XLOC_016236 | USP17L27     | chr4:9355363-9356956     | 0 | 1 |
| XLOC_016237 | XLOC_016237 | USP17L9P     | chr4:9360107-9361700     | 0 | 1 |
| XLOC_016238 | XLOC_016238 | USP17L27     | chr4:9364854-9366447     | 0 | 1 |
| XLOC_016239 | XLOC_016239 | USP17L6P     | chr4:9369599-9370796     | 0 | 1 |
| XLOC_016241 | XLOC_016241 | DRD5         | chr4:9783257-9785633     | 0 | 1 |
| XLOC_016242 | XLOC_016242 | MIR572       | chr4:11370450-11370545   | 0 | 1 |
| XLOC_016243 | XLOC_016243 | MIR5091      | chr4:13629488-13629581   | 0 | 1 |
| XLOC_016244 | XLOC_016244 | LOC152742    | chr4:14113591-14141676   | 0 | 1 |
| XLOC_016246 | XLOC_016246 | C1QTNF7      | chr4:15341559-15447791   | 0 | 1 |
| XLOC_016250 | XLOC_016250 | CD38         | chr4:15779930-15850706   | 0 | 1 |
| XLOC_016252 | XLOC_016252 | CLRN2        | chr4:17516787-17528727   | 0 | 1 |
| XLOC_016256 | XLOC_016256 | SLIT2        | chr4:20255234-20620788   | 0 | 1 |
| XLOC_016257 | XLOC_016257 | SLIT2-IT1    | chr4:20255234-20620788   | 0 | 1 |
| XLOC_016258 | XLOC_016258 | MIR218-1     | chr4:20255234-20620788   | 0 | 1 |
| XLOC_016260 | XLOC_016260 | GBA3         | chr4:22694547-22821192   | 0 | 1 |

|             |             |              |                          |   |   |
|-------------|-------------|--------------|--------------------------|---|---|
| XLOC_016261 | XLOC_016261 | SOD3         | chr4:24797084-24802467   | 0 | 1 |
| XLOC_016266 | XLOC_016266 | SLC34A2      | chr4:25657434-25680368   | 0 | 1 |
| XLOC_016271 | XLOC_016271 | MIR4275      | chr4:28821203-28821290   | 0 | 1 |
| XLOC_016273 | XLOC_016273 | DTHD1        | chr4:36283236-36346407   | 0 | 1 |
| XLOC_016274 | XLOC_016274 | KIAA1239     | chr4:37246689-37451087   | 0 | 1 |
| XLOC_016281 | XLOC_016281 | MIR574       | chr4:38869353-38947365   | 0 | 1 |
| XLOC_016291 | XLOC_016291 | CHRNA9       | chr4:40337345-40357234   | 0 | 1 |
| XLOC_016293 | XLOC_016293 | UCHL1        | chr4:41258897-41270446   | 0 | 1 |
| XLOC_016298 | XLOC_016298 | SHISA3       | chr4:42399855-42404504   | 0 | 1 |
| XLOC_016299 | XLOC_016299 | GRXCR1       | chr4:42895282-43032675   | 0 | 1 |
| XLOC_016301 | XLOC_016301 | GABRB1       | chr4:47033294-47428447   | 0 | 1 |
| XLOC_016306 | XLOC_016306 | ZAR1         | chr4:48492308-48496422   | 0 | 1 |
| XLOC_016308 | XLOC_016308 | CWH43        | chr4:48988264-49064095   | 0 | 1 |
| XLOC_016310 | XLOC_016310 | SPATA18      | chr4:52917592-52963458   | 0 | 1 |
| XLOC_016312 | XLOC_016312 | MIR4449      | chr4:53578620-53580305   | 0 | 1 |
| XLOC_016314 | XLOC_016314 | LOC152578    | chr4:53656160-53681631   | 0 | 1 |
| XLOC_016317 | XLOC_016317 | LNX1-AS1     | chr4:54326436-54457753   | 0 | 1 |
| XLOC_016318 | XLOC_016318 | LNX1-AS2     | chr4:54459122-54471548   | 0 | 1 |
| XLOC_016319 | XLOC_016319 | GSX2         | chr4:54966247-54968122   | 0 | 1 |
| XLOC_016320 | XLOC_016320 | PDGFRA       | chr4:55095263-55164412   | 0 | 1 |
| XLOC_016321 | XLOC_016321 | KIT          | chr4:55524094-55606881   | 0 | 1 |
| XLOC_016324 | XLOC_016324 | LOC644145    | chr4:56686236-56703430   | 0 | 1 |
| XLOC_016331 | XLOC_016331 | THEGL        | chr4:57396774-57469489   | 0 | 1 |
| XLOC_016334 | XLOC_016334 | LOC255130    | chr4:57845108-58071465   | 0 | 1 |
| XLOC_016335 | XLOC_016335 | LPHN3        | chr4:62362838-62938168   | 0 | 1 |
| XLOC_016336 | XLOC_016336 | LOC100144602 | chr4:66535678-66559104   | 0 | 1 |
| XLOC_016339 | XLOC_016339 | LOC550113    | chr4:68918915-68995587   | 0 | 1 |
| XLOC_016340 | XLOC_016340 | FTLP10       | chr4:69048009-69083798   | 0 | 1 |
| XLOC_016341 | XLOC_016341 | TMPPRSS11E   | chr4:69313166-69363322   | 0 | 1 |
| XLOC_016342 | XLOC_016342 | UGT2B10      | chr4:69681712-69697741   | 0 | 1 |
| XLOC_016343 | XLOC_016343 | UGT2B7       | chr4:69962192-69978705   | 0 | 1 |
| XLOC_016344 | XLOC_016344 | UGT2B28      | chr4:70146216-70160768   | 0 | 1 |
| XLOC_016345 | XLOC_016345 | CSN1S1       | chr4:70796798-70812288   | 0 | 1 |
| XLOC_016346 | XLOC_016346 | STATH        | chr4:70861647-70868173   | 0 | 1 |
| XLOC_016347 | XLOC_016347 | HTN3         | chr4:70894129-70902255   | 0 | 1 |
| XLOC_016348 | XLOC_016348 | HTN1         | chr4:70916158-70924559   | 0 | 1 |
| XLOC_016349 | XLOC_016349 | CSN1S2AP     | chr4:70933102-70950988   | 0 | 1 |
| XLOC_016350 | XLOC_016350 | CSN1S2BP     | chr4:70999320-71012421   | 0 | 1 |
| XLOC_016352 | XLOC_016352 | ODAM         | chr4:71062243-71070293   | 0 | 1 |
| XLOC_016353 | XLOC_016353 | FDCSP        | chr4:71091787-71100968   | 0 | 1 |
| XLOC_016354 | XLOC_016354 | CSN3         | chr4:71108332-71117145   | 0 | 1 |
| XLOC_016355 | XLOC_016355 | CABS1        | chr4:71200670-71202833   | 0 | 1 |
| XLOC_016356 | XLOC_016356 | SMR3A        | chr4:71226492-71232823   | 0 | 1 |
| XLOC_016357 | XLOC_016357 | SMR3B        | chr4:71248794-71255961   | 0 | 1 |
| XLOC_016358 | XLOC_016358 | PROL1        | chr4:71263598-71275914   | 0 | 1 |
| XLOC_016359 | XLOC_016359 | MUC7         | chr4:71296208-71348714   | 0 | 1 |
| XLOC_016360 | XLOC_016360 | AMTN         | chr4:71384297-71398459   | 0 | 1 |
| XLOC_016361 | XLOC_016361 | AMBN         | chr4:71457974-71473004   | 0 | 1 |
| XLOC_016367 | XLOC_016367 | SLC4A4       | chr4:72053002-72437804   | 0 | 1 |
| XLOC_016370 | XLOC_016370 | AFP          | chr4:74301932-74321492   | 0 | 1 |
| XLOC_016371 | XLOC_016371 | AFM          | chr4:74347461-74369718   | 0 | 1 |
| XLOC_016372 | XLOC_016372 | LOC728040    | chr4:74374519-74394250   | 0 | 1 |
| XLOC_016374 | XLOC_016374 | CXCL6        | chr4:74702272-74704477   | 0 | 1 |
| XLOC_016375 | XLOC_016375 | PF4V1        | chr4:74719012-74720198   | 0 | 1 |
| XLOC_016380 | XLOC_016380 | AREG         | chr4:75310852-75320726   | 0 | 1 |
| XLOC_016381 | XLOC_016381 | AREG         | chr4:75480628-75490485   | 0 | 1 |
| XLOC_016383 | XLOC_016383 | LOC441025    | chr4:76279285-76287776   | 0 | 1 |
| XLOC_016387 | XLOC_016387 | ART3         | chr4:76932332-77033955   | 0 | 1 |
| XLOC_016390 | XLOC_016390 | MIR4450      | chr4:77356252-77704405   | 0 | 1 |
| XLOC_016401 | XLOC_016401 | GDEP         | chr4:80748624-80784401   | 0 | 1 |
| XLOC_016414 | XLOC_016414 | MIR4451      | chr4:86396283-86923823   | 0 | 1 |
| XLOC_016418 | XLOC_016418 | DSPP         | chr4:88529680-88538025   | 0 | 1 |
| XLOC_016419 | XLOC_016419 | DMP1         | chr4:88571453-88585512   | 0 | 1 |
| XLOC_016420 | XLOC_016420 | IBSP         | chr4:88720701-88733601   | 0 | 1 |
| XLOC_016421 | XLOC_016421 | MEPE         | chr4:88742562-88767968   | 0 | 1 |
| XLOC_016429 | XLOC_016429 | LOC644248    | chr4:90645249-90763142   | 0 | 1 |
| XLOC_016430 | XLOC_016430 | MMRN1        | chr4:90816051-90875780   | 0 | 1 |
| XLOC_016431 | XLOC_016431 | CCSER1       | chr4:91048683-92523370   | 0 | 1 |
| XLOC_016432 | XLOC_016432 | GRID2        | chr4:93225549-94693649   | 0 | 1 |
| XLOC_016433 | XLOC_016433 | ATOH1        | chr4:94750077-94751142   | 0 | 1 |
| XLOC_016436 | XLOC_016436 | BMPR1B       | chr4:95679127-96079601   | 0 | 1 |
| XLOC_016437 | XLOC_016437 | PDHA2        | chr4:96761238-96762625   | 0 | 1 |
| XLOC_016440 | XLOC_016440 | MIR3684      | chr4:99916787-99983960   | 0 | 1 |
| XLOC_016442 | XLOC_016442 | C4orf17      | chr4:100432160-100463460 | 0 | 1 |
| XLOC_016447 | XLOC_016447 | BANK1        | chr4:102711763-102995969 | 0 | 1 |
| XLOC_016452 | XLOC_016452 | ARHGEF38-IT1 | chr4:106473776-106602070 | 0 | 1 |
| XLOC_016454 | XLOC_016454 | NPNT         | chr4:106816596-106892828 | 0 | 1 |
| XLOC_016474 | XLOC_016474 | MIR1243      | chr4:113739238-114304896 | 0 | 1 |
| XLOC_016476 | XLOC_016476 | MIR577       | chr4:115519610-115598202 | 0 | 1 |

|             |             |              |                          |   |   |
|-------------|-------------|--------------|--------------------------|---|---|
| XLOC_016477 | XLOC_016477 | MIR1973      | chr4:117220880-117220924 | 0 | 1 |
| XLOC_016478 | XLOC_016478 | NDST3        | chr4:118955499-119179789 | 0 | 1 |
| XLOC_016481 | XLOC_016481 | CEP170P1     | chr4:119437494-119475359 | 0 | 1 |
| XLOC_016487 | XLOC_016487 | PP12613      | chr4:122680084-122687963 | 0 | 1 |
| XLOC_016495 | XLOC_016495 | LOC285419    | chr4:124573939-124851518 | 0 | 1 |
| XLOC_016496 | XLOC_016496 | FAT4         | chr4:126237566-126414087 | 0 | 1 |
| XLOC_016497 | XLOC_016497 | MIR2054      | chr4:126428413-126428462 | 0 | 1 |
| XLOC_016506 | XLOC_016506 | PCDH10       | chr4:134070469-134112732 | 0 | 1 |
| XLOC_016508 | XLOC_016508 | LINC00499    | chr4:139230864-139345498 | 0 | 1 |
| XLOC_016513 | XLOC_016513 | SCOC         | chr4:141178439-141303710 | 0 | 1 |
| XLOC_016520 | XLOC_016520 | GUSBP5       | chr4:144480624-144482613 | 0 | 1 |
| XLOC_016528 | XLOC_016528 | EDNRA        | chr4:148402068-148466106 | 0 | 1 |
| XLOC_016531 | XLOC_016531 | MIR4799      | chr4:148653452-148993927 | 0 | 1 |
| XLOC_016543 | XLOC_016543 | TLR2         | chr4:154605440-154627242 | 0 | 1 |
| XLOC_016544 | XLOC_016544 | FGF          | chr4:155484131-155493915 | 0 | 1 |
| XLOC_016546 | XLOC_016546 | RBM46        | chr4:155702426-155749965 | 0 | 1 |
| XLOC_016547 | XLOC_016547 | NPY2R        | chr4:156129780-156138228 | 0 | 1 |
| XLOC_016548 | XLOC_016548 | GUCY1A3      | chr4:156587861-156658214 | 0 | 1 |
| XLOC_016549 | XLOC_016549 | GUCY1B3      | chr4:156680125-156728783 | 0 | 1 |
| XLOC_016550 | XLOC_016550 | TDO2         | chr4:156824844-156841558 | 0 | 1 |
| XLOC_016551 | XLOC_016551 | GLRB         | chr4:157997276-158093242 | 0 | 1 |
| XLOC_016552 | XLOC_016552 | GRIA2        | chr4:158141735-158287226 | 0 | 1 |
| XLOC_016553 | XLOC_016553 | LOC340017    | chr4:158493641-158497303 | 0 | 1 |
| XLOC_016555 | XLOC_016555 | RXFP1        | chr4:159442865-159574521 | 0 | 1 |
| XLOC_016558 | XLOC_016558 | MIR3688-2    | chr4:160049953-160050046 | 0 | 1 |
| XLOC_016560 | XLOC_016560 | NPY5R        | chr4:164285090-164273086 | 0 | 1 |
| XLOC_016562 | XLOC_016562 | MIR5684      | chr4:165426541-165630646 | 0 | 1 |
| XLOC_016564 | XLOC_016564 | LOC100506013 | chr4:165798155-165818676 | 0 | 1 |
| XLOC_016565 | XLOC_016565 | FAM218A      | chr4:165875597-165898818 | 0 | 1 |
| XLOC_016569 | XLOC_016569 | CPE          | chr4:166300096-166419482 | 0 | 1 |
| XLOC_016570 | XLOC_016570 | MIR578       | chr4:166300096-166419482 | 0 | 1 |
| XLOC_016571 | XLOC_016571 | TLL1         | chr4:166794409-167025609 | 0 | 1 |
| XLOC_016572 | XLOC_016572 | ANXA10       | chr4:169013687-169108893 | 0 | 1 |
| XLOC_016575 | XLOC_016575 | LOC100506122 | chr4:171961752-171980311 | 0 | 1 |
| XLOC_016576 | XLOC_016576 | GALNTL6      | chr4:172734574-173961558 | 0 | 1 |
| XLOC_016579 | XLOC_016579 | NBLA00301    | chr4:174451608-174462981 | 0 | 1 |
| XLOC_016581 | XLOC_016581 | MIR4276      | chr4:175344945-175345015 | 0 | 1 |
| XLOC_016582 | XLOC_016582 | ADAM29       | chr4:175839508-175899331 | 0 | 1 |
| XLOC_016583 | XLOC_016583 | WDR17        | chr4:176986984-177103979 | 0 | 1 |
| XLOC_016586 | XLOC_016586 | LOC285501    | chr4:178649910-178911904 | 0 | 1 |
| XLOC_016587 | XLOC_016587 | MIR1305      | chr4:183090445-183090531 | 0 | 1 |
| XLOC_016596 | XLOC_016596 | HELT         | chr4:185940082-185941926 | 0 | 1 |
| XLOC_016605 | XLOC_016605 | F11          | chr4:187187117-187422212 | 0 | 1 |
| XLOC_016608 | XLOC_016608 | LOC401164    | chr4:189376731-189523062 | 0 | 1 |
| XLOC_016610 | XLOC_016610 | DUX2         | chr4:190988866-190990406 | 0 | 1 |
| XLOC_016611 | XLOC_016611 | DUX4L4       | chr4:190992092-190993703 | 0 | 1 |
| XLOC_016612 | XLOC_016612 | DUX4L5       | chr4:190995385-190996996 | 0 | 1 |
| XLOC_016613 | XLOC_016613 | DUX4L6       | chr4:190998678-191000289 | 0 | 1 |
| XLOC_016614 | XLOC_016614 | DUX4L4       | chr4:191001978-191003583 | 0 | 1 |
| XLOC_016615 | XLOC_016615 | DUX4         | chr4:191005266-191006883 | 0 | 1 |
| XLOC_016616 | XLOC_016616 | DUX4L3       | chr4:191008565-191010176 | 0 | 1 |
| XLOC_016617 | XLOC_016617 | DUX4         | chr4:191011859-191013476 | 0 | 1 |
| XLOC_016627 | XLOC_016627 | RNF212       | chr4:1065265-1107352     | 0 | 1 |
| XLOC_016628 | XLOC_016628 | TMED11P      | chr4:1108984-1116952     | 0 | 1 |
| XLOC_016642 | XLOC_016642 | HTT-AS1      | chr4:3064972-3076241     | 0 | 1 |
| XLOC_016644 | XLOC_016644 | LOC100133461 | chr4:3675319-3679582     | 0 | 1 |
| XLOC_016650 | XLOC_016650 | CYTL1        | chr4:5016313-5021197     | 0 | 1 |
| XLOC_016651 | XLOC_016651 | EVC2         | chr4:5564145-5711275     | 0 | 1 |
| XLOC_016653 | XLOC_016653 | MIR378D1     | chr4:5925001-5925055     | 0 | 1 |
| XLOC_016654 | XLOC_016654 | JAKMIP1      | chr4:6027925-6202318     | 0 | 1 |
| XLOC_016661 | XLOC_016661 | PSAPL1       | chr4:7194373-7744564     | 0 | 1 |
| XLOC_016665 | XLOC_016665 | HMX1         | chr4:8868772-8873543     | 0 | 1 |
| XLOC_016669 | XLOC_016669 | MIR3138      | chr4:10075962-10118573   | 0 | 1 |
| XLOC_016671 | XLOC_016671 | CLNK         | chr4:10491837-10686386   | 0 | 1 |
| XLOC_016672 | XLOC_016672 | HS3ST1       | chr4:11399987-11430537   | 0 | 1 |
| XLOC_016674 | XLOC_016674 | LOC285547    | chr4:13527942-13533041   | 0 | 1 |
| XLOC_016675 | XLOC_016675 | NKX3-2       | chr4:13542453-13546114   | 0 | 1 |
| XLOC_016676 | XLOC_016676 | LOC285548    | chr4:13547699-13549448   | 0 | 1 |
| XLOC_016678 | XLOC_016678 | LOC441009    | chr4:14911584-15003669   | 0 | 1 |
| XLOC_016680 | XLOC_016680 | FGFBP1       | chr4:15937192-15940363   | 0 | 1 |
| XLOC_016681 | XLOC_016681 | FGFBP2       | chr4:15961862-15964859   | 0 | 1 |
| XLOC_016684 | XLOC_016684 | LDB2         | chr4:16503164-16900424   | 0 | 1 |
| XLOC_016685 | XLOC_016685 | MIR548AX     | chr4:16503164-16900424   | 0 | 1 |
| XLOC_016691 | XLOC_016691 | KCNIP4-IT1   | chr4:20730238-21950374   | 0 | 1 |
| XLOC_016694 | XLOC_016694 | MIR548AJ2    | chr4:23199716-23464726   | 0 | 1 |
| XLOC_016696 | XLOC_016696 | MIR573       | chr4:24521814-24521913   | 0 | 1 |
| XLOC_016702 | XLOC_016702 | CCKAR        | chr4:26483017-26492042   | 0 | 1 |
| XLOC_016704 | XLOC_016704 | MIR4801      | chr4:37243531-37243613   | 0 | 1 |
| XLOC_016718 | XLOC_016718 | MIR4802      | chr4:40425271-40631883   | 0 | 1 |

|             |             |              |                          |   |   |
|-------------|-------------|--------------|--------------------------|---|---|
| XLOC_016720 | XLOC_016720 | PHOX2B       | chr4:41746098-41750987   | 0 | 1 |
| XLOC_016723 | XLOC_016723 | KCTD8        | chr4:44175919-44450824   | 0 | 1 |
| XLOC_016727 | XLOC_016727 | GABRA2       | chr4:46251580-46392056   | 0 | 1 |
| XLOC_016729 | XLOC_016729 | GABRA4       | chr4:46920916-46996424   | 0 | 1 |
| XLOC_016741 | XLOC_016741 | ERVMER34-1   | chr4:53609683-53617807   | 0 | 1 |
| XLOC_016746 | XLOC_016746 | KDR          | chr4:55944425-55991762   | 0 | 1 |
| XLOC_016753 | XLOC_016753 | HOPX         | chr4:57514153-57547872   | 0 | 1 |
| XLOC_016754 | XLOC_016754 | SPINK2       | chr4:57676025-57688035   | 0 | 1 |
| XLOC_016757 | XLOC_016757 | TECRL        | chr4:65144176-65275178   | 0 | 1 |
| XLOC_016758 | XLOC_016758 | LOC401134    | chr4:65779998-65870218   | 0 | 1 |
| XLOC_016759 | XLOC_016759 | EPHA5        | chr4:66185280-66535653   | 0 | 1 |
| XLOC_016764 | XLOC_016764 | TMPRSS11A    | chr4:68776018-68829232   | 0 | 1 |
| XLOC_016765 | XLOC_016765 | TMPRSS11GP   | chr4:68857529-68863157   | 0 | 1 |
| XLOC_016766 | XLOC_016766 | TMPRSS11F    | chr4:68918915-68995587   | 0 | 1 |
| XLOC_016767 | XLOC_016767 | SYT14L       | chr4:68918915-68995587   | 0 | 1 |
| XLOC_016768 | XLOC_016768 | TMPRSS11BNL  | chr4:69048009-69083798   | 0 | 1 |
| XLOC_016769 | XLOC_016769 | TMPRSS11B    | chr4:69092370-69111412   | 0 | 1 |
| XLOC_016771 | XLOC_016771 | UGT2B17      | chr4:69402902-69434245   | 0 | 1 |
| XLOC_016772 | XLOC_016772 | UGT2B15      | chr4:69512314-69536494   | 0 | 1 |
| XLOC_016773 | XLOC_016773 | UGT2A3       | chr4:69794176-69817509   | 0 | 1 |
| XLOC_016774 | XLOC_016774 | UGT2B10      | chr4:69870294-69886113   | 0 | 1 |
| XLOC_016775 | XLOC_016775 | UGT2B11      | chr4:70066050-70080449   | 0 | 1 |
| XLOC_016776 | XLOC_016776 | UGT2B4       | chr4:70345882-70361626   | 0 | 1 |
| XLOC_016778 | XLOC_016778 | SULT1B1      | chr4:70592685-70626430   | 0 | 1 |
| XLOC_016779 | XLOC_016779 | SULT1E1      | chr4:70706929-70725870   | 0 | 1 |
| XLOC_016780 | XLOC_016780 | CSN2         | chr4:70820973-70826726   | 0 | 1 |
| XLOC_016783 | XLOC_016783 | GC           | chr4:72607410-72671237   | 0 | 1 |
| XLOC_016784 | XLOC_016784 | ADAMTS3      | chr4:73146685-73434516   | 0 | 1 |
| XLOC_016787 | XLOC_016787 | RASSF6       | chr4:74437266-74486348   | 0 | 1 |
| XLOC_016788 | XLOC_016788 | PF4          | chr4:74846541-74847841   | 0 | 1 |
| XLOC_016789 | XLOC_016789 | PPBP         | chr4:74852155-74853907   | 0 | 1 |
| XLOC_016790 | XLOC_016790 | CXCL5        | chr4:74861358-74864416   | 0 | 1 |
| XLOC_016792 | XLOC_016792 | PPBPP2       | chr4:74919754-74921116   | 0 | 1 |
| XLOC_016801 | XLOC_016801 | CXCL9        | chr4:76922622-76928641   | 0 | 1 |
| XLOC_016802 | XLOC_016802 | CXCL10       | chr4:76932332-77033955   | 0 | 1 |
| XLOC_016803 | XLOC_016803 | CXCL11       | chr4:76932332-77033955   | 0 | 1 |
| XLOC_016811 | XLOC_016811 | NAA11        | chr4:80238271-80247171   | 0 | 1 |
| XLOC_016812 | XLOC_016812 | GK2          | chr4:80327506-80329372   | 0 | 1 |
| XLOC_016814 | XLOC_016814 | PRKG2        | chr4:82009836-82126215   | 0 | 1 |
| XLOC_016819 | XLOC_016819 | LINC00575    | chr4:83534265-83542590   | 0 | 1 |
| XLOC_016821 | XLOC_016821 | MIR575       | chr4:83550689-83720010   | 0 | 1 |
| XLOC_016830 | XLOC_016830 | NKX6-1       | chr4:85414435-85419387   | 0 | 1 |
| XLOC_016832 | XLOC_016832 | MAPK10       | chr4:86936275-87374283   | 0 | 1 |
| XLOC_016837 | XLOC_016837 | MIR5705      | chr4:88221646-88221735   | 0 | 1 |
| XLOC_016846 | XLOC_016846 | GPRIN3       | chr4:90165428-90229161   | 0 | 1 |
| XLOC_016847 | XLOC_016847 | SNCA         | chr4:90645249-90763142   | 0 | 1 |
| XLOC_016848 | XLOC_016848 | HPGDS        | chr4:95219706-95264027   | 0 | 1 |
| XLOC_016849 | XLOC_016849 | UNC5C        | chr4:96083655-96470361   | 0 | 1 |
| XLOC_016854 | XLOC_016854 | ADH4         | chr4:100010007-100222513 | 0 | 1 |
| XLOC_016857 | XLOC_016857 | ADH1A        | chr4:100010007-100222513 | 0 | 1 |
| XLOC_016858 | XLOC_016858 | ADH1B        | chr4:100227526-100242572 | 0 | 1 |
| XLOC_016859 | XLOC_016859 | ADH1C        | chr4:100257648-100273917 | 0 | 1 |
| XLOC_016860 | XLOC_016860 | ADH7         | chr4:100333417-100356667 | 0 | 1 |
| XLOC_016865 | XLOC_016865 | DDIT4L       | chr4:101107026-101111655 | 0 | 1 |
| XLOC_016866 | XLOC_016866 | EMCN         | chr4:101316497-101439250 | 0 | 1 |
| XLOC_016867 | XLOC_016867 | EMCN-IT3     | chr4:101581435-101596270 | 0 | 1 |
| XLOC_016876 | XLOC_016876 | TACR3        | chr4:104510624-104640973 | 0 | 1 |
| XLOC_016881 | XLOC_016881 | GIMD1        | chr4:107279339-107288592 | 0 | 1 |
| XLOC_016882 | XLOC_016882 | DKK2         | chr4:107842958-107957453 | 0 | 1 |
| XLOC_016886 | XLOC_016886 | AGXT2L1      | chr4:109663201-109684235 | 0 | 1 |
| XLOC_016891 | XLOC_016891 | CFI          | chr4:110661847-110723335 | 0 | 1 |
| XLOC_016897 | XLOC_016897 | MIR367       | chr4:113460488-113578748 | 0 | 1 |
| XLOC_016898 | XLOC_016898 | MIR302D      | chr4:113460488-113578748 | 0 | 1 |
| XLOC_016899 | XLOC_016899 | MIR302A      | chr4:113460488-113578748 | 0 | 1 |
| XLOC_016900 | XLOC_016900 | MIR302C      | chr4:113460488-113578748 | 0 | 1 |
| XLOC_016901 | XLOC_016901 | MIR302B      | chr4:113460488-113578748 | 0 | 1 |
| XLOC_016904 | XLOC_016904 | NDST4        | chr4:115748926-116035032 | 0 | 1 |
| XLOC_016905 | XLOC_016905 | TRAM1L1      | chr4:118004709-118006736 | 0 | 1 |
| XLOC_016915 | XLOC_016915 | TNIP3        | chr4:122052563-122148621 | 0 | 1 |
| XLOC_016916 | XLOC_016916 | QRFPFR       | chr4:122249796-122302181 | 0 | 1 |
| XLOC_016918 | XLOC_016918 | TMEM155      | chr4:122680084-122687963 | 0 | 1 |
| XLOC_016921 | XLOC_016921 | TRPC3        | chr4:122800182-122872909 | 0 | 1 |
| XLOC_016922 | XLOC_016922 | IL2          | chr4:123372625-123377650 | 0 | 1 |
| XLOC_016923 | XLOC_016923 | IL21         | chr4:123533782-123542212 | 0 | 1 |
| XLOC_016930 | XLOC_016930 | PABPC4L      | chr4:135117488-135122903 | 0 | 1 |
| XLOC_016932 | XLOC_016932 | LINC00616    | chr4:138948576-139163503 | 0 | 1 |
| XLOC_016939 | XLOC_016939 | LOC100129858 | chr4:141178439-141303710 | 0 | 1 |
| XLOC_016940 | XLOC_016940 | CLGN         | chr4:141309606-141348815 | 0 | 1 |
| XLOC_016941 | XLOC_016941 | UCP1         | chr4:141481049-141489959 | 0 | 1 |

|             |             |              |                          |   |   |
|-------------|-------------|--------------|--------------------------|---|---|
| XLOC_016942 | XLOC_016942 | TBC1D9       | chr4:141541935-141677471 | 0 | 1 |
| XLOC_016943 | XLOC_016943 | TNRC18P1     | chr4:141541935-141677471 | 0 | 1 |
| XLOC_016944 | XLOC_016944 | RNF150       | chr4:141786724-142054616 | 0 | 1 |
| XLOC_016945 | XLOC_016945 | INPP4B       | chr4:142949181-143767604 | 0 | 1 |
| XLOC_016946 | XLOC_016946 | FREM3        | chr4:144498560-144621828 | 0 | 1 |
| XLOC_016947 | XLOC_016947 | GYPE         | chr4:144792018-144826716 | 0 | 1 |
| XLOC_016948 | XLOC_016948 | GYPB         | chr4:144917256-144940496 | 0 | 1 |
| XLOC_016949 | XLOC_016949 | GYPA         | chr4:145030455-145061904 | 0 | 1 |
| XLOC_016954 | XLOC_016954 | LOC100505545 | chr4:147030606-147043065 | 0 | 1 |
| XLOC_016956 | XLOC_016956 | TTC29        | chr4:147628178-147867034 | 0 | 1 |
| XLOC_016963 | XLOC_016963 | MIR3140      | chr4:153242409-153456393 | 0 | 1 |
| XLOC_016964 | XLOC_016964 | TMEM154      | chr4:153547265-153601317 | 0 | 1 |
| XLOC_016967 | XLOC_016967 | RNF175       | chr4:154631311-154681387 | 0 | 1 |
| XLOC_016968 | XLOC_016968 | SFRP2        | chr4:154701741-154710228 | 0 | 1 |
| XLOC_016969 | XLOC_016969 | DCHS2        | chr4:155155526-155412930 | 0 | 1 |
| XLOC_016971 | XLOC_016971 | FGA          | chr4:155504279-155511897 | 0 | 1 |
| XLOC_016972 | XLOC_016972 | FGG          | chr4:155525285-155533902 | 0 | 1 |
| XLOC_016973 | XLOC_016973 | MAP9         | chr4:156263811-156298122 | 0 | 1 |
| XLOC_016974 | XLOC_016974 | ASIC5        | chr4:156750880-156787425 | 0 | 1 |
| XLOC_016976 | XLOC_016976 | PDGFC        | chr4:157682762-157892546 | 0 | 1 |
| XLOC_016980 | XLOC_016980 | C4orf45      | chr4:159690181-159956333 | 0 | 1 |
| XLOC_016981 | XLOC_016981 | MIR3688-1    | chr4:160049953-160050046 | 0 | 1 |
| XLOC_016984 | XLOC_016984 | NPY1R        | chr4:164245116-164253947 | 0 | 1 |
| XLOC_016985 | XLOC_016985 | TKTL2        | chr4:164392246-164395047 | 0 | 1 |
| XLOC_016987 | XLOC_016987 | ANP32C       | chr4:164445449-165304407 | 0 | 1 |
| XLOC_017002 | XLOC_017002 | SCRG1        | chr4:174309298-174320617 | 0 | 1 |
| XLOC_017003 | XLOC_017003 | HAND2        | chr4:174447651-174451378 | 0 | 1 |
| XLOC_017006 | XLOC_017006 | GLRA3        | chr4:175563197-175750465 | 0 | 1 |
| XLOC_017009 | XLOC_017009 | ASB5         | chr4:177134825-177190373 | 0 | 1 |
| XLOC_017010 | XLOC_017010 | VEGFC        | chr4:177604690-177713895 | 0 | 1 |
| XLOC_017012 | XLOC_017012 | LINC00290    | chr4:181985242-182080302 | 0 | 1 |
| XLOC_017028 | XLOC_017028 | MIR3945      | chr4:185772166-185772264 | 0 | 1 |
| XLOC_017029 | XLOC_017029 | LOC100506229 | chr4:185814153-185820615 | 0 | 1 |
| XLOC_017034 | XLOC_017034 | PDLIM3       | chr4:186421814-186456712 | 0 | 1 |
| XLOC_017035 | XLOC_017035 | SORBS2       | chr4:186506597-186877870 | 0 | 1 |
| XLOC_017037 | XLOC_017037 | LOC285441    | chr4:187187117-187422212 | 0 | 1 |
| XLOC_017038 | XLOC_017038 | MTNR1A       | chr4:187454808-187476537 | 0 | 1 |
| XLOC_017040 | XLOC_017040 | LOC339975    | chr4:188225236-188426767 | 0 | 1 |
| XLOC_017059 | XLOC_017059 | SLC6A19      | chr5:1201709-1225230     | 0 | 1 |
| XLOC_017060 | XLOC_017060 | SLC6A18      | chr5:1225469-1246304     | 0 | 1 |
| XLOC_017063 | XLOC_017063 | IRX1         | chr5:3596167-3601517     | 0 | 1 |
| XLOC_017064 | XLOC_017064 | LOC340094    | chr5:5034471-5070115     | 0 | 1 |
| XLOC_017067 | XLOC_017067 | UBE2QL1      | chr5:6448735-6496834     | 0 | 1 |
| XLOC_017068 | XLOC_017068 | LOC255167    | chr5:6582286-6588613     | 0 | 1 |
| XLOC_017071 | XLOC_017071 | ADCY2        | chr5:7396342-7830194     | 0 | 1 |
| XLOC_017074 | XLOC_017074 | LOC100505806 | chr5:9546311-9550409     | 0 | 1 |
| XLOC_017075 | XLOC_017075 | SNORD123     | chr5:9546311-9550409     | 0 | 1 |
| XLOC_017080 | XLOC_017080 | CT49         | chr5:12574968-12805295   | 0 | 1 |
| XLOC_017085 | XLOC_017085 | FBXL7        | chr5:15500304-15939900   | 0 | 1 |
| XLOC_017086 | XLOC_017086 | BASP1        | chr5:17130136-17276954   | 0 | 1 |
| XLOC_017088 | XLOC_017088 | PMCHL1       | chr5:21750972-22853731   | 0 | 1 |
| XLOC_017089 | XLOC_017089 | PRDM9        | chr5:23507723-23528706   | 0 | 1 |
| XLOC_017091 | XLOC_017091 | LSP1P3       | chr5:28926976-28927420   | 0 | 1 |
| XLOC_017097 | XLOC_017097 | LOC340113    | chr5:32947548-32962573   | 0 | 1 |
| XLOC_017099 | XLOC_017099 | RXFP3        | chr5:33936490-33939023   | 0 | 1 |
| XLOC_017105 | XLOC_017105 | IL7R         | chr5:35856976-35879705   | 0 | 1 |
| XLOC_017107 | XLOC_017107 | SLC1A3       | chr5:36606456-36688436   | 0 | 1 |
| XLOC_017110 | XLOC_017110 | EGFLAM       | chr5:38258510-38465582   | 0 | 1 |
| XLOC_017118 | XLOC_017118 | CCDC152      | chr5:42756919-42812024   | 0 | 1 |
| XLOC_017122 | XLOC_017122 | NNT          | chr5:43573286-43705668   | 0 | 1 |
| XLOC_017131 | XLOC_017131 | HSPB3        | chr5:53751430-53752214   | 0 | 1 |
| XLOC_017132 | XLOC_017132 | SNX18        | chr5:53813588-53842416   | 0 | 1 |
| XLOC_017133 | XLOC_017133 | GZMK         | chr5:54320106-54329960   | 0 | 1 |
| XLOC_017134 | XLOC_017134 | GZMA         | chr5:54398473-54406080   | 0 | 1 |
| XLOC_017142 | XLOC_017142 | GAPT         | chr5:57787329-57792185   | 0 | 1 |
| XLOC_017143 | XLOC_017143 | RAB3C        | chr5:57878938-58147406   | 0 | 1 |
| XLOC_017150 | XLOC_017150 | RNF180       | chr5:63461670-63668696   | 0 | 1 |
| XLOC_017151 | XLOC_017151 | RG57BP       | chr5:63801773-63908121   | 0 | 1 |
| XLOC_017152 | XLOC_017152 | FAM159B      | chr5:63986134-64064496   | 0 | 1 |
| XLOC_017174 | XLOC_017174 | SERF1A       | chr5:70196489-70214357   | 0 | 1 |
| XLOC_017179 | XLOC_017179 | CARTPT       | chr5:71014989-71016875   | 0 | 1 |
| XLOC_017181 | XLOC_017181 | MIR4803      | chr5:71403117-71505397   | 0 | 1 |
| XLOC_017184 | XLOC_017184 | MIR4804      | chr5:72112417-72210215   | 0 | 1 |
| XLOC_017186 | XLOC_017186 | TMEM171      | chr5:72416387-72427644   | 0 | 1 |
| XLOC_017187 | XLOC_017187 | TMEM174      | chr5:72469022-72470970   | 0 | 1 |
| XLOC_017196 | XLOC_017196 | SV2C         | chr5:75379304-75621416   | 0 | 1 |
| XLOC_017200 | XLOC_017200 | F2RL1        | chr5:76114832-76131140   | 0 | 1 |
| XLOC_017201 | XLOC_017201 | S100Z        | chr5:76145825-76217056   | 0 | 1 |
| XLOC_017202 | XLOC_017202 | CRHBP        | chr5:76248679-76265299   | 0 | 1 |

|             |             |              |                          |   |   |
|-------------|-------------|--------------|--------------------------|---|---|
| XLOC_017208 | XLOC_017208 | BHMT         | chr5:78407603-78428113   | 0 | 1 |
| XLOC_017213 | XLOC_017213 | SPZ1         | chr5:79615789-79617660   | 0 | 1 |
| XLOC_017218 | XLOC_017218 | RNU5E-1      | chr5:80256507-81047072   | 0 | 1 |
| XLOC_017223 | XLOC_017223 | MIR3977      | chr5:82135973-82136043   | 0 | 1 |
| XLOC_017225 | XLOC_017225 | VCAN         | chr5:82767492-82878122   | 0 | 1 |
| XLOC_017226 | XLOC_017226 | NBPF22P      | chr5:85578261-85593365   | 0 | 1 |
| XLOC_017228 | XLOC_017228 | MIR3607      | chr5:85913783-85916583   | 0 | 1 |
| XLOC_017235 | XLOC_017235 | MIR548AO     | chr5:92919042-93447404   | 0 | 1 |
| XLOC_017239 | XLOC_017239 | GPR150       | chr5:94955979-94957284   | 0 | 1 |
| XLOC_017243 | XLOC_017243 | MIR583       | chr5:95414841-95414916   | 0 | 1 |
| XLOC_017253 | XLOC_017253 | RAB9BP1      | chr5:104435174-104435799 | 0 | 1 |
| XLOC_017256 | XLOC_017256 | LOC100289673 | chr5:109218882-109221200 | 0 | 1 |
| XLOC_017260 | XLOC_017260 | CAMK4        | chr5:110559946-110820748 | 0 | 1 |
| XLOC_017262 | XLOC_017262 | NREP-AS1     | chr5:110834021-111353003 | 0 | 1 |
| XLOC_017265 | XLOC_017265 | FLJ11235     | chr5:111755279-111756677 | 0 | 1 |
| XLOC_017270 | XLOC_017270 | KCNN2        | chr5:113698015-113832197 | 0 | 1 |
| XLOC_017273 | XLOC_017273 | ARL14EPL     | chr5:115387162-115394827 | 0 | 1 |
| XLOC_017276 | XLOC_017276 | MIR1244-2    | chr5:118172568-118324240 | 0 | 1 |
| XLOC_017281 | XLOC_017281 | PRR16        | chr5:119800018-120022964 | 0 | 1 |
| XLOC_017282 | XLOC_017282 | FTMT         | chr5:121187649-121188523 | 0 | 1 |
| XLOC_017295 | XLOC_017295 | MEGF10       | chr5:126626455-126796910 | 0 | 1 |
| XLOC_017297 | XLOC_017297 | CTXN3        | chr5:126984712-126994322 | 0 | 1 |
| XLOC_017299 | XLOC_017299 | SLC27A6      | chr5:128301209-128369335 | 0 | 1 |
| XLOC_017301 | XLOC_017301 | MIR4633      | chr5:128430441-128449719 | 0 | 1 |
| XLOC_017302 | XLOC_017302 | ADAMTS19     | chr5:128796102-129074376 | 0 | 1 |
| XLOC_017303 | XLOC_017303 | KIAA1024L    | chr5:129083883-129100756 | 0 | 1 |
| XLOC_017304 | XLOC_017304 | CHSY3        | chr5:129240522-129522327 | 0 | 1 |
| XLOC_017307 | XLOC_017307 | IL3          | chr5:131396346-131398896 | 0 | 1 |
| XLOC_017309 | XLOC_017309 | PDLIM4       | chr5:131593350-131609147 | 0 | 1 |
| XLOC_017315 | XLOC_017315 | IL4          | chr5:132009677-132018370 | 0 | 1 |
| XLOC_017317 | XLOC_017317 | SOWAHA       | chr5:132149032-132152489 | 0 | 1 |
| XLOC_017334 | XLOC_017334 | FBXL21       | chr5:135266005-135277367 | 0 | 1 |
| XLOC_017337 | XLOC_017337 | NPY6R        | chr5:137136881-137146439 | 0 | 1 |
| XLOC_017338 | XLOC_017338 | MYOT         | chr5:137203544-137223540 | 0 | 1 |
| XLOC_017339 | XLOC_017339 | PKD2L2       | chr5:137225124-137368802 | 0 | 1 |
| XLOC_017340 | XLOC_017340 | WNT8A        | chr5:137419773-137427199 | 0 | 1 |
| XLOC_017364 | XLOC_017364 | VTRNA1-1     | chr5:140090860-140090958 | 0 | 1 |
| XLOC_017365 | XLOC_017365 | VTRNA1-2     | chr5:140098510-140098598 | 0 | 1 |
| XLOC_017368 | XLOC_017368 | PCDHB1       | chr5:140430978-140433512 | 0 | 1 |
| XLOC_017374 | XLOC_017374 | PCDHB17      | chr5:140535579-140537990 | 0 | 1 |
| XLOC_017395 | XLOC_017395 | MIR5197      | chr5:143059424-143059536 | 0 | 1 |
| XLOC_017396 | XLOC_017396 | HMHBI        | chr5:143191725-143200284 | 0 | 1 |
| XLOC_017400 | XLOC_017400 | POU4F3       | chr5:145718586-145720083 | 0 | 1 |
| XLOC_017402 | XLOC_017402 | STK32A       | chr5:146614578-146763768 | 0 | 1 |
| XLOC_017403 | XLOC_017403 | JAKMIP2-AS1  | chr5:146939556-147162411 | 0 | 1 |
| XLOC_017404 | XLOC_017404 | SCGB3A2      | chr5:147258273-147261756 | 0 | 1 |
| XLOC_017405 | XLOC_017405 | SPINK5       | chr5:147443534-147516925 | 0 | 1 |
| XLOC_017406 | XLOC_017406 | SPINK14      | chr5:147549295-147554961 | 0 | 1 |
| XLOC_017407 | XLOC_017407 | SPINK6       | chr5:147582356-147594700 | 0 | 1 |
| XLOC_017408 | XLOC_017408 | SPINK13      | chr5:147648422-147665773 | 0 | 1 |
| XLOC_017409 | XLOC_017409 | SPINK7       | chr5:147691989-147695481 | 0 | 1 |
| XLOC_017410 | XLOC_017410 | SPINK9       | chr5:147715121-147719412 | 0 | 1 |
| XLOC_017412 | XLOC_017412 | ADRB2        | chr5:148206155-148208197 | 0 | 1 |
| XLOC_017422 | XLOC_017422 | CDX1         | chr5:149546343-149564121 | 0 | 1 |
| XLOC_017441 | XLOC_017441 | KIF4B        | chr5:154393259-154397685 | 0 | 1 |
| XLOC_017444 | XLOC_017444 | ITK          | chr5:156607906-156682109 | 0 | 1 |
| XLOC_017446 | XLOC_017446 | NIPAL4       | chr5:156887026-156901730 | 0 | 1 |
| XLOC_017447 | XLOC_017447 | C5orf52      | chr5:157098560-157107162 | 0 | 1 |
| XLOC_017452 | XLOC_017452 | ADRA1B       | chr5:159343739-159400017 | 0 | 1 |
| XLOC_017456 | XLOC_017456 | MIR3142      | chr5:159901408-159901490 | 0 | 1 |
| XLOC_017457 | XLOC_017457 | MIR146A      | chr5:159912358-159912457 | 0 | 1 |
| XLOC_017458 | XLOC_017458 | GABRA6       | chr5:161112657-161129598 | 0 | 1 |
| XLOC_017459 | XLOC_017459 | GABRA1       | chr5:161274196-161326965 | 0 | 1 |
| XLOC_017460 | XLOC_017460 | GABRG2       | chr5:161494647-161582545 | 0 | 1 |
| XLOC_017468 | XLOC_017468 | MIR103B1     | chr5:167982627-168006614 | 0 | 1 |
| XLOC_017470 | XLOC_017470 | DOCK2        | chr5:169064250-169510386 | 0 | 1 |
| XLOC_017471 | XLOC_017471 | MIR378E      | chr5:169064250-169510386 | 0 | 1 |
| XLOC_017472 | XLOC_017472 | FOX11        | chr5:169532916-169536729 | 0 | 1 |
| XLOC_017473 | XLOC_017473 | C5orf58      | chr5:169659949-169673235 | 0 | 1 |
| XLOC_017475 | XLOC_017475 | KCNIP1       | chr5:169780880-170163636 | 0 | 1 |
| XLOC_017476 | XLOC_017476 | GABRP        | chr5:170210722-170241050 | 0 | 1 |
| XLOC_017478 | XLOC_017478 | TLX3         | chr5:170736287-170739138 | 0 | 1 |
| XLOC_017491 | XLOC_017491 | C5orf47      | chr5:173416161-173433143 | 0 | 1 |
| XLOC_017494 | XLOC_017494 | MIR4634      | chr5:174178736-174178790 | 0 | 1 |
| XLOC_017497 | XLOC_017497 | CPLX2        | chr5:175223609-175311023 | 0 | 1 |
| XLOC_017498 | XLOC_017498 | FAM153B      | chr5:175490711-175541801 | 0 | 1 |
| XLOC_017499 | XLOC_017499 | LOC100507387 | chr5:175546551-175552168 | 0 | 1 |
| XLOC_017505 | XLOC_017505 | EIF4E1B      | chr5:176057682-176073642 | 0 | 1 |
| XLOC_017513 | XLOC_017513 | SLC34A1      | chr5:176811431-176825849 | 0 | 1 |



|             |             |              |                          |   |   |
|-------------|-------------|--------------|--------------------------|---|---|
| XLOC_017526 | XLOC_017526 | ZNF879       | chr5:178450775-178461388 | 0 | 1 |
| XLOC_017527 | XLOC_017527 | ZNF354C      | chr5:178487606-178507691 | 0 | 1 |
| XLOC_017534 | XLOC_017534 | LINC00847    | chr5:180256953-180262726 | 0 | 1 |
| XLOC_017535 | XLOC_017535 | BTNL8        | chr5:180326076-18037906  | 0 | 1 |
| XLOC_017536 | XLOC_017536 | BTNL3        | chr5:180415844-180433727 | 0 | 1 |
| XLOC_017538 | XLOC_017538 | OR2V2        | chr5:180581942-180582890 | 0 | 1 |
| XLOC_017541 | XLOC_017541 | OR4F3        | chr5:180794287-180795226 | 0 | 1 |
| XLOC_017546 | XLOC_017546 | MIR4456      | chr5:535954-535997       | 0 | 1 |
| XLOC_017550 | XLOC_017550 | LOC100506688 | chr5:988424-997455       | 0 | 1 |
| XLOC_017552 | XLOC_017552 | MIR4635      | chr5:1050488-1112172     | 0 | 1 |
| XLOC_017554 | XLOC_017554 | MIR4457      | chr5:1309424-1309492     | 0 | 1 |
| XLOC_017560 | XLOC_017560 | MIR4277      | chr5:1708899-1708983     | 0 | 1 |
| XLOC_017564 | XLOC_017564 | LOC285577    | chr5:3417265-3536208     | 0 | 1 |
| XLOC_017568 | XLOC_017568 | MIR4278      | chr5:6827965-6828034     | 0 | 1 |
| XLOC_017569 | XLOC_017569 | MIR4454      | chr5:7269415-7269467     | 0 | 1 |
| XLOC_017571 | XLOC_017571 | C5orf49      | chr5:7830490-7851603     | 0 | 1 |
| XLOC_017575 | XLOC_017575 | MIR4636      | chr5:9035137-9546233     | 0 | 1 |
| XLOC_017576 | XLOC_017576 | TAS2R1       | chr5:9629108-9630463     | 0 | 1 |
| XLOC_017577 | XLOC_017577 | LOC285692    | chr5:9641426-9903936     | 0 | 1 |
| XLOC_017581 | XLOC_017581 | CTNND2       | chr5:10971951-11904110   | 0 | 1 |
| XLOC_017584 | XLOC_017584 | MIR4637      | chr5:14704908-14871887   | 0 | 1 |
| XLOC_017585 | XLOC_017585 | MARCH11      | chr5:16067473-16179897   | 0 | 1 |
| XLOC_017589 | XLOC_017589 | LOC285696    | chr5:17130136-17276954   | 0 | 1 |
| XLOC_017590 | XLOC_017590 | LOC401177    | chr5:17379014-17387419   | 0 | 1 |
| XLOC_017591 | XLOC_017591 | CDH18        | chr5:19473154-19988353   | 0 | 1 |
| XLOC_017593 | XLOC_017593 | CDH10        | chr5:24487208-24645085   | 0 | 1 |
| XLOC_017594 | XLOC_017594 | LOC340107    | chr5:24835388-24840692   | 0 | 1 |
| XLOC_017595 | XLOC_017595 | CDH9         | chr5:26880708-27038689   | 0 | 1 |
| XLOC_017597 | XLOC_017597 | MIR4279      | chr5:31799030-32111038   | 0 | 1 |
| XLOC_017601 | XLOC_017601 | ADAMTS12     | chr5:33527286-33892124   | 0 | 1 |
| XLOC_017602 | XLOC_017602 | SLC45A2      | chr5:33944720-33984780   | 0 | 1 |
| XLOC_017606 | XLOC_017606 | PRLR         | chr5:35048860-35230823   | 0 | 1 |
| XLOC_017607 | XLOC_017607 | CAPSL        | chr5:35904397-35938881   | 0 | 1 |
| XLOC_017609 | XLOC_017609 | UGT3A2       | chr5:36035118-36067023   | 0 | 1 |
| XLOC_017611 | XLOC_017611 | MIR580       | chr5:36103413-36152015   | 0 | 1 |
| XLOC_017617 | XLOC_017617 | GDNF         | chr5:37812778-37839782   | 0 | 1 |
| XLOC_017618 | XLOC_017618 | EGFLAM-AS4   | chr5:38258510-38465582   | 0 | 1 |
| XLOC_017619 | XLOC_017619 | LIFR         | chr5:38475064-38595507   | 0 | 1 |
| XLOC_017620 | XLOC_017620 | MIR3650      | chr5:38475064-38595507   | 0 | 1 |
| XLOC_017622 | XLOC_017622 | FYB          | chr5:39105353-39270759   | 0 | 1 |
| XLOC_017623 | XLOC_017623 | C9           | chr5:39284377-39364655   | 0 | 1 |
| XLOC_017629 | XLOC_017629 | SNORD72      | chr5:40831429-40835387   | 0 | 1 |
| XLOC_017630 | XLOC_017630 | MROH2B       | chr5:40998121-41071444   | 0 | 1 |
| XLOC_017631 | XLOC_017631 | C6           | chr5:41142247-41261540   | 0 | 1 |
| XLOC_017639 | XLOC_017639 | CCL28        | chr5:43381599-43412488   | 0 | 1 |
| XLOC_017644 | XLOC_017644 | FGF10        | chr5:44305096-44388784   | 0 | 1 |
| XLOC_017645 | XLOC_017645 | HCN1         | chr5:45255051-45696220   | 0 | 1 |
| XLOC_017650 | XLOC_017650 | MIR581       | chr5:53180613-53606403   | 0 | 1 |
| XLOC_017651 | XLOC_017651 | ESM1         | chr5:54273694-54281414   | 0 | 1 |
| XLOC_017653 | XLOC_017653 | MIR449A      | chr5:54408798-54469005   | 0 | 1 |
| XLOC_017654 | XLOC_017654 | MIR449B      | chr5:54408798-54469005   | 0 | 1 |
| XLOC_017655 | XLOC_017655 | MIR449C      | chr5:54408798-54469005   | 0 | 1 |
| XLOC_017660 | XLOC_017660 | MIR5687      | chr5:54603575-54830873   | 0 | 1 |
| XLOC_017664 | XLOC_017664 | ANKRD55      | chr5:55395506-55529186   | 0 | 1 |
| XLOC_017666 | XLOC_017666 | ACTBL2       | chr5:56775842-56778636   | 0 | 1 |
| XLOC_017674 | XLOC_017674 | HTR1A        | chr5:63255874-63258119   | 0 | 1 |
| XLOC_017681 | XLOC_017681 | CD180        | chr5:66478103-66492617   | 0 | 1 |
| XLOC_017693 | XLOC_017693 | ZNF366       | chr5:71739233-71803249   | 0 | 1 |
| XLOC_017703 | XLOC_017703 | F2RL2        | chr5:75699148-76003957   | 0 | 1 |
| XLOC_017716 | XLOC_017716 | LOC644936    | chr5:79594916-79596297   | 0 | 1 |
| XLOC_017718 | XLOC_017718 | ANKRD34B     | chr5:79852573-79866304   | 0 | 1 |
| XLOC_017727 | XLOC_017727 | HAPLN1       | chr5:82934016-83016896   | 0 | 1 |
| XLOC_017728 | XLOC_017728 | EDIL3        | chr5:83238125-83680611   | 0 | 1 |
| XLOC_017729 | XLOC_017729 | MIR4280      | chr5:86410695-86410771   | 0 | 1 |
| XLOC_017734 | XLOC_017734 | MIR3660      | chr5:89312437-89312537   | 0 | 1 |
| XLOC_017750 | XLOC_017750 | LIX1         | chr5:96427573-96478520   | 0 | 1 |
| XLOC_017756 | XLOC_017756 | SLCO4C1      | chr5:101569691-101632253 | 0 | 1 |
| XLOC_017757 | XLOC_017757 | SLCO6A1      | chr5:101707651-101834720 | 0 | 1 |
| XLOC_017770 | XLOC_017770 | TSSK1B       | chr5:112312406-112824527 | 0 | 1 |
| XLOC_017784 | XLOC_017784 | ZNF608       | chr5:123972609-124080805 | 0 | 1 |
| XLOC_017789 | XLOC_017789 | FBN2         | chr5:127593600-127873735 | 0 | 1 |
| XLOC_017790 | XLOC_017790 | MIR4460      | chr5:128732754-128732840 | 0 | 1 |
| XLOC_017797 | XLOC_017797 | MIR3936      | chr5:131630144-131731306 | 0 | 1 |
| XLOC_017799 | XLOC_017799 | IL5          | chr5:131877135-131879214 | 0 | 1 |
| XLOC_017807 | XLOC_017807 | MIR1289-2    | chr5:132532151-132948223 | 0 | 1 |
| XLOC_017816 | XLOC_017816 | LOC340073    | chr5:134571923-134583867 | 0 | 1 |
| XLOC_017818 | XLOC_017818 | C5orf20      | chr5:134779903-134783038 | 0 | 1 |
| XLOC_017819 | XLOC_017819 | TIFAB        | chr5:134784557-134788089 | 0 | 1 |
| XLOC_017820 | XLOC_017820 | NEUROG1      | chr5:134869971-134871639 | 0 | 1 |

|             |             |              |                          |   |   |
|-------------|-------------|--------------|--------------------------|---|---|
| XLOC_017821 | XLOC_017821 | CXCL14       | chr5:134906370-134914969 | 0 | 1 |
| XLOC_017823 | XLOC_017823 | IL9          | chr5:135227934-135231516 | 0 | 1 |
| XLOC_017824 | XLOC_017824 | LECT2        | chr5:135282599-135290723 | 0 | 1 |
| XLOC_017828 | XLOC_017828 | TRPC7        | chr5:135548998-135701164 | 0 | 1 |
| XLOC_017829 | XLOC_017829 | SPOCK1       | chr5:136310986-136835018 | 0 | 1 |
| XLOC_017831 | XLOC_017831 | MIR874       | chr5:136953188-137071779 | 0 | 1 |
| XLOC_017834 | XLOC_017834 | NME5         | chr5:137450860-137475132 | 0 | 1 |
| XLOC_017841 | XLOC_017841 | SNORD63      | chr5:137890570-137911318 | 0 | 1 |
| XLOC_017867 | XLOC_017867 | LOC729080    | chr5:141275190-141276260 | 0 | 1 |
| XLOC_017872 | XLOC_017872 | ARHGAP26-AS1 | chr5:142150291-142608572 | 0 | 1 |
| XLOC_017876 | XLOC_017876 | GRXCR2       | chr5:145239295-145252531 | 0 | 1 |
| XLOC_017879 | XLOC_017879 | GPR151       | chr5:145894416-145895676 | 0 | 1 |
| XLOC_017880 | XLOC_017880 | PPP2R2B      | chr5:145969066-146461083 | 0 | 1 |
| XLOC_017881 | XLOC_017881 | PPP2R2B-IT1  | chr5:145969066-146461083 | 0 | 1 |
| XLOC_017882 | XLOC_017882 | DPYSL3       | chr5:146770370-146889619 | 0 | 1 |
| XLOC_017883 | XLOC_017883 | JAKMIP2      | chr5:146939556-147162411 | 0 | 1 |
| XLOC_017885 | XLOC_017885 | C5orf46      | chr5:147272270-147286101 | 0 | 1 |
| XLOC_017886 | XLOC_017886 | HTR4         | chr5:147830594-148033739 | 0 | 1 |
| XLOC_017894 | XLOC_017894 | CAMK2A       | chr5:149599053-149669403 | 0 | 1 |
| XLOC_017901 | XLOC_017901 | ZNF300P1     | chr5:150309997-150326146 | 0 | 1 |
| XLOC_017905 | XLOC_017905 | SLC36A3      | chr5:150655925-150683334 | 0 | 1 |
| XLOC_017908 | XLOC_017908 | SPARC        | chr5:151040656-151066615 | 0 | 1 |
| XLOC_017910 | XLOC_017910 | GLRA1        | chr5:151202073-151304397 | 0 | 1 |
| XLOC_017911 | XLOC_017911 | NMUR2        | chr5:151771101-151784840 | 0 | 1 |
| XLOC_017914 | XLOC_017914 | HAND1        | chr5:153854531-153857824 | 0 | 1 |
| XLOC_017915 | XLOC_017915 | MIR3141      | chr5:153975571-153975632 | 0 | 1 |
| XLOC_017918 | XLOC_017918 | TIMD4        | chr5:156346292-156390266 | 0 | 1 |
| XLOC_017919 | XLOC_017919 | HAVCR1       | chr5:156456530-156485970 | 0 | 1 |
| XLOC_017922 | XLOC_017922 | FAM71B       | chr5:156589343-156593279 | 0 | 1 |
| XLOC_017924 | XLOC_017924 | ADAM19       | chr5:156904311-157002783 | 0 | 1 |
| XLOC_017925 | XLOC_017925 | SOX30        | chr5:157052686-157079428 | 0 | 1 |
| XLOC_017929 | XLOC_017929 | IL12B        | chr5:158741790-158757481 | 0 | 1 |
| XLOC_017930 | XLOC_017930 | LOC285627    | chr5:158875563-158893284 | 0 | 1 |
| XLOC_017936 | XLOC_017936 | ATP10B       | chr5:159990126-160279219 | 0 | 1 |
| XLOC_017937 | XLOC_017937 | LOC285629    | chr5:160358785-160365633 | 0 | 1 |
| XLOC_017938 | XLOC_017938 | GABRB2       | chr5:160715435-160975130 | 0 | 1 |
| XLOC_017941 | XLOC_017941 | MIR103A1     | chr5:167982627-168006614 | 0 | 1 |
| XLOC_017942 | XLOC_017942 | SLIT3        | chr5:168088737-168728133 | 0 | 1 |
| XLOC_017943 | XLOC_017943 | MIR218-2     | chr5:168088737-168728133 | 0 | 1 |
| XLOC_017944 | XLOC_017944 | MIR585       | chr5:168088737-168728133 | 0 | 1 |
| XLOC_017945 | XLOC_017945 | FAM196B      | chr5:169064250-169510386 | 0 | 1 |
| XLOC_017946 | XLOC_017946 | LCP2         | chr5:169675087-169724822 | 0 | 1 |
| XLOC_017947 | XLOC_017947 | KCNMB1       | chr5:169780880-170163636 | 0 | 1 |
| XLOC_017948 | XLOC_017948 | MIR3912      | chr5:170813659-170813764 | 0 | 1 |
| XLOC_017956 | XLOC_017956 | STC2         | chr5:172741725-172756506 | 0 | 1 |
| XLOC_017958 | XLOC_017958 | FLJ16171     | chr5:174346084-174422734 | 0 | 1 |
| XLOC_017959 | XLOC_017959 | DRD1         | chr5:174867674-174871163 | 0 | 1 |
| XLOC_017967 | XLOC_017967 | SNCB         | chr5:176047209-176057557 | 0 | 1 |
| XLOC_017968 | XLOC_017968 | MIR4281      | chr5:176047209-176057557 | 0 | 1 |
| XLOC_017983 | XLOC_017983 | FAM153A      | chr5:177150364-177207505 | 0 | 1 |
| XLOC_017984 | XLOC_017984 | PROP1        | chr5:177419235-177423243 | 0 | 1 |
| XLOC_017998 | XLOC_017998 | MIR1229      | chr5:179224597-179285840 | 0 | 1 |
| XLOC_018002 | XLOC_018002 | MIR340       | chr5:179382473-179499109 | 0 | 1 |
| XLOC_018003 | XLOC_018003 | RASGEF1C     | chr5:179527794-179636130 | 0 | 1 |
| XLOC_018006 | XLOC_018006 | SCGB3A1      | chr5:180017104-180018487 | 0 | 1 |
| XLOC_018008 | XLOC_018008 | OR2Y1        | chr5:180166122-180167058 | 0 | 1 |
| XLOC_018012 | XLOC_018012 | OR2V1        | chr5:180551356-180552304 | 0 | 1 |
| XLOC_018014 | XLOC_018014 | MIR4638      | chr5:180649565-180649633 | 0 | 1 |
| XLOC_018016 | XLOC_018016 | SNORD96A     | chr5:180663927-180670906 | 0 | 1 |
| XLOC_018021 | XLOC_018021 | FOXQ1        | chr6:1312674-1314993     | 0 | 1 |
| XLOC_018022 | XLOC_018022 | FOXF2        | chr6:1390068-1395832     | 0 | 1 |
| XLOC_018031 | XLOC_018031 | FAM50B       | chr6:3849631-3851551     | 0 | 1 |
| XLOC_018035 | XLOC_018035 | PPP1R3G      | chr6:5085719-5087455     | 0 | 1 |
| XLOC_018037 | XLOC_018037 | LY86         | chr6:6346697-6655216     | 0 | 1 |
| XLOC_018047 | XLOC_018047 | MIR5689      | chr6:10439949-10440027   | 0 | 1 |
| XLOC_018055 | XLOC_018055 | TMEM170B     | chr6:11538459-11583757   | 0 | 1 |
| XLOC_018061 | XLOC_018061 | RNF182       | chr6:13924676-13980240   | 0 | 1 |
| XLOC_018065 | XLOC_018065 | MIR4639      | chr6:16129316-16148478   | 0 | 1 |
| XLOC_018067 | XLOC_018067 | STMND1       | chr6:17102488-17131603   | 0 | 1 |
| XLOC_018068 | XLOC_018068 | RBM24        | chr6:17281808-17294099   | 0 | 1 |
| XLOC_018073 | XLOC_018073 | MIR548A1     | chr6:18572014-18572111   | 0 | 1 |
| XLOC_018074 | XLOC_018074 | ID4          | chr6:19837600-19842431   | 0 | 1 |
| XLOC_018078 | XLOC_018078 | LINC00340    | chr6:21666674-22194616   | 0 | 1 |
| XLOC_018079 | XLOC_018079 | HDGFL1       | chr6:22569677-22570750   | 0 | 1 |
| XLOC_018087 | XLOC_018087 | SCGN         | chr6:25652428-25702008   | 0 | 1 |
| XLOC_018088 | XLOC_018088 | HIST1H2BA    | chr6:25727136-25727573   | 0 | 1 |
| XLOC_018089 | XLOC_018089 | HIST1H2APS1  | chr6:25732660-25733089   | 0 | 1 |
| XLOC_018090 | XLOC_018090 | SLC17A4      | chr6:25754926-25781403   | 0 | 1 |
| XLOC_018094 | XLOC_018094 | HIST1H3C     | chr6:26045638-26046097   | 0 | 1 |

|             |             |              |                        |   |   |
|-------------|-------------|--------------|------------------------|---|---|
| XLOC_018105 | XLOC_018105 | HIST1H4F     | chr6:26240653-26241021 | 0 | 1 |
| XLOC_018114 | XLOC_018114 | BTN1A1       | chr6:26501494-26510652 | 0 | 1 |
| XLOC_018122 | XLOC_018122 | MIR3143      | chr6:27115404-27115467 | 0 | 1 |
| XLOC_018124 | XLOC_018124 | VN1R10P      | chr6:27292539-27293741 | 0 | 1 |
| XLOC_018133 | XLOC_018133 | HIST1H2AL    | chr6:27833106-27833576 | 0 | 1 |
| XLOC_018145 | XLOC_018145 | GPX5         | chr6:28493788-28502728 | 0 | 1 |
| XLOC_018146 | XLOC_018146 | LOC100129636 | chr6:29003999-29044517 | 0 | 1 |
| XLOC_018147 | XLOC_018147 | OR2J3        | chr6:29079667-29080603 | 0 | 1 |
| XLOC_018148 | XLOC_018148 | OR2J2        | chr6:29141310-29142351 | 0 | 1 |
| XLOC_018149 | XLOC_018149 | OR14J1       | chr6:29274466-29275432 | 0 | 1 |
| XLOC_018150 | XLOC_018150 | OR12D2       | chr6:29364415-29365448 | 0 | 1 |
| XLOC_018151 | XLOC_018151 | OR10C1       | chr6:29407715-29408754 | 0 | 1 |
| XLOC_018153 | XLOC_018153 | LOC100507362 | chr6:29497182-29501345 | 0 | 1 |
| XLOC_018154 | XLOC_018154 | SNORD32B     | chr6:29550028-29550105 | 0 | 1 |
| XLOC_018156 | XLOC_018156 | MOG          | chr6:29624757-29640149 | 0 | 1 |
| XLOC_018173 | XLOC_018173 | MIR877       | chr6:30539169-30559309 | 0 | 1 |
| XLOC_018179 | XLOC_018179 | MIR4640      | chr6:30851860-30867933 | 0 | 1 |
| XLOC_018183 | XLOC_018183 | MUC21        | chr6:30951484-30957675 | 0 | 1 |
| XLOC_018184 | XLOC_018184 | MUC22        | chr6:30973728-31003179 | 0 | 1 |
| XLOC_018185 | XLOC_018185 | HCG22        | chr6:31021226-31027655 | 0 | 1 |
| XLOC_018191 | XLOC_018191 | HCG26        | chr6:31439005-31440185 | 0 | 1 |
| XLOC_018198 | XLOC_018198 | AIF1         | chr6:31582993-31584798 | 0 | 1 |
| XLOC_018204 | XLOC_018204 | LY6G6F       | chr6:31674683-31678372 | 0 | 1 |
| XLOC_018205 | XLOC_018205 | LY6G6D       | chr6:31683132-31685581 | 0 | 1 |
| XLOC_018211 | XLOC_018211 | SNORD48      | chr6:31802692-31807541 | 0 | 1 |
| XLOC_018212 | XLOC_018212 | SNORD52      | chr6:31802692-31807541 | 0 | 1 |
| XLOC_018219 | XLOC_018219 | STK19        | chr6:31981517-31981961 | 0 | 1 |
| XLOC_018224 | XLOC_018224 | HCG23        | chr6:32358286-32361468 | 0 | 1 |
| XLOC_018225 | XLOC_018225 | HLA-DRA      | chr6:32407618-32412826 | 0 | 1 |
| XLOC_018226 | XLOC_018226 | HLA-DQA1     | chr6:32605182-32611429 | 0 | 1 |
| XLOC_018227 | XLOC_018227 | HLA-DQA2     | chr6:32709162-32714664 | 0 | 1 |
| XLOC_018232 | XLOC_018232 | HLA-DPB1     | chr6:33032345-33057473 | 0 | 1 |
| XLOC_018233 | XLOC_018233 | HLA-DPB2     | chr6:33080292-33096890 | 0 | 1 |
| XLOC_018236 | XLOC_018236 | MIR219-1     | chr6:33175611-33175721 | 0 | 1 |
| XLOC_018260 | XLOC_018260 | CLPSL2       | chr6:35744391-35747329 | 0 | 1 |
| XLOC_018261 | XLOC_018261 | CLPSL1       | chr6:35748830-35755841 | 0 | 1 |
| XLOC_018272 | XLOC_018272 | PI16         | chr6:36916038-36932613 | 0 | 1 |
| XLOC_018273 | XLOC_018273 | FGD2         | chr6:36973422-36996845 | 0 | 1 |
| XLOC_018279 | XLOC_018279 | DNAH8        | chr6:38683116-38989574 | 0 | 1 |
| XLOC_018280 | XLOC_018280 | GLP1R        | chr6:39016556-39055520 | 0 | 1 |
| XLOC_018281 | XLOC_018281 | DAAM2        | chr6:39760158-39902290 | 0 | 1 |
| XLOC_018282 | XLOC_018282 | TDRG1        | chr6:40346162-40347631 | 0 | 1 |
| XLOC_018286 | XLOC_018286 | TREML4       | chr6:41196061-41206120 | 0 | 1 |
| XLOC_018287 | XLOC_018287 | TREML5P      | chr6:41217114-41217327 | 0 | 1 |
| XLOC_018288 | XLOC_018288 | NCR2         | chr6:41303527-41318625 | 0 | 1 |
| XLOC_018290 | XLOC_018290 | MIR4641      | chr6:41514163-41570122 | 0 | 1 |
| XLOC_018298 | XLOC_018298 | ATP6V0CP3    | chr6:42695313-42695932 | 0 | 1 |
| XLOC_018301 | XLOC_018301 | PTCRA        | chr6:42883726-42893575 | 0 | 1 |
| XLOC_018311 | XLOC_018311 | TTBK1        | chr6:43211221-43255997 | 0 | 1 |
| XLOC_018312 | XLOC_018312 | SLC22A7      | chr6:43265997-43276530 | 0 | 1 |
| XLOC_018323 | XLOC_018323 | CAPN11       | chr6:44126547-44152139 | 0 | 1 |
| XLOC_018329 | XLOC_018329 | MIR4642      | chr6:44355250-44418161 | 0 | 1 |
| XLOC_018334 | XLOC_018334 | ANKRD66      | chr6:46714653-46726954 | 0 | 1 |
| XLOC_018335 | XLOC_018335 | MEP1A        | chr6:46761093-46807519 | 0 | 1 |
| XLOC_018337 | XLOC_018337 | GPR111       | chr6:47624325-47665533 | 0 | 1 |
| XLOC_018339 | XLOC_018339 | OPN5         | chr6:47749774-47794116 | 0 | 1 |
| XLOC_018341 | XLOC_018341 | GLYATL3      | chr6:49467670-49495777 | 0 | 1 |
| XLOC_018343 | XLOC_018343 | TFAP2D       | chr6:50681256-50740746 | 0 | 1 |
| XLOC_018344 | XLOC_018344 | TFAP2B       | chr6:50786438-50815326 | 0 | 1 |
| XLOC_018345 | XLOC_018345 | MIR206       | chr6:52009146-52009232 | 0 | 1 |
| XLOC_018346 | XLOC_018346 | MIR133B      | chr6:52013720-52013839 | 0 | 1 |
| XLOC_018347 | XLOC_018347 | IL17A        | chr6:52051184-52055436 | 0 | 1 |
| XLOC_018353 | XLOC_018353 | MIR5685      | chr6:53132195-53213977 | 0 | 1 |
| XLOC_018355 | XLOC_018355 | MLIP-IT1     | chr6:53863687-53871950 | 0 | 1 |
| XLOC_018356 | XLOC_018356 | MLIP         | chr6:53883713-54131078 | 0 | 1 |
| XLOC_018357 | XLOC_018357 | TINAG        | chr6:54173202-54254950 | 0 | 1 |
| XLOC_018359 | XLOC_018359 | HCRTR2       | chr6:55039070-55147418 | 0 | 1 |
| XLOC_018360 | XLOC_018360 | GFRAL        | chr6:55192266-55267291 | 0 | 1 |
| XLOC_018361 | XLOC_018361 | BEND6        | chr6:56819772-56892142 | 0 | 1 |
| XLOC_018369 | XLOC_018369 | SLC25A51P1   | chr6:66497771-66499376 | 0 | 1 |
| XLOC_018370 | XLOC_018370 | BAI3         | chr6:69345631-70099403 | 0 | 1 |
| XLOC_018371 | XLOC_018371 | COL19A1      | chr6:70576447-70922157 | 0 | 1 |
| XLOC_018372 | XLOC_018372 | FAM135A      | chr6:71123106-71270877 | 0 | 1 |
| XLOC_018378 | XLOC_018378 | KHDC3L       | chr6:74072399-74073898 | 0 | 1 |
| XLOC_018388 | XLOC_018388 | RNY4         | chr6:80451635-80451669 | 0 | 1 |
| XLOC_018394 | XLOC_018394 | PRSS35       | chr6:84222193-84235421 | 0 | 1 |
| XLOC_018395 | XLOC_018395 | RIPLY2       | chr6:84562984-84567234 | 0 | 1 |
| XLOC_018399 | XLOC_018399 | HTR1E        | chr6:87647023-87726397 | 0 | 1 |
| XLOC_018407 | XLOC_018407 | SPACA1       | chr6:88757506-88776550 | 0 | 1 |

|             |             |              |                          |   |   |
|-------------|-------------|--------------|--------------------------|---|---|
| XLOC_018412 | XLOC_018412 | GJA10        | chr6:90604187-90605819   | 0 | 1 |
| XLOC_018413 | XLOC_018413 | MIR4464      | chr6:91022460-91022552   | 0 | 1 |
| XLOC_018414 | XLOC_018414 | MIR4643      | chr6:92231377-92231455   | 0 | 1 |
| XLOC_018415 | XLOC_018415 | TSG1         | chr6:94416800-94486199   | 0 | 1 |
| XLOC_018417 | XLOC_018417 | FUT9         | chr6:96463844-96663488   | 0 | 1 |
| XLOC_018419 | XLOC_018419 | FHL5         | chr6:97010423-97064512   | 0 | 1 |
| XLOC_018421 | XLOC_018421 | MIR2113      | chr6:98472406-98472495   | 0 | 1 |
| XLOC_018422 | XLOC_018422 | POU3F2       | chr6:99282579-99286666   | 0 | 1 |
| XLOC_018424 | XLOC_018424 | PRDM13       | chr6:100054649-100063454 | 0 | 1 |
| XLOC_018425 | XLOC_018425 | LOC728012    | chr6:100367785-100524295 | 0 | 1 |
| XLOC_018426 | XLOC_018426 | GRIK2        | chr6:101846860-102517958 | 0 | 1 |
| XLOC_018427 | XLOC_018427 | LIN28B       | chr6:105404922-105531207 | 0 | 1 |
| XLOC_018428 | XLOC_018428 | BVES-AS1     | chr6:105585561-105627858 | 0 | 1 |
| XLOC_018434 | XLOC_018434 | NR2E1        | chr6:108487214-108510013 | 0 | 1 |
| XLOC_018440 | XLOC_018440 | CCDC162P     | chr6:109615505-109629423 | 0 | 1 |
| XLOC_018443 | XLOC_018443 | GPR6         | chr6:110300297-110301924 | 0 | 1 |
| XLOC_018453 | XLOC_018453 | RFPL4B       | chr6:112668531-112672498 | 0 | 1 |
| XLOC_018455 | XLOC_018455 | FLJ34503     | chr6:114225550-114242806 | 0 | 1 |
| XLOC_018461 | XLOC_018461 | FAM26D       | chr6:116817650-116880031 | 0 | 1 |
| XLOC_018465 | XLOC_018465 | RFX6         | chr6:117198375-117253326 | 0 | 1 |
| XLOC_018466 | XLOC_018466 | VGLL2        | chr6:117586720-117594728 | 0 | 1 |
| XLOC_018472 | XLOC_018472 | LOC100287632 | chr6:119103870-119104581 | 0 | 1 |
| XLOC_018479 | XLOC_018479 | CLVS2        | chr6:123317581-123385063 | 0 | 1 |
| XLOC_018484 | XLOC_018484 | HEY2         | chr6:126070731-126082415 | 0 | 1 |
| XLOC_018489 | XLOC_018489 | RSPO3        | chr6:127440047-127518184 | 0 | 1 |
| XLOC_018494 | XLOC_018494 | TMEM200A     | chr6:130687425-130764210 | 0 | 1 |
| XLOC_018500 | XLOC_018500 | LOC100507254 | chr6:132455117-132490514 | 0 | 1 |
| XLOC_018501 | XLOC_018501 | TAAR9        | chr6:132859426-132860475 | 0 | 1 |
| XLOC_018502 | XLOC_018502 | TAAR8        | chr6:132873831-132874860 | 0 | 1 |
| XLOC_018503 | XLOC_018503 | TAAR6        | chr6:132891460-132892498 | 0 | 1 |
| XLOC_018505 | XLOC_018505 | SNORD101     | chr6:133135707-133138703 | 0 | 1 |
| XLOC_018506 | XLOC_018506 | SNORD100     | chr6:133135707-133138703 | 0 | 1 |
| XLOC_018508 | XLOC_018508 | LINC00326    | chr6:133409218-133427717 | 0 | 1 |
| XLOC_018509 | XLOC_018509 | EYA4         | chr6:133562494-133853258 | 0 | 1 |
| XLOC_018510 | XLOC_018510 | MGC34034     | chr6:134142284-134175130 | 0 | 1 |
| XLOC_018511 | XLOC_018511 | TCF21        | chr6:134210258-134216675 | 0 | 1 |
| XLOC_018513 | XLOC_018513 | LOC154092    | chr6:134758853-134825158 | 0 | 1 |
| XLOC_018515 | XLOC_018515 | LINC00271    | chr6:135818938-136011976 | 0 | 1 |
| XLOC_018527 | XLOC_018527 | LOC100132735 | chr6:140092209-140181608 | 0 | 1 |
| XLOC_018528 | XLOC_018528 | MIR3668      | chr6:140526388-140526463 | 0 | 1 |
| XLOC_018529 | XLOC_018529 | MIR4465      | chr6:141004950-141005020 | 0 | 1 |
| XLOC_018536 | XLOC_018536 | ZC2HC1B      | chr6:144185572-144259483 | 0 | 1 |
| XLOC_018540 | XLOC_018540 | GRM1         | chr6:146348781-146758731 | 0 | 1 |
| XLOC_018541 | XLOC_018541 | RAB32        | chr6:146864827-146876086 | 0 | 1 |
| XLOC_018542 | XLOC_018542 | ADGB         | chr6:146920135-147136597 | 0 | 1 |
| XLOC_018554 | XLOC_018554 | PPP1R14C     | chr6:150464187-150571528 | 0 | 1 |
| XLOC_018555 | XLOC_018555 | IYD          | chr6:150690027-150725765 | 0 | 1 |
| XLOC_018561 | XLOC_018561 | ESR1         | chr6:152011630-152424408 | 0 | 1 |
| XLOC_018564 | XLOC_018564 | OPRM1        | chr6:154331630-154677900 | 0 | 1 |
| XLOC_018570 | XLOC_018570 | MIR3692      | chr6:157802556-158094977 | 0 | 1 |
| XLOC_018573 | XLOC_018573 | SYNJ2-IT1    | chr6:158402887-158520207 | 0 | 1 |
| XLOC_018579 | XLOC_018579 | FNDC1        | chr6:159590428-159693140 | 0 | 1 |
| XLOC_018584 | XLOC_018584 | MAS1         | chr6:160327973-160329107 | 0 | 1 |
| XLOC_018593 | XLOC_018593 | LINC00602    | chr6:166337535-166403103 | 0 | 1 |
| XLOC_018597 | XLOC_018597 | TCP10L2      | chr6:167584080-167596396 | 0 | 1 |
| XLOC_018598 | XLOC_018598 | UNC93A       | chr6:167704802-167729502 | 0 | 1 |
| XLOC_018599 | XLOC_018599 | TTLL2        | chr6:167738573-167756177 | 0 | 1 |
| XLOC_018601 | XLOC_018601 | KIF25        | chr6:168418552-168445769 | 0 | 1 |
| XLOC_018607 | XLOC_018607 | MIR4644      | chr6:170615843-170714237 | 0 | 1 |
| XLOC_018611 | XLOC_018611 | LOC285768    | chr6:961240-1101567      | 0 | 1 |
| XLOC_018616 | XLOC_018616 | MIR4645      | chr6:2854264-2854341     | 0 | 1 |
| XLOC_018625 | XLOC_018625 | PXDC1        | chr6:3722835-3752246     | 0 | 1 |
| XLOC_018630 | XLOC_018630 | MIR3691      | chr6:5108652-5261172     | 0 | 1 |
| XLOC_018632 | XLOC_018632 | F13A1        | chr6:6144310-6320924     | 0 | 1 |
| XLOC_018633 | XLOC_018633 | LY86-AS1     | chr6:6346697-6655216     | 0 | 1 |
| XLOC_018637 | XLOC_018637 | SCARNA27     | chr6:7727010-8102828     | 0 | 1 |
| XLOC_018644 | XLOC_018644 | ELOVL2       | chr6:10980992-11079377   | 0 | 1 |
| XLOC_018657 | XLOC_018657 | NHLRC1       | chr6:18120717-18122851   | 0 | 1 |
| XLOC_018661 | XLOC_018661 | LOC729177    | chr6:21666674-22194616   | 0 | 1 |
| XLOC_018662 | XLOC_018662 | PRL          | chr6:22287472-22303082   | 0 | 1 |
| XLOC_018669 | XLOC_018669 | CMAHP        | chr6:25081294-25138620   | 0 | 1 |
| XLOC_018670 | XLOC_018670 | HIST1H2AA    | chr6:25726290-25726790   | 0 | 1 |
| XLOC_018671 | XLOC_018671 | SLC17A1      | chr6:25783125-25832287   | 0 | 1 |
| XLOC_018672 | XLOC_018672 | SLC17A3      | chr6:25845327-25874471   | 0 | 1 |
| XLOC_018673 | XLOC_018673 | SLC17A2      | chr6:25912983-25930946   | 0 | 1 |
| XLOC_018674 | XLOC_018674 | HIST1H1A     | chr6:26017259-26018040   | 0 | 1 |
| XLOC_018678 | XLOC_018678 | HIST1H2BB    | chr6:26043454-26043885   | 0 | 1 |
| XLOC_018680 | XLOC_018680 | HIST1H1T     | chr6:26107639-26108364   | 0 | 1 |
| XLOC_018686 | XLOC_018686 | HIST1H4G     | chr6:26246838-26247205   | 0 | 1 |

|             |             |              |                        |   |   |
|-------------|-------------|--------------|------------------------|---|---|
| XLOC_018696 | XLOC_018696 | POM121L2     | chr6:27276841-27280011 | 0 | 1 |
| XLOC_018705 | XLOC_018705 | HIST1H4L     | chr6:27840925-27841289 | 0 | 1 |
| XLOC_018708 | XLOC_018708 | OR2B2        | chr6:27878962-27880174 | 0 | 1 |
| XLOC_018713 | XLOC_018713 | ZSCAN23      | chr6:28400431-28411279 | 0 | 1 |
| XLOC_018714 | XLOC_018714 | GPX6         | chr6:28471072-28483570 | 0 | 1 |
| XLOC_018718 | XLOC_018718 | ZNF311       | chr6:28962593-28973037 | 0 | 1 |
| XLOC_018719 | XLOC_018719 | OR2W1        | chr6:29003999-29044517 | 0 | 1 |
| XLOC_018720 | XLOC_018720 | OR2B3        | chr6:29053984-29055090 | 0 | 1 |
| XLOC_018721 | XLOC_018721 | OR5V1        | chr6:29323006-29324054 | 0 | 1 |
| XLOC_018722 | XLOC_018722 | OR12D3       | chr6:29341199-29343068 | 0 | 1 |
| XLOC_018723 | XLOC_018723 | OR11A1       | chr6:29393280-29395509 | 0 | 1 |
| XLOC_018724 | XLOC_018724 | MAS1L        | chr6:29454542-29455679 | 0 | 1 |
| XLOC_018725 | XLOC_018725 | UBD          | chr6:29523388-29527702 | 0 | 1 |
| XLOC_018727 | XLOC_018727 | ZFP57        | chr6:29640168-29644931 | 0 | 1 |
| XLOC_018730 | XLOC_018730 | HCG4         | chr6:29758807-29765584 | 0 | 1 |
| XLOC_018735 | XLOC_018735 | TRIM10       | chr6:30119722-30128711 | 0 | 1 |
| XLOC_018747 | XLOC_018747 | SFTA2        | chr6:30899126-30899952 | 0 | 1 |
| XLOC_018748 | XLOC_018748 | C6orf15      | chr6:31078999-31080332 | 0 | 1 |
| XLOC_018758 | XLOC_018758 | SNORD84      | chr6:31496738-31514625 | 0 | 1 |
| XLOC_018759 | XLOC_018759 | LTB          | chr6:31548335-31550202 | 0 | 1 |
| XLOC_018766 | XLOC_018766 | MIR4646      | chr6:31654725-31671137 | 0 | 1 |
| XLOC_018767 | XLOC_018767 | LY6G6E       | chr6:31679752-31681842 | 0 | 1 |
| XLOC_018780 | XLOC_018780 | MIR1236      | chr6:31919863-31937532 | 0 | 1 |
| XLOC_018782 | XLOC_018782 | TNXB         | chr6:31973358-31981050 | 0 | 1 |
| XLOC_018792 | XLOC_018792 | C6orf10      | chr6:32260474-32339656 | 0 | 1 |
| XLOC_018793 | XLOC_018793 | BTNL2        | chr6:32362512-32374900 | 0 | 1 |
| XLOC_018797 | XLOC_018797 | HLA-DQB1     | chr6:32627240-32634466 | 0 | 1 |
| XLOC_018798 | XLOC_018798 | HLA-DQB2     | chr6:32723874-32731330 | 0 | 1 |
| XLOC_018805 | XLOC_018805 | HLA-DOA      | chr6:32971959-32977389 | 0 | 1 |
| XLOC_018818 | XLOC_018818 | IP6K3        | chr6:33689442-33714762 | 0 | 1 |
| XLOC_018820 | XLOC_018820 | MLN          | chr6:33762448-33771793 | 0 | 1 |
| XLOC_018821 | XLOC_018821 | LOC100507584 | chr6:33857287-33864684 | 0 | 1 |
| XLOC_018822 | XLOC_018822 | MIR1275      | chr6:33967748-33967828 | 0 | 1 |
| XLOC_018823 | XLOC_018823 | GRM4         | chr6:33989622-34123399 | 0 | 1 |
| XLOC_018833 | XLOC_018833 | MIR5690      | chr6:35541361-35704724 | 0 | 1 |
| XLOC_018837 | XLOC_018837 | C6orf222     | chr6:36283534-36304662 | 0 | 1 |
| XLOC_018838 | XLOC_018838 | ETV7         | chr6:36321997-36355577 | 0 | 1 |
| XLOC_018841 | XLOC_018841 | MIR3925      | chr6:36590212-36590289 | 0 | 1 |
| XLOC_018847 | XLOC_018847 | MIR4462      | chr6:37523140-37523198 | 0 | 1 |
| XLOC_018848 | XLOC_018848 | MDGA1        | chr6:37600283-37665766 | 0 | 1 |
| XLOC_018851 | XLOC_018851 | LOC100131047 | chr6:38683116-38998574 | 0 | 1 |
| XLOC_018854 | XLOC_018854 | KCNK17       | chr6:39266776-39282237 | 0 | 1 |
| XLOC_018855 | XLOC_018855 | KCNK16       | chr6:39282473-39290330 | 0 | 1 |
| XLOC_018856 | XLOC_018856 | KIF6         | chr6:39302875-39693181 | 0 | 1 |
| XLOC_018857 | XLOC_018857 | MOCS1        | chr6:39760158-39902290 | 0 | 1 |
| XLOC_018858 | XLOC_018858 | FLJ41649     | chr6:40312083-40323745 | 0 | 1 |
| XLOC_018859 | XLOC_018859 | LRFN2        | chr6:40359372-40555126 | 0 | 1 |
| XLOC_018862 | XLOC_018862 | TREML1       | chr6:41116998-41122087 | 0 | 1 |
| XLOC_018864 | XLOC_018864 | TREML2       | chr6:41157551-41168925 | 0 | 1 |
| XLOC_018865 | XLOC_018865 | TREML3P      | chr6:41176291-41185685 | 0 | 1 |
| XLOC_018868 | XLOC_018868 | PGC          | chr6:41704448-41715139 | 0 | 1 |
| XLOC_018885 | XLOC_018885 | CRIP3        | chr6:43265997-43276530 | 0 | 1 |
| XLOC_018899 | XLOC_018899 | MIR586       | chr6:44794466-45518819 | 0 | 1 |
| XLOC_018904 | XLOC_018904 | PLA2G7       | chr6:46655611-46703430 | 0 | 1 |
| XLOC_018905 | XLOC_018905 | GPR116       | chr6:46820241-46922675 | 0 | 1 |
| XLOC_018910 | XLOC_018910 | RHAG         | chr6:49572889-49604587 | 0 | 1 |
| XLOC_018911 | XLOC_018911 | CRISP2       | chr6:49660070-49681303 | 0 | 1 |
| XLOC_018912 | XLOC_018912 | CRISP3       | chr6:49695091-49712168 | 0 | 1 |
| XLOC_018913 | XLOC_018913 | PGK2         | chr6:49753363-49755053 | 0 | 1 |
| XLOC_018914 | XLOC_018914 | CRISP1       | chr6:49801978-49844809 | 0 | 1 |
| XLOC_018915 | XLOC_018915 | DEFB133      | chr6:49913813-49917157 | 0 | 1 |
| XLOC_018916 | XLOC_018916 | DEFB114      | chr6:49928004-49931818 | 0 | 1 |
| XLOC_018917 | XLOC_018917 | DEFB113      | chr6:49936389-49937338 | 0 | 1 |
| XLOC_018918 | XLOC_018918 | DEFB110      | chr6:49976850-49989694 | 0 | 1 |
| XLOC_018919 | XLOC_018919 | DEFB112      | chr6:50011287-50016364 | 0 | 1 |
| XLOC_018920 | XLOC_018920 | PKHD1        | chr6:51480144-51952423 | 0 | 1 |
| XLOC_018924 | XLOC_018924 | GSTA7P       | chr6:52604260-52609957 | 0 | 1 |
| XLOC_018925 | XLOC_018925 | GSTA2        | chr6:52614884-52628361 | 0 | 1 |
| XLOC_018926 | XLOC_018926 | GSTA1        | chr6:52656177-52668664 | 0 | 1 |
| XLOC_018927 | XLOC_018927 | GSTA5        | chr6:52696540-52710893 | 0 | 1 |
| XLOC_018928 | XLOC_018928 | GSTA3        | chr6:52761438-52774496 | 0 | 1 |
| XLOC_018933 | XLOC_018933 | RPS16P5      | chr6:53132195-53213977 | 0 | 1 |
| XLOC_018936 | XLOC_018936 | HMGCLL1      | chr6:55299170-55444012 | 0 | 1 |
| XLOC_018937 | XLOC_018937 | BMP5         | chr6:55620237-55740375 | 0 | 1 |
| XLOC_018938 | XLOC_018938 | COL21A1      | chr6:55921387-56112378 | 0 | 1 |
| XLOC_018939 | XLOC_018939 | RNU6-71      | chr6:56137688-56615138 | 0 | 1 |
| XLOC_018943 | XLOC_018943 | KHDRBS2      | chr6:62389864-62996100 | 0 | 1 |
| XLOC_018947 | XLOC_018947 | COL9A1       | chr6:70925742-71012786 | 0 | 1 |
| XLOC_018949 | XLOC_018949 | MIR30C2      | chr6:72086662-72086734 | 0 | 1 |

|             |             |              |                          |   |   |
|-------------|-------------|--------------|--------------------------|---|---|
| XLOC_018950 | XLOC_018950 | MIR30A       | chr6:72113253-72113324   | 0 | 1 |
| XLOC_018952 | XLOC_018952 | MIR4282      | chr6:73331570-73908573   | 0 | 1 |
| XLOC_018953 | XLOC_018953 | KCNQ5-AS1    | chr6:73331570-73908573   | 0 | 1 |
| XLOC_018954 | XLOC_018954 | KHDC1L       | chr6:73933267-73935175   | 0 | 1 |
| XLOC_018955 | XLOC_018955 | KHDC1        | chr6:73951037-74020088   | 0 | 1 |
| XLOC_018956 | XLOC_018956 | DPPA5        | chr6:74062784-74063999   | 0 | 1 |
| XLOC_018966 | XLOC_018966 | HTR1B        | chr6:78171947-78173120   | 0 | 1 |
| XLOC_018970 | XLOC_018970 | C6orf7       | chr6:80513303-80580137   | 0 | 1 |
| XLOC_018971 | XLOC_018971 | ELOVL4       | chr6:80624528-80657315   | 0 | 1 |
| XLOC_018976 | XLOC_018976 | ME1          | chr6:83920109-84140938   | 0 | 1 |
| XLOC_018977 | XLOC_018977 | SNAP91       | chr6:84262604-84419127   | 0 | 1 |
| XLOC_018979 | XLOC_018979 | TBX18        | chr6:85442215-85473954   | 0 | 1 |
| XLOC_018984 | XLOC_018984 | SNORD50B     | chr6:86386724-86388451   | 0 | 1 |
| XLOC_018985 | XLOC_018985 | CGA          | chr6:87795215-87804865   | 0 | 1 |
| XLOC_018989 | XLOC_018989 | CNR1         | chr6:88849584-88875767   | 0 | 1 |
| XLOC_018992 | XLOC_018992 | GABRR1       | chr6:89887222-89941007   | 0 | 1 |
| XLOC_018995 | XLOC_018995 | RRAGD        | chr6:90074334-90121995   | 0 | 1 |
| XLOC_019000 | XLOC_019000 | EPHA7        | chr6:93949739-94129300   | 0 | 1 |
| XLOC_019003 | XLOC_019003 | MIR548H3     | chr6:97372495-97862283   | 0 | 1 |
| XLOC_019011 | XLOC_019011 | MCHR2        | chr6:100367785-100524295 | 0 | 1 |
| XLOC_019012 | XLOC_019012 | SIM1         | chr6:100836749-100911551 | 0 | 1 |
| XLOC_019015 | XLOC_019015 | LINC00577    | chr6:105384168-105388402 | 0 | 1 |
| XLOC_019017 | XLOC_019017 | POPCD3       | chr6:105585561-105627858 | 0 | 1 |
| XLOC_019021 | XLOC_019021 | LOC100422737 | chr6:107165326-107235300 | 0 | 1 |
| XLOC_019024 | XLOC_019024 | SCML4        | chr6:108023363-108145521 | 0 | 1 |
| XLOC_019037 | XLOC_019037 | SLC22A16     | chr6:110745891-110797844 | 0 | 1 |
| XLOC_019045 | XLOC_019045 | LOC285758    | chr6:114189178-114194512 | 0 | 1 |
| XLOC_019047 | XLOC_019047 | HS3ST5       | chr6:114376749-114384041 | 0 | 1 |
| XLOC_019052 | XLOC_019052 | BET3L        | chr6:116817650-116880031 | 0 | 1 |
| XLOC_019054 | XLOC_019054 | FAM162B      | chr6:117073359-117086886 | 0 | 1 |
| XLOC_019055 | XLOC_019055 | GPRC6A       | chr6:117113247-117150198 | 0 | 1 |
| XLOC_019056 | XLOC_019056 | ROS1         | chr6:117609529-117747018 | 0 | 1 |
| XLOC_019060 | XLOC_019060 | FAM184A      | chr6:119280995-119470358 | 0 | 1 |
| XLOC_019061 | XLOC_019061 | MIR548B      | chr6:119280995-119470358 | 0 | 1 |
| XLOC_019063 | XLOC_019063 | LOC285762    | chr6:119773711-119812467 | 0 | 1 |
| XLOC_019066 | XLOC_019066 | TRDN         | chr6:123537483-123958238 | 0 | 1 |
| XLOC_019069 | XLOC_019069 | MIR5695      | chr6:126433836-126443762 | 0 | 1 |
| XLOC_019072 | XLOC_019072 | THEMIS       | chr6:128029338-128239776 | 0 | 1 |
| XLOC_019075 | XLOC_019075 | TMEM244      | chr6:130152388-130182416 | 0 | 1 |
| XLOC_019076 | XLOC_019076 | SAMD3        | chr6:130465446-130686570 | 0 | 1 |
| XLOC_019084 | XLOC_019084 | TAAR5        | chr6:132909730-132910877 | 0 | 1 |
| XLOC_019085 | XLOC_019085 | TAAR3        | chr6:132929363-132930441 | 0 | 1 |
| XLOC_019086 | XLOC_019086 | TAAR2        | chr6:132938288-132945414 | 0 | 1 |
| XLOC_019087 | XLOC_019087 | TAAR1        | chr6:132966122-132967142 | 0 | 1 |
| XLOC_019088 | XLOC_019088 | VNN1         | chr6:133001996-133035194 | 0 | 1 |
| XLOC_019089 | XLOC_019089 | VNN3         | chr6:133043925-133055904 | 0 | 1 |
| XLOC_019090 | XLOC_019090 | VNN2         | chr6:133065008-133084598 | 0 | 1 |
| XLOC_019093 | XLOC_019093 | HMG1A1P7     | chr6:134435110-134438818 | 0 | 1 |
| XLOC_019097 | XLOC_019097 | MIR3662      | chr6:135281516-135376036 | 0 | 1 |
| XLOC_019105 | XLOC_019105 | IL22RA2      | chr6:137464956-137494785 | 0 | 1 |
| XLOC_019107 | XLOC_019107 | QLIG3        | chr6:137813335-137815531 | 0 | 1 |
| XLOC_019108 | XLOC_019108 | LOC100130476 | chr6:138144806-138204451 | 0 | 1 |
| XLOC_019112 | XLOC_019112 | MIR3145      | chr6:138743180-138893668 | 0 | 1 |
| XLOC_019115 | XLOC_019115 | TXLNB        | chr6:139561198-139613208 | 0 | 1 |
| XLOC_019117 | XLOC_019117 | LOC645434    | chr6:139790131-139795733 | 0 | 1 |
| XLOC_019119 | XLOC_019119 | LOC153910    | chr6:142847591-142959026 | 0 | 1 |
| XLOC_019132 | XLOC_019132 | LOC100128176 | chr6:149068270-149398126 | 0 | 1 |
| XLOC_019153 | XLOC_019153 | NOX3         | chr6:155716501-155777037 | 0 | 1 |
| XLOC_019154 | XLOC_019154 | MIR4466      | chr6:157099063-157531913 | 0 | 1 |
| XLOC_019158 | XLOC_019158 | MIR3918      | chr6:159071045-159185908 | 0 | 1 |
| XLOC_019162 | XLOC_019162 | TAGAP        | chr6:159456026-159466184 | 0 | 1 |
| XLOC_019167 | XLOC_019167 | SNORA29      | chr6:160181290-160210735 | 0 | 1 |
| XLOC_019169 | XLOC_019169 | SLC22A2      | chr6:160637793-160679963 | 0 | 1 |
| XLOC_019175 | XLOC_019175 | PACRG-AS1    | chr6:161768589-163745505 | 0 | 1 |
| XLOC_019176 | XLOC_019176 | DKFZp451B082 | chr6:163759373-163768065 | 0 | 1 |
| XLOC_019177 | XLOC_019177 | CAHM         | chr6:163834096-163834982 | 0 | 1 |
| XLOC_019178 | XLOC_019178 | C6orf118     | chr6:165693152-165723111 | 0 | 1 |
| XLOC_019179 | XLOC_019179 | PDE10A       | chr6:165740775-166075588 | 0 | 1 |
| XLOC_019180 | XLOC_019180 | LINC00473    | chr6:166337535-166403103 | 0 | 1 |
| XLOC_019181 | XLOC_019181 | T            | chr6:166571145-166582157 | 0 | 1 |
| XLOC_019186 | XLOC_019186 | RPS6KA2-IT1  | chr6:166822853-167275771 | 0 | 1 |
| XLOC_019187 | XLOC_019187 | MIR1913      | chr6:166822853-167275771 | 0 | 1 |
| XLOC_019189 | XLOC_019189 | MIR3939      | chr6:167411294-167411400 | 0 | 1 |
| XLOC_019190 | XLOC_019190 | GPR31        | chr6:167570359-167571319 | 0 | 1 |
| XLOC_019191 | XLOC_019191 | TCP10        | chr6:167786576-167797998 | 0 | 1 |
| XLOC_019194 | XLOC_019194 | HGC6.3       | chr6:168376603-168377619 | 0 | 1 |
| XLOC_019195 | XLOC_019195 | FRMD1        | chr6:168456463-168479839 | 0 | 1 |
| XLOC_019196 | XLOC_019196 | DACT2        | chr6:168707583-168720402 | 0 | 1 |
| XLOC_019202 | XLOC_019202 | LOC154449    | chr6:170563421-170571657 | 0 | 1 |

|             |             |              |                          |   |   |
|-------------|-------------|--------------|--------------------------|---|---|
| XLOC_020326 | XLOC_020326 | FAM20C       | chr7:192968-300740       | 0 | 1 |
| XLOC_020327 | XLOC_020327 | LOC100288524 | chr7:330135-331454       | 0 | 1 |
| XLOC_020328 | XLOC_020328 | LOC442497    | chr7:419390-422845       | 0 | 1 |
| XLOC_020336 | XLOC_020336 | UNCX         | chr7:1272653-1276613     | 0 | 1 |
| XLOC_020348 | XLOC_020348 | SDKI         | chr7:3341079-4308631     | 0 | 1 |
| XLOC_020372 | XLOC_020372 | NXP1         | chr7:8473584-8792593     | 0 | 1 |
| XLOC_020373 | XLOC_020373 | PER4         | chr7:9673899-9675447     | 0 | 1 |
| XLOC_020378 | XLOC_020378 | LOC100506025 | chr7:16127151-16460947   | 0 | 1 |
| XLOC_020379 | XLOC_020379 | LRRC72       | chr7:16566504-16621114   | 0 | 1 |
| XLOC_020384 | XLOC_020384 | MACC1-AS1    | chr7:20174278-20257013   | 0 | 1 |
| XLOC_020391 | XLOC_020391 | IL6          | chr7:22766765-22771621   | 0 | 1 |
| XLOC_020392 | XLOC_020392 | SNORD93      | chr7:22896231-22896305   | 0 | 1 |
| XLOC_020401 | XLOC_020401 | NPY          | chr7:24323806-24331484   | 0 | 1 |
| XLOC_020407 | XLOC_020407 | C7orf71      | chr7:26677489-26686924   | 0 | 1 |
| XLOC_020413 | XLOC_020413 | EVX1         | chr7:27282163-27286192   | 0 | 1 |
| XLOC_020421 | XLOC_020421 | WIPF3        | chr7:29846169-29956682   | 0 | 1 |
| XLOC_020425 | XLOC_020425 | MIR550A1     | chr7:30323922-30407308   | 0 | 1 |
| XLOC_020430 | XLOC_020430 | GHRHR        | chr7:31003635-31019146   | 0 | 1 |
| XLOC_020432 | XLOC_020432 | CCDC129      | chr7:31553684-31698334   | 0 | 1 |
| XLOC_020433 | XLOC_020433 | PPP1R17      | chr7:31726630-31748069   | 0 | 1 |
| XLOC_020439 | XLOC_020439 | BMPER        | chr7:33944522-34195484   | 0 | 1 |
| XLOC_020440 | XLOC_020440 | NPSR1        | chr7:34386123-34917944   | 0 | 1 |
| XLOC_020441 | XLOC_020441 | LOC401324    | chr7:35353465-35416086   | 0 | 1 |
| XLOC_020445 | XLOC_020445 | GPR141       | chr7:37779995-37780913   | 0 | 1 |
| XLOC_020446 | XLOC_020446 | NME8         | chr7:37888198-37940002   | 0 | 1 |
| XLOC_020447 | XLOC_020447 | EPDR1        | chr7:37960162-37991542   | 0 | 1 |
| XLOC_020450 | XLOC_020450 | POU6F2       | chr7:39017608-39504390   | 0 | 1 |
| XLOC_020457 | XLOC_020457 | INHBA-AS1    | chr7:41728600-41818976   | 0 | 1 |
| XLOC_020460 | XLOC_020460 | MIR3943      | chr7:43152197-43602938   | 0 | 1 |
| XLOC_020468 | XLOC_020468 | MIR4649      | chr7:44143959-44154159   | 0 | 1 |
| XLOC_020474 | XLOC_020474 | RAMP3        | chr7:45197366-45223850   | 0 | 1 |
| XLOC_020476 | XLOC_020476 | IGFBP1       | chr7:45927958-45933267   | 0 | 1 |
| XLOC_020477 | XLOC_020477 | C7orf65      | chr7:47694841-47701246   | 0 | 1 |
| XLOC_020479 | XLOC_020479 | C7orf69      | chr7:47814249-47988071   | 0 | 1 |
| XLOC_020484 | XLOC_020484 | VWC2         | chr7:49813256-49952138   | 0 | 1 |
| XLOC_020485 | XLOC_020485 | C7orf72      | chr7:50135681-50198852   | 0 | 1 |
| XLOC_020486 | XLOC_020486 | IKZF1        | chr7:50344377-50472798   | 0 | 1 |
| XLOC_020487 | XLOC_020487 | LOC100129427 | chr7:50526133-50633154   | 0 | 1 |
| XLOC_020488 | XLOC_020488 | POM121L12    | chr7:53103348-53104618   | 0 | 1 |
| XLOC_020489 | XLOC_020489 | VSTM2A       | chr7:54610018-54639419   | 0 | 1 |
| XLOC_020490 | XLOC_020490 | LOC285878    | chr7:54610018-54639419   | 0 | 1 |
| XLOC_020499 | XLOC_020499 | DKFZp434L192 | chr7:56563915-56564977   | 0 | 1 |
| XLOC_020500 | XLOC_020500 | MIR3147      | chr7:57472730-57472796   | 0 | 1 |
| XLOC_020501 | XLOC_020501 | ZNF716       | chr7:57509882-57533265   | 0 | 1 |
| XLOC_020502 | XLOC_020502 | LOC100287704 | chr7:62809447-62812152   | 0 | 1 |
| XLOC_020503 | XLOC_020503 | MIR4283-2    | chr7:63081467-63081547   | 0 | 1 |
| XLOC_020504 | XLOC_020504 | ZNF727       | chr7:63505820-63538927   | 0 | 1 |
| XLOC_020505 | XLOC_020505 | ZNF735       | chr7:63667580-63680668   | 0 | 1 |
| XLOC_020506 | XLOC_020506 | ZNF679       | chr7:63688851-63727309   | 0 | 1 |
| XLOC_020507 | XLOC_020507 | ZNF736       | chr7:63773185-63810017   | 0 | 1 |
| XLOC_020509 | XLOC_020509 | LOC641746    | chr7:64042987-64044129   | 0 | 1 |
| XLOC_020528 | XLOC_020528 | WBSCR17      | chr7:70597522-71178586   | 0 | 1 |
| XLOC_020529 | XLOC_020529 | MIR3914-2    | chr7:70597522-71178586   | 0 | 1 |
| XLOC_020530 | XLOC_020530 | MIR4650-1    | chr7:72023728-72298813   | 0 | 1 |
| XLOC_020538 | XLOC_020538 | FZD9         | chr7:72848108-72850450   | 0 | 1 |
| XLOC_020541 | XLOC_020541 | MIR4284      | chr7:73113534-73134017   | 0 | 1 |
| XLOC_020545 | XLOC_020545 | ELN          | chr7:73442426-73484236   | 0 | 1 |
| XLOC_020555 | XLOC_020555 | GATSL1       | chr7:74379082-74438803   | 0 | 1 |
| XLOC_020557 | XLOC_020557 | SPDYEBP      | chr7:74936532-74946587   | 0 | 1 |
| XLOC_020558 | XLOC_020558 | SPDYEBP      | chr7:74964559-74988306   | 0 | 1 |
| XLOC_020565 | XLOC_020565 | MIR4651      | chr7:75544419-75623992   | 0 | 1 |
| XLOC_020566 | XLOC_020566 | SNORA14A     | chr7:75544419-75623992   | 0 | 1 |
| XLOC_020580 | XLOC_020580 | RPL13AP17    | chr7:77646373-79100524   | 0 | 1 |
| XLOC_020581 | XLOC_020581 | MAGI2-AS2    | chr7:77646373-79100524   | 0 | 1 |
| XLOC_020583 | XLOC_020583 | MIR548M      | chr7:79400571-79400606   | 0 | 1 |
| XLOC_020592 | XLOC_020592 | ZNF804B      | chr7:88388752-88966346   | 0 | 1 |
| XLOC_020607 | XLOC_020607 | MIR4652      | chr7:93346239-93346317   | 0 | 1 |
| XLOC_020608 | XLOC_020608 | GNGT1        | chr7:93535819-93540485   | 0 | 1 |
| XLOC_020609 | XLOC_020609 | GNG11        | chr7:93551015-93555826   | 0 | 1 |
| XLOC_020610 | XLOC_020610 | COL1A2       | chr7:94023872-94060544   | 0 | 1 |
| XLOC_020612 | XLOC_020612 | PEG10        | chr7:94285636-94299006   | 0 | 1 |
| XLOC_020616 | XLOC_020616 | DLX6         | chr7:96597826-96643377   | 0 | 1 |
| XLOC_020618 | XLOC_020618 | TAC1         | chr7:97361270-97369784   | 0 | 1 |
| XLOC_020622 | XLOC_020622 | NPTX2        | chr7:98246596-98259181   | 0 | 1 |
| XLOC_020624 | XLOC_020624 | MIR3609      | chr7:98476112-98610866   | 0 | 1 |
| XLOC_020658 | XLOC_020658 | ZAN          | chr7:100331248-100395419 | 0 | 1 |
| XLOC_020667 | XLOC_020667 | MIR4653      | chr7:100797685-100804557 | 0 | 1 |
| XLOC_020672 | XLOC_020672 | MIR4285      | chr7:101928404-101962178 | 0 | 1 |
| XLOC_020676 | XLOC_020676 | MIR4467      | chr7:102105389-102119381 | 0 | 1 |

|             |             |                |                          |   |   |
|-------------|-------------|----------------|--------------------------|---|---|
| XLOC_020678 | XLOC_020678 | SPDYE2L        | chr7:102277194-102312176 | 0 | 1 |
| XLOC_020684 | XLOC_020684 | LHFPL3         | chr7:103969103-104567092 | 0 | 1 |
| XLOC_020688 | XLOC_020688 | PIK3CG         | chr7:106505923-106547592 | 0 | 1 |
| XLOC_020689 | XLOC_020689 | PRKAR2B        | chr7:106685177-106802256 | 0 | 1 |
| XLOC_020703 | XLOC_020703 | MIR3666        | chr7:113726364-114333827 | 0 | 1 |
| XLOC_020704 | XLOC_020704 | MDFIC          | chr7:114562208-114659970 | 0 | 1 |
| XLOC_020714 | XLOC_020714 | ANKRD7         | chr7:117864711-117882784 | 0 | 1 |
| XLOC_020715 | XLOC_020715 | KCND2          | chr7:119913721-120390387 | 0 | 1 |
| XLOC_020719 | XLOC_020719 | PTPRZ1         | chr7:121513158-121702090 | 0 | 1 |
| XLOC_020723 | XLOC_020723 | HYALP1         | chr7:123454192-123459484 | 0 | 1 |
| XLOC_020724 | XLOC_020724 | HYAL4          | chr7:123485222-123517531 | 0 | 1 |
| XLOC_020725 | XLOC_020725 | SPAM1          | chr7:123565285-123611461 | 0 | 1 |
| XLOC_020730 | XLOC_020730 | MIR593         | chr7:127292201-127732659 | 0 | 1 |
| XLOC_020731 | XLOC_020731 | MIR129-1       | chr7:127847924-127847996 | 0 | 1 |
| XLOC_020756 | XLOC_020756 | CPA5           | chr7:129984629-130008571 | 0 | 1 |
| XLOC_020757 | XLOC_020757 | CPA1           | chr7:130020289-130027949 | 0 | 1 |
| XLOC_020759 | XLOC_020759 | MIR335         | chr7:130126015-130371406 | 0 | 1 |
| XLOC_020761 | XLOC_020761 | FLJ40288       | chr7:132333552-132413528 | 0 | 1 |
| XLOC_020765 | XLOC_020765 | AKR1B15        | chr7:134233848-134264592 | 0 | 1 |
| XLOC_020770 | XLOC_020770 | STRA8          | chr7:134916730-134943244 | 0 | 1 |
| XLOC_020773 | XLOC_020773 | CHRM2          | chr7:136553398-136849088 | 0 | 1 |
| XLOC_020774 | XLOC_020774 | MIR490         | chr7:136553398-136849088 | 0 | 1 |
| XLOC_020775 | XLOC_020775 | LOC100130880   | chr7:137559724-137686847 | 0 | 1 |
| XLOC_020776 | XLOC_020776 | AKR1D1         | chr7:137761177-137803050 | 0 | 1 |
| XLOC_020777 | XLOC_020777 | MIR4468        | chr7:137808503-137808567 | 0 | 1 |
| XLOC_020783 | XLOC_020783 | CLEC2L         | chr7:139208673-139229731 | 0 | 1 |
| XLOC_020796 | XLOC_020796 | OR9A4          | chr7:141618675-141619620 | 0 | 1 |
| XLOC_020798 | XLOC_020798 | LOC93432       | chr7:141811548-141843783 | 0 | 1 |
| XLOC_020801 | XLOC_020801 | PRSS2          | chr7:142478756-142482399 | 0 | 1 |
| XLOC_020803 | XLOC_020803 | C7orf34        | chr7:142636602-142637957 | 0 | 1 |
| XLOC_020804 | XLOC_020804 | OR6V1          | chr7:142749437-142750379 | 0 | 1 |
| XLOC_020805 | XLOC_020805 | PIP            | chr7:142829173-142836834 | 0 | 1 |
| XLOC_020806 | XLOC_020806 | TAS2R39        | chr7:142880511-142881528 | 0 | 1 |
| XLOC_020807 | XLOC_020807 | TAS2R40        | chr7:142919171-142920143 | 0 | 1 |
| XLOC_020814 | XLOC_020814 | TAS2R60        | chr7:143078359-143220540 | 0 | 1 |
| XLOC_020815 | XLOC_020815 | TAS2R41        | chr7:143078359-143220540 | 0 | 1 |
| XLOC_020818 | XLOC_020818 | OR2F2          | chr7:143632325-143633279 | 0 | 1 |
| XLOC_020819 | XLOC_020819 | OR2F1          | chr7:143657019-143658108 | 0 | 1 |
| XLOC_020820 | XLOC_020820 | OR6B1          | chr7:143701089-143702025 | 0 | 1 |
| XLOC_020821 | XLOC_020821 | OR2A5          | chr7:143747494-143748430 | 0 | 1 |
| XLOC_020822 | XLOC_020822 | OR2A25         | chr7:143771312-143772245 | 0 | 1 |
| XLOC_020823 | XLOC_020823 | OR2A12         | chr7:143792200-143793133 | 0 | 1 |
| XLOC_020824 | XLOC_020824 | OR2A2          | chr7:143806675-143807632 | 0 | 1 |
| XLOC_020825 | XLOC_020825 | OR2A14         | chr7:143826205-143827138 | 0 | 1 |
| XLOC_020827 | XLOC_020827 | OR2A20P,OR2A9P | chr7:143996465-143997598 | 0 | 1 |
| XLOC_020829 | XLOC_020829 | RNU6-57        | chr7:144038210-144038237 | 0 | 1 |
| XLOC_020832 | XLOC_020832 | MIR548AQ       | chr7:145813452-148118088 | 0 | 1 |
| XLOC_020833 | XLOC_020833 | MIR548F3       | chr7:145813452-148118088 | 0 | 1 |
| XLOC_020834 | XLOC_020834 | MIR548T        | chr7:145813452-148118088 | 0 | 1 |
| XLOC_020835 | XLOC_020835 | C7orf33        | chr7:148287656-148312952 | 0 | 1 |
| XLOC_020842 | XLOC_020842 | KRBA1          | chr7:149412147-149431664 | 0 | 1 |
| XLOC_020848 | XLOC_020848 | RNU6-33        | chr7:150064035-150064063 | 0 | 1 |
| XLOC_020852 | XLOC_020852 | LOC285972      | chr7:150130741-150145228 | 0 | 1 |
| XLOC_020853 | XLOC_020853 | GIMAP8         | chr7:150147961-150176483 | 0 | 1 |
| XLOC_020854 | XLOC_020854 | GIMAP7         | chr7:150211944-150218161 | 0 | 1 |
| XLOC_020855 | XLOC_020855 | GIMAP4         | chr7:150264457-150271041 | 0 | 1 |
| XLOC_020858 | XLOC_020858 | TMEM176A       | chr7:150488375-150502208 | 0 | 1 |
| XLOC_020867 | XLOC_020867 | WDR86-AS1      | chr7:151078206-151110132 | 0 | 1 |
| XLOC_020869 | XLOC_020869 | GALNTL5        | chr7:151653463-151717019 | 0 | 1 |
| XLOC_020874 | XLOC_020874 | DPP6           | chr7:153584418-154685995 | 0 | 1 |
| XLOC_020877 | XLOC_020877 | HTR5A          | chr7:154858778-154879102 | 0 | 1 |
| XLOC_020887 | XLOC_020887 | LOC100506585   | chr7:157331749-158380482 | 0 | 1 |
| XLOC_020888 | XLOC_020888 | MIR5707        | chr7:158384307-158384388 | 0 | 1 |
| XLOC_020890 | XLOC_020890 | LINC00689      | chr7:158801044-158818929 | 0 | 1 |
| XLOC_020896 | XLOC_020896 | MIR339         | chr7:1036622-1177893     | 0 | 1 |
| XLOC_020903 | XLOC_020903 | MIR4655        | chr7:1855427-2272583     | 0 | 1 |
| XLOC_020908 | XLOC_020908 | CARD11         | chr7:2945709-3083509     | 0 | 1 |
| XLOC_020909 | XLOC_020909 | MIR4656        | chr7:4815261-4834026     | 0 | 1 |
| XLOC_020910 | XLOC_020910 | RADIL          | chr7:4838739-4923335     | 0 | 1 |
| XLOC_020911 | XLOC_020911 | PAPOLB         | chr7:4838739-4923335     | 0 | 1 |
| XLOC_020916 | XLOC_020916 | MIR589         | chr7:5515427-5553399     | 0 | 1 |
| XLOC_020931 | XLOC_020931 | COL28A1        | chr7:7398243-7575460     | 0 | 1 |
| XLOC_020935 | XLOC_020935 | THSD7A         | chr7:11410061-11871824   | 0 | 1 |
| XLOC_020936 | XLOC_020936 | VWDE           | chr7:12370508-12443852   | 0 | 1 |
| XLOC_020939 | XLOC_020939 | AGMO           | chr7:15239942-15601640   | 0 | 1 |
| XLOC_020940 | XLOC_020940 | MEOX2          | chr7:15650836-15726308   | 0 | 1 |
| XLOC_020944 | XLOC_020944 | AGR2           | chr7:16832263-16844738   | 0 | 1 |
| XLOC_020945 | XLOC_020945 | AGR3           | chr7:16899029-16921613   | 0 | 1 |
| XLOC_020947 | XLOC_020947 | PRPS1L1        | chr7:18066399-18067486   | 0 | 1 |



|             |             |              |                          |   |   |
|-------------|-------------|--------------|--------------------------|---|---|
| XLOC_020948 | XLOC_020948 | TWIST1       | chr7:19155090-19157295   | 0 | 1 |
| XLOC_020949 | XLOC_020949 | FERD3L       | chr7:19184404-19185044   | 0 | 1 |
| XLOC_020951 | XLOC_020951 | MIR3146      | chr7:19735084-19748660   | 0 | 1 |
| XLOC_020952 | XLOC_020952 | TMEM196      | chr7:19758937-19812404   | 0 | 1 |
| XLOC_020963 | XLOC_020963 | CLK2P        | chr7:23624334-23626146   | 0 | 1 |
| XLOC_020968 | XLOC_020968 | NPVF         | chr7:25264190-25268105   | 0 | 1 |
| XLOC_020969 | XLOC_020969 | RNU6-16      | chr7:25880600-25880630   | 0 | 1 |
| XLOC_020970 | XLOC_020970 | MIR148A      | chr7:25989538-25989606   | 0 | 1 |
| XLOC_020987 | XLOC_020987 | TRIL         | chr7:28992973-28998029   | 0 | 1 |
| XLOC_020990 | XLOC_020990 | MIR550A3     | chr7:29685537-29727859   | 0 | 1 |
| XLOC_020997 | XLOC_020997 | NEUROD6      | chr7:31377074-31380538   | 0 | 1 |
| XLOC_020998 | XLOC_020998 | PDE1C        | chr7:31792631-32338383   | 0 | 1 |
| XLOC_020999 | XLOC_020999 | LOC100130673 | chr7:32496509-32498106   | 0 | 1 |
| XLOC_021002 | XLOC_021002 | MIR550B2     | chr7:32772592-32772689   | 0 | 1 |
| XLOC_021007 | XLOC_021007 | NPSR1-AS1    | chr7:34386123-34917944   | 0 | 1 |
| XLOC_021010 | XLOC_021010 | TBX20        | chr7:35242041-35293711   | 0 | 1 |
| XLOC_021013 | XLOC_021013 | AOAH         | chr7:36552548-36764154   | 0 | 1 |
| XLOC_021014 | XLOC_021014 | AOAH-IT1     | chr7:36552548-36764154   | 0 | 1 |
| XLOC_021015 | XLOC_021015 | ELMO1        | chr7:36892510-37488895   | 0 | 1 |
| XLOC_021016 | XLOC_021016 | MIR1200      | chr7:36892510-37488895   | 0 | 1 |
| XLOC_021017 | XLOC_021017 | SFRP4        | chr7:37945534-37956525   | 0 | 1 |
| XLOC_021018 | XLOC_021018 | TARP         | chr7:38299243-38313248   | 0 | 1 |
| XLOC_021019 | XLOC_021019 | AMPH         | chr7:38423296-38671167   | 0 | 1 |
| XLOC_021022 | XLOC_021022 | POU6F2-AS1   | chr7:39017608-39504390   | 0 | 1 |
| XLOC_021025 | XLOC_021025 | GLI3         | chr7:42000547-42276618   | 0 | 1 |
| XLOC_021036 | XLOC_021036 | MYL7         | chr7:44178462-44180916   | 0 | 1 |
| XLOC_021037 | XLOC_021037 | GCK          | chr7:44183869-44229022   | 0 | 1 |
| XLOC_021054 | XLOC_021054 | IGFBP3       | chr7:45951843-45960871   | 0 | 1 |
| XLOC_021059 | XLOC_021059 | ZBPB         | chr7:49977023-50132860   | 0 | 1 |
| XLOC_021064 | XLOC_021064 | FLJ45974     | chr7:53723201-53879624   | 0 | 1 |
| XLOC_021065 | XLOC_021065 | HPVC1        | chr7:54268916-54270114   | 0 | 1 |
| XLOC_021067 | XLOC_021067 | EGFR-AS1     | chr7:55086724-55275031   | 0 | 1 |
| XLOC_021075 | XLOC_021075 | LOC650226    | chr7:56491396-56516068   | 0 | 1 |
| XLOC_021076 | XLOC_021076 | LOC100130849 | chr7:56943077-56949839   | 0 | 1 |
| XLOC_021077 | XLOC_021077 | MIR4283-2    | chr7:57023491-57023571   | 0 | 1 |
| XLOC_021079 | XLOC_021079 | GUSBP10      | chr7:57233376-57247863   | 0 | 1 |
| XLOC_021081 | XLOC_021081 | LOC100287834 | chr7:62856717-62859419   | 0 | 1 |
| XLOC_021082 | XLOC_021082 | LOC100506050 | chr7:63484795-63490480   | 0 | 1 |
| XLOC_021091 | XLOC_021091 | MIR4650-1    | chr7:66461791-66704507   | 0 | 1 |
| XLOC_021093 | XLOC_021093 | MIR3914-1    | chr7:70597522-71178586   | 0 | 1 |
| XLOC_021124 | XLOC_021124 | CCL24        | chr7:75441113-75443033   | 0 | 1 |
| XLOC_021136 | XLOC_021136 | MIR548AU     | chr7:77646373-79100524   | 0 | 1 |
| XLOC_021137 | XLOC_021137 | GNAT3        | chr7:80087986-80141242   | 0 | 1 |
| XLOC_021148 | XLOC_021148 | ABCB4        | chr7:87031360-87105019   | 0 | 1 |
| XLOC_021149 | XLOC_021149 | ABCB1        | chr7:87133178-87461613   | 0 | 1 |
| XLOC_021152 | XLOC_021152 | STEAP4       | chr7:87905743-87936228   | 0 | 1 |
| XLOC_021153 | XLOC_021153 | C7orf62      | chr7:88388752-88966346   | 0 | 1 |
| XLOC_021154 | XLOC_021154 | MTERF        | chr7:91502020-91510016   | 0 | 1 |
| XLOC_021165 | XLOC_021165 | MIR653       | chr7:93053798-93204042   | 0 | 1 |
| XLOC_021166 | XLOC_021166 | MIR489       | chr7:93053798-93204042   | 0 | 1 |
| XLOC_021167 | XLOC_021167 | TFPI2        | chr7:93514708-93520303   | 0 | 1 |
| XLOC_021175 | XLOC_021175 | MIR591       | chr7:95749531-95951459   | 0 | 1 |
| XLOC_021176 | XLOC_021176 | C7orf76      | chr7:96110937-96132835   | 0 | 1 |
| XLOC_021179 | XLOC_021179 | DLX6-AS1     | chr7:96597826-96643377   | 0 | 1 |
| XLOC_021180 | XLOC_021180 | DLX5         | chr7:96649701-96654143   | 0 | 1 |
| XLOC_021183 | XLOC_021183 | OCM2         | chr7:97614012-97619416   | 0 | 1 |
| XLOC_021203 | XLOC_021203 | MIR93        | chr7:99690403-99723128   | 0 | 1 |
| XLOC_021204 | XLOC_021204 | MIR106B      | chr7:99690403-99723128   | 0 | 1 |
| XLOC_021246 | XLOC_021246 | LHFPL3-AS1   | chr7:103969103-104567092 | 0 | 1 |
| XLOC_021247 | XLOC_021247 | LHFPL3-AS2   | chr7:103969103-104567092 | 0 | 1 |
| XLOC_021261 | XLOC_021261 | LAMB4        | chr7:107663995-107770801 | 0 | 1 |
| XLOC_021262 | XLOC_021262 | NRCAM        | chr7:107788070-108096841 | 0 | 1 |
| XLOC_021265 | XLOC_021265 | C7orf66      | chr7:108524037-108524637 | 0 | 1 |
| XLOC_021266 | XLOC_021266 | E1F3IP1      | chr7:109599283-109600270 | 0 | 1 |
| XLOC_021273 | XLOC_021273 | PPP1R3A      | chr7:113516881-113559082 | 0 | 1 |
| XLOC_021274 | XLOC_021274 | TFEC         | chr7:115575201-115670867 | 0 | 1 |
| XLOC_021276 | XLOC_021276 | ST7-AS2      | chr7:116592500-116870075 | 0 | 1 |
| XLOC_021277 | XLOC_021277 | WNT2         | chr7:116916685-116963343 | 0 | 1 |
| XLOC_021287 | XLOC_021287 | TAS2R16      | chr7:122634758-122635754 | 0 | 1 |
| XLOC_021292 | XLOC_021292 | TMEM229A     | chr7:123670969-123673523 | 0 | 1 |
| XLOC_021293 | XLOC_021293 | GPR37        | chr7:124385654-124406079 | 0 | 1 |
| XLOC_021294 | XLOC_021294 | LOC154872    | chr7:124417345-124430864 | 0 | 1 |
| XLOC_021297 | XLOC_021297 | MIR592       | chr7:126078651-126892428 | 0 | 1 |
| XLOC_021300 | XLOC_021300 | PAX4         | chr7:127250345-127255780 | 0 | 1 |
| XLOC_021309 | XLOC_021309 | MIR182       | chr7:129410222-129410332 | 0 | 1 |
| XLOC_021310 | XLOC_021310 | MIR96        | chr7:129414532-129414609 | 0 | 1 |
| XLOC_021311 | XLOC_021311 | MIR183       | chr7:129414744-129414854 | 0 | 1 |
| XLOC_021318 | XLOC_021318 | KLF14        | chr7:130417395-130418888 | 0 | 1 |
| XLOC_021319 | XLOC_021319 | MIR29A       | chr7:130561505-130561569 | 0 | 1 |

|             |             |                    |                          |   |   |
|-------------|-------------|--------------------|--------------------------|---|---|
| XLOC_021320 | XLOC_021320 | MIR29B1            | chr7:130562217-130562298 | 0 | 1 |
| XLOC_021324 | XLOC_021324 | PLXNA4             | chr7:131808090-132333447 | 0 | 1 |
| XLOC_021332 | XLOC_021332 | FAM180A            | chr7:135414345-135433594 | 0 | 1 |
| XLOC_021334 | XLOC_021334 | LOC349160          | chr7:136553398-136849088 | 0 | 1 |
| XLOC_021338 | XLOC_021338 | SVOPL              | chr7:138279029-138363790 | 0 | 1 |
| XLOC_021344 | XLOC_021344 | KLRG2              | chr7:139138087-139168457 | 0 | 1 |
| XLOC_021357 | XLOC_021357 | CLEC5A             | chr7:141627156-141646783 | 0 | 1 |
| XLOC_021358 | XLOC_021358 | TAS2R38            | chr7:141672430-141673573 | 0 | 1 |
| XLOC_021359 | XLOC_021359 | MOXD2P             | chr7:141940555-141946886 | 0 | 1 |
| XLOC_021360 | XLOC_021360 | PRSS58             | chr7:141951957-141957878 | 0 | 1 |
| XLOC_021361 | XLOC_021361 | LOC730441          | chr7:141968100-141972068 | 0 | 1 |
| XLOC_021363 | XLOC_021363 | TRPV5              | chr7:142605647-142630820 | 0 | 1 |
| XLOC_021365 | XLOC_021365 | OR9A2              | chr7:142723286-142724219 | 0 | 1 |
| XLOC_021373 | XLOC_021373 | RNU6-57            | chr7:143906939-143906966 | 0 | 1 |
| XLOC_021378 | XLOC_021378 | NOBOX              | chr7:144094332-144107320 | 0 | 1 |
| XLOC_021380 | XLOC_021380 | MIR548I4           | chr7:145813452-148118088 | 0 | 1 |
| XLOC_021381 | XLOC_021381 | MIR548F4           | chr7:145813452-148118088 | 0 | 1 |
| XLOC_021392 | XLOC_021392 | RARRES2            | chr7:150035406-150038763 | 0 | 1 |
| XLOC_021400 | XLOC_021400 | GBX1               | chr7:150845675-150864867 | 0 | 1 |
| XLOC_021401 | XLOC_021401 | ASB10              | chr7:150872784-150884919 | 0 | 1 |
| XLOC_021404 | XLOC_021404 | WDR86              | chr7:151078206-151110132 | 0 | 1 |
| XLOC_021406 | XLOC_021406 | MIR3907            | chr7:151127055-151137099 | 0 | 1 |
| XLOC_021412 | XLOC_021412 | LOC100128264       | chr7:154858778-154879102 | 0 | 1 |
| XLOC_021414 | XLOC_021414 | SHH                | chr7:155595557-155604967 | 0 | 1 |
| XLOC_021420 | XLOC_021420 | MIR153-2           | chr7:157331749-158380482 | 0 | 1 |
| XLOC_021421 | XLOC_021421 | MIR595             | chr7:157331749-158380482 | 0 | 1 |
| XLOC_021428 | XLOC_021428 | ERICH1-AS1         | chr8:687586-1087777      | 0 | 1 |
| XLOC_021429 | XLOC_021429 | DLGAP2             | chr8:1449568-1656642     | 0 | 1 |
| XLOC_021431 | XLOC_021431 | MIR596             | chr8:1765396-1765473     | 0 | 1 |
| XLOC_021437 | XLOC_021437 | MIR4659A           | chr8:6565877-6619021     | 0 | 1 |
| XLOC_021438 | XLOC_021438 | LOC100652791       | chr8:6666040-6699975     | 0 | 1 |
| XLOC_021439 | XLOC_021439 | DEFB109P1B         | chr8:7159132-7212876     | 0 | 1 |
| XLOC_021440 | XLOC_021440 | USP17L1P           | chr8:7159132-7212876     | 0 | 1 |
| XLOC_021441 | XLOC_021441 | USP17L4            | chr8:7159132-7212876     | 0 | 1 |
| XLOC_021442 | XLOC_021442 | DEFB105B           | chr8:7345242-7347073     | 0 | 1 |
| XLOC_021443 | XLOC_021443 | DEFB107A           | chr8:7353367-7366833     | 0 | 1 |
| XLOC_021444 | XLOC_021444 | FAM90A10P          | chr8:7627105-7628835     | 0 | 1 |
| XLOC_021445 | XLOC_021445 | DEFB106B           | chr8:7682693-7686575     | 0 | 1 |
| XLOC_021446 | XLOC_021446 | DEFB104B           | chr8:7693992-7698764     | 0 | 1 |
| XLOC_021447 | XLOC_021447 | SPAG11A, SPAG11B   | chr8:7705401-7721319     | 0 | 1 |
| XLOC_021448 | XLOC_021448 | DEFB103A, DEFB103B | chr8:7738725-7740180     | 0 | 1 |
| XLOC_021449 | XLOC_021449 | DEFB4A             | chr8:7752198-7754237     | 0 | 1 |
| XLOC_021450 | XLOC_021450 | ZNF705B            | chr8:7783858-7809935     | 0 | 1 |
| XLOC_021451 | XLOC_021451 | FAM66E             | chr8:7812534-7866277     | 0 | 1 |
| XLOC_021455 | XLOC_021455 | MIR4660            | chr8:8905954-8906028     | 0 | 1 |
| XLOC_021458 | XLOC_021458 | MIR597             | chr8:9413444-9639856     | 0 | 1 |
| XLOC_021461 | XLOC_021461 | C8orf74            | chr8:10530146-10558103   | 0 | 1 |
| XLOC_021465 | XLOC_021465 | BLK                | chr8:11351520-11422108   | 0 | 1 |
| XLOC_021466 | XLOC_021466 | LINC00208          | chr8:11434043-11438850   | 0 | 1 |
| XLOC_021471 | XLOC_021471 | ZNF705D            | chr8:11946846-11973025   | 0 | 1 |
| XLOC_021472 | XLOC_021472 | FAM66D             | chr8:11973290-12008698   | 0 | 1 |
| XLOC_021473 | XLOC_021473 | FAM66A             | chr8:12219527-12268510   | 0 | 1 |
| XLOC_021475 | XLOC_021475 | MIR3926-2          | chr8:12579405-12612992   | 0 | 1 |
| XLOC_021478 | XLOC_021478 | TUSC3              | chr8:15397595-15624158   | 0 | 1 |
| XLOC_021479 | XLOC_021479 | EFHA2              | chr8:16884746-16980148   | 0 | 1 |
| XLOC_021489 | XLOC_021489 | LPL                | chr8:19796581-19824770   | 0 | 1 |
| XLOC_021491 | XLOC_021491 | LZTS1-AS1          | chr8:20133283-20147969   | 0 | 1 |
| XLOC_021492 | XLOC_021492 | LOC286114          | chr8:20831496-20852630   | 0 | 1 |
| XLOC_021516 | XLOC_021516 | ADAM28             | chr8:24151579-24212726   | 0 | 1 |
| XLOC_021517 | XLOC_021517 | ADAMDEC1           | chr8:24241797-24263526   | 0 | 1 |
| XLOC_021518 | XLOC_021518 | ADAM7              | chr8:24298508-24367077   | 0 | 1 |
| XLOC_021519 | XLOC_021519 | NEFM               | chr8:24771273-24776606   | 0 | 1 |
| XLOC_021528 | XLOC_021528 | MIR3622A           | chr8:27559189-27559284   | 0 | 1 |
| XLOC_021531 | XLOC_021531 | PNOC               | chr8:28174648-28200868   | 0 | 1 |
| XLOC_021535 | XLOC_021535 | LOC286135          | chr8:29779028-29811123   | 0 | 1 |
| XLOC_021542 | XLOC_021542 | NRG1               | chr8:31497267-32622558   | 0 | 1 |
| XLOC_021543 | XLOC_021543 | NRG1-IT3           | chr8:31497267-32622558   | 0 | 1 |
| XLOC_021545 | XLOC_021545 | UNC5D              | chr8:35092974-35652181   | 0 | 1 |
| XLOC_021546 | XLOC_021546 | KCNU1              | chr8:36641841-36793643   | 0 | 1 |
| XLOC_021561 | XLOC_021561 | ADAM5              | chr8:39172181-39260375   | 0 | 1 |
| XLOC_021562 | XLOC_021562 | LOC100130964       | chr8:39420630-39437653   | 0 | 1 |
| XLOC_021563 | XLOC_021563 | ADAM18             | chr8:39442086-39587583   | 0 | 1 |
| XLOC_021565 | XLOC_021565 | IDO2               | chr8:39792473-39873910   | 0 | 1 |
| XLOC_021566 | XLOC_021566 | C8orf4             | chr8:40010986-40012827   | 0 | 1 |
| XLOC_021575 | XLOC_021575 | CHRNA3             | chr8:42552561-42592209   | 0 | 1 |
| XLOC_021580 | XLOC_021580 | POTEA              | chr8:43147584-43218328   | 0 | 1 |
| XLOC_021581 | XLOC_021581 | LINC00293          | chr8:47752507-47767407   | 0 | 1 |
| XLOC_021586 | XLOC_021586 | C8orf22            | chr8:49966894-49988642   | 0 | 1 |
| XLOC_021587 | XLOC_021587 | SNTG1              | chr8:50824596-51705427   | 0 | 1 |

|             |             |              |                          |   |   |
|-------------|-------------|--------------|--------------------------|---|---|
| XLOC_021588 | XLOC_021588 | NPBWR1       | chr8:53852467-53853454   | 0 | 1 |
| XLOC_021592 | XLOC_021592 | RP1          | chr8:55528626-55543394   | 0 | 1 |
| XLOC_021593 | XLOC_021593 | XKR4         | chr8:56015016-56438710   | 0 | 1 |
| XLOC_021597 | XLOC_021597 | LOC100507651 | chr8:58131647-58145388   | 0 | 1 |
| XLOC_021598 | XLOC_021598 | LOC286177    | chr8:58173784-58179170   | 0 | 1 |
| XLOC_021599 | XLOC_021599 | LINC00588    | chr8:58192101-58197290   | 0 | 1 |
| XLOC_021606 | XLOC_021606 | MIR4470      | chr8:62627346-62627418   | 0 | 1 |
| XLOC_021607 | XLOC_021607 | NKAIN3       | chr8:63161500-63903628   | 0 | 1 |
| XLOC_021608 | XLOC_021608 | UG0898H09    | chr8:63161500-63903628   | 0 | 1 |
| XLOC_021611 | XLOC_021611 | LOC100130155 | chr8:65285774-65291386   | 0 | 1 |
| XLOC_021612 | XLOC_021612 | MIR124-2     | chr8:65291705-65291814   | 0 | 1 |
| XLOC_021613 | XLOC_021613 | BHLHE22      | chr8:65492794-65496191   | 0 | 1 |
| XLOC_021617 | XLOC_021617 | LOC100505659 | chr8:67104348-67109554   | 0 | 1 |
| XLOC_021624 | XLOC_021624 | PREX2        | chr8:68864602-69143897   | 0 | 1 |
| XLOC_021629 | XLOC_021629 | LOC100132891 | chr8:72753776-72987819   | 0 | 1 |
| XLOC_021630 | XLOC_021630 | RNU6-83      | chr8:72753776-72987819   | 0 | 1 |
| XLOC_021631 | XLOC_021631 | KCNB2        | chr8:73449625-73850584   | 0 | 1 |
| XLOC_021638 | XLOC_021638 | MIR5681A     | chr8:75460777-75460852   | 0 | 1 |
| XLOC_021639 | XLOC_021639 | FLJ39080     | chr8:75512100-75670587   | 0 | 1 |
| XLOC_021640 | XLOC_021640 | MIR2052      | chr8:75512100-75670587   | 0 | 1 |
| XLOC_021641 | XLOC_021641 | PI15         | chr8:75736771-75767264   | 0 | 1 |
| XLOC_021642 | XLOC_021642 | CRISPLD1     | chr8:75896707-75946793   | 0 | 1 |
| XLOC_021645 | XLOC_021645 | PKIA         | chr8:79428335-79517502   | 0 | 1 |
| XLOC_021648 | XLOC_021648 | MIR5708      | chr8:81153623-81153708   | 0 | 1 |
| XLOC_021649 | XLOC_021649 | ZBTB10       | chr8:81398447-81434610   | 0 | 1 |
| XLOC_021652 | XLOC_021652 | RALYL        | chr8:85095452-85834078   | 0 | 1 |
| XLOC_021658 | XLOC_021658 | REXO1L2P     | chr8:86727072-86728150   | 0 | 1 |
| XLOC_021659 | XLOC_021659 | REXO1L2P     | chr8:86748526-86749604   | 0 | 1 |
| XLOC_021663 | XLOC_021663 | CNBD1        | chr8:87878675-88394955   | 0 | 1 |
| XLOC_021667 | XLOC_021667 | LINC00534    | chr8:91233715-91400187   | 0 | 1 |
| XLOC_021671 | XLOC_021671 | MIR4661      | chr8:92114846-92231464   | 0 | 1 |
| XLOC_021681 | XLOC_021681 | MIR3150A     | chr8:96085138-96085224   | 0 | 1 |
| XLOC_021692 | XLOC_021692 | KCNS2        | chr8:99439249-99443023   | 0 | 1 |
| XLOC_021697 | XLOC_021697 | MIR4471      | chr8:101394990-101395073 | 0 | 1 |
| XLOC_021698 | XLOC_021698 | FLJ42969     | chr8:102064281-102088479 | 0 | 1 |
| XLOC_021699 | XLOC_021699 | NACAP1       | chr8:102381120-102381823 | 0 | 1 |
| XLOC_021700 | XLOC_021700 | GRHL2        | chr8:102504667-102681952 | 0 | 1 |
| XLOC_021701 | XLOC_021701 | MIR5680      | chr8:103137659-103137743 | 0 | 1 |
| XLOC_021702 | XLOC_021702 | ODF1         | chr8:103563847-103573245 | 0 | 1 |
| XLOC_021705 | XLOC_021705 | MIR3151      | chr8:104145190-104242533 | 0 | 1 |
| XLOC_021710 | XLOC_021710 | DCSTAMP      | chr8:105352023-105368917 | 0 | 1 |
| XLOC_021716 | XLOC_021716 | PKHD1L1      | chr8:110374705-110543500 | 0 | 1 |
| XLOC_021718 | XLOC_021718 | MIR2053      | chr8:113235158-114449242 | 0 | 1 |
| XLOC_021721 | XLOC_021721 | AARD         | chr8:117950463-117956239 | 0 | 1 |
| XLOC_021722 | XLOC_021722 | SLC30A8      | chr8:117962511-118188953 | 0 | 1 |
| XLOC_021726 | XLOC_021726 | MAL2         | chr8:120220609-120257914 | 0 | 1 |
| XLOC_021729 | XLOC_021729 | COL14A1      | chr8:121137346-121384273 | 0 | 1 |
| XLOC_021737 | XLOC_021737 | FER1L6       | chr8:124864226-125132302 | 0 | 1 |
| XLOC_021741 | XLOC_021741 | LOC157381    | chr8:125954249-125963337 | 0 | 1 |
| XLOC_021749 | XLOC_021749 | MIR1204      | chr8:128808207-128808274 | 0 | 1 |
| XLOC_021751 | XLOC_021751 | MIR1205      | chr8:128902873-129113499 | 0 | 1 |
| XLOC_021752 | XLOC_021752 | MIR1206      | chr8:128902873-129113499 | 0 | 1 |
| XLOC_021753 | XLOC_021753 | MIR1207      | chr8:128902873-129113499 | 0 | 1 |
| XLOC_021754 | XLOC_021754 | MIR1208      | chr8:129162361-129162434 | 0 | 1 |
| XLOC_021758 | XLOC_021758 | WISP1        | chr8:134203281-134243932 | 0 | 1 |
| XLOC_021760 | XLOC_021760 | LOC286094    | chr8:136246373-136311962 | 0 | 1 |
| XLOC_021761 | XLOC_021761 | KHDRBS3      | chr8:136469715-136659848 | 0 | 1 |
| XLOC_021764 | XLOC_021764 | LOC731779    | chr8:142350647-142354720 | 0 | 1 |
| XLOC_021766 | XLOC_021766 | MIR4472-1    | chr8:143257699-143257779 | 0 | 1 |
| XLOC_021767 | XLOC_021767 | LINC00051    | chr8:143279716-143290364 | 0 | 1 |
| XLOC_021772 | XLOC_021772 | GML          | chr8:143916216-143928262 | 0 | 1 |
| XLOC_021796 | XLOC_021796 | SCXB         | chr8:145321516-145323045 | 0 | 1 |
| XLOC_021798 | XLOC_021798 | SCXA         | chr8:145486055-145515120 | 0 | 1 |
| XLOC_021812 | XLOC_021812 | OR4F21       | chr8:116085-117024       | 0 | 1 |
| XLOC_021816 | XLOC_021816 | LOC286083    | chr8:1244293-1250827     | 0 | 1 |
| XLOC_021817 | XLOC_021817 | CSMD1        | chr8:2792874-4852328     | 0 | 1 |
| XLOC_021820 | XLOC_021820 | MIR4659B     | chr8:6565877-6619021     | 0 | 1 |
| XLOC_021821 | XLOC_021821 | XKR5         | chr8:6666040-6699975     | 0 | 1 |
| XLOC_021822 | XLOC_021822 | DEFB1        | chr8:6728096-6735529     | 0 | 1 |
| XLOC_021824 | XLOC_021824 | DEFA4        | chr8:6793344-6795786     | 0 | 1 |
| XLOC_021825 | XLOC_021825 | DEFA8P       | chr8:6808247-6809121     | 0 | 1 |
| XLOC_021826 | XLOC_021826 | DEFA9P       | chr8:6816810-6817683     | 0 | 1 |
| XLOC_021827 | XLOC_021827 | DEFA10P      | chr8:6825662-6826635     | 0 | 1 |
| XLOC_021828 | XLOC_021828 | DEFA1B       | chr8:6835170-6837614     | 0 | 1 |
| XLOC_021829 | XLOC_021829 | DEFT1P2      | chr8:6844699-6847243     | 0 | 1 |
| XLOC_021830 | XLOC_021830 | DEFA1        | chr8:6854287-6856724     | 0 | 1 |
| XLOC_021831 | XLOC_021831 | DEFT1P2      | chr8:6863802-6866346     | 0 | 1 |
| XLOC_021832 | XLOC_021832 | DEFA1        | chr8:6873390-6875823     | 0 | 1 |
| XLOC_021833 | XLOC_021833 | DEFA11P      | chr8:6886122-6887011     | 0 | 1 |

|             |             |                   |                        |   |   |
|-------------|-------------|-------------------|------------------------|---|---|
| XLOC_021835 | XLOC_021835 | LOC349196         | chr8:7118140-7121014   | 0 | 1 |
| XLOC_021836 | XLOC_021836 | LOC349196         | chr8:7125762-7128636   | 0 | 1 |
| XLOC_021837 | XLOC_021837 | LOC349196         | chr8:7141006-7143880   | 0 | 1 |
| XLOC_021838 | XLOC_021838 | FAM66B            | chr8:7159132-7212876   | 0 | 1 |
| XLOC_021839 | XLOC_021839 | ZNF705G           | chr8:7215497-7220490   | 0 | 1 |
| XLOC_021840 | XLOC_021840 | DEFB4B            | chr8:7272384-7274354   | 0 | 1 |
| XLOC_021841 | XLOC_021841 | DEFB103A,DEFB103B | chr8:7286415-7287870   | 0 | 1 |
| XLOC_021842 | XLOC_021842 | SPAG11B           | chr8:7305275-7321192   | 0 | 1 |
| XLOC_021843 | XLOC_021843 | DEFB104A          | chr8:7327829-7332604   | 0 | 1 |
| XLOC_021844 | XLOC_021844 | DEFB106B          | chr8:7340025-7343909   | 0 | 1 |
| XLOC_021845 | XLOC_021845 | FAM90A7P          | chr8:7413659-7416626   | 0 | 1 |
| XLOC_021846 | XLOC_021846 | FAM90A7P          | chr8:7421309-7431920   | 0 | 1 |
| XLOC_021847 | XLOC_021847 | DEFB107B          | chr8:7669241-7673238   | 0 | 1 |
| XLOC_021848 | XLOC_021848 | DEFB105A          | chr8:7679529-7681360   | 0 | 1 |
| XLOC_021849 | XLOC_021849 | USP17L8           | chr8:7812534-7866277   | 0 | 1 |
| XLOC_021851 | XLOC_021851 | DEFB109P1B        | chr8:7812534-7866277   | 0 | 1 |
| XLOC_021852 | XLOC_021852 | MIR548I3          | chr8:7946462-7946611   | 0 | 1 |
| XLOC_021856 | XLOC_021856 | LINC00599         | chr8:9757573-9760839   | 0 | 1 |
| XLOC_021857 | XLOC_021857 | MIR124-1          | chr8:9760897-9760982   | 0 | 1 |
| XLOC_021861 | XLOC_021861 | MIR1322           | chr8:10622883-10697299 | 0 | 1 |
| XLOC_021863 | XLOC_021863 | MIR598            | chr8:10753656-11058875 | 0 | 1 |
| XLOC_021868 | XLOC_021868 | LOC100133267      | chr8:11921897-11929256 | 0 | 1 |
| XLOC_021869 | XLOC_021869 | LOC392196         | chr8:11973290-12008698 | 0 | 1 |
| XLOC_021870 | XLOC_021870 | USP17L7           | chr8:11973290-12008698 | 0 | 1 |
| XLOC_021871 | XLOC_021871 | USP17L2           | chr8:11973290-12008698 | 0 | 1 |
| XLOC_021874 | XLOC_021874 | DEFB130           | chr8:12168470-12175825 | 0 | 1 |
| XLOC_021875 | XLOC_021875 | LOC649352         | chr8:12219527-12268510 | 0 | 1 |
| XLOC_021876 | XLOC_021876 | DEFB109P1         | chr8:12219527-12268510 | 0 | 1 |
| XLOC_021881 | XLOC_021881 | MIR3926-1         | chr8:12579405-12612992 | 0 | 1 |
| XLOC_021882 | XLOC_021882 | LOC340357         | chr8:12623570-12668910 | 0 | 1 |
| XLOC_021885 | XLOC_021885 | MIR383            | chr8:13947372-15095792 | 0 | 1 |
| XLOC_021887 | XLOC_021887 | FGF20             | chr8:16850333-16859674 | 0 | 1 |
| XLOC_021891 | XLOC_021891 | FGL1              | chr8:17721899-17753047 | 0 | 1 |
| XLOC_021894 | XLOC_021894 | LOC100128993      | chr8:19041185-19103032 | 0 | 1 |
| XLOC_021896 | XLOC_021896 | SLC18A1           | chr8:20002365-20040717 | 0 | 1 |
| XLOC_021897 | XLOC_021897 | LZTS1             | chr8:20103675-20112803 | 0 | 1 |
| XLOC_021898 | XLOC_021898 | GFRA2             | chr8:21549529-21646346 | 0 | 1 |
| XLOC_021903 | XLOC_021903 | LGI3              | chr8:22004342-22014344 | 0 | 1 |
| XLOC_021909 | XLOC_021909 | PEBP4             | chr8:22570764-22785421 | 0 | 1 |
| XLOC_021916 | XLOC_021916 | NKX2-6            | chr8:23559963-23564111 | 0 | 1 |
| XLOC_021918 | XLOC_021918 | NEFL              | chr8:24808468-24814383 | 0 | 1 |
| XLOC_021921 | XLOC_021921 | EBF2              | chr8:25699245-25902640 | 0 | 1 |
| XLOC_021926 | XLOC_021926 | CHRNA2            | chr8:27317277-27336813 | 0 | 1 |
| XLOC_021928 | XLOC_021928 | MIR3622B          | chr8:27559189-27559284 | 0 | 1 |
| XLOC_021932 | XLOC_021932 | MIR4287           | chr8:27727398-27850369 | 0 | 1 |
| XLOC_021936 | XLOC_021936 | MIR4288           | chr8:28351721-28431785 | 0 | 1 |
| XLOC_021940 | XLOC_021940 | LINC00589         | chr8:29578775-29605625 | 0 | 1 |
| XLOC_021941 | XLOC_021941 | MIR3148           | chr8:29814787-29814864 | 0 | 1 |
| XLOC_021942 | XLOC_021942 | MIR548O2          | chr8:29920257-30108213 | 0 | 1 |
| XLOC_021949 | XLOC_021949 | TEX15             | chr8:30689059-30706533 | 0 | 1 |
| XLOC_021954 | XLOC_021954 | DUSP26            | chr8:33448853-33457439 | 0 | 1 |
| XLOC_021958 | XLOC_021958 | GOT1L1            | chr8:37791799-37797647 | 0 | 1 |
| XLOC_021959 | XLOC_021959 | ADRB3             | chr8:37820513-37824184 | 0 | 1 |
| XLOC_021965 | XLOC_021965 | C8orf86           | chr8:38368351-38386180 | 0 | 1 |
| XLOC_021968 | XLOC_021968 | ADAM3A            | chr8:39308563-39380508 | 0 | 1 |
| XLOC_021969 | XLOC_021969 | ADAM2             | chr8:39601254-39695779 | 0 | 1 |
| XLOC_021970 | XLOC_021970 | ZMAT4             | chr8:40388110-40755343 | 0 | 1 |
| XLOC_021971 | XLOC_021971 | SFRP1             | chr8:41119475-41166990 | 0 | 1 |
| XLOC_021972 | XLOC_021972 | NKX6-3            | chr8:41503828-41504878 | 0 | 1 |
| XLOC_021974 | XLOC_021974 | MIR486            | chr8:41510743-41754280 | 0 | 1 |
| XLOC_021979 | XLOC_021979 | CHRNA6            | chr8:42607779-42623929 | 0 | 1 |
| XLOC_021984 | XLOC_021984 | EFCAB1            | chr8:49627473-49647870 | 0 | 1 |
| XLOC_021995 | XLOC_021995 | SBF1P1            | chr8:56015016-56438710 | 0 | 1 |
| XLOC_021998 | XLOC_021998 | SNORD54           | chr8:56980738-56987140 | 0 | 1 |
| XLOC_021999 | XLOC_021999 | MOS               | chr8:57025500-57026541 | 0 | 1 |
| XLOC_022001 | XLOC_022001 | SDR16C5           | chr8:57212569-57233241 | 0 | 1 |
| XLOC_022002 | XLOC_022002 | PENK              | chr8:57353512-57359282 | 0 | 1 |
| XLOC_022003 | XLOC_022003 | LOC100507632      | chr8:57430877-57472382 | 0 | 1 |
| XLOC_022005 | XLOC_022005 | CYP7A1            | chr8:59402736-59412720 | 0 | 1 |
| XLOC_022007 | XLOC_022007 | TOX               | chr8:59717976-60031767 | 0 | 1 |
| XLOC_022008 | XLOC_022008 | CA8               | chr8:61101422-61193954 | 0 | 1 |
| XLOC_022009 | XLOC_022009 | LOC100130298      | chr8:61878679-61880307 | 0 | 1 |
| XLOC_022013 | XLOC_022013 | LOC401463         | chr8:65486865-65489820 | 0 | 1 |
| XLOC_022014 | XLOC_022014 | CYP7B1            | chr8:65508528-65711348 | 0 | 1 |
| XLOC_022015 | XLOC_022015 | LINC00251         | chr8:66073379-66092575 | 0 | 1 |
| XLOC_022019 | XLOC_022019 | CRH               | chr8:67088611-67090846 | 0 | 1 |
| XLOC_022023 | XLOC_022023 | PTTG3P            | chr8:67579786-67774257 | 0 | 1 |
| XLOC_022025 | XLOC_022025 | SNORD87           | chr8:67782983-67837777 | 0 | 1 |
| XLOC_022026 | XLOC_022026 | TCF24             | chr8:67858735-67874825 | 0 | 1 |

|             |             |              |                          |   |   |
|-------------|-------------|--------------|--------------------------|---|---|
| XLOC_022027 | XLOC_022027 | PPP1R42      | chr8:67900366-67940786   | 0 | 1 |
| XLOC_022030 | XLOC_022030 | CPA6         | chr8:68334404-68658620   | 0 | 1 |
| XLOC_022031 | XLOC_022031 | LOC286189    | chr8:69215702-69731258   | 0 | 1 |
| XLOC_022038 | XLOC_022038 | EYA1         | chr8:72109667-72274467   | 0 | 1 |
| XLOC_022039 | XLOC_022039 | MSC          | chr8:72753776-72987819   | 0 | 1 |
| XLOC_022040 | XLOC_022040 | TRPA1        | chr8:72753776-72987819   | 0 | 1 |
| XLOC_022041 | XLOC_022041 | LOC392232    | chr8:73117533-73163869   | 0 | 1 |
| XLOC_022049 | XLOC_022049 | MIR5681B     | chr8:75460777-75460852   | 0 | 1 |
| XLOC_022050 | XLOC_022050 | ZFHx4-AS1    | chr8:77523113-77779521   | 0 | 1 |
| XLOC_022058 | XLOC_022058 | PMP2         | chr8:82352563-82359719   | 0 | 1 |
| XLOC_022059 | XLOC_022059 | FABP9        | chr8:82370617-82373758   | 0 | 1 |
| XLOC_022060 | XLOC_022060 | FABP4        | chr8:82390731-82395473   | 0 | 1 |
| XLOC_022067 | XLOC_022067 | CA1          | chr8:86240457-86290342   | 0 | 1 |
| XLOC_022068 | XLOC_022068 | REXO1L2P     | chr8:86566827-86567905   | 0 | 1 |
| XLOC_022069 | XLOC_022069 | REXO1L1      | chr8:86568694-86575726   | 0 | 1 |
| XLOC_022070 | XLOC_022070 | REXO1L2P     | chr8:86756683-86757761   | 0 | 1 |
| XLOC_022071 | XLOC_022071 | REXO1L1      | chr8:86758550-86789306   | 0 | 1 |
| XLOC_022072 | XLOC_022072 | REXO1L2P     | chr8:86758550-86789306   | 0 | 1 |
| XLOC_022073 | XLOC_022073 | REXO1L2P     | chr8:86802519-86803597   | 0 | 1 |
| XLOC_022074 | XLOC_022074 | REXO1L2P     | chr8:86814712-86815790   | 0 | 1 |
| XLOC_022075 | XLOC_022075 | REXO1L2P     | chr8:86839093-86840171   | 0 | 1 |
| XLOC_022076 | XLOC_022076 | PSKH2        | chr8:87060690-87081851   | 0 | 1 |
| XLOC_022077 | XLOC_022077 | SLC7A13      | chr8:87226287-87242604   | 0 | 1 |
| XLOC_022079 | XLOC_022079 | CNGB3        | chr8:87586162-87755903   | 0 | 1 |
| XLOC_022081 | XLOC_022081 | MMP16        | chr8:89049459-89339717   | 0 | 1 |
| XLOC_022083 | XLOC_022083 | CALB1        | chr8:91070837-91095107   | 0 | 1 |
| XLOC_022088 | XLOC_022088 | FLJ46284     | chr8:93725189-93798288   | 0 | 1 |
| XLOC_022090 | XLOC_022090 | C8orf87      | chr8:94146323-94179079   | 0 | 1 |
| XLOC_022093 | XLOC_022093 | MIR378D2     | chr8:94928249-94928347   | 0 | 1 |
| XLOC_022098 | XLOC_022098 | LOC100288748 | chr8:95649512-95651695   | 0 | 1 |
| XLOC_022101 | XLOC_022101 | MIR3150B     | chr8:96085138-96085224   | 0 | 1 |
| XLOC_022102 | XLOC_022102 | C8orf69      | chr8:96219234-96228602   | 0 | 1 |
| XLOC_022104 | XLOC_022104 | LOC100500773 | chr8:96959212-96960576   | 0 | 1 |
| XLOC_022108 | XLOC_022108 | TSPYL5       | chr8:98285713-98290176   | 0 | 1 |
| XLOC_022114 | XLOC_022114 | MIR599       | chr8:100025493-100889814 | 0 | 1 |
| XLOC_022115 | XLOC_022115 | MIR875       | chr8:100025493-100889814 | 0 | 1 |
| XLOC_022117 | XLOC_022117 | RGS22        | chr8:100973275-101118344 | 0 | 1 |
| XLOC_022133 | XLOC_022133 | DPYS         | chr8:105391651-105479277 | 0 | 1 |
| XLOC_022136 | XLOC_022136 | ANGPT1       | chr8:108261709-108510254 | 0 | 1 |
| XLOC_022137 | XLOC_022137 | RSPO2        | chr8:108911543-109095913 | 0 | 1 |
| XLOC_022142 | XLOC_022142 | KCNV1        | chr8:110979232-110986959 | 0 | 1 |
| XLOC_022145 | XLOC_022145 | LINC00536    | chr8:116962735-117337297 | 0 | 1 |
| XLOC_022150 | XLOC_022150 | TNFRSF11B    | chr8:119935795-119964383 | 0 | 1 |
| XLOC_022159 | XLOC_022159 | MIR4663      | chr8:124228027-124228103 | 0 | 1 |
| XLOC_022164 | XLOC_022164 | ANXA13       | chr8:124693033-124749647 | 0 | 1 |
| XLOC_022165 | XLOC_022165 | FER1L6-AS1   | chr8:124864226-125132302 | 0 | 1 |
| XLOC_022172 | XLOC_022172 | LOC727677    | chr8:128455594-128494384 | 0 | 1 |
| XLOC_022173 | XLOC_022173 | LOC728724    | chr8:130228712-130253486 | 0 | 1 |
| XLOC_022174 | XLOC_022174 | GSDMC        | chr8:130760441-130799134 | 0 | 1 |
| XLOC_022176 | XLOC_022176 | MIR5194      | chr8:130851838-131028897 | 0 | 1 |
| XLOC_022180 | XLOC_022180 | ADCY8        | chr8:131792546-132052835 | 0 | 1 |
| XLOC_022181 | XLOC_022181 | OC90         | chr8:133036466-133071627 | 0 | 1 |
| XLOC_022182 | XLOC_022182 | HHLA1        | chr8:133073732-133117512 | 0 | 1 |
| XLOC_022187 | XLOC_022187 | SLA          | chr8:133879204-134147143 | 0 | 1 |
| XLOC_022191 | XLOC_022191 | MIR30B       | chr8:135812762-135812850 | 0 | 1 |
| XLOC_022192 | XLOC_022192 | MIR30D       | chr8:135817118-135817188 | 0 | 1 |
| XLOC_022193 | XLOC_022193 | FAM135B      | chr8:139142265-139509065 | 0 | 1 |
| XLOC_022194 | XLOC_022194 | COL22A1      | chr8:139600477-139926236 | 0 | 1 |
| XLOC_022200 | XLOC_022200 | GPR20        | chr8:142366586-142377365 | 0 | 1 |
| XLOC_022201 | XLOC_022201 | MROH5        | chr8:142443928-142517330 | 0 | 1 |
| XLOC_022206 | XLOC_022206 | SLURP1       | chr8:143822361-143823829 | 0 | 1 |
| XLOC_022207 | XLOC_022207 | LYPD2        | chr8:143831627-143833952 | 0 | 1 |
| XLOC_022209 | XLOC_022209 | LY6D         | chr8:143866297-143868008 | 0 | 1 |
| XLOC_022210 | XLOC_022210 | CYP11B1      | chr8:143953772-143961236 | 0 | 1 |
| XLOC_022211 | XLOC_022211 | CYP11B2      | chr8:143991974-143999259 | 0 | 1 |
| XLOC_022213 | XLOC_022213 | LY6H         | chr8:144239330-144242053 | 0 | 1 |
| XLOC_022225 | XLOC_022225 | MIR4664      | chr8:144806102-144815914 | 0 | 1 |
| XLOC_022231 | XLOC_022231 | MIR661       | chr8:144989320-145050913 | 0 | 1 |
| XLOC_022261 | XLOC_022261 | DMRT3        | chr9:976967-991732       | 0 | 1 |
| XLOC_022264 | XLOC_022264 | VLDLR        | chr9:2535654-2654485     | 0 | 1 |
| XLOC_022271 | XLOC_022271 | MIR101-2     | chr9:4792833-4861064     | 0 | 1 |
| XLOC_022273 | XLOC_022273 | INSL4        | chr9:5231418-5233967     | 0 | 1 |
| XLOC_022275 | XLOC_022275 | PDCD1LG2     | chr9:5510544-5571282     | 0 | 1 |
| XLOC_022278 | XLOC_022278 | MIR4665      | chr9:5919007-6008003     | 0 | 1 |
| XLOC_022279 | XLOC_022279 | IL33         | chr9:6215785-6257983     | 0 | 1 |
| XLOC_022280 | XLOC_022280 | TPD5L3       | chr9:6328348-6331900     | 0 | 1 |
| XLOC_022285 | XLOC_022285 | LINC00583    | chr9:13927969-13945606   | 0 | 1 |
| XLOC_022286 | XLOC_022286 | LOC389705    | chr9:14993324-15019722   | 0 | 1 |
| XLOC_022292 | XLOC_022292 | MIR3152      | chr9:18474078-18910947   | 0 | 1 |

|             |             |              |                          |   |   |
|-------------|-------------|--------------|--------------------------|---|---|
| XLOC_022297 | XLOC_022297 | MIR491       | chr9:20658308-20995954   | 0 | 1 |
| XLOC_022299 | XLOC_022299 | IFNA1        | chr9:21440452-21441135   | 0 | 1 |
| XLOC_022301 | XLOC_022301 | C9orf53      | chr9:21967137-21994490   | 0 | 1 |
| XLOC_022303 | XLOC_022303 | DMRTA1       | chr9:22446839-22452472   | 0 | 1 |
| XLOC_022308 | XLOC_022308 | IFNK         | chr9:27325206-27529850   | 0 | 1 |
| XLOC_022311 | XLOC_022311 | TMEM215      | chr9:32783496-32789199   | 0 | 1 |
| XLOC_022313 | XLOC_022313 | SPINK4       | chr9:33240195-33248565   | 0 | 1 |
| XLOC_022320 | XLOC_022320 | SNORD121B    | chr9:33921690-34048947   | 0 | 1 |
| XLOC_022324 | XLOC_022324 | LOC415056    | chr9:34551429-34590138   | 0 | 1 |
| XLOC_022334 | XLOC_022334 | MIR4667      | chr9:35605280-35618424   | 0 | 1 |
| XLOC_022344 | XLOC_022344 | RECK         | chr9:36036909-36124452   | 0 | 1 |
| XLOC_022345 | XLOC_022345 | GLIPR2       | chr9:36136741-36163903   | 0 | 1 |
| XLOC_022358 | XLOC_022358 | SPATA31A2    | chr9:39355698-39361959   | 0 | 1 |
| XLOC_022359 | XLOC_022359 | SPATA31A2    | chr9:39884974-39891210   | 0 | 1 |
| XLOC_022360 | XLOC_022360 | FAM74A1      | chr9:39900199-39907240   | 0 | 1 |
| XLOC_022361 | XLOC_022361 | SPATA31A3    | chr9:40700290-40706537   | 0 | 1 |
| XLOC_022362 | XLOC_022362 | FAM74A3      | chr9:40715523-40722679   | 0 | 1 |
| XLOC_022363 | XLOC_022363 | SPATA31A5    | chr9:41500678-41506925   | 0 | 1 |
| XLOC_022364 | XLOC_022364 | LOC643648    | chr9:41958801-42019584   | 0 | 1 |
| XLOC_022366 | XLOC_022366 | FAM95B1      | chr9:42468588-42474238   | 0 | 1 |
| XLOC_022367 | XLOC_022367 | FOXDL4       | chr9:42717233-42720342   | 0 | 1 |
| XLOC_022369 | XLOC_022369 | CNTNAP3B     | chr9:43684884-43922473   | 0 | 1 |
| XLOC_022370 | XLOC_022370 | LOC643648    | chr9:44387386-44391416   | 0 | 1 |
| XLOC_022372 | XLOC_022372 | FAM27A       | chr9:45727028-45728283   | 0 | 1 |
| XLOC_022374 | XLOC_022374 | LOC643648    | chr9:46829289-46833319   | 0 | 1 |
| XLOC_022378 | XLOC_022378 | ANKRD20A4    | chr9:69381980-69425109   | 0 | 1 |
| XLOC_022388 | XLOC_022388 | C9orf135     | chr9:72435730-72521148   | 0 | 1 |
| XLOC_022393 | XLOC_022393 | TMC1         | chr9:75136716-75451267   | 0 | 1 |
| XLOC_022395 | XLOC_022395 | RORB         | chr9:77112251-77302117   | 0 | 1 |
| XLOC_022400 | XLOC_022400 | PCA3         | chr9:79226291-79521003   | 0 | 1 |
| XLOC_022401 | XLOC_022401 | FOXB2        | chr9:79634570-79635869   | 0 | 1 |
| XLOC_022406 | XLOC_022406 | SPATA31D5P   | chr9:84528351-84534842   | 0 | 1 |
| XLOC_022407 | XLOC_022407 | SPATA31D4    | chr9:84543342-84549913   | 0 | 1 |
| XLOC_022408 | XLOC_022408 | SPATA31D3    | chr9:84558414-84565009   | 0 | 1 |
| XLOC_022409 | XLOC_022409 | SPATA31D1    | chr9:84603686-84610171   | 0 | 1 |
| XLOC_022416 | XLOC_022416 | C9orf170     | chr9:89763558-89774641   | 0 | 1 |
| XLOC_022419 | XLOC_022419 | CTSL3P       | chr9:90387386-90401799   | 0 | 1 |
| XLOC_022420 | XLOC_022420 | CTSL1P8      | chr9:90459659-90462339   | 0 | 1 |
| XLOC_022421 | XLOC_022421 | SPATA31E1    | chr9:90497771-90503814   | 0 | 1 |
| XLOC_022422 | XLOC_022422 | SPATA31C1    | chr9:90532876-90538572   | 0 | 1 |
| XLOC_022427 | XLOC_022427 | MIR3153      | chr9:91926112-91931618   | 0 | 1 |
| XLOC_022430 | XLOC_022430 | UNQ6494      | chr9:92254697-92334674   | 0 | 1 |
| XLOC_022432 | XLOC_022432 | MIR3910-1    | chr9:94398532-94398643   | 0 | 1 |
| XLOC_022434 | XLOC_022434 | LINC00475    | chr9:94903748-94921890   | 0 | 1 |
| XLOC_022439 | XLOC_022439 | SUSD3        | chr9:95820988-95847415   | 0 | 1 |
| XLOC_022444 | XLOC_022444 | MIR4291      | chr9:96581638-96581703   | 0 | 1 |
| XLOC_022446 | XLOC_022446 | MIRLET7A1    | chr9:96938238-96938318   | 0 | 1 |
| XLOC_022447 | XLOC_022447 | MIRLET7F1    | chr9:96938628-96938715   | 0 | 1 |
| XLOC_022453 | XLOC_022453 | MIR2278      | chr9:97488950-97849500   | 0 | 1 |
| XLOC_022454 | XLOC_022454 | MIR23B       | chr9:97488950-97849500   | 0 | 1 |
| XLOC_022455 | XLOC_022455 | MIR27B       | chr9:97488950-97849500   | 0 | 1 |
| XLOC_022456 | XLOC_022456 | MIR24-1      | chr9:97488950-97849500   | 0 | 1 |
| XLOC_022461 | XLOC_022461 | LOC441455    | chr9:99488102-99489749   | 0 | 1 |
| XLOC_022469 | XLOC_022469 | FOXE1        | chr9:100615536-100618997 | 0 | 1 |
| XLOC_022473 | XLOC_022473 | COL15A1      | chr9:101706137-101833068 | 0 | 1 |
| XLOC_022481 | XLOC_022481 | LPPR1        | chr9:103791030-104087417 | 0 | 1 |
| XLOC_022484 | XLOC_022484 | CYLC2        | chr9:105757592-105780770 | 0 | 1 |
| XLOC_022486 | XLOC_022486 | OR13F1       | chr9:107266543-107267503 | 0 | 1 |
| XLOC_022487 | XLOC_022487 | OR13C8       | chr9:107331448-107332411 | 0 | 1 |
| XLOC_022488 | XLOC_022488 | OR13D1       | chr9:107456702-107457743 | 0 | 1 |
| XLOC_022502 | XLOC_022502 | MUSK         | chr9:113431050-113563278 | 0 | 1 |
| XLOC_022506 | XLOC_022506 | MIR4668      | chr9:114659205-114695433 | 0 | 1 |
| XLOC_022514 | XLOC_022514 | BSPRY        | chr9:116111811-116133513 | 0 | 1 |
| XLOC_022519 | XLOC_022519 | MIR455       | chr9:116918230-117072975 | 0 | 1 |
| XLOC_022524 | XLOC_022524 | DEC1         | chr9:117904096-118164923 | 0 | 1 |
| XLOC_022526 | XLOC_022526 | LOC100128505 | chr9:119187503-120177317 | 0 | 1 |
| XLOC_022528 | XLOC_022528 | TLR4         | chr9:120466452-120479769 | 0 | 1 |
| XLOC_022537 | XLOC_022537 | OR1J2        | chr9:125273080-125274022 | 0 | 1 |
| XLOC_022538 | XLOC_022538 | OR1J4        | chr9:125281419-125282361 | 0 | 1 |
| XLOC_022539 | XLOC_022539 | OR1N2        | chr9:125315448-125316441 | 0 | 1 |
| XLOC_022541 | XLOC_022541 | OR1L1        | chr9:125423994-125424927 | 0 | 1 |
| XLOC_022542 | XLOC_022542 | OR1L3        | chr9:125437408-125438383 | 0 | 1 |
| XLOC_022543 | XLOC_022543 | OR1L4        | chr9:125486268-125487204 | 0 | 1 |
| XLOC_022545 | XLOC_022545 | OR5C1        | chr9:125551211-125552174 | 0 | 1 |
| XLOC_022546 | XLOC_022546 | OR1K1        | chr9:125562401-125563352 | 0 | 1 |
| XLOC_022550 | XLOC_022550 | LHX2         | chr9:126773888-126795442 | 0 | 1 |
| XLOC_022553 | XLOC_022553 | GPR144       | chr9:127213422-127239379 | 0 | 1 |
| XLOC_022554 | XLOC_022554 | MIR181A2HG   | chr9:127284702-127533576 | 0 | 1 |
| XLOC_022555 | XLOC_022555 | MIR181A2     | chr9:127284702-127533576 | 0 | 1 |

|             |             |                     |                          |   |   |
|-------------|-------------|---------------------|--------------------------|---|---|
| XLOC_022556 | XLOC_022556 | MIR181B2            | chr9:127284702-127533576 | 0 | 1 |
| XLOC_022575 | XLOC_022575 | MIR2861,MIR3960     | chr9:130548111-130548286 | 0 | 1 |
| XLOC_022587 | XLOC_022587 | MIR2964A            | chr9:131154896-131154993 | 0 | 1 |
| XLOC_022603 | XLOC_022603 | C9orf106            | chr9:132083294-132084882 | 0 | 1 |
| XLOC_022606 | XLOC_022606 | PRRX2               | chr9:132427919-132484951 | 0 | 1 |
| XLOC_022621 | XLOC_022621 | SNORD62A            | chr9:134305476-134375575 | 0 | 1 |
| XLOC_022622 | XLOC_022622 | SNORD62B            | chr9:134305476-134375575 | 0 | 1 |
| XLOC_022632 | XLOC_022632 | CELP                | chr9:135957925-135962478 | 0 | 1 |
| XLOC_022634 | XLOC_022634 | SNORD24             | chr9:136215068-136218280 | 0 | 1 |
| XLOC_022635 | XLOC_022635 | SNORD36B            | chr9:136215068-136218280 | 0 | 1 |
| XLOC_022636 | XLOC_022636 | SNORD36A            | chr9:136215068-136218280 | 0 | 1 |
| XLOC_022637 | XLOC_022637 | SNORD36C            | chr9:136215068-136218280 | 0 | 1 |
| XLOC_022643 | XLOC_022643 | DBH                 | chr9:136501484-136524466 | 0 | 1 |
| XLOC_022647 | XLOC_022647 | MIR4669             | chr9:137218315-137332431 | 0 | 1 |
| XLOC_022649 | XLOC_022649 | FCN2                | chr9:137772657-137779366 | 0 | 1 |
| XLOC_022650 | XLOC_022650 | OLFM1               | chr9:137967088-138013030 | 0 | 1 |
| XLOC_022651 | XLOC_022651 | LOC401557           | chr9:138073454-138079152 | 0 | 1 |
| XLOC_022652 | XLOC_022652 | C9orf62             | chr9:138235094-138238404 | 0 | 1 |
| XLOC_022656 | XLOC_022656 | OBP2A               | chr9:138437984-138441815 | 0 | 1 |
| XLOC_022659 | XLOC_022659 | LCN9                | chr9:138555167-138557755 | 0 | 1 |
| XLOC_022665 | XLOC_022665 | MIR126              | chr9:139553307-139567130 | 0 | 1 |
| XLOC_022671 | XLOC_022671 | MIR4292             | chr9:139690789-139735639 | 0 | 1 |
| XLOC_022676 | XLOC_022676 | MIR4479             | chr9:139780964-139821067 | 0 | 1 |
| XLOC_022679 | XLOC_022679 | PTGDS               | chr9:139871955-139876194 | 0 | 1 |
| XLOC_022680 | XLOC_022680 | LCNL1               | chr9:139877444-139880210 | 0 | 1 |
| XLOC_022700 | XLOC_022700 | MIR602              | chr9:140732870-140732968 | 0 | 1 |
| XLOC_022705 | XLOC_022705 | FAM138C             | chr9:34393-35864         | 0 | 1 |
| XLOC_022715 | XLOC_022715 | INSL6               | chr9:5163862-5185618     | 0 | 1 |
| XLOC_022724 | XLOC_022724 | PTPRD               | chr9:8314245-10612723    | 0 | 1 |
| XLOC_022725 | XLOC_022725 | MPDZ                | chr9:13105702-13279563   | 0 | 1 |
| XLOC_022729 | XLOC_022729 | CER1                | chr9:14719731-14722715   | 0 | 1 |
| XLOC_022730 | XLOC_022730 | FREM1               | chr9:14734663-14910993   | 0 | 1 |
| XLOC_022742 | XLOC_022742 | MIR4473             | chr9:20344967-20622514   | 0 | 1 |
| XLOC_022743 | XLOC_022743 | MIR4474             | chr9:20344967-20622514   | 0 | 1 |
| XLOC_022745 | XLOC_022745 | IFNB1               | chr9:21077103-21077943   | 0 | 1 |
| XLOC_022746 | XLOC_022746 | IFNW1               | chr9:21140630-21142144   | 0 | 1 |
| XLOC_022747 | XLOC_022747 | IFNA21              | chr9:21165635-21166659   | 0 | 1 |
| XLOC_022748 | XLOC_022748 | IFNA4               | chr9:21186617-21187598   | 0 | 1 |
| XLOC_022749 | XLOC_022749 | IFNA7               | chr9:21201467-21202204   | 0 | 1 |
| XLOC_022750 | XLOC_022750 | IFNA10              | chr9:21206179-21207142   | 0 | 1 |
| XLOC_022751 | XLOC_022751 | IFNA16              | chr9:21216371-21217310   | 0 | 1 |
| XLOC_022753 | XLOC_022753 | IFNA14              | chr9:21239200-21239978   | 0 | 1 |
| XLOC_022754 | XLOC_022754 | IFNA22P             | chr9:21277686-21278562   | 0 | 1 |
| XLOC_022755 | XLOC_022755 | IFNA5               | chr9:21304612-21305312   | 0 | 1 |
| XLOC_022757 | XLOC_022757 | IFNA6               | chr9:21350316-21350886   | 0 | 1 |
| XLOC_022758 | XLOC_022758 | IFNA13              | chr9:21367370-21368075   | 0 | 1 |
| XLOC_022759 | XLOC_022759 | IFNA2               | chr9:21384253-21385396   | 0 | 1 |
| XLOC_022762 | XLOC_022762 | MIR31               | chr9:21454266-21559697   | 0 | 1 |
| XLOC_022765 | XLOC_022765 | ELAVL2              | chr9:23690102-23826063   | 0 | 1 |
| XLOC_022766 | XLOC_022766 | IZUMO3              | chr9:24543212-24545674   | 0 | 1 |
| XLOC_022775 | XLOC_022775 | LINGO2              | chr9:27948083-29212998   | 0 | 1 |
| XLOC_022776 | XLOC_022776 | MIR876              | chr9:27948083-29212998   | 0 | 1 |
| XLOC_022777 | XLOC_022777 | MIR873              | chr9:27948083-29212998   | 0 | 1 |
| XLOC_022778 | XLOC_022778 | LOC401497           | chr9:30388932-30408452   | 0 | 1 |
| XLOC_022782 | XLOC_022782 | TAF1L               | chr9:32629451-32635667   | 0 | 1 |
| XLOC_022787 | XLOC_022787 | AQP7                | chr9:33384947-33402517   | 0 | 1 |
| XLOC_022790 | XLOC_022790 | SUGT1P1             | chr9:33504534-33511164   | 0 | 1 |
| XLOC_022793 | XLOC_022793 | SNORD121A           | chr9:33921690-34048947   | 0 | 1 |
| XLOC_022805 | XLOC_022805 | CCL27               | chr9:34652181-34662689   | 0 | 1 |
| XLOC_022806 | XLOC_022806 | CCL19               | chr9:34689566-34691274   | 0 | 1 |
| XLOC_022807 | XLOC_022807 | CCL21               | chr9:34709001-34710147   | 0 | 1 |
| XLOC_022808 | XLOC_022808 | FAM205A             | chr9:34723049-34729535   | 0 | 1 |
| XLOC_022809 | XLOC_022809 | FAM205B             | chr9:34830263-34838583   | 0 | 1 |
| XLOC_022817 | XLOC_022817 | SIT1                | chr9:35649296-35650947   | 0 | 1 |
| XLOC_022826 | XLOC_022826 | FAM221B             | chr9:35817013-35828744   | 0 | 1 |
| XLOC_022828 | XLOC_022828 | OR2S2               | chr9:35957104-35958151   | 0 | 1 |
| XLOC_022831 | XLOC_022831 | MIR4475             | chr9:36823535-36823596   | 0 | 1 |
| XLOC_022832 | XLOC_022832 | PAX5                | chr9:36838530-37034476   | 0 | 1 |
| XLOC_022833 | XLOC_022833 | MIR4540             | chr9:36838530-37034476   | 0 | 1 |
| XLOC_022834 | XLOC_022834 | MIR4476             | chr9:36838530-37034476   | 0 | 1 |
| XLOC_022844 | XLOC_022844 | CNTNAP3             | chr9:39072763-39288300   | 0 | 1 |
| XLOC_022847 | XLOC_022847 | SPATA31A4           | chr9:41321106-41327397   | 0 | 1 |
| XLOC_022848 | XLOC_022848 | LOC653501,ZNF658B   | chr9:41588832-41609544   | 0 | 1 |
| XLOC_022852 | XLOC_022852 | FAM95B1             | chr9:43027662-43033312   | 0 | 1 |
| XLOC_022853 | XLOC_022853 | ANKRD20A2,ANKRD20A3 | chr9:43089971-43133544   | 0 | 1 |
| XLOC_022854 | XLOC_022854 | LOC642929           | chr9:43140536-43145484   | 0 | 1 |
| XLOC_022855 | XLOC_022855 | SPATA31A6           | chr9:43624501-43630730   | 0 | 1 |
| XLOC_022856 | XLOC_022856 | FAM74A2,FAM74A4     | chr9:65487272-65494386   | 0 | 1 |
| XLOC_022857 | XLOC_022857 | SPATA31A5           | chr9:65503362-65509610   | 0 | 1 |

|             |             |                   |                          |   |   |
|-------------|-------------|-------------------|--------------------------|---|---|
| XLOC_022858 | XLOC_022858 | LOC286297         | chr9:67017374-67032072   | 0 | 1 |
| XLOC_022860 | XLOC_022860 | FAM27B            | chr9:67792928-67794189   | 0 | 1 |
| XLOC_022867 | XLOC_022867 | FOXDL4            | chr9:70426622-70429731   | 0 | 1 |
| XLOC_022871 | XLOC_022871 | PRKACG            | chr9:71627448-71629039   | 0 | 1 |
| XLOC_022875 | XLOC_022875 | LOC494558         | chr9:72434320-72435655   | 0 | 1 |
| XLOC_022880 | XLOC_022880 | MIR204            | chr9:73149965-73736514   | 0 | 1 |
| XLOC_022883 | XLOC_022883 | C9orf57           | chr9:74666296-74675521   | 0 | 1 |
| XLOC_022890 | XLOC_022890 | MIR548H3          | chr9:78118511-78338744   | 0 | 1 |
| XLOC_022893 | XLOC_022893 | VPS13A-AS1        | chr9:79791671-80032399   | 0 | 1 |
| XLOC_022904 | XLOC_022904 | MIR7-1            | chr9:86582997-86595569   | 0 | 1 |
| XLOC_022913 | XLOC_022913 | LOC494127         | chr9:89698800-89700140   | 0 | 1 |
| XLOC_022914 | XLOC_022914 | LOC392364         | chr9:90472957-90473971   | 0 | 1 |
| XLOC_022916 | XLOC_022916 | SPATA31C2         | chr9:90744219-90749900   | 0 | 1 |
| XLOC_022917 | XLOC_022917 | LOC286238         | chr9:91262093-91267075   | 0 | 1 |
| XLOC_022918 | XLOC_022918 | MIR4289           | chr9:91360750-91360820   | 0 | 1 |
| XLOC_022921 | XLOC_022921 | LOC286370         | chr9:92782935-92803781   | 0 | 1 |
| XLOC_022922 | XLOC_022922 | MIR4290           | chr9:92782935-92803781   | 0 | 1 |
| XLOC_022923 | XLOC_022923 | LOC340515         | chr9:93224713-93345028   | 0 | 1 |
| XLOC_022924 | XLOC_022924 | DIRAS2            | chr9:93372113-93405108   | 0 | 1 |
| XLOC_022925 | XLOC_022925 | LOC100129316      | chr9:93825575-93837414   | 0 | 1 |
| XLOC_022928 | XLOC_022928 | MIR3910-2         | chr9:94398532-94398643   | 0 | 1 |
| XLOC_022929 | XLOC_022929 | ROR2              | chr9:94484877-94712444   | 0 | 1 |
| XLOC_022938 | XLOC_022938 | MIR4670           | chr9:95059639-95432547   | 0 | 1 |
| XLOC_022949 | XLOC_022949 | FBP1              | chr9:97365420-97402531   | 0 | 1 |
| XLOC_022950 | XLOC_022950 | MIR3074           | chr9:97488950-97849500   | 0 | 1 |
| XLOC_022954 | XLOC_022954 | LINC00092         | chr9:98782013-98784037   | 0 | 1 |
| XLOC_022955 | XLOC_022955 | LOC158434         | chr9:98868942-98878693   | 0 | 1 |
| XLOC_022966 | XLOC_022966 | LOC286359         | chr9:100153118-100158973 | 0 | 1 |
| XLOC_022970 | XLOC_022970 | HEMGN             | chr9:100689072-100707134 | 0 | 1 |
| XLOC_022985 | XLOC_022985 | PPP3R2            | chr9:104331633-104500862 | 0 | 1 |
| XLOC_022986 | XLOC_022986 | OR13C4            | chr9:107288533-107289490 | 0 | 1 |
| XLOC_022987 | XLOC_022987 | OR13C3            | chr9:107298050-107299094 | 0 | 1 |
| XLOC_022988 | XLOC_022988 | OR13C5            | chr9:107360737-107361694 | 0 | 1 |
| XLOC_022989 | XLOC_022989 | OR13C2            | chr9:107366951-107367908 | 0 | 1 |
| XLOC_022990 | XLOC_022990 | OR13C9            | chr9:107379528-107380485 | 0 | 1 |
| XLOC_022992 | XLOC_022992 | MIR548Q           | chr9:109625377-109848716 | 0 | 1 |
| XLOC_022998 | XLOC_022998 | MIR32             | chr9:111777414-111882225 | 0 | 1 |
| XLOC_022999 | XLOC_022999 | FRRS1L            | chr9:111899580-111929571 | 0 | 1 |
| XLOC_023004 | XLOC_023004 | TXNDC8            | chr9:113065866-113100125 | 0 | 1 |
| XLOC_023006 | XLOC_023006 | LPAR1             | chr9:113636053-113800365 | 0 | 1 |
| XLOC_023007 | XLOC_023007 | OR2K2             | chr9:114089762-114090713 | 0 | 1 |
| XLOC_023010 | XLOC_023010 | LRRC37A5P         | chr9:114365110-114375833 | 0 | 1 |
| XLOC_023026 | XLOC_023026 | AMBP              | chr9:116822407-116840752 | 0 | 1 |
| XLOC_023030 | XLOC_023030 | LOC100505478      | chr9:117428713-117444369 | 0 | 1 |
| XLOC_023032 | XLOC_023032 | TNFSF8            | chr9:117655622-117692875 | 0 | 1 |
| XLOC_023033 | XLOC_023033 | TNC               | chr9:117781853-117880536 | 0 | 1 |
| XLOC_023034 | XLOC_023034 | LINC00474         | chr9:118650543-118687377 | 0 | 1 |
| XLOC_023036 | XLOC_023036 | SNORA70C          | chr9:119187503-120177317 | 0 | 1 |
| XLOC_023037 | XLOC_023037 | DBC1              | chr9:121928907-122131739 | 0 | 1 |
| XLOC_023038 | XLOC_023038 | MIR147A           | chr9:123007256-123007328 | 0 | 1 |
| XLOC_023050 | XLOC_023050 | MIR4478           | chr9:124882360-124882446 | 0 | 1 |
| XLOC_023052 | XLOC_023052 | LHX6              | chr9:124964855-124991091 | 0 | 1 |
| XLOC_023054 | XLOC_023054 | OR1J1             | chr9:125239236-125240205 | 0 | 1 |
| XLOC_023055 | XLOC_023055 | OR1N1             | chr9:125288636-125289572 | 0 | 1 |
| XLOC_023056 | XLOC_023056 | OR1L8             | chr9:125329826-125330756 | 0 | 1 |
| XLOC_023057 | XLOC_023057 | OR1B1             | chr9:125390857-125391814 | 0 | 1 |
| XLOC_023060 | XLOC_023060 | SNORD90           | chr9:125611731-125667562 | 0 | 1 |
| XLOC_023066 | XLOC_023066 | MIR601            | chr9:126141932-126692417 | 0 | 1 |
| XLOC_023087 | XLOC_023087 | MIR4672           | chr9:130628758-130640022 | 0 | 1 |
| XLOC_023097 | XLOC_023097 | MIR199B           | chr9:130928343-131017527 | 0 | 1 |
| XLOC_023098 | XLOC_023098 | MIR3154           | chr9:130928343-131017527 | 0 | 1 |
| XLOC_023101 | XLOC_023101 | MIR219-2          | chr9:131154896-131154993 | 0 | 1 |
| XLOC_023130 | XLOC_023130 | GBGT1             | chr9:136028339-136039301 | 0 | 1 |
| XLOC_023131 | XLOC_023131 | OBP2B             | chr9:136080665-136084628 | 0 | 1 |
| XLOC_023139 | XLOC_023139 | TMEM8C            | chr9:136379707-136390068 | 0 | 1 |
| XLOC_023140 | XLOC_023140 | FAM163B           | chr9:136443536-136445368 | 0 | 1 |
| XLOC_023145 | XLOC_023145 | MIR3689A,MIR3689E | chr9:137741020-137742490 | 0 | 1 |
| XLOC_023146 | XLOC_023146 | MIR3689C          | chr9:137741020-137742490 | 0 | 1 |
| XLOC_023147 | XLOC_023147 | MIR3689D1         | chr9:137741020-137742490 | 0 | 1 |
| XLOC_023148 | XLOC_023148 | MIR3689B          | chr9:137741020-137742490 | 0 | 1 |
| XLOC_023149 | XLOC_023149 | MIR3689D2         | chr9:137741020-137742490 | 0 | 1 |
| XLOC_023150 | XLOC_023150 | MIR3689F          | chr9:137742587-137742653 | 0 | 1 |
| XLOC_023151 | XLOC_023151 | FCN1              | chr9:137801430-137809806 | 0 | 1 |
| XLOC_023154 | XLOC_023154 | GLT6D1            | chr9:138515501-138531386 | 0 | 1 |
| XLOC_023155 | XLOC_023155 | SOHLH1            | chr9:138585254-138591374 | 0 | 1 |
| XLOC_023170 | XLOC_023170 | MIR4673           | chr9:139388895-139440238 | 0 | 1 |
| XLOC_023171 | XLOC_023171 | MIR4674           | chr9:139440624-139440711 | 0 | 1 |
| XLOC_023175 | XLOC_023175 | LCN6              | chr9:139638468-139644363 | 0 | 1 |
| XLOC_023176 | XLOC_023176 | LCN8              | chr9:139648839-139652731 | 0 | 1 |



|             |             |                          |                          |   |   |
|-------------|-------------|--------------------------|--------------------------|---|---|
| XLOC_023190 | XLOC_023190 | MIR3621                  | chr9:140033608-140064491 | 0 | 1 |
| XLOC_023232 | XLOC_023232 | PLCXD1                   | chrX:192990-220022       | 0 | 1 |
| XLOC_023233 | XLOC_023233 | LINC00685                | chrX:281384-282054       | 0 | 1 |
| XLOC_023234 | XLOC_023234 | SHOX                     | chrX:585078-620146       | 0 | 1 |
| XLOC_023235 | XLOC_023235 | CSF2RA                   | chrX:1387692-1428828     | 0 | 1 |
| XLOC_023236 | XLOC_023236 | MIR3690                  | chrX:1387692-1428828     | 0 | 1 |
| XLOC_023237 | XLOC_023237 | IL3RA                    | chrX:1455508-1501582     | 0 | 1 |
| XLOC_023238 | XLOC_023238 | ASMTL-AS1                | chrX:1519423-1572655     | 0 | 1 |
| XLOC_023239 | XLOC_023239 | AKAP17A,ASMT             | chrX:1710485-1761974     | 0 | 1 |
| XLOC_023240 | XLOC_023240 | CD99P1                   | chrX:2527305-2575270     | 0 | 1 |
| XLOC_023241 | XLOC_023241 | CD99                     | chrX:2609227-2659350     | 0 | 1 |
| XLOC_023243 | XLOC_023243 | GYG2                     | chrX:2746862-2800861     | 0 | 1 |
| XLOC_023244 | XLOC_023244 | ARSH                     | chrX:2924653-2951426     | 0 | 1 |
| XLOC_023245 | XLOC_023245 | ARSF                     | chrX:2958274-3030770     | 0 | 1 |
| XLOC_023247 | XLOC_023247 | MIR4767                  | chrX:6966960-7066231     | 0 | 1 |
| XLOC_023250 | XLOC_023250 | MIR651                   | chrX:8095005-8095102     | 0 | 1 |
| XLOC_023256 | XLOC_023256 | CLCN4                    | chrX:10124984-10205699   | 0 | 1 |
| XLOC_023258 | XLOC_023258 | AMELX                    | chrX:11155662-11683821   | 0 | 1 |
| XLOC_023260 | XLOC_023260 | FRMPD4                   | chrX:12156584-12742642   | 0 | 1 |
| XLOC_023263 | XLOC_023263 | TLR8                     | chrX:12920935-12961419   | 0 | 1 |
| XLOC_023265 | XLOC_023265 | LOC100093698             | chrX:13328770-13338518   | 0 | 1 |
| XLOC_023266 | XLOC_023266 | LOC100133123             | chrX:13353359-13359944   | 0 | 1 |
| XLOC_023267 | XLOC_023267 | EGFL6                    | chrX:13587693-13651694   | 0 | 1 |
| XLOC_023273 | XLOC_023273 | BMX                      | chrX:15518899-15574652   | 0 | 1 |
| XLOC_023278 | XLOC_023278 | S100G                    | chrX:16606121-16731059   | 0 | 1 |
| XLOC_023283 | XLOC_023283 | MIR4768                  | chrX:17393542-17754113   | 0 | 1 |
| XLOC_023289 | XLOC_023289 | CNKSR2                   | chrX:21392535-21672813   | 0 | 1 |
| XLOC_023294 | XLOC_023294 | ZNF645                   | chrX:22277913-23311263   | 0 | 1 |
| XLOC_023295 | XLOC_023295 | DDX53                    | chrX:22277913-23311263   | 0 | 1 |
| XLOC_023296 | XLOC_023296 | PTCHD1                   | chrX:23352984-23414918   | 0 | 1 |
| XLOC_023302 | XLOC_023302 | SUPT20HL1                | chrX:24380877-24383541   | 0 | 1 |
| XLOC_023305 | XLOC_023305 | SCARNA23                 | chrX:24712063-25015102   | 0 | 1 |
| XLOC_023306 | XLOC_023306 | MAGEB18                  | chrX:26156459-26158853   | 0 | 1 |
| XLOC_023308 | XLOC_023308 | MAGEB5                   | chrX:26234285-26236387   | 0 | 1 |
| XLOC_023309 | XLOC_023309 | VENTXP1                  | chrX:26576453-26579169   | 0 | 1 |
| XLOC_023310 | XLOC_023310 | DCAF8L2                  | chrX:27764925-27766938   | 0 | 1 |
| XLOC_023312 | XLOC_023312 | IL1RAPL1                 | chrX:28605680-29974017   | 0 | 1 |
| XLOC_023314 | XLOC_023314 | MAGEB3                   | chrX:30248552-30255610   | 0 | 1 |
| XLOC_023315 | XLOC_023315 | MAGEB1,MAGEB4            | chrX:30260056-30270155   | 0 | 1 |
| XLOC_023317 | XLOC_023317 | FAM47B                   | chrX:34960912-34963034   | 0 | 1 |
| XLOC_023318 | XLOC_023318 | MAGEB16                  | chrX:35816458-35821852   | 0 | 1 |
| XLOC_023322 | XLOC_023322 | FAM47C                   | chrX:37026431-37029739   | 0 | 1 |
| XLOC_023327 | XLOC_023327 | CXorf27                  | chrX:37850069-37850570   | 0 | 1 |
| XLOC_023328 | XLOC_023328 | SYTL5                    | chrX:37865834-37988073   | 0 | 1 |
| XLOC_023333 | XLOC_023333 | MPC1L                    | chrX:40482817-40483388   | 0 | 1 |
| XLOC_023340 | XLOC_023340 | DUSP21                   | chrX:44703248-44704134   | 0 | 1 |
| XLOC_023347 | XLOC_023347 | RGN                      | chrX:46937774-46952712   | 0 | 1 |
| XLOC_023352 | XLOC_023352 | ZNF157                   | chrX:47229998-47273098   | 0 | 1 |
| XLOC_023353 | XLOC_023353 | SNORA11C                 | chrX:47229998-47273098   | 0 | 1 |
| XLOC_023356 | XLOC_023356 | MIR4769                  | chrX:47420498-47479256   | 0 | 1 |
| XLOC_023358 | XLOC_023358 | CXXC1P1                  | chrX:47566589-47596027   | 0 | 1 |
| XLOC_023360 | XLOC_023360 | SPACA5,SPACA5B           | chrX:47863733-47869128   | 0 | 1 |
| XLOC_023361 | XLOC_023361 | SSX6                     | chrX:47967366-47980068   | 0 | 1 |
| XLOC_023362 | XLOC_023362 | SPACA5,SPACA5B           | chrX:47986602-47991997   | 0 | 1 |
| XLOC_023363 | XLOC_023363 | SSX1                     | chrX:48114796-48126879   | 0 | 1 |
| XLOC_023364 | XLOC_023364 | SSX4B                    | chrX:48242956-48252785   | 0 | 1 |
| XLOC_023373 | XLOC_023373 | GLOD5                    | chrX:48620153-48632064   | 0 | 1 |
| XLOC_023374 | XLOC_023374 | GATA1                    | chrX:48644981-48652717   | 0 | 1 |
| XLOC_023383 | XLOC_023383 | GAGE10                   | chrX:49160124-49176311   | 0 | 1 |
| XLOC_023384 | XLOC_023384 | GAGE12J                  | chrX:49178515-49185866   | 0 | 1 |
| XLOC_023385 | XLOC_023385 | GAGE12D,GAGE12F,GAGE13,G | chrX:49188093-49313710   | 0 | 1 |
| XLOC_023386 | XLOC_023386 | GAGE12D                  | chrX:49315880-49323262   | 0 | 1 |
| XLOC_023387 | XLOC_023387 | GAGE12D,GAGE12F          | chrX:49325433-49332821   | 0 | 1 |
| XLOC_023388 | XLOC_023388 | GAGE12D,GAGE12F          | chrX:49334991-49342370   | 0 | 1 |
| XLOC_023389 | XLOC_023389 | GAGE12D                  | chrX:49344540-49351917   | 0 | 1 |
| XLOC_023390 | XLOC_023390 | GAGE2A                   | chrX:49354117-49361430   | 0 | 1 |
| XLOC_023391 | XLOC_023391 | GAGE1                    | chrX:49363615-49373139   | 0 | 1 |
| XLOC_023395 | XLOC_023395 | MIR532                   | chrX:49687224-49863892   | 0 | 1 |
| XLOC_023396 | XLOC_023396 | MIR188                   | chrX:49687224-49863892   | 0 | 1 |
| XLOC_023397 | XLOC_023397 | MIR500A                  | chrX:49687224-49863892   | 0 | 1 |
| XLOC_023398 | XLOC_023398 | MIR362                   | chrX:49687224-49863892   | 0 | 1 |
| XLOC_023399 | XLOC_023399 | MIR501                   | chrX:49687224-49863892   | 0 | 1 |
| XLOC_023400 | XLOC_023400 | MIR500B                  | chrX:49687224-49863892   | 0 | 1 |
| XLOC_023401 | XLOC_023401 | MIR660                   | chrX:49687224-49863892   | 0 | 1 |
| XLOC_023402 | XLOC_023402 | MIR502                   | chrX:49687224-49863892   | 0 | 1 |
| XLOC_023404 | XLOC_023404 | BMP15                    | chrX:50653734-50659641   | 0 | 1 |
| XLOC_023405 | XLOC_023405 | NUDT10                   | chrX:51075082-51080377   | 0 | 1 |
| XLOC_023406 | XLOC_023406 | CENPVP2                  | chrX:51453924-51455226   | 0 | 1 |
| XLOC_023410 | XLOC_023410 | MAGED4                   | chrX:51927918-51935366   | 0 | 1 |

|             |             |                 |                          |   |   |
|-------------|-------------|-----------------|--------------------------|---|---|
| XLOC_023411 | XLOC_023411 | XAGE2,XAGE2B    | chrX:52112077-52118822   | 0 | 1 |
| XLOC_023412 | XLOC_023412 | XAGE1C,XAGE1E   | chrX:52238809-52243953   | 0 | 1 |
| XLOC_023413 | XLOC_023413 | XAGE1B,XAGE1C   | chrX:52511760-52516904   | 0 | 1 |
| XLOC_023414 | XLOC_023414 | SSX8            | chrX:52651984-52662998   | 0 | 1 |
| XLOC_023415 | XLOC_023415 | SSX2,SSX2B      | chrX:52780307-52790617   | 0 | 1 |
| XLOC_023416 | XLOC_023416 | XAGE5           | chrX:52841227-52847322   | 0 | 1 |
| XLOC_023417 | XLOC_023417 | FAM156A,FAM156B | chrX:52926321-52937585   | 0 | 1 |
| XLOC_023429 | XLOC_023429 | PAGE5           | chrX:55246790-55250541   | 0 | 1 |
| XLOC_023430 | XLOC_023430 | MIR4536-1       | chrX:55477892-55477953   | 0 | 1 |
| XLOC_023431 | XLOC_023431 | MAGEH1          | chrX:55478537-55479999   | 0 | 1 |
| XLOC_023432 | XLOC_023432 | FOX2            | chrX:55649832-55652621   | 0 | 1 |
| XLOC_023441 | XLOC_023441 | MIR223          | chrX:65238711-65238821   | 0 | 1 |
| XLOC_023447 | XLOC_023447 | FAM155B         | chrX:68725077-68752351   | 0 | 1 |
| XLOC_023448 | XLOC_023448 | EDA             | chrX:68835910-69259321   | 0 | 1 |
| XLOC_023449 | XLOC_023449 | MIR676          | chrX:68835910-69259321   | 0 | 1 |
| XLOC_023453 | XLOC_023453 | AWAT1           | chrX:69454504-69460511   | 0 | 1 |
| XLOC_023454 | XLOC_023454 | ARR3            | chrX:69488184-69501690   | 0 | 1 |
| XLOC_023462 | XLOC_023462 | GJB1            | chrX:70430034-70948962   | 0 | 1 |
| XLOC_023468 | XLOC_023468 | FLJ46446        | chrX:70430034-70948962   | 0 | 1 |
| XLOC_023469 | XLOC_023469 | CXorf49B        | chrX:70983139-70987051   | 0 | 1 |
| XLOC_023470 | XLOC_023470 | NHSL2           | chrX:71130937-71363424   | 0 | 1 |
| XLOC_023472 | XLOC_023472 | FLJ44635        | chrX:71364033-71381600   | 0 | 1 |
| XLOC_023474 | XLOC_023474 | DMRTC1B         | chrX:72064875-72068636   | 0 | 1 |
| XLOC_023475 | XLOC_023475 | LINC00684       | chrX:72158002-72158798   | 0 | 1 |
| XLOC_023476 | XLOC_023476 | PABPC1L2B       | chrX:72223351-72225551   | 0 | 1 |
| XLOC_023477 | XLOC_023477 | CDX4            | chrX:72667089-72674421   | 0 | 1 |
| XLOC_023481 | XLOC_023481 | MIR374C         | chrX:73164158-73513409   | 0 | 1 |
| XLOC_023482 | XLOC_023482 | ZCCHC13         | chrX:73524024-73524869   | 0 | 1 |
| XLOC_023486 | XLOC_023486 | MAGEE1          | chrX:75648045-75651746   | 0 | 1 |
| XLOC_023487 | XLOC_023487 | FGF16           | chrX:76709646-76712013   | 0 | 1 |
| XLOC_023491 | XLOC_023491 | LPAR4           | chrX:78003205-78012578   | 0 | 1 |
| XLOC_023492 | XLOC_023492 | P2RY10          | chrX:78200828-78217438   | 0 | 1 |
| XLOC_023493 | XLOC_023493 | GPR174          | chrX:78426468-78427726   | 0 | 1 |
| XLOC_023494 | XLOC_023494 | TBX22           | chrX:79270254-79287268   | 0 | 1 |
| XLOC_023495 | XLOC_023495 | FAM46D          | chrX:79591002-79700810   | 0 | 1 |
| XLOC_023497 | XLOC_023497 | POU3F4          | chrX:82763268-82764775   | 0 | 1 |
| XLOC_023498 | XLOC_023498 | CYLC1           | chrX:83116133-83141708   | 0 | 1 |
| XLOC_023499 | XLOC_023499 | UBE2DNL         | chrX:84189156-84189896   | 0 | 1 |
| XLOC_023502 | XLOC_023502 | DACH2           | chrX:85403454-86087605   | 0 | 1 |
| XLOC_023503 | XLOC_023503 | KLHL4           | chrX:86772714-86925050   | 0 | 1 |
| XLOC_023504 | XLOC_023504 | CPXCR1          | chrX:88002225-88009785   | 0 | 1 |
| XLOC_023505 | XLOC_023505 | TGIF2LX         | chrX:89176939-89177882   | 0 | 1 |
| XLOC_023506 | XLOC_023506 | PABPC5          | chrX:90689596-90693583   | 0 | 1 |
| XLOC_023511 | XLOC_023511 | TNMD            | chrX:99839789-99854882   | 0 | 1 |
| XLOC_023523 | XLOC_023523 | NXF2B           | chrX:101502093-101581634 | 0 | 1 |
| XLOC_023524 | XLOC_023524 | NXF4            | chrX:101804892-101826621 | 0 | 1 |
| XLOC_023531 | XLOC_023531 | TCEAL7          | chrX:102585113-102587251 | 0 | 1 |
| XLOC_023539 | XLOC_023539 | PLP1            | chrX:103031438-103047547 | 0 | 1 |
| XLOC_023540 | XLOC_023540 | TMSB15B         | chrX:103139054-103401708 | 0 | 1 |
| XLOC_023541 | XLOC_023541 | H2BFXP          | chrX:103139054-103401708 | 0 | 1 |
| XLOC_023542 | XLOC_023542 | H2BFM           | chrX:103139054-103401708 | 0 | 1 |
| XLOC_023543 | XLOC_023543 | ZCCHC18         | chrX:103139054-103401708 | 0 | 1 |
| XLOC_023545 | XLOC_023545 | IL1RAPL2        | chrX:103810995-105011822 | 0 | 1 |
| XLOC_023546 | XLOC_023546 | NRK             | chrX:105066535-105202602 | 0 | 1 |
| XLOC_023547 | XLOC_023547 | MUM1L1          | chrX:105412297-105452949 | 0 | 1 |
| XLOC_023549 | XLOC_023549 | RNF128          | chrX:105937067-106040246 | 0 | 1 |
| XLOC_023557 | XLOC_023557 | COL4A5          | chrX:107683073-107940775 | 0 | 1 |
| XLOC_023560 | XLOC_023560 | MIR3978         | chrX:109245862-109421016 | 0 | 1 |
| XLOC_023562 | XLOC_023562 | TDGF1P3         | chrX:109763539-109766249 | 0 | 1 |
| XLOC_023563 | XLOC_023563 | PAK3            | chrX:110187512-110464173 | 0 | 1 |
| XLOC_023564 | XLOC_023564 | DKFZp686D0853   | chrX:110754889-110765627 | 0 | 1 |
| XLOC_023566 | XLOC_023566 | TRPCSOS         | chrX:111017541-111326004 | 0 | 1 |
| XLOC_023568 | XLOC_023568 | HTR2C           | chrX:113818550-114144624 | 0 | 1 |
| XLOC_023569 | XLOC_023569 | SNORA35         | chrX:113818550-114144624 | 0 | 1 |
| XLOC_023570 | XLOC_023570 | MIR764          | chrX:113818550-114144624 | 0 | 1 |
| XLOC_023571 | XLOC_023571 | MIR1912         | chrX:113818550-114144624 | 0 | 1 |
| XLOC_023572 | XLOC_023572 | MIR1264         | chrX:113818550-114144624 | 0 | 1 |
| XLOC_023573 | XLOC_023573 | MIR1298         | chrX:113818550-114144624 | 0 | 1 |
| XLOC_023574 | XLOC_023574 | MIR1911         | chrX:113818550-114144624 | 0 | 1 |
| XLOC_023575 | XLOC_023575 | MIR448          | chrX:113818550-114144624 | 0 | 1 |
| XLOC_023576 | XLOC_023576 | RBMXL3          | chrX:114345182-114468635 | 0 | 1 |
| XLOC_023580 | XLOC_023580 | SLC6A14         | chrX:115567746-115592625 | 0 | 1 |
| XLOC_023582 | XLOC_023582 | MIR1277         | chrX:117480035-117583923 | 0 | 1 |
| XLOC_023593 | XLOC_023593 | AKAP14          | chrX:119029935-119054679 | 0 | 1 |
| XLOC_023594 | XLOC_023594 | RHOXF2B         | chrX:119292466-119297945 | 0 | 1 |
| XLOC_023596 | XLOC_023596 | ATP1B4          | chrX:119495939-119517104 | 0 | 1 |
| XLOC_023603 | XLOC_023603 | LOC100129520    | chrX:124453968-124456950 | 0 | 1 |
| XLOC_023604 | XLOC_023604 | CXorf64         | chrX:125953746-125955768 | 0 | 1 |
| XLOC_023606 | XLOC_023606 | XPNPEP2         | chrX:128872945-128903525 | 0 | 1 |

|             |             |                      |                          |   |   |
|-------------|-------------|----------------------|--------------------------|---|---|
| XLOC_023607 | XLOC_023607 | SASH3                | chrX:128913891-128929176 | 0 | 1 |
| XLOC_023614 | XLOC_023614 | ARHGAP36             | chrX:130192215-130223857 | 0 | 1 |
| XLOC_023615 | XLOC_023615 | OR13H1               | chrX:130678047-130678974 | 0 | 1 |
| XLOC_023617 | XLOC_023617 | HS6ST2-AS1           | chrX:131760037-132095423 | 0 | 1 |
| XLOC_023618 | XLOC_023618 | CCDC160              | chrX:133371076-133379808 | 0 | 1 |
| XLOC_023623 | XLOC_023623 | SMIM10               | chrX:134124967-134126503 | 0 | 1 |
| XLOC_023624 | XLOC_023624 | FAM127A              | chrX:134166332-134167575 | 0 | 1 |
| XLOC_023626 | XLOC_023626 | LINC00086            | chrX:134555867-134560225 | 0 | 1 |
| XLOC_023628 | XLOC_023628 | CT45A1               | chrX:134847184-134856988 | 0 | 1 |
| XLOC_023629 | XLOC_023629 | CT45A2,CT45A3,CT45A4 | chrX:134866213-134891519 | 0 | 1 |
| XLOC_023630 | XLOC_023630 | SAGE1                | chrX:134975784-134995220 | 0 | 1 |
| XLOC_023633 | XLOC_023633 | GPR112               | chrX:135383121-135499047 | 0 | 1 |
| XLOC_023634 | XLOC_023634 | BRS3                 | chrX:135570124-135574598 | 0 | 1 |
| XLOC_023636 | XLOC_023636 | VGLL1                | chrX:135614310-135638966 | 0 | 1 |
| XLOC_023637 | XLOC_023637 | MIR934               | chrX:135614310-135638966 | 0 | 1 |
| XLOC_023638 | XLOC_023638 | LOC100128420         | chrX:135721701-135724588 | 0 | 1 |
| XLOC_023640 | XLOC_023640 | ZIC3                 | chrX:136648345-136654259 | 0 | 1 |
| XLOC_023641 | XLOC_023641 | FGF13-AS1            | chrX:137713733-138287185 | 0 | 1 |
| XLOC_023642 | XLOC_023642 | SRD5A1P1             | chrX:138528977-138531132 | 0 | 1 |
| XLOC_023643 | XLOC_023643 | F9                   | chrX:138612894-138645617 | 0 | 1 |
| XLOC_023644 | XLOC_023644 | LOC389895            | chrX:139173825-139175070 | 0 | 1 |
| XLOC_023645 | XLOC_023645 | RP1-177G6.2          | chrX:139791923-139796996 | 0 | 1 |
| XLOC_023646 | XLOC_023646 | SPANXB2              | chrX:140084755-140085871 | 0 | 1 |
| XLOC_023647 | XLOC_023647 | SPANXB1              | chrX:140096760-140097876 | 0 | 1 |
| XLOC_023648 | XLOC_023648 | SPANXA2-OT1          | chrX:140590842-140738069 | 0 | 1 |
| XLOC_023649 | XLOC_023649 | SPANXA2              | chrX:140590842-140738069 | 0 | 1 |
| XLOC_023650 | XLOC_023650 | MAGEC3               | chrX:140926101-140985618 | 0 | 1 |
| XLOC_023651 | XLOC_023651 | MAGEC1               | chrX:140991641-140997187 | 0 | 1 |
| XLOC_023652 | XLOC_023652 | SPANXN4              | chrX:142113703-142122066 | 0 | 1 |
| XLOC_023653 | XLOC_023653 | UBE2NL               | chrX:142967172-142968357 | 0 | 1 |
| XLOC_023654 | XLOC_023654 | SPANXN1              | chrX:144329106-144337728 | 0 | 1 |
| XLOC_023656 | XLOC_023656 | TMEM257              | chrX:144908927-144911370 | 0 | 1 |
| XLOC_023657 | XLOC_023657 | CXorf51B             | chrX:145891301-145891929 | 0 | 1 |
| XLOC_023660 | XLOC_023660 | AFF2                 | chrX:147582138-148082193 | 0 | 1 |
| XLOC_023662 | XLOC_023662 | MAGEA11              | chrX:148769902-148798928 | 0 | 1 |
| XLOC_023663 | XLOC_023663 | HSFX2                | chrX:148855725-148858528 | 0 | 1 |
| XLOC_023664 | XLOC_023664 | MAGEA9B              | chrX:148863592-148869399 | 0 | 1 |
| XLOC_023667 | XLOC_023667 | MIR2114              | chrX:149396238-149396318 | 0 | 1 |
| XLOC_023672 | XLOC_023672 | MIR4330              | chrX:150336693-150336798 | 0 | 1 |
| XLOC_023673 | XLOC_023673 | GPR50                | chrX:150345055-150349937 | 0 | 1 |
| XLOC_023675 | XLOC_023675 | PASD1                | chrX:150732006-150845211 | 0 | 1 |
| XLOC_023676 | XLOC_023676 | PRRG3                | chrX:150863729-150870063 | 0 | 1 |
| XLOC_023677 | XLOC_023677 | FATE1                | chrX:150884507-150891664 | 0 | 1 |
| XLOC_023678 | XLOC_023678 | CNGA2                | chrX:150903217-150914036 | 0 | 1 |
| XLOC_023680 | XLOC_023680 | GABRQ                | chrX:151806636-151821825 | 0 | 1 |
| XLOC_023681 | XLOC_023681 | MAGEA6               | chrX:151867244-151870814 | 0 | 1 |
| XLOC_023682 | XLOC_023682 | MAGEA2,MAGEA2B       | chrX:151883118-151887095 | 0 | 1 |
| XLOC_023684 | XLOC_023684 | CSAG2,CSAG3          | chrX:151927733-151928738 | 0 | 1 |
| XLOC_023687 | XLOC_023687 | PNMA3                | chrX:152224765-152228827 | 0 | 1 |
| XLOC_023688 | XLOC_023688 | PNMA6C,PNMA6D        | chrX:152240726-152243402 | 0 | 1 |
| XLOC_023690 | XLOC_023690 | ZFP92                | chrX:152683780-152687086 | 0 | 1 |
| XLOC_023693 | XLOC_023693 | DUSP9                | chrX:152907896-152916781 | 0 | 1 |
| XLOC_023699 | XLOC_023699 | AVPR2                | chrX:153167984-153172620 | 0 | 1 |
| XLOC_023701 | XLOC_023701 | MIR3202-1            | chrX:153237990-153248646 | 0 | 1 |
| XLOC_023703 | XLOC_023703 | OPN1MW               | chrX:153448084-153462352 | 0 | 1 |
| XLOC_023704 | XLOC_023704 | OPN1MW               | chrX:153485202-153523564 | 0 | 1 |
| XLOC_023715 | XLOC_023715 | FAM223B              | chrX:153799478-153800188 | 0 | 1 |
| XLOC_023716 | XLOC_023716 | CTAG1B               | chrX:153813417-153815075 | 0 | 1 |
| XLOC_023719 | XLOC_023719 | SNORA56              | chrX:153991030-154005964 | 0 | 1 |
| XLOC_023720 | XLOC_023720 | H2AFB1               | chrX:154064063-154250998 | 0 | 1 |
| XLOC_023725 | XLOC_023725 | H2AFB3               | chrX:154610427-154610944 | 0 | 1 |
| XLOC_023726 | XLOC_023726 | F8A1                 | chrX:154611748-154613450 | 0 | 1 |
| XLOC_023727 | XLOC_023727 | MIR1184-3            | chrX:154686574-154688276 | 0 | 1 |
| XLOC_023728 | XLOC_023728 | TMLHE-AS1            | chrX:154696200-154842622 | 0 | 1 |
| XLOC_023729 | XLOC_023729 | SPRY3                | chrX:154997450-155012117 | 0 | 1 |
| XLOC_023730 | XLOC_023730 | VAMP7                | chrX:155110942-155173433 | 0 | 1 |
| XLOC_023731 | XLOC_023731 | IL9R                 | chrX:155227245-155240482 | 0 | 1 |
| XLOC_023732 | XLOC_023732 | GTPBP6               | chrX:221425-230887       | 0 | 1 |
| XLOC_023733 | XLOC_023733 | PPP2R3B              | chrX:294667-347690       | 0 | 1 |
| XLOC_023734 | XLOC_023734 | CRLF2                | chrX:1314886-1331530     | 0 | 1 |
| XLOC_023735 | XLOC_023735 | SLC25A6              | chrX:1505044-1511039     | 0 | 1 |
| XLOC_023736 | XLOC_023736 | ASMTL                | chrX:1519423-1572655     | 0 | 1 |
| XLOC_023737 | XLOC_023737 | P2RY8                | chrX:1581465-1656037     | 0 | 1 |
| XLOC_023738 | XLOC_023738 | DHRX,ZBED1           | chrX:2137554-2419015     | 0 | 1 |
| XLOC_023741 | XLOC_023741 | ARSE                 | chrX:2852672-2882494     | 0 | 1 |
| XLOC_023742 | XLOC_023742 | MXRA5                | chrX:3226608-3264684     | 0 | 1 |
| XLOC_023745 | XLOC_023745 | NLGN4X               | chrX:5808082-6146706     | 0 | 1 |
| XLOC_023746 | XLOC_023746 | MIR4770              | chrX:6301946-6302004     | 0 | 1 |
| XLOC_023750 | XLOC_023750 | VCX2                 | chrX:8137984-8139308     | 0 | 1 |

|             |             |                |                        |   |   |
|-------------|-------------|----------------|------------------------|---|---|
| XLOC_023751 | XLOC_023751 | KAL1           | chrX:8496914-8700227   | 0 | 1 |
| XLOC_023752 | XLOC_023752 | FAM9A          | chrX:8758836-8769424   | 0 | 1 |
| XLOC_023753 | XLOC_023753 | FAM9B          | chrX:8993036-9001116   | 0 | 1 |
| XLOC_023756 | XLOC_023756 | ARHGAP6        | chrX:11155662-11683821 | 0 | 1 |
| XLOC_023757 | XLOC_023757 | TLR8-AS1       | chrX:12920935-12961419 | 0 | 1 |
| XLOC_023758 | XLOC_023758 | FAM9C          | chrX:13053735-13062917 | 0 | 1 |
| XLOC_023759 | XLOC_023759 | ATXN3L         | chrX:13328770-13338518 | 0 | 1 |
| XLOC_023764 | XLOC_023764 | ASB9           | chrX:15262108-15288589 | 0 | 1 |
| XLOC_023765 | XLOC_023765 | ASB11          | chrX:15299830-15333746 | 0 | 1 |
| XLOC_023774 | XLOC_023774 | RAI2           | chrX:17818168-17879457 | 0 | 1 |
| XLOC_023776 | XLOC_023776 | SCML2          | chrX:18257432-18372844 | 0 | 1 |
| XLOC_023785 | XLOC_023785 | MIR23C         | chrX:20024830-20135114 | 0 | 1 |
| XLOC_023789 | XLOC_023789 | KLHL34         | chrX:21673608-21676448 | 0 | 1 |
| XLOC_023790 | XLOC_023790 | SMPX           | chrX:21724089-21776278 | 0 | 1 |
| XLOC_023791 | XLOC_023791 | PHEX-AS1       | chrX:22050920-22266478 | 0 | 1 |
| XLOC_023792 | XLOC_023792 | LOC100873065   | chrX:22277913-23311263 | 0 | 1 |
| XLOC_023797 | XLOC_023797 | SUPT20HL2      | chrX:24328978-24331432 | 0 | 1 |
| XLOC_023798 | XLOC_023798 | PCYT1B         | chrX:24576203-24690979 | 0 | 1 |
| XLOC_023800 | XLOC_023800 | SMEK3P         | chrX:27478327-27481458 | 0 | 1 |
| XLOC_023801 | XLOC_023801 | DCAF8L1        | chrX:27996109-27999566 | 0 | 1 |
| XLOC_023802 | XLOC_023802 | NR0B1          | chrX:30322538-30327495 | 0 | 1 |
| XLOC_023803 | XLOC_023803 | CXorf21        | chrX:30576940-30596033 | 0 | 1 |
| XLOC_023805 | XLOC_023805 | FTHL17         | chrX:31089357-31090170 | 0 | 1 |
| XLOC_023806 | XLOC_023806 | DMD            | chrX:31137344-33357726 | 0 | 1 |
| XLOC_023807 | XLOC_023807 | FAM47A         | chrX:34147868-34150447 | 0 | 1 |
| XLOC_023808 | XLOC_023808 | TMEM47         | chrX:34645180-34675405 | 0 | 1 |
| XLOC_023813 | XLOC_023813 | LOC286442      | chrX:39164209-39186616 | 0 | 1 |
| XLOC_023817 | XLOC_023817 | LOC100132831   | chrX:40690469-40692449 | 0 | 1 |
| XLOC_023819 | XLOC_023819 | PPP1R2P9       | chrX:42636616-42637486 | 0 | 1 |
| XLOC_023820 | XLOC_023820 | MAOB           | chrX:43625856-43741721 | 0 | 1 |
| XLOC_023821 | XLOC_023821 | NDP            | chrX:43808023-43832921 | 0 | 1 |
| XLOC_023822 | XLOC_023822 | EFHC2          | chrX:44007127-44202923 | 0 | 1 |
| XLOC_023826 | XLOC_023826 | MIR222         | chrX:45606420-45606530 | 0 | 1 |
| XLOC_023838 | XLOC_023838 | SSX5           | chrX:48045655-48056199 | 0 | 1 |
| XLOC_023839 | XLOC_023839 | SSX9           | chrX:48160984-48165614 | 0 | 1 |
| XLOC_023840 | XLOC_023840 | SSX3           | chrX:48205862-48216142 | 0 | 1 |
| XLOC_023841 | XLOC_023841 | SSX4B          | chrX:48261523-48271355 | 0 | 1 |
| XLOC_023856 | XLOC_023856 | CACNA1F        | chrX:49061522-49089833 | 0 | 1 |
| XLOC_023858 | XLOC_023858 | PAGE1          | chrX:49452053-49460596 | 0 | 1 |
| XLOC_023860 | XLOC_023860 | AKAP4          | chrX:49955410-49965664 | 0 | 1 |
| XLOC_023861 | XLOC_023861 | DGKK           | chrX:50111878-50213721 | 0 | 1 |
| XLOC_023863 | XLOC_023863 | NUDT11         | chrX:51232862-51239459 | 0 | 1 |
| XLOC_023864 | XLOC_023864 | CENPVP2        | chrX:51424145-51425447 | 0 | 1 |
| XLOC_023865 | XLOC_023865 | MAGED4,MAGED4B | chrX:51804922-51812368 | 0 | 1 |
| XLOC_023866 | XLOC_023866 | SNORA11D       | chrX:51804922-51812368 | 0 | 1 |
| XLOC_023867 | XLOC_023867 | SNORA11E       | chrX:51927918-51935366 | 0 | 1 |
| XLOC_023868 | XLOC_023868 | XAGE1B,XAGE1D  | chrX:52255219-52260363 | 0 | 1 |
| XLOC_023869 | XLOC_023869 | XAGE2,XAGE2B   | chrX:52380351-52387096 | 0 | 1 |
| XLOC_023870 | XLOC_023870 | XAGE1C         | chrX:52528159-52533303 | 0 | 1 |
| XLOC_023871 | XLOC_023871 | XAGE1A,XAGE1C  | chrX:52541053-52546197 | 0 | 1 |
| XLOC_023872 | XLOC_023872 | SSX7           | chrX:52673110-52683950 | 0 | 1 |
| XLOC_023873 | XLOC_023873 | SSX2           | chrX:52725945-52736249 | 0 | 1 |
| XLOC_023874 | XLOC_023874 | SPANXN5        | chrX:52825185-52826388 | 0 | 1 |
| XLOC_023875 | XLOC_023875 | XAGE3          | chrX:52891557-52897119 | 0 | 1 |
| XLOC_023882 | XLOC_023882 | MIR98          | chrX:53559056-53713697 | 0 | 1 |
| XLOC_023883 | XLOC_023883 | MIRLET7F2      | chrX:53559056-53713697 | 0 | 1 |
| XLOC_023888 | XLOC_023888 | ITIH6          | chrX:54775331-54824673 | 0 | 1 |
| XLOC_023893 | XLOC_023893 | PAGE3          | chrX:55284848-55291165 | 0 | 1 |
| XLOC_023894 | XLOC_023894 | USP51          | chrX:55511048-55515631 | 0 | 1 |
| XLOC_023899 | XLOC_023899 | ZXDA           | chrX:57931863-57937067 | 0 | 1 |
| XLOC_023903 | XLOC_023903 | MIR1468        | chrX:63005881-63005967 | 0 | 1 |
| XLOC_023905 | XLOC_023905 | ASB12          | chrX:63444071-63450511 | 0 | 1 |
| XLOC_023906 | XLOC_023906 | MTMR8          | chrX:63487960-63615333 | 0 | 1 |
| XLOC_023909 | XLOC_023909 | FRMD8P1        | chrX:64770501-64772301 | 0 | 1 |
| XLOC_023910 | XLOC_023910 | VSI6A          | chrX:65241579-65259967 | 0 | 1 |
| XLOC_023917 | XLOC_023917 | TEX11          | chrX:69748789-70128567 | 0 | 1 |
| XLOC_023918 | XLOC_023918 | SLC7A3         | chrX:70145429-70150975 | 0 | 1 |
| XLOC_023920 | XLOC_023920 | CXorf65        | chrX:70323738-70326638 | 0 | 1 |
| XLOC_023925 | XLOC_023925 | CXCR3          | chrX:70430034-70948962 | 0 | 1 |
| XLOC_023926 | XLOC_023926 | CXorf49B       | chrX:70430034-70948962 | 0 | 1 |
| XLOC_023933 | XLOC_023933 | LINC00684      | chrX:72001688-72002484 | 0 | 1 |
| XLOC_023934 | XLOC_023934 | DMRTC1B        | chrX:72091858-72095622 | 0 | 1 |
| XLOC_023936 | XLOC_023936 | PABPC1L2A      | chrX:72297176-72299351 | 0 | 1 |
| XLOC_023942 | XLOC_023942 | MIR421         | chrX:73164158-73513409 | 0 | 1 |
| XLOC_023943 | XLOC_023943 | MIR374B        | chrX:73164158-73513409 | 0 | 1 |
| XLOC_023944 | XLOC_023944 | MIR545         | chrX:73164158-73513409 | 0 | 1 |
| XLOC_023945 | XLOC_023945 | MIR374A        | chrX:73164158-73513409 | 0 | 1 |
| XLOC_023947 | XLOC_023947 | KIAA2022       | chrX:73952690-74145287 | 0 | 1 |
| XLOC_023951 | XLOC_023951 | MAGEE2         | chrX:75002822-75005079 | 0 | 1 |

|             |             |                      |                          |   |   |
|-------------|-------------|----------------------|--------------------------|---|---|
| XLOC_023952 | XLOC_023952 | MIR384               | chrX:76139697-76139785   | 0 | 1 |
| XLOC_023957 | XLOC_023957 | CYSLTR1              | chrX:77528129-77583087   | 0 | 1 |
| XLOC_023958 | XLOC_023958 | ZCCHC5               | chrX:77911565-77914825   | 0 | 1 |
| XLOC_023959 | XLOC_023959 | MIR4328              | chrX:78156690-78156746   | 0 | 1 |
| XLOC_023960 | XLOC_023960 | ITM2A                | chrX:78615880-78623049   | 0 | 1 |
| XLOC_023964 | XLOC_023964 | HDX                  | chrX:83572881-83757487   | 0 | 1 |
| XLOC_023968 | XLOC_023968 | NAP1L3               | chrX:92925924-92928682   | 0 | 1 |
| XLOC_023969 | XLOC_023969 | LOC643486            | chrX:95592084-95592901   | 0 | 1 |
| XLOC_023970 | XLOC_023970 | LOC442459            | chrX:98716599-99194841   | 0 | 1 |
| XLOC_023983 | XLOC_023983 | NXF5                 | chrX:101087084-101112549 | 0 | 1 |
| XLOC_023987 | XLOC_023987 | NXF2                 | chrX:101615315-101694929 | 0 | 1 |
| XLOC_023988 | XLOC_023988 | TMSB15A              | chrX:101768609-101771699 | 0 | 1 |
| XLOC_023989 | XLOC_023989 | BEX1                 | chrX:102317580-102319168 | 0 | 1 |
| XLOC_023990 | XLOC_023990 | NXF3                 | chrX:102330749-102348022 | 0 | 1 |
| XLOC_023993 | XLOC_023993 | BEX2                 | chrX:102564273-102565974 | 0 | 1 |
| XLOC_023996 | XLOC_023996 | GLRA4                | chrX:102962271-102983552 | 0 | 1 |
| XLOC_023999 | XLOC_023999 | H2BFWT               | chrX:103139054-103401708 | 0 | 1 |
| XLOC_024000 | XLOC_024000 | H2BFXP               | chrX:103139054-103401708 | 0 | 1 |
| XLOC_024002 | XLOC_024002 | ESX1                 | chrX:103494718-103499599 | 0 | 1 |
| XLOC_024003 | XLOC_024003 | TEX13A               | chrX:103810995-105011822 | 0 | 1 |
| XLOC_024004 | XLOC_024004 | SERPINA7             | chrX:105277189-105282718 | 0 | 1 |
| XLOC_024008 | XLOC_024008 | NUP62CL              | chrX:106366656-106449670 | 0 | 1 |
| XLOC_024013 | XLOC_024013 | IRS4                 | chrX:107975726-107979607 | 0 | 1 |
| XLOC_024014 | XLOC_024014 | GUCY2F               | chrX:108616134-108725285 | 0 | 1 |
| XLOC_024018 | XLOC_024018 | SNORD96B             | chrX:109437413-109699562 | 0 | 1 |
| XLOC_024019 | XLOC_024019 | CHRDL1               | chrX:109917083-110039286 | 0 | 1 |
| XLOC_024022 | XLOC_024022 | RNU6-28              | chrX:110537006-110664835 | 0 | 1 |
| XLOC_024024 | XLOC_024024 | LHFPL1               | chrX:111873878-111923375 | 0 | 1 |
| XLOC_024026 | XLOC_024026 | MIR4329              | chrX:112018104-112084043 | 0 | 1 |
| XLOC_024028 | XLOC_024028 | LRCH2                | chrX:114345182-114468635 | 0 | 1 |
| XLOC_024029 | XLOC_024029 | CXorf61              | chrX:115592852-115594194 | 0 | 1 |
| XLOC_024030 | XLOC_024030 | KLHL13               | chrX:117031775-117251303 | 0 | 1 |
| XLOC_024036 | XLOC_024036 | MIR766               | chrX:118749687-118827333 | 0 | 1 |
| XLOC_024042 | XLOC_024042 | RHOXF2B              | chrX:119206228-119211707 | 0 | 1 |
| XLOC_024043 | XLOC_024043 | RHOXF1               | chrX:119243010-119249847 | 0 | 1 |
| XLOC_024049 | XLOC_024049 | CT47B1               | chrX:120006451-120009779 | 0 | 1 |
| XLOC_024050 | XLOC_024050 | CT47A1,CT47A4        | chrX:120011344-120066151 | 0 | 1 |
| XLOC_024051 | XLOC_024051 | CT47A8               | chrX:120067694-120071012 | 0 | 1 |
| XLOC_024052 | XLOC_024052 | CT47A11              | chrX:120072555-120075873 | 0 | 1 |
| XLOC_024053 | XLOC_024053 | CT47A5               | chrX:120077415-120080733 | 0 | 1 |
| XLOC_024054 | XLOC_024054 | CT47A3               | chrX:120082276-120085594 | 0 | 1 |
| XLOC_024055 | XLOC_024055 | CT47A7               | chrX:120087136-120090454 | 0 | 1 |
| XLOC_024056 | XLOC_024056 | CT47A1,CT47A2,CT47A6 | chrX:120092019-120100198 | 0 | 1 |
| XLOC_024057 | XLOC_024057 | CT47A2               | chrX:120101740-120105058 | 0 | 1 |
| XLOC_024058 | XLOC_024058 | CT47A9               | chrX:120106600-120109918 | 0 | 1 |
| XLOC_024059 | XLOC_024059 | CT47A8               | chrX:120111460-120114778 | 0 | 1 |
| XLOC_024060 | XLOC_024060 | CT47A6               | chrX:120116320-120119638 | 0 | 1 |
| XLOC_024062 | XLOC_024062 | TENM1                | chrX:123509755-124097666 | 0 | 1 |
| XLOC_024063 | XLOC_024063 | DCAF12L2             | chrX:125297481-125300080 | 0 | 1 |
| XLOC_024064 | XLOC_024064 | DCAF12L1             | chrX:125683365-125686842 | 0 | 1 |
| XLOC_024065 | XLOC_024065 | ACTRT1               | chrX:127184940-127186382 | 0 | 1 |
| XLOC_024066 | XLOC_024066 | SMARCA1              | chrX:128580477-128657460 | 0 | 1 |
| XLOC_024072 | XLOC_024072 | GPR119               | chrX:129518318-129519511 | 0 | 1 |
| XLOC_024076 | XLOC_024076 | FRMD7                | chrX:131211020-131262050 | 0 | 1 |
| XLOC_024079 | XLOC_024079 | HS6ST2               | chrX:131760037-132095423 | 0 | 1 |
| XLOC_024080 | XLOC_024080 | USP26                | chrX:132159506-132162300 | 0 | 1 |
| XLOC_024081 | XLOC_024081 | TFDP3                | chrX:132350696-132352376 | 0 | 1 |
| XLOC_024083 | XLOC_024083 | GPC3                 | chrX:132669775-133119673 | 0 | 1 |
| XLOC_024084 | XLOC_024084 | MIR363               | chrX:133303407-133303482 | 0 | 1 |
| XLOC_024085 | XLOC_024085 | MIR92A2              | chrX:133303567-133303642 | 0 | 1 |
| XLOC_024086 | XLOC_024086 | MIR19B2              | chrX:133303700-133303796 | 0 | 1 |
| XLOC_024087 | XLOC_024087 | MIR20B               | chrX:133303838-133303907 | 0 | 1 |
| XLOC_024088 | XLOC_024088 | MIR18B               | chrX:133304070-133304141 | 0 | 1 |
| XLOC_024089 | XLOC_024089 | MIR106A              | chrX:133304227-133304308 | 0 | 1 |
| XLOC_024090 | XLOC_024090 | MIR450B              | chrX:133674214-133674292 | 0 | 1 |
| XLOC_024091 | XLOC_024091 | MIR450A1             | chrX:133674370-133674461 | 0 | 1 |
| XLOC_024092 | XLOC_024092 | MIR450A2             | chrX:133674537-133674637 | 0 | 1 |
| XLOC_024093 | XLOC_024093 | MIR542               | chrX:133675370-133675467 | 0 | 1 |
| XLOC_024094 | XLOC_024094 | MGC16121,MIR424      | chrX:133677406-133680741 | 0 | 1 |
| XLOC_024095 | XLOC_024095 | MIR503               | chrX:133677406-133680741 | 0 | 1 |
| XLOC_024099 | XLOC_024099 | FAM127C              | chrX:134154533-134156566 | 0 | 1 |
| XLOC_024100 | XLOC_024100 | FAM127B              | chrX:134184962-134186221 | 0 | 1 |
| XLOC_024101 | XLOC_024101 | LINC00087            | chrX:134229014-134232733 | 0 | 1 |
| XLOC_024105 | XLOC_024105 | CT45A4               | chrX:134928696-134936735 | 0 | 1 |
| XLOC_024107 | XLOC_024107 | CT45A6               | chrX:134963214-134971244 | 0 | 1 |
| XLOC_024112 | XLOC_024112 | SNORD61              | chrX:135951352-135962939 | 0 | 1 |
| XLOC_024113 | XLOC_024113 | GPR101               | chrX:136112306-136113833 | 0 | 1 |
| XLOC_024114 | XLOC_024114 | LOC158696            | chrX:137696891-137699799 | 0 | 1 |
| XLOC_024116 | XLOC_024116 | MIR504               | chrX:137713733-138287185 | 0 | 1 |

|             |             |                   |                          |   |   |
|-------------|-------------|-------------------|--------------------------|---|---|
| XLOC_024119 | XLOC_024119 | MIR505            | chrX:139006306-139006390 | 0 | 1 |
| XLOC_024120 | XLOC_024120 | CXorf66           | chrX:139037883-139047677 | 0 | 1 |
| XLOC_024121 | XLOC_024121 | SOX3              | chrX:139585151-139587225 | 0 | 1 |
| XLOC_024122 | XLOC_024122 | CDR1              | chrX:139865424-139866723 | 0 | 1 |
| XLOC_024123 | XLOC_024123 | MIR320D2          | chrX:140008336-140008384 | 0 | 1 |
| XLOC_024124 | XLOC_024124 | LDOC1             | chrX:140269930-140271310 | 0 | 1 |
| XLOC_024125 | XLOC_024125 | SPANXC            | chrX:140335595-140336646 | 0 | 1 |
| XLOC_024126 | XLOC_024126 | SPANXA2           | chrX:140590842-140738069 | 0 | 1 |
| XLOC_024128 | XLOC_024128 | MAGEC2            | chrX:141290127-141293076 | 0 | 1 |
| XLOC_024129 | XLOC_024129 | SPANXN3           | chrX:142596563-142605307 | 0 | 1 |
| XLOC_024130 | XLOC_024130 | SLITRK4           | chrX:142710594-142723926 | 0 | 1 |
| XLOC_024131 | XLOC_024131 | SPANXN2           | chrX:142795054-142804516 | 0 | 1 |
| XLOC_024132 | XLOC_024132 | MIR890            | chrX:145075792-145075869 | 0 | 1 |
| XLOC_024133 | XLOC_024133 | MIR888            | chrX:145076301-145076378 | 0 | 1 |
| XLOC_024134 | XLOC_024134 | MIR892A           | chrX:145078186-145078261 | 0 | 1 |
| XLOC_024135 | XLOC_024135 | MIR892B           | chrX:145078715-145078792 | 0 | 1 |
| XLOC_024136 | XLOC_024136 | MIR891B           | chrX:145082570-145082649 | 0 | 1 |
| XLOC_024137 | XLOC_024137 | MIR891A           | chrX:145109311-145109390 | 0 | 1 |
| XLOC_024138 | XLOC_024138 | CXorf51A          | chrX:145895621-145896249 | 0 | 1 |
| XLOC_024139 | XLOC_024139 | MIR506            | chrX:146312237-146312361 | 0 | 1 |
| XLOC_024140 | XLOC_024140 | MIR507            | chrX:146312501-146312595 | 0 | 1 |
| XLOC_024141 | XLOC_024141 | MIR508            | chrX:146318430-146318545 | 0 | 1 |
| XLOC_024142 | XLOC_024142 | MIR514B           | chrX:146331668-146331748 | 0 | 1 |
| XLOC_024143 | XLOC_024143 | MIR509-1          | chrX:146340277-146340368 | 0 | 1 |
| XLOC_024144 | XLOC_024144 | MIR509-3          | chrX:146341169-146341244 | 0 | 1 |
| XLOC_024145 | XLOC_024145 | MIR509-1          | chrX:146342049-146342143 | 0 | 1 |
| XLOC_024146 | XLOC_024146 | MIR510            | chrX:146353852-146353926 | 0 | 1 |
| XLOC_024147 | XLOC_024147 | MIR514A1          | chrX:146360764-146360862 | 0 | 1 |
| XLOC_024148 | XLOC_024148 | MIR514A2          | chrX:146363460-146363548 | 0 | 1 |
| XLOC_024149 | XLOC_024149 | MIR514A3          | chrX:146366158-146366246 | 0 | 1 |
| XLOC_024153 | XLOC_024153 | MAGEA9B           | chrX:148663308-148669116 | 0 | 1 |
| XLOC_024154 | XLOC_024154 | HSFX2             | chrX:148674171-148676974 | 0 | 1 |
| XLOC_024158 | XLOC_024158 | GABRE             | chrX:151121595-151143151 | 0 | 1 |
| XLOC_024159 | XLOC_024159 | MIR452            | chrX:151121595-151143151 | 0 | 1 |
| XLOC_024161 | XLOC_024161 | GABRA3            | chrX:151335633-151619831 | 0 | 1 |
| XLOC_024162 | XLOC_024162 | MIR105-1          | chrX:151335633-151619831 | 0 | 1 |
| XLOC_024163 | XLOC_024163 | MIR767            | chrX:151335633-151619831 | 0 | 1 |
| XLOC_024164 | XLOC_024164 | MIR105-2          | chrX:151335633-151619831 | 0 | 1 |
| XLOC_024165 | XLOC_024165 | CSAG2,CSAG3       | chrX:151876742-151877747 | 0 | 1 |
| XLOC_024167 | XLOC_024167 | MAGEA2,MAGEA2B    | chrX:151918387-151922364 | 0 | 1 |
| XLOC_024168 | XLOC_024168 | MAGEA3            | chrX:151934651-151938240 | 0 | 1 |
| XLOC_024170 | XLOC_024170 | PNMA5             | chrX:152157367-152162671 | 0 | 1 |
| XLOC_024171 | XLOC_024171 | PNMA6D            | chrX:152243995-152246070 | 0 | 1 |
| XLOC_024172 | XLOC_024172 | MAGEA1            | chrX:152481521-152486116 | 0 | 1 |
| XLOC_024179 | XLOC_024179 | PDZD4             | chrX:153067622-153096003 | 0 | 1 |
| XLOC_024185 | XLOC_024185 | MIR3202-2         | chrX:153237990-153248646 | 0 | 1 |
| XLOC_024187 | XLOC_024187 | MIR718            | chrX:153285370-153285440 | 0 | 1 |
| XLOC_024189 | XLOC_024189 | TEX28             | chrX:153485202-153523564 | 0 | 1 |
| XLOC_024197 | XLOC_024197 | CTAG1A            | chrX:153845864-153847522 | 0 | 1 |
| XLOC_024199 | XLOC_024199 | CTAG2             | chrX:153880245-153881853 | 0 | 1 |
| XLOC_024204 | XLOC_024204 | MIR1184-1         | chrX:154064063-154250998 | 0 | 1 |
| XLOC_024209 | XLOC_024209 | MIR1184-3         | chrX:154611748-154613450 | 0 | 1 |
| XLOC_024210 | XLOC_024210 | FBA1              | chrX:154686574-154688276 | 0 | 1 |
| XLOC_024211 | XLOC_024211 | H2AFB3            | chrX:154689079-154689596 | 0 | 1 |
| XLOC_024213 | XLOC_024213 | PLCXD1            | chrY:142990-170022       | 0 | 1 |
| XLOC_024214 | XLOC_024214 | LINC00685         | chrY:231384-232054       | 0 | 1 |
| XLOC_024215 | XLOC_024215 | SHOX              | chrY:535078-570146       | 0 | 1 |
| XLOC_024216 | XLOC_024216 | CSF2RA            | chrY:1337692-1378828     | 0 | 1 |
| XLOC_024217 | XLOC_024217 | MIR3690           | chrY:1337692-1378828     | 0 | 1 |
| XLOC_024218 | XLOC_024218 | IL3RA             | chrY:1405508-1451582     | 0 | 1 |
| XLOC_024219 | XLOC_024219 | ASMTL-AS1         | chrY:1469423-1522655     | 0 | 1 |
| XLOC_024220 | XLOC_024220 | AKAP17A,ASMT      | chrY:1660485-1711974     | 0 | 1 |
| XLOC_024221 | XLOC_024221 | CD99P1            | chrY:2477305-2525270     | 0 | 1 |
| XLOC_024222 | XLOC_024222 | CD99              | chrY:2559227-2609350     | 0 | 1 |
| XLOC_024223 | XLOC_024223 | XGFPY2            | chrY:2620336-2643037     | 0 | 1 |
| XLOC_024224 | XLOC_024224 | RPS4Y1            | chrY:2709622-2734997     | 0 | 1 |
| XLOC_024225 | XLOC_024225 | ZFY               | chrY:2803111-2850547     | 0 | 1 |
| XLOC_024226 | XLOC_024226 | LINC00278         | chrY:2871036-2970313     | 0 | 1 |
| XLOC_024227 | XLOC_024227 | TGIF2LY           | chrY:3447125-3448082     | 0 | 1 |
| XLOC_024229 | XLOC_024229 | TSPY2             | chrY:6114263-6117053     | 0 | 1 |
| XLOC_024230 | XLOC_024230 | TTY1B             | chrY:6258441-6296485     | 0 | 1 |
| XLOC_024231 | XLOC_024231 | TTY21             | chrY:6311474-6315118     | 0 | 1 |
| XLOC_024232 | XLOC_024232 | TTY7,TTY7B        | chrY:6317508-6325947     | 0 | 1 |
| XLOC_024233 | XLOC_024233 | TBL1Y             | chrY:6778726-6959724     | 0 | 1 |
| XLOC_024234 | XLOC_024234 | PRKY              | chrY:7142012-7249588     | 0 | 1 |
| XLOC_024235 | XLOC_024235 | TTY12             | chrY:7672964-7678723     | 0 | 1 |
| XLOC_024236 | XLOC_024236 | TTY19             | chrY:8572512-8573324     | 0 | 1 |
| XLOC_024237 | XLOC_024237 | TSPY3,TSPY4,TSPY8 | chrY:9195451-9368285     | 0 | 1 |
| XLOC_024238 | XLOC_024238 | TSPY1             | chrY:9195451-9368285     | 0 | 1 |

|             |             |                 |                        |   |   |
|-------------|-------------|-----------------|------------------------|---|---|
| XLOC_024239 | XLOC_024239 | TTY8B           | chrY:9528708-9531308   | 0 | 1 |
| XLOC_024240 | XLOC_024240 | TTY2            | chrY:9573894-9611928   | 0 | 1 |
| XLOC_024241 | XLOC_024241 | TTY22           | chrY:9638761-9650854   | 0 | 1 |
| XLOC_024242 | XLOC_024242 | TTY23B          | chrY:9748406-9749571   | 0 | 1 |
| XLOC_024243 | XLOC_024243 | TTY15           | chrY:14774297-14804153 | 0 | 1 |
| XLOC_024244 | XLOC_024244 | USP9Y           | chrY:14813159-14972768 | 0 | 1 |
| XLOC_024245 | XLOC_024245 | DDX3Y           | chrY:15016018-15032390 | 0 | 1 |
| XLOC_024246 | XLOC_024246 | TMSB4Y          | chrY:15815446-15817902 | 0 | 1 |
| XLOC_024247 | XLOC_024247 | VCY             | chrY:16168097-16168838 | 0 | 1 |
| XLOC_024248 | XLOC_024248 | NLGN4Y          | chrY:16634487-16955848 | 0 | 1 |
| XLOC_024249 | XLOC_024249 | FAM41AY1        | chrY:19612837-19628622 | 0 | 1 |
| XLOC_024250 | XLOC_024250 | CDY2A,CDY2B     | chrY:20137666-20139627 | 0 | 1 |
| XLOC_024251 | XLOC_024251 | XKRY            | chrY:20297334-20298915 | 0 | 1 |
| XLOC_024252 | XLOC_024252 | FAM224A,FAM224B | chrY:20488418-20492736 | 0 | 1 |
| XLOC_024253 | XLOC_024253 | HSFY1,HSFY2     | chrY:20708556-20752407 | 0 | 1 |
| XLOC_024254 | XLOC_024254 | TTY9A           | chrY:20891767-20935621 | 0 | 1 |
| XLOC_024255 | XLOC_024255 | XLNG2P          | chrY:21729243-21769056 | 0 | 1 |
| XLOC_024256 | XLOC_024256 | EIF1AY          | chrY:22737610-22755040 | 0 | 1 |
| XLOC_024257 | XLOC_024257 | RPS4Y2          | chrY:22917953-22942918 | 0 | 1 |
| XLOC_024258 | XLOC_024258 | RBMY1B          | chrY:23673223-23687672 | 0 | 1 |
| XLOC_024259 | XLOC_024259 | RBMY1B          | chrY:23696764-23711212 | 0 | 1 |
| XLOC_024260 | XLOC_024260 | TTY6,TTY6B      | chrY:24291111-24292981 | 0 | 1 |
| XLOC_024261 | XLOC_024261 | RBMY1F,RBMY1J   | chrY:24455005-24564028 | 0 | 1 |
| XLOC_024262 | XLOC_024262 | PRY2            | chrY:24636543-24660784 | 0 | 1 |
| XLOC_024263 | XLOC_024263 | TTY17C          | chrY:24997730-24998862 | 0 | 1 |
| XLOC_024264 | XLOC_024264 | TTY4            | chrY:25082601-25119431 | 0 | 1 |
| XLOC_024265 | XLOC_024265 | BPY2            | chrY:25130409-25151610 | 0 | 1 |
| XLOC_024266 | XLOC_024266 | DAZ2,DAZ3,DAZ4  | chrY:25365580-25437503 | 0 | 1 |
| XLOC_024267 | XLOC_024267 | TTY17C          | chrY:26631478-26632610 | 0 | 1 |
| XLOC_024268 | XLOC_024268 | TTY4            | chrY:26716348-26753172 | 0 | 1 |
| XLOC_024269 | XLOC_024269 | BPY2            | chrY:26764150-26785352 | 0 | 1 |
| XLOC_024270 | XLOC_024270 | DAZ2,DAZ3,DAZ4  | chrY:26979966-27053187 | 0 | 1 |
| XLOC_024271 | XLOC_024271 | GOLGA2P2Y       | chrY:27601457-27606322 | 0 | 1 |
| XLOC_024272 | XLOC_024272 | CSPG4P1Y        | chrY:27629054-27632852 | 0 | 1 |
| XLOC_024273 | XLOC_024273 | CDY1            | chrY:27768263-27771048 | 0 | 1 |
| XLOC_024274 | XLOC_024274 | TTY3            | chrY:27874636-27879535 | 0 | 1 |
| XLOC_024275 | XLOC_024275 | SPRY3           | chrY:59100456-59115123 | 0 | 1 |
| XLOC_024276 | XLOC_024276 | VAMP7           | chrY:59213948-59276439 | 0 | 1 |
| XLOC_024277 | XLOC_024277 | IL9R            | chrY:59330251-59343488 | 0 | 1 |
| XLOC_024278 | XLOC_024278 | GTPBP6          | chrY:171425-180887     | 0 | 1 |
| XLOC_024279 | XLOC_024279 | PPP2R3B         | chrY:244667-297690     | 0 | 1 |
| XLOC_024280 | XLOC_024280 | CRLF2           | chrY:1264886-1281530   | 0 | 1 |
| XLOC_024281 | XLOC_024281 | SLC25A6         | chrY:1455044-1461039   | 0 | 1 |
| XLOC_024282 | XLOC_024282 | ASMTL           | chrY:1469423-1522655   | 0 | 1 |
| XLOC_024283 | XLOC_024283 | P2RY8           | chrY:1531465-1606037   | 0 | 1 |
| XLOC_024284 | XLOC_024284 | DHRX,ZBED1      | chrY:2087554-2369015   | 0 | 1 |
| XLOC_024285 | XLOC_024285 | SRY             | chrY:2654895-2655792   | 0 | 1 |
| XLOC_024286 | XLOC_024286 | TTY23B          | chrY:6110486-6111651   | 0 | 1 |
| XLOC_024287 | XLOC_024287 | TTY2            | chrY:6258441-6296485   | 0 | 1 |
| XLOC_024288 | XLOC_024288 | TTY8B           | chrY:6339071-6341671   | 0 | 1 |
| XLOC_024289 | XLOC_024289 | AMELY           | chrY:6733958-6742068   | 0 | 1 |
| XLOC_024290 | XLOC_024290 | TTY16           | chrY:7567397-7569288   | 0 | 1 |
| XLOC_024291 | XLOC_024291 | TTY18           | chrY:8551410-8551919   | 0 | 1 |
| XLOC_024292 | XLOC_024292 | TTY11           | chrY:8651358-8685423   | 0 | 1 |
| XLOC_024293 | XLOC_024293 | RBMY1A3P        | chrY:9154669-9160483   | 0 | 1 |
| XLOC_024294 | XLOC_024294 | TTY20           | chrY:9167488-9172441   | 0 | 1 |
| XLOC_024295 | XLOC_024295 | FAM197Y5        | chrY:9187188-9192791   | 0 | 1 |
| XLOC_024296 | XLOC_024296 | FAM197Y5        | chrY:9195451-9368285   | 0 | 1 |
| XLOC_024297 | XLOC_024297 | FAM197Y2        | chrY:9195451-9368285   | 0 | 1 |
| XLOC_024298 | XLOC_024298 | FAM197Y2        | chrY:9195451-9368285   | 0 | 1 |
| XLOC_024299 | XLOC_024299 | FAM197Y2        | chrY:9195451-9368285   | 0 | 1 |
| XLOC_024300 | XLOC_024300 | RBMY3AP         | chrY:9448329-9452762   | 0 | 1 |
| XLOC_024301 | XLOC_024301 | TTY7,TTY7B      | chrY:9544432-9552871   | 0 | 1 |
| XLOC_024302 | XLOC_024302 | TTY21           | chrY:9555261-9558905   | 0 | 1 |
| XLOC_024303 | XLOC_024303 | TTY1B           | chrY:9573894-9611928   | 0 | 1 |
| XLOC_024306 | XLOC_024306 | VCY             | chrY:16097651-16098392 | 0 | 1 |
| XLOC_024307 | XLOC_024307 | NLGN4Y-AS1      | chrY:16634487-16955848 | 0 | 1 |
| XLOC_024308 | XLOC_024308 | FAM224A,FAM224B | chrY:19687040-19691353 | 0 | 1 |
| XLOC_024309 | XLOC_024309 | XKRY2           | chrY:19880859-19882440 | 0 | 1 |
| XLOC_024310 | XLOC_024310 | CDY2A,CDY2B     | chrY:19990139-19992100 | 0 | 1 |
| XLOC_024311 | XLOC_024311 | FAM41AY2        | chrY:20551155-20566932 | 0 | 1 |
| XLOC_024312 | XLOC_024312 | TTY9B           | chrY:20708556-20752407 | 0 | 1 |
| XLOC_024313 | XLOC_024313 | HSFY1,HSFY2     | chrY:20891767-20935621 | 0 | 1 |
| XLOC_024314 | XLOC_024314 | NCRNA00185      | chrY:21034386-21040114 | 0 | 1 |
| XLOC_024315 | XLOC_024315 | TTY14           | chrY:21094584-21239302 | 0 | 1 |
| XLOC_024317 | XLOC_024317 | BCORP1          | chrY:21617316-21665039 | 0 | 1 |
| XLOC_024318 | XLOC_024318 | KDM5D           | chrY:21867300-21906825 | 0 | 1 |
| XLOC_024319 | XLOC_024319 | TTY10           | chrY:22627553-22681114 | 0 | 1 |
| XLOC_024320 | XLOC_024320 | RBMY2EP         | chrY:23557033-23563448 | 0 | 1 |

|             |             |            |                           |             |          |
|-------------|-------------|------------|---------------------------|-------------|----------|
| XLOC_024321 | XLOC_024321 | TTY13      | chrY:23745485-23756552    | 0           | 1        |
| XLOC_024322 | XLOC_024322 | RBMY1B     | chrY:24026222-24040673    | 0           | 1        |
| XLOC_024323 | XLOC_024323 | RBMY1B     | chrY:24049764-24064214    | 0           | 1        |
| XLOC_024324 | XLOC_024324 | PRY        | chrY:24217902-24242154    | 0           | 1        |
| XLOC_024325 | XLOC_024325 | RBMY1J     | chrY:24314688-24329089    | 0           | 1        |
| XLOC_024326 | XLOC_024326 | TTY5       | chrY:24442944-24445023    | 0           | 1        |
| XLOC_024327 | XLOC_024327 | TTY6,TTY6B | chrY:24585736-24587606    | 0           | 1        |
| XLOC_024328 | XLOC_024328 | DAZ1,DAZ4  | chrY:25275501-25345254    | 0           | 1        |
| XLOC_024329 | XLOC_024329 | TTY3B      | chrY:26082873-26087769    | 0           | 1        |
| XLOC_024330 | XLOC_024330 | CDY1       | chrY:26191376-26194161    | 0           | 1        |
| XLOC_024331 | XLOC_024331 | CSPG4P1Y   | chrY:26329580-26333378    | 0           | 1        |
| XLOC_024332 | XLOC_024332 | GOLGA2P2Y  | chrY:26356113-26360978    | 0           | 1        |
| XLOC_024333 | XLOC_024333 | DAZ3,DAZ4  | chrY:26909215-26959639    | 0           | 1        |
| XLOC_024334 | XLOC_024334 | BPY2C      | chrY:27177049-27198251    | 0           | 1        |
| XLOC_024335 | XLOC_024335 | TTY4B      | chrY:27209229-27246039    | 0           | 1        |
| XLOC_024336 | XLOC_024336 | TTY17B     | chrY:27329789-27330920    | 0           | 1        |
| XLOC_006652 | XLOC_006652 | KIF26A     | chr14:104605059-104647235 | 1.56E-05    | 0.999791 |
| XLOC_019038 | XLOC_019038 | CDK19      | chr6:110931180-111136412  | 7.86E-05    | 0.999791 |
| XLOC_002358 | XLOC_002358 | RPP38      | chr10:15137383-15146256   | 0.000118404 | 0.999791 |
| XLOC_022356 | XLOC_022356 | ALDH1B1    | chr9:38392660-38398662    | 0.000130112 | 0.999791 |
| XLOC_014482 | XLOC_014482 | ASPHD2     | chr22:26825279-26840978   | 0.000131749 | 0.999791 |
| XLOC_001672 | XLOC_001672 | SASS6      | chr1:100549101-100598511  | 0.000150405 | 0.999791 |
| XLOC_022198 | XLOC_022198 | PTK2       | chr8:141668480-142011412  | 0.000170834 | 0.999791 |
| XLOC_001585 | XLOC_001585 | DOCK7      | chr1:62920396-63154039    | 0.000186513 | 0.999791 |
| XLOC_004215 | XLOC_004215 | UBE2L6     | chr1:157319127-57335803   | 0.000295482 | 0.999791 |
| XLOC_021532 | XLOC_021532 | FZD3       | chr8:28351721-28431785    | 0.00035881  | 0.999791 |
| XLOC_013790 | XLOC_013790 | DNAJC5     | chr20:62526454-62567384   | 0.000363182 | 0.999791 |
| XLOC_004868 | XLOC_004868 | ESPL1      | chr12:53662082-53687427   | 0.00036511  | 0.999791 |
| XLOC_008103 | XLOC_008103 | RBL2       | chr16:53468350-53537170   | 0.000430454 | 0.999791 |
| XLOC_022698 | XLOC_022698 | EHMT1      | chr9:140513443-140730578  | 0.000480863 | 0.999791 |
| XLOC_010724 | XLOC_010724 | ZNF430     | chr19:21203425-21242852   | 0.000490878 | 0.999791 |
| XLOC_008239 | XLOC_008239 | NUDT7      | chr16:77756388-77776157   | 0.000507443 | 0.999791 |
| XLOC_008443 | XLOC_008443 | RPS15A     | chr16:18794276-18801656   | 0.00052681  | 0.999791 |
| XLOC_002644 | XLOC_002644 | PAX2       | chr10:102505467-102589698 | 0.000540514 | 0.999791 |
| XLOC_022586 | XLOC_022586 | URM1       | chr9:131133597-131154295  | 0.000552479 | 0.999791 |
| XLOC_007347 | XLOC_007347 | MESDC1     | chr15:81293294-81296345   | 0.000589264 | 0.999791 |
| XLOC_002664 | XLOC_002664 | FBXL15     | chr10:104162373-104182893 | 0.000592899 | 0.999791 |
| XLOC_005060 | XLOC_005060 | PARPBP     | chr12:102513955-102591614 | 0.000669471 | 0.999791 |
| XLOC_015054 | XLOC_015054 | ABHD5      | chr3:43732374-43764217    | 0.000688517 | 0.999791 |
| XLOC_022865 | XLOC_022865 | CBWD6      | chr9:69204537-69262593    | 0.000692378 | 0.999791 |
| XLOC_004978 | XLOC_004978 | SLC35E3    | chr12:69139935-69159853   | 0.000736968 | 0.999791 |
| XLOC_011765 | XLOC_011765 | DMWD       | chr19:46286263-46296060   | 0.000742462 | 0.999791 |
| XLOC_005711 | XLOC_005711 | DDX54      | chr12:113587662-113623284 | 0.000776002 | 0.999791 |
| XLOC_021161 | XLOC_021161 | SAMD9      | chr7:92728825-92747336    | 0.000786277 | 1        |
| XLOC_011014 | XLOC_011014 | PPFIA3     | chr19:49622662-49654280   | 0.000828388 | 0.999791 |
| XLOC_003138 | XLOC_003138 | GPAM       | chr10:113909621-113943537 | 0.000877723 | 0.999791 |
| XLOC_013083 | XLOC_013083 | FHL2       | chr2:105977282-106055230  | 0.000903738 | 0.999791 |
| XLOC_020611 | XLOC_020611 | CASD1      | chr7:94139169-94186328    | 0.00090401  | 0.999791 |
| XLOC_000347 | XLOC_000347 | RNF220     | chr1:44870959-45117396    | 0.000952196 | 0.999791 |
| XLOC_010541 | XLOC_010541 | TRAPPC5    | chr19:7745706-7747748     | 0.000968291 | 0.999791 |
| XLOC_008981 | XLOC_008981 | TMEM98     | chr17:31254927-31288667   | 0.00103742  | 0.999791 |
| XLOC_011743 | XLOC_011743 | ZNF180     | chr19:44979858-45004574   | 0.00105141  | 0.999791 |
| XLOC_004564 | XLOC_004564 | DDX6       | chr11:118618472-118661972 | 0.0010539   | 0.999791 |
| XLOC_005912 | XLOC_005912 | SUGT1      | chr13:53226830-53262433   | 0.00114323  | 0.999791 |
| XLOC_018317 | XLOC_018317 | MAD2L1BP   | chr6:43597278-43608688    | 0.00116687  | 0.999791 |
| XLOC_013757 | XLOC_013757 | SS18L1     | chr20:60718821-60757566   | 0.00123008  | 0.999791 |
| XLOC_017058 | XLOC_017058 | NKD2       | chr5:1009076-1038927      | 0.00126645  | 0.999791 |
| XLOC_006356 | XLOC_006356 | GPR137C    | chr14:53019865-53104431   | 0.00130224  | 1        |
| XLOC_019029 | XLOC_019029 | CD164      | chr6:109687716-109703762  | 0.00137179  | 0.999791 |
| XLOC_011082 | XLOC_011082 | ZNF480     | chr19:52800425-52829174   | 0.00138917  | 0.999791 |
| XLOC_003338 | XLOC_003338 | TEAD1      | chr11:12695968-12966284   | 0.00140411  | 0.999791 |
| XLOC_015045 | XLOC_015045 | NKTR       | chr3:42589458-42690233    | 0.00147905  | 0.999791 |
| XLOC_015993 | XLOC_015993 | PLSCR1     | chr3:146232966-146262628  | 0.00150054  | 0.999791 |
| XLOC_013363 | XLOC_013363 | RNF25      | chr2:219528586-219567440  | 0.00150538  | 0.999791 |
| XLOC_011347 | XLOC_011347 | NDUFA11    | chr19:5891286-5904024     | 0.00152186  | 0.999791 |
| XLOC_007705 | XLOC_007705 | NRG4       | chr15:76234327-76304785   | 0.00152466  | 0.999791 |
| XLOC_000309 | XLOC_000309 | ZFP69      | chr1:40943301-40962015    | 0.0015575   | 0.999791 |
| XLOC_010763 | XLOC_010763 | LSM14A     | chr19:34663351-34720420   | 0.00155997  | 0.999791 |
| XLOC_006903 | XLOC_006903 | TGFB3      | chr14:76424441-76448092   | 0.00156299  | 0.999791 |
| XLOC_008478 | XLOC_008478 | ARHGAP17   | chr16:24930711-25026675   | 0.0015685   | 0.999791 |
| XLOC_015107 | XLOC_015107 | APEH       | chr3:49711434-49720934    | 0.0015915   | 0.999791 |
| XLOC_020364 | XLOC_020364 | C7orf26    | chr7:6629914-6648355      | 0.00159674  | 0.999791 |
| XLOC_003780 | XLOC_003780 | JRKL       | chr1:96123157-96126727    | 0.00160796  | 0.999791 |
| XLOC_022175 | XLOC_022175 | FAM49B     | chr8:130851838-131028897  | 0.00161576  | 0.999791 |
| XLOC_003001 | XLOC_003001 | AGAP5      | chr10:75434032-75457554   | 0.00163963  | 0.999791 |
| XLOC_009673 | XLOC_009673 | TOP2A      | chr17:38544772-38574202   | 0.00165825  | 0.999791 |
| XLOC_007941 | XLOC_007941 | SNN        | chr16:11762288-11836648   | 0.0017098   | 0.999791 |
| XLOC_011498 | XLOC_011498 | BRD4       | chr19:15348300-15391262   | 0.00175096  | 0.999791 |
| XLOC_000211 | XLOC_000211 | PIGV       | chr1:27114453-27124894    | 0.00180245  | 0.999791 |



|             |             |                   |                           |            |          |
|-------------|-------------|-------------------|---------------------------|------------|----------|
| XLOC_004476 | XLOC_004476 | SESN3             | chr11:94898676-94965705   | 0.00183102 | 1        |
| XLOC_022127 | XLOC_022127 | UBR5              | chr8:103264501-103424917  | 0.00184933 | 0.999791 |
| XLOC_016625 | XLOC_016625 | DGKQ              | chr4:952671-967348        | 0.00187347 | 0.999791 |
| XLOC_021665 | XLOC_021665 | OSGIN2            | chr8:90914095-90940095    | 0.00188404 | 0.999791 |
| XLOC_022704 | XLOC_022704 | WASH1             | chr9:11986-29739          | 0.00191131 | 0.999791 |
| XLOC_005138 | XLOC_005138 | GATC              | chr12:120884240-120907558 | 0.00197163 | 0.999791 |
| XLOC_022046 | XLOC_022046 | UBE2W             | chr8:74692331-74791145    | 0.00197181 | 0.999791 |
| XLOC_011447 | XLOC_011447 | ZNF442            | chr19:12460184-12476475   | 0.00197506 | 0.999791 |
| XLOC_003865 | XLOC_003865 | CBL               | chr11:119076985-119178859 | 0.00198885 | 0.999791 |
| XLOC_004065 | XLOC_004065 | DENND5A           | chr11:9160374-9286873     | 0.0020034  | 0.999791 |
| XLOC_013625 | XLOC_013625 | CEP250            | chr20:34043222-34099803   | 0.00201048 | 0.999791 |
| XLOC_013904 | XLOC_013904 | ZNF337            | chr20:25654850-25677469   | 0.00205062 | 0.999791 |
| XLOC_022119 | XLOC_022119 | RNF19A            | chr8:101269287-101322379  | 0.00205551 | 0.999791 |
| XLOC_006824 | XLOC_006824 | ATG14             | chr14:55833108-55878576   | 0.00213263 | 0.999791 |
| XLOC_006440 | XLOC_006440 | PTGR2             | chr14:74318533-74352168   | 0.00216002 | 0.999791 |
| XLOC_020644 | XLOC_020644 | STAG3             | chr7:99775537-99869855    | 0.002169   | 1        |
| XLOC_002215 | XLOC_002215 | ACBD3             | chr1:226332379-226374423  | 0.0021704  | 0.999791 |
| XLOC_011836 | XLOC_011836 | TEAD2             | chr19:49838676-49865714   | 0.0021928  | 0.999791 |
| XLOC_000682 | XLOC_000682 | SETDB1            | chr1:150898814-150937220  | 0.00226183 | 0.999791 |
| XLOC_001918 | XLOC_001918 | HDGF              | chr1:156711898-156722240  | 0.00227209 | 0.999791 |
| XLOC_006686 | XLOC_006686 | TMEM55B           | chr14:20926011-20929637   | 0.00230724 | 0.999791 |
| XLOC_009799 | XLOC_009799 | WNT3              | chr17:44841686-44896082   | 0.00235245 | 0.999791 |
| XLOC_017599 | XLOC_017599 | MTMR12            | chr5:32227110-32313114    | 0.00235313 | 0.999791 |
| XLOC_020426 | XLOC_020426 | DKFZP586H1420     | chr7:30409665-30412410    | 0.00236431 | 0.999791 |
| XLOC_012257 | XLOC_012257 | HTRA2             | chr2:74753774-74784678    | 0.00240139 | 0.999791 |
| XLOC_013135 | XLOC_013135 | IWS1              | chr2:128238382-128284087  | 0.00245428 | 0.999791 |
| XLOC_002683 | XLOC_002683 | GSTO2             | chr10:106028630-106059176 | 0.00246475 | 0.999791 |
| XLOC_008295 | XLOC_008295 | SPG7              | chr16:89574804-89624174   | 0.00246482 | 0.999791 |
| XLOC_021490 | XLOC_021490 | ATP6V1B2          | chr8:20054703-20079207    | 0.00246734 | 0.999791 |
| XLOC_011747 | XLOC_011747 | ZNF296            | chr19:45574757-45579688   | 0.00252615 | 0.999791 |
| XLOC_023836 | XLOC_023836 | ZNF182            | chrX:47834249-47863394    | 0.00253878 | 0.999791 |
| XLOC_023157 | XLOC_023157 | UBAC1             | chr9:138824814-138853226  | 0.00254379 | 0.999791 |
| XLOC_008179 | XLOC_008179 | CTCF              | chr16:67596309-67673088   | 0.00257648 | 0.999791 |
| XLOC_016192 | XLOC_016192 | ZBTB49            | chr4:4291923-4323513      | 0.00257995 | 0.999791 |
| XLOC_000735 | XLOC_000735 | CREB3L4           | chr1:153931574-153950451  | 0.00260578 | 0.999791 |
| XLOC_013507 | XLOC_013507 | CDC25B            | chr20:3776400-3786761     | 0.0026223  | 0.999791 |
| XLOC_009086 | XLOC_009086 | RUNDC1            | chr17:41132581-41145707   | 0.00266529 | 0.999791 |
| XLOC_013336 | XLOC_013336 | IDH1              | chr2:209100952-209119806  | 0.00267845 | 0.999791 |
| XLOC_022054 | XLOC_022054 | MRPS28            | chr8:80831094-80942506    | 0.00268206 | 0.999791 |
| XLOC_008482 | XLOC_008482 | IL21R-AS1         | chr16:27413482-27464714   | 0.00272668 | 1        |
| XLOC_007999 | XLOC_007999 | PLK1              | chr16:23690200-23724821   | 0.0027268  | 0.999791 |
| XLOC_017518 | XLOC_017518 | LOC728554         | chr5:177302261-177311269  | 0.00273743 | 0.999791 |
| XLOC_013022 | XLOC_013022 | IMMT              | chr2:86371054-8642893     | 0.00276214 | 0.999791 |
| XLOC_007276 | XLOC_007276 | KIF23             | chr15:69706626-69740764   | 0.00276444 | 0.999791 |
| XLOC_011463 | XLOC_011463 | DNASE2            | chr19:12986024-12992335   | 0.0027801  | 0.999791 |
| XLOC_017399 | XLOC_017399 | RBM27             | chr5:145583162-145668784  | 0.00279326 | 0.999791 |
| XLOC_022226 | XLOC_022226 | SCRIB             | chr8:144873089-144897549  | 0.00289368 | 0.999791 |
| XLOC_010682 | XLOC_010682 | GLT25D1           | chr19:17666510-17693965   | 0.00291134 | 0.999791 |
| XLOC_000326 | XLOC_000326 | ERMAP             | chr1:43272722-43310660    | 0.00293043 | 0.999791 |
| XLOC_011579 | XLOC_011579 | UQCRFS1           | chr19:29698166-29704136   | 0.00294046 | 0.999791 |
| XLOC_023712 | XLOC_023712 | FAM50A            | chrX:153672472-153679002  | 0.00297995 | 0.999791 |
| XLOC_022899 | XLOC_022899 | UBQLN1            | chr9:86274877-86323168    | 0.0030047  | 0.999791 |
| XLOC_013533 | XLOC_013533 | NDUFA5            | chr20:13765671-13799067   | 0.00302217 | 0.999791 |
| XLOC_007843 | XLOC_007843 | SOX8              | chr16:1031807-1036979     | 0.00306239 | 0.999791 |
| XLOC_010593 | XLOC_010593 | CCDC159           | chr19:11457180-11465620   | 0.00312534 | 0.999791 |
| XLOC_023064 | XLOC_023064 | STRBP             | chr9:125883907-126030855  | 0.00312984 | 0.999791 |
| XLOC_017745 | XLOC_017745 | SPATA9            | chr5:94994019-95018714    | 0.00321559 | 1        |
| XLOC_013130 | XLOC_013130 | BIN1              | chr2:127805598-127864903  | 0.00326765 | 0.999791 |
| XLOC_010111 | XLOC_010111 | SOGA2             | chr18:8717368-8832775     | 0.00330636 | 0.999791 |
| XLOC_002984 | XLOC_002984 | SPOCK2            | chr10:73818791-73848790   | 0.00333762 | 1        |
| XLOC_022010 | XLOC_022010 | ASPH              | chr8:62200524-62627199    | 0.00335985 | 0.999791 |
| XLOC_008368 | XLOC_008368 | PRSS27            | chr16:2762422-2770552     | 0.00336372 | 0.999791 |
| XLOC_011472 | XLOC_011472 | LOC284454.MIR24-2 | chr19:13945329-13947173   | 0.00342867 | 0.999791 |
| XLOC_020639 | XLOC_020639 | COP56             | chr7:99686582-99689822    | 0.00349441 | 0.999791 |
| XLOC_006253 | XLOC_006253 | PARP2             | chr14:20811772-20826063   | 0.00355804 | 0.999791 |
| XLOC_004806 | XLOC_004806 | PPHLN1            | chr12:42719946-42842422   | 0.00360092 | 0.999791 |
| XLOC_002140 | XLOC_002140 | DSTYK             | chr1:205111630-205180727  | 0.00369063 | 0.999791 |
| XLOC_001883 | XLOC_001883 | KRTCAP2           | chr1:155141883-155145804  | 0.00370568 | 0.999791 |
| XLOC_009335 | XLOC_009335 | C17orf89          | chr17:79213110-79215098   | 0.00373272 | 0.999791 |
| XLOC_012751 | XLOC_012751 | ANO7              | chr2:242127923-242164791  | 0.00382422 | 0.999791 |
| XLOC_023186 | XLOC_023186 | SAPCD2            | chr9:139956578-139965028  | 0.00383858 | 0.999791 |
| XLOC_021791 | XLOC_021791 | CYC1              | chr8:145149959-145152428  | 0.0038803  | 0.999791 |
| XLOC_016087 | XLOC_016087 | ALG3              | chr3:183948316-183967313  | 0.00390474 | 0.999791 |
| XLOC_000862 | XLOC_000862 | SFT2D2            | chr1:168195254-168212088  | 0.00392592 | 0.999791 |
| XLOC_006104 | XLOC_006104 | TPT1              | chr13:45911303-45915297   | 0.00394856 | 0.999791 |
| XLOC_010380 | XLOC_010380 | FECH              | chr18:55212072-55253969   | 0.00397385 | 0.999791 |
| XLOC_003132 | XLOC_003132 | XPNPEP1           | chr10:111624523-111683311 | 0.00403808 | 0.999791 |
| XLOC_016074 | XLOC_016074 | MRPL47            | chr3:179306254-179322434  | 0.00406121 | 0.999791 |
| XLOC_000037 | XLOC_000037 | FAM213B           | chr1:2517898-2564481      | 0.00412323 | 0.999791 |

|             |             |                     |                           |            |          |
|-------------|-------------|---------------------|---------------------------|------------|----------|
| XLOC_009175 | XLOC_009175 | NME1,NME1-NME2,NME2 | chr17:49230896-49249105   | 0.00415715 | 0.999791 |
| XLOC_001528 | XLOC_001528 | EFCAB14             | chr1:47139707-47184736    | 0.00419243 | 0.999791 |
| XLOC_003362 | XLOC_003362 | ZDHHC13             | chr11:19138691-19197967   | 0.00428817 | 0.999791 |
| XLOC_000731 | XLOC_000731 | SNAPIN              | chr1:153631129-153643504  | 0.00431901 | 0.999791 |
| XLOC_018824 | XLOC_018824 | C6orf1              | chr6:34214156-34216904    | 0.0043895  | 0.999791 |
| XLOC_000076 | XLOC_000076 | PGD                 | chr1:10459084-10480201    | 0.00439011 | 0.999791 |
| XLOC_012754 | XLOC_012754 | BOK                 | chr2:242483800-242513553  | 0.00439477 | 0.999791 |
| XLOC_024108 | XLOC_024108 | MMGT1               | chrX:135044230-135056134  | 0.0044265  | 0.999791 |
| XLOC_012178 | XLOC_012178 | PPP1R21             | chr2:48667907-48742531    | 0.0044985  | 0.999791 |
| XLOC_000466 | XLOC_000466 | MSH4                | chr1:76262555-76378923    | 0.00454023 | 0.999791 |
| XLOC_011258 | XLOC_011258 | PPAP2C              | chr19:281043-291435       | 0.00455927 | 0.999791 |
| XLOC_005026 | XLOC_005026 | CRADD               | chr12:94071150-94244531   | 0.00456841 | 0.999791 |
| XLOC_015582 | XLOC_015582 | IQSEC1              | chr3:12938541-13114617    | 0.00458091 | 0.999791 |
| XLOC_015163 | XLOC_015163 | KCTD6               | chr3:58477822-58488087    | 0.00458316 | 0.999791 |
| XLOC_022891 | XLOC_022891 | RFK                 | chr9:79000432-79009444    | 0.00458828 | 0.999791 |
| XLOC_016288 | XLOC_016288 | UBE2K               | chr4:39699663-39784410    | 0.00461396 | 0.999791 |
| XLOC_022405 | XLOC_022405 | TLE4                | chr9:82186877-82341656    | 0.00464803 | 0.999791 |
| XLOC_015729 | XLOC_015729 | IFRD2               | chr3:50316517-50330026    | 0.00465239 | 0.999791 |
| XLOC_016475 | XLOC_016475 | UGT8                | chr4:115519610-115598202  | 0.0047086  | 0.999791 |
| XLOC_023465 | XLOC_023465 | TAF1                | chrX:70430034-70948962    | 0.00471313 | 0.999791 |
| XLOC_016004 | XLOC_016004 | SERP1               | chr3:150259779-150264428  | 0.00472661 | 0.999791 |
| XLOC_005514 | XLOC_005514 | DNAJC14             | chr12:56211805-56236767   | 0.0047388  | 0.999791 |
| XLOC_017390 | XLOC_017390 | RELL2               | chr5:141016516-141030986  | 0.00474205 | 0.999791 |
| XLOC_006300 | XLOC_006300 | TSSK4               | chr14:24674925-24677454   | 0.00475256 | 1        |
| XLOC_011846 | XLOC_011846 | PTOV1-AS1           | chr19:50341902-50363999   | 0.00479909 | 0.999791 |
| XLOC_006364 | XLOC_006364 | LGALS3              | chr14:55595934-55612148   | 0.0048235  | 0.999791 |
| XLOC_021168 | XLOC_021168 | BET1                | chr7:93620999-93633690    | 0.00483504 | 0.999791 |
| XLOC_021651 | XLOC_021651 | CHMP4C              | chr8:82644687-82671748    | 0.00483569 | 0.999791 |
| XLOC_013295 | XLOC_013295 | SF3B1               | chr2:198256697-198299771  | 0.00484213 | 0.999791 |
| XLOC_004122 | XLOC_004122 | LGR4                | chr11:27387507-27494334   | 0.00484911 | 0.999791 |
| XLOC_010262 | XLOC_010262 | RBFA                | chr18:77794345-77810652   | 0.00485813 | 0.999791 |
| XLOC_009481 | XLOC_009481 | SLC25A35            | chr17:8191081-8198170     | 0.00491785 | 0.999791 |
| XLOC_011422 | XLOC_011422 | KRI1                | chr19:10654646-10676702   | 0.00492077 | 0.999791 |
| XLOC_008723 | XLOC_008723 | RNF166              | chr16:88762902-88772829   | 0.00496376 | 0.999791 |
| XLOC_000250 | XLOC_000250 | KPNA6               | chr1:32573643-32642168    | 0.00496847 | 0.999791 |
| XLOC_012248 | XLOC_012248 | TET3                | chr2:74273449-74335302    | 0.00502648 | 0.999791 |
| XLOC_011071 | XLOC_011071 | ZNF175              | chr19:52074530-52092991   | 0.00503248 | 0.999791 |
| XLOC_009048 | XLOC_009048 | RARA                | chr17:38465422-38513895   | 0.00504897 | 0.999791 |
| XLOC_011686 | XLOC_011686 | C19orf54            | chr19:41223007-41255828   | 0.00509517 | 0.999791 |
| XLOC_022218 | XLOC_022218 | MROH6               | chr8:144648362-144654928  | 0.00509604 | 0.999791 |
| XLOC_011547 | XLOC_011547 | NR2C2AP             | chr19:19256375-19314238   | 0.00511118 | 0.999791 |
| XLOC_006657 | XLOC_006657 | ZBTB42              | chr14:105266932-105271048 | 0.00512887 | 0.999791 |
| XLOC_016632 | XLOC_016632 | SLBP                | chr4:1694526-1714030      | 0.00531439 | 0.999791 |
| XLOC_000932 | XLOC_000932 | RNF2                | chr1:185014550-185071740  | 0.00532554 | 0.999791 |
| XLOC_003124 | XLOC_003124 | SH3PXD2A            | chr10:105353783-105615164 | 0.00538235 | 0.999791 |
| XLOC_016602 | XLOC_016602 | FAM149A             | chr4:187065994-187093817  | 0.00540572 | 0.999791 |
| XLOC_015612 | XLOC_015612 | TOP2B               | chr3:25469753-25705863    | 0.00541646 | 0.999791 |
| XLOC_012111 | XLOC_012111 | BRE                 | chr2:28004265-28561767    | 0.00543148 | 0.999791 |
| XLOC_004460 | XLOC_004460 | SLC36A4             | chr11:92880849-92931095   | 0.00545597 | 0.999791 |
| XLOC_014850 | XLOC_014850 | POLR3H              | chr22:41865128-41940479   | 0.00546167 | 0.999791 |
| XLOC_009101 | XLOC_009101 | C17orf53            | chr17:42219273-42239844   | 0.00549921 | 0.999791 |
| XLOC_000289 | XLOC_000289 | ZC3H12A             | chr1:37940118-37949978    | 0.00553628 | 0.999791 |
| XLOC_014651 | XLOC_014651 | SHANK3              | chr22:51113069-51171640   | 0.00555797 | 0.999791 |
| XLOC_001897 | XLOC_001897 | KIAA0907            | chr1:155882835-155904188  | 0.0055848  | 0.999791 |
| XLOC_014125 | XLOC_014125 | GRIK1-AS2           | chr21:30909253-31312282   | 0.00559602 | 1        |
| XLOC_011847 | XLOC_011847 | PNKP                | chr19:50364459-50370822   | 0.00566381 | 0.999791 |
| XLOC_022581 | XLOC_022581 | C9orf16             | chr9:130922538-130926207  | 0.00573658 | 0.999791 |
| XLOC_006849 | XLOC_006849 | WDR89               | chr14:64063756-64108641   | 0.00574346 | 0.999791 |
| XLOC_007138 | XLOC_007138 | EIF2AK4             | chr15:40226346-40327797   | 0.00574993 | 0.999791 |
| XLOC_022984 | XLOC_022984 | GRIN3A              | chr9:104331633-104500862  | 0.00577576 | 1        |
| XLOC_012547 | XLOC_012547 | NUP35               | chr2:183989082-184026408  | 0.0057922  | 0.999791 |
| XLOC_009068 | XLOC_009068 | STAT5A              | chr17:40439564-40463960   | 0.00584302 | 0.999791 |
| XLOC_013491 | XLOC_013491 | NOP56               | chr20:2633177-2639039     | 0.005872   | 0.999791 |
| XLOC_009261 | XLOC_009261 | RPL38               | chr17:72199794-72206019   | 0.00590011 | 0.999791 |
| XLOC_012957 | XLOC_012957 | NFU1                | chr2:69623244-69664760    | 0.00590726 | 0.999791 |
| XLOC_008702 | XLOC_008702 | KIAA1609            | chr16:84509965-84538288   | 0.00591134 | 0.999791 |
| XLOC_016463 | XLOC_016463 | CCDC109B            | chr4:110481354-110608872  | 0.0059665  | 0.999791 |
| XLOC_006888 | XLOC_006888 | ENTPD5              | chr14:74433180-74486026   | 0.00599953 | 0.999791 |
| XLOC_001463 | XLOC_001463 | MTF1                | chr1:38275238-38325292    | 0.00604171 | 0.999791 |
| XLOC_008629 | XLOC_008629 | GFOD2               | chr16:67708435-67753273   | 0.00608315 | 0.999791 |
| XLOC_021806 | XLOC_021806 | LRRC14              | chr8:145743348-145754458  | 0.00608955 | 0.999791 |
| XLOC_022901 | XLOC_022901 | KIF27               | chr9:86451614-86536380    | 0.00608971 | 1        |
| XLOC_000730 | XLOC_000730 | CHTOP               | chr1:153591275-153618782  | 0.00617201 | 0.999791 |
| XLOC_003062 | XLOC_003062 | ALDH18A1            | chr10:97365685-97416567   | 0.00621077 | 0.999791 |
| XLOC_005696 | XLOC_005696 | GPN3                | chr12:110890290-110928192 | 0.00621718 | 0.999791 |
| XLOC_007622 | XLOC_007622 | FAM96A              | chr15:64364760-64386207   | 0.00626068 | 0.999791 |
| XLOC_016398 | XLOC_016398 | BMP2K               | chr4:79697531-79833341    | 0.00629123 | 0.999791 |
| XLOC_010176 | XLOC_010176 | C18orf21            | chr18:33552587-33559250   | 0.00630455 | 0.999791 |
| XLOC_007749 | XLOC_007749 | BTBD1               | chr15:83685180-83736167   | 0.00634955 | 0.999791 |

|             |             |                        |                           |            |          |
|-------------|-------------|------------------------|---------------------------|------------|----------|
| XLOC_011186 | XLOC_011186 | RPL28                  | chr19:55897299-55903451   | 0.0064195  | 0.999791 |
| XLOC_005691 | XLOC_005691 | GLTP                   | chr12:110288747-110318293 | 0.00643775 | 0.999791 |
| XLOC_008242 | XLOC_008242 | WVOX                   | chr16:78133326-79246564   | 0.00644606 | 0.999791 |
| XLOC_001921 | XLOC_001921 | ARHGEF11               | chr1:156904631-157015162  | 0.00648551 | 0.999791 |
| XLOC_007971 | XLOC_007971 | CCP110                 | chr16:19535178-19564728   | 0.00651107 | 0.999791 |
| XLOC_008068 | XLOC_008068 | ZNF646                 | chr16:31085742-31100130   | 0.00655435 | 0.999791 |
| XLOC_011517 | XLOC_011517 | NR2F6                  | chr19:17342693-17356151   | 0.006564   | 0.999791 |
| XLOC_001099 | XLOC_001099 | GALNT2                 | chr1:230202955-230417875  | 0.00657421 | 0.999791 |
| XLOC_015760 | XLOC_015760 | NT5DC2                 | chr3:52529355-52569093    | 0.00658221 | 0.999791 |
| XLOC_010692 | XLOC_010692 | MAST3                  | chr19:18208602-18262499   | 0.00660723 | 0.999791 |
| XLOC_008713 | XLOC_008713 | MTHFS                  | chr16:86563781-86588841   | 0.00661988 | 0.999791 |
| XLOC_005331 | XLOC_005331 | WBP11                  | chr12:14939411-14956401   | 0.00662938 | 0.999791 |
| XLOC_009832 | XLOC_009832 | ZNF652                 | chr17:47366567-47439835   | 0.00666549 | 0.999791 |
| XLOC_014400 | XLOC_014400 | PEX26                  | chr22:18560685-18573797   | 0.00667322 | 0.999791 |
| XLOC_018263 | XLOC_018263 | MAPK14                 | chr6:35995453-36079013    | 0.00670228 | 0.999791 |
| XLOC_010455 | XLOC_010455 | RPS15                  | chr19:1438362-1440492     | 0.00674803 | 0.999791 |
| XLOC_021172 | XLOC_021172 | PON2                   | chr7:95034173-95064384    | 0.00675221 | 0.999791 |
| XLOC_021910 | XLOC_021910 | TNFRSF10B              | chr8:22844929-22941132    | 0.00675334 | 0.999791 |
| XLOC_005240 | XLOC_005240 | MRPL51                 | chr12:6601315-6602471     | 0.0067555  | 0.999791 |
| XLOC_007467 | XLOC_007467 | HERC2                  | chr15:28356182-28567298   | 0.00682441 | 0.999791 |
| XLOC_012263 | XLOC_012263 | MRPL19                 | chr2:75873908-75889334    | 0.00685435 | 0.999791 |
| XLOC_018365 | XLOC_018365 | PRIM2                  | chr6:57182421-57513376    | 0.00686159 | 0.999791 |
| XLOC_015037 | XLOC_015037 | RPL14                  | chr3:40498782-40503863    | 0.00689028 | 0.999791 |
| XLOC_008767 | XLOC_008767 | EMC6                   | chr17:3539761-3599698     | 0.0069215  | 0.999791 |
| XLOC_007896 | XLOC_007896 | KREMEN2                | chr16:3014216-3018384     | 0.00693685 | 0.999791 |
| XLOC_016279 | XLOC_016279 | KLF3                   | chr4:38614321-38703129    | 0.0069393  | 0.999791 |
| XLOC_008954 | XLOC_008954 | ANKRD13B               | chr17:27920526-27948441   | 0.00695547 | 0.999791 |
| XLOC_006406 | XLOC_006406 | GPHN                   | chr14:66974124-67648525   | 0.00696011 | 0.999791 |
| XLOC_012162 | XLOC_012162 | CAMKMT                 | chr2:44589042-44999731    | 0.00696013 | 0.999791 |
| XLOC_002514 | XLOC_002514 | NUDT13                 | chr10:74870209-74891581   | 0.00696908 | 0.999791 |
| XLOC_017292 | XLOC_017292 | PHAX                   | chr5:125936606-125962944  | 0.00697768 | 0.999791 |
| XLOC_010089 | XLOC_010089 | USP14                  | chr18:158482-213739       | 0.00698536 | 0.999791 |
| XLOC_009801 | XLOC_009801 | CDC27                  | chr17:45195310-45266665   | 0.00699792 | 0.999791 |
| XLOC_015728 | XLOC_015728 | LUST                   | chr3:50126340-50156397    | 0.00700388 | 1        |
| XLOC_022552 | XLOC_022552 | LOC100129034           | chr9:127115743-127177752  | 0.00700712 | 0.999791 |
| XLOC_011481 | XLOC_011481 | ASF1B                  | chr19:14230320-14247440   | 0.00703279 | 0.999791 |
| XLOC_007432 | XLOC_007432 | MEF2A                  | chr15:100106132-100256629 | 0.0070991  | 0.999791 |
| XLOC_015131 | XLOC_015131 | PARP3                  | chr3:51976360-51982883    | 0.0072003  | 0.999791 |
| XLOC_011631 | XLOC_011631 | ZNF585B                | chr19:37672480-37701451   | 0.00734909 | 0.999791 |
| XLOC_023685 | XLOC_023685 | NSDHL                  | chrX:151999510-152037907  | 0.00740006 | 0.999791 |
| XLOC_008374 | XLOC_008374 | PKMYT1                 | chr16:3019341-3030540     | 0.00746256 | 0.999791 |
| XLOC_024175 | XLOC_024175 | FAM58A                 | chrX:152853382-152864632  | 0.00749888 | 0.999791 |
| XLOC_006327 | XLOC_006327 | PAX9                   | chr14:37126772-37147011   | 0.00754005 | 0.999791 |
| XLOC_003180 | XLOC_003180 | CTBP2                  | chr10:126676417-126849624 | 0.00754449 | 0.999791 |
| XLOC_017294 | XLOC_017294 | LMNB1                  | chr5:126112314-126172712  | 0.0075964  | 0.999791 |
| XLOC_004386 | XLOC_004386 | LOC100133315           | chr11:71576554-71639493   | 0.00761328 | 0.999791 |
| XLOC_001123 | XLOC_001123 | MTR                    | chr1:236958580-237067281  | 0.00770153 | 0.999791 |
| XLOC_013723 | XLOC_013723 | PFDN4                  | chr20:52824501-52836492   | 0.00772557 | 0.999791 |
| XLOC_007874 | XLOC_007874 | E4F1                   | chr16:2273566-2285743     | 0.0077347  | 0.999791 |
| XLOC_023257 | XLOC_023257 | HCCS                   | chrX:1129405-1141204      | 0.00774709 | 0.999791 |
| XLOC_023053 | XLOC_023053 | RBM18                  | chr9:125001833-125085742  | 0.00777017 | 0.999791 |
| XLOC_012276 | XLOC_012276 | VAMP8                  | chr2:85804613-85809156    | 0.00778698 | 0.999791 |
| XLOC_020402 | XLOC_020402 | MPP6                   | chr7:24613084-24727498    | 0.0078216  | 0.999791 |
| XLOC_000995 | XLOC_000995 | MDM4                   | chr1:204485506-204527248  | 0.00791235 | 0.999791 |
| XLOC_007108 | XLOC_007108 | LOC646278              | chr15:29034979-29101720   | 0.00793314 | 1        |
| XLOC_015753 | XLOC_015753 | TWF2                   | chr3:52262625-52273183    | 0.00799651 | 0.999791 |
| XLOC_001017 | XLOC_001017 | CD55                   | chr1:207494816-207534311  | 0.00799962 | 0.999791 |
| XLOC_001654 | XLOC_001654 | EVI5                   | chr1:92974252-93257961    | 0.00805183 | 0.999791 |
| XLOC_009660 | XLOC_009660 | CACNB1                 | chr17:37329708-37353956   | 0.00806681 | 0.999791 |
| XLOC_014017 | XLOC_014017 | STAU1                  | chr20:47729875-47804904   | 0.00809926 | 0.999791 |
| XLOC_013263 | XLOC_013263 | CWC22                  | chr2:180809603-180871780  | 0.00810074 | 0.999791 |
| XLOC_015608 | XLOC_015608 | NKIRAS1                | chr3:23933571-23965187    | 0.0081023  | 0.999791 |
| XLOC_000191 | XLOC_000191 | TMEM57                 | chr1:25757387-25826698    | 0.00817664 | 0.999791 |
| XLOC_015344 | XLOC_015344 | UBA5                   | chr3:132276981-132593050  | 0.00818001 | 0.999791 |
| XLOC_006793 | XLOC_006793 | RPL36AL                | chr14:50085406-50087349   | 0.00822324 | 0.999791 |
| XLOC_012334 | XLOC_012334 | RPL31                  | chr2:101618690-101767846  | 0.00827923 | 0.999791 |
| XLOC_021044 | XLOC_021044 | PURB                   | chr7:44915891-44924960    | 0.00829045 | 0.999791 |
| XLOC_013192 | XLOC_013192 | ACVR1                  | chr2:158592957-158732374  | 0.00829072 | 0.999791 |
| XLOC_021474 | XLOC_021474 | LOC100506990           | chr8:12294521-12523120    | 0.00838163 | 0.999791 |
| XLOC_017990 | XLOC_017990 | ZNF354A                | chr5:178138521-178157703  | 0.00838565 | 0.999791 |
| XLOC_010467 | XLOC_010467 | OAZ1                   | chr19:2269519-2273487     | 0.00843776 | 0.999791 |
| XLOC_012990 | XLOC_012990 | RTKN                   | chr2:74652987-74669060    | 0.00846192 | 0.999791 |
| XLOC_001957 | XLOC_001957 | PEX19                  | chr1:160246598-160254941  | 0.00847249 | 0.999791 |
| XLOC_002377 | XLOC_002377 | BM11,COMMD3,COMMD3-BM1 | chr10:22605311-22620414   | 0.00849445 | 0.999791 |
| XLOC_007810 | XLOC_007810 | MPG                    | chr16:127017-188697       | 0.00852223 | 0.999791 |
| XLOC_017628 | XLOC_017628 | RPL37                  | chr5:40831429-40835387    | 0.00852879 | 0.999791 |
| XLOC_000772 | XLOC_000772 | SLC25A44               | chr1:156163729-156182587  | 0.00858373 | 0.999791 |
| XLOC_014316 | XLOC_014316 | SETD4                  | chr21:37406838-37432819   | 0.00858927 | 0.999791 |
| XLOC_014201 | XLOC_014201 | TRAPPC10               | chr21:45432205-45526432   | 0.00861166 | 0.999791 |

|             |             |                           |                           |            |          |
|-------------|-------------|---------------------------|---------------------------|------------|----------|
| XLOC_022633 | XLOC_022633 | RPL7A                     | chr9:136215068-136218280  | 0.00864086 | 0.999791 |
| XLOC_022160 | XLOC_022160 | C8orf76,ZHX1,ZHX1-C8ORF76 | chr8:124232195-124267781  | 0.00864551 | 0.999791 |
| XLOC_004092 | XLOC_004092 | PIK3C2A                   | chr11:17108123-17191354   | 0.00870606 | 0.999791 |
| XLOC_008583 | XLOC_008583 | AMFR                      | chr16:56395363-56459450   | 0.00871738 | 0.999791 |
| XLOC_008752 | XLOC_008752 | SERPINF1                  | chr17:1665258-1680859     | 0.00877093 | 1        |
| XLOC_002690 | XLOC_002690 | SMC3                      | chr10:112327448-112364392 | 0.00879422 | 0.999791 |
| XLOC_010781 | XLOC_010781 | USF2                      | chr19:35759895-35770718   | 0.00879847 | 0.999791 |
| XLOC_017898 | XLOC_017898 | RBM22                     | chr5:150070351-150080669  | 0.00880242 | 0.999791 |
| XLOC_000394 | XLOC_000394 | PRPF38A                   | chr1:52870218-52883992    | 0.00884256 | 0.999791 |
| XLOC_017753 | XLOC_017753 | CHD1                      | chr5:98190907-98262238    | 0.00890435 | 0.999791 |
| XLOC_012632 | XLOC_012632 | PKI55                     | chr2:217081611-217084915  | 0.00891772 | 0.999791 |
| XLOC_002099 | XLOC_002099 | KIF14                     | chr1:200520624-200589862  | 0.00891752 | 0.999791 |
| XLOC_003237 | XLOC_003237 | TSPAN4                    | chr11:842823-867116       | 0.00891967 | 0.999791 |
| XLOC_001289 | XLOC_001289 | CASP9                     | chr1:15818768-15851285    | 0.00896718 | 0.999791 |
| XLOC_000470 | XLOC_000470 | FAM73A                    | chr1:78245308-78345225    | 0.00897849 | 0.999791 |
| XLOC_020453 | XLOC_020453 | RALA                      | chr7:39663151-39747723    | 0.00900051 | 0.999791 |
| XLOC_015874 | XLOC_015874 | WDR52                     | chr3:112931374-113160361  | 0.00901197 | 1        |
| XLOC_020978 | XLOC_020978 | HOXA5                     | chr7:27179982-27196296    | 0.00903412 | 0.999791 |
| XLOC_021467 | XLOC_021467 | GATA4                     | chr8:11561716-11617509    | 0.00905081 | 0.999791 |
| XLOC_019116 | XLOC_019116 | CITED2                    | chr6:139693391-139695787  | 0.00905716 | 0.999791 |
| XLOC_007266 | XLOC_007266 | MAP2K5                    | chr15:67835020-68099455   | 0.00905827 | 0.999791 |
| XLOC_019006 | XLOC_019006 | FAXC                      | chr6:99720792-99797531    | 0.00912481 | 0.999791 |
| XLOC_021739 | XLOC_021739 | RNF139                    | chr8:125487007-125551329  | 0.00917091 | 0.999791 |
| XLOC_000609 | XLOC_000609 | VANGL1                    | chr1:116184573-116240845  | 0.00918308 | 0.999791 |
| XLOC_007836 | XLOC_007836 | METRN                     | chr16:765172-767480       | 0.0092187  | 0.999791 |
| XLOC_022228 | XLOC_022228 | NRBP2                     | chr8:144915754-144923146  | 0.00923937 | 0.999791 |
| XLOC_006338 | XLOC_006338 | PRPF39                    | chr14:45553301-45603732   | 0.00924113 | 0.999791 |
| XLOC_006033 | XLOC_006033 | C1QTNF9B                  | chr13:24304327-24471125   | 0.00924215 | 1        |
| XLOC_018050 | XLOC_018050 | TMEM14C                   | chr6:10723147-10731362    | 0.00929933 | 0.999791 |
| XLOC_015536 | XLOC_015536 | PAK2                      | chr3:196466727-196559518  | 0.00939864 | 0.999791 |
| XLOC_004362 | XLOC_004362 | NUDT8                     | chr11:67395408-67397408   | 0.00940606 | 0.999791 |
| XLOC_001403 | XLOC_001403 | MATN1                     | chr1:31184123-31199593    | 0.00940938 | 1        |
| XLOC_001236 | XLOC_001236 | RPL22                     | chr1:6245079-6259679      | 0.00942582 | 0.999791 |
| XLOC_013132 | XLOC_013132 | ERCC3                     | chr2:128014865-128051752  | 0.00954345 | 0.999791 |
| XLOC_009204 | XLOC_009204 | DHX40                     | chr17:57642885-57685713   | 0.00958726 | 0.999791 |
| XLOC_009820 | XLOC_009820 | HOXB7                     | chr17:46684594-46688383   | 0.00965788 | 0.999791 |
| XLOC_008887 | XLOC_008887 | MED9                      | chr17:17380299-17396534   | 0.00967264 | 0.999791 |
| XLOC_009454 | XLOC_009454 | PHF23                     | chr17:7138346-7142825     | 0.0096851  | 0.999791 |
| XLOC_021236 | XLOC_021236 | RASA4                     | chr7:102220092-102257205  | 0.00980475 | 0.999791 |
| XLOC_008977 | XLOC_008977 | RHBDL3                    | chr17:30593194-30651680   | 0.00985647 | 0.999791 |
| XLOC_010269 | XLOC_010269 | YES1                      | chr18:721591-812327       | 0.00988868 | 0.999791 |
| XLOC_023039 | XLOC_023039 | CDK5RAP2                  | chr9:123151146-123342448  | 0.00989672 | 0.999791 |
| XLOC_003743 | XLOC_003743 | C11orf73                  | chr11:86013252-86056985   | 0.00991257 | 0.999791 |
| XLOC_020728 | XLOC_020728 | SND1                      | chr7:127292201-127732659  | 0.00993162 | 0.999791 |
| XLOC_010851 | XLOC_010851 | SUPT5H                    | chr19:39936185-39967308   | 0.00998359 | 0.999791 |
| XLOC_011699 | XLOC_011699 | ATP1A3                    | chr19:42470733-42498428   | 0.00999538 | 0.999791 |
| XLOC_006659 | XLOC_006659 | CEP170B                   | chr14:105331649-105363107 | 0.0100388  | 0.999791 |
| XLOC_003877 | XLOC_003877 | UBASH3B                   | chr11:122526397-122685187 | 0.0101153  | 0.999791 |
| XLOC_011022 | XLOC_011022 | RPL13A                    | chr19:49990810-49995564   | 0.0101267  | 0.999791 |
| XLOC_014401 | XLOC_014401 | TUBA8                     | chr22:18593452-18614498   | 0.0101398  | 0.999791 |
| XLOC_005066 | XLOC_005066 | TXNRD1                    | chr12:104609556-104744085 | 0.010169   | 0.999791 |
| XLOC_022930 | XLOC_022930 | SPTLC1                    | chr9:94793426-94877690    | 0.0102076  | 0.999791 |
| XLOC_015741 | XLOC_015741 | VPRBP                     | chr3:51428698-51534018    | 0.0102314  | 0.999791 |
| XLOC_004869 | XLOC_004869 | PFDN5                     | chr12:53689234-53693234   | 0.0102432  | 0.999791 |
| XLOC_018254 | XLOC_018254 | ZNF76                     | chr6:35227509-35263760    | 0.0102846  | 0.999791 |
| XLOC_017125 | XLOC_017125 | ISL1                      | chr5:50668570-50690563    | 0.0103405  | 1        |
| XLOC_022452 | XLOC_022452 | C9orf3                    | chr9:97488950-97849500    | 0.0103652  | 0.999791 |
| XLOC_009865 | XLOC_009865 | MKS1                      | chr17:56282796-56296966   | 0.0103756  | 0.999791 |
| XLOC_016542 | XLOC_016542 | KIAA0922                  | chr4:154387497-154557862  | 0.0104003  | 0.999791 |
| XLOC_006036 | XLOC_006036 | PARP4                     | chr13:24995068-25086948   | 0.0104368  | 0.999791 |
| XLOC_014613 | XLOC_014613 | PARVG                     | chr22:44568835-44603035   | 0.0104457  | 1        |
| XLOC_001953 | XLOC_001953 | PIGM                      | chr1:159997461-160001783  | 0.0104527  | 0.999791 |
| XLOC_009881 | XLOC_009881 | PTRH2                     | chr17:57774666-57784856   | 0.0104776  | 0.999791 |
| XLOC_005665 | XLOC_005665 | NFYB                      | chr12:104510857-104532040 | 0.0105077  | 0.999791 |
| XLOC_000759 | XLOC_000759 | FDPS                      | chr1:155278538-155300909  | 0.0105235  | 0.999791 |
| XLOC_007690 | XLOC_007690 | ULK3                      | chr15:75128458-75135552   | 0.0105335  | 0.999791 |
| XLOC_017865 | XLOC_017865 | ARAP3                     | chr5:141032967-141061800  | 0.0105497  | 0.999791 |
| XLOC_011460 | XLOC_011460 | HOOK2                     | chr19:12873816-12886434   | 0.0106086  | 0.999791 |
| XLOC_013609 | XLOC_013609 | ACTL10                    | chr20:32244892-32262264   | 0.0106388  | 0.999791 |
| XLOC_024040 | XLOC_024040 | RNF113A                   | chrX:119004494-119010629  | 0.0106797  | 0.999791 |
| XLOC_013104 | XLOC_013104 | LOC541471                 | chr2:112124590-112252692  | 0.010684   | 0.999791 |
| XLOC_000335 | XLOC_000335 | SZT2                      | chr1:43855555-43919918    | 0.0107268  | 0.999791 |
| XLOC_012049 | XLOC_012049 | GPCAL1                    | chr2:10443029-10567743    | 0.0108233  | 0.999791 |
| XLOC_014547 | XLOC_014547 | NOL12                     | chr22:38082343-38089485   | 0.0108904  | 0.999791 |
| XLOC_007873 | XLOC_007873 | MLST8                     | chr16:2255177-2261069     | 0.0109326  | 0.999791 |
| XLOC_006390 | XLOC_006390 | SNAPC1                    | chr14:62229074-62263146   | 0.0109357  | 0.999791 |
| XLOC_014358 | XLOC_014358 | ICOSL                     | chr21:45646721-45660834   | 0.0109486  | 0.999791 |
| XLOC_006351 | XLOC_006351 | FRMD6                     | chr14:51921229-52197444   | 0.0109868  | 0.999791 |
| XLOC_015877 | XLOC_015877 | NAA50                     | chr3:113435306-113465120  | 0.0110082  | 0.999791 |

|             |             |                           |                           |           |          |
|-------------|-------------|---------------------------|---------------------------|-----------|----------|
| XLOC_009205 | XLOC_009205 | CLTC                      | chr17:57697049-57774317   | 0.0110101 | 0.999791 |
| XLOC_010499 | XLOC_010499 | MPND                      | chr19:4343523-4360083     | 0.0110103 | 0.999791 |
| XLOC_011851 | XLOC_011851 | VRK3                      | chr19:50479723-50528805   | 0.0110178 | 0.999791 |
| XLOC_012755 | XLOC_012755 | ATG4B                     | chr2:242577026-242613271  | 0.0110276 | 0.999791 |
| XLOC_012788 | XLOC_012788 | NOL10                     | chr2:10710891-10830113    | 0.0110584 | 0.999791 |
| XLOC_021719 | XLOC_021719 | UTP23                     | chr8:117778741-117786921  | 0.0111068 | 0.999791 |
| XLOC_017209 | XLOC_017209 | JMY                       | chr5:78531924-78623038    | 0.0111567 | 0.999791 |
| XLOC_024068 | XLOC_024068 | ZDHC9                     | chrX:128937263-128977910  | 0.0112502 | 0.999791 |
| XLOC_020732 | XLOC_020732 | LEP                       | chr7:127881330-127897682  | 0.0112941 | 1        |
| XLOC_010790 | XLOC_010790 | TMEM147                   | chr19:36024313-36038429   | 0.0112992 | 0.999791 |
| XLOC_015904 | XLOC_015904 | KPNA1                     | chr3:122140747-122233786  | 0.0113555 | 0.999791 |
| XLOC_021912 | XLOC_021912 | TNFRSF10A                 | chr8:23048969-23082680    | 0.0113746 | 0.999791 |
| XLOC_009140 | XLOC_009140 | SP2                       | chr17:45973515-46006323   | 0.0113767 | 0.999791 |
| XLOC_007693 | XLOC_007693 | COX5A                     | chr15:75212616-75230495   | 0.0114302 | 0.999791 |
| XLOC_015097 | XLOC_015097 | ARIH2                     | chr3:48955220-49022971    | 0.0114551 | 0.999791 |
| XLOC_006345 | XLOC_006345 | ARF6                      | chr14:50359735-50363772   | 0.0114631 | 0.999791 |
| XLOC_006458 | XLOC_006458 | TTL5                      | chr14:76127550-76421425   | 0.0114806 | 0.999791 |
| XLOC_004260 | XLOC_004260 | EEF1G                     | chr11:62327072-62341460   | 0.0114877 | 0.999791 |
| XLOC_005512 | XLOC_005512 | CD63                      | chr12:56119226-56123457   | 0.0114904 | 0.999791 |
| XLOC_013025 | XLOC_013025 | CHMP3,RNF103,RNF103-CHMP3 | chr2:86730552-87005164    | 0.0115121 | 0.999791 |
| XLOC_004919 | XLOC_004919 | RPS26                     | chr12:56435685-56438007   | 0.0115666 | 0.999791 |
| XLOC_002402 | XLOC_002402 | C10orf68,CCDC7            | chr10:32735040-33171792   | 0.0115748 | 0.999791 |
| XLOC_022979 | XLOC_022979 | TEX10                     | chr9:103064356-103115259  | 0.0116009 | 0.999791 |
| XLOC_016471 | XLOC_016471 | ALPK1                     | chr4:113218498-113363764  | 0.0117913 | 0.999791 |
| XLOC_009427 | XLOC_009427 | ZNF232                    | chr17:5009030-5026397     | 0.0118031 | 0.999791 |
| XLOC_010713 | XLOC_010713 | MAU2                      | chr19:19431629-19469563   | 0.0118052 | 0.999791 |
| XLOC_014605 | XLOC_014605 | RNU12                     | chr22:43011250-43011399   | 0.0118406 | 0.999791 |
| XLOC_016511 | XLOC_016511 | RAB33B                    | chr4:140374960-140397069  | 0.0119074 | 0.999791 |
| XLOC_002578 | XLOC_002578 | FAS                       | chr10:90694830-90775542   | 0.0119151 | 0.999791 |
| XLOC_001906 | XLOC_001906 | C1orf85                   | chr1:156262477-156265480  | 0.0119375 | 0.999791 |
| XLOC_012579 | XLOC_012579 | SGOL2                     | chr2:201390864-201448818  | 0.0119531 | 0.999791 |
| XLOC_016502 | XLOC_016502 | C4orf29                   | chr4:128838959-128952455  | 0.0120242 | 0.999791 |
| XLOC_002888 | XLOC_002888 | SEPT7L                    | chr10:38671997-38691780   | 0.0120242 | 1        |
| XLOC_001098 | XLOC_001098 | URB2                      | chr1:229761980-229795946  | 0.0120443 | 0.999791 |
| XLOC_012829 | XLOC_012829 | HADHA                     | chr2:26413503-26467594    | 0.0120603 | 0.999791 |
| XLOC_007281 | XLOC_007281 | THSD4                     | chr15:71433787-72075722   | 0.0121112 | 1        |
| XLOC_000116 | XLOC_000116 | EFHD2                     | chr1:15736390-15756839    | 0.0122109 | 0.999791 |
| XLOC_004967 | XLOC_004967 | TBC1D30                   | chr12:65218351-65274798   | 0.0122583 | 1        |
| XLOC_020985 | XLOC_020985 | HIBADH                    | chr7:27565058-27702620    | 0.0122626 | 0.999791 |
| XLOC_004486 | XLOC_004486 | TMEM123                   | chr11:102267055-102323775 | 0.0122983 | 0.999791 |
| XLOC_013848 | XLOC_013848 | LINC00654                 | chr20:5479217-5485242     | 0.0123016 | 1        |
| XLOC_010922 | XLOC_010922 | PVR                       | chr19:45147097-45169428   | 0.0123171 | 0.999791 |
| XLOC_021484 | XLOC_021484 | PCM1                      | chr8:17780365-17887457    | 0.0123197 | 0.999791 |
| XLOC_000649 | XLOC_000649 | PDIA3P                    | chr1:146649429-146651528  | 0.0123265 | 0.999791 |
| XLOC_022097 | XLOC_022097 | KIAA1429                  | chr8:95500004-95565746    | 0.0123329 | 0.999791 |
| XLOC_013871 | XLOC_013871 | OVOL2                     | chr20:18004795-18038521   | 0.0125255 | 0.999791 |
| XLOC_005096 | XLOC_005096 | ATP2A2                    | chr12:110719031-110788897 | 0.0126236 | 0.999791 |
| XLOC_014684 | XLOC_014684 | TRMT2A                    | chr22:20067754-20104818   | 0.0126388 | 0.999791 |
| XLOC_015944 | XLOC_015944 | EFCAB12                   | chr3:129120163-129147494  | 0.0126442 | 1        |
| XLOC_002098 | XLOC_002098 | ZNF281                    | chr1:200375419-200379166  | 0.0126616 | 0.999791 |
| XLOC_022732 | XLOC_022732 | PSIP1                     | chr9:15464064-15511003    | 0.0127216 | 0.999791 |
| XLOC_003330 | XLOC_003330 | AMPD3                     | chr11:10471867-10529126   | 0.0127424 | 0.999791 |
| XLOC_015794 | XLOC_015794 | FHIT                      | chr3:59735035-61237133    | 0.0128032 | 0.999791 |
| XLOC_002966 | XLOC_002966 | DNA2                      | chr10:70173820-70231730   | 0.0128403 | 0.999791 |
| XLOC_001631 | XLOC_001631 | BCL10                     | chr1:85731459-85743771    | 0.0128511 | 0.999791 |
| XLOC_006985 | XLOC_006985 | BAG5                      | chr14:104022880-104029151 | 0.0128775 | 0.999791 |
| XLOC_016323 | XLOC_016323 | TMEM165                   | chr4:56262079-56292342    | 0.0129115 | 0.999791 |
| XLOC_014575 | XLOC_014575 | FAM83F                    | chr22:40390952-40426043   | 0.0129132 | 0.999791 |
| XLOC_011003 | XLOC_011003 | PPP1R15A                  | chr19:49375648-49379319   | 0.0130343 | 0.999791 |
| XLOC_002843 | XLOC_002843 | C10orf114                 | chr10:21783420-21786213   | 0.0130432 | 0.999791 |
| XLOC_023025 | XLOC_023025 | POLE3                     | chr9:116169517-116191879  | 0.0130432 | 0.999791 |
| XLOC_013740 | XLOC_013740 | RAB22A                    | chr20:56884770-56942563   | 0.0131297 | 0.999791 |
| XLOC_011727 | XLOC_011727 | XRCC1                     | chr19:44047463-44079730   | 0.0132137 | 0.999791 |
| XLOC_013012 | XLOC_013012 | RETSAT                    | chr2:85569077-85581821    | 0.0132202 | 0.999791 |
| XLOC_009599 | XLOC_009599 | TEFM                      | chr17:29226000-29233286   | 0.0133041 | 0.999791 |
| XLOC_017701 | XLOC_017701 | COL4A3BP                  | chr5:74666927-74895646    | 0.0133494 | 0.999791 |
| XLOC_017279 | XLOC_017279 | HSD17B4                   | chr5:118788137-118878030  | 0.0133656 | 0.999791 |
| XLOC_007858 | XLOC_007858 | NUBP2                     | chr16:1832932-1839192     | 0.0134073 | 0.999791 |
| XLOC_003356 | XLOC_003356 | GTF2H1                    | chr11:18343815-18388590   | 0.013472  | 0.999791 |
| XLOC_008154 | XLOC_008154 | NDRG4                     | chr16:58497548-58547523   | 0.0135045 | 0.999791 |
| XLOC_004478 | XLOC_004478 | MTMR2                     | chr11:95566043-95657371   | 0.0135677 | 0.999791 |
| XLOC_015161 | XLOC_015161 | RPP14                     | chr3:58291971-58305920    | 0.0136193 | 0.999791 |
| XLOC_004262 | XLOC_004262 | MTA2                      | chr11:62360674-62369312   | 0.013626  | 0.999791 |
| XLOC_003954 | XLOC_003954 | CHID1                     | chr11:867858-915058       | 0.0136283 | 0.999791 |
| XLOC_005213 | XLOC_005213 | SLC6A12                   | chr12:299242-323371       | 0.0136837 | 1        |
| XLOC_006931 | XLOC_006931 | RPS6KA5                   | chr14:91337166-91526993   | 0.0136885 | 1        |
| XLOC_019014 | XLOC_019014 | HACE1                     | chr6:105175967-105307794  | 0.013696  | 0.999791 |
| XLOC_021554 | XLOC_021554 | DDHD2                     | chr8:38089008-38120287    | 0.0137594 | 0.999791 |
| XLOC_021657 | XLOC_021657 | CA2                       | chr8:86376130-86393721    | 0.0137641 | 0.999791 |

|             |             |                          |                           |           |          |
|-------------|-------------|--------------------------|---------------------------|-----------|----------|
| XLOC_002939 | XLOC_002939 | SGMS1                    | chr10:52065344-52383737   | 0.0138183 | 0.999791 |
| XLOC_013667 | XLOC_013667 | LOC100505783             | chr20:42839599-42854667   | 0.0138191 | 0.999791 |
| XLOC_022596 | XLOC_022596 | ENDOG                    | chr9:131580778-131592100  | 0.0138215 | 0.999791 |
| XLOC_009870 | XLOC_009870 | SUPT4H1                  | chr17:56378587-56494931   | 0.0138236 | 0.999791 |
| XLOC_017100 | XLOC_017100 | RAI14                    | chr5:34656432-34832717    | 0.0138631 | 0.999791 |
| XLOC_012464 | XLOC_012464 | EPC2                     | chr2:149402559-149545136  | 0.013914  | 0.999791 |
| XLOC_011511 | XLOC_011511 | CHERP                    | chr19:16607204-16653263   | 0.0139186 | 0.999791 |
| XLOC_008461 | XLOC_008461 | NPIPL3                   | chr16:21413454-21436658   | 0.0139544 | 0.999791 |
| XLOC_014842 | XLOC_014842 | SLC25A17                 | chr22:41165638-41215392   | 0.0139554 | 0.999791 |
| XLOC_012029 | XLOC_012029 | TRAPPC12                 | chr2:3383445-3483342      | 0.0140082 | 0.999791 |
| XLOC_004268 | XLOC_004268 | UBXN1                    | chr1:162443971-162446527  | 0.0140272 | 0.999791 |
| XLOC_012660 | XLOC_012660 | STK16                    | chr2:220110191-220136910  | 0.01403   | 0.999791 |
| XLOC_011923 | XLOC_011923 | ZNF816,ZNF816-ZNF321P    | chr19:53430387-53466164   | 0.0140423 | 0.999791 |
| XLOC_022968 | XLOC_022968 | XPA                      | chr9:100437190-100459691  | 0.0140438 | 0.999791 |
| XLOC_004141 | XLOC_004141 | APIP                     | chr1:34903842-35017675    | 0.0140873 | 0.999791 |
| XLOC_009247 | XLOC_009247 | LINC00674                | chr17:66097695-66132070   | 0.0140935 | 0.999791 |
| XLOC_011312 | XLOC_011312 | PIP5K1C                  | chr19:3630178-3700477     | 0.0141032 | 0.999791 |
| XLOC_015326 | XLOC_015326 | C3orf37                  | chr3:128997683-129024135  | 0.0141067 | 0.999791 |
| XLOC_007538 | XLOC_007538 | UBR1                     | chr15:43235097-43398286   | 0.0141629 | 0.999791 |
| XLOC_022217 | XLOC_022217 | ZC3H3                    | chr8:144519824-144623620  | 0.0141931 | 0.999791 |
| XLOC_020710 | XLOC_020710 | ST7                      | chr7:116592500-116870075  | 0.0142362 | 0.999791 |
| XLOC_017210 | XLOC_017210 | PAPD4                    | chr5:78908242-78982471    | 0.0142375 | 0.999791 |
| XLOC_011205 | XLOC_011205 | ZNF583                   | chr19:56915382-56936400   | 0.014244  | 0.999791 |
| XLOC_012425 | XLOC_012425 | MZT2B                    | chr2:130908964-130948300  | 0.0142958 | 0.999791 |
| XLOC_013903 | XLOC_013903 | NANP                     | chr20:25593572-25604648   | 0.0143468 | 0.999791 |
| XLOC_008403 | XLOC_008403 | GLYR1                    | chr16:4853203-4897303     | 0.0143705 | 0.999791 |
| XLOC_010094 | XLOC_010094 | NDC80                    | chr18:2571509-2616634     | 0.0144061 | 0.999791 |
| XLOC_015873 | XLOC_015873 | C3orf17                  | chr3:112721291-112738555  | 0.0144911 | 0.999791 |
| XLOC_010470 | XLOC_010470 | GADD45B                  | chr19:2476122-2478257     | 0.0144938 | 0.999791 |
| XLOC_010841 | XLOC_010841 | MRPS12                   | chr19:39405903-39423659   | 0.0144951 | 0.999791 |
| XLOC_022314 | XLOC_022314 | CHMP5                    | chr9:33264876-33282067    | 0.0145183 | 0.999791 |
| XLOC_000881 | XLOC_000881 | PRRC2C                   | chr1:171454665-171562650  | 0.0145492 | 0.999791 |
| XLOC_013657 | XLOC_013657 | DHX35                    | chr20:37590980-37668366   | 0.0145599 | 0.999791 |
| XLOC_022681 | XLOC_022681 | C9orf142                 | chr9:139886869-139888428  | 0.014655  | 0.999791 |
| XLOC_016070 | XLOC_016070 | TBL1XR1                  | chr3:176738541-176915048  | 0.0146944 | 0.999791 |
| XLOC_009860 | XLOC_009860 | COIL                     | chr17:75015560-5038411    | 0.0147021 | 0.999791 |
| XLOC_022417 | XLOC_022417 | DAPK1                    | chr9:90112755-90323549    | 0.0147888 | 0.999791 |
| XLOC_014421 | XLOC_014421 | ZNF74                    | chr22:20748404-20762753   | 0.0148185 | 0.999791 |
| XLOC_018481 | XLOC_018481 | RNF217                   | chr6:125304513-125404661  | 0.0148521 | 0.999791 |
| XLOC_022124 | XLOC_022124 | ZNF706                   | chr8:102209265-102218292  | 0.0148851 | 0.999791 |
| XLOC_004706 | XLOC_004706 | CLEC4A                   | chr12:8276227-8291203     | 0.0149519 | 0.999791 |
| XLOC_016067 | XLOC_016067 | NCEH1                    | chr3:172348434-172429008  | 0.014953  | 0.999791 |
| XLOC_005682 | XLOC_005682 | SSH1                     | chr12:109176465-109251359 | 0.014967  | 0.999791 |
| XLOC_012543 | XLOC_012543 | SSFA2                    | chr2:182756471-182795464  | 0.0149765 | 0.999791 |
| XLOC_001337 | XLOC_001337 | ECE1                     | chr1:21543739-21672034    | 0.01499   | 0.999791 |
| XLOC_003948 | XLOC_003948 | DEAF1                    | chr11:644224-705028       | 0.0150141 | 0.999791 |
| XLOC_011341 | XLOC_011341 | LONP1                    | chr19:5691844-5720463     | 0.0150202 | 0.999791 |
| XLOC_001636 | XLOC_001636 | SEP15                    | chr1:87328127-87380107    | 0.015073  | 0.999791 |
| XLOC_020621 | XLOC_020621 | BRI3                     | chr7:97910978-98030427    | 0.0150805 | 0.999791 |
| XLOC_012207 | XLOC_012207 | AFTPH                    | chr2:64751438-64820138    | 0.0151867 | 0.999791 |
| XLOC_021775 | XLOC_021775 | GPIHBP1                  | chr8:144295067-144299044  | 0.0152029 | 1        |
| XLOC_015617 | XLOC_015617 | SLC4A7                   | chr3:27414211-27525911    | 0.0152383 | 0.999791 |
| XLOC_016683 | XLOC_016683 | TAPT1                    | chr4:16162127-16228161    | 0.0152483 | 0.999791 |
| XLOC_015100 | XLOC_015100 | NDUFAF3                  | chr3:49044636-49060926    | 0.0152578 | 0.999791 |
| XLOC_004458 | XLOC_004458 | CHORDC1                  | chr11:89933596-89956532   | 0.0152674 | 0.999791 |
| XLOC_012226 | XLOC_012226 | MXD1                     | chr2:70142172-70170076    | 0.0152737 | 0.999791 |
| XLOC_009901 | XLOC_009901 | CCDC47                   | chr17:61822609-61851088   | 0.0152799 | 0.999791 |
| XLOC_004419 | XLOC_004419 | PRKRIR                   | chr1:176061003-176091880  | 0.0153155 | 0.999791 |
| XLOC_014590 | XLOC_014590 | XRCC6                    | chr22:42017294-42060052   | 0.0153825 | 0.999791 |
| XLOC_001912 | XLOC_001912 | IQGAP3                   | chr1:156495196-156542396  | 0.0153857 | 0.999791 |
| XLOC_021030 | XLOC_021030 | MRPS24,URGCP,URGCP-MRPS: | chr7:43906156-43965996    | 0.0153938 | 0.999791 |
| XLOC_022414 | XLOC_022414 | NAA35                    | chr9:88556056-88637217    | 0.0154326 | 0.999791 |
| XLOC_001601 | XLOC_001601 | DEPDC1                   | chr1:68939834-68962799    | 0.0154503 | 0.999791 |
| XLOC_018458 | XLOC_018458 | DSE                      | chr6:116601282-116759442  | 0.0154624 | 0.999791 |
| XLOC_008230 | XLOC_008230 | PSMD7                    | chr16:74330672-74340186   | 0.0154631 | 0.999791 |
| XLOC_001077 | XLOC_001077 | H3F3A                    | chr1:226250407-226259703  | 0.0155142 | 0.999791 |
| XLOC_010670 | XLOC_010670 | MYO9B                    | chr19:17186590-17234104   | 0.0155479 | 0.999791 |
| XLOC_012550 | XLOC_012550 | ZC3H15                   | chr2:187350884-187374087  | 0.0155497 | 0.999791 |
| XLOC_013509 | XLOC_013509 | MAVS                     | chr20:3827445-3856770     | 0.0155878 | 0.999791 |
| XLOC_017188 | XLOC_017188 | BTF3                     | chr5:72794249-72801448    | 0.0155884 | 0.999791 |
| XLOC_020863 | XLOC_020863 | SLC4A2                   | chr7:150755298-150773614  | 0.0156371 | 0.999791 |
| XLOC_002062 | XLOC_002062 | GLUL                     | chr1:182350838-182361341  | 0.0156436 | 0.999791 |
| XLOC_001444 | XLOC_001444 | CLSPN                    | chr1:36197712-36235551    | 0.0156458 | 0.999791 |
| XLOC_002182 | XLOC_002182 | USH2A                    | chr1:215796235-216596738  | 0.0156489 | 1        |
| XLOC_006988 | XLOC_006988 | C14orf2                  | chr14:104378624-104387903 | 0.0156768 | 0.999791 |
| XLOC_007604 | XLOC_007604 | ADAM10                   | chr15:58888509-59042177   | 0.0157427 | 0.999791 |
| XLOC_000905 | XLOC_000905 | FAM20B                   | chr1:178995073-179045702  | 0.0157482 | 0.999791 |
| XLOC_009447 | XLOC_009447 | SLC16A11                 | chr17:6944948-6947242     | 0.0157498 | 1        |
| XLOC_022513 | XLOC_022513 | PRPF4                    | chr9:116037913-116055185  | 0.0158127 | 0.999791 |

|             |             |                               |                           |           |          |
|-------------|-------------|-------------------------------|---------------------------|-----------|----------|
| XLOC_005824 | XLOC_005824 | RPL21                         | chr13:27825691-27830702   | 0.0158536 | 0.999791 |
| XLOC_008700 | XLOC_008700 | TAF1C                         | chr16:84178864-84220676   | 0.0158615 | 0.999791 |
| XLOC_003433 | XLOC_003433 | MDK                           | chr11:46402333-46405387   | 0.0159715 | 0.999791 |
| XLOC_000262 | XLOC_000262 | RBBP4                         | chr1:33116748-33168361    | 0.0159852 | 0.999791 |
| XLOC_009082 | XLOC_009082 | AOC2                          | chr17:40996608-41002724   | 0.0160014 | 0.999791 |
| XLOC_004825 | XLOC_004825 | TUBA1C                        | chr12:49658864-49667113   | 0.0160339 | 0.999791 |
| XLOC_000178 | XLOC_000178 | PITHD1                        | chr1:24104875-24114722    | 0.0160371 | 0.999791 |
| XLOC_015026 | XLOC_015026 | WDR48                         | chr3:39093506-39137881    | 0.0160505 | 0.999791 |
| XLOC_002971 | XLOC_002971 | TYSND1                        | chr10:71897736-71906496   | 0.0160591 | 0.999791 |
| XLOC_010588 | XLOC_010588 | C19orf52                      | chr19:11039423-11040916   | 0.0160656 | 0.999791 |
| XLOC_022957 | XLOC_022957 | SLC35D2                       | chr9:99082987-99145992    | 0.0160774 | 0.999791 |
| XLOC_011758 | XLOC_011758 | EML2                          | chr19:46112657-46148775   | 0.0161837 | 0.999791 |
| XLOC_001075 | XLOC_001075 | SRP9                          | chr1:225965514-225978168  | 0.0161911 | 0.999791 |
| XLOC_023242 | XLOC_023242 | XG                            | chrX:2670092-2734541      | 0.0162028 | 1        |
| XLOC_001893 | XLOC_001893 | ASH1L                         | chr1:155305051-155533735  | 0.0162427 | 0.999791 |
| XLOC_002532 | XLOC_002532 | RPS24                         | chr10:79793517-79816571   | 0.0162497 | 0.999791 |
| XLOC_000559 | XLOC_000559 | SCARNA2                       | chr1:109642814-109643234  | 0.0162556 | 0.999791 |
| XLOC_010472 | XLOC_010472 | ZNF554                        | chr19:2819871-2836733     | 0.016349  | 0.999791 |
| XLOC_015342 | XLOC_015342 | DNAJC13                       | chr3:132136552-132257876  | 0.0163649 | 0.999791 |
| XLOC_016021 | XLOC_016021 | PLCH1                         | chr3:155197670-155421997  | 0.0163734 | 0.999791 |
| XLOC_017866 | XLOC_017866 | PCDH1                         | chr5:141232672-141257944  | 0.0163999 | 0.999791 |
| XLOC_003949 | XLOC_003949 | PDCC1                         | chr1:767222-777487        | 0.0164169 | 0.999791 |
| XLOC_003308 | XLOC_003308 | ZNF215                        | chr11:6947653-6979278     | 0.016543  | 0.999791 |
| XLOC_002819 | XLOC_002819 | PHYH                          | chr10:13319795-13342130   | 0.0165452 | 0.999791 |
| XLOC_003063 | XLOC_003063 | TCTN3                         | chr10:97423152-97453900   | 0.0165454 | 0.999791 |
| XLOC_000286 | XLOC_000286 | THRAP3                        | chr1:36690016-36770957    | 0.0165711 | 0.999791 |
| XLOC_015622 | XLOC_015622 | CMTM6                         | chr3:32522803-32544403    | 0.0165771 | 0.999791 |
| XLOC_005704 | XLOC_005704 | BRAP                          | chr12:112079949-112123790 | 0.0166324 | 0.999791 |
| XLOC_010361 | XLOC_010361 | C18orf32,RPL17,RPL17-C18orf32 | chr18:47007547-47018935   | 0.0166362 | 0.999791 |
| XLOC_007536 | XLOC_007536 | CDAN1                         | chr15:43015759-43029417   | 0.0166444 | 0.999791 |
| XLOC_001044 | XLOC_001044 | VASH2                         | chr1:213123886-213164927  | 0.0167269 | 0.999791 |
| XLOC_011584 | XLOC_011584 | ANKRD27                       | chr19:33087906-33166102   | 0.016746  | 0.999791 |
| XLOC_018111 | XLOC_018111 | BTN2A3P                       | chr6:26421618-26430816    | 0.0168615 | 1        |
| XLOC_022380 | XLOC_022380 | CBWD3                         | chr9:70856838-70914932    | 0.0168956 | 1        |
| XLOC_003387 | XLOC_003387 | PRRG4                         | chr11:32851480-32879669   | 0.0169132 | 0.999791 |
| XLOC_002920 | XLOC_002920 | BMS1P1                        | chr10:48927373-48952629   | 0.016919  | 1        |
| XLOC_021537 | XLOC_021537 | DCTN6                         | chr8:29920257-30108213    | 0.0169591 | 0.999791 |
| XLOC_008429 | XLOC_008429 | PARN                          | chr16:14529556-14724128   | 0.0169628 | 0.999791 |
| XLOC_000596 | XLOC_000596 | WNT2B                         | chr1:113010039-113063910  | 0.0169848 | 0.999791 |
| XLOC_016712 | XLOC_016712 | RPL9                          | chr4:39455744-39460568    | 0.0170024 | 0.999791 |
| XLOC_002524 | XLOC_002524 | ADK                           | chr10:75910942-76469061   | 0.0170027 | 0.999791 |
| XLOC_022576 | XLOC_022576 | CDK9                          | chr9:130548304-130553052  | 0.0170189 | 0.999791 |
| XLOC_004644 | XLOC_004644 | ERC1                          | chr12:1100403-1605099     | 0.0170409 | 0.999791 |
| XLOC_012451 | XLOC_012451 | UBXN4                         | chr2:136499188-136542633  | 0.0171777 | 0.999791 |
| XLOC_013061 | XLOC_013061 | COA5                          | chr2:99215785-99224981    | 0.0172114 | 0.999791 |
| XLOC_010293 | XLOC_010293 | PTPN2                         | chr18:12785476-12884334   | 0.0173409 | 0.999791 |
| XLOC_020492 | XLOC_020492 | LANCL2                        | chr7:55433140-55501435    | 0.0173562 | 0.999791 |
| XLOC_011839 | XLOC_011839 | PIH1D1                        | chr19:49949549-49955115   | 0.0173771 | 0.999791 |
| XLOC_001868 | XLOC_001868 | TPM3                          | chr1:154127779-154164609  | 0.0174227 | 0.999791 |
| XLOC_000857 | XLOC_000857 | POU2F1                        | chr1:167190065-167396582  | 0.0175176 | 0.999791 |
| XLOC_008550 | XLOC_008550 | UBE2MP1                       | chr16:34403801-34404762   | 0.017563  | 0.999791 |
| XLOC_010862 | XLOC_010862 | ZNF546                        | chr19:40502942-40523514   | 0.0175668 | 1        |
| XLOC_003709 | XLOC_003709 | DNAJB13                       | chr11:73661363-73681332   | 0.017579  | 1        |
| XLOC_016269 | XLOC_016269 | TBC1D19                       | chr4:26585545-26756918    | 0.0175843 | 0.999791 |
| XLOC_006640 | XLOC_006640 | TNFAIP2                       | chr14:103592663-103603776 | 0.0175861 | 0.999791 |
| XLOC_022496 | XLOC_022496 | TMEM38B                       | chr9:108456805-108538892  | 0.0176251 | 0.999791 |
| XLOC_022032 | XLOC_022032 | LOC100505718                  | chr8:69824037-70016425    | 0.0176525 | 0.999791 |
| XLOC_001201 | XLOC_001201 | AURKAIP1                      | chr1:1309109-1310818      | 0.0176592 | 0.999791 |
| XLOC_006323 | XLOC_006323 | PSMA6                         | chr14:35761573-35786682   | 0.0177006 | 0.999791 |
| XLOC_015962 | XLOC_015962 | AMOTL2                        | chr3:134074189-134093406  | 0.0177378 | 0.999791 |
| XLOC_003164 | XLOC_003164 | TIAL1                         | chr10:121332977-121356541 | 0.017748  | 0.999791 |
| XLOC_017920 | XLOC_017920 | HAVCR2                        | chr5:156512842-156536248  | 0.0177924 | 1        |
| XLOC_003414 | XLOC_003414 | ALKBH3                        | chr11:43902356-43942494   | 0.0177971 | 0.999791 |
| XLOC_015381 | XLOC_015381 | U2SURP                        | chr3:142720371-142779567  | 0.0178008 | 0.999791 |
| XLOC_013639 | XLOC_013639 | SRC                           | chr20:35973087-36033821   | 0.0178412 | 0.999791 |
| XLOC_007363 | XLOC_007363 | FAM103A1                      | chr15:83654954-83680393   | 0.0178725 | 0.999791 |
| XLOC_008325 | XLOC_008325 | RPUSD1                        | chr16:834973-838383       | 0.0178951 | 0.999791 |
| XLOC_003613 | XLOC_003613 | NEAT1                         | chr1:65190268-65194003    | 0.0178988 | 0.999791 |
| XLOC_016785 | XLOC_016785 | COX18                         | chr4:73920415-73935472    | 0.0179011 | 0.999791 |
| XLOC_010766 | XLOC_010766 | PDCC2L                        | chr19:34895302-34917072   | 0.0179019 | 0.999791 |
| XLOC_003679 | XLOC_003679 | FADD                          | chr11:70049268-70053508   | 0.0179469 | 0.999791 |
| XLOC_015706 | XLOC_015706 | QARS                          | chr3:49133364-49142562    | 0.0179619 | 0.999791 |
| XLOC_000438 | XLOC_000438 | RAVER2                        | chr1:65210777-65432187    | 0.0179623 | 0.999791 |
| XLOC_022234 | XLOC_022234 | SHARPIN                       | chr8:145153535-145159140  | 0.0179769 | 0.999791 |
| XLOC_004074 | XLOC_004074 | EIF4G2                        | chr1:10818592-10830582    | 0.0179975 | 0.999791 |
| XLOC_018621 | XLOC_018621 | TUBB2A                        | chr6:3153901-3157783      | 0.0180175 | 0.999791 |
| XLOC_021313 | XLOC_021313 | ZC3HC1                        | chr7:129658125-129691233  | 0.0180474 | 0.999791 |
| XLOC_022722 | XLOC_022722 | GLDC                          | chr9:6532463-6645692      | 0.0181319 | 1        |
| XLOC_009369 | XLOC_009369 | ABR                           | chr17:906757-1090616      | 0.0181587 | 0.999791 |

|             |             |                         |                           |           |          |
|-------------|-------------|-------------------------|---------------------------|-----------|----------|
| XLOC_011285 | XLOC_011285 | KLF16                   | chr19:1852397-1863564     | 0.0181728 | 0.999791 |
| XLOC_010659 | XLOC_010659 | TPM4                    | chr19:16178316-16213813   | 0.0182007 | 0.999791 |
| XLOC_015465 | XLOC_015465 | ATP11B                  | chr3:182511290-182639421  | 0.0182017 | 0.999791 |
| XLOC_009780 | XLOC_009780 | CCDC43                  | chr17:42754804-42767165   | 0.0182339 | 0.999791 |
| XLOC_021888 | XLOC_021888 | CNOT7                   | chr8:17086739-17104387    | 0.0182514 | 0.999791 |
| XLOC_021902 | XLOC_021902 | REEP4                   | chr8:21995532-21999448    | 0.0182532 | 0.999791 |
| XLOC_007342 | XLOC_007342 | ZFAND6                  | chr15:80351909-80430735   | 0.0182692 | 0.999791 |
| XLOC_005104 | XLOC_005104 | ACAD10                  | chr12:112123856-112194911 | 0.0182847 | 0.999791 |
| XLOC_017561 | XLOC_017561 | MRPL36                  | chr5:1798498-1799956      | 0.0182938 | 0.999791 |
| XLOC_002046 | XLOC_002046 | RFWD2                   | chr1:175913966-176176370  | 0.0182996 | 0.999791 |
| XLOC_017964 | XLOC_017964 | CLTB                    | chr5:175819455-175843570  | 0.0183282 | 0.999791 |
| XLOC_018267 | XLOC_018267 | KCTD20                  | chr6:36358328-36458315    | 0.0183544 | 0.999791 |
| XLOC_017673 | XLOC_017673 | DIMT1                   | chr5:61684350-61699728    | 0.0183591 | 0.999791 |
| XLOC_012306 | XLOC_012306 | FAHD2A                  | chr2:96068447-96078879    | 0.0183686 | 0.999791 |
| XLOC_014543 | XLOC_014543 | GGA1                    | chr22:38004480-38029571   | 0.0184526 | 0.999791 |
| XLOC_003819 | XLOC_003819 | SDHD                    | chr11:111957570-111966518 | 0.0184587 | 0.999791 |
| XLOC_023977 | XLOC_023977 | TAF7L                   | chrX:100523240-100548059  | 0.01848   | 1        |
| XLOC_005760 | XLOC_005760 | ZCCHC8                  | chr12:122956145-122985543 | 0.018514  | 0.999791 |
| XLOC_004754 | XLOC_004754 | MGST1                   | chr12:16500075-16530123   | 0.0185324 | 0.999791 |
| XLOC_023070 | XLOC_023070 | RPL35                   | chr9:127615695-127624240  | 0.0186081 | 0.999791 |
| XLOC_003399 | XLOC_003399 | PDHX                    | chr11:34903842-35017675   | 0.0186286 | 0.999791 |
| XLOC_010060 | XLOC_010060 | OGFOD3                  | chr17:80347085-80408707   | 0.0186605 | 0.999791 |
| XLOC_003695 | XLOC_003695 | LRTOMT                  | chr11:71709957-71823822   | 0.0186987 | 0.999791 |
| XLOC_005515 | XLOC_005515 | MMP19                   | chr12:56211805-56236767   | 0.0187304 | 0.999791 |
| XLOC_018081 | XLOC_018081 | KAAG1                   | chr6:24171982-24383520    | 0.0187317 | 0.999791 |
| XLOC_011231 | XLOC_011231 | ZNF211                  | chr19:58144534-58154147   | 0.0187799 | 0.999791 |
| XLOC_007379 | XLOC_007379 | PDE8A                   | chr15:85523743-85682376   | 0.0187892 | 0.999791 |
| XLOC_004156 | XLOC_004156 | PEX16                   | chr11:45931219-45939674   | 0.018885  | 0.999791 |
| XLOC_014026 | XLOC_014026 | ADNP                    | chr20:49506882-49547527   | 0.0189149 | 0.999791 |
| XLOC_000782 | XLOC_000782 | PRCC                    | chr1:156737273-156770609  | 0.018944  | 0.999791 |
| XLOC_006647 | XLOC_006647 | ZFYVE21                 | chr14:104182080-104200005 | 0.0189471 | 0.999791 |
| XLOC_001108 | XLOC_001108 | NTPCR                   | chr1:233086369-233114219  | 0.0189663 | 0.999791 |
| XLOC_013897 | XLOC_013897 | APMAP                   | chr20:24943579-24973425   | 0.0189735 | 0.999791 |
| XLOC_020516 | XLOC_020516 | CCT6P1                  | chr7:65111923-65235797    | 0.0189893 | 0.999791 |
| XLOC_000298 | XLOC_000298 | MACF1                   | chr1:39547088-39952810    | 0.0189918 | 0.999791 |
| XLOC_005217 | XLOC_005217 | RAD52                   | chr12:1021254-1058863     | 0.0190023 | 0.999791 |
| XLOC_018530 | XLOC_018530 | VTA1                    | chr6:142468409-142542085  | 0.0190087 | 0.999791 |
| XLOC_006993 | XLOC_006993 | AKT1                    | chr14:105235686-105262080 | 0.0190949 | 0.999791 |
| XLOC_007910 | XLOC_007910 | ZNF263                  | chr16:3333486-3341459     | 0.019109  | 0.999791 |
| XLOC_000621 | XLOC_000621 | WDR3                    | chr1:118472371-118727848  | 0.019164  | 0.999791 |
| XLOC_005834 | XLOC_005834 | POMP                    | chr13:29233140-29253093   | 0.0191779 | 0.999791 |
| XLOC_007833 | XLOC_007833 | RHOT2                   | chr16:718082-724174       | 0.0191987 | 0.999791 |
| XLOC_022238 | XLOC_022238 | TMEM249                 | chr8:145576885-145578574  | 0.0192595 | 0.999791 |
| XLOC_013626 | XLOC_013626 | ERGIC3                  | chr20:34129777-34145405   | 0.0193455 | 0.999791 |
| XLOC_017616 | XLOC_017616 | NUP155                  | chr5:37291940-37371197    | 0.0194339 | 0.999791 |
| XLOC_021944 | XLOC_021944 | MBOAT4                  | chr8:29920257-30108213    | 0.0194806 | 1        |
| XLOC_015715 | XLOC_015715 | RHOA                    | chr3:49396578-49449526    | 0.0194895 | 0.999791 |
| XLOC_007668 | XLOC_007668 | MYO9A                   | chr15:72118360-72433311   | 0.0196524 | 1        |
| XLOC_010779 | XLOC_010779 | FXYP5                   | chr19:35645624-35660788   | 0.0196962 | 0.999791 |
| XLOC_001196 | XLOC_001196 | UBE2J2                  | chr1:1189291-1209234      | 0.0197452 | 0.999791 |
| XLOC_003656 | XLOC_003656 | ANKRD13D                | chr11:67056761-67069955   | 0.0197465 | 0.999791 |
| XLOC_023334 | XLOC_023334 | USP9X                   | chrX:40944887-41095832    | 0.0197712 | 0.999791 |
| XLOC_009976 | XLOC_009976 | WBP2                    | chr17:73841779-73851501   | 0.0198391 | 0.999791 |
| XLOC_009774 | XLOC_009774 | UBTF                    | chr17:42282400-42298994   | 0.0199069 | 0.999791 |
| XLOC_008532 | XLOC_008532 | ZNF668                  | chr16:31072163-31085641   | 0.0199198 | 0.999791 |
| XLOC_009646 | XLOC_009646 | LOC440434               | chr17:36351795-36413256   | 0.019923  | 0.999791 |
| XLOC_013844 | XLOC_013844 | TMEM230                 | chr20:5080483-5093733     | 0.0200566 | 0.999791 |
| XLOC_018666 | XLOC_018666 | TDP2                    | chr6:24650204-24667115    | 0.0201386 | 0.999791 |
| XLOC_008888 | XLOC_008888 | RAI1                    | chr17:17584786-17740325   | 0.0201589 | 0.999791 |
| XLOC_002343 | XLOC_002343 | PROSER2                 | chr10:11865396-11936709   | 0.0202155 | 0.999791 |
| XLOC_004543 | XLOC_004543 | ZNF259                  | chr11:116649275-116658739 | 0.0202671 | 0.999791 |
| XLOC_015658 | XLOC_015658 | CDCP1                   | chr3:45123768-45187914    | 0.020302  | 0.999791 |
| XLOC_010531 | XLOC_010531 | ARHGEF18                | chr19:7459998-7537371     | 0.0203112 | 0.999791 |
| XLOC_006337 | XLOC_006337 | FAM179B                 | chr14:45431415-45543634   | 0.0203286 | 0.999791 |
| XLOC_003402 | XLOC_003402 | FJX1                    | chr11:35639734-35642421   | 0.0203661 | 0.999791 |
| XLOC_021583 | XLOC_021583 | KIAA0146                | chr8:48173488-48648563    | 0.0203912 | 0.999791 |
| XLOC_018664 | XLOC_018664 | GPLD1                   | chr6:24426061-24489850    | 0.0204319 | 1        |
| XLOC_016591 | XLOC_016591 | CDKN2AIP                | chr4:184365788-184369049  | 0.0204931 | 0.999791 |
| XLOC_018297 | XLOC_018297 | UBR2                    | chr6:42531759-42661243    | 0.0205165 | 0.999791 |
| XLOC_007307 | XLOC_007307 | CPLX3                   | chr15:75118950-75124136   | 0.0205311 | 1        |
| XLOC_005492 | XLOC_005492 | ATP5G2                  | chr12:54058943-54070512   | 0.0205414 | 0.999791 |
| XLOC_017353 | XLOC_017353 | PURA                    | chr5:139493707-139499001  | 0.0205627 | 0.999791 |
| XLOC_005648 | XLOC_005648 | GOLGA2P5                | chr12:100550174-100567121 | 0.0205767 | 0.999791 |
| XLOC_003975 | XLOC_003975 | KCNQ1OT1                | chr11:2466220-2870340     | 0.0205959 | 1        |
| XLOC_010569 | XLOC_010569 | P2RY11,PPAN,PPAN-P2RY11 | chr19:10216898-10230599   | 0.0207379 | 0.999791 |
| XLOC_017135 | XLOC_017135 | GPX8                    | chr5:54408798-54469005    | 0.0207572 | 0.999791 |
| XLOC_001087 | XLOC_001087 | ARF1                    | chr1:228270360-228286913  | 0.0207888 | 0.999791 |
| XLOC_011005 | XLOC_011005 | DHDH                    | chr19:49436938-49448226   | 0.0207972 | 0.999791 |
| XLOC_022464 | XLOC_022464 | FAM22G                  | chr9:99691285-99704572    | 0.0208006 | 1        |



|             |             |              |                           |           |          |
|-------------|-------------|--------------|---------------------------|-----------|----------|
| XLOC_022590 | XLOC_022590 | GLE1         | chr9:131266970-131304580  | 0.020829  | 0.999791 |
| XLOC_004525 | XLOC_004525 | FDXACB1      | chr11:111744779-111754797 | 0.0208781 | 0.999791 |
| XLOC_006382 | XLOC_006382 | PCNXL4       | chr14:60558628-60601532   | 0.0208825 | 0.999791 |
| XLOC_014227 | XLOC_014227 | PCNT         | chr21:47744035-47865682   | 0.0208983 | 0.999791 |
| XLOC_015748 | XLOC_015748 | RPL29        | chr3:52027643-52029958    | 0.0209299 | 0.999791 |
| XLOC_002400 | XLOC_002400 | MAP3K8       | chr10:30722949-30750762   | 0.0209363 | 0.999791 |
| XLOC_023536 | XLOC_023536 | TCEAL1       | chrX:102883647-102885876  | 0.0210069 | 0.999791 |
| XLOC_014337 | XLOC_014337 | PLAC4        | chr21:42539727-42648524   | 0.0210116 | 1        |
| XLOC_010368 | XLOC_010368 | MBD1         | chr18:47793251-47808144   | 0.0210183 | 0.999791 |
| XLOC_019018 | XLOC_019018 | PREP         | chr6:105725441-105850999  | 0.0210251 | 0.999791 |
| XLOC_014193 | XLOC_014193 | NDUFV3       | chr21:44313377-44329773   | 0.0210398 | 0.999791 |
| XLOC_005743 | XLOC_005743 | COQ5         | chr12:120941081-120966964 | 0.0210591 | 0.999791 |
| XLOC_001629 | XLOC_001629 | SYDE2        | chr1:85623355-85666728    | 0.0210693 | 0.999791 |
| XLOC_005208 | XLOC_005208 | ZNF140       | chr12:133657036-133684258 | 0.0210825 | 0.999791 |
| XLOC_014864 | XLOC_014864 | RRP7B        | chr22:42949924-42978017   | 0.0210847 | 0.999791 |
| XLOC_008462 | XLOC_008462 | LOC100190986 | chr16:21443344-21445776   | 0.0210873 | 0.999791 |
| XLOC_016001 | XLOC_016001 | COMMD2       | chr3:149456256-149470286  | 0.0210992 | 0.999791 |
| XLOC_003892 | XLOC_003892 | TBRG1        | chr11:124492741-124564687 | 0.0211103 | 0.999791 |
| XLOC_005804 | XLOC_005804 | IL17D        | chr13:21277481-21297237   | 0.0211866 | 0.999791 |
| XLOC_022551 | XLOC_022551 | NEK6         | chr9:127019884-127114719  | 0.0211893 | 0.999791 |
| XLOC_001431 | XLOC_001431 | AK2          | chr1:33473540-33502512    | 0.0212111 | 0.999791 |
| XLOC_007487 | XLOC_007487 | SLC12A6      | chr15:34517244-34630265   | 0.0212614 | 0.999791 |
| XLOC_015441 | XLOC_015441 | SEC62        | chr3:169684579-169716161  | 0.021337  | 0.999791 |
| XLOC_022140 | XLOC_022140 | NUDCD1       | chr8:110253147-110346350  | 0.021361  | 0.999791 |
| XLOC_003185 | XLOC_003185 | UROS         | chr10:127477146-127511837 | 0.0214063 | 0.999791 |
| XLOC_004616 | XLOC_004616 | RPUSD4       | chr11:126071988-126081587 | 0.0214138 | 0.999791 |
| XLOC_018170 | XLOC_018170 | HLA-E        | chr6:30457182-30461982    | 0.0214733 | 0.999791 |
| XLOC_021035 | XLOC_021035 | POLD2        | chr7:44154278-44163169    | 0.0214813 | 0.999791 |
| XLOC_017344 | XLOC_017344 | REEP2        | chr5:137774689-137782658  | 0.0215143 | 0.999791 |
| XLOC_023439 | XLOC_023439 | ZC3H12B      | chrX:64708614-64727767    | 0.0215629 | 1        |
| XLOC_018193 | XLOC_018193 | MCCD1        | chr6:31496738-31514625    | 0.0215875 | 0.999791 |
| XLOC_023203 | XLOC_023203 | ZMYND19      | chr9:140476530-140484937  | 0.0216502 | 0.999791 |
| XLOC_017635 | XLOC_017635 | LOC648987    | chr5:43014830-43018913    | 0.0216572 | 0.999791 |
| XLOC_022694 | XLOC_022694 | TOR4A        | chr9:140172279-140177093  | 0.0216586 | 0.999791 |
| XLOC_005547 | XLOC_005547 | DCTN2        | chr12:57916658-57941114   | 0.021693  | 0.999791 |
| XLOC_003762 | XLOC_003762 | KIAA1731     | chr1:193394815-193463522  | 0.0217152 | 0.999791 |
| XLOC_009222 | XLOC_009222 | ACE          | chr17:61554421-61575741   | 0.0217561 | 0.999791 |
| XLOC_007305 | XLOC_007305 | CSK          | chr15:75074424-75095539   | 0.0218089 | 0.999791 |
| XLOC_010334 | XLOC_010334 | RPRED1A      | chr18:33569791-33647373   | 0.0218212 | 0.999791 |
| XLOC_014408 | XLOC_014408 | MRPL40       | chr22:19420035-19423596   | 0.0218237 | 0.999791 |
| XLOC_018754 | XLOC_018754 | HLA-C        | chr6:31236525-31239913    | 0.0218476 | 0.999791 |
| XLOC_010249 | XLOC_010249 | ZNF407       | chr18:72342918-72777628   | 0.021848  | 0.999791 |
| XLOC_008168 | XLOC_008168 | C16orf70     | chr16:67143914-67184902   | 0.0218897 | 0.999791 |
| XLOC_023586 | XLOC_023586 | LONRF3       | chrX:118108712-118151949  | 0.0219356 | 0.999791 |
| XLOC_010058 | XLOC_010058 | CD7          | chr17:80272745-80275480   | 0.0219958 | 1        |
| XLOC_001693 | XLOC_001693 | SORT1        | chr1:109852187-109940563  | 0.0220559 | 0.999791 |
| XLOC_003150 | XLOC_003150 | KIAA1598     | chr10:118642887-118886097 | 0.0220585 | 0.999791 |
| XLOC_017391 | XLOC_017391 | KIAA0141     | chr5:141303384-141321612  | 0.0220623 | 0.999791 |
| XLOC_007630 | XLOC_007630 | SPG21        | chr15:65255362-65282251   | 0.0220899 | 0.999791 |
| XLOC_017814 | XLOC_017814 | SAR1B        | chr5:133936838-133968533  | 0.0221085 | 0.999791 |
| XLOC_017646 | XLOC_017646 | EMB          | chr5:49692030-49737234    | 0.0221091 | 0.999791 |
| XLOC_005410 | XLOC_005410 | SENP1        | chr12:48436680-48540187   | 0.0221586 | 0.999791 |
| XLOC_023605 | XLOC_023605 | OCRL         | chrX:128674251-128726530  | 0.0221596 | 0.999791 |
| XLOC_012422 | XLOC_012422 | UGGT1        | chr2:128848753-128953249  | 0.0222167 | 0.999791 |
| XLOC_020660 | XLOC_020660 | TRIP6        | chr7:100464949-100471076  | 0.0222795 | 0.999791 |
| XLOC_004549 | XLOC_004549 | PCSK7        | chr11:117075787-117102811 | 0.0223569 | 0.999791 |
| XLOC_008687 | XLOC_008687 | KARS         | chr16:75661621-75681585   | 0.0223781 | 0.999791 |
| XLOC_014382 | XLOC_014382 | SLC19A1      | chr21:46934628-46962385   | 0.0224539 | 0.999791 |
| XLOC_020547 | XLOC_020547 | EIF4H        | chr7:73588705-73611429    | 0.0226133 | 0.999791 |
| XLOC_018397 | XLOC_018397 | MRAP2        | chr6:84743419-84800605    | 0.0226146 | 0.999791 |
| XLOC_008850 | XLOC_008850 | NTN1         | chr17:8924858-9147317     | 0.0226712 | 0.999791 |
| XLOC_011451 | XLOC_011451 | ZNF564       | chr19:12636183-12662356   | 0.0226778 | 0.999791 |
| XLOC_022646 | XLOC_022646 | RXRA         | chr9:137218315-137332431  | 0.02269   | 0.999791 |
| XLOC_016927 | XLOC_016927 | MFSD8        | chr4:128838959-128952455  | 0.0226961 | 0.999791 |
| XLOC_009115 | XLOC_009115 | HEXIM2       | chr17:43238263-43247406   | 0.0227183 | 0.999791 |
| XLOC_023946 | XLOC_023946 | RLIM         | chrX:73802810-73834461    | 0.022733  | 0.999791 |
| XLOC_000094 | XLOC_000094 | VPS13D       | chr1:12290112-12572098    | 0.0227415 | 0.999791 |
| XLOC_017742 | XLOC_017742 | KIAA0825     | chr5:93486555-93954309    | 0.0227537 | 1        |
| XLOC_007421 | XLOC_007421 | LOC440311    | chr15:95398591-95400293   | 0.0227931 | 1        |
| XLOC_015850 | XLOC_015850 | RPL24        | chr3:101399933-101405563  | 0.0227952 | 0.999791 |
| XLOC_002529 | XLOC_002529 | ZNF503-AS2   | chr10:77157602-77168740   | 0.0229426 | 0.999791 |
| XLOC_008680 | XLOC_008680 | BCAR1        | chr16:75262927-75301951   | 0.0230027 | 0.999791 |
| XLOC_010428 | XLOC_010428 | FSTL3        | chr19:676388-683392       | 0.0230158 | 0.999791 |
| XLOC_002697 | XLOC_002697 | VT11A        | chr10:114206755-114578504 | 0.0230286 | 0.999791 |
| XLOC_015732 | XLOC_015732 | HYAL2        | chr3:50355220-50360281    | 0.0230361 | 0.999791 |
| XLOC_023261 | XLOC_023261 | PRPS2        | chrX:12809473-12842346    | 0.0230574 | 0.999791 |
| XLOC_013932 | XLOC_013932 | AHCY         | chr20:32868070-32869608   | 0.0230694 | 0.999791 |
| XLOC_000916 | XLOC_000916 | KIAA1614     | chr1:180882312-180915239  | 0.0231755 | 1        |
| XLOC_014164 | XLOC_014164 | SIM2         | chr21:38071990-38122510   | 0.023218  | 0.999791 |

|             |             |              |                           |           |          |
|-------------|-------------|--------------|---------------------------|-----------|----------|
| XLOC_001258 | XLOC_001258 | LZIC         | chr1:9989775-10002826     | 0.023226  | 0.999791 |
| XLOC_007120 | XLOC_007120 | ARHGAP11A    | chr15:32907690-32931868   | 0.0232687 | 0.999791 |
| XLOC_008779 | XLOC_008779 | PLD2         | chr17:4710395-4726727     | 0.0233007 | 0.999791 |
| XLOC_022884 | XLOC_022884 | ZFAND5       | chr9:74966340-74980163    | 0.0233522 | 0.999791 |
| XLOC_004163 | XLOC_004163 | CKAP5        | chr11:46765083-46867859   | 0.0233683 | 0.999791 |
| XLOC_020741 | XLOC_020741 | ATP6V1F      | chr7:128502856-128505903  | 0.0234168 | 0.999791 |
| XLOC_024035 | XLOC_024035 | SEPT6        | chrX:118749687-118827333  | 0.0234633 | 0.999791 |
| XLOC_023794 | XLOC_023794 | APOO         | chrX:23851464-23926057    | 0.0234839 | 0.999791 |
| XLOC_007576 | XLOC_007576 | TRPM7        | chr15:50849351-50979012   | 0.0235539 | 0.999791 |
| XLOC_016416 | XLOC_016416 | AFF1         | chr4:87856153-88062206    | 0.0235558 | 0.999791 |
| XLOC_020810 | XLOC_020810 | CASP2        | chr7:142985307-143004789  | 0.0236024 | 0.999791 |
| XLOC_007334 | XLOC_007334 | CHRNA5       | chr15:78857861-78913637   | 0.0236981 | 0.999791 |
| XLOC_010189 | XLOC_010189 | HAUS1        | chr18:43684297-43708299   | 0.0237403 | 0.999791 |
| XLOC_005653 | XLOC_005653 | GNPTAB       | chr12:102139274-102224645 | 0.0237498 | 0.999791 |
| XLOC_011446 | XLOC_011446 | ZNF563       | chr19:12428303-12444534   | 0.0237529 | 0.999791 |
| XLOC_022066 | XLOC_022066 | C8orf59      | chr8:86089618-86132643    | 0.0237649 | 0.999791 |
| XLOC_017236 | XLOC_017236 | ANKRD32      | chr5:93954390-94031573    | 0.0238512 | 0.999791 |
| XLOC_002962 | XLOC_002962 | HERC4        | chr10:69681655-69835103   | 0.0238621 | 0.999791 |
| XLOC_008589 | XLOC_008589 | CIAPIN1      | chr16:57462086-57495187   | 0.0239147 | 0.999791 |
| XLOC_008102 | XLOC_008102 | CHD9         | chr16:53088944-53361414   | 0.0239297 | 0.999791 |
| XLOC_016130 | XLOC_016130 | LSG1         | chr3:194361516-194393206  | 0.023989  | 0.999791 |
| XLOC_011483 | XLOC_011483 | DDX39A       | chr19:14519609-14530195   | 0.0240117 | 0.999791 |
| XLOC_002441 | XLOC_002441 | FAM21B       | chr10:47894022-47949417   | 0.0240163 | 0.999791 |
| XLOC_003027 | XLOC_003027 | WAPAL        | chr10:88195012-88281541   | 0.0240404 | 0.999791 |
| XLOC_008092 | XLOC_008092 | LONP2        | chr16:48274602-48420559   | 0.0241946 | 0.999791 |
| XLOC_018576 | XLOC_018576 | TMEM181      | chr6:158957467-159056467  | 0.0242475 | 0.999791 |
| XLOC_020361 | XLOC_020361 | USP42        | chr7:6144549-6201195      | 0.0242487 | 0.999791 |
| XLOC_000675 | XLOC_000675 | PRPF3        | chr1:150293927-150325704  | 0.0242991 | 0.999791 |
| XLOC_006767 | XLOC_006767 | PPP2R3C      | chr14:35554677-35591519   | 0.0243688 | 0.999791 |
| XLOC_005846 | XLOC_005846 | BRCA2        | chr13:32889616-32973809   | 0.0243829 | 1        |
| XLOC_017671 | XLOC_017671 | ERCC8        | chr5:60169658-60240905    | 0.0243846 | 0.999791 |
| XLOC_007841 | XLOC_007841 | CHTF18       | chr16:838621-850733       | 0.0243978 | 0.999791 |
| XLOC_022423 | XLOC_022423 | SPIN1        | chr9:91003296-91093622    | 0.0244088 | 0.999791 |
| XLOC_013047 | XLOC_013047 | TMEM127      | chr2:96915945-96931751    | 0.0244214 | 0.999791 |
| XLOC_021387 | XLOC_021387 | ZNF746       | chr7:149169883-149194898  | 0.0244383 | 0.999791 |
| XLOC_018523 | XLOC_018523 | CCDC28A      | chr6:139046347-139114456  | 0.0244523 | 0.999791 |
| XLOC_011841 | XLOC_011841 | NOSIP        | chr19:50058724-50083829   | 0.0245374 | 0.999791 |
| XLOC_024186 | XLOC_024186 | IRAK1        | chrX:153275956-153285342  | 0.0245585 | 0.999791 |
| XLOC_013750 | XLOC_013750 | FAM217B      | chr20:58508818-58523702   | 0.0245784 | 0.999791 |
| XLOC_001051 | XLOC_001051 | KCTD3        | chr1:215740734-215795149  | 0.0246082 | 0.999791 |
| XLOC_009190 | XLOC_009190 | DYNLL2       | chr17:56160779-56167618   | 0.0246283 | 0.999791 |
| XLOC_018468 | XLOC_018468 | NUS1         | chr6:117996616-118031866  | 0.0246969 | 0.999791 |
| XLOC_021925 | XLOC_021925 | TRIM35       | chr8:27142403-27168834    | 0.024718  | 0.999791 |
| XLOC_013063 | XLOC_013063 | KIAA1211L    | chr2:99410308-99552684    | 0.0247334 | 1        |
| XLOC_011543 | XLOC_011543 | HOMER3       | chr19:19040009-19052041   | 0.0247389 | 0.999791 |
| XLOC_016003 | XLOC_016003 | PFN2         | chr3:149682690-149688741  | 0.0247863 | 0.999791 |
| XLOC_006291 | XLOC_006291 | LRRC16B      | chr14:24521205-24538937   | 0.0249003 | 0.999791 |
| XLOC_015538 | XLOC_015538 | LOC1522217   | chr3:196669493-196670884  | 0.0249075 | 0.999791 |
| XLOC_005386 | XLOC_005386 | YAF2         | chr12:42550906-42632154   | 0.0249188 | 0.999791 |
| XLOC_014931 | XLOC_014931 | MTMR14       | chr3:9691116-9744078      | 0.0249248 | 0.999791 |
| XLOC_007959 | XLOC_007959 | ABCC1        | chr16:16043433-16236930   | 0.0249445 | 0.999791 |
| XLOC_006267 | XLOC_006267 | RNASE7       | chr14:21510384-21512392   | 0.0249543 | 1        |
| XLOC_004246 | XLOC_004246 | VWCE         | chr11:61025757-61062788   | 0.0250026 | 0.999791 |
| XLOC_010663 | XLOC_010663 | AP1M1        | chr19:16308664-16346156   | 0.0251176 | 0.999791 |
| XLOC_012596 | XLOC_012596 | FAM117B      | chr2:203499900-203634480  | 0.0251281 | 0.999791 |
| XLOC_001874 | XLOC_001874 | ADAR         | chr1:154554533-154600456  | 0.0251381 | 0.999791 |
| XLOC_005391 | XLOC_005391 | TWF1         | chr12:44187525-44200178   | 0.0251882 | 0.999791 |
| XLOC_020905 | XLOC_020905 | SNX8         | chr7:2291404-2354099      | 0.0252064 | 0.999791 |
| XLOC_012071 | XLOC_012071 | UBXN2A       | chr2:24163375-24223693    | 0.0252197 | 0.999791 |
| XLOC_007849 | XLOC_007849 | BAIAP3       | chr16:1383605-1401873     | 0.0252243 | 0.999791 |
| XLOC_008160 | XLOC_008160 | CMTM2        | chr16:66613350-66622177   | 0.0252601 | 1        |
| XLOC_013573 | XLOC_013573 | FAM182A      | chr20:26035249-26067553   | 0.0252733 | 1        |
| XLOC_017695 | XLOC_017695 | ANKRA2       | chr5:72848024-72861511    | 0.0252734 | 0.999791 |
| XLOC_008214 | XLOC_008214 | SF3B3        | chr16:70557690-70611571   | 0.0252761 | 0.999791 |
| XLOC_022458 | XLOC_022458 | ERCC6L2      | chr9:98568369-98731122    | 0.0253704 | 1        |
| XLOC_008733 | XLOC_008733 | SPATA2L      | chr16:89753075-89768121   | 0.0254846 | 0.999791 |
| XLOC_009359 | XLOC_009359 | TBCD         | chr17:80709939-80901062   | 0.0254916 | 0.999791 |
| XLOC_017891 | XLOC_017891 | TIGD6        | chr5:149372685-149432706  | 0.0255011 | 0.999791 |
| XLOC_021317 | XLOC_021317 | COPG2,TSGA13 | chr7:130126015-130371406  | 0.0255109 | 0.999791 |
| XLOC_014553 | XLOC_014553 | MICALL1      | chr22:38302154-38338465   | 0.0255339 | 0.999791 |
| XLOC_022107 | XLOC_022107 | MTERFD1      | chr8:97251644-97273796    | 0.0255435 | 0.999791 |
| XLOC_011589 | XLOC_011589 | CEBPA        | chr19:33790839-33793430   | 0.0255794 | 0.999791 |
| XLOC_012988 | XLOC_012988 | DCTN1        | chr2:74588280-74621008    | 0.025584  | 0.999791 |
| XLOC_008664 | XLOC_008664 | AP1G1        | chr16:71762904-71842976   | 0.0255864 | 0.999791 |
| XLOC_020956 | XLOC_020956 | RAPGEF5      | chr7:22157907-22396533    | 0.0256062 | 0.999791 |
| XLOC_007473 | XLOC_007473 | TJP1         | chr15:29992356-30114706   | 0.025627  | 0.999791 |
| XLOC_010552 | XLOC_010552 | ANGPTL4      | chr19:8429010-8439257     | 0.0256754 | 0.999791 |
| XLOC_008349 | XLOC_008349 | RPS2         | chr16:2012061-2014827     | 0.0256833 | 0.999791 |
| XLOC_008483 | XLOC_008483 | GTF3C1       | chr16:27471933-27561251   | 0.0256971 | 0.999791 |

|             |             |                             |                           |           |          |
|-------------|-------------|-----------------------------|---------------------------|-----------|----------|
| XLOC_016080 | XLOC_016080 | MCCC1                       | chr3:182733005-182817365  | 0.0257012 | 0.999791 |
| XLOC_005613 | XLOC_005613 | CEP290                      | chr12:88429267-88535993   | 0.0257282 | 0.999791 |
| XLOC_017115 | XLOC_017115 | C5orf51                     | chr5:41904469-41921738    | 0.0257377 | 0.999791 |
| XLOC_013020 | XLOC_013020 | LOC90784                    | chr2:86247338-86250991    | 0.0257441 | 0.999791 |
| XLOC_006455 | XLOC_006455 | JDP2                        | chr14:75894508-75939404   | 0.0257742 | 0.999791 |
| XLOC_017350 | XLOC_017350 | UBE2D2                      | chr5:138940750-139008018  | 0.0258133 | 0.999791 |
| XLOC_022618 | XLOC_022618 | NUP214                      | chr9:134000980-134109091  | 0.0258133 | 0.999791 |
| XLOC_021291 | XLOC_021291 | WASL                        | chr7:123321996-123389116  | 0.0258358 | 0.999791 |
| XLOC_010198 | XLOC_010198 | SKA1                        | chr18:47901391-47920538   | 0.0258876 | 0.999791 |
| XLOC_006488 | XLOC_006488 | CALM1                       | chr14:90863326-90874619   | 0.0258916 | 0.999791 |
| XLOC_009649 | XLOC_009649 | C17orf96                    | chr17:36827958-36831187   | 0.0259518 | 0.999791 |
| XLOC_020983 | XLOC_020983 | HOXA11                      | chr7:27220775-27224835    | 0.0259846 | 0.999791 |
| XLOC_020472 | XLOC_020472 | PPIA                        | chr7:44836240-44842716    | 0.0259848 | 0.999791 |
| XLOC_015997 | XLOC_015997 | CP                          | chr3:148847370-148939832  | 0.0260087 | 0.999791 |
| XLOC_021730 | XLOC_021730 | MTBP                        | chr8:121408082-121535875  | 0.0260154 | 0.999791 |
| XLOC_001493 | XLOC_001493 | ZMYND12                     | chr1:42896000-42921938    | 0.0260244 | 1        |
| XLOC_002992 | XLOC_002992 | DNAJC9                      | chr10:75002581-75007025   | 0.0260369 | 0.999791 |
| XLOC_015896 | XLOC_015896 | RABL3                       | chr3:120405527-120461384  | 0.0260444 | 0.999791 |
| XLOC_007911 | XLOC_007911 | ZNF75A                      | chr16:3348807-3368576     | 0.0261118 | 0.999791 |
| XLOC_004799 | XLOC_004799 | DNM1L                       | chr12:32832136-32898584   | 0.0261542 | 0.999791 |
| XLOC_000785 | XLOC_000785 | LRRC71                      | chr1:156890423-156902880  | 0.0262035 | 0.999791 |
| XLOC_010451 | XLOC_010451 | EFNA2                       | chr19:1286152-13014129    | 0.0262569 | 0.999791 |
| XLOC_010322 | XLOC_010322 | B4GALT6                     | chr18:29202208-29264686   | 0.0263128 | 0.999791 |
| XLOC_004651 | XLOC_004651 | FKBP4                       | chr12:2904107-2914587     | 0.0263174 | 0.999791 |
| XLOC_022391 | XLOC_022391 | C9orf85                     | chr9:74526422-74588371    | 0.0263228 | 0.999791 |
| XLOC_021522 | XLOC_021522 | PPP2R2A                     | chr8:26149006-26230195    | 0.0263377 | 0.999791 |
| XLOC_014693 | XLOC_014693 | KLHL22                      | chr22:20795805-20850170   | 0.0263509 | 0.999791 |
| XLOC_006040 | XLOC_006040 | MTMR6                       | chr13:25820340-25861704   | 0.0263554 | 0.999791 |
| XLOC_016799 | XLOC_016799 | NAAA                        | chr4:76831807-76862166    | 0.0264228 | 0.999791 |
| XLOC_000383 | XLOC_000383 | CMPK1                       | chr1:47799468-47844511    | 0.0264411 | 0.999791 |
| XLOC_016049 | XLOC_016049 | PDCD10                      | chr3:167401694-167452651  | 0.0264577 | 0.999791 |
| XLOC_018117 | XLOC_018117 | ABT1                        | chr6:26597170-26600277    | 0.0264942 | 0.999791 |
| XLOC_009188 | XLOC_009188 | AKAP1                       | chr17:55162552-55198710   | 0.0265751 | 0.999791 |
| XLOC_008200 | XLOC_008200 | SNTB2                       | chr16:69221049-69342955   | 0.0265777 | 0.999791 |
| XLOC_007633 | XLOC_007633 | UBAP1L                      | chr15:65385341-65398697   | 0.0266119 | 0.999791 |
| XLOC_018250 | XLOC_018250 | SNRPC                       | chr6:34724870-34741634    | 0.0266346 | 0.999791 |
| XLOC_022347 | XLOC_022347 | CLTA                        | chr9:36190852-36212059    | 0.0266647 | 0.999791 |
| XLOC_014506 | XLOC_014506 | SLC35E4                     | chr22:31031792-31043862   | 0.0266762 | 0.999791 |
| XLOC_017231 | XLOC_017231 | POLR3G                      | chr5:89770680-89810369    | 0.0267017 | 0.999791 |
| XLOC_007719 | XLOC_007719 | CHRNA3                      | chr15:78857861-78913637   | 0.0267228 | 1        |
| XLOC_008947 | XLOC_008947 | ERAL1                       | chr17:27182042-27188072   | 0.0267339 | 0.999791 |
| XLOC_022402 | XLOC_022402 | VPS13A                      | chr9:79791671-80032399    | 0.0267364 | 0.999791 |
| XLOC_023879 | XLOC_023879 | SMC1A                       | chrX:53401069-53449618    | 0.0267393 | 0.999791 |
| XLOC_006683 | XLOC_006683 | TEP1                        | chr14:20833825-20881579   | 0.0268254 | 0.999791 |
| XLOC_007252 | XLOC_007252 | ANKDD1A                     | chr15:65204100-65251041   | 0.0269351 | 0.999791 |
| XLOC_014803 | XLOC_014803 | TST                         | chr22:37406899-37425863   | 0.0269537 | 0.999791 |
| XLOC_003851 | XLOC_003851 | PHLDB1                      | chr11:118477212-118528748 | 0.0269564 | 0.999791 |
| XLOC_003783 | XLOC_003783 | TMEM133                     | chr11:100862810-100864666 | 0.0269658 | 0.999791 |
| XLOC_016268 | XLOC_016268 | RBPJ                        | chr4:26321331-26436752    | 0.0269784 | 0.999791 |
| XLOC_002555 | XLOC_002555 | CCSER2                      | chr10:86088409-86278276   | 0.0269948 | 0.999791 |
| XLOC_013048 | XLOC_013048 | SNRNP200                    | chr2:96940073-96971307    | 0.0270166 | 0.999791 |
| XLOC_002592 | XLOC_002592 | BTAF1                       | chr10:93683735-93790080   | 0.0270216 | 0.999791 |
| XLOC_021353 | XLOC_021353 | MRPS33                      | chr7:140705960-140714781  | 0.0270688 | 0.999791 |
| XLOC_001416 | XLOC_001416 | BAI2                        | chr1:32192717-32229648    | 0.0271053 | 0.999791 |
| XLOC_005675 | XLOC_005675 | PRDM4                       | chr12:108126642-108154914 | 0.0271332 | 0.999791 |
| XLOC_014121 | XLOC_014121 | USP16                       | chr21:30396937-30426807   | 0.0271411 | 0.999791 |
| XLOC_009515 | XLOC_009515 | CDRT4, TVP23C, TVP23C-CDRT4 | chr17:15339331-15466945   | 0.0271658 | 0.999791 |
| XLOC_012421 | XLOC_012421 | SFT2D3                      | chr2:128458596-128461407  | 0.0272042 | 0.999791 |
| XLOC_015780 | XLOC_015780 | FAM208A                     | chr3:56591183-56717135    | 0.0272383 | 0.999791 |
| XLOC_017506 | XLOC_017506 | TSPAN17                     | chr5:176074387-176086059  | 0.0272397 | 0.999791 |
| XLOC_009304 | XLOC_009304 | METTL23                     | chr17:74722911-74729962   | 0.0272623 | 0.999791 |
| XLOC_009289 | XLOC_009289 | SAP30BP                     | chr17:73663398-73704139   | 0.0272783 | 0.999791 |
| XLOC_009530 | XLOC_009530 | PEMT                        | chr17:17408876-17495017   | 0.0273131 | 0.999791 |
| XLOC_017311 | XLOC_017311 | SLC22A5                     | chr5:131630144-131731306  | 0.0273172 | 0.999791 |
| XLOC_010475 | XLOC_010475 | ZNF57                       | chr19:2900895-2918474     | 0.0273452 | 0.999791 |
| XLOC_001353 | XLOC_001353 | GALE                        | chr1:24122088-24127294    | 0.0273567 | 0.999791 |
| XLOC_002172 | XLOC_002172 | NEK2                        | chr1:211831598-211848972  | 0.0273829 | 0.999791 |
| XLOC_023355 | XLOC_023355 | TIMP1                       | chrX:47420498-47479256    | 0.0273836 | 0.999791 |
| XLOC_008065 | XLOC_008065 | SETD1A                      | chr16:30968614-30995981   | 0.0273987 | 0.999791 |
| XLOC_009939 | XLOC_009939 | ABCA10, ABCA5               | chr17:67144147-67323323   | 0.0274101 | 0.999791 |
| XLOC_021662 | XLOC_021662 | CPNE3                       | chr8:87526655-87573726    | 0.0274707 | 0.999791 |
| XLOC_009575 | XLOC_009575 | KIAA0100                    | chr17:26926150-26972177   | 0.0275471 | 0.999791 |
| XLOC_006410 | XLOC_006410 | PLEKHH1                     | chr14:68000007-68067017   | 0.0275595 | 0.999791 |
| XLOC_002362 | XLOC_002362 | STAM                        | chr10:17686123-17758821   | 0.0275715 | 0.999791 |
| XLOC_002756 | XLOC_002756 | DOCK1                       | chr10:128594022-129250780 | 0.0275733 | 0.999791 |
| XLOC_024194 | XLOC_024194 | SLC10A3                     | chrX:153715649-153719002  | 0.0276084 | 0.999791 |
| XLOC_019157 | XLOC_019157 | DYNLT1                      | chr6:159057506-159065804  | 0.0276449 | 0.999791 |
| XLOC_011417 | XLOC_011417 | ICAM3                       | chr19:10444451-10450345   | 0.0276658 | 0.999791 |
| XLOC_002821 | XLOC_002821 | BEND7                       | chr10:13480483-13544976   | 0.0276831 | 0.999791 |

|             |             |              |                           |           |          |
|-------------|-------------|--------------|---------------------------|-----------|----------|
| XLOC_000882 | XLOC_000882 | METTL13      | chr1:171750760-171766856  | 0.0277002 | 0.999791 |
| XLOC_010127 | XLOC_010127 | SLMO1        | chr18:12407894-12432236   | 0.0277072 | 0.999791 |
| XLOC_012362 | XLOC_012362 | GCC2         | chr2:109065576-109125854  | 0.0277671 | 0.999791 |
| XLOC_022707 | XLOC_022707 | CBWD1        | chr9:121037-179075        | 0.0277684 | 0.999791 |
| XLOC_007642 | XLOC_007642 | DENND4A      | chr15:65952956-66084631   | 0.0278112 | 0.999791 |
| XLOC_011566 | XLOC_011566 | ZNF100       | chr19:21906842-21950430   | 0.0278249 | 0.999791 |
| XLOC_016064 | XLOC_016064 | PLD1         | chr3:171318194-171528284  | 0.0279595 | 1        |
| XLOC_022577 | XLOC_022577 | FPGS         | chr9:130565153-130576556  | 0.0279663 | 0.999791 |
| XLOC_003863 | XLOC_003863 | NLRX1        | chr11:119039439-119054725 | 0.027981  | 0.999791 |
| XLOC_009590 | XLOC_009590 | ABHD15       | chr17:27887688-27894042   | 0.0279832 | 0.999791 |
| XLOC_006630 | XLOC_006630 | PPP2R5C      | chr14:102228134-102394328 | 0.0279914 | 0.999791 |
| XLOC_005356 | XLOC_005356 | KRAS         | chr12:25358179-25403854   | 0.028046  | 0.999791 |
| XLOC_014005 | XLOC_014005 | NCOA5        | chr20:44689625-44718580   | 0.0280863 | 0.999791 |
| XLOC_017715 | XLOC_017715 | SERINC5      | chr5:79407049-79551898    | 0.0280979 | 0.999791 |
| XLOC_003443 | XLOC_003443 | SLC39A13     | chr11:47430045-47438051   | 0.0281008 | 0.999791 |
| XLOC_018575 | XLOC_018575 | TULP4        | chr6:158733691-158932856  | 0.0281475 | 0.999791 |
| XLOC_016096 | XLOC_016096 | IGF2BP2      | chr3:185361526-185542827  | 0.0281545 | 0.999791 |
| XLOC_005154 | XLOC_005154 | BCL7A        | chr12:122459860-122499950 | 0.0281753 | 0.999791 |
| XLOC_013046 | XLOC_013046 | STARD7       | chr2:96850602-96908362    | 0.0282151 | 0.999791 |
| XLOC_012127 | XLOC_012127 | SLC30A6      | chr2:32390909-32449181    | 0.0282246 | 0.999791 |
| XLOC_009622 | XLOC_009622 | PEX12        | chr17:33901813-33905656   | 0.0282593 | 0.999791 |
| XLOC_015786 | XLOC_015786 | ARF4         | chr3:57557089-57583215    | 0.0282976 | 0.999791 |
| XLOC_003593 | XLOC_003593 | CCDC88B      | chr11:64107689-64125006   | 0.02833   | 0.999791 |
| XLOC_016084 | XLOC_016084 | MAP6D1       | chr3:183533663-183543393  | 0.0283572 | 0.999791 |
| XLOC_007997 | XLOC_007997 | UBFD1        | chr16:23568861-23585710   | 0.0283826 | 0.999791 |
| XLOC_012564 | XLOC_012564 | NAB1         | chr2:191513847-191557492  | 0.0284099 | 0.999791 |
| XLOC_008622 | XLOC_008622 | KCTD19       | chr16:67311412-67360661   | 0.0284286 | 1        |
| XLOC_014821 | XLOC_014821 | CSNK1E       | chr22:38686696-38714089   | 0.028451  | 0.999791 |
| XLOC_013097 | XLOC_013097 | NPHP1        | chr2:110880913-110962639  | 0.028502  | 0.999791 |
| XLOC_023666 | XLOC_023666 | LOC100272228 | chrX:149106765-149185018  | 0.0285072 | 1        |
| XLOC_020642 | XLOC_020642 | MBLAC1       | chr7:99724319-99726121    | 0.028559  | 0.999791 |
| XLOC_006125 | XLOC_006125 | KPNA3        | chr13:50273442-50367057   | 0.0286222 | 0.999791 |
| XLOC_005678 | XLOC_005678 | SART3        | chr12:108915990-108955165 | 0.0286239 | 0.999791 |
| XLOC_023724 | XLOC_023724 | VBP1         | chrX:154444700-154468098  | 0.0286306 | 0.999791 |
| XLOC_010279 | XLOC_010279 | ZBTB14       | chr18:5289017-5297052     | 0.0286453 | 0.999791 |
| XLOC_018892 | XLOC_018892 | MRPS18A      | chr6:43638933-43655549    | 0.0286477 | 0.999791 |
| XLOC_016410 | XLOC_016410 | AGPAT9       | chr4:84457066-84527027    | 0.0286911 | 0.999791 |
| XLOC_012953 | XLOC_012953 | FBXO48       | chr2:68689504-68694390    | 0.0286955 | 1        |
| XLOC_007694 | XLOC_007694 | RPP25        | chr15:75247442-75249775   | 0.0287503 | 0.999791 |
| XLOC_006485 | XLOC_006485 | TDP1         | chr14:90422245-90511108   | 0.0287505 | 0.999791 |
| XLOC_001067 | XLOC_001067 | DISP1        | chr1:222988430-223179337  | 0.0287867 | 1        |
| XLOC_012375 | XLOC_012375 | MERTK        | chr2:112656190-112786945  | 0.0288108 | 0.999791 |
| XLOC_006427 | XLOC_006427 | SIPA1L1      | chr14:71996041-72206120   | 0.0288219 | 0.999791 |
| XLOC_021468 | XLOC_021468 | NEIL2        | chr8:11627171-11644854    | 0.028913  | 0.999791 |
| XLOC_005526 | XLOC_005526 | MIP          | chr12:56843285-56848435   | 0.028938  | 1        |
| XLOC_010097 | XLOC_010097 | MYL12A       | chr18:3247527-3256234     | 0.0289984 | 0.999791 |
| XLOC_013487 | XLOC_013487 | STK35        | chr20:2082527-2129198     | 0.0290248 | 0.999791 |
| XLOC_024016 | XLOC_024016 | ACSL4        | chrX:108884563-108976621  | 0.0291633 | 0.999791 |
| XLOC_020699 | XLOC_020699 | ZNF277       | chr7:111846642-111983989  | 0.0291897 | 0.999791 |
| XLOC_001758 | XLOC_001758 | FAM72D       | chr1:143896451-143913143  | 0.0291908 | 0.999791 |
| XLOC_014258 | XLOC_014258 | N6AMT1       | chr21:30244512-30257695   | 0.02924   | 0.999791 |
| XLOC_012059 | XLOC_012059 | FAM84A       | chr2:14772809-14780168    | 0.0292433 | 1        |
| XLOC_006055 | XLOC_006055 | UBL3         | chr13:30338544-30424820   | 0.0292706 | 0.999791 |
| XLOC_014893 | XLOC_014893 | CERK         | chr22:47080306-47134152   | 0.0293118 | 0.999791 |
| XLOC_017153 | XLOC_017153 | CWC27        | chr5:64064754-64314590    | 0.029355  | 0.999791 |
| XLOC_018879 | XLOC_018879 | C6orf226     | chr6:42858002-42858554    | 0.0293619 | 0.999791 |
| XLOC_000821 | XLOC_000821 | UFC1         | chr1:161123533-161128646  | 0.0293837 | 0.999791 |
| XLOC_004917 | XLOC_004917 | SUOX         | chr12:56391042-56399309   | 0.0294774 | 0.999791 |
| XLOC_013794 | XLOC_013794 | PRPF6        | chr20:62612430-62664453   | 0.029549  | 0.999791 |
| XLOC_002235 | XLOC_002235 | TAF5L        | chr1:229728865-229761794  | 0.0295793 | 0.999791 |
| XLOC_012979 | XLOC_012979 | FBXO41       | chr2:73481809-73496758    | 0.0295797 | 0.999791 |
| XLOC_000340 | XLOC_000340 | IPO13        | chr1:44412477-44433694    | 0.0295845 | 0.999791 |
| XLOC_000576 | XLOC_000576 | STRIP1       | chr1:110574198-110597263  | 0.0296621 | 0.999791 |
| XLOC_011754 | XLOC_011754 | ERCC1        | chr19:45882891-45927177   | 0.0297246 | 0.999791 |
| XLOC_009450 | XLOC_009450 | ASGR1        | chr17:7076750-7082883     | 0.0297454 | 0.999791 |
| XLOC_014639 | XLOC_014639 | PIM3         | chr22:50354142-50357720   | 0.0297691 | 0.999791 |
| XLOC_009852 | XLOC_009852 | MBTD1        | chr17:49254785-49337427   | 0.0297731 | 0.999791 |
| XLOC_017057 | XLOC_017057 | TRIP13       | chr5:892968-918164        | 0.0298064 | 0.999791 |
| XLOC_021674 | XLOC_021674 | RBM12B-AS1   | chr8:94743730-94753224    | 0.0298282 | 0.999791 |
| XLOC_009027 | XLOC_009027 | RPL19        | chr17:37356535-37360980   | 0.0298838 | 0.999791 |
| XLOC_011277 | XLOC_011277 | PCSK4        | chr19:1481426-1490407     | 0.0300062 | 0.999791 |
| XLOC_018755 | XLOC_018755 | HLA-B        | chr6:31321648-31324989    | 0.0300258 | 0.999791 |
| XLOC_012212 | XLOC_012212 | ACTR2        | chr2:65454828-65498390    | 0.0300284 | 0.999791 |
| XLOC_023091 | XLOC_023091 | DPM2         | chr9:130697373-130700763  | 0.0300531 | 0.999791 |
| XLOC_013741 | XLOC_013741 | VAPB         | chr20:56964174-57026156   | 0.0300603 | 0.999791 |
| XLOC_002681 | XLOC_002681 | SFR1         | chr10:105881815-105886143 | 0.0300644 | 0.999791 |
| XLOC_013082 | XLOC_013082 | TGFBRAP1     | chr2:105883539-105946148  | 0.0300996 | 0.999791 |
| XLOC_002791 | XLOC_002791 | PITRM1       | chr10:3179918-3215033     | 0.0300997 | 0.999791 |
| XLOC_002849 | XLOC_002849 | PIP4K2A      | chr10:22823765-23003503   | 0.030139  | 0.999791 |

|             |             |             |                           |           |          |
|-------------|-------------|-------------|---------------------------|-----------|----------|
| XLOC_002998 | XLOC_002998 | USP54       | chr10:75257295-75335433   | 0.0301436 | 0.999791 |
| XLOC_023080 | XLOC_023080 | FAM129B     | chr9:130267617-130341268  | 0.0301755 | 0.999791 |
| XLOC_013835 | XLOC_013835 | C20orf27    | chr20:3734145-3749035     | 0.0302129 | 0.999791 |
| XLOC_004684 | XLOC_004684 | USP5        | chr12:6961284-6975795     | 0.0302432 | 0.999791 |
| XLOC_018464 | XLOC_018464 | KPNA5       | chr6:117002366-117063030  | 0.0303029 | 0.999791 |
| XLOC_007513 | XLOC_007513 | C15orf57    | chr15:40845297-40857252   | 0.0303665 | 0.999791 |
| XLOC_008235 | XLOC_008235 | TERF2IP     | chr16:75681634-75691341   | 0.0303721 | 0.999791 |
| XLOC_000293 | XLOC_000293 | C1orf122    | chr1:38268613-38275126    | 0.0303828 | 0.999791 |
| XLOC_010705 | XLOC_010705 | KLHL26      | chr19:18747837-18781302   | 0.0304024 | 0.999791 |
| XLOC_009347 | XLOC_009347 | ASPSCR1     | chr17:79935425-79975282   | 0.0304042 | 0.999791 |
| XLOC_001799 | XLOC_001799 | APH1A       | chr1:150237798-150241609  | 0.0304221 | 0.999791 |
| XLOC_005862 | XLOC_005862 | COG6        | chr13:40229763-40365802   | 0.0304264 | 0.999791 |
| XLOC_001117 | XLOC_001117 | GGPS1       | chr1:235491752-235507844  | 0.0304462 | 0.999791 |
| XLOC_016952 | XLOC_016952 | OTUD4       | chr4:146054801-146100832  | 0.0304992 | 0.999791 |
| XLOC_009249 | XLOC_009249 | AMZ2        | chr17:66244144-66253305   | 0.0305043 | 0.999791 |
| XLOC_023188 | XLOC_023188 | DPP7        | chr9:140004991-140009195  | 0.0305444 | 0.999791 |
| XLOC_009243 | XLOC_009243 | NOL11       | chr17:65714060-65740266   | 0.0305489 | 0.999791 |
| XLOC_022451 | XLOC_022451 | HIATL1      | chr9:97136832-97223202    | 0.0305581 | 0.999791 |
| XLOC_010039 | XLOC_010039 | ARL16       | chr17:79648223-79650954   | 0.0305795 | 0.999791 |
| XLOC_003332 | XLOC_003332 | CTR9        | chr11:10772810-10801290   | 0.0306014 | 0.999791 |
| XLOC_006763 | XLOC_006763 | EAPP        | chr14:34985134-35008943   | 0.0306025 | 0.999791 |
| XLOC_010047 | XLOC_010047 | MAFG        | chr17:79876144-79885587   | 0.0306107 | 0.999791 |
| XLOC_010372 | XLOC_010372 | MBD2        | chr18:51677970-51751158   | 0.0306166 | 0.999791 |
| XLOC_023489 | XLOC_023489 | ATP7A       | chrX:77166193-77305892    | 0.0306511 | 0.999791 |
| XLOC_009902 | XLOC_009902 | FTSJ3       | chr17:61896792-61909387   | 0.0307217 | 0.999791 |
| XLOC_005175 | XLOC_005175 | DNAH10      | chr12:124247041-124420267 | 0.0307755 | 1        |
| XLOC_011958 | XLOC_011958 | TNNI3       | chr19:55663135-55669100   | 0.0308453 | 0.999791 |
| XLOC_020885 | XLOC_020885 | UBE3C       | chr7:156931654-157062066  | 0.0309041 | 0.999791 |
| XLOC_013425 | XLOC_013425 | KCNJ13      | chr2:233562014-233725289  | 0.0309055 | 1        |
| XLOC_023760 | XLOC_023760 | TRAPPC2     | chrX:13730360-13752754    | 0.0309066 | 0.999791 |
| XLOC_022386 | XLOC_022386 | TJP2        | chr9:71736179-71870124    | 0.0309432 | 0.999791 |
| XLOC_012382 | XLOC_012382 | SLC20A1     | chr2:113403433-113421400  | 0.0310218 | 0.999791 |
| XLOC_011482 | XLOC_011482 | LPHN1       | chr19:14247963-14316997   | 0.0310417 | 0.999791 |
| XLOC_012043 | XLOC_012043 | IAH1        | chr2:9614669-9628591      | 0.0310623 | 0.999791 |
| XLOC_002822 | XLOC_002822 | FRMD4A      | chr10:13685705-14372866   | 0.0310631 | 0.999791 |
| XLOC_018401 | XLOC_018401 | SMIM8       | chr6:87992696-88052043    | 0.0310852 | 0.999791 |
| XLOC_001188 | XLOC_001188 | C1orf170    | chr1:910578-917473        | 0.0311387 | 0.999791 |
| XLOC_000371 | XLOC_000371 | NSUN4       | chr1:46805848-46830824    | 0.0311778 | 0.999791 |
| XLOC_011972 | XLOC_011972 | ISOC2       | chr19:55964345-55973049   | 0.0311843 | 0.999791 |
| XLOC_022296 | XLOC_022296 | FOCAD       | chr9:20658308-20995954    | 0.0312497 | 0.999791 |
| XLOC_013406 | XLOC_013406 | TRIP12      | chr2:230631929-230786655  | 0.0312598 | 0.999791 |
| XLOC_019091 | XLOC_019091 | SLC18B1     | chr6:133090506-133119747  | 0.0312703 | 0.999791 |
| XLOC_012172 | XLOC_012172 | TTC7A       | chr2:47129008-47303275    | 0.0313161 | 0.999791 |
| XLOC_004297 | XLOC_004297 | MACROD1     | chr11:63766029-63933585   | 0.0313296 | 0.999791 |
| XLOC_014426 | XLOC_014426 | SNAP29      | chr22:21213291-21245501   | 0.0313446 | 0.999791 |
| XLOC_001505 | XLOC_001505 | ERI3        | chr1:44686741-44820939    | 0.0313681 | 0.999791 |
| XLOC_011590 | XLOC_011590 | PEPD        | chr19:33877854-34012799   | 0.0314555 | 0.999791 |
| XLOC_010390 | XLOC_010390 | RNF152      | chr18:59482303-59560304   | 0.0314646 | 0.999791 |
| XLOC_001106 | XLOC_001106 | DISC1,TSNAX | chr1:231664398-232177019  | 0.0314937 | 0.999791 |
| XLOC_021114 | XLOC_021114 | STAG3L2     | chr7:74298262-74306731    | 0.0315373 | 0.999791 |
| XLOC_001058 | XLOC_001058 | IARS2       | chr1:220046618-220321383  | 0.0315425 | 0.999791 |
| XLOC_003259 | XLOC_003259 | SLC22A18    | chr11:2909326-2946476     | 0.0315739 | 0.999791 |
| XLOC_023332 | XLOC_023332 | ATP6AP2     | chrX:40440215-40465888    | 0.0315987 | 0.999791 |
| XLOC_023341 | XLOC_023341 | KDM6A       | chrX:44732422-44971845    | 0.0316466 | 0.999791 |
| XLOC_004753 | XLOC_004753 | DERA        | chr12:16064185-16190315   | 0.0316714 | 0.999791 |
| XLOC_012031 | XLOC_012031 | RPS7        | chr2:3622852-3628509      | 0.0317099 | 0.999791 |
| XLOC_001992 | XLOC_001992 | TMCO1       | chr1:165693527-165738159  | 0.0317204 | 0.999791 |
| XLOC_012233 | XLOC_012233 | NAGK        | chr2:71295407-71305998    | 0.0317437 | 0.999791 |
| XLOC_020470 | XLOC_020470 | OGDH        | chr7:44646120-44748669    | 0.0318395 | 0.999791 |
| XLOC_005831 | XLOC_005831 | PDX1        | chr13:28494167-28500451   | 0.0319839 | 0.999791 |
| XLOC_005519 | XLOC_005519 | RNF41       | chr12:56596287-56615753   | 0.0320207 | 0.999791 |
| XLOC_020681 | XLOC_020681 | ARMC10      | chr7:102715327-102789569  | 0.0320228 | 0.999791 |
| XLOC_000485 | XLOC_000485 | LOC646626   | chr1:85731459-85743771    | 0.0320265 | 0.999791 |
| XLOC_007225 | XLOC_007225 | TCF12       | chr15:57210832-57580714   | 0.0320663 | 0.999791 |
| XLOC_003568 | XLOC_003568 | TMEM179B    | chr1:62554873-62559486    | 0.0320811 | 0.999791 |
| XLOC_010996 | XLOC_010996 | CYTH2       | chr19:48972464-48985571   | 0.0320842 | 0.999791 |
| XLOC_011201 | XLOC_011201 | ZNF444      | chr19:56652534-56672262   | 0.0320942 | 0.999791 |
| XLOC_013438 | XLOC_013438 | ILKAP       | chr2:239079042-239112324  | 0.0320942 | 0.999791 |
| XLOC_012769 | XLOC_012769 | TSSC1       | chr2:3192740-3381653      | 0.0320943 | 0.999791 |
| XLOC_022568 | XLOC_022568 | GARNL3      | chr9:130026755-130155828  | 0.0321403 | 0.999791 |
| XLOC_010439 | XLOC_010439 | ARID3A      | chr19:926036-972803       | 0.0321902 | 0.999791 |
| XLOC_015567 | XLOC_015567 | CIDECP      | chr3:10059236-10067820    | 0.0322194 | 0.999791 |
| XLOC_011938 | XLOC_011938 | TFPT        | chr19:54610319-54635150   | 0.0322372 | 0.999791 |
| XLOC_002179 | XLOC_002179 | FLVCR1-AS1  | chr1:213029945-213031480  | 0.0322971 | 0.999791 |
| XLOC_010518 | XLOC_010518 | CAPS        | chr19:5914192-5978320     | 0.0323277 | 0.999791 |
| XLOC_003666 | XLOC_003666 | NDUFV1      | chr11:67374322-67380012   | 0.0323378 | 0.999791 |
| XLOC_006365 | XLOC_006365 | FBXO34      | chr14:55738020-55820329   | 0.0323393 | 0.999791 |
| XLOC_015266 | XLOC_015266 | ZDHC23      | chr3:113666747-113681827  | 0.032412  | 0.999791 |
| XLOC_003832 | XLOC_003832 | REXO2       | chr11:114310107-114321000 | 0.0324247 | 0.999791 |

|             |             |             |                           |           |          |
|-------------|-------------|-------------|---------------------------|-----------|----------|
| XLOC_003506 | XLOC_003506 | FAM111A     | chr11:58910317-58922511   | 0.032431  | 0.999791 |
| XLOC_015806 | XLOC_015806 | SUCLG2      | chr3:67410883-67705038    | 0.0324429 | 0.999791 |
| XLOC_004247 | XLOC_004247 | DDB1        | chr11:61066918-61136975   | 0.0325015 | 0.999791 |
| XLOC_006929 | XLOC_006929 | NRDE2       | chr14:90744397-90798481   | 0.0325146 | 0.999791 |
| XLOC_022736 | XLOC_022736 | HAUS6       | chr9:19053134-19102940    | 0.0325488 | 0.999791 |
| XLOC_007163 | XLOC_007163 | MGA         | chr15:41952609-42062141   | 0.0325751 | 0.999791 |
| XLOC_013877 | XLOC_013877 | CRNKL1      | chr20:20015011-20341346   | 0.0325921 | 0.999791 |
| XLOC_009557 | XLOC_009557 | USP22       | chr17:20902905-20946352   | 0.0327449 | 0.999791 |
| XLOC_008481 | XLOC_008481 | NSMCE1      | chr16:27236314-27301789   | 0.0327533 | 0.999791 |
| XLOC_008308 | XLOC_008308 | AFG3L1P     | chr16:90036182-90067195   | 0.032755  | 0.999791 |
| XLOC_004614 | XLOC_004614 | PUS3        | chr11:125753508-125773116 | 0.0327635 | 0.999791 |
| XLOC_013501 | XLOC_013501 | MRPS26      | chr20:3026674-3028896     | 0.0327699 | 0.999791 |
| XLOC_014059 | XLOC_014059 | TAF4        | chr20:60549853-60640866   | 0.0327959 | 0.999791 |
| XLOC_012236 | XLOC_012236 | DYSF        | chr2:71680752-71913893    | 0.0328099 | 1        |
| XLOC_002767 | XLOC_002767 | PWWP2B      | chr10:134210701-134231358 | 0.0328381 | 0.999791 |
| XLOC_005875 | XLOC_005875 | LACC1       | chr13:44410488-44468068   | 0.0328426 | 0.999791 |
| XLOC_003162 | XLOC_003162 | PRDX3       | chr10:120927214-120938345 | 0.0328453 | 0.999791 |
| XLOC_008525 | XLOC_008525 | LOC730183   | chr16:30709024-30709810   | 0.0328588 | 0.999791 |
| XLOC_004867 | XLOC_004867 | MFSD5       | chr12:53645369-53648190   | 0.0328765 | 0.999791 |
| XLOC_013544 | XLOC_013544 | POLR3F      | chr20:18448032-18465286   | 0.0328864 | 0.999791 |
| XLOC_005297 | XLOC_005297 | CSDA        | chr12:10851675-10875953   | 0.0329079 | 0.999791 |
| XLOC_010847 | XLOC_010847 | SAMD4B      | chr19:39833107-39875537   | 0.0329286 | 0.999791 |
| XLOC_023071 | XLOC_023071 | GOLGA1      | chr9:127640572-127703386  | 0.0329441 | 0.999791 |
| XLOC_004355 | XLOC_004355 | CORO1B      | chr11:67205517-67211292   | 0.0329823 | 0.999791 |
| XLOC_007492 | XLOC_007492 | GOLGA8B     | chr15:34817483-34875771   | 0.0329873 | 0.999791 |
| XLOC_015556 | XLOC_015556 | RAD18       | chr3:8918879-9005159      | 0.0329931 | 0.999791 |
| XLOC_006462 | XLOC_006462 | VASH1       | chr14:77228234-77249363   | 0.0330113 | 0.999791 |
| XLOC_010258 | XLOC_010258 | NFATC1      | chr18:77155771-77289323   | 0.0330799 | 0.999791 |
| XLOC_006734 | XLOC_006734 | CHMP4A      | chr14:24678786-24683036   | 0.0331641 | 0.999791 |
| XLOC_001442 | XLOC_001442 | PSMB2       | chr1:36065142-36107445    | 0.0331672 | 0.999791 |
| XLOC_014571 | XLOC_014571 | SMCR7L      | chr22:39898283-39914137   | 0.0331904 | 0.999791 |
| XLOC_006026 | XLOC_006026 | SKA3        | chr13:21727733-21753220   | 0.0332291 | 0.999791 |
| XLOC_023279 | XLOC_023279 | SYAP1       | chrX:16737706-16780807    | 0.0332391 | 0.999791 |
| XLOC_006140 | XLOC_006140 | NEK3        | chr13:52706778-52733996   | 0.0332798 | 0.999791 |
| XLOC_013615 | XLOC_013615 | ITCH        | chr20:32951040-33099198   | 0.0332805 | 0.999791 |
| XLOC_004085 | XLOC_004085 | COPB1       | chr11:14479048-14521441   | 0.0332834 | 0.999791 |
| XLOC_004400 | XLOC_004400 | COA4        | chr11:73583712-73638781   | 0.0332923 | 0.999791 |
| XLOC_020683 | XLOC_020683 | PSMC2       | chr7:102987970-103086624  | 0.0333075 | 0.999791 |
| XLOC_023590 | XLOC_023590 | UBE2A       | chrX:118708498-118718379  | 0.0333188 | 0.999791 |
| XLOC_009331 | XLOC_009331 | CHMP6       | chr17:78965640-78973933   | 0.0333222 | 0.999791 |
| XLOC_006668 | XLOC_006668 | C14orf80    | chr14:105956191-105965585 | 0.0333522 | 0.999791 |
| XLOC_000320 | XLOC_000320 | PPCS        | chr1:42922172-42926086    | 0.0334033 | 0.999791 |
| XLOC_002593 | XLOC_002593 | MARCH5      | chr10:94050919-94113721   | 0.0334176 | 0.999791 |
| XLOC_007286 | XLOC_007286 | ARIH1       | chr15:72766666-72878896   | 0.0334423 | 0.999791 |
| XLOC_010448 | XLOC_010448 | MIDN        | chr19:1248551-1259142     | 0.0334431 | 0.999791 |
| XLOC_015602 | XLOC_015602 | SATB1       | chr3:18389132-18480265    | 0.033447  | 0.999791 |
| XLOC_018543 | XLOC_018543 | STXBP5      | chr6:147162524-147711612  | 0.0334464 | 0.999791 |
| XLOC_008533 | XLOC_008533 | PRSS53      | chr16:31085742-31100130   | 0.0334918 | 0.999791 |
| XLOC_008824 | XLOC_008824 | SNORA48     | chr17:7465308-7482324     | 0.0335068 | 0.999791 |
| XLOC_003868 | XLOC_003868 | OAF         | chr11:120081746-120100650 | 0.0335116 | 0.999791 |
| XLOC_005783 | XLOC_005783 | SLC15A4     | chr12:129277738-129308541 | 0.0335755 | 0.999791 |
| XLOC_002995 | XLOC_002995 | ANXA7       | chr10:75135188-75173841   | 0.0335756 | 0.999791 |
| XLOC_012776 | XLOC_012776 | RNF144A-AS1 | chr2:7052406-7184309      | 0.0336115 | 1        |
| XLOC_003805 | XLOC_003805 | FDX1        | chr11:110300660-110335608 | 0.0336235 | 0.999791 |
| XLOC_014040 | XLOC_014040 | AURKA       | chr20:54944444-54967351   | 0.0336498 | 0.999791 |
| XLOC_022527 | XLOC_022527 | TRIM32      | chr9:119187503-120177317  | 0.0337132 | 0.999791 |
| XLOC_012186 | XLOC_012186 | EML6        | chr2:54952148-55199156    | 0.0337429 | 0.999791 |
| XLOC_015448 | XLOC_015448 | ECT2        | chr3:172468474-172539264  | 0.0337618 | 0.999791 |
| XLOC_014531 | XLOC_014531 | MCM5        | chr22:35796115-35820495   | 0.0337698 | 0.999791 |
| XLOC_015089 | XLOC_015089 | DHX30       | chr3:47844398-47891686    | 0.0337838 | 0.999791 |
| XLOC_012808 | XLOC_012808 | SDC1        | chr2:20400557-20425194    | 0.0337902 | 0.999791 |
| XLOC_005497 | XLOC_005497 | SMUG1       | chr12:54574141-54582778   | 0.0338429 | 0.999791 |
| XLOC_020399 | XLOC_020399 | FAM221A     | chr7:23719748-23742269    | 0.0338824 | 0.999791 |
| XLOC_006531 | XLOC_006531 | YY1         | chr14:100705101-100744804 | 0.0339227 | 0.999791 |
| XLOC_008587 | XLOC_008587 | FAM192A     | chr16:57186377-57219976   | 0.0339425 | 0.999791 |
| XLOC_000684 | XLOC_000684 | PRUNE       | chr1:150980972-151008189  | 0.0339715 | 0.999791 |
| XLOC_022319 | XLOC_022319 | UBE2R2      | chr9:33817181-33920401    | 0.033978  | 0.999791 |
| XLOC_007340 | XLOC_007340 | KIAA1024    | chr15:79724857-79764642   | 0.0339976 | 1        |
| XLOC_013183 | XLOC_013183 | CACNB4      | chr2:152689285-152955593  | 0.0340341 | 0.999791 |
| XLOC_009676 | XLOC_009676 | SMARCE1     | chr17:38783975-38804103   | 0.0340998 | 0.999791 |
| XLOC_017686 | XLOC_017686 | SMA4        | chr5:69423288-69586004    | 0.0341102 | 0.999791 |
| XLOC_005667 | XLOC_005667 | ALDH1L2     | chr12:105413561-105478341 | 0.0341191 | 1        |
| XLOC_022256 | XLOC_022256 | ZNF252P     | chr8:146198974-146231432  | 0.0341211 | 0.999791 |
| XLOC_012843 | XLOC_012843 | ZNF513      | chr2:27593362-27603611    | 0.0341465 | 0.999791 |
| XLOC_016434 | XLOC_016434 | SMARCAD1    | chr4:95128758-95212443    | 0.0341836 | 0.999791 |
| XLOC_008484 | XLOC_008484 | GSGL1L      | chr16:27798849-28074830   | 0.0341866 | 1        |
| XLOC_006813 | XLOC_006813 | GNPNAT1     | chr14:53241910-53258386   | 0.034297  | 0.999791 |
| XLOC_009374 | XLOC_009374 | INPP5K      | chr17:1397870-1420182     | 0.0342981 | 0.999791 |
| XLOC_011848 | XLOC_011848 | AKT1S1      | chr19:50372296-50380644   | 0.0344893 | 0.999791 |

|             |             |                            |                           |           |          |
|-------------|-------------|----------------------------|---------------------------|-----------|----------|
| XLOC_022784 | XLOC_022784 | SMU1                       | chr9:33041849-33076714    | 0.0346192 | 0.999791 |
| XLOC_014404 | XLOC_014404 | DGCR5                      | chr22:18958010-18982142   | 0.0346201 | 1        |
| XLOC_012562 | XLOC_012562 | INPP1                      | chr2:191208195-191236391  | 0.0346247 | 0.999791 |
| XLOC_007548 | XLOC_007548 | CATSPER2P1                 | chr15:44028145-44038496   | 0.034716  | 1        |
| XLOC_016871 | XLOC_016871 | UBE2D3                     | chr4:103717132-103790032  | 0.0347335 | 0.999791 |
| XLOC_006089 | XLOC_006089 | MRPS31                     | chr13:41303431-41345347   | 0.0347458 | 0.999791 |
| XLOC_001001 | XLOC_001001 | MFSD4                      | chr1:205538111-205572046  | 0.0347787 | 1        |
| XLOC_000255 | XLOC_000255 | EIF3I                      | chr1:32687970-32697205    | 0.0347951 | 0.999791 |
| XLOC_018565 | XLOC_018565 | SCAF8                      | chr6:155054511-155155194  | 0.0348771 | 0.999791 |
| XLOC_007518 | XLOC_007518 | RHOV                       | chr15:41164411-41166487   | 0.0348907 | 0.999791 |
| XLOC_003933 | XLOC_003933 | BET1L                      | chr11:202923-207422       | 0.035     | 0.999791 |
| XLOC_003712 | XLOC_003712 | RNF169                     | chr1:74459912-74660232    | 0.0350153 | 0.999791 |
| XLOC_005771 | XLOC_005771 | SBNO1                      | chr12:123773655-123834988 | 0.0350676 | 0.999791 |
| XLOC_017542 | XLOC_017542 | CCDC127                    | chr5:204874-218297        | 0.0350865 | 0.999791 |
| XLOC_015234 | XLOC_015234 | CEP97                      | chr3:101443493-101486181  | 0.0350948 | 0.999791 |
| XLOC_000812 | XLOC_000812 | PEA15                      | chr1:160175124-160185162  | 0.0351086 | 0.999791 |
| XLOC_009532 | XLOC_009532 | SREBF1                     | chr17:17584786-17740325   | 0.035115  | 0.999791 |
| XLOC_004607 | XLOC_004607 | MSANTD2                    | chr11:124636393-124670299 | 0.0351636 | 0.999791 |
| XLOC_014853 | XLOC_014853 | NHP2L1                     | chr22:42069936-42084913   | 0.0351662 | 0.999791 |
| XLOC_005176 | XLOC_005176 | FAM101A,ZNF664,ZNF664-FAM1 | chr12:124457761-124800570 | 0.0351747 | 0.999791 |
| XLOC_002214 | XLOC_002214 | SDE2                       | chr1:226170402-226187066  | 0.0351855 | 0.999791 |
| XLOC_004257 | XLOC_004257 | FBXO2                      | chr1:61717355-61735132    | 0.0351937 | 0.999791 |
| XLOC_023616 | XLOC_023616 | MST4                       | chrX:131157244-131209971  | 0.0352588 | 0.999791 |
| XLOC_002383 | XLOC_002383 | KIAA1217                   | chr10:23983674-24836772   | 0.0352727 | 0.999791 |
| XLOC_002525 | XLOC_002525 | KAT6B                      | chr10:76586170-76792380   | 0.0352739 | 0.999791 |
| XLOC_006460 | XLOC_006460 | GPATCH2L                   | chr14:76618258-76669134   | 0.035317  | 0.999791 |
| XLOC_003072 | XLOC_003072 | FRAT2                      | chr10:99092253-99094458   | 0.0353334 | 0.999791 |
| XLOC_016880 | XLOC_016880 | TBCK                       | chr4:106967232-107270381  | 0.0354052 | 0.999791 |
| XLOC_018980 | XLOC_018980 | SNX14                      | chr6:86215214-86303629    | 0.0354056 | 0.999791 |
| XLOC_005655 | XLOC_005655 | NUP37                      | chr12:102467972-102512361 | 0.0354735 | 0.999791 |
| XLOC_012572 | XLOC_012572 | HSPE1,HSPE1-MOB4,MOB4      | chr2:198351307-198418423  | 0.0354845 | 0.999791 |
| XLOC_015231 | XLOC_015231 | PCNP                       | chr3:101293041-101313281  | 0.0354894 | 0.999791 |
| XLOC_011652 | XLOC_011652 | RINL                       | chr19:39358471-39368919   | 0.0355119 | 0.999791 |
| XLOC_003230 | XLOC_003230 | TALDO1                     | chr1:747431-765024        | 0.0355127 | 0.999791 |
| XLOC_012005 | XLOC_012005 | ZNF329                     | chr19:58637694-58662148   | 0.0355205 | 0.999791 |
| XLOC_021666 | XLOC_021666 | DECR1                      | chr8:91013579-91064227    | 0.0355582 | 0.999791 |
| XLOC_007488 | XLOC_007488 | NOP10                      | chr15:34633916-34635362   | 0.0356157 | 0.999791 |
| XLOC_002612 | XLOC_002612 | ENTPD1                     | chr10:97471535-97849992   | 0.0356352 | 0.999791 |
| XLOC_014150 | XLOC_014150 | ITSN1                      | chr21:35014783-35261609   | 0.0356838 | 0.999791 |
| XLOC_003875 | XLOC_003875 | SC5DL                      | chr11:121163387-121184119 | 0.035698  | 0.999791 |
| XLOC_015136 | XLOC_015136 | GLYCTK                     | chr3:52321835-52329272    | 0.0357077 | 0.999791 |
| XLOC_022463 | XLOC_022463 | LOC441454                  | chr9:99671356-99672737    | 0.035721  | 1        |
| XLOC_022251 | XLOC_022251 | ZNF34                      | chr8:145998500-146012725  | 0.0357472 | 0.999791 |
| XLOC_012759 | XLOC_012759 | NEU4                       | chr2:242750159-242758739  | 0.0357746 | 1        |
| XLOC_007816 | XLOC_007816 | ITFG3                      | chr16:284800-316119       | 0.0358051 | 0.999791 |
| XLOC_014903 | XLOC_014903 | MAPK12                     | chr22:50691330-50700089   | 0.0358689 | 0.999791 |
| XLOC_015106 | XLOC_015106 | BSN                        | chr3:49591921-49708982    | 0.0359664 | 1        |
| XLOC_013654 | XLOC_013654 | ACTR5                      | chr20:37377096-37401089   | 0.0359742 | 0.999791 |
| XLOC_001313 | XLOC_001313 | ALDH4A1                    | chr1:19197923-19229293    | 0.0359807 | 0.999791 |
| XLOC_005725 | XLOC_005725 | FBXO21                     | chr12:117581584-117628300 | 0.0360367 | 0.999791 |
| XLOC_003112 | XLOC_003112 | PSD                        | chr10:104162373-104182893 | 0.0360891 | 0.999791 |
| XLOC_008411 | XLOC_008411 | USP7                       | chr16:8985950-9057341     | 0.0361074 | 0.999791 |
| XLOC_004808 | XLOC_004808 | TMEM117                    | chr12:44229961-44783541   | 0.0361364 | 0.999791 |
| XLOC_009877 | XLOC_009877 | TRIM37                     | chr17:56833229-57184266   | 0.0361571 | 0.999791 |
| XLOC_008630 | XLOC_008630 | RANBP10                    | chr16:67757004-67840555   | 0.0362017 | 0.999791 |
| XLOC_012958 | XLOC_012958 | AAK1                       | chr2:69685126-69870977    | 0.0362199 | 0.999791 |
| XLOC_004270 | XLOC_004270 | BSCL2,HNRNPUL2             | chr11:62457733-62494857   | 0.03624   | 0.999791 |
| XLOC_000509 | XLOC_000509 | RPL5                       | chr1:93297593-93427079    | 0.0364292 | 0.999791 |
| XLOC_008136 | XLOC_008136 | CPNE2                      | chr16:57126454-57181878   | 0.0364884 | 0.999791 |
| XLOC_002693 | XLOC_002693 | SHOC2                      | chr10:112679300-112773425 | 0.0365029 | 0.999791 |
| XLOC_010691 | XLOC_010691 | ARRDC2                     | chr19:18111943-18124911   | 0.036542  | 0.999791 |
| XLOC_011330 | XLOC_011330 | LRG1                       | chr19:4537226-4540036     | 0.0365536 | 1        |
| XLOC_000753 | XLOC_000753 | EFNA1                      | chr1:155100348-155107386  | 0.036648  | 0.999791 |
| XLOC_000972 | XLOC_000972 | RNPEP                      | chr1:201951765-201975275  | 0.036662  | 0.999791 |
| XLOC_000242 | XLOC_000242 | ZCCHC17                    | chr1:31769841-31837780    | 0.0367018 | 0.999791 |
| XLOC_013045 | XLOC_013045 | DUSP2                      | chr2:96808907-96811179    | 0.0367275 | 0.999791 |
| XLOC_015543 | XLOC_015543 | RPL35A                     | chr3:197615945-197886886  | 0.0367609 | 0.999791 |
| XLOC_007208 | XLOC_007208 | DTWD1                      | chr15:49913225-49937333   | 0.0367835 | 0.999791 |
| XLOC_017555 | XLOC_017555 | CLPTM1L                    | chr5:1317999-1345002      | 0.0368402 | 0.999791 |
| XLOC_018618 | XLOC_018618 | SERPIN9                    | chr6:2887499-2903546      | 0.0368658 | 0.999791 |
| XLOC_013572 | XLOC_013572 | LOC100134868               | chr20:25990434-26002430   | 0.0368866 | 0.999791 |
| XLOC_008710 | XLOC_008710 | EMC8                       | chr16:85812230-85833148   | 0.0369009 | 0.999791 |
| XLOC_005651 | XLOC_005651 | ARL1                       | chr12:101786902-101801572 | 0.0369397 | 0.999791 |
| XLOC_016782 | XLOC_016782 | GRSF1                      | chr4:71681498-71705627    | 0.036948  | 0.999791 |
| XLOC_002840 | XLOC_002840 | NSUN6                      | chr10:18834263-18940550   | 0.0369663 | 0.999791 |
| XLOC_016438 | XLOC_016438 | RAP1GDS1                   | chr4:99182526-99365012    | 0.0369746 | 0.999791 |
| XLOC_002080 | XLOC_002080 | TPR                        | chr1:185703682-186446655  | 0.0369823 | 0.999791 |
| XLOC_001711 | XLOC_001711 | WDR77                      | chr1:111982511-112004525  | 0.0370478 | 0.999791 |
| XLOC_015657 | XLOC_015657 | ZDHC3                      | chr3:44956752-45017674    | 0.0373074 | 0.999791 |

|             |             |                           |                           |           |          |
|-------------|-------------|---------------------------|---------------------------|-----------|----------|
| XLOC_000005 | XLOC_000005 | LOC643837                 | chr1:762970-794826        | 0.0373106 | 0.999791 |
| XLOC_003363 | XLOC_003363 | NAV2                      | chr11:19372270-20143147   | 0.0373198 | 0.999791 |
| XLOC_010513 | XLOC_010513 | HSD11B1L                  | chr19:5678432-5688534     | 0.0373228 | 0.999791 |
| XLOC_007160 | XLOC_007160 | RTF1                      | chr15:41709301-41775761   | 0.0373287 | 0.999791 |
| XLOC_005102 | XLOC_005102 | CUX2                      | chr12:111471827-111788358 | 0.0373421 | 1        |
| XLOC_002458 | XLOC_002458 | AGAP6                     | chr10:51748077-51770259   | 0.0373834 | 0.999791 |
| XLOC_021220 | XLOC_021220 | GIGYF1                    | chr7:100277129-100286870  | 0.0373907 | 0.999791 |
| XLOC_002654 | XLOC_002654 | BTRC                      | chr10:103113789-103317078 | 0.0374204 | 0.999791 |
| XLOC_017721 | XLOC_017721 | LOC100131067              | chr5:80256507-81047072    | 0.0374571 | 0.999791 |
| XLOC_009655 | XLOC_009655 | RPL23                     | chr17:37006320-37010053   | 0.0374989 | 0.999791 |
| XLOC_012711 | XLOC_012711 | GIGYF2                    | chr2:233562014-233725289  | 0.0375399 | 0.999791 |
| XLOC_023559 | XLOC_023559 | TMEM164                   | chrX:109245862-109421016  | 0.0375623 | 0.999791 |
| XLOC_012325 | XLOC_012325 | INPP4A                    | chr2:99061320-99207496    | 0.0376131 | 0.999791 |
| XLOC_005246 | XLOC_005246 | ACRBP                     | chr12:6747241-6756580     | 0.037764  | 1        |
| XLOC_004860 | XLOC_004860 | KRT86                     | chr12:52695648-52702947   | 0.0377649 | 1        |
| XLOC_023346 | XLOC_023346 | PHF16                     | chrX:46771735-46920641    | 0.0378003 | 0.999791 |
| XLOC_012126 | XLOC_012126 | SPAST                     | chr2:32288679-32382706    | 0.0378203 | 0.999791 |
| XLOC_009883 | XLOC_009883 | RNFT1                     | chr17:58029722-58042117   | 0.0378359 | 0.999791 |
| XLOC_000890 | XLOC_000890 | KLHL20                    | chr1:173684079-173755840  | 0.0378368 | 0.999791 |
| XLOC_017346 | XLOC_017346 | CTNNA1                    | chr5:138089106-138270723  | 0.0378861 | 0.999791 |
| XLOC_017206 | XLOC_017206 | SCAMP1                    | chr5:77656338-77776562    | 0.0378898 | 0.999791 |
| XLOC_001500 | XLOC_001500 | ELOVL1                    | chr1:43829067-43833745    | 0.0379316 | 0.999791 |
| XLOC_004659 | XLOC_004659 | CCND2                     | chr12:4382901-4414522     | 0.037933  | 0.999791 |
| XLOC_012949 | XLOC_012949 | C1D                       | chr2:68269331-68290159    | 0.0379623 | 0.999791 |
| XLOC_011818 | XLOC_011818 | BCAT2                     | chr19:49298318-49314320   | 0.0379726 | 0.999791 |
| XLOC_009769 | XLOC_009769 | TMEM101                   | chr17:42088555-42092345   | 0.0380454 | 0.999791 |
| XLOC_000046 | XLOC_000046 | DFFB                      | chr1:3773844-3801993      | 0.0380911 | 0.999791 |
| XLOC_015478 | XLOC_015478 | VWA5B2                    | chr3:183948316-183967313  | 0.0380961 | 0.999791 |
| XLOC_020946 | XLOC_020946 | SNX13                     | chr7:17830384-17980131    | 0.0381101 | 0.999791 |
| XLOC_015350 | XLOC_015350 | SRPRB                     | chr3:133502876-133540336  | 0.0381272 | 0.999791 |
| XLOC_005202 | XLOC_005202 | FBRSL1                    | chr12:133067156-133161773 | 0.038136  | 0.999791 |
| XLOC_002258 | XLOC_002258 | B3GALNT2                  | chr1:235530727-235667781  | 0.0381693 | 0.999791 |
| XLOC_011520 | XLOC_011520 | ANO8                      | chr19:17420336-17445638   | 0.0381706 | 0.999791 |
| XLOC_006713 | XLOC_006713 | PSMB5                     | chr14:23495059-23504429   | 0.0381793 | 0.999791 |
| XLOC_015061 | XLOC_015061 | ZNF35                     | chr3:44690232-44702283    | 0.0381853 | 0.999791 |
| XLOC_006046 | XLOC_006046 | LNX2                      | chr13:28120049-28194720   | 0.038186  | 0.999791 |
| XLOC_014631 | XLOC_014631 | GRAMD4                    | chr22:47022657-47075688   | 0.0381865 | 0.999791 |
| XLOC_005427 | XLOC_005427 | DDN                       | chr12:49388932-49393088   | 0.0381879 | 0.999791 |
| XLOC_017158 | XLOC_017158 | SREK1                     | chr5:65440045-65479444    | 0.0382461 | 0.999791 |
| XLOC_017802 | XLOC_017802 | SHROOM1                   | chr5:132157832-132166590  | 0.0382894 | 0.999791 |
| XLOC_003176 | XLOC_003176 | OAT                       | chr10:126085871-126107545 | 0.0383083 | 0.999791 |
| XLOC_002407 | XLOC_002407 | ZNF33A                    | chr10:38299577-38348995   | 0.0383134 | 0.999791 |
| XLOC_001317 | XLOC_001317 | EMC1                      | chr1:19542157-19578053    | 0.0383891 | 0.999791 |
| XLOC_010177 | XLOC_010177 | ELP2                      | chr18:33709836-33754688   | 0.0384056 | 0.999791 |
| XLOC_004324 | XLOC_004324 | LOC254100                 | chr11:65336690-65337884   | 0.0384083 | 0.999791 |
| XLOC_003106 | XLOC_003106 | NPM3                      | chr10:103541081-103543170 | 0.0384507 | 0.999791 |
| XLOC_010610 | XLOC_010610 | ZNF791                    | chr19:12721731-12740676   | 0.0384739 | 0.999791 |
| XLOC_005209 | XLOC_005209 | ZNF10                     | chr12:133707213-133736049 | 0.0384797 | 0.999791 |
| XLOC_004135 | XLOC_004135 | C11orf91                  | chr11:33719653-33722286   | 0.0384949 | 0.999791 |
| XLOC_005532 | XLOC_005532 | PTGES3                    | chr12:57057124-57082078   | 0.0385327 | 0.999791 |
| XLOC_008715 | XLOC_008715 | FBXO31                    | chr16:87362941-87425708   | 0.0385454 | 0.999791 |
| XLOC_003594 | XLOC_003594 | RPS6KA4                   | chr11:64126624-64139687   | 0.0385699 | 0.999791 |
| XLOC_018447 | XLOC_018447 | RPF2                      | chr6:111303290-111346794  | 0.0385852 | 0.999791 |
| XLOC_002238 | XLOC_002238 | C1orf198                  | chr1:230972864-231005335  | 0.0386344 | 0.999791 |
| XLOC_013360 | XLOC_013360 | TMBIM1                    | chr2:219135114-219211516  | 0.0387263 | 0.999791 |
| XLOC_004162 | XLOC_004162 | ARHGAP1                   | chr11:46698624-46722215   | 0.038792  | 0.999791 |
| XLOC_014394 | XLOC_014394 | IL17RA                    | chr22:17565848-17596584   | 0.0388562 | 0.999791 |
| XLOC_023069 | XLOC_023069 | NR6A1                     | chr9:127284702-127533576  | 0.0389241 | 0.999791 |
| XLOC_012844 | XLOC_012844 | PPM1G                     | chr2:27604065-27632550    | 0.0389242 | 0.999791 |
| XLOC_021781 | XLOC_021781 | TIGD5                     | chr8:144680073-144682485  | 0.0389941 | 0.999791 |
| XLOC_017393 | XLOC_017393 | NDFIP1                    | chr5:141488323-141534008  | 0.039046  | 0.999791 |
| XLOC_011555 | XLOC_011555 | ATP13A1                   | chr19:19756009-19774503   | 0.039051  | 0.999791 |
| XLOC_002618 | XLOC_002618 | LCOR                      | chr10:98592016-98724198   | 0.0390512 | 0.999791 |
| XLOC_009276 | XLOC_009276 | KCTD2                     | chr17:73043278-73061981   | 0.0390632 | 0.999791 |
| XLOC_021011 | XLOC_021011 | HERPUD2                   | chr7:35672269-35734772    | 0.0391246 | 0.999791 |
| XLOC_009999 | XLOC_009999 | LOC100131096              | chr17:76000317-76107880   | 0.0391473 | 0.999791 |
| XLOC_000021 | XLOC_000021 | LOC148413                 | chr1:1334909-1342693      | 0.0391474 | 0.999791 |
| XLOC_015013 | XLOC_015013 | C3orf35                   | chr3:37440967-37476988    | 0.0391605 | 1        |
| XLOC_000521 | XLOC_000521 | RWDD3, TMEM56, TMEM56-RWD | chr1:9558072-95712781     | 0.039187  | 0.999791 |
| XLOC_003266 | XLOC_003266 | RRM1                      | chr11:4115923-4160106     | 0.0392365 | 0.999791 |
| XLOC_020422 | XLOC_020422 | PLEKHA8                   | chr7:30067976-30157961    | 0.0392401 | 0.999791 |
| XLOC_008895 | XLOC_008895 | SMCR7                     | chr17:18163847-18169095   | 0.0392842 | 0.999791 |
| XLOC_000591 | XLOC_000591 | RAP1A                     | chr1:112162404-112256101  | 0.039309  | 0.999791 |
| XLOC_010999 | XLOC_010999 | SPHK2                     | chr19:49118583-49133663   | 0.0393321 | 0.999791 |
| XLOC_018629 | XLOC_018629 | LYRM4                     | chr6:5108652-5261172      | 0.0393453 | 0.999791 |
| XLOC_000669 | XLOC_000669 | VPS4A                     | chr1:150039341-150117505  | 0.0393519 | 0.999791 |
| XLOC_011704 | XLOC_011704 | GSK3A                     | chr19:42734337-42746736   | 0.0394236 | 0.999791 |
| XLOC_014791 | XLOC_014791 | RBFOX2                    | chr22:36134782-36424585   | 0.0394701 | 0.999791 |
| XLOC_001525 | XLOC_001525 | MKNK1                     | chr1:47004367-47069966    | 0.039504  | 0.999791 |



|             |             |                         |                           |           |          |
|-------------|-------------|-------------------------|---------------------------|-----------|----------|
| XLOC_021521 | XLOC_021521 | CDCA2                   | chr8:25316512-25365425    | 0.0395304 | 0.999791 |
| XLOC_023444 | XLOC_023444 | YIPF6                   | chrX:67718623-6775127     | 0.0395377 | 0.999791 |
| XLOC_008437 | XLOC_008437 | FOPNL                   | chr16:15959576-15982447   | 0.0395623 | 0.999791 |
| XLOC_023620 | XLOC_023620 | HPRT1                   | chrX:133594174-133634698  | 0.0395796 | 0.999791 |
| XLOC_007648 | XLOC_007648 | RPL4                    | chr15:66791652-66797193   | 0.0395898 | 0.999791 |
| XLOC_012196 | XLOC_012196 | KIAA1841                | chr2:61293005-61365169    | 0.039612  | 0.999791 |
| XLOC_020335 | XLOC_020335 | GPER                    | chr7:1036622-1177893      | 0.0396426 | 1        |
| XLOC_009845 | XLOC_009845 | LRRC59                  | chr17:48450580-48474914   | 0.0396979 | 0.999791 |
| XLOC_015916 | XLOC_015916 | SLC12A8                 | chr3:124801479-124931609  | 0.0397591 | 0.999791 |
| XLOC_000223 | XLOC_000223 | PPP1R8                  | chr1:28157251-28178183    | 0.0397649 | 0.999791 |
| XLOC_014136 | XLOC_014136 | SOD1                    | chr21:33031934-33041243   | 0.0397783 | 0.999791 |
| XLOC_000888 | XLOC_000888 | PRDX6                   | chr1:173446485-173457946  | 0.0397793 | 0.999791 |
| XLOC_022721 | XLOC_022721 | RANBP6                  | chr9:6011018-6015640      | 0.0397803 | 0.999791 |
| XLOC_018883 | XLOC_018883 | MRPL2                   | chr6:43021766-43027242    | 0.0398271 | 0.999791 |
| XLOC_022501 | XLOC_022501 | AKAP2,PALM2,PALM2-AKAP2 | chr9:112403067-112934791  | 0.0398615 | 0.999791 |
| XLOC_014818 | XLOC_014818 | BAIAP2L2                | chr22:38480895-38506676   | 0.0398659 | 1        |
| XLOC_023167 | XLOC_023167 | INPP5E                  | chr9:139323066-139334256  | 0.0398678 | 0.999791 |
| XLOC_000075 | XLOC_000075 | KIF1B                   | chr1:10270763-10441661    | 0.0398774 | 0.999791 |
| XLOC_009458 | XLOC_009458 | YBX2                    | chr17:7191570-7197876     | 0.0398815 | 1        |
| XLOC_009047 | XLOC_009047 | CDC6                    | chr17:38444145-38459413   | 0.0398844 | 0.999791 |
| XLOC_020659 | XLOC_020659 | SLC12A9                 | chr7:100450340-100464634  | 0.0399486 | 0.999791 |
| XLOC_011264 | XLOC_011264 | POLRMT                  | chr19:617222-633568       | 0.0399731 | 0.999791 |
| XLOC_004654 | XLOC_004654 | RHNO1                   | chr12:2945981-2998691     | 0.0400053 | 0.999791 |
| XLOC_021348 | XLOC_021348 | SLC37A3                 | chr7:140033551-140098311  | 0.0400079 | 0.999791 |
| XLOC_021978 | XLOC_021978 | SLC20A2                 | chr8:42273979-42408140    | 0.0400161 | 0.999791 |
| XLOC_021480 | XLOC_021480 | ZDHHC2                  | chr8:17013835-17080241    | 0.0400482 | 0.999791 |
| XLOC_000177 | XLOC_000177 | TCEB3                   | chr1:24069855-24104787    | 0.0400961 | 0.999791 |
| XLOC_010016 | XLOC_010016 | TBC1D16                 | chr17:77906141-78009657   | 0.0401037 | 0.999791 |
| XLOC_006200 | XLOC_006200 | GGACT                   | chr13:100741268-101241046 | 0.0401251 | 0.999791 |
| XLOC_005521 | XLOC_005521 | CS                      | chr12:56665482-56694175   | 0.0401274 | 0.999791 |
| XLOC_020933 | XLOC_020933 | ICA1                    | chr7:8152814-8302242      | 0.0401348 | 0.999791 |
| XLOC_003505 | XLOC_003505 | FAM111B                 | chr11:58874657-58894888   | 0.0401397 | 0.999791 |
| XLOC_007242 | XLOC_007242 | LACTB                   | chr15:63413998-63434260   | 0.0401716 | 0.999791 |
| XLOC_021027 | XLOC_021027 | PSMA2                   | chr7:42956461-42971805    | 0.0401929 | 0.999791 |
| XLOC_014149 | XLOC_014149 | SON                     | chr21:34915349-34949812   | 0.0402599 | 0.999791 |
| XLOC_007823 | XLOC_007823 | SOLH                    | chr16:577855-604636       | 0.0402638 | 0.999791 |
| XLOC_012153 | XLOC_012153 | PKDCC                   | chr2:42275160-42285668    | 0.0402843 | 0.999791 |
| XLOC_008332 | XLOC_008332 | TSR3                    | chr16:1383605-1401873     | 0.0403078 | 0.999791 |
| XLOC_010018 | XLOC_010018 | SGSH                    | chr17:78143790-78194199   | 0.0403098 | 0.999791 |
| XLOC_006487 | XLOC_006487 | PSMC1                   | chr14:90722893-90738966   | 0.0403234 | 0.999791 |
| XLOC_018174 | XLOC_018174 | MRPS18B                 | chr6:30585485-30594174    | 0.0403486 | 0.999791 |
| XLOC_014832 | XLOC_014832 | CBX7                    | chr22:39526778-39548538   | 0.0403786 | 0.999791 |
| XLOC_004688 | XLOC_004688 | LRRC23                  | chr12:7013896-7023406     | 0.0404266 | 0.999791 |
| XLOC_008621 | XLOC_008621 | FHOD1                   | chr16:67263291-67281425   | 0.040437  | 0.999791 |
| XLOC_008163 | XLOC_008163 | PDP2                    | chr16:66914382-66925002   | 0.0404538 | 0.999791 |
| XLOC_022967 | XLOC_022967 | TSTD2                   | chr9:100263461-100436029  | 0.0404842 | 0.999791 |
| XLOC_000781 | XLOC_000781 | RRNAD1                  | chr1:156698262-156706752  | 0.0405032 | 0.999791 |
| XLOC_005133 | XLOC_005133 | PRKAB1                  | chr12:120105760-120119429 | 0.0405597 | 0.999791 |
| XLOC_003845 | XLOC_003845 | UBE4A                   | chr11:118230295-118289530 | 0.0405699 | 0.999791 |
| XLOC_009848 | XLOC_009848 | ANKRD40                 | chr17:48770550-48785270   | 0.0405861 | 0.999791 |
| XLOC_018475 | XLOC_018475 | HSF2                    | chr6:122720695-122754264  | 0.0405936 | 0.999791 |
| XLOC_017811 | XLOC_017811 | PPP2CA                  | chr5:133532147-133561950  | 0.0406386 | 0.999791 |
| XLOC_015466 | XLOC_015466 | B3GNT5                  | chr3:182895830-183145855  | 0.0406484 | 0.999791 |
| XLOC_007821 | XLOC_007821 | DECR2                   | chr16:451857-462487       | 0.0406485 | 0.999791 |
| XLOC_010582 | XLOC_010582 | QTRT1                   | chr19:10812111-10824043   | 0.0406691 | 0.999791 |
| XLOC_023929 | XLOC_023929 | RPS4X                   | chrX:71492452-71497141    | 0.0408143 | 0.999791 |
| XLOC_017463 | XLOC_017463 | MAT2B                   | chr5:162930069-162946359  | 0.040855  | 0.999791 |
| XLOC_021713 | XLOC_021713 | EMC2                    | chr8:109455852-109499136  | 0.0408629 | 0.999791 |
| XLOC_015000 | XLOC_015000 | CMTM8                   | chr3:32280170-32411813    | 0.0408692 | 0.999791 |
| XLOC_007860 | XLOC_007860 | NDUFB10                 | chr16:2009516-2011976     | 0.0409722 | 0.999791 |
| XLOC_023609 | XLOC_023609 | BCORL1                  | chrX:129139163-129192058  | 0.0410477 | 0.999791 |
| XLOC_007209 | XLOC_007209 | SLC27A2                 | chr15:50474392-50528589   | 0.0410721 | 0.999791 |
| XLOC_007401 | XLOC_007401 | NGRN                    | chr15:90808894-90815443   | 0.0410754 | 0.999791 |
| XLOC_004786 | XLOC_004786 | KLHL42                  | chr12:27933186-27955973   | 0.041086  | 0.999791 |
| XLOC_010426 | XLOC_010426 | HCN2                    | chr19:589892-617159       | 0.0411326 | 1        |
| XLOC_010927 | XLOC_010927 | BCAM                    | chr19:45312315-45324678   | 0.0411331 | 0.999791 |
| XLOC_011383 | XLOC_011383 | NDUFA7                  | chr19:8376183-8386280     | 0.0411512 | 0.999791 |
| XLOC_009235 | XLOC_009235 | CEP95                   | chr17:62503157-62534062   | 0.0412166 | 0.999791 |
| XLOC_020531 | XLOC_020531 | SBDSP1                  | chr7:72299951-72307978    | 0.0412331 | 0.999791 |
| XLOC_016688 | XLOC_016688 | DCAF16                  | chr4:17802277-17812381    | 0.0412861 | 0.999791 |
| XLOC_008055 | XLOC_008055 | FBRS                    | chr16:30675777-30682131   | 0.0412922 | 0.999791 |
| XLOC_010767 | XLOC_010767 | UBA2                    | chr19:34919267-34960798   | 0.0412935 | 0.999791 |
| XLOC_002924 | XLOC_002924 | ARHGAP22                | chr10:49654067-49864310   | 0.0413417 | 0.999791 |
| XLOC_013504 | XLOC_013504 | ITPA                    | chr20:3189513-3204516     | 0.0413812 | 0.999791 |
| XLOC_003618 | XLOC_003618 | SSSCA1                  | chr11:65337942-65339239   | 0.0414534 | 0.999791 |
| XLOC_007835 | XLOC_007835 | STUB1                   | chr16:730114-734439       | 0.0414721 | 0.999791 |
| XLOC_001222 | XLOC_001222 | LOC100133445            | chr1:2487207-2495267      | 0.041484  | 0.999791 |
| XLOC_017982 | XLOC_017982 | LOC202181               | chr5:177045500-177099278  | 0.0414931 | 0.999791 |
| XLOC_016630 | XLOC_016630 | CTBP1                   | chr4:1205227-1242908      | 0.0415469 | 0.999791 |

|             |             |              |                           |           |          |
|-------------|-------------|--------------|---------------------------|-----------|----------|
| XLOC_021906 | XLOC_021906 | BIN3         | chr8:22462144-22526661    | 0.0415865 | 0.999791 |
| XLOC_000172 | XLOC_000172 | KDM1A        | chr1:23345940-23410184    | 0.0415869 | 0.999791 |
| XLOC_023979 | XLOC_023979 | BTX          | chrX:100604434-100641212  | 0.0415993 | 1        |
| XLOC_012290 | XLOC_012290 | LINC00152    | chr2:87754973-87821030    | 0.0416102 | 0.999791 |
| XLOC_018310 | XLOC_018310 | CUL9         | chr6:43149921-43192325    | 0.0416208 | 0.999791 |
| XLOC_003717 | XLOC_003717 | RPS3         | chr1:175110534-75133345   | 0.0416274 | 0.999791 |
| XLOC_015397 | XLOC_015397 | EIF2A        | chr3:150264573-150303803  | 0.04164   | 0.999791 |
| XLOC_016698 | XLOC_016698 | CCDC149      | chr4:24807738-24981826    | 0.0417451 | 0.999791 |
| XLOC_016180 | XLOC_016180 | FAM193A      | chr4:2627158-2734302      | 0.0418056 | 0.999791 |
| XLOC_008027 | XLOC_008027 | LAT          | chr16:28996146-29002104   | 0.0418615 | 0.999791 |
| XLOC_015062 | XLOC_015062 | ZNF502       | chr3:44754134-44765323    | 0.0418838 | 0.999791 |
| XLOC_001512 | XLOC_001512 | ZSWIM5       | chr1:45482075-45672250    | 0.0418917 | 1        |
| XLOC_017453 | XLOC_017453 | TTC1         | chr5:159436179-159492550  | 0.0418963 | 0.999791 |
| XLOC_016929 | XLOC_016929 | SCLT1        | chr4:129805151-130014764  | 0.0419117 | 0.999791 |
| XLOC_015833 | XLOC_015833 | PROS1        | chr3:93591880-93692934    | 0.0419488 | 0.999791 |
| XLOC_007933 | XLOC_007933 | PMM2         | chr16:8891669-8943194     | 0.0419503 | 0.999791 |
| XLOC_019137 | XLOC_019137 | NUP43        | chr6:150045456-150067688  | 0.0419576 | 0.999791 |
| XLOC_009569 | XLOC_009569 | SLC46A1      | chr17:26698986-26733230   | 0.0419974 | 0.999791 |
| XLOC_003097 | XLOC_003097 | NDUFB8       | chr10:102283496-102289636 | 0.0420443 | 0.999791 |
| XLOC_000302 | XLOC_000302 | MFSD2A       | chr1:40420783-40435628    | 0.0420842 | 0.999791 |
| XLOC_008868 | XLOC_008868 | ZNF286A      | chr17:15602890-15624100   | 0.0421112 | 0.999791 |
| XLOC_022903 | XLOC_022903 | HNRNPK       | chr9:86582997-86595569    | 0.0421469 | 0.999791 |
| XLOC_018994 | XLOC_018994 | UBE2J1       | chr6:90036343-90062619    | 0.0421499 | 0.999791 |
| XLOC_019147 | XLOC_019147 | FBXO5        | chr6:153291657-153304740  | 0.0421774 | 0.999791 |
| XLOC_006102 | XLOC_006102 | NUFIP1       | chr13:45513383-45563613   | 0.0421776 | 0.999791 |
| XLOC_015431 | XLOC_015431 | PPM1L        | chr3:160473995-160788817  | 0.0421982 | 1        |
| XLOC_014057 | XLOC_014057 | PPP1R3D      | chr20:58508818-58523702   | 0.0422233 | 0.999791 |
| XLOC_007662 | XLOC_007662 | TLE3         | chr15:70340542-70390256   | 0.042224  | 0.999791 |
| XLOC_016893 | XLOC_016893 | PITX2        | chr4:111538579-111563279  | 0.0422293 | 0.999791 |
| XLOC_014991 | XLOC_014991 | CMC1         | chr3:28283123-28361263    | 0.042246  | 0.999791 |
| XLOC_015639 | XLOC_015639 | CSRNP1       | chr3:39183341-39195102    | 0.0422955 | 0.999791 |
| XLOC_000631 | XLOC_000631 | LOC100130000 | chr1:143687129-143714180  | 0.0423609 | 1        |
| XLOC_000090 | XLOC_000090 | MFN2         | chr1:12040237-12073572    | 0.0423864 | 0.999791 |
| XLOC_002030 | XLOC_002030 | GAS5         | chr1:173832385-173837125  | 0.0423947 | 0.999791 |
| XLOC_000867 | XLOC_000867 | ATP1B1       | chr1:169075946-169337186  | 0.0425379 | 0.999791 |
| XLOC_006938 | XLOC_006938 | TRIP11       | chr14:92432422-92506403   | 0.0425618 | 0.999791 |
| XLOC_012890 | XLOC_012890 | ZFP36L2      | chr2:43449540-43453745    | 0.0425788 | 0.999791 |
| XLOC_010393 | XLOC_010393 | KDSR         | chr18:60994970-61034506   | 0.0425892 | 0.999791 |
| XLOC_010672 | XLOC_010672 | OCEL1        | chr19:17337054-17340028   | 0.0425956 | 0.999791 |
| XLOC_000768 | XLOC_000768 | LAMTOR2      | chr1:156024516-156028301  | 0.0426395 | 0.999791 |
| XLOC_003223 | XLOC_003223 | PTDSS2       | chr11:450279-491387       | 0.0426614 | 0.999791 |
| XLOC_014330 | XLOC_014330 | HMGN1        | chr21:40714240-40721047   | 0.0426784 | 0.999791 |
| XLOC_014166 | XLOC_014166 | TTC3         | chr21:38445570-38575408   | 0.0427035 | 0.999791 |
| XLOC_006968 | XLOC_006968 | BCL11B       | chr14:99635624-99737822   | 0.0427046 | 1        |
| XLOC_003094 | XLOC_003094 | BLOC1S2      | chr10:102033034-102046469 | 0.0427678 | 0.999791 |
| XLOC_006914 | XLOC_006914 | SPTLC2       | chr14:77972339-78083110   | 0.0427913 | 0.999791 |
| XLOC_016843 | XLOC_016843 | PYURF        | chr4:89442128-89444952    | 0.0428659 | 0.999791 |
| XLOC_008973 | XLOC_008973 | SUZ12        | chr17:30264043-30328057   | 0.042931  | 0.999791 |
| XLOC_020742 | XLOC_020742 | LOC100130705 | chr7:128506463-128512101  | 0.0429345 | 0.999791 |
| XLOC_018164 | XLOC_018164 | ZNRD1        | chr6:30029035-30032686    | 0.0430705 | 0.999791 |
| XLOC_018294 | XLOC_018294 | BYSL         | chr6:41888964-41900784    | 0.0430969 | 0.999791 |
| XLOC_001223 | XLOC_001223 | MMEL1        | chr1:2517898-2564481      | 0.0431317 | 0.999791 |
| XLOC_005598 | XLOC_005598 | E2F7         | chr12:77415025-77459360   | 0.0431541 | 0.999791 |
| XLOC_017355 | XLOC_017355 | CYSTM1       | chr5:139554652-139623374  | 0.0432391 | 0.999791 |
| XLOC_012383 | XLOC_012383 | IL37         | chr2:113670547-113676458  | 0.0432472 | 1        |
| XLOC_017401 | XLOC_017401 | TCERG1       | chr5:145826872-145891069  | 0.0432665 | 0.999791 |
| XLOC_009828 | XLOC_009828 | SNF8         | chr17:47007458-47022154   | 0.0433266 | 0.999791 |
| XLOC_006321 | XLOC_006321 | FAM177A1     | chr14:35514112-35552589   | 0.0433468 | 0.999791 |
| XLOC_023288 | XLOC_023288 | PDHA1        | chrX:19362010-19533379    | 0.0433698 | 0.999791 |
| XLOC_010994 | XLOC_010994 | GRWD1        | chr19:48949029-48957164   | 0.0433831 | 0.999791 |
| XLOC_011413 | XLOC_011413 | S1PR2        | chr19:10332108-10341948   | 0.043388  | 0.999791 |
| XLOC_019114 | XLOC_019114 | REPS1        | chr6:139225619-139309398  | 0.0434431 | 0.999791 |
| XLOC_015681 | XLOC_015681 | SMARCC1      | chr3:47627377-47823405    | 0.043474  | 0.999791 |
| XLOC_007715 | XLOC_007715 | TBC1D2B      | chr15:78287326-78369994   | 0.0435084 | 0.999791 |
| XLOC_003401 | XLOC_003401 | CD44         | chr11:35160416-35253949   | 0.0435348 | 0.999791 |
| XLOC_005541 | XLOC_005541 | STAT6        | chr12:57482676-57505196   | 0.0435366 | 0.999791 |
| XLOC_001382 | XLOC_001382 | SLC9A1       | chr1:27425299-27481621    | 0.0435491 | 0.999791 |
| XLOC_003241 | XLOC_003241 | LOC255512    | chr11:1330937-1331937     | 0.0435517 | 0.999791 |
| XLOC_021981 | XLOC_021981 | RNF170       | chr8:42704779-42751866    | 0.0435991 | 0.999791 |
| XLOC_017544 | XLOC_017544 | PP7080       | chr5:470624-473080        | 0.0436327 | 0.999791 |
| XLOC_013328 | XLOC_013328 | METTL21A     | chr2:208473838-208489973  | 0.0436573 | 0.999791 |
| XLOC_001543 | XLOC_001543 | EPS15        | chr1:51819934-51984995    | 0.0436628 | 0.999791 |
| XLOC_008099 | XLOC_008099 | NKD1         | chr16:50582240-50674771   | 0.0437109 | 0.999791 |
| XLOC_010891 | XLOC_010891 | ZNF574       | chr19:42580289-42585720   | 0.0437703 | 0.999791 |
| XLOC_021191 | XLOC_021191 | ZNF394       | chr7:99090853-99097877    | 0.0437784 | 0.999791 |
| XLOC_016519 | XLOC_016519 | SMARCA5      | chr4:144434615-144478642  | 0.0438086 | 0.999791 |
| XLOC_018571 | XLOC_018571 | SNX9         | chr6:158244293-158366109  | 0.043832  | 0.999791 |
| XLOC_003711 | XLOC_003711 | POLD3        | chr11:74303574-74354105   | 0.0438431 | 0.999791 |
| XLOC_021654 | XLOC_021654 | E2F5         | chr8:86089618-86132643    | 0.0439267 | 0.999791 |

|             |             |                |                           |           |          |
|-------------|-------------|----------------|---------------------------|-----------|----------|
| XLOC_021073 | XLOC_021073 | CHCHD2         | chr7:56169265-56174187    | 0.0440245 | 0.999791 |
| XLOC_014074 | XLOC_014074 | YTHDF1         | chr20:61826781-61847538   | 0.0440841 | 0.999791 |
| XLOC_012107 | XLOC_012107 | ZNF512         | chr2:27805835-27846082    | 0.0441104 | 0.999791 |
| XLOC_012606 | XLOC_012606 | EEF1B2         | chr2:207024317-207027653  | 0.0441386 | 0.999791 |
| XLOC_001673 | XLOC_001673 | LRRC39         | chr1:100598705-100643829  | 0.0441896 | 0.999791 |
| XLOC_010307 | XLOC_010307 | TMEM241        | chr18:20875978-21017925   | 0.0441942 | 0.999791 |
| XLOC_023166 | XLOC_023166 | SDCCAG3        | chr9:139296373-139305054  | 0.0442046 | 0.999791 |
| XLOC_002331 | XLOC_002331 | RBM17          | chr10:6130948-6159422     | 0.0443645 | 0.999791 |
| XLOC_023816 | XLOC_023816 | MED14          | chrX:40508794-40594804    | 0.0443883 | 0.999791 |
| XLOC_014649 | XLOC_014649 | LOC100144603   | chr22:51021454-51022355   | 0.0444238 | 0.999791 |
| XLOC_021046 | XLOC_021046 | SNHG15         | chr7:45022626-45026259    | 0.0444527 | 0.999791 |
| XLOC_023086 | XLOC_023086 | AK1            | chr9:130628758-130640022  | 0.0444662 | 0.999791 |
| XLOC_021895 | XLOC_021895 | CSGALNACT1     | chr8:19261671-19540261    | 0.0444773 | 1        |
| XLOC_005544 | XLOC_005544 | R3HDM2         | chr12:57647547-57704246   | 0.0444931 | 0.999791 |
| XLOC_022517 | XLOC_022517 | ZNF618         | chr9:116638561-116818875  | 0.0445167 | 0.999791 |
| XLOC_006786 | XLOC_006786 | FKBP3          | chr14:45553301-45603732   | 0.0445338 | 0.999791 |
| XLOC_014013 | XLOC_014013 | SLC13A3,TP53RK | chr20:45186461-45318276   | 0.0445881 | 0.999791 |
| XLOC_015030 | XLOC_015030 | RPSA           | chr3:39448203-39454032    | 0.0446536 | 0.999791 |
| XLOC_015526 | XLOC_015526 | FAM43A         | chr3:194406621-194409766  | 0.0446578 | 0.999791 |
| XLOC_022339 | XLOC_022339 | NPR2           | chr9:35792405-35812259    | 0.0447056 | 0.999791 |
| XLOC_017349 | XLOC_017349 | PAIP2          | chr5:138677518-138719039  | 0.0447474 | 0.999791 |
| XLOC_005739 | XLOC_005739 | MSI1           | chr12:120779132-120806983 | 0.0447685 | 0.999791 |
| XLOC_016593 | XLOC_016593 | TRAPPC11       | chr4:184580419-184634747  | 0.0447718 | 0.999791 |
| XLOC_007886 | XLOC_007886 | PDPK1          | chr16:2587964-2653191     | 0.0448032 | 0.999791 |
| XLOC_005222 | XLOC_005222 | DCP1B          | chr12:2055213-2113677     | 0.0448139 | 0.999791 |
| XLOC_015224 | XLOC_015224 | NIT2           | chr3:100053561-100074478  | 0.0448579 | 0.999791 |
| XLOC_009324 | XLOC_009324 | GAA            | chr17:78075354-78093679   | 0.0448831 | 0.999791 |
| XLOC_021507 | XLOC_021507 | KIAA1967       | chr8:22462144-22526661    | 0.0449109 | 0.999791 |
| XLOC_017672 | XLOC_017672 | SMIM15         | chr5:60453535-60458302    | 0.0449416 | 0.999791 |
| XLOC_002227 | XLOC_002227 | TRIM11         | chr1:228581376-228594517  | 0.0449566 | 0.999791 |
| XLOC_013620 | XLOC_013620 | ACSS2          | chr20:33462765-33515769   | 0.0449761 | 0.999791 |
| XLOC_001583 | XLOC_001583 | TM2D1          | chr1:62146718-62191095    | 0.0449953 | 0.999791 |
| XLOC_013580 | XLOC_013580 | HM13           | chr20:30102240-30116066   | 0.044997  | 0.999791 |
| XLOC_011735 | XLOC_011735 | ZNF404         | chr19:44376514-44384288   | 0.0450316 | 0.999791 |
| XLOC_001212 | XLOC_001212 | GNB1           | chr1:1716724-1822526      | 0.0450954 | 0.999791 |
| XLOC_002801 | XLOC_002801 | ANKRD16        | chr10:5903688-5979558     | 0.0451195 | 0.999791 |
| XLOC_018009 | XLOC_018009 | MGAT1          | chr5:180217540-180237137  | 0.0451206 | 0.999791 |
| XLOC_012312 | XLOC_012312 | NCAPH          | chr2:97001483-97041274    | 0.0451419 | 0.999791 |
| XLOC_014628 | XLOC_014628 | TTC38          | chr22:46663860-46689905   | 0.0451974 | 0.999791 |
| XLOC_008333 | XLOC_008333 | UNKL           | chr16:1401899-1464705     | 0.04523   | 0.999791 |
| XLOC_023366 | XLOC_023366 | PORCN          | chrX:48367370-48379202    | 0.0452513 | 0.999791 |
| XLOC_000409 | XLOC_000409 | ACOT11         | chr1:55013806-55100417    | 0.0452522 | 1        |
| XLOC_024048 | XLOC_024048 | C1GALT1C1      | chrX:119759528-119764005  | 0.0453005 | 0.999791 |
| XLOC_013827 | XLOC_013827 | FASTKD5,UBOX5  | chr20:3087556-3140556     | 0.0453776 | 0.999791 |
| XLOC_008628 | XLOC_008628 | ENKD1          | chr16:67696849-67700628   | 0.0453838 | 0.999791 |
| XLOC_022154 | XLOC_022154 | MRPL13         | chr8:121408082-121535875  | 0.0453917 | 0.999791 |
| XLOC_023558 | XLOC_023558 | NXT2           | chrX:108779009-108787927  | 0.0454253 | 0.999791 |
| XLOC_021544 | XLOC_021544 | MAK16          | chr8:33342684-33370703    | 0.0454374 | 0.999791 |
| XLOC_011942 | XLOC_011942 | LILRB3         | chr19:54720146-54726959   | 0.0454449 | 1        |
| XLOC_023419 | XLOC_023419 | TSPYL2         | chrX:53111541-53117728    | 0.0455587 | 0.999791 |
| XLOC_013632 | XLOC_013632 | AAR2           | chr20:34824338-34844863   | 0.0456612 | 0.999791 |
| XLOC_011618 | XLOC_011618 | COX7A1         | chr19:36641823-36643771   | 0.0456715 | 1        |
| XLOC_013510 | XLOC_013510 | PANK2          | chr20:3869485-39045002    | 0.0456879 | 0.999791 |
| XLOC_012511 | XLOC_012511 | DYNC1I2        | chr2:172543918-172606668  | 0.0457389 | 0.999791 |
| XLOC_023365 | XLOC_023365 | FTSJ1          | chrX:48334548-48344752    | 0.0457544 | 0.999791 |
| XLOC_020686 | XLOC_020686 | RINT1          | chr7:105172531-105221976  | 0.0458308 | 0.999791 |
| XLOC_005450 | XLOC_005450 | TFCP2          | chr12:51487538-51566926   | 0.0459261 | 0.999791 |
| XLOC_018328 | XLOC_018328 | CDC5L          | chr6:44355250-44418161    | 0.04597   | 0.999791 |
| XLOC_010010 | XLOC_010010 | CANT1          | chr17:76987797-77005899   | 0.0460113 | 0.999791 |
| XLOC_009117 | XLOC_009117 | MAP3K14-AS1    | chr17:43325302-43394414   | 0.0460306 | 0.999791 |
| XLOC_008646 | XLOC_008646 | NQO1           | chr16:69743303-69760533   | 0.0460485 | 0.999791 |
| XLOC_017203 | XLOC_017203 | AGGF1          | chr5:76326209-76361058    | 0.0460596 | 0.999791 |
| XLOC_014251 | XLOC_014251 | MRPL39         | chr21:26957967-26979801   | 0.0460886 | 0.999791 |
| XLOC_015737 | XLOC_015737 | TMEM115        | chr3:50392179-50396939    | 0.0461131 | 0.999791 |
| XLOC_000121 | XLOC_000121 | DDI2,RSC1A1    | chr1:15943952-15988217    | 0.0461499 | 0.999791 |
| XLOC_014221 | XLOC_014221 | COL18A1        | chr21:46825096-46933634   | 0.046223  | 0.999791 |
| XLOC_002457 | XLOC_002457 | NCOA4          | chr10:51565107-51590734   | 0.0462383 | 0.999791 |
| XLOC_005769 | XLOC_005769 | MPHOSPH9       | chr12:123640945-123706441 | 0.0463169 | 0.999791 |
| XLOC_009798 | XLOC_009798 | ARL17A         | chr17:44590075-44657088   | 0.0463241 | 1        |
| XLOC_001377 | XLOC_001377 | GNP2           | chr1:27205872-27216869    | 0.0463594 | 0.999791 |
| XLOC_014632 | XLOC_014632 | TBC1D22A       | chr22:47158517-47571342   | 0.0464909 | 0.999791 |
| XLOC_021777 | XLOC_021777 | GLI4           | chr8:144349606-144359101  | 0.0464918 | 0.999791 |
| XLOC_023095 | XLOC_023095 | PTGES2         | chr9:130882971-130890741  | 0.0465103 | 0.999791 |
| XLOC_001527 | XLOC_001527 | ATPAF1         | chr1:47100710-47134099    | 0.0465133 | 0.999791 |
| XLOC_016659 | XLOC_016659 | GRPEL1         | chr4:7061779-7069800      | 0.0465222 | 0.999791 |
| XLOC_009412 | XLOC_009412 | ANKFY1         | chr17:40666664-4167274    | 0.0465295 | 0.999791 |
| XLOC_001857 | XLOC_001857 | S100A16        | chr1:153579366-153585514  | 0.0465299 | 0.999791 |
| XLOC_010834 | XLOC_010834 | SPRED3         | chr19:38880839-38890523   | 0.0465326 | 0.999791 |
| XLOC_023009 | XLOC_023009 | PTGR1          | chr9:114287446-114362135  | 0.0465636 | 0.999791 |

|             |             |                  |                           |           |          |
|-------------|-------------|------------------|---------------------------|-----------|----------|
| XLOC_020700 | XLOC_020700 | IFRD1            | chr7:112063198-112117258  | 0.0465789 | 0.999791 |
| XLOC_011530 | XLOC_011530 | PDE4C            | chr19:18318770-18359010   | 0.0466202 | 1        |
| XLOC_009672 | XLOC_009672 | GJD3             | chr17:38516904-38520945   | 0.0466804 | 0.999791 |
| XLOC_005925 | XLOC_005925 | TDRD3            | chr13:60970590-61148013   | 0.0466838 | 0.999791 |
| XLOC_020337 | XLOC_020337 | MAFK             | chr7:1570367-1596066      | 0.0466932 | 0.999791 |
| XLOC_014810 | XLOC_014810 | MFNG             | chr22:37865100-37882478   | 0.0467688 | 1        |
| XLOC_013812 | XLOC_013812 | FKBP1A,SDCBP2    | chr20:1290554-1373816     | 0.0468155 | 0.999791 |
| XLOC_006120 | XLOC_006120 | RCBTB2           | chr13:49063098-49107316   | 0.04691   | 1        |
| XLOC_000971 | XLOC_000971 | TIMM17A          | chr1:201924618-201939789  | 0.0469867 | 0.999791 |
| XLOC_013921 | XLOC_013921 | PLAGL2           | chr20:30780306-30795546   | 0.0470204 | 0.999791 |
| XLOC_021690 | XLOC_021690 | C8orf47          | chr8:99076749-99105838    | 0.0470485 | 0.999791 |
| XLOC_021577 | XLOC_021577 | FNTA             | chr8:42911441-42940932    | 0.0470887 | 0.999791 |
| XLOC_022837 | XLOC_022837 | TOMM5            | chr9:37588411-37592636    | 0.0471058 | 0.999791 |
| XLOC_021008 | XLOC_021008 | DPY19L1          | chr7:34968492-35077653    | 0.0471078 | 0.999791 |
| XLOC_011581 | XLOC_011581 | C19orf12         | chr19:30189792-30206696   | 0.0471394 | 0.999791 |
| XLOC_006999 | XLOC_006999 | BRF1             | chr14:105675622-105864484 | 0.0471849 | 0.999791 |
| XLOC_002316 | XLOC_002316 | WDR37            | chr10:1102775-1178237     | 0.0472175 | 0.999791 |
| XLOC_003168 | XLOC_003168 | ATE1             | chr10:123502624-123687546 | 0.0472636 | 0.999791 |
| XLOC_020866 | XLOC_020866 | NUB1             | chr7:151038846-151075548  | 0.0472768 | 0.999791 |
| XLOC_007922 | XLOC_007922 | MGRN1            | chr16:4674824-4740975     | 0.0472903 | 0.999791 |
| XLOC_014235 | XLOC_014235 | C21orf15         | chr21:15215453-15220685   | 0.0472969 | 0.999791 |
| XLOC_022120 | XLOC_022120 | ANKRD46          | chr8:101521979-101572014  | 0.0473023 | 0.999791 |
| XLOC_015754 | XLOC_015754 | WDR82            | chr3:52288437-52312659    | 0.0473397 | 0.999791 |
| XLOC_004426 | XLOC_004426 | INTS4            | chr11:77589765-77705717   | 0.0473586 | 0.999791 |
| XLOC_022317 | XLOC_022317 | ANXA2P2          | chr9:33624222-33625532    | 0.0474822 | 0.999791 |
| XLOC_010325 | XLOC_010325 | GAREM            | chr18:29843483-30050447   | 0.0474871 | 1        |
| XLOC_018306 | XLOC_018306 | RRP36            | chr6:42989384-42997337    | 0.0475946 | 0.999791 |
| XLOC_021481 | XLOC_021481 | VPS37A           | chr8:17104400-17271040    | 0.047654  | 0.999791 |
| XLOC_006254 | XLOC_006254 | APEX1            | chr14:20923289-20925931   | 0.0477785 | 0.999791 |
| XLOC_009112 | XLOC_009112 | NMT1             | chr17:43138679-43186382   | 0.0478691 | 0.999791 |
| XLOC_017950 | XLOC_017950 | STK10            | chr5:171469073-171615346  | 0.0478803 | 0.999791 |
| XLOC_011689 | XLOC_011689 | TGFB1            | chr19:41836811-41859831   | 0.0479407 | 0.999791 |
| XLOC_004344 | XLOC_004344 | MRPL11           | chr1:166202549-66206310   | 0.047956  | 0.999791 |
| XLOC_001355 | XLOC_001355 | FUCA1            | chr1:24171571-24194859    | 0.0479665 | 0.999791 |
| XLOC_014429 | XLOC_014429 | LZTR1            | chr22:21336557-21353326   | 0.048105  | 0.999791 |
| XLOC_009900 | XLOC_009900 | STRADA           | chr17:61780191-61819330   | 0.0481957 | 0.999791 |
| XLOC_003650 | XLOC_003650 | LRFN4            | chr1:166615996-66725847   | 0.0482021 | 0.999791 |
| XLOC_002021 | XLOC_002021 | VAMP4            | chr1:171669295-171711379  | 0.0482062 | 0.999791 |
| XLOC_014503 | XLOC_014503 | SEC14L2          | chr22:30792929-30821291   | 0.0482278 | 0.999791 |
| XLOC_017854 | XLOC_017854 | SRA1             | chr5:139929651-139937678  | 0.0482896 | 0.999791 |
| XLOC_009459 | XLOC_009459 | GPS2             | chr17:7215977-7218658     | 0.0483116 | 0.999791 |
| XLOC_002741 | XLOC_002741 | PSTK             | chr10:124739555-124749907 | 0.0483353 | 0.999791 |
| XLOC_016697 | XLOC_016697 | DHX15            | chr4:24529087-24586184    | 0.0484183 | 0.999791 |
| XLOC_009341 | XLOC_009341 | MRPL12           | chr17:79670399-79674556   | 0.0484628 | 0.999791 |
| XLOC_000555 | XLOC_000555 | STXBP3           | chr1:109289284-109352148  | 0.0484799 | 0.999791 |
| XLOC_009281 | XLOC_009281 | LOC100287042     | chr17:73267379-73285530   | 0.0484867 | 1        |
| XLOC_022971 | XLOC_022971 | TRIM14           | chr9:100818958-100881488  | 0.0484887 | 0.999791 |
| XLOC_014517 | XLOC_014517 | DEPDC5           | chr22:32149936-32303020   | 0.0485866 | 0.999791 |
| XLOC_024196 | XLOC_024196 | G6PD             | chrX:153759605-153793261  | 0.0486062 | 0.999791 |
| XLOC_002631 | XLOC_002631 | ZFYVE27          | chr10:99496877-99520664   | 0.048637  | 0.999791 |
| XLOC_012582 | XLOC_012582 | BZW1             | chr2:201676268-201688569  | 0.0486466 | 0.999791 |
| XLOC_000597 | XLOC_000597 | CAPZA1           | chr1:113162074-113214241  | 0.0486513 | 0.999791 |
| XLOC_018656 | XLOC_018656 | KIF13A           | chr6:17759413-17987854    | 0.048705  | 0.999791 |
| XLOC_015038 | XLOC_015038 | ZNF619           | chr3:40518603-40531728    | 0.0487169 | 0.999791 |
| XLOC_001593 | XLOC_001593 | SLC35D1          | chr1:67465014-67520080    | 0.0487362 | 0.999791 |
| XLOC_012141 | XLOC_012141 | NDUFAF7          | chr2:37458773-37476303    | 0.0488012 | 0.999791 |
| XLOC_009854 | XLOC_009854 | COX11            | chr17:52978051-53046064   | 0.0488138 | 0.999791 |
| XLOC_019161 | XLOC_019161 | RSPH3            | chr6:159398265-159421198  | 0.0488779 | 0.999791 |
| XLOC_015389 | XLOC_015389 | GYG1             | chr3:148709194-148745456  | 0.0488789 | 0.999791 |
| XLOC_008128 | XLOC_008128 | MT1IP            | chr16:56709648-56711653   | 0.048957  | 1        |
| XLOC_011728 | XLOC_011728 | IRGQ             | chr19:44088518-44100287   | 0.0489703 | 0.999791 |
| XLOC_002209 | XLOC_002209 | ENAH             | chr1:225674533-225840845  | 0.0489976 | 0.999791 |
| XLOC_006982 | XLOC_006982 | CDC42BPB         | chr14:103398715-103523742 | 0.0490275 | 0.999791 |
| XLOC_000087 | XLOC_000087 | AGTRAP           | chr1:11796141-11810828    | 0.04905   | 0.999791 |
| XLOC_022478 | XLOC_022478 | INVS             | chr9:102861501-103063426  | 0.0490594 | 0.999791 |
| XLOC_021254 | XLOC_021254 | SYPL1            | chr7:105730813-105753093  | 0.0491137 | 0.999791 |
| XLOC_020606 | XLOC_020606 | CCDC132          | chr7:92861652-92990435    | 0.0491822 | 0.999791 |
| XLOC_007965 | XLOC_007965 | TMC7             | chr16:18995255-19075262   | 0.049197  | 0.999791 |
| XLOC_001242 | XLOC_001242 | PLEKHG5,TNFRSF25 | chr1:6521213-6580121      | 0.0492145 | 0.999791 |
| XLOC_020598 | XLOC_020598 | CLDN12           | chr7:90032647-90045268    | 0.0492483 | 0.999791 |
| XLOC_016701 | XLOC_016701 | SEL1L3           | chr4:25749048-25864610    | 0.0492589 | 0.999791 |
| XLOC_007865 | XLOC_007865 | GFER             | chr16:2034149-2037750     | 0.0492977 | 0.999791 |
| XLOC_003544 | XLOC_003544 | PPP1R32          | chr1:161248584-61258400   | 0.0495342 | 0.999791 |
| XLOC_018741 | XLOC_018741 | DHX16            | chr6:30614815-30640830    | 0.0495712 | 0.999791 |
| XLOC_010675 | XLOC_010675 | MRPL34           | chr19:17416476-17417652   | 0.049606  | 0.999791 |
| XLOC_017267 | XLOC_017267 | SRP19            | chr5:112196884-112258031  | 0.0496066 | 0.999791 |
| XLOC_005238 | XLOC_005238 | CD27-AS1         | chr12:6548166-6560884     | 0.0496393 | 0.999791 |
| XLOC_021967 | XLOC_021967 | TM2D2            | chr8:38846326-38854041    | 0.0496477 | 0.999791 |
| XLOC_002320 | XLOC_002320 | PITRM1-AS1       | chr10:3179918-3215033     | 0.0496587 | 0.999791 |

|             |             |              |                           |           |          |
|-------------|-------------|--------------|---------------------------|-----------|----------|
| XLOC_016883 | XLOC_016883 | PAPSS1       | chr4:108534821-108641419  | 0.0496919 | 0.999791 |
| XLOC_008620 | XLOC_008620 | LRRRC29      | chr16:67241041-67260901   | 0.0496983 | 0.999791 |
| XLOC_017533 | XLOC_017533 | CNOT6        | chr5:179921416-180005353  | 0.0497051 | 0.999791 |
| XLOC_005011 | XLOC_005011 | METTL25      | chr12:82746082-82873016   | 0.049734  | 0.999791 |
| XLOC_009796 | XLOC_009796 | KANSL1       | chr17:44107281-44302740   | 0.049751  | 0.999791 |
| XLOC_001097 | XLOC_001097 | RAB4A,SPHAR  | chr1:229406808-229441640  | 0.0497554 | 0.999791 |
| XLOC_014741 | XLOC_014741 | PITPNB       | chr22:28247656-28315255   | 0.0497585 | 0.999791 |
| XLOC_015650 | XLOC_015650 | HIGD1A       | chr3:42824399-42846027    | 0.0497944 | 0.999791 |
| XLOC_008089 | XLOC_008089 | GPT2         | chr16:46918307-46965201   | 0.0498853 | 0.999791 |
| XLOC_007664 | XLOC_007664 | UACA         | chr15:70946892-71055850   | 0.0499643 | 0.999791 |
| XLOC_013440 | XLOC_013440 | HES6         | chr2:239146907-239148681  | 0.050012  | 0.999791 |
| XLOC_013191 | XLOC_013191 | ACVR1C       | chr2:158383278-158485399  | 0.0500204 | 1        |
| XLOC_020661 | XLOC_020661 | SRRT         | chr7:100472700-100486285  | 0.0500418 | 0.999791 |
| XLOC_021111 | XLOC_021111 | WBSCR27      | chr7:73248920-73256855    | 0.0500841 | 0.999791 |
| XLOC_020575 | XLOC_020575 | LOC100132832 | chr7:76668796-76682355    | 0.0502101 | 0.999791 |
| XLOC_010312 | XLOC_010312 | SS18         | chr18:23596216-23670611   | 0.0502371 | 0.999791 |
| XLOC_000039 | XLOC_000039 | PRDM16       | chr1:2985741-3355185      | 0.050243  | 0.999791 |
| XLOC_002780 | XLOC_002780 | CYP2E1       | chr10:135340866-135352620 | 0.0502809 | 0.999791 |
| XLOC_005053 | XLOC_005053 | GAS2L3       | chr12:100967488-101018685 | 0.0502903 | 1        |
| XLOC_018362 | XLOC_018362 | KIAA1586     | chr6:56911383-56920023    | 0.0503399 | 0.999791 |
| XLOC_007143 | XLOC_007143 | KNSTRN       | chr15:40674921-40686489   | 0.0503409 | 0.999791 |
| XLOC_021417 | XLOC_021417 | LMBR1        | chr7:156473569-156685902  | 0.0503578 | 0.999791 |
| XLOC_008753 | XLOC_008753 | RPA1         | chr17:1733272-1802848     | 0.0503808 | 0.999791 |
| XLOC_004267 | XLOC_004267 | C11orf48     | chr11:62430288-62441162   | 0.0503826 | 0.999791 |
| XLOC_004678 | XLOC_004678 | PTMS         | chr12:6875540-6880118     | 0.0504349 | 0.999791 |
| XLOC_022171 | XLOC_022171 | FAM84B       | chr8:127564682-127570711  | 0.0504785 | 0.999791 |
| XLOC_016264 | XLOC_016264 | ZCCHC4       | chr4:25314395-25372005    | 0.0504908 | 0.999791 |
| XLOC_016215 | XLOC_016215 | TRMT44       | chr4:8442531-8478282      | 0.0505512 | 0.999791 |
| XLOC_021197 | XLOC_021197 | TRIM4        | chr7:99488029-99517223    | 0.0505747 | 0.999791 |
| XLOC_004255 | XLOC_004255 | FADS3        | chr1:61640997-61659006    | 0.0505751 | 0.999791 |
| XLOC_016205 | XLOC_016205 | BLOC1S4      | chr4:6717841-6719387      | 0.0506405 | 0.999791 |
| XLOC_017709 | XLOC_017709 | AP3B1        | chr5:77298149-77590579    | 0.050748  | 0.999791 |
| XLOC_012646 | XLOC_012646 | RQCD1        | chr2:219433302-219461158  | 0.0507787 | 0.999791 |
| XLOC_015549 | XLOC_015549 | SUMF1        | chr3:4402828-4508966      | 0.0507801 | 0.999791 |
| XLOC_014387 | XLOC_014387 | MCM3AP       | chr21:47649157-47705236   | 0.0507926 | 0.999791 |
| XLOC_005805 | XLOC_005805 | SAP18        | chr13:21714652-21723224   | 0.0508872 | 0.999791 |
| XLOC_023292 | XLOC_023292 | SMS          | chrX:21958690-22012955    | 0.0509022 | 0.999791 |
| XLOC_023198 | XLOC_023198 | EXD3         | chr9:140201347-140317714  | 0.0509765 | 0.999791 |
| XLOC_005520 | XLOC_005520 | ANKRD52      | chr12:56623819-56652143   | 0.0510068 | 0.999791 |
| XLOC_006470 | XLOC_006470 | SLIRP        | chr14:78174413-78183941   | 0.0510228 | 0.999791 |
| XLOC_012821 | XLOC_012821 | ADCY3        | chr2:25013135-25142055    | 0.0510559 | 0.999791 |
| XLOC_000612 | XLOC_000612 | ATP1A1       | chr1:116915794-116961244  | 0.0510783 | 0.999791 |
| XLOC_019155 | XLOC_019155 | TMEM242      | chr6:157710053-157745253  | 0.0511294 | 0.999791 |
| XLOC_009356 | XLOC_009356 | FOXK2        | chr17:80477593-80562483   | 0.0511527 | 0.999791 |
| XLOC_012765 | XLOC_012765 | TMEM18       | chr2:667972-677439        | 0.0511781 | 0.999791 |
| XLOC_004480 | XLOC_004480 | CCDC82       | chr11:96085928-96123083   | 0.0511879 | 0.999791 |
| XLOC_018051 | XLOC_018051 | TMEM14B      | chr6:10747994-10757214    | 0.0511903 | 0.999791 |
| XLOC_018485 | XLOC_018485 | NCOA7        | chr6:126102306-126253176  | 0.0512187 | 0.999791 |
| XLOC_002616 | XLOC_002616 | ZNF518A      | chr10:97889471-97923517   | 0.0513012 | 0.999791 |
| XLOC_011485 | XLOC_011485 | GIPC1        | chr19:14588570-14606961   | 0.0513097 | 0.999791 |
| XLOC_023847 | XLOC_023847 | QTUD5        | chrX:48779302-48815648    | 0.0513141 | 0.999791 |
| XLOC_010964 | XLOC_010964 | SAE1         | chr19:47634079-47713893   | 0.0514932 | 0.999791 |
| XLOC_010144 | XLOC_010144 | GATA6        | chr18:19749403-19782491   | 0.0514942 | 0.999791 |
| XLOC_002688 | XLOC_002688 | MXI1         | chr10:111967362-112047123 | 0.0515969 | 0.999791 |
| XLOC_002397 | XLOC_002397 | BAMBI        | chr10:28966423-28971868   | 0.0515981 | 0.999791 |
| XLOC_000691 | XLOC_000691 | PSMD4        | chr1:151227196-151239954  | 0.051652  | 0.999791 |
| XLOC_000023 | XLOC_000023 | VWA1         | chr1:1370902-1378262      | 0.0517197 | 0.999791 |
| XLOC_008266 | XLOC_008266 | KIAA0513     | chr16:85061409-85127828   | 0.0517344 | 0.999791 |
| XLOC_005210 | XLOC_005210 | ZNF268       | chr12:133757994-133783697 | 0.0517815 | 0.999791 |
| XLOC_021604 | XLOC_021604 | CHD7         | chr8:61591323-61780586    | 0.0517884 | 0.999791 |
| XLOC_017095 | XLOC_017095 | SUB1         | chr5:32585604-32604185    | 0.0518602 | 0.999791 |
| XLOC_001430 | XLOC_001430 | RNF19B       | chr1:33402049-33430286    | 0.0518725 | 0.999791 |
| XLOC_020512 | XLOC_020512 | ZNF273       | chr7:64363619-64391955    | 0.051988  | 0.999791 |
| XLOC_000112 | XLOC_000112 | PRDM2        | chr1:14026734-14151574    | 0.0519918 | 0.999791 |
| XLOC_014145 | XLOC_014145 | IFNAR2       | chr21:34602230-34636820   | 0.0520458 | 0.999791 |
| XLOC_003014 | XLOC_003014 | POLR3A       | chr10:79734906-79789298   | 0.0520597 | 0.999791 |
| XLOC_014511 | XLOC_014511 | SMTN         | chr22:31477281-31500610   | 0.052078  | 0.999791 |
| XLOC_005592 | XLOC_005592 | KRR1         | chr12:75874512-75905418   | 0.0520912 | 0.999791 |
| XLOC_020617 | XLOC_020617 | ACN9         | chr7:96745904-96811075    | 0.0521821 | 0.999791 |
| XLOC_010764 | XLOC_010764 | KIAA0355     | chr19:34745455-34846471   | 0.0521931 | 0.999791 |
| XLOC_004669 | XLOC_004669 | CD9          | chr12:6309481-6347437     | 0.0522099 | 0.999791 |
| XLOC_002838 | XLOC_002838 | PTPLA        | chr10:17631957-17659373   | 0.0522372 | 0.999791 |
| XLOC_021693 | XLOC_021693 | OSR2         | chr8:99956630-99964326    | 0.0523072 | 0.999791 |
| XLOC_008355 | XLOC_008355 | PKD1         | chr16:2097989-2185899     | 0.0523871 | 0.999791 |
| XLOC_020694 | XLOC_020694 | SLC26A4      | chr7:107296960-107358252  | 0.0525539 | 1        |
| XLOC_017985 | XLOC_017985 | NHP2         | chr5:177576464-177580961  | 0.0525608 | 0.999791 |
| XLOC_021345 | XLOC_021345 | HIPK2        | chr7:139246315-139477693  | 0.0525686 | 0.999791 |
| XLOC_020682 | XLOC_020682 | PMPCB        | chr7:102937872-102985320  | 0.0526295 | 0.999791 |
| XLOC_014611 | XLOC_014611 | SAMM50       | chr22:44351260-44392412   | 0.052631  | 0.999791 |

|             |             |              |                           |           |          |
|-------------|-------------|--------------|---------------------------|-----------|----------|
| XLOC_014456 | XLOC_014456 | MMP11        | chr22:24115035-24126503   | 0.0526589 | 0.999791 |
| XLOC_012247 | XLOC_012247 | DGUOK        | chr2:74153952-74186088    | 0.0526807 | 0.999791 |
| XLOC_002815 | XLOC_002815 | UPF2         | chr10:11962020-12085169   | 0.0527213 | 0.999791 |
| XLOC_023509 | XLOC_023509 | DIAPH2       | chrX:95939661-96855597    | 0.0527409 | 0.999791 |
| XLOC_017780 | XLOC_017780 | LOX          | chr5:121398889-121414055  | 0.0527765 | 0.999791 |
| XLOC_004133 | XLOC_004133 | CCDC73       | chr11:32605312-32816187   | 0.0527996 | 0.999791 |
| XLOC_007570 | XLOC_007570 | FAM227B      | chr15:49447975-49913118   | 0.0528605 | 0.999791 |
| XLOC_008444 | XLOC_008444 | ARL6IP1      | chr16:18802990-18812857   | 0.0528952 | 0.999791 |
| XLOC_016156 | XLOC_016156 | IQCG         | chr3:197615945-197686886  | 0.0529084 | 0.999791 |
| XLOC_018269 | XLOC_018269 | CDKN1A       | chr6:36644236-36655116    | 0.0529611 | 0.999791 |
| XLOC_009366 | XLOC_009366 | GEMIN4       | chr17:647660-655501       | 0.0529927 | 0.999791 |
| XLOC_022661 | XLOC_022661 | GPSM1        | chr9:139221931-139254057  | 0.0529963 | 0.999791 |
| XLOC_020521 | XLOC_020521 | TPST1        | chr7:65670258-65825438    | 0.0529995 | 0.999791 |
| XLOC_000957 | XLOC_000957 | NEK7         | chr1:198126107-198291548  | 0.0529998 | 0.999791 |
| XLOC_019135 | XLOC_019135 | KATNA1       | chr6:149916010-149969940  | 0.0530539 | 0.999791 |
| XLOC_014300 | XLOC_014300 | PAXBP1       | chr21:34100424-34144169   | 0.0530733 | 0.999791 |
| XLOC_006009 | XLOC_006009 | CDC16        | chr13:115000361-115038150 | 0.0530939 | 0.999791 |
| XLOC_017257 | XLOC_017257 | SLC25A46     | chr5:110074753-110098484  | 0.0531512 | 0.999791 |
| XLOC_006469 | XLOC_006469 | AHSA1        | chr14:77924372-77935815   | 0.0531665 | 0.999791 |
| XLOC_009915 | XLOC_009915 | POLG2        | chr17:62473901-62493184   | 0.0532243 | 0.999791 |
| XLOC_011154 | XLOC_011154 | CACNG7       | chr19:54415990-54446969   | 0.0533168 | 0.999791 |
| XLOC_001435 | XLOC_001435 | SMIM12       | chr1:35315962-35325417    | 0.053423  | 0.999791 |
| XLOC_009135 | XLOC_009135 | NPEPPS       | chr17:45608443-45700642   | 0.0534868 | 0.999791 |
| XLOC_012876 | XLOC_012876 | HNRPLL       | chr2:38790327-38830178    | 0.0535515 | 0.999791 |
| XLOC_018251 | XLOC_018251 | UHRF1BP1     | chr6:34759793-34845291    | 0.0535534 | 0.999791 |
| XLOC_011635 | XLOC_011635 | ZFP30        | chr19:38123388-38146313   | 0.0535894 | 0.999791 |
| XLOC_009738 | XLOC_009738 | DXH58        | chr17:40253421-40264751   | 0.0536641 | 1        |
| XLOC_002878 | XLOC_002878 | ITGB1        | chr10:33189245-33247293   | 0.0536735 | 0.999791 |
| XLOC_001878 | XLOC_001878 | PYGO2        | chr1:154929501-154934258  | 0.0537028 | 0.999791 |
| XLOC_009559 | XLOC_009559 | C17orf103    | chr17:21142183-21156578   | 0.0537458 | 0.999791 |
| XLOC_017730 | XLOC_017730 | CCNH         | chr5:86690078-86708850    | 0.0537501 | 0.999791 |
| XLOC_001649 | XLOC_001649 | ZNF644       | chr1:91380856-91487812    | 0.0537595 | 0.999791 |
| XLOC_004333 | XLOC_004333 | FOSL1        | chr1:65659691-65667997    | 0.0537907 | 0.999791 |
| XLOC_021302 | XLOC_021302 | MGC27345     | chr7:127937737-127947816  | 0.0538174 | 0.999791 |
| XLOC_016386 | XLOC_016386 | USO1         | chr4:76649828-76735366    | 0.0538948 | 0.999791 |
| XLOC_001522 | XLOC_001522 | POMGNT1      | chr1:46654352-46686928    | 0.0540527 | 0.999791 |
| XLOC_010903 | XLOC_010903 | ZNF575       | chr19:44037339-44040284   | 0.0540652 | 0.999791 |
| XLOC_021097 | XLOC_021097 | NSUN5P2      | chr7:72349935-72425302    | 0.0540662 | 0.999791 |
| XLOC_021367 | XLOC_021367 | FAM131B      | chr7:143050492-143059840  | 0.0541091 | 0.999791 |
| XLOC_012053 | XLOC_012053 | PQLC3        | chr2:11295539-11318998    | 0.0541137 | 0.999791 |
| XLOC_003603 | XLOC_003603 | TM7SF2,VPS51 | chr11:64863586-64883707   | 0.0541908 | 0.999791 |
| XLOC_001595 | XLOC_001595 | SERBP1       | chr1:67873492-67896123    | 0.0542006 | 0.999791 |
| XLOC_000199 | XLOC_000199 | ZNF593       | chr1:26496387-26497364    | 0.0542052 | 0.999791 |
| XLOC_021189 | XLOC_021189 | PDAP1        | chr7:98972297-99006305    | 0.0542085 | 0.999791 |
| XLOC_008177 | XLOC_008177 | HSD11B2      | chr16:67465035-67471454   | 0.0542117 | 0.999791 |
| XLOC_009566 | XLOC_009566 | POLDIP2      | chr17:26662547-26684603   | 0.0542157 | 0.999791 |
| XLOC_002491 | XLOC_002491 | KIAA1279     | chr10:70748476-70776739   | 0.0542493 | 0.999791 |
| XLOC_000062 | XLOC_000062 | PER3         | chr1:7844762-7905237      | 0.0542544 | 1        |
| XLOC_017724 | XLOC_017724 | RPS23        | chr5:81569138-81574235    | 0.0542609 | 0.999791 |
| XLOC_001455 | XLOC_001455 | MEAF6        | chr1:37955560-37980420    | 0.0542631 | 0.999791 |
| XLOC_021115 | XLOC_021115 | WBSR16       | chr7:74456282-74489699    | 0.054264  | 0.999791 |
| XLOC_023589 | XLOC_023589 | SLC25A5      | chrX:118599995-118605359  | 0.0542728 | 0.999791 |
| XLOC_004970 | XLOC_004970 | MSRB3        | chr12:65672422-65806687   | 0.0542764 | 0.999791 |
| XLOC_011459 | XLOC_011459 | C19orf43     | chr19:12841453-12845529   | 0.0542986 | 0.999791 |
| XLOC_002174 | XLOC_002174 | INTS7        | chr1:212113740-212278187  | 0.0543261 | 0.999791 |
| XLOC_004946 | XLOC_004946 | PIP4K2C      | chr12:57984941-57997211   | 0.0543577 | 0.999791 |
| XLOC_011342 | XLOC_011342 | PRR22        | chr19:5782970-5784776     | 0.0544197 | 0.999791 |
| XLOC_008153 | XLOC_008153 | GINS3        | chr16:58426297-58440048   | 0.0544391 | 0.999791 |
| XLOC_022597 | XLOC_022597 | LRRC8A       | chr9:131644390-131680317  | 0.0544629 | 0.999791 |
| XLOC_013138 | XLOC_013138 | POLR2D       | chr2:128603839-128615729  | 0.0544727 | 0.999791 |
| XLOC_013624 | XLOC_013624 | MMP24        | chr20:33814538-33864804   | 0.0545256 | 0.999791 |
| XLOC_006866 | XLOC_006866 | ZFYVE26      | chr14:68213236-68283306   | 0.0545535 | 0.999791 |
| XLOC_016816 | XLOC_016816 | HNRNPD       | chr4:83274466-83295149    | 0.0545752 | 0.999791 |
| XLOC_011674 | XLOC_011674 | TTC9B        | chr19:40721964-40724306   | 0.0546009 | 0.999791 |
| XLOC_014847 | XLOC_014847 | RANGAP1      | chr22:41641614-41682216   | 0.0546126 | 0.999791 |
| XLOC_002199 | XLOC_002199 | AIDA         | chr1:222841354-222885864  | 0.0546884 | 0.999791 |
| XLOC_011308 | XLOC_011308 | DOHD         | chr19:3490818-3500938     | 0.0546892 | 0.999791 |
| XLOC_004471 | XLOC_004471 | TAF1D        | chr11:93469095-93474703   | 0.0547409 | 0.999791 |
| XLOC_023584 | XLOC_023584 | IL13RA1      | chrX:117861558-117928496  | 0.0547457 | 0.999791 |
| XLOC_002521 | XLOC_002521 | ZSWIM8       | chr10:75545381-75561556   | 0.0548599 | 0.999791 |
| XLOC_012962 | XLOC_012962 | C2orf42      | chr2:70377016-70418151    | 0.054878  | 0.999791 |
| XLOC_015187 | XLOC_015187 | PPP4R2       | chr3:73046118-73115011    | 0.0548917 | 0.999791 |
| XLOC_001482 | XLOC_001482 | PPT1         | chr1:40538381-40563142    | 0.0549067 | 0.999791 |
| XLOC_002730 | XLOC_002730 | WDR11        | chr10:122216465-122806858 | 0.054998  | 0.999791 |
| XLOC_007245 | XLOC_007245 | USP3         | chr15:63796709-63894620   | 0.0550664 | 0.999791 |
| XLOC_009791 | XLOC_009791 | ARHGAP27     | chr17:43506717-43510282   | 0.0550672 | 0.999791 |
| XLOC_009099 | XLOC_009099 | NAGS         | chr17:42082031-42086436   | 0.0550807 | 0.999791 |
| XLOC_017154 | XLOC_017154 | PPWD1        | chr5:64859062-64883376    | 0.0551003 | 0.999791 |
| XLOC_008660 | XLOC_008660 | ZNF19        | chr16:71507975-71523254   | 0.0552107 | 0.999791 |

|             |             |                             |                           |           |          |
|-------------|-------------|-----------------------------|---------------------------|-----------|----------|
| XLOC_012578 | XLOC_012578 | SPATS2L                     | chr2:201170603-201346986  | 0.0552591 | 0.999791 |
| XLOC_003346 | XLOC_003346 | C11orf58                    | chr11:16760147-16779901   | 0.0552722 | 0.999791 |
| XLOC_015710 | XLOC_015710 | CCDC71                      | chr3:49199967-49203785    | 0.0553392 | 0.999791 |
| XLOC_007358 | XLOC_007358 | GOLGA6L9                    | chr15:83098709-83108111   | 0.0553452 | 1        |
| XLOC_004137 | XLOC_004137 | FBXO3                       | chr11:33762489-33796071   | 0.0553569 | 0.999791 |
| XLOC_020650 | XLOC_020650 | NYAP1                       | chr7:100081549-100092424  | 0.0554237 | 0.999791 |
| XLOC_022113 | XLOC_022113 | STK3                        | chr8:99466858-99954799    | 0.0554583 | 0.999791 |
| XLOC_010103 | XLOC_010103 | LINC00667                   | chr18:5238098-5246505     | 0.0554672 | 0.999791 |
| XLOC_012243 | XLOC_012243 | ALMS1P                      | chr2:73872045-73912694    | 0.0554727 | 1        |
| XLOC_019033 | XLOC_019033 | AKD1                        | chr6:109814058-110012415  | 0.0555449 | 0.999791 |
| XLOC_020886 | XLOC_020886 | DNAJB6                      | chr7:157129709-157210133  | 0.055547  | 0.999791 |
| XLOC_010668 | XLOC_010668 | SIN3B                       | chr19:16940208-16991164   | 0.055556  | 0.999791 |
| XLOC_002029 | XLOC_002029 | CENPL                       | chr1:173768687-173793777  | 0.0555785 | 0.999791 |
| XLOC_016797 | XLOC_016797 | G3BP2                       | chr4:76567952-76598667    | 0.0555992 | 0.999791 |
| XLOC_014024 | XLOC_014024 | TMEM189, TMEM189-UBE2V1, UE | chr20:48697660-48770335   | 0.0556173 | 0.999791 |
| XLOC_023121 | XLOC_023121 | UCK1                        | chr9:134378288-134406662  | 0.0556188 | 0.999791 |
| XLOC_005322 | XLOC_005322 | GPR19                       | chr12:12813994-12849121   | 0.0556256 | 1        |
| XLOC_015843 | XLOC_015843 | FILIP1L                     | chr3:99273152-99897476    | 0.0556417 | 0.999791 |
| XLOC_020458 | XLOC_020458 | MRPL32                      | chr7:42971938-42977453    | 0.0557044 | 0.999791 |
| XLOC_022064 | XLOC_022064 | ZFAND1                      | chr8:82613565-82633539    | 0.0557434 | 0.999791 |
| XLOC_003215 | XLOC_003215 | RIC8A                       | chr11:208529-236362       | 0.0557842 | 0.999791 |
| XLOC_008402 | XLOC_008402 | ROGD1                       | chr16:4846962-4852951     | 0.055807  | 0.999791 |
| XLOC_016040 | XLOC_016040 | B3GALNT1                    | chr3:160801670-160823160  | 0.0558474 | 0.999791 |
| XLOC_021632 | XLOC_021632 | TERF1                       | chr8:73921096-73959987    | 0.055853  | 0.999791 |
| XLOC_022351 | XLOC_022351 | GRHPR                       | chr9:37422706-37436986    | 0.0558641 | 0.999791 |
| XLOC_005969 | XLOC_005969 | TM9SF2                      | chr13:100153627-100216302 | 0.0558752 | 0.999791 |
| XLOC_000966 | XLOC_000966 | NAV1                        | chr1:201617449-201796102  | 0.0559022 | 0.999791 |
| XLOC_013220 | XLOC_013220 | CERS6-AS1                   | chr2:169312758-169642939  | 0.0559455 | 0.999791 |
| XLOC_013464 | XLOC_013464 | HDLBP                       | chr2:242166681-242293441  | 0.0559879 | 0.999791 |
| XLOC_005043 | XLOC_005043 | TMPO                        | chr12:98906750-98944157   | 0.0559987 | 0.999791 |
| XLOC_001511 | XLOC_001511 | HECTD3                      | chr1:45468219-45477027    | 0.0560249 | 0.999791 |
| XLOC_022129 | XLOC_022129 | AZIN1                       | chr8:103838535-103876397  | 0.0560886 | 0.999791 |
| XLOC_001021 | XLOC_001021 | CD46                        | chr1:207925382-207968861  | 0.0561801 | 0.999791 |
| XLOC_018416 | XLOC_018416 | MANEA                       | chr6:96025372-96057328    | 0.0562011 | 0.999791 |
| XLOC_021454 | XLOC_021454 | ERI1                        | chr8:8860313-8890849      | 0.0562309 | 0.999791 |
| XLOC_000393 | XLOC_000393 | ZFYVE9                      | chr1:52608045-52812358    | 0.0563214 | 0.999791 |
| XLOC_017688 | XLOC_017688 | NAIP                        | chr5:70264309-70320941    | 0.0564242 | 0.999791 |
| XLOC_009733 | XLOC_009733 | NT5C3B                      | chr17:39981333-39992523   | 0.0564412 | 0.999791 |
| XLOC_022132 | XLOC_022132 | SLC25A32                    | chr8:104410865-104455680  | 0.0564696 | 0.999791 |
| XLOC_007659 | XLOC_007659 | ANP32A                      | chr15:69070874-69113261   | 0.0565241 | 0.999791 |
| XLOC_018025 | XLOC_018025 | WRNIP1                      | chr6:2765665-2785979      | 0.0565374 | 0.999791 |
| XLOC_012223 | XLOC_012223 | ANXA4                       | chr2:69969126-70053596    | 0.0565754 | 0.999791 |
| XLOC_017731 | XLOC_017731 | TMEM161B                    | chr5:87491022-87564665    | 0.056587  | 0.999791 |
| XLOC_022535 | XLOC_022535 | MRRF                        | chr9:125001833-125085742  | 0.0565945 | 0.999791 |
| XLOC_020350 | XLOC_020350 | AP5Z1                       | chr7:4815261-4834026      | 0.0566977 | 0.999791 |
| XLOC_010722 | XLOC_010722 | ZNF486                      | chr19:20278022-20311299   | 0.0567559 | 0.999791 |
| XLOC_008391 | XLOC_008391 | ADCY9                       | chr16:4012649-4166186     | 0.056866  | 0.999791 |
| XLOC_013014 | XLOC_013014 | LOC100630918                | chr2:85764589-85766009    | 0.0569538 | 0.999791 |
| XLOC_017109 | XLOC_017109 | WDR70                       | chr5:37379411-37752774    | 0.0569643 | 0.999791 |
| XLOC_011449 | XLOC_011449 | ZNF443                      | chr19:12540519-12551926   | 0.0570081 | 0.999791 |
| XLOC_006664 | XLOC_006664 | TEX22                       | chr14:105864919-105880196 | 0.0570297 | 1        |
| XLOC_009142 | XLOC_009142 | CDK5RAP3                    | chr17:46048428-46059147   | 0.0571456 | 0.999791 |
| XLOC_022006 | XLOC_022006 | NSMAF                       | chr8:59496063-59572404    | 0.0571578 | 0.999791 |
| XLOC_011993 | XLOC_011993 | ZNF416                      | chr19:58082933-58090243   | 0.057162  | 0.999791 |
| XLOC_015982 | XLOC_015982 | TFDP2                       | chr3:141663269-141868386  | 0.0571676 | 0.999791 |
| XLOC_023553 | XLOC_023553 | PRPS1                       | chrX:106871653-106894256  | 0.0571826 | 0.999791 |
| XLOC_000645 | XLOC_000645 | RNF115                      | chr1:145611035-145688776  | 0.0571896 | 0.999791 |
| XLOC_016082 | XLOC_016082 | MCF2L2                      | chr3:182895830-183145855  | 0.0572057 | 1        |
| XLOC_011440 | XLOC_011440 | ACP5                        | chr19:11685474-11689801   | 0.0572314 | 1        |
| XLOC_002271 | XLOC_002271 | FH                          | chr1:241660856-241683085  | 0.0572326 | 0.999791 |
| XLOC_000163 | XLOC_000163 | LINC00339                   | chr1:22351706-22357715    | 0.0572403 | 0.999791 |
| XLOC_003581 | XLOC_003581 | STIP1                       | chr1:63953586-63972020    | 0.0573509 | 0.999791 |
| XLOC_001888 | XLOC_001888 | FAM189B                     | chr1:155216995-155225274  | 0.0573766 | 0.999791 |
| XLOC_002149 | XLOC_002149 | RAB7L1                      | chr1:205737113-205744610  | 0.0573913 | 0.999791 |
| XLOC_018942 | XLOC_018942 | GUSBP4                      | chr6:58246158-58287724    | 0.057439  | 0.999791 |
| XLOC_000067 | XLOC_000067 | H6PD                        | chr1:9294862-9331394      | 0.0574517 | 0.999791 |
| XLOC_004161 | XLOC_004161 | HARBI1                      | chr11:46624855-46638777   | 0.0574549 | 0.999791 |
| XLOC_008746 | XLOC_008746 | TIMM22                      | chr17:900356-905390       | 0.0575076 | 0.999791 |
| XLOC_005108 | XLOC_005108 | ERP29                       | chr12:112451151-112461024 | 0.0575187 | 0.999791 |
| XLOC_002785 | XLOC_002785 | LARP4B                      | chr10:852853-977645       | 0.0575868 | 0.999791 |
| XLOC_014140 | XLOC_014140 | EVA1C                       | chr21:33784751-33887697   | 0.0575944 | 0.999791 |
| XLOC_006116 | XLOC_006116 | SUCLA2                      | chr13:48516790-48575462   | 0.057611  | 0.999791 |
| XLOC_023901 | XLOC_023901 | LOC92249                    | chrX:62646438-62780873    | 0.0576911 | 0.999791 |
| XLOC_023370 | XLOC_023370 | WDR13                       | chrX:48455879-48463582    | 0.0576984 | 0.999791 |
| XLOC_014007 | XLOC_014007 | SLC35C2                     | chr20:44978176-44993064   | 0.0577168 | 0.999791 |
| XLOC_014708 | XLOC_014708 | PRAME                       | chr22:22890122-22901696   | 0.0577485 | 0.999791 |
| XLOC_007560 | XLOC_007560 | SHF                         | chr15:45459411-45493373   | 0.0577705 | 0.999791 |
| XLOC_001231 | XLOC_001231 | CEP104                      | chr1:3728644-3773797      | 0.0577933 | 0.999791 |
| XLOC_005639 | XLOC_005639 | LTA4H                       | chr12:96394530-96437298   | 0.0578144 | 0.999791 |

|             |             |              |                           |           |          |
|-------------|-------------|--------------|---------------------------|-----------|----------|
| XLOC_015627 | XLOC_015627 | CLASP2       | chr3:33537738-33759705    | 0.0578439 | 0.999791 |
| XLOC_016700 | XLOC_016700 | SEPSECS      | chr4:25121626-25162204    | 0.057903  | 0.999791 |
| XLOC_016961 | XLOC_016961 | PET112       | chr4:152591808-152682175  | 0.057962  | 0.999791 |
| XLOC_015537 | XLOC_015537 | SENP5        | chr3:196594726-196661584  | 0.0580293 | 0.999791 |
| XLOC_004974 | XLOC_004974 | CAND1        | chr12:67663060-67708388   | 0.0580297 | 0.999791 |
| XLOC_014416 | XLOC_014416 | RANBP1       | chr22:20105023-20114704   | 0.0580627 | 0.999791 |
| XLOC_004870 | XLOC_004870 | C12orf10     | chr12:53693469-53700965   | 0.058069  | 0.999791 |
| XLOC_007496 | XLOC_007496 | AQR          | chr15:35148551-35261995   | 0.0580856 | 0.999791 |
| XLOC_003495 | XLOC_003495 | CLP1         | chr11:57425215-57429337   | 0.0581147 | 0.999791 |
| XLOC_004769 | XLOC_004769 | GOLT1B       | chr12:21654698-21671337   | 0.0581456 | 0.999791 |
| XLOC_017539 | XLOC_017539 | TRIM41       | chr5:180650262-180662808  | 0.0581515 | 0.999791 |
| XLOC_018054 | XLOC_018054 | SMIM13       | chr6:11094265-11138969    | 0.0581643 | 0.999791 |
| XLOC_006047 | XLOC_006047 | CDX2         | chr13:28536204-28543505   | 0.0582017 | 0.999791 |
| XLOC_003091 | XLOC_003091 | CHUK         | chr10:101948123-101989344 | 0.0582158 | 0.999791 |
| XLOC_014779 | XLOC_014779 | PRR14L       | chr22:32077333-32146120   | 0.0582677 | 0.999791 |
| XLOC_024190 | XLOC_024190 | FLNA         | chrX:153576899-153603006  | 0.0583113 | 0.999791 |
| XLOC_011411 | XLOC_011411 | EIF3G        | chr19:10216898-10230599   | 0.0583439 | 0.999791 |
| XLOC_008042 | XLOC_008042 | TAKO2        | chr16:29985187-30003582   | 0.0583605 | 0.999791 |
| XLOC_010473 | XLOC_010473 | ZNF555       | chr19:2841432-2860472     | 0.0583829 | 0.999791 |
| XLOC_011321 | XLOC_011321 | ZBTB7A       | chr19:4045215-4066816     | 0.0584015 | 0.999791 |
| XLOC_002113 | XLOC_002113 | PTPN7        | chr1:202116140-202130716  | 0.0584223 | 0.999791 |
| XLOC_000402 | XLOC_000402 | LOC100507564 | chr1:53692563-53793821    | 0.0584434 | 1        |
| XLOC_010245 | XLOC_010245 | TIMM21       | chr18:71815745-71826204   | 0.0584521 | 0.999791 |
| XLOC_011244 | XLOC_011244 | ZSCAN22      | chr19:58838384-58853712   | 0.0584588 | 0.999791 |
| XLOC_006366 | XLOC_006366 | KTN1         | chr14:56046924-56151302   | 0.0585126 | 0.999791 |
| XLOC_012904 | XLOC_012904 | CALM2        | chr2:47387220-47403740    | 0.0585175 | 0.999791 |
| XLOC_020471 | XLOC_020471 | ZMIZ2        | chr7:44788529-44809479    | 0.0585205 | 0.999791 |
| XLOC_006028 | XLOC_006028 | EFHA1        | chr13:22066827-22178355   | 0.0585561 | 0.999791 |
| XLOC_023850 | XLOC_023850 | TFE3         | chrX:48886241-48900990    | 0.0586057 | 0.999791 |
| XLOC_012012 | XLOC_012012 | ZBTB45       | chr19:59024896-59030921   | 0.0586347 | 0.999791 |
| XLOC_023762 | XLOC_023762 | GEMIN8       | chrX:14024844-14048035    | 0.0586439 | 0.999791 |
| XLOC_014941 | XLOC_014941 | FANCD2       | chr3:10068112-10149915    | 0.0586501 | 0.999791 |
| XLOC_021388 | XLOC_021388 | ZNF767       | chr7:149244244-149321881  | 0.0588222 | 0.999791 |
| XLOC_004305 | XLOC_004305 | SF1          | chr1:164532075-64546316   | 0.0588733 | 0.999791 |
| XLOC_023534 | XLOC_023534 | TCEAL4       | chrX:102840418-102842655  | 0.0589185 | 0.999791 |
| XLOC_008644 | XLOC_008644 | TERF2        | chr16:69389463-69419891   | 0.0589572 | 0.999791 |
| XLOC_002731 | XLOC_002731 | TACC2        | chr10:123748688-124014057 | 0.0589723 | 0.999791 |
| XLOC_022220 | XLOC_022220 | EEF1D        | chr8:144661866-144679845  | 0.0589894 | 0.999791 |
| XLOC_013073 | XLOC_013073 | TBC1D8       | chr2:101618690-101767846  | 0.0590165 | 0.999791 |
| XLOC_003149 | XLOC_003149 | HSPA12A      | chr10:118430702-118502085 | 0.0590281 | 0.999791 |
| XLOC_005415 | XLOC_005415 | KANSL2       | chr12:49046994-49076035   | 0.0590497 | 0.999791 |
| XLOC_024073 | XLOC_024073 | ENOX2        | chrX:129757356-130037208  | 0.0590669 | 0.999791 |
| XLOC_018244 | XLOC_018244 | SYNGAP1      | chr6:33387846-33421466    | 0.0591733 | 0.999791 |
| XLOC_010773 | XLOC_010773 | GRAMD1A      | chr19:35491245-35517373   | 0.0591933 | 0.999791 |
| XLOC_023078 | XLOC_023078 | RPL12        | chr9:130209952-130213711  | 0.0592311 | 0.999791 |
| XLOC_017326 | XLOC_017326 | CAMLG        | chr5:134074169-134087850  | 0.0592667 | 0.999791 |
| XLOC_005870 | XLOC_005870 | DGKH         | chr13:42614171-42803891   | 0.0592845 | 1        |
| XLOC_019013 | XLOC_019013 | ASCC3        | chr6:100956607-101329224  | 0.0592877 | 0.999791 |
| XLOC_023595 | XLOC_023595 | ZBTB33       | chrX:119384606-119392251  | 0.0594109 | 0.999791 |
| XLOC_021815 | XLOC_021815 | ERIC1H       | chr8:614199-681226        | 0.0594165 | 0.999791 |
| XLOC_004565 | XLOC_004565 | BCL9L        | chr11:118754474-118781613 | 0.0594396 | 0.999791 |
| XLOC_006372 | XLOC_006372 | NAA30        | chr14:57857270-57879466   | 0.0594738 | 0.999791 |
| XLOC_003234 | XLOC_003234 | PNPLA2       | chr11:818900-825571       | 0.0594911 | 0.999791 |
| XLOC_010290 | XLOC_010290 | AFG3L2       | chr18:12328942-12377275   | 0.0594977 | 0.999791 |
| XLOC_003135 | XLOC_003135 | LOC282997    | chr10:112628647-112630662 | 0.0595392 | 0.999791 |
| XLOC_000016 | XLOC_000016 | B3GALT6      | chr1:1167628-1170420      | 0.059573  | 0.999791 |
| XLOC_008650 | XLOC_008650 | EXOSC6       | chr16:70284133-70285833   | 0.0595996 | 0.999791 |
| XLOC_012686 | XLOC_012686 | FBXO36       | chr2:230787206-230877825  | 0.0596037 | 0.999791 |
| XLOC_013823 | XLOC_013823 | IDH3B        | chr20:2639040-2644865     | 0.059628  | 0.999791 |
| XLOC_017735 | XLOC_017735 | CETN3        | chr5:89689528-89705603    | 0.0596719 | 0.999791 |
| XLOC_003800 | XLOC_003800 | ACAT1        | chr11:107992257-108018891 | 0.0596868 | 0.999791 |
| XLOC_009229 | XLOC_009229 | PSMC5        | chr17:61896792-61909387   | 0.0596933 | 0.999791 |
| XLOC_017462 | XLOC_017462 | HMMR         | chr5:162887516-162918953  | 0.0597006 | 0.999791 |
| XLOC_017155 | XLOC_017155 | TRAPPC13     | chr5:64920557-65017941    | 0.0597505 | 0.999791 |
| XLOC_005424 | XLOC_005424 | FKBP11       | chr12:49315741-49319330   | 0.0597636 | 0.999791 |
| XLOC_012901 | XLOC_012901 | PIGF         | chr2:46769866-46844251    | 0.0597692 | 0.999791 |
| XLOC_005489 | XLOC_005489 | MAP3K12      | chr12:53845885-53893444   | 0.0598185 | 0.999791 |
| XLOC_011613 | XLOC_011613 | SYNE4        | chr19:36494001-36499672   | 0.0598207 | 1        |
| XLOC_013147 | XLOC_013147 | SMPD4        | chr2:130908964-130948300  | 0.0598455 | 0.999791 |
| XLOC_008224 | XLOC_008224 | DHODH        | chr16:72042642-72059316   | 0.0599349 | 0.999791 |
| XLOC_022085 | XLOC_022085 | LOC100127983 | chr8:91803920-91997485    | 0.0599412 | 1        |
| XLOC_013384 | XLOC_013384 | OBSL1        | chr2:220415449-220436268  | 0.0599995 | 0.999791 |
| XLOC_001555 | XLOC_001555 | LRP8         | chr1:53692563-53793821    | 0.0600004 | 0.999791 |
| XLOC_023301 | XLOC_023301 | ZFX          | chrX:24164341-24234372    | 0.0600409 | 0.999791 |
| XLOC_015014 | XLOC_015014 | ITGA9        | chr3:37493812-37861281    | 0.0600619 | 1        |
| XLOC_001462 | XLOC_001462 | YRDC         | chr1:38268613-38275126    | 0.0601944 | 0.999791 |
| XLOC_017817 | XLOC_017817 | H2AFY        | chr5:134670070-134735577  | 0.0602223 | 0.999791 |
| XLOC_017874 | XLOC_017874 | YIPF5        | chr5:143537722-143550278  | 0.0602375 | 0.999791 |
| XLOC_020892 | XLOC_020892 | PRKAR1B      | chr7:588833-826116        | 0.0602974 | 0.999791 |



|             |             |              |                           |           |          |
|-------------|-------------|--------------|---------------------------|-----------|----------|
| XLOC_011313 | XLOC_011313 | APBA3        | chr19:3708334-3761673     | 0.0603319 | 0.999791 |
| XLOC_009148 | XLOC_009148 | ATP5G1       | chr17:46970147-46973232   | 0.0603375 | 0.999791 |
| XLOC_001266 | XLOC_001266 | FBXO2        | chr1:11708417-11723384    | 0.0604653 | 0.999791 |
| XLOC_008138 | XLOC_008138 | ARL2BP       | chr16:57279037-57287545   | 0.0604813 | 0.999791 |
| XLOC_013221 | XLOC_013221 | SPC25        | chr2:169727400-169746944  | 0.0604835 | 0.999791 |
| XLOC_001446 | XLOC_001446 | TRAPPC3      | chr1:36602169-36621654    | 0.0604981 | 0.999791 |
| XLOC_022349 | XLOC_022349 | LOC100506710 | chr9:37079892-37090398    | 0.0605037 | 0.999791 |
| XLOC_015321 | XLOC_015321 | RAB7A        | chr3:128444978-128533641  | 0.0605437 | 0.999791 |
| XLOC_016247 | XLOC_016247 | CC2D2A       | chr4:15471488-15603180    | 0.0605481 | 0.999791 |
| XLOC_010057 | XLOC_010057 | CSNK1D       | chr17:80200536-80231594   | 0.0605489 | 0.999791 |
| XLOC_018884 | XLOC_018884 | DNPH1        | chr6:43193366-43197211    | 0.0607196 | 0.999791 |
| XLOC_004986 | XLOC_004986 | RAB31P       | chr12:70132630-70216984   | 0.0607261 | 0.999791 |
| XLOC_013125 | XLOC_013125 | TMEM185B     | chr2:120975046-120980984  | 0.0607465 | 0.999791 |
| XLOC_006389 | XLOC_006389 | HIF1A        | chr14:62162118-62215807   | 0.0607539 | 0.999791 |
| XLOC_009079 | XLOC_009079 | WNK4         | chr17:40932648-40949084   | 0.0607613 | 0.999791 |
| XLOC_002265 | XLOC_002265 | HEATR1       | chr1:236681513-236767841  | 0.0607724 | 0.999791 |
| XLOC_000737 | XLOC_000737 | UBAP2L       | chr1:154179182-154243329  | 0.0607746 | 0.999791 |
| XLOC_002490 | XLOC_002490 | DDX21        | chr10:70715878-70744825   | 0.0608037 | 0.999791 |
| XLOC_014897 | XLOC_014897 | BRD1         | chr22:50166936-50218452   | 0.0608345 | 0.999791 |
| XLOC_022882 | XLOC_022882 | FAM108B1     | chr9:74477367-74526148    | 0.0608497 | 0.999791 |
| XLOC_009078 | XLOC_009078 | VPS25        | chr17:40925453-40931617   | 0.0609262 | 0.999791 |
| XLOC_014518 | XLOC_014518 | YWHAH        | chr22:32329506-32353950   | 0.0609365 | 0.999791 |
| XLOC_000024 | XLOC_000024 | ATAD3C       | chr1:1385068-1405538      | 0.0609402 | 1        |
| XLOC_024182 | XLOC_024182 | NAA10        | chrX:153195279-153200607  | 0.0609556 | 0.999791 |
| XLOC_000145 | XLOC_000145 | MRT04        | chr1:19578074-19586622    | 0.0609746 | 0.999791 |
| XLOC_017336 | XLOC_017336 | SMAD5        | chr5:135465202-135518422  | 0.0609777 | 0.999791 |
| XLOC_012729 | XLOC_012729 | LRRFIP1      | chr2:238536223-238690290  | 0.0611792 | 0.999791 |
| XLOC_001393 | XLOC_001393 | DNAJC8       | chr1:28526789-28559542    | 0.0611873 | 0.999791 |
| XLOC_007704 | XLOC_007704 | FBXO22-AS1   | chr15:76196199-76227608   | 0.0611959 | 0.999791 |
| XLOC_023342 | XLOC_023342 | KRBOX4       | chrX:46306623-46334074    | 0.0611998 | 0.999791 |
| XLOC_023058 | XLOC_023058 | PDCL         | chr9:125580375-125590935  | 0.061237  | 0.999791 |
| XLOC_016498 | XLOC_016498 | INTU         | chr4:128554086-128637934  | 0.0612789 | 0.999791 |
| XLOC_004512 | XLOC_004512 | SLC35F2      | chr11:107661716-107729914 | 0.0612988 | 0.999791 |
| XLOC_022044 | XLOC_022044 | RPL7         | chr8:74202873-74205869    | 0.0613817 | 0.999791 |
| XLOC_009526 | XLOC_009526 | PLD6         | chr17:17104308-17109646   | 0.0613901 | 0.999791 |
| XLOC_012245 | XLOC_012245 | STAMBP       | chr2:74056042-74094295    | 0.0614344 | 0.999791 |
| XLOC_009176 | XLOC_009176 | UTP18        | chr17:49337896-49375292   | 0.0614896 | 0.999791 |
| XLOC_009786 | XLOC_009786 | DCAKD        | chr17:43100705-43138473   | 0.0616009 | 0.999791 |
| XLOC_015897 | XLOC_015897 | POLQ         | chr3:121150272-121264853  | 0.0617089 | 0.999791 |
| XLOC_012984 | XLOC_012984 | DUSP11       | chr2:73989324-74007284    | 0.0617294 | 0.999791 |
| XLOC_000892 | XLOC_000892 | GAS5-AS1     | chr1:173832385-173837125  | 0.0617415 | 0.999791 |
| XLOC_000007 | XLOC_000007 | KLHL17       | chr1:895966-901099        | 0.0617799 | 0.999791 |
| XLOC_014771 | XLOC_014771 | MORC2        | chr22:31318294-31364187   | 0.0618225 | 0.999791 |
| XLOC_010641 | XLOC_010641 | ZNF333       | chr19:14800869-14831772   | 0.0618962 | 0.999791 |
| XLOC_013767 | XLOC_013767 | OGFR         | chr20:61436176-61445352   | 0.0619181 | 0.999791 |
| XLOC_022411 | XLOC_022411 | RM1I         | chr9:86595636-86618987    | 0.0619335 | 0.999791 |
| XLOC_015950 | XLOC_015950 | ASTE1        | chr3:130569368-130745646  | 0.0619886 | 0.999791 |
| XLOC_000248 | XLOC_000248 | KHDRBS1      | chr1:32479294-32526460    | 0.0621445 | 0.999791 |
| XLOC_017909 | XLOC_017909 | ATOX1        | chr5:151122382-151138210  | 0.0621802 | 0.999791 |
| XLOC_010330 | XLOC_010330 | ZNF24        | chr18:32912177-32924426   | 0.062195  | 0.999791 |
| XLOC_008120 | XLOC_008120 | MT1E         | chr16:56659584-56661024   | 0.0622304 | 0.999791 |
| XLOC_012814 | XLOC_012814 | ATAD2B       | chr2:23971533-24149936    | 0.0622508 | 0.999791 |
| XLOC_002189 | XLOC_002189 | BPNT1        | chr1:220046618-220321383  | 0.0622581 | 0.999791 |
| XLOC_004130 | XLOC_004130 | IMMP1L       | chr11:31391376-31531169   | 0.0623131 | 0.999791 |
| XLOC_007635 | XLOC_007635 | CLPX         | chr15:65442783-65477563   | 0.062335  | 0.999791 |
| XLOC_011439 | XLOC_011439 | ELOF1        | chr19:11663857-11670051   | 0.0623364 | 0.999791 |
| XLOC_011576 | XLOC_011576 | ZNF681       | chr19:23921996-23941693   | 0.0623941 | 0.999791 |
| XLOC_011035 | XLOC_011035 | PRMT1        | chr19:50180408-50191707   | 0.0624101 | 0.999791 |
| XLOC_010026 | XLOC_010026 | AZI1         | chr17:79163392-79196751   | 0.0624672 | 0.999791 |
| XLOC_018245 | XLOC_018245 | ZBTB9        | chr6:33422355-33425320    | 0.0625857 | 0.999791 |
| XLOC_002663 | XLOC_002663 | NFKB2        | chr10:104153866-104162286 | 0.0625904 | 0.999791 |
| XLOC_010700 | XLOC_010700 | SSBP4        | chr19:18530145-18549111   | 0.0626605 | 0.999791 |
| XLOC_017642 | XLOC_017642 | PAIP1        | chr5:43526369-43557521    | 0.0626778 | 0.999791 |
| XLOC_005533 | XLOC_005533 | NACA         | chr12:57106210-57119326   | 0.0627302 | 0.999791 |
| XLOC_019078 | XLOC_019078 | MED23        | chr6:131894343-131949379  | 0.0627678 | 0.999791 |
| XLOC_021717 | XLOC_021717 | EBAG9        | chr8:110551928-110577391  | 0.0627845 | 0.999791 |
| XLOC_021679 | XLOC_021679 | INTS8        | chr8:95835517-95907482    | 0.0627982 | 0.999791 |
| XLOC_014044 | XLOC_014044 | MTRNR2L3     | chr20:55904830-55998278   | 0.0628005 | 1        |
| XLOC_023107 | XLOC_023107 | DOLK         | chr9:131707808-131769375  | 0.0628141 | 0.999791 |
| XLOC_023928 | XLOC_023928 | ERCC6L       | chrX:71401525-71483814    | 0.0628641 | 0.999791 |
| XLOC_017435 | XLOC_017435 | MFAP3        | chr5:153418518-153437014  | 0.0629359 | 0.999791 |
| XLOC_003380 | XLOC_003380 | ARL14EP      | chr11:30344648-30359165   | 0.0629403 | 0.999791 |
| XLOC_004307 | XLOC_004307 | MEN1         | chr11:64570985-64578766   | 0.0629579 | 0.999791 |
| XLOC_007677 | XLOC_007677 | NPTN         | chr15:73735498-73925753   | 0.0629632 | 0.999791 |
| XLOC_023351 | XLOC_023351 | USP11        | chrX:47092313-47107727    | 0.0629658 | 0.999791 |
| XLOC_012933 | XLOC_012933 | FAM161A      | chr2:62051982-62081278    | 0.0629775 | 0.999791 |
| XLOC_004662 | XLOC_004662 | DYRK4        | chr12:4699243-4723041     | 0.0629949 | 0.999791 |
| XLOC_022161 | XLOC_022161 | ATAD2        | chr8:124332090-124408705  | 0.0630022 | 0.999791 |
| XLOC_007333 | XLOC_007333 | PSMA4        | chr15:78832746-78841563   | 0.0630053 | 0.999791 |

|             |             |                     |                           |           |          |
|-------------|-------------|---------------------|---------------------------|-----------|----------|
| XLOC_015564 | XLOC_015564 | PRRT3               | chr3:9987225-9996471      | 0.0630258 | 0.999791 |
| XLOC_010143 | XLOC_010143 | MIB1                | chr18:19321544-19450912   | 0.0630372 | 0.999791 |
| XLOC_024177 | XLOC_024177 | BCAP31              | chrX:152965946-152990201  | 0.063121  | 0.999791 |
| XLOC_018445 | XLOC_018445 | AMD1                | chr6:111195986-111216913  | 0.0631415 | 0.999791 |
| XLOC_021790 | XLOC_021790 | GPA1                | chr8:145137523-145141119  | 0.0631705 | 0.999791 |
| XLOC_017711 | XLOC_017711 | ARSB                | chr5:78073036-78282357    | 0.0631785 | 0.999791 |
| XLOC_002933 | XLOC_002933 | PARG                | chr10:51026324-51371331   | 0.0633341 | 0.999791 |
| XLOC_014813 | XLOC_014813 | ANKRD54             | chr22:38226861-38240378   | 0.0633718 | 0.999791 |
| XLOC_010036 | XLOC_010036 | NPLOC4              | chr17:79523912-79604138   | 0.0633826 | 0.999791 |
| XLOC_008428 | XLOC_008428 | CPPED1              | chr16:12753655-12897744   | 0.063428  | 0.999791 |
| XLOC_017633 | XLOC_017633 | OXCT1               | chr5:41730166-41870791    | 0.0634339 | 0.999791 |
| XLOC_023202 | XLOC_023202 | WDR85               | chr9:140449360-140473387  | 0.0634529 | 0.999791 |
| XLOC_016457 | XLOC_016457 | CYP2U1              | chr4:108852716-108874613  | 0.0634648 | 0.999791 |
| XLOC_004349 | XLOC_004349 | SPTBN2              | chr11:66452719-66488870   | 0.0634976 | 0.999791 |
| XLOC_004380 | XLOC_004380 | SHANK2              | chr11:70313960-70935808   | 0.0635342 | 0.999791 |
| XLOC_013887 | XLOC_013887 | NAPB                | chr20:23355155-23402156   | 0.0636143 | 0.999791 |
| XLOC_013168 | XLOC_013168 | MCM6                | chr2:136597195-136634047  | 0.0636507 | 0.999791 |
| XLOC_017359 | XLOC_017359 | TMCO6               | chr5:140019011-140027370  | 0.0637275 | 0.999791 |
| XLOC_002680 | XLOC_002680 | SLK                 | chr10:105727469-105787342 | 0.0637506 | 0.999791 |
| XLOC_008513 | XLOC_008513 | LOC440354,LOC595101 | chr16:30278913-30346695   | 0.063826  | 0.999791 |
| XLOC_018036 | XLOC_018036 | FARS2               | chr6:5261583-5771816      | 0.0638746 | 0.999791 |
| XLOC_010324 | XLOC_010324 | TRAPPC8             | chr18:29409135-29523091   | 0.0639232 | 0.999791 |
| XLOC_003069 | XLOC_003069 | TM9SF3              | chr10:98277866-98346809   | 0.0639449 | 0.999791 |
| XLOC_002208 | XLOC_002208 | LBR                 | chr1:225589203-225616557  | 0.0639508 | 0.999791 |
| XLOC_004323 | XLOC_004323 | LTBP3               | chr11:65292547-65325699   | 0.0639568 | 0.999791 |
| XLOC_010335 | XLOC_010335 | SLC39A6             | chr18:33688493-33709357   | 0.0639833 | 0.999791 |
| XLOC_018255 | XLOC_018255 | DEF6                | chr6:35265594-35289548    | 0.0640554 | 0.999791 |
| XLOC_009367 | XLOC_009367 | GLOD4               | chr17:6625468-695741      | 0.0640863 | 0.999791 |
| XLOC_010052 | XLOC_010052 | DCXR                | chr17:79993756-79995573   | 0.0640927 | 0.999791 |
| XLOC_001895 | XLOC_001895 | GON4L               | chr1:155715558-155826972  | 0.0641426 | 0.999791 |
| XLOC_021756 | XLOC_021756 | PHF20L1             | chr8:133787603-133861052  | 0.0642008 | 0.999791 |
| XLOC_005205 | XLOC_005205 | PGAM5               | chr12:133287392-133299323 | 0.0642217 | 0.999791 |
| XLOC_006492 | XLOC_006492 | CP5F2               | chr14:92588297-92630543   | 0.064395  | 0.999791 |
| XLOC_002202 | XLOC_002202 | CAPN8               | chr1:223714971-223853436  | 0.0643966 | 1        |
| XLOC_017679 | XLOC_017679 | SGTB                | chr5:64920557-65017941    | 0.0644207 | 0.999791 |
| XLOC_007319 | XLOC_007319 | FBXO22              | chr15:76196199-76227608   | 0.0644695 | 0.999791 |
| XLOC_009833 | XLOC_009833 | PHB                 | chr17:47481419-47492242   | 0.0645155 | 0.999791 |
| XLOC_023133 | XLOC_023133 | SURF6               | chr9:136197551-136203047  | 0.0645248 | 0.999791 |
| XLOC_021684 | XLOC_021684 | PTDSS1              | chr8:97274166-97346774    | 0.0645381 | 0.999791 |
| XLOC_016435 | XLOC_016435 | PDLIM5              | chr4:95373007-95589378    | 0.0645477 | 0.999791 |
| XLOC_010920 | XLOC_010920 | ZNF233              | chr19:44764032-44779470   | 0.0645889 | 0.999791 |
| XLOC_016493 | XLOC_016493 | SPATA5              | chr4:123844224-124240604  | 0.0646204 | 0.999791 |
| XLOC_018779 | XLOC_018779 | NELFE               | chr6:31919863-31937532    | 0.0646411 | 0.999791 |
| XLOC_007264 | XLOC_007264 | IQCH                | chr15:67493012-67819641   | 0.0646719 | 0.999791 |
| XLOC_008854 | XLOC_008854 | ADPRM               | chr17:10600926-10614875   | 0.0647037 | 0.999791 |
| XLOC_010917 | XLOC_010917 | ZNF234              | chr19:44645709-44664462   | 0.0647084 | 0.999791 |
| XLOC_012971 | XLOC_012971 | TEX261              | chr2:71213067-71222001    | 0.0647161 | 0.999791 |
| XLOC_006482 | XLOC_006482 | TTC8                | chr14:89290977-89344335   | 0.0647604 | 0.999791 |
| XLOC_020638 | XLOC_020638 | ZSCAN21             | chr7:99647416-99679371    | 0.0647753 | 0.999791 |
| XLOC_003113 | XLOC_003113 | CUEDC2              | chr10:104183001-104192423 | 0.0648018 | 0.999791 |
| XLOC_022012 | XLOC_022012 | TTPA                | chr8:63972047-63998612    | 0.0648225 | 1        |
| XLOC_023348 | XLOC_023348 | RBM10               | chrX:47004616-47046214    | 0.0648628 | 0.999791 |
| XLOC_006449 | XLOC_006449 | YLPM1               | chr14:75230068-75304013   | 0.06491   | 0.999791 |
| XLOC_003673 | XLOC_003673 | GAL                 | chr11:68451982-68458643   | 0.064916  | 0.999791 |
| XLOC_017810 | XLOC_017810 | SKP1                | chr5:133492081-133512724  | 0.0649412 | 0.999791 |
| XLOC_000994 | XLOC_000994 | SOX13               | chr1:204042245-204096871  | 0.0650156 | 0.999791 |
| XLOC_021497 | XLOC_021497 | FAM160B2            | chr8:21946713-21961891    | 0.0650206 | 0.999791 |
| XLOC_017415 | XLOC_017415 | GRPEL2              | chr5:148724976-148734146  | 0.0650366 | 0.999791 |
| XLOC_017290 | XLOC_017290 | CSNK1G3             | chr5:122847792-122952738  | 0.0650805 | 0.999791 |
| XLOC_004266 | XLOC_004266 | INTS5               | chr11:62414319-62420774   | 0.0651431 | 0.999791 |
| XLOC_002634 | XLOC_002634 | CNNM1               | chr10:101088855-101154087 | 0.0651519 | 1        |
| XLOC_000232 | XLOC_000232 | RCC1                | chr1:28832454-28865708    | 0.0651675 | 0.999791 |
| XLOC_001344 | XLOC_001344 | LUZP1               | chr1:23410515-23495351    | 0.0651703 | 0.999791 |
| XLOC_021109 | XLOC_021109 | ABHD11              | chr7:73150424-73153190    | 0.0651924 | 0.999791 |
| XLOC_010676 | XLOC_010676 | DDA1                | chr19:17420336-17445638   | 0.0652006 | 0.999791 |
| XLOC_002217 | XLOC_002217 | PARP1               | chr1:226548391-226595801  | 0.0652477 | 0.999791 |
| XLOC_014701 | XLOC_014701 | YDJC                | chr22:21982377-21984340   | 0.0653023 | 0.999791 |
| XLOC_009754 | XLOC_009754 | BECN1               | chr17:40950853-40976310   | 0.0653286 | 0.999791 |
| XLOC_004890 | XLOC_004890 | COPZ1               | chr12:54718873-54745635   | 0.0653321 | 0.999791 |
| XLOC_021272 | XLOC_021272 | LOC401397           | chr7:112756772-112758637  | 0.0653425 | 0.999791 |
| XLOC_003156 | XLOC_003156 | FAM204A             | chr10:120068571-120101839 | 0.0654377 | 0.999791 |
| XLOC_017482 | XLOC_017482 | NEURL1B             | chr5:172068275-172118533  | 0.0654767 | 0.999791 |
| XLOC_018131 | XLOC_018131 | HIST1H4J            | chr6:27791902-27792258    | 0.0654886 | 0.999791 |
| XLOC_002882 | XLOC_002882 | CUL2                | chr10:35297478-35379570   | 0.0655379 | 0.999791 |
| XLOC_004785 | XLOC_004785 | MRPS35              | chr12:27863705-27909237   | 0.065542  | 0.999791 |
| XLOC_007133 | XLOC_007133 | SPRED1              | chr15:38545051-38649450   | 0.0655453 | 0.999791 |
| XLOC_024098 | XLOC_024098 | MOSPD1              | chrX:134021661-134049297  | 0.065606  | 0.999791 |
| XLOC_018890 | XLOC_018890 | XPO5                | chr6:43490067-43543812    | 0.0656296 | 0.999791 |
| XLOC_000009 | XLOC_000009 | ISG15               | chr1:948846-949919        | 0.0656987 | 0.999791 |

|             |             |           |                           |           |          |
|-------------|-------------|-----------|---------------------------|-----------|----------|
| XLOC_013315 | XLOC_013315 | SUMO1     | chr2:203070902-203103322  | 0.0657086 | 0.999791 |
| XLOC_005484 | XLOC_005484 | CSAD      | chr12:53551446-53584654   | 0.0657387 | 0.999791 |
| XLOC_016995 | XLOC_016995 | SH3RF1    | chr4:170015406-170192249  | 0.0657406 | 0.999791 |
| XLOC_006803 | XLOC_006803 | MAP4K5    | chr14:50885210-50999376   | 0.0657493 | 0.999791 |
| XLOC_021957 | XLOC_021957 | RAB11FIP1 | chr8:37716464-37757015    | 0.0658421 | 0.999791 |
| XLOC_002181 | XLOC_002181 | PTPN14    | chr1:214522038-214725024  | 0.0658428 | 0.999791 |
| XLOC_000575 | XLOC_000575 | AHCYL1    | chr1:110527386-110566364  | 0.0659923 | 0.999791 |
| XLOC_014584 | XLOC_014584 | EP300     | chr22:41488613-41576081   | 0.0660332 | 0.999791 |
| XLOC_004764 | XLOC_004764 | SLCO1B3   | chr12:20963637-21069843   | 0.0660539 | 0.999791 |
| XLOC_001542 | XLOC_001542 | TTC39A    | chr1:51752929-51810785    | 0.0660958 | 0.999791 |
| XLOC_009589 | XLOC_009589 | NUFIP2    | chr17:27582853-27621166   | 0.0661193 | 0.999791 |
| XLOC_005750 | XLOC_005750 | ANAPC5    | chr12:121746047-121792012 | 0.0661764 | 0.999791 |
| XLOC_012737 | XLOC_012737 | ASB1      | chr2:239335625-239360891  | 0.0661913 | 0.999791 |
| XLOC_005045 | XLOC_005045 | SNORA53   | chr12:98987402-98995778   | 0.0662012 | 0.999791 |
| XLOC_002991 | XLOC_002991 | ECD       | chr10:74894281-74927853   | 0.0662144 | 0.999791 |
| XLOC_001197 | XLOC_001197 | ACAP3     | chr1:1227763-1243269      | 0.0662175 | 0.999791 |
| XLOC_015919 | XLOC_015919 | SNX4      | chr3:125165487-125239058  | 0.0662224 | 0.999791 |
| XLOC_011030 | XLOC_011030 | RCN3      | chr19:50030874-50046890   | 0.0662467 | 0.999791 |
| XLOC_005430 | XLOC_005430 | RHEBL1    | chr12:49458467-49463775   | 0.0662478 | 0.999791 |
| XLOC_004303 | XLOC_004303 | RASGRP2   | chr11:64494382-64512928   | 0.0663091 | 0.999791 |
| XLOC_023184 | XLOC_023184 | NPDC1     | chr9:139933908-139940676  | 0.0663095 | 0.999791 |
| XLOC_014672 | XLOC_014672 | DGCR14    | chr22:19117791-19132190   | 0.0663184 | 0.999791 |
| XLOC_006898 | XLOC_006898 | MLH3      | chr14:75480466-75518235   | 0.0663392 | 0.999791 |
| XLOC_013822 | XLOC_013822 | ZNF343    | chr20:2462466-2489778     | 0.0663404 | 0.999791 |
| XLOC_017156 | XLOC_017156 | NLN       | chr5:65018022-65125111    | 0.0663651 | 0.999791 |
| XLOC_017656 | XLOC_017656 | MCIN      | chr5:54515424-54523143    | 0.0664022 | 0.999791 |
| XLOC_020375 | XLOC_020375 | TMEM106B  | chr7:12250847-12276890    | 0.0664259 | 0.999791 |
| XLOC_010723 | XLOC_010723 | ZNF85     | chr19:21106058-21133503   | 0.0664722 | 0.999791 |
| XLOC_012976 | XLOC_012976 | SFXN5     | chr2:73169164-73298965    | 0.0664792 | 0.999791 |
| XLOC_016917 | XLOC_016917 | ANXA5     | chr4:122589151-122618147  | 0.0664833 | 0.999791 |
| XLOC_010811 | XLOC_010811 | ZNF146    | chr19:36673186-36729675   | 0.0664859 | 0.999791 |
| XLOC_017212 | XLOC_017212 | THBS4     | chr5:79331169-79379107    | 0.0665063 | 1        |
| XLOC_013312 | XLOC_013312 | TMEM237   | chr2:202484906-202508252  | 0.0665375 | 0.999791 |
| XLOC_012434 | XLOC_012434 | PLEKHB2   | chr2:131862419-131907425  | 0.0665656 | 0.999791 |
| XLOC_000868 | XLOC_000868 | BLZF1     | chr1:169337193-169396670  | 0.0665899 | 0.999791 |
| XLOC_023501 | XLOC_023501 | ZNF711    | chrX:84498996-84528368    | 0.0666078 | 0.999791 |
| XLOC_017935 | XLOC_017935 | SLU7      | chr5:159828647-159846168  | 0.0666665 | 0.999791 |
| XLOC_002488 | XLOC_002488 | STOX1     | chr10:70587293-70655209   | 0.0666785 | 0.999791 |
| XLOC_002891 | XLOC_002891 | ZNF33B    | chr10:43084554-43133992   | 0.0667157 | 0.999791 |
| XLOC_023479 | XLOC_023479 | TSIX      | chrX:73012039-73072588    | 0.0667896 | 1        |
| XLOC_006915 | XLOC_006915 | ALKBH1    | chr14:78138748-78174356   | 0.0668321 | 0.999791 |
| XLOC_015967 | XLOC_015967 | DZIP1L    | chr3:137780826-137834451  | 0.0668376 | 0.999791 |
| XLOC_014298 | XLOC_014298 | C21orf59  | chr21:33973983-33984918   | 0.0668552 | 0.999791 |
| XLOC_017626 | XLOC_017626 | PRKAA1    | chr5:40759480-40798297    | 0.0668991 | 0.999791 |
| XLOC_023003 | XLOC_023003 | TXN       | chr9:113006091-113018920  | 0.0669098 | 0.999791 |
| XLOC_015223 | XLOC_015223 | TBC1D23   | chr3:99979660-100044096   | 0.0669101 | 0.999791 |
| XLOC_005537 | XLOC_005537 | ZBTB39    | chr12:57392616-574400297  | 0.0669371 | 0.999791 |
| XLOC_008427 | XLOC_008427 | GSPT1     | chr16:11961984-12010519   | 0.0669622 | 0.999791 |
| XLOC_022838 | XLOC_022838 | EXOSC3    | chr9:37779710-37785089    | 0.0669683 | 0.999791 |
| XLOC_005552 | XLOC_005552 | METT1L    | chr12:58162350-58165914   | 0.0669981 | 0.999791 |
| XLOC_010601 | XLOC_010601 | ZNF491    | chr19:11909390-11919306   | 0.0670209 | 1        |
| XLOC_008442 | XLOC_008442 | NOMO2     | chr16:18511181-18573434   | 0.0670366 | 0.999791 |
| XLOC_008223 | XLOC_008223 | IST1      | chr16:71928310-72033877   | 0.0670601 | 0.999791 |
| XLOC_016791 | XLOC_016791 | CXCL3     | chr4:74902311-74904490    | 0.0671623 | 1        |
| XLOC_009277 | XLOC_009277 | SLC16A5   | chr17:73083821-73102255   | 0.0671873 | 0.999791 |
| XLOC_011731 | XLOC_011731 | PLAUR     | chr19:44150246-44174498   | 0.0672331 | 0.999791 |
| XLOC_020995 | XLOC_020995 | LOC401320 | chr7:30587972-30617395    | 0.0672579 | 0.999791 |
| XLOC_023125 | XLOC_023125 | TTF1      | chr9:135250936-135282238  | 0.0673085 | 0.999791 |
| XLOC_009300 | XLOC_009300 | SNHG16    | chr17:74553845-74561430   | 0.0673417 | 0.999791 |
| XLOC_002748 | XLOC_002748 | FAM175B   | chr10:126490353-126525239 | 0.0673679 | 0.999791 |
| XLOC_018535 | XLOC_018535 | LTV1      | chr6:144164507-144184943  | 0.0673869 | 0.999791 |
| XLOC_006342 | XLOC_006342 | MGAT2     | chr14:50087488-50090199   | 0.0674449 | 0.999791 |
| XLOC_015025 | XLOC_015025 | EXOG      | chr3:38537762-38567796    | 0.0674579 | 0.999791 |
| XLOC_017413 | XLOC_017413 | ABLIM3    | chr5:148521053-148639999  | 0.0675207 | 1        |
| XLOC_017298 | XLOC_017298 | SLC12A2   | chr5:127419482-127525380  | 0.0675857 | 0.999791 |
| XLOC_021088 | XLOC_021088 | LOC493754 | chr7:66018552-66043498    | 0.0676393 | 0.999791 |
| XLOC_003647 | XLOC_003647 | CCS       | chr11:66360689-66373490   | 0.0676583 | 0.999791 |
| XLOC_023723 | XLOC_023723 | BRCC3     | chrX:154299694-154351349  | 0.0676593 | 0.999791 |
| XLOC_015340 | XLOC_015340 | NUDT16    | chr3:131100514-131107674  | 0.0677499 | 0.999791 |
| XLOC_000337 | XLOC_000337 | KDM4A     | chr1:44115796-44173012    | 0.0678153 | 0.999791 |
| XLOC_020849 | XLOC_020849 | REPIN1    | chr7:150065878-150071133  | 0.0678314 | 0.999791 |
| XLOC_001748 | XLOC_001748 | ZNF697    | chr1:120161999-120190390  | 0.0678647 | 0.999791 |
| XLOC_011964 | XLOC_011964 | HSPBP1    | chr19:55773590-55791751   | 0.0679489 | 0.999791 |
| XLOC_010122 | XLOC_010122 | CHMP1B    | chr18:11689013-11908796   | 0.0680273 | 0.999791 |
| XLOC_014488 | XLOC_014488 | HSCB      | chr22:29138042-29153496   | 0.068057  | 0.999791 |
| XLOC_017528 | XLOC_017528 | RUFY1     | chr5:178977561-179037027  | 0.068149  | 0.999791 |
| XLOC_018015 | XLOC_018015 | GNB2L1    | chr5:180663927-180670906  | 0.0682151 | 0.999791 |
| XLOC_007156 | XLOC_007156 | CHAC1     | chr15:41245635-41248717   | 0.0682512 | 0.999791 |
| XLOC_012917 | XLOC_012917 | CCDC88A   | chr2:55514977-55647057    | 0.0682872 | 0.999791 |

|             |             |               |                           |           |          |
|-------------|-------------|---------------|---------------------------|-----------|----------|
| XLOC_011445 | XLOC_011445 | ZNF44         | chr19:12382624-12405714   | 0.0683003 | 0.999791 |
| XLOC_007600 | XLOC_007600 | MNS1          | chr15:56657643-56757335   | 0.06835   | 0.999791 |
| XLOC_020510 | XLOC_020510 | ZNF107        | chr7:64126510-64171401    | 0.06838   | 0.999791 |
| XLOC_012189 | XLOC_012189 | CCDC104       | chr2:55746739-55772216    | 0.0684288 | 0.999791 |
| XLOC_023461 | XLOC_023461 | NLGN3         | chrX:70364680-70391051    | 0.0684298 | 0.999791 |
| XLOC_010118 | XLOC_010118 | VAPA          | chr18:9913954-9960018     | 0.0684363 | 0.999791 |
| XLOC_008563 | XLOC_008563 | SIAH1         | chr16:48274602-48420559   | 0.0684688 | 0.999791 |
| XLOC_018533 | XLOC_018533 | PEX3          | chr6:143771917-143811751  | 0.0685029 | 0.999791 |
| XLOC_011450 | XLOC_011450 | ZNF709        | chr19:12571997-12595632   | 0.0685498 | 0.999791 |
| XLOC_020568 | XLOC_020568 | SRRM3         | chr7:75831215-75916605    | 0.0685586 | 0.999791 |
| XLOC_012539 | XLOC_012539 | PLEKHA3       | chr2:179059207-179672150  | 0.0686002 | 0.999791 |
| XLOC_016455 | XLOC_016455 | AIMP1         | chr4:106967232-107270381  | 0.0686633 | 0.999791 |
| XLOC_009977 | XLOC_009977 | TRIM47        | chr17:73870244-73874656   | 0.0686925 | 0.999791 |
| XLOC_006737 | XLOC_006737 | TGM1          | chr14:24718319-24732416   | 0.0686932 | 1        |
| XLOC_002279 | XLOC_002279 | ADSS          | chr1:244571793-244615436  | 0.0687093 | 0.999791 |
| XLOC_005557 | XLOC_005557 | LRIG3         | chr12:59265936-59314319   | 0.0687406 | 0.999791 |
| XLOC_020925 | XLOC_020925 | DAGLB         | chr7:6448746-6487643      | 0.0687687 | 0.999791 |
| XLOC_002502 | XLOC_002502 | PALD1         | chr10:72238563-72328206   | 0.0688125 | 0.999791 |
| XLOC_002961 | XLOC_002961 | DNAJC12       | chr10:69556426-69597937   | 0.068815  | 0.999791 |
| XLOC_014612 | XLOC_014612 | PARVB         | chr22:44395090-44565112   | 0.0688355 | 0.999791 |
| XLOC_023700 | XLOC_023700 | TMEM187       | chrX:153237990-153248646  | 0.0688434 | 0.999791 |
| XLOC_015576 | XLOC_015576 | TAMM41        | chr3:11831918-11883352    | 0.0688551 | 0.999791 |
| XLOC_016453 | XLOC_016453 | GSTCD         | chr4:106629940-106768882  | 0.0688642 | 0.999791 |
| XLOC_015251 | XLOC_015251 | PHLDB2,PLCXD2 | chr3:111393522-111695364  | 0.0689299 | 0.999791 |
| XLOC_011299 | XLOC_011299 | LMNB2         | chr19:2428162-2456966     | 0.0689328 | 0.999791 |
| XLOC_011578 | XLOC_011578 | LINC00662     | chr19:28281400-28284848   | 0.068942  | 0.999791 |
| XLOC_005858 | XLOC_005858 | UFM1          | chr13:38923941-38937143   | 0.0689433 | 0.999791 |
| XLOC_004273 | XLOC_004273 | NXF1          | chr11:62559597-62572964   | 0.0689916 | 0.999791 |
| XLOC_015522 | XLOC_015522 | OPA1          | chr3:193310932-193415600  | 0.0690154 | 0.999791 |
| XLOC_020870 | XLOC_020870 | GALNT11       | chr7:151722777-151819427  | 0.0690222 | 0.999791 |
| XLOC_008475 | XLOC_008475 | NDUFAB1       | chr16:23592334-23607639   | 0.0690319 | 0.999791 |
| XLOC_021943 | XLOC_021943 | TMEM66        | chr8:29920257-30108213    | 0.0690752 | 0.999791 |
| XLOC_000639 | XLOC_000639 | LIX1L         | chr1:145477084-145499091  | 0.0691124 | 0.999791 |
| XLOC_022510 | XLOC_022510 | FAM225A       | chr9:115875175-115882126  | 0.0692231 | 0.999791 |
| XLOC_016270 | XLOC_016270 | STIM2         | chr4:26862312-27027003    | 0.0692456 | 0.999791 |
| XLOC_012902 | XLOC_012902 | MCFD2         | chr2:47129008-47303275    | 0.0692501 | 0.999791 |
| XLOC_007875 | XLOC_007875 | DNASE1L2      | chr16:2286467-2288712     | 0.0692805 | 0.999791 |
| XLOC_021410 | XLOC_021410 | XRCC2         | chr7:152343586-152373250  | 0.069377  | 0.999791 |
| XLOC_002940 | XLOC_002940 | A1CF          | chr10:52559168-52645435   | 0.0694013 | 1        |
| XLOC_005629 | XLOC_005629 | SOCS2-AS1     | chr12:93959403-93970521   | 0.069414  | 0.999791 |
| XLOC_023976 | XLOC_023976 | TRMT2B        | chrX:100264333-100307105  | 0.0694167 | 0.999791 |
| XLOC_017692 | XLOC_017692 | MRPS27        | chr5:71515235-71616084    | 0.0694237 | 0.999791 |
| XLOC_006044 | XLOC_006044 | USP12         | chr13:27640286-27746033   | 0.0694268 | 0.999791 |
| XLOC_012080 | XLOC_012080 | RAB10         | chr2:26256728-26360323    | 0.0694556 | 0.999791 |
| XLOC_005895 | XLOC_005895 | PHF11         | chr13:50069800-501103117  | 0.0694737 | 0.999791 |
| XLOC_021529 | XLOC_021529 | ESCO2         | chr8:27632057-27662424    | 0.0694739 | 0.999791 |
| XLOC_012242 | XLOC_012242 | ALMS1         | chr2:73612885-73837046    | 0.0694749 | 0.999791 |
| XLOC_001887 | XLOC_001887 | GBA           | chr1:155204238-155214653  | 0.0695453 | 0.999791 |
| XLOC_017313 | XLOC_017313 | RAD50         | chr5:131892615-131980313  | 0.0695969 | 0.999791 |
| XLOC_001991 | XLOC_001991 | ALDH9A1       | chr1:165631448-165667900  | 0.069632  | 0.999791 |
| XLOC_021511 | XLOC_021511 | LOC389641     | chr8:23082733-23088439    | 0.0696944 | 0.999791 |
| XLOC_017224 | XLOC_017224 | XRCC4         | chr5:82373316-82649579    | 0.0698042 | 0.999791 |
| XLOC_022255 | XLOC_022255 | ZNF16         | chr8:146155743-146176274  | 0.0698198 | 0.999791 |
| XLOC_011261 | XLOC_011261 | C2CD4C        | chr19:405442-409170       | 0.0698291 | 0.999791 |
| XLOC_008350 | XLOC_008350 | SNORA10       | chr16:2012061-2014827     | 0.0698444 | 0.999791 |
| XLOC_012310 | XLOC_012310 | CIAO1         | chr2:96931883-96939900    | 0.0698466 | 0.999791 |
| XLOC_009460 | XLOC_009460 | NEURL4        | chr17:7218950-7232638     | 0.0698613 | 0.999791 |
| XLOC_020789 | XLOC_020789 | TMEM178B      | chr7:140774031-141180179  | 0.0699429 | 1        |
| XLOC_000534 | XLOC_000534 | RTCA          | chr1:100731713-100758325  | 0.069984  | 0.999791 |
| XLOC_008731 | XLOC_008731 | ANKRD11       | chr16:89334028-89556969   | 0.0699956 | 0.999791 |
| XLOC_000236 | XLOC_000236 | GMEB1         | chr1:28995239-29042115    | 0.0700182 | 0.999791 |
| XLOC_022153 | XLOC_022153 | DSCC1         | chr8:120846180-120868170  | 0.0700557 | 0.999791 |
| XLOC_010852 | XLOC_010852 | TIMM50        | chr19:39971051-39981528   | 0.0700761 | 0.999791 |
| XLOC_020597 | XLOC_020597 | GTPBP10       | chr7:89975978-90020769    | 0.0701248 | 0.999791 |
| XLOC_001820 | XLOC_001820 | TDRKH         | chr1:151744040-151763010  | 0.0701673 | 0.999791 |
| XLOC_003426 | XLOC_003426 | SLC35C1       | chr11:45825622-45834567   | 0.070173  | 0.999791 |
| XLOC_005670 | XLOC_005670 | CKAP4         | chr12:106631658-106641713 | 0.0702179 | 0.999791 |
| XLOC_001958 | XLOC_001958 | COPA          | chr1:160258376-160328742  | 0.0702507 | 0.999791 |
| XLOC_013195 | XLOC_013195 | BAZ2B         | chr2:160175489-160473059  | 0.0705113 | 0.999791 |
| XLOC_023772 | XLOC_023772 | CTPS2         | chrX:16606121-16731059    | 0.0705139 | 0.999791 |
| XLOC_001549 | XLOC_001549 | ZCCHC11       | chr1:52888947-53018762    | 0.0705227 | 0.999791 |
| XLOC_016409 | XLOC_016409 | MRPS18C       | chr4:84377117-84406290    | 0.0705451 | 0.999791 |
| XLOC_004643 | XLOC_004643 | WNK1          | chr12:862088-1020618      | 0.0705986 | 0.999791 |
| XLOC_005367 | XLOC_005367 | ERGIC2        | chr12:29493578-29534143   | 0.0706136 | 0.999791 |
| XLOC_004964 | XLOC_004964 | TBK1          | chr12:64845839-64895899   | 0.070641  | 0.999791 |
| XLOC_011006 | XLOC_011006 | BAX           | chr19:49458116-49465055   | 0.0706702 | 0.999791 |
| XLOC_006373 | XLOC_006373 | ACTR10        | chr14:58666832-58702353   | 0.0706717 | 0.999791 |
| XLOC_021208 | XLOC_021208 | GPC2          | chr7:99767228-99774990    | 0.0707244 | 0.999791 |
| XLOC_013314 | XLOC_013314 | ALS2          | chr2:202564985-202645895  | 0.0707878 | 0.999791 |

|             |             |           |                            |           |          |
|-------------|-------------|-----------|----------------------------|-----------|----------|
| XLOC_001859 | XLOC_001859 | S100A13   | chr1:153591275-153618782   | 0.070824  | 0.999791 |
| XLOC_020646 | XLOC_020646 | SPDYE3    | chr7:99905324-99965454     | 0.0708337 | 1        |
| XLOC_023932 | XLOC_023932 | PHKA1     | chrX:71798663-71934029     | 0.0708389 | 0.999791 |
| XLOC_006184 | XLOC_006184 | ABCC4     | chr13:95672082-95953687    | 0.0708559 | 0.999791 |
| XLOC_015244 | XLOC_015244 | DZIP3     | chr3:108268717-108413693   | 0.0709803 | 0.999791 |
| XLOC_006114 | XLOC_006114 | ESD       | chr13:47345390-47371367    | 0.0710053 | 0.999791 |
| XLOC_021224 | XLOC_021224 | VGf       | chr7:100805789-100808852   | 0.0710063 | 0.999791 |
| XLOC_005134 | XLOC_005134 | CCDC64    | chr12:120427647-120532299  | 0.0710352 | 0.999791 |
| XLOC_019031 | XLOC_019031 | MICAL1    | chr6:109765265-10977190    | 0.0710392 | 0.999791 |
| XLOC_011353 | XLOC_011353 | GTF2F1    | chr19:6379579-6393291      | 0.0710476 | 0.999791 |
| XLOC_005016 | XLOC_005016 | C12orf29  | chr12:88429267-88535993    | 0.0710514 | 0.999791 |
| XLOC_021520 | XLOC_021520 | DOCK5     | chr8:25042286-25270619     | 0.0711597 | 0.999791 |
| XLOC_013592 | XLOC_013592 | POFUT1    | chr20:30795695-30826467    | 0.0711861 | 0.999791 |
| XLOC_005736 | XLOC_005736 | RPLP0     | chr12:120634502-120639014  | 0.0712543 | 0.999791 |
| XLOC_010798 | XLOC_010798 | PSENFEN   | chr19:36236493-36237903    | 0.0712722 | 0.999791 |
| XLOC_000358 | XLOC_000358 | UROD      | chr1:45477804-45481341     | 0.0712809 | 0.999791 |
| XLOC_011164 | XLOC_011164 | LENG8     | chr19:54960064-54974894    | 0.0713133 | 0.999791 |
| XLOC_022813 | XLOC_022813 | STOML2    | chr9:35099888-35103154     | 0.071339  | 0.999791 |
| XLOC_003860 | XLOC_003860 | C2CD2L    | chr11:118978092-118987827  | 0.0714281 | 0.999791 |
| XLOC_005378 | XLOC_005378 | YARS2     | chr12:32899477-32908887    | 0.0714708 | 0.999791 |
| XLOC_006887 | XLOC_006887 | FAM161B   | chr14:74399694-74429813    | 0.0715143 | 0.999791 |
| XLOC_005192 | XLOC_005192 | LOC116437 | chr12:131649555-1316897476 | 0.0715486 | 1        |
| XLOC_008353 | XLOC_008353 | ZNF598    | chr16:2047652-2059822      | 0.0715557 | 0.999791 |
| XLOC_005716 | XLOC_005716 | RBM19     | chr12:114254542-114404176  | 0.071596  | 0.999791 |
| XLOC_007433 | XLOC_007433 | ASB7      | chr15:101142754-101191904  | 0.0716627 | 0.999791 |
| XLOC_002218 | XLOC_002218 | ITPKB     | chr1:226819390-226926876   | 0.0716727 | 0.999791 |
| XLOC_002708 | XLOC_002708 | TRUB1     | chr10:116697951-116737439  | 0.0716912 | 0.999791 |
| XLOC_012963 | XLOC_012963 | TIA1      | chr2:70436575-70475779     | 0.0717144 | 0.999791 |
| XLOC_005407 | XLOC_005407 | HDAC7     | chr12:48166966-48213763    | 0.0717154 | 0.999791 |
| XLOC_006906 | XLOC_006906 | IRF2BPL   | chr14:77490885-77495042    | 0.071763  | 0.999791 |
| XLOC_010205 | XLOC_010205 | POLI      | chr18:51795848-51824604    | 0.0717631 | 0.999791 |
| XLOC_014540 | XLOC_014540 | KCTD17    | chr22:37447778-37459430    | 0.071881  | 0.999791 |
| XLOC_023828 | XLOC_023828 | SLC9A7    | chrX:46458685-46618607     | 0.0719125 | 0.999791 |
| XLOC_021609 | XLOC_021609 | YTHDF3    | chr8:64081120-64125346     | 0.0719465 | 0.999791 |
| XLOC_003416 | XLOC_003416 | C11orf96  | chr11:43964105-43965433    | 0.0719886 | 1        |
| XLOC_016609 | XLOC_016609 | FRG1      | chr4:190861973-190884359   | 0.0720554 | 0.999791 |
| XLOC_022976 | XLOC_022976 | ALG2      | chr9:101978706-101984246   | 0.0720713 | 0.999791 |
| XLOC_006636 | XLOC_006636 | RCOR1     | chr14:103058995-103196913  | 0.0720899 | 0.999791 |
| XLOC_020603 | XLOC_020603 | GATAD1    | chr7:92076761-92089381     | 0.0721108 | 0.999791 |
| XLOC_000063 | XLOC_000063 | PARK7     | chr1:8021713-8045342       | 0.0721533 | 0.999791 |
| XLOC_003029 | XLOC_003029 | GLUD1     | chr10:88809958-88854776    | 0.072257  | 0.999791 |
| XLOC_007280 | XLOC_007280 | LRRC49    | chr15:71184927-71342436    | 0.0722577 | 0.999791 |
| XLOC_012883 | XLOC_012883 | THUMP2    | chr2:39963199-40006416     | 0.0722957 | 0.999791 |
| XLOC_009147 | XLOC_009147 | CALCOCO2  | chr17:46908349-46942607    | 0.0723502 | 0.999791 |
| XLOC_008928 | XLOC_008928 | NLK       | chr17:26369687-26523404    | 0.0724435 | 0.999791 |
| XLOC_007945 | XLOC_007945 | SHISA9    | chr16:12995476-13334273    | 0.0724492 | 0.999791 |
| XLOC_012211 | XLOC_012211 | CEP68     | chr2:65283494-65357435     | 0.0725283 | 0.999791 |
| XLOC_019102 | XLOC_019102 | MAP3K5    | chr6:136878186-137113656   | 0.0725454 | 0.999791 |
| XLOC_013546 | XLOC_013546 | SEC23B    | chr20:18488187-18542059    | 0.0725495 | 0.999791 |
| XLOC_012241 | XLOC_012241 | CCT7      | chr2:73461363-73480150     | 0.0726727 | 0.999791 |
| XLOC_001203 | XLOC_001203 | MRPL20    | chr1:1334909-1342693       | 0.0727393 | 0.999791 |
| XLOC_018278 | XLOC_018278 | ZFAND3    | chr6:37787306-38122399     | 0.0727813 | 0.999791 |
| XLOC_002338 | XLOC_002338 | ATP5C1    | chr10:7830092-7849762      | 0.0727923 | 0.999791 |
| XLOC_011037 | XLOC_011037 | ADM5      | chr19:50191941-50194247    | 0.0729152 | 0.999791 |
| XLOC_003125 | XLOC_003125 | OBFC1     | chr10:105637317-105678045  | 0.0729279 | 0.999791 |
| XLOC_004535 | XLOC_004535 | ZW10      | chr11:113603904-113644485  | 0.0729652 | 0.999791 |
| XLOC_014844 | XLOC_014844 | ST13      | chr22:41220600-41252687    | 0.0731362 | 0.999791 |
| XLOC_008506 | XLOC_008506 | TBX6      | chr16:30097114-30103205    | 0.0732518 | 0.999791 |
| XLOC_003708 | XLOC_003708 | PAAF1     | chr11:73583712-73638781    | 0.0732524 | 0.999791 |
| XLOC_012951 | XLOC_012951 | PPP3R1    | chr2:68405988-68479651     | 0.0732998 | 0.999791 |
| XLOC_021000 | XLOC_021000 | LSM5      | chr7:32524944-32534870     | 0.0733056 | 0.999791 |
| XLOC_023274 | XLOC_023274 | CA5BP1    | chrX:15693038-15721474     | 0.0733184 | 0.999791 |
| XLOC_007315 | XLOC_007315 | NEIL1     | chr15:75639330-75647592    | 0.0733192 | 0.999791 |
| XLOC_010848 | XLOC_010848 | MED29     | chr19:39881962-39891203    | 0.0733262 | 0.999791 |
| XLOC_015629 | XLOC_015629 | TRANK1    | chr3:36868307-36986548     | 0.0733985 | 1        |
| XLOC_017771 | XLOC_017771 | TRIM36    | chr5:114460458-114516243   | 0.0734516 | 0.999791 |
| XLOC_001616 | XLOC_001616 | USP33     | chr1:78161673-78225564     | 0.0734633 | 0.999791 |
| XLOC_000824 | XLOC_000824 | NDUFS2    | chr1:161169104-161184184   | 0.073473  | 0.999791 |
| XLOC_019094 | XLOC_019094 | SGK1      | chr6:134490383-134639196   | 0.0734914 | 0.999791 |
| XLOC_021257 | XLOC_021257 | COG5      | chr7:106809405-107218968   | 0.0735544 | 0.999791 |
| XLOC_003264 | XLOC_003264 | PGAP2     | chr11:3696239-3847601      | 0.0735999 | 0.999791 |
| XLOC_012414 | XLOC_012414 | LOC254128 | chr2:122407229-122494503   | 0.0736033 | 0.999791 |
| XLOC_013391 | XLOC_013391 | WDFY1     | chr2:224740064-224810052   | 0.0736068 | 0.999791 |
| XLOC_004547 | XLOC_004547 | SIK3      | chr11:116714117-116968993  | 0.0736356 | 0.999791 |
| XLOC_015295 | XLOC_015295 | PARP14    | chr3:122399671-122449687   | 0.0736468 | 0.999791 |
| XLOC_008297 | XLOC_008297 | CPNE7     | chr16:89642175-89663654    | 0.073688  | 0.999791 |
| XLOC_006432 | XLOC_006432 | PAPLN     | chr14:73704204-73741347    | 0.0736963 | 1        |
| XLOC_023019 | XLOC_023019 | FKBP15    | chr9:115927799-115983641   | 0.0737579 | 0.999791 |
| XLOC_015043 | XLOC_015043 | VIPR1     | chr3:42530790-42579065     | 0.0738083 | 0.999791 |

|             |             |                           |                           |           |          |
|-------------|-------------|---------------------------|---------------------------|-----------|----------|
| XLOC_021269 | XLOC_021269 | TMEM168                   | chr7:112405786-112430478  | 0.0738203 | 0.999791 |
| XLOC_021574 | XLOC_021574 | C8orf40                   | chr8:42273979-42408140    | 0.073831  | 0.999791 |
| XLOC_000553 | XLOC_000553 | PRPF38B                   | chr1:109234931-109244422  | 0.0738457 | 0.999791 |
| XLOC_020792 | XLOC_020792 | SSBP1                     | chr7:141438120-141450288  | 0.0738736 | 0.999791 |
| XLOC_008963 | XLOC_008963 | SUZ12P1                   | chr17:29036625-29097068   | 0.0738835 | 0.999791 |
| XLOC_007988 | XLOC_007988 | EEF2K                     | chr16:22217591-22300066   | 0.0739719 | 0.999791 |
| XLOC_008902 | XLOC_008902 | FBXW10                    | chr17:18647325-18682662   | 0.0739789 | 1        |
| XLOC_012802 | XLOC_012802 | NT5C1B,NT5C1B-RDH14,RDH14 | chr2:18735988-18770846    | 0.0740376 | 0.999791 |
| XLOC_013113 | XLOC_013113 | PAX8                      | chr2:113973573-114036498  | 0.0740951 | 0.999791 |
| XLOC_005498 | XLOC_005498 | CBX5                      | chr12:54624730-54673915   | 0.0741224 | 0.999791 |
| XLOC_000617 | XLOC_000617 | TTF2                      | chr1:117602948-117645491  | 0.0741454 | 0.999791 |
| XLOC_016333 | XLOC_016333 | POLR2B                    | chr4:57845108-58071465    | 0.0741564 | 0.999791 |
| XLOC_001876 | XLOC_001876 | PMVK                      | chr1:154897207-154909484  | 0.074163  | 0.999791 |
| XLOC_018314 | XLOC_018314 | TJAP1                     | chr6:43445260-43474294    | 0.0742133 | 0.999791 |
| XLOC_007219 | XLOC_007219 | TMOD3                     | chr15:52121824-52204331   | 0.0742711 | 0.999791 |
| XLOC_014642 | XLOC_014642 | TRABD                     | chr22:50624359-50638027   | 0.0742951 | 0.999791 |
| XLOC_004717 | XLOC_004717 | LOC642846                 | chr12:9436252-9466684     | 0.0743013 | 0.999791 |
| XLOC_005674 | XLOC_005674 | CRY1                      | chr12:107385142-107487635 | 0.0743079 | 0.999791 |
| XLOC_015902 | XLOC_015902 | CCDC58                    | chr3:122078435-122102074  | 0.0743418 | 0.999791 |
| XLOC_021184 | XLOC_021184 | TECPR1                    | chr7:97844754-97881563    | 0.0743481 | 0.999791 |
| XLOC_014889 | XLOC_014889 | CDPF1                     | chr22:46639909-46646193   | 0.0743811 | 0.999791 |
| XLOC_008717 | XLOC_008717 | KLHDC4                    | chr16:87741417-87799598   | 0.0744129 | 0.999791 |
| XLOC_023041 | XLOC_023041 | FBXW2                     | chr9:123519253-123555740  | 0.0744405 | 0.999791 |
| XLOC_010210 | XLOC_010210 | WDR7                      | chr18:54318615-54697036   | 0.0745013 | 0.999791 |
| XLOC_023460 | XLOC_023460 | MED12                     | chrX:70338405-70362304    | 0.0745614 | 0.999791 |
| XLOC_017708 | XLOC_017708 | TBCA                      | chr5:76986994-77072185    | 0.0746379 | 0.999791 |
| XLOC_007543 | XLOC_007543 | ZSCAN29                   | chr15:43650369-43662258   | 0.0746553 | 0.999791 |
| XLOC_012203 | XLOC_012203 | OTX1                      | chr2:63277191-63284966    | 0.0747387 | 0.999791 |
| XLOC_007462 | XLOC_007462 | UBE3A                     | chr15:25582395-25684175   | 0.0747688 | 0.999791 |
| XLOC_006520 | XLOC_006520 | GSKIP                     | chr14:96829788-96853627   | 0.0747831 | 0.999791 |
| XLOC_022714 | XLOC_022714 | AK3                       | chr9:4709556-4742043      | 0.0748424 | 0.999791 |
| XLOC_021883 | XLOC_021883 | DLC1                      | chr8:12940871-13372429    | 0.0748506 | 0.999791 |
| XLOC_006885 | XLOC_006885 | PNMA1                     | chr14:74178485-74181128   | 0.0748622 | 0.999791 |
| XLOC_020901 | XLOC_020901 | PSMG3                     | chr7:1606969-1609668      | 0.0748814 | 0.999791 |
| XLOC_022028 | XLOC_022028 | COP55                     | chr8:67955314-67974562    | 0.0748931 | 0.999791 |
| XLOC_002965 | XLOC_002965 | RUFY2                     | chr10:70103274-70167051   | 0.0749019 | 0.999791 |
| XLOC_006064 | XLOC_006064 | N4BP2L2                   | chr13:33006929-33112936   | 0.0749364 | 0.999791 |
| XLOC_017013 | XLOC_017013 | MGC45800                  | chr4:183060158-183065668  | 0.0749679 | 0.999791 |
| XLOC_006409 | XLOC_006409 | EIF2S1                    | chr14:67827033-67853233   | 0.0751053 | 0.999791 |
| XLOC_001504 | XLOC_001504 | SLC6A9                    | chr1:44457279-44497164    | 0.0751871 | 0.999791 |
| XLOC_015759 | XLOC_015759 | TNNC1                     | chr3:52485106-52488057    | 0.075258  | 0.999791 |
| XLOC_023995 | XLOC_023995 | MORF4L2                   | chrX:102930425-102947484  | 0.0752664 | 0.999791 |
| XLOC_007707 | XLOC_007707 | TYRO3P                    | chr15:76508628-76603810   | 0.0753126 | 1        |
| XLOC_022268 | XLOC_022268 | PPAPDC2                   | chr9:4598315-4666674      | 0.075343  | 0.999791 |
| XLOC_007322 | XLOC_007322 | RCN2                      | chr15:77223961-77242601   | 0.0753438 | 0.999791 |
| XLOC_009199 | XLOC_009199 | PRR11                     | chr17:57232859-57284070   | 0.0753666 | 0.999791 |
| XLOC_004661 | XLOC_004661 | RAD51AP1                  | chr12:4647949-4669213     | 0.0753839 | 0.999791 |
| XLOC_021436 | XLOC_021436 | AGPAT5                    | chr8:6565877-6619021      | 0.0755115 | 0.999791 |
| XLOC_001218 | XLOC_001218 | PEX10                     | chr1:2323213-2344010      | 0.0755198 | 0.999791 |
| XLOC_016878 | XLOC_016878 | PPA2                      | chr4:106290233-106395227  | 0.07552   | 0.999791 |
| XLOC_008209 | XLOC_008209 | PDPR                      | chr16:70147528-70195184   | 0.0755465 | 0.999791 |
| XLOC_004177 | XLOC_004177 | MTCH2                     | chr11:47638857-47664206   | 0.075557  | 0.999791 |
| XLOC_020563 | XLOC_020563 | RHBDD2                    | chr7:75508316-75518244    | 0.0756031 | 0.999791 |
| XLOC_011089 | XLOC_011089 | ZNF701                    | chr19:53073525-53090427   | 0.075606  | 1        |
| XLOC_024011 | XLOC_024011 | PSMD10                    | chrX:107327434-107334874  | 0.0756371 | 0.999791 |
| XLOC_022141 | XLOC_022141 | SYBU                      | chr8:110586404-110704020  | 0.0756442 | 0.999791 |
| XLOC_015071 | XLOC_015071 | SACM1L                    | chr3:45730753-45786900    | 0.07566   | 0.999791 |
| XLOC_007226 | XLOC_007226 | LOC283663                 | chr15:57592562-57599967   | 0.0756755 | 1        |
| XLOC_008380 | XLOC_008380 | ZNF200                    | chr16:3272324-3285457     | 0.075775  | 0.999791 |
| XLOC_003536 | XLOC_003536 | CD5                       | chr11:60869929-60895323   | 0.075828  | 1        |
| XLOC_013961 | XLOC_013961 | TTI1                      | chr20:36611422-36661833   | 0.0758374 | 0.999791 |
| XLOC_022591 | XLOC_022591 | SPTAN1                    | chr9:131314836-131419129  | 0.0758657 | 0.999791 |
| XLOC_013947 | XLOC_013947 | NFS1                      | chr20:34256609-34288902   | 0.0758893 | 0.999791 |
| XLOC_015142 | XLOC_015142 | GNL3                      | chr3:52719935-52742197    | 0.0759597 | 0.999791 |
| XLOC_023200 | XLOC_023200 | NSMF                      | chr9:140342022-140353786  | 0.0760313 | 0.999791 |
| XLOC_010637 | XLOC_010637 | CD97                      | chr19:14491955-14519537   | 0.0760563 | 0.999791 |
| XLOC_002139 | XLOC_002139 | RBBP5                     | chr1:205055269-205091150  | 0.0760717 | 0.999791 |
| XLOC_023588 | XLOC_023588 | SLC25A43                  | chrX:118533257-118588437  | 0.0760911 | 0.999791 |
| XLOC_008914 | XLOC_008914 | SPECC1                    | chr17:19912648-20218072   | 0.0760969 | 0.999791 |
| XLOC_008201 | XLOC_008201 | VPS4A                     | chr16:69345286-69358946   | 0.0761946 | 0.999791 |
| XLOC_016800 | XLOC_016800 | SDAD1                     | chr4:76871067-76912113    | 0.0762491 | 0.999791 |
| XLOC_006154 | XLOC_006154 | MZT1                      | chr13:73282494-73301938   | 0.0762825 | 0.999791 |
| XLOC_000233 | XLOC_000233 | TRNAU1AP                  | chr1:28879528-28908366    | 0.0762936 | 0.999791 |
| XLOC_000410 | XLOC_000410 | MROH7,TTC4                | chr1:55107426-55208328    | 0.0763294 | 0.999791 |
| XLOC_019057 | XLOC_019057 | GOPC                      | chr6:117803819-117923705  | 0.0763298 | 0.999791 |
| XLOC_020893 | XLOC_020893 | ADAP1                     | chr7:937536-994289        | 0.0763727 | 0.999791 |
| XLOC_002494 | XLOC_002494 | SUPV3L1                   | chr10:70939992-70968849   | 0.0763811 | 0.999791 |
| XLOC_020662 | XLOC_020662 | MUC12                     | chr7:100612903-100662230  | 0.0763818 | 1        |
| XLOC_004209 | XLOC_004209 | SSRP1                     | chr11:57093458-57103351   | 0.0763943 | 0.999791 |

|             |             |           |                           |           |          |
|-------------|-------------|-----------|---------------------------|-----------|----------|
| XLOC_010822 | XLOC_010822 | HKR1      | chr19:37825579-37855357   | 0.0764073 | 0.999791 |
| XLOC_000911 | XLOC_000911 | TOR1AIP1  | chr1:179851176-179889212  | 0.0764374 | 0.999791 |
| XLOC_009251 | XLOC_009251 | PRKAR1A   | chr17:66507920-66597095   | 0.0764892 | 0.999791 |
| XLOC_017610 | XLOC_017610 | LMBRD2    | chr5:36103413-36152015    | 0.0765418 | 1        |
| XLOC_017082 | XLOC_017082 | FAM105A   | chr5:14581890-14616287    | 0.0765419 | 0.999791 |
| XLOC_022843 | XLOC_022843 | ANKRD18A  | chr9:38571360-38620360    | 0.0765443 | 0.999791 |
| XLOC_008625 | XLOC_008625 | ATP6V0D1  | chr16:67471916-67515089   | 0.0765473 | 0.999791 |
| XLOC_010482 | XLOC_010482 | NFIC      | chr19:3359560-3469215     | 0.0765786 | 0.999791 |
| XLOC_007257 | XLOC_007257 | RAB11A    | chr15:66161796-66184329   | 0.0766066 | 0.999791 |
| XLOC_006942 | XLOC_006942 | ITPK1     | chr14:93403258-93582263   | 0.0766078 | 0.999791 |
| XLOC_005253 | XLOC_005253 | PHB2      | chr12:7074514-7079916     | 0.0766468 | 0.999791 |
| XLOC_004862 | XLOC_004862 | EIF4B     | chr12:53400061-53435993   | 0.0766682 | 0.999791 |
| XLOC_013629 | XLOC_013629 | PHF20     | chr20:34359922-34538288   | 0.0766829 | 0.999791 |
| XLOC_003226 | XLOC_003226 | PHRF1     | chr11:576482-612222       | 0.0767017 | 0.999791 |
| XLOC_005147 | XLOC_005147 | P2RX4     | chr12:121647663-121671909 | 0.0767251 | 0.999791 |
| XLOC_012167 | XLOC_012167 | RHOQ      | chr2:46769866-46844251    | 0.0767399 | 0.999791 |
| XLOC_013735 | XLOC_013735 | RAE1      | chr20:55904830-55998278   | 0.0767624 | 0.999791 |
| XLOC_020591 | XLOC_020591 | ADAM22    | chr7:87563565-87832204    | 0.0767945 | 0.999791 |
| XLOC_010736 | XLOC_010736 | RPSAP58   | chr19:23945815-24010919   | 0.0769128 | 0.999791 |
| XLOC_000237 | XLOC_000237 | YTHDF2    | chr1:29063132-29096287    | 0.0769175 | 0.999791 |
| XLOC_014243 | XLOC_014243 | C21orf91  | chr21:19149720-19191703   | 0.0769792 | 0.999791 |
| XLOC_021664 | XLOC_021664 | RIPK2     | chr8:90769974-90803292    | 0.077009  | 0.999791 |
| XLOC_006965 | XLOC_006965 | ATG2B     | chr14:96747594-96829678   | 0.0770403 | 0.999791 |
| XLOC_012886 | XLOC_012886 | COX7A2L   | chr2:42577644-42588356    | 0.0770783 | 0.999791 |
| XLOC_002493 | XLOC_002493 | VPS26A    | chr10:70883907-70932616   | 0.07715   | 0.999791 |
| XLOC_009259 | XLOC_009259 | C17orf80  | chr17:71228775-71258019   | 0.0772326 | 0.999791 |
| XLOC_015070 | XLOC_015070 | LIMD1     | chr3:45636322-45730374    | 0.0772756 | 0.999791 |
| XLOC_004569 | XLOC_004569 | HYOU1     | chr11:118914895-118927925 | 0.0773012 | 0.999791 |
| XLOC_011954 | XLOC_011954 | GP6       | chr19:55525074-55549632   | 0.0773017 | 1        |
| XLOC_006275 | XLOC_006275 | OXA1L     | chr14:23235730-23240998   | 0.0773043 | 0.999791 |
| XLOC_004752 | XLOC_004752 | STRAP     | chr12:16035287-16056410   | 0.0773597 | 0.999791 |
| XLOC_009009 | XLOC_009009 | AATF      | chr17:35306174-35414171   | 0.0774153 | 0.999791 |
| XLOC_001466 | XLOC_001466 | FHL3      | chr1:38462441-38471187    | 0.0774278 | 0.999791 |
| XLOC_014585 | XLOC_014585 | L3MBTL2   | chr22:41601312-41636935   | 0.0775183 | 0.999791 |
| XLOC_011193 | XLOC_011193 | ZNF581    | chr19:56154985-56156989   | 0.0775293 | 0.999791 |
| XLOC_002285 | XLOC_002285 | AHCTF1    | chr1:247002401-247094726  | 0.0775309 | 0.999791 |
| XLOC_013676 | XLOC_013676 | YWHAB     | chr20:43514343-43537161   | 0.0775781 | 0.999791 |
| XLOC_012757 | XLOC_012757 | D2HGDH    | chr2:242674029-242708231  | 0.0775785 | 0.999791 |
| XLOC_002484 | XLOC_002484 | HNRNP33   | chr10:70042416-70102953   | 0.0776164 | 0.999791 |
| XLOC_008088 | XLOC_008088 | ORC6      | chr16:46723557-46732306   | 0.0776362 | 0.999791 |
| XLOC_013074 | XLOC_013074 | SNORD89   | chr2:101889397-101889511  | 0.0776758 | 0.999791 |
| XLOC_015906 | XLOC_015906 | HSPBAP1   | chr3:122458843-122512666  | 0.077723  | 0.999791 |
| XLOC_012690 | XLOC_012690 | CAB39     | chr2:231577556-231685790  | 0.077728  | 0.999791 |
| XLOC_019156 | XLOC_019156 | SERAC1    | chr6:158530535-158589312  | 0.0777548 | 0.999791 |
| XLOC_018740 | XLOC_018740 | PPP1R10   | chr6:30568176-30585084    | 0.0777678 | 0.999791 |
| XLOC_021860 | XLOC_021860 | PINX1     | chr8:10622883-10697299    | 0.0777961 | 0.999791 |
| XLOC_000765 | XLOC_000765 | MSTO2P    | chr1:155715558-155826972  | 0.0778461 | 1        |
| XLOC_008958 | XLOC_008958 | CPD       | chr17:28705941-28796675   | 0.0779035 | 0.999791 |
| XLOC_018665 | XLOC_018665 | KIAA0319  | chr6:24544331-24646383    | 0.0779273 | 1        |
| XLOC_011583 | XLOC_011583 | LOC400684 | chr19:32880955-32896445   | 0.0779686 | 0.999791 |
| XLOC_006082 | XLOC_006082 | PROSER1   | chr13:39584001-39612213   | 0.0780745 | 0.999791 |
| XLOC_017508 | XLOC_017508 | ZNF346    | chr5:176449696-176493745  | 0.078163  | 0.999791 |
| XLOC_005151 | XLOC_005151 | SETD1B    | chr12:122242637-122270562 | 0.0781713 | 0.999791 |
| XLOC_008677 | XLOC_008677 | WDR59     | chr16:74907470-75019017   | 0.0782134 | 0.999791 |
| XLOC_016992 | XLOC_016992 | DDX60     | chr4:169137441-169239958  | 0.0782194 | 1        |
| XLOC_018959 | XLOC_018959 | EEF1A1    | chr6:74225472-74230755    | 0.0782323 | 0.999791 |
| XLOC_011311 | XLOC_011311 | CACTIN    | chr19:3607244-3626813     | 0.0782511 | 0.999791 |
| XLOC_022560 | XLOC_022560 | RABEPK    | chr9:127962820-127996438  | 0.0782854 | 0.999791 |
| XLOC_023016 | XLOC_023016 | ZNF883    | chr9:115759399-115774472  | 0.0783289 | 0.999791 |
| XLOC_007958 | XLOC_007958 | NDE1      | chr16:15737123-15950887   | 0.078348  | 0.999791 |
| XLOC_016249 | XLOC_016249 | BST1      | chr4:15704572-15733796    | 0.0784044 | 0.999791 |
| XLOC_008385 | XLOC_008385 | ZNF597    | chr16:3486109-3493490     | 0.0784273 | 0.999791 |
| XLOC_004275 | XLOC_004275 | WDR74     | chr11:62600382-62607628   | 0.0785044 | 0.999791 |
| XLOC_002354 | XLOC_002354 | HSPA14    | chr10:14880260-14913740   | 0.0786368 | 0.999791 |
| XLOC_022599 | XLOC_022599 | NUP188    | chr9:131707808-131769375  | 0.0786452 | 0.999791 |
| XLOC_012945 | XLOC_012945 | SPRED2    | chr2:65537984-65659656    | 0.0786614 | 0.999791 |
| XLOC_014083 | XLOC_014083 | STMN3     | chr20:62271057-62284963   | 0.0787435 | 0.999791 |
| XLOC_001733 | XLOC_001733 | SIKE1     | chr1:115312104-115323308  | 0.078754  | 0.999791 |
| XLOC_009862 | XLOC_009862 | CUEDC1    | chr17:55938603-56032684   | 0.0787631 | 0.999791 |
| XLOC_010919 | XLOC_010919 | ZNF227    | chr19:44716690-44741421   | 0.0788093 | 0.999791 |
| XLOC_006166 | XLOC_006166 | RNF219    | chr13:78628989-79233314   | 0.0788186 | 0.999791 |
| XLOC_018040 | XLOC_018040 | DSP       | chr6:7541869-756946       | 0.0788542 | 0.999791 |
| XLOC_021738 | XLOC_021738 | TRMT12    | chr8:125463047-125465266  | 0.0788695 | 0.999791 |
| XLOC_006894 | XLOC_006894 | KIAA0317  | chr14:75127954-75179807   | 0.0789737 | 0.999791 |
| XLOC_009981 | XLOC_009981 | ACOX1     | chr17:73937588-74002080   | 0.0789873 | 0.999791 |
| XLOC_013442 | XLOC_013442 | LOC151171 | chr2:239419330-239464140  | 0.0790164 | 1        |
| XLOC_012585 | XLOC_012585 | CFLAR     | chr2:201980876-202037411  | 0.0790744 | 0.999791 |
| XLOC_020630 | XLOC_020630 | ZNF789    | chr7:99070514-99085217    | 0.0790845 | 0.999791 |
| XLOC_009130 | XLOC_009130 | GOSR2     | chr17:45000485-45018733   | 0.0791176 | 0.999791 |

|             |             |            |                           |           |          |
|-------------|-------------|------------|---------------------------|-----------|----------|
| XLOC_024193 | XLOC_024193 | UBL4A      | chrX:153712055-153714932  | 0.0791353 | 0.999791 |
| XLOC_009890 | XLOC_009890 | SCARNA20   | chr17:58254690-58469586   | 0.0792118 | 1        |
| XLOC_013359 | XLOC_013359 | AAMP       | chr2:219128851-219134893  | 0.0792271 | 0.999791 |
| XLOC_022589 | XLOC_022589 | ODF2       | chr9:131217433-131263571  | 0.0792552 | 0.999791 |
| XLOC_022939 | XLOC_022939 | IPPK       | chr9:95059639-95432547    | 0.0793954 | 0.999791 |
| XLOC_012479 | XLOC_012479 | PKP4       | chr2:159313475-159537940  | 0.0794014 | 0.999791 |
| XLOC_018544 | XLOC_018544 | SAMD5      | chr6:147829827-147891157  | 0.0794356 | 0.999791 |
| XLOC_021252 | XLOC_021252 | EFCAB10    | chr7:105172531-105221976  | 0.0794481 | 0.999791 |
| XLOC_007118 | XLOC_007118 | KLF13      | chr15:31619082-31670102   | 0.0794876 | 0.999791 |
| XLOC_021256 | XLOC_021256 | CCDC71L    | chr7:106297210-106301634  | 0.0795448 | 0.999791 |
| XLOC_012668 | XLOC_012668 | INHHA      | chr2:220436953-220440435  | 0.0795589 | 0.999791 |
| XLOC_009735 | XLOC_009735 | ACLY       | chr17:40023178-40075272   | 0.0795849 | 0.999791 |
| XLOC_016151 | XLOC_016151 | DLG1       | chr3:196769430-197030621  | 0.0796154 | 0.999791 |
| XLOC_011322 | XLOC_011322 | MAP2K2     | chr19:4090319-4124126     | 0.0797027 | 0.999791 |
| XLOC_016159 | XLOC_016159 | ZNF876P    | chr4:206388-249773        | 0.0797924 | 1        |
| XLOC_022692 | XLOC_022692 | C9orf173   | chr9:140144670-140147949  | 0.0798051 | 1        |
| XLOC_015940 | XLOC_015940 | CNBP       | chr3:128886657-128902810  | 0.0798359 | 0.999791 |
| XLOC_000206 | XLOC_000206 | DHDDS      | chr1:26758772-26797795    | 0.0798495 | 0.999791 |
| XLOC_014393 | XLOC_014393 | CECR7      | chr22:17517459-17539682   | 0.0798839 | 0.999791 |
| XLOC_003172 | XLOC_003172 | C10orf88   | chr10:124690418-124713919 | 0.0798856 | 0.999791 |
| XLOC_015804 | XLOC_015804 | MAGI1      | chr3:65339905-66024509    | 0.0798869 | 0.999791 |
| XLOC_013001 | XLOC_013001 | GCFC2      | chr2:75889831-75938111    | 0.0800594 | 0.999791 |
| XLOC_008047 | XLOC_008047 | CORO1A     | chr16:30194730-30200575   | 0.0801032 | 0.999791 |
| XLOC_021322 | XLOC_021322 | FLJ43663   | chr7:130628918-130793562  | 0.0801345 | 0.999791 |
| XLOC_000859 | XLOC_000859 | MPZL1      | chr1:167691186-167761156  | 0.0802031 | 0.999791 |
| XLOC_005813 | XLOC_005813 | SPATA13    | chr13:24734860-24881212   | 0.0802118 | 0.999791 |
| XLOC_009827 | XLOC_009827 | TTL6       | chr17:46839592-46894469   | 0.0802542 | 1        |
| XLOC_023287 | XLOC_023287 | PHKA2-AS1  | chrX:18908413-19002480    | 0.0802886 | 1        |
| XLOC_014834 | XLOC_014834 | RPL3       | chr22:39708886-39715670   | 0.0803468 | 0.999791 |
| XLOC_020613 | XLOC_020613 | PPP1R9A    | chr7:94536948-94925727    | 0.0803473 | 0.999791 |
| XLOC_012335 | XLOC_012335 | CNOT11     | chr2:101869344-101886778  | 0.0803697 | 0.999791 |
| XLOC_015548 | XLOC_015548 | CRBN       | chr3:3191316-3221401      | 0.0803796 | 0.999791 |
| XLOC_004098 | XLOC_004098 | SAAL1      | chr11:18101889-18127638   | 0.0804102 | 0.999791 |
| XLOC_011265 | XLOC_011265 | RNF126     | chr19:647525-663233       | 0.0804645 | 0.999791 |
| XLOC_003956 | XLOC_003956 | TOLLIP     | chr11:1295597-1330892     | 0.080475  | 0.999791 |
| XLOC_016470 | XLOC_016470 | AP1AR      | chr4:113152894-113191211  | 0.0804891 | 0.999791 |
| XLOC_013873 | XLOC_013873 | RBBP9      | chr20:18467187-18477887   | 0.0805326 | 0.999791 |
| XLOC_000830 | XLOC_000830 | HSPA6      | chr1:161494035-161496687  | 0.0805352 | 0.999791 |
| XLOC_017214 | XLOC_017214 | ZFYVE16    | chr5:79703837-79775498    | 0.0806592 | 0.999791 |
| XLOC_001069 | XLOC_001069 | CAPN2      | chr1:223889294-223963720  | 0.080676  | 0.999791 |
| XLOC_007105 | XLOC_007105 | HERC2P9    | chr15:28899587-28930410   | 0.0807435 | 0.999791 |
| XLOC_012063 | XLOC_012063 | GEN1       | chr2:17935176-17966632    | 0.080745  | 0.999791 |
| XLOC_018258 | XLOC_018258 | RPL10A     | chr6:35436177-35438558    | 0.0807606 | 0.999791 |
| XLOC_007792 | XLOC_007792 | TTC23      | chr15:99676527-99789815   | 0.0807942 | 0.999791 |
| XLOC_009181 | XLOC_009181 | HLF        | chr17:53342320-53402426   | 0.0808522 | 1        |
| XLOC_019152 | XLOC_019152 | TFB1M      | chr6:155411422-155635617  | 0.0809038 | 0.999791 |
| XLOC_008769 | XLOC_008769 | CYB5D2     | chr17:4046461-4060995     | 0.0809344 | 0.999791 |
| XLOC_018999 | XLOC_018999 | MAP3K7     | chr6:91223291-91297020    | 0.081111  | 0.999791 |
| XLOC_003609 | XLOC_003609 | CDC42EP2   | chr11:65082288-65089900   | 0.0811258 | 0.999791 |
| XLOC_022547 | XLOC_022547 | RABGAP1    | chr9:125703287-125867147  | 0.0811264 | 0.999791 |
| XLOC_006696 | XLOC_006696 | HNRNPC     | chr14:21677295-21737638   | 0.0811405 | 0.999791 |
| XLOC_015845 | XLOC_015845 | TOMM70A    | chr3:100082302-100175170  | 0.0812011 | 0.999791 |
| XLOC_023193 | XLOC_023193 | TMEM203    | chr9:140098534-140100090  | 0.0812099 | 0.999791 |
| XLOC_013707 | XLOC_013707 | DDX27      | chr20:47835831-47860614   | 0.0812273 | 0.999791 |
| XLOC_000852 | XLOC_000852 | UCK2       | chr1:165796731-165880855  | 0.081252  | 0.999791 |
| XLOC_008299 | XLOC_008299 | C16orf55   | chr16:89710838-89736866   | 0.0812564 | 0.999791 |
| XLOC_002076 | XLOC_002076 | TRMT1L     | chr1:185087217-185260913  | 0.0813146 | 0.999791 |
| XLOC_013291 | XLOC_013291 | GTFC3C     | chr2:197627755-197664492  | 0.0813939 | 0.999791 |
| XLOC_017163 | XLOC_017163 | CENPH      | chr5:68485374-68506184    | 0.0814267 | 0.999791 |
| XLOC_004061 | XLOC_004061 | TMEM9B     | chr11:8968839-8985989     | 0.0815254 | 0.999791 |
| XLOC_016295 | XLOC_016295 | TMEM33     | chr4:41937136-41962824    | 0.081562  | 0.999791 |
| XLOC_005390 | XLOC_005390 | PUS7L      | chr12:44122409-44152620   | 0.0815635 | 0.999791 |
| XLOC_006219 | XLOC_006219 | IRS2       | chr13:110406183-110438914 | 0.0816375 | 0.999791 |
| XLOC_007500 | XLOC_007500 | CSNK1A1P1  | chr15:36871811-37110707   | 0.0817213 | 1        |
| XLOC_010021 | XLOC_010021 | BAIAP2-AS1 | chr17:79002932-79008519   | 0.0817239 | 0.999791 |
| XLOC_003120 | XLOC_003120 | USMG5      | chr10:105127723-105156270 | 0.0817558 | 0.999791 |
| XLOC_012783 | XLOC_012783 | YWHAQ      | chr2:9724105-9771106      | 0.0817627 | 0.999791 |
| XLOC_017432 | XLOC_017432 | SLC36A1    | chr5:150827162-150871940  | 0.0818257 | 0.999791 |
| XLOC_012448 | XLOC_012448 | RAB3GAP1   | chr2:135809834-135928279  | 0.0818684 | 0.999791 |
| XLOC_017697 | XLOC_017697 | GFM2       | chr5:73980968-74072737    | 0.0818782 | 0.999791 |
| XLOC_008245 | XLOC_008245 | ATMIN      | chr16:81069457-81080951   | 0.0818985 | 0.999791 |
| XLOC_008492 | XLOC_008492 | TUFM       | chr16:28853731-28857729   | 0.0819568 | 0.999791 |
| XLOC_001865 | XLOC_001865 | JTB        | chr1:153931574-153950451  | 0.0819873 | 0.999791 |
| XLOC_017877 | XLOC_017877 | PLAC8L1    | chr5:145463875-145483946  | 0.0820803 | 0.999791 |
| XLOC_020847 | XLOC_020847 | C7orf29    | chr7:149944300-150035245  | 0.0820825 | 0.999791 |
| XLOC_023168 | XLOC_023168 | SEC16A     | chr9:139334547-139380519  | 0.0821046 | 0.999791 |
| XLOC_007641 | XLOC_007641 | VWA9       | chr15:65871095-65903627   | 0.0821129 | 0.999791 |
| XLOC_021130 | XLOC_021130 | POMZP3     | chr7:76178657-76257299    | 0.0821261 | 0.999791 |
| XLOC_010760 | XLOC_010760 | CEBPG      | chr19:33864574-33873592   | 0.0822053 | 0.999791 |



|             |             |              |                           |           |          |
|-------------|-------------|--------------|---------------------------|-----------|----------|
| XLOC_021732 | XLOC_021732 | ZHX2         | chr8:123793900-123986755  | 0.0824    | 0.999791 |
| XLOC_001642 | XLOC_001642 | GBP2         | chr1:89573309-89591799    | 0.0824355 | 1        |
| XLOC_010447 | XLOC_010447 | ATP5D        | chr19:1241748-1244824     | 0.0824524 | 0.999791 |
| XLOC_017928 | XLOC_017928 | RNF145       | chr5:158584416-158637061  | 0.0824573 | 0.999791 |
| XLOC_003677 | XLOC_003677 | CCND1        | chr1:69455872-69469242    | 0.0824627 | 0.999791 |
| XLOC_000826 | XLOC_000826 | TOMM40L      | chr1:161195832-161208000  | 0.0824891 | 0.999791 |
| XLOC_004931 | XLOC_004931 | SPRYD4       | chr12:56862300-56882181   | 0.0825067 | 0.999791 |
| XLOC_000312 | XLOC_000312 | NFYC         | chr1:41154751-41237275    | 0.0825655 | 0.999791 |
| XLOC_008602 | XLOC_008602 | GOT2         | chr16:58741034-58768246   | 0.0825698 | 0.999791 |
| XLOC_017323 | XLOC_017323 | UBE2B        | chr5:133706869-133727799  | 0.0826755 | 0.999791 |
| XLOC_008219 | XLOC_008219 | CALB2        | chr16:71392615-71424342   | 0.082676  | 0.999791 |
| XLOC_022645 | XLOC_022645 | WDR5         | chr9:137001209-137025094  | 0.0827042 | 0.999791 |
| XLOC_018032 | XLOC_018032 | PRPF4B       | chr6:4021568-4065217      | 0.0828236 | 0.999791 |
| XLOC_000482 | XLOC_000482 | RPF1         | chr1:84944919-84972262    | 0.0828308 | 0.999791 |
| XLOC_022670 | XLOC_022670 | RABL6        | chr9:139690789-139735639  | 0.0829096 | 0.999791 |
| XLOC_014729 | XLOC_014729 | FAM211B      | chr22:24979717-25024972   | 0.082945  | 0.999791 |
| XLOC_009536 | XLOC_009536 | FLII         | chr17:18128935-18162230   | 0.0829628 | 0.999791 |
| XLOC_008959 | XLOC_008959 | GOSR1        | chr17:28804425-28853832   | 0.0829742 | 0.999791 |
| XLOC_022530 | XLOC_022530 | LOC253039    | chr9:123605319-123616651  | 0.0829762 | 0.999791 |
| XLOC_015041 | XLOC_015041 | CTNNB1       | chr3:41240941-41281939    | 0.0830169 | 0.999791 |
| XLOC_015952 | XLOC_015952 | MRPL3        | chr3:131181044-131221860  | 0.0830685 | 0.999791 |
| XLOC_017987 | XLOC_017987 | AGXT2L2      | chr5:177631507-177659803  | 0.0830979 | 0.999791 |
| XLOC_006075 | XLOC_006075 | ALG5         | chr13:37523907-37573504   | 0.0831771 | 0.999791 |
| XLOC_023740 | XLOC_023740 | ARSD         | chrX:2822010-2847416      | 0.0831981 | 0.999791 |
| XLOC_012609 | XLOC_012609 | ZDBF2        | chr2:207139522-207179148  | 0.0833583 | 0.999791 |
| XLOC_000215 | XLOC_000215 | TRNP1        | chr1:27320194-27327377    | 0.0833657 | 0.999791 |
| XLOC_012140 | XLOC_012140 | LOC100505876 | chr2:37423634-37458740    | 0.0834278 | 0.999791 |
| XLOC_015058 | XLOC_015058 | ZKSCAN7      | chr3:44596712-44624973    | 0.0834723 | 0.999791 |
| XLOC_016997 | XLOC_016997 | C4orf27      | chr4:170650618-170679093  | 0.0835076 | 0.999791 |
| XLOC_017347 | XLOC_017347 | MATR3        | chr5:138609440-138667366  | 0.0835589 | 0.999791 |
| XLOC_007692 | XLOC_007692 | FAM219B      | chr15:75192327-75199462   | 0.0836791 | 0.999791 |
| XLOC_009013 | XLOC_009013 | DUSP14       | chr17:35849950-35873588   | 0.0837144 | 0.999791 |
| XLOC_012782 | XLOC_012782 | ADAM17       | chr2:9629410-9695917      | 0.0837272 | 0.999791 |
| XLOC_006281 | XLOC_006281 | C14orf119    | chr14:23527773-23569665   | 0.0837296 | 0.999791 |
| XLOC_004839 | XLOC_004839 | SMARCD1      | chr12:50478982-50494494   | 0.0837589 | 0.999791 |
| XLOC_012467 | XLOC_012467 | LYPD6        | chr2:150186498-150330659  | 0.0837597 | 0.999791 |
| XLOC_020713 | XLOC_020713 | NAA38        | chr7:117824085-117844093  | 0.0837958 | 0.999791 |
| XLOC_000266 | XLOC_000266 | ADC          | chr1:33546713-33585995    | 0.0838366 | 0.999791 |
| XLOC_011098 | XLOC_011098 | ZNF765       | chr19:53898396-53915262   | 0.0838648 | 0.999791 |
| XLOC_001263 | XLOC_001263 | SRM          | chr1:11114648-11120091    | 0.0839059 | 0.999791 |
| XLOC_017351 | XLOC_017351 | CXXC5        | chr5:139028300-139062680  | 0.0839878 | 0.999791 |
| XLOC_007194 | XLOC_007194 | SPATA5L1     | chr15:45694518-45713616   | 0.0840265 | 0.999791 |
| XLOC_004801 | XLOC_004801 | ALG10B       | chr12:38710556-38723528   | 0.0840519 | 0.999791 |
| XLOC_011950 | XLOC_011950 | LENG9        | chr19:54960064-54974894   | 0.0841008 | 0.999791 |
| XLOC_002225 | XLOC_002225 | MRPL55       | chr1:228294379-228297013  | 0.0841229 | 0.999791 |
| XLOC_021242 | XLOC_021242 | DNAJC2       | chr7:102937872-102985320  | 0.084143  | 0.999791 |
| XLOC_000633 | XLOC_000633 | SEC22B       | chr1:145096406-145116997  | 0.0841659 | 0.999791 |
| XLOC_012378 | XLOC_012378 | ZC3H6        | chr2:113033177-113097640  | 0.0841878 | 1        |
| XLOC_018207 | XLOC_018207 | MSH5,SAPCD1  | chr6:31707724-31732624    | 0.0842127 | 0.999791 |
| XLOC_018659 | XLOC_018659 | DEK          | chr6:18224399-18264799    | 0.0843104 | 0.999791 |
| XLOC_016687 | XLOC_016687 | FAM184B      | chr4:17633708-17783135    | 0.0844512 | 1        |
| XLOC_009776 | XLOC_009776 | SLC25A39     | chr17:42396992-42402217   | 0.0844557 | 0.999791 |
| XLOC_014172 | XLOC_014172 | ETS2         | chr21:40177230-40196878   | 0.0845206 | 0.999791 |
| XLOC_015604 | XLOC_015604 | EFHB         | chr3:19920965-19975706    | 0.0845778 | 1        |
| XLOC_016194 | XLOC_016194 | LOC100507266 | chr4:4543857-4712664      | 0.0845841 | 1        |
| XLOC_001161 | XLOC_001161 | RPS9         | chr19:54704725-54711515   | 0.0846168 | 0.999791 |
| XLOC_005902 | XLOC_005902 | RNASEH2B     | chr13:51456514-51544596   | 0.0846202 | 0.999791 |
| XLOC_001144 | XLOC_001144 | SCCPDH       | chr1:246887377-246931440  | 0.0846396 | 0.999791 |
| XLOC_007793 | XLOC_007793 | LYSMD4       | chr15:100267611-100273626 | 0.0846574 | 0.999791 |
| XLOC_020656 | XLOC_020656 | POP7         | chr7:100303675-100305123  | 0.0846765 | 0.999791 |
| XLOC_015866 | XLOC_015866 | GCSAM        | chr3:111839687-111852152  | 0.084741  | 1        |
| XLOC_023138 | XLOC_023138 | SLC2A6       | chr9:136336215-136344276  | 0.0847501 | 0.999791 |
| XLOC_000323 | XLOC_000323 | YBX1         | chr1:43148065-43168020    | 0.0848023 | 0.999791 |
| XLOC_002476 | XLOC_002476 | ADO          | chr10:64564515-64568239   | 0.0848084 | 0.999791 |
| XLOC_001732 | XLOC_001732 | CSDE1,NRAS   | chr1:115247084-115300671  | 0.0848358 | 0.999791 |
| XLOC_018330 | XLOC_018330 | RUNX2        | chr6:44794466-45518819    | 0.0848559 | 0.999791 |
| XLOC_018897 | XLOC_018897 | AARS2        | chr6:44266462-44281063    | 0.0849132 | 0.999791 |
| XLOC_022282 | XLOC_022282 | KDM4C        | chr9:6720862-7175648      | 0.0849191 | 0.999791 |
| XLOC_002659 | XLOC_002659 | PPRC1        | chr10:103892786-103910090 | 0.0849253 | 0.999791 |
| XLOC_007117 | XLOC_007117 | FAN1         | chr15:31196054-31283807   | 0.0850034 | 0.999791 |
| XLOC_009534 | XLOC_009534 | TOM1L2       | chr17:17746821-17875784   | 0.0850057 | 0.999791 |
| XLOC_015484 | XLOC_015484 | FAM131A      | chr3:184053716-184079439  | 0.0850217 | 0.999791 |
| XLOC_015978 | XLOC_015978 | COPB2        | chr3:139076432-139108522  | 0.0850353 | 0.999791 |
| XLOC_010694 | XLOC_010694 | IFI30        | chr19:18284578-18288927   | 0.085076  | 0.999791 |
| XLOC_020734 | XLOC_020734 | METTL2B      | chr7:128116782-128142978  | 0.0851271 | 0.999791 |
| XLOC_001537 | XLOC_001537 | SPATA6       | chr1:48761043-48937876    | 0.085131  | 0.999791 |
| XLOC_024034 | XLOC_024034 | NKRF         | chrX:118722299-118739846  | 0.0851707 | 0.999791 |
| XLOC_012164 | XLOC_012164 | PRKCE        | chr2:45879042-46415129    | 0.0851742 | 0.999791 |
| XLOC_003908 | XLOC_003908 | FAM118B      | chr11:126081618-126138877 | 0.0852185 | 0.999791 |

|             |             |                               |                           |           |          |
|-------------|-------------|-------------------------------|---------------------------|-----------|----------|
| XLOC_017145 | XLOC_017145 | NDUFAF2                       | chr5:60240955-60448864    | 0.0852232 | 0.999791 |
| XLOC_012848 | XLOC_012848 | CCDC121                       | chr2:27848505-27917847    | 0.0852929 | 1        |
| XLOC_022915 | XLOC_022915 | CDK20                         | chr9:90581358-90589695    | 0.0853343 | 0.999791 |
| XLOC_006861 | XLOC_006861 | PLEK2                         | chr14:67853699-67878828   | 0.0853919 | 0.999791 |
| XLOC_017123 | XLOC_017123 | MRPS30                        | chr5:44809026-44815618    | 0.0854078 | 0.999791 |
| XLOC_003531 | XLOC_003531 | CCDC86                        | chr11:60609428-60623444   | 0.0854539 | 0.999791 |
| XLOC_006054 | XLOC_006054 | SLC7A1                        | chr13:30083550-30169825   | 0.0855037 | 0.999791 |
| XLOC_006018 | XLOC_006018 | GJA3                          | chr13:20712394-20735183   | 0.0856452 | 0.999791 |
| XLOC_014954 | XLOC_014954 | MKRN2                         | chr3:12598512-12705700    | 0.0856565 | 0.999791 |
| XLOC_024176 | XLOC_024176 | PNCK                          | chrX:152935187-152939816  | 0.0856869 | 1        |
| XLOC_000896 | XLOC_000896 | CACYBP                        | chr1:174968570-174981163  | 0.0857213 | 0.999791 |
| XLOC_015771 | XLOC_015771 | ACTR8                         | chr3:53901093-53916229    | 0.0857415 | 0.999791 |
| XLOC_006646 | XLOC_006646 | KLC1                          | chr14:104095524-104181823 | 0.0858165 | 0.999791 |
| XLOC_014766 | XLOC_014766 | SEC14L4                       | chr22:30884897-30901698   | 0.0858218 | 0.999791 |
| XLOC_014242 | XLOC_014242 | BTG3                          | chr21:18965967-18985268   | 0.0858883 | 0.999791 |
| XLOC_000296 | XLOC_000296 | AKIRIN1                       | chr1:39456915-39471737    | 0.0859027 | 0.999791 |
| XLOC_008204 | XLOC_008204 | NFAT5                         | chr16:69599868-69738569   | 0.085932  | 0.999791 |
| XLOC_008555 | XLOC_008555 | VPS35                         | chr16:46693588-46723144   | 0.0859477 | 0.999791 |
| XLOC_015124 | XLOC_015124 | RBM15B                        | chr3:51428698-51534018    | 0.0859602 | 0.999791 |
| XLOC_011685 | XLOC_011685 | ADCK4                         | chr19:41197433-41222790   | 0.0860875 | 0.999791 |
| XLOC_016034 | XLOC_016034 | LXN                           | chr3:158362316-158410360  | 0.0861268 | 0.999791 |
| XLOC_012545 | XLOC_012545 | DNAJC10                       | chr2:183580767-183644750  | 0.0862265 | 0.999791 |
| XLOC_020752 | XLOC_020752 | KLHDC10                       | chr7:129710348-129775560  | 0.0862675 | 0.999791 |
| XLOC_010141 | XLOC_010141 | SNRPD1                        | chr18:19192259-19210208   | 0.0863923 | 0.999791 |
| XLOC_008058 | XLOC_008058 | LOC100862671                  | chr16:30751511-30756517   | 0.0863982 | 0.999791 |
| XLOC_001260 | XLOC_001260 | CASZ1                         | chr1:10696665-10856733    | 0.0864007 | 0.999791 |
| XLOC_022607 | XLOC_022607 | TOR1B                         | chr9:132565431-132573560  | 0.0864039 | 0.999791 |
| XLOC_001396 | XLOC_001396 | SNORA61                       | chr1:28879528-28908366    | 0.0864388 | 0.999791 |
| XLOC_007777 | XLOC_007777 | AP3S2,C15orf38,C15orf38-AP3S2 | chr15:90373830-90456222   | 0.0864735 | 0.999791 |
| XLOC_023669 | XLOC_023669 | MTM1                          | chrX:149737046-149841616  | 0.086507  | 0.999791 |
| XLOC_015800 | XLOC_015800 | PSMD6                         | chr3:63989697-64009686    | 0.0866323 | 0.999791 |
| XLOC_006288 | XLOC_006288 | DHRS4                         | chr14:24407939-24438488   | 0.0866381 | 0.999791 |
| XLOC_006301 | XLOC_006301 | GMPR2                         | chr14:24701647-24708447   | 0.0867197 | 0.999791 |
| XLOC_012756 | XLOC_012756 | ING5                          | chr2:242641455-242668896  | 0.0867961 | 0.999791 |
| XLOC_009520 | XLOC_009520 | CENPV                         | chr17:16245847-16256812   | 0.0868024 | 0.999791 |
| XLOC_017055 | XLOC_017055 | EXOC3                         | chr5:443333-467409        | 0.0868102 | 0.999791 |
| XLOC_023349 | XLOC_023349 | UBA1                          | chrX:47050198-47074527    | 0.0869565 | 0.999791 |
| XLOC_017665 | XLOC_017665 | MIER3                         | chr5:56205086-56247954    | 0.0869754 | 0.999791 |
| XLOC_012346 | XLOC_012346 | SLC9A2                        | chr2:103236165-103327809  | 0.0869887 | 1        |
| XLOC_020992 | XLOC_020992 | FKBP14                        | chr7:30050198-30066417    | 0.0870148 | 0.999791 |
| XLOC_004807 | XLOC_004807 | IRAK4                         | chr12:44152746-44183346   | 0.08705   | 0.999791 |
| XLOC_022240 | XLOC_022240 | CPSF1                         | chr8:145597730-145634733  | 0.087061  | 0.999791 |
| XLOC_010128 | XLOC_010128 | PSMG2                         | chr18:12658737-12725739   | 0.08709   | 0.999791 |
| XLOC_009598 | XLOC_009598 | CRLF3                         | chr17:29109701-291151778  | 0.0871203 | 0.999791 |
| XLOC_001976 | XLOC_001976 | NR1I3                         | chr1:161195832-161208000  | 0.0871223 | 0.999791 |
| XLOC_012400 | XLOC_012400 | DDX18                         | chr2:118572254-118589953  | 0.0871264 | 0.999791 |
| XLOC_002941 | XLOC_002941 | CSTF2T                        | chr10:52750910-54073888   | 0.0871284 | 0.999791 |
| XLOC_000641 | XLOC_000641 | PEX11B                        | chr1:145516164-145523732  | 0.0871425 | 0.999791 |
| XLOC_014788 | XLOC_014788 | LARGE                         | chr22:33669061-34316416   | 0.0871666 | 0.999791 |
| XLOC_014115 | XLOC_014115 | JAM2                          | chr21:27011593-27089874   | 0.0871694 | 1        |
| XLOC_020772 | XLOC_020772 | C7orf73                       | chr7:135347220-135361160  | 0.0871968 | 0.999791 |
| XLOC_003087 | XLOC_003087 | COX15                         | chr10:101419262-101515894 | 0.0872534 | 0.999791 |
| XLOC_017066 | XLOC_017066 | KIAA0947                      | chr5:5422785-5490347      | 0.0872713 | 0.999791 |
| XLOC_010029 | XLOC_010029 | LINC00482                     | chr17:79276623-79283048   | 0.0873078 | 1        |
| XLOC_014777 | XLOC_014777 | E1F4ENF1                      | chr22:31835344-31885874   | 0.0873085 | 0.999791 |
| XLOC_009765 | XLOC_009765 | MPP3                          | chr17:41878166-41910547   | 0.087398  | 0.999791 |
| XLOC_021595 | XLOC_021595 | LYN                           | chr8:56792385-56925006    | 0.0874405 | 0.999791 |
| XLOC_012471 | XLOC_012471 | FMNL2                         | chr2:153191750-153506348  | 0.0874792 | 0.999791 |
| XLOC_008455 | XLOC_008455 | THUMPD1                       | chr16:20744988-20753199   | 0.0874869 | 0.999791 |
| XLOC_020358 | XLOC_020358 | CCZ1                          | chr7:5938340-5965603      | 0.0875529 | 0.999791 |
| XLOC_022786 | XLOC_022786 | BAG1                          | chr9:33252469-33264759    | 0.0875889 | 0.999791 |
| XLOC_008567 | XLOC_008567 | BRD7                          | chr16:50352928-50402845   | 0.0876524 | 0.999791 |
| XLOC_007534 | XLOC_007534 | ZFP106                        | chr15:42705020-42749730   | 0.0876733 | 0.999791 |
| XLOC_006297 | XLOC_006297 | RNF31                         | chr14:24616658-24629870   | 0.0876843 | 0.999791 |
| XLOC_017493 | XLOC_017493 | MSX2                          | chr5:174151574-174157902  | 0.0877064 | 0.999791 |
| XLOC_001866 | XLOC_001866 | RAB13                         | chr1:153954092-153958853  | 0.087707  | 0.999791 |
| XLOC_021089 | XLOC_021089 | GTF2IRD1P1                    | chr7:66205642-66309813    | 0.0877313 | 0.999791 |
| XLOC_004848 | XLOC_004848 | LETMD1                        | chr12:51442081-51454207   | 0.0878666 | 0.999791 |
| XLOC_001119 | XLOC_001119 | GPR137B                       | chr1:236305831-236372209  | 0.0879173 | 0.999791 |
| XLOC_018648 | XLOC_018648 | LOC100130357                  | chr6:12717036-13295818    | 0.0879357 | 1        |
| XLOC_021105 | XLOC_021105 | TBL2                          | chr7:72983276-72993013    | 0.0879963 | 0.999791 |
| XLOC_012816 | XLOC_012816 | SF3B14                        | chr2:24290453-24293913    | 0.0880004 | 0.999791 |
| XLOC_017325 | XLOC_017325 | SEC24A                        | chr5:133984474-134063601  | 0.0880559 | 0.999791 |
| XLOC_017103 | XLOC_017103 | DNAJC21                       | chr5:34929697-34959069    | 0.0880906 | 0.999791 |
| XLOC_023100 | XLOC_023100 | TRUB2                         | chr9:131071395-131084697  | 0.0881228 | 0.999791 |
| XLOC_000536 | XLOC_000536 | CDC14A                        | chr1:100818022-100985833  | 0.0883116 | 0.999791 |
| XLOC_011099 | XLOC_011099 | ZNF761                        | chr19:53935226-53961515   | 0.0883491 | 0.999791 |
| XLOC_013736 | XLOC_013736 | RBM38                         | chr20:55904830-55998278   | 0.0883549 | 0.999791 |
| XLOC_012519 | XLOC_012519 | CDCA7                         | chr2:174219560-174233718  | 0.088357  | 0.999791 |

|             |             |                         |                           |           |          |
|-------------|-------------|-------------------------|---------------------------|-----------|----------|
| XLOC_006450 | XLOC_006450 | DLST                    | chr14:75348593-75370450   | 0.0883842 | 0.999791 |
| XLOC_010055 | XLOC_010055 | FASN                    | chr17:80036213-80056106   | 0.0884225 | 0.999791 |
| XLOC_018406 | XLOC_018406 | ORC3                    | chr6:88299784-88371712    | 0.0884645 | 0.999791 |
| XLOC_001296 | XLOC_001296 | EPHA2                   | chr1:16450831-16482582    | 0.0884775 | 0.999791 |
| XLOC_004879 | XLOC_004879 | HOXC11                  | chr12:54356091-54370203   | 0.0885539 | 0.999791 |
| XLOC_011032 | XLOC_011032 | PRR12                   | chr19:50094911-50129696   | 0.0886534 | 0.999791 |
| XLOC_020634 | XLOC_020634 | ZSCAN25                 | chr7:99214570-99230030    | 0.0887011 | 0.999791 |
| XLOC_013643 | XLOC_013643 | VSTM2L                  | chr20:36531498-36573747   | 0.0887139 | 1        |
| XLOC_017663 | XLOC_017663 | IL6ST                   | chr5:55230924-55290821    | 0.0887194 | 0.999791 |
| XLOC_022975 | XLOC_022975 | ANKS6                   | chr9:101494290-101558794  | 0.0887687 | 0.999791 |
| XLOC_014008 | XLOC_014008 | ELMO2                   | chr20:44994689-45035271   | 0.0887704 | 0.999791 |
| XLOC_007154 | XLOC_007154 | VPS18                   | chr15:41186627-41196173   | 0.0887724 | 0.999791 |
| XLOC_006191 | XLOC_006191 | STK24                   | chr13:99102454-99229396   | 0.0889167 | 0.999791 |
| XLOC_011565 | XLOC_011565 | ZNF708                  | chr19:21473962-21512212   | 0.0889179 | 0.999791 |
| XLOC_008082 | XLOC_008082 | ZNF267                  | chr16:31885078-31928629   | 0.0889187 | 0.999791 |
| XLOC_014560 | XLOC_014560 | TOMM22                  | chr22:39077953-39080766   | 0.0889767 | 0.999791 |
| XLOC_009732 | XLOC_009732 | LEPREL4                 | chr17:39958204-39968451   | 0.0889927 | 0.999791 |
| XLOC_016328 | XLOC_016328 | PAICS                   | chr4:57301914-57327534    | 0.0890063 | 0.999791 |
| XLOC_021992 | XLOC_021992 | ATP6V1H                 | chr8:54628102-54755871    | 0.0890443 | 0.999791 |
| XLOC_006762 | XLOC_006762 | SPTSSA                  | chr14:34902143-34931468   | 0.0890456 | 0.999791 |
| XLOC_005162 | XLOC_005162 | HIP1R                   | chr12:123320038-123347507 | 0.0890896 | 0.999791 |
| XLOC_004979 | XLOC_004979 | MDM2                    | chr12:69201970-69239320   | 0.0891035 | 0.999791 |
| XLOC_021386 | XLOC_021386 | ZNF777                  | chr7:149128453-149158053  | 0.0891583 | 0.999791 |
| XLOC_005346 | XLOC_005346 | LDHB                    | chr12:21788274-21810789   | 0.0891894 | 0.999791 |
| XLOC_015455 | XLOC_015455 | PIK3CA                  | chr3:178866310-178952497  | 0.0892008 | 0.999791 |
| XLOC_016460 | XLOC_016460 | RPL34                   | chr4:109541721-109551639  | 0.0892224 | 0.999791 |
| XLOC_016522 | XLOC_016522 | ABCE1                   | chr4:145915726-146050676  | 0.0893089 | 0.999791 |
| XLOC_005529 | XLOC_005529 | ATP5B                   | chr12:57031958-57039852   | 0.0893873 | 0.999791 |
| XLOC_001336 | XLOC_001336 | EIF4G3                  | chr1:21132784-21503381    | 0.0893875 | 0.999791 |
| XLOC_005398 | XLOC_005398 | SCAF11                  | chr12:46312913-46384401   | 0.089574  | 0.999791 |
| XLOC_015104 | XLOC_015104 | TCTA                    | chr3:49449638-49453909    | 0.0896483 | 0.999791 |
| XLOC_010755 | XLOC_010755 | C19orf40                | chr19:33463147-33467960   | 0.0896621 | 0.999791 |
| XLOC_007963 | XLOC_007963 | PKD1P1                  | chr16:16411465-16444465   | 0.0896779 | 0.999791 |
| XLOC_018116 | XLOC_018116 | HMGNA4                  | chr6:26538571-26547164    | 0.0898019 | 0.999791 |
| XLOC_001437 | XLOC_001437 | LOC653160               | chr1:35441299-35444307    | 0.0898419 | 0.999791 |
| XLOC_010545 | XLOC_010545 | LRRC8E                  | chr19:7953389-7969809     | 0.0899981 | 0.999791 |
| XLOC_008514 | XLOC_008514 | CD2BP2                  | chr16:30362086-30366682   | 0.0899945 | 0.999791 |
| XLOC_017683 | XLOC_017683 | TAF9                    | chr5:68647552-68710630    | 0.0900234 | 0.999791 |
| XLOC_017031 | XLOC_017031 | LRP2BP                  | chr4:186131283-186300152  | 0.0900785 | 0.999791 |
| XLOC_001419 | XLOC_001419 | PTP4A2                  | chr1:32372021-32403988    | 0.0901101 | 0.999791 |
| XLOC_023335 | XLOC_023335 | DDX3X                   | chrX:41192650-41209524    | 0.0901144 | 0.999791 |
| XLOC_016835 | XLOC_016835 | LOC100506746            | chr4:87846045-87856002    | 0.0901508 | 0.999791 |
| XLOC_018429 | XLOC_018429 | PRDM1                   | chr6:106534194-106557814  | 0.0902103 | 1        |
| XLOC_009563 | XLOC_009563 | LYRM9                   | chr17:26205339-26220409   | 0.0902152 | 0.999791 |
| XLOC_006087 | XLOC_006087 | FOXO1                   | chr13:41129800-41240734   | 0.09023   | 0.999791 |
| XLOC_003171 | XLOC_003171 | CUZD1,FAM24B            | chr10:124591670-124658230 | 0.0903417 | 0.999791 |
| XLOC_004778 | XLOC_004778 | FGFR1OP2                | chr12:27091304-27119581   | 0.0903656 | 0.999791 |
| XLOC_021426 | XLOC_021426 | ZNF596                  | chr8:158344-197339        | 0.0903704 | 0.999791 |
| XLOC_015481 | XLOC_015481 | PSMD2                   | chr3:184017021-184026840  | 0.0904102 | 0.999791 |
| XLOC_021326 | XLOC_021326 | SLC35B4                 | chr7:133974089-134001827  | 0.0904596 | 0.999791 |
| XLOC_005864 | XLOC_005864 | SLC25A15                | chr13:41363546-41495910   | 0.0905356 | 0.999791 |
| XLOC_023008 | XLOC_023008 | KIAA0368                | chr9:114122972-114247025  | 0.0905415 | 0.999791 |
| XLOC_008395 | XLOC_008395 | CORO7,CORO7-PAM16,PAM16 | chr16:4390251-4466962     | 0.0906206 | 0.999791 |
| XLOC_020540 | XLOC_020540 | WBSCR22                 | chr7:73097897-73112551    | 0.0906233 | 0.999791 |
| XLOC_004913 | XLOC_004913 | TMEM198B                | chr12:56211805-56236767   | 0.0906517 | 0.999791 |
| XLOC_001364 | XLOC_001364 | SYF2                    | chr1:25548766-25559013    | 0.0906679 | 0.999791 |
| XLOC_017675 | XLOC_017675 | SREK1IP1                | chr5:63986134-64064496    | 0.0906681 | 0.999791 |
| XLOC_002345 | XLOC_002345 | SEC61A2                 | chr10:12171639-12292589   | 0.0906807 | 0.999791 |
| XLOC_022888 | XLOC_022888 | C9orf41                 | chr9:77597872-77643310    | 0.0907291 | 0.999791 |
| XLOC_013394 | XLOC_013394 | CUL3                    | chr2:225334866-225450114  | 0.0907711 | 0.999791 |
| XLOC_015444 | XLOC_015444 | SKIL                    | chr3:170075472-170114637  | 0.0907951 | 0.999791 |
| XLOC_006429 | XLOC_006429 | DCAF4                   | chr14:73393039-73426357   | 0.0908151 | 0.999791 |
| XLOC_008736 | XLOC_008736 | CENPBD1                 | chr16:90036182-90067195   | 0.0908378 | 0.999791 |
| XLOC_013803 | XLOC_013803 | TBC1D20                 | chr20:416123-443187       | 0.0908724 | 0.999791 |
| XLOC_006435 | XLOC_006435 | ACOT2                   | chr14:74034323-74042362   | 0.0909209 | 0.999791 |
| XLOC_001354 | XLOC_001354 | HMGCL                   | chr1:24128366-24151949    | 0.0909899 | 0.999791 |
| XLOC_019120 | XLOC_019120 | HIVEP2                  | chr6:143072603-143266338  | 0.0909989 | 0.999791 |
| XLOC_002997 | XLOC_002997 | PPP3CB                  | chr10:75196562-75255782   | 0.0910034 | 0.999791 |
| XLOC_013407 | XLOC_013407 | SLC16A14                | chr2:230899689-230933715  | 0.0910312 | 0.999791 |
| XLOC_006799 | XLOC_006799 | METTL21D                | chr14:50575349-50583297   | 0.0910595 | 0.999791 |
| XLOC_006641 | XLOC_006641 | EIF5                    | chr14:103800338-103811361 | 0.0911558 | 0.999791 |
| XLOC_008926 | XLOC_008926 | KSR1                    | chr17:25799035-25950718   | 0.0911879 | 1        |
| XLOC_003497 | XLOC_003497 | CTNND1,TMX2             | chr11:57479994-57586652   | 0.0911936 | 0.999791 |
| XLOC_021962 | XLOC_021962 | PPAPDC1B                | chr8:38120649-38126738    | 0.0911987 | 0.999791 |
| XLOC_014715 | XLOC_014715 | GUSBP11                 | chr22:23980674-24059610   | 0.0912458 | 0.999791 |
| XLOC_022771 | XLOC_022771 | LINC00032               | chr9:27245681-27282791    | 0.0912766 | 1        |
| XLOC_014704 | XLOC_014704 | PPM1F                   | chr22:22273791-22307250   | 0.0912872 | 0.999791 |
| XLOC_001755 | XLOC_001755 | ANKRD20A12P             | chr1:142697420-142713605  | 0.0913572 | 0.999791 |
| XLOC_011705 | XLOC_011705 | ERF                     | chr19:42751716-42759309   | 0.0914282 | 0.999791 |

|             |             |            |                           |           |          |
|-------------|-------------|------------|---------------------------|-----------|----------|
| XLOC_004695 | XLOC_004695 | EMG1       | chr12:7079943-7085165     | 0.0915461 | 0.999791 |
| XLOC_021225 | XLOC_021225 | NAT16      | chr7:100813773-100823557  | 0.0915746 | 0.999791 |
| XLOC_003086 | XLOC_003086 | SLC25A28   | chr10:101370274-101380221 | 0.0917656 | 0.999791 |
| XLOC_017146 | XLOC_017146 | ZSWIM6     | chr5:60628099-60841999    | 0.0917924 | 0.999791 |
| XLOC_011915 | XLOC_011915 | ZNF616     | chr19:52617652-52643191   | 0.0918278 | 0.999791 |
| XLOC_006995 | XLOC_006995 | CDCA4      | chr14:105475909-105487425 | 0.0918473 | 0.999791 |
| XLOC_013983 | XLOC_013983 | TOMM34     | chr20:43570770-43589114   | 0.0918969 | 0.999791 |
| XLOC_000823 | XLOC_000823 | PPOX       | chr1:161136180-161141010  | 0.0918981 | 0.999791 |
| XLOC_015523 | XLOC_015523 | HES1       | chr3:193853930-193856401  | 0.0919194 | 0.999791 |
| XLOC_002629 | XLOC_002629 | PI4K2A     | chr10:99400442-99436187   | 0.0919679 | 0.999791 |
| XLOC_016910 | XLOC_016910 | FLJ14186   | chr4:120326677-120331815  | 0.0919775 | 0.999791 |
| XLOC_020955 | XLOC_020955 | CDCA7L     | chr7:21582832-21985542    | 0.0920409 | 0.999791 |
| XLOC_015108 | XLOC_015108 | RNF123     | chr3:49726949-49761384    | 0.092073  | 0.999791 |
| XLOC_015179 | XLOC_015179 | KBTBD8     | chr3:67048726-67061632    | 0.092073  | 0.999791 |
| XLOC_020466 | XLOC_020466 | DBNL       | chr7:44084238-44101315    | 0.0920954 | 0.999791 |
| XLOC_017952 | XLOC_017952 | SH3PXD2B   | chr5:171760502-171881527  | 0.0921077 | 0.999791 |
| XLOC_003228 | XLOC_003228 | TMEM80     | chr11:644224-705028       | 0.0921139 | 0.999791 |
| XLOC_007486 | XLOC_007486 | KATNBL1    | chr15:34432874-34502297   | 0.0921496 | 0.999791 |
| XLOC_016920 | XLOC_016920 | BBS7       | chr4:122745483-122791652  | 0.0921548 | 0.999791 |
| XLOC_012752 | XLOC_012752 | SEPT2      | chr2:242166681-242293441  | 0.0922319 | 0.999791 |
| XLOC_017507 | XLOC_017507 | UNC5A      | chr5:176237559-176326333  | 0.0922644 | 0.999791 |
| XLOC_021673 | XLOC_021673 | FAM92A1    | chr8:94712772-94740671    | 0.092359  | 0.999791 |
| XLOC_007977 | XLOC_007977 | LOC81691   | chr16:20775311-20860990   | 0.0923819 | 0.999791 |
| XLOC_016517 | XLOC_016517 | USP38      | chr4:144106069-144143141  | 0.0923877 | 0.999791 |
| XLOC_005397 | XLOC_005397 | LOC400027  | chr12:46119502-46121704   | 0.0923891 | 0.999791 |
| XLOC_015727 | XLOC_015727 | MON1A      | chr3:49946301-49967445    | 0.0924552 | 0.999791 |
| XLOC_013351 | XLOC_013351 | PECR       | chr2:216903110-216946539  | 0.0924836 | 0.999791 |
| XLOC_000277 | XLOC_000277 | ZMYM4      | chr1:35734567-35887545    | 0.0924926 | 0.999791 |
| XLOC_015192 | XLOC_015192 | LOC401074  | chr3:75721431-75728454    | 0.0924927 | 1        |
| XLOC_002993 | XLOC_002993 | MRPS16     | chr10:75007124-75118617   | 0.0925933 | 0.999791 |
| XLOC_007899 | XLOC_007899 | CLDN9      | chr16:3062456-3064506     | 0.0926011 | 1        |
| XLOC_002411 | XLOC_002411 | LOC399744  | chr10:38717073-38741081   | 0.0926076 | 0.999791 |
| XLOC_003620 | XLOC_003620 | EHBP1L1    | chr1:65343508-65360116    | 0.0926511 | 0.999791 |
| XLOC_007148 | XLOC_007148 | CASC5      | chr15:40886446-40954881   | 0.0926599 | 0.999791 |
| XLOC_004345 | XLOC_004345 | ZDHHC24    | chr1:66306734-66313671    | 0.092695  | 0.999791 |
| XLOC_016523 | XLOC_016523 | SMAD1      | chr4:146402950-146480325  | 0.0927231 | 0.999791 |
| XLOC_009640 | XLOC_009640 | ACACA      | chr17:35441926-35766902   | 0.0927579 | 0.999791 |
| XLOC_002871 | XLOC_002871 | MTPAP      | chr10:30598729-30638267   | 0.0927694 | 0.999791 |
| XLOC_015661 | XLOC_015661 | LIMD1-AS1  | chr3:45636322-45730374    | 0.0927829 | 0.999791 |
| XLOC_001798 | XLOC_001798 | ANP32E     | chr1:150190716-150208504  | 0.0928003 | 0.999791 |
| XLOC_022523 | XLOC_022523 | C9orf91    | chr9:117373705-117408703  | 0.092803  | 0.999791 |
| XLOC_002655 | XLOC_002655 | DPDC       | chr10:103348088-103369410 | 0.0928074 | 0.999791 |
| XLOC_007453 | XLOC_007453 | NIPA1      | chr15:23043278-23086843   | 0.0928521 | 0.999791 |
| XLOC_008433 | XLOC_008433 | RRN3       | chr16:15153878-15188158   | 0.0929059 | 0.999791 |
| XLOC_008302 | XLOC_008302 | ZNF276     | chr16:89773540-89883065   | 0.0929373 | 0.999791 |
| XLOC_010112 | XLOC_010112 | NDUFV2     | chr18:9102627-9134343     | 0.0929502 | 0.999791 |
| XLOC_004169 | XLOC_004169 | ACP2       | chr1:47260852-47290584    | 0.092958  | 0.999791 |
| XLOC_000871 | XLOC_000871 | GORAB      | chr1:170501262-170522974  | 0.0929582 | 0.999791 |
| XLOC_004462 | XLOC_004462 | SNORA25    | chr11:93463680-93463812   | 0.0929657 | 0.999791 |
| XLOC_008696 | XLOC_008696 | MPHOSPH6   | chr16:82181766-82203829   | 0.0929868 | 0.999791 |
| XLOC_001767 | XLOC_001767 | NUDT17     | chr1:145575987-145589435  | 0.0930481 | 0.999791 |
| XLOC_018853 | XLOC_018853 | KCNK5      | chr6:39156746-39197251    | 0.0930719 | 0.999791 |
| XLOC_015716 | XLOC_015716 | AMT,NICN1  | chr3:49454210-49466757    | 0.0930888 | 0.999791 |
| XLOC_017102 | XLOC_017102 | BRIX1      | chr5:34915819-34925787    | 0.0931173 | 0.999791 |
| XLOC_021192 | XLOC_021192 | FAM200A    | chr7:99143922-99149757    | 0.0931186 | 0.999791 |
| XLOC_011813 | XLOC_011813 | NTN5       | chr19:49141271-49185502   | 0.093123  | 0.999791 |
| XLOC_010100 | XLOC_010100 | DLGAP1-AS1 | chr18:3496029-4455266     | 0.0931397 | 0.999791 |
| XLOC_010671 | XLOC_010671 | USE1       | chr19:17326154-17330638   | 0.0931856 | 0.999791 |
| XLOC_021403 | XLOC_021403 | SMARCD3    | chr7:150936058-150974231  | 0.0932699 | 0.999791 |
| XLOC_017419 | XLOC_017419 | PPARGC1B   | chr5:149109814-149234585  | 0.0932731 | 0.999791 |
| XLOC_013535 | XLOC_013535 | SNRPB2     | chr20:16710608-16722417   | 0.0932737 | 0.999791 |
| XLOC_009072 | XLOC_009072 | COASY      | chr17:40714091-40718299   | 0.0934367 | 0.999791 |
| XLOC_006764 | XLOC_006764 | SNX6       | chr14:35030617-35099366   | 0.0934723 | 0.999791 |
| XLOC_008978 | XLOC_008978 | ZNF207     | chr17:30677127-30697468   | 0.0935007 | 0.999791 |
| XLOC_022289 | XLOC_022289 | CNTLN      | chr9:17135037-17503917    | 0.0935754 | 0.999791 |
| XLOC_008698 | XLOC_008698 | MBTPS1     | chr16:84087368-84150517   | 0.0935792 | 0.999791 |
| XLOC_008656 | XLOC_008656 | VAC14      | chr16:70721341-70835061   | 0.0935896 | 0.999791 |
| XLOC_022522 | XLOC_022522 | ATP6V1G1   | chr9:117349993-117361152  | 0.0936196 | 0.999791 |
| XLOC_001723 | XLOC_001723 | RSBN1      | chr1:114304453-114355070  | 0.0936674 | 0.999791 |
| XLOC_005794 | XLOC_005794 | GOLGA3     | chr12:133345494-133405426 | 0.0936843 | 0.999791 |
| XLOC_011899 | XLOC_011899 | SIGLEC10   | chr19:51913274-51921057   | 0.0936925 | 1        |
| XLOC_022092 | XLOC_022092 | RBM12B     | chr8:94743730-94753224    | 0.09371   | 0.999791 |
| XLOC_000595 | XLOC_000595 | CTTNBP2NL  | chr1:112938799-113003786  | 0.0937127 | 0.999791 |
| XLOC_016148 | XLOC_016148 | NCPB2      | chr3:196662272-196669464  | 0.0937171 | 0.999791 |
| XLOC_012586 | XLOC_012586 | CASP10     | chr2:202047620-202094129  | 0.0938592 | 0.999791 |
| XLOC_000268 | XLOC_000268 | ZSCAN20    | chr1:33938231-33961995    | 0.0938712 | 1        |
| XLOC_004528 | XLOC_004528 | TIMM8B     | chr1:111944967-111957522  | 0.093915  | 0.999791 |
| XLOC_016958 | XLOC_016958 | NR3C2      | chr4:148999914-149363672  | 0.0939284 | 1        |
| XLOC_024075 | XLOC_024075 | LOC286467  | chrX:130836677-130964671  | 0.0940234 | 0.999791 |

|             |             |              |                           |           |          |
|-------------|-------------|--------------|---------------------------|-----------|----------|
| XLOC_005709 | XLOC_005709 | RPL6         | chr12:112842993-112847443 | 0.0940397 | 0.999791 |
| XLOC_022842 | XLOC_022842 | LOC100289137 | chr9:38540563-38545369    | 0.0940842 | 0.999791 |
| XLOC_016181 | XLOC_016181 | SH3BP2       | chr4:2794749-2842823      | 0.0941015 | 0.999791 |
| XLOC_015443 | XLOC_015443 | PRKCI        | chr3:169940219-170023770  | 0.0942036 | 0.999791 |
| XLOC_004068 | XLOC_004068 | LOC440028    | chr11:9776316-10315754    | 0.0942246 | 0.999791 |
| XLOC_002417 | XLOC_002417 | CSGALNACT2   | chr10:43633892-43680754   | 0.0942681 | 0.999791 |
| XLOC_004031 | XLOC_004031 | PRKCDDBP     | chr11:6340175-6341740     | 0.0942829 | 0.999791 |
| XLOC_001211 | XLOC_001211 | NADK         | chr1:1682670-1711508      | 0.0943222 | 0.999791 |
| XLOC_020627 | XLOC_020627 | ARPC1B       | chr7:98972297-99006305    | 0.0943337 | 0.999791 |
| XLOC_013553 | XLOC_013553 | NAA20        | chr20:19997933-20014273   | 0.0944166 | 0.999791 |
| XLOC_010815 | XLOC_010815 | ZNF382       | chr19:37096206-37119499   | 0.0944279 | 1        |
| XLOC_007568 | XLOC_007568 | COPS2        | chr15:49417470-49447854   | 0.0944675 | 0.999791 |
| XLOC_015461 | XLOC_015461 | TTC14        | chr3:180319917-180328918  | 0.0944696 | 0.999791 |
| XLOC_020519 | XLOC_020519 | ASL          | chr7:65540775-65558329    | 0.0944928 | 0.999791 |
| XLOC_002192 | XLOC_002192 | RAB3GAP2     | chr1:220321609-220445843  | 0.0945677 | 0.999791 |
| XLOC_008056 | XLOC_008056 | SRCAP        | chr16:30710461-30751450   | 0.0946047 | 0.999791 |
| XLOC_006665 | XLOC_006665 | MTA1         | chr14:105886185-105937057 | 0.0946197 | 0.999791 |
| XLOC_012345 | XLOC_012345 | SLC9A4       | chr2:103089761-103150431  | 0.0946307 | 1        |
| XLOC_022082 | XLOC_022082 | NBN          | chr8:90945563-90966899    | 0.0946691 | 0.999791 |
| XLOC_010044 | XLOC_010044 | ALYREF       | chr17:79845710-79849462   | 0.0947004 | 0.999791 |
| XLOC_020907 | XLOC_020907 | GNA12        | chr7:2767740-2883959      | 0.0947306 | 0.999791 |
| XLOC_009407 | XLOC_009407 | C17orf85     | chr17:3710044-3749345     | 0.0947498 | 0.999791 |
| XLOC_002816 | XLOC_002816 | NUDT5        | chr10:12171639-12292589   | 0.0947613 | 0.999791 |
| XLOC_006098 | XLOC_006098 | CCDC122      | chr13:44410488-44468068   | 0.0948068 | 0.999791 |
| XLOC_006731 | XLOC_006731 | PSME2        | chr14:24612573-24615855   | 0.0948111 | 0.999791 |
| XLOC_021801 | XLOC_021801 | ADCK5        | chr8:145597730-145634733  | 0.0948223 | 0.999791 |
| XLOC_005097 | XLOC_005097 | FAM216A      | chr12:110890290-110928192 | 0.0948628 | 0.999791 |
| XLOC_008162 | XLOC_008162 | CA7          | chr16:66878281-66888049   | 0.0948785 | 1        |
| XLOC_007895 | XLOC_007895 | FLYWCH1      | chr16:2961979-3001209     | 0.0948893 | 0.999791 |
| XLOC_020628 | XLOC_020628 | BUD31        | chr7:99006600-99063824    | 0.0949167 | 0.999791 |
| XLOC_016456 | XLOC_016456 | SGMS2        | chr4:108745720-108836204  | 0.0949184 | 0.999791 |
| XLOC_014607 | XLOC_014607 | TSPO         | chr22:43547519-43559248   | 0.095026  | 0.999791 |
| XLOC_000267 | XLOC_000267 | ZNF362       | chr1:33722173-33766320    | 0.0950723 | 0.999791 |
| XLOC_006395 | XLOC_006395 | MTHFD1       | chr14:64854758-64926725   | 0.0950756 | 0.999791 |
| XLOC_018125 | XLOC_018125 | ZNF391       | chr6:27356523-27369227    | 0.0951199 | 0.999791 |
| XLOC_002188 | XLOC_002188 | EPRS         | chr1:220046618-220321383  | 0.0951358 | 0.999791 |
| XLOC_006890 | XLOC_006890 | ABCD4        | chr14:74751979-74769767   | 0.095158  | 0.999791 |
| XLOC_013235 | XLOC_013235 | OLA1         | chr2:174937174-175113365  | 0.0951904 | 0.999791 |
| XLOC_000635 | XLOC_000635 | NBPF10       | chr1:145293370-145368684  | 0.095204  | 1        |
| XLOC_018638 | XLOC_018638 | SLC35B3      | chr6:8413300-8435794      | 0.0952284 | 0.999791 |
| XLOC_011255 | XLOC_011255 | WASH5P       | chr19:60950-70966         | 0.0952739 | 0.999791 |
| XLOC_000640 | XLOC_000640 | RBM8A        | chr1:145507556-145516076  | 0.0952792 | 0.999791 |
| XLOC_011195 | XLOC_011195 | U2AF2        | chr19:56165415-56186082   | 0.0953759 | 0.999791 |
| XLOC_004815 | XLOC_004815 | PFKM         | chr12:48436680-48540187   | 0.0953986 | 0.999791 |
| XLOC_013340 | XLOC_013340 | LANCL1       | chr2:211295972-211341499  | 0.0954644 | 0.999791 |
| XLOC_001268 | XLOC_001268 | MTHFR        | chr1:11845786-11907840    | 0.0955104 | 0.999791 |
| XLOC_002722 | XLOC_002722 | GRK5         | chr10:120967196-121215131 | 0.0955208 | 0.999791 |
| XLOC_023161 | XLOC_023161 | QSOX2        | chr9:139098181-139137687  | 0.0955681 | 0.999791 |
| XLOC_005086 | XLOC_005086 | UNG          | chr12:109535398-109548798 | 0.0955812 | 0.999791 |
| XLOC_008038 | XLOC_008038 | MVP_PAGR1    | chr16:29827527-29859360   | 0.0956256 | 0.999791 |
| XLOC_014855 | XLOC_014855 | TNFRSF13C    | chr22:42321035-42322821   | 0.0956901 | 0.999791 |
| XLOC_006302 | XLOC_006302 | NOP9         | chr14:24769097-24774374   | 0.0957301 | 0.999791 |
| XLOC_010749 | XLOC_010749 | ZNF507       | chr19:32836513-32878573   | 0.0957673 | 0.999791 |
| XLOC_015221 | XLOC_015221 | CMSS1        | chr3:99273152-99897476    | 0.0957971 | 0.999791 |
| XLOC_006845 | XLOC_006845 | HIF1A-AS2    | chr14:62162118-62215807   | 0.0959822 | 0.999791 |
| XLOC_007157 | XLOC_007157 | CHP1         | chr15:41523436-41574083   | 0.0960089 | 0.999791 |
| XLOC_009903 | XLOC_009903 | SMARCD2      | chr17:61909440-61920351   | 0.0960458 | 0.999791 |
| XLOC_010709 | XLOC_010709 | ARMC6        | chr19:19144386-19168987   | 0.0961403 | 0.999791 |
| XLOC_014848 | XLOC_014848 | TOB2         | chr22:41829491-41843027   | 0.0961437 | 0.999791 |
| XLOC_012512 | XLOC_012512 | HAT1         | chr2:172778934-172848600  | 0.0962262 | 0.999791 |
| XLOC_023849 | XLOC_023849 | GRIPAP1      | chrX:48830133-48858675    | 0.0962402 | 0.999791 |
| XLOC_017657 | XLOC_017657 | CCNO         | chr5:54526980-54529508    | 0.0962579 | 0.999791 |
| XLOC_017261 | XLOC_017261 | STARD4-AS1   | chr5:110834021-111353003  | 0.0963417 | 1        |
| XLOC_019098 | XLOC_019098 | AHI1         | chr6:135605109-135818903  | 0.096354  | 0.999791 |
| XLOC_005827 | XLOC_005827 | RASL11A      | chr13:27844463-27847827   | 0.0964447 | 0.999791 |
| XLOC_008097 | XLOC_008097 | PAPD5        | chr16:50186828-50269219   | 0.0965045 | 0.999791 |
| XLOC_023908 | XLOC_023908 | LAS1L        | chrX:64732461-64754686    | 0.0965433 | 0.999791 |
| XLOC_017615 | XLOC_017615 | C5orf42      | chr5:37106329-37249530    | 0.0965573 | 1        |
| XLOC_010958 | XLOC_010958 | PPP5C        | chr19:46850250-46894232   | 0.0965707 | 0.999791 |
| XLOC_002883 | XLOC_002883 | FZD8         | chr10:35927176-35930362   | 0.0966709 | 0.999791 |
| XLOC_001412 | XLOC_001412 | SNRNP40      | chr1:31732414-31769644    | 0.0966926 | 0.999791 |
| XLOC_014849 | XLOC_014849 | PHF5A        | chr22:41855720-41864708   | 0.0967441 | 0.999791 |
| XLOC_001694 | XLOC_001694 | PSMA5        | chr1:109941652-109969108  | 0.0969174 | 0.999791 |
| XLOC_012470 | XLOC_012470 | RIF1         | chr2:152266396-152333860  | 0.0969433 | 0.999791 |
| XLOC_006210 | XLOC_006210 | KDELC1       | chr13:103436630-103528351 | 0.0969441 | 0.999791 |
| XLOC_003951 | XLOC_003951 | SLC25A22     | chr11:790474-798269       | 0.097008  | 0.999791 |
| XLOC_012131 | XLOC_012131 | TTC27        | chr2:32853086-33046118    | 0.0970164 | 0.999791 |
| XLOC_021341 | XLOC_021341 | ZC3HAV1L     | chr7:138710451-138720775  | 0.097026  | 0.999791 |
| XLOC_006438 | XLOC_006438 | DNAL1        | chr14:74111577-74170431   | 0.0970379 | 0.999791 |

|             |             |              |                           |           |          |
|-------------|-------------|--------------|---------------------------|-----------|----------|
| XLOC_015596 | XLOC_015596 | HACL1        | chr3:15602239-15643130    | 0.0970413 | 0.999791 |
| XLOC_008559 | XLOC_008559 | NETO2        | chr16:47115430-47177936   | 0.0970787 | 0.999791 |
| XLOC_008807 | XLOC_008807 | ELP5         | chr17:7155371-7166512     | 0.0970809 | 0.999791 |
| XLOC_004562 | XLOC_004562 | IFT46        | chr11:118401802-118436791 | 0.0972247 | 0.999791 |
| XLOC_015999 | XLOC_015999 | TM4SF1       | chr3:149086804-149095568  | 0.0973069 | 0.999791 |
| XLOC_001102 | XLOC_001102 | ARV1         | chr1:231114822-231136479  | 0.0974014 | 0.999791 |
| XLOC_015328 | XLOC_015328 | IFT122       | chr3:129149786-129239191  | 0.0974177 | 0.999791 |
| XLOC_007452 | XLOC_007452 | NIPA2        | chr15:23004683-23034427   | 0.0974468 | 0.999791 |
| XLOC_013250 | XLOC_013250 | NFE2L2       | chr2:178095030-178129859  | 0.0975437 | 0.999791 |
| XLOC_010480 | XLOC_010480 | NCLN         | chr19:3185874-3209573     | 0.0976113 | 0.999791 |
| XLOC_006228 | XLOC_006228 | PCID2        | chr13:113831852-113863029 | 0.0976657 | 0.999791 |
| XLOC_016679 | XLOC_016679 | FBXL5        | chr4:15606006-15657035    | 0.0977739 | 0.999791 |
| XLOC_003979 | XLOC_003979 | NAP1L4       | chr11:2965659-3013607     | 0.0978037 | 0.999791 |
| XLOC_014602 | XLOC_014602 | LOC388906    | chr22:42665758-42670868   | 0.0978621 | 1        |
| XLOC_001070 | XLOC_001070 | FBXO28       | chr1:224301788-224349749  | 0.0978651 | 0.999791 |
| XLOC_016852 | XLOC_016852 | EIF4E        | chr4:99799606-99851786    | 0.0978741 | 0.999791 |
| XLOC_011681 | XLOC_011681 | SERTAD1      | chr19:40928408-40931932   | 0.0978947 | 0.999791 |
| XLOC_004329 | XLOC_004329 | AP5B1        | chr11:65541368-65548062   | 0.0979342 | 0.999791 |
| XLOC_015949 | XLOC_015949 | PIK3R4       | chr3:130397777-130465696  | 0.0979441 | 0.999791 |
| XLOC_017836 | XLOC_017836 | CDC23        | chr5:137514416-137549032  | 0.0979573 | 0.999791 |
| XLOC_007556 | XLOC_007556 | SPG11        | chr15:44829265-44955876   | 0.0979877 | 0.999791 |
| XLOC_010028 | XLOC_010028 | SLC38A10     | chr17:79218798-79269096   | 0.0980448 | 0.999791 |
| XLOC_011034 | XLOC_011034 | BCL2L12      | chr19:50162825-50177173   | 0.0980676 | 0.999791 |
| XLOC_008639 | XLOC_008639 | SLC7A6OS     | chr16:68298418-68344868   | 0.098102  | 0.999791 |
| XLOC_011587 | XLOC_011587 | RHPN2        | chr19:33469497-33558224   | 0.0981621 | 0.999791 |
| XLOC_018442 | XLOC_018442 | FIG4         | chr6:110012423-110146634  | 0.0981691 | 0.999791 |
| XLOC_004496 | XLOC_004496 | DCUN1D5      | chr11:102921412-102962944 | 0.0982121 | 0.999791 |
| XLOC_010278 | XLOC_010278 | LINC00526    | chr18:5236722-5238028     | 0.0982235 | 0.999791 |
| XLOC_007989 | XLOC_007989 | POLR3E       | chr16:22308695-22346424   | 0.098246  | 0.999791 |
| XLOC_011444 | XLOC_011444 | ZNF20.ZNF625 | chr19:12242167-12267546   | 0.0983401 | 0.999791 |
| XLOC_006695 | XLOC_006695 | LINC00641    | chr14:21668237-21675059   | 0.0983535 | 0.999791 |
| XLOC_002466 | XLOC_002466 | UBE2D1       | chr10:60094738-60130513   | 0.0984831 | 0.999791 |
| XLOC_000034 | XLOC_000034 | RER1         | chr1:2323213-2340410      | 0.0984971 | 0.999791 |
| XLOC_009920 | XLOC_009920 | LOC146880    | chr17:62745779-62778117   | 0.0985286 | 0.999791 |
| XLOC_021343 | XLOC_021343 | LOC100129148 | chr7:139025104-139112272  | 0.098552  | 0.999791 |
| XLOC_012817 | XLOC_012817 | TP53I3       | chr2:24300302-24308085    | 0.0986998 | 0.999791 |
| XLOC_001902 | XLOC_001902 | UBQLN4       | chr1:156005091-156023516  | 0.0988658 | 0.999791 |
| XLOC_007502 | XLOC_007502 | MEIS2        | chr15:37183221-37393500   | 0.0988978 | 0.999791 |
| XLOC_007344 | XLOC_007344 | ARNT2        | chr15:80696691-80890277   | 0.0989128 | 0.999791 |
| XLOC_007390 | XLOC_007390 | ABHD2        | chr15:89631380-89745591   | 0.098925  | 0.999791 |
| XLOC_017079 | XLOC_017079 | ANKRD33B     | chr5:10564434-10657928    | 0.0989541 | 0.999791 |
| XLOC_017136 | XLOC_017136 | SKIV2L2      | chr5:54603575-54830873    | 0.099076  | 0.999791 |
| XLOC_005173 | XLOC_005173 | TCTN2        | chr12:124155659-124192950 | 0.099079  | 0.999791 |
| XLOC_016662 | XLOC_016662 | AFAP1        | chr4:7755816-7941653      | 0.0991038 | 0.999791 |
| XLOC_022482 | XLOC_022482 | ZNF189       | chr9:104161162-104172942  | 0.0991656 | 0.999791 |
| XLOC_021904 | XLOC_021904 | PHYHIP       | chr8:22077215-22089851    | 0.0991825 | 1        |
| XLOC_016808 | XLOC_016808 | CCNI         | chr4:77969176-77997125    | 0.0992048 | 0.999791 |
| XLOC_004308 | XLOC_004308 | CDC42BPG     | chr11:64591661-64612041   | 0.0992876 | 1        |
| XLOC_011008 | XLOC_011008 | RUVBL2       | chr19:49497155-49519182   | 0.0993028 | 0.999791 |
| XLOC_007310 | XLOC_007310 | PPCDC        | chr15:75315926-75343067   | 0.0993201 | 0.999791 |
| XLOC_024005 | XLOC_024005 | RIPPLY1      | chrX:106143292-106174091  | 0.0993524 | 1        |
| XLOC_014586 | XLOC_014586 | ZC3H7B       | chr22:41697506-41756151   | 0.0993792 | 0.999791 |
| XLOC_022450 | XLOC_022450 | LOC100132077 | chr9:97094757-97123230    | 0.0994187 | 1        |
| XLOC_001259 | XLOC_001259 | DFFA         | chr1:10520602-10532613    | 0.0994548 | 0.999791 |
| XLOC_011657 | XLOC_011657 | FBXO27       | chr19:39514662-39523198   | 0.0994585 | 1        |
| XLOC_010622 | XLOC_010622 | NACC1        | chr19:13229101-13251961   | 0.0994998 | 0.999791 |
| XLOC_021892 | XLOC_021892 | ASAH1        | chr8:17913924-17942507    | 0.099502  | 0.999791 |
| XLOC_005707 | XLOC_005707 | NAA25        | chr12:112464492-112546635 | 0.0995204 | 0.999791 |
| XLOC_010568 | XLOC_010568 | C19orf66     | chr19:10196805-10213425   | 0.0995385 | 0.999791 |
| XLOC_004044 | XLOC_004044 | OR2D2        | chr11:6912804-6913731     | 0.0995615 | 1        |
| XLOC_011499 | XLOC_011499 | AKAP8        | chr19:15464331-15490612   | 0.0995894 | 0.999791 |
| XLOC_008578 | XLOC_008578 | CRNDE        | chr16:54952776-54963101   | 0.0996058 | 0.999791 |
| XLOC_001237 | XLOC_001237 | ICMT         | chr1:6266188-6296044      | 0.099648  | 0.999791 |
| XLOC_010751 | XLOC_010751 | PDCD5        | chr19:33072093-33078358   | 0.0996614 | 0.999791 |
| XLOC_021264 | XLOC_021264 | THAP5        | chr7:108202670-108210167  | 0.0996673 | 0.999791 |
| XLOC_007932 | XLOC_007932 | ABAT         | chr16:8768443-8878432     | 0.0996871 | 0.999791 |
| XLOC_002414 | XLOC_002414 | BMS1         | chr10:43277953-43330385   | 0.0997043 | 0.999791 |
| XLOC_006702 | XLOC_006702 | METTL3       | chr14:21945334-21979457   | 0.0997082 | 0.999791 |
| XLOC_015961 | XLOC_015961 | RYK          | chr3:133875977-133969586  | 0.099756  | 0.999791 |
| XLOC_002967 | XLOC_002967 | SLC25A16     | chr10:70242089-70287280   | 0.0997742 | 0.999791 |
| XLOC_018982 | XLOC_018982 | SNHG5        | chr6:86386724-86388451    | 0.0998069 | 0.999791 |
| XLOC_011541 | XLOC_011541 | CERS1        | chr19:18979360-19006953   | 0.0998302 | 1        |
| XLOC_003011 | XLOC_003011 | ZNF503       | chr10:77157602-77168740   | 0.0998317 | 0.999791 |
| XLOC_000453 | XLOC_000453 | SRSF11       | chr1:70671364-70717701    | 0.0998432 | 0.999791 |
| XLOC_020894 | XLOC_020894 | COX19        | chr7:1004485-1015235      | 0.0999564 | 0.999791 |
| XLOC_011669 | XLOC_011669 | DYRK1B       | chr19:40315989-40324841   | 0.100016  | 0.999791 |
| XLOC_010625 | XLOC_010625 | MRI1         | chr19:13875336-13885096   | 0.100028  | 0.999791 |
| XLOC_013658 | XLOC_013658 | TOP1         | chr20:39657461-39753126   | 0.100053  | 0.999791 |
| XLOC_009166 | XLOC_009166 | RSAD1        | chr17:48556189-48563336   | 0.100182  | 0.999791 |

|             |             |                             |                           |          |          |
|-------------|-------------|-----------------------------|---------------------------|----------|----------|
| XLOC_000170 | XLOC_000170 | EPHB2                       | chr1:23037330-23241823    | 0.100249 | 0.999791 |
| XLOC_000998 | XLOC_000998 | TMCC2                       | chr1:205197037-205242471  | 0.100265 | 0.999791 |
| XLOC_002517 | XLOC_002517 | GLUD1P3                     | chr10:75491298-75495367   | 0.100286 | 1        |
| XLOC_012695 | XLOC_012695 | PSMD1                       | chr2:231921577-232037540  | 0.100292 | 0.999791 |
| XLOC_006634 | XLOC_006634 | TECPR2                      | chr14:102829299-102968818 | 0.100323 | 0.999791 |
| XLOC_023115 | XLOC_023115 | C9orf78                     | chr9:132589563-132597572  | 0.100328 | 0.999791 |
| XLOC_012234 | XLOC_012234 | MPHOSPH10                   | chr2:71357443-71377232    | 0.100508 | 0.999791 |
| XLOC_003070 | XLOC_003070 | PIK3AP1                     | chr10:98353068-98480279   | 0.100572 | 0.999791 |
| XLOC_023438 | XLOC_023438 | ZXDB                        | chrX:57618268-57623910    | 0.100626 | 0.999791 |
| XLOC_001301 | XLOC_001301 | CROCCP3                     | chr1:16793930-16819196    | 0.100687 | 1        |
| XLOC_017767 | XLOC_017767 | EPB41L4A                    | chr5:111498314-111755010  | 0.100708 | 0.999791 |
| XLOC_011234 | XLOC_011234 | ZNF776                      | chr19:58258163-58269527   | 0.100746 | 0.999791 |
| XLOC_022243 | XLOC_022243 | VPS28                       | chr8:145648999-145653927  | 0.100784 | 0.999791 |
| XLOC_017425 | XLOC_017425 | NDST1                       | chr5:149887673-149937773  | 0.100835 | 0.999791 |
| XLOC_001627 | XLOC_001627 | MCOLN2                      | chr1:85391265-85462796    | 0.100861 | 0.999791 |
| XLOC_003507 | XLOC_003507 | DTX4                        | chr11:58939811-58980494   | 0.100863 | 0.999791 |
| XLOC_020556 | XLOC_020556 | GTF2IRD2B                   | chr7:74508346-74565623    | 0.100901 | 1        |
| XLOC_020587 | XLOC_020587 | DMTF1                       | chr7:86781676-86849031    | 0.100922 | 0.999791 |
| XLOC_013837 | XLOC_013837 | CENPB                       | chr20:3764497-3767337     | 0.100924 | 0.999791 |
| XLOC_021956 | XLOC_021956 | BRF2                        | chr8:37654400-37707431    | 0.100996 | 0.999791 |
| XLOC_022235 | XLOC_022235 | BOP1                        | chr8:145486055-145515120  | 0.101006 | 0.999791 |
| XLOC_005954 | XLOC_005954 | MIR17,MIR17HG,MIR18A,MIR19A | chr13:92000073-92006829   | 0.101012 | 0.999791 |
| XLOC_000843 | XLOC_000843 | UAP1                        | chr1:162531295-162569633  | 0.101039 | 0.999791 |
| XLOC_017448 | XLOC_017448 | THG1L                       | chr5:157158322-157166772  | 0.101042 | 0.999791 |
| XLOC_012837 | XLOC_012837 | SLC5A6                      | chr2:27422454-27440046    | 0.101089 | 0.999791 |
| XLOC_011452 | XLOC_011452 | ZNF490                      | chr19:12686919-12721623   | 0.101103 | 0.999791 |
| XLOC_009758 | XLOC_009758 | BRCA1                       | chr17:41196311-41277500   | 0.101125 | 0.999791 |
| XLOC_016173 | XLOC_016173 | FGFR3                       | chr4:1795038-1810599      | 0.101226 | 0.999791 |
| XLOC_011911 | XLOC_011911 | ZNF615                      | chr19:52494586-52511483   | 0.101275 | 0.999791 |
| XLOC_022810 | XLOC_022810 | VCP                         | chr9:35056064-35072739    | 0.101294 | 0.999791 |
| XLOC_007423 | XLOC_007423 | NR2F2                       | chr15:96869156-96883492   | 0.101326 | 0.999791 |
| XLOC_013760 | XLOC_013760 | ADRM1                       | chr20:60878026-60883918   | 0.101368 | 0.999791 |
| XLOC_021510 | XLOC_021510 | TNFRSF10C                   | chr8:22941867-22974950    | 0.101368 | 0.999791 |
| XLOC_013872 | XLOC_013872 | DZANK1                      | chr20:18364010-18447829   | 0.101375 | 1        |
| XLOC_013556 | XLOC_013556 | PLK1S1                      | chr20:21106623-21227258   | 0.101501 | 0.999791 |
| XLOC_003577 | XLOC_003577 | NAA40                       | chr1:163706441-63724446   | 0.101542 | 0.999791 |
| XLOC_020461 | XLOC_020461 | STK17A                      | chr7:43622691-43666978    | 0.101562 | 0.999791 |
| XLOC_003615 | XLOC_003615 | MALAT1                      | chr11:65265232-65273939   | 0.10163  | 0.999791 |
| XLOC_023941 | XLOC_023941 | FTX                         | chrX:73164158-73513409    | 0.10167  | 0.999791 |
| XLOC_014967 | XLOC_014967 | NR2C2                       | chr3:14984285-15106816    | 0.10177  | 0.999791 |
| XLOC_010707 | XLOC_010707 | UPF1                        | chr19:18942743-18979039   | 0.101938 | 0.999791 |
| XLOC_012577 | XLOC_012577 | C2orf47                     | chr2:200793633-200828847  | 0.102111 | 0.999791 |
| XLOC_007774 | XLOC_007774 | PEX11A                      | chr15:90224761-90234015   | 0.102145 | 0.999791 |
| XLOC_010563 | XLOC_010563 | LOC284385                   | chr19:9732157-9745538     | 0.102184 | 0.999791 |
| XLOC_000589 | XLOC_000589 | ATP5F1                      | chr1:111982511-112004525  | 0.102201 | 0.999791 |
| XLOC_024169 | XLOC_024169 | CETN2                       | chrX:151995870-151999301  | 0.102253 | 0.999791 |
| XLOC_007947 | XLOC_007947 | MKL2                        | chr16:14165195-14360630   | 0.102455 | 0.999791 |
| XLOC_003408 | XLOC_003408 | C11orf74                    | chr11:36613492-36680817   | 0.102457 | 0.999791 |
| XLOC_008336 | XLOC_008336 | CLCN7                       | chr16:1494933-1525085     | 0.10246  | 0.999791 |
| XLOC_018553 | XLOC_018553 | ULBP1                       | chr6:150285142-150294846  | 0.102504 | 0.999791 |
| XLOC_013804 | XLOC_013804 | CSNK2A1                     | chr20:463337-524482       | 0.102561 | 0.999791 |
| XLOC_021430 | XLOC_021430 | CLN8                        | chr8:1711869-1734736      | 0.102567 | 0.999791 |
| XLOC_007339 | XLOC_007339 | TMED3                       | chr15:79603490-79615189   | 0.102582 | 0.999791 |
| XLOC_001202 | XLOC_001202 | CENL2                       | chr1:1321090-1334718      | 0.102595 | 0.999791 |
| XLOC_015084 | XLOC_015084 | NBEAL2                      | chr3:46963230-47051194    | 0.102626 | 0.999791 |
| XLOC_021748 | XLOC_021748 | MYC                         | chr8:128748314-128753680  | 0.102646 | 0.999791 |
| XLOC_013392 | XLOC_013392 | SERPINE2                    | chr2:224839764-224904036  | 0.10266  | 0.999791 |
| XLOC_006679 | XLOC_006679 | TTC5                        | chr14:20757300-20774153   | 0.102668 | 0.999791 |
| XLOC_018987 | XLOC_018987 | RARS2                       | chr6:88224095-88299735    | 0.102802 | 0.999791 |
| XLOC_014785 | XLOC_014785 | C22orf28                    | chr22:32783561-32808274   | 0.102806 | 0.999791 |
| XLOC_009417 | XLOC_009417 | PELP1                       | chr17:4574678-4607632     | 0.102841 | 0.999791 |
| XLOC_001597 | XLOC_001597 | DIRAS3                      | chr1:68167148-68698284    | 0.102877 | 1        |
| XLOC_001228 | XLOC_001228 | WRAP73                      | chr1:3547330-3566671      | 0.102901 | 0.999791 |
| XLOC_000686 | XLOC_000686 | C1orf56                     | chr1:151020258-151032125  | 0.102937 | 0.999791 |
| XLOC_005486 | XLOC_005486 | RARG                        | chr12:53604349-53626040   | 0.103036 | 0.999791 |
| XLOC_023884 | XLOC_023884 | PHF8                        | chrX:53963112-54071569    | 0.10307  | 0.999791 |
| XLOC_018850 | XLOC_018850 | GLO1                        | chr6:38643701-38679952    | 0.103151 | 0.999791 |
| XLOC_006031 | XLOC_006031 | SACS                        | chr13:23902964-24007841   | 0.103169 | 0.999791 |
| XLOC_006848 | XLOC_006848 | PPP2R5E                     | chr14:63841354-64010079   | 0.103206 | 0.999791 |
| XLOC_010608 | XLOC_010608 | ZNF788                      | chr19:12203077-12225494   | 0.103254 | 1        |
| XLOC_006433 | XLOC_006433 | C14orf169                   | chr14:73945188-74025651   | 0.103318 | 0.999791 |
| XLOC_005594 | XLOC_005594 | NAP1L1                      | chr12:76438671-76478738   | 0.103329 | 0.999791 |
| XLOC_011245 | XLOC_011245 | A1BG-AS1                    | chr19:58858171-58874214   | 0.10334  | 1        |
| XLOC_003898 | XLOC_003898 | SLC37A2                     | chr11:124933012-124960412 | 0.103347 | 1        |
| XLOC_009464 | XLOC_009464 | FXR2                        | chr17:7494547-7536700     | 0.103359 | 0.999791 |
| XLOC_015679 | XLOC_015679 | ELP6                        | chr3:47537129-47555199    | 0.103425 | 0.999791 |
| XLOC_013067 | XLOC_013067 | LYG1                        | chr2:99900700-99917639    | 0.103438 | 0.999791 |
| XLOC_011662 | XLOC_011662 | GMFG                        | chr19:39818998-39826726   | 0.103444 | 1        |
| XLOC_023671 | XLOC_023671 | HMGGB3                      | chrX:150151762-150159248  | 0.103473 | 0.999791 |

|             |             |           |                           |          |          |
|-------------|-------------|-----------|---------------------------|----------|----------|
| XLOC_018781 | XLOC_018781 | DOM3Z     | chr6:31937587-31949223    | 0.103586 | 0.999791 |
| XLOC_012283 | XLOC_012283 | PTCD3     | chr2:86333304-86369280    | 0.103591 | 0.999791 |
| XLOC_015348 | XLOC_015348 | CDV3      | chr3:133292433-133309118  | 0.103687 | 0.999791 |
| XLOC_010589 | XLOC_010589 | SMARCA4   | chr19:11071597-11172958   | 0.10369  | 0.999791 |
| XLOC_020604 | XLOC_020604 | RBM48     | chr7:92158086-92166823    | 0.103708 | 0.999791 |
| XLOC_021594 | XLOC_021594 | TGS1      | chr8:56651319-56738005    | 0.103787 | 0.999791 |
| XLOC_008405 | XLOC_008405 | NAGPA     | chr16:5074844-5092972     | 0.103812 | 0.999791 |
| XLOC_021795 | XLOC_021795 | MROH1     | chr8:145202918-145316843  | 0.103843 | 0.999791 |
| XLOC_004369 | XLOC_004369 | SUV420H1  | chr1:67923506-67980784    | 0.103897 | 0.999791 |
| XLOC_015230 | XLOC_015230 | TRMT10C   | chr3:101280679-101285290  | 0.103944 | 0.999791 |
| XLOC_002648 | XLOC_002648 | C10orf2   | chr10:102747292-102754158 | 0.103949 | 0.999791 |
| XLOC_010130 | XLOC_010130 | CEP192    | chr18:12991360-13125051   | 0.103968 | 0.999791 |
| XLOC_022428 | XLOC_022428 | SECISBP2  | chr9:91933411-91974561    | 0.103986 | 0.999791 |
| XLOC_004697 | XLOC_004697 | C1RL-AS1  | chr12:7247145-7274447     | 0.103988 | 1        |
| XLOC_005118 | XLOC_005118 | TPCN1     | chr12:113659259-113736389 | 0.104015 | 0.999791 |
| XLOC_004696 | XLOC_004696 | C1S       | chr12:7167979-7178335     | 0.104055 | 0.999791 |
| XLOC_006095 | XLOC_006095 | VWA8      | chr13:42140960-42535221   | 0.104098 | 0.999791 |
| XLOC_015134 | XLOC_015134 | ALAS1     | chr3:52232098-52248343    | 0.104202 | 0.999791 |
| XLOC_001540 | XLOC_001540 | DMRTA2    | chr1:50883222-50889119    | 0.10429  | 0.999791 |
| XLOC_014479 | XLOC_014479 | ADRBK2    | chr22:25960860-26125258   | 0.104453 | 0.999791 |
| XLOC_007255 | XLOC_007255 | PTPLAD1   | chr15:65822826-65870693   | 0.104519 | 0.999791 |
| XLOC_002699 | XLOC_002699 | TCF7L2    | chr10:114710008-114927436 | 0.104528 | 0.999791 |
| XLOC_015682 | XLOC_015682 | MAP4      | chr3:47892179-48130769    | 0.10455  | 0.999791 |
| XLOC_017172 | XLOC_017172 | GTF2H2B   | chr5:69711196-69746189    | 0.104582 | 0.999791 |
| XLOC_005957 | XLOC_005957 | GPR180    | chr13:95254103-95286899   | 0.104591 | 0.999791 |
| XLOC_014124 | XLOC_014124 | BACH1     | chr21:30671219-30734217   | 0.104604 | 0.999791 |
| XLOC_004977 | XLOC_004977 | NUP107    | chr12:69080730-69136473   | 0.10466  | 0.999791 |
| XLOC_010469 | XLOC_010469 | TMPPRSS9  | chr19:2389783-2427875     | 0.104726 | 1        |
| XLOC_021779 | XLOC_021779 | RHPN1     | chr8:144451024-144466390  | 0.104746 | 0.999791 |
| XLOC_020410 | XLOC_020410 | HOXA-AS4  | chr7:27202056-27219880    | 0.104786 | 0.999791 |
| XLOC_001917 | XLOC_001917 | MRPL24    | chr1:156707093-156710923  | 0.104807 | 0.999791 |
| XLOC_015458 | XLOC_015458 | ACTL6A    | chr3:179280707-179306193  | 0.104834 | 0.999791 |
| XLOC_009503 | XLOC_009503 | TMEM220   | chr17:10616638-10718481   | 0.104838 | 1        |
| XLOC_021678 | XLOC_021678 | DPY19L4   | chr8:95732102-95806076    | 0.104857 | 0.999791 |
| XLOC_005698 | XLOC_005698 | PPTC7     | chr12:110972236-111021064 | 0.104901 | 0.999791 |
| XLOC_008320 | XLOC_008320 | JMJDB     | chr16:730114-734439       | 0.104908 | 0.999791 |
| XLOC_008458 | XLOC_008458 | DNAH3     | chr16:20944475-21191937   | 0.104948 | 1        |
| XLOC_015945 | XLOC_015945 | MBD4      | chr3:129149786-129239191  | 0.104991 | 0.999791 |
| XLOC_018070 | XLOC_018070 | FAM8A1    | chr6:17600517-17611950    | 0.104998 | 0.999791 |
| XLOC_022033 | XLOC_022033 | SLCO5A1   | chr8:70584567-70747299    | 0.105142 | 0.999791 |
| XLOC_018777 | XLOC_018777 | EHMT2     | chr6:31847536-31865464    | 0.10521  | 0.999791 |
| XLOC_006728 | XLOC_006728 | DHRS4-AS1 | chr14:24407939-24438488   | 0.105216 | 0.999791 |
| XLOC_014485 | XLOC_014485 | MIAT      | chr22:27053445-27072440   | 0.105235 | 1        |
| XLOC_000079 | XLOC_000079 | TARDBP    | chr1:11072678-11085549    | 0.10524  | 0.999791 |
| XLOC_015156 | XLOC_015156 | APPL1     | chr3:57261764-57326710    | 0.105248 | 0.999791 |
| XLOC_016039 | XLOC_016039 | SCARNA7   | chr3:160212782-160283376  | 0.105295 | 0.999791 |
| XLOC_021853 | XLOC_021853 | SGK223    | chr8:8175257-8239257      | 0.10535  | 0.999791 |
| XLOC_011726 | XLOC_011726 | ETHE1     | chr19:44010870-44031396   | 0.105399 | 0.999791 |
| XLOC_006499 | XLOC_006499 | UBR7      | chr14:93669236-93695561   | 0.105472 | 0.999791 |
| XLOC_017474 | XLOC_017474 | LOC257358 | chr5:169758434-169762104  | 0.105476 | 1        |
| XLOC_010222 | XLOC_010222 | PMAIP1    | chr18:57567191-57571538   | 0.105489 | 0.999791 |
| XLOC_003818 | XLOC_003818 | C11orf57  | chr1:1111944967-111957522 | 0.105503 | 0.999791 |
| XLOC_004772 | XLOC_004772 | ETNK1     | chr12:22778075-22843608   | 0.105507 | 0.999791 |
| XLOC_008338 | XLOC_008338 | IFT140    | chr16:1543351-1662109     | 0.105525 | 0.999791 |
| XLOC_022350 | XLOC_022350 | ZCCHC7    | chr9:37120468-37358145    | 0.105543 | 0.999791 |
| XLOC_007803 | XLOC_007803 | PCSK6     | chr15:101844132-102030187 | 0.105589 | 0.999791 |
| XLOC_003857 | XLOC_003857 | TRAPPC4   | chr11:118889240-118894385 | 0.105601 | 0.999791 |
| XLOC_003163 | XLOC_003163 | RGS10     | chr10:121259338-121302222 | 0.105728 | 0.999791 |
| XLOC_023550 | XLOC_023550 | TBC1D8B   | chrX:106045918-106119377  | 0.105765 | 0.999791 |
| XLOC_010680 | XLOC_010680 | PGLS      | chr19:17622431-17632097   | 0.105767 | 0.999791 |
| XLOC_020649 | XLOC_020649 | MEPCE     | chr7:99998494-100031749   | 0.105784 | 0.999791 |
| XLOC_016619 | XLOC_016619 | ZNF721    | chr4:419223-533320        | 0.10579  | 0.999791 |
| XLOC_010587 | XLOC_010587 | CARM1     | chr19:10982252-11039357   | 0.105843 | 0.999791 |
| XLOC_001340 | XLOC_001340 | HSPG2     | chr1:22138757-22263750    | 0.105844 | 0.999791 |
| XLOC_014940 | XLOC_014940 | PRRT3-AS1 | chr3:9987225-9996471      | 0.105869 | 0.999791 |
| XLOC_016810 | XLOC_016810 | PAQR3     | chr4:79839093-79860582    | 0.10591  | 0.999791 |
| XLOC_010991 | XLOC_010991 | EMP3      | chr19:48828628-48833810   | 0.105913 | 0.999791 |
| XLOC_016332 | XLOC_016332 | REST      | chr4:57774041-57802010    | 0.105949 | 0.999791 |
| XLOC_004831 | XLOC_004831 | KCNH3     | chr12:49932939-49952077   | 0.105958 | 0.999791 |
| XLOC_009308 | XLOC_009308 | SCARNA16  | chr17:75084724-75213181   | 0.106013 | 0.999791 |
| XLOC_016459 | XLOC_016459 | LEF1-AS1  | chr4:108968700-109097586  | 0.106014 | 0.999791 |
| XLOC_022804 | XLOC_022804 | SIGMAR1   | chr9:34634718-34637768    | 0.10617  | 0.999791 |
| XLOC_022152 | XLOC_022152 | TAF2      | chr8:120743013-120845074  | 0.106217 | 0.999791 |
| XLOC_018381 | XLOC_018381 | CD109     | chr6:74405507-74538041    | 0.106245 | 0.999791 |
| XLOC_005385 | XLOC_005385 | GXYLT1    | chr12:42475647-42538673   | 0.10628  | 0.999791 |
| XLOC_015586 | XLOC_015586 | XPC       | chr3:14186647-14220172    | 0.106316 | 0.999791 |
| XLOC_005894 | XLOC_005894 | SETDB2    | chr13:50018428-50069139   | 0.106324 | 0.999791 |
| XLOC_008989 | XLOC_008989 | ZNF830    | chr17:33288548-33290205   | 0.106337 | 0.999791 |
| XLOC_006523 | XLOC_006523 | VRK1      | chr14:97263683-97347951   | 0.106466 | 0.999791 |



|             |             |                             |                           |          |          |
|-------------|-------------|-----------------------------|---------------------------|----------|----------|
| XLOC_021173 | XLOC_021173 | PDK4                        | chr7:95212808-95225925    | 0.106517 | 1        |
| XLOC_001485 | XLOC_001485 | LOC100130557                | chr1:41154751-41237275    | 0.106566 | 0.999791 |
| XLOC_013069 | XLOC_013069 | REV1                        | chr2:100016937-100106480  | 0.1066   | 0.999791 |
| XLOC_005906 | XLOC_005906 | WDFY2                       | chr13:52158483-52336171   | 0.106627 | 0.999791 |
| XLOC_004243 | XLOC_004243 | PRPF19                      | chr1:160658019-60674061   | 0.106714 | 0.999791 |
| XLOC_017248 | XLOC_017248 | LOC100289230                | chr5:98264837-98266713    | 0.106724 | 0.999791 |
| XLOC_003600 | XLOC_003600 | ARL2,SNX15                  | chr11:64781584-64808044   | 0.106756 | 0.999791 |
| XLOC_022162 | XLOC_022162 | FBXO32                      | chr8:124510126-124553493  | 0.106794 | 0.999791 |
| XLOC_017120 | XLOC_017120 | ZNF131                      | chr5:43121641-43175823    | 0.106867 | 0.999791 |
| XLOC_012374 | XLOC_012374 | BCL2L11                     | chr2:111878490-111926022  | 0.106869 | 0.999791 |
| XLOC_015067 | XLOC_015067 | EXOSC7                      | chr3:45017740-45054158    | 0.106893 | 0.999791 |
| XLOC_006909 | XLOC_006909 | POMT2                       | chr14:77741298-77787225   | 0.106919 | 0.999791 |
| XLOC_010449 | XLOC_010449 | CIRBP                       | chr19:1267469-1274809     | 0.106937 | 0.999791 |
| XLOC_010711 | XLOC_010711 | RFXANK                      | chr19:19256375-19314238   | 0.106962 | 0.999791 |
| XLOC_005150 | XLOC_005150 | TMEM120B                    | chr12:122150657-122231594 | 0.10705  | 0.999791 |
| XLOC_011516 | XLOC_011516 | HAUS8                       | chr19:17160570-17186343   | 0.107128 | 0.999791 |
| XLOC_006091 | XLOC_006091 | ELF1                        | chr13:41506054-41593508   | 0.107147 | 0.999791 |
| XLOC_022565 | XLOC_022565 | ZBTB43                      | chr9:129567284-129600487  | 0.107155 | 0.999791 |
| XLOC_020329 | XLOC_020329 | FLJ44511                    | chr7:560027-564869        | 0.107296 | 1        |
| XLOC_007407 | XLOC_007407 | FES                         | chr15:91427664-91439006   | 0.10736  | 0.999791 |
| XLOC_008104 | XLOC_008104 | FTO                         | chr16:53737874-54148379   | 0.107406 | 0.999791 |
| XLOC_023463 | XLOC_023463 | NONO                        | chrX:70430034-70948962    | 0.107416 | 0.999791 |
| XLOC_022794 | XLOC_022794 | DCAF12                      | chr9:34086380-34126771    | 0.107458 | 0.999791 |
| XLOC_011262 | XLOC_011262 | SHC2                        | chr19:416582-460996       | 0.107504 | 0.999791 |
| XLOC_017363 | XLOC_017363 | ZMAT2                       | chr5:140080031-140086239  | 0.107573 | 0.999791 |
| XLOC_014562 | XLOC_014562 | POBEC3A,POBEC3A_B,POBEC3A_C | chr22:39353526-39388784   | 0.107616 | 0.999791 |
| XLOC_006918 | XLOC_006918 | CEP128                      | chr14:80962820-81405884   | 0.107642 | 0.999791 |
| XLOC_023259 | XLOC_023259 | MSL3                        | chrX:11776277-11793872    | 0.107685 | 0.999791 |
| XLOC_022850 | XLOC_022850 | KGFLP2                      | chr9:41958801-42019584    | 0.107696 | 1        |
| XLOC_022953 | XLOC_022953 | LINC00476                   | chr9:98568369-98731122    | 0.107725 | 0.999791 |
| XLOC_007894 | XLOC_007894 | FLYWCH2                     | chr16:2933195-2949383     | 0.107765 | 0.999791 |
| XLOC_018636 | XLOC_018636 | BLOC1S5,EEF1E1,TXNDC5       | chr6:7727010-8102828      | 0.107816 | 0.999791 |
| XLOC_004976 | XLOC_004976 | RAP1B                       | chr12:69004618-69054385   | 0.107847 | 0.999791 |
| XLOC_016841 | XLOC_016841 | ABCG2                       | chr4:89011415-89152474    | 0.107905 | 0.999791 |
| XLOC_007805 | XLOC_007805 | TARSL2                      | chr15:102193954-102264645 | 0.107913 | 0.999791 |
| XLOC_011627 | XLOC_011627 | ZNF850                      | chr19:37234379-37263716   | 0.107935 | 0.999791 |
| XLOC_012672 | XLOC_012672 | SGPP2                       | chr2:223289321-223423617  | 0.107964 | 0.999791 |
| XLOC_001042 | XLOC_001042 | TATDN3                      | chr1:212965169-212990167  | 0.108035 | 0.999791 |
| XLOC_015155 | XLOC_015155 | SPATA12                     | chr3:56761445-57113336    | 0.108135 | 1        |
| XLOC_009179 | XLOC_009179 | TOM1L1                      | chr17:52978051-53046064   | 0.108141 | 0.999791 |
| XLOC_017171 | XLOC_017171 | SMN2                        | chr5:69345349-69373422    | 0.108146 | 0.999791 |
| XLOC_014909 | XLOC_014909 | SCO2,TYMP                   | chr22:50946644-50988514   | 0.108159 | 0.999791 |
| XLOC_021502 | XLOC_021502 | SLC39A14                    | chr8:22224761-22291640    | 0.108161 | 0.999791 |
| XLOC_002085 | XLOC_002085 | GLRX2                       | chr1:193065594-193075244  | 0.108191 | 0.999791 |
| XLOC_012214 | XLOC_012214 | ETAA1                       | chr2:67624441-67637533    | 0.108197 | 0.999791 |
| XLOC_014949 | XLOC_014949 | HRH1                        | chr3:11178778-11304939    | 0.108262 | 0.999791 |
| XLOC_007256 | XLOC_007256 | SLC24A1                     | chr15:65914269-65948598   | 0.108324 | 0.999791 |
| XLOC_015680 | XLOC_015680 | CSPG5                       | chr3:47603727-47621730    | 0.108325 | 0.999791 |
| XLOC_009062 | XLOC_009062 | FKBP10                      | chr17:39968961-39979469   | 0.108407 | 0.999791 |
| XLOC_008189 | XLOC_008189 | DUS2L                       | chr16:68055176-68113226   | 0.108429 | 0.999791 |
| XLOC_008207 | XLOC_008207 | CLEC18A                     | chr16:69984607-69988250   | 0.108444 | 1        |
| XLOC_007261 | XLOC_007261 | ZWILCH                      | chr15:66797430-66857835   | 0.10847  | 0.999791 |
| XLOC_017949 | XLOC_017949 | FBXW11                      | chr5:171288555-171433877  | 0.108482 | 0.999791 |
| XLOC_013269 | XLOC_013269 | NCKAP1                      | chr2:183789604-183903229  | 0.108664 | 0.999791 |
| XLOC_021780 | XLOC_021780 | GSDMD                       | chr8:144635556-144645231  | 0.108668 | 0.999791 |
| XLOC_014988 | XLOC_014988 | RARB                        | chr3:25469753-25705863    | 0.10867  | 1        |
| XLOC_023940 | XLOC_023940 | XIST                        | chrX:73012039-73072588    | 0.108711 | 0.999791 |
| XLOC_008400 | XLOC_008400 | ZNF500                      | chr16:4800814-4817166     | 0.108801 | 0.999791 |
| XLOC_022868 | XLOC_022868 | CBWD3,CBWD5                 | chr9:70431999-70490177    | 0.10882  | 0.999791 |
| XLOC_000766 | XLOC_000766 | SYT11                       | chr1:155829259-155854990  | 0.108928 | 1        |
| XLOC_009005 | XLOC_009005 | GGNBP2                      | chr17:34900736-34946276   | 0.109    | 0.999791 |
| XLOC_023610 | XLOC_023610 | RAB33A                      | chrX:129305772-129318844  | 0.109066 | 1        |
| XLOC_008837 | XLOC_008837 | CHD3                        | chr17:7788122-7816075     | 0.109089 | 0.999791 |
| XLOC_006353 | XLOC_006353 | C14orf166                   | chr14:52456227-52471420   | 0.109101 | 0.999791 |
| XLOC_003438 | XLOC_003438 | LRP4-AS1                    | chr11:46867961-46940173   | 0.109137 | 1        |
| XLOC_018842 | XLOC_018842 | CPNE5                       | chr6:36708554-36807220    | 0.109185 | 1        |
| XLOC_005280 | XLOC_005280 | DDX12P                      | chr12:9570286-9600768     | 0.109263 | 0.999791 |
| XLOC_014261 | XLOC_014261 | CCT8                        | chr21:30428647-30446010   | 0.109268 | 0.999791 |
| XLOC_021020 | XLOC_021020 | FAM183B                     | chr7:38724945-38726689    | 0.109294 | 0.999791 |
| XLOC_018835 | XLOC_018835 | SRPK1                       | chr6:35800810-35888957    | 0.109485 | 0.999791 |
| XLOC_007610 | XLOC_007610 | BNIP2                       | chr15:59955061-59981642   | 0.109512 | 0.999791 |
| XLOC_002263 | XLOC_002263 | ERO1LB                      | chr1:236378421-236445339  | 0.109538 | 0.999791 |
| XLOC_020353 | XLOC_020353 | WIPI2                       | chr7:5229834-5273486      | 0.109574 | 0.999791 |
| XLOC_001063 | XLOC_001063 | HLX                         | chr1:221052742-221058400  | 0.109619 | 0.999791 |
| XLOC_002003 | XLOC_002003 | ANKRD36BP1                  | chr1:168214818-168216668  | 0.109632 | 1        |
| XLOC_000183 | XLOC_000183 | GRHL3                       | chr1:24645811-24741587    | 0.109692 | 1        |
| XLOC_004515 | XLOC_004515 | KDELC2                      | chr11:108342832-108369159 | 0.109713 | 0.999791 |
| XLOC_016657 | XLOC_016657 | LOC100129931                | chr4:6911170-7059677      | 0.109733 | 0.999791 |
| XLOC_002175 | XLOC_002175 | TMEM206                     | chr1:212537815-212588267  | 0.109788 | 0.999791 |

|             |             |                |                           |          |          |
|-------------|-------------|----------------|---------------------------|----------|----------|
| XLOC_006805 | XLOC_006805 | NIN            | chr14:51186480-51297839   | 0.109802 | 0.999791 |
| XLOC_014021 | XLOC_014021 | B4GALT5        | chr20:48249482-48330421   | 0.10985  | 0.999791 |
| XLOC_010678 | XLOC_010678 | MVB12A         | chr19:17530911-17536140   | 0.109918 | 0.999791 |
| XLOC_013866 | XLOC_013866 | KIF16B         | chr20:16252748-16554079   | 0.110055 | 0.999791 |
| XLOC_019020 | XLOC_019020 | RTN4IP1        | chr6:107018902-107077373  | 0.110116 | 0.999791 |
| XLOC_022470 | XLOC_022470 | ANP32B         | chr9:100745488-100778224  | 0.110127 | 0.999791 |
| XLOC_021126 | XLOC_021126 | STYXL1         | chr7:75625654-75677321    | 0.110132 | 0.999791 |
| XLOC_011289 | XLOC_011289 | MKNK2          | chr19:2037469-2051243     | 0.11015  | 0.999791 |
| XLOC_006136 | XLOC_006136 | DHRS12         | chr13:52342128-52378298   | 0.110161 | 0.999791 |
| XLOC_008264 | XLOC_008264 | USP10          | chr16:84733554-84813527   | 0.110164 | 0.999791 |
| XLOC_008144 | XLOC_008144 | GPR114         | chr16:57576600-57611100   | 0.110183 | 0.999791 |
| XLOC_006452 | XLOC_006452 | ZC2HC1C        | chr14:75536298-75544799   | 0.110292 | 1        |
| XLOC_011509 | XLOC_011509 | EPS15L1        | chr19:16466054-16582823   | 0.110318 | 0.999791 |
| XLOC_022468 | XLOC_022468 | NCBP1          | chr9:100263461-100436029  | 0.110412 | 0.999791 |
| XLOC_018717 | XLOC_018717 | TRIM27         | chr6:28870778-28891768    | 0.110433 | 0.999791 |
| XLOC_022259 | XLOC_022259 | KANK1          | chr9:470293-746106        | 0.11057  | 0.999791 |
| XLOC_000311 | XLOC_000311 | ZNF684         | chr1:40997232-41013841    | 0.110593 | 0.999791 |
| XLOC_009028 | XLOC_009028 | CDK12          | chr17:37617738-37690800   | 0.11063  | 0.999791 |
| XLOC_022239 | XLOC_022239 | FBXL6          | chr8:145579087-145582183  | 0.1107   | 0.999791 |
| XLOC_009060 | XLOC_009060 | EIF1           | chr17:39845126-39847898   | 0.110737 | 0.999791 |
| XLOC_010000 | XLOC_010000 | TMC6           | chr17:76108998-76139049   | 0.110756 | 0.999791 |
| XLOC_008653 | XLOC_008653 | ST3GAL2        | chr16:70413337-70472991   | 0.110774 | 0.999791 |
| XLOC_009512 | XLOC_009512 | PMP22          | chr17:15133095-15168644   | 0.110786 | 0.999791 |
| XLOC_012364 | XLOC_012364 | RANBP2         | chr2:109335936-109402267  | 0.110814 | 0.999791 |
| XLOC_022111 | XLOC_022111 | HRSP12         | chr8:99114566-99129418    | 0.110847 | 0.999791 |
| XLOC_003058 | XLOC_003058 | NOC3L          | chr10:96092988-96122683   | 0.110872 | 0.999791 |
| XLOC_023159 | XLOC_023159 | C9orf69        | chr9:139006426-139010731  | 0.110964 | 0.999791 |
| XLOC_002958 | XLOC_002958 | JMJ1D1C        | chr10:64926987-65226322   | 0.110998 | 0.999791 |
| XLOC_012202 | XLOC_012202 | EHPB1          | chr2:62900985-63275656    | 0.110999 | 0.999791 |
| XLOC_014878 | XLOC_014878 | KIAA1644       | chr22:44639556-447708731  | 0.111112 | 1        |
| XLOC_010054 | XLOC_010054 | DUS1L          | chr17:80015747-80023697   | 0.111124 | 0.999791 |
| XLOC_018019 | XLOC_018019 | DUSP22         | chr6:292100-351355        | 0.111162 | 0.999791 |
| XLOC_020631 | XLOC_020631 | ZKSCAN5        | chr7:99102272-99131445    | 0.111212 | 0.999791 |
| XLOC_009815 | XLOC_009815 | HOXB3          | chr17:46626231-46651810   | 0.111233 | 0.999791 |
| XLOC_015735 | XLOC_015735 | ZMYND10        | chr3:50378536-50383156    | 0.111269 | 0.999791 |
| XLOC_012052 | XLOC_012052 | C2orf50        | chr2:11273178-11286911    | 0.111307 | 1        |
| XLOC_016363 | XLOC_016363 | UTP3           | chr4:71554195-71556268    | 0.111311 | 0.999791 |
| XLOC_002820 | XLOC_002820 | SEPHS1         | chr10:13359437-13390298   | 0.111328 | 0.999791 |
| XLOC_001546 | XLOC_001546 | KTI12, TXNDC12 | chr1:52485803-52521843    | 0.111408 | 0.999791 |
| XLOC_008304 | XLOC_008304 | TCF25          | chr16:89939993-8997792    | 0.111536 | 0.999791 |
| XLOC_013296 | XLOC_013296 | HSPD1          | chr2:198351307-198418423  | 0.111587 | 0.999791 |
| XLOC_003195 | XLOC_003195 | LOC387723      | chr10:131862161-131909081 | 0.111623 | 0.999791 |
| XLOC_010581 | XLOC_010581 | ILF3           | chr19:10764936-10803095   | 0.111637 | 0.999791 |
| XLOC_007384 | XLOC_007384 | MRPS11         | chr15:89010683-89021861   | 0.111654 | 0.999791 |
| XLOC_005493 | XLOC_005493 | CALCOCO1       | chr12:54104901-54121307   | 0.111686 | 0.999791 |
| XLOC_020369 | XLOC_020369 | MIOS           | chr7:7606615-7647110      | 0.111716 | 0.999791 |
| XLOC_015046 | XLOC_015046 | ZBTB47         | chr3:42695175-42709072    | 0.11174  | 0.999791 |
| XLOC_006910 | XLOC_006910 | TMED8          | chr14:77808113-77843396   | 0.111781 | 1        |
| XLOC_002542 | XLOC_002542 | TMEM254        | chr10:81805988-81852307   | 0.111801 | 0.999791 |
| XLOC_006448 | XLOC_006448 | FCF1           | chr14:75179849-75203390   | 0.111865 | 0.999791 |
| XLOC_008806 | XLOC_008806 | ACADVL         | chr17:7093209-7128586     | 0.111967 | 0.999791 |
| XLOC_012082 | XLOC_012082 | HADHB          | chr2:26467615-26513333    | 0.112    | 0.999791 |
| XLOC_017926 | XLOC_017926 | CLINT1         | chr5:157212750-157286183  | 0.112119 | 0.999791 |
| XLOC_016149 | XLOC_016149 | PIGZ           | chr3:196673213-196695704  | 0.112157 | 0.999791 |
| XLOC_008809 | XLOC_008809 | EIF5A          | chr17:7210317-7215782     | 0.112236 | 0.999791 |
| XLOC_000184 | XLOC_000184 | NIPAL3         | chr1:24742244-24799473    | 0.112246 | 0.999791 |
| XLOC_004208 | XLOC_004208 | TNKS1BP1       | chr11:57067102-57092413   | 0.112251 | 0.999791 |
| XLOC_009185 | XLOC_009185 | DGKE           | chr17:54911459-54946036   | 0.112286 | 0.999791 |
| XLOC_004506 | XLOC_004506 | MSANTD4        | chr11:105878628-105892954 | 0.112356 | 0.999791 |
| XLOC_002154 | XLOC_002154 | EIF2D          | chr1:206764973-206785904  | 0.112373 | 0.999791 |
| XLOC_008596 | XLOC_008596 | CSNK2A2        | chr16:58191811-58231782   | 0.112424 | 0.999791 |
| XLOC_001971 | XLOC_001971 | PFDN2          | chr1:161070345-161102478  | 0.112499 | 0.999791 |
| XLOC_013450 | XLOC_013450 | NDUFA10        | chr2:240896788-240964819  | 0.112522 | 0.999791 |
| XLOC_013224 | XLOC_013224 | FASTKD1        | chr2:170386262-170430424  | 0.112544 | 0.999791 |
| XLOC_022969 | XLOC_022969 | C9orf156       | chr9:100666771-100684852  | 0.112573 | 0.999791 |
| XLOC_008830 | XLOC_008830 | WRAP53         | chr17:7571719-7606820     | 0.11258  | 0.999791 |
| XLOC_004449 | XLOC_004449 | FZD4           | chr11:86656716-86666440   | 0.112591 | 0.999791 |
| XLOC_014466 | XLOC_014466 | SPECC1L        | chr22:24666789-24813708   | 0.112615 | 0.999791 |
| XLOC_000214 | XLOC_000214 | NUDC           | chr1:27248212-27273362    | 0.112667 | 0.999791 |
| XLOC_012683 | XLOC_012683 | AGFG1          | chr2:228336847-228425938  | 0.112673 | 0.999791 |
| XLOC_006123 | XLOC_006123 | RCBTB1         | chr13:50106081-50159719   | 0.112674 | 0.999791 |
| XLOC_018291 | XLOC_018291 | MDFI           | chr6:41606194-41621982    | 0.11269  | 0.999791 |
| XLOC_001516 | XLOC_001516 | PRDX1          | chr1:45965855-45988562    | 0.112716 | 0.999791 |
| XLOC_008775 | XLOC_008775 | ZMYND15        | chr17:4643309-4649414     | 0.112776 | 0.999791 |
| XLOC_012337 | XLOC_012337 | MAP4K4         | chr2:102314164-102511152  | 0.112799 | 0.999791 |
| XLOC_017596 | XLOC_017596 | DROSHA         | chr5:31400601-31532282    | 0.112845 | 0.999791 |
| XLOC_013078 | XLOC_013078 | MFSD9          | chr2:103333665-103353337  | 0.112856 | 0.999791 |
| XLOC_021228 | XLOC_021228 | CLDN15         | chr7:100875372-100882101  | 0.112926 | 0.999791 |
| XLOC_005373 | XLOC_005373 | FAM60A         | chr12:31433519-31479159   | 0.112957 | 0.999791 |

|             |             |                           |                           |          |          |
|-------------|-------------|---------------------------|---------------------------|----------|----------|
| XLOC_013849 | XLOC_013849 | GPCPD1                    | chr20:5525079-5591672     | 0.112965 | 0.999791 |
| XLOC_001819 | XLOC_001819 | MRPL9                     | chr1:151732122-151743806  | 0.113002 | 0.999791 |
| XLOC_012534 | XLOC_012534 | HNRNPA3                   | chr2:178077421-178088685  | 0.113053 | 0.999791 |
| XLOC_003300 | XLOC_003300 | TIMM10B                   | chr11:6495912-6505911     | 0.11306  | 0.999791 |
| XLOC_009535 | XLOC_009535 | ATPAF2                    | chr17:17921333-17942480   | 0.113171 | 0.999791 |
| XLOC_020696 | XLOC_020696 | DLD                       | chr7:107531585-107561643  | 0.113192 | 0.999791 |
| XLOC_014331 | XLOC_014331 | LCA5L                     | chr21:40777769-40816128   | 0.113257 | 1        |
| XLOC_005703 | XLOC_005703 | ATXN2                     | chr12:111890017-112037480 | 0.113354 | 0.999791 |
| XLOC_010868 | XLOC_010868 | ITPKC                     | chr19:41223007-41255828   | 0.113364 | 0.999791 |
| XLOC_021680 | XLOC_021680 | NDUFAF6                   | chr8:96037213-96070944    | 0.11338  | 0.999791 |
| XLOC_009990 | XLOC_009990 | RHBDF2                    | chr17:74466974-74497509   | 0.113391 | 0.999791 |
| XLOC_016132 | XLOC_016132 | ACAP2                     | chr3:194995464-195163817  | 0.11341  | 0.999791 |
| XLOC_000181 | XLOC_000181 | PNRC2                     | chr1:24286300-24289949    | 0.113431 | 0.999791 |
| XLOC_009307 | XLOC_009307 | SEC14L1                   | chr17:75084724-75213181   | 0.113474 | 0.999791 |
| XLOC_002277 | XLOC_002277 | CEP170                    | chr1:243287729-243418708  | 0.113488 | 1        |
| XLOC_003409 | XLOC_003409 | API5                      | chr11:43333504-43366080   | 0.113492 | 0.999791 |
| XLOC_021567 | XLOC_021567 | GOLGA7                    | chr8:41348080-41368499    | 0.113534 | 0.999791 |
| XLOC_020594 | XLOC_020594 | STEAP1                    | chr7:89783688-89794141    | 0.113592 | 0.999791 |
| XLOC_007011 | XLOC_007011 | CYFIP1                    | chr15:22892683-23003603   | 0.113738 | 0.999791 |
| XLOC_001638 | XLOC_001638 | GTF2B                     | chr1:89318320-89357301    | 0.113746 | 0.999791 |
| XLOC_014782 | XLOC_014782 | RFPL2                     | chr22:32586421-32600718   | 0.113816 | 1        |
| XLOC_021646 | XLOC_021646 | ZC2HC1A                   | chr8:79578281-79631997    | 0.113949 | 0.999791 |
| XLOC_008424 | XLOC_008424 | ZC3H7A                    | chr16:11844441-11891114   | 0.114001 | 0.999791 |
| XLOC_009803 | XLOC_009803 | OSBPL7                    | chr17:45884732-45899147   | 0.114059 | 0.999791 |
| XLOC_010192 | XLOC_010192 | KATNAL2                   | chr18:44526786-44628614   | 0.114111 | 1        |
| XLOC_014148 | XLOC_014148 | IFNGR2                    | chr21:34775201-34852316   | 0.114131 | 0.999791 |
| XLOC_003909 | XLOC_003909 | FOXRED1                   | chr11:126138934-126148027 | 0.11427  | 0.999791 |
| XLOC_021333 | XLOC_021333 | MTPN                      | chr7:135611502-135662204  | 0.114291 | 0.999791 |
| XLOC_015119 | XLOC_015119 | HEMK1                     | chr3:50595455-50622421    | 0.114297 | 0.999791 |
| XLOC_007418 | XLOC_007418 | CHD2                      | chr15:93443550-93571237   | 0.114305 | 0.999791 |
| XLOC_007189 | XLOC_007189 | SORD                      | chr15:45315301-45367287   | 0.11437  | 0.999791 |
| XLOC_018049 | XLOC_018049 | PAK1IP1                   | chr6:10695187-10709970    | 0.114502 | 0.999791 |
| XLOC_023197 | XLOC_023197 | NRARP                     | chr9:140194082-140196703  | 0.114595 | 0.999791 |
| XLOC_017424 | XLOC_017424 | TCOF1                     | chr5:149737201-149779871  | 0.114608 | 0.999791 |
| XLOC_016251 | XLOC_016251 | TAPT1-AS1                 | chr4:16228285-16259810    | 0.114622 | 1        |
| XLOC_005044 | XLOC_005044 | SLC25A3                   | chr12:98987402-98995778   | 0.114745 | 0.999791 |
| XLOC_012899 | XLOC_012899 | SRBD1                     | chr2:45615818-45838433    | 0.114855 | 0.999791 |
| XLOC_021108 | XLOC_021108 | STX1A                     | chr7:73113534-73134017    | 0.114866 | 0.999791 |
| XLOC_001187 | XLOC_001187 | NOC2L                     | chr1:861120-894679        | 0.114903 | 0.999791 |
| XLOC_020797 | XLOC_020797 | MGAM                      | chr7:141695678-141806547  | 0.114954 | 1        |
| XLOC_012379 | XLOC_012379 | TTL                       | chr2:113239742-113290222  | 0.114971 | 0.999791 |
| XLOC_008512 | XLOC_008512 | LOC613037                 | chr16:30234349-30256932   | 0.11501  | 0.999791 |
| XLOC_006867 | XLOC_006867 | ZFP36L1                   | chr14:69254371-69262960   | 0.115047 | 0.999791 |
| XLOC_004401 | XLOC_004401 | UCP2                      | chr11:73685715-73693889   | 0.115078 | 0.999791 |
| XLOC_000760 | XLOC_000760 | RUSC1                     | chr1:155278538-155300909  | 0.11508  | 0.999791 |
| XLOC_014507 | XLOC_014507 | OSBP2                     | chr22:31090792-31303811   | 0.115207 | 0.999791 |
| XLOC_007859 | XLOC_007859 | FAHD1                     | chr16:1877224-1922179     | 0.115219 | 0.999791 |
| XLOC_017162 | XLOC_017162 | CCNB1                     | chr5:68462836-68474070    | 0.115231 | 0.999791 |
| XLOC_012633 | XLOC_012633 | SMARCAL1                  | chr2:217277136-217347774  | 0.115238 | 0.999791 |
| XLOC_012612 | XLOC_012612 | FASTKD2                   | chr2:207630111-207660911  | 0.115239 | 0.999791 |
| XLOC_021551 | XLOC_021551 | EIF4EBP1                  | chr8:37888019-37917883    | 0.115331 | 0.999791 |
| XLOC_006298 | XLOC_006298 | IRF9                      | chr14:24630421-24635774   | 0.115336 | 0.999791 |
| XLOC_008135 | XLOC_008135 | NLRC5                     | chr16:57050985-57117436   | 0.115396 | 0.999791 |
| XLOC_017320 | XLOC_017320 | HSPA4                     | chr5:132387661-132440709  | 0.115431 | 0.999791 |
| XLOC_015767 | XLOC_015767 | RFT1                      | chr3:53122500-53164470    | 0.115547 | 0.999791 |
| XLOC_022186 | XLOC_022186 | TMEM71                    | chr8:133722191-133772914  | 0.115549 | 0.999791 |
| XLOC_014510 | XLOC_014510 | TUG1                      | chr22:31365633-31375380   | 0.115555 | 0.999791 |
| XLOC_017921 | XLOC_017921 | MED7                      | chr5:156565450-156569921  | 0.115612 | 0.999791 |
| XLOC_007544 | XLOC_007544 | TP53BP1                   | chr15:43663312-43910998   | 0.115639 | 0.999791 |
| XLOC_021206 | XLOC_021206 | C7orf43                   | chr7:99752042-99756302    | 0.115753 | 0.999791 |
| XLOC_007223 | XLOC_007223 | FLJ27352                  | chr15:55611132-55800432   | 0.115832 | 0.999791 |
| XLOC_003901 | XLOC_003901 | STT3A                     | chr11:125462738-125491280 | 0.115901 | 0.999791 |
| XLOC_001916 | XLOC_001916 | ISG20L2                   | chr1:156692412-156697705  | 0.115956 | 0.999791 |
| XLOC_020436 | XLOC_020436 | LOC401321                 | chr7:32797897-32802536    | 0.116039 | 0.999791 |
| XLOC_006800 | XLOC_006800 | SOS2                      | chr14:50583845-50698099   | 0.116047 | 0.999791 |
| XLOC_008601 | XLOC_008601 | SLC38A7                   | chr16:58700297-58718674   | 0.116094 | 0.999791 |
| XLOC_009607 | XLOC_009607 | C17orf75                  | chr17:30655459-30669228   | 0.116107 | 0.999791 |
| XLOC_008389 | XLOC_008389 | TRAP1                     | chr16:3702939-3767598     | 0.116192 | 0.999791 |
| XLOC_017367 | XLOC_017367 | PCDHA1,PCDHA10,PCDHA11,PC | chr5:140165875-140391929  | 0.116287 | 1        |
| XLOC_016649 | XLOC_016649 | STX18                     | chr4:4387982-4543775      | 0.116329 | 0.999791 |
| XLOC_020451 | XLOC_020451 | YAE1D1                    | chr7:39606002-39612480    | 0.116391 | 0.999791 |
| XLOC_001028 | XLOC_001028 | DIEXF                     | chr1:210001311-210030910  | 0.1164   | 0.999791 |
| XLOC_004788 | XLOC_004788 | FAR2                      | chr12:29301935-29488549   | 0.116414 | 0.999791 |
| XLOC_009121 | XLOC_009121 | MAPT                      | chr17:43920721-44105699   | 0.116456 | 1        |
| XLOC_021101 | XLOC_021101 | NSUN5                     | chr7:72716513-72722864    | 0.116478 | 0.999791 |
| XLOC_021379 | XLOC_021379 | TPK1                      | chr7:144149033-144533146  | 0.116489 | 0.999791 |
| XLOC_007763 | XLOC_007763 | MRPL46                    | chr15:89002708-89010633   | 0.116513 | 0.999791 |
| XLOC_021127 | XLOC_021127 | YWHAG                     | chr7:75956107-75988342    | 0.116533 | 0.999791 |
| XLOC_007647 | XLOC_007647 | SNAPC5                    | chr15:66679210-66790146   | 0.116579 | 0.999791 |

|             |             |                           |                           |          |          |
|-------------|-------------|---------------------------|---------------------------|----------|----------|
| XLOC_012826 | XLOC_012826 | DTNB                      | chr2:25600066-25896516    | 0.116595 | 0.999791 |
| XLOC_010929 | XLOC_010929 | TOMM40                    | chr19:45394476-45406946   | 0.116621 | 0.999791 |
| XLOC_008891 | XLOC_008891 | DRG2                      | chr17:17991180-18011299   | 0.116627 | 0.999791 |
| XLOC_014554 | XLOC_014554 | POLR2F                    | chr22:38339056-38365319   | 0.116632 | 0.999791 |
| XLOC_007516 | XLOC_007516 | DNAJC17                   | chr15:41060066-41106767   | 0.116702 | 0.999791 |
| XLOC_013246 | XLOC_013246 | HOXD-AS2                  | chr2:176999568-177001826  | 0.116716 | 0.999791 |
| XLOC_024033 | XLOC_024033 | CXorf56                   | chrX:118672111-118699397  | 0.116878 | 0.999791 |
| XLOC_018069 | XLOC_018069 | CAP2                      | chr6:17393735-17558023    | 0.116896 | 0.999791 |
| XLOC_006872 | XLOC_006872 | LOC100289511              | chr14:70232999-70238722   | 0.11704  | 1        |
| XLOC_005880 | XLOC_005880 | GTF2F2                    | chr13:45694630-45858239   | 0.117149 | 0.999791 |
| XLOC_001208 | XLOC_001208 | CDK11A,CDK11B             | chr1:1571099-1655791      | 0.117174 | 0.999791 |
| XLOC_023173 | XLOC_023173 | SNHG7,SNORA17,SNORA43     | chr9:139607023-139622636  | 0.117177 | 0.999791 |
| XLOC_008595 | XLOC_008595 | C16orf80                  | chr16:58147496-58163296   | 0.117297 | 0.999791 |
| XLOC_005160 | XLOC_005160 | DENR                      | chr12:123237370-123255953 | 0.117311 | 0.999791 |
| XLOC_021813 | XLOC_021813 | RPL23AP53                 | chr8:158344-197339        | 0.11739  | 0.999791 |
| XLOC_004610 | XLOC_004610 | TMEM218                   | chr11:124964265-124981659 | 0.117435 | 0.999791 |
| XLOC_017019 | XLOC_017019 | RWDD4                     | chr4:184560788-184580331  | 0.117513 | 0.999791 |
| XLOC_013321 | XLOC_013321 | NDUFS1                    | chr2:206987802-207024243  | 0.117538 | 0.999791 |
| XLOC_000674 | XLOC_000674 | MRPS21                    | chr1:150266268-150280819  | 0.11754  | 0.999791 |
| XLOC_014578 | XLOC_014578 | ADSL                      | chr22:40742503-40762575   | 0.117546 | 0.999791 |
| XLOC_015421 | XLOC_015421 | GFM1                      | chr3:158362316-158410360  | 0.117555 | 0.999791 |
| XLOC_002895 | XLOC_002895 | ZNF32                     | chr10:44124264-44170147   | 0.117678 | 0.999791 |
| XLOC_017775 | XLOC_017775 | TICAM2,TMED7,TMED7-TICAM2 | chr5:114914338-114961876  | 0.117773 | 0.999791 |
| XLOC_024070 | XLOC_024070 | AIFM1                     | chrX:129263337-129299861  | 0.117779 | 0.999791 |
| XLOC_024077 | XLOC_024077 | RAP2C                     | chrX:131337051-131353508  | 0.117928 | 0.999791 |
| XLOC_002537 | XLOC_002537 | EIF5AL1                   | chr10:81272356-81276192   | 0.117951 | 0.999791 |
| XLOC_008137 | XLOC_008137 | RSPRY1                    | chr16:57220240-57272947   | 0.11797  | 0.999791 |
| XLOC_001630 | XLOC_001630 | C1orf52                   | chr1:85715636-85725355    | 0.117985 | 0.999791 |
| XLOC_004213 | XLOC_004213 | SLC43A1                   | chr11:57252003-57283192   | 0.118031 | 0.999791 |
| XLOC_023067 | XLOC_023067 | PSMB7                     | chr9:127115743-127177752  | 0.118034 | 0.999791 |
| XLOC_011385 | XLOC_011385 | RAB11B-AS1                | chr19:8439259-8469317     | 0.118037 | 0.999791 |
| XLOC_010517 | XLOC_010517 | VMAC                      | chr19:5904851-5910263     | 0.118101 | 0.999791 |
| XLOC_017917 | XLOC_017917 | GEMIN5                    | chr5:154266975-154317776  | 0.118124 | 0.999791 |
| XLOC_021090 | XLOC_021090 | SBDS                      | chr7:66452689-66460588    | 0.118182 | 0.999791 |
| XLOC_013478 | XLOC_013478 | TRIB3                     | chr20:361307-378203       | 0.118183 | 0.999791 |
| XLOC_022462 | XLOC_022462 | LOC100132781              | chr9:99631181-99634510    | 0.118183 | 1        |
| XLOC_014202 | XLOC_014202 | PWP2                      | chr21:45527207-45551063   | 0.118264 | 0.999791 |
| XLOC_004167 | XLOC_004167 | ARFGAP2                   | chr11:46958250-47198676   | 0.118324 | 0.999791 |
| XLOC_006655 | XLOC_006655 | ADSS1                     | chr14:105190533-105213647 | 0.118324 | 0.999791 |
| XLOC_022138 | XLOC_022138 | EIF3E                     | chr8:109213971-109260959  | 0.118351 | 0.999791 |
| XLOC_016703 | XLOC_016703 | ARAP2                     | chr4:36067619-36245979    | 0.118461 | 0.999791 |
| XLOC_015846 | XLOC_015846 | ABI3BP                    | chr3:100468178-100712334  | 0.118509 | 1        |
| XLOC_005596 | XLOC_005596 | OSBPL8                    | chr12:76745577-76953589   | 0.118517 | 0.999791 |
| XLOC_009262 | XLOC_009262 | TTYH2                     | chr17:72209695-72258157   | 0.11868  | 0.999791 |
| XLOC_011550 | XLOC_011550 | SUGP1                     | chr19:19387321-19431321   | 0.118705 | 0.999791 |
| XLOC_002953 | XLOC_002953 | ANK3                      | chr10:61786055-62493284   | 0.118731 | 1        |
| XLOC_022399 | XLOC_022399 | GCNT1                     | chr9:79056581-79122332    | 0.118747 | 0.999791 |
| XLOC_010121 | XLOC_010121 | GNAL                      | chr18:11689013-11908796   | 0.118791 | 0.999791 |
| XLOC_014592 | XLOC_014592 | MEI1                      | chr22:42095517-42195459   | 0.118864 | 1        |
| XLOC_009414 | XLOC_009414 | MYBBP1A                   | chr17:4402128-4458681     | 0.118908 | 0.999791 |
| XLOC_022780 | XLOC_022780 | TOPORS                    | chr9:32540541-32553015    | 0.119109 | 0.999791 |
| XLOC_017963 | XLOC_017963 | NOP16                     | chr5:175810939-175815763  | 0.119114 | 0.999791 |
| XLOC_008447 | XLOC_008447 | C16orf88                  | chr16:19717673-19868859   | 0.119202 | 0.999791 |
| XLOC_014601 | XLOC_014601 | LOC100132273              | chr22:42486936-42521354   | 0.119246 | 0.999791 |
| XLOC_008129 | XLOC_008129 | MT1X                      | chr16:56716381-56718108   | 0.119275 | 0.999791 |
| XLOC_019148 | XLOC_019148 | MTRF1L                    | chr6:153308399-153323925  | 0.119288 | 0.999791 |
| XLOC_021107 | XLOC_021107 | DNAJC30                   | chr7:73095247-73097781    | 0.119341 | 0.999791 |
| XLOC_013593 | XLOC_013593 | KIF3B                     | chr20:30865453-30922811   | 0.119437 | 0.999791 |
| XLOC_013356 | XLOC_013356 | TNS1                      | chr2:218664511-218808796  | 0.119458 | 1        |
| XLOC_016934 | XLOC_016934 | ELF2                      | chr4:139978870-140060630  | 0.119497 | 0.999791 |
| XLOC_018139 | XLOC_018139 | ZKSCAN8                   | chr6:28109715-28125236    | 0.119616 | 1        |
| XLOC_001677 | XLOC_001677 | DPH5                      | chr1:101455179-101491362  | 0.119636 | 0.999791 |
| XLOC_010833 | XLOC_010833 | PSMD8                     | chr19:38865189-38874464   | 0.119705 | 0.999791 |
| XLOC_008493 | XLOC_008493 | LOC100289092              | chr16:28889808-28936532   | 0.11972  | 0.999791 |
| XLOC_023763 | XLOC_023763 | FANCB                     | chrX:14861528-14891184    | 0.119778 | 0.999791 |
| XLOC_008784 | XLOC_008784 | ENO3                      | chr17:4854383-4860426     | 0.119812 | 0.999791 |
| XLOC_016300 | XLOC_016300 | GUF1                      | chr4:44680432-44702697    | 0.119828 | 0.999791 |
| XLOC_015158 | XLOC_015158 | SLMAP                     | chr3:57743173-57914894    | 0.119832 | 0.999791 |
| XLOC_005733 | XLOC_005733 | RAB35                     | chr12:120532898-120554643 | 0.11991  | 0.999791 |
| XLOC_015690 | XLOC_015690 | UCN2                      | chr3:48599150-48601201    | 0.119925 | 1        |
| XLOC_023781 | XLOC_023781 | SH3KBP1                   | chrX:19552082-19905744    | 0.119946 | 0.999791 |
| XLOC_010365 | XLOC_010365 | MYO5B                     | chr18:47349155-47721451   | 0.120014 | 0.999791 |
| XLOC_016656 | XLOC_016656 | MRFAP1L1                  | chr4:6709428-6711606      | 0.120015 | 0.999791 |
| XLOC_014985 | XLOC_014985 | RPL15                     | chr3:23933571-23965187    | 0.120085 | 0.999791 |
| XLOC_002949 | XLOC_002949 | SLC16A9                   | chr10:61410521-61469649   | 0.1201   | 0.999791 |
| XLOC_014473 | XLOC_014473 | SGSM1                     | chr22:25202135-25322813   | 0.120178 | 0.999791 |
| XLOC_018052 | XLOC_018052 | SYCP2L                    | chr6:10887063-10974541    | 0.120238 | 1        |
| XLOC_000764 | XLOC_000764 | DAP3                      | chr1:155658881-155708800  | 0.120292 | 0.999791 |
| XLOC_021556 | XLOC_021556 | TACC1                     | chr8:38585703-38710546    | 0.120296 | 0.999791 |

|             |             |             |                           |          |          |
|-------------|-------------|-------------|---------------------------|----------|----------|
| XLOC_018896 | XLOC_018896 | TCTE1       | chr6:44247896-44265458    | 0.120321 | 1        |
| XLOC_021570 | XLOC_021570 | AP3M2       | chr8:42010463-42028701    | 0.120322 | 0.999791 |
| XLOC_000349 | XLOC_000349 | C1orf228    | chr1:45140393-45191263    | 0.120424 | 1        |
| XLOC_015233 | XLOC_015233 | PDCL3P4     | chr3:101431277-101432260  | 0.120454 | 1        |
| XLOC_020525 | XLOC_020525 | TYW1        | chr7:66461791-66704507    | 0.120534 | 0.999791 |
| XLOC_007220 | XLOC_007220 | MAPK6       | chr15:52311410-52358462   | 0.120597 | 0.999791 |
| XLOC_011304 | XLOC_011304 | ZNF77       | chr19:2933215-2944969     | 0.120605 | 0.999791 |
| XLOC_003052 | XLOC_003052 | IDE         | chr10:94211440-94333852   | 0.120639 | 0.999791 |
| XLOC_009432 | XLOC_009432 | DHX33       | chr17:5344231-5372380     | 0.120658 | 0.999791 |
| XLOC_011272 | XLOC_011272 | SBNO2       | chr19:1107632-1174282     | 0.120892 | 0.999791 |
| XLOC_006795 | XLOC_006795 | POLE2       | chr14:50110269-50155098   | 0.12102  | 0.999791 |
| XLOC_020900 | XLOC_020900 | TMEM184A    | chr7:1570367-1596066      | 0.121022 | 0.999791 |
| XLOC_002637 | XLOC_002637 | CUTC        | chr10:101419262-101515894 | 0.121027 | 0.999791 |
| XLOC_017832 | XLOC_017832 | HNRNPA0     | chr5:137087072-137090039  | 0.121028 | 0.999791 |
| XLOC_000775 | XLOC_000775 | TSACC       | chr1:156278751-156316785  | 0.121051 | 0.999791 |
| XLOC_005910 | XLOC_005910 | TPTE2P3     | chr13:53063127-53161225   | 0.121152 | 1        |
| XLOC_005828 | XLOC_005828 | GTF3A       | chr13:27998680-28024739   | 0.121179 | 0.999791 |
| XLOC_017220 | XLOC_017220 | ZCCHC9      | chr5:80256507-81047072    | 0.121181 | 0.999791 |
| XLOC_021251 | XLOC_021251 | PUS7        | chr7:105096959-105162685  | 0.121182 | 0.999791 |
| XLOC_015947 | XLOC_015947 | TMCC1       | chr3:129366634-129612419  | 0.121204 | 0.999791 |
| XLOC_004216 | XLOC_004216 | YPEL4       | chr11:57412559-57417417   | 0.121232 | 0.999791 |
| XLOC_014794 | XLOC_014794 | APOL2       | chr22:36622254-36636000   | 0.121242 | 0.999791 |
| XLOC_010048 | XLOC_010048 | PYCR1       | chr17:79890266-79894968   | 0.121255 | 0.999791 |
| XLOC_017263 | XLOC_017263 | EPB41LA-AS1 | chr5:111496222-111498198  | 0.121264 | 0.999791 |
| XLOC_010745 | XLOC_010745 | URI1        | chr19:30414550-30507519   | 0.121366 | 0.999791 |
| XLOC_001323 | XLOC_001323 | TMCO4       | chr1:20008705-20126410    | 0.121395 | 0.999791 |
| XLOC_004424 | XLOC_004424 | CLNS1A      | chr11:77327195-77348851   | 0.121466 | 0.999791 |
| XLOC_001448 | XLOC_001448 | STK40       | chr1:36805224-36851485    | 0.121474 | 0.999791 |
| XLOC_016171 | XLOC_016171 | CRIPAK      | chr4:1385339-1389782      | 0.121543 | 0.999791 |
| XLOC_015811 | XLOC_015811 | UBA3        | chr3:69103880-69129524    | 0.12159  | 0.999791 |
| XLOC_015361 | XLOC_015361 | ARMC8       | chr3:137906114-138048728  | 0.121728 | 0.999791 |
| XLOC_018325 | XLOC_018325 | HSP90AB1    | chr6:44213902-44221625    | 0.12173  | 0.999791 |
| XLOC_006787 | XLOC_006787 | MIS18BP1    | chr14:45672392-45722605   | 0.121771 | 0.999791 |
| XLOC_001729 | XLOC_001729 | BCAS2       | chr1:115110180-115124265  | 0.121802 | 0.999791 |
| XLOC_023114 | XLOC_023114 | TOR1A       | chr9:132575220-132586441  | 0.121944 | 0.999791 |
| XLOC_013843 | XLOC_013843 | SLC23A2     | chr20:4833001-4990939     | 0.122005 | 0.999791 |
| XLOC_013182 | XLOC_013182 | ARL5A       | chr2:152657479-152685009  | 0.122011 | 0.999791 |
| XLOC_020914 | XLOC_020914 | TNRC18      | chr7:5346422-5463177      | 0.122179 | 0.999791 |
| XLOC_001473 | XLOC_001473 | PABPC4      | chr1:40026484-40042521    | 0.122272 | 0.999791 |
| XLOC_007611 | XLOC_007611 | ANXA2       | chr15:60639349-60690185   | 0.122282 | 0.999791 |
| XLOC_005404 | XLOC_005404 | RPAP3       | chr12:48055714-48099844   | 0.122294 | 0.999791 |
| XLOC_013129 | XLOC_013129 | MKI67IP     | chr2:122407229-122494503  | 0.12232  | 0.999791 |
| XLOC_001625 | XLOC_001625 | SSX2IP      | chr1:85109389-85156240    | 0.122388 | 0.999791 |
| XLOC_004441 | XLOC_004441 | CCDC90B     | chr11:82972501-82997377   | 0.122407 | 0.999791 |
| XLOC_020403 | XLOC_020403 | NFE2L3      | chr7:26191846-26226756    | 0.122423 | 0.999791 |
| XLOC_005408 | XLOC_005408 | VDR         | chr12:48235319-48298814   | 0.122495 | 0.999791 |
| XLOC_007872 | XLOC_007872 | TRAF7       | chr16:2205798-2246465     | 0.122588 | 0.999791 |
| XLOC_001858 | XLOC_001858 | S100A14     | chr1:153586731-153588808  | 0.122622 | 1        |
| XLOC_014669 | XLOC_014669 | GGT3P       | chr22:18761201-18779474   | 0.122711 | 1        |
| XLOC_016561 | XLOC_016561 | TMA16       | chr4:164415672-164441691  | 0.122721 | 0.999791 |
| XLOC_000251 | XLOC_000251 | TXLNA       | chr1:32645344-32663886    | 0.122735 | 0.999791 |
| XLOC_002973 | XLOC_002973 | PPA1        | chr10:71962585-71993190   | 0.122775 | 0.999791 |
| XLOC_010454 | XLOC_010454 | DAZAP1      | chr19:1407583-1435682     | 0.122827 | 0.999791 |
| XLOC_001871 | XLOC_001871 | C1orf43     | chr1:154179182-154243329  | 0.122934 | 0.999791 |
| XLOC_018423 | XLOC_018423 | TSTD3       | chr6:99968869-99981059    | 0.122944 | 0.999791 |
| XLOC_021200 | XLOC_021200 | ZNF3        | chr7:99647416-99679371    | 0.122958 | 0.999791 |
| XLOC_005749 | XLOC_005749 | CAMKK2      | chr12:121675494-121736111 | 0.12297  | 0.999791 |
| XLOC_011250 | XLOC_011250 | ZNF324      | chr19:58978411-58984945   | 0.123019 | 0.999791 |
| XLOC_016377 | XLOC_016377 | MTHFD2L     | chr4:75023828-75168814    | 0.123024 | 0.999791 |
| XLOC_004366 | XLOC_004366 | FAM86C2P    | chr11:67559237-67572807   | 0.123054 | 0.999791 |
| XLOC_014964 | XLOC_014964 | CCDC174     | chr3:14693252-14714166    | 0.12323  | 0.999791 |
| XLOC_008327 | XLOC_008327 | LMF1        | chr16:903634-1031318      | 0.123307 | 0.999791 |
| XLOC_000292 | XLOC_000292 | MANEAL      | chr1:38259773-38267278    | 0.123575 | 0.999791 |
| XLOC_008905 | XLOC_008905 | SLC5A10     | chr17:18853988-18950336   | 0.12359  | 0.999791 |
| XLOC_013621 | XLOC_013621 | MYH7B       | chr20:33543703-33680618   | 0.123621 | 1        |
| XLOC_008409 | XLOC_008409 | TMEM186     | chr16:8889036-8891505     | 0.123686 | 0.999791 |
| XLOC_013705 | XLOC_013705 | ARFGF2      | chr20:47538274-47653230   | 0.123751 | 0.999791 |
| XLOC_009080 | XLOC_009080 | CNTD1       | chr17:40950853-40976310   | 0.12378  | 1        |
| XLOC_015684 | XLOC_015684 | NME6        | chr3:48335588-48342848    | 0.123783 | 0.999791 |
| XLOC_002823 | XLOC_002823 | FAM107B     | chr10:14560558-14816896   | 0.123828 | 0.999791 |
| XLOC_004102 | XLOC_004102 | TSG101      | chr11:18501857-18548503   | 0.123833 | 0.999791 |
| XLOC_009744 | XLOC_009744 | STAT5B      | chr17:40351194-40428424   | 0.123836 | 0.999791 |
| XLOC_021706 | XLOC_021706 | FZD6        | chr8:104310660-104345094  | 0.123858 | 0.999791 |
| XLOC_018352 | XLOC_018352 | FBXO9       | chr6:52929795-52965670    | 0.123906 | 0.999791 |
| XLOC_020342 | XLOC_020342 | EIF3B       | chr7:2394473-24203577     | 0.123937 | 0.999791 |
| XLOC_015763 | XLOC_015763 | NEK4        | chr3:52744795-52804965    | 0.123954 | 0.999791 |
| XLOC_016384 | XLOC_016384 | THAP6       | chr4:76439653-76455236    | 0.123955 | 0.999791 |
| XLOC_016509 | XLOC_016509 | CCRN4L      | chr4:139936942-139967095  | 0.123965 | 0.999791 |
| XLOC_012986 | XLOC_012986 | MOB1A       | chr2:74383210-74405995    | 0.123989 | 0.999791 |

|             |             |                         |                           |          |          |
|-------------|-------------|-------------------------|---------------------------|----------|----------|
| XLOC_009371 | XLOC_009371 | YWHAE                   | chr17:1247833-1303556     | 0.124117 | 0.999791 |
| XLOC_004180 | XLOC_004180 | NUP160                  | chr11:47799669-47870057   | 0.124126 | 0.999791 |
| XLOC_001048 | XLOC_001048 | SMYD2                   | chr1:214454564-214510477  | 0.124156 | 0.999791 |
| XLOC_010166 | XLOC_010166 | RNF138                  | chr18:29671817-29711524   | 0.124166 | 0.999791 |
| XLOC_013675 | XLOC_013675 | KCNK15                  | chr20:43374487-43438979   | 0.124241 | 1        |
| XLOC_001239 | XLOC_001239 | ACOT7                   | chr1:6324331-6453826      | 0.124246 | 0.999791 |
| XLOC_003799 | XLOC_003799 | CUL5                    | chr11:107879407-107978488 | 0.124272 | 0.999791 |
| XLOC_016633 | XLOC_016633 | TMEM129                 | chr4:1717678-1723084      | 0.124288 | 0.999791 |
| XLOC_010573 | XLOC_010573 | MRPL4                   | chr19:10362639-10370736   | 0.124317 | 0.999791 |
| XLOC_003328 | XLOC_003328 | SBF2-AS1                | chr11:9776316-10315754    | 0.124349 | 0.999791 |
| XLOC_009982 | XLOC_009982 | EVPL                    | chr17:74002926-74023507   | 0.124425 | 0.999791 |
| XLOC_000508 | XLOC_000508 | RPAP2                   | chr1:92711954-92853732    | 0.124431 | 0.999791 |
| XLOC_005534 | XLOC_005534 | PRIM1                   | chr12:57125363-57146146   | 0.124518 | 0.999791 |
| XLOC_011309 | XLOC_011309 | MFS12                   | chr19:3538262-3557571     | 0.124565 | 0.999791 |
| XLOC_021396 | XLOC_021396 | ATG9B                   | chr7:150688143-150721586  | 0.124607 | 0.999791 |
| XLOC_021889 | XLOC_021889 | MTMR7                   | chr8:17104400-17271040    | 0.124617 | 0.999791 |
| XLOC_009792 | XLOC_009792 | PLEKHM1                 | chr17:43513265-43568146   | 0.124632 | 0.999791 |
| XLOC_010947 | XLOC_010947 | GIPR                    | chr19:46171501-46185717   | 0.124655 | 0.999791 |
| XLOC_008314 | XLOC_008314 | RGS11                   | chr16:318309-325914       | 0.124664 | 0.999791 |
| XLOC_005200 | XLOC_005200 | NOC4L                   | chr12:132628992-132636986 | 0.124666 | 0.999791 |
| XLOC_018815 | XLOC_018815 | BAK1                    | chr6:33540322-33548070    | 0.124777 | 0.999791 |
| XLOC_020840 | XLOC_020840 | ZNF783                  | chr7:148959261-148982085  | 0.124783 | 0.999791 |
| XLOC_022578 | XLOC_022578 | SLC25A25                | chr9:130830478-130871537  | 0.124807 | 0.999791 |
| XLOC_014056 | XLOC_014056 | SYCP2                   | chr20:58438617-58507209   | 0.124832 | 1        |
| XLOC_003200 | XLOC_003200 | STK32C                  | chr10:134020995-134121477 | 0.124845 | 0.999791 |
| XLOC_021482 | XLOC_021482 | SLC7A2                  | chr8:17354596-17428077    | 0.124888 | 0.999791 |
| XLOC_011269 | XLOC_011269 | R3HDM4                  | chr19:896502-913225       | 0.124899 | 0.999791 |
| XLOC_010006 | XLOC_010006 | USP36                   | chr17:76792964-76836969   | 0.125073 | 0.999791 |
| XLOC_005206 | XLOC_005206 | ZNF26                   | chr12:133562933-133589154 | 0.125093 | 0.999791 |
| XLOC_013644 | XLOC_013644 | RPRD1B                  | chr20:36661947-36720766   | 0.125184 | 0.999791 |
| XLOC_011983 | XLOC_011983 | ZSCAN5A                 | chr19:56732678-56739659   | 0.125284 | 0.999791 |
| XLOC_012571 | XLOC_012571 | COQ10B                  | chr2:198318230-198339851  | 0.125359 | 0.999791 |
| XLOC_017361 | XLOC_017361 | WDR55                   | chr5:140044383-140053171  | 0.125435 | 0.999791 |
| XLOC_012135 | XLOC_012135 | LTBP1                   | chr2:33172368-33624575    | 0.125473 | 0.999791 |
| XLOC_007397 | XLOC_007397 | ZNF710                  | chr15:90544751-90625432   | 0.125531 | 0.999791 |
| XLOC_022779 | XLOC_022779 | DDX58                   | chr9:32455299-32526322    | 0.125556 | 0.999791 |
| XLOC_009934 | XLOC_009934 | FAM20A                  | chr17:66507920-66597095   | 0.125619 | 1        |
| XLOC_016760 | XLOC_016760 | CENPC1                  | chr4:68337988-68411256    | 0.125619 | 0.999791 |
| XLOC_001699 | XLOC_001699 | ALX3                    | chr11:110602996-110613322 | 0.125724 | 0.999791 |
| XLOC_013597 | XLOC_013597 | MAPRE1                  | chr20:31407698-31438211   | 0.125759 | 0.999791 |
| XLOC_002273 | XLOC_002273 | CHML                    | chr1:241695433-241803701  | 0.125793 | 0.999791 |
| XLOC_018256 | XLOC_018256 | PPARD                   | chr6:35310334-35395968    | 0.125834 | 0.999791 |
| XLOC_020906 | XLOC_020906 | BRAT1                   | chr7:2577443-2595392      | 0.125842 | 0.999791 |
| XLOC_016479 | XLOC_016479 | SNHG8                   | chr4:119199916-119200978  | 0.125924 | 0.999791 |
| XLOC_019134 | XLOC_019134 | PPIL4                   | chr6:149825630-149867238  | 0.125939 | 0.999791 |
| XLOC_003238 | XLOC_003238 | AP2A2                   | chr11:925808-1012245      | 0.125988 | 0.999791 |
| XLOC_012183 | XLOC_012183 | C2orf73                 | chr2:54558070-54588714    | 0.126014 | 1        |
| XLOC_014388 | XLOC_014388 | C21orf58                | chr21:47721046-47743785   | 0.126066 | 0.999791 |
| XLOC_012329 | XLOC_012329 | MRPL30                  | chr2:99797541-99816020    | 0.126151 | 0.999791 |
| XLOC_007013 | XLOC_007013 | HERC2P7                 | chr15:23390721-23393943   | 0.126218 | 0.999791 |
| XLOC_014495 | XLOC_014495 | RFPL1                   | chr22:29833003-29838444   | 0.126218 | 1        |
| XLOC_009979 | XLOC_009979 | MRPL38                  | chr17:73894723-73901181   | 0.126233 | 0.999791 |
| XLOC_015069 | XLOC_015069 | LARS2                   | chr3:45430074-45590328    | 0.126326 | 0.999791 |
| XLOC_004999 | XLOC_004999 | GLIPR1                  | chr12:75874512-75905418   | 0.12663  | 0.999791 |
| XLOC_002315 | XLOC_002315 | IDI2-AS1                | chr10:1064846-1095061     | 0.126655 | 0.999791 |
| XLOC_007284 | XLOC_007284 | HEXA-AS1                | chr15:72635777-72671129   | 0.126789 | 1        |
| XLOC_010714 | XLOC_010714 | GATAD2A                 | chr19:19496641-19619741   | 0.126798 | 0.999791 |
| XLOC_009169 | XLOC_009169 | SPATA20                 | chr17:48624449-48633213   | 0.126818 | 0.999791 |
| XLOC_007939 | XLOC_007939 | CLEC16A                 | chr16:11038344-11276046   | 0.126835 | 0.999791 |
| XLOC_005399 | XLOC_005399 | SLC38A1                 | chr12:46576840-46663208   | 0.127056 | 0.999791 |
| XLOC_011379 | XLOC_011379 | TIMM44                  | chr19:7991602-8008708     | 0.127072 | 0.999791 |
| XLOC_005605 | XLOC_005605 | CCDC59                  | chr12:82746082-82873016   | 0.127073 | 0.999791 |
| XLOC_018532 | XLOC_018532 | AIG1                    | chr6:143382022-143661441  | 0.12709  | 0.999791 |
| XLOC_009949 | XLOC_009949 | MGC16275                | chr17:72206134-72209460   | 0.12717  | 0.999791 |
| XLOC_012169 | XLOC_012169 | SOCS5                   | chr2:46926098-46989927    | 0.127177 | 0.999791 |
| XLOC_009518 | XLOC_009518 | ZSWIM7                  | chr17:15879874-15932723   | 0.127197 | 0.999791 |
| XLOC_009372 | XLOC_009372 | CRK                     | chr17:1324646-1359561     | 0.127225 | 0.999791 |
| XLOC_014559 | XLOC_014559 | CBY1                    | chr22:39052657-39069855   | 0.127229 | 0.999791 |
| XLOC_016015 | XLOC_016015 | MBNL1-AS1               | chr3:151980404-152183569  | 0.127348 | 1        |
| XLOC_003608 | XLOC_003608 | POLA2                   | chr11:65029431-65065088   | 0.127451 | 0.999791 |
| XLOC_008148 | XLOC_008148 | KATNB1                  | chr16:57769659-57791162   | 0.127503 | 0.999791 |
| XLOC_014515 | XLOC_014515 | DRG1                    | chr22:31795638-31830172   | 0.127526 | 0.999791 |
| XLOC_018606 | XLOC_018606 | FAM120B                 | chr6:170615843-170714237  | 0.127542 | 0.999791 |
| XLOC_020680 | XLOC_020680 | LRRC17                  | chr7:102453307-102715288  | 0.127548 | 1        |
| XLOC_011248 | XLOC_011248 | ZNF584                  | chr19:58920062-58929692   | 0.127604 | 0.999791 |
| XLOC_006374 | XLOC_006374 | PSMA3                   | chr14:58711522-58764855   | 0.127627 | 0.999791 |
| XLOC_006001 | XLOC_006001 | CUL4A                   | chr13:113863085-113919392 | 0.127632 | 0.999791 |
| XLOC_012527 | XLOC_012527 | HOXD9                   | chr2:176987412-176989645  | 0.127648 | 0.999791 |
| XLOC_017387 | XLOC_017387 | PCDHGA1,PCDHGA10,PCDHGA | chr5:140710251-140892548  | 0.127675 | 0.999791 |

|             |             |              |                           |          |          |
|-------------|-------------|--------------|---------------------------|----------|----------|
| XLOC_006739 | XLOC_006739 | DHRS1        | chr14:24759803-24769039   | 0.127728 | 0.999791 |
| XLOC_009015 | XLOC_009015 | MRPL45       | chr17:36452988-36479101   | 0.127737 | 0.999791 |
| XLOC_023544 | XLOC_023544 | FAM199X      | chrX:103411155-103440582  | 0.127764 | 0.999791 |
| XLOC_016427 | XLOC_016427 | FAM13A-AS1   | chr4:89630939-89978346    | 0.127789 | 1        |
| XLOC_001464 | XLOC_001464 | INPP5B       | chr1:38326368-38412729    | 0.127832 | 0.999791 |
| XLOC_020981 | XLOC_020981 | HOXA10,HOXA9 | chr7:27202056-27219880    | 0.127857 | 0.999791 |
| XLOC_018060 | XLOC_018060 | NOL7         | chr6:13615558-13621127    | 0.127954 | 0.999791 |
| XLOC_018996 | XLOC_018996 | LYRM2        | chr6:90142896-90348474    | 0.127954 | 0.999791 |
| XLOC_007170 | XLOC_007170 | HAUS2        | chr15:42841010-42862190   | 0.127957 | 0.999791 |
| XLOC_004833 | XLOC_004833 | TMBIM6       | chr12:50135292-50158717   | 0.127967 | 0.999791 |
| XLOC_020836 | XLOC_020836 | CUL1         | chr7:148395932-148498202  | 0.127998 | 0.999791 |
| XLOC_008277 | XLOC_008277 | MAP1LC3B     | chr16:87425800-87438380   | 0.128008 | 0.999791 |
| XLOC_002380 | XLOC_002380 | MSRB2        | chr10:23384426-23410942   | 0.128014 | 0.999791 |
| XLOC_021229 | XLOC_021229 | FIS1         | chr7:100882892-100888371  | 0.128247 | 0.999791 |
| XLOC_011419 | XLOC_011419 | CDC37        | chr19:10501808-10514271   | 0.128265 | 0.999791 |
| XLOC_018457 | XLOC_018457 | NT5DC1       | chr6:116421998-116566853  | 0.128337 | 0.999791 |
| XLOC_006092 | XLOC_006092 | KBTBD6       | chr13:41701708-41706936   | 0.128555 | 0.999791 |
| XLOC_014084 | XLOC_014084 | ARFRP1       | chr20:62289162-62367494   | 0.128556 | 0.999791 |
| XLOC_012743 | XLOC_012743 | DUSP28       | chr2:241499470-241503431  | 0.128562 | 0.999791 |
| XLOC_004432 | XLOC_004432 | NARS2        | chr11:78147006-78285909   | 0.128621 | 0.999791 |
| XLOC_012041 | XLOC_012041 | ASAP2        | chr2:9346893-9545812      | 0.128625 | 0.999791 |
| XLOC_018778 | XLOC_018778 | ZBTB12       | chr6:31865561-31913449    | 0.128661 | 0.999791 |
| XLOC_004648 | XLOC_004648 | LRTM2        | chr12:1901122-2027870     | 0.128693 | 1        |
| XLOC_018997 | XLOC_018997 | MDN1         | chr6:90353230-90529442    | 0.128851 | 0.999791 |
| XLOC_005789 | XLOC_005789 | DDX51        | chr12:132621139-132628880 | 0.128853 | 0.999791 |
| XLOC_022398 | XLOC_022398 | RPSAP9       | chr9:79013514-79014954    | 0.128896 | 0.999791 |
| XLOC_012045 | XLOC_012045 | GRHL1        | chr2:10091791-10142412    | 0.128988 | 0.999791 |
| XLOC_006109 | XLOC_006109 | ZC3H13       | chr13:46536313-46626894   | 0.12905  | 0.999791 |
| XLOC_014219 | XLOC_014219 | ADARB1       | chr21:46494492-46646478   | 0.129075 | 0.999791 |
| XLOC_018210 | XLOC_018210 | C6orf48      | chr6:31802692-31807541    | 0.129083 | 0.999791 |
| XLOC_012934 | XLOC_012934 | CCT4         | chr2:62095261-62115806    | 0.129093 | 0.999791 |
| XLOC_005724 | XLOC_005724 | TESC         | chr12:117476727-117537251 | 0.129115 | 0.999791 |
| XLOC_021695 | XLOC_021695 | POLR2K       | chr8:101162838-101166230  | 0.129206 | 0.999791 |
| XLOC_008130 | XLOC_008130 | NUP93        | chr16:56764016-56878861   | 0.129318 | 0.999791 |
| XLOC_021789 | XLOC_021789 | EXOSC4       | chr8:145133521-145135551  | 0.129371 | 0.999791 |
| XLOC_005275 | XLOC_005275 | LINC00612    | chr12:9208184-9217666     | 0.129404 | 1        |
| XLOC_010708 | XLOC_010708 | DDX49        | chr19:19030483-19039442   | 0.12942  | 0.999791 |
| XLOC_016170 | XLOC_016170 | UVSSA        | chr4:1341103-1381837      | 0.129432 | 0.999791 |
| XLOC_008171 | XLOC_008171 | E2F4         | chr16:67226067-67232821   | 0.129444 | 0.999791 |
| XLOC_008904 | XLOC_008904 | PRPSAP2      | chr17:18759611-18834599   | 0.129513 | 0.999791 |
| XLOC_013726 | XLOC_013726 | FAM210B      | chr20:54933982-54943718   | 0.129621 | 0.999791 |
| XLOC_018348 | XLOC_018348 | PAQR8        | chr6:52226925-52227575    | 0.129704 | 0.999791 |
| XLOC_005483 | XLOC_005483 | SPRYD3       | chr12:53436972-53473204   | 0.129705 | 0.999791 |
| XLOC_009363 | XLOC_009363 | RPH3AL       | chr17:62179-202633        | 0.129705 | 0.999791 |
| XLOC_019165 | XLOC_019165 | TCP1         | chr6:160181290-160210735  | 0.129752 | 0.999791 |
| XLOC_011786 | XLOC_011786 | SLC1A5       | chr19:47278139-47291842   | 0.129757 | 0.999791 |
| XLOC_008289 | XLOC_008289 | ACSF3        | chr16:89160216-89222171   | 0.130077 | 0.999791 |
| XLOC_008712 | XLOC_008712 | FENDRR       | chr16:86508130-86542466   | 0.130091 | 1        |
| XLOC_008364 | XLOC_008364 | ABCA3        | chr16:2325878-2390747     | 0.130107 | 0.999791 |
| XLOC_000676 | XLOC_000676 | RPRD2        | chr1:150336989-150449041  | 0.130131 | 0.999791 |
| XLOC_012560 | XLOC_012560 | PMS1         | chr2:190634992-190742355  | 0.130154 | 0.999791 |
| XLOC_011943 | XLOC_011943 | LILRA6       | chr19:54740468-54746724   | 0.130199 | 1        |
| XLOC_016514 | XLOC_016514 | ELMOD2       | chr4:141445311-141474924  | 0.130299 | 0.999791 |
| XLOC_013852 | XLOC_013852 | FERMT1       | chr20:6055491-6104191     | 0.130318 | 0.999791 |
| XLOC_013703 | XLOC_013703 | NCOA3        | chr20:46130600-46285621   | 0.130334 | 0.999791 |
| XLOC_017680 | XLOC_017680 | LOC100303749 | chr5:65222381-65376851    | 0.130339 | 1        |
| XLOC_014863 | XLOC_014863 | RRP7A        | chr22:42896584-42915829   | 0.130414 | 0.999791 |
| XLOC_005428 | XLOC_005428 | PRKAG1       | chr12:49396054-49412629   | 0.130425 | 0.999791 |
| XLOC_006810 | XLOC_006810 | NID2         | chr14:52471519-52535946   | 0.130436 | 1        |
| XLOC_008310 | XLOC_008310 | POLR3K       | chr16:96978-103632        | 0.130447 | 0.999791 |
| XLOC_019002 | XLOC_019002 | NDUF4F4      | chr6:97337186-97345767    | 0.130544 | 0.999791 |
| XLOC_011319 | XLOC_011319 | EEF2         | chr19:3976053-3985461     | 0.130645 | 0.999791 |
| XLOC_005455 | XLOC_005455 | GALNT6       | chr12:51745832-51909547   | 0.130716 | 0.999791 |
| XLOC_015656 | XLOC_015656 | KIAA1143     | chr3:44790235-44803173    | 0.130734 | 0.999791 |
| XLOC_003183 | XLOC_003183 | FLJ37035     | chr10:127371811-127408062 | 0.130737 | 1        |
| XLOC_021778 | XLOC_021778 | ZNF696       | chr8:144373558-144382120  | 0.130743 | 0.999791 |
| XLOC_000332 | XLOC_000332 | TIE1         | chr1:43766565-43788781    | 0.13084  | 1        |
| XLOC_008193 | XLOC_008193 | PRMT7        | chr16:68344876-68391169   | 0.130933 | 0.999791 |
| XLOC_015482 | XLOC_015482 | EIF4G1       | chr3:184032282-184053146  | 0.13097  | 0.999791 |
| XLOC_001346 | XLOC_001346 | HNRNPR       | chr1:23636275-23670853    | 0.130981 | 0.999791 |
| XLOC_005661 | XLOC_005661 | NT5DC3       | chr12:104166080-104234975 | 0.130989 | 0.999791 |
| XLOC_020841 | XLOC_020841 | LOC155060    | chr7:148982371-148994403  | 0.131008 | 0.999791 |
| XLOC_000688 | XLOC_000688 | GABPB2       | chr1:151043079-151091007  | 0.131131 | 0.999791 |
| XLOC_018473 | XLOC_018473 | ASF1A        | chr6:119134611-119256327  | 0.131164 | 0.999791 |
| XLOC_019051 | XLOC_019051 | TSPYL1       | chr6:116596021-116601280  | 0.131251 | 0.999791 |
| XLOC_023345 | XLOC_023345 | RP2          | chrX:46696346-46741791    | 0.131325 | 0.999791 |
| XLOC_022202 | XLOC_022202 | TSNARE1      | chr8:143293440-143484543  | 0.131375 | 0.999791 |
| XLOC_000278 | XLOC_000278 | NCDN         | chr1:36023392-36032380    | 0.131454 | 0.999791 |
| XLOC_015704 | XLOC_015704 | IMPDH2       | chr3:49061761-49066875    | 0.131458 | 0.999791 |

|             |             |              |                           |          |          |
|-------------|-------------|--------------|---------------------------|----------|----------|
| XLOC_013692 | XLOC_013692 | ZSWIM3       | chr20:44486219-44507769   | 0.131476 | 0.999791 |
| XLOC_004765 | XLOC_004765 | SLCO1B7      | chr12:21168629-21243040   | 0.131541 | 1        |
| XLOC_011638 | XLOC_011638 | ZNF573       | chr19:38229202-38270230   | 0.131603 | 1        |
| XLOC_015355 | XLOC_015355 | PCCB         | chr3:135969166-136049013  | 0.131643 | 0.999791 |
| XLOC_002007 | XLOC_002007 | NME7         | chr1:169075946-169337186  | 0.131666 | 0.999791 |
| XLOC_019068 | XLOC_019068 | HDCC2        | chr6:125596495-125623282  | 0.13167  | 0.999791 |
| XLOC_013173 | XLOC_013173 | GTDC1        | chr2:144703580-145090083  | 0.131704 | 0.999791 |
| XLOC_017288 | XLOC_017288 | SNX24        | chr5:122181159-122344902  | 0.131815 | 0.999791 |
| XLOC_016877 | XLOC_016877 | CXXC4        | chr4:105389462-105416058  | 0.131887 | 1        |
| XLOC_010816 | XLOC_010816 | ZNF567       | chr19:37180301-37212225   | 0.132043 | 0.999791 |
| XLOC_001628 | XLOC_001628 | MCOLN3       | chr1:85483764-85514223    | 0.132104 | 0.999791 |
| XLOC_005078 | XLOC_005078 | BTBD11       | chr12:107712196-108053419 | 0.132154 | 0.999791 |
| XLOC_008884 | XLOC_008884 | MPRIP        | chr17:16946073-17095962   | 0.132173 | 0.999791 |
| XLOC_005023 | XLOC_005023 | NUDT4        | chr12:93771700-93797024   | 0.132203 | 0.999791 |
| XLOC_005586 | XLOC_005586 | ZFC3H1       | chr12:72003378-72074428   | 0.132213 | 0.999791 |
| XLOC_002204 | XLOC_002204 | NVL          | chr1:224415035-224517891  | 0.132218 | 0.999791 |
| XLOC_008426 | XLOC_008426 | RSL1D1       | chr16:11928054-11945442   | 0.132228 | 0.999791 |
| XLOC_023600 | XLOC_023600 | XIAP         | chrX:122993661-123047829  | 0.132314 | 0.999791 |
| XLOC_003382 | XLOC_003382 | ELP4         | chr1:131531296-131805329  | 0.132355 | 0.999791 |
| XLOC_022614 | XLOC_022614 | EXOSC2       | chr9:133569157-133580452  | 0.132356 | 0.999791 |
| XLOC_021536 | XLOC_021536 | LEPROTL1     | chr8:29920257-30108213    | 0.132528 | 0.999791 |
| XLOC_013902 | XLOC_013902 | NINL         | chr20:25433337-25566153   | 0.132531 | 0.999791 |
| XLOC_000459 | XLOC_000459 | TYW3         | chr1:75171171-75232360    | 0.13254  | 0.999791 |
| XLOC_005242 | XLOC_005242 | NOP2         | chr12:6666035-6677498     | 0.132641 | 0.999791 |
| XLOC_002802 | XLOC_002802 | IL15RA       | chr10:5994333-6020150     | 0.132661 | 0.999791 |
| XLOC_016473 | XLOC_016473 | ANK2         | chr4:113739238-114304896  | 0.13278  | 1        |
| XLOC_009128 | XLOC_009128 | NSF          | chr17:44668034-44834828   | 0.132785 | 0.999791 |
| XLOC_004373 | XLOC_004373 | MRPL21       | chr11:68658745-68671303   | 0.132832 | 0.999791 |
| XLOC_015303 | XLOC_015303 | UMPS         | chr3:124449212-124468119  | 0.132903 | 0.999791 |
| XLOC_008872 | XLOC_008872 | ADORA2B      | chr17:15848230-15879210   | 0.132923 | 0.999791 |
| XLOC_009275 | XLOC_009275 | ICT1         | chr17:73008779-73017356   | 0.132937 | 0.999791 |
| XLOC_008172 | XLOC_008172 | ELMO3        | chr16:67233027-67237927   | 0.132988 | 0.999791 |
| XLOC_005106 | XLOC_005106 | MAPKAPK5     | chr12:112277572-112331228 | 0.133122 | 0.999791 |
| XLOC_009392 | XLOC_009392 | METTL16      | chr17:2319347-2415200     | 0.133145 | 0.999791 |
| XLOC_021433 | XLOC_021433 | KBTBD11      | chr8:1922043-1955109      | 0.133145 | 0.999791 |
| XLOC_002797 | XLOC_002797 | TUBAL3       | chr10:5435060-5446793     | 0.133161 | 0.999791 |
| XLOC_020891 | XLOC_020891 | PDGFA        | chr7:536896-559481        | 0.133224 | 0.999791 |
| XLOC_018860 | XLOC_018860 | UNC5CL       | chr6:40994639-41006938    | 0.133398 | 0.999791 |
| XLOC_001639 | XLOC_001639 | CCBL2,RBMXL1 | chr1:89401455-89458643    | 0.133413 | 0.999791 |
| XLOC_012860 | XLOC_012860 | MEMO1        | chr2:32092893-32235698    | 0.133431 | 0.999791 |
| XLOC_016752 | XLOC_016752 | PPAT         | chr4:57259528-57301802    | 0.133435 | 0.999791 |
| XLOC_024067 | XLOC_024067 | APLN         | chrX:128779235-128788933  | 0.133469 | 0.999791 |
| XLOC_001577 | XLOC_001577 | MYSM1        | chr1:59120410-59165747    | 0.133518 | 0.999791 |
| XLOC_010038 | XLOC_010038 | OXLD1        | chr17:79632065-79633618   | 0.133606 | 0.999791 |
| XLOC_006481 | XLOC_006481 | ZC3H14       | chr14:89029252-89079853   | 0.133624 | 0.999791 |
| XLOC_001809 | XLOC_001809 | CDC42SE1     | chr1:151020258-151032125  | 0.133626 | 0.999791 |
| XLOC_022562 | XLOC_022562 | PBX3         | chr9:128509616-128729655  | 0.133663 | 0.999791 |
| XLOC_022604 | XLOC_022604 | LOC100506190 | chr9:132250938-132275965  | 0.133671 | 0.999791 |
| XLOC_012498 | XLOC_012498 | BBS5         | chr2:170336005-170363165  | 0.133711 | 0.999791 |
| XLOC_015120 | XLOC_015120 | MAPKAPK3     | chr3:50649292-50686728    | 0.133717 | 0.999791 |
| XLOC_003341 | XLOC_003341 | FAR1         | chr11:13690205-13753893   | 0.133756 | 0.999791 |
| XLOC_017465 | XLOC_017465 | WWC1         | chr5:167719064-167899308  | 0.13378  | 0.999791 |
| XLOC_008197 | XLOC_008197 | TANGO6       | chr16:68877508-69119085   | 0.133792 | 0.999791 |
| XLOC_014798 | XLOC_014798 | EIF3D        | chr22:36906896-36925277   | 0.1338   | 0.999791 |
| XLOC_010695 | XLOC_010695 | MPV17L2      | chr19:18304039-18307550   | 0.133824 | 0.999791 |
| XLOC_018729 | XLOC_018729 | IFITM4P      | chr6:29718583-29718925    | 0.133846 | 1        |
| XLOC_010794 | XLOC_010794 | COX6B1       | chr19:36139124-36149686   | 0.133898 | 0.999791 |
| XLOC_005742 | XLOC_005742 | LOC100506668 | chr12:120907659-120936298 | 0.133901 | 0.999791 |
| XLOC_023810 | XLOC_023810 | DYNLT3       | chrX:37698088-37706889    | 0.13396  | 0.999791 |
| XLOC_011412 | XLOC_011412 | DNMT1        | chr19:10244021-10305755   | 0.13397  | 0.999791 |
| XLOC_018604 | XLOC_018604 | C6orf70      | chr6:170151720-170181617  | 0.133991 | 0.999791 |
| XLOC_011007 | XLOC_011007 | FTL          | chr19:49468565-49470136   | 0.134221 | 0.999791 |
| XLOC_000955 | XLOC_000955 | C1orf53      | chr1:197871681-197876497  | 0.134315 | 0.999791 |
| XLOC_000374 | XLOC_000374 | DMBX1        | chr1:46972667-46979886    | 0.134325 | 0.999791 |
| XLOC_010869 | XLOC_010869 | SNRPA        | chr19:41256758-41271297   | 0.134329 | 0.999791 |
| XLOC_005774 | XLOC_005774 | EIF2B1       | chr12:124105569-124147151 | 0.134372 | 0.999791 |
| XLOC_023611 | XLOC_023611 | SLC25A14     | chrX:129474046-129507335  | 0.134374 | 0.999791 |
| XLOC_023845 | XLOC_023845 | SLC35A2      | chrX:48760458-48769235    | 0.134416 | 0.999791 |
| XLOC_010602 | XLOC_010602 | ZNF440       | chr19:11925106-11946016   | 0.13445  | 0.999791 |
| XLOC_021548 | XLOC_021548 | ERLIN2       | chr8:37594096-37615319    | 0.134514 | 0.999791 |
| XLOC_012648 | XLOC_012648 | BCS1L        | chr2:219524378-219528166  | 0.134649 | 0.999791 |
| XLOC_006928 | XLOC_006928 | EFCAB11      | chr14:90263468-90421089   | 0.134768 | 0.999791 |
| XLOC_006775 | XLOC_006775 | SLC25A21     | chr14:37147125-37642998   | 0.134829 | 0.999791 |
| XLOC_011354 | XLOC_011354 | KHSRP        | chr19:6413118-6424822     | 0.134888 | 0.999791 |
| XLOC_000229 | XLOC_000229 | SESN2        | chr1:28585962-28609002    | 0.134911 | 0.999791 |
| XLOC_000746 | XLOC_000746 | FLAD1        | chr1:154955769-154965587  | 0.134914 | 0.999791 |
| XLOC_011210 | XLOC_011210 | ZNF71        | chr19:57106663-57135544   | 0.134914 | 0.999791 |
| XLOC_020405 | XLOC_020405 | SNX10        | chr7:26331514-26413949    | 0.134995 | 0.999791 |
| XLOC_018059 | XLOC_018059 | SIRT5        | chr6:13574760-13615390    | 0.135005 | 0.999791 |



|             |             |                       |                           |          |          |
|-------------|-------------|-----------------------|---------------------------|----------|----------|
| XLOC_016253 | XLOC_016253 | LAP3                  | chr4:17578926-17609590    | 0.13505  | 0.999791 |
| XLOC_016297 | XLOC_016297 | SLC30A9               | chr4:41992522-42089551    | 0.13505  | 0.999791 |
| XLOC_005105 | XLOC_005105 | ALDH2                 | chr12:112204690-112247789 | 0.13509  | 0.999791 |
| XLOC_010440 | XLOC_010440 | WDR18                 | chr19:984327-994569       | 0.135139 | 0.999791 |
| XLOC_007725 | XLOC_007725 | MTHFS,ST20,ST20-MTHFS | chr15:80135888-80217196   | 0.135218 | 0.999791 |
| XLOC_002180 | XLOC_002180 | ANGEL2                | chr1:213165523-213189168  | 0.135252 | 0.999791 |
| XLOC_002584 | XLOC_002584 | IFIT5                 | chr10:91174324-91180759   | 0.135291 | 0.999791 |
| XLOC_023126 | XLOC_023126 | DDX31                 | chr9:135469675-135565470  | 0.135315 | 0.999791 |
| XLOC_017813 | XLOC_017813 | CDKN2AIPNL            | chr5:133737755-133747598  | 0.135336 | 0.999791 |
| XLOC_017603 | XLOC_017603 | AMACR,C1QTNF3         | chr5:33987090-34124633    | 0.135404 | 0.999791 |
| XLOC_015589 | XLOC_015589 | MRPS25                | chr3:14984285-15106816    | 0.135424 | 0.999791 |
| XLOC_001517 | XLOC_001517 | CCDC17                | chr1:46085715-46089731    | 0.135425 | 1        |
| XLOC_010938 | XLOC_010938 | PPP1R37               | chr19:45596430-45650543   | 0.135447 | 0.999791 |
| XLOC_012799 | XLOC_012799 | FAM49A                | chr2:16730729-16847134    | 0.135489 | 1        |
| XLOC_004403 | XLOC_004403 | C2CD3                 | chr1:73745479-73882064    | 0.135507 | 1        |
| XLOC_014034 | XLOC_014034 | ZNF217                | chr20:52183609-52199636   | 0.135575 | 0.999791 |
| XLOC_000053 | XLOC_000053 | RNF207                | chr1:6266188-6296044      | 0.135706 | 0.999791 |
| XLOC_003396 | XLOC_003396 | NAT10                 | chr11:34127110-34168458   | 0.135707 | 0.999791 |
| XLOC_009408 | XLOC_009408 | CAMKK1                | chr17:3763616-3796337     | 0.135719 | 0.999791 |
| XLOC_001795 | XLOC_001795 | SF3B4                 | chr1:149895208-149900144  | 0.135721 | 0.999791 |
| XLOC_015911 | XLOC_015911 | CCDC14                | chr3:123632273-123680255  | 0.135757 | 0.999791 |
| XLOC_007210 | XLOC_007210 | GABPB1-AS1            | chr15:50569388-506509503  | 0.135897 | 0.999791 |
| XLOC_021041 | XLOC_021041 | DDX56                 | chr7:44605015-44614137    | 0.136    | 0.999791 |
| XLOC_013898 | XLOC_013898 | ACSS1                 | chr20:24986865-25038818   | 0.136018 | 0.999791 |
| XLOC_011158 | XLOC_011158 | PRPF31                | chr19:54610319-54635150   | 0.136074 | 0.999791 |
| XLOC_001913 | XLOC_001913 | GPATCH4               | chr1:156564099-156571279  | 0.136157 | 0.999791 |
| XLOC_023613 | XLOC_023613 | FAM45B                | chrX:129628914-129631421  | 0.136313 | 1        |
| XLOC_023998 | XLOC_023998 | SLC25A53              | chrX:103139054-103401708  | 0.136358 | 1        |
| XLOC_021218 | XLOC_021218 | TFR2                  | chr7:100218038-100239173  | 0.136387 | 0.999791 |
| XLOC_002677 | XLOC_002677 | PDCD11                | chr10:105156411-105206019 | 0.136431 | 0.999791 |
| XLOC_011636 | XLOC_011636 | ZNF781                | chr19:38158649-38183216   | 0.136441 | 1        |
| XLOC_011291 | XLOC_011291 | AP3D1                 | chr19:2100986-2151556     | 0.136649 | 0.999791 |
| XLOC_011920 | XLOC_011920 | ZNF28                 | chr19:53300660-53324922   | 0.136654 | 0.999791 |
| XLOC_009387 | XLOC_009387 | TSR1                  | chr17:2207247-2240678     | 0.136676 | 0.999791 |
| XLOC_017360 | XLOC_017360 | IK                    | chr5:140027383-140042065  | 0.136726 | 0.999791 |
| XLOC_011080 | XLOC_011080 | ZNF766                | chr19:52772823-52795976   | 0.136836 | 0.999791 |
| XLOC_001480 | XLOC_001480 | TRIT1                 | chr1:40306705-40349177    | 0.136915 | 0.999791 |
| XLOC_023904 | XLOC_023904 | AMER1                 | chrX:63404996-63425624    | 0.136958 | 0.999791 |
| XLOC_004172 | XLOC_004172 | PSMC3                 | chr1:47440319-47448024    | 0.136967 | 0.999791 |
| XLOC_018027 | XLOC_018027 | NQO2                  | chr6:3000066-3019994      | 0.137042 | 0.999791 |
| XLOC_017161 | XLOC_017161 | SLC30A5               | chr5:68389775-68426899    | 0.137083 | 0.999791 |
| XLOC_007970 | XLOC_007970 | TMC5                  | chr16:19422056-19510434   | 0.137116 | 0.999791 |
| XLOC_015349 | XLOC_015349 | TF                    | chr3:133464976-133497850  | 0.137155 | 1        |
| XLOC_001091 | XLOC_001091 | IBA57                 | chr1:228353428-228369958  | 0.137232 | 0.999791 |
| XLOC_023823 | XLOC_023823 | FUNDC1                | chrX:44382884-44402221    | 0.137265 | 0.999791 |
| XLOC_009172 | XLOC_009172 | LUC7L3                | chr17:48796925-48830072   | 0.137333 | 0.999791 |
| XLOC_015391 | XLOC_015391 | HPS3                  | chr3:148847370-148939832  | 0.137424 | 0.999791 |
| XLOC_014203 | XLOC_014203 | C21orf33              | chr21:45553493-45565605   | 0.137432 | 0.999791 |
| XLOC_023280 | XLOC_023280 | TXLNG                 | chrX:16804554-16862642    | 0.137544 | 0.999791 |
| XLOC_004771 | XLOC_004771 | CMAS                  | chr12:22199109-22218606   | 0.137556 | 0.999791 |
| XLOC_006430 | XLOC_006430 | RBM25                 | chr14:73525220-73588076   | 0.137668 | 0.999791 |
| XLOC_002591 | XLOC_002591 | TNKS2                 | chr10:93558150-93625232   | 0.137701 | 0.999791 |
| XLOC_015093 | XLOC_015093 | ZNF589                | chr3:48282595-48312479    | 0.137706 | 0.999791 |
| XLOC_018435 | XLOC_018435 | LACE1                 | chr6:108616097-108844251  | 0.137817 | 0.999791 |
| XLOC_012287 | XLOC_012287 | RMND5A                | chr2:86730552-87005164    | 0.137829 | 0.999791 |
| XLOC_003541 | XLOC_003541 | TMEM138               | chr11:61066918-61136975   | 0.137838 | 0.999791 |
| XLOC_018315 | XLOC_018315 | POLR1C                | chr6:43484776-43489246    | 0.137854 | 0.999791 |
| XLOC_019129 | XLOC_019129 | SHPRH                 | chr6:145946439-146285233  | 0.138053 | 0.999791 |
| XLOC_017567 | XLOC_017567 | NSUN2                 | chr5:6599351-6633473      | 0.138073 | 0.999791 |
| XLOC_005563 | XLOC_005563 | C12orf66              | chr12:64586418-64616076   | 0.138099 | 0.999791 |
| XLOC_009508 | XLOC_009508 | ELAC2                 | chr17:12692828-12921381   | 0.138125 | 0.999791 |
| XLOC_007446 | XLOC_007446 | LOC646214             | chr15:21932513-21940739   | 0.138191 | 1        |
| XLOC_011690 | XLOC_011690 | B9D2                  | chr19:41860321-41889987   | 0.138239 | 0.999791 |
| XLOC_015626 | XLOC_015626 | UBP1                  | chr3:33429828-33481897    | 0.138299 | 0.999791 |
| XLOC_017889 | XLOC_017889 | CSNK1A1               | chr5:148875456-148931115  | 0.1383   | 0.999791 |
| XLOC_018646 | XLOC_018646 | NEDD9                 | chr6:11183530-11382581    | 0.138317 | 1        |
| XLOC_008739 | XLOC_008739 | LOC100130015          | chr16:90089007-90114191   | 0.138335 | 0.999791 |
| XLOC_018619 | XLOC_018619 | SERPINB6              | chr6:2948392-2972399      | 0.138342 | 0.999791 |
| XLOC_019159 | XLOC_019159 | EZR                   | chr6:159186772-159240456  | 0.138355 | 0.999791 |
| XLOC_002016 | XLOC_002016 | KIFAP3                | chr1:169890469-170043879  | 0.138359 | 0.999791 |
| XLOC_016641 | XLOC_016641 | NOP1A                 | chr4:2937277-2965118      | 0.138381 | 0.999791 |
| XLOC_011402 | XLOC_011402 | ZNF121                | chr19:9676291-9695209     | 0.138508 | 0.999791 |
| XLOC_001043 | XLOC_001043 | FLVCR1                | chr1:213031596-213072705  | 0.138521 | 0.999791 |
| XLOC_011223 | XLOC_011223 | ZNF17                 | chr19:57922528-57933307   | 0.138573 | 0.999791 |
| XLOC_010893 | XLOC_010893 | ZNF526                | chr19:42724491-42732353   | 0.138618 | 0.999791 |
| XLOC_007481 | XLOC_007481 | WHAMMP1               | chr15:32812048-32825942   | 0.138645 | 0.999791 |
| XLOC_022270 | XLOC_022270 | RCL1                  | chr9:4792833-4861064      | 0.13891  | 0.999791 |
| XLOC_001413 | XLOC_001413 | FABP3                 | chr1:31838099-31845923    | 0.138957 | 1        |
| XLOC_008456 | XLOC_008456 | ERI2                  | chr16:20775311-20860990   | 0.138981 | 0.999791 |

|             |             |               |                           |          |          |
|-------------|-------------|---------------|---------------------------|----------|----------|
| XLOC_002366 | XLOC_002366 | TMEM236       | chr10:18041226-18089854   | 0.139    | 1        |
| XLOC_013408 | XLOC_013408 | SP110         | chr2:231033644-231090444  | 0.139139 | 0.999791 |
| XLOC_014218 | XLOC_014218 | FAM207A       | chr21:46359954-46396888   | 0.139139 | 0.999791 |
| XLOC_022472 | XLOC_022472 | GALNT12       | chr9:101569980-101612363  | 0.139165 | 0.999791 |
| XLOC_007147 | XLOC_007147 | RPUSD2        | chr15:40861536-40866661   | 0.139191 | 0.999791 |
| XLOC_009381 | XLOC_009381 | MIR22.MIR22HG | chr17:1614797-1619566     | 0.139266 | 0.999791 |
| XLOC_016366 | XLOC_016366 | DCK           | chr4:71859264-71896629    | 0.139317 | 0.999791 |
| XLOC_018364 | XLOC_018364 | BAG2          | chr6:57037103-57050012    | 0.139331 | 0.999791 |
| XLOC_020768 | XLOC_020768 | AGBL3         | chr7:134671258-134820530  | 0.139332 | 1        |
| XLOC_005856 | XLOC_005856 | EXOSC8        | chr13:37574677-37633850   | 0.139402 | 0.999791 |
| XLOC_015923 | XLOC_015923 | SLC41A3       | chr3:125725199-125820391  | 0.139439 | 0.999791 |
| XLOC_021589 | XLOC_021589 | RGS20         | chr8:54764367-54871863    | 0.139561 | 1        |
| XLOC_014999 | XLOC_014999 | GPD1L         | chr3:32148002-32210207    | 0.139606 | 0.999791 |
| XLOC_015647 | XLOC_015647 | SEC22C        | chr3:42589458-42690233    | 0.139675 | 0.999791 |
| XLOC_000927 | XLOC_000927 | LAMC2         | chr1:183155173-183214262  | 0.139681 | 1        |
| XLOC_018649 | XLOC_018649 | TBC1D7        | chr6:13305183-13328787    | 0.1397   | 0.999791 |
| XLOC_020971 | XLOC_020971 | HNRNPA2B1     | chr7:26229555-26240413    | 0.1397   | 0.999791 |
| XLOC_002742 | XLOC_002742 | ACADSB        | chr10:124768428-124817806 | 0.139953 | 0.999791 |
| XLOC_023517 | XLOC_023517 | DRP2          | chrX:100474932-100519485  | 0.139981 | 1        |
| XLOC_002893 | XLOC_002893 | HNRNPF        | chr10:43881064-43904696   | 0.140013 | 0.999791 |
| XLOC_020784 | XLOC_020784 | TBXAS1        | chr7:139478046-139720125  | 0.140074 | 1        |
| XLOC_023135 | XLOC_023135 | SURF1         | chr9:136218665-136223361  | 0.14009  | 0.999791 |
| XLOC_002219 | XLOC_002219 | CDC42BPA      | chr1:227177565-227505826  | 0.140233 | 0.999791 |
| XLOC_005734 | XLOC_005734 | GCN1L1        | chr12:120565013-120632513 | 0.140244 | 0.999791 |
| XLOC_016873 | XLOC_016873 | SLC9B2        | chr4:103946651-103998170  | 0.140279 | 0.999791 |
| XLOC_001458 | XLOC_001458 | GNL2          | chr1:38022519-38061586    | 0.140323 | 0.999791 |
| XLOC_018350 | XLOC_018350 | LOC730101     | chr6:52529198-52533951    | 0.140333 | 0.999791 |
| XLOC_009430 | XLOC_009430 | NUP88         | chr17:5289345-5342471     | 0.140338 | 0.999791 |
| XLOC_007798 | XLOC_007798 | PRKXP1        | chr15:101087956-101099488 | 0.140357 | 1        |
| XLOC_006685 | XLOC_006685 | OSGEP         | chr14:20915206-20923267   | 0.14045  | 0.999791 |
| XLOC_020954 | XLOC_020954 | SP8           | chr7:20821893-20826508    | 0.140456 | 1        |
| XLOC_020695 | XLOC_020695 | CBL1          | chr7:107384278-107402083  | 0.14048  | 0.999791 |
| XLOC_004784 | XLOC_004784 | REP15         | chr12:27849427-27850566   | 0.140561 | 0.999791 |
| XLOC_005936 | XLOC_005936 | UCHL3         | chr13:76123615-76180156   | 0.140637 | 0.999791 |
| XLOC_022638 | XLOC_022638 | SURF2         | chr9:136223420-136228040  | 0.140698 | 0.999791 |
| XLOC_016118 | XLOC_016118 | MB21D2        | chr3:192514604-192635950  | 0.140712 | 0.999791 |
| XLOC_011732 | XLOC_011732 | SMG9          | chr19:44235300-44259142   | 0.140889 | 0.999791 |
| XLOC_016287 | XLOC_016287 | UGDH-AS1      | chr4:39529458-39640481    | 0.140972 | 0.999791 |
| XLOC_018715 | XLOC_018715 | SCAND3        | chr6:28539406-28555112    | 0.141018 | 0.999791 |
| XLOC_005198 | XLOC_005198 | SNORA49       | chr12:132434464-132565011 | 0.141043 | 0.999791 |
| XLOC_000033 | XLOC_000033 | SKI           | chr1:2160133-2241652      | 0.141059 | 0.999791 |
| XLOC_012321 | XLOC_012321 | LOC728537     | chr2:98286205-98319529    | 0.141266 | 0.999791 |
| XLOC_004618 | XLOC_004618 | FLJ39051      | chr11:126173646-126225482 | 0.141352 | 0.999791 |
| XLOC_018738 | XLOC_018738 | HCG18         | chr6:30201815-30314635    | 0.141383 | 0.999791 |
| XLOC_015712 | XLOC_015712 | C3orf62       | chr3:49306029-49314508    | 0.14148  | 0.999791 |
| XLOC_017014 | XLOC_017014 | DCTD          | chr4:183811243-183838630  | 0.141542 | 0.999791 |
| XLOC_021755 | XLOC_021755 | EFR3A         | chr8:132916355-133025886  | 0.1416   | 0.999791 |
| XLOC_005758 | XLOC_005758 | VPS33A        | chr12:122716093-122751068 | 0.141621 | 0.999791 |
| XLOC_009330 | XLOC_009330 | RPTOR         | chr17:78518624-78940173   | 0.14164  | 0.999791 |
| XLOC_012314 | XLOC_012314 | FER1L5        | chr2:97308573-97370624    | 0.141699 | 1        |
| XLOC_020950 | XLOC_020950 | TWISTNB       | chr7:19735084-19748660    | 0.141746 | 0.999791 |
| XLOC_009783 | XLOC_009783 | GFAP          | chr17:42982993-42992920   | 0.14179  | 1        |
| XLOC_014430 | XLOC_014430 | THAP7-AS1     | chr22:1354060-21368576    | 0.141844 | 0.999791 |
| XLOC_018907 | XLOC_018907 | TNFRSF21      | chr6:47199267-47277680    | 0.1419   | 0.999791 |
| XLOC_016146 | XLOC_016146 | WDR53         | chr3:196281058-196295413  | 0.141934 | 0.999791 |
| XLOC_021488 | XLOC_021488 | INTS10        | chr8:19674917-19709586    | 0.141943 | 0.999791 |
| XLOC_003320 | XLOC_003320 | AKIP1         | chr11:8932700-8954553     | 0.141956 | 0.999791 |
| XLOC_002689 | XLOC_002689 | DUSP5         | chr10:112257624-112271302 | 0.141985 | 0.999791 |
| XLOC_005440 | XLOC_005440 | BCDIN3D       | chr12:50222325-50236912   | 0.142066 | 0.999791 |
| XLOC_000498 | XLOC_000498 | LRRCSB        | chr1:89990396-90063420    | 0.142126 | 0.999791 |
| XLOC_008312 | XLOC_008312 | NPRL3         | chr16:127017-188697       | 0.14228  | 0.999791 |
| XLOC_018559 | XLOC_018559 | C6orf211      | chr6:151773421-151791232  | 0.142284 | 0.999791 |
| XLOC_018433 | XLOC_018433 | SOBP          | chr6:107811316-107982513  | 0.142395 | 0.999791 |
| XLOC_008642 | XLOC_008642 | COG8,PDF      | chr16:69362523-69377013   | 0.142421 | 0.999791 |
| XLOC_014564 | XLOC_014564 | APOBEC3D      | chr22:394171117-39429256  | 0.142446 | 1        |
| XLOC_004116 | XLOC_004116 | FANCF         | chr11:22644078-22647387   | 0.142647 | 0.999791 |
| XLOC_018958 | XLOC_018958 | MB21D1        | chr6:74134855-74162043    | 0.142692 | 0.999791 |
| XLOC_005071 | XLOC_005071 | KIAA1033      | chr12:105501491-105562906 | 0.142778 | 0.999791 |
| XLOC_014327 | XLOC_014327 | PSMG1         | chr21:40547371-40555440   | 0.142897 | 0.999791 |
| XLOC_013419 | XLOC_013419 | PDE6D         | chr2:232597146-232645974  | 0.142918 | 0.999791 |
| XLOC_020693 | XLOC_020693 | BCAP29        | chr7:107220421-107263762  | 0.142921 | 0.999791 |
| XLOC_022769 | XLOC_022769 | PLAA          | chr9:26903367-27062931    | 0.143062 | 0.999791 |
| XLOC_017678 | XLOC_017678 | TRIM23        | chr5:64885506-64920187    | 0.143077 | 0.999791 |
| XLOC_006155 | XLOC_006155 | DIS3          | chr13:73302041-73590591   | 0.143325 | 0.999791 |
| XLOC_007800 | XLOC_007800 | CHSY1         | chr15:101715927-101792137 | 0.143382 | 0.999791 |
| XLOC_001361 | XLOC_001361 | STPG1         | chr1:24645811-24741587    | 0.143431 | 0.999791 |
| XLOC_017868 | XLOC_017868 | PCDH12        | chr5:141324529-141338627  | 0.143426 | 1        |
| XLOC_008286 | XLOC_008286 | CTU2          | chr16:88772890-88851372   | 0.143465 | 0.999791 |
| XLOC_003591 | XLOC_003591 | ESRRA         | chr11:64073043-64085033   | 0.143469 | 0.999791 |

|             |             |              |                           |          |          |
|-------------|-------------|--------------|---------------------------|----------|----------|
| XLOC_008873 | XLOC_008873 | TTC19        | chr17:15879874-15932723   | 0.143513 | 0.999791 |
| XLOC_002394 | XLOC_002394 | RAB18        | chr10:27793102-27831166   | 0.143571 | 0.999791 |
| XLOC_015002 | XLOC_015002 | CNOT10       | chr3:32726636-32815367    | 0.143616 | 0.999791 |
| XLOC_007515 | XLOC_007515 | RMDN3        | chr15:41028085-41047458   | 0.143654 | 0.999791 |
| XLOC_001199 | XLOC_001199 | DVL1         | chr1:1270657-1284492      | 0.143693 | 0.999791 |
| XLOC_011288 | XLOC_011288 | BTBD2        | chr19:1985446-2015702     | 0.143736 | 0.999791 |
| XLOC_008724 | XLOC_008724 | PIEZO1       | chr16:88722890-88851372   | 0.143777 | 0.999791 |
| XLOC_009393 | XLOC_009393 | CLUH         | chr17:2592679-2614927     | 0.143793 | 0.999791 |
| XLOC_010800 | XLOC_010800 | C19orf55     | chr19:36249043-36260077   | 0.143823 | 0.999791 |
| XLOC_001635 | XLOC_001635 | ODF2L        | chr1:86812506-86862025    | 0.143856 | 0.999791 |
| XLOC_007573 | XLOC_007573 | GABPB1       | chr15:50569388-50650503   | 0.143921 | 0.999791 |
| XLOC_020498 | XLOC_020498 | SUMF2        | chr7:56131916-56160689    | 0.143979 | 0.999791 |
| XLOC_021260 | XLOC_021260 | LAMB1        | chr7:107564245-107643804  | 0.144014 | 0.999791 |
| XLOC_019009 | XLOC_019009 | USP45        | chr6:99880183-99963252    | 0.144153 | 0.999791 |
| XLOC_000042 | XLOC_000042 | TPRG1L       | chr1:3541555-3546694      | 0.144219 | 0.999791 |
| XLOC_005419 | XLOC_005419 | CCNT1        | chr12:49082240-491110781  | 0.144249 | 0.999791 |
| XLOC_009228 | XLOC_009228 | DDX42        | chr17:61851566-61896677   | 0.144343 | 0.999791 |
| XLOC_002054 | XLOC_002054 | ABL2         | chr1:179068461-179198819  | 0.144533 | 0.999791 |
| XLOC_022764 | XLOC_022764 | CDKN2B       | chr9:21994789-22121093    | 0.144536 | 0.999791 |
| XLOC_020374 | XLOC_020374 | PHF14        | chr7:11013498-11209250    | 0.1447   | 0.999791 |
| XLOC_022167 | XLOC_022167 | TATDN1       | chr8:125487007-125551329  | 0.144775 | 0.999791 |
| XLOC_001230 | XLOC_001230 | LRRC47       | chr1:3696783-3713068      | 0.144776 | 0.999791 |
| XLOC_015736 | XLOC_015736 | NPRL2        | chr3:50384918-50391496    | 0.144777 | 0.999791 |
| XLOC_003825 | XLOC_003825 | ANKK1        | chr11:113258512-113271140 | 0.144788 | 1        |
| XLOC_020679 | XLOC_020679 | FAM185A      | chr7:102389398-10244672   | 0.144809 | 0.999791 |
| XLOC_017438 | XLOC_017438 | LARP1        | chr5:154092461-154197163  | 0.144866 | 0.999791 |
| XLOC_004295 | XLOC_004295 | C11orf95     | chr11:63527363-63536113   | 0.144963 | 0.999791 |
| XLOC_009929 | XLOC_009929 | PSMD12       | chr17:65336618-65362721   | 0.144963 | 0.999791 |
| XLOC_012631 | XLOC_012631 | XRCC5        | chr2:216974019-217071016  | 0.145036 | 0.999791 |
| XLOC_007115 | XLOC_007115 | LOC100288637 | chr15:30938317-31065209   | 0.145045 | 0.999791 |
| XLOC_007295 | XLOC_007295 | LOXL1        | chr15:74209808-74244478   | 0.145213 | 0.999791 |
| XLOC_022329 | XLOC_022329 | C9orf131     | chr9:35041101-35045988    | 0.145307 | 1        |
| XLOC_001145 | XLOC_001145 | LOC149134    | chr1:246952918-246954788  | 0.145351 | 0.999791 |
| XLOC_013317 | XLOC_013317 | WDR12        | chr2:203745322-203776949  | 0.145368 | 0.999791 |
| XLOC_013937 | XLOC_013937 | GSS          | chr20:33516235-33543601   | 0.145548 | 0.999791 |
| XLOC_015276 | XLOC_015276 | POGLUT1      | chr3:119187784-119213554  | 0.145551 | 0.999791 |
| XLOC_008885 | XLOC_008885 | NT5M         | chr17:17206679-17250977   | 0.145633 | 0.999791 |
| XLOC_015162 | XLOC_015162 | PXK          | chr3:58318616-58410878    | 0.145746 | 0.999791 |
| XLOC_016637 | XLOC_016637 | MXD4         | chr4:2249159-2263739      | 0.14582  | 0.999791 |
| XLOC_011672 | XLOC_011672 | ZNF780B      | chr19:40534166-40562115   | 0.145865 | 0.999791 |
| XLOC_021459 | XLOC_021459 | MSRA         | chr8:9911829-10286401     | 0.145878 | 0.999791 |
| XLOC_002166 | XLOC_002166 | C1orf74      | chr1:209929393-209957890  | 0.145913 | 0.999791 |
| XLOC_007131 | XLOC_007131 | C15orf41     | chr15:36871811-37110707   | 0.145942 | 0.999791 |
| XLOC_001852 | XLOC_001852 | S100A6       | chr1:153507075-153508717  | 0.146011 | 0.999791 |
| XLOC_004558 | XLOC_004558 | MPZL3        | chr11:118100335-118123011 | 0.146018 | 1        |
| XLOC_005796 | XLOC_005796 | ZNF605       | chr12:133498018-133532892 | 0.146043 | 0.999791 |
| XLOC_003776 | XLOC_003776 | SRSF8        | chr1:94800055-94804388    | 0.146046 | 0.999791 |
| XLOC_007193 | XLOC_007193 | GATM-AS1     | chr15:45653321-45672321   | 0.146063 | 1        |
| XLOC_004527 | XLOC_004527 | PIH1D2       | chr11:111895537-111944895 | 0.14607  | 0.999791 |
| XLOC_021034 | XLOC_021034 | POLM         | chr7:44111846-44122129    | 0.146119 | 0.999791 |
| XLOC_006143 | XLOC_006143 | VPS36        | chr13:52986736-53024763   | 0.146155 | 0.999791 |
| XLOC_012149 | XLOC_012149 | LOC728730    | chr2:39664556-39828484    | 0.146165 | 0.999791 |
| XLOC_021811 | XLOC_021811 | C8orf33      | chr8:146277823-146281416  | 0.146165 | 0.999791 |
| XLOC_001443 | XLOC_001443 | C1orf216     | chr1:36179476-36184790    | 0.146212 | 0.999791 |
| XLOC_020760 | XLOC_020760 | MKLN1        | chr7:130794854-131181398  | 0.14625  | 0.999791 |
| XLOC_009092 | XLOC_009092 | TMEM106A     | chr17:41363893-41371589   | 0.14632  | 0.999791 |
| XLOC_012115 | XLOC_012115 | PPP1CB       | chr2:28974613-29025806    | 0.146371 | 0.999791 |
| XLOC_014532 | XLOC_014532 | RASD2        | chr22:35937351-35950045   | 0.146516 | 0.999791 |
| XLOC_012993 | XLOC_012993 | LBX2         | chr2:74724643-74734821    | 0.146524 | 0.999791 |
| XLOC_005055 | XLOC_005055 | UTP20        | chr12:101673904-101780397 | 0.146605 | 0.999791 |
| XLOC_004473 | XLOC_004473 | GPR83        | chr1:94110476-94134585    | 0.146614 | 1        |
| XLOC_013275 | XLOC_013275 | COL5A2       | chr2:189896640-190044605  | 0.146699 | 1        |
| XLOC_003621 | XLOC_003621 | PCNXL3       | chr11:65383782-65404910   | 0.146714 | 0.999791 |
| XLOC_013178 | XLOC_013178 | RBM43        | chr2:152104727-152118389  | 0.146746 | 0.999791 |
| XLOC_005167 | XLOC_005167 | SETD8        | chr12:123868703-123893900 | 0.14684  | 0.999791 |
| XLOC_017572 | XLOC_017572 | FASTKD3      | chr5:7859271-7869150      | 0.146918 | 0.999791 |
| XLOC_021858 | XLOC_021858 | RP1L1        | chr8:10463859-10512617    | 0.147032 | 1        |
| XLOC_012326 | XLOC_012326 | UNC50        | chr2:99225041-99234977    | 0.14705  | 0.999791 |
| XLOC_023158 | XLOC_023158 | NACC2        | chr9:138898382-138987131  | 0.147114 | 0.999791 |
| XLOC_013943 | XLOC_013943 | UQCC         | chr20:33890368-33999945   | 0.147162 | 0.999791 |
| XLOC_009390 | XLOC_009390 | MNT          | chr17:2287353-2304258     | 0.147176 | 0.999791 |
| XLOC_018175 | XLOC_018175 | ATAT1        | chr6:30594612-30614598    | 0.147205 | 0.999791 |
| XLOC_000837 | XLOC_000837 | ATF6         | chr1:161736033-161933860  | 0.147328 | 0.999791 |
| XLOC_012878 | XLOC_012878 | DHX57        | chr2:39024875-39103021    | 0.147389 | 0.999791 |
| XLOC_007552 | XLOC_007552 | MFAP1        | chr15:44096732-44116951   | 0.147399 | 0.999791 |
| XLOC_009339 | XLOC_009339 | CCDC137      | chr17:79633760-79640936   | 0.147448 | 0.999791 |
| XLOC_008212 | XLOC_008212 | DDX19A       | chr16:70380823-70407281   | 0.147503 | 0.999791 |
| XLOC_003418 | XLOC_003418 | ACCS         | chr11:44087728-44105569   | 0.147661 | 0.999791 |
| XLOC_000308 | XLOC_000308 | ZFP69B       | chr1:40916336-40929390    | 0.147769 | 0.999791 |

|             |             |                |                           |          |          |
|-------------|-------------|----------------|---------------------------|----------|----------|
| XLOC_015808 | XLOC_015808 | EOGT           | chr3:69024367-69062774    | 0.147804 | 0.999791 |
| XLOC_005616 | XLOC_005616 | DUSP6          | chr12:89741836-89746296   | 0.147806 | 0.999791 |
| XLOC_013201 | XLOC_013201 | AHCTF1P1       | chr2:162355577-162364413  | 0.147898 | 1        |
| XLOC_014610 | XLOC_014610 | PNPLA3         | chr22:44319618-44343448   | 0.147928 | 0.999791 |
| XLOC_021803 | XLOC_021803 | PPP1R16A       | chr8:145722108-145727504  | 0.147934 | 0.999791 |
| XLOC_011736 | XLOC_011736 | LOC100505715   | chr19:44395955-44405955   | 0.148031 | 1        |
| XLOC_001318 | XLOC_001318 | AKR7L          | chr1:19592475-19600568    | 0.148068 | 0.999791 |
| XLOC_010461 | XLOC_010461 | ADAT3,SCAMP4   | chr19:1905370-1926012     | 0.148078 | 0.999791 |
| XLOC_001248 | XLOC_001248 | ERRF1          | chr1:8071778-8086393      | 0.148114 | 0.999791 |
| XLOC_005595 | XLOC_005595 | BBS10          | chr12:76738265-76742222   | 0.14816  | 0.999791 |
| XLOC_020494 | XLOC_020494 | MRPS17         | chr7:56019610-56023033    | 0.148266 | 0.999791 |
| XLOC_000650 | XLOC_000650 | CHD1L          | chr1:146714290-146767447  | 0.148272 | 0.999791 |
| XLOC_004679 | XLOC_004679 | LAG3           | chr12:6881669-6887621     | 0.148274 | 1        |
| XLOC_006900 | XLOC_006900 | NEK9           | chr14:75548817-75593778   | 0.148367 | 0.999791 |
| XLOC_019025 | XLOC_019025 | SEC63          | chr6:108188959-108279482  | 0.148373 | 0.999791 |
| XLOC_021384 | XLOC_021384 | ZNF786         | chr7:148766732-148787869  | 0.148413 | 0.999791 |
| XLOC_018299 | XLOC_018299 | GLTSCR1L       | chr6:42788793-42836296    | 0.148474 | 0.999791 |
| XLOC_009898 | XLOC_009898 | CYB561         | chr17:61509664-61523722   | 0.148475 | 0.999791 |
| XLOC_023143 | XLOC_023143 | BRD3           | chr9:136890560-136933141  | 0.148489 | 0.999791 |
| XLOC_018988 | XLOC_018988 | AKIRIN2        | chr6:88384577-88411985    | 0.148493 | 0.999791 |
| XLOC_015122 | XLOC_015122 | DOCK3          | chr3:50712671-51421629    | 0.148533 | 1        |
| XLOC_006334 | XLOC_006334 | CTAGE5         | chr14:39734475-39820397   | 0.148557 | 0.999791 |
| XLOC_014676 | XLOC_014676 | HIRA           | chr22:19318223-19419219   | 0.148595 | 0.999791 |
| XLOC_007522 | XLOC_007522 | NDUFAF1        | chr15:41679546-41694658   | 0.148698 | 0.999791 |
| XLOC_015023 | XLOC_015023 | XYLB           | chr3:38388250-38456467    | 0.148808 | 0.999791 |
| XLOC_008101 | XLOC_008101 | CYLD           | chr16:50775960-50835846   | 0.148939 | 0.999791 |
| XLOC_000338 | XLOC_000338 | ST3GAL3        | chr1:44173203-44396837    | 0.148941 | 0.999791 |
| XLOC_003333 | XLOC_003333 | LOC729013      | chr11:10879763-10900823   | 0.148956 | 0.999791 |
| XLOC_021139 | XLOC_021139 | HGF            | chr7:81331443-81399452    | 0.149011 | 0.999791 |
| XLOC_009804 | XLOC_009804 | MRPL10         | chr17:45900637-45908907   | 0.149015 | 0.999791 |
| XLOC_006632 | XLOC_006632 | WDR20          | chr14:102606188-102690010 | 0.149044 | 0.999791 |
| XLOC_011219 | XLOC_011219 | ZNF543         | chr19:57831864-57842144   | 0.149125 | 0.999791 |
| XLOC_002985 | XLOC_002985 | ASCC1          | chr10:73855789-73995618   | 0.149189 | 0.999791 |
| XLOC_013400 | XLOC_013400 | TM4SF20        | chr2:228226873-228244022  | 0.149433 | 1        |
| XLOC_003076 | XLOC_003076 | MORN4          | chr10:99374309-99393913   | 0.14944  | 0.999791 |
| XLOC_008607 | XLOC_008607 | TK2            | chr16:66541905-66584315   | 0.149515 | 0.999791 |
| XLOC_016539 | XLOC_016539 | FHDC1          | chr4:153864134-153900848  | 0.149653 | 1        |
| XLOC_000914 | XLOC_000914 | LHX4           | chr1:180199432-180244188  | 0.149757 | 0.999791 |
| XLOC_016469 | XLOC_016469 | C4orf32        | chr4:113066552-113110237  | 0.149846 | 0.999791 |
| XLOC_003130 | XLOC_003130 | ITPRIP         | chr10:106069453-106098251 | 0.14988  | 0.999791 |
| XLOC_008821 | XLOC_008821 | POLR2A         | chr17:7387697-7417935     | 0.149927 | 0.999791 |
| XLOC_020344 | XLOC_020344 | LFNG           | chr7:2552162-2568810      | 0.149996 | 0.999791 |
| XLOC_017522 | XLOC_017522 | HNRNPAB        | chr5:177631507-177659803  | 0.150021 | 0.999791 |
| XLOC_012866 | XLOC_012866 | FEZ2           | chr2:36779403-36825332    | 0.150058 | 0.999791 |
| XLOC_013457 | XLOC_013457 | ANKMY1         | chr2:241418838-241497405  | 0.150203 | 0.999791 |
| XLOC_018026 | XLOC_018026 | DKFZP686H15217 | chr6:2988200-2991405      | 0.150222 | 0.999791 |
| XLOC_009808 | XLOC_009808 | COPZ2          | chr17:46103532-46115152   | 0.150255 | 0.999791 |
| XLOC_020523 | XLOC_020523 | RABGEF1        | chr7:66205642-66309813    | 0.150376 | 0.999791 |
| XLOC_001743 | XLOC_001743 | GDAP2          | chr1:118406106-118472302  | 0.150388 | 0.999791 |
| XLOC_003734 | XLOC_003734 | USP35          | chr11:77898857-77925757   | 0.15039  | 0.999791 |
| XLOC_004414 | XLOC_004414 | KLHL35         | chr11:75133437-75141674   | 0.1504   | 0.999791 |
| XLOC_005152 | XLOC_005152 | PSMD9          | chr12:122326636-122355771 | 0.150407 | 0.999791 |
| XLOC_010611 | XLOC_010611 | WDR83          | chr19:12777617-12792701   | 0.150433 | 0.999791 |
| XLOC_021901 | XLOC_021901 | HR             | chr8:21971931-21988565    | 0.150511 | 0.999791 |
| XLOC_004963 | XLOC_004963 | XPOT           | chr12:64798152-64842463   | 0.150553 | 0.999791 |
| XLOC_014308 | XLOC_014308 | CRYZL1         | chr21:34961647-35014160   | 0.150576 | 0.999791 |
| XLOC_007920 | XLOC_007920 | HMOX2          | chr16:4511694-4560348     | 0.150604 | 0.999791 |
| XLOC_016693 | XLOC_016693 | GPR125         | chr4:22388996-22517677    | 0.150709 | 0.999791 |
| XLOC_003978 | XLOC_003978 | PHLDA2         | chr11:2949502-2950650     | 0.150812 | 0.999791 |
| XLOC_011519 | XLOC_011519 | ABHD8          | chr19:17402939-17414282   | 0.150813 | 0.999791 |
| XLOC_020349 | XLOC_020349 | FOXK1          | chr7:4721929-4811074      | 0.150897 | 0.999791 |
| XLOC_014831 | XLOC_014831 | CBX6           | chr22:39260247-39268258   | 0.150934 | 0.999791 |
| XLOC_013179 | XLOC_013179 | NMI            | chr2:152126981-152146430  | 0.150948 | 0.999791 |
| XLOC_010129 | XLOC_010129 | SEH1L          | chr18:12947982-12987536   | 0.150972 | 0.999791 |
| XLOC_005179 | XLOC_005179 | AACS           | chr12:125549924-125627871 | 0.151096 | 0.999791 |
| XLOC_016254 | XLOC_016254 | MED28          | chr4:17616272-17626160    | 0.151119 | 0.999791 |
| XLOC_002599 | XLOC_002599 | CYP26A1        | chr10:94833231-94837641   | 0.151234 | 1        |
| XLOC_012792 | XLOC_012792 | E2F6           | chr2:11584500-11606297    | 0.151298 | 0.999791 |
| XLOC_008530 | XLOC_008530 | FBXL19-AS1     | chr16:30930639-30960104   | 0.151335 | 1        |
| XLOC_021590 | XLOC_021590 | MRPL15         | chr8:55047780-55061074    | 0.151389 | 0.999791 |
| XLOC_022592 | XLOC_022592 | SET            | chr9:131445933-131458675  | 0.151391 | 0.999791 |
| XLOC_011893 | XLOC_011893 | VSIG10L        | chr19:51834794-51845378   | 0.151399 | 0.999791 |
| XLOC_015096 | XLOC_015096 | ATRIP,TREX1    | chr3:48488113-48509044    | 0.151443 | 0.999791 |
| XLOC_007587 | XLOC_007587 | MYO5A          | chr15:52599479-52821247   | 0.151445 | 0.999791 |
| XLOC_007497 | XLOC_007497 | ZNF770         | chr15:35270541-35280497   | 0.151559 | 0.999791 |
| XLOC_017545 | XLOC_017545 | SLC9A3         | chr5:473333-524549        | 0.15158  | 0.999791 |
| XLOC_008907 | XLOC_008907 | EPN2           | chr17:19140689-19240028   | 0.151581 | 0.999791 |
| XLOC_020651 | XLOC_020651 | AGFG2          | chr7:100136833-100165843  | 0.151751 | 0.999791 |
| XLOC_020554 | XLOC_020554 | PMS2P5         | chr7:74306893-74336166    | 0.151774 | 0.999791 |

|             |             |                           |                           |          |          |
|-------------|-------------|---------------------------|---------------------------|----------|----------|
| XLOC_010931 | XLOC_010931 | APOC1                     | chr19:45417920-45422606   | 0.15181  | 0.999791 |
| XLOC_006147 | XLOC_006147 | DIAPH3                    | chr13:60239720-60738119   | 0.151849 | 0.999791 |
| XLOC_004889 | XLOC_004889 | HNRNPA1                   | chr12:54674487-54679030   | 0.151864 | 0.999791 |
| XLOC_013530 | XLOC_013530 | BTBD3                     | chr20:11871476-11907243   | 0.15189  | 0.999791 |
| XLOC_017119 | XLOC_017119 | LOC153684                 | chr5:43042235-43045370    | 0.151968 | 1        |
| XLOC_017940 | XLOC_017940 | PANK3                     | chr5:167982627-168006614  | 0.15197  | 0.999791 |
| XLOC_010684 | XLOC_010684 | FCHO1                     | chr19:17858526-17899377   | 0.152054 | 0.999791 |
| XLOC_005091 | XLOC_005091 | FAM222A                   | chr12:110152186-110211292 | 0.152107 | 0.999791 |
| XLOC_001265 | XLOC_001265 | MTOR                      | chr1:11166587-11322608    | 0.152116 | 0.999791 |
| XLOC_023885 | XLOC_023885 | FAM120C                   | chrX:54094756-54209714    | 0.152116 | 0.999791 |
| XLOC_011912 | XLOC_011912 | ZNF614                    | chr19:52516576-52531680   | 0.152143 | 1        |
| XLOC_004261 | XLOC_004261 | TUT1                      | chr1:162342516-62359109   | 0.152227 | 0.999791 |
| XLOC_016036 | XLOC_016036 | IFT80                     | chr3:159974773-160117320  | 0.152248 | 0.999791 |
| XLOC_017751 | XLOC_017751 | RIOK2                     | chr5:96496570-96519005    | 0.152276 | 0.999791 |
| XLOC_002769 | XLOC_002769 | INPP5A                    | chr10:134351352-134596984 | 0.15232  | 0.999791 |
| XLOC_017976 | XLOC_017976 | PRR7-AS1                  | chr5:176853686-176883287  | 0.15233  | 0.999791 |
| XLOC_002825 | XLOC_002825 | DCLRE1C                   | chr10:14948870-14996094   | 0.152331 | 0.999791 |
| XLOC_007612 | XLOC_007612 | NARG2                     | chr15:60711807-60771359   | 0.152394 | 0.999791 |
| XLOC_004248 | XLOC_004248 | CYBASC3                   | chr1:161066918-61136975   | 0.15266  | 0.999791 |
| XLOC_006168 | XLOC_006168 | RBM26                     | chr13:79894099-79979923   | 0.152668 | 0.999791 |
| XLOC_008150 | XLOC_008150 | USB1                      | chr16:58035276-58055527   | 0.152707 | 0.999791 |
| XLOC_014667 | XLOC_014667 | MICAL3                    | chr22:18270415-18507325   | 0.152781 | 0.999791 |
| XLOC_011226 | XLOC_011226 | ZNF773                    | chr19:58011308-58019510   | 0.152807 | 0.999791 |
| XLOC_009349 | XLOC_009349 | RAC3                      | chr17:79989531-79992080   | 0.15295  | 0.999791 |
| XLOC_016464 | XLOC_016464 | GAR1                      | chr4:110736665-110745893  | 0.153164 | 0.999791 |
| XLOC_022585 | XLOC_022585 | SLC27A4                   | chr9:131102838-131123749  | 0.153173 | 0.999791 |
| XLOC_001777 | XLOC_001777 | ACP6                      | chr1:147119167-147142634  | 0.153288 | 0.999791 |
| XLOC_012093 | XLOC_012093 | EMILIN1                   | chr2:27301434-27309265    | 0.153298 | 1        |
| XLOC_010897 | XLOC_010897 | MEGF8                     | chr19:42829760-42882921   | 0.153355 | 0.999791 |
| XLOC_007475 | XLOC_007475 | MTMR10                    | chr15:31196054-31283807   | 0.15343  | 0.999791 |
| XLOC_004429 | XLOC_004429 | ALG8                      | chr1:77726760-77850699    | 0.15345  | 0.999791 |
| XLOC_008199 | XLOC_008199 | CIRH1A                    | chr16:69166498-69202937   | 0.153506 | 0.999791 |
| XLOC_012916 | XLOC_012916 | MTIF2                     | chr2:55463755-55496384    | 0.153534 | 0.999791 |
| XLOC_021063 | XLOC_021063 | COBL                      | chr7:51083908-51384515    | 0.153585 | 0.999791 |
| XLOC_003169 | XLOC_003169 | NSMCE4A                   | chr10:123716602-123734743 | 0.153671 | 0.999791 |
| XLOC_002147 | XLOC_002147 | SLC45A3                   | chr1:205626980-205649630  | 0.153694 | 0.999791 |
| XLOC_006004 | XLOC_006004 | TFDP1                     | chr13:114239002-114295788 | 0.153804 | 0.999791 |
| XLOC_018810 | XLOC_018810 | WDR46                     | chr6:33246879-33257304    | 0.153847 | 0.999791 |
| XLOC_002754 | XLOC_002754 | BCCIP                     | chr10:127512103-127569884 | 0.153861 | 0.999791 |
| XLOC_020899 | XLOC_020899 | INTS1                     | chr7:1509912-1544018      | 0.153926 | 0.999791 |
| XLOC_005668 | XLOC_005668 | APPL2                     | chr12:105567074-105630008 | 0.154007 | 0.999791 |
| XLOC_002936 | XLOC_002936 | TIMM23                    | chr10:51592080-51623386   | 0.154012 | 0.999791 |
| XLOC_015598 | XLOC_015598 | DPH3                      | chr3:16298567-16306496    | 0.154059 | 0.999791 |
| XLOC_017433 | XLOC_017433 | G3BP1                     | chr5:151151475-151184915  | 0.154111 | 0.999791 |
| XLOC_004376 | XLOC_004376 | ORAOV1                    | chr1:169480331-69490165   | 0.154258 | 0.999791 |
| XLOC_023339 | XLOC_023339 | MAOA                      | chrX:43514154-43606071    | 0.154264 | 1        |
| XLOC_003682 | XLOC_003682 | CTTN                      | chr1:70244611-70282690    | 0.154278 | 0.999791 |
| XLOC_001234 | XLOC_001234 | NPHP4                     | chr1:5922869-6161253      | 0.154285 | 0.999791 |
| XLOC_012155 | XLOC_012155 | MTA3                      | chr2:42795670-42936353    | 0.154346 | 0.999791 |
| XLOC_020929 | XLOC_020929 | CCZ1B                     | chr7:6838565-6865926      | 0.154346 | 0.999791 |
| XLOC_022907 | XLOC_022907 | GOLM1                     | chr9:88641057-88715116    | 0.154533 | 0.999791 |
| XLOC_013652 | XLOC_013652 | ARHGAP40                  | chr20:37230576-37279295   | 0.154754 | 0.999791 |
| XLOC_005978 | XLOC_005978 | BIVM,BIVM-ERCC5,ERCC5     | chr13:103436630-103528351 | 0.154794 | 0.999791 |
| XLOC_009756 | XLOC_009756 | AARSD1,PTGES3L,PTGES3L-AA | chr17:41102542-41132545   | 0.154834 | 0.999791 |
| XLOC_003839 | XLOC_003839 | BACE1-AS                  | chr11:117103403-117186972 | 0.154889 | 0.999791 |
| XLOC_014974 | XLOC_014974 | OXNAD1                    | chr3:16306666-16347594    | 0.154902 | 0.999791 |
| XLOC_006843 | XLOC_006843 | TRMT5                     | chr14:61438166-61447782   | 0.154934 | 0.999791 |
| XLOC_012894 | XLOC_012894 | LRPPRC                    | chr2:44113362-44223144    | 0.154971 | 0.999791 |
| XLOC_023420 | XLOC_023420 | RIBC1                     | chrX:53449804-53458063    | 0.155044 | 0.999791 |
| XLOC_004859 | XLOC_004859 | KRT7                      | chr12:52626953-52642709   | 0.155055 | 0.999791 |
| XLOC_016647 | XLOC_016647 | TMEM128                   | chr4:4237268-4249934      | 0.155071 | 0.999791 |
| XLOC_007574 | XLOC_007574 | FLJ10038                  | chr15:50569388-50650503   | 0.155091 | 0.999791 |
| XLOC_002212 | XLOC_002212 | PYCR2                     | chr1:226107576-226112040  | 0.155119 | 0.999791 |
| XLOC_015644 | XLOC_015644 | ULK4                      | chr3:41288089-42003660    | 0.155149 | 1        |
| XLOC_023780 | XLOC_023780 | MAP3K15                   | chrX:19362010-19533379    | 0.155184 | 0.999791 |
| XLOC_005095 | XLOC_005095 | IFT81                     | chr12:110562139-110656600 | 0.155203 | 0.999791 |
| XLOC_002760 | XLOC_002760 | MGMT                      | chr10:131265453-131565783 | 0.155211 | 0.999791 |
| XLOC_020701 | XLOC_020701 | C7orf53                   | chr7:112120907-112130943  | 0.155254 | 0.999791 |
| XLOC_013797 | XLOC_013797 | OPRL1                     | chr20:62711470-62731996   | 0.155493 | 0.999791 |
| XLOC_001674 | XLOC_001674 | DBT                       | chr1:100652477-100715409  | 0.155496 | 0.999791 |
| XLOC_015985 | XLOC_015985 | ATR                       | chr3:142168076-142297668  | 0.155519 | 0.999791 |
| XLOC_004276 | XLOC_004276 | SNHG1                     | chr1:162619459-62623360   | 0.155614 | 0.999791 |
| XLOC_006357 | XLOC_006357 | PSMC6                     | chr14:53173895-53194716   | 0.155633 | 0.999791 |
| XLOC_000113 | XLOC_000113 | KAZN                      | chr1:14925212-15478960    | 0.155651 | 0.999791 |
| XLOC_012117 | XLOC_012117 | WDR43                     | chr2:29117532-29171080    | 0.155669 | 0.999791 |
| XLOC_022312 | XLOC_022312 | DNAJA1                    | chr9:33025208-33039062    | 0.155713 | 0.999791 |
| XLOC_000420 | XLOC_000420 | FGGY                      | chr1:59762624-60228402    | 0.155877 | 0.999791 |
| XLOC_011048 | XLOC_011048 | FLJ26850                  | chr19:50553936-50570052   | 0.155877 | 0.999791 |
| XLOC_001481 | XLOC_001481 | MYCL1                     | chr1:40361095-40367687    | 0.155921 | 0.999791 |

|             |             |                       |                           |          |          |
|-------------|-------------|-----------------------|---------------------------|----------|----------|
| XLOC_002184 | XLOC_002184 | GPATCH2               | chr1:217603833-217804409  | 0.156049 | 0.999791 |
| XLOC_001390 | XLOC_001390 | RPA2                  | chr1:28218048-28241236    | 0.156095 | 0.999791 |
| XLOC_011903 | XLOC_011903 | FLJ30403              | chr19:52095035-52097633   | 0.156214 | 0.999791 |
| XLOC_021655 | XLOC_021655 | CA13                  | chr8:86157715-86196302    | 0.156244 | 0.999791 |
| XLOC_005765 | XLOC_005765 | VPS37B                | chr12:123349874-123380712 | 0.156374 | 0.999791 |
| XLOC_016817 | XLOC_016817 | HNRPLD                | chr4:83343716-83351378    | 0.156416 | 0.999791 |
| XLOC_008048 | XLOC_008048 | SLX1B,SULT1A4         | chr16:30204255-30218248   | 0.156417 | 0.999791 |
| XLOC_013712 | XLOC_013712 | SLC9A8                | chr20:48429249-48508779   | 0.156584 | 0.999791 |
| XLOC_012389 | XLOC_012389 | PSD4                  | chr2:113931559-113960677  | 0.156687 | 0.999791 |
| XLOC_015623 | XLOC_015623 | DYNC1L1               | chr3:32567462-32612366    | 0.156702 | 0.999791 |
| XLOC_016713 | XLOC_016713 | UGDH                  | chr4:39500374-39529218    | 0.156718 | 0.999791 |
| XLOC_022710 | XLOC_022710 | KIAA0020              | chr9:2804154-2844130      | 0.156846 | 0.999791 |
| XLOC_001656 | XLOC_001656 | TMED5                 | chr1:93615298-93646246    | 0.156864 | 0.999791 |
| XLOC_001720 | XLOC_001720 | SLC16A1               | chr1:113454469-113498975  | 0.156898 | 0.999791 |
| XLOC_021072 | XLOC_021072 | PHKG1                 | chr7:56131916-56160689    | 0.156951 | 0.999791 |
| XLOC_010753 | XLOC_010753 | NUDT19                | chr19:33182866-33204702   | 0.157078 | 0.999791 |
| XLOC_016026 | XLOC_016026 | SSR3                  | chr3:156257928-156272973  | 0.157112 | 0.999791 |
| XLOC_008334 | XLOC_008334 | C16orf91              | chr16:1469744-1470801     | 0.157298 | 0.999791 |
| XLOC_012217 | XLOC_012217 | APLF                  | chr2:68694690-68807294    | 0.157321 | 1        |
| XLOC_007828 | XLOC_007828 | PIGQ                  | chr16:619967-634136       | 0.157349 | 0.999791 |
| XLOC_020837 | XLOC_020837 | ZNF398                | chr7:148823507-148880118  | 0.157498 | 0.999791 |
| XLOC_015459 | XLOC_015459 | NDUFB5                | chr3:179322574-179342288  | 0.157678 | 0.999791 |
| XLOC_001394 | XLOC_001394 | SNHG12                | chr1:28879528-28908366    | 0.157729 | 0.999791 |
| XLOC_003791 | XLOC_003791 | DYNC2H1               | chr11:102980159-103350591 | 0.157762 | 0.999791 |
| XLOC_007634 | XLOC_007634 | PDCD7                 | chr15:65409716-65426174   | 0.157811 | 0.999791 |
| XLOC_017194 | XLOC_017194 | POLK                  | chr5:74666927-74895646    | 0.157833 | 0.999791 |
| XLOC_021733 | XLOC_021733 | WDR67                 | chr8:124084919-124164392  | 0.157838 | 0.999791 |
| XLOC_022418 | XLOC_022418 | CTSL1                 | chr9:90340973-90346384    | 0.157909 | 0.999791 |
| XLOC_009200 | XLOC_009200 | SMG8                  | chr17:57287370-57292611   | 0.157955 | 0.999791 |
| XLOC_021354 | XLOC_021354 | KIAA1147              | chr7:141356527-141401953  | 0.157969 | 0.999791 |
| XLOC_021708 | XLOC_021708 | DCAF13                | chr8:104410865-104455680  | 0.158028 | 0.999791 |
| XLOC_015643 | XLOC_015643 | ENTPD3-AS1            | chr3:40428672-40494799    | 0.158052 | 1        |
| XLOC_001330 | XLOC_001330 | CAMK2N1               | chr1:20808883-20812728    | 0.158132 | 0.999791 |
| XLOC_016595 | XLOC_016595 | CCDC111               | chr4:185570766-185655286  | 0.158316 | 0.999791 |
| XLOC_017072 | XLOC_017072 | MTRR                  | chr5:7869216-7901235      | 0.158369 | 0.999791 |
| XLOC_017000 | XLOC_017000 | AADAT                 | chr4:170981372-171011372  | 0.158404 | 0.999791 |
| XLOC_008558 | XLOC_008558 | DNAJA2                | chr16:46989273-47007625   | 0.15841  | 0.999791 |
| XLOC_007575 | XLOC_007575 | USP50                 | chr15:50716578-50838902   | 0.158447 | 0.999791 |
| XLOC_005628 | XLOC_005628 | UBE2N                 | chr12:93802087-93836026   | 0.158496 | 0.999791 |
| XLOC_015112 | XLOC_015112 | SEMA3F                | chr3:50192847-50226508    | 0.158605 | 0.999791 |
| XLOC_020423 | XLOC_020423 | C7orf41               | chr7:30174551-30202381    | 0.158615 | 0.999791 |
| XLOC_022933 | XLOC_022933 | NOL8                  | chr9:95059639-95432547    | 0.158656 | 0.999791 |
| XLOC_002370 | XLOC_002370 | CACNB2                | chr10:18429605-18830688   | 0.158684 | 1        |
| XLOC_008377 | XLOC_008377 | CCDC64B               | chr16:3077867-3089133     | 0.158849 | 1        |
| XLOC_009861 | XLOC_009861 | MRPS23                | chr17:55916286-55927433   | 0.158896 | 0.999791 |
| XLOC_003804 | XLOC_003804 | ZC3H12C               | chr11:109964086-110042566 | 0.158974 | 0.999791 |
| XLOC_003787 | XLOC_003787 | YAP1                  | chr11:101981191-102104154 | 0.159051 | 0.999791 |
| XLOC_020599 | XLOC_020599 | CDK14                 | chr7:90338711-90839904    | 0.15916  | 1        |
| XLOC_008745 | XLOC_008745 | RNMTL1                | chr17:662548-695741       | 0.159176 | 0.999791 |
| XLOC_003648 | XLOC_003648 | RBM14,RBM14-RBM4,RBM4 | chr1:166384052-66445275   | 0.15918  | 0.999791 |
| XLOC_004874 | XLOC_004874 | PCBP2                 | chr12:53845885-53893444   | 0.159193 | 0.999791 |
| XLOC_005143 | XLOC_005143 | UNC119B               | chr12:121148237-121161443 | 0.159209 | 0.999791 |
| XLOC_008766 | XLOC_008766 | CTNS                  | chr17:3539761-3599698     | 0.159313 | 0.999791 |
| XLOC_012753 | XLOC_012753 | FARP2                 | chr2:242295663-242448987  | 0.159338 | 0.999791 |
| XLOC_004735 | XLOC_004735 | CREBL2                | chr12:12764830-12798041   | 0.159346 | 0.999791 |
| XLOC_007582 | XLOC_007582 | LEO1                  | chr15:52230221-52263958   | 0.159392 | 0.999791 |
| XLOC_017509 | XLOC_017509 | FGFR4                 | chr5:176513920-176525126  | 0.159462 | 0.999791 |
| XLOC_009380 | XLOC_009380 | TLCD2                 | chr17:1606083-1613662     | 0.159478 | 0.999791 |
| XLOC_001800 | XLOC_001800 | MCL1                  | chr1:150547026-150552214  | 0.159501 | 0.999791 |
| XLOC_012535 | XLOC_012535 | AGPS                  | chr2:178257470-178408564  | 0.159506 | 0.999791 |
| XLOC_022249 | XLOC_022249 | ARHGAP39              | chr8:145754562-145838888  | 0.159599 | 0.999791 |
| XLOC_003361 | XLOC_003361 | TMEM86A               | chr11:18720350-18747777   | 0.159651 | 0.999791 |
| XLOC_008641 | XLOC_008641 | CHTF8                 | chr16:69139466-69166493   | 0.159764 | 0.999791 |
| XLOC_003371 | XLOC_003371 | GAS2                  | chr11:22688159-22834547   | 0.159808 | 1        |
| XLOC_000462 | XLOC_000462 | RABGGTB               | chr1:76251878-76260775    | 0.159833 | 0.999791 |
| XLOC_009071 | XLOC_009071 | HSD17B1               | chr17:40703983-40707232   | 0.159908 | 0.999791 |
| XLOC_003386 | XLOC_003386 | EIF3M                 | chr11:32605312-32816187   | 0.159953 | 0.999791 |
| XLOC_011910 | XLOC_011910 | ZNF350                | chr19:52467592-52490079   | 0.16009  | 0.999791 |
| XLOC_012514 | XLOC_012514 | DLX1                  | chr2:172950207-172954401  | 0.160121 | 0.999791 |
| XLOC_002467 | XLOC_002467 | TFAM                  | chr10:60144902-60158990   | 0.160148 | 0.999791 |
| XLOC_024039 | XLOC_024039 | UPF3B                 | chrX:118967988-118986991  | 0.160227 | 0.999791 |
| XLOC_009100 | XLOC_009100 | G6PC3                 | chr17:42148097-42153712   | 0.160307 | 0.999791 |
| XLOC_004134 | XLOC_004134 | CSTF3                 | chr11:33106129-33183037   | 0.160378 | 0.999791 |
| XLOC_006978 | XLOC_006978 | HSP90AA1              | chr14:102547074-102606086 | 0.160481 | 0.999791 |
| XLOC_018392 | XLOC_018392 | DOPEY1                | chr6:83777384-83906256    | 0.160572 | 1        |
| XLOC_001544 | XLOC_001544 | NRD1                  | chr1:52082545-52344609    | 0.160606 | 0.999791 |
| XLOC_000315 | XLOC_000315 | KCNQ4                 | chr1:41249683-41306124    | 0.16062  | 0.999791 |
| XLOC_012087 | XLOC_012087 | SLC35F6               | chr2:26987141-27004099    | 0.160693 | 0.999791 |
| XLOC_006289 | XLOC_006289 | DHRS4L2               | chr14:24439082-24475617   | 0.160714 | 0.999791 |

|             |             |              |                           |          |          |
|-------------|-------------|--------------|---------------------------|----------|----------|
| XLOC_015352 | XLOC_015352 | CEP63        | chr3:134196545-134293855  | 0.160723 | 0.999791 |
| XLOC_010614 | XLOC_010614 | JUNB         | chr19:12902309-12904125   | 0.160909 | 0.999791 |
| XLOC_010771 | XLOC_010771 | ZNF181       | chr19:35225479-35233774   | 0.160939 | 0.999791 |
| XLOC_016745 | XLOC_016745 | CHIC2        | chr4:54875957-54930815    | 0.160948 | 0.999791 |
| XLOC_010411 | XLOC_010411 | LOC400657    | chr18:72259009-72265071   | 0.160953 | 0.999791 |
| XLOC_004066 | XLOC_004066 | TMEM41B      | chr11:9302200-9336315     | 0.160988 | 0.999791 |
| XLOC_017677 | XLOC_017677 | CENPK        | chr5:64813592-64858995    | 0.161022 | 0.999791 |
| XLOC_010257 | XLOC_010257 | ATP9B        | chr18:76829396-77138282   | 0.161036 | 0.999791 |
| XLOC_022222 | XLOC_022222 | TSTA3        | chr8:144694787-144699732  | 0.161037 | 0.999791 |
| XLOC_013185 | XLOC_013185 | PRPF40A      | chr2:153508106-153573975  | 0.161086 | 0.999791 |
| XLOC_023330 | XLOC_023330 | TSPAN7       | chrX:38420730-38548172    | 0.161204 | 0.999791 |
| XLOC_014936 | XLOC_014936 | JAGN1        | chr3:9932270-9936031      | 0.161342 | 0.999791 |
| XLOC_021245 | XLOC_021245 | ORC5         | chr7:103766787-103848495  | 0.161373 | 0.999791 |
| XLOC_004466 | XLOC_004466 | SNORA8       | chr11:93465526-93465665   | 0.161494 | 0.999791 |
| XLOC_018403 | XLOC_018403 | C6orf164     | chr6:88106841-88109459    | 0.161736 | 1        |
| XLOC_002800 | XLOC_002800 | GDI2         | chr10:5807185-5855512     | 0.161738 | 0.999791 |
| XLOC_012007 | XLOC_012007 | ZNF497       | chr19:58858171-58874214   | 0.161739 | 0.999791 |
| XLOC_004103 | XLOC_004103 | UEVLD        | chr11:18552949-18610293   | 0.161842 | 0.999791 |
| XLOC_000548 | XLOC_000548 | PRMT6        | chr1:107599266-107601916  | 0.16187  | 0.999791 |
| XLOC_022774 | XLOC_022774 | C9orf72      | chr9:27546542-27573864    | 0.161977 | 0.999791 |
| XLOC_003055 | XLOC_003055 | FRA10AC1     | chr10:95427639-95462329   | 0.161989 | 0.999791 |
| XLOC_006016 | XLOC_006016 | PSPC1        | chr13:20248891-20357159   | 0.16213  | 0.999791 |
| XLOC_003928 | XLOC_003928 | ACAD8        | chr11:134123433-134135746 | 0.16218  | 0.999791 |
| XLOC_018340 | XLOC_018340 | CENPQ        | chr6:49431095-49460820    | 0.162187 | 0.999791 |
| XLOC_022801 | XLOC_022801 | RPP25L       | chr9:34610481-34612110    | 0.162211 | 0.999791 |
| XLOC_008020 | XLOC_008020 | ATXN2L       | chr16:28834368-28848558   | 0.162236 | 0.999791 |
| XLOC_013068 | XLOC_013068 | TXNDC9       | chr2:99935486-99952860    | 0.162356 | 0.999791 |
| XLOC_012025 | XLOC_012025 | ACP1         | chr2:264868-278282        | 0.162562 | 0.999791 |
| XLOC_023407 | XLOC_023407 | GSPT2        | chrX:51486480-51489326    | 0.162588 | 0.999791 |
| XLOC_018843 | XLOC_018843 | PPIL1        | chr6:36822605-36842800    | 0.162644 | 0.999791 |
| XLOC_023137 | XLOC_023137 | REXO4        | chr9:136243283-136324508  | 0.162689 | 0.999791 |
| XLOC_008323 | XLOC_008323 | CCDC78       | chr16:771141-776473       | 0.162861 | 0.999791 |
| XLOC_009439 | XLOC_009439 | MED31        | chr17:6481644-6554954     | 0.162933 | 0.999791 |
| XLOC_013056 | XLOC_013056 | FAHD2B       | chr2:97749322-97760582    | 0.162977 | 0.999791 |
| XLOC_012815 | XLOC_012815 | C2orf44      | chr2:24252205-24270296    | 0.162985 | 0.999791 |
| XLOC_016970 | XLOC_016970 | PLRG1        | chr4:155456148-155471585  | 0.163132 | 0.999791 |
| XLOC_001765 | XLOC_001765 | POLR3GL      | chr1:145456235-145470387  | 0.163151 | 0.999791 |
| XLOC_011466 | XLOC_011466 | FARSA        | chr19:13033283-13044558   | 0.163255 | 0.999791 |
| XLOC_013540 | XLOC_013540 | MGME1        | chr20:17949761-17971762   | 0.163265 | 0.999791 |
| XLOC_007328 | XLOC_007328 | IDH3A        | chr15:78441718-78462884   | 0.163285 | 0.999791 |
| XLOC_003366 | XLOC_003366 | PRMT3        | chr11:20409075-20530879   | 0.163309 | 0.999791 |
| XLOC_008195 | XLOC_008195 | CDH3         | chr16:68678150-68732957   | 0.163358 | 1        |
| XLOC_018471 | XLOC_018471 | PLN          | chr6:118781934-119031238  | 0.163377 | 1        |
| XLOC_010178 | XLOC_010178 | MOCOS        | chr18:33767479-33848685   | 0.163537 | 0.999791 |
| XLOC_009136 | XLOC_009136 | KPNB1        | chr17:45727203-45761004   | 0.163546 | 0.999791 |
| XLOC_020962 | XLOC_020962 | TRA2A        | chr7:23544400-23571656    | 0.163591 | 0.999791 |
| XLOC_015749 | XLOC_015749 | DUSP7        | chr3:52082936-52090461    | 0.163651 | 0.999791 |
| XLOC_017127 | XLOC_017127 | ITGA2        | chr5:52285155-52390609    | 0.163654 | 0.999791 |
| XLOC_016059 | XLOC_016059 | RPL22L1      | chr3:170582664-170588045  | 0.16366  | 0.999791 |
| XLOC_021788 | XLOC_021788 | SPATC1       | chr8:145086581-145102015  | 0.163771 | 1        |
| XLOC_015414 | XLOC_015414 | TIPARP       | chr3:156390959-156424557  | 0.163772 | 0.999791 |
| XLOC_017627 | XLOC_017627 | LOC100506548 | chr5:40825364-40829244    | 0.16378  | 0.999791 |
| XLOC_009978 | XLOC_009978 | TRIM65       | chr17:73885040-73893084   | 0.163785 | 0.999791 |
| XLOC_001659 | XLOC_001659 | DNTTIP2      | chr1:94335013-94344762    | 0.163817 | 0.999791 |
| XLOC_016655 | XLOC_016655 | PPP2R2C      | chr4:6322304-6565327      | 0.163847 | 1        |
| XLOC_020637 | XLOC_020637 | ZKSCAN1      | chr7:99613218-99635403    | 0.163862 | 0.999791 |
| XLOC_012380 | XLOC_012380 | POLR1B       | chr2:113299491-113334727  | 0.163892 | 0.999791 |
| XLOC_009214 | XLOC_009214 | C17orf82     | chr17:59489111-59490641   | 0.163975 | 1        |
| XLOC_005344 | XLOC_005344 | RECQL        | chr12:21590537-21654603   | 0.164113 | 0.999791 |
| XLOC_015905 | XLOC_015905 | PARP9        | chr3:122246759-122294049  | 0.164206 | 0.999791 |
| XLOC_015278 | XLOC_015278 | ADPRH        | chr3:119298522-119308792  | 0.164362 | 0.999791 |
| XLOC_016073 | XLOC_016073 | GNB4         | chr3:179113875-179169371  | 0.164383 | 1        |
| XLOC_004980 | XLOC_004980 | CPSF6        | chr12:69633316-69668138   | 0.164504 | 0.999791 |
| XLOC_005348 | XLOC_005348 | ABCC9        | chr12:21950323-22089628   | 0.164524 | 0.999791 |
| XLOC_012356 | XLOC_012356 | RGPD4        | chr2:108443387-108509000  | 0.164551 | 1        |
| XLOC_004921 | XLOC_004921 | PA2G4        | chr12:56498102-56507694   | 0.164658 | 0.999791 |
| XLOC_012198 | XLOC_012198 | AHSA2        | chr2:61404554-61697849    | 0.164801 | 0.999791 |
| XLOC_008789 | XLOC_008789 | RABEP1       | chr17:5185557-5289132     | 0.164803 | 0.999791 |
| XLOC_022611 | XLOC_022611 | ASS1         | chr9:133320093-133376661  | 0.164813 | 0.999791 |
| XLOC_010201 | XLOC_010201 | ELAC1        | chr18:48494386-48514490   | 0.164821 | 0.999791 |
| XLOC_018874 | XLOC_018874 | GUCA1B       | chr6:42151021-42162694    | 0.164823 | 0.999791 |
| XLOC_018903 | XLOC_018903 | CYP39A1      | chr6:46517444-46620523    | 0.164856 | 0.999791 |
| XLOC_021807 | XLOC_021807 | ZNF517       | chr8:146024260-146034529  | 0.165157 | 0.999791 |
| XLOC_005119 | XLOC_005119 | PLBD2        | chr12:113796370-113827458 | 0.165181 | 0.999791 |
| XLOC_012060 | XLOC_012060 | DDX1         | chr2:15731744-15771235    | 0.165229 | 0.999791 |
| XLOC_007503 | XLOC_007503 | RASGRP1      | chr15:38780301-38857007   | 0.165241 | 0.999791 |
| XLOC_017586 | XLOC_017586 | ZNF622       | chr5:16451627-16465894    | 0.165266 | 0.999791 |
| XLOC_021623 | XLOC_021623 | CSPP1        | chr8:67976602-68108849    | 0.165425 | 0.999791 |
| XLOC_003053 | XLOC_003053 | MYOF         | chr10:95066185-95242074   | 0.165436 | 0.999791 |

|             |             |              |                           |          |          |
|-------------|-------------|--------------|---------------------------|----------|----------|
| XLOC_020535 | XLOC_020535 | LOC100093631 | chr7:72569011-72621336    | 0.165484 | 0.999791 |
| XLOC_013388 | XLOC_013388 | FARSB        | chr2:223436161-223520827  | 0.1655   | 0.999791 |
| XLOC_021158 | XLOC_021158 | PEX1         | chr7:92116336-92157845    | 0.165555 | 0.999791 |
| XLOC_005523 | XLOC_005523 | STAT2        | chr12:56735381-56754037   | 0.165566 | 0.999791 |
| XLOC_015963 | XLOC_015963 | ANAPC13      | chr3:134196545-134293855  | 0.165562 | 0.999791 |
| XLOC_016844 | XLOC_016844 | NAP1L5       | chr4:89513573-89629693    | 0.165686 | 0.999791 |
| XLOC_012182 | XLOC_012182 | ACYP2        | chr2:54342409-54532435    | 0.165689 | 0.999791 |
| XLOC_015745 | XLOC_015745 | RRP9         | chr3:51967441-51975957    | 0.165724 | 0.999791 |
| XLOC_006215 | XLOC_006215 | ARGLU1       | chr13:107195661-107220514 | 0.165767 | 0.999791 |
| XLOC_018383 | XLOC_018383 | SENP6        | chr6:76311621-76427994    | 0.165929 | 0.999791 |
| XLOC_023304 | XLOC_023304 | POLA1        | chrX:24712063-25015102    | 0.165977 | 0.999791 |
| XLOC_012891 | XLOC_012891 | THADA        | chr2:43457974-43823185    | 0.165999 | 0.999791 |
| XLOC_008476 | XLOC_008476 | PALB2        | chr16:23614482-23652678   | 0.166033 | 0.999791 |
| XLOC_005190 | XLOC_005190 | RAN          | chr12:131356616-131360826 | 0.166036 | 0.999791 |
| XLOC_014769 | XLOC_014769 | PES1         | chr22:30972611-31003000   | 0.166124 | 0.999791 |
| XLOC_008876 | XLOC_008876 | UBB          | chr17:16284366-16286054   | 0.166228 | 0.999791 |
| XLOC_010730 | XLOC_010730 | ZNF429       | chr19:21688436-21721079   | 0.166354 | 0.999791 |
| XLOC_011457 | XLOC_011457 | TNPO2        | chr19:12810007-12834810   | 0.166435 | 0.999791 |
| XLOC_014581 | XLOC_014581 | XPNPEP3      | chr22:41253084-41328823   | 0.166684 | 0.999791 |
| XLOC_009971 | XLOC_009971 | RECQL5       | chr17:73584138-73663269   | 0.166786 | 0.999791 |
| XLOC_015687 | XLOC_015687 | CCDC51       | chr3:48473579-48481529    | 0.166811 | 0.999791 |
| XLOC_019062 | XLOC_019062 | MAN1A1       | chr6:119498365-119670931  | 0.166833 | 0.999791 |
| XLOC_014872 | XLOC_014872 | MCAT         | chr22:43528211-43539403   | 0.16684  | 0.999791 |
| XLOC_012567 | XLOC_012567 | NABP1        | chr2:192542797-192553248  | 0.166869 | 0.999791 |
| XLOC_017662 | XLOC_017662 | SLC38A9      | chr5:54921672-55008163    | 0.166951 | 0.999791 |
| XLOC_013678 | XLOC_013678 | STK4         | chr20:43595119-43708593   | 0.166958 | 0.999791 |
| XLOC_007832 | XLOC_007832 | WDR90        | chr16:699362-717829       | 0.16702  | 0.999791 |
| XLOC_001490 | XLOC_001490 | HIVEP3       | chr1:41972035-42501596    | 0.167051 | 1        |
| XLOC_018384 | XLOC_018384 | MYO6         | chr6:76458908-76629254    | 0.167122 | 0.999791 |
| XLOC_013230 | XLOC_013230 | SLC25A12     | chr2:172639914-172750816  | 0.167169 | 0.999791 |
| XLOC_006997 | XLOC_006997 | JAG2         | chr14:105607317-105635161 | 0.167219 | 0.999791 |
| XLOC_008518 | XLOC_008518 | SEPHS2       | chr16:30454951-30457224   | 0.167235 | 0.999791 |
| XLOC_015733 | XLOC_015733 | TUSC2        | chr3:50362340-50365668    | 0.167242 | 0.999791 |
| XLOC_006453 | XLOC_006453 | FOS          | chr14:75745480-75748937   | 0.16728  | 0.999791 |
| XLOC_021342 | XLOC_021342 | ZC3HAV1      | chr7:138728265-138794465  | 0.167332 | 0.999791 |
| XLOC_001130 | XLOC_001130 | KMO          | chr1:241695433-241803701  | 0.167377 | 1        |
| XLOC_015988 | XLOC_015988 | LOC100289361 | chr3:142719686-142720309  | 0.167528 | 0.999791 |
| XLOC_017484 | XLOC_017484 | RPL26L1      | chr5:172386438-172396774  | 0.16756  | 0.999791 |
| XLOC_007631 | XLOC_007631 | MTFMT        | chr15:65293849-65321977   | 0.167584 | 0.999791 |
| XLOC_003932 | XLOC_003932 | LOC100133161 | chr11:126986-131920       | 0.167642 | 1        |
| XLOC_006857 | XLOC_006857 | MAX          | chr14:65381078-65569413   | 0.167654 | 0.999791 |
| XLOC_015394 | XLOC_015394 | RNF13        | chr3:149530474-149679925  | 0.167673 | 0.999791 |
| XLOC_018699 | XLOC_018699 | HIST1H2BL    | chr6:27775256-27775709    | 0.167764 | 0.999791 |
| XLOC_007869 | XLOC_007869 | TSC2         | chr16:2097989-2185899     | 0.16784  | 0.999791 |
| XLOC_000487 | XLOC_000487 | CLCA2        | chr1:86889768-86922240    | 0.168045 | 1        |
| XLOC_013721 | XLOC_013721 | MOCS3        | chr20:49575350-49578399   | 0.168223 | 0.999791 |
| XLOC_006285 | XLOC_006285 | NGDN         | chr14:23938897-23947402   | 0.16829  | 0.999791 |
| XLOC_013016 | XLOC_013016 | TMEM150A     | chr2:85825669-85829822    | 0.168389 | 0.999791 |
| XLOC_000017 | XLOC_000017 | SCNN1D       | chr1:1215815-1227409      | 0.168431 | 0.999791 |
| XLOC_000743 | XLOC_000743 | CHRNA2       | chr1:154540256-154552353  | 0.168503 | 1        |
| XLOC_001095 | XLOC_001095 | RNF187       | chr1:228675067-228683889  | 0.168566 | 0.999791 |
| XLOC_014199 | XLOC_014199 | RRP1         | chr21:45209417-45223983   | 0.168623 | 0.999791 |
| XLOC_014650 | XLOC_014650 | MAPK8IP2     | chr22:51039130-51049979   | 0.168629 | 0.999791 |
| XLOC_015541 | XLOC_015541 | FYTTD1       | chr3:197398258-197511317  | 0.168642 | 0.999791 |
| XLOC_005574 | XLOC_005574 | MDM1         | chr12:68688345-68726161   | 0.168683 | 0.999791 |
| XLOC_021223 | XLOC_021223 | ACHE         | chr7:100487614-100493541  | 0.168727 | 0.999791 |
| XLOC_006943 | XLOC_006943 | MOAP1        | chr14:93648540-93651249   | 0.168935 | 0.999791 |
| XLOC_022037 | XLOC_022037 | LACTB2       | chr8:71520811-71581447    | 0.169029 | 0.999791 |
| XLOC_014621 | XLOC_014621 | ATXN10       | chr22:46067677-46241187   | 0.169153 | 0.999791 |
| XLOC_018418 | XLOC_018418 | UFL1         | chr6:96969701-97003151    | 0.16917  | 0.999791 |
| XLOC_020414 | XLOC_020414 | TAX1BP1      | chr7:27778991-27869386    | 0.169186 | 0.999791 |
| XLOC_001745 | XLOC_001745 | TBX15        | chr1:119425665-119532179  | 0.169209 | 1        |
| XLOC_016994 | XLOC_016994 | CBR4         | chr4:169908741-169931468  | 0.169317 | 0.999791 |
| XLOC_013116 | XLOC_013116 | SLC35F5      | chr2:114471932-114514400  | 0.169514 | 0.999791 |
| XLOC_022300 | XLOC_022300 | MTAP         | chr9:21802634-21865969    | 0.169548 | 0.999791 |
| XLOC_014819 | XLOC_014819 | PLA2G6       | chr22:38507501-38577836   | 0.169574 | 0.999791 |
| XLOC_015157 | XLOC_015157 | PDE12        | chr3:57541980-57547768    | 0.169618 | 0.999791 |
| XLOC_020844 | XLOC_020844 | ZNF862       | chr7:149535508-149564568  | 0.169618 | 0.999791 |
| XLOC_003395 | XLOC_003395 | CAPRN1       | chr11:34073229-34124157   | 0.169632 | 0.999791 |
| XLOC_001623 | XLOC_001623 | CTBS         | chr1:85018803-85040163    | 0.169682 | 0.999791 |
| XLOC_001700 | XLOC_001700 | LOC440600    | chr1:110828998-110881793  | 0.169762 | 1        |
| XLOC_018891 | XLOC_018891 | GTPBP2       | chr6:43543877-43596936    | 0.169804 | 0.999791 |
| XLOC_007819 | XLOC_007819 | LOC100134368 | chr16:432240-442960       | 0.169885 | 1        |
| XLOC_020665 | XLOC_020665 | SERPINE1     | chr7:100770369-100782547  | 0.169902 | 0.999791 |
| XLOC_021103 | XLOC_021103 | BAZ1B        | chr7:72854727-72936615    | 0.169931 | 0.999791 |
| XLOC_008081 | XLOC_008081 | ZNF720       | chr16:31724549-3172886    | 0.170044 | 0.999791 |
| XLOC_012688 | XLOC_012688 | SP140L       | chr2:231191893-231268445  | 0.170046 | 0.999791 |
| XLOC_017241 | XLOC_017241 | RHOBTB3      | chr5:95066849-95132071    | 0.170087 | 0.999791 |
| XLOC_013015 | XLOC_013015 | GGCX         | chr2:85766100-85788657    | 0.170194 | 0.999791 |



|             |             |                             |                           |          |          |
|-------------|-------------|-----------------------------|---------------------------|----------|----------|
| XLOC_022122 | XLOC_022122 | PABPC1                      | chr8:101715143-101734315  | 0.170213 | 0.999791 |
| XLOC_024316 | XLOC_024316 | CD24                        | chrY:21094584-21239302    | 0.170282 | 0.999791 |
| XLOC_016203 | XLOC_016203 | LOC93622                    | chr4:6675820-6677774      | 0.170381 | 0.999791 |
| XLOC_018409 | XLOC_018409 | PM20D2                      | chr6:89855768-89875288    | 0.170471 | 0.999791 |
| XLOC_003612 | XLOC_003612 | FRMD8                       | chr11:65154040-65180995   | 0.170498 | 0.999791 |
| XLOC_014910 | XLOC_014910 | ODF3B                       | chr22:50968837-50971008   | 0.170517 | 0.999791 |
| XLOC_004217 | XLOC_004217 | MED19                       | chr11:57471186-57479673   | 0.170586 | 0.999791 |
| XLOC_008063 | XLOC_008063 | FBXL19                      | chr16:30930639-30960104   | 0.170732 | 0.999791 |
| XLOC_004982 | XLOC_004982 | YEATS4                      | chr12:69753531-69784576   | 0.170883 | 0.999791 |
| XLOC_022063 | XLOC_022063 | SLC10A5                     | chr8:82605890-82607207    | 0.170962 | 0.999791 |
| XLOC_010826 | XLOC_010826 | ZNF540                      | chr19:38039850-38105079   | 0.170968 | 1        |
| XLOC_017443 | XLOC_017443 | PPP1R2P3                    | chr5:156277548-156279539  | 0.171134 | 1        |
| XLOC_002111 | XLOC_002111 | LMOD1                       | chr1:201865583-201915716  | 0.171189 | 1        |
| XLOC_012175 | XLOC_012175 | MSH2                        | chr2:47630205-47710367    | 0.171198 | 0.999791 |
| XLOC_006480 | XLOC_006480 | SPATA7                      | chr14:88851987-88904804   | 0.171265 | 0.999791 |
| XLOC_017305 | XLOC_017305 | LYRM7                       | chr5:130506640-130541119  | 0.171315 | 0.999791 |
| XLOC_023165 | XLOC_023165 | SNAPC4                      | chr9:139270028-139292889  | 0.171436 | 0.999791 |
| XLOC_011224 | XLOC_011224 | ZNF749                      | chr19:57946692-57957191   | 0.171532 | 0.999791 |
| XLOC_005640 | XLOC_005640 | CDK17                       | chr12:96672038-96794366   | 0.171538 | 0.999791 |
| XLOC_021141 | XLOC_021141 | PCLO                        | chr7:82383320-82792197    | 0.171648 | 1        |
| XLOC_020790 | XLOC_020790 | AGK                         | chr7:141251077-141354209  | 0.171695 | 0.999791 |
| XLOC_019040 | XLOC_019040 | REV3L                       | chr6:111620233-111804414  | 0.171758 | 0.999791 |
| XLOC_022500 | XLOC_022500 | FAM206A                     | chr9:111696672-111703237  | 0.171759 | 0.999791 |
| XLOC_008256 | XLOC_008256 | MLYCD                       | chr16:83932729-83949787   | 0.171905 | 0.999791 |
| XLOC_017024 | XLOC_017024 | MLF1IP                      | chr4:185570766-185655286  | 0.171945 | 0.999791 |
| XLOC_017668 | XLOC_017668 | PDE4D                       | chr5:58264865-59843484    | 0.171946 | 0.999791 |
| XLOC_006223 | XLOC_006223 | CARS2                       | chr13:111293756-111358480 | 0.171947 | 0.999791 |
| XLOC_002536 | XLOC_002536 | PIPF                        | chr10:81107219-81115089   | 0.172066 | 0.999791 |
| XLOC_008939 | XLOC_008939 | SUPT6H                      | chr17:26989301-27029249   | 0.172406 | 0.999791 |
| XLOC_009336 | XLOC_009336 | BAHCC1                      | chr17:79373539-79433358   | 0.172431 | 0.999791 |
| XLOC_016097 | XLOC_016097 | TRA2B                       | chr3:185632357-185655924  | 0.172547 | 0.999791 |
| XLOC_010830 | XLOC_010830 | C19orf33                    | chr19:38794199-38806606   | 0.172612 | 0.999791 |
| XLOC_005079 | XLOC_005079 | PWP1                        | chr12:108079589-108106257 | 0.17271  | 0.999791 |
| XLOC_019145 | XLOC_019145 | RMND1                       | chr6:151725896-151773316  | 0.172726 | 0.999791 |
| XLOC_002615 | XLOC_002615 | CCNJ                        | chr10:97471535-97849992   | 0.172773 | 0.999791 |
| XLOC_002630 | XLOC_002630 | MARVELD1                    | chr10:99473464-99477909   | 0.172794 | 0.999791 |
| XLOC_006757 | XLOC_006757 | HEATR5A                     | chr14:31760993-31889788   | 0.172834 | 0.999791 |
| XLOC_011624 | XLOC_011624 | ZNF260                      | chr19:37001588-37019248   | 0.172946 | 0.999791 |
| XLOC_008527 | XLOC_008527 | ZNF629                      | chr16:30789769-30798523   | 0.173048 | 0.999791 |
| XLOC_006217 | XLOC_006217 | LIG4                        | chr13:108859791-108870716 | 0.173082 | 0.999791 |
| XLOC_009431 | XLOC_009431 | C1QBP                       | chr17:5289345-5342471     | 0.17314  | 0.999791 |
| XLOC_018873 | XLOC_018873 | C6orf132                    | chr6:42068856-42110715    | 0.173146 | 0.999791 |
| XLOC_021389 | XLOC_021389 | ZNF467                      | chr7:149461452-149470295  | 0.173257 | 0.999791 |
| XLOC_010604 | XLOC_010604 | ZNF69                       | chr19:11998669-12025365   | 0.173289 | 0.999791 |
| XLOC_010838 | XLOC_010838 | ACTN4                       | chr19:39138266-39235114   | 0.17342  | 0.999791 |
| XLOC_001739 | XLOC_001739 | CD58                        | chr1:117057155-117113715  | 0.17349  | 0.999791 |
| XLOC_003640 | XLOC_003640 | CNIH2                       | chr1:166045671-166051685  | 0.173495 | 0.999791 |
| XLOC_004358 | XLOC_004358 | PITPNM1                     | chr1:167259238-67272843   | 0.173559 | 0.999791 |
| XLOC_004955 | XLOC_004955 | TSFM                        | chr12:58176527-58209852   | 0.173588 | 0.999791 |
| XLOC_014412 | XLOC_014412 | COMT                        | chr22:19863039-20004309   | 0.173669 | 0.999791 |
| XLOC_011740 | XLOC_011740 | ZFP112                      | chr19:44830705-44860856   | 0.173703 | 0.999791 |
| XLOC_011216 | XLOC_011216 | AURKC                       | chr19:57742376-57746916   | 0.173705 | 0.999791 |
| XLOC_012565 | XLOC_012565 | GLS                         | chr2:191745546-191830270  | 0.17378  | 0.999791 |
| XLOC_006397 | XLOC_006397 | ZBTB1                       | chr14:64971291-65000408   | 0.173804 | 0.999791 |
| XLOC_005452 | XLOC_005452 | SMAGP                       | chr12:51632507-51664202   | 0.173815 | 0.999791 |
| XLOC_015275 | XLOC_015275 | ARHGAP31                    | chr3:119013219-119138323  | 0.173926 | 0.999791 |
| XLOC_011567 | XLOC_011567 | ZNF43                       | chr19:21987750-22034870   | 0.174042 | 1        |
| XLOC_016255 | XLOC_016255 | NCAPG                       | chr4:17812435-18023483    | 0.174043 | 0.999791 |
| XLOC_011918 | XLOC_011918 | ZNF611                      | chr19:53206065-53238307   | 0.174173 | 0.999791 |
| XLOC_004228 | XLOC_004228 | LPXN                        | chr11:58294343-58345639   | 0.174309 | 0.999791 |
| XLOC_015699 | XLOC_015699 | SLC25A20                    | chr3:48894355-48936426    | 0.17446  | 0.999791 |
| XLOC_000449 | XLOC_000449 | GADD45A                     | chr1:68150859-68154021    | 0.17449  | 0.999791 |
| XLOC_002507 | XLOC_002507 | CDH23                       | chr10:73156690-73575704   | 0.17465  | 1        |
| XLOC_005587 | XLOC_005587 | MRS2P2                      | chr12:72233486-72320629   | 0.174723 | 1        |
| XLOC_007688 | XLOC_007688 | CYP1A1                      | chr15:75011882-75017877   | 0.174751 | 1        |
| XLOC_007795 | XLOC_007795 | ADAMTS17                    | chr15:100511642-100882183 | 0.174841 | 1        |
| XLOC_021929 | XLOC_021929 | CCDC25                      | chr8:27590832-27630170    | 0.174909 | 0.999791 |
| XLOC_000741 | XLOC_000741 | IL6R                        | chr1:154377668-154441926  | 0.175055 | 0.999791 |
| XLOC_013075 | XLOC_013075 | RNF149                      | chr2:101892062-101925178  | 0.17509  | 0.999791 |
| XLOC_017658 | XLOC_017658 | DHX29                       | chr5:54552072-54603521    | 0.175102 | 0.999791 |
| XLOC_006836 | XLOC_006836 | L3HYPDH                     | chr14:59939405-59951073   | 0.175151 | 0.999791 |
| XLOC_005522 | XLOC_005522 | CNPY2,PAN2                  | chr12:56704212-56727837   | 0.175249 | 0.999791 |
| XLOC_000492 | XLOC_000492 | HS2ST1                      | chr1:87380334-87575681    | 0.175299 | 0.999791 |
| XLOC_014458 | XLOC_014458 | SLC2A11                     | chr22:24199058-24227725   | 0.17538  | 0.999791 |
| XLOC_006282 | XLOC_006282 | BCL2L2,BCL2L2-PABPN1,PABPN1 | chr14:23775970-23795394   | 0.175467 | 0.999791 |
| XLOC_017330 | XLOC_017330 | PCBD2                       | chr5:134240809-134298336  | 0.175517 | 0.999791 |
| XLOC_005662 | XLOC_005662 | GNN                         | chr12:104237526-104323989 | 0.175629 | 1        |
| XLOC_017912 | XLOC_017912 | FAM114A2                    | chr5:153371268-153418497  | 0.175633 | 0.999791 |
| XLOC_019125 | XLOC_019125 | PLAGL1                      | chr6:144261436-144385735  | 0.175708 | 0.999791 |

|             |             |                            |                           |          |          |
|-------------|-------------|----------------------------|---------------------------|----------|----------|
| XLOC_015060 | XLOC_015060 | ZNF197                     | chr3:44666510-44689963    | 0.175927 | 0.999791 |
| XLOC_009941 | XLOC_009941 | LINC00673                  | chr17:70399462-70588943   | 0.175955 | 1        |
| XLOC_023880 | XLOC_023880 | HSD17B10                   | chrX:53458205-53461323    | 0.176053 | 0.999791 |
| XLOC_017833 | XLOC_017833 | FAM13B                     | chr5:137225124-137368802  | 0.176089 | 0.999791 |
| XLOC_014116 | XLOC_014116 | GABPA                      | chr21:27096790-27144771   | 0.176129 | 0.999791 |
| XLOC_020965 | XLOC_020965 | OSBPL3                     | chr7:24836163-25019760    | 0.17615  | 0.999791 |
| XLOC_005911 | XLOC_005911 | HNRNPA1L2                  | chr13:53191604-53217919   | 0.176226 | 0.999791 |
| XLOC_012145 | XLOC_012145 | GALM                       | chr2:38893051-38961909    | 0.176351 | 0.999791 |
| XLOC_000399 | XLOC_000399 | SCP2                       | chr1:53392900-53517289    | 0.176419 | 0.999791 |
| XLOC_009615 | XLOC_009615 | NLE1                       | chr17:33458367-33469322   | 0.17652  | 0.999791 |
| XLOC_015588 | XLOC_015588 | FGD5-AS1                   | chr3:14984285-15106816    | 0.176538 | 0.999791 |
| XLOC_014197 | XLOC_014197 | RRP1B                      | chr21:45079431-45115960   | 0.176556 | 0.999791 |
| XLOC_004797 | XLOC_004797 | BICD1                      | chr12:32260184-32531141   | 0.176557 | 1        |
| XLOC_017809 | XLOC_017809 | VDAC1                      | chr5:133307565-133340824  | 0.176613 | 0.999791 |
| XLOC_002473 | XLOC_002473 | ARID5B                     | chr10:63661012-63856707   | 0.176803 | 1        |
| XLOC_000341 | XLOC_000341 | DPH2                       | chr1:44435652-44439043    | 0.176862 | 0.999791 |
| XLOC_014174 | XLOC_014174 | WRB                        | chr21:40752212-40769815   | 0.176958 | 0.999791 |
| XLOC_020966 | XLOC_020966 | CYCS                       | chr7:25158269-25164980    | 0.177272 | 0.999791 |
| XLOC_011215 | XLOC_011215 | ZNF264                     | chr19:57702867-57734214   | 0.177276 | 0.999791 |
| XLOC_016486 | XLOC_016486 | LOC645513                  | chr4:120375937-120549981  | 0.177482 | 0.999791 |
| XLOC_007888 | XLOC_007888 | FLJ42627                   | chr16:2688982-2696130     | 0.177527 | 0.999791 |
| XLOC_002666 | XLOC_002666 | LOC100505761               | chr10:104209573-104216050 | 0.177528 | 0.999791 |
| XLOC_021500 | XLOC_021500 | POLR3D                     | chr8:22102618-22108680    | 0.177553 | 0.999791 |
| XLOC_007799 | XLOC_007799 | LINS                       | chr15:101109427-101142445 | 0.177574 | 0.999791 |
| XLOC_007394 | XLOC_007394 | TICRR                      | chr15:90118817-90198682   | 0.177707 | 0.999791 |
| XLOC_010970 | XLOC_010970 | DHX34                      | chr19:47852537-47885961   | 0.177765 | 0.999791 |
| XLOC_009365 | XLOC_009365 | VPS53                      | chr17:411907-618096       | 0.177793 | 0.999791 |
| XLOC_022682 | XLOC_022682 | C9orf139                   | chr9:139901685-139931234  | 0.178104 | 1        |
| XLOC_010321 | XLOC_010321 | LOC100652770               | chr18:29078026-29136874   | 0.178174 | 1        |
| XLOC_012285 | XLOC_012285 | MRPL35                     | chr2:86426555-86440477    | 0.178201 | 0.999791 |
| XLOC_007371 | XLOC_007371 | GOLGA6L4                   | chr15:84904524-84914120   | 0.178351 | 1        |
| XLOC_016510 | XLOC_016510 | NAA15                      | chr4:140211070-140311935  | 0.178415 | 0.999791 |
| XLOC_010677 | XLOC_010677 | GTPBP3                     | chr19:17445790-17453540   | 0.178437 | 0.999791 |
| XLOC_022756 | XLOC_022756 | KLHL9                      | chr9:21331017-21335429    | 0.17847  | 0.999791 |
| XLOC_004263 | XLOC_004263 | EML3                       | chr11:62369690-62382592   | 0.178727 | 0.999791 |
| XLOC_017087 | XLOC_017087 | GUSBP1                     | chr5:21459588-21589481    | 0.178732 | 0.999791 |
| XLOC_000925 | XLOC_000925 | DHX9                       | chr1:182808438-182857117  | 0.178831 | 0.999791 |
| XLOC_016836 | XLOC_016836 | KLHL8                      | chr4:88082213-88141674    | 0.178955 | 0.999791 |
| XLOC_004412 | XLOC_004412 | ARRB1                      | chr11:74971165-75062875   | 0.178994 | 0.999791 |
| XLOC_021635 | XLOC_021635 | TMEM70                     | chr8:74888376-74895018    | 0.179094 | 0.999791 |
| XLOC_015765 | XLOC_015765 | MUSTN1, TMEM110, TMEM110-M | chr3:52867130-52931597    | 0.179095 | 0.999791 |
| XLOC_014137 | XLOC_014137 | HUNK                       | chr21:33245627-33376377   | 0.179193 | 0.999791 |
| XLOC_017023 | XLOC_017023 | CASP3                      | chr4:185548849-185570629  | 0.179193 | 0.999791 |
| XLOC_001815 | XLOC_001815 | RFX5                       | chr1:151313115-151319769  | 0.179208 | 0.999791 |
| XLOC_009932 | XLOC_009932 | WIPI1                      | chr17:66417421-66453653   | 0.179279 | 0.999791 |
| XLOC_021770 | XLOC_021770 | LY6K                       | chr8:143781528-143808391  | 0.179549 | 1        |
| XLOC_008787 | XLOC_008787 | USP6                       | chr17:5031686-5078324     | 0.1796   | 1        |
| XLOC_014069 | XLOC_014069 | TCFL5                      | chr20:61448413-61493115   | 0.1796   | 0.999791 |
| XLOC_024118 | XLOC_024118 | ATP11C                     | chrX:138808504-138914447  | 0.180026 | 0.999791 |
| XLOC_008164 | XLOC_008164 | CES2                       | chr16:66968346-66978994   | 0.180064 | 0.999791 |
| XLOC_020359 | XLOC_020359 | AIMP2                      | chr7:6048881-6098860      | 0.180105 | 0.999791 |
| XLOC_018107 | XLOC_018107 | HIST1H2BI                  | chr6:26273203-26273640    | 0.180191 | 1        |
| XLOC_012919 | XLOC_012919 | PNPT1                      | chr2:55861197-55921045    | 0.180345 | 0.999791 |
| XLOC_022695 | XLOC_022695 | NOXA1                      | chr9:140317846-140335901  | 0.180362 | 0.999791 |
| XLOC_012147 | XLOC_012147 | MORN2                      | chr2:39103102-39109850    | 0.180364 | 0.999791 |
| XLOC_007331 | XLOC_007331 | IREB2                      | chr15:78730517-78793798   | 0.180382 | 0.999791 |
| XLOC_005059 | XLOC_005059 | DRAM1                      | chr12:102271104-102317401 | 0.180424 | 0.999791 |
| XLOC_012558 | XLOC_012558 | ASNSD1                     | chr2:190526124-190535557  | 0.180426 | 0.999791 |
| XLOC_014937 | XLOC_014937 | IL17RE                     | chr3:9944295-9958084      | 0.180474 | 0.999791 |
| XLOC_007127 | XLOC_007127 | C15orf55                   | chr15:34638065-34649931   | 0.180479 | 1        |
| XLOC_001226 | XLOC_001226 | MEGF6                      | chr1:3404505-3528059      | 0.180568 | 0.999791 |
| XLOC_005083 | XLOC_005083 | ISCU                       | chr12:108956293-108963160 | 0.18058  | 0.999791 |
| XLOC_015931 | XLOC_015931 | MGLL                       | chr3:127407904-127542093  | 0.180711 | 0.999791 |
| XLOC_013548 | XLOC_013548 | DTD1                       | chr20:18568555-18744560   | 0.180756 | 0.999791 |
| XLOC_007773 | XLOC_007773 | PLIN1                      | chr15:90207599-90222648   | 0.180763 | 1        |
| XLOC_001460 | XLOC_001460 | C1orf109                   | chr1:38147241-38156192    | 0.180798 | 0.999791 |
| XLOC_020883 | XLOC_020883 | NOM1                       | chr7:156742416-156765876  | 0.1808   | 0.999791 |
| XLOC_011370 | XLOC_011370 | PEX11G                     | chr19:7541755-7553924     | 0.18085  | 0.999791 |
| XLOC_002550 | XLOC_002550 | GHITM                      | chr10:85899184-85913311   | 0.180931 | 0.999791 |
| XLOC_007222 | XLOC_007222 | PIGB                       | chr15:55611132-55800432   | 0.180971 | 0.999791 |
| XLOC_023510 | XLOC_023510 | RPA4                       | chrX:95939661-96855597    | 0.180975 | 1        |
| XLOC_020989 | XLOC_020989 | LOC646762,ZNRF2P2          | chr7:29685537-29727859    | 0.180981 | 0.999791 |
| XLOC_001554 | XLOC_001554 | MAGOH                      | chr1:53692563-53793821    | 0.181018 | 0.999791 |
| XLOC_014879 | XLOC_014879 | LDOC1L                     | chr22:44888449-44894005   | 0.181033 | 0.999791 |
| XLOC_004729 | XLOC_004729 | LOC100129361               | chr12:10998447-11328619   | 0.181158 | 0.999791 |
| XLOC_014969 | XLOC_014969 | SH3BP5-AS1                 | chr3:15295690-15382901    | 0.181167 | 0.999791 |
| XLOC_012415 | XLOC_012415 | TSN                        | chr2:122513120-122525428  | 0.181216 | 0.999791 |
| XLOC_001908 | XLOC_001908 | CCT3                       | chr1:156278751-156316785  | 0.18133  | 0.999791 |
| XLOC_002216 | XLOC_002216 | LIN9                       | chr1:226418849-226497449  | 0.181398 | 0.999791 |

|             |             |            |                           |          |          |
|-------------|-------------|------------|---------------------------|----------|----------|
| XLOC_015893 | XLOC_015893 | LRRC58     | chr3:120043575-120068186  | 0.181477 | 0.999791 |
| XLOC_021526 | XLOC_021526 | EPHX2      | chr8:27348518-27402439    | 0.181492 | 0.999791 |
| XLOC_017696 | XLOC_017696 | ENC1       | chr5:73923230-73937249    | 0.181533 | 0.999791 |
| XLOC_002486 | XLOC_002486 | CCAR1      | chr10:70480970-70551309   | 0.181626 | 0.999791 |
| XLOC_018029 | XLOC_018029 | BPHL       | chr6:3118925-3153432      | 0.181687 | 0.999791 |
| XLOC_009141 | XLOC_009141 | PNPO       | chr17:46018888-46026674   | 0.181703 | 0.999791 |
| XLOC_001818 | XLOC_001818 | CELF3      | chr1:151672533-151689290  | 0.181785 | 1        |
| XLOC_004973 | XLOC_004973 | HELB       | chr12:66696334-66737423   | 0.181858 | 0.999791 |
| XLOC_022483 | XLOC_022483 | RNF20      | chr9:104296132-104325626  | 0.181925 | 0.999791 |
| XLOC_013557 | XLOC_013557 | XRN2       | chr20:21283941-21370463   | 0.182027 | 0.999791 |
| XLOC_005871 | XLOC_005871 | AKAP11     | chr13:42846288-42897403   | 0.182146 | 0.999791 |
| XLOC_005406 | XLOC_005406 | RAPGEF3    | chr12:48128452-48152889   | 0.182252 | 0.999791 |
| XLOC_000188 | XLOC_000188 | CLIC4      | chr1:25071759-25170815    | 0.182294 | 0.999791 |
| XLOC_004641 | XLOC_004641 | CCDC77     | chr12:389222-551806       | 0.182305 | 0.999791 |
| XLOC_011539 | XLOC_011539 | CRLF1      | chr19:18704034-18717660   | 0.182475 | 0.999791 |
| XLOC_003638 | XLOC_003638 | KLC2       | chr11:66024764-66035332   | 0.182524 | 0.999791 |
| XLOC_015283 | XLOC_015283 | GTF2E1     | chr3:120461557-120501916  | 0.182571 | 0.999791 |
| XLOC_012732 | XLOC_012732 | SCLY,UBE2F | chr2:238875586-239008054  | 0.182825 | 0.999791 |
| XLOC_017272 | XLOC_017272 | AQPEP      | chr5:115298150-115363299  | 0.182848 | 1        |
| XLOC_016098 | XLOC_016098 | ETV5       | chr3:185764105-185826901  | 0.182865 | 0.999791 |
| XLOC_017076 | XLOC_017076 | CCT5       | chr5:10250281-10266501    | 0.183008 | 0.999791 |
| XLOC_000392 | XLOC_000392 | BTF3L4     | chr1:52521856-52556388    | 0.183225 | 0.999791 |
| XLOC_022612 | XLOC_022612 | FUBP3      | chr9:133454959-133513739  | 0.183346 | 0.999791 |
| XLOC_000500 | XLOC_000500 | LRRC8D     | chr1:90286572-90401989    | 0.183358 | 0.999791 |
| XLOC_006794 | XLOC_006794 | DNAAF2     | chr14:50091891-50101948   | 0.183377 | 0.999791 |
| XLOC_018623 | XLOC_018623 | TUBB2B     | chr6:3224494-3227968      | 0.183475 | 0.999791 |
| XLOC_013266 | XLOC_013266 | NEUROD1    | chr2:182540832-182545392  | 0.183511 | 1        |
| XLOC_010291 | XLOC_010291 | SPIRE1     | chr18:12446510-12657912   | 0.183555 | 0.999791 |
| XLOC_009354 | XLOC_009354 | HEXDC      | chr17:80347085-80480707   | 0.183568 | 0.999791 |
| XLOC_020549 | XLOC_020549 | LAT2       | chr7:73624086-73644164    | 0.183583 | 0.999791 |
| XLOC_012484 | XLOC_012484 | PSMD14     | chr2:162164785-162268228  | 0.183706 | 0.999791 |
| XLOC_001633 | XLOC_001633 | ZNHIT6     | chr1:86115105-86174116    | 0.183759 | 0.999791 |
| XLOC_004058 | XLOC_004058 | ST5        | chr11:8714898-8932498     | 0.183828 | 0.999791 |
| XLOC_007929 | XLOC_007929 | ALG1       | chr16:5121809-5147789     | 0.184003 | 0.999791 |
| XLOC_006187 | XLOC_006187 | UGGT2      | chr13:96453835-96705736   | 0.184089 | 0.999791 |
| XLOC_016404 | XLOC_016404 | C4orf22    | chr4:81256873-81884910    | 0.184142 | 0.999791 |
| XLOC_003802 | XLOC_003802 | DDX10      | chr11:108535815-108811648 | 0.184208 | 0.999791 |
| XLOC_001056 | XLOC_001056 | LYPLAL1    | chr1:219347191-219386207  | 0.184288 | 0.999791 |
| XLOC_004642 | XLOC_004642 | B4GALNT3   | chr12:569542-671058       | 0.184388 | 0.999791 |
| XLOC_017773 | XLOC_017773 | CCDC112    | chr5:114602884-114632458  | 0.184404 | 0.999791 |
| XLOC_004447 | XLOC_004447 | ME3        | chr11:86152149-86383678   | 0.184627 | 0.999791 |
| XLOC_014027 | XLOC_014027 | DPM1       | chr20:49551404-49575060   | 0.184628 | 0.999791 |
| XLOC_016035 | XLOC_016035 | RARRRES1   | chr3:158414896-158450275  | 0.184813 | 0.999791 |
| XLOC_015557 | XLOC_015557 | SRGAP3     | chr3:9022275-9291369      | 0.184974 | 1        |
| XLOC_007657 | XLOC_007657 | CLN6       | chr15:68499329-68522080   | 0.184987 | 0.999791 |
| XLOC_004737 | XLOC_004737 | APOLD1     | chr12:12878850-12944399   | 0.184992 | 1        |
| XLOC_023082 | XLOC_023082 | PTRH1      | chr9:130469270-130477936  | 0.185004 | 0.999791 |
| XLOC_001245 | XLOC_001245 | DNAJC11    | chr1:6684924-6761966      | 0.185176 | 0.999791 |
| XLOC_012649 | XLOC_012649 | STK36      | chr2:219528586-219567440  | 0.185225 | 0.999791 |
| XLOC_014462 | XLOC_014462 | LOC391322  | chr22:24373116-24374043   | 0.185309 | 0.999791 |
| XLOC_008956 | XLOC_008956 | NSRP1      | chr17:28443824-28513493   | 0.185323 | 0.999791 |
| XLOC_007400 | XLOC_007400 | TTL13      | chr15:90792763-90802312   | 0.185353 | 1        |
| XLOC_017557 | XLOC_017557 | LPCAT1     | chr5:1461541-1524076      | 0.185354 | 0.999791 |
| XLOC_004634 | XLOC_004634 | LOC283174  | chr11:133766329-133771635 | 0.185513 | 0.999791 |
| XLOC_013799 | XLOC_013799 | PCMTD2     | chr20:62887047-62907579   | 0.185568 | 0.999791 |
| XLOC_001198 | XLOC_001198 | CPSF3L     | chr1:1243993-1260067      | 0.185617 | 0.999791 |
| XLOC_007919 | XLOC_007919 | DNAJA3     | chr16:4475805-4506775     | 0.185642 | 0.999791 |
| XLOC_006870 | XLOC_006870 | ERH        | chr14:69846839-69865021   | 0.185711 | 0.999791 |
| XLOC_009782 | XLOC_009782 | EFTUD2     | chr17:42923720-42976993   | 0.185742 | 0.999791 |
| XLOC_014804 | XLOC_014804 | TMPRSS6    | chr22:37461478-37499693   | 0.185753 | 1        |
| XLOC_018432 | XLOC_018432 | C6orf203   | chr6:107349406-107372547  | 0.185774 | 0.999791 |
| XLOC_020884 | XLOC_020884 | LOC645249  | chr7:156803550-156809118  | 0.185815 | 0.999791 |
| XLOC_023120 | XLOC_023120 | FAM78A     | chr9:134133464-134151906  | 0.185933 | 0.999791 |
| XLOC_011404 | XLOC_011404 | ZNF562     | chr19:9759337-9785776     | 0.185968 | 0.999791 |
| XLOC_007318 | XLOC_007318 | UBE2Q2     | chr15:76135621-76193388   | 0.186063 | 0.999791 |
| XLOC_009362 | XLOC_009362 | DOC2B      | chr17:6010-31420          | 0.186066 | 0.999791 |
| XLOC_022559 | XLOC_022559 | ARPCS5L    | chr9:127631483-127639696  | 0.186092 | 0.999791 |
| XLOC_005996 | XLOC_005996 | ATP11A     | chr13:113344642-113541482 | 0.186246 | 0.999791 |
| XLOC_018313 | XLOC_018313 | ABCC10     | chr6:43395291-43423786    | 0.186265 | 0.999791 |
| XLOC_019205 | XLOC_019205 | PDCD2      | chr6:170884659-170893780  | 0.186323 | 0.999791 |
| XLOC_001209 | XLOC_001209 | SLC35E2B   | chr1:1571099-1655791      | 0.186342 | 0.999791 |
| XLOC_009174 | XLOC_009174 | TOB1-AS1   | chr17:48939586-48945732   | 0.186346 | 0.999791 |
| XLOC_013664 | XLOC_013664 | IFT52      | chr20:42219578-42275862   | 0.186353 | 0.999791 |
| XLOC_017682 | XLOC_017682 | CCDC125    | chr5:68576518-68616410    | 0.186387 | 0.999791 |
| XLOC_004121 | XLOC_004121 | CCDC34     | chr11:27360060-27384795   | 0.186407 | 0.999791 |
| XLOC_012974 | XLOC_012974 | CYP26B1    | chr2:7236366-72374963     | 0.186896 | 0.999791 |
| XLOC_020652 | XLOC_020652 | FBXO24     | chr7:100183955-100205798  | 0.186935 | 1        |
| XLOC_000440 | XLOC_000440 | DNAJC6     | chr1:65730376-65881552    | 0.18695  | 0.999791 |
| XLOC_016307 | XLOC_016307 | OCIAD1     | chr4:48833059-48863834    | 0.187023 | 0.999791 |

|             |             |                        |                           |          |          |
|-------------|-------------|------------------------|---------------------------|----------|----------|
| XLOC_011632 | XLOC_011632 | LOC284412              | chr19:37756840-37759912   | 0.187064 | 0.999791 |
| XLOC_002660 | XLOC_002660 | NOLC1                  | chr10:103911932-103923627 | 0.187075 | 0.999791 |
| XLOC_006408 | XLOC_006408 | MPP5                   | chr14:67708011-67802778   | 0.187146 | 0.999791 |
| XLOC_013282 | XLOC_013282 | TMEM194B               | chr2:191371618-191399468  | 0.187195 | 0.999791 |
| XLOC_005243 | XLOC_005243 | CHD4                   | chr12:6679247-6716551     | 0.187211 | 0.999791 |
| XLOC_008502 | XLOC_008502 | KCTD13                 | chr16:29917656-29937545   | 0.187274 | 0.999791 |
| XLOC_014493 | XLOC_014493 | EWSR1                  | chr22:29663997-29696515   | 0.187353 | 0.999791 |
| XLOC_005630 | XLOC_005630 | CCDC41                 | chr12:94702055-94853764   | 0.187419 | 0.999791 |
| XLOC_021132 | XLOC_021132 | PION                   | chr7:76940067-77045717    | 0.187516 | 0.999791 |
| XLOC_017698 | XLOC_017698 | FAM169A                | chr5:74073398-74162663    | 0.187526 | 0.999791 |
| XLOC_015766 | XLOC_015766 | SFMBT1                 | chr3:52937582-53080089    | 0.187548 | 0.999791 |
| XLOC_017466 | XLOC_017466 | RARS                   | chr5:167913462-167946309  | 0.187577 | 0.999791 |
| XLOC_011671 | XLOC_011671 | FCGBP                  | chr19:40353962-40440533   | 0.187655 | 1        |
| XLOC_012573 | XLOC_012573 | MARS2                  | chr2:198570027-198573114  | 0.187664 | 0.999791 |
| XLOC_008823 | XLOC_008823 | EIF4A1, SENP3          | chr17:7465308-7482324     | 0.187909 | 0.999791 |
| XLOC_016165 | XLOC_016165 | TMEM175                | chr4:926261-952443        | 0.187913 | 0.999791 |
| XLOC_012557 | XLOC_012557 | WDR75                  | chr2:190306158-190340264  | 0.187937 | 0.999791 |
| XLOC_020415 | XLOC_020415 | JAZF1-AS1              | chr7:27870192-28280996    | 0.188047 | 1        |
| XLOC_008878 | XLOC_008878 | C17orf76-AS1, SNORD49B | chr17:16342300-16395505   | 0.188111 | 0.999791 |
| XLOC_001349 | XLOC_001349 | ASAP3                  | chr1:23755055-23810750    | 0.188147 | 0.999791 |
| XLOC_014371 | XLOC_014371 | UBE2G2                 | chr21:46188494-46221751   | 0.188178 | 0.999791 |
| XLOC_013941 | XLOC_013941 | EIF6                   | chr20:33866708-33872619   | 0.188232 | 0.999791 |
| XLOC_017800 | XLOC_017800 | KIF3A                  | chr5:132028322-132073265  | 0.1883   | 0.999791 |
| XLOC_017759 | XLOC_017759 | NUDT12                 | chr5:102884555-102898490  | 0.188365 | 0.999791 |
| XLOC_001575 | XLOC_001575 | OMA1                   | chr1:58946390-59012446    | 0.188381 | 0.999791 |
| XLOC_005516 | XLOC_005516 | WIBG                   | chr12:56295196-56321697   | 0.188495 | 0.999791 |
| XLOC_012771 | XLOC_012771 | RNASEH1                | chr2:3592690-3605940      | 0.188784 | 0.999791 |
| XLOC_006818 | XLOC_006818 | CNIH                   | chr14:54893646-54908148   | 0.188812 | 0.999791 |
| XLOC_008805 | XLOC_008805 | SLC16A13               | chr17:693393-6943440      | 0.188824 | 0.999791 |
| XLOC_020380 | XLOC_020380 | BZW2                   | chr7:16685758-16746148    | 0.188831 | 0.999791 |
| XLOC_000365 | XLOC_000365 | TMEM69                 | chr1:46153846-46216485    | 0.188844 | 0.999791 |
| XLOC_023748 | XLOC_023748 | HDHD1                  | chrX:6966960-7066231      | 0.189054 | 0.999791 |
| XLOC_000836 | XLOC_000836 | DUSP12                 | chr1:161719580-161726952  | 0.18907  | 0.999791 |
| XLOC_000030 | XLOC_000030 | CALML6                 | chr1:1846265-1848733      | 0.189123 | 1        |
| XLOC_006472 | XLOC_006472 | ADCK1                  | chr14:78266425-78400297   | 0.18915  | 0.999791 |
| XLOC_000069 | XLOC_000069 | SLC25A33               | chr1:9599527-9642831      | 0.18917  | 0.999791 |
| XLOC_002743 | XLOC_002743 | HMX3                   | chr10:124895566-124897247 | 0.189179 | 0.999791 |
| XLOC_016090 | XLOC_016090 | THPO                   | chr3:184089772-184095932  | 0.18921  | 1        |
| XLOC_005549 | XLOC_005549 | AGAP2                  | chr12:58118075-58135944   | 0.189216 | 0.999791 |
| XLOC_013830 | XLOC_013830 | SLC4A11                | chr20:3208062-3219887     | 0.189301 | 0.999791 |
| XLOC_013699 | XLOC_013699 | SLC2A10                | chr20:45338278-45364985   | 0.189383 | 0.999791 |
| XLOC_020518 | XLOC_020518 | VKORC1L1               | chr7:65338256-65419800    | 0.189386 | 0.999791 |
| XLOC_017025 | XLOC_017025 | ACSL1                  | chr4:185676748-185747215  | 0.189389 | 0.999791 |
| XLOC_010944 | XLOC_010944 | PPM1N                  | chr19:46001730-46005764   | 0.189905 | 0.999791 |
| XLOC_002948 | XLOC_002948 | FAM13C                 | chr10:60936347-61122661   | 0.190026 | 1        |
| XLOC_011556 | XLOC_011556 | ZNF14                  | chr19:19821280-19843921   | 0.190333 | 0.999791 |
| XLOC_011047 | XLOC_011047 | ZNF473                 | chr19:50529211-50552031   | 0.190381 | 0.999791 |
| XLOC_022889 | XLOC_022889 | NMRK1                  | chr9:77676115-77703133    | 0.190428 | 0.999791 |
| XLOC_005693 | XLOC_005693 | C12orf76               | chr12:110478982-110505500 | 0.190438 | 0.999791 |
| XLOC_016413 | XLOC_016413 | ARHGAP24               | chr4:86396283-86923823    | 0.190745 | 1        |
| XLOC_017015 | XLOC_017015 | WWC2-AS2               | chr4:184018173-184020352  | 0.190796 | 0.999791 |
| XLOC_019100 | XLOC_019100 | BCLAF1                 | chr6:136578000-136610989  | 0.190799 | 0.999791 |
| XLOC_002672 | XLOC_002672 | AS3MT, C10orf32        | chr10:104613966-104661655 | 0.190851 | 0.999791 |
| XLOC_023435 | XLOC_023435 | UBQLN2                 | chrX:56590025-56593443    | 0.190853 | 0.999791 |
| XLOC_010183 | XLOC_010183 | PIK3C3                 | chr18:39535198-39661446   | 0.190877 | 0.999791 |
| XLOC_005535 | XLOC_005535 | SDR9C7                 | chr12:57316937-57328189   | 0.191013 | 1        |
| XLOC_018438 | XLOC_018438 | ARMC2                  | chr6:109169618-109295352  | 0.19107  | 1        |
| XLOC_005196 | XLOC_005196 | PUS1                   | chr12:132413744-132428406 | 0.191092 | 0.999791 |
| XLOC_007144 | XLOC_007144 | IVD                    | chr15:40697685-40713512   | 0.191158 | 0.999791 |
| XLOC_001900 | XLOC_001900 | ARHGEF2                | chr1:155916629-155948336  | 0.191163 | 0.999791 |
| XLOC_023897 | XLOC_023897 | SPIN2B                 | chrX:57146114-57147979    | 0.191182 | 0.999791 |
| XLOC_021026 | XLOC_021026 | C7orf25                | chr7:42948871-42951689    | 0.191183 | 0.999791 |
| XLOC_008301 | XLOC_008301 | LOC100128881           | chr16:89773540-89883065   | 0.191285 | 0.999791 |
| XLOC_005681 | XLOC_005681 | CORO1C                 | chr12:109038884-109125326 | 0.191443 | 0.999791 |
| XLOC_010577 | XLOC_010577 | PDE4A                  | chr19:10527448-10580307   | 0.191466 | 0.999791 |
| XLOC_008668 | XLOC_008668 | TXNL4B                 | chr16:72118755-72146811   | 0.191537 | 0.999791 |
| XLOC_012235 | XLOC_012235 | ZNF638                 | chr2:71558884-71662191    | 0.191684 | 0.999791 |
| XLOC_013950 | XLOC_013950 | LINC00657              | chr20:34633539-34638882   | 0.191691 | 0.999791 |
| XLOC_018658 | XLOC_018658 | TPMT                   | chr6:18128544-18155374    | 0.191727 | 0.999791 |
| XLOC_020861 | XLOC_020861 | ABC8B                  | chr7:150725509-150744869  | 0.191802 | 0.999791 |
| XLOC_017284 | XLOC_017284 | ZNF474                 | chr5:121465214-121489266  | 0.191834 | 0.999791 |
| XLOC_007946 | XLOC_007946 | ERCC4                  | chr16:14014013-14046205   | 0.191923 | 0.999791 |
| XLOC_012653 | XLOC_012653 | WNT10A                 | chr2:219745254-219758651  | 0.191971 | 0.999791 |
| XLOC_011978 | XLOC_011978 | NLRP9                  | chr19:56219797-56249768   | 0.192215 | 1        |
| XLOC_000198 | XLOC_000198 | FAM110D                | chr1:26485510-26489119    | 0.192346 | 0.999791 |
| XLOC_018446 | XLOC_018446 | GTF3C6                 | chr6:111279762-111289091  | 0.192493 | 0.999791 |
| XLOC_003582 | XLOC_003582 | FERMT3                 | chr11:63974151-63993726   | 0.192579 | 1        |
| XLOC_009577 | XLOC_009577 | PROCA1                 | chr17:27030533-27038872   | 0.192648 | 0.999791 |
| XLOC_001371 | XLOC_001371 | PAFAH2                 | chr1:26286257-26324648    | 0.192894 | 0.999791 |

|             |             |              |                           |          |          |
|-------------|-------------|--------------|---------------------------|----------|----------|
| XLOC_012852 | XLOC_012852 | TRMT61B      | chr2:29033699-29093175    | 0.193016 | 0.999791 |
| XLOC_010612 | XLOC_010612 | ASNA1        | chr19:12848305-12859137   | 0.193178 | 0.999791 |
| XLOC_011917 | XLOC_011917 | ZNF83        | chr19:53115617-53193886   | 0.193244 | 0.999791 |
| XLOC_008674 | XLOC_008674 | RFWD3        | chr16:74655296-74700779   | 0.193289 | 0.999791 |
| XLOC_003073 | XLOC_003073 | RRP12        | chr10:99116457-99161127   | 0.1934   | 0.999791 |
| XLOC_006368 | XLOC_006368 | PELI2        | chr14:56585092-56768031   | 0.193512 | 0.999791 |
| XLOC_018789 | XLOC_018789 | AGER         | chr6:32148744-32152099    | 0.193882 | 0.999791 |
| XLOC_021487 | XLOC_021487 | SH2D4A       | chr8:19171080-19253729    | 0.193983 | 0.999791 |
| XLOC_001141 | XLOC_001141 | EFCAB2       | chr1:245133170-245288530  | 0.193994 | 0.999791 |
| XLOC_006419 | XLOC_006419 | KIAA0247     | chr14:70078309-70181861   | 0.194028 | 0.999791 |
| XLOC_008460 | XLOC_008460 | CRYM         | chr16:21269838-21329912   | 0.194125 | 0.999791 |
| XLOC_008637 | XLOC_008637 | DDX28        | chr16:68055176-68113226   | 0.194143 | 0.999791 |
| XLOC_006358 | XLOC_006358 | STYX         | chr14:53196882-53241705   | 0.194357 | 0.999791 |
| XLOC_015239 | XLOC_015239 | LOC344595    | chr3:106959538-107045811  | 0.194407 | 0.999791 |
| XLOC_008890 | XLOC_008890 | GID4         | chr17:17942610-17971718   | 0.194432 | 0.999791 |
| XLOC_022708 | XLOC_022708 | C9orf66      | chr9:213107-465259        | 0.194432 | 1        |
| XLOC_023049 | XLOC_023049 | TTL11        | chr9:124584203-124855885  | 0.194479 | 0.999791 |
| XLOC_012210 | XLOC_012210 | SLC1A4       | chr2:65215578-65251000    | 0.194519 | 0.999791 |
| XLOC_011767 | XLOC_011767 | SYMPK        | chr19:46318699-46366548   | 0.194559 | 0.999791 |
| XLOC_014047 | XLOC_014047 | PMEPA1       | chr20:56223447-56286592   | 0.194637 | 0.999791 |
| XLOC_001368 | XLOC_001368 | AUNIP        | chr1:26160496-26185848    | 0.194744 | 0.999791 |
| XLOC_017858 | XLOC_017858 | DND1         | chr5:140044383-140053171  | 0.194799 | 0.999791 |
| XLOC_009736 | XLOC_009736 | DNAJC7       | chr17:40118758-40190044   | 0.195097 | 0.999791 |
| XLOC_010452 | XLOC_010452 | MUM1         | chr19:1354975-1378430     | 0.195342 | 0.999791 |
| XLOC_013021 | XLOC_013021 | POLR1A       | chr2:86253450-8633278     | 0.195376 | 0.999791 |
| XLOC_008194 | XLOC_008194 | ZFP90        | chr16:68573660-68601039   | 0.195615 | 0.999791 |
| XLOC_022352 | XLOC_022352 | POLR1E       | chr9:37485944-37503693    | 0.195677 | 0.999791 |
| XLOC_009956 | XLOC_009956 | NAT9         | chr17:72766685-72772470   | 0.195879 | 0.999791 |
| XLOC_015663 | XLOC_015663 | LZTFL1       | chr3:45864809-45957216    | 0.195938 | 0.999791 |
| XLOC_006346 | XLOC_006346 | ATP5S        | chr14:50779046-50792946   | 0.195972 | 0.999791 |
| XLOC_003074 | XLOC_003074 | EXOSC1       | chr10:99195665-99205768   | 0.195981 | 0.999791 |
| XLOC_019070 | XLOC_019070 | ECHDC1       | chr6:127609856-127664754  | 0.19619  | 0.999791 |
| XLOC_000820 | XLOC_000820 | NIT1         | chr1:161070345-161102478  | 0.19625  | 0.999791 |
| XLOC_022263 | XLOC_022263 | SMARCA2      | chr9:2015341-2193623      | 0.19633  | 0.999791 |
| XLOC_006024 | XLOC_006024 | XPO4         | chr13:21351467-21476913   | 0.196451 | 0.999791 |
| XLOC_007341 | XLOC_007341 | C15orf37     | chr15:80135888-80217196   | 0.196461 | 0.999791 |
| XLOC_018929 | XLOC_018929 | GSTA4        | chr6:52842745-52860178    | 0.196664 | 0.999791 |
| XLOC_000763 | XLOC_000763 | MSTO1        | chr1:155579960-155584758  | 0.196705 | 0.999791 |
| XLOC_021808 | XLOC_021808 | ZNF7         | chr8:146052902-146068606  | 0.196867 | 0.999791 |
| XLOC_007889 | XLOC_007889 | KCTD5        | chr16:2732494-2759031     | 0.196909 | 0.999791 |
| XLOC_015322 | XLOC_015322 | ACAD9        | chr3:128598332-128631957  | 0.196919 | 0.999791 |
| XLOC_023696 | XLOC_023696 | PLXNB3       | chrX:153029650-153044801  | 0.196948 | 0.999791 |
| XLOC_017030 | XLOC_017030 | KIAA1430     | chr4:186080818-186125182  | 0.196954 | 0.999791 |
| XLOC_023144 | XLOC_023144 | RNU6ATAC     | chr9:137029561-137029686  | 0.19699  | 0.999791 |
| XLOC_016282 | XLOC_016282 | KLHL5        | chr4:39046450-39127853    | 0.197048 | 0.999791 |
| XLOC_015951 | XLOC_015951 | LOC339874    | chr3:130745693-131100319  | 0.197081 | 1        |
| XLOC_014378 | XLOC_014378 | SSR4P1       | chr21:46490870-46493126   | 0.1972   | 0.999791 |
| XLOC_004855 | XLOC_004855 | GRASP        | chr12:52400728-52409673   | 0.197267 | 0.999791 |
| XLOC_021691 | XLOC_021691 | POP1         | chr8:99129520-99172069    | 0.197284 | 0.999791 |
| XLOC_020383 | XLOC_020383 | HDAC9        | chr7:18126571-19036992    | 0.197359 | 0.999791 |
| XLOC_002058 | XLOC_002058 | ACBD6        | chr1:180257351-180472022  | 0.197383 | 0.999791 |
| XLOC_000006 | XLOC_000006 | SAMD11       | chr1:861120-894679        | 0.197414 | 0.999791 |
| XLOC_015559 | XLOC_015559 | LHFPL4       | chr3:9540044-9595486      | 0.197508 | 0.999791 |
| XLOC_010004 | XLOC_010004 | DNAH17       | chr17:76374734-76573476   | 0.197514 | 1        |
| XLOC_001093 | XLOC_001093 | HIST3H2BB    | chr1:228645807-228646259  | 0.197579 | 1        |
| XLOC_020750 | XLOC_020750 | SMKR1        | chr7:129142319-129152773  | 0.197594 | 0.999791 |
| XLOC_003817 | XLOC_003817 | DLAT         | chr11:111895537-111944895 | 0.197621 | 0.999791 |
| XLOC_020758 | XLOC_020758 | MEST         | chr7:130126015-130371406  | 0.197688 | 0.999791 |
| XLOC_016206 | XLOC_016206 | KIAA0232     | chr4:6784458-6885899      | 0.197793 | 0.999791 |
| XLOC_004586 | XLOC_004586 | HSPA8        | chr11:122928199-122932901 | 0.197881 | 0.999791 |
| XLOC_021012 | XLOC_021012 | KIAA0895     | chr7:36363758-36493400    | 0.19791  | 0.999791 |
| XLOC_022549 | XLOC_022549 | CRB2         | chr9:126118447-126141032  | 0.198062 | 1        |
| XLOC_021364 | XLOC_021364 | KEL          | chr7:142638200-142659503  | 0.198194 | 1        |
| XLOC_000917 | XLOC_000917 | MR1          | chr1:181002560-181031074  | 0.19834  | 0.999791 |
| XLOC_008251 | XLOC_008251 | PLCG2        | chr16:81812898-81991899   | 0.198371 | 0.999791 |
| XLOC_012305 | XLOC_012305 | KCNIP3       | chr2:95963071-96051825    | 0.198491 | 0.999791 |
| XLOC_001617 | XLOC_001617 | FUBP1        | chr1:78413590-78444777    | 0.198595 | 0.999791 |
| XLOC_006756 | XLOC_006756 | HECTD1       | chr14:31569323-31676689   | 0.198649 | 0.999791 |
| XLOC_002876 | XLOC_002876 | KIF5B        | chr10:32297937-32345371   | 0.198818 | 0.999791 |
| XLOC_011475 | XLOC_011475 | C19orf57     | chr19:13993167-14016909   | 0.198977 | 0.999791 |
| XLOC_018941 | XLOC_018941 | RAB23        | chr6:57053581-57087078    | 0.199054 | 0.999791 |
| XLOC_001508 | XLOC_001508 | TCTEX1D4     | chr1:45266035-45272957    | 0.199081 | 1        |
| XLOC_015578 | XLOC_015578 | LOC100129480 | chr3:12581279-12586963    | 0.199234 | 1        |
| XLOC_014311 | XLOC_014311 | RCAN1        | chr21:35888783-35987382   | 0.199263 | 0.999791 |
| XLOC_005672 | XLOC_005672 | LOC100505978 | chr12:106751435-107283094 | 0.199356 | 1        |
| XLOC_005237 | XLOC_005237 | SCNN1A       | chr12:6456008-6500737     | 0.199633 | 0.999791 |
| XLOC_002808 | XLOC_002808 | KIN          | chr10:7792924-7829990     | 0.199669 | 0.999791 |
| XLOC_009375 | XLOC_009375 | PITPNA       | chr17:1420212-1466110     | 0.199869 | 0.999791 |
| XLOC_017056 | XLOC_017056 | CEP72        | chr5:612404-653666        | 0.200031 | 0.999791 |

|             |             |                   |                           |          |          |
|-------------|-------------|-------------------|---------------------------|----------|----------|
| XLOC_005218 | XLOC_005218 | FBXL14            | chr12:1675158-1703331     | 0.20016  | 0.999791 |
| XLOC_017543 | XLOC_017543 | C5orf55           | chr5:441642-443258        | 0.200419 | 0.999791 |
| XLOC_007213 | XLOC_007213 | AP4E1             | chr15:51200868-51298097   | 0.200435 | 0.999791 |
| XLOC_008647 | XLOC_008647 | NOB1              | chr16:69775756-69788871   | 0.200536 | 0.999791 |
| XLOC_007653 | XLOC_007653 | LCTL              | chr15:66797430-66857835   | 0.200878 | 0.999791 |
| XLOC_011505 | XLOC_011505 | OR10H1            | chr19:15917816-15918936   | 0.200913 | 1        |
| XLOC_009089 | XLOC_009089 | RND2              | chr17:41177257-41184058   | 0.200989 | 0.999791 |
| XLOC_017178 | XLOC_017178 | MCCC2             | chr5:70883114-70954530    | 0.201002 | 0.999791 |
| XLOC_018011 | XLOC_018011 | ZFP62             | chr5:180274610-180288286  | 0.201044 | 0.999791 |
| XLOC_000815 | XLOC_000815 | NHLH1             | chr1:160336860-160342638  | 0.20111  | 1        |
| XLOC_015133 | XLOC_015133 | ABHD14A,ACY1      | chr3:52009041-52023218    | 0.201229 | 0.999791 |
| XLOC_002720 | XLOC_002720 | NANOS1            | chr10:120789227-120793854 | 0.201242 | 0.999791 |
| XLOC_006912 | XLOC_006912 | VIPAS39           | chr14:77893017-77923983   | 0.201325 | 0.999791 |
| XLOC_008949 | XLOC_008949 | PIPOX             | chr17:27369917-27384236   | 0.201429 | 1        |
| XLOC_022718 | XLOC_022718 | PLGRKT            | chr9:5357966-5437937      | 0.2015   | 0.999791 |
| XLOC_021670 | XLOC_021670 | LRRRC69           | chr8:92114846-92231464    | 0.201524 | 1        |
| XLOC_021864 | XLOC_021864 | FAM167A           | chr8:11197145-11324276    | 0.201527 | 0.999791 |
| XLOC_001786 | XLOC_001786 | HIST2H2BF         | chr1:149754244-149783928  | 0.201641 | 0.999791 |
| XLOC_021696 | XLOC_021696 | SPAG1             | chr8:101170262-101254132  | 0.201664 | 0.999791 |
| XLOC_018772 | XLOC_018772 | VARS              | chr6:31745296-31763712    | 0.201812 | 0.999791 |
| XLOC_013850 | XLOC_013850 | TRMT6             | chr20:5918485-5931173     | 0.201817 | 0.999791 |
| XLOC_007915 | XLOC_007915 | CLUAP1            | chr16:3550944-3627392     | 0.201842 | 0.999791 |
| XLOC_016573 | XLOC_016573 | PALLD             | chr4:169418216-169849608  | 0.201931 | 0.999791 |
| XLOC_014670 | XLOC_014670 | PRODH             | chr22:18900286-18924066   | 0.201959 | 0.999791 |
| XLOC_011814 | XLOC_011814 | MAMSTR            | chr19:49216254-49222976   | 0.2024   | 0.999791 |
| XLOC_011611 | XLOC_011611 | NFKBID            | chr19:36379142-36391552   | 0.202611 | 0.999791 |
| XLOC_015983 | XLOC_015983 | GK5               | chr3:141876368-141944449  | 0.202836 | 0.999791 |
| XLOC_010634 | XLOC_010634 | IL27RA            | chr19:14142551-14163717   | 0.202928 | 0.999791 |
| XLOC_016079 | XLOC_016079 | DCUN1D1           | chr3:182660558-182698326  | 0.203064 | 0.999791 |
| XLOC_003738 | XLOC_003738 | ANKRD42           | chr11:82905290-82960013   | 0.203274 | 1        |
| XLOC_023695 | XLOC_023695 | ABCD1             | chrX:152990322-153010216  | 0.203296 | 0.999791 |
| XLOC_015719 | XLOC_015719 | AMIGO3            | chr3:49726949-49761384    | 0.203339 | 0.999791 |
| XLOC_020428 | XLOC_020428 | FAM188B,INMT      | chr7:30791750-30932002    | 0.203658 | 0.999791 |
| XLOC_006534 | XLOC_006534 | WDR25             | chr14:100842754-100996640 | 0.203663 | 0.999791 |
| XLOC_013966 | XLOC_013966 | SNORA71A          | chr20:37049238-37064018   | 0.203665 | 0.999791 |
| XLOC_013793 | XLOC_013793 | UCKL1-AS1         | chr20:62571181-62601223   | 0.203851 | 1        |
| XLOC_018875 | XLOC_018875 | MRPS10            | chr6:42174538-42185633    | 0.203942 | 0.999791 |
| XLOC_000197 | XLOC_000197 | PDIK1L            | chr1:26437655-26452039    | 0.204083 | 0.999791 |
| XLOC_010598 | XLOC_010598 | ZNF627            | chr19:11708234-11729974   | 0.204126 | 0.999791 |
| XLOC_001860 | XLOC_001860 | ILF2              | chr1:153631129-153643504  | 0.204128 | 0.999791 |
| XLOC_015232 | XLOC_015232 | LOC100009676      | chr3:101368282-101398057  | 0.204227 | 0.999791 |
| XLOC_018241 | XLOC_018241 | PFDN6             | chr6:33257373-33258711    | 0.204233 | 0.999791 |
| XLOC_002937 | XLOC_002937 | FLJ31813          | chr10:51780941-51827563   | 0.204386 | 0.999791 |
| XLOC_003548 | XLOC_003548 | DAGLA             | chr11:614447904-61514474  | 0.204439 | 0.999791 |
| XLOC_006637 | XLOC_006637 | TRAF3             | chr14:103243815-103377837 | 0.204595 | 0.999791 |
| XLOC_004884 | XLOC_004884 | HOXC4,HOXC5,HOXC6 | chr12:54410641-54449814   | 0.204788 | 0.999791 |
| XLOC_012229 | XLOC_012229 | VAX2              | chr2:71127719-71160575    | 0.205023 | 1        |
| XLOC_009647 | XLOC_009647 | GPR179            | chr17:36481492-36499693   | 0.205105 | 1        |
| XLOC_015398 | XLOC_015398 | SELT              | chr3:150321065-150348234  | 0.205138 | 0.999791 |
| XLOC_017994 | XLOC_017994 | HNRNPH1           | chr5:179041178-179050722  | 0.205148 | 0.999791 |
| XLOC_004744 | XLOC_004744 | HTR7P1            | chr12:13153375-13157764   | 0.205299 | 0.999791 |
| XLOC_017329 | XLOC_017329 | TXNDC15           | chr5:134209459-134237323  | 0.205664 | 0.999791 |
| XLOC_005694 | XLOC_005694 | ANAPC7            | chr12:110810704-110841535 | 0.20584  | 0.999791 |
| XLOC_011586 | XLOC_011586 | CEP89             | chr19:33369903-33462869   | 0.205874 | 0.999791 |
| XLOC_016664 | XLOC_016664 | ACOX3             | chr4:8368008-8442452      | 0.205892 | 0.999791 |
| XLOC_005747 | XLOC_005747 | C12orf43          | chr12:121440847-121454300 | 0.205963 | 0.999791 |
| XLOC_009007 | XLOC_009007 | MRM1              | chr17:34958024-34965407   | 0.206001 | 0.999791 |
| XLOC_003969 | XLOC_003969 | IGF2,INS,INS-IGF2 | chr1:2150341-2182439      | 0.206042 | 1        |
| XLOC_003870 | XLOC_003870 | TMEM136           | chr11:120195837-120204388 | 0.2061   | 0.999791 |
| XLOC_023793 | XLOC_023793 | ACOT9             | chrX:23721776-23761407    | 0.206158 | 0.999791 |
| XLOC_023343 | XLOC_023343 | ZNF674-AS1        | chrX:46404924-46407910    | 0.206193 | 0.999791 |
| XLOC_006819 | XLOC_006819 | GMBF              | chr14:54941208-54955744   | 0.206357 | 0.999791 |
| XLOC_019198 | XLOC_019198 | WDR27             | chr6:169857302-170102159  | 0.206393 | 0.999791 |
| XLOC_017165 | XLOC_017165 | CDK7              | chr5:68530621-68573257    | 0.206398 | 0.999791 |
| XLOC_010718 | XLOC_010718 | ZNF101            | chr19:19779662-19791138   | 0.206498 | 0.999791 |
| XLOC_006021 | XLOC_006021 | CRYL1             | chr13:20977805-21100012   | 0.206539 | 0.999791 |
| XLOC_007748 | XLOC_007748 | C15orf40          | chr15:83654954-83680393   | 0.206718 | 0.999791 |
| XLOC_018493 | XLOC_018493 | L3MBTL3           | chr6:130339727-130462594  | 0.206787 | 0.999791 |
| XLOC_000471 | XLOC_000471 | NEXN              | chr1:78354199-78409578    | 0.206826 | 1        |
| XLOC_020495 | XLOC_020495 | GBAS              | chr7:56032269-56067875    | 0.207055 | 0.999791 |
| XLOC_005110 | XLOC_005110 | PTPN11            | chr12:112856535-112947717 | 0.207134 | 0.999791 |
| XLOC_008076 | XLOC_008076 | ARMC5             | chr16:31470316-31478488   | 0.20718  | 0.999791 |
| XLOC_010770 | XLOC_010770 | ZNF302            | chr19:35168566-35177302   | 0.207189 | 0.999791 |
| XLOC_005855 | XLOC_005855 | RFXAP             | chr13:37393338-37403740   | 0.20737  | 0.999791 |
| XLOC_004828 | XLOC_004828 | DNAJC22           | chr12:49741040-49745685   | 0.207537 | 0.999791 |
| XLOC_002500 | XLOC_002500 | H2AFY2            | chr10:71812356-71892690   | 0.20758  | 0.999791 |
| XLOC_011625 | XLOC_011625 | ZNF529            | chr19:37034516-37096178   | 0.207606 | 0.999791 |
| XLOC_017713 | XLOC_017713 | HOMER1            | chr5:78669785-78809700    | 0.207628 | 0.999791 |
| XLOC_005879 | XLOC_005879 | KIAA1704          | chr13:45563686-45602404   | 0.207669 | 0.999791 |

|             |             |                     |                           |          |          |
|-------------|-------------|---------------------|---------------------------|----------|----------|
| XLOC_015203 | XLOC_015203 | NSUN3               | chr3:93776765-93845630    | 0.207792 | 0.999791 |
| XLOC_021222 | XLOC_021222 | UFSP1               | chr7:100486343-100487339  | 0.207801 | 0.999791 |
| XLOC_016732 | XLOC_016732 | NFXL1               | chr4:47849257-47916633    | 0.207844 | 0.999791 |
| XLOC_000907 | XLOC_000907 | SOAT1               | chr1:179262848-179327814  | 0.20815  | 0.999791 |
| XLOC_009700 | XLOC_009700 | KRTAP4-8            | chr17:39253233-39254375   | 0.208175 | 0.999791 |
| XLOC_006131 | XLOC_006131 | DLEU7               | chr13:51286758-51424041   | 0.208278 | 1        |
| XLOC_001578 | XLOC_001578 | JUN                 | chr1:59246462-59249785    | 0.208328 | 0.999791 |
| XLOC_001738 | XLOC_001738 | ATP1A10S            | chr1:116915794-116961244  | 0.208426 | 0.999791 |
| XLOC_023717 | XLOC_023717 | DKC1                | chrX:153991030-154005964  | 0.208444 | 0.999791 |
| XLOC_024208 | XLOC_024208 | TMLHE-AS1           | chrX:154576449-154603823  | 0.208624 | 1        |
| XLOC_014489 | XLOC_014489 | CCDC117             | chr22:29168661-29185283   | 0.208658 | 0.999791 |
| XLOC_011949 | XLOC_011949 | LAIR1               | chr19:54865234-54876721   | 0.208714 | 1        |
| XLOC_008202 | XLOC_008202 | NIP7                | chr16:69362523-69377013   | 0.208751 | 0.999791 |
| XLOC_020330 | XLOC_020330 | HEATR2              | chr7:588833-826116        | 0.208853 | 0.999791 |
| XLOC_018801 | XLOC_018801 | PSMB8               | chr6:32808493-32821748    | 0.208863 | 0.999791 |
| XLOC_022365 | XLOC_022365 | ANKRD20A2,ANKRD20A3 | chr9:42368302-42411863    | 0.208891 | 1        |
| XLOC_005294 | XLOC_005294 | KLRAP1              | chr12:10741076-10752434   | 0.208899 | 1        |
| XLOC_012806 | XLOC_012806 | MATN3               | chr2:20191812-20212455    | 0.208928 | 1        |
| XLOC_010471 | XLOC_010471 | THOP1               | chr19:2785505-2813599     | 0.209163 | 0.999791 |
| XLOC_005759 | XLOC_005759 | CLIP1               | chr12:122755980-122907116 | 0.209259 | 0.999791 |
| XLOC_004930 | XLOC_004930 | IL23A               | chr12:56732662-56734194   | 0.209543 | 0.999791 |
| XLOC_003378 | XLOC_003378 | METTL15             | chr1:28129797-28355054    | 0.209606 | 0.999791 |
| XLOC_009004 | XLOC_009004 | PIGW                | chr17:34891402-34895150   | 0.209625 | 0.999791 |
| XLOC_015856 | XLOC_015856 | IFT57               | chr3:107879658-107941417  | 0.209663 | 0.999791 |
| XLOC_000992 | XLOC_000992 | ZBED6               | chr1:203764750-203823256  | 0.209747 | 1        |
| XLOC_016554 | XLOC_016554 | TMEM144             | chr4:159131400-159176439  | 0.209763 | 0.999791 |
| XLOC_003423 | XLOC_003423 | PRDM11              | chr11:45115563-45256675   | 0.209774 | 1        |
| XLOC_006963 | XLOC_006963 | SNHG10              | chr14:95999248-96001209   | 0.209793 | 0.999791 |
| XLOC_021633 | XLOC_021633 | RDH10               | chr8:74206836-74237520    | 0.209809 | 0.999791 |
| XLOC_015740 | XLOC_015740 | CISH                | chr3:50643884-50649262    | 0.20983  | 0.999791 |
| XLOC_008360 | XLOC_008360 | BRICD5              | chr16:2255177-2261069     | 0.209836 | 0.999791 |
| XLOC_013229 | XLOC_013229 | METTL8              | chr2:172173912-172341562  | 0.209968 | 0.999791 |
| XLOC_009605 | XLOC_009605 | UTP6                | chr17:30190189-30228729   | 0.209998 | 0.999791 |
| XLOC_012224 | XLOC_012224 | GMCL1               | chr2:70056817-70106727    | 0.21002  | 0.999791 |
| XLOC_003767 | XLOC_003767 | PANX1               | chr11:93862093-93915137   | 0.210131 | 0.999791 |
| XLOC_016648 | XLOC_016648 | LYAR                | chr4:4269428-4291896      | 0.210141 | 0.999791 |
| XLOC_009859 | XLOC_009859 | TRIM25              | chr17:54965269-54991409   | 0.210157 | 0.999791 |
| XLOC_001827 | XLOC_001827 | S100A11             | chr1:152004981-152009511  | 0.210273 | 0.999791 |
| XLOC_017954 | XLOC_017954 | LOC100268168        | chr5:172381785-172386371  | 0.210446 | 0.999791 |
| XLOC_007545 | XLOC_007545 | PIIP5K1             | chr15:43663312-43910998   | 0.210706 | 0.999791 |
| XLOC_018981 | XLOC_018981 | SYNCRIP             | chr6:86317501-86353043    | 0.210903 | 0.999791 |
| XLOC_007698 | XLOC_007698 | PTPN9               | chr15:75759461-75871625   | 0.211223 | 0.999791 |
| XLOC_018756 | XLOC_018756 | ATP6V1G2,DDX39B     | chr6:31496738-31514625    | 0.211243 | 0.999791 |
| XLOC_018216 | XLOC_018216 | STK19               | chr6:31937587-31949223    | 0.211279 | 0.999791 |
| XLOC_022789 | XLOC_022789 | NOL6                | chr9:33461350-33473941    | 0.211313 | 0.999791 |
| XLOC_012822 | XLOC_012822 | DNAJC27             | chr2:25166504-25194963    | 0.211417 | 0.999791 |
| XLOC_007679 | XLOC_007679 | LOXL1-AS1           | chr15:74209808-74244478   | 0.21146  | 0.999791 |
| XLOC_000299 | XLOC_000299 | KIAA0754            | chr1:39547088-39552810    | 0.211547 | 1        |
| XLOC_001351 | XLOC_001351 | ID3                 | chr1:23884420-23886285    | 0.211773 | 0.999791 |
| XLOC_013427 | XLOC_013427 | USP40               | chr2:234384164-234474236  | 0.211809 | 0.999791 |
| XLOC_007655 | XLOC_007655 | IQCH-AS1            | chr15:67493012-67819641   | 0.211844 | 0.999791 |
| XLOC_021408 | XLOC_021408 | PRKAG2              | chr7:151253200-151576308  | 0.211858 | 0.999791 |
| XLOC_016960 | XLOC_016960 | SH3D19              | chr4:152041432-152149182  | 0.21186  | 0.999791 |
| XLOC_020976 | XLOC_020976 | HOXA3               | chr7:27145808-27166639    | 0.21207  | 0.999791 |
| XLOC_020675 | XLOC_020675 | LRWD1               | chr7:102105389-102119381  | 0.212098 | 0.999791 |
| XLOC_018322 | XLOC_018322 | TMEM63B             | chr6:44095375-44123256    | 0.212102 | 0.999791 |
| XLOC_011874 | XLOC_011874 | C19orf48            | chr19:51300960-51307974   | 0.212135 | 0.999791 |
| XLOC_010820 | XLOC_010820 | ZNF420              | chr19:37569381-37620651   | 0.212146 | 0.999791 |
| XLOC_011666 | XLOC_011666 | EID2B               | chr19:40021629-40023494   | 0.212182 | 0.999791 |
| XLOC_014748 | XLOC_014748 | RHBDD3              | chr22:29655843-29663914   | 0.212184 | 0.999791 |
| XLOC_014002 | XLOC_014002 | NEURL2              | chr20:44517110-44541003   | 0.212355 | 0.999791 |
| XLOC_023635 | XLOC_023635 | HTATSF1             | chrX:135579237-135594503  | 0.21271  | 0.999791 |
| XLOC_014405 | XLOC_014405 | DGCR9               | chr22:19005346-19007761   | 0.212797 | 1        |
| XLOC_018763 | XLOC_018763 | GPANK1              | chr6:31629005-31637843    | 0.212815 | 0.999791 |
| XLOC_000738 | XLOC_000738 | HAX1                | chr1:154245038-154248355  | 0.212929 | 0.999791 |
| XLOC_018800 | XLOC_018800 | TAP2                | chr6:32789609-32806547    | 0.213045 | 0.999791 |
| XLOC_005125 | XLOC_005125 | FBXW8               | chr12:117348760-117468953 | 0.213108 | 0.999791 |
| XLOC_017479 | XLOC_017479 | NPM1                | chr5:170814707-170837888  | 0.213169 | 0.999791 |
| XLOC_021005 | XLOC_021005 | NT5C3               | chr7:33053724-33102409    | 0.213192 | 0.999791 |
| XLOC_009671 | XLOC_009671 | NR1D1               | chr17:38218445-38256978   | 0.213202 | 0.999791 |
| XLOC_016091 | XLOC_016091 | MAGEF1              | chr3:184428154-184429836  | 0.213301 | 0.999791 |
| XLOC_014606 | XLOC_014606 | BIK                 | chr22:43506753-43525718   | 0.213354 | 0.999791 |
| XLOC_004660 | XLOC_004660 | C12orf5             | chr12:4430358-4469190     | 0.213388 | 0.999791 |
| XLOC_007566 | XLOC_007566 | SHC4                | chr15:49115933-49255641   | 0.213425 | 1        |
| XLOC_012895 | XLOC_012895 | PREPL               | chr2:44502596-44589001    | 0.213542 | 0.999791 |
| XLOC_007592 | XLOC_007592 | RSL24D1             | chr15:55473511-55489231   | 0.213661 | 0.999791 |
| XLOC_016198 | XLOC_016198 | EVC                 | chr4:5712923-5816031      | 0.213692 | 0.999791 |
| XLOC_017549 | XLOC_017549 | BRD9                | chr5:863849-892939        | 0.213701 | 0.999791 |
| XLOC_015413 | XLOC_015413 | KCNAB1              | chr3:155838336-156256927  | 0.213954 | 0.999791 |

|             |             |                         |                           |          |          |
|-------------|-------------|-------------------------|---------------------------|----------|----------|
| XLOC_013585 | XLOC_013585 | TPX2                    | chr20:30326903-30389603   | 0.214038 | 0.999791 |
| XLOC_021568 | XLOC_021568 | GINS4                   | chr8:41386724-41402565    | 0.214061 | 0.999791 |
| XLOC_017234 | XLOC_017234 | NR2F1                   | chr5:92919042-93447404    | 0.214121 | 0.999791 |
| XLOC_001105 | XLOC_001105 | SPRNTN                  | chr1:231473681-231490769  | 0.214257 | 0.999791 |
| XLOC_008834 | XLOC_008834 | KDM6B                   | chr17:7743234-7758118     | 0.214287 | 0.999791 |
| XLOC_007430 | XLOC_007430 | LRRC28                  | chr15:99791651-99926498   | 0.214301 | 0.999791 |
| XLOC_013316 | XLOC_013316 | ICA1L                   | chr2:203637872-203736371  | 0.214306 | 0.999791 |
| XLOC_010867 | XLOC_010867 | LTPB4                   | chr19:41099071-41135725   | 0.214333 | 0.999791 |
| XLOC_020496 | XLOC_020496 | CCT6A                   | chr7:56119377-56131682    | 0.21438  | 0.999791 |
| XLOC_009973 | XLOC_009973 | H3F3B                   | chr17:73772514-73775860   | 0.214507 | 0.999791 |
| XLOC_006820 | XLOC_006820 | GCH1                    | chr14:55308723-55369542   | 0.214712 | 0.999791 |
| XLOC_004033 | XLOC_004033 | HPX                     | chr1:6452267-6462254      | 0.214838 | 1        |
| XLOC_015747 | XLOC_015747 | ABHD14B                 | chr3:52002525-52008646    | 0.214867 | 0.999791 |
| XLOC_023852 | XLOC_023852 | WDR45                   | chrX:48932091-48958059    | 0.21514  | 0.999791 |
| XLOC_005074 | XLOC_005074 | POLR3B                  | chr12:106751435-107283094 | 0.215152 | 0.999791 |
| XLOC_007956 | XLOC_007956 | MPV17L                  | chr16:15489610-15503543   | 0.21524  | 1        |
| XLOC_018647 | XLOC_018647 | ADTRP                   | chr6:11713887-11779280    | 0.21536  | 1        |
| XLOC_021182 | XLOC_021182 | MGC72080                | chr7:97595907-97601638    | 0.215416 | 0.999791 |
| XLOC_007498 | XLOC_007498 | ATPBD4                  | chr15:35663169-36151202   | 0.215549 | 0.999791 |
| XLOC_008362 | XLOC_008362 | ECI1                    | chr16:2289872-2301602     | 0.215754 | 0.999791 |
| XLOC_023581 | XLOC_023581 | WDR44                   | chrX:117480035-117583923  | 0.21578  | 0.999791 |
| XLOC_014815 | XLOC_014815 | C22orf23                | chr22:38339056-38365319   | 0.215977 | 0.999791 |
| XLOC_004474 | XLOC_004474 | MRE11A                  | chr11:94150468-94227040   | 0.216027 | 0.999791 |
| XLOC_008033 | XLOC_008033 | QPRT                    | chr16:29690440-29709314   | 0.216056 | 1        |
| XLOC_008611 | XLOC_008611 | NAE1                    | chr16:66836780-66864879   | 0.216057 | 0.999791 |
| XLOC_002621 | XLOC_002621 | FRAT1                   | chr10:99079021-99081672   | 0.216182 | 0.999791 |
| XLOC_006444 | XLOC_006444 | LIN52                   | chr14:74551655-74667117   | 0.216354 | 0.999791 |
| XLOC_000224 | XLOC_000224 | SCARNA1                 | chr1:28157251-28178183    | 0.216381 | 1        |
| XLOC_010609 | XLOC_010609 | ZNF136                  | chr19:12273871-12300064   | 0.216469 | 0.999791 |
| XLOC_000458 | XLOC_000458 | FPGT,FPGT-TNNI3K,TNNI3K | chr17:4663895-75010116    | 0.21667  | 0.999791 |
| XLOC_001421 | XLOC_001421 | MTMR9LP                 | chr1:32697260-32707311    | 0.216782 | 0.999791 |
| XLOC_013806 | XLOC_013806 | SRXN1                   | chr20:627267-634014       | 0.216822 | 0.999791 |
| XLOC_007918 | XLOC_007918 | VASN                    | chr16:4390251-4466962     | 0.216863 | 0.999791 |
| XLOC_001402 | XLOC_001402 | MECR                    | chr1:29519384-29557454    | 0.216882 | 0.999791 |
| XLOC_015926 | XLOC_015926 | ZXDC                    | chr3:126156443-126194762  | 0.216967 | 0.999791 |
| XLOC_010861 | XLOC_010861 | PSMC4                   | chr19:40476911-40487671   | 0.217088 | 0.999791 |
| XLOC_000494 | XLOC_000494 | LMO4                    | chr1:87794150-87814607    | 0.2171   | 0.999791 |
| XLOC_021288 | XLOC_021288 | SLC13A1                 | chr7:122753587-122840025  | 0.217202 | 1        |
| XLOC_017490 | XLOC_017490 | CPEB4                   | chr5:173315330-173387313  | 0.217238 | 0.999791 |
| XLOC_000510 | XLOC_000510 | SNORD21                 | chr1:93297593-93427079    | 0.217242 | 0.999791 |
| XLOC_006420 | XLOC_006420 | SRSF5                   | chr14:70232999-70238722   | 0.217289 | 0.999791 |
| XLOC_016086 | XLOC_016086 | ABCC5                   | chr3:183637723-183735272  | 0.217382 | 0.999791 |
| XLOC_010750 | XLOC_010750 | DPY19L3                 | chr19:32896654-32976799   | 0.217395 | 0.999791 |
| XLOC_013677 | XLOC_013677 | PABPC1L                 | chr20:43538702-43567962   | 0.217548 | 0.999791 |
| XLOC_006286 | XLOC_006286 | THTPA                   | chr14:23980968-24048009   | 0.217554 | 0.999791 |
| XLOC_002865 | XLOC_002865 | WAC-AS1                 | chr10:28808845-28821283   | 0.217642 | 0.999791 |
| XLOC_006377 | XLOC_006377 | KIAA0586                | chr14:58862643-59015549   | 0.217898 | 0.999791 |
| XLOC_015503 | XLOC_015503 | SNORA4                  | chr3:186501360-186524484  | 0.217911 | 0.999791 |
| XLOC_015027 | XLOC_015027 | TTC21A                  | chr3:39149151-39180394    | 0.21873  | 1        |
| XLOC_022768 | XLOC_022768 | CAAP1                   | chr9:26840682-26892826    | 0.218792 | 0.999791 |
| XLOC_009012 | XLOC_009012 | TADA2A                  | chr17:35766976-35837226   | 0.218816 | 0.999791 |
| XLOC_002312 | XLOC_002312 | ZMYND11                 | chr10:180404-300577       | 0.218916 | 0.999791 |
| XLOC_012877 | XLOC_012877 | SRSF7                   | chr2:38970740-38978636    | 0.218925 | 0.999791 |
| XLOC_018248 | XLOC_018248 | HMG1A                   | chr6:34204576-34214008    | 0.218952 | 0.999791 |
| XLOC_015532 | XLOC_015532 | SLC51A                  | chr3:195943382-195960301  | 0.219136 | 1        |
| XLOC_006011 | XLOC_006011 | CHAMP1                  | chr13:115079964-115092803 | 0.219207 | 0.999791 |
| XLOC_005034 | XLOC_005034 | METAP2                  | chr12:95867821-95909613   | 0.219285 | 0.999791 |
| XLOC_023708 | XLOC_023708 | SNORA70                 | chrX:153626570-153650063  | 0.219349 | 0.999791 |
| XLOC_021062 | XLOC_021062 | GRB10                   | chr7:50657759-50861159    | 0.219374 | 0.999791 |
| XLOC_013299 | XLOC_013299 | SATB2                   | chr2:200134222-200337481  | 0.219404 | 0.999791 |
| XLOC_006766 | XLOC_006766 | BAZ1A                   | chr14:35221936-35344853   | 0.219443 | 0.999791 |
| XLOC_002745 | XLOC_002745 | BUB3                    | chr10:124913759-124924886 | 0.219506 | 0.999791 |
| XLOC_004783 | XLOC_004783 | PPF1B1                  | chr12:27677044-27848497   | 0.219528 | 0.999791 |
| XLOC_012724 | XLOC_012724 | AGAP1                   | chr2:236402732-237040444  | 0.219611 | 0.999791 |
| XLOC_007238 | XLOC_007238 | C2CD4A                  | chr15:62359175-62363116   | 0.219664 | 1        |
| XLOC_013463 | XLOC_013463 | PASK                    | chr2:242045513-242089394  | 0.219738 | 0.999791 |
| XLOC_010825 | XLOC_010825 | ZNF793                  | chr19:37997840-38034239   | 0.219747 | 1        |
| XLOC_008693 | XLOC_008693 | GCSH                    | chr16:81115551-81129980   | 0.219795 | 0.999791 |
| XLOC_016050 | XLOC_016050 | GOLIM4                  | chr3:167727653-167813417  | 0.219803 | 0.999791 |
| XLOC_009364 | XLOC_009364 | FAM101B                 | chr17:289770-295731       | 0.219812 | 1        |
| XLOC_012961 | XLOC_012961 | LOC100133985            | chr2:70351167-70352448    | 0.219817 | 0.999791 |
| XLOC_012255 | XLOC_012255 | LBX2-AS1                | chr2:74724643-74734821    | 0.21983  | 0.999791 |
| XLOC_008686 | XLOC_008686 | ADAT1                   | chr16:75632246-75657221   | 0.219931 | 0.999791 |
| XLOC_015200 | XLOC_015200 | C3orf38                 | chr3:88101099-88207115    | 0.219949 | 0.999791 |
| XLOC_000133 | XLOC_000133 | MST1P2                  | chr1:16972068-16976915    | 0.220123 | 0.999791 |
| XLOC_021303 | XLOC_021303 | RBM28                   | chr7:127950435-127983962  | 0.22019  | 0.999791 |
| XLOC_016938 | XLOC_016938 | MAML3                   | chr4:140586921-141075233  | 0.220198 | 0.999791 |
| XLOC_000276 | XLOC_000276 | ZMYM1                   | chr1:35544971-35581455    | 0.220288 | 0.999791 |
| XLOC_001710 | XLOC_001710 | OVGP1                   | chr1:11956936-11970399    | 0.220468 | 0.999791 |



|             |             |                  |                           |          |          |
|-------------|-------------|------------------|---------------------------|----------|----------|
| XLOC_010184 | XLOC_010184 | LOC284260        | chr18:39766632-40271389   | 0.220505 | 1        |
| XLOC_001290 | XLOC_001290 | AGMAT            | chr1:15853351-15911605    | 0.220541 | 0.999791 |
| XLOC_006050 | XLOC_006050 | PAN3-AS1         | chr13:28710979-28869475   | 0.220542 | 0.999791 |
| XLOC_016621 | XLOC_016621 | MFS07            | chr4:671710-682973        | 0.220554 | 1        |
| XLOC_004312 | XLOC_004312 | ATG2A            | chr11:64662003-64684722   | 0.220569 | 0.999791 |
| XLOC_002786 | XLOC_002786 | ID12             | chr10:1064846-1095061     | 0.220603 | 0.999791 |
| XLOC_015034 | XLOC_015034 | MYRIP            | chr3:39851302-40353915    | 0.220641 | 1        |
| XLOC_014652 | XLOC_014652 | ACR              | chr22:51176651-51183727   | 0.220846 | 1        |
| XLOC_005614 | XLOC_005614 | KITLG            | chr12:88886569-88974250   | 0.221013 | 1        |
| XLOC_022981 | XLOC_022981 | MRPL50           | chr9:104152248-104160919  | 0.221061 | 0.999791 |
| XLOC_018181 | XLOC_018181 | VAR52            | chr6:30881981-30894235    | 0.221132 | 0.999791 |
| XLOC_022687 | XLOC_022687 | NDOR1            | chr9:140100118-140113813  | 0.221149 | 0.999791 |
| XLOC_001045 | XLOC_001045 | RPS6KC1          | chr1:213224587-213446808  | 0.221191 | 0.999791 |
| XLOC_001565 | XLOC_001565 | SSBP3            | chr1:54692194-54872092    | 0.221233 | 0.999791 |
| XLOC_005394 | XLOC_005394 | RACGAP1P         | chr12:45456400-45459194   | 0.221342 | 1        |
| XLOC_001885 | XLOC_001885 | THBS3            | chr1:155165378-155177772  | 0.221348 | 0.999791 |
| XLOC_003737 | XLOC_003737 | PCF11            | chr1:82868136-82869835    | 0.221446 | 0.999791 |
| XLOC_009180 | XLOC_009180 | STXBP4           | chr17:53046125-53241449   | 0.221542 | 1        |
| XLOC_002221 | XLOC_002221 | JMJD4            | chr1:227916239-227968932  | 0.221599 | 0.999791 |
| XLOC_007218 | XLOC_007218 | TMOD2            | chr15:52043757-52108558   | 0.221724 | 0.999791 |
| XLOC_021579 | XLOC_021579 | HGSNAT           | chr8:42995591-43057970    | 0.221994 | 0.999791 |
| XLOC_002762 | XLOC_002762 | GLRX3            | chr10:131934638-131978646 | 0.222037 | 0.999791 |
| XLOC_010050 | XLOC_010050 | NOTUM            | chr17:79910382-79919057   | 0.222044 | 0.999791 |
| XLOC_005593 | XLOC_005593 | PHLDA1           | chr12:76419226-76425556   | 0.222146 | 0.999791 |
| XLOC_011966 | XLOC_011966 | COX6B2           | chr19:55861069-55866182   | 0.222455 | 0.999791 |
| XLOC_012928 | XLOC_012928 | PUS10            | chr2:61167547-61279125    | 0.222458 | 0.999791 |
| XLOC_022711 | XLOC_022711 | RFX3             | chr9:3224646-3525983      | 0.222491 | 0.999791 |
| XLOC_020692 | XLOC_020692 | DUS4L            | chr7:106809405-107218968  | 0.222548 | 0.999791 |
| XLOC_013257 | XLOC_013257 | FKBP7            | chr2:179059207-179672150  | 0.222683 | 0.999791 |
| XLOC_012702 | XLOC_012702 | DIS3L2           | chr2:232826292-233208678  | 0.222755 | 0.999791 |
| XLOC_004071 | XLOC_004071 | RNF141           | chr11:10533224-10562774   | 0.223126 | 0.999791 |
| XLOC_016142 | XLOC_016142 | TC1X1D2, TM4SF19 | chr3:196018089-196065291  | 0.223154 | 0.999791 |
| XLOC_013789 | XLOC_013789 | TPD52L2          | chr20:62496580-62522898   | 0.223186 | 0.999791 |
| XLOC_007772 | XLOC_007772 | KIF7             | chr15:90118817-90198682   | 0.223331 | 0.999791 |
| XLOC_011153 | XLOC_011153 | PRKCG            | chr19:54385466-54410901   | 0.223377 | 0.999791 |
| XLOC_008006 | XLOC_008006 | LOC554206        | chr16:25043061-25044098   | 0.223385 | 0.999791 |
| XLOC_004081 | XLOC_004081 | LOC100506305     | chr11:13001080-13011095   | 0.223504 | 1        |
| XLOC_014398 | XLOC_014398 | BCL2L13          | chr22:18121349-18213621   | 0.223508 | 0.999791 |
| XLOC_015098 | XLOC_015098 | P4HTM            | chr3:49027340-49044581    | 0.223616 | 0.999791 |
| XLOC_022792 | XLOC_022792 | UBAP2            | chr9:33921690-34048947    | 0.223625 | 0.999791 |
| XLOC_016283 | XLOC_016283 | WDR19            | chr4:39184023-39287430    | 0.224024 | 0.999791 |
| XLOC_003869 | XLOC_003869 | POU2F3           | chr11:120107348-120190653 | 0.224208 | 1        |
| XLOC_005302 | XLOC_005302 | PRH1, PRR4       | chr12:10998447-11328619   | 0.224223 | 0.999791 |
| XLOC_011278 | XLOC_011278 | ADAMTSL5         | chr19:1505016-1513188     | 0.224476 | 0.999791 |
| XLOC_000072 | XLOC_000072 | NMNAT1           | chr1:10003485-10045556    | 0.224483 | 0.999791 |
| XLOC_005850 | XLOC_005850 | RFC3             | chr13:34392205-34540695   | 0.224529 | 0.999791 |
| XLOC_011667 | XLOC_011667 | EID2             | chr19:40029446-40030838   | 0.224591 | 0.999791 |
| XLOC_003930 | XLOC_003930 | GLB1L2           | chr11:134201767-134246218 | 0.224635 | 0.999791 |
| XLOC_014454 | XLOC_014454 | RGL4             | chr22:23980674-24059610   | 0.224669 | 0.999791 |
| XLOC_021759 | XLOC_021759 | ZFAT-AS1         | chr8:135490030-135725292  | 0.224709 | 1        |
| XLOC_001182 | XLOC_001182 | LOC100133331     | chr1:661138-665731        | 0.22489  | 0.999791 |
| XLOC_022572 | XLOC_022572 | STXBP1           | chr9:130374485-130454995  | 0.225023 | 0.999791 |
| XLOC_003104 | XLOC_003104 | FBXW4            | chr10:103370420-103454743 | 0.225035 | 0.999791 |
| XLOC_003061 | XLOC_003061 | SORBS1           | chr10:97071529-97321171   | 0.225257 | 1        |
| XLOC_016207 | XLOC_016207 | TBC1D14          | chr4:6911170-7059677      | 0.225312 | 0.999791 |
| XLOC_007709 | XLOC_007709 | TSPAN3           | chr15:77336359-77363570   | 0.225368 | 0.999791 |
| XLOC_007551 | XLOC_007551 | SERINC4          | chr15:44038589-44094769   | 0.225464 | 0.999791 |
| XLOC_013093 | XLOC_013093 | SEPT10           | chr2:110300373-110371783  | 0.22559  | 0.999791 |
| XLOC_023831 | XLOC_023831 | ZNF41            | chrX:47305560-47342345    | 0.225743 | 1        |
| XLOC_017566 | XLOC_017566 | MED10            | chr5:6372038-6378639      | 0.226137 | 0.999791 |
| XLOC_020873 | XLOC_020873 | ACTR3B           | chr7:152456833-152552464  | 0.226156 | 0.999791 |
| XLOC_010666 | XLOC_010666 | TMEM38A          | chr19:16771937-16799816   | 0.226168 | 0.999791 |
| XLOC_006879 | XLOC_006879 | MED6             | chr14:71050956-71067384   | 0.226368 | 0.999791 |
| XLOC_006137 | XLOC_006137 | LINC00282        | chr13:52387482-52419286   | 0.226508 | 1        |
| XLOC_021907 | XLOC_021907 | FLJ14107         | chr8:22462144-22526661    | 0.226525 | 1        |
| XLOC_005932 | XLOC_005932 | PIBF1            | chr13:73302041-73590591   | 0.226715 | 0.999791 |
| XLOC_020542 | XLOC_020542 | LINC00035        | chr7:73149398-73150330    | 0.226762 | 0.999791 |
| XLOC_017098 | XLOC_017098 | TARS             | chr5:33440801-33468196    | 0.226788 | 0.999791 |
| XLOC_010759 | XLOC_010759 | CEBPA-AS1        | chr19:33793762-33795963   | 0.226847 | 0.999791 |
| XLOC_001903 | XLOC_001903 | MEX3A            | chr1:156041803-156051789  | 0.227076 | 0.999791 |
| XLOC_017612 | XLOC_017612 | NADKD1           | chr5:36192693-36242258    | 0.227392 | 0.999791 |
| XLOC_013758 | XLOC_013758 | GTPBP5           | chr20:60758080-60777810   | 0.227439 | 0.999791 |
| XLOC_001736 | XLOC_001736 | CASQ2            | chr1:116242625-116311426  | 0.227607 | 1        |
| XLOC_003439 | XLOC_003439 | C11orf49         | chr11:46958250-47198676   | 0.227763 | 0.999791 |
| XLOC_002081 | XLOC_002081 | PDC              | chr1:185703682-186446655  | 0.227631 | 1        |
| XLOC_020576 | XLOC_020576 | CCDC146          | chr7:76751933-76924521    | 0.228326 | 0.999791 |
| XLOC_011469 | XLOC_011469 | TRMT1            | chr19:13215713-13227563   | 0.228446 | 0.999791 |
| XLOC_007395 | XLOC_007395 | WDR93            | chr15:90234027-90286869   | 0.228558 | 1        |
| XLOC_011364 | XLOC_011364 | EMR4P            | chr19:6952510-6990857     | 0.228595 | 1        |

|             |             |              |                           |          |          |
|-------------|-------------|--------------|---------------------------|----------|----------|
| XLOC_013302 | XLOC_013302 | KCTD18       | chr2:201353683-201374792  | 0.228805 | 0.999791 |
| XLOC_012139 | XLOC_012139 | GPATCH11     | chr2:37311593-37323738    | 0.228918 | 0.999791 |
| XLOC_020664 | XLOC_020664 | TRIM56       | chr7:100728785-100733889  | 0.228968 | 0.999791 |
| XLOC_020749 | XLOC_020749 | STRIP2       | chr7:129074273-129128239  | 0.229046 | 0.999791 |
| XLOC_015384 | XLOC_015384 | C3orf58      | chr3:143690639-143711210  | 0.22909  | 0.999791 |
| XLOC_016399 | XLOC_016399 | LOC100505875 | chr4:79892901-80229953    | 0.229161 | 1        |
| XLOC_015915 | XLOC_015915 | HEG1         | chr3:124684553-124774802  | 0.229258 | 0.999791 |
| XLOC_002994 | XLOC_002994 | TTC18        | chr10:75007124-75118617   | 0.229321 | 0.999791 |
| XLOC_000560 | XLOC_000560 | KIAA1324     | chr1:109656584-109749403  | 0.22938  | 1        |
| XLOC_020404 | XLOC_020404 | CBX3         | chr7:26240830-26253227    | 0.229519 | 0.999791 |
| XLOC_008849 | XLOC_008849 | NDEL1        | chr17:8339169-8371495     | 0.229811 | 0.999791 |
| XLOC_000361 | XLOC_000361 | TOE1         | chr1:45794913-45956840    | 0.229845 | 0.999791 |
| XLOC_021078 | XLOC_021078 | ZNF479       | chr7:57187325-57207571    | 0.2299   | 1        |
| XLOC_011996 | XLOC_011996 | ZNF552       | chr19:58318449-58326281   | 0.230055 | 0.999791 |
| XLOC_003675 | XLOC_003675 | TPCN2        | chr1:68816349-68858072    | 0.230119 | 0.999791 |
| XLOC_023178 | XLOC_023178 | KIAA1984-AS1 | chr9:139690789-139735639  | 0.230207 | 0.999791 |
| XLOC_002565 | XLOC_002565 | LOC439994    | chr10:88998423-89103331   | 0.23064  | 0.999791 |
| XLOC_001320 | XLOC_001320 | LOC100506730 | chr1:19619740-19622230    | 0.2309   | 0.999791 |
| XLOC_017392 | XLOC_017392 | RNF14        | chr5:141346401-141369856  | 0.231021 | 0.999791 |
| XLOC_008615 | XLOC_008615 | B3GNT9       | chr16:67143914-67184902   | 0.231103 | 0.999791 |
| XLOC_004971 | XLOC_004971 | HMG2         | chr12:66151799-66360071   | 0.231125 | 0.999791 |
| XLOC_013862 | XLOC_013862 | ESF1         | chr20:13694968-13765579   | 0.231158 | 0.999791 |
| XLOC_008651 | XLOC_008651 | AARS         | chr16:70286296-70323412   | 0.231261 | 0.999791 |
| XLOC_016744 | XLOC_016744 | RPL21P44     | chr4:54851665-54853449    | 0.23129  | 1        |
| XLOC_019166 | XLOC_019166 | SNORA20      | chr6:160181290-160210735  | 0.231478 | 1        |
| XLOC_002281 | XLOC_002281 | HNRNPU       | chr1:245013601-245027827  | 0.231697 | 0.999791 |
| XLOC_004876 | XLOC_004876 | LOC100652999 | chr12:53901639-54020199   | 0.231707 | 1        |
| XLOC_006796 | XLOC_006796 | NEMF         | chr14:50250531-50319539   | 0.231752 | 0.999791 |
| XLOC_014700 | XLOC_014700 | RIMBP3C      | chr22:21899957-21978323   | 0.231978 | 1        |
| XLOC_001357 | XLOC_001357 | SRSF10       | chr1:24292936-24306953    | 0.232336 | 0.999791 |
| XLOC_003690 | XLOC_003690 | FAM86C1      | chr11:71498556-71524905   | 0.232371 | 0.999791 |
| XLOC_012605 | XLOC_012605 | NRP2         | chr2:206547223-206662857  | 0.232507 | 0.999791 |
| XLOC_017327 | XLOC_017327 | DDX46        | chr5:134094460-134166812  | 0.23252  | 0.999791 |
| XLOC_001722 | XLOC_001722 | PHTF1        | chr1:114239823-114301777  | 0.2328   | 0.999791 |
| XLOC_021669 | XLOC_021669 | OTUD6B       | chr8:92082423-92099323    | 0.232804 | 0.999791 |
| XLOC_003614 | XLOC_003614 | MIR612       | chr1:165211928-65212028   | 0.232818 | 1        |
| XLOC_000930 | XLOC_000930 | TSEN15       | chr1:184020810-184043344  | 0.232828 | 0.999791 |
| XLOC_017450 | XLOC_017450 | UBLCP1       | chr5:158690088-158713048  | 0.233213 | 0.999791 |
| XLOC_008096 | XLOC_008096 | HEATR3       | chr16:50099880-50139375   | 0.233246 | 0.999791 |
| XLOC_015799 | XLOC_015799 | THOC7        | chr3:63805040-63849597    | 0.233589 | 0.999791 |
| XLOC_012347 | XLOC_012347 | TMEM182      | chr2:103378489-103434138  | 0.233609 | 0.999791 |
| XLOC_010056 | XLOC_010056 | CCDC57       | chr17:80059345-80170689   | 0.233665 | 0.999791 |
| XLOC_002857 | XLOC_002857 | ANKRD26      | chr10:27293044-27389427   | 0.233764 | 1        |
| XLOC_018677 | XLOC_018677 | HIST1H2AB    | chr6:26033319-26033796    | 0.233867 | 0.999791 |
| XLOC_023164 | XLOC_023164 | CARD9        | chr9:139258407-139268133  | 0.233991 | 0.999791 |
| XLOC_002853 | XLOC_002853 | ENKUR        | chr10:25270907-25351208   | 0.234055 | 1        |
| XLOC_011236 | XLOC_011236 | ZNF587B      | chr19:58341661-58357606   | 0.234098 | 0.999791 |
| XLOC_000120 | XLOC_000120 | DNAJC16      | chr1:15853351-15911605    | 0.234115 | 0.999791 |
| XLOC_018268 | XLOC_018268 | SRSF3        | chr6:36562089-36572244    | 0.234256 | 0.999791 |
| XLOC_000026 | XLOC_000026 | ATAD3A       | chr1:1447522-1470067      | 0.234278 | 0.999791 |
| XLOC_022507 | XLOC_022507 | HSDL2        | chr9:115142188-115234685  | 0.234334 | 0.999791 |
| XLOC_019128 | XLOC_019128 | FBXO30       | chr6:145946439-146285233  | 0.234366 | 0.999791 |
| XLOC_021994 | XLOC_021994 | LYPLA1       | chr8:54958937-55014577    | 0.234391 | 0.999791 |
| XLOC_004834 | XLOC_004834 | BCDIN3D-AS1  | chr12:50222325-50236912   | 0.234496 | 1        |
| XLOC_022205 | XLOC_022205 | LOC100288181 | chr8:143781528-143808391  | 0.234739 | 1        |
| XLOC_009159 | XLOC_009159 | ITGA3        | chr17:48133339-48167849   | 0.23489  | 0.999791 |
| XLOC_010743 | XLOC_010743 | PLEKHF1      | chr19:30156326-30166383   | 0.234926 | 0.999791 |
| XLOC_023300 | XLOC_023300 | EIF2S3       | chrX:24073064-24096927    | 0.23509  | 0.999791 |
| XLOC_000279 | XLOC_000279 | TFAP2E       | chr1:36038970-36060927    | 0.235305 | 0.999791 |
| XLOC_009045 | XLOC_009045 | RAPGEFL1     | chr17:38334241-38351906   | 0.235344 | 0.999791 |
| XLOC_011623 | XLOC_011623 | ZNF566       | chr19:36936020-36980463   | 0.235476 | 0.999791 |
| XLOC_006332 | XLOC_006332 | PNN          | chr14:39644386-39652422   | 0.235552 | 0.999791 |
| XLOC_003878 | XLOC_003878 | CRTAM        | chr11:122709254-122743347 | 0.235875 | 1        |
| XLOC_020980 | XLOC_020980 | HOXA7        | chr7:27179982-27196296    | 0.235972 | 0.999791 |
| XLOC_021993 | XLOC_021993 | TCEA1        | chr8:54879115-54935008    | 0.235977 | 0.999791 |
| XLOC_009894 | XLOC_009894 | INTS2        | chr17:59942727-60005377   | 0.235988 | 0.999791 |
| XLOC_016364 | XLOC_016364 | RUFY3        | chr4:71570653-71674336    | 0.236233 | 0.999791 |
| XLOC_017746 | XLOC_017746 | GLRX         | chr5:95149552-95158577    | 0.236471 | 0.999791 |
| XLOC_011820 | XLOC_011820 | PLEKHA4      | chr19:49340353-49371884   | 0.236489 | 0.999791 |
| XLOC_000316 | XLOC_000316 | CTPS1        | chr1:41445006-41478235    | 0.236617 | 0.999791 |
| XLOC_005878 | XLOC_005878 | TSC22D1-AS1  | chr13:45006278-45154568   | 0.236696 | 1        |
| XLOC_017840 | XLOC_017840 | HSPA9        | chr5:137890570-137911318  | 0.236731 | 0.999791 |
| XLOC_009996 | XLOC_009996 | SRSF2        | chr17:74730196-74775336   | 0.236763 | 0.999791 |
| XLOC_009919 | XLOC_009919 | SMURF2       | chr17:62540734-62658386   | 0.236812 | 0.999791 |
| XLOC_023422 | XLOC_023422 | GNL3L        | chrX:54556643-54593720    | 0.236915 | 0.999791 |
| XLOC_000513 | XLOC_000513 | CCDC18       | chr1:93646280-93744287    | 0.237106 | 0.999791 |
| XLOC_008718 | XLOC_008718 | SLC7A5       | chr16:87863628-87903100   | 0.23726  | 0.999791 |
| XLOC_011155 | XLOC_011155 | CACNG8       | chr19:54466289-54493469   | 0.23726  | 1        |
| XLOC_013869 | XLOC_013869 | SNX5         | chr20:17922243-17949490   | 0.237304 | 0.999791 |

|             |             |              |                           |          |          |
|-------------|-------------|--------------|---------------------------|----------|----------|
| XLOC_013413 | XLOC_013413 | NCL          | chr2:232319458-232329205  | 0.237358 | 0.999791 |
| XLOC_014085 | XLOC_014085 | ZBTB46       | chr20:62371210-62436856   | 0.237466 | 0.999791 |
| XLOC_016979 | XLOC_016979 | PPID         | chr4:159630278-159644552  | 0.237547 | 0.999791 |
| XLOC_017182 | XLOC_017182 | PTCD2        | chr5:71616199-71655180    | 0.237633 | 0.999791 |
| XLOC_009642 | XLOC_009642 | DDX52        | chr17:35972362-36003493   | 0.237858 | 0.999791 |
| XLOC_018557 | XLOC_018557 | MTHFD1L      | chr6:151186814-151423023  | 0.237884 | 0.999791 |
| XLOC_010665 | XLOC_010665 | C19orf44     | chr19:16607204-16653263   | 0.237901 | 0.999791 |
| XLOC_000057 | XLOC_000057 | ZBTB48       | chr1:6640062-6649340      | 0.237939 | 0.999791 |
| XLOC_002408 | XLOC_002408 | ZNF37A       | chr10:38383263-38412278   | 0.237956 | 0.999791 |
| XLOC_002657 | XLOC_002657 | LOC100289509 | chr10:103578824-103603677 | 0.237988 | 0.999791 |
| XLOC_007375 | XLOC_007375 | SCAND2P      | chr15:85174690-85185694   | 0.23812  | 0.999791 |
| XLOC_010910 | XLOC_010910 | ZNF155       | chr19:44488321-44502477   | 0.238134 | 0.999791 |
| XLOC_012330 | XLOC_012330 | EIF5B        | chr2:99953833-100016728   | 0.238266 | 0.999791 |
| XLOC_012197 | XLOC_012197 | C2orf74      | chr2:61372242-61391964    | 0.23851  | 1        |
| XLOC_013086 | XLOC_013086 | RGPD3        | chr2:107021135-107084801  | 0.238526 | 1        |
| XLOC_010063 | XLOC_010063 | RAB40B       | chr17:80614942-80656598   | 0.238579 | 0.999791 |
| XLOC_015535 | XLOC_015535 | PIGX         | chr3:196439244-196462876  | 0.238651 | 0.999791 |
| XLOC_022250 | XLOC_022250 | ZNF251       | chr8:145946293-145980970  | 0.239229 | 0.999791 |
| XLOC_002704 | XLOC_002704 | ADRB1        | chr10:115803805-115806667 | 0.23943  | 1        |
| XLOC_015202 | XLOC_015202 | ARL13B       | chr3:93698982-93774522    | 0.239491 | 0.999791 |
| XLOC_001660 | XLOC_001660 | GCLM         | chr1:94352589-94375012    | 0.239575 | 0.999791 |
| XLOC_014716 | XLOC_014716 | ZNF70        | chr22:24083771-24093279   | 0.239667 | 0.999791 |
| XLOC_021618 | XLOC_021618 | RRS1         | chr8:67341262-67342968    | 0.239786 | 0.999791 |
| XLOC_001454 | XLOC_001454 | LOC728431    | chr1:37920479-37940044    | 0.239811 | 0.999791 |
| XLOC_003765 | XLOC_003765 | MED17        | chr11:93517404-93546496   | 0.239959 | 0.999791 |
| XLOC_008015 | XLOC_008015 | KIAA0556     | chr16:27561467-27791692   | 0.240071 | 0.999791 |
| XLOC_006740 | XLOC_006740 | CIDEB        | chr14:24774392-24787242   | 0.240801 | 0.999791 |
| XLOC_008407 | XLOC_008407 | FAM86A       | chr16:5121809-5147789     | 0.240837 | 0.999791 |
| XLOC_022763 | XLOC_022763 | CDKN2A       | chr9:21967137-21994490    | 0.240943 | 0.999791 |
| XLOC_012098 | XLOC_012098 | CAD          | chr2:27440257-27466654    | 0.240981 | 0.999791 |
| XLOC_018056 | XLOC_018056 | HIVEP1       | chr6:12012723-12165232    | 0.241151 | 1        |
| XLOC_009293 | XLOC_009293 | GALR2        | chr17:74070891-74073573   | 0.241176 | 1        |
| XLOC_018667 | XLOC_018667 | C6orf62      | chr6:24667262-24719403    | 0.241179 | 0.999791 |
| XLOC_007589 | XLOC_007589 | FAM214A      | chr15:52873517-52970820   | 0.241225 | 0.999791 |
| XLOC_008945 | XLOC_008945 | NEK8         | chr17:27055831-27069784   | 0.241336 | 0.999791 |
| XLOC_000725 | XLOC_000725 | PRR9         | chr1:153190059-153191793  | 0.241386 | 1        |
| XLOC_016102 | XLOC_016102 | TBCCD1       | chr3:186263855-186288332  | 0.241413 | 0.999791 |
| XLOC_005495 | XLOC_005495 | HOTAIR       | chr12:54356091-54370203   | 0.241425 | 0.999791 |
| XLOC_017477 | XLOC_017477 | RANBP17      | chr5:170288895-170727019  | 0.241448 | 0.999791 |
| XLOC_022685 | XLOC_022685 | GRIN1        | chr9:140033608-140064491  | 0.241492 | 1        |
| XLOC_005216 | XLOC_005216 | NINJ2        | chr12:673461-772755       | 0.241579 | 0.999791 |
| XLOC_018411 | XLOC_018411 | CASP8AP2     | chr6:90539618-90584155    | 0.241858 | 0.999791 |
| XLOC_005228 | XLOC_005228 | EFCAB4B      | chr12:3724493-3862366     | 0.241923 | 0.999791 |
| XLOC_017140 | XLOC_017140 | SETD9        | chr5:56205086-56247954    | 0.241939 | 0.999791 |
| XLOC_012158 | XLOC_012158 | DYNC2L1      | chr2:44001177-44037149    | 0.242142 | 0.999791 |
| XLOC_010303 | XLOC_010303 | ABHD3        | chr18:19230857-19284766   | 0.242161 | 0.999791 |
| XLOC_017641 | XLOC_017641 | C5orf34      | chr5:43486802-43515273    | 0.242347 | 0.999791 |
| XLOC_012509 | XLOC_012509 | DCAF17       | chr2:172173912-172341562  | 0.242551 | 0.999791 |
| XLOC_006255 | XLOC_006255 | PNP          | chr14:20937537-20946165   | 0.242678 | 0.999791 |
| XLOC_007402 | XLOC_007402 | ZNF774       | chr15:90895476-90904715   | 0.242723 | 0.999791 |
| XLOC_002420 | XLOC_002420 | ZNF485       | chr10:44101854-44113352   | 0.242854 | 0.999791 |
| XLOC_012629 | XLOC_012629 | ATIC         | chr2:216176678-216214496  | 0.242913 | 0.999791 |
| XLOC_012846 | XLOC_012846 | IFT172       | chr2:27665232-27712571    | 0.242915 | 0.999791 |
| XLOC_016077 | XLOC_016077 | DNAJC19      | chr3:180701497-180707562  | 0.242916 | 0.999791 |
| XLOC_011075 | XLOC_011075 | LINC00085    | chr19:52196592-52208443   | 0.242996 | 0.999791 |
| XLOC_011020 | XLOC_011020 | ALDH16A1     | chr19:49956472-49974305   | 0.243123 | 0.999791 |
| XLOC_001177 | XLOC_001177 | PGBD2        | chr1:249200441-249213345  | 0.243131 | 0.999791 |
| XLOC_023118 | XLOC_023118 | QRFP         | chr9:133768814-133769225  | 0.243146 | 0.999791 |
| XLOC_005405 | XLOC_005405 | ENDOU        | chr12:48103517-48119355   | 0.243227 | 1        |
| XLOC_013482 | XLOC_013482 | C20orf202    | chr20:1184097-1188918     | 0.243339 | 1        |
| XLOC_021628 | XLOC_021628 | XKR9         | chr8:71581599-71648177    | 0.243379 | 1        |
| XLOC_002778 | XLOC_002778 | MTG1         | chr10:135207620-135238121 | 0.243446 | 0.999791 |
| XLOC_022442 | XLOC_022442 | FAM120A      | chr9:96208781-96328397    | 0.243462 | 0.999791 |
| XLOC_003068 | XLOC_003068 | LL2          | chr10:98124362-98273683   | 0.243516 | 1        |
| XLOC_023786 | XLOC_023786 | EIF1AX       | chrX:20142635-20159966    | 0.243547 | 0.999791 |
| XLOC_006059 | XLOC_006059 | HMGB1        | chr13:31032878-31040081   | 0.243655 | 0.999791 |
| XLOC_008685 | XLOC_008685 | TMEM231      | chr16:75572014-75590184   | 0.243687 | 0.999791 |
| XLOC_002360 | XLOC_002360 | VIM          | chr10:17270257-17279592   | 0.243731 | 0.999791 |
| XLOC_014362 | XLOC_014362 | TSPEAR       | chr21:45917774-46131495   | 0.244065 | 1        |
| XLOC_022662 | XLOC_022662 | PMPCA        | chr9:139305115-139318213  | 0.244084 | 0.999791 |
| XLOC_006032 | XLOC_006032 | MIPEP        | chr13:24304327-24471125   | 0.244121 | 0.999791 |
| XLOC_017761 | XLOC_017761 | FBXL17       | chr5:107194733-107717799  | 0.244248 | 0.999791 |
| XLOC_008394 | XLOC_008394 | TFAP4        | chr16:4307186-4323001     | 0.24433  | 0.999791 |
| XLOC_020674 | XLOC_020674 | ORAI2        | chr7:102073976-102105321  | 0.244344 | 0.999791 |
| XLOC_008093 | XLOC_008093 | LOC100507577 | chr16:48274602-48420559   | 0.244361 | 0.999791 |
| XLOC_013861 | XLOC_013861 | TASP1        | chr20:13370035-13619583   | 0.244578 | 0.999791 |
| XLOC_021494 | XLOC_021494 | NPM2         | chr8:21882353-21894408    | 0.244693 | 0.999791 |
| XLOC_021253 | XLOC_021253 | ATXN7L1      | chr7:105245220-105517031  | 0.244734 | 0.999791 |
| XLOC_004372 | XLOC_004372 | CPT1A        | chr11:68522087-68609399   | 0.244829 | 0.999791 |

|             |             |              |                           |          |          |
|-------------|-------------|--------------|---------------------------|----------|----------|
| XLOC_000590 | XLOC_000590 | C1orf162     | chr1:112016603-112021134  | 0.244974 | 0.999791 |
| XLOC_011251 | XLOC_011251 | ZNF446       | chr19:58987794-58992597   | 0.245173 | 0.999791 |
| XLOC_002564 | XLOC_002564 | FAM22A       | chr10:88985204-88994733   | 0.245518 | 0.999791 |
| XLOC_007594 | XLOC_007594 | CCPG1,DYX1C1 | chr15:55611132-55800432   | 0.245537 | 0.999791 |
| XLOC_000333 | XLOC_000333 | MPL          | chr1:43803474-43820135    | 0.245548 | 1        |
| XLOC_004883 | XLOC_004883 | HOXC8        | chr12:54402889-54406545   | 0.245576 | 0.999791 |
| XLOC_006893 | XLOC_006893 | LTBP2        | chr14:74964885-75079034   | 0.245628 | 0.999791 |
| XLOC_008387 | XLOC_008387 | NLR3         | chr16:3550944-3627392     | 0.245879 | 1        |
| XLOC_012680 | XLOC_012680 | RHBDD1       | chr2:227700670-227863923  | 0.246139 | 0.999791 |
| XLOC_022224 | XLOC_022224 | FAM83H       | chr8:144806102-144815914  | 0.246207 | 0.999791 |
| XLOC_010600 | XLOC_010600 | ZNF441       | chr19:11877814-11894893   | 0.246253 | 0.999791 |
| XLOC_008998 | XLOC_008998 | TAF15        | chr17:34136458-34174246   | 0.246895 | 0.999791 |
| XLOC_011922 | XLOC_011922 | ZNF320       | chr19:53379424-53394599   | 0.246907 | 0.999791 |
| XLOC_011782 | XLOC_011782 | DACT3        | chr19:47150868-47220384   | 0.247003 | 0.999791 |
| XLOC_018700 | XLOC_018700 | HIST1H2AJ    | chr6:27782079-27782518    | 0.247111 | 0.999791 |
| XLOC_000401 | XLOC_000401 | CPT2         | chr1:53662100-53686289    | 0.247255 | 0.999791 |
| XLOC_000330 | XLOC_000330 | WDR65        | chr1:43629844-43720029    | 0.247354 | 1        |
| XLOC_010468 | XLOC_010468 | SPPL2B       | chr19:2328628-2355100     | 0.247459 | 0.999791 |
| XLOC_008818 | XLOC_008818 | FGF11        | chr17:7342688-7348251     | 0.247501 | 0.999791 |
| XLOC_011757 | XLOC_011757 | GPR4         | chr19:46093022-46105466   | 0.247557 | 1        |
| XLOC_022688 | XLOC_022688 | C9orf169     | chr9:140119643-140120763  | 0.247566 | 0.999791 |
| XLOC_009246 | XLOC_009246 | KPNA2        | chr17:66031847-66042970   | 0.247748 | 0.999791 |
| XLOC_014852 | XLOC_014852 | DES1         | chr22:41994031-42017061   | 0.248291 | 0.999791 |
| XLOC_000610 | XLOC_000610 | SLC22A15     | chr1:116519118-116612675  | 0.248309 | 0.999791 |
| XLOC_021238 | XLOC_021238 | FBXL13       | chr7:102453307-102715288  | 0.24882  | 1        |
| XLOC_021786 | XLOC_021786 | LOC100128338 | chr8:144816309-144828507  | 0.248895 | 0.999791 |
| XLOC_001054 | XLOC_001054 | RRP15        | chr1:218458628-218511325  | 0.249044 | 0.999791 |
| XLOC_024009 | XLOC_024009 | TSC22D3      | chrX:106956451-107019017  | 0.249069 | 0.999791 |
| XLOC_018229 | XLOC_018229 | PSMB9        | chr6:32821937-32827628    | 0.249139 | 0.999791 |
| XLOC_015525 | XLOC_015525 | TMEM44-AS1   | chr3:194304996-194354150  | 0.249347 | 0.999791 |
| XLOC_001465 | XLOC_001465 | SF3A3        | chr1:38422651-38455761    | 0.24944  | 0.999791 |
| XLOC_022128 | XLOC_022128 | KLF10        | chr8:103661004-103667983  | 0.24972  | 0.999791 |
| XLOC_002284 | XLOC_002284 | TFB2M        | chr1:246703862-246729565  | 0.249737 | 0.999791 |
| XLOC_012042 | XLOC_012042 | CPSF3        | chr2:9563665-9613239      | 0.249738 | 0.999791 |
| XLOC_014018 | XLOC_014018 | ZNFX1        | chr20:47862438-47905795   | 0.249849 | 0.999791 |
| XLOC_000577 | XLOC_000577 | UBL4B        | chr1:110655061-110656569  | 0.249975 | 1        |
| XLOC_006464 | XLOC_006464 | KIAA1737     | chr14:77564577-77583630   | 0.250097 | 0.999791 |
| XLOC_013931 | XLOC_013931 | EIF2S2       | chr20:32676114-32700085   | 0.250045 | 0.999791 |
| XLOC_012804 | XLOC_012804 | TTC32        | chr2:20096513-20101744    | 0.250573 | 0.999791 |
| XLOC_013582 | XLOC_013582 | ID1          | chr20:30193085-30194317   | 0.250609 | 0.999791 |
| XLOC_007519 | XLOC_007519 | INO80        | chr15:41271078-41408340   | 0.250639 | 0.999791 |
| XLOC_020747 | XLOC_020747 | SMO          | chr7:128828712-128853385  | 0.250643 | 1        |
| XLOC_021619 | XLOC_021619 | ADHFE1       | chr8:67344717-67381044    | 0.250802 | 0.999791 |
| XLOC_007547 | XLOC_007547 | CATSPER2     | chr15:43922771-43941039   | 0.250846 | 0.999791 |
| XLOC_016884 | XLOC_016884 | LEF1         | chr4:108968700-109097586  | 0.250973 | 0.999791 |
| XLOC_009337 | XLOC_009337 | FSCN2        | chr17:79495416-79504156   | 0.250999 | 1        |
| XLOC_008820 | XLOC_008820 | SLC35G6      | chr17:7362684-7387568     | 0.251028 | 1        |
| XLOC_017054 | XLOC_017054 | AHRR,PDCD6   | chr5:271735-438405        | 0.251082 | 0.999791 |
| XLOC_024006 | XLOC_024006 | MORC4        | chrX:106183963-106243474  | 0.251245 | 0.999791 |
| XLOC_014014 | XLOC_014014 | ZMYND8       | chr20:45838380-45985474   | 0.251271 | 0.999791 |
| XLOC_001498 | XLOC_001498 | EBNA1BP2     | chr1:43629844-43720029    | 0.251316 | 0.999791 |
| XLOC_007718 | XLOC_007718 | WDR61        | chr15:78575577-78591940   | 0.251554 | 0.999791 |
| XLOC_010382 | XLOC_010382 | ATP8B1       | chr18:55297533-55470327   | 0.251787 | 1        |
| XLOC_009502 | XLOC_009502 | SCO1         | chr17:10583648-10600885   | 0.252012 | 0.999791 |
| XLOC_013984 | XLOC_013984 | STK4-AS1     | chr20:43592439-43595099   | 0.252201 | 1        |
| XLOC_016428 | XLOC_016428 | TIGD2        | chr4:90033967-90036052    | 0.252504 | 0.999791 |
| XLOC_022262 | XLOC_022262 | DMRT2        | chr9:1050345-1057554      | 0.252682 | 0.999791 |
| XLOC_009864 | XLOC_009864 | SRSF1        | chr17:56078279-56084707   | 0.252694 | 0.999791 |
| XLOC_000356 | XLOC_000356 | PLK3         | chr1:45266035-45272957    | 0.252721 | 0.999791 |
| XLOC_003119 | XLOC_003119 | PCGF6        | chr10:105062552-105110891 | 0.252762 | 0.999791 |
| XLOC_008526 | XLOC_008526 | C16orf93     | chr16:30759619-30787628   | 0.252791 | 0.999791 |
| XLOC_010065 | XLOC_010065 | B3GNTL1      | chr17:80901666-81009686   | 0.252815 | 0.999791 |
| XLOC_023369 | XLOC_023369 | RBM3         | chrX:48432740-48439553    | 0.252862 | 0.999791 |
| XLOC_010466 | XLOC_010466 | AMH          | chr19:2249112-2252072     | 0.253136 | 1        |
| XLOC_013672 | XLOC_013672 | TTPAL        | chr20:43104525-43123244   | 0.253247 | 0.999791 |
| XLOC_015331 | XLOC_015331 | LOC100507032 | chr3:129612713-129627755  | 0.25334  | 0.999791 |
| XLOC_005170 | XLOC_005170 | TMED2        | chr12:124069075-124082688 | 0.253351 | 0.999791 |
| XLOC_022666 | XLOC_022666 | FAM69B       | chr9:139607023-139622636  | 0.253465 | 0.999791 |
| XLOC_023485 | XLOC_023485 | PBDC1        | chrX:75392770-75398033    | 0.253477 | 0.999791 |
| XLOC_012502 | XLOC_012502 | SSB          | chr2:170655321-170681353  | 0.253487 | 0.999791 |
| XLOC_009098 | XLOC_009098 | FAM215A      | chr17:41994575-41995355   | 0.253525 | 1        |
| XLOC_020902 | XLOC_020902 | MAD1L1       | chr7:1855427-2272583      | 0.253658 | 0.999791 |
| XLOC_017189 | XLOC_017189 | UTP15        | chr5:72861597-72877794    | 0.253676 | 0.999791 |
| XLOC_009469 | XLOC_009469 | KCNAB3       | chr17:7825176-7832753     | 0.253892 | 0.999791 |
| XLOC_001602 | XLOC_001602 | LRRC40       | chr1:70610484-70671361    | 0.253895 | 0.999791 |
| XLOC_022306 | XLOC_022306 | IFT74        | chr9:26903367-27062931    | 0.253958 | 0.999791 |
| XLOC_005304 | XLOC_005304 | TAS2R14      | chr12:10998447-11328619   | 0.254017 | 1        |
| XLOC_000929 | XLOC_000929 | RGL1         | chr1:183605207-183897666  | 0.254075 | 0.999791 |
| XLOC_001014 | XLOC_001014 | PKF2B2       | chr1:207226619-207254388  | 0.254079 | 0.999791 |

|             |             |                  |                           |          |          |
|-------------|-------------|------------------|---------------------------|----------|----------|
| XLOC_023965 | XLOC_023965 | SATL1            | chrX:84258897-84363974    | 0.254154 | 0.999791 |
| XLOC_007484 | XLOC_007484 | AVEN             | chr15:34158427-34357287   | 0.254243 | 0.999791 |
| XLOC_009875 | XLOC_009875 | C17orf47         | chr17:56618947-56621733   | 0.25426  | 1        |
| XLOC_003028 | XLOC_003028 | MMRN2            | chr10:88695297-88717425   | 0.254572 | 1        |
| XLOC_002874 | XLOC_002874 | ZEB1-AS1         | chr10:31605456-31608024   | 0.25462  | 0.999791 |
| XLOC_014943 | XLOC_014943 | VHL              | chr3:10183318-10195354    | 0.254663 | 0.999791 |
| XLOC_015909 | XLOC_015909 | PTPLB            | chr3:123213362-123303924  | 0.254676 | 0.999791 |
| XLOC_001472 | XLOC_001472 | PIPEL            | chr1:39957317-40025370    | 0.254963 | 1        |
| XLOC_009876 | XLOC_009876 | TEX14            | chr17:56634037-56769416   | 0.254967 | 1        |
| XLOC_007588 | XLOC_007588 | ARPP19           | chr15:52839431-52861213   | 0.255131 | 0.999791 |
| XLOC_015298 | XLOC_015298 | PDIA5            | chr3:122785855-122880953  | 0.255406 | 0.999791 |
| XLOC_009916 | XLOC_009916 | DDX5             | chr17:62494373-62502484   | 0.255499 | 0.999791 |
| XLOC_011804 | XLOC_011804 | CARD8            | chr19:48711342-48761450   | 0.255756 | 0.999791 |
| XLOC_006279 | XLOC_006279 | REM2             | chr14:23352431-23356889   | 0.255805 | 0.999791 |
| XLOC_007413 | XLOC_007413 | SLCO3A1          | chr15:92396937-92715665   | 0.256016 | 0.999791 |
| XLOC_000501 | XLOC_000501 | ZNF326           | chr1:90460677-90494094    | 0.256058 | 0.999791 |
| XLOC_004352 | XLOC_004352 | CLCF1            | chr11:67085309-67159158   | 0.256062 | 0.999791 |
| XLOC_004958 | XLOC_004958 | USP15            | chr12:62654120-62803501   | 0.256091 | 0.999791 |
| XLOC_010494 | XLOC_010494 | ANKRD24          | chr19:4183350-4224811     | 0.256316 | 1        |
| XLOC_003676 | XLOC_003676 | MYEOV            | chr11:69061621-69064754   | 0.256332 | 0.999791 |
| XLOC_017977 | XLOC_017977 | DBN1             | chr5:176883613-176900694  | 0.256577 | 0.999791 |
| XLOC_010832 | XLOC_010832 | CATSPERG         | chr19:38826442-38861589   | 0.256615 | 1        |
| XLOC_004259 | XLOC_004259 | AHNAK            | chr11:62201013-62314332   | 0.256636 | 0.999791 |
| XLOC_024109 | XLOC_024109 | MAP7D3           | chrX:135295378-135338641  | 0.256928 | 0.999791 |
| XLOC_007983 | XLOC_007983 | METTL9           | chr16:21610855-21668792   | 0.256988 | 0.999791 |
| XLOC_002836 | XLOC_002836 | TRDMT1           | chr10:17184981-17244070   | 0.25703  | 0.999791 |
| XLOC_010762 | XLOC_010762 | KCTD15           | chr19:34287750-34306666   | 0.257501 | 0.999791 |
| XLOC_015929 | XLOC_015929 | TXNRD3, TXNRD3NB | chr3:126290621-126373967  | 0.257541 | 0.999791 |
| XLOC_012536 | XLOC_012536 | RBM45            | chr2:178977181-178994382  | 0.257585 | 0.999791 |
| XLOC_001520 | XLOC_001520 | IPP              | chr1:46153846-46216485    | 0.257831 | 0.999791 |
| XLOC_012367 | XLOC_012367 | SOWAHC           | chr2:110371910-110376564  | 0.25791  | 0.999791 |
| XLOC_021675 | XLOC_021675 | TMEM67           | chr8:94767071-94831460    | 0.258073 | 0.999791 |
| XLOC_018300 | XLOC_018300 | RPL7L1           | chr6:42847670-42854731    | 0.258395 | 0.999791 |
| XLOC_013714 | XLOC_013714 | SNAI1            | chr20:48599512-48605420   | 0.258489 | 0.999791 |
| XLOC_001470 | XLOC_001470 | GJA9, MYCBP      | chr1:39328161-39347298    | 0.258505 | 0.999791 |
| XLOC_017704 | XLOC_017704 | ZBED3            | chr5:76372531-76444176    | 0.258654 | 0.999791 |
| XLOC_016183 | XLOC_016183 | NOP14-AS1        | chr4:2937277-2965118      | 0.258784 | 0.999791 |
| XLOC_016623 | XLOC_016623 | CPLX1            | chr4:778744-819945        | 0.258912 | 0.999791 |
| XLOC_009116 | XLOC_009116 | FMNL1            | chr17:43299291-43324683   | 0.259145 | 1        |
| XLOC_005618 | XLOC_005618 | ATP2B1           | chr12:89981825-90049844   | 0.259176 | 0.999791 |
| XLOC_002084 | XLOC_002084 | UCHL5            | chr11:192981495-193060906 | 0.259328 | 0.999791 |
| XLOC_018028 | XLOC_018028 | RIPK1            | chr6:3077057-3115421      | 0.259356 | 0.999791 |
| XLOC_002535 | XLOC_002535 | ZMIZ1            | chr10:80828791-81076285   | 0.259667 | 0.999791 |
| XLOC_020362 | XLOC_020362 | RAC1             | chr7:6414125-6443598      | 0.259714 | 0.999791 |
| XLOC_004699 | XLOC_004699 | PEX5             | chr12:7341758-7371169     | 0.259922 | 0.999791 |
| XLOC_013717 | XLOC_013717 | PTPN1            | chr20:49126890-49201086   | 0.259931 | 0.999791 |
| XLOC_021960 | XLOC_021960 | STAR             | chr8:38000217-38008600    | 0.259993 | 1        |
| XLOC_001507 | XLOC_001507 | BEST4            | chr1:45249256-45253426    | 0.260051 | 1        |
| XLOC_021727 | XLOC_021727 | NOV              | chr8:120428551-120436678  | 0.260113 | 0.999791 |
| XLOC_003047 | XLOC_003047 | NUDT9P1          | chr10:92911760-92912837   | 0.26048  | 1        |
| XLOC_006633 | XLOC_006633 | ZNF839           | chr14:102783713-102809511 | 0.260535 | 0.999791 |
| XLOC_000632 | XLOC_000632 | NBPF9            | chr1:144614958-144828810  | 0.260542 | 0.999791 |
| XLOC_003389 | XLOC_003389 | DEPDC7           | chr11:33037409-33055128   | 0.260887 | 0.999791 |
| XLOC_015956 | XLOC_015956 | ACAD11, NPHP3    | chr3:132276981-132593050  | 0.260992 | 0.999791 |
| XLOC_014714 | XLOC_014714 | C22orf43         | chr22:23950638-23974508   | 0.261287 | 1        |
| XLOC_016316 | XLOC_016316 | FIP1L1           | chr4:54243819-54326103    | 0.261441 | 0.999791 |
| XLOC_020340 | XLOC_020340 | ELFN1            | chr7:1748797-1787590      | 0.261532 | 0.999791 |
| XLOC_014260 | XLOC_014260 | RWDD2B           | chr21:30378079-30391685   | 0.261554 | 0.999791 |
| XLOC_002834 | XLOC_002834 | RSU1             | chr10:16632616-16859453   | 0.261624 | 0.999791 |
| XLOC_013085 | XLOC_013085 | UXS1             | chr2:106709758-106810795  | 0.261671 | 0.999791 |
| XLOC_000360 | XLOC_000360 | HPDL             | chr1:45792544-45794346    | 0.261853 | 0.999791 |
| XLOC_008268 | XLOC_008268 | LINC00311        | chr16:85316563-85321685   | 0.262213 | 1        |
| XLOC_018410 | XLOC_018410 | ANKRD6           | chr6:90142896-90348474    | 0.26233  | 1        |
| XLOC_013348 | XLOC_013348 | FN1              | chr2:216225178-216300791  | 0.262345 | 1        |
| XLOC_022761 | XLOC_022761 | IFNE             | chr9:21454266-21559697    | 0.26239  | 1        |
| XLOC_004882 | XLOC_004882 | HOXC9            | chr12:54393876-54397120   | 0.262565 | 0.999791 |
| XLOC_020921 | XLOC_020921 | PMS2             | chr7:6012869-6048737      | 0.263063 | 0.999791 |
| XLOC_023379 | XLOC_023379 | MAGIX            | chrX:49019180-49023836    | 0.263168 | 0.999791 |
| XLOC_012698 | XLOC_012698 | B3GNT7           | chr2:232260334-232265875  | 0.26333  | 1        |
| XLOC_012863 | XLOC_012863 | FAM98A           | chr2:33808728-33824362    | 0.263468 | 0.999791 |
| XLOC_015625 | XLOC_015625 | SUSD5            | chr3:33191536-33260707    | 0.26353  | 1        |
| XLOC_013661 | XLOC_013661 | SRSF6            | chr20:42086503-42092244   | 0.26364  | 0.999791 |
| XLOC_017779 | XLOC_017779 | DTWD2            | chr5:118172568-118324240  | 0.263731 | 0.999791 |
| XLOC_022713 | XLOC_022713 | SPATA6L          | chr9:4598315-4666674      | 0.263916 | 0.999791 |
| XLOC_002234 | XLOC_002234 | ABCB10           | chr1:229652328-229694442  | 0.264005 | 0.999791 |
| XLOC_022644 | XLOC_022644 | LINC00094        | chr9:136890560-136933141  | 0.264076 | 0.999791 |
| XLOC_007740 | XLOC_007740 | AGSK1, LOC727849 | chr15:83130032-83182930   | 0.264088 | 1        |
| XLOC_002845 | XLOC_002845 | SKIDA1           | chr10:21802408-21814611   | 0.264222 | 1        |
| XLOC_011741 | XLOC_011741 | ZNF285           | chr19:44889807-44905777   | 0.264314 | 1        |

|             |             |              |                           |          |          |
|-------------|-------------|--------------|---------------------------|----------|----------|
| XLOC_012044 | XLOC_012044 | TAF1B        | chr2:9983570-10074545     | 0.264335 | 0.999791 |
| XLOC_011873 | XLOC_011873 | SHANK1       | chr19:51165083-51220195   | 0.264537 | 0.999791 |
| XLOC_005689 | XLOC_005689 | FAM222A-AS1  | chr12:110152186-110211292 | 0.264573 | 0.999791 |
| XLOC_008892 | XLOC_008892 | MYO15A       | chr17:18012019-18083116   | 0.264641 | 1        |
| XLOC_009980 | XLOC_009980 | FBF1         | chr17:73906617-73937119   | 0.264698 | 0.999791 |
| XLOC_014139 | XLOC_014139 | C21orf119    | chr21:33765441-33766266   | 0.264716 | 0.999791 |
| XLOC_006023 | XLOC_006023 | N6AMT2       | chr13:21303072-21348057   | 0.264806 | 0.999791 |
| XLOC_017328 | XLOC_017328 | C5orf24      | chr5:134181369-134195425  | 0.264832 | 0.999791 |
| XLOC_006697 | XLOC_006697 | SUPT16H      | chr14:21819630-21852425   | 0.264974 | 0.999791 |
| XLOC_000344 | XLOC_000344 | CCDC24       | chr1:44457279-44497164    | 0.265147 | 0.999791 |
| XLOC_009090 | XLOC_009090 | NBR2         | chr17:41277599-41297125   | 0.265237 | 0.999791 |
| XLOC_007967 | XLOC_007967 | ITPR1PL2     | chr16:19125253-19132952   | 0.265297 | 0.999791 |
| XLOC_007614 | XLOC_007614 | VPS13C       | chr15:62144589-62352664   | 0.265361 | 0.999791 |
| XLOC_020527 | XLOC_020527 | AUTS2        | chr7:69063904-70257885    | 0.265582 | 0.999791 |
| XLOC_016018 | XLOC_016018 | DHX36        | chr3:153993456-154042286  | 0.265589 | 0.999791 |
| XLOC_020394 | XLOC_020394 | NUPL2        | chr7:23221445-23240630    | 0.265598 | 0.999791 |
| XLOC_019049 | XLOC_019049 | COL10A1      | chr6:116421998-116566853  | 0.265699 | 1        |
| XLOC_011233 | XLOC_011233 | ZNF551       | chr19:58193336-58201169   | 0.265856 | 0.999791 |
| XLOC_004864 | XLOC_004864 | IGFBP6       | chr12:53491435-53496128   | 0.265934 | 0.999791 |
| XLOC_000965 | XLOC_000965 | RPS10P7      | chr1:201489031-201489720  | 0.265942 | 0.999791 |
| XLOC_014770 | XLOC_014770 | DUSP18       | chr22:31058038-31063872   | 0.266224 | 1        |
| XLOC_023513 | XLOC_023513 | CSTF2        | chrX:100075347-100095923  | 0.266259 | 0.999791 |
| XLOC_014184 | XLOC_014184 | MX1          | chr21:42792519-42831141   | 0.266296 | 0.999791 |
| XLOC_022728 | XLOC_022728 | ZDHHC21      | chr9:14611068-14693480    | 0.266313 | 0.999791 |
| XLOC_001244 | XLOC_001244 | KLHL21       | chr1:6650783-6662929      | 0.266366 | 0.999791 |
| XLOC_001567 | XLOC_001567 | PARS2        | chr1:55222570-55230226    | 0.266406 | 0.999791 |
| XLOC_003042 | XLOC_003042 | PANK1        | chr10:91339253-91405329   | 0.266531 | 1        |
| XLOC_010504 | XLOC_010504 | LOC100131094 | chr19:4675243-4723855     | 0.266642 | 1        |
| XLOC_012647 | XLOC_012647 | PLCD4        | chr2:219472487-219501909  | 0.267023 | 0.999791 |
| XLOC_014306 | XLOC_014306 | GART         | chr21:34876237-34915198   | 0.267066 | 0.999791 |
| XLOC_013106 | XLOC_013106 | ZC3H8        | chr2:112973438-113012664  | 0.267141 | 0.999791 |
| XLOC_015791 | XLOC_015791 | FAM107A      | chr3:58549844-58563491    | 0.267224 | 1        |
| XLOC_010214 | XLOC_010214 | LOC100505549 | chr18:55297533-55470327   | 0.26748  | 0.999791 |
| XLOC_018171 | XLOC_018171 | PRR3         | chr6:30509154-30532473    | 0.267544 | 0.999791 |
| XLOC_012070 | XLOC_012070 | KLHL29       | chr2:23608297-23931483    | 0.267913 | 0.999791 |
| XLOC_017553 | XLOC_017553 | TERT         | chr5:1253286-1295162      | 0.267978 | 0.999791 |
| XLOC_018832 | XLOC_018832 | FKBP5        | chr6:35541361-35704724    | 0.268047 | 0.999791 |
| XLOC_000924 | XLOC_000924 | NPL          | chr1:182758583-182799519  | 0.268113 | 0.999791 |
| XLOC_010412 | XLOC_010412 | ZADH2        | chr18:72909277-72921281   | 0.268284 | 0.999791 |
| XLOC_021622 | XLOC_021622 | MCMDC2       | chr8:67782983-67837777    | 0.268329 | 1        |
| XLOC_006042 | XLOC_006042 | RNF6         | chr13:26786904-26796508   | 0.268349 | 0.999791 |
| XLOC_011812 | XLOC_011812 | CA11         | chr19:49141271-49185502   | 0.26843  | 0.999791 |
| XLOC_017839 | XLOC_017839 | ETF1         | chr5:137841781-137878989  | 0.268476 | 0.999791 |
| XLOC_016658 | XLOC_016658 | CCDC96       | chr4:6911170-7059677      | 0.268664 | 0.999791 |
| XLOC_008742 | XLOC_008742 | C17orf97     | chr17:260117-264457       | 0.268733 | 0.999791 |
| XLOC_023290 | XLOC_023290 | MBTPS2       | chrX:21857655-21903541    | 0.268906 | 0.999791 |
| XLOC_023324 | XLOC_023324 | LANCL3       | chrX:37430821-37536750    | 0.268912 | 1        |
| XLOC_003301 | XLOC_003301 | DNHD1        | chr11:6518525-6593254     | 0.269309 | 0.999791 |
| XLOC_015235 | XLOC_015235 | NFKBIZ,NXPE3 | chr3:101498028-101579869  | 0.269502 | 0.999791 |
| XLOC_001399 | XLOC_001399 | TAF12        | chr1:28929608-28969604    | 0.269682 | 0.999791 |
| XLOC_004985 | XLOC_004985 | CCT2         | chr12:69979207-69995357   | 0.269746 | 0.999791 |
| XLOC_013040 | XLOC_013040 | ZNF514       | chr2:95813399-95825263    | 0.269891 | 0.999791 |
| XLOC_013514 | XLOC_013514 | PRNP         | chr20:4666796-4682234     | 0.270097 | 0.999791 |
| XLOC_023608 | XLOC_023608 | UTP14A       | chrX:129040096-129063738  | 0.270104 | 0.999791 |
| XLOC_009111 | XLOC_009111 | CCDC103      | chr17:42977079-42981047   | 0.270239 | 0.999791 |
| XLOC_010153 | XLOC_010153 | IMPACT       | chr18:22006608-22033494   | 0.27029  | 0.999791 |
| XLOC_017592 | XLOC_017592 | CDH12        | chr5:21750972-22853731    | 0.270445 | 1        |
| XLOC_022170 | XLOC_022170 | LOC100130231 | chr8:126934766-126963441  | 0.270445 | 1        |
| XLOC_015277 | XLOC_015277 | TIMMDC1      | chr3:119217367-119243125  | 0.270582 | 0.999791 |
| XLOC_008072 | XLOC_008072 | TRIM72       | chr16:31225341-31236510   | 0.270621 | 0.999791 |
| XLOC_006303 | XLOC_006303 | LTB4R,LTB4R2 | chr14:24774392-24787242   | 0.270753 | 0.999791 |
| XLOC_002922 | XLOC_002922 | LOC399753    | chr10:49218158-49239658   | 0.270883 | 1        |
| XLOC_000327 | XLOC_000327 | ZNF691       | chr1:43312243-43318146    | 0.270995 | 0.999791 |
| XLOC_014882 | XLOC_014882 | LOC100506714 | chr22:45529638-45559662   | 0.271248 | 0.999791 |
| XLOC_003887 | XLOC_003887 | VWA5A        | chr11:123986110-124017618 | 0.271249 | 0.999791 |
| XLOC_019096 | XLOC_019096 | HBS1L        | chr6:135281516-135376036  | 0.271433 | 0.999791 |
| XLOC_002385 | XLOC_002385 | THNSL1       | chr10:25270907-25351208   | 0.271441 | 0.999791 |
| XLOC_000626 | XLOC_000626 | PHGDH        | chr1:120254418-120286849  | 0.271891 | 0.999791 |
| XLOC_017069 | XLOC_017069 | SRD5A1       | chr5:6633499-6669675      | 0.271957 | 0.999791 |
| XLOC_010842 | XLOC_010842 | PAPL         | chr19:39574944-39602128   | 0.272295 | 0.999791 |
| XLOC_021515 | XLOC_021515 | SLC25A37     | chr8:23386362-23430063    | 0.272325 | 0.999791 |
| XLOC_001374 | XLOC_001374 | UBXN11       | chr1:26608772-26647014    | 0.272329 | 0.999791 |
| XLOC_014375 | XLOC_014375 | C21orf67     | chr21:46353198-46359828   | 0.272567 | 0.999791 |
| XLOC_016892 | XLOC_016892 | ELOVL6       | chr4:110970228-111119820  | 0.272775 | 0.999791 |
| XLOC_007508 | XLOC_007508 | C15orf56     | chr15:40453209-40569688   | 0.272841 | 0.999791 |
| XLOC_004747 | XLOC_004747 | ATF7IP       | chr12:14518610-14651697   | 0.272852 | 0.999791 |
| XLOC_004617 | XLOC_004617 | SRPR         | chr11:126081618-126138877 | 0.272928 | 0.999791 |
| XLOC_003088 | XLOC_003088 | DNMBP        | chr10:101635333-101769676 | 0.272995 | 0.999791 |
| XLOC_002682 | XLOC_002682 | GSTO1        | chr10:106013951-106027222 | 0.27312  | 0.999791 |

|             |             |              |                           |          |          |
|-------------|-------------|--------------|---------------------------|----------|----------|
| XLOC_011406 | XLOC_011406 | ZNF846       | chr19:9868150-9879410     | 0.273363 | 1        |
| XLOC_009332 | XLOC_009332 | BAIAP2       | chr17:79008946-79156964   | 0.273693 | 0.999791 |
| XLOC_003161 | XLOC_003161 | SFXN4        | chr10:120900424-120925204 | 0.274342 | 0.999791 |
| XLOC_001243 | XLOC_001243 | NOL9         | chr1:6581406-6614658      | 0.274565 | 0.999791 |
| XLOC_010400 | XLOC_010400 | DSEL         | chr18:65173818-65566856   | 0.274711 | 1        |
| XLOC_000687 | XLOC_000687 | MLLT11       | chr1:151032150-151040973  | 0.274804 | 0.999791 |
| XLOC_012365 | XLOC_012365 | CCDC138      | chr2:109403218-109492847  | 0.275042 | 0.999791 |
| XLOC_008115 | XLOC_008115 | OGFOD1       | chr16:56485423-56511407   | 0.275094 | 0.999791 |
| XLOC_014753 | XLOC_014753 | THOC5        | chr22:29904155-29949736   | 0.275127 | 0.999791 |
| XLOC_001034 | XLOC_001034 | LINC00467    | chr1:211556096-211605877  | 0.275323 | 0.999791 |
| XLOC_003224 | XLOC_003224 | LRRC56       | chr1:1537521-560779       | 0.275392 | 0.999791 |
| XLOC_023974 | XLOC_023974 | NOX1         | chrX:100098312-100129334  | 0.27555  | 1        |
| XLOC_021637 | XLOC_021637 | GDAP1        | chr8:75262617-75279335    | 0.275773 | 0.999791 |
| XLOC_004775 | XLOC_004775 | LYRM5        | chr12:25348149-25357949   | 0.275805 | 0.999791 |
| XLOC_008546 | XLOC_008546 | SLC6A10P     | chr16:32888796-32896463   | 0.275874 | 1        |
| XLOC_008520 | XLOC_008520 | ZNF747       | chr16:30542778-30546194   | 0.275882 | 0.999791 |
| XLOC_022902 | XLOC_022902 | C9orf64      | chr9:86553226-86571663    | 0.27589  | 0.999791 |
| XLOC_012441 | XLOC_012441 | CCDC74A      | chr2:132202795-132360468  | 0.276091 | 0.999791 |
| XLOC_002717 | XLOC_002717 | SLC18A2      | chr10:119000583-119038941 | 0.27617  | 0.999791 |
| XLOC_007602 | XLOC_007602 | LOC145783    | chr15:57178367-57210697   | 0.276376 | 1        |
| XLOC_001872 | XLOC_001872 | SHE          | chr1:154451953-154474526  | 0.2764   | 1        |
| XLOC_010930 | XLOC_010930 | APOE         | chr19:45409038-45412650   | 0.276403 | 0.999791 |
| XLOC_004604 | XLOC_004604 | SIAE         | chr11:124492741-124564687 | 0.276599 | 0.999791 |
| XLOC_001571 | XLOC_001571 | PPAP2B       | chr1:56960418-57045257    | 0.276758 | 0.999791 |
| XLOC_012079 | XLOC_012079 | EFR3B        | chr2:25264972-25382004    | 0.276891 | 1        |
| XLOC_009793 | XLOC_009793 | LRRC37A4P    | chr17:43583248-43597889   | 0.277003 | 0.999791 |
| XLOC_002355 | XLOC_002355 | SUV39H2      | chr10:14920781-14946304   | 0.27707  | 0.999791 |
| XLOC_004250 | XLOC_004250 | SYT7         | chr11:61281187-61348344   | 0.277162 | 0.999791 |
| XLOC_013765 | XLOC_013765 | NTSR1        | chr20:61340188-61394123   | 0.277246 | 0.999791 |
| XLOC_016734 | XLOC_016734 | TXK          | chr4:48068409-48136273    | 0.27741  | 1        |
| XLOC_022584 | XLOC_022584 | COQ4         | chr9:131084790-131096351  | 0.277512 | 0.993188 |
| XLOC_023674 | XLOC_023674 | VMA21        | chrX:150565656-150577836  | 0.277512 | 0.999791 |
| XLOC_023930 | XLOC_023930 | CITED1       | chrX:71521487-71527037    | 0.277594 | 0.999791 |
| XLOC_009424 | XLOC_009424 | CAMTA2       | chr17:4871286-4890960     | 0.277717 | 0.999791 |
| XLOC_005038 | XLOC_005038 | ELK3         | chr12:96588206-96661606   | 0.277746 | 0.999791 |
| XLOC_023047 | XLOC_023047 | STOM         | chr9:124101265-124132582  | 0.277801 | 1        |
| XLOC_021096 | XLOC_021096 | SPDYE7P      | chr7:72333317-72339655    | 0.277943 | 0.999791 |
| XLOC_001411 | XLOC_001411 | NKAIN1       | chr1:31652591-31712734    | 0.277966 | 0.999791 |
| XLOC_012405 | XLOC_012405 | TMEM37       | chr2:120189445-120196096  | 0.278035 | 1        |
| XLOC_022099 | XLOC_022099 | CNCE2        | chr8:95835517-95907482    | 0.278137 | 0.999791 |
| XLOC_021323 | XLOC_021323 | PODXL        | chr7:131185020-131241376  | 0.278456 | 0.999791 |
| XLOC_000804 | XLOC_000804 | DUSP23       | chr1:159750758-159752333  | 0.278754 | 0.999791 |
| XLOC_013252 | XLOC_013252 | LOC100130691 | chr2:178148235-178257419  | 0.278915 | 1        |
| XLOC_000422 | XLOC_000422 | NFIA         | chr1:61542945-61928460    | 0.278944 | 0.999791 |
| XLOC_014295 | XLOC_014295 | URB1         | chr21:33664123-33765312   | 0.279029 | 0.999791 |
| XLOC_001766 | XLOC_001766 | GNRHR2       | chr1:145507556-145516076  | 0.279041 | 0.999791 |
| XLOC_004516 | XLOC_004516 | EXPH5        | chr1:108376157-108464374  | 0.279111 | 1        |
| XLOC_020889 | XLOC_020889 | WDR60        | chr7:158649268-158738883  | 0.27914  | 0.999791 |
| XLOC_001180 | XLOC_001180 | LOC729737    | chr1:134772-140566        | 0.279355 | 1        |
| XLOC_004101 | XLOC_004101 | HPS5         | chr11:18300216-18343721   | 0.279427 | 0.999791 |
| XLOC_021540 | XLOC_021540 | UBXN8        | chr8:30601689-30624520    | 0.279446 | 0.999791 |
| XLOC_023119 | XLOC_023119 | FIBCD1       | chr9:133777824-133814455  | 0.279461 | 0.999791 |
| XLOC_016405 | XLOC_016405 | BMP3         | chr4:81952118-81978685    | 0.279702 | 1        |
| XLOC_010640 | XLOC_010640 | CLEC17A      | chr19:14693895-14721956   | 0.279992 | 1        |
| XLOC_014806 | XLOC_014806 | C1QTNF6      | chr22:37576205-37584330   | 0.280026 | 0.999791 |
| XLOC_000461 | XLOC_000461 | ACADM        | chr1:76190042-76229355    | 0.280101 | 0.999791 |
| XLOC_016738 | XLOC_016738 | LRRC66       | chr4:52859865-52883786    | 0.280118 | 1        |
| XLOC_023185 | XLOC_023185 | ENTPD2       | chr9:139942550-139948503  | 0.28013  | 0.999791 |
| XLOC_010789 | XLOC_010789 | GAPDHS       | chr19:36024313-36038429   | 0.280136 | 1        |
| XLOC_015819 | XLOC_015819 | SHQ1         | chr3:72798427-72897598    | 0.280228 | 0.999791 |
| XLOC_000367 | XLOC_000367 | TSPAN1       | chr1:46640748-46651634    | 0.280477 | 1        |
| XLOC_017524 | XLOC_017524 | ZFP2         | chr5:178322915-178360210  | 0.280495 | 1        |
| XLOC_011456 | XLOC_011456 | FBXW9        | chr19:12799729-12807455   | 0.280571 | 0.999791 |
| XLOC_012528 | XLOC_012528 | HOXD8        | chr2:176994421-176997423  | 0.280944 | 0.999791 |
| XLOC_002766 | XLOC_002766 | LRRC27       | chr10:134145613-134195010 | 0.281014 | 0.999791 |
| XLOC_004886 | XLOC_004886 | FLJ12825     | chr12:54452037-54516018   | 0.281133 | 1        |
| XLOC_009975 | XLOC_009975 | UNC13D       | chr17:73823307-73840798   | 0.281666 | 0.999791 |
| XLOC_018030 | XLOC_018030 | PSMG4        | chr6:3259161-3268300      | 0.281694 | 0.999791 |
| XLOC_006732 | XLOC_006732 | IPO4         | chr14:24641233-24658124   | 0.281794 | 0.993188 |
| XLOC_005064 | XLOC_005064 | TDG          | chr12:104359592-104382656 | 0.281811 | 0.999791 |
| XLOC_003785 | XLOC_003785 | KIAA1377     | chr11:101761404-101871793 | 0.281841 | 1        |
| XLOC_013916 | XLOC_013916 | BCL2L1       | chr20:30252260-30310656   | 0.281922 | 0.999791 |
| XLOC_002544 | XLOC_002544 | LINC00857    | chr10:81967465-81979413   | 0.282194 | 0.999791 |
| XLOC_008845 | XLOC_008845 | PFAS         | chr17:8152595-8173809     | 0.282225 | 0.999791 |
| XLOC_004942 | XLOC_004942 | GLI1         | chr12:57853917-57873633   | 0.282888 | 1        |
| XLOC_012411 | XLOC_012411 | INHBB        | chr2:121103718-121109383  | 0.283305 | 1        |
| XLOC_014343 | XLOC_014343 | ZBTB21       | chr21:43406939-43430496   | 0.283424 | 0.999791 |
| XLOC_016145 | XLOC_016145 | C3orf43      | chr3:196233749-196242237  | 0.283614 | 1        |
| XLOC_002755 | XLOC_002755 | FANK1        | chr10:127585107-127698161 | 0.283903 | 0.999791 |

|             |             |              |                            |          |          |
|-------------|-------------|--------------|----------------------------|----------|----------|
| XLOC_021854 | XLOC_021854 | MFHAS1       | chr8:8641998-8751131       | 0.284151 | 0.999791 |
| XLOC_004078 | XLOC_004078 | CSNK2A3      | chr11:11292420-11643561    | 0.284238 | 1        |
| XLOC_012591 | XLOC_012591 | NOP58        | chr2:203130514-203168384   | 0.284596 | 0.9731   |
| XLOC_003240 | XLOC_003240 | MUC5B        | chr11:1244294-1283406      | 0.284751 | 1        |
| XLOC_012083 | XLOC_012083 | EPT1         | chr2:26531040-26618759     | 0.284905 | 0.998026 |
| XLOC_023967 | XLOC_023967 | CHM          | chrX:85116184-85302566     | 0.285014 | 0.999791 |
| XLOC_014918 | XLOC_014918 | TRNT1        | chr3:3168599-3190706       | 0.285059 | 0.999791 |
| XLOC_011249 | XLOC_011249 | ZNF324B      | chr19:58962970-58969199    | 0.285137 | 0.999791 |
| XLOC_024078 | XLOC_024078 | MBNL3        | chrX:131503342-131623996   | 0.285314 | 1        |
| XLOC_015376 | XLOC_015376 | GRK7         | chr3:141497042-141535892   | 0.285349 | 1        |
| XLOC_001676 | XLOC_001676 | EXTL2        | chr1:101337927-101360735   | 0.28535  | 0.999791 |
| XLOC_014911 | XLOC_014911 | SYCE3        | chr22:50989540-51001328    | 0.285449 | 0.995491 |
| XLOC_017104 | XLOC_017104 | SPEF2        | chr5:35617988-35814713     | 0.285501 | 0.999791 |
| XLOC_024111 | XLOC_024111 | RBMX         | chrX:135951352-135962939   | 0.285524 | 0.999791 |
| XLOC_016394 | XLOC_016394 | MRPL1        | chr4:78783804-78873944     | 0.285634 | 0.999791 |
| XLOC_002477 | XLOC_002477 | NRBF2        | chr10:64893006-64914786    | 0.285997 | 0.999791 |
| XLOC_022221 | XLOC_022221 | PYCRL        | chr8:144686082-144691784   | 0.286095 | 0.993188 |
| XLOC_004062 | XLOC_004062 | NRIP3        | chr11:9002122-9025596      | 0.286185 | 1        |
| XLOC_019122 | XLOC_019122 | ADAT2        | chr6:143743968-143771841   | 0.286227 | 0.999791 |
| XLOC_017870 | XLOC_017870 | SPRY4        | chr5:141689991-141704620   | 0.286365 | 0.999791 |
| XLOC_008218 | XLOC_008218 | LOC100130894 | chr16:70721341-70835061    | 0.286534 | 1        |
| XLOC_013479 | XLOC_013479 | RBCK1        | chr20:388708-411610        | 0.286767 | 0.999791 |
| XLOC_007249 | XLOC_007249 | TRIP4        | chr15:64680002-64747502    | 0.286804 | 0.999791 |
| XLOC_007581 | XLOC_007581 | LYSMD2       | chr15:52015260-52043650    | 0.286907 | 0.999791 |
| XLOC_017416 | XLOC_017416 | PCYOX1L      | chr5:148737569-148749221   | 0.287008 | 0.999791 |
| XLOC_021226 | XLOC_021226 | MOGAT3       | chr7:100839012-100844302   | 0.28706  | 1        |
| XLOC_020560 | XLOC_020560 | TRIM74       | chr7:75024902-75034888     | 0.287146 | 0.999791 |
| XLOC_016037 | XLOC_016037 | TRIM59       | chr3:160153290-160167626   | 0.287488 | 1        |
| XLOC_015006 | XLOC_015006 | FBXL2        | chr3:33318933-33428757     | 0.287569 | 1        |
| XLOC_023179 | XLOC_023179 | EDF1         | chr9:139756570-139760738   | 0.287571 | 0.999791 |
| XLOC_023896 | XLOC_023896 | SPIN3        | chrX:57002802-57021988     | 0.287646 | 0.999791 |
| XLOC_005737 | XLOC_005737 | PXN          | chr12:120639093-120703574  | 0.287666 | 0.998026 |
| XLOC_014591 | XLOC_014591 | C22orf46     | chr22:42086546-42094140    | 0.287814 | 0.999791 |
| XLOC_009288 | XLOC_009288 | SMIM6        | chr17:73584138-73663269    | 0.287961 | 1        |
| XLOC_018964 | XLOC_018964 | FILIP1       | chr6:76017799-76203496     | 0.287981 | 1        |
| XLOC_016829 | XLOC_016829 | FAM175A      | chr4:84377117-84406290     | 0.287997 | 0.999791 |
| XLOC_008071 | XLOC_008071 | FUS          | chr16:31191430-31206192    | 0.288012 | 0.993188 |
| XLOC_003897 | XLOC_003897 | CCDC15       | chr11:124824016-124911385  | 0.288369 | 1        |
| XLOC_008309 | XLOC_008309 | GAS8         | chr16:90089007-90114191    | 0.288433 | 0.999791 |
| XLOC_003540 | XLOC_003540 | DAK          | chr11:61066918-61136975    | 0.28859  | 0.999791 |
| XLOC_007426 | XLOC_007426 | ARRDC4       | chr15:98503932-98517068    | 0.288625 | 0.999791 |
| XLOC_000219 | XLOC_000219 | SYTL1        | chr1:27668482-27680423     | 0.288643 | 0.999791 |
| XLOC_003727 | XLOC_003727 | B3GNT6       | chr11:76745434-76753005    | 0.288744 | 1        |
| XLOC_000504 | XLOC_000504 | EPHX4        | chr1:92495532-92529093     | 0.288809 | 0.999791 |
| XLOC_008294 | XLOC_008294 | LOC100287036 | chr16:89334028-89556969    | 0.288881 | 1        |
| XLOC_017258 | XLOC_017258 | TSLP         | chr5:110405777-110413722   | 0.288949 | 0.999791 |
| XLOC_008073 | XLOC_008073 | ITGAM        | chr16:31271287-31344213    | 0.288977 | 1        |
| XLOC_010744 | XLOC_010744 | CCNE1        | chr19:30302900-30315215    | 0.289019 | 0.999791 |
| XLOC_004399 | XLOC_004399 | RAB6A        | chr11:73386682-73472201    | 0.289034 | 0.9731   |
| XLOC_009839 | XLOC_009839 | LOC284080    | chr17:48127712-48133103    | 0.28941  | 1        |
| XLOC_020882 | XLOC_020882 | RNF32        | chr7:156433352-156469820   | 0.289457 | 0.999791 |
| XLOC_014871 | XLOC_014871 | TTL1         | chr22:43435522-43485434    | 0.289624 | 0.999791 |
| XLOC_001717 | XLOC_001717 | ST7L         | chr1:113066140-113162040   | 0.289887 | 0.999791 |
| XLOC_022615 | XLOC_022615 | ABL1         | chr9:133589267-133763062   | 0.289888 | 0.954435 |
| XLOC_023117 | XLOC_023117 | LOC100272217 | chr9:133452736-133454881   | 0.289969 | 0.999791 |
| XLOC_015927 | XLOC_015927 | UROC1        | chr3:126200007-126236616   | 0.290041 | 1        |
| XLOC_004872 | XLOC_004872 | AMHR2        | chr12:53817638-53825318    | 0.290067 | 1        |
| XLOC_002056 | XLOC_002056 | TOR1AIP2     | chr1:179809101-179846941   | 0.290236 | 0.961735 |
| XLOC_009357 | XLOC_009357 | FN3KRP       | chr17:80674581-80685893    | 0.290298 | 0.999791 |
| XLOC_007169 | XLOC_007169 | SNAP23       | chr15:42787503-42825259    | 0.290453 | 0.967711 |
| XLOC_005141 | XLOC_005141 | CABP1        | chr12:121078421-1211105127 | 0.290627 | 0.999791 |
| XLOC_004766 | XLOC_004766 | SLCO1B1      | chr12:21284127-21392730    | 0.29093  | 1        |
| XLOC_018888 | XLOC_018888 | LRRRC73      | chr6:43474702-43478081     | 0.290953 | 0.999791 |
| XLOC_007183 | XLOC_007183 | CASC4        | chr15:44580908-44707959    | 0.290984 | 0.960884 |
| XLOC_006396 | XLOC_006396 | AKAP5        | chr14:64932216-64941221    | 0.291005 | 1        |
| XLOC_011414 | XLOC_011414 | ZGLP1        | chr19:10415478-10420233    | 0.291037 | 0.999791 |
| XLOC_012215 | XLOC_012215 | PNO1         | chr2:68385004-68403094     | 0.291065 | 0.999791 |
| XLOC_004510 | XLOC_004510 | ALKBH8       | chr11:107373452-107436461  | 0.291072 | 0.999791 |
| XLOC_008393 | XLOC_008393 | LOC100507501 | chr16:4295825-4303790      | 0.291234 | 0.999791 |
| XLOC_023113 | XLOC_023113 | PTGES        | chr9:132500614-132515344   | 0.291522 | 1        |
| XLOC_003985 | XLOC_003985 | ZNF195       | chr11:3379156-3400452      | 0.291527 | 0.999791 |
| XLOC_003127 | XLOC_003127 | WDR96        | chr10:105889645-105992120  | 0.291639 | 1        |
| XLOC_002255 | XLOC_002255 | RBM34        | chr1:235294497-235324571   | 0.291697 | 0.966897 |
| XLOC_006328 | XLOC_006328 | LOC100129794 | chr14:37147125-37642998    | 0.29185  | 0.999791 |
| XLOC_014749 | XLOC_014749 | RASL10A      | chr22:29708921-29711745    | 0.292997 | 1        |
| XLOC_012030 | XLOC_012030 | LOC100506054 | chr2:3605975-3609340       | 0.29304  | 0.999791 |
| XLOC_004402 | XLOC_004402 | UCP3         | chr11:73711325-73720282    | 0.293137 | 1        |
| XLOC_013300 | XLOC_013300 | FONG         | chr2:200625258-200715896   | 0.293152 | 0.999791 |
| XLOC_018441 | XLOC_018441 | SMPD2        | chr6:109711417-109765122   | 0.293187 | 0.999791 |



|             |             |               |                           |          |          |
|-------------|-------------|---------------|---------------------------|----------|----------|
| XLOC_002505 | XLOC_002505 | UNC5B         | chr10:72972291-73062635   | 0.293248 | 0.999791 |
| XLOC_012531 | XLOC_012531 | HOXD3         | chr2:177028804-177037826  | 0.293332 | 0.999791 |
| XLOC_008836 | XLOC_008836 | CYB5D1        | chr17:7760002-7765600     | 0.293387 | 0.999791 |
| XLOC_019043 | XLOC_019043 | TUBE1         | chr6:112391859-112423993  | 0.293397 | 0.999791 |
| XLOC_020573 | XLOC_020573 | LOC100133091  | chr7:76178657-76257299    | 0.293421 | 0.999791 |
| XLOC_014640 | XLOC_014640 | MOV10L1       | chr22:50528434-50600116   | 0.293591 | 1        |
| XLOC_012363 | XLOC_012363 | LIMS1         | chr2:109150810-109303702  | 0.293904 | 0.999791 |
| XLOC_003085 | XLOC_003085 | GOT1          | chr10:101156626-101190530 | 0.294129 | 0.999791 |
| XLOC_018577 | XLOC_018577 | SYTL3         | chr6:159071045-159185908  | 0.294265 | 0.999791 |
| XLOC_013311 | XLOC_013311 | ALS2CR11      | chr2:202352143-202483905  | 0.294376 | 1        |
| XLOC_002890 | XLOC_002890 | ZNF37BP       | chr10:43008960-43048280   | 0.294746 | 0.999791 |
| XLOC_008486 | XLOC_008486 | EIF3C,EIF3CL  | chr16:28390899-28437775   | 0.294887 | 1        |
| XLOC_007474 | XLOC_007474 | CHRFAM7A      | chr15:30653442-30685864   | 0.295141 | 1        |
| XLOC_004472 | XLOC_004472 | VSTM5         | chr11:93553734-93583668   | 0.295292 | 1        |
| XLOC_008098 | XLOC_008098 | ADCY7         | chr16:50321822-50352043   | 0.295549 | 0.988021 |
| XLOC_006362 | XLOC_006362 | SOCS4         | chr14:55493843-55516206   | 0.295705 | 0.999791 |
| XLOC_000008 | XLOC_000008 | PLEKHN1       | chr1:901876-910484        | 0.295922 | 0.999791 |
| XLOC_001461 | XLOC_001461 | EPHA10        | chr1:38181645-38230824    | 0.295962 | 0.999791 |
| XLOC_005559 | XLOC_005559 | C12orf61      | chr12:62995530-62997214   | 0.296004 | 1        |
| XLOC_010892 | XLOC_010892 | LOC100505622  | chr19:42636780-42641251   | 0.296314 | 1        |
| XLOC_016425 | XLOC_016425 | HERC5         | chr4:89378267-89427319    | 0.296383 | 1        |
| XLOC_022112 | XLOC_022112 | NIPAL2        | chr8:99204386-99306621    | 0.296629 | 1        |
| XLOC_023331 | XLOC_023331 | MID1IP1       | chrX:38660684-38665783    | 0.296651 | 0.993188 |
| XLOC_010727 | XLOC_010727 | ZNF738        | chr19:21541734-21571384   | 0.296835 | 0.999791 |
| XLOC_023889 | XLOC_023889 | PFKFB1        | chrX:54959566-55024967    | 0.297452 | 1        |
| XLOC_010408 | XLOC_010408 | FBXO15        | chr18:71740587-71815100   | 0.297507 | 0.999791 |
| XLOC_007142 | XLOC_007142 | DISP2         | chr15:40650433-40663256   | 0.297599 | 0.999791 |
| XLOC_016158 | XLOC_016158 | ZNF595,ZNF718 | chr4:53226-156490         | 0.297611 | 0.999791 |
| XLOC_012786 | XLOC_012786 | ODC1          | chr2:10580507-10588453    | 0.29765  | 0.966897 |
| XLOC_023298 | XLOC_023298 | SAT1          | chrX:23801274-23804327    | 0.297774 | 0.949191 |
| XLOC_007885 | XLOC_007885 | AMDHD2        | chr16:2570362-2581409     | 0.297828 | 0.999791 |
| XLOC_007388 | XLOC_007388 | ISG20         | chr15:89182038-89198879   | 0.297864 | 0.993188 |
| XLOC_015566 | XLOC_015566 | LOC401052     | chr3:10048101-10052779    | 0.298031 | 0.999791 |
| XLOC_020961 | XLOC_020961 | IGF2BP3       | chr7:23349827-23509995    | 0.298272 | 0.993188 |
| XLOC_011194 | XLOC_011194 | CCDC106       | chr19:56158953-56164526   | 0.298354 | 0.999791 |
| XLOC_023997 | XLOC_023997 | RAB9B         | chrX:103077254-103087212  | 0.29843  | 1        |
| XLOC_006119 | XLOC_006119 | LPAR6         | chr13:48877882-49056026   | 0.298653 | 1        |
| XLOC_016033 | XLOC_016033 | SHOX2         | chr3:157813799-157823952  | 0.298714 | 1        |
| XLOC_010576 | XLOC_010576 | ICAM5         | chr19:10400654-10407454   | 0.298887 | 0.999791 |
| XLOC_011998 | XLOC_011998 | ZNF814        | chr19:58380746-58400442   | 0.298987 | 0.999791 |
| XLOC_015086 | XLOC_015086 | KIF9-AS1      | chr3:47205859-47388306    | 0.299239 | 1        |
| XLOC_008306 | XLOC_008306 | TUBB3         | chr16:89988416-90002505   | 0.299423 | 0.910882 |
| XLOC_008369 | XLOC_008369 | SRRM2-AS1     | chr16:2787076-2821413     | 0.299692 | 1        |
| XLOC_005103 | XLOC_005103 | SH2B3         | chr12:111843751-111889427 | 0.299834 | 0.934472 |
| XLOC_022703 | XLOC_022703 | FAM157B       | chr9:141106636-141134172  | 0.299936 | 1        |
| XLOC_008675 | XLOC_008675 | MLKL          | chr16:74705752-74734789   | 0.300116 | 0.999791 |
| XLOC_013214 | XLOC_013214 | LOC100506124  | chr2:166713985-166728451  | 0.300145 | 0.999791 |
| XLOC_014342 | XLOC_014342 | C2CD2         | chr21:43305218-43373999   | 0.300221 | 0.910882 |
| XLOC_017812 | XLOC_017812 | CDKL3         | chr5:133634114-133702765  | 0.300502 | 0.999791 |
| XLOC_002540 | XLOC_002540 | LOC642361     | chr10:81585657-81587358   | 0.300521 | 0.999791 |
| XLOC_001513 | XLOC_001513 | MUTYH         | chr1:45794913-45956840    | 0.300525 | 0.999791 |
| XLOC_006896 | XLOC_006896 | RPS6KL1       | chr14:75370656-75389145   | 0.300702 | 0.999791 |
| XLOC_009377 | XLOC_009377 | SCARF1        | chr17:1537151-1549041     | 0.300722 | 0.999791 |
| XLOC_017600 | XLOC_017600 | ZFR           | chr5:32354455-32444844    | 0.300768 | 0.942643 |
| XLOC_021071 | XLOC_021071 | PSPH          | chr7:56078743-56119268    | 0.301265 | 0.999791 |
| XLOC_022230 | XLOC_022230 | PLEC          | chr8:144989320-145050913  | 0.301403 | 0.914868 |
| XLOC_010606 | XLOC_010606 | ZNF763        | chr19:12075868-12091198   | 0.301444 | 0.999791 |
| XLOC_021503 | XLOC_021503 | PPP3CC        | chr8:22298482-22398657    | 0.301506 | 1        |
| XLOC_018195 | XLOC_018195 | LTA           | chr6:31539875-31542100    | 0.301692 | 1        |
| XLOC_018908 | XLOC_018908 | PTCHD4        | chr6:47845763-48036425    | 0.301998 | 1        |
| XLOC_017788 | XLOC_017788 | FLJ33630      | chr5:127357243-127418766  | 0.302342 | 0.999791 |
| XLOC_008384 | XLOC_008384 | ZSCAN32       | chr16:3432084-3451025     | 0.30265  | 0.999791 |
| XLOC_008672 | XLOC_008672 | CLEC18B       | chr16:74442528-74455368   | 0.302779 | 1        |
| XLOC_014829 | XLOC_014829 | DNAL4         | chr22:39174512-39190161   | 0.302821 | 0.999791 |
| XLOC_011790 | XLOC_011790 | ZC3H4         | chr19:47567446-47617009   | 0.302893 | 0.993188 |
| XLOC_002935 | XLOC_002935 | AGAP7         | chr10:51464150-51486327   | 0.302914 | 0.999791 |
| XLOC_017758 | XLOC_017758 | GIN1          | chr5:102421703-102455842  | 0.303464 | 0.999791 |
| XLOC_015924 | XLOC_015924 | ALDH1L1       | chr3:125822403-125929011  | 0.303561 | 1        |
| XLOC_021314 | XLOC_021314 | TMEM209       | chr7:129804554-129845338  | 0.303577 | 0.993188 |
| XLOC_021559 | XLOC_021559 | ADAM9         | chr8:38854504-38962779    | 0.30359  | 0.910882 |
| XLOC_013788 | XLOC_013788 | ABHD16B       | chr20:62492565-62494341   | 0.303865 | 0.999791 |
| XLOC_010247 | XLOC_010247 | CNDP2         | chr18:72163499-72190689   | 0.303868 | 0.910882 |
| XLOC_015638 | XLOC_015638 | GORASP1       | chr3:39138090-39149130    | 0.304018 | 0.999617 |
| XLOC_008270 | XLOC_008270 | COX4I1        | chr16:85833172-85840607   | 0.304205 | 0.956701 |
| XLOC_018201 | XLOC_018201 | APOM          | chr6:31606804-31625987    | 0.304328 | 0.999791 |
| XLOC_009250 | XLOC_009250 | ARSG          | chr17:66255322-66417000   | 0.304972 | 0.999791 |
| XLOC_007973 | XLOC_007973 | IQCK          | chr16:19717673-19868859   | 0.305133 | 0.999791 |
| XLOC_018082 | XLOC_018082 | MRS2          | chr6:24403152-24425816    | 0.305969 | 0.961735 |
| XLOC_001518 | XLOC_001518 | GPBP1L1       | chr1:46092975-46152302    | 0.30649  | 0.873023 |

|             |             |              |                           |          |          |
|-------------|-------------|--------------|---------------------------|----------|----------|
| XLOC_006729 | XLOC_006729 | NRL          | chr14:24549315-24553832   | 0.306658 | 0.999791 |
| XLOC_000218 | XLOC_000218 | LOC644961    | chr1:27648635-27662891    | 0.30667  | 1        |
| XLOC_008109 | XLOC_008109 | CAPNS2       | chr16:55542912-55620582   | 0.306671 | 1        |
| XLOC_015502 | XLOC_015502 | SNORA63      | chr3:186501360-186524484  | 0.306691 | 0.999791 |
| XLOC_020593 | XLOC_020593 | DPY19L2P4    | chr7:89748713-89754914    | 0.306694 | 1        |
| XLOC_005093 | XLOC_005093 | TCHP         | chr12:110338078-110355874 | 0.306699 | 0.999791 |
| XLOC_021350 | XLOC_021350 | DENND2A      | chr7:140218219-140302342  | 0.306763 | 1        |
| XLOC_020508 | XLOC_020508 | LOC649395    | chr7:63894070-63895895    | 0.306818 | 1        |
| XLOC_009634 | XLOC_009634 | CCL3L1       | chr17:34522267-34524156   | 0.306823 | 1        |
| XLOC_015835 | XLOC_015835 | DHFRL1       | chr3:93776765-93845630    | 0.307103 | 0.999791 |
| XLOC_017878 | XLOC_017878 | LARS         | chr5:145492588-145562294  | 0.307148 | 0.910882 |
| XLOC_014320 | XLOC_014320 | HLCS         | chr21:38123188-38362545   | 0.307285 | 0.999791 |
| XLOC_003384 | XLOC_003384 | RCN1         | chr11:32112476-32127272   | 0.307494 | 0.886909 |
| XLOC_020898 | XLOC_020898 | MICALL2      | chr7:1473994-1499109      | 0.307984 | 0.999791 |
| XLOC_022394 | XLOC_022394 | ANXA1        | chr9:75766780-75785307    | 0.308019 | 0.957042 |
| XLOC_001008 | XLOC_001008 | RASSF5       | chr1:206680878-206762616  | 0.308263 | 0.999791 |
| XLOC_016289 | XLOC_016289 | N4BP2        | chr4:40044536-40159872    | 0.308288 | 0.999791 |
| XLOC_008708 | XLOC_008708 | C16orf74     | chr16:85741123-85784689   | 0.308387 | 0.956701 |
| XLOC_003701 | XLOC_003701 | ATG16L2      | chr11:72525450-72540680   | 0.308751 | 0.949191 |
| XLOC_010474 | XLOC_010474 | ZNF556       | chr19:2867332-2878501     | 0.308898 | 0.999791 |
| XLOC_010490 | XLOC_010490 | ATCAY        | chr19:3880617-3928080     | 0.308985 | 1        |
| XLOC_008881 | XLOC_008881 | CCDC144A     | chr17:16593638-16678311   | 0.30909  | 1        |
| XLOC_024200 | XLOC_024200 | GAB3         | chrX:153903526-153979348  | 0.309191 | 1        |
| XLOC_009081 | XLOC_009081 | PSME3        | chr17:40985158-40995777   | 0.309611 | 0.8679   |
| XLOC_004998 | XLOC_004998 | GLIPR1L2     | chr12:75784849-75826177   | 0.309896 | 1        |
| XLOC_004517 | XLOC_004517 | RDX          | chr11:110045604-110167437 | 0.310115 | 1        |
| XLOC_002329 | XLOC_002329 | FAM208B      | chr10:5726800-5805703     | 0.310434 | 0.993188 |
| XLOC_001440 | XLOC_001440 | SFPQ         | chr1:35649200-35658743    | 0.310536 | 0.956701 |
| XLOC_015432 | XLOC_015432 | NMD3         | chr3:160939098-160969795  | 0.310662 | 0.886909 |
| XLOC_014758 | XLOC_014758 | OSM          | chr22:30658818-30662829   | 0.310827 | 1        |
| XLOC_017332 | XLOC_017332 | CATSPER3     | chr5:134303595-134347397  | 0.311208 | 0.999791 |
| XLOC_002346 | XLOC_002346 | CDC123       | chr10:12171639-12292589   | 0.311317 | 0.999791 |
| XLOC_014891 | XLOC_014891 | CN5H6.4      | chr22:46691039-46692557   | 0.311447 | 1        |
| XLOC_015700 | XLOC_015700 | ARIH2OS      | chr3:48955220-49022971    | 0.311559 | 0.999791 |
| XLOC_008772 | XLOC_008772 | SMTNL2       | chr17:4487275-4511614     | 0.311567 | 1        |
| XLOC_018712 | XLOC_018712 | ZSCAN12      | chr6:28346597-28367544    | 0.311721 | 0.999791 |
| XLOC_018137 | XLOC_018137 | ZSCAN12P1    | chr6:28058584-28063493    | 0.311805 | 0.999791 |
| XLOC_001653 | XLOC_001653 | GF11         | chr1:92940317-92952433    | 0.311881 | 0.999791 |
| XLOC_015790 | XLOC_015790 | ACOX2        | chr3:58490862-58522929    | 0.31192  | 0.999791 |
| XLOC_010555 | XLOC_010555 | HNRNPM       | chr19:8509802-8554002     | 0.311962 | 0.89596  |
| XLOC_003950 | XLOC_003950 | CEND1        | chr11:787109-790126       | 0.312147 | 1        |
| XLOC_021232 | XLOC_021232 | SPDYE6       | chr7:101986191-101996889  | 0.3124   | 1        |
| XLOC_018628 | XLOC_018628 | RPP40        | chr6:4995279-5004271      | 0.312499 | 0.999791 |
| XLOC_005822 | XLOC_005822 | CDK8         | chr13:26828755-26978569   | 0.3126   | 0.999791 |
| XLOC_016163 | XLOC_016163 | MYL5         | chr4:671710-682973        | 0.312759 | 0.999791 |
| XLOC_014808 | XLOC_014808 | RAC2         | chr22:37621309-37640305   | 0.313025 | 0.999791 |
| XLOC_023316 | XLOC_023316 | GK           | chrX:30671475-30749577    | 0.313181 | 0.999791 |
| XLOC_003772 | XLOC_003772 | PIWIL4       | chr11:94300473-94354587   | 0.313274 | 0.999791 |
| XLOC_013071 | XLOC_013071 | LONRF2       | chr2:100889752-100939195  | 0.313407 | 1        |
| XLOC_000835 | XLOC_000835 | FCRLB        | chr1:161692456-161697933  | 0.313427 | 0.999791 |
| XLOC_004631 | XLOC_004631 | SNX19        | chr11:130745765-130786382 | 0.313603 | 0.999791 |
| XLOC_006806 | XLOC_006806 | PYGL         | chr14:51371934-51411248   | 0.313799 | 0.886909 |
| XLOC_000294 | XLOC_000294 | UTP11L       | chr1:38478383-38490497    | 0.313819 | 0.886864 |
| XLOC_000395 | XLOC_000395 | GPX7         | chr1:53068042-53074723    | 0.31415  | 1        |
| XLOC_013836 | XLOC_013836 | SPEF1        | chr20:3758150-3762102     | 0.314413 | 1        |
| XLOC_010311 | XLOC_010311 | ZNF521       | chr18:22641887-22932214   | 0.314566 | 1        |
| XLOC_017640 | XLOC_017640 | C5orf28      | chr5:43444353-43483992    | 0.314809 | 0.999791 |
| XLOC_016872 | XLOC_016872 | SLC9B1       | chr4:103790134-103940896  | 0.315142 | 1        |
| XLOC_004319 | XLOC_004319 | ZNHIT2       | chr11:64883874-64885170   | 0.315209 | 0.999791 |
| XLOC_007606 | XLOC_007606 | SLTM         | chr15:59171243-59225852   | 0.315291 | 0.886909 |
| XLOC_009319 | XLOC_009319 | C1QTNF1      | chr17:77015290-77045870   | 0.315505 | 0.956701 |
| XLOC_006758 | XLOC_006758 | DTD2         | chr14:31915242-31926680   | 0.315512 | 0.999791 |
| XLOC_006315 | XLOC_006315 | NUBPL        | chr14:32030590-32330429   | 0.315841 | 0.999791 |
| XLOC_016376 | XLOC_016376 | CXCL1        | chr4:74735108-74737019    | 0.315851 | 1        |
| XLOC_023187 | XLOC_023187 | LOC100289341 | chr9:139979397-139981269  | 0.315989 | 0.999791 |
| XLOC_007864 | XLOC_007864 | TBL3         | chr16:2022063-2028751     | 0.31617  | 0.873899 |
| XLOC_023655 | XLOC_023655 | SLITRK2      | chrX:144899346-144907360  | 0.316603 | 1        |
| XLOC_022931 | XLOC_022931 | IARS         | chr9:94972489-95056038    | 0.316692 | 0.966897 |
| XLOC_014225 | XLOC_014225 | MCM3AP-AS1   | chr21:47649157-47705236   | 0.316738 | 1        |
| XLOC_010367 | XLOC_010367 | CCDC11       | chr18:47753562-47792865   | 0.316772 | 0.999791 |
| XLOC_005037 | XLOC_005037 | AMDHD1       | chr12:96337070-96362370   | 0.316923 | 0.999791 |
| XLOC_010381 | XLOC_010381 | NARS         | chr18:55267893-55289177   | 0.316978 | 0.910882 |
| XLOC_006709 | XLOC_006709 | PRMT5        | chr14:23389732-23398661   | 0.316996 | 0.867056 |
| XLOC_013324 | XLOC_013324 | MDH1B        | chr2:207602488-207630050  | 0.317124 | 1        |
| XLOC_007644 | XLOC_007644 | MEGF11       | chr15:66187633-66546075   | 0.317283 | 1        |
| XLOC_021304 | XLOC_021304 | PRRT4        | chr7:127990378-128001739  | 0.317925 | 0.993188 |
| XLOC_017689 | XLOC_017689 | GTF2H2       | chr5:70330950-70363497    | 0.318071 | 0.999791 |
| XLOC_014175 | XLOC_014175 | SH3BGR       | chr21:40817796-40887433   | 0.318077 | 0.999791 |
| XLOC_014906 | XLOC_014906 | DENND6B      | chr22:50750391-50765489   | 0.318185 | 0.999791 |

|             |             |              |                           |          |          |
|-------------|-------------|--------------|---------------------------|----------|----------|
| XLOC_019197 | XLOC_019197 | THBS2        | chr6:169615874-169654137  | 0.318229 | 0.999791 |
| XLOC_020751 | XLOC_020751 | NRF1         | chr7:129251554-129396922  | 0.318292 | 0.999791 |
| XLOC_013706 | XLOC_013706 | CSE1L        | chr20:47662782-47713497   | 0.318299 | 0.866946 |
| XLOC_017093 | XLOC_017093 | C5orf22      | chr5:31532372-31555165    | 0.318309 | 0.994496 |
| XLOC_002759 | XLOC_002759 | PTPRE        | chr10:129705324-129884164 | 0.319058 | 0.999791 |
| XLOC_011968 | XLOC_011968 | IL11         | chr19:55875749-55881831   | 0.319279 | 0.957042 |
| XLOC_020991 | XLOC_020991 | SCRN1        | chr7:29959718-30029905    | 0.319282 | 1        |
| XLOC_012250 | XLOC_012250 | MTHFD2       | chr2:74425689-74442424    | 0.319408 | 0.956701 |
| XLOC_008062 | XLOC_008062 | CTF1         | chr16:30907927-30914881   | 0.320199 | 0.999791 |
| XLOC_022283 | XLOC_022283 | TYRP1        | chr9:12693385-12710266    | 0.320317 | 1        |
| XLOC_019059 | XLOC_019059 | MCM9         | chr6:119134611-119256327  | 0.320459 | 0.999791 |
| XLOC_014321 | XLOC_014321 | PIGP         | chr21:38437663-38445458   | 0.32093  | 0.993188 |
| XLOC_018188 | XLOC_018188 | HCG27        | chr6:31165536-31171745    | 0.321059 | 0.999791 |
| XLOC_002101 | XLOC_002101 | KIF21B       | chr1:200938513-200992828  | 0.321177 | 1        |
| XLOC_015072 | XLOC_015072 | CCR9         | chr3:45864809-45957216    | 0.321219 | 1        |
| XLOC_015903 | XLOC_015903 | WDR5B        | chr3:122130699-122134882  | 0.321247 | 0.999791 |
| XLOC_009547 | XLOC_009547 | B9D1         | chr17:19240866-19290532   | 0.321437 | 0.999791 |
| XLOC_007978 | XLOC_007978 | LYRM1        | chr16:20869395-20936328   | 0.321794 | 0.999791 |
| XLOC_006224 | XLOC_006224 | LINC00346    | chr13:111516333-111522655 | 0.322002 | 0.999791 |
| XLOC_009201 | XLOC_009201 | GDPD1        | chr17:57297827-57353330   | 0.322225 | 0.999791 |
| XLOC_013795 | XLOC_013795 | LINC00176    | chr20:62665696-62671315   | 0.322225 | 0.999791 |
| XLOC_012987 | XLOC_012987 | SLC4A5       | chr2:74443368-74570534    | 0.322509 | 0.914868 |
| XLOC_005295 | XLOC_005295 | MAGOHB       | chr12:10756363-10766208   | 0.322534 | 0.999791 |
| XLOC_003003 | XLOC_003003 | ZSWIM8-AS1   | chr10:75545381-75561556   | 0.322578 | 0.999791 |
| XLOC_009376 | XLOC_009376 | SLC43A2      | chr17:1477695-1532130     | 0.322895 | 0.999791 |
| XLOC_008155 | XLOC_008155 | SETD6        | chr16:58549382-58663790   | 0.323191 | 0.999791 |
| XLOC_000415 | XLOC_000415 | LOC100507634 | chr1:55681080-55683128    | 0.323503 | 0.999791 |
| XLOC_009352 | XLOC_009352 | TEX19        | chr17:80317122-80321652   | 0.323619 | 0.999791 |
| XLOC_007726 | XLOC_007726 | BCL2A1       | chr15:80253231-80263643   | 0.323648 | 0.873023 |
| XLOC_016166 | XLOC_016166 | IDUA         | chr4:972862-998317        | 0.323825 | 0.999791 |
| XLOC_013456 | XLOC_013456 | PP14571      | chr2:241375114-241407495  | 0.323918 | 1        |
| XLOC_023094 | XLOC_023094 | LOC100289019 | chr9:130873449-130881013  | 0.324018 | 0.999791 |
| XLOC_001596 | XLOC_001596 | GNG12        | chr1:68167148-68698284    | 0.324041 | 0.999791 |
| XLOC_013962 | XLOC_013962 | TGM2         | chr20:36756863-36793700   | 0.324054 | 0.902763 |
| XLOC_020915 | XLOC_020915 | FBXL18       | chr7:5515427-5553399      | 0.324123 | 0.999791 |
| XLOC_006277 | XLOC_006277 | MMP14        | chr14:23305792-23316803   | 0.324242 | 0.873023 |
| XLOC_010731 | XLOC_010731 | LOC641367    | chr19:21906842-21950430   | 0.324456 | 1        |
| XLOC_010898 | XLOC_010898 | LOC100996307 | chr19:42901299-43156507   | 0.324457 | 1        |
| XLOC_006817 | XLOC_006817 | BMP4         | chr14:54416454-54423554   | 0.324786 | 0.999791 |
| XLOC_014470 | XLOC_014470 | GGT1         | chr22:24979717-25024972   | 0.324991 | 0.999791 |
| XLOC_008531 | XLOC_008531 | STX1B        | chr16:31000576-31021829   | 0.325028 | 0.999791 |
| XLOC_022919 | XLOC_022919 | SHC3         | chr9:91620685-91793682    | 0.325198 | 1        |
| XLOC_010623 | XLOC_010623 | IER2         | chr19:13261281-13265718   | 0.325215 | 0.812173 |
| XLOC_009236 | XLOC_009236 | RGS9         | chr17:63133455-63223821   | 0.325487 | 1        |
| XLOC_007645 | XLOC_007645 | TIPIN        | chr15:66629007-66649054   | 0.325501 | 0.999791 |
| XLOC_022898 | XLOC_022898 | FRMD3        | chr9:85857904-86153348    | 0.325518 | 1        |
| XLOC_022195 | XLOC_022195 | KCNK9        | chr8:140624803-140715299  | 0.32571  | 1        |
| XLOC_005025 | XLOC_005025 | SOCS2        | chr12:93959403-93970521   | 0.32613  | 0.949191 |
| XLOC_005907 | XLOC_005907 | CCDC70       | chr13:52436116-52440372   | 0.32642  | 1        |
| XLOC_020811 | XLOC_020811 | CLCN1        | chr7:143013218-143049097  | 0.326447 | 1        |
| XLOC_013283 | XLOC_013283 | STAT1        | chr2:191833761-191878976  | 0.326595 | 0.886909 |
| XLOC_014886 | XLOC_014886 | WNT7B        | chr22:46316247-46373008   | 0.326843 | 1        |
| XLOC_004139 | XLOC_004139 | ABTB2        | chr11:34172533-34379555   | 0.326888 | 0.999791 |
| XLOC_022184 | XLOC_022184 | HPYR1        | chr8:133572744-133573726  | 0.326905 | 1        |
| XLOC_018259 | XLOC_018259 | ARMC12       | chr6:35704858-35716685    | 0.326947 | 0.999791 |
| XLOC_014950 | XLOC_014950 | ATG7         | chr3:11314009-11762220    | 0.327289 | 0.999791 |
| XLOC_002314 | XLOC_002314 | GTPBP4       | chr10:1034348-1063708     | 0.327626 | 0.754339 |
| XLOC_011603 | XLOC_011603 | LOC100506469 | chr19:36024313-36038429   | 0.327706 | 0.999791 |
| XLOC_009491 | XLOC_009491 | PIK3R5       | chr17:8782232-8869029     | 0.327731 | 1        |
| XLOC_018071 | XLOC_018071 | KDM1B        | chr6:18155618-18224084    | 0.327881 | 0.999791 |
| XLOC_005098 | XLOC_005098 | RAD9B        | chr12:110940004-110969891 | 0.328188 | 0.999791 |
| XLOC_006726 | XLOC_006726 | ZFH2         | chr14:23980968-24048009   | 0.328358 | 1        |
| XLOC_013496 | XLOC_013496 | EBF4         | chr20:2673523-2740754     | 0.328367 | 0.999791 |
| XLOC_013769 | XLOC_013769 | DPH3P1       | chr20:61448413-61493115   | 0.328599 | 0.999791 |
| XLOC_019103 | XLOC_019103 | NHEG1        | chr6:137303295-137314368  | 0.328607 | 1        |
| XLOC_013776 | XLOC_013776 | BIRC7        | chr20:61867275-61871854   | 0.328611 | 1        |
| XLOC_014480 | XLOC_014480 | MYO18B       | chr22:26138119-26427007   | 0.328871 | 1        |
| XLOC_008624 | XLOC_008624 | ZDHHC1       | chr16:67428321-67450339   | 0.328898 | 0.999791 |
| XLOC_012950 | XLOC_012950 | WDR92        | chr2:68357280-68384692    | 0.329097 | 0.999791 |
| XLOC_007525 | XLOC_007525 | SPTBN5       | chr15:42120282-42186275   | 0.329201 | 1        |
| XLOC_011593 | XLOC_011593 | ZNF599       | chr19:35248978-35264134   | 0.329471 | 0.999791 |
| XLOC_020881 | XLOC_020881 | LINC00244    | chr7:156333184-156333795  | 0.330198 | 1        |
| XLOC_014374 | XLOC_014374 | ITGB2        | chr21:46305867-46349595   | 0.330619 | 1        |
| XLOC_015839 | XLOC_015839 | CPOX         | chr3:98298289-98312455    | 0.330769 | 0.797051 |
| XLOC_023153 | XLOC_023153 | C9orf116     | chr9:138387025-138391761  | 0.331095 | 0.999791 |
| XLOC_011328 | XLOC_011328 | PLIN4        | chr19:4472254-4517716     | 0.331255 | 1        |
| XLOC_013832 | XLOC_013832 | GFRA4        | chr20:3639938-3644046     | 0.331381 | 1        |
| XLOC_003323 | XLOC_003323 | IPO7         | chr11:9406168-9469674     | 0.331832 | 0.691708 |
| XLOC_004011 | XLOC_004011 | HBG2         | chr11:5274420-5276011     | 0.33227  | 0.999791 |

|             |             |              |                           |          |          |
|-------------|-------------|--------------|---------------------------|----------|----------|
| XLOC_008919 | XLOC_008919 | MAP2K3       | chr17:21187967-21218551   | 0.332361 | 0.763244 |
| XLOC_019127 | XLOC_019127 | EPM2A        | chr6:145946439-146285233  | 0.332387 | 0.999791 |
| XLOC_008414 | XLOC_008414 | TEKT5        | chr16:10721360-10788802   | 0.33246  | 1        |
| XLOC_016646 | XLOC_016646 | OTOP1        | chr4:4190529-4228621      | 0.332566 | 1        |
| XLOC_001327 | XLOC_001327 | PLA2G2D      | chr1:20439142-20446059    | 0.332598 | 1        |
| XLOC_015555 | XLOC_015555 | OXTR         | chr3:8792094-8811300      | 0.332822 | 1        |
| XLOC_011016 | XLOC_011016 | CD37         | chr19:49838676-49865714   | 0.332984 | 1        |
| XLOC_004768 | XLOC_004768 | PYROXD1      | chr12:21590537-21654603   | 0.333017 | 0.999791 |
| XLOC_017215 | XLOC_017215 | FAM151B      | chr5:79783799-79838382    | 0.333027 | 1        |
| XLOC_011384 | XLOC_011384 | KANK3        | chr19:8387467-8408146     | 0.333111 | 0.999791 |
| XLOC_004635 | XLOC_004635 | IGSF9B       | chr11:133785184-133826880 | 0.333802 | 1        |
| XLOC_004776 | XLOC_004776 | RASSF8       | chr12:26107587-26232825   | 0.334244 | 1        |
| XLOC_005232 | XLOC_005232 | C12orf4      | chr12:4596900-4647637     | 0.334546 | 0.999791 |
| XLOC_007980 | XLOC_007980 | ANKS4B       | chr16:21245015-21263750   | 0.334822 | 1        |
| XLOC_003021 | XLOC_003021 | MAT1A        | chr10:82031575-82049434   | 0.334914 | 1        |
| XLOC_002768 | XLOC_002768 | C10orf91     | chr10:134258713-134261825 | 0.334936 | 1        |
| XLOC_021248 | XLOC_021248 | LOC100216546 | chr7:104622193-104631612  | 0.335065 | 1        |
| XLOC_014953 | XLOC_014953 | TSEN2        | chr3:12525930-12574820    | 0.335296 | 0.999791 |
| XLOC_009775 | XLOC_009775 | SLC4A1       | chr17:42325757-42345502   | 0.335396 | 1        |
| XLOC_011924 | XLOC_011924 | ZNF702P      | chr19:53471503-53496784   | 0.335606 | 0.999791 |
| XLOC_023862 | XLOC_023862 | SHROOM4      | chrX:50334642-50557044    | 0.335688 | 1        |
| XLOC_003807 | XLOC_003807 | C11orf93     | chr11:111164113-111179460 | 0.335926 | 0.999791 |
| XLOC_014355 | XLOC_014355 | HSF2BP       | chr21:44949071-45079374   | 0.336269 | 0.999791 |
| XLOC_015169 | XLOC_015169 | C3orf49      | chr3:63805040-63849597    | 0.336367 | 1        |
| XLOC_004503 | XLOC_004503 | CARD16       | chr11:104912052-104916051 | 0.336412 | 1        |
| XLOC_012275 | XLOC_012275 | MAT2A        | chr2:85766100-85788657    | 0.336455 | 0.999791 |
| XLOC_002289 | XLOC_002289 | ZNF124       | chr1:247285276-247335318  | 0.336514 | 0.999791 |
| XLOC_013905 | XLOC_013905 | FAM182B      | chr20:25744101-25781927   | 0.33659  | 1        |
| XLOC_023141 | XLOC_023141 | SARDH        | chr9:136528683-136605077  | 0.336662 | 0.999791 |
| XLOC_009501 | XLOC_009501 | MYH3         | chr17:10531842-10560626   | 0.336755 | 1        |
| XLOC_000880 | XLOC_000880 | TOP1P1       | chr1:171283485-171311223  | 0.336936 | 1        |
| XLOC_008684 | XLOC_008684 | CHST5        | chr16:75562427-75569068   | 0.337068 | 0.999791 |
| XLOC_003343 | XLOC_003343 | PDE3B        | chr11:14665268-14893604   | 0.337232 | 0.999791 |
| XLOC_005268 | XLOC_005268 | FAM90A1      | chr12:8373855-8380214     | 0.337563 | 0.999791 |
| XLOC_014973 | XLOC_014973 | GALNT15      | chr3:16216183-16271253    | 0.337684 | 1        |
| XLOC_007550 | XLOC_007550 | MIR1282      | chr15:44038589-44094769   | 0.337688 | 0.999791 |
| XLOC_000117 | XLOC_000117 | CTRC         | chr1:15764937-15773153    | 0.337759 | 1        |
| XLOC_013581 | XLOC_013581 | PSIMCT-1     | chr20:30102240-30161066   | 0.337894 | 0.999791 |
| XLOC_007818 | XLOC_007818 | PDIA2        | chr16:333117-337209       | 0.337962 | 1        |
| XLOC_000200 | XLOC_000200 | CNKSR1       | chr1:26503980-26516375    | 0.338305 | 0.999791 |
| XLOC_004143 | XLOC_004143 | PAMR1        | chr11:35453375-35547176   | 0.338799 | 1        |
| XLOC_001880 | XLOC_001880 | DCST2        | chr1:154991002-155006257  | 0.339012 | 1        |
| XLOC_007185 | XLOC_007185 | EIF3J        | chr15:44829265-44955876   | 0.339051 | 0.999791 |
| XLOC_007290 | XLOC_007290 | ADPGK-AS1    | chr15:73043707-73090540   | 0.339104 | 1        |
| XLOC_012818 | XLOC_012818 | PFN4         | chr2:24338243-24346151    | 0.339447 | 1        |
| XLOC_005753 | XLOC_005753 | RHOF         | chr12:122150657-122231594 | 0.339499 | 0.891812 |
| XLOC_017483 | XLOC_017483 | ERGIC1       | chr5:172261222-172379688  | 0.339519 | 0.774655 |
| XLOC_017149 | XLOC_017149 | IPO11,LRRC70 | chr5:61708572-61924416    | 0.339563 | 0.9205   |
| XLOC_001605 | XLOC_001605 | ZRANB2       | chr1:71318035-71546972    | 0.340442 | 0.777779 |
| XLOC_014572 | XLOC_014572 | ATF4         | chr22:39916568-39918691   | 0.340503 | 0.94436  |
| XLOC_022846 | XLOC_022846 | ZNF658       | chr9:40771401-40792112    | 0.340514 | 1        |
| XLOC_014220 | XLOC_014220 | LOC642852    | chr21:46707966-46717269   | 0.340846 | 0.999791 |
| XLOC_023466 | XLOC_023466 | OGT          | chrX:70430034-70948962    | 0.341295 | 0.999791 |
| XLOC_000561 | XLOC_000561 | SARS         | chr1:109756514-109780804  | 0.341386 | 0.886909 |
| XLOC_003404 | XLOC_003404 | LDLRAD3      | chr11:35965611-36252841   | 0.341515 | 0.999791 |
| XLOC_022795 | XLOC_022795 | KIF24        | chr9:34179002-34329198    | 0.341923 | 0.999791 |
| XLOC_009648 | XLOC_009648 | SRCIN1       | chr17:36686258-36762183   | 0.342124 | 0.999791 |
| XLOC_010120 | XLOC_010120 | NAPG         | chr18:10525872-10552766   | 0.342901 | 0.910882 |
| XLOC_024071 | XLOC_024071 | ZNF280C      | chrX:129336672-129402922  | 0.342998 | 0.999791 |
| XLOC_012587 | XLOC_012587 | CASP8        | chr2:202098165-202152434  | 0.343097 | 0.891812 |
| XLOC_001998 | XLOC_001998 | CD247        | chr1:167399876-167487847  | 0.343211 | 1        |
| XLOC_002423 | XLOC_002423 | ZNF32-AS2    | chr10:44124264-44170147   | 0.343253 | 0.999791 |
| XLOC_016935 | XLOC_016935 | MGARP        | chr4:140187316-140201492  | 0.343341 | 1        |
| XLOC_004933 | XLOC_004933 | HSD17B6      | chr12:57157107-57181574   | 0.343549 | 0.999791 |
| XLOC_013570 | XLOC_013570 | PYGB         | chr20:25228705-25371618   | 0.343677 | 0.999791 |
| XLOC_004939 | XLOC_004939 | SHMT2        | chr12:57623355-57634475   | 0.343947 | 0.900729 |
| XLOC_013254 | XLOC_013254 | TTC30A       | chr2:178479025-178483694  | 0.344737 | 1        |
| XLOC_009696 | XLOC_009696 | KRTAP2-1     | chr17:39202795-39203568   | 0.344943 | 1        |
| XLOC_008835 | XLOC_008835 | TMEM88       | chr17:7758383-7759417     | 0.345369 | 0.999791 |
| XLOC_007661 | XLOC_007661 | ANP32A-IT1   | chr15:69070874-69113261   | 0.34566  | 1        |
| XLOC_000166 | XLOC_000166 | EPHA8        | chr1:22890003-22930087    | 0.345691 | 1        |
| XLOC_021650 | XLOC_021650 | FABP5        | chr8:82192717-82197012    | 0.34582  | 0.668574 |
| XLOC_011816 | XLOC_011816 | IZUMO1       | chr19:49244144-49250166   | 0.345837 | 1        |
| XLOC_011253 | XLOC_011253 | LOC100131691 | chr19:59070552-59086164   | 0.345928 | 1        |
| XLOC_011480 | XLOC_011480 | PRKACA       | chr19:14202506-14228559   | 0.346138 | 0.654702 |
| XLOC_001794 | XLOC_001794 | SV2A         | chr1:149874871-149889434  | 0.346969 | 1        |
| XLOC_002386 | XLOC_002386 | GPR158       | chr10:25447000-25891157   | 0.347753 | 1        |
| XLOC_002569 | XLOC_002569 | PAPSS2       | chr10:89419475-89507462   | 0.347778 | 1        |
| XLOC_006160 | XLOC_006160 | KCTD12       | chr13:77454303-77460540   | 0.3478   | 0.967815 |

|             |             |                       |                           |          |          |
|-------------|-------------|-----------------------|---------------------------|----------|----------|
| XLOC_012004 | XLOC_012004 | ZSCAN18               | chr19:58595208-58629793   | 0.347969 | 1        |
| XLOC_014764 | XLOC_014764 | SEC14L3               | chr22:30855215-30868034   | 0.348076 | 1        |
| XLOC_019113 | XLOC_019113 | LOC100507462          | chr6:139046347-139114456  | 0.348125 | 1        |
| XLOC_004990 | XLOC_004990 | THAP2                 | chr12:72003378-72074428   | 0.348442 | 0.999791 |
| XLOC_004309 | XLOC_004309 | EHD1                  | chr11:64620207-64646191   | 0.348753 | 0.646951 |
| XLOC_010002 | XLOC_010002 | LOC100996291          | chr17:76257429-76274573   | 0.348788 | 1        |
| XLOC_011237 | XLOC_011237 | ZNF587                | chr19:58361180-58376491   | 0.348871 | 0.974262 |
| XLOC_022493 | XLOC_022493 | FSD1L                 | chr9:108210314-108311385  | 0.348948 | 0.999791 |
| XLOC_008175 | XLOC_008175 | PLEKHG4               | chr16:67311412-67360661   | 0.34927  | 0.910882 |
| XLOC_006994 | XLOC_006994 | AHNAK2                | chr14:105403590-105446694 | 0.349356 | 0.774655 |
| XLOC_003167 | XLOC_003167 | FGFR2                 | chr10:123237843-123357972 | 0.349378 | 0.999791 |
| XLOC_021241 | XLOC_021241 | DPY19L2P2             | chr7:102815461-102920913  | 0.349737 | 1        |
| XLOC_007867 | XLOC_007867 | NPW                   | chr16:2069520-2070756     | 0.349781 | 0.999791 |
| XLOC_016492 | XLOC_016492 | FGF2                  | chr4:123747862-123844159  | 0.350038 | 1        |
| XLOC_017113 | XLOC_017113 | CARD6                 | chr5:40841409-40855456    | 0.350061 | 0.999791 |
| XLOC_001427 | XLOC_001427 | YARS                  | chr1:33240839-33242480    | 0.350223 | 0.886909 |
| XLOC_020412 | XLOC_020412 | HOTTIP                | chr7:27240039-27246130    | 0.350282 | 1        |
| XLOC_007259 | XLOC_007259 | DIS3L                 | chr15:66585632-66626236   | 0.350338 | 0.910882 |
| XLOC_000909 | XLOC_000909 | TDRD5                 | chr11:179560747-179660407 | 0.350393 | 0.999791 |
| XLOC_017175 | XLOC_017175 | SMN2                  | chr5:70220767-70248842    | 0.350559 | 0.999791 |
| XLOC_014509 | XLOC_014509 | MORC2-AS1             | chr22:31318294-31364187   | 0.350591 | 0.999791 |
| XLOC_006066 | XLOC_006066 | N4BP2L2-IT2           | chr13:33006929-33112936   | 0.350694 | 1        |
| XLOC_015182 | XLOC_015182 | ARL6IP5               | chr3:69134089-69155239    | 0.350729 | 0.662844 |
| XLOC_011063 | XLOC_011063 | SIGLEC9               | chr19:51628136-51639520   | 0.350819 | 1        |
| XLOC_015910 | XLOC_015910 | MYLK                  | chr3:123304402-123603149  | 0.351463 | 1        |
| XLOC_018266 | XLOC_018266 | PNPLA1                | chr6:36210944-36276372    | 0.35169  | 1        |
| XLOC_018262 | XLOC_018262 | LHFPL5                | chr6:35773070-35791852    | 0.352621 | 1        |
| XLOC_013469 | XLOC_013469 | PDCD1                 | chr2:242792032-242801058  | 0.352979 | 1        |
| XLOC_008019 | XLOC_008019 | EIF3C,EIF3CL          | chr16:28699878-28747053   | 0.353349 | 0.999791 |
| XLOC_004790 | XLOC_004790 | LOC100287314          | chr12:30948614-30955645   | 0.353363 | 0.999791 |
| XLOC_013999 | XLOC_013999 | TNNC2                 | chr20:44451854-44455953   | 0.35351  | 1        |
| XLOC_002233 | XLOC_002233 | NUP133                | chr1:229577043-229644088  | 0.353581 | 0.638821 |
| XLOC_016110 | XLOC_016110 | LPP-AS2               | chr3:187868993-188608460  | 0.353691 | 1        |
| XLOC_012054 | XLOC_012054 | LINC00570             | chr2:11534106-11543203    | 0.353814 | 1        |
| XLOC_011088 | XLOC_011088 | ZNF808                | chr19:53030908-53059303   | 0.354092 | 0.999791 |
| XLOC_002670 | XLOC_002670 | SFXN2                 | chr10:104474297-104498946 | 0.354439 | 0.934472 |
| XLOC_007887 | XLOC_007887 | LOC652276             | chr16:2653384-26809495    | 0.354536 | 0.999791 |
| XLOC_022056 | XLOC_022056 | ZNF704                | chr8:81540685-81787016    | 0.354633 | 1        |
| XLOC_007994 | XLOC_007994 | HS3ST2                | chr16:22825859-22927659   | 0.354812 | 1        |
| XLOC_005049 | XLOC_005049 | ACTR6                 | chr12:100593864-100618202 | 0.354938 | 0.748784 |
| XLOC_006052 | XLOC_006052 | SLC46A3               | chr13:29274217-29293150   | 0.35499  | 0.999791 |
| XLOC_002860 | XLOC_002860 | LRRC37A6P             | chr10:27534781-27541235   | 0.355116 | 1        |
| XLOC_008643 | XLOC_008643 | TMED6                 | chr16:69377148-69385712   | 0.355565 | 0.999791 |
| XLOC_015932 | XLOC_015932 | RUVBL1                | chr3:127799799-127842671  | 0.355594 | 0.608253 |
| XLOC_020605 | XLOC_020605 | MGC16142              | chr7:92167788-92169079    | 0.355828 | 0.999791 |
| XLOC_017578 | XLOC_017578 | FAM173B               | chr5:10225619-10250021    | 0.355868 | 0.999791 |
| XLOC_008392 | XLOC_008392 | SRL                   | chr16:4239374-4292081     | 0.355936 | 1        |
| XLOC_004039 | XLOC_004039 | DCHS1                 | chr11:6642557-6677074     | 0.356232 | 1        |
| XLOC_000603 | XLOC_000603 | AP4B1-AS1             | chr1:114356432-114447741  | 0.356441 | 1        |
| XLOC_013955 | XLOC_013955 | SAMHD1                | chr20:35504569-35580246   | 0.356599 | 0.999791 |
| XLOC_003558 | XLOC_003558 | ASRGL1                | chr11:62104773-62160887   | 0.357062 | 0.999791 |
| XLOC_001298 | XLOC_001298 | RSGL1                 | chr11:16558181-16563659   | 0.357294 | 0.999791 |
| XLOC_007121 | XLOC_007121 | SCG5                  | chr15:32933869-32989298   | 0.357969 | 1        |
| XLOC_019026 | XLOC_019026 | OSTM1                 | chr6:108362612-108395941  | 0.358329 | 0.910882 |
| XLOC_006437 | XLOC_006437 | ACOT6                 | chr14:74083547-74086592   | 0.358827 | 1        |
| XLOC_000375 | XLOC_000375 | MKNK1-AS1             | chr1:47004367-47069966    | 0.358832 | 1        |
| XLOC_016169 | XLOC_016169 | MAEA                  | chr4:1283671-1333925      | 0.359221 | 0.64943  |
| XLOC_008373 | XLOC_008373 | PRSS22                | chr16:2902727-2908171     | 0.359563 | 0.999791 |
| XLOC_008293 | XLOC_008293 | ZNF778                | chr16:89284110-89295965   | 0.359748 | 0.999791 |
| XLOC_015225 | XLOC_015225 | LNP1                  | chr3:100082302-100175170  | 0.359844 | 0.999791 |
| XLOC_007465 | XLOC_007465 | GABRB3                | chr15:26788693-27018935   | 0.359887 | 0.999791 |
| XLOC_012910 | XLOC_012910 | ASB3,GPR75,GPR75-ASB3 | chr2:53897116-54087170    | 0.360446 | 0.999791 |
| XLOC_004514 | XLOC_004514 | C11orf65              | chr11:108253726-108338258 | 0.360543 | 0.999791 |
| XLOC_005112 | XLOC_005112 | OAS1                  | chr12:113344738-113357712 | 0.360717 | 1        |
| XLOC_013555 | XLOC_013555 | INSM1                 | chr20:20348764-20351592   | 0.360817 | 1        |
| XLOC_002141 | XLOC_002141 | NUAK2                 | chr1:205271190-205290883  | 0.360861 | 1        |
| XLOC_018203 | XLOC_018203 | LY6G5B                | chr6:31638727-31640227    | 0.361021 | 0.999791 |
| XLOC_019022 | XLOC_019022 | BEND3                 | chr6:107386384-107435636  | 0.361155 | 0.999791 |
| XLOC_016052 | XLOC_016052 | TERC                  | chr3:169482397-169482848  | 0.361317 | 0.999791 |
| XLOC_001225 | XLOC_001225 | FLJ42875              | chr1:2976180-2984289      | 0.361348 | 0.999791 |
| XLOC_009960 | XLOC_009960 | USH1G                 | chr17:72912175-72919351   | 0.361435 | 0.999791 |
| XLOC_012194 | XLOC_012194 | REL                   | chr2:61108751-61150178    | 0.361442 | 1        |
| XLOC_019016 | XLOC_019016 | BVES                  | chr6:105544698-105585049  | 0.361534 | 1        |
| XLOC_018569 | XLOC_018569 | ZDHC14                | chr6:157802556-158094977  | 0.361584 | 0.999791 |
| XLOC_017892 | XLOC_017892 | CSF1R                 | chr5:149432853-149492935  | 0.361788 | 1        |
| XLOC_005437 | XLOC_005437 | FAM186B               | chr12:49976657-49999433   | 0.362221 | 1        |
| XLOC_003840 | XLOC_003840 | CEP164                | chr11:117192493-117283982 | 0.362235 | 0.914868 |
| XLOC_018507 | XLOC_018507 | SNORA33               | chr6:133135707-133138703  | 0.362234 | 0.999791 |
| XLOC_007514 | XLOC_007514 | LOC100505648          | chr15:40985952-40987303   | 0.362525 | 1        |

|             |             |              |                           |          |          |
|-------------|-------------|--------------|---------------------------|----------|----------|
| XLOC_013518 | XLOC_013518 | LOC643406    | chr20:5451841-5457780     | 0.362923 | 1        |
| XLOC_002392 | XLOC_002392 | PDSS1        | chr10:26986594-27150016   | 0.363596 | 0.999791 |
| XLOC_021810 | XLOC_021810 | ZNF252P-AS1  | chr8:146198974-146231432  | 0.363786 | 1        |
| XLOC_009471 | XLOC_009471 | ALOX12B      | chr17:7975953-7991021     | 0.363823 | 0.999791 |
| XLOC_023000 | XLOC_023000 | EPB41L4B     | chr9:111934253-112083021  | 0.364039 | 0.735322 |
| XLOC_017420 | XLOC_017420 | SLC26A2      | chr5:149340299-149366963  | 0.364061 | 0.910882 |
| XLOC_018144 | XLOC_018144 | ZKSCAN3      | chr6:28317690-28336954    | 0.364111 | 0.999791 |
| XLOC_015698 | XLOC_015698 | PRKAR2A      | chr3:48788092-48885270    | 0.365064 | 0.999791 |
| XLOC_013259 | XLOC_013259 | CCDC141      | chr2:179694483-179914786  | 0.365317 | 1        |
| XLOC_000259 | XLOC_000259 | TSSK3        | chr1:32827861-32829924    | 0.365389 | 0.999791 |
| XLOC_005172 | XLOC_005172 | GTF2H3       | chr12:124105569-124147151 | 0.365498 | 0.999791 |
| XLOC_017614 | XLOC_017614 | LOC646719    | chr5:36871462-36876796    | 0.365508 | 0.949191 |
| XLOC_006015 | XLOC_006015 | TPTE2        | chr13:19997018-20135714   | 0.365534 | 1        |
| XLOC_004716 | XLOC_004716 | LOC100499405 | chr12:9392598-9395645     | 0.365729 | 1        |
| XLOC_014397 | XLOC_014397 | SLC25A18     | chr22:18043182-18073647   | 0.365954 | 1        |
| XLOC_005362 | XLOC_005362 | ASUN         | chr12:27058111-27091254   | 0.366066 | 0.603585 |
| XLOC_010819 | XLOC_010819 | ZNF568       | chr19:37407230-37488834   | 0.366302 | 1        |
| XLOC_013586 | XLOC_013586 | MYLK2        | chr20:30407177-30422500   | 0.366932 | 1        |
| XLOC_009514 | XLOC_009514 | TEKT3        | chr17:15207128-15244958   | 0.366985 | 1        |
| XLOC_005551 | XLOC_005551 | CYP27B1      | chr12:58156116-58160976   | 0.367198 | 0.999791 |
| XLOC_013164 | XLOC_013164 | LOC100129961 | chr2:135596185-135676176  | 0.367233 | 1        |
| XLOC_010969 | XLOC_010969 | C5AR2        | chr19:47835403-47845272   | 0.367371 | 1        |
| XLOC_013107 | XLOC_013107 | RGPD8        | chr2:113125945-113191222  | 0.367408 | 1        |
| XLOC_022295 | XLOC_022295 | ACER2        | chr9:19408924-19452500    | 0.367453 | 1        |
| XLOC_008935 | XLOC_008935 | SARM1        | chr17:26698986-26733230   | 0.367507 | 0.999791 |
| XLOC_004364 | XLOC_004364 | ACY3         | chr11:67410025-67418130   | 0.367917 | 1        |
| XLOC_011274 | XLOC_011274 | CIRBP-AS1    | chr19:1267469-1274809     | 0.368197 | 0.999791 |
| XLOC_009438 | XLOC_009438 | KIAA0753     | chr17:6481644-6554954     | 0.368313 | 0.999791 |
| XLOC_001080 | XLOC_001080 | PSEN2        | chr1:227058272-227083804  | 0.368633 | 0.938694 |
| XLOC_008903 | XLOC_008903 | TVP23B       | chr17:18684581-18710026   | 0.369112 | 0.759521 |
| XLOC_008329 | XLOC_008329 | C1QTNF8      | chr16:1138225-1146244     | 0.369117 | 1        |
| XLOC_009183 | XLOC_009183 | ANKFN1       | chr17:54230835-54560007   | 0.369203 | 1        |
| XLOC_012989 | XLOC_012989 | C2orf81      | chr2:74641302-74644844    | 0.369297 | 0.999791 |
| XLOC_010241 | XLOC_010241 | CCDC102B     | chr18:66382490-66722426   | 0.369474 | 1        |
| XLOC_013057 | XLOC_013057 | LOC100506123 | chr2:98081675-98091049    | 0.369555 | 0.999791 |
| XLOC_009544 | XLOC_009544 | FAM83G       | chr17:18853988-18950336   | 0.369857 | 0.774655 |
| XLOC_002359 | XLOC_002359 | PTER         | chr10:16478941-16564004   | 0.369948 | 0.816615 |
| XLOC_020705 | XLOC_020705 | TES          | chr7:11580546-115898837   | 0.370365 | 1        |
| XLOC_023152 | XLOC_023152 | LOC100506599 | chr9:138354564-138364095  | 0.37099  | 0.999791 |
| XLOC_021336 | XLOC_021336 | DGKI         | chr7:137074384-137531609  | 0.371229 | 0.934472 |
| XLOC_002604 | XLOC_002604 | SLC35G1      | chr10:95653729-95662491   | 0.37131  | 0.999791 |
| XLOC_015338 | XLOC_015338 | NEK11        | chr3:130745693-131100319  | 0.371398 | 0.999791 |
| XLOC_012008 | XLOC_012008 | ZNF837       | chr19:58878989-58892389   | 0.371912 | 0.999791 |
| XLOC_023471 | XLOC_023471 | RPS26P11     | chrX:71130937-71363424    | 0.3723   | 0.999791 |
| XLOC_015339 | XLOC_015339 | NUDT16P1     | chr3:130745693-131100319  | 0.372439 | 0.999791 |
| XLOC_019104 | XLOC_019104 | IL20RA       | chr6:137321107-137366298  | 0.372445 | 0.999791 |
| XLOC_011908 | XLOC_011908 | ZNF577       | chr19:52359055-52391229   | 0.373124 | 1        |
| XLOC_007986 | XLOC_007986 | C16orf52     | chr16:22019455-22095972   | 0.37361  | 0.999791 |
| XLOC_010457 | XLOC_010457 | REEP6        | chr19:1491164-1497924     | 0.373861 | 0.86102  |
| XLOC_009539 | XLOC_009539 | USP32P2      | chr17:18414575-18424566   | 0.373885 | 1        |
| XLOC_000858 | XLOC_000858 | RCS1         | chr1:167599473-167675486  | 0.374035 | 1        |
| XLOC_012106 | XLOC_012106 | C2orf16      | chr2:27799388-27805589    | 0.374067 | 1        |
| XLOC_015379 | XLOC_015379 | TRPC1        | chr3:142443265-142526729  | 0.374143 | 1        |
| XLOC_005257 | XLOC_005257 | C1RL         | chr12:7247145-7274447     | 0.374405 | 0.914868 |
| XLOC_023268 | XLOC_023268 | TCEANC       | chrX:13671306-13682247    | 0.374637 | 1        |
| XLOC_002719 | XLOC_002719 | CASC2        | chr10:119806331-119969665 | 0.37514  | 1        |
| XLOC_013715 | XLOC_013715 | CEBPB        | chr20:48807119-48809227   | 0.37516  | 0.754339 |
| XLOC_007114 | XLOC_007114 | ARHGAP11B    | chr15:30918878-30931013   | 0.375527 | 0.999791 |
| XLOC_017953 | XLOC_017953 | DUSP1        | chr5:172195092-172198203  | 0.375716 | 0.653038 |
| XLOC_013731 | XLOC_013731 | FAM209B      | chr20:55108301-55111574   | 0.375759 | 0.999791 |
| XLOC_006093 | XLOC_006093 | KBTBD7       | chr13:41765710-41768702   | 0.375899 | 1        |
| XLOC_001071 | XLOC_001071 | DEGS1        | chr1:224370909-224381142  | 0.376079 | 0.439127 |
| XLOC_010621 | XLOC_010621 | NFIX         | chr19:13106583-13209610   | 0.376104 | 0.562407 |
| XLOC_009124 | XLOC_009124 | KANSL1-AS1   | chr17:44107281-44302740   | 0.37639  | 0.999791 |
| XLOC_004151 | XLOC_004151 | ALX4         | chr11:44282277-44331716   | 0.376543 | 1        |
| XLOC_017661 | XLOC_017661 | RNF138P1     | chr5:54603575-54830873    | 0.376799 | 1        |
| XLOC_019121 | XLOC_019121 | LOC100507489 | chr6:143287558-143358719  | 0.376891 | 1        |
| XLOC_022579 | XLOC_022579 | LOC389791    | chr9:130890807-130892913  | 0.377275 | 0.999791 |
| XLOC_000431 | XLOC_000431 | EFCAB7       | chr1:63989012-64038364    | 0.377372 | 0.999791 |
| XLOC_011628 | XLOC_011628 | ZNF790       | chr19:37288451-37407193   | 0.37744  | 0.999791 |
| XLOC_007546 | XLOC_007546 | STRC         | chr15:43663312-43910998   | 0.377873 | 1        |
| XLOC_002636 | XLOC_002636 | ENTPD7       | chr10:101419262-101515894 | 0.377929 | 0.999791 |
| XLOC_015364 | XLOC_015364 | FAIM         | chr3:138327541-138352213  | 0.37815  | 0.999791 |
| XLOC_021321 | XLOC_021321 | LOC646329    | chr7:130565750-130598069  | 0.378266 | 0.439814 |
| XLOC_003019 | XLOC_003019 | TMEM254-AS1  | chr10:81805988-81852307   | 0.378428 | 1        |
| XLOC_023769 | XLOC_023769 | TMEM27       | chrX:15645440-15683154    | 0.379077 | 0.999791 |
| XLOC_006459 | XLOC_006459 | IFT43        | chr14:76452095-76550416   | 0.379185 | 0.726329 |
| XLOC_021966 | XLOC_021966 | RNF5P1       | chr8:38457692-38458775    | 0.379239 | 1        |
| XLOC_015542 | XLOC_015542 | LRCH3        | chr3:197518144-197598456  | 0.379331 | 0.999791 |

|             |             |              |                           |          |          |
|-------------|-------------|--------------|---------------------------|----------|----------|
| XLOC_005482 | XLOC_005482 | LOC283335    | chr12:53436972-53473204   | 0.379571 | 0.999791 |
| XLOC_018807 | XLOC_018807 | COL11A2      | chr6:33130468-33160245    | 0.379613 | 1        |
| XLOC_009468 | XLOC_009468 | LOC284023    | chr17:7816639-7819265     | 0.379827 | 0.833451 |
| XLOC_004322 | XLOC_004322 | SLC25A45     | chr11:65142662-65150142   | 0.380295 | 0.999791 |
| XLOC_006760 | XLOC_006760 | ARHGAP5-AS1  | chr14:32544624-32545905   | 0.380373 | 0.999791 |
| XLOC_021230 | XLOC_021230 | RABL5        | chr7:100956647-100965093  | 0.381314 | 0.653038 |
| XLOC_011476 | XLOC_011476 | PODNL1       | chr19:14041999-14072256   | 0.3814   | 1        |
| XLOC_008965 | XLOC_008965 | ADAP2        | chr17:29248753-29286211   | 0.381434 | 1        |
| XLOC_014675 | XLOC_014675 | CLTCL1       | chr22:19166986-19279239   | 0.381983 | 0.963288 |
| XLOC_004934 | XLOC_004934 | GPR182       | chr12:57388354-57390469   | 0.382668 | 1        |
| XLOC_011462 | XLOC_011462 | RTBDN        | chr19:12936290-12946242   | 0.382691 | 0.999791 |
| XLOC_021128 | XLOC_021128 | SRCRB4D      | chr7:76018645-76071388    | 0.382711 | 0.999791 |
| XLOC_021915 | XLOC_021915 | NKX3-1       | chr8:23536205-23540450    | 0.382779 | 0.949191 |
| XLOC_016157 | XLOC_016157 | ANKRD18BP    | chr3:197784403-197807542  | 0.382903 | 1        |
| XLOC_020338 | XLOC_020338 | PSMG3-AS1    | chr7:1609708-1629261      | 0.383348 | 1        |
| XLOC_012864 | XLOC_012864 | MYADML       | chr2:33951127-33953284    | 0.383623 | 1        |
| XLOC_000434 | XLOC_000434 | ROR1         | chr1:64239689-64647179    | 0.383681 | 1        |
| XLOC_011951 | XLOC_011951 | CDC42EP5     | chr19:54976209-54984422   | 0.383903 | 0.999791 |
| XLOC_014250 | XLOC_014250 | LINC00515    | chr21:26955086-26955536   | 0.384006 | 1        |
| XLOC_006483 | XLOC_006483 | FOXN3-AS1    | chr14:89622515-90085494   | 0.384045 | 0.999791 |
| XLOC_020429 | XLOC_020429 | AQP1         | chr7:30951414-30965131    | 0.384048 | 1        |
| XLOC_014451 | XLOC_014451 | RAB36        | chr22:23487512-23506631   | 0.38422  | 0.910882 |
| XLOC_010329 | XLOC_010329 | ZSCAN30      | chr18:32820993-32870196   | 0.38473  | 0.999791 |
| XLOC_002824 | XLOC_002824 | CDNF         | chr10:14861250-14879983   | 0.384769 | 0.999791 |
| XLOC_017794 | XLOC_017794 | ACSL6        | chr5:131285666-131347761  | 0.384895 | 1        |
| XLOC_019050 | XLOC_019050 | TSPYL4       | chr6:116571130-116575261  | 0.385061 | 0.852186 |
| XLOC_001384 | XLOC_001384 | FCN3         | chr1:27695600-27701315    | 0.385113 | 1        |
| XLOC_001142 | XLOC_001142 | KIF26B       | chr1:245318286-245866428  | 0.385391 | 1        |
| XLOC_008375 | XLOC_008375 | CLDN6        | chr16:3064712-3068188     | 0.385449 | 1        |
| XLOC_012342 | XLOC_012342 | IL18R1       | chr2:102979096-103015217  | 0.38613  | 1        |
| XLOC_018100 | XLOC_018100 | HIST1H2BE    | chr6:26184023-26184458    | 0.386234 | 1        |
| XLOC_001126 | XLOC_001126 | CHRM3        | chr1:239792372-240072717  | 0.386612 | 1        |
| XLOC_018253 | XLOC_018253 | SCUBE3       | chr6:35182189-35218609    | 0.386882 | 1        |
| XLOC_020632 | XLOC_020632 | ZNF655       | chr7:99156044-99174076    | 0.387455 | 0.999791 |
| XLOC_000798 | XLOC_000798 | IFI16        | chr1:158979681-159024945  | 0.387889 | 0.372926 |
| XLOC_006209 | XLOC_006209 | TEX30        | chr13:103418462-103426149 | 0.388161 | 1        |
| XLOC_002577 | XLOC_002577 | STAMBPL1     | chr10:90639943-90683259   | 0.388189 | 0.910882 |
| XLOC_018101 | XLOC_018101 | HIST1H2BF    | chr6:26199786-26200216    | 0.388541 | 0.999791 |
| XLOC_021058 | XLOC_021058 | SUN3         | chr7:48026745-48068716    | 0.388937 | 0.467171 |
| XLOC_016975 | XLOC_016975 | CTSO         | chr4:156845269-156875048  | 0.389183 | 1        |
| XLOC_015857 | XLOC_015857 | MYH15        | chr3:108099215-108248169  | 0.38927  | 1        |
| XLOC_000455 | XLOC_000455 | CTH          | chr1:70876900-70905534    | 0.389672 | 0.830467 |
| XLOC_022824 | XLOC_022824 | SPAG8        | chr9:35792405-35812259    | 0.389738 | 1        |
| XLOC_000321 | XLOC_000321 | CCDC30       | chr1:43000559-43120335    | 0.389905 | 1        |
| XLOC_020960 | XLOC_020960 | KLHL7-AS1    | chr7:23140846-23145322    | 0.391061 | 1        |
| XLOC_018613 | XLOC_018613 | C6orf195     | chr6:2622971-2635298      | 0.391088 | 1        |
| XLOC_004113 | XLOC_004113 | LOC100126784 | chr11:19372270-20143147   | 0.391505 | 0.999791 |
| XLOC_003552 | XLOC_003552 | BEST1        | chr11:61717355-61735132   | 0.391685 | 1        |
| XLOC_006454 | XLOC_006454 | LOC731223    | chr14:75761106-75763111   | 0.39196  | 0.999791 |
| XLOC_002503 | XLOC_002503 | ADAMTS14     | chr10:72432558-72522195   | 0.392025 | 1        |
| XLOC_011700 | XLOC_011700 | GRIK5        | chr19:42502467-42569957   | 0.39216  | 0.999791 |
| XLOC_007111 | XLOC_007111 | GOLGA8T      | chr15:30427989-30439395   | 0.392202 | 1        |
| XLOC_013909 | XLOC_013909 | MLLT10P1     | chr20:29637583-29638138   | 0.392214 | 1        |
| XLOC_005018 | XLOC_005018 | LOC338758    | chr12:90102731-90105729   | 0.392507 | 1        |
| XLOC_020677 | XLOC_020677 | SPDYE2L      | chr7:102178365-102213068  | 0.392558 | 1        |
| XLOC_003789 | XLOC_003789 | BIRC2        | chr11:102217912-102249401 | 0.393017 | 0.416523 |
| XLOC_002567 | XLOC_002567 | OPN4         | chr10:88414313-88426216   | 0.393182 | 1        |
| XLOC_023075 | XLOC_023075 | MAPKAP1      | chr9:128199672-128469513  | 0.393232 | 0.610388 |
| XLOC_007960 | XLOC_007960 | NOMO3        | chr16:16326388-16388668   | 0.393433 | 1        |
| XLOC_002894 | XLOC_002894 | ZNF239       | chr10:44051792-44070066   | 0.393799 | 0.999791 |
| XLOC_021476 | XLOC_021476 | KIAA1456     | chr8:12803182-12887284    | 0.394157 | 1        |
| XLOC_016813 | XLOC_016813 | ANTXR2       | chr4:80822770-80994477    | 0.394215 | 0.372926 |
| XLOC_018349 | XLOC_018349 | EFHC1        | chr6:52284993-52360583    | 0.394584 | 0.934472 |
| XLOC_020780 | XLOC_020780 | TTC26        | chr7:138818489-138874550  | 0.394669 | 0.999791 |
| XLOC_011574 | XLOC_011574 | ZNF91        | chr19:23540497-23578269   | 0.394693 | 0.957042 |
| XLOC_023812 | XLOC_023812 | RPGR         | chrX:38128422-38186788    | 0.394836 | 0.998026 |
| XLOC_015822 | XLOC_015822 | FAM86DP      | chr3:75470702-75484266    | 0.394926 | 0.794784 |
| XLOC_021095 | XLOC_021095 | TYW1B        | chr7:72023728-72298813    | 0.395414 | 0.999791 |
| XLOC_021745 | XLOC_021745 | TRIB1        | chr8:126442562-126450644  | 0.395444 | 0.371043 |
| XLOC_004336 | XLOC_004336 | CATSPER1     | chr11:65784222-65793988   | 0.395568 | 0.999791 |
| XLOC_012830 | XLOC_012830 | GPR113       | chr2:26531040-26618759    | 0.396    | 1        |
| XLOC_006376 | XLOC_006376 | TOMM20L      | chr14:58862643-59015549   | 0.396105 | 0.999791 |
| XLOC_008491 | XLOC_008491 | SULT1A1      | chr16:28616907-28634907   | 0.396325 | 0.86102  |
| XLOC_010698 | XLOC_010698 | GDF15        | chr19:18496967-18499986   | 0.396543 | 0.64943  |
| XLOC_015153 | XLOC_015153 | CCDC66       | chr3:56591183-56711735    | 0.396573 | 0.999791 |
| XLOC_017913 | XLOC_017913 | FLJ38109     | chr5:153570294-153825382  | 0.396671 | 1        |
| XLOC_012074 | XLOC_012074 | FAM228B      | chr2:24346349-24392507    | 0.396889 | 0.999791 |
| XLOC_010963 | XLOC_010963 | NPAS1        | chr19:47524142-47549017   | 0.397129 | 0.999791 |
| XLOC_003159 | XLOC_003159 | EIF3A        | chr10:120794540-120840334 | 0.397242 | 0.388523 |

|             |             |              |                           |          |          |
|-------------|-------------|--------------|---------------------------|----------|----------|
| XLOC_015803 | XLOC_015803 | ADAMTS9      | chr3:64501330-64997143    | 0.397272 | 1        |
| XLOC_017846 | XLOC_017846 | PROB1        | chr5:138727634-138730885  | 0.397429 | 0.999791 |
| XLOC_013614 | XLOC_013614 | ASIP         | chr20:32848170-32857148   | 0.397431 | 1        |
| XLOC_000125 | XLOC_000125 | FBLJM1       | chr1:16085254-16113084    | 0.397734 | 0.999791 |
| XLOC_010270 | XLOC_010270 | LINC00470    | chr18:1268311-1359630     | 0.39823  | 1        |
| XLOC_008066 | XLOC_008066 | HSD3B7       | chr16:30996518-31000473   | 0.398352 | 0.389544 |
| XLOC_021793 | XLOC_021793 | KIAA1875     | chr8:145162628-145173218  | 0.398819 | 1        |
| XLOC_010200 | XLOC_010200 | ME2          | chr18:48405431-48476162   | 0.398892 | 0.326135 |
| XLOC_005120 | XLOC_005120 | SDSL         | chr12:113860215-113876081 | 0.399448 | 0.371043 |
| XLOC_017531 | XLOC_017531 | LTC4S        | chr5:179220985-179223513  | 0.400178 | 0.999791 |
| XLOC_001200 | XLOC_001200 | MXRA8        | chr1:1288070-1293915      | 0.400234 | 0.999791 |
| XLOC_022760 | XLOC_022760 | MIR31HG      | chr9:21454266-21559697    | 0.401061 | 0.999791 |
| XLOC_019095 | XLOC_019095 | ALDH8A1      | chr6:135238527-135271260  | 0.401125 | 1        |
| XLOC_012483 | XLOC_012483 | TANK         | chr2:161993465-162092683  | 0.401134 | 0.999791 |
| XLOC_006798 | XLOC_006798 | C14orf183    | chr14:50550368-50559361   | 0.401273 | 1        |
| XLOC_017221 | XLOC_017221 | ATG10        | chr5:81267843-81551216    | 0.401984 | 0.999791 |
| XLOC_016131 | XLOC_016131 | XXYLT1       | chr3:194789012-194991895  | 0.402033 | 0.993188 |
| XLOC_021878 | XLOC_021878 | FAM86B2      | chr8:12283123-12293852    | 0.402125 | 0.999791 |
| XLOC_005545 | XLOC_005545 | ARHGAP9      | chr12:57853917-57873633   | 0.402467 | 1        |
| XLOC_017116 | XLOC_017116 | FBXO4        | chr5:41925355-41941672    | 0.402473 | 0.797576 |
| XLOC_018044 | XLOC_018044 | LOC100506207 | chr6:8435855-8785678      | 0.402689 | 1        |
| XLOC_008367 | XLOC_008367 | ERVK13-1     | chr16:2708389-2723440     | 0.402944 | 0.886909 |
| XLOC_008463 | XLOC_008463 | LOC100271836 | chr16:21458003-21513602   | 0.403233 | 1        |
| XLOC_010932 | XLOC_010932 | APOC1P1      | chr19:45430059-45434643   | 0.403264 | 1        |
| XLOC_011302 | XLOC_011302 | SLC39A3      | chr19:2732522-2740074     | 0.404894 | 0.86102  |
| XLOC_005977 | XLOC_005977 | TPP2         | chr13:103249285-103331523 | 0.405053 | 0.326135 |
| XLOC_021087 | XLOC_021087 | LINC00174    | chr7:65841030-65865395    | 0.405147 | 0.999791 |
| XLOC_013997 | XLOC_013997 | WFDC10B      | chr20:44313289-44337456   | 0.405211 | 1        |
| XLOC_021742 | XLOC_021742 | ZNF572       | chr8:125985538-125991630  | 0.405278 | 0.978746 |
| XLOC_010814 | XLOC_010814 | LOC728752    | chr19:36980528-36981942   | 0.40573  | 0.999791 |
| XLOC_021402 | XLOC_021402 | ABCF2        | chr7:150904922-150924317  | 0.405735 | 0.377392 |
| XLOC_017736 | XLOC_017736 | MBLAC2       | chr5:89754019-89770585    | 0.405893 | 0.939694 |
| XLOC_003744 | XLOC_003744 | CCDC81       | chr11:86085777-86134151   | 0.406515 | 1        |
| XLOC_021315 | XLOC_021315 | CEP41        | chr7:130033611-130081051  | 0.4067   | 0.967711 |
| XLOC_022788 | XLOC_022788 | AQP3         | chr9:33441151-33447631    | 0.40671  | 1        |
| XLOC_001825 | XLOC_001825 | THEM4        | chr1:151843342-151882361  | 0.406976 | 0.610388 |
| XLOC_014381 | XLOC_014381 | COL18A1-AS1  | chr21:46825096-46933634   | 0.40743  | 1        |
| XLOC_007844 | XLOC_007844 | SSTR5        | chr16:1114081-1131454     | 0.40755  | 1        |
| XLOC_004938 | XLOC_004938 | NXP4         | chr12:57610577-57620232   | 0.407793 | 0.387491 |
| XLOC_022053 | XLOC_022053 | HEY1         | chr8:80676244-80680098    | 0.408195 | 0.999791 |
| XLOC_006236 | XLOC_006236 | RASA3        | chr13:114747193-114898095 | 0.408792 | 0.318368 |
| XLOC_017379 | XLOC_017379 | PCDHB10      | chr5:140571951-140575213  | 0.409467 | 1        |
| XLOC_022151 | XLOC_022151 | ENPP2        | chr8:120569316-120651106  | 0.409531 | 1        |
| XLOC_012191 | XLOC_012191 | VRK2         | chr2:58273776-58468515    | 0.40974  | 0.999791 |
| XLOC_016184 | XLOC_016184 | GRK4         | chr4:2965342-3042474      | 0.409967 | 0.999791 |
| XLOC_005174 | XLOC_005174 | ATP6V0A2     | chr12:124196864-124246301 | 0.410084 | 0.910882 |
| XLOC_004253 | XLOC_004253 | FADS1        | chr1:161567096-61584529   | 0.410146 | 1        |
| XLOC_017319 | XLOC_017319 | LEAP2        | chr5:132209357-132210582  | 0.410165 | 0.999791 |
| XLOC_003560 | XLOC_003560 | ROM1         | chr11:62369690-62382592   | 0.410312 | 0.999791 |
| XLOC_015834 | XLOC_015834 | STX19        | chr3:93698982-93774522    | 0.410534 | 1        |
| XLOC_010191 | XLOC_010191 | RNF165       | chr18:43914186-44040783   | 0.410556 | 1        |
| XLOC_004520 | XLOC_004520 | POU2AF1      | chr11:111222980-111250157 | 0.410612 | 1        |
| XLOC_022573 | XLOC_022573 | C9orf17      | chr9:130469270-130477936  | 0.410646 | 0.999791 |
| XLOC_011437 | XLOC_011437 | ELAVL3       | chr19:11562142-11591803   | 0.410715 | 1        |
| XLOC_022515 | XLOC_022515 | C9orf43      | chr9:116169517-116191879  | 0.410816 | 0.999791 |
| XLOC_011031 | XLOC_011031 | PRRG2        | chr19:50084586-50094265   | 0.410943 | 0.999791 |
| XLOC_018430 | XLOC_018430 | AIM1         | chr6:106959729-107018334  | 0.411163 | 1        |
| XLOC_006500 | XLOC_006500 | UNC79        | chr14:93799564-94173689   | 0.411169 | 1        |
| XLOC_017906 | XLOC_017906 | SLC36A2      | chr5:150694538-150727151  | 0.411412 | 1        |
| XLOC_005382 | XLOC_005382 | KIF21A       | chr12:39687029-39837192   | 0.412708 | 0.886909 |
| XLOC_006718 | XLOC_006718 | HOMEZ        | chr14:23742843-23755309   | 0.412827 | 0.794784 |
| XLOC_007619 | XLOC_007619 | LOC100130855 | chr15:63796709-63894620   | 0.413113 | 0.999791 |
| XLOC_023329 | XLOC_023329 | OTC          | chrX:38211735-38280703    | 0.413473 | 1        |
| XLOC_012161 | XLOC_012161 | SLC3A1       | chr2:44502596-44589001    | 0.413612 | 1        |
| XLOC_012150 | XLOC_012150 | TMEM178A     | chr2:39892637-39945104    | 0.413863 | 1        |
| XLOC_002004 | XLOC_002004 | LOC100505918 | chr1:168369426-168391894  | 0.414713 | 1        |
| XLOC_011573 | XLOC_011573 | ZNF724P      | chr19:23406606-23433172   | 0.41493  | 1        |
| XLOC_008658 | XLOC_008658 | FTSJD1       | chr16:71316202-71323509   | 0.415054 | 0.421482 |
| XLOC_000638 | XLOC_000638 | ANKRD34A     | chr1:145470507-145475647  | 0.415406 | 0.978746 |
| XLOC_008576 | XLOC_008576 | RPGRIP1L     | chr16:53633817-53737771   | 0.415791 | 1        |
| XLOC_001392 | XLOC_001392 | PTAFR        | chr1:28473676-28520447    | 0.415975 | 1        |
| XLOC_020552 | XLOC_020552 | GTF2I        | chr7:74072029-74175022    | 0.416402 | 0.999791 |
| XLOC_009052 | XLOC_009052 | KRTAP4-9     | chr17:39261640-39262740   | 0.416891 | 0.999791 |
| XLOC_005643 | XLOC_005643 | LOC643770    | chr12:98879321-98897633   | 0.416901 | 1        |
| XLOC_006106 | XLOC_006106 | SLC25A30     | chr13:45967453-45992516   | 0.416904 | 0.999791 |
| XLOC_019044 | XLOC_019044 | LAMA4        | chr6:112429133-112575917  | 0.417129 | 1        |
| XLOC_018247 | XLOC_018247 | ITPR3        | chr6:33589155-33664348    | 0.417266 | 0.362896 |
| XLOC_018080 | XLOC_018080 | NRSN1        | chr6:24126413-24147757    | 0.417633 | 1        |
| XLOC_005001 | XLOC_005001 | NAV3         | chr12:78225068-78606790   | 0.417767 | 0.304629 |



|             |             |              |                           |          |          |
|-------------|-------------|--------------|---------------------------|----------|----------|
| XLOC_016412 | XLOC_016412 | WDFY3-AS2    | chr4:85887970-85928168    | 0.418032 | 1        |
| XLOC_016054 | XLOC_016054 | LRR34        | chr3:169511215-169530574  | 0.419305 | 0.999791 |
| XLOC_018106 | XLOC_018106 | HIST1H2BH    | chr6:26251878-26252303    | 0.419348 | 0.999791 |
| XLOC_019036 | XLOC_019036 | DDO          | chr6:110713382-110736753  | 0.41993  | 1        |
| XLOC_017128 | XLOC_017128 | LOC257396    | chr5:52405686-52410952    | 0.420107 | 0.999791 |
| XLOC_017114 | XLOC_017114 | C7           | chr5:40909598-40983042    | 0.420189 | 1        |
| XLOC_004555 | XLOC_004555 | SCN4B        | chr11:118004091-118023630 | 0.420611 | 1        |
| XLOC_016692 | XLOC_016692 | LOC100505912 | chr4:22328989-22341289    | 0.42074  | 1        |
| XLOC_009888 | XLOC_009888 | LOC653653    | chr17:58179120-58180280   | 0.421025 | 1        |
| XLOC_005067 | XLOC_005067 | EID3         | chr12:104609556-104744085 | 0.421148 | 1        |
| XLOC_016652 | XLOC_016652 | CRMP1        | chr4:5822490-5894785      | 0.421308 | 0.886909 |
| XLOC_005332 | XLOC_005332 | C12orf69     | chr12:14956505-14976791   | 0.421824 | 1        |
| XLOC_011436 | XLOC_011436 | CCDC151      | chr19:11531271-11545980   | 0.421919 | 0.999791 |
| XLOC_009298 | XLOC_009298 | AANAT        | chr17:74449432-74466199   | 0.422607 | 1        |
| XLOC_004791 | XLOC_004791 | TSPAN11      | chr12:31079837-31149537   | 0.422906 | 1        |
| XLOC_005869 | XLOC_005869 | VWA8-AS1     | chr13:42535304-42555701   | 0.423724 | 1        |
| XLOC_005748 | XLOC_005748 | OASL         | chr12:121458094-121477045 | 0.424355 | 1        |
| XLOC_024181 | XLOC_024181 | ARHGAP4      | chrX:153172829-153191714  | 0.424502 | 1        |
| XLOC_010003 | XLOC_010003 | SOCS3        | chr17:76352858-76356158   | 0.425071 | 0.3419   |
| XLOC_023092 | XLOC_023092 | FAM102A      | chr9:130702860-130742812  | 0.425081 | 0.313279 |
| XLOC_014502 | XLOC_014502 | CCDC157      | chr22:30727976-30773894   | 0.425237 | 0.999791 |
| XLOC_003661 | XLOC_003661 | CARNS1       | chr11:67183148-67193078   | 0.425483 | 1        |
| XLOC_015017 | XLOC_015017 | VILL         | chr3:38035077-38048676    | 0.425492 | 1        |
| XLOC_009146 | XLOC_009146 | HOXB-AS5     | chr17:46800541-46802119   | 0.425493 | 0.999791 |
| XLOC_004500 | XLOC_004500 | CASP4        | chr11:104813593-104839325 | 0.425776 | 0.268623 |
| XLOC_015254 | XLOC_015254 | TMPRSS7      | chr3:111758464-111800116  | 0.426028 | 1        |
| XLOC_012488 | XLOC_012488 | SCN2A        | chr2:166095911-166248820  | 0.426177 | 1        |
| XLOC_015082 | XLOC_015082 | TMIE         | chr3:46742822-46752413    | 0.426364 | 1        |
| XLOC_020763 | XLOC_020763 | LRGUK        | chr7:133812104-133948933  | 0.426384 | 1        |
| XLOC_002900 | XLOC_002900 | C10orf25     | chr10:45493145-45500777   | 0.426919 | 0.999791 |
| XLOC_008029 | XLOC_008029 | SNX29P2      | chr16:29313607-29376380   | 0.427316 | 1        |
| XLOC_018746 | XLOC_018746 | IER3         | chr6:30710975-30712327    | 0.428985 | 0.372926 |
| XLOC_007177 | XLOC_007177 | MAP1A        | chr15:43663312-43910998   | 0.429434 | 1        |
| XLOC_007909 | XLOC_007909 | FLJ39639     | chr16:3313767-3317566     | 0.430502 | 1        |
| XLOC_007755 | XLOC_007755 | WDR73        | chr15:85186011-85197521   | 0.430689 | 0.415668 |
| XLOC_005270 | XLOC_005270 | LOC389634    | chr12:8509559-8543348     | 0.430717 | 0.999791 |
| XLOC_016645 | XLOC_016645 | FAM86EP      | chr4:3943668-3957148      | 0.430791 | 0.999791 |
| XLOC_013390 | XLOC_013390 | AP1S3        | chr2:224620046-224702319  | 0.430815 | 1        |
| XLOC_002852 | XLOC_002852 | PRTFDC1      | chr10:25137553-25241533   | 0.431244 | 0.598908 |
| XLOC_018732 | XLOC_018732 | ZNRD1-AS1    | chr6:29968787-30028961    | 0.431357 | 0.999791 |
| XLOC_021714 | XLOC_021714 | TRHR         | chr8:110099652-110131812  | 0.431725 | 1        |
| XLOC_012935 | XLOC_012935 | TMEM17       | chr2:62727355-62733604    | 0.43254  | 0.999791 |
| XLOC_002715 | XLOC_002715 | ENO4         | chr10:118609022-118642112 | 0.432729 | 1        |
| XLOC_018615 | XLOC_018615 | SERPINB1     | chr6:2832565-2842283      | 0.432885 | 0.244149 |
| XLOC_015362 | XLOC_015362 | MRAS         | chr3:138066489-138124377  | 0.433032 | 0.886909 |
| XLOC_002684 | XLOC_002684 | CCDC147      | chr10:106113521-106214848 | 0.433088 | 0.999791 |
| XLOC_004075 | XLOC_004075 | SNORD97      | chr11:10818592-10830582   | 0.433298 | 0.999791 |
| XLOC_018935 | XLOC_018935 | KLHL31       | chr6:53512698-53530506    | 0.433635 | 1        |
| XLOC_018264 | XLOC_018264 | MAPK13       | chr6:36098260-36112301    | 0.434513 | 0.193759 |
| XLOC_000290 | XLOC_000290 | DNALI1       | chr1:38022519-38061586    | 0.435097 | 1        |
| XLOC_021085 | XLOC_021085 | LOC441242    | chr7:65111923-65235797    | 0.437453 | 1        |
| XLOC_022233 | XLOC_022233 | OPLAH        | chr8:145106166-145115584  | 0.437505 | 0.167476 |
| XLOC_017853 | XLOC_017853 | HBEGF        | chr5:139712427-139726188  | 0.43838  | 0.244149 |
| XLOC_004649 | XLOC_004649 | CACNA1C      | chr12:2162415-2807115     | 0.438631 | 1        |
| XLOC_018709 | XLOC_018709 | TOB2P1       | chr6:28183115-28186707    | 0.439127 | 0.999791 |
| XLOC_012104 | XLOC_012104 | KRTCAP3      | chr2:27665232-27712571    | 0.439668 | 0.999791 |
| XLOC_015032 | XLOC_015032 | SNORA62      | chr3:39448203-39454032    | 0.439919 | 0.999791 |
| XLOC_000937 | XLOC_000937 | OCLM         | chr1:185703682-186446655  | 0.440128 | 1        |
| XLOC_001689 | XLOC_001689 | TAF13        | chr1:109606997-109618624  | 0.440437 | 0.914868 |
| XLOC_012180 | XLOC_012180 | CHAC2        | chr2:53897116-54087170    | 0.440543 | 0.999791 |
| XLOC_017427 | XLOC_017427 | MYOZ3        | chr5:150040402-150058930  | 0.440938 | 1        |
| XLOC_013193 | XLOC_013193 | CCDC148      | chr2:159023161-159313265  | 0.441033 | 1        |
| XLOC_021040 | XLOC_021040 | NPC1L1       | chr7:44552134-44580914    | 0.441996 | 1        |
| XLOC_016032 | XLOC_016032 | VEPH1        | chr3:156977531-157221415  | 0.44201  | 0.999791 |
| XLOC_012956 | XLOC_012956 | GFPT1        | chr2:69546900-69614386    | 0.442897 | 0.216036 |
| XLOC_006855 | XLOC_006855 | GPX2         | chr14:65381078-65569413   | 0.443061 | 1        |
| XLOC_005107 | XLOC_005107 | ADAM1A       | chr12:112336866-112339706 | 0.443112 | 0.999791 |
| XLOC_008037 | XLOC_008037 | PRRT2        | chr16:29823408-29827202   | 0.443497 | 1        |
| XLOC_016259 | XLOC_016259 | PACRGL       | chr4:20702035-20729980    | 0.443604 | 0.886909 |
| XLOC_020879 | XLOC_020879 | EN2          | chr7:155250823-155257526  | 0.444138 | 1        |
| XLOC_016285 | XLOC_016285 | LIAS         | chr4:39460664-39479271    | 0.44439  | 0.372926 |
| XLOC_006743 | XLOC_006743 | CBLN3        | chr14:24895739-24898731   | 0.444781 | 1        |
| XLOC_010354 | XLOC_010354 | HDHD2        | chr18:44633780-44676871   | 0.444962 | 0.485083 |
| XLOC_010456 | XLOC_010456 | APC2         | chr19:1450147-1479228     | 0.444968 | 0.999791 |
| XLOC_022677 | XLOC_022677 | C8G          | chr9:139839697-139841426  | 0.445314 | 1        |
| XLOC_009443 | XLOC_009443 | LOC100506713 | chr17:6888441-6915653     | 0.445868 | 0.999791 |
| XLOC_010674 | XLOC_010674 | ANKLE1       | chr19:17392453-17398454   | 0.445875 | 0.999791 |
| XLOC_002799 | XLOC_002799 | ASB13        | chr10:5680819-5708558     | 0.445974 | 0.244149 |
| XLOC_009945 | XLOC_009945 | CPSF4L       | chr17:71228775-71258019   | 0.446019 | 1        |

|             |             |              |                           |          |          |
|-------------|-------------|--------------|---------------------------|----------|----------|
| XLOC_013320 | XLOC_013320 | GCSHP3       | chr2:206980296-206981296  | 0.446462 | 0.999791 |
| XLOC_008536 | XLOC_008536 | PRSS36       | chr16:31150246-31161415   | 0.446514 | 0.999791 |
| XLOC_010484 | XLOC_010484 | C19orf71     | chr19:3538262-3557571     | 0.446609 | 0.999791 |
| XLOC_023851 | XLOC_023851 | PRAF2        | chrX:48928817-48931662    | 0.446758 | 0.999791 |
| XLOC_015764 | XLOC_015764 | ITIH4        | chr3:52847005-52864717    | 0.447435 | 1        |
| XLOC_020865 | XLOC_020865 | CHPF2        | chr7:150929584-150935905  | 0.447649 | 0.999791 |
| XLOC_023022 | XLOC_023022 | WDR31        | chr9:116077930-116102620  | 0.447792 | 0.999791 |
| XLOC_010185 | XLOC_010185 | SETBP1       | chr18:42260137-42648475   | 0.449017 | 1        |
| XLOC_016631 | XLOC_016631 | FAM53A       | chr4:1641607-1685988      | 0.449598 | 0.910882 |
| XLOC_020493 | XLOC_020493 | ZNF713       | chr7:55980330-56008433    | 0.449899 | 1        |
| XLOC_005233 | XLOC_005233 | AKAP3        | chr12:4724675-4754343     | 0.450122 | 1        |
| XLOC_018642 | XLOC_018642 | MAK          | chr6:10762955-10838788    | 0.450181 | 1        |
| XLOC_016441 | XLOC_016441 | LOC100507053 | chr4:100010007-100222513  | 0.450247 | 1        |
| XLOC_011197 | XLOC_011197 | RFPL4A       | chr19:56270506-56274541   | 0.450646 | 1        |
| XLOC_018791 | XLOC_018791 | GPSM3,NOTCH4 | chr6:32158542-32191844    | 0.450695 | 1        |
| XLOC_023012 | XLOC_023012 | PTBP3        | chr9:114758831-115112545  | 0.45074  | 0.596581 |
| XLOC_012736 | XLOC_012736 | TRAF3IP1     | chr2:239229184-239309541  | 0.450964 | 0.638821 |
| XLOC_006944 | XLOC_006944 | C14orf142    | chr14:93669236-93695561   | 0.451099 | 0.999791 |
| XLOC_018249 | XLOC_018249 | PACSIN1      | chr6:34433837-34503000    | 0.451694 | 1        |
| XLOC_012616 | XLOC_012616 | CCNYL1       | chr2:208576263-208620896  | 0.452074 | 0.998026 |
| XLOC_009110 | XLOC_009110 | HIGD1B       | chr17:42923720-42976993   | 0.452141 | 1        |
| XLOC_011823 | XLOC_011823 | LHB          | chr19:49519236-49520347   | 0.452973 | 0.999791 |
| XLOC_015880 | XLOC_015880 | ZNF80        | chr3:113953479-113956425  | 0.45313  | 1        |
| XLOC_006631 | XLOC_006631 | DYNC1H1      | chr14:102430864-102517135 | 0.45324  | 0.22936  |
| XLOC_010172 | XLOC_010172 | ZNF397       | chr18:32820993-32870196   | 0.453252 | 0.999791 |
| XLOC_008714 | XLOC_008714 | C16orf95     | chr16:87336403-87351026   | 0.453256 | 0.999791 |
| XLOC_005770 | XLOC_005770 | CDK2AP1      | chr12:123745516-123756863 | 0.453861 | 0.153855 |
| XLOC_020919 | XLOC_020919 | RNF216-IT1   | chr7:5659671-5821361      | 0.453968 | 1        |
| XLOC_020596 | XLOC_020596 | C7orf63      | chr7:89874487-89940377    | 0.454067 | 0.999791 |
| XLOC_003114 | XLOC_003114 | C10orf95     | chr10:104209573-104216050 | 0.454511 | 0.999791 |
| XLOC_023089 | XLOC_023089 | ST6GALNAC4   | chr9:130670164-130679305  | 0.454826 | 0.212044 |
| XLOC_007943 | XLOC_007943 | SNX29        | chr16:12070601-12668146   | 0.455268 | 0.934472 |
| XLOC_022203 | XLOC_022203 | ARC          | chr8:143692404-143695833  | 0.455338 | 0.64943  |
| XLOC_004795 | XLOC_004795 | METTLL20     | chr12:31800093-31822016   | 0.455364 | 0.999791 |
| XLOC_010059 | XLOC_010059 | SECTM1       | chr17:80278899-80291921   | 0.455399 | 0.564963 |
| XLOC_016423 | XLOC_016423 | PKD2         | chr4:88928798-88998931    | 0.455813 | 0.529851 |
| XLOC_012624 | XLOC_012624 | CPS1         | chr2:211342405-211543831  | 0.455959 | 0.999791 |
| XLOC_011999 | XLOC_011999 | ZNF417       | chr19:58417141-58427978   | 0.456211 | 0.999791 |
| XLOC_014757 | XLOC_014757 | LIF          | chr22:30636435-30642840   | 0.457469 | 0.184583 |
| XLOC_009248 | XLOC_009248 | LOC440461    | chr17:66194800-66196443   | 0.458572 | 1        |
| XLOC_002401 | XLOC_002401 | ZEB1         | chr10:31608100-31818742   | 0.459925 | 0.22936  |
| XLOC_008523 | XLOC_008523 | ZNF785       | chr16:30591993-30597092   | 0.460118 | 0.993188 |
| XLOC_013998 | XLOC_013998 | WFDC3        | chr20:44402846-44420547   | 0.460344 | 1        |
| XLOC_018786 | XLOC_018786 | PRRT1        | chr6:32116139-32119720    | 0.460392 | 0.999791 |
| XLOC_001009 | XLOC_001009 | DYRK3        | chr1:206808880-206822542  | 0.461528 | 0.207365 |
| XLOC_010401 | XLOC_010401 | TMX3         | chr18:66340924-66382353   | 0.461826 | 0.186588 |
| XLOC_014914 | XLOC_014914 | RABL2B       | chr22:51195513-51238065   | 0.462117 | 0.797576 |
| XLOC_000817 | XLOC_000817 | SLAMF7       | chr1:160709076-160724601  | 0.462147 | 1        |
| XLOC_020400 | XLOC_020400 | STK31        | chr7:23749785-23872130    | 0.462365 | 1        |
| XLOC_011622 | XLOC_011622 | ZFP82        | chr19:36882860-36909550   | 0.462739 | 1        |
| XLOC_023829 | XLOC_023829 | CXorf31      | chrX:46746853-46759139    | 0.46281  | 1        |
| XLOC_016162 | XLOC_016162 | PDE6B        | chr4:619362-664681        | 0.463239 | 1        |
| XLOC_004559 | XLOC_004559 | MPZL2        | chr11:118124130-118135251 | 0.463284 | 1        |
| XLOC_018476 | XLOC_018476 | PKIB         | chr6:122793061-123047518  | 0.463347 | 1        |
| XLOC_000115 | XLOC_000115 | FHAD1        | chr1:15573767-15724622    | 0.463685 | 0.418208 |
| XLOC_015436 | XLOC_015436 | EGFEM1P      | chr3:167967309-168548374  | 0.463962 | 1        |
| XLOC_011263 | XLOC_011263 | ODF3L2       | chr19:463345-474983       | 0.464008 | 0.999791 |
| XLOC_014350 | XLOC_014350 | WDR4         | chr21:44263189-44299699   | 0.464313 | 0.519342 |
| XLOC_008352 | XLOC_008352 | NOXO1        | chr16:2028917-2031550     | 0.464676 | 1        |
| XLOC_002115 | XLOC_002115 | SYT2         | chr1:202559724-202679551  | 0.465003 | 1        |
| XLOC_010422 | XLOC_010422 | TPGS1        | chr19:507496-519654       | 0.46568  | 0.857467 |
| XLOC_002288 | XLOC_002288 | C1orf229     | chr1:247273461-247275719  | 0.465788 | 0.999791 |
| XLOC_015580 | XLOC_015580 | TMEM40       | chr3:12775391-12800808    | 0.466737 | 1        |
| XLOC_013042 | XLOC_013042 | GPAT2        | chr2:96676298-96700727    | 0.466793 | 1        |
| XLOC_017011 | XLOC_017011 | AGA          | chr4:178351928-178363657  | 0.467428 | 0.811106 |
| XLOC_011471 | XLOC_011471 | CACNA1A      | chr19:13317255-13617274   | 0.467714 | 1        |
| XLOC_016444 | XLOC_016444 | DAPP1        | chr4:100737980-100791346  | 0.46783  | 1        |
| XLOC_003841 | XLOC_003841 | IL10RA       | chr11:117857105-117872199 | 0.468703 | 1        |
| XLOC_017426 | XLOC_017426 | SYNPO        | chr5:149980641-150038792  | 0.46888  | 0.999791 |
| XLOC_022628 | XLOC_022628 | C9orf9       | chr9:135754289-135765418  | 0.469166 | 0.886909 |
| XLOC_002057 | XLOC_002057 | LOC100527964 | chr1:180199432-180244188  | 0.46993  | 0.999791 |
| XLOC_002194 | XLOC_002194 | AURKAPS1     | chr1:220321609-220445843  | 0.470204 | 0.999791 |
| XLOC_020994 | XLOC_020994 | GGT2         | chr7:30536236-30544457    | 0.47036  | 0.155119 |
| XLOC_014025 | XLOC_014025 | FAM65C       | chr20:49202646-49253426   | 0.470767 | 1        |
| XLOC_005099 | XLOC_005099 | TCTN1        | chr12:111051831-111127617 | 0.47086  | 0.411018 |
| XLOC_008993 | XLOC_008993 | SLFN5        | chr17:33570085-33594761   | 0.471002 | 0.832462 |
| XLOC_000047 | XLOC_000047 | LOC100133612 | chr17:3816967-3832011     | 0.471348 | 1        |
| XLOC_003108 | XLOC_003108 | KCNIP2       | chr10:103578824-103603677 | 0.471479 | 1        |
| XLOC_010909 | XLOC_010909 | ZNF221       | chr19:44455396-44471752   | 0.4718   | 1        |

|             |             |                     |                           |          |           |
|-------------|-------------|---------------------|---------------------------|----------|-----------|
| XLOC_015113 | XLOC_015113 | GNAT1               | chr3:50229042-50235129    | 0.471864 | 1         |
| XLOC_017916 | XLOC_017916 | C5orf4              | chr5:154198051-154230213  | 0.472012 | 1         |
| XLOC_023464 | XLOC_023464 | ITGB1BP2            | chrX:70430034-70948962    | 0.472238 | 0.999791  |
| XLOC_009419 | XLOC_009419 | VMO1                | chr17:4688579-4689729     | 0.47257  | 0.999791  |
| XLOC_010828 | XLOC_010828 | SIPA1L3             | chr19:38397867-38699008   | 0.472899 | 0.292267  |
| XLOC_018463 | XLOC_018463 | RSPH4A              | chr6:116937641-116954148  | 0.473419 | 1         |
| XLOC_013485 | XLOC_013485 | SDCBP2-AS1          | chr20:1290554-1373816     | 0.473655 | 1         |
| XLOC_015668 | XLOC_015668 | LRRC2               | chr3:46556877-46608040    | 0.473958 | 1         |
| XLOC_011507 | XLOC_011507 | CYP4F11             | chr19:16023179-16045676   | 0.474059 | 1         |
| XLOC_018017 | XLOC_018017 | SNORD95             | chr5:180663927-180670906  | 0.474127 | 0.999791  |
| XLOC_000894 | XLOC_000894 | RABGAP1L            | chr1:174128551-174964445  | 0.474943 | 0.999791  |
| XLOC_000732 | XLOC_000732 | NPR1                | chr1:153651163-153666468  | 0.475302 | 1         |
| XLOC_009606 | XLOC_009606 | ARGFXP2             | chr17:30469472-30552746   | 0.475401 | 1         |
| XLOC_003199 | XLOC_003199 | BNIP3               | chr10:133781203-133795435 | 0.475514 | 1         |
| XLOC_006197 | XLOC_006197 | GPR183              | chr13:99848627-100058554  | 0.475617 | 1         |
| XLOC_015908 | XLOC_015908 | ADCY5               | chr3:123001142-123167392  | 0.475892 | 1         |
| XLOC_020572 | XLOC_020572 | UPK3B               | chr7:76139744-76157199    | 0.476021 | 0.999791  |
| XLOC_022376 | XLOC_022376 | ANKRD20A1,ANKRD20A3 | chr9:67926760-67970293    | 0.476253 | 1         |
| XLOC_006859 | XLOC_006859 | FUT8-AS1            | chr14:65877309-66210839   | 0.476383 | 1         |
| XLOC_012319 | XLOC_012319 | LOC100506123        | chr2:97948228-97957632    | 0.476526 | 0.910882  |
| XLOC_012143 | XLOC_012143 | RMDN2               | chr2:38152461-38294285    | 0.476531 | 1         |
| XLOC_021785 | XLOC_021785 | MAPK15              | chr8:144798506-144804633  | 0.476572 | 0.774655  |
| XLOC_008692 | XLOC_008692 | C16orf46            | chr16:81087101-81110872   | 0.476668 | 0.999791  |
| XLOC_009510 | XLOC_009510 | COX10-AS1           | chr17:13932608-14111996   | 0.476749 | 0.999791  |
| XLOC_021201 | XLOC_021201 | MCM7                | chr7:99690403-99723128    | 0.47726  | 0.471351  |
| XLOC_004703 | XLOC_004703 | NANOG               | chr12:7941994-7948655     | 0.477385 | 1         |
| XLOC_006661 | XLOC_006661 | C14orf79            | chr14:105452615-105461855 | 0.478139 | 0.430859  |
| XLOC_002696 | XLOC_002696 | ACSL5               | chr10:114133915-114188138 | 0.478205 | 1         |
| XLOC_010989 | XLOC_010989 | LOC100505812        | chr19:48711342-48761450   | 0.478236 | 0.999791  |
| XLOC_007187 | XLOC_007187 | TRIM69              | chr15:45028559-45060025   | 0.478588 | 1         |
| XLOC_015219 | XLOC_015219 | ST3GAL6             | chr3:98433176-98514689    | 0.478679 | 1         |
| XLOC_007021 | XLOC_007021 | PAR5                | chr15:25230006-25233379   | 0.479514 | 1         |
| XLOC_001919 | XLOC_001919 | SH2D2A              | chr1:156776034-156851642  | 0.480257 | 0.910882  |
| XLOC_023859 | XLOC_023859 | LOC158572           | chrX:49641326-49643959    | 0.480474 | 1         |
| XLOC_023950 | XLOC_023950 | TTC3P1              | chrX:74960372-74962914    | 0.480478 | 1         |
| XLOC_017852 | XLOC_017852 | PFDN1               | chr5:139624634-139682689  | 0.4819   | 0.0760821 |
| XLOC_003893 | XLOC_003893 | SPA17               | chr11:124492741-124564687 | 0.481935 | 0.999791  |
| XLOC_003645 | XLOC_003645 | BBS1                | chr11:66278118-66301084   | 0.481975 | 0.372926  |
| XLOC_011806 | XLOC_011806 | TMEM143             | chr19:48835615-48867186   | 0.481993 | 0.790746  |
| XLOC_005615 | XLOC_005615 | LOC728084           | chr12:89404902-89413469   | 0.481998 | 1         |
| XLOC_014428 | XLOC_014428 | AIFM3               | chr22:21319417-21335649   | 0.482063 | 0.999791  |
| XLOC_011723 | XLOC_011723 | PSG9                | chr19:43757434-43773682   | 0.482195 | 1         |
| XLOC_016933 | XLOC_016933 | SLC7A11             | chr4:138948576-139163503  | 0.482792 | 0.648523  |
| XLOC_002089 | XLOC_002089 | F13B                | chr1:197008320-197036397  | 0.484197 | 1         |
| XLOC_008285 | XLOC_008285 | SNAI3-AS1           | chr16:88729780-88753594   | 0.484276 | 0.999791  |
| XLOC_021391 | XLOC_021391 | ACTR3C              | chr7:149944300-150035245  | 0.484368 | 0.999791  |
| XLOC_000025 | XLOC_000025 | ATAD3B              | chr1:1407163-1431582      | 0.484665 | 0.111388  |
| XLOC_015236 | XLOC_015236 | LOC152225           | chr3:101659702-101716770  | 0.48471  | 0.240259  |
| XLOC_021486 | XLOC_021486 | NAT2                | chr8:18248754-18258723    | 0.484983 | 1         |
| XLOC_021098 | XLOC_021098 | STAG3L3             | chr7:72467988-72476448    | 0.485166 | 0.999791  |
| XLOC_017381 | XLOC_017381 | PCDHB12             | chr5:140588290-140591698  | 0.485308 | 1         |
| XLOC_000672 | XLOC_000672 | C1orf54             | chr1:150245182-150253335  | 0.485409 | 0.999791  |
| XLOC_015868 | XLOC_015868 | BTLA                | chr3:112182812-112218408  | 0.485908 | 1         |
| XLOC_020345 | XLOC_020345 | IQCE                | chr7:2598631-2654368      | 0.486288 | 0.735322  |
| XLOC_014418 | XLOC_014418 | LOC150197           | chr22:20193854-20196060   | 0.48683  | 1         |
| XLOC_021385 | XLOC_021385 | ZNF425              | chr7:148799877-148823438  | 0.487225 | 0.999791  |
| XLOC_015304 | XLOC_015304 | FAM86JP             | chr3:125635443-125655887  | 0.487292 | 0.999791  |
| XLOC_006782 | XLOC_006782 | LOC100288846        | chr14:39734475-39820397   | 0.487586 | 0.999791  |
| XLOC_007557 | XLOC_007557 | PATL2               | chr15:44957929-44969086   | 0.488168 | 1         |
| XLOC_007646 | XLOC_007646 | SCARNA14            | chr15:66629007-66649054   | 0.488865 | 0.999791  |
| XLOC_011002 | XLOC_011002 | FGF21               | chr19:49259343-49261582   | 0.488928 | 1         |
| XLOC_010424 | XLOC_010424 | GZMM                | chr19:544033-549920       | 0.489202 | 1         |
| XLOC_023376 | XLOC_023376 | ERAS                | chrX:48684922-48688279    | 0.489349 | 1         |
| XLOC_018663 | XLOC_018663 | DCDC2               | chr6:24171982-24383520    | 0.4898   | 0.914868  |
| XLOC_010721 | XLOC_010721 | ZNF90               | chr19:20188802-20231977   | 0.490186 | 1         |
| XLOC_004945 | XLOC_004945 | KIF5A               | chr12:57943846-57978554   | 0.490425 | 1         |
| XLOC_003718 | XLOC_003718 | SNORD15A            | chr11:75110534-75133345   | 0.490961 | 0.999791  |
| XLOC_014329 | XLOC_014329 | BRWD1-IT2           | chr21:40685860-40686888   | 0.491085 | 0.999791  |
| XLOC_003658 | XLOC_003658 | LOC100130987        | chr11:67085309-67159158   | 0.491451 | 0.999791  |
| XLOC_014822 | XLOC_014822 | LOC400927           | chr22:38740669-38794931   | 0.492789 | 0.999791  |
| XLOC_006287 | XLOC_006287 | DHRS2               | chr14:24105572-24114848   | 0.493158 | 1         |
| XLOC_000035 | XLOC_000035 | PLCH2               | chr1:2407753-2436964      | 0.493411 | 1         |
| XLOC_002165 | XLOC_002165 | LAMB3               | chr1:209788217-209825820  | 0.493415 | 0.119609  |
| XLOC_004746 | XLOC_004746 | EMP1                | chr12:13349601-13369708   | 0.493721 | 0.0833451 |
| XLOC_016603 | XLOC_016603 | CYP4V2              | chr4:187112673-187134617  | 0.494773 | 0.777779  |
| XLOC_005658 | XLOC_005658 | LINC00485           | chr12:103203060-103218177 | 0.495137 | 1         |
| XLOC_022475 | XLOC_022475 | SEC61B              | chr9:101984569-101992901  | 0.495272 | 0.0501483 |
| XLOC_008657 | XLOC_008657 | HYDIN               | chr16:70841286-71264625   | 0.495328 | 1         |
| XLOC_012696 | XLOC_012696 | ARMC9               | chr2:232063293-232238606  | 0.496842 | 0.638821  |

|             |             |              |                           |          |           |
|-------------|-------------|--------------|---------------------------|----------|-----------|
| XLOC_020959 | XLOC_020959 | FAM126A      | chr7:22980877-23053770    | 0.497369 | 1         |
| XLOC_005803 | XLOC_005803 | IFT88        | chr13:21141207-21265576   | 0.498282 | 0.886909  |
| XLOC_017371 | XLOC_017371 | PCDHB4       | chr5:140501580-140505201  | 0.498924 | 1         |
| XLOC_013963 | XLOC_013963 | KIAA1755     | chr20:36838906-36889174   | 0.499294 | 0.415668  |
| XLOC_003981 | XLOC_003981 | CARS         | chr11:3022151-3078681     | 0.499615 | 0.175333  |
| XLOC_015937 | XLOC_015937 | LOC653712    | chr3:128580350-128590384  | 0.500411 | 1         |
| XLOC_002914 | XLOC_002914 | BMS1P6       | chr10:47225570-47243511   | 0.50091  | 1         |
| XLOC_006932 | XLOC_006932 | GPR68        | chr14:91698875-91720224   | 0.501    | 1         |
| XLOC_017418 | XLOC_017418 | ARHGEF37     | chr5:148961134-149014527  | 0.501172 | 0.999791  |
| XLOC_010547 | XLOC_010547 | TGFBR3L      | chr19:7981031-7983980     | 0.501508 | 0.999791  |
| XLOC_011828 | XLOC_011828 | CGB8         | chr19:49550894-49552368   | 0.502504 | 0.999791  |
| XLOC_002097 | XLOC_002097 | SMIM16       | chr1:200311671-200342920  | 0.502516 | 1         |
| XLOC_011979 | XLOC_011979 | NLRP11       | chr19:56296762-56393220   | 0.502971 | 1         |
| XLOC_014984 | XLOC_014984 | UBE2E1       | chr3:23847383-23933131    | 0.503394 | 0.102278  |
| XLOC_005970 | XLOC_005970 | CLYBL        | chr13:100258918-100549388 | 0.503786 | 0.989431  |
| XLOC_004943 | XLOC_004943 | MARS         | chr12:57881735-57914300   | 0.504093 | 0.999791  |
| XLOC_021922 | XLOC_021922 | PNMA2        | chr8:26362195-26371483    | 0.504544 | 1         |
| XLOC_015813 | XLOC_015813 | FRMD4B       | chr3:69219145-69435430    | 0.504595 | 1         |
| XLOC_001624 | XLOC_001624 | C1orf180     | chr1:85093912-85100703    | 0.505563 | 1         |
| XLOC_022404 | XLOC_022404 | PSAT1        | chr9:80912058-80945009    | 0.505767 | 0.244149  |
| XLOC_001297 | XLOC_001297 | ARHGEF19     | chr1:16524598-16539104    | 0.507002 | 0.141773  |
| XLOC_009213 | XLOC_009213 | TBX2         | chr17:59477256-59486827   | 0.507236 | 1         |
| XLOC_012010 | XLOC_012010 | ZNF132       | chr19:58944180-58951589   | 0.507358 | 1         |
| XLOC_009244 | XLOC_009244 | SNORA38B     | chr17:65714060-65740266   | 0.507935 | 1         |
| XLOC_022410 | XLOC_022410 | IDNK         | chr9:86237963-86259045    | 0.50817  | 0.956701  |
| XLOC_002957 | XLOC_002957 | EGR2         | chr10:64571755-64578927   | 0.508503 | 1         |
| XLOC_012277 | XLOC_012277 | VAMP5        | chr2:85811530-85820511    | 0.508705 | 1         |
| XLOC_006851 | XLOC_006851 | ESR2         | chr14:64693750-64805268   | 0.508764 | 1         |
| XLOC_017467 | XLOC_017467 | FBLL1        | chr5:167956581-167957639  | 0.508902 | 1         |
| XLOC_008074 | XLOC_008074 | ITGAX        | chr16:31366508-31394318   | 0.508957 | 0.774655  |
| XLOC_011179 | XLOC_011179 | FCAR         | chr19:55385548-55401839   | 0.509245 | 1         |
| XLOC_003360 | XLOC_003360 | SPTY2D1-AS1  | chr11:18621350-18656020   | 0.509581 | 1         |
| XLOC_013188 | XLOC_013188 | NR4A2        | chr2:157180943-157189287  | 0.510057 | 0.999791  |
| XLOC_004767 | XLOC_004767 | IAPP         | chr12:21417533-21548371   | 0.510232 | 1         |
| XLOC_010019 | XLOC_010019 | LOC100294362 | chr17:78234659-78411884   | 0.510532 | 1         |
| XLOC_017372 | XLOC_017372 | PCDHB5       | chr5:140514799-140517704  | 0.511563 | 1         |
| XLOC_005832 | XLOC_005832 | ATP5EP2      | chr13:28519342-28519710   | 0.511571 | 0.999791  |
| XLOC_000667 | XLOC_000667 | HIST2H2AC    | chr1:149858524-149858961  | 0.512025 | 0.999791  |
| XLOC_010717 | XLOC_010717 | CILP2        | chr19:19649073-19657468   | 0.512385 | 1         |
| XLOC_001969 | XLOC_001969 | ARHGAP30     | chr1:161016731-161039760  | 0.512572 | 1         |
| XLOC_013716 | XLOC_013716 | LOC284751    | chr20:48909256-48931456   | 0.512866 | 0.999791  |
| XLOC_010655 | XLOC_010655 | UCA1         | chr19:15939756-15947131   | 0.514145 | 0.146412  |
| XLOC_002025 | XLOC_002025 | TNFSF4       | chr1:173152869-173176471  | 0.514854 | 1         |
| XLOC_005376 | XLOC_005376 | H3F3C        | chr12:31944118-31945175   | 0.515961 | 1         |
| XLOC_001686 | XLOC_001686 | AKNAD1       | chr1:109358519-109401146  | 0.51662  | 1         |
| XLOC_004056 | XLOC_004056 | STK33        | chr11:8413417-8615503     | 0.516935 | 1         |
| XLOC_016378 | XLOC_016378 | EPGN         | chr4:75174186-75182520    | 0.517024 | 1         |
| XLOC_010954 | XLOC_010954 | IGFL2        | chr19:46651038-46664561   | 0.517303 | 1         |
| XLOC_009549 | XLOC_009549 | MFAP4        | chr17:19240866-19290532   | 0.518334 | 1         |
| XLOC_018583 | XLOC_018583 | PNLDC1       | chr6:160221300-160241735  | 0.519004 | 1         |
| XLOC_002814 | XLOC_002814 | PROSER2-AS1  | chr10:11865396-11936709   | 0.5192   | 1         |
| XLOC_003321 | XLOC_003321 | TMEM9B-AS1   | chr11:8986221-8997830     | 0.519228 | 0.999791  |
| XLOC_018402 | XLOC_018402 | C6orf163     | chr6:88054570-88075181    | 0.519432 | 1         |
| XLOC_021893 | XLOC_021893 | PSD3         | chr8:18384812-18871196    | 0.519882 | 1         |
| XLOC_003117 | XLOC_003117 | CYP17A1      | chr10:104590287-104597290 | 0.520629 | 1         |
| XLOC_006293 | XLOC_006293 | PCK2         | chr14:24563482-24573339   | 0.521352 | 0.06575   |
| XLOC_021643 | XLOC_021643 | HNF4G        | chr8:76452202-76479061    | 0.521642 | 0.956701  |
| XLOC_008262 | XLOC_008262 | ATP2C2       | chr16:84402132-84497793   | 0.522047 | 1         |
| XLOC_009093 | XLOC_009093 | ARL4D        | chr17:41476352-41478504   | 0.522276 | 1         |
| XLOC_014048 | XLOC_014048 | PPP4R1L      | chr20:56807832-56884495   | 0.522417 | 1         |
| XLOC_015077 | XLOC_015077 | CCRL2        | chr3:46448720-46451014    | 0.523663 | 0.873023  |
| XLOC_006862 | XLOC_006862 | TMEM229B     | chr14:67936982-67982021   | 0.523942 | 0.999791  |
| XLOC_017204 | XLOC_017204 | ZBED3-AS1    | chr5:76372531-76444176    | 0.523957 | 1         |
| XLOC_015677 | XLOC_015677 | KIF9         | chr3:47205859-47388306    | 0.524621 | 0.999791  |
| XLOC_008792 | XLOC_008792 | LOC339166    | chr17:5675553-5834016     | 0.525424 | 1         |
| XLOC_022219 | XLOC_022219 | NAPRT1       | chr8:144656954-144660513  | 0.52574  | 0.0501483 |
| XLOC_007796 | XLOC_007796 | FLJ42289     | chr15:100884661-100890923 | 0.5258   | 1         |
| XLOC_010961 | XLOC_010961 | FKRP         | chr19:47222767-47261832   | 0.526278 | 0.999791  |
| XLOC_017755 | XLOC_017755 | ST8SIA4      | chr5:100142638-100238987  | 0.526342 | 1         |
| XLOC_010716 | XLOC_010716 | YJEFN3       | chr19:19639669-19648393   | 0.526513 | 0.993188  |
| XLOC_011378 | XLOC_011378 | CTXN1        | chr19:7989380-7991051     | 0.52722  | 0.233114  |
| XLOC_007109 | XLOC_007109 | APBA2        | chr15:29213839-294110516  | 0.527494 | 1         |
| XLOC_018620 | XLOC_018620 | HTATSF1P2    | chr6:3020389-3025005      | 0.527865 | 0.266483  |
| XLOC_001775 | XLOC_001775 | FMO5         | chr1:146655883-146697230  | 0.529018 | 1         |
| XLOC_010591 | XLOC_010591 | C19orf80     | chr19:11309968-11373168   | 0.52923  | 1         |
| XLOC_002159 | XLOC_002159 | C1orf116     | chr1:207191865-207206101  | 0.529236 | 1         |
| XLOC_014015 | XLOC_014015 | SULF2        | chr20:46286149-46415360   | 0.529353 | 1         |
| XLOC_008274 | XLOC_008274 | FLJ30679     | chr16:86588925-86590905   | 0.529642 | 1         |
| XLOC_017684 | XLOC_017684 | LOC100272216 | chr5:68926979-68929028    | 0.530368 | 1         |

|             |             |               |                           |          |           |
|-------------|-------------|---------------|---------------------------|----------|-----------|
| XLOC_001661 | XLOC_001661 | ABCA4         | chr1:94458393-94586705    | 0.530809 | 1         |
| XLOC_022672 | XLOC_022672 | C9orf172      | chr9:139738866-139741797  | 0.531255 | 0.999791  |
| XLOC_017991 | XLOC_017991 | AACSP1        | chr5:178191863-178203277  | 0.531737 | 0.993188  |
| XLOC_011357 | XLOC_011357 | DENND1C       | chr19:6464259-6481798     | 0.531792 | 1         |
| XLOC_013350 | XLOC_013350 | MREG          | chr2:216807313-216878346  | 0.532504 | 0.171442  |
| XLOC_016795 | XLOC_016795 | RCHY1         | chr4:76404246-76439640    | 0.532855 | 0.0760821 |
| XLOC_020920 | XLOC_020920 | RSPH10B       | chr7:5965776-6010314      | 0.53356  | 1         |
| XLOC_020941 | XLOC_020941 | ISPD          | chr7:16127151-16460947    | 0.533569 | 1         |
| XLOC_023325 | XLOC_023325 | XK            | chrX:37545132-37591383    | 0.533801 | 0.956701  |
| XLOC_017345 | XLOC_017345 | EGR1          | chr5:137801180-137805004  | 0.533876 | 0.0961594 |
| XLOC_021211 | XLOC_021211 | ZCWPW1        | chr7:99998494-100031749   | 0.534139 | 0.999791  |
| XLOC_015188 | XLOC_015188 | EBLN2         | chr3:73046118-73115011    | 0.534318 | 1         |
| XLOC_023697 | XLOC_023697 | SRPK3         | chrX:153046455-153051187  | 0.53449  | 1         |
| XLOC_020533 | XLOC_020533 | LOC541473     | chr7:72440191-72443668    | 0.535419 | 0.999791  |
| XLOC_022520 | XLOC_022520 | ORM1          | chr9:117085302-117088759  | 0.535594 | 1         |
| XLOC_001822 | XLOC_001822 | RORC          | chr1:151778546-151804348  | 0.536527 | 1         |
| XLOC_002964 | XLOC_002964 | PBLD          | chr10:70042416-70102953   | 0.536858 | 0.999791  |
| XLOC_008783 | XLOC_008783 | RNF167        | chr17:4843629-4848517     | 0.537001 | 0.0501483 |
| XLOC_014439 | XLOC_014439 | CCDC116       | chr22:21987085-21991616   | 0.537001 | 1         |
| XLOC_002073 | XLOC_002073 | GLT25D2       | chr1:183904965-184006863  | 0.537118 | 0.873023  |
| XLOC_007814 | XLOC_007814 | HBA1          | chr16:226678-227520       | 0.53725  | 0.999791  |
| XLOC_014385 | XLOC_014385 | SPATC1L       | chr21:47581061-47604373   | 0.53778  | 1         |
| XLOC_002761 | XLOC_002761 | CTAGE7P       | chr10:131862161-131909081 | 0.537975 | 1         |
| XLOC_013114 | XLOC_013114 | DDX11L2       | chr2:114341229-114361294  | 0.538347 | 0.999791  |
| XLOC_012396 | XLOC_012396 | RABL2A        | chr2:114384816-114400975  | 0.538639 | 0.886909  |
| XLOC_012433 | XLOC_012433 | ARHGEF4       | chr2:131674223-131804836  | 0.538914 | 1         |
| XLOC_001772 | XLOC_001772 | NBPF11,NBPF24 | chr1:146032541-146082765  | 0.538966 | 1         |
| XLOC_007572 | XLOC_007572 | HDC           | chr15:50534145-50558162   | 0.53898  | 1         |
| XLOC_011815 | XLOC_011815 | RASIP1        | chr19:49223841-49243970   | 0.539333 | 1         |
| XLOC_002264 | XLOC_002264 | LGALS8-AS1    | chr1:236681513-236767841  | 0.539343 | 0.999791  |
| XLOC_013290 | XLOC_013290 | LOC100130452  | chr2:197504355-197597530  | 0.539879 | 1         |
| XLOC_000592 | XLOC_000592 | LOC100506343  | chr1:112264685-112310199  | 0.540188 | 1         |
| XLOC_003342 | XLOC_003342 | SPON1         | chr1:113984183-14289679   | 0.54067  | 1         |
| XLOC_016491 | XLOC_016491 | BBS12         | chr4:123653856-123666098  | 0.540808 | 0.744522  |
| XLOC_002310 | XLOC_002310 | SH3BP5L       | chr1:249104650-249120154  | 0.541101 | 0.0961594 |
| XLOC_006827 | XLOC_006827 | LINC00520     | chr14:56247852-56263392   | 0.541326 | 1         |
| XLOC_007957 | XLOC_007957 | C16orf45      | chr16:15528324-15682116   | 0.541962 | 1         |
| XLOC_010479 | XLOC_010479 | S1PR4         | chr19:3178735-3180330     | 0.543076 | 1         |
| XLOC_017637 | XLOC_017637 | LOC100132356  | chr5:43065288-43067073    | 0.543117 | 1         |
| XLOC_007139 | XLOC_007139 | LOC100131089  | chr15:40331511-40359710   | 0.543472 | 0.999791  |
| XLOC_009723 | XLOC_009723 | KRT19         | chr17:39679868-39684641   | 0.543745 | 1         |
| XLOC_013031 | XLOC_013031 | KRCC1         | chr2:88326723-88355248    | 0.544752 | 0.430859  |
| XLOC_002737 | XLOC_002737 | DMBT1         | chr10:124320180-124403252 | 0.544836 | 1         |
| XLOC_011661 | XLOC_011661 | LRFN1         | chr19:39797456-39805976   | 0.545565 | 1         |
| XLOC_007928 | XLOC_007928 | NAGPA-AS1     | chr16:5074844-5092972     | 0.545954 | 1         |
| XLOC_013240 | XLOC_013240 | CHN1          | chr2:175664041-175870107  | 0.546047 | 1         |
| XLOC_004502 | XLOC_004502 | CASP1         | chr1:104896236-104905884  | 0.546274 | 1         |
| XLOC_011748 | XLOC_011748 | NKPD1         | chr19:45653007-45663408   | 0.546411 | 1         |
| XLOC_002515 | XLOC_002515 | FAM149B1      | chr10:74927876-75001939   | 0.546777 | 0.403332  |
| XLOC_007192 | XLOC_007192 | SLC28A2       | chr15:45544427-45568132   | 0.54718  | 1         |
| XLOC_001025 | XLOC_001025 | G0S2          | chr1:209848669-209849735  | 0.548331 | 0.0501483 |
| XLOC_011739 | XLOC_011739 | ZNF235        | chr19:44790500-44809178   | 0.548382 | 0.999791  |
| XLOC_001176 | XLOC_001176 | ZNF672        | chr1:249132529-249143714  | 0.548489 | 0.0760821 |
| XLOC_009435 | XLOC_009435 | NLRP1         | chr17:5404718-5487832     | 0.548517 | 0.910882  |
| XLOC_020927 | XLOC_020927 | GRID2IP       | chr7:6536408-6591067      | 0.549151 | 1         |
| XLOC_023127 | XLOC_023127 | AK8           | chr9:135600964-135754198  | 0.549305 | 0.999791  |
| XLOC_004057 | XLOC_004057 | TRIM66        | chr11:8633583-8680383     | 0.549429 | 0.430859  |
| XLOC_021207 | XLOC_021207 | GAL3ST4       | chr7:99756864-99766373    | 0.549496 | 0.999791  |
| XLOC_017995 | XLOC_017995 | C5orf60       | chr5:179068557-179072047  | 0.54962  | 1         |
| XLOC_009909 | XLOC_009909 | CD79B         | chr17:62006097-62009704   | 0.550058 | 1         |
| XLOC_022956 | XLOC_022956 | HSD17B3       | chr9:98997588-99064434    | 0.551437 | 0.999791  |
| XLOC_008106 | XLOC_008106 | IRX6          | chr16:55358470-55364672   | 0.551792 | 1         |
| XLOC_007369 | XLOC_007369 | LOC100505679  | chr15:84841241-84850985   | 0.554208 | 0.999791  |
| XLOC_007399 | XLOC_007399 | GDPGP1        | chr15:90777486-90785312   | 0.554406 | 0.999791  |
| XLOC_001305 | XLOC_001305 | MST1L         | chr1:17081128-17090975    | 0.555648 | 0.993188  |
| XLOC_001216 | XLOC_001216 | MORN1         | chr1:2252695-2322993      | 0.557869 | 0.999791  |
| XLOC_013991 | XLOC_013991 | TP53TG5       | chr20:43990576-44039250   | 0.558346 | 0.999791  |
| XLOC_009613 | XLOC_009613 | CCT6B         | chr17:33254877-3328528    | 0.559104 | 0.777779  |
| XLOC_020467 | XLOC_020467 | AEBP1         | chr7:44143959-44154159    | 0.559852 | 1         |
| XLOC_021346 | XLOC_021346 | PARP12        | chr7:139723548-139763521  | 0.559899 | 0.0728308 |
| XLOC_021908 | XLOC_021908 | EGR3          | chr8:22545173-22550815    | 0.560444 | 0.642725  |
| XLOC_013253 | XLOC_013253 | TTC30B        | chr2:178414880-178417524  | 0.560495 | 1         |
| XLOC_012230 | XLOC_012230 | ATP6V1B1      | chr2:71162997-71192561    | 0.560686 | 1         |
| XLOC_013064 | XLOC_013064 | TSGA10        | chr2:99613723-99771187    | 0.560974 | 1         |
| XLOC_002779 | XLOC_002779 | LOC619207     | chr10:135267431-135281953 | 0.561132 | 1         |
| XLOC_017860 | XLOC_017860 | SLC25A2       | chr5:140682195-140683612  | 0.562087 | 1         |
| XLOC_010853 | XLOC_010853 | DLL3          | chr19:39989556-39999121   | 0.563436 | 1         |
| XLOC_005826 | XLOC_005826 | SNORA27       | chr13:27825691-27830702   | 0.564425 | 0.999791  |
| XLOC_007283 | XLOC_007283 | SENP8         | chr15:72118360-72433311   | 0.564472 | 0.999791  |

|             |             |            |                           |          |           |
|-------------|-------------|------------|---------------------------|----------|-----------|
| XLOC_009654 | XLOC_009654 | C17orf98   | chr17:36991340-36997642   | 0.565768 | 0.999791  |
| XLOC_011928 | XLOC_011928 | ZNF665     | chr19:53666551-53696619   | 0.565929 | 1         |
| XLOC_013167 | XLOC_013167 | LCT        | chr2:136545414-136594750  | 0.568013 | 1         |
| XLOC_014461 | XLOC_014461 | GSTT2      | chr22:24322313-24326106   | 0.568757 | 0.999791  |
| XLOC_004416 | XLOC_004416 | MAP6       | chr11:75297962-75379479   | 0.568945 | 1         |
| XLOC_010943 | XLOC_010943 | FOSB       | chr19:45971252-45978437   | 0.570508 | 0.186588  |
| XLOC_007742 | XLOC_007742 | CPEB1      | chr15:83211950-83378635   | 0.570696 | 1         |
| XLOC_000646 | XLOC_000646 | PDZK1      | chr1:145727665-145764206  | 0.570864 | 1         |
| XLOC_001334 | XLOC_001334 | SH2D5      | chr1:21046224-21059133    | 0.571177 | 0.967815  |
| XLOC_018095 | XLOC_018095 | HFE        | chr6:26087508-26095469    | 0.571811 | 0.86102   |
| XLOC_008259 | XLOC_008259 | DNAAF1     | chr16:84178864-84220676   | 0.572129 | 1         |
| XLOC_015505 | XLOC_015505 | ST6GAL1    | chr3:186648314-186796341  | 0.57271  | 0.117049  |
| XLOC_018587 | XLOC_018587 | SLC22A1    | chr6:160542862-160579750  | 0.573202 | 1         |
| XLOC_004277 | XLOC_004277 | SNORD22    | chr11:62619459-62623360   | 0.574033 | 0.999791  |
| XLOC_007924 | XLOC_007924 | C16orf71   | chr16:4746510-4799397     | 0.57478  | 1         |
| XLOC_010681 | XLOC_010681 | FAM129C    | chr19:17634109-17664648   | 0.575255 | 1         |
| XLOC_021877 | XLOC_021877 | FAM90A25P  | chr8:12272029-12275541    | 0.575954 | 0.999791  |
| XLOC_013870 | XLOC_013870 | SNORD17    | chr20:17922243-17949490   | 0.576404 | 0.999791  |
| XLOC_010236 | XLOC_010236 | SERPINB8   | chr18:61637262-61656608   | 0.576732 | 0.0879628 |
| XLOC_015970 | XLOC_015970 | NME9       | chr3:137906114-138048728  | 0.578765 | 1         |
| XLOC_023177 | XLOC_023177 | LCN15      | chr9:139654085-139658965  | 0.579049 | 0.999791  |
| XLOC_002938 | XLOC_002938 | ASAH2      | chr10:51946999-52008370   | 0.57918  | 1         |
| XLOC_023269 | XLOC_023269 | RAB9A      | chrX:13707239-13727944    | 0.579421 | 0.114315  |
| XLOC_020769 | XLOC_020769 | TMEM140    | chr7:134832765-134855578  | 0.580816 | 0.999791  |
| XLOC_007512 | XLOC_007512 | MRPL42P5   | chr15:40824082-40824749   | 0.582193 | 0.999791  |
| XLOC_016743 | XLOC_016743 | LNX1       | chr4:54326436-54457753    | 0.582479 | 1         |
| XLOC_004708 | XLOC_004708 | FAM66C     | chr12:8332804-8353596     | 0.582696 | 1         |
| XLOC_020465 | XLOC_020465 | FLJ35390   | chr7:44068485-44083895    | 0.582969 | 0.999791  |
| XLOC_003824 | XLOC_003824 | TTC12      | chr11:113185250-113237114 | 0.583979 | 0.06575   |
| XLOC_008586 | XLOC_008586 | MT1G       | chr16:56700652-56701977   | 0.585301 | 0.999791  |
| XLOC_001138 | XLOC_001138 | C1orf101   | chr1:244624672-244803662  | 0.585625 | 1         |
| XLOC_007672 | XLOC_007672 | CELFB      | chr15:72577067-72612525   | 0.58577  | 0.866946  |
| XLOC_013923 | XLOC_013923 | C20orf203  | chr20:31219426-31239783   | 0.586    | 1         |
| XLOC_006877 | XLOC_006877 | ADAM20P1   | chr14:70935595-70950473   | 0.586733 | 1         |
| XLOC_020795 | XLOC_020795 | TAS2R5     | chr7:141490016-141491166  | 0.586823 | 0.999791  |
| XLOC_011940 | XLOC_011940 | TMC4       | chr19:54663833-54676944   | 0.58852  | 0.999791  |
| XLOC_024173 | XLOC_024173 | TREX2      | chrX:152710177-152711945  | 0.589483 | 0.999791  |
| XLOC_009269 | XLOC_009269 | RAB37      | chr17:72667255-72743474   | 0.589621 | 1         |
| XLOC_011802 | XLOC_011802 | PLA2G4C    | chr19:48551099-48614109   | 0.589734 | 1         |
| XLOC_018795 | XLOC_018795 | HLA-DRB6   | chr6:32520489-32527779    | 0.59063  | 1         |
| XLOC_009931 | XLOC_009931 | SLC16A6    | chr17:66255322-66417000   | 0.59091  | 0.999791  |
| XLOC_005947 | XLOC_005947 | RBM26-AS1  | chr13:79980443-79998468   | 0.592886 | 1         |
| XLOC_023248 | XLOC_023248 | STS        | chrX:7137471-7272682      | 0.593984 | 1         |
| XLOC_023519 | XLOC_023519 | ARMCX4     | chrX:100673250-100790975  | 0.594253 | 0.754339  |
| XLOC_009595 | XLOC_009595 | SLC6A4     | chr17:28521336-28562986   | 0.59435  | 1         |
| XLOC_020843 | XLOC_020843 | SSPO       | chr7:149473130-149531053  | 0.595746 | 1         |
| XLOC_005153 | XLOC_005153 | WDR66      | chr12:122356462-122441832 | 0.596101 | 1         |
| XLOC_015415 | XLOC_015415 | LEKR1      | chr3:156544095-156763918  | 0.596717 | 1         |
| XLOC_001406 | XLOC_001406 | SDC3       | chr1:31342312-31381480    | 0.596825 | 0.0501483 |
| XLOC_004357 | XLOC_004357 | TMEM134    | chr11:67231818-67236748   | 0.59685  | 0.114315  |
| XLOC_014648 | XLOC_014648 | KLHDC7B    | chr22:50986461-50989452   | 0.597188 | 1         |
| XLOC_011750 | XLOC_011750 | EXOC3L2    | chr19:45715878-45737469   | 0.597974 | 1         |
| XLOC_006194 | XLOC_006194 | UBAC2-AS1  | chr13:99848627-100058554  | 0.598075 | 1         |
| XLOC_009913 | XLOC_009913 | TEX2       | chr17:62224794-62340653   | 0.598966 | 0.0934342 |
| XLOC_012269 | XLOC_012269 | DNAH6      | chr2:84743578-85046713    | 0.599057 | 1         |
| XLOC_021452 | XLOC_021452 | FAM86B3P   | chr8:8086091-8102387      | 0.600537 | 0.830467  |
| XLOC_023529 | XLOC_023529 | RAB40AL    | chrX:102192199-102193228  | 0.600909 | 1         |
| XLOC_016742 | XLOC_016742 | SCFD2      | chr4:53739150-54232242    | 0.602129 | 0.471351  |
| XLOC_002739 | XLOC_002739 | LOC399815  | chr10:124591670-124658230 | 0.603061 | 0.999791  |
| XLOC_009541 | XLOC_009541 | CCDC144B   | chr17:18441114-18528930   | 0.604307 | 1         |
| XLOC_006399 | XLOC_006399 | PPP1R36    | chr14:65016619-65056096   | 0.605193 | 1         |
| XLOC_020979 | XLOC_020979 | HOXA6      | chr7:27179982-27196296    | 0.606719 | 1         |
| XLOC_000317 | XLOC_000317 | SLFNL1-AS1 | chr1:41480261-41707815    | 0.60677  | 1         |
| XLOC_003607 | XLOC_003607 | SLC22A20   | chr11:64981310-65010228   | 0.607152 | 1         |
| XLOC_021509 | XLOC_021509 | LOC286059  | chr8:22844929-22941132    | 0.607621 | 1         |
| XLOC_022863 | XLOC_022863 | LOC440896  | chr9:69174213-69181041    | 0.608025 | 1         |
| XLOC_006700 | XLOC_006700 | SNORD8     | chr14:21853352-21905457   | 0.609343 | 1         |
| XLOC_002272 | XLOC_002272 | OPN3       | chr1:241695433-241803701  | 0.610136 | 1         |
| XLOC_013326 | XLOC_013326 | KLF7       | chr2:207938861-208031970  | 0.610156 | 1         |
| XLOC_008553 | XLOC_008553 | ANKRD26P1  | chr16:46503248-46603009   | 0.610207 | 1         |
| XLOC_008740 | XLOC_008740 | PRDM7      | chr16:90122973-90142338   | 0.612691 | 1         |
| XLOC_011000 | XLOC_011000 | SEC1P      | chr19:49141271-49185502   | 0.612713 | 1         |
| XLOC_016445 | XLOC_016445 | LOC256880  | chr4:100871635-100873620  | 0.612796 | 1         |
| XLOC_004218 | XLOC_004218 | BTBD18     | chr11:57479994-57586652   | 0.613211 | 1         |
| XLOC_002566 | XLOC_002566 | FAM22D     | chr10:89117476-89130452   | 0.613274 | 1         |
| XLOC_001398 | XLOC_001398 | SNORA16A   | chr1:28879528-28908366    | 0.613882 | 0.999791  |
| XLOC_014328 | XLOC_014328 | BRWD1      | chr21:40557403-40685712   | 0.61523  | 0.998026  |
| XLOC_023445 | XLOC_023445 | STARDB     | chrX:67867510-67945684    | 0.615285 | 1         |
| XLOC_012915 | XLOC_012915 | CLHC1      | chr2:55399686-55462989    | 0.617489 | 0.999791  |

|             |             |              |                           |          |           |
|-------------|-------------|--------------|---------------------------|----------|-----------|
| XLOC_000362 | XLOC_000362 | MMACHC       | chr1:45965855-45988562    | 0.617853 | 0.999791  |
| XLOC_004941 | XLOC_004941 | INHBE        | chr12:57849095-57851791   | 0.619788 | 0.956701  |
| XLOC_017331 | XLOC_017331 | MIR4461      | chr5:134240809-134298336  | 0.619804 | 0.999791  |
| XLOC_014977 | XLOC_014977 | KCNH8        | chr3:19190016-19577135    | 0.621496 | 1         |
| XLOC_004292 | XLOC_004292 | HRASLS2      | chr1:63014620-63330855    | 0.62313  | 1         |
| XLOC_009323 | XLOC_009323 | CCDC40       | chr17:78010430-78074412   | 0.626023 | 0.873899  |
| XLOC_000480 | XLOC_000480 | SAMD13       | chr1:84764048-84816481    | 0.626924 | 1         |
| XLOC_012995 | XLOC_012995 | DQX1         | chr2:74745257-74753408    | 0.629569 | 1         |
| XLOC_005680 | XLOC_005680 | SEPLG        | chr12:109015679-109027670 | 0.630217 | 1         |
| XLOC_009656 | XLOC_009656 | SNORA21      | chr17:37006320-37010053   | 0.630967 | 0.999791  |
| XLOC_004580 | XLOC_004580 | MIR100HG     | chr11:121959810-122073770 | 0.631607 | 1         |
| XLOC_002642 | XLOC_002642 | WNT8B        | chr10:102222811-102243399 | 0.631663 | 1         |
| XLOC_005488 | XLOC_005488 | SP7          | chr12:53720359-53730004   | 0.631899 | 1         |
| XLOC_006443 | XLOC_006443 | CCDC176      | chr14:74486058-74551196   | 0.632133 | 0.999791  |
| XLOC_007571 | XLOC_007571 | ATP8B4       | chr15:50150434-50411419   | 0.632186 | 1         |
| XLOC_008690 | XLOC_008690 | CDYL2        | chr16:80637675-80838175   | 0.632346 | 1         |
| XLOC_003646 | XLOC_003646 | ACTN3        | chr11:66313865-66330799   | 0.633829 | 1         |
| XLOC_003249 | XLOC_003249 | LSP1         | chr11:1874199-1913493     | 0.63396  | 1         |
| XLOC_003881 | XLOC_003881 | GRAMD1B      | chr11:123396527-123493518 | 0.634421 | 1         |
| XLOC_008786 | XLOC_008786 | ZFP3         | chr17:4981753-4999639     | 0.634661 | 1         |
| XLOC_000300 | XLOC_000300 | BMP8A        | chr1:39957317-40025370    | 0.634867 | 1         |
| XLOC_016888 | XLOC_016888 | SEC24B-AS1   | chr4:110351118-110461615  | 0.637689 | 0.999791  |
| XLOC_008152 | XLOC_008152 | CCDC113      | chr16:58283839-58328951   | 0.637918 | 0.167476  |
| XLOC_007270 | XLOC_007270 | CORO2B       | chr15:68871307-69020144   | 0.638302 | 1.037037  |
| XLOC_023028 | XLOC_023028 | AKNA         | chr9:117096432-117156685  | 0.638946 | 0.0728308 |
| XLOC_010252 | XLOC_010252 | FLJ44313     | chr18:74207476-74210045   | 0.639767 | 0.978746  |
| XLOC_005542 | XLOC_005542 | NDUFA4L2     | chr12:57623355-57634475   | 0.640343 | 0.999791  |
| XLOC_022020 | XLOC_022020 | LOC100505676 | chr8:67331821-67341212    | 0.641034 | 1         |
| XLOC_001366 | XLOC_001366 | RHCE         | chr1:25664788-25747363    | 0.642363 | 0.999791  |
| XLOC_005867 | XLOC_005867 | OR7E37P      | chr13:42016699-42017902   | 0.644652 | 1         |
| XLOC_005900 | XLOC_005900 | ST13P4       | chr13:50746153-50747751   | 0.644685 | 1         |
| XLOC_021198 | XLOC_021198 | GJC3         | chr7:99520891-99527243    | 0.645689 | 1         |
| XLOC_022331 | XLOC_022331 | ATP8B5P      | chr9:35406751-35483026    | 0.646301 | 1         |
| XLOC_012171 | XLOC_012171 | LOC100134259 | chr2:47055002-47086145    | 0.646322 | 1         |
| XLOC_017018 | XLOC_017018 | LOC389247    | chr4:184415889-184425668  | 0.646569 | 0.999791  |
| XLOC_010720 | XLOC_010720 | ZNF93        | chr19:20011721-20046382   | 0.649165 | 1         |
| XLOC_023338 | XLOC_023338 | GPR82        | chrX:41374188-41782287    | 0.649433 | 1         |
| XLOC_017380 | XLOC_017380 | PCDHB11      | chr5:140579347-140582618  | 0.649506 | 0.999791  |
| XLOC_017222 | XLOC_017222 | ATP6AP1L     | chr5:81601165-81614147    | 0.652102 | 0.999791  |
| XLOC_006478 | XLOC_006478 | GPR65        | chr14:88471467-88481155   | 0.652785 | 1         |
| XLOC_000811 | XLOC_000811 | CASQ1        | chr1:160160284-160171676  | 0.652795 | 1         |
| XLOC_016403 | XLOC_016403 | FGF5         | chr4:81187741-81212171    | 0.653405 | 0.244149  |
| XLOC_012073 | XLOC_012073 | FKBP1B       | chr2:24272583-24286550    | 0.653937 | 1         |
| XLOC_005161 | XLOC_005161 | CCDC62       | chr12:123259055-123311927 | 0.655237 | 1         |
| XLOC_005269 | XLOC_005269 | FAM86FP      | chr12:8383644-8395542     | 0.656044 | 0.371043  |
| XLOC_019048 | XLOC_019048 | FRK          | chr6:116262692-116381921  | 0.658215 | 1         |
| XLOC_013399 | XLOC_013399 | COL4A4       | chr2:227867426-228029275  | 0.659637 | 1         |
| XLOC_019200 | XLOC_019200 | TCTE3        | chr6:170140214-170151638  | 0.659894 | 1         |
| XLOC_009731 | XLOC_009731 | JUP          | chr17:39910858-39942964   | 0.660721 | 1         |
| XLOC_017308 | XLOC_017308 | CSF2         | chr5:131409484-131411863  | 0.661201 | 1         |
| XLOC_008005 | XLOC_008005 | SLC5A11      | chr16:24857183-24922949   | 0.661605 | 1         |
| XLOC_003773 | XLOC_003773 | AMOTL1       | chr11:94501507-94609918   | 0.66291  | 1         |
| XLOC_003121 | XLOC_003121 | CALHM2       | chr10:105206542-105212162 | 0.66293  | 1         |
| XLOC_005459 | XLOC_005459 | KRT81        | chr12:52679696-52685299   | 0.665406 | 0.978746  |
| XLOC_023622 | XLOC_023622 | FAM122C      | chrX:133903595-133988641  | 0.665548 | 0.999791  |
| XLOC_011165 | XLOC_011165 | LAIR2        | chr19:55014012-55021900   | 0.665711 | 0.999791  |
| XLOC_018692 | XLOC_018692 | GUSBP2       | chr6:26839265-26924333    | 0.666529 | 1         |
| XLOC_003217 | XLOC_003217 | NLRP6        | chr11:278569-285388       | 0.668239 | 1         |
| XLOC_007479 | XLOC_007479 | OTUD7A       | chr15:31775328-31947542   | 0.668406 | 1         |
| XLOC_013376 | XLOC_013376 | GLB1L        | chr2:220101502-220110131  | 0.66893  | 0.66929   |
| XLOC_013908 | XLOC_013908 | MIR663A      | chr20:26167654-26189869   | 0.669956 | 0.999791  |
| XLOC_007627 | XLOC_007627 | RBPMS2       | chr15:65032094-65067770   | 0.670714 | 1         |
| XLOC_004850 | XLOC_004850 | SLC4A8       | chr12:51745832-51909547   | 0.67263  | 0.999791  |
| XLOC_009157 | XLOC_009157 | FLJ45513     | chr17:47915670-47926199   | 0.672813 | 1         |
| XLOC_006139 | XLOC_006139 | NEK5         | chr13:52638899-52703214   | 0.67403  | 1         |
| XLOC_017871 | XLOC_017871 | FGF1         | chr5:141971742-142077635  | 0.674351 | 1         |
| XLOC_003547 | XLOC_003547 | RPLP0P2      | chr11:61382507-61406821   | 0.677258 | 0.28478   |
| XLOC_016286 | XLOC_016286 | LOC401127    | chr4:39481874-39483523    | 0.677999 | 1         |
| XLOC_003310 | XLOC_003310 | RBMXL2       | chr11:7110164-7112379     | 0.67939  | 1         |
| XLOC_002337 | XLOC_002337 | ITIH2        | chr10:7745235-7791483     | 0.680563 | 1         |
| XLOC_007511 | XLOC_007511 | C15orf52     | chr15:40623652-40633168   | 0.681813 | 1         |
| XLOC_002460 | XLOC_002460 | ASAH2B       | chr10:52499687-52514569   | 0.682556 | 1         |
| XLOC_014097 | XLOC_014097 | ANKRD30BP2   | chr21:14410486-14490571   | 0.683064 | 1         |
| XLOC_005199 | XLOC_005199 | EP400NL      | chr12:132568827-132610885 | 0.683589 | 0.999791  |
| XLOC_018221 | XLOC_018221 | CYP21A2      | chr6:32006092-32077151    | 0.684115 | 1         |
| XLOC_022815 | XLOC_022815 | FAM166B      | chr9:35490006-35563896    | 0.684964 | 0.999791  |
| XLOC_006403 | XLOC_006403 | LOC100506321 | chr14:65381078-65569413   | 0.685095 | 1         |
| XLOC_023621 | XLOC_023621 | LINC00629    | chrX:133684053-133694428  | 0.685816 | 1         |
| XLOC_002061 | XLOC_002061 | ZNF648       | chr1:182023704-182030847  | 0.686537 | 1         |

|             |             |                 |                           |          |          |
|-------------|-------------|-----------------|---------------------------|----------|----------|
| XLOC_018451 | XLOC_018451 | WISP3           | chr6:112375277-112390887  | 0.687136 | 1        |
| XLOC_009125 | XLOC_009125 | LRRRC37A        | chr17:44372496-44439163   | 0.687495 | 1        |
| XLOC_005264 | XLOC_005264 | SLC2A14         | chr12:7966396-8025495     | 0.687773 | 1        |
| XLOC_004470 | XLOC_004470 | SNORA40         | chr11:93468275-93468402   | 0.688414 | 0.999791 |
| XLOC_008832 | XLOC_008832 | DNAH2           | chr17:7623038-7737058     | 0.688843 | 1        |
| XLOC_016147 | XLOC_016147 | CEP19           | chr3:196433147-196439123  | 0.690308 | 0.854021 |
| XLOC_015544 | XLOC_015544 | LMLN            | chr3:197687070-197770591  | 0.691618 | 0.216036 |
| XLOC_005657 | XLOC_005657 | IGF1            | chr12:102789644-102874378 | 0.692176 | 1        |
| XLOC_009325 | XLOC_009325 | CARD14          | chr17:78143790-78194199   | 0.692488 | 1        |
| XLOC_018578 | XLOC_018578 | C6orf99         | chr6:159309618-159331385  | 0.693602 | 0.999791 |
| XLOC_021199 | XLOC_021199 | AZGP1           | chr7:99564349-99573735    | 0.695751 | 1        |
| XLOC_000493 | XLOC_000493 | LOC339524       | chr1:87595447-87634886    | 0.695858 | 1        |
| XLOC_016029 | XLOC_016029 | PA2G4P4         | chr3:156465131-156534851  | 0.696133 | 1        |
| XLOC_022712 | XLOC_022712 | GLIS3           | chr9:3824127-4300035      | 0.699002 | 1        |
| XLOC_011465 | XLOC_011465 | SYCE2           | chr19:13001973-13030086   | 0.699535 | 0.999791 |
| XLOC_015605 | XLOC_015605 | PP2D1           | chr3:19988571-20053765    | 0.700136 | 1        |
| XLOC_015524 | XLOC_015524 | FLJ34208        | chr3:194207868-194209274  | 0.701246 | 1        |
| XLOC_012651 | XLOC_012651 | CYP27A1         | chr2:219646471-219680016  | 0.701445 | 1        |
| XLOC_017169 | XLOC_017169 | GTF2H2C,GTF2H2D | chr5:68856050-68888729    | 0.702118 | 0.326135 |
| XLOC_008145 | XLOC_008145 | GPR56           | chr16:57653909-57698944   | 0.703475 | 1        |
| XLOC_021335 | XLOC_021335 | PTN             | chr7:136912091-137028546  | 0.703713 | 0.983758 |
| XLOC_010735 | XLOC_010735 | ZNF492          | chr19:22817125-22850472   | 0.705001 | 1        |
| XLOC_010904 | XLOC_010904 | PINLYP          | chr19:44080951-44086256   | 0.705717 | 0.999791 |
| XLOC_016188 | XLOC_016188 | HGFAC           | chr4:3443725-3451213      | 0.706722 | 1        |
| XLOC_001450 | XLOC_001450 | OSCP1           | chr1:36883506-36916086    | 0.706844 | 0.598908 |
| XLOC_001644 | XLOC_001644 | GBP4            | chr1:89646830-89664633    | 0.707559 | 1        |
| XLOC_006521 | XLOC_006521 | AK7             | chr14:96858447-96955764   | 0.707748 | 1        |
| XLOC_004909 | XLOC_004909 | METTL7B         | chr12:56075329-56106089   | 0.708493 | 0.999791 |
| XLOC_017887 | XLOC_017887 | SH3TC2          | chr5:148361712-148442737  | 0.70897  | 1        |
| XLOC_002287 | XLOC_002287 | ZNF669          | chr1:247263263-247267674  | 0.71045  | 0.230376 |
| XLOC_015309 | XLOC_015309 | CHST13          | chr3:126243130-126262134  | 0.711836 | 0.999791 |
| XLOC_024103 | XLOC_024103 | CXorf48         | chrX:134290460-134305751  | 0.711926 | 1        |
| XLOC_001657 | XLOC_001657 | LOC100131564    | chr1:93775665-93811368    | 0.711947 | 0.547553 |
| XLOC_013768 | XLOC_013768 | COL9A3          | chr20:61448413-61493115   | 0.71198  | 0.117049 |
| XLOC_009831 | XLOC_009831 | PHOSPHO1        | chr17:47300731-47308128   | 0.712633 | 1        |
| XLOC_016175 | XLOC_016175 | SCARNA22        | chr4:1873122-1983934      | 0.712804 | 0.999791 |
| XLOC_011060 | XLOC_011060 | MGC45922        | chr19:51320936-51322134   | 0.716246 | 1        |
| XLOC_013520 | XLOC_013520 | CHGB            | chr20:5891973-5906005     | 0.716717 | 1        |
| XLOC_012687 | XLOC_012687 | SP140           | chr2:231090444-231177930  | 0.717549 | 1        |
| XLOC_012297 | XLOC_012297 | ANKRD36BP2      | chr2:89065418-89106109    | 0.718418 | 1        |
| XLOC_015948 | XLOC_015948 | FAM86HP         | chr3:129800673-129830276  | 0.718885 | 0.471351 |
| XLOC_023520 | XLOC_023520 | ARMCX1          | chrX:100805513-100809675  | 0.718902 | 1        |
| XLOC_003919 | XLOC_003919 | LINC00167       | chr11:129769600-129875381 | 0.72004  | 1        |
| XLOC_004178 | XLOC_004178 | AGBL2           | chr11:47681142-47736928   | 0.720592 | 1        |
| XLOC_014783 | XLOC_014783 | SLC5A4          | chr22:32614462-32651318   | 0.721629 | 1        |
| XLOC_000235 | XLOC_000235 | RNU11           | chr1:28975111-28975246    | 0.721896 | 0.999791 |
| XLOC_023251 | XLOC_023251 | VCX3B           | chrX:8432870-8434551      | 0.722205 | 1        |
| XLOC_014167 | XLOC_014167 | DSCR9           | chr21:38580803-38594037   | 0.722285 | 1        |
| XLOC_004730 | XLOC_004730 | LOC338817       | chr12:11700963-11717335   | 0.722968 | 1        |
| XLOC_015439 | XLOC_015439 | LRRIQ4          | chr3:169539709-169555560  | 0.724907 | 1        |
| XLOC_009752 | XLOC_009752 | RAMP2-AS1       | chr17:40905946-40915060   | 0.725413 | 1        |
| XLOC_006398 | XLOC_006398 | HSPA2           | chr14:65007185-65009954   | 0.726317 | 1        |
| XLOC_023011 | XLOC_023011 | C9orf84         | chr9:114448900-114454779  | 0.727081 | 1        |
| XLOC_009504 | XLOC_009504 | MAGOH2          | chr17:10616638-10718481   | 0.727421 | 1        |
| XLOC_021434 | XLOC_021434 | MYOM2           | chr8:1993157-2093380      | 0.727488 | 1        |
| XLOC_020764 | XLOC_020764 | AKR1B10         | chr7:134212343-134226166  | 0.728443 | 1        |
| XLOC_017385 | XLOC_017385 | PCDHB19P        | chr5:140619688-140624312  | 0.729947 | 1        |
| XLOC_009685 | XLOC_009685 | KRT20           | chr17:39032140-39041495   | 0.730464 | 1        |
| XLOC_000505 | XLOC_000505 | BTBD8           | chr1:92545861-92613401    | 0.730647 | 1        |
| XLOC_003002 | XLOC_003002 | BMS1P4          | chr10:75458908-75490272   | 0.730656 | 0.956701 |
| XLOC_011064 | XLOC_011064 | SIGLEC7         | chr19:51645557-51656783   | 0.730764 | 1        |
| XLOC_000136 | XLOC_000136 | PADI1           | chr1:17531620-17572501    | 0.732589 | 1        |
| XLOC_023132 | XLOC_023132 | ABO             | chr9:136130562-136150630  | 0.732656 | 1        |
| XLOC_023538 | XLOC_023538 | TMEM31          | chrX:102962271-102983552  | 0.732786 | 1        |
| XLOC_005349 | XLOC_005349 | ST8SIA1         | chr12:22346324-22487648   | 0.733668 | 1        |
| XLOC_014888 | XLOC_014888 | C22orf26        | chr22:46446338-46454402   | 0.733965 | 1        |
| XLOC_011766 | XLOC_011766 | RSPH6A          | chr19:46298967-46318605   | 0.734252 | 1        |
| XLOC_012116 | XLOC_012116 | SPDYA           | chr2:29033699-29093175    | 0.734265 | 1        |
| XLOC_005699 | XLOC_005699 | HVCN1           | chr12:111051831-111127617 | 0.734802 | 1        |
| XLOC_002923 | XLOC_002923 | FRMPD2          | chr10:49364600-49482941   | 0.735154 | 1        |
| XLOC_009638 | XLOC_009638 | TBC1D3G         | chr17:34797174-34808103   | 0.735286 | 1        |
| XLOC_012322 | XLOC_012322 | ZAP70           | chr2:98330030-98356323    | 0.736265 | 1        |
| XLOC_024031 | XLOC_024031 | KIAA1210        | chrX:118212597-118284542  | 0.736685 | 1        |
| XLOC_012970 | XLOC_012970 | CD207           | chr2:71057342-71062953    | 0.737414 | 1        |
| XLOC_007852 | XLOC_007852 | TMEM204         | chr16:1543351-1662109     | 0.739111 | 1        |
| XLOC_023768 | XLOC_023768 | ACE2            | chrX:15579155-15620192    | 0.739725 | 1        |
| XLOC_018610 | XLOC_018610 | HUS1B           | chr6:485137-693141        | 0.74073  | 0.999791 |
| XLOC_014816 | XLOC_014816 | SOX10           | chr22:38368318-38380539   | 0.741221 | 1        |
| XLOC_011228 | XLOC_011228 | ZIK1            | chr19:58095627-58103758   | 0.741336 | 1        |



|             |             |              |                           |          |          |
|-------------|-------------|--------------|---------------------------|----------|----------|
| XLOC_003929 | XLOC_003929 | GLB1L3       | chr11:134146274-134189458 | 0.741471 | 1        |
| XLOC_011523 | XLOC_011523 | TMEM221      | chr19:17546317-17559376   | 0.742446 | 1        |
| XLOC_001981 | XLOC_001981 | RPL31P11     | chr1:161653494-161655042  | 0.742679 | 1        |
| XLOC_015260 | XLOC_015260 | BOC          | chr3:112931374-113160361  | 0.743404 | 1        |
| XLOC_000055 | XLOC_000055 | ESPN         | chr1:6484847-6521004      | 0.743634 | 1        |
| XLOC_009531 | XLOC_009531 | SMCR5        | chr17:17584786-17740325   | 0.744784 | 1        |
| XLOC_005062 | XLOC_005062 | STAB2        | chr12:103981068-104160502 | 0.744846 | 1        |
| XLOC_021415 | XLOC_021415 | LOC285889    | chr7:156230482-156238282  | 0.744972 | 1        |
| XLOC_012095 | XLOC_012095 | ABHD1        | chr2:27346656-27357542    | 0.745844 | 1        |
| XLOC_007561 | XLOC_007561 | GATM         | chr15:45653321-45672321   | 0.74621  | 1        |
| XLOC_013344 | XLOC_013344 | IKZF2        | chr2:213864410-214016333  | 0.747108 | 1        |
| XLOC_022091 | XLOC_022091 | LINC00535    | chr8:94358694-94712661    | 0.747168 | 1        |
| XLOC_005781 | XLOC_005781 | LOC387895    | chr12:127215246-127256808 | 0.748814 | 1        |
| XLOC_003233 | XLOC_003233 | SNORA52      | chr11:809935-812876       | 0.748859 | 0.999791 |
| XLOC_008014 | XLOC_008014 | IL21R        | chr16:27413482-27464714   | 0.74927  | 1        |
| XLOC_003296 | XLOC_003296 | C11orf42     | chr11:6226797-6232365     | 0.749637 | 1        |
| XLOC_013783 | XLOC_013783 | C20orf195    | chr20:62184372-62188035   | 0.750048 | 1        |
| XLOC_011083 | XLOC_011083 | ZNF610       | chr19:52839497-52870376   | 0.750083 | 1        |
| XLOC_023787 | XLOC_023787 | SCARNA9L     | chrX:20142635-20159966    | 0.75073  | 0.999791 |
| XLOC_002341 | XLOC_002341 | CELF2        | chr10:11047258-11378672   | 0.75118  | 1        |
| XLOC_009102 | XLOC_009102 | ASB16        | chr17:42248073-42264085   | 0.751576 | 1        |
| XLOC_011824 | XLOC_011824 | LOC101059948 | chr19:49521504-49522741   | 0.751774 | 0.999791 |
| XLOC_000384 | XLOC_000384 | FOXE3        | chr1:47881743-47883724    | 0.75291  | 1        |
| XLOC_006343 | XLOC_006343 | KLHDC1       | chr14:50159822-50219870   | 0.754989 | 1        |
| XLOC_013090 | XLOC_013090 | SH3RF3-AS1   | chr2:109743783-110262207  | 0.755214 | 1        |
| XLOC_015773 | XLOC_015773 | ESRG         | chr3:54156692-55108584    | 0.756815 | 1        |
| XLOC_000376 | XLOC_000376 | TEX38        | chr1:47137496-47139256    | 0.757262 | 1        |
| XLOC_017026 | XLOC_017026 | SLED1        | chr4:185676748-185747215  | 0.757585 | 1        |
| XLOC_011069 | XLOC_011069 | LOC100129083 | chr19:51913274-51921057   | 0.759794 | 1        |
| XLOC_005808 | XLOC_005808 | FGF9         | chr13:22245214-22278640   | 0.761556 | 0.364154 |
| XLOC_010951 | XLOC_010951 | FOXA3        | chr19:46367517-46377055   | 0.761588 | 1        |
| XLOC_017312 | XLOC_017312 | C5orf56      | chr5:131746464-131811736  | 0.762897 | 0.999791 |
| XLOC_006667 | XLOC_006667 | CRIP1        | chr14:105953256-105955124 | 0.763077 | 0.999791 |
| XLOC_004045 | XLOC_004045 | ZNF214       | chr11:7020548-7041586     | 0.764069 | 0.653038 |
| XLOC_020367 | XLOC_020367 | RSPH10B2     | chr7:6793739-6838396      | 0.764432 | 1        |
| XLOC_023526 | XLOC_023526 | GPRASP1      | chrX:101854095-101972661  | 0.764446 | 1        |
| XLOC_018734 | XLOC_018734 | TRIM31       | chr6:30070673-30080867    | 0.76456  | 1        |
| XLOC_001886 | XLOC_001886 | GBAP1        | chr1:155178489-155197325  | 0.765508 | 0.999791 |
| XLOC_004794 | XLOC_004794 | DENND5B-AS1  | chr12:31535156-31768285   | 0.767357 | 1        |
| XLOC_013951 | XLOC_013951 | SLA2         | chr20:35201875-35274619   | 0.767422 | 1        |
| XLOC_007482 | XLOC_007482 | FMN1         | chr15:33057746-33360085   | 0.768229 | 1        |
| XLOC_007639 | XLOC_007639 | IGDCC4       | chr15:65673824-65715410   | 0.769418 | 1        |
| XLOC_002032 | XLOC_002032 | SNORD47      | chr1:173832385-173837125  | 0.769683 | 0.999791 |
| XLOC_003632 | XLOC_003632 | TSGA10IP     | chr11:65713114-65727434   | 0.770806 | 0.999791 |
| XLOC_008770 | XLOC_008770 | SPNS3        | chr17:4337218-4391499     | 0.772488 | 0.999791 |
| XLOC_008017 | XLOC_008017 | APOBR        | chr16:28505969-28510291   | 0.77365  | 1        |
| XLOC_008851 | XLOC_008851 | WDR16        | chr17:9479943-9546776     | 0.773701 | 1        |
| XLOC_008781 | XLOC_008781 | C17orf107    | chr17:4736634-4806369     | 0.775117 | 1        |
| XLOC_006797 | XLOC_006797 | C14orf182    | chr14:50448429-50474238   | 0.778535 | 1        |
| XLOC_018270 | XLOC_018270 | RAB44        | chr6:36665627-36700960    | 0.781803 | 1        |
| XLOC_010968 | XLOC_010968 | C5AR1        | chr19:47813103-47825327   | 0.782273 | 0.886909 |
| XLOC_011745 | XLOC_011745 | CEACAM22P    | chr19:45041044-45060150   | 0.782492 | 1        |
| XLOC_015569 | XLOC_015569 | GHRL         | chr3:10290176-10335133    | 0.782519 | 1        |
| XLOC_005664 | XLOC_005664 | GLT8D2       | chr12:104382764-104443915 | 0.784398 | 1        |
| XLOC_014431 | XLOC_014431 | P2RX6        | chr22:21369441-21382302   | 0.784552 | 1        |
| XLOC_014825 | XLOC_014825 | DMC1         | chr22:38914953-38966189   | 0.785325 | 1        |
| XLOC_006314 | XLOC_006314 | AP4S1        | chr14:31363004-31565656   | 0.785651 | 0.999791 |
| XLOC_013662 | XLOC_013662 | L3MBTL1      | chr20:42136319-42170535   | 0.785711 | 0.610388 |
| XLOC_017961 | XLOC_017961 | LOC643201    | chr5:175570087-175626298  | 0.786002 | 1        |
| XLOC_012538 | XLOC_012538 | DFNB59       | chr2:179059207-179672150  | 0.787641 | 0.999791 |
| XLOC_021672 | XLOC_021672 | SLC26A7      | chr8:92261515-92410378    | 0.787841 | 1        |
| XLOC_010907 | XLOC_010907 | IRGC         | chr19:44220213-44224169   | 0.789147 | 1        |
| XLOC_023291 | XLOC_023291 | YY2          | chrX:21857655-21903541    | 0.78971  | 0.999791 |
| XLOC_010527 | XLOC_010527 | EMR1         | chr19:6887559-6940464     | 0.792188 | 1        |
| XLOC_024096 | XLOC_024096 | PLAC1        | chrX:133699872-133792513  | 0.796656 | 1        |
| XLOC_000600 | XLOC_000600 | AKR7A2P1     | chr1:113454469-113498975  | 0.796907 | 1        |
| XLOC_009922 | XLOC_009922 | LRRRC37A3    | chr17:62850487-62914903   | 0.797143 | 1        |
| XLOC_016667 | XLOC_016667 | SLC2A9       | chr4:9827847-10041872     | 0.79738  | 1        |
| XLOC_013006 | XLOC_013006 | REG3A        | chr2:79384131-79386880    | 0.799157 | 1        |
| XLOC_006507 | XLOC_006507 | PPP4R4       | chr14:94640648-94746072   | 0.803088 | 0.999791 |
| XLOC_003429 | XLOC_003429 | GYLTL1B      | chr11:45943195-45950647   | 0.803725 | 1        |
| XLOC_012580 | XLOC_012580 | AOX1         | chr2:201450730-201536217  | 0.803783 | 1        |
| XLOC_013781 | XLOC_013781 | COL20A1      | chr20:61924537-61962285   | 0.804739 | 1        |
| XLOC_014001 | XLOC_014001 | SPATA25      | chr20:44515129-44516238   | 0.805069 | 1        |
| XLOC_011935 | XLOC_011935 | VSTM1        | chr19:54544079-54567207   | 0.809334 | 1        |
| XLOC_014262 | XLOC_014262 | GRIK1        | chr21:30909253-31312282   | 0.809495 | 1        |
| XLOC_017195 | XLOC_017195 | ANKDD1B      | chr5:74916139-74966865    | 0.812034 | 1        |
| XLOC_004664 | XLOC_004664 | GALNT8       | chr12:4829751-4881892     | 0.813637 | 1        |
| XLOC_003766 | XLOC_003766 | HEPHL1       | chr11:93754377-93847374   | 0.81397  | 1        |

|             |             |              |                           |          |           |
|-------------|-------------|--------------|---------------------------|----------|-----------|
| XLOC_018197 | XLOC_018197 | LST1         | chr6:31553955-31560762    | 0.81508  | 1         |
| XLOC_020387 | XLOC_020387 | RPL23P8      | chr7:20866916-20867439    | 0.815979 | 1         |
| XLOC_022346 | XLOC_022346 | CCIN         | chr9:36169388-36171331    | 0.816523 | 1         |
| XLOC_005156 | XLOC_005156 | LRRC43       | chr12:122652265-122688018 | 0.818364 | 1         |
| XLOC_009587 | XLOC_009587 | SEZ6         | chr17:27281946-27333081   | 0.821263 | 1         |
| XLOC_003706 | XLOC_003706 | PLEKHB1      | chr11:73357222-73373864   | 0.82227  | 1         |
| XLOC_002237 | XLOC_002237 | AGT          | chr1:230838271-230850336  | 0.823194 | 1         |
| XLOC_017501 | XLOC_017501 | ARL10        | chr5:175792501-175800503  | 0.825343 | 1         |
| XLOC_018096 | XLOC_018096 | HIST1H4C     | chr6:26104175-26104565    | 0.826307 | 0.999791  |
| XLOC_005088 | XLOC_005088 | MYO1H        | chr12:109826523-109886176 | 0.826602 | 1         |
| XLOC_004089 | XLOC_004089 | SOX6         | chr11:15987994-16497935   | 0.827168 | 1         |
| XLOC_002837 | XLOC_002837 | ST8SIA6      | chr10:17362675-17496254   | 0.827232 | 1         |
| XLOC_012936 | XLOC_012936 | LOC100132215 | chr2:62900985-63275656    | 0.828159 | 1         |
| XLOC_012163 | XLOC_012163 | SIX3         | chr2:45169036-45173216    | 0.829027 | 1         |
| XLOC_016415 | XLOC_016415 | PTPN13       | chr4:87515467-87736328    | 0.829122 | 1         |
| XLOC_017489 | XLOC_017489 | LOC285593    | chr5:173006645-173012075  | 0.831545 | 1         |
| XLOC_017138 | XLOC_017138 | IL31RA       | chr5:55147206-55218682    | 0.831987 | 1         |
| XLOC_018152 | XLOC_018152 | OR2H1        | chr6:29426229-29432099    | 0.832265 | 1         |
| XLOC_016112 | XLOC_016112 | LEPREL1      | chr3:189674516-189840226  | 0.833576 | 1         |
| XLOC_002155 | XLOC_002155 | IL10         | chr1:206940947-206945839  | 0.834197 | 1         |
| XLOC_012614 | XLOC_012614 | CPO          | chr2:207804277-207834198  | 0.835361 | 1         |
| XLOC_000305 | XLOC_000305 | TMCO2        | chr1:40713572-40717365    | 0.836544 | 1         |
| XLOC_000999 | XLOC_000999 | LEMD1-AS1    | chr1:205342379-205391214  | 0.836758 | 1         |
| XLOC_011211 | XLOC_011211 | SMIM17       | chr19:57154526-57168614   | 0.83708  | 1         |
| XLOC_021711 | XLOC_021711 | ZFPM2        | chr8:106331146-106816767  | 0.838293 | 1         |
| XLOC_016856 | XLOC_016856 | ADH6         | chr4:100010007-100222513  | 0.83848  | 1         |
| XLOC_017286 | XLOC_017286 | SNCAIP       | chr5:121647819-121814782  | 0.839318 | 0.446454  |
| XLOC_012368 | XLOC_012368 | RGPD5, RGPD6 | chr2:110550334-110615282  | 0.839661 | 1         |
| XLOC_009698 | XLOC_009698 | KRTAP2-3     | chr17:39215492-39216344   | 0.839758 | 0.66929   |
| XLOC_018771 | XLOC_018771 | VWA7         | chr6:31733370-31745108    | 0.840252 | 1         |
| XLOC_021859 | XLOC_021859 | SOX7         | chr8:10581277-10588022    | 0.841071 | 1         |
| XLOC_023761 | XLOC_023761 | GPM6B        | chrX:13789061-13956831    | 0.841094 | 1         |
| XLOC_002247 | XLOC_002247 | DISC2        | chr1:231664398-232177019  | 0.841777 | 1         |
| XLOC_004146 | XLOC_004146 | RAG2         | chr1:36613492-36680817    | 0.843512 | 1         |
| XLOC_017092 | XLOC_017092 | CDH6         | chr5:31193761-31329253    | 0.844169 | 1         |
| XLOC_005325 | XLOC_005325 | GSF1         | chr12:13236470-13256630   | 0.844641 | 1         |
| XLOC_016660 | XLOC_016660 | FLJ36777     | chr4:7099150-7105103      | 0.844845 | 1         |
| XLOC_012292 | XLOC_012292 | PLGLB2       | chr2:88047605-88285309    | 0.844856 | 1         |
| XLOC_006310 | XLOC_006310 | C14orf23     | chr14:29241909-29264000   | 0.84519  | 1         |
| XLOC_000254 | XLOC_000254 | DCDC2B       | chr1:32674694-32681797    | 0.845393 | 1         |
| XLOC_008180 | XLOC_008180 | RLTPR        | chr16:67679029-67694718   | 0.845709 | 1         |
| XLOC_001217 | XLOC_001217 | LOC100129534 | chr1:2252695-2322993      | 0.845958 | 0.91464   |
| XLOC_016296 | XLOC_016296 | DCAF4L1      | chr4:41983712-41988484    | 0.846361 | 1         |
| XLOC_016020 | XLOC_016020 | LOC100507537 | chr3:155008020-155011489  | 0.847334 | 1         |
| XLOC_012862 | XLOC_012862 | NLRC4        | chr2:32449517-32490812    | 0.856909 | 1         |
| XLOC_008425 | XLOC_008425 | BCAR4        | chr16:11913691-11922689   | 0.857018 | 1         |
| XLOC_004840 | XLOC_004840 | GPD1         | chr12:50497601-50505103   | 0.858275 | 1         |
| XLOC_022994 | XLOC_022994 | ACTL7B       | chr9:111616868-111618275  | 0.858538 | 1         |
| XLOC_008600 | XLOC_008600 | SNORA50      | chr16:58549382-58663790   | 0.861282 | 0.999791  |
| XLOC_021636 | XLOC_021636 | LY96         | chr8:74903563-74941307    | 0.862288 | 0.891812  |
| XLOC_001831 | XLOC_001831 | HRNR         | chr1:152184551-152196672  | 0.864182 | 1         |
| XLOC_012716 | XLOC_012716 | SCARNA5      | chr2:234160216-234204320  | 0.865251 | 0.999791  |
| XLOC_005307 | XLOC_005307 | TAS2R19      | chr12:10998447-11328619   | 0.866421 | 1         |
| XLOC_008799 | XLOC_008799 | XAF1         | chr17:6659155-6678964     | 0.866675 | 1         |
| XLOC_014574 | XLOC_014574 | GRAP2        | chr22:40297085-40367384   | 0.867412 | 1         |
| XLOC_000141 | XLOC_000141 | ACTL8        | chr1:18081807-18153558    | 0.869088 | 0.0961594 |
| XLOC_007350 | XLOC_007350 | FAM154B      | chr15:82555151-82577267   | 0.869984 | 1         |
| XLOC_009485 | XLOC_009485 | RNF222       | chr17:8294022-8301144     | 0.870461 | 1         |
| XLOC_015878 | XLOC_015878 | KIAA1407     | chr3:113682983-113775460  | 0.872832 | 0.276909  |
| XLOC_004465 | XLOC_004465 | SNORA1       | chr11:93465169-93465299   | 0.873068 | 1         |
| XLOC_009067 | XLOC_009067 | HSPB9        | chr17:40274755-40275371   | 0.874044 | 1         |
| XLOC_016016 | XLOC_016016 | TMEM14E      | chr3:151980404-152183569  | 0.874335 | 1         |
| XLOC_000028 | XLOC_000028 | MMP23B       | chr1:1567559-1570030      | 0.874681 | 1         |
| XLOC_009545 | XLOC_009545 | GRAP         | chr17:18853988-18950336   | 0.87509  | 1         |
| XLOC_005409 | XLOC_005409 | COL2A1       | chr12:48366747-48398285   | 0.876081 | 1         |
| XLOC_019201 | XLOC_019201 | LINC00242    | chr6:170188885-170202969  | 0.876884 | 0.891812  |
| XLOC_003354 | XLOC_003354 | LOC494141    | chr11:18230684-18235111   | 0.877576 | 1         |
| XLOC_008597 | XLOC_008597 | PRSS54       | chr16:58283839-58328951   | 0.879587 | 0.999791  |
| XLOC_015540 | XLOC_015540 | DLG1-AS1     | chr3:196769430-197030621  | 0.879691 | 1         |
| XLOC_008505 | XLOC_008505 | FAM57B       | chr16:30034654-30042186   | 0.880809 | 1         |
| XLOC_011387 | XLOC_011387 | PRAM1        | chr19:8554939-8567538     | 0.881701 | 1         |
| XLOC_010223 | XLOC_010223 | CDH20        | chr18:59157774-59222365   | 0.881781 | 1         |
| XLOC_014932 | XLOC_014932 | CPNE9        | chr3:9745509-9771592      | 0.883319 | 1         |
| XLOC_022797 | XLOC_022797 | C9orf24      | chr9:34379016-34397849    | 0.883548 | 1         |
| XLOC_022660 | XLOC_022660 | KCNT1        | chr9:138594030-138684993  | 0.883604 | 1         |
| XLOC_015365 | XLOC_015365 | C3orf72      | chr3:138666075-138672830  | 0.884312 | 1         |
| XLOC_001855 | XLOC_001855 | S100A3       | chr1:153519808-153521734  | 0.886961 | 0.117049  |
| XLOC_013989 | XLOC_013989 | MATN4        | chr20:43922086-43946464   | 0.887509 | 1         |
| XLOC_004611 | XLOC_004611 | FEZ1         | chr11:125315640-125366206 | 0.887922 | 1         |

|             |             |                           |                           |          |          |
|-------------|-------------|---------------------------|---------------------------|----------|----------|
| XLOC_022368 | XLOC_022368 | AQP7P3                    | chr9:42844369-42893137    | 0.889594 | 0.999791 |
| XLOC_003344 | XLOC_003344 | CALCB                     | chr11:15095145-15100177   | 0.889796 | 1        |
| XLOC_006749 | XLOC_006749 | STXBP6                    | chr14:25281305-25519095   | 0.893219 | 0.337665 |
| XLOC_012597 | XLOC_012597 | ALS2CR8                   | chr2:203776977-203851060  | 0.896687 | 1        |
| XLOC_022277 | XLOC_022277 | MLANA                     | chr9:5890908-5909822      | 0.897999 | 1        |
| XLOC_009051 | XLOC_009051 | KRTAP4-7                  | chr17:39240458-39241396   | 0.900049 | 1        |
| XLOC_005366 | XLOC_005366 | PTHLLH                    | chr12:28111016-28124916   | 0.901279 | 1        |
| XLOC_011497 | XLOC_011497 | EPHX3                     | chr19:15337729-15343858   | 0.902006 | 1        |
| XLOC_007990 | XLOC_007990 | SMG1P1                    | chr16:22430866-22503541   | 0.903536 | 1        |
| XLOC_003667 | XLOC_003667 | ALDH3B1                   | chr11:67776047-67796743   | 0.904087 | 1        |
| XLOC_020431 | XLOC_020431 | ADCYAP1R1                 | chr7:31092075-31151093    | 0.906851 | 1        |
| XLOC_021746 | XLOC_021746 | PCAT1                     | chr8:128025398-128033259  | 0.907308 | 1        |
| XLOC_007195 | XLOC_007195 | C15orf48                  | chr15:45722726-45725647   | 0.907605 | 1        |
| XLOC_000975 | XLOC_000975 | PTPRVP                    | chr1:202137178-202158577  | 0.910207 | 1        |
| XLOC_015511 | XLOC_015511 | TPRG1                     | chr3:188889762-189041271  | 0.910244 | 1        |
| XLOC_001146 | XLOC_001146 | VN1R5                     | chr1:247419373-247420447  | 0.910865 | 1        |
| XLOC_007744 | XLOC_007744 | LOC338963                 | chr15:83379222-83382745   | 0.912047 | 1        |
| XLOC_001626 | XLOC_001626 | LPAR3                     | chr1:85279085-85358896    | 0.913008 | 1        |
| XLOC_000771 | XLOC_000771 | SEMA4A                    | chr1:156119734-156147542  | 0.913858 | 1        |
| XLOC_013436 | XLOC_013436 | COL6A3                    | chr2:238232654-238322850  | 0.915223 | 1        |
| XLOC_018774 | XLOC_018774 | HSPA1L                    | chr6:31777395-31782835    | 0.915285 | 1        |
| XLOC_010370 | XLOC_010370 | MRO                       | chr18:48321489-48351754   | 0.915968 | 1        |
| XLOC_017233 | XLOC_017233 | ARRDC3-AS1                | chr5:90664540-90716532    | 0.917204 | 1        |
| XLOC_008467 | XLOC_008467 | PDZD9                     | chr16:21995185-22012431   | 0.920116 | 1        |
| XLOC_010586 | XLOC_010586 | C19orf38                  | chr19:10959105-10980360   | 0.920971 | 1        |
| XLOC_003946 | XLOC_003946 | CDHR5                     | chr11:616564-625067       | 0.92162  | 1        |
| XLOC_014498 | XLOC_014498 | CABP7                     | chr22:30116343-30162969   | 0.922535 | 1        |
| XLOC_000976 | XLOC_000976 | LGR6                      | chr1:202163117-202288889  | 0.922701 | 1        |
| XLOC_013095 | XLOC_013095 | MALL                      | chr2:110841446-110874143  | 0.923642 | 1        |
| XLOC_011401 | XLOC_011401 | ZNF426                    | chr19:9638680-9649303     | 0.924064 | 1        |
| XLOC_001073 | XLOC_001073 | CNIH3                     | chr1:224804178-224928249  | 0.925089 | 1        |
| XLOC_023984 | XLOC_023984 | ZMAT1                     | chrX:101137259-101187039  | 0.928402 | 1        |
| XLOC_022043 | XLOC_022043 | LOC100130301              | chr8:74153658-74171737    | 0.929665 | 1        |
| XLOC_011646 | XLOC_011646 | MAP4K1                    | chr19:39078280-39108643   | 0.930422 | 1        |
| XLOC_002807 | XLOC_002807 | ITIH5                     | chr10:7601231-7708961     | 0.933004 | 1        |
| XLOC_016806 | XLOC_016806 | CCDC158                   | chr4:77234191-77328458    | 0.933057 | 1        |
| XLOC_001954 | XLOC_001954 | KCNJ10                    | chr1:160007256-160040051  | 0.936105 | 1        |
| XLOC_010109 | XLOC_010109 | PTPRM                     | chr18:7567313-8406859     | 0.936652 | 1        |
| XLOC_014826 | XLOC_014826 | FAM227A                   | chr22:38974124-39052634   | 0.937289 | 1        |
| XLOC_012718 | XLOC_012718 | SAG                       | chr2:234216308-234255701  | 0.937886 | 1        |
| XLOC_005986 | XLOC_005986 | TNFSF13B                  | chr13:108921976-108960832 | 0.937966 | 1        |
| XLOC_015300 | XLOC_015300 | MYLK-AS1                  | chr3:123304402-123603149  | 0.93927  | 1        |
| XLOC_010519 | XLOC_010519 | LOC100128568              | chr19:5978413-6110664     | 0.940674 | 1        |
| XLOC_017041 | XLOC_017041 | TRIML2                    | chr4:189012426-189026408  | 0.941367 | 0.774655 |
| XLOC_016116 | XLOC_016116 | UTS2D                     | chr3:190984943-191116459  | 0.941587 | 1        |
| XLOC_005184 | XLOC_005184 | LINC00507                 | chr12:128399954-128436097 | 0.942823 | 1        |
| XLOC_021514 | XLOC_021514 | LOC100507156              | chr8:23154409-23261722    | 0.943269 | 1        |
| XLOC_007454 | XLOC_007454 | LOC283683                 | chr15:23094330-23115254   | 0.943502 | 1        |
| XLOC_021616 | XLOC_021616 | TRIM55                    | chr8:67039277-67087718    | 0.94408  | 1        |
| XLOC_009139 | XLOC_009139 | LRRC46                    | chr17:45908992-45918699   | 0.944759 | 0.999791 |
| XLOC_017700 | XLOC_017700 | ANKRD31                   | chr5:74364121-74532703    | 0.945664 | 1        |
| XLOC_001307 | XLOC_001307 | MFAP2                     | chr1:17300998-17308081    | 0.948742 | 0.999791 |
| XLOC_003820 | XLOC_003820 | TEX12                     | chr11:112038094-112043279 | 0.94961  | 1        |
| XLOC_015242 | XLOC_015242 | LINC00636                 | chr3:107602051-107647753  | 0.949772 | 1        |
| XLOC_017519 | XLOC_017519 | FAM153C                   | chr5:177433966-177476088  | 0.952056 | 1        |
| XLOC_020365 | XLOC_020365 | ZNF853                    | chr7:6655526-6663921      | 0.952196 | 1        |
| XLOC_020459 | XLOC_020459 | HECW1                     | chr7:43152197-43602938    | 0.952222 | 1        |
| XLOC_003190 | XLOC_003190 | FAM196A                   | chr10:128594022-129250780 | 0.952312 | 1        |
| XLOC_001579 | XLOC_001579 | HSD52                     | chr1:59597607-59612479    | 0.953167 | 1        |
| XLOC_003033 | XLOC_003033 | KLLN                      | chr10:89618917-89623194   | 0.953246 | 1        |
| XLOC_012179 | XLOC_012179 | GTF2A1L,STON1,STON1-GTF2A | chr2:48757063-49003656    | 0.956129 | 1        |
| XLOC_004269 | XLOC_004269 | LRRN4CL                   | chr11:62453873-62457371   | 0.958588 | 1        |
| XLOC_004128 | XLOC_004128 | DCDC5                     | chr11:30885149-31014233   | 0.963061 | 1        |
| XLOC_003564 | XLOC_003564 | GNG3                      | chr11:62457733-62494857   | 0.963176 | 1        |
| XLOC_019071 | XLOC_019071 | KIAA0408,SOGA3            | chr6:127759550-127840500  | 0.963389 | 1        |
| XLOC_004124 | XLOC_004124 | BDNF                      | chr11:27528398-27743605   | 0.964321 | 1        |
| XLOC_016076 | XLOC_016076 | CCDC39                    | chr3:180331795-180397283  | 0.968392 | 1        |
| XLOC_018804 | XLOC_018804 | HLA-DMA                   | chr6:32916390-32920899    | 0.968897 | 0.720823 |
| XLOC_022373 | XLOC_022373 | KGFLP1                    | chr9:46687556-46746820    | 0.969337 | 1        |
| XLOC_013347 | XLOC_013347 | ABCA12                    | chr2:215796265-216003151  | 0.969785 | 1        |
| XLOC_005180 | XLOC_005180 | TMEM132B                  | chr12:125811161-126143589 | 0.972287 | 1        |
| XLOC_005235 | XLOC_005235 | VWF                       | chr12:6058039-6233836     | 0.974606 | 1        |
| XLOC_017314 | XLOC_017314 | IL13                      | chr5:131993864-131996801  | 0.978805 | 1        |
| XLOC_001052 | XLOC_001052 | SPATA17                   | chr1:217804694-218040484  | 0.979497 | 1        |
| XLOC_020635 | XLOC_020635 | CYP3A43                   | chr7:99425635-99464173    | 0.979902 | 1        |
| XLOC_000571 | XLOC_000571 | GSTM2                     | chr1:110210643-110226619  | 0.981196 | 1        |
| XLOC_018333 | XLOC_018333 | TDRD6                     | chr6:46655611-46703430    | 0.982811 | 1        |
| XLOC_023282 | XLOC_023282 | NHS                       | chrX:17393542-17754113    | 0.98404  | 1        |
| XLOC_011266 | XLOC_011266 | PRSS57                    | chr19:885455-695461       | 0.984089 | 1        |

|             |             |              |                           |          |          |
|-------------|-------------|--------------|---------------------------|----------|----------|
| XLOC_022655 | XLOC_022655 | LCN1         | chr9:138413283-138418386  | 0.984388 | 1        |
| XLOC_017850 | XLOC_017850 | TMEM173      | chr5:138855112-138862343  | 0.985624 | 1        |
| XLOC_002390 | XLOC_002390 | LINC00264    | chr10:26878793-26883251   | 0.986304 | 1        |
| XLOC_015127 | XLOC_015127 | GRM2         | chr3:51741080-51752625    | 0.987476 | 1        |
| XLOC_021113 | XLOC_021113 | GTF2IRD2     | chr7:74210483-74267841    | 0.988565 | 1        |
| XLOC_022525 | XLOC_022525 | PAPPA        | chr9:118916070-119164600  | 0.991862 | 1        |
| XLOC_015395 | XLOC_015395 | LOC646903    | chr3:149689065-149691029  | 0.9919   | 1        |
| XLOC_011068 | XLOC_011068 | IGLN5        | chr19:51815101-51834102   | 0.996238 | 1        |
| XLOC_008782 | XLOC_008782 | GP1BA        | chr17:4835591-4838325     | 0.997931 | 1        |
| XLOC_011084 | XLOC_011084 | ZNF880       | chr19:52873169-52889046   | 0.999599 | 1        |
| XLOC_004782 | XLOC_004782 | C12orf70     | chr12:27619742-27655118   | 0.999668 | 1        |
| XLOC_007992 | XLOC_007992 | LOC653786    | chr16:22557018-22588186   | 1.00093  | 1        |
| XLOC_004680 | XLOC_004680 | CD4          | chr12:6898637-6929976     | 1.00102  | 1        |
| XLOC_022448 | XLOC_022448 | MIRLET7D     | chr9:96938851-96966848    | 1.00141  | 1        |
| XLOC_009064 | XLOC_009064 | TTC25        | chr17:40086887-40117668   | 1.00479  | 1        |
| XLOC_007196 | XLOC_007196 | HMG2P46      | chr15:45774679-45848928   | 1.00562  | 1        |
| XLOC_024183 | XLOC_024183 | RENBP        | chrX:153200721-153210232  | 1.00635  | 0.866946 |
| XLOC_023833 | XLOC_023833 | CFP          | chrX:47483611-47489704    | 1.00693  | 1        |
| XLOC_017647 | XLOC_017647 | LOC642366    | chr5:50668570-50690563    | 1.01096  | 1        |
| XLOC_000404 | XLOC_000404 | DIO1         | chr1:54359860-54376759    | 1.01143  | 1        |
| XLOC_005245 | XLOC_005245 | LPAR5        | chr12:6728000-6745297     | 1.01431  | 1        |
| XLOC_003580 | XLOC_003580 | FLRT1        | chr11:63766029-63933585   | 1.01772  | 1        |
| XLOC_006270 | XLOC_006270 | TMEM253      | chr14:21558204-21572863   | 1.01826  | 0.999791 |
| XLOC_011598 | XLOC_011598 | LGIA         | chr19:35615416-35626178   | 1.01873  | 1        |
| XLOC_009035 | XLOC_009035 | GRB7         | chr17:37894161-37903538   | 1.01887  | 1        |
| XLOC_018803 | XLOC_018803 | HLA-DMB      | chr6:32902405-32908847    | 1.01961  | 1        |
| XLOC_003746 | XLOC_003746 | LOC100506368 | chr11:8666662-86711989    | 1.02014  | 1        |
| XLOC_007857 | XLOC_007857 | EME2         | chr16:1823228-1826239     | 1.02015  | 0.999791 |
| XLOC_019030 | XLOC_019030 | PPIL6        | chr6:109711417-109765122  | 1.0209   | 0.999791 |
| XLOC_003318 | XLOC_003318 | SNORA3       | chr11:8703994-8711419     | 1.02244  | 0.999791 |
| XLOC_023079 | XLOC_023079 | SNORA65      | chr9:130209952-130213711  | 1.02284  | 0.999791 |
| XLOC_006422 | XLOC_006422 | ADAM21       | chr14:70918873-70926622   | 1.02321  | 1        |
| XLOC_011837 | XLOC_011837 | PTH2         | chr19:49925670-49926698   | 1.02321  | 1        |
| XLOC_022657 | XLOC_022657 | PAEP         | chr9:138453603-138458622  | 1.0242   | 1        |
| XLOC_021747 | XLOC_021747 | POU5F1B      | chr8:128427856-128429441  | 1.02528  | 0.290362 |
| XLOC_011045 | XLOC_011045 | ATF5         | chr19:95302912-95437193   | 1.02665  | 0.638821 |
| XLOC_008028 | XLOC_008028 | RRN3P2       | chr16:29086162-29128038   | 1.02682  | 1        |
| XLOC_001867 | XLOC_001867 | NUP210L      | chr1:153965167-154127592  | 1.03285  | 1        |
| XLOC_013136 | XLOC_013136 | LIMS2        | chr2:128395995-128439360  | 1.03304  | 1        |
| XLOC_004013 | XLOC_004013 | OR51B4       | chr1:5322243-5323176      | 1.03529  | 1        |
| XLOC_011986 | XLOC_011986 | ZNF835       | chr19:57174019-57183123   | 1.03574  | 1        |
| XLOC_012630 | XLOC_012630 | TMEM169      | chr2:216946588-216967506  | 1.03609  | 1        |
| XLOC_001715 | XLOC_001715 | KCND3        | chr1:112318453-112531777  | 1.03663  | 1        |
| XLOC_018731 | XLOC_018731 | HCG4B        | chr6:29892368-29893428    | 1.04563  | 0.978746 |
| XLOC_001214 | XLOC_001214 | KIAA1751     | chr1:1884751-1935276      | 1.04671  | 1        |
| XLOC_014036 | XLOC_014036 | BCAS1        | chr20:52560078-52687304   | 1.04904  | 1        |
| XLOC_002516 | XLOC_002516 | DNAJC9-AS1   | chr10:75007124-75118617   | 1.04953  | 1        |
| XLOC_011024 | XLOC_011024 | SNORD33      | chr19:49990810-49995564   | 1.0497   | 0.999791 |
| XLOC_013490 | XLOC_013490 | TMC2         | chr20:2517252-2622430     | 1.05169  | 1        |
| XLOC_014157 | XLOC_014157 | LOC100506385 | chr21:36118121-36157168   | 1.05432  | 1        |
| XLOC_002356 | XLOC_002356 | MEIG1        | chr10:15001437-15014850   | 1.05467  | 1        |
| XLOC_000429 | XLOC_000429 | FOXD3        | chr1:63788729-63790797    | 1.05711  | 1        |
| XLOC_002201 | XLOC_002201 | SUSD4        | chr1:223394160-223537544  | 1.05754  | 0.865976 |
| XLOC_008777 | XLOC_008777 | GLTPD2       | chr17:4692253-4693884     | 1.05771  | 0.999791 |
| XLOC_023832 | XLOC_023832 | SYN1         | chrX:47420498-47479256    | 1.06116  | 1        |
| XLOC_014535 | XLOC_014535 | APOL1        | chr22:36649116-36663577   | 1.06172  | 1        |
| XLOC_007509 | XLOC_007509 | ANKRD63      | chr15:40573644-40574787   | 1.06342  | 1        |
| XLOC_014957 | XLOC_014957 | FBLN2        | chr3:13590624-13679922    | 1.06424  | 1        |
| XLOC_005249 | XLOC_005249 | PIANP        | chr12:6802956-6810009     | 1.06462  | 1        |
| XLOC_010463 | XLOC_010463 | IZUMO4       | chr19:2096867-2099583     | 1.06501  | 1        |
| XLOC_007312 | XLOC_007312 | GOLGA6C      | chr15:75550898-75565796   | 1.0678   | 1        |
| XLOC_004823 | XLOC_004823 | CCDC65       | chr12:49297892-49315359   | 1.06786  | 1        |
| XLOC_020791 | XLOC_020791 | WEE2         | chr7:141404137-141438030  | 1.06786  | 1        |
| XLOC_005582 | XLOC_005582 | BEST3        | chr12:70047388-70093196   | 1.06997  | 0.111388 |
| XLOC_009436 | XLOC_009436 | AIP1         | chr17:6327058-6338519     | 1.07325  | 1        |
| XLOC_011692 | XLOC_011692 | B3GNT8       | chr19:41931263-41934635   | 1.07406  | 1        |
| XLOC_018057 | XLOC_018057 | EDN1         | chr6:12290528-12297427    | 1.07463  | 1        |
| XLOC_020691 | XLOC_020691 | GPR22        | chr7:106809405-107218968  | 1.07642  | 1        |
| XLOC_022699 | XLOC_022699 | FLJ40292     | chr9:140513443-140730578  | 1.07977  | 1        |
| XLOC_003351 | XLOC_003351 | KCNC1        | chr11:17757494-17804602   | 1.07999  | 1        |
| XLOC_022912 | XLOC_022912 | LOC440173    | chr9:89623365-89657041    | 1.08111  | 1        |
| XLOC_017356 | XLOC_017356 | SLC4A9       | chr5:139739786-139754722  | 1.08165  | 1        |
| XLOC_003688 | XLOC_003688 | KRTAP5-9     | chr11:71259465-71260653   | 1.08321  | 1        |
| XLOC_001975 | XLOC_001975 | APOA2        | chr1:161192082-161193418  | 1.08392  | 0.999791 |
| XLOC_004526 | XLOC_004526 | CRYAB        | chr11:111779349-111782473 | 1.08424  | 1        |
| XLOC_015454 | XLOC_015454 | KCNMB2       | chr3:178254223-178562217  | 1.08926  | 1        |
| XLOC_013292 | XLOC_013292 | C2orf66      | chr2:197669138-197675000  | 1.08965  | 1        |
| XLOC_000625 | XLOC_000625 | HSD3BP4      | chr1:120106502-120115199  | 1.09233  | 1        |
| XLOC_016507 | XLOC_016507 | SLC7A11-AS1  | chr4:138948576-139163503  | 1.09389  | 1        |

|             |             |              |                           |         |          |
|-------------|-------------|--------------|---------------------------|---------|----------|
| XLOC_013483 | XLOC_013483 | RAD21L1      | chr20:1206763-1235145     | 1.09542 | 1        |
| XLOC_005507 | XLOC_005507 | DCD          | chr12:55038374-55042149   | 1.09698 | 1        |
| XLOC_014016 | XLOC_014016 | PREX1        | chr20:47240792-4744420    | 1.09714 | 1        |
| XLOC_007123 | XLOC_007123 | RYR3         | chr15:33603176-34158303   | 1.10043 | 1        |
| XLOC_000963 | XLOC_000963 | IGFN1        | chr1:201159952-201198080  | 1.10163 | 1        |
| XLOC_007682 | XLOC_007682 | LOC283731    | chr15:74418713-74421619   | 1.10421 | 1        |
| XLOC_009223 | XLOC_009223 | KCNH6        | chr17:61600694-61626338   | 1.10589 | 1        |
| XLOC_006526 | XLOC_006526 | HHIPL1       | chr14:100111479-100143011 | 1.11115 | 1        |
| XLOC_006105 | XLOC_006105 | SNORA31      | chr13:45911303-45915297   | 1.11435 | 0.999791 |
| XLOC_001592 | XLOC_001592 | WDR78        | chr1:67278571-67390570    | 1.11631 | 1        |
| XLOC_013534 | XLOC_013534 | MACROD2      | chr20:13976145-16033841   | 1.11669 | 1        |
| XLOC_006192 | XLOC_006192 | SLC15A1      | chr13:99336054-99404929   | 1.11943 | 1        |
| XLOC_000368 | XLOC_000368 | LURAP1       | chr1:46654352-46686928    | 1.12274 | 1        |
| XLOC_008183 | XLOC_008183 | TSNAXIP1     | chr16:67841009-67861971   | 1.12378 | 1        |
| XLOC_005187 | XLOC_005187 | GLT1D1       | chr12:129338080-129469509 | 1.12526 | 1        |
| XLOC_000412 | XLOC_000412 | TMEM61       | chr1:55446464-55457966    | 1.12847 | 1        |
| XLOC_004940 | XLOC_004940 | INHBC        | chr12:57828542-57844609   | 1.12947 | 1        |
| XLOC_004315 | XLOC_004315 | BATF2        | chr1:64755416-64764517    | 1.13218 | 0.304629 |
| XLOC_011091 | XLOC_011091 | ERVV-1       | chr19:53517343-53519833   | 1.13329 | 1        |
| XLOC_004560 | XLOC_004560 | CD3D         | chr11:118209788-118213459 | 1.13772 | 1        |
| XLOC_011389 | XLOC_011389 | MYO1F        | chr19:8585673-8642331     | 1.13925 | 1        |
| XLOC_021038 | XLOC_021038 | CAMK2B       | chr7:44256748-44365230    | 1.13999 | 1        |
| XLOC_002639 | XLOC_002639 | DNMBP-AS1    | chr10:101635333-101769676 | 1.1421  | 1        |
| XLOC_013284 | XLOC_013284 | STAT4        | chr2:191894301-192016322  | 1.14483 | 1        |
| XLOC_006638 | XLOC_006638 | AMN          | chr14:103388992-103397179 | 1.14607 | 1        |
| XLOC_006471 | XLOC_006471 | C14orf178    | chr14:78183943-78236085   | 1.14648 | 1        |
| XLOC_009391 | XLOC_009391 | LOC284009    | chr17:2310274-2318730     | 1.14754 | 1        |
| XLOC_016443 | XLOC_016443 | MTTP         | chr4:100485239-100545154  | 1.14791 | 1        |
| XLOC_006753 | XLOC_006753 | LOC100506071 | chr14:31343740-31359822   | 1.14918 | 1        |
| XLOC_001751 | XLOC_001751 | NBPF7        | chr11:120377387-120387779 | 1.1533  | 1        |
| XLOC_015693 | XLOC_015693 | TMEM89       | chr3:48658274-48659189    | 1.15415 | 1        |
| XLOC_018469 | XLOC_018469 | SLC35F1      | chr6:118228688-118638839  | 1.15593 | 1        |
| XLOC_005453 | XLOC_005453 | BIN2         | chr12:51674821-51717938   | 1.15759 | 1        |
| XLOC_018539 | XLOC_018539 | LOC100507557 | chr6:145946439-146285233  | 1.15915 | 1        |
| XLOC_021689 | XLOC_021689 | MATN2        | chr8:98881310-99048946    | 1.16032 | 1        |
| XLOC_022982 | XLOC_022982 | ALDOB        | chr9:104182841-104198062  | 1.16056 | 1        |
| XLOC_009936 | XLOC_009936 | ABCA9        | chr17:66970772-67057136   | 1.16112 | 1        |
| XLOC_008489 | XLOC_008489 | NUPR1        | chr16:28548661-28550495   | 1.1623  | 0.119609 |
| XLOC_003267 | XLOC_003267 | LOC100506082 | chr11:4208381-4223883     | 1.16242 | 1        |
| XLOC_000483 | XLOC_000483 | WDR63        | chr1:85527992-85598821    | 1.16461 | 1        |
| XLOC_005479 | XLOC_005479 | KRT79        | chr12:53215230-53228077   | 1.16677 | 0.228313 |
| XLOC_006491 | XLOC_006491 | SNORA11B     | chr14:91580356-91691703   | 1.17448 | 1        |
| XLOC_005884 | XLOC_005884 | CPB2-AS1     | chr13:46626982-46679211   | 1.17602 | 1        |
| XLOC_000715 | XLOC_000715 | LCE1B        | chr1:152784446-152785585  | 1.17793 | 1        |
| XLOC_011506 | XLOC_011506 | CYP4F2       | chr19:15988833-16008884   | 1.17879 | 1        |
| XLOC_013968 | XLOC_013968 | SNORA71D     | chr20:37049238-37064018   | 1.17973 | 0.999791 |
| XLOC_022495 | XLOC_022495 | TAL2         | chr9:108424737-108425385  | 1.18058 | 1        |
| XLOC_005266 | XLOC_005266 | C3AR1        | chr12:8210918-8218955     | 1.18097 | 1        |
| XLOC_009847 | XLOC_009847 | CACNA1G-AS1  | chr17:48633567-48704832   | 1.18097 | 1        |
| XLOC_023002 | XLOC_023002 | C9orf152     | chr9:112961845-112970413  | 1.18645 | 1        |
| XLOC_010540 | XLOC_010540 | C19orf59     | chr19:7741942-7744719     | 1.18705 | 1        |
| XLOC_011521 | XLOC_011521 | PLVAP        | chr19:17462263-17488137   | 1.19127 | 1        |
| XLOC_014752 | XLOC_014752 | RFPL1-AS1    | chr22:29833003-29838444   | 1.19187 | 1        |
| XLOC_021289 | XLOC_021289 | IQUB         | chr7:123092235-123174718  | 1.19676 | 1        |
| XLOC_022557 | XLOC_022557 | OLFML2A      | chr9:127539436-127577159  | 1.19797 | 1        |
| XLOC_023015 | XLOC_023015 | SLC46A2      | chr9:115641199-115653193  | 1.20179 | 1        |
| XLOC_008728 | XLOC_008728 | PABPN1L      | chr16:88929747-88933068   | 1.20262 | 1        |
| XLOC_018799 | XLOC_018799 | HLA-DOB      | chr6:32780539-32784825    | 1.2032  | 1        |
| XLOC_006881 | XLOC_006881 | DPF3         | chr14:73136659-73360809   | 1.20354 | 1        |
| XLOC_004063 | XLOC_004063 | SCUBE2       | chr11:9041046-9113150     | 1.20377 | 1        |
| XLOC_022459 | XLOC_022459 | LOC158435    | chr9:98828120-98864194    | 1.20714 | 1        |
| XLOC_009168 | XLOC_009168 | EPN3         | chr17:48610047-48621111   | 1.20803 | 1        |
| XLOC_015853 | XLOC_015853 | LOC100302640 | chr3:106828636-106959485  | 1.20829 | 0.999791 |
| XLOC_012101 | XLOC_012101 | LOC100505624 | chr2:27548715-27579901    | 1.21279 | 1        |
| XLOC_005310 | XLOC_005310 | TAS2R43      | chr12:10998447-11328619   | 1.21405 | 1        |
| XLOC_004171 | XLOC_004171 | SPI1         | chr11:47376408-47400127   | 1.21749 | 1        |
| XLOC_018190 | XLOC_018190 | HCP5         | chr6:31430956-31433586    | 1.2248  | 1        |
| XLOC_005755 | XLOC_005755 | HPD          | chr12:122277432-122326517 | 1.22612 | 1        |
| XLOC_006265 | XLOC_006265 | SLC39A2      | chr14:21467413-21470034   | 1.22914 | 1        |
| XLOC_009287 | XLOC_009287 | SMIM5        | chr17:73584138-73663269   | 1.22928 | 1        |
| XLOC_020718 | XLOC_020718 | WNT16        | chr7:120965420-120981158  | 1.23081 | 1        |
| XLOC_011085 | XLOC_011085 | ZNF528       | chr19:52901120-52921657   | 1.23315 | 1        |
| XLOC_002558 | XLOC_002558 | LDB3         | chr10:88428205-88495824   | 1.24128 | 1        |
| XLOC_005485 | XLOC_005485 | ITGB7        | chr12:53585106-53601000   | 1.24172 | 1        |
| XLOC_005787 | XLOC_005787 | RIMBP2       | chr12:130880680-131002410 | 1.24239 | 1        |
| XLOC_014349 | XLOC_014349 | RSPH1        | chr21:43892596-43916401   | 1.24477 | 0.326135 |
| XLOC_020957 | XLOC_020957 | STEAP1B      | chr7:22459062-22539901    | 1.24593 | 1        |
| XLOC_009619 | XLOC_009619 | SLFN13       | chr17:33762114-33775856   | 1.24685 | 1        |
| XLOC_003571 | XLOC_003571 | SLC22A9      | chr11:63014620-63330855   | 1.24697 | 1        |

|             |             |                           |                           |         |          |
|-------------|-------------|---------------------------|---------------------------|---------|----------|
| XLOC_013867 | XLOC_013867 | BFSP1                     | chr20:17474549-17539605   | 1.24853 | 0.149432 |
| XLOC_018548 | XLOC_018548 | SUMO4                     | chr6:149639435-149732747  | 1.24883 | 1        |
| XLOC_023857 | XLOC_023857 | FOXP3                     | chrX:49091926-49121288    | 1.25272 | 1        |
| XLOC_010167 | XLOC_010167 | MEP1B                     | chr18:29769986-29800366   | 1.25307 | 1        |
| XLOC_014395 | XLOC_014395 | CECR5-AS1                 | chr22:17618409-17646335   | 1.25536 | 0.999791 |
| XLOC_021094 | XLOC_021094 | CALN1                     | chr7:71244475-71877360    | 1.25638 | 1        |
| XLOC_004285 | XLOC_004285 | CHRM1                     | chr11:62676150-62689012   | 1.25799 | 1        |
| XLOC_000729 | XLOC_000729 | S100A1                    | chr1:153591275-153618782  | 1.25873 | 0.999791 |
| XLOC_018058 | XLOC_018058 | PHACTR1                   | chr6:12717036-13295818    | 1.25986 | 1        |
| XLOC_013554 | XLOC_013554 | C20orf26                  | chr20:20015011-20341346   | 1.26064 | 1        |
| XLOC_013089 | XLOC_013089 | EDAR                      | chr2:109510926-109605828  | 1.26103 | 1        |
| XLOC_006065 | XLOC_006065 | MINOS1P1                  | chr13:33006929-33112936   | 1.26521 | 1        |
| XLOC_000398 | XLOC_000398 | ZYG11A                    | chr1:53308182-53360247    | 1.26704 | 1        |
| XLOC_001757 | XLOC_001757 | PPIAL4G                   | chr1:143767143-143767881  | 1.26976 | 1        |
| XLOC_020357 | XLOC_020357 | OCM                       | chr7:5920428-5925994      | 1.27142 | 1        |
| XLOC_018562 | XLOC_018562 | MYCT1                     | chr6:153019029-153045715  | 1.27373 | 1        |
| XLOC_010650 | XLOC_010650 | CYP4F3                    | chr19:15751706-15771570   | 1.27862 | 1        |
| XLOC_009759 | XLOC_009759 | LINC00854                 | chr17:41373436-41381062   | 1.2831  | 1        |
| XLOC_018589 | XLOC_018589 | PLG                       | chr6:161123224-161175085  | 1.28456 | 1        |
| XLOC_020736 | XLOC_020736 | FAM71F2                   | chr7:128312345-128323379  | 1.28831 | 1        |
| XLOC_016451 | XLOC_016451 | ARHGEF38                  | chr4:106473776-106602070  | 1.28926 | 1        |
| XLOC_000357 | XLOC_000357 | BTBD19                    | chr1:45274153-45279801    | 1.29721 | 1        |
| XLOC_009703 | XLOC_009703 | KRTAP4-6                  | chr17:39295684-39296739   | 1.29865 | 1        |
| XLOC_004573 | XLOC_004573 | MCAM                      | chr11:119179233-119187840 | 1.30149 | 1        |
| XLOC_015895 | XLOC_015895 | HGD                       | chr3:120347014-120401418  | 1.30255 | 1        |
| XLOC_008430 | XLOC_008430 | PLA2G10                   | chr16:14766404-14788526   | 1.30338 | 1        |
| XLOC_022564 | XLOC_022564 | LMX1B                     | chr9:129376721-129463311  | 1.30614 | 1        |
| XLOC_000003 | XLOC_000003 | LOC100132062,LOC100133331 | chr1:323891-328581        | 1.30837 | 1        |
| XLOC_014217 | XLOC_014217 | ITGB2-AS1                 | chr21:46305867-46349595   | 1.30959 | 1        |
| XLOC_000996 | XLOC_000996 | NFASC                     | chr1:204797781-204991950  | 1.31123 | 1        |
| XLOC_022877 | XLOC_022877 | LOC100507299              | chr9:72658496-72873790    | 1.31608 | 1        |
| XLOC_000712 | XLOC_000712 | LCE1F                     | chr1:152748847-152749445  | 1.31888 | 1        |
| XLOC_002475 | XLOC_002475 | ZNF365                    | chr10:64133915-64431771   | 1.32036 | 1        |
| XLOC_001343 | XLOC_001343 | LOC729059                 | chr1:23337326-23342343    | 1.32139 | 1        |
| XLOC_014917 | XLOC_014917 | CNTN4                     | chr3:2140549-3099645      | 1.32188 | 1        |
| XLOC_021560 | XLOC_021560 | ADAM32                    | chr8:38965049-39142436    | 1.32257 | 1        |
| XLOC_005068 | XLOC_005068 | CHST11                    | chr12:104850691-105155792 | 1.3239  | 1        |
| XLOC_008697 | XLOC_008697 | SLC38A8                   | chr16:84043388-84075762   | 1.327   | 1        |
| XLOC_016825 | XLOC_016825 | PLAC8                     | chr4:84011210-84035911    | 1.33045 | 1        |
| XLOC_011351 | XLOC_011351 | ACER1                     | chr19:6306509-6333640     | 1.33536 | 0.244149 |
| XLOC_013402 | XLOC_013402 | SLC19A3                   | chr2:228549925-228582745  | 1.3357  | 1        |
| XLOC_018491 | XLOC_018491 | C6orf58                   | chr6:127898318-127912963  | 1.34046 | 1        |
| XLOC_002738 | XLOC_002738 | FLJ46361                  | chr10:124516209-124557161 | 1.34743 | 1        |
| XLOC_003376 | XLOC_003376 | BDNF-AS                   | chr11:27528398-27743605   | 1.34743 | 1        |
| XLOC_007674 | XLOC_007674 | HIGD2B                    | chr15:72968122-72978490   | 1.34783 | 1        |
| XLOC_005679 | XLOC_005679 | TMEM119                   | chr12:108983621-108991894 | 1.34853 | 1        |
| XLOC_008147 | XLOC_008147 | CCDC135                   | chr16:57728712-57765367   | 1.35003 | 1        |
| XLOC_003977 | XLOC_003977 | SLC22A18AS                | chr11:2909326-2946476     | 1.35336 | 0.999791 |
| XLOC_006835 | XLOC_006835 | GPR135                    | chr14:59930239-59932059   | 1.35384 | 1        |
| XLOC_002186 | XLOC_002186 | LOC643723                 | chr1:219254316-219347130  | 1.35713 | 1        |
| XLOC_003309 | XLOC_003309 | NLRP14                    | chr11:7041699-7092757     | 1.35844 | 1        |
| XLOC_023021 | XLOC_023021 | RNF183                    | chr9:116059372-116061320  | 1.36252 | 1        |
| XLOC_000205 | XLOC_000205 | LIN28A                    | chr1:26737268-26756219    | 1.36442 | 1        |
| XLOC_005355 | XLOC_005355 | CASC1                     | chr12:25205180-25348094   | 1.36503 | 1        |
| XLOC_014108 | XLOC_014108 | CXADR                     | chr21:18885223-18965897   | 1.36633 | 1        |
| XLOC_016385 | XLOC_016385 | C4orf26                   | chr4:76481257-76491103    | 1.36776 | 1        |
| XLOC_015217 | XLOC_015217 | ORSK2                     | chr3:98216524-98217475    | 1.37044 | 1        |
| XLOC_014390 | XLOC_014390 | LOC101101776              | chr22:16162065-16172265   | 1.37716 | 1        |
| XLOC_005901 | XLOC_005901 | DLEU7-AS1                 | chr13:51286758-51424041   | 1.37891 | 1        |
| XLOC_017316 | XLOC_017316 | CCNI2                     | chr5:132083136-132113561  | 1.38242 | 1        |
| XLOC_006468 | XLOC_006468 | SAMD15                    | chr14:77843761-77857587   | 1.38285 | 1        |
| XLOC_014496 | XLOC_014496 | NEFH                      | chr22:29876180-29887277   | 1.38291 | 1        |
| XLOC_007862 | XLOC_007862 | SNORA78                   | chr16:2014996-2015505     | 1.38501 | 0.999791 |
| XLOC_014029 | XLOC_014029 | NFATC2                    | chr20:50003493-50179370   | 1.38506 | 1        |
| XLOC_008439 | XLOC_008439 | XYLT1                     | chr16:17196180-17564738   | 1.38853 | 1        |
| XLOC_008187 | XLOC_008187 | NRN1L                     | chr16:67918780-67920271   | 1.39092 | 1        |
| XLOC_023293 | XLOC_023293 | PHEX                      | chrX:22050920-22266478    | 1.39999 | 1        |
| XLOC_002570 | XLOC_002570 | CFL1P1                    | chr10:89578069-89605369   | 1.40073 | 1        |
| XLOC_014875 | XLOC_014875 | EFCAB6                    | chr22:43912133-44208217   | 1.40158 | 1        |
| XLOC_003596 | XLOC_003596 | LOC100996455              | chr11:64216528-64219128   | 1.40222 | 1        |
| XLOC_015140 | XLOC_015140 | STAB1                     | chr3:52529355-52569093    | 1.40263 | 1        |
| XLOC_011571 | XLOC_011571 | ZNF99                     | chr19:22934984-22966973   | 1.40465 | 1        |
| XLOC_013412 | XLOC_013412 | HTR2B                     | chr2:231921577-232037540  | 1.41112 | 1        |
| XLOC_003141 | XLOC_003141 | NRAP                      | chr10:115310589-115423829 | 1.41215 | 1        |
| XLOC_009483 | XLOC_009483 | KRBA2                     | chr17:8271972-8274858     | 1.41352 | 1        |
| XLOC_005686 | XLOC_005686 | FOXN4                     | chr12:109715782-109747025 | 1.41388 | 1        |
| XLOC_007320 | XLOC_007320 | C15orf27                  | chr15:76352298-76497304   | 1.41766 | 1        |
| XLOC_005816 | XLOC_005816 | TPTE2P6                   | chr13:25154345-25171812   | 1.41816 | 1        |
| XLOC_000056 | XLOC_000056 | TAS1R1                    | chr1:6615337-6639817      | 1.42003 | 1        |

|             |             |              |                           |         |          |
|-------------|-------------|--------------|---------------------------|---------|----------|
| XLOC_006053 | XLOC_006053 | MTUS2-AS1    | chr13:29598747-30080084   | 1.42596 | 1        |
| XLOC_017397 | XLOC_017397 | KCTD16       | chr5:143550436-143856944  | 1.42608 | 1        |
| XLOC_002170 | XLOC_002170 | RD3          | chr1:211649863-211666259  | 1.43284 | 1        |
| XLOC_009689 | XLOC_009689 | KRTAP3-3     | chr17:39149681-39150385   | 1.43466 | 1        |
| XLOC_018043 | XLOC_018043 | PIP5K1P1     | chr6:7727010-8102828      | 1.43557 | 1        |
| XLOC_007563 | XLOC_007563 | MYEF2        | chr15:48413168-48470558   | 1.437   | 1        |
| XLOC_017232 | XLOC_017232 | GPR98        | chr5:89854616-90460033    | 1.43824 | 1        |
| XLOC_013026 | XLOC_013026 | CD8A         | chr2:87011727-87035519    | 1.43917 | 1        |
| XLOC_011934 | XLOC_011934 | NLRP12       | chr19:54296854-54327648   | 1.44039 | 1        |
| XLOC_003133 | XLOC_003133 | LOC100505933 | chr10:111705316-111895323 | 1.44267 | 1        |
| XLOC_005301 | XLOC_005301 | TAS2R10      | chr12:10977944-10978868   | 1.44322 | 1        |
| XLOC_017574 | XLOC_017574 | SEMA5A       | chr5:9035137-9546233      | 1.44324 | 1        |
| XLOC_008618 | XLOC_008618 | EXOC3L1      | chr16:67218281-67224107   | 1.44347 | 1        |
| XLOC_018524 | XLOC_018524 | ECT2L        | chr6:139117247-139225207  | 1.45346 | 1        |
| XLOC_011373 | XLOC_011373 | FCER2        | chr19:7753642-7767032     | 1.4567  | 1        |
| XLOC_021285 | XLOC_021285 | RNF133       | chr7:121958477-122526813  | 1.45795 | 1        |
| XLOC_001519 | XLOC_001519 | RPS15AP10    | chr1:46092975-46152302    | 1.46212 | 1        |
| XLOC_018716 | XLOC_018716 | LOC401242    | chr6:28827401-28831454    | 1.46275 | 1        |
| XLOC_010162 | XLOC_010162 | DSG3         | chr18:29027731-29058665   | 1.469   | 1        |
| XLOC_018379 | XLOC_018379 | DDX43        | chr6:74104284-74127289    | 1.47388 | 1        |
| XLOC_006271 | XLOC_006271 | RPGRIP1      | chr14:21756135-21819460   | 1.47663 | 1        |
| XLOC_012084 | XLOC_012084 | CCDC164      | chr2:26624783-26679579    | 1.4819  | 1        |
| XLOC_022529 | XLOC_022529 | LOC100288842 | chr9:123555774-123561009  | 1.4848  | 0.735322 |
| XLOC_003126 | XLOC_003126 | COL17A1      | chr10:105791045-105845638 | 1.4872  | 1        |
| XLOC_018404 | XLOC_018404 | C6orf165     | chr6:88117689-88174191    | 1.49106 | 1        |
| XLOC_015884 | XLOC_015884 | LSAMP        | chr3:115521209-116164385  | 1.49802 | 1        |
| XLOC_016516 | XLOC_016516 | IL15         | chr4:142557748-142655140  | 1.50023 | 1        |
| XLOC_003166 | XLOC_003166 | WDR11-AS1    | chr10:122216465-122806858 | 1.50728 | 1        |
| XLOC_023591 | XLOC_023591 | SOWAHD       | chrX:118892575-118894165  | 1.51565 | 1        |
| XLOC_017842 | XLOC_017842 | LRRTM2       | chr5:138089106-138270723  | 1.51597 | 1        |
| XLOC_006261 | XLOC_006261 | RNASE3       | chr14:21359561-21360507   | 1.52082 | 1        |
| XLOC_011408 | XLOC_011408 | QLFM2        | chr19:9964393-10047070    | 1.52322 | 1        |
| XLOC_011011 | XLOC_011011 | CGB5         | chr19:49547101-49548568   | 1.52675 | 0.999791 |
| XLOC_009846 | XLOC_009846 | CHAD         | chr17:48503518-48552200   | 1.52816 | 1        |
| XLOC_011464 | XLOC_011464 | KLF1         | chr19:12995236-12998017   | 1.52826 | 1        |
| XLOC_008328 | XLOC_008328 | SSTR5-AS1    | chr16:1114081-11314454    | 1.52927 | 1        |
| XLOC_002560 | XLOC_002560 | SNCG         | chr10:88718287-88723017   | 1.52992 | 1        |
| XLOC_005454 | XLOC_005454 | CELA1        | chr12:51722226-51740463   | 1.53045 | 1        |
| XLOC_005690 | XLOC_005690 | TRPV4        | chr12:110220891-110271241 | 1.53291 | 1        |
| XLOC_000566 | XLOC_000566 | GPR61        | chr1:110082493-110084855  | 1.53395 | 1        |
| XLOC_011059 | XLOC_011059 | ACPT         | chr19:51293671-51298481   | 1.54334 | 1        |
| XLOC_014536 | XLOC_014536 | NCF4         | chr22:37257029-37274059   | 1.54683 | 1        |
| XLOC_014142 | XLOC_014142 | C21orf49     | chr21:34144410-34186053   | 1.5469  | 1        |
| XLOC_014765 | XLOC_014765 | SDC4P        | chr22:30877276-30877743   | 1.54832 | 1        |
| XLOC_006051 | XLOC_006051 | FLT1         | chr13:28874482-29069265   | 1.55019 | 1        |
| XLOC_006653 | XLOC_006653 | C14orf180    | chr14:105046055-105056183 | 1.55129 | 1        |
| XLOC_014833 | XLOC_014833 | PDGFB        | chr22:39619684-39640957   | 1.55229 | 1        |
| XLOC_004382 | XLOC_004382 | FLJ42102     | chr17:71116791-71134400   | 1.55718 | 1        |
| XLOC_004858 | XLOC_004858 | LINC00592    | chr12:52604713-52617597   | 1.56246 | 1        |
| XLOC_001348 | XLOC_001348 | TCEA3        | chr1:23707554-23751261    | 1.56361 | 1        |
| XLOC_008291 | XLOC_008291 | LOC400558    | chr16:89232790-89235555   | 1.5656  | 1        |
| XLOC_014768 | XLOC_014768 | GAL3ST1      | chr22:30950623-30960876   | 1.56861 | 1        |
| XLOC_015976 | XLOC_015976 | PRR23C       | chr3:138760943-138763734  | 1.57052 | 1        |
| XLOC_009910 | XLOC_009910 | SCN4A        | chr17:62015913-62050278   | 1.57137 | 1        |
| XLOC_009562 | XLOC_009562 | NOS2         | chr17:26083791-26127555   | 1.57728 | 1        |
| XLOC_009621 | XLOC_009621 | SLFN14       | chr17:33875143-33885110   | 1.58017 | 1        |
| XLOC_011489 | XLOC_011489 | EMR2         | chr19:14843508-14889353   | 1.5812  | 1        |
| XLOC_008804 | XLOC_008804 | BCL6B        | chr17:6926368-6932961     | 1.58189 | 1        |
| XLOC_014122 | XLOC_014122 | C21orf7      | chr21:30452872-30548202   | 1.58444 | 1        |
| XLOC_005979 | XLOC_005979 | METTL21EP    | chr13:103532448-103548383 | 1.58496 | 1        |
| XLOC_003986 | XLOC_003986 | OR7E12P      | chr11:3402190-3430378     | 1.58664 | 1        |
| XLOC_013500 | XLOC_013500 | GNRH2        | chr20:3024267-3026391     | 1.5908  | 1        |
| XLOC_012114 | XLOC_012114 | PLB1         | chr2:28718937-28866653    | 1.59195 | 1        |
| XLOC_010754 | XLOC_010754 | TDRD12       | chr19:33210678-33281714   | 1.59283 | 1        |
| XLOC_011711 | XLOC_011711 | CEACAM8      | chr19:42901299-43156507   | 1.59407 | 1        |
| XLOC_015492 | XLOC_015492 | C3orf65      | chr3:185361526-185542827  | 1.59606 | 1        |
| XLOC_019174 | XLOC_019174 | PARK2        | chr6:161768589-163745505  | 1.59798 | 1        |
| XLOC_013044 | XLOC_013044 | ASTL         | chr2:96789588-96804175    | 1.60109 | 1        |
| XLOC_014222 | XLOC_014222 | PCBP3        | chr21:47269874-47362368   | 1.6037  | 1        |
| XLOC_016030 | XLOC_016030 | LOC339894    | chr3:156799455-156840791  | 1.61572 | 1        |
| XLOC_024115 | XLOC_024115 | FGF13        | chrX:137713733-138287185  | 1.61708 | 1        |
| XLOC_008738 | XLOC_008738 | C16orf3      | chr16:90089007-90114191   | 1.61791 | 1        |
| XLOC_007253 | XLOC_007253 | SLC51B       | chr15:65337707-65360388   | 1.61972 | 1        |
| XLOC_016533 | XLOC_016533 | MAB21L2      | chr4:151185810-151936649  | 1.62317 | 1        |
| XLOC_003947 | XLOC_003947 | SCT          | chr11:626312-6271173      | 1.63898 | 1        |
| XLOC_011825 | XLOC_011825 | CGB          | chr19:49526125-49527632   | 1.6496  | 1        |
| XLOC_005897 | XLOC_005897 | CTAGE10P     | chr13:50464544-50467516   | 1.64998 | 1        |
| XLOC_014846 | XLOC_014846 | CHADL        | chr22:41601312-41636935   | 1.65004 | 1        |
| XLOC_016212 | XLOC_016212 | AFAP1-AS1    | chr4:7755816-7941653      | 1.65017 | 1        |

|             |             |              |                           |         |          |
|-------------|-------------|--------------|---------------------------|---------|----------|
| XLOC_008404 | XLOC_008404 | PPL          | chr16:4932507-4987136     | 1.65133 | 1        |
| XLOC_012037 | XLOC_012037 | RSAD2        | chr2:7017795-7038363      | 1.65172 | 1        |
| XLOC_001960 | XLOC_001960 | CD84         | chr1:160510883-160549306  | 1.65758 | 1        |
| XLOC_020449 | XLOC_020449 | LOC100506776 | chr7:38381177-38418238    | 1.66448 | 1        |
| XLOC_011675 | XLOC_011675 | CNTD2        | chr19:40728114-40732597   | 1.66533 | 1        |
| XLOC_015049 | XLOC_015049 | CCBP2        | chr3:42850963-42908775    | 1.6691  | 1        |
| XLOC_011189 | XLOC_011189 | SSC5D        | chr19:55999869-56030466   | 1.66968 | 1        |
| XLOC_012377 | XLOC_012377 | FBLN7        | chr2:112895961-112945791  | 1.6726  | 1        |
| XLOC_007776 | XLOC_007776 | ANPEP        | chr15:90328125-90358072   | 1.68468 | 1        |
| XLOC_011301 | XLOC_011301 | DIRAS1       | chr19:2714564-2721390     | 1.69052 | 1        |
| XLOC_004608 | XLOC_004608 | ROBO4        | chr11:124754113-124767831 | 1.69542 | 1        |
| XLOC_013313 | XLOC_013313 | MPP4         | chr2:202509596-202563417  | 1.7043  | 1        |
| XLOC_015758 | XLOC_015758 | SEMA3G       | chr3:52467267-52479043    | 1.70657 | 1        |
| XLOC_021884 | XLOC_021884 | SGCZ         | chr8:13947372-15095792    | 1.71011 | 1        |
| XLOC_015021 | XLOC_015021 | SLC22A13     | chr3:38307297-38319806    | 1.71201 | 1        |
| XLOC_004491 | XLOC_004491 | MMP10        | chr11:102641232-102651359 | 1.71996 | 1        |
| XLOC_013874 | XLOC_013874 | LINC00652    | chr20:18768614-18776709   | 1.72351 | 1        |
| XLOC_005635 | XLOC_005635 | USP44        | chr12:95910887-95945263   | 1.72522 | 1        |
| XLOC_000283 | XLOC_000283 | TEKT2        | chr1:36549675-36553876    | 1.7256  | 1        |
| XLOC_018048 | XLOC_018048 | GCNT2        | chr6:10521567-10629601    | 1.73163 | 1        |
| XLOC_004928 | XLOC_004928 | SLC39A5      | chr12:56623819-56652143   | 1.73638 | 1        |
| XLOC_023718 | XLOC_023718 | SNORA36A     | chrX:153991030-154005964  | 1.7419  | 0.999791 |
| XLOC_013944 | XLOC_013944 | GDF5         | chr20:34021148-34026027   | 1.74229 | 1        |
| XLOC_013967 | XLOC_013967 | SNORA71C     | chr20:37049238-37064018   | 1.74245 | 0.999791 |
| XLOC_015274 | XLOC_015274 | UPK1B        | chr3:118892424-118924000  | 1.74365 | 1        |
| XLOC_022876 | XLOC_022876 | LOC100507244 | chr9:72658496-72873790    | 1.74694 | 1        |
| XLOC_017008 | XLOC_017008 | SPATA4       | chr4:177105724-177116822  | 1.74701 | 1        |
| XLOC_003312 | XLOC_003312 | OLFML1       | chr11:7506599-7532606     | 1.74871 | 1        |
| XLOC_018836 | XLOC_018836 | SLC26A8      | chr6:35911290-35992413    | 1.75392 | 1        |
| XLOC_001713 | XLOC_001713 | LOC100129269 | chr11:112141628-112150940 | 1.75464 | 1        |
| XLOC_012072 | XLOC_012072 | MFS2B        | chr2:24232952-24247145    | 1.76046 | 1        |
| XLOC_005581 | XLOC_005581 | LRRC10       | chr12:70002344-70004942   | 1.76205 | 1        |
| XLOC_008127 | XLOC_008127 | MT1H         | chr16:56703725-56705041   | 1.7634  | 1        |
| XLOC_015872 | XLOC_015872 | CD200R1      | chr3:112641531-112693937  | 1.76346 | 1        |
| XLOC_011169 | XLOC_011169 | LILRB1       | chr19:55128628-55149004   | 1.76715 | 1        |
| XLOC_009677 | XLOC_009677 | KRT222       | chr17:38811871-38821416   | 1.7694  | 1        |
| XLOC_009038 | XLOC_009038 | GSDMA        | chr17:38119225-38134019   | 1.77267 | 1        |
| XLOC_011381 | XLOC_011381 | FBN3         | chr19:8130286-8212385     | 1.77516 | 1        |
| XLOC_010458 | XLOC_010458 | PLK5         | chr19:1524072-1535455     | 1.77528 | 1        |
| XLOC_023068 | XLOC_023068 | NR5A1        | chr9:127243514-127269699  | 1.78808 | 1        |
| XLOC_021355 | XLOC_021355 | FLJ40852     | chr7:141404137-141438030  | 1.79045 | 1        |
| XLOC_012157 | XLOC_012157 | PLEKHH2      | chr2:43864438-43995126    | 1.79481 | 1        |
| XLOC_015795 | XLOC_015795 | PTPRG-AS1    | chr3:61547242-62304622    | 1.79652 | 1        |
| XLOC_015257 | XLOC_015257 | CD200        | chr3:112051915-112081658  | 1.79708 | 1        |
| XLOC_023895 | XLOC_023895 | UQCRBP1      | chrX:56755717-56844004    | 1.80427 | 1        |
| XLOC_002626 | XLOC_002626 | HOGA1        | chr10:99344101-99372555   | 1.80475 | 1        |
| XLOC_011995 | XLOC_011995 | ZNF671       | chr19:58231118-58238995   | 1.80558 | 1        |
| XLOC_021394 | XLOC_021394 | TMEM176B     | chr7:150488375-150502208  | 1.80695 | 1        |
| XLOC_005612 | XLOC_005612 | C12orf50     | chr12:88373815-88423176   | 1.81089 | 1        |
| XLOC_011549 | XLOC_011549 | TM6SF2       | chr19:19375173-19384074   | 1.81469 | 1        |
| XLOC_009294 | XLOC_009294 | ZACN         | chr17:74075262-74099868   | 1.81811 | 1        |
| XLOC_023299 | XLOC_023299 | CXorf58      | chrX:23926122-23957624    | 1.81866 | 1        |
| XLOC_002713 | XLOC_002713 | PNLIPRP1     | chr10:118350489-118368686 | 1.81957 | 1        |
| XLOC_009674 | XLOC_009674 | TNS4         | chr17:38632079-38657854   | 1.82385 | 1        |
| XLOC_018567 | XLOC_018567 | CLDN20       | chr6:155411422-155635617  | 1.82508 | 1        |
| XLOC_011710 | XLOC_011710 | CEACAM1      | chr19:42901299-43156507   | 1.83282 | 1        |
| XLOC_013640 | XLOC_013640 | NNAT         | chr20:36145818-36156333   | 1.83499 | 1        |
| XLOC_007124 | XLOC_007124 | CHRM5        | chr15:34158427-34357287   | 1.85941 | 1        |
| XLOC_010687 | XLOC_010687 | SNORA68      | chr19:17970686-17974133   | 1.86178 | 0.999791 |
| XLOC_011053 | XLOC_011053 | MYBPC2       | chr19:50936159-50969583   | 1.86282 | 1        |
| XLOC_006921 | XLOC_006921 | STON2        | chr14:81726993-81893748   | 1.8764  | 1        |
| XLOC_011608 | XLOC_011608 | HSPB6        | chr19:36245466-36247930   | 1.88228 | 1        |
| XLOC_005539 | XLOC_005539 | MYO1A        | chr12:57422300-57444549   | 1.89168 | 1        |
| XLOC_009661 | XLOC_009661 | STAC2        | chr17:37366788-37382040   | 1.89218 | 1        |
| XLOC_001621 | XLOC_001621 | UOX          | chr1:84830640-84863576    | 1.90135 | 1        |
| XLOC_012636 | XLOC_012636 | RUFY4        | chr2:218899656-218955304  | 1.90731 | 1        |
| XLOC_024180 | XLOC_024180 | L1CAM        | chrX:153126970-153141399  | 1.92513 | 1        |
| XLOC_001832 | XLOC_001832 | FLG          | chr1:152274650-152297679  | 1.93547 | 1        |
| XLOC_009778 | XLOC_009778 | ITGA2B       | chr17:42449549-42466873   | 1.93746 | 1        |
| XLOC_001997 | XLOC_001997 | GPA33        | chr1:167022081-167059868  | 1.94008 | 1        |
| XLOC_003261 | XLOC_003261 | LOC650368    | chr11:3402190-3430378     | 1.9416  | 1        |
| XLOC_009578 | XLOC_009578 | NARR,RAB34   | chr17:27041298-27045286   | 1.94293 | 1        |
| XLOC_015085 | XLOC_015085 | NRADDP       | chr3:47053031-47054957    | 1.94318 | 1        |
| XLOC_005496 | XLOC_005496 | LOC100240735 | chr12:54452037-54516018   | 1.9465  | 1        |
| XLOC_011369 | XLOC_011369 | LOC100128573 | chr19:7537722-7538247     | 1.95779 | 1        |
| XLOC_002405 | XLOC_002405 | GJD4         | chr10:35894337-35897863   | 1.95891 | 1        |
| XLOC_017717 | XLOC_017717 | CRSP8P       | chr5:79646423-79647785    | 1.96326 | 1        |
| XLOC_008917 | XLOC_008917 | LOC100287072 | chr17:20615758-20641178   | 1.97004 | 1        |
| XLOC_013808 | XLOC_013808 | SLC52A3      | chr20:740723-749228       | 1.98786 | 1        |



|             |             |              |                           |         |          |
|-------------|-------------|--------------|---------------------------|---------|----------|
| XLOC_018816 | XLOC_018816 | LINC00336    | chr6:33551475-33561115    | 2.00464 | 1        |
| XLOC_015174 | XLOC_015174 | PRICKLE2-AS3 | chr3:64053639-64211131    | 2.00702 | 1        |
| XLOC_014120 | XLOC_014120 | LINC00161    | chr21:29911639-29912677   | 2.01045 | 1        |
| XLOC_013070 | XLOC_013070 | AFF3         | chr2:100163715-100759037  | 2.01099 | 1        |
| XLOC_012637 | XLOC_012637 | CXCR2        | chr2:218990012-219001976  | 2.01291 | 1        |
| XLOC_009234 | XLOC_009234 | MILR1        | chr17:62461568-62464760   | 2.02834 | 1        |
| XLOC_013411 | XLOC_013411 | LOC348761    | chr2:231849082-231860747  | 2.03484 | 1        |
| XLOC_010041 | XLOC_010041 | PPP1R27      | chr17:79791367-79792926   | 2.04704 | 1        |
| XLOC_000448 | XLOC_000448 | IL12RB2      | chr1:67773046-67862583    | 2.0519  | 1        |
| XLOC_010388 | XLOC_010388 | CCBE1        | chr18:57098170-57364644   | 2.07092 | 1        |
| XLOC_007504 | XLOC_007504 | FSIP1        | chr15:39892231-40075039   | 2.07256 | 1        |
| XLOC_021301 | XLOC_021301 | LRRC4        | chr7:127292201-127732659  | 2.07408 | 1        |
| XLOC_018596 | XLOC_018596 | CCR6         | chr6:167525294-167552629  | 2.07415 | 1        |
| XLOC_022598 | XLOC_022598 | PHYHD1       | chr9:131683173-131704320  | 2.0785  | 1        |
| XLOC_013589 | XLOC_013589 | CCM2L        | chr20:30598244-30619984   | 2.08074 | 1        |
| XLOC_003000 | XLOC_003000 | SYNPO2L      | chr10:75404643-75415832   | 2.08093 | 1        |
| XLOC_002254 | XLOC_002254 | SNORA14B     | chr1:235272657-235292256  | 2.08715 | 0.999791 |
| XLOC_014567 | XLOC_014567 | APOBEC3H     | chr22:39493228-39500072   | 2.0908  | 1        |
| XLOC_018318 | XLOC_018318 | RSPH9        | chr6:43612766-43638748    | 2.10302 | 1        |
| XLOC_021886 | XLOC_021886 | MSR1         | chr8:15965386-16050300    | 2.10628 | 1        |
| XLOC_018007 | XLOC_018007 | FLT4         | chr5:180028505-180076624  | 2.10653 | 1        |
| XLOC_014165 | XLOC_014165 | DSCR6        | chr21:38378862-38391958   | 2.11319 | 1        |
| XLOC_001634 | XLOC_001634 | COL24A1      | chr1:86194915-86622121    | 2.11618 | 1        |
| XLOC_003421 | XLOC_003421 | TSPAN18      | chr11:44785975-44972857   | 2.12106 | 1        |
| XLOC_016056 | XLOC_016056 | LOC100128164 | chr3:169661771-169684522  | 2.12165 | 1        |
| XLOC_021331 | XLOC_021331 | SLC13A4      | chr7:135365986-135412933  | 2.12404 | 1        |
| XLOC_000352 | XLOC_000352 | SNORD55      | chr1:45241245-45244412    | 2.1245  | 0.999791 |
| XLOC_001773 | XLOC_001773 | LOC728989    | chr1:146490894-146514599  | 2.15384 | 1        |
| XLOC_011324 | XLOC_011324 | TMIGD2       | chr19:4292224-4302428     | 2.15759 | 1        |
| XLOC_004453 | XLOC_004453 | NOX4         | chr11:89057521-89322779   | 2.16838 | 1        |
| XLOC_010296 | XLOC_010296 | MC2R         | chr18:13882042-13915535   | 2.17082 | 1        |
| XLOC_006086 | XLOC_006086 | LINC00598    | chr13:40921270-41055143   | 2.17337 | 1        |
| XLOC_010244 | XLOC_010244 | LOC100505817 | chr18:70992175-71017124   | 2.17958 | 1        |
| XLOC_004632 | XLOC_004632 | OPCML        | chr11:132284874-133402403 | 2.1914  | 1        |
| XLOC_011318 | XLOC_011318 | MIR637       | chr19:3958451-3969826     | 2.19865 | 0.999791 |
| XLOC_014835 | XLOC_014835 | SNORD83B     | chr22:39708886-39715670   | 2.19884 | 0.999791 |
| XLOC_013668 | XLOC_013668 | GDAP1L1      | chr20:42875738-42909557   | 2.20006 | 1        |
| XLOC_002178 | XLOC_002178 | C1orf227     | chr1:213003484-213020991  | 2.20023 | 1        |
| XLOC_012832 | XLOC_012832 | CIB4         | chr2:26804072-26864211    | 2.20182 | 1        |
| XLOC_012120 | XLOC_012120 | FAM179A      | chr2:29204163-29275096    | 2.20228 | 1        |
| XLOC_004347 | XLOC_004347 | CCDC87       | chr11:66357639-66360554   | 2.20868 | 1        |
| XLOC_011906 | XLOC_011906 | HAS1         | chr19:52216364-52227221   | 2.21158 | 1        |
| XLOC_024198 | XLOC_024198 | FAM223B      | chrX:153860738-153861448  | 2.21194 | 1        |
| XLOC_012039 | XLOC_012039 | LOC100506274 | chr2:7561391-7590381      | 2.21616 | 1        |
| XLOC_011985 | XLOC_011985 | ZNF667       | chr19:56950692-56988770   | 2.22746 | 1        |
| XLOC_021933 | XLOC_021933 | NUGGC        | chr8:27879480-27941388    | 2.22789 | 1        |
| XLOC_017352 | XLOC_017352 | PSD2         | chr5:139175405-139224048  | 2.23387 | 1        |
| XLOC_002378 | XLOC_002378 | SPAG6        | chr10:22634373-22706539   | 2.2347  | 1        |
| XLOC_011204 | XLOC_011204 | ZNF582-AS1   | chr19:56905044-56910544   | 2.23503 | 1        |
| XLOC_013352 | XLOC_013352 | MARCH4       | chr2:217122584-217236750  | 2.24148 | 1        |
| XLOC_014662 | XLOC_014662 | CECR1        | chr22:17660191-17690779   | 2.26071 | 1        |
| XLOC_003590 | XLOC_003590 | TEX40        | chr11:64067862-64072239   | 2.266   | 1        |
| XLOC_002126 | XLOC_002126 | LOC730227    | chr1:203267885-203274453  | 2.2719  | 1        |
| XLOC_021985 | XLOC_021985 | SNAI2        | chr8:49830238-49833999    | 2.2737  | 1        |
| XLOC_008344 | XLOC_008344 | MEIOB        | chr16:1877224-1922179     | 2.27439 | 1        |
| XLOC_004805 | XLOC_004805 | PDZRN4       | chr12:41582249-41968392   | 2.27718 | 1        |
| XLOC_005203 | XLOC_005203 | P2RX2        | chr12:133195402-133198972 | 2.27851 | 1        |
| XLOC_004988 | XLOC_004988 | KCNMB4       | chr12:70760061-70828072   | 2.27988 | 1        |
| XLOC_000554 | XLOC_000554 | FNDC7        | chr1:109255555-109285367  | 2.28093 | 1        |
| XLOC_021872 | XLOC_021872 | FAM90A2P     | chr8:12030962-12034776    | 2.28814 | 1        |
| XLOC_011712 | XLOC_011712 | PSG3         | chr19:43225793-43244668   | 2.28817 | 1        |
| XLOC_002363 | XLOC_002363 | TMEM236      | chr10:17794259-17842866   | 2.29155 | 1        |
| XLOC_002627 | XLOC_002627 | C10orf62     | chr10:99344101-99372555   | 2.29407 | 1        |
| XLOC_017992 | XLOC_017992 | GRM6         | chr5:178405329-178422124  | 2.29439 | 1        |
| XLOC_008258 | XLOC_008258 | NECAB2       | chr16:84002236-84036379   | 2.30164 | 0.842042 |
| XLOC_006426 | XLOC_006426 | LOC145474    | chr14:71954577-71956420   | 2.30468 | 1        |
| XLOC_009840 | XLOC_009840 | SAMD14       | chr17:48172100-48207246   | 2.33045 | 1        |
| XLOC_002976 | XLOC_002976 | NODAL        | chr10:72191691-72201465   | 2.33114 | 1        |
| XLOC_009727 | XLOC_009727 | KRT16        | chr17:39766030-39769079   | 2.33164 | 1        |
| XLOC_013896 | XLOC_013896 | GGTLC1       | chr20:23965689-23969416   | 2.33188 | 1        |
| XLOC_000581 | XLOC_000581 | PROK1        | chr1:110993787-110999976  | 2.33341 | 1        |
| XLOC_020385 | XLOC_020385 | ITGB8        | chr7:20370724-20455382    | 2.33471 | 1        |
| XLOC_018246 | XLOC_018246 | GGNBP1       | chr6:33551475-33561115    | 2.33855 | 1        |
| XLOC_009896 | XLOC_009896 | TBC1D3P2     | chr17:60342066-60353016   | 2.34695 | 1        |
| XLOC_023425 | XLOC_023425 | TRO          | chrX:54946995-54957866    | 2.35538 | 1        |
| XLOC_023924 | XLOC_023924 | INGX         | chrX:70430034-70948962    | 2.35823 | 1        |
| XLOC_005329 | XLOC_005329 | GUCY2C       | chr12:14765567-14849519   | 2.36266 | 1        |
| XLOC_018591 | XLOC_018591 | PACRG        | chr6:161768589-163745505  | 2.37294 | 1        |
| XLOC_008381 | XLOC_008381 | MEFV         | chr16:3292027-3306627     | 2.37907 | 1        |

|             |             |                  |                           |         |          |
|-------------|-------------|------------------|---------------------------|---------|----------|
| XLOC_019039 | XLOC_019039 | GSTM2P1          | chr6:111367621-111368757  | 2.38482 | 1        |
| XLOC_016695 | XLOC_016695 | PPARGC1A         | chr4:23793643-23891700    | 2.39847 | 1        |
| XLOC_008920 | XLOC_008920 | KCNJ12,KCNJ18    | chr17:21279698-21323179   | 2.40525 | 1        |
| XLOC_022237 | XLOC_022237 | SCRT1            | chr8:145554453-145559943  | 2.42614 | 1        |
| XLOC_001027 | XLOC_001027 | TRAF3IP3         | chr1:209929393-209957890  | 2.4268  | 1        |
| XLOC_013345 | XLOC_013345 | LOC100130451     | chr2:214141276-214148929  | 2.42937 | 1        |
| XLOC_007558 | XLOC_007558 | DUOX2            | chr15:45384851-45406359   | 2.44498 | 1        |
| XLOC_003198 | XLOC_003198 | FLJ46300         | chr10:133604733-133622535 | 2.46837 | 1        |
| XLOC_009690 | XLOC_009690 | KRTAP3-2         | chr17:39155444-39156138   | 2.47052 | 1        |
| XLOC_005364 | XLOC_005364 | C12orf71         | chr12:27233989-27235455   | 2.4731  | 1        |
| XLOC_014301 | XLOC_014301 | C21orf62         | chr21:34144410-34186053   | 2.48272 | 1        |
| XLOC_009952 | XLOC_009952 | CD300C           | chr17:72537204-72542310   | 2.48768 | 1        |
| XLOC_003345 | XLOC_003345 | INSC             | chr11:15133969-15268754   | 2.49368 | 1        |
| XLOC_004302 | XLOC_004302 | NRXN2            | chr11:64373645-64490660   | 2.49935 | 1        |
| XLOC_010998 | XLOC_010998 | SPACA4           | chr19:49103856-49116694   | 2.51062 | 1        |
| XLOC_012274 | XLOC_012274 | SH2D6            | chr2:85661917-85664152    | 2.51158 | 1        |
| XLOC_005431 | XLOC_005431 | DHH              | chr12:49483205-49488602   | 2.54203 | 1        |
| XLOC_001193 | XLOC_001193 | TNFRSF4          | chr1:1146705-1149548      | 2.55035 | 1        |
| XLOC_013225 | XLOC_013225 | CCDC173          | chr2:170501934-170550931  | 2.55461 | 1        |
| XLOC_000160 | XLOC_000160 | LDLRAD2          | chr1:22138757-22263750    | 2.55597 | 1        |
| XLOC_021217 | XLOC_021217 | PCOLCE-AS1       | chr7:100183955-100205798  | 2.5565  | 1        |
| XLOC_022212 | XLOC_022212 | LOC100133669     | chr8:144063447-144099807  | 2.56485 | 1        |
| XLOC_017764 | XLOC_017764 | TMEM232          | chr5:109755197-110062450  | 2.59007 | 1        |
| XLOC_010415 | XLOC_010415 | LOC100131655     | chr18:74506687-74534251   | 2.59667 | 1        |
| XLOC_014679 | XLOC_014679 | CLDN5            | chr22:19510546-19512660   | 2.62324 | 1        |
| XLOC_003025 | XLOC_003025 | GRID1            | chr10:87337487-88126250   | 2.62637 | 1        |
| XLOC_015316 | XLOC_015316 | KBTBD12          | chr3:127641901-127706514  | 2.63599 | 1        |
| XLOC_000898 | XLOC_000898 | PAPPA2           | chr1:176432306-176811970  | 2.65234 | 1        |
| XLOC_016204 | XLOC_016204 | S100P            | chr4:6695565-6698897      | 2.67669 | 1        |
| XLOC_011640 | XLOC_011640 | WDR87            | chr19:38375471-38397317   | 2.67718 | 1        |
| XLOC_007982 | XLOC_007982 | SNX29P1          | chr16:21360683-21397254   | 2.69104 | 1        |
| XLOC_023971 | XLOC_023971 | PCDH19           | chrX:99546641-99665271    | 2.70007 | 1        |
| XLOC_021316 | XLOC_021316 | MESTIT1          | chr7:130126015-130371406  | 2.71898 | 1        |
| XLOC_018866 | XLOC_018866 | TREM1            | chr6:41242998-41254457    | 2.73921 | 1        |
| XLOC_003012 | XLOC_003012 | KCNMA1           | chr10:78629358-79397577   | 2.74755 | 1        |
| XLOC_020397 | XLOC_020397 | RPS2P32          | chr7:23530006-23531031    | 2.75218 | 1        |
| XLOC_007797 | XLOC_007797 | CERS3            | chr15:100940599-101084925 | 2.76115 | 1        |
| XLOC_017065 | XLOC_017065 | ADAMTS16         | chr5:5140442-5320412      | 2.76797 | 1        |
| XLOC_022934 | XLOC_022934 | OGN              | chr9:95059639-95432547    | 2.77398 | 1        |
| XLOC_016966 | XLOC_016966 | ANXA2P1          | chr4:154074269-154260474  | 2.77775 | 1        |
| XLOC_005158 | XLOC_005158 | LOC100507066     | chr12:122755980-122907116 | 2.78566 | 1        |
| XLOC_017712 | XLOC_017712 | DMGDH            | chr5:78293428-78365449    | 2.78875 | 1        |
| XLOC_013322 | XLOC_013322 | GPR1             | chr2:207040041-207082771  | 2.85222 | 1        |
| XLOC_000954 | XLOC_000954 | CRB1             | chr1:197170591-197447585  | 2.90256 | 1        |
| XLOC_009196 | XLOC_009196 | BZRAP1-AS1       | chr17:56378587-56494931   | 2.9162  | 1        |
| XLOC_018768 | XLOC_018768 | LY6G6C           | chr6:31686424-31689511    | 2.92448 | 1        |
| XLOC_018115 | XLOC_018115 | HCG11            | chr6:26521933-26527612    | 3.00276 | 1        |
| XLOC_021142 | XLOC_021142 | SEMA3E           | chr7:82993221-83278479    | 3.02321 | 1        |
| XLOC_014291 | XLOC_014291 | TIAM1            | chr21:32490735-32931290   | 3.03189 | 1        |
| XLOC_010950 | XLOC_010950 | LOC388553        | chr19:46242887-46262748   | 3.06387 | 1        |
| XLOC_023313 | XLOC_023313 | MAGEB2           | chrX:30233674-30238206    | 3.45011 | 0.108247 |
| XLOC_012443 | XLOC_012443 | GPR39            | chr2:133174146-133429070  | 3.54915 | 1        |
| XLOC_018126 | XLOC_018126 | LOC100507173     | chr6:27661813-27678001    | 3.62286 | 1        |
| XLOC_016710 | XLOC_016710 | TMEM156          | chr4:38968440-39034041    | 3.84782 | 1        |
| XLOC_009884 | XLOC_009884 | TBC1D3P1-DHX40P1 | chr17:58053384-58096336   | 3.88606 | 1        |
| XLOC_011316 | XLOC_011316 | ZFR2             | chr19:3804021-3869027     | 3.9753  | 1        |
| XLOC_016136 | XLOC_016136 | MUC4             | chr3:195473637-195538844  | 4.25149 | 1        |
| XLOC_000001 | XLOC_000001 | DDX11L1          | chr1:11873-29370          | inf     | 1        |
| XLOC_000128 | XLOC_000128 | CLCNKA           | chr1:16348485-16360545    | inf     | 1        |
| XLOC_000155 | XLOC_000155 | CDA              | chr1:20915443-20945400    | inf     | 1        |
| XLOC_000159 | XLOC_000159 | ALPL             | chr1:21835857-21904905    | inf     | 1        |
| XLOC_000186 | XLOC_000186 | NCMAP            | chr1:24882566-24935818    | inf     | 1        |
| XLOC_000246 | XLOC_000246 | TINAGL1          | chr1:32042085-32053287    | inf     | 1        |
| XLOC_000247 | XLOC_000247 | HCRTR1           | chr1:32083300-32092919    | inf     | 1        |
| XLOC_000396 | XLOC_000396 | FAM159A          | chr1:53099065-53122737    | inf     | 1        |
| XLOC_000417 | XLOC_000417 | PRKAA2           | chr1:57110989-57181008    | inf     | 1        |
| XLOC_000419 | XLOC_000419 | LOC100131060     | chr1:59250822-59365384    | inf     | 1        |
| XLOC_000447 | XLOC_000447 | IL23R            | chr1:67632168-67725650    | inf     | 1        |
| XLOC_000467 | XLOC_000467 | ST6GALNAC3       | chr1:76540388-77096669    | inf     | 1        |
| XLOC_000473 | XLOC_000473 | GIPC2            | chr1:78511588-78603112    | inf     | 1        |
| XLOC_000481 | XLOC_000481 | DNASE2B          | chr1:84864214-84880691    | inf     | 1        |
| XLOC_000522 | XLOC_000522 | FLJ31662         | chr1:95940292-95944912    | inf     | 1        |
| XLOC_000594 | XLOC_000594 | LOC643355        | chr1:112533189-112541463  | inf     | 1        |
| XLOC_000742 | XLOC_000742 | TDRD10           | chr1:154474694-154520623  | inf     | 1        |
| XLOC_000761 | XLOC_000761 | POU5F1P4         | chr1:155305051-155533735  | inf     | 1        |
| XLOC_000767 | XLOC_000767 | RXFP4            | chr1:155911479-155912625  | inf     | 1        |
| XLOC_000769 | XLOC_000769 | RAB25            | chr1:156030965-156040295  | inf     | 1        |
| XLOC_000776 | XLOC_000776 | RHBG             | chr1:156338979-156355013  | inf     | 1        |
| XLOC_000808 | XLOC_000808 | KCNJ9            | chr1:160051359-160059212  | inf     | 1        |

|             |             |              |                           |     |   |
|-------------|-------------|--------------|---------------------------|-----|---|
| XLOC_000816 | XLOC_000816 | VANGL2       | chr1:160370363-160398468  | inf | 1 |
| XLOC_000829 | XLOC_000829 | FCGR2A       | chr1:161475204-161489360  | inf | 1 |
| XLOC_000988 | XLOC_000988 | SNORA77      | chr1:203595914-203713209  | inf | 1 |
| XLOC_000989 | XLOC_000989 | LINC00260    | chr1:203595914-203713209  | inf | 1 |
| XLOC_001013 | XLOC_001013 | IL24         | chr1:207070787-207095378  | inf | 1 |
| XLOC_001019 | XLOC_001019 | CR1          | chr1:207669472-207815110  | inf | 1 |
| XLOC_001024 | XLOC_001024 | CAMK1G       | chr1:209757044-209787284  | inf | 1 |
| XLOC_001026 | XLOC_001026 | HSD11B1      | chr1:209859524-209908295  | inf | 1 |
| XLOC_001055 | XLOC_001055 | TGFB2        | chr1:218517537-218617961  | inf | 1 |
| XLOC_001115 | XLOC_001115 | LINC00184    | chr1:234765056-234770526  | inf | 1 |
| XLOC_001207 | XLOC_001207 | C1orf233     | chr1:1533387-1535476      | inf | 1 |
| XLOC_001224 | XLOC_001224 | TTC34        | chr1:2572806-2706230      | inf | 1 |
| XLOC_001251 | XLOC_001251 | SLC2A7       | chr1:9063358-9086404      | inf | 1 |
| XLOC_001300 | XLOC_001300 | SPATA21      | chr1:16725137-16763919    | inf | 1 |
| XLOC_001329 | XLOC_001329 | LOC339505    | chr1:20686293-20755287    | inf | 1 |
| XLOC_001345 | XLOC_001345 | HTR1D        | chr1:23518387-23521222    | inf | 1 |
| XLOC_001363 | XLOC_001363 | RUNX3        | chr1:25226001-25291501    | inf | 1 |
| XLOC_001404 | XLOC_001404 | LAPTM5       | chr1:31205314-31230683    | inf | 1 |
| XLOC_001415 | XLOC_001415 | COL16A1      | chr1:32117847-32169768    | inf | 1 |
| XLOC_001436 | XLOC_001436 | DLGAP3       | chr1:35331036-35370984    | inf | 1 |
| XLOC_001467 | XLOC_001467 | POU3F1       | chr1:38509522-38512450    | inf | 1 |
| XLOC_001530 | XLOC_001530 | CYP4A11      | chr1:47394845-47407156    | inf | 1 |
| XLOC_001594 | XLOC_001594 | C1orf141     | chr1:67557858-67600654    | inf | 1 |
| XLOC_001724 | XLOC_001724 | PTPN22       | chr1:114356432-114447741  | inf | 1 |
| XLOC_001731 | XLOC_001731 | AMPD1        | chr1:115215719-115238239  | inf | 1 |
| XLOC_001750 | XLOC_001750 | REG4         | chr1:120336640-120354203  | inf | 1 |
| XLOC_001754 | XLOC_001754 | FCGR1B       | chr1:120926127-120935944  | inf | 1 |
| XLOC_001776 | XLOC_001776 | LINC00624    | chr1:146853913-146989699  | inf | 1 |
| XLOC_001899 | XLOC_001899 | SCARNA4      | chr1:155882835-155904188  | inf | 1 |
| XLOC_001974 | XLOC_001974 | ADAMTS4      | chr1:161159537-161168845  | inf | 1 |
| XLOC_001979 | XLOC_001979 | FCGR3A       | chr1:161511550-161520413  | inf | 1 |
| XLOC_001983 | XLOC_001983 | C1orf111     | chr1:162343514-162346644  | inf | 1 |
| XLOC_001990 | XLOC_001990 | LOC400794    | chr1:165446078-165551341  | inf | 1 |
| XLOC_002010 | XLOC_002010 | F5           | chr1:169481191-169555769  | inf | 1 |
| XLOC_002012 | XLOC_002012 | SELL         | chr1:169659805-169680843  | inf | 1 |
| XLOC_002013 | XLOC_002013 | SELE         | chr1:169691780-169703220  | inf | 1 |
| XLOC_002038 | XLOC_002038 | SNORD76      | chr1:173832385-173837125  | inf | 1 |
| XLOC_002048 | XLOC_002048 | ASTN1        | chr1:176830202-177134024  | inf | 1 |
| XLOC_002053 | XLOC_002053 | ANGPTL1      | chr1:178694299-178889237  | inf | 1 |
| XLOC_002068 | XLOC_002068 | NMNAT2       | chr1:183217371-183387634  | inf | 1 |
| XLOC_002072 | XLOC_002072 | APOBEC4      | chr1:183605207-183897666  | inf | 1 |
| XLOC_002075 | XLOC_002075 | FAM129A      | chr1:184760165-184943682  | inf | 1 |
| XLOC_002094 | XLOC_002094 | LOC100131234 | chr1:198777131-198906558  | inf | 1 |
| XLOC_002122 | XLOC_002122 | MYOG         | chr1:203052256-203055166  | inf | 1 |
| XLOC_002167 | XLOC_002167 | IRF6         | chr1:209958967-209979520  | inf | 1 |
| XLOC_002324 | XLOC_002324 | AKR1C3       | chr10:5090957-5149878     | inf | 1 |
| XLOC_002336 | XLOC_002336 | LINC00707    | chr10:6821559-6884868     | inf | 1 |
| XLOC_002340 | XLOC_002340 | GATA3        | chr10:8096666-8117164     | inf | 1 |
| XLOC_002421 | XLOC_002421 | ZNF32-AS3    | chr10:44124264-44170147   | inf | 1 |
| XLOC_002435 | XLOC_002435 | GLUD1P7      | chr10:46764667-46768346   | inf | 1 |
| XLOC_002437 | XLOC_002437 | GPRIN2       | chr10:46993545-47000568   | inf | 1 |
| XLOC_002534 | XLOC_002534 | LINC00595    | chr10:80027084-80039970   | inf | 1 |
| XLOC_002601 | XLOC_002601 | FFAR4        | chr10:95326421-95349829   | inf | 1 |
| XLOC_002610 | XLOC_002610 | CYP2C9       | chr10:96698414-96749148   | inf | 1 |
| XLOC_002652 | XLOC_002652 | TLX1         | chr10:102891060-102897546 | inf | 1 |
| XLOC_002661 | XLOC_002661 | ELOVL3       | chr10:103986142-103989344 | inf | 1 |
| XLOC_002702 | XLOC_002702 | PLEKHS1      | chr10:115511212-115542192 | inf | 1 |
| XLOC_002735 | XLOC_002735 | ARMS2        | chr10:124214178-124216868 | inf | 1 |
| XLOC_002753 | XLOC_002753 | MIR4484      | chr10:127477146-127511837 | inf | 1 |
| XLOC_002774 | XLOC_002774 | VENTX        | chr10:135051407-135055433 | inf | 1 |
| XLOC_002782 | XLOC_002782 | TUBB8        | chr10:92827-95178         | inf | 1 |
| XLOC_002889 | XLOC_002889 | LOC441666    | chr10:42827313-42863493   | inf | 1 |
| XLOC_002909 | XLOC_002909 | LINC00842    | chr10:47096453-47151400   | inf | 1 |
| XLOC_002911 | XLOC_002911 | ANXA8        | chr10:47157983-47174143   | inf | 1 |
| XLOC_002915 | XLOC_002915 | RBP3         | chr10:48381486-48390991   | inf | 1 |
| XLOC_003079 | XLOC_003079 | CRTAC1       | chr10:99609994-99790585   | inf | 1 |
| XLOC_003123 | XLOC_003123 | CALHM3       | chr10:105232560-105238997 | inf | 1 |
| XLOC_003184 | XLOC_003184 | MMP21        | chr10:127455026-127464390 | inf | 1 |
| XLOC_003243 | XLOC_003243 | LOC338651    | chr11:1490684-1785501     | inf | 1 |
| XLOC_003263 | XLOC_003263 | ART1         | chr11:3666360-3685646     | inf | 1 |
| XLOC_003284 | XLOC_003284 | OR5112       | chr11:5362112-5526882     | inf | 1 |
| XLOC_003285 | XLOC_003285 | OR52D1       | chr11:5362112-5526882     | inf | 1 |
| XLOC_003305 | XLOC_003305 | OR10A2       | chr11:6890985-6891897     | inf | 1 |
| XLOC_003306 | XLOC_003306 | OR10A4       | chr11:6897855-6898850     | inf | 1 |
| XLOC_003331 | XLOC_003331 | MRV11-AS1    | chr11:10562782-10715535   | inf | 1 |
| XLOC_003347 | XLOC_003347 | OR7E14P      | chr11:17073432-17074591   | inf | 1 |
| XLOC_003359 | XLOC_003359 | LDHAL6A      | chr11:18477373-18501147   | inf | 1 |
| XLOC_003379 | XLOC_003379 | FSHB         | chr11:30252562-30256824   | inf | 1 |
| XLOC_003422 | XLOC_003422 | LOC221122    | chr11:44995452-44999578   | inf | 1 |

|             |             |              |                           |     |   |
|-------------|-------------|--------------|---------------------------|-----|---|
| XLOC_003446 | XLOC_003446 | FAM180B      | chr11:47608229-47610746   | inf | 1 |
| XLOC_003521 | XLOC_003521 | MS4A7        | chr11:60145957-60163426   | inf | 1 |
| XLOC_003570 | XLOC_003570 | SLC22A10     | chr11:63014620-63330855   | inf | 1 |
| XLOC_003660 | XLOC_003660 | TBC1D10C     | chr11:67171383-67177561   | inf | 1 |
| XLOC_003683 | XLOC_003683 | SHANK2-AS1   | chr11:70313960-70935808   | inf | 1 |
| XLOC_003684 | XLOC_003684 | SHANK2-AS3   | chr11:70313960-70935808   | inf | 1 |
| XLOC_003759 | XLOC_003759 | FAT3         | chr11:92085261-92629635   | inf | 1 |
| XLOC_003768 | XLOC_003768 | FOLR4        | chr11:94038802-94040858   | inf | 1 |
| XLOC_003806 | XLOC_003806 | C11orf53     | chr11:111126706-111156972 | inf | 1 |
| XLOC_003852 | XLOC_003852 | CXCR5        | chr11:118754474-118781613 | inf | 1 |
| XLOC_003864 | XLOC_003864 | PDZD3        | chr11:119056165-119060932 | inf | 1 |
| XLOC_003872 | XLOC_003872 | GRIK4        | chr11:120531027-120856969 | inf | 1 |
| XLOC_003891 | XLOC_003891 | PANX3        | chr11:124481452-124490251 | inf | 1 |
| XLOC_003915 | XLOC_003915 | FLI1         | chr11:128556429-128683162 | inf | 1 |
| XLOC_003922 | XLOC_003922 | ADAMTS15     | chr11:130318868-130346539 | inf | 1 |
| XLOC_004007 | XLOC_004007 | HBB          | chr11:5246695-5248301     | inf | 1 |
| XLOC_004060 | XLOC_004060 | ASCL3        | chr11:8959118-8964580     | inf | 1 |
| XLOC_004090 | XLOC_004090 | PLEKHA7      | chr11:16809206-17035963   | inf | 1 |
| XLOC_004119 | XLOC_004119 | MUC15        | chr11:26353677-26684836   | inf | 1 |
| XLOC_004129 | XLOC_004129 | DCDC1        | chr11:31284170-31391357   | inf | 1 |
| XLOC_004140 | XLOC_004140 | ELF5         | chr11:34500341-34535347   | inf | 1 |
| XLOC_004170 | XLOC_004170 | MYBPC3       | chr11:47352956-47374253   | inf | 1 |
| XLOC_004251 | XLOC_004251 | DKFZP434K028 | chr11:61520120-61555989   | inf | 1 |
| XLOC_004278 | XLOC_004278 | SNORD31      | chr11:62619459-62623360   | inf | 1 |
| XLOC_004337 | XLOC_004337 | GAL3ST3      | chr11:65808235-65816651   | inf | 1 |
| XLOC_004363 | XLOC_004363 | TBX10        | chr11:67398773-67407031   | inf | 1 |
| XLOC_004374 | XLOC_004374 | MRGPRD       | chr11:68747489-68748455   | inf | 1 |
| XLOC_004391 | XLOC_004391 | PHOX2A       | chr11:71935881-71955220   | inf | 1 |
| XLOC_004404 | XLOC_004404 | P4HA3        | chr11:73977701-74022699   | inf | 1 |
| XLOC_004433 | XLOC_004433 | TENM4        | chr11:78364327-79151695   | inf | 1 |
| XLOC_004464 | XLOC_004464 | SNORD6       | chr11:93464668-93464739   | inf | 1 |
| XLOC_004483 | XLOC_004483 | TRPC6        | chr11:101322294-101454659 | inf | 1 |
| XLOC_004487 | XLOC_004487 | MMP7         | chr11:102391238-102401478 | inf | 1 |
| XLOC_004493 | XLOC_004493 | MMP3         | chr11:102654406-102714342 | inf | 1 |
| XLOC_004508 | XLOC_004508 | GUCY1A2      | chr11:106544737-106889171 | inf | 1 |
| XLOC_004561 | XLOC_004561 | LOC100131626 | chr11:118230295-118289530 | inf | 1 |
| XLOC_004589 | XLOC_004589 | SCN3B        | chr11:123499894-123525315 | inf | 1 |
| XLOC_004711 | XLOC_004711 | RIMKLB       | chr12:8850517-8929787     | inf | 1 |
| XLOC_004817 | XLOC_004817 | H1FNT        | chr12:48722762-48724062   | inf | 1 |
| XLOC_004948 | XLOC_004948 | ARHGEF25     | chr12:58003962-58011028   | inf | 1 |
| XLOC_005002 | XLOC_005002 | SYT1         | chr12:79257772-79845788   | inf | 1 |
| XLOC_005005 | XLOC_005005 | OTOGL        | chr12:80603232-80772870   | inf | 1 |
| XLOC_005022 | XLOC_005022 | PLEKHG7      | chr12:93130264-93165868   | inf | 1 |
| XLOC_005111 | XLOC_005111 | RPH3A        | chr12:113229548-113336684 | inf | 1 |
| XLOC_005115 | XLOC_005115 | DTX1         | chr12:113495661-113535833 | inf | 1 |
| XLOC_005169 | XLOC_005169 | MIR3908      | chr12:124020955-124021081 | inf | 1 |
| XLOC_005183 | XLOC_005183 | FLJ37505     | chr12:128366161-128383184 | inf | 1 |
| XLOC_005191 | XLOC_005191 | GPR133       | chr12:131438451-131626008 | inf | 1 |
| XLOC_005221 | XLOC_005221 | LOC100271702 | chr12:2038367-2045742     | inf | 1 |
| XLOC_005234 | XLOC_005234 | ANO2         | chr12:5671816-6055398     | inf | 1 |
| XLOC_005272 | XLOC_005272 | AICDA        | chr12:8754761-8765442     | inf | 1 |
| XLOC_005303 | XLOC_005303 | TAS2R13      | chr12:10998447-11328619   | inf | 1 |
| XLOC_005305 | XLOC_005305 | TAS2R50      | chr12:10998447-11328619   | inf | 1 |
| XLOC_005313 | XLOC_005313 | PRB3         | chr12:11418856-11422641   | inf | 1 |
| XLOC_005343 | XLOC_005343 | SLCO1A2      | chr12:21417533-21548371   | inf | 1 |
| XLOC_005447 | XLOC_005447 | FAM186A      | chr12:50721094-50790405   | inf | 1 |
| XLOC_005472 | XLOC_005472 | KRT73        | chr12:53001353-53012343   | inf | 1 |
| XLOC_005474 | XLOC_005474 | KRT1         | chr12:53068519-53074191   | inf | 1 |
| XLOC_005677 | XLOC_005677 | CMKLR1       | chr12:108681820-108733094 | inf | 1 |
| XLOC_005726 | XLOC_005726 | NOS1         | chr12:117645946-117799607 | inf | 1 |
| XLOC_005763 | XLOC_005763 | HCAR3        | chr12:123199302-123201439 | inf | 1 |
| XLOC_005883 | XLOC_005883 | SPERT        | chr13:46276445-46288693   | inf | 1 |
| XLOC_005892 | XLOC_005892 | MLNR         | chr13:49794473-49796513   | inf | 1 |
| XLOC_005903 | XLOC_005903 | FAM124A      | chr13:51796469-51858377   | inf | 1 |
| XLOC_005974 | XLOC_005974 | NALCN-AS1    | chr13:101360578-102068813 | inf | 1 |
| XLOC_006043 | XLOC_006043 | GPR12        | chr13:27329338-27334922   | inf | 1 |
| XLOC_006080 | XLOC_006080 | LINC00571    | chr13:38624953-38717369   | inf | 1 |
| XLOC_006103 | XLOC_006103 | KCTD4        | chr13:45694630-45858239   | inf | 1 |
| XLOC_006110 | XLOC_006110 | CPB2         | chr13:46626982-46679211   | inf | 1 |
| XLOC_006112 | XLOC_006112 | LINC00563    | chr13:46870579-46871979   | inf | 1 |
| XLOC_006144 | XLOC_006144 | LECT1        | chr13:53277399-53313947   | inf | 1 |
| XLOC_006165 | XLOC_006165 | POU4F1       | chr13:78628989-79233314   | inf | 1 |
| XLOC_006177 | XLOC_006177 | LINC00410    | chr13:91543207-91578851   | inf | 1 |
| XLOC_006263 | XLOC_006263 | RNASE2       | chr14:21423629-21424594   | inf | 1 |
| XLOC_006305 | XLOC_006305 | NYNRIN       | chr14:24867991-24888494   | inf | 1 |
| XLOC_006330 | XLOC_006330 | SSTR1        | chr14:38677203-38682268   | inf | 1 |
| XLOC_006418 | XLOC_006418 | PLEKHD1      | chr14:69951470-69995215   | inf | 1 |
| XLOC_006493 | XLOC_006493 | SLC24A4      | chr14:92788924-92967825   | inf | 1 |
| XLOC_006642 | XLOC_006642 | SNORA28      | chr14:103800338-103811361 | inf | 1 |

|             |             |               |                           |     |          |
|-------------|-------------|---------------|---------------------------|-----|----------|
| XLOC_006649 | XLOC_006649 | TDRD9         | chr14:104394816-104519004 | inf | 1        |
| XLOC_006722 | XLOC_006722 | MYH6          | chr14:23851198-23877486   | inf | 1        |
| XLOC_006752 | XLOC_006752 | PRKD1         | chr14:29896116-30396899   | inf | 1        |
| XLOC_006761 | XLOC_006761 | EGLN3         | chr14:34393420-34420284   | inf | 1        |
| XLOC_006828 | XLOC_006828 | OTX2          | chr14:57267424-57277194   | inf | 1        |
| XLOC_006831 | XLOC_006831 | SLC35F4       | chr14:58030639-58332592   | inf | 1        |
| XLOC_006920 | XLOC_006920 | SNORA79       | chr14:81641795-81687575   | inf | 0.999791 |
| XLOC_007018 | XLOC_007018 | NPAP1         | chr15:24920540-24928593   | inf | 1        |
| XLOC_007019 | XLOC_007019 | SNRPN,SNURF   | chr15:25068793-25223729   | inf | 1        |
| XLOC_007020 | XLOC_007020 | PAR-SN        | chr15:25227140-25228937   | inf | 1        |
| XLOC_007207 | XLOC_007207 | FGF7          | chr15:49447975-49913118   | inf | 1        |
| XLOC_007217 | XLOC_007217 | SCG3          | chr15:51973549-52013223   | inf | 1        |
| XLOC_007234 | XLOC_007234 | LDHAL6B       | chr15:59428167-59665071   | inf | 1        |
| XLOC_007304 | XLOC_007304 | CYP1A2        | chr15:75041183-75048941   | inf | 1        |
| XLOC_007335 | XLOC_007335 | LOC646938     | chr15:79044378-79045734   | inf | 1        |
| XLOC_007366 | XLOC_007366 | SH3GL3        | chr15:84116090-84287493   | inf | 1        |
| XLOC_007412 | XLOC_007412 | SV2B          | chr15:91643181-91844539   | inf | 1        |
| XLOC_007480 | XLOC_007480 | ULK4P1,ULK4P3 | chr15:32698800-32727250   | inf | 1        |
| XLOC_007517 | XLOC_007517 | PPP1R14D      | chr15:41107642-41120907   | inf | 1        |
| XLOC_007528 | XLOC_007528 | PLA2G4E       | chr15:42273779-42342901   | inf | 1        |
| XLOC_007583 | XLOC_007583 | BCL2L10       | chr15:52401821-52404972   | inf | 1        |
| XLOC_007636 | XLOC_007636 | CILP          | chr15:65488336-65503840   | inf | 1        |
| XLOC_007683 | XLOC_007683 | STRA6         | chr15:74471807-74502046   | inf | 1        |
| XLOC_007711 | XLOC_007711 | LINC00597     | chr15:77400497-77712446   | inf | 1        |
| XLOC_007732 | XLOC_007732 | TMC3          | chr15:81624759-81666418   | inf | 1        |
| XLOC_007842 | XLOC_007842 | PRR25         | chr16:855442-863861       | inf | 1        |
| XLOC_007968 | XLOC_007968 | SYT17         | chr16:19179637-19278554   | inf | 1        |
| XLOC_007974 | XLOC_007974 | ACSM5         | chr16:20420855-20452281   | inf | 1        |
| XLOC_007987 | XLOC_007987 | VWA3A         | chr16:22103862-22168287   | inf | 1        |
| XLOC_008012 | XLOC_008012 | FLJ21408      | chr16:27236314-27301789   | inf | 1        |
| XLOC_008023 | XLOC_008023 | CD19          | chr16:28943259-28950668   | inf | 1        |
| XLOC_008057 | XLOC_008057 | SNORA30       | chr16:30710461-30751450   | inf | 1        |
| XLOC_008100 | XLOC_008100 | NOD2          | chr16:50731049-50766987   | inf | 1        |
| XLOC_008123 | XLOC_008123 | MT1A          | chr16:56672577-56673999   | inf | 1        |
| XLOC_008146 | XLOC_008146 | GPR97         | chr16:57702156-57723290   | inf | 1        |
| XLOC_008210 | XLOC_008210 | CLEC18C       | chr16:70207927-70220798   | inf | 1        |
| XLOC_008253 | XLOC_008253 | CDH13         | chr16:82660398-83830215   | inf | 1        |
| XLOC_008275 | XLOC_008275 | FOXC2         | chr16:86600856-86602537   | inf | 1        |
| XLOC_008284 | XLOC_008284 | IL17C         | chr16:88705000-88706882   | inf | 1        |
| XLOC_008318 | XLOC_008318 | LINC00235     | chr16:576846-577407       | inf | 1        |
| XLOC_008337 | XLOC_008337 | PTX4          | chr16:1535939-1538468     | inf | 1        |
| XLOC_008477 | XLOC_008477 | ERN2          | chr16:23690200-23724821   | inf | 1        |
| XLOC_008511 | XLOC_008511 | LOC388242     | chr16:30204255-30218248   | inf | 1        |
| XLOC_008542 | XLOC_008542 | CSDAP1        | chr16:31579087-31580845   | inf | 1        |
| XLOC_008593 | XLOC_008593 | CNGB1         | chr16:57916243-58005020   | inf | 1        |
| XLOC_008605 | XLOC_008605 | CDH11         | chr16:64980682-65155919   | inf | 1        |
| XLOC_008636 | XLOC_008636 | DPEP2         | chr16:68021292-68033421   | inf | 1        |
| XLOC_008748 | XLOC_008748 | TUSC5         | chr17:1182956-1204281     | inf | 1        |
| XLOC_008840 | XLOC_008840 | GUCY2D        | chr17:7905987-7923658     | inf | 1        |
| XLOC_008841 | XLOC_008841 | ALOX15B       | chr17:7942357-7952451     | inf | 1        |
| XLOC_008880 | XLOC_008880 | SNORD65       | chr17:16342300-16395505   | inf | 1        |
| XLOC_008899 | XLOC_008899 | KRT16P1       | chr17:18343221-18346208   | inf | 1        |
| XLOC_008906 | XLOC_008906 | GRAPL         | chr17:19030781-19062148   | inf | 1        |
| XLOC_008944 | XLOC_008944 | SNORD4B       | chr17:27046999-27053949   | inf | 1        |
| XLOC_008951 | XLOC_008951 | MIR4523       | chr17:27717679-27717748   | inf | 1        |
| XLOC_009008 | XLOC_009008 | LHX1          | chr17:35294771-35301915   | inf | 1        |
| XLOC_009049 | XLOC_009049 | IGFBP4        | chr17:38599675-38613982   | inf | 1        |
| XLOC_009097 | XLOC_009097 | CD300LG       | chr17:41924515-41940997   | inf | 1        |
| XLOC_009150 | XLOC_009150 | IGF2BP1       | chr17:47074773-47133507   | inf | 1        |
| XLOC_009152 | XLOC_009152 | ABI3          | chr17:47283595-47300587   | inf | 1        |
| XLOC_009167 | XLOC_009167 | MYCBPAP       | chr17:48585744-48608862   | inf | 1        |
| XLOC_009194 | XLOC_009194 | EPX           | chr17:56270088-56282535   | inf | 1        |
| XLOC_009210 | XLOC_009210 | C17orf64      | chr17:58499864-58508787   | inf | 1        |
| XLOC_009232 | XLOC_009232 | SNORD104      | chr17:62223437-62223517   | inf | 1        |
| XLOC_009256 | XLOC_009256 | SOX9          | chr17:70117160-70122560   | inf | 1        |
| XLOC_009272 | XLOC_009272 | OTOP2         | chr17:72920369-72930006   | inf | 1        |
| XLOC_009409 | XLOC_009409 | P2RX1         | chr17:3799884-3819960     | inf | 1        |
| XLOC_009415 | XLOC_009415 | GGT6          | chr17:4460221-4463876     | inf | 1        |
| XLOC_009511 | XLOC_009511 | CDRT15        | chr17:14139172-14140150   | inf | 1        |
| XLOC_009540 | XLOC_009540 | FAM106A       | chr17:18427879-18430160   | inf | 1        |
| XLOC_009546 | XLOC_009546 | EPN2-AS1      | chr17:19140689-19240028   | inf | 1        |
| XLOC_009555 | XLOC_009555 | KRT16P3       | chr17:20404826-20407811   | inf | 1        |
| XLOC_009564 | XLOC_009564 | KRT18P55      | chr17:26603011-26634408   | inf | 1        |
| XLOC_009601 | XLOC_009601 | OMG           | chr17:29421944-29704695   | inf | 1        |
| XLOC_009623 | XLOC_009623 | GAS2L2        | chr17:34071529-34079897   | inf | 1        |
| XLOC_009625 | XLOC_009625 | C17orf66      | chr17:34181959-34195895   | inf | 1        |
| XLOC_009637 | XLOC_009637 | TBC1D3H       | chr17:34745935-34757050   | inf | 1        |
| XLOC_009643 | XLOC_009643 | HNF1B         | chr17:36046433-36105096   | inf | 1        |
| XLOC_009644 | XLOC_009644 | LOC284100     | chr17:36202572-36244363   | inf | 1        |

|             |             |              |                          |     |          |
|-------------|-------------|--------------|--------------------------|-----|----------|
| XLOC_009664 | XLOC_009664 | NEUROD2      | chr17:37760020-37764175  | inf | 1        |
| XLOC_009684 | XLOC_009684 | KRT12        | chr17:39017429-39023462  | inf | 1        |
| XLOC_009695 | XLOC_009695 | KRTAP1-1     | chr17:39196810-39197173  | inf | 1        |
| XLOC_009729 | XLOC_009729 | KRT42P       | chr17:39782578-39796451  | inf | 1        |
| XLOC_009837 | XLOC_009837 | TAC4         | chr17:47915670-47926199  | inf | 1        |
| XLOC_009838 | XLOC_009838 | DLX3         | chr17:48067368-48072588  | inf | 1        |
| XLOC_009917 | XLOC_009917 | MIR3064      | chr17:62494373-62502484  | inf | 1        |
| XLOC_009947 | XLOC_009947 | SDK2         | chr17:71330522-71640227  | inf | 1        |
| XLOC_009950 | XLOC_009950 | BTBD17       | chr17:72352554-72357958  | inf | 1        |
| XLOC_009985 | XLOC_009985 | FOXJ1        | chr17:74132414-74236390  | inf | 1        |
| XLOC_010020 | XLOC_010020 | NPTX1        | chr17:78440632-78450404  | inf | 1        |
| XLOC_010031 | XLOC_010031 | LOC100130370 | chr17:79349698-79359160  | inf | 1        |
| XLOC_010140 | XLOC_010140 | GREB1L       | chr18:18822202-19102791  | inf | 1        |
| XLOC_010188 | XLOC_010188 | SIGLEC15     | chr18:43405544-43422521  | inf | 1        |
| XLOC_010212 | XLOC_010212 | ST8SIA3      | chr18:55019720-55036161  | inf | 1        |
| XLOC_010228 | XLOC_010228 | SERPINB5     | chr18:61144143-61172318  | inf | 1        |
| XLOC_010276 | XLOC_010276 | DLGAP1       | chr18:3496029-4455266    | inf | 1        |
| XLOC_010323 | XLOC_010323 | SLC25A52     | chr18:29339658-29340843  | inf | 1        |
| XLOC_010363 | XLOC_010363 | SNORD58A     | chr18:47007547-47018935  | inf | 1        |
| XLOC_010441 | XLOC_010441 | GRIN3B       | chr19:1000436-1021141    | inf | 1        |
| XLOC_010493 | XLOC_010493 | CREB3L3      | chr19:4153597-4173051    | inf | 1        |
| XLOC_010498 | XLOC_010498 | FSD1         | chr19:4304590-4323843    | inf | 1        |
| XLOC_010543 | XLOC_010543 | CLEC4GP1     | chr19:7852369-7855898    | inf | 1        |
| XLOC_010644 | XLOC_010644 | CASP14       | chr19:15160290-15169103  | inf | 1        |
| XLOC_010669 | XLOC_010669 | F2RL3        | chr19:16999825-17002830  | inf | 1        |
| XLOC_010712 | XLOC_010712 | NCAN         | chr19:19322781-19363061  | inf | 1        |
| XLOC_010784 | XLOC_010784 | CD22         | chr19:35820071-35838264  | inf | 1        |
| XLOC_010813 | XLOC_010813 | LOC644189    | chr19:36912075-36913799  | inf | 1        |
| XLOC_010824 | XLOC_010824 | ZNF570       | chr19:37959981-37976242  | inf | 1        |
| XLOC_010827 | XLOC_010827 | LOC644554    | chr19:38308050-38345836  | inf | 1        |
| XLOC_010871 | XLOC_010871 | CYP2G1P      | chr19:41396730-41406413  | inf | 1        |
| XLOC_010921 | XLOC_010921 | IGSF23       | chr19:45116939-45140081  | inf | 1        |
| XLOC_011009 | XLOC_011009 | CGB2         | chr19:49535129-49536495  | inf | 1        |
| XLOC_011055 | XLOC_011055 | SNAR-F       | chr19:51108219-51108342  | inf | 0.999791 |
| XLOC_011058 | XLOC_011058 | GPR32        | chr19:51273720-51274989  | inf | 1        |
| XLOC_011061 | XLOC_011061 | KLK3         | chr19:51358170-51364020  | inf | 1        |
| XLOC_011093 | XLOC_011093 | ZNF818P      | chr19:53716200-53719355  | inf | 1        |
| XLOC_011163 | XLOC_011163 | TTYH1        | chr19:54926604-54947899  | inf | 1        |
| XLOC_011167 | XLOC_011167 | LILRA2       | chr19:55085256-55099027  | inf | 1        |
| XLOC_011185 | XLOC_011185 | TMEM190      | chr19:55888203-55889612  | inf | 1        |
| XLOC_011203 | XLOC_011203 | ZNF542       | chr19:56879467-56891196  | inf | 1        |
| XLOC_011208 | XLOC_011208 | ZFP28        | chr19:57050316-57068170  | inf | 1        |
| XLOC_011220 | XLOC_011220 | ZNF304       | chr19:57862644-57871265  | inf | 1        |
| XLOC_011358 | XLOC_011358 | TUBB4A       | chr19:6494329-6502330    | inf | 1        |
| XLOC_011359 | XLOC_011359 | CD70         | chr19:6585849-6591163    | inf | 1        |
| XLOC_011484 | XLOC_011484 | PTGER1       | chr19:14583277-14586174  | inf | 1        |
| XLOC_011609 | XLOC_011609 | PRODH2       | chr19:36290891-36304201  | inf | 1        |
| XLOC_011645 | XLOC_011645 | RASGRP4      | chr19:38893774-38916945  | inf | 1        |
| XLOC_011687 | XLOC_011687 | CYP2A6       | chr19:41349442-41356352  | inf | 1        |
| XLOC_011709 | XLOC_011709 | CXCL17       | chr19:42901299-43156507  | inf | 1        |
| XLOC_011772 | XLOC_011772 | PGLYRP1      | chr19:46522411-46526556  | inf | 1        |
| XLOC_011780 | XLOC_011780 | PTGIR        | chr19:47123724-47128354  | inf | 1        |
| XLOC_011781 | XLOC_011781 | GNG8         | chr19:47137332-47137939  | inf | 1        |
| XLOC_011801 | XLOC_011801 | CABP5        | chr19:48532639-48547311  | inf | 1        |
| XLOC_011821 | XLOC_011821 | TULP2        | chr19:49384221-49401996  | inf | 1        |
| XLOC_011880 | XLOC_011880 | KLKP1        | chr19:51385351-51399654  | inf | 1        |
| XLOC_011884 | XLOC_011884 | KLK7         | chr19:51479734-51487320  | inf | 1        |
| XLOC_011905 | XLOC_011905 | SIGLEC14     | chr19:52145805-52150132  | inf | 1        |
| XLOC_011929 | XLOC_011929 | ZNF677       | chr19:53738637-53758111  | inf | 1        |
| XLOC_011947 | XLOC_011947 | LILRA5       | chr19:54818352-54824409  | inf | 1        |
| XLOC_011965 | XLOC_011965 | TMEM150B     | chr19:55824226-55836708  | inf | 1        |
| XLOC_011982 | XLOC_011982 | ZSCAN5B      | chr19:56701057-56704421  | inf | 1        |
| XLOC_012026 | XLOC_012026 | SNTG2        | chr2:946553-1371384      | inf | 1        |
| XLOC_012062 | XLOC_012062 | VSNL1        | chr2:17721806-17837706   | inf | 1        |
| XLOC_012089 | XLOC_012089 | DPYSL5       | chr2:27070968-27173219   | inf | 1        |
| XLOC_012100 | XLOC_012100 | TRIM54       | chr2:27505296-27531130   | inf | 1        |
| XLOC_012123 | XLOC_012123 | LBH          | chr2:30454396-30482899   | inf | 1        |
| XLOC_012142 | XLOC_012142 | QPCT         | chr2:37571752-37600465   | inf | 1        |
| XLOC_012166 | XLOC_012166 | TMEM247      | chr2:46706703-46711564   | inf | 1        |
| XLOC_012219 | XLOC_012219 | ARHGAP25     | chr2:68961912-69053957   | inf | 1        |
| XLOC_012244 | XLOC_012244 | C2orf78      | chr2:74011315-74044274   | inf | 1        |
| XLOC_012282 | XLOC_012282 | LOC284950    | chr2:86042252-86053911   | inf | 1        |
| XLOC_012341 | XLOC_012341 | IL1RL1       | chr2:102927961-102968497 | inf | 1        |
| XLOC_012343 | XLOC_012343 | IL18RAP      | chr2:103035253-103069024 | inf | 1        |
| XLOC_012354 | XLOC_012354 | C2orf40      | chr2:106682112-106694609 | inf | 1        |
| XLOC_012413 | XLOC_012413 | RNU4ATAC     | chr2:122095351-122407052 | inf | 1        |
| XLOC_012418 | XLOC_012418 | PROC         | chr2:128175995-128186822 | inf | 1        |
| XLOC_012424 | XLOC_012424 | CCDC74B-AS1  | chr2:130887195-130902707 | inf | 1        |
| XLOC_012432 | XLOC_012432 | AMER3        | chr2:131513076-131525707 | inf | 1        |

|             |             |                   |                          |     |   |
|-------------|-------------|-------------------|--------------------------|-----|---|
| XLOC_012486 | XLOC_012486 | SLC4A10           | chr2:162480844-162841786 | inf | 1 |
| XLOC_012490 | XLOC_012490 | LOC100506134      | chr2:166729871-166810348 | inf | 1 |
| XLOC_012492 | XLOC_012492 | B3GALT1           | chr2:168675181-168727366 | inf | 1 |
| XLOC_012575 | XLOC_012575 | SATB2-AS1         | chr2:200134222-200337481 | inf | 1 |
| XLOC_012661 | XLOC_012661 | TUBA4B            | chr2:220110191-220136910 | inf | 1 |
| XLOC_012692 | XLOC_012692 | LOC151484         | chr2:231751260-231769232 | inf | 1 |
| XLOC_012747 | XLOC_012747 | AQP12A            | chr2:241631261-241637900 | inf | 1 |
| XLOC_012748 | XLOC_012748 | AGXT              | chr2:241808161-241818536 | inf | 1 |
| XLOC_012784 | XLOC_012784 | CYS1              | chr2:10196925-10220538   | inf | 1 |
| XLOC_012831 | XLOC_012831 | OTOF              | chr2:26680070-26781566   | inf | 1 |
| XLOC_012858 | XLOC_012858 | XDH               | chr2:31557187-31637611   | inf | 1 |
| XLOC_012881 | XLOC_012881 | CDKL4             | chr2:39405687-39456673   | inf | 1 |
| XLOC_012927 | XLOC_012927 | FLJ16341          | chr2:61074894-61108449   | inf | 1 |
| XLOC_013030 | XLOC_013030 | RGPD1, RGPD2      | chr2:88047605-88285309   | inf | 1 |
| XLOC_013033 | XLOC_013033 | FABP1             | chr2:88422507-88427650   | inf | 1 |
| XLOC_013038 | XLOC_013038 | LOC442028         | chr2:95534429-95613087   | inf | 1 |
| XLOC_013043 | XLOC_013043 | ADRA2B            | chr2:96778622-96781888   | inf | 1 |
| XLOC_013148 | XLOC_013148 | TUBA3E            | chr2:130949317-130956034 | inf | 1 |
| XLOC_013161 | XLOC_013161 | LYPD1             | chr2:133174146-133429070 | inf | 1 |
| XLOC_013261 | XLOC_013261 | ZNF385B           | chr2:180306710-180726232 | inf | 1 |
| XLOC_013289 | XLOC_013289 | HECW2             | chr2:197063976-197457335 | inf | 1 |
| XLOC_013355 | XLOC_013355 | DIRC3             | chr2:218148745-218621316 | inf | 1 |
| XLOC_013386 | XLOC_013386 | EPHA4             | chr2:222282746-222437010 | inf | 1 |
| XLOC_013393 | XLOC_013393 | FAM124B           | chr2:225243414-225266711 | inf | 1 |
| XLOC_013410 | XLOC_013410 | GPR55             | chr2:231772042-231789941 | inf | 1 |
| XLOC_013418 | XLOC_013418 | NMUR1             | chr2:232387870-232395182 | inf | 1 |
| XLOC_013460 | XLOC_013460 | C2orf54           | chr2:241825464-241835573 | inf | 1 |
| XLOC_013502 | XLOC_013502 | OXT               | chr20:3052265-3053162    | inf | 1 |
| XLOC_013528 | XLOC_013528 | SNAP25            | chr20:10004459-10288066  | inf | 1 |
| XLOC_013536 | XLOC_013536 | OTOR              | chr20:16729002-16732809  | inf | 1 |
| XLOC_013568 | XLOC_013568 | CST7              | chr20:24929865-24940564  | inf | 1 |
| XLOC_013590 | XLOC_013590 | HCK               | chr20:30639990-30689657  | inf | 1 |
| XLOC_013641 | XLOC_013641 | LOC100287792      | chr20:36305311-36311636  | inf | 1 |
| XLOC_013653 | XLOC_013653 | SLC32A1           | chr20:37353104-37358015  | inf | 1 |
| XLOC_013670 | XLOC_013670 | HNF4A             | chr20:42984440-43061485  | inf | 1 |
| XLOC_013682 | XLOC_013682 | RBPJL             | chr20:43922086-43946464  | inf | 1 |
| XLOC_013685 | XLOC_013685 | WFDC2             | chr20:44098393-44110172  | inf | 1 |
| XLOC_013697 | XLOC_013697 | SLC12A5           | chr20:44650328-44688789  | inf | 1 |
| XLOC_013704 | XLOC_013704 | LINC00494         | chr20:46988653-46999381  | inf | 1 |
| XLOC_013847 | XLOC_013847 | LINC00658         | chr20:5412602-5426394    | inf | 1 |
| XLOC_013885 | XLOC_013885 | CD93              | chr20:23059992-23066977  | inf | 1 |
| XLOC_013958 | XLOC_013958 | GHRH              | chr20:35879489-35885299  | inf | 1 |
| XLOC_013970 | XLOC_013970 | MAFB              | chr20:39314516-39317876  | inf | 1 |
| XLOC_013975 | XLOC_013975 | GTSF1L            | chr20:42354800-42355642  | inf | 1 |
| XLOC_013985 | XLOC_013985 | KCNS1             | chr20:43720949-43729753  | inf | 1 |
| XLOC_014077 | XLOC_014077 | KCNQ2             | chr20:62037541-62103993  | inf | 1 |
| XLOC_014109 | XLOC_014109 | CHODL             | chr21:19289656-19639687  | inf | 1 |
| XLOC_014126 | XLOC_014126 | GRIK1-AS1         | chr21:30909253-31312282  | inf | 1 |
| XLOC_014176 | XLOC_014176 | B3GALT5           | chr21:41029253-41034815  | inf | 1 |
| XLOC_014177 | XLOC_014177 | IGSF5             | chr21:41117333-41174023  | inf | 1 |
| XLOC_014187 | XLOC_014187 | ZNF295-AS1        | chr21:43442112-43445060  | inf | 1 |
| XLOC_014189 | XLOC_014189 | ABCG1             | chr21:43619798-43717354  | inf | 1 |
| XLOC_014224 | XLOC_014224 | COL6A2            | chr21:47518032-47552763  | inf | 1 |
| XLOC_014256 | XLOC_014256 | ADAMTS5           | chr21:28290230-28339439  | inf | 1 |
| XLOC_014351 | XLOC_014351 | CBS               | chr21:44473300-44496472  | inf | 1 |
| XLOC_014359 | XLOC_014359 | DNMT3L            | chr21:45666221-45682099  | inf | 1 |
| XLOC_014363 | XLOC_014363 | KRTAP10-1         | chr21:45917774-46131495  | inf | 1 |
| XLOC_014364 | XLOC_014364 | KRTAP10-2         | chr21:45917774-46131495  | inf | 1 |
| XLOC_014384 | XLOC_014384 | FTCD              | chr21:47556175-47575481  | inf | 1 |
| XLOC_014468 | XLOC_014468 | UPB1              | chr22:24891250-24922553  | inf | 1 |
| XLOC_014484 | XLOC_014484 | CRYBA4            | chr22:27017927-27026636  | inf | 1 |
| XLOC_014519 | XLOC_014519 | SLC5A1            | chr22:32439018-32509011  | inf | 1 |
| XLOC_014537 | XLOC_014537 | CSF2RB            | chr22:37309674-37336479  | inf | 1 |
| XLOC_014570 | XLOC_014570 | MGAT3             | chr22:39853324-39888199  | inf | 1 |
| XLOC_014598 | XLOC_014598 | WBP2NL            | chr22:42394728-42424477  | inf | 1 |
| XLOC_014657 | XLOC_014657 | ANKRD62P1-PARP4P3 | chr22:17134598-17156430  | inf | 1 |
| XLOC_014696 | XLOC_014696 | TUBA3FP           | chr22:21354060-21368576  | inf | 1 |
| XLOC_014723 | XLOC_014723 | GSTTP1            | chr22:24340594-24347258  | inf | 1 |
| XLOC_014733 | XLOC_014733 | LOC100128531      | chr22:25423940-25593415  | inf | 1 |
| XLOC_014787 | XLOC_014787 | SYN3              | chr22:32908539-33454377  | inf | 1 |
| XLOC_014868 | XLOC_014868 | A4GALT            | chr22:43088126-43116876  | inf | 1 |
| XLOC_014900 | XLOC_014900 | MLC1              | chr22:50497819-50524358  | inf | 1 |
| XLOC_015011 | XLOC_015011 | MLH1              | chr3:37034840-37092337   | inf | 1 |
| XLOC_015033 | XLOC_015033 | MOBP              | chr3:39509069-39567857   | inf | 1 |
| XLOC_015050 | XLOC_015050 | ZNF662            | chr3:42947401-42960825   | inf | 1 |
| XLOC_015052 | XLOC_015052 | FAM198A           | chr3:43020758-43099207   | inf | 1 |
| XLOC_015076 | XLOC_015076 | CCR5              | chr3:46411632-46417697   | inf | 1 |
| XLOC_015102 | XLOC_015102 | CCDC36            | chr3:49235860-49295537   | inf | 1 |
| XLOC_015114 | XLOC_015114 | SLC38A3           | chr3:50242691-50258406   | inf | 1 |

|             |             |                        |                          |     |          |
|-------------|-------------|------------------------|--------------------------|-----|----------|
| XLOC_015132 | XLOC_015132 | GPR62                  | chr3:51989329-52001482   | inf | 1        |
| XLOC_015147 | XLOC_015147 | ITIH1                  | chr3:52811601-52826084   | inf | 1        |
| XLOC_015222 | XLOC_015222 | TMEM30C                | chr3:99904667-99913030   | inf | 1        |
| XLOC_015240 | XLOC_015240 | CCDC54                 | chr3:107096187-107097481 | inf | 1        |
| XLOC_015262 | XLOC_015262 | SIDT1                  | chr3:113251217-113348422 | inf | 1        |
| XLOC_015281 | XLOC_015281 | NR1I2                  | chr3:119499330-119537332 | inf | 1        |
| XLOC_015285 | XLOC_015285 | ARGFX                  | chr3:121286777-121309469 | inf | 1        |
| XLOC_015286 | XLOC_015286 | FBXO40                 | chr3:121312169-121349139 | inf | 1        |
| XLOC_015308 | XLOC_015308 | CCDC37                 | chr3:126113781-126155398 | inf | 1        |
| XLOC_015332 | XLOC_015332 | TRH                    | chr3:129693113-129696779 | inf | 1        |
| XLOC_015333 | XLOC_015333 | ALG1L2                 | chr3:129800673-129830276 | inf | 1        |
| XLOC_015409 | XLOC_015409 | C3orf79                | chr3:153202283-153220486 | inf | 1        |
| XLOC_015426 | XLOC_015426 | C3orf80                | chr3:159943422-159946000 | inf | 1        |
| XLOC_015430 | XLOC_015430 | ARL14                  | chr3:160394947-160396235 | inf | 1        |
| XLOC_015487 | XLOC_015487 | EPHB3                  | chr3:184279586-184300196 | inf | 1        |
| XLOC_015496 | XLOC_015496 | FETUB                  | chr3:186358148-186370797 | inf | 1        |
| XLOC_015527 | XLOC_015527 | LOC100507391           | chr3:194429149-194502897 | inf | 1        |
| XLOC_015568 | XLOC_015568 | FANCD2OS               | chr3:10068112-10149915   | inf | 1        |
| XLOC_015600 | XLOC_015600 | DAZL                   | chr3:16628300-16647006   | inf | 1        |
| XLOC_015640 | XLOC_015640 | XIRP1                  | chr3:39224705-39234085   | inf | 1        |
| XLOC_015665 | XLOC_015665 | XCR1                   | chr3:46062290-46068979   | inf | 1        |
| XLOC_015670 | XLOC_015670 | PRSS50                 | chr3:46753605-46759373   | inf | 1        |
| XLOC_015685 | XLOC_015685 | SPINK8                 | chr3:48348335-48369831   | inf | 1        |
| XLOC_015744 | XLOC_015744 | IQCF1                  | chr3:51928891-51937386   | inf | 1        |
| XLOC_015777 | XLOC_015777 | ERC2                   | chr3:55542335-56502391   | inf | 1        |
| XLOC_015797 | XLOC_015797 | CADPS                  | chr3:62384020-62861064   | inf | 1        |
| XLOC_015885 | XLOC_015885 | IGSF11                 | chr3:118619478-118864898 | inf | 1        |
| XLOC_015933 | XLOC_015933 | DNAJB8                 | chr3:128181274-128191160 | inf | 1        |
| XLOC_015934 | XLOC_015934 | GATA2                  | chr3:128198264-128212030 | inf | 1        |
| XLOC_015943 | XLOC_015943 | SNORA7B                | chr3:129101676-129118282 | inf | 0.999791 |
| XLOC_015953 | XLOC_015953 | SNORA58                | chr3:131181044-131221860 | inf | 1        |
| XLOC_015992 | XLOC_015992 | PLSCR2                 | chr3:146151074-146213778 | inf | 1        |
| XLOC_016010 | XLOC_016010 | GPR87                  | chr3:150804675-151176497 | inf | 1        |
| XLOC_016047 | XLOC_016047 | SERPINI2               | chr3:167159576-167191920 | inf | 1        |
| XLOC_016083 | XLOC_016083 | KLHL6                  | chr3:183205318-183273499 | inf | 1        |
| XLOC_016095 | XLOC_016095 | LIPH                   | chr3:185225699-185270369 | inf | 1        |
| XLOC_016119 | XLOC_016119 | ATP13A5                | chr3:192992830-193096514 | inf | 1        |
| XLOC_016124 | XLOC_016124 | LOC100131551           | chr3:194018988-194030593 | inf | 1        |
| XLOC_016140 | XLOC_016140 | ZDHHC19                | chr3:195924322-195938300 | inf | 1        |
| XLOC_016209 | XLOC_016209 | SORCS2                 | chr4:7194373-7744564     | inf | 1        |
| XLOC_016275 | XLOC_016275 | C4orf19                | chr4:37455551-37687999   | inf | 1        |
| XLOC_016290 | XLOC_016290 | RHOH                   | chr4:40198526-40246281   | inf | 1        |
| XLOC_016337 | XLOC_016337 | STAP1                  | chr4:68424445-68472616   | inf | 1        |
| XLOC_016362 | XLOC_016362 | ENAM                   | chr4:71494460-71512536   | inf | 1        |
| XLOC_016368 | XLOC_016368 | NPFFR2                 | chr4:72897520-73013918   | inf | 1        |
| XLOC_016369 | XLOC_016369 | ALB                    | chr4:74269971-74287129   | inf | 1        |
| XLOC_016393 | XLOC_016393 | CXCL13                 | chr4:78432906-78532988   | inf | 1        |
| XLOC_016396 | XLOC_016396 | ANXA3                  | chr4:79472741-79531605   | inf | 1        |
| XLOC_016397 | XLOC_016397 | LOC100505702           | chr4:79567147-79605655   | inf | 1        |
| XLOC_016400 | XLOC_016400 | LOC100506035           | chr4:80413746-80497614   | inf | 1        |
| XLOC_016484 | XLOC_016484 | MYO22                  | chr4:120056938-120108944 | inf | 1        |
| XLOC_016490 | XLOC_016490 | ADAD1                  | chr4:123300120-123350947 | inf | 1        |
| XLOC_016527 | XLOC_016527 | POU4F2                 | chr4:147560044-147563623 | inf | 1        |
| XLOC_016545 | XLOC_016545 | LRAT                   | chr4:155665162-155674270 | inf | 1        |
| XLOC_016589 | XLOC_016589 | FAM92A1P2              | chr4:183958817-183961272 | inf | 1        |
| XLOC_016594 | XLOC_016594 | STOX2                  | chr4:184826508-184938875 | inf | 1        |
| XLOC_016607 | XLOC_016607 | TRIML1                 | chr4:189060597-189068649 | inf | 1        |
| XLOC_016670 | XLOC_016670 | ZNF518B                | chr4:10441503-10459032   | inf | 1        |
| XLOC_016707 | XLOC_016707 | TLR10                  | chr4:38773859-38784611   | inf | 1        |
| XLOC_016726 | XLOC_016726 | GABRG1                 | chr4:46037786-46126082   | inf | 1        |
| XLOC_016777 | XLOC_016777 | UGT2A1,UGT2A2          | chr4:70454134-70518967   | inf | 1        |
| XLOC_016833 | XLOC_016833 | SLC10A6                | chr4:87744620-87770416   | inf | 1        |
| XLOC_016887 | XLOC_016887 | COL25A1                | chr4:109731876-110223799 | inf | 1        |
| XLOC_016991 | XLOC_016991 | SPOCK3                 | chr4:167654535-168155741 | inf | 1        |
| XLOC_017017 | XLOC_017017 | CLDN24                 | chr4:184242916-184243579 | inf | 1        |
| XLOC_017027 | XLOC_017027 | LOC731424              | chr4:185764449-185768200 | inf | 1        |
| XLOC_017101 | XLOC_017101 | TTC23L                 | chr5:34839268-34899564   | inf | 1        |
| XLOC_017117 | XLOC_017117 | GHR                    | chr5:42423876-42721980   | inf | 1        |
| XLOC_017137 | XLOC_017137 | DDX4                   | chr5:55033844-55112974   | inf | 1        |
| XLOC_017147 | XLOC_017147 | C5orf64                | chr5:60933635-61002362   | inf | 1        |
| XLOC_017219 | XLOC_017219 | CKMT2                  | chr5:80256507-81047072   | inf | 1        |
| XLOC_017275 | XLOC_017275 | LOC728342              | chr5:116751207-116915439 | inf | 1        |
| XLOC_017280 | XLOC_017280 | FAM170A                | chr5:118965253-118971517 | inf | 1        |
| XLOC_017291 | XLOC_017291 | GRAMD3                 | chr5:125695787-125829853 | inf | 1        |
| XLOC_017293 | XLOC_017293 | C5orf48                | chr5:125967413-125971974 | inf | 1        |
| XLOC_017333 | XLOC_017333 | SLC25A48               | chr5:135170364-135224326 | inf | 1        |
| XLOC_017389 | XLOC_017389 | LOC100505658           | chr5:140894587-140998622 | inf | 1        |
| XLOC_017417 | XLOC_017417 | MIR143,MIR143HG,MIR145 | chr5:148786439-148812399 | inf | 1        |
| XLOC_017423 | XLOC_017423 | SLC6A7                 | chr5:149569519-149590635 | inf | 1        |



|             |             |              |                          |     |   |
|-------------|-------------|--------------|--------------------------|-----|---|
| XLOC_017442 | XLOC_017442 | SGCD         | chr5:155753766-156194798 | inf | 1 |
| XLOC_017464 | XLOC_017464 | TENM2        | chr5:166711842-167691162 | inf | 1 |
| XLOC_017556 | XLOC_017556 | SLC6A3       | chr5:1392904-1445543     | inf | 1 |
| XLOC_017570 | XLOC_017570 | LOC442132    | chr5:7299486-7306827     | inf | 1 |
| XLOC_017652 | XLOC_017652 | CDC20B       | chr5:54408798-54469005   | inf | 1 |
| XLOC_017667 | XLOC_017667 | PLK2         | chr5:57749809-57755966   | inf | 1 |
| XLOC_017707 | XLOC_017707 | OTP          | chr5:76924536-76934522   | inf | 1 |
| XLOC_017733 | XLOC_017733 | MEF2C        | chr5:88014057-88199922   | inf | 1 |
| XLOC_017748 | XLOC_017748 | PCSK1        | chr5:95726039-95768985   | inf | 1 |
| XLOC_017781 | XLOC_017781 | MGC32805     | chr5:121647819-121814782 | inf | 1 |
| XLOC_017806 | XLOC_017806 | FSTL4        | chr5:132532151-132948223 | inf | 1 |
| XLOC_017827 | XLOC_017827 | LOC389332    | chr5:135527155-135528851 | inf | 1 |
| XLOC_017849 | XLOC_017849 | ECSCR        | chr5:138784244-138842320 | inf | 1 |
| XLOC_017873 | XLOC_017873 | NR3C1        | chr5:142657495-142815077 | inf | 1 |
| XLOC_017927 | XLOC_017927 | EBF1         | chr5:158122922-158526788 | inf | 1 |
| XLOC_017986 | XLOC_017986 | GMCL1P1      | chr5:177611510-177614433 | inf | 1 |
| XLOC_018023 | XLOC_018023 | FOXC1        | chr6:1610680-1614129     | inf | 1 |
| XLOC_018033 | XLOC_018033 | C6orf201     | chr6:4068592-4135831     | inf | 1 |
| XLOC_018045 | XLOC_018045 | HULC         | chr6:8435855-8785678     | inf | 1 |
| XLOC_018166 | XLOC_018166 | TRIM40       | chr6:30104509-30116512   | inf | 1 |
| XLOC_018206 | XLOC_018206 | C6orf25      | chr6:31691120-31694485   | inf | 1 |
| XLOC_018296 | XLOC_018296 | GUCA1A       | chr6:42123143-42147794   | inf | 1 |
| XLOC_018338 | XLOC_018338 | GPR115       | chr6:47666288-47689757   | inf | 1 |
| XLOC_018358 | XLOC_018358 | FAM83B       | chr6:54711568-54809897   | inf | 1 |
| XLOC_018480 | XLOC_018480 | NKAIN2       | chr6:124125068-125146786 | inf | 1 |
| XLOC_018497 | XLOC_018497 | ARG1         | chr6:131894343-131949379 | inf | 1 |
| XLOC_018592 | XLOC_018592 | QKI          | chr6:163835674-163999628 | inf | 1 |
| XLOC_018602 | XLOC_018602 | SMOC2        | chr6:168841830-169068674 | inf | 1 |
| XLOC_018614 | XLOC_018614 | MYLK4        | chr6:2663862-2751154     | inf | 1 |
| XLOC_018635 | XLOC_018635 | CAGE1        | chr6:7326886-7389942     | inf | 1 |
| XLOC_018640 | XLOC_018640 | LINC00518    | chr6:10428017-10435055   | inf | 1 |
| XLOC_018668 | XLOC_018668 | FAM65B       | chr6:24804512-24911195   | inf | 1 |
| XLOC_018704 | XLOC_018704 | HIST1H3I     | chr6:27839622-27840099   | inf | 1 |
| XLOC_018757 | XLOC_018757 | SNORD117     | chr6:31496738-31514625   | inf | 1 |
| XLOC_018806 | XLOC_018806 | HLA-DPA1     | chr6:33032345-33057473   | inf | 1 |
| XLOC_018887 | XLOC_018887 | DLK2         | chr6:43395291-43423786   | inf | 1 |
| XLOC_018921 | XLOC_018921 | IL17F        | chr6:52101483-52109298   | inf | 1 |
| XLOC_018931 | XLOC_018931 | GCM1         | chr6:52991759-53013624   | inf | 1 |
| XLOC_018944 | XLOC_018944 | LGSN         | chr6:63985855-64029882   | inf | 1 |
| XLOC_018951 | XLOC_018951 | LINC00472    | chr6:72124148-72130448   | inf | 1 |
| XLOC_018961 | XLOC_018961 | COL12A1      | chr6:75794041-75915623   | inf | 1 |
| XLOC_018991 | XLOC_018991 | SRSF12       | chr6:89805677-89827800   | inf | 1 |
| XLOC_018998 | XLOC_018998 | BACH2        | chr6:90636246-91006627   | inf | 1 |
| XLOC_019079 | XLOC_019079 | OR2A4        | chr6:131958441-132068550 | inf | 1 |
| XLOC_019082 | XLOC_019082 | MOXD1        | chr6:132617193-132722664 | inf | 1 |
| XLOC_019150 | XLOC_019150 | IPCEF1       | chr6:154331630-154677900 | inf | 1 |
| XLOC_019171 | XLOC_019171 | LPA          | chr6:160952514-161087407 | inf | 1 |
| XLOC_020333 | XLOC_020333 | CYP2W1       | chr7:1022834-1029276     | inf | 1 |
| XLOC_020339 | XLOC_020339 | TFAMP1       | chr7:1654105-1656328     | inf | 1 |
| XLOC_020417 | XLOC_020417 | LOC100506497 | chr7:29019582-29186153   | inf | 1 |
| XLOC_020482 | XLOC_020482 | ABCA13       | chr7:48211056-48687091   | inf | 1 |
| XLOC_020534 | XLOC_020534 | PMS2L2       | chr7:72476588-72519691   | inf | 1 |
| XLOC_020582 | XLOC_020582 | MAGI2-AS3    | chr7:77646373-79100524   | inf | 1 |
| XLOC_020586 | XLOC_020586 | GRM3         | chr7:86273229-86494192   | inf | 1 |
| XLOC_020589 | XLOC_020589 | RUNDC3B      | chr7:87133178-87461613   | inf | 1 |
| XLOC_020722 | XLOC_020722 | LMOD2        | chr7:123295860-123304147 | inf | 1 |
| XLOC_020727 | XLOC_020727 | FSCN3        | chr7:127233688-127241851 | inf | 1 |
| XLOC_020745 | XLOC_020745 | LOC407835    | chr7:128766324-128768050 | inf | 1 |
| XLOC_020754 | XLOC_020754 | CPA2         | chr7:129906702-129929637 | inf | 1 |
| XLOC_020786 | XLOC_020786 | RAB19        | chr7:140103842-140126050 | inf | 1 |
| XLOC_020828 | XLOC_020828 | OR2A1        | chr7:144015217-144016150 | inf | 1 |
| XLOC_020831 | XLOC_020831 | CNTNAP2      | chr7:145813452-148118088 | inf | 1 |
| XLOC_020996 | XLOC_020996 | CRHR2        | chr7:30691558-30739719   | inf | 1 |
| XLOC_021009 | XLOC_021009 | DPY19L2P1    | chr7:35120898-35225774   | inf | 1 |
| XLOC_021024 | XLOC_021024 | INHBA        | chr7:41728600-41818976   | inf | 1 |
| XLOC_021074 | XLOC_021074 | NUPR1L       | chr7:56182373-56184090   | inf | 1 |
| XLOC_021116 | XLOC_021116 | NCF1C        | chr7:74572383-74587816   | inf | 1 |
| XLOC_021118 | XLOC_021118 | GATSL2       | chr7:74807604-74867341   | inf | 1 |
| XLOC_021119 | XLOC_021119 | PMS2L2       | chr7:74964559-74988306   | inf | 1 |
| XLOC_021123 | XLOC_021123 | CCL26        | chr7:75398841-75419064   | inf | 1 |
| XLOC_021164 | XLOC_021164 | CALCR        | chr7:93053798-93204042   | inf | 1 |
| XLOC_021195 | XLOC_021195 | CYP3A4       | chr7:99354582-99381811   | inf | 1 |
| XLOC_021244 | XLOC_021244 | RELN         | chr7:103112230-103629963 | inf | 1 |
| XLOC_021374 | XLOC_021374 | OR2A1        | chr7:143929003-143929936 | inf | 1 |
| XLOC_021456 | XLOC_021456 | LOC157273    | chr8:9182560-9192590     | inf | 1 |
| XLOC_021498 | XLOC_021498 | SFTPC        | chr8:22019183-22021991   | inf | 1 |
| XLOC_021501 | XLOC_021501 | PIWIL2       | chr8:22132809-22213584   | inf | 1 |
| XLOC_021591 | XLOC_021591 | SOX17        | chr8:55370494-55373456   | inf | 1 |
| XLOC_021610 | XLOC_021610 | LOC286184    | chr8:64681987-64698054   | inf | 1 |

|             |             |                          |                          |        |   |
|-------------|-------------|--------------------------|--------------------------|--------|---|
| XLOC_021660 | XLOC_021660 | ATP6V0D2                 | chr8:87111138-87166454   | inf    | 1 |
| XLOC_021685 | XLOC_021685 | SDC2                     | chr8:97505881-97624037   | inf    | 1 |
| XLOC_021989 | XLOC_021989 | FAM150A                  | chr8:53446596-53478021   | inf    | 1 |
| XLOC_022016 | XLOC_022016 | LOC286186                | chr8:66439242-66474901   | inf    | 1 |
| XLOC_022061 | XLOC_022061 | FABP12                   | chr8:82437280-82443550   | inf    | 1 |
| XLOC_022094 | XLOC_022094 | CDH17                    | chr8:95139393-95229531   | inf    | 1 |
| XLOC_022125 | XLOC_022125 | NCALD                    | chr8:102698769-103137135 | inf    | 1 |
| XLOC_022143 | XLOC_022143 | CSMD3                    | chr8:113235158-114449242 | inf    | 1 |
| XLOC_022223 | XLOC_022223 | CCDC166                  | chr8:144788863-144790279 | inf    | 1 |
| XLOC_022241 | XLOC_022241 | MIR1234                  | chr8:145597730-145634733 | inf    | 1 |
| XLOC_022266 | XLOC_022266 | GLIS3-AS1                | chr9:3824127-4300035     | inf    | 1 |
| XLOC_022307 | XLOC_022307 | TEK                      | chr9:27109146-27230172   | inf    | 1 |
| XLOC_022316 | XLOC_022316 | ANKRD18B                 | chr9:33524410-33573001   | inf    | 1 |
| XLOC_022387 | XLOC_022387 | FAM189A2                 | chr9:71939487-72007370   | inf    | 1 |
| XLOC_022389 | XLOC_022389 | MAMDC2                   | chr9:72658496-72873790   | inf    | 1 |
| XLOC_022540 | XLOC_022540 | OR1Q1                    | chr9:125377016-125377961 | inf    | 1 |
| XLOC_022548 | XLOC_022548 | GPR21                    | chr9:125703287-125867147 | inf    | 1 |
| XLOC_022574 | XLOC_022574 | TTC16                    | chr9:130478357-130497628 | inf    | 1 |
| XLOC_022642 | XLOC_022642 | ADAMTSL2                 | chr9:136397285-136440641 | inf    | 1 |
| XLOC_022667 | XLOC_022667 | LOC100128593             | chr9:139638468-139644363 | inf    | 1 |
| XLOC_022709 | XLOC_022709 | FLJ35024                 | chr9:2535654-2654485     | inf    | 1 |
| XLOC_022733 | XLOC_022733 | C9orf92                  | chr9:16203932-16276311   | inf    | 1 |
| XLOC_022845 | XLOC_022845 | LOC653501,ZNF658B        | chr9:39443813-39464526   | inf    | 1 |
| XLOC_022870 | XLOC_022870 | TMEM252                  | chr9:71151497-71155783   | inf    | 1 |
| XLOC_022879 | XLOC_022879 | TRPM3                    | chr9:73149965-73736514   | inf    | 1 |
| XLOC_022894 | XLOC_022894 | GNA14                    | chr9:80037994-80263232   | inf    | 1 |
| XLOC_022897 | XLOC_022897 | RASEF                    | chr9:85594499-85678043   | inf    | 1 |
| XLOC_022935 | XLOC_022935 | OMD                      | chr9:95059639-95432547   | inf    | 1 |
| XLOC_022945 | XLOC_022945 | BARX1                    | chr9:96713908-96717608   | inf    | 1 |
| XLOC_022947 | XLOC_022947 | FAM22F                   | chr9:97080477-97090926   | inf    | 1 |
| XLOC_023081 | XLOC_023081 | MIR3911                  | chr9:130374485-130454995 | inf    | 1 |
| XLOC_023254 | XLOC_023254 | LOC100288814             | chrX:9935397-9936042     | inf    | 1 |
| XLOC_023262 | XLOC_023262 | TLR7                     | chrX:12885201-12908480   | inf    | 1 |
| XLOC_023277 | XLOC_023277 | GRPR                     | chrX:16141423-16171641   | inf    | 1 |
| XLOC_023311 | XLOC_023311 | MAGEB10                  | chrX:27826106-27841131   | inf    | 1 |
| XLOC_023336 | XLOC_023336 | NYX                      | chrX:41306712-41334905   | inf    | 1 |
| XLOC_023418 | XLOC_023418 | GPR173                   | chrX:53078505-53109796   | inf    | 1 |
| XLOC_023424 | XLOC_023424 | SNORA11                  | chrX:54834170-54842445   | inf    | 1 |
| XLOC_023450 | XLOC_023450 | OTUD6A                   | chrX:69282340-69284029   | inf    | 1 |
| XLOC_023507 | XLOC_023507 | PCDH11X                  | chrX:91034259-91878228   | inf    | 1 |
| XLOC_023508 | XLOC_023508 | FAM133A                  | chrX:92929011-92967273   | inf    | 1 |
| XLOC_023515 | XLOC_023515 | TMEM35                   | chrX:100333835-100351355 | inf    | 1 |
| XLOC_023522 | XLOC_023522 | TCEAL2                   | chrX:101380659-101382684 | inf    | 1 |
| XLOC_023552 | XLOC_023552 | PIH1D3                   | chrX:106449861-106487473 | inf    | 1 |
| XLOC_023567 | XLOC_023567 | ZCCHC16                  | chrX:111326252-111700473 | inf    | 1 |
| XLOC_023602 | XLOC_023602 | SH2D1A                   | chrX:123480131-123507010 | inf    | 1 |
| XLOC_023659 | XLOC_023659 | FMR1NB                   | chrX:147062848-147108187 | inf    | 1 |
| XLOC_023665 | XLOC_023665 | MAGEA8                   | chrX:149009940-149014609 | inf    | 1 |
| XLOC_023679 | XLOC_023679 | MAGEA4                   | chrX:151081360-151093642 | inf    | 1 |
| XLOC_023702 | XLOC_023702 | OPN1LW                   | chrX:153409724-153424507 | inf    | 1 |
| XLOC_023747 | XLOC_023747 | VCX3A                    | chrX:6451658-6453159     | inf    | 1 |
| XLOC_023775 | XLOC_023775 | BEND2                    | chrX:18181050-18239024   | inf    | 1 |
| XLOC_023783 | XLOC_023783 | LOC729609                | chrX:20004934-20007897   | inf    | 1 |
| XLOC_023825 | XLOC_023825 | MIR221                   | chrX:45605584-45605694   | inf    | 1 |
| XLOC_023927 | XLOC_023927 | RGAG4                    | chrX:71130937-71363424   | inf    | 1 |
| XLOC_023938 | XLOC_023938 | NAP1L2                   | chrX:72432136-72434710   | inf    | 1 |
| XLOC_023963 | XLOC_023963 | RPS6KA6                  | chrX:83313353-83442943   | inf    | 1 |
| XLOC_023992 | XLOC_023992 | TCEAL5                   | chrX:102528617-102531797 | inf    | 1 |
| XLOC_024012 | XLOC_024012 | COL4A6                   | chrX:107398836-107682704 | inf    | 1 |
| XLOC_024023 | XLOC_024023 | TRPC5                    | chrX:111017541-111326004 | inf    | 1 |
| XLOC_024038 | XLOC_024038 | SNORA69                  | chrX:118920468-118925606 | inf    | 1 |
| XLOC_024074 | XLOC_024074 | IGSF1                    | chrX:130407482-130423403 | inf    | 1 |
| XLOC_024127 | XLOC_024127 | SPANXE                   | chrX:140785567-140786655 | inf    | 1 |
| XLOC_024160 | XLOC_024160 | MAGEA10,MAGEA10-MAGEA5,M | chrX:151282520-151307050 | inf    | 1 |
| XLOC_024201 | XLOC_024201 | MPP1                     | chrX:154006958-154033802 | inf    | 1 |
| XLOC_024206 | XLOC_024206 | RAB39B                   | chrX:154487525-154493852 | inf    | 1 |
| XLOC_024305 | XLOC_024305 | UTY                      | chrY:15360258-15592550   | inf    | 1 |
| XLOC_000073 | XLOC_000073 | RBP7                     | chr1:10057254-10076078   | #NAME? | 1 |
| XLOC_000138 | XLOC_000138 | PADI4                    | chr1:17634689-17690495   | #NAME? | 1 |
| XLOC_000153 | XLOC_000153 | VWA5B1                   | chr1:20617411-20681387   | #NAME? | 1 |
| XLOC_000204 | XLOC_000204 | CD52                     | chr1:26608772-26647014   | #NAME? | 1 |
| XLOC_000225 | XLOC_000225 | THEMIS2                  | chr1:28199054-28213193   | #NAME? | 1 |
| XLOC_000272 | XLOC_000272 | GJB5                     | chr1:35220647-35224113   | #NAME? | 1 |
| XLOC_000353 | XLOC_000353 | SNORD46                  | chr1:45241245-45244412   | #NAME? | 1 |
| XLOC_000413 | XLOC_000413 | BSND                     | chr1:55464616-55474465   | #NAME? | 1 |
| XLOC_000414 | XLOC_000414 | PCSK9                    | chr1:55505148-55530526   | #NAME? | 1 |
| XLOC_000477 | XLOC_000477 | IFI44                    | chr1:79115476-79129763   | #NAME? | 1 |
| XLOC_000488 | XLOC_000488 | CLCA1                    | chr1:86934525-86965974   | #NAME? | 1 |
| XLOC_000556 | XLOC_000556 | SRG7                     | chr1:109358519-109401146 | #NAME? | 1 |

|             |             |              |                          |        |          |
|-------------|-------------|--------------|--------------------------|--------|----------|
| XLOC_000578 | XLOC_000578 | SLC6A17      | chr1:110693131-110744823 | #NAME? | 1        |
| XLOC_000586 | XLOC_000586 | CHIAP2       | chr1:111823145-111828730 | #NAME? | 1        |
| XLOC_000623 | XLOC_000623 | HSD3B2       | chr1:119957553-119965662 | #NAME? | 1        |
| XLOC_000714 | XLOC_000714 | LCE1D        | chr1:152769226-152770657 | #NAME? | 1        |
| XLOC_000747 | XLOC_000747 | LENEP        | chr1:154966061-154966791 | #NAME? | 1        |
| XLOC_000749 | XLOC_000749 | DCST1        | chr1:155006281-155042029 | #NAME? | 1        |
| XLOC_000806 | XLOC_000806 | SLAMF8       | chr1:159796478-159832447 | #NAME? | 1        |
| XLOC_000831 | XLOC_000831 | FCGR2C       | chr1:161551128-161571010 | #NAME? | 1        |
| XLOC_000834 | XLOC_000834 | FCRLA        | chr1:161676761-161684142 | #NAME? | 1        |
| XLOC_000910 | XLOC_000910 | FAM163A      | chr1:179712297-179785333 | #NAME? | 1        |
| XLOC_000950 | XLOC_000950 | CFHR1        | chr1:196788860-196801319 | #NAME? | 1        |
| XLOC_000958 | XLOC_000958 | PTPRC        | chr1:198608097-198726605 | #NAME? | 1        |
| XLOC_000961 | XLOC_000961 | GPR25        | chr1:200842082-200843306 | #NAME? | 1        |
| XLOC_000964 | XLOC_000964 | PKP1         | chr1:201252579-201302121 | #NAME? | 1        |
| XLOC_000979 | XLOC_000979 | LOC641515    | chr1:202794328-202795421 | #NAME? | 1        |
| XLOC_000990 | XLOC_000990 | LAX1         | chr1:203734283-203745480 | #NAME? | 1        |
| XLOC_000997 | XLOC_000997 | CNTN2        | chr1:205012339-205047171 | #NAME? | 1        |
| XLOC_001011 | XLOC_001011 | IL19         | chr1:206972214-207016326 | #NAME? | 1        |
| XLOC_001046 | XLOC_001046 | LINC00538    | chr1:214098091-214099996 | #NAME? | 1        |
| XLOC_001066 | XLOC_001066 | FAM177B      | chr1:222910557-222924002 | #NAME? | 1        |
| XLOC_001078 | XLOC_001078 | MIXL1        | chr1:226411382-226413513 | #NAME? | 1        |
| XLOC_001079 | XLOC_001079 | C1orf95      | chr1:226736500-226796915 | #NAME? | 1        |
| XLOC_001112 | XLOC_001112 | SLC35F3      | chr1:234040678-234460262 | #NAME? | 1        |
| XLOC_001116 | XLOC_001116 | LOC100506810 | chr1:234859788-234867390 | #NAME? | 1        |
| XLOC_001133 | XLOC_001133 | SDCCAG8      | chr1:243419306-244006886 | #NAME? | 1        |
| XLOC_001229 | XLOC_001229 | TP73-AS1     | chr1:3569128-3663937     | #NAME? | 1        |
| XLOC_001270 | XLOC_001270 | NPPB         | chr1:11917520-11918992   | #NAME? | 1        |
| XLOC_001358 | XLOC_001358 | MYOM3        | chr1:24382530-24438665   | #NAME? | 1        |
| XLOC_001380 | XLOC_001380 | C1orf172     | chr1:27276046-27286901   | #NAME? | 1        |
| XLOC_001475 | XLOC_001475 | HEYL         | chr1:40089102-40105348   | #NAME? | 1        |
| XLOC_001489 | XLOC_001489 | EDN2         | chr1:41944445-41950344   | #NAME? | 1        |
| XLOC_001499 | XLOC_001499 | C1orf210     | chr1:43747556-43751288   | #NAME? | 1        |
| XLOC_001532 | XLOC_001532 | TAL1         | chr1:47681962-47695443   | #NAME? | 1        |
| XLOC_001552 | XLOC_001552 | SLC1A7       | chr1:53552854-53608289   | #NAME? | 1        |
| XLOC_001563 | XLOC_001563 | CDCP2        | chr1:54604667-54618679   | #NAME? | 1        |
| XLOC_001586 | XLOC_001586 | LINC00466    | chr1:63624753-63782901   | #NAME? | 1        |
| XLOC_001591 | XLOC_001591 | INSL5        | chr1:67263423-67266942   | #NAME? | 1        |
| XLOC_001604 | XLOC_001604 | PTGER3       | chr1:71318035-71546972   | #NAME? | 1        |
| XLOC_001641 | XLOC_001641 | GBP1         | chr1:89517986-89531043   | #NAME? | 1        |
| XLOC_001690 | XLOC_001690 | C1orf194     | chr1:109648572-109656479 | #NAME? | 1        |
| XLOC_001692 | XLOC_001692 | MYBPHL       | chr1:109834986-109849663 | #NAME? | 1        |
| XLOC_001706 | XLOC_001706 | LRIF1        | chr1:111489811-111506566 | #NAME? | 1        |
| XLOC_001712 | XLOC_001712 | ADORA3       | chr1:112025969-112106597 | #NAME? | 1        |
| XLOC_001742 | XLOC_001742 | VTCN1        | chr1:117686208-117753582 | #NAME? | 1        |
| XLOC_001778 | XLOC_001778 | GJA5         | chr1:147228331-147245484 | #NAME? | 1        |
| XLOC_001853 | XLOC_001853 | S100A5       | chr1:153509622-153514241 | #NAME? | 1        |
| XLOC_001875 | XLOC_001875 | KCNN3        | chr1:154669941-154842754 | #NAME? | 1        |
| XLOC_001909 | XLOC_001909 | C1orf61      | chr1:156374054-156399184 | #NAME? | 1        |
| XLOC_002047 | XLOC_002047 | SCARNA3      | chr1:175913966-176176370 | #NAME? | 0.999791 |
| XLOC_002050 | XLOC_002050 | SEC16B       | chr1:177898241-177939050 | #NAME? | 1        |
| XLOC_002055 | XLOC_002055 | NPHS2        | chr1:179334854-179545084 | #NAME? | 1        |
| XLOC_002063 | XLOC_002063 | TEDDM1       | chr1:182367251-182369751 | #NAME? | 1        |
| XLOC_002086 | XLOC_002086 | B3GALT2      | chr1:193091087-193223942 | #NAME? | 1        |
| XLOC_002132 | XLOC_002132 | GOLT1A       | chr1:204167287-204183220 | #NAME? | 1        |
| XLOC_002145 | XLOC_002145 | LOC284578    | chr1:205523400-205525763 | #NAME? | 1        |
| XLOC_002161 | XLOC_002161 | MIR29C       | chr1:207975196-207975284 | #NAME? | 1        |
| XLOC_002163 | XLOC_002163 | CD34         | chr1:208059882-208084683 | #NAME? | 1        |
| XLOC_002251 | XLOC_002251 | LOC100506795 | chr1:234663636-234667525 | #NAME? | 1        |
| XLOC_002364 | XLOC_002364 | MRC1         | chr1:17851361-17953178   | #NAME? | 1        |
| XLOC_002413 | XLOC_002413 | LINC00839    | chr1:42970938-42990785   | #NAME? | 1        |
| XLOC_002416 | XLOC_002416 | RET          | chr1:43572516-43625797   | #NAME? | 1        |
| XLOC_002418 | XLOC_002418 | FXRD4        | chr1:43867091-43871783   | #NAME? | 1        |
| XLOC_002442 | XLOC_002442 | CTSL1P2      | chr1:48155942-48158691   | #NAME? | 1        |
| XLOC_002450 | XLOC_002450 | WDFY4        | chr1:49893517-50191001   | #NAME? | 1        |
| XLOC_002456 | XLOC_002456 | MSMB         | chr1:51549552-51562518   | #NAME? | 1        |
| XLOC_002469 | XLOC_002469 | FAM133CP     | chr1:60272903-60588845   | #NAME? | 1        |
| XLOC_002548 | XLOC_002548 | SH2D4B       | chr1:82297657-82406316   | #NAME? | 1        |
| XLOC_002594 | XLOC_002594 | MARK2P9      | chr1:94178417-94179363   | #NAME? | 1        |
| XLOC_002609 | XLOC_002609 | CYP2C19      | chr1:96522462-96612671   | #NAME? | 1        |
| XLOC_002694 | XLOC_002694 | ADRA2A       | chr1:112836789-112840662 | #NAME? | 1        |
| XLOC_002700 | XLOC_002700 | HABP2        | chr1:115310589-115423829 | #NAME? | 1        |
| XLOC_002714 | XLOC_002714 | PNLIPRP2     | chr1:118380464-118404654 | #NAME? | 1        |
| XLOC_002776 | XLOC_002776 | PRAP1        | chr1:135160843-135166187 | #NAME? | 1        |
| XLOC_002793 | XLOC_002793 | LINC00704    | chr1:4692376-4720262     | #NAME? | 1        |
| XLOC_002806 | XLOC_002806 | SFMBT2       | chr1:7200585-7453448     | #NAME? | 1        |
| XLOC_002817 | XLOC_002817 | CCDC3        | chr1:12938624-13043704   | #NAME? | 1        |
| XLOC_002841 | XLOC_002841 | NEBL         | chr1:21068902-21463852   | #NAME? | 1        |
| XLOC_002863 | XLOC_002863 | ARMC4        | chr1:28101096-28287977   | #NAME? | 1        |
| XLOC_002892 | XLOC_002892 | RASGEF1A     | chr1:43689983-43762367   | #NAME? | 1        |

|             |             |              |                           |        |   |
|-------------|-------------|--------------|---------------------------|--------|---|
| XLOC_002896 | XLOC_002896 | HNRNPA3P1    | chr10:44282859-44285865   | #NAME? | 1 |
| XLOC_002910 | XLOC_002910 | HNRNPA1P33   | chr10:47096453-47151400   | #NAME? | 1 |
| XLOC_002916 | XLOC_002916 | GDF2         | chr10:48413091-48416853   | #NAME? | 1 |
| XLOC_002927 | XLOC_002927 | VSTM4        | chr10:50222332-50323559   | #NAME? | 1 |
| XLOC_002989 | XLOC_002989 | PLA2G12B     | chr10:74694937-74714510   | #NAME? | 1 |
| XLOC_003009 | XLOC_003009 | DUSP13       | chr10:76854189-76868970   | #NAME? | 1 |
| XLOC_003017 | XLOC_003017 | SFTPA2       | chr10:81315607-81320163   | #NAME? | 1 |
| XLOC_003022 | XLOC_003022 | DYDC1        | chr10:82095860-82127829   | #NAME? | 1 |
| XLOC_003037 | XLOC_003037 | FAS-AS1      | chr10:90694830-90775542   | #NAME? | 1 |
| XLOC_003066 | XLOC_003066 | BLNK         | chr10:97951454-98031333   | #NAME? | 1 |
| XLOC_003089 | XLOC_003089 | CPN1         | chr10:101802064-101841642 | #NAME? | 1 |
| XLOC_003145 | XLOC_003145 | AFAP1L2      | chr10:116054582-116164515 | #NAME? | 1 |
| XLOC_003147 | XLOC_003147 | GFRA1        | chr10:117816441-118033126 | #NAME? | 1 |
| XLOC_003246 | XLOC_003246 | KRTAP5-6     | chr11:1490684-1785501     | #NAME? | 1 |
| XLOC_003258 | XLOC_003258 | KCNQ1DN      | chr11:2891262-2893336     | #NAME? | 1 |
| XLOC_003262 | XLOC_003262 | TRPC2        | chr11:3647689-3658789     | #NAME? | 1 |
| XLOC_003272 | XLOC_003272 | OR52I1       | chr11:4615268-4616243     | #NAME? | 1 |
| XLOC_003286 | XLOC_003286 | OR52B6       | chr11:5602106-5603114     | #NAME? | 1 |
| XLOC_003294 | XLOC_003294 | OR56B4       | chr11:6129008-6129968     | #NAME? | 1 |
| XLOC_003307 | XLOC_003307 | OR2D3        | chr11:6942232-6943225     | #NAME? | 1 |
| XLOC_003311 | XLOC_003311 | SYT9         | chr11:7273180-7490276     | #NAME? | 1 |
| XLOC_003437 | XLOC_003437 | F2           | chr11:46740742-46761056   | #NAME? | 1 |
| XLOC_003514 | XLOC_003514 | OR10V2P      | chr11:59516284-59517054   | #NAME? | 1 |
| XLOC_003530 | XLOC_003530 | MS4A10       | chr11:60552820-60568778   | #NAME? | 1 |
| XLOC_003532 | XLOC_003532 | ZP1          | chr11:60635014-60643164   | #NAME? | 1 |
| XLOC_003535 | XLOC_003535 | CD6          | chr11:60739112-60787848   | #NAME? | 1 |
| XLOC_003589 | XLOC_003589 | KCNK4        | chr11:64058792-64067503   | #NAME? | 1 |
| XLOC_003627 | XLOC_003627 | SNX32        | chr11:65601409-65621172   | #NAME? | 1 |
| XLOC_003629 | XLOC_003629 | CTSW         | chr11:65647283-65656010   | #NAME? | 1 |
| XLOC_003641 | XLOC_003641 | TMEM151A     | chr11:66059372-66064135   | #NAME? | 1 |
| XLOC_003651 | XLOC_003651 | C11orf86     | chr11:66742753-66744479   | #NAME? | 1 |
| XLOC_003686 | XLOC_003686 | KRTAP5-7     | chr11:71238312-71239210   | #NAME? | 1 |
| XLOC_003692 | XLOC_003692 | LOC100129216 | chr11:71576554-71639493   | #NAME? | 1 |
| XLOC_003703 | XLOC_003703 | P2RY6        | chr11:72975569-73009664   | #NAME? | 1 |
| XLOC_003786 | XLOC_003786 | C11orf70     | chr11:101918168-101955291 | #NAME? | 1 |
| XLOC_003796 | XLOC_003796 | ELMOD1       | chr11:107461816-107537505 | #NAME? | 1 |
| XLOC_003830 | XLOC_003830 | NNMT         | chr11:114166534-114183238 | #NAME? | 1 |
| XLOC_003844 | XLOC_003844 | CD3G         | chr11:118215058-118224497 | #NAME? | 1 |
| XLOC_003848 | XLOC_003848 | TTC36        | chr11:118398209-118401740 | #NAME? | 1 |
| XLOC_003854 | XLOC_003854 | UPK2         | chr11:118827007-118829269 | #NAME? | 1 |
| XLOC_003907 | XLOC_003907 | DDX25        | chr11:125774260-125793006 | #NAME? | 1 |
| XLOC_003924 | XLOC_003924 | NTM          | chr11:131240370-132206716 | #NAME? | 1 |
| XLOC_003925 | XLOC_003925 | LOC100128239 | chr11:133902166-133911236 | #NAME? | 1 |
| XLOC_003935 | XLOC_003935 | IFITM5       | chr11:298200-299526       | #NAME? | 1 |
| XLOC_003960 | XLOC_003960 | KRTAP5-2     | chr11:1490684-1785501     | #NAME? | 1 |
| XLOC_004008 | XLOC_004008 | HBD          | chr11:5254058-5255858     | #NAME? | 1 |
| XLOC_004018 | XLOC_004018 | UBQLNL       | chr11:5535622-5537956     | #NAME? | 1 |
| XLOC_004042 | XLOC_004042 | OR2A2        | chr11:6789237-6790188     | #NAME? | 1 |
| XLOC_004043 | XLOC_004043 | OR6A2        | chr11:6815755-6817139     | #NAME? | 1 |
| XLOC_004050 | XLOC_004050 | LOC283299    | chr11:7872297-7927502     | #NAME? | 1 |
| XLOC_004095 | XLOC_004095 | USH1C        | chr11:17515441-17565963   | #NAME? | 1 |
| XLOC_004106 | XLOC_004106 | PTPN5        | chr11:18749474-18813389   | #NAME? | 1 |
| XLOC_004153 | XLOC_004153 | SYT13        | chr11:45261852-45307884   | #NAME? | 1 |
| XLOC_004280 | XLOC_004280 | SNORD29      | chr11:62619459-62623360   | #NAME? | 1 |
| XLOC_004318 | XLOC_004318 | LOC100130348 | chr11:64851693-64856542   | #NAME? | 1 |
| XLOC_004485 | XLOC_004485 | ANGPTL5      | chr11:101761404-101871793 | #NAME? | 1 |
| XLOC_004501 | XLOC_004501 | CASP5        | chr11:104864966-104893895 | #NAME? | 1 |
| XLOC_004556 | XLOC_004556 | SCN2B        | chr11:118033518-118047337 | #NAME? | 1 |
| XLOC_004557 | XLOC_004557 | AMICA1       | chr11:118064441-118095809 | #NAME? | 1 |
| XLOC_004563 | XLOC_004563 | TREH         | chr11:118528941-118550381 | #NAME? | 1 |
| XLOC_004576 | XLOC_004576 | THY1         | chr11:119252487-119369944 | #NAME? | 1 |
| XLOC_004587 | XLOC_004587 | CLMP         | chr11:122943032-123066007 | #NAME? | 1 |
| XLOC_004613 | XLOC_004613 | PATE2        | chr11:125646027-125648714 | #NAME? | 1 |
| XLOC_004619 | XLOC_004619 | KIRREL3      | chr11:126293395-126870766 | #NAME? | 1 |
| XLOC_004630 | XLOC_004630 | ADAMTS8      | chr11:130274817-130298539 | #NAME? | 1 |
| XLOC_004710 | XLOC_004710 | CLEC4D       | chr12:8666135-8674960     | #NAME? | 1 |
| XLOC_004712 | XLOC_004712 | A2ML1        | chr12:8975149-9029381     | #NAME? | 1 |
| XLOC_004770 | XLOC_004770 | C12orf39     | chr12:21679255-21684210   | #NAME? | 1 |
| XLOC_004812 | XLOC_004812 | PCED1B       | chr12:47602202-47630443   | #NAME? | 1 |
| XLOC_004820 | XLOC_004820 | OR8S1        | chr12:48919414-48921886   | #NAME? | 1 |
| XLOC_004821 | XLOC_004821 | LOC255411    | chr12:49121217-49159569   | #NAME? | 1 |
| XLOC_004853 | XLOC_004853 | ACVRL1       | chr12:52301201-52317145   | #NAME? | 1 |
| XLOC_004887 | XLOC_004887 | LOC100240734 | chr12:54452037-54516018   | #NAME? | 1 |
| XLOC_004972 | XLOC_004972 | IRAK3        | chr12:66582977-66648394   | #NAME? | 1 |
| XLOC_005182 | XLOC_005182 | LOC100507206 | chr12:127215246-127256808 | #NAME? | 1 |
| XLOC_005220 | XLOC_005220 | CACNA2D4     | chr12:1901122-2027870     | #NAME? | 1 |
| XLOC_005282 | XLOC_005282 | CLECL1       | chr12:9868455-9885895     | #NAME? | 1 |
| XLOC_005288 | XLOC_005288 | CLECTA       | chr12:10269375-10282868   | #NAME? | 1 |
| XLOC_005292 | XLOC_005292 | KLRC2        | chr12:10583205-10588592   | #NAME? | 1 |

|             |             |                   |                           |        |   |
|-------------|-------------|-------------------|---------------------------|--------|---|
| XLOC_005311 | XLOC_005311 | TAS2R30           | chr12:10998447-11328619   | #NAME? | 1 |
| XLOC_005353 | XLOC_005353 | BCAT1             | chr12:24962957-25102393   | #NAME? | 1 |
| XLOC_005414 | XLOC_005414 | LALBA             | chr12:48961466-48963829   | #NAME? | 1 |
| XLOC_005417 | XLOC_005417 | SNORA2A           | chr12:49046994-49076035   | #NAME? | 1 |
| XLOC_005418 | XLOC_005418 | SNORA2B           | chr12:49046994-49076035   | #NAME? | 1 |
| XLOC_005426 | XLOC_005426 | WNT10B            | chr12:49359122-49365641   | #NAME? | 1 |
| XLOC_005441 | XLOC_005441 | FAIM2             | chr12:50260678-50297760   | #NAME? | 1 |
| XLOC_005458 | XLOC_005458 | LOC283403         | chr12:52599364-52604639   | #NAME? | 1 |
| XLOC_005460 | XLOC_005460 | KRT83             | chr12:52708084-52715182   | #NAME? | 1 |
| XLOC_005461 | XLOC_005461 | KRT85             | chr12:52753789-52761309   | #NAME? | 1 |
| XLOC_005478 | XLOC_005478 | KRT4              | chr12:53200326-53207900   | #NAME? | 1 |
| XLOC_005500 | XLOC_005500 | GPR84             | chr12:54756228-54758270   | #NAME? | 1 |
| XLOC_005524 | XLOC_005524 | APOF              | chr12:56754354-56756583   | #NAME? | 1 |
| XLOC_005683 | XLOC_005683 | SVOP              | chr12:109304657-109458845 | #NAME? | 1 |
| XLOC_005714 | XLOC_005714 | SDS               | chr12:113830250-113841692 | #NAME? | 1 |
| XLOC_005746 | XLOC_005746 | HNF1A-AS1         | chr12:121407640-121410095 | #NAME? | 1 |
| XLOC_005790 | XLOC_005790 | GALNT9            | chr12:132680916-132905905 | #NAME? | 1 |
| XLOC_005809 | XLOC_005809 | SGCG              | chr13:23755059-23899304   | #NAME? | 1 |
| XLOC_005823 | XLOC_005823 | WASF3             | chr13:27131839-27263082   | #NAME? | 1 |
| XLOC_005843 | XLOC_005843 | RXFP2             | chr13:32313678-32377009   | #NAME? | 1 |
| XLOC_005860 | XLOC_005860 | FREM2             | chr13:39261172-39461267   | #NAME? | 1 |
| XLOC_005926 | XLOC_005926 | OR7E156P          | chr13:64311567-64316701   | #NAME? | 1 |
| XLOC_005946 | XLOC_005946 | POU4F1-AS1        | chr13:78628989-79233314   | #NAME? | 1 |
| XLOC_005955 | XLOC_005955 | GPC5              | chr13:92050934-93519487   | #NAME? | 1 |
| XLOC_005987 | XLOC_005987 | MYO16             | chr13:109248499-109860355 | #NAME? | 1 |
| XLOC_005988 | XLOC_005988 | COL4A2            | chr13:110959630-111165373 | #NAME? | 1 |
| XLOC_005998 | XLOC_005998 | F7                | chr13:113760101-113774995 | #NAME? | 1 |
| XLOC_006034 | XLOC_006034 | ANKRD20A19P       | chr13:24481422-24523454   | #NAME? | 1 |
| XLOC_006058 | XLOC_006058 | LINC00426         | chr13:30914406-30948036   | #NAME? | 1 |
| XLOC_006101 | XLOC_006101 | LINC00330         | chr13:45373639-45383766   | #NAME? | 1 |
| XLOC_006108 | XLOC_006108 | SIAH3             | chr13:46354415-46425846   | #NAME? | 1 |
| XLOC_006145 | XLOC_006145 | PCDH8             | chr13:53418108-53422775   | #NAME? | 1 |
| XLOC_006220 | XLOC_006220 | COL4A1            | chr13:110801309-110959496 | #NAME? | 1 |
| XLOC_006252 | XLOC_006252 | OR11H4            | chr14:20710950-20711925   | #NAME? | 1 |
| XLOC_006262 | XLOC_006262 | ECRP              | chr14:21387499-21388335   | #NAME? | 1 |
| XLOC_006318 | XLOC_006318 | NPAS3             | chr14:33408458-34273382   | #NAME? | 1 |
| XLOC_006324 | XLOC_006324 | INSM2             | chr14:36003247-36006260   | #NAME? | 1 |
| XLOC_006378 | XLOC_006378 | DACT1             | chr14:59100785-59115038   | #NAME? | 1 |
| XLOC_006387 | XLOC_006387 | PRKCH             | chr14:61788514-62017698   | #NAME? | 1 |
| XLOC_006405 | XLOC_006405 | LINC00238         | chr14:66953108-66965271   | #NAME? | 1 |
| XLOC_006412 | XLOC_006412 | RDH12             | chr14:68168602-68201168   | #NAME? | 1 |
| XLOC_006416 | XLOC_006416 | GALNT16           | chr14:69726680-69821190   | #NAME? | 1 |
| XLOC_006473 | XLOC_006473 | NRXN3             | chr14:78636715-80334633   | #NAME? | 1 |
| XLOC_006479 | XLOC_006479 | LOC283587         | chr14:88490893-88553688   | #NAME? | 1 |
| XLOC_006484 | XLOC_006484 | FOXN3-AS2         | chr14:89622515-90085494   | #NAME? | 1 |
| XLOC_006496 | XLOC_006496 | CHGA              | chr14:93389444-93401638   | #NAME? | 1 |
| XLOC_006510 | XLOC_006510 | SERPINA3          | chr14:95078713-95090390   | #NAME? | 1 |
| XLOC_006660 | XLOC_006660 | PLD4              | chr14:105391186-105399573 | #NAME? | 1 |
| XLOC_006676 | XLOC_006676 | OR11H2            | chr14:20181062-20182491   | #NAME? | 1 |
| XLOC_006684 | XLOC_006684 | KLHL33            | chr14:20896969-20903801   | #NAME? | 1 |
| XLOC_006688 | XLOC_006688 | RNASE11,RNASE12   | chr14:21051051-21058982   | #NAME? | 1 |
| XLOC_006699 | XLOC_006699 | SNORD9            | chr14:21853352-21905457   | #NAME? | 1 |
| XLOC_006741 | XLOC_006741 | ADCY4             | chr14:24787554-24804277   | #NAME? | 1 |
| XLOC_006807 | XLOC_006807 | TRIM9             | chr14:51441980-51562422   | #NAME? | 1 |
| XLOC_006825 | XLOC_006825 | TBPL2             | chr14:55880929-55907263   | #NAME? | 1 |
| XLOC_006841 | XLOC_006841 | SIX1              | chr14:61111416-61116155   | #NAME? | 1 |
| XLOC_006873 | XLOC_006873 | SLC10A1           | chr14:70242551-70264006   | #NAME? | 1 |
| XLOC_006917 | XLOC_006917 | DIO2              | chr14:80663867-80921810   | #NAME? | 1 |
| XLOC_006961 | XLOC_006961 | LINC00341         | chr14:95873603-95876427   | #NAME? | 1 |
| XLOC_007014 | XLOC_007014 | GOLGA8EP          | chr15:23435069-23448423   | #NAME? | 1 |
| XLOC_007112 | XLOC_007112 | DKFZP434L187      | chr15:30488238-30506743   | #NAME? | 1 |
| XLOC_007129 | XLOC_007129 | ATPBD4-AS1        | chr15:35663169-36151202   | #NAME? | 1 |
| XLOC_007214 | XLOC_007214 | DCAF13P3          | chr15:51200868-51298097   | #NAME? | 1 |
| XLOC_007282 | XLOC_007282 | NR2E3             | chr15:72102893-72110597   | #NAME? | 1 |
| XLOC_007300 | XLOC_007300 | LOC729739         | chr15:74630102-74660081   | #NAME? | 1 |
| XLOC_007306 | XLOC_007306 | LMAN1L            | chr15:75105193-75118099   | #NAME? | 1 |
| XLOC_007321 | XLOC_007321 | ISL2              | chr15:76629146-76634816   | #NAME? | 1 |
| XLOC_007348 | XLOC_007348 | C15orf26          | chr15:81426643-81441516   | #NAME? | 1 |
| XLOC_007357 | XLOC_007357 | UBE2Q2P2,UBE2Q2P3 | chr15:83023772-83084729   | #NAME? | 1 |
| XLOC_007416 | XLOC_007416 | ASB9P1            | chr15:93338713-93340338   | #NAME? | 1 |
| XLOC_007422 | XLOC_007422 | LOC145820         | chr15:95976321-96051076   | #NAME? | 1 |
| XLOC_007443 | XLOC_007443 | NBEAP1            | chr15:20874796-20961480   | #NAME? | 1 |
| XLOC_007451 | XLOC_007451 | GOLGA8BP          | chr15:22702284-22715728   | #NAME? | 1 |
| XLOC_007466 | XLOC_007466 | OCA2              | chr15:28000022-28344458   | #NAME? | 1 |
| XLOC_007495 | XLOC_007495 | ACTC1             | chr15:35080296-35087927   | #NAME? | 1 |
| XLOC_007505 | XLOC_007505 | GPR176            | chr15:40091222-40213093   | #NAME? | 1 |
| XLOC_007529 | XLOC_007529 | PLA2G4D           | chr15:42359880-42386752   | #NAME? | 1 |
| XLOC_007559 | XLOC_007559 | DUOXA1            | chr15:45406522-45422075   | #NAME? | 1 |
| XLOC_007578 | XLOC_007578 | TNFAIP8L3         | chr15:51348798-51397473   | #NAME? | 1 |

|             |             |           |                         |        |          |
|-------------|-------------|-----------|-------------------------|--------|----------|
| XLOC_007590 | XLOC_007590 | ONECUT1   | chr15:53049159-53082209 | #NAME? | 1        |
| XLOC_007638 | XLOC_007638 | IGDCC3    | chr15:65619464-65670378 | #NAME? | 1        |
| XLOC_007658 | XLOC_007658 | ITGA11    | chr15:68594041-68724492 | #NAME? | 1        |
| XLOC_007789 | XLOC_007789 | LOC91948  | chr15:98285845-98417659 | #NAME? | 1        |
| XLOC_007811 | XLOC_007811 | HBZ       | chr16:202853-204504     | #NAME? | 1        |
| XLOC_007826 | XLOC_007826 | C16orf11  | chr16:610421-615529     | #NAME? | 1        |
| XLOC_007827 | XLOC_007827 | NHLRC4    | chr16:617031-619495     | #NAME? | 1        |
| XLOC_007921 | XLOC_007921 | C16orf96  | chr16:4606490-4650318   | #NAME? | 1        |
| XLOC_007927 | XLOC_007927 | SEC14L5   | chr16:5008317-5069156   | #NAME? | 1        |
| XLOC_007938 | XLOC_007938 | CIITA     | chr16:10971054-11018840 | #NAME? | 1        |
| XLOC_007942 | XLOC_007942 | TNFRSF17  | chr16:12058963-12061925 | #NAME? | 1        |
| XLOC_008001 | XLOC_008001 | PRKCB     | chr16:23847299-24231932 | #NAME? | 1        |
| XLOC_008052 | XLOC_008052 | ITGAL     | chr16:30483982-30534506 | #NAME? | 1        |
| XLOC_008061 | XLOC_008061 | MIR762    | chr16:30899115-30905399 | #NAME? | 1        |
| XLOC_008075 | XLOC_008075 | ITGAD     | chr16:31404632-31437826 | #NAME? | 1        |
| XLOC_008113 | XLOC_008113 | GNAO1     | chr16:56225250-56391356 | #NAME? | 1        |
| XLOC_008139 | XLOC_008139 | CCL22     | chr16:57392694-57400102 | #NAME? | 1        |
| XLOC_008240 | XLOC_008240 | VAT1L     | chr16:77822482-78014001 | #NAME? | 1        |
| XLOC_008348 | XLOC_008348 | RPL3L     | chr16:1994579-2004679   | #NAME? | 1        |
| XLOC_008371 | XLOC_008371 | PRSS33    | chr16:2833953-2836708   | #NAME? | 1        |
| XLOC_008372 | XLOC_008372 | PRSS30P   | chr16:2889573-2892752   | #NAME? | 1        |
| XLOC_008401 | XLOC_008401 | SEPT12    | chr16:4827614-4846492   | #NAME? | 1        |
| XLOC_008406 | XLOC_008406 | C16orf89  | chr16:5094122-5116146   | #NAME? | 1        |
| XLOC_008499 | XLOC_008499 | C16orf54  | chr16:29753785-29757340 | #NAME? | 1        |
| XLOC_008566 | XLOC_008566 | ZNF423    | chr16:49524514-49891830 | #NAME? | 1        |
| XLOC_008568 | XLOC_008568 | SNX20     | chr16:50700210-50715264 | #NAME? | 1        |
| XLOC_008606 | XLOC_008606 | LOC283867 | chr16:65318401-65610203 | #NAME? | 1        |
| XLOC_008667 | XLOC_008667 | PKD1L3    | chr16:71928310-72033877 | #NAME? | 1        |
| XLOC_008829 | XLOC_008829 | ATP1B2    | chr17:7554253-7561089   | #NAME? | 1        |
| XLOC_008857 | XLOC_008857 | DNAH9     | chr17:11501747-11873065 | #NAME? | 1        |
| XLOC_008871 | XLOC_008871 | MEIS3P1   | chr17:15690163-15693019 | #NAME? | 1        |
| XLOC_008883 | XLOC_008883 | FAM106CP  | chr17:16690205-16707819 | #NAME? | 1        |
| XLOC_008950 | XLOC_008950 | CRYBA1    | chr17:27573874-27581502 | #NAME? | 1        |
| XLOC_008967 | XLOC_008967 | DRXP4     | chr17:29297955-29326929 | #NAME? | 1        |
| XLOC_008982 | XLOC_008982 | SPACA3    | chr17:31318881-31324892 | #NAME? | 1        |
| XLOC_008992 | XLOC_008992 | UNC45B    | chr17:33474835-33516364 | #NAME? | 1        |
| XLOC_009085 | XLOC_009085 | G6PC      | chr17:41052813-41066450 | #NAME? | 1        |
| XLOC_009132 | XLOC_009132 | MYL4      | chr17:45286427-45301045 | #NAME? | 1        |
| XLOC_009154 | XLOC_009154 | NGFR      | chr17:47572654-47592382 | #NAME? | 1        |
| XLOC_009155 | XLOC_009155 | NXP3      | chr17:47653297-47661171 | #NAME? | 1        |
| XLOC_009230 | XLOC_009230 | TCAM1P    | chr17:61934375-61941739 | #NAME? | 1        |
| XLOC_009240 | XLOC_009240 | CACNG4    | chr17:64960979-65029518 | #NAME? | 1        |
| XLOC_009241 | XLOC_009241 | CACNG1    | chr17:65040651-65052911 | #NAME? | 1        |
| XLOC_009267 | XLOC_009267 | CD300A    | chr17:72462521-72480937 | #NAME? | 1        |
| XLOC_009290 | XLOC_009290 | ITGB4     | chr17:73717515-73753899 | #NAME? | 1        |
| XLOC_009410 | XLOC_009410 | ATP2A3    | chr17:3827162-3867758   | #NAME? | 1        |
| XLOC_009426 | XLOC_009426 | SLC52A1   | chr17:4935896-4938727   | #NAME? | 1        |
| XLOC_009441 | XLOC_009441 | SLC13A5   | chr17:6588038-6616740   | #NAME? | 1        |
| XLOC_009442 | XLOC_009442 | TEKT1     | chr17:6703299-6735060   | #NAME? | 1        |
| XLOC_009487 | XLOC_009487 | CCDC42    | chr17:8633245-8648154   | #NAME? | 1        |
| XLOC_009495 | XLOC_009495 | GAS7      | chr17:9813925-10101868  | #NAME? | 1        |
| XLOC_009499 | XLOC_009499 | MYH1      | chr17:10395626-10421859 | #NAME? | 1        |
| XLOC_009522 | XLOC_009522 | ZNF287    | chr17:16453630-16472520 | #NAME? | 1        |
| XLOC_009603 | XLOC_009603 | EVI2A     | chr17:29421944-29704695 | #NAME? | 1        |
| XLOC_009633 | XLOC_009633 | TBC1D3B   | chr17:34493060-34503988 | #NAME? | 1        |
| XLOC_009635 | XLOC_009635 | TBC1D3C   | chr17:34581084-34592032 | #NAME? | 1        |
| XLOC_009697 | XLOC_009697 | KRTAP2-2  | chr17:39210750-39211463 | #NAME? | 1        |
| XLOC_009701 | XLOC_009701 | KRTAP4-11 | chr17:39273433-39274606 | #NAME? | 1        |
| XLOC_009704 | XLOC_009704 | KRTAP4-5  | chr17:39305175-39306054 | #NAME? | 1        |
| XLOC_009742 | XLOC_009742 | HCRT      | chr17:40336077-40337470 | #NAME? | 1        |
| XLOC_009762 | XLOC_009762 | MEOX1     | chr17:41717757-41739262 | #NAME? | 1        |
| XLOC_009767 | XLOC_009767 | PPY       | chr17:42018171-42019833 | #NAME? | 1        |
| XLOC_009768 | XLOC_009768 | PYY       | chr17:42030106-42081837 | #NAME? | 1        |
| XLOC_009872 | XLOC_009872 | HSF5      | chr17:56497528-56565759 | #NAME? | 1        |
| XLOC_009892 | XLOC_009892 | NACA2     | chr17:59666793-59668563 | #NAME? | 1        |
| XLOC_009918 | XLOC_009918 | MIR5047   | chr17:62494373-62502484 | #NAME? | 1        |
| XLOC_009954 | XLOC_009954 | CD300E    | chr17:72606021-72619897 | #NAME? | 1        |
| XLOC_009998 | XLOC_009998 | FLJ45079  | chr17:75875082-75880169 | #NAME? | 1        |
| XLOC_010158 | XLOC_010158 | AQP4-AS1  | chr18:24432007-24765302 | #NAME? | 1        |
| XLOC_010168 | XLOC_010168 | WBP11P1   | chr18:30091625-30094597 | #NAME? | 1        |
| XLOC_010186 | XLOC_010186 | SLC14A2   | chr18:42792946-43263060 | #NAME? | 1        |
| XLOC_010187 | XLOC_010187 | SLC14A1   | chr18:43304091-43332485 | #NAME? | 1        |
| XLOC_010208 | XLOC_010208 | RAB27B    | chr18:52495707-52562747 | #NAME? | 1        |
| XLOC_010218 | XLOC_010218 | ZNF532    | chr18:56530060-56653709 | #NAME? | 1        |
| XLOC_010233 | XLOC_010233 | SERPINB2  | chr18:61554938-61571124 | #NAME? | 1        |
| XLOC_010317 | XLOC_010317 | CDH2      | chr18:25530929-25757445 | #NAME? | 1        |
| XLOC_010337 | XLOC_010337 | CELF4     | chr18:34823007-35146000 | #NAME? | 1        |
| XLOC_010373 | XLOC_010373 | SNORA37   | chr18:51677970-51751158 | #NAME? | 0.999791 |
| XLOC_010379 | XLOC_010379 | LINC-ROR  | chr18:54721803-54739350 | #NAME? | 1        |

|             |             |              |                          |        |   |
|-------------|-------------|--------------|--------------------------|--------|---|
| XLOC_010384 | XLOC_010384 | ALPK2        | chr18:56148481-56296189  | #NAME? | 1 |
| XLOC_010402 | XLOC_010402 | CD226        | chr18:67530192-67624232  | #NAME? | 1 |
| XLOC_010434 | XLOC_010434 | AZU1         | chr19:827830-832017      | #NAME? | 1 |
| XLOC_010542 | XLOC_010542 | CLEC4M       | chr19:7828034-7834491    | #NAME? | 1 |
| XLOC_010629 | XLOC_010629 | MIR181D      | chr19:13985688-13985825  | #NAME? | 1 |
| XLOC_010633 | XLOC_010633 | RLN3         | chr19:14139016-14141783  | #NAME? | 1 |
| XLOC_010688 | XLOC_010688 | SLC5A5       | chr19:17982781-18005983  | #NAME? | 1 |
| XLOC_010776 | XLOC_010776 | FXYD3        | chr19:35606731-35615228  | #NAME? | 1 |
| XLOC_010782 | XLOC_010782 | HAMP         | chr19:35773409-35776045  | #NAME? | 1 |
| XLOC_010788 | XLOC_010788 | FFAR2        | chr19:35940616-35942669  | #NAME? | 1 |
| XLOC_010795 | XLOC_010795 | UPK1A        | chr19:36157714-36169367  | #NAME? | 1 |
| XLOC_010808 | XLOC_010808 | OVOL3        | chr19:36602104-36616849  | #NAME? | 1 |
| XLOC_010844 | XLOC_010844 | NCCRP1       | chr19:39687603-39692522  | #NAME? | 1 |
| XLOC_010856 | XLOC_010856 | LOC100129935 | chr19:40129324-40133041  | #NAME? | 1 |
| XLOC_010876 | XLOC_010876 | CYP2S1       | chr19:41699114-41713444  | #NAME? | 1 |
| XLOC_010902 | XLOC_010902 | TEX101       | chr19:43892762-43922767  | #NAME? | 1 |
| XLOC_010933 | XLOC_010933 | APOC2,APOC4  | chr19:45445494-45452822  | #NAME? | 1 |
| XLOC_011018 | XLOC_011018 | CCDC155      | chr19:49891474-49921256  | #NAME? | 1 |
| XLOC_011019 | XLOC_011019 | LOC100507003 | chr19:49929687-49932075  | #NAME? | 1 |
| XLOC_011026 | XLOC_011026 | SNORD35A     | chr19:49990810-49995564  | #NAME? | 1 |
| XLOC_011156 | XLOC_011156 | CACNG6       | chr19:54495541-54515920  | #NAME? | 1 |
| XLOC_011199 | XLOC_011199 | NLRP8        | chr19:56459197-56499995  | #NAME? | 1 |
| XLOC_011214 | XLOC_011214 | USP29        | chr19:57631508-57643293  | #NAME? | 1 |
| XLOC_011307 | XLOC_011307 | C19orf77     | chr19:3474404-3480540    | #NAME? | 1 |
| XLOC_011337 | XLOC_011337 | PTPRS        | chr19:5205518-5340814    | #NAME? | 1 |
| XLOC_011344 | XLOC_011344 | FUT6         | chr19:5830636-5839742    | #NAME? | 1 |
| XLOC_011367 | XLOC_011367 | MBD3L3       | chr19:7056215-7058645    | #NAME? | 1 |
| XLOC_011409 | XLOC_011409 | COL5A3       | chr19:10070236-10121147  | #NAME? | 1 |
| XLOC_011468 | XLOC_011468 | LYL1         | chr19:13209841-13213974  | #NAME? | 1 |
| XLOC_011494 | XLOC_011494 | SLC1A6       | chr19:15060844-15121455  | #NAME? | 1 |
| XLOC_011508 | XLOC_011508 | CIB3         | chr19:16272178-16284286  | #NAME? | 1 |
| XLOC_011515 | XLOC_011515 | CPAMD8       | chr19:17003761-17137625  | #NAME? | 1 |
| XLOC_011524 | XLOC_011524 | NXNL1        | chr19:17566233-17571725  | #NAME? | 1 |
| XLOC_011559 | XLOC_011559 | ZNF682       | chr19:20115226-20150277  | #NAME? | 1 |
| XLOC_011564 | XLOC_011564 | ZNF626       | chr19:20802744-20844402  | #NAME? | 1 |
| XLOC_011568 | XLOC_011568 | ZNF208       | chr19:22148896-22193745  | #NAME? | 1 |
| XLOC_011604 | XLOC_011604 | ATP4A        | chr19:36041094-36054560  | #NAME? | 1 |
| XLOC_011605 | XLOC_011605 | UPK1A-AS1    | chr19:36157714-36169367  | #NAME? | 1 |
| XLOC_011718 | XLOC_011718 | PSG11        | chr19:43511808-43530631  | #NAME? | 1 |
| XLOC_011721 | XLOC_011721 | PSG4         | chr19:43696853-43709926  | #NAME? | 1 |
| XLOC_011751 | XLOC_011751 | CKM          | chr19:45809670-45826235  | #NAME? | 1 |
| XLOC_011773 | XLOC_011773 | IGFL4        | chr19:46543005-46544274  | #NAME? | 1 |
| XLOC_011777 | XLOC_011777 | PNMAL1       | chr19:46969747-46974820  | #NAME? | 1 |
| XLOC_011792 | XLOC_011792 | MIR3191      | chr19:47724078-47736023  | #NAME? | 1 |
| XLOC_011896 | XLOC_011896 | NKG7         | chr19:51874873-51875960  | #NAME? | 1 |
| XLOC_011897 | XLOC_011897 | LIM2         | chr19:51883162-51891210  | #NAME? | 1 |
| XLOC_011904 | XLOC_011904 | SIGLEC5      | chr19:52114755-52133727  | #NAME? | 1 |
| XLOC_011932 | XLOC_011932 | LOC284379    | chr19:54102884-54106751  | #NAME? | 1 |
| XLOC_011987 | XLOC_011987 | PEG3,ZIM2    | chr19:57285922-57352097  | #NAME? | 1 |
| XLOC_012185 | XLOC_012185 | RPL23AP32    | chr2:54683453-54898583   | #NAME? | 1 |
| XLOC_012213 | XLOC_012213 | MEIS1        | chr2:66662531-66799891   | #NAME? | 1 |
| XLOC_012266 | XLOC_012266 | CTNNA2       | chr2:79740059-80875988   | #NAME? | 1 |
| XLOC_012280 | XLOC_012280 | GNLY         | chr2:85921413-85925875   | #NAME? | 1 |
| XLOC_012311 | XLOC_012311 | ITPR1PL1     | chr2:96991061-96994091   | #NAME? | 1 |
| XLOC_012339 | XLOC_012339 | IL1R1        | chr2:102770401-102796334 | #NAME? | 1 |
| XLOC_012351 | XLOC_012351 | GPR45        | chr2:105858199-105859924 | #NAME? | 1 |
| XLOC_012384 | XLOC_012384 | IL36G        | chr2:113735605-113743227 | #NAME? | 1 |
| XLOC_012423 | XLOC_012423 | RAB6C        | chr2:130724164-130740311 | #NAME? | 1 |
| XLOC_012457 | XLOC_012457 | KYNU         | chr2:143635194-143799885 | #NAME? | 1 |
| XLOC_012461 | XLOC_012461 | PABPC1P2     | chr2:147344624-147348558 | #NAME? | 1 |
| XLOC_012465 | XLOC_012465 | KIF5C        | chr2:149632791-149883273 | #NAME? | 1 |
| XLOC_012474 | XLOC_012474 | KCNJ3        | chr2:155555092-155714864 | #NAME? | 1 |
| XLOC_012477 | XLOC_012477 | UPP2         | chr2:158851690-158992666 | #NAME? | 1 |
| XLOC_012497 | XLOC_012497 | DHRS9        | chr2:169921298-169952677 | #NAME? | 1 |
| XLOC_012499 | XLOC_012499 | KLHL41       | chr2:170366211-170382772 | #NAME? | 1 |
| XLOC_012523 | XLOC_012523 | HOXD13       | chr2:176957531-176960666 | #NAME? | 1 |
| XLOC_012549 | XLOC_012549 | FISP2        | chr2:186603354-186698016 | #NAME? | 1 |
| XLOC_012581 | XLOC_012581 | AOX2P        | chr2:201560445-201658941 | #NAME? | 1 |
| XLOC_012602 | XLOC_012602 | CTLA4        | chr2:204732510-204738683 | #NAME? | 1 |
| XLOC_012608 | XLOC_012608 | SNORA41      | chr2:207024317-207027653 | #NAME? | 1 |
| XLOC_012663 | XLOC_012663 | DES          | chr2:220283098-220291461 | #NAME? | 1 |
| XLOC_012681 | XLOC_012681 | COL4A3       | chr2:228029280-228179508 | #NAME? | 1 |
| XLOC_012707 | XLOC_012707 | CHRND        | chr2:233390869-233401375 | #NAME? | 1 |
| XLOC_012735 | XLOC_012735 | LOC643387    | chr2:239140326-239142985 | #NAME? | 1 |
| XLOC_012767 | XLOC_012767 | PXDN         | chr2:1635658-1748291     | #NAME? | 1 |
| XLOC_012813 | XLOC_012813 | LOC645949    | chr2:21910305-21933524   | #NAME? | 1 |
| XLOC_012874 | XLOC_012874 | CYP1B1       | chr2:38294745-38303323   | #NAME? | 1 |
| XLOC_012885 | XLOC_012885 | C2orf91      | chr2:42162507-42180943   | #NAME? | 1 |
| XLOC_012888 | XLOC_012888 | OXER1        | chr2:42989638-42991401   | #NAME? | 1 |

|             |             |              |                          |        |          |
|-------------|-------------|--------------|--------------------------|--------|----------|
| XLOC_012893 | XLOC_012893 | ABCG5        | chr2:44039610-44065958   | #NAME? | 1        |
| XLOC_012898 | XLOC_012898 | UNQ6975      | chr2:45401479-45482080   | #NAME? | 1        |
| XLOC_012913 | XLOC_012913 | TSPYL6       | chr2:54342409-54532435   | #NAME? | 1        |
| XLOC_012937 | XLOC_012937 | DBIL5P2      | chr2:63344985-63346677   | #NAME? | 1        |
| XLOC_012943 | XLOC_012943 | LOC400958    | chr2:65128973-65159581   | #NAME? | 1        |
| XLOC_012959 | XLOC_012959 | SNORA36C     | chr2:69685126-69870977   | #NAME? | 1        |
| XLOC_012967 | XLOC_012967 | ADD2         | chr2:70889215-70995375   | #NAME? | 1        |
| XLOC_012999 | XLOC_012999 | TACR1        | chr2:75273589-75426645   | #NAME? | 1        |
| XLOC_013066 | XLOC_013066 | LYG2         | chr2:99858710-99871570   | #NAME? | 1        |
| XLOC_013087 | XLOC_013087 | ST6GAL2      | chr2:107418055-107503563 | #NAME? | 1        |
| XLOC_013088 | XLOC_013088 | LOC729121    | chr2:108439519-108442583 | #NAME? | 1        |
| XLOC_013110 | XLOC_013110 | IL1A         | chr2:113531491-113542971 | #NAME? | 1        |
| XLOC_013150 | XLOC_013150 | LOC100216479 | chr2:131174325-131186119 | #NAME? | 1        |
| XLOC_013154 | XLOC_013154 | WTH3DI       | chr2:132118064-132121731 | #NAME? | 1        |
| XLOC_013155 | XLOC_013155 | LOC401010    | chr2:132199733-132202467 | #NAME? | 1        |
| XLOC_013187 | XLOC_013187 | LOC100144595 | chr2:154728425-155313950 | #NAME? | 1        |
| XLOC_013212 | XLOC_013212 | SCN3A        | chr2:165944029-166060577 | #NAME? | 1        |
| XLOC_013308 | XLOC_013308 | CFAR-AS1     | chr2:201980876-202037411 | #NAME? | 1        |
| XLOC_013341 | XLOC_013341 | ERBB4        | chr2:212240441-213403352 | #NAME? | 1        |
| XLOC_013358 | XLOC_013358 | CXCR1        | chr2:219027567-219031716 | #NAME? | 1        |
| XLOC_013365 | XLOC_013365 | FEV          | chr2:219845808-219850379 | #NAME? | 1        |
| XLOC_013368 | XLOC_013368 | CCDC108      | chr2:219866936-219906245 | #NAME? | 1        |
| XLOC_013389 | XLOC_013389 | SCG2         | chr2:224461657-224467217 | #NAME? | 1        |
| XLOC_013409 | XLOC_013409 | LOC151475    | chr2:231555635-231565244 | #NAME? | 1        |
| XLOC_013414 | XLOC_013414 | SNORA75      | chr2:232319458-232329205 | #NAME? | 1        |
| XLOC_013445 | XLOC_013445 | MIR4440      | chr2:239969863-240322643 | #NAME? | 1        |
| XLOC_013447 | XLOC_013447 | MGC16025     | chr2:239969863-240322643 | #NAME? | 1        |
| XLOC_013455 | XLOC_013455 | OTOS         | chr2:241078445-241080073 | #NAME? | 1        |
| XLOC_013492 | XLOC_013492 | SNORD110     | chr20:2633177-2639039    | #NAME? | 1        |
| XLOC_013503 | XLOC_013503 | UBOX5-AS1    | chr20:3087556-3140556    | #NAME? | 1        |
| XLOC_013532 | XLOC_013532 | ISM1         | chr20:13202417-13281297  | #NAME? | 1        |
| XLOC_013537 | XLOC_013537 | PCSK2        | chr20:17206751-17465222  | #NAME? | 1        |
| XLOC_013551 | XLOC_013551 | SLC24A3      | chr20:19193289-19703541  | #NAME? | 1        |
| XLOC_013646 | XLOC_013646 | LBP          | chr20:36974813-37005653  | #NAME? | 1        |
| XLOC_013648 | XLOC_013648 | SNORA39      | chr20:37075296-37079564  | #NAME? | 0.999791 |
| XLOC_013674 | XLOC_013674 | WISP2        | chr20:43343884-43356452  | #NAME? | 1        |
| XLOC_013679 | XLOC_013679 | P13          | chr20:43803539-43805185  | #NAME? | 1        |
| XLOC_013686 | XLOC_013686 | WFDC10A      | chr20:44236577-44259907  | #NAME? | 1        |
| XLOC_013702 | XLOC_013702 | LOC100131496 | chr20:45838380-45985474  | #NAME? | 1        |
| XLOC_013728 | XLOC_013728 | CASS4        | chr20:54987167-55034396  | #NAME? | 1        |
| XLOC_013742 | XLOC_013742 | APCDD1L-AS1  | chr20:57090434-57194948  | #NAME? | 1        |
| XLOC_013751 | XLOC_013751 | CDH26        | chr20:58533470-58588168  | #NAME? | 1        |
| XLOC_013753 | XLOC_013753 | LOC284757    | chr20:58713547-58897314  | #NAME? | 1        |
| XLOC_013772 | XLOC_013772 | LOC63930     | chr20:61640734-61716423  | #NAME? | 1        |
| XLOC_013773 | XLOC_013773 | LOC100144597 | chr20:61640734-61716423  | #NAME? | 1        |
| XLOC_013798 | XLOC_013798 | MYT1         | chr20:62795826-62873606  | #NAME? | 1        |
| XLOC_013810 | XLOC_013810 | RSPO4        | chr20:939095-982907      | #NAME? | 1        |
| XLOC_013917 | XLOC_013917 | FOXS1        | chr20:30432102-30433420  | #NAME? | 1        |
| XLOC_013930 | XLOC_013930 | PXMP4        | chr20:32290549-32308136  | #NAME? | 1        |
| XLOC_013935 | XLOC_013935 | HMGB3P1      | chr20:33421377-33422265  | #NAME? | 1        |
| XLOC_013942 | XLOC_013942 | FAM83C       | chr20:33873533-33880225  | #NAME? | 1        |
| XLOC_013965 | XLOC_013965 | SNORA71B     | chr20:37049238-37064018  | #NAME? | 0.999791 |
| XLOC_013976 | XLOC_013976 | JPH2         | chr20:42740336-42816218  | #NAME? | 1        |
| XLOC_013986 | XLOC_013986 | WFDC5        | chr20:43738092-43743813  | #NAME? | 1        |
| XLOC_014020 | XLOC_014020 | PTGIS        | chr20:48120410-48184707  | #NAME? | 1        |
| XLOC_014041 | XLOC_014041 | GCNT7        | chr20:55043646-55101208  | #NAME? | 1        |
| XLOC_014042 | XLOC_014042 | BMP7         | chr20:55743808-55841707  | #NAME? | 1        |
| XLOC_014072 | XLOC_014072 | LINC00029    | chr20:61640734-61716423  | #NAME? | 1        |
| XLOC_014095 | XLOC_014095 | MIR3648      | chr21:9825831-9826011    | #NAME? | 1        |
| XLOC_014100 | XLOC_014100 | ABCC13       | chr21:15646119-15673692  | #NAME? | 1        |
| XLOC_014123 | XLOC_014123 | LINC00189    | chr21:30565814-30660526  | #NAME? | 1        |
| XLOC_014138 | XLOC_014138 | MRAP         | chr21:33664123-33765312  | #NAME? | 1        |
| XLOC_014169 | XLOC_014169 | DSCR8        | chr21:39493544-39528605  | #NAME? | 1        |
| XLOC_014171 | XLOC_014171 | KCNJ15       | chr21:39601836-39673746  | #NAME? | 1        |
| XLOC_014249 | XLOC_014249 | LINC00158    | chr21:26758132-26804013  | #NAME? | 1        |
| XLOC_014310 | XLOC_014310 | KCNE1        | chr21:35818985-35884573  | #NAME? | 1        |
| XLOC_014314 | XLOC_014314 | RUNX1-IT1    | chr21:36160097-36421595  | #NAME? | 1        |
| XLOC_014317 | XLOC_014317 | LOC100133286 | chr21:37441939-37498938  | #NAME? | 1        |
| XLOC_014339 | XLOC_014339 | LINC00479    | chr21:43131679-43135935  | #NAME? | 1        |
| XLOC_014376 | XLOC_014376 | LINC00163    | chr21:46409778-46414001  | #NAME? | 1        |
| XLOC_014380 | XLOC_014380 | COL18A1-AS2  | chr21:46825096-46933634  | #NAME? | 1        |
| XLOC_014425 | XLOC_014425 | SERPIND1     | chr22:21061978-21213100  | #NAME? | 1        |
| XLOC_014432 | XLOC_014432 | LOC400891    | chr22:21400248-21418457  | #NAME? | 1        |
| XLOC_014447 | XLOC_014447 | GGTLC2       | chr22:22988781-22990368  | #NAME? | 1        |
| XLOC_014521 | XLOC_014521 | RFPL3        | chr22:32750871-32767063  | #NAME? | 1        |
| XLOC_014541 | XLOC_014541 | CYTH4        | chr22:37678494-37711389  | #NAME? | 1        |
| XLOC_014619 | XLOC_014619 | RIBC2        | chr22:45809571-45828302  | #NAME? | 1        |
| XLOC_014645 | XLOC_014645 | ADM2         | chr22:50919984-50924866  | #NAME? | 1        |
| XLOC_014658 | XLOC_014658 | XKR3         | chr22:17264305-17302584  | #NAME? | 1        |



|             |             |              |                          |        |   |
|-------------|-------------|--------------|--------------------------|--------|---|
| XLOC_014668 | XLOC_014668 | MIR648       | chr22:18270415-18507325  | #NAME? | 1 |
| XLOC_014686 | XLOC_014686 | LOC284865    | chr22:20186252-20192441  | #NAME? | 1 |
| XLOC_014707 | XLOC_014707 | ZNF280A      | chr22:22868060-22874613  | #NAME? | 1 |
| XLOC_014709 | XLOC_014709 | POM121L1P    | chr22:22974027-22987012  | #NAME? | 1 |
| XLOC_014711 | XLOC_014711 | CESSAP1      | chr22:23701792-23724313  | #NAME? | 1 |
| XLOC_014725 | XLOC_014725 | GSTTP2       | chr22:24385937-24401899  | #NAME? | 1 |
| XLOC_014732 | XLOC_014732 | TMEM211      | chr22:25331207-25335314  | #NAME? | 1 |
| XLOC_014780 | XLOC_014780 | C22orf24     | chr22:32329506-32353590  | #NAME? | 1 |
| XLOC_014854 | XLOC_014854 | SHISA8       | chr22:42305557-42310671  | #NAME? | 1 |
| XLOC_014867 | XLOC_014867 | ATP5L2       | chr22:43013845-43045405  | #NAME? | 1 |
| XLOC_014896 | XLOC_014896 | C22orf34     | chr22:50013289-50051190  | #NAME? | 1 |
| XLOC_014899 | XLOC_014899 | IL17REL      | chr22:50432941-50451055  | #NAME? | 1 |
| XLOC_014927 | XLOC_014927 | LINC00312    | chr3:8613467-8616354     | #NAME? | 1 |
| XLOC_014948 | XLOC_014948 | SLC6A1       | chr3:11034419-11080930   | #NAME? | 1 |
| XLOC_014960 | XLOC_014960 | TPRXL        | chr3:13978806-14107481   | #NAME? | 1 |
| XLOC_014966 | XLOC_014966 | FGD5         | chr3:14860468-14976072   | #NAME? | 1 |
| XLOC_015148 | XLOC_015148 | ITIH3        | chr3:52828783-52843025   | #NAME? | 1 |
| XLOC_015191 | XLOC_015191 | FRG2C        | chr3:75713480-75716368   | #NAME? | 1 |
| XLOC_015201 | XLOC_015201 | EPHA3        | chr3:89156673-89531284   | #NAME? | 1 |
| XLOC_015294 | XLOC_015294 | PARP15       | chr3:122296448-122355536 | #NAME? | 1 |
| XLOC_015356 | XLOC_015356 | SLC35G2      | chr3:136537860-136574734 | #NAME? | 1 |
| XLOC_015363 | XLOC_015363 | ESYT3        | chr3:138153414-138197256 | #NAME? | 1 |
| XLOC_015452 | XLOC_015452 | LINC00578    | chr3:177159708-177470492 | #NAME? | 1 |
| XLOC_015495 | XLOC_015495 | AHSJ         | chr3:186330849-186339107 | #NAME? | 1 |
| XLOC_015504 | XLOC_015504 | ADIPOQ       | chr3:186560462-186576252 | #NAME? | 1 |
| XLOC_015514 | XLOC_015514 | CLDN16       | chr3:190105660-190129932 | #NAME? | 1 |
| XLOC_015550 | XLOC_015550 | EGOT         | chr3:4535031-4889524     | #NAME? | 1 |
| XLOC_015551 | XLOC_015551 | BHLHE40-AS1  | chr3:4939913-4948186     | #NAME? | 1 |
| XLOC_015553 | XLOC_015553 | LMCD1-AS1    | chr3:8262833-8543344     | #NAME? | 1 |
| XLOC_015610 | XLOC_015610 | THR8         | chr3:24158644-24541502   | #NAME? | 1 |
| XLOC_015630 | XLOC_015630 | EPM2AIP1     | chr3:37027356-37034795   | #NAME? | 1 |
| XLOC_015641 | XLOC_015641 | CX3CR1       | chr3:39304984-39323226   | #NAME? | 1 |
| XLOC_015660 | XLOC_015660 | LARS2-AS1    | chr3:45430074-45590328   | #NAME? | 1 |
| XLOC_015788 | XLOC_015788 | DNASE1L3     | chr3:58178352-58196730   | #NAME? | 1 |
| XLOC_015964 | XLOC_015964 | KY           | chr3:134318764-134369864 | #NAME? | 1 |
| XLOC_015968 | XLOC_015968 | A4GNT        | chr3:137842559-137851229 | #NAME? | 1 |
| XLOC_015974 | XLOC_015974 | PRR23A       | chr3:138722803-138725110 | #NAME? | 1 |
| XLOC_015991 | XLOC_015991 | PLSCR4       | chr3:145910123-145968966 | #NAME? | 1 |
| XLOC_016005 | XLOC_016005 | FAM194A      | chr3:150377674-150421742 | #NAME? | 1 |
| XLOC_016007 | XLOC_016007 | CLRN1        | chr3:150643949-150797617 | #NAME? | 1 |
| XLOC_016048 | XLOC_016048 | WDR49        | chr3:167196472-167371289 | #NAME? | 1 |
| XLOC_016058 | XLOC_016058 | SLC7A14      | chr3:170177341-170303863 | #NAME? | 1 |
| XLOC_016068 | XLOC_016068 | SPATA16      | chr3:172607146-172859058 | #NAME? | 1 |
| XLOC_016092 | XLOC_016092 | C3orf70      | chr3:184795837-184870802 | #NAME? | 1 |
| XLOC_016111 | XLOC_016111 | TPRG1-AS2    | chr3:188889762-189041271 | #NAME? | 1 |
| XLOC_016121 | XLOC_016121 | OPA1-AS1     | chr3:193310932-193415600 | #NAME? | 1 |
| XLOC_016178 | XLOC_016178 | LOC402160    | chr4:2420700-2464690     | #NAME? | 1 |
| XLOC_016193 | XLOC_016193 | NSG1         | chr4:4387982-4543775     | #NAME? | 1 |
| XLOC_016197 | XLOC_016197 | C4orf6       | chr4:5526882-5529527     | #NAME? | 1 |
| XLOC_016272 | XLOC_016272 | PCDH7        | chr4:30722029-31148423   | #NAME? | 1 |
| XLOC_016292 | XLOC_016292 | NSUN7        | chr4:40751913-40812002   | #NAME? | 1 |
| XLOC_016351 | XLOC_016351 | C4orf40      | chr4:71019903-71032326   | #NAME? | 1 |
| XLOC_016379 | XLOC_016379 | EREG         | chr4:75230859-75254477   | #NAME? | 1 |
| XLOC_016422 | XLOC_016422 | SPP1         | chr4:88896801-88904563   | #NAME? | 1 |
| XLOC_016499 | XLOC_016499 | SLC25A31     | chr4:128651554-128695447 | #NAME? | 1 |
| XLOC_016521 | XLOC_016521 | HHIP         | chr4:145564067-145659881 | #NAME? | 1 |
| XLOC_016525 | XLOC_016525 | C4orf51      | chr4:146601355-146653948 | #NAME? | 1 |
| XLOC_016535 | XLOC_016535 | PRSS48       | chr4:152198324-152212605 | #NAME? | 1 |
| XLOC_016563 | XLOC_016563 | LOC100505989 | chr4:165675282-165724947 | #NAME? | 1 |
| XLOC_016566 | XLOC_016566 | TRIM60       | chr4:165953150-165962896 | #NAME? | 1 |
| XLOC_016606 | XLOC_016606 | ZFP42        | chr4:188916924-188926199 | #NAME? | 1 |
| XLOC_016666 | XLOC_016666 | MIR548I2     | chr4:9557788-9557937     | #NAME? | 1 |
| XLOC_016716 | XLOC_016716 | LOC344967    | chr4:40044536-40159872   | #NAME? | 1 |
| XLOC_016721 | XLOC_016721 | BEND4        | chr4:42112869-42154895   | #NAME? | 1 |
| XLOC_016724 | XLOC_016724 | YIPF7        | chr4:44624353-44653658   | #NAME? | 1 |
| XLOC_016728 | XLOC_016728 | COX7B2       | chr4:46736846-46911252   | #NAME? | 1 |
| XLOC_016756 | XLOC_016756 | IGFBP7       | chr4:57845108-58071465   | #NAME? | 1 |
| XLOC_016763 | XLOC_016763 | TMPRSS11D    | chr4:68686593-68749716   | #NAME? | 1 |
| XLOC_016781 | XLOC_016781 | IGJ          | chr4:71521257-71532348   | #NAME? | 1 |
| XLOC_016807 | XLOC_016807 | SOWAHB       | chr4:77816081-77819002   | #NAME? | 1 |
| XLOC_016840 | XLOC_016840 | SPARCL1      | chr4:88394487-88450655   | #NAME? | 1 |
| XLOC_016850 | XLOC_016850 | STPG2        | chr4:98480024-99064391   | #NAME? | 1 |
| XLOC_016855 | XLOC_016855 | PCNAP1       | chr4:100010007-100222513 | #NAME? | 1 |
| XLOC_016895 | XLOC_016895 | NEUROG2      | chr4:113434671-113437328 | #NAME? | 1 |
| XLOC_016977 | XLOC_016977 | FAM198B      | chr4:159045731-159094202 | #NAME? | 1 |
| XLOC_016982 | XLOC_016982 | FSTL5        | chr4:162305043-163085186 | #NAME? | 1 |
| XLOC_016988 | XLOC_016988 | TRIM61       | chr4:165875597-165898818 | #NAME? | 1 |
| XLOC_016998 | XLOC_016998 | LOC100506085 | chr4:170838911-170897053 | #NAME? | 1 |
| XLOC_017005 | XLOC_017005 | HPGD         | chr4:175411327-175444049 | #NAME? | 1 |

|             |             |                           |                          |        |          |
|-------------|-------------|---------------------------|--------------------------|--------|----------|
| XLOC_017021 | XLOC_017021 | LOC728175                 | chr4:185262183-185275130 | #NAME? | 1        |
| XLOC_017042 | XLOC_017042 | FRG2                      | chr4:190945522-190948412 | #NAME? | 1        |
| XLOC_017078 | XLOC_017078 | ROPN1L                    | chr5:10441973-10465138   | #NAME? | 1        |
| XLOC_017111 | XLOC_017111 | OSMR                      | chr5:38845959-38935743   | #NAME? | 1        |
| XLOC_017121 | XLOC_017121 | NIM1                      | chr5:43192169-43280952   | #NAME? | 1        |
| XLOC_017129 | XLOC_017129 | FST                       | chr5:52776263-52782304   | #NAME? | 1        |
| XLOC_017144 | XLOC_017144 | PART1                     | chr5:58264865-59843484   | #NAME? | 1        |
| XLOC_017176 | XLOC_017176 | PMCHL2                    | chr5:70671611-70681820   | #NAME? | 1        |
| XLOC_017198 | XLOC_017198 | NCRUPAR                   | chr5:76008227-76008713   | #NAME? | 1        |
| XLOC_017264 | XLOC_017264 | SNORA13                   | chr5:111496222-111498198 | #NAME? | 1        |
| XLOC_017322 | XLOC_017322 | MIR3661                   | chr5:133532147-133561950 | #NAME? | 1        |
| XLOC_017414 | XLOC_017414 | AFAP1L1                   | chr5:148651400-148721367 | #NAME? | 1        |
| XLOC_017429 | XLOC_017429 | IRGM                      | chr5:150226084-150228231 | #NAME? | 1        |
| XLOC_017434 | XLOC_017434 | GRIA1                     | chr5:152870083-153193429 | #NAME? | 1        |
| XLOC_017481 | XLOC_017481 | EFCAB9                    | chr5:171621175-171630458 | #NAME? | 1        |
| XLOC_017492 | XLOC_017492 | HMP19                     | chr5:173472606-173536182 | #NAME? | 1        |
| XLOC_017496 | XLOC_017496 | HRH2                      | chr5:175085039-175113245 | #NAME? | 1        |
| XLOC_017540 | XLOC_017540 | LOC100132062,LOC100133331 | chr5:180750506-180755196 | #NAME? | 1        |
| XLOC_017562 | XLOC_017562 | IRX4                      | chr5:1877540-1882880     | #NAME? | 1        |
| XLOC_017573 | XLOC_017573 | LOC729506                 | chr5:8333595-8457677     | #NAME? | 1        |
| XLOC_017608 | XLOC_017608 | UGT3A1                    | chr5:35953190-36001130   | #NAME? | 1        |
| XLOC_017613 | XLOC_017613 | RANBP3L                   | chr5:36249103-36302011   | #NAME? | 1        |
| XLOC_017632 | XLOC_017632 | PLCXD3                    | chr5:41307047-41510730   | #NAME? | 1        |
| XLOC_017634 | XLOC_017634 | SEPP1                     | chr5:42756919-42812024   | #NAME? | 1        |
| XLOC_017643 | XLOC_017643 | LOC100652772              | chr5:43573286-43705668   | #NAME? | 1        |
| XLOC_017690 | XLOC_017690 | LOC647859                 | chr5:70370029-70388897   | #NAME? | 1        |
| XLOC_017705 | XLOC_017705 | SNORA47                   | chr5:76372531-76444176   | #NAME? | 0.999791 |
| XLOC_017722 | XLOC_017722 | ACOT12                    | chr5:80256507-81047072   | #NAME? | 1        |
| XLOC_017732 | XLOC_017732 | LINC00461,MIR9-2          | chr5:87836596-87980620   | #NAME? | 1        |
| XLOC_017741 | XLOC_017741 | POU5F2                    | chr5:92919042-93447404   | #NAME? | 1        |
| XLOC_017754 | XLOC_017754 | LOC100133050              | chr5:99715208-99723958   | #NAME? | 1        |
| XLOC_017787 | XLOC_017787 | C5orf63                   | chr5:126378249-126409184 | #NAME? | 1        |
| XLOC_017822 | XLOC_017822 | LOC340074                 | chr5:134984371-134989624 | #NAME? | 1        |
| XLOC_017825 | XLOC_017825 | VTRNA2-1                  | chr5:135416186-135416286 | #NAME? | 1        |
| XLOC_017830 | XLOC_017830 | KLHL3                     | chr5:136953188-137071779 | #NAME? | 1        |
| XLOC_017845 | XLOC_017845 | MZB1                      | chr5:138723256-138725605 | #NAME? | 1        |
| XLOC_017851 | XLOC_017851 | NRG2                      | chr5:139226363-139422884 | #NAME? | 1        |
| XLOC_017856 | XLOC_017856 | CD14                      | chr5:140011312-140013286 | #NAME? | 1        |
| XLOC_017923 | XLOC_017923 | FNDC9                     | chr5:156693090-156822606 | #NAME? | 1        |
| XLOC_017974 | XLOC_017974 | PFN3                      | chr5:176827107-176827637 | #NAME? | 1        |
| XLOC_018042 | XLOC_018042 | BMP6                      | chr6:7727010-8102828     | #NAME? | 1        |
| XLOC_018053 | XLOC_018053 | ELOVL2-AS1                | chr6:10980992-11079377   | #NAME? | 1        |
| XLOC_018092 | XLOC_018092 | HIST1H3A                  | chr6:26020717-26021186   | #NAME? | 0.155119 |
| XLOC_018167 | XLOC_018167 | TRIM15                    | chr6:30130982-30140473   | #NAME? | 1        |
| XLOC_018196 | XLOC_018196 | TNF                       | chr6:31543343-31546112   | #NAME? | 1        |
| XLOC_018214 | XLOC_018214 | CFB                       | chr6:31913720-31919861   | #NAME? | 1        |
| XLOC_018283 | XLOC_018283 | TSPO2                     | chr6:41010236-41012076   | #NAME? | 1        |
| XLOC_018327 | XLOC_018327 | SPATS1                    | chr6:44310396-44344904   | #NAME? | 1        |
| XLOC_018377 | XLOC_018377 | KCNQ5                     | chr6:73331570-73908573   | #NAME? | 1        |
| XLOC_018459 | XLOC_018459 | FAM26F                    | chr6:116782532-116784934 | #NAME? | 1        |
| XLOC_018460 | XLOC_018460 | FAM26E                    | chr6:116817650-116880031 | #NAME? | 1        |
| XLOC_018474 | XLOC_018474 | GJA1                      | chr6:121756744-121770873 | #NAME? | 1        |
| XLOC_018477 | XLOC_018477 | FABP7                     | chr6:123100645-123105218 | #NAME? | 1        |
| XLOC_018495 | XLOC_018495 | SMLR1                     | chr6:131148544-131158276 | #NAME? | 1        |
| XLOC_018518 | XLOC_018518 | SLC35D3                   | chr6:137243401-137246776 | #NAME? | 1        |
| XLOC_018556 | XLOC_018556 | PLEKHG1                   | chr6:150920998-151164799 | #NAME? | 1        |
| XLOC_018563 | XLOC_018563 | VIP                       | chr6:153071931-153080902 | #NAME? | 1        |
| XLOC_018588 | XLOC_018588 | SLC22A3                   | chr6:160769404-160873611 | #NAME? | 1        |
| XLOC_018622 | XLOC_018622 | LOC100507194              | chr6:3183051-3196001     | #NAME? | 1        |
| XLOC_018626 | XLOC_018626 | FAM217A                   | chr6:4068592-4135831     | #NAME? | 1        |
| XLOC_018643 | XLOC_018643 | GCM2                      | chr6:10873455-10882098   | #NAME? | 1        |
| XLOC_018703 | XLOC_018703 | HIST1H1B                  | chr6:27834569-27835359   | #NAME? | 1        |
| XLOC_018706 | XLOC_018706 | HIST1H3J                  | chr6:27858092-27858570   | #NAME? | 1        |
| XLOC_018753 | XLOC_018753 | PSORS1C3                  | chr6:31141511-31145676   | #NAME? | 1        |
| XLOC_018760 | XLOC_018760 | NCR3                      | chr6:31553955-31560762   | #NAME? | 1        |
| XLOC_018834 | XLOC_018834 | CLPS                      | chr6:35762758-35765121   | #NAME? | 1        |
| XLOC_018877 | XLOC_018877 | PRPH2                     | chr6:42664332-42690358   | #NAME? | 1        |
| XLOC_018900 | XLOC_018900 | CLIC5                     | chr6:458666189-46048085  | #NAME? | 1        |
| XLOC_018906 | XLOC_018906 | GPR110                    | chr6:46967812-47010082   | #NAME? | 1        |
| XLOC_018932 | XLOC_018932 | ELOVL5                    | chr6:53132195-53213977   | #NAME? | 1        |
| XLOC_018965 | XLOC_018965 | IMPJ1                     | chr6:76631061-76782335   | #NAME? | 1        |
| XLOC_018983 | XLOC_018983 | SNORD50A                  | chr6:86386724-86388451   | #NAME? | 1        |
| XLOC_018986 | XLOC_018986 | GJB7                      | chr6:87992696-88052043   | #NAME? | 1        |
| XLOC_018993 | XLOC_018993 | GABRR2                    | chr6:89966839-90025018   | #NAME? | 1        |
| XLOC_019035 | XLOC_019035 | METTL24                   | chr6:110567148-110679475 | #NAME? | 1        |
| XLOC_019118 | XLOC_019118 | NMBR                      | chr6:142396744-142409936 | #NAME? | 1        |
| XLOC_019130 | XLOC_019130 | LOC729176                 | chr6:146920135-147136597 | #NAME? | 1        |
| XLOC_019182 | XLOC_019182 | PRR18                     | chr6:166719167-166721871 | #NAME? | 1        |
| XLOC_020386 | XLOC_020386 | ABCBS5                    | chr7:20655244-20796637   | #NAME? | 1        |

|             |             |                            |                          |        |          |
|-------------|-------------|----------------------------|--------------------------|--------|----------|
| XLOC_020390 | XLOC_020390 | LOC100506178               | chr7:22602955-22613617   | #NAME? | 1        |
| XLOC_020475 | XLOC_020475 | ADCY1                      | chr7:45614124-45762714   | #NAME? | 1        |
| XLOC_020478 | XLOC_020478 | LINC00525                  | chr7:47801073-47806370   | #NAME? | 1        |
| XLOC_020483 | XLOC_020483 | CDC14C                     | chr7:48964156-48967049   | #NAME? | 1        |
| XLOC_020497 | XLOC_020497 | SNORA15                    | chr7:56119377-56131682   | #NAME? | 1        |
| XLOC_020536 | XLOC_020536 | NCF1B                      | chr7:72634673-72649979   | #NAME? | 1        |
| XLOC_020544 | XLOC_020544 | WBSR28                     | chr7:73275488-73280223   | #NAME? | 1        |
| XLOC_020548 | XLOC_020548 | MIR590                     | chr7:73588705-73611429   | #NAME? | 1        |
| XLOC_020585 | XLOC_020585 | CD36                       | chr7:80231503-80308593   | #NAME? | 1        |
| XLOC_020636 | XLOC_020636 | AZGP1P1                    | chr7:99578384-99581860   | #NAME? | 1        |
| XLOC_020663 | XLOC_020663 | MUC17                      | chr7:100663363-100702140 | #NAME? | 1        |
| XLOC_020669 | XLOC_020669 | COL26A1                    | chr7:101006121-101202304 | #NAME? | 1        |
| XLOC_020702 | XLOC_020702 | FOXP2                      | chr7:113726364-114333827 | #NAME? | 1        |
| XLOC_020712 | XLOC_020712 | CFTR                       | chr7:117120016-117308718 | #NAME? | 1        |
| XLOC_020721 | XLOC_020721 | ASB15                      | chr7:123249111-123277932 | #NAME? | 1        |
| XLOC_020737 | XLOC_020737 | FAM71F1                    | chr7:128355442-128371797 | #NAME? | 1        |
| XLOC_020753 | XLOC_020753 | C7orf45                    | chr7:129847703-129856684 | #NAME? | 1        |
| XLOC_020779 | XLOC_020779 | TMEM213                    | chr7:138391038-138490769 | #NAME? | 1        |
| XLOC_020800 | XLOC_020800 | PRSS1                      | chr7:142457318-142460927 | #NAME? | 1        |
| XLOC_020856 | XLOC_020856 | GIMAP2                     | chr7:150382793-150390728 | #NAME? | 1        |
| XLOC_020857 | XLOC_020857 | GIMAP1,GIMAP1-GIMAP5,GIMAF | chr7:150413644-150440737 | #NAME? | 1        |
| XLOC_020859 | XLOC_020859 | ABP1                       | chr7:150549564-150558379 | #NAME? | 1        |
| XLOC_020912 | XLOC_020912 | MMD2                       | chr7:4931875-4998844     | #NAME? | 1        |
| XLOC_020913 | XLOC_020913 | ZNF890P                    | chr7:5160940-5184177     | #NAME? | 1        |
| XLOC_020938 | XLOC_020938 | DGKB                       | chr7:14184673-14881075   | #NAME? | 1        |
| XLOC_020942 | XLOC_020942 | SOSTDC1                    | chr7:16501105-16505474   | #NAME? | 1        |
| XLOC_020972 | XLOC_020972 | KIAA0087                   | chr7:26572739-26578444   | #NAME? | 1        |
| XLOC_020982 | XLOC_020982 | MIR196B                    | chr7:27202056-27219880   | #NAME? | 1        |
| XLOC_021047 | XLOC_021047 | SNORA9                     | chr7:45022626-45026259   | #NAME? | 0.999791 |
| XLOC_021050 | XLOC_021050 | SNORA5A                    | chr7:45139698-45151346   | #NAME? | 1        |
| XLOC_021051 | XLOC_021051 | SNORA5C                    | chr7:45139698-45151346   | #NAME? | 0.999791 |
| XLOC_021052 | XLOC_021052 | SNORA5B                    | chr7:45139698-45151346   | #NAME? | 0.999791 |
| XLOC_021055 | XLOC_021055 | TNS3                       | chr7:47314751-47621742   | #NAME? | 1        |
| XLOC_021100 | XLOC_021100 | GTF2IRD2P1                 | chr7:72656901-72685658   | #NAME? | 1        |
| XLOC_021117 | XLOC_021117 | LOC100093631               | chr7:74601103-74653459   | #NAME? | 1        |
| XLOC_021169 | XLOC_021169 | SGCE                       | chr7:94214535-94285521   | #NAME? | 1        |
| XLOC_021186 | XLOC_021186 | TMEM130                    | chr7:98444110-98467673   | #NAME? | 1        |
| XLOC_021194 | XLOC_021194 | CYP3A7,CYP3A7-CYP3AP1      | chr7:99282301-99332819   | #NAME? | 1        |
| XLOC_021196 | XLOC_021196 | OR2AE1                     | chr7:99473684-99474656   | #NAME? | 1        |
| XLOC_021202 | XLOC_021202 | MIR25                      | chr7:99690403-99723128   | #NAME? | 1        |
| XLOC_021219 | XLOC_021219 | ACTL6B                     | chr7:100240725-100254084 | #NAME? | 1        |
| XLOC_021231 | XLOC_021231 | MYL10                      | chr7:101256604-101272576 | #NAME? | 1        |
| XLOC_021243 | XLOC_021243 | SLC26A5                    | chr7:102987970-103086624 | #NAME? | 1        |
| XLOC_021258 | XLOC_021258 | SLC26A4-AS1                | chr7:107296960-107358252 | #NAME? | 1        |
| XLOC_021259 | XLOC_021259 | SLC26A3                    | chr7:107405911-107443678 | #NAME? | 1        |
| XLOC_021278 | XLOC_021278 | ASZ1                       | chr7:117003275-117067577 | #NAME? | 1        |
| XLOC_021366 | XLOC_021366 | OR6W1P                     | chr7:142759380-142760882 | #NAME? | 1        |
| XLOC_021375 | XLOC_021375 | OR2A20P,OR2A9P             | chr7:143947563-143948696 | #NAME? | 1        |
| XLOC_021390 | XLOC_021390 | ATP6V0E2-AS1               | chr7:149564782-149577787 | #NAME? | 1        |
| XLOC_021405 | XLOC_021405 | CRYGN                      | chr7:151127055-151137099 | #NAME? | 1        |
| XLOC_021413 | XLOC_021413 | CNPY1                      | chr7:155293952-155326539 | #NAME? | 1        |
| XLOC_021424 | XLOC_021424 | VIPR2                      | chr7:158820865-158937649 | #NAME? | 1        |
| XLOC_021460 | XLOC_021460 | PRSS55                     | chr8:10383055-10411676   | #NAME? | 1        |
| XLOC_021470 | XLOC_021470 | DEFB135                    | chr8:11839829-11842099   | #NAME? | 1        |
| XLOC_021539 | XLOC_021539 | SMIM18                     | chr8:30436030-30515738   | #NAME? | 1        |
| XLOC_021600 | XLOC_021600 | FAM110B                    | chr8:58907112-59062277   | #NAME? | 1        |
| XLOC_021625 | XLOC_021625 | C8orf34                    | chr8:69215702-69731258   | #NAME? | 1        |
| XLOC_021647 | XLOC_021647 | STMN2                      | chr8:80523048-80578410   | #NAME? | 1        |
| XLOC_021704 | XLOC_021704 | BAALC                      | chr8:104145190-104242533 | #NAME? | 1        |
| XLOC_021707 | XLOC_021707 | CTHRC1                     | chr8:104383742-104395232 | #NAME? | 1        |
| XLOC_021709 | XLOC_021709 | RIMS2                      | chr8:104512975-105266656 | #NAME? | 1        |
| XLOC_021757 | XLOC_021757 | TG                         | chr8:133879204-134147143 | #NAME? | 1        |
| XLOC_021797 | XLOC_021797 | FAM203A                    | chr8:145437879-145440828 | #NAME? | 1        |
| XLOC_021823 | XLOC_021823 | DEFA6                      | chr8:6782215-6783598     | #NAME? | 1        |
| XLOC_021834 | XLOC_021834 | DEFA5                      | chr8:6912828-6914259     | #NAME? | 1        |
| XLOC_021850 | XLOC_021850 | USP17L3                    | chr8:7812534-7866277     | #NAME? | 1        |
| XLOC_021866 | XLOC_021866 | DEFB136                    | chr8:11831445-11832108   | #NAME? | 1        |
| XLOC_021899 | XLOC_021899 | DOK2                       | chr8:21766383-21771205   | #NAME? | 1        |
| XLOC_021905 | XLOC_021905 | MIR320A                    | chr8:22102474-22102556   | #NAME? | 1        |
| XLOC_021924 | XLOC_021924 | STMN4                      | chr8:27093813-27115903   | #NAME? | 1        |
| XLOC_021931 | XLOC_021931 | SCARA5                     | chr8:27727398-27850369   | #NAME? | 1        |
| XLOC_021950 | XLOC_021950 | PURG                       | chr8:30853320-31031277   | #NAME? | 1        |
| XLOC_021973 | XLOC_021973 | ANK1                       | chr8:41510743-41754280   | #NAME? | 1        |
| XLOC_021977 | XLOC_021977 | DKK4                       | chr8:42231585-42234674   | #NAME? | 1        |
| XLOC_021986 | XLOC_021986 | PXDNL                      | chr8:52232136-52722005   | #NAME? | 1        |
| XLOC_021988 | XLOC_021988 | ST18                       | chr8:53023391-53322439   | #NAME? | 1        |
| XLOC_022034 | XLOC_022034 | PRDM14                     | chr8:70963885-70983562   | #NAME? | 1        |
| XLOC_022080 | XLOC_022080 | DCAF4L2                    | chr8:88882970-88886296   | #NAME? | 1        |
| XLOC_022105 | XLOC_022105 | GDF6                       | chr8:97154557-97173020   | #NAME? | 1        |

|             |             |               |                          |        |   |
|-------------|-------------|---------------|--------------------------|--------|---|
| XLOC_022130 | XLOC_022130 | C8orf56       | chr8:104145190-104242533 | #NAME? | 1 |
| XLOC_022131 | XLOC_022131 | LOC100499183  | chr8:104145190-104242533 | #NAME? | 1 |
| XLOC_022155 | XLOC_022155 | SNTB1         | chr8:121547984-121824309 | #NAME? | 1 |
| XLOC_022163 | XLOC_022163 | KLHL38        | chr8:124657914-124665190 | #NAME? | 1 |
| XLOC_022208 | XLOC_022208 | LYNX1         | chr8:143845755-143859640 | #NAME? | 1 |
| XLOC_022257 | XLOC_022257 | DDX11L5       | chr9:11986-29739         | #NAME? | 1 |
| XLOC_022298 | XLOC_022298 | IFNA8         | chr9:21409145-21410184   | #NAME? | 1 |
| XLOC_022304 | XLOC_022304 | FLJ35282      | chr9:22646198-22824212   | #NAME? | 1 |
| XLOC_022327 | XLOC_022327 | KIAA1045      | chr9:34958191-34982541   | #NAME? | 1 |
| XLOC_022342 | XLOC_022342 | HRCT1         | chr9:35906188-35907138   | #NAME? | 1 |
| XLOC_022371 | XLOC_022371 | FAM27C        | chr9:44990235-44991492   | #NAME? | 1 |
| XLOC_022379 | XLOC_022379 | LOC100133920  | chr9:69651360-69664949   | #NAME? | 1 |
| XLOC_022382 | XLOC_022382 | PGM5          | chr9:70970108-71145977   | #NAME? | 1 |
| XLOC_022392 | XLOC_022392 | GDA           | chr9:74729510-74867140   | #NAME? | 1 |
| XLOC_022412 | XLOC_022412 | NTRK2         | chr9:87283465-87638505   | #NAME? | 1 |
| XLOC_022425 | XLOC_022425 | C9orf47,S1PR3 | chr9:91605777-91620069   | #NAME? | 1 |
| XLOC_022499 | XLOC_022499 | ACTL7A        | chr9:111624602-111626035 | #NAME? | 1 |
| XLOC_022521 | XLOC_022521 | ORM2          | chr9:117092068-117095536 | #NAME? | 1 |
| XLOC_022544 | XLOC_022544 | OR1L6         | chr9:125512126-125513062 | #NAME? | 1 |
| XLOC_022629 | XLOC_022629 | GF11B         | chr9:135854097-135867084 | #NAME? | 1 |
| XLOC_022658 | XLOC_022658 | LOC100130954  | chr9:138466770-138478958 | #NAME? | 1 |
| XLOC_022689 | XLOC_022689 | RNF224        | chr9:140122017-140124090 | #NAME? | 1 |
| XLOC_022701 | XLOC_022701 | CACNA1B       | chr9:140772240-141019076 | #NAME? | 1 |
| XLOC_022702 | XLOC_022702 | TUBBP5        | chr9:141044564-141071885 | #NAME? | 1 |
| XLOC_022726 | XLOC_022726 | FLJ41200      | chr9:13406378-13431328   | #NAME? | 1 |
| XLOC_022735 | XLOC_022735 | FAM154A       | chr9:18927890-19033256   | #NAME? | 1 |
| XLOC_022740 | XLOC_022740 | SLC24A2       | chr9:19507449-19787017   | #NAME? | 1 |
| XLOC_022752 | XLOC_022752 | IFNA17        | chr9:21227241-21228221   | #NAME? | 1 |
| XLOC_022800 | XLOC_022800 | CNTFR         | chr9:34551429-34590138   | #NAME? | 1 |
| XLOC_022841 | XLOC_022841 | IGFBPL1       | chr9:38406524-38424444   | #NAME? | 1 |
| XLOC_022851 | XLOC_022851 | LOC286297     | chr9:42844369-42893137   | #NAME? | 1 |
| XLOC_022872 | XLOC_022872 | BANCR         | chr9:71911596-71921972   | #NAME? | 1 |
| XLOC_022873 | XLOC_022873 | APBA1         | chr9:72042448-72287275   | #NAME? | 1 |
| XLOC_022885 | XLOC_022885 | ALDH1A1       | chr9:75515577-75568233   | #NAME? | 1 |
| XLOC_022965 | XLOC_022965 | LOC340508     | chr9:99837952-99844227   | #NAME? | 1 |
| XLOC_023031 | XLOC_023031 | TNFSF15       | chr9:117546914-117568408 | #NAME? | 1 |
| XLOC_023077 | XLOC_023077 | ANGPTL2       | chr9:129677052-129985445 | #NAME? | 1 |
| XLOC_023111 | XLOC_023111 | C9orf50       | chr9:132374503-132383055 | #NAME? | 1 |
| XLOC_023246 | XLOC_023246 | CXorf28       | chrX:3189860-3202694     | #NAME? | 1 |
| XLOC_023249 | XLOC_023249 | VX            | chrX:7810302-7812184     | #NAME? | 1 |
| XLOC_023271 | XLOC_023271 | GLRA2         | chrX:14547419-14749933   | #NAME? | 1 |
| XLOC_023307 | XLOC_023307 | MAGEB6        | chrX:26210556-26213763   | #NAME? | 1 |
| XLOC_023319 | XLOC_023319 | CXorf22       | chrX:35937850-36008269   | #NAME? | 1 |
| XLOC_023320 | XLOC_023320 | CHDC2         | chrX:36065052-36163187   | #NAME? | 1 |
| XLOC_023337 | XLOC_023337 | GPR34         | chrX:41374188-41782287   | #NAME? | 1 |
| XLOC_023392 | XLOC_023392 | PAGE4         | chrX:49593905-49598570   | #NAME? | 1 |
| XLOC_023428 | XLOC_023428 | PAGE2         | chrX:55115496-55119260   | #NAME? | 1 |
| XLOC_023434 | XLOC_023434 | KLF8          | chrX:56258821-56314322   | #NAME? | 1 |
| XLOC_023442 | XLOC_023442 | HEPH          | chrX:65382432-65487230   | #NAME? | 1 |
| XLOC_023443 | XLOC_023443 | AR            | chrX:66763873-66950461   | #NAME? | 1 |
| XLOC_023514 | XLOC_023514 | ARL13A        | chrX:100224696-100245820 | #NAME? | 1 |
| XLOC_023561 | XLOC_023561 | RGAG1         | chrX:109437413-109699562 | #NAME? | 1 |
| XLOC_023579 | XLOC_023579 | AGTR2         | chrX:115301957-115306225 | #NAME? | 1 |
| XLOC_023585 | XLOC_023585 | ZCCHC12       | chrX:117957786-117960931 | #NAME? | 1 |
| XLOC_023668 | XLOC_023668 | MAMLD1        | chrX:149531550-149682448 | #NAME? | 1 |
| XLOC_023683 | XLOC_023683 | CSAG1         | chrX:151903227-151909518 | #NAME? | 1 |
| XLOC_023691 | XLOC_023691 | BGN           | chrX:152713122-152775004 | #NAME? | 1 |
| XLOC_023692 | XLOC_023692 | ATP2B3        | chrX:152801579-152848387 | #NAME? | 1 |
| XLOC_023779 | XLOC_023779 | GPR64         | chrX:19007424-19140755   | #NAME? | 1 |
| XLOC_023796 | XLOC_023796 | ZFX-AS1       | chrX:24164341-24234372   | #NAME? | 1 |
| XLOC_023799 | XLOC_023799 | ARX           | chrX:25021812-25034065   | #NAME? | 1 |
| XLOC_023809 | XLOC_023809 | FTH1P18       | chrX:37060954-37061867   | #NAME? | 1 |
| XLOC_023824 | XLOC_023824 | CXorf36       | chrX:45007617-45060146   | #NAME? | 1 |
| XLOC_023843 | XLOC_023843 | PCSK1N        | chrX:48689503-48694036   | #NAME? | 1 |
| XLOC_023890 | XLOC_023890 | ALAS2         | chrX:55035487-55057497   | #NAME? | 1 |
| XLOC_023898 | XLOC_023898 | SPIN2A        | chrX:57162082-57164058   | #NAME? | 1 |
| XLOC_023914 | XLOC_023914 | AWAT2         | chrX:69260391-69269788   | #NAME? | 1 |
| XLOC_023915 | XLOC_023915 | P2RY4         | chrX:69478015-69479654   | #NAME? | 1 |
| XLOC_023921 | XLOC_023921 | IL2RG         | chrX:70327253-70331481   | #NAME? | 1 |
| XLOC_023966 | XLOC_023966 | POF1B         | chrX:84532394-84634748   | #NAME? | 1 |
| XLOC_023985 | XLOC_023985 | TCEAL6        | chrX:101394932-101397388 | #NAME? | 1 |
| XLOC_024010 | XLOC_024010 | TEX13B        | chrX:107224093-107225600 | #NAME? | 1 |
| XLOC_024020 | XLOC_024020 | CAPN6         | chrX:110488326-110513774 | #NAME? | 1 |
| XLOC_024021 | XLOC_024021 | DCX           | chrX:110537006-110664835 | #NAME? | 1 |
| XLOC_024102 | XLOC_024102 | LINC00633     | chrX:134252881-134254405 | #NAME? | 1 |
| XLOC_024106 | XLOC_024106 | CT45A5        | chrX:134945650-134953994 | #NAME? | 1 |
| XLOC_024150 | XLOC_024150 | FMR1-AS1      | chrX:146990948-147032647 | #NAME? | 1 |
| XLOC_024166 | XLOC_024166 | MAGEA12       | chrX:151895977-151903184 | #NAME? | 1 |
| XLOC_024202 | XLOC_024202 | SMIM9         | chrX:154051622-154062937 | #NAME? | 1 |

XLOC\_024304

XLOC\_024304

GYG2P1

chrY:14517914-14533389

#NAME?

1

## Normalized fragments per kilobase per million reads (FPKM)

| gene                      | c0_0 | c0_1       | c0_2       | t0_0       | t0_1      |            |
|---------------------------|------|------------|------------|------------|-----------|------------|
| RPS17L                    |      | 0          | 553.426    | 0.0966119  | 0.2634    | 0          |
| ENG                       |      | 2.08032    | 0.689186   | 2.4932     | 0.174328  | 0.394156   |
| IL13RA2                   |      | 144.392    | 57.493     | 168.162    | 28.2242   | 19.7251    |
| NCAPD3                    |      | 5.28476    | 4.853      | 5.34099    | 1.47366   | 1.56521    |
| HIST1H1C                  |      | 124.861    | 103.855    | 136.787    | 36.472    | 50.2223    |
| HCLS1                     |      | 1.08439    | 0.742599   | 1.15658    | 0.389646  | 0.41308    |
| JAM3                      |      | 0.592103   | 0.74833    | 0.770137   | 0.177743  | 0.497246   |
| HIST2H2BE                 |      | 5.00238    | 5.21079    | 6.39497    | 2.09197   | 2.52241    |
| ICAM2                     |      | 9.14458    | 7.58692    | 8.7894     | 2.94636   | 5.42334    |
| HOXB13                    |      | 2.2579     | 1.54951    | 2.0147     | 0.716678  | 1.3809     |
| ADM                       |      | 220.538    | 44.0281    | 79.3371    | 81.5133   | 35.8519    |
| IFI27                     |      | 43.843     | 36.6253    | 44.2833    | 18.047    | 37.7528    |
| TFRC                      |      | 24.9029    | 10.7693    | 7.88569    | 9.17165   | 10.044     |
| AKAP12                    |      | 2.71704    | 1.10073    | 2.09974    | 1.36187   | 1.21079    |
| CA9                       |      | 153.72     | 393.434    | 174.128    | 58.8318   | 277.306    |
| CALD1                     |      | 40.1839    | 23.3042    | 33.4379    | 15.6324   | 24.6177    |
| STK39                     |      | 10.5629    | 8.92105    | 9.71316    | 6.19864   | 5.74187    |
| RGS4                      |      | 11.2933    | 22.1998    | 11.8276    | 7.67384   | 13.4445    |
| HIST1H2BK                 |      | 49.6779    | 55.3111    | 65.6457    | 38.4811   | 31.2116    |
| C8orf58                   |      | 53.2413    | 46.4574    | 27.4667    | 23.6555   | 34.7222    |
| FAM47E,FAM47E-STBD1,STBD1 |      | 14.3515    | 10.81      | 7.84494    | 6.30467   | 9.49238    |
| IFFO2                     |      | 12.8397    | 10.4899    | 7.34586    | 6.43067   | 8.45183    |
| SRFBP1                    |      | 19.2674    | 14.0796    | 23.0397    | 30.417    | 18.9558    |
| AASDHPPT                  |      | 8.27286    | 9.36878    | 10.5012    | 14.1505   | 13.2317    |
| CMBL                      |      | 10.458     | 14.1171    | 9.93522    | 13.977    | 20.6485    |
| KLF2                      |      | 18.9886    | 23.7777    | 51.3973    | 51.5915   | 33.5114    |
| WDR35                     |      | 1.67335    | 1.59056    | 1.91872    | 2.96259   | 2.34054    |
| VPS4B                     |      | 6.09051    | 5.33821    | 6.1865     | 9.41717   | 8.57701    |
| ZBTB38                    |      | 1.69071    | 1.62176    | 1.78571    | 2.58015   | 2.36103    |
| HMOX1                     |      | 40.7967    | 54.8345    | 51.1897    | 61.976    | 56.5417    |
| RMDN1                     |      | 7.79984    | 8.32114    | 9.53608    | 13.7778   | 13.5755    |
| WARS                      |      | 24.2358    | 18.9386    | 73.7792    | 86.2851   | 23.5427    |
| TFPI                      |      | 14.2274    | 21.5676    | 11.9242    | 26.5852   | 23.7062    |
| GARS                      |      | 39.7109    | 32.7711    | 109.377    | 118.501   | 43.9528    |
| ASNS                      |      | 51.1112    | 32.7021    | 202.968    | 217.594   | 40.296     |
| PIP5KL1                   |      | 15.3062    | 13.9256    | 16.1068    | 26.895    | 15.2961    |
| MOK                       |      | 6.64206    | 6.09179    | 7.78129    | 12.839    | 9.52648    |
| NGFRAP1                   |      | 88.1829    | 98.1403    | 93.4086    | 149.828   | 164.368    |
| ALOXE3                    |      | 4.84584    | 3.95955    | 5.72147    | 11.0757   | 5.2773     |
| FAM86B1                   |      | 2.04655    | 3.33809    | 3.87768    | 5.38123   | 4.89392    |
| LAMA1                     |      | 10.5349    | 6.55225    | 9.13032    | 19.3967   | 8.73653    |
| HINT2                     |      | 11.4066    | 16.2656    | 18.751     | 32.3824   | 22.9772    |
| STARD3NL                  |      | 10.3699    | 10.1689    | 12.5525    | 18.0164   | 22.1787    |
| S100A2                    |      | 571.292    | 629.543    | 512.704    | 1126.96   | 704.278    |
| CUBN                      |      | 0.453107   | 0.600128   | 0.437888   | 1.03161   | 0.744935   |
| SNRPD3                    |      | 46.5548    | 37.9301    | 42.2871    | 88.5532   | 70.2714    |
| GFPT2                     |      | 11.0791    | 10.0355    | 27.0457    | 36.0308   | 17.5033    |
| ZNF114                    |      | 3.82196    | 4.38488    | 3.74538    | 8.49315   | 4.9579     |
| SGIP1                     |      | 0.425352   | 0.584569   | 0.505688   | 1.09143   | 0.759927   |
| NPTXR                     |      | 0.209923   | 0.26288    | 0.242957   | 0.535384  | 0.468755   |
| KCNN4                     |      | 7.46109    | 12.3974    | 6.20615    | 19.1677   | 18.0144    |
| TRPV2                     |      | 0.1796     | 0.653199   | 0.231387   | 1.15616   | 0.503099   |
| RAP2B                     |      | 5.92927    | 5.93731    | 5.59053    | 19.6613   | 6.64518    |
| RPS17                     |      | 0          | 551.048    | 0          | 0         | 0          |
| NBPF11,NBPF24             |      | 0          | 0.0281715  | 0.0982892  | 0         | 0          |
| MTUS1                     |      | 0.39029    | 0.106004   | 0.321279   | 0.0405304 | 0          |
| KCNJ1                     |      | 0.112895   | 0.0125448  | 0.0436942  | 0         | 0          |
| EFHD1                     |      | 0.190459   | 0.293086   | 0.0234838  | 0         | 0.0495562  |
| SIGLEC1                   |      | 0.0544025  | 0          | 0          | 0         | 0.00608335 |
| C20orf144                 |      | 0.642492   | 0.164283   | 0.456009   | 0         | 0.148624   |
| MASP2                     |      | 0.178876   | 0.310643   | 0.146656   | 0         | 0.0563999  |
| SYNDIG1L                  |      | 0.13647    | 0.117071   | 0.0602191  | 0         | 0.0154505  |
| CGNL1                     |      | 0.0262567  | 0.00893974 | 0.0480863  | 0         | 0.00416732 |
| BEX4                      |      | 0.159747   | 0.033288   | 0.143968   | 0         | 0          |
| CXorf30                   |      | 0.0342028  | 0.0404712  | 0.0261144  | 0         | 0          |
| LINC00649                 |      | 0.0187249  | 0.0665118  | 0.0116907  | 0         | 0.0125408  |
| LINC00222                 |      | 0.041473   | 0.0779812  | 0.0515813  | 0.0230326 | 0          |
| SCN8A                     |      | 0          | 0.0145365  | 0.00509925 | 0         | 0.00271205 |
| C11orf45                  |      | 0.102841   | 0.122059   | 0.143105   | 0         | 0.0388616  |
| RBM47                     |      | 0.00597797 | 0.0525719  | 0.00760262 | 0.0100284 | 0          |
| KCNV2                     |      | 0.0599086  | 0.133015   | 0.0238484  | 0.0330228 | 0          |
| NXNL2                     |      | 0.0668767  | 0.151345   | 0.0273618  | 0         | 0          |
| C8orf12,TDH               |      | 0.068668   | 0          | 0.111259   | 0         | 0.0289957  |
| USHBP1                    |      | 0.262084   | 0.0401182  | 0.275775   | 0.05124   | 0.0181721  |
| LOC100129924              |      | 0          | 0.0460038  | 0.282163   | 0.0551456 | 0          |

|                |            |            |            |            |            |
|----------------|------------|------------|------------|------------|------------|
| EDA2R          | 0          | 0.0301527  | 0.0436722  | 0          | 0          |
| DLEC1          | 0.0204518  | 0.0423384  | 0.0126333  | 0          | 0.0129638  |
| GRIA3          | 0          | 0.00644377 | 0.0372532  | 0.0074718  | 0          |
| C17orf72       | 0.0345689  | 0.123404   | 0.0418485  | 0          | 0.0141858  |
| FBXO17         | 0.0607174  | 0.0619938  | 0.018537   | 0.0253577  | 0          |
| PTPN6          | 0.0289168  | 0.0200235  | 0.0517052  | 0          | 0.0184859  |
| SULT2B1        | 0.109102   | 0.289447   | 0.086276   | 0          | 0.0892152  |
| GLIS1          | 0          | 0.0880186  | 0.0199853  | 0          | 0.0198874  |
| GRIA4          | 0.0188147  | 0          | 0.00971232 | 0          | 0.00527534 |
| BCL2L14        | 0.0342027  | 0.0518187  | 0          | 0          | 0.0161192  |
| SLC2A1-AS1     | 0.0813189  | 0.301726   | 0.0333385  | 0.0449971  | 0.03532    |
| PRF1           | 0.073098   | 0.0393178  | 0.141429   | 0.0490241  | 0          |
| TCP11          | 0.123201   | 0.0426556  | 0.0376752  | 0          | 0.0396881  |
| NOSTRIN        | 0.034343   | 0.0485394  | 0.0142134  | 0.0189211  | 0          |
| C10orf131      | 0.0565527  | 0.0553132  | 0.0240247  | 0          | 0.026706   |
| RIMS4          | 0.0240718  | 0          | 0.0147331  | 0          | 0.00763145 |
| CD96           | 0.0288689  | 0.0208345  | 0.0242759  | 0.00799915 | 0.00649985 |
| CLDN11         | 0.0308772  | 0.0429889  | 0          | 0          | 0.0145556  |
| TRPV6          | 0          | 0.0152428  | 0.054688   | 0          | 0.0139276  |
| KCNA6          | 0.0209345  | 0          | 0.0128927  | 0          | 0.00682474 |
| BARHL1         | 0.0711838  | 0.140373   | 0.0839707  | 0.0594436  | 0          |
| RRAD           | 0.630102   | 0.763835   | 0.746633   | 0.196049   | 0.184225   |
| RAET1L         | 0.0720052  | 0.146911   | 0          | 0          | 0.0459507  |
| ZAR1L          | 0.0357599  | 0          | 0.174154   | 0          | 0.0445448  |
| ZNF772         | 0.00851397 | 0.0189755  | 0          | 0          | 0.00597465 |
| WFDC13         | 0.0358943  | 0.0509042  | 0.0224503  | 0          | 0.0237875  |
| TIAM2          | 0          | 0.0131678  | 0.057596   | 0.0153858  | 0          |
| SNX31          | 0.00987926 | 0.0142253  | 0.0371326  | 0          | 0.0134237  |
| ANKRD30BL      | 0.0409462  | 0.0588359  | 0.0258525  | 0          | 0.0276927  |
| KLHL32         | 0.0242878  | 0.00890377 | 0.053978   | 0          | 0.00836528 |
| CXCR6          | 0.0259983  | 0.0184118  | 0.0323308  | 0          | 0.0171127  |
| POBEC2         | 0.0316466  | 0.0219699  | 0.0387568  | 0          | 0.0206064  |
| ZNF549         | 0.0162479  | 0.046722   | 0.0204399  | 0.00903023 | 0          |
| FLNC           | 0.038107   | 0.0902257  | 0.0501668  | 0.0063595  | 0.0273481  |
| NAALADL1       | 0.0526385  | 0.123557   | 0.0630533  | 0.0219491  | 0.032323   |
| CYP2C18        | 0.0284832  | 0.0407182  | 0          | 0.0157735  | 0          |
| VTN            | 0          | 0.111842   | 0          | 0          | 0.0260638  |
| CPNE4          | 0          | 0.0664194  | 0          | 0.015607   | 0          |
| LOC91450       | 0.0817385  | 0.109266   | 0.0991738  | 0.0682999  | 0          |
| C1orf204,VSIG8 | 0.0648606  | 0.135485   | 0.13353    | 0.0179951  | 0.0420083  |
| NLRP4          | 0.0071396  | 0.0198903  | 0.0613326  | 0.0118282  | 0.00930767 |
| LINC00310      | 0.040976   | 0.190989   | 0.0816772  | 0.0752266  | 0          |
| ZNF569         | 0.00950657 | 0.0280101  | 0.0243343  | 0          | 0.00668233 |
| FUT5           | 0.0411001  | 0.13757    | 0.0245884  | 0          | 0.0502423  |
| GIMAP6         | 0          | 0.0201881  | 0.0177686  | 0          | 0.0094115  |
| VSIG2          | 0          | 0.0402158  | 0.107948   | 0          | 0.0368813  |
| LOC100507346   | 0.0634935  | 0.0355947  | 0.0314058  | 0          | 0.0330469  |
| CCDC79         | 0          | 0.0240754  | 0.020981   | 0          | 0.0114549  |
| CSNK1G2-AS1    | 0.0658661  | 0.0849509  | 0          | 0          | 0.0389697  |
| ABRA           | 0.00780255 | 0.0225814  | 0.00989497 | 0          | 0.0106311  |
| GAS6-AS1       | 0.19102    | 0.187563   | 0.0565194  | 0          | 0.115089   |
| TMEM150C       | 0.0396141  | 0          | 0.0496295  | 0          | 0          |
| SCUBE1         | 0.0201246  | 0.0131984  | 0.0119908  | 0          | 0.0120722  |
| TAS2R3         | 0.120672   | 0          | 0.030261   | 0.040305   | 0          |
| RARRES3        | 0.0822297  | 0.111717   | 0          | 0          | 0.0522615  |
| C10orf82       | 0.158474   | 0.0429838  | 0.154314   | 0          | 0.0406066  |
| LOC100506136   | 0.0280675  | 0.0811409  | 0.0705803  | 0.0232366  | 0          |
| FRMPD1         | 0.02201    | 0.0300615  | 0.00673503 | 0.00913133 | 0.00693344 |
| PEX5L          | 0.00957107 | 0.0177589  | 0.00305385 | 0.00400457 | 0          |
| FAM228A        | 0.031266   | 0.109188   | 0.23145    | 0          | 0.102422   |
| DPYD           | 0.0171073  | 0.00712881 | 0          | 0          | 0.00670079 |
| NFE2           | 0.0404066  | 0          | 0.0487222  | 0          | 0.0247637  |
| SEPT14         | 0.0109876  | 0.00812969 | 0.0139814  | 0.00915104 | 0          |
| LOC100505716   | 0.0429639  | 0.0615879  | 0.0811166  | 0.017986   | 0.0144024  |
| LOC284276      | 0.026778   | 0.0188715  | 0.016567   | 0          | 0.0173867  |
| CPA4           | 0.0287324  | 0.0409862  | 0.0357394  | 0          | 0.0127191  |
| SLC10A4        | 0.0157484  | 0          | 0.059181   | 0          | 0.0213652  |
| MX2            | 0.0376412  | 0.0519467  | 0.02303    | 0.0155677  | 0          |
| KCNQ3          | 0.00590125 | 0.00285632 | 0.0149434  | 0.00327711 | 0          |
| LOC100130075   | 0.0942959  | 0.0430391  | 0          | 0          | 0.0397322  |
| C3             | 0.046299   | 0.0463334  | 0          | 0.00958434 | 0.00709856 |
| MESP2          | 0.205545   | 0.0910162  | 0.0409081  | 0.0571008  | 0.041792   |
| GPR143         | 0.0423076  | 0.0585078  | 0.0258644  | 0          | 0          |
| ATP2B2         | 0.00983458 | 0.00460266 | 0          | 0          | 0.00427469 |
| ADRA1A         | 0.0565544  | 0          | 0.0227865  | 0          | 0.0235583  |
| TMEM240        | 0.0957256  | 0.0628886  | 0.113717   | 0          | 0          |
| IDO1           | 0.0757553  | 0.0357852  | 0.0316442  | 0.0210424  | 0          |
| GJB3           | 0          | 0.07729    | 0          | 0          | 0.0236687  |
| RRH            | 0.0453693  | 0.0664155  | 0.15435    | 0          | 0          |

|              |            |            |            |            |            |
|--------------|------------|------------|------------|------------|------------|
| LOC100506895 | 0.0247125  | 0          | 0.0102162  | 0          | 0.0107794  |
| TEX29        | 0.65519    | 1.1134     | 0.329021   | 0.180363   | 0.274943   |
| IGSF22       | 0.0309684  | 0.0743053  | 0.0224122  | 0.0102715  | 0.00758414 |
| LOC100144604 | 0          | 0.0556456  | 0.0164638  | 0.0222047  | 0          |
| NR0B2        | 0.0912722  | 0.0822319  | 0          | 0          | 0          |
| GP5          | 0          | 0.0464012  | 0          | 0          | 0.0145165  |
| HOOK1        | 0.00671937 | 0          | 0.00861839 | 0          | 0.00480244 |
| OVOL1        | 0          | 0.0314599  | 0.0141432  | 0          | 0.0144745  |
| LINC00102    | 0.016856   | 0.0709979  | 0          | 0.0277783  | 0          |
| ATOH8        | 0.0160589  | 0.0517065  | 0.0263508  | 0          | 0.0204398  |
| GPM6A        | 0.0337215  | 0          | 0.0109389  | 0.0141948  | 0          |
| ZNF750       | 0          | 0.0277959  | 0.0123585  | 0          | 0.0129232  |
| HIST1H4D     | 0.805666   | 0.66398    | 0.196914   | 0.540129   | 0          |
| LOC148696    | 0.0309362  | 0.0171245  | 0.0153031  | 0.0206121  | 0          |
| KLHL14       | 0.0455966  | 0.016456   | 0.0143504  | 0.00951657 | 0.0154462  |
| MN1          | 0.00582377 | 0.0241385  | 0          | 0.00978614 | 0          |
| CPED1        | 0.0156534  | 0          | 0.00474472 | 0          | 0          |
| FSTL1        | 0.0486365  | 0.0521593  | 0.0228355  | 0          | 0.00819787 |
| HIST1H2BJ    | 3.21956    | 2.58032    | 2.0214     | 0.790786   | 0.737948   |
| LOC440900    | 0          | 0.256146   | 0.0763691  | 0          | 0          |
| VAV1         | 0.299391   | 0.0877331  | 0.333265   | 0.0363245  | 0.144386   |
| ZNF843       | 0.0264883  | 0.0691522  | 0.0942628  | 0          | 0.0631541  |
| GNG4         | 0.0265853  | 0.0305946  | 0.0468094  | 0.0178522  | 0.00711278 |
| HLA-DRB5     | 0          | 0.110274   | 0.0328467  | 0          | 0          |
| GLIPR1L1     | 0.0275456  | 0.119597   | 0          | 0          | 0          |
| PYCARD       | 0          | 0.403956   | 0.196165   | 0          | 0.200898   |
| SRRM4        | 0          | 0.00454124 | 0.00802514 | 0          | 0.00422866 |
| TMEM25       | 0.109164   | 0          | 0.116119   | 0.0549027  | 0.0205966  |
| BMP2         | 0.026201   | 0.063186   | 0          | 0.0145636  | 0          |
| TNFRSF9      | 0.0116541  | 0.0284127  | 0          | 0.00650777 | 0          |
| DCT          | 0          | 0.0153823  | 0.0271353  | 0          | 0.0143676  |
| LINC00640    | 0.407638   | 0.172596   | 0.100012   | 0.0668959  | 0.162507   |
| GDPD2        | 0.0143409  | 0.0393245  | 0.0176056  | 0.02397    | 0          |
| SHROOM3      | 0.0213004  | 0.0100667  | 0.0206494  | 0.00394543 | 0.00940997 |
| MRC2         | 0.00686265 | 0.0270344  | 0          | 0.0114797  | 0          |
| MAP2K4P1     | 0          | 0.0128232  | 0.0223345  | 0          | 0.0120151  |
| CALHM1       | 0          | 0          | 0.036153   | 0          | 0.0123905  |
| RCAN3AS      | 0.481693   | 0.647085   | 0.530513   | 0.200518   | 0.152879   |
| TSPY26P      | 0          | 0          | 0.142627   | 0          | 0.0489395  |
| LOC100505841 | 0.80137    | 0.788953   | 0.589687   | 0.529029   | 0.215989   |
| MYO7B        | 0.00522656 | 0.00688369 | 0.00623292 | 0          | 0.00630169 |
| ARID3C       | 0.143225   | 0.141371   | 0.214681   | 0          | 0.17182    |
| KLK15        | 0.0318457  | 0.139803   | 0.0774552  | 0          | 0.0403347  |
| A2M          | 0          | 0          | 0.0188093  | 0          | 0.00650387 |
| LRRC7        | 0.00343072 | 0.0100411  | 0.00435655 | 0          | 0          |
| TP53AIP1     | 0.201965   | 0.0127316  | 0.0223915  | 0.0301476  | 0.035587   |
| MYPN         | 0.00917188 | 0.0129613  | 0          | 0.00762729 | 0          |
| C6orf123     | 0.0362812  | 0.0519995  | 0          | 0.0304361  | 0          |
| COL8A2       | 0.00735282 | 0.030043   | 0          | 0          | 0          |
| LOC100506422 | 0.00916101 | 0          | 0.03456    | 0.0151444  | 0          |
| LOXL4        | 0.00819423 | 0.0110857  | 0.00995426 | 0          | 0.0102119  |
| FNBP1        | 0.0307674  | 0.00714559 | 0.0126154  | 0.00852438 | 0          |
| STXBPSL      | 0.00635121 | 0.00626821 | 0.0161945  | 0.00705713 | 0.00297005 |
| VSIG1        | 0.00742    | 0          | 0.0280399  | 0.0123903  | 0          |
| SLC2A5       | 0.0406645  | 0.056689   | 0.0664144  | 0.0226303  | 0.0349698  |
| AGPAT4-IT1   | 0          | 0          | 0.0637181  | 0          | 0.0224901  |
| PTENP1       | 0.011143   | 0.00819805 | 0.00711529 | 0.00929343 | 0          |
| MYO1G        | 0.0113147  | 0.0148514  | 0.0269645  | 0.0188262  | 0          |
| SLC9A9       | 0.01287    | 0.0277561  | 0.00807528 | 0          | 0.0174279  |
| OR13J1       | 0.0443327  | 0          | 0.107102   | 0          | 0.0547331  |
| HIST1H2BN    | 1.91067    | 1.61116    | 1.94365    | 0.898171   | 0.840887   |
| DNAJC5B      | 0.0184019  | 0.0261171  | 0.0458532  | 0          | 0          |
| GRM8         | 0.00641865 | 0.00912514 | 0.00797493 | 0          | 0.00854421 |
| ARHGEF26-AS1 | 0.0389521  | 0.0234108  | 0.0100215  | 0.0261392  | 0          |
| SYT12        | 0          | 0          | 0.0477244  | 0          | 0          |
| TACR2        | 0.0255844  | 0.0178815  | 0.0157982  | 0.0214501  | 0          |
| C8orf42      | 0          | 0.0577972  | 0.0637796  | 0.0238406  | 0.0203116  |
| LINC00620    | 0.19693    | 0          | 0.0691908  | 0.0469358  | 0          |
| STAU2-AS1    | 0.0419656  | 0.0602886  | 0          | 0          | 0.0375168  |
| FOLR3        | 0.18169    | 0.121431   | 0          | 0          | 0.111225   |
| BOLA1        | 0.457356   | 0.339183   | 0.183386   | 0.168999   | 0.189441   |
| DLG2         | 0.0219998  | 0.00397869 | 0.00693969 | 0.00456554 | 0.00748245 |
| CYP2F1       | 0.0479984  | 0.0322033  | 0          | 0          | 0.0295666  |
| LOC100128288 | 0.0945723  | 0.0153141  | 0.0663349  | 0.0175012  | 0.0289758  |
| CBY3         | 0.162383   | 0          | 0.0959415  | 0          | 0.0962056  |
| CC2D2B       | 0.0118901  | 0.0175571  | 0.0151457  | 0          | 0.0166158  |
| DPEP1        | 0.384927   | 0.20936    | 0.650214   | 0.0754844  | 0.190374   |
| LOC100506834 | 0.0150589  | 0.00776365 | 0          | 0.00844795 | 0          |
| LOC147646    | 0.0265667  | 0.0361384  | 0.0650999  | 0          | 0          |



|                 |            |            |            |            |            |
|-----------------|------------|------------|------------|------------|------------|
| CRYBB3          | 0.499917   | 0.267996   | 0.239738   | 0.167153   | 0.12217    |
| ZNF813          | 0.0144713  | 0.0140947  | 0.0122558  | 0          | 0.00662363 |
| PRSS37          | 0.0497759  | 0          | 0.0610231  | 0.0413717  | 0          |
| PVRL3-AS1       | 0.0672347  | 0.0647682  | 0.0559409  | 0          | 0.0307004  |
| LG12            | 0.229161   | 0.148527   | 0.173357   | 0.0647771  | 0.0915071  |
| ACTN1-AS1       | 0.184265   | 0.122838   | 0          | 0          | 0.116028   |
| COL9A2          | 0.027414   | 0          | 0.0162021  | 0          | 0.0165042  |
| EFCAB13         | 0.0202573  | 0.0393508  | 0.0405342  | 0          | 0.0280729  |
| SNORA46         | 2.52624    | 7.12187    | 0          | 0          | 3.6607     |
| SNORA6          | 1.62884    | 2.19622    | 1.9547     | 0          | 2.19365    |
| FAM19A2         | 0.0124429  | 0.00912487 | 0.00791353 | 0          | 0          |
| MADCAM1         | 0          | 0.0880716  | 0.039817   | 0          | 0.0487129  |
| ASAP1-IT1       | 0.10838    | 0.0632169  | 0          | 0.0355599  | 0.0296757  |
| ECM2            | 0.0227344  | 0.0325153  | 0.0212365  | 0.0141239  | 0          |
| LINC00173       | 0.356702   | 1.26669    | 0.0260876  | 0.176476   | 0.3829     |
| WWTR1-AS1       | 0.128203   | 0.150919   | 0.0895537  | 0.0302014  | 0.0473915  |
| LOC100506874    | 0          | 0.0388631  | 0          | 0.0149516  | 0          |
| PPM1E           | 0.0239224  | 0.0251744  | 0.00872813 | 0.011436   | 0.00476594 |
| MUC13           | 0.0164463  | 0.0116611  | 0          | 0          | 0.0109249  |
| SPN             | 0.0039189  | 0.0163549  | 0.00965521 | 0.00655202 | 0.00506005 |
| DPY19L2         | 0          | 0.0160002  | 0.00678427 | 0.00883289 | 0          |
| HIST1H3E        | 0.79879    | 0.209704   | 0.188486   | 0          | 0.194211   |
| CDIP1           | 0.0248322  | 0          | 0.0152417  | 0          | 0.015722   |
| KRT17           | 0.18818    | 0.484911   | 0.332833   | 0.0778503  | 0.277818   |
| WNT5B           | 0.0831632  | 0.0898716  | 0.0200632  | 0.0551282  | 0.0208913  |
| KLHL30          | 0          | 0.0151011  | 0.068034   | 0.0189858  | 0.0138549  |
| PLA2G1B         | 0.144656   | 0          | 0.175161   | 0          | 0          |
| ALOX12          | 0.0133231  | 0.0361026  | 0.0487015  | 0.0222872  | 0.016561   |
| SMC1B           | 0.0179385  | 0.012682   | 0.028038   | 0.00738323 | 0          |
| TRIM67          | 0.00702339 | 0          | 0.00869216 | 0          | 0          |
| PRPH            | 0.439515   | 0          | 0.171992   | 0          | 0.244173   |
| ANP32AP1        | 0.0756604  | 0          | 0.0458466  | 0          | 0.0485299  |
| DAND5           | 0.188287   | 0.129428   | 0.206862   | 0          | 0.143347   |
| FOXDL3          | 0.0388545  | 0          | 0.0239293  | 0          | 0.0251684  |
| SCGB1B2P        | 0.996668   | 0.567062   | 0.681979   | 0.353077   | 0.176565   |
| KRT15           | 0.147643   | 0.0434553  | 0.117523   | 0.0271074  | 0.0399763  |
| RPL13AP3        | 0.0539758  | 0.0249939  | 0          | 0          | 0          |
| MIR1248,SNORA81 | 0          | 38.2908    | 2.2089     | 5.90522    | 8.79317    |
| CDKL5           | 0.020653   | 0.0288855  | 0.0170082  | 0          | 0.0269121  |
| CCL3            | 0.101904   | 0          | 0.0627576  | 0          | 0.0667868  |
| TMEM45B         | 0.0600174  | 0.10352    | 0.0450714  | 0.02012    | 0.0644059  |
| CLDN14          | 0.101734   | 0.0873675  | 0.161123   | 0.0563162  | 0.0267597  |
| MFAP5           | 0          | 0.0349112  | 0          | 0          | 0          |
| KLHDC9          | 0.073142   | 0.644089   | 0.219881   | 0          | 0.318595   |
| FAM35BP         | 0.00609437 | 0.0358589  | 0          | 0          | 0.0171302  |
| VN1R2           | 0.0582859  | 0          | 0.0722969  | 0          | 0.0533502  |
| M1AP            | 0.0103625  | 0.0288499  | 0.0255623  | 0          | 0.0266218  |
| KLKB1           | 0.00968806 | 0.0138953  | 0.0971135  | 0.0321763  | 0          |
| PPIAP30         | 0          | 0.143315   | 0.0619156  | 0.0841988  | 0          |
| RIN2            | 0.0571878  | 0.0357425  | 0.0472741  | 0.0105724  | 0.0473702  |
| EGF             | 0.0082261  | 0          | 0.00518755 | 0          | 0.00554972 |
| KISS1           | 0.228438   | 0          | 0.0902706  | 0          | 0          |
| COL5A1          | 0          | 0          | 0.031224   | 0          | 0.00540016 |
| DEFB131         | 0.494803   | 0          | 1.20005    | 0          | 0.70355    |
| FAM71A          | 0.0244289  | 0.0328228  | 0.0147803  | 0          | 0.029971   |
| SLC38A4         | 0.191218   | 0.0164119  | 0.0910404  | 0.0458291  | 0.0388719  |
| GCNT3           | 0.0416519  | 0          | 0          | 0.0173036  | 0          |
| ENPP3           | 0.012959   | 0          | 0.0082673  | 0          | 0.0089159  |
| JMJD1C-AS1      | 0.895187   | 0.918378   | 1.00412    | 0.0832198  | 0.84084    |
| C16orf62        | 0.0496013  | 0.0397352  | 0.0349563  | 0.0117718  | 0.0278501  |
| NAP1L6          | 0          | 0.0535086  | 0          | 0          | 0          |
| RIPK4           | 0.0465165  | 0.0632207  | 0.0113636  | 0          | 0.0347106  |
| RHBDL2          | 0.0269188  | 0.132331   | 0.0666994  | 0          | 0          |
| SRPX2           | 0.0118251  | 0.0328534  | 0.0868676  | 0.0196254  | 0.0152819  |
| HIST1H2BO       | 1.05937    | 1.94622    | 1.42777    | 1.08911    | 0.329602   |
| FAM83E          | 0.243136   | 0.287284   | 0.69509    | 0.122128   | 0.146209   |
| FBP2            | 0          | 0.0664795  | 0.0296985  | 0.0408225  | 0          |
| PYDC1           | 0.346483   | 0.599627   | 0.40794    | 0.574959   | 0          |
| C13orf45        | 0.0452111  | 0          | 0.0284114  | 0          | 0.0315493  |
| KRTAP5-10       | 0.123316   | 0.282047   | 0          | 0.0697857  | 0.103574   |
| MAP1B           | 0.00364292 | 0.0102968  | 0.00682321 | 0          | 0.00241722 |
| SPTBN4          | 0.277639   | 0.253184   | 0.0981216  | 0.0461601  | 0.116972   |
| BCO2            | 0.0736328  | 0.0701792  | 0.0615054  | 0.0545354  | 0.0335516  |
| C4A,C4B_2       | 0.0181282  | 0.00811768 | 0.0145655  | 0.0100337  | 0.00748115 |
| SLC22A14        | 0.0475414  | 0.0218357  | 0.0386684  | 0.0264334  | 0.0199577  |
| SH2D7           | 0          | 0.0445042  | 0.020098   | 0.0277047  | 0          |
| SERPINA1        | 0.0499477  | 0.0687736  | 0.102574   | 0.0276644  | 0.0529217  |
| LOC100653515    | 0.0415905  | 0.0364649  | 0          | 0          | 0.0337696  |
| SND1-IT1        | 0.0778166  | 0.0858333  | 0.024772   | 0.0325377  | 0.0134831  |

|                 |            |            |            |            |            |
|-----------------|------------|------------|------------|------------|------------|
| LOC643401       | 0          | 0.289605   | 0.0632055  | 0.0851636  | 0.0674248  |
| C9orf171        | 0.0393823  | 0.0541201  | 0.0964691  | 0.0328851  | 0.0496967  |
| LINC00319       | 0.0558244  | 0.0373462  | 0.0167811  | 0.0233619  | 0          |
| RS1             | 0.00861268 | 0.0244446  | 0          | 0.0144082  | 0          |
| RUNX1T1         | 0.0064332  | 0.0142166  | 0.00408545 | 0.010786   | 0          |
| DZIP1           | 0          | 0.0132433  | 0.0115113  | 0          | 0          |
| MIR3651,SNORA84 | 55.0645    | 33.7057    | 11.3891    | 15.5183    | 17.0559    |
| TMEM255A        | 0.00748067 | 0.0777261  | 0.00954177 | 0          | 0.0418222  |
| KRTAP2-4        | 0          | 0.0877228  | 0.155462   | 0.106683   | 0          |
| LRRC25          | 0          | 0.0851083  | 0.0191183  | 0.0263972  | 0.0196713  |
| DMRT1           | 0.0141993  | 0.0614947  | 0.0356964  | 0.0237881  | 0          |
| TPTE2P1         | 0.0128194  | 0.0138663  | 0.00810578 | 0.00534576 | 0.00436832 |
| ISM2            | 0.0126573  | 0.0170053  | 0          | 0          | 0.0132309  |
| SMAD5-AS1       | 0.0561217  | 0.0815821  | 0.124149   | 0.0469034  | 0.0191294  |
| AOC4            | 0          | 0.0433952  | 0.0193499  | 0          | 0          |
| EQTN            | 0.19206    | 0.0348234  | 0.0904327  | 0          | 0.066096   |
| KCNN1           | 0.193983   | 0.211968   | 0.267494   | 0.0539588  | 0.134716   |
| CDHR2           | 0          | 0.0105914  | 0.0190492  | 0          | 0          |
| CRX             | 0.0252067  | 0.0352145  | 0.0465378  | 0.0314135  | 0.0164841  |
| CETN4P          | 0.0881269  | 0.65515    | 0.222929   | 0.0729449  | 0.124702   |
| MYH16           | 0.0610611  | 0.0156947  | 0          | 0.0199404  | 0.0145579  |
| TMCC3           | 0          | 0.00561094 | 0.00977418 | 0          | 0          |
| ARHGDI8         | 0.0428689  | 0          | 0.0794281  | 0          | 0.0553412  |
| SERPIN7         | 0.0352612  | 0.0171655  | 0.163687   | 0.0391097  | 0.016218   |
| RYR1            | 0          | 0.0061396  | 0.00278643 | 0          | 0          |
| MAEL            | 0.0145432  | 0.0210212  | 0.0183113  | 0.0243184  | 0          |
| NAT8L           | 0.0459226  | 0.0180634  | 0.0161285  | 0          | 0.0248399  |
| JAKMIP3         | 0.128871   | 0.291918   | 0.0488849  | 0.0589836  | 0.107482   |
| STYK1           | 0.182002   | 0.157931   | 0.197035   | 0.0394054  | 0.10619    |
| HSD17B13        | 0.113656   | 0.146965   | 0.0505715  | 0.0343624  | 0.0143952  |
| NACAD           | 0          | 0.0196438  | 0          | 0          | 0.00899004 |
| CNDP1           | 0.0604045  | 0.136241   | 0.0149045  | 0.0804193  | 0.0158934  |
| PCDH18          | 0.0965039  | 0.111464   | 0.0262886  | 0.0115286  | 0.0956602  |
| LINC00568       | 0.207079   | 0.0922471  | 0.331188   | 0.113031   | 0.174954   |
| LOC100288432    | 0.184945   | 1.25       | 1.11211    | 0.608681   | 0.233919   |
| RAPGEF4-AS1     | 0.0141515  | 0          | 0          | 0          | 0.00649006 |
| HLA-G           | 0.0732306  | 0.0968242  | 0.116826   | 0          | 0.0892724  |
| ST8SIA5         | 0.0849472  | 0.0956469  | 0.0514744  | 0.070737   | 0.0354354  |
| EMX2OS          | 0.00330229 | 0.0046275  | 0.00409361 | 0.00549584 | 0          |
| NWD1            | 0          | 0.00494209 | 0.00877861 | 0          | 0          |
| TLX2            | 0          | 0.0757955  | 0          | 0          | 0.0349681  |
| LOC100131289    | 1.0623     | 1.79142    | 1.01307    | 0.15298    | 1.13944    |
| PRELP           | 0.0204556  | 0          | 0.0188898  | 0          | 0          |
| C7orf57         | 0.108358   | 0          | 0.0164541  | 0.0214709  | 0.0363274  |
| LGR5            | 0.0272016  | 0          | 0.0341684  | 0          | 0.0122178  |
| APOBEC3G        | 0          | 0.0415312  | 0          | 0          | 0.019324   |
| TIGD4           | 0.153528   | 0.0621778  | 0.247762   | 0.0141082  | 0.0951643  |
| C6orf223        | 0.0947125  | 0.151879   | 0.127057   | 0.0158122  | 0.107931   |
| HAS2-AS1        | 0.0381194  | 0          | 0.0484111  | 0          | 0.0175807  |
| ANKRD53         | 0          | 0          | 0.0744701  | 0.034691   | 0          |
| LOC100287846    | 0          | 0.0210838  | 0          | 0          | 0.00990647 |
| LOC285626       | 0          | 0.046367   | 0          | 0          | 0.0217917  |
| LINC00511       | 0.0554247  | 0.0158812  | 0.0554476  | 0.0158812  | 0.0595885  |
| RPL34-AS1       | 0          | 0          | 0.022027   | 0          | 0          |
| POM121L9P       | 0.0564763  | 0.0306902  | 0          | 0          | 0.0212548  |
| RLN1            | 0.0295316  | 0.0852028  | 0.0742386  | 0.0491398  | 0.0397661  |
| STL             | 0.0115391  | 0.0572809  | 0.0295477  | 0.0192553  | 0.0272006  |
| HSPA12B         | 0.10835    | 0.223277   | 0.147313   | 0.0515832  | 0.148705   |
| LOC100506655    | 0.0189643  | 0.0264265  | 0.0234612  | 0.0157741  | 0          |
| EFNB3           | 0.0105065  | 0.0291768  | 0.0258957  | 0.017653   | 0.0134635  |
| GNRHR           | 0.00347336 | 0          | 0.00885885 | 0.005833   | 0          |
| CNGA1           | 0.0286671  | 0.0824105  | 0.0358639  | 0.047335   | 0.00981401 |
| SLCO1C1         | 0          | 0.0201783  | 0          | 0          | 0.00964284 |
| KRTDAP          | 1.61097    | 0.828695   | 0.850587   | 0.377492   | 0.662311   |
| CKMT1A          | 0.0484522  | 0.0875879  | 0.0783875  | 0.0536144  | 0.020218   |
| SNORA22         | 2.69324    | 7.31944    | 0          | 0          | 0          |
| SYCP3           | 0.130311   | 0.13251    | 0.163815   | 0.153486   | 0.0507308  |
| LOC100129617    | 0.0708863  | 0.0604921  | 0.0708703  | 0.0714139  | 0          |
| KRT5            | 0.22101    | 0.019608   | 0.177187   | 0.0977147  | 0          |
| PSG5            | 0.0149456  | 0          | 0.0378455  | 0.0252586  | 0          |
| SLC6A20         | 0.00495125 | 0          | 0.0123268  | 0.00828478 | 0          |
| LYZ             | 0.0809732  | 0.0936044  | 0.0203374  | 0.0269232  | 0.0670668  |
| HAPLN3          | 0.913024   | 1.42671    | 0.358531   | 0.374138   | 0.884007   |
| STAG3L1         | 0.0757817  | 0.0419168  | 0.148101   | 0.0504278  | 0.0776904  |
| C8orf46         | 0.0133457  | 0.00969351 | 0.0420813  | 0.0222401  | 0.00912186 |
| TNFRSF1B        | 0          | 0.0121327  | 0.0109115  | 0          | 0.0111609  |
| SERPING1        | 0.095342   | 0.0866949  | 0.0386665  | 0.0263485  | 0.0804841  |
| ZNF733P         | 0.0116791  | 0.0165613  | 0.0146842  | 0          | 0          |
| SNORD94         | 2.79301    | 10.9879    | 3.29656    | 4.5852     | 3.69483    |

|                           |            |            |            |            |            |
|---------------------------|------------|------------|------------|------------|------------|
| HES2                      | 0          | 0.0200705  | 0.0180084  | 0          | 0.0185597  |
| TC2N                      | 0.00406848 | 0.0311077  | 0.00527971 | 0.0136644  | 0.00596924 |
| INTS4L2                   | 0.0614702  | 0.13032    | 0          | 0.0256239  | 0.0402914  |
| JPH3                      | 0          | 0.0310525  | 0.0521907  | 0          | 0          |
| MAML2                     | 0.0503677  | 0.0592964  | 0.00524113 | 0.0210144  | 0.0274632  |
| ATP13A4                   | 0.0103175  | 0.00732492 | 0          | 0.00856582 | 0          |
| LCN10                     | 0.0158417  | 0          | 0.0383528  | 0.0263221  | 0          |
| TMEM59L                   | 0.421085   | 0.150437   | 0.10184    | 0.141585   | 0.137492   |
| ARL17A,ARL17B             | 0.195944   | 0.25884    | 0.280265   | 0.0657958  | 0.126521   |
| PBOV1                     | 0.0359138  | 0.0267284  | 0.034493   | 0.0149852  | 0          |
| HP                        | 0          | 0.0281725  | 0.0252003  | 0          | 0.0262054  |
| CPM                       | 0.00333694 | 0.0292754  | 0.0126887  | 0.00557614 | 0.00462013 |
| SLC7A5P1                  | 0.295262   | 0.372178   | 0.690732   | 0          | 0.170171   |
| C11orf52,HSPB2            | 0.0488457  | 0          | 0.116991   | 0.0809486  | 0          |
| QOEP                      | 0.0522208  | 0.071736   | 0.0633028  | 0          | 0          |
| FLJ33360                  | 0.0689812  | 0.114471   | 0.100418   | 0.0573566  | 0.0611874  |
| B3GNT4                    | 2.43596    | 2.93734    | 1.79352    | 0.577472   | 2.67141    |
| RASGRF1                   | 0.0110199  | 0.00768156 | 0          | 0.0091781  | 0          |
| GOLGA7B                   | 0.191425   | 0.0823883  | 0.319998   | 0.0655009  | 0.081807   |
| SNORA45                   | 2.96448    | 7.89429    | 0          | 0          | 0          |
| PTGER4                    | 0.109793   | 0.181636   | 0.158816   | 0.070385   | 0.137201   |
| ARL4C                     | 0.123984   | 0.369234   | 0.0826199  | 0.0122464  | 0.168731   |
| OR2B6                     | 0.179521   | 0.132679   | 0.301934   | 0.100015   | 0.0413838  |
| PIGR                      | 0.0134041  | 0.00915211 | 0          | 0.0111256  | 0          |
| SLC16A8                   | 0.0773414  | 0.100603   | 0.0458468  | 0.0648001  | 0.0461744  |
| PRG2                      | 0.0404635  | 0.103076   | 0.0490861  | 0          | 0.0960064  |
| FKBP6                     | 0          | 0.0269715  | 0.024505   | 0          | 0.0257372  |
| XKRX                      | 0.0364477  | 0.0389986  | 0.0340085  | 0.0302698  | 0.0243459  |
| DPYSL4                    | 0.0911271  | 0.119381   | 0.0180116  | 0.0252666  | 0.0364997  |
| PRICKLE1                  | 0          | 0.00803147 | 0.00701624 | 0          | 0.00754129 |
| HIATL2                    | 1.05456    | 1.46104    | 1.45867    | 0.84082    | 0.709433   |
| METTL7A                   | 0.0319895  | 0.0232288  | 0          | 0.0133738  | 0          |
| MDS2                      | 0          | 0.0454093  | 0.0396578  | 0          | 0.0429168  |
| ALOX5                     | 0.0688175  | 0.0370722  | 0.0331543  | 0.0458222  | 0          |
| S100A4                    | 0.365984   | 1.1029     | 0.705029   | 0.240019   | 0.469934   |
| GPR124                    | 0.0643412  | 0.0667925  | 0.120245   | 0.0239509  | 0.0782079  |
| KCNMB2-IT1                | 0.0543705  | 0          | 0.264791   | 0.0886032  | 0.0725597  |
| CYBRD1                    | 0.0158389  | 0.0311119  | 0          | 0.00882823 | 0.0149344  |
| KLK1                      | 0.0778178  | 0.211996   | 0.0940256  | 0          | 0.194789   |
| TMEM139                   | 0.0751199  | 0.163468   | 0.0207589  | 0.0279621  | 0.0438263  |
| RIMS1                     | 0.0961366  | 0.0576927  | 0.213778   | 0.0536229  | 0.0633603  |
| KIAA1683                  | 0.0362925  | 0.047749   | 0.0216623  | 0.0150633  | 0.0108146  |
| TRIM34,TRIM6,TRIM6-TRIM34 | 0.438664   | 0.402859   | 0.476717   | 0.221371   | 0.278622   |
| SYNM                      | 0.00420641 | 0.0151724  | 0.00519122 | 0.00698241 | 0.00549698 |
| SP5                       | 0.880675   | 1.20916    | 1.00351    | 0.184599   | 0.755219   |
| ST14                      | 0.0381985  | 0.0167711  | 0.0303325  | 0.021307   | 0          |
| FKBP1AP1                  | 0.0344978  | 0.0250346  | 0.0434575  | 0.028839   | 0.0236241  |
| TRIM17                    | 0.0288742  | 0.0750245  | 0.0228089  | 0.0316866  | 0          |
| ELANE                     | 0          | 0          | 0.176358   | 0          | 0.0905237  |
| DNAH7                     | 0.00323677 | 0          | 0.00203992 | 0.00269081 | 0          |
| LRRC37A11P                | 0.0137744  | 0.0190518  | 0.0253489  | 0          | 0.0176159  |
| CD33                      | 0.18387    | 0.0978995  | 0.108278   | 0.0434054  | 0.0574483  |
| SLC28A3                   | 0.00957485 | 0          | 0.00602649 | 0.00797149 | 0          |
| FOXDL6                    | 0.0585472  | 0          | 0.0901493  | 0.0244753  | 0          |
| COCH                      | 0.0170306  | 0          | 0.0107458  | 0.0141955  | 0          |
| COL23A1                   | 0.0266658  | 0.0173314  | 0.0317232  | 0          | 0.0159213  |
| KRT34                     | 0.0564236  | 0.125131   | 0.0452358  | 0.0933444  | 0.0230739  |
| CPXM2                     | 0          | 0.055556   | 0          | 0          | 0          |
| RPL13P5                   | 0.942805   | 1.53996    | 0.865699   | 0.0912609  | 1.15462    |
| SCARNA6                   | 0.558679   | 0.382959   | 0          | 0          | 0          |
| DEFB134                   | 1.2156     | 0.876911   | 0          | 0          | 0          |
| RGS17                     | 0.0633744  | 0.11533    | 0          | 0.0262081  | 0.0662083  |
| RNF39                     | 0.0895444  | 0          | 0.13603    | 0.0374749  | 0          |
| PGM5-AS1                  | 0.165193   | 0.478464   | 0.0694399  | 0          | 0.369759   |
| HRH4                      | 0.0154405  | 0.0114891  | 0.0393672  | 0          | 0.0216134  |
| CNBD2                     | 0.114784   | 0.100667   | 0.150478   | 0.0762207  | 0.0591491  |
| SERPINI1                  | 0.492601   | 0.349727   | 0.287011   | 0.27338    | 0.243977   |
| GPR132                    | 0.0101906  | 0.0135889  | 0          | 0          | 0.0123735  |
| BTBD16                    | 0.0622865  | 0          | 0.0760772  | 0.051563   | 0.0200744  |
| PXT1                      | 0          | 0.0174817  | 0.0457753  | 0          | 0.0329857  |
| PVRL4                     | 0.0992311  | 0.0804311  | 0.0712607  | 0.0693528  | 0.0319832  |
| MACC1                     | 0.0129951  | 0.00323631 | 0.0111512  | 0.00725557 | 0.00309658 |
| NDRG2                     | 0          | 0          | 0.0333933  | 0          | 0.0174836  |
| KALRN                     | 0.0450643  | 0.0301562  | 0.0168497  | 0.0130476  | 0.00498392 |
| GPRC5C                    | 0.314563   | 0.593916   | 0.358144   | 0.115423   | 0.25641    |
| SH3RF2                    | 1.36197    | 0.569981   | 0.544607   | 0.416277   | 0.444018   |
| IDH1-AS1                  | 1.30864    | 1.53438    | 1.24654    | 0.311646   | 1.19058    |
| IL22RA1                   | 0.909764   | 0.964652   | 0.458438   | 0.378124   | 0.643928   |
| USP49                     | 0.125981   | 0.147846   | 0.178426   | 0.0483857  | 0.0882356  |

|                    |            |           |            |           |            |
|--------------------|------------|-----------|------------|-----------|------------|
| ZNF705A            | 0.00607012 | 0.0177021 | 0.00768888 | 0         | 0.0166706  |
| PDE1B              | 0.00930202 | 0.0127108 | 0          | 0         | 0.0116658  |
| HIST1H2BD          | 19.9683    | 14.4227   | 15.6772    | 10.107    | 6.69156    |
| KCNE2              | 0.284899   | 0.246372  | 0.350623   | 0         | 0.0915133  |
| POM121L10P         | 0.0417299  | 0.0479743 | 0.0273059  | 0.0267237 | 0.0240498  |
| OPN1SW             | 0.0735882  | 0.205018  | 0.314606   | 0.0614725 | 0.188907   |
| SNORA54            | 0          | 35.7505   | 0          | 0         | 19.0667    |
| NREP               | 0.0888011  | 0.093274  | 0.0647697  | 0.0425553 | 0.0888125  |
| C1QTNF9            | 0.0385426  | 0.0364305 | 0          | 0         | 0.017222   |
| ALOX5AP            | 0          | 0         | 0.0879596  | 0         | 0.0470178  |
| CLDN4              | 0.222127   | 0.164523  | 0.237273   | 0.082853  | 0.120486   |
| SPATA32            | 0.0769414  | 0.0673436 | 0.0304966  | 0         | 0.093584   |
| KRT80              | 1.49225    | 0.674854  | 1.24937    | 0.727536  | 0.516581   |
| LOC728558          | 0.017226   | 0.0335763 | 0.0218437  | 0         | 0.00791999 |
| DAW1               | 0          | 0.0615726 | 0.0895433  | 0.0239364 | 0.0570483  |
| HOXD1              | 0.130495   | 0.151349  | 0.106713   | 0         | 0.170105   |
| EPN2-IT1           | 0.0354783  | 0.0490924 | 0          | 0         | 0.0454279  |
| HCG17              | 0.173955   | 0.436178  | 0.378125   | 0.216005  | 0.235946   |
| LOH12CR2           | 0.347703   | 0.343212  | 0.389209   | 0.0865141 | 0.277145   |
| SGK2               | 0.259481   | 0.517638  | 0.183819   | 0.112541  | 0.244318   |
| SRD5A3-AS1         | 0.083172   | 0         | 0.0678014  | 0.0455584 | 0.0353468  |
| SERPINE3           | 0.0431474  | 0         | 0.0788029  | 0         | 0.0276343  |
| LOC728024          | 0          | 0         | 0.0409078  | 0         | 0.0220517  |
| KIAA1199           | 0.0820041  | 0.087237  | 0.104886   | 0.049526  | 0.0190578  |
| ANKRD1             | 0.508255   | 0.513818  | 0.30715    | 0.253744  | 0.189161   |
| EPHA1-AS1          | 0          | 0         | 0.0103351  | 0         | 0.00557685 |
| SMOC1              | 0.00756967 | 0.010527  | 0          | 0         | 0.00979484 |
| LOC100289187       | 1.18848    | 1.74501   | 1.77897    | 0.773364  | 1.05255    |
| DAB2               | 0.010876   | 0.0393089 | 0.0547881  | 0.0181261 | 0.0288644  |
| IGFALS             | 0.223511   | 0.245233  | 0.149469   | 0         | 0.335141   |
| HIST1H1D           | 1.50935    | 0.714024  | 1.69141    | 0.710723  | 0.660854   |
| LOC100131726       | 0.102135   | 0.14029   | 0.093941   | 0.0848601 | 0.0970127  |
| NRON               | 0.0176916  | 0.0251302 | 0          | 0         | 0.0232947  |
| IMPG2              | 0.019495   | 0.0143774 | 0.0278996  | 0.0203371 | 0          |
| NFATC4             | 0.745595   | 0.361519  | 0.53988    | 0.188516  | 0.492425   |
| TMEM191C           | 0.718505   | 0.976555  | 0.320925   | 0.274784  | 0.636319   |
| HOXA-AS3           | 0.0155491  | 0.0761593 | 0.038489   | 0.0129823 | 0.0303989  |
| HHIPL2             | 0.138604   | 0.189972  | 0.168988   | 0.191221  | 0.0590008  |
| NDNF               | 0.00853348 | 0.0122139 | 0.0426106  | 0         | 0.0346598  |
| C20orf118          | 0.0846015  | 0.0393391 | 0.0346561  | 0         | 0.0367424  |
| NCF1               | 0.0344003  | 0         | 0.0406297  | 0         | 0.0411153  |
| PDCL2              | 0.055689   | 0         | 0.0348429  | 0         | 0          |
| NELL2              | 0.0338281  | 0.0193141 | 0.00848026 | 0.03358   | 0          |
| SLN                | 0.15664    | 0.110285  | 0.0484494  | 0         | 0.103566   |
| SNORA57            | 13.0803    | 34.263    | 12.8406    | 7.1557    | 14.4462    |
| MAP1LC3A           | 0.201411   | 0.120935  | 0.108172   | 0         | 0.0612517  |
| SCARNA8            | 0          | 4.19232   | 3.66135    | 0         | 4.32398    |
| SSUH2              | 0.159055   | 0         | 0.205388   | 0.030997  | 0.0710747  |
| GPR52              | 0          | 0         | 0.0440065  | 0         | 0.0242958  |
| SNORA18            | 44.5206    | 60.0881   | 43.1041    | 19.6271   | 40.0724    |
| TTN-AS1            | 0.205206   | 0.246755  | 0.172197   | 0.106606  | 0.0844953  |
| DHRS4L1            | 0.122429   | 0.200443  | 0.149561   | 0.0818891 | 0.0923459  |
| TUBA3D             | 0.044029   | 0.0294646 | 0.132761   | 0.0369477 | 0          |
| SLC35G5            | 0          | 0.132032  | 0.0391931  | 0.0539329 | 0.0405283  |
| TCN2               | 0.0816888  | 0.0416714 | 0.0793669  | 0.0544853 | 0.0573993  |
| FAM81B             | 0.0146432  | 0.0206032 | 0          | 0         | 0.0195261  |
| HIST1H2BC          | 3.57935    | 0.358537  | 3.72339    | 1.54778   | 0.821832   |
| CSTA               | 0          | 0.509549  | 0.676667   | 0.263443  | 0.222682   |
| FXD7               | 0.158504   | 0.520285  | 0.09421    | 0         | 0.291156   |
| ASPDH              | 0.169135   | 0.0743737 | 0          | 0         | 0.135208   |
| CYP21A2            | 0.0457288  | 0.122282  | 0.145967   | 0         | 0.0942476  |
| EPO                | 0.143508   | 0.267591  | 0.17142    | 0.047555  | 0.177273   |
| ANKRD65            | 0.0214311  | 0         | 0.0259007  | 0         | 0.0264333  |
| CDO1               | 0.0148315  | 0.0852009 | 0.0558612  | 0         | 0.0606096  |
| ZNF512B            | 0.102148   | 0.0401632 | 0.0290809  | 0         | 0.0220662  |
| KCNA7              | 0.0205466  | 0         | 0          | 0.011427  | 0          |
| NAPSA              | 0.0505204  | 0.103862  | 0.0921039  | 0.0424132 | 0.0953869  |
| LINC00665          | 0          | 0.0255658 | 0.203073   | 0         | 0.0958233  |
| GGT8P              | 0.0478214  | 0.0160547 | 0          | 0         | 0.0148242  |
| LOC100506394       | 0.0653861  | 0.457337  | 0.196586   | 0.130794  | 0.178217   |
| SLC8A2             | 0.0352185  | 0.0119366 | 0          | 0         | 0.0110064  |
| OAS2               | 0.0102819  | 0.0144314 | 0.0207414  | 0.0170134 | 0.00842767 |
| ZNRF3-AS1          | 0.0721341  | 0.0435259 | 0.0128541  | 0.0171422 | 0          |
| CLIC3              | 0.300636   | 0         | 0.116701   | 0         | 0.234807   |
| CLIC2              | 0.105756   | 0.197787  | 0.226008   | 0.117359  | 0.129325   |
| FLJ26245.RNA5SP411 | 0.0157474  | 0.070056  | 0          | 0.0262317 | 0.0220324  |
| TP1P3              | 0.0471044  | 0         | 0.0576391  | 0         | 0.0592242  |
| ATP6V0A4           | 0.0169145  | 0.0117693 | 0.0104015  | 0         | 0.0221177  |
| HIST1H2AM          | 6.86653    | 2.79329   | 4.70525    | 2.59498   | 2.10095    |

|                    |            |            |            |            |            |
|--------------------|------------|------------|------------|------------|------------|
| LOC148709          | 0.297778   | 0.449462   | 0.221156   | 0.160051   | 0.259297   |
| LOC100507091       | 0.0125963  | 0          | 0.0154389  | 0          | 0.0158825  |
| EXOC3L4            | 0          | 0.0296861  | 0.108221   | 0.0382887  | 0          |
| LOC100188947       | 0.199458   | 0.312925   | 0.06195    | 0.0833133  | 0.063621   |
| LOC645638          | 0.0593881  | 0.166116   | 0.146059   | 0          | 0          |
| ANGPT2             | 0.00804539 | 0.00592386 | 0.0204485  | 0.00669637 | 0.00562217 |
| RTN1               | 0.0355204  | 0.0512885  | 0.011522   | 0          | 0.0242244  |
| MYLK3              | 0.0259643  | 0.0166877  | 0.0181853  | 0.0241355  | 0          |
| VTRNA1-3           | 0          | 132.175    | 133.835    | 0          | 151.568    |
| LINC00266-1        | 0.0466506  | 0.125062   | 0.11297    | 0          | 0          |
| PDGFRB             | 0.0107468  | 0.0145071  | 0.0194995  | 0          | 0.00667321 |
| FBXW12             | 0.101809   | 0.0714168  | 0.083482   | 0.0278786  | 0.0888856  |
| ARL9               | 0.224588   | 0.155332   | 0.318201   | 0.123828   | 0.142347   |
| SNORD58C           | 0          | 89.4693    | 88.26      | 0          | 101.711    |
| COX8C              | 0.181238   | 0.126521   | 0.111172   | 0          | 0.23982    |
| SOX15              | 0.324982   | 0.67029    | 0.346843   | 0.181281   | 0.396764   |
| NPHS1              | 0.100258   | 0.0764948  | 0.0762026  | 0.0628213  | 0.0156636  |
| ACSM1              | 0.0119559  | 0          | 0.0145819  | 0          | 0.0152138  |
| HBBP1              | 0.306444   | 0.24508    | 0.107321   | 0.144807   | 0.232198   |
| SH3GL1P2           | 0.0715395  | 0.0949325  | 0.137656   | 0.0716736  | 0.0520468  |
| PVRIG              | 0.0519507  | 0.0695501  | 0.0313617  | 0.0871384  | 0          |
| HRC                | 0.00959053 | 0.0248645  | 0.0345165  | 0          | 0.0229397  |
| C16orf86           | 0.325331   | 0.654943   | 0.388036   | 0.421658   | 0.298693   |
| A2M-AS1            | 0.0560118  | 0.211935   | 0.127475   | 0.0747641  | 0.0914297  |
| PAGE2B             | 0.121686   | 0.496911   | 0          | 0.19774    | 0.156901   |
| AKR1B1             | 0.0193239  | 0          | 0.023729   | 0          | 0.0247786  |
| LOC100128770       | 0.0383981  | 0.15461    | 0.0308524  | 0.0426503  | 0.063407   |
| DACT3-AS1          | 0.079077   | 0          | 0.0969142  | 0          | 0.10134    |
| OPRK1              | 0          | 0.0143533  | 0          | 0.00822063 | 0          |
| WWC3               | 0.0235333  | 0.0263015  | 0.00581058 | 0.0235971  | 0          |
| KCNJ4              | 0.0504981  | 0.098679   | 0.0592162  | 0          | 0.120274   |
| GOLGA6L10          | 0.0816101  | 0.0626228  | 0.0551637  | 0.041709   | 0.0508784  |
| HHIP-AS1           | 0.238818   | 0.112065   | 0.0990829  | 0.177002   | 0.0348708  |
| LGALS4             | 0.0884444  | 0.358774   | 0.0711213  | 0.0492057  | 0.146746   |
| TGFBI              | 0.0304585  | 0.0138527  | 0          | 0          | 0.0256759  |
| DUSP15             | 0.0969024  | 0.385987   | 0.230295   | 0.160032   | 0          |
| ZBTB20             | 0.11394    | 0.047706   | 0.104969   | 0.0171872  | 0.104618   |
| CGB7               | 0.662614   | 1.83874    | 0.85462    | 0.460256   | 1.49458    |
| TRPM5              | 0.0109084  | 0.0427405  | 0          | 0.0182149  | 0.0129949  |
| LIPT2              | 0.942505   | 3.3553     | 1.65566    | 0.865921   | 2.14977    |
| FEZF1              | 0.277298   | 0.500917   | 0.121831   | 0.0994255  | 0.180776   |
| MRGPRX3            | 0.084472   | 0.14724    | 0.181878   | 0          | 0.0544046  |
| PDZD2              | 0.00650364 | 0.00300825 | 0          | 0          | 0.00558935 |
| C11orf34           | 0          | 0.0472123  | 0          | 0.027583   | 0          |
| FCGR2B             | 0          | 0.0331726  | 0          | 0.0193909  | 0          |
| PBX1               | 0.191021   | 0.341515   | 0.232856   | 0.0958374  | 0.183054   |
| RAB3A              | 4.47462    | 2.99874    | 1.70016    | 1.59746    | 2.58214    |
| HLA-F-AS1          | 2.83843    | 1.97112    | 1.86861    | 1.4911     | 1.44145    |
| KLHL10             | 0.0580488  | 0.0821019  | 0.101463   | 0.0194206  | 0.0610137  |
| HM13-AS1           | 0.249846   | 0.224405   | 0.491567   | 0          | 0.425473   |
| BHLHB9             | 0.177635   | 0.172569   | 0.204836   | 0.0987799  | 0.141493   |
| LRRC3-AS1          | 0.0879348  | 0.0591209  | 0.105909   | 0.0723413  | 0          |
| BEND3P3            | 0.0672007  | 0.03787    | 0          | 0.0224675  | 0.0234716  |
| HIST1H2AH          | 1.73408    | 1.57347    | 1.42206    | 1.77432    | 0.323739   |
| FOXL1              | 0.0473664  | 0.0832629  | 0.0581542  | 0.0591348  | 0.0312342  |
| SNORA76            | 21.5522    | 14.0424    | 6.22927    | 17.3246    | 7.30778    |
| BIRC3              | 0.766432   | 1.10706    | 0.514257   | 0.451036   | 0.738434   |
| LOC100507300       | 0.0311706  | 0          | 0          | 0          | 0          |
| TAT                | 0          | 0.0273253  | 0          | 0.0161005  | 0          |
| MTUS2              | 0.0271322  | 0.0189899  | 0.125809   | 0.0565915  | 0.00879362 |
| ALPK3              | 0.0591874  | 0.0256009  | 0.0360722  | 0.0223879  | 0.030357   |
| RNF112             | 0.543806   | 0.466385   | 0.248408   | 0.256792   | 0.238596   |
| SYDE1              | 0.0410386  | 0.0364746  | 0          | 0.0459813  | 0          |
| ASIC4              | 0.0142118  | 0.0376665  | 0.0170149  | 0.0237619  | 0.0172398  |
| SLFN1              | 0.136399   | 0.128832   | 0.186913   | 0.130434   | 0.0704467  |
| MAGI2              | 0.276856   | 0.390421   | 0.438656   | 0.166297   | 0.247555   |
| FOXD4L5            | 0          | 0.0320986  | 0          | 0.0190692  | 0          |
| MTRNR2L1           | 0.525259   | 1.51931    | 0.66492    | 0.4009     | 0.651226   |
| CSDC2              | 0.109887   | 0.041621   | 0.0942483  | 0.0263402  | 0.0380775  |
| RNF148             | 0.227429   | 0.190597   | 0.213487   | 0.157467   | 0.0507766  |
| LUZP4              | 0.0125979  | 0          | 0.015653   | 0          | 0.0169406  |
| FAM132A            | 1.82255    | 2.45402    | 1.04334    | 0.980542   | 1.9019     |
| SLC15A2            | 0.0386646  | 0.0342311  | 0.0098657  | 0.0194223  | 0.0161204  |
| HIST1H2AD,HIST1H3D | 2.77156    | 2.03068    | 3.82031    | 1.90608    | 1.5825     |
| HBA2               | 0.102411   | 0.930974   | 0.484865   | 0.170086   | 0.740084   |
| PDE7B              | 0.139751   | 0.142743   | 0.150767   | 0.0920563  | 0.0758842  |
| LOC727896          | 0.0470719  | 0.017609   | 0          | 0.0196611  | 0.00849186 |
| COL1A1             | 0.0570092  | 0.152642   | 0.0690376  | 0.0638468  | 0.070103   |
| CSPG4              | 0.0362496  | 0.030084   | 0.00544011 | 0          | 0.0273519  |

|              |            |            |            |            |            |
|--------------|------------|------------|------------|------------|------------|
| GPR85        | 0          | 0.00677229 | 0.00575511 | 0.00750161 | 0          |
| PGAM4        | 0.17906    | 0.159759   | 0.2024     | 0.0271861  | 0.211541   |
| LOC145837    | 0.0407834  | 0.077255   | 0.0677449  | 0.0452658  | 0.0182235  |
| TAS2R46      | 0          | 0.0417623  | 0.0357637  | 0.046646   | 0          |
| ENDOD1       | 0.277132   | 0.613436   | 0.435504   | 0.202599   | 0.3382     |
| PPEF1        | 0.250672   | 0.191256   | 0.281853   | 0.0872649  | 0.214062   |
| SERTAD4-AS1  | 4.36714    | 4.58952    | 5.11874    | 1.42347    | 3.20058    |
| RHOBTB1      | 0.794638   | 0.687778   | 0.794476   | 0.412157   | 0.644025   |
| PPEF2        | 0.0457655  | 0.127448   | 0.00941651 | 0.0126696  | 0.0987423  |
| CERKL        | 0.0462311  | 0.0227695  | 0.0295575  | 0          | 0.0323893  |
| UNC5B-AS1    | 1.53741    | 2.44957    | 2.08935    | 0.367071   | 2.00687    |
| DACH1        | 0.273832   | 0.269152   | 0.328453   | 0.125324   | 0.23839    |
| TPH1         | 0.0122211  | 0          | 0.0153893  | 0          | 0.0169003  |
| CCDC114      | 0.0766524  | 0.189511   | 0.0788933  | 0.0729807  | 0.0802819  |
| FERMT2       | 0.0556478  | 0.0180385  | 0.0392931  | 0.0103454  | 0.0254872  |
| ABCC11       | 0.0304526  | 0.0419781  | 0.0289143  | 0.0202326  | 0.0310524  |
| ITGA10       | 0.151601   | 0.139955   | 0.124114   | 0.0755127  | 0.0715871  |
| SPDEF        | 0.0475132  | 0.0619715  | 0.0282224  | 0          | 0.0846192  |
| TMEM92       | 0.101948   | 0.08425    | 0.137915   | 0.017001   | 0.0386677  |
| LINC00669    | 0.830191   | 0.770711   | 0.480675   | 0.49651    | 0.434467   |
| FUT3         | 0.0186031  | 0.0750812  | 0.0445445  | 0.0620806  | 0.0230286  |
| LYPD3        | 0.352102   | 1.62097    | 0.342268   | 0.512403   | 0.66865    |
| EPS8L2       | 1.55913    | 2.83136    | 1.08639    | 0.660182   | 1.90113    |
| LOC100128076 | 0.137708   | 0.300931   | 0.0415106  | 0.0862519  | 0.210773   |
| SSTR2        | 0.0163893  | 0          | 0.0307094  | 0          | 0          |
| GALNT3       | 0.0326716  | 0.0194276  | 0.0250618  | 0.0109221  | 0.0368459  |
| GPR157       | 0.174095   | 0.530241   | 0.27416    | 0.193587   | 0.414088   |
| KLK4         | 0.0578561  | 0          | 0          | 0          | 0.0359954  |
| COLEC10      | 0.053215   | 0.0762108  | 0.0498655  | 0.0221384  | 0.089309   |
| CYP3A5       | 0.0776859  | 0.0566937  | 0.138079   | 0.0887142  | 0.05366    |
| LRRC19       | 0.00551126 | 0.0252001  | 0.0143171  | 0          | 0.00803043 |
| C18orf56     | 6.21989    | 8.21614    | 9.23914    | 4.15043    | 6.17227    |
| LINC00441    | 0.127579   | 0.0711374  | 0.189651   | 0.084966   | 0.0662508  |
| PADI3        | 0.0355109  | 0.0243529  | 0          | 0.014837   | 0.0224444  |
| KIAA1958     | 1.2197     | 0.969857   | 0.742471   | 0.486758   | 1.03784    |
| SNORA32      | 0          | 9.12974    | 8.03625    | 10.6512    | 0          |
| SCN11A       | 0          | 0.0050262  | 0.00438755 | 0.00584136 | 0          |
| TAS2R31      | 0.0259274  | 0          | 0.0330459  | 0          | 0.0368308  |
| IHH          | 0.0863384  | 0.0285763  | 0.103478   | 0.0722932  | 0.026063   |
| FLJ25758     | 0.0204274  | 0.083163   | 0.0494922  | 0.033907   | 0.0255943  |
| ABCA17P      | 0.123802   | 0.144866   | 0.187416   | 0.103252   | 0.107678   |
| GVINP1       | 0.0137123  | 0.0130945  | 0.0114845  | 0.00758273 | 0          |
| LOC440925    | 0.135543   | 0.306599   | 0.136312   | 0.15004    | 0.171268   |
| HCG9         | 0.126378   | 0.335637   | 0          | 0.210062   | 0.0778486  |
| SSPN         | 0          | 0.0155446  | 0.013301   | 0.00866551 | 0          |
| ZPLD1        | 0.0408679  | 0.0351115  | 0          | 0.00978883 | 0.0166014  |
| HIST2H2AB    | 0.465882   | 0.199354   | 0.358655   | 0          | 0.378822   |
| GPR162       | 4.62661    | 7.90635    | 3.39053    | 1.93943    | 5.99916    |
| PTGER2       | 0.0476775  | 0          | 0.0300635  | 0          | 0.0487949  |
| STARD4       | 2.35855    | 2.20944    | 1.43364    | 1.03797    | 1.6518     |
| EPHA1        | 0          | 0.0262495  | 0          | 0.0163939  | 0          |
| HNMT         | 0          | 0.0550382  | 0.0481412  | 0.0644822  | 0          |
| KLK14        | 0.488899   | 0.149756   | 0.22546    | 0.187538   | 0.0923987  |
| CCDC80       | 1.40759    | 2.09473    | 1.26849    | 0.623897   | 1.67725    |
| C10orf10     | 0.0736909  | 0.23948    | 0.0179607  | 0.0245955  | 0.183745   |
| LINC00313    | 0.0735353  | 0.192614   | 0.0843246  | 0          | 0.0919923  |
| SLC5A2       | 0.132814   | 0.117838   | 0.237645   | 0.0371388  | 0          |
| GFR3         | 0.219717   | 0.0249261  | 0.17896    | 0.122917   | 0.045472   |
| SLC47A2      | 0.0287674  | 0          | 0          | 0          | 0.0181383  |
| LEMD1        | 0.120748   | 0.128807   | 0          | 0.0752739  | 0          |
| C2orf62      | 0.0856229  | 0.150938   | 0.102243   | 0.0940133  | 0.0697238  |
| HIST1H4I     | 1.39346    | 1.02644    | 1.11636    | 0.777624   | 0.381668   |
| NKAPL        | 0          | 0.0409225  | 0          | 0          | 0          |
| L1TD1        | 0.0282629  | 0.0200266  | 0.0353994  | 0.0232367  | 0.012819   |
| FABP6        | 13.241     | 9.53501    | 14.8954    | 7.99053    | 7.75752    |
| APOL6        | 0.115497   | 0.161931   | 0.166654   | 0.0690237  | 0.148094   |
| C2           | 0.179172   | 0.15946    | 0.209671   | 0.11454    | 0.132759   |
| ATP6V1C2     | 0.343043   | 0.351329   | 0.409726   | 0.24742    | 0.33091    |
| INSL3        | 0          | 0.157198   | 0          | 0.0990348  | 0          |
| CHRM4        | 0.214597   | 0.325066   | 0.147437   | 0.0513166  | 0.331093   |
| SNORD10      | 8.78062    | 23.1195    | 4.14539    | 5.73115    | 14.0458    |
| TRIM46       | 0.14375    | 0.122113   | 0.0814294  | 0.067897   | 0.129284   |
| ZMIZ1-AS1    | 0.0858701  | 0.0876238  | 0.0458192  | 0.0408562  | 0.0983107  |
| SPEG         | 0          | 0          | 0.054077   | 0          | 0.034381   |
| OSBPL1A      | 4.72662    | 3.71788    | 4.00855    | 2.16225    | 3.49961    |
| PPP1R12B     | 0.667503   | 0.597191   | 0.525348   | 0.348915   | 0.443074   |
| CTAGE9       | 0.0922913  | 0.0477003  | 0.0629766  | 0.027746   | 0.0562495  |
| SLC26A1      | 0.732462   | 0.441479   | 0.834633   | 0.489434   | 0.563856   |
| CTAGE15P     | 0.117291   | 0.190444   | 0.157121   | 0.0970109  | 0.0786056  |

|                      |            |            |            |            |            |
|----------------------|------------|------------|------------|------------|------------|
| EXD1                 | 0.00786955 | 0.0114325  | 0.0198481  | 0          | 0.0107883  |
| PCDHGB8P             | 0          | 0.0191943  | 0.01693    | 0.02285    | 0          |
| SRMS                 | 0.136222   | 0          | 0.0804435  | 0.0568089  | 0.0807331  |
| LOC100128750         | 0.346564   | 0.695563   | 0.706418   | 0.385778   | 0.249324   |
| ZNF586               | 0.701742   | 0.846311   | 0.467421   | 0.200741   | 0.463696   |
| CCDC13               | 0.0426607  | 0.0139466  | 0.0127167  | 0          | 0.025689   |
| PCDHB6               | 0.0413488  | 0.0147339  | 0          | 0.0172402  | 0          |
| GNAT2                | 0.14483    | 0.0998495  | 0.0221903  | 0.0598227  | 0.0463172  |
| TGM4                 | 0          | 0.0112081  | 0.00994735 | 0.0134194  | 0          |
| TMED10P1             | 0.193166   | 0.172574   | 0.154067   | 0.0962403  | 0.111863   |
| CRB3                 | 1.43354    | 1.96609    | 2.35198    | 1.38228    | 0.983924   |
| WHAMMP2              | 0.0213479  | 0.0572795  | 0.0384512  | 0          | 0.0364003  |
| ANKRD61              | 0.0946174  | 0.156597   | 0.0927583  | 0          | 0.120101   |
| TCERG1L              | 0          | 0.0381753  | 0          | 0          | 0          |
| LOC100129055         | 0.115636   | 0.217516   | 0.0295684  | 0.0644344  | 0.0978626  |
| ALS2CR12             | 0          | 0.0759498  | 0.0269805  | 0.0179277  | 0.0286254  |
| SLC44A4              | 0.0677118  | 0.0372016  | 0.049631   | 0          | 0.0513641  |
| LOC100506801         | 0.166079   | 0.106246   | 0.0813982  | 0.0368442  | 0.111583   |
| BRD7P3               | 0.0145384  | 0.020941   | 0.0366026  | 0.0360862  | 0.0100083  |
| BOK-AS1              | 0          | 0.0749432  | 0.0661319  | 0.0901827  | 0          |
| FLJ42351             | 0.876908   | 1.19263    | 0.803706   | 0.24251    | 0.831897   |
| WFIKKN1              | 0.344598   | 0.219687   | 0.202356   | 0.0580192  | 0.198701   |
| FLJ27354             | 0.857096   | 1.00775    | 1.10847    | 0.374876   | 0.896381   |
| PTCSC3               | 0.042222   | 0.0300711  | 0.0262772  | 0.0350348  | 0.0282385  |
| B3GAT2               | 1.73498    | 2.52619    | 1.7342     | 1.01663    | 1.63991    |
| TNFSF14              | 0.0259708  | 0.0605397  | 0.0214796  | 0.0582348  | 0.0110969  |
| PRR26                | 0.143817   | 0.142392   | 0.0373188  | 0.0507462  | 0.0506328  |
| LOC100652739         | 0.36207    | 0.37182    | 0.170534   | 0.120412   | 0.339874   |
| CMYA5                | 0.00607262 | 0.00214179 | 0.00189369 | 0.00250372 | 0.0040271  |
| GCKR                 | 0.159528   | 0.116838   | 0.194967   | 0.102106   | 0.137591   |
| HOXA2                | 0.226419   | 0.29447    | 0.256437   | 0.219463   | 0.2502     |
| ADORA2A-AS1          | 0.0775181  | 0.0824865  | 0.044486   | 0.0656076  | 0.0453177  |
| RASAL2-AS1           | 0.0217777  | 0.097684   | 0.125936   | 0.0366394  | 0.122708   |
| CACNA1H              | 0.0248675  | 0          | 0.00733603 | 0.0207998  | 0          |
| ZNF790-AS1           | 0          | 0.0889574  | 0.0596802  | 0.0397968  | 0          |
| MLLT4-AS1            | 0.189694   | 0.249634   | 0.157296   | 0.105901   | 0.169419   |
| DKKL1                | 1.11324    | 1.09222    | 0.654216   | 0.587108   | 0.404229   |
| C21orf90             | 0.601501   | 1.54114    | 0.64712    | 0.414717   | 0.711858   |
| LOC285740            | 0.0240519  | 0.0404948  | 0.0298153  | 0.0398382  | 0          |
| FSD2                 | 0.0175605  | 0          | 0          | 0          | 0.0114605  |
| CORO6                | 0          | 0.0432504  | 0          | 0          | 0          |
| C5orf27              | 0.0275899  | 0          | 0          | 0          | 0.0180088  |
| NCOR1P1              | 0.189336   | 0          | 0          | 0          | 0.123588   |
| ST7-OT4              | 0.0534363  | 0.157306   | 0.179403   | 0.059278   | 0.0994589  |
| CLDN2                | 0.045695   | 0.0352832  | 0.0452056  | 0.0423965  | 0.0234399  |
| HPCA                 | 0.490605   | 0.172929   | 0.125099   | 0.172145   | 0.159909   |
| ALDH1A3              | 0.00757585 | 0.0215798  | 0.0470921  | 0.0126177  | 0.0101763  |
| FUT7                 | 0          | 0.0471568  | 0          | 0          | 0          |
| HIST2H3D             | 0.172545   | 0.663386   | 0.811148   | 0.286862   | 0.204584   |
| DNM3                 | 0.0243823  | 0.0324604  | 0.0104139  | 0.00905979 | 0.0153636  |
| AQP8                 | 0.120558   | 0.120725   | 0.145016   | 0          | 0.148333   |
| LSM11                | 2.11144    | 2.03095    | 2.26912    | 1.10852    | 1.65861    |
| COLEC11              | 0.980033   | 0.766221   | 0.583666   | 0.567756   | 0.572898   |
| RPL13AP6             | 0.723103   | 0.264108   | 0.396488   | 0.546633   | 0.243398   |
| GPBAR1               | 0.151965   | 0.152143   | 0.274301   | 0.127819   | 0.0495648  |
| PRSS16               | 2.86179    | 3.03133    | 2.86341    | 1.77301    | 1.93879    |
| SYT3                 | 0.0685886  | 0.112778   | 0.0611692  | 0.0285314  | 0.0413668  |
| PTTG2                | 0.111324   | 0.394156   | 0.276521   | 0          | 0.514521   |
| LINC006233,LOC728875 | 0.786567   | 0.940048   | 0.875581   | 0.469527   | 0.796797   |
| TCAP                 | 0.240224   | 0.157264   | 0.336378   | 0.267409   | 0.143704   |
| MID1                 | 0.0525327  | 0.054814   | 0.0524948  | 0.0502022  | 0.0412755  |
| GPR146               | 7.98469    | 6.95283    | 4.34296    | 2.95764    | 6.48097    |
| LRRN2                | 0          | 0.0304466  | 0          | 0          | 0          |
| FAM69A               | 2.95761    | 2.45727    | 2.59745    | 1.90117    | 1.74948    |
| LOC100129138         | 0.146819   | 0.236165   | 0.106869   | 0.146048   | 0.0724267  |
| OR2H2                | 0.444218   | 0.0888724  | 0.389926   | 0.105523   | 0.331994   |
| HIST1H2BG            | 3.55813    | 1.39354    | 4.30529    | 2.84649    | 1.42338    |
| LOC729444            | 0.022647   | 0.0314092  | 0          | 0.0126333  | 0.00955717 |
| SIGLEC16             | 0.292745   | 0.291527   | 0.333019   | 0.130328   | 0.268157   |
| MEX3B                | 1.65499    | 1.63262    | 1.00585    | 0.817208   | 1.16374    |
| CACNA11              | 0          | 0.00510656 | 0.00458999 | 0.00636206 | 0          |
| RAPSN                | 0.0613005  | 0.174703   | 0.12973    | 0.0509771  | 0.190342   |
| PLGLB2               | 0          | 0          | 0.0183138  | 0.0120226  | 0          |
| RASL11B              | 0.0293059  | 0          | 0          | 0          | 0.0193779  |
| MORF4L2-AS1          | 0.175325   | 0.20294    | 0.112632   | 0.120889   | 0.101454   |
| HIST1H1E             | 3.68131    | 3.25952    | 2.88567    | 2.55908    | 1.03103    |
| UBA7                 | 0.222618   | 0.311951   | 0.118901   | 0.11891    | 0.219161   |
| C1orf189             | 0.17981    | 0.126858   | 0.111599   | 0          | 0.115423   |
| ZNF860               | 0.0769807  | 0.00930132 | 0.0893678  | 0.0638831  | 0.0174884  |

|              |            |            |            |            |            |
|--------------|------------|------------|------------|------------|------------|
| LOC554223    | 0.0812802  | 0.112294   | 0          | 0.0452452  | 0.0348272  |
| SVEP1        | 0.00355031 | 0          | 0          | 0          | 0.00235739 |
| NDRG1        | 434.258    | 604.523    | 297.49     | 183.972    | 478.134    |
| SPAG5-AS1    | 0.750616   | 0.670429   | 0.335631   | 0.34797    | 0.40784    |
| TAS1R3       | 0.189514   | 0.0549609  | 0.174981   | 0.106335   | 0.0988715  |
| ZRANB2-AS2   | 0.201808   | 0.124298   | 0.431763   | 0.188568   | 0.159898   |
| CA14         | 0.0150205  | 0.0418749  | 0.0184714  | 0.0498142  | 0          |
| ZSCAN10      | 0.0525194  | 0          | 0.0617929  | 0          | 0.0309045  |
| ZBTB26       | 1.43967    | 0.982641   | 0.840513   | 0.629274   | 0.939365   |
| ARSI         | 0.0246264  | 0.0329309  | 0.0739448  | 0.0205184  | 0.0453249  |
| FNDC5        | 0.0181181  | 0.0740595  | 0.0654292  | 0.0224755  | 0.0346058  |
| INPP5D       | 0.169777   | 0.492493   | 0.18308    | 0.114804   | 0.33747    |
| SPNS2        | 1.08868    | 1.22237    | 1.28258    | 0.525578   | 1.35034    |
| ADAMTS6      | 0.0549297  | 0.0798182  | 0.0219275  | 0.0193472  | 0.0591429  |
| MSLN         | 0.0687673  | 0.0899838  | 0          | 0.0382036  | 0.0275912  |
| REN          | 0.0207668  | 0.0852813  | 0.050535   | 0.103913   | 0          |
| PRUNE2       | 0          | 0.00236221 | 0.002073   | 0          | 0          |
| CSTF3-AS1    | 0.0284675  | 0.0205061  | 0.0178526  | 0          | 0.0191689  |
| ZNF205-AS1   | 0.187871   | 0.329768   | 0.324798   | 0.177233   | 0.101929   |
| BCL3         | 11.8893    | 11.9338    | 8.1397     | 5.92592    | 8.11193    |
| DGCR10       | 0.0642845  | 0          | 0          | 0          | 0.0430309  |
| FAM226A      | 0.693477   | 0.760847   | 0.511031   | 0.330835   | 0.506014   |
| LOC729683    | 0.571133   | 0.710651   | 0.985899   | 0.413129   | 0.540074   |
| IL7          | 0.751054   | 0.667726   | 0.801602   | 0.323889   | 0.806711   |
| ETV3         | 0.639971   | 0.567519   | 0.42963    | 0.336921   | 0.384721   |
| HAS2         | 0.510401   | 0.2023     | 0.740833   | 0.2394     | 0.390784   |
| FAM83A       | 0.119264   | 0.0592434  | 0          | 0.0475446  | 0.0218824  |
| NPFF         | 2.38798    | 1.69619    | 1.69312    | 1.33255    | 0.900826   |
| SEMA7A       | 0.263769   | 0.227919   | 0.395739   | 0.176265   | 0.197091   |
| SAMD12-AS1   | 0.0849122  | 0.1201     | 0.0522629  | 0          | 0.173036   |
| CLDN3        | 2.19658    | 1.53867    | 3.32081    | 1.74178    | 1.77518    |
| USP32P1      | 0.239492   | 0.13695    | 0.222959   | 0.136651   | 0.128929   |
| IQGAP2       | 0.00338059 | 0.0144962  | 0          | 0          | 0          |
| OLFML2B      | 0.758319   | 0.526925   | 0.603267   | 0.381502   | 0.623702   |
| GOLGA6L10    | 0.0937819  | 0.0802419  | 0.03927    | 0.0311524  | 0.0676349  |
| HIST1H4A     | 0.603416   | 0.404065   | 0.540726   | 0          | 0          |
| NAALAD2      | 0.0632098  | 0.120362   | 0.0720637  | 0.0736983  | 0.0528312  |
| FTH1P3       | 0.179484   | 0.0491114  | 0.393758   | 0.0596493  | 0.0456087  |
| CADPS2       | 0.867886   | 0.992168   | 0.83222    | 0.470305   | 0.941288   |
| RNF223       | 0.343123   | 0.147435   | 0.477098   | 0.28895    | 0.0662228  |
| LOC100507250 | 0.299457   | 0.260392   | 0.304898   | 0.188444   | 0.2815     |
| GCNT4        | 0.0649841  | 0.0439516  | 0.0151079  | 0.0394805  | 0.0334046  |
| CDHR3        | 0.0321323  | 0.0591418  | 0.0480393  | 0.0213872  | 0.0383504  |
| TRIM58       | 0.0212984  | 0.0154504  | 0.0469783  | 0.0178539  | 0.02904    |
| DYNC111      | 0.167586   | 0.152717   | 0.11429    | 0.0835965  | 0.120698   |
| LOC79015     | 0          | 0          | 0.0518488  | 0.0348437  | 0          |
| DNAI1        | 0.0197102  | 0.0534535  | 0.0240141  | 0.0163321  | 0.0493642  |
| GRIN2C       | 0.126287   | 0.256813   | 0.176886   | 0.134088   | 0.164845   |
| FLJ37201     | 0.0826058  | 0.0541022  | 0.0732209  | 0.0605077  | 0.0439653  |
| RRAS         | 45.6541    | 53.2006    | 30.8834    | 20.6585    | 43.9639    |
| ANAPC1P1     | 0.0260318  | 0          | 0          | 0          | 0.0176359  |
| SSBP2        | 2.102      | 2.47078    | 1.89492    | 1.0067     | 2.14459    |
| CACNA1G      | 0.0050782  | 0.0204586  | 0          | 0.00839807 | 0          |
| C10orf55     | 0.23983    | 0.256865   | 0.278087   | 0.11072    | 0.34355    |
| SBSN         | 0.0759954  | 0.0206082  | 0.0454442  | 0          | 0          |
| OR13A1       | 0.040956   | 0.0195191  | 0          | 0.0227858  | 0.0181148  |
| FPR3         | 0          | 0.0657284  | 0.011397   | 0.0151668  | 0.0371245  |
| HIST1H2AE    | 12.2069    | 9.22312    | 14.5528    | 9.24977    | 5.20239    |
| LINC00239    | 0.115769   | 0.157497   | 0.281515   | 0          | 0.0717876  |
| GDPD3        | 2.37267    | 1.59419    | 1.74436    | 1.7447     | 0.866542   |
| ACSBG1       | 0.0519428  | 0.154063   | 0.12556    | 0.0344992  | 0.0643215  |
| RPL19P12     | 0.0535407  | 0          | 0.131625   | 0.0442854  | 0.0343932  |
| ENPP6        | 0.0253142  | 0.00895061 | 0.0552123  | 0.0105453  | 0.0167164  |
| LCN12        | 0.0704818  | 0.279418   | 0.251123   | 0.117511   | 0.17073    |
| KIF17        | 0.712726   | 1.18687    | 0.620386   | 0.43254    | 0.67912    |
| ZNF732       | 0          | 0          | 0.0428915  | 0.0140601  | 0          |
| TMEM74       | 0.0123499  | 0.0180392  | 0          | 0.0206635  | 0          |
| LOC730091    | 0.00708946 | 0.0103217  | 0          | 0.0118396  | 0          |
| TCF7L1       | 0.250772   | 0.0938908  | 0.118514   | 0.162866   | 0.104107   |
| APOA1        | 0.169935   | 0          | 0.066443   | 0.0933873  | 0.0678667  |
| IQCD         | 0.17111    | 0.256502   | 0.181066   | 0.0703783  | 0.15932    |
| RAB30        | 0.265121   | 0.590233   | 0.13476    | 0.0258756  | 0.597587   |
| SPDYEBP      | 0          | 0.0129466  | 0.0336152  | 0          | 0          |
| LMOD3        | 0.0051618  | 0.00740473 | 0          | 0.0085671  | 0          |
| MAF          | 0.0155583  | 0.00583333 | 0.00500448 | 0          | 0.0110756  |
| PSTPIP1      | 0          | 0.0288013  | 0.0787357  | 0.0733241  | 0          |
| RPRML        | 0          | 0.0972971  | 0.0878862  | 0          | 0          |
| ALLC         | 0.229885   | 0.263996   | 0.116342   | 0.0630198  | 0.322159   |
| SYCE1        | 0.0597639  | 0.025777   | 0.0472208  | 0.0326731  | 0.0237836  |



|                 |            |            |            |            |           |
|-----------------|------------|------------|------------|------------|-----------|
| DLEU2L          | 0.268919   | 0.228189   | 0.174731   | 0.202007   | 0.160474  |
| EAF2            | 1.49384    | 2.67707    | 2.03371    | 1.15746    | 2.01137   |
| PON3            | 1.06578    | 0.95618    | 1.0176     | 0.505768   | 0.801875  |
| RPS6KA2         | 0.319168   | 0.319928   | 0.330963   | 0.174774   | 0.277071  |
| PIN4P1          | 0.0199133  | 0.0557133  | 0.0123662  | 0.0165141  | 0.0262974 |
| C1orf106        | 0.366689   | 0.234834   | 0.280198   | 0.191224   | 0.225864  |
| ANKRD37         | 23.5638    | 10.1479    | 10.6546    | 10.4851    | 9.38844   |
| DRD4            | 3.13473    | 2.70955    | 1.59707    | 1.28647    | 2.665     |
| DUXA            | 0.0129064  | 0.0184511  | 0          | 0.0214773  | 0         |
| SPRY1           | 5.8213     | 1.19722    | 3.26475    | 3.19959    | 1.25696   |
| ALG1L9P         | 0.00993142 | 0.102135   | 0.270038   | 0.166632   | 0.0958254 |
| SLC28A1         | 0          | 0          | 0.0295761  | 0.0202717  | 0         |
| SLC34A3         | 0          | 0.0321581  | 0.0292074  | 0          | 0         |
| ENO1-AS1        | 0.513589   | 0.714731   | 0.204965   | 0.423435   | 0.564031  |
| CBR3-AS1        | 0.733992   | 1.47706    | 0.667041   | 0.416568   | 0.996679  |
| IL17B           | 0          | 0.0795641  | 0.0726892  | 0          | 0         |
| CREB3L2         | 4.40889    | 4.29101    | 4.39706    | 3.12755    | 3.37281   |
| DNM1P35         | 0.179851   | 0.223365   | 0.298273   | 0.24076    | 0.114939  |
| TACSTD2         | 0.0670631  | 0.0305303  | 0          | 0          | 0.0283086 |
| DENND2D         | 0.0151454  | 0.0536689  | 0.0187973  | 0          | 0.0201579 |
| IL1RAP          | 3.6307     | 4.59764    | 1.83128    | 1.49201    | 4.14522   |
| PRCD            | 0.174396   | 0.108972   | 0.0982057  | 0.0678204  | 0.124758  |
| PCDHB18         | 0.0193526  | 0.0550806  | 0.0238988  | 0.0160765  | 0.0519843 |
| C6orf52         | 1.66791    | 1.67066    | 3.06793    | 1.02947    | 1.76842   |
| IRAK2           | 1.45099    | 1.50849    | 0.922682   | 0.822015   | 1.10674   |
| NOS1AP          | 0.15834    | 0.436521   | 0.236265   | 0.195527   | 0.253206  |
| CBX3P2          | 0.245896   | 0.756967   | 0.286016   | 0.146059   | 0.529823  |
| C12orf60        | 1.21738    | 1.60454    | 1.809      | 0.834458   | 0.998793  |
| FHOD3           | 0.0710136  | 0.0592929  | 0.0464128  | 0.0632533  | 0.0207503 |
| GABBR2          | 0          | 0.0282544  | 0          | 0          | 0.0196336 |
| GNMT            | 0.52407    | 0.17466    | 0.314477   | 0.21782    | 0.199054  |
| LRRN3           | 0.017328   | 0.00849498 | 0.0146682  | 0.009647   | 0.0080197 |
| MORN5           | 0          | 0          | 0.150727   | 0          | 0.104722  |
| DKK3            | 0.185892   | 0.115303   | 0.20515    | 0.155575   | 0.0665381 |
| LCN2            | 0.116116   | 0.105378   | 0.0463765  | 0          | 0.0504052 |
| RASA4CP         | 0.198849   | 0.223365   | 0.203186   | 0.0471409  | 0.23878   |
| ENPEP           | 0.0381828  | 0.0247777  | 0.0592026  | 0.0283289  | 0.0411821 |
| RHD             | 0.107402   | 0.183308   | 0.0536713  | 0.0539741  | 0.0507039 |
| CLIP4           | 0.00527969 | 0.00787903 | 0.0271241  | 0.00886265 | 0         |
| INSIG1          | 20.9965    | 15.8447    | 12.7965    | 9.77304    | 15.1423   |
| HIF3A           | 0.00582483 | 0.00823267 | 0          | 0.00973956 | 0         |
| CD82            | 2.91895    | 3.70757    | 2.01136    | 1.50786    | 2.99875   |
| CALCRL          | 0          | 0          | 0.00847774 | 0          | 0         |
| ZNF841          | 3.49569    | 2.44713    | 1.62079    | 1.82356    | 2.15783   |
| LGALS9          | 0.206702   | 0.217002   | 0.148621   | 0.171223   | 0.151358  |
| EYS             | 0.0307132  | 0.0133655  | 0.0069109  | 0.00907346 | 0.0100562 |
| DDAH2           | 53.1063    | 56.9653    | 39.8673    | 25.9447    | 47.1989   |
| HIST1H2AC       | 2.73148    | 5.11092    | 7.66818    | 3.21867    | 2.68725   |
| DERL3           | 1.27572    | 2.67667    | 0.877752   | 0.631957   | 1.8283    |
| MTRNR2L10       | 1.48859    | 2.00398    | 1.4402     | 0.818454   | 1.77977   |
| RIMKLA          | 3.05608    | 3.77327    | 2.12521    | 1.28539    | 3.39029   |
| ALDOC           | 254.501    | 256.184    | 143.209    | 99.6436    | 243.739   |
| ARHGEF33        | 0.0114517  | 0.0163398  | 0.0287231  | 0.019035   | 0         |
| REPS2           | 0.32397    | 0.430848   | 0.587557   | 0.172846   | 0.41905   |
| ATXN1           | 0.3599     | 0.424614   | 0.376387   | 0.218714   | 0.351825  |
| ARMCX2          | 0.11926    | 0.167255   | 0.135337   | 0.0330607  | 0.156883  |
| SHISA7          | 0.0108627  | 0.0223478  | 0.00665665 | 0.0182273  | 0         |
| HERC2P3         | 0.734575   | 0.640727   | 0.629706   | 0.435953   | 0.529102  |
| NRP1            | 0.930353   | 1.37617    | 1.11344    | 0.510423   | 1.20758   |
| AGSK1_LOC727849 | 0.386336   | 0.217764   | 0.345804   | 0.160523   | 0.315786  |
| CXCL2           | 0.151092   | 0.685171   | 0.348336   | 0.291776   | 0.27233   |
| KRTAP5-8        | 0          | 0.135392   | 0.04062    | 0          | 0.124074  |
| SNORA44         | 3.62998    | 4.81051    | 0          | 5.91399    | 0         |
| CLEC2B          | 0.278847   | 0.498069   | 0.0859976  | 0.112251   | 0.340205  |
| MIR210HG        | 22.6083    | 18.1112    | 11.1965    | 10.9155    | 15.439    |
| N4BP2L1         | 0.746205   | 0.691861   | 0.592697   | 0.569154   | 0.349426  |
| NOXRED1         | 0.255736   | 0.116432   | 0.271339   | 0.180018   | 0.12749   |
| HIST2H2BC       | 6.5662     | 9.57327    | 5.67588    | 4.18798    | 4.90894   |
| FAM46A          | 0.281613   | 0.793211   | 0.341156   | 0.259502   | 0.494266  |
| LOC115110       | 1.6607     | 1.27317    | 1.20017    | 1.03056    | 1.29352   |
| LOC143666       | 1.31232    | 2.17227    | 1.05103    | 1.0727     | 1.247     |
| DNAH11          | 0.00149831 | 0          | 0.0130876  | 0.00496913 | 0         |
| CYP46A1         | 0.0380045  | 0.0506453  | 0.113671   | 0.0630976  | 0.0466762 |
| HSPA5           | 227.023    | 264.967    | 250.672    | 135.879    | 227.45    |
| HSP90B2P        | 0.0144184  | 0.0614951  | 0          | 0.0119231  | 0.0289825 |
| FOSL2           | 8.76249    | 8.27123    | 3.97555    | 4.28118    | 6.83818   |
| LCE1E           | 0.0305366  | 0.171277   | 0.225564   | 0.152657   | 0.0399654 |
| TMEM191B        | 2.50386    | 2.35929    | 1.67366    | 1.14858    | 2.21059   |
| RBP5            | 0.209892   | 0.18785    | 0.210681   | 0.115741   | 0.130465  |

|                 |            |            |            |           |            |
|-----------------|------------|------------|------------|-----------|------------|
| C1orf110        | 0.208538   | 0.272767   | 0.354937   | 0.248151  | 0.157295   |
| JSRP1           | 46.0634    | 37.9014    | 45.8016    | 23.7013   | 42.75      |
| SLC5A12         | 0.00312961 | 0.00924974 | 0          | 0         | 0.00879266 |
| ADAMTSL1        | 0.412315   | 0.88068    | 0.761029   | 0.420944  | 0.772768   |
| C17orf74        | 0.666259   | 0.255202   | 0.834988   | 0.399471  | 0.552091   |
| PARP10          | 6.0467     | 5.83552    | 5.11232    | 3.08929   | 6.11042    |
| CAV1            | 7.42776    | 17.5521    | 9.04789    | 4.05175   | 15.3187    |
| PARD6G-AS1      | 0.541257   | 0.597739   | 0.337762   | 0.53725   | 0.194767   |
| PGPEP1L         | 0.0347662  | 0.0467337  | 0          | 0.057635  | 0          |
| ASIC3           | 2.11084    | 1.89614    | 1.34898    | 1.64829   | 1.44811    |
| ACSM3           | 0.427493   | 0.373996   | 0.370073   | 0.145335  | 0.272812   |
| CD274           | 1.29423    | 1.13214    | 0.929907   | 0.94821   | 0.736748   |
| ZNF550          | 0.115191   | 0.413937   | 0.475804   | 0.152373  | 0.441483   |
| ANGPTL3         | 0.0176242  | 0          | 0          | 0         | 0.0125722  |
| LINC00634       | 0.26306    | 0.541295   | 0.175855   | 0.243997  | 0.249482   |
| BTC             | 0          | 0          | 0.0532658  | 0         | 0          |
| NLRP3           | 0.198065   | 0.0872145  | 0.0688744  | 0.0529508 | 0.128733   |
| TMSB4X          | 284.549    | 255.714    | 425.97     | 209.857   | 230.391    |
| SYNE1           | 0.0205924  | 0.0153047  | 0.00681547 | 0.0117367 | 0.00613948 |
| C4A,C4B         | 0.0180706  | 0.0323856  | 0          | 0         | 0.0149148  |
| CLUHP3          | 0.579957   | 0.411746   | 0.429217   | 0.455999  | 0.357334   |
| PRSS8           | 0.493053   | 0.53006    | 0.262443   | 0.265016  | 0.33866    |
| RASGEF1B        | 0.0105607  | 0.135461   | 0.0262937  | 0.0525067 | 0.0704699  |
| SNORD15B        | 13.187     | 26.4755    | 9.75331    | 5.32524   | 6.63128    |
| SNORA23         | 3.65091    | 6.97034    | 4.49234    | 3.01491   | 6.69651    |
| LIPG            | 0.150246   | 0.0539553  | 0.0624996  | 0.0417697 | 0.092902   |
| LOC100499489    | 1.59705    | 3.80976    | 2.02976    | 0.982711  | 2.97167    |
| CERS5           | 25.3443    | 29.1473    | 28.4315    | 17.3109   | 22.324     |
| AGPAT4          | 0.563789   | 0.540878   | 0.489032   | 0.370409  | 0.454798   |
| ZDHH8P1         | 1.12519    | 1.02576    | 1.04006    | 0.845955  | 0.901123   |
| LNPEP           | 0.777019   | 0.584509   | 0.675269   | 0.425218  | 0.473822   |
| FGL2            | 0.00926252 | 0          | 0          | 0         | 0.00663659 |
| OR51B5          | 0.60479    | 0.424442   | 0.625333   | 0.469934  | 0.357791   |
| EDARADD         | 0.764434   | 1.01348    | 0.781534   | 0.598346  | 0.671633   |
| C11orf16        | 0.0148746  | 0.0401102  | 0.0181862  | 0         | 0          |
| CSR2            | 43.4517    | 46.5168    | 31.2769    | 24.2952   | 42.467     |
| CACNA2D1        | 0.173143   | 0.281047   | 0.136352   | 0.117084  | 0.257982   |
| CCRL1           | 0.0694024  | 0.0282828  | 0.024369   | 0.0158582 | 0.0401742  |
| ASPN            | 0.0177126  | 0          | 0          | 0         | 0.0127218  |
| LOC100270746    | 2.22585    | 3.63672    | 3.56682    | 1.66421   | 2.88127    |
| C19orf35        | 0.044242   | 0.0294244  | 0.0530701  | 0.0372761 | 0.0536758  |
| C2orf15         | 1.7287     | 1.67685    | 1.74923    | 1.25456   | 1.4004     |
| LINC00304       | 0.0884906  | 0.0237829  | 0.0850706  | 0.0887213 | 0.0217908  |
| LINC00628       | 0.0459061  | 0.126648   | 0.0566102  | 0.0765895 | 0.0879318  |
| UCN             | 3.58922    | 2.77508    | 5.07119    | 3.11441   | 2.88415    |
| FRMD5           | 2.47748    | 2.94151    | 2.05865    | 1.24622   | 2.94873    |
| MYB             | 1.71342    | 1.3433     | 1.01799    | 1.06307   | 1.18138    |
| TUFT1           | 16.0526    | 18.9394    | 13.019     | 9.92387   | 15.2364    |
| MPP7            | 0.319714   | 0.1439     | 0.212257   | 0.209511  | 0.159981   |
| FAAH2           | 1.10502    | 1.18065    | 0.892678   | 0.764446  | 0.925223   |
| TINCR           | 0.528493   | 0.247527   | 0.242173   | 0.210643  | 0.250692   |
| GPRC5D          | 0.407962   | 0.529937   | 0.543517   | 0.566904  | 0.133601   |
| AGSK1_LOC727849 | 0.0100326  | 0.0922078  | 0.0241653  | 0         | 0.0122638  |
| TCP10L          | 0.942357   | 0.824397   | 0.747577   | 0.461895  | 0.937954   |
| ANXA9           | 0.41857    | 0.585831   | 0.37006    | 0.213524  | 0.437936   |
| C10orf12        | 1.08063    | 0.790178   | 0.465062   | 0.558045  | 0.698063   |
| LINC00162       | 0.0620617  | 0.0817346  | 0          | 0.103197  | 0          |
| MAGI3           | 0.519179   | 0.434582   | 0.501022   | 0.311093  | 0.411684   |
| PIPSL           | 0.020317   | 0          | 0.00833248 | 0         | 0.0087606  |
| FOXP3           | 3.2008     | 4.12646    | 3.01643    | 1.96424   | 3.25287    |
| DOC2GP          | 0.109673   | 0          | 0.26407    | 0         | 0.270461   |
| CCDC167         | 32.7046    | 26.5343    | 26.0828    | 19.6715   | 21.3418    |
| INSIG2          | 22.1629    | 18.7178    | 9.3693     | 9.82119   | 19.3644    |
| TUBB1           | 0.058081   | 0.236728   | 0.0449594  | 0.0844148 | 0.0966739  |
| HOXA1           | 1.90608    | 1.68384    | 1.85727    | 1.3561    | 1.23625    |
| CCDC19          | 0.183737   | 0.192965   | 0.138341   | 0.108569  | 0.120394   |
| SERPINC1        | 0.0173091  | 0.0953469  | 0          | 0.0287028 | 0.0221521  |
| DEGS2           | 0.038885   | 0.153807   | 0.0916376  | 0.0648849 | 0.140781   |
| MYO7A           | 0.167045   | 0.232486   | 0.141683   | 0.0879132 | 0.166048   |
| TRIM5           | 2.89126    | 2.23287    | 2.41743    | 1.63845   | 1.98905    |
| TNFAIP3         | 0.580732   | 1.05603    | 0.340716   | 0.345168  | 0.847781   |
| COL6A6          | 0.00254079 | 0.00357767 | 0.00630714 | 0         | 0          |
| F3              | 4.09314    | 4.4228     | 2.04121    | 2.26985   | 3.7066     |
| FABP2           | 0.0182756  | 0          | 0          | 0         | 0.0132718  |
| LHPP            | 14.0111    | 11.6613    | 10.5927    | 6.30591   | 11.8683    |
| LOC286190       | 0.0113302  | 0.0168294  | 0          | 0         | 0          |
| PKLR            | 0.700725   | 0.627355   | 0.481607   | 0.549906  | 0.357203   |
| DDC             | 0.0330148  | 0.0228866  | 0.040456   | 0.0273156 | 0.0426548  |
| GGN12-AS1       | 0.10746    | 0.0461537  | 0.0805405  | 0.107342  | 0.043273   |

|                      |            |           |            |            |            |
|----------------------|------------|-----------|------------|------------|------------|
| LOC730668            | 0.0227934  | 0.0833102 | 0.037285   | 0.025392   | 0.0386222  |
| CDRT1                | 0.0343595  | 0.0958687 | 0.0527574  | 0.0427419  | 0.0447639  |
| TSPAN15              | 7.89714    | 7.85906   | 6.67211    | 4.91347    | 7.01499    |
| TAGLN2               | 73.5242    | 127.997   | 72.0992    | 49.9361    | 88.4369    |
| PFKFB4               | 73.7189    | 81.9505   | 35.6811    | 32.865     | 75.7688    |
| ANGPT4               | 0          | 0         | 0.0433135  | 0          | 0          |
| SNORA64              | 13.9924    | 9.40851   | 8.36417    | 5.60338    | 4.92431    |
| LINC00622            | 0.194916   | 0.113933  | 0.251659   | 0.100986   | 0.170735   |
| HIST1H4K             | 0.849035   | 0         | 0          | 0          | 0.258341   |
| PROM1                | 0.0351761  | 0.0255164 | 0.00732815 | 0          | 0.00801445 |
| CD74                 | 0          | 0         | 0.0566653  | 0          | 0          |
| LOC339666            | 0          | 0.217879  | 0.127839   | 0          | 0.0679859  |
| ERVFRD-1             | 0.0153605  | 0.0437921 | 0.0191902  | 0.0128689  | 0.0305119  |
| GSTM1                | 31.8207    | 47.4929   | 26.8288    | 16.9518    | 44.1765    |
| CES4A                | 0          | 0         | 0.0534532  | 0.0207269  | 0.0182276  |
| SVIP                 | 7.06035    | 8.12527   | 7.10911    | 4.85587    | 6.77621    |
| TMEM121              | 1.13221    | 1.3889    | 1.39717    | 0.956861   | 1.32377    |
| ETV2                 | 0.499327   | 0.649138  | 0.420831   | 0.414756   | 0.29837    |
| C17orf50             | 0.069205   | 0.0891879 | 0          | 0.115203   | 0          |
| FDP2L2A              | 0.0635483  | 0.0478237 | 0.0241473  | 0.0325165  | 0.0319549  |
| KCP                  | 0.00961603 | 0.0125421 | 0.0347018  | 0.0413952  | 0          |
| LRRC33               | 0.150575   | 0.133882  | 0.100179   | 0.111418   | 0.082043   |
| SPAG4                | 26.4362    | 30.5241   | 25.0573    | 12.9573    | 28.8288    |
| CALR3                | 0.0205098  | 0.028511  | 0          | 0          | 0          |
| LOC283177            | 0.0184888  | 0.0130096 | 0.0346106  | 0          | 0.0485103  |
| HILPDA               | 44.7419    | 38.2793   | 23.0664    | 22.8467    | 34.0768    |
| SLC29A1              | 90.4921    | 84.6935   | 78.7107    | 60.6885    | 67.416     |
| NPPA                 | 0.408484   | 0.183443  | 0.165142   | 0.22642    | 0.167645   |
| KCNMB3               | 0.706905   | 0.581804  | 0.726919   | 0.56174    | 0.467552   |
| NEK10                | 0.00828846 | 0.0238347 | 0.0208018  | 0.0275816  | 0.0111518  |
| HTRA1                | 0.231451   | 0.582142  | 0.367703   | 0.236001   | 0.382427   |
| PFN1P2               | 0.820818   | 0.444277  | 0.329543   | 0.520695   | 0.344862   |
| GRIP2                | 0.100229   | 0.0677458 | 0.0793507  | 0.089711   | 0.0577684  |
| BOLA3-AS1            | 4.81024    | 4.69891   | 3.9136     | 3.03668    | 3.51353    |
| DLEU2                | 0.227917   | 0.136314  | 0.307983   | 0.220261   | 0.10394    |
| LOC154761            | 3.02707    | 2.37558   | 1.48854    | 1.18819    | 2.39398    |
| SCD                  | 102.604    | 161.417   | 65.7619    | 54.8859    | 132.973    |
| ZNF829               | 0.00751472 | 0.0108954 | 0.00475529 | 0          | 0.0103361  |
| ARL6                 | 1.20943    | 1.00383   | 1.20445    | 0.804453   | 0.951214   |
| LOC100128361         | 0.603575   | 0.530867  | 0.635679   | 0.50412    | 0.360229   |
| RPL23AP64            | 0.416535   | 0.212973  | 0.190903   | 0          | 0.330298   |
| GAS1                 | 0.44532    | 1.10837   | 0.423173   | 0.361043   | 0.793504   |
| LOC440356            | 0.279656   | 0.226641  | 0.204991   | 0.186081   | 0.139163   |
| CREB5                | 3.77958    | 3.74749   | 2.93691    | 2.2468     | 3.48554    |
| LOC283038            | 0.0370248  | 0.0644281 | 0.0559535  | 0.0123064  | 0.050546   |
| TLR1                 | 0.0762949  | 0.089647  | 0.0193585  | 0.0634182  | 0.0318028  |
| MAP7D2               | 0.0487385  | 0.0598882 | 0.030334   | 0.0403962  | 0.0403071  |
| C17orf78             | 0.0117923  | 0.0167992 | 0          | 0          | 0          |
| RUND3A               | 0.927725   | 1.38263   | 0.620427   | 0.479184   | 0.99478    |
| ZDHC15               | 0.0035659  | 0         | 0.00455572 | 0.00596468 | 0          |
| LDHC                 | 0.0377032  | 0.0274857 | 0.166909   | 0          | 0.104091   |
| LOC100505738,MIR4458 | 2.5272     | 4.1118    | 2.78022    | 1.72445    | 2.92697    |
| RASD1                | 0          | 0.36891   | 0.0392556  | 0.0549132  | 0.18967    |
| NIPAL1               | 0.173583   | 0.142028  | 0.150659   | 0.12665    | 0.178488   |
| PLEKHG4B             | 0.00254321 | 0.0103037 | 0          | 0          | 0.00950901 |
| FXYD1                | 1.47498    | 1.50339   | 1.75587    | 1.42967    | 0.856582   |
| ATL1                 | 0.512702   | 0.945768  | 0.574802   | 0.380521   | 0.611868   |
| TMTC2                | 0.288333   | 0.150858  | 0.250371   | 0.182568   | 0.202118   |
| KBTBD3               | 0.688544   | 0.901718  | 0.605648   | 0.334683   | 0.826387   |
| CDKN2C               | 21.2074    | 20.4618   | 10.7191    | 10.0239    | 20.1314    |
| MARCH1               | 0.224758   | 0.318517  | 0.154778   | 0.182727   | 0.21869    |
| ZNF274               | 0.0223233  | 0.0609091 | 0.0819272  | 0.0739159  | 0.0479628  |
| HFE2                 | 0.0170324  | 0.024635  | 0          | 0          | 0          |
| TPPP3                | 0.0375478  | 0.242008  | 0.222811   | 0          | 0.179118   |
| SNX33                | 42.5386    | 35.614    | 19.0777    | 20.7513    | 31.6236    |
| GEMIN8P4             | 0.904205   | 1.1932    | 1.46515    | 0.752235   | 0.877101   |
| GLUD2                | 0          | 0.0319685 | 0.028199   | 0          | 0.0446133  |
| PLA2G3               | 0.0120409  | 0         | 0.0440797  | 0.0201575  | 0          |
| FOXD4L1              | 0.292861   | 0.29597   | 0.796384   | 0.163513   | 0.390652   |
| JAK2                 | 0.432423   | 0.409771  | 0.348344   | 0.282772   | 0.335685   |
| C3orf20              | 0          | 0.0262591 | 0.0118092  | 0.0160497  | 0.0121044  |
| MAP1LC3C             | 0.7451     | 0.498508  | 1.21673    | 0.41247    | 0.532114   |
| TSSK6                | 1.1714     | 1.32527   | 2.56483    | 0.978186   | 1.26997    |
| HIST1H3G             | 1.50618    | 1.37489   | 1.24762    | 0.992916   | 1.29012    |
| CPEB2                | 0.221996   | 0.266342  | 0.220796   | 0.205953   | 0.204525   |
| TAGLN                | 45.3046    | 77.7449   | 46.369     | 20.5851    | 74.5437    |
| RTN4                 | 127.043    | 133.005   | 160.235    | 98.0428    | 114.41     |
| BEAN1                | 0.224107   | 0.309549  | 0.233478   | 0.157126   | 0.259828   |
| RAB20                | 41.9901    | 29.4276   | 20.6411    | 20.6761    | 30.6951    |

|              |            |            |           |           |            |
|--------------|------------|------------|-----------|-----------|------------|
| RNF144B      | 0.166186   | 0.202034   | 0.250718  | 0.10742   | 0.244557   |
| CCDC171      | 0.740156   | 0.375895   | 0.551086  | 0.49697   | 0.335701   |
| PHF19        | 96.1644    | 101.41     | 83.6011   | 63.6628   | 81.2048    |
| RAET1G       | 0.895994   | 0.783745   | 0.24423   | 0.334342  | 0.792951   |
| CDH5         | 0.00692624 | 0.00941909 | 0         | 0         | 0          |
| FAM63B       | 0.779749   | 0.467251   | 0.387166  | 0.340343  | 0.549977   |
| SEPT4        | 0.31764    | 0.559549   | 0.402419  | 0.220582  | 0.443217   |
| PHF1         | 35.887     | 42.1985    | 28.5608   | 22.4014   | 35.0343    |
| PDE5A        | 0.506687   | 0.494405   | 0.356227  | 0.319673  | 0.441758   |
| ING2         | 13.5999    | 13.3585    | 7.31853   | 7.98537   | 12.117     |
| CLK3         | 31.1379    | 24.475     | 15.9641   | 16.3311   | 20.8212    |
| FABP5P3      | 0.0331233  | 0          | 0.0405637 | 0.0546884 | 0          |
| AMZ1         | 0.00774105 | 0.0104283  | 0         | 0         | 0          |
| NEU3         | 0.450189   | 0.65949    | 0.605854  | 0.552341  | 0.479878   |
| HOXA11-AS    | 2.41499    | 2.63656    | 3.19237   | 2.12867   | 2.38173    |
| SEMA3D       | 4.25072    | 4.32452    | 4.7427    | 2.64232   | 4.63065    |
| HEIH         | 0.0250483  | 0.101106   | 0.0302249 | 0.0414301 | 0.0313017  |
| LRRC26       | 6.29838    | 7.44371    | 5.96347   | 5.74605   | 5.05588    |
| HIPK3        | 0.403115   | 0.389825   | 0.413105  | 0.254053  | 0.341045   |
| HIST1H2BM    | 0          | 0          | 0.282104  | 0         | 0          |
| XKR6         | 0.265219   | 0.134506   | 0.1668    | 0.0917475 | 0.136069   |
| MANF         | 99.3504    | 93.1577    | 89.338    | 59.2053   | 79.7078    |
| SMIM1        | 5.24838    | 8.15806    | 6.47432   | 3.40343   | 4.90957    |
| GADD45G      | 1.62346    | 3.46832    | 0.808183  | 1.25202   | 1.978      |
| TBX19        | 0.773516   | 0.901113   | 0.35685   | 0.368119  | 0.843804   |
| ADORA2A      | 1.92114    | 1.50136    | 1.62578   | 1.16102   | 1.37016    |
| C1orf51      | 0.698578   | 0.787905   | 0.656784  | 0.748945  | 0.704478   |
| EFNA5        | 1.14356    | 1.14952    | 1.09115   | 0.592593  | 1.32741    |
| NRGN         | 24.0002    | 20.0321    | 14.008    | 16.1724   | 17.6427    |
| SLC43A3      | 0.349442   | 0.259281   | 0.200614  | 0.154929  | 0.285568   |
| HLA-DRB1     | 0.0549534  | 0.0371824  | 0.0331512 | 0.0455221 | 0          |
| CDKL2        | 0.158593   | 0.236558   | 0.170651  | 0.100389  | 0.207491   |
| LINC00671    | 0.0164944  | 0          | 0.020272  | 0.0274186 | 0          |
| FAM160A1     | 1.82806    | 2.41394    | 1.09026   | 0.934511  | 2.10165    |
| IFI6         | 4.53734    | 4.30668    | 4.5089    | 3.94622   | 2.52087    |
| IL34         | 0          | 0.0581033  | 0.0262571 | 0.0366322 | 0.0265202  |
| THAP8        | 4.14622    | 5.40631    | 2.96143   | 3.41877   | 2.97589    |
| LOC100129917 | 0.23295    | 0.320984   | 0.306672  | 0.284145  | 0.320407   |
| HCAR2        | 0.0146821  | 0          | 0.0179813 | 0.0243749 | 0          |
| ADAM11       | 4.6044     | 1.92246    | 3.48797   | 2.88414   | 2.05765    |
| DUSP8        | 7.50939    | 7.1482     | 4.4487    | 4.59157   | 5.59474    |
| CDADC1       | 1.81526    | 2.44982    | 1.84956   | 1.27552   | 1.78296    |
| C1orf192     | 0.0390705  | 0.161975   | 0         | 0         | 0.151462   |
| SOX2-OT      | 1.05116    | 2.12613    | 1.10563   | 0.552005  | 1.98287    |
| KLF9         | 1.1159     | 2.09356    | 1.40825   | 0.89571   | 1.70855    |
| OSBPL10      | 10.4952    | 9.22006    | 7.10233   | 6.12143   | 8.39578    |
| MICALCL      | 0.292599   | 0.251184   | 0.348256  | 0.241792  | 0.23384    |
| RFTN2        | 0.0282565  | 0.0208893  | 0.0450423 | 0.035413  | 0.00985546 |
| FAM167B      | 0.971062   | 0.786725   | 1.14544   | 0.763401  | 0.617979   |
| SGPP1        | 4.15597    | 4.26061    | 5.99043   | 3.5184    | 3.6081     |
| COX17        | 115.257    | 103.461    | 115.667   | 69.7066   | 73.8885    |
| PNKD         | 57.5452    | 62.8742    | 48.545    | 33.2734   | 53.1       |
| IRS1         | 0.405432   | 0.806837   | 0.480181  | 0.411746  | 0.486034   |
| LINC00696    | 0.00930909 | 0          | 0.0113368 | 0.0154834 | 0          |
| FAM219A      | 13.072     | 12.7007    | 7.8822    | 7.66667   | 11.0886    |
| TMEM8B       | 6.65446    | 5.92427    | 4.49157   | 3.74123   | 5.69199    |
| PIAS1        | 6.39812    | 3.94587    | 5.16074   | 3.92682   | 3.7754     |
| KCNE1L       | 0.585524   | 0.416401   | 0.78035   | 0.767303  | 0.193016   |
| GPRC5A       | 11.6557    | 16.2613    | 6.01609   | 7.42729   | 13.0595    |
| ACTA1        | 0.551978   | 0.361336   | 0.758239  | 0.559829  | 0.329546   |
| SERHL        | 0.0245602  | 0          | 0.0298068 | 0.0408187 | 0          |
| RIMBP3       | 0.048154   | 0.108698   | 0.0329538 | 0.0573004 | 0.0498395  |
| NRN1         | 39.4469    | 46.2364    | 30.5237   | 20.5963   | 43.1469    |
| VPS9D1       | 2.49407    | 2.73909    | 2.58963   | 2.07831   | 2.50949    |
| LOC100506195 | 0.0447291  | 0.0117766  | 0.0560028 | 0.055211  | 0.0295182  |
| PCSK5        | 2.29917    | 1.89739    | 1.37561   | 1.09102   | 1.92588    |
| FGD6         | 0.119552   | 0.0749082  | 0.112831  | 0.0554884 | 0.104703   |
| PAX6         | 0.103871   | 0.0978952  | 0.0923127 | 0.0840499 | 0.0755558  |
| LOC285819    | 0.366159   | 0.453146   | 0.342316  | 0.277199  | 0.368712   |
| DNAJB4       | 3.27169    | 5.04468    | 2.49921   | 1.88839   | 4.10814    |
| SFTPB        | 0.0435564  | 0.029979   | 0         | 0.0416445 | 0.0137593  |
| SNORA26      | 0          | 39.6978    | 0         | 0         | 8.28529    |
| LOC728875    | 0.158803   | 0.0709127  | 0.253056  | 0.0873443 | 0          |
| C3orf45      | 0.0221106  | 0          | 0.0270939 | 0.0370143 | 0          |
| EGFR         | 1.39876    | 1.55003    | 1.08509   | 0.923455  | 1.30062    |
| LHX3         | 0.56602    | 0.434422   | 0.36499   | 0.182005  | 0.507409   |
| SPDYE5       | 0.112189   | 0.194694   | 0.232971  | 0.189001  | 0.126763   |
| P2RY1        | 0.0561174  | 0.135545   | 0.0825324 | 0.0467746 | 0.0769557  |
| LOC150381    | 3.48025    | 5.62606    | 3.59093   | 2.45527   | 4.28875    |

|           |           |            |            |            |           |
|-----------|-----------|------------|------------|------------|-----------|
| HOXA4     | 5.42404   | 6.79957    | 4.52165    | 3.60855    | 5.65933   |
| PLOD1     | 127.199   | 154.661    | 100.712    | 79.0421    | 124.595   |
| PER1      | 9.24081   | 6.81886    | 4.45326    | 5.0967     | 6.75524   |
| FRZB      | 0.0473618 | 0          | 0.0120408  | 0.0318103  | 0.0130638 |
| LPAL2     | 0.182785  | 0.385948   | 0.193096   | 0.16152    | 0.201427  |
| SEMA3C    | 0.362312  | 0.502259   | 0.250902   | 0.221076   | 0.479084  |
| FGD4      | 0.134455  | 0.0492253  | 0.121169   | 0.0474119  | 0.06011   |
| PLEKHH3   | 12.328    | 15.0547    | 11.1251    | 7.84887    | 13.9584   |
| SEMA3A    | 1.86095   | 2.07016    | 1.49497    | 0.972621   | 2.13229   |
| DDR2      | 0.160736  | 0.0854644  | 0.141717   | 0.114945   | 0.138327  |
| PMS2P4    | 1.54196   | 1.40331    | 1.3595     | 0.834641   | 1.23567   |
| PRSS12    | 2.04156   | 1.87676    | 1.52987    | 1.19148    | 1.76076   |
| HOXD4     | 1.34395   | 0.69999    | 1.32554    | 0.972035   | 0.56619   |
| WHSC1     | 15.3178   | 11.8739    | 13.9847    | 10.7523    | 10.7139   |
| TULP1     | 0.0566537 | 0.145991   | 0.0670011  | 0.0623289  | 0.0448835 |
| OTOA      | 0.0534383 | 0.0440735  | 0.0915067  | 0.0355547  | 0.0135913 |
| MAP3K9    | 0.633408  | 0.716058   | 0.353787   | 0.300698   | 0.656088  |
| TBC1D3    | 0.17692   | 0.216026   | 0.288991   | 0.106714   | 0.159908  |
| CNGA4     | 0.118846  | 0.0456289  | 0.040846   | 0.0844043  | 0.0418353 |
| MST1      | 2.24855   | 2.77933    | 1.40306    | 1.46357    | 2.51802   |
| TP53TG1   | 5.86505   | 9.33198    | 5.73067    | 3.48357    | 7.66901   |
| ZNF821    | 5.41043   | 6.99908    | 4.81255    | 3.43126    | 5.98854   |
| ABHD12B   | 0.0499353 | 0.0717114  | 0.0419287  | 0.0278925  | 0.0669304 |
| MLLT3     | 4.55514   | 4.84693    | 3.04016    | 2.21512    | 4.83113   |
| ARAF      | 25.6468   | 27.8461    | 17.4915    | 16.9636    | 22.1286   |
| EFCAB5    | 0.0101216 | 0.0428707  | 0.0282103  | 0.0166218  | 0.0362946 |
| ROCK1P1   | 0.543584  | 0.420158   | 0.504144   | 0.369786   | 0.363574  |
| FNDC3B    | 2.75481   | 1.79615    | 2.2255     | 1.69041    | 1.66919   |
| MAPRE3    | 1.59595   | 1.83236    | 0.792527   | 1.27662    | 1.29142   |
| MLK7-AS1  | 0.0559873 | 0.0533884  | 0.0464794  | 0.0308838  | 0.0879337 |
| GMPR      | 20.229    | 15.4056    | 15.8841    | 12.9551    | 14.2197   |
| ZNF878    | 0.16784   | 0.513583   | 0.290446   | 0.342256   | 0.189941  |
| PGF       | 21.519    | 21.5924    | 13.7912    | 14.7342    | 16.0248   |
| ZNF414    | 15.1068   | 16.4844    | 11.4841    | 9.59279    | 12.7636   |
| MBD5      | 0.220034  | 0.181496   | 0.194224   | 0.137539   | 0.187906  |
| SLC22A31  | 0.102704  | 0.0341519  | 0.123452   | 0.0433174  | 0.155541  |
| SEC24D    | 5.06666   | 3.5746     | 3.27222    | 2.79571    | 3.54301   |
| SPINK1    | 0.245565  | 0.114386   | 0.10061    | 0.13541    | 0.216207  |
| LINC00672 | 0.0761228 | 0.197474   | 0.111416   | 0.0784152  | 0.163353  |
| TECTA     | 0.0490555 | 0.0733054  | 0.0761291  | 0.0595747  | 0.084229  |
| CCDC144C  | 0.0129429 | 0.00607601 | 0.00538714 | 0.00708967 | 0.0115604 |
| LINC00273 | 0.112947  | 0.0709752  | 0.0651636  | 0.0941692  | 0         |
| TENM3     | 0.251331  | 0.201356   | 0.186988   | 0.191384   | 0.199552  |
| MATN1-AS1 | 1.21392   | 1.51626    | 1.17907    | 0.771278   | 1.17947   |
| GSDMB     | 2.60545   | 2.63568    | 1.56584    | 1.64225    | 1.89686   |
| ASH1L-AS1 | 1.55267   | 3.43702    | 2.21846    | 1.53756    | 2.60882   |
| SEMA6A    | 0.0704423 | 0.0264865  | 0.0741119  | 0.0433873  | 0.054451  |
| HMSD      | 7.46849   | 4.76643    | 5.69643    | 5.13025    | 4.69504   |
| HP07349   | 2.81244   | 3.89251    | 5.42071    | 4.09235    | 2.77424   |
| LELC3B    | 2.141     | 1.56764    | 1.50027    | 1.14952    | 0.762621  |
| PDLIM2    | 167.207   | 178.399    | 137.779    | 94.137     | 158.3     |
| CHST7     | 1.76095   | 1.16876    | 1.31392    | 1.21199    | 1.10917   |
| SMAD3     | 4.64775   | 5.02355    | 5.09335    | 3.04254    | 4.49306   |
| QLAH      | 0.0443724 | 0          | 0.07401    | 0.0245016  | 0.0398874 |
| TK1       | 131.436   | 135.656    | 106.416    | 93.5943    | 109.383   |
| LPCAT3    | 10.9541   | 15.8258    | 8.7667     | 7.2778     | 12.8909   |
| ZNF461    | 0.559947  | 0.626967   | 0.3709     | 0.452163   | 0.492543  |
| RORA      | 1.96327   | 1.9455     | 1.14512    | 0.971175   | 1.83942   |
| CTDSP1    | 42.853    | 47.5836    | 47.1715    | 31.2145    | 34.7851   |
| HRASLS    | 0.200097  | 0.184751   | 0.289891   | 0.16828    | 0.172494  |
| LCE1C     | 0.0755342 | 0          | 0.265982   | 0          | 0         |
| CHRNA     | 0.0821906 | 0.0220412  | 0.0198396  | 0.0548877  | 0.0402342 |
| GGN       | 1.01161   | 0.912895   | 0.715254   | 0.509691   | 1.11063   |
| TXNDC16   | 0.693135  | 0.763792   | 0.446454   | 0.400976   | 0.68381   |
| BHLHE41   | 5.20702   | 3.14205    | 2.80359    | 2.84255    | 2.87486   |
| TET1      | 0.0112912 | 0.0164233  | 0.00573122 | 0          | 0.0217019 |
| ANKRD45   | 0.017717  | 0          | 0.0225511  | 0.0148273  | 0         |
| CXorf57   | 1.97445   | 1.70178    | 1.68478    | 1.20867    | 1.66435   |
| C14orf105 | 0.0253102 | 0          | 0.0315545  | 0.0138818  | 0         |
| PRDM10    | 2.02074   | 1.39506    | 0.982279   | 1.01688    | 1.16107   |
| ZNF620    | 0.486594  | 0.886565   | 0.574527   | 0.469607   | 0.560492  |
| FBLN5     | 3.45692   | 3.4028     | 3.06927    | 2.34612    | 3.17281   |
| EFEMP2    | 4.70931   | 3.46076    | 1.48548    | 2.07348    | 3.89529   |
| LLGL2     | 41.9477   | 38.9097    | 31.4235    | 27.3666    | 32.3042   |
| LOC113230 | 5.27388   | 6.19615    | 4.14771    | 4.12147    | 3.9913    |
| P4HA2     | 37.3015   | 39.4899    | 28.1926    | 19.7529    | 40.767    |
| RAET1K    | 1.5633    | 2.27091    | 2.06216    | 1.49384    | 1.58603   |
| HMGNS     | 3.6912    | 3.18694    | 1.61165    | 2.67203    | 2.64974   |
| EEF1A2    | 0.0534551 | 0.0679814  | 0          | 0          | 0.0939537 |

|              |            |           |            |            |            |
|--------------|------------|-----------|------------|------------|------------|
| PPP5D1       | 0.225666   | 0.1287    | 0.168855   | 0.113292   | 0.210619   |
| STAC3        | 0.703582   | 0.630934  | 0.764086   | 0.807802   | 0.493997   |
| DFNA5        | 0.0237067  | 0         | 0.0146588  | 0          | 0.029689   |
| ARHGAP42     | 0.466997   | 0.226162  | 0.344913   | 0.298298   | 0.338198   |
| LINC00115    | 2.15014    | 1.83942   | 2.11544    | 1.36447    | 1.50768    |
| RBM44        | 0.120543   | 0.152083  | 0.0916178  | 0.0594388  | 0.15787    |
| ZNF154       | 0.0475994  | 0.102434  | 0.0197803  | 0.0529542  | 0.0640112  |
| HIST1H2AK    | 0.140954   | 0.363672  | 0.325433   | 0.230065   | 0.171766   |
| RNF122       | 5.70728    | 4.71128   | 2.72818    | 3.44278    | 4.01308    |
| AATK         | 0.701042   | 0.78029   | 0.404003   | 0.436497   | 0.604356   |
| DBP          | 20.8307    | 23.0181   | 12.871     | 13.5711    | 17.6732    |
| RALGFS2      | 2.98269    | 2.66811   | 2.4046     | 1.83361    | 2.40445    |
| AXDND1       | 1.09935    | 0.938353  | 0.596547   | 0.696032   | 0.779257   |
| CD163L1      | 0.282957   | 0.175149  | 0.143425   | 0.108283   | 0.168813   |
| C9orf163     | 0.410059   | 0.447781  | 0.562207   | 0.530835   | 0.272755   |
| GPR18        | 0.0186545  | 0.0542619 | 0          | 0.031093   | 0.0252937  |
| ACSBG2       | 0.0246134  | 0.0456825 | 0.0101385  | 0.0407668  | 0.0214129  |
| C12orf73     | 3.86105    | 3.34258   | 3.27594    | 2.49863    | 2.63608    |
| C1orf114     | 0.0108284  | 0.0604191 | 0.0134181  | 0.0176706  | 0.0288385  |
| PCYOX1       | 5.60958    | 8.40622   | 5.27382    | 3.98082    | 6.6617     |
| CLUL1        | 0.0774321  | 0.0316451 | 0.0277385  | 0.036701   | 0.0297961  |
| HIST1H2AI    | 1.15746    | 0.925374  | 1.1807     | 0.711161   | 0.343713   |
| LMBR1L       | 13.3505    | 14.8936   | 10.3378    | 9.53565    | 11.8536    |
| LOC100131434 | 0.0227782  | 0.0980457 | 0.0284758  | 0.0190568  | 0.0764086  |
| RDH16        | 0.28024    | 0.430812  | 0.100739   | 0.302768   | 0.210054   |
| HYAL1        | 0.0214096  | 0.0294493 | 0.0788864  | 0.0357079  | 0.0270249  |
| LMTK3        | 0.742605   | 0.613056  | 0.680738   | 0.49578    | 0.592004   |
| RPSAP52      | 2.10725    | 2.37727   | 3.04169    | 1.79743    | 1.62485    |
| FAM19A3      | 1.42093    | 0.881743  | 1.30968    | 1.02011    | 0.856629   |
| SEC14L1P1    | 0.135048   | 0.334556  | 0.294623   | 0.138125   | 0.271062   |
| PYY2         | 1.16004    | 0.73274   | 1.38549    | 1.29603    | 0.470834   |
| RASSF2       | 0.030884   | 0         | 0.016457   | 0.00734533 | 0.00582224 |
| CTSL2        | 3.11486    | 2.25479   | 2.55878    | 2.17826    | 1.96091    |
| PMS2CL       | 3.83598    | 2.92069   | 2.56297    | 2.27953    | 2.74615    |
| ARTN         | 0.110352   | 0.383897  | 0.260435   | 0.183914   | 0.185449   |
| ZNF204P      | 2.08443    | 2.09011   | 1.57643    | 1.81128    | 1.70727    |
| IL20RB       | 0.177208   | 0.196369  | 0.203495   | 0.157032   | 0.0607078  |
| CAPN5        | 8.79437    | 6.56108   | 4.82688    | 5.31881    | 6.56401    |
| PVRL3        | 1.39981    | 1.60554   | 1.48029    | 0.89019    | 1.58929    |
| SLC44A3      | 0.86177    | 0.971191  | 0.908661   | 0.663614   | 0.959254   |
| YY1P2        | 0.0812752  | 0.0516468 | 0.0594648  | 0.116646   | 0.0325017  |
| IQSEC2       | 9.45534    | 9.0425    | 7.65571    | 6.07198    | 6.79747    |
| FLJ42709     | 0.380939   | 0.560132  | 0.510156   | 0.244833   | 0.418555   |
| SCARNA10     | 0.806726   | 2.13825   | 1.00341    | 1.11263    | 0.754104   |
| ZNF717       | 0.150856   | 0.171175  | 0.181968   | 0.104572   | 0.15243    |
| PC           | 1.59505    | 1.40405   | 2.09383    | 1.19096    | 1.47184    |
| MAPK8IP1     | 1.00181    | 1.13485   | 1.0289     | 0.754446   | 0.851535   |
| LYSMD1       | 2.53895    | 1.84012   | 2.27737    | 1.96177    | 1.32203    |
| ILK          | 82.5705    | 79.3279   | 77.0516    | 54.5557    | 72.8816    |
| SEMA4B       | 17.9814    | 19.5304   | 11.6074    | 11.3824    | 15.8512    |
| TMEM53       | 2.26727    | 2.73787   | 2.30784    | 1.84337    | 2.51839    |
| MIER2        | 17.3503    | 13.4455   | 16.904     | 12.3644    | 12.1492    |
| SH3BGR12     | 1.77805    | 1.72755   | 1.68255    | 1.2205     | 1.42247    |
| LINC00565    | 0.64517    | 0.327429  | 0.647782   | 0.462634   | 0.174389   |
| GLCC1        | 1.13201    | 1.01603   | 0.856213   | 0.748511   | 1.05926    |
| KLF5         | 1.64262    | 2.23334   | 1.92145    | 1.13965    | 2.14972    |
| STARD5       | 2.01552    | 2.40776   | 1.31726    | 1.40796    | 2.07602    |
| CLDN23       | 1.19647    | 0.514101  | 0.689767   | 0.579489   | 0.87079    |
| HS3ST3B1     | 0.0797744  | 0.400993  | 0.354555   | 0.354553   | 0.202221   |
| HSH2D        | 0.514416   | 0.355433  | 0.319463   | 0.333897   | 0.374127   |
| LOC100292680 | 0.0585364  | 0         | 0.0359049  | 0.0733936  | 0          |
| SMIM14       | 1.11926    | 2.28727   | 1.63641    | 1.17411    | 1.67455    |
| NRM          | 32.2883    | 29.1474   | 25.7966    | 23.8143    | 25.8094    |
| SLC23A1      | 0.0137995  | 0.0191006 | 0.0503953  | 0.0229206  | 0.0177488  |
| DHCR7        | 53.3729    | 41.478    | 36.5352    | 32.229     | 39.3187    |
| SULF1        | 0.0239784  | 0.0342382 | 0.00999579 | 0.0265717  | 0.0053815  |
| PYGM         | 0.00999136 | 0.0937166 | 0.0842527  | 0.0332908  | 0.0613291  |
| FAM209A      | 0.153181   | 0.282319  | 0.125429   | 0.0844049  | 0.264956   |
| HSD17B7P2    | 1.49588    | 1.02076   | 0.708115   | 1.20801    | 0.701537   |
| KIRREL       | 0.888799   | 1.35854   | 0.688337   | 0.702349   | 0.890073   |
| AP1M2        | 4.53659    | 2.72186   | 4.01833    | 2.97587    | 2.74041    |
| LRI73        | 0.141381   | 0.0941331 | 0.11406    | 0.139295   | 0.053214   |
| KDM5B-AS1    | 27.8232    | 35.1039   | 19.1878    | 13.6049    | 33.9866    |
| KLHL36       | 16.4598    | 12.7838   | 10.2178    | 8.79413    | 12.3774    |
| RFPL3S       | 2.37683    | 1.4883    | 2.33361    | 1.68432    | 1.65614    |
| KLF11        | 1.61859    | 3.01755   | 1.49243    | 1.20954    | 2.33228    |
| FOXJ2        | 2.67808    | 2.69777   | 2.51021    | 1.9835     | 2.36574    |
| CCDC28B      | 11.6902    | 12.3825   | 6.83461    | 7.62798    | 11.1965    |
| SYNGR4       | 0.140446   | 0.124848  | 0.111352   | 0.15535    | 0.0577722  |

|                     |            |            |            |            |            |
|---------------------|------------|------------|------------|------------|------------|
| ANKRD36B            | 0.378161   | 0.536212   | 0.25903    | 0.309149   | 0.443227   |
| REC8                | 0.793901   | 0.576908   | 0.675014   | 0.615596   | 0.596687   |
| LOC400043           | 0.326754   | 0.225813   | 0.0336424  | 0.137242   | 0.274437   |
| SCARF2              | 2.83476    | 1.66417    | 1.62479    | 1.50981    | 1.75801    |
| RASGRP3             | 0.0299169  | 0.0216976  | 0.0749493  | 0.049886   | 0.0136219  |
| KCNK3               | 0.00926371 | 0.0252304  | 0          | 0.0155     | 0.0115705  |
| MGAT4A              | 1.23285    | 0.987282   | 1.16624    | 0.738554   | 0.936788   |
| IGFLR1              | 3.32322    | 5.0115     | 2.86072    | 3.24369    | 3.53706    |
| TEC                 | 1.36666    | 1.28562    | 0.857637   | 0.700936   | 1.2765     |
| PLA2G4A             | 1.51329    | 1.83383    | 1.32882    | 0.63843    | 2.24486    |
| OBSCN               | 0.912759   | 1.1364     | 0.782753   | 0.712718   | 0.987207   |
| SNTA1               | 18.0693    | 19.4735    | 14.8661    | 10.4276    | 18.8697    |
| CLVS1               | 0.0353008  | 0.0343799  | 0.014945   | 0          | 0.0243181  |
| LYPD5               | 0.605468   | 0.486361   | 0.374271   | 0.330624   | 0.552863   |
| MGC12916            | 4.30206    | 4.36957    | 2.19772    | 2.46473    | 3.86652    |
| ACBD7               | 1.63331    | 1.84059    | 2.55513    | 1.44555    | 1.95384    |
| C2orf48             | 2.68544    | 1.34714    | 2.84138    | 1.74715    | 1.28662    |
| TMEM81              | 3.49167    | 3.72211    | 2.91209    | 3.02303    | 2.20207    |
| CRTC2               | 21.9237    | 20.9849    | 17.4334    | 15.5709    | 16.7426    |
| HSD17B8             | 6.95717    | 9.933      | 6.42883    | 5.58918    | 8.04115    |
| LOC100505666        | 0.922121   | 1.3233     | 0.888898   | 0.611987   | 1.19587    |
| DFNB31              | 16.6717    | 20.9564    | 10.7252    | 11.5163    | 17.4871    |
| ESRRB               | 0.200515   | 0.310985   | 0.116578   | 0.11127    | 0.131643   |
| WDTC1               | 1.63953    | 1.39328    | 1.39207    | 1.373      | 1.16701    |
| MAP2                | 0.170351   | 0.0960256  | 0.0719952  | 0.10905    | 0.0424105  |
| CAND2               | 0.0452384  | 0.109317   | 0.0765849  | 0.0302847  | 0.0886751  |
| BTN3A1              | 2.40338    | 1.68024    | 1.09589    | 1.34566    | 1.63345    |
| SLC9C1              | 0.00467734 | 0          | 0.00601326 | 0          | 0          |
| ZNF469              | 0.0230538  | 0.00428836 | 0.0117454  | 0.00549569 | 0.0196338  |
| DUOX1               | 0.0377125  | 0.0509008  | 0.045542   | 0.0525078  | 0.0311595  |
| ZFAND2B             | 33.1293    | 31.084     | 28.1498    | 23.6529    | 23.9698    |
| C11orf68            | 76.638     | 63.9535    | 63.2871    | 56.2223    | 52.5274    |
| FAM115C             | 2.52137    | 2.40185    | 1.17243    | 1.23774    | 2.48454    |
| LOC100505695        | 2.1529     | 2.88267    | 5.08164    | 2.44133    | 2.36758    |
| PCIF1               | 14.2162    | 15.0943    | 11.1094    | 9.84596    | 12.6481    |
| LOC728228           | 0.0581485  | 0.23993    | 0.141067   | 0.0962321  | 0.147615   |
| HCG25               | 0.215321   | 0.351099   | 0.312644   | 0.141654   | 0.327196   |
| DEPTOR              | 0.697961   | 1.07328    | 0.759308   | 0.5988     | 0.775746   |
| SLC7A5P2            | 0.430334   | 0.471606   | 0.487951   | 0.385752   | 0.278982   |
| FUT11               | 5.59233    | 5.29597    | 2.54503    | 3.18837    | 4.80613    |
| RYR2                | 0.159588   | 0.107654   | 0.245598   | 0.149258   | 0.105973   |
| UTS2                | 7.63386    | 5.80793    | 5.19039    | 4.95732    | 4.32496    |
| LIPE                | 4.10806    | 2.98871    | 4.11924    | 3.30983    | 2.21514    |
| C2orf82             | 5.01491    | 5.9471     | 5.66498    | 4.61086    | 4.46568    |
| LOC100131257        | 0.00366111 | 0.00400478 | 0.00465379 | 0.00305193 | 0.00504975 |
| MTRNR2L5            | 0.0122327  | 0          | 0.0155924  | 0          | 0          |
| SNORA80B            | 3.06806    | 8.29982    | 7.35421    | 5.02149    | 4.25871    |
| GJC1                | 10.8616    | 4.94735    | 11.1276    | 7.44278    | 6.08785    |
| KIF12               | 1.01388    | 1.55493    | 1.03184    | 0.830515   | 1.21878    |
| ASB4                | 0.00534899 | 0          | 0.00680282 | 0          | 0          |
| KNDC1               | 1.11087    | 1.25514    | 1.01451    | 0.790813   | 1.15131    |
| GCHFR               | 95.6207    | 85.5614    | 71.5046    | 53.706     | 87.1219    |
| SH2D3A              | 8.5841     | 7.35549    | 8.44834    | 6.72188    | 6.28627    |
| ETV1                | 0.71256    | 0.666059   | 0.607511   | 0.518109   | 0.604944   |
| BTD                 | 1.44295    | 1.78674    | 1.25851    | 1.14587    | 1.36712    |
| SDF2L1              | 79.5963    | 89.9449    | 75.1987    | 61.6482    | 75.3874    |
| GAMT                | 0.213887   | 0.281167   | 0.254116   | 0.0712172  | 0.227609   |
| FRRS1               | 0.630853   | 0.489295   | 0.390849   | 0.252205   | 0.517581   |
| FOXP4               | 11.184     | 10.2416    | 11.1167    | 8.67492    | 8.59101    |
| TMEM163             | 0.0639725  | 0          | 0.0599445  | 0.026767   | 0.0429468  |
| MAGT1               | 9.35337    | 10.2637    | 10.1956    | 6.99573    | 9.16418    |
| SPINT1              | 56.8099    | 53.4606    | 51.142     | 39.9013    | 46.5651    |
| USPL1               | 3.19383    | 3.3248     | 3.06144    | 2.38507    | 2.882      |
| TMSB10              | 6097.46    | 7120.22    | 5235.79    | 3684.44    | 6081.83    |
| FAM63A              | 7.5396     | 6.91968    | 4.91371    | 4.84932    | 5.32615    |
| PDGFRL              | 4.88035    | 5.56307    | 5.17571    | 3.19303    | 5.17307    |
| KLHL25              | 3.18119    | 4.41508    | 3.1604     | 2.86449    | 3.027      |
| KDM4A-AS1           | 0.552924   | 0.603751   | 0.45521    | 0.418397   | 0.47681    |
| PPP1R3F             | 0.626237   | 0.406571   | 1.12189    | 0.592607   | 0.54696    |
| TLR9                | 0.0310036  | 0.0138285  | 0          | 0.0173712  | 0          |
| RFX2                | 3.56983    | 3.14082    | 3.03514    | 2.46644    | 2.77824    |
| SLC22A11            | 0.0163449  | 0          | 0.0197085  | 0          | 0          |
| LOC100616530        | 0.381631   | 0.184088   | 0.165581   | 0.28014    | 0          |
| MGAT5B              | 2.84804    | 5.2257     | 1.83918    | 1.2696     | 4.84049    |
| IRF7                | 0.0786955  | 0.0647522  | 0.0622158  | 0.0878296  | 0.0299478  |
| NT5E                | 0.402673   | 1.24041    | 0.925796   | 0.507899   | 0.942465   |
| LRRC3               | 1.34925    | 2.29895    | 1.31579    | 1.19187    | 1.75608    |
| KIAA1244            | 3.75153    | 3.60011    | 2.53165    | 2.04778    | 3.57753    |
| RBAK,RBAK-LOC389458 | 44.169     | 40.8562    | 37.2312    | 30.7897    | 39.7079    |

|              |           |            |           |           |           |
|--------------|-----------|------------|-----------|-----------|-----------|
| SNAPC3       | 4.3022    | 2.76973    | 3.01723   | 2.63896   | 2.74075   |
| F2R          | 0.902883  | 1.02396    | 0.816768  | 0.500934  | 0.998295  |
| ZNF488       | 0.356981  | 0.218585   | 0.327506  | 0.263615  | 0.233081  |
| FEM1B        | 1.34178   | 2.54001    | 1.05137   | 0.803342  | 2.19444   |
| RTN4R        | 23.9399   | 15.9742    | 20.2135   | 16.7926   | 16.3505   |
| CMPK2        | 0.306283  | 0.590792   | 0.302295  | 0.287583  | 0.444555  |
| GAD1         | 10.4012   | 12.7983    | 8.12717   | 5.74445   | 11.5717   |
| CPEB3        | 0.280979  | 0.209285   | 0.116761  | 0.180842  | 0.112811  |
| LONRF1       | 4.28925   | 2.5088     | 4.71722   | 2.75859   | 2.3004    |
| ZCCHC2       | 1.90035   | 1.58842    | 1.43092   | 1.29449   | 1.40948   |
| FRAS1        | 1.14245   | 1.20193    | 0.963709  | 0.779613  | 1.22549   |
| ZNF284       | 1.22925   | 0.690836   | 0.872437  | 0.71499   | 0.542131  |
| FGF18        | 0.403292  | 0.355715   | 0.416316  | 0.502908  | 0.255786  |
| FP588        | 0.192838  | 0.192069   | 0.20419   | 0.161054  | 0.153007  |
| KCNJ14       | 0.530128  | 0.611813   | 0.903176  | 0.483331  | 0.7008    |
| ESAM         | 10.1385   | 9.71861    | 10.2302   | 7.22481   | 9.04416   |
| ATOH7        | 0.213574  | 0.17236    | 0.263359  | 0.152069  | 0.202319  |
| ZNRF2        | 1.47283   | 1.06518    | 1.42067   | 0.880432  | 0.91587   |
| CDK2AP2      | 57.124    | 48.6622    | 54.6081   | 39.1443   | 45.3499   |
| ARPC5        | 25.9085   | 28.1307    | 30.4575   | 21.4454   | 23.2019   |
| SMPDL3B      | 1.20605   | 2.44565    | 1.71659   | 1.13363   | 2.04904   |
| NRSN2        | 0.273636  | 0.371353   | 0.313982  | 0.253993  | 0.322124  |
| HK3          | 0.0243756 | 0.0161926  | 0.0292297 | 0.0407453 | 0.014769  |
| FLJ43681     | 0.764887  | 0.601923   | 0.880241  | 0.597306  | 0.700835  |
| CRYM-AS1     | 0.157295  | 0.116518   | 0.298809  | 0.0562571 | 0.1584    |
| LOC100133957 | 2.33804   | 2.02833    | 3.05076   | 2.16313   | 1.77003   |
| IFITM1       | 1.82      | 1.14638    | 1.3006    | 1.11857   | 1.45844   |
| RGS12        | 2.59335   | 2.62385    | 2.31459   | 2.02591   | 2.14493   |
| VPS37D       | 26.2639   | 24.8365    | 19.019    | 14.9025   | 23.4754   |
| BTN3A3       | 1.45145   | 1.37556    | 0.794577  | 0.954346  | 1.29185   |
| E2F8         | 1.57443   | 1.30849    | 1.17251   | 1.21494   | 1.33024   |
| PRH2         | 0.0242723 | 0.00979245 | 0.0168918 | 0.0109832 | 0.0208718 |
| SGOL1-AS1    | 2.42662   | 1.25148    | 1.42866   | 1.19969   | 1.30793   |
| CBWD2        | 1.75169   | 1.6806     | 1.91538   | 1.48596   | 1.50109   |
| PRORS1P      | 0.301309  | 0.988741   | 0.434717  | 0.391941  | 0.687792  |
| ETNK2        | 1.12035   | 1.79571    | 1.42854   | 1.00997   | 1.47249   |
| SNORA74A     | 1.40192   | 1.94645    | 0         | 0         | 1.85265   |
| ACAP1        | 0.679376  | 0.89707    | 0.585133  | 0.474489  | 0.544752  |
| KIAA1467     | 2.02161   | 1.70894    | 1.62389   | 1.10972   | 1.70852   |
| ALDOA        | 4724.14   | 5806.13    | 4026.84   | 2919.42   | 4900.81   |
| SH3D21       | 6.3254    | 8.2068     | 4.10084   | 3.79403   | 7.62055   |
| MFGE8        | 16.5648   | 14.0397    | 18.0364   | 12.7599   | 12.6304   |
| WTIP         | 3.10495   | 1.36716    | 1.48391   | 1.69626   | 1.59507   |
| THRA         | 10.6063   | 9.71736    | 8.62466   | 8.03414   | 8.39089   |
| OXCT2        | 1.84981   | 2.21863    | 1.52926   | 1.51419   | 1.8921    |
| SLC16A4      | 0.0968886 | 0.181645   | 0.0774834 | 0.122878  | 0.139695  |
| LOC729970    | 2.13537   | 2.34115    | 1.91962   | 1.26596   | 2.05359   |
| FUZ          | 3.4298    | 1.92925    | 2.9446    | 2.45217   | 2.37566   |
| MSS51        | 0.975295  | 0.623934   | 0.787401  | 0.713676  | 0.486194  |
| IFLTD1       | 0.0279477 | 0          | 0.0234726 | 0.0155198 | 0.0256264 |
| JUND         | 125.985   | 163.078    | 116.918   | 90.9908   | 143.043   |
| CCDC154      | 0.551104  | 0.221889   | 0.487179  | 0.326852  | 0.381693  |
| LOC220729    | 1.16539   | 1.5984     | 1.1767    | 0.805931  | 1.40253   |
| CRISPLD2     | 0.0478568 | 0.0588254  | 0.0221997 | 0.0299735 | 0.0626561 |
| MSMO1        | 28.3035   | 20.4978    | 22.1044   | 17.8278   | 22.166    |
| HKDC1        | 0.501815  | 0.76541    | 2.15753   | 1.09084   | 0.520897  |
| CYBB         | 0.0296456 | 0.0578748  | 0.0502248 | 0.0247224 | 0.0413106 |
| BEX5         | 14.1749   | 15.1406    | 14.0404   | 10.9968   | 11.9797   |
| C19orf81     | 1.80526   | 1.48295    | 1.44025   | 0.817616  | 1.56734   |
| TIGD3        | 1.94487   | 3.69534    | 2.27406   | 1.65663   | 2.99837   |
| SYTL2        | 0.817844  | 0.953929   | 0.729062  | 0.51461   | 1.05621   |
| BRIP1        | 2.203     | 1.34753    | 2.01301   | 1.53715   | 1.29139   |
| SAP30        | 62.5089   | 52.8447    | 32.3203   | 34.5066   | 55.0783   |
| POU2F2       | 0.114054  | 0.116437   | 0.0886545 | 0.0922198 | 0.0811002 |
| TMEM170A     | 5.2578    | 5.45907    | 4.79976   | 2.64219   | 5.42832   |
| IFIT3        | 0.367662  | 0.386002   | 0.216683  | 0.151924  | 0.351358  |
| C20orf196    | 2.8592    | 1.93808    | 2.54887   | 1.94276   | 1.61907   |
| PLAT         | 0.936699  | 1.2593     | 0.849209  | 0.84065   | 1.02922   |
| RNF157       | 0.457357  | 0.744657   | 0.608392  | 0.371413  | 0.668226  |
| FGFBP3       | 1.86708   | 2.18955    | 1.76029   | 1.4692    | 1.74344   |
| MT1JP        | 1.97101   | 1.82642    | 1.82096   | 2.00204   | 1.72242   |
| ANKRD50      | 1.25538   | 1.33139    | 0.989788  | 0.882412  | 1.14833   |
| TMPO-AS1     | 1.07167   | 1.8857     | 1.2826    | 1.24874   | 1.27869   |
| SAT2         | 138.188   | 144.282    | 122.169   | 104.637   | 103.833   |
| DBIL5P       | 0.106462  | 0.271286   | 0.361145  | 0.177037  | 0.197542  |
| NMU          | 19.3455   | 23.0382    | 17.9201   | 13.8455   | 18.8219   |
| TBC1D28      | 0.0571437 | 0.078405   | 0         | 0.0475281 | 0.0361418 |
| DNAJC3       | 7.19939   | 6.74138    | 6.6436    | 4.77703   | 6.72288   |
| TNFRSF8      | 0.378212  | 0.0979615  | 0.458263  | 0.290914  | 0.179832  |



|              |            |           |            |            |           |
|--------------|------------|-----------|------------|------------|-----------|
| HSD17B7      | 9.472      | 6.48635   | 8.74666    | 6.8692     | 6.49194   |
| ZKSCAN4      | 1.67493    | 2.10581   | 1.56396    | 1.43889    | 1.33007   |
| CRYBG3       | 0.335344   | 0.335065  | 0.256397   | 0.185519   | 0.344751  |
| CABYR        | 0.606771   | 0.726838  | 0.656842   | 0.37534    | 0.786226  |
| TRABD2B      | 0.0497812  | 0.0475187 | 0.0660388  | 0.0447917  | 0.0389355 |
| ATF3         | 11.3848    | 14.2613   | 22.3272    | 9.76426    | 13.2732   |
| ATP6V0E2     | 0.0347391  | 0         | 0.0634666  | 0.0584379  | 0.0203798 |
| RTN4RL2      | 30.2342    | 28.2181   | 25.569     | 19.6274    | 28.0769   |
| SLC2A1       | 114.368    | 126.51    | 74.2056    | 70.7991    | 114.516   |
| PDIA4        | 73.3446    | 83.4152   | 64.7901    | 49.5908    | 78.1151   |
| PHF7         | 1.54288    | 1.88971   | 1.50338    | 0.97844    | 1.72311   |
| SYP          | 0.268263   | 0.297034  | 0.326635   | 0.191418   | 0.211331  |
| MRPL27       | 76.3132    | 84.9289   | 76.444     | 56.0839    | 69.0085   |
| SPEM1        | 0.698006   | 0.577085  | 0.565576   | 0.519286   | 0.483508  |
| NTN4         | 0.64617    | 0.474383  | 0.534357   | 0.439933   | 0.435113  |
| LOC553103    | 0.253118   | 0.209764  | 0.185977   | 0.0281142  | 0.345513  |
| PHLDA3       | 101.067    | 135.883   | 88.156     | 65.5613    | 116.915   |
| SREBF2       | 37.5869    | 32.0196   | 30.2858    | 26.4504    | 31.1009   |
| ITGAE        | 3.11526    | 3.87729   | 3.0054     | 2.27139    | 2.83214   |
| PVRL2        | 54.3228    | 54.5876   | 42.0852    | 37.4562    | 48.2386   |
| ZNF815P      | 0.621593   | 0.666721  | 0.624215   | 0.375979   | 0.585957  |
| LOC728743    | 0.764167   | 1.19498   | 0.727904   | 0.679033   | 0.909277  |
| AMIGO1       | 2.10431    | 2.84694   | 2.44637    | 1.70324    | 2.2274    |
| PFKFB3       | 28.8146    | 25.3433   | 17.0196    | 19.5501    | 20.5065   |
| LOC100129046 | 0.0935873  | 0.0256175 | 0.0458719  | 0.062118   | 0.0709064 |
| GPR89A       | 4.4591     | 4.7176    | 4.46781    | 3.36228    | 3.69482   |
| TSPAN10      | 1.20626    | 0.574028  | 1.28321    | 0.539724   | 0.812308  |
| SLC11A1      | 0.119693   | 0.20236   | 0.266346   | 0.150294   | 0.148969  |
| NS3BP        | 1.34827    | 2.6594    | 2.60755    | 2.15959    | 1.70856   |
| LINC00460    | 0.402666   | 1.03635   | 0.459607   | 0.155279   | 0.885675  |
| DMXL1        | 0.85727    | 1.06125   | 0.7038     | 0.636381   | 0.827544  |
| LOC400752    | 0.414799   | 1.00721   | 0.777129   | 0.198786   | 0.806068  |
| SNAI3        | 2.65885    | 3.43762   | 2.3679     | 2.36942    | 2.69587   |
| AKT3         | 1.91708    | 1.7902    | 1.59808    | 1.37647    | 1.52117   |
| STARD13-AS   | 0.0428061  | 0.0606883 | 0.106535   | 0          | 0.170172  |
| LDLRAD4      | 0.0898938  | 0.0409158 | 0.071061   | 0.0777547  | 0.0399633 |
| TFEB         | 2.8318     | 1.93      | 2.09455    | 2.43779    | 1.45941   |
| LOC100130238 | 0.036988   | 0         | 0.0111627  | 0          | 0.0227552 |
| BREA2        | 0.643162   | 0.512314  | 0.734919   | 0.440326   | 0.424704  |
| FLVCR2       | 0.798266   | 1.13732   | 1.03647    | 0.666494   | 1.02344   |
| NFAM1        | 0.00549632 | 0.0296975 | 0.00669217 | 0          | 0.0339631 |
| FAM162A      | 382.432    | 426.182   | 275.189    | 190.352    | 413.883   |
| ARHGAP33     | 2.84881    | 3.68523   | 2.31524    | 2.74403    | 3.19786   |
| MBOAT1       | 1.80983    | 1.62853   | 1.25486    | 1.28587    | 1.44549   |
| RAB6B        | 0.230907   | 0.517326  | 0.511165   | 0.311041   | 0.342588  |
| LOC284837    | 0.05217    | 0.0296339 | 0.0357456  | 0.049689   | 0.0452911 |
| PSCA         | 0.430769   | 0.980488  | 0.607835   | 0.360038   | 0.793214  |
| TAS2R4       | 0.0677147  | 0.0498738 | 0.0854862  | 0.0564228  | 0.0469035 |
| ENPP1        | 0.826204   | 1.06456   | 0.877628   | 0.723756   | 0.929729  |
| KPNA7        | 0.0179691  | 0.0488961 | 0          | 0          | 0.0226202 |
| RASSF7       | 42.3129    | 39.0733   | 39.2726    | 30.3877    | 34.4898   |
| TRPM6        | 0.0385041  | 0.0403255 | 0.0674722  | 0.0256301  | 0.0516661 |
| STX11        | 0.203066   | 0.293624  | 0.253153   | 0.203987   | 0.207944  |
| MCF2         | 0.0168733  | 0         | 0.00711028 | 0.00934796 | 0         |
| TMEM120A     | 33.9641    | 44.3664   | 34.9818    | 25.2697    | 36.9936   |
| ABHD4        | 9.74222    | 9.39487   | 7.2992     | 6.14205    | 8.98034   |
| NUCB2        | 11.0021    | 11.5918   | 11.8924    | 8.96433    | 10.4009   |
| PARP16       | 9.16704    | 8.39616   | 10.475     | 6.96054    | 8.07121   |
| POU5F1P3     | 0.0323646  | 0.0856382 | 0          | 0          | 0.0397826 |
| LRIG2        | 2.15206    | 2.64539   | 1.74149    | 1.55354    | 2.2186    |
| JPX          | 3.97348    | 3.84909   | 3.22984    | 2.45057    | 3.13184   |
| ITGA1,PELO   | 21.3651    | 16.1195   | 17.048     | 14.6064    | 14.3219   |
| TXNIP        | 21.1777    | 41.0329   | 20.597     | 17.5481    | 33.0754   |
| ARHGEF5      | 4.56531    | 3.58433   | 4.3411     | 3.39594    | 3.18103   |
| FADS2        | 9.37617    | 7.81112   | 7.50813    | 7.42371    | 6.49692   |
| E2F1         | 16.7771    | 20.5785   | 14.1092    | 13.2516    | 17.6968   |
| PROSAPI1     | 5.02486    | 6.64555   | 3.92964    | 3.64429    | 6.02661   |
| ICAM4        | 0.17897    | 0.095323  | 0.241111   | 0.0995394  | 0.111252  |
| PITPNA-AS1   | 9.86041    | 15.5469   | 17.4224    | 10.4787    | 10.9168   |
| MPP2         | 6.93766    | 7.21836   | 4.08491    | 4.24166    | 7.60437   |
| HAPLN2       | 0.126654   | 0.0420973 | 0.0378202  | 0.0529456  | 0.114788  |
| H2AFX        | 205.74     | 188.619   | 214.643    | 175.546    | 151.162   |
| KRT10        | 13.4386    | 21.5965   | 15.6624    | 11.2596    | 15.5456   |
| ERMP1        | 4.94271    | 5.42009   | 4.04572    | 3.31762    | 5.39014   |
| DUSP10       | 0.80887    | 1.61686   | 0.568536   | 0.615138   | 1.38041   |
| BAAT         | 0.132626   | 0.11169   | 0.112837   | 0.0633561  | 0.158465  |
| PDZD7        | 2.76175    | 3.01958   | 1.98809    | 1.67675    | 2.71219   |
| TRAPPC6B     | 3.51611    | 3.82709   | 5.12751    | 2.96326    | 3.55487   |
| UNC13B       | 1.61518    | 1.4662    | 1.27995    | 1.05248    | 1.37721   |

|              |            |           |            |            |            |
|--------------|------------|-----------|------------|------------|------------|
| CALR         | 504.151    | 583.747   | 427.936    | 341.962    | 524.663    |
| MNF1         | 35.1373    | 44.5768   | 28.2848    | 26.7132    | 36.1808    |
| ZNF224       | 0.0169382  | 0.0592185 | 0.031442   | 0.0279702  | 0.0444804  |
| SLC25A5-AS1  | 0.201575   | 0.553963  | 0.344912   | 0.198586   | 0.401174   |
| CD27         | 0.189694   | 0.363651  | 0.229068   | 0.180634   | 0.264934   |
| TBC1D2       | 10.9875    | 9.05997   | 12.1396    | 8.6128     | 8.40389    |
| MYBL2        | 21.462     | 18.1833   | 17.6572    | 17.8827    | 16.0215    |
| EIF1B-AS1    | 0.084119   | 0.0857665 | 0.105025   | 0.020036   | 0.0965764  |
| PCDH11Y      | 0.0139567  | 0.0333635 | 0.0234541  | 0.00776241 | 0.0249108  |
| CNPY3        | 59.274     | 56.3795   | 56.4968    | 44.2182    | 47.3163    |
| IFIH1        | 0.589525   | 0.665211  | 0.528229   | 0.494132   | 0.491533   |
| HAL          | 0.0771971  | 0.0916385 | 0.128847   | 0.107394   | 0.0770475  |
| RBFOX3       | 0.0485223  | 0.043205  | 0.0582167  | 0.0541088  | 0.0395858  |
| SMAD6        | 0.56626    | 1.44042   | 0.745864   | 0.597127   | 1.11101    |
| MYL9         | 82.0799    | 94.1967   | 78.7107    | 51.6658    | 91.0794    |
| LYSMD3       | 2.61864    | 2.10032   | 2.33771    | 1.89466    | 1.8121     |
| SLC39A10     | 4.68601    | 3.99226   | 3.59077    | 3.12737    | 3.68501    |
| MSI2         | 7.14999    | 6.50073   | 5.43386    | 4.66831    | 6.27908    |
| PTGS1        | 0.005193   | 0.0295137 | 0.00648267 | 0.017324   | 0.00686284 |
| LOC100506804 | 0.0763299  | 0.299522  | 0.167859   | 0.127147   | 0.179436   |
| EMILIN3      | 5.18208    | 4.67934   | 2.73287    | 3.70898    | 4.22936    |
| HBE1         | 139.046    | 201.323   | 115.961    | 105.904    | 172.544    |
| MYH10        | 0.0842687  | 0.0574434 | 0.114794   | 0.0853826  | 0.0495802  |
| FOXP1        | 3.16256    | 3.62272   | 3.36787    | 2.58712    | 3.57632    |
| PJA2         | 3.66479    | 4.38942   | 3.35991    | 2.4275     | 4.29345    |
| USP30-AS1    | 0.043596   | 0.11937   | 0.105154   | 0.217524   | 0          |
| RGMB         | 6.6022     | 9.26989   | 9.18503    | 5.47722    | 8.85729    |
| CFDP1        | 34.9931    | 32.5113   | 23.478     | 21.0052    | 32.3411    |
| FBXO16       | 1.14643    | 0.821805  | 0.667717   | 0.773072   | 0.578733   |
| PLIN5        | 1.93778    | 1.59562   | 1.57926    | 1.63369    | 1.30371    |
| OLFML3       | 0.0154602  | 0.021191  | 0.0189336  | 0.0257275  | 0.0195354  |
| LOC648691    | 0.00784031 | 0.0110689 | 0.00974157 | 0.0130213  | 0.0103136  |
| CACFD1       | 6.44918    | 6.29506   | 6.43316    | 5.2089     | 5.66961    |
| CARHSP1      | 29.6136    | 37.1695   | 23.1428    | 20.5372    | 32.6379    |
| CABLES2      | 1.9882     | 2.27569   | 1.72946    | 1.70639    | 2.15322    |
| KTN1-AS1     | 1.65814    | 1.60664   | 1.79043    | 1.23689    | 1.27739    |
| PCDHB15      | 0.133196   | 0.167618  | 0.0817096  | 0.177639   | 0.0870659  |
| TMED1        | 33.7381    | 37.6769   | 30.9502    | 23.232     | 32.0609    |
| ASCL5        | 0.29294    | 0.50976   | 0.574227   | 0.325314   | 0.294966   |
| GPX3         | 0.0635737  | 0.0218993 | 0.0390719  | 0.0532336  | 0.0201837  |
| RASA2        | 0.562348   | 0.812289  | 0.485042   | 0.306431   | 0.826408   |
| FITM1        | 0.718294   | 1.3902    | 0.686728   | 0.520867   | 0.94824    |
| GNAQ         | 1.08648    | 0.907378  | 0.877087   | 0.994813   | 0.793029   |
| SMAP1        | 3.78414    | 4.52968   | 3.40687    | 2.37266    | 4.96432    |
| RAVER1       | 38.9889    | 35.3123   | 28.5437    | 28.9568    | 30.1786    |
| CTAGE6P      | 0.0409944  | 0.0465326 | 0.0819614  | 0.054241   | 0.0549498  |
| NCOA6        | 4.82097    | 3.71896   | 3.85566    | 3.58078    | 3.14435    |
| SRGAP1       | 0.590501   | 0.58409   | 0.492774   | 0.469627   | 0.502686   |
| SMPD3        | 0.605198   | 0.424044  | 0.38949    | 0.500797   | 0.294579   |
| PLAU         | 25.8474    | 24.7644   | 37.7838    | 21.9929    | 26.7205    |
| SBSPON       | 0.329471   | 0.358469  | 0.282106   | 0.282283   | 0.27719    |
| U2AF1L4      | 3.63417    | 3.47784   | 2.62086    | 2.05041    | 2.76548    |
| SEPT1        | 1.06847    | 1.0955    | 1.04692    | 0.786454   | 0.89104    |
| UQCRHL       | 1.92865    | 2.71113   | 2.38277    | 2.21492    | 2.12569    |
| ATP2B4       | 1.78221    | 2.41548   | 1.27783    | 1.22445    | 2.30232    |
| ZIC2         | 7.58305    | 6.22471   | 5.27385    | 4.79692    | 5.65636    |
| ANKRD20A5P   | 0.10179    | 0.116277  | 0.0613373  | 0.107153   | 0.073495   |
| FAM110C      | 1.9008     | 1.35664   | 1.323      | 1.38391    | 1.18183    |
| KDM3A        | 26.7536    | 25.8906   | 14.1994    | 15.9228    | 23.7267    |
| DKFZP434A062 | 0.0340033  | 0.0184548 | 0.0248157  | 0.034244   | 0.0169128  |
| CCDC175      | 0.36198    | 0.46124   | 0.380351   | 0.339185   | 0.371863   |
| TFAP2A       | 4.58817    | 5.0309    | 2.88192    | 3.52395    | 4.26502    |
| TNFAIP8      | 3.85968    | 3.48392   | 2.81743    | 2.32501    | 3.61315    |
| ZFP14        | 0.414237   | 0.245356  | 0.307755   | 0.303045   | 0.216209   |
| ZNF649       | 0.146991   | 0.173917  | 0.143264   | 0.100007   | 0.172472   |
| ZNF30        | 0.413776   | 0.929284  | 0.717818   | 0.486855   | 0.696721   |
| PAG1         | 0.116188   | 0.0775675 | 0.082227   | 0.0906681  | 0.05938    |
| OIP5-AS1     | 10.2352    | 9.06976   | 8.96872    | 6.88532    | 8.16626    |
| LOC284581    | 0.0153564  | 0.0329444 | 0.0290042  | 0.0256204  | 0.010312   |
| FAM72B       | 2.28202    | 1.08778   | 2.15273    | 1.93619    | 1.0187     |
| DAZAP2       | 30.0538    | 41.5257   | 28.3143    | 23.4642    | 34.4097    |
| LPAR2        | 17.1357    | 18.2015   | 15.9522    | 15.1579    | 14.9441    |
| LDHD         | 3.50473    | 6.95204   | 2.37256    | 2.0615     | 6.14861    |
| PRELID2      | 8.51055    | 8.39734   | 6.02727    | 5.49267    | 7.6567     |
| MT1L         | 1513.88    | 1394.03   | 1102.25    | 1081.19    | 1163.09    |
| SLC39A9      | 15.0301    | 16.4616   | 14.2624    | 11.3933    | 14.2233    |
| BCOR         | 2.32484    | 1.71477   | 1.75768    | 1.53595    | 1.66777    |
| IGSF3        | 1.57656    | 1.66268   | 1.47074    | 1.13889    | 1.47087    |
| TTC37        | 2.07036    | 1.56305   | 1.47225    | 1.44758    | 1.54511    |

|              |            |            |            |            |            |
|--------------|------------|------------|------------|------------|------------|
| DNASE1       | 0.889505   | 0.702043   | 0.445072   | 0.60658    | 0.604575   |
| STXBP5-AS1   | 0.0284224  | 0.0311056  | 0.0271375  | 0.0356703  | 0.009754   |
| FBXL8.HSF4   | 11.6496    | 14.63      | 7.61722    | 8.1473     | 13.6417    |
| WEE1         | 36.295     | 34.5273    | 22.1696    | 24.3736    | 30.9155    |
| HIPK4        | 0.156525   | 0.0683581  | 0.124524   | 0.17467    | 0.0206536  |
| NBPF1        | 0.822691   | 0.876996   | 1.11634    | 0.630778   | 0.879007   |
| FNDC4        | 10.5351    | 17.2383    | 11.2821    | 8.24866    | 14.3944    |
| PIK3IP1      | 2.74599    | 5.38038    | 2.16297    | 1.91376    | 4.74099    |
| SLC10A7      | 0.504358   | 0.525855   | 0.612984   | 0.394174   | 0.455105   |
| LOC100129250 | 19.8518    | 20.1715    | 13.6086    | 11.0272    | 19.6803    |
| CYB5A        | 13.1236    | 10.7034    | 11.4215    | 9.26327    | 10.1085    |
| LINC00324    | 0.759769   | 1.21702    | 0.706402   | 0.507708   | 0.988852   |
| DIP2A-IT1    | 0.0763936  | 0.108071   | 0.0946898  | 0.126076   | 0.103069   |
| FAM72A       | 1.63616    | 1.1002     | 1.89683    | 1.6962     | 0.834237   |
| RAD54L2      | 0.313347   | 0.233924   | 0.260199   | 0.207109   | 0.237253   |
| CDCA3        | 30.5538    | 27.5847    | 30.9862    | 23.9187    | 23.0787    |
| MMAA         | 0.513167   | 0.49149    | 0.471058   | 0.404617   | 0.419883   |
| REEP1        | 0.597325   | 0.797971   | 0.825606   | 0.663924   | 0.674895   |
| FANCM        | 0.684795   | 0.517179   | 0.365327   | 0.529299   | 0.42492    |
| LURAP1L      | 0.893316   | 0.812049   | 8.98429    | 3.17906    | 0.912978   |
| ANAPC15      | 22.7754    | 24.6704    | 20.7159    | 17.6754    | 19.1614    |
| RSBN1L-AS1   | 4.30416    | 5.19127    | 4.97794    | 3.33198    | 4.0779     |
| PGAP3        | 2.18537    | 2.12054    | 1.47737    | 1.29928    | 2.09534    |
| VCL          | 15.7329    | 15.3613    | 13.1277    | 10.6072    | 15.5223    |
| EFNA4        | 40.4912    | 36.3341    | 27.272     | 25.093     | 31.8082    |
| HDAC6        | 2.88039    | 2.83818    | 1.8522     | 2.18996    | 2.47046    |
| MYOM1        | 0.16497    | 0.126793   | 0.133664   | 0.0862154  | 0.141921   |
| RHOG         | 71.5941    | 63.5097    | 62.1324    | 50.5264    | 55.475     |
| NKX2-5       | 26.5501    | 25.6797    | 29.2071    | 20.3764    | 24.0544    |
| RAB11FIP5    | 26.0162    | 26.8799    | 18.7677    | 18.0952    | 22.6738    |
| IFI35        | 4.98607    | 4.13993    | 4.89346    | 5.09581    | 5.15596    |
| ABCA1        | 0.0385172  | 0.0643739  | 0.0268414  | 0.0751096  | 0.0200313  |
| TEF          | 2.31687    | 3.30054    | 2.2472     | 1.65432    | 3.04298    |
| AGAP9        | 0.157019   | 0.153497   | 0.0960745  | 0.111703   | 0.0851651  |
| CECR6        | 0.393609   | 0.614975   | 0.483818   | 0.311836   | 0.528604   |
| ZNF143       | 5.90691    | 4.17337    | 4.78887    | 4.00872    | 3.60092    |
| LEPREL2      | 23.5249    | 26.2316    | 19.4188    | 18.9342    | 21.2292    |
| DSTNP2       | 3.71306    | 3.82224    | 3.12748    | 3.08124    | 2.70302    |
| FBXO6        | 20.7024    | 18.5146    | 15.6669    | 14.2481    | 15.7565    |
| USP18        | 3.72548    | 3.86769    | 3.29731    | 2.86268    | 3.76805    |
| FAM64A       | 17.3376    | 16.333     | 19.7034    | 15.0945    | 12.918     |
| KCNH1        | 0.00925662 | 0.0043603  | 0.00383963 | 0.0103036  | 0.00405358 |
| SPAG5        | 22.0723    | 19.9879    | 17.5867    | 15.8347    | 17.6468    |
| SHBG         | 0.646808   | 0.973801   | 0.500395   | 0.940498   | 0.453876   |
| SKOR1        | 0.341626   | 0.845801   | 0.425534   | 0.566372   | 0.390602   |
| LCP1         | 99.7914    | 73.8304    | 96.6446    | 73.0719    | 72.5319    |
| HLTF         | 0.0260692  | 0.0957099  | 0.066354   | 0.0434028  | 0.0728753  |
| MAP3K3       | 5.04215    | 5.23305    | 4.73817    | 3.86579    | 4.51999    |
| KHK          | 6.1239     | 8.96114    | 6.35954    | 5.33332    | 6.92454    |
| FANCG        | 19.7827    | 19.9616    | 16.3473    | 14.2216    | 19.2806    |
| KLF4         | 2.759      | 4.09402    | 7.7034     | 3.63649    | 3.46275    |
| PIM2         | 26.4688    | 19.999     | 18.416     | 16.8194    | 19.564     |
| RGS2         | 2.947      | 9.62147    | 2.83994    | 2.27885    | 8.37781    |
| TIMP2        | 7.76858    | 9.95866    | 7.54702    | 6.2704     | 8.76882    |
| STX8         | 51.6813    | 47.3522    | 46.6856    | 37.5486    | 42.6217    |
| KIAA2013     | 63.3324    | 67.4877    | 54.1774    | 49.1707    | 56.0652    |
| SOCS1        | 2.47765    | 3.55652    | 3.54981    | 2.35118    | 3.24027    |
| CCNG2        | 10.2061    | 7.53973    | 6.87246    | 6.51176    | 7.54842    |
| KIAA0430     | 2.21908    | 2.2633     | 1.97248    | 1.8132     | 2.02374    |
| ERN1         | 0.174415   | 0.214612   | 0.174      | 0.151282   | 0.14134    |
| HCN3         | 0.930873   | 0.943485   | 0.769968   | 0.849453   | 0.815617   |
| SHCBP1       | 6.58731    | 5.00013    | 5.81155    | 5.01736    | 4.42418    |
| PPAPDC3      | 0.213873   | 0.403115   | 0.286412   | 0.396594   | 0.235685   |
| JHDM1D       | 2.22       | 1.81647    | 2.04463    | 1.6885     | 1.64833    |
| CCSAP        | 2.83967    | 1.72111    | 1.90108    | 1.78715    | 1.79911    |
| PPP1R3E      | 2.70349    | 1.49365    | 1.81816    | 1.93313    | 1.28517    |
| MYL2         | 0.0810019  | 0          | 0          | 0.0666385  | 0          |
| DAPK3        | 162.759    | 148.189    | 131.068    | 109.139    | 142.809    |
| HYLS1        | 2.34304    | 3.91773    | 4.13594    | 2.5949     | 3.07102    |
| PLCB2        | 0.107954   | 0.24269    | 0.220288   | 0.0898226  | 0.264167   |
| BACE1        | 2.80374    | 2.42934    | 3.22303    | 2.37959    | 2.50928    |
| CACNA1D      | 0.0132674  | 0.00464853 | 0.0205354  | 0          | 0.0259983  |
| CYTH1        | 4.48604    | 4.566      | 4.98402    | 3.99539    | 3.90078    |
| CA5B         | 0.956233   | 1.04964    | 0.784484   | 0.671274   | 1.11879    |
| C19orf73     | 2.347      | 2.02991    | 3.55146    | 2.83694    | 0.896777   |
| TPP1         | 36.7194    | 47.5097    | 31.7965    | 29.1611    | 38.115     |
| DPCR1        | 0.00767284 | 0          | 0          | 0.00631788 | 0          |
| FGF17        | 4.72325    | 4.67347    | 2.72405    | 4.03287    | 3.71117    |
| RPP30        | 6.76733    | 6.84065    | 6.45257    | 5.33144    | 6.14194    |

|            |           |           |           |           |            |
|------------|-----------|-----------|-----------|-----------|------------|
| RELB       | 13.0784   | 13.1494   | 15.6402   | 10.998    | 11.1999    |
| CRYBB2     | 7.64764   | 6.74848   | 7.47076   | 4.85477   | 6.72465    |
| MOV10      | 35.5329   | 34.6037   | 29.8274   | 29.7081   | 28.9629    |
| PARD6A     | 15.6269   | 19.4777   | 15.736    | 12.4565   | 15.3941    |
| TUBGCP4    | 9.73011   | 7.60958   | 7.54767   | 6.17098   | 7.41262    |
| AKAP9      | 1.08825   | 1.54741   | 0.295955  | 0.694472  | 1.45179    |
| ZNF784     | 8.60567   | 12.7538   | 7.15507   | 6.22435   | 10.1078    |
| CROT       | 0.478121  | 0.98488   | 0.636559  | 0.421173  | 0.803609   |
| N4BP3      | 5.03321   | 4.62619   | 5.25335   | 3.76966   | 4.17424    |
| FAM3B      | 0.239198  | 0.282349  | 0.173085  | 0.13263   | 0.266683   |
| ATP1B3     | 76.6895   | 84.227    | 89.3905   | 65.8288   | 68.2204    |
| DNAH5      | 0.0289221 | 0.0216382 | 0.0241111 | 0.0297576 | 0.0222234  |
| RRAGB      | 2.96665   | 4.22173   | 2.99394   | 2.28818   | 3.45204    |
| CNTNAP1    | 8.10959   | 9.41902   | 5.85181   | 5.91827   | 8.93102    |
| RNASEL     | 0.590411  | 0.667914  | 0.423991  | 0.469653  | 0.511636   |
| CCDC120    | 0.382061  | 0.335008  | 0.389914  | 0.270637  | 0.443624   |
| ATP8A1     | 0.291209  | 0.594985  | 0.246747  | 0.250122  | 0.474417   |
| CAMK2D     | 4.68359   | 5.41129   | 3.67411   | 3.28792   | 5.11063    |
| PAIP2B     | 2.52056   | 2.58085   | 2.0263    | 1.71469   | 2.52033    |
| YPEL3      | 22.9557   | 32.0808   | 18.1367   | 17.9238   | 25.8801    |
| FKBP2      | 102.767   | 82.5339   | 86.6147   | 75.2821   | 77.733     |
| SNORA72    | 3.89018   | 27.1448   | 23.2289   | 12.5935   | 11.3015    |
| ORC1       | 4.73506   | 4.56368   | 3.69967   | 3.11782   | 4.59891    |
| TSSK2      | 0.380486  | 0.346283  | 0.957694  | 0.530534  | 0.097178   |
| NES        | 8.79587   | 6.51747   | 6.46529   | 6.0075    | 7.03052    |
| WDR54      | 103.847   | 113.515   | 88.4364   | 68.6569   | 105.583    |
| MURC       | 0.193448  | 0.192634  | 0.242843  | 0.167282  | 0.159262   |
| LINC00263  | 17.0599   | 15.4123   | 15.4174   | 10.9038   | 15.1789    |
| TIPARP-AS1 | 0.243248  | 0.508512  | 0.299952  | 0.203409  | 0.36294    |
| PHLDB3     | 13.2217   | 10.6791   | 9.9449    | 9.94766   | 8.99556    |
| DYDC2      | 0.0124676 | 0.0531432 | 0         | 0.0378992 | 0.0164313  |
| C5orf45    | 70.4538   | 45.077    | 56.1057   | 48.7983   | 40.5495    |
| DRAP1      | 613.738   | 578.362   | 491.885   | 441.07    | 514.249    |
| C1orf220   | 0.122143  | 0.145186  | 0.0702374 | 0.0783886 | 0.134917   |
| CLDN22     | 1.48312   | 1.6993    | 1.77514   | 1.42966   | 1.42603    |
| C10orf118  | 0.334381  | 0.391745  | 0.217019  | 0.29266   | 0.257218   |
| TMEM91     | 7.13029   | 9.21631   | 5.01657   | 5.55202   | 6.38862    |
| TTC13      | 1.55226   | 1.18795   | 1.60901   | 1.26778   | 1.0702     |
| CTGF       | 16.6478   | 18.3176   | 11.9456   | 11.0724   | 17.793     |
| IKZF3      | 0.0181513 | 0.0186142 | 0.0162718 | 0.0173074 | 0.0174636  |
| CSF1       | 2.51731   | 3.44268   | 2.94236   | 2.64376   | 2.6918     |
| LOC441461  | 3.24077   | 2.07639   | 2.49633   | 2.23024   | 2.56504    |
| HERC2P10   | 0.137636  | 0         | 0         | 0.113854  | 0          |
| NCKIPSD    | 30.4685   | 28.2178   | 20.1957   | 20.6762   | 25.0489    |
| LRRIQ3     | 0.142824  | 0.203834  | 0.183974  | 0.181158  | 0.0883885  |
| CGRRF1     | 5.53192   | 8.27349   | 7.08792   | 3.99055   | 6.63912    |
| C6orf106   | 17.4726   | 18.7879   | 14.8374   | 12.6781   | 17.0064    |
| DNMT3A     | 1.63829   | 1.29747   | 1.42703   | 1.4444    | 1.06998    |
| C14orf1    | 39.5148   | 34.7494   | 33.1694   | 27.8776   | 35.777     |
| LGALS1     | 2312.74   | 2306.51   | 2291.66   | 1486.55   | 2283.31    |
| CTSS       | 0.0315485 | 0.0368034 | 0.0134094 | 0.0175741 | 0.022123   |
| PDXP       | 64.1326   | 56.0751   | 46.5383   | 44.5468   | 51.6773    |
| WDR62      | 7.28353   | 6.40763   | 8.04721   | 7.42033   | 4.60196    |
| SUCO       | 3.99547   | 3.04224   | 2.94143   | 2.51083   | 3.00383    |
| CREB1      | 2.4735    | 1.94212   | 2.16723   | 1.81057   | 1.94326    |
| NR5A2      | 0.026406  | 0.0389019 | 0.0168464 | 0.014728  | 0.00614336 |
| CDH24      | 11.1539   | 14.4431   | 9.09866   | 9.60773   | 11.7941    |
| DHRS13     | 37.9081   | 37.2794   | 34.1446   | 25.2407   | 36.5056    |
| PMFBP1     | 0.104638  | 0.102076  | 0.117839  | 0.113849  | 0.0952673  |
| FIGF,PIR   | 0.901808  | 0.905972  | 0.607121  | 0.763937  | 0.659262   |
| GPT        | 0.283613  | 0.368201  | 0.36979   | 0.618032  | 0.0335195  |
| GLB1,TMPPE | 32.1644   | 34.7168   | 31.9527   | 24.7983   | 31.9703    |
| ART5       | 0.588974  | 0.575801  | 0.523916  | 0.402677  | 0.619687   |
| CCBL1      | 13.4599   | 14.5623   | 9.43337   | 9.14195   | 12.6541    |
| C1R        | 0.402437  | 0.974351  | 0.426774  | 0.565036  | 0.605324   |
| BMS1P5     | 0.191925  | 0.28788   | 0.166334  | 0.134494  | 0.258962   |
| GCAT       | 132.989   | 131.867   | 107.89    | 86.1113   | 124.238    |
| PAF1       | 16.9376   | 17.4191   | 16.3908   | 13.3427   | 15.1767    |
| CRHR1      | 8.97791   | 9.0011    | 9.4384    | 7.55967   | 7.81356    |
| RASAL1     | 0.0179373 | 0         | 0         | 0.0148757 | 0          |
| CTAGE4     | 0.291209  | 0.271495  | 0.30162   | 0.233936  | 0.144796   |
| NUDT22     | 65.755    | 66.8697   | 59.1944   | 50.3147   | 60.6097    |
| ANKS1B     | 4.49015   | 2.92043   | 2.84406   | 3.44594   | 2.81958    |
| SLC29A4    | 16.1752   | 18.1079   | 12.8778   | 12.3552   | 16.2426    |
| ARVCF      | 18.1774   | 17.4383   | 13.3487   | 13.1895   | 15.3321    |
| MTMR11     | 3.00708   | 3.3378    | 2.58943   | 1.84574   | 3.78133    |
| PRR15      | 2.82141   | 2.37809   | 3.31568   | 2.8993    | 2.37705    |
| LOC400680  | 0.502741  | 0.597466  | 0.55529   | 0.314143  | 0.540333   |
| RAB3IL1    | 6.51      | 5.6005    | 6.99155   | 5.15118   | 4.83724    |

|                     |            |            |            |            |            |
|---------------------|------------|------------|------------|------------|------------|
| ARMC7               | 6.90297    | 7.55461    | 8.86858    | 6.84523    | 6.20597    |
| FHL1                | 0.06036    | 0.121528   | 0.13662    | 0.100815   | 0.10946    |
| SLC25A13            | 5.0701     | 4.87476    | 5.83715    | 3.91921    | 4.47811    |
| B3GALTL             | 1.76969    | 1.68398    | 1.65816    | 1.28317    | 1.69979    |
| GLCE                | 1.15655    | 1.31278    | 1.2167     | 0.999136   | 1.07679    |
| ZNF33BP1            | 0.0291444  | 0          | 0          | 0.0241978  | 0          |
| TVP23A              | 0.123581   | 0.163449   | 0.0205244  | 0.0690733  | 0.172914   |
| CTSK                | 1.01899    | 1.33565    | 0.889989   | 0.763878   | 1.43506    |
| SYT15               | 1.13071    | 0.886497   | 1.16916    | 1.12584    | 0.653721   |
| EBP                 | 75.6309    | 78.0104    | 64.3896    | 57.1696    | 69.7814    |
| GGTA1P              | 0.278603   | 0.289301   | 0.116214   | 0.277545   | 0.124258   |
| TMEM184B            | 19.3485    | 20.3887    | 19.3785    | 16.5452    | 16.7919    |
| ERP44               | 17.6294    | 17.3995    | 16.8848    | 12.7425    | 16.834     |
| HOXC10              | 9.67957    | 8.07576    | 8.79076    | 7.74366    | 7.09072    |
| ARRDC3              | 10.7529    | 4.23656    | 5.44408    | 6.12298    | 5.00852    |
| CCDC61              | 9.3804     | 10.631     | 7.42958    | 7.16738    | 8.89588    |
| CTAGE4              | 0.0660166  | 0.0585661  | 0.113518   | 0.0955372  | 0.0883766  |
| EHHADH              | 0.819179   | 0.682727   | 0.844797   | 0.672097   | 0.790289   |
| CTDSPL              | 6.86306    | 7.09961    | 7.09728    | 5.80541    | 6.35753    |
| AVP11               | 21.3002    | 22.9302    | 14.886     | 14.7048    | 20.5143    |
| RDH11               | 19.5921    | 19.7743    | 18.4499    | 14.5391    | 18.289     |
| TRAF6               | 1.55964    | 2.16315    | 1.80699    | 1.34622    | 1.85838    |
| ZNF624              | 0.450868   | 0.35385    | 0.362654   | 0.284813   | 0.368093   |
| OST4                | 556.943    | 656.402    | 483.117    | 364.946    | 605.193    |
| KCNJ5               | 0.0301837  | 0          | 0          | 0          | 0.0252732  |
| CGN                 | 2.11187    | 2.72099    | 1.32091    | 1.46438    | 2.50538    |
| FOXF1               | 1.63829    | 2.59541    | 2.10994    | 1.76768    | 1.91931    |
| ANKRD10             | 9.96253    | 9.95848    | 10.7967    | 9.00984    | 7.6943     |
| CYP2D6              | 2.0298     | 1.76362    | 1.67665    | 1.73645    | 1.49182    |
| PGK1                | 801.78     | 920.027    | 736.345    | 471.715    | 934.646    |
| MTRNR2L6            | 1.02051    | 1.03939    | 0.885192   | 0.732796   | 1.10428    |
| POT1                | 3.5709     | 3.29748    | 3.52639    | 2.8513     | 2.94211    |
| C10orf111           | 0.0503263  | 0.169053   | 0.168496   | 0.0839871  | 0.0906991  |
| ANKAR               | 0.190315   | 0.260244   | 0.225063   | 0.181341   | 0.196614   |
| CCDC107             | 15.0691    | 18.2535    | 12.9264    | 10.017     | 17.0326    |
| HCFC1R1             | 414.371    | 497.445    | 311.526    | 291.322    | 417.968    |
| LAMA2               | 0          | 0.00315795 | 0.00837037 | 0.00374454 | 0.00589862 |
| GSTM4               | 16.1591    | 17.7422    | 14.8626    | 12.3679    | 16.5363    |
| UBTD1               | 37.3904    | 37.9688    | 34.4995    | 26.8416    | 33.0824    |
| TUBB6               | 4.27693    | 4.99175    | 5.99806    | 3.41414    | 4.6599     |
| HMBOX1              | 1.16124    | 0.828518   | 0.889427   | 0.667309   | 0.926414   |
| SLC22A4             | 0.188071   | 0.417322   | 0.483997   | 0.292448   | 0.404294   |
| SERPINF2            | 0.181008   | 0.193645   | 0.131264   | 0.121403   | 0.110719   |
| MICB                | 10.573     | 8.47175    | 7.20793    | 7.90739    | 7.21184    |
| PLEKHA2             | 14.0815    | 13.3869    | 8.78112    | 8.22447    | 14.2958    |
| LOC643623           | 0.0150587  | 0          | 0          | 0.0125488  | 0          |
| RAD54L              | 11.9395    | 9.82157    | 8.63085    | 9.68373    | 8.23276    |
| LOC388152,LOC642423 | 14.9219    | 15.7873    | 15.5908    | 11.5226    | 13.9247    |
| PKD1L1              | 0.143393   | 0.0562437  | 0.152159   | 0.119566   | 0.0932712  |
| TIGD7               | 0.1228     | 0.169967   | 0.0962465  | 0.0678553  | 0.122222   |
| UAP1L1              | 51.5562    | 45.8547    | 35.0658    | 37.684     | 42.7552    |
| JMJD6               | 35.2491    | 22.1742    | 23.6091    | 23.556     | 21.5193    |
| TMEM200B            | 7.57377    | 6.73825    | 7.00619    | 6.07477    | 5.57048    |
| SLC27A5             | 18.3259    | 22.04      | 18.2878    | 13.2476    | 17.7556    |
| ODF3L1              | 0.063539   | 0          | 0          | 0.0530041  | 0          |
| SLC35G3             | 0.0320864  | 0          | 0          | 0.0267678  | 0          |
| NKAPP1              | 0.247381   | 0.417389   | 0.500139   | 0.198393   | 0.457913   |
| FAM229A             | 2.70521    | 2.8165     | 4.16964    | 3.70832    | 1.28728    |
| SLC48A1             | 9.58837    | 10.1615    | 9.90577    | 7.54037    | 8.66486    |
| SEPT8               | 11.6293    | 11.6569    | 9.46513    | 8.99929    | 10.2244    |
| MESP1               | 44.2952    | 37.918     | 39.7811    | 35.7254    | 31.9743    |
| DKFZp779M0652       | 1.32101    | 1.5617     | 0.838162   | 0.778428   | 1.25402    |
| NFIL3               | 42.1862    | 25.4998    | 32.6431    | 28.2823    | 23.8156    |
| ESYT1               | 40.6146    | 48.8996    | 36.7209    | 29.9753    | 44.8924    |
| SRGAP2D             | 0.229723   | 0.311371   | 0.34232    | 0.337442   | 0.223819   |
| SNX30               | 2.8586     | 3.21552    | 2.70173    | 2.06427    | 3.00804    |
| PTPLAD2             | 0.0323223  | 0          | 0          | 0.0269847  | 0          |
| HEPACAM             | 0.0179403  | 0          | 0          | 0.0149778  | 0          |
| LINC00574           | 0.0601755  | 0.142948   | 0.0548226  | 0.0251468  | 0.112006   |
| SPDYE1              | 0.141442   | 0.148423   | 0.12826    | 0.153034   | 0.0699469  |
| SLC39A8             | 11.1291    | 12.5408    | 11.9291    | 9.26099    | 11.0869    |
| C4orf3              | 109.564    | 124.486    | 77.7577    | 62.8506    | 123.8      |
| PAK4                | 44.9577    | 39.1046    | 34.6532    | 31.504     | 35.8942    |
| ANKRD36             | 0.386158   | 0.426182   | 0.228845   | 0.238797   | 0.410404   |
| FOXDI               | 126.51     | 107.8      | 80.181     | 78.3327    | 109.841    |
| DPM3                | 129.808    | 166.51     | 112.014    | 99.7153    | 141.503    |
| WNK3                | 0.00714354 | 0          | 0          | 0.00596864 | 0          |
| AMN1                | 1.61744    | 1.11549    | 0.934428   | 0.800329   | 1.20902    |
| LRP5L               | 7.09745    | 6.80243    | 6.65484    | 6.69249    | 5.28345    |

|              |           |            |            |           |           |
|--------------|-----------|------------|------------|-----------|-----------|
| TFCP2L1      | 1.17772   | 1.07949    | 0.91409    | 0.892513  | 1.02132   |
| BCL9         | 1.77629   | 2.21295    | 1.5388     | 1.47807   | 1.86213   |
| SVIL         | 1.96566   | 1.88866    | 1.63438    | 1.56083   | 1.6472    |
| PTGFRN       | 9.1571    | 8.42864    | 7.2376     | 6.60488   | 7.89601   |
| PDE11A       | 0.124643  | 0.0979973  | 0.0741333  | 0.0842114 | 0.0886171 |
| LASP1        | 71.0585   | 62.4034    | 60.9216    | 49.5741   | 62.4307   |
| DPYSL2       | 7.16425   | 12.648     | 5.43025    | 5.0379    | 11.8025   |
| TTC39B       | 0.551646  | 0.43297    | 0.444329   | 0.502134  | 0.419678  |
| MNX1         | 21.812    | 17.473     | 24.4076    | 17.1036   | 17.0521   |
| ERO1L        | 45.2091   | 44.3225    | 33.2103    | 25.6513   | 47.2144   |
| HIST1H4E     | 5.1393    | 3.18092    | 7.24625    | 4.14067   | 2.17988   |
| CDC25A       | 6.0214    | 6.11377    | 6.8059     | 5.50138   | 5.76319   |
| PIKFYVE      | 1.96124   | 1.53978    | 1.66346    | 1.43614   | 1.37833   |
| TMEM48       | 6.58272   | 5.7736     | 7.10326    | 5.7307    | 5.08739   |
| ZNF248       | 1.88364   | 1.63834    | 1.83724    | 1.69609   | 1.30612   |
| KIF20A       | 8.10656   | 7.00661    | 7.70725    | 6.51321   | 6.0605    |
| SUN2         | 21.4175   | 21.654     | 18.8397    | 15.9969   | 18.9101   |
| CLCN6        | 3.19809   | 3.19272    | 2.33403    | 2.23374   | 3.0067    |
| SAP25        | 2.43424   | 1.40276    | 1.27787    | 1.68342   | 1.5173    |
| ANG.RNASE4   | 27.3745   | 33.3641    | 18.7755    | 16.2537   | 34.339    |
| ITGA6        | 2.12058   | 2.01447    | 2.43823    | 1.81591   | 1.86115   |
| OSTCP1       | 0         | 0.0925888  | 0.160316   | 0.211764  | 0         |
| GNMB         | 0.0649388 | 0.267923   | 0.122426   | 0.136114  | 0.130302  |
| FOXN2        | 3.24697   | 2.57792    | 3.58946    | 2.50003   | 2.49747   |
| RGS9BP       | 0.113119  | 0.198403   | 0.215915   | 0.0811697 | 0.164222  |
| CCDC50       | 7.59059   | 8.50562    | 8.17498    | 6.13952   | 7.2186    |
| KCNK7        | 0.874447  | 0.306076   | 0.422062   | 0.676754  | 0.277715  |
| PRMT8        | 0.691698  | 1.34215    | 0.7828     | 0.498681  | 1.18546   |
| CABP4        | 0.0124293 | 0.00852287 | 0.00762788 | 0         | 0.0241211 |
| TMEM106C     | 112.146   | 122.046    | 103.862    | 87.2254   | 113.504   |
| SLC2A12      | 0.659756  | 0.590598   | 0.60413    | 0.481991  | 0.640035  |
| MYADML2      | 0         | 0.064483   | 0.116161   | 0         | 0.0394374 |
| LOC100130417 | 0.330045  | 0.223257   | 0.596753   | 0.408706  | 0.414609  |
| NECAB1       | 0.050865  | 0.0415834  | 0.045512   | 0.0196632 | 0.0683959 |
| FAM193B      | 11.6614   | 13.5927    | 6.80347    | 8.50269   | 11.5587   |
| CCDC23       | 12.1602   | 15.0237    | 12.4752    | 10.2086   | 12.2      |
| TTLL7        | 0.181179  | 0.196862   | 0.149165   | 0.11247   | 0.24138   |
| HERC2P2      | 2.53129   | 2.00394    | 1.59185    | 1.8385    | 1.56013   |
| PBXIP1       | 9.19385   | 10.2519    | 7.20219    | 6.97798   | 8.97279   |
| ERAP2        | 4.05145   | 3.8782     | 3.2674     | 3.23944   | 3.5941    |
| CBX1         | 56.1497   | 55.22      | 51.6719    | 40.3427   | 53.7358   |
| H1FX         | 234.895   | 226.574    | 293.844    | 216.01    | 217.466   |
| ANXA2R       | 4.35408   | 3.80696    | 4.05855    | 3.89672   | 2.95772   |
| INCENP       | 10.4132   | 9.07898    | 7.16433    | 8.40698   | 8.47282   |
| ZBTB25       | 4.44437   | 4.09432    | 2.02797    | 2.94299   | 3.44855   |
| CXorf40A     | 6.45701   | 7.67635    | 6.77704    | 5.83032   | 6.21165   |
| SPRY2        | 9.01836   | 6.75984    | 6.84387    | 6.49696   | 6.33472   |
| CSF3         | 0.048056  | 0          | 0          | 0.040352  | 0         |
| APOBEC3F     | 3.97217   | 3.17573    | 3.34261    | 2.93122   | 3.09397   |
| DCUN1D3      | 2.21944   | 2.18938    | 2.00179    | 1.82573   | 1.83975   |
| MECP2        | 35.7377   | 30.9403    | 27.619     | 21.884    | 29.9558   |
| NEO1         | 6.30009   | 6.80349    | 6.26347    | 4.9063    | 6.4491    |
| HCAR1        | 0.0193363 | 0          | 0          | 0.0162455 | 0         |
| SLC45A1      | 4.0081    | 4.96582    | 2.688      | 2.87661   | 4.17171   |
| WDFY3        | 1.16212   | 1.08215    | 1.0731     | 0.902066  | 1.08684   |
| PDIA6        | 139.652   | 144.988    | 133.316    | 104.106   | 138.61    |
| MVD          | 40.8397   | 32.0341    | 37.0428    | 30.7596   | 29.817    |
| CASP6        | 13.4098   | 13.1296    | 11.5081    | 10.5645   | 12.548    |
| TBC1D12      | 1.81706   | 1.63656    | 1.70915    | 1.23712   | 1.49866   |
| CCDC9        | 7.78846   | 9.02686    | 6.60632    | 6.26572   | 7.73326   |
| TMEM116      | 3.64004   | 4.21768    | 4.62295    | 3.91525   | 3.47716   |
| GUSBP3       | 0.112906  | 0.109088   | 0.118332   | 0.125978  | 0.127641  |
| C1GALT1      | 4.29198   | 4.34589    | 3.46621    | 3.24434   | 4.06114   |
| RAB3D        | 13.1799   | 15.8873    | 11.0893    | 9.77956   | 14.3951   |
| LOC100507117 | 0.0338195 | 0.0163179  | 0.0141946  | 0.0188046 | 0.0152774 |
| AQP6         | 0.0120357 | 0.016346   | 0.0146052  | 0         | 0.0151629 |
| TECR         | 132.256   | 123.499    | 110.826    | 106.129   | 110.858   |
| VEGFB        | 93.1769   | 88.8884    | 71.0655    | 63.9313   | 84.2593   |
| PPP1R11      | 48.3111   | 48.4868    | 41.8527    | 35.2368   | 41.7096   |
| ING1         | 8.35146   | 6.81517    | 6.1454     | 5.98935   | 6.50761   |
| SCAMP2       | 41.5084   | 38.3157    | 38.6898    | 31.7557   | 34.1071   |
| COLQ         | 0.922326  | 0.699454   | 0.515489   | 0.786737  | 0.52623   |
| BPGM         | 3.74005   | 4.5515     | 4.49414    | 3.34748   | 4.32516   |
| ETV6         | 2.27133   | 2.16393    | 2.13103    | 1.7398    | 1.93812   |
| C1orf213     | 1.73848   | 1.54069    | 0.920303   | 0.781746  | 1.62603   |
| ZNF292       | 2.80343   | 2.40077    | 1.16886    | 1.94006   | 2.26112   |
| MANBA        | 12.2787   | 13.3973    | 9.55966    | 8.55293   | 12.445    |
| MIF          | 3910.89   | 4140.87    | 3612.71    | 2596.62   | 3961.87   |
| KIAA1324L    | 0.330227  | 0.372778   | 0.304666   | 0.260822  | 0.376264  |

|              |            |           |           |            |           |
|--------------|------------|-----------|-----------|------------|-----------|
| TEKT4        | 0.648369   | 0.693829  | 0.4385    | 0.507561   | 0.473196  |
| IRF1         | 2.39586    | 5.01346   | 2.6244    | 2.38022    | 3.94066   |
| UTRN         | 1.28912    | 1.26592   | 1.1452    | 1.11223    | 1.16393   |
| BMF          | 0.311037   | 0.63941   | 0.265558  | 0.279604   | 0.515135  |
| C11orf92     | 0.0603355  | 0.135131  | 0.09339   | 0.0698474  | 0.0825583 |
| RRP8         | 14.1732    | 14.2639   | 12.9549   | 11.0621    | 12.3842   |
| BAG6         | 75.698     | 62.0393   | 67.2639   | 58.182     | 57.0972   |
| INE2         | 1.87522    | 2.48531   | 2.42599   | 1.64019    | 2.4139    |
| MOB3A        | 11.5791    | 10.2311   | 9.2976    | 9.57637    | 8.96058   |
| SRPX         | 13.4932    | 15.5104   | 11.5456   | 9.15229    | 15.4663   |
| NTNG2        | 1.85254    | 2.79422   | 1.31462   | 1.16153    | 2.6182    |
| PDP1         | 6.61534    | 7.44066   | 5.48085   | 4.94362    | 7.29119   |
| DBNDD1       | 43.6497    | 45.6109   | 41.8232   | 35.1961    | 39.7298   |
| MAPK7        | 12.296     | 10.4656   | 8.3064    | 9.43252    | 8.9904    |
| TIFA         | 6.10678    | 6.52513   | 8.80315   | 5.57394    | 6.01786   |
| COQ2         | 15.7837    | 18.7501   | 17.47     | 13.4259    | 17.125    |
| RYBP         | 8.68351    | 7.44615   | 6.26484   | 6.07796    | 6.92483   |
| BRPF1        | 5.72746    | 7.12717   | 5.98409   | 5.05505    | 5.86666   |
| TGFA         | 2.36149    | 2.1013    | 2.37353   | 2.02273    | 1.70928   |
| GREB1        | 0.130278   | 0.0453787 | 0.100646  | 0.0606411  | 0.102926  |
| ZNF641       | 2.45331    | 1.79569   | 2.95793   | 2.05801    | 1.82615   |
| ARHGEF26     | 0.167784   | 0.169941  | 0.152413  | 0.193953   | 0.128524  |
| C6orf47      | 9.56217    | 9.83591   | 10.6127   | 8.97504    | 8.06027   |
| CCDC110      | 0.181634   | 0.122109  | 0.0708979 | 0.103991   | 0.126373  |
| ANKRD23      | 2.51973    | 2.18345   | 1.3064    | 1.8247     | 2.11104   |
| MAP3K4       | 2.84775    | 2.00127   | 2.53675   | 2.23868    | 2.12955   |
| GALR3        | 1.46842    | 1.06041   | 1.83656   | 0.972991   | 1.3223    |
| CREBRF       | 2.16155    | 2.23622   | 1.88529   | 1.64559    | 1.90041   |
| BANP         | 7.41929    | 5.42664   | 6.94922   | 5.72047    | 5.34134   |
| BLVRB        | 187.644    | 201.316   | 179.169   | 147.53     | 165.782   |
| CACNA2D2     | 0.15469    | 0.246878  | 0.127944  | 0.0740908  | 0.239528  |
| AP2S1        | 209.49     | 188.581   | 184.57    | 160.295    | 162.727   |
| MTFP1        | 154.138    | 148.533   | 160.046   | 122.084    | 125.065   |
| TP73         | 4.43137    | 4.16127   | 3.51211   | 3.42737    | 3.74621   |
| AKAP7        | 0.941342   | 0.922942  | 0.949328  | 0.962319   | 0.608929  |
| CEP55        | 15.7272    | 12.0147   | 15.2078   | 13.0145    | 9.94941   |
| MET          | 7.99378    | 8.15234   | 8.57818   | 6.63678    | 7.38042   |
| TAF5         | 3.31984    | 2.38908   | 3.50891   | 2.64919    | 2.53982   |
| KLF12        | 0.481737   | 0.406337  | 0.459142  | 0.431834   | 0.352889  |
| PCDHB3       | 0.186109   | 0.223265  | 0.13379   | 0.146797   | 0.158252  |
| MAP2K7       | 26.8472    | 22.7003   | 22.0282   | 20.2117    | 21.5584   |
| MT1B         | 0.151705   | 0.20585   | 0.183837  | 0          | 0.194925  |
| PELI3        | 11.5803    | 11.3047   | 12.5969   | 9.57097    | 11.0709   |
| PPP2R5B      | 23.6613    | 21.6998   | 14.1212   | 14.5604    | 22.0259   |
| COX8A        | 1048.74    | 1005.33   | 870.367   | 806.817    | 814.452   |
| PHPT1        | 107.394    | 175.304   | 105.102   | 91.5275    | 142.509   |
| BCYRN1       | 26.1059    | 30.2143   | 26.0293   | 23.9393    | 29.5968   |
| ITGAV        | 2.5747     | 2.75043   | 2.29735   | 1.94931    | 2.43995   |
| SGK196       | 0.519768   | 0.380666  | 0.497594  | 0.378016   | 0.495389  |
| TUBA4A       | 93.0651    | 105.024   | 75.435    | 68.2251    | 92.3483   |
| NBPF3        | 4.92953    | 5.25713   | 6.31327   | 4.15723    | 4.69664   |
| BTN2A2       | 3.96105    | 3.60413   | 2.77734   | 2.83202    | 3.18527   |
| ARHGAP32     | 2.08052    | 2.32432   | 1.29216   | 1.51385    | 2.08539   |
| SLX4IP       | 0.256367   | 0.408809  | 0.224236  | 0.209868   | 0.193514  |
| HLA-L        | 0.00949803 | 0.020148  | 0.0117883 | 0.00787294 | 0.0189581 |
| BAD          | 83.64      | 91.9725   | 76.793    | 54.9133    | 92.3457   |
| MYO1D        | 3.69401    | 3.66699   | 3.81573   | 2.99087    | 3.56517   |
| RFC1         | 8.92689    | 8.49747   | 8.23185   | 6.96691    | 8.31514   |
| ENPP5        | 0.621113   | 0.435208  | 0.298773  | 0.391651   | 0.430917  |
| LOC100271722 | 2.33744    | 2.52105   | 2.60905   | 1.59748    | 2.13137   |
| FOXD2-AS1    | 3.38711    | 2.65286   | 4.58956   | 3.19216    | 2.48169   |
| LINC00853    | 1.707      | 1.9883    | 1.85306   | 1.12765    | 1.70179   |
| CSRP1        | 104.927    | 109.013   | 98.7206   | 82.0287    | 97.5269   |
| SCFD1        | 7.93852    | 7.01585   | 8.40855   | 6.17631    | 6.52662   |
| MKL1         | 5.18501    | 4.90338   | 4.81358   | 4.45637    | 3.97536   |
| KCNJ11       | 7.37529    | 6.70944   | 5.8447    | 5.94319    | 5.40783   |
| KLHDC2       | 18.1499    | 21.5314   | 20.4421   | 14.5974    | 20.0372   |
| NAIF1        | 3.2094     | 4.66002   | 3.34897   | 2.60795    | 4.00368   |
| MEF2D        | 12.0944    | 9.45394   | 10.8526   | 9.16321    | 8.80728   |
| FKBP9L       | 0.478158   | 0.490595  | 0.666361  | 0.379155   | 0.633207  |
| GRN          | 160.932    | 162.824   | 148.358   | 135.014    | 134.412   |
| EIF2AK3      | 2.24937    | 1.91309   | 1.97084   | 1.59535    | 1.84396   |
| COX7A2       | 292.578    | 326.143   | 278.314   | 220.347    | 272.475   |
| SMTNL1       | 0.0170538  | 0.0440057 | 0.0405207 | 0.027878   | 0         |
| PRSS23       | 1.63098    | 4.84334   | 2.89058   | 1.94568    | 3.80352   |
| ALG12        | 6.04069    | 7.72844   | 6.09385   | 5.41182    | 6.0724    |
| TRIQK        | 2.32835    | 2.4555    | 2.46285   | 1.72568    | 2.28279   |
| TNXB         | 0.0149124  | 0.0498983 | 0.0300598 | 0.0208908  | 0.0155167 |
| LOC729041    | 2.33069    | 2.41049   | 1.57148   | 1.3446     | 2.16503   |

|                         |            |           |           |            |            |
|-------------------------|------------|-----------|-----------|------------|------------|
| LRRN4                   | 2.39213    | 1.31958   | 1.5184    | 1.81948    | 1.32149    |
| PHKB                    | 4.38587    | 4.02003   | 4.34561   | 3.19885    | 3.86949    |
| PROX1                   | 0.0556064  | 0.0360144 | 0.0508504 | 0.0447458  | 0.0379585  |
| BST2                    | 419.455    | 450.121   | 347.1     | 303.775    | 407.099    |
| PGM5P2                  | 0.100403   | 0.162455  | 0.12487   | 0.0958723  | 0.132611   |
| C17orf104               | 0.0691349  | 0.0835702 | 0.0775931 | 0.014434   | 0.104317   |
| COX20                   | 4.57613    | 5.22957   | 4.82338   | 3.47694    | 4.45963    |
| DDT                     | 295.232    | 327.393   | 272.223   | 225.783    | 287.536    |
| EME1                    | 2.33872    | 2.11174   | 2.55547   | 2.48161    | 1.43983    |
| LOC284801               | 0.0409381  | 0.0598997 | 0.0260223 | 0.0342312  | 0          |
| ZNF487P                 | 0.259782   | 0.50772   | 0.360063  | 0.24978    | 0.443962   |
| CYR61                   | 248.053    | 183.648   | 221.65    | 176.242    | 191.209    |
| AGBL5                   | 12.0943    | 16.1192   | 12.866    | 9.28903    | 15.2368    |
| ZSCAN2                  | 6.09774    | 7.74578   | 5.85876   | 5.0918     | 5.70884    |
| CAPN7                   | 3.42063    | 3.61879   | 3.30901   | 2.76773    | 3.22082    |
| GBA2                    | 11.6768    | 10.5051   | 10.2797   | 9.20998    | 9.72612    |
| ALKBH7                  | 74.7444    | 76.139    | 79.4766   | 57.1203    | 72.6669    |
| LINC00659               | 0.638899   | 0.430296  | 0.576903  | 0.587349   | 0.297052   |
| DMAP1                   | 17.402     | 19.3299   | 13.6907   | 13.9615    | 16.4052    |
| CELSR3                  | 1.11887    | 1.5794    | 0.744727  | 0.986548   | 1.36303    |
| COL7A1                  | 0.756308   | 0.85995   | 0.498712  | 0.582019   | 0.850029   |
| GAN                     | 0.248698   | 0.228169  | 0.247111  | 0.187157   | 0.230188   |
| TLN1                    | 18.2348    | 18.9228   | 15.3401   | 13.4102    | 18.8439    |
| ZNF548                  | 1.53476    | 1.57202   | 1.6529    | 1.27416    | 1.54282    |
| IQCJ,IQCJ-SCHIP1,SCHIP1 | 7.8387     | 6.7788    | 6.69866   | 5.52991    | 6.72286    |
| PLA2G12A                | 4.57829    | 4.11339   | 4.98056   | 3.66782    | 4.22326    |
| SCARA3                  | 11.3419    | 14.8632   | 9.93668   | 9.51373    | 13.1887    |
| FUT1                    | 3.30101    | 3.83217   | 3.11457   | 2.97672    | 2.71063    |
| ISCA2                   | 30.904     | 34.0337   | 31.7964   | 23.2556    | 30.81      |
| TNNI2                   | 0.105119   | 0         | 0         | 0          | 0          |
| PLK4                    | 5.93945    | 4.9145    | 4.6009    | 4.61275    | 4.84229    |
| GPR156                  | 0.00593866 | 0         | 0.0146634 | 0.00987899 | 0.00769511 |
| SLC44A2                 | 26.3985    | 21.427    | 15.044    | 18.0762    | 20.9189    |
| CDC42EP4                | 9.04262    | 10.6079   | 8.01506   | 7.75227    | 8.95959    |
| MDC1                    | 6.02062    | 4.58983   | 4.83209   | 4.78858    | 4.37646    |
| HOXA13                  | 1.16877    | 0.986041  | 0.529765  | 0.54534    | 0.878309   |
| YOD1                    | 2.4566     | 2.37436   | 1.54237   | 1.58947    | 2.30239    |
| PSMB10                  | 51.4993    | 54.4177   | 46.2549   | 42.9382    | 42.6131    |
| ITPR1                   | 2.81187    | 3.53922   | 1.77084   | 1.82503    | 3.07379    |
| ARID5A                  | 11.097     | 13.21     | 8.78988   | 8.23843    | 12.0862    |
| KIAA1715                | 5.01274    | 5.05274   | 3.50032   | 2.82039    | 5.25782    |
| LIME1                   | 10.0158    | 6.01913   | 7.82223   | 8.2821     | 4.66999    |
| ZNF844                  | 1.96153    | 1.06062   | 1.09902   | 1.24811    | 1.31011    |
| BNIP3L                  | 48.9818    | 56.46     | 42.7104   | 29.0683    | 58.8288    |
| CRTC3                   | 6.96287    | 7.09464   | 6.82442   | 5.44787    | 5.71241    |
| PMCH                    | 1.06032    | 1.17768   | 1.02275   | 0.99254    | 0.720694   |
| MAP3K11                 | 20.0638    | 20.231    | 19.1322   | 16.595     | 17.4591    |
| FLJ13224                | 0.0382714  | 0.251144  | 0.22534   | 0.254013   | 0.185675   |
| DPP8                    | 1.0314     | 0.929447  | 0.894385  | 0.8059     | 0.972669   |
| TBC1D5                  | 4.11171    | 4.11649   | 3.7758    | 2.92504    | 4.02113    |
| TBC1D22B                | 4.87901    | 4.71743   | 3.58267   | 3.64361    | 3.87567    |
| YPEL2                   | 1.72097    | 1.31756   | 1.31776   | 1.31931    | 1.09727    |
| CAPS2                   | 0.0808118  | 0.0521227 | 0.0679595 | 0.0744656  | 0.0492093  |
| GHDC                    | 16.8823    | 15.6291   | 16.3259   | 13.332     | 15.5231    |
| TPI1                    | 1217.46    | 1350.54   | 988.441   | 866.48     | 1233.18    |
| GLS2                    | 10.7497    | 13.6321   | 10.8989   | 8.70548    | 12.6582    |
| HSP90B1                 | 107.155    | 104.763   | 98.0897   | 78.59      | 102.953    |
| NFKBIE                  | 11.0011    | 13.6802   | 11.2294   | 9.34371    | 11.6477    |
| XKR8                    | 11.6648    | 13.2552   | 9.62463   | 8.38501    | 13.0068    |
| THEM6                   | 86.7229    | 81.4533   | 84.0388   | 69.1893    | 74.53      |
| BLCAP                   | 35.1937    | 52.1568   | 31.6047   | 28.4895    | 43.4165    |
| CDKN2D                  | 10.8971    | 12.3002   | 9.18801   | 8.68079    | 10.5594    |
| IRF2BP2                 | 31.6616    | 20.1923   | 25.9199   | 23.5185    | 18.3405    |
| SNRNP70                 | 156.274    | 117.986   | 121.946   | 117.832    | 113.505    |
| TAF3                    | 2.67147    | 2.49297   | 2.46561   | 2.03842    | 2.3584     |
| PANK4                   | 12.9479    | 13.0902   | 9.44177   | 8.97856    | 12.7298    |
| LPP                     | 2.41853    | 2.05298   | 2.12029   | 1.78321    | 1.94462    |
| MPC2                    | 16.5407    | 17.2506   | 15.3899   | 11.3763    | 18.3689    |
| LOC100506314            | 0.665065   | 0.693365  | 0.577788  | 0.582576   | 0.472978   |
| PMM1                    | 59.4392    | 60.8165   | 61.9544   | 50.064     | 55.29      |
| PDE8B                   | 0.139435   | 0.209777  | 0.220661  | 0.242547   | 0.147758   |
| USP30                   | 2.8731     | 3.1267    | 2.04723   | 2.01536    | 2.88706    |
| TANC2                   | 2.00555    | 2.1091    | 1.54298   | 1.31343    | 2.1928     |
| TMEM151B                | 0.0245741  | 0.0334724 | 0.0997545 | 0.0549734  | 0.0512181  |
| CASP7                   | 4.43035    | 5.11919   | 4.32344   | 3.60752    | 4.35916    |
| IL10RB                  | 19.7042    | 23.6864   | 19.6479   | 16.4533    | 20.4623    |
| CDON                    | 0.324893   | 0.324785  | 0.244324  | 0.248122   | 0.3346     |
| KIAA1328                | 0.415771   | 0.417403  | 0.371526  | 0.306795   | 0.33686    |
| MBIP                    | 5.76769    | 6.83968   | 4.65087   | 4.06914    | 6.01116    |



|              |            |           |            |           |            |
|--------------|------------|-----------|------------|-----------|------------|
| EXOC2        | 4.41622    | 4.28247   | 4.13155    | 3.76754   | 3.78432    |
| IFT27        | 10.2922    | 9.44741   | 14.5105    | 9.23814   | 8.59976    |
| XRCC6BP1     | 5.12938    | 6.54962   | 5.73347    | 4.76461   | 5.69522    |
| MICA         | 33.4389    | 29.0278   | 29.5036    | 27.5761   | 24.6063    |
| TPT1-AS1     | 6.34276    | 7.23957   | 6.10786    | 4.48326   | 7.27111    |
| HSPA1B       | 46.9803    | 79.6522   | 34.2737    | 41.8428   | 60.4479    |
| METTL12      | 5.21345    | 4.23426   | 6.64316    | 4.1238    | 3.954      |
| MIEN1        | 104.709    | 108.897   | 100.428    | 82.8417   | 97.5387    |
| CLK4         | 6.52258    | 4.97149   | 4.42079    | 4.44932   | 4.89914    |
| GPI          | 325.755    | 421.431   | 262.87     | 229.399   | 384.503    |
| LINC00294    | 2.93901    | 2.62202   | 3.50611    | 2.40867   | 2.37299    |
| FAM46C       | 0.152823   | 0.608658  | 0.109109   | 0.104964  | 0.487998   |
| FLJ20021     | 4.13163    | 3.79391   | 3.28371    | 3.69559   | 3.41757    |
| GKAP1        | 2.8651     | 1.72855   | 3.33358    | 2.36035   | 2.21949    |
| PARD6B       | 2.93313    | 1.89763   | 2.22542    | 2.03828   | 1.68099    |
| AVIL         | 0.153331   | 0.0891238 | 0.394002   | 0.146984  | 0.186805   |
| ZNF585A      | 0.824096   | 1.13093   | 0.854336   | 0.58424   | 1.00016    |
| GMEB2        | 7.57812    | 7.27661   | 5.91792    | 5.94634   | 6.53984    |
| LOC100506233 | 3.55866    | 4.66322   | 4.26211    | 4.19723   | 3.43163    |
| DSC3         | 0.00888966 | 0         | 0.0075726  | 0.0099288 | 0.0041686  |
| CAV2         | 3.13518    | 3.75315   | 2.71178    | 1.84284   | 4.27201    |
| TSC22D2      | 11.3551    | 10.9848   | 7.68843    | 8.55283   | 9.22069    |
| GPR126       | 3.24192    | 2.4019    | 3.09224    | 2.42317   | 2.96315    |
| TMUB1        | 180.835    | 136.057   | 173.184    | 149.154   | 125.631    |
| F11R         | 5.32455    | 6.13599   | 5.54747    | 4.50243   | 5.87923    |
| DTX2         | 14.9035    | 11.5725   | 11.0313    | 11.3146   | 9.82586    |
| GM2A         | 12.8319    | 15.1614   | 9.94451    | 9.08797   | 15.2803    |
| ACACB        | 0.417675   | 0.477394  | 0.430729   | 0.387033  | 0.377092   |
| TET2         | 0.814066   | 0.56271   | 0.615373   | 0.539573  | 0.628804   |
| FAM212A      | 7.31827    | 11.3556   | 8.12168    | 5.18062   | 10.157     |
| GOLGA8S      | 0.369033   | 0.392227  | 0.316933   | 0.303802  | 0.376287   |
| RTDR1        | 0.0834514  | 0.074588  | 0.101212   | 0.139412  | 0.0340182  |
| KIAA1191     | 31.7833    | 41.5555   | 33.1651    | 26.0178   | 35.8454    |
| ACOT4        | 0          | 0.0635172 | 0.0836114  | 0.0382686 | 0.088228   |
| PEX2         | 8.31068    | 9.93355   | 7.26696    | 6.30642   | 9.14881    |
| ASPRV1       | 0.754415   | 0.804423  | 0.793274   | 0.675641  | 0.56592    |
| DENND3       | 1.14684    | 1.19751   | 1.01028    | 0.773928  | 1.37622    |
| CLDN7        | 0.0952587  | 0.066392  | 0.264736   | 0         | 0.18444    |
| LDLR         | 17.4524    | 13.8248   | 14.4747    | 13.6789   | 13.1156    |
| HK2          | 57.894     | 50.1465   | 32.3548    | 36.458    | 48.8003    |
| ANKZF1       | 57.9301    | 46.9461   | 38.8904    | 41.7166   | 44.74      |
| SIRT2        | 44.5856    | 45.8506   | 38.7676    | 31.8612   | 41.5299    |
| LINC00663    | 2.00951    | 1.50916   | 2.05136    | 2.05621   | 1.21493    |
| MED13L       | 1.86044    | 1.76488   | 1.70292    | 1.48585   | 1.48376    |
| GJC2         | 0.117161   | 0.0614068 | 0.0557658  | 0.0787664 | 0          |
| UBE2Q2P1     | 0.158176   | 0.221191  | 0.195947   | 0.174712  | 0.156722   |
| GAB2         | 3.85454    | 2.75527   | 2.89819    | 2.93263   | 2.46127    |
| ALDH6A1      | 2.7761     | 2.47993   | 3.22749    | 1.89602   | 3.05954    |
| MRPL17       | 57.9825    | 55.7474   | 43.2408    | 36.2122   | 56.4585    |
| HMHA1        | 27.4011    | 32.8755   | 18.7103    | 17.6755   | 31.4525    |
| NIPSNAP3B    | 0.469748   | 0.410781  | 0.641584   | 0.546901  | 0.349756   |
| PSORS1C1     | 1.07293    | 0.895786  | 0.793429   | 0.695604  | 0.727561   |
| FUNDC2       | 17.7724    | 27.8763   | 19.9575    | 14.9613   | 23.3367    |
| VOPP1        | 24.0675    | 26.1166   | 23.4804    | 19.8241   | 22.6792    |
| ENO1         | 2516.05    | 2687.47   | 2254.15    | 1700.93   | 2634.06    |
| CEP152       | 1.59832    | 1.28217   | 1.13407    | 1.2897    | 1.27186    |
| CHRNE        | 5.16272    | 4.45811   | 3.77594    | 3.74121   | 4.30276    |
| MAP3K1       | 1.17438    | 0.834783  | 0.891064   | 0.861264  | 0.718631   |
| KIFC1        | 38.1017    | 34.1517   | 34.1486    | 32.1269   | 30.6108    |
| AMOT         | 0.256875   | 0.243171  | 0.202833   | 0.19577   | 0.238145   |
| SNORA80      | 6.34377    | 17.2026   | 7.58532    | 5.19747   | 4.45919    |
| SLC17A5      | 10.4637    | 11.3399   | 7.68755    | 7.50908   | 10.0464    |
| MLXIP        | 6.36108    | 6.91968   | 4.00239    | 4.48841   | 6.0056     |
| ABCB6        | 10.2462    | 14.7139   | 7.41667    | 7.53778   | 13.7794    |
| PSPN         | 0.918308   | 0.517291  | 0.157852   | 0.21957   | 0.473189   |
| TAF11        | 17.617     | 17.2201   | 15.2256    | 14.2478   | 15.2101    |
| PCP2         | 0.931395   | 0.682932  | 1.09708    | 0.851863  | 0.93844    |
| ANKRD12      | 1.04656    | 1.10037   | 0.24605    | 0.750936  | 1.03252    |
| MED15        | 30.2869    | 24.3044   | 21.2435    | 22.4268   | 22.7537    |
| LMAN1        | 2.80218    | 2.93918   | 1.7869     | 1.86721   | 2.84146    |
| UNC119       | 88.3918    | 92.9752   | 68.0061    | 62.9038   | 90.5894    |
| GMNN         | 24.8162    | 23.7237   | 18.4422    | 19.2274   | 22.2768    |
| DBI          | 196.998    | 219.105   | 165.843    | 159.928   | 193.159    |
| MUC6         | 0.146398   | 0.0633271 | 0.0207261  | 0.0794917 | 0.103797   |
| C14orf28     | 0.905529   | 1.67022   | 1.30122    | 0.93682   | 1.51532    |
| FAM229B      | 2.54845    | 3.14521   | 2.37061    | 1.72431   | 3.01516    |
| DNAJC27-AS1  | 0.0108257  | 0.0230536 | 0.00674619 | 0.0181207 | 0.00713968 |
| TMEM74B      | 20.7875    | 19.7814   | 13.4638    | 15.3572   | 19.1248    |
| PI4KAP1      | 19.3458    | 15.3339   | 11.0608    | 14.0531   | 14.9255    |

|                     |           |           |           |           |           |
|---------------------|-----------|-----------|-----------|-----------|-----------|
| RBM33               | 5.19273   | 4.87153   | 3.22847   | 3.7453    | 4.63922   |
| BROX                | 1.46287   | 0.960748  | 1.12628   | 0.92728   | 1.05281   |
| MOB3B               | 0.588531  | 0.596267  | 0.513889  | 0.616615  | 0.472106  |
| HGB1                | 0.210657  | 0.288456  | 0.322459  | 0.17552   | 0.533215  |
| LOC151009,LOC440894 | 4.24929   | 4.10166   | 4.84564   | 3.59932   | 4.38056   |
| IPMK                | 3.1641    | 1.87485   | 1.77036   | 2.05137   | 2.13744   |
| SLC25A40            | 2.87369   | 2.51816   | 2.22195   | 1.98405   | 2.53852   |
| KIAA1432            | 1.68004   | 1.75863   | 1.40393   | 1.24524   | 1.69336   |
| ARSK                | 1.17861   | 1.32164   | 0.727593  | 0.691531  | 1.33738   |
| MGC2889             | 0.0207384 | 0.0151087 | 0.0655128 | 0.0173113 | 0.0142773 |
| PABPC3              | 0.0213449 | 0         | 0.0531031 | 0.0355328 | 0.028561  |
| ACAT2               | 15.1905   | 12.0521   | 13.2799   | 12.387    | 11.958    |
| YY1AP1              | 22.7932   | 23.1996   | 20.8598   | 17.7995   | 21.5739   |
| SENP7               | 1.43782   | 1.3454    | 1.13185   | 1.11426   | 1.36202   |
| GSTM5               | 0.167604  | 0.287432  | 0.092231  | 0.124377  | 0.314716  |
| NDUFAF4P1           | 0.0172402 | 0.0259419 | 0.0334509 | 0.0288724 | 0.0371942 |
| DOK7                | 0.0218918 | 0         | 0.0522268 | 0         | 0.0259586 |
| RNF38               | 3.79577   | 3.07245   | 3.16092   | 2.80597   | 2.9467    |
| GOLPH3L             | 6.53605   | 6.2177    | 6.54689   | 5.56323   | 5.69365   |
| TNFSF9              | 23.2509   | 22.814    | 16.7337   | 17.3933   | 19.8741   |
| ARSJ                | 2.59584   | 2.40976   | 1.69044   | 1.66142   | 2.53407   |
| LOC441204           | 0.0758894 | 0.0653727 | 0.0572461 | 0.075847  | 0.0410919 |
| MAPK3               | 77.9179   | 92.7058   | 67.7725   | 58.4696   | 83.3766   |
| PRKCQ-AS1           | 2.88255   | 2.12076   | 3.17352   | 2.24217   | 1.92013   |
| DDIT4               | 187.361   | 58.363    | 264.97    | 161.463   | 56.6966   |
| QRICH2              | 0.906625  | 1.01355   | 1.11144   | 0.894125  | 0.904728  |
| TCP11L2             | 0.61829   | 0.725464  | 0.47977   | 0.428586  | 0.832755  |
| SLC25A1             | 196.234   | 180.909   | 151.167   | 142.907   | 174.115   |
| ZNF700              | 5.06322   | 4.25237   | 3.7939    | 4.13266   | 3.86044   |
| IMPDH1              | 99.8993   | 103.089   | 98.1614   | 83.8604   | 90.2603   |
| UOCRQ               | 106.548   | 129.99    | 92.6382   | 81.6344   | 116.767   |
| DTL                 | 3.39457   | 2.18486   | 2.46363   | 2.81287   | 1.52368   |
| CEP78               | 4.58872   | 4.96392   | 3.96781   | 3.64264   | 4.82216   |
| ZNRF1               | 15.0999   | 19.193    | 11.2068   | 9.43966   | 19.9668   |
| ATP8B3              | 0.38375   | 0.396124  | 0.538313  | 0.449036  | 0.393044  |
| ZNF460              | 0.482384  | 0.402523  | 0.486085  | 0.443195  | 0.361553  |
| ID2                 | 1.12838   | 5.49394   | 1.39641   | 1.819     | 3.63004   |
| LOC388692           | 0.386686  | 0.394524  | 0.416812  | 0.415403  | 0.340756  |
| CCDC170             | 0.0247134 | 0.0411636 | 0.0154441 | 0.0204155 | 0.0279757 |
| DDIT3               | 113.567   | 96.2961   | 150.824   | 86.7859   | 91.0446   |
| ZBTB32              | 0.0979836 | 0.103588  | 0.140974  | 0.0976144 | 0.0952955 |
| TCF19               | 9.0657    | 9.44227   | 7.81425   | 7.80847   | 9.02378   |
| AIP                 | 70.9619   | 65.3008   | 65.5846   | 53.1195   | 59.3335   |
| TMEM55A             | 9.88737   | 9.48626   | 7.69439   | 7.22551   | 9.81618   |
| GNAI2               | 63.0156   | 78.9188   | 51.0705   | 49.4272   | 69.4142   |
| SFTA1P              | 416.648   | 318.685   | 474.022   | 323.58    | 329.474   |
| ALKBH5              | 58.4806   | 68.3528   | 44.4013   | 41.4844   | 64.6486   |
| LOC645166           | 4.24328   | 5.60619   | 4.47675   | 3.42484   | 4.05341   |
| RAB27A              | 1.84365   | 2.04847   | 2.16321   | 1.46265   | 2.25505   |
| CDKN2B-AS1          | 0.278912  | 0.173105  | 0.133042  | 0.124424  | 0.215713  |
| TMEM63C             | 1.37324   | 1.78909   | 1.44497   | 1.27018   | 1.59726   |
| TMEM135             | 2.87859   | 2.81509   | 2.13029   | 1.83276   | 2.94074   |
| ZBTB34              | 3.19253   | 2.52935   | 2.94791   | 2.58411   | 2.57062   |
| CLDN18              | 0.04945   | 0.0100788 | 0.0707804 | 0.058683  | 0.0285924 |
| FEM1A               | 14.0911   | 19.8337   | 16.8694   | 13.7867   | 15.5092   |
| INTS12              | 12.5334   | 14.9344   | 14.5385   | 10.1085   | 13.4016   |
| NGLY1               | 20.1925   | 20.8086   | 15.8095   | 13.3147   | 20.9041   |
| HSPB11              | 41.3541   | 35.4844   | 38.0648   | 30.3752   | 34.7284   |
| ZDHHC18             | 29.8101   | 31.1859   | 28.0611   | 24.9471   | 26.8801   |
| CCNG1               | 51.8424   | 67.3182   | 57.9656   | 41.3283   | 62.6695   |
| ALG14               | 5.41642   | 6.46827   | 6.81785   | 5.38718   | 5.63737   |
| MKI67               | 12.7228   | 9.61088   | 10.0706   | 11.106    | 8.54007   |
| MAP3K6              | 3.49406   | 2.8937    | 1.96681   | 2.28269   | 3.39497   |
| PGM1                | 44.7334   | 55.062    | 38.4673   | 29.5467   | 56.1511   |
| ARID4A              | 0.843434  | 0.719862  | 0.606184  | 0.637146  | 0.719882  |
| RMRP                | 89.3155   | 146.586   | 92.4306   | 56.6993   | 111.48    |
| ZNF674              | 0.503049  | 0.433883  | 0.746437  | 0.39387   | 0.400294  |
| ROCK1               | 3.53074   | 3.10817   | 2.58232   | 2.67744   | 3.0965    |
| HSD17B11            | 29.3262   | 37.171    | 34.416    | 24.8184   | 34.7255   |
| SPOPL               | 1.82075   | 1.6806    | 1.39237   | 1.37961   | 1.53972   |
| STX5                | 26.9951   | 31.131    | 32.3947   | 24.4722   | 25.0276   |
| LOC100216545        | 1.91083   | 1.69217   | 2.12608   | 1.46586   | 1.55193   |
| MARCH9              | 18.1478   | 15.5606   | 16.5461   | 14.4044   | 15.2696   |
| CHRN1               | 38.7914   | 34.6041   | 39.609    | 29.3801   | 37.9729   |
| SNORA38             | 17.851    | 0         | 4.29142   | 0         | 0         |
| MTSS1L              | 17.5239   | 14.7123   | 15.5282   | 13.817    | 13.6661   |
| YEATS2              | 16.2305   | 13.0277   | 11.3747   | 11.1445   | 12.7013   |
| CAMSAP3             | 17.0642   | 12.0904   | 14.1533   | 13.8061   | 10.8902   |
| RRN3P3              | 0.658556  | 0.602905  | 1.30808   | 0.872743  | 0.503153  |

|                       |           |           |           |           |           |
|-----------------------|-----------|-----------|-----------|-----------|-----------|
| LOC729732             | 1.724     | 1.59336   | 1.41781   | 1.81593   | 1.03678   |
| KATNAL1               | 0.44934   | 0.438176  | 0.267042  | 0.310969  | 0.396541  |
| MAST4                 | 0.859945  | 0.78498   | 0.636562  | 0.530432  | 0.980513  |
| CCNJL                 | 7.1415    | 7.59858   | 6.34053   | 4.89387   | 8.02615   |
| LEPR,LEPROT           | 6.93613   | 8.28496   | 8.32361   | 5.8235    | 8.24649   |
| WDR41                 | 13.1006   | 11.3562   | 15.006    | 10.4915   | 11.4084   |
| DST                   | 1.50696   | 1.63218   | 0.826377  | 1.11002   | 1.56929   |
| SPTB                  | 0.846921  | 0.408244  | 0.867227  | 0.740816  | 0.437699  |
| FAHD2CP               | 5.81694   | 6.84662   | 5.06034   | 4.55587   | 5.50991   |
| HLA-F                 | 69.4587   | 77.376    | 66.7526   | 56.395    | 63.8742   |
| RALGAP2               | 1.33323   | 1.36268   | 1.11297   | 0.946167  | 1.44271   |
| CBR3                  | 17.9937   | 23.6787   | 14.7927   | 13.3168   | 22.2472   |
| LAMC3                 | 0.0659418 | 0.120983  | 0.133861  | 0.0991086 | 0.110129  |
| SEC61G                | 401.283   | 430.573   | 320.001   | 259.812   | 400.145   |
| RNF216P1              | 10.8902   | 13.2795   | 10.7571   | 8.65589   | 12.269    |
| INPP5J                | 3.4131    | 4.1384    | 2.61964   | 3.01209   | 2.93638   |
| RTKN2                 | 0.249885  | 0.18463   | 0.236765  | 0.209268  | 0.212011  |
| ZNF185                | 0.190669  | 0.208411  | 0.128248  | 0.134657  | 0.165112  |
| SLC26A11              | 7.70751   | 8.9204    | 7.0049    | 7.52236   | 7.62789   |
| C5orf38               | 6.22866   | 6.67719   | 7.32916   | 5.51046   | 6.65987   |
| GAB1                  | 0.381325  | 0.289145  | 0.289801  | 0.29024   | 0.286035  |
| ACTA2                 | 2.23317   | 4.00832   | 2.25367   | 2.0353    | 2.97809   |
| HSPA1A                | 2.4832    | 4.39898   | 2.02634   | 2.22468   | 2.8421    |
| RNF43                 | 0.0302749 | 0.0838194 | 0.0148404 | 0.0302813 | 0.0387059 |
| NEURL                 | 7.75496   | 5.2359    | 8.39646   | 6.37241   | 5.31334   |
| EXT1                  | 15.4079   | 16.3123   | 10.9125   | 11.1265   | 15.9945   |
| CLK1                  | 42.7931   | 22.3698   | 29.4248   | 29.0397   | 21.8726   |
| CD40                  | 16.3031   | 20.3938   | 15.7903   | 13.3209   | 18.0098   |
| TSPAN14               | 4.42881   | 4.93036   | 4.79783   | 3.66848   | 4.33063   |
| MYL6                  | 824.986   | 1016.23   | 811.081   | 634.84    | 915.832   |
| HMGCS1                | 3.50524   | 2.79891   | 2.67404   | 2.41287   | 3.00194   |
| USP28                 | 6.47024   | 4.73595   | 5.00702   | 4.54886   | 4.93647   |
| CAMK2N2               | 66.5502   | 67.1016   | 58.5555   | 52.9554   | 59.8238   |
| ATF7                  | 3.82399   | 3.22679   | 3.19567   | 2.94957   | 2.69399   |
| PIM1                  | 22.3131   | 20.7884   | 17.3899   | 15.1927   | 18.5272   |
| FGFRL1                | 14.2814   | 12.4958   | 13.2965   | 11.5116   | 12.1221   |
| ULBP2                 | 14.7034   | 10.9927   | 14.424    | 11.4363   | 10.9311   |
| SLC7A10               | 0.0902314 | 0.182187  | 0.19032   | 0.0752445 | 0.168454  |
| LOC100128822          | 6.2807    | 8.45049   | 10.0236   | 6.09264   | 7.87246   |
| ATL3                  | 10.529    | 11.4541   | 10.1295   | 8.56832   | 10.5171   |
| LAMTOR4               | 310.582   | 359.106   | 284.326   | 250.579   | 310.667   |
| LCA5                  | 0.393235  | 0.262689  | 0.351753  | 0.31868   | 0.283631  |
| HDAC5                 | 17.4529   | 18.1986   | 16.5696   | 14.3663   | 16.3019   |
| SMIM7                 | 25.6176   | 28.411    | 29.2655   | 21.7235   | 24.2622   |
| TM7SF3                | 9.65406   | 10.4657   | 9.49823   | 8.09968   | 9.65347   |
| EHD4                  | 16.866    | 17.3546   | 14.0588   | 12.5643   | 17.0728   |
| LENG1                 | 12.8275   | 13.2153   | 14.0392   | 10.1786   | 11.7917   |
| PTPRG                 | 1.48041   | 1.19717   | 1.35128   | 0.956957  | 1.35084   |
| NR1H2                 | 36.9177   | 46.7324   | 31.3278   | 29.4578   | 41.6903   |
| MED16                 | 30.7134   | 29.6111   | 28.6395   | 25.5807   | 27.2823   |
| NCAPG2                | 12.0186   | 9.35513   | 10.7497   | 10.0813   | 9.5784    |
| GPC4                  | 6.32637   | 6.72269   | 6.64804   | 5.49769   | 6.20606   |
| TRIM50                | 0.0446603 | 0         | 0         | 0         | 0         |
| CCDC134               | 5.59153   | 5.00438   | 3.70319   | 4.14429   | 4.5693    |
| ZNF484                | 1.075     | 1.40722   | 0.661258  | 0.703694  | 1.2615    |
| ZNF81                 | 0.180557  | 0.124598  | 0.178238  | 0.200506  | 0.110814  |
| MEX3C                 | 6.18499   | 6.44437   | 8.61122   | 5.69691   | 6.07561   |
| IGSF8                 | 19.8213   | 22.4092   | 13.3207   | 14.6616   | 21.3694   |
| C1QTNF2               | 1.32328   | 1.26871   | 1.09265   | 1.23396   | 0.984901  |
| SPC24                 | 10.1917   | 10.8104   | 8.88485   | 8.59653   | 10.3198   |
| ANKRD9                | 22.0806   | 18.4443   | 16.8618   | 14.0902   | 20.9538   |
| PRICKLE3              | 19.5435   | 14.7209   | 15.325    | 14.597    | 13.5967   |
| ADORA1                | 2.41328   | 2.29343   | 2.22626   | 2.16686   | 1.89159   |
| PLCG1                 | 16.8961   | 15.8658   | 12.8884   | 12.301    | 15.8211   |
| CCDC150               | 1.49926   | 1.44828   | 0.926827  | 1.26165   | 1.11024   |
| TPM2                  | 91.8217   | 124.617   | 73.1059   | 59.3777   | 132.69    |
| PI4KAP2               | 16.8155   | 15.3331   | 10.99     | 12.8987   | 14.2002   |
| C1QTNF9B-AS1          | 0.100576  | 0.175096  | 0.347349  | 0.209269  | 0.108767  |
| RBM15                 | 6.00351   | 4.79317   | 4.65643   | 5.02398   | 4.13722   |
| BGLAP,PMF1,PMF1-BGLAP | 46.7219   | 51.6145   | 46.8012   | 37.366    | 46.6929   |
| BTG2                  | 9.72915   | 12.4886   | 11.1306   | 8.19581   | 11.8234   |
| NPC2                  | 240.671   | 339.767   | 247.689   | 200.573   | 287.537   |
| SLC16A7               | 0.173269  | 0.204763  | 0.170552  | 0.159705  | 0.160378  |
| ACBD4                 | 12.0504   | 10.4212   | 10.5783   | 9.41377   | 9.44391   |
| TPBG                  | 11.7121   | 12.1904   | 12.4837   | 10.2184   | 11.7595   |
| ITPKA                 | 38.0224   | 38.2521   | 30.1123   | 28.715    | 34.4469   |
| PIGA                  | 3.19031   | 2.89587   | 2.92406   | 2.54757   | 2.74512   |
| PIAS2                 | 11.6688   | 12.7824   | 8.33928   | 7.58859   | 13.0206   |
| MICAL2                | 5.22877   | 3.84566   | 4.41234   | 4.3807    | 3.72957   |

|                           |           |           |           |           |           |
|---------------------------|-----------|-----------|-----------|-----------|-----------|
| ERBB3                     | 4.71475   | 5.59702   | 4.43583   | 4.20763   | 4.60627   |
| LOC100379224              | 1.80948   | 2.06693   | 2.39961   | 1.5576    | 2.03879   |
| ECM1                      | 2.08576   | 1.76847   | 1.01141   | 1.73048   | 1.486     |
| MMD                       | 2.45609   | 2.6777    | 2.54136   | 1.88237   | 2.79027   |
| CRELD1                    | 12.5293   | 15.7725   | 10.055    | 9.48753   | 13.3751   |
| RAG1                      | 0.0667459 | 0.0782176 | 0.0803189 | 0.0669401 | 0.0690005 |
| ARHGAP23                  | 3.10989   | 2.97156   | 2.0912    | 2.38862   | 2.71402   |
| B4GALT3                   | 36.4383   | 34.1667   | 32.9362   | 28.7272   | 31.2338   |
| ERCC6,PGBD3               | 1.82413   | 1.41415   | 1.85211   | 1.3715    | 1.70677   |
| FOXO3                     | 7.18797   | 5.73324   | 5.57086   | 5.10255   | 5.84597   |
| PHF17                     | 8.52499   | 7.37919   | 7.36024   | 6.98699   | 6.83638   |
| SCPEP1                    | 13.1911   | 11.1004   | 10.5355   | 9.62058   | 11.8555   |
| NARF                      | 72.0041   | 96.6662   | 76.5424   | 59.4604   | 84.8672   |
| BHLHA15                   | 2.61428   | 1.91087   | 2.72631   | 2.01456   | 2.06018   |
| CACNB3                    | 24.4522   | 26.9796   | 21.2399   | 18.2476   | 24.5895   |
| RASSF4                    | 4.35823   | 5.26505   | 3.3653    | 3.39946   | 5.20139   |
| ARHGEF35                  | 1.77463   | 1.64803   | 2.03668   | 1.61453   | 1.498     |
| H1FO                      | 176.884   | 221.944   | 229.333   | 152.447   | 212.504   |
| INADL                     | 1.93467   | 1.74207   | 2.09335   | 1.43156   | 1.78233   |
| DCLRE1B                   | 2.7085    | 3.48464   | 2.71905   | 2.03149   | 3.38339   |
| CRY2                      | 5.30358   | 6.14303   | 3.72423   | 3.85636   | 5.85514   |
| LOC100130776              | 79.9743   | 76.1163   | 76.1564   | 60.5584   | 69.0178   |
| IFFO1                     | 0.0309745 | 0.0406248 | 0.0918698 | 0.0513049 | 0.0374137 |
| POU6F1                    | 1.85441   | 2.00742   | 1.89633   | 1.56643   | 2.03666   |
| NDUFS4                    | 81.5132   | 78.1807   | 70.4046   | 58.1232   | 73.669    |
| MT1F                      | 113.947   | 122.217   | 69.6834   | 80.6547   | 111.064   |
| WBP1L                     | 5.5579    | 6.96072   | 5.82686   | 4.85334   | 6.11109   |
| ARHGAP19,SLIT1            | 2.48059   | 2.57611   | 2.19954   | 2.03647   | 2.32936   |
| SULT1A2                   | 0.147317  | 0         | 0         | 0.0762584 | 0         |
| PITPNM3                   | 0.36222   | 0.232144  | 0.183848  | 0.243811  | 0.295429  |
| FAM109A                   | 7.647     | 9.30498   | 7.56218   | 7.02092   | 7.62159   |
| BBC3                      | 35.5926   | 44.5623   | 69.6624   | 35.1755   | 39.1206   |
| SMPD1                     | 6.86593   | 8.33986   | 5.73125   | 5.99261   | 7.07824   |
| P4HA1                     | 31.7688   | 37.7715   | 28.2415   | 20.789    | 38.8335   |
| SMYD3                     | 24.4805   | 26.1618   | 21.9905   | 16.5817   | 26.606    |
| UPRT                      | 6.50072   | 7.34533   | 4.47534   | 3.83371   | 7.94905   |
| LOC729603                 | 0.194836  | 0.24504   | 0.325549  | 0.176491  | 0.228548  |
| PTPRR                     | 0.231273  | 0.49252   | 0.240696  | 0.303212  | 0.181194  |
| LSMD1                     | 48.5185   | 70.986    | 43.0124   | 40.3852   | 56.6249   |
| USP37                     | 1.87559   | 1.11303   | 1.28295   | 1.23535   | 1.33677   |
| UBXN2B                    | 5.91169   | 6.34356   | 6.99464   | 5.42301   | 5.30979   |
| PVT1                      | 34.1007   | 41.515    | 29.9889   | 26.8591   | 35.2454   |
| DTX3L                     | 2.12252   | 1.63838   | 1.7268    | 1.60906   | 1.43015   |
| PSRC1                     | 32.8802   | 28.2986   | 34.4895   | 28.068    | 24.1932   |
| RILP                      | 21.9085   | 26.3528   | 17.2703   | 16.4127   | 22.1462   |
| DPY19L2P3                 | 0.260542  | 0.180779  | 0.282201  | 0.168333  | 0.174666  |
| ASB8                      | 5.66659   | 7.00775   | 5.23806   | 4.63168   | 6.40657   |
| ZDHHC16                   | 24.6734   | 27.5771   | 26.3697   | 21.1796   | 23.8728   |
| TJP3                      | 0.685991  | 0.579747  | 0.721613  | 0.694864  | 0.463092  |
| CORO2A                    | 6.32231   | 6.85062   | 5.59764   | 4.99938   | 6.62782   |
| POP5                      | 27.9135   | 35.7102   | 28.799    | 24.2112   | 31.0121   |
| PET100                    | 180.798   | 165.614   | 145.854   | 144.066   | 138.068   |
| TNFRSF14                  | 16.3898   | 27.1223   | 14.9457   | 13.1596   | 24.4939   |
| KIAA1109                  | 0.956849  | 1.06417   | 0.87133   | 0.764364  | 1.02738   |
| FAM187B                   | 0.062593  | 0         | 0         | 0         | 0         |
| RPIA                      | 19.633    | 16.5553   | 19.4996   | 15.1993   | 16.8697   |
| KIF18B                    | 13.4486   | 10.1892   | 11.0303   | 12.0526   | 8.67745   |
| LDHA                      | 1043.87   | 1170.95   | 905.909   | 662.225   | 1179.09   |
| C17orf67                  | 1.25414   | 1.5159    | 1.91151   | 1.43188   | 1.1257    |
| MOSPD3                    | 51.5649   | 57.6603   | 45.3008   | 38.6005   | 57.7122   |
| POMT1                     | 25.1446   | 23.3401   | 23.2435   | 20.7679   | 20.9171   |
| COX16,SYNJ2BP,SYNJ2BP-COX | 33.7085   | 39.2638   | 32.301    | 27.4638   | 35.8624   |
| LOC399715                 | 0.606316  | 0.398908  | 0.213858  | 0.498065  | 0.371341  |
| HIST1H3H                  | 2.31654   | 1.38837   | 2.89402   | 2.79323   | 1.10258   |
| FBXO8                     | 4.44221   | 3.72872   | 4.18882   | 3.16976   | 3.77925   |
| PTPRK                     | 1.47348   | 1.5428    | 1.47188   | 1.18295   | 1.52812   |
| CADM1                     | 6.21822   | 6.49961   | 5.83931   | 4.55876   | 6.7399    |
| ZNF571                    | 0.937487  | 0.807537  | 0.923589  | 0.893851  | 0.802134  |
| PTTG1                     | 217.358   | 200.614   | 218.374   | 170.661   | 177.367   |
| CCM2                      | 21.7712   | 18.8377   | 22.1098   | 19.4514   | 16.9906   |
| DOK3                      | 4.74772   | 2.611     | 3.82445   | 4.18442   | 2.9111    |
| STAM2                     | 1.88807   | 1.7697    | 1.93129   | 1.60003   | 1.61379   |
| CCDC124                   | 274.61    | 230.024   | 232.313   | 199.461   | 226.017   |
| MADD                      | 7.00226   | 7.04004   | 6.15047   | 5.45458   | 6.52302   |
| CLDND1                    | 27.8863   | 23.5306   | 25.2514   | 21.0073   | 22.5133   |
| ARNTL                     | 4.56134   | 4.17083   | 4.51579   | 3.97299   | 3.9078    |
| VN1R1                     | 0.192512  | 0.284984  | 0.425555  | 0.159823  | 0.426923  |
| HUS1                      | 7.0463    | 5.91625   | 5.36176   | 5.31376   | 5.69715   |
| ZNF165                    | 9.8833    | 6.97226   | 12.7013   | 8.99126   | 6.20376   |

|                       |           |            |           |           |           |
|-----------------------|-----------|------------|-----------|-----------|-----------|
| LOC100288069          | 1.49865   | 0.7754     | 0.960465  | 0.891471  | 0.986045  |
| CD302.LY75.LY75-CD302 | 0.320251  | 0.493888   | 0.376945  | 0.259219  | 0.410943  |
| LOC100507547          | 1.57557   | 3.31928    | 2.49176   | 0.956195  | 3.55314   |
| MAGED2                | 40.3655   | 44.2086    | 37.4136   | 33.7222   | 40.259    |
| SLC26A6               | 10.4881   | 11.7465    | 7.06284   | 8.71324   | 9.68375   |
| HAS3                  | 1.31448   | 2.13454    | 1.00937   | 1.12688   | 1.8945    |
| RHBDL1                | 3.74345   | 2.79776    | 1.84106   | 2.87754   | 3.76106   |
| DGKG                  | 2.35403   | 2.54502    | 1.85285   | 1.80649   | 2.28756   |
| LCLAT1                | 3.14708   | 2.88834    | 3.08231   | 2.72093   | 2.52093   |
| POLDIP3               | 36.2671   | 29.757     | 30.3116   | 28.0451   | 28.3524   |
| SRF                   | 28.0156   | 23.0795    | 26.1874   | 20.9205   | 21.247    |
| TP53I11               | 14.964    | 13.863     | 14.5787   | 13.6613   | 12.7738   |
| MOSPD2                | 1.06918   | 0.885807   | 0.856199  | 0.83582   | 0.753532  |
| NUDT15                | 9.47019   | 11.5053    | 9.39539   | 7.30793   | 11.0972   |
| ZFPL1                 | 42.2948   | 45.0016    | 40.0695   | 36.5722   | 38.9125   |
| CKAP2L                | 3.26278   | 2.72287    | 2.7401    | 2.97899   | 2.46696   |
| CYP51A1               | 33.2244   | 30.5784    | 29.1127   | 23.7213   | 33.3024   |
| AGAP4                 | 1.31634   | 1.24072    | 0.934393  | 1.3744    | 0.872077  |
| ECSIT.ZNF653          | 47.5001   | 45.4122    | 46.3804   | 37.1974   | 38.0048   |
| MTERFD2               | 8.08112   | 9.54964    | 8.85003   | 7.08734   | 8.34979   |
| AKAP6                 | 0.013569  | 0.00560157 | 0.0195455 | 0.012897  | 0.010526  |
| NUPL1                 | 14.0772   | 9.38061    | 12.2912   | 10.8444   | 10.0322   |
| LSR                   | 48.2062   | 50.686     | 53.4394   | 40.8823   | 47.1456   |
| CHN2                  | 0.437865  | 0.514791   | 0.586443  | 0.453714  | 0.405917  |
| ERAP1                 | 2.84889   | 2.79905    | 2.97318   | 2.48458   | 2.83913   |
| PLCD1                 | 4.13685   | 5.68602    | 3.12131   | 2.97769   | 5.19111   |
| SELK                  | 61.6585   | 63.1125    | 58.1288   | 51.8267   | 54.021    |
| DAPK2                 | 0.952756  | 1.0139     | 0.714725  | 0.834855  | 0.823256  |
| HOXB-AS3              | 0.817158  | 0.804532   | 0.894939  | 1.1671    | 0.534533  |
| PPP1R13L              | 3.3154    | 4.12229    | 3.05359   | 3.32833   | 3.25064   |
| MRPL33                | 118.191   | 135.3      | 130.906   | 92.1032   | 124.773   |
| ARID1A                | 5.65825   | 5.13848    | 4.69605   | 4.97504   | 4.66279   |
| IMP3                  | 174.025   | 137.264    | 127.598   | 122.13    | 132.202   |
| CLIP2                 | 20.1871   | 22.026     | 15.3951   | 14.4987   | 21.5006   |
| ADCK2                 | 43.2923   | 41.6608    | 48.0547   | 36.9436   | 40.1371   |
| TMEM234               | 5.32485   | 5.62078    | 4.39205   | 4.16454   | 5.42846   |
| CDS1                  | 1.82865   | 1.87488    | 1.84019   | 1.64738   | 1.72402   |
| PEF1                  | 35.6851   | 33.3283    | 38.4974   | 28.7851   | 31.2859   |
| TMC8                  | 0.129974  | 0.251046   | 0.157272  | 0.108662  | 0.264931  |
| SCYL1                 | 48.8434   | 46.7154    | 46.4309   | 44.346    | 35.9273   |
| GAS2L1                | 16.0002   | 19.5217    | 14.8618   | 13.3248   | 17.2955   |
| KCTD11                | 19.0968   | 15.9333    | 14.3644   | 13.075    | 15.33     |
| COBLL1                | 0.15151   | 0.0916635  | 0.123135  | 0.12635   | 0.080979  |
| PTPDC1                | 1.93252   | 1.39362    | 2.20012   | 1.95583   | 1.27592   |
| PON1                  | 0.0370927 | 0          | 0.0310805 | 0.0205737 | 0.0169642 |
| HSP90AB4P             | 0.078377  | 0.0325529  | 0.0387871 | 0.025877  | 0.0915122 |
| KIAA0226              | 3.52265   | 3.6424     | 3.13271   | 3.21225   | 3.24759   |
| FMR1                  | 5.76737   | 5.11601    | 5.34503   | 4.72916   | 4.43784   |
| ZSWIM1                | 4.53327   | 5.63326    | 3.92474   | 3.29344   | 5.03141   |
| GNAI1                 | 4.08884   | 3.78483    | 3.91874   | 2.88969   | 4.23613   |
| FBXO42                | 9.10782   | 10.024     | 6.63114   | 6.36795   | 9.85647   |
| BCAR3                 | 7.44479   | 6.27079    | 6.85841   | 6.0574    | 6.15128   |
| RNFT2                 | 2.50959   | 2.08564    | 1.87674   | 1.88269   | 2.04346   |
| GADD45GIP1            | 237.25    | 237.356    | 219.058   | 182.223   | 216.815   |
| CNNM2                 | 3.6763    | 3.99369    | 2.80224   | 2.61852   | 3.22551   |
| ZNF395                | 16.5589   | 17.9832    | 11.0212   | 11.1793   | 18.0293   |
| PDE7A                 | 2.16287   | 1.85447    | 1.90779   | 1.93466   | 1.76533   |
| LAPTM4B               | 0.855801  | 1.4124     | 1.44597   | 1.15398   | 1.08805   |
| CNN2                  | 141.982   | 127.137    | 134.228   | 111.844   | 124.578   |
| TMEM185A              | 5.95755   | 6.95099    | 5.80185   | 5.2947    | 5.97962   |
| SLC41A2               | 0.668713  | 0.595946   | 0.618329  | 0.493374  | 0.541103  |
| DDOST                 | 167.379   | 193.739    | 181.269   | 150.587   | 169.095   |
| SOAT2                 | 0.0817566 | 0.245052   | 0.0398275 | 0.164921  | 0.0405763 |
| SORBS3                | 121.263   | 125.855    | 108.643   | 100.473   | 113.529   |
| NCAPD2                | 35.1852   | 30.9812    | 35.4968   | 29.2641   | 29.0366   |
| PDK3                  | 7.5242    | 7.05763    | 5.85563   | 4.05201   | 8.18991   |
| GIT1                  | 40.277    | 47.4788    | 38.342    | 36.6143   | 37.6825   |
| PPP1R3B               | 28.6007   | 12.6129    | 19.3067   | 20.5592   | 11.139    |
| ESCO1                 | 3.10002   | 2.42025    | 1.76666   | 2.31614   | 2.58097   |
| UHRF2                 | 6.67844   | 6.64163    | 5.59121   | 5.23454   | 6.7034    |
| RIT1                  | 6.26048   | 6.90346    | 5.07295   | 4.70348   | 6.76637   |
| LOC440894             | 1.7056    | 1.69525    | 1.78398   | 1.51251   | 1.37018   |
| TAB1                  | 14.8182   | 13.2277    | 13.129    | 11.788    | 12.3725   |
| ELL2                  | 6.45532   | 5.65596    | 2.8067    | 3.714     | 6.32847   |
| ARHGEF28              | 14.1643   | 8.49175    | 13.2655   | 11.426    | 8.89096   |
| MTL5                  | 2.33729   | 1.61142    | 2.41311   | 1.88596   | 1.9869    |
| ACSL3                 | 13.1479   | 11.766     | 10.0661   | 9.89145   | 11.8046   |
| RNASEH2C              | 22.8785   | 25.1686    | 21.1295   | 17.6006   | 23.1895   |
| AHR                   | 0.23536   | 0.38829    | 0.310346  | 0.197058  | 0.32712   |

|                            |           |           |           |           |           |
|----------------------------|-----------|-----------|-----------|-----------|-----------|
| SIAH2                      | 21.6276   | 12.9206   | 21.1553   | 16.4794   | 13.3455   |
| SNX12                      | 16.1751   | 20.5192   | 16.1283   | 13.7682   | 18.3892   |
| LOC283693                  | 0.172517  | 0.0235771 | 0.0632546 | 0.144405  | 0.0215606 |
| PLIN2                      | 49.7116   | 45.8821   | 35.3824   | 35.5147   | 45.681    |
| FAM104B                    | 5.91805   | 8.31043   | 6.64219   | 4.92735   | 7.19623   |
| ARHGEF6                    | 0.396788  | 0.509616  | 0.287501  | 0.293737  | 0.474956  |
| HOMER2                     | 0.122653  | 0.206228  | 0.277671  | 0.151314  | 0.172662  |
| ARFGAP3                    | 7.83957   | 6.92913   | 7.64656   | 6.048     | 8.03526   |
| MYO1E                      | 6.85724   | 5.517     | 6.24337   | 4.74159   | 6.33251   |
| POLR2J3                    | 3.12479   | 3.30633   | 2.88547   | 2.72227   | 2.83696   |
| TNRC6C                     | 0.500749  | 0.41778   | 0.599321  | 0.445003  | 0.366988  |
| LSS                        | 16.782    | 15.9496   | 17.5255   | 14.3978   | 15.279    |
| IVNS1ABP                   | 19.5138   | 19.9743   | 14.6892   | 14.653    | 19.4374   |
| CRKL                       | 15.0561   | 14.6907   | 12.3424   | 11.0995   | 14.0643   |
| C7orf61                    | 0.584719  | 0.344753  | 0.265109  | 0.361627  | 0.368356  |
| ZNF22                      | 8.73991   | 9.65504   | 10.5134   | 6.80511   | 9.65373   |
| SLC6A16                    | 0.21861   | 0.258411  | 0.294613  | 0.335086  | 0.227637  |
| HEPACAM2                   | 0.0210252 | 0.0151179 | 0         | 0.0174948 | 0.0142113 |
| KIAA1211                   | 3.07639   | 2.91556   | 2.39868   | 2.45103   | 2.79784   |
| ATG16L1                    | 6.39555   | 5.22285   | 6.00196   | 5.47311   | 4.67406   |
| C15orf39                   | 7.01767   | 9.82702   | 5.82247   | 5.82762   | 8.5825    |
| MARVELD3                   | 1.36502   | 1.17344   | 1.39554   | 1.46302   | 0.928867  |
| PRADC1                     | 17.6269   | 18.4865   | 14.5687   | 12.66     | 17.8041   |
| STARD3                     | 30.4377   | 30.4425   | 28.7977   | 25.0139   | 28.2231   |
| CENPO                      | 3.71552   | 3.12763   | 4.49479   | 3.56497   | 3.02489   |
| MLL3                       | 1.87652   | 1.68327   | 1.23582   | 1.35082   | 1.60489   |
| TMEM52                     | 50.9318   | 47.3477   | 36.8986   | 37.2742   | 45.2045   |
| RNF144A                    | 2.44291   | 1.96061   | 2.11558   | 1.92215   | 1.81279   |
| FAM102B                    | 1.86887   | 2.37099   | 1.75446   | 1.4975    | 2.22541   |
| OR7D2                      | 0.0313571 | 0.16274   | 0.0298455 | 0.0526896 | 0.0875317 |
| ZNF582                     | 0.0624799 | 0.0129153 | 0.0564465 | 0.0593901 | 0.0243329 |
| GRAMD1C                    | 0.880442  | 0.958369  | 0.590221  | 0.645011  | 0.843595  |
| NBPF16                     | 5.22572   | 6.0022    | 5.1214    | 4.77259   | 5.06172   |
| ICAM1                      | 41.1343   | 33.3916   | 27.0252   | 30.8684   | 29.6681   |
| EMC9                       | 40.5157   | 36.8772   | 43.1818   | 36.5727   | 32.5417   |
| DDB2                       | 23.056    | 34.1999   | 22.4869   | 17.3447   | 33.0614   |
| PCMTD1                     | 3.67263   | 3.18387   | 2.56459   | 2.71546   | 3.03199   |
| ELMSAN1                    | 4.36132   | 3.58624   | 2.6984    | 2.91201   | 3.8273    |
| SIN3A                      | 5.36354   | 4.66641   | 5.19805   | 4.75663   | 4.35447   |
| KIF15                      | 2.72588   | 2.59251   | 2.61947   | 2.61616   | 2.07618   |
| CAMTA1                     | 70.1186   | 60.9212   | 67.0795   | 56.2332   | 59.162    |
| GFOD1                      | 1.3049    | 1.37084   | 1.13221   | 1.25163   | 1.16799   |
| PAQR5                      | 3.03819   | 3.29417   | 2.74146   | 2.22892   | 3.67573   |
| ACADS                      | 59.2601   | 60.221    | 49.521    | 43.7889   | 58.0202   |
| PNRC1                      | 45.8474   | 26.6207   | 32.017    | 31.604    | 28.2019   |
| RASGRF2                    | 0.0364815 | 0.084846  | 0.0528948 | 0.0374094 | 0.0455218 |
| FAM151A                    | 0.293474  | 0.23881   | 0.373379  | 0.163173  | 0.435046  |
| EPB41L1                    | 5.06223   | 5.6293    | 4.7005    | 3.98784   | 5.41442   |
| C1QTNF4                    | 0.451579  | 1.04235   | 0.345462  | 0.125374  | 0.86296   |
| TMEM39A                    | 4.48567   | 3.88963   | 4.62206   | 4.15688   | 3.65672   |
| DDX26B                     | 1.48868   | 1.2125    | 1.12873   | 0.90343   | 1.49324   |
| SCRN2                      | 54.3626   | 51.8948   | 42.5506   | 41.15     | 49.5845   |
| ZDHHC4                     | 40.4579   | 45.5185   | 42.6701   | 33.7687   | 40.1444   |
| UBE2C                      | 354.284   | 295.023   | 318.13    | 287.153   | 253.376   |
| SPSB2                      | 8.86625   | 10.8024   | 9.76135   | 7.29267   | 10.023    |
| DIP2A                      | 4.64552   | 4.27781   | 3.99878   | 3.62452   | 4.39302   |
| PRCP                       | 33.0176   | 44.187    | 35.4211   | 26.6269   | 41.4471   |
| KDM2A                      | 12.8627   | 13.4322   | 10.2663   | 9.67518   | 13.0074   |
| LOC100129726               | 0.0199772 | 0.0276743 | 0.0488544 | 0.0332251 | 0.0516648 |
| SCAND1                     | 160.569   | 147.693   | 186.714   | 128.234   | 145.636   |
| RNF34                      | 9.40437   | 8.95171   | 10.0341   | 8.35405   | 6.7931    |
| HERC3                      | 3.69221   | 3.23747   | 2.46091   | 2.19836   | 3.97211   |
| WDR45B                     | 53.9368   | 55.2757   | 41.7209   | 37.5853   | 55.7217   |
| EZH2                       | 16.4295   | 11.6687   | 25.0875   | 18.9456   | 10.621    |
| PGRMC2                     | 18.4761   | 19.0882   | 17.6868   | 15.3851   | 18.9392   |
| SNX22                      | 0.397632  | 0.489098  | 0.447712  | 0.238382  | 0.516588  |
| STRA13                     | 75.3219   | 97.4941   | 75.7675   | 64.9587   | 82.7911   |
| MIR155_MIR155HG            | 4.71981   | 3.24618   | 5.7702    | 3.72065   | 3.39235   |
| TAS2R20                    | 0.463712  | 0.311952  | 0.324482  | 0.359658  | 0.435385  |
| STAG3L4                    | 6.36353   | 6.23232   | 7.36151   | 5.65184   | 5.61951   |
| GBE1                       | 27.0182   | 36.5296   | 26.0721   | 17.4274   | 37.0479   |
| MLL4                       | 8.39889   | 6.70079   | 6.87595   | 7.22191   | 6.14971   |
| RPS6KA1                    | 22.6126   | 25.829    | 20.8631   | 19.8336   | 24.422    |
| PGAM1                      | 519.419   | 590.129   | 409.685   | 358.29    | 580.46    |
| CD79A                      | 0.618453  | 1.10194   | 1.03761   | 0.519217  | 1.01759   |
| PEAR1                      | 1.81101   | 1.81619   | 1.26311   | 1.37922   | 1.7223    |
| TNFSF12,TNFSF12-TNFSF13,TN | 19.385    | 18.4317   | 16.3193   | 14.3062   | 17.1272   |
| HTT                        | 5.09825   | 5.28979   | 4.16059   | 4.28811   | 4.92923   |
| ARHGEF40                   | 3.08182   | 3.08758   | 2.24047   | 2.34446   | 2.71061   |

|              |           |           |          |           |           |
|--------------|-----------|-----------|----------|-----------|-----------|
| ARL15        | 1.25731   | 1.51974   | 1.343    | 0.879723  | 1.53011   |
| SAV1         | 15.0491   | 16.6584   | 12.8681  | 11.2077   | 15.4213   |
| TMEM258      | 552.606   | 558.474   | 504.238  | 413.802   | 508.881   |
| RLF          | 5.9617    | 4.11477   | 3.97843  | 4.12682   | 4.05663   |
| TSPAN13      | 5.58262   | 5.54429   | 5.30879  | 4.78846   | 5.1532    |
| CTNNB1P1     | 8.10532   | 8.80004   | 7.9698   | 6.95381   | 8.06721   |
| LOC389906    | 19.7607   | 20.3415   | 21.945   | 18.4474   | 16.8683   |
| FAM71E1      | 4.95134   | 4.14079   | 4.89243  | 4.516     | 2.68149   |
| POLE4        | 87.5726   | 102.433   | 79.2916  | 67.4724   | 89.8206   |
| MMS22L       | 1.38279   | 1.00271   | 1.45267  | 1.32945   | 1.06377   |
| PRKD2        | 20.7984   | 20.6398   | 15.106   | 16.7663   | 18.7976   |
| MYO15B       | 0.575323  | 0.777399  | 0.362834 | 0.527098  | 0.66595   |
| B4GALNT4     | 16.9151   | 13.3084   | 14.7983  | 13.4412   | 13.7301   |
| LTN1         | 1.20621   | 1.34359   | 1.15039  | 0.924788  | 1.19213   |
| CD276        | 29.4709   | 26.411    | 23.8815  | 23.66     | 23.8335   |
| ZFYVE20      | 3.67259   | 4.36301   | 3.5821   | 3.22819   | 3.73182   |
| PLAG1        | 1.37826   | 1.45695   | 0.990078 | 0.937423  | 1.58012   |
| PDIA3        | 111.285   | 123.528   | 109.517  | 88.6769   | 121.288   |
| IFIT1        | 0.100901  | 0.195605  | 0.134106 | 0.120271  | 0.190294  |
| EGLN1        | 20.5544   | 23.4577   | 14.3965  | 12.9769   | 24.4995   |
| FOXM1        | 27.2963   | 26.0086   | 23.8454  | 23.8148   | 22.9919   |
| TTC9C        | 27.4531   | 21.3286   | 26.0312  | 20.2439   | 19.7605   |
| AXIN2        | 0.62003   | 1.10017   | 0.576364 | 0.500841  | 1.13055   |
| ZFAT         | 1.66146   | 1.78149   | 1.41465  | 1.26997   | 1.73811   |
| NCOR2        | 11.1401   | 9.73522   | 10.6194  | 9.63889   | 8.65377   |
| EVI5L        | 8.536     | 6.23432   | 8.21243  | 6.78215   | 6.81148   |
| FOXA1        | 1.35886   | 1.89126   | 1.17871  | 1.20833   | 1.76561   |
| ARHGAP44     | 3.0396    | 3.41027   | 2.95596  | 2.64325   | 3.16634   |
| PRKAG2-AS1   | 15.2703   | 18.689    | 19.0495  | 13.2633   | 19.1728   |
| RING1        | 42.7483   | 44.5386   | 38.5877  | 33.8937   | 41.0251   |
| RNF213       | 1.34764   | 1.48476   | 1.18119  | 1.18462   | 1.31458   |
| ZNF223       | 0.882819  | 1.3545    | 0.976581 | 0.683142  | 1.35522   |
| KLF6         | 10.3462   | 6.48415   | 11.3024  | 9.119     | 5.4479    |
| TMEM65       | 6.28648   | 4.65978   | 5.19029  | 4.15133   | 5.5247    |
| MEIS3        | 67.1439   | 71.2735   | 63.71    | 56.841    | 64.331    |
| PKD1L2       | 0.0771751 | 0.0910043 | 0.108856 | 0.05966   | 0.0910966 |
| WNT4         | 0.419432  | 0.48612   | 0.307027 | 0.330754  | 0.416514  |
| IRF2BP1      | 22.7573   | 19.2464   | 24.5076  | 21.5464   | 15.1967   |
| ST6GALNAC6   | 90.5707   | 130.023   | 99.5219  | 79.0793   | 111.155   |
| SEL1L        | 4.23378   | 3.94269   | 4.61371  | 3.85166   | 3.63076   |
| TMEM59       | 69.4762   | 79.2012   | 73.725   | 55.3698   | 76.1958   |
| KXD1         | 158.568   | 153.153   | 137.78   | 121.175   | 140.35    |
| KAT2B        | 1.58702   | 1.42656   | 1.68938  | 1.33671   | 1.40264   |
| C6orf141     | 1.92462   | 1.61488   | 1.49097  | 1.06407   | 2.17527   |
| GPC1         | 37.1269   | 39.6351   | 31.812   | 31.3452   | 34.0984   |
| TAF9B        | 8.74707   | 9.98023   | 8.19323  | 6.54134   | 10.0858   |
| C19orf10     | 145.517   | 151.68    | 143.301  | 120.296   | 131.577   |
| STAG1        | 3.51741   | 3.27244   | 3.61578  | 2.85654   | 3.35902   |
| SMG7-AS1     | 0.0740137 | 0         | 0.092116 | 0.0525777 | 0.056426  |
| LOC646471    | 0.340016  | 0.317625  | 0.304578 | 0.275276  | 0.32552   |
| DGCR6        | 24.6874   | 28.3524   | 22.359   | 18.6198   | 27.5301   |
| LRP1         | 7.4339    | 9.62654   | 5.22661  | 5.34659   | 9.02725   |
| RND1         | 0.762506  | 2.1922    | 1.15222  | 1.22841   | 1.59593   |
| MFSD3        | 48.4609   | 56.3169   | 49.707   | 39.0411   | 55.5546   |
| TMEM214      | 30.146    | 28.3285   | 28.1007  | 26.0046   | 25.8647   |
| DYRK2        | 3.73681   | 4.24964   | 2.93752  | 2.94016   | 3.92357   |
| SAP30L       | 2.97707   | 2.88284   | 3.32479  | 2.70637   | 2.89511   |
| TROAP        | 40.651    | 47.2747   | 47.9135  | 39.5054   | 38.6864   |
| LOC100270804 | 0.300375  | 0.568698  | 0.406577 | 0.319306  | 0.35878   |
| CPQ          | 8.92317   | 8.94383   | 9.5195   | 8.00351   | 7.74103   |
| EXD2         | 4.98909   | 5.37421   | 4.04205  | 3.94878   | 5.01586   |
| PRR19        | 7.63628   | 7.96659   | 7.28213  | 5.91385   | 7.59848   |
| GPR161       | 2.55398   | 2.66628   | 2.54448  | 2.19422   | 2.3558    |
| DLX2         | 1.80185   | 2.12216   | 2.18486  | 1.80577   | 1.45185   |
| LATS2        | 4.27456   | 3.57549   | 4.19767  | 3.73097   | 3.32422   |
| ZNF630       | 0.496218  | 0.424723  | 0.698417 | 0.494282  | 0.446593  |
| GOLGA4       | 4.09806   | 4.11002   | 1.13896  | 3.36931   | 3.88158   |
| C6orf89      | 4.83673   | 5.74501   | 5.26248  | 4.6739    | 4.72461   |
| TMUB2        | 12.104    | 10.5537   | 11.5548  | 9.64705   | 10.802    |
| SLC25A42     | 4.2459    | 3.61619   | 4.57848  | 3.42782   | 3.81131   |
| DCP1A        | 4.22806   | 3.01256   | 3.83423  | 3.38037   | 2.81601   |
| BAIAP2L1     | 27.8249   | 28.0123   | 25.5835  | 22.7468   | 26.7199   |
| ZNF511       | 30.5685   | 41.7168   | 28.4225  | 23.4207   | 36.2624   |
| CBX4         | 19.4962   | 22.973    | 25.3705  | 19.3203   | 20.8873   |
| WHSC1L1      | 4.75564   | 5.85397   | 4.95879  | 4.37064   | 5.11041   |
| C18orf25     | 2.37125   | 2.12158   | 1.98182  | 1.82498   | 2.13167   |
| SLC2A8       | 26.281    | 31.6702   | 26.3502  | 24.3517   | 24.9294   |
| C6orf136     | 32.4454   | 24.6672   | 26.0948  | 25.2236   | 21.9759   |
| HPCAL4       | 1.23624   | 0.932774  | 1.11214  | 0.832698  | 1.1641    |

|                     |           |           |           |           |           |
|---------------------|-----------|-----------|-----------|-----------|-----------|
| RAP1GAP             | 4.43728   | 4.65213   | 3.39543   | 3.34939   | 4.22424   |
| LOC654342           | 8.90853   | 11.8199   | 13.212    | 8.17862   | 9.15534   |
| KREMEN1             | 3.03461   | 2.91647   | 2.40111   | 2.14821   | 2.92978   |
| RTN2                | 14.3178   | 16.0301   | 15.4203   | 11.3298   | 14.3363   |
| EVI2B               | 0.030592  | 0.0301871 | 0         | 0.0169425 | 0         |
| FZD5                | 2.34547   | 3.0312    | 2.6238    | 1.90239   | 2.93013   |
| PIDD                | 15.0209   | 17.9219   | 11.151    | 11.7887   | 16.7323   |
| CDK2                | 31.4243   | 36.0062   | 31.8171   | 27.2771   | 34.4553   |
| BICD2               | 10.6761   | 11.2888   | 10.2697   | 8.69096   | 10.1825   |
| LOC728613           | 0.689813  | 0.552398  | 0.773842  | 0.561025  | 0.712637  |
| ACER3               | 1.34129   | 1.16535   | 1.22469   | 1.0021    | 1.14036   |
| SHB                 | 12.1981   | 13.2545   | 8.48285   | 9.09732   | 12.8957   |
| ALS2CL              | 8.08234   | 7.91221   | 5.4224    | 5.92685   | 7.74234   |
| C8orf82,LRRRC24     | 92.9438   | 76.7337   | 101.165   | 76.8292   | 72.7221   |
| PTOV1               | 65.1395   | 78.1643   | 57.0333   | 49.0739   | 75.8009   |
| UNK                 | 9.18008   | 10.7332   | 7.69992   | 7.22233   | 10.2228   |
| CDK6                | 2.94162   | 2.35699   | 2.38297   | 2.24154   | 2.22364   |
| LOC100652768        | 1.45966   | 2.23819   | 1.42651   | 1.83412   | 1.60076   |
| FZR1                | 28.4575   | 27.4758   | 24.316    | 22.9337   | 24.4504   |
| HEATR6              | 3.00195   | 3.89197   | 3.09862   | 3.04796   | 3.14713   |
| COQ7                | 3.6894    | 4.07231   | 3.99203   | 3.05444   | 4.18004   |
| SLC2A4RG            | 71.4083   | 68.2884   | 48.386    | 52.9367   | 66.5459   |
| CKS1B               | 173.243   | 168.709   | 184.616   | 155.374   | 149.098   |
| PACSN3              | 47.1226   | 46.7791   | 39.0896   | 37.6957   | 44.3389   |
| LOC644656           | 1.34048   | 2.01913   | 2.0819    | 1.3038    | 1.71335   |
| BLM                 | 2.44833   | 2.23104   | 2.37583   | 2.35405   | 1.9607    |
| EXTL3               | 16.9852   | 15.2845   | 13.6745   | 13.0494   | 13.9359   |
| RAB1B               | 174.947   | 177.435   | 153.927   | 139.564   | 169.959   |
| C11orf24            | 21.9074   | 22.8119   | 19.4655   | 19.2602   | 20.1778   |
| RAPH1               | 0.767291  | 0.710583  | 1.0328    | 0.809237  | 0.68582   |
| SH3GL2              | 0.0374275 | 0.0532357 | 0.0467178 | 0.0466501 | 0.0248938 |
| MICU1               | 34.646    | 34.398    | 29.5342   | 26.9313   | 32.4824   |
| DCUN1D2             | 3.57762   | 5.06777   | 3.49627   | 3.46544   | 4.35365   |
| MEX3D               | 28.1709   | 29.9221   | 25.618    | 22.6235   | 27.5393   |
| SHKBP1              | 89.631    | 81.0591   | 85.5916   | 75.5795   | 76.2055   |
| DNAJB9              | 8.20648   | 9.60368   | 10.5863   | 7.44228   | 9.98574   |
| MCM3                | 28.5337   | 30.4001   | 27.3052   | 26.1591   | 27.2143   |
| TP53I13             | 60.9756   | 58.4492   | 60.7279   | 49.293    | 55.4143   |
| PRKAB2              | 2.88968   | 3.59961   | 3.17807   | 2.6346    | 3.06207   |
| GABARAPL1           | 8.53176   | 9.18461   | 7.57678   | 7.42504   | 7.89572   |
| FEM1C               | 4.4231    | 3.53272   | 2.90328   | 3.01879   | 3.81648   |
| ZER1                | 34.0616   | 39.6496   | 30.3084   | 26.496    | 39.2485   |
| CYP2D7P1            | 1.60853   | 1.14373   | 0.789599  | 1.54211   | 1.24273   |
| CHST6               | 0.0235253 | 0.0383307 | 0.0243316 | 0.0262414 | 0.0152063 |
| ZNF493              | 1.24069   | 1.37567   | 0.917108  | 0.940273  | 1.43039   |
| ELMOD3              | 3.8647    | 3.7859    | 4.58798   | 3.80475   | 3.33277   |
| AKAP8L              | 31.4002   | 33.9566   | 23.7077   | 23.8741   | 32.1921   |
| MARCH3              | 0.38058   | 0.440005  | 0.309992  | 0.2573    | 0.482458  |
| PRR14               | 32.8088   | 28.9993   | 31.1213   | 29.0773   | 25.8131   |
| PLCE1               | 0.0711078 | 0.0791849 | 0.052662  | 0.0647229 | 0.0649003 |
| GPR160              | 19.7026   | 21.9101   | 16.649    | 13.0292   | 21.8259   |
| SERTAD2             | 7.7702    | 6.24488   | 6.09888   | 5.77267   | 6.04607   |
| ZNF433              | 2.03244   | 1.80516   | 1.21848   | 1.38419   | 2.1021    |
| THAP9               | 1.22783   | 1.22187   | 0.837136  | 1.02226   | 1.05813   |
| NFIB                | 2.7267    | 2.74378   | 2.99217   | 2.53342   | 2.57593   |
| BTG1,LOC256021      | 21.2471   | 15.2612   | 17.68     | 15.0657   | 15.4554   |
| RAET1E              | 0.0235994 | 0         | 0         | 0         | 0         |
| HSBP1L1             | 78.633    | 77.0366   | 89.5458   | 69.1757   | 67.143    |
| FAM160B1            | 2.50007   | 2.5097    | 1.91474   | 1.84035   | 2.55407   |
| UQCR10              | 90.7415   | 99.6402   | 80.7996   | 72.1668   | 91.4563   |
| SLC39A4             | 44.4103   | 42.9739   | 38.8001   | 33.4386   | 41.405    |
| LETM2               | 2.97486   | 3.23288   | 3.96148   | 3.33006   | 2.64538   |
| SLC17A7             | 0.533323  | 0.352023  | 0.386008  | 0.275609  | 0.357275  |
| ZCCHC10             | 4.36695   | 4.04847   | 4.35613   | 4.0543    | 3.35242   |
| LPIN3               | 4.33111   | 4.53088   | 2.9667    | 3.65048   | 4.31295   |
| CRYBB2P1            | 22.3015   | 21.412    | 22.6582   | 16.3036   | 20.877    |
| FLJ45445            | 0.0213441 | 0.0140816 | 0.0896749 | 0.035774  | 0         |
| SLAIN2              | 3.8005    | 3.3723    | 3.46644   | 2.85331   | 3.23288   |
| EIF2AK2             | 2.91912   | 2.14878   | 2.77731   | 2.62527   | 2.01443   |
| AP3S1               | 50.2603   | 48.3962   | 49.1423   | 38.1238   | 53.0014   |
| HDAC2               | 6.19638   | 6.62443   | 8.10514   | 5.54484   | 7.20017   |
| CLSTN3              | 9.85363   | 11.3797   | 7.62416   | 8.3569    | 11.1938   |
| PIIB                | 639.847   | 733.323   | 668.237   | 525.89    | 668.658   |
| HERC2P4             | 0.97282   | 0.79795   | 1.40396   | 0.994235  | 1.0122    |
| ATRX                | 1.96824   | 2.25491   | 0.797611  | 1.4726    | 2.22692   |
| ANKRD20A8P,LOC90499 | 0.0103068 | 0         | 0         | 0         | 0         |
| PRDM5               | 1.38235   | 1.45618   | 1.35377   | 0.947565  | 1.45107   |
| SYNE2               | 4.05206   | 4.0225    | 2.03812   | 3.51334   | 4.12609   |
| LIG1                | 24.3942   | 21.3831   | 15.7123   | 21.5463   | 19.065    |



|              |           |           |           |           |           |
|--------------|-----------|-----------|-----------|-----------|-----------|
| MTMR4        | 7.58497   | 8.78996   | 6.78752   | 6.33108   | 7.97003   |
| GDPD5        | 8.26598   | 10.274    | 7.59019   | 7.39856   | 9.15063   |
| STX6         | 6.31472   | 6.37662   | 6.0987    | 5.06355   | 6.23775   |
| ACAA2        | 38.4932   | 33.2537   | 37.272    | 29.495    | 35.6639   |
| PTP4A3       | 13.8274   | 16.8699   | 10.7351   | 10.8193   | 15.854    |
| PHF21A       | 3.90765   | 3.47075   | 3.28982   | 3.07299   | 3.49591   |
| MPI          | 58.1699   | 60.0838   | 46.9165   | 41.075    | 60.5405   |
| WAS          | 0.274378  | 0.25962   | 0.117476  | 0.228881  | 0.142955  |
| CDC26        | 57.6561   | 63.8889   | 60.5414   | 44.638    | 58.9175   |
| FAM110A      | 12.757    | 10.591    | 11.0752   | 9.51327   | 9.91445   |
| ARG2         | 23.9381   | 19.0112   | 23.8846   | 21.0783   | 16.6361   |
| TNPO3        | 18.169    | 15.0844   | 17.6837   | 15.276    | 14.4255   |
| C11orf71     | 8.76087   | 6.07558   | 7.88667   | 6.59117   | 5.56876   |
| VPS41        | 3.82878   | 2.99957   | 3.20638   | 3.16171   | 2.81562   |
| TMEM60       | 28.4059   | 25.148    | 29.3311   | 23.2703   | 24.1963   |
| LRRC1        | 3.64384   | 3.68326   | 3.78572   | 3.35028   | 3.66868   |
| CGGBP1       | 8.28666   | 8.92145   | 8.69915   | 7.08102   | 8.23636   |
| FNBP1L       | 5.68363   | 5.28188   | 4.88589   | 4.39468   | 5.28577   |
| GK3P         | 0         | 0.0460418 | 0.0536839 | 0.0357942 | 0.0144368 |
| MSL1         | 7.40297   | 7.33676   | 6.10194   | 6.54378   | 6.31516   |
| LINC00637    | 0.014566  | 0.0403962 | 0         | 0.0486568 | 0         |
| COX14        | 55.2114   | 64.0182   | 57.1755   | 48.0673   | 57.5565   |
| ABTB1        | 18.7255   | 21.407    | 16.2948   | 13.9905   | 20.0827   |
| CYB5B        | 12.4239   | 12.9117   | 12.7732   | 10.6669   | 12.1746   |
| ZNF613       | 1.66548   | 1.75272   | 1.7797    | 1.4703    | 1.61055   |
| RG55         | 0.341123  | 0.315551  | 0.534928  | 0.275397  | 0.375785  |
| CISD3        | 14.5871   | 16.5947   | 14.9517   | 11.1459   | 15.7739   |
| TBX1         | 1.90051   | 2.64261   | 1.59311   | 1.88417   | 2.08406   |
| ADD3         | 3.37811   | 3.32318   | 3.40374   | 2.76432   | 3.64536   |
| AGL          | 2.07843   | 1.99512   | 1.78125   | 1.70068   | 1.92901   |
| TMEM132A     | 34.3587   | 40.3356   | 28.453    | 27.2408   | 38.0786   |
| C14orf37     | 1.34235   | 1.48282   | 0.968995  | 0.843347  | 1.36834   |
| PFN1         | 1350.36   | 1270.22   | 1309.58   | 1123.75   | 1216.7    |
| CCNA2        | 22.5055   | 19.0461   | 19.7392   | 20.2493   | 17.0839   |
| ZNF438       | 1.3861    | 1.55474   | 1.05139   | 0.791301  | 1.44745   |
| DLG5-AS1     | 0.815526  | 0.681052  | 0.941755  | 0.709174  | 0.702389  |
| CHKA         | 27.987    | 22.9903   | 27.0684   | 21.6244   | 24.037    |
| SERGEF       | 23.4181   | 22.2445   | 20.4402   | 17        | 22.1906   |
| OPHN1        | 2.62865   | 2.00158   | 1.87798   | 1.83681   | 2.22863   |
| AP4M1        | 26.3276   | 29.8087   | 22.7607   | 21.2348   | 28.0887   |
| MASTL        | 7.34519   | 5.18922   | 6.86362   | 6.45777   | 5.00827   |
| MUC20        | 0.0383897 | 0.0909999 | 0.0689423 | 0.0854796 | 0.0452199 |
| ACTG1        | 3501.79   | 3245.65   | 3622.8    | 2730.23   | 3125.34   |
| NCAPH2       | 24.1127   | 23.4861   | 19.5639   | 21.0881   | 20.3446   |
| NUP85        | 24.9335   | 22.8204   | 26.3502   | 22.6934   | 21.2109   |
| FEZF1-AS1    | 3.23428   | 2.96472   | 2.54622   | 2.63414   | 3.03967   |
| SEPT3        | 8.47598   | 10.3599   | 8.18955   | 7.81248   | 8.82749   |
| SAMD10       | 5.25284   | 3.21926   | 4.32882   | 4.00158   | 3.86308   |
| SMEK1        | 11.8084   | 12.7533   | 12.0003   | 10.1482   | 12.797    |
| COMMD9       | 6.25663   | 6.32943   | 6.32082   | 5.26337   | 5.76706   |
| BBS9         | 1.11125   | 1.33631   | 1.05673   | 0.874086  | 1.38169   |
| UBE3B        | 6.78952   | 7.05604   | 6.80931   | 6.06551   | 6.58267   |
| TRIM22       | 0.0743448 | 0.159929  | 0.111504  | 0.0861706 | 0.181996  |
| TAPBP.ZBTB22 | 34.7489   | 36.5776   | 29.459    | 29.1954   | 33.9346   |
| PCGF1        | 25.7741   | 19.1172   | 18.5184   | 19.1473   | 18.2841   |
| C9orf40      | 12.1557   | 8.20611   | 15.3153   | 11.4815   | 8.58295   |
| CFL1         | 782.267   | 720.89    | 686.096   | 665.833   | 652.822   |
| TBC1D10B     | 27.6268   | 26.0523   | 23.9734   | 24.2509   | 23.7823   |
| EMID1        | 8.53391   | 11.1778   | 8.72563   | 7.82452   | 9.71998   |
| NBEAL1       | 0.0594739 | 0.0355985 | 0.050252  | 0.0110017 | 0.0670836 |
| LOC729852    | 2.72841   | 2.84553   | 2.82935   | 2.01651   | 2.89327   |
| MCF2L        | 1.84721   | 2.01732   | 1.605     | 1.61001   | 1.85225   |
| GMPPB        | 7.8523    | 8.49015   | 6.35687   | 6.19087   | 7.39588   |
| STEAP2       | 3.23686   | 2.53871   | 2.65964   | 2.69466   | 2.6073    |
| LRRC45       | 10.1801   | 11.0696   | 8.72608   | 8.93482   | 10.3494   |
| CCDC74B      | 1.32242   | 1.46022   | 1.21249   | 1.38347   | 1.4272    |
| MIRLET7DHG   | 0.689638  | 0.399738  | 0.642622  | 0.544463  | 0.374911  |
| TP53BP2      | 15.3012   | 12.8261   | 9.78077   | 11.411    | 11.9915   |
| TRIM2        | 1.83752   | 1.92765   | 2.18904   | 1.6829    | 1.89561   |
| ARNT         | 5.87644   | 6.49117   | 4.79111   | 4.31955   | 6.45442   |
| ZBTB44       | 3.09161   | 2.77058   | 3.11855   | 2.37719   | 2.76182   |
| SIRT1        | 4.07538   | 3.92881   | 4.43923   | 3.22665   | 3.70968   |
| ARHGDI3      | 0.437368  | 0.832382  | 0.289004  | 0.242604  | 0.473168  |
| LOC100288911 | 10.665    | 12.2555   | 10.2243   | 8.71174   | 10.8405   |
| CARD10       | 8.3444    | 8.11583   | 7.86964   | 7.32388   | 7.11417   |
| PCDHB8       | 1.53237   | 1.93944   | 0.909851  | 0.900051  | 2.11687   |
| TICAM1       | 19.1352   | 15.5481   | 16.664    | 15.7803   | 15.1116   |
| KIAA1984     | 0.205027  | 0.169034  | 0.198164  | 0.0611455 | 0.288712  |
| NUDT1        | 56.9464   | 53.5941   | 47.8258   | 46.7004   | 48.2534   |

|           |            |            |            |            |           |
|-----------|------------|------------|------------|------------|-----------|
| HELZ2     | 3.24694    | 3.39253    | 2.67277    | 3.06475    | 2.98962   |
| FBXL16    | 30.238     | 26.0617    | 28.3145    | 26.5429    | 25.4332   |
| OPA3      | 3.62506    | 3.06387    | 3.38379    | 3.07058    | 2.75123   |
| YIPF4     | 15.5745    | 15.0777    | 17.3287    | 13.2431    | 14.1877   |
| RGS14     | 5.20339    | 7.57446    | 4.63114    | 4.79908    | 6.41989   |
| PAN3      | 4.5671     | 4.15666    | 3.75868    | 3.86536    | 4.07859   |
| FAM171B   | 0.169071   | 0.210315   | 0.235091   | 0.183778   | 0.238883  |
| LAMB2     | 14.0689    | 19.1016    | 11.3183    | 11.4061    | 17.9281   |
| R3HCC1    | 45.3725    | 60.5902    | 42.1216    | 37.8018    | 53.4539   |
| SLC16A2   | 4.96212    | 6.04706    | 3.94317    | 3.9754     | 5.63874   |
| SLC2A3    | 21.6517    | 15.5209    | 12.6675    | 13.5661    | 17.5743   |
| AQP7P1    | 0.0239008  | 0.0110508  | 0.029488   | 0.026636   | 0.0307928 |
| PLEKHA5   | 2.0321     | 1.2856     | 2.02964    | 1.76763    | 1.50925   |
| CENPA     | 19.9694    | 17.5208    | 26.3958    | 20.6839    | 15.8674   |
| PIP4K2B   | 8.38118    | 7.86642    | 7.45307    | 6.94612    | 6.95221   |
| DNAH14    | 5.8394     | 4.83174    | 5.42692    | 5.72927    | 4.52119   |
| TTC9      | 0.776434   | 0.647244   | 0.60053    | 0.462445   | 0.780039  |
| SAP130    | 7.73688    | 7.94981    | 6.00807    | 6.72995    | 6.60043   |
| UBAP1     | 20.2729    | 22.7129    | 18.3557    | 15.789     | 21.4094   |
| REXO1     | 18.929     | 16.9609    | 16.8559    | 16.9839    | 15.3449   |
| NMNAT3    | 2.98839    | 2.95298    | 2.68061    | 2.34057    | 2.60456   |
| USP53     | 1.09407    | 1.21348    | 0.983306   | 0.94813    | 1.14749   |
| CDH4      | 0.0331991  | 0.0673198  | 0.0334209  | 0.027663   | 0.0822877 |
| PIK3C2B   | 1.65681    | 1.87397    | 1.27746    | 1.34992    | 1.78864   |
| NENF      | 132.496    | 164.096    | 131.609    | 109.369    | 142.076   |
| TAF6      | 46.6643    | 45.0933    | 43.3979    | 40.8295    | 43.579    |
| TAB3      | 2.13163    | 2.00884    | 1.84378    | 1.73173    | 2.01556   |
| SLC25A41  | 1.74449    | 1.58296    | 1.03645    | 1.35642    | 1.70543   |
| APLP1     | 17.3089    | 17.9455    | 13.0774    | 12.708     | 18.8251   |
| IFI2L1    | 22.5978    | 24.0649    | 21.5769    | 20.4251    | 22.8735   |
| PPIL2     | 9.02115    | 9.3816     | 7.74749    | 7.51858    | 9.03845   |
| RHBDF1    | 25.7743    | 21.3679    | 16.2206    | 18.8312    | 20.4391   |
| FOXH1     | 13.6049    | 13.7662    | 9.31806    | 11.6258    | 12.8538   |
| NCK2      | 17.5447    | 17.9682    | 18.9948    | 14.591     | 16.7045   |
| C7orf50   | 102.724    | 81.5939    | 100.425    | 82.4326    | 80.4968   |
| TTC39C    | 25.6894    | 25.4384    | 24.495     | 19.5296    | 25.1961   |
| SLC7A9    | 0.251998   | 0.194063   | 0.128933   | 0.0704059  | 0.294661  |
| RGS3      | 10.8154    | 12.7204    | 7.84924    | 9.75159    | 11.4165   |
| HSD17B14  | 27.9817    | 34.3997    | 23.9411    | 22.9832    | 27.3407   |
| PRR24     | 24.2289    | 28.9679    | 20.2966    | 19.7747    | 24.4118   |
| FLJ35946  | 0.27651    | 0.295667   | 0.520161   | 0.460112   | 0.256009  |
| HRAS      | 43.4599    | 41.9016    | 45.072     | 39.0764    | 36.7807   |
| MTX3      | 1.3214     | 1.5912     | 1.49795    | 1.13166    | 1.68563   |
| CDK16     | 44.5988    | 49.0947    | 46.3701    | 39.1754    | 44.825    |
| MAN2C1    | 13.9443    | 15.6835    | 10.9983    | 12.5583    | 13.1661   |
| RABEP2    | 29.3507    | 22.228     | 22.3184    | 19.461     | 25.5362   |
| TMED9     | 176.467    | 195.583    | 167.631    | 141.342    | 183.837   |
| SESTD1    | 0.548662   | 0.442882   | 0.430418   | 0.4768     | 0.445744  |
| DENND4C   | 3.064      | 2.77438    | 2.42049    | 2.22887    | 2.84084   |
| ZNF331    | 0.395969   | 0.469841   | 0.412038   | 0.34444    | 0.459767  |
| ZNF496    | 7.93627    | 6.90147    | 7.79091    | 6.75574    | 6.71841   |
| SLC16A10  | 1.56292    | 1.24418    | 1.50066    | 1.38554    | 1.3632    |
| UBE2O     | 13.1147    | 12.2226    | 7.82664    | 9.73078    | 11.166    |
| PPIH      | 95.1246    | 83.9991    | 83.3781    | 76.7515    | 76.1269   |
| ENTHD2    | 14.6343    | 14.136     | 14.7177    | 13.5407    | 11.9231   |
| MAFF      | 52.4431    | 36.3827    | 43.3387    | 38.8867    | 36.0556   |
| CCDC102A  | 5.88867    | 6.58395    | 5.32128    | 4.778      | 6.31518   |
| NEB       | 0.00388661 | 0.00535602 | 0.00835918 | 0.00891159 | 0         |
| PARP11    | 1.3277     | 1.24663    | 1.0719     | 0.912072   | 1.21207   |
| XRN1      | 1.73411    | 1.61091    | 1.33506    | 1.3578     | 1.61991   |
| RIMS3     | 0.781485   | 0.89738    | 0.838302   | 0.694978   | 0.819745  |
| MSMP      | 1.69809    | 3.15068    | 2.01636    | 2.41063    | 2.12166   |
| STARD10   | 29.1466    | 34.192     | 28.7988    | 22.3468    | 33.8162   |
| ELF4      | 9.65282    | 8.82707    | 8.74459    | 8.34806    | 8.51314   |
| NELFB     | 118.462    | 108.788    | 103.944    | 98.8574    | 100.716   |
| LIPA      | 11.3014    | 13.7122    | 12.416     | 10.2627    | 12.728    |
| NDUFB4    | 306.255    | 300.394    | 244.243    | 222.933    | 283.875   |
| ACTB      | 2088.41    | 1935.51    | 1868.69    | 1663.54    | 1891.72   |
| NCOR1     | 2.00514    | 1.70635    | 1.53095    | 1.53185    | 1.68796   |
| SLC25A10  | 82.3828    | 75.0077    | 69.3198    | 68.1435    | 72.6638   |
| RAB11FIP4 | 4.36281    | 4.70319    | 3.97577    | 3.53605    | 4.36469   |
| RAPGEF2   | 1.53589    | 1.43109    | 1.77715    | 1.42489    | 1.31694   |
| LOC285074 | 10.6248    | 13.9623    | 12.2368    | 10.2486    | 11.6957   |
| MYPOP     | 14.6311    | 9.14449    | 13.0756    | 12.8291    | 8.92958   |
| FA2H      | 3.037      | 2.8368     | 2.59194    | 2.62002    | 2.95332   |
| CYP20A1   | 1.27322    | 1.22767    | 1.52805    | 1.14642    | 1.19693   |
| LAMB2P1   | 0.598402   | 1.2633     | 0.650254   | 0.758478   | 1.08499   |
| C17orf58  | 19.8072    | 20.8597    | 16.6289    | 14.7931    | 21.5685   |
| ZFYVE19   | 22.9627    | 24.958     | 21.7751    | 19.3215    | 22.7276   |

|              |            |           |           |           |           |
|--------------|------------|-----------|-----------|-----------|-----------|
| SAMD9L       | 0.0677988  | 0.0908724 | 0.0618165 | 0.0540095 | 0.0898152 |
| ZNF579       | 44.5479    | 28.4445   | 39.2979   | 37.3537   | 25.8386   |
| ZNF451       | 4.34472    | 3.93685   | 4.03752   | 3.7001    | 3.67038   |
| CBFA2T3      | 1.93926    | 2.18182   | 1.79225   | 2.05692   | 1.90389   |
| RECQL4       | 35.4202    | 30.4833   | 28.5535   | 32.0345   | 29.6716   |
| BTBD7        | 2.61228    | 2.63575   | 3.14646   | 2.15431   | 2.73939   |
| H1FX-AS1     | 0.33545    | 0.560653  | 0.546208  | 0.589035  | 0.494652  |
| ZBTB2        | 4.34668    | 5.78482   | 5.63463   | 4.28177   | 5.23522   |
| ZNF680       | 2.27402    | 1.8084    | 1.33043   | 1.66525   | 1.82156   |
| TNIP1        | 73.1558    | 81.0647   | 62.1665   | 55.4393   | 76.6281   |
| HINFP        | 12.504     | 11.0704   | 11.7518   | 10.3317   | 9.79067   |
| ATP13A3      | 7.93411    | 8.63766   | 7.82559   | 7.02715   | 7.59824   |
| LEMD2        | 30.5675    | 24.2076   | 32.4667   | 26.4301   | 23.4411   |
| AGO4         | 1.96347    | 2.09695   | 2.0243    | 1.78154   | 2.04504   |
| COA3         | 53.8797    | 67.1755   | 51.715    | 42.5028   | 59.8359   |
| SEPT7P2      | 1.23574    | 2.11853   | 1.57763   | 1.41328   | 1.71527   |
| RUSC1-AS1    | 11.7016    | 11.6043   | 9.42151   | 11.6603   | 10.0388   |
| FLJ42393     | 0.10127    | 0.0540657 | 0.0633008 | 0.105405  | 0.067366  |
| KDM8         | 0.473937   | 0.703287  | 0.522869  | 0.574368  | 0.410003  |
| AP1G2_JPH4   | 16.8456    | 17.2877   | 13.8403   | 15.2225   | 14.8346   |
| UGCG         | 7.48433    | 8.48755   | 6.12017   | 6.16598   | 7.37441   |
| BCRP3        | 0.432202   | 0.46429   | 0.173382  | 0.526712  | 0.178369  |
| PATL1        | 16.4465    | 15.4602   | 14.0059   | 12.6534   | 15.0083   |
| RFC5         | 13.595     | 14.8575   | 14.1506   | 12.3804   | 14.8315   |
| DOK1         | 24.4603    | 22.3821   | 23.3431   | 21.9483   | 22.1487   |
| PROX2        | 0.0216331  | 0         | 0         | 0         | 0.0194171 |
| TRIOBP       | 9.55739    | 13.8639   | 10.0567   | 9.11974   | 11.5255   |
| INF2         | 47.1185    | 37.9514   | 43.86     | 40.8445   | 36.1425   |
| CMTM3        | 57.4701    | 73.8865   | 54.7179   | 47.3308   | 67.7567   |
| ZDHC2        | 4.22068    | 4.32836   | 4.29655   | 3.51158   | 4.42952   |
| SERTAD3      | 18.6985    | 17.3243   | 17.2368   | 15.8485   | 14.8776   |
| SPTY2D1      | 2.64555    | 3.2227    | 2.59507   | 2.35488   | 2.79849   |
| CRIP2        | 26.3125    | 43.7709   | 23.9522   | 19.6153   | 41.4557   |
| NTMT1        | 156.977    | 151.393   | 134.455   | 121.992   | 145.845   |
| DPY19L1P1    | 0.829645   | 0.566628  | 0.769933  | 0.676205  | 0.685861  |
| DUSP16       | 3.16951    | 2.47434   | 3.07388   | 2.75012   | 2.24115   |
| NOTCH2       | 5.25165    | 4.90513   | 4.04046   | 4.23949   | 4.28811   |
| KIF3C        | 2.89536    | 2.78439   | 2.43527   | 2.21298   | 2.82748   |
| HIST1H3F     | 0.72995    | 2.87469   | 2.07144   | 1.68895   | 0.884354  |
| PLXND1       | 11.2115    | 9.24038   | 8.68153   | 9.08039   | 8.69759   |
| COL6A1       | 24.5009    | 27.3795   | 16.9623   | 19.5396   | 25.7106   |
| GGH          | 50.5256    | 47.616    | 48.3511   | 43.4252   | 45.6383   |
| GNB2         | 489.893    | 446.571   | 467.498   | 407.176   | 430.761   |
| EPB41L5      | 1.51265    | 1.78704   | 1.84106   | 1.31665   | 1.85582   |
| CDKN3        | 36.8599    | 33.475    | 46.7347   | 32.1166   | 31.5633   |
| SURF4        | 144.597    | 162.553   | 163.36    | 129.35    | 148.435   |
| ICK          | 2.19513    | 1.92164   | 2.18624   | 1.76021   | 1.77513   |
| CAPN3        | 2.72252    | 3.34472   | 1.80292   | 2.92859   | 2.5805    |
| LOC100132354 | 0          | 0.0177644 | 0.0315755 | 0.0213423 | 0         |
| ZNF827       | 0.212918   | 0.270965  | 0.234151  | 0.114153  | 0.360743  |
| SIPA1        | 16.1552    | 16.7257   | 12.3523   | 13.6025   | 14.336    |
| SUSD2        | 0.087428   | 0.115143  | 0.104021  | 0.104379  | 0.105299  |
| PDE4B        | 1.23988    | 1.43742   | 1.12647   | 0.927882  | 1.50712   |
| CHPF         | 50.7502    | 47.6537   | 51.4      | 44.6395   | 43.2064   |
| MAN2A2       | 8.26456    | 9.20603   | 7.30175   | 6.97411   | 8.78311   |
| METTL6       | 3.2772     | 3.78089   | 5.53588   | 3.86008   | 3.44888   |
| CDR2         | 7.68461    | 8.83238   | 9.07219   | 7.19866   | 7.92084   |
| C4orf52      | 31.0085    | 31.9193   | 33.9911   | 26.7777   | 27.3576   |
| FAM122B      | 5.96926    | 6.40215   | 6.62916   | 6.407     | 5.43508   |
| KCNAB2       | 46.0081    | 39.6175   | 37.3544   | 37.1688   | 39.3891   |
| GTF2IRD1     | 24.292     | 23.3178   | 20.543    | 20.6014   | 21.1466   |
| CRABP2       | 182.101    | 234.495   | 128.99    | 119.51    | 226.369   |
| DHRS3        | 0.125192   | 0.653596  | 0.30432   | 0.314322  | 0.36363   |
| ANO10        | 8.82104    | 8.07456   | 7.88407   | 6.70563   | 7.3668    |
| ACTG2        | 0.0271225  | 0.147403  | 0.0331727 | 0.045365  | 0.100777  |
| MAPK11       | 16.6939    | 17.016    | 13.9179   | 14.3554   | 15.875    |
| RSF1         | 3.20555    | 2.25175   | 1.95044   | 2.39777   | 2.46167   |
| ZNF341       | 2.38984    | 1.92895   | 1.53038   | 1.9433    | 1.74188   |
| PDS5B        | 2.27285    | 1.92154   | 2.18278   | 1.84128   | 2.12715   |
| ULK1         | 7.03703    | 8.59687   | 5.70069   | 5.49339   | 8.31018   |
| CTSC         | 41.1572    | 47.3308   | 44.4315   | 35.4827   | 46.1118   |
| BCRP2        | 3.16899    | 3.66156   | 2.97024   | 2.71667   | 3.05963   |
| COMMD10      | 7.32203    | 6.91807   | 7.33576   | 5.41571   | 5.82894   |
| COL6A4P2     | 0.00485244 | 0         | 0         | 0         | 0         |
| CASKIN2      | 4.66018    | 4.8045    | 4.83466   | 4.7094    | 3.97884   |
| SETD5        | 9.2746     | 7.59726   | 7.13876   | 7.18791   | 7.67758   |
| EPHB6        | 0.0809664  | 0.0478657 | 0.226485  | 0.0898978 | 0.0881142 |
| NTNC1        | 2.44788    | 1.97181   | 1.79792   | 2.08813   | 1.85083   |
| QPCTL        | 19.3449    | 18.1709   | 18.8503   | 14.9628   | 18.7538   |

|              |           |           |           |           |           |
|--------------|-----------|-----------|-----------|-----------|-----------|
| NOL3         | 25.4522   | 23.2592   | 18.69     | 19.7889   | 21.2403   |
| LCAT_SLC12A4 | 27.0602   | 25.5953   | 24.4407   | 23.0951   | 24.0255   |
| ATAD5        | 1.27504   | 0.786955  | 0.47787   | 0.970883  | 0.85947   |
| PIK3R3       | 0.817217  | 1.11204   | 1.20622   | 0.86341   | 0.847335  |
| PDE6G        | 0.0908903 | 0.0608457 | 0         | 0         | 0.0557516 |
| MLEC         | 22.1546   | 27.3258   | 21.5129   | 18.7859   | 26.4107   |
| CYB5R1       | 25.4697   | 30.3195   | 26.8948   | 21.826    | 29.2324   |
| C4orf46      | 4.10378   | 4.17745   | 5.0716    | 3.67779   | 4.48792   |
| RANGRF       | 72.7872   | 67.3461   | 69.5045   | 60.3017   | 60.7634   |
| HN1          | 128.644   | 136.894   | 124.681   | 113.702   | 121.849   |
| C9orf153     | 0.0295068 | 0.0571993 | 0.0622456 | 0.0650511 | 0.0686202 |
| TMEM167B     | 7.70579   | 9.27711   | 7.8826    | 6.26355   | 9.08531   |
| GPSM2        | 1.57649   | 1.66896   | 1.8486    | 1.62681   | 1.45077   |
| LOC285540    | 0.043949  | 0         | 0         | 0         | 0         |
| MYLIP        | 4.22151   | 7.09741   | 3.91809   | 3.95771   | 6.30713   |
| BAHD1        | 11.9489   | 12.06     | 10.3306   | 10.2344   | 10.5856   |
| ENHO         | 16.4888   | 19.2495   | 15.5114   | 14.0215   | 18.2946   |
| PRX          | 1.58524   | 1.53485   | 1.57901   | 1.20912   | 1.76239   |
| NUDCD2       | 46.816    | 37.4557   | 47.0886   | 38.2071   | 42.1739   |
| MTFR1L       | 23.3393   | 28.9387   | 20.9197   | 18.3373   | 27.1284   |
| MGC21881     | 0.703331  | 1.54169   | 1.27696   | 1.05975   | 0.840544  |
| MT1M         | 237.703   | 254.538   | 174.55    | 209.317   | 210.273   |
| CCDC94       | 17.7419   | 22.3146   | 17.0948   | 14.9715   | 21.4284   |
| CHCHD6       | 77.1344   | 82.9389   | 64.2195   | 58.1231   | 80.1768   |
| KHNYN        | 15.3958   | 14.4698   | 12.3194   | 12.3979   | 14.1143   |
| COX5B        | 510.909   | 534.392   | 483.553   | 399.448   | 513.387   |
| IRAK1BP1     | 1.37503   | 1.99773   | 1.44738   | 1.69431   | 1.36714   |
| TESK1        | 26.4319   | 23.7302   | 26.9789   | 22.4242   | 23.3377   |
| EPHX1        | 16.2486   | 23.1308   | 13.7236   | 14.9784   | 19.6928   |
| LOH12CR1     | 4.69696   | 3.85528   | 5.0202    | 3.79928   | 4.28777   |
| ZDHHC17      | 2.67499   | 2.90008   | 2.44317   | 2.18135   | 2.84945   |
| FAM35DP      | 0.238937  | 0.252202  | 0.171183  | 0.152756  | 0.266727  |
| ZNF699       | 0.14369   | 0.0439254 | 0.0257969 | 0.0170771 | 0.0829203 |
| LIMD2        | 9.43419   | 8.77897   | 7.57243   | 8.19547   | 8.1457    |
| ANAPC11      | 127.988   | 133.389   | 121.362   | 111.3     | 119.979   |
| IDI1         | 21.6323   | 16.7631   | 18.5483   | 16.289    | 18.4756   |
| ETS1         | 32.9311   | 25.4056   | 26.4154   | 24.6642   | 26.9464   |
| CDK10        | 46.4899   | 42.4878   | 33.7013   | 38.4434   | 39.8474   |
| ATP12A       | 0         | 0.0100795 | 0.0179226 | 0.0122223 | 0         |
| SBF1         | 10.912    | 10.1363   | 9.11712   | 9.09935   | 9.31744   |
| SNX21        | 12.705    | 12.0322   | 9.34646   | 9.60319   | 11.1368   |
| ARL3         | 6.35952   | 6.70055   | 5.55153   | 5.03064   | 6.1831    |
| DNM1         | 11.522    | 12.7812   | 9.04787   | 9.38917   | 12.7152   |
| SEMA4G       | 5.60859   | 5.44075   | 3.52616   | 4.20628   | 5.60075   |
| CAPZB        | 103.671   | 96.0927   | 95.6845   | 82.1964   | 98.9905   |
| OSTC         | 67.7066   | 77.7723   | 75.0611   | 54.7395   | 76.3129   |
| FLCN         | 19.6581   | 19.7267   | 15.4076   | 14.1804   | 20.0014   |
| TMEM184C     | 3.27247   | 4.47731   | 4.46197   | 3.46576   | 4.00721   |
| RFESD        | 1.91965   | 1.82271   | 1.34585   | 1.08299   | 1.76822   |
| DNAJB1       | 66.2802   | 101.776   | 63.6514   | 63.2679   | 83.3509   |
| ZNF775       | 10.3753   | 10.1969   | 8.88949   | 9.20778   | 8.03027   |
| ZBTB17       | 16.8001   | 13.987    | 10.6562   | 12.355    | 12.1902   |
| BCKDK        | 154.343   | 147.996   | 105.926   | 107.336   | 151.441   |
| PPP1R12A     | 4.91264   | 3.79802   | 4.82485   | 3.86276   | 3.98599   |
| ZNF169       | 0.865179  | 0.716865  | 0.787147  | 0.763189  | 0.725134  |
| SNX16        | 3.93496   | 2.04594   | 3.79846   | 3.30041   | 2.24371   |
| DNAJB2       | 46.1576   | 38.0425   | 33.1136   | 35.6005   | 33.9911   |
| FAM134A      | 26.757    | 36.739    | 24.988    | 22.0975   | 33.5749   |
| PSEN1        | 5.97448   | 6.47451   | 6.69939   | 5.33606   | 6.09329   |
| RUSC2        | 13.3351   | 8.08951   | 10.8722   | 10.9952   | 8.0458    |
| PROZ         | 0.1239    | 0.197257  | 0.302116  | 0.310932  | 0.104516  |
| NUP210       | 18.3549   | 17.9211   | 13.2109   | 15.4404   | 16.7993   |
| MRPL22       | 12.7976   | 13.2407   | 13.2377   | 10.0627   | 13.4299   |
| FRMD6-AS1    | 0.283117  | 0.541776  | 0.220371  | 0.324336  | 0.353494  |
| ZNF449       | 0.849768  | 0.669818  | 0.573503  | 0.823306  | 0.596529  |
| PRR15L       | 0.0369759 | 0.0255118 | 0         | 0         | 0.0235141 |
| GSTT1        | 50.9761   | 67.221    | 47.3976   | 41.9204   | 59.433    |
| GPX4         | 384.988   | 474.699   | 391.083   | 336.776   | 417.199   |
| YIPF1        | 9.98373   | 13.1389   | 11.0391   | 8.80838   | 11.3845   |
| DESI2        | 14.0426   | 15.7295   | 17.9297   | 12.767    | 16.1723   |
| PIK3CD       | 2.96457   | 2.97266   | 2.54371   | 2.62373   | 2.74944   |
| STRN         | 1.08312   | 1.09498   | 0.957414  | 0.896953  | 1.01351   |
| RBL1         | 0.625269  | 0.596281  | 0.588059  | 0.609746  | 0.57671   |
| CHCHD7       | 20.6999   | 22.9496   | 20.3045   | 17.9211   | 21.3243   |
| DLGAP4       | 29.67     | 26.0202   | 23.983    | 22.9299   | 24.4469   |
| NEDD4        | 1.7029    | 1.69346   | 1.99964   | 1.60698   | 1.75288   |
| TOR2A        | 44.6566   | 44.6693   | 41.9018   | 37.9033   | 43.4741   |
| LINC00265    | 4.50068   | 3.45501   | 3.58891   | 3.72724   | 3.41848   |
| ESYT2        | 7.67241   | 8.72162   | 7.73267   | 6.41541   | 8.68809   |

|                            |           |           |           |           |           |
|----------------------------|-----------|-----------|-----------|-----------|-----------|
| IL12A                      | 1.62041   | 1.96758   | 1.1855    | 1.08573   | 2.02233   |
| EML5                       | 0.21353   | 0.19048   | 0.210656  | 0.228168  | 0.134556  |
| ZNF628                     | 5.82144   | 6.27303   | 3.9123    | 3.73596   | 6.27312   |
| MAP7                       | 5.8992    | 5.98449   | 5.66901   | 4.38516   | 6.89652   |
| MAPKAPK5-AS1               | 9.71348   | 11.2528   | 9.52828   | 7.5453    | 10.6227   |
| CUTA                       | 336.079   | 323.241   | 312.527   | 264.569   | 304.457   |
| MAN2A1                     | 0.740237  | 0.626716  | 0.585077  | 0.587418  | 0.652736  |
| GEMIN6                     | 31.2915   | 29.7213   | 34.9019   | 27.2632   | 26.7657   |
| CALML4                     | 2.69787   | 2.17821   | 2.22749   | 2.24659   | 2.06852   |
| ATHL1                      | 42.4051   | 38.7015   | 19.1275   | 34.4297   | 38.9935   |
| TPD52                      | 36.4088   | 38.1218   | 28.3687   | 25.7426   | 40.1328   |
| AASS                       | 6.54096   | 5.99506   | 5.35078   | 5.34313   | 6.06512   |
| WASH3P                     | 14.101    | 14.9863   | 12.333    | 13.4716   | 11.4805   |
| PER2                       | 2.07113   | 2.05788   | 2.35448   | 1.9252    | 1.86911   |
| ITPR2                      | 0.439271  | 0.421648  | 0.366761  | 0.362977  | 0.39999   |
| TIMM8A                     | 9.12816   | 11.0104   | 9.00877   | 7.95164   | 9.02692   |
| BIRC5                      | 39.6915   | 42.2024   | 46.4226   | 37.5139   | 37.3505   |
| C19orf21                   | 0.521011  | 0.226961  | 0.506852  | 0.332259  | 0.289504  |
| CLIP3                      | 0.403248  | 0.52445   | 0.218941  | 0.328714  | 0.467034  |
| EFNB1                      | 9.16831   | 9.23574   | 8.58471   | 7.37125   | 8.90713   |
| NDUFB2-AS1                 | 1.00371   | 1.72893   | 1.2817    | 0.796985  | 1.8249    |
| PRPF40B                    | 0.99693   | 0.849678  | 1.07512   | 1.06912   | 0.945247  |
| TMEM191A                   | 1.04929   | 1.32363   | 0.648236  | 0.615915  | 1.35247   |
| ENO2                       | 292.922   | 312.07    | 176.448   | 174.036   | 336.415   |
| C2orf27A                   | 0.152267  | 0.528527  | 0.470179  | 0.296774  | 0.515144  |
| THOC6                      | 161.011   | 155.536   | 139.871   | 124.77    | 151.259   |
| ZBTB5                      | 2.72163   | 3.00987   | 2.46479   | 2.05571   | 2.96573   |
| ZNF439                     | 1.7675    | 1.38599   | 1.37098   | 1.23037   | 1.4217    |
| CDKN1B                     | 11.4242   | 8.24217   | 12.6211   | 10.5453   | 7.71505   |
| LRP11                      | 5.3226    | 5.01496   | 6.19796   | 4.96692   | 5.05352   |
| OPTN                       | 29.3668   | 32.4296   | 29.2225   | 24.2702   | 31.4037   |
| MIS12                      | 7.37732   | 10.7249   | 8.91927   | 7.07107   | 9.62329   |
| RCAN3                      | 3.5074    | 3.60491   | 3.10345   | 3.14219   | 3.66123   |
| STAP2                      | 19.474    | 20.4419   | 17.7428   | 14.7454   | 20.3971   |
| IRF4                       | 0.043672  | 0.0349371 | 0.0913222 | 0.0161977 | 0.0591632 |
| PLEKHO1                    | 23.2378   | 26.8465   | 24.437    | 20.5588   | 23.9827   |
| SHD                        | 0.523018  | 0.469794  | 0.425019  | 0.315591  | 0.706894  |
| C3orf18                    | 7.33271   | 7.03745   | 6.036     | 5.60909   | 7.23091   |
| GLUD1P7                    | 0.0402388 | 0.0432928 | 0.0295554 | 0.0480854 | 0.0330733 |
| C10orf137                  | 2.56597   | 1.22487   | 2.61091   | 2.16586   | 1.74985   |
| PPFIBP2                    | 2.25598   | 1.91995   | 1.83021   | 1.74137   | 1.85153   |
| PLCL2                      | 1.46475   | 1.41065   | 1.14097   | 1.18703   | 1.45648   |
| GMDS                       | 22.2298   | 19.7209   | 20.4603   | 18.937    | 19.3375   |
| TAPBPL                     | 1.67708   | 2.29367   | 1.30149   | 1.86197   | 1.29024   |
| ST6GALNAC2                 | 0.153507  | 0.191252  | 0.150236  | 0.153059  | 0.158385  |
| CACHD1                     | 1.25638   | 0.979162  | 1.30867   | 1.15885   | 0.979217  |
| PICK1                      | 16.9479   | 16.9948   | 17.7887   | 14.1086   | 16.2564   |
| MST1R                      | 6.58644   | 5.82557   | 4.70129   | 5.58589   | 5.89056   |
| FAM117A                    | 11.6562   | 12.7188   | 11.1182   | 9.04609   | 12.4377   |
| IMPAD1                     | 11.3736   | 11.5839   | 9.84383   | 8.47133   | 11.4064   |
| OTUD7B                     | 2.75297   | 2.81251   | 2.11644   | 2.06343   | 2.71399   |
| CDS2                       | 4.64802   | 4.87359   | 5.00673   | 3.86827   | 5.02741   |
| NFRKB                      | 5.64607   | 5.85607   | 5.45086   | 4.89672   | 5.29546   |
| IGF2R                      | 5.46414   | 4.39523   | 5.62088   | 5.21774   | 4.34388   |
| HTRA4                      | 0.0128637 | 0.0365241 | 0         | 0.0216512 | 0         |
| ANKRD20A9P                 | 0.0805311 | 0.0934326 | 0.0821516 | 0.0844075 | 0.0815937 |
| SAMD12                     | 1.82165   | 2.04133   | 1.66872   | 1.51202   | 1.89617   |
| ZNF703                     | 5.58041   | 4.77984   | 6.09757   | 4.63758   | 4.26066   |
| SPCS2                      | 28.4775   | 29.1294   | 26.3913   | 23.619    | 27.9894   |
| B4GALT4                    | 5.83376   | 5.26089   | 5.76842   | 5.35012   | 5.03746   |
| TRPS1                      | 0.65108   | 0.503368  | 0.477775  | 0.474082  | 0.470244  |
| MAB21L3                    | 0.17533   | 0.128533  | 0.104237  | 0.140037  | 0.0793892 |
| YPEL1                      | 3.42712   | 3.76058   | 2.97031   | 3.20986   | 3.07993   |
| MIR4763,MIRLET7A3,MIRLET7B | 0.261242  | 1.17942   | 0.528786  | 0.347588  | 1.04224   |
| FBXL22                     | 0.083476  | 0.114778  | 0.169647  | 0.0930069 | 0.141283  |
| TRAF4                      | 21.8814   | 22.441    | 19.09     | 18.3085   | 20.3403   |
| ZNF283                     | 1.9596    | 1.79932   | 2.2866    | 1.69838   | 2.17916   |
| PLSCR3,TMEM256             | 276.351   | 313.123   | 263.066   | 221.086   | 284.719   |
| EXT2                       | 20.4599   | 22.6663   | 20.7156   | 18.8449   | 20.7552   |
| KRTAP5-1                   | 0.188608  | 0.128241  | 0.290296  | 0.322487  | 0.0589055 |
| HHLA3                      | 35.8353   | 32.5761   | 33.3711   | 29.2809   | 31.2998   |
| SH3BP4                     | 4.40932   | 4.178     | 3.41517   | 3.49003   | 4.16716   |
| SIGLEC11                   | 0.0218452 | 0         | 0.0396385 | 0.0362707 | 0         |
| LINGO3                     | 0         | 0.0523003 | 0         | 0         | 0.0474211 |
| SGCB                       | 3.28119   | 4.29945   | 3.17712   | 2.86066   | 3.93285   |
| RNPEPL1                    | 52.5517   | 51.1572   | 49.1175   | 44.3879   | 49.6272   |
| ZSCAN16                    | 4.12047   | 4.73987   | 6.36885   | 5.27462   | 3.5636    |
| AP1S2                      | 12.0948   | 13.2401   | 15.6113   | 10.8732   | 13.5642   |
| TUBGCP3                    | 4.39218   | 3.02302   | 4.10081   | 3.89938   | 3.01732   |

|               |           |            |           |            |            |
|---------------|-----------|------------|-----------|------------|------------|
| DPY30         | 62.2057   | 62.0205    | 56.1962   | 50.7885    | 58.7165    |
| PKP2          | 3.68903   | 2.96029    | 3.48195   | 3.07987    | 3.34298    |
| HY1           | 19.3952   | 30.6764    | 20.2794   | 18.4292    | 24.958     |
| C1orf145      | 0.491266  | 0.918664   | 0.509557  | 0.443302   | 0.73158    |
| SCYL2         | 5.20088   | 5.00914    | 5.0345    | 4.13093    | 4.99177    |
| FAM21A,FAM21B | 2.05314   | 1.90102    | 1.78908   | 1.53624    | 1.89877    |
| RAB11B        | 111.711   | 93.9767    | 91.4899   | 86.9392    | 97.7887    |
| ZFHX4         | 0.0133327 | 0.0142978  | 0         | 0.00278273 | 0.01331    |
| TMEM217       | 0.120297  | 0.150105   | 0.255356  | 0.146976   | 0.0627516  |
| KDM5C         | 25.2714   | 23.2935    | 19.905    | 18.4867    | 25.4796    |
| ZFAND2A       | 12.8498   | 20.1516    | 19.5239   | 12.2991    | 16.271     |
| LMBRD1        | 9.07586   | 9.04977    | 8.82534   | 7.80728    | 8.84705    |
| SUGP2         | 9.35952   | 7.76182    | 7.96553   | 7.77474    | 7.94052    |
| ABHD13        | 1.39558   | 1.83156    | 1.73711   | 1.37832    | 1.63532    |
| GLTSCR1       | 3.13212   | 2.95239    | 2.30394   | 3.00246    | 2.37022    |
| CTDSP2        | 21.8834   | 26.2235    | 24.3      | 19.849     | 24.5674    |
| MZF1          | 15.7371   | 11.9044    | 12.4215   | 12.2064    | 12.5194    |
| MON2          | 1.56131   | 1.14706    | 1.25177   | 1.37536    | 1.07007    |
| GNA13         | 6.84398   | 6.19484    | 6.42086   | 5.66187    | 6.36816    |
| SNORA74B      | 0.487995  | 3.32434    | 0.586245  | 0.801839   | 3.18462    |
| TAB2          | 9.77153   | 8.14499    | 9.34671   | 7.24459    | 9.10777    |
| SP6           | 2.57088   | 2.95023    | 2.41863   | 2.18704    | 2.77852    |
| DENND5B       | 0.548129  | 0.682526   | 0.505251  | 0.438874   | 0.680544   |
| LOC100130899  | 5.10864   | 6.17314    | 5.60434   | 4.9589     | 5.17151    |
| TMEM79        | 3.96471   | 2.84152    | 4.97959   | 3.89729    | 3.01618    |
| PI4KA         | 15.5415   | 14.5885    | 12.4163   | 13.7475    | 12.3383    |
| STC1          | 0.0242938 | 0.0441677  | 0.0307106 | 0.010167   | 0.0578379  |
| ABCA2         | 27.4244   | 30.7383    | 17.459    | 20.8374    | 30.9515    |
| STK38         | 5.48967   | 4.69753    | 6.28173   | 5.155      | 4.48108    |
| GSG2          | 3.97937   | 3.36993    | 3.63256   | 2.93668    | 3.29679    |
| ALCAM         | 5.90963   | 7.28589    | 6.39895   | 4.82333    | 7.32489    |
| TCF20         | 4.87725   | 4.1064     | 4.86927   | 4.3942     | 3.82854    |
| CCNK          | 18.3766   | 19.7384    | 17.5508   | 16.3191    | 18.4586    |
| ZSCAN31       | 1.09345   | 1.03663    | 1.24942   | 1.03962    | 0.920051   |
| PPIE          | 39.126    | 43.7036    | 45.2381   | 33.0193    | 39.6845    |
| LOC100507424  | 0.80784   | 0.595113   | 0.634132  | 0.425675   | 0.604338   |
| SHROOM2       | 0.672662  | 0.471164   | 0.57956   | 0.523444   | 0.547883   |
| ACYP1         | 18.2352   | 13.0161    | 15.3367   | 16.1372    | 11.6624    |
| ITGB5         | 22.8957   | 28.4989    | 25.2472   | 19.3651    | 27.8179    |
| C1orf63       | 14.5662   | 9.96853    | 13.5911   | 13.0201    | 8.2379     |
| PHTF2         | 3.11627   | 2.44091    | 2.88862   | 2.67917    | 2.62118    |
| ZNF639        | 9.59952   | 10.5648    | 9.45022   | 7.39165    | 10.5855    |
| KDM2B         | 10.6947   | 10.1997    | 8.28785   | 8.60758    | 10.0083    |
| MPST          | 157.641   | 153.07     | 170.557   | 134.969    | 137.719    |
| ALKBH4        | 12.095    | 14.143     | 10.81     | 11.1863    | 12.297     |
| ATF2          | 4.9359    | 4.30943    | 4.91416   | 4.45948    | 4.15081    |
| CENPN         | 18.5447   | 18.7438    | 20.9634   | 18.3847    | 15.7112    |
| SLC25A26      | 17.5035   | 24.5847    | 18.388    | 13.9776    | 22.5832    |
| AFF4          | 3.74368   | 3.76222    | 3.08286   | 2.94729    | 3.63462    |
| KLRG1         | 0.14075   | 0.150267   | 0.162494  | 0.149932   | 0.0532936  |
| KLHL7         | 13.8131   | 14.264     | 10.2033   | 10.3345    | 13.892     |
| KLF15         | 4.91952   | 3.94375    | 6.34909   | 4.32809    | 4.58571    |
| TMA7          | 424.723   | 487.692    | 458.361   | 361.204    | 431.228    |
| PITX1         | 30.5807   | 28.8545    | 35.571    | 28.329     | 28.984     |
| LOC374443     | 0.820254  | 1.05839    | 1.3326    | 0.893775   | 1.16927    |
| FAM76B        | 1.91982   | 2.05262    | 1.93538   | 1.78519    | 2.0217     |
| GSTM3         | 16.2119   | 18.3969    | 15.9312   | 12.9021    | 18.7265    |
| DAAM1         | 0.628768  | 0.611744   | 0.464321  | 0.508416   | 0.555083   |
| OAZ2          | 33.3547   | 42.2564    | 35.7043   | 28.5601    | 39.2931    |
| MAN1B1        | 45.6129   | 45.2105    | 42.3106   | 39.296     | 43.1849    |
| LOC440300     | 0.237999  | 0.169722   | 0.177019  | 0.21482    | 0.223024   |
| USP1          | 10.0248   | 11.5426    | 11.7707   | 9.93036    | 10.8957    |
| SRSF9         | 327.755   | 329.986    | 274.466   | 258.71     | 319.383    |
| DET1          | 3.60482   | 1.89907    | 4.19028   | 2.97392    | 2.21864    |
| MAP4K3        | 3.60976   | 2.93201    | 3.09001   | 2.77068    | 3.17958    |
| ANXA6         | 50.3728   | 57.2029    | 48.0037   | 40.327     | 57.1745    |
| TSHZ1         | 1.71954   | 1.76562    | 1.6235    | 1.82813    | 1.43747    |
| ABCF1         | 14.4587   | 14.5914    | 13.6796   | 12.035     | 13.8252    |
| PTPRCAP       | 2.82731   | 1.497      | 1.59595   | 1.07609    | 2.19027    |
| KIAA0895L     | 6.96604   | 6.61847    | 4.71333   | 5.39467    | 6.77428    |
| TMEM126A      | 30.575    | 34.2893    | 27.5734   | 27.0368    | 28.2024    |
| GINM1         | 15.752    | 14.5407    | 15.3693   | 12.1819    | 16.074     |
| EPN1          | 107.586   | 99.9732    | 99.6294   | 91.7559    | 94.0365    |
| USP19         | 9.07374   | 9.78349    | 9.1123    | 8.00988    | 10.0185    |
| HYDIN2        | 0.0044113 | 0.00256075 | 0.0055922 | 0.00736787 | 0.00241823 |
| TMLHE         | 7.1182    | 8.29667    | 6.31746   | 5.17544    | 7.51229    |
| KCTD1         | 3.31611   | 2.65858    | 3.32136   | 3.49394    | 2.32733    |
| PLD3          | 53.9774   | 55.2087    | 52.1946   | 45.9908    | 51.492     |
| SNORA24       | 30.9755   | 10.422     | 27.5278   | 6.22297    | 21.6231    |

|               |           |           |           |           |           |
|---------------|-----------|-----------|-----------|-----------|-----------|
| TXNRD2        | 26.8757   | 19.8716   | 25.929    | 22.7144   | 21.33     |
| MLL           | 1.29733   | 1.09376   | 0.974609  | 1.08155   | 1.04689   |
| COMMD1        | 27.1494   | 24.5883   | 24.4039   | 27.2316   | 20.5066   |
| SPSB3         | 47.93     | 46.4607   | 45.5066   | 44.7893   | 42.8487   |
| SPATS2        | 10.5282   | 10.291    | 8.93253   | 7.44091   | 10.289    |
| LYST          | 0.394239  | 0.256089  | 0.279198  | 0.263887  | 0.319566  |
| C12orf75      | 21.594    | 28.3983   | 25.6189   | 20.831    | 26.3891   |
| CHMP7         | 20.0784   | 22.2324   | 16.4779   | 15.4906   | 22.1847   |
| ERLIN1        | 13.2733   | 15.5711   | 17.6543   | 14.3207   | 14.048    |
| C7orf60       | 4.20222   | 4.03061   | 3.20385   | 3.11946   | 4.08257   |
| NFATC3        | 4.45415   | 4.21898   | 4.2427    | 3.78786   | 4.0039    |
| FAM212B       | 0.804223  | 1.40432   | 0.959499  | 0.752631  | 1.26622   |
| UFSP2         | 12.8607   | 10.7296   | 10.2973   | 9.91335   | 10.5108   |
| FARP1         | 15.125    | 14.7521   | 14.0906   | 13.2128   | 14.4745   |
| C11orf83      | 16.6171   | 21.1679   | 15.4585   | 15.3299   | 17.5542   |
| TRIM3         | 4.11286   | 4.09621   | 3.90605   | 3.75838   | 3.82578   |
| EPS8          | 3.04673   | 2.49366   | 2.40317   | 2.55066   | 2.88475   |
| TOR3A         | 14.8746   | 22.1766   | 15.6143   | 15.7761   | 17.7954   |
| ATG9A         | 27.3659   | 28.3139   | 22.4662   | 23.2286   | 25.808    |
| LMO2          | 2.64804   | 2.70477   | 2.43447   | 2.32332   | 2.84761   |
| THAP11        | 23.8694   | 28.33     | 26.2323   | 22.5177   | 24.2974   |
| NOTCH2NL      | 6.52324   | 6.96118   | 5.63922   | 5.34111   | 6.5226    |
| RNF26         | 23.1028   | 28.3059   | 23.4731   | 22.3489   | 24.1856   |
| MMP15         | 7.55123   | 7.68585   | 6.73503   | 6.37953   | 6.95398   |
| CREBBP        | 3.89503   | 3.38827   | 3.43756   | 3.15341   | 3.32264   |
| SIDT2         | 3.68402   | 4.7539    | 3.30555   | 3.0083    | 4.74154   |
| HESX1         | 0.574952  | 0.379322  | 0.605844  | 0.582277  | 0.3629    |
| XRRA1         | 14.0496   | 10.603    | 10.1752   | 10.413    | 10.4014   |
| CTTNBP2       | 0.782811  | 0.579129  | 0.642822  | 0.555829  | 0.764841  |
| NDUFA3        | 235.942   | 205.195   | 188.331   | 194.559   | 180.936   |
| CEPT1         | 11.4545   | 12.3693   | 11.4034   | 9.31721   | 12.0302   |
| LOC100294145  | 1.8       | 2.83243   | 2.35852   | 1.85351   | 2.40598   |
| CENPE         | 0.817662  | 0.832165  | 0.248208  | 0.762732  | 0.725241  |
| PIGL          | 7.07395   | 5.85778   | 5.29594   | 5.62057   | 6.66914   |
| CST3          | 236.873   | 274.816   | 197.443   | 198.817   | 241.808   |
| LOC144486     | 0.160767  | 0.185468  | 0.194112  | 0.194866  | 0.150836  |
| CXorf23       | 0.655662  | 0.530711  | 0.531908  | 0.639218  | 0.522869  |
| ST3GAL5       | 2.45739   | 2.23847   | 1.55764   | 1.64164   | 2.75442   |
| CHEK2         | 14.4973   | 15.0469   | 11.4003   | 12.2262   | 13.5913   |
| WDR38         | 0.0625555 | 0         | 0.0365932 | 0.0522232 | 0.0377343 |
| ZNF692        | 27.7963   | 22.4414   | 20.1294   | 22.3459   | 20.9388   |
| HIID2A        | 264.502   | 279.49    | 248.047   | 225.775   | 246.056   |
| ZNF670,ZNF695 | 5.32982   | 5.47652   | 4.63068   | 4.43417   | 4.85124   |
| C19orf53      | 141.416   | 165.096   | 139.455   | 122.746   | 151.604   |
| OAS3          | 2.3594    | 2.02439   | 1.70582   | 2.26942   | 1.92646   |
| HARS2         | 9.5307    | 10.4526   | 9.37835   | 8.11851   | 9.71725   |
| GLA           | 19.1937   | 22.5048   | 18.6983   | 17.458    | 20.5486   |
| MAN1C1        | 0.141067  | 0.0601991 | 0.146021  | 0.144458  | 0.0562881 |
| PLEKHJ1       | 101.89    | 104.5     | 116.396   | 96.5411   | 86.9528   |
| TOM1          | 19.2876   | 20.8134   | 16.0875   | 16.1252   | 17.9285   |
| RASL10B       | 10.018    | 10.3028   | 11.7682   | 8.89158   | 10.0332   |
| FRG1B         | 7.54002   | 9.08524   | 7.66573   | 5.40067   | 9.8677    |
| HPS1          | 34.3383   | 36.2675   | 32.9764   | 29.148    | 33.3144   |
| PDZD11        | 19.6674   | 20.9542   | 21.0112   | 18.5844   | 19.9831   |
| CD59          | 15.2559   | 19.2716   | 15.1677   | 12.2533   | 18.7609   |
| BANF1         | 261.531   | 251.878   | 249.148   | 222.28    | 236.476   |
| TMEM39B       | 18.5187   | 19.2268   | 15.6824   | 12.7232   | 18.8285   |
| PAXIP1        | 6.25468   | 5.55751   | 6.00537   | 5.40453   | 5.56627   |
| FUK           | 5.0154    | 4.65951   | 4.51212   | 4.40103   | 4.48642   |
| MIPEPP3       | 0.226153  | 0.917102  | 0.120963  | 0.286622  | 0.429258  |
| PAM           | 11.0884   | 13.4847   | 10.8441   | 9.29446   | 12.917    |
| PCDHB16       | 1.15598   | 1.39729   | 0.868945  | 1.04818   | 1.04908   |
| KIF11         | 9.92711   | 8.28756   | 9.16475   | 9.37094   | 7.61842   |
| SERPINH1      | 117.642   | 108.839   | 109.774   | 104.35    | 94.4264   |
| PAOX          | 5.85966   | 7.10288   | 6.39131   | 5.18992   | 6.49583   |
| RAD9A         | 4.99964   | 7.95378   | 4.66004   | 4.8906    | 7.27037   |
| GSN           | 38.4547   | 32.8535   | 33.3448   | 29.7257   | 33.8395   |
| RNF208        | 65.4209   | 58.238    | 53.7382   | 52.6253   | 60.9604   |
| LRRC14B       | 0         | 0.0472756 | 0         | 0         | 0.0431313 |
| ZNF792        | 1.27307   | 1.64811   | 0.867836  | 1.03171   | 1.46996   |
| FBXL20        | 2.39084   | 2.65549   | 2.30486   | 1.88686   | 2.61294   |
| DNAJC1        | 7.4189    | 8.59875   | 7.12325   | 7.50441   | 7.29361   |
| MRPS9         | 36.2152   | 30.1613   | 33.3885   | 28.3434   | 33.3193   |
| PKP3          | 47.1509   | 49.1599   | 41.7628   | 39.1727   | 47.4585   |
| CIC           | 11.4544   | 12.3519   | 8.59225   | 9.23332   | 11.6222   |
| NDUFA2        | 114.203   | 148.496   | 102.113   | 97.1011   | 133.893   |
| ECH1          | 135.562   | 151.063   | 121.92    | 116.489   | 135.494   |
| PRPSAP1       | 25.6917   | 30.067    | 22.9688   | 20.5984   | 28.436    |
| ZFYVE1        | 8.09479   | 8.81195   | 6.41394   | 6.71012   | 8.24069   |

|                           |           |           |           |           |           |
|---------------------------|-----------|-----------|-----------|-----------|-----------|
| COX6C                     | 385.11    | 387.081   | 338.93    | 317.641   | 361.619   |
| ACOT13                    | 7.75128   | 6.85614   | 7.88435   | 6.46014   | 6.99854   |
| MCU                       | 7.42578   | 6.52145   | 7.03112   | 5.87344   | 6.98893   |
| GCA                       | 2.76792   | 2.59002   | 2.48769   | 2.20493   | 2.79643   |
| RNF121                    | 7.70831   | 9.42385   | 10.1481   | 7.28737   | 8.62404   |
| ZCCHC6                    | 3.50913   | 3.06071   | 2.56426   | 2.65323   | 2.8062    |
| C1orf151-NBL1,MINOS1,NBL1 | 104.672   | 115.431   | 96.1787   | 86.5876   | 109.8     |
| PLXNB2                    | 24.7391   | 30.4245   | 18.8289   | 20.7643   | 28.4974   |
| SYNGR2                    | 88.532    | 108.146   | 102.262   | 84.6602   | 92.4067   |
| VPS11                     | 11.1319   | 14.3327   | 11.1657   | 10.4722   | 13.2853   |
| SH3BGR3                   | 326.399   | 330.256   | 258.608   | 254.874   | 331.547   |
| DICER1-AS1                | 3.59848   | 3.35121   | 3.51012   | 3.54604   | 2.19537   |
| PALM3                     | 16.0578   | 18.6793   | 10.2068   | 12.5815   | 17.3587   |
| MBP                       | 3.49439   | 3.52126   | 3.66969   | 3.09296   | 2.97887   |
| CASKIN1                   | 13.2749   | 12.6327   | 11.861    | 11.4741   | 11.2033   |
| NSMCE2                    | 24.2499   | 23.4975   | 25.5223   | 20.344    | 23.3574   |
| FOXJ3                     | 9.57811   | 8.76172   | 9.04069   | 7.49799   | 9.19954   |
| DOLPP1                    | 16.3735   | 16.3533   | 20.6831   | 16.1978   | 16.415    |
| QSOX1                     | 61.6313   | 53.145    | 49.1024   | 46.4931   | 54.2479   |
| GULP1                     | 2.38706   | 2.7214    | 2.24816   | 2.23428   | 2.70401   |
| RERE                      | 4.07416   | 4.92672   | 3.40732   | 3.53878   | 4.7611    |
| DTNBP1                    | 23.5302   | 20.6238   | 24.4549   | 21.3376   | 19.1469   |
| ARHGAP26                  | 0.416958  | 0.466636  | 0.416083  | 0.391166  | 0.349586  |
| KAT8                      | 27.5094   | 24.6677   | 18.9454   | 20.9704   | 24.7881   |
| LATS1                     | 2.31878   | 2.74617   | 1.83586   | 1.87952   | 2.5658    |
| SMIM4                     | 64.9129   | 73.5996   | 71.068    | 57.7619   | 64.1798   |
| PCDHB2                    | 2.6457    | 3.05581   | 2.24812   | 2.16395   | 3.33159   |
| SCRN3                     | 1.68965   | 1.65034   | 1.88964   | 1.89621   | 1.14152   |
| STXBP2                    | 65.2843   | 66.1391   | 61.8931   | 56.1836   | 59.9753   |
| BBIP1                     | 7.37929   | 8.47684   | 9.96952   | 7.74545   | 7.38431   |
| PACS2                     | 10.3129   | 10.0287   | 10.7539   | 8.64712   | 10.1881   |
| ECI2                      | 36.0702   | 40.2997   | 28.1499   | 27.9942   | 40.8505   |
| ANKRD39                   | 21.0037   | 25.6607   | 16.5029   | 17.1889   | 21.984    |
| NFE2L1                    | 21.9157   | 22.6062   | 23.6837   | 21.7305   | 19.5992   |
| C17orf100                 | 0.275278  | 0.472322  | 0.566952  | 0.494578  | 0.386319  |
| HHLA2                     | 0.0164453 | 0.0358172 | 0.0103543 | 0.027396  | 0         |
| CLCC1                     | 6.78878   | 5.76388   | 5.9285    | 5.87126   | 5.38823   |
| TM9SF4                    | 16.2796   | 18.04     | 13.2482   | 12.7959   | 17.6269   |
| ACTR1A                    | 30.5519   | 30.5228   | 34.6114   | 28.0162   | 29.0505   |
| PPM1J                     | 24.1475   | 26.3212   | 20.1374   | 18.9031   | 25.5967   |
| RPL23AP7                  | 7.2397    | 10.223    | 7.86663   | 6.12035   | 9.54182   |
| OCLN                      | 5.1284    | 4.70387   | 5.71278   | 4.75036   | 4.33362   |
| GOLGA8A                   | 22.0677   | 22.3275   | 11.9011   | 17.3827   | 22.4018   |
| CYGB                      | 0.222775  | 0.108317  | 0.341239  | 0.135264  | 0.300529  |
| C2orf49                   | 13.7062   | 7.7857    | 9.55006   | 10.9378   | 8.09848   |
| SDHAP3                    | 4.72986   | 3.86013   | 4.04868   | 4.73869   | 3.60337   |
| DNAJB7                    | 0.169375  | 0.309216  | 0.176177  | 0.153652  | 0.208572  |
| PRDM8                     | 20.8077   | 22.878    | 24.2105   | 20.6244   | 22.8712   |
| C10orf11                  | 12.7779   | 15.4106   | 14.3593   | 11.0192   | 13.3994   |
| TMEM160                   | 65.7025   | 62.1478   | 67.0044   | 67.8005   | 53.1214   |
| ORMDL2                    | 20.7818   | 26.7497   | 22.9495   | 20.0417   | 23.4439   |
| DIP2B                     | 3.45174   | 3.5291    | 2.96293   | 3.05325   | 3.20285   |
| EXOC6B                    | 0.563567  | 0.305533  | 0.391412  | 0.452295  | 0.388243  |
| LIMK2                     | 10.3024   | 9.5666    | 9.15721   | 9.05151   | 9.11548   |
| NTRK1                     | 0         | 0.0853525 | 0.0386757 | 0.0271444 | 0.0579462 |
| CHIC1                     | 1.09094   | 1.11178   | 0.989787  | 0.898772  | 1.16399   |
| SWSAP1                    | 1.5632    | 3.43428   | 2.63619   | 2.05058   | 2.77486   |
| PPP2R5D                   | 23.4852   | 24.2081   | 20.3056   | 20.217    | 22.9782   |
| UBE2H                     | 12.5625   | 12.7912   | 10.9664   | 9.91034   | 12.9549   |
| MROH8                     | 0.0145658 | 0.133644  | 0.0560028 | 0.0965086 | 0.0378055 |
| ASTN2                     | 3.24961   | 3.76918   | 2.85765   | 2.69163   | 3.41598   |
| LSM3                      | 115.29    | 114.888   | 95.8471   | 97.4785   | 101.626   |
| YIPF2                     | 30.9769   | 31.3385   | 34.3391   | 28.9918   | 27.5691   |
| OGG1                      | 14.844    | 15.9193   | 15.2083   | 14.586    | 12.7309   |
| PCNA-AS1                  | 43.7816   | 53.5212   | 49.7604   | 37.3713   | 61.0185   |
| SEPW1                     | 198.368   | 219.994   | 176.387   | 157.835   | 211.386   |
| RPP21,TRIM39,TRIM39-RPP21 | 167.144   | 166.016   | 171.726   | 143.083   | 159.708   |
| TMEM8A                    | 34.9466   | 31.4691   | 35.2071   | 31.0187   | 29.7823   |
| FDFT1                     | 74.8703   | 56.3124   | 62.3903   | 60.1077   | 60.9369   |
| CHST14                    | 20.1238   | 23.9305   | 23.6778   | 18.3804   | 22.5556   |
| SZRD1                     | 42.1765   | 51.8578   | 37.5781   | 34.0348   | 50.1048   |
| OGFOD2                    | 7.57807   | 9.60137   | 8.42343   | 7.36636   | 8.5954    |
| ELK1                      | 30.5706   | 31.5782   | 29.1776   | 27.4592   | 29.5945   |
| GNRH1                     | 0.947734  | 0.703819  | 0.694802  | 0.598254  | 0.740004  |
| CLN3                      | 26.0349   | 27.2116   | 24.7559   | 24.1036   | 23.7397   |
| CECR5                     | 124.15    | 113.997   | 111.974   | 98.3661   | 113.735   |
| PKM                       | 1256.34   | 1621.22   | 1164.24   | 987.869   | 1523.09   |
| RBMS1                     | 0.173438  | 0.101709  | 0.141423  | 0.123619  | 0.0952041 |
| C1QL3                     | 0.110078  | 0.242361  | 0.523545  | 0.131168  | 0.39225   |



|                        |            |           |            |          |           |
|------------------------|------------|-----------|------------|----------|-----------|
| TBC1D4                 | 5.72059    | 4.76676   | 5.41828    | 4.45568  | 5.75689   |
| PPP2R5A                | 10.8342    | 11.4539   | 11.7694    | 9.37718  | 11.6171   |
| FAM122A                | 2.41019    | 2.89663   | 3.31929    | 2.31958  | 2.85289   |
| IL17RB                 | 3.22405    | 3.52835   | 2.5389     | 2.89559  | 3.31243   |
| RTEL1,TNFRSF6B         | 8.07551    | 6.88013   | 7.18081    | 7.71804  | 6.62111   |
| PCNA                   | 74.5477    | 94.0943   | 73.5773    | 67.8301  | 92.6982   |
| HID1                   | 19.1587    | 20.8558   | 18.3355    | 17.0078  | 20.478    |
| LRRC42                 | 30.8087    | 29.3163   | 27.9195    | 24.583   | 28.5818   |
| UXT                    | 122.338    | 147.767   | 124.921    | 102.575  | 133.1     |
| MEA1                   | 141.278    | 161.27    | 122.353    | 112.123  | 153.329   |
| C20orf111              | 33.9121    | 28.129    | 29.8318    | 26.3155  | 25.6493   |
| VPS54                  | 3.15046    | 2.93108   | 3.44529    | 2.64687  | 3.02359   |
| WDHD1                  | 2.92016    | 2.53522   | 2.33373    | 2.719    | 2.51738   |
| PTCH1                  | 2.35336    | 1.81573   | 1.50615    | 1.87512  | 1.75483   |
| OTUD1                  | 4.36301    | 4.43851   | 3.90272    | 3.79617  | 4.17587   |
| PRKCQ                  | 1.61737    | 1.04873   | 1.70157    | 1.40986  | 1.15946   |
| RELL1                  | 5.95125    | 7.24649   | 5.46363    | 5.67469  | 6.53828   |
| BRWD3                  | 0.683391   | 0.63711   | 0.578261   | 0.548637 | 0.614481  |
| RALY                   | 44.1225    | 45.2914   | 48.0608    | 41.4172  | 41.2235   |
| SH3GL1                 | 71.1534    | 67.8295   | 69.2946    | 58.9773  | 66.5803   |
| SAYSD1                 | 3.36976    | 5.18046   | 3.60558    | 2.69592  | 4.49501   |
| ESRP2                  | 13.0974    | 11.157    | 11.3347    | 11.1175  | 11.2089   |
| TNFRSF11A              | 0.985476   | 0.874152  | 0.875028   | 0.853827 | 0.93972   |
| LMTK2                  | 3.546      | 3.89309   | 3.58878    | 3.50698  | 3.12455   |
| TPGS2                  | 35.3677    | 41.8158   | 37.3723    | 32.8768  | 38.9855   |
| LGMN                   | 27.9199    | 29.8867   | 28.6069    | 25.7569  | 26.8536   |
| LMAN2                  | 119.068    | 117.77    | 115.368    | 107.835  | 107.292   |
| SETD2                  | 3.09784    | 2.54562   | 2.81697    | 2.66955  | 2.45709   |
| GNG13                  | 0          | 0.0572693 | 0          | 0        | 0.0524601 |
| DEF8                   | 45.1623    | 49.9379   | 38.307     | 37.2978  | 44.0897   |
| BUD13                  | 14.3006    | 12.5711   | 13.2292    | 13.5438  | 11.4204   |
| ASXL1                  | 13.1821    | 13.7873   | 11.0743    | 10.3622  | 13.2731   |
| RAB40A                 | 0.553473   | 0.457313  | 0.701189   | 0.801472 | 0.209758  |
| FAM210A                | 8.25867    | 8.10912   | 6.25775    | 6.42914  | 8.0521    |
| AES                    | 203.412    | 211.37    | 203.488    | 172.914  | 198.073   |
| CENPW                  | 77.5153    | 65.4919   | 67.4902    | 75.7593  | 52.6289   |
| P4HB                   | 437.908    | 442.758   | 382.838    | 338.545  | 429.544   |
| MAD2L2                 | 139.333    | 136.789   | 123.287    | 120.597  | 123.242   |
| FAM81A                 | 0.606535   | 0.663906  | 0.719805   | 0.682849 | 0.528784  |
| TNNT1                  | 154.697    | 188.6     | 141.767    | 123.775  | 166.129   |
| TRIB2                  | 1.10268    | 1.37861   | 0.819761   | 1.24625  | 1.16666   |
| CD101                  | 0.43613    | 0.253499  | 0.545924   | 0.399641 | 0.437015  |
| CHEK1                  | 11.8035    | 11.9781   | 11.6099    | 10.9047  | 10.8777   |
| LPCAT2                 | 1.90608    | 2.12176   | 1.9586     | 1.75022  | 2.01479   |
| MANSC1                 | 3.65862    | 3.99302   | 3.60319    | 3.55109  | 3.70533   |
| SYNPO2                 | 0.00526983 | 0         | 0.00665045 | 0        | 0.0109161 |
| CUL7                   | 6.44571    | 7.68404   | 5.79589    | 5.97228  | 6.56014   |
| B2M                    | 750.086    | 883.294   | 765.668    | 628.679  | 827.088   |
| FBXO7                  | 68.8429    | 71.3481   | 68.5132    | 60.7461  | 65.0752   |
| POLR2L                 | 171.873    | 204.301   | 152.509    | 142.35   | 174.75    |
| SRGAP2,SRGAP2C,SRGAP2D | 5.72138    | 4.25311   | 5.40323    | 5.30743  | 4.09557   |
| MAP3K10                | 10.7867    | 9.14517   | 10.2292    | 9.77951  | 9.39326   |
| TBC1D9B                | 32.827     | 33.8871   | 26.3144    | 24.0945  | 35.199    |
| PTPRF                  | 24.8123    | 29.5127   | 21.4146    | 19.7444  | 29.1506   |
| KLK6                   | 0          | 0.0292216 | 0          | 0        | 0.0267871 |
| CDK3,TEN1              | 34.7055    | 43.5126   | 37.6535    | 32.6194  | 38.1807   |
| ST3GAL1                | 7.35427    | 5.15273   | 5.84553    | 6.44921  | 4.74702   |
| EIF4A2                 | 171.028    | 189.606   | 129.296    | 133.726  | 179.48    |
| IER5                   | 15.4212    | 31.4724   | 16.6623    | 14.249   | 27.8919   |
| LMO7                   | 2.91281    | 2.76178   | 2.80119    | 2.51332  | 2.94947   |
| NT5C                   | 145.97     | 120.712   | 146.008    | 120.042  | 116.345   |
| AKR7A3                 | 13.0646    | 12.7664   | 10.007     | 10.5613  | 11.5353   |
| MTCH1                  | 32.0233    | 32.2711   | 29.518     | 28.2556  | 28.3051   |
| CORIN                  | 0.181397   | 0.160928  | 0.150986   | 0.148459 | 0.167623  |
| MVB12B                 | 6.79395    | 5.72421   | 7.27302    | 6.44081  | 5.3909    |
| XPO7                   | 16.2216    | 15.1888   | 15.1544    | 13.6634  | 15.4896   |
| CAT                    | 7.62733    | 9.47386   | 6.05275    | 5.82906  | 9.97102   |
| SYNU1                  | 0.749511   | 0.706244  | 0.638331   | 0.658626 | 0.62546   |
| NDUFB2                 | 368.427    | 408.198   | 325.513    | 321.778  | 350.138   |
| CCNT2                  | 2.76612    | 3.00554   | 2.77104    | 2.6889   | 2.55392   |
| TSC22D4                | 54.1641    | 46.2458   | 43.3013    | 46.1741  | 44.5154   |
| NDUFA8                 | 145.927    | 142.903   | 152.033    | 125.445  | 138.04    |
| FLJ38576               | 0.0804456  | 0.0491488 | 0.100604   | 0.077    | 0.0308519 |
| C12orf23               | 11.8549    | 12.7659   | 10.4022    | 8.39659  | 13.345    |
| LY6E                   | 477.133    | 480.021   | 418.035    | 390.646  | 449.673   |
| FCGRT                  | 42.0914    | 46.8224   | 37.1673    | 32.974   | 47.8691   |
| TGFBR3                 | 0.529868   | 0.462967  | 0.330097   | 0.406111 | 0.437099  |
| RNF181                 | 176.311    | 198.957   | 163.813    | 143.722  | 182.866   |
| BHLHE40                | 77.1434    | 27.5013   | 39.4524    | 54.1314  | 23.657    |

|              |           |           |           |           |           |
|--------------|-----------|-----------|-----------|-----------|-----------|
| POM121C      | 12.0538   | 13.2179   | 9.80057   | 10.3817   | 11.9468   |
| ZC3H10       | 3.71469   | 3.56848   | 3.18049   | 3.13185   | 2.87406   |
| C18orf8      | 11.1214   | 8.42696   | 11.0437   | 9.69253   | 8.00994   |
| ZNF367       | 3.03635   | 4.63094   | 3.04934   | 2.82841   | 4.56398   |
| LOC375295    | 17.7573   | 20.8726   | 24.1723   | 16.3801   | 21.0426   |
| VPS8         | 3.57909   | 3.85451   | 3.6795    | 3.13347   | 3.81436   |
| XYLT2        | 18.2612   | 19.0392   | 14.4577   | 15.4431   | 17.7905   |
| TSSC4        | 39.4802   | 40.56     | 40.6924   | 37.8876   | 33.7423   |
| HSPA7        | 0         | 0.0192786 | 0         | 0         | 0.0176879 |
| PTK7         | 32.6257   | 31.971    | 27.8551   | 27.7767   | 31.742    |
| IGF1R        | 2.44922   | 2.61918   | 2.11684   | 2.23608   | 2.23954   |
| TNFRSF1A     | 27.8639   | 31.202    | 32.3782   | 26.7392   | 28.5533   |
| SUSD1        | 5.66052   | 5.36062   | 5.53573   | 4.72823   | 5.13398   |
| STX17        | 3.37418   | 2.8359    | 3.19928   | 2.76567   | 3.08873   |
| EDEM2        | 10.409    | 11.0166   | 10.4564   | 9.35552   | 9.63541   |
| PREB         | 46.7432   | 44.5179   | 44.2913   | 40.1292   | 43.8781   |
| TPST2        | 16.4375   | 14.7764   | 16.0481   | 13.1685   | 14.6973   |
| NTAN1        | 24.8001   | 29.7863   | 22.0522   | 19.9584   | 28.4964   |
| USP32        | 4.74376   | 3.89982   | 3.59036   | 3.60564   | 4.39481   |
| STT3B        | 8.41305   | 8.08216   | 8.63218   | 5.96965   | 10.0905   |
| EEPD1        | 2.59312   | 1.82799   | 1.51041   | 1.71716   | 2.27013   |
| SH3BP1       | 24.2968   | 26.7613   | 20.2997   | 21.1418   | 25.7068   |
| OTUD3        | 1.5321    | 2.09085   | 1.43708   | 1.3409    | 2.11455   |
| MCOLN1       | 8.58192   | 12.4451   | 9.45403   | 8.81125   | 10.1614   |
| OTUB2        | 1.10081   | 1.5275    | 0.856602  | 1.04024   | 1.20444   |
| WDR76        | 6.00112   | 5.59409   | 6.43465   | 6.15956   | 5.6981    |
| SLC39A1      | 114.779   | 110.955   | 120.305   | 98.7889   | 104.93    |
| SH2B2        | 21.4921   | 14.6167   | 16.7341   | 16.273    | 15.5813   |
| ZNF137P      | 0.317364  | 0.304466  | 0.368337  | 0.438426  | 0.23851   |
| ANKRD35      | 0         | 0.0123531 | 0         | 0         | 0.0113388 |
| NF2          | 9.00814   | 9.28013   | 8.31923   | 8.70324   | 7.45224   |
| SRRD         | 16.717    | 17.1586   | 15.3729   | 12.5477   | 16.5939   |
| EXO1         | 6.20696   | 4.98613   | 5.79655   | 5.71375   | 5.51142   |
| LOC642236    | 0.226495  | 0.286744  | 0.253284  | 0.23614   | 0.248069  |
| ZNF184       | 2.43998   | 1.8848    | 2.13232   | 1.85372   | 1.81125   |
| BAZ2A        | 11.6766   | 11.3042   | 9.64476   | 9.96118   | 10.5669   |
| LIN7B        | 3.75199   | 4.01442   | 1.98579   | 3.23777   | 2.46735   |
| CUL4B        | 7.63137   | 8.13479   | 6.93934   | 5.96228   | 8.16076   |
| CITED4       | 78.9245   | 111.349   | 96.8007   | 77.7199   | 98.2487   |
| WDR1         | 135.703   | 125.162   | 148.475   | 116.711   | 123.814   |
| HCFC2        | 0.994545  | 0.773372  | 0.700998  | 0.798569  | 0.763451  |
| SPNS1        | 27.414    | 26.3304   | 30.4965   | 28.0824   | 20.4352   |
| PIGO         | 13.346    | 9.74019   | 10.3882   | 11.0686   | 10.3919   |
| HELLS        | 4.1684    | 3.60121   | 3.81736   | 3.7044    | 3.97279   |
| MIR7-3HG     | 0         | 0.0674321 | 0         | 0         | 0.0619234 |
| TOX2         | 12.4754   | 14.8809   | 9.21126   | 9.6824    | 13.5746   |
| SNHG11       | 8.57163   | 13.8953   | 14.6121   | 8.90802   | 12.2582   |
| FAF1         | 30.291    | 28.5417   | 28.3663   | 25.3688   | 27.296    |
| IER5L        | 27.9717   | 31.9086   | 25.8466   | 24.2159   | 28.2097   |
| PMEL         | 0.928248  | 0.811858  | 0.958511  | 0.634488  | 0.927834  |
| MFS10        | 202.576   | 165.016   | 181.416   | 163.828   | 172.313   |
| VGLL4        | 10.3761   | 9.86314   | 10.1469   | 9.40486   | 9.09542   |
| GSK3B        | 5.29844   | 5.93529   | 5.01009   | 4.22476   | 6.04479   |
| XBP1         | 38.7409   | 43.9493   | 96.2491   | 51.3287   | 37.569    |
| TBC1D1       | 18.3913   | 18.6016   | 15.5424   | 15.0261   | 18.6946   |
| MLL5         | 6.15874   | 6.32243   | 4.36245   | 4.8698    | 6.37988   |
| CLMN         | 1.36309   | 1.37368   | 1.20891   | 0.989296  | 1.57539   |
| AAMDC        | 22.6863   | 28.8717   | 26.1303   | 23.2802   | 22.6032   |
| KCMF1        | 11.7289   | 9.40975   | 11.4363   | 9.06149   | 9.65593   |
| KLB          | 0.0384541 | 0.0335971 | 0.0484932 | 0.0321149 | 0.0369786 |
| HELZ         | 2.48106   | 2.1552    | 1.67783   | 1.65881   | 2.37934   |
| RTTN         | 1.14841   | 0.711692  | 0.982826  | 0.884893  | 0.864145  |
| WSB1         | 55.5422   | 52.759    | 32.5603   | 39.2442   | 57.1012   |
| PEX13        | 3.77129   | 4.11513   | 3.27989   | 2.89223   | 4.2174    |
| COMMD4       | 147.124   | 135.985   | 121.484   | 137.027   | 114.374   |
| ADD1         | 23.0307   | 23.3965   | 19.5703   | 19.5834   | 22.9944   |
| NUDT16L1     | 28.0458   | 32.9944   | 30.1816   | 23.4093   | 33.7649   |
| FAM108A1     | 107.966   | 95.788    | 117.787   | 94.3429   | 94.5833   |
| PITPNM2      | 3.10868   | 2.94865   | 2.56945   | 2.72097   | 2.67083   |
| DCP2         | 2.37979   | 1.65736   | 2.3429    | 2.07625   | 1.53055   |
| FAM96B       | 185.346   | 165.642   | 179.804   | 160.874   | 154.115   |
| SLC39A7      | 48.0691   | 44.3729   | 45.7708   | 40.3257   | 44.5147   |
| LRRC8C       | 3.65339   | 4.50538   | 3.79113   | 3.48157   | 4.10157   |
| ZSCAN9       | 9.55098   | 5.59823   | 7.6128    | 7.42813   | 5.37959   |
| LOC100508120 | 0.554459  | 0.600581  | 0.696535  | 0.675045  | 0.449327  |
| LIMCH1       | 1.96469   | 2.19969   | 1.56933   | 1.75131   | 1.98876   |
| INPL1        | 18.9028   | 17.7785   | 17.6513   | 16.3657   | 17.5971   |
| GUCD1        | 20.2463   | 26.0413   | 21.5463   | 18.7375   | 23.5022   |
| AHDC1        | 1.66906   | 1.62896   | 1.49619   | 1.38143   | 1.6896    |

|                            |           |            |           |           |            |
|----------------------------|-----------|------------|-----------|-----------|------------|
| LRIG1                      | 2.4705    | 2.26953    | 3.03154   | 2.66358   | 1.8965     |
| HAUS7                      | 19.7155   | 17.979     | 21.5164   | 19.0987   | 16.2305    |
| LOC728323                  | 0.425286  | 0.308992   | 0.299652  | 0.265877  | 0.397446   |
| FAM172BP                   | 0.138672  | 0.357347   | 0.268574  | 0.212653  | 0.335797   |
| ZMYM2                      | 2.64788   | 2.40273    | 1.70755   | 1.83936   | 2.6255     |
| ILVBL                      | 42.5322   | 44.9214    | 37.7185   | 31.6699   | 43.6602    |
| RC3H1                      | 1.42631   | 1.57318    | 1.23879   | 1.30572   | 1.42216    |
| EMD                        | 141.133   | 134.787    | 126.581   | 121.31    | 122.011    |
| SCN1B                      | 6.18721   | 6.06398    | 3.36598   | 5.57914   | 4.92062    |
| MVK                        | 19.4518   | 12.2654    | 15.8904   | 16.7203   | 12.257     |
| RPL13AP20                  | 2.87543   | 2.49906    | 2.23667   | 2.12292   | 2.0432     |
| ROBO1                      | 1.1197    | 1.13682    | 1.02366   | 0.884713  | 1.3935     |
| AGAP3                      | 49.6057   | 38.6973    | 40.7768   | 40.3803   | 39.2594    |
| PTPN3                      | 7.41849   | 5.84079    | 5.83905   | 5.94434   | 6.40536    |
| SNRPA1                     | 55.6858   | 42.9438    | 51.6555   | 49.9213   | 42.3168    |
| SNAPC2                     | 55.8426   | 59.9266    | 58.1428   | 49.6388   | 56.0058    |
| PHF2                       | 4.84703   | 4.89887    | 4.66707   | 4.53273   | 4.17576    |
| HSF1                       | 141.866   | 130.466    | 137.32    | 124.595   | 124.097    |
| TPRN                       | 46.836    | 43.7213    | 54.265    | 40.2579   | 43.4133    |
| CDK18                      | 10.6958   | 9.50755    | 8.16393   | 8.19317   | 9.17918    |
| JMJD7,JMJD7-PLA2G4B,PLA2G4 | 18.2628   | 22.6471    | 17.9147   | 15.8079   | 21.5676    |
| TMEM86B                    | 2.41137   | 2.01501    | 2.09952   | 2.27369   | 2.31664    |
| LUC7L                      | 28.2151   | 25.3647    | 23.3642   | 23.5692   | 26.8821    |
| IFNGR1                     | 7.49053   | 7.72937    | 7.43514   | 5.9899    | 8.06274    |
| NUF2                       | 15.4893   | 10.7872    | 13.4361   | 13.3799   | 11.5978    |
| IRX5                       | 0.480744  | 0.49777    | 0.41068   | 0.31365   | 0.55634    |
| RELA                       | 65.0853   | 66.3024    | 57.2893   | 53.0855   | 65.5032    |
| LINC00116                  | 13.5322   | 14.8724    | 13.8576   | 12.1926   | 13.6087    |
| ZNF805                     | 1.01628   | 1.46806    | 1.06563   | 0.848283  | 1.36896    |
| PRDM12                     | 0.723399  | 1.8918     | 1.51872   | 0.840362  | 1.80356    |
| SHFM1                      | 469.862   | 409.765    | 418.567   | 390.143   | 394.548    |
| CAMSAP2                    | 2.6412    | 2.43791    | 2.31793   | 2.26423   | 2.18028    |
| PIAS3                      | 7.38853   | 8.29185    | 6.30319   | 6.1787    | 8.19631    |
| YIF1A                      | 70.593    | 71.9081    | 75.0398   | 64.1297   | 68.812     |
| BUB1B,PAK6                 | 20.9971   | 16.8631    | 18.2899   | 18.4022   | 16.3495    |
| OSBPL5                     | 6.26204   | 3.84052    | 5.70043   | 5.35517   | 4.03051    |
| ROMO1                      | 442.727   | 493.405    | 406.914   | 362.7     | 463.096    |
| SYNGR3                     | 9.42123   | 10.7283    | 8.01031   | 8.7967    | 8.48784    |
| ALG9                       | 3.92004   | 4.07822    | 3.63123   | 2.95805   | 4.16339    |
| COMMD7                     | 28.5346   | 30.7178    | 30.8619   | 25.0047   | 28.557     |
| ITSN2                      | 1.8416    | 1.23281    | 1.32604   | 1.37577   | 1.36371    |
| TUBA1B                     | 756.542   | 697.509    | 735.548   | 697.064   | 618.6      |
| C2orf72                    | 7.90199   | 7.24568    | 5.78464   | 5.62355   | 7.32237    |
| SMAD4                      | 4.72852   | 4.5819     | 4.26713   | 3.6998    | 4.69948    |
| ENTPD8                     | 0.250961  | 0.446944   | 0.0249914 | 0.098633  | 0.463759   |
| TMEM198                    | 1.9364    | 2.07527    | 3.09106   | 2.44416   | 1.67085    |
| FLJ45340                   | 6.11941   | 5.58518    | 3.83112   | 4.87588   | 5.80739    |
| NDUFC1                     | 212.145   | 195.411    | 190.746   | 171.443   | 178.429    |
| CACTIN-AS1                 | 0.258812  | 0.253267   | 0.115207  | 0.272021  | 0.191213   |
| MAML1                      | 6.15701   | 5.9263     | 5.86898   | 5.54621   | 5.58801    |
| MARC1                      | 9.15318   | 9.65594    | 9.24034   | 8.48873   | 9.47742    |
| MYOZ1                      | 0         | 0.0250736  | 0         | 0         | 0.0231019  |
| GBF1                       | 6.64463   | 6.30213    | 6.415     | 6.16939   | 5.95667    |
| FRY                        | 0.0134799 | 0.00636786 | 0         | 0.0112339 | 0.00296098 |
| SIPA1L2                    | 0.404612  | 0.258442   | 0.401608  | 0.39107   | 0.246395   |
| TEX264                     | 101.299   | 97.7565    | 102.987   | 86.5089   | 93.0857    |
| ZKSCAN2                    | 0.940874  | 1.46393    | 1.18186   | 0.974838  | 1.25126    |
| PGAM2                      | 1.19507   | 1.03602    | 1.28549   | 1.23631   | 1.30886    |
| SWI5                       | 35.389    | 42.1439    | 36.6621   | 32.1332   | 33.7431    |
| TADA1                      | 7.88438   | 8.35628    | 6.83157   | 6.53559   | 8.15812    |
| BTN2A1                     | 5.94774   | 4.8272     | 5.75551   | 4.67409   | 5.24971    |
| NLGN2                      | 27.1783   | 28.5855    | 19.2647   | 22.0302   | 28.4223    |
| DENND6A                    | 3.39399   | 3.46746    | 3.55337   | 3.13262   | 3.36555    |
| PARD3                      | 19.3194   | 19.5043    | 19.6003   | 17.4657   | 18.2262    |
| ZCCHC24                    | 1.51814   | 1.76689    | 1.45631   | 1.42674   | 1.60068    |
| CCND3                      | 29.0364   | 32.3595    | 29.6245   | 27.5343   | 28.9885    |
| C22orf39                   | 12.5369   | 15.0291    | 12.6463   | 9.90272   | 13.8212    |
| LOC731275                  | 0.404343  | 0.400048   | 0.408349  | 0.294677  | 0.388225   |
| SLC25A4                    | 16.0623   | 19.176     | 14.3731   | 12.8986   | 19.2179    |
| INO80E                     | 60.6745   | 66.0189    | 67.3859   | 56.5302   | 62.6739    |
| LRRC4B                     | 1.2556    | 0.883903   | 0.848621  | 0.820518  | 1.11846    |
| ZFPM1                      | 2.90737   | 1.80588    | 3.15312   | 2.40609   | 2.28871    |
| TAZ                        | 24.1435   | 21.6323    | 19.7581   | 19.1811   | 21.6008    |
| MED13                      | 2.6386    | 2.65898    | 2.91008   | 2.37407   | 2.45412    |
| SMAD2                      | 5.48497   | 5.41372    | 6.18096   | 4.73791   | 5.26336    |
| DERL2                      | 26.3208   | 27.0586    | 31.2311   | 24.6914   | 26.3238    |
| LOC440354                  | 0.186879  | 0.328364   | 0.343561  | 0.236237  | 0.300153   |
| PLA2G15                    | 10.6465   | 12.7772    | 9.7191    | 8.42815   | 12.3152    |
| MAN1A2                     | 0.947439  | 0.707105   | 0.903473  | 0.727635  | 0.824417   |

|                               |            |            |            |            |            |
|-------------------------------|------------|------------|------------|------------|------------|
| PPP2R3A                       | 1.11383    | 1.21034    | 1.07702    | 0.920306   | 1.32019    |
| TMEM68                        | 9.88178    | 9.31675    | 8.73193    | 7.17478    | 9.44824    |
| AJUBA                         | 13.3955    | 12.5087    | 13.7975    | 11.3075    | 12.5114    |
| HIP1                          | 4.69286    | 4.26601    | 3.70372    | 4.06945    | 4.14363    |
| ATP6V0B                       | 163.69     | 176.398    | 182.506    | 151.695    | 155.016    |
| TAGLN3                        | 0          | 0.0405665  | 0          | 0          | 0.0374198  |
| MIB2                          | 9.76916    | 10.3689    | 10.694     | 8.37141    | 11.5685    |
| PSTPIP2                       | 0.0588533  | 0.0211672  | 0.00922418 | 0.0489694  | 0.0197978  |
| SEMA3B                        | 0.68995    | 1.01854    | 0.574099   | 0.981305   | 0.637506   |
| PLEKHG2                       | 6.88055    | 6.42656    | 6.18708    | 6.34961    | 6.43555    |
| PPARA                         | 1.23274    | 1.12049    | 1.19217    | 1.0078     | 1.0988     |
| HDAC3                         | 68.3241    | 82.3292    | 63.4906    | 56.014     | 81.8397    |
| ZNF654                        | 1.98285    | 1.75084    | 1.6612     | 1.58049    | 1.7637     |
| FLT3LG                        | 10.2746    | 8.37035    | 8.84618    | 9.23707    | 7.66338    |
| SYNJ2                         | 1.06692    | 0.926161   | 1.26195    | 1.14682    | 0.786511   |
| CST6                          | 0          | 0.117752   | 0          | 0          | 0.108645   |
| UBXN7                         | 2.66261    | 1.63663    | 1.73731    | 1.79852    | 1.82534    |
| C19orf47                      | 8.48077    | 8.71074    | 8.62281    | 7.73257    | 8.54364    |
| LAPTM4A                       | 75.4039    | 95.9799    | 90.3899    | 69.3447    | 95.0787    |
| SDHAF1                        | 29.6767    | 30.6962    | 38.707     | 29.9392    | 25.5966    |
| C17orf62                      | 39.0207    | 38.8749    | 36.6108    | 35.8317    | 35.9419    |
| NRIP1                         | 0.681277   | 0.52797    | 0.498817   | 0.508912   | 0.536691   |
| DCAF5                         | 5.91965    | 4.7459     | 4.93857    | 4.76351    | 4.79341    |
| GP1BB,SEPT5                   | 9.52658    | 11.9511    | 7.09611    | 9.19094    | 9.73614    |
| SBF2                          | 2.49625    | 2.33192    | 2.16822    | 1.92584    | 2.35232    |
| TRPT1                         | 78.1698    | 75.5459    | 64.9763    | 60.967     | 75.0346    |
| CHMP2A                        | 115.878    | 117.661    | 101.369    | 101.494    | 104.974    |
| APP                           | 75.3507    | 84.669     | 74.786     | 64.3022    | 86.5718    |
| PEAK1                         | 1.43031    | 1.35623    | 1.16385    | 1.20884    | 1.26183    |
| GNB5                          | 8.04134    | 9.03437    | 8.68694    | 6.90699    | 8.81793    |
| SNAP47                        | 18.9636    | 19.5395    | 18.8683    | 16.3014    | 17.1734    |
| SLC30A1                       | 1.75431    | 4.25244    | 3.07844    | 1.7273     | 4.51819    |
| EAF1                          | 5.92886    | 5.35086    | 6.16001    | 5.65842    | 4.96317    |
| PPIG                          | 9.98072    | 8.26743    | 6.82159    | 8.08455    | 9.44775    |
| LOC100130093                  | 0.750009   | 0.833775   | 0.675034   | 0.625904   | 0.799203   |
| ZNF385C                       | 0.0500776  | 0          | 0.0152791  | 0          | 0.015837   |
| EGLN2,MIA,RAB4B               | 52.623     | 48.1822    | 54.6974    | 49.858     | 44.0124    |
| C22orf32                      | 21.3589    | 31.9986    | 26.986     | 21.0407    | 26.7422    |
| STK11IP                       | 2.55959    | 2.63974    | 2.24575    | 2.26408    | 2.24487    |
| FANCC                         | 3.33258    | 3.29041    | 3.33622    | 3.09412    | 3.01719    |
| RRM2B                         | 6.92004    | 11.5506    | 8.65889    | 6.12137    | 11.1161    |
| C20orf24,TGIF2,TGIF2-C20orf24 | 75.9989    | 95.8141    | 85.2283    | 71.4829    | 87.46      |
| SERINC3                       | 17.1922    | 16.4519    | 18.7162    | 14.4222    | 17.4493    |
| LRRC37A2                      | 0.23618    | 0.234098   | 0.201135   | 0.187662   | 0.253552   |
| ZNF330                        | 30.024     | 27.2595    | 28.3125    | 25.0224    | 28.3121    |
| FAM41C                        | 0.212437   | 0.66794    | 0.435018   | 0.355002   | 0.58499    |
| C4orf33                       | 5.84988    | 6.3984     | 5.35189    | 5.96907    | 5.56696    |
| SMARCB1                       | 91.8508    | 89.7956    | 86.3049    | 80.5742    | 84.208     |
| CRYGS                         | 2.30414    | 2.12932    | 2.22906    | 2.56759    | 1.6808     |
| LOC100506844                  | 15.2718    | 18.6058    | 14.2326    | 11.7513    | 16.6492    |
| TMEM159                       | 46.2506    | 55.1048    | 49.4225    | 40.5859    | 53.0095    |
| MESDC2                        | 7.48897    | 7.91249    | 7.65554    | 6.73607    | 7.54619    |
| NCAM1                         | 0.00816299 | 0          | 0.00506624 | 0.00679412 | 0.00537545 |
| GDE1                          | 21.8908    | 27.3289    | 22.2634    | 19.4031    | 25.876     |
| CTNNA1                        | 32.8927    | 33.8273    | 29.0694    | 27.5618    | 35.1264    |
| FAM78B                        | 3.609      | 2.92093    | 4.17511    | 3.14552    | 2.60292    |
| EDEM1                         | 10.9564    | 10.9182    | 9.8653     | 8.8199     | 11.1158    |
| C12orf65                      | 10.4675    | 9.77955    | 11.5058    | 9.91992    | 9.29945    |
| RHOU                          | 0.207736   | 0.302336   | 0.370909   | 0.262945   | 0.267674   |
| CD83                          | 3.08305    | 5.33241    | 3.44946    | 3.52664    | 4.34474    |
| MTFR2                         | 12.3784    | 9.30918    | 11.758     | 11.5616    | 8.94336    |
| CREB3L1                       | 0          | 0.0179069  | 0          | 0          | 0.0165497  |
| NDUFS8                        | 204.765    | 185.94     | 181.253    | 179.816    | 168.148    |
| FAM89A                        | 20.7294    | 22.7885    | 27.4839    | 19.9139    | 21.0069    |
| NPAS2                         | 8.50754    | 10.8555    | 7.15391    | 6.88521    | 10.0622    |
| EIF4EBP2                      | 3.62647    | 4.80241    | 4.58979    | 3.6136     | 4.56513    |
| ACBD5                         | 8.07421    | 6.2723     | 6.23143    | 6.61322    | 6.50823    |
| NEIL3                         | 2.52832    | 1.27966    | 2.04142    | 2.21528    | 1.47696    |
| LOC388948                     | 0          | 0.0356598  | 0          | 0          | 0.0329616  |
| RAD51B                        | 5.95858    | 6.16262    | 5.12064    | 5.002      | 5.69076    |
| TNFRSF10D                     | 33.0227    | 41.4186    | 27.6134    | 27.0893    | 38.7435    |
| NKIRAS2                       | 14.0232    | 13.7008    | 14.4875    | 12.7497    | 11.596     |
| ANKIB1                        | 3.07727    | 2.89462    | 2.7646     | 2.5938     | 2.77739    |
| GPATCH3                       | 8.13743    | 9.00615    | 7.52841    | 7.33062    | 8.31819    |
| PIK3CB                        | 3.03886    | 2.55465    | 3.01045    | 2.61583    | 2.46191    |
| CPZ                           | 26.0915    | 29.9935    | 23.6705    | 21.0956    | 30.2795    |
| TREM2                         | 0          | 0          | 0.0777829  | 0          | 0          |
| EMILIN2                       | 0          | 0.00960633 | 0          | 0          | 0.00888208 |
| GNS                           | 9.67246    | 9.97231    | 9.25444    | 8.63624    | 9.72894    |

|              |            |            |           |           |            |
|--------------|------------|------------|-----------|-----------|------------|
| ITFG1        | 10.569     | 11.0924    | 9.96957   | 9.19509   | 11.0897    |
| LRRC37B      | 1.84085    | 2.26487    | 1.71699   | 1.63964   | 2.11994    |
| FAM214B      | 4.29073    | 4.54169    | 3.90213   | 3.76685   | 4.33456    |
| RRAS2        | 19.716     | 18.2715    | 21.0799   | 16.4357   | 19.658     |
| C5           | 0.260163   | 0.453979   | 0.306199  | 0.262091  | 0.363728   |
| TESK2        | 1.84497    | 2.82192    | 2.22576   | 1.65027   | 2.33363    |
| AGPHD1       | 2.08779    | 4.1676     | 2.88257   | 2.73733   | 3.69971    |
| PTPRJ        | 4.36041    | 4.69721    | 3.22415   | 3.36438   | 4.5799     |
| NCKAP5L      | 6.3444     | 5.69743    | 6.60023   | 5.78482   | 5.4116     |
| TMEM2        | 0.442311   | 0.513596   | 0.601888  | 0.46808   | 0.546126   |
| NDUFA9       | 51.9276    | 53.6478    | 52.8695   | 43.4757   | 55.2733    |
| PCGF3        | 5.55984    | 5.41417    | 4.94405   | 4.77566   | 5.44717    |
| GTPBP8       | 8.57048    | 8.11405    | 8.50765   | 7.05375   | 8.49714    |
| RILPL2       | 25.9481    | 33.7605    | 29.0295   | 24.2542   | 31.152     |
| LRRC20       | 7.39098    | 6.87968    | 6.28971   | 6.46109   | 6.52664    |
| PLXDC1       | 0.108318   | 0.111044   | 0.108646  | 0.0974561 | 0.108781   |
| ARHGEF17     | 3.75831    | 3.5495     | 3.31427   | 3.02513   | 3.65409    |
| ZZZ3         | 3.26065    | 2.75513    | 3.45323   | 2.59832   | 2.82136    |
| GEMIN7       | 24.1604    | 26.8682    | 23.6706   | 21.0739   | 25.6542    |
| EFCAB3       | 0.564128   | 0.469557   | 0.372648  | 0.319847  | 0.261644   |
| HIBCH        | 2.60903    | 2.77923    | 2.38384   | 2.13107   | 2.89507    |
| PBK          | 29.5768    | 24.9843    | 30.4345   | 26.6415   | 25.7335    |
| DHCR24       | 43.1851    | 47.4165    | 39.1672   | 37.4183   | 46.8632    |
| TBCEL        | 1.30194    | 1.44873    | 1.54482   | 1.28614   | 1.30594    |
| COX6A1       | 670.091    | 691.99     | 617.633   | 555.082   | 682.256    |
| LINC00638    | 0.192717   | 0.0936402  | 0.519284  | 0.230094  | 0.172791   |
| HERPUD1      | 37.5126    | 44.4404    | 70.4484   | 40.7631   | 41.6613    |
| FAM134C      | 17.0223    | 17.7662    | 16.8527   | 14.5278   | 17.0403    |
| C20orf112    | 1.61024    | 1.50348    | 1.43388   | 1.50053   | 1.3698     |
| CCNB2        | 49.0209    | 45.5142    | 48.9983   | 44.7912   | 41.5854    |
| CELF5        | 0.527602   | 0.483762   | 0.32825   | 0.289242  | 0.42153    |
| PPP6C        | 16.808     | 17.7894    | 18.2581   | 14.5413   | 18.2531    |
| CSRNP2       | 5.65984    | 5.14239    | 6.6964    | 5.50228   | 5.09404    |
| GTF2E2       | 25.7211    | 22.6996    | 22.8533   | 23.0645   | 20.0445    |
| MRPL45P2     | 1.91184    | 2.7464     | 2.42017   | 1.71543   | 2.22418    |
| SLC30A4      | 0.0912152  | 0.0976806  | 0.129526  | 0.118847  | 0.0928457  |
| SOC56        | 1.99681    | 2.54684    | 2.3952    | 1.91658   | 2.49916    |
| USP43        | 1.61572    | 1.20672    | 1.28659   | 1.45708   | 1.24584    |
| PGM2L1       | 0.475644   | 0.468937   | 0.402558  | 0.440864  | 0.411075   |
| ZYX          | 398.074    | 351.256    | 356.549   | 336.742   | 339.035    |
| TKTL1        | 0.0210127  | 0          | 0.013011  | 0.0175943 | 0.0137666  |
| CDCA8        | 32.0025    | 32.1453    | 35.4406   | 30.8986   | 28.4851    |
| NXN          | 12.4188    | 11.7309    | 9.35511   | 8.73099   | 12.3885    |
| SCAMP3       | 48.4631    | 55.4301    | 47.8122   | 47.6841   | 45.8066    |
| KCNQ1        | 12.7103    | 12.4057    | 10.8252   | 10.084    | 12.4195    |
| HMGB2        | 227.935    | 200.28     | 204.236   | 211.928   | 189.155    |
| FNBP4        | 10.7596    | 8.9353     | 9.22681   | 9.88632   | 8.7749     |
| LOC100132352 | 4.45355    | 4.68968    | 6.0921    | 4.18287   | 4.53513    |
| AXL          | 228.035    | 245.663    | 210.043   | 192.561   | 243.981    |
| FAF2         | 10.7281    | 11.1053    | 9.99769   | 8.89585   | 11.2889    |
| CEP57L1      | 1.9925     | 1.58985    | 1.64187   | 1.39978   | 1.60848    |
| FAM174A      | 8.33687    | 6.92753    | 7.50373   | 6.92052   | 7.10917    |
| DNAH12       | 0.00414156 | 0.00910976 | 0.013185  | 0.010364  | 0.00287395 |
| RNF111       | 3.01092    | 2.02384    | 2.6815    | 2.4717    | 2.03749    |
| TRAPPC9      | 9.93946    | 10.5479    | 7.6077    | 8.23389   | 10.5783    |
| SPEN         | 3.99528    | 3.50133    | 3.29517   | 3.63845   | 3.40373    |
| SH3GL1P1     | 0.184539   | 0.413419   | 0.357253  | 0.189344  | 0.395281   |
| ARHGAP18     | 1.67903    | 1.36268    | 1.31084   | 1.17659   | 1.77945    |
| TEX9         | 0.4665     | 0.344946   | 0.51456   | 0.533714  | 0.313906   |
| DIDO1        | 5.69758    | 7.40378    | 5.80652   | 5.98899   | 6.27049    |
| ZNF558       | 4.69201    | 4.83812    | 4.94353   | 3.88716   | 5.02566    |
| SEMA4C       | 14.0782    | 12.5435    | 13.7119   | 12.6531   | 11.6664    |
| NUDT14       | 39.8689    | 48.0129    | 37.0318   | 31.0782   | 44.0726    |
| SOX2         | 0.0700587  | 0.0796434  | 0.0696707 | 0.0467882 | 0.131063   |
| COPE         | 287.008    | 282.882    | 251.957   | 237.587   | 269.025    |
| KCNIP4       | 0.254146   | 0.0886583  | 0.429121  | 0.327646  | 0.154048   |
| GSTZ1        | 24.517     | 23.377     | 26.0715   | 21.2247   | 22.2215    |
| LIMK1        | 21.6505    | 21.5098    | 20.6083   | 21.6224   | 19.3977    |
| NEURL3       | 0.0475801  | 0.0962951  | 0.0288967 | 0.039637  | 0.120147   |
| KCTD9        | 6.71377    | 6.16044    | 6.27971   | 5.30153   | 6.50655    |
| ITM2C        | 105.49     | 112.116    | 105.38    | 93.8415   | 108.202    |
| MTFR1        | 15.6028    | 13.0165    | 15.7116   | 12.9362   | 13.5793    |
| LAGE3        | 18.5662    | 22.7091    | 16.9452   | 15.8116   | 21.0099    |
| UBALD2       | 84.5616    | 77.873     | 114.489   | 86.8751   | 68.2371    |
| TCIRG1       | 44.217     | 46.6691    | 32.3065   | 36.1762   | 43.2377    |
| IGIP         | 1.37434    | 1.15566    | 0.950287  | 1.32867   | 0.977051   |
| HAVCR1P1     | 0.0574489  | 0.0813621  | 0.0237804 | 0.0317141 | 0.0507732  |
| LMAN2L       | 6.83165    | 6.93125    | 7.12914   | 6.36109   | 6.82137    |
| ARL4A        | 2.12237    | 3.88044    | 2.92803   | 1.80596   | 3.85231    |

|              |            |           |           |            |           |
|--------------|------------|-----------|-----------|------------|-----------|
| SNRPG        | 275.235    | 252.97    | 269.762   | 238.07     | 240.747   |
| PPP1R2       | 9.15592    | 11.3373   | 9.83212   | 7.85806    | 11.1834   |
| TLN2         | 1.27936    | 1.03628   | 1.02883   | 1.08798    | 1.04006   |
| ZRSR2        | 6.9043     | 6.50681   | 6.81842   | 6.56605    | 6.08833   |
| HMG2         | 211.344    | 207.895   | 190.899   | 196.251    | 191.314   |
| CRIM1        | 9.0148     | 10.6006   | 9.06561   | 7.89364    | 9.93779   |
| KIAA0101     | 27.9865    | 18.9566   | 29.9414   | 27.3265    | 17.9096   |
| RRAGC        | 13.5599    | 13.1293   | 13.761    | 11.6954    | 13.2637   |
| DIRC2        | 10.9791    | 9.72479   | 10.8486   | 9.41116    | 9.94571   |
| CNNM4        | 3.80403    | 3.72582   | 2.87539   | 3.12726    | 3.78567   |
| PDK1         | 24.4016    | 24.2306   | 20.7081   | 16.7361    | 26.8008   |
| CCDC84       | 19.5021    | 13.9657   | 14.3111   | 16.6102    | 12.1161   |
| BRSK2        | 11.8433    | 11.9252   | 10.3886   | 10.7222    | 10.9634   |
| CLIC1        | 599.232    | 628.393   | 543.27    | 496.881    | 613.363   |
| ITM2B        | 47.7134    | 53.9815   | 50.8836   | 41.8028    | 53.3621   |
| RAB24        | 27.1637    | 28.6382   | 28.3372   | 24.656     | 25.9073   |
| LSM1         | 33.6686    | 34.9509   | 39.4733   | 30.5824    | 31.9161   |
| RBPMS        | 34.3398    | 28.3842   | 32.9074   | 32.4643    | 27.9995   |
| KANSL3       | 8.02024    | 7.44795   | 8.65019   | 7.2816     | 7.36797   |
| TRAK1        | 4.18141    | 4.27413   | 3.98252   | 3.8566     | 4.1923    |
| TIMM17B      | 119.227    | 109.489   | 117.918   | 104.707    | 107.082   |
| FITM2        | 0.779564   | 0.959364  | 1.05434   | 0.895352   | 0.670582  |
| BCKDHA       | 124.877    | 116.671   | 108.214   | 92.0896    | 120.484   |
| LOC441155    | 0.117544   | 0.118691  | 0.0769527 | 0.0463739  | 0.104188  |
| CTSH         | 17.5601    | 23.2522   | 17.9552   | 15.9181    | 21.6933   |
| RCOR2        | 14.54      | 12.0903   | 15.6871   | 12.9759    | 12.1807   |
| ZNF524       | 34.0767    | 23.3707   | 34.2681   | 30.6869    | 22.1622   |
| SNRNP35      | 10.5463    | 13.8409   | 10.4431   | 9.11518    | 13.8802   |
| NUCKS1       | 19.5035    | 20.224    | 16.0403   | 15.1631    | 21.2018   |
| OSBPL9       | 15.0176    | 16.5072   | 15.1296   | 13.074     | 15.7316   |
| ZDHC12       | 79.0799    | 89.2295   | 70.2195   | 69.2841    | 78.8017   |
| SPAG16       | 8.10438    | 7.75249   | 7.72498   | 6.9533     | 8.21899   |
| TMEM11       | 27.5708    | 27.1744   | 22.3459   | 22.5172    | 26.1005   |
| FAM225B      | 0.476599   | 0.380387  | 0.470907  | 0.476308   | 0.376094  |
| ZNF836       | 1.67572    | 1.28719   | 2.21319   | 1.75539    | 1.30234   |
| AMZ2P1       | 2.20336    | 1.96361   | 1.98106   | 1.47837    | 2.21573   |
| HERC1        | 0.773543   | 0.677956  | 0.656231  | 0.692363   | 0.629887  |
| DCPS         | 38.4034    | 34.3214   | 32.1854   | 30.3378    | 35.2632   |
| HEBP1        | 60.1292    | 77.6245   | 64.0501   | 55.7934    | 69.5832   |
| LOC100288198 | 0.561549   | 0.509443  | 0.531876  | 0.419613   | 0.611866  |
| RAB8B        | 5.59381    | 5.64487   | 4.92225   | 4.15297    | 6.30595   |
| SWAP70       | 6.744      | 6.89884   | 5.66675   | 5.82151    | 6.4363    |
| SLC35A1      | 7.12865    | 6.77889   | 6.68391   | 5.76132    | 6.78327   |
| TMEM50B      | 6.98953    | 9.81054   | 7.50655   | 6.62187    | 9.41352   |
| LRCH4        | 13.619     | 12.1948   | 12.1017   | 13.0147    | 11.2358   |
| LDB1         | 19.7147    | 21.0319   | 17.7926   | 18.1306    | 20.7065   |
| SDHAP2       | 1.20925    | 0.912197  | 1.18564   | 1.12878    | 1.15832   |
| CAMK1D       | 4.5017     | 4.0295    | 3.41761   | 3.52855    | 3.90983   |
| WDR88        | 0.0517228  | 0.0475964 | 0.0210112 | 0.0286293  | 0.0220642 |
| GGA3         | 11.7064    | 13.1714   | 11.0671   | 10.1071    | 12.8782   |
| RAF1         | 19.798     | 21.9635   | 19.4808   | 17.9855    | 21.1695   |
| NDUFB7       | 263.119    | 286.437   | 236.219   | 220.742    | 273.02    |
| CTSB         | 42.8744    | 56.477    | 48.6277   | 42.5013    | 48.921    |
| ZNF2         | 1.42964    | 1.17073   | 1.69536   | 1.39024    | 1.04096   |
| KCNRG,TRIM13 | 3.70999    | 4.59868   | 3.65251   | 2.92736    | 4.46445   |
| NADSYN1      | 31.8336    | 36.1726   | 30.4313   | 27.5109    | 32.2832   |
| MGST2        | 58.1125    | 79.5615   | 65.6275   | 51.7891    | 75.7127   |
| DSTN         | 60.2637    | 72.3698   | 64.5782   | 52.5811    | 76.3123   |
| SOD2         | 29.7264    | 35.6265   | 28.7275   | 26.1019    | 30.5176   |
| CD72         | 0.686569   | 0.912452  | 0.466765  | 0.664104   | 0.80887   |
| GUSB         | 25.7504    | 31.6076   | 24.6633   | 25.3227    | 26.6053   |
| ARHGEF7      | 9.28607    | 9.84749   | 7.85398   | 7.66312    | 9.43814   |
| EPHB4        | 39.4413    | 34.3672   | 35.6057   | 34.1169    | 33.4724   |
| ARHGEF9      | 1.97629    | 1.84463   | 2.42022   | 1.51581    | 2.13575   |
| ARSA         | 9.52471    | 9.04515   | 8.21813   | 8.50484    | 8.92978   |
| ZNF225       | 0.590971   | 0.525444  | 0.67417   | 0.441122   | 0.585259  |
| POLB         | 24.6904    | 21.5655   | 25.7718   | 22.112     | 21.6861   |
| PPP1R14B     | 487.583    | 461.657   | 417.632   | 377.815    | 457.431   |
| LRFN3        | 13.328     | 11.8147   | 11.4086   | 10.6591    | 11.8684   |
| B3GAT3       | 40.1822    | 36.8788   | 38.501    | 35.5184    | 36.9237   |
| NF1          | 1.17528    | 1.07738   | 1.07506   | 0.975884   | 1.10993   |
| BLOC1S3      | 10.4504    | 11.492    | 13.7138   | 10.668     | 10.472    |
| TMEM19       | 2.04826    | 2.56346   | 3.02755   | 1.96969    | 2.41768   |
| AGPAT2       | 280.098    | 290.75    | 291.32    | 260.589    | 266.42    |
| FAM21C       | 6.16589    | 6.45504   | 6.15298   | 5.92582    | 5.83594   |
| OSGEPL1      | 2.04468    | 2.02856   | 2.22798   | 1.6959     | 2.16205   |
| RAB38        | 23.2918    | 25.5518   | 21.8221   | 19.0697    | 25.8981   |
| UNC13A       | 0.00279566 | 0.0113817 | 0.0203938 | 0.00464374 | 0.0175805 |
| CCDC85B      | 332.673    | 242.223   | 351.935   | 283.309    | 250.801   |

|                 |            |           |            |           |            |
|-----------------|------------|-----------|------------|-----------|------------|
| ZNF565          | 0.95727    | 0.671051  | 0.557844   | 0.682672  | 0.659052   |
| NAMPT           | 24.217     | 20.3526   | 20.5834    | 18.3247   | 21.5518    |
| SESN1           | 3.86905    | 4.43829   | 2.66748    | 2.35934   | 4.66515    |
| TMEM45A         | 12.8399    | 17.6712   | 12.5217    | 8.56489   | 19.8439    |
| ZNF707          | 7.7853     | 9.7227    | 10.2577    | 7.54933   | 9.23569    |
| MSN             | 0.038884   | 0.0090155 | 0.00802413 | 0.0432993 | 0.00833227 |
| PNPLA6          | 30.465     | 36.1849   | 26.0602    | 25.9904   | 35.1189    |
| PCMT1           | 54.927     | 52.9915   | 57.0613    | 47.934    | 53.4117    |
| EHD2            | 8.24219    | 10.02     | 6.64742    | 6.74373   | 9.92043    |
| PPIC            | 13.9932    | 12.416    | 14.0198    | 12.1495   | 12.5313    |
| PPP1CA          | 209.959    | 213.794   | 195.853    | 192.506   | 192.984    |
| FGD3            | 4.4995     | 4.49437   | 4.05944    | 4.12039   | 4.03353    |
| PAQR7           | 19.6286    | 17.9417   | 17.3113    | 16.7191   | 16.6314    |
| GPR89B,GPR89C   | 0.066592   | 0.0322671 | 0.0834514  | 0.0184944 | 0.0909725  |
| SP3             | 5.7891     | 5.11405   | 6.4338     | 5.107     | 5.22606    |
| RFTN1           | 0.0372547  | 0         | 0.022799   | 0.0154963 | 0.0237358  |
| RUNX1           | 7.66022    | 9.57419   | 7.8439     | 7.18366   | 8.58385    |
| ITGA7           | 4.23417    | 5.32637   | 2.36227    | 3.16785   | 5.52348    |
| TMEM141         | 171.088    | 154.681   | 152.325    | 140.451   | 144.948    |
| LOC100131347    | 0.0574007  | 0.0638458 | 0.0709108  | 0.0574176 | 0.0593194  |
| ZNF254          | 1.12716    | 1.07497   | 0.808127   | 0.896936  | 1.07047    |
| NOTCH1          | 8.48466    | 6.1027    | 8.05205    | 7.63693   | 6.02573    |
| ZNF782          | 0.595983   | 0.648696  | 0.848513   | 0.683216  | 0.683424   |
| MMS19           | 24.5913    | 23.781    | 24.8099    | 21.6833   | 23.0779    |
| RALGAPA1        | 1.39837    | 1.06893   | 1.31322    | 1.11172   | 1.2247     |
| CDT1            | 93.2413    | 61.1398   | 94.997     | 91.2254   | 57.0652    |
| TRIM24          | 4.69796    | 3.5759    | 4.37509    | 4.19495   | 3.71937    |
| B3GNT2          | 3.57345    | 4.0224    | 4.32704    | 3.18607   | 4.07554    |
| HLA-J           | 1.24054    | 2.35093   | 1.25696    | 1.22429   | 2.05332    |
| C20orf96        | 9.02152    | 7.98512   | 9.06641    | 8.48895   | 7.54121    |
| LETM1           | 14.3493    | 15.0778   | 14.7148    | 13.1155   | 14.9744    |
| ABI2            | 8.75473    | 8.08346   | 8.67284    | 7.38375   | 8.99057    |
| TNK1            | 9.24708    | 9.14639   | 11.4241    | 8.76156   | 8.92288    |
| GNA15           | 8.54834    | 8.40943   | 7.48032    | 7.54367   | 8.03812    |
| FOXO4           | 1.71022    | 1.30324   | 1.60568    | 1.56476   | 1.55058    |
| RNF10           | 32.406     | 31.9101   | 29.7814    | 27.3114   | 31.5498    |
| MGAT4B          | 107.422    | 107.299   | 101.853    | 93.9852   | 100.966    |
| CA12            | 8.52198    | 13.0731   | 4.75153    | 5.64258   | 13.4345    |
| CYB561D2        | 33.0142    | 40.7386   | 30.8393    | 28.775    | 35.7104    |
| C17orf49,RNASEK | 438.007    | 402.699   | 401.83     | 382.716   | 365.997    |
| PXMP2           | 12.24      | 14.2818   | 15.2249    | 12.3146   | 11.5811    |
| MYO18A,TIAF1    | 12.6189    | 12.2596   | 8.62906    | 10.8721   | 10.9577    |
| C11orf82        | 2.12451    | 1.88314   | 2.22742    | 2.14944   | 1.61       |
| SLC2A4          | 0.677865   | 0.7649    | 0.785278   | 0.667207  | 0.907829   |
| MIR1291,SNORA34 | 2.3511     | 6.32287   | 0          | 3.80827   | 0          |
| ABCC6           | 1.575      | 1.20236   | 0.855758   | 0.764761  | 1.53865    |
| ZBTB4           | 8.38588    | 9.51225   | 6.9265     | 7.2504    | 9.05251    |
| ZNF79           | 3.56874    | 3.79541   | 5.04965    | 3.33706   | 3.30136    |
| INO80C          | 12.11717   | 11.4235   | 11.8756    | 10.2447   | 11.529     |
| ZNF660          | 0.00913083 | 0.0659059 | 0.0345554  | 0.0151376 | 0.0377165  |
| APOPT1          | 23.5559    | 22.3961   | 27.6843    | 22.1689   | 20.399     |
| MRPS34          | 181.427    | 175.175   | 178.609    | 166.558   | 165.815    |
| C4orf48         | 59.4178    | 47.7194   | 68.3807    | 53.3723   | 52.2791    |
| CLCN2           | 7.84925    | 7.21957   | 6.60872    | 8.10893   | 6.08451    |
| TRERF1          | 3.43792    | 3.22696   | 2.10246    | 2.5119    | 3.40062    |
| ING4            | 6.86863    | 6.96821   | 6.73046    | 5.88109   | 6.09836    |
| DMXL2           | 2.55421    | 2.29851   | 1.89868    | 2.00133   | 2.45835    |
| LAMC1           | 11.6195    | 11.2981   | 9.50954    | 9.20935   | 11.6359    |
| LOC100506100    | 6.99849    | 7.49079   | 7.22111    | 6.97382   | 8.08757    |
| SCAPER          | 2.49292    | 2.45732   | 2.14177    | 1.9566    | 2.52122    |
| GABARAP         | 357.155    | 417.823   | 347.62     | 318.243   | 364.129    |
| ZFP64           | 7.42591    | 6.26956   | 5.88927    | 6.16905   | 6.33435    |
| SUMO1P3         | 0.093159   | 0.0539406 | 0          | 0         | 0.103537   |
| QSER1           | 2.90023    | 2.1975    | 3.1197     | 2.64534   | 2.31513    |
| EFNB2           | 1.2076     | 1.43169   | 1.01224    | 0.990391  | 1.37887    |
| CDC42EP3        | 1.74147    | 2.04534   | 2.30167    | 1.70438   | 1.99371    |
| HS1BP3          | 22.4935    | 23.2779   | 20.0918    | 19.7128   | 21.5722    |
| KDM5A           | 2.63372    | 2.52528   | 2.1266     | 2.21712   | 2.38601    |
| MYL12B          | 561.681    | 598.787   | 638.319    | 540.215   | 551.679    |
| ITGB3BP         | 21.2717    | 15.6312   | 15.6392    | 16.409    | 17.9143    |
| OSTF1           | 17.1324    | 16.6211   | 17.3159    | 16.2083   | 16.5962    |
| ST7-AS1         | 1.93583    | 7.32249   | 4.21849    | 2.41321   | 6.86878    |
| SLC38A2         | 29.1692    | 31.82     | 43.0363    | 28.4703   | 34.2359    |
| RNF185          | 17.5       | 25.0424   | 18.455     | 16.2309   | 22.9073    |
| FAM65A          | 23.6031    | 19.6625   | 20.4132    | 21.2637   | 19.069     |
| SOCS7           | 2.18855    | 1.83808   | 2.3679     | 2.1052    | 1.65293    |
| FBXO44          | 25.2814    | 22.2772   | 22.2852    | 21.6521   | 21.9671    |
| ULBP3           | 2.10159    | 3.17269   | 2.29909    | 2.13988   | 2.47657    |
| NEK1            | 1.27787    | 0.910088  | 1.20578    | 1.09778   | 1.08462    |

|              |           |           |           |           |            |
|--------------|-----------|-----------|-----------|-----------|------------|
| POM121L8P    | 0.37628   | 0.457455  | 0.28823   | 0.384425  | 0.374162   |
| VEZT         | 6.67887   | 6.54048   | 6.25051   | 5.69544   | 6.90344    |
| ZNF431       | 2.75889   | 2.45495   | 1.85498   | 2.30388   | 2.36755    |
| SCARNA12     | 7.22607   | 10.3875   | 8.94442   | 5.92644   | 8.97595    |
| MFAP3L       | 0.167751  | 0.220613  | 0.295891  | 0.199788  | 0.220049   |
| PPM1A        | 4.03644   | 4.32509   | 4.01946   | 3.54309   | 4.21448    |
| LINC00240    | 0.452538  | 0.761568  | 0.817837  | 0.893103  | 0.487102   |
| POLR2J       | 105.049   | 125.106   | 110.103   | 94.3308   | 116.782    |
| HYPK,SERF2   | 153.792   | 161.148   | 155.132   | 129.006   | 159.249    |
| SEC61A1      | 80.7735   | 79.1355   | 86.3474   | 71.6245   | 78.1911    |
| TBC1D10A     | 18.2954   | 14.7938   | 13.8248   | 15.1724   | 14.1465    |
| SLC6A8       | 65.6195   | 73.8388   | 56.538    | 55.6496   | 69.8571    |
| ALKBH6       | 19.3021   | 20.261    | 16.6161   | 18.7344   | 18.3899    |
| MOGS         | 45.6895   | 43.2207   | 47.4933   | 42.201    | 43.4978    |
| ACD          | 41.1854   | 38.5318   | 41.2419   | 37.6827   | 35.619     |
| EMC3         | 25.8185   | 31.9677   | 28.2039   | 25.5726   | 27.9845    |
| BARX2        | 0         | 0.0251002 | 0         | 0         | 0.0233856  |
| PLBD1        | 16.2287   | 17.706    | 14.69     | 13.6923   | 17.8852    |
| TSEN34       | 56.5057   | 63.062    | 53.7031   | 46.419    | 63.2435    |
| KIF20B       | 1.74199   | 1.70387   | 0.555787  | 1.60636   | 1.60684    |
| KCND1        | 0.656973  | 0.493314  | 0.274295  | 0.674758  | 0.40705    |
| SPIB         | 0.0924591 | 0.0462219 | 0.113173  | 0.170027  | 0.0321906  |
| RAB21        | 13.6232   | 11.7483   | 13.0719   | 11.1352   | 12.3817    |
| CEP76        | 1.49544   | 1.50917   | 1.82421   | 1.45474   | 1.36309    |
| PHLPP1       | 4.01189   | 2.65603   | 2.9873    | 3.23968   | 3.00875    |
| MAN2B1       | 23.9154   | 38.5802   | 21.7996   | 21.3446   | 33.9735    |
| SSH2         | 1.50821   | 0.806279  | 0.924148  | 1.02986   | 1.01445    |
| C1orf115     | 3.429     | 3.80763   | 3.0481    | 3.25316   | 3.58782    |
| NARFL        | 11.2396   | 11.8978   | 14.4182   | 12.109    | 10.203     |
| TMEM131      | 4.83519   | 4.7408    | 4.72998   | 4.54233   | 4.56805    |
| PHKA2        | 4.52906   | 4.50569   | 3.9793    | 4.00233   | 4.43997    |
| CADM4        | 12.428    | 14.9579   | 12.5955   | 12.7027   | 14.0408    |
| DUT          | 41.7489   | 42.714    | 43.3677   | 38.7037   | 44.12      |
| CDK4         | 180.813   | 210.09    | 214.169   | 173.44    | 199.235    |
| ABRACL       | 84.1241   | 82.0872   | 104.671   | 84.0009   | 76.0153    |
| GTSE1        | 12.9359   | 10.2835   | 10.7117   | 11.4022   | 9.5227     |
| SEMA4F       | 4.37719   | 5.59705   | 2.98996   | 3.7483    | 5.20512    |
| RNF5         | 69.1745   | 72.3097   | 70.2983   | 58.1724   | 72.1856    |
| LOC100505839 | 0         | 0.035573  | 0         | 0         | 0.0331592  |
| RAB41        | 0         | 0.0381393 | 0         | 0         | 0.0355529  |
| ZFP1         | 2.21148   | 2.47163   | 2.26714   | 2.06613   | 2.28328    |
| ITPK1-AS1    | 0.0391116 | 0         | 0.0279581 | 0.0374704 | 0.014734   |
| C1orf226     | 1.62151   | 1.62282   | 1.85911   | 1.91387   | 1.31762    |
| C16orf72     | 9.27994   | 6.19745   | 8.67244   | 7.94896   | 6.38812    |
| INSR         | 2.98004   | 3.21259   | 2.81564   | 2.95795   | 2.82644    |
| AGTPBP1      | 5.65639   | 4.95193   | 5.13362   | 4.70295   | 5.01948    |
| ASB14        | 0.390834  | 0.304317  | 0.193045  | 0.271954  | 0.298496   |
| LOC646999    | 0.028064  | 0.0411273 | 0.0594001 | 0.047001  | 0.0388567  |
| LOC158376    | 0         | 0.0578397 | 0         | 0         | 0.0539348  |
| RILPL1       | 11.8237   | 9.82086   | 10.1979   | 9.97494   | 10.4273    |
| DNAJB14      | 1.38248   | 1.24907   | 1.35932   | 1.28259   | 1.2912     |
| ABHD6        | 5.56427   | 5.24615   | 6.07811   | 5.41448   | 5.25924    |
| COA6         | 67.6154   | 67.2519   | 74.7113   | 60.1125   | 61.4455    |
| SLC16A3      | 258.737   | 231.383   | 182.158   | 192.798   | 235.125    |
| SH3TC1       | 5.47359   | 4.16451   | 3.39925   | 4.55065   | 4.21539    |
| HOXB4        | 6.35874   | 5.01326   | 6.76432   | 5.81208   | 4.78264    |
| FAM166A      | 8.60072   | 8.94524   | 9.21656   | 8.45252   | 7.96065    |
| ASPHD1       | 39.6666   | 32.7857   | 38.0065   | 34.1106   | 30.7545    |
| WNK2         | 7.24979   | 6.65702   | 5.74889   | 6.47277   | 6.26773    |
| THAP7        | 27.7848   | 30.7122   | 32.7862   | 27.554    | 29.3015    |
| PHIP         | 2.82447   | 2.54129   | 1.8878    | 2.51167   | 2.67608    |
| CDH15        | 0.88335   | 0.951832  | 0.499646  | 0.571726  | 1.12236    |
| TENC1        | 0.827454  | 0.885021  | 0.652732  | 0.696847  | 0.550398   |
| GUSBP9,SMA5  | 0.586652  | 0.772874  | 0.610166  | 0.559922  | 0.703593   |
| CNKSR3       | 1.67352   | 1.62988   | 1.78589   | 1.77566   | 1.51436    |
| MAP4K2       | 19.3577   | 17.0908   | 15.6963   | 16.4025   | 16.6007    |
| ANO6         | 10.8078   | 14.2595   | 9.25429   | 8.2124    | 14.9784    |
| ENTPD4       | 3.95149   | 4.26254   | 3.4872    | 3.8853    | 3.87154    |
| COL6A4P1     | 0.0113585 | 0.14317   | 0.0279007 | 0.0752539 | 0.0743204  |
| DR1          | 16.1309   | 16.2937   | 17.2708   | 14.0721   | 16.1241    |
| PTPRB        | 0.012079  | 0.0146167 | 0.0152543 | 0.0235407 | 0.00821131 |
| DPF1         | 3.34964   | 2.62663   | 2.98617   | 3.15202   | 2.97581    |
| NFKBIL1      | 41.5303   | 36.655    | 44.9455   | 35.7404   | 34.5519    |
| DLG4         | 22.364    | 22.5328   | 18.8994   | 17.9962   | 22.4895    |
| LY6G5C       | 2.00951   | 2.57962   | 2.19177   | 1.87      | 2.35651    |
| OS9          | 60.3625   | 67.7104   | 63.1996   | 57.9493   | 61.7665    |
| SUV420H2     | 9.33212   | 10.6949   | 6.77289   | 8.03793   | 9.99018    |
| CERS6        | 3.43808   | 3.3136    | 3.04161   | 2.89875   | 3.26886    |
| EBF3         | 0.076418  | 0.0518131 | 0.0595296 | 0.0789006 | 0.0324638  |



|              |           |           |           |           |           |
|--------------|-----------|-----------|-----------|-----------|-----------|
| LRP6         | 1.27453   | 1.00494   | 1.26405   | 1.22674   | 1.04245   |
| DCTN3        | 107.404   | 102.973   | 96.8622   | 89.7262   | 98.1114   |
| PTPRN        | 0.127953  | 0.247926  | 0.0257045 | 0.0891984 | 0.153759  |
| DGCR2        | 16.6088   | 18.7306   | 18.0173   | 15.0309   | 18.2669   |
| PLEKHA1      | 4.25563   | 4.46374   | 3.75817   | 3.79289   | 3.82508   |
| KLC4         | 5.51755   | 5.20773   | 5.75296   | 5.09637   | 4.98881   |
| USP46        | 1.10625   | 1.15174   | 1.27302   | 0.983792  | 1.20632   |
| CIT          | 4.33571   | 3.55158   | 5.02252   | 4.34255   | 3.5458    |
| CD99L2       | 6.37224   | 7.02611   | 6.3259    | 5.41362   | 6.74336   |
| CHRD         | 2.52444   | 3.05858   | 1.89034   | 2.79529   | 2.41192   |
| ANGEL1       | 7.45579   | 7.18888   | 6.35951   | 5.97113   | 7.90327   |
| RAD21-AS1    | 0.0894858 | 0.0480716 | 0.0848161 | 0.111716  | 0.0150836 |
| STX7         | 5.28971   | 4.96138   | 5.20102   | 4.50715   | 4.69032   |
| PDXK         | 19.4224   | 18.468    | 17.0972   | 16.8354   | 17.6598   |
| MLLT10       | 8.6964    | 8.01495   | 9.63085   | 7.42764   | 7.75139   |
| PTPN23       | 8.61571   | 7.78392   | 6.96676   | 7.11828   | 7.0734    |
| FNIP2        | 0.395874  | 0.321511  | 0.336336  | 0.338916  | 0.348631  |
| MAP3K2       | 1.84945   | 1.56618   | 1.52843   | 1.50837   | 1.65373   |
| KIAA1161     | 1.05304   | 1.6227    | 0.904215  | 0.867851  | 1.61776   |
| FBXW5        | 142.351   | 154.226   | 150.315   | 126.428   | 146.011   |
| VEZF1        | 7.07055   | 7.81988   | 7.08416   | 5.99996   | 8.22014   |
| ATN1         | 43.0839   | 41.8796   | 41.1233   | 40.1685   | 39.4028   |
| KIAA0195     | 13.1708   | 13.8291   | 9.36084   | 10.8361   | 13.3003   |
| LGALS1       | 6.78851   | 6.28871   | 5.91316   | 6.08554   | 6.31741   |
| FGFR1        | 24.6355   | 23.9674   | 20.5526   | 20.9715   | 23.7765   |
| FRS3         | 5.15251   | 4.39192   | 4.54493   | 4.83172   | 3.81046   |
| CHCHD1       | 75.867    | 78.7951   | 68.6379   | 64.6411   | 73.2606   |
| MON1B,SYCE1L | 10.4462   | 9.47725   | 9.73838   | 9.82064   | 8.70082   |
| ZMYM5        | 3.69875   | 5.13537   | 4.65473   | 3.15108   | 5.04142   |
| SETD5-AS1    | 3.45744   | 5.03901   | 3.5675    | 4.0119    | 3.5122    |
| SERPINA10    | 0         | 0.0156533 | 0         | 0         | 0.0146281 |
| SDF2         | 17.5029   | 22.6958   | 19.3424   | 16.2402   | 21.2129   |
| LIN54        | 2.12454   | 1.72687   | 2.2416    | 1.90533   | 1.77059   |
| CLDND2       | 0.264312  | 0.527851  | 0.10581   | 0.14778   | 0.536008  |
| SLC52A2      | 100.197   | 101.76    | 120.27    | 96.5969   | 95.2131   |
| SUDS3        | 7.5309    | 6.66483   | 6.41624   | 6.098     | 7.27544   |
| ENDOV        | 7.91495   | 7.95963   | 9.71583   | 7.30135   | 6.16333   |
| TSPAN9       | 2.56906   | 2.53325   | 2.50854   | 2.5055    | 2.2627    |
| DAG1         | 11.0837   | 13.2572   | 9.75375   | 9.8238    | 12.821    |
| DALRD3       | 37.111    | 42.6794   | 36.2381   | 33.9368   | 39.8453   |
| SIK2         | 1.95403   | 1.68637   | 1.9143    | 1.8055    | 1.53227   |
| NFKBIA       | 17.8182   | 49.3672   | 16.7287   | 16.6173   | 42.5683   |
| MAP7D1       | 41.6602   | 40.2231   | 38.5181   | 37.6367   | 37.7661   |
| TRIO         | 2.8385    | 2.69611   | 2.30848   | 2.26585   | 2.74989   |
| NUSAP1       | 42.4981   | 39.3003   | 35.8369   | 39.8061   | 37.1544   |
| LOC96610     | 2.97923   | 2.65547   | 2.62641   | 2.74833   | 2.38912   |
| HOXB8        | 3.44236   | 2.93309   | 4.02207   | 2.84078   | 3.73222   |
| RAB40C       | 18.8812   | 16.7037   | 15.9005   | 13.84     | 17.2557   |
| SLC2A13      | 0.569523  | 0.523508  | 0.427563  | 0.436467  | 0.606661  |
| HDAC8        | 10.9683   | 9.92858   | 10.4315   | 10.247    | 8.94666   |
| SELM         | 372.584   | 465.632   | 350.928   | 291.19    | 436.165   |
| LEPRE1       | 17.0957   | 18.9487   | 15.7768   | 14.8246   | 17.7411   |
| JAZF1        | 2.72172   | 1.9556    | 2.27959   | 2.27692   | 1.97402   |
| RPS19BP1     | 125.019   | 112.547   | 144.946   | 115.157   | 105.851   |
| MTMR1        | 4.11007   | 3.28142   | 3.80329   | 3.39685   | 3.66083   |
| MTMR3        | 4.42951   | 5.72808   | 3.69454   | 3.89321   | 5.35644   |
| IFITM3       | 396.012   | 343.906   | 312.976   | 316.177   | 329.819   |
| VPS37C       | 14.5071   | 12.5046   | 14.5158   | 13.3187   | 12.0059   |
| SMCHD1       | 3.34448   | 3.13912   | 3.19527   | 3.16655   | 2.97051   |
| DNAH1        | 0.170541  | 0.200544  | 0.159742  | 0.1288    | 0.207803  |
| SLC25A24     | 4.02292   | 4.47796   | 5.06317   | 3.49339   | 5.1289    |
| MED21        | 5.45862   | 5.44375   | 5.52589   | 4.54325   | 5.45374   |
| RICTOR       | 1.82199   | 1.65999   | 1.53491   | 1.45034   | 1.59611   |
| BTBD10       | 10.978    | 8.90583   | 10.7242   | 9.50988   | 8.74825   |
| RRAGA        | 68.5267   | 70.9957   | 63.1685   | 52.9362   | 76.7569   |
| TMEM14A      | 24.9971   | 26.4688   | 22.0589   | 20.953    | 26.9998   |
| LOC388796    | 109.605   | 118.556   | 131.229   | 100.779   | 110.617   |
| SBK1         | 4.46779   | 4.27779   | 4.38866   | 4.387     | 3.99359   |
| TUBB         | 517.294   | 482.438   | 468.836   | 463.674   | 444.432   |
| STAT3        | 10.096    | 9.8449    | 7.8495    | 8.15708   | 10.1387   |
| IL17RC       | 16.795    | 17.7892   | 15.3124   | 14.2572   | 18.9383   |
| TUBG1        | 47.2336   | 44.409    | 41.4789   | 44.7879   | 39.6194   |
| ATP5I        | 764.998   | 773.897   | 715.507   | 658.876   | 703.724   |
| LINC00852    | 0.368723  | 1.59012   | 0.404492  | 0.464297  | 1.32787   |
| PTMA         | 1148.09   | 1226.12   | 1074.31   | 1028.36   | 1138.32   |
| RFX1         | 4.4583    | 3.46601   | 2.93264   | 4.09739   | 3.00719   |
| WWC2         | 1.00326   | 0.845144  | 1.01209   | 0.949467  | 0.905525  |
| TXNDC11      | 8.09474   | 7.81917   | 8.83176   | 6.74347   | 8.3608    |
| ARF5         | 318.187   | 304.722   | 314.221   | 281.382   | 286.596   |

|                 |           |           |           |           |           |
|-----------------|-----------|-----------|-----------|-----------|-----------|
| RALBP1          | 17.9355   | 17.4476   | 14.4358   | 14.6744   | 17.7347   |
| CKS2            | 463.684   | 432.427   | 468.115   | 403.781   | 407.114   |
| ETFDH           | 3.30841   | 3.14371   | 2.96145   | 2.80441   | 3.29679   |
| BLOC1S1, RDH5   | 118.298   | 118.835   | 114.751   | 107.545   | 109.65    |
| MRPS7           | 39.7145   | 41.0599   | 41.701    | 36.4469   | 39.9577   |
| MCC             | 0.0508507 | 0.02142   | 0.049598  | 0.0598602 | 0.0280216 |
| RBM42           | 66.0345   | 63.4336   | 66.5753   | 67.7442   | 54.0761   |
| CRAMP1L         | 2.44337   | 2.20845   | 2.19943   | 2.42941   | 1.98896   |
| LRRRC16A        | 1.79862   | 1.44203   | 1.77033   | 1.65207   | 1.62395   |
| ORC4            | 4.42616   | 4.77654   | 4.69354   | 3.8083    | 4.85916   |
| C4orf21         | 0.868564  | 0.579313  | 0.60853   | 0.829383  | 0.623818  |
| HSPB1           | 908.665   | 930.768   | 812.975   | 799.48    | 854.818   |
| NAA60           | 22.4378   | 19.2173   | 23.9974   | 20.167    | 19.4691   |
| STK25           | 78.8471   | 89.7351   | 75.8818   | 71.3466   | 83.728    |
| PAPD7           | 12.5474   | 10.4237   | 11.1048   | 11.2222   | 9.81741   |
| ULK2            | 1.54264   | 1.52654   | 1.94084   | 1.48679   | 1.72318   |
| ZGPAT           | 13.7641   | 17.5882   | 12.4609   | 13.771    | 15.6023   |
| POLR2J2, UPK3BL | 56.6155   | 52.9771   | 46.8771   | 51.0255   | 49.5323   |
| SDR39U1         | 58.3881   | 55.6345   | 50.8432   | 55.1      | 51.0983   |
| OFD1            | 5.67089   | 4.97713   | 5.41058   | 4.87503   | 4.98668   |
| APOL4           | 0.021476  | 0.0300972 | 0.0177436 | 0.0238034 | 0.0281852 |
| RHPN1-AS1       | 2.09828   | 3.51952   | 2.3107    | 2.02411   | 3.09734   |
| C1orf131        | 5.08194   | 5.98417   | 5.12997   | 4.7734    | 6.25013   |
| FXN             | 9.50591   | 10.5374   | 9.18003   | 8.48966   | 9.7012    |
| MYNN            | 2.52894   | 2.35773   | 2.35335   | 1.88657   | 2.65657   |
| NDUFB11         | 131.358   | 133.29    | 127.03    | 108.469   | 134.015   |
| MAP1S           | 25.8005   | 21.5699   | 22.0046   | 21.8833   | 21.4174   |
| RPN2            | 78.2637   | 89.3933   | 80.1968   | 73.5751   | 89.2571   |
| RB1             | 5.51232   | 5.53776   | 5.27627   | 4.81488   | 5.79042   |
| TRAF2           | 40.4536   | 30.1241   | 42.8686   | 39.5736   | 27.7448   |
| SPOCD1          | 12.6999   | 10.0723   | 16.0494   | 11.3727   | 11.468    |
| SAMD1           | 51.6698   | 60.898    | 44.3029   | 45.0758   | 54.4147   |
| TP53            | 28.8541   | 26.3715   | 28.264    | 27.5833   | 24.3376   |
| POLL            | 24.8413   | 21.6976   | 25.4398   | 21.9935   | 20.5185   |
| FSBP, RAD54B    | 4.2506    | 3.72827   | 4.40109   | 3.87143   | 3.85203   |
| TRAF1           | 0.99488   | 0.994141  | 1.11474   | 1.23711   | 0.743593  |
| PROSC           | 29.7708   | 31.2421   | 30.0095   | 24.3791   | 33.1202   |
| RAB12           | 13.1123   | 12.0573   | 12.9852   | 12.2379   | 11.5427   |
| SRRM1           | 23.0664   | 20.4863   | 16.8663   | 17.6072   | 22.2327   |
| GPR108          | 37.11     | 39.13     | 41.0461   | 35.6597   | 36.2348   |
| CYP4F35P        | 0.459316  | 0.449629  | 0.257768  | 0.376439  | 0.404452  |
| NECAP2          | 21.9677   | 25.0484   | 25.7575   | 19.2425   | 23.914    |
| PIGN            | 3.41996   | 3.09778   | 3.03622   | 2.84463   | 3.20846   |
| H2AFV           | 43.5058   | 45.121    | 40.5105   | 41.5508   | 38.3737   |
| LOC440288       | 2.56488   | 2.00455   | 2.96797   | 2.39858   | 2.35763   |
| CNPPD1          | 48.0036   | 45.659    | 47.5955   | 43.2121   | 41.8339   |
| DSN1            | 10.4091   | 10.5164   | 8.26804   | 9.14037   | 10.3807   |
| NUAK1           | 1.3246    | 1.2826    | 1.06004   | 1.07435   | 1.4479    |
| MRPL48          | 23.2534   | 24.8881   | 25.1047   | 21.2654   | 23.9985   |
| ZNF519          | 0.397468  | 0.402921  | 0.403625  | 0.40554   | 0.362664  |
| CAMK2G          | 6.48689   | 6.55834   | 5.94262   | 6.03655   | 6.38993   |
| PSMD6-AS2       | 0.191525  | 0.108161  | 0.210014  | 0.152222  | 0.204544  |
| SOX12           | 21.3903   | 17.9863   | 22.1155   | 18.1388   | 19.7313   |
| MELK            | 12.3372   | 7.94265   | 12.683    | 11.2312   | 8.80661   |
| ZNF384          | 17.7953   | 15.1482   | 15.7851   | 16.1411   | 14.4443   |
| LZTS2           | 62.624    | 61.9438   | 52.4344   | 53.1638   | 60.8072   |
| BHMT2           | 0         | 0.0139918 | 0         | 0         | 0.0131183 |
| TTC21B          | 1.81782   | 1.81178   | 1.71355   | 1.6618    | 1.74928   |
| HPS4            | 7.1364    | 7.09748   | 6.08677   | 5.95879   | 6.90668   |
| KAZALD1         | 2.876     | 4.2026    | 2.86314   | 2.91941   | 3.65351   |
| NCKAP1L         | 0.0261964 | 0.018188  | 0.0564543 | 0.0434989 | 0.0507139 |
| SLC35E1         | 16.7952   | 17.0352   | 13.6814   | 12.5047   | 18.0624   |
| CEL             | 1.18675   | 0.62389   | 1.02627   | 1.21436   | 0.850742  |
| ILF3-AS1        | 4.05485   | 7.34132   | 7.67876   | 5.80383   | 6.38997   |
| CTU1            | 15.3513   | 9.43455   | 16.6554   | 13.4092   | 11.4879   |
| GLG1            | 18.4087   | 19.9111   | 15.7875   | 15.0338   | 19.9306   |
| DEPDC4          | 0.163474  | 0.354537  | 0.232202  | 0.101176  | 0.308859  |
| LPCAT4          | 31.3095   | 36.9029   | 25.2181   | 26.1633   | 34.9542   |
| ATP5E, SLMO2    | 673.888   | 733.033   | 675.56    | 600.227   | 656.795   |
| KCTD10          | 10.389    | 11.0797   | 10.6481   | 8.97017   | 11.2396   |
| ORAI1           | 38.6496   | 34.956    | 37.3551   | 35.5024   | 33.1187   |
| KIAA1522        | 16.6419   | 15.8331   | 11.8978   | 14.6332   | 13.9642   |
| IDH3G           | 73.9972   | 77.289    | 59.1397   | 59.1101   | 72.2565   |
| SH2B1           | 14.8211   | 14.6264   | 15.0882   | 14.2181   | 14.3167   |
| ADAM21P1        | 0         | 0.0149719 | 0         | 0         | 0.0140439 |
| PIP5K1B         | 0.0248482 | 0.0476786 | 0.114023  | 0.096262  | 0.0336196 |
| FAM114A1        | 5.04728   | 5.52975   | 4.4279    | 4.17607   | 5.6315    |
| FAM46B          | 0.349401  | 1.02659   | 0.540406  | 0.500437  | 0.798907  |
| KAT5            | 12.5907   | 13.9479   | 10.3572   | 11.2215   | 13.5443   |

|           |           |           |           |           |           |
|-----------|-----------|-----------|-----------|-----------|-----------|
| FAM104A   | 14.5657   | 14.3366   | 14.148    | 12.8344   | 14.8063   |
| BBX       | 2.59333   | 2.53241   | 2.15542   | 2.06774   | 2.7533    |
| PRMT2     | 21.0718   | 20.9342   | 19.3201   | 17.4783   | 21.5398   |
| FLJ22184  | 17.4318   | 13.8408   | 13.4103   | 15.7808   | 12.8848   |
| MRPL43    | 86.9243   | 97.1632   | 86.4426   | 75.3297   | 89.8288   |
| C7orf49   | 15.1716   | 27.4197   | 20.3143   | 16.6342   | 24.5253   |
| PPP1R13B  | 3.09562   | 2.34193   | 2.65462   | 3.07022   | 1.90443   |
| OSBPL11   | 1.10438   | 1.37852   | 1.412     | 1.15713   | 1.16722   |
| ATP5J     | 162.941   | 158.969   | 172.812   | 153.031   | 151.341   |
| STIM1     | 9.37486   | 10.693    | 8.52729   | 8.85948   | 9.8555    |
| CCDC42B   | 0.346126  | 0.0499334 | 0.319196  | 0.0644542 | 0.405802  |
| ATRAID    | 105.315   | 126.439   | 104.501   | 89.8667   | 118.8     |
| NAB2      | 50.0954   | 42.9849   | 35.5642   | 39.4924   | 41.0614   |
| AQP11     | 0.979664  | 1.56757   | 0.65337   | 0.842729  | 1.50119   |
| DGAT2     | 4.86401   | 6.70078   | 6.54302   | 6.21916   | 5.5418    |
| MRGBP     | 45.7807   | 42.0065   | 38.7064   | 35.0261   | 45.045    |
| C1orf27   | 3.17425   | 3.39549   | 2.91617   | 2.88117   | 3.25113   |
| RNF8      | 5.85128   | 7.05027   | 6.00079   | 5.27232   | 6.72844   |
| AKR7A2    | 39.574    | 42.6564   | 36.8526   | 33.3873   | 42.2923   |
| ATG12     | 9.57092   | 10.1681   | 10.0484   | 8.84563   | 9.77731   |
| RAB15     | 10.32     | 12.3462   | 12.4353   | 10.8451   | 12.0775   |
| DIP2C     | 2.57332   | 2.54085   | 2.25961   | 2.3708    | 2.51023   |
| GRIN2D    | 23.9498   | 17.61     | 21.3356   | 22.0706   | 18.4061   |
| ZMPSTE24  | 6.45007   | 7.09337   | 9.42663   | 7.10418   | 6.64844   |
| SRSF4     | 57.5114   | 45.6106   | 41.2813   | 43.5022   | 48.0119   |
| CEBPD     | 22.7605   | 37.738    | 28.5393   | 23.9822   | 31.7743   |
| FURIN     | 21.9316   | 22.3712   | 21.7951   | 20.793    | 21.2524   |
| RAP2A     | 3.34115   | 3.1346    | 3.41985   | 2.74818   | 3.25346   |
| TDRD7     | 6.00718   | 5.62091   | 5.52038   | 5.4491    | 5.10909   |
| ZNF219    | 17.7755   | 17.7      | 20.3117   | 16.8666   | 15.8209   |
| SMIM11    | 14.3952   | 14.8072   | 20.2405   | 14.0444   | 13.8696   |
| PNPLA7    | 2.30405   | 2.34642   | 1.53015   | 2.08146   | 1.89772   |
| KIAA0319L | 8.08279   | 9.0154    | 7.37664   | 7.31686   | 8.60246   |
| TXN2      | 97.8068   | 111.783   | 97.3143   | 92.2367   | 99.018    |
| ZRANB3    | 0.482515  | 0.564732  | 0.630717  | 0.581314  | 0.502131  |
| DDX59     | 6.15624   | 4.92619   | 5.09476   | 5.29961   | 4.57786   |
| TMEM183A  | 35.5724   | 37.3026   | 36.0717   | 32.3291   | 35.1193   |
| GALT      | 14.6306   | 14.0497   | 13.6197   | 12.9502   | 12.2248   |
| ATXN1L    | 2.34056   | 2.44164   | 1.9782    | 2.15526   | 2.2613    |
| PLXNA3    | 7.21137   | 8.58827   | 4.44559   | 5.61271   | 8.9129    |
| RAPGEF4   | 0.105697  | 0.0835484 | 0.0464321 | 0.0263533 | 0.128673  |
| NME4      | 75.1041   | 86.0298   | 73.4821   | 67.9872   | 75.7308   |
| TSC1      | 5.21691   | 4.52145   | 4.01537   | 4.67279   | 4.26534   |
| TMOD1     | 1.2029    | 0.860832  | 1.13647   | 0.835267  | 1.25138   |
| BOD1      | 36.5285   | 38.4182   | 39.3313   | 31.9      | 37.2126   |
| PGM3      | 5.00917   | 4.82483   | 4.86394   | 4.49232   | 4.99357   |
| CNOT6L    | 2.76042   | 2.58038   | 2.68529   | 2.46997   | 2.71345   |
| FAM195A   | 116.359   | 112.288   | 112.723   | 97.2144   | 108.536   |
| EXOC1     | 6.22546   | 6.10794   | 6.43841   | 5.34752   | 5.60596   |
| PLS1      | 3.36622   | 3.35666   | 3.24158   | 3.30025   | 3.65788   |
| PTCHD3P1  | 5.30568   | 5.25885   | 5.84634   | 4.64793   | 5.87256   |
| ZNF212    | 8.86895   | 10.8264   | 7.73519   | 8.64353   | 9.45633   |
| HDDC3     | 16.6746   | 20.7388   | 17.2745   | 15.6493   | 18.815    |
| DSCR3     | 16.8373   | 15.8138   | 14.9094   | 13.893    | 15.7033   |
| GTF3C2    | 12.4976   | 12.7265   | 12.7614   | 11.7767   | 12.0603   |
| PAFAH1B3  | 108.754   | 110.697   | 106.606   | 96.7027   | 106.738   |
| DYNLRB1   | 178.113   | 185.248   | 175.437   | 157.921   | 181.372   |
| B3GAT1    | 8.39065   | 8.19327   | 7.97262   | 7.9684    | 7.78804   |
| SGSM2     | 9.83345   | 11.5995   | 9.04611   | 8.89641   | 11.5297   |
| MT2A      | 11677.9   | 7781.27   | 6100.33   | 9076.17   | 8770.46   |
| SPRN      | 2.60699   | 2.52842   | 2.952     | 2.62484   | 2.55847   |
| MTMR9     | 1.15774   | 1.18941   | 1.45065   | 1.1659    | 1.31243   |
| CCNF      | 11.4213   | 8.28229   | 11.1001   | 11.8671   | 7.30982   |
| NTHL1     | 35.8834   | 39.2628   | 34.4841   | 32.6774   | 35.4459   |
| ZNF483    | 0.315095  | 0.393123  | 0.137471  | 0.244547  | 0.368518  |
| LPPR2     | 19.8787   | 18.2082   | 17.5112   | 15.3013   | 18.5343   |
| MITD1     | 19.0898   | 19.1193   | 18.6453   | 19.1641   | 15.0048   |
| C19orf60  | 63.0007   | 49.7488   | 66.1861   | 55.382    | 56.4527   |
| TCEA2     | 0.0285753 | 0.184197  | 0         | 0         | 0.101942  |
| UFDL1L    | 23.2855   | 27.6843   | 28.151    | 23.8068   | 24.1058   |
| HLA-A     | 1087.06   | 1405.03   | 1086.4    | 935.661   | 1356.8    |
| MANBAL    | 50.4221   | 61.9141   | 57.2186   | 47.4932   | 55.2899   |
| TTC31     | 5.81927   | 5.42373   | 6.1039    | 6.10977   | 4.96942   |
| DAD1      | 190.832   | 249.832   | 214.281   | 170.349   | 238.792   |
| PCCA      | 1.6101    | 1.38407   | 1.04528   | 0.832166  | 1.85523   |
| PHLPP2    | 1.42873   | 1.33211   | 1.52192   | 1.34892   | 1.34511   |
| PIGH      | 12.8876   | 15.9881   | 16.3603   | 12.4099   | 14.2745   |
| AGXT2     | 0         | 0.0146943 | 0         | 0         | 0.0138156 |
| TPRA1     | 53.0923   | 46.95     | 49.8926   | 47.997    | 42.1796   |

|            |          |           |           |          |           |
|------------|----------|-----------|-----------|----------|-----------|
| SLC24A6    | 10.9599  | 10.7855   | 11.1677   | 10.7988  | 10.111    |
| ADNP2      | 11.4112  | 11.3932   | 9.83493   | 10.146   | 10.7257   |
| OGFRL1     | 13.1056  | 14.3352   | 14.5      | 12.1486  | 12.782    |
| KIAA0040   | 1.52079  | 1.93059   | 2.13502   | 1.9275   | 1.62427   |
| CDC45      | 37.4384  | 30.5325   | 38.0465   | 38.0821  | 26.6696   |
| LAMTOR5    | 156.563  | 157.528   | 130.042   | 124.604  | 152.79    |
| RPS27L     | 70.1362  | 91.5496   | 70.4349   | 62.5129  | 82        |
| KCTD21     | 1.00015  | 1.09441   | 1.11593   | 1.07638  | 0.933784  |
| MGST3      | 83.8534  | 89.2095   | 76.7134   | 72.1926  | 86.5933   |
| SCIN       | 0        | 0.0121141 | 0         | 0        | 0.0113923 |
| HSD17B12   | 27.163   | 25.345    | 29.4927   | 23.5853  | 27.3367   |
| PPIL3      | 15.7358  | 11.7803   | 16.0032   | 12.5573  | 13.4861   |
| CLEC2D     | 0.672407 | 0.589628  | 0.598811  | 0.59167  | 0.639239  |
| GET4       | 42.2288  | 39.2868   | 46.145    | 39.6491  | 36.6315   |
| SNX25      | 5.01896  | 5.12091   | 5.47159   | 4.58126  | 5.4433    |
| MAST2      | 21.6699  | 23.2595   | 17.8844   | 19.3433  | 22.2009   |
| SPTBN1     | 9.89428  | 9.2488    | 8.76566   | 8.74807  | 9.36277   |
| CRTAP      | 32.55    | 45.8733   | 31.7185   | 27.7839  | 43.1807   |
| ANKRD49    | 5.25911  | 5.9949    | 5.76975   | 5.08959  | 5.54324   |
| NPC1       | 11.4136  | 10.1952   | 11.0699   | 10.7233  | 9.65009   |
| PBRM1      | 2.14149  | 1.5868    | 1.97235   | 1.98712  | 1.66218   |
| LMCD1      | 0.147946 | 0.0755908 | 0.0678224 | 0.184366 | 0.0234369 |
| SSNA1      | 169.195  | 208.588   | 196.503   | 158.933  | 178.635   |
| TEX21P     | 0.066476 | 0         | 0.167162  | 0.109975 | 0.0297601 |
| LLPH       | 47.5377  | 55.2152   | 49.9142   | 45.2187  | 51.1777   |
| HDAC10     | 15.4192  | 16.2656   | 10.7367   | 14.1314  | 15.8298   |
| ELAVL1     | 18.3396  | 18.6064   | 17.4978   | 16.3174  | 18.5022   |
| SSR2       | 302.566  | 339.005   | 322.715   | 278.505  | 314.558   |
| CBLB       | 0.78488  | 0.47232   | 0.554787  | 0.699523 | 0.495521  |
| ABHD10     | 13.8839  | 15.4481   | 11.9651   | 11.4416  | 16.4208   |
| CTSA       | 56.0727  | 66.1322   | 48.7922   | 52.8107  | 56.1345   |
| TMEM97     | 22.8905  | 30.3946   | 22.0459   | 21.7464  | 28.3926   |
| SEC11C     | 27.437   | 26.6376   | 31.7036   | 29.1295  | 22.6389   |
| ETV4       | 71.4155  | 63.1773   | 70.7233   | 65.9157  | 61.7948   |
| TCF3       | 30.976   | 31.1511   | 30.6071   | 28.3367  | 28.6243   |
| DCLK2      | 0.642498 | 0.651502  | 0.658306  | 0.562337 | 0.661442  |
| CPT1C      | 5.52542  | 6.13704   | 4.12019   | 4.68576  | 6.14582   |
| CTIF       | 12.3403  | 11.4304   | 10.8708   | 10.4529  | 11.6914   |
| DHPS       | 49.2084  | 53.5439   | 47.3641   | 42.2955  | 49.7733   |
| SNRPD2     | 563.914  | 669.752   | 570.52    | 502.809  | 613.797   |
| FKTN       | 2.98046  | 3.63806   | 4.13032   | 3.19519  | 3.15488   |
| EEFSEC     | 17.7535  | 15.2013   | 15.1674   | 15.7971  | 14.5654   |
| REEP3      | 3.49915  | 3.61482   | 4.26774   | 3.36865  | 3.642     |
| ST3GAL4    | 19.7525  | 18.3048   | 20.8272   | 16.8702  | 17.939    |
| UBR4       | 6.12423  | 5.9226    | 5.76979   | 5.4373   | 6.06162   |
| ANXA11     | 73.9066  | 77.0063   | 64.432    | 64.0509  | 74.8364   |
| ARRB2      | 99.5932  | 102.901   | 91.5022   | 84.6195  | 102.286   |
| PICALM     | 24.2369  | 23.1155   | 24.7395   | 21.3622  | 23.1891   |
| NRIP2      | 0.101883 | 0.238221  | 0.112616  | 0.101896 | 0.142687  |
| C2orf43    | 3.03639  | 2.97511   | 3.41654   | 2.71539  | 2.86587   |
| SH2D3C     | 0.445675 | 0.424818  | 0.146771  | 0.466968 | 0.353397  |
| TOX4       | 9.84569  | 9.6501    | 11.7216   | 9.34528  | 8.63673   |
| GRIP1      | 0.46326  | 0.342582  | 0.364723  | 0.384688 | 0.293732  |
| C1orf21    | 2.57591  | 2.95448   | 2.29473   | 1.83663  | 3.36519   |
| DOCK11     | 0.745908 | 0.595634  | 1.00158   | 0.722551 | 0.688605  |
| ARHGEF39   | 8.00058  | 7.87134   | 6.50311   | 6.61721  | 7.5717    |
| C3orf52    | 5.09923  | 6.2404    | 6.48351   | 4.76855  | 6.20843   |
| PTTG1IP    | 78.7136  | 90.7576   | 80.9484   | 69.6358  | 90.6938   |
| GMPPA      | 32.7162  | 29.1422   | 29.964    | 29.9475  | 26.7217   |
| CAB39L     | 3.2386   | 3.48738   | 3.20052   | 2.90756  | 3.22663   |
| SCML1      | 4.00382  | 2.85175   | 3.57567   | 3.59543  | 3.14329   |
| TMEM42     | 10.2868  | 13.7378   | 13.2953   | 11.2125  | 11.0756   |
| TMEM251    | 23.6945  | 24.5278   | 26.0194   | 22.7347  | 22.2401   |
| SLC35A5    | 3.08833  | 2.58366   | 3.86739   | 2.57485  | 3.04639   |
| NUCB1      | 107.622  | 129.08    | 96.1388   | 93.7133  | 120.064   |
| UNC45A     | 35.5663  | 36.1342   | 31.7189   | 30.9385  | 35.5884   |
| HMG3       | 23.8839  | 25.8031   | 26.9499   | 22.7374  | 25.2508   |
| POC5       | 3.78982  | 3.10743   | 4.66539   | 3.68259  | 2.98246   |
| TMEM238    | 24.05    | 21.8853   | 22.2662   | 19.1367  | 21.8755   |
| RHOC       | 270.075  | 294.067   | 273.751   | 241.525  | 272.902   |
| GAPDH      | 7719.6   | 9677.76   | 7455.04   | 6199.84  | 9228.95   |
| BRSK1      | 10.65    | 10.417    | 8.73278   | 9.20644  | 9.49572   |
| BRI3BP     | 15.2253  | 15.5112   | 11.8044   | 11.6175  | 15.3035   |
| HNRNPU-AS1 | 5.48838  | 6.73199   | 5.89118   | 5.3182   | 5.98103   |
| CD40LG     | 0        | 0.0193221 | 0         | 0        | 0.0182039 |
| SPIRE2     | 10.1435  | 7.96198   | 9.38026   | 9.66337  | 7.65298   |
| C4orf36    | 0.34626  | 0.267434  | 0.430651  | 0.193753 | 0.446735  |
| FOXRED2    | 9.36883  | 9.27603   | 9.78733   | 9.8296   | 7.67127   |
| VPREB3     | 0.597264 | 0.229388  | 0.408972  | 0.141612 | 0.425821  |

|                    |           |            |            |           |            |
|--------------------|-----------|------------|------------|-----------|------------|
| TNK2               | 10.6515   | 9.56502    | 8.37897    | 9.23507   | 9.08307    |
| RELT               | 14.3121   | 12.2819    | 10.596     | 11.1491   | 13.5735    |
| KIFC2              | 19.0424   | 20.652     | 12.3959    | 17.545    | 20.0155    |
| CANX               | 78.7023   | 85.2563    | 82.611     | 71.4429   | 83.7565    |
| BATF3              | 25.4071   | 24.2193    | 26.3923    | 21.9447   | 24.4579    |
| MPC1               | 19.6115   | 16.5613    | 21.2596    | 20.7461   | 16.6214    |
| GNAZ               | 4.16724   | 5.24725    | 3.86637    | 4.12597   | 4.97936    |
| ASIC1              | 7.83694   | 8.63186    | 6.51738    | 7.04765   | 8.63575    |
| POLG               | 16.2767   | 16.9159    | 13.9913    | 14.0714   | 16.5482    |
| GABARAPL2          | 128.391   | 92.6415    | 114.974    | 106.829   | 87.6694    |
| TRAF5              | 5.94409   | 4.45189    | 3.93407    | 4.67911   | 5.01748    |
| PPP1R35            | 68.8808   | 72.9639    | 89.3754    | 76.932    | 62.2794    |
| FAM76A             | 1.09133   | 1.1986     | 1.33372    | 1.25097   | 1.06552    |
| CHST12             | 10.5242   | 8.3972     | 11.8554    | 9.26681   | 8.48744    |
| ENY2               | 36.567    | 36.3052    | 37.7228    | 31.9576   | 35.1047    |
| FAM98B             | 4.65143   | 4.45288    | 4.66352    | 3.97075   | 4.23616    |
| MMAB               | 6.24433   | 6.38252    | 6.43358    | 5.25629   | 6.07443    |
| SLC9A3R1           | 55.784    | 48.6465    | 53.4543    | 48.5619   | 47.7036    |
| MCM10              | 4.66778   | 3.42352    | 4.00521    | 4.59566   | 3.53058    |
| VPS26B             | 17.9638   | 16.4123    | 16.433     | 15.2391   | 16.9607    |
| CYTH3              | 4.83214   | 4.49058    | 4.6786     | 4.13138   | 4.29874    |
| ZNF229             | 0         | 0.00642104 | 0          | 0         | 0.00605295 |
| GEMIN2             | 10.0513   | 7.10972    | 10.6241    | 9.0503    | 7.33459    |
| STAU2              | 6.85138   | 6.66496    | 7.5834     | 6.36966   | 6.83546    |
| HERC6              | 2.99315   | 3.13745    | 3.12039    | 3.20214   | 2.96652    |
| CELSR2             | 2.4223    | 2.85686    | 2.07271    | 2.36796   | 2.50783    |
| SGK494             | 0.649283  | 0.641545   | 0.565944   | 0.634121  | 0.557153   |
| SQRDL              | 10.846    | 12.9017    | 10.1267    | 9.38771   | 12.388     |
| MED4               | 14.1614   | 17.5404    | 15.5599    | 13.5529   | 17.5477    |
| PRKD3              | 2.46353   | 2.6434     | 2.16486    | 2.26904   | 2.6636     |
| SNPH               | 1.22392   | 1.54182    | 1.30784    | 1.21411   | 1.16708    |
| HMGXB3             | 16.7051   | 15.1437    | 15.6244    | 14.562    | 14.8858    |
| LIPT1              | 7.67804   | 8.14573    | 8.71379    | 6.9832    | 8.79231    |
| IKZF4              | 1.38192   | 1.2783     | 1.06503    | 1.17556   | 1.24934    |
| GCOM1,MYZAP,POLR2M | 8.56772   | 10.131     | 10.6203    | 8.21534   | 9.38143    |
| SEC24C             | 13.5998   | 11.0333    | 10.784     | 11.3691   | 11.4627    |
| AGAP8              | 0.992157  | 0.874857   | 0.833094   | 1.03574   | 0.689607   |
| ALG1L              | 0.306879  | 0.241297   | 0.636368   | 0.438434  | 0.443273   |
| ZNRF2P1            | 0.842472  | 0.58755    | 0.84908    | 0.532615  | 0.804366   |
| TOMM7              | 297.147   | 414.365    | 322.539    | 279.81    | 347.585    |
| PMS2P1             | 10.822    | 10.9962    | 12.5728    | 9.12064   | 11.6146    |
| AUP1               | 166.462   | 181.77     | 179.643    | 158.254   | 162.662    |
| ATP9A              | 2.53811   | 2.9048     | 3.1517     | 2.78563   | 2.42236    |
| METTL14            | 2.82744   | 3.58811    | 3.14663    | 2.71824   | 3.44539    |
| RAB26              | 12.8727   | 12.5481    | 8.80666    | 10.2091   | 13.53      |
| LOC100507140       | 0         | 0.0192567  | 0          | 0         | 0.0181637  |
| MARK2              | 12.1284   | 10.5337    | 11.4706    | 11.0894   | 10.9753    |
| ARL5B              | 3.56941   | 1.87417    | 2.83379    | 2.7846    | 2.12804    |
| PERP               | 29.2186   | 35.6633    | 29.1303    | 25.769    | 35.2405    |
| ZNF282             | 28.823    | 22.2087    | 28.3685    | 26.9817   | 21.4056    |
| NCOA2              | 0.283494  | 0.316303   | 0.2612     | 0.294143  | 0.2073     |
| HBP1               | 6.0451    | 5.74244    | 4.99124    | 4.84552   | 5.71109    |
| IFI27L2            | 199.724   | 208.529    | 210.898    | 184.972   | 195.423    |
| PAWR               | 19.2774   | 14.0882    | 18.2514    | 17.3775   | 14.2579    |
| CENPJ              | 1.45098   | 1.20683    | 1.21973    | 1.36814   | 1.08989    |
| AP4B1              | 6.56334   | 5.84       | 7.02401    | 6.02973   | 6.55031    |
| MCF2L-AS1          | 0.864263  | 0.767705   | 1.15326    | 0.891889  | 0.842762   |
| CLK2               | 22.4356   | 19.3154    | 14.2079    | 19.3202   | 18.7336    |
| C12orf45           | 47.3577   | 49.7653    | 48.1604    | 43.2019   | 42.5098    |
| FXR1               | 6.29869   | 5.81085    | 7.01697    | 5.86308   | 5.55687    |
| QRICH1             | 18.6025   | 20.4482    | 17.094     | 16.3252   | 19.7579    |
| AMMECR1            | 1.44586   | 0.928878   | 1.60239    | 1.24628   | 1.16609    |
| EPAS1              | 2.62004   | 3.2429     | 1.76809    | 1.94891   | 3.11158    |
| WARS2              | 6.00508   | 4.73949    | 5.99712    | 5.2996    | 5.49199    |
| LARP1B             | 4.70769   | 5.29762    | 5.48362    | 4.09023   | 5.61592    |
| SIRPA              | 4.57045   | 5.20109    | 4.09439    | 4.79744   | 4.82556    |
| RAB3B              | 3.3536    | 3.14405    | 3.15973    | 2.9054    | 3.20746    |
| PRR5L              | 1.45271   | 1.11833    | 1.52141    | 1.36159   | 1.08744    |
| CCDC88C            | 4.12999   | 3.29987    | 3.4959     | 3.65491   | 3.1151     |
| NPR3               | 0.0383296 | 0.00945828 | 0.00407081 | 0.0159865 | 0.0270521  |
| TMEM63A            | 6.29101   | 5.26749    | 5.10113    | 5.50974   | 5.21405    |
| MALT1              | 5.27948   | 4.12543    | 5.72441    | 4.91192   | 4.79052    |
| HOXB2              | 21.9219   | 19.8023    | 25.3347    | 21.8788   | 19.9156    |
| SNUPN              | 20.7146   | 17.8461    | 18.5004    | 17.2288   | 17.7532    |
| ATP6V1A            | 7.09522   | 6.94372    | 5.87621    | 5.52992   | 7.0048     |
| RRBP1              | 18.928    | 16.9482    | 16.487     | 16.8701   | 17.4354    |
| ZYG11B             | 1.90418   | 2.15915    | 1.4737     | 1.55772   | 2.20887    |
| IFIT2              | 0.0702807 | 0.194565   | 0.0666972  | 0.0979234 | 0.15125    |
| DERL1              | 27.3418   | 29.4841    | 31.3498    | 24.5955   | 30.5049    |

|                             |           |           |          |           |           |
|-----------------------------|-----------|-----------|----------|-----------|-----------|
| ZNF177,ZNF559,ZNF559-ZNF177 | 2.23628   | 2.93305   | 2.74858  | 2.65149   | 2.38712   |
| GIT2                        | 8.73571   | 8.64423   | 6.23072  | 7.04769   | 8.75497   |
| UBL5                        | 519.267   | 569.928   | 499.024  | 432.711   | 543.016   |
| DAXX                        | 34.9915   | 31.3797   | 33.605   | 31.2638   | 28.633    |
| MINK1                       | 23.2354   | 21.7811   | 17.0718  | 18.5611   | 22.7454   |
| TRIM38                      | 1.77181   | 1.74306   | 2.1808   | 1.8357    | 1.6998    |
| NEDD4L                      | 8.42651   | 9.64633   | 7.62648  | 7.07407   | 9.38962   |
| C9orf37                     | 7.08686   | 5.16865   | 7.32998  | 6.85673   | 5.08384   |
| DNAJB11                     | 21.848    | 25.9733   | 22.9034  | 21.7447   | 24.1263   |
| CIB1                        | 206.605   | 225.559   | 164.101  | 164.094   | 222.37    |
| SPR                         | 71.6915   | 80.4407   | 72.8455  | 64.9777   | 74.7301   |
| KLHL15                      | 1.17683   | 1.94982   | 1.28014  | 1.07141   | 1.8784    |
| RAB2A                       | 23.0069   | 24.7646   | 27.2819  | 20.7904   | 25.4755   |
| CLCN5                       | 0.888484  | 0.748959  | 0.688926 | 0.852021  | 0.686502  |
| MTRNR2L8                    | 31.1589   | 43.5537   | 35.3571  | 31.0776   | 40.4331   |
| IP6K1                       | 9.52474   | 8.1146    | 9.55461  | 8.52039   | 7.81389   |
| TRPM4                       | 11.3388   | 10.0387   | 6.78401  | 9.4598    | 9.99405   |
| BNIP1                       | 16.6864   | 14.5968   | 15.8849  | 13.88     | 14.1834   |
| NDUFA12                     | 109.621   | 97.7417   | 101.913  | 99.0616   | 92.9875   |
| SHISA5                      | 103.085   | 110.232   | 90.6199  | 88.2838   | 104.828   |
| FNDC3A                      | 4.98633   | 5.18282   | 5.11488  | 4.53363   | 5.21189   |
| SMC2                        | 5.97559   | 5.48875   | 4.2067   | 4.83913   | 6.19239   |
| PDSS2                       | 2.41669   | 2.39497   | 2.39981  | 1.88018   | 2.84494   |
| C15orf62                    | 0.210526  | 0.346289  | 0.388364 | 0.308708  | 0.212768  |
| SPAG7                       | 43.0969   | 44.4388   | 34.8597  | 35.2522   | 45.8674   |
| ADAM20                      | 0.0284708 | 0.0311138 | 0        | 0.0238599 | 0.019455  |
| ISOC1                       | 8.97669   | 7.49492   | 8.6823   | 8.01276   | 7.80981   |
| ZNF48                       | 10.9722   | 10.4847   | 13.4199  | 11.3431   | 9.52456   |
| PARL                        | 50.3418   | 49.6395   | 47.2142  | 42.9788   | 50.7996   |
| SGSM3                       | 18.2505   | 17.2039   | 16.2182  | 17.0318   | 16.9262   |
| TMEM161B-AS1                | 2.60642   | 1.74443   | 2.11229  | 1.62082   | 2.25933   |
| TMEM30A                     | 11.2283   | 14.1594   | 12.1736  | 10.2585   | 13.5822   |
| STX2                        | 3.82687   | 4.54009   | 4.05929  | 4.21796   | 3.54065   |
| BAG4                        | 4.3576    | 3.94178   | 4.25224  | 3.93693   | 3.91013   |
| MRPL18                      | 69.25     | 69.7159   | 76.2619  | 68.8169   | 64.6398   |
| ABLIM2                      | 0.396119  | 0.328724  | 0.507509 | 0.341972  | 0.300666  |
| C17orf59                    | 18.1009   | 13.6715   | 15.9094  | 16.8328   | 12.3642   |
| LSM7                        | 271.759   | 251.162   | 249.009  | 223.661   | 252.812   |
| C9orf96                     | 0.0879118 | 0.177814  | 0.119855 | 0.110181  | 0.175847  |
| CNN3                        | 69.485    | 78.8103   | 70.0696  | 59.5519   | 82.4555   |
| MYO19                       | 13.9124   | 12.5345   | 14.385   | 13.6001   | 11.985    |
| IDH2                        | 59.5703   | 68.2197   | 51.6589  | 51.6874   | 67.6053   |
| USP39                       | 28.5068   | 31.8148   | 32.8979  | 27.5917   | 31.7389   |
| TULP3                       | 10.6995   | 9.92139   | 8.6771   | 9.10632   | 9.9835    |
| ZNF275                      | 3.25582   | 3.42024   | 3.17323  | 3.20361   | 3.10619   |
| TRMT13                      | 2.20359   | 1.99543   | 2.99024  | 2.35825   | 2.11613   |
| RNASET2                     | 57.4573   | 67.3899   | 51.0872  | 51.6106   | 61.1237   |
| PPDPF                       | 676.837   | 620.888   | 540.278  | 598.351   | 575.687   |
| WASF1                       | 3.11472   | 2.85572   | 3.40496  | 2.70491   | 3.0172    |
| RPA3                        | 19.7815   | 17.3748   | 17.9024  | 17.5486   | 17.6502   |
| KDM4D                       | 0.443396  | 0.381897  | 0.421456 | 0.406575  | 0.459716  |
| TP53INP2                    | 6.00379   | 7.83764   | 7.11384  | 6.0685    | 7.62921   |
| DBF4B                       | 7.10826   | 5.20436   | 7.55813  | 7.33532   | 4.78905   |
| C10orf76                    | 4.23698   | 3.86402   | 4.3259   | 3.70029   | 4.11627   |
| UBE3D                       | 2.03514   | 1.59365   | 1.66349  | 1.89253   | 1.49708   |
| ARHGEF3                     | 1.27361   | 1.34725   | 1.37459  | 1.06837   | 1.43407   |
| SLC11A2                     | 7.29584   | 6.81905   | 7.44597  | 6.64141   | 6.91694   |
| AKT2                        | 16.9698   | 17.1962   | 16.6098  | 15.0709   | 17.3938   |
| CCDC38                      | 0         | 0.0162628 | 0        | 0         | 0.0153741 |
| RGL2                        | 26.3394   | 27.9896   | 24.9687  | 22.1318   | 28.4859   |
| WDR24                       | 7.10626   | 8.04802   | 6.40698  | 6.39622   | 7.83583   |
| RAD1                        | 4.27194   | 4.26132   | 5.35903  | 4.50106   | 3.85383   |
| MKRN1                       | 47.268    | 47.9942   | 44.0389  | 40.3487   | 49.2769   |
| SH3GLB1                     | 9.01811   | 8.81536   | 9.35783  | 7.7187    | 9.05585   |
| VAT1                        | 181.602   | 202.253   | 175.472  | 163.44    | 186.836   |
| CHRAC1                      | 28.4724   | 30.8819   | 31.2887  | 25.5469   | 32.2572   |
| C10orf35                    | 25.3339   | 26.9244   | 23.0632  | 23.9819   | 24.6701   |
| R3HDM1                      | 4.17877   | 4.11058   | 4.45669  | 4.24004   | 3.66779   |
| WDSUB1                      | 5.48113   | 4.40884   | 7.18143  | 4.8855    | 5.30822   |
| TRAF3IP2-AS1                | 2.69606   | 4.05767   | 3.65698  | 3.33888   | 2.98431   |
| COPG1                       | 39.0627   | 38.4748   | 39.7831  | 35.6061   | 36.7486   |
| PNPLA8                      | 2.15341   | 1.60233   | 2.07501  | 1.89131   | 1.75306   |
| NIPBL                       | 2.02814   | 1.89304   | 1.38842  | 1.74783   | 1.99493   |
| FAM173A                     | 70.8388   | 73.6295   | 79.5971  | 64.4863   | 67.2229   |
| ZNF354B                     | 1.81336   | 1.58247   | 1.65003  | 1.63654   | 1.65557   |
| CNST                        | 3.92927   | 3.18518   | 3.34569  | 2.96304   | 3.38903   |
| CD320                       | 284.858   | 296.072   | 251.762  | 226.158   | 303.774   |
| PRKX                        | 6.62297   | 5.19872   | 6.3259   | 5.87858   | 5.94391   |
| LCMT1                       | 36.6488   | 40.9298   | 39.4275  | 35.9471   | 36.0521   |

|              |            |           |           |           |           |
|--------------|------------|-----------|-----------|-----------|-----------|
| COO6         | 20.2773    | 18.1002   | 17.6572   | 17.2869   | 18.1234   |
| HIPK1        | 2.61372    | 2.34319   | 2.53098   | 2.24523   | 2.5329    |
| TOMM6        | 146.303    | 150.703   | 120.301   | 123.622   | 141.814   |
| PSMF1        | 32.3538    | 32.084    | 37.7417   | 29.2042   | 30.8445   |
| HSPA4L       | 3.72537    | 3.28672   | 2.41543   | 2.56811   | 4.17439   |
| CKB          | 5.42516    | 11.3525   | 3.98261   | 5.10333   | 7.92011   |
| RCAN2        | 0.00663709 | 0.0195316 | 0.0676763 | 0.022185  | 0.0184342 |
| EXO5         | 2.42204    | 3.43802   | 4.28474   | 2.99889   | 2.74961   |
| NDUFB6       | 58.9634    | 60.3181   | 58.0833   | 52.5232   | 57.8342   |
| GUK1         | 284.811    | 319.763   | 231.255   | 226.945   | 302.081   |
| RBM7         | 12.0022    | 10.5531   | 12.1929   | 10.1634   | 11.0093   |
| ENPP4        | 1.63018    | 1.7716    | 1.56727   | 1.44383   | 1.86979   |
| MARCKS       | 12.4736    | 11.0229   | 12.4696   | 11.0183   | 11.5516   |
| RDH13        | 10.6706    | 6.69568   | 10.3859   | 8.52305   | 7.59028   |
| PHC3         | 2.02213    | 1.78663   | 1.42665   | 1.48289   | 1.84557   |
| RPL23AP82    | 4.97794    | 6.105     | 4.79323   | 4.17607   | 6.3617    |
| LOC100129518 | 0.0364684  | 0.284235  | 0.271178  | 0.121392  | 0.242798  |
| OSCAR        | 2.09009    | 2.9668    | 2.19272   | 2.63988   | 2.28715   |
| MRPS22       | 41.9809    | 41.0091   | 44.1464   | 39.0372   | 39.2589   |
| DGAT2L6      | 0.0154587  | 0.0219508 | 0.0192229 | 0.0257107 | 0         |
| KIAA1804     | 3.73845    | 2.33897   | 2.94597   | 3.18052   | 2.28563   |
| MED20        | 3.43495    | 3.62381   | 3.92994   | 3.32185   | 3.34178   |
| RPN1         | 78.4049    | 84.7227   | 82.4577   | 71.0953   | 86.7596   |
| ELL          | 13.5895    | 11.9323   | 12.2423   | 13.341    | 10.6961   |
| CREBZF       | 6.16708    | 5.28251   | 6.54755   | 6.07424   | 4.96236   |
| B3GALT4      | 0.311874   | 0.450001  | 0.0674724 | 0.0947694 | 0.689181  |
| PCED1A       | 17.4574    | 18.5151   | 14.2459   | 15.7514   | 16.6103   |
| PIGC         | 9.61392    | 12.0858   | 12.7919   | 10.3298   | 11.2632   |
| DDX50        | 33.0427    | 27.0707   | 30.2132   | 25.606    | 31.7192   |
| PARP6        | 7.72685    | 8.09148   | 7.00112   | 7.24174   | 7.55351   |
| VAMP1        | 3.22201    | 6.26016   | 2.16901   | 3.38508   | 5.10036   |
| RBM23        | 25.6888    | 26.6052   | 25.1395   | 22.0243   | 26.7433   |
| BCL6         | 5.61726    | 3.93029   | 2.93359   | 3.83139   | 4.31103   |
| PTAR1        | 1.69485    | 1.49358   | 1.65387   | 1.4521    | 1.60193   |
| QDPR         | 34.5543    | 34.3076   | 31.3848   | 30.7187   | 32.9118   |
| EMC10        | 34.161     | 37.5151   | 33.2844   | 32.9991   | 33.4277   |
| CINP         | 28.2069    | 32.9438   | 22.0439   | 22.5105   | 33.2119   |
| MCM8         | 2.73887    | 1.87933   | 2.09981   | 2.52502   | 1.89337   |
| AIF1L        | 40.8265    | 46.8473   | 40.9106   | 37.5697   | 44.3925   |
| ZBTB40       | 2.57177    | 2.17955   | 2.66394   | 2.42753   | 2.08698   |
| CDRT15P1     | 0.263974   | 0.265766  | 0.478375  | 0.383889  | 0.162254  |
| ADAMTS2      | 0.10218    | 0.191325  | 0.0241454 | 0.129791  | 0.0646673 |
| ZC4H2        | 5.35195    | 5.80652   | 4.0283    | 3.84823   | 7.1087    |
| SNX3         | 129.986    | 145.842   | 133.649   | 108.822   | 152.175   |
| FAM220A      | 7.38114    | 7.01569   | 7.36934   | 6.79438   | 7.13159   |
| DDX60L       | 0.333796   | 0.257537  | 0.371858  | 0.287506  | 0.285862  |
| HECTD4       | 0.980768   | 0.836302  | 0.731356  | 0.779072  | 0.868546  |
| DOCK8        | 0.413948   | 0.484593  | 0.365059  | 0.445787  | 0.378349  |
| RGS16        | 2.81849    | 5.69695   | 4.55846   | 3.96981   | 4.21962   |
| SAC3D1       | 43.3957    | 48.8954   | 43.1402   | 39.6516   | 43.8563   |
| TPM1         | 48.1556    | 43.4072   | 58.8839   | 46        | 44.3354   |
| STARD9       | 0.430168   | 0.573106  | 0.345566  | 0.351233  | 0.54484   |
| C21orf2      | 4.42167    | 5.3277    | 4.63974   | 3.82341   | 5.21326   |
| POLR2G       | 114.865    | 117.09    | 122.691   | 112.938   | 101.871   |
| BCL2         | 1.30345    | 2.41251   | 1.48421   | 1.44227   | 1.93152   |
| KLHDC3       | 52.4061    | 50.2226   | 45.3113   | 44.3581   | 48.6125   |
| LRRCC1       | 2.60873    | 2.52841   | 1.04574   | 2.44293   | 2.36743   |
| MYBL1        | 1.06835    | 0.756832  | 1.34834   | 0.969767  | 0.859032  |
| SAFB2        | 12.4704    | 11.1944   | 13.8827   | 11.8839   | 11.8347   |
| SPDL1        | 3.03555    | 2.53351   | 4.06689   | 3.57353   | 1.99566   |
| DHRS11       | 9.85707    | 15.5201   | 11.7314   | 10.2392   | 13.6379   |
| TAOK1        | 3.84306    | 3.57984   | 3.63887   | 3.3905    | 3.46186   |
| TXNDC17      | 35.5547    | 34.0579   | 30.5269   | 27.7682   | 35.137    |
| AMPD2        | 43.4104    | 47.0902   | 28.2409   | 32.9733   | 48.496    |
| AIRN         | 0.0265534  | 0.050876  | 0.0165396 | 0.032439  | 0.0436998 |
| TTLL4        | 7.29097    | 6.49148   | 6.25638   | 6.3989    | 6.43789   |
| PRG4         | 0.0711465  | 0.0466458 | 0.0474777 | 0.0554849 | 0.049674  |
| NSD1         | 2.10669    | 1.85709   | 2.18656   | 2.05493   | 1.75333   |
| LAMP3        | 0.812418   | 0.585016  | 1.07458   | 0.800185  | 0.626712  |
| GOLGB1       | 3.76698    | 4.07584   | 1.3163    | 3.11095   | 4.18534   |
| CHAF1B       | 9.136      | 10.7383   | 8.1247    | 8.84085   | 10.2569   |
| SIMC1        | 11.8281    | 7.73458   | 10.675    | 10.3562   | 7.77918   |
| SHMT1        | 19.5907    | 17.695    | 17.0964   | 17.9726   | 17.8935   |
| ZBTB3        | 1.08297    | 1.56783   | 1.00915   | 0.680181  | 1.58449   |
| CCR10        | 25.0397    | 23.1077   | 27.1538   | 20.9672   | 28.4459   |
| ZDHC8        | 11.7329    | 11.3356   | 11.3721   | 11.3318   | 10.3945   |
| HYAL3,NAT6   | 28.6301    | 29.5885   | 24.3107   | 24.7673   | 28.7681   |
| HIST4H4      | 0.979127   | 0.186456  | 1.32809   | 0.697285  | 0.696145  |
| TKT          | 319.176    | 280.786   | 329.61    | 279.099   | 284.69    |

|           |           |           |           |           |           |
|-----------|-----------|-----------|-----------|-----------|-----------|
| NME3      | 73.5171   | 78.2905   | 76.6665   | 71.514    | 72.7577   |
| DEPDC1B   | 7.0778    | 6.8106    | 8.10662   | 6.74085   | 6.23507   |
| ALDH7A1   | 16.139    | 15.9075   | 14.9243   | 14.1504   | 16.2928   |
| APOA1BP   | 143.743   | 166.157   | 133.872   | 130.288   | 148.999   |
| ZBTB41    | 0.606122  | 0.450483  | 0.445763  | 0.473647  | 0.508018  |
| PPFIA1    | 6.48318   | 5.58856   | 6.59282   | 6.21433   | 5.47794   |
| KIAA1549L | 1.27893   | 1.39284   | 1.15768   | 1.12161   | 1.36674   |
| TNFAIP1   | 11.745    | 13.4749   | 12.1235   | 11.3753   | 11.8364   |
| RDM1      | 2.34427   | 2.01882   | 1.69598   | 1.95889   | 1.59629   |
| ONECUT2   | 0.377903  | 0.384172  | 0.359688  | 0.352442  | 0.31971   |
| FTSJD2    | 11.23     | 10.9364   | 9.11627   | 9.54213   | 11.1206   |
| VPS72     | 40.7451   | 48.2093   | 37.9113   | 38.4219   | 44.4009   |
| ZC3H12D   | 0.0202888 | 0.0283393 | 0.0250232 | 0.0226558 | 0.0349655 |
| MED1      | 5.00268   | 5.17712   | 4.96968   | 4.76013   | 4.72954   |
| PTPN12    | 8.91668   | 8.5656    | 8.697     | 8.37288   | 7.98889   |
| NUDT18    | 11.1937   | 11.0015   | 13.5596   | 9.72877   | 10.515    |
| VAV2      | 17.1889   | 15.5541   | 15.8101   | 15.951    | 14.9209   |
| WDR47     | 1.88172   | 1.6455    | 1.69427   | 1.50949   | 1.63155   |
| ARL8A     | 27.3303   | 27.1254   | 26.5474   | 26.3192   | 25.1269   |
| PRTN3     | 0         | 0.141542  | 0.0638973 | 0         | 0.194736  |
| CENPI     | 0.691234  | 0.605451  | 0.544417  | 0.502024  | 0.680946  |
| PRSS56    | 0.486793  | 0.389909  | 0.215037  | 0.256071  | 0.566266  |
| LDLRAP1   | 8.98817   | 10.0097   | 9.18645   | 8.88311   | 9.12701   |
| YPEL5     | 15.4913   | 17.6183   | 17.3374   | 12.98     | 18.4035   |
| AIFM2     | 23.3091   | 21.0977   | 20.5909   | 20.8006   | 19.472    |
| PCOLCE    | 21.9842   | 17.7564   | 15.2426   | 20.1676   | 15.3975   |
| RAD23A    | 138.85    | 128.973   | 129.022   | 127.425   | 121.107   |
| PLCD3     | 18.4218   | 21.4782   | 17.2032   | 17.8113   | 19.9435   |
| SPPL3     | 12.3988   | 13.6776   | 14.0144   | 11.3662   | 13.2631   |
| TBC1D17   | 12.428    | 13.6065   | 10.5954   | 10.8226   | 13.4149   |
| DCAF7     | 28.0297   | 31.3205   | 27.1711   | 25.4625   | 30.2872   |
| FMO4      | 0.330671  | 0.712727  | 0.310856  | 0.531769  | 0.433859  |
| CD3EAP    | 2.09305   | 2.39772   | 1.84182   | 1.6624    | 2.27886   |
| MPLKIP    | 25.9749   | 21.2095   | 30.0432   | 23.3505   | 21.884    |
| HEXB      | 66.995    | 68.0472   | 73.6914   | 60.9642   | 69.7911   |
| C14orf159 | 7.44408   | 6.88633   | 7.0915    | 6.84472   | 6.58748   |
| DUS3L     | 47.5349   | 43.1888   | 40.85     | 41.726    | 40.9384   |
| ANAPC16   | 18.5131   | 23.5338   | 25.6128   | 19.4124   | 20.8294   |
| SUFU      | 4.21218   | 4.13231   | 4.27079   | 3.78274   | 4.15707   |
| TLE6      | 8.47693   | 9.38034   | 4.72128   | 5.801     | 10.3225   |
| SLC1A1    | 2.09273   | 1.87595   | 1.92696   | 1.45555   | 2.10225   |
| ETFA      | 104.063   | 104.104   | 101.368   | 90.0305   | 106.756   |
| FAM98C    | 49.4064   | 47.5579   | 50.9626   | 47.3814   | 41.4428   |
| NDUFA6    | 55.5993   | 66.7599   | 62.6897   | 52.1892   | 63.4985   |
| TRIM45    | 0.438433  | 0.666479  | 0.294175  | 0.446346  | 0.494778  |
| KCTD7     | 1.81635   | 1.14675   | 1.65265   | 1.65527   | 1.2933    |
| AAAS      | 25.4081   | 24.2851   | 24.9354   | 24.9749   | 23.0313   |
| ENTPD6    | 31.6255   | 36.5429   | 35.6416   | 31.6526   | 33.254    |
| MYO5C     | 0.702808  | 0.53948   | 0.746847  | 0.616601  | 0.676642  |
| C7orf13   | 0.732769  | 0.635542  | 1.5917    | 1.07464   | 0.70464   |
| GLTPD1    | 19.6415   | 26.6954   | 21.364    | 19.9523   | 23.8436   |
| GNPDA2    | 4.12104   | 4.34673   | 3.88986   | 3.15384   | 4.73985   |
| LCORL     | 4.16861   | 3.04642   | 3.45748   | 3.496     | 3.33495   |
| FAM89B    | 30.5193   | 36.7256   | 35.7133   | 32.4769   | 33.0486   |
| CDK5R1    | 2.73058   | 2.67245   | 2.44796   | 2.29263   | 2.77284   |
| JPH1      | 3.538     | 2.22404   | 3.40353   | 3.34066   | 2.58263   |
| MRPL14    | 120.105   | 123.275   | 121.071   | 103.65    | 120.583   |
| ZNF525    | 1.21199   | 0.928304  | 1.18991   | 1.12822   | 0.896     |
| RAD51C    | 18.2363   | 20.0718   | 23.182    | 19.8115   | 18.3142   |
| RSBN1L    | 3.39049   | 2.34818   | 2.79953   | 2.56373   | 2.79737   |
| ATXN3     | 1.99516   | 1.93465   | 1.61825   | 1.67995   | 1.93449   |
| F12       | 33.954    | 33.2617   | 35.8692   | 28.5397   | 34.7408   |
| SEC31A    | 7.05356   | 6.68583   | 6.51648   | 6.04421   | 6.91415   |
| NIPSNAP1  | 80.7278   | 86.0009   | 70.1273   | 66.7267   | 87.0119   |
| THAP3     | 25.8167   | 29.5039   | 22.6857   | 22.1509   | 24.6379   |
| UQCRC2    | 91.5863   | 98.0827   | 92.7339   | 81.1542   | 95.0864   |
| MMP1      | 0.177349  | 0.159569  | 0.221277  | 0.156454  | 0.194398  |
| SRI       | 71.1119   | 64.7052   | 73.0278   | 61.0889   | 71.5547   |
| ATP5SL    | 26.3971   | 33.0689   | 26.8764   | 24.2696   | 30.0279   |
| ZNF845    | 1.33731   | 1.45274   | 1.14948   | 1.27342   | 1.20113   |
| KIAA1009  | 0.415612  | 0.419018  | 0.204915  | 0.429771  | 0.373692  |
| ACOT8     | 19.9506   | 20.1837   | 18.1501   | 16.7797   | 19.865    |
| PROM2     | 0.358978  | 0.344776  | 0.179867  | 0.317989  | 0.369553  |
| ZMYM3     | 7.7281    | 9.33553   | 5.51295   | 6.49532   | 9.59284   |
| NELFA     | 48.3383   | 38.2384   | 38.4371   | 41.9384   | 38.5032   |
| NUMA1     | 20.9865   | 20.8989   | 18.1559   | 19.9718   | 19.1721   |
| PPM1B     | 8.71503   | 7.89696   | 9.02717   | 8.53608   | 7.0513    |
| PINK1     | 19.1332   | 19.2465   | 19.6343   | 18.3902   | 19.0192   |
| BFAR      | 19.6995   | 18.7825   | 21.4773   | 18.7342   | 18.8582   |



|                       |           |           |           |           |           |
|-----------------------|-----------|-----------|-----------|-----------|-----------|
| PIF1                  | 6.97648   | 5.62279   | 7.14273   | 7.73212   | 4.86127   |
| MSRB1                 | 23.2172   | 27.0503   | 24.5167   | 22.804    | 23.7988   |
| NIPSNAP3A             | 5.88268   | 5.75333   | 6.48613   | 5.35108   | 5.78808   |
| TAF10                 | 142.702   | 143.223   | 133.044   | 129.775   | 131.376   |
| CKLF,CKLF-CMTM1,CMTM1 | 53.8103   | 70.6417   | 51.5309   | 50.3172   | 63.7323   |
| LIG3                  | 6.80466   | 5.74777   | 5.31195   | 5.53888   | 5.81107   |
| CCDC126               | 0.948894  | 1.42248   | 1.06122   | 0.842049  | 1.26193   |
| RND3                  | 5.85264   | 6.32944   | 5.44273   | 5.03799   | 5.74996   |
| C9orf129              | 1.95559   | 2.64732   | 1.79362   | 1.89808   | 2.03814   |
| KLC3                  | 33.9617   | 34.5946   | 37.6184   | 30.6903   | 34.4259   |
| ASCC2                 | 22.2801   | 19.9295   | 21.3991   | 19.7054   | 19.7755   |
| IMPA2                 | 29.8586   | 32.5733   | 26.3732   | 28.8312   | 31.1266   |
| TBC1D15               | 5.4541    | 5.99386   | 5.73511   | 4.85912   | 6.06441   |
| RALGAPB               | 3.52431   | 3.3545    | 3.68475   | 3.43917   | 3.38716   |
| ERLEC1                | 11.452    | 10.7837   | 12.9446   | 10.2935   | 11.3832   |
| SLX4                  | 1.62842   | 1.16491   | 1.61692   | 1.67514   | 0.979649  |
| TYMS                  | 20.6221   | 24.3221   | 18.8025   | 19.4748   | 25.3514   |
| MOB3C                 | 4.05971   | 5.71787   | 5.37432   | 4.12203   | 5.55083   |
| NHLRC2                | 1.47099   | 1.09646   | 0.992438  | 1.18836   | 1.04726   |
| TNIP2                 | 44.9896   | 48.6087   | 48.8287   | 44.3735   | 42.6109   |
| ACVR2A                | 0.612163  | 0.726444  | 0.801596  | 0.631517  | 0.674637  |
| ZNF740                | 6.86695   | 6.90949   | 6.97145   | 6.29385   | 6.49914   |
| B4GALT7               | 36.8005   | 32.7773   | 32.6848   | 30.1155   | 34.2784   |
| ZNF75D                | 1.09638   | 1.23673   | 1.43746   | 1.37743   | 1.20796   |
| SEC22A                | 4.20758   | 4.47133   | 4.35348   | 3.80885   | 4.43846   |
| NBPF15,NBPF16         | 7.10981   | 7.17627   | 5.68967   | 6.39798   | 6.39933   |
| LOC100506060          | 1.21718   | 1.02033   | 1.26544   | 1.24564   | 0.904631  |
| ZNF92                 | 2.30028   | 2.25685   | 1.47132   | 1.90024   | 2.28169   |
| IRF2                  | 5.47269   | 4.21134   | 5.86749   | 5.37129   | 4.43809   |
| SNX2                  | 26.4481   | 26.465    | 27.8527   | 24.4109   | 27.2607   |
| MYH9                  | 75.4031   | 64.721    | 62.4063   | 63.071    | 69.9455   |
| GTDC2                 | 9.7631    | 10.5686   | 8.09829   | 8.20967   | 10.5715   |
| REEP5                 | 21.9354   | 25.2631   | 27.8311   | 20.5599   | 25.2882   |
| SLC25A34              | 0.224964  | 0.145465  | 0.158754  | 0.218452  | 0.0740043 |
| EXOSC10               | 24.2847   | 22.5325   | 22.1145   | 22.0398   | 21.703    |
| LRRC6                 | 0.967766  | 0.930785  | 1.0596    | 1.30799   | 0.759451  |
| IL11RA                | 0.751325  | 1.23748   | 0.952901  | 0.827992  | 1.41354   |
| VAMP3                 | 20.5089   | 26.2193   | 21.8642   | 19.2657   | 25.3149   |
| TLR6                  | 0.762027  | 0.681141  | 0.621345  | 0.57305   | 0.708348  |
| SNX7                  | 11.3734   | 11.7046   | 11.7597   | 10.1411   | 12.6801   |
| C11orf30              | 0.938752  | 0.753508  | 0.670115  | 0.856967  | 0.747272  |
| CLASP1                | 3.64844   | 3.06046   | 3.00071   | 3.05359   | 3.38109   |
| N4BP1                 | 2.90005   | 2.72837   | 3.23501   | 2.9509    | 2.78777   |
| RANBP9                | 10.5818   | 9.44524   | 11.7652   | 10.0569   | 10.1515   |
| NCS1                  | 50.0396   | 52.5915   | 49.8354   | 45.4835   | 50.6669   |
| METAP1                | 31.9921   | 29.2792   | 31.4421   | 27.1435   | 31.6625   |
| PARM1                 | 1.30539   | 1.67511   | 1.27646   | 1.15882   | 1.58336   |
| ZNF780A               | 1.75257   | 1.34415   | 1.95714   | 1.59024   | 1.27899   |
| CCDC69                | 3.72875   | 5.2154    | 3.3633    | 3.6916    | 4.76728   |
| COG2                  | 5.46313   | 6.7807    | 6.5362    | 5.1275    | 6.82801   |
| ASPM                  | 3.08521   | 2.39015   | 1.47771   | 3.08977   | 2.10517   |
| AGPAT1                | 37.1573   | 32.7719   | 35.8561   | 34.0161   | 33.2541   |
| ACTR3                 | 0.566954  | 1.49152   | 1.26109   | 0.877321  | 1.36213   |
| RALGDS                | 51.9845   | 54.9744   | 46.4052   | 43.064    | 55.5115   |
| CFL2                  | 13.1523   | 16.3633   | 12.8184   | 11.4108   | 16.5024   |
| RNF40                 | 18.3843   | 16.8648   | 15.5389   | 16.3643   | 16.8758   |
| VPS52                 | 9.66859   | 9.61388   | 8.42639   | 9.55978   | 8.48794   |
| MRPS14                | 12.3642   | 10.2568   | 11.1429   | 9.93981   | 11.4152   |
| TTC33                 | 1.59248   | 1.61027   | 1.59263   | 1.3564    | 1.58051   |
| PIN1                  | 94.1539   | 89.2944   | 91.4721   | 81.5593   | 88.1271   |
| SERHL2                | 0.0232905 | 0.0316686 | 0.112497  | 0.0768731 | 0         |
| COQ3                  | 12.0368   | 10.7923   | 10.9052   | 11.5137   | 9.75169   |
| DPP3                  | 18.1694   | 16.3877   | 15.1533   | 16.3192   | 16.0695   |
| FOXD4                 | 0.721436  | 0.566133  | 1.54578   | 0.895379  | 0.808624  |
| NAGA                  | 12.2803   | 13.446    | 11.5632   | 11.5162   | 12.1676   |
| CTC1                  | 3.1013    | 2.88033   | 2.71434   | 2.97455   | 2.79355   |
| FAM83D                | 16.4658   | 15.9169   | 17.9294   | 16.8967   | 14.6978   |
| WIPF2                 | 5.1466    | 4.93353   | 4.2802    | 4.16761   | 5.15811   |
| RBM41                 | 1.2808    | 0.99177   | 1.02117   | 1.37322   | 0.981129  |
| SQLE                  | 20.6818   | 14.847    | 19.797    | 18.3623   | 16.1473   |
| IRF5                  | 26.1055   | 24.2043   | 26.3857   | 23.1583   | 23.852    |
| FN3K                  | 43.0467   | 40.8811   | 30.8362   | 35.9171   | 40.2222   |
| SOS1                  | 2.06423   | 1.82811   | 2.12361   | 2.03489   | 1.7241    |
| ELF3                  | 0.053513  | 0.0494387 | 0.0656613 | 0.059243  | 0.0691828 |
| CHRNA7                | 1.35837   | 1.54273   | 1.30361   | 1.18601   | 1.54305   |
| FBXL4                 | 3.56906   | 3.55431   | 3.62848   | 3.29442   | 3.52688   |
| ZNF592                | 3.59443   | 3.46601   | 3.25539   | 3.04829   | 3.51986   |
| RBM6                  | 16.2642   | 13.6519   | 12.9448   | 14.6755   | 13.7161   |
| LSM2                  | 119.535   | 112.425   | 112.568   | 103.235   | 109.601   |

|                           |            |          |            |           |          |
|---------------------------|------------|----------|------------|-----------|----------|
| TRIM62                    | 3.16957    | 3.45575  | 2.77556    | 2.93524   | 3.3812   |
| EFCAB4A                   | 6.51844    | 6.31375  | 6.93949    | 6.45827   | 7.00079  |
| PLP2                      | 415.756    | 492.837  | 435.569    | 384.725   | 467.104  |
| BCKDHB                    | 6.61183    | 8.63135  | 8.70193    | 7.11993   | 8.47564  |
| SCARNA18                  | 2.7448     | 22.5621  | 0          | 0         | 19.0988  |
| SDC4                      | 47.4697    | 79.1825  | 43.8149    | 41.3782   | 75.8404  |
| EIF4E3                    | 3.4037     | 3.36008  | 3.31179    | 3.02469   | 3.68741  |
| MRPS5                     | 41.1291    | 39.1241  | 38.4824    | 37.4391   | 37.1376  |
| FBXO18                    | 21.5014    | 20.0524  | 20.8477    | 19.8797   | 19.5494  |
| CNTROB                    | 14.9103    | 13.2347  | 14.0445    | 13.0756   | 14.0968  |
| HMG20B                    | 105.425    | 118.866  | 110.434    | 102.27    | 106.25   |
| TUBGCP5                   | 4.9153     | 5.92118  | 4.2612     | 3.73083   | 6.23262  |
| ATP5H                     | 278.023    | 304.224  | 294.543    | 263.812   | 277.495  |
| ARID1B                    | 3.24152    | 2.73573  | 3.20642    | 3.15592   | 2.68105  |
| PGBD4                     | 0.37723    | 0.792857 | 0.404485   | 0.502709  | 0.608419 |
| PWWP2A                    | 7.9232     | 5.24751  | 5.7834     | 6.18343   | 6.17667  |
| KLHL24                    | 2.74619    | 2.50796  | 2.70513    | 2.33502   | 2.58873  |
| TMEM259                   | 84.2903    | 73.2594  | 75.1812    | 74.2553   | 74.553   |
| UPP1                      | 567.898    | 467.677  | 608.365    | 502.729   | 489.612  |
| MRPL28                    | 116.12     | 106.874  | 116.453    | 113.972   | 98.915   |
| STEAP3                    | 15.2832    | 16.3475  | 15.6056    | 14.5267   | 15.0961  |
| SLC44A1                   | 10.5795    | 13.0924  | 9.71509    | 8.92673   | 13.5786  |
| PRKDC                     | 12.2326    | 10.1199  | 10.8571    | 10.8651   | 11.4194  |
| MAF1                      | 187.005    | 192.315  | 223.65     | 178.832   | 188.039  |
| GPR153                    | 5.35236    | 5.90703  | 5.84186    | 5.4737    | 6.23188  |
| TUBB4B                    | 824.193    | 843.644  | 819.184    | 764.828   | 791.43   |
| C19orf24                  | 112.468    | 112.863  | 125.829    | 100.773   | 108.781  |
| PCDHB9                    | 0.397782   | 0.35845  | 0.424603   | 0.264704  | 0.525037 |
| NR1H3                     | 4.5253     | 3.44348  | 3.40751    | 3.52689   | 3.376    |
| FAM172A                   | 2.04501    | 2.51505  | 2.0165     | 1.67863   | 2.58193  |
| RBKS                      | 1.91922    | 3.43285  | 2.34607    | 1.88273   | 2.99244  |
| SUV39H1                   | 10.4955    | 8.39876  | 10.6609    | 10.0681   | 9.31472  |
| MSTN                      | 0.00728151 | 0.010933 | 0.00935465 | 0         | 0        |
| METTL21B                  | 3.36479    | 3.63327  | 3.12583    | 2.68846   | 4.03295  |
| RHOB                      | 17.6295    | 31.2272  | 36.1637    | 22.2219   | 29.4623  |
| RTN3                      | 51.5973    | 55.2235  | 53.4512    | 47.6761   | 57.7174  |
| COG3                      | 2.67882    | 2.35424  | 2.90452    | 2.72458   | 2.33786  |
| GTF2A1                    | 3.53711    | 2.54367  | 4.07532    | 3.57966   | 2.6837   |
| ISYNA1                    | 5.91302    | 5.37508  | 4.57709    | 4.91885   | 5.39092  |
| AP2A1                     | 30.3427    | 27.8194  | 26.7874    | 26.8116   | 28.1476  |
| GPX1                      | 673.712    | 808.207  | 670.806    | 597.654   | 753.731  |
| DVL3                      | 17.154     | 18.4892  | 16.7129    | 15.2034   | 17.4667  |
| NR1D2                     | 3.10987    | 3.91898  | 3.46178    | 2.96021   | 3.6452   |
| CMC4.MTCP1                | 15.3649    | 15.7237  | 13.9768    | 11.5503   | 17.8066  |
| SMG7                      | 8.92159    | 8.26003  | 9.25031    | 8.40147   | 8.23306  |
| C4orf47                   | 1.61134    | 1.74084  | 1.0308     | 1.24783   | 2.22538  |
| CDSN                      | 0.153348   | 0.142358 | 0.0628277  | 0.0857718 | 0.163435 |
| MTSS1                     | 1.94469    | 1.94759  | 1.87019    | 1.78615   | 1.83578  |
| PPP1R15B                  | 6.21955    | 7.95547  | 9.33534    | 7.10375   | 6.98715  |
| LOC284889                 | 2.52384    | 1.79113  | 2.28391    | 2.4741    | 1.83577  |
| NDUF55                    | 399.366    | 415.607  | 343.174    | 351.795   | 389.311  |
| BTBD6                     | 43.3463    | 53.5353  | 46.6333    | 41.9929   | 48.9714  |
| NCK1                      | 7.77425    | 5.58442  | 7.57267    | 6.56841   | 6.44861  |
| FKBPL                     | 4.87617    | 6.28519  | 5.87252    | 5.38397   | 5.35618  |
| SCARB2                    | 20.0985    | 26.1935  | 20.9624    | 17.8619   | 25.6184  |
| ATP10D                    | 0.754295   | 0.853862 | 0.841285   | 0.714255  | 0.801546 |
| WDYHV1                    | 13.4833    | 12.2588  | 12.1672    | 11.0434   | 11.9352  |
| MRPL42                    | 12.7404    | 14.4312  | 12.6048    | 11.0064   | 14.5205  |
| ARHGAP29                  | 34.5084    | 32.8497  | 36.6961    | 31.0546   | 32.8867  |
| SIRT4                     | 2.35931    | 1.95496  | 1.46998    | 1.70912   | 1.98819  |
| ZNF266                    | 9.6952     | 10.9662  | 8.73992    | 9.5111    | 10.109   |
| DXD17                     | 73.9893    | 66.9458  | 66.0389    | 66.3636   | 62.9729  |
| MED30                     | 36.985     | 35.7597  | 34.0463    | 33.5488   | 35.7721  |
| MCTP2                     | 0.863396   | 0.869921 | 0.61385    | 0.668858  | 1.02749  |
| CA3                       | 0.790153   | 0.699712 | 0.626836   | 0.607662  | 0.802988 |
| CLPTM1                    | 45.7648    | 45.2155  | 43.4824    | 41.993    | 45.8141  |
| CENPM                     | 31.1585    | 31.6524  | 36.9487    | 34.7156   | 25.4881  |
| TSKU                      | 17.4614    | 17.4254  | 15.3656    | 14.9176   | 17.443   |
| DOCK4                     | 0.564106   | 0.42374  | 0.386032   | 0.47048   | 0.448182 |
| ORAI3                     | 14.6203    | 17.9213  | 15.9122    | 11.865    | 18.6588  |
| PLEKHG3                   | 14.6336    | 10.8836  | 11.6598    | 12.7447   | 10.5113  |
| ACSF2                     | 6.0601     | 8.38921  | 5.95267    | 5.71807   | 7.64556  |
| HNRNPH2,RPL36A,RPL36A-HNR | 1417.73    | 2310.19  | 1584.88    | 1448.9    | 1833.31  |
| LOC654433                 | 3.51984    | 1.57201  | 3.12613    | 2.78474   | 2.09395  |
| FBXL3                     | 5.63778    | 6.33398  | 5.48586    | 4.39467   | 6.7771   |
| USP25                     | 3.80478    | 3.78457  | 4.49454    | 3.66606   | 3.76401  |
| CEP350                    | 1.35172    | 1.28148  | 1.22305    | 1.1897    | 1.33576  |
| LAMTOR1                   | 97.3869    | 102.391  | 96.7284    | 90.0793   | 97.6362  |
| FAM3C                     | 18.818     | 21.1563  | 20.2301    | 17.4851   | 22.4471  |

|              |           |           |           |           |           |
|--------------|-----------|-----------|-----------|-----------|-----------|
| NDUFB1       | 178.242   | 173.086   | 177.294   | 162.388   | 159.389   |
| MIR497HG     | 1.33863   | 1.24013   | 1.46076   | 1.38803   | 1.11638   |
| MYH11        | 0.0828322 | 0.0539824 | 0.123271  | 0.0950306 | 0.0449121 |
| ZNF335       | 7.22527   | 7.02722   | 5.57315   | 6.39198   | 6.65498   |
| IKBKE        | 2.841     | 2.97403   | 2.12311   | 2.21865   | 2.68766   |
| TMF1         | 3.85506   | 3.29815   | 2.86894   | 2.92653   | 3.76579   |
| ATP6V0E1     | 182.401   | 235.889   | 199.015   | 170.948   | 207.732   |
| MED26        | 6.02813   | 6.1251    | 6.02783   | 5.20245   | 6.41569   |
| RNASEH2A     | 66.925    | 63.2031   | 64.3491   | 64.4587   | 58.4381   |
| CNTRL        | 2.37715   | 1.88064   | 1.96859   | 2.47546   | 1.71083   |
| IKZF5        | 3.62311   | 3.54576   | 3.62057   | 2.69718   | 4.03227   |
| ZNF280D      | 2.8509    | 2.88697   | 3.67776   | 2.84761   | 3.25838   |
| IFNAR1       | 6.07123   | 6.10129   | 4.97405   | 5.03767   | 5.94601   |
| SERINC1      | 15.8919   | 18.9615   | 17.2299   | 13.5387   | 19.847    |
| PCTP         | 7.62832   | 9.3673    | 9.01122   | 6.71666   | 9.58049   |
| WHAMM        | 6.02952   | 5.06023   | 5.0269    | 5.23598   | 4.96814   |
| FCHSD1       | 12.0969   | 12.8553   | 11.6121   | 11.3121   | 13.3311   |
| NET1         | 8.5844    | 8.66308   | 6.9169    | 7.55835   | 8.38404   |
| ACAA1        | 38.7908   | 40.1591   | 37.0085   | 34.8762   | 38.1146   |
| LOC285033    | 1.03333   | 1.6669    | 1.593     | 1.01273   | 1.47406   |
| SMNDC1       | 56.4317   | 41.2664   | 49.3708   | 48.6814   | 45.5664   |
| HHAT         | 0.424878  | 0.633637  | 0.529593  | 0.499626  | 0.620363  |
| SUCLG1       | 51.5121   | 45.3842   | 52.2884   | 47.9507   | 43.5413   |
| EMP2         | 3.49414   | 3.70316   | 3.12605   | 3.38034   | 3.4488    |
| MAP2K4       | 6.17446   | 5.29429   | 6.3242    | 5.84902   | 5.07068   |
| HNF1A        | 0.408894  | 0.476154  | 0.503471  | 0.527245  | 0.362833  |
| ARHGEF10     | 6.8235    | 6.71453   | 6.41546   | 6.33422   | 6.49947   |
| RPL13        | 761.346   | 1269.34   | 846.004   | 752.318   | 1067.42   |
| ZNF516       | 3.09874   | 2.25297   | 2.85219   | 2.80416   | 2.36308   |
| B3GNT1       | 10.7723   | 15.7872   | 9.03179   | 10.4385   | 15.2671   |
| FAM118A      | 6.08942   | 5.76234   | 5.29851   | 5.78297   | 5.01886   |
| UQCRC1       | 233.643   | 239.933   | 224.546   | 208.541   | 230.007   |
| USP31        | 1.75616   | 1.60861   | 1.72229   | 1.56637   | 1.51962   |
| PXN-AS1      | 1.96      | 3.90015   | 1.98869   | 1.73538   | 2.95958   |
| SPINT2       | 2.54024   | 2.10082   | 2.41531   | 2.46705   | 2.1837    |
| SIGIRR       | 48.5066   | 49.2508   | 42.7989   | 44.3626   | 44.987    |
| GPATCH8      | 5.89236   | 4.90471   | 5.00184   | 5.2433    | 5.16205   |
| PIK3R1       | 1.02863   | 1.09025   | 0.907544  | 0.85579   | 1.12354   |
| BA1          | 0.599245  | 0.751594  | 0.482247  | 0.54111   | 0.76087   |
| ARF3         | 42.814    | 45.6536   | 44.4284   | 39.8592   | 47.1122   |
| PCDHB13      | 1.85934   | 2.33925   | 1.41583   | 1.67724   | 1.90102   |
| CNOT8        | 35.8875   | 31.5554   | 24.1428   | 27.1077   | 34.8868   |
| NMRAL1       | 35.2427   | 40.5264   | 36.8339   | 33.7059   | 36.0531   |
| CCDC163P     | 0.845356  | 0.902858  | 1.26706   | 0.843662  | 1.10772   |
| TRIM68       | 0.737541  | 1.02292   | 1.15767   | 1.11281   | 0.740263  |
| GPRIN1       | 5.1824    | 5.92212   | 5.67587   | 5.27608   | 5.42535   |
| LOC100288778 | 15.1621   | 13.9636   | 13.2844   | 13.1614   | 12.4374   |
| TMEM219      | 111.119   | 119.745   | 109.203   | 99.6592   | 109.488   |
| SUMO2        | 307.491   | 286.577   | 334.874   | 285.852   | 277.856   |
| CNOT3        | 19.7587   | 16.3392   | 17.7505   | 16.2911   | 17.5955   |
| ARL6IP4      | 200.57    | 210.973   | 202.378   | 183.655   | 201.246   |
| SNRPE        | 63.3592   | 65.6921   | 58.8362   | 57.2123   | 62.7569   |
| GOLGA5       | 7.81326   | 7.73527   | 7.30683   | 7.1758    | 8.03433   |
| RABIF        | 2.40901   | 3.70144   | 3.02085   | 2.40219   | 3.67686   |
| PTPN18       | 15.7087   | 16.251    | 15.3612   | 16.3354   | 14.272    |
| RANBP3       | 24.6917   | 25.0508   | 23.1662   | 22.9989   | 23.3115   |
| HOXB5        | 2.58124   | 3.07441   | 1.96439   | 2.74887   | 2.35749   |
| TATDN2       | 7.91441   | 8.82348   | 7.85136   | 7.72217   | 8.15092   |
| TSPAN12      | 1.31282   | 1.16418   | 1.57195   | 1.14281   | 1.34369   |
| UBE4B        | 5.83389   | 5.06793   | 5.53683   | 5.06672   | 5.27743   |
| HECA         | 4.73948   | 5.04375   | 4.16845   | 4.08999   | 4.94045   |
| BNC2         | 0.883211  | 0.894022  | 0.789159  | 0.781047  | 0.960844  |
| GRB2         | 38.4817   | 38.7902   | 40.9899   | 35.9623   | 39.9292   |
| PSMC3IP      | 26.6669   | 20.759    | 22.5252   | 23.9563   | 19.6899   |
| SLC19A2      | 9.72006   | 6.99846   | 9.62501   | 9.3831    | 6.63707   |
| ZBTB7B       | 12.3824   | 8.86604   | 12.2553   | 12.8397   | 8.03852   |
| LRP4         | 1.72725   | 1.62517   | 1.21613   | 1.61378   | 1.44157   |
| TBRG4        | 85.3749   | 79.5019   | 67.0807   | 74.3172   | 76.9205   |
| C5orf30      | 4.88279   | 5.36873   | 4.35114   | 4.02521   | 5.44586   |
| EXTL1        | 0.0323232 | 0.0286402 | 0.0777812 | 0.0540587 | 0.0779993 |
| GOLGA6L5     | 0.382302  | 0.285086  | 0.191214  | 0.278228  | 0.3586    |
| BCL7C        | 109.263   | 124.83    | 91.4321   | 97.22     | 115.552   |
| ZNF236       | 0.962168  | 0.694966  | 0.81191   | 0.79669   | 0.766619  |
| ZNF205       | 22.8904   | 16.4045   | 20.734    | 21.4149   | 15.5223   |
| LRP3         | 34.4394   | 35.394    | 38.9648   | 34.9452   | 34.8598   |
| OSBP         | 17.03     | 14.477    | 16.4183   | 16.1304   | 15.0139   |
| C8orf48      | 2.74182   | 2.08902   | 2.46644   | 2.50171   | 2.05884   |
| ABCB7        | 15.2973   | 15.6106   | 15.5589   | 13.4513   | 15.8354   |
| PMS2P3       | 0.785283  | 1.01896   | 1.0393    | 0.723634  | 0.969152  |

|                           |           |           |           |           |           |
|---------------------------|-----------|-----------|-----------|-----------|-----------|
| ATG4D                     | 21.3286   | 18.6997   | 21.0796   | 19.0037   | 19.0152   |
| IMP4                      | 130.11    | 141.064   | 130.209   | 121.897   | 128.539   |
| TMEM199                   | 6.58948   | 7.97642   | 7.98555   | 6.8556    | 7.21149   |
| POLR2H                    | 236.289   | 253.007   | 217.755   | 194.496   | 248.4     |
| LEMD3                     | 3.43573   | 3.13563   | 3.43642   | 3.02233   | 3.36342   |
| SLC22A23                  | 1.71408   | 1.72086   | 1.73403   | 1.67421   | 1.56759   |
| SNX17                     | 42.9454   | 47.8033   | 43.8186   | 40.616    | 42.8551   |
| ZCWPW2                    | 0.0964728 | 0.160512  | 0.122933  | 0.180812  | 0.137458  |
| PLXNB1                    | 5.09591   | 6.91491   | 3.84898   | 5.49854   | 5.87658   |
| ZDHC6                     | 13.5015   | 11.8333   | 18.2315   | 14.189    | 12.423    |
| FAM105B                   | 2.38038   | 2.49335   | 2.09661   | 2.08747   | 2.44177   |
| GUSBP9                    | 0.0598407 | 0.0834688 | 0.0727547 | 0.0998081 | 0         |
| SPON2                     | 0.341606  | 0.571506  | 0.477197  | 0.449529  | 0.525449  |
| KDM4B                     | 14.3225   | 14.1491   | 10.507    | 11.5281   | 14.3823   |
| OCIAD2                    | 262.184   | 290.018   | 261.056   | 245.763   | 276.211   |
| JARID2                    | 2.44126   | 2.42424   | 1.85906   | 2.01344   | 2.3529    |
| PEX14                     | 27.3406   | 20.2353   | 24.7291   | 24.1337   | 20.474    |
| TANC1                     | 1.91895   | 1.72068   | 1.91052   | 1.60271   | 1.87364   |
| LMNA                      | 72.3601   | 99.4373   | 80.9241   | 68.7984   | 88.4772   |
| GLT8D1                    | 14.57     | 15.5914   | 16.4566   | 13.3922   | 17.3489   |
| VAMP2                     | 31.5037   | 35.3098   | 27.482    | 29.5533   | 34.1859   |
| C3orf33                   | 3.94038   | 4.5328    | 3.62919   | 3.59397   | 4.99736   |
| BCL2L15                   | 0.0315647 | 0.0675299 | 0.0579476 | 0.0302989 | 0.070379  |
| DNAJC25,DNAJC25-GNG10,GNC | 77.0355   | 101.239   | 110.23    | 80.2029   | 96.327    |
| PARD3B                    | 0.372904  | 0.441323  | 0.32305   | 0.329439  | 0.469139  |
| C1orf159                  | 15.8138   | 14.025    | 13.8786   | 15.4379   | 13.1039   |
| TBCE                      | 4.74723   | 5.09525   | 5.28388   | 4.11791   | 5.11036   |
| CCNB3                     | 0.530963  | 0.301948  | 0.630044  | 0.600995  | 0.33868   |
| ASAP1                     | 14.4075   | 13.8598   | 12.1408   | 11.2459   | 14.83     |
| GPBP1                     | 14.6589   | 14.8669   | 13.209    | 12.5291   | 15.2442   |
| TSEN54                    | 33.8027   | 29.8581   | 32.1073   | 31.2651   | 29.8373   |
| ZNF737                    | 0.613259  | 0.920071  | 0.596744  | 0.444817  | 1.13659   |
| PIGK                      | 2.76647   | 3.25797   | 3.22794   | 2.70253   | 3.09675   |
| MCM4                      | 41.0272   | 40.3457   | 36.0714   | 39.6734   | 40.7017   |
| RASSF1                    | 19.1971   | 17.4968   | 23.3901   | 20.5122   | 14.0079   |
| MYEOV2                    | 203.027   | 247.381   | 221.513   | 199.299   | 221.096   |
| CWF19L1                   | 10.9655   | 11.2601   | 12.3198   | 10.8797   | 10.6453   |
| PIGS                      | 19.1409   | 19.71     | 17.9942   | 17.8272   | 19.9628   |
| LOC100335030              | 0.238428  | 0.263038  | 0.288349  | 0.272645  | 0.174727  |
| PCGF5                     | 9.29251   | 13.2379   | 10.4983   | 9.1777    | 12.0979   |
| ENOSF1                    | 15.8787   | 15.6078   | 14.3802   | 15.9749   | 14.8463   |
| TRIM33                    | 3.20849   | 2.68526   | 3.16458   | 2.86984   | 2.53347   |
| POLR2C                    | 48.0237   | 51.4595   | 48.4989   | 41.3267   | 51.084    |
| MIIP                      | 32.8908   | 31.4606   | 40.5873   | 33.579    | 27.4481   |
| SEC23A                    | 5.44493   | 3.3955    | 4.21442   | 3.92316   | 4.2974    |
| BUB1                      | 17.302    | 13.7285   | 16.7023   | 15.4897   | 12.8495   |
| PSMB3                     | 324.957   | 288.243   | 300.423   | 292.051   | 281.358   |
| ZNF544                    | 4.07383   | 4.18392   | 4.77514   | 3.71837   | 3.9689    |
| MED18                     | 10.9503   | 11.0406   | 13.6585   | 10.572    | 10.7831   |
| TTN                       | 0.014233  | 0.0177551 | 0.0171846 | 0.0131669 | 0.0138884 |
| ATP6AP1                   | 67.1723   | 70.0426   | 63.9936   | 60.338    | 65.5712   |
| PPM1D                     | 1.70528   | 1.99329   | 2.38107   | 1.66375   | 2.20732   |
| COMMD6                    | 52.7033   | 87.6085   | 62.7605   | 52.7533   | 75.3169   |
| C2orf88                   | 0.663386  | 1.1299    | 1.0764    | 0.703061  | 1.15497   |
| STRN4                     | 49.7363   | 45.4991   | 49.7768   | 49.2025   | 43.9291   |
| G2E3                      | 0.954685  | 1.21542   | 0.993552  | 0.864888  | 1.19705   |
| ARHGAP21                  | 5.03964   | 4.77096   | 4.9       | 4.57939   | 5.2097    |
| INCA1                     | 0.551482  | 0.674908  | 0.614978  | 0.703657  | 0.649402  |
| CENPP                     | 1.89423   | 2.02413   | 1.66497   | 1.6466    | 1.79603   |
| NDFIP2                    | 5.76348   | 6.64975   | 6.78078   | 5.5086    | 6.74657   |
| ZNF317                    | 10.0738   | 10.2917   | 9.86084   | 9.65554   | 9.78986   |
| IMMP2L                    | 12.507    | 14.1742   | 11.6089   | 11.164    | 13.4054   |
| SMAP2                     | 18.4922   | 16.5074   | 13.0672   | 13.548    | 19.5777   |
| GALK2                     | 9.76543   | 9.97477   | 9.49719   | 8.04954   | 10.7929   |
| UBN1                      | 5.46692   | 4.63933   | 5.79126   | 5.24593   | 4.42089   |
| NDNL2                     | 16.5793   | 17.2645   | 17.6221   | 16.3383   | 16.9161   |
| FAM168A                   | 1.74101   | 1.54008   | 1.4225    | 1.48866   | 1.34966   |
| FKBP8                     | 305.204   | 298.586   | 270.559   | 271.102   | 289.654   |
| ATF1                      | 6.01717   | 7.10115   | 6.57084   | 5.65774   | 6.89315   |
| METTL22                   | 5.86875   | 7.90479   | 6.35958   | 5.69468   | 7.16646   |
| CPVL                      | 12.5426   | 13.3412   | 14.0852   | 12.4459   | 12.4353   |
| ZNF383                    | 2.06186   | 2.59094   | 1.5966    | 1.88872   | 2.24923   |
| GOLGA8I                   | 0.110653  | 0.0557833 | 0.0335033 | 0.0454842 | 0.121187  |
| CTBP1-AS1                 | 3.18399   | 3.56557   | 4.14015   | 3.33401   | 3.56742   |
| PKD2                      | 16.9583   | 20.87     | 18.6512   | 17.4101   | 19.4779   |
| NCR3LG1                   | 0.291785  | 0.184118  | 0.264363  | 0.260328  | 0.195491  |
| SEPT11                    | 14.4208   | 15.4104   | 13.4435   | 13.1026   | 15.6616   |
| CASK                      | 1.4636    | 1.43543   | 1.50104   | 1.33722   | 1.52978   |
| KPTN                      | 4.14634   | 4.60954   | 3.328     | 4.28211   | 3.94269   |

|                               |           |           |            |           |           |
|-------------------------------|-----------|-----------|------------|-----------|-----------|
| ZNF445                        | 1.34302   | 1.31293   | 1.05073    | 1.28056   | 1.1904    |
| CNTF,ZFP91                    | 6.75783   | 6.56857   | 6.902      | 6.07613   | 7.04459   |
| BTN3A2                        | 8.36306   | 8.49877   | 5.98617    | 6.98583   | 8.1488    |
| RASA1                         | 3.6312    | 2.52443   | 3.5657     | 3.09107   | 2.99324   |
| CSTF1                         | 11.9932   | 12.878    | 13.6809    | 10.8934   | 13.1742   |
| DCAF15                        | 32.8621   | 26.7637   | 29.0343    | 30.6076   | 23.7084   |
| CFD                           | 24.0718   | 20.949    | 27.1127    | 22.4901   | 20.2839   |
| C12orf44                      | 51.1001   | 55.7401   | 78.9245    | 53.9777   | 50.4352   |
| CSTB                          | 266.924   | 294.934   | 248.894    | 228.787   | 279.453   |
| IL16                          | 0.0474444 | 0.0495751 | 0.00488711 | 0.013149  | 0.0561189 |
| UGP2                          | 16.8917   | 15.2274   | 15.1112    | 14.2524   | 16.6156   |
| MDH1                          | 96.8349   | 99.3335   | 97.6511    | 87.8227   | 101.116   |
| WFS1                          | 13.7613   | 15.8516   | 11.5992    | 13.4267   | 14.9118   |
| CDC42EP1                      | 105.629   | 91.1179   | 142.08     | 112.562   | 82.2824   |
| HDAC11                        | 10.1513   | 9.11096   | 10.7546    | 10.4187   | 8.88918   |
| C5orf54                       | 1.46823   | 1.02647   | 1.80796    | 1.69487   | 0.980282  |
| MRP63                         | 27.1533   | 25.6212   | 31.658     | 25.6258   | 26.1545   |
| KDELR3                        | 12.1138   | 19.8081   | 12.0561    | 11.6208   | 19.4038   |
| FZD7                          | 3.61747   | 4.78589   | 3.45414    | 3.43836   | 4.70645   |
| RGP1                          | 1.70215   | 1.24098   | 1.68856    | 2.01172   | 1.16468   |
| POLR1D                        | 240.382   | 239.498   | 273.251    | 233.193   | 209.802   |
| NUP54                         | 13.3756   | 12.7051   | 15.0408    | 13.4474   | 13.4242   |
| PLCB3                         | 25.8815   | 23.3424   | 21.9373    | 22.1086   | 24.2373   |
| MAPK1IP1L                     | 10.7102   | 10.7985   | 10.263     | 9.27746   | 11.0633   |
| C7orf55,C7orf55-LUC7L2,LUC7L2 | 45.1219   | 43.4714   | 46.5569    | 39.9404   | 44.5687   |
| NGEF                          | 13.8958   | 13.6198   | 13.6906    | 13.6888   | 13.5374   |
| NBPF14                        | 2.85733   | 3.1973    | 2.90679    | 2.86838   | 3.34138   |
| TRIM8                         | 35.0152   | 32.6559   | 38.8287    | 32.7443   | 33.6912   |
| TIGD1                         | 1.46552   | 2.52682   | 1.91348    | 1.91698   | 2.10285   |
| RBMS2                         | 8.35122   | 8.51711   | 7.65634    | 7.47336   | 8.32443   |
| ZNF687                        | 7.04811   | 8.30996   | 7.87201    | 7.19426   | 8.52022   |
| ZFH3                          | 1.27179   | 1.05426   | 1.07991    | 1.1032    | 0.994878  |
| SPCS3                         | 13.5372   | 16.0963   | 15.8221    | 13.0227   | 16.7768   |
| ISY1,ISY1-RAB43,RAB43         | 21.5078   | 21.007    | 20.5065    | 19.6875   | 20.0649   |
| GBP3                          | 1.96671   | 1.33906   | 2.00463    | 1.92257   | 1.39368   |
| FANCA                         | 8.19436   | 7.09087   | 7.3251     | 8.67006   | 6.85126   |
| FRS2                          | 1.83326   | 2.14774   | 2.02721    | 1.78891   | 2.32436   |
| KIAA2026                      | 0.628261  | 0.67517   | 0.628003   | 0.64741   | 0.678685  |
| TTYH3                         | 23.2897   | 22.9584   | 19.6035    | 20.502    | 23.3822   |
| C17orf51                      | 2.05492   | 2.83929   | 3.76535    | 2.6743    | 2.84003   |
| SYPL2                         | 0.0168752 | 0         | 0.0104551  | 0         | 0.0109912 |
| SIVA1                         | 141.731   | 155.258   | 150.177    | 132.946   | 150.369   |
| NAGLU                         | 21.0175   | 20.6871   | 18.9418    | 18.1401   | 20.4466   |
| OXR1                          | 11.2927   | 8.96155   | 10.2874    | 9.38857   | 9.73037   |
| E2F3                          | 4.12331   | 3.20066   | 4.83067    | 4.03467   | 3.18329   |
| LOC654433                     | 2.36545   | 4.47565   | 3.44517    | 3.05778   | 3.83916   |
| FBXW4P1                       | 0.329555  | 0.261952  | 0.273384   | 0.275883  | 0.312957  |
| MTERFD3                       | 3.07056   | 4.16579   | 3.83704    | 3.61033   | 3.53723   |
| MRPS6,SLC5A3                  | 58.9825   | 67.8957   | 59.3602    | 56.0025   | 64.042    |
| WWTR1                         | 2.38878   | 2.36718   | 1.88115    | 1.78796   | 2.48799   |
| CASC3                         | 26.7445   | 25.8184   | 26.5223    | 24.6814   | 25.0026   |
| SASH1                         | 1.16565   | 1.24104   | 1.13411    | 1.1534    | 1.03094   |
| STX3                          | 13.0419   | 14.0984   | 13.2918    | 11.5074   | 13.0883   |
| LRPAP1                        | 14.4448   | 16.6803   | 16.2585    | 13.6562   | 16.3046   |
| DNM2                          | 42.489    | 41.273    | 43.6103    | 41.1227   | 38.5953   |
| C11orf54                      | 4.7453    | 3.6956    | 5.20106    | 4.20125   | 4.17148   |
| RNF135                        | 5.97029   | 6.90428   | 7.37611    | 5.86537   | 7.42052   |
| SCAF4                         | 9.85024   | 7.23724   | 10.2145    | 9.75533   | 6.98184   |
| CALU                          | 27.1517   | 27.6714   | 29.386     | 24.9427   | 29.1608   |
| SEC13                         | 74.1124   | 77.7307   | 69.5236    | 69.3515   | 70.2254   |
| TMEM87A                       | 8.70831   | 10.998    | 9.83631    | 8.28466   | 11.3269   |
| MAPKAPK2                      | 31.1433   | 34.7727   | 33.1119    | 29.5396   | 32.8612   |
| LOC100130275                  | 2.07291   | 2.39987   | 2.75869    | 2.46868   | 2.68959   |
| ESPNL                         | 0.0868909 | 0.037701  | 0.091502   | 0.0644883 | 0.0918744 |
| DOK4                          | 13.4315   | 15.9476   | 12.5427    | 12.4264   | 14.8232   |
| TMEM180                       | 6.11899   | 4.52748   | 6.39606    | 5.92116   | 4.64448   |
| RAPGEF1                       | 18.1983   | 18.0256   | 18.6381    | 18.0622   | 16.4736   |
| PPP2R4                        | 168.467   | 179.486   | 159.369    | 149.971   | 174.387   |
| COQ10A                        | 12.5129   | 15.5748   | 11.7317    | 11.8917   | 13.3092   |
| PIK3R2                        | 29.7201   | 30.1703   | 25.6996    | 26.2911   | 30.3494   |
| SP4                           | 0.691444  | 0.553079  | 0.677436   | 0.671275  | 0.531416  |
| TACO1                         | 16.6793   | 17.2754   | 16.8896    | 15.8375   | 16.0032   |
| CUX1                          | 24.8712   | 31.7204   | 24.0572    | 23.3641   | 30.836    |
| SYTL4                         | 1.03507   | 0.934753  | 0.791326   | 0.992877  | 0.979778  |
| ZMAT3                         | 2.71167   | 4.03849   | 2.57243    | 2.32015   | 4.01205   |
| VKORC1                        | 345.79    | 373.93    | 366.944    | 297.817   | 373.279   |
| FAT2                          | 0.0183024 | 0.0230099 | 0.0143281  | 0.0277301 | 0.0106318 |
| LPIN1                         | 9.58258   | 7.78428   | 7.67582    | 8.73522   | 7.8922    |
| F8A1                          | 6.88654   | 6.62064   | 7.85009    | 6.60901   | 7.98438   |

|                       |          |          |          |          |          |
|-----------------------|----------|----------|----------|----------|----------|
| ZP3                   | 12.4735  | 13.4089  | 12.1504  | 10.1783  | 13.0949  |
| NDST2                 | 5.96653  | 5.98295  | 7.11299  | 5.9525   | 6.23754  |
| LOC150776             | 10.8251  | 9.8966   | 8.35866  | 9.49921  | 10.7794  |
| IPO8                  | 8.21483  | 7.33074  | 7.6128   | 7.86889  | 7.50591  |
| SLC25A29              | 42.3064  | 47.6711  | 45.0322  | 42.4481  | 43.508   |
| SRRM2                 | 47.6227  | 42.6191  | 38.0394  | 41.5734  | 43.3894  |
| LSM10                 | 52.179   | 65.8144  | 62.4033  | 50.4796  | 60.8368  |
| IL18BP                | 1.04825  | 1.38794  | 0.990052 | 1.07471  | 1.16915  |
| MLL2                  | 2.16577  | 2.17094  | 1.8903   | 2.24155  | 1.96776  |
| CNIH4                 | 115.81   | 136.222  | 139.385  | 111.974  | 130.396  |
| CCDC6                 | 10.1041  | 9.29306  | 10.6831  | 9.75896  | 8.68946  |
| NDRG3                 | 5.67058  | 6.98592  | 5.97251  | 5.68071  | 6.32926  |
| HK1                   | 78.945   | 85.1233  | 64.6844  | 63.9061  | 88.3735  |
| RFC2                  | 33.848   | 35.9986  | 30.2416  | 32.0326  | 36.668   |
| UOCR11                | 77.2032  | 88.9017  | 74.4576  | 68.368   | 83.4927  |
| PTEN                  | 7.59311  | 7.77484  | 9.32112  | 7.44581  | 8.26155  |
| PLEKHM2               | 35.0117  | 31.8222  | 35.0999  | 31.0171  | 31.0584  |
| CEP135                | 2.04436  | 1.86181  | 1.30276  | 1.88743  | 1.78429  |
| NDUFA13               | 560.945  | 592.398  | 579.186  | 520.371  | 537.587  |
| CDYL                  | 7.89291  | 6.66974  | 7.91383  | 7.3296   | 6.94681  |
| ZNF230                | 0.911435 | 0.756798 | 0.82527  | 0.668703 | 0.872116 |
| C11orf35              | 2.0811   | 2.03998  | 2.51411  | 2.42805  | 2.26916  |
| DHFR                  | 12.7874  | 12.3916  | 13.5145  | 13.1057  | 13.0366  |
| HIC1                  | 4.02066  | 4.3995   | 7.2455   | 5.11042  | 3.88784  |
| UIMC1                 | 10.8938  | 11.3576  | 11.5452  | 10.5145  | 10.5544  |
| GALNT10               | 2.00433  | 2.21846  | 1.87377  | 2.07295  | 1.88437  |
| PARD6G                | 2.45279  | 2.85023  | 2.59014  | 2.19272  | 2.96712  |
| DYRK1A                | 5.3491   | 5.33429  | 5.30828  | 5.30967  | 5.21736  |
| IRX2                  | 8.63355  | 6.48038  | 8.53952  | 7.95472  | 5.60627  |
| DUSP19                | 0.493015 | 0.413234 | 0.539789 | 0.420396 | 0.528238 |
| NOD1                  | 1.8212   | 2.04888  | 1.53674  | 1.87018  | 1.91263  |
| C19orf25              | 30.5932  | 25.7637  | 42.436   | 31.0326  | 26.2199  |
| LTBR                  | 39.4516  | 41.124   | 39.2786  | 38.7186  | 32.8219  |
| OSGIN1                | 28.8351  | 19.3602  | 15.9622  | 22.2482  | 19.2935  |
| SF3B5                 | 262.394  | 293.159  | 281.517  | 239.204  | 282.39   |
| SRRM5                 | 0.498222 | 0.635021 | 0.486703 | 0.378662 | 0.444103 |
| INO80D                | 0.552151 | 0.478943 | 0.667161 | 0.51384  | 0.59548  |
| ZNF771                | 11.7383  | 9.0341   | 16.539   | 13.0805  | 9.26731  |
| USP4                  | 3.80395  | 4.22117  | 3.10644  | 3.43301  | 3.77424  |
| SLC27A1               | 5.99294  | 7.47447  | 4.99389  | 5.55269  | 6.99142  |
| WLS                   | 34.8748  | 41.296   | 36.0204  | 33.6934  | 38.6138  |
| WWP2                  | 12.2851  | 10.7725  | 11.6495  | 11.8087  | 9.75031  |
| NBR1                  | 23.1703  | 21.3165  | 22.0169  | 19.1168  | 22.3946  |
| WASF2                 | 20.5504  | 19.2641  | 17.6998  | 18.2206  | 18.5977  |
| RSRC2                 | 29.2442  | 22.8777  | 19.223   | 23.0866  | 25.7941  |
| CDC25C                | 5.71071  | 5.09709  | 6.88939  | 6.1055   | 4.54847  |
| SUPT3H                | 3.92843  | 4.05761  | 4.34524  | 3.54882  | 4.25093  |
| APAF1                 | 1.85344  | 1.3153   | 1.56157  | 1.54365  | 1.60633  |
| PRPF8                 | 43.4449  | 41.2332  | 35.9674  | 39.2046  | 40.89    |
| AURKB                 | 104.714  | 86.3382  | 101.515  | 109.444  | 77.4321  |
| MARCH2                | 13.5454  | 17.792   | 11.6144  | 11.9535  | 16.2552  |
| DYM                   | 9.44809  | 8.86893  | 10.5206  | 8.34005  | 9.56203  |
| ZNF623                | 5.43395  | 4.25738  | 5.12035  | 4.89098  | 4.49307  |
| WDR83OS               | 199.09   | 208.72   | 182.197  | 187.346  | 185.275  |
| SHPK,TRPV1            | 4.83216  | 5.48885  | 4.24812  | 4.27479  | 5.53289  |
| FUT4                  | 2.91562  | 3.49013  | 3.44406  | 2.75558  | 3.42016  |
| BOD1L1                | 1.07073  | 0.980447 | 0.510448 | 0.95383  | 0.982442 |
| NBAS                  | 8.05063  | 7.06952  | 7.54396  | 6.78866  | 7.62901  |
| ARPC3                 | 286.543  | 285.156  | 289.169  | 261.338  | 279.719  |
| ANKS1A                | 4.92259  | 3.98995  | 4.36672  | 4.34108  | 4.3074   |
| CHST15                | 9.4211   | 8.71993  | 8.88065  | 8.83341  | 8.91805  |
| MYH14                 | 6.40754  | 5.05758  | 5.22882  | 5.75068  | 5.09895  |
| EIF1B                 | 49.9452  | 52.0959  | 72.9995  | 53.3326  | 48.6793  |
| ACO2                  | 23.3673  | 25.0018  | 22.327   | 22.5222  | 24.2826  |
| MTF2                  | 6.20735  | 7.2266   | 5.11555  | 5.8554   | 7.12502  |
| SELO                  | 26.2496  | 26.1934  | 23.5677  | 23.4066  | 25.9991  |
| DUSP4                 | 0.436001 | 0.583878 | 0.551614 | 0.460345 | 0.605878 |
| MC1R                  | 2.45948  | 2.11766  | 2.45347  | 2.84896  | 2.14405  |
| POP4                  | 12.0672  | 13.4813  | 13.692   | 11.6725  | 13.4096  |
| PLIN3                 | 69.933   | 72.3343  | 73.3405  | 63.1777  | 75.7486  |
| MDP1,NEED8,NEED8-MDP1 | 276.674  | 291.298  | 285.09   | 259.758  | 264.555  |
| TUBGCP2               | 23.0357  | 23.9469  | 21.0595  | 20.4556  | 23.804   |
| PBX2                  | 31.44    | 32.4129  | 27.2898  | 26.8813  | 33.8128  |
| AASDH                 | 2.17851  | 2.71622  | 1.9577   | 2.01153  | 2.49686  |
| ZNF428                | 11.7017  | 10.6128  | 13.691   | 11.0375  | 11.6435  |
| GABBR1                | 5.88719  | 5.15302  | 3.53599  | 5.60804  | 5.33152  |
| PCBP4                 | 41.6758  | 45.2156  | 43.2421  | 37.3564  | 45.2319  |
| LRRRC61               | 44.1156  | 43.6079  | 48.4092  | 44.8641  | 43.0087  |
| CDKN1C                | 11.3446  | 13.0488  | 12.5441  | 11.4894  | 12.2528  |

|             |           |           |           |           |           |
|-------------|-----------|-----------|-----------|-----------|-----------|
| RAPGEF6     | 1.06572   | 1.15787   | 1.07088   | 1.04121   | 1.12806   |
| ZNF345      | 0.309117  | 0.487393  | 0.654316  | 0.478771  | 0.59517   |
| NUDCD3      | 12.829    | 13.5409   | 12.7073   | 11.8423   | 13.6877   |
| CYB561D1    | 2.97196   | 4.20592   | 3.70756   | 3.16746   | 3.70481   |
| TRMT10B     | 3.14579   | 2.58596   | 2.81882   | 3.15769   | 2.21551   |
| BCAN        | 3.28035   | 3.17958   | 3.08326   | 2.79684   | 3.21618   |
| SMG5        | 17.2624   | 14.6734   | 20.8105   | 17.1682   | 14.4019   |
| RALB        | 21.0814   | 20.3167   | 18.948    | 17.8065   | 20.8468   |
| ZZEF1       | 1.95526   | 1.97547   | 1.88065   | 2.05603   | 1.61064   |
| B4GALT1     | 8.46949   | 9.65684   | 9.2423    | 8.75577   | 9.5516    |
| CNOT4       | 4.96793   | 3.43895   | 4.77131   | 4.46506   | 3.21436   |
| GSE1        | 6.52002   | 5.33997   | 5.76828   | 5.92726   | 5.4617    |
| OR2A7       | 0.750343  | 0.787488  | 0.74003   | 0.652373  | 0.960977  |
| TGFBR1      | 5.9308    | 7.59165   | 6.12716   | 5.23779   | 7.47928   |
| FAM211A     | 2.95014   | 2.7956    | 3.0153    | 2.91652   | 2.70532   |
| RAB8A       | 27.5167   | 27.2123   | 28.6207   | 26.3145   | 26.1971   |
| ZHX3        | 2.69706   | 2.41285   | 1.72389   | 2.12051   | 2.58964   |
| FAM171A1    | 14.284    | 17.4005   | 14.6469   | 13.6535   | 16.2865   |
| UBE2Q1      | 19.4235   | 21.9872   | 20.4325   | 18.4924   | 20.4075   |
| MLXIPL      | 5.87964   | 6.64055   | 5.89764   | 6.86766   | 6.25231   |
| SLC7A7      | 0.218999  | 0.255133  | 0.144214  | 0.215203  | 0.169615  |
| TTC17       | 8.35277   | 7.71238   | 8.7887    | 7.6962    | 7.75718   |
| NUTF2       | 255.525   | 275.41    | 247.571   | 223.234   | 269.16    |
| RIMBP3C     | 0.0291336 | 0.0383889 | 0.0174613 | 0.0121392 | 0.0439389 |
| ORMDL3      | 14.0445   | 19.8612   | 14.3498   | 13.3925   | 17.3632   |
| MLLT1       | 28.7827   | 25.1371   | 30.5625   | 28.8105   | 24.858    |
| ACOT1       | 2.82985   | 2.89714   | 3.49727   | 2.80722   | 2.80922   |
| GTPBP1      | 16.0835   | 14.9453   | 13.0127   | 14.012    | 15.7311   |
| HDHD3       | 29.1144   | 31.5323   | 32.9337   | 29.5166   | 29.5595   |
| C9orf123    | 25.6371   | 31.9899   | 27.2486   | 22.3741   | 30.042    |
| POLD4       | 27.219    | 27.871    | 26.592    | 25.7499   | 24.8516   |
| PGPEP1      | 7.29471   | 7.07521   | 7.88026   | 6.7231    | 7.18297   |
| COMTD1      | 52.6752   | 39.9643   | 60.3877   | 51.9437   | 41.3672   |
| FBXO25      | 14.6705   | 14.4305   | 18.1576   | 14.595    | 14.7585   |
| CALM3       | 82.9349   | 90.137    | 75.6012   | 77.5      | 86.5421   |
| SOX4        | 10.1228   | 9.58717   | 7.77942   | 9.2319    | 9.14092   |
| RPS19       | 4887.43   | 7968.65   | 5172.37   | 4640.36   | 6786.91   |
| CC2D1B      | 5.03308   | 4.91916   | 4.80986   | 4.46841   | 4.97535   |
| IER3IP1     | 36.6653   | 42.6245   | 41.4485   | 37.0873   | 39.1946   |
| PPAP2A      | 8.55924   | 9.69905   | 10.8647   | 8.94232   | 9.51      |
| FUCA2       | 39.8534   | 51.8112   | 40.4484   | 40.0821   | 47.05     |
| PEBP1       | 165.621   | 200.677   | 158.65    | 148.155   | 199.712   |
| HOXB9       | 24.2763   | 24.4964   | 23.8285   | 21.8161   | 24.3449   |
| ATG13       | 10.557    | 11.8403   | 12.1597   | 11.2149   | 10.3592   |
| SCD5        | 14.6497   | 14.6339   | 13.5348   | 13.3734   | 14.6105   |
| MFI2        | 33.4904   | 40.7706   | 32.0521   | 33.3573   | 37.8376   |
| TMEM51      | 5.15953   | 4.10607   | 5.71605   | 5.89915   | 3.65419   |
| GTF2H5      | 3.80206   | 3.9959    | 3.62089   | 2.92996   | 4.23397   |
| ANO9        | 0.135287  | 0.197838  | 0.0483607 | 0         | 0.295916  |
| SLC35B1     | 39.208    | 48.1766   | 42.4637   | 40.8645   | 42.0806   |
| ECHDC2      | 11.5012   | 10.1911   | 9.96482   | 10.9456   | 9.876     |
| DBNDD2,SYS1 | 209.927   | 200.081   | 232.183   | 198.406   | 187.854   |
| MARCH6      | 10.1911   | 9.98893   | 9.77135   | 9.28267   | 10.1941   |
| RMI2        | 6.55698   | 5.72939   | 7.59612   | 7.07405   | 5.5341    |
| PLXNC1      | 0.460042  | 0.615256  | 0.682921  | 0.5588    | 0.563889  |
| DRAM2       | 18.7063   | 25.1814   | 21.4171   | 18.2674   | 23.4144   |
| IKKB        | 12.5211   | 11.3204   | 13.5363   | 12.2974   | 11.0145   |
| GNA11       | 6.14915   | 9.28319   | 7.94233   | 6.63176   | 8.38775   |
| GEM         | 2.03881   | 1.95506   | 1.69186   | 1.74998   | 2.02002   |
| APOOL       | 2.34079   | 2.5541    | 2.30615   | 2.20956   | 2.61923   |
| PRKRA       | 21.083    | 23.5286   | 18.8821   | 17.0859   | 24.7217   |
| CCNC        | 20.7806   | 23.5525   | 26.0648   | 20.6016   | 24.2412   |
| SPRYD7      | 5.07488   | 5.1299    | 6.14272   | 4.97527   | 5.28844   |
| DNAJB5      | 4.15755   | 4.89058   | 3.17132   | 3.33603   | 4.9634    |
| ADIPOR2     | 9.88253   | 9.97192   | 11.5916   | 10.0342   | 9.54353   |
| CDC45       | 17.4874   | 16.5422   | 16.3843   | 19.1727   | 15.9102   |
| PIGG        | 5.96729   | 5.64483   | 5.68059   | 5.30324   | 5.69247   |
| C11orf63    | 0.427715  | 0.518187  | 0.568981  | 0.592858  | 0.313103  |
| TP1P2       | 0.15426   | 0.144549  | 0.191713  | 0.107236  | 0.134848  |
| SRP72       | 19.5677   | 21.2095   | 20.5684   | 17.9141   | 21.0812   |
| PAK1        | 21.4519   | 22.6039   | 19.7689   | 19.4803   | 22.2079   |
| NEU1        | 83.3286   | 87.9483   | 76.1635   | 74.4146   | 79.3001   |
| VTI1B       | 69.3114   | 72.8202   | 70.9306   | 64.4978   | 68.4232   |
| RIN1        | 71.3898   | 52.5658   | 49.9592   | 60.0565   | 52.7281   |
| COPS7B      | 24.1285   | 18.901    | 21.8432   | 22.453    | 18.5358   |
| SNED1       | 0.465971  | 0.563642  | 0.407814  | 0.418083  | 0.600142  |
| CEP85L      | 0.483801  | 0.579534  | 0.419818  | 0.336831  | 0.539781  |
| ALDH3A2     | 7.99119   | 9.33869   | 7.26425   | 6.73634   | 10.0891   |
| DHX8        | 6.1298    | 6.66735   | 7.01615   | 6.14742   | 6.37148   |

|              |           |           |           |           |           |
|--------------|-----------|-----------|-----------|-----------|-----------|
| ZNF468       | 1.74593   | 2.42657   | 2.43083   | 1.92957   | 2.45432   |
| SLC50A1      | 40.9556   | 40.9845   | 41.5285   | 37.694    | 42.5881   |
| NAF1         | 8.22328   | 6.97928   | 9.57728   | 7.61176   | 7.30517   |
| CDR2L        | 17.9443   | 15.9434   | 16.732    | 17.6587   | 14.8662   |
| ARHGAP35     | 4.53599   | 4.06009   | 4.39368   | 4.22444   | 4.05837   |
| LIMA1        | 4.53441   | 4.27616   | 4.02197   | 3.92383   | 4.55001   |
| PDCL3        | 16.2772   | 19.2465   | 14.0352   | 15.5529   | 17.3854   |
| GSTP1        | 944.006   | 1159.02   | 832.353   | 837.785   | 1077.9    |
| CECR2        | 0.0498807 | 0.0498058 | 0.0332493 | 0.0526403 | 0.0348051 |
| NSFL1C       | 20.7781   | 23.1083   | 20.1033   | 19.973    | 22.116    |
| TBC1D26      | 0.162841  | 0.241644  | 0.108466  | 0.0982579 | 0.315955  |
| MBOAT2       | 5.01761   | 4.73267   | 4.72267   | 4.2573    | 4.93327   |
| UNC93B1      | 34.0561   | 33.7112   | 35.1415   | 32.7271   | 32.7089   |
| JAK3         | 1.34975   | 1.78835   | 1.02701   | 1.198     | 1.72516   |
| KRT18        | 190.272   | 219.473   | 238.81    | 203.712   | 202.95    |
| NCSTN        | 23.2415   | 25.4557   | 22.2119   | 22.2513   | 23.028    |
| NSUN5P1      | 10.9683   | 9.27151   | 7.66738   | 10.0362   | 8.34076   |
| TRAPPC1      | 159.256   | 151.793   | 139.426   | 142.294   | 149.761   |
| TAF8         | 4.57066   | 4.36417   | 5.17823   | 4.02415   | 4.39637   |
| UCKL1        | 32.3557   | 35.6831   | 28.6431   | 30.2176   | 31.0537   |
| OTUB1        | 66.6347   | 76.5831   | 54.5933   | 60.6043   | 71.8049   |
| SF3A2        | 109.589   | 90.3363   | 122.895   | 111.663   | 78.7186   |
| PTBP1        | 155.158   | 157.644   | 131.726   | 145.103   | 151.047   |
| PTGDR2       | 1.25056   | 1.05381   | 0.922349  | 1.24139   | 0.854075  |
| ARHGEF10L    | 5.82289   | 4.52519   | 5.98141   | 5.51898   | 4.37512   |
| TOPBP1       | 7.65976   | 6.39262   | 6.6005    | 7.21632   | 6.5959    |
| DEDD         | 20.1418   | 19.0858   | 21.578    | 19.1136   | 19.5926   |
| ZNF410       | 14.7629   | 17.3111   | 17.6241   | 14.8914   | 15.3181   |
| MEGF9        | 1.12621   | 1.09271   | 1.18079   | 1.13841   | 1.23351   |
| EXOC4        | 18.5683   | 19.1423   | 17.0508   | 16.2869   | 19.4191   |
| FLNB         | 10.8898   | 9.57131   | 9.63002   | 10.4505   | 9.36957   |
| KIF4A        | 6.76849   | 5.49238   | 6.7821    | 6.49054   | 5.09073   |
| CMC2         | 57.8255   | 44.6983   | 55.661    | 50.4225   | 45.2121   |
| DDRK1        | 84.8229   | 86.5838   | 89.749    | 80.7249   | 82.5829   |
| FOXI3        | 0.0484625 | 0.193076  | 0.115775  | 0.0806135 | 0.177617  |
| ZFP36        | 15.5759   | 8.53699   | 19.1664   | 15.5812   | 8.52923   |
| LOC100505865 | 0.145121  | 0.284091  | 0.0713937 | 0.238871  | 0.189604  |
| SMAD7        | 2.86213   | 4.88308   | 2.19596   | 2.56859   | 4.59444   |
| RIOK3        | 12.4103   | 10.5738   | 9.72025   | 9.7691    | 11.3007   |
| HMGCR        | 5.79572   | 4.34458   | 5.80248   | 4.85759   | 4.7448    |
| GLIS2        | 16.799    | 10.2883   | 14.0954   | 14.7127   | 9.84973   |
| KLHDC8B      | 6.8676    | 10.3669   | 7.66464   | 6.3535    | 9.39527   |
| ADPGK        | 16.6549   | 20.0697   | 18.5678   | 17.1626   | 18.5038   |
| GTF2A2       | 25.1448   | 26.4723   | 28.5321   | 24.2849   | 26.2473   |
| HOTAIRM1     | 14.1205   | 16.4829   | 15.8803   | 14.5541   | 17.047    |
| UBC          | 501.509   | 536.66    | 545.055   | 443.316   | 532.784   |
| KIF1C        | 20.5196   | 23.1915   | 19.3349   | 18.1089   | 22.719    |
| FBXW7        | 3.40247   | 2.92855   | 2.99798   | 3.15236   | 3.24362   |
| TONSL        | 29.0447   | 27.3404   | 23.3788   | 28.8175   | 26.2331   |
| MXD3         | 29.1047   | 33.7394   | 31.0892   | 29.298    | 30.5601   |
| NSA2         | 138.944   | 170.968   | 150.017   | 135.974   | 147.564   |
| TIMM10       | 53.6905   | 53.4501   | 63.303    | 50.7901   | 47.4413   |
| POM121       | 11.6322   | 12.4369   | 11.3387   | 10.8541   | 12.1448   |
| MPDU1        | 52.4691   | 65.3736   | 46.1949   | 47.1558   | 60.4782   |
| C1orf35      | 33.6712   | 33.8447   | 30.811    | 34.512    | 30.5569   |
| ITGB1BP1     | 27.4063   | 30.2551   | 27.4415   | 24.0634   | 29.8748   |
| GATSL3       | 4.81255   | 4.18833   | 3.79926   | 4.90418   | 3.64654   |
| FIZ1         | 7.72348   | 5.82754   | 6.32561   | 6.34224   | 6.02353   |
| HSBP1        | 53.5638   | 61.1563   | 54.2746   | 49.6173   | 59.9794   |
| KIAA1549     | 1.52381   | 1.1536    | 1.40495   | 1.4318    | 1.14958   |
| TMEM126B     | 33.3324   | 37.0865   | 41.2223   | 34.4922   | 33.5945   |
| TEAD4        | 50.5252   | 40.9321   | 48.5044   | 45.8851   | 38.5229   |
| SEZ6L2       | 25.2943   | 32.8691   | 24.1054   | 23.5318   | 30.979    |
| MRPS31P5     | 1.87585   | 2.63045   | 1.72101   | 1.76092   | 2.28331   |
| FAM57A       | 25.9931   | 29.8735   | 26.1881   | 24.2686   | 30.7008   |
| ZNF506       | 2.31903   | 2.01033   | 2.43905   | 2.13269   | 2.30752   |
| GDF11        | 4.81993   | 4.87223   | 4.46823   | 4.2172    | 4.82976   |
| MORC3        | 3.87125   | 3.28122   | 3.42      | 2.97203   | 3.84174   |
| SCAI         | 1.3031    | 1.20497   | 1.05061   | 1.04523   | 1.30421   |
| TNRC6A       | 1.57163   | 1.52048   | 1.39618   | 1.45015   | 1.55427   |
| COTL1        | 240.531   | 283.547   | 220.811   | 216.635   | 271.714   |
| C16orf59     | 9.61462   | 7.46073   | 10.7378   | 10.7696   | 7.15345   |
| ABCC2        | 0.140298  | 0.121326  | 0.185097  | 0.142605  | 0.149721  |
| TANGO2       | 10.0772   | 12.0196   | 10.6339   | 10.6702   | 10.8749   |
| HAGHL        | 87.7146   | 87.952    | 94.9912   | 80.1048   | 91.9232   |
| UBIAD1       | 6.67138   | 10.8238   | 9.95288   | 6.74624   | 10.4041   |
| RPL23A       | 2222.6    | 2964.89   | 2412.43   | 2123.49   | 2640.86   |
| ZMYM6        | 1.9232    | 1.90797   | 1.64704   | 1.58336   | 2.09767   |
| MT1DP        | 8.96032   | 8.23844   | 3.57351   | 5.92925   | 9.07737   |



|                           |           |           |           |           |           |
|---------------------------|-----------|-----------|-----------|-----------|-----------|
| GINS1                     | 7.33038   | 7.43801   | 7.70352   | 7.64324   | 7.56246   |
| PARVA                     | 3.61459   | 4.86756   | 3.69432   | 3.48614   | 4.67393   |
| LRRC37BP1                 | 4.17331   | 4.67123   | 4.56593   | 3.86421   | 4.98944   |
| ACVR1B                    | 7.11241   | 6.80883   | 6.64554   | 7.03886   | 6.71685   |
| TRMT112                   | 458.39    | 483.682   | 401.868   | 427.471   | 432.28    |
| RPL36                     | 4813.74   | 7547.91   | 5043.12   | 4590.33   | 6143.02   |
| EXOC5                     | 3.96949   | 3.03183   | 3.33229   | 3.57213   | 3.56172   |
| LMF2                      | 52.0813   | 63.4094   | 47.9511   | 51.3109   | 58.8666   |
| FANCI                     | 7.96482   | 6.44935   | 7.01047   | 8.11335   | 6.06274   |
| HMBS                      | 23.8268   | 25.6316   | 24.5264   | 23.632    | 23.9099   |
| ACTR1B                    | 84.6777   | 99.0969   | 72.8983   | 69.2379   | 100.763   |
| RBX1                      | 64.627    | 67.1416   | 68.1674   | 61.5042   | 68.3845   |
| SKP2                      | 8.8433    | 11.7177   | 5.62923   | 7.83597   | 11.6915   |
| LOXL2                     | 0.401398  | 0.311087  | 0.565679  | 0.369066  | 0.357532  |
| NDUFA1                    | 288.247   | 293.885   | 261.525   | 268.125   | 257.745   |
| TMEM44                    | 15.075    | 16.8502   | 14.1925   | 12.8693   | 16.2641   |
| GMPS                      | 48.1399   | 44.7738   | 45.3813   | 44.9614   | 44.8824   |
| DGKA                      | 10.9847   | 11.9353   | 9.21058   | 9.80335   | 12.3346   |
| JAK1                      | 14.1316   | 15.9971   | 14.8101   | 13.2976   | 16.4641   |
| DPH1_OVCA2                | 100.893   | 110.13    | 113.544   | 98.3754   | 101.16    |
| TBCC                      | 16.0304   | 22.0523   | 19.0037   | 18.0036   | 20.1436   |
| MXRA7                     | 42.8276   | 61.166    | 45.3276   | 39.7271   | 61.3779   |
| NRTN                      | 8.89174   | 9.28483   | 9.76827   | 8.63195   | 9.36579   |
| LSM4                      | 145.994   | 149.69    | 147.246   | 139.582   | 141.408   |
| MRPL23                    | 112.346   | 112.432   | 115.244   | 102.535   | 107.554   |
| XPO6                      | 36.1978   | 33.566    | 31.1638   | 32.0161   | 34.9751   |
| SIRT7                     | 24.7801   | 21.2785   | 20.8698   | 21.3341   | 21.7527   |
| STMN1                     | 197.29    | 195.238   | 186.954   | 195.875   | 186.848   |
| ANKH                      | 3.91191   | 4.5189    | 4.20311   | 3.62082   | 4.77339   |
| WAC                       | 23.5501   | 20.8516   | 27.3962   | 22.5174   | 21.4207   |
| PEX7                      | 7.67874   | 8.23564   | 8.20556   | 7.85177   | 7.52885   |
| AAGAB                     | 11.457    | 12.617    | 13.0852   | 11.9343   | 11.7658   |
| C11orf80_RCE1             | 24.0668   | 28.3947   | 23.6943   | 23.3193   | 25.8119   |
| MYO1B                     | 11.8165   | 10.6262   | 9.31583   | 9.31382   | 12.4756   |
| SEC23IP                   | 3.14053   | 2.6317    | 3.29189   | 2.80451   | 2.90174   |
| CDKAL1                    | 3.17862   | 3.08376   | 2.46321   | 2.55854   | 2.9196    |
| FDX1L                     | 26.7434   | 32.5616   | 29.701    | 24.7042   | 28.7421   |
| HN1L                      | 19.5406   | 18.6063   | 22.1696   | 20.0086   | 17.798    |
| TRIM52                    | 1.45791   | 2.06219   | 1.88486   | 1.98753   | 1.6593    |
| EIF1AD                    | 12.5723   | 12.0156   | 10.4404   | 10.5622   | 12.1839   |
| CAPN12                    | 18.1553   | 15.8923   | 14.6668   | 16.3056   | 15.2868   |
| CELSR1                    | 0.0483129 | 0.0416351 | 0.0580682 | 0.0577447 | 0.0424399 |
| TNFRSF12A                 | 514.383   | 459.65    | 624.041   | 508.786   | 447.443   |
| AP5M1                     | 4.13487   | 3.31112   | 5.18912   | 4.16112   | 3.70755   |
| GNB3                      | 2.81305   | 2.53481   | 1.52807   | 2.78751   | 2.12279   |
| CCHCR1                    | 12.6361   | 10.7017   | 8.24446   | 10.2305   | 11.8189   |
| STX10                     | 90.0992   | 96.928    | 91.4182   | 86.6933   | 85.4562   |
| RPAIN                     | 38.8563   | 35.5996   | 46.6921   | 37.4095   | 33.4026   |
| CBX2                      | 7.62488   | 9.28138   | 6.56456   | 7.63589   | 9.28376   |
| ARID3B                    | 5.11323   | 3.37443   | 4.02159   | 4.69041   | 3.21259   |
| DLGAP5                    | 7.91567   | 7.52597   | 7.84966   | 7.61117   | 7.36105   |
| MARC2                     | 5.30029   | 5.74639   | 4.12272   | 5.10008   | 4.96423   |
| CXXC1                     | 21.9273   | 22.8369   | 21.4016   | 22.6883   | 20.0678   |
| KDELRL1                   | 269.126   | 305.647   | 275.668   | 250.785   | 299.093   |
| PRR13                     | 98.472    | 99.6629   | 81.4326   | 88.9986   | 95.2738   |
| CBR1                      | 49.6772   | 58.3314   | 38.7323   | 42.4241   | 57.5654   |
| PNISR                     | 8.52402   | 6.896     | 6.28658   | 7.83967   | 7.25068   |
| MYO10                     | 6.66733   | 6.70745   | 5.9991    | 5.92271   | 7.1842    |
| TBC1D13                   | 16.8415   | 21.9725   | 19.9726   | 18.7304   | 20.291    |
| LRSAM1                    | 18.4175   | 18.4228   | 14.784    | 15.3625   | 19.8013   |
| DNAJB12                   | 14.9736   | 16.3391   | 16.6882   | 15.7479   | 14.7532   |
| DDX24                     | 38.8381   | 39.3876   | 34.3254   | 34.8864   | 40.5262   |
| YKT6                      | 26.6734   | 34.362    | 31.8143   | 27.0111   | 31.2221   |
| FBXO45                    | 3.73327   | 3.56717   | 3.83392   | 3.31107   | 3.971     |
| LRRK1                     | 1.33666   | 1.30154   | 1.47629   | 1.48361   | 1.18978   |
| LRRD1                     | 0.0147311 | 0.0553614 | 0.028351  | 0.0122051 | 0.0427953 |
| GTF3C4                    | 4.26422   | 7.02822   | 4.96806   | 4.29271   | 6.64238   |
| MRPL16                    | 80.5581   | 65.0559   | 63.3733   | 72.3767   | 67.6389   |
| ELK4                      | 3.88536   | 4.20481   | 4.4883    | 3.67929   | 4.23927   |
| CYFIP2                    | 10.3978   | 10.6135   | 9.28073   | 9.3639    | 10.81     |
| ZMAT5                     | 29.0233   | 32.6939   | 34.6126   | 29.7472   | 31.3646   |
| IQCC                      | 1.35802   | 1.98315   | 1.39411   | 1.55057   | 2.04873   |
| TMEM222                   | 29.7244   | 36.3822   | 36.9619   | 29.873    | 31.3418   |
| L2HGDH                    | 3.41393   | 3.11246   | 2.95358   | 3.00899   | 3.3493    |
| C8orf44_C8orf44-SGK3_SGK3 | 2.45087   | 2.27719   | 2.30818   | 2.00439   | 2.54959   |
| ADI1                      | 19.4178   | 22.9268   | 20.8295   | 19.4787   | 21.0402   |
| SYVN1                     | 15.0795   | 16.3011   | 16.9881   | 15.8153   | 14.7668   |
| EFNA3                     | 46.8421   | 40.4203   | 28.0568   | 35.6274   | 43.4102   |
| THOC1                     | 9.65235   | 7.57986   | 8.90149   | 8.27512   | 8.21965   |

|                             |           |           |           |          |           |
|-----------------------------|-----------|-----------|-----------|----------|-----------|
| GAS6                        | 21.5706   | 29.051    | 23.6577   | 20.7569  | 28.4586   |
| C19orf45                    | 0.624886  | 0.981424  | 0.778885  | 0.987254 | 0.68673   |
| AK4                         | 16.2094   | 19.3684   | 14.2307   | 13.1472  | 21.0724   |
| CREB3                       | 29.8799   | 34.7382   | 29.9193   | 28.7664  | 32.7063   |
| XAB2                        | 37.1858   | 32.8837   | 32.7401   | 34.2446  | 30.4394   |
| TAF4B                       | 1.86281   | 1.55039   | 1.93103   | 1.42803  | 1.71364   |
| ANAPC2                      | 29.6601   | 30.1132   | 28.1827   | 27.9813  | 30.4798   |
| SMC4                        | 9.29168   | 6.96112   | 6.47033   | 8.93695  | 6.62201   |
| VASP                        | 62.8119   | 56.2676   | 64.1922   | 60.0358  | 56.0658   |
| ENOX1                       | 0         | 0.0271983 | 0.0120599 | 0        | 0.0378838 |
| DCBLD2                      | 2.58919   | 3.02813   | 2.9572    | 2.54962  | 3.15913   |
| HES4                        | 85.2448   | 71.3274   | 97.0069   | 92.066   | 63.7881   |
| PRRG1                       | 2.12806   | 1.55263   | 2.47013   | 1.96613  | 1.9062    |
| RAP1GAP2                    | 6.51633   | 5.50732   | 6.58555   | 6.3139   | 5.0424    |
| STOML1                      | 4.75504   | 3.11551   | 5.40427   | 4.89579  | 3.41716   |
| CTSD                        | 173.478   | 175.217   | 163.558   | 163.918  | 160.265   |
| TRIM21                      | 6.57469   | 6.54196   | 6.96369   | 6.27721  | 6.75267   |
| TMPRSS5                     | 0.57223   | 0.462892  | 0.316336  | 0.381946 | 0.688653  |
| FKBP9                       | 8.25736   | 11.1944   | 9.37942   | 8.22041  | 10.7262   |
| E2F2                        | 2.3443    | 3.21517   | 1.9561    | 2.33396  | 3.32741   |
| FUT2                        | 0.219053  | 0.277951  | 0.176089  | 0.254417 | 0.207247  |
| SF3B2                       | 98.0609   | 96.3809   | 75.2074   | 89.2947  | 89.7871   |
| PLEKHF2                     | 6.52201   | 7.48848   | 5.95604   | 5.66853  | 7.70754   |
| ZNF823                      | 2.03948   | 2.03009   | 1.62239   | 1.63692  | 2.18919   |
| ECHS1                       | 156.401   | 166.287   | 132.262   | 135.602  | 164.092   |
| MBD6                        | 14.9044   | 12.8887   | 14.0167   | 15.2753  | 11.8773   |
| ASB6                        | 36.5195   | 41.1492   | 39.2241   | 36.2703  | 37.4896   |
| TACC3                       | 39.0366   | 39.9285   | 40.3656   | 37.8435  | 38.6511   |
| AKTIP                       | 5.04712   | 5.88185   | 7.57394   | 5.91663  | 5.46494   |
| SH3GLB2                     | 159.408   | 141.874   | 146.293   | 147.051  | 133.95    |
| MAP3K13                     | 8.51788   | 9.39429   | 10.5131   | 8.82423  | 10.0674   |
| RNF7                        | 46.8895   | 53.8026   | 58.0008   | 42.3917  | 53.629    |
| RBBP7                       | 42.2149   | 37.6147   | 48.9884   | 41.9909  | 41.8981   |
| DNAJC4                      | 19.662    | 25.1629   | 19.0595   | 18.288   | 24.9102   |
| KLHL18                      | 3.81449   | 3.81031   | 5.05751   | 3.85654  | 3.51474   |
| DDX11-AS1                   | 0.665415  | 1.0195    | 0.984659  | 0.799108 | 0.891055  |
| RNF214                      | 4.72807   | 2.66732   | 4.10403   | 3.9142   | 2.90078   |
| SLC25A23                    | 35.6805   | 38.1292   | 33.206    | 32.5882  | 37.9049   |
| SCARB1                      | 58.8953   | 63.1889   | 51.6557   | 53.6196  | 59.417    |
| COG4                        | 10.485    | 11.0234   | 10.7306   | 10.4206  | 10.5451   |
| KLHL11                      | 0.480441  | 0.278192  | 0.448354  | 0.490229 | 0.303718  |
| LPGAT1                      | 4.50338   | 4.72741   | 5.29079   | 5.05617  | 4.33279   |
| LTK                         | 42.6798   | 45.9345   | 40.2872   | 37.7158  | 44.3411   |
| IDS                         | 9.93505   | 16.5453   | 9.13584   | 9.03943  | 14.779    |
| CES3                        | 6.82708   | 7.57305   | 4.54992   | 6.15948  | 6.90196   |
| PLEKHG6                     | 0.0608869 | 0         | 0         | 0        | 0.058759  |
| PCYT2                       | 15.1112   | 15.1531   | 13.1284   | 13.6295  | 14.0902   |
| TLR3                        | 0.0940752 | 0.181427  | 0.220031  | 0.108288 | 0.212871  |
| SYNRG                       | 3.2853    | 3.38039   | 2.81085   | 2.6631   | 3.03925   |
| CDK5                        | 34.6838   | 41.0755   | 32.7687   | 34.3565  | 37.1698   |
| MAPK1                       | 10.7014   | 9.00505   | 11.2199   | 10.0358  | 9.56828   |
| TWSG1                       | 7.62163   | 9.6855    | 7.89051   | 6.99744  | 9.95291   |
| TTK                         | 5.44532   | 5.20889   | 6.04389   | 5.68132  | 4.87691   |
| ZFYVE28                     | 6.71104   | 5.67699   | 4.42156   | 5.05364  | 6.06529   |
| POFUT2                      | 9.06548   | 10.1447   | 8.61634   | 8.83351  | 9.69941   |
| ITFG2                       | 3.52728   | 4.20932   | 3.57273   | 3.27904  | 3.54614   |
| TMEM43                      | 14.4982   | 16.9087   | 17.2311   | 13.5289  | 16.7613   |
| MYADM                       | 47.8475   | 44.2486   | 41.4966   | 40.5553  | 46.8759   |
| LOC283922                   | 0.470105  | 0.518661  | 0.573476  | 0.608446 | 0.552827  |
| BCAS3                       | 2.52601   | 2.90741   | 2.5145    | 2.26959  | 2.6612    |
| PI4KB                       | 18.4122   | 21.8241   | 18.0683   | 17.8042  | 20.6452   |
| TFAP2C                      | 0.219209  | 0.717555  | 0.247342  | 0.278949 | 0.61978   |
| KCNH2                       | 22.2369   | 20.1013   | 20.2904   | 20.606   | 20.226    |
| PHC2                        | 146.196   | 127.437   | 131.429   | 128.161  | 128.242   |
| CCDC91                      | 4.1177    | 4.38791   | 4.81862   | 3.9764   | 4.20686   |
| QRSL1                       | 4.55598   | 4.30944   | 5.29731   | 4.6096   | 4.02251   |
| MATK                        | 1.53228   | 1.52337   | 1.14394   | 0.737811 | 2.14607   |
| DPP9                        | 15.9788   | 14.8658   | 16.4049   | 15.6045  | 15.5096   |
| GALNS                       | 10.3921   | 6.82397   | 11.2079   | 9.97991  | 7.43581   |
| NANS                        | 121.826   | 119.718   | 127.441   | 113.847  | 114.138   |
| PLLP                        | 0.954488  | 1.94478   | 0.867105  | 0.733605 | 1.88702   |
| TUBGCP6                     | 6.4083    | 7.12709   | 4.99872   | 6.24082  | 6.77725   |
| SDHA                        | 64.5746   | 58.4638   | 54.9456   | 60.2505  | 59.4974   |
| TTC28                       | 0.484824  | 0.356061  | 0.478392  | 0.366386 | 0.462014  |
| HRK                         | 2.17806   | 2.69847   | 1.94991   | 1.88918  | 2.8063    |
| SCNM1,TNFAIP8L2,TNFAIP8L2-5 | 9.73985   | 12.2274   | 11.2132   | 9.63368  | 10.122    |
| OXSM                        | 20.9629   | 17.5284   | 18.1041   | 17.0833  | 18.257    |
| PDXDC2P                     | 4.02702   | 3.2387    | 2.63346   | 4.07532  | 3.1921    |
| DDX23                       | 23.5157   | 23.6295   | 19.5052   | 22.1544  | 22.1194   |

|              |           |           |          |           |           |
|--------------|-----------|-----------|----------|-----------|-----------|
| HINT1        | 618.145   | 775.822   | 718.708  | 603.425   | 688.345   |
| GCDH         | 29.7002   | 28.4045   | 27.345   | 27.615    | 28.1525   |
| RP9P         | 8.2756    | 9.4697    | 9.19666  | 8.8246    | 7.86177   |
| PPM1M        | 8.64321   | 10.7638   | 8.35437  | 8.72412   | 8.33871   |
| ERBB2        | 16.9399   | 20.3477   | 15.5484  | 16.6238   | 19.5801   |
| PACS1        | 19.3214   | 21.5967   | 19.1764  | 17.5721   | 21.9665   |
| PSMD13       | 112.199   | 122.908   | 107.676  | 106.397   | 114.462   |
| MTDH         | 27.2969   | 25.3903   | 29.224   | 25.522    | 25.7672   |
| ADIRF,AGAP11 | 39.0189   | 78.4883   | 31.2734  | 36.3303   | 59.7189   |
| MAP3K14      | 2.44118   | 3.60607   | 2.88184  | 2.42479   | 3.61369   |
| ZNF576       | 6.07457   | 6.4137    | 5.55968  | 5.69349   | 5.68745   |
| ACTG1P4      | 0.0665188 | 0.0558554 | 0.049492 | 0.0669596 | 0.0512195 |
| ATP8B2       | 0.892279  | 0.901281  | 0.885034 | 0.804416  | 1.12641   |
| NDUFA4       | 66.783    | 82.997    | 61.0362  | 59.3356   | 77.0454   |
| ECE2         | 46.7124   | 41.6508   | 43.4194  | 37.2402   | 41.8254   |
| PTPMT1       | 16.4377   | 19.974    | 16.1716  | 17.4477   | 16.0734   |
| SLC6A6       | 4.26125   | 4.08572   | 3.37719  | 3.06329   | 4.90445   |
| SIX5         | 13.0334   | 9.90006   | 15.4379  | 13.7995   | 9.94863   |
| RTFDC1       | 47.0045   | 48.3812   | 48.9795  | 44.0842   | 47.2343   |
| SEMA6B       | 21.7013   | 16.3215   | 17.7049  | 17.939    | 17.9307   |
| NIF3L1       | 21.9335   | 17.7135   | 21.1078  | 20.1588   | 17.1156   |
| WBP4         | 4.15351   | 4.14774   | 4.40576  | 3.94178   | 4.40148   |
| PTRHD1       | 44.9788   | 61.3736   | 47.3709  | 42.4355   | 56.1823   |
| SQSTM1       | 206.251   | 195.121   | 232.534  | 194.301   | 183.699   |
| TRAIIP       | 6.8013    | 5.66787   | 6.2442   | 7.26124   | 5.72961   |
| VEGFA        | 19.3232   | 19.1881   | 30.791   | 21.8227   | 17.6469   |
| DHX37        | 11.9526   | 11.4793   | 13.5371  | 11.6211   | 10.3388   |
| CDC14B       | 4.05404   | 3.81821   | 4.73166  | 4.07858   | 3.80142   |
| ARFIP1       | 6.684     | 6.0978    | 6.11445  | 5.66135   | 7.03419   |
| VMP1         | 67.5329   | 60.9502   | 72.6652  | 65.8051   | 60.4257   |
| ZBTB18       | 2.61005   | 1.91911   | 2.29094  | 1.94386   | 2.5907    |
| AKR1A1       | 124.867   | 136.217   | 133.873  | 118.442   | 125.838   |
| APEX2        | 22.4825   | 21.5814   | 22.9159  | 20.3801   | 22.0683   |
| COQ9         | 31.2251   | 32.9146   | 28.527   | 28.5941   | 32.4855   |
| PTCH2        | 0.246658  | 0.247786  | 0.384723 | 0.494906  | 0.188337  |
| DVL2         | 33.1723   | 29.5383   | 33.42    | 30.9987   | 28.5412   |
| RPS18        | 10930.7   | 18215.9   | 11864    | 10579.8   | 15630.1   |
| GCC1         | 4.73742   | 7.73336   | 6.8621   | 5.27965   | 6.6731    |
| FRYL         | 1.23839   | 1.27678   | 1.27676  | 1.25269   | 1.23678   |
| CCDC53       | 19.5628   | 19.7466   | 22.6351  | 18.1379   | 20.5438   |
| SMG6         | 12.4461   | 12.1107   | 11.7003  | 12.1682   | 11.5725   |
| EPOR         | 7.93359   | 7.28627   | 5.51862  | 7.30759   | 7.88077   |
| HELQ         | 2.17853   | 2.06755   | 2.27852  | 2.04708   | 2.07175   |
| GALNT18      | 35.7488   | 34.4059   | 32.0239  | 30.7157   | 35.0888   |
| ANKLE2       | 13.5271   | 13.8845   | 14.1538  | 13.6693   | 13.179    |
| DTL          | 7.20686   | 6.31057   | 6.40653  | 6.96868   | 6.72368   |
| TCEAL3       | 17.5784   | 17.5313   | 14.3225  | 15.6198   | 18.5192   |
| TMED10       | 24.5064   | 27.6982   | 24.8073  | 21.3781   | 29.9539   |
| RPL30        | 5739.92   | 8614.51   | 6379.55  | 5552.38   | 7570.38   |
| ZMYM6NB      | 27.088    | 39.1905   | 33.2443  | 27.5639   | 36.5496   |
| SUMO3        | 32.4369   | 32.5521   | 31.706   | 30.2125   | 33.3926   |
| ZNF578       | 1.82793   | 1.58108   | 1.57727  | 1.87623   | 1.38438   |
| MKKS         | 9.99113   | 11.8553   | 15.4149  | 10.7962   | 11.5629   |
| RPL32P3      | 2.22188   | 2.4067    | 2.19094  | 2.19061   | 2.18091   |
| TINF2        | 16.9241   | 18.961    | 14.6877  | 14.5871   | 19.0842   |
| MINPP1       | 7.15595   | 6.63143   | 7.03165  | 6.49312   | 6.37641   |
| SLC25A36     | 16.9473   | 15.3055   | 14.5915  | 14.5691   | 16.2285   |
| NT5C2        | 6.9237    | 6.13283   | 8.23861  | 7.24616   | 6.27317   |
| ZNF800       | 2.72969   | 2.80203   | 3.23576  | 2.62058   | 3.17605   |
| DOC2A        | 15.055    | 15.599    | 12.7348  | 14.8239   | 12.5031   |
| CDIPT        | 51.4105   | 55.0527   | 53.5689  | 49.6991   | 49.0889   |
| RAD51D,RFFL  | 15.3687   | 11.6814   | 14.354   | 13.9058   | 12.6581   |
| SNIP1        | 3.475     | 4.48807   | 3.48351  | 2.95138   | 4.52611   |
| YWHAZ        | 218.607   | 245.31    | 255.655  | 209.803   | 250.228   |
| NUMB         | 11.2157   | 10.5631   | 11.1428  | 10.1791   | 10.8588   |
| POGK         | 12.6608   | 14.4149   | 13.7316  | 11.6815   | 13.2255   |
| ZNF408       | 9.13471   | 10.9632   | 11.5179  | 9.48142   | 10.5135   |
| NUDT9        | 6.69402   | 7.73988   | 6.86298  | 6.35129   | 7.35195   |
| SETMAR       | 4.11882   | 6.16955   | 5.16785  | 4.36833   | 5.83816   |
| USP2         | 0.671623  | 0.667502  | 0.493914 | 0.634069  | 0.63919   |
| MIF4GD       | 24.3325   | 26.5818   | 25.993   | 24.915    | 23.9895   |
| ZNF833P      | 0.593061  | 0.638762  | 0.54436  | 0.583555  | 0.657678  |
| C9orf174     | 0.417445  | 0.527897  | 0.416212 | 0.472932  | 0.412945  |
| PAPOLA       | 24.7489   | 23.2125   | 25.2958  | 23.115    | 24.7034   |
| THAP9-AS1    | 12.4932   | 14.1558   | 14.3871  | 12.4413   | 14.5892   |
| BOLA3        | 89.1149   | 91.8743   | 69.4513  | 76.3168   | 87.1813   |
| HAUS4        | 37.9527   | 47.1872   | 40.1605  | 35.2769   | 43.4546   |
| LOC100286793 | 0.436368  | 0.834616  | 1.00937  | 0.856396  | 0.703546  |
| SHC1         | 152.825   | 193.745   | 136.747  | 133.898   | 199.942   |

|              |           |           |            |           |            |
|--------------|-----------|-----------|------------|-----------|------------|
| FBXL12       | 11.0281   | 13.7701   | 12.1593    | 10.5001   | 13.3661    |
| HDAC4        | 0.50279   | 0.406929  | 0.527675   | 0.423557  | 0.410104   |
| TMED4        | 35.2753   | 38.0595   | 39.7351    | 34.1585   | 39.6318    |
| SRPK2        | 10.9789   | 9.09388   | 9.375      | 9.88134   | 9.38913    |
| NOMO1        | 12.9361   | 15.8854   | 13.1009    | 12.5758   | 15.3861    |
| LAMTOR3      | 4.73401   | 5.20066   | 5.50806    | 4.45191   | 5.58735    |
| CNPY4        | 2.13275   | 2.01535   | 1.44619    | 1.90961   | 2.10099    |
| DIABLO       | 43.8152   | 43.4291   | 42.4226    | 39.7452   | 44.8722    |
| MTX1         | 52.5945   | 52.3044   | 41.9556    | 45.4371   | 51.1769    |
| RPL18        | 3211.64   | 4471.91   | 3260.75    | 3059.56   | 3913.87    |
| LGALS3BP     | 35.3752   | 49.062    | 35.0455    | 35.2235   | 45.3654    |
| PAFAH1B1     | 14.253    | 14.2045   | 13.4337    | 12.4924   | 14.4501    |
| NBEA         | 0.0037839 | 0         | 0.00238235 | 0         | 0.00258026 |
| LOC100507118 | 6.30518   | 5.39023   | 6.8359     | 6.35886   | 5.64082    |
| SP100        | 19.8822   | 18.9527   | 14.0039    | 15.6155   | 19.9488    |
| PBX4         | 1.38201   | 1.83451   | 1.25979    | 1.12247   | 1.71952    |
| SDF4         | 86.0289   | 92.2139   | 84.4487    | 83.2897   | 87.4199    |
| RBBP6        | 6.07909   | 9.03757   | 7.14675    | 6.04986   | 9.0001     |
| IFITM2       | 677.237   | 616.628   | 506.081    | 553.485   | 633.924    |
| COA1         | 47.1172   | 46.0643   | 51.3102    | 43.0353   | 45.6067    |
| COMMD8       | 10.6497   | 11.2093   | 9.61305    | 9.6868    | 11.094     |
| FAM222B      | 6.55018   | 4.82114   | 5.56294    | 6.356     | 4.86656    |
| EIF5A2       | 0.917472  | 1.42323   | 1.29057    | 1.14171   | 1.15329    |
| FBXO10       | 2.79527   | 2.34626   | 2.90903    | 2.79154   | 2.30118    |
| C1orf112     | 3.3451    | 2.86978   | 3.29858    | 3.28782   | 2.82267    |
| SNX27        | 3.54032   | 3.38136   | 3.71688    | 3.50698   | 3.37183    |
| TGFBR2       | 1.18617   | 1.22338   | 0.816786   | 1.02503   | 1.23781    |
| ZDHC5        | 16.2608   | 16.3643   | 19.1571    | 16.0472   | 16.7058    |
| RSRC1        | 4.00172   | 4.08538   | 3.28602    | 3.80649   | 3.67132    |
| KDM5B        | 8.30248   | 6.03554   | 7.07845    | 7.31625   | 6.08954    |
| C11orf75     | 14.4855   | 12.8109   | 14.2129    | 12.3277   | 13.0259    |
| METRNL       | 62.5164   | 59.8713   | 60.8151    | 58.4194   | 57.9095    |
| GINS2        | 26.1906   | 25.8348   | 24.1717    | 24.2381   | 26.7357    |
| PPFIA4       | 0.070053  | 0.0953418 | 0.121095   | 0.0584852 | 0.146213   |
| PHF3         | 6.99049   | 6.49213   | 4.69937    | 5.84084   | 6.97557    |
| ZNF527       | 0.744484  | 1.20658   | 0.869202   | 0.733601  | 1.1654     |
| AHCYL2       | 2.32798   | 2.50246   | 2.47356    | 2.05961   | 2.68112    |
| SGOL1        | 3.57261   | 2.33472   | 3.60602    | 3.51647   | 2.05535    |
| GSY2         | 0.0133175 | 0.0096864 | 0.016759   | 0.0110937 | 0.0273322  |
| ZNF688       | 6.90165   | 5.79867   | 6.47712    | 7.76147   | 4.64155    |
| MIA3         | 4.21717   | 4.3727    | 4.0032     | 4.00413   | 4.41302    |
| LRRC41       | 32.5015   | 31.0237   | 33.1575    | 30.1483   | 31.4262    |
| TRPC4AP      | 40.4542   | 40.0327   | 38.4852    | 34.892    | 40.2727    |
| HES7         | 15.1332   | 9.97185   | 13.7798    | 14.3817   | 10.3374    |
| TGFB111      | 59.0669   | 58.549    | 58.6125    | 52.5458   | 58.0666    |
| FUT10        | 2.78721   | 3.11486   | 2.64408    | 2.4341    | 2.90604    |
| MSH3         | 0.481966  | 0.418363  | 0.412801   | 0.349425  | 0.485432   |
| ATG4A        | 1.96923   | 2.33905   | 1.9749     | 2.40291   | 2.0369     |
| DGKD         | 5.46671   | 4.48175   | 4.24522    | 5.04735   | 4.46054    |
| CHKB,CPT1B   | 18.9925   | 22.7966   | 13.8369    | 18.4676   | 21.5988    |
| FAM53C       | 13.738    | 16.4555   | 15.0644    | 12.4005   | 17.4168    |
| LOC728392    | 0.661692  | 0.808744  | 0.681231   | 0.892203  | 0.636521   |
| PML          | 17.9569   | 12.348    | 14.7026    | 15.6119   | 12.0446    |
| PTPRU        | 14.3255   | 13.5973   | 11.8416    | 13.0858   | 13.4493    |
| HSPA13       | 5.31242   | 5.86817   | 8.02351    | 6.42892   | 4.96683    |
| WDR33        | 12.3992   | 12.6188   | 11.2877    | 10.892    | 13.2574    |
| HIAT1        | 13.0822   | 12.9499   | 12.5626    | 11.8174   | 13.5245    |
| USP6NL       | 3.13669   | 2.57232   | 3.44253    | 2.93797   | 2.81366    |
| LRCH1        | 3.05158   | 2.34334   | 3.05207    | 2.87468   | 2.52134    |
| ACVR2B       | 1.50692   | 1.14206   | 1.52317    | 1.44583   | 1.13904    |
| TMX1         | 18.0559   | 17.0037   | 18.7853    | 14.7234   | 19.5358    |
| PHF10        | 22.2943   | 20.6725   | 19.5492    | 19.8482   | 22.5931    |
| NUBP1        | 13.6672   | 17.1444   | 14.9657    | 14.4113   | 14.2525    |
| FZD2         | 5.98825   | 6.35473   | 5.39676    | 5.85404   | 5.99265    |
| LOC550112    | 6.24333   | 5.43654   | 7.43925    | 5.70009   | 5.76334    |
| INO80B,WBP1  | 69.6972   | 79.6533   | 72.8594    | 67.3677   | 71.3887    |
| XPR1         | 1.75067   | 2.00426   | 1.91152    | 1.80571   | 1.94464    |
| SCAP         | 28.0796   | 26.541    | 27.1116    | 27.8415   | 24.6189    |
| IRF3         | 62.7501   | 58.4317   | 65.8768    | 64.0535   | 55.2474    |
| CCNDBP1      | 9.50752   | 11.4827   | 11.5718    | 9.52926   | 11.623     |
| TIRAP        | 1.80259   | 1.99351   | 2.01546    | 1.82301   | 1.93826    |
| PAFAH1B2     | 16.8128   | 19.6904   | 20.3214    | 17.2933   | 19.3029    |
| DUSP3        | 24.5152   | 22.5192   | 21.6993    | 20.7272   | 22.738     |
| VIMP         | 35.5808   | 36.3898   | 47.9428    | 35.4994   | 38.207     |
| DMPK         | 12.8433   | 12.5848   | 13.9666    | 12.4384   | 12.2201    |
| CERS2        | 73.6646   | 75.8167   | 83.2194    | 69.1369   | 75.2812    |
| NHEJ1        | 7.31894   | 9.20343   | 7.90557    | 6.27418   | 9.41189    |
| FGF8         | 0.897579  | 1.40299   | 0.97335    | 0.947365  | 1.23206    |
| IP6K2        | 57.5434   | 65.6707   | 52.4482    | 51.8984   | 64.3768    |

|                          |          |          |          |          |          |
|--------------------------|----------|----------|----------|----------|----------|
| PRSS3                    | 50.0325  | 55.0928  | 54.656   | 44.0704  | 53.7353  |
| TTC28-AS1                | 12.9654  | 12.3529  | 16.1217  | 12.8835  | 11.2747  |
| TLK1                     | 6.77888  | 6.46983  | 7.01214  | 6.47075  | 6.68969  |
| MUT                      | 5.70299  | 6.01666  | 5.98318  | 5.49651  | 6.1354   |
| KBTBD4                   | 6.67665  | 9.10799  | 6.43702  | 6.46212  | 8.79117  |
| ATG5                     | 7.71642  | 7.37911  | 9.15834  | 7.31033  | 8.13775  |
| ZBTB6                    | 3.39472  | 2.80254  | 3.11091  | 2.81511  | 3.01487  |
| CAP1                     | 76.5946  | 72.8756  | 78.6595  | 73.1075  | 73.4268  |
| GSTK1                    | 122.637  | 150.611  | 124.142  | 111.766  | 143.625  |
| MFSD1                    | 11.2903  | 11.4024  | 12.9141  | 11.0671  | 13.2934  |
| SPHK1                    | 220.02   | 231.083  | 216.515  | 198.155  | 218.195  |
| PPP3CA                   | 1.89162  | 2.19631  | 2.35654  | 1.95177  | 2.45649  |
| UBE2V2                   | 25.59    | 20.4742  | 20.9646  | 20.3031  | 22.2294  |
| HIST3H2A                 | 26.9357  | 29.1496  | 52.3221  | 36.1203  | 24.776   |
| SNHG6                    | 885.367  | 1328.49  | 950.409  | 924.986  | 1059.11  |
| MOCS2                    | 17.4901  | 15.4839  | 18.3779  | 15.4837  | 17.3304  |
| COL27A1                  | 5.30434  | 5.03838  | 3.91223  | 4.79331  | 4.8307   |
| SH3BP5                   | 6.56329  | 7.28583  | 6.43166  | 6.21217  | 7.26754  |
| NR4A3                    | 0.31738  | 0.312911 | 0.235371 | 0.325751 | 0.289219 |
| DCTN5                    | 5.98066  | 5.75837  | 6.80671  | 5.91929  | 5.9755   |
| ARMCX5,ARMCX5-GPRASP2,GF | 2.45234  | 3.60377  | 2.7437   | 2.3039   | 3.30378  |
| KIF2C                    | 32.8675  | 29.0561  | 36.7642  | 35.4856  | 26.1531  |
| ATP2C1                   | 15.3672  | 16.5064  | 14.2363  | 13.5666  | 17.594   |
| DCBLD1                   | 0.69639  | 0.588261 | 0.648821 | 0.564903 | 0.654876 |
| NOTCH3                   | 0.147348 | 0.218318 | 0.131387 | 0.165908 | 0.257645 |
| ZBTB37                   | 0.301339 | 0.216548 | 0.140537 | 0.183225 | 0.214598 |
| PPP4R1                   | 8.34644  | 8.71821  | 9.63693  | 8.08753  | 8.90702  |
| TPPP                     | 1.65635  | 1.88748  | 1.19342  | 1.72812  | 1.77033  |
| AEBP2                    | 2.00011  | 1.72097  | 1.8784   | 1.75225  | 1.91687  |
| MIR600HG                 | 1.1252   | 0.889976 | 1.04599  | 1.12829  | 1.02587  |
| CWF19L2                  | 2.05464  | 1.65382  | 1.75456  | 1.71067  | 1.77418  |
| BNIP1                    | 0.306282 | 0.102125 | 0.209813 | 0.182819 | 0.110912 |
| INTS6                    | 1.77221  | 1.74502  | 2.03678  | 1.76273  | 1.82115  |
| AP5S1                    | 4.95124  | 7.1884   | 4.77971  | 4.16905  | 7.13938  |
| CBFA2T2                  | 2.82538  | 2.33905  | 2.24184  | 2.22064  | 2.6872   |
| PIN4                     | 10.9581  | 12.4319  | 11.2392  | 10.6495  | 10.6141  |
| PIGU                     | 19.2986  | 15.5877  | 19.7853  | 17.853   | 16.6842  |
| PHF15                    | 3.09049  | 4.38549  | 3.49602  | 3.43684  | 3.6843   |
| CHURC1,CHURC1-FNTB,FNTB  | 23.9999  | 25.3402  | 24.5606  | 22.4804  | 23.6677  |
| FAM160A2                 | 8.72416  | 11.2817  | 8.46208  | 8.19244  | 10.5073  |
| ARID4B                   | 1.55802  | 1.37727  | 1.30836  | 1.47448  | 1.37561  |
| LSM14B                   | 23.3552  | 22.5942  | 22.5697  | 20.27    | 22.9136  |
| HDAC1                    | 67.9777  | 66.9809  | 66.174   | 68.5399  | 62.4393  |
| MIER1                    | 5.94092  | 6.2661   | 6.35464  | 5.26626  | 6.82503  |
| TTI2                     | 5.54226  | 6.26143  | 6.14788  | 5.55559  | 5.88307  |
| NAT14                    | 1.32854  | 2.11534  | 1.87244  | 1.73064  | 1.28515  |
| DLG5                     | 4.66548  | 4.86348  | 4.89395  | 5.00008  | 4.52046  |
| DDX19B                   | 11.5692  | 11.6932  | 13.1789  | 12.8535  | 11.0942  |
| DDHD1                    | 1.7672   | 1.29918  | 1.40181  | 1.51296  | 1.50589  |
| RNF24                    | 3.49647  | 3.35368  | 2.64271  | 2.89857  | 3.84606  |
| ATL2                     | 12.7367  | 10.5714  | 11.9503  | 11.4948  | 11.548   |
| CDC42SE2                 | 5.02477  | 6.33463  | 5.67283  | 5.36785  | 6.1319   |
| MTRNR2L2                 | 44.7122  | 62.7149  | 43.6347  | 43.5646  | 53.8105  |
| IQGAP1                   | 8.62548  | 10.7285  | 8.46206  | 8.45429  | 10.5366  |
| SEMA6C                   | 2.4518   | 3.23138  | 2.27313  | 2.62914  | 3.26834  |
| NUP205                   | 17.6957  | 15.7433  | 17.4121  | 16.3502  | 16.3906  |
| MARK4                    | 13.8249  | 13.354   | 11.5089  | 12.7122  | 12.2891  |
| PTRF                     | 59.067   | 66.0677  | 58.9977  | 51.0793  | 68.266   |
| PCNX                     | 2.91752  | 2.73089  | 2.81852  | 2.61249  | 2.78266  |
| UBL7                     | 47.9474  | 55.597   | 52.4207  | 46.5419  | 50.4697  |
| ATP5O                    | 312.82   | 348.095  | 325.762  | 286.423  | 328.543  |
| TRMT10A                  | 0.534138 | 0.705825 | 0.564833 | 0.642316 | 0.500407 |
| MSL2                     | 5.23986  | 4.27457  | 5.51475  | 4.64314  | 4.49556  |
| OARD1                    | 12.171   | 11.4612  | 12.9556  | 11.684   | 11.7002  |
| APBB1                    | 15.8075  | 17.8969  | 14.5721  | 14.3419  | 16.6544  |
| ANKRD19P                 | 0.977831 | 0.828432 | 0.810024 | 0.883519 | 0.773002 |
| TBX3                     | 1.58803  | 2.33292  | 1.43861  | 1.63316  | 2.08572  |
| EID1                     | 21.7051  | 29.1191  | 27.0836  | 23.4986  | 28.0326  |
| PRRC2B                   | 23.2925  | 21.7136  | 19.8883  | 22.0918  | 20.3874  |
| SLC38A5                  | 165.202  | 201.153  | 159.015  | 133.852  | 202.524  |
| MECOM                    | 2.07462  | 2.28856  | 1.86844  | 2.05979  | 2.15625  |
| ZNF322                   | 3.14259  | 3.09877  | 4.08339  | 3.06692  | 3.12411  |
| TNKS                     | 4.36742  | 3.40493  | 3.68361  | 3.78644  | 3.70868  |
| ZBTB8A                   | 1.78744  | 1.58999  | 1.88486  | 1.79234  | 1.57814  |
| ADRA2C                   | 20.1395  | 16.1146  | 16.9048  | 16.4548  | 17.3471  |
| SRP14                    | 213.944  | 226.712  | 207.749  | 199.38   | 222.77   |
| HCFC1                    | 9.7567   | 10.0131  | 8.87557  | 10.1939  | 9.52545  |
| JRK                      | 8.36454  | 7.32076  | 8.60186  | 8.80938  | 6.65107  |
| FAM133B                  | 11.4542  | 14.5643  | 12.1553  | 10.484   | 14.6254  |

|                          |          |          |          |          |          |
|--------------------------|----------|----------|----------|----------|----------|
| LRRFIP2                  | 9.86401  | 9.01173  | 9.20624  | 9.28453  | 9.41995  |
| ZNF142                   | 3.13519  | 3.04341  | 2.92774  | 3.34323  | 2.95633  |
| EIF2B4                   | 28.8604  | 32.5051  | 29.5486  | 28.2738  | 31.0502  |
| TMEM208                  | 75.8747  | 80.5385  | 76.2589  | 73.5177  | 69.6285  |
| PPP1R18                  | 70.7345  | 47.1112  | 64.789   | 64.5511  | 47.751   |
| GXYLT2                   | 0.638793 | 0.869875 | 0.47605  | 0.674912 | 0.663642 |
| GNPAT                    | 17.4878  | 18.221   | 16.8439  | 15.0467  | 18.8842  |
| SPOP                     | 12.5732  | 10.8773  | 13.6381  | 11.5453  | 11.0829  |
| NUMBL                    | 10.884   | 14.1367  | 8.99124  | 9.53512  | 13.8428  |
| CSRP2BP,PET117           | 16.0099  | 19.7122  | 17.5851  | 16.1455  | 17.2684  |
| KAT6A                    | 3.6744   | 3.81567  | 3.11703  | 3.47264  | 3.56734  |
| LOC100132247             | 2.48494  | 2.22303  | 2.33049  | 2.32532  | 2.43281  |
| SOGA1                    | 0.407397 | 0.462153 | 0.586968 | 0.546922 | 0.347151 |
| LOC100287177             | 25.5223  | 25.2953  | 22.3458  | 19.3896  | 24.66    |
| ARHGEF1                  | 50.9441  | 40.971   | 41.7458  | 45.1985  | 42.2069  |
| SAMD8                    | 3.90561  | 3.2092   | 3.50379  | 3.38218  | 3.3678   |
| TTBK2                    | 0.426889 | 0.373371 | 0.36804  | 0.380629 | 0.340838 |
| EIF2B5                   | 21.3536  | 19.8664  | 23.1382  | 20.6091  | 20.354   |
| HGS                      | 90.2642  | 77.4446  | 92.9756  | 87.6876  | 75.7994  |
| CDC7                     | 2.99527  | 2.43048  | 2.37281  | 2.98691  | 2.37686  |
| ATF7IP2                  | 2.3097   | 1.54983  | 1.47033  | 1.98295  | 1.64625  |
| PEX6                     | 6.90444  | 6.75848  | 7.8822   | 6.50743  | 7.28239  |
| PLEKHM3                  | 0.419965 | 0.345393 | 0.31591  | 0.298335 | 0.373079 |
| SFI1                     | 7.6387   | 8.10664  | 6.07925  | 6.63587  | 8.60622  |
| IKBK2                    | 12.4769  | 12.3263  | 12.9012  | 12.5447  | 11.767   |
| COG7                     | 6.54553  | 7.15832  | 5.14097  | 6.06891  | 6.96712  |
| HNRNPL                   | 199.794  | 189.087  | 173.386  | 181.928  | 192.264  |
| ZNF213                   | 8.00847  | 7.90882  | 9.68237  | 7.96474  | 8.30656  |
| CEP44                    | 2.33246  | 1.52445  | 2.36768  | 2.28482  | 1.46004  |
| ZCCHC3                   | 15.3823  | 14.279   | 14.7756  | 14.5924  | 12.9008  |
| DOCK9                    | 0.98578  | 0.936294 | 1.051    | 1.00302  | 0.992709 |
| CENPT                    | 18.6636  | 19.2814  | 16.6398  | 16.4825  | 19.9934  |
| CAPRIN2                  | 30.1283  | 23.7393  | 18.0849  | 24.1762  | 26.4578  |
| MFF                      | 26.6402  | 27.2389  | 29.4003  | 24.061   | 28.171   |
| SMOX                     | 17.5529  | 20.1272  | 20.4416  | 19.5368  | 18.2033  |
| STX4                     | 53.6652  | 56.083   | 41.858   | 47.0185  | 53.0063  |
| DKFZP434I0714            | 0.597346 | 0.874347 | 1.07694  | 0.809508 | 0.65072  |
| ARL8B                    | 20.5122  | 19.4818  | 22.8744  | 19.194   | 20.3534  |
| DYNLL1                   | 319.382  | 280.324  | 321.441  | 287.387  | 264.273  |
| NPIP                     | 49.0208  | 55.2391  | 45.3057  | 50.4161  | 50.1672  |
| ATG3                     | 33.5665  | 29.028   | 35.2809  | 32.759   | 28.5422  |
| C5orf15                  | 11.8738  | 11.3462  | 11.2288  | 11.3068  | 11.7035  |
| LOC338799                | 1.88718  | 4.21775  | 1.74042  | 2.6987   | 2.84069  |
| DOCK6                    | 14.9151  | 13.0054  | 11.1469  | 13.3862  | 12.4672  |
| HIRIP3                   | 11.6097  | 10.5949  | 8.79286  | 11.5747  | 9.8025   |
| ZNF768                   | 47.0257  | 46.5197  | 55.3531  | 46.3409  | 44.6537  |
| GATAD2B                  | 6.38013  | 5.71871  | 5.91457  | 5.8049   | 5.70817  |
| TBXA2R                   | 2.8175   | 3.29227  | 3.53972  | 3.13096  | 2.86419  |
| MND1                     | 41.4701  | 28.3647  | 39.2453  | 38.5971  | 28.2123  |
| LSM6                     | 27.1137  | 25.0117  | 24.9149  | 25.9066  | 23.7562  |
| SRP54                    | 10.5814  | 8.85502  | 10.0225  | 10.6169  | 9.22705  |
| ABHD12                   | 36.1116  | 44.7519  | 39.9229  | 38.2671  | 41.058   |
| ANAPC1                   | 6.33175  | 6.3466   | 6.92716  | 6.17654  | 6.32738  |
| SRP68                    | 43.7884  | 41.3295  | 40.8759  | 38.5619  | 42.2035  |
| CDC73                    | 5.48172  | 5.07792  | 5.05432  | 4.43274  | 5.72914  |
| ERV3-1,ZNF117            | 0.868576 | 0.846259 | 0.857416 | 0.855543 | 0.681263 |
| TGIF1                    | 40.7111  | 30.0122  | 57.4375  | 43.7134  | 31.3014  |
| ADPRHL2                  | 35.3402  | 37.5955  | 36.7221  | 31.8356  | 40.6009  |
| MBNL2                    | 3.69374  | 3.57731  | 2.95337  | 2.9683   | 4.06913  |
| CEACAM19                 | 12.0924  | 9.02245  | 13.9734  | 11.4157  | 10.5118  |
| INPP5F                   | 5.09766  | 4.53346  | 5.45678  | 5.64537  | 4.58735  |
| ANKMY2                   | 5.99839  | 6.73802  | 5.99511  | 5.52242  | 7.34799  |
| ARHGAP8,PRR5,PRR5-ARHGAP | 30.649   | 26.2554  | 34.0121  | 29.8025  | 23.3247  |
| KDEL2                    | 51.4718  | 57.2164  | 56.5144  | 49.8558  | 56.8753  |
| BCL7B                    | 42.7966  | 41.0806  | 44.5601  | 39.5397  | 39.6114  |
| RPE                      | 6.24727  | 5.66663  | 6.81651  | 5.90057  | 6.4093   |
| PCGF2                    | 46.926   | 44.2977  | 43.4482  | 44.843   | 41.8309  |
| TSPAN33                  | 24.0196  | 29.0619  | 29.4166  | 26.304   | 25.1296  |
| ATXN7L3B                 | 13.6171  | 14.8777  | 17.2047  | 13.9556  | 15.0197  |
| DLG3                     | 7.44136  | 6.8667   | 7.6195   | 7.54511  | 6.86846  |
| PLCB4                    | 0.676004 | 0.51866  | 0.719267 | 0.644106 | 0.659218 |
| ELL3                     | 1.39196  | 1.94021  | 1.22599  | 1.19064  | 1.89652  |
| JAG1                     | 1.08952  | 1.73848  | 1.53659  | 1.06752  | 1.8868   |
| FGFR1OP                  | 9.29852  | 7.34846  | 5.99753  | 7.64552  | 7.70171  |
| KRIT1                    | 5.39072  | 4.12626  | 4.7153   | 4.92452  | 4.25965  |
| SUN1                     | 16.7773  | 16.7352  | 16.4029  | 15.2591  | 17.8345  |
| PKIG                     | 22.3769  | 29.1541  | 24.2275  | 22.6332  | 28.5855  |
| MAGED1                   | 21.433   | 24.4738  | 20.2923  | 19.6935  | 25.1633  |
| GPR35                    | 0.517226 | 0.263572 | 0.512329 | 0.523577 | 0.278473 |

|             |           |           |           |           |           |
|-------------|-----------|-----------|-----------|-----------|-----------|
| GOLGA2      | 26.3515   | 22.394    | 21.7868   | 22.6599   | 23.349    |
| CAPG        | 141.245   | 141.103   | 136.877   | 129.275   | 138.236   |
| CCDC92      | 1.79176   | 2.15425   | 3.39331   | 2.06365   | 2.08172   |
| MGC2752     | 11.3446   | 11.6815   | 11.3693   | 10.0992   | 11.0529   |
| GNL1        | 13.8381   | 13.4175   | 13.7473   | 13.1458   | 13.1671   |
| POLR2J4     | 0.852379  | 0.844716  | 0.805783  | 0.760379  | 0.871403  |
| SARNP       | 46.5325   | 45.9469   | 42.1604   | 42.0872   | 44.8476   |
| RPS5        | 4313.4    | 6326.95   | 4535.97   | 4036.46   | 5561.09   |
| AUH         | 9.66475   | 6.72357   | 8.65814   | 8.0152    | 8.04919   |
| GPR3        | 4.67026   | 6.6011    | 5.80543   | 5.34602   | 6.44792   |
| INTS3       | 9.50617   | 9.20549   | 8.04805   | 9.42814   | 9.12392   |
| EGFL7       | 233.011   | 176.743   | 207.47    | 204.673   | 183.265   |
| DNPEP       | 47.1892   | 48.7817   | 45.5339   | 42.9785   | 47.2337   |
| ASB16-AS1   | 4.67414   | 5.07591   | 5.27545   | 6.21994   | 3.95841   |
| MBD3        | 66.7044   | 59.6594   | 69.5905   | 65.0394   | 58.3934   |
| COPS4       | 22.9858   | 26.1531   | 24.4157   | 20.6706   | 25.6344   |
| HNRNPUL1    | 60.6483   | 55.6503   | 63.1343   | 62.3473   | 54.2738   |
| PQLC1       | 38.798    | 42.9637   | 40.213    | 36.2246   | 43.2407   |
| SKAP2       | 4.11887   | 4.32564   | 4.02455   | 3.79026   | 4.5602    |
| UBAC2       | 19.7821   | 17.3882   | 22.5199   | 18.0223   | 18.1115   |
| AGO3        | 1.53115   | 1.41001   | 1.21627   | 1.3713    | 1.38139   |
| SUPT20H     | 11.7517   | 9.95324   | 10.4317   | 10.5422   | 10.4368   |
| UOCR8       | 53.6399   | 64.1345   | 50.307    | 50.5425   | 57.8297   |
| CLSTN1      | 29.279    | 29.9524   | 28.0676   | 27.4536   | 31.0518   |
| ZNF600      | 5.74748   | 5.08265   | 4.58475   | 5.21534   | 5.22352   |
| TMEM54      | 147.269   | 156.978   | 127.886   | 128.01    | 151.991   |
| USF1        | 20.5203   | 20.6977   | 21.2549   | 20.0084   | 20.5009   |
| CHCHD4      | 15.2675   | 15.4416   | 17.9592   | 16.0501   | 13.8532   |
| IFITM10     | 0.768604  | 0.806331  | 0.652862  | 0.751966  | 0.809429  |
| CLPB        | 7.49238   | 7.77568   | 4.8631    | 5.58383   | 7.84532   |
| CEP120      | 3.349     | 3.24187   | 3.40439   | 3.60755   | 2.80686   |
| SLC29A3     | 5.25969   | 7.42089   | 7.31883   | 5.32678   | 7.663     |
| CKAP2       | 13.5739   | 13.5354   | 15.3816   | 13.2822   | 13.3172   |
| PIGT        | 63.2093   | 71.1337   | 59.4972   | 61.3022   | 68.0603   |
| ARFIP2      | 9.92764   | 10.9424   | 9.43974   | 8.53738   | 11.5547   |
| STIL        | 3.764     | 3.32507   | 4.15286   | 4.1986    | 2.93314   |
| SYT5        | 0.0742889 | 0         | 0         | 0         | 0.0296161 |
| ATP5L       | 126.954   | 169.652   | 138.332   | 119.669   | 154.897   |
| TUBG2       | 15.5815   | 18.0155   | 12.0085   | 15.2049   | 16.5747   |
| DBF4        | 6.56454   | 5.34492   | 7.171     | 6.32522   | 5.99041   |
| TMEM158     | 29.4986   | 31.218    | 26.5551   | 26.1469   | 30.3087   |
| STRN3       | 5.28664   | 4.11053   | 5.36395   | 5.21066   | 3.71929   |
| FCHO2       | 1.93387   | 2.11254   | 1.6372    | 1.7739    | 2.00573   |
| RNF146      | 7.0107    | 5.38339   | 8.40982   | 7.03607   | 5.72621   |
| TMEM109     | 31.7827   | 30.9935   | 27.8624   | 29.267    | 30.3372   |
| FAM201A     | 3.90828   | 4.015     | 4.30789   | 3.51357   | 5.16902   |
| VPS13B      | 1.7717    | 1.63026   | 1.60721   | 1.64879   | 1.67262   |
| RHOD        | 66.1891   | 68.4562   | 79.9278   | 62.4145   | 67.0966   |
| IFNLR1      | 1.67679   | 1.60874   | 1.59798   | 1.67076   | 1.46344   |
| POGZ        | 5.58345   | 5.08859   | 5.2631    | 5.51762   | 4.80654   |
| FAM115A     | 10.3267   | 10.0641   | 7.17339   | 8.70148   | 10.5459   |
| PTPRA,VPS16 | 31.2203   | 31.9545   | 30.7419   | 29.992    | 31.7698   |
| ARRDC1      | 107.688   | 85.2524   | 102.782   | 101.172   | 87.0866   |
| PSORS1C2    | 0.134792  | 0.278489  | 0         | 0.170597  | 0.170079  |
| TLE1        | 7.37918   | 6.93509   | 6.69894   | 7.38615   | 7.01868   |
| CEMP1       | 10.9257   | 9.86131   | 11.0313   | 12.2423   | 9.57169   |
| SRR         | 0.732199  | 0.631031  | 0.778946  | 0.682026  | 0.6639    |
| ACPL2       | 4.13466   | 4.30118   | 3.14801   | 3.42693   | 4.39203   |
| THAP4       | 89.2182   | 90.7966   | 84.9887   | 84.049    | 84.1609   |
| PPP2R1B     | 7.18374   | 6.02533   | 6.46938   | 6.57922   | 6.36204   |
| MSX1        | 19.6462   | 22.4714   | 21.2771   | 19.6185   | 23.0978   |
| EXOC7       | 29.956    | 31.2949   | 27.9128   | 28.3781   | 31.8384   |
| SLC9A3R2    | 41.4474   | 43.013    | 36.4815   | 35.8035   | 42.7295   |
| DAB2IP      | 6.78348   | 6.90133   | 6.1035    | 6.9889    | 6.18653   |
| THAP1       | 5.27091   | 6.65555   | 6.12814   | 4.62665   | 6.35755   |
| FOXD2       | 2.04524   | 1.90022   | 1.62852   | 2.15691   | 1.78172   |
| HARS        | 35.4918   | 37.357    | 41.8469   | 39.5534   | 31.3179   |
| MPV17       | 48.2525   | 41.4277   | 47.6615   | 46.0023   | 41.2512   |
| UBN2        | 1.34545   | 1.10031   | 1.26356   | 1.26608   | 1.0868    |
| ACRV1       | 0.0291358 | 0.0411331 | 0.179568  | 0.07762   | 0.0608656 |
| RAB17       | 0.0339605 | 0.0911121 | 0.0205684 | 0.0283961 | 0.0834004 |
| DDX11       | 13.2297   | 11.0965   | 12.2968   | 13.8611   | 10.8062   |
| TELO2       | 28.5258   | 25.4226   | 28.7397   | 28.776    | 25.2294   |
| IMPA1       | 9.29175   | 9.45179   | 9.4682    | 8.36876   | 9.61202   |
| APLP2       | 77.3137   | 89.1032   | 72.4534   | 74.5223   | 83.7617   |
| APC         | 1.13643   | 1.04661   | 0.862421  | 1.04451   | 1.07591   |
| GAK         | 20.099    | 17.9004   | 21.2415   | 20.6609   | 17.4228   |
| WASH7P      | 10.6208   | 10.1154   | 10.0509   | 10.8684   | 9.57905   |
| WDR34       | 149.145   | 141.927   | 136.322   | 145.607   | 143.844   |

|                            |            |          |           |           |          |
|----------------------------|------------|----------|-----------|-----------|----------|
| EIF4E2                     | 40.8825    | 42.7636  | 39.6398   | 35.84     | 41.2336  |
| CCDC22                     | 23.962     | 20.1827  | 16.5784   | 19.6525   | 20.6719  |
| ADIPOR1                    | 48.2381    | 56.0157  | 48.0255   | 45.3955   | 53.1968  |
| RPS21                      | 6027.16    | 9511.6   | 6479.83   | 5853.8    | 8094.73  |
| ZBTB24                     | 2.38412    | 5.21248  | 2.69302   | 2.40565   | 4.79677  |
| SIK1                       | 15.8118    | 14.0806  | 10.8038   | 13.7332   | 13.1733  |
| TMEM201                    | 7.04618    | 10.4855  | 8.54738   | 7.84831   | 9.41211  |
| METAP1D                    | 1.04613    | 0.975001 | 1.10598   | 0.940581  | 0.836449 |
| EFTUD1                     | 18.7635    | 15.0134  | 14.526    | 15.0528   | 16.8176  |
| TRAF3IP2                   | 4.66279    | 4.48739  | 4.17318   | 3.73325   | 5.08951  |
| MED11                      | 23.5442    | 27.2036  | 20.4636   | 21.4363   | 25.1086  |
| PHKG2                      | 6.13302    | 8.77302  | 8.08012   | 7.15133   | 8.84649  |
| EPB41L2                    | 15.8926    | 14.2664  | 13.9852   | 14.9162   | 14.5523  |
| MSANTD3,MSANTD3-TMEFF1,TI  | 78.7584    | 100.094  | 68.0971   | 70.8007   | 94.2285  |
| ANKHD1,ANKHD1-EIF4EBP3,EIF | 37.6184    | 26.5773  | 35.8149   | 37.1024   | 26.2609  |
| TMEM243                    | 14.2255    | 13.1137  | 18.7411   | 15.1153   | 13.6415  |
| RB1CC1                     | 6.55167    | 6.85008  | 5.50235   | 6.11105   | 6.94239  |
| SLC39A11                   | 5.00331    | 5.05018  | 4.83254   | 4.69527   | 5.57718  |
| RNF44                      | 11.0978    | 10.1913  | 9.64765   | 10.159    | 10.8782  |
| RBM4B                      | 8.70338    | 9.08308  | 10.5263   | 8.26932   | 9.03362  |
| GNG7                       | 1.56431    | 1.38539  | 1.5353    | 1.24325   | 1.25896  |
| MCEE                       | 4.5392     | 3.87581  | 4.4514    | 3.672     | 4.47359  |
| CTRL                       | 1.13484    | 1.41117  | 1.33207   | 0.967315  | 1.573    |
| DGCR8                      | 4.96515    | 6.9344   | 5.82504   | 5.66288   | 6.3775   |
| AKAP13                     | 1.86717    | 1.82226  | 1.44837   | 1.73204   | 1.75982  |
| TLK2                       | 4.26223    | 3.94727  | 4.5662    | 4.12571   | 3.56682  |
| CTDP1                      | 12.6059    | 11.439   | 11.3147   | 12.135    | 11.2411  |
| ARHGAP5                    | 2.88994    | 2.61495  | 2.44039   | 2.54119   | 2.79284  |
| SART1                      | 28.0532    | 24.6101  | 25.9731   | 27.1748   | 24.2098  |
| MAPKBP1                    | 3.08773    | 2.61705  | 2.56832   | 2.72878   | 3.06657  |
| SLC4A1AP                   | 8.47687    | 7.61866  | 7.38842   | 8.17318   | 7.58722  |
| UBALD1                     | 38.8625    | 40.5406  | 50.5038   | 40.2198   | 39.2662  |
| ATP5J2,ATP5J2-PTCD1,PTCD1  | 755.737    | 745.739  | 711.452   | 686.6     | 733.132  |
| TUBA1A                     | 38.1025    | 49.5016  | 39.0176   | 34.6011   | 50.1971  |
| CHDH                       | 4.6507     | 4.39444  | 4.65114   | 4.44684   | 4.94735  |
| NINJ1                      | 58.5518    | 73.8215  | 57.1369   | 59.1427   | 67.2205  |
| TIMM9                      | 42.299     | 42.0696  | 53.4038   | 43.6998   | 35.7365  |
| METTL2A                    | 9.95963    | 10.12    | 10.1839   | 9.25333   | 9.72     |
| CYB5RL                     | 0.459268   | 0.489211 | 0.536766  | 0.610854  | 0.424319 |
| Corf31                     | 1.27331    | 0.73226  | 1.17007   | 1.12569   | 0.789744 |
| LOC100134229               | 3.48067    | 4.07454  | 5.68457   | 4.18862   | 3.71548  |
| FAM73B                     | 17.5906    | 18.71    | 18.3258   | 17.6396   | 18.7852  |
| AEN                        | 19.7538    | 30.7767  | 28.898    | 21.2794   | 29.8677  |
| PRC1                       | 18.5732    | 17.1405  | 20.7058   | 19.0412   | 16.0888  |
| CIZ1                       | 110.116    | 120.651  | 112.866   | 111.77    | 111.925  |
| RABAC1                     | 127.03     | 143.109  | 139.464   | 119.06    | 141.628  |
| RPAP1                      | 8.89456    | 8.40772  | 7.08322   | 8.24608   | 8.02902  |
| MED22                      | 43.611     | 34.8622  | 47.8606   | 41.2381   | 35.0841  |
| DDX41                      | 49.8817    | 60.1949  | 34.0948   | 40.781    | 58.0838  |
| SLC17A9                    | 25.4553    | 27.2029  | 16.8561   | 21.8369   | 28.0706  |
| NUDT3,RPS10,RPS10-NUDT3    | 4687.52    | 7792.21  | 5260.62   | 4681.41   | 6657.94  |
| TCAIM                      | 5.5672     | 7.11976  | 6.67102   | 6.0436    | 6.46228  |
| BRMS1                      | 41.2717    | 48.2431  | 49.2349   | 44.9537   | 39.6499  |
| KIAA0930                   | 11.2048    | 12.6536  | 11.246    | 10.4459   | 12.5262  |
| DONSON                     | 10.5708    | 11.3815  | 11.5086   | 11.8087   | 10.7436  |
| RWDD2A                     | 4.0471     | 4.97154  | 2.81215   | 3.86912   | 4.88615  |
| RNF216                     | 10.5627    | 9.62425  | 9.1596    | 9.50998   | 9.68023  |
| BDP1                       | 1.31871    | 0.999109 | 0.808544  | 1.07642   | 1.13691  |
| LOC100130581               | 0.712978   | 0.739227 | 0.60896   | 0.677687  | 0.574763 |
| RPL41                      | 11894.5    | 15637    | 12807     | 11337.2   | 13748.8  |
| TRIP10                     | 45.8259    | 39.8687  | 41.5509   | 42.0215   | 36.6428  |
| TGDS                       | 6.69689    | 5.382    | 5.86551   | 5.58211   | 5.44128  |
| PACSN2                     | 15.6969    | 17.233   | 15.6868   | 14.283    | 17.1376  |
| SCARNA9                    | 6.8004     | 3.66631  | 4.97399   | 5.94828   | 3.44738  |
| CCDC136                    | 6.76461    | 6.61342  | 5.67841   | 5.80313   | 6.75201  |
| GDI1                       | 52.5727    | 59.3388  | 44.1365   | 48.1158   | 55.5261  |
| PTPRN2                     | 2.41788    | 2.42508  | 2.42512   | 2.31973   | 2.33258  |
| PDE6A                      | 0.00841784 | 0        | 0.0209262 | 0.0210074 | 0        |
| FYN                        | 6.74852    | 6.22241  | 7.95399   | 6.62586   | 7.19352  |
| ERBB2IP                    | 6.48573    | 5.58323  | 6.55026   | 5.70033   | 6.14346  |
| ATP13A2                    | 19.3732    | 22.2413  | 19.251    | 18.8234   | 20.8471  |
| HABP4                      | 16.3368    | 18.0152  | 14.91     | 16.5326   | 16.5585  |
| EMC4                       | 88.5984    | 99.4201  | 86.3142   | 84.0696   | 92.5733  |
| TAP1                       | 24.431     | 26.069   | 23.5097   | 21.6079   | 27.0603  |
| MCM2                       | 37.3822    | 37.0334  | 32.4621   | 39.1005   | 36.0738  |
| MPPE1                      | 8.08842    | 10.7949  | 7.87943   | 8.73286   | 9.42825  |
| LOC100289495               | 0.190558   | 0.254022 | 0.271928  | 0.173458  | 0.295051 |
| C9orf89                    | 61.7803    | 75.801   | 55.0877   | 53.131    | 73.1726  |
| RPL26                      | 4982.4     | 7552.03  | 5466.17   | 4961.27   | 6455.83  |



|              |           |           |           |           |           |
|--------------|-----------|-----------|-----------|-----------|-----------|
| SMCR8        | 1.75094   | 2.38333   | 2.20602   | 1.98766   | 1.96587   |
| IGHMBP2      | 7.71246   | 6.05756   | 6.17663   | 6.82916   | 6.46821   |
| POLH         | 1.88998   | 2.19943   | 1.99234   | 1.75946   | 1.984     |
| PRKCA        | 1.30198   | 0.965076  | 0.862363  | 1.11175   | 0.994425  |
| DNMT3B       | 1.87564   | 1.45672   | 1.55086   | 1.73863   | 1.44664   |
| ANAPC4       | 5.94659   | 5.74682   | 5.87929   | 6.11832   | 5.17035   |
| ZNF561       | 4.41377   | 4.64834   | 4.67351   | 3.86111   | 5.04586   |
| TMEM223      | 15.404    | 16.148    | 16.7821   | 15.4649   | 16.3145   |
| MAFG-AS1     | 5.738     | 6.18581   | 7.29755   | 7.06185   | 5.17343   |
| SPICE1       | 1.63387   | 1.32877   | 0.982737  | 1.30902   | 1.42211   |
| MNAT1        | 26.337    | 22.7581   | 21.2536   | 22.3519   | 25.6162   |
| PITPNC1      | 6.14483   | 7.48806   | 6.1084    | 5.75282   | 7.23414   |
| BRD2         | 31.7115   | 34.3918   | 35.5802   | 30.2033   | 35.5075   |
| GALK1        | 54.694    | 52.8156   | 45.6836   | 47.1376   | 52.4528   |
| CWC25        | 6.19872   | 5.97275   | 6.9069    | 6.12164   | 6.10624   |
| FZD1         | 1.48798   | 2.23076   | 1.41962   | 1.7261    | 2.1326    |
| LRRC57       | 3.28716   | 4.44769   | 3.57109   | 3.24211   | 4.36826   |
| PFKP         | 99.5388   | 87.0264   | 82.5554   | 86.3395   | 90.094    |
| CYP2R1       | 8.59574   | 11.8395   | 11.0481   | 8.58338   | 12.1285   |
| ELP3         | 10.8759   | 9.69081   | 11.0819   | 9.90681   | 9.73489   |
| WRN          | 1.86499   | 1.61874   | 1.77814   | 1.7091    | 1.71713   |
| BID          | 29.9102   | 31.1546   | 31.4626   | 25.9774   | 31.8513   |
| TRAFD1       | 9.28243   | 11.757    | 10.3013   | 9.42849   | 10.928    |
| JOSD1        | 21.3758   | 21.085    | 22.4656   | 20.1509   | 22.8446   |
| ZNF454       | 0.0106703 | 0.0599835 | 0.0396851 | 0.0176664 | 0.0141691 |
| CCDC153      | 0.145667  | 0.188608  | 0.344531  | 0.159452  | 0         |
| CISD2        | 5.74994   | 6.58035   | 7.19088   | 5.63352   | 6.52404   |
| PHF12        | 4.70548   | 3.50187   | 4.29528   | 4.55212   | 3.85886   |
| HIST1H2AG    | 3.04739   | 0.843722  | 1.82525   | 1.71834   | 1.60706   |
| CDC34        | 133.49    | 116.558   | 135.643   | 124.188   | 115.91    |
| DBR1         | 4.2815    | 4.93272   | 5.47158   | 4.26986   | 5.96091   |
| CGREF1       | 19.4363   | 23.7178   | 19.4842   | 18.4018   | 22.3084   |
| SRD5A3       | 4.35594   | 5.62451   | 4.16856   | 2.76145   | 6.90664   |
| R3HCC1L      | 6.38021   | 5.71004   | 7.45718   | 6.62963   | 5.61836   |
| KIAA2018     | 0.43891   | 0.621206  | 0.562939  | 0.479064  | 0.593399  |
| MCRS1        | 32.2451   | 31.9785   | 32.2256   | 32.0868   | 28.6613   |
| JOSD2        | 53.8623   | 46.2552   | 55.3266   | 48.0385   | 47.4429   |
| MFSD6        | 1.49384   | 1.7207    | 2.14634   | 1.83743   | 1.66721   |
| FAM178A      | 3.10119   | 3.93579   | 3.8455    | 3.27812   | 4.02211   |
| USP24        | 3.75779   | 3.26751   | 3.30486   | 3.38475   | 3.51883   |
| RNH1         | 116.962   | 97.5659   | 108.321   | 102.003   | 102.239   |
| C2orf69      | 4.24306   | 4.10319   | 4.18441   | 4.21901   | 3.98333   |
| FBL          | 544.013   | 600.176   | 503.953   | 490.197   | 575.335   |
| DOPEY2       | 1.6414    | 1.40137   | 1.80045   | 1.60618   | 1.52253   |
| SLC27A3      | 6.36507   | 9.87715   | 4.50736   | 5.98475   | 9.60856   |
| PPP1CC       | 96.7501   | 90.5883   | 104.562   | 93.6398   | 91.8246   |
| SSR1         | 8.96237   | 9.28281   | 9.3555    | 8.12943   | 9.9148    |
| TMTCS3       | 1.05543   | 1.19487   | 0.922515  | 1.09532   | 1.03408   |
| ZNF609       | 4.11952   | 3.64768   | 3.64225   | 3.97411   | 3.49023   |
| LOC100129722 | 0.761368  | 0.981926  | 0.215974  | 0.975577  | 0.656225  |
| CXorf40B     | 15.7448   | 17.9295   | 14.3012   | 13.6861   | 17.2807   |
| SLC25A38     | 40.7065   | 47.3715   | 53.9012   | 44.4156   | 43.2847   |
| SWT1         | 1.11633   | 0.945884  | 0.75554   | 0.759971  | 1.2094    |
| FAM131C      | 26.0489   | 28.1058   | 24.4344   | 22.9313   | 28.2398   |
| DTYMK        | 62.9372   | 66.6419   | 80.4089   | 71.992    | 59.4848   |
| IL4I1,NUP62  | 25.4988   | 25.3666   | 24.1466   | 26.9495   | 23.0782   |
| CHMP2B       | 17.8341   | 16.0796   | 17.8429   | 16.1803   | 17.611    |
| EPC1         | 5.30158   | 5.79774   | 5.01321   | 4.2437    | 6.54189   |
| UHRF1        | 20.624    | 17.1029   | 18.2012   | 21.249    | 17.8152   |
| SEMA4D       | 8.00699   | 8.89919   | 7.12409   | 7.5477    | 9.05864   |
| PDE2A        | 0.112005  | 0.139838  | 0.0483153 | 0.133447  | 0.0884327 |
| C2orf68      | 3.69068   | 3.73714   | 4.69091   | 4.3653    | 3.40185   |
| ARHGAP12     | 5.67364   | 6.25371   | 5.07465   | 5.09665   | 6.08056   |
| UBE2D4       | 3.37442   | 3.43066   | 3.75069   | 3.35907   | 3.13791   |
| LOC100287015 | 1.34352   | 1.67573   | 2.2083    | 1.62105   | 1.58326   |
| TSR2         | 27.119    | 26.1021   | 26.2753   | 25.7009   | 27.3559   |
| ABCD3        | 9.20155   | 9.95486   | 8.78018   | 8.47074   | 10.0188   |
| TYW5         | 1.64188   | 1.5726    | 1.94979   | 1.8048    | 1.67543   |
| DYNC1LI2     | 8.53382   | 8.37419   | 7.9403    | 7.74759   | 9.07973   |
| EYA3         | 4.57769   | 4.46196   | 4.27578   | 4.4559    | 4.34419   |
| MUL1         | 14.4053   | 20.9064   | 17.2632   | 14.6477   | 20.0837   |
| PUF60        | 220.937   | 216.394   | 209.23    | 211.421   | 211.829   |
| CHPT1        | 12.858    | 14.9161   | 14.8887   | 13.2873   | 14.3329   |
| WDR81        | 10.703    | 10.6567   | 15.2105   | 13.3133   | 8.77861   |
| GMIP         | 17.1754   | 18.2548   | 14.4415   | 16.3912   | 16.9045   |
| MAPK9        | 10.0729   | 11.1508   | 10.8162   | 10.1284   | 10.6929   |
| TRIM26       | 13.6244   | 16.0584   | 15.6843   | 15.0387   | 14.8318   |
| DIAPH1       | 11.935    | 10.362    | 12.36     | 12.8936   | 10.2356   |
| SLC6A13      | 0.314928  | 0.721109  | 0.617731  | 0.491326  | 0.608572  |

|                        |          |          |          |          |          |
|------------------------|----------|----------|----------|----------|----------|
| PCNXL2                 | 1.14491  | 1.04019  | 1.24507  | 1.15795  | 0.99553  |
| METTL18                | 4.20213  | 5.25287  | 4.70723  | 4.04144  | 5.23815  |
| KCNK1                  | 15.4016  | 12.7752  | 15.2294  | 14.9833  | 11.8184  |
| ZNF787                 | 82.8454  | 59.8866  | 88.3828  | 76.3238  | 60.6015  |
| PCDHB7                 | 0.479484 | 0.819282 | 0.442041 | 0.535413 | 0.704212 |
| POC1A                  | 15.9939  | 15.1316  | 19.6629  | 17.5998  | 13.0378  |
| UVRAG                  | 1.66313  | 1.44433  | 1.66619  | 1.60282  | 1.58696  |
| KIF18A                 | 1.99049  | 1.30052  | 1.78885  | 2.06331  | 1.4929   |
| PPP1R7                 | 62.1431  | 57.8625  | 58.8375  | 58.2608  | 56.7025  |
| C7orf31                | 1.16695  | 1.46069  | 1.67631  | 1.122    | 1.34521  |
| ATXN7                  | 1.72393  | 1.54863  | 1.83192  | 1.55983  | 1.61205  |
| FAM91A1                | 11.8836  | 9.41782  | 10.5465  | 10.2934  | 9.93399  |
| C7orf10                | 0.223737 | 0.575463 | 0.362496 | 0.396889 | 0.393728 |
| WSB2                   | 20.5897  | 18.633   | 20.3424  | 20.2917  | 17.1076  |
| CYB5R4                 | 3.65452  | 3.55459  | 4.23694  | 3.54279  | 3.51536  |
| SIL1                   | 40.4536  | 43.2971  | 36.0068  | 35.9284  | 43.706   |
| FBXO46                 | 17.9914  | 12.1032  | 15.4126  | 16.272   | 12.7372  |
| BLOC1S6                | 10.4295  | 10.8112  | 10.4134  | 9.27814  | 11.651   |
| MTIF3                  | 33.6444  | 28.9159  | 35.8456  | 32.3534  | 29.011   |
| FASTK                  | 47.837   | 50.2588  | 46.0399  | 47.1626  | 43.7145  |
| SH3YL1                 | 6.0572   | 6.1402   | 8.05772  | 6.43544  | 6.95268  |
| RPS29                  | 8594.84  | 12736.6  | 9652.73  | 8605.44  | 10302.3  |
| EIF3H                  | 546.017  | 571.709  | 607.58   | 522.054  | 561.91   |
| CRLS1                  | 15.3513  | 17.3492  | 17.2261  | 13.9476  | 17.9302  |
| BDH2                   | 6.47438  | 7.11325  | 5.47952  | 5.58469  | 7.41031  |
| PPM1K                  | 3.10244  | 1.94794  | 2.84863  | 2.71222  | 2.17919  |
| A1BG                   | 0.357662 | 0.349519 | 0.527499 | 0.347827 | 0.39114  |
| RPL37A                 | 9246.8   | 13826.6  | 9544.39  | 8975.72  | 11855.5  |
| FAM3A                  | 15.2676  | 15.3216  | 15.9639  | 13.7999  | 16.1203  |
| TMEM64                 | 6.53859  | 6.1323   | 6.56533  | 6.02931  | 6.09733  |
| PILRA                  | 0.57167  | 0.565158 | 0.590519 | 0.479925 | 0.460453 |
| MAZ                    | 139.559  | 120.802  | 138.613  | 133.012  | 117.741  |
| LOC100132707           | 0.513269 | 0.969143 | 0.769083 | 0.636299 | 1.04688  |
| TMEM50A                | 29.0845  | 33.1553  | 34.5744  | 28.4304  | 32.2098  |
| GAREML                 | 7.90171  | 7.16048  | 8.33864  | 8.35904  | 6.35054  |
| CAPN1                  | 93.2104  | 97.6961  | 85.9335  | 84.859   | 97.6882  |
| RNF215                 | 19.5816  | 20.0861  | 16.4811  | 17.2402  | 18.909   |
| NR4A1                  | 16.2997  | 10.9349  | 14.535   | 15.6841  | 9.29518  |
| KIAA1468               | 2.54311  | 2.21344  | 2.06823  | 2.26881  | 2.1672   |
| PLA2G16                | 70.1232  | 69.9653  | 69.7179  | 69.4448  | 62.9454  |
| C8orf37                | 0.654977 | 0.709439 | 0.620274 | 0.757355 | 0.730069 |
| YIF1B                  | 24.7866  | 21.7808  | 22.8909  | 24.2718  | 20.3417  |
| CBX8                   | 16.7688  | 17.8643  | 12.2977  | 15.1915  | 16.7113  |
| DTX2P1-UPK3BP1-PMS2P11 | 0.463035 | 0.356223 | 0.483149 | 0.555518 | 0.325746 |
| CLEC11A                | 240.208  | 243.762  | 212.93   | 200.315  | 280.3    |
| RCOR3                  | 4.10571  | 4.04992  | 3.63436  | 3.52106  | 4.40558  |
| ABCF3                  | 20.4498  | 22.3353  | 21.5031  | 21.344   | 21.3594  |
| LINC00630              | 0.293016 | 0.339658 | 0.178865 | 0.304148 | 0.305439 |
| HCST                   | 2.01106  | 1.81295  | 2.41166  | 1.46703  | 1.69888  |
| FGD1                   | 12.0295  | 10.7587  | 10.6648  | 11.6909  | 10.6296  |
| GZF1                   | 2.50924  | 2.66655  | 2.31771  | 2.2978   | 2.64048  |
| ZNF84                  | 4.5089   | 4.06842  | 3.89565  | 4.17378  | 4.05707  |
| TMEM245                | 6.18359  | 5.9693   | 5.99094  | 5.6391   | 6.727    |
| AGO2                   | 20.9153  | 16.1663  | 18.741   | 19.3529  | 15.6516  |
| C11orf1                | 13.3278  | 20.9009  | 18.8839  | 14.8218  | 19.013   |
| RNF114                 | 29.2784  | 31.8587  | 33.791   | 27.7249  | 31.1259  |
| PARP8                  | 2.32435  | 2.16054  | 2.50809  | 2.11857  | 2.39466  |
| DGCR6L                 | 69.6247  | 91.8323  | 70.5575  | 68.419   | 84.5703  |
| LOC645212              | 4.687    | 4.53264  | 5.08371  | 4.7842   | 4.37024  |
| ORC2                   | 3.51569  | 3.32091  | 3.22312  | 3.23118  | 3.47059  |
| LRP12                  | 3.71254  | 2.83523  | 3.60039  | 3.26824  | 3.01559  |
| ZNF436                 | 1.39275  | 1.89661  | 1.62381  | 1.56371  | 1.81438  |
| EDC4                   | 17.2452  | 16.3419  | 15.1781  | 17.0605  | 15.8041  |
| ARHGDI3                | 300.429  | 259.858  | 266.258  | 290.978  | 248.89   |
| YBEY                   | 18.0328  | 21.8776  | 21.7338  | 17.7703  | 22.7439  |
| DCAF11                 | 16.4087  | 17.3616  | 18.4172  | 17.458   | 16.58    |
| MAP1LC3B2              | 4.20395  | 2.65405  | 4.54001  | 4.50844  | 2.91054  |
| FIGNL1                 | 2.53379  | 2.24956  | 3.12939  | 2.71333  | 2.36318  |
| ZNF8                   | 2.98951  | 1.73078  | 2.41753  | 2.27246  | 2.34766  |
| RAB11FIP3              | 15.4944  | 16.3499  | 15.601   | 14.7253  | 15.8341  |
| GPR155                 | 0.332516 | 0.389567 | 0.242748 | 0.228291 | 0.446048 |
| PDRG1                  | 24.1711  | 27.356   | 29.0154  | 23.5192  | 25.9414  |
| SLC35A3                | 2.57358  | 2.46887  | 2.46113  | 2.24436  | 2.76824  |
| H2AFZ                  | 411.239  | 424.706  | 497.444  | 478.619  | 382.822  |
| SDCBP                  | 77.4928  | 83.2778  | 74.6661  | 64.7621  | 91.2045  |
| PPP1R26                | 20.7851  | 14.6727  | 19.3578  | 19.6583  | 14.131   |
| TMEM102                | 25.6807  | 25.0578  | 26.93    | 22.0379  | 28.0034  |
| RPS16                  | 4823.35  | 6729.25  | 5114.4   | 4572.44  | 5911.24  |
| FSCN1                  | 191.498  | 157.682  | 159.002  | 165.867  | 171.047  |

|                          |           |           |          |           |           |
|--------------------------|-----------|-----------|----------|-----------|-----------|
| OAZ3                     | 2.52393   | 3.9019    | 3.0995   | 2.70443   | 3.6618    |
| SNRNP48                  | 4.25172   | 4.34192   | 3.87088  | 4.4124    | 4.15586   |
| KLHL23,PHOSPHO2,PHOSPHO2 | 6.82578   | 5.72889   | 7.86676  | 6.93689   | 6.01645   |
| MAP2K1                   | 50.2793   | 49.1499   | 42.1934  | 40.7216   | 53.0684   |
| NXT1                     | 29.9808   | 37.2924   | 38.0747  | 30.7968   | 37.3255   |
| NHLH2                    | 0.4013    | 0.673849  | 0.51099  | 0.512142  | 0.467404  |
| MOB1B                    | 1.55449   | 1.44573   | 1.64929  | 1.42297   | 1.39839   |
| SLC9A5                   | 5.94726   | 5.80716   | 4.21978  | 5.66195   | 5.52627   |
| TMEM51-AS1               | 0.108019  | 0.0729297 | 0.147482 | 0.149294  | 0.091598  |
| POLR2E                   | 84.0004   | 84.4952   | 78.6263  | 79.7441   | 79.4729   |
| TAF1A                    | 4.36394   | 2.75364   | 3.6657   | 3.82402   | 2.76872   |
| LRP10                    | 44.0741   | 41.5784   | 41.4644  | 39.6409   | 43.4974   |
| MRPS2                    | 296.135   | 288.631   | 285.787  | 268.532   | 285.661   |
| SDHAP1                   | 1.1703    | 1.10678   | 0.983414 | 0.988259  | 1.33151   |
| DXH32                    | 13.3098   | 14.3974   | 13.1855  | 11.624    | 15.3893   |
| THUMPD3                  | 12.138    | 11.4718   | 11.5359  | 10.2118   | 13.445    |
| HIC2                     | 1.77975   | 1.85705   | 1.44531  | 1.5862    | 1.90575   |
| ZNF675                   | 1.97176   | 2.70243   | 1.45252  | 1.93109   | 2.63476   |
| PCDHB14                  | 2.21335   | 3.33512   | 2.95793  | 2.29189   | 3.08018   |
| SAFB                     | 39.5042   | 32.9404   | 38.9189  | 38.6048   | 33.3405   |
| SP1                      | 8.15275   | 8.19683   | 7.97416  | 8.3898    | 8.0999    |
| TEKT4P2                  | 9.42044   | 9.64803   | 9.44442  | 8.80606   | 8.85317   |
| NOS3                     | 8.99217   | 8.0518    | 8.02968  | 8.59044   | 8.25981   |
| GATS                     | 1.34435   | 1.95038   | 1.78437  | 1.58406   | 1.85045   |
| MRPL37                   | 179.685   | 193.374   | 183.027  | 175.068   | 183.391   |
| TGOLN2                   | 13.1903   | 16.3346   | 13.1202  | 13.4185   | 16.2293   |
| RPLP2                    | 6476.42   | 8454.07   | 6468.88  | 6117.57   | 7596.71   |
| SDHC                     | 34.1419   | 39.0152   | 35.552   | 31.841    | 40.2257   |
| ZSCAN26                  | 5.78619   | 5.05013   | 6.25808  | 5.62324   | 4.93609   |
| NFX1                     | 7.59685   | 5.69649   | 7.38385  | 6.81882   | 6.28328   |
| APH1B                    | 3.42525   | 3.94123   | 4.24273  | 3.81395   | 3.6217    |
| RNMT                     | 9.84301   | 9.05088   | 8.12252  | 8.30971   | 9.91931   |
| LITAF                    | 23.7206   | 29.7215   | 27.8475  | 23.0291   | 30.9625   |
| SLC25A11                 | 74.4101   | 74.6135   | 68.6845  | 71.4205   | 71.2599   |
| ABCA7                    | 2.43364   | 3.16867   | 1.59945  | 2.33037   | 2.83824   |
| TBCB                     | 83.3024   | 79.9617   | 83.0511  | 82.7532   | 78.7739   |
| AKAP10                   | 4.81929   | 3.7729    | 4.2186   | 4.20521   | 4.20521   |
| YTHDC2                   | 2.30378   | 2.10604   | 2.09144  | 2.1205    | 2.2522    |
| APBP2                    | 3.18157   | 2.62616   | 3.52556  | 2.85197   | 3.0103    |
| EXOSC5                   | 131.526   | 131.826   | 145.939  | 117.363   | 125.74    |
| C2CD5                    | 4.60962   | 3.92466   | 4.24397  | 4.24251   | 4.44372   |
| CENPF                    | 7.9146    | 6.81421   | 3.01321  | 7.88601   | 6.40912   |
| UBE2L3                   | 44.88     | 44.4311   | 44.4898  | 44.7185   | 43.2614   |
| PIP5K1A                  | 25.124    | 26.286    | 26.1519  | 24.2549   | 26.1278   |
| SPSB1                    | 17.7875   | 15.3003   | 15.7257  | 15.9226   | 16.1197   |
| SLC25A51                 | 2.97168   | 3.03889   | 3.14015  | 2.90284   | 2.87011   |
| CTDNEP1                  | 119.148   | 126.313   | 110.208  | 116.727   | 118.055   |
| UBR3                     | 2.25574   | 1.85055   | 1.71141  | 1.77264   | 2.16181   |
| FMNL3                    | 3.91712   | 3.56609   | 3.56359  | 3.84691   | 3.47401   |
| TARBP2                   | 22.4521   | 26.5264   | 22.5777  | 20.9091   | 25.4792   |
| C19orf70                 | 99.3834   | 118.035   | 100.925  | 93.3339   | 110.297   |
| DNM1P41                  | 0.199391  | 0.352817  | 0.32246  | 0.37014   | 0.226832  |
| CAPZA2                   | 41.2633   | 46.9117   | 45.2107  | 36.0305   | 49.8986   |
| SLC25A27                 | 2.12063   | 1.48413   | 1.07371  | 1.82726   | 1.36668   |
| CTNBL1                   | 22.6211   | 25.1438   | 25.5259  | 24.0727   | 22.319    |
| PFKL                     | 67.5043   | 71.9708   | 54.0304  | 56.5185   | 73.8015   |
| BRPF3                    | 4.09315   | 4.72236   | 4.20589  | 3.93253   | 4.55805   |
| LIN37                    | 9.4873    | 9.6405    | 10.3209  | 9.59164   | 9.39455   |
| ZRANB2-AS1               | 0.0457013 | 0.0620356 | 0        | 0.0758188 | 0.0292451 |
| MALSU1                   | 60.7279   | 64.9062   | 56.1095  | 57.5907   | 62.7651   |
| RPS8                     | 4813.26   | 7606.12   | 5098.54  | 4798.2    | 6559.27   |
| AFMID                    | 18.3327   | 19.0303   | 18.5078  | 15.718    | 20.0412   |
| CNOT1                    | 16.8409   | 14.9791   | 17.0497  | 15.7619   | 15.7952   |
| CEP85                    | 5.7056    | 4.87553   | 6.06007  | 5.74235   | 5.02239   |
| TM9SF1                   | 16.4038   | 21.4583   | 17.0422  | 17.1276   | 19.4662   |
| UBE2E3                   | 47.1157   | 52.6258   | 45.721   | 42.667    | 50.9842   |
| PPP2CB                   | 41.3492   | 38.7822   | 40.5945  | 40.1017   | 37.6089   |
| MCPH1                    | 3.75561   | 3.27287   | 3.263    | 3.6271    | 3.29725   |
| FAM13A                   | 1.60831   | 1.65593   | 1.25796  | 1.31755   | 1.76659   |
| TSPAN6                   | 14.177    | 19.9221   | 15.8774  | 12.8013   | 20.0504   |
| C22orf29,GNB1L           | 15.5598   | 12.9263   | 16.3351  | 14.7575   | 14.3484   |
| PGAP1                    | 0.878266  | 0.948272  | 0.86139  | 0.78007   | 1.13298   |
| CDC37L1                  | 6.968     | 5.89382   | 7.16179  | 5.99184   | 7.31894   |
| BTBD9                    | 1.54829   | 1.74896   | 1.25142  | 1.51007   | 1.61596   |
| RBM5                     | 24.0067   | 27.0313   | 22.8445  | 23.2085   | 26.4363   |
| PILRB                    | 55.7821   | 51.6218   | 42.5817  | 59.8124   | 45.4154   |
| FER                      | 0.960456  | 1.13728   | 0.771914 | 0.984436  | 0.973359  |
| WDR91                    | 2.17057   | 3.37045   | 1.89669  | 2.28825   | 2.78123   |
| TMEM62                   | 8.42688   | 7.95348   | 9.22603  | 7.87378   | 8.47195   |

|                          |           |          |           |           |           |
|--------------------------|-----------|----------|-----------|-----------|-----------|
| LPIN2                    | 5.34671   | 4.69137  | 3.85236   | 4.21457   | 5.51458   |
| PKN3                     | 84.4855   | 81.6128  | 84.3049   | 88.0884   | 76.8023   |
| SETX                     | 4.16778   | 4.27393  | 4.31085   | 3.92461   | 4.71083   |
| HOXD-AS1                 | 1.75923   | 2.33954  | 2.40591   | 1.94112   | 2.42955   |
| RBBP8                    | 4.22837   | 4.3547   | 5.69635   | 5.36055   | 4.1186    |
| MBNL1                    | 7.48724   | 6.11621  | 6.40702   | 6.92543   | 6.19342   |
| RFX7                     | 2.23738   | 1.8795   | 1.82362   | 1.843     | 2.04078   |
| NMB                      | 35.9259   | 35.0072  | 33.0372   | 29.77     | 37.5401   |
| COL13A1                  | 3.05      | 3.51358  | 2.43882   | 2.3403    | 3.53578   |
| ZNF419                   | 2.61885   | 2.17917  | 3.52085   | 2.80544   | 2.63779   |
| MEF2B,MEF2BNB,MEF2BNB-ME | 13.423    | 11.9239  | 15.3166   | 13.8877   | 11.4512   |
| INTS9                    | 11.254    | 11.2941  | 11.1283   | 11.348    | 10.8353   |
| SCYL3                    | 0.625385  | 0.989804 | 0.749713  | 0.693355  | 1.02273   |
| TBKBP1                   | 6.90995   | 6.74155  | 5.97153   | 6.80309   | 6.07304   |
| ING3                     | 5.82638   | 8.44409  | 7.65308   | 6.14643   | 8.93785   |
| SHISA4                   | 12.4314   | 12.5725  | 10.8904   | 11.0382   | 11.6614   |
| CD81                     | 330.656   | 327.091  | 327.115   | 322.265   | 306.796   |
| ROCK2                    | 1.26829   | 1.19596  | 1.03318   | 1.0761    | 1.36821   |
| PDS5A                    | 8.22292   | 7.27817  | 7.89277   | 7.93856   | 7.28877   |
| MED8                     | 15.8846   | 16.2683  | 24.1632   | 18.6607   | 16.6873   |
| CEP57                    | 11.1017   | 7.64385  | 12.0272   | 10.6459   | 9.00982   |
| DNAJC28                  | 0.175533  | 0.486429 | 0.159426  | 0.207496  | 0.325629  |
| BSDC1                    | 17.6519   | 18.4271  | 19.4486   | 17.6861   | 18.3071   |
| ARID2                    | 2.02718   | 1.647    | 1.99567   | 1.96441   | 1.66934   |
| CCDC97                   | 13.8855   | 15.402   | 18.6695   | 15.6885   | 14.2067   |
| STK17B                   | 3.11553   | 2.62575  | 2.76193   | 2.5352    | 2.82602   |
| RPL10                    | 1591.71   | 2245.47  | 1724.48   | 1578.73   | 1969.37   |
| CBFB                     | 17.1025   | 16.6414  | 17.8806   | 17.0436   | 17.1125   |
| ASXL2                    | 0.56449   | 0.452973 | 0.519814  | 0.49834   | 0.608525  |
| RPL11                    | 3818.85   | 5187.54  | 4023.91   | 3883.99   | 4469      |
| FICD                     | 0.451903  | 0.470707 | 0.874018  | 0.512122  | 0.54419   |
| LOC100507463             | 0.917379  | 0.983359 | 1.29545   | 1.1375    | 0.767481  |
| CXCL16                   | 42.6964   | 48.5324  | 41.7881   | 43.0631   | 47.7674   |
| ADA                      | 23.5409   | 24.6643  | 20.3281   | 22.3      | 24.8653   |
| TOP3B                    | 8.63308   | 8.58631  | 7.77054   | 7.52177   | 9.55222   |
| PRDM15                   | 0.728573  | 0.684568 | 0.823111  | 0.884203  | 0.48321   |
| VPS29                    | 46.4292   | 46.8504  | 53.749    | 48.404    | 41.9449   |
| GLTSCR2                  | 687.909   | 904.813  | 735.428   | 681.458   | 820.741   |
| KAT2A                    | 41.4435   | 41.05    | 32.5738   | 36.0725   | 42.1359   |
| SLC33A1                  | 4.03461   | 3.58214  | 4.62136   | 4.01755   | 3.75826   |
| RAB14                    | 21.6078   | 22.9591  | 21.9065   | 19.9798   | 23.9619   |
| METTL17                  | 40.0913   | 37.2965  | 40.0145   | 41.0592   | 36.8414   |
| HOXB6                    | 7.17377   | 5.18618  | 6.43346   | 6.3859    | 4.852     |
| GGA2                     | 10.8918   | 9.8256   | 8.86927   | 9.15442   | 10.8846   |
| HIST1H4B                 | 1.41974   | 0.647311 | 1.33464   | 1.5822    | 1.19081   |
| ZNF23                    | 8.00775   | 7.10887  | 8.22671   | 7.33664   | 8.14453   |
| RNGTT                    | 3.40533   | 2.76659  | 3.08506   | 3.26738   | 2.78031   |
| UST                      | 2.89403   | 2.31743  | 2.89322   | 2.76578   | 2.44622   |
| CCDC115                  | 14.9233   | 18.0155  | 15.3993   | 14.5931   | 16.7734   |
| RPL39                    | 7249.57   | 11800.9  | 7440.39   | 6921.49   | 10108.5   |
| RWDD1                    | 33.8849   | 38.6404  | 40.0601   | 33.5676   | 38.1658   |
| SYNC                     | 27.6893   | 25.5547  | 28.7368   | 26.4936   | 25.0699   |
| C14orf93                 | 5.46254   | 6.44696  | 6.42448   | 5.30371   | 6.1155    |
| WASH2P                   | 9.24611   | 9.36056  | 10.6015   | 10.7586   | 8.78845   |
| LOC100499227             | 0.883327  | 1.09101  | 1.30267   | 1.1489    | 1.00486   |
| ZNF714                   | 0.481857  | 0.467953 | 0.509327  | 0.446763  | 0.58385   |
| MTRF1                    | 3.18228   | 2.26768  | 2.96359   | 2.79005   | 2.70181   |
| RNF4                     | 18.1039   | 18.9124  | 16.9108   | 17.4914   | 19.181    |
| TP53INP1                 | 1.44695   | 2.60423  | 1.72072   | 1.4198    | 2.66093   |
| DLEU1                    | 6.9739    | 6.75797  | 7.33815   | 5.87963   | 7.2333    |
| FAM120AOS                | 17.9496   | 19.7927  | 17.7505   | 16.5496   | 18.4875   |
| SERF1A                   | 0.0890524 | 0.14692  | 0.0734638 | 0.0985323 | 0.0989512 |
| PSMB1                    | 226.729   | 216.374  | 229.766   | 221.532   | 209.346   |
| DLL1                     | 7.13345   | 6.11983  | 6.68782   | 6.73275   | 6.99243   |
| LINC00514                | 0.263673  | 0.343713 | 0.276234  | 0.273202  | 0.237762  |
| TPRKB                    | 43.0689   | 45.5232  | 50.3637   | 42.9425   | 41.5573   |
| RGS19                    | 25.8028   | 20.8371  | 24.5058   | 21.343    | 24.1356   |
| ARPC4,ARPC4-TTLL3,TTLL3  | 121.24    | 116.522  | 117.28    | 116.001   | 110.035   |
| TCEB1                    | 57.6244   | 57.1458  | 62.2586   | 55.1095   | 56.7699   |
| GANC                     | 0.580483  | 0.465079 | 0.54575   | 0.476114  | 0.66922   |
| LGALS8                   | 7.68484   | 7.39259  | 7.57837   | 6.50794   | 8.12152   |
| MARCH8                   | 0.615918  | 0.776149 | 0.708185  | 0.384649  | 0.942639  |
| UBXN6                    | 146.58    | 144.179  | 153.524   | 131.195   | 149.345   |
| CCDC85C                  | 19.34     | 17.9288  | 18.197    | 18.0689   | 18.7351   |
| BRK1                     | 74.3534   | 96.118   | 83.6156   | 65.9911   | 96.7095   |
| SEPT9                    | 47.7522   | 47.2898  | 38.1986   | 44.1411   | 48.2618   |
| ZDHC11                   | 4.69938   | 3.20948  | 3.3669    | 4.12898   | 4.04965   |
| NPB                      | 1.16466   | 0.629608 | 0.969579  | 0.554186  | 0.195005  |
| ZNF271                   | 2.71315   | 3.62987  | 3.47289   | 3.00057   | 3.08804   |

|                 |          |           |          |          |          |
|-----------------|----------|-----------|----------|----------|----------|
| TMEM104         | 1.74052  | 1.17433   | 2.81679  | 2.31336  | 1.20314  |
| LARP7           | 9.35916  | 9.83579   | 6.81915  | 8.48607  | 9.90931  |
| NAPEPLD         | 2.25089  | 2.00558   | 2.46538  | 2.21275  | 2.12449  |
| FLJ46906        | 4.52     | 5.38508   | 5.16029  | 5.19475  | 4.5817   |
| PQBP1           | 70.4385  | 74.6894   | 88.3248  | 70.968   | 66.9278  |
| SPIN4           | 1.25021  | 1.77518   | 1.56282  | 1.54486  | 1.63213  |
| RPL8            | 10708.4  | 13710.2   | 11089.2  | 10088.2  | 12499.7  |
| ZNF138          | 4.21795  | 3.15128   | 2.52868  | 2.96832  | 3.56553  |
| RIC8B           | 1.57492  | 1.57313   | 1.74059  | 1.60601  | 1.50651  |
| UBE2I           | 82.3745  | 84.6441   | 79.2555  | 80.5556  | 81.3361  |
| MCTP1           | 4.53301  | 4.1702    | 4.97655  | 4.41087  | 4.6392   |
| PRDX2           | 606.39   | 655.017   | 480.987  | 560.513  | 608.731  |
| TIMELESS        | 7.44285  | 7.06715   | 5.67666  | 7.49293  | 6.32785  |
| SLC3A2          | 162.881  | 144.813   | 260.946  | 194.877  | 137.009  |
| SKA2            | 18.4928  | 14.3912   | 18.924   | 18.2278  | 14.0402  |
| SMG1            | 2.69998  | 2.13147   | 2.63868  | 2.47453  | 2.29926  |
| BMPR2           | 0.803984 | 0.78926   | 0.699854 | 0.633966 | 0.964202 |
| TCEB2           | 492.25   | 498.571   | 480.777  | 446.976  | 501.885  |
| HOXC13          | 0.317676 | 0.0966672 | 0.515855 | 0.294217 | 0.178588 |
| C12orf52        | 21.8538  | 25.3698   | 21.0956  | 20.1287  | 23.8818  |
| LOC100130744    | 0.532355 | 0.594469  | 0.650612 | 0.578202 | 0.548707 |
| RPLP1           | 9284.33  | 14631.1   | 9257.29  | 8867.29  | 12810.1  |
| HTATIP2         | 34.6363  | 41.5355   | 34.6075  | 34.103   | 38.5895  |
| ARMCX6          | 30.4326  | 36.8843   | 30.2209  | 28.874   | 33.7976  |
| KIAA0196        | 12.0866  | 12.0132   | 12.0037  | 12.094   | 12.0426  |
| ZNF462          | 1.12034  | 0.865636  | 1.01669  | 1.11058  | 0.902803 |
| C6orf57         | 15.0103  | 15.8176   | 14.0427  | 10.0723  | 20.7238  |
| IKBKAP          | 4.99552  | 4.79986   | 4.77432  | 4.7808   | 4.97521  |
| GPN1            | 25.9467  | 35.132    | 24.6254  | 25.5546  | 32.8376  |
| ARMCX3          | 9.28872  | 8.21358   | 8.78703  | 8.10454  | 9.16659  |
| DGAT1           | 32.5399  | 36.3648   | 29.7938  | 32.7557  | 31.5098  |
| NAPA            | 41.9175  | 44.4902   | 47.3836  | 49.0951  | 36.5832  |
| DENND4B         | 13.2123  | 11.9402   | 9.90953  | 11.9726  | 12.8239  |
| EIF2AK1         | 29.5252  | 30.5304   | 29.5507  | 26.8315  | 31.9968  |
| TNIK            | 4.45388  | 8.68119   | 4.70016  | 4.69517  | 8.14872  |
| RAB5B           | 10.856   | 10.6223   | 11.4067  | 10.7354  | 10.5592  |
| CLOCK           | 0.761618 | 0.902548  | 0.712202 | 0.83108  | 0.833616 |
| EIF4A3          | 81.6871  | 82.2225   | 67.8444  | 73.4148  | 83.6942  |
| RALGAP1         | 0.955861 | 0.781114  | 0.985839 | 0.840565 | 0.954085 |
| C14orf101       | 3.18565  | 3.64066   | 3.955    | 3.67906  | 3.21904  |
| KIAA1524        | 2.65479  | 1.63761   | 2.40225  | 2.55394  | 1.66586  |
| CROCCP2         | 22.1288  | 21.0408   | 21.0265  | 22.9868  | 19.8512  |
| FCHSD2          | 4.60415  | 4.24359   | 4.20086  | 4.25674  | 4.31136  |
| LOC100507217    | 29.8011  | 36.2418   | 39.7552  | 31.2905  | 34.131   |
| FYCO1           | 3.19411  | 3.2246    | 2.3766   | 3.02908  | 3.04563  |
| UBE2T           | 56.6659  | 44.5544   | 48.2692  | 54.2788  | 47.1545  |
| COPRS           | 111.644  | 130.21    | 102.083  | 106.481  | 118.323  |
| MED24           | 26.0046  | 24.1062   | 20.0825  | 23.0387  | 25.0217  |
| FANCE           | 16.013   | 13.2931   | 14.8607  | 15.0244  | 12.8525  |
| CHAF1A          | 14.571   | 12.4689   | 12.8292  | 15.6541  | 12.4196  |
| ANLN            | 10.9842  | 9.69269   | 9.57171  | 9.93634  | 10.2319  |
| MFSD11          | 3.32472  | 3.105     | 3.91869  | 3.51734  | 3.18452  |
| MRPL54          | 65.0554  | 88.2933   | 63.5503  | 62.6387  | 72.8254  |
| QTRTD1          | 5.17078  | 5.34245   | 6.1364   | 4.96468  | 5.47559  |
| LRRRC48         | 0.318327 | 0.258519  | 0.214713 | 0.294232 | 0.290063 |
| OXSRI           | 9.24288  | 8.35606   | 8.73673  | 7.82484  | 9.53306  |
| PSAP            | 217.573  | 217.593   | 228.104  | 209.046  | 216.426  |
| FAM200B         | 3.28439  | 4.00455   | 3.78754  | 3.70611  | 3.31254  |
| CDC42           | 65.7929  | 82.7951   | 78.5092  | 64.3418  | 84.8796  |
| M6PR            | 65.3992  | 70.5924   | 72.5486  | 65.8076  | 66.927   |
| RACGAP1         | 15.1702  | 15.0153   | 16.6749  | 14.9858  | 14.1184  |
| ZBTB80S         | 12.6134  | 14.5866   | 15.7965  | 14.6095  | 12.9911  |
| SLC4A3          | 4.43386  | 4.36216   | 3.57405  | 4.42407  | 3.84709  |
| RPL18A          | 4915.39  | 7121.47   | 5226.87  | 4720.02  | 6398.58  |
| SIRT3           | 11.3761  | 14.3264   | 10.4696  | 10.7403  | 13.5335  |
| ORMDL1          | 20.0375  | 20.2869   | 23.6895  | 21.1578  | 20.168   |
| FDXR            | 42.6034  | 52.703    | 37.2063  | 39.1886  | 48.6264  |
| CCL5            | 1.47045  | 1.32396   | 1.4117   | 1.33562  | 1.52318  |
| PPME1           | 49.4233  | 44.1466   | 39.3421  | 41.5221  | 47.746   |
| DSG2            | 10.0813  | 11.1693   | 10.0474  | 9.40269  | 11.7387  |
| SUGT1P3,TPTE2P5 | 0.192028 | 0.416041  | 0.279019 | 0.243876 | 0.28141  |
| ARAP1           | 15.0222  | 14.9894   | 14.0653  | 14.6689  | 14.7032  |
| YME1L1          | 23.6341  | 24.7422   | 27.0967  | 22.9664  | 25.9754  |
| NEDD1           | 4.01436  | 3.48509   | 4.21467  | 3.88648  | 3.80035  |
| DNAAF3          | 28.6872  | 33.5319   | 22.304   | 27.0974  | 30.632   |
| DCTPP1          | 86.0014  | 99.549    | 97.8851  | 88.0671  | 92.1684  |
| DANCR           | 86.2448  | 84.4743   | 119.671  | 94.2929  | 76.4769  |
| EEA1            | 1.73072  | 1.20511   | 0.701964 | 1.37577  | 1.36198  |
| PUM1            | 9.58556  | 7.55983   | 8.56319  | 8.70188  | 7.2591   |

|               |          |          |            |           |           |
|---------------|----------|----------|------------|-----------|-----------|
| ENGASE        | 4.67081  | 5.50329  | 4.22253    | 5.02306   | 5.2037    |
| USP13         | 1.61055  | 1.65079  | 1.69194    | 1.61923   | 1.60502   |
| INIP          | 5.40827  | 5.96939  | 4.96363    | 4.66665   | 6.33952   |
| PLTP          | 8.9565   | 9.62161  | 8.6004     | 9.34455   | 7.93026   |
| EPB41         | 3.90585  | 3.58238  | 4.52605    | 4.25469   | 3.96686   |
| SIRT6         | 29.5584  | 24.683   | 30.1085    | 27.6477   | 24.7574   |
| NCOA1         | 2.13626  | 1.9273   | 1.94054    | 1.83772   | 2.18172   |
| TMEM99        | 8.55433  | 10.275   | 9.93717    | 9.01631   | 8.28245   |
| TSPAN31       | 6.96656  | 7.72061  | 7.70524    | 6.47047   | 7.558     |
| HEBP2         | 48.1852  | 57.2884  | 51.9765    | 47.5026   | 54.4418   |
| ZNF133        | 8.16762  | 6.80118  | 5.1418     | 7.16338   | 6.60616   |
| HAGH          | 40.4209  | 35.7851  | 41.5939    | 40.103    | 34.1804   |
| BLMH          | 16.6613  | 14.8393  | 14.9571    | 15.2403   | 14.3914   |
| UHMK1         | 9.99824  | 10.5781  | 10.2235    | 8.3478    | 11.7144   |
| BRMS1L        | 1.64405  | 2.45961  | 2.1851     | 1.70415   | 2.49076   |
| UBE2Z         | 41.6668  | 45.9345  | 44.9921    | 39.4676   | 46.9087   |
| FIBP          | 90.2008  | 98.6248  | 96.2384    | 90.417    | 102.487   |
| TMEM167A      | 7.02721  | 7.56841  | 7.86545    | 6.8883    | 7.4962    |
| SFXN3         | 37.7711  | 39.0812  | 34.9094    | 35.4058   | 41.5682   |
| RPS13         | 3129.32  | 4294.69  | 3427.47    | 2955.69   | 3994.86   |
| PPP4C         | 159.147  | 151.434  | 151.63     | 154.511   | 142.166   |
| ADAMTS13      | 4.80171  | 4.63373  | 3.46538    | 4.65296   | 4.80007   |
| MRPS15        | 120.591  | 124.704  | 114.885    | 117.228   | 116.594   |
| SPATA2        | 3.72044  | 5.3803   | 4.79012    | 4.34573   | 4.73091   |
| HJURP         | 19.7866  | 11.9676  | 19.1014    | 19.1584   | 13.6878   |
| THOC3         | 18.4253  | 18.8744  | 16.8521    | 16.6617   | 19.9085   |
| USP34         | 3.31177  | 2.82488  | 3.07604    | 3.10706   | 3.05966   |
| GNG5          | 302.585  | 285.579  | 290.817    | 270.272   | 300.998   |
| HAUS5         | 6.88094  | 5.70218  | 6.39766    | 7.22306   | 6.04078   |
| OIP5          | 12.7437  | 8.20498  | 12.0496    | 11.5519   | 8.94391   |
| TMEM192       | 2.92016  | 2.80623  | 3.44228    | 2.66988   | 2.76065   |
| KIAA1919      | 0.563089 | 0.586013 | 0.51888    | 0.398898  | 0.657302  |
| KCNC4         | 3.57207  | 3.6062   | 4.14945    | 3.87836   | 3.03899   |
| MRPS36        | 18.5069  | 19.6575  | 22.4815    | 17.9719   | 18.5506   |
| SCMH1         | 14.2458  | 12.9389  | 14.0919    | 14.4512   | 12.0558   |
| KIF2A         | 5.89819  | 4.39396  | 5.68061    | 5.4624    | 4.82204   |
| KLHL2         | 2.54277  | 2.09768  | 2.87768    | 2.77904   | 2.03197   |
| MMADHC        | 72.2106  | 70.2727  | 78.9886    | 64.952    | 75.1073   |
| SETD7         | 6.55473  | 6.70526  | 6.61351    | 6.16578   | 6.73971   |
| GCLC          | 5.69122  | 6.6616   | 6.07994    | 5.61088   | 6.57746   |
| SLC7A6        | 4.31982  | 4.40555  | 5.64012    | 4.41143   | 4.96806   |
| TRMU          | 19.9855  | 16.0543  | 20.5473    | 18.3197   | 17.7563   |
| EDEM3         | 0.725816 | 0.58011  | 1.04882    | 0.767178  | 0.702691  |
| MZT2A         | 363.61   | 374.524  | 366.349    | 338.601   | 363.437   |
| HECTD2        | 0.847354 | 0.933429 | 0.768896   | 0.877902  | 1.04036   |
| GLMN          | 6.15856  | 4.65543  | 5.18673    | 5.22605   | 5.61244   |
| MYRF          | 4.22981  | 4.61526  | 3.68112    | 4.17461   | 4.59251   |
| TMEM87B       | 3.20854  | 2.6659   | 3.31954    | 2.78924   | 3.14632   |
| RPS11         | 5182.25  | 7657.82  | 5392.96    | 4754.34   | 7029.06   |
| RAD23B        | 50.2851  | 50.4747  | 51.7054    | 46.7881   | 51.1254   |
| ANKRD44       | 0.540223 | 0.3804   | 0.596853   | 0.59104   | 0.395301  |
| C2orf76       | 1.22831  | 1.59906  | 1.0073     | 1.30826   | 0.969723  |
| CAMSAP1       | 8.13883  | 7.43533  | 8.85456    | 8.54213   | 7.05795   |
| ZC3H11A       | 16.3149  | 16.3911  | 17.022     | 15.3756   | 16.6259   |
| GPR137        | 13.0623  | 13.7876  | 14.6781    | 13.5278   | 13.0605   |
| MARK3         | 19.6507  | 18.777   | 22.2712    | 19.9318   | 18.5273   |
| TMOD4         | 0.130564 | 0.126218 | 0.181995   | 0.247832  | 0.116616  |
| MRFAP1        | 132.094  | 136.051  | 140.29     | 129.42    | 133.693   |
| UBA6          | 7.31511  | 6.37862  | 6.6364     | 6.38864   | 7.25863   |
| CTSZ          | 80.878   | 86.4049  | 83.1966    | 79.9981   | 80.3358   |
| LOC728190     | 16.345   | 19.2105  | 21.1459    | 16.2296   | 15.3735   |
| BIRC6         | 2.01866  | 1.75155  | 2.0615     | 1.99262   | 1.84069   |
| ZNF160        | 6.12635  | 5.31799  | 4.13111    | 5.17177   | 5.85213   |
| CRAT          | 86.0756  | 86.5058  | 80.397     | 76.7497   | 92.6405   |
| EPB49         | 19.1112  | 23.8291  | 17.7658    | 19.8079   | 20.9442   |
| ZNF678        | 0.479107 | 0.529693 | 0.435775   | 0.476382  | 0.47818   |
| WDR26         | 9.24626  | 7.51671  | 7.93643    | 8.09246   | 8.49821   |
| HMGXB4        | 5.16785  | 5.2316   | 4.23676    | 5.03031   | 4.93362   |
| P2RX5,TAX1BP3 | 88.3211  | 101.923  | 89.8538    | 88.5536   | 92.2183   |
| TBL1X         | 4.64524  | 4.46037  | 6.23241    | 5.32805   | 4.5799    |
| C12orf49      | 5.44388  | 8.35667  | 5.26117    | 4.5936    | 7.94171   |
| UQCRH         | 876.481  | 939.714  | 871.041    | 788.789   | 914.057   |
| CD47          | 5.04069  | 6.80691  | 7.7722     | 5.92086   | 6.66689   |
| KANSL1L       | 3.53961  | 2.91923  | 3.77346    | 3.38605   | 3.17279   |
| TYRO3         | 16.7041  | 19.1755  | 15.2501    | 16.0652   | 18.1973   |
| GPKOW         | 9.60957  | 10.4426  | 9.33464    | 10.0303   | 10.1573   |
| TRIM7         | 13.1242  | 11.0141  | 15.7619    | 14.7199   | 11.2615   |
| TLR5          | 0.038233 | 0.023738 | 0.00686384 | 0.0181872 | 0.0297805 |
| KIAA1551      | 0.82272  | 1.12753  | 0.480024   | 0.790153  | 1.10782   |

|              |          |          |          |          |          |
|--------------|----------|----------|----------|----------|----------|
| MLLT4        | 5.41982  | 4.63354  | 5.43693  | 5.39103  | 5.08704  |
| ZNF580       | 83.9176  | 77.711   | 102.277  | 90.8356  | 73.4974  |
| HSPH1        | 4.23534  | 5.7962   | 3.57766  | 4.53758  | 5.0885   |
| C5orf114     | 37.3768  | 32.1332  | 38.8452  | 37.1067  | 33.0869  |
| TSTD1        | 34.0819  | 38.0919  | 31.0439  | 34.0388  | 34.875   |
| SH3RF3       | 101.641  | 89.7835  | 94.357   | 86.7554  | 94.3507  |
| TRIM44       | 1.0444   | 0.881214 | 0.932284 | 1.00807  | 1.01001  |
| ERCC2        | 6.29239  | 4.68676  | 5.14081  | 5.85221  | 5.12098  |
| HIF1AN       | 25.8186  | 26.5815  | 25.2618  | 24.485   | 26.2204  |
| DNTTIP1      | 5.99917  | 5.95661  | 6.03556  | 5.84324  | 5.75481  |
| GALNT1       | 87.8586  | 73.8504  | 83.2392  | 74.5829  | 77.2043  |
| NUP153       | 4.91674  | 4.58903  | 5.03294  | 4.68618  | 4.90496  |
| USP21        | 6.59626  | 5.63401  | 6.62737  | 5.99616  | 5.96247  |
| MAFA         | 17.5931  | 14.8963  | 15.2012  | 16.7002  | 15.1425  |
| RPL27        | 4.42305  | 5.53594  | 5.19415  | 4.33645  | 5.71308  |
| C15orf61     | 4296.05  | 6374.47  | 4819.98  | 4323.41  | 5618.37  |
| ZNF501       | 12.5468  | 11.4484  | 14.796   | 11.729   | 12.8366  |
| PVRL1        | 0.547813 | 0.597802 | 0.770346 | 0.582187 | 0.558985 |
| C17orf70     | 9.55545  | 10.9643  | 7.67719  | 9.82899  | 9.83571  |
| SSH3         | 14.1814  | 14.7357  | 14.9342  | 14.891   | 14.3949  |
| PPP2R1A      | 19.6922  | 22.9368  | 17.8072  | 19.2876  | 21.813   |
| NRBP1        | 206.778  | 203.947  | 198.155  | 190.497  | 204.303  |
| SLC45A4      | 53.6012  | 55.1852  | 54.9169  | 51.6727  | 54.4834  |
| ACIN1        | 4.17288  | 4.41061  | 4.78987  | 4.61455  | 3.80902  |
| RAB5A        | 68.8597  | 58.1828  | 57.7937  | 58.7763  | 61.1421  |
| AOC3         | 14.045   | 12.9895  | 14.8066  | 12.5633  | 14.2696  |
| MMP25        | 0.927218 | 0.524604 | 1.16504  | 0.95665  | 0.798736 |
| HEXA         | 2.99431  | 2.8243   | 2.62949  | 3.08645  | 2.81627  |
| UHRF1BP1L    | 47.1817  | 52.9596  | 52.8042  | 48.0838  | 49.0376  |
| IBTK         | 1.50319  | 1.49243  | 1.48427  | 1.44006  | 1.54432  |
| CDK1         | 5.22822  | 4.24681  | 4.84111  | 4.4946   | 5.02124  |
| MRPL49       | 44.806   | 35.9781  | 44.1208  | 44.0207  | 37.7537  |
| MID2         | 27.2659  | 31.2942  | 34.9732  | 29.0717  | 30.3158  |
| LOC286367    | 1.4748   | 1.31411  | 1.19493  | 1.15799  | 1.56478  |
| TRABD2A      | 0.560522 | 0.857047 | 0.407818 | 0.566559 | 0.774121 |
| NPAT         | 17.8808  | 20.8702  | 15.6995  | 16.4972  | 20.8456  |
| EI24         | 1.49242  | 1.20882  | 1.52811  | 1.60355  | 1.18507  |
| BDH1         | 45.3468  | 49.207   | 45.7403  | 41.6394  | 50.0042  |
| NANOS3       | 23.0564  | 23.4135  | 22.0858  | 22.1324  | 23.7228  |
| TOP3A        | 2.55416  | 2.64491  | 2.74748  | 1.97813  | 3.0574   |
| LSM12        | 4.72282  | 3.85658  | 4.28312  | 4.53765  | 4.06261  |
| LOC100506963 | 64.1177  | 62.5215  | 61.1599  | 59.9758  | 62.4336  |
| ANKRD13A     | 3.28258  | 2.96328  | 3.29181  | 2.86876  | 3.37009  |
| MRPL41       | 30.7522  | 28.5968  | 27.4578  | 24.8863  | 31.6139  |
| SNX1         | 504.611  | 540.727  | 569.477  | 503.579  | 499.672  |
| ALG10        | 5.9804   | 5.46478  | 6.32876  | 5.78038  | 5.80362  |
| ATF6B        | 1.20733  | 1.02603  | 1.39078  | 1.24085  | 1.2416   |
| TMEM5        | 44.5431  | 39.6587  | 44.8968  | 45.9668  | 37.1152  |
| LINC00493    | 9.20581  | 9.5613   | 10.4295  | 8.20506  | 10.3989  |
| CRTC1        | 128.254  | 129.969  | 138.314  | 124.436  | 119.195  |
| TOP1MT       | 4.08311  | 4.02798  | 3.96374  | 4.02212  | 4.18803  |
| DCAF6        | 109.285  | 120.152  | 109.031  | 99.5164  | 111.349  |
| CDC20        | 5.15099  | 4.59332  | 5.97461  | 4.8956   | 4.99866  |
| SLC15A3      | 136.528  | 112.882  | 156.673  | 135.958  | 100.118  |
| STX12        | 1.97214  | 3.56014  | 1.85705  | 1.8248   | 4.34738  |
| CYHR1        | 11.1462  | 10.4687  | 9.81443  | 9.88635  | 11.5155  |
| CCDC93       | 69.0118  | 70.0764  | 72.3694  | 68.2277  | 66.0303  |
| DDX20        | 4.83752  | 4.60457  | 4.35984  | 4.45678  | 4.63395  |
| TNFAIP8L1    | 5.90021  | 6.26138  | 7.16351  | 6.43117  | 5.9189   |
| APBB2        | 6.52379  | 6.01847  | 7.31514  | 6.42681  | 5.54298  |
| KIAA1671     | 0.915595 | 0.840812 | 1.15573  | 1.0495   | 0.824985 |
| BBS4         | 2.08166  | 2.09447  | 1.8201   | 2.05035  | 2.00731  |
| TBP          | 4.63755  | 6.14375  | 5.45782  | 4.52922  | 6.24301  |
| HINT3        | 10.9268  | 7.95876  | 10.5914  | 10.3661  | 7.50133  |
| S100PBP      | 5.91085  | 6.25504  | 6.14996  | 5.82834  | 6.45639  |
| CRHR1-IT1    | 4.18391  | 3.21406  | 4.08989  | 3.849    | 3.39083  |
| NASP         | 4.44079  | 4.00479  | 3.9293   | 4.73032  | 3.37459  |
| CHCHD10      | 46.3438  | 43.1458  | 45.1503  | 48.5976  | 43.1699  |
| LAMP2        | 352.586  | 338.389  | 290.86   | 321.389  | 327.898  |
| COX7C        | 12.052   | 13.5982  | 12.605   | 11.1306  | 13.5931  |
| BARD1        | 1178.1   | 1400.89  | 1149.21  | 1097.41  | 1312.77  |
| NTF4         | 0.207367 | 0.218936 | 0.225692 | 0.179675 | 0.253325 |
| EGFL8,PPT2   | 1.60966  | 2.14612  | 0.854289 | 1.03858  | 1.91402  |
| MYLPF        | 40.652   | 38.1457  | 36.4942  | 36.4081  | 39.8273  |
| HP1BP3       | 0.109998 | 0.28956  | 0        | 0        | 0.20355  |
| KIF13B       | 28.3421  | 26.1457  | 28.474   | 26.4462  | 27.3846  |
| CDK5RAP1     | 1.78825  | 1.61038  | 1.65387  | 1.75285  | 1.63566  |
| HLA-H        | 18.1763  | 15.994   | 16.7855  | 17.9923  | 15.262   |
|              | 11.63    | 15.4006  | 12.2446  | 10.1669  | 16.9495  |

|                 |            |           |            |           |            |
|-----------------|------------|-----------|------------|-----------|------------|
| KDM3B           | 8.9698     | 7.11573   | 7.47833    | 8.25052   | 7.51288    |
| RABGGTA         | 15.522     | 14.8734   | 15.1922    | 14.2464   | 14.5667    |
| PRMT10          | 2.36436    | 2.30034   | 2.25098    | 2.27902   | 2.46878    |
| METTL5          | 60.1011    | 62.0397   | 63.8078    | 57.2353   | 63.1023    |
| KBTBD2          | 9.24172    | 7.20021   | 9.29172    | 8.49882   | 7.89197    |
| NUDT6           | 4.81074    | 5.18933   | 5.63823    | 4.99744   | 5.2682     |
| AGPAT3          | 7.48378    | 7.62482   | 8.61568    | 7.74671   | 7.8502     |
| UBA52           | 349.084    | 442.158   | 371.319    | 339.084   | 399.736    |
| SKIV2L          | 8.4968     | 9.07622   | 6.82816    | 8.36615   | 8.72266    |
| RPL32           | 1157.77    | 1736.16   | 1318.45    | 1143.65   | 1524.42    |
| CEBPZ           | 8.20759    | 8.04319   | 8.45657    | 7.90166   | 8.44022    |
| SMURF1          | 7.10795    | 5.89162   | 6.96832    | 6.61812   | 6.19863    |
| ZNF385A         | 17.1654    | 17.6771   | 14.3738    | 18.2117   | 14.6891    |
| CHFR            | 0.42864    | 0.439088  | 0.174797   | 0.348242  | 0.504127   |
| PSME1           | 164.852    | 196.957   | 155.954    | 158.66    | 185.936    |
| LIN7C           | 5.75551    | 5.33379   | 6.46355    | 5.47054   | 5.68261    |
| DCAF10          | 2.87917    | 2.47235   | 3.02819    | 2.55904   | 2.46568    |
| AP2B1           | 46.2719    | 43.7044   | 46.6894    | 44.511    | 45.358     |
| IL4R            | 6.19915    | 7.08934   | 7.11688    | 6.9494    | 6.65925    |
| KIAA1107        | 0.369321   | 0.252507  | 0.298141   | 0.425592  | 0.301069   |
| COPS7A          | 51.6983    | 53.3729   | 50.3714    | 48.2142   | 52.3112    |
| GSTT2           | 1.19688    | 1.62146   | 0.784878   | 1.48112   | 1.28124    |
| NISCH           | 17.7683    | 18.0673   | 16.3632    | 17.443    | 17.7365    |
| C11orf84        | 49.6351    | 46.6032   | 45.5129    | 50.0823   | 40.5743    |
| ZNF621          | 2.7831     | 2.07852   | 2.9109     | 2.64001   | 2.14852    |
| CACUL1          | 7.64281    | 7.19072   | 7.38628    | 6.71258   | 7.4075     |
| HUWE1           | 7.72095    | 7.27995   | 7.21428    | 7.68671   | 7.08345    |
| KIDINS220       | 2.43453    | 2.03147   | 2.38752    | 2.24089   | 2.46856    |
| KANK2           | 2.21699    | 2.98444   | 1.6825     | 2.15954   | 2.77631    |
| SLC35A4         | 23.0642    | 25.1312   | 27.0938    | 24.7956   | 23.9801    |
| PIAS4           | 11.2373    | 9.8501    | 10.3179    | 9.92628   | 11.2229    |
| TARBP1          | 5.17084    | 4.53119   | 4.44919    | 4.49997   | 5.48853    |
| JKAMP           | 12.6035    | 16.6934   | 13.7348    | 12.0357   | 17.498     |
| MF12-AS1        | 3.99569    | 2.93171   | 3.21204    | 3.91785   | 3.63527    |
| COX7B           | 319.13     | 327.678   | 318.925    | 298.601   | 311.126    |
| FBXO43          | 0.130848   | 0.10085   | 0.165592   | 0.114561  | 0.115749   |
| TMEM107         | 11.4891    | 11.3605   | 8.04506    | 9.16739   | 12.5837    |
| POLE            | 6.7504     | 6.44239   | 6.06172    | 7.40482   | 5.76284    |
| ZNF347          | 0.00459674 | 0.0198477 | 0.00576679 | 0.0152417 | 0.00624365 |
| MGEA5           | 22.9252    | 24.6231   | 18.858     | 21.1048   | 24.8147    |
| CROCC           | 6.53777    | 5.71532   | 5.68699    | 6.26538   | 5.7704     |
| PPP6R3          | 11.5572    | 9.92899   | 13.1315    | 11.1715   | 10.2503    |
| MSH6            | 6.89935    | 7.2022    | 6.64496    | 6.69679   | 7.61929    |
| SSU72           | 141.75     | 139.105   | 151.596    | 140.394   | 134.697    |
| GNPDA1          | 103.881    | 104.205   | 101.567    | 97.7983   | 99.3878    |
| ZNF12           | 5.18521    | 3.69804   | 5.26612    | 5.35403   | 3.25133    |
| PTK2B           | 0.46448    | 0.504311  | 0.614712   | 0.675082  | 0.338136   |
| APRT            | 223.523    | 237.51    | 224.598    | 217.07    | 216.732    |
| CREM            | 22.8082    | 18.1046   | 19.3829    | 20.1737   | 19.6217    |
| ZNF865          | 8.44487    | 7.77671   | 9.11025    | 8.59318   | 8.16879    |
| GNPTG           | 16.3464    | 25.9887   | 17.9791    | 17.0379   | 23.1767    |
| SNX11           | 7.70072    | 8.76216   | 8.77518    | 7.55681   | 9.43232    |
| TPD52L1         | 25.5743    | 23.19     | 25.8062    | 23.9245   | 22.785     |
| ZNF764          | 3.63841    | 3.90312   | 3.57714    | 3.88865   | 3.71453    |
| GSR             | 24.0684    | 23.5737   | 20.6629    | 23.9823   | 24.1254    |
| DARS2           | 6.30661    | 5.80196   | 6.54523    | 6.18517   | 5.69486    |
| PJA1            | 7.46289    | 6.56878   | 8.83417    | 7.42003   | 6.88775    |
| SGPL1           | 5.90825    | 6.09982   | 8.4132     | 7.19348   | 5.77097    |
| CD151           | 355.112    | 364.51    | 362.913    | 331.231   | 365.851    |
| IFT20           | 23.3785    | 25.092    | 30.0723    | 24.5225   | 23.4239    |
| WNT11           | 7.05907    | 9.7626    | 7.01976    | 8.21157   | 8.45436    |
| ZNF319          | 2.4026     | 3.87253   | 3.18167    | 2.87914   | 3.45147    |
| RAB1A           | 40.5941    | 42.6437   | 42.1174    | 37.2855   | 45.6587    |
| SFXN1           | 14.8534    | 12.5809   | 13.6539    | 12.9497   | 14.3335    |
| NUDT21          | 24.3048    | 23.6314   | 24.4218    | 23.4701   | 24.4926    |
| CNP             | 18.8478    | 20.9551   | 20.7787    | 19.7311   | 19.8791    |
| SNHIT1          | 155.983    | 157.206   | 153.605    | 142.496   | 157.794    |
| SS18L2          | 18.2079    | 21.0329   | 18.3956    | 17.0081   | 21.5379    |
| TTLL12          | 59.552     | 58.6928   | 50.9031    | 54.7196   | 58.2555    |
| STAG2           | 9.329      | 8.67621   | 8.50801    | 8.53836   | 8.69621    |
| CREG1           | 35.5678    | 40.3532   | 39.293     | 35.0624   | 40.2587    |
| AP3M1           | 5.84776    | 5.50359   | 7.57789    | 6.12001   | 5.17765    |
| ATP6V0C         | 241.283    | 253.01    | 253.217    | 248.057   | 245.18     |
| FAM156A,FAM156B | 0.717044   | 0.489877  | 0.528846   | 0.630664  | 0.532662   |
| PSMB6           | 240.953    | 243.918   | 228.205    | 231.179   | 238.655    |
| LOC283070       | 7.38615    | 9.1736    | 8.10051    | 7.28139   | 9.72557    |
| TMEM177         | 26.565     | 40.1543   | 34.4755    | 28.8293   | 35.6872    |
| COPS3           | 35.1332    | 36.7327   | 42.9734    | 38.0281   | 35.4944    |
| CCNL1           | 19.7712    | 26.6549   | 18.4368    | 19.9562   | 25.2856    |



|                      |           |           |           |           |           |
|----------------------|-----------|-----------|-----------|-----------|-----------|
| CD160                | 0.098979  | 0.179893  | 0.123493  | 0.14078   | 0.205313  |
| IQCB1                | 13.9136   | 14.3008   | 14.2506   | 13.8431   | 14.3799   |
| CAPN10               | 12.293    | 11.0849   | 12.4661   | 11.9991   | 11.2412   |
| HEATR4               | 0.0147545 | 0.0200803 | 0.0541067 | 0.0244027 | 0.037257  |
| ALG13                | 4.10872   | 4.51074   | 4.23334   | 3.76404   | 5.04766   |
| HADH                 | 41.8173   | 46.1205   | 40.4415   | 40.1659   | 45.0507   |
| ACTR3                | 41.1191   | 35.3213   | 44.2841   | 37.6376   | 39.9753   |
| AZ12                 | 17.2098   | 14.1695   | 16.8894   | 15.7324   | 15.6319   |
| LRP5                 | 14.4542   | 11.1767   | 12.9965   | 14.104    | 11.3032   |
| LINC00202-1          | 0.16336   | 0.187791  | 0.0830205 | 0.111478  | 0.22445   |
| RPS25                | 4063.82   | 5935.47   | 4350.62   | 3997.93   | 5113.29   |
| PROCR                | 150.704   | 190.383   | 149.493   | 144.491   | 180.716   |
| DEDD2                | 36.0986   | 41.9199   | 38.8359   | 35.3474   | 40.3431   |
| NAPA-AS1             | 2.997     | 5.02991   | 2.49695   | 1.86533   | 4.43924   |
| RPS28                | 6392.92   | 8722.75   | 6173.07   | 5919.92   | 7883.93   |
| DCTN4                | 13.608    | 11.9973   | 12.669    | 12.6233   | 12.1521   |
| PTPN21               | 1.52034   | 1.33175   | 1.5713    | 1.58499   | 1.21913   |
| TUSC1                | 7.35867   | 9.7948    | 11.7988   | 8.08098   | 10.0093   |
| ZNF607               | 1.75357   | 1.56898   | 1.62401   | 1.64056   | 1.76007   |
| MIPOL1               | 0.321626  | 0.296785  | 0.327597  | 0.231789  | 0.387393  |
| PLEKHA8P1            | 2.14993   | 1.94847   | 2.22604   | 2.04678   | 1.93914   |
| ZBED4                | 4.38178   | 3.38104   | 4.58041   | 4.10553   | 3.78488   |
| ZSWIM4               | 6.54884   | 6.75973   | 5.64741   | 6.4617    | 6.21338   |
| ZNF286B              | 2.42586   | 2.72357   | 2.58822   | 2.46424   | 2.34779   |
| EIF3F                | 388.065   | 478.258   | 396.924   | 384.253   | 440.449   |
| FAM35A               | 4.57521   | 4.06768   | 4.63892   | 4.39959   | 4.21308   |
| RCC2                 | 21.4181   | 18.6305   | 27.8741   | 24.7219   | 18.5372   |
| LOC100289561,PRKRIP1 | 35.6768   | 32.6432   | 29.0195   | 31.2247   | 35.0286   |
| PKN2                 | 4.41084   | 4.13051   | 4.06054   | 4.10319   | 4.45794   |
| FAM174B              | 6.77021   | 9.41087   | 7.69269   | 6.60506   | 9.15794   |
| MYL6B                | 113.977   | 126.506   | 108.831   | 99.8078   | 124.686   |
| SLC35B2              | 42.2743   | 41.2239   | 43.6359   | 41.3421   | 40.8296   |
| PLEKHA6              | 1.55256   | 1.48274   | 1.58506   | 1.59381   | 1.28268   |
| BABAM1               | 56.6745   | 56.0044   | 48.6634   | 52.5025   | 52.1714   |
| ZNF18                | 2.11636   | 2.10632   | 1.81934   | 1.81544   | 2.34964   |
| FBXO33               | 2.60542   | 2.70377   | 2.54108   | 2.38258   | 3.07189   |
| SFT2D1               | 106.362   | 98.9953   | 110.486   | 99.268    | 106.169   |
| VCPIP1               | 2.59556   | 2.33109   | 2.73294   | 2.56127   | 2.40723   |
| GRTP1                | 11.7614   | 10.254    | 13.0832   | 12.4883   | 10.4873   |
| FAAH                 | 9.64288   | 10.0173   | 8.88126   | 9.24872   | 9.54236   |
| DHX38                | 14.9916   | 13.949    | 11.7187   | 13.6511   | 14.3785   |
| GPR107               | 15.3126   | 15.6201   | 14.9844   | 15.08     | 15.0341   |
| RGL3                 | 15.0568   | 13.242    | 11.2603   | 15.938    | 11.4136   |
| FUT8                 | 2.21294   | 2.26414   | 2.13926   | 2.10051   | 2.19238   |
| EIF3L                | 225.073   | 334.96    | 260.439   | 230.037   | 308.815   |
| CIB2                 | 22.1026   | 25.2592   | 20.4667   | 19.1997   | 25.7292   |
| CSNK1G1              | 2.20461   | 2.02224   | 1.7772    | 1.98882   | 1.93803   |
| ADRBK1               | 38.2727   | 36.689    | 37.2553   | 37.0312   | 38.5079   |
| LYPLA2               | 91.0887   | 104.76    | 91.213    | 87.1868   | 99.8046   |
| FLJ13197             | 0.0354317 | 0.0168976 | 0         | 0.0196974 | 0.0318857 |
| TYK2                 | 21.9107   | 21.061    | 16.5864   | 21.4134   | 20.1521   |
| PSMA7                | 254.4     | 279.856   | 273.945   | 263.069   | 256.703   |
| GRINA                | 335.617   | 360.121   | 336.902   | 317.063   | 353.72    |
| MRPL44               | 25.9459   | 26.5644   | 27.0678   | 24.8727   | 25.8869   |
| ILDR2                | 0.554885  | 0.554551  | 0.748216  | 0.602656  | 0.580109  |
| APOBEC3C             | 14.4755   | 15.3819   | 15.37     | 13.6332   | 17.0986   |
| IPO9                 | 5.72009   | 5.51445   | 5.21985   | 5.44311   | 5.64128   |
| CD68                 | 433.38    | 465.366   | 369.107   | 382.546   | 464.942   |
| ATP7B                | 1.19983   | 1.18546   | 1.0449    | 0.969561  | 1.40219   |
| SYK                  | 8.88556   | 8.73126   | 8.97969   | 8.56899   | 8.80753   |
| PTK6                 | 4.95218   | 3.59152   | 4.83584   | 4.43208   | 4.49652   |
| DCAF8                | 14.5721   | 13.7398   | 14.8565   | 13.3921   | 14.8333   |
| WBP5                 | 44.1989   | 52.1578   | 40.0995   | 39.233    | 52.7189   |
| AP1B1                | 27.9768   | 23.456    | 23.8339   | 27.4835   | 22.7961   |
| ACVR2B-AS1           | 0.353968  | 0.565757  | 0.560154  | 0.364131  | 0.630464  |
| LHFPL2               | 2.71035   | 2.18025   | 2.91116   | 2.73542   | 2.24351   |
| BMPR1A               | 2.78441   | 2.8328    | 2.88716   | 2.74338   | 2.93984   |
| TMEM216              | 24.7384   | 32.7412   | 31.0761   | 25.9341   | 31.6224   |
| C1orf174             | 15.861    | 14.7822   | 14.8143   | 14.4617   | 15.4473   |
| EXOSC9               | 16.639    | 16.9922   | 18.1756   | 16.0852   | 17.7066   |
| RPS6KB1              | 2.41218   | 3.19635   | 3.04361   | 2.52362   | 3.20737   |
| USP48                | 9.14817   | 9.02351   | 7.51381   | 8.14699   | 9.8174    |
| PSME4                | 9.60535   | 9.4881    | 9.51294   | 9.04265   | 10.0141   |
| LOC389765            | 0.892406  | 0.461413  | 0.58251   | 0.576709  | 0.597454  |
| CCT6P3               | 3.02102   | 4.1094    | 2.80249   | 3.21079   | 3.62219   |
| USP27X               | 1.12355   | 1.31857   | 1.31355   | 1.55485   | 1.21141   |
| SFN                  | 57.1246   | 64.2764   | 70.3866   | 63.1343   | 66.369    |
| BEGAIN               | 4.62384   | 3.90224   | 3.78905   | 3.55152   | 4.91659   |
| NDUFB3               | 70.6778   | 61.4763   | 62.4224   | 66.5868   | 60.2391   |

|           |          |           |           |           |          |
|-----------|----------|-----------|-----------|-----------|----------|
| ZNF202    | 2.85982  | 3.45533   | 3.97531   | 3.07509   | 3.50976  |
| TNRC6B    | 1.2462   | 1.32232   | 1.27506   | 1.30984   | 1.25628  |
| PDXDC1    | 10.9436  | 9.59333   | 11.6451   | 10.6972   | 9.37989  |
| ZDHC7     | 10.609   | 13.3589   | 11.1858   | 10.6688   | 13.2979  |
| ADH5      | 45.3562  | 48.1789   | 47.4663   | 42.3255   | 51.2717  |
| ATAD1     | 10.7257  | 10.7826   | 10.3516   | 10.0663   | 10.7896  |
| ZNF148    | 2.03435  | 1.81868   | 1.97403   | 1.97443   | 1.77673  |
| PDCD4     | 15.5468  | 14.3277   | 16.5627   | 14.8081   | 16.3061  |
| SERINC2   | 34.6688  | 33.0803   | 31.3246   | 32.7714   | 32.9998  |
| TFG       | 59.9107  | 50.5903   | 65.213    | 56.9874   | 52.0561  |
| SMPDL3A   | 1.38945  | 1.54568   | 1.51527   | 1.41802   | 1.49956  |
| KEAP1     | 40.4274  | 38.9051   | 39.4353   | 38.9086   | 37.6753  |
| TCEANC2   | 0.733981 | 0.700336  | 1.13084   | 1.0098    | 0.70019  |
| PDE4DIP   | 0.583225 | 0.609308  | 0.479375  | 0.387847  | 0.802445 |
| PPP1R9B   | 19.9277  | 16.5818   | 18.0236   | 21.8331   | 16.2679  |
| SLCO4A1   | 28.4945  | 39.3569   | 23.0943   | 25.4364   | 39.4393  |
| TLCD1     | 11.4699  | 15.3273   | 11.8616   | 12.7648   | 12.0781  |
| MAPRE2    | 2.86652  | 3.00182   | 2.84986   | 2.75751   | 3.15246  |
| AP1S1     | 175.051  | 162.488   | 165.521   | 155.596   | 178.521  |
| PRELID1   | 161.734  | 173.384   | 177.571   | 167.142   | 160.342  |
| TEAD3     | 13.9432  | 10.9946   | 12.1374   | 13.275    | 11.0822  |
| PHF13     | 5.81233  | 6.48926   | 5.91247   | 6.35317   | 6.49293  |
| ABCG4     | 1.46928  | 1.3562    | 1.52321   | 1.4584    | 1.43033  |
| MSMD11    | 27.456   | 25.957    | 25.3721   | 24.6694   | 27.5208  |
| ANAPC10   | 6.64079  | 6.2497    | 7.20933   | 6.19586   | 6.51621  |
| LOC550643 | 90.1553  | 94.4056   | 82.054    | 82.2222   | 93.6793  |
| METTL4    | 1.67256  | 1.4677    | 2.12217   | 1.74715   | 1.44501  |
| ZNF222    | 3.34761  | 2.89496   | 3.6149    | 3.20767   | 2.96364  |
| ABLIM1    | 8.73835  | 9.85462   | 9.01129   | 8.75891   | 10.1255  |
| ATP6V1E2  | 2.09165  | 2.34488   | 2.65582   | 2.54832   | 1.87255  |
| ATRN      | 3.52867  | 3.96632   | 3.25051   | 3.33875   | 3.79894  |
| ZFP41     | 3.95003  | 3.73918   | 5.81712   | 4.89526   | 3.51634  |
| GPS1      | 73.6421  | 86.643    | 71.5023   | 73.2895   | 78.9868  |
| PTP4A1    | 14.2406  | 14.0754   | 14.8431   | 13.8314   | 14.5207  |
| EED       | 12.135   | 11.8314   | 13.4469   | 12.0103   | 12.6871  |
| SF3A1     | 23.0092  | 24.1052   | 19.5843   | 22.1777   | 23.2482  |
| ZCRB1     | 21.134   | 22.4063   | 23.2693   | 20.2195   | 22.6394  |
| MSANTD1   | 0.164433 | 0.0732341 | 0.197645  | 0.137416  | 0.101036 |
| LOC643669 | 0.58136  | 0.480028  | 0.363243  | 0.224559  | 0.888924 |
| PGP       | 9.27137  | 11.6796   | 10.1218   | 9.8196    | 11.2543  |
| NUP50     | 10.1232  | 9.26881   | 11.892    | 11.267    | 9.21531  |
| MCMBP     | 14.6582  | 14.6377   | 16.6283   | 15.2808   | 14.7624  |
| SEC24B    | 7.37051  | 5.03753   | 6.59591   | 6.71642   | 5.44299  |
| PGGT1B    | 4.18112  | 3.54217   | 5.08967   | 4.39741   | 3.37842  |
| SMC6      | 2.01861  | 1.49018   | 1.71028   | 1.90709   | 1.63974  |
| SNHG9     | 39.7901  | 74.0369   | 43.7577   | 34.1532   | 73.9185  |
| NDUFS7    | 183.584  | 157.411   | 163.936   | 177.648   | 149.277  |
| PDZD8     | 2.01546  | 1.51733   | 1.91151   | 1.83452   | 1.70492  |
| VSIG10    | 3.78914  | 4.1122    | 4.15494   | 4.14649   | 3.92226  |
| SDHB      | 120.827  | 114.378   | 126.269   | 116.369   | 117.995  |
| PODXL2    | 45.9712  | 53.095    | 48.5594   | 48.0363   | 49.9692  |
| PDHB      | 28.232   | 26.9694   | 31.561    | 27.3366   | 29.3497  |
| WTAP      | 30.3941  | 34.3725   | 38.7893   | 30.6526   | 36.3973  |
| CLPP      | 199.768  | 188.104   | 192.544   | 190.744   | 182.319  |
| CNN1      | 0.139146 | 0.0911109 | 0.220847  | 0.115388  | 0.249976 |
| BAP1      | 24.9801  | 26.1407   | 22.3361   | 24.2478   | 25.275   |
| RHOT1     | 7.26203  | 5.44599   | 5.72238   | 6.02694   | 6.72172  |
| IL8       | 0.033714 | 0.119995  | 0.0145922 | 0.0188695 | 0.147681 |
| ALDH5A1   | 4.25095  | 4.30609   | 3.73535   | 4.2826    | 4.34833  |
| MORF4L1   | 74.0053  | 74.7348   | 71.5083   | 70.8455   | 73.7978  |
| FAM126B   | 1.33826  | 1.18143   | 1.03248   | 1.08026   | 1.3167   |
| DNAJC24   | 3.13274  | 2.27848   | 3.48143   | 3.13692   | 2.6773   |
| DAP       | 31.7151  | 36.3487   | 36.9752   | 31.4104   | 36.546   |
| BCL11A    | 1.06892  | 0.680916  | 0.846303  | 0.899681  | 0.899285 |
| EVA1B     | 23.1491  | 25.0938   | 31.4703   | 25.4627   | 26.456   |
| C1orf50   | 11.2895  | 11.829    | 12.4856   | 11.5039   | 10.9414  |
| HMG20A    | 6.83436  | 6.81457   | 7.11908   | 6.55065   | 7.37967  |
| GTF3C5    | 97.4524  | 94.0897   | 93.9491   | 102.091   | 88.0322  |
| CNFN      | 5.60388  | 6.52758   | 4.44426   | 7.28772   | 3.79567  |
| PPP6R1    | 41.6988  | 40.1978   | 40.1995   | 40.0998   | 40.293   |
| TSPAN5    | 4.07223  | 4.49683   | 2.84847   | 3.11876   | 5.47081  |
| LAMP1     | 63.2672  | 68.6246   | 68.0212   | 66.2476   | 62.36    |
| ZNF432    | 1.41581  | 1.61891   | 0.94729   | 1.42573   | 1.82009  |
| ZC3H18    | 8.55454  | 8.55597   | 8.05726   | 8.76237   | 7.93963  |
| MAD2L1    | 50.3972  | 47.7515   | 51.4205   | 49.2545   | 51.4337  |
| EIF3K     | 269.308  | 331.071   | 288.34    | 276.745   | 287.58   |
| PRRC2A    | 36.5146  | 34.7457   | 32.6522   | 34.8866   | 32.83    |
| TARS2     | 29.9372  | 26.992    | 24.7573   | 27.6434   | 27.9147  |
| POLD1     | 35.9538  | 29.0712   | 29.8451   | 35.1679   | 29.4442  |

|           |           |           |            |           |           |
|-----------|-----------|-----------|------------|-----------|-----------|
| WDR6      | 26.2645   | 32.3002   | 25.8565    | 25.8852   | 32.769    |
| DHTKD1    | 3.59968   | 3.39476   | 3.87206    | 3.94125   | 3.33738   |
| RPS27     | 9158.54   | 14949.6   | 9956.71    | 9227.68   | 12337     |
| KIFC3     | 47.3312   | 45.3093   | 44.207     | 43.29     | 47.8671   |
| MINA      | 7.763     | 7.86776   | 8.0684     | 7.01278   | 8.24121   |
| TRADD     | 8.72727   | 11.3483   | 10.183     | 9.8924    | 8.54618   |
| CCDC130   | 23.3035   | 20.0681   | 20.0384    | 22.8799   | 17.0251   |
| ZRANB1    | 4.13701   | 4.03305   | 4.4042     | 3.97079   | 4.3592    |
| RAB11FIP2 | 1.41686   | 1.3659    | 1.56979    | 1.55259   | 1.30995   |
| COX10     | 9.21073   | 8.16585   | 7.60131    | 8.13918   | 8.43312   |
| ARPC1A    | 108.945   | 123.522   | 124.164    | 115.162   | 117.768   |
| ADAMTSL4  | 4.28424   | 4.25061   | 2.32822    | 2.98434   | 5.47972   |
| SLC12A7   | 14.3541   | 13.9611   | 12.164     | 13.8218   | 12.8166   |
| ATXN7L2   | 8.76118   | 10.8637   | 5.59149    | 7.90889   | 10.4391   |
| ZNHIT3    | 72.4947   | 80.6407   | 83.1012    | 70.6765   | 76.9797   |
| DIXDC1    | 1.00716   | 0.807185  | 0.724432   | 0.913861  | 0.915889  |
| AMMECR1L  | 5.40471   | 6.30589   | 6.46824    | 5.98988   | 5.6784    |
| EXOC8     | 1.9642    | 2.6661    | 1.9242     | 2.03813   | 2.35543   |
| RREB1     | 3.27696   | 3.03095   | 2.60435    | 3.13391   | 2.79496   |
| ZWINT     | 29.6655   | 27.4402   | 31.9606    | 33.0918   | 26.1786   |
| HOOK3     | 1.16127   | 1.07163   | 1.07092    | 1.11614   | 1.12843   |
| STK11     | 21.0892   | 18.7569   | 24.9192    | 23.3516   | 17.5002   |
| FAM109B   | 2.13517   | 3.47497   | 3.10895    | 2.37772   | 3.25729   |
| NDUFA5    | 33.4871   | 32.7453   | 32.4767    | 30.2453   | 34.8636   |
| ARNTL2    | 3.41343   | 2.92451   | 3.36017    | 3.24868   | 3.24224   |
| MYCBP2    | 1.63598   | 1.43037   | 1.47191    | 1.50163   | 1.52852   |
| CMTM7     | 90.2479   | 80.6092   | 75.6142    | 79.1778   | 84.8307   |
| SLC37A4   | 23.4255   | 27.5172   | 22.1673    | 21.4541   | 27.9285   |
| VPS39     | 7.71869   | 9.50867   | 7.88071    | 7.72945   | 9.38571   |
| C11orf31  | 168.562   | 159.094   | 169.611    | 157.638   | 165.149   |
| PAQR6     | 5.21386   | 3.72587   | 3.14184    | 4.6907    | 4.06156   |
| ARL6IP6   | 4.2973    | 4.64246   | 5.87656    | 4.75284   | 5.39064   |
| TM2D3     | 18.9983   | 21.7924   | 18.1092    | 17.5711   | 22.0517   |
| CLCN3     | 6.04085   | 5.57011   | 7.14381    | 6.34511   | 5.62048   |
| TRAM1     | 36.0357   | 42.1394   | 43.0202    | 34.6597   | 44.323    |
| PDCD6IP   | 17.7607   | 17.0282   | 16.543     | 15.5252   | 18.8441   |
| SLC23A3   | 0.594454  | 0.738584  | 0.672709   | 0.920938  | 0.398355  |
| ELOVL7    | 3.61634   | 3.56136   | 4.18492    | 3.72343   | 3.52631   |
| ACTN1     | 74.4514   | 74.9034   | 69.1116    | 69.3661   | 78.4394   |
| ZNF25     | 2.03137   | 1.59728   | 1.64617    | 1.69194   | 2.00866   |
| MYO1C     | 49.0556   | 43.0448   | 50.9406    | 49.3915   | 42.849    |
| SLC37A1   | 7.29396   | 6.35816   | 6.22661    | 7.27321   | 5.59612   |
| TADA3     | 65.7408   | 60.2287   | 71.4343    | 60.4531   | 64.106    |
| NFKB1     | 7.5104    | 6.37544   | 7.76824    | 6.79995   | 7.23272   |
| BSG       | 614.019   | 700.518   | 585.416    | 592.045   | 673.165   |
| LOC440335 | 0.0685816 | 0         | 0.251393   | 0.109924  | 0.0857111 |
| ZNF799    | 1.51996   | 2.17902   | 1.52075    | 1.5893    | 2.34246   |
| PSMB4     | 499.541   | 521.438   | 496.33     | 467.779   | 514.479   |
| EARS2     | 10.3867   | 9.55285   | 10.2617    | 9.17318   | 10.4192   |
| SH3BGR1   | 17.128    | 21.5633   | 15.8432    | 16.5805   | 21.275    |
| ARCN1     | 26.5901   | 24.4046   | 27.7491    | 24.2194   | 26.5406   |
| CHCHD5    | 40.4085   | 38.7951   | 32.8826    | 36.8824   | 34.5165   |
| OSBPL2    | 9.23412   | 8.4909    | 9.00151    | 9.4359    | 8.28588   |
| CDKL1     | 0.914233  | 0.817509  | 1.05195    | 1.03472   | 0.871344  |
| C6orf170  | 0.413843  | 0.313877  | 0.264563   | 0.371948  | 0.338989  |
| CAMK1     | 34.0034   | 34.5715   | 31.0728    | 31.5425   | 35.9326   |
| NDUFB9    | 561.594   | 579.077   | 611.445    | 559.452   | 552.685   |
| MAST1     | 6.58324   | 5.12788   | 4.89079    | 5.84564   | 5.58343   |
| ZNF547    | 9.94656   | 10.8327   | 9.91495    | 9.61794   | 9.99202   |
| CTDSPL2   | 3.33261   | 2.68359   | 2.60101    | 2.74188   | 3.22964   |
| NMT2      | 3.44369   | 4.1685    | 3.45583    | 3.23112   | 4.14403   |
| SIX4      | 2.40793   | 1.62801   | 2.28509    | 2.23489   | 1.82564   |
| THSD1     | 0.937601  | 0.903102  | 0.815729   | 0.816869  | 0.819221  |
| ROBO3     | 3.14123   | 2.5923    | 3.33138    | 3.65708   | 2.39575   |
| PRPF18    | 10.7779   | 11.4142   | 8.90542    | 9.48623   | 12.0431   |
| FBN1      | 0.0243111 | 0.0293646 | 0.00234157 | 0.0188066 | 0.0299626 |
| SELRC1    | 3.77225   | 4.85246   | 5.0366     | 3.76608   | 4.81255   |
| RAD21     | 65.7689   | 59.3964   | 59.904     | 65.1691   | 60.7415   |
| PRRC1     | 7.65493   | 7.13845   | 6.89824    | 6.95688   | 7.54931   |
| TBC1D25   | 6.17449   | 5.62288   | 6.14537    | 5.14827   | 6.744     |
| ZBTB11    | 1.93133   | 1.49879   | 2.22306    | 1.84497   | 1.72657   |
| APBB3     | 10.8594   | 8.22876   | 6.62793    | 9.35183   | 8.43609   |
| TBC1D24   | 3.49554   | 2.55691   | 3.60025    | 3.35626   | 2.2859    |
| TROVE2    | 6.50144   | 6.33114   | 5.10271    | 5.03806   | 6.95223   |
| MED25     | 23.6026   | 20.6987   | 20.0937    | 21.5039   | 21.9443   |
| RFC4      | 29.0982   | 22.0621   | 33.7555    | 31.869    | 22.8553   |
| ZNF300    | 6.28503   | 5.39712   | 6.57482    | 6.64239   | 5.51708   |
| DDR1      | 10.0148   | 10.5513   | 10.2366    | 10.5313   | 10.4353   |
| SAR1A     | 22.6196   | 25.82     | 25.9075    | 22.5238   | 27.0552   |

|                           |          |          |          |          |           |
|---------------------------|----------|----------|----------|----------|-----------|
| TLE2                      | 36.7953  | 38.9375  | 30.247   | 33.7166  | 39.7466   |
| PODC2                     | 0.145062 | 0.10021  | 0.267651 | 0.212132 | 0.0689383 |
| FAM203A                   | 1.59673  | 2.12304  | 2.24791  | 2.03815  | 2.0626    |
| TIMM13                    | 79.6299  | 77.778   | 86.6287  | 79.5858  | 70.7401   |
| BBS2                      | 14.5128  | 11.2402  | 13.6051  | 12.6138  | 13.5328   |
| CWC15                     | 25.9777  | 28.3212  | 22.8272  | 23.5767  | 28.2111   |
| BACE2                     | 18.3279  | 21.9461  | 15.6614  | 16.155   | 22.2214   |
| TAF6L                     | 10.5414  | 10.2717  | 11.2846  | 10.4572  | 10.3408   |
| RAB28                     | 7.78677  | 9.90861  | 10.1776  | 8.87299  | 10.0567   |
| CHRNA10                   | 1.15577  | 0.555742 | 1.47151  | 1.34688  | 0.430087  |
| ADAM8                     | 1.11342  | 0.67567  | 0.903156 | 1.06433  | 0.834158  |
| TRMT61A                   | 10.71    | 11.6857  | 16.2531  | 12.4237  | 10.4548   |
| RFNG                      | 68.2529  | 74.4286  | 63.6533  | 62.7538  | 71.8617   |
| RAB5C                     | 72.7823  | 80.8154  | 75.5446  | 73.815   | 74.8089   |
| FAH                       | 30.5716  | 35.0379  | 24.3896  | 27.5471  | 34.8281   |
| SMC5                      | 3.74378  | 3.75315  | 2.72043  | 3.4114   | 3.8747    |
| SEPN1                     | 74.8196  | 83.2531  | 65.3255  | 73.518   | 80.1199   |
| CPSF4                     | 60.9589  | 55.5067  | 75.1441  | 64.0806  | 53.5681   |
| PRR7                      | 40.2235  | 31.8807  | 51.758   | 43.8954  | 36.8799   |
| LOC286437                 | 0.261432 | 0.256976 | 0.188803 | 0.187194 | 0.228086  |
| LOXL3                     | 5.91493  | 4.9827   | 6.2176   | 5.83171  | 4.68967   |
| MAPK8IP3                  | 11.0956  | 11.2132  | 7.4742   | 10.5515  | 10.9485   |
| ZNF358                    | 53.7161  | 51.7178  | 60.6011  | 56.5825  | 45.0967   |
| EPG5                      | 1.58674  | 1.57243  | 1.30776  | 1.56595  | 1.53842   |
| FAM171A2                  | 9.30217  | 7.75854  | 7.97325  | 7.58974  | 8.96876   |
| AP2M1                     | 204.522  | 234.518  | 183.889  | 181.962  | 237.05    |
| FLJ31306                  | 9.67269  | 10.8987  | 12.6187  | 10.7762  | 11.2274   |
| SLC31A1                   | 10.8139  | 13.1105  | 16.4809  | 13.8937  | 11.9944   |
| LRBA                      | 4.23316  | 4.02469  | 4.19211  | 3.86793  | 4.36578   |
| AGPAT6                    | 13.7065  | 15.6396  | 15.3654  | 14.0149  | 15.8323   |
| XRCC3                     | 12.848   | 10.1519  | 13.3982  | 14.6381  | 9.3743    |
| KLHL28                    | 0.723422 | 0.714905 | 0.770142 | 0.600073 | 0.87606   |
| TSC22D1                   | 12.8153  | 16.9859  | 16.0109  | 12.9598  | 17.0697   |
| RPS3A                     | 3029.3   | 4669.82  | 3484.28  | 3000.12  | 4254.7    |
| APTX                      | 15.7833  | 17.6286  | 17.2711  | 16.8561  | 16.7182   |
| C16orf13                  | 172.843  | 185.41   | 161.584  | 163.937  | 174.986   |
| PQLC2                     | 27.7158  | 25.0528  | 28.8757  | 26.3436  | 24.4696   |
| EPS8L1                    | 10.0732  | 7.57489  | 8.56251  | 7.70151  | 9.00601   |
| FAM195B                   | 63.8983  | 65.905   | 68.7183  | 67.4197  | 58.271    |
| KCTD14,NDUFC2,NDUFC2-KCT1 | 18.3908  | 23.2043  | 20.0502  | 18.5462  | 22.1636   |
| SCARNA17                  | 8.44111  | 5.33345  | 4.61315  | 4.70923  | 7.34795   |
| MLX                       | 35.3786  | 27.8657  | 29.1778  | 30.2631  | 28.9603   |
| FAU                       | 1758.73  | 2423.01  | 1875.91  | 1732.67  | 2204.7    |
| CRYZ                      | 17.9568  | 16.9445  | 16.4708  | 13.6118  | 20.726    |
| CDK13                     | 1.83145  | 1.32367  | 2.25359  | 1.84764  | 1.4603    |
| LRR1                      | 15.3695  | 13.7012  | 16.6909  | 15.7333  | 14.0797   |
| SCAMP5                    | 22.9675  | 25.2246  | 20.5335  | 22.6978  | 24.6905   |
| PPP2R2D                   | 14.1521  | 10.3946  | 15.1907  | 14.1705  | 10.3471   |
| AAED1                     | 26.9891  | 28.8377  | 31.0372  | 27.5404  | 26.8368   |
| ZNF318                    | 2.25744  | 2.61394  | 2.249    | 2.13806  | 2.68303   |
| ADCY6                     | 7.44944  | 6.66667  | 6.29183  | 7.18768  | 6.5939    |
| SNRPB                     | 431.725  | 413.691  | 494.029  | 434.262  | 400.214   |
| SEC31B                    | 0.779321 | 0.674447 | 0.483542 | 0.675128 | 0.926342  |
| MED27                     | 50.1558  | 50.547   | 50.4551  | 46.6939  | 50.0558   |
| TCF7                      | 5.38802  | 5.81202  | 6.77301  | 6.85209  | 5.23525   |
| NECAB3                    | 34.3438  | 34.6179  | 31.3972  | 32.149   | 35.0053   |
| TRRAP                     | 6.22651  | 5.19082  | 5.74371  | 6.13718  | 5.27711   |
| RNPS1                     | 136.064  | 127.398  | 140.083  | 130.383  | 128.255   |
| SNRK-AS1                  | 0.132727 | 0.290659 | 0.280393 | 0.232792 | 0.327626  |
| SDHAF2                    | 26.5034  | 34.4084  | 30.0237  | 26.3832  | 33.7      |
| STARD13                   | 1.67315  | 1.35778  | 1.35824  | 1.30496  | 1.61165   |
| PSMD3                     | 81.3565  | 84.7216  | 85.5952  | 82.1953  | 84.0339   |
| CNNM3                     | 7.16528  | 8.10472  | 7.16336  | 6.80249  | 8.56435   |
| FTSJ2                     | 15.0915  | 20.9051  | 15.3609  | 16.07    | 19.3768   |
| C3orf14                   | 0        | 0.146214 | 0.041909 | 0        | 0.186964  |
| TOB1                      | 8.0932   | 13.7896  | 9.45456  | 8.24797  | 12.9148   |
| FAM108C1                  | 10.0363  | 8.80306  | 9.58771  | 10.3939  | 8.39773   |
| GNAS                      | 447.766  | 485.045  | 448.069  | 441.391  | 475.514   |
| PGM2                      | 9.12431  | 7.21668  | 8.27757  | 8.10362  | 8.5112    |
| BRAF                      | 2.24624  | 1.73516  | 2.40524  | 2.19242  | 1.80699   |
| BLVRA                     | 46.0592  | 55.2377  | 38.7961  | 42.3331  | 52.9817   |
| PSMD5                     | 17.8485  | 17.8168  | 18.786   | 16.3664  | 19.5581   |
| COG1                      | 7.54942  | 7.4926   | 8.60951  | 8.23578  | 7.25528   |
| MDH2                      | 338.47   | 355.68   | 320.781  | 316.878  | 345.68    |
| CISD1                     | 11.7354  | 11.4858  | 11.914   | 10.9778  | 12.152    |
| CHD8                      | 3.50682  | 3.89664  | 3.4115   | 3.54818  | 3.68684   |
| CHMP4B                    | 64.2097  | 69.0743  | 61.6762  | 67.1032  | 64.3842   |
| YIPF3                     | 65.8752  | 72.8876  | 77.9068  | 69.7414  | 71.8024   |
| CHMP1A                    | 44.9432  | 45.7531  | 48.3405  | 44.6062  | 45.9522   |

|                             |            |            |            |            |           |
|-----------------------------|------------|------------|------------|------------|-----------|
| RPS6KA3                     | 3.54232    | 3.21457    | 3.59134    | 3.53526    | 3.31088   |
| DDX55                       | 10.7448    | 10.2732    | 9.40298    | 10.5366    | 10.5431   |
| GAPVD1                      | 6.57212    | 5.92806    | 6.64899    | 6.54509    | 6.09964   |
| C1QL2                       | 0          | 0          | 0.0424524  | 0          | 0.0421837 |
| LOC100288123                | 0.0742646  | 0.324904   | 0.176823   | 0.247187   | 0.237232  |
| MUS81                       | 26.7283    | 24.247     | 33.7312    | 29.2058    | 23.9416   |
| TAF7                        | 26.5935    | 36.1326    | 31.8476    | 26.522     | 36.0497   |
| RXRB                        | 25.8884    | 22.8069    | 24.0068    | 23.7127    | 24.1564   |
| AMBRA1                      | 6.47389    | 4.75991    | 6.02425    | 5.70589    | 5.14138   |
| P2RY2                       | 0.36273    | 0.585599   | 0.602258   | 0.404198   | 0.589424  |
| ZNF557                      | 1.58335    | 2.0012     | 1.9842     | 1.72673    | 1.86972   |
| RRN3P1                      | 4.96667    | 4.80455    | 5.62772    | 4.93092    | 5.20616   |
| SMYD5                       | 22.7617    | 22.7202    | 21.1593    | 20.7267    | 24.7746   |
| ANGPTL6                     | 2.689      | 3.49448    | 3.94668    | 3.08748    | 3.47218   |
| DCUN1D4                     | 4.93507    | 4.60063    | 6.42895    | 5.2305     | 4.64921   |
| TMTC4                       | 4.22412    | 3.76718    | 3.99998    | 3.73245    | 4.19832   |
| F8                          | 2.29557    | 3.69625    | 2.74311    | 2.16119    | 3.66855   |
| ZNF253                      | 1.57086    | 1.5599     | 1.56224    | 1.72777    | 1.56965   |
| ANKRD17                     | 6.5713     | 4.62309    | 6.06736    | 6.06965    | 5.26641   |
| TRIM16                      | 3.57709    | 4.00496    | 3.91447    | 4.01771    | 3.66518   |
| CC2D1A                      | 20.8962    | 17.4438    | 21.5563    | 23.5579    | 16.0823   |
| FNDC8                       | 1.22929    | 0.834291   | 1.55016    | 1.4791     | 0.655051  |
| LOC202781                   | 7.60691    | 9.36337    | 8.29544    | 7.17544    | 10.4693   |
| TRAK2                       | 1.33125    | 1.11259    | 1.43575    | 1.28564    | 1.22188   |
| CCNB1IP1                    | 132.205    | 172.202    | 167.393    | 145.25     | 151.429   |
| LRRC15                      | 0.0142095  | 0.00660727 | 0          | 0          | 0.0122625 |
| C18orf54                    | 1.35569    | 0.920722   | 1.56402    | 1.44147    | 1.085     |
| BORA                        | 4.53818    | 3.50868    | 5.39308    | 4.60922    | 3.84699   |
| ZUFSP                       | 6.72387    | 5.08081    | 5.61051    | 6.1069     | 5.33452   |
| ASH2L                       | 8.9526     | 8.75651    | 9.28927    | 9.09294    | 8.90884   |
| SLC31A2                     | 7.50985    | 9.08279    | 7.83331    | 6.98074    | 9.18038   |
| KIAA1656                    | 0.587659   | 0.492653   | 0.557401   | 0.693633   | 0.427326  |
| RLN2                        | 0.0360121  | 0.0458698  | 0.080011   | 0          | 0.0965289 |
| CERCAM                      | 75.8385    | 86.6414    | 64.3724    | 68.082     | 88.3299   |
| KIAA0391                    | 14.6545    | 18.2245    | 12.5023    | 13.3322    | 18.2575   |
| DPF2                        | 32.0502    | 27.073     | 28.6503    | 28.8896    | 27.2217   |
| CYBA                        | 375.473    | 355.738    | 382.245    | 356.888    | 360.565   |
| GALNT7                      | 3.54332    | 3.76545    | 3.86385    | 3.85628    | 3.49653   |
| PUSL1                       | 36.6406    | 46.37      | 40.6698    | 38.2069    | 42.8979   |
| MITF                        | 0.473556   | 0.287681   | 0.638555   | 0.603636   | 0.231338  |
| TXNL4A                      | 70.2357    | 67.6631    | 76.1404    | 73.6591    | 63.645    |
| DLX4                        | 0.832448   | 0.653936   | 0.970445   | 0.813928   | 0.796107  |
| ATP6V0A1                    | 10.725     | 8.97777    | 11.5829    | 10.7506    | 9.39875   |
| PPP6R2                      | 12.8708    | 13.1191    | 13.6909    | 14.0556    | 12.3213   |
| ATXN7L3                     | 14.9401    | 16.3218    | 17.62      | 15.9441    | 15.9345   |
| ANKS3                       | 8.07128    | 6.01566    | 8.35231    | 7.00073    | 6.53473   |
| CHD6                        | 1.39253    | 1.39226    | 1.0022     | 1.1107     | 1.41661   |
| EPPK1                       | 0.00546939 | 0          | 0.025864   | 0.018181   | 0.0128575 |
| AGO1                        | 3.03089    | 3.57348    | 2.99281    | 2.91672    | 3.58098   |
| ATP5G3                      | 60.4292    | 67.8803    | 61.7499    | 56.6846    | 68.6175   |
| RHEB                        | 84.1862    | 84.7419    | 85.5819    | 79.6013    | 85.9151   |
| ITGA5                       | 26.8253    | 25.8788    | 22.7554    | 25.649     | 25.0398   |
| RASAL2                      | 0.748833   | 0.898638   | 0.780295   | 0.71653    | 0.910458  |
| ANKRD28                     | 4.31886    | 3.92208    | 4.16213    | 4.11906    | 4.11896   |
| CCDC101                     | 13.7508    | 12.305     | 13.2646    | 13.5934    | 11.7408   |
| SEPT7                       | 18.1897    | 19.6405    | 19.4939    | 17.5673    | 21.4374   |
| IL17RD                      | 1.42551    | 1.13231    | 1.37898    | 1.03382    | 1.379     |
| PKDREJ                      | 0.00646479 | 0.018723   | 0.00811516 | 0.00539044 | 0.0219096 |
| NDUFS6                      | 130.104    | 123.219    | 134.698    | 135.866    | 111.922   |
| AMY2B, RNPC3                | 3.11347    | 3.04564    | 3.57523    | 3.00852    | 3.69779   |
| GALNT4, POC1B, POC1B-GALNT4 | 5.44621    | 5.75357    | 5.50355    | 4.75886    | 6.66087   |
| CCDC90A                     | 4.71166    | 4.9704     | 5.31104    | 4.73852    | 5.25561   |
| MTX2                        | 38.6817    | 33.8579    | 38.5621    | 36.497     | 33.7364   |
| RPS14                       | 3897.51    | 5410.41    | 4202.1     | 3780.32    | 4897      |
| ZIC5                        | 1.12135    | 1.67866    | 1.47588    | 1.43351    | 1.40394   |
| CIR1                        | 12.6381    | 14.1576    | 10.5756    | 11.5641    | 14.129    |
| RPS6KB2                     | 47.9363    | 58.4588    | 46.4331    | 49.0872    | 56.1236   |
| DNAJA4                      | 6.32263    | 5.89041    | 5.50535    | 6.23355    | 5.6209    |
| UBTD2                       | 6.61203    | 6.17337    | 7.39069    | 5.86087    | 6.39133   |
| PSMA1                       | 138.6      | 133.183    | 137.995    | 130.73     | 139.233   |
| CLN5                        | 5.3052     | 4.90957    | 5.99604    | 4.53431    | 5.43517   |
| MARCKSL1                    | 233.515    | 278.117    | 232.715    | 219.553    | 274.766   |
| EZH1                        | 4.89272    | 4.02883    | 4.50066    | 4.87297    | 4.20415   |
| GNE                         | 2.36931    | 2.04122    | 2.38035    | 1.88922    | 2.38793   |
| USP8                        | 4.82367    | 4.13809    | 4.87038    | 4.67479    | 4.68015   |
| TMEM248                     | 15.7374    | 18.0307    | 16.3661    | 15.7119    | 17.7993   |
| GID8                        | 15.517     | 16.577     | 14.9724    | 14.6172    | 16.7028   |
| MARVELD2                    | 0.422449   | 0.480283   | 0.45052    | 0.320807   | 0.641872  |
| SGTA                        | 67.516     | 62.7156    | 77.1235    | 69.9952    | 59.1015   |

|                         |           |           |           |           |           |
|-------------------------|-----------|-----------|-----------|-----------|-----------|
| LLGL1                   | 16.5911   | 19.7307   | 16.8232   | 16.3598   | 20.4191   |
| GYS1                    | 63.4153   | 61.4584   | 43.2966   | 49.113    | 67.1225   |
| DNAJC18                 | 1.53834   | 1.88451   | 2.23906   | 1.56738   | 2.00132   |
| RPPH1                   | 26.4798   | 74.2016   | 24.4559   | 17.9216   | 59.8073   |
| C19orf26                | 3.79406   | 2.83915   | 3.46628   | 3.99709   | 2.56388   |
| PGBD1                   | 1.2447    | 2.45713   | 1.65789   | 1.28007   | 2.51837   |
| SMIM3                   | 6.91628   | 10.1903   | 8.50279   | 7.39988   | 8.51858   |
| HEXIM1                  | 7.97159   | 17.0633   | 9.48285   | 7.84404   | 16.9019   |
| FLJ37453                | 2.25193   | 3.4155    | 2.25363   | 1.81284   | 3.50361   |
| UBE2G1                  | 10.0289   | 10.2786   | 12.8248   | 10.6103   | 10.9832   |
| CHCHD3                  | 72.6118   | 74.2199   | 77.0012   | 72.2216   | 72.4156   |
| PLS3                    | 11.2801   | 10.8061   | 12.4223   | 10.7395   | 12.1587   |
| GANAB                   | 84.9896   | 92.6098   | 91.1388   | 87.3279   | 97.4301   |
| RPL27A                  | 345.882   | 494.807   | 384.656   | 344.882   | 437.634   |
| TMEM246                 | 25.7586   | 27.6708   | 28.0093   | 25.7839   | 26.9962   |
| HDGFRP2                 | 43.3115   | 40.6373   | 35.4778   | 39.8049   | 41.5317   |
| RCCD1                   | 10.0377   | 10.8726   | 10.1429   | 10.3925   | 10.427    |
| CCDC12                  | 39.6458   | 43.3929   | 31.7938   | 37.3195   | 40.1528   |
| ALAD                    | 7.50461   | 8.71791   | 7.27276   | 7.37448   | 8.93318   |
| CNOT2                   | 18.2319   | 16.8377   | 17.8171   | 16.6408   | 18.5447   |
| SNORA12                 | 2.11394   | 76.5497   | 2.58752   | 0         | 80.9375   |
| S100A10                 | 160.889   | 291.911   | 152.014   | 120.172   | 304.596   |
| DCLRE1A                 | 2.54387   | 2.27173   | 2.87816   | 2.31793   | 2.70196   |
| MYD88                   | 12.531    | 14.1548   | 13.3285   | 12.3011   | 14.7288   |
| STRADB                  | 16.1577   | 20.7427   | 17.6093   | 16.0419   | 22.5575   |
| EP400                   | 3.18733   | 2.86171   | 2.81412   | 3.21429   | 2.90392   |
| CEP112                  | 1.88384   | 1.2386    | 1.66217   | 1.35055   | 2.21415   |
| LAMA5                   | 3.54838   | 3.98873   | 2.50117   | 3.44      | 4.02507   |
| SNRPF                   | 138.978   | 130.524   | 144.404   | 134.619   | 131.489   |
| B4GALT2                 | 43.3135   | 41.1463   | 46.2914   | 40.9721   | 41.8187   |
| RPS27A                  | 1595.65   | 2314.02   | 1857.48   | 1666.58   | 2011.16   |
| APITD1,APITD1-CORT,CORT | 7.33995   | 9.49363   | 10.4149   | 8.92271   | 8.77967   |
| MCTS1                   | 2.73925   | 2.71352   | 3.13726   | 2.61953   | 2.68484   |
| TXNL1                   | 67.1405   | 62.9795   | 88.9591   | 69.4566   | 63.3443   |
| PIIP5K2                 | 2.86439   | 2.56485   | 2.20826   | 2.38869   | 3.03581   |
| AXIN1                   | 31.4839   | 27.9546   | 31.9793   | 30.2422   | 27.5359   |
| CPNE1,RBM12             | 87.5768   | 100.803   | 82.8652   | 80.8678   | 99.6912   |
| PTPRH                   | 0.912282  | 1.02291   | 0.778712  | 0.953373  | 0.811034  |
| PTS                     | 14.8886   | 14.2887   | 14.3449   | 13.8107   | 14.6127   |
| RNF168                  | 6.84965   | 6.06852   | 4.60716   | 5.62822   | 6.50747   |
| TRAPPC2L                | 78.7161   | 92.8884   | 68.6548   | 75.5789   | 80.2561   |
| SMARCC2                 | 16.2799   | 14.9246   | 16.0317   | 16.8885   | 14.806    |
| LOC100505687            | 2.43703   | 3.9025    | 3.97231   | 3.47105   | 3.66675   |
| ZNRF3                   | 1.69319   | 1.12251   | 1.82244   | 1.81667   | 1.01179   |
| GRK6                    | 26.689    | 29.2293   | 29.5075   | 28.7754   | 29.2332   |
| GPD2                    | 4.00616   | 3.85146   | 3.60993   | 3.8482    | 4.09153   |
| PGS1                    | 11.3778   | 10.147    | 12.0561   | 12.7527   | 9.52848   |
| THYN1                   | 54.6702   | 57.6572   | 56.8186   | 54.4499   | 54.5542   |
| PKN1                    | 112.84    | 111.136   | 115.445   | 111.832   | 106.505   |
| HSDL1                   | 7.07097   | 5.58457   | 6.41314   | 6.1397    | 6.70919   |
| MIR4315-1,PLEKHM1P      | 2.40196   | 2.0633    | 1.58863   | 1.9444    | 1.96643   |
| TNPO1                   | 9.55397   | 8.19011   | 10.9453   | 9.35124   | 8.73687   |
| SMEK2                   | 7.23436   | 6.04951   | 7.29753   | 6.80942   | 6.62289   |
| UBE2M                   | 128.895   | 127.801   | 136.379   | 126.445   | 124.902   |
| TRIAP1                  | 17.8333   | 24.1947   | 21.5943   | 16.1976   | 24.0917   |
| NR2C1                   | 5.52486   | 4.78924   | 5.35962   | 5.07795   | 5.29771   |
| SPAG9                   | 3.93242   | 3.29999   | 4.05026   | 4.01348   | 3.0788    |
| ATPIF1                  | 319.94    | 292.758   | 251.015   | 289.573   | 302.2     |
| PRDM6                   | 0.036404  | 0.0672306 | 0.0736314 | 0.0805768 | 0.0312977 |
| BMP8B                   | 0.709657  | 0.714234  | 0.954769  | 1.03674   | 0.644559  |
| PAPOLG                  | 1.65793   | 1.59295   | 1.80817   | 1.65368   | 1.6346    |
| NFATC2IP                | 10.0869   | 8.90782   | 9.0761    | 9.96294   | 9.54084   |
| ARFGAP1                 | 32.8075   | 30.1647   | 29.2993   | 33.5531   | 28.6361   |
| CRELD2                  | 10.0578   | 15.3719   | 8.89558   | 10.2089   | 15.2757   |
| CSMD2                   | 0.0156934 | 0.024556  | 0.01911   | 0.0262213 | 0.0169359 |
| CDC40                   | 4.68154   | 3.79399   | 4.73445   | 4.37639   | 4.20937   |
| TMEM212                 | 0.0316946 | 0.227006  | 0.0661959 | 0.157466  | 0.127725  |
| LOC100127888            | 1.21807   | 1.43797   | 0.844651  | 1.32007   | 1.38296   |
| TUBD1                   | 1.9325    | 1.76133   | 1.85554   | 2.0905    | 1.28402   |
| F10                     | 0.136958  | 0.120205  | 0.270907  | 0.188751  | 0.138978  |
| PRKCZ                   | 18.6023   | 19.3431   | 18.6701   | 17.5745   | 20.2848   |
| PHACTR4                 | 4.30991   | 3.62777   | 4.56659   | 4.24549   | 3.91674   |
| C1orf86                 | 151.797   | 135.033   | 159.333   | 144.589   | 149.292   |
| ZNF250                  | 1.5528    | 1.46467   | 1.81856   | 1.8795    | 1.32754   |
| FAM213A                 | 17.1065   | 18.5701   | 16.7569   | 16.6494   | 18.9675   |
| SECISBP2L               | 2.218     | 2.17833   | 1.94595   | 2.00139   | 2.40195   |
| PLOD3                   | 48.7216   | 50.09     | 43.4213   | 45.0576   | 51.8088   |
| ADAM15                  | 97.3955   | 120.202   | 82.8139   | 85.9953   | 121.316   |
| WIZ                     | 18.4525   | 15.8864   | 15.5247   | 17.4889   | 15.1522   |

|              |           |           |           |           |           |
|--------------|-----------|-----------|-----------|-----------|-----------|
| AVL9         | 4.84415   | 4.46298   | 3.87391   | 4.10985   | 4.47651   |
| RPS6         | 4035.79   | 6036.63   | 4443.99   | 3960.94   | 5600.43   |
| DENND1A      | 14.9184   | 15.7974   | 11.7955   | 13.7227   | 15.8696   |
| CAPNS1       | 271.396   | 263.895   | 265.08    | 245.546   | 280.438   |
| ACO1         | 14.7736   | 15.578    | 14.7034   | 14.4816   | 16.1175   |
| PAQR4        | 23.1025   | 28.9811   | 24.5457   | 23.5042   | 27.3893   |
| EIF2B2       | 18.591    | 19.8159   | 18.438    | 19.5916   | 17.8199   |
| TMCO3        | 7.99471   | 9.28865   | 9.97147   | 8.7371    | 9.00249   |
| GTF2H4       | 25.9373   | 32.9462   | 24.5269   | 27.5395   | 29.1142   |
| SAMD4A       | 3.28808   | 3.21353   | 2.81823   | 3.29733   | 3.08409   |
| FLOT2        | 37.7933   | 40.576    | 33.7273   | 35.6441   | 41.2469   |
| WHAMMP3      | 0.176689  | 0.17132   | 0.189769  | 0.167166  | 0.154469  |
| RP9          | 12.8339   | 14.3048   | 13.6229   | 14.1388   | 12.5404   |
| TMBIM4       | 25.7486   | 31.2464   | 31.6278   | 25.5337   | 29.5043   |
| FEN1         | 19.8824   | 19.5787   | 19.9383   | 22.0787   | 19.7576   |
| DLL4         | 0.672234  | 1.60661   | 0.788069  | 0.869572  | 1.6806    |
| NSL1         | 0.861161  | 0.994109  | 0.879203  | 0.977438  | 1.02052   |
| FBXO11       | 9.03056   | 8.16818   | 10.0343   | 9.66685   | 8.94753   |
| UBE2S        | 505.243   | 458.116   | 642.303   | 536.165   | 416.377   |
| MPHOSPH8     | 11.03     | 9.61557   | 8.9685    | 10.2035   | 10.3866   |
| ATP6V1E1     | 55.5437   | 56.5968   | 47.7733   | 50.6561   | 56.3419   |
| NECAP1       | 7.29697   | 7.78714   | 8.28509   | 7.34384   | 7.95017   |
| MED4-AS1     | 3.46575   | 4.11064   | 3.18218   | 3.24848   | 4.38811   |
| ACRC         | 0.306455  | 0.164364  | 0.240221  | 0.324549  | 0.175716  |
| POLR2I       | 90.4833   | 86.9513   | 91.2768   | 78.9766   | 93.51     |
| HEATR5B      | 1.84129   | 1.73297   | 2.16887   | 1.86298   | 1.84605   |
| RBMX2        | 18.0726   | 17.8111   | 21.8186   | 18.1553   | 18.1075   |
| PRKCD        | 15.7993   | 14.2078   | 14.0777   | 15.2713   | 15.0273   |
| TADA2B       | 5.33345   | 6.61667   | 4.7308    | 5.2478    | 6.11924   |
| CCNY         | 23.1714   | 22.7677   | 27.5647   | 22.7348   | 23.9161   |
| FAM168B      | 8.95119   | 10.5532   | 10.2074   | 8.9938    | 10.8531   |
| CEP70        | 2.74421   | 3.05342   | 3.15954   | 2.7178    | 3.43579   |
| MTRNR2L4     | 0.0817987 | 0.295858  | 0.128779  | 0.273206  | 0.0842037 |
| ARHGAP10     | 4.79339   | 5.09652   | 4.35988   | 4.80069   | 5.02476   |
| SLC41A1      | 12.1176   | 13.5052   | 11.0786   | 11.6944   | 13.2859   |
| FAM32A       | 36.6356   | 45.6833   | 42.3147   | 38.6301   | 43.1884   |
| TBPL1        | 7.93073   | 6.71629   | 9.66512   | 8.17861   | 7.07482   |
| ATM          | 1.76372   | 1.42057   | 1.48824   | 1.6144    | 1.54647   |
| BTNL9        | 2.67217   | 3.44423   | 2.47895   | 2.95833   | 3.11362   |
| RC3H2        | 2.84984   | 3.31353   | 2.6616    | 2.55093   | 3.2964    |
| IL32         | 380.902   | 401.7     | 346.265   | 347.063   | 408.168   |
| ZNF174       | 3.89842   | 4.21561   | 3.90392   | 3.71869   | 4.41479   |
| TMEM145      | 32.2161   | 32.0032   | 23.5775   | 31.6843   | 31.588    |
| ARHGEF16     | 16.9326   | 12.0873   | 12.8814   | 15.2287   | 12.2503   |
| KPNA4        | 7.53459   | 7.01643   | 9.78801   | 7.78932   | 7.65004   |
| PAXBP1-AS1   | 0.0705402 | 0.0705422 | 0.0785241 | 0.0399971 | 0.0666449 |
| VPS33B       | 7.47636   | 9.01864   | 7.2051    | 8.32814   | 8.53903   |
| ADCK3        | 23.0092   | 25.7828   | 20.5183   | 20.3492   | 27.4951   |
| ZCCHC14      | 2.63006   | 2.3371    | 2.97852   | 2.76184   | 2.38804   |
| METTL10      | 3.41232   | 2.51421   | 3.85734   | 3.17285   | 2.85906   |
| DHRS7        | 51.5364   | 59.8849   | 52.7767   | 49.9532   | 60.3633   |
| HS6ST1       | 11.4716   | 12.0389   | 11.5573   | 11.7351   | 11.8916   |
| CNEP1R1      | 5.20047   | 5.92708   | 5.49526   | 5.43908   | 6.00037   |
| PHC1         | 4.39789   | 4.4954    | 3.97908   | 4.05006   | 5.04288   |
| SLC30A7      | 2.22316   | 1.72302   | 2.50053   | 2.02911   | 2.16351   |
| NUDT2        | 47.496    | 53.8706   | 52.5538   | 47.8473   | 49.0475   |
| TRMT11       | 8.66747   | 6.06184   | 8.5406    | 7.27618   | 7.78055   |
| PELI1        | 2.0099    | 1.78626   | 2.04687   | 1.76975   | 2.18626   |
| BCR          | 9.79993   | 9.35739   | 8.96516   | 9.53991   | 9.42687   |
| LOC100506023 | 0.0303851 | 0.0457461 | 0.0488599 | 0.0574087 | 0.0323818 |
| USP47        | 6.26837   | 6.40617   | 5.53917   | 5.88717   | 6.88921   |
| RNF125       | 2.26888   | 1.90553   | 2.29376   | 2.02895   | 2.34859   |
| NOA1         | 37.9328   | 32.7943   | 47.732    | 41.7202   | 31.2283   |
| KCNK6        | 13.7586   | 11.5922   | 10.9286   | 12.5894   | 11.378    |
| ESRP1        | 0         | 0         | 0.0324671 | 0.0207538 | 0         |
| TMEM41A      | 7.73639   | 9.98798   | 8.06162   | 7.78122   | 9.90457   |
| CAST         | 37.825    | 32.2903   | 33.8396   | 33.5143   | 34.6228   |
| NHSL1        | 0.775541  | 0.533135  | 0.996039  | 1.0742    | 0.536723  |
| U2AF1        | 168.74    | 157.192   | 213.407   | 179.38    | 151.323   |
| MARCH7       | 12.919    | 12.4209   | 13.1676   | 12.3591   | 12.6647   |
| EML4         | 4.96828   | 4.29599   | 5.28113   | 5.15014   | 4.54183   |
| DOT1L        | 8.98551   | 7.23075   | 7.62448   | 9.09561   | 7.55369   |
| FAM53B       | 6.25476   | 5.80721   | 7.3708    | 6.36377   | 6.11505   |
| GOLPH3       | 15.3168   | 17.722    | 18.4214   | 16.017    | 17.1389   |
| STK38L       | 2.76314   | 2.65111   | 3.29039   | 2.8668    | 2.90769   |
| XPO1         | 30.0977   | 26.4763   | 26.3096   | 28.1864   | 29.0447   |
| DPAGT1       | 24.8382   | 19.7625   | 25.2933   | 24.238    | 22.12     |
| TOMM20       | 51.3509   | 66.867    | 58.1912   | 50.307    | 66.4033   |
| PNPLA4       | 6.75698   | 9.98523   | 9.01675   | 6.70609   | 9.77961   |

|                |           |          |           |           |           |
|----------------|-----------|----------|-----------|-----------|-----------|
| WDPCP          | 0.543713  | 0.439924 | 0.460729  | 0.500486  | 0.531607  |
| CARKD          | 20.2661   | 23.5453  | 23.9882   | 22.4046   | 22.5671   |
| TMPRSS13       | 0.0234434 | 0        | 0.0181194 | 0.0300029 | 0.0112869 |
| MAPK8          | 8.75857   | 6.87555  | 8.28396   | 8.54117   | 6.9754    |
| PLXNA2         | 0.362515  | 0.376661 | 0.458859  | 0.460381  | 0.351242  |
| ATP6V1D        | 28.3536   | 29.2244  | 25.369    | 24.8867   | 30.1335   |
| DNASE1L1       | 14.8817   | 17.261   | 14.5037   | 13.8139   | 17.4942   |
| ZFP37          | 2.45987   | 2.51656  | 2.03632   | 2.13958   | 2.89511   |
| CKMT1B         | 13.3036   | 15.2107  | 10.7478   | 12.0727   | 14.591    |
| BMP1           | 8.51513   | 9.55751  | 6.95337   | 8.40114   | 8.76779   |
| RNF130         | 45.6809   | 57.4609  | 48.0808   | 44.1049   | 56.9943   |
| PTH1R          | 6.85756   | 5.89677  | 6.28695   | 6.1774    | 7.92618   |
| TRAPPC6A       | 22.8444   | 34.854   | 35.9021   | 29.0815   | 28.0546   |
| RASSF3         | 6.89845   | 6.44449  | 5.87166   | 6.62425   | 7.0301    |
| GPR63          | 0.889212  | 0.835024 | 1.01723   | 0.992562  | 0.707217  |
| NFKBIB         | 22.225    | 19.8402  | 26.8641   | 25.1602   | 18.1551   |
| CSNK2B         | 231.057   | 233.565  | 245.236   | 243.697   | 206.771   |
| PRKCSH         | 224.492   | 240.863  | 228.653   | 227.289   | 233.941   |
| KLHL12         | 10.117    | 9.67147  | 10.4303   | 9.58772   | 9.95834   |
| LINC00471      | 0.102621  | 0.114739 | 0.178125  | 0.0680916 | 0.107968  |
| TAOK3          | 1.36735   | 1.07708  | 1.34943   | 1.37074   | 1.17394   |
| DARS           | 54.1967   | 55.9553  | 66.4128   | 49.5276   | 63.1662   |
| BRD8           | 12.2903   | 12.2996  | 11.6532   | 12.9777   | 11.7567   |
| DDX47          | 31.2399   | 35.9809  | 29.5861   | 29.3489   | 36.2336   |
| MGC39372       | 1.59739   | 2.41937  | 2.1053    | 2.11077   | 1.85035   |
| SFSWAP         | 9.62676   | 9.43085  | 8.88631   | 9.53669   | 9.48945   |
| ZNF689         | 3.17311   | 4.03615  | 3.8376    | 3.55078   | 3.69388   |
| ISCA1          | 23.4495   | 29.6473  | 23.2174   | 21.3248   | 31.3575   |
| ADPRHL1        | 3.14208   | 3.85531  | 3.82404   | 3.58328   | 3.56702   |
| HIST1H3B       | 1.74108   | 0.62756  | 1.88181   | 0.786222  | 1.54421   |
| MLLT6          | 15.9868   | 18.8531  | 16.7639   | 18.2729   | 17.0114   |
| C12orf57       | 283.328   | 382.724  | 287.71    | 276.271   | 349.558   |
| PPP1R12C       | 21.1123   | 17.6081  | 22.1702   | 22.9771   | 16.1901   |
| DMKN           | 68.1973   | 88.7352  | 81.1987   | 68.8591   | 81.5154   |
| EDC3           | 10.1327   | 9.5201   | 10.2525   | 10.057    | 9.71182   |
| ALKBH2         | 30.5373   | 32.5099  | 35.2233   | 31.5407   | 30.1586   |
| PRICKLE4       | 2.47096   | 2.37964  | 1.87582   | 2.72336   | 2         |
| SNRNP25        | 25.8266   | 30.7799  | 25.1758   | 24.7178   | 29.8619   |
| PHF6           | 4.04864   | 3.43217  | 4.37839   | 4.02434   | 3.87781   |
| TMEM194A       | 6.47226   | 4.88092  | 7.66785   | 7.04011   | 5.4503    |
| TFIP11         | 10.9598   | 12.8835  | 11.9547   | 11.399    | 12.6588   |
| MBOAT7         | 96.151    | 102.789  | 88.8265   | 89.9833   | 105.765   |
| SLC35E2        | 3.30638   | 3.3728   | 3.87247   | 3.4953    | 3.03518   |
| SPPL2A         | 3.52743   | 2.78468  | 3.79222   | 4.02838   | 2.87821   |
| CMTM4          | 11.9036   | 12.5343  | 12.0805   | 11.9476   | 12.0779   |
| BCAS4          | 29.2593   | 23.12    | 28.6414   | 26.0203   | 24.2533   |
| SARS2          | 17.3769   | 16.8176  | 15.2321   | 15.8835   | 17.5455   |
| EMC7           | 81.4635   | 86.6494  | 89.9313   | 83.2133   | 84.1293   |
| EBI3           | 0.342278  | 0.25671  | 0.684414  | 0.443305  | 0.237682  |
| PDLIM7         | 93.4437   | 85.9824  | 84.9145   | 88.6623   | 90.4424   |
| ABCB9          | 3.7592    | 4.51061  | 3.93959   | 3.73994   | 4.94051   |
| WDR36          | 6.39895   | 6.45398  | 7.01976   | 6.37442   | 6.93318   |
| CABIN1         | 10.1067   | 10.305   | 7.63472   | 8.80398   | 11.5491   |
| HAUS3,POLN     | 1.65959   | 1.97905  | 1.72801   | 1.68978   | 2.04166   |
| UPF3A          | 14.0852   | 14.2998  | 15.668    | 14.1164   | 15.143    |
| USP20          | 11.8681   | 12.7387  | 13.1903   | 13.0056   | 12.7149   |
| FANCL          | 10.2847   | 7.0921   | 9.19314   | 9.75144   | 7.58695   |
| YTHDC1         | 5.34869   | 5.5988   | 5.09967   | 5.03789   | 5.90028   |
| SSR4           | 387.737   | 506.957  | 387.848   | 365.66    | 473.359   |
| ARFGEF1        | 4.60329   | 3.52136  | 4.51686   | 4.19439   | 4.14596   |
| SNRK           | 0.496682  | 0.614183 | 0.472616  | 0.625045  | 0.536226  |
| MFN1           | 5.66502   | 4.71235  | 6.91791   | 5.65197   | 5.14277   |
| TMEM161A       | 55.9972   | 47.7125  | 51.035    | 55.4881   | 48.3942   |
| MAMDC4         | 3.39549   | 3.20764  | 2.05195   | 3.46096   | 3.64012   |
| GNAI3          | 15.2452   | 15.4785  | 14.8924   | 13.9865   | 16.5718   |
| BAG3           | 32.3767   | 32.4389  | 24.8807   | 32.1813   | 30.3307   |
| FAM136A        | 32.794    | 34.0604  | 35.2204   | 34.4374   | 33.9638   |
| LARP4          | 2.87968   | 2.29471  | 3.23202   | 3.17091   | 2.21385   |
| DNLZ           | 80.7927   | 100.828  | 81.848    | 83.525    | 87.939    |
| CCDC142,MRPL53 | 105.095   | 94.9823  | 107.136   | 98.2328   | 96.9431   |
| RPUSD3         | 70.1536   | 69.6929  | 59.9452   | 60.9623   | 72.9115   |
| NDUFS3         | 97.4374   | 104.157  | 95.8884   | 95.4487   | 103.876   |
| RNF11          | 14.9118   | 17.2375  | 17.141    | 14.728    | 17.7426   |
| HPS6           | 14.0665   | 20.8139  | 17.9176   | 16.3747   | 18.8678   |
| NUP98          | 7.57508   | 7.24863  | 8.25782   | 7.93927   | 6.99499   |
| PTBP2          | 3.62154   | 4.01195  | 3.16077   | 3.33194   | 4.47959   |
| GDF9           | 0.084614  | 0.191626 | 0.0456188 | 0.0604627 | 0.0648745 |
| FNIP1          | 6.31641   | 6.17163  | 5.61131   | 5.49321   | 5.90247   |
| EXOC6          | 3.1936    | 2.90698  | 3.01385   | 2.72819   | 3.34001   |



|              |           |           |           |           |           |
|--------------|-----------|-----------|-----------|-----------|-----------|
| CABLES1      | 1.24293   | 1.39077   | 2.11298   | 1.82371   | 1.24512   |
| GORASP2      | 30.7225   | 31.3426   | 35.9584   | 28.9729   | 34.3282   |
| AGRN         | 14.1578   | 17.665    | 10.3406   | 13.707    | 17.0061   |
| SLC29A2      | 17.43     | 13.8137   | 13.6041   | 16.8274   | 14.7357   |
| FAT1         | 1.14454   | 1.1997    | 1.25618   | 1.28687   | 1.15241   |
| HPSE         | 2.66634   | 2.39696   | 2.79716   | 2.53048   | 2.80108   |
| FCER1G       | 0.550336  | 0.512985  | 0.749575  | 0.305328  | 0.638792  |
| MSL3P1       | 3.44982   | 4.13902   | 5.64808   | 4.62088   | 3.78048   |
| PHACTR2      | 2.04619   | 1.7362    | 1.80666   | 1.76794   | 1.94145   |
| RHOBTB2      | 3.6428    | 3.99369   | 3.80757   | 3.60872   | 3.92643   |
| RBM39        | 41.9479   | 46.9467   | 42.3121   | 42.0861   | 47.7357   |
| CLU          | 44.72     | 44.6161   | 32.7888   | 38.745    | 46.843    |
| SENP2        | 6.0143    | 7.37488   | 6.81466   | 6.37751   | 7.58476   |
| ANKRD13C     | 2.08715   | 1.92079   | 1.77282   | 1.82798   | 2.12398   |
| PRDX4        | 182.078   | 237.585   | 213.612   | 180.752   | 238.387   |
| FAM188A      | 11.1997   | 10.3679   | 11.8067   | 10.4912   | 11.0929   |
| SETD3        | 10.782    | 9.14379   | 11.501    | 10.462    | 10.1568   |
| RPS20        | 3290.11   | 4392.55   | 3602.63   | 3289.94   | 3949.97   |
| THOC2        | 4.20661   | 3.50312   | 3.33427   | 3.79656   | 3.78799   |
| SNW1         | 36.973    | 31.9816   | 32.6784   | 35.7918   | 33.8612   |
| PI4K2B       | 2.5051    | 2.97957   | 3.41983   | 3.12462   | 3.47602   |
| PPM1H        | 1.54597   | 1.21755   | 1.66282   | 1.47889   | 1.39573   |
| CELF1        | 23.2897   | 18.1689   | 19.835    | 22.839    | 18.9004   |
| WWP1         | 6.5928    | 6.8798    | 6.75697   | 6.44055   | 7.24503   |
| ETFB         | 93.1435   | 106.38    | 84.2545   | 87.5029   | 101.302   |
| RAD51        | 7.25196   | 6.67964   | 8.00588   | 8.30747   | 6.18909   |
| MAN2B2       | 10.4491   | 11.1251   | 10.2892   | 11.1426   | 9.9942    |
| TRIM28       | 191.527   | 202.821   | 169.8     | 179.974   | 200.888   |
| NPEPL1.STX16 | 35.8498   | 38.9841   | 32.4478   | 35.625    | 38.7217   |
| ZAK          | 5.55552   | 4.83774   | 5.90712   | 5.39557   | 5.4067    |
| NABP2        | 53.8603   | 52.4871   | 52.3729   | 53.1366   | 49.0043   |
| SMYD4        | 2.03409   | 1.9588    | 2.21254   | 1.86761   | 1.89222   |
| CHD5         | 0.0417847 | 0.0229858 | 0.0626547 | 0.052063  | 0.0508514 |
| ZBED5        | 10.2191   | 10.4196   | 10.2024   | 9.21004   | 11.0567   |
| LOC100129550 | 0.992083  | 1.06873   | 1.1471    | 0.901091  | 1.16896   |
| SLC38A6      | 3.77931   | 4.16239   | 4.11085   | 3.71645   | 4.31661   |
| ARHGAP27     | 7.26049   | 7.15082   | 6.35116   | 7.1395    | 6.70806   |
| MRPL52       | 68.3385   | 76.8485   | 62.8473   | 67.8217   | 68.6703   |
| ABI1         | 17.2752   | 16.0044   | 16.5107   | 15.721    | 16.2625   |
| ZNF45        | 1.5607    | 1.87997   | 1.86407   | 1.53499   | 2.07707   |
| CLASRP       | 21.8284   | 18.98     | 19.2286   | 21.497    | 18.9554   |
| MRPL23-AS1   | 0.147373  | 0.0553091 | 0.0754106 | 0.105173  | 0.0254953 |
| PISD         | 20.1366   | 22.8751   | 21.4253   | 21.2198   | 22.8831   |
| IGFBP2       | 42.4876   | 48.4979   | 34.0108   | 41.4117   | 45.0342   |
| NKAP         | 19.3416   | 19.338    | 18.1736   | 16.9915   | 21.2767   |
| POLR3C       | 11.051    | 14.1732   | 16.9276   | 12.334    | 13.5591   |
| TMEM9        | 65.5937   | 81.9593   | 62.3445   | 62.3443   | 84.2843   |
| SLC25A19     | 22.1422   | 21.7251   | 27.3003   | 23.2808   | 22.1426   |
| LOC441081    | 0.255339  | 0.293861  | 0.177225  | 0.270605  | 0.372904  |
| HIST1H4H     | 4.18219   | 1.4323    | 4.73896   | 3.90721   | 1.83283   |
| TRIM16L      | 4.6881    | 6.11341   | 4.85519   | 4.36976   | 5.57498   |
| H19.MIR675   | 2.65143   | 2.89673   | 1.12347   | 1.65701   | 3.40431   |
| CRIP1        | 7.87907   | 6.64442   | 7.80558   | 7.28813   | 7.80063   |
| SPCS1        | 142.701   | 170.091   | 154.781   | 142.512   | 165.442   |
| NAA16        | 2.4954    | 3.0522    | 2.39861   | 2.53281   | 3.26891   |
| ABHD16A      | 27.5706   | 27.026    | 25.86     | 26.1443   | 27.4627   |
| RRM2         | 44.3322   | 42.931    | 42.6622   | 47.6889   | 43.2086   |
| ENSA         | 136.327   | 147.772   | 131.01    | 138.921   | 148.229   |
| C6orf120     | 5.09791   | 6.0432    | 7.22833   | 5.69544   | 6.1404    |
| C1orf123     | 28.0102   | 28.0107   | 28.6526   | 26.2399   | 27.6716   |
| IGBP1        | 60.34     | 74.7879   | 69.3591   | 63.2666   | 67.0674   |
| PSKH1        | 4.6953    | 7.19417   | 7.39057   | 5.62669   | 7.24293   |
| ARMC1        | 10.2443   | 10.6483   | 11.7491   | 9.94037   | 11.137    |
| PYROXD2      | 0.0488965 | 0.0436152 | 0.0592235 | 0.0544048 | 0.0398536 |
| C16orf87     | 3.16833   | 2.96359   | 2.60168   | 2.30318   | 3.3781    |
| MLF2         | 193.159   | 193.997   | 194.318   | 186.655   | 196.533   |
| PGRMC1       | 93.6044   | 96.6672   | 91.6991   | 83.0183   | 109.872   |
| ALG6         | 2.59667   | 2.1658    | 2.5905    | 2.77556   | 2.51092   |
| SMAD9        | 3.75056   | 4.63205   | 2.96121   | 3.15679   | 4.89021   |
| SEC11A       | 142.554   | 156.815   | 172.182   | 151.6     | 146.421   |
| NAT1         | 1.28049   | 2.40027   | 1.65507   | 1.45585   | 2.29887   |
| MGAT5        | 4.02703   | 3.95349   | 3.69766   | 3.83233   | 3.93013   |
| FLOT1        | 97.579    | 111.522   | 110.968   | 101.999   | 106.017   |
| ATP6V1C1     | 14.6079   | 14.1984   | 15.7954   | 14.3206   | 15.3074   |
| PCBD1        | 205.257   | 206.609   | 198.358   | 202.464   | 193.186   |
| ZNF32-AS1    | 17.4721   | 18.8362   | 19.7291   | 18.3435   | 19.0271   |
| MUC1         | 4.26839   | 3.39917   | 4.11076   | 4.13897   | 3.82741   |
| SCAF1        | 19.3643   | 15.9626   | 16.161    | 18.5133   | 16.0138   |
| FAM134B      | 0.540027  | 0.415456  | 0.57958   | 0.645205  | 0.347791  |

|                    |           |           |           |           |           |
|--------------------|-----------|-----------|-----------|-----------|-----------|
| MOB2               | 24.9322   | 23.4412   | 27.6012   | 24.9858   | 22.4676   |
| POU5F1             | 0.0252905 | 0.140437  | 0.0919867 | 0.0798742 | 0.0883965 |
| ATP5A1             | 260.002   | 263.793   | 278.481   | 256.984   | 273.057   |
| COMMD5             | 51.597    | 62.8631   | 67.8157   | 57.7414   | 61.129    |
| EBPL               | 123.308   | 133.276   | 131.935   | 114.632   | 138.173   |
| PKNOX1             | 1.96779   | 1.96369   | 2.15374   | 2.12972   | 1.78413   |
| GLRX5              | 43.8876   | 50.6468   | 49.0929   | 48.737    | 45.6446   |
| RIOK1              | 14.2229   | 11.8201   | 12.8366   | 12.0619   | 13.9017   |
| SLC9A6             | 1.93955   | 2.12597   | 2.09581   | 1.91112   | 2.31487   |
| KIF22              | 71.6852   | 54.2598   | 62.9613   | 73.2287   | 50.2449   |
| VDAC3              | 101.425   | 107.966   | 106.88    | 91.949    | 117.976   |
| TRAM2              | 2.43135   | 2.66995   | 2.73845   | 2.4193    | 2.74513   |
| IKBIP              | 13.0291   | 13.8626   | 11.5951   | 11.5786   | 13.8755   |
| ENOPH1             | 18.4124   | 17.6409   | 20.372    | 17.9885   | 18.4475   |
| DGKZ               | 27.0538   | 21.2135   | 27.7482   | 27.7987   | 21.2674   |
| EIF2B3             | 6.53089   | 5.66536   | 6.90552   | 7.06807   | 6.07174   |
| MTO1               | 5.61645   | 5.09887   | 6.63079   | 6.0787    | 5.46337   |
| FAM91A2.LINC00623  | 4.26674   | 3.89496   | 5.34707   | 4.7598    | 4.26758   |
| ZNF510             | 1.51466   | 1.80555   | 1.55324   | 1.53301   | 1.94042   |
| FAM45A             | 6.18374   | 7.70485   | 7.53925   | 6.05127   | 8.14405   |
| DHRS7B             | 10.3261   | 10.2682   | 11.2707   | 10.6349   | 10.8253   |
| LOC100506083       | 0.268754  | 0.189538  | 0.380816  | 0.286279  | 0.178815  |
| KAT7               | 10.5121   | 9.83412   | 8.37499   | 10.1412   | 10.0116   |
| TMEM205            | 92.7442   | 107.226   | 88.9863   | 92.6568   | 106.022   |
| PTGER4P2-CDK2AP2P2 | 0.0536331 | 0.0101012 | 0.103971  | 0.056414  | 0.0385978 |
| ATG4C              | 2.33657   | 2.06882   | 2.15163   | 2.10078   | 2.46596   |
| DEXI               | 32.205    | 29.0128   | 31.1261   | 30.5255   | 30.5978   |
| ARPC2              | 200.912   | 202.639   | 207.323   | 191.603   | 209.908   |
| COPS8              | 31.5962   | 31.4054   | 29.7377   | 28.5682   | 34.6462   |
| RAMP1              | 47.4847   | 45.8405   | 43.8675   | 45.3659   | 45.4349   |
| C16orf58           | 43.0832   | 47.1615   | 42.0031   | 42.743    | 45.1924   |
| ATP2A1             | 1.28536   | 1.70713   | 0.795531  | 1.47748   | 1.38483   |
| NHLRC3             | 3.72355   | 2.30128   | 3.38893   | 3.43188   | 2.48953   |
| SPATA24            | 1.7125    | 2.22388   | 1.57022   | 1.68458   | 1.65331   |
| RMND5B             | 21.2319   | 19.3047   | 20.5187   | 20.547    | 17.6005   |
| TMX4               | 6.31993   | 7.48059   | 5.90876   | 6.256     | 6.95794   |
| PATZ1              | 21.4315   | 19.3095   | 20.1731   | 21.3217   | 18.5613   |
| MIS18A             | 17.1163   | 12.8421   | 17.7872   | 18.4366   | 13.288    |
| TCP11L1            | 3.96952   | 3.67027   | 3.34714   | 3.58722   | 3.39057   |
| CXorf38            | 2.88327   | 2.47768   | 2.05794   | 2.55055   | 2.62087   |
| PTPN4              | 0.530071  | 0.515031  | 0.69193   | 0.623583  | 0.489071  |
| KRT8               | 21.9418   | 22.2725   | 22.9395   | 22.6426   | 19.1691   |
| RIN3               | 11.1142   | 11.6177   | 10.6078   | 11.1108   | 11.6479   |
| PLXNA1             | 7.05818   | 6.94318   | 6.48597   | 7.47445   | 6.56284   |
| CPSF7              | 14.6086   | 16.6386   | 15.7298   | 16.0772   | 15.7642   |
| RAB2B              | 4.11119   | 3.71032   | 3.58794   | 3.55899   | 3.94154   |
| THAP10             | 0.808504  | 0.332643  | 1.4312    | 0.841119  | 0.680379  |
| PCBP1              | 202.4     | 192.864   | 192.248   | 188.534   | 192.585   |
| PRDX5              | 367.144   | 362.585   | 400.485   | 378.217   | 341.497   |
| RPS12              | 7528.24   | 10933.8   | 7990.25   | 7563.4    | 9459.97   |
| PUM2               | 13.717    | 11.0973   | 13.5535   | 12.6128   | 12.1212   |
| VDAC2              | 178.254   | 192.518   | 178.497   | 169.921   | 193.972   |
| LOC100507373       | 0.453129  | 0.586569  | 0.414674  | 0.424052  | 0.648687  |
| ZFAS1              | 572.181   | 831.273   | 640.762   | 577.839   | 722.949   |
| NELFCD             | 40.5123   | 40.0061   | 35.9009   | 36.735    | 41.6601   |
| CRCP               | 10.5379   | 10.9647   | 12.2327   | 10.6685   | 11.183    |
| SUPT7L             | 9.39083   | 9.8663    | 9.86996   | 9.88289   | 9.9005    |
| TCEAL8             | 40.7596   | 45.0453   | 45.3757   | 39.8526   | 47.6452   |
| PLEKHO2            | 4.84806   | 5.27109   | 4.62172   | 4.42488   | 5.09882   |
| NFYA               | 3.74957   | 4.30207   | 3.50506   | 3.93846   | 4.0554    |
| RAD17              | 7.57129   | 7.33927   | 8.49413   | 7.72964   | 7.81059   |
| BPTF               | 1.81792   | 1.59275   | 1.48007   | 1.61653   | 1.74828   |
| FBXO38             | 7.46858   | 6.73837   | 5.86999   | 6.8465    | 6.93347   |
| CD2AP              | 6.35463   | 5.21797   | 5.87325   | 5.59654   | 6.13749   |
| POR                | 45.3875   | 40.86     | 44.8619   | 43.7135   | 42.6194   |
| SNRNP27            | 22.369    | 19.8369   | 19.6896   | 19.989    | 22.3854   |
| ALG11.UTP14C       | 1.75542   | 2.15323   | 1.7018    | 1.71405   | 2.08911   |
| CMIP               | 9.80577   | 9.38006   | 7.73065   | 8.03807   | 10.289    |
| ARHGEF12           | 5.00191   | 5.27656   | 5.14378   | 4.93689   | 5.22402   |
| IPO5               | 25.8456   | 28.6576   | 29.364    | 25.4397   | 31.0505   |
| DDAH1              | 24.0656   | 18.7725   | 19.1397   | 19.9664   | 23.1487   |
| TIPRL              | 10.1406   | 9.24411   | 10.4707   | 9.02387   | 9.96987   |
| CYB5R3             | 53.7946   | 56.9847   | 52.5382   | 53.46     | 57.5983   |
| DICER1             | 1.74229   | 1.91344   | 1.56902   | 1.69229   | 1.78706   |
| ZNF226             | 5.49826   | 6.56092   | 3.34333   | 5.2891    | 6.59272   |
| GPATCH1            | 1.86322   | 1.96298   | 1.78913   | 1.78417   | 2.14221   |
| PCYT1A             | 6.45757   | 5.09688   | 8.25634   | 7.78336   | 5.48928   |
| OR4F5              | 0         | 0         | 0         | 0         | 0         |
| OR4F3              | 0         | 0         | 0         | 0         | 0         |

|                   |   |   |   |   |   |
|-------------------|---|---|---|---|---|
| LOC254099         | 0 | 0 | 0 | 0 | 0 |
| MIR200B           | 0 | 0 | 0 | 0 | 0 |
| MIR200A           | 0 | 0 | 0 | 0 | 0 |
| MIR429            | 0 | 0 | 0 | 0 | 0 |
| TLL10             | 0 | 0 | 0 | 0 | 0 |
| TMEM88B           | 0 | 0 | 0 | 0 | 0 |
| MMP23A            | 0 | 0 | 0 | 0 | 0 |
| GABRD             | 0 | 0 | 0 | 0 | 0 |
| ACTRT2            | 0 | 0 | 0 | 0 | 0 |
| MIR4251           | 0 | 0 | 0 | 0 | 0 |
| CCDC27            | 0 | 0 | 0 | 0 | 0 |
| LOC728716         | 0 | 0 | 0 | 0 | 0 |
| LOC284661         | 0 | 0 | 0 | 0 | 0 |
| AJAP1             | 0 | 0 | 0 | 0 | 0 |
| MIR4417           | 0 | 0 | 0 | 0 | 0 |
| HES3              | 0 | 0 | 0 | 0 | 0 |
| CA6               | 0 | 0 | 0 | 0 | 0 |
| MTOR-AS1          | 0 | 0 | 0 | 0 | 0 |
| ANGPTL7           | 0 | 0 | 0 | 0 | 0 |
| PTCHD2            | 0 | 0 | 0 | 0 | 0 |
| DRAXIN            | 0 | 0 | 0 | 0 | 0 |
| SNORA59A          | 0 | 0 | 0 | 0 | 0 |
| AADAACL4          | 0 | 0 | 0 | 0 | 0 |
| AADAACL3          | 0 | 0 | 0 | 0 | 0 |
| C1orf158          | 0 | 0 | 0 | 0 | 0 |
| PRAMEF12          | 0 | 0 | 0 | 0 | 0 |
| PRAMEF1           | 0 | 0 | 0 | 0 | 0 |
| PRAMEF2           | 0 | 0 | 0 | 0 | 0 |
| PRAMEF7,PRAMEF8   | 0 | 0 | 0 | 0 | 0 |
| PRAMEF22          | 0 | 0 | 0 | 0 | 0 |
| PRAMEF5           | 0 | 0 | 0 | 0 | 0 |
| PRAMEF9           | 0 | 0 | 0 | 0 | 0 |
| PRAMEF16          | 0 | 0 | 0 | 0 | 0 |
| PRAMEF20,PRAMEF21 | 0 | 0 | 0 | 0 | 0 |
| PRAMEF9           | 0 | 0 | 0 | 0 | 0 |
| PRAMEF17          | 0 | 0 | 0 | 0 | 0 |
| PRAMEF20,PRAMEF21 | 0 | 0 | 0 | 0 | 0 |
| PDPN              | 0 | 0 | 0 | 0 | 0 |
| CELA2A            | 0 | 0 | 0 | 0 | 0 |
| CELA2B            | 0 | 0 | 0 | 0 | 0 |
| TMEM82            | 0 | 0 | 0 | 0 | 0 |
| C1orf64           | 0 | 0 | 0 | 0 | 0 |
| CLCNKB            | 0 | 0 | 0 | 0 | 0 |
| MIR3675           | 0 | 0 | 0 | 0 | 0 |
| MIR3675           | 0 | 0 | 0 | 0 | 0 |
| PADI6             | 0 | 0 | 0 | 0 | 0 |
| IGSF21            | 0 | 0 | 0 | 0 | 0 |
| KLHDC7A           | 0 | 0 | 0 | 0 | 0 |
| PAX7              | 0 | 0 | 0 | 0 | 0 |
| HTR6              | 0 | 0 | 0 | 0 | 0 |
| PLA2G5            | 0 | 0 | 0 | 0 | 0 |
| PLA2G2F           | 0 | 0 | 0 | 0 | 0 |
| UBXN10            | 0 | 0 | 0 | 0 | 0 |
| FAM43B            | 0 | 0 | 0 | 0 | 0 |
| CELA3B            | 0 | 0 | 0 | 0 | 0 |
| CELA3A            | 0 | 0 | 0 | 0 | 0 |
| C1QA              | 0 | 0 | 0 | 0 | 0 |
| C1QC              | 0 | 0 | 0 | 0 | 0 |
| C1QB              | 0 | 0 | 0 | 0 | 0 |
| MIR4684           | 0 | 0 | 0 | 0 | 0 |
| MIR3115           | 0 | 0 | 0 | 0 | 0 |
| MIR378F           | 0 | 0 | 0 | 0 | 0 |
| LOC284632         | 0 | 0 | 0 | 0 | 0 |
| CATSPER4          | 0 | 0 | 0 | 0 | 0 |
| MIR1976           | 0 | 0 | 0 | 0 | 0 |
| RAB42             | 0 | 0 | 0 | 0 | 0 |
| OPRD1             | 0 | 0 | 0 | 0 | 0 |
| LOC149086         | 0 | 0 | 0 | 0 | 0 |
| LOC284551         | 0 | 0 | 0 | 0 | 0 |
| LCK               | 0 | 0 | 0 | 0 | 0 |
| ZBTB8B            | 0 | 0 | 0 | 0 | 0 |
| HMGB4             | 0 | 0 | 0 | 0 | 0 |
| LOC402779         | 0 | 0 | 0 | 0 | 0 |
| C1orf94           | 0 | 0 | 0 | 0 | 0 |
| GJB4              | 0 | 0 | 0 | 0 | 0 |
| GJA4              | 0 | 0 | 0 | 0 | 0 |
| MIR4255           | 0 | 0 | 0 | 0 | 0 |
| MIR3659           | 0 | 0 | 0 | 0 | 0 |
| MIR30E            | 0 | 0 | 0 | 0 | 0 |

|              |   |   |   |   |   |
|--------------|---|---|---|---|---|
| MIR30C1      | 0 | 0 | 0 | 0 | 0 |
| GUCA2B       | 0 | 0 | 0 | 0 | 0 |
| FAM183A      | 0 | 0 | 0 | 0 | 0 |
| TMEM125      | 0 | 0 | 0 | 0 | 0 |
| KLF17        | 0 | 0 | 0 | 0 | 0 |
| MIR5584      | 0 | 0 | 0 | 0 | 0 |
| SNORD38A     | 0 | 0 | 0 | 0 | 0 |
| SNORD38B     | 0 | 0 | 0 | 0 | 0 |
| EFCAB14-AS1  | 0 | 0 | 0 | 0 | 0 |
| CYP4B1       | 0 | 0 | 0 | 0 | 0 |
| CYP4X1       | 0 | 0 | 0 | 0 | 0 |
| CYP4Z1       | 0 | 0 | 0 | 0 | 0 |
| CYP4A22      | 0 | 0 | 0 | 0 | 0 |
| SLC5A9       | 0 | 0 | 0 | 0 | 0 |
| ELAVL4       | 0 | 0 | 0 | 0 | 0 |
| C1orf185     | 0 | 0 | 0 | 0 | 0 |
| PODN         | 0 | 0 | 0 | 0 | 0 |
| DMRTB1       | 0 | 0 | 0 | 0 | 0 |
| MIR4781      | 0 | 0 | 0 | 0 | 0 |
| C1orf177     | 0 | 0 | 0 | 0 | 0 |
| MIR4422      | 0 | 0 | 0 | 0 | 0 |
| C8A          | 0 | 0 | 0 | 0 | 0 |
| MGC34796     | 0 | 0 | 0 | 0 | 0 |
| UBE2U        | 0 | 0 | 0 | 0 | 0 |
| MIR4794      | 0 | 0 | 0 | 0 | 0 |
| MIR3117      | 0 | 0 | 0 | 0 | 0 |
| TCTEX1D1     | 0 | 0 | 0 | 0 | 0 |
| PIN1P1       | 0 | 0 | 0 | 0 | 0 |
| LHX8         | 0 | 0 | 0 | 0 | 0 |
| SNORD45C     | 0 | 0 | 0 | 0 | 0 |
| SNORD45A     | 0 | 0 | 0 | 0 | 0 |
| SNORD45B     | 0 | 0 | 0 | 0 | 0 |
| ST6GALNAC5   | 0 | 0 | 0 | 0 | 0 |
| AK5          | 0 | 0 | 0 | 0 | 0 |
| MGC27382     | 0 | 0 | 0 | 0 | 0 |
| PTGFR        | 0 | 0 | 0 | 0 | 0 |
| IFI44L       | 0 | 0 | 0 | 0 | 0 |
| LPHN2        | 0 | 0 | 0 | 0 | 0 |
| PRKACB       | 0 | 0 | 0 | 0 | 0 |
| MIR4423      | 0 | 0 | 0 | 0 | 0 |
| CLCA4        | 0 | 0 | 0 | 0 | 0 |
| CLCA3P       | 0 | 0 | 0 | 0 | 0 |
| GBP6         | 0 | 0 | 0 | 0 | 0 |
| GBP1P1       | 0 | 0 | 0 | 0 | 0 |
| BRDT         | 0 | 0 | 0 | 0 | 0 |
| C1orf146     | 0 | 0 | 0 | 0 | 0 |
| SNORA66      | 0 | 0 | 0 | 0 | 0 |
| MIR760       | 0 | 0 | 0 | 0 | 0 |
| DPYD-AS1     | 0 | 0 | 0 | 0 | 0 |
| LOC729987    | 0 | 0 | 0 | 0 | 0 |
| LOC100129620 | 0 | 0 | 0 | 0 | 0 |
| LPPR4        | 0 | 0 | 0 | 0 | 0 |
| PALMD        | 0 | 0 | 0 | 0 | 0 |
| MIR553       | 0 | 0 | 0 | 0 | 0 |
| GPR88        | 0 | 0 | 0 | 0 | 0 |
| VCAM1        | 0 | 0 | 0 | 0 | 0 |
| S1PR1        | 0 | 0 | 0 | 0 | 0 |
| DNAJA1P5     | 0 | 0 | 0 | 0 | 0 |
| AMY2A        | 0 | 0 | 0 | 0 | 0 |
| AMY1A        | 0 | 0 | 0 | 0 | 0 |
| AMY1A        | 0 | 0 | 0 | 0 | 0 |
| NTNG1        | 0 | 0 | 0 | 0 | 0 |
| VAV3-AS1     | 0 | 0 | 0 | 0 | 0 |
| NBPF6        | 0 | 0 | 0 | 0 | 0 |
| MIR197       | 0 | 0 | 0 | 0 | 0 |
| CYMP         | 0 | 0 | 0 | 0 | 0 |
| CD53         | 0 | 0 | 0 | 0 | 0 |
| CHI3L2       | 0 | 0 | 0 | 0 | 0 |
| CHIA         | 0 | 0 | 0 | 0 | 0 |
| PIFO         | 0 | 0 | 0 | 0 | 0 |
| SYCP1        | 0 | 0 | 0 | 0 | 0 |
| TSHB         | 0 | 0 | 0 | 0 | 0 |
| MIR320B1     | 0 | 0 | 0 | 0 | 0 |
| CD2          | 0 | 0 | 0 | 0 | 0 |
| MIR942       | 0 | 0 | 0 | 0 | 0 |
| HAO2         | 0 | 0 | 0 | 0 | 0 |
| HSD3B1       | 0 | 0 | 0 | 0 | 0 |
| HIST2H2BA    | 0 | 0 | 0 | 0 | 0 |
| EMBP1        | 0 | 0 | 0 | 0 | 0 |

|              |   |   |   |   |   |
|--------------|---|---|---|---|---|
| GPR89C       | 0 | 0 | 0 | 0 | 0 |
| GJA8         | 0 | 0 | 0 | 0 | 0 |
| PPIAL4E      | 0 | 0 | 0 | 0 | 0 |
| PPIAL4D      | 0 | 0 | 0 | 0 | 0 |
| FCGR1C       | 0 | 0 | 0 | 0 | 0 |
| PPIAL4B      | 0 | 0 | 0 | 0 | 0 |
| FCGR1A       | 0 | 0 | 0 | 0 | 0 |
| HIST2H4B     | 0 | 0 | 0 | 0 | 0 |
| HIST2H2AA3   | 0 | 0 | 0 | 0 | 0 |
| HIST2H3C     | 0 | 0 | 0 | 0 | 0 |
| MIR4257      | 0 | 0 | 0 | 0 | 0 |
| MIR554       | 0 | 0 | 0 | 0 | 0 |
| RIAD1        | 0 | 0 | 0 | 0 | 0 |
| LOC100132111 | 0 | 0 | 0 | 0 | 0 |
| LCE5A        | 0 | 0 | 0 | 0 | 0 |
| CRCT1        | 0 | 0 | 0 | 0 | 0 |
| LCE3C        | 0 | 0 | 0 | 0 | 0 |
| LCE3B        | 0 | 0 | 0 | 0 | 0 |
| LCE2D        | 0 | 0 | 0 | 0 | 0 |
| LCE2C        | 0 | 0 | 0 | 0 | 0 |
| LCE2B        | 0 | 0 | 0 | 0 | 0 |
| LCE2A        | 0 | 0 | 0 | 0 | 0 |
| LCE4A        | 0 | 0 | 0 | 0 | 0 |
| C1orf68      | 0 | 0 | 0 | 0 | 0 |
| KPRP         | 0 | 0 | 0 | 0 | 0 |
| LCE1A        | 0 | 0 | 0 | 0 | 0 |
| LCE6A        | 0 | 0 | 0 | 0 | 0 |
| SMCP         | 0 | 0 | 0 | 0 | 0 |
| IVL          | 0 | 0 | 0 | 0 | 0 |
| SPRR4        | 0 | 0 | 0 | 0 | 0 |
| SPRR1A       | 0 | 0 | 0 | 0 | 0 |
| SPRR3        | 0 | 0 | 0 | 0 | 0 |
| SPRR1B       | 0 | 0 | 0 | 0 | 0 |
| LELP1        | 0 | 0 | 0 | 0 | 0 |
| LOR          | 0 | 0 | 0 | 0 | 0 |
| S100A9       | 0 | 0 | 0 | 0 | 0 |
| S100A7A      | 0 | 0 | 0 | 0 | 0 |
| AQP10        | 0 | 0 | 0 | 0 | 0 |
| MIR4258      | 0 | 0 | 0 | 0 | 0 |
| MIR92B       | 0 | 0 | 0 | 0 | 0 |
| TTC24        | 0 | 0 | 0 | 0 | 0 |
| CYCSP52      | 0 | 0 | 0 | 0 | 0 |
| CD1D         | 0 | 0 | 0 | 0 | 0 |
| CD1A         | 0 | 0 | 0 | 0 | 0 |
| CD1C         | 0 | 0 | 0 | 0 | 0 |
| CD1E         | 0 | 0 | 0 | 0 | 0 |
| OR10K1       | 0 | 0 | 0 | 0 | 0 |
| OR10R2       | 0 | 0 | 0 | 0 | 0 |
| OR10Z1       | 0 | 0 | 0 | 0 | 0 |
| OR6K6        | 0 | 0 | 0 | 0 | 0 |
| MNDA         | 0 | 0 | 0 | 0 | 0 |
| PYHIN1       | 0 | 0 | 0 | 0 | 0 |
| CADM3        | 0 | 0 | 0 | 0 | 0 |
| DARC         | 0 | 0 | 0 | 0 | 0 |
| FCER1A       | 0 | 0 | 0 | 0 | 0 |
| OR10J1       | 0 | 0 | 0 | 0 | 0 |
| APCS         | 0 | 0 | 0 | 0 | 0 |
| FCRL6        | 0 | 0 | 0 | 0 | 0 |
| LOC100505633 | 0 | 0 | 0 | 0 | 0 |
| ATP1A2       | 0 | 0 | 0 | 0 | 0 |
| ATP1A4       | 0 | 0 | 0 | 0 | 0 |
| LY9          | 0 | 0 | 0 | 0 | 0 |
| PCP4L1       | 0 | 0 | 0 | 0 | 0 |
| MIR4654      | 0 | 0 | 0 | 0 | 0 |
| MIR556       | 0 | 0 | 0 | 0 | 0 |
| LRRC52       | 0 | 0 | 0 | 0 | 0 |
| LOC440700    | 0 | 0 | 0 | 0 | 0 |
| FMO9P        | 0 | 0 | 0 | 0 | 0 |
| DUSP27       | 0 | 0 | 0 | 0 | 0 |
| MIR557       | 0 | 0 | 0 | 0 | 0 |
| XCL1         | 0 | 0 | 0 | 0 | 0 |
| LINC00626    | 0 | 0 | 0 | 0 | 0 |
| METTL11B     | 0 | 0 | 0 | 0 | 0 |
| PRRX1        | 0 | 0 | 0 | 0 | 0 |
| MROH9        | 0 | 0 | 0 | 0 | 0 |
| FMO3         | 0 | 0 | 0 | 0 | 0 |
| MIR1295B     | 0 | 0 | 0 | 0 | 0 |
| FMO6P        | 0 | 0 | 0 | 0 | 0 |
| FMO2         | 0 | 0 | 0 | 0 | 0 |

|              |   |   |   |   |   |
|--------------|---|---|---|---|---|
| FMO1         | 0 | 0 | 0 | 0 | 0 |
| MIR3120      | 0 | 0 | 0 | 0 | 0 |
| C1orf105     | 0 | 0 | 0 | 0 | 0 |
| FASLG        | 0 | 0 | 0 | 0 | 0 |
| LOC730159    | 0 | 0 | 0 | 0 | 0 |
| TNN          | 0 | 0 | 0 | 0 | 0 |
| FAM5B        | 0 | 0 | 0 | 0 | 0 |
| TEX35        | 0 | 0 | 0 | 0 | 0 |
| MIR4424      | 0 | 0 | 0 | 0 | 0 |
| GM140        | 0 | 0 | 0 | 0 | 0 |
| CACNA1E      | 0 | 0 | 0 | 0 | 0 |
| LINC00272    | 0 | 0 | 0 | 0 | 0 |
| RGSL1        | 0 | 0 | 0 | 0 | 0 |
| LOC284648    | 0 | 0 | 0 | 0 | 0 |
| HMCN1        | 0 | 0 | 0 | 0 | 0 |
| LOC440704    | 0 | 0 | 0 | 0 | 0 |
| RGS18        | 0 | 0 | 0 | 0 | 0 |
| RGS21        | 0 | 0 | 0 | 0 | 0 |
| RGS1         | 0 | 0 | 0 | 0 | 0 |
| RGS13        | 0 | 0 | 0 | 0 | 0 |
| MIR1278      | 0 | 0 | 0 | 0 | 0 |
| CFH          | 0 | 0 | 0 | 0 | 0 |
| CFHR3        | 0 | 0 | 0 | 0 | 0 |
| CFHR4        | 0 | 0 | 0 | 0 | 0 |
| CFHR2        | 0 | 0 | 0 | 0 | 0 |
| CFHR5        | 0 | 0 | 0 | 0 | 0 |
| LHX9         | 0 | 0 | 0 | 0 | 0 |
| MIR5191      | 0 | 0 | 0 | 0 | 0 |
| MIR1231      | 0 | 0 | 0 | 0 | 0 |
| GPR37L1      | 0 | 0 | 0 | 0 | 0 |
| OPTC         | 0 | 0 | 0 | 0 | 0 |
| AVPR1B       | 0 | 0 | 0 | 0 | 0 |
| CTSE         | 0 | 0 | 0 | 0 | 0 |
| IL20         | 0 | 0 | 0 | 0 | 0 |
| C4BPB        | 0 | 0 | 0 | 0 | 0 |
| C4BPA        | 0 | 0 | 0 | 0 | 0 |
| CR2          | 0 | 0 | 0 | 0 | 0 |
| CR1L         | 0 | 0 | 0 | 0 | 0 |
| MIR205HG     | 0 | 0 | 0 | 0 | 0 |
| SYT14        | 0 | 0 | 0 | 0 | 0 |
| SERTAD4      | 0 | 0 | 0 | 0 | 0 |
| MIR3122      | 0 | 0 | 0 | 0 | 0 |
| SNORA16B     | 0 | 0 | 0 | 0 | 0 |
| KCNK2        | 0 | 0 | 0 | 0 | 0 |
| LINC00210    | 0 | 0 | 0 | 0 | 0 |
| RNU5F-1      | 0 | 0 | 0 | 0 | 0 |
| MARK1        | 0 | 0 | 0 | 0 | 0 |
| C1orf65      | 0 | 0 | 0 | 0 | 0 |
| PRSS38       | 0 | 0 | 0 | 0 | 0 |
| WNT3A        | 0 | 0 | 0 | 0 | 0 |
| MIR3620      | 0 | 0 | 0 | 0 | 0 |
| MIR4666A     | 0 | 0 | 0 | 0 | 0 |
| CAPN9        | 0 | 0 | 0 | 0 | 0 |
| MAP10        | 0 | 0 | 0 | 0 | 0 |
| MIR4427      | 0 | 0 | 0 | 0 | 0 |
| MIR4671      | 0 | 0 | 0 | 0 | 0 |
| ACTN2        | 0 | 0 | 0 | 0 | 0 |
| LOC100130331 | 0 | 0 | 0 | 0 | 0 |
| RPS7P5       | 0 | 0 | 0 | 0 | 0 |
| FMN2         | 0 | 0 | 0 | 0 | 0 |
| MIR3123      | 0 | 0 | 0 | 0 | 0 |
| WDR64        | 0 | 0 | 0 | 0 | 0 |
| MIR4677      | 0 | 0 | 0 | 0 | 0 |
| LOC339529    | 0 | 0 | 0 | 0 | 0 |
| C1orf100     | 0 | 0 | 0 | 0 | 0 |
| OR2W5        | 0 | 0 | 0 | 0 | 0 |
| GCSAML       | 0 | 0 | 0 | 0 | 0 |
| OR2G2        | 0 | 0 | 0 | 0 | 0 |
| OR2G3        | 0 | 0 | 0 | 0 | 0 |
| OR2W3        | 0 | 0 | 0 | 0 | 0 |
| OR2T8        | 0 | 0 | 0 | 0 | 0 |
| OR2L13       | 0 | 0 | 0 | 0 | 0 |
| OR2L8        | 0 | 0 | 0 | 0 | 0 |
| OR2AK2       | 0 | 0 | 0 | 0 | 0 |
| OR2L1P       | 0 | 0 | 0 | 0 | 0 |
| OR2L5        | 0 | 0 | 0 | 0 | 0 |
| OR2L2        | 0 | 0 | 0 | 0 | 0 |
| OR2L3        | 0 | 0 | 0 | 0 | 0 |
| OR2M1P       | 0 | 0 | 0 | 0 | 0 |

|                    |   |   |   |   |   |
|--------------------|---|---|---|---|---|
| OR2M5              | 0 | 0 | 0 | 0 | 0 |
| OR2M2              | 0 | 0 | 0 | 0 | 0 |
| OR2M3              | 0 | 0 | 0 | 0 | 0 |
| OR2M4              | 0 | 0 | 0 | 0 | 0 |
| OR14C36            | 0 | 0 | 0 | 0 | 0 |
| OR2T4              | 0 | 0 | 0 | 0 | 0 |
| OR2T6              | 0 | 0 | 0 | 0 | 0 |
| OR2T1              | 0 | 0 | 0 | 0 | 0 |
| OR2T2              | 0 | 0 | 0 | 0 | 0 |
| OR2T3              | 0 | 0 | 0 | 0 | 0 |
| OR2T5              | 0 | 0 | 0 | 0 | 0 |
| OR2G6              | 0 | 0 | 0 | 0 | 0 |
| MIR3124            | 0 | 0 | 0 | 0 | 0 |
| FAM138F            | 0 | 0 | 0 | 0 | 0 |
| OR4F3              | 0 | 0 | 0 | 0 | 0 |
| TNFRSF18           | 0 | 0 | 0 | 0 | 0 |
| HES5               | 0 | 0 | 0 | 0 | 0 |
| MIR551A            | 0 | 0 | 0 | 0 | 0 |
| MIR4689            | 0 | 0 | 0 | 0 | 0 |
| MIR4252            | 0 | 0 | 0 | 0 | 0 |
| MIR34A             | 0 | 0 | 0 | 0 | 0 |
| C1orf200           | 0 | 0 | 0 | 0 | 0 |
| C1orf127           | 0 | 0 | 0 | 0 | 0 |
| PRAMEF11           | 0 | 0 | 0 | 0 | 0 |
| HNRNPCL1,LOC649330 | 0 | 0 | 0 | 0 | 0 |
| PRAMEF4            | 0 | 0 | 0 | 0 | 0 |
| PRAMEF10           | 0 | 0 | 0 | 0 | 0 |
| PRAMEF6            | 0 | 0 | 0 | 0 | 0 |
| PRAMEF5            | 0 | 0 | 0 | 0 | 0 |
| LOC440563          | 0 | 0 | 0 | 0 | 0 |
| PRAMEF3            | 0 | 0 | 0 | 0 | 0 |
| PRAMEF8            | 0 | 0 | 0 | 0 | 0 |
| PRAMEF13,PRAMEF14  | 0 | 0 | 0 | 0 | 0 |
| PRAMEF18           | 0 | 0 | 0 | 0 | 0 |
| PRAMEF7,PRAMEF8    | 0 | 0 | 0 | 0 | 0 |
| PRAMEF14           | 0 | 0 | 0 | 0 | 0 |
| PRAMEF18           | 0 | 0 | 0 | 0 | 0 |
| LRRC38             | 0 | 0 | 0 | 0 | 0 |
| HSPB7              | 0 | 0 | 0 | 0 | 0 |
| ESPNP              | 0 | 0 | 0 | 0 | 0 |
| MIR3675            | 0 | 0 | 0 | 0 | 0 |
| PADI2              | 0 | 0 | 0 | 0 | 0 |
| TAS1R2             | 0 | 0 | 0 | 0 | 0 |
| MIR4695            | 0 | 0 | 0 | 0 | 0 |
| RNF186             | 0 | 0 | 0 | 0 | 0 |
| PLA2G2E            | 0 | 0 | 0 | 0 | 0 |
| PLA2G2A            | 0 | 0 | 0 | 0 | 0 |
| PLA2G2C            | 0 | 0 | 0 | 0 | 0 |
| MIR4253            | 0 | 0 | 0 | 0 | 0 |
| CNR2               | 0 | 0 | 0 | 0 | 0 |
| SLC30A2            | 0 | 0 | 0 | 0 | 0 |
| TRIM63             | 0 | 0 | 0 | 0 | 0 |
| AIM1L              | 0 | 0 | 0 | 0 | 0 |
| ZNF683             | 0 | 0 | 0 | 0 | 0 |
| CD164L2            | 0 | 0 | 0 | 0 | 0 |
| FGR                | 0 | 0 | 0 | 0 | 0 |
| SNORD99            | 0 | 0 | 0 | 0 | 0 |
| MIR4420            | 0 | 0 | 0 | 0 | 0 |
| SNORD103A          | 0 | 0 | 0 | 0 | 0 |
| SNORD103A          | 0 | 0 | 0 | 0 | 0 |
| SNORD85            | 0 | 0 | 0 | 0 | 0 |
| MIR4254            | 0 | 0 | 0 | 0 | 0 |
| CSF3R              | 0 | 0 | 0 | 0 | 0 |
| GRIK3              | 0 | 0 | 0 | 0 | 0 |
| MIR5581            | 0 | 0 | 0 | 0 | 0 |
| RSPO1              | 0 | 0 | 0 | 0 | 0 |
| LOC339442          | 0 | 0 | 0 | 0 | 0 |
| SNORA55            | 0 | 0 | 0 | 0 | 0 |
| NT5C1A             | 0 | 0 | 0 | 0 | 0 |
| GUCA2A             | 0 | 0 | 0 | 0 | 0 |
| CLDN19             | 0 | 0 | 0 | 0 | 0 |
| KNCN               | 0 | 0 | 0 | 0 | 0 |
| CYP4Z2P            | 0 | 0 | 0 | 0 | 0 |
| PDZK1IP1           | 0 | 0 | 0 | 0 | 0 |
| SKINTL             | 0 | 0 | 0 | 0 | 0 |
| AGBL4              | 0 | 0 | 0 | 0 | 0 |
| BEND5              | 0 | 0 | 0 | 0 | 0 |
| SLC25A3P1          | 0 | 0 | 0 | 0 | 0 |
| LDLRAD1            | 0 | 0 | 0 | 0 | 0 |

|                 |   |   |   |   |   |
|-----------------|---|---|---|---|---|
| TTC22           | 0 | 0 | 0 | 0 | 0 |
| C1orf168        | 0 | 0 | 0 | 0 | 0 |
| C8B             | 0 | 0 | 0 | 0 | 0 |
| DAB1            | 0 | 0 | 0 | 0 | 0 |
| MIR4711         | 0 | 0 | 0 | 0 | 0 |
| CYP2J2          | 0 | 0 | 0 | 0 | 0 |
| C1orf87         | 0 | 0 | 0 | 0 | 0 |
| KANK4           | 0 | 0 | 0 | 0 | 0 |
| MIR3671         | 0 | 0 | 0 | 0 | 0 |
| MIR101-1        | 0 | 0 | 0 | 0 | 0 |
| MIR1262         | 0 | 0 | 0 | 0 | 0 |
| RPE65           | 0 | 0 | 0 | 0 | 0 |
| MIR186          | 0 | 0 | 0 | 0 | 0 |
| NEGR1           | 0 | 0 | 0 | 0 | 0 |
| NEGR1-IT1       | 0 | 0 | 0 | 0 | 0 |
| C1orf173        | 0 | 0 | 0 | 0 | 0 |
| SLC44A5         | 0 | 0 | 0 | 0 | 0 |
| ASB17           | 0 | 0 | 0 | 0 | 0 |
| ELTD1           | 0 | 0 | 0 | 0 | 0 |
| MIR548AP        | 0 | 0 | 0 | 0 | 0 |
| LOC100505768    | 0 | 0 | 0 | 0 | 0 |
| GBP7            | 0 | 0 | 0 | 0 | 0 |
| GBP5            | 0 | 0 | 0 | 0 | 0 |
| BARHL2          | 0 | 0 | 0 | 0 | 0 |
| HFM1            | 0 | 0 | 0 | 0 | 0 |
| MIR137_MIR137HG | 0 | 0 | 0 | 0 | 0 |
| MIR2682         | 0 | 0 | 0 | 0 | 0 |
| LPPR5           | 0 | 0 | 0 | 0 | 0 |
| LOC100128787    | 0 | 0 | 0 | 0 | 0 |
| RNU6-6          | 0 | 0 | 0 | 0 | 0 |
| OLFM3           | 0 | 0 | 0 | 0 | 0 |
| COL11A1         | 0 | 0 | 0 | 0 | 0 |
| AMY1A           | 0 | 0 | 0 | 0 | 0 |
| VAV3            | 0 | 0 | 0 | 0 | 0 |
| NBPF4           | 0 | 0 | 0 | 0 | 0 |
| HENMT1          | 0 | 0 | 0 | 0 | 0 |
| EPS8L3          | 0 | 0 | 0 | 0 | 0 |
| KCNA10          | 0 | 0 | 0 | 0 | 0 |
| KCNA2           | 0 | 0 | 0 | 0 | 0 |
| KCNA3           | 0 | 0 | 0 | 0 | 0 |
| PGCP1           | 0 | 0 | 0 | 0 | 0 |
| MIR4256         | 0 | 0 | 0 | 0 | 0 |
| LOC643441       | 0 | 0 | 0 | 0 | 0 |
| SYT6            | 0 | 0 | 0 | 0 | 0 |
| DENND2C         | 0 | 0 | 0 | 0 | 0 |
| TSPAN2          | 0 | 0 | 0 | 0 | 0 |
| NGF             | 0 | 0 | 0 | 0 | 0 |
| SPAG17          | 0 | 0 | 0 | 0 | 0 |
| HMGCS2          | 0 | 0 | 0 | 0 | 0 |
| ADAM30          | 0 | 0 | 0 | 0 | 0 |
| PPIAL4B         | 0 | 0 | 0 | 0 | 0 |
| LOC653513       | 0 | 0 | 0 | 0 | 0 |
| PDZK1P1         | 0 | 0 | 0 | 0 | 0 |
| PDZK1P1         | 0 | 0 | 0 | 0 | 0 |
| MIR5087         | 0 | 0 | 0 | 0 | 0 |
| FLJ39739        | 0 | 0 | 0 | 0 | 0 |
| PPIAL4B         | 0 | 0 | 0 | 0 | 0 |
| PPIAL4D         | 0 | 0 | 0 | 0 | 0 |
| HIST2H3A        | 0 | 0 | 0 | 0 | 0 |
| HIST2H2AA3      | 0 | 0 | 0 | 0 | 0 |
| HIST2H4A        | 0 | 0 | 0 | 0 | 0 |
| HORMAD1         | 0 | 0 | 0 | 0 | 0 |
| SELENBP1        | 0 | 0 | 0 | 0 | 0 |
| LINGO4          | 0 | 0 | 0 | 0 | 0 |
| C2CD4D          | 0 | 0 | 0 | 0 | 0 |
| THEM5           | 0 | 0 | 0 | 0 | 0 |
| TCHHL1          | 0 | 0 | 0 | 0 | 0 |
| TCHH            | 0 | 0 | 0 | 0 | 0 |
| RPTN            | 0 | 0 | 0 | 0 | 0 |
| FLG2            | 0 | 0 | 0 | 0 | 0 |
| CRNN            | 0 | 0 | 0 | 0 | 0 |
| LCE3E           | 0 | 0 | 0 | 0 | 0 |
| LCE3D           | 0 | 0 | 0 | 0 | 0 |
| LCE3A           | 0 | 0 | 0 | 0 | 0 |
| SPRR2D          | 0 | 0 | 0 | 0 | 0 |
| SPRR2A          | 0 | 0 | 0 | 0 | 0 |
| SPRR2B          | 0 | 0 | 0 | 0 | 0 |
| SPRR2E          | 0 | 0 | 0 | 0 | 0 |
| SPRR2F          | 0 | 0 | 0 | 0 | 0 |



|              |   |   |   |   |   |
|--------------|---|---|---|---|---|
| SPRR2C       | 0 | 0 | 0 | 0 | 0 |
| SPRR2G       | 0 | 0 | 0 | 0 | 0 |
| PGLYRP3      | 0 | 0 | 0 | 0 | 0 |
| PGLYRP4      | 0 | 0 | 0 | 0 | 0 |
| S100A12      | 0 | 0 | 0 | 0 | 0 |
| S100A8       | 0 | 0 | 0 | 0 | 0 |
| S100A7L2     | 0 | 0 | 0 | 0 | 0 |
| S100A7       | 0 | 0 | 0 | 0 | 0 |
| MIR190B      | 0 | 0 | 0 | 0 | 0 |
| SNORA42      | 0 | 0 | 0 | 0 | 0 |
| VHLL         | 0 | 0 | 0 | 0 | 0 |
| MIR9-1       | 0 | 0 | 0 | 0 | 0 |
| INSRR        | 0 | 0 | 0 | 0 | 0 |
| MIR765       | 0 | 0 | 0 | 0 | 0 |
| ETV3L        | 0 | 0 | 0 | 0 | 0 |
| FCRL5        | 0 | 0 | 0 | 0 | 0 |
| FCRL4        | 0 | 0 | 0 | 0 | 0 |
| FCRL3        | 0 | 0 | 0 | 0 | 0 |
| FCRL2        | 0 | 0 | 0 | 0 | 0 |
| FCRL1        | 0 | 0 | 0 | 0 | 0 |
| CD5L         | 0 | 0 | 0 | 0 | 0 |
| LOC646268    | 0 | 0 | 0 | 0 | 0 |
| CD1B         | 0 | 0 | 0 | 0 | 0 |
| OR10T2       | 0 | 0 | 0 | 0 | 0 |
| OR10K2       | 0 | 0 | 0 | 0 | 0 |
| OR6Y1        | 0 | 0 | 0 | 0 | 0 |
| OR6P1        | 0 | 0 | 0 | 0 | 0 |
| OR10X1       | 0 | 0 | 0 | 0 | 0 |
| SPTA1        | 0 | 0 | 0 | 0 | 0 |
| OR6K2        | 0 | 0 | 0 | 0 | 0 |
| OR6K3        | 0 | 0 | 0 | 0 | 0 |
| OR6N1        | 0 | 0 | 0 | 0 | 0 |
| OR6N2        | 0 | 0 | 0 | 0 | 0 |
| AIM2         | 0 | 0 | 0 | 0 | 0 |
| LOC100131825 | 0 | 0 | 0 | 0 | 0 |
| OR10J3       | 0 | 0 | 0 | 0 | 0 |
| OR10J5       | 0 | 0 | 0 | 0 | 0 |
| CRP          | 0 | 0 | 0 | 0 | 0 |
| IGSF9        | 0 | 0 | 0 | 0 | 0 |
| SLAMF9       | 0 | 0 | 0 | 0 | 0 |
| SLAMF6       | 0 | 0 | 0 | 0 | 0 |
| SLAMF1       | 0 | 0 | 0 | 0 | 0 |
| CD48         | 0 | 0 | 0 | 0 | 0 |
| CD244        | 0 | 0 | 0 | 0 | 0 |
| ITLN1        | 0 | 0 | 0 | 0 | 0 |
| ITLN2        | 0 | 0 | 0 | 0 | 0 |
| MPZ          | 0 | 0 | 0 | 0 | 0 |
| FCGR3B       | 0 | 0 | 0 | 0 | 0 |
| SH2D1B       | 0 | 0 | 0 | 0 | 0 |
| LOC100505795 | 0 | 0 | 0 | 0 | 0 |
| LMX1A        | 0 | 0 | 0 | 0 | 0 |
| RXRG         | 0 | 0 | 0 | 0 | 0 |
| MIR921       | 0 | 0 | 0 | 0 | 0 |
| ADCY10       | 0 | 0 | 0 | 0 | 0 |
| XCL2         | 0 | 0 | 0 | 0 | 0 |
| DPT          | 0 | 0 | 0 | 0 | 0 |
| SELP         | 0 | 0 | 0 | 0 | 0 |
| MIR3119-1    | 0 | 0 | 0 | 0 | 0 |
| LOC284688    | 0 | 0 | 0 | 0 | 0 |
| MIR1295A     | 0 | 0 | 0 | 0 | 0 |
| MYOC         | 0 | 0 | 0 | 0 | 0 |
| DNM3OS       | 0 | 0 | 0 | 0 | 0 |
| TNFSF18      | 0 | 0 | 0 | 0 | 0 |
| SLC9C2       | 0 | 0 | 0 | 0 | 0 |
| SNORD81      | 0 | 0 | 0 | 0 | 0 |
| SNORD80      | 0 | 0 | 0 | 0 | 0 |
| SNORD79      | 0 | 0 | 0 | 0 | 0 |
| SNORD78      | 0 | 0 | 0 | 0 | 0 |
| SNORD44      | 0 | 0 | 0 | 0 | 0 |
| SNORD77      | 0 | 0 | 0 | 0 | 0 |
| SNORD75      | 0 | 0 | 0 | 0 | 0 |
| SNORD74      | 0 | 0 | 0 | 0 | 0 |
| TNR          | 0 | 0 | 0 | 0 | 0 |
| MIR488       | 0 | 0 | 0 | 0 | 0 |
| LOC730102    | 0 | 0 | 0 | 0 | 0 |
| MIR3121      | 0 | 0 | 0 | 0 | 0 |
| RGS8         | 0 | 0 | 0 | 0 | 0 |
| SHCBP1L      | 0 | 0 | 0 | 0 | 0 |
| NCF2         | 0 | 0 | 0 | 0 | 0 |

|                 |   |   |   |   |   |
|-----------------|---|---|---|---|---|
| LOC100288079    | 0 | 0 | 0 | 0 | 0 |
| MIR548F1        | 0 | 0 | 0 | 0 | 0 |
| PTGS2           | 0 | 0 | 0 | 0 | 0 |
| FAM5C           | 0 | 0 | 0 | 0 | 0 |
| KCNT2           | 0 | 0 | 0 | 0 | 0 |
| MIR4735         | 0 | 0 | 0 | 0 | 0 |
| DENND1B         | 0 | 0 | 0 | 0 | 0 |
| ATP6V1G3        | 0 | 0 | 0 | 0 | 0 |
| MIR181B1        | 0 | 0 | 0 | 0 | 0 |
| MIR181A1        | 0 | 0 | 0 | 0 | 0 |
| CACNA1S         | 0 | 0 | 0 | 0 | 0 |
| TNNT2           | 0 | 0 | 0 | 0 | 0 |
| LAD1            | 0 | 0 | 0 | 0 | 0 |
| TNNI1           | 0 | 0 | 0 | 0 | 0 |
| RNU6-79         | 0 | 0 | 0 | 0 | 0 |
| LOC401980       | 0 | 0 | 0 | 0 | 0 |
| MYBPH           | 0 | 0 | 0 | 0 | 0 |
| CHI3L1          | 0 | 0 | 0 | 0 | 0 |
| CHIT1           | 0 | 0 | 0 | 0 | 0 |
| FMOD            | 0 | 0 | 0 | 0 | 0 |
| LINC00303       | 0 | 0 | 0 | 0 | 0 |
| KLHDC8A         | 0 | 0 | 0 | 0 | 0 |
| MIR135B         | 0 | 0 | 0 | 0 | 0 |
| PM20D1          | 0 | 0 | 0 | 0 | 0 |
| SLC26A9         | 0 | 0 | 0 | 0 | 0 |
| C1orf186        | 0 | 0 | 0 | 0 | 0 |
| FAIM3           | 0 | 0 | 0 | 0 | 0 |
| FCAMR           | 0 | 0 | 0 | 0 | 0 |
| MIR29B2         | 0 | 0 | 0 | 0 | 0 |
| ESRRG           | 0 | 0 | 0 | 0 | 0 |
| LOC728463       | 0 | 0 | 0 | 0 | 0 |
| SLC30A10        | 0 | 0 | 0 | 0 | 0 |
| MIR215          | 0 | 0 | 0 | 0 | 0 |
| MIR194-1        | 0 | 0 | 0 | 0 | 0 |
| MIR664,SNORA36B | 0 | 0 | 0 | 0 | 0 |
| C1orf140        | 0 | 0 | 0 | 0 | 0 |
| MIR320B2        | 0 | 0 | 0 | 0 | 0 |
| MIR4742         | 0 | 0 | 0 | 0 | 0 |
| LEFTY1          | 0 | 0 | 0 | 0 | 0 |
| LEFTY2          | 0 | 0 | 0 | 0 | 0 |
| ZNF847P         | 0 | 0 | 0 | 0 | 0 |
| WNT9A           | 0 | 0 | 0 | 0 | 0 |
| MIR5008         | 0 | 0 | 0 | 0 | 0 |
| HIST3H3         | 0 | 0 | 0 | 0 | 0 |
| PGBD5           | 0 | 0 | 0 | 0 | 0 |
| LOC149373       | 0 | 0 | 0 | 0 | 0 |
| SNRPD2P2        | 0 | 0 | 0 | 0 | 0 |
| LINC00582       | 0 | 0 | 0 | 0 | 0 |
| MIR4753         | 0 | 0 | 0 | 0 | 0 |
| MIR1537         | 0 | 0 | 0 | 0 | 0 |
| NID1            | 0 | 0 | 0 | 0 | 0 |
| MT1P2           | 0 | 0 | 0 | 0 | 0 |
| ZP4             | 0 | 0 | 0 | 0 | 0 |
| LOC339535       | 0 | 0 | 0 | 0 | 0 |
| GREM2           | 0 | 0 | 0 | 0 | 0 |
| RGS7            | 0 | 0 | 0 | 0 | 0 |
| PLD5            | 0 | 0 | 0 | 0 | 0 |
| LOC255654       | 0 | 0 | 0 | 0 | 0 |
| MIR3916         | 0 | 0 | 0 | 0 | 0 |
| OR2B11          | 0 | 0 | 0 | 0 | 0 |
| OR2C3           | 0 | 0 | 0 | 0 | 0 |
| OR13G1          | 0 | 0 | 0 | 0 | 0 |
| OR6F1           | 0 | 0 | 0 | 0 | 0 |
| OR1C1           | 0 | 0 | 0 | 0 | 0 |
| OR14A16         | 0 | 0 | 0 | 0 | 0 |
| OR11L1          | 0 | 0 | 0 | 0 | 0 |
| OR2T33          | 0 | 0 | 0 | 0 | 0 |
| OR2T12          | 0 | 0 | 0 | 0 | 0 |
| OR2M7           | 0 | 0 | 0 | 0 | 0 |
| OR2T29          | 0 | 0 | 0 | 0 | 0 |
| OR2T34          | 0 | 0 | 0 | 0 | 0 |
| OR2T10          | 0 | 0 | 0 | 0 | 0 |
| OR2T11          | 0 | 0 | 0 | 0 | 0 |
| OR2T35          | 0 | 0 | 0 | 0 | 0 |
| OR2T27          | 0 | 0 | 0 | 0 | 0 |
| OR14I1          | 0 | 0 | 0 | 0 | 0 |
| LYPD8           | 0 | 0 | 0 | 0 | 0 |
| LINC00200       | 0 | 0 | 0 | 0 | 0 |
| ADARB2-AS1      | 0 | 0 | 0 | 0 | 0 |

|                    |   |   |   |   |   |
|--------------------|---|---|---|---|---|
| LINC00705          | 0 | 0 | 0 | 0 | 0 |
| AKR1E2             | 0 | 0 | 0 | 0 | 0 |
| AKR1C1             | 0 | 0 | 0 | 0 | 0 |
| AKR1C4             | 0 | 0 | 0 | 0 | 0 |
| UCN3               | 0 | 0 | 0 | 0 | 0 |
| CALML3             | 0 | 0 | 0 | 0 | 0 |
| MIR3155A           | 0 | 0 | 0 | 0 | 0 |
| ECHDC3             | 0 | 0 | 0 | 0 | 0 |
| MIR4480            | 0 | 0 | 0 | 0 | 0 |
| MIR1265            | 0 | 0 | 0 | 0 | 0 |
| ST8SIA6-AS1        | 0 | 0 | 0 | 0 | 0 |
| MIR511-1           | 0 | 0 | 0 | 0 | 0 |
| MRC1               | 0 | 0 | 0 | 0 | 0 |
| MIR511-2           | 0 | 0 | 0 | 0 | 0 |
| SLC39A12           | 0 | 0 | 0 | 0 | 0 |
| PLXDC2             | 0 | 0 | 0 | 0 | 0 |
| MIR4675            | 0 | 0 | 0 | 0 | 0 |
| NEBL-AS1           | 0 | 0 | 0 | 0 | 0 |
| LOC100130992       | 0 | 0 | 0 | 0 | 0 |
| ARMC3              | 0 | 0 | 0 | 0 | 0 |
| PTF1A              | 0 | 0 | 0 | 0 | 0 |
| MIR603             | 0 | 0 | 0 | 0 | 0 |
| MYO3A              | 0 | 0 | 0 | 0 | 0 |
| GAD2               | 0 | 0 | 0 | 0 | 0 |
| APBB1IP            | 0 | 0 | 0 | 0 | 0 |
| LINC00202-2        | 0 | 0 | 0 | 0 | 0 |
| MIR5586            | 0 | 0 | 0 | 0 | 0 |
| LYZL1              | 0 | 0 | 0 | 0 | 0 |
| ANKRD30A           | 0 | 0 | 0 | 0 | 0 |
| ACTR3BP5           | 0 | 0 | 0 | 0 | 0 |
| MIR5100            | 0 | 0 | 0 | 0 | 0 |
| LINC00619          | 0 | 0 | 0 | 0 | 0 |
| LINC00840          | 0 | 0 | 0 | 0 | 0 |
| LINC00841          | 0 | 0 | 0 | 0 | 0 |
| LOC100130539       | 0 | 0 | 0 | 0 | 0 |
| TMEM72             | 0 | 0 | 0 | 0 | 0 |
| ANKRD30BP3         | 0 | 0 | 0 | 0 | 0 |
| MIR3156-1          | 0 | 0 | 0 | 0 | 0 |
| PPYR1              | 0 | 0 | 0 | 0 | 0 |
| ANXA8L2            | 0 | 0 | 0 | 0 | 0 |
| BMS1P2             | 0 | 0 | 0 | 0 | 0 |
| FAM25C             | 0 | 0 | 0 | 0 | 0 |
| ANXA8              | 0 | 0 | 0 | 0 | 0 |
| FAM170B-AS1        | 0 | 0 | 0 | 0 | 0 |
| C10orf71           | 0 | 0 | 0 | 0 | 0 |
| CHAT               | 0 | 0 | 0 | 0 | 0 |
| SLC18A3            | 0 | 0 | 0 | 0 | 0 |
| C10orf53           | 0 | 0 | 0 | 0 | 0 |
| PRKG1              | 0 | 0 | 0 | 0 | 0 |
| MIR605             | 0 | 0 | 0 | 0 | 0 |
| DKK1               | 0 | 0 | 0 | 0 | 0 |
| BICC1              | 0 | 0 | 0 | 0 | 0 |
| PHYHIPL            | 0 | 0 | 0 | 0 | 0 |
| C10orf107          | 0 | 0 | 0 | 0 | 0 |
| MIR548AV           | 0 | 0 | 0 | 0 | 0 |
| ANXA2P3            | 0 | 0 | 0 | 0 | 0 |
| LRRTM3             | 0 | 0 | 0 | 0 | 0 |
| SNORD98            | 0 | 0 | 0 | 0 | 0 |
| SRGN               | 0 | 0 | 0 | 0 | 0 |
| CHST3              | 0 | 0 | 0 | 0 | 0 |
| MIR4676            | 0 | 0 | 0 | 0 | 0 |
| OIT3               | 0 | 0 | 0 | 0 | 0 |
| ZNF503-AS1         | 0 | 0 | 0 | 0 | 0 |
| LINC00856          | 0 | 0 | 0 | 0 | 0 |
| SFTPA1             | 0 | 0 | 0 | 0 | 0 |
| LOC100288974,MBL1P | 0 | 0 | 0 | 0 | 0 |
| PLAC9              | 0 | 0 | 0 | 0 | 0 |
| NRG3               | 0 | 0 | 0 | 0 | 0 |
| C10orf99           | 0 | 0 | 0 | 0 | 0 |
| CDHR1              | 0 | 0 | 0 | 0 | 0 |
| RGR                | 0 | 0 | 0 | 0 | 0 |
| LINC00858          | 0 | 0 | 0 | 0 | 0 |
| GRID1-AS1          | 0 | 0 | 0 | 0 | 0 |
| FAM25A             | 0 | 0 | 0 | 0 | 0 |
| MIR4678            | 0 | 0 | 0 | 0 | 0 |
| LIPJ               | 0 | 0 | 0 | 0 | 0 |
| LIPF               | 0 | 0 | 0 | 0 | 0 |
| LIPK               | 0 | 0 | 0 | 0 | 0 |
| LIPN               | 0 | 0 | 0 | 0 | 0 |

|                  |   |   |   |   |   |
|------------------|---|---|---|---|---|
| LIPM             | 0 | 0 | 0 | 0 | 0 |
| MIR4679-1        | 0 | 0 | 0 | 0 | 0 |
| IFIT1B           | 0 | 0 | 0 | 0 | 0 |
| LOC643529        | 0 | 0 | 0 | 0 | 0 |
| LINC00502        | 0 | 0 | 0 | 0 | 0 |
| HHEX             | 0 | 0 | 0 | 0 | 0 |
| CYP26C1          | 0 | 0 | 0 | 0 | 0 |
| PDE6C            | 0 | 0 | 0 | 0 | 0 |
| LGI1             | 0 | 0 | 0 | 0 | 0 |
| C10orf129        | 0 | 0 | 0 | 0 | 0 |
| DNMT             | 0 | 0 | 0 | 0 | 0 |
| LOC100505540     | 0 | 0 | 0 | 0 | 0 |
| ANKRD2           | 0 | 0 | 0 | 0 | 0 |
| MIR5692C2        | 0 | 0 | 0 | 0 | 0 |
| NKX2-3           | 0 | 0 | 0 | 0 | 0 |
| MIR608           | 0 | 0 | 0 | 0 | 0 |
| FLJ41350         | 0 | 0 | 0 | 0 | 0 |
| MIR146B          | 0 | 0 | 0 | 0 | 0 |
| LOC729020        | 0 | 0 | 0 | 0 | 0 |
| INA              | 0 | 0 | 0 | 0 | 0 |
| SORCS3           | 0 | 0 | 0 | 0 | 0 |
| RNU6-53          | 0 | 0 | 0 | 0 | 0 |
| RBM20            | 0 | 0 | 0 | 0 | 0 |
| TECTB            | 0 | 0 | 0 | 0 | 0 |
| MIR4295          | 0 | 0 | 0 | 0 | 0 |
| TDRD1            | 0 | 0 | 0 | 0 | 0 |
| VWA2             | 0 | 0 | 0 | 0 | 0 |
| ATRNL1           | 0 | 0 | 0 | 0 | 0 |
| CCDC172          | 0 | 0 | 0 | 0 | 0 |
| PNLIPRP3         | 0 | 0 | 0 | 0 | 0 |
| PNLIP            | 0 | 0 | 0 | 0 | 0 |
| KCNK18           | 0 | 0 | 0 | 0 | 0 |
| EMX2             | 0 | 0 | 0 | 0 | 0 |
| MIR4681          | 0 | 0 | 0 | 0 | 0 |
| MIR4682          | 0 | 0 | 0 | 0 | 0 |
| PPAPDC1A         | 0 | 0 | 0 | 0 | 0 |
| MIR5694          | 0 | 0 | 0 | 0 | 0 |
| MIR3941          | 0 | 0 | 0 | 0 | 0 |
| FAM24A           | 0 | 0 | 0 | 0 | 0 |
| HMX2             | 0 | 0 | 0 | 0 | 0 |
| GPR26            | 0 | 0 | 0 | 0 | 0 |
| LOC100169752     | 0 | 0 | 0 | 0 | 0 |
| NPS              | 0 | 0 | 0 | 0 | 0 |
| FOXI2            | 0 | 0 | 0 | 0 | 0 |
| LOC399829        | 0 | 0 | 0 | 0 | 0 |
| GPR123           | 0 | 0 | 0 | 0 | 0 |
| UTF1             | 0 | 0 | 0 | 0 | 0 |
| DUX2,DUX4,DUX4L2 | 0 | 0 | 0 | 0 | 0 |
| MIR5699          | 0 | 0 | 0 | 0 | 0 |
| ADARB2           | 0 | 0 | 0 | 0 | 0 |
| LINC00700        | 0 | 0 | 0 | 0 | 0 |
| LINC00701        | 0 | 0 | 0 | 0 | 0 |
| AKR1C6P          | 0 | 0 | 0 | 0 | 0 |
| AKR1C2           | 0 | 0 | 0 | 0 | 0 |
| AKR1CL1          | 0 | 0 | 0 | 0 | 0 |
| CALML5           | 0 | 0 | 0 | 0 | 0 |
| IL2RA            | 0 | 0 | 0 | 0 | 0 |
| MIR3155B         | 0 | 0 | 0 | 0 | 0 |
| GATA3-AS1        | 0 | 0 | 0 | 0 | 0 |
| LINC00710        | 0 | 0 | 0 | 0 | 0 |
| CELF2-AS2        | 0 | 0 | 0 | 0 | 0 |
| UCMA             | 0 | 0 | 0 | 0 | 0 |
| ITGA8            | 0 | 0 | 0 | 0 | 0 |
| LOC100129213     | 0 | 0 | 0 | 0 | 0 |
| C10orf113        | 0 | 0 | 0 | 0 | 0 |
| MIR1915          | 0 | 0 | 0 | 0 | 0 |
| EBLN1            | 0 | 0 | 0 | 0 | 0 |
| C10orf67         | 0 | 0 | 0 | 0 | 0 |
| GPR158-AS1       | 0 | 0 | 0 | 0 | 0 |
| PTCHD3           | 0 | 0 | 0 | 0 | 0 |
| MKX              | 0 | 0 | 0 | 0 | 0 |
| LINC00837        | 0 | 0 | 0 | 0 | 0 |
| MIR604           | 0 | 0 | 0 | 0 | 0 |
| MIR938           | 0 | 0 | 0 | 0 | 0 |
| KIAA1462         | 0 | 0 | 0 | 0 | 0 |
| LYZL2            | 0 | 0 | 0 | 0 | 0 |
| LINC00838        | 0 | 0 | 0 | 0 | 0 |
| MTRNR2L7         | 0 | 0 | 0 | 0 | 0 |
| CXCL12           | 0 | 0 | 0 | 0 | 0 |

|                 |   |   |   |   |   |
|-----------------|---|---|---|---|---|
| TMEM72-AS1      | 0 | 0 | 0 | 0 | 0 |
| RSU1P2          | 0 | 0 | 0 | 0 | 0 |
| ZFAND4          | 0 | 0 | 0 | 0 | 0 |
| PTPN20A,PTPN20B | 0 | 0 | 0 | 0 | 0 |
| FAM25C          | 0 | 0 | 0 | 0 | 0 |
| AGAP9           | 0 | 0 | 0 | 0 | 0 |
| GDF10           | 0 | 0 | 0 | 0 | 0 |
| PTPN20A,PTPN20B | 0 | 0 | 0 | 0 | 0 |
| FRMPD2P1        | 0 | 0 | 0 | 0 | 0 |
| FAM25C          | 0 | 0 | 0 | 0 | 0 |
| LRR1C18         | 0 | 0 | 0 | 0 | 0 |
| MIR4294         | 0 | 0 | 0 | 0 | 0 |
| FAM170B         | 0 | 0 | 0 | 0 | 0 |
| C10orf128       | 0 | 0 | 0 | 0 | 0 |
| DRGX            | 0 | 0 | 0 | 0 | 0 |
| OGDHL           | 0 | 0 | 0 | 0 | 0 |
| PRKG1-AS1       | 0 | 0 | 0 | 0 | 0 |
| MBL2            | 0 | 0 | 0 | 0 | 0 |
| PCDH15          | 0 | 0 | 0 | 0 | 0 |
| MIR3924         | 0 | 0 | 0 | 0 | 0 |
| M1              | 0 | 0 | 0 | 0 | 0 |
| C10orf40        | 0 | 0 | 0 | 0 | 0 |
| TMEM26          | 0 | 0 | 0 | 0 | 0 |
| MIR1296         | 0 | 0 | 0 | 0 | 0 |
| CTNNA3          | 0 | 0 | 0 | 0 | 0 |
| NEUROG3         | 0 | 0 | 0 | 0 | 0 |
| NPF1R1          | 0 | 0 | 0 | 0 | 0 |
| TBATA           | 0 | 0 | 0 | 0 | 0 |
| C10orf105       | 0 | 0 | 0 | 0 | 0 |
| C10orf54        | 0 | 0 | 0 | 0 | 0 |
| MIR1256         | 0 | 0 | 0 | 0 | 0 |
| DUPD1           | 0 | 0 | 0 | 0 | 0 |
| SFTPD           | 0 | 0 | 0 | 0 | 0 |
| LRIT2           | 0 | 0 | 0 | 0 | 0 |
| LRIT1           | 0 | 0 | 0 | 0 | 0 |
| MIR346          | 0 | 0 | 0 | 0 | 0 |
| LOC728218       | 0 | 0 | 0 | 0 | 0 |
| RNLS            | 0 | 0 | 0 | 0 | 0 |
| ANKRD22         | 0 | 0 | 0 | 0 | 0 |
| MIR4679-2       | 0 | 0 | 0 | 0 | 0 |
| CH25H           | 0 | 0 | 0 | 0 | 0 |
| SLC16A12        | 0 | 0 | 0 | 0 | 0 |
| MIR107          | 0 | 0 | 0 | 0 | 0 |
| HTR7            | 0 | 0 | 0 | 0 | 0 |
| PPP1R3C         | 0 | 0 | 0 | 0 | 0 |
| RBP4            | 0 | 0 | 0 | 0 | 0 |
| LOC100128054    | 0 | 0 | 0 | 0 | 0 |
| CYP2C8          | 0 | 0 | 0 | 0 | 0 |
| PDLIM1          | 0 | 0 | 0 | 0 | 0 |
| MIR3157         | 0 | 0 | 0 | 0 | 0 |
| OPALIN          | 0 | 0 | 0 | 0 | 0 |
| SFRP5           | 0 | 0 | 0 | 0 | 0 |
| MIR4685         | 0 | 0 | 0 | 0 | 0 |
| HPSE2           | 0 | 0 | 0 | 0 | 0 |
| PKD2L1          | 0 | 0 | 0 | 0 | 0 |
| TLX1NB          | 0 | 0 | 0 | 0 | 0 |
| LBX1            | 0 | 0 | 0 | 0 | 0 |
| MIR3158-2       | 0 | 0 | 0 | 0 | 0 |
| PITX3           | 0 | 0 | 0 | 0 | 0 |
| MIR609          | 0 | 0 | 0 | 0 | 0 |
| MIR4482-1       | 0 | 0 | 0 | 0 | 0 |
| SORCS1          | 0 | 0 | 0 | 0 | 0 |
| GUCY2GP         | 0 | 0 | 0 | 0 | 0 |
| MIR4483         | 0 | 0 | 0 | 0 | 0 |
| VAX1            | 0 | 0 | 0 | 0 | 0 |
| MIR3663         | 0 | 0 | 0 | 0 | 0 |
| PRLHR           | 0 | 0 | 0 | 0 | 0 |
| SNORA19         | 0 | 0 | 0 | 0 | 0 |
| C10orf120       | 0 | 0 | 0 | 0 | 0 |
| NKX1-2          | 0 | 0 | 0 | 0 | 0 |
| MIR4296         | 0 | 0 | 0 | 0 | 0 |
| TEX36           | 0 | 0 | 0 | 0 | 0 |
| ADAM12          | 0 | 0 | 0 | 0 | 0 |
| LINC00601       | 0 | 0 | 0 | 0 | 0 |
| C10orf90        | 0 | 0 | 0 | 0 | 0 |
| CLRN3           | 0 | 0 | 0 | 0 | 0 |
| MIR4297         | 0 | 0 | 0 | 0 | 0 |
| MIR378C         | 0 | 0 | 0 | 0 | 0 |
| NKX6-2          | 0 | 0 | 0 | 0 | 0 |

|               |   |   |   |   |   |
|---------------|---|---|---|---|---|
| TTC40         | 0 | 0 | 0 | 0 | 0 |
| MIR202        | 0 | 0 | 0 | 0 | 0 |
| CALY          | 0 | 0 | 0 | 0 | 0 |
| FUOM          | 0 | 0 | 0 | 0 | 0 |
| MIR3944       | 0 | 0 | 0 | 0 | 0 |
| FRG2B         | 0 | 0 | 0 | 0 | 0 |
| SCGB1C1       | 0 | 0 | 0 | 0 | 0 |
| ODF3          | 0 | 0 | 0 | 0 | 0 |
| MUC2          | 0 | 0 | 0 | 0 | 0 |
| KRTAP5-5      | 0 | 0 | 0 | 0 | 0 |
| FAM99A        | 0 | 0 | 0 | 0 | 0 |
| SYT8          | 0 | 0 | 0 | 0 | 0 |
| TNNT3         | 0 | 0 | 0 | 0 | 0 |
| IGF2-AS       | 0 | 0 | 0 | 0 | 0 |
| MIR4686       | 0 | 0 | 0 | 0 | 0 |
| TSPAN32       | 0 | 0 | 0 | 0 | 0 |
| MRGPRG-AS1    | 0 | 0 | 0 | 0 | 0 |
| OR52K2        | 0 | 0 | 0 | 0 | 0 |
| OR52K1        | 0 | 0 | 0 | 0 | 0 |
| OR52M1        | 0 | 0 | 0 | 0 | 0 |
| OR52I2        | 0 | 0 | 0 | 0 | 0 |
| OR51D1        | 0 | 0 | 0 | 0 | 0 |
| OR51E1        | 0 | 0 | 0 | 0 | 0 |
| OR51F2        | 0 | 0 | 0 | 0 | 0 |
| OR51T1        | 0 | 0 | 0 | 0 | 0 |
| OR51A7        | 0 | 0 | 0 | 0 | 0 |
| MMP26         | 0 | 0 | 0 | 0 | 0 |
| OR51L1        | 0 | 0 | 0 | 0 | 0 |
| OR52J3        | 0 | 0 | 0 | 0 | 0 |
| OR51B6        | 0 | 0 | 0 | 0 | 0 |
| OR51M1        | 0 | 0 | 0 | 0 | 0 |
| OR51Q1        | 0 | 0 | 0 | 0 | 0 |
| OR56B1        | 0 | 0 | 0 | 0 | 0 |
| OR52N4        | 0 | 0 | 0 | 0 | 0 |
| OR52N2        | 0 | 0 | 0 | 0 | 0 |
| OR52E4        | 0 | 0 | 0 | 0 | 0 |
| OR56A3        | 0 | 0 | 0 | 0 | 0 |
| OR52W1        | 0 | 0 | 0 | 0 | 0 |
| CCKBR         | 0 | 0 | 0 | 0 | 0 |
| OR2AG1        | 0 | 0 | 0 | 0 | 0 |
| OR10A5        | 0 | 0 | 0 | 0 | 0 |
| OR5E1P        | 0 | 0 | 0 | 0 | 0 |
| TUB           | 0 | 0 | 0 | 0 | 0 |
| KRT8P41       | 0 | 0 | 0 | 0 | 0 |
| RASSF10       | 0 | 0 | 0 | 0 | 0 |
| MYOD1         | 0 | 0 | 0 | 0 | 0 |
| MRGPRX4       | 0 | 0 | 0 | 0 | 0 |
| SAA1          | 0 | 0 | 0 | 0 | 0 |
| MIR4486       | 0 | 0 | 0 | 0 | 0 |
| SLC6A5        | 0 | 0 | 0 | 0 | 0 |
| NELL1         | 0 | 0 | 0 | 0 | 0 |
| ANO5          | 0 | 0 | 0 | 0 | 0 |
| SLC17A6       | 0 | 0 | 0 | 0 | 0 |
| LUZP2         | 0 | 0 | 0 | 0 | 0 |
| ANO3          | 0 | 0 | 0 | 0 | 0 |
| FIBIN         | 0 | 0 | 0 | 0 | 0 |
| BBOX1         | 0 | 0 | 0 | 0 | 0 |
| MIR610        | 0 | 0 | 0 | 0 | 0 |
| DKFZp686K1684 | 0 | 0 | 0 | 0 | 0 |
| WT1-AS        | 0 | 0 | 0 | 0 | 0 |
| EHF           | 0 | 0 | 0 | 0 | 0 |
| MIR1343       | 0 | 0 | 0 | 0 | 0 |
| MIR3973       | 0 | 0 | 0 | 0 | 0 |
| MIR670        | 0 | 0 | 0 | 0 | 0 |
| MIR129-2      | 0 | 0 | 0 | 0 | 0 |
| ACCSL         | 0 | 0 | 0 | 0 | 0 |
| LOC100507384  | 0 | 0 | 0 | 0 | 0 |
| MIR4688       | 0 | 0 | 0 | 0 | 0 |
| MIR3160-2     | 0 | 0 | 0 | 0 | 0 |
| OR4B1         | 0 | 0 | 0 | 0 | 0 |
| OR4X2         | 0 | 0 | 0 | 0 | 0 |
| OR4X1         | 0 | 0 | 0 | 0 | 0 |
| OR4S1         | 0 | 0 | 0 | 0 | 0 |
| OR4C3         | 0 | 0 | 0 | 0 | 0 |
| OR4A47        | 0 | 0 | 0 | 0 | 0 |
| TRIM49B       | 0 | 0 | 0 | 0 | 0 |
| LOC440040     | 0 | 0 | 0 | 0 | 0 |
| OR4C13        | 0 | 0 | 0 | 0 | 0 |
| LOC646813     | 0 | 0 | 0 | 0 | 0 |

|             |   |   |   |   |   |
|-------------|---|---|---|---|---|
| OR4C46      | 0 | 0 | 0 | 0 | 0 |
| TRIM48      | 0 | 0 | 0 | 0 | 0 |
| OR4A16      | 0 | 0 | 0 | 0 | 0 |
| OR4A15      | 0 | 0 | 0 | 0 | 0 |
| OR4C15      | 0 | 0 | 0 | 0 | 0 |
| OR4C16      | 0 | 0 | 0 | 0 | 0 |
| OR4P4       | 0 | 0 | 0 | 0 | 0 |
| OR4S2       | 0 | 0 | 0 | 0 | 0 |
| OR4C6       | 0 | 0 | 0 | 0 | 0 |
| OR5D13      | 0 | 0 | 0 | 0 | 0 |
| OR5D14      | 0 | 0 | 0 | 0 | 0 |
| OR5L1       | 0 | 0 | 0 | 0 | 0 |
| OR5D18      | 0 | 0 | 0 | 0 | 0 |
| OR5L2       | 0 | 0 | 0 | 0 | 0 |
| OR5D16      | 0 | 0 | 0 | 0 | 0 |
| TRIM51      | 0 | 0 | 0 | 0 | 0 |
| OR5AS1      | 0 | 0 | 0 | 0 | 0 |
| OR8I2       | 0 | 0 | 0 | 0 | 0 |
| OR8H2       | 0 | 0 | 0 | 0 | 0 |
| OR8H3       | 0 | 0 | 0 | 0 | 0 |
| OR5J2       | 0 | 0 | 0 | 0 | 0 |
| OR5T3       | 0 | 0 | 0 | 0 | 0 |
| OR5T1       | 0 | 0 | 0 | 0 | 0 |
| OR8K3       | 0 | 0 | 0 | 0 | 0 |
| OR8K1       | 0 | 0 | 0 | 0 | 0 |
| OR8J1       | 0 | 0 | 0 | 0 | 0 |
| OR8U1,OR8U8 | 0 | 0 | 0 | 0 | 0 |
| OR5AR1      | 0 | 0 | 0 | 0 | 0 |
| OR9G9       | 0 | 0 | 0 | 0 | 0 |
| OR5AK2      | 0 | 0 | 0 | 0 | 0 |
| OR5AK4P     | 0 | 0 | 0 | 0 | 0 |
| LRRC55      | 0 | 0 | 0 | 0 | 0 |
| P2RX3       | 0 | 0 | 0 | 0 | 0 |
| MIR130A     | 0 | 0 | 0 | 0 | 0 |
| OR9Q1       | 0 | 0 | 0 | 0 | 0 |
| OR6Q1       | 0 | 0 | 0 | 0 | 0 |
| OR9Q2       | 0 | 0 | 0 | 0 | 0 |
| OR1S1       | 0 | 0 | 0 | 0 | 0 |
| GLYATL1     | 0 | 0 | 0 | 0 | 0 |
| OR5AN1      | 0 | 0 | 0 | 0 | 0 |
| OR5A1       | 0 | 0 | 0 | 0 | 0 |
| OR4D6       | 0 | 0 | 0 | 0 | 0 |
| OR4D10      | 0 | 0 | 0 | 0 | 0 |
| OR4D11      | 0 | 0 | 0 | 0 | 0 |
| OR4D9       | 0 | 0 | 0 | 0 | 0 |
| PLAC1L      | 0 | 0 | 0 | 0 | 0 |
| MS4A3       | 0 | 0 | 0 | 0 | 0 |
| MS4A2       | 0 | 0 | 0 | 0 | 0 |
| MS4A4A      | 0 | 0 | 0 | 0 | 0 |
| MS4A6E      | 0 | 0 | 0 | 0 | 0 |
| MS4A14      | 0 | 0 | 0 | 0 | 0 |
| MS4A5       | 0 | 0 | 0 | 0 | 0 |
| MS4A1       | 0 | 0 | 0 | 0 | 0 |
| MS4A12      | 0 | 0 | 0 | 0 | 0 |
| MS4A13      | 0 | 0 | 0 | 0 | 0 |
| LINC00301   | 0 | 0 | 0 | 0 | 0 |
| MS4A8B      | 0 | 0 | 0 | 0 | 0 |
| MS4A15      | 0 | 0 | 0 | 0 | 0 |
| PGA3        | 0 | 0 | 0 | 0 | 0 |
| PGA4        | 0 | 0 | 0 | 0 | 0 |
| PGA5        | 0 | 0 | 0 | 0 | 0 |
| MIR4488     | 0 | 0 | 0 | 0 | 0 |
| LRRC10B     | 0 | 0 | 0 | 0 | 0 |
| SCGB1D1     | 0 | 0 | 0 | 0 | 0 |
| SCGB2A1     | 0 | 0 | 0 | 0 | 0 |
| SCGB1D2     | 0 | 0 | 0 | 0 | 0 |
| SCGB2A2     | 0 | 0 | 0 | 0 | 0 |
| SCGB1A1     | 0 | 0 | 0 | 0 | 0 |
| LGALS12     | 0 | 0 | 0 | 0 | 0 |
| MIR1237     | 0 | 0 | 0 | 0 | 0 |
| SLC22A12    | 0 | 0 | 0 | 0 | 0 |
| SPDYC       | 0 | 0 | 0 | 0 | 0 |
| MIR548AR    | 0 | 0 | 0 | 0 | 0 |
| MIR4690     | 0 | 0 | 0 | 0 | 0 |
| MIR4489     | 0 | 0 | 0 | 0 | 0 |
| NPAS4       | 0 | 0 | 0 | 0 | 0 |
| MIR4691     | 0 | 0 | 0 | 0 | 0 |
| ANO1        | 0 | 0 | 0 | 0 | 0 |
| MIR548K     | 0 | 0 | 0 | 0 | 0 |

|                     |   |   |   |   |   |
|---------------------|---|---|---|---|---|
| DEFB108B            | 0 | 0 | 0 | 0 | 0 |
| FOLR1               | 0 | 0 | 0 | 0 | 0 |
| FOLR2               | 0 | 0 | 0 | 0 | 0 |
| MIR4692             | 0 | 0 | 0 | 0 | 0 |
| SLCO2B1             | 0 | 0 | 0 | 0 | 0 |
| TPBGL               | 0 | 0 | 0 | 0 | 0 |
| MOGAT2              | 0 | 0 | 0 | 0 | 0 |
| OMP                 | 0 | 0 | 0 | 0 | 0 |
| THRSP               | 0 | 0 | 0 | 0 | 0 |
| CCDC83              | 0 | 0 | 0 | 0 | 0 |
| GRM5-AS1            | 0 | 0 | 0 | 0 | 0 |
| TYR                 | 0 | 0 | 0 | 0 | 0 |
| FOLH1B              | 0 | 0 | 0 | 0 | 0 |
| TRIM77              | 0 | 0 | 0 | 0 | 0 |
| MIR5692A1           | 0 | 0 | 0 | 0 | 0 |
| TRIM53AP            | 0 | 0 | 0 | 0 | 0 |
| TRIM49D1P,TRIM49D2P | 0 | 0 | 0 | 0 | 0 |
| TRIM64              | 0 | 0 | 0 | 0 | 0 |
| TRIM49C             | 0 | 0 | 0 | 0 | 0 |
| UBTFL1              | 0 | 0 | 0 | 0 | 0 |
| MTNR1B              | 0 | 0 | 0 | 0 | 0 |
| CCDC67              | 0 | 0 | 0 | 0 | 0 |
| LOC643037           | 0 | 0 | 0 | 0 | 0 |
| KDM4E               | 0 | 0 | 0 | 0 | 0 |
| MIR1260B            | 0 | 0 | 0 | 0 | 0 |
| CNTN5               | 0 | 0 | 0 | 0 | 0 |
| LOC101054525        | 0 | 0 | 0 | 0 | 0 |
| WTAPP1              | 0 | 0 | 0 | 0 | 0 |
| MIR4693             | 0 | 0 | 0 | 0 | 0 |
| DDI1                | 0 | 0 | 0 | 0 | 0 |
| LOC643923           | 0 | 0 | 0 | 0 | 0 |
| RAB39A              | 0 | 0 | 0 | 0 | 0 |
| C11orf87            | 0 | 0 | 0 | 0 | 0 |
| MIR4491             | 0 | 0 | 0 | 0 | 0 |
| MIR34B              | 0 | 0 | 0 | 0 | 0 |
| MIR34C              | 0 | 0 | 0 | 0 | 0 |
| C11orf88            | 0 | 0 | 0 | 0 | 0 |
| LAYN                | 0 | 0 | 0 | 0 | 0 |
| CLDN25              | 0 | 0 | 0 | 0 | 0 |
| HTR3B               | 0 | 0 | 0 | 0 | 0 |
| HTR3A               | 0 | 0 | 0 | 0 | 0 |
| ZBTB16              | 0 | 0 | 0 | 0 | 0 |
| NXPE2               | 0 | 0 | 0 | 0 | 0 |
| APOC3               | 0 | 0 | 0 | 0 | 0 |
| TMPRSS4             | 0 | 0 | 0 | 0 | 0 |
| CD3E                | 0 | 0 | 0 | 0 | 0 |
| MIR4492             | 0 | 0 | 0 | 0 | 0 |
| FOXR1               | 0 | 0 | 0 | 0 | 0 |
| SORL1               | 0 | 0 | 0 | 0 | 0 |
| LOC341056           | 0 | 0 | 0 | 0 | 0 |
| OR8D4               | 0 | 0 | 0 | 0 | 0 |
| OR4D5               | 0 | 0 | 0 | 0 | 0 |
| OR10G4              | 0 | 0 | 0 | 0 | 0 |
| OR10G9              | 0 | 0 | 0 | 0 | 0 |
| OR10G8              | 0 | 0 | 0 | 0 | 0 |
| OR8G2               | 0 | 0 | 0 | 0 | 0 |
| OR8G1,OR8G5         | 0 | 0 | 0 | 0 | 0 |
| OR8A1               | 0 | 0 | 0 | 0 | 0 |
| HEPN1               | 0 | 0 | 0 | 0 | 0 |
| PKNOX2              | 0 | 0 | 0 | 0 | 0 |
| PATE1               | 0 | 0 | 0 | 0 | 0 |
| PATE3               | 0 | 0 | 0 | 0 | 0 |
| PATE4               | 0 | 0 | 0 | 0 | 0 |
| KIRREL3-AS2         | 0 | 0 | 0 | 0 | 0 |
| KIRREL3-AS3         | 0 | 0 | 0 | 0 | 0 |
| C11orf44            | 0 | 0 | 0 | 0 | 0 |
| MIR210              | 0 | 0 | 0 | 0 | 0 |
| KRTAP5-3            | 0 | 0 | 0 | 0 | 0 |
| KRTAP5-4            | 0 | 0 | 0 | 0 | 0 |
| FAM99B              | 0 | 0 | 0 | 0 | 0 |
| MIR4298             | 0 | 0 | 0 | 0 | 0 |
| MIR483              | 0 | 0 | 0 | 0 | 0 |
| TH                  | 0 | 0 | 0 | 0 | 0 |
| ASCL2               | 0 | 0 | 0 | 0 | 0 |
| C11orf21            | 0 | 0 | 0 | 0 | 0 |
| MRGPRG              | 0 | 0 | 0 | 0 | 0 |
| MRGPRE              | 0 | 0 | 0 | 0 | 0 |
| OR52B4              | 0 | 0 | 0 | 0 | 0 |
| C11orf40            | 0 | 0 | 0 | 0 | 0 |



|                     |   |   |   |   |   |
|---------------------|---|---|---|---|---|
| OR51E2              | 0 | 0 | 0 | 0 | 0 |
| OR51F1              | 0 | 0 | 0 | 0 | 0 |
| OR52R1              | 0 | 0 | 0 | 0 | 0 |
| OR51S1              | 0 | 0 | 0 | 0 | 0 |
| OR51G2              | 0 | 0 | 0 | 0 | 0 |
| OR51G1              | 0 | 0 | 0 | 0 | 0 |
| OR51A4              | 0 | 0 | 0 | 0 | 0 |
| OR51A2              | 0 | 0 | 0 | 0 | 0 |
| OR52E2              | 0 | 0 | 0 | 0 | 0 |
| OR52A5              | 0 | 0 | 0 | 0 | 0 |
| OR52A1              | 0 | 0 | 0 | 0 | 0 |
| OR51V1              | 0 | 0 | 0 | 0 | 0 |
| OR51B2              | 0 | 0 | 0 | 0 | 0 |
| OR51I1              | 0 | 0 | 0 | 0 | 0 |
| UBQLN3              | 0 | 0 | 0 | 0 | 0 |
| OR52H1              | 0 | 0 | 0 | 0 | 0 |
| OR52N5              | 0 | 0 | 0 | 0 | 0 |
| OR52N1              | 0 | 0 | 0 | 0 | 0 |
| OR52E6              | 0 | 0 | 0 | 0 | 0 |
| OR52E8              | 0 | 0 | 0 | 0 | 0 |
| OR56A5              | 0 | 0 | 0 | 0 | 0 |
| OR52L1              | 0 | 0 | 0 | 0 | 0 |
| OR56A4              | 0 | 0 | 0 | 0 | 0 |
| OR56A1              | 0 | 0 | 0 | 0 | 0 |
| OR52B2              | 0 | 0 | 0 | 0 | 0 |
| CYB5R2              | 0 | 0 | 0 | 0 | 0 |
| OVCH2               | 0 | 0 | 0 | 0 | 0 |
| OR5P2               | 0 | 0 | 0 | 0 | 0 |
| OR5P3               | 0 | 0 | 0 | 0 | 0 |
| OR10A6              | 0 | 0 | 0 | 0 | 0 |
| OR10A3              | 0 | 0 | 0 | 0 | 0 |
| NLRP10              | 0 | 0 | 0 | 0 | 0 |
| RIC3                | 0 | 0 | 0 | 0 | 0 |
| LMO1                | 0 | 0 | 0 | 0 | 0 |
| MIR5691             | 0 | 0 | 0 | 0 | 0 |
| LYVE1               | 0 | 0 | 0 | 0 | 0 |
| MRV1                | 0 | 0 | 0 | 0 | 0 |
| MIR4299             | 0 | 0 | 0 | 0 | 0 |
| PTH                 | 0 | 0 | 0 | 0 | 0 |
| CALCA               | 0 | 0 | 0 | 0 | 0 |
| ABCC8               | 0 | 0 | 0 | 0 | 0 |
| SAA3P               | 0 | 0 | 0 | 0 | 0 |
| SAA2,SAA2-SAA4,SAA4 | 0 | 0 | 0 | 0 | 0 |
| MRGPRX1             | 0 | 0 | 0 | 0 | 0 |
| MRGPRX2             | 0 | 0 | 0 | 0 | 0 |
| CSRP3               | 0 | 0 | 0 | 0 | 0 |
| NAV2-AS5            | 0 | 0 | 0 | 0 | 0 |
| NAV2-AS4            | 0 | 0 | 0 | 0 | 0 |
| MIR4694             | 0 | 0 | 0 | 0 | 0 |
| DBX1                | 0 | 0 | 0 | 0 | 0 |
| CCDC179             | 0 | 0 | 0 | 0 | 0 |
| KCNA4               | 0 | 0 | 0 | 0 | 0 |
| MPPED2              | 0 | 0 | 0 | 0 | 0 |
| WT1                 | 0 | 0 | 0 | 0 | 0 |
| SLC1A2              | 0 | 0 | 0 | 0 | 0 |
| LRRC4C              | 0 | 0 | 0 | 0 | 0 |
| LOC100507205        | 0 | 0 | 0 | 0 | 0 |
| HNRNPKP3            | 0 | 0 | 0 | 0 | 0 |
| CHST1               | 0 | 0 | 0 | 0 | 0 |
| C11orf94            | 0 | 0 | 0 | 0 | 0 |
| MIR3160-1           | 0 | 0 | 0 | 0 | 0 |
| MIR5582             | 0 | 0 | 0 | 0 | 0 |
| SNORD67             | 0 | 0 | 0 | 0 | 0 |
| OR4C45              | 0 | 0 | 0 | 0 | 0 |
| TRIM64C             | 0 | 0 | 0 | 0 | 0 |
| FOLH1               | 0 | 0 | 0 | 0 | 0 |
| OR4C12              | 0 | 0 | 0 | 0 | 0 |
| LOC441601           | 0 | 0 | 0 | 0 | 0 |
| OR4A5               | 0 | 0 | 0 | 0 | 0 |
| TRIM51HP            | 0 | 0 | 0 | 0 | 0 |
| OR4C11              | 0 | 0 | 0 | 0 | 0 |
| OR5W2               | 0 | 0 | 0 | 0 | 0 |
| OR5I1               | 0 | 0 | 0 | 0 | 0 |
| OR10AG1             | 0 | 0 | 0 | 0 | 0 |
| OR7E5P              | 0 | 0 | 0 | 0 | 0 |
| OR5F1               | 0 | 0 | 0 | 0 | 0 |
| OR8J3               | 0 | 0 | 0 | 0 | 0 |
| OR8K5               | 0 | 0 | 0 | 0 | 0 |
| OR5T2               | 0 | 0 | 0 | 0 | 0 |

|           |   |   |   |   |   |
|-----------|---|---|---|---|---|
| OR8H1     | 0 | 0 | 0 | 0 | 0 |
| OR5R1     | 0 | 0 | 0 | 0 | 0 |
| OR5M9     | 0 | 0 | 0 | 0 | 0 |
| OR5M3     | 0 | 0 | 0 | 0 | 0 |
| OR5M8     | 0 | 0 | 0 | 0 | 0 |
| OR5M11    | 0 | 0 | 0 | 0 | 0 |
| OR5M10    | 0 | 0 | 0 | 0 | 0 |
| OR5M1     | 0 | 0 | 0 | 0 | 0 |
| OR5AP2    | 0 | 0 | 0 | 0 | 0 |
| OR9G4     | 0 | 0 | 0 | 0 | 0 |
| APLNR     | 0 | 0 | 0 | 0 | 0 |
| PRG3      | 0 | 0 | 0 | 0 | 0 |
| OR9I1     | 0 | 0 | 0 | 0 | 0 |
| OR1S2     | 0 | 0 | 0 | 0 | 0 |
| OR10Q1    | 0 | 0 | 0 | 0 | 0 |
| OR10W1    | 0 | 0 | 0 | 0 | 0 |
| OR5B17    | 0 | 0 | 0 | 0 | 0 |
| OR5B3     | 0 | 0 | 0 | 0 | 0 |
| OR5B2     | 0 | 0 | 0 | 0 | 0 |
| OR5B12    | 0 | 0 | 0 | 0 | 0 |
| OR5B21    | 0 | 0 | 0 | 0 | 0 |
| GLYAT     | 0 | 0 | 0 | 0 | 0 |
| GLYATL2   | 0 | 0 | 0 | 0 | 0 |
| LOC283194 | 0 | 0 | 0 | 0 | 0 |
| MPEG1     | 0 | 0 | 0 | 0 | 0 |
| OR5A2     | 0 | 0 | 0 | 0 | 0 |
| MIR3162   | 0 | 0 | 0 | 0 | 0 |
| OR10V1    | 0 | 0 | 0 | 0 | 0 |
| GIF       | 0 | 0 | 0 | 0 | 0 |
| TCN1      | 0 | 0 | 0 | 0 | 0 |
| MS4A6A    | 0 | 0 | 0 | 0 | 0 |
| MIR1908   | 0 | 0 | 0 | 0 | 0 |
| SCGB1D4   | 0 | 0 | 0 | 0 | 0 |
| SNORD30   | 0 | 0 | 0 | 0 | 0 |
| SNORD28   | 0 | 0 | 0 | 0 | 0 |
| SNORD27   | 0 | 0 | 0 | 0 | 0 |
| SNORD26   | 0 | 0 | 0 | 0 | 0 |
| SNORD25   | 0 | 0 | 0 | 0 | 0 |
| SLC22A6   | 0 | 0 | 0 | 0 | 0 |
| SLC22A8   | 0 | 0 | 0 | 0 | 0 |
| SLC22A24  | 0 | 0 | 0 | 0 | 0 |
| SLC22A25  | 0 | 0 | 0 | 0 | 0 |
| MIR3680-2 | 0 | 0 | 0 | 0 | 0 |
| HRASLS5   | 0 | 0 | 0 | 0 | 0 |
| MIR192    | 0 | 0 | 0 | 0 | 0 |
| MIR194-2  | 0 | 0 | 0 | 0 | 0 |
| GPHA2     | 0 | 0 | 0 | 0 | 0 |
| C11orf85  | 0 | 0 | 0 | 0 | 0 |
| CD248     | 0 | 0 | 0 | 0 | 0 |
| CTSF      | 0 | 0 | 0 | 0 | 0 |
| GPR152    | 0 | 0 | 0 | 0 | 0 |
| CABP2     | 0 | 0 | 0 | 0 | 0 |
| ALDH3B2   | 0 | 0 | 0 | 0 | 0 |
| MRGPRF    | 0 | 0 | 0 | 0 | 0 |
| FGF19     | 0 | 0 | 0 | 0 | 0 |
| FGF4      | 0 | 0 | 0 | 0 | 0 |
| FGF3      | 0 | 0 | 0 | 0 | 0 |
| MIR3664   | 0 | 0 | 0 | 0 | 0 |
| KRTAP5-11 | 0 | 0 | 0 | 0 | 0 |
| MIR3165   | 0 | 0 | 0 | 0 | 0 |
| MIR139    | 0 | 0 | 0 | 0 | 0 |
| KCNE3     | 0 | 0 | 0 | 0 | 0 |
| CHRD2     | 0 | 0 | 0 | 0 | 0 |
| MIR4696   | 0 | 0 | 0 | 0 | 0 |
| OR2AT4    | 0 | 0 | 0 | 0 | 0 |
| MIR326    | 0 | 0 | 0 | 0 | 0 |
| LOC283214 | 0 | 0 | 0 | 0 | 0 |
| LRRC32    | 0 | 0 | 0 | 0 | 0 |
| GUCY2EP   | 0 | 0 | 0 | 0 | 0 |
| GDPD4     | 0 | 0 | 0 | 0 | 0 |
| RNU6-83   | 0 | 0 | 0 | 0 | 0 |
| MIR708    | 0 | 0 | 0 | 0 | 0 |
| MIR5579   | 0 | 0 | 0 | 0 | 0 |
| MIR4300   | 0 | 0 | 0 | 0 | 0 |
| FAM181B   | 0 | 0 | 0 | 0 | 0 |
| SNORA70E  | 0 | 0 | 0 | 0 | 0 |
| CCDC89    | 0 | 0 | 0 | 0 | 0 |
| OR7E2P    | 0 | 0 | 0 | 0 | 0 |
| GRM5      | 0 | 0 | 0 | 0 | 0 |

|                         |   |   |   |   |   |
|-------------------------|---|---|---|---|---|
| TRIM49                  | 0 | 0 | 0 | 0 | 0 |
| TRIM64B                 | 0 | 0 | 0 | 0 | 0 |
| TRIM49D1P,TRIM49D2P     | 0 | 0 | 0 | 0 | 0 |
| TRIM53AP                | 0 | 0 | 0 | 0 | 0 |
| MIR4490                 | 0 | 0 | 0 | 0 | 0 |
| SNORD5                  | 0 | 0 | 0 | 0 | 0 |
| MIR1304                 | 0 | 0 | 0 | 0 | 0 |
| JRKL-AS1                | 0 | 0 | 0 | 0 | 0 |
| PGR                     | 0 | 0 | 0 | 0 | 0 |
| MIR3920                 | 0 | 0 | 0 | 0 | 0 |
| MMP20                   | 0 | 0 | 0 | 0 | 0 |
| MMP27                   | 0 | 0 | 0 | 0 | 0 |
| MMP8                    | 0 | 0 | 0 | 0 | 0 |
| MMP12                   | 0 | 0 | 0 | 0 | 0 |
| MMP13                   | 0 | 0 | 0 | 0 | 0 |
| PDGFD                   | 0 | 0 | 0 | 0 | 0 |
| CASP12                  | 0 | 0 | 0 | 0 | 0 |
| LOC643733               | 0 | 0 | 0 | 0 | 0 |
| CARD17                  | 0 | 0 | 0 | 0 | 0 |
| CARD18                  | 0 | 0 | 0 | 0 | 0 |
| ARHGAP20                | 0 | 0 | 0 | 0 | 0 |
| LOC100132078            | 0 | 0 | 0 | 0 | 0 |
| BTG4                    | 0 | 0 | 0 | 0 | 0 |
| IL18                    | 0 | 0 | 0 | 0 | 0 |
| LOC100288346            | 0 | 0 | 0 | 0 | 0 |
| DRD2                    | 0 | 0 | 0 | 0 | 0 |
| MIR4301                 | 0 | 0 | 0 | 0 | 0 |
| NXPE1                   | 0 | 0 | 0 | 0 | 0 |
| NXPE4                   | 0 | 0 | 0 | 0 | 0 |
| LOC283143               | 0 | 0 | 0 | 0 | 0 |
| APOA5                   | 0 | 0 | 0 | 0 | 0 |
| APOA4                   | 0 | 0 | 0 | 0 | 0 |
| DSCAML1                 | 0 | 0 | 0 | 0 | 0 |
| FXYD2,FXYD6,FXYD6-FXYD2 | 0 | 0 | 0 | 0 | 0 |
| TMPRSS4-AS1             | 0 | 0 | 0 | 0 | 0 |
| MFRP                    | 0 | 0 | 0 | 0 | 0 |
| TRIM29                  | 0 | 0 | 0 | 0 | 0 |
| LOC649133               | 0 | 0 | 0 | 0 | 0 |
| MIR125B1                | 0 | 0 | 0 | 0 | 0 |
| BLID                    | 0 | 0 | 0 | 0 | 0 |
| MIRLET7A2               | 0 | 0 | 0 | 0 | 0 |
| MIR100                  | 0 | 0 | 0 | 0 | 0 |
| BSX                     | 0 | 0 | 0 | 0 | 0 |
| MIR4493                 | 0 | 0 | 0 | 0 | 0 |
| OR6X1                   | 0 | 0 | 0 | 0 | 0 |
| OR6M1                   | 0 | 0 | 0 | 0 | 0 |
| TMEM225                 | 0 | 0 | 0 | 0 | 0 |
| OR6T1                   | 0 | 0 | 0 | 0 | 0 |
| OR10S1                  | 0 | 0 | 0 | 0 | 0 |
| OR10G7                  | 0 | 0 | 0 | 0 | 0 |
| OR8D1                   | 0 | 0 | 0 | 0 | 0 |
| OR8D2                   | 0 | 0 | 0 | 0 | 0 |
| OR8B2                   | 0 | 0 | 0 | 0 | 0 |
| OR8B3                   | 0 | 0 | 0 | 0 | 0 |
| OR8B4                   | 0 | 0 | 0 | 0 | 0 |
| OR8B8                   | 0 | 0 | 0 | 0 | 0 |
| OR8B12                  | 0 | 0 | 0 | 0 | 0 |
| MIR3167                 | 0 | 0 | 0 | 0 | 0 |
| FLI1-AS1                | 0 | 0 | 0 | 0 | 0 |
| SPATA19                 | 0 | 0 | 0 | 0 | 0 |
| IQSEC3                  | 0 | 0 | 0 | 0 | 0 |
| CACNA1C-IT3             | 0 | 0 | 0 | 0 | 0 |
| KCNA1                   | 0 | 0 | 0 | 0 | 0 |
| KCNA5                   | 0 | 0 | 0 | 0 | 0 |
| NTF3                    | 0 | 0 | 0 | 0 | 0 |
| MIR200C                 | 0 | 0 | 0 | 0 | 0 |
| MIR141                  | 0 | 0 | 0 | 0 | 0 |
| ACSM4                   | 0 | 0 | 0 | 0 | 0 |
| DPPA3                   | 0 | 0 | 0 | 0 | 0 |
| NANOGNB                 | 0 | 0 | 0 | 0 | 0 |
| CLEC6A                  | 0 | 0 | 0 | 0 | 0 |
| KLRF1                   | 0 | 0 | 0 | 0 | 0 |
| KLRF2                   | 0 | 0 | 0 | 0 | 0 |
| CLEC12A                 | 0 | 0 | 0 | 0 | 0 |
| CLEC12B                 | 0 | 0 | 0 | 0 | 0 |
| CLEC9A                  | 0 | 0 | 0 | 0 | 0 |
| TMEM52B                 | 0 | 0 | 0 | 0 | 0 |
| KLRD1                   | 0 | 0 | 0 | 0 | 0 |
| MIR1244-2               | 0 | 0 | 0 | 0 | 0 |

|                |   |   |   |   |   |
|----------------|---|---|---|---|---|
| MIR613         | 0 | 0 | 0 | 0 | 0 |
| MIR614         | 0 | 0 | 0 | 0 | 0 |
| H2AFJ          | 0 | 0 | 0 | 0 | 0 |
| PDE6H          | 0 | 0 | 0 | 0 | 0 |
| PTPRO          | 0 | 0 | 0 | 0 | 0 |
| SKP1P2         | 0 | 0 | 0 | 0 | 0 |
| MIR3974        | 0 | 0 | 0 | 0 | 0 |
| PIK3C2G        | 0 | 0 | 0 | 0 | 0 |
| CAPZA3         | 0 | 0 | 0 | 0 | 0 |
| LOC100506393   | 0 | 0 | 0 | 0 | 0 |
| PDE3A          | 0 | 0 | 0 | 0 | 0 |
| MIR920         | 0 | 0 | 0 | 0 | 0 |
| LRMP           | 0 | 0 | 0 | 0 | 0 |
| LOC101055625   | 0 | 0 | 0 | 0 | 0 |
| C12orf40       | 0 | 0 | 0 | 0 | 0 |
| LRRK2          | 0 | 0 | 0 | 0 | 0 |
| CNTN1          | 0 | 0 | 0 | 0 | 0 |
| MIR4698        | 0 | 0 | 0 | 0 | 0 |
| C12orf68       | 0 | 0 | 0 | 0 | 0 |
| ANP32D         | 0 | 0 | 0 | 0 | 0 |
| C12orf54       | 0 | 0 | 0 | 0 | 0 |
| WNT1           | 0 | 0 | 0 | 0 | 0 |
| AQP2           | 0 | 0 | 0 | 0 | 0 |
| AQP5           | 0 | 0 | 0 | 0 | 0 |
| TMPRSS12       | 0 | 0 | 0 | 0 | 0 |
| HIGD1C         | 0 | 0 | 0 | 0 | 0 |
| ANKRD33        | 0 | 0 | 0 | 0 | 0 |
| HOXC12         | 0 | 0 | 0 | 0 | 0 |
| MIR196A2       | 0 | 0 | 0 | 0 | 0 |
| MIR615         | 0 | 0 | 0 | 0 | 0 |
| MIR148B        | 0 | 0 | 0 | 0 | 0 |
| MUCL1          | 0 | 0 | 0 | 0 | 0 |
| NEUROD4        | 0 | 0 | 0 | 0 | 0 |
| OR9K2          | 0 | 0 | 0 | 0 | 0 |
| OR10A7         | 0 | 0 | 0 | 0 | 0 |
| OR6C74         | 0 | 0 | 0 | 0 | 0 |
| OR6C1          | 0 | 0 | 0 | 0 | 0 |
| OR6C3          | 0 | 0 | 0 | 0 | 0 |
| OR6C75         | 0 | 0 | 0 | 0 | 0 |
| OR6C65         | 0 | 0 | 0 | 0 | 0 |
| OR6C76         | 0 | 0 | 0 | 0 | 0 |
| OR6C2          | 0 | 0 | 0 | 0 | 0 |
| OR6C68         | 0 | 0 | 0 | 0 | 0 |
| OR6C4          | 0 | 0 | 0 | 0 | 0 |
| OR2AP1         | 0 | 0 | 0 | 0 | 0 |
| OR10P1         | 0 | 0 | 0 | 0 | 0 |
| MIR1228        | 0 | 0 | 0 | 0 | 0 |
| DTX3           | 0 | 0 | 0 | 0 | 0 |
| SLC26A10       | 0 | 0 | 0 | 0 | 0 |
| MIRLET71       | 0 | 0 | 0 | 0 | 0 |
| MIR548C        | 0 | 0 | 0 | 0 | 0 |
| FLJ41278       | 0 | 0 | 0 | 0 | 0 |
| MIR3913-2      | 0 | 0 | 0 | 0 | 0 |
| TPH2           | 0 | 0 | 0 | 0 | 0 |
| TRHDE          | 0 | 0 | 0 | 0 | 0 |
| MIR1252        | 0 | 0 | 0 | 0 | 0 |
| MIR5692B       | 0 | 0 | 0 | 0 | 0 |
| PTPRQ          | 0 | 0 | 0 | 0 | 0 |
| MYF6           | 0 | 0 | 0 | 0 | 0 |
| MYF5           | 0 | 0 | 0 | 0 | 0 |
| ACSS3          | 0 | 0 | 0 | 0 | 0 |
| MIR4699        | 0 | 0 | 0 | 0 | 0 |
| LRRIQ1         | 0 | 0 | 0 | 0 | 0 |
| ALX1           | 0 | 0 | 0 | 0 | 0 |
| NTS            | 0 | 0 | 0 | 0 | 0 |
| LINC00615      | 0 | 0 | 0 | 0 | 0 |
| CLLU1          | 0 | 0 | 0 | 0 | 0 |
| C12orf74       | 0 | 0 | 0 | 0 | 0 |
| MIR5700        | 0 | 0 | 0 | 0 | 0 |
| KRT19P2.MIR492 | 0 | 0 | 0 | 0 | 0 |
| MIR331         | 0 | 0 | 0 | 0 | 0 |
| MIR3685        | 0 | 0 | 0 | 0 | 0 |
| PGAM1P5        | 0 | 0 | 0 | 0 | 0 |
| RMST           | 0 | 0 | 0 | 0 | 0 |
| MIR1251        | 0 | 0 | 0 | 0 | 0 |
| MIR135A2       | 0 | 0 | 0 | 0 | 0 |
| FAM71C         | 0 | 0 | 0 | 0 | 0 |
| MIR1827        | 0 | 0 | 0 | 0 | 0 |
| SLC17A8        | 0 | 0 | 0 | 0 | 0 |

|                         |   |   |   |   |   |
|-------------------------|---|---|---|---|---|
| NR1H4                   | 0 | 0 | 0 | 0 | 0 |
| ANO4                    | 0 | 0 | 0 | 0 | 0 |
| SPIC                    | 0 | 0 | 0 | 0 | 0 |
| MYBPC1                  | 0 | 0 | 0 | 0 | 0 |
| ASCL1                   | 0 | 0 | 0 | 0 | 0 |
| MIR3922                 | 0 | 0 | 0 | 0 | 0 |
| RFX4                    | 0 | 0 | 0 | 0 | 0 |
| ASCL4                   | 0 | 0 | 0 | 0 | 0 |
| WSCD2                   | 0 | 0 | 0 | 0 | 0 |
| DAO                     | 0 | 0 | 0 | 0 | 0 |
| MIR4497                 | 0 | 0 | 0 | 0 | 0 |
| CCDC63                  | 0 | 0 | 0 | 0 | 0 |
| LOC100131138            | 0 | 0 | 0 | 0 | 0 |
| TBX5-AS1                | 0 | 0 | 0 | 0 | 0 |
| HSPB8                   | 0 | 0 | 0 | 0 | 0 |
| CCDC60                  | 0 | 0 | 0 | 0 | 0 |
| TMEM233                 | 0 | 0 | 0 | 0 | 0 |
| P2RX7                   | 0 | 0 | 0 | 0 | 0 |
| MIR5188                 | 0 | 0 | 0 | 0 | 0 |
| LOC100128554            | 0 | 0 | 0 | 0 | 0 |
| TMEM132C                | 0 | 0 | 0 | 0 | 0 |
| MIR3612                 | 0 | 0 | 0 | 0 | 0 |
| FZD10                   | 0 | 0 | 0 | 0 | 0 |
| PIWIL1                  | 0 | 0 | 0 | 0 | 0 |
| MMP17                   | 0 | 0 | 0 | 0 | 0 |
| FAM138D                 | 0 | 0 | 0 | 0 | 0 |
| LOC574538               | 0 | 0 | 0 | 0 | 0 |
| MIR3649                 | 0 | 0 | 0 | 0 | 0 |
| CACNA1C-AS4             | 0 | 0 | 0 | 0 | 0 |
| CACNA1C-AS1             | 0 | 0 | 0 | 0 | 0 |
| LOC283440               | 0 | 0 | 0 | 0 | 0 |
| FGF23                   | 0 | 0 | 0 | 0 | 0 |
| FGF6                    | 0 | 0 | 0 | 0 | 0 |
| SCARNA11                | 0 | 0 | 0 | 0 | 0 |
| CD163                   | 0 | 0 | 0 | 0 | 0 |
| APOBEC1                 | 0 | 0 | 0 | 0 | 0 |
| GDF3                    | 0 | 0 | 0 | 0 | 0 |
| CLEC4C                  | 0 | 0 | 0 | 0 | 0 |
| CLEC4E                  | 0 | 0 | 0 | 0 | 0 |
| PZP                     | 0 | 0 | 0 | 0 | 0 |
| A2MP1                   | 0 | 0 | 0 | 0 | 0 |
| MIR1244-1               | 0 | 0 | 0 | 0 | 0 |
| KLRB1                   | 0 | 0 | 0 | 0 | 0 |
| CD69                    | 0 | 0 | 0 | 0 | 0 |
| CLEC2A                  | 0 | 0 | 0 | 0 | 0 |
| CLEC1B                  | 0 | 0 | 0 | 0 | 0 |
| CLEC1A                  | 0 | 0 | 0 | 0 | 0 |
| OLR1                    | 0 | 0 | 0 | 0 | 0 |
| KLRC4,KLRC4-KLRK1,KLRK1 | 0 | 0 | 0 | 0 | 0 |
| KLRC3                   | 0 | 0 | 0 | 0 | 0 |
| KLRC1                   | 0 | 0 | 0 | 0 | 0 |
| TAS2R7                  | 0 | 0 | 0 | 0 | 0 |
| TAS2R8                  | 0 | 0 | 0 | 0 | 0 |
| TAS2R9                  | 0 | 0 | 0 | 0 | 0 |
| TAS2R42                 | 0 | 0 | 0 | 0 | 0 |
| PRB4                    | 0 | 0 | 0 | 0 | 0 |
| PRB1                    | 0 | 0 | 0 | 0 | 0 |
| PRB2                    | 0 | 0 | 0 | 0 | 0 |
| RNU6-19                 | 0 | 0 | 0 | 0 | 0 |
| C12orf36                | 0 | 0 | 0 | 0 | 0 |
| GRIN2B                  | 0 | 0 | 0 | 0 | 0 |
| ART4                    | 0 | 0 | 0 | 0 | 0 |
| MGP                     | 0 | 0 | 0 | 0 | 0 |
| ERP27                   | 0 | 0 | 0 | 0 | 0 |
| RERG                    | 0 | 0 | 0 | 0 | 0 |
| SLC15A5                 | 0 | 0 | 0 | 0 | 0 |
| LMO3                    | 0 | 0 | 0 | 0 | 0 |
| REGL                    | 0 | 0 | 0 | 0 | 0 |
| PLCZ1                   | 0 | 0 | 0 | 0 | 0 |
| KCNJ8                   | 0 | 0 | 0 | 0 | 0 |
| SOX5                    | 0 | 0 | 0 | 0 | 0 |
| LINC00477               | 0 | 0 | 0 | 0 | 0 |
| C12orf77                | 0 | 0 | 0 | 0 | 0 |
| MIR4302                 | 0 | 0 | 0 | 0 | 0 |
| LOC100506451            | 0 | 0 | 0 | 0 | 0 |
| MANSC4                  | 0 | 0 | 0 | 0 | 0 |
| OVCH1                   | 0 | 0 | 0 | 0 | 0 |
| TMTC1                   | 0 | 0 | 0 | 0 | 0 |
| RNU6-78                 | 0 | 0 | 0 | 0 | 0 |

|              |   |   |   |   |   |
|--------------|---|---|---|---|---|
| SYT10        | 0 | 0 | 0 | 0 | 0 |
| CPNE8        | 0 | 0 | 0 | 0 | 0 |
| ABCD2        | 0 | 0 | 0 | 0 | 0 |
| ADAMTS20     | 0 | 0 | 0 | 0 | 0 |
| DBX2         | 0 | 0 | 0 | 0 | 0 |
| RNY5         | 0 | 0 | 0 | 0 | 0 |
| AMIGO2       | 0 | 0 | 0 | 0 | 0 |
| PCED1B-AS1   | 0 | 0 | 0 | 0 | 0 |
| OR10AD1      | 0 | 0 | 0 | 0 | 0 |
| MIR4701      | 0 | 0 | 0 | 0 | 0 |
| C1QL4        | 0 | 0 | 0 | 0 | 0 |
| LOC283332    | 0 | 0 | 0 | 0 | 0 |
| MIR1293      | 0 | 0 | 0 | 0 | 0 |
| FIGNL2       | 0 | 0 | 0 | 0 | 0 |
| KRT84        | 0 | 0 | 0 | 0 | 0 |
| KRT82        | 0 | 0 | 0 | 0 | 0 |
| KRT75        | 0 | 0 | 0 | 0 | 0 |
| KRT6B        | 0 | 0 | 0 | 0 | 0 |
| KRT6C        | 0 | 0 | 0 | 0 | 0 |
| KRT6A        | 0 | 0 | 0 | 0 | 0 |
| KRT71        | 0 | 0 | 0 | 0 | 0 |
| KRT74        | 0 | 0 | 0 | 0 | 0 |
| KRT72        | 0 | 0 | 0 | 0 | 0 |
| KRT2         | 0 | 0 | 0 | 0 | 0 |
| KRT77        | 0 | 0 | 0 | 0 | 0 |
| KRT76        | 0 | 0 | 0 | 0 | 0 |
| KRT3         | 0 | 0 | 0 | 0 | 0 |
| KRT78        | 0 | 0 | 0 | 0 | 0 |
| HOXC-AS5     | 0 | 0 | 0 | 0 | 0 |
| GTSF1        | 0 | 0 | 0 | 0 | 0 |
| PPP1R1A      | 0 | 0 | 0 | 0 | 0 |
| GLYCAM1      | 0 | 0 | 0 | 0 | 0 |
| LACRT        | 0 | 0 | 0 | 0 | 0 |
| TESPA1       | 0 | 0 | 0 | 0 | 0 |
| OR6C6        | 0 | 0 | 0 | 0 | 0 |
| OR6C70       | 0 | 0 | 0 | 0 | 0 |
| SNORD59B     | 0 | 0 | 0 | 0 | 0 |
| SNORD59A     | 0 | 0 | 0 | 0 | 0 |
| TAC3         | 0 | 0 | 0 | 0 | 0 |
| B4GALNT1     | 0 | 0 | 0 | 0 | 0 |
| MIR26A2      | 0 | 0 | 0 | 0 | 0 |
| AVPR1A       | 0 | 0 | 0 | 0 | 0 |
| C12orf56     | 0 | 0 | 0 | 0 | 0 |
| WIF1         | 0 | 0 | 0 | 0 | 0 |
| IFNG         | 0 | 0 | 0 | 0 | 0 |
| IL26         | 0 | 0 | 0 | 0 | 0 |
| IL22         | 0 | 0 | 0 | 0 | 0 |
| SNORA70G     | 0 | 0 | 0 | 0 | 0 |
| MIR1279      | 0 | 0 | 0 | 0 | 0 |
| MIR3913-1    | 0 | 0 | 0 | 0 | 0 |
| TSPAN8       | 0 | 0 | 0 | 0 | 0 |
| TRHDE-AS1    | 0 | 0 | 0 | 0 | 0 |
| LOC100507377 | 0 | 0 | 0 | 0 | 0 |
| KCNC2        | 0 | 0 | 0 | 0 | 0 |
| LIN7A        | 0 | 0 | 0 | 0 | 0 |
| MIR617       | 0 | 0 | 0 | 0 | 0 |
| MIR618       | 0 | 0 | 0 | 0 | 0 |
| PPFIA2       | 0 | 0 | 0 | 0 | 0 |
| SLC6A15      | 0 | 0 | 0 | 0 | 0 |
| TSPAN19      | 0 | 0 | 0 | 0 | 0 |
| RASSF9       | 0 | 0 | 0 | 0 | 0 |
| MGAT4C       | 0 | 0 | 0 | 0 | 0 |
| MIR548AL     | 0 | 0 | 0 | 0 | 0 |
| MKRN9P       | 0 | 0 | 0 | 0 | 0 |
| CCER1        | 0 | 0 | 0 | 0 | 0 |
| EPYC         | 0 | 0 | 0 | 0 | 0 |
| KERA         | 0 | 0 | 0 | 0 | 0 |
| LUM          | 0 | 0 | 0 | 0 | 0 |
| DCN          | 0 | 0 | 0 | 0 | 0 |
| CLLU1OS      | 0 | 0 | 0 | 0 | 0 |
| LOC643339    | 0 | 0 | 0 | 0 | 0 |
| MIR4303      | 0 | 0 | 0 | 0 | 0 |
| SLC9A7P1     | 0 | 0 | 0 | 0 | 0 |
| SLC5A8       | 0 | 0 | 0 | 0 | 0 |
| PAH          | 0 | 0 | 0 | 0 | 0 |
| C12orf42     | 0 | 0 | 0 | 0 | 0 |
| LOC100287944 | 0 | 0 | 0 | 0 | 0 |
| LOC728739    | 0 | 0 | 0 | 0 | 0 |
| LHX5         | 0 | 0 | 0 | 0 | 0 |

|              |   |   |   |   |   |
|--------------|---|---|---|---|---|
| TBX5         | 0 | 0 | 0 | 0 | 0 |
| MIR620       | 0 | 0 | 0 | 0 | 0 |
| MIR4472-2    | 0 | 0 | 0 | 0 | 0 |
| KSR2         | 0 | 0 | 0 | 0 | 0 |
| LOC144742    | 0 | 0 | 0 | 0 | 0 |
| MIR4498      | 0 | 0 | 0 | 0 | 0 |
| MORN3        | 0 | 0 | 0 | 0 | 0 |
| IL31         | 0 | 0 | 0 | 0 | 0 |
| MIR4304      | 0 | 0 | 0 | 0 | 0 |
| LOC400084    | 0 | 0 | 0 | 0 | 0 |
| LOC440117    | 0 | 0 | 0 | 0 | 0 |
| TMEM132D     | 0 | 0 | 0 | 0 | 0 |
| LOC100190940 | 0 | 0 | 0 | 0 | 0 |
| FLJ31485     | 0 | 0 | 0 | 0 | 0 |
| LRCOL1       | 0 | 0 | 0 | 0 | 0 |
| ANHX         | 0 | 0 | 0 | 0 | 0 |
| LINC00442    | 0 | 0 | 0 | 0 | 0 |
| RNU6-52      | 0 | 0 | 0 | 0 | 0 |
| LINC00421    | 0 | 0 | 0 | 0 | 0 |
| LINC00327    | 0 | 0 | 0 | 0 | 0 |
| TNFRSF19     | 0 | 0 | 0 | 0 | 0 |
| MIR2276      | 0 | 0 | 0 | 0 | 0 |
| RNF17        | 0 | 0 | 0 | 0 | 0 |
| ATP8A2       | 0 | 0 | 0 | 0 | 0 |
| SNORD102     | 0 | 0 | 0 | 0 | 0 |
| GSX1         | 0 | 0 | 0 | 0 | 0 |
| LINC00544    | 0 | 0 | 0 | 0 | 0 |
| LINC00398    | 0 | 0 | 0 | 0 | 0 |
| MEDAG        | 0 | 0 | 0 | 0 | 0 |
| TEX26        | 0 | 0 | 0 | 0 | 0 |
| EEF1DP3      | 0 | 0 | 0 | 0 | 0 |
| KL           | 0 | 0 | 0 | 0 | 0 |
| SPG20OS      | 0 | 0 | 0 | 0 | 0 |
| CCNA1        | 0 | 0 | 0 | 0 | 0 |
| SERTM1       | 0 | 0 | 0 | 0 | 0 |
| LINC00547    | 0 | 0 | 0 | 0 | 0 |
| LINC00366    | 0 | 0 | 0 | 0 | 0 |
| LINC00332    | 0 | 0 | 0 | 0 | 0 |
| RGCC         | 0 | 0 | 0 | 0 | 0 |
| TNFSF11      | 0 | 0 | 0 | 0 | 0 |
| FAM216B      | 0 | 0 | 0 | 0 | 0 |
| DNAJC15      | 0 | 0 | 0 | 0 | 0 |
| LINC00284    | 0 | 0 | 0 | 0 | 0 |
| SERP2        | 0 | 0 | 0 | 0 | 0 |
| CYSLTR2      | 0 | 0 | 0 | 0 | 0 |
| ARL11        | 0 | 0 | 0 | 0 | 0 |
| MIR4703      | 0 | 0 | 0 | 0 | 0 |
| MIR759       | 0 | 0 | 0 | 0 | 0 |
| OLFM4        | 0 | 0 | 0 | 0 | 0 |
| LINC00558    | 0 | 0 | 0 | 0 | 0 |
| MIR5007      | 0 | 0 | 0 | 0 | 0 |
| PRR20B       | 0 | 0 | 0 | 0 | 0 |
| PRR20D       | 0 | 0 | 0 | 0 | 0 |
| PRR20E       | 0 | 0 | 0 | 0 | 0 |
| PRR20A       | 0 | 0 | 0 | 0 | 0 |
| PCDH17       | 0 | 0 | 0 | 0 | 0 |
| DIAPH3-AS1   | 0 | 0 | 0 | 0 | 0 |
| DIAPH3-AS2   | 0 | 0 | 0 | 0 | 0 |
| PCDH9-AS2    | 0 | 0 | 0 | 0 | 0 |
| PCDH9-AS3    | 0 | 0 | 0 | 0 | 0 |
| ATXN8OS      | 0 | 0 | 0 | 0 | 0 |
| LINC00348    | 0 | 0 | 0 | 0 | 0 |
| LINC00381    | 0 | 0 | 0 | 0 | 0 |
| LINC00347    | 0 | 0 | 0 | 0 | 0 |
| BTF3P11      | 0 | 0 | 0 | 0 | 0 |
| IRG1         | 0 | 0 | 0 | 0 | 0 |
| MYCBP2-AS1   | 0 | 0 | 0 | 0 | 0 |
| SCEL         | 0 | 0 | 0 | 0 | 0 |
| SLAIN1       | 0 | 0 | 0 | 0 | 0 |
| LINC00446    | 0 | 0 | 0 | 0 | 0 |
| LINC00333    | 0 | 0 | 0 | 0 | 0 |
| LINC00351    | 0 | 0 | 0 | 0 | 0 |
| SLITRK5      | 0 | 0 | 0 | 0 | 0 |
| LINC00433    | 0 | 0 | 0 | 0 | 0 |
| MIR622       | 0 | 0 | 0 | 0 | 0 |
| GPC6         | 0 | 0 | 0 | 0 | 0 |
| CLDN10       | 0 | 0 | 0 | 0 | 0 |
| HS6ST3       | 0 | 0 | 0 | 0 | 0 |

|                           |   |   |   |   |   |
|---------------------------|---|---|---|---|---|
| MIR3170                   | 0 | 0 | 0 | 0 | 0 |
| FKSG29                    | 0 | 0 | 0 | 0 | 0 |
| MIR623                    | 0 | 0 | 0 | 0 | 0 |
| MIR4306                   | 0 | 0 | 0 | 0 | 0 |
| ITGBL1                    | 0 | 0 | 0 | 0 | 0 |
| FGF14-AS2                 | 0 | 0 | 0 | 0 | 0 |
| DAOA                      | 0 | 0 | 0 | 0 | 0 |
| LINC00343                 | 0 | 0 | 0 | 0 | 0 |
| LINC00551                 | 0 | 0 | 0 | 0 | 0 |
| LINC00443                 | 0 | 0 | 0 | 0 | 0 |
| SOX1                      | 0 | 0 | 0 | 0 | 0 |
| SPACA7                    | 0 | 0 | 0 | 0 | 0 |
| C13orf35                  | 0 | 0 | 0 | 0 | 0 |
| GRK1                      | 0 | 0 | 0 | 0 | 0 |
| TMEM255B                  | 0 | 0 | 0 | 0 | 0 |
| TUBA3C                    | 0 | 0 | 0 | 0 | 0 |
| ANKRD26P3                 | 0 | 0 | 0 | 0 | 0 |
| GJB2                      | 0 | 0 | 0 | 0 | 0 |
| GJB6                      | 0 | 0 | 0 | 0 | 0 |
| MIR4499                   | 0 | 0 | 0 | 0 | 0 |
| LINC00424                 | 0 | 0 | 0 | 0 | 0 |
| BASP1P1                   | 0 | 0 | 0 | 0 | 0 |
| SPATA13-AS1               | 0 | 0 | 0 | 0 | 0 |
| AMER2                     | 0 | 0 | 0 | 0 | 0 |
| SHISA2                    | 0 | 0 | 0 | 0 | 0 |
| PRHOXNB                   | 0 | 0 | 0 | 0 | 0 |
| FLT3                      | 0 | 0 | 0 | 0 | 0 |
| LINC00297                 | 0 | 0 | 0 | 0 | 0 |
| TEX26-AS1                 | 0 | 0 | 0 | 0 | 0 |
| LINC00423                 | 0 | 0 | 0 | 0 | 0 |
| LINC00457                 | 0 | 0 | 0 | 0 | 0 |
| MAB21L1                   | 0 | 0 | 0 | 0 | 0 |
| DCLK1                     | 0 | 0 | 0 | 0 | 0 |
| CCDC169,CCDC169-SOHLH2,SC | 0 | 0 | 0 | 0 | 0 |
| SPG20                     | 0 | 0 | 0 | 0 | 0 |
| CSNK1A1L                  | 0 | 0 | 0 | 0 | 0 |
| POSTN                     | 0 | 0 | 0 | 0 | 0 |
| TRPC4                     | 0 | 0 | 0 | 0 | 0 |
| STOML3                    | 0 | 0 | 0 | 0 | 0 |
| LHFP                      | 0 | 0 | 0 | 0 | 0 |
| MIR4305                   | 0 | 0 | 0 | 0 | 0 |
| LINC00548                 | 0 | 0 | 0 | 0 | 0 |
| MIR320D1                  | 0 | 0 | 0 | 0 | 0 |
| EPST11                    | 0 | 0 | 0 | 0 | 0 |
| SMIM2-IT1                 | 0 | 0 | 0 | 0 | 0 |
| FAM194B                   | 0 | 0 | 0 | 0 | 0 |
| KIAA0226L                 | 0 | 0 | 0 | 0 | 0 |
| HTR2A                     | 0 | 0 | 0 | 0 | 0 |
| LINC00462                 | 0 | 0 | 0 | 0 | 0 |
| MIR3613                   | 0 | 0 | 0 | 0 | 0 |
| MIR16-1                   | 0 | 0 | 0 | 0 | 0 |
| MIR15A                    | 0 | 0 | 0 | 0 | 0 |
| RNASEH2B-AS1              | 0 | 0 | 0 | 0 | 0 |
| GUCY1B2                   | 0 | 0 | 0 | 0 | 0 |
| MIR5693                   | 0 | 0 | 0 | 0 | 0 |
| MIR1297                   | 0 | 0 | 0 | 0 | 0 |
| MIR3169                   | 0 | 0 | 0 | 0 | 0 |
| PCDH20                    | 0 | 0 | 0 | 0 | 0 |
| PCDH9                     | 0 | 0 | 0 | 0 | 0 |
| LINC00550                 | 0 | 0 | 0 | 0 | 0 |
| KLHL1                     | 0 | 0 | 0 | 0 | 0 |
| CTAGE11P                  | 0 | 0 | 0 | 0 | 0 |
| MIR3665                   | 0 | 0 | 0 | 0 | 0 |
| EDNRB                     | 0 | 0 | 0 | 0 | 0 |
| LINC00331                 | 0 | 0 | 0 | 0 | 0 |
| NDFIP2-AS1                | 0 | 0 | 0 | 0 | 0 |
| SLITRK1                   | 0 | 0 | 0 | 0 | 0 |
| SLITRK6                   | 0 | 0 | 0 | 0 | 0 |
| MIR4500HG                 | 0 | 0 | 0 | 0 | 0 |
| MIR4500                   | 0 | 0 | 0 | 0 | 0 |
| LINC00353                 | 0 | 0 | 0 | 0 | 0 |
| LINC00559                 | 0 | 0 | 0 | 0 | 0 |
| LINC00379                 | 0 | 0 | 0 | 0 | 0 |
| GPC5-AS1                  | 0 | 0 | 0 | 0 | 0 |
| GPC6-AS2                  | 0 | 0 | 0 | 0 | 0 |
| SOX21                     | 0 | 0 | 0 | 0 | 0 |
| CLDN10-AS1                | 0 | 0 | 0 | 0 | 0 |
| LINC00359                 | 0 | 0 | 0 | 0 | 0 |
| OXGR1                     | 0 | 0 | 0 | 0 | 0 |



|              |   |   |   |   |   |
|--------------|---|---|---|---|---|
| RNF113B      | 0 | 0 | 0 | 0 | 0 |
| MIR548AN     | 0 | 0 | 0 | 0 | 0 |
| PCCA-AS1     | 0 | 0 | 0 | 0 | 0 |
| NALCN        | 0 | 0 | 0 | 0 | 0 |
| FGF14        | 0 | 0 | 0 | 0 | 0 |
| MIR2681      | 0 | 0 | 0 | 0 | 0 |
| MIR4705      | 0 | 0 | 0 | 0 | 0 |
| FGF14-IT1    | 0 | 0 | 0 | 0 | 0 |
| METTL21C     | 0 | 0 | 0 | 0 | 0 |
| CCDC168      | 0 | 0 | 0 | 0 | 0 |
| SLC10A2      | 0 | 0 | 0 | 0 | 0 |
| MIR548AS     | 0 | 0 | 0 | 0 | 0 |
| DAOA-AS1     | 0 | 0 | 0 | 0 | 0 |
| FAM155A      | 0 | 0 | 0 | 0 | 0 |
| MYO16-AS1    | 0 | 0 | 0 | 0 | 0 |
| COL4A2-AS1   | 0 | 0 | 0 | 0 | 0 |
| ATP4B        | 0 | 0 | 0 | 0 | 0 |
| LINC00552    | 0 | 0 | 0 | 0 | 0 |
| OR11H12      | 0 | 0 | 0 | 0 | 0 |
| POTEG        | 0 | 0 | 0 | 0 | 0 |
| LOC101101776 | 0 | 0 | 0 | 0 | 0 |
| OR4Q3        | 0 | 0 | 0 | 0 | 0 |
| OR4M1        | 0 | 0 | 0 | 0 | 0 |
| OR4N2        | 0 | 0 | 0 | 0 | 0 |
| OR4K2        | 0 | 0 | 0 | 0 | 0 |
| OR4K5        | 0 | 0 | 0 | 0 | 0 |
| OR4K1        | 0 | 0 | 0 | 0 | 0 |
| OR4K15       | 0 | 0 | 0 | 0 | 0 |
| OR4L1        | 0 | 0 | 0 | 0 | 0 |
| OR4K17       | 0 | 0 | 0 | 0 | 0 |
| OR4N5        | 0 | 0 | 0 | 0 | 0 |
| OR11G2       | 0 | 0 | 0 | 0 | 0 |
| OR11H6       | 0 | 0 | 0 | 0 | 0 |
| RNASE10      | 0 | 0 | 0 | 0 | 0 |
| EDDM3A       | 0 | 0 | 0 | 0 | 0 |
| EDDM3B       | 0 | 0 | 0 | 0 | 0 |
| RNASE6       | 0 | 0 | 0 | 0 | 0 |
| TPPP2        | 0 | 0 | 0 | 0 | 0 |
| RNASE8       | 0 | 0 | 0 | 0 | 0 |
| OR4E2        | 0 | 0 | 0 | 0 | 0 |
| PSMB11       | 0 | 0 | 0 | 0 | 0 |
| IL25         | 0 | 0 | 0 | 0 | 0 |
| CMTM5        | 0 | 0 | 0 | 0 | 0 |
| CPNE6        | 0 | 0 | 0 | 0 | 0 |
| MIR4307      | 0 | 0 | 0 | 0 | 0 |
| LINC00645    | 0 | 0 | 0 | 0 | 0 |
| FOXG1        | 0 | 0 | 0 | 0 | 0 |
| IGBP1P1      | 0 | 0 | 0 | 0 | 0 |
| LINC00609    | 0 | 0 | 0 | 0 | 0 |
| MIA2         | 0 | 0 | 0 | 0 | 0 |
| LRFN5        | 0 | 0 | 0 | 0 | 0 |
| SNORD127     | 0 | 0 | 0 | 0 | 0 |
| GNG2         | 0 | 0 | 0 | 0 | 0 |
| PTGDR        | 0 | 0 | 0 | 0 | 0 |
| OTX2-AS1     | 0 | 0 | 0 | 0 | 0 |
| LRRC9        | 0 | 0 | 0 | 0 | 0 |
| SIX6         | 0 | 0 | 0 | 0 | 0 |
| FLJ22447     | 0 | 0 | 0 | 0 | 0 |
| SYT16        | 0 | 0 | 0 | 0 | 0 |
| LINC00643    | 0 | 0 | 0 | 0 | 0 |
| RHOJ         | 0 | 0 | 0 | 0 | 0 |
| MIR4706      | 0 | 0 | 0 | 0 | 0 |
| FAM71D       | 0 | 0 | 0 | 0 | 0 |
| SNORD56B     | 0 | 0 | 0 | 0 | 0 |
| RGS6         | 0 | 0 | 0 | 0 | 0 |
| MIR4505      | 0 | 0 | 0 | 0 | 0 |
| VSX2         | 0 | 0 | 0 | 0 | 0 |
| VRTN         | 0 | 0 | 0 | 0 | 0 |
| BATF         | 0 | 0 | 0 | 0 | 0 |
| C14orf166B   | 0 | 0 | 0 | 0 | 0 |
| MIR1260A     | 0 | 0 | 0 | 0 | 0 |
| DIO2-AS1     | 0 | 0 | 0 | 0 | 0 |
| TSHR         | 0 | 0 | 0 | 0 | 0 |
| FLRT2        | 0 | 0 | 0 | 0 | 0 |
| LOC283585    | 0 | 0 | 0 | 0 | 0 |
| KCNK13       | 0 | 0 | 0 | 0 | 0 |
| LINC00642    | 0 | 0 | 0 | 0 | 0 |
| FAM181A      | 0 | 0 | 0 | 0 | 0 |
| LINC00521    | 0 | 0 | 0 | 0 | 0 |

|             |   |   |   |   |   |
|-------------|---|---|---|---|---|
| SERPINA4    | 0 | 0 | 0 | 0 | 0 |
| SERPINA5    | 0 | 0 | 0 | 0 | 0 |
| SERPINA13P  | 0 | 0 | 0 | 0 | 0 |
| TCL6        | 0 | 0 | 0 | 0 | 0 |
| TCL1B       | 0 | 0 | 0 | 0 | 0 |
| LINC00617   | 0 | 0 | 0 | 0 | 0 |
| C14orf132   | 0 | 0 | 0 | 0 | 0 |
| BDKRB2      | 0 | 0 | 0 | 0 | 0 |
| BDKRB1      | 0 | 0 | 0 | 0 | 0 |
| C14orf177   | 0 | 0 | 0 | 0 | 0 |
| MIR5698     | 0 | 0 | 0 | 0 | 0 |
| EML1        | 0 | 0 | 0 | 0 | 0 |
| EVL         | 0 | 0 | 0 | 0 | 0 |
| MIR345      | 0 | 0 | 0 | 0 | 0 |
| SLC25A47    | 0 | 0 | 0 | 0 | 0 |
| LINC00523   | 0 | 0 | 0 | 0 | 0 |
| DLK1        | 0 | 0 | 0 | 0 | 0 |
| MIR2392     | 0 | 0 | 0 | 0 | 0 |
| MEG3,MIR770 | 0 | 0 | 0 | 0 | 0 |
| MIR493      | 0 | 0 | 0 | 0 | 0 |
| MIR337      | 0 | 0 | 0 | 0 | 0 |
| MIR665      | 0 | 0 | 0 | 0 | 0 |
| MIR431      | 0 | 0 | 0 | 0 | 0 |
| MIR433      | 0 | 0 | 0 | 0 | 0 |
| MIR127      | 0 | 0 | 0 | 0 | 0 |
| MIR432      | 0 | 0 | 0 | 0 | 0 |
| MIR136      | 0 | 0 | 0 | 0 | 0 |
| MEG8        | 0 | 0 | 0 | 0 | 0 |
| SNORD113-1  | 0 | 0 | 0 | 0 | 0 |
| SNORD113-2  | 0 | 0 | 0 | 0 | 0 |
| SNORD113-4  | 0 | 0 | 0 | 0 | 0 |
| SNORD113-5  | 0 | 0 | 0 | 0 | 0 |
| SNORD113-6  | 0 | 0 | 0 | 0 | 0 |
| SNORD113-7  | 0 | 0 | 0 | 0 | 0 |
| SNORD113-9  | 0 | 0 | 0 | 0 | 0 |
| SNORD114-1  | 0 | 0 | 0 | 0 | 0 |
| SNORD114-2  | 0 | 0 | 0 | 0 | 0 |
| SNORD114-3  | 0 | 0 | 0 | 0 | 0 |
| SNORD114-4  | 0 | 0 | 0 | 0 | 0 |
| SNORD114-5  | 0 | 0 | 0 | 0 | 0 |
| SNORD114-6  | 0 | 0 | 0 | 0 | 0 |
| SNORD114-7  | 0 | 0 | 0 | 0 | 0 |
| SNORD114-8  | 0 | 0 | 0 | 0 | 0 |
| SNORD114-9  | 0 | 0 | 0 | 0 | 0 |
| SNORD114-10 | 0 | 0 | 0 | 0 | 0 |
| SNORD114-11 | 0 | 0 | 0 | 0 | 0 |
| SNORD114-12 | 0 | 0 | 0 | 0 | 0 |
| SNORD114-13 | 0 | 0 | 0 | 0 | 0 |
| SNORD114-14 | 0 | 0 | 0 | 0 | 0 |
| SNORD114-15 | 0 | 0 | 0 | 0 | 0 |
| SNORD114-16 | 0 | 0 | 0 | 0 | 0 |
| SNORD114-17 | 0 | 0 | 0 | 0 | 0 |
| SNORD114-18 | 0 | 0 | 0 | 0 | 0 |
| SNORD114-19 | 0 | 0 | 0 | 0 | 0 |
| SNORD114-20 | 0 | 0 | 0 | 0 | 0 |
| SNORD114-21 | 0 | 0 | 0 | 0 | 0 |
| SNORD114-22 | 0 | 0 | 0 | 0 | 0 |
| SNORD114-23 | 0 | 0 | 0 | 0 | 0 |
| SNORD114-24 | 0 | 0 | 0 | 0 | 0 |
| SNORD114-25 | 0 | 0 | 0 | 0 | 0 |
| SNORD114-26 | 0 | 0 | 0 | 0 | 0 |
| SNORD114-27 | 0 | 0 | 0 | 0 | 0 |
| SNORD114-28 | 0 | 0 | 0 | 0 | 0 |
| SNORD114-29 | 0 | 0 | 0 | 0 | 0 |
| SNORD114-30 | 0 | 0 | 0 | 0 | 0 |
| SNORD114-31 | 0 | 0 | 0 | 0 | 0 |
| MIR379      | 0 | 0 | 0 | 0 | 0 |
| MIR411      | 0 | 0 | 0 | 0 | 0 |
| MIR299      | 0 | 0 | 0 | 0 | 0 |
| MIR380      | 0 | 0 | 0 | 0 | 0 |
| MIR1197     | 0 | 0 | 0 | 0 | 0 |
| MIR323A     | 0 | 0 | 0 | 0 | 0 |
| MIR758      | 0 | 0 | 0 | 0 | 0 |
| MIR329-1    | 0 | 0 | 0 | 0 | 0 |
| MIR329-2    | 0 | 0 | 0 | 0 | 0 |
| MIR494      | 0 | 0 | 0 | 0 | 0 |
| MIR1193     | 0 | 0 | 0 | 0 | 0 |
| MIR543      | 0 | 0 | 0 | 0 | 0 |
| MIR495      | 0 | 0 | 0 | 0 | 0 |

|              |   |   |   |   |   |
|--------------|---|---|---|---|---|
| MIR376C      | 0 | 0 | 0 | 0 | 0 |
| MIR376A2     | 0 | 0 | 0 | 0 | 0 |
| MIR654       | 0 | 0 | 0 | 0 | 0 |
| MIR376B      | 0 | 0 | 0 | 0 | 0 |
| MIR376A1     | 0 | 0 | 0 | 0 | 0 |
| MIR300       | 0 | 0 | 0 | 0 | 0 |
| MIR1185-1    | 0 | 0 | 0 | 0 | 0 |
| MIR1185-2    | 0 | 0 | 0 | 0 | 0 |
| MIR381       | 0 | 0 | 0 | 0 | 0 |
| MIR487B      | 0 | 0 | 0 | 0 | 0 |
| MIR539       | 0 | 0 | 0 | 0 | 0 |
| MIR889       | 0 | 0 | 0 | 0 | 0 |
| MIR655       | 0 | 0 | 0 | 0 | 0 |
| MIR487A      | 0 | 0 | 0 | 0 | 0 |
| MIR382       | 0 | 0 | 0 | 0 | 0 |
| MIR134       | 0 | 0 | 0 | 0 | 0 |
| MIR668       | 0 | 0 | 0 | 0 | 0 |
| MIR485       | 0 | 0 | 0 | 0 | 0 |
| MIR323B      | 0 | 0 | 0 | 0 | 0 |
| MIR154       | 0 | 0 | 0 | 0 | 0 |
| MIR496       | 0 | 0 | 0 | 0 | 0 |
| MIR377       | 0 | 0 | 0 | 0 | 0 |
| MIR541       | 0 | 0 | 0 | 0 | 0 |
| MIR409       | 0 | 0 | 0 | 0 | 0 |
| MIR412       | 0 | 0 | 0 | 0 | 0 |
| MIR369       | 0 | 0 | 0 | 0 | 0 |
| MIR410       | 0 | 0 | 0 | 0 | 0 |
| MIR656       | 0 | 0 | 0 | 0 | 0 |
| MEG9         | 0 | 0 | 0 | 0 | 0 |
| DIO3         | 0 | 0 | 0 | 0 | 0 |
| MIR4309      | 0 | 0 | 0 | 0 | 0 |
| ASPG         | 0 | 0 | 0 | 0 | 0 |
| MIR203       | 0 | 0 | 0 | 0 | 0 |
| KIAA0125     | 0 | 0 | 0 | 0 | 0 |
| LINC00226    | 0 | 0 | 0 | 0 | 0 |
| LINC00221    | 0 | 0 | 0 | 0 | 0 |
| LOC642426    | 0 | 0 | 0 | 0 | 0 |
| LOC101101776 | 0 | 0 | 0 | 0 | 0 |
| POTEM        | 0 | 0 | 0 | 0 | 0 |
| OR4K14       | 0 | 0 | 0 | 0 | 0 |
| OR4K13       | 0 | 0 | 0 | 0 | 0 |
| SNORD126     | 0 | 0 | 0 | 0 | 0 |
| RNASE9       | 0 | 0 | 0 | 0 | 0 |
| OR6S1        | 0 | 0 | 0 | 0 | 0 |
| RNASE1       | 0 | 0 | 0 | 0 | 0 |
| RNASE13      | 0 | 0 | 0 | 0 | 0 |
| OR5AU1       | 0 | 0 | 0 | 0 | 0 |
| SALL2        | 0 | 0 | 0 | 0 | 0 |
| OR10G3       | 0 | 0 | 0 | 0 | 0 |
| OR10G2       | 0 | 0 | 0 | 0 | 0 |
| CEBPE        | 0 | 0 | 0 | 0 | 0 |
| SLC7A8       | 0 | 0 | 0 | 0 | 0 |
| SLC22A17     | 0 | 0 | 0 | 0 | 0 |
| EFS          | 0 | 0 | 0 | 0 | 0 |
| MIR208A      | 0 | 0 | 0 | 0 | 0 |
| MYH7         | 0 | 0 | 0 | 0 | 0 |
| MIR208B      | 0 | 0 | 0 | 0 | 0 |
| RIPK3        | 0 | 0 | 0 | 0 | 0 |
| CMA1         | 0 | 0 | 0 | 0 | 0 |
| CTSG         | 0 | 0 | 0 | 0 | 0 |
| GZMH         | 0 | 0 | 0 | 0 | 0 |
| GZMB         | 0 | 0 | 0 | 0 | 0 |
| NOVA1        | 0 | 0 | 0 | 0 | 0 |
| MIR548A1     | 0 | 0 | 0 | 0 | 0 |
| MIR624       | 0 | 0 | 0 | 0 | 0 |
| GPR33        | 0 | 0 | 0 | 0 | 0 |
| SFTA3        | 0 | 0 | 0 | 0 | 0 |
| NKX2-1       | 0 | 0 | 0 | 0 | 0 |
| NKX2-8       | 0 | 0 | 0 | 0 | 0 |
| MIR4503      | 0 | 0 | 0 | 0 | 0 |
| CLEC14A      | 0 | 0 | 0 | 0 | 0 |
| LINC00639    | 0 | 0 | 0 | 0 | 0 |
| FSCB         | 0 | 0 | 0 | 0 | 0 |
| RPL10L       | 0 | 0 | 0 | 0 | 0 |
| MDGA2        | 0 | 0 | 0 | 0 | 0 |
| MIR548Y      | 0 | 0 | 0 | 0 | 0 |
| LINC00648    | 0 | 0 | 0 | 0 | 0 |
| FRMD6-AS2    | 0 | 0 | 0 | 0 | 0 |
| MIR5580      | 0 | 0 | 0 | 0 | 0 |

|              |   |   |   |   |   |
|--------------|---|---|---|---|---|
| MIR4308      | 0 | 0 | 0 | 0 | 0 |
| C14orf39     | 0 | 0 | 0 | 0 | 0 |
| TMEM30B      | 0 | 0 | 0 | 0 | 0 |
| KCNH5        | 0 | 0 | 0 | 0 | 0 |
| GPHB5        | 0 | 0 | 0 | 0 | 0 |
| MIR4708      | 0 | 0 | 0 | 0 | 0 |
| CCDC177      | 0 | 0 | 0 | 0 | 0 |
| SLC8A3       | 0 | 0 | 0 | 0 | 0 |
| RNU6-6       | 0 | 0 | 0 | 0 | 0 |
| ZDHC22       | 0 | 0 | 0 | 0 | 0 |
| NGB          | 0 | 0 | 0 | 0 | 0 |
| GALC         | 0 | 0 | 0 | 0 | 0 |
| KCNK10       | 0 | 0 | 0 | 0 | 0 |
| TTC7B        | 0 | 0 | 0 | 0 | 0 |
| CATSPERB     | 0 | 0 | 0 | 0 | 0 |
| PRIMA1       | 0 | 0 | 0 | 0 | 0 |
| FAM181A-AS1  | 0 | 0 | 0 | 0 | 0 |
| ASB2         | 0 | 0 | 0 | 0 | 0 |
| SERPINA6     | 0 | 0 | 0 | 0 | 0 |
| SERPINA11    | 0 | 0 | 0 | 0 | 0 |
| SERPINA9     | 0 | 0 | 0 | 0 | 0 |
| SERPINA12    | 0 | 0 | 0 | 0 | 0 |
| GSC          | 0 | 0 | 0 | 0 | 0 |
| MIR3173      | 0 | 0 | 0 | 0 | 0 |
| SYNE3        | 0 | 0 | 0 | 0 | 0 |
| TCL1A        | 0 | 0 | 0 | 0 | 0 |
| LOC100129345 | 0 | 0 | 0 | 0 | 0 |
| C14orf64     | 0 | 0 | 0 | 0 | 0 |
| RTL1         | 0 | 0 | 0 | 0 | 0 |
| DIO3OS       | 0 | 0 | 0 | 0 | 0 |
| MIR1247      | 0 | 0 | 0 | 0 | 0 |
| LINC00605    | 0 | 0 | 0 | 0 | 0 |
| RD3L         | 0 | 0 | 0 | 0 | 0 |
| MIR3545      | 0 | 0 | 0 | 0 | 0 |
| TMEM179      | 0 | 0 | 0 | 0 | 0 |
| MIR4710      | 0 | 0 | 0 | 0 | 0 |
| ELK2AP       | 0 | 0 | 0 | 0 | 0 |
| ADAM6        | 0 | 0 | 0 | 0 | 0 |
| CHEK2P2      | 0 | 0 | 0 | 0 | 0 |
| GOLGA8CP     | 0 | 0 | 0 | 0 | 0 |
| CT60         | 0 | 0 | 0 | 0 | 0 |
| OR4M2        | 0 | 0 | 0 | 0 | 0 |
| OR4N4        | 0 | 0 | 0 | 0 | 0 |
| OR4N3P       | 0 | 0 | 0 | 0 | 0 |
| REREP3       | 0 | 0 | 0 | 0 | 0 |
| GOLGA6L1     | 0 | 0 | 0 | 0 | 0 |
| MKRN3        | 0 | 0 | 0 | 0 | 0 |
| PWRN1        | 0 | 0 | 0 | 0 | 0 |
| SNORD109A    | 0 | 0 | 0 | 0 | 0 |
| SNORD116-1   | 0 | 0 | 0 | 0 | 0 |
| SNORD116-2   | 0 | 0 | 0 | 0 | 0 |
| SNORD116-9   | 0 | 0 | 0 | 0 | 0 |
| SNORD116-4   | 0 | 0 | 0 | 0 | 0 |
| SNORD116-5   | 0 | 0 | 0 | 0 | 0 |
| SNORD116-6   | 0 | 0 | 0 | 0 | 0 |
| SNORD116-7   | 0 | 0 | 0 | 0 | 0 |
| SNORD116-8   | 0 | 0 | 0 | 0 | 0 |
| SNORD116-9   | 0 | 0 | 0 | 0 | 0 |
| SNORD116-10  | 0 | 0 | 0 | 0 | 0 |
| SNORD116-11  | 0 | 0 | 0 | 0 | 0 |
| SNORD116-12  | 0 | 0 | 0 | 0 | 0 |
| SNORD116-13  | 0 | 0 | 0 | 0 | 0 |
| SNORD116-14  | 0 | 0 | 0 | 0 | 0 |
| SNORD116-15  | 0 | 0 | 0 | 0 | 0 |
| SNORD116-16  | 0 | 0 | 0 | 0 | 0 |
| SNORD116-17  | 0 | 0 | 0 | 0 | 0 |
| SNORD116-18  | 0 | 0 | 0 | 0 | 0 |
| SNORD116-19  | 0 | 0 | 0 | 0 | 0 |
| SNORD116-20  | 0 | 0 | 0 | 0 | 0 |
| SNORD116-21  | 0 | 0 | 0 | 0 | 0 |
| SNORD116-22  | 0 | 0 | 0 | 0 | 0 |
| SNORD116-23  | 0 | 0 | 0 | 0 | 0 |
| SNORD116-24  | 0 | 0 | 0 | 0 | 0 |
| SNORD116-25  | 0 | 0 | 0 | 0 | 0 |
| SNORD116-26  | 0 | 0 | 0 | 0 | 0 |
| SNORD116-27  | 0 | 0 | 0 | 0 | 0 |
| SNORD116-28  | 0 | 0 | 0 | 0 | 0 |
| SNORD116-29  | 0 | 0 | 0 | 0 | 0 |
| IPW          | 0 | 0 | 0 | 0 | 0 |

|                            |   |   |   |   |   |
|----------------------------|---|---|---|---|---|
| PAR1                       | 0 | 0 | 0 | 0 | 0 |
| SNORD115-1                 | 0 | 0 | 0 | 0 | 0 |
| SNORD115-2                 | 0 | 0 | 0 | 0 | 0 |
| SNORD115-3                 | 0 | 0 | 0 | 0 | 0 |
| SNORD115-4                 | 0 | 0 | 0 | 0 | 0 |
| SNORD115-5                 | 0 | 0 | 0 | 0 | 0 |
| SNORD115-6                 | 0 | 0 | 0 | 0 | 0 |
| SNORD115-7                 | 0 | 0 | 0 | 0 | 0 |
| SNORD115-8                 | 0 | 0 | 0 | 0 | 0 |
| SNORD115-9                 | 0 | 0 | 0 | 0 | 0 |
| SNORD115-10                | 0 | 0 | 0 | 0 | 0 |
| SNORD115-43                | 0 | 0 | 0 | 0 | 0 |
| SNORD115-10                | 0 | 0 | 0 | 0 | 0 |
| SNORD115-13                | 0 | 0 | 0 | 0 | 0 |
| SNORD115-14                | 0 | 0 | 0 | 0 | 0 |
| SNORD115-16                | 0 | 0 | 0 | 0 | 0 |
| SNORD115-18                | 0 | 0 | 0 | 0 | 0 |
| SNORD115-18                | 0 | 0 | 0 | 0 | 0 |
| SNORD115-17                | 0 | 0 | 0 | 0 | 0 |
| SNORD115-15,SNORD115-20,SN | 0 | 0 | 0 | 0 | 0 |
| SNORD115-22                | 0 | 0 | 0 | 0 | 0 |
| PAR4                       | 0 | 0 | 0 | 0 | 0 |
| SNORD115-24                | 0 | 0 | 0 | 0 | 0 |
| SNORD115-25                | 0 | 0 | 0 | 0 | 0 |
| SNORD115-26                | 0 | 0 | 0 | 0 | 0 |
| SNORD115-27                | 0 | 0 | 0 | 0 | 0 |
| SNORD115-28                | 0 | 0 | 0 | 0 | 0 |
| SNORD115-11                | 0 | 0 | 0 | 0 | 0 |
| SNORD115-30                | 0 | 0 | 0 | 0 | 0 |
| SNORD115-31                | 0 | 0 | 0 | 0 | 0 |
| SNORD115-32                | 0 | 0 | 0 | 0 | 0 |
| SNORD115-33                | 0 | 0 | 0 | 0 | 0 |
| SNORD115-35                | 0 | 0 | 0 | 0 | 0 |
| SNORD115-11                | 0 | 0 | 0 | 0 | 0 |
| SNORD115-37                | 0 | 0 | 0 | 0 | 0 |
| SNORD115-38                | 0 | 0 | 0 | 0 | 0 |
| SNORD115-39                | 0 | 0 | 0 | 0 | 0 |
| SNORD115-40                | 0 | 0 | 0 | 0 | 0 |
| SNORD115-41                | 0 | 0 | 0 | 0 | 0 |
| SNORD115-10                | 0 | 0 | 0 | 0 | 0 |
| SNORD115-11                | 0 | 0 | 0 | 0 | 0 |
| SNORD115-44                | 0 | 0 | 0 | 0 | 0 |
| SNORD115-45                | 0 | 0 | 0 | 0 | 0 |
| SNORD115-47                | 0 | 0 | 0 | 0 | 0 |
| SNORD115-48                | 0 | 0 | 0 | 0 | 0 |
| SNORD109B                  | 0 | 0 | 0 | 0 | 0 |
| LOC100128714               | 0 | 0 | 0 | 0 | 0 |
| LOC503519                  | 0 | 0 | 0 | 0 | 0 |
| GABRA5                     | 0 | 0 | 0 | 0 | 0 |
| GABRG3                     | 0 | 0 | 0 | 0 | 0 |
| GOLGA8F,GOLGA8G            | 0 | 0 | 0 | 0 | 0 |
| MIR4509-1                  | 0 | 0 | 0 | 0 | 0 |
| LOC100289656               | 0 | 0 | 0 | 0 | 0 |
| ULK4P3                     | 0 | 0 | 0 | 0 | 0 |
| ULK4P2                     | 0 | 0 | 0 | 0 | 0 |
| GREM1                      | 0 | 0 | 0 | 0 | 0 |
| MIR4510                    | 0 | 0 | 0 | 0 | 0 |
| TMCO5A                     | 0 | 0 | 0 | 0 | 0 |
| C15orf53                   | 0 | 0 | 0 | 0 | 0 |
| C15orf54                   | 0 | 0 | 0 | 0 | 0 |
| THBS1                      | 0 | 0 | 0 | 0 | 0 |
| PHGR1                      | 0 | 0 | 0 | 0 | 0 |
| MIR626                     | 0 | 0 | 0 | 0 | 0 |
| ADAL                       | 0 | 0 | 0 | 0 | 0 |
| RNU6-28                    | 0 | 0 | 0 | 0 | 0 |
| C15orf43                   | 0 | 0 | 0 | 0 | 0 |
| DUXA2                      | 0 | 0 | 0 | 0 | 0 |
| SEMA6D                     | 0 | 0 | 0 | 0 | 0 |
| SLC24A5                    | 0 | 0 | 0 | 0 | 0 |
| CTXN2                      | 0 | 0 | 0 | 0 | 0 |
| SLC12A1                    | 0 | 0 | 0 | 0 | 0 |
| MIR4712                    | 0 | 0 | 0 | 0 | 0 |
| MIR4713                    | 0 | 0 | 0 | 0 | 0 |
| GLDN                       | 0 | 0 | 0 | 0 | 0 |
| UNC13C                     | 0 | 0 | 0 | 0 | 0 |
| AQP9                       | 0 | 0 | 0 | 0 | 0 |
| LIPC                       | 0 | 0 | 0 | 0 | 0 |
| FOXB1                      | 0 | 0 | 0 | 0 | 0 |
| MIR190A                    | 0 | 0 | 0 | 0 | 0 |

|                   |   |   |   |   |   |
|-------------------|---|---|---|---|---|
| KBTBD13           | 0 | 0 | 0 | 0 | 0 |
| MIR4311           | 0 | 0 | 0 | 0 | 0 |
| MIR548H4          | 0 | 0 | 0 | 0 | 0 |
| NOX5,SPESP1       | 0 | 0 | 0 | 0 | 0 |
| LINC00277         | 0 | 0 | 0 | 0 | 0 |
| LINC00593         | 0 | 0 | 0 | 0 | 0 |
| TMEM202           | 0 | 0 | 0 | 0 | 0 |
| MIR630            | 0 | 0 | 0 | 0 | 0 |
| GOLGA6B           | 0 | 0 | 0 | 0 | 0 |
| C15orf60          | 0 | 0 | 0 | 0 | 0 |
| TBC1D21           | 0 | 0 | 0 | 0 | 0 |
| ISLR2             | 0 | 0 | 0 | 0 | 0 |
| ISLR              | 0 | 0 | 0 | 0 | 0 |
| CCDC33            | 0 | 0 | 0 | 0 | 0 |
| GOLGA6D           | 0 | 0 | 0 | 0 | 0 |
| LOC253044         | 0 | 0 | 0 | 0 | 0 |
| MIR5003           | 0 | 0 | 0 | 0 | 0 |
| CRABP1            | 0 | 0 | 0 | 0 | 0 |
| MIR184            | 0 | 0 | 0 | 0 | 0 |
| ANKRD34C          | 0 | 0 | 0 | 0 | 0 |
| LOC390660         | 0 | 0 | 0 | 0 | 0 |
| UBE2Q2P2,UBE2Q2P3 | 0 | 0 | 0 | 0 | 0 |
| GOLGA6L9          | 0 | 0 | 0 | 0 | 0 |
| LOC440297         | 0 | 0 | 0 | 0 | 0 |
| LOC390660         | 0 | 0 | 0 | 0 | 0 |
| LOC440297         | 0 | 0 | 0 | 0 | 0 |
| LOC283692         | 0 | 0 | 0 | 0 | 0 |
| SCARNA15          | 0 | 0 | 0 | 0 | 0 |
| MIR4515           | 0 | 0 | 0 | 0 | 0 |
| TM6SF1            | 0 | 0 | 0 | 0 | 0 |
| ADAMTSL3          | 0 | 0 | 0 | 0 | 0 |
| EFTUD1P1          | 0 | 0 | 0 | 0 | 0 |
| AGBL1             | 0 | 0 | 0 | 0 | 0 |
| LINC00052         | 0 | 0 | 0 | 0 | 0 |
| NTRK3-AS1         | 0 | 0 | 0 | 0 | 0 |
| MIR1179           | 0 | 0 | 0 | 0 | 0 |
| MIR7-2            | 0 | 0 | 0 | 0 | 0 |
| ACAN              | 0 | 0 | 0 | 0 | 0 |
| MIR9-3            | 0 | 0 | 0 | 0 | 0 |
| LOC254559         | 0 | 0 | 0 | 0 | 0 |
| ST8SIA2           | 0 | 0 | 0 | 0 | 0 |
| C15orf32          | 0 | 0 | 0 | 0 | 0 |
| MIR3175           | 0 | 0 | 0 | 0 | 0 |
| MIR1469           | 0 | 0 | 0 | 0 | 0 |
| SPATA8            | 0 | 0 | 0 | 0 | 0 |
| MIR4714           | 0 | 0 | 0 | 0 | 0 |
| OR4F6             | 0 | 0 | 0 | 0 | 0 |
| OR4F15            | 0 | 0 | 0 | 0 | 0 |
| OR4F13P           | 0 | 0 | 0 | 0 | 0 |
| FAM138E           | 0 | 0 | 0 | 0 | 0 |
| GOLGA6L6          | 0 | 0 | 0 | 0 | 0 |
| POTEB             | 0 | 0 | 0 | 0 | 0 |
| NF1P2             | 0 | 0 | 0 | 0 | 0 |
| CXADRP2           | 0 | 0 | 0 | 0 | 0 |
| POTEB             | 0 | 0 | 0 | 0 | 0 |
| NF1P2             | 0 | 0 | 0 | 0 | 0 |
| MIR4509-3         | 0 | 0 | 0 | 0 | 0 |
| LOC440243         | 0 | 0 | 0 | 0 | 0 |
| MIR4508           | 0 | 0 | 0 | 0 | 0 |
| MAGEL2            | 0 | 0 | 0 | 0 | 0 |
| NDN               | 0 | 0 | 0 | 0 | 0 |
| PWRN2             | 0 | 0 | 0 | 0 | 0 |
| ATP10A            | 0 | 0 | 0 | 0 | 0 |
| MIR4715           | 0 | 0 | 0 | 0 | 0 |
| MIR4509-1         | 0 | 0 | 0 | 0 | 0 |
| GOLGA8F,GOLGA8G   | 0 | 0 | 0 | 0 | 0 |
| GOLGA6L7P         | 0 | 0 | 0 | 0 | 0 |
| FAM189A1          | 0 | 0 | 0 | 0 | 0 |
| TRPM1             | 0 | 0 | 0 | 0 | 0 |
| MIR211            | 0 | 0 | 0 | 0 | 0 |
| LOC283710         | 0 | 0 | 0 | 0 | 0 |
| TMCO5B            | 0 | 0 | 0 | 0 | 0 |
| MIR1233-2         | 0 | 0 | 0 | 0 | 0 |
| MIR1233-1         | 0 | 0 | 0 | 0 | 0 |
| GJD2              | 0 | 0 | 0 | 0 | 0 |
| MIR3942           | 0 | 0 | 0 | 0 | 0 |
| LOC145845         | 0 | 0 | 0 | 0 | 0 |
| MIR4310           | 0 | 0 | 0 | 0 | 0 |
| PLA2G4F           | 0 | 0 | 0 | 0 | 0 |

|           |   |   |   |   |   |
|-----------|---|---|---|---|---|
| MIR627    | 0 | 0 | 0 | 0 | 0 |
| EPB42     | 0 | 0 | 0 | 0 | 0 |
| TGM5      | 0 | 0 | 0 | 0 | 0 |
| TGM7      | 0 | 0 | 0 | 0 | 0 |
| LCMT2     | 0 | 0 | 0 | 0 | 0 |
| MIR4716   | 0 | 0 | 0 | 0 | 0 |
| CYP19A1   | 0 | 0 | 0 | 0 | 0 |
| MIR1266   | 0 | 0 | 0 | 0 | 0 |
| WDR72     | 0 | 0 | 0 | 0 | 0 |
| MIR628    | 0 | 0 | 0 | 0 | 0 |
| PYGO1     | 0 | 0 | 0 | 0 | 0 |
| PRTG      | 0 | 0 | 0 | 0 | 0 |
| ALDH1A2   | 0 | 0 | 0 | 0 | 0 |
| MIR2116   | 0 | 0 | 0 | 0 | 0 |
| C2CD4B    | 0 | 0 | 0 | 0 | 0 |
| MGC15885  | 0 | 0 | 0 | 0 | 0 |
| MIR1272   | 0 | 0 | 0 | 0 | 0 |
| RASL12    | 0 | 0 | 0 | 0 | 0 |
| MIR4511   | 0 | 0 | 0 | 0 | 0 |
| SNORD18C  | 0 | 0 | 0 | 0 | 0 |
| SNORD18B  | 0 | 0 | 0 | 0 | 0 |
| SNORD16   | 0 | 0 | 0 | 0 | 0 |
| SNORD18A  | 0 | 0 | 0 | 0 | 0 |
| MIR4312   | 0 | 0 | 0 | 0 | 0 |
| MIR629    | 0 | 0 | 0 | 0 | 0 |
| LARP6     | 0 | 0 | 0 | 0 | 0 |
| CT62      | 0 | 0 | 0 | 0 | 0 |
| GRAMD2    | 0 | 0 | 0 | 0 | 0 |
| HCN4      | 0 | 0 | 0 | 0 | 0 |
| C15orf59  | 0 | 0 | 0 | 0 | 0 |
| GOLGA6A   | 0 | 0 | 0 | 0 | 0 |
| CYP11A1   | 0 | 0 | 0 | 0 | 0 |
| MIR4513   | 0 | 0 | 0 | 0 | 0 |
| MIR631    | 0 | 0 | 0 | 0 | 0 |
| MIR4313   | 0 | 0 | 0 | 0 | 0 |
| LINGO1    | 0 | 0 | 0 | 0 | 0 |
| LOC645752 | 0 | 0 | 0 | 0 | 0 |
| CHRNA4    | 0 | 0 | 0 | 0 | 0 |
| ADAMTS7   | 0 | 0 | 0 | 0 | 0 |
| LOC729911 | 0 | 0 | 0 | 0 | 0 |
| LOC283688 | 0 | 0 | 0 | 0 | 0 |
| MIR549    | 0 | 0 | 0 | 0 | 0 |
| MIR4514   | 0 | 0 | 0 | 0 | 0 |
| LOC440297 | 0 | 0 | 0 | 0 | 0 |
| AP3B2     | 0 | 0 | 0 | 0 | 0 |
| HDGFRP3   | 0 | 0 | 0 | 0 | 0 |
| BNC1      | 0 | 0 | 0 | 0 | 0 |
| LOC642423 | 0 | 0 | 0 | 0 | 0 |
| MIR1276   | 0 | 0 | 0 | 0 | 0 |
| LOC727915 | 0 | 0 | 0 | 0 | 0 |
| NTRK3     | 0 | 0 | 0 | 0 | 0 |
| MIR3529   | 0 | 0 | 0 | 0 | 0 |
| RLBP1     | 0 | 0 | 0 | 0 | 0 |
| RHCG      | 0 | 0 | 0 | 0 | 0 |
| LOC283761 | 0 | 0 | 0 | 0 | 0 |
| MIR5094   | 0 | 0 | 0 | 0 | 0 |
| GABARAPL3 | 0 | 0 | 0 | 0 | 0 |
| RGMA      | 0 | 0 | 0 | 0 | 0 |
| LOC400456 | 0 | 0 | 0 | 0 | 0 |
| FAM169B   | 0 | 0 | 0 | 0 | 0 |
| DNM1P46   | 0 | 0 | 0 | 0 | 0 |
| OR4F4     | 0 | 0 | 0 | 0 | 0 |
| DDX11L9   | 0 | 0 | 0 | 0 | 0 |
| DDX11L10  | 0 | 0 | 0 | 0 | 0 |
| HBM       | 0 | 0 | 0 | 0 | 0 |
| HBQ1      | 0 | 0 | 0 | 0 | 0 |
| MIR5587   | 0 | 0 | 0 | 0 | 0 |
| MIR3176   | 0 | 0 | 0 | 0 | 0 |
| MIR662    | 0 | 0 | 0 | 0 | 0 |
| TPSAB1    | 0 | 0 | 0 | 0 | 0 |
| TPSD1     | 0 | 0 | 0 | 0 | 0 |
| MIR3177   | 0 | 0 | 0 | 0 | 0 |
| RNF151    | 0 | 0 | 0 | 0 | 0 |
| MIR4516   | 0 | 0 | 0 | 0 | 0 |
| MIR3677   | 0 | 0 | 0 | 0 | 0 |
| MIR940    | 0 | 0 | 0 | 0 | 0 |
| MIR4717   | 0 | 0 | 0 | 0 | 0 |
| NTN3      | 0 | 0 | 0 | 0 | 0 |
| PRSS41    | 0 | 0 | 0 | 0 | 0 |

|                     |   |   |   |   |   |
|---------------------|---|---|---|---|---|
| PRSS21              | 0 | 0 | 0 | 0 | 0 |
| ZG16B               | 0 | 0 | 0 | 0 | 0 |
| OR1F1               | 0 | 0 | 0 | 0 | 0 |
| OR1F2P              | 0 | 0 | 0 | 0 | 0 |
| OR2C1               | 0 | 0 | 0 | 0 | 0 |
| RBF0X1              | 0 | 0 | 0 | 0 | 0 |
| MIR548X             | 0 | 0 | 0 | 0 | 0 |
| MIR4718             | 0 | 0 | 0 | 0 | 0 |
| MIR193B             | 0 | 0 | 0 | 0 | 0 |
| MIR365A             | 0 | 0 | 0 | 0 | 0 |
| MIR3179-3           | 0 | 0 | 0 | 0 | 0 |
| MIR3180-3           | 0 | 0 | 0 | 0 | 0 |
| MIR3179-1           | 0 | 0 | 0 | 0 | 0 |
| MIR3180-1           | 0 | 0 | 0 | 0 | 0 |
| ABCC6P1             | 0 | 0 | 0 | 0 | 0 |
| CLEC19A             | 0 | 0 | 0 | 0 | 0 |
| ACSM2A              | 0 | 0 | 0 | 0 | 0 |
| MIR548D2            | 0 | 0 | 0 | 0 | 0 |
| SCNN1G              | 0 | 0 | 0 | 0 | 0 |
| SCNN1B              | 0 | 0 | 0 | 0 | 0 |
| CHP2                | 0 | 0 | 0 | 0 | 0 |
| CACNG3              | 0 | 0 | 0 | 0 | 0 |
| HS3ST4              | 0 | 0 | 0 | 0 | 0 |
| C16orf82            | 0 | 0 | 0 | 0 | 0 |
| MIR4517             | 0 | 0 | 0 | 0 | 0 |
| LOC606724           | 0 | 0 | 0 | 0 | 0 |
| SLX1A,SLX1B,SULT1A3 | 0 | 0 | 0 | 0 | 0 |
| ZG16                | 0 | 0 | 0 | 0 | 0 |
| C16orf92            | 0 | 0 | 0 | 0 | 0 |
| MIR4518             | 0 | 0 | 0 | 0 | 0 |
| AHSP                | 0 | 0 | 0 | 0 | 0 |
| TP53TG3D            | 0 | 0 | 0 | 0 | 0 |
| TP53TG3,TP53TG3B    | 0 | 0 | 0 | 0 | 0 |
| TP53TG3,TP53TG3B    | 0 | 0 | 0 | 0 | 0 |
| LOC283914           | 0 | 0 | 0 | 0 | 0 |
| MIR548AE2           | 0 | 0 | 0 | 0 | 0 |
| C16orf78            | 0 | 0 | 0 | 0 | 0 |
| MMP2                | 0 | 0 | 0 | 0 | 0 |
| SLC6A2              | 0 | 0 | 0 | 0 | 0 |
| CES1P2              | 0 | 0 | 0 | 0 | 0 |
| CES1P1              | 0 | 0 | 0 | 0 | 0 |
| MIR3935             | 0 | 0 | 0 | 0 | 0 |
| MT4                 | 0 | 0 | 0 | 0 | 0 |
| MT3                 | 0 | 0 | 0 | 0 | 0 |
| MIR138-2            | 0 | 0 | 0 | 0 | 0 |
| SLC12A3             | 0 | 0 | 0 | 0 | 0 |
| CETP                | 0 | 0 | 0 | 0 | 0 |
| CX3CL1              | 0 | 0 | 0 | 0 | 0 |
| CCL17               | 0 | 0 | 0 | 0 | 0 |
| TEPP                | 0 | 0 | 0 | 0 | 0 |
| LRRC36              | 0 | 0 | 0 | 0 | 0 |
| CDH1                | 0 | 0 | 0 | 0 | 0 |
| MIR140              | 0 | 0 | 0 | 0 | 0 |
| MIR1972-2           | 0 | 0 | 0 | 0 | 0 |
| SNORD111B           | 0 | 0 | 0 | 0 | 0 |
| SNORD111            | 0 | 0 | 0 | 0 | 0 |
| CHST4               | 0 | 0 | 0 | 0 | 0 |
| HPR                 | 0 | 0 | 0 | 0 | 0 |
| HTA                 | 0 | 0 | 0 | 0 | 0 |
| LOC100506172        | 0 | 0 | 0 | 0 | 0 |
| CTRB1               | 0 | 0 | 0 | 0 | 0 |
| CNTNAP4             | 0 | 0 | 0 | 0 | 0 |
| MIR4719             | 0 | 0 | 0 | 0 | 0 |
| CLEC3A              | 0 | 0 | 0 | 0 | 0 |
| DYNLRB2             | 0 | 0 | 0 | 0 | 0 |
| BCMO1               | 0 | 0 | 0 | 0 | 0 |
| MIR4720             | 0 | 0 | 0 | 0 | 0 |
| HSD17B2             | 0 | 0 | 0 | 0 | 0 |
| MIR3182             | 0 | 0 | 0 | 0 | 0 |
| ADAD2               | 0 | 0 | 0 | 0 | 0 |
| WFDC1               | 0 | 0 | 0 | 0 | 0 |
| LOC400548           | 0 | 0 | 0 | 0 | 0 |
| IRF8                | 0 | 0 | 0 | 0 | 0 |
| LOC146513           | 0 | 0 | 0 | 0 | 0 |
| MIR5189             | 0 | 0 | 0 | 0 | 0 |
| TPSG1               | 0 | 0 | 0 | 0 | 0 |
| TPSB2               | 0 | 0 | 0 | 0 | 0 |
| LINC00254           | 0 | 0 | 0 | 0 | 0 |
| HS3ST6              | 0 | 0 | 0 | 0 | 0 |



|              |   |   |   |   |   |
|--------------|---|---|---|---|---|
| MIR1225      | 0 | 0 | 0 | 0 | 0 |
| MIR3180-5    | 0 | 0 | 0 | 0 | 0 |
| SNORD60      | 0 | 0 | 0 | 0 | 0 |
| MIR3178      | 0 | 0 | 0 | 0 | 0 |
| C16orf90     | 0 | 0 | 0 | 0 | 0 |
| TMEM114      | 0 | 0 | 0 | 0 | 0 |
| GRIN2A       | 0 | 0 | 0 | 0 | 0 |
| TNP2         | 0 | 0 | 0 | 0 | 0 |
| PRM3         | 0 | 0 | 0 | 0 | 0 |
| PRM2         | 0 | 0 | 0 | 0 | 0 |
| PRM1         | 0 | 0 | 0 | 0 | 0 |
| ABCC6P2      | 0 | 0 | 0 | 0 | 0 |
| MIR3180-4    | 0 | 0 | 0 | 0 | 0 |
| MIR3180-1    | 0 | 0 | 0 | 0 | 0 |
| MIR3179-1    | 0 | 0 | 0 | 0 | 0 |
| GPRC5B       | 0 | 0 | 0 | 0 | 0 |
| GPR139       | 0 | 0 | 0 | 0 | 0 |
| GP2          | 0 | 0 | 0 | 0 | 0 |
| UMOD         | 0 | 0 | 0 | 0 | 0 |
| PDILT        | 0 | 0 | 0 | 0 | 0 |
| ACSM2B       | 0 | 0 | 0 | 0 | 0 |
| ZP2          | 0 | 0 | 0 | 0 | 0 |
| IGSF6        | 0 | 0 | 0 | 0 | 0 |
| MIR548AA2    | 0 | 0 | 0 | 0 | 0 |
| IL27         | 0 | 0 | 0 | 0 | 0 |
| BOLA2B       | 0 | 0 | 0 | 0 | 0 |
| LOC388242    | 0 | 0 | 0 | 0 | 0 |
| BOLA2B       | 0 | 0 | 0 | 0 | 0 |
| MIR4519      | 0 | 0 | 0 | 0 | 0 |
| COX6A2       | 0 | 0 | 0 | 0 | 0 |
| LOC390705    | 0 | 0 | 0 | 0 | 0 |
| TP53TG3      | 0 | 0 | 0 | 0 | 0 |
| LOC390705    | 0 | 0 | 0 | 0 | 0 |
| RNU6-76      | 0 | 0 | 0 | 0 | 0 |
| LOC146481    | 0 | 0 | 0 | 0 | 0 |
| LOC100130700 | 0 | 0 | 0 | 0 | 0 |
| ABCC12       | 0 | 0 | 0 | 0 | 0 |
| CBLN1        | 0 | 0 | 0 | 0 | 0 |
| SALL1        | 0 | 0 | 0 | 0 | 0 |
| C16orf97     | 0 | 0 | 0 | 0 | 0 |
| LOC100505619 | 0 | 0 | 0 | 0 | 0 |
| TOX3         | 0 | 0 | 0 | 0 | 0 |
| LOC643714    | 0 | 0 | 0 | 0 | 0 |
| LOC643802    | 0 | 0 | 0 | 0 | 0 |
| IRX3         | 0 | 0 | 0 | 0 | 0 |
| CES1         | 0 | 0 | 0 | 0 | 0 |
| CES5A        | 0 | 0 | 0 | 0 | 0 |
| LOC283856    | 0 | 0 | 0 | 0 | 0 |
| DKFZP434H168 | 0 | 0 | 0 | 0 | 0 |
| LOC644649    | 0 | 0 | 0 | 0 | 0 |
| CDH8         | 0 | 0 | 0 | 0 | 0 |
| CDH16        | 0 | 0 | 0 | 0 | 0 |
| MIR328       | 0 | 0 | 0 | 0 | 0 |
| AGRP         | 0 | 0 | 0 | 0 | 0 |
| DPEP3        | 0 | 0 | 0 | 0 | 0 |
| MIR1538      | 0 | 0 | 0 | 0 | 0 |
| SNORA70D     | 0 | 0 | 0 | 0 | 0 |
| SNORD71      | 0 | 0 | 0 | 0 | 0 |
| CTRB2        | 0 | 0 | 0 | 0 | 0 |
| ADAMTS18     | 0 | 0 | 0 | 0 | 0 |
| SDR42E1      | 0 | 0 | 0 | 0 | 0 |
| KCNQ4        | 0 | 0 | 0 | 0 | 0 |
| FAM92B       | 0 | 0 | 0 | 0 | 0 |
| MIR5093      | 0 | 0 | 0 | 0 | 0 |
| MIR1910      | 0 | 0 | 0 | 0 | 0 |
| LOC732275    | 0 | 0 | 0 | 0 | 0 |
| CA5A         | 0 | 0 | 0 | 0 | 0 |
| MIR4722      | 0 | 0 | 0 | 0 | 0 |
| LOC100506388 | 0 | 0 | 0 | 0 | 0 |
| BHLHA9       | 0 | 0 | 0 | 0 | 0 |
| OR1A2        | 0 | 0 | 0 | 0 | 0 |
| OR1A1        | 0 | 0 | 0 | 0 | 0 |
| OR1D4        | 0 | 0 | 0 | 0 | 0 |
| OR3A4P       | 0 | 0 | 0 | 0 | 0 |
| OR3A3        | 0 | 0 | 0 | 0 | 0 |
| ASPA         | 0 | 0 | 0 | 0 | 0 |
| TM4SF5       | 0 | 0 | 0 | 0 | 0 |
| LOC100130950 | 0 | 0 | 0 | 0 | 0 |
| WSCD1        | 0 | 0 | 0 | 0 | 0 |

|              |   |   |   |   |   |
|--------------|---|---|---|---|---|
| MIR4520B     | 0 | 0 | 0 | 0 | 0 |
| ALOX15P1     | 0 | 0 | 0 | 0 | 0 |
| FBXO39       | 0 | 0 | 0 | 0 | 0 |
| ALOX12P2     | 0 | 0 | 0 | 0 | 0 |
| TMEM95       | 0 | 0 | 0 | 0 | 0 |
| RPL29P2      | 0 | 0 | 0 | 0 | 0 |
| SCARNA21     | 0 | 0 | 0 | 0 | 0 |
| MIR4314      | 0 | 0 | 0 | 0 | 0 |
| MIR4521      | 0 | 0 | 0 | 0 | 0 |
| MIR3676      | 0 | 0 | 0 | 0 | 0 |
| ARHGEF15     | 0 | 0 | 0 | 0 | 0 |
| ODF4         | 0 | 0 | 0 | 0 | 0 |
| GLP2R        | 0 | 0 | 0 | 0 | 0 |
| TMEM220-AS1  | 0 | 0 | 0 | 0 | 0 |
| SHISA6       | 0 | 0 | 0 | 0 | 0 |
| MIR744       | 0 | 0 | 0 | 0 | 0 |
| LINC00670    | 0 | 0 | 0 | 0 | 0 |
| MYOC         | 0 | 0 | 0 | 0 | 0 |
| CDRT7        | 0 | 0 | 0 | 0 | 0 |
| CDRT15P2     | 0 | 0 | 0 | 0 | 0 |
| MIR1288      | 0 | 0 | 0 | 0 | 0 |
| SNORD49A     | 0 | 0 | 0 | 0 | 0 |
| SMCR9        | 0 | 0 | 0 | 0 | 0 |
| EVPLL        | 0 | 0 | 0 | 0 | 0 |
| LOC339240    | 0 | 0 | 0 | 0 | 0 |
| LGALS9C      | 0 | 0 | 0 | 0 | 0 |
| SLC47A1      | 0 | 0 | 0 | 0 | 0 |
| SNORA59B     | 0 | 0 | 0 | 0 | 0 |
| CDRT15L2     | 0 | 0 | 0 | 0 | 0 |
| FAM27L       | 0 | 0 | 0 | 0 | 0 |
| FLJ36000     | 0 | 0 | 0 | 0 | 0 |
| TBC1D3P5     | 0 | 0 | 0 | 0 | 0 |
| PPY2         | 0 | 0 | 0 | 0 | 0 |
| MIR4723      | 0 | 0 | 0 | 0 | 0 |
| SLC13A2      | 0 | 0 | 0 | 0 | 0 |
| FOXN1        | 0 | 0 | 0 | 0 | 0 |
| SNORD42B     | 0 | 0 | 0 | 0 | 0 |
| SNORD4A      | 0 | 0 | 0 | 0 | 0 |
| SNORD42A     | 0 | 0 | 0 | 0 | 0 |
| MIR451B      | 0 | 0 | 0 | 0 | 0 |
| MIR423       | 0 | 0 | 0 | 0 | 0 |
| TBC1D29      | 0 | 0 | 0 | 0 | 0 |
| MIR193A      | 0 | 0 | 0 | 0 | 0 |
| MIR4725      | 0 | 0 | 0 | 0 | 0 |
| MIR365B      | 0 | 0 | 0 | 0 | 0 |
| CCL2         | 0 | 0 | 0 | 0 | 0 |
| CCL7         | 0 | 0 | 0 | 0 | 0 |
| CCL11        | 0 | 0 | 0 | 0 | 0 |
| CCL8         | 0 | 0 | 0 | 0 | 0 |
| CCL13        | 0 | 0 | 0 | 0 | 0 |
| TMEM132E     | 0 | 0 | 0 | 0 | 0 |
| SNORD7       | 0 | 0 | 0 | 0 | 0 |
| CCL18        | 0 | 0 | 0 | 0 | 0 |
| CCL4         | 0 | 0 | 0 | 0 | 0 |
| CCL4L1       | 0 | 0 | 0 | 0 | 0 |
| CCL4L2       | 0 | 0 | 0 | 0 | 0 |
| MIR2909      | 0 | 0 | 0 | 0 | 0 |
| MIR4726      | 0 | 0 | 0 | 0 | 0 |
| MIR4727      | 0 | 0 | 0 | 0 | 0 |
| PPP1R1B      | 0 | 0 | 0 | 0 | 0 |
| PNMT         | 0 | 0 | 0 | 0 | 0 |
| MIR4728      | 0 | 0 | 0 | 0 | 0 |
| ZPBP2        | 0 | 0 | 0 | 0 | 0 |
| LRRC3C       | 0 | 0 | 0 | 0 | 0 |
| SNORD124     | 0 | 0 | 0 | 0 | 0 |
| KRTAP9-1     | 0 | 0 | 0 | 0 | 0 |
| KRTAP9-2     | 0 | 0 | 0 | 0 | 0 |
| KRTAP9-3     | 0 | 0 | 0 | 0 | 0 |
| KRTAP9-8     | 0 | 0 | 0 | 0 | 0 |
| KRTAP9-4     | 0 | 0 | 0 | 0 | 0 |
| KRTAP9-9     | 0 | 0 | 0 | 0 | 0 |
| LOC100505782 | 0 | 0 | 0 | 0 | 0 |
| GAST         | 0 | 0 | 0 | 0 | 0 |
| RAMP2        | 0 | 0 | 0 | 0 | 0 |
| MIR2117      | 0 | 0 | 0 | 0 | 0 |
| C17orf105    | 0 | 0 | 0 | 0 | 0 |
| SPPL2C       | 0 | 0 | 0 | 0 | 0 |
| MAPT-IT1     | 0 | 0 | 0 | 0 | 0 |
| STH          | 0 | 0 | 0 | 0 | 0 |

|              |   |   |   |   |   |
|--------------|---|---|---|---|---|
| NSFP1        | 0 | 0 | 0 | 0 | 0 |
| WNT9B        | 0 | 0 | 0 | 0 | 0 |
| MIR5089      | 0 | 0 | 0 | 0 | 0 |
| ITGB3        | 0 | 0 | 0 | 0 | 0 |
| TBX21        | 0 | 0 | 0 | 0 | 0 |
| B4GALNT2     | 0 | 0 | 0 | 0 | 0 |
| FLJ40194     | 0 | 0 | 0 | 0 | 0 |
| SGCA         | 0 | 0 | 0 | 0 | 0 |
| ABCC3        | 0 | 0 | 0 | 0 | 0 |
| WFIKKN2      | 0 | 0 | 0 | 0 | 0 |
| C17orf112    | 0 | 0 | 0 | 0 | 0 |
| KIF2B        | 0 | 0 | 0 | 0 | 0 |
| NOG          | 0 | 0 | 0 | 0 | 0 |
| RNF126P1     | 0 | 0 | 0 | 0 | 0 |
| OR4D1        | 0 | 0 | 0 | 0 | 0 |
| MSX2P1       | 0 | 0 | 0 | 0 | 0 |
| OR4D2        | 0 | 0 | 0 | 0 | 0 |
| LPO          | 0 | 0 | 0 | 0 | 0 |
| MIR4729      | 0 | 0 | 0 | 0 | 0 |
| MIR21        | 0 | 0 | 0 | 0 | 0 |
| CA4          | 0 | 0 | 0 | 0 | 0 |
| TBX4         | 0 | 0 | 0 | 0 | 0 |
| MIR548W      | 0 | 0 | 0 | 0 | 0 |
| MIR634       | 0 | 0 | 0 | 0 | 0 |
| CACNG5       | 0 | 0 | 0 | 0 | 0 |
| MIR4524B     | 0 | 0 | 0 | 0 | 0 |
| MAP2K6       | 0 | 0 | 0 | 0 | 0 |
| KCNJ16       | 0 | 0 | 0 | 0 | 0 |
| KCNJ2        | 0 | 0 | 0 | 0 | 0 |
| LOC400620    | 0 | 0 | 0 | 0 | 0 |
| DNAI2        | 0 | 0 | 0 | 0 | 0 |
| KIF19        | 0 | 0 | 0 | 0 | 0 |
| GPR142       | 0 | 0 | 0 | 0 | 0 |
| C17orf77     | 0 | 0 | 0 | 0 | 0 |
| OTOP3        | 0 | 0 | 0 | 0 | 0 |
| MIR3678      | 0 | 0 | 0 | 0 | 0 |
| RNF157-AS1   | 0 | 0 | 0 | 0 | 0 |
| SNORD1C      | 0 | 0 | 0 | 0 | 0 |
| SNORD1B      | 0 | 0 | 0 | 0 | 0 |
| SNORD1A      | 0 | 0 | 0 | 0 | 0 |
| LOC100507351 | 0 | 0 | 0 | 0 | 0 |
| C17orf99     | 0 | 0 | 0 | 0 | 0 |
| TMEM235      | 0 | 0 | 0 | 0 | 0 |
| ENPP7        | 0 | 0 | 0 | 0 | 0 |
| MIR4730      | 0 | 0 | 0 | 0 | 0 |
| MIR3065      | 0 | 0 | 0 | 0 | 0 |
| AATK-AS1     | 0 | 0 | 0 | 0 | 0 |
| GCGR         | 0 | 0 | 0 | 0 | 0 |
| UTS2R        | 0 | 0 | 0 | 0 | 0 |
| MIR3183      | 0 | 0 | 0 | 0 | 0 |
| RTN4RL1      | 0 | 0 | 0 | 0 | 0 |
| MIR132       | 0 | 0 | 0 | 0 | 0 |
| MIR212       | 0 | 0 | 0 | 0 | 0 |
| SNORD91B     | 0 | 0 | 0 | 0 | 0 |
| SNORD91A     | 0 | 0 | 0 | 0 | 0 |
| MIR1253      | 0 | 0 | 0 | 0 | 0 |
| OR1D5        | 0 | 0 | 0 | 0 | 0 |
| OR1D2        | 0 | 0 | 0 | 0 | 0 |
| OR1G1        | 0 | 0 | 0 | 0 | 0 |
| OR3A2        | 0 | 0 | 0 | 0 | 0 |
| OR3A1        | 0 | 0 | 0 | 0 | 0 |
| OR1E1        | 0 | 0 | 0 | 0 | 0 |
| OR1E2        | 0 | 0 | 0 | 0 | 0 |
| SPATA22      | 0 | 0 | 0 | 0 | 0 |
| TRPV3        | 0 | 0 | 0 | 0 | 0 |
| ALOX15       | 0 | 0 | 0 | 0 | 0 |
| ZNF594       | 0 | 0 | 0 | 0 | 0 |
| SCIMP        | 0 | 0 | 0 | 0 | 0 |
| MIR4520A     | 0 | 0 | 0 | 0 | 0 |
| MIR195       | 0 | 0 | 0 | 0 | 0 |
| MIR497       | 0 | 0 | 0 | 0 | 0 |
| CLEC10A      | 0 | 0 | 0 | 0 | 0 |
| ASGR2        | 0 | 0 | 0 | 0 | 0 |
| MIR324       | 0 | 0 | 0 | 0 | 0 |
| SPDYE4       | 0 | 0 | 0 | 0 | 0 |
| MFSD6L       | 0 | 0 | 0 | 0 | 0 |
| PIK3R6       | 0 | 0 | 0 | 0 | 0 |
| DHRSTC       | 0 | 0 | 0 | 0 | 0 |
| RCVRN        | 0 | 0 | 0 | 0 | 0 |

|             |   |   |   |   |   |
|-------------|---|---|---|---|---|
| MYH13       | 0 | 0 | 0 | 0 | 0 |
| MYH8        | 0 | 0 | 0 | 0 | 0 |
| MYH4        | 0 | 0 | 0 | 0 | 0 |
| MYH2        | 0 | 0 | 0 | 0 | 0 |
| LINC00675   | 0 | 0 | 0 | 0 | 0 |
| PIRT        | 0 | 0 | 0 | 0 | 0 |
| HS3ST3A1    | 0 | 0 | 0 | 0 | 0 |
| MIR4731     | 0 | 0 | 0 | 0 | 0 |
| KRT16P2     | 0 | 0 | 0 | 0 | 0 |
| TNFRSF13B   | 0 | 0 | 0 | 0 | 0 |
| MIR33B      | 0 | 0 | 0 | 0 | 0 |
| MIR1180     | 0 | 0 | 0 | 0 | 0 |
| ALDH3A1     | 0 | 0 | 0 | 0 | 0 |
| LGALS9B     | 0 | 0 | 0 | 0 | 0 |
| CCDC144NL   | 0 | 0 | 0 | 0 | 0 |
| MIR4522     | 0 | 0 | 0 | 0 | 0 |
| SEBOX       | 0 | 0 | 0 | 0 | 0 |
| MIR451A     | 0 | 0 | 0 | 0 | 0 |
| MIR144      | 0 | 0 | 0 | 0 | 0 |
| MIR4732     | 0 | 0 | 0 | 0 | 0 |
| MIR3184     | 0 | 0 | 0 | 0 | 0 |
| TMIGD1      | 0 | 0 | 0 | 0 | 0 |
| MIR4733     | 0 | 0 | 0 | 0 | 0 |
| ASIC2       | 0 | 0 | 0 | 0 | 0 |
| AA06        | 0 | 0 | 0 | 0 | 0 |
| CCL1        | 0 | 0 | 0 | 0 | 0 |
| C17orf102   | 0 | 0 | 0 | 0 | 0 |
| SLFN11      | 0 | 0 | 0 | 0 | 0 |
| SLFN12      | 0 | 0 | 0 | 0 | 0 |
| SLFN12L     | 0 | 0 | 0 | 0 | 0 |
| MMP28       | 0 | 0 | 0 | 0 | 0 |
| LYZL6       | 0 | 0 | 0 | 0 | 0 |
| CCL16       | 0 | 0 | 0 | 0 | 0 |
| CCL14,CCL15 | 0 | 0 | 0 | 0 | 0 |
| CCL23       | 0 | 0 | 0 | 0 | 0 |
| CCL3L1      | 0 | 0 | 0 | 0 | 0 |
| TBC1D3      | 0 | 0 | 0 | 0 | 0 |
| MIR4734     | 0 | 0 | 0 | 0 | 0 |
| FBXO47      | 0 | 0 | 0 | 0 | 0 |
| ARL5C       | 0 | 0 | 0 | 0 | 0 |
| CCR7        | 0 | 0 | 0 | 0 | 0 |
| KRT24       | 0 | 0 | 0 | 0 | 0 |
| KRT25       | 0 | 0 | 0 | 0 | 0 |
| KRT26       | 0 | 0 | 0 | 0 | 0 |
| KRT27       | 0 | 0 | 0 | 0 | 0 |
| KRT28       | 0 | 0 | 0 | 0 | 0 |
| KRT23       | 0 | 0 | 0 | 0 | 0 |
| KRT39       | 0 | 0 | 0 | 0 | 0 |
| KRT40       | 0 | 0 | 0 | 0 | 0 |
| KRTAP3-1    | 0 | 0 | 0 | 0 | 0 |
| KRTAP1-5    | 0 | 0 | 0 | 0 | 0 |
| KRTAP1-4    | 0 | 0 | 0 | 0 | 0 |
| KRTAP1-3    | 0 | 0 | 0 | 0 | 0 |
| KRTAP4-12   | 0 | 0 | 0 | 0 | 0 |
| KRTAP4-4    | 0 | 0 | 0 | 0 | 0 |
| KRTAP4-3    | 0 | 0 | 0 | 0 | 0 |
| KRTAP4-2    | 0 | 0 | 0 | 0 | 0 |
| KRTAP4-1    | 0 | 0 | 0 | 0 | 0 |
| KRTAP29-1   | 0 | 0 | 0 | 0 | 0 |
| KRTAP16-1   | 0 | 0 | 0 | 0 | 0 |
| KRTAP17-1   | 0 | 0 | 0 | 0 | 0 |
| KRT33A      | 0 | 0 | 0 | 0 | 0 |
| KRT33B      | 0 | 0 | 0 | 0 | 0 |
| KRT31       | 0 | 0 | 0 | 0 | 0 |
| KRT37       | 0 | 0 | 0 | 0 | 0 |
| KRT38       | 0 | 0 | 0 | 0 | 0 |
| KRT32       | 0 | 0 | 0 | 0 | 0 |
| KRT35       | 0 | 0 | 0 | 0 | 0 |
| KRT36       | 0 | 0 | 0 | 0 | 0 |
| KRT13       | 0 | 0 | 0 | 0 | 0 |
| LOC147093   | 0 | 0 | 0 | 0 | 0 |
| KRT9        | 0 | 0 | 0 | 0 | 0 |
| KRT14       | 0 | 0 | 0 | 0 | 0 |
| HAP1        | 0 | 0 | 0 | 0 | 0 |
| KCNH4       | 0 | 0 | 0 | 0 | 0 |
| SOST        | 0 | 0 | 0 | 0 | 0 |
| C1QL1       | 0 | 0 | 0 | 0 | 0 |
| LOC644172   | 0 | 0 | 0 | 0 | 0 |
| MAPT-AS1    | 0 | 0 | 0 | 0 | 0 |

|              |   |   |   |   |   |
|--------------|---|---|---|---|---|
| MIR152       | 0 | 0 | 0 | 0 | 0 |
| SKAP1        | 0 | 0 | 0 | 0 | 0 |
| MIR1203      | 0 | 0 | 0 | 0 | 0 |
| HOXB1        | 0 | 0 | 0 | 0 | 0 |
| MIR10A       | 0 | 0 | 0 | 0 | 0 |
| MIR196A1     | 0 | 0 | 0 | 0 | 0 |
| PRAC         | 0 | 0 | 0 | 0 | 0 |
| MIR3185      | 0 | 0 | 0 | 0 | 0 |
| GIP          | 0 | 0 | 0 | 0 | 0 |
| GNGT2        | 0 | 0 | 0 | 0 | 0 |
| HILS1        | 0 | 0 | 0 | 0 | 0 |
| LINC00483    | 0 | 0 | 0 | 0 | 0 |
| CA10         | 0 | 0 | 0 | 0 | 0 |
| TMEM100      | 0 | 0 | 0 | 0 | 0 |
| MTVR2        | 0 | 0 | 0 | 0 | 0 |
| MPO          | 0 | 0 | 0 | 0 | 0 |
| BZRAP1       | 0 | 0 | 0 | 0 | 0 |
| MIR142       | 0 | 0 | 0 | 0 | 0 |
| MIR4736      | 0 | 0 | 0 | 0 | 0 |
| MIR454       | 0 | 0 | 0 | 0 | 0 |
| MIR301A      | 0 | 0 | 0 | 0 | 0 |
| MIR4737      | 0 | 0 | 0 | 0 | 0 |
| MARCH10      | 0 | 0 | 0 | 0 | 0 |
| CSH2         | 0 | 0 | 0 | 0 | 0 |
| GH2          | 0 | 0 | 0 | 0 | 0 |
| CSH1         | 0 | 0 | 0 | 0 | 0 |
| CSHL1        | 0 | 0 | 0 | 0 | 0 |
| GH1          | 0 | 0 | 0 | 0 | 0 |
| PECAM1       | 0 | 0 | 0 | 0 | 0 |
| APOH         | 0 | 0 | 0 | 0 | 0 |
| MIR635       | 0 | 0 | 0 | 0 | 0 |
| ABCA8        | 0 | 0 | 0 | 0 | 0 |
| ABCA6        | 0 | 0 | 0 | 0 | 0 |
| MIR4524A     | 0 | 0 | 0 | 0 | 0 |
| KCNJ2-AS1    | 0 | 0 | 0 | 0 | 0 |
| LINC00469    | 0 | 0 | 0 | 0 | 0 |
| CD300LB      | 0 | 0 | 0 | 0 | 0 |
| CD300LD      | 0 | 0 | 0 | 0 | 0 |
| CD300LF      | 0 | 0 | 0 | 0 | 0 |
| FADS6        | 0 | 0 | 0 | 0 | 0 |
| MIR4738      | 0 | 0 | 0 | 0 | 0 |
| ST6GALNAC1   | 0 | 0 | 0 | 0 | 0 |
| MIR4316      | 0 | 0 | 0 | 0 | 0 |
| LOC100507410 | 0 | 0 | 0 | 0 | 0 |
| MIR4739      | 0 | 0 | 0 | 0 | 0 |
| MIR657       | 0 | 0 | 0 | 0 | 0 |
| MIR338       | 0 | 0 | 0 | 0 | 0 |
| MIR1250      | 0 | 0 | 0 | 0 | 0 |
| TMEM105      | 0 | 0 | 0 | 0 | 0 |
| MIR4740      | 0 | 0 | 0 | 0 | 0 |
| MIR3186      | 0 | 0 | 0 | 0 | 0 |
| CETN1        | 0 | 0 | 0 | 0 | 0 |
| ADCYAP1      | 0 | 0 | 0 | 0 | 0 |
| DLGAP1-AS3   | 0 | 0 | 0 | 0 | 0 |
| DLGAP1-AS5   | 0 | 0 | 0 | 0 | 0 |
| LOC645355    | 0 | 0 | 0 | 0 | 0 |
| MIR3976      | 0 | 0 | 0 | 0 | 0 |
| LOC100130480 | 0 | 0 | 0 | 0 | 0 |
| ARHGAP28     | 0 | 0 | 0 | 0 | 0 |
| LRRC30       | 0 | 0 | 0 | 0 | 0 |
| RAB31        | 0 | 0 | 0 | 0 | 0 |
| TXNDC2       | 0 | 0 | 0 | 0 | 0 |
| APCDD1       | 0 | 0 | 0 | 0 | 0 |
| C18orf61     | 0 | 0 | 0 | 0 | 0 |
| CIDEA        | 0 | 0 | 0 | 0 | 0 |
| MIR5190      | 0 | 0 | 0 | 0 | 0 |
| MIR4526      | 0 | 0 | 0 | 0 | 0 |
| MCSR         | 0 | 0 | 0 | 0 | 0 |
| ANKRD30B     | 0 | 0 | 0 | 0 | 0 |
| MIR3156-2    | 0 | 0 | 0 | 0 | 0 |
| MIR320C1     | 0 | 0 | 0 | 0 | 0 |
| LAMA3        | 0 | 0 | 0 | 0 | 0 |
| MIR320C2     | 0 | 0 | 0 | 0 | 0 |
| LOC729950    | 0 | 0 | 0 | 0 | 0 |
| PSMA8        | 0 | 0 | 0 | 0 | 0 |
| MIR302F      | 0 | 0 | 0 | 0 | 0 |
| DSG1         | 0 | 0 | 0 | 0 | 0 |
| DSG4         | 0 | 0 | 0 | 0 | 0 |
| TTR          | 0 | 0 | 0 | 0 | 0 |

|              |   |   |   |   |   |
|--------------|---|---|---|---|---|
| ASXL3        | 0 | 0 | 0 | 0 | 0 |
| DTNA         | 0 | 0 | 0 | 0 | 0 |
| MIR3975      | 0 | 0 | 0 | 0 | 0 |
| MIR4318      | 0 | 0 | 0 | 0 | 0 |
| MIR5583-1    | 0 | 0 | 0 | 0 | 0 |
| MIR4743      | 0 | 0 | 0 | 0 | 0 |
| MIR1539      | 0 | 0 | 0 | 0 | 0 |
| MAPK4        | 0 | 0 | 0 | 0 | 0 |
| LOC100287225 | 0 | 0 | 0 | 0 | 0 |
| DCC          | 0 | 0 | 0 | 0 | 0 |
| DYNAP        | 0 | 0 | 0 | 0 | 0 |
| MIR4529      | 0 | 0 | 0 | 0 | 0 |
| BOD1L2       | 0 | 0 | 0 | 0 | 0 |
| MIR122       | 0 | 0 | 0 | 0 | 0 |
| OACYLP       | 0 | 0 | 0 | 0 | 0 |
| GRP          | 0 | 0 | 0 | 0 | 0 |
| SERPINB12    | 0 | 0 | 0 | 0 | 0 |
| SERPINB13    | 0 | 0 | 0 | 0 | 0 |
| SERPINB11    | 0 | 0 | 0 | 0 | 0 |
| SERPINB10    | 0 | 0 | 0 | 0 | 0 |
| LOC284294    | 0 | 0 | 0 | 0 | 0 |
| CDH7         | 0 | 0 | 0 | 0 | 0 |
| MIR5011      | 0 | 0 | 0 | 0 | 0 |
| LOC643542    | 0 | 0 | 0 | 0 | 0 |
| DOK6         | 0 | 0 | 0 | 0 | 0 |
| C18orf63     | 0 | 0 | 0 | 0 | 0 |
| LOC339298    | 0 | 0 | 0 | 0 | 0 |
| GALR1        | 0 | 0 | 0 | 0 | 0 |
| SALL3        | 0 | 0 | 0 | 0 | 0 |
| KCNG2        | 0 | 0 | 0 | 0 | 0 |
| COLEC12      | 0 | 0 | 0 | 0 | 0 |
| C18orf42     | 0 | 0 | 0 | 0 | 0 |
| EPB41L3      | 0 | 0 | 0 | 0 | 0 |
| TMEM200C     | 0 | 0 | 0 | 0 | 0 |
| L3MBTL4      | 0 | 0 | 0 | 0 | 0 |
| MIR4317      | 0 | 0 | 0 | 0 | 0 |
| LINC00668    | 0 | 0 | 0 | 0 | 0 |
| LOC100192426 | 0 | 0 | 0 | 0 | 0 |
| PIEZO2       | 0 | 0 | 0 | 0 | 0 |
| LOC100288122 | 0 | 0 | 0 | 0 | 0 |
| CXADRP3      | 0 | 0 | 0 | 0 | 0 |
| POTEC        | 0 | 0 | 0 | 0 | 0 |
| LOC644669    | 0 | 0 | 0 | 0 | 0 |
| MIR133A1     | 0 | 0 | 0 | 0 | 0 |
| MIR1-2       | 0 | 0 | 0 | 0 | 0 |
| CTAGE1       | 0 | 0 | 0 | 0 | 0 |
| ANKRD29      | 0 | 0 | 0 | 0 | 0 |
| LOC728606    | 0 | 0 | 0 | 0 | 0 |
| AQP4         | 0 | 0 | 0 | 0 | 0 |
| CHST9        | 0 | 0 | 0 | 0 | 0 |
| DSC2         | 0 | 0 | 0 | 0 | 0 |
| DSC1         | 0 | 0 | 0 | 0 | 0 |
| CCDC178      | 0 | 0 | 0 | 0 | 0 |
| NOL4         | 0 | 0 | 0 | 0 | 0 |
| ZNF396       | 0 | 0 | 0 | 0 | 0 |
| MIR187       | 0 | 0 | 0 | 0 | 0 |
| MIR5583-2    | 0 | 0 | 0 | 0 | 0 |
| KC6          | 0 | 0 | 0 | 0 | 0 |
| RIT2         | 0 | 0 | 0 | 0 | 0 |
| SYT4         | 0 | 0 | 0 | 0 | 0 |
| MIR4319      | 0 | 0 | 0 | 0 | 0 |
| LOXHD1       | 0 | 0 | 0 | 0 | 0 |
| TCEB3CL2     | 0 | 0 | 0 | 0 | 0 |
| TCEB3CL2     | 0 | 0 | 0 | 0 | 0 |
| TCEB3C       | 0 | 0 | 0 | 0 | 0 |
| TCEB3B       | 0 | 0 | 0 | 0 | 0 |
| ZBTB7C       | 0 | 0 | 0 | 0 | 0 |
| MIR4744      | 0 | 0 | 0 | 0 | 0 |
| MIR4320      | 0 | 0 | 0 | 0 | 0 |
| STARD6       | 0 | 0 | 0 | 0 | 0 |
| CCDC68       | 0 | 0 | 0 | 0 | 0 |
| TCF4         | 0 | 0 | 0 | 0 | 0 |
| LOC100505474 | 0 | 0 | 0 | 0 | 0 |
| MIR3591      | 0 | 0 | 0 | 0 | 0 |
| RAX          | 0 | 0 | 0 | 0 | 0 |
| CPLX4        | 0 | 0 | 0 | 0 | 0 |
| MC4R         | 0 | 0 | 0 | 0 | 0 |
| SERPINB4     | 0 | 0 | 0 | 0 | 0 |
| SERPINB3     | 0 | 0 | 0 | 0 | 0 |

|               |   |   |   |   |   |
|---------------|---|---|---|---|---|
| LINC00305     | 0 | 0 | 0 | 0 | 0 |
| LOC400654     | 0 | 0 | 0 | 0 | 0 |
| CDH19         | 0 | 0 | 0 | 0 | 0 |
| LOC100505776  | 0 | 0 | 0 | 0 | 0 |
| CBLN2         | 0 | 0 | 0 | 0 | 0 |
| NETO1         | 0 | 0 | 0 | 0 | 0 |
| LOC400655     | 0 | 0 | 0 | 0 | 0 |
| FAM69C        | 0 | 0 | 0 | 0 | 0 |
| C18orf62      | 0 | 0 | 0 | 0 | 0 |
| OR4F17        | 0 | 0 | 0 | 0 | 0 |
| FGF22         | 0 | 0 | 0 | 0 | 0 |
| PALM          | 0 | 0 | 0 | 0 | 0 |
| MIR4745       | 0 | 0 | 0 | 0 | 0 |
| MIR3187       | 0 | 0 | 0 | 0 | 0 |
| KISS1R        | 0 | 0 | 0 | 0 | 0 |
| ONECUT3       | 0 | 0 | 0 | 0 | 0 |
| GIPC3         | 0 | 0 | 0 | 0 | 0 |
| NMRK2         | 0 | 0 | 0 | 0 | 0 |
| MIR4746       | 0 | 0 | 0 | 0 | 0 |
| MIR7-3        | 0 | 0 | 0 | 0 | 0 |
| MIR4747       | 0 | 0 | 0 | 0 | 0 |
| ZNRF4         | 0 | 0 | 0 | 0 | 0 |
| CATSPERD      | 0 | 0 | 0 | 0 | 0 |
| MBD3L5        | 0 | 0 | 0 | 0 | 0 |
| MBD3L2        | 0 | 0 | 0 | 0 | 0 |
| RETN          | 0 | 0 | 0 | 0 | 0 |
| CCL25         | 0 | 0 | 0 | 0 | 0 |
| CERS4         | 0 | 0 | 0 | 0 | 0 |
| OR2Z1         | 0 | 0 | 0 | 0 | 0 |
| MBD3L1        | 0 | 0 | 0 | 0 | 0 |
| OR1M1         | 0 | 0 | 0 | 0 | 0 |
| OR7E24        | 0 | 0 | 0 | 0 | 0 |
| RDH8          | 0 | 0 | 0 | 0 | 0 |
| C3P1          | 0 | 0 | 0 | 0 | 0 |
| SNORD105      | 0 | 0 | 0 | 0 | 0 |
| SNORD105B     | 0 | 0 | 0 | 0 | 0 |
| MIR4322       | 0 | 0 | 0 | 0 | 0 |
| MIR1238       | 0 | 0 | 0 | 0 | 0 |
| MIR638        | 0 | 0 | 0 | 0 | 0 |
| MIR4748       | 0 | 0 | 0 | 0 | 0 |
| TSPAN16       | 0 | 0 | 0 | 0 | 0 |
| BEST2         | 0 | 0 | 0 | 0 | 0 |
| MIR181C       | 0 | 0 | 0 | 0 | 0 |
| OR7C2         | 0 | 0 | 0 | 0 | 0 |
| CCDC105       | 0 | 0 | 0 | 0 | 0 |
| OR111         | 0 | 0 | 0 | 0 | 0 |
| MIR1470       | 0 | 0 | 0 | 0 | 0 |
| CYP4F22       | 0 | 0 | 0 | 0 | 0 |
| CYP4F8        | 0 | 0 | 0 | 0 | 0 |
| CYP4F12       | 0 | 0 | 0 | 0 | 0 |
| OR10H2        | 0 | 0 | 0 | 0 | 0 |
| OR10H3        | 0 | 0 | 0 | 0 | 0 |
| OR10H5        | 0 | 0 | 0 | 0 | 0 |
| OR10H4        | 0 | 0 | 0 | 0 | 0 |
| LINC00661     | 0 | 0 | 0 | 0 | 0 |
| FLJ25328      | 0 | 0 | 0 | 0 | 0 |
| B3GNT3        | 0 | 0 | 0 | 0 | 0 |
| MIR3188       | 0 | 0 | 0 | 0 | 0 |
| MIR3189       | 0 | 0 | 0 | 0 | 0 |
| ZNF257        | 0 | 0 | 0 | 0 | 0 |
| ZNF729        | 0 | 0 | 0 | 0 | 0 |
| LOC440518     | 0 | 0 | 0 | 0 | 0 |
| ZNF726        | 0 | 0 | 0 | 0 | 0 |
| LOC148145     | 0 | 0 | 0 | 0 | 0 |
| LOC100505835  | 0 | 0 | 0 | 0 | 0 |
| VSTM2B        | 0 | 0 | 0 | 0 | 0 |
| ZNF536        | 0 | 0 | 0 | 0 | 0 |
| DKFZp566F0947 | 0 | 0 | 0 | 0 | 0 |
| THEG5         | 0 | 0 | 0 | 0 | 0 |
| CHST8         | 0 | 0 | 0 | 0 | 0 |
| SCGB2B3P      | 0 | 0 | 0 | 0 | 0 |
| HPN           | 0 | 0 | 0 | 0 | 0 |
| MAG           | 0 | 0 | 0 | 0 | 0 |
| FFAR1         | 0 | 0 | 0 | 0 | 0 |
| FFAR3         | 0 | 0 | 0 | 0 | 0 |
| LOC100128682  | 0 | 0 | 0 | 0 | 0 |
| KIRREL2       | 0 | 0 | 0 | 0 | 0 |
| LOC100134317  | 0 | 0 | 0 | 0 | 0 |
| LGALS7B       | 0 | 0 | 0 | 0 | 0 |

|               |   |   |   |   |   |
|---------------|---|---|---|---|---|
| IFNL2         | 0 | 0 | 0 | 0 | 0 |
| IFNL1         | 0 | 0 | 0 | 0 | 0 |
| SELV          | 0 | 0 | 0 | 0 | 0 |
| LGALS13       | 0 | 0 | 0 | 0 | 0 |
| LGALS16       | 0 | 0 | 0 | 0 | 0 |
| LGALS17A      | 0 | 0 | 0 | 0 | 0 |
| LGALS14       | 0 | 0 | 0 | 0 | 0 |
| LEUTX         | 0 | 0 | 0 | 0 | 0 |
| CYP2B7P1      | 0 | 0 | 0 | 0 | 0 |
| CYP2B6        | 0 | 0 | 0 | 0 | 0 |
| CYP2A13       | 0 | 0 | 0 | 0 | 0 |
| C19orf69      | 0 | 0 | 0 | 0 | 0 |
| CEACAM21      | 0 | 0 | 0 | 0 | 0 |
| CEACAM5       | 0 | 0 | 0 | 0 | 0 |
| CEACAM6       | 0 | 0 | 0 | 0 | 0 |
| CEACAM3       | 0 | 0 | 0 | 0 | 0 |
| DMRTC2        | 0 | 0 | 0 | 0 | 0 |
| LOC100289650  | 0 | 0 | 0 | 0 | 0 |
| PRG1          | 0 | 0 | 0 | 0 | 0 |
| CD177         | 0 | 0 | 0 | 0 | 0 |
| CEACAM16      | 0 | 0 | 0 | 0 | 0 |
| CBLC          | 0 | 0 | 0 | 0 | 0 |
| MIR642A       | 0 | 0 | 0 | 0 | 0 |
| MIR769        | 0 | 0 | 0 | 0 | 0 |
| DKFZp434J0226 | 0 | 0 | 0 | 0 | 0 |
| IGFL1         | 0 | 0 | 0 | 0 | 0 |
| MIR3190       | 0 | 0 | 0 | 0 | 0 |
| SNORD23       | 0 | 0 | 0 | 0 | 0 |
| SNAR-A13      | 0 | 0 | 0 | 0 | 0 |
| SNAR-C2       | 0 | 0 | 0 | 0 | 0 |
| SNAR-A2       | 0 | 0 | 0 | 0 | 0 |
| SNAR-A8       | 0 | 0 | 0 | 0 | 0 |
| SNAR-C5       | 0 | 0 | 0 | 0 | 0 |
| SNAR-A2       | 0 | 0 | 0 | 0 | 0 |
| SNAR-C4       | 0 | 0 | 0 | 0 | 0 |
| SNAR-A13      | 0 | 0 | 0 | 0 | 0 |
| SNAR-C3       | 0 | 0 | 0 | 0 | 0 |
| SNAR-C5       | 0 | 0 | 0 | 0 | 0 |
| ELSPBP1       | 0 | 0 | 0 | 0 | 0 |
| SNAR-G1       | 0 | 0 | 0 | 0 | 0 |
| SNORD32A      | 0 | 0 | 0 | 0 | 0 |
| SNORD34       | 0 | 0 | 0 | 0 | 0 |
| SNORD35B      | 0 | 0 | 0 | 0 | 0 |
| MIR5088       | 0 | 0 | 0 | 0 | 0 |
| MIR4749       | 0 | 0 | 0 | 0 | 0 |
| MIR4750       | 0 | 0 | 0 | 0 | 0 |
| KLK2          | 0 | 0 | 0 | 0 | 0 |
| SIGLEC17P     | 0 | 0 | 0 | 0 | 0 |
| SIGLECL1      | 0 | 0 | 0 | 0 | 0 |
| CEACAM18      | 0 | 0 | 0 | 0 | 0 |
| MIR99B        | 0 | 0 | 0 | 0 | 0 |
| MIRLET7E      | 0 | 0 | 0 | 0 | 0 |
| MIR125A       | 0 | 0 | 0 | 0 | 0 |
| FPR2          | 0 | 0 | 0 | 0 | 0 |
| MIR643        | 0 | 0 | 0 | 0 | 0 |
| ZNF534        | 0 | 0 | 0 | 0 | 0 |
| ERVV-2        | 0 | 0 | 0 | 0 | 0 |
| FAM90A27P     | 0 | 0 | 0 | 0 | 0 |
| DPRX          | 0 | 0 | 0 | 0 | 0 |
| MIR512-2      | 0 | 0 | 0 | 0 | 0 |
| MIR512-2      | 0 | 0 | 0 | 0 | 0 |
| MIR1323       | 0 | 0 | 0 | 0 | 0 |
| MIR498        | 0 | 0 | 0 | 0 | 0 |
| MIR520E       | 0 | 0 | 0 | 0 | 0 |
| MIR515-2      | 0 | 0 | 0 | 0 | 0 |
| MIR519E       | 0 | 0 | 0 | 0 | 0 |
| MIR520F       | 0 | 0 | 0 | 0 | 0 |
| MIR515-1      | 0 | 0 | 0 | 0 | 0 |
| MIR519C       | 0 | 0 | 0 | 0 | 0 |
| MIR1283-1     | 0 | 0 | 0 | 0 | 0 |
| MIR520A       | 0 | 0 | 0 | 0 | 0 |
| MIR526B       | 0 | 0 | 0 | 0 | 0 |
| MIR519B       | 0 | 0 | 0 | 0 | 0 |
| MIR525        | 0 | 0 | 0 | 0 | 0 |
| MIR523        | 0 | 0 | 0 | 0 | 0 |
| MIR518F       | 0 | 0 | 0 | 0 | 0 |
| MIR520B       | 0 | 0 | 0 | 0 | 0 |
| MIR518B       | 0 | 0 | 0 | 0 | 0 |
| MIR526A1      | 0 | 0 | 0 | 0 | 0 |



|                      |   |   |   |   |   |
|----------------------|---|---|---|---|---|
| MIR520C              | 0 | 0 | 0 | 0 | 0 |
| MIR518C              | 0 | 0 | 0 | 0 | 0 |
| MIR524               | 0 | 0 | 0 | 0 | 0 |
| MIR517A              | 0 | 0 | 0 | 0 | 0 |
| MIR519D              | 0 | 0 | 0 | 0 | 0 |
| MIR521-2             | 0 | 0 | 0 | 0 | 0 |
| MIR520D              | 0 | 0 | 0 | 0 | 0 |
| MIR517B              | 0 | 0 | 0 | 0 | 0 |
| MIR520G              | 0 | 0 | 0 | 0 | 0 |
| MIR516B2             | 0 | 0 | 0 | 0 | 0 |
| MIR526A2             | 0 | 0 | 0 | 0 | 0 |
| MIR518E              | 0 | 0 | 0 | 0 | 0 |
| MIR518A1             | 0 | 0 | 0 | 0 | 0 |
| MIR518D              | 0 | 0 | 0 | 0 | 0 |
| MIR516B1             | 0 | 0 | 0 | 0 | 0 |
| MIR518A2             | 0 | 0 | 0 | 0 | 0 |
| MIR517C              | 0 | 0 | 0 | 0 | 0 |
| MIR520H              | 0 | 0 | 0 | 0 | 0 |
| MIR521-1             | 0 | 0 | 0 | 0 | 0 |
| MIR522               | 0 | 0 | 0 | 0 | 0 |
| MIR519A1             | 0 | 0 | 0 | 0 | 0 |
| MIR527               | 0 | 0 | 0 | 0 | 0 |
| MIR516A1             | 0 | 0 | 0 | 0 | 0 |
| MIR1283-2            | 0 | 0 | 0 | 0 | 0 |
| MIR516A2             | 0 | 0 | 0 | 0 | 0 |
| MIR519A2             | 0 | 0 | 0 | 0 | 0 |
| MIR371A              | 0 | 0 | 0 | 0 | 0 |
| MIR372               | 0 | 0 | 0 | 0 | 0 |
| MIR373               | 0 | 0 | 0 | 0 | 0 |
| MIR4752              | 0 | 0 | 0 | 0 | 0 |
| KIR3DX1              | 0 | 0 | 0 | 0 | 0 |
| LILRA1               | 0 | 0 | 0 | 0 | 0 |
| LILRB4               | 0 | 0 | 0 | 0 | 0 |
| LILRP2               | 0 | 0 | 0 | 0 | 0 |
| KIR3DL3              | 0 | 0 | 0 | 0 | 0 |
| KIR2DL3              | 0 | 0 | 0 | 0 | 0 |
| KIR2DL1              | 0 | 0 | 0 | 0 | 0 |
| KIR2DL4,LOC100287534 | 0 | 0 | 0 | 0 | 0 |
| KIR3DL1              | 0 | 0 | 0 | 0 | 0 |
| KIR2DS4              | 0 | 0 | 0 | 0 | 0 |
| KIR3DL2              | 0 | 0 | 0 | 0 | 0 |
| NCR1                 | 0 | 0 | 0 | 0 | 0 |
| NLRP2                | 0 | 0 | 0 | 0 | 0 |
| NLRP5                | 0 | 0 | 0 | 0 | 0 |
| GALP                 | 0 | 0 | 0 | 0 | 0 |
| LOC100128252         | 0 | 0 | 0 | 0 | 0 |
| ZNF471               | 0 | 0 | 0 | 0 | 0 |
| ZNF470               | 0 | 0 | 0 | 0 | 0 |
| PEG3-AS1             | 0 | 0 | 0 | 0 | 0 |
| MIMT1                | 0 | 0 | 0 | 0 | 0 |
| ZNF530               | 0 | 0 | 0 | 0 | 0 |
| ZNF134               | 0 | 0 | 0 | 0 | 0 |
| ZSCAN4               | 0 | 0 | 0 | 0 | 0 |
| LOC100128398         | 0 | 0 | 0 | 0 | 0 |
| ZSCAN1               | 0 | 0 | 0 | 0 | 0 |
| ZNF135               | 0 | 0 | 0 | 0 | 0 |
| LOC646862            | 0 | 0 | 0 | 0 | 0 |
| FAM138A              | 0 | 0 | 0 | 0 | 0 |
| THEG                 | 0 | 0 | 0 | 0 | 0 |
| LPPR3                | 0 | 0 | 0 | 0 | 0 |
| MIR1227              | 0 | 0 | 0 | 0 | 0 |
| RAX2                 | 0 | 0 | 0 | 0 | 0 |
| SNORD37              | 0 | 0 | 0 | 0 | 0 |
| ARRDC5               | 0 | 0 | 0 | 0 | 0 |
| MBD3L4               | 0 | 0 | 0 | 0 | 0 |
| CLEC4G               | 0 | 0 | 0 | 0 | 0 |
| CD209                | 0 | 0 | 0 | 0 | 0 |
| LOC388499            | 0 | 0 | 0 | 0 | 0 |
| MIR4999              | 0 | 0 | 0 | 0 | 0 |
| ADAMTS10             | 0 | 0 | 0 | 0 | 0 |
| ACTL9                | 0 | 0 | 0 | 0 | 0 |
| MUC16                | 0 | 0 | 0 | 0 | 0 |
| OR7G2                | 0 | 0 | 0 | 0 | 0 |
| OR7G1                | 0 | 0 | 0 | 0 | 0 |
| OR7G3                | 0 | 0 | 0 | 0 | 0 |
| OR7D4                | 0 | 0 | 0 | 0 | 0 |
| ZNF560               | 0 | 0 | 0 | 0 | 0 |
| ZNF812               | 0 | 0 | 0 | 0 | 0 |
| S1PR5                | 0 | 0 | 0 | 0 | 0 |

|              |   |   |   |   |   |
|--------------|---|---|---|---|---|
| MIR199A1     | 0 | 0 | 0 | 0 | 0 |
| SNORD41      | 0 | 0 | 0 | 0 | 0 |
| MIR27A       | 0 | 0 | 0 | 0 | 0 |
| MIR23A       | 0 | 0 | 0 | 0 | 0 |
| EMR3         | 0 | 0 | 0 | 0 | 0 |
| OR7C1        | 0 | 0 | 0 | 0 | 0 |
| OR7A5        | 0 | 0 | 0 | 0 | 0 |
| OR7A10       | 0 | 0 | 0 | 0 | 0 |
| OR7A17       | 0 | 0 | 0 | 0 | 0 |
| RASAL3       | 0 | 0 | 0 | 0 | 0 |
| PGLYRP2      | 0 | 0 | 0 | 0 | 0 |
| CYP4F24P     | 0 | 0 | 0 | 0 | 0 |
| IL12RB1      | 0 | 0 | 0 | 0 | 0 |
| LOC729966    | 0 | 0 | 0 | 0 | 0 |
| COMP         | 0 | 0 | 0 | 0 | 0 |
| HAPLN4       | 0 | 0 | 0 | 0 | 0 |
| MIR1270-2    | 0 | 0 | 0 | 0 | 0 |
| ZNF826P      | 0 | 0 | 0 | 0 | 0 |
| MIR1270-2    | 0 | 0 | 0 | 0 | 0 |
| ZNF676       | 0 | 0 | 0 | 0 | 0 |
| ZNF98        | 0 | 0 | 0 | 0 | 0 |
| ZNF728       | 0 | 0 | 0 | 0 | 0 |
| LOC284395    | 0 | 0 | 0 | 0 | 0 |
| TSHZ3        | 0 | 0 | 0 | 0 | 0 |
| SCGB2B2      | 0 | 0 | 0 | 0 | 0 |
| LOC400685    | 0 | 0 | 0 | 0 | 0 |
| LOC100652909 | 0 | 0 | 0 | 0 | 0 |
| LOC100128675 | 0 | 0 | 0 | 0 | 0 |
| TYROBP       | 0 | 0 | 0 | 0 | 0 |
| LOC100631378 | 0 | 0 | 0 | 0 | 0 |
| PPP1R14A     | 0 | 0 | 0 | 0 | 0 |
| LGALS7       | 0 | 0 | 0 | 0 | 0 |
| SYCN         | 0 | 0 | 0 | 0 | 0 |
| IFNL3        | 0 | 0 | 0 | 0 | 0 |
| IFNL4        | 0 | 0 | 0 | 0 | 0 |
| MIR4530      | 0 | 0 | 0 | 0 | 0 |
| CLC          | 0 | 0 | 0 | 0 | 0 |
| MIR641       | 0 | 0 | 0 | 0 | 0 |
| CYP2A7       | 0 | 0 | 0 | 0 | 0 |
| LOC100505495 | 0 | 0 | 0 | 0 | 0 |
| CEACAM4      | 0 | 0 | 0 | 0 | 0 |
| CEACAM7      | 0 | 0 | 0 | 0 | 0 |
| LYPD4        | 0 | 0 | 0 | 0 | 0 |
| MIR4323      | 0 | 0 | 0 | 0 | 0 |
| PSG8         | 0 | 0 | 0 | 0 | 0 |
| PSG10P       | 0 | 0 | 0 | 0 | 0 |
| PSG1         | 0 | 0 | 0 | 0 | 0 |
| PSG6         | 0 | 0 | 0 | 0 | 0 |
| PSG7         | 0 | 0 | 0 | 0 | 0 |
| PSG2         | 0 | 0 | 0 | 0 | 0 |
| LOC284344    | 0 | 0 | 0 | 0 | 0 |
| CEACAM20     | 0 | 0 | 0 | 0 | 0 |
| MIR4531      | 0 | 0 | 0 | 0 | 0 |
| MIR330       | 0 | 0 | 0 | 0 | 0 |
| MIR642B      | 0 | 0 | 0 | 0 | 0 |
| NANOS2       | 0 | 0 | 0 | 0 | 0 |
| NOVA2        | 0 | 0 | 0 | 0 | 0 |
| IGFL3        | 0 | 0 | 0 | 0 | 0 |
| RNU6-66      | 0 | 0 | 0 | 0 | 0 |
| CCDC8        | 0 | 0 | 0 | 0 | 0 |
| PNMAL2       | 0 | 0 | 0 | 0 | 0 |
| MIR320E      | 0 | 0 | 0 | 0 | 0 |
| SNAR-E       | 0 | 0 | 0 | 0 | 0 |
| ZNF541       | 0 | 0 | 0 | 0 | 0 |
| TPRX1        | 0 | 0 | 0 | 0 | 0 |
| SULT2A1      | 0 | 0 | 0 | 0 | 0 |
| BSPH1        | 0 | 0 | 0 | 0 | 0 |
| SNAR-G2      | 0 | 0 | 0 | 0 | 0 |
| CGB1         | 0 | 0 | 0 | 0 | 0 |
| MIR4324      | 0 | 0 | 0 | 0 | 0 |
| MIR150       | 0 | 0 | 0 | 0 | 0 |
| TSKS         | 0 | 0 | 0 | 0 | 0 |
| SNAR-A8      | 0 | 0 | 0 | 0 | 0 |
| SNAR-A4      | 0 | 0 | 0 | 0 | 0 |
| SNAR-A10     | 0 | 0 | 0 | 0 | 0 |
| SNAR-A7      | 0 | 0 | 0 | 0 | 0 |
| SNAR-A14     | 0 | 0 | 0 | 0 | 0 |
| SNAR-A3      | 0 | 0 | 0 | 0 | 0 |
| SNAR-A6      | 0 | 0 | 0 | 0 | 0 |

|              |   |   |   |   |   |
|--------------|---|---|---|---|---|
| SNAR-A10     | 0 | 0 | 0 | 0 | 0 |
| SNAR-A8      | 0 | 0 | 0 | 0 | 0 |
| SNAR-B1      | 0 | 0 | 0 | 0 | 0 |
| SNAR-B2      | 0 | 0 | 0 | 0 | 0 |
| SNAR-D       | 0 | 0 | 0 | 0 | 0 |
| IZUMO2       | 0 | 0 | 0 | 0 | 0 |
| KCNC3        | 0 | 0 | 0 | 0 | 0 |
| NAPSB        | 0 | 0 | 0 | 0 | 0 |
| SNORD88B     | 0 | 0 | 0 | 0 | 0 |
| SNORD88A     | 0 | 0 | 0 | 0 | 0 |
| SNORD88C     | 0 | 0 | 0 | 0 | 0 |
| KLK5         | 0 | 0 | 0 | 0 | 0 |
| KLK8         | 0 | 0 | 0 | 0 | 0 |
| KLK9         | 0 | 0 | 0 | 0 | 0 |
| KLK10        | 0 | 0 | 0 | 0 | 0 |
| KLK11        | 0 | 0 | 0 | 0 | 0 |
| KLK12        | 0 | 0 | 0 | 0 | 0 |
| KLK13        | 0 | 0 | 0 | 0 | 0 |
| SIGLEC8      | 0 | 0 | 0 | 0 | 0 |
| SIGLEC12     | 0 | 0 | 0 | 0 | 0 |
| SIGLEC6      | 0 | 0 | 0 | 0 | 0 |
| FPR1         | 0 | 0 | 0 | 0 | 0 |
| ZNF415       | 0 | 0 | 0 | 0 | 0 |
| VN1R4        | 0 | 0 | 0 | 0 | 0 |
| BIRC8        | 0 | 0 | 0 | 0 | 0 |
| MIR371B      | 0 | 0 | 0 | 0 | 0 |
| TARM1        | 0 | 0 | 0 | 0 | 0 |
| LILRB5       | 0 | 0 | 0 | 0 | 0 |
| LILRB2       | 0 | 0 | 0 | 0 | 0 |
| LILRA3       | 0 | 0 | 0 | 0 | 0 |
| LILRA4       | 0 | 0 | 0 | 0 | 0 |
| NLRP7        | 0 | 0 | 0 | 0 | 0 |
| RNU6-64      | 0 | 0 | 0 | 0 | 0 |
| FAM71E2      | 0 | 0 | 0 | 0 | 0 |
| SBK2         | 0 | 0 | 0 | 0 | 0 |
| SGK110       | 0 | 0 | 0 | 0 | 0 |
| NLRP13       | 0 | 0 | 0 | 0 | 0 |
| ZIM3         | 0 | 0 | 0 | 0 | 0 |
| ZNF418       | 0 | 0 | 0 | 0 | 0 |
| ZNF256       | 0 | 0 | 0 | 0 | 0 |
| C19orf18     | 0 | 0 | 0 | 0 | 0 |
| ZNF606       | 0 | 0 | 0 | 0 | 0 |
| MIR4754      | 0 | 0 | 0 | 0 | 0 |
| TPO          | 0 | 0 | 0 | 0 | 0 |
| LOC730811    | 0 | 0 | 0 | 0 | 0 |
| SOX11        | 0 | 0 | 0 | 0 | 0 |
| LOC150622    | 0 | 0 | 0 | 0 | 0 |
| LOC400940    | 0 | 0 | 0 | 0 | 0 |
| KCNF1        | 0 | 0 | 0 | 0 | 0 |
| MIR3125      | 0 | 0 | 0 | 0 | 0 |
| MYCN         | 0 | 0 | 0 | 0 | 0 |
| MSGN1        | 0 | 0 | 0 | 0 | 0 |
| KCNS3        | 0 | 0 | 0 | 0 | 0 |
| MIR4757      | 0 | 0 | 0 | 0 | 0 |
| FLJ12334     | 0 | 0 | 0 | 0 | 0 |
| GDF7         | 0 | 0 | 0 | 0 | 0 |
| C2orf70      | 0 | 0 | 0 | 0 | 0 |
| TCF23        | 0 | 0 | 0 | 0 | 0 |
| DNAJC5G      | 0 | 0 | 0 | 0 | 0 |
| MIR4263      | 0 | 0 | 0 | 0 | 0 |
| SNORD92      | 0 | 0 | 0 | 0 | 0 |
| SNORD53      | 0 | 0 | 0 | 0 | 0 |
| EHD3         | 0 | 0 | 0 | 0 | 0 |
| MIR558       | 0 | 0 | 0 | 0 | 0 |
| MIR4765      | 0 | 0 | 0 | 0 | 0 |
| LINC00486    | 0 | 0 | 0 | 0 | 0 |
| LOC100271832 | 0 | 0 | 0 | 0 | 0 |
| VIT          | 0 | 0 | 0 | 0 | 0 |
| CYP1B1-AS1   | 0 | 0 | 0 | 0 | 0 |
| SLC8A1-AS1   | 0 | 0 | 0 | 0 | 0 |
| LOC388942    | 0 | 0 | 0 | 0 | 0 |
| ABCG8        | 0 | 0 | 0 | 0 | 0 |
| EPCAM        | 0 | 0 | 0 | 0 | 0 |
| MIR559       | 0 | 0 | 0 | 0 | 0 |
| CCDC85A      | 0 | 0 | 0 | 0 | 0 |
| FLJ30838     | 0 | 0 | 0 | 0 | 0 |
| MIR5192      | 0 | 0 | 0 | 0 | 0 |
| MIR4434      | 0 | 0 | 0 | 0 | 0 |
| LOC339807    | 0 | 0 | 0 | 0 | 0 |

|                  |   |   |   |   |   |
|------------------|---|---|---|---|---|
| PLEK             | 0 | 0 | 0 | 0 | 0 |
| PROKR1           | 0 | 0 | 0 | 0 | 0 |
| GKN1             | 0 | 0 | 0 | 0 | 0 |
| ANTXR1           | 0 | 0 | 0 | 0 | 0 |
| MIR3126          | 0 | 0 | 0 | 0 | 0 |
| OR7E91P          | 0 | 0 | 0 | 0 | 0 |
| EMX1             | 0 | 0 | 0 | 0 | 0 |
| NOTO             | 0 | 0 | 0 | 0 | 0 |
| DCTN1-AS1        | 0 | 0 | 0 | 0 | 0 |
| MIR5000          | 0 | 0 | 0 | 0 | 0 |
| REG3G            | 0 | 0 | 0 | 0 | 0 |
| REG1A            | 0 | 0 | 0 | 0 | 0 |
| LOC1720          | 0 | 0 | 0 | 0 | 0 |
| FUNDC2P2         | 0 | 0 | 0 | 0 | 0 |
| RGPD1,RGPD2      | 0 | 0 | 0 | 0 | 0 |
| MIR4435-1        | 0 | 0 | 0 | 0 | 0 |
| SMYD1            | 0 | 0 | 0 | 0 | 0 |
| THNSL2           | 0 | 0 | 0 | 0 | 0 |
| TEX37            | 0 | 0 | 0 | 0 | 0 |
| MIR4436A         | 0 | 0 | 0 | 0 | 0 |
| ACTR3BP2         | 0 | 0 | 0 | 0 | 0 |
| MAL              | 0 | 0 | 0 | 0 | 0 |
| TRIM43           | 0 | 0 | 0 | 0 | 0 |
| MIR3127          | 0 | 0 | 0 | 0 | 0 |
| VWA3B            | 0 | 0 | 0 | 0 | 0 |
| CNGA3            | 0 | 0 | 0 | 0 | 0 |
| NMS              | 0 | 0 | 0 | 0 | 0 |
| MIR5696          | 0 | 0 | 0 | 0 | 0 |
| IL1R2            | 0 | 0 | 0 | 0 | 0 |
| IL1RL2           | 0 | 0 | 0 | 0 | 0 |
| MIR4772          | 0 | 0 | 0 | 0 | 0 |
| LOC150568        | 0 | 0 | 0 | 0 | 0 |
| POU3F3           | 0 | 0 | 0 | 0 | 0 |
| PLGLA            | 0 | 0 | 0 | 0 | 0 |
| SLC5A7           | 0 | 0 | 0 | 0 | 0 |
| SULT1C3          | 0 | 0 | 0 | 0 | 0 |
| SULT1C2          | 0 | 0 | 0 | 0 | 0 |
| SULT1C2P1        | 0 | 0 | 0 | 0 | 0 |
| SULT1C4          | 0 | 0 | 0 | 0 | 0 |
| LIMS3L           | 0 | 0 | 0 | 0 | 0 |
| LOC100507334     | 0 | 0 | 0 | 0 | 0 |
| MIR4436B2        | 0 | 0 | 0 | 0 | 0 |
| ACOXL            | 0 | 0 | 0 | 0 | 0 |
| IL36A            | 0 | 0 | 0 | 0 | 0 |
| IL36RN           | 0 | 0 | 0 | 0 | 0 |
| IL1F10           | 0 | 0 | 0 | 0 | 0 |
| IL1RN            | 0 | 0 | 0 | 0 | 0 |
| FAM138B          | 0 | 0 | 0 | 0 | 0 |
| DPP10            | 0 | 0 | 0 | 0 | 0 |
| MARCO            | 0 | 0 | 0 | 0 | 0 |
| PCDP1            | 0 | 0 | 0 | 0 | 0 |
| GLI2             | 0 | 0 | 0 | 0 | 0 |
| CNTNAP5          | 0 | 0 | 0 | 0 | 0 |
| GYPC             | 0 | 0 | 0 | 0 | 0 |
| GPR17            | 0 | 0 | 0 | 0 | 0 |
| CFC1B            | 0 | 0 | 0 | 0 | 0 |
| LOC646743,TISP43 | 0 | 0 | 0 | 0 | 0 |
| CYP4F30P         | 0 | 0 | 0 | 0 | 0 |
| GPR148           | 0 | 0 | 0 | 0 | 0 |
| POTEE            | 0 | 0 | 0 | 0 | 0 |
| LOC440910        | 0 | 0 | 0 | 0 | 0 |
| LOC389043        | 0 | 0 | 0 | 0 | 0 |
| RNU6-81          | 0 | 0 | 0 | 0 | 0 |
| MIR3679          | 0 | 0 | 0 | 0 | 0 |
| ACMSD            | 0 | 0 | 0 | 0 | 0 |
| MIR128-1         | 0 | 0 | 0 | 0 | 0 |
| LOC100507600     | 0 | 0 | 0 | 0 | 0 |
| THSD7B           | 0 | 0 | 0 | 0 | 0 |
| ARHGAP15         | 0 | 0 | 0 | 0 | 0 |
| ZEB2-AS1         | 0 | 0 | 0 | 0 | 0 |
| DKFZp686O1327    | 0 | 0 | 0 | 0 | 0 |
| LYPD6B           | 0 | 0 | 0 | 0 | 0 |
| TNFAIP6          | 0 | 0 | 0 | 0 | 0 |
| MIR4773-1        | 0 | 0 | 0 | 0 | 0 |
| GALNT13          | 0 | 0 | 0 | 0 | 0 |
| GALNT5           | 0 | 0 | 0 | 0 | 0 |
| CCDC148-AS1      | 0 | 0 | 0 | 0 | 0 |
| DAPL1            | 0 | 0 | 0 | 0 | 0 |
| TBR1             | 0 | 0 | 0 | 0 | 0 |

|                           |   |   |   |   |   |
|---------------------------|---|---|---|---|---|
| CSRNP3                    | 0 | 0 | 0 | 0 | 0 |
| XIRP2                     | 0 | 0 | 0 | 0 | 0 |
| MIR4774                   | 0 | 0 | 0 | 0 | 0 |
| G6PC2                     | 0 | 0 | 0 | 0 | 0 |
| MYO3B                     | 0 | 0 | 0 | 0 | 0 |
| LOC285084                 | 0 | 0 | 0 | 0 | 0 |
| SP9                       | 0 | 0 | 0 | 0 | 0 |
| HOXD12                    | 0 | 0 | 0 | 0 | 0 |
| HOXD11                    | 0 | 0 | 0 | 0 | 0 |
| HOXD10                    | 0 | 0 | 0 | 0 | 0 |
| MIR10B                    | 0 | 0 | 0 | 0 | 0 |
| OSBPL6                    | 0 | 0 | 0 | 0 | 0 |
| ITGA4                     | 0 | 0 | 0 | 0 | 0 |
| PPP1R1C                   | 0 | 0 | 0 | 0 | 0 |
| ZNF804A                   | 0 | 0 | 0 | 0 | 0 |
| MIR561                    | 0 | 0 | 0 | 0 | 0 |
| COL3A1                    | 0 | 0 | 0 | 0 | 0 |
| MIR1245A                  | 0 | 0 | 0 | 0 | 0 |
| PCGEM1                    | 0 | 0 | 0 | 0 | 0 |
| PLCL1                     | 0 | 0 | 0 | 0 | 0 |
| CDK15                     | 0 | 0 | 0 | 0 | 0 |
| SNORD70                   | 0 | 0 | 0 | 0 | 0 |
| SNORD11B                  | 0 | 0 | 0 | 0 | 0 |
| SNORD11                   | 0 | 0 | 0 | 0 | 0 |
| CD28                      | 0 | 0 | 0 | 0 | 0 |
| ICOS                      | 0 | 0 | 0 | 0 | 0 |
| SNORD51                   | 0 | 0 | 0 | 0 | 0 |
| ADAM23                    | 0 | 0 | 0 | 0 | 0 |
| LOC200726                 | 0 | 0 | 0 | 0 | 0 |
| MIR3130-2                 | 0 | 0 | 0 | 0 | 0 |
| LOC100507443              | 0 | 0 | 0 | 0 | 0 |
| PTH2R                     | 0 | 0 | 0 | 0 | 0 |
| UNC80                     | 0 | 0 | 0 | 0 | 0 |
| CPS1-IT1                  | 0 | 0 | 0 | 0 | 0 |
| VWC2L                     | 0 | 0 | 0 | 0 | 0 |
| VWC2L-IT1                 | 0 | 0 | 0 | 0 | 0 |
| MIR26B                    | 0 | 0 | 0 | 0 | 0 |
| VIL1                      | 0 | 0 | 0 | 0 | 0 |
| WNT6                      | 0 | 0 | 0 | 0 | 0 |
| CDK5R2                    | 0 | 0 | 0 | 0 | 0 |
| LINC00608                 | 0 | 0 | 0 | 0 | 0 |
| LOC100129175              | 0 | 0 | 0 | 0 | 0 |
| CCDC140                   | 0 | 0 | 0 | 0 | 0 |
| MOGAT1                    | 0 | 0 | 0 | 0 | 0 |
| KCNE4                     | 0 | 0 | 0 | 0 | 0 |
| NYAP2                     | 0 | 0 | 0 | 0 | 0 |
| MIR548AR                  | 0 | 0 | 0 | 0 | 0 |
| LOC646736                 | 0 | 0 | 0 | 0 | 0 |
| CCL20                     | 0 | 0 | 0 | 0 | 0 |
| SPATA3                    | 0 | 0 | 0 | 0 | 0 |
| MIR4777                   | 0 | 0 | 0 | 0 | 0 |
| C2orf57                   | 0 | 0 | 0 | 0 | 0 |
| ALPP                      | 0 | 0 | 0 | 0 | 0 |
| ALPPL2                    | 0 | 0 | 0 | 0 | 0 |
| ALPI                      | 0 | 0 | 0 | 0 | 0 |
| NEU2                      | 0 | 0 | 0 | 0 | 0 |
| UGT1A1,UGT1A10,UGT1A3,UGT | 0 | 0 | 0 | 0 | 0 |
| TRPM8                     | 0 | 0 | 0 | 0 | 0 |
| SPP2                      | 0 | 0 | 0 | 0 | 0 |
| CXCR7                     | 0 | 0 | 0 | 0 | 0 |
| MLPH                      | 0 | 0 | 0 | 0 | 0 |
| PRLH                      | 0 | 0 | 0 | 0 | 0 |
| TWIST2                    | 0 | 0 | 0 | 0 | 0 |
| MIR4269                   | 0 | 0 | 0 | 0 | 0 |
| LOC150935                 | 0 | 0 | 0 | 0 | 0 |
| MIR149                    | 0 | 0 | 0 | 0 | 0 |
| GAL3ST2                   | 0 | 0 | 0 | 0 | 0 |
| CXXC11                    | 0 | 0 | 0 | 0 | 0 |
| FAM150B                   | 0 | 0 | 0 | 0 | 0 |
| LOC339822                 | 0 | 0 | 0 | 0 | 0 |
| MYT1L                     | 0 | 0 | 0 | 0 | 0 |
| LOC100505964              | 0 | 0 | 0 | 0 | 0 |
| LOC727982                 | 0 | 0 | 0 | 0 | 0 |
| LINC00487                 | 0 | 0 | 0 | 0 | 0 |
| LOC339788                 | 0 | 0 | 0 | 0 | 0 |
| LINC00299                 | 0 | 0 | 0 | 0 | 0 |
| MIR4261                   | 0 | 0 | 0 | 0 | 0 |
| FLJ33534                  | 0 | 0 | 0 | 0 | 0 |
| MIR4429                   | 0 | 0 | 0 | 0 | 0 |

|              |   |   |   |   |   |
|--------------|---|---|---|---|---|
| NTSR2        | 0 | 0 | 0 | 0 | 0 |
| MIR4262      | 0 | 0 | 0 | 0 | 0 |
| LOC100506474 | 0 | 0 | 0 | 0 | 0 |
| MYCNOS       | 0 | 0 | 0 | 0 | 0 |
| RAD51AP2     | 0 | 0 | 0 | 0 | 0 |
| OSR1         | 0 | 0 | 0 | 0 | 0 |
| APOB         | 0 | 0 | 0 | 0 | 0 |
| POMC         | 0 | 0 | 0 | 0 | 0 |
| MIR1301      | 0 | 0 | 0 | 0 | 0 |
| C2orf53      | 0 | 0 | 0 | 0 | 0 |
| SLC30A3      | 0 | 0 | 0 | 0 | 0 |
| C2orf71      | 0 | 0 | 0 | 0 | 0 |
| ALK          | 0 | 0 | 0 | 0 | 0 |
| CAPN13       | 0 | 0 | 0 | 0 | 0 |
| GALNT14      | 0 | 0 | 0 | 0 | 0 |
| CAPN14       | 0 | 0 | 0 | 0 | 0 |
| SRD5A2       | 0 | 0 | 0 | 0 | 0 |
| SULT6B1      | 0 | 0 | 0 | 0 | 0 |
| LOC375196    | 0 | 0 | 0 | 0 | 0 |
| SLC8A1       | 0 | 0 | 0 | 0 | 0 |
| KCNG3        | 0 | 0 | 0 | 0 | 0 |
| HAAO         | 0 | 0 | 0 | 0 | 0 |
| LOC728819    | 0 | 0 | 0 | 0 | 0 |
| MIR548AD     | 0 | 0 | 0 | 0 | 0 |
| SIX2         | 0 | 0 | 0 | 0 | 0 |
| C2orf61      | 0 | 0 | 0 | 0 | 0 |
| KCNK12       | 0 | 0 | 0 | 0 | 0 |
| LHCGR        | 0 | 0 | 0 | 0 | 0 |
| FSHR         | 0 | 0 | 0 | 0 | 0 |
| NRXN1        | 0 | 0 | 0 | 0 | 0 |
| MIR3682      | 0 | 0 | 0 | 0 | 0 |
| EFEMP1       | 0 | 0 | 0 | 0 | 0 |
| MIR217       | 0 | 0 | 0 | 0 | 0 |
| MIR216A      | 0 | 0 | 0 | 0 | 0 |
| MIR216B      | 0 | 0 | 0 | 0 | 0 |
| MIR4432      | 0 | 0 | 0 | 0 | 0 |
| LOC339803    | 0 | 0 | 0 | 0 | 0 |
| SNORA70B     | 0 | 0 | 0 | 0 | 0 |
| LINC00309    | 0 | 0 | 0 | 0 | 0 |
| MIR4778      | 0 | 0 | 0 | 0 | 0 |
| MEIS1-AS3    | 0 | 0 | 0 | 0 | 0 |
| LOC644838    | 0 | 0 | 0 | 0 | 0 |
| CNRIP1       | 0 | 0 | 0 | 0 | 0 |
| BMP10        | 0 | 0 | 0 | 0 | 0 |
| GKN2         | 0 | 0 | 0 | 0 | 0 |
| FIGLA        | 0 | 0 | 0 | 0 | 0 |
| CLEC4F       | 0 | 0 | 0 | 0 | 0 |
| EGR4         | 0 | 0 | 0 | 0 | 0 |
| NAT8         | 0 | 0 | 0 | 0 | 0 |
| NAT8B        | 0 | 0 | 0 | 0 | 0 |
| EVA1A        | 0 | 0 | 0 | 0 | 0 |
| LRRTM4       | 0 | 0 | 0 | 0 | 0 |
| SNAR-H       | 0 | 0 | 0 | 0 | 0 |
| REG1B        | 0 | 0 | 0 | 0 | 0 |
| REG1P        | 0 | 0 | 0 | 0 | 0 |
| MIR4264      | 0 | 0 | 0 | 0 | 0 |
| LRRTM1       | 0 | 0 | 0 | 0 | 0 |
| MIR4779      | 0 | 0 | 0 | 0 | 0 |
| CD8B         | 0 | 0 | 0 | 0 | 0 |
| MIR4780      | 0 | 0 | 0 | 0 | 0 |
| TRIM43B      | 0 | 0 | 0 | 0 | 0 |
| FAM178B      | 0 | 0 | 0 | 0 | 0 |
| CHST10       | 0 | 0 | 0 | 0 | 0 |
| CREG2        | 0 | 0 | 0 | 0 | 0 |
| RFX8         | 0 | 0 | 0 | 0 | 0 |
| LOC100287010 | 0 | 0 | 0 | 0 | 0 |
| LOC284998    | 0 | 0 | 0 | 0 | 0 |
| LOC100506421 | 0 | 0 | 0 | 0 | 0 |
| LOC285000    | 0 | 0 | 0 | 0 | 0 |
| MIR4265      | 0 | 0 | 0 | 0 | 0 |
| MIR4266      | 0 | 0 | 0 | 0 | 0 |
| MIR4267      | 0 | 0 | 0 | 0 | 0 |
| MIR4436B1    | 0 | 0 | 0 | 0 | 0 |
| LIMS3        | 0 | 0 | 0 | 0 | 0 |
| RGPD5,RGPD6  | 0 | 0 | 0 | 0 | 0 |
| MIR4435-1    | 0 | 0 | 0 | 0 | 0 |
| IL1B         | 0 | 0 | 0 | 0 | 0 |
| IL36B        | 0 | 0 | 0 | 0 | 0 |
| MIR4782      | 0 | 0 | 0 | 0 | 0 |

|                  |   |   |   |   |   |
|------------------|---|---|---|---|---|
| LOC100499194     | 0 | 0 | 0 | 0 | 0 |
| LOC389023        | 0 | 0 | 0 | 0 | 0 |
| EN1              | 0 | 0 | 0 | 0 | 0 |
| SCTR             | 0 | 0 | 0 | 0 | 0 |
| LOC84931         | 0 | 0 | 0 | 0 | 0 |
| CYP27C1          | 0 | 0 | 0 | 0 | 0 |
| MIR4783          | 0 | 0 | 0 | 0 | 0 |
| LOC389033        | 0 | 0 | 0 | 0 | 0 |
| LOC100131320     | 0 | 0 | 0 | 0 | 0 |
| LOC440905        | 0 | 0 | 0 | 0 | 0 |
| POTEF            | 0 | 0 | 0 | 0 | 0 |
| LOC646743,TISP43 | 0 | 0 | 0 | 0 | 0 |
| CFC1,CFC1B       | 0 | 0 | 0 | 0 | 0 |
| MIR4784          | 0 | 0 | 0 | 0 | 0 |
| C2orf27B         | 0 | 0 | 0 | 0 | 0 |
| MIR663B          | 0 | 0 | 0 | 0 | 0 |
| NCKAP5           | 0 | 0 | 0 | 0 | 0 |
| MAP3K19          | 0 | 0 | 0 | 0 | 0 |
| CXCR4            | 0 | 0 | 0 | 0 | 0 |
| NXPH2            | 0 | 0 | 0 | 0 | 0 |
| LRP1B            | 0 | 0 | 0 | 0 | 0 |
| ZEB2             | 0 | 0 | 0 | 0 | 0 |
| RPRM             | 0 | 0 | 0 | 0 | 0 |
| ERMN             | 0 | 0 | 0 | 0 | 0 |
| CYTIP            | 0 | 0 | 0 | 0 | 0 |
| PLA2R1           | 0 | 0 | 0 | 0 | 0 |
| ITGB6            | 0 | 0 | 0 | 0 | 0 |
| MIR4785          | 0 | 0 | 0 | 0 | 0 |
| DPP4             | 0 | 0 | 0 | 0 | 0 |
| GCG              | 0 | 0 | 0 | 0 | 0 |
| FAP              | 0 | 0 | 0 | 0 | 0 |
| KCNH7            | 0 | 0 | 0 | 0 | 0 |
| FIGN             | 0 | 0 | 0 | 0 | 0 |
| GRB14            | 0 | 0 | 0 | 0 | 0 |
| SNORA70F         | 0 | 0 | 0 | 0 | 0 |
| SLC38A11         | 0 | 0 | 0 | 0 | 0 |
| SCN1A            | 0 | 0 | 0 | 0 | 0 |
| SCN9A            | 0 | 0 | 0 | 0 | 0 |
| SCN7A            | 0 | 0 | 0 | 0 | 0 |
| ABCB11           | 0 | 0 | 0 | 0 | 0 |
| LRP2             | 0 | 0 | 0 | 0 | 0 |
| WIPF1            | 0 | 0 | 0 | 0 | 0 |
| CHRNA1           | 0 | 0 | 0 | 0 | 0 |
| MIR933           | 0 | 0 | 0 | 0 | 0 |
| EVX2             | 0 | 0 | 0 | 0 | 0 |
| MIR1246          | 0 | 0 | 0 | 0 | 0 |
| MIR3128          | 0 | 0 | 0 | 0 | 0 |
| MIR1258          | 0 | 0 | 0 | 0 | 0 |
| MIR4437          | 0 | 0 | 0 | 0 | 0 |
| PDE1A            | 0 | 0 | 0 | 0 | 0 |
| ZSWIM2           | 0 | 0 | 0 | 0 | 0 |
| DIRC1            | 0 | 0 | 0 | 0 | 0 |
| MIR1245B         | 0 | 0 | 0 | 0 | 0 |
| MIR3129          | 0 | 0 | 0 | 0 | 0 |
| SLC40A1          | 0 | 0 | 0 | 0 | 0 |
| SDPR             | 0 | 0 | 0 | 0 | 0 |
| TMEFF2           | 0 | 0 | 0 | 0 | 0 |
| BOLL             | 0 | 0 | 0 | 0 | 0 |
| DYTN             | 0 | 0 | 0 | 0 | 0 |
| MIR2355          | 0 | 0 | 0 | 0 | 0 |
| CRYGD            | 0 | 0 | 0 | 0 | 0 |
| CRYGC            | 0 | 0 | 0 | 0 | 0 |
| CRYGB            | 0 | 0 | 0 | 0 | 0 |
| CRYGA            | 0 | 0 | 0 | 0 | 0 |
| C2orf80          | 0 | 0 | 0 | 0 | 0 |
| ACADL            | 0 | 0 | 0 | 0 | 0 |
| MYL1             | 0 | 0 | 0 | 0 | 0 |
| MIR548F2         | 0 | 0 | 0 | 0 | 0 |
| MIR4776-2        | 0 | 0 | 0 | 0 | 0 |
| LINC00607        | 0 | 0 | 0 | 0 | 0 |
| IGFBP5           | 0 | 0 | 0 | 0 | 0 |
| TNP1             | 0 | 0 | 0 | 0 | 0 |
| CXCR2P1          | 0 | 0 | 0 | 0 | 0 |
| PRKAG3           | 0 | 0 | 0 | 0 | 0 |
| CRYBA2           | 0 | 0 | 0 | 0 | 0 |
| MIR375           | 0 | 0 | 0 | 0 | 0 |
| MIR3131          | 0 | 0 | 0 | 0 | 0 |
| MIR153-1         | 0 | 0 | 0 | 0 | 0 |
| RESP18           | 0 | 0 | 0 | 0 | 0 |

|              |   |   |   |   |   |
|--------------|---|---|---|---|---|
| MIR3132      | 0 | 0 | 0 | 0 | 0 |
| MIR4268      | 0 | 0 | 0 | 0 | 0 |
| PAX3         | 0 | 0 | 0 | 0 | 0 |
| DOCK10       | 0 | 0 | 0 | 0 | 0 |
| MIR4439      | 0 | 0 | 0 | 0 | 0 |
| MIR5702      | 0 | 0 | 0 | 0 | 0 |
| C2orf83      | 0 | 0 | 0 | 0 | 0 |
| SPHKAP       | 0 | 0 | 0 | 0 | 0 |
| PID1         | 0 | 0 | 0 | 0 | 0 |
| DNER         | 0 | 0 | 0 | 0 | 0 |
| SNORD20      | 0 | 0 | 0 | 0 | 0 |
| SNORD82      | 0 | 0 | 0 | 0 | 0 |
| MIR1471      | 0 | 0 | 0 | 0 | 0 |
| NPPC         | 0 | 0 | 0 | 0 | 0 |
| ECEL1P2      | 0 | 0 | 0 | 0 | 0 |
| ECEL1        | 0 | 0 | 0 | 0 | 0 |
| DNAJB3       | 0 | 0 | 0 | 0 | 0 |
| LOC100286922 | 0 | 0 | 0 | 0 | 0 |
| GBX2         | 0 | 0 | 0 | 0 | 0 |
| ASB18        | 0 | 0 | 0 | 0 | 0 |
| IQCA1        | 0 | 0 | 0 | 0 | 0 |
| LOC151174    | 0 | 0 | 0 | 0 | 0 |
| FLJ43879     | 0 | 0 | 0 | 0 | 0 |
| MIR4441      | 0 | 0 | 0 | 0 | 0 |
| MIR2467      | 0 | 0 | 0 | 0 | 0 |
| MIR4786      | 0 | 0 | 0 | 0 | 0 |
| OR6B2        | 0 | 0 | 0 | 0 | 0 |
| PRR21        | 0 | 0 | 0 | 0 | 0 |
| OR6B3        | 0 | 0 | 0 | 0 | 0 |
| AQP12B       | 0 | 0 | 0 | 0 | 0 |
| KIF1A        | 0 | 0 | 0 | 0 | 0 |
| LOC200772    | 0 | 0 | 0 | 0 | 0 |
| DEFB125      | 0 | 0 | 0 | 0 | 0 |
| DEFB126      | 0 | 0 | 0 | 0 | 0 |
| DEFB127      | 0 | 0 | 0 | 0 | 0 |
| DEFB129      | 0 | 0 | 0 | 0 | 0 |
| DEFB132      | 0 | 0 | 0 | 0 | 0 |
| TGM3         | 0 | 0 | 0 | 0 | 0 |
| TGM6         | 0 | 0 | 0 | 0 | 0 |
| SNORA51      | 0 | 0 | 0 | 0 | 0 |
| SNORD56      | 0 | 0 | 0 | 0 | 0 |
| SNORD57      | 0 | 0 | 0 | 0 | 0 |
| C20orf141    | 0 | 0 | 0 | 0 | 0 |
| TMEM239      | 0 | 0 | 0 | 0 | 0 |
| MIR103A2     | 0 | 0 | 0 | 0 | 0 |
| PRND         | 0 | 0 | 0 | 0 | 0 |
| PLCB1        | 0 | 0 | 0 | 0 | 0 |
| LAMP5        | 0 | 0 | 0 | 0 | 0 |
| ANKEF1       | 0 | 0 | 0 | 0 | 0 |
| SP TLC3      | 0 | 0 | 0 | 0 | 0 |
| BANF2        | 0 | 0 | 0 | 0 | 0 |
| LINC00851    | 0 | 0 | 0 | 0 | 0 |
| MIR3192      | 0 | 0 | 0 | 0 | 0 |
| SCP2D1       | 0 | 0 | 0 | 0 | 0 |
| PAX1         | 0 | 0 | 0 | 0 | 0 |
| LOC100270679 | 0 | 0 | 0 | 0 | 0 |
| SSTR4        | 0 | 0 | 0 | 0 | 0 |
| CSTL1        | 0 | 0 | 0 | 0 | 0 |
| CST8         | 0 | 0 | 0 | 0 | 0 |
| CST13P       | 0 | 0 | 0 | 0 | 0 |
| FLJ33581     | 0 | 0 | 0 | 0 | 0 |
| SYNDIG1      | 0 | 0 | 0 | 0 | 0 |
| DEFB115      | 0 | 0 | 0 | 0 | 0 |
| DEFB118      | 0 | 0 | 0 | 0 | 0 |
| DEFB123      | 0 | 0 | 0 | 0 | 0 |
| REM1         | 0 | 0 | 0 | 0 | 0 |
| LINC00028    | 0 | 0 | 0 | 0 | 0 |
| MIR3193      | 0 | 0 | 0 | 0 | 0 |
| COX4I2       | 0 | 0 | 0 | 0 | 0 |
| TTLL9        | 0 | 0 | 0 | 0 | 0 |
| XKR7         | 0 | 0 | 0 | 0 | 0 |
| LOC149950    | 0 | 0 | 0 | 0 | 0 |
| BPIFB2       | 0 | 0 | 0 | 0 | 0 |
| BPIFB6       | 0 | 0 | 0 | 0 | 0 |
| BPIFB3       | 0 | 0 | 0 | 0 | 0 |
| BPIFB4       | 0 | 0 | 0 | 0 | 0 |
| BPIFA2       | 0 | 0 | 0 | 0 | 0 |
| BPIFA4P      | 0 | 0 | 0 | 0 | 0 |
| BPIFA3       | 0 | 0 | 0 | 0 | 0 |



|                            |   |   |   |   |   |
|----------------------------|---|---|---|---|---|
| BPIFA1                     | 0 | 0 | 0 | 0 | 0 |
| BPIFB1                     | 0 | 0 | 0 | 0 | 0 |
| MIR4755                    | 0 | 0 | 0 | 0 | 0 |
| MIR644A                    | 0 | 0 | 0 | 0 | 0 |
| MIR499A                    | 0 | 0 | 0 | 0 | 0 |
| BPI                        | 0 | 0 | 0 | 0 | 0 |
| SNORA60                    | 0 | 0 | 0 | 0 | 0 |
| ADIG                       | 0 | 0 | 0 | 0 | 0 |
| PPP1R16B                   | 0 | 0 | 0 | 0 | 0 |
| R3HDML                     | 0 | 0 | 0 | 0 | 0 |
| MIR3646                    | 0 | 0 | 0 | 0 | 0 |
| SEMG1                      | 0 | 0 | 0 | 0 | 0 |
| SEMG2                      | 0 | 0 | 0 | 0 | 0 |
| SPINT4                     | 0 | 0 | 0 | 0 | 0 |
| MMP9                       | 0 | 0 | 0 | 0 | 0 |
| EYA2                       | 0 | 0 | 0 | 0 | 0 |
| MIR3616                    | 0 | 0 | 0 | 0 | 0 |
| SNORD12C                   | 0 | 0 | 0 | 0 | 0 |
| SNORD12B                   | 0 | 0 | 0 | 0 | 0 |
| SNORD12                    | 0 | 0 | 0 | 0 | 0 |
| MIR645                     | 0 | 0 | 0 | 0 | 0 |
| TSHZ2                      | 0 | 0 | 0 | 0 | 0 |
| DOK5                       | 0 | 0 | 0 | 0 | 0 |
| MC3R                       | 0 | 0 | 0 | 0 | 0 |
| SPO11                      | 0 | 0 | 0 | 0 | 0 |
| MIR5095                    | 0 | 0 | 0 | 0 | 0 |
| PCK1                       | 0 | 0 | 0 | 0 | 0 |
| MIR4532                    | 0 | 0 | 0 | 0 | 0 |
| C20orf85                   | 0 | 0 | 0 | 0 | 0 |
| ZNF831                     | 0 | 0 | 0 | 0 | 0 |
| EDN3                       | 0 | 0 | 0 | 0 | 0 |
| PHACTR3                    | 0 | 0 | 0 | 0 | 0 |
| C20orf197                  | 0 | 0 | 0 | 0 | 0 |
| MIR4533                    | 0 | 0 | 0 | 0 | 0 |
| C20orf166                  | 0 | 0 | 0 | 0 | 0 |
| MIR1-1                     | 0 | 0 | 0 | 0 | 0 |
| HAR1A                      | 0 | 0 | 0 | 0 | 0 |
| MIR124-3                   | 0 | 0 | 0 | 0 | 0 |
| MIR3196                    | 0 | 0 | 0 | 0 | 0 |
| FLJ16779                   | 0 | 0 | 0 | 0 | 0 |
| MIR4326                    | 0 | 0 | 0 | 0 | 0 |
| MIR941-1,MIR941-3,MIR941-4 | 0 | 0 | 0 | 0 | 0 |
| MIR941-2,MIR941-3,MIR941-4 | 0 | 0 | 0 | 0 | 0 |
| DEFB128                    | 0 | 0 | 0 | 0 | 0 |
| TCF15                      | 0 | 0 | 0 | 0 | 0 |
| SCRT2                      | 0 | 0 | 0 | 0 | 0 |
| SIRPB2                     | 0 | 0 | 0 | 0 | 0 |
| SIRPD                      | 0 | 0 | 0 | 0 | 0 |
| SIRPB1                     | 0 | 0 | 0 | 0 | 0 |
| SIRPG                      | 0 | 0 | 0 | 0 | 0 |
| LOC100289473               | 0 | 0 | 0 | 0 | 0 |
| PDYN                       | 0 | 0 | 0 | 0 | 0 |
| SNORD119                   | 0 | 0 | 0 | 0 | 0 |
| CPXM1                      | 0 | 0 | 0 | 0 | 0 |
| AVP                        | 0 | 0 | 0 | 0 | 0 |
| C20orf194                  | 0 | 0 | 0 | 0 | 0 |
| ADAM33                     | 0 | 0 | 0 | 0 | 0 |
| MIR103B2                   | 0 | 0 | 0 | 0 | 0 |
| ADRA1D                     | 0 | 0 | 0 | 0 | 0 |
| PRNT                       | 0 | 0 | 0 | 0 | 0 |
| PROKR2                     | 0 | 0 | 0 | 0 | 0 |
| HAO1                       | 0 | 0 | 0 | 0 | 0 |
| PAK7                       | 0 | 0 | 0 | 0 | 0 |
| SNAP25-AS1                 | 0 | 0 | 0 | 0 | 0 |
| LOC339593                  | 0 | 0 | 0 | 0 | 0 |
| ISM1-AS1                   | 0 | 0 | 0 | 0 | 0 |
| SEL1L2                     | 0 | 0 | 0 | 0 | 0 |
| FLRT3                      | 0 | 0 | 0 | 0 | 0 |
| MACROD2-AS1                | 0 | 0 | 0 | 0 | 0 |
| C20orf78                   | 0 | 0 | 0 | 0 | 0 |
| LOC100130264               | 0 | 0 | 0 | 0 | 0 |
| NKX2-4                     | 0 | 0 | 0 | 0 | 0 |
| NKX2-2                     | 0 | 0 | 0 | 0 | 0 |
| LOC284788                  | 0 | 0 | 0 | 0 | 0 |
| LINC00261                  | 0 | 0 | 0 | 0 | 0 |
| FOXA2                      | 0 | 0 | 0 | 0 | 0 |
| THBD                       | 0 | 0 | 0 | 0 | 0 |
| LINC00656                  | 0 | 0 | 0 | 0 | 0 |
| CST11                      | 0 | 0 | 0 | 0 | 0 |

|                         |   |   |   |   |   |
|-------------------------|---|---|---|---|---|
| CST9L                   | 0 | 0 | 0 | 0 | 0 |
| CST9                    | 0 | 0 | 0 | 0 | 0 |
| CST4                    | 0 | 0 | 0 | 0 | 0 |
| CST1                    | 0 | 0 | 0 | 0 | 0 |
| CST2                    | 0 | 0 | 0 | 0 | 0 |
| CST5                    | 0 | 0 | 0 | 0 | 0 |
| VSX1                    | 0 | 0 | 0 | 0 | 0 |
| LOC284798               | 0 | 0 | 0 | 0 | 0 |
| DEFB116                 | 0 | 0 | 0 | 0 | 0 |
| DEFB119                 | 0 | 0 | 0 | 0 | 0 |
| DEFB121                 | 0 | 0 | 0 | 0 | 0 |
| DEFB122                 | 0 | 0 | 0 | 0 | 0 |
| DEFB124                 | 0 | 0 | 0 | 0 | 0 |
| SUN5                    | 0 | 0 | 0 | 0 | 0 |
| GGT7                    | 0 | 0 | 0 | 0 | 0 |
| MIR499B                 | 0 | 0 | 0 | 0 | 0 |
| C20orf173               | 0 | 0 | 0 | 0 | 0 |
| LINC00489               | 0 | 0 | 0 | 0 | 0 |
| LOC339568               | 0 | 0 | 0 | 0 | 0 |
| PTPRT                   | 0 | 0 | 0 | 0 | 0 |
| WFDC12                  | 0 | 0 | 0 | 0 | 0 |
| SLPI                    | 0 | 0 | 0 | 0 | 0 |
| SPINT3                  | 0 | 0 | 0 | 0 | 0 |
| EPPIN,EPPIN-WFDC6,WFDC6 | 0 | 0 | 0 | 0 | 0 |
| WFDC8                   | 0 | 0 | 0 | 0 | 0 |
| WFDC9                   | 0 | 0 | 0 | 0 | 0 |
| WFDC11                  | 0 | 0 | 0 | 0 | 0 |
| CDH22                   | 0 | 0 | 0 | 0 | 0 |
| ZNF663                  | 0 | 0 | 0 | 0 | 0 |
| MKRN7P                  | 0 | 0 | 0 | 0 | 0 |
| ZNF334                  | 0 | 0 | 0 | 0 | 0 |
| OCSTAMP                 | 0 | 0 | 0 | 0 | 0 |
| KCNB1                   | 0 | 0 | 0 | 0 | 0 |
| LINC00651               | 0 | 0 | 0 | 0 | 0 |
| KCNG1                   | 0 | 0 | 0 | 0 | 0 |
| MIR3194                 | 0 | 0 | 0 | 0 | 0 |
| SALL4                   | 0 | 0 | 0 | 0 | 0 |
| SUMO1P1                 | 0 | 0 | 0 | 0 | 0 |
| MIR4756                 | 0 | 0 | 0 | 0 | 0 |
| CYP24A1                 | 0 | 0 | 0 | 0 | 0 |
| CBLN4                   | 0 | 0 | 0 | 0 | 0 |
| MIR4325                 | 0 | 0 | 0 | 0 | 0 |
| CTCFL                   | 0 | 0 | 0 | 0 | 0 |
| ZBP1                    | 0 | 0 | 0 | 0 | 0 |
| APCDD1L                 | 0 | 0 | 0 | 0 | 0 |
| MIR296                  | 0 | 0 | 0 | 0 | 0 |
| MIR298                  | 0 | 0 | 0 | 0 | 0 |
| GNAS-AS1                | 0 | 0 | 0 | 0 | 0 |
| LOC100506384            | 0 | 0 | 0 | 0 | 0 |
| MIR1257                 | 0 | 0 | 0 | 0 | 0 |
| HRH3                    | 0 | 0 | 0 | 0 | 0 |
| RBBP8NL                 | 0 | 0 | 0 | 0 | 0 |
| GATA5                   | 0 | 0 | 0 | 0 | 0 |
| C20orf166-AS1           | 0 | 0 | 0 | 0 | 0 |
| BHLHE23                 | 0 | 0 | 0 | 0 | 0 |
| HAR1B                   | 0 | 0 | 0 | 0 | 0 |
| NKAIN4                  | 0 | 0 | 0 | 0 | 0 |
| CHRNA4                  | 0 | 0 | 0 | 0 | 0 |
| MIR1914                 | 0 | 0 | 0 | 0 | 0 |
| MIR647                  | 0 | 0 | 0 | 0 | 0 |
| SOX18                   | 0 | 0 | 0 | 0 | 0 |
| C20orf201               | 0 | 0 | 0 | 0 | 0 |
| NPBWR2                  | 0 | 0 | 0 | 0 | 0 |
| MIR3687                 | 0 | 0 | 0 | 0 | 0 |
| POTED                   | 0 | 0 | 0 | 0 | 0 |
| RBM11                   | 0 | 0 | 0 | 0 | 0 |
| SAMSN1-AS1              | 0 | 0 | 0 | 0 | 0 |
| LINC00478               | 0 | 0 | 0 | 0 | 0 |
| MIR99A                  | 0 | 0 | 0 | 0 | 0 |
| MIRLET7C                | 0 | 0 | 0 | 0 | 0 |
| MIR125B2                | 0 | 0 | 0 | 0 | 0 |
| C21orf37                | 0 | 0 | 0 | 0 | 0 |
| NCAM2                   | 0 | 0 | 0 | 0 | 0 |
| RNU6-67                 | 0 | 0 | 0 | 0 | 0 |
| LINC00308               | 0 | 0 | 0 | 0 | 0 |
| LOC339622               | 0 | 0 | 0 | 0 | 0 |
| MIR4759                 | 0 | 0 | 0 | 0 | 0 |
| LINC00113               | 0 | 0 | 0 | 0 | 0 |
| LINC00314               | 0 | 0 | 0 | 0 | 0 |

|                        |   |   |   |   |   |
|------------------------|---|---|---|---|---|
| KRTAP13-1              | 0 | 0 | 0 | 0 | 0 |
| KRTAP13-4              | 0 | 0 | 0 | 0 | 0 |
| KRTAP15-1              | 0 | 0 | 0 | 0 | 0 |
| KRTAP6-3               | 0 | 0 | 0 | 0 | 0 |
| KRTAP22-1              | 0 | 0 | 0 | 0 | 0 |
| KRTAP20-1              | 0 | 0 | 0 | 0 | 0 |
| KRTAP20-4              | 0 | 0 | 0 | 0 | 0 |
| KRTAP20-2              | 0 | 0 | 0 | 0 | 0 |
| KRTAP20-3              | 0 | 0 | 0 | 0 | 0 |
| OLIG2                  | 0 | 0 | 0 | 0 | 0 |
| OLIG1                  | 0 | 0 | 0 | 0 | 0 |
| CLIC6                  | 0 | 0 | 0 | 0 | 0 |
| MIR802                 | 0 | 0 | 0 | 0 | 0 |
| DSCR10                 | 0 | 0 | 0 | 0 | 0 |
| BRWD1-AS1              | 0 | 0 | 0 | 0 | 0 |
| PCP4                   | 0 | 0 | 0 | 0 | 0 |
| DSCAM-AS1              | 0 | 0 | 0 | 0 | 0 |
| MIR3197                | 0 | 0 | 0 | 0 | 0 |
| LINC00111              | 0 | 0 | 0 | 0 | 0 |
| LINC00112              | 0 | 0 | 0 | 0 | 0 |
| UMODL1                 | 0 | 0 | 0 | 0 | 0 |
| UBASH3A                | 0 | 0 | 0 | 0 | 0 |
| PDE9A                  | 0 | 0 | 0 | 0 | 0 |
| CRYAA                  | 0 | 0 | 0 | 0 | 0 |
| AIRE                   | 0 | 0 | 0 | 0 | 0 |
| TRPM2                  | 0 | 0 | 0 | 0 | 0 |
| KRTAP10-4              | 0 | 0 | 0 | 0 | 0 |
| KRTAP10-7              | 0 | 0 | 0 | 0 | 0 |
| KRTAP10-8              | 0 | 0 | 0 | 0 | 0 |
| KRTAP10-9              | 0 | 0 | 0 | 0 | 0 |
| KRTAP10-10             | 0 | 0 | 0 | 0 | 0 |
| KRTAP10-11             | 0 | 0 | 0 | 0 | 0 |
| KRTAP12-3              | 0 | 0 | 0 | 0 | 0 |
| KRTAP10-12             | 0 | 0 | 0 | 0 | 0 |
| TPTE                   | 0 | 0 | 0 | 0 | 0 |
| BAGE,BAGE3,BAGE4,BAGE5 | 0 | 0 | 0 | 0 | 0 |
| MIR3156-3              | 0 | 0 | 0 | 0 | 0 |
| ANKRD20A11P            | 0 | 0 | 0 | 0 | 0 |
| LIPI                   | 0 | 0 | 0 | 0 | 0 |
| SAMSN1                 | 0 | 0 | 0 | 0 | 0 |
| LOC388813              | 0 | 0 | 0 | 0 | 0 |
| CHODL-AS1              | 0 | 0 | 0 | 0 | 0 |
| TMPRSS15               | 0 | 0 | 0 | 0 | 0 |
| LINC00320              | 0 | 0 | 0 | 0 | 0 |
| LINC00317              | 0 | 0 | 0 | 0 | 0 |
| D21S2088E              | 0 | 0 | 0 | 0 | 0 |
| CYYR1                  | 0 | 0 | 0 | 0 | 0 |
| ADAMTS1                | 0 | 0 | 0 | 0 | 0 |
| MIR5009                | 0 | 0 | 0 | 0 | 0 |
| CLDN17                 | 0 | 0 | 0 | 0 | 0 |
| LINC00307              | 0 | 0 | 0 | 0 | 0 |
| CLDN8                  | 0 | 0 | 0 | 0 | 0 |
| KRTAP24-1              | 0 | 0 | 0 | 0 | 0 |
| KRTAP25-1              | 0 | 0 | 0 | 0 | 0 |
| KRTAP26-1              | 0 | 0 | 0 | 0 | 0 |
| KRTAP27-1              | 0 | 0 | 0 | 0 | 0 |
| KRTAP23-1              | 0 | 0 | 0 | 0 | 0 |
| KRTAP13-2              | 0 | 0 | 0 | 0 | 0 |
| MIR4327                | 0 | 0 | 0 | 0 | 0 |
| KRTAP13-3              | 0 | 0 | 0 | 0 | 0 |
| KRTAP19-1              | 0 | 0 | 0 | 0 | 0 |
| KRTAP19-2              | 0 | 0 | 0 | 0 | 0 |
| KRTAP19-3              | 0 | 0 | 0 | 0 | 0 |
| KRTAP19-4              | 0 | 0 | 0 | 0 | 0 |
| KRTAP19-5              | 0 | 0 | 0 | 0 | 0 |
| KRTAP19-6              | 0 | 0 | 0 | 0 | 0 |
| KRTAP19-7              | 0 | 0 | 0 | 0 | 0 |
| KRTAP22-2              | 0 | 0 | 0 | 0 | 0 |
| KRTAP6-2               | 0 | 0 | 0 | 0 | 0 |
| KRTAP6-1               | 0 | 0 | 0 | 0 | 0 |
| KRTAP21-3              | 0 | 0 | 0 | 0 | 0 |
| KRTAP21-2              | 0 | 0 | 0 | 0 | 0 |
| KRTAP21-1              | 0 | 0 | 0 | 0 | 0 |
| KRTAP8-1               | 0 | 0 | 0 | 0 | 0 |
| KRTAP7-1               | 0 | 0 | 0 | 0 | 0 |
| KRTAP11-1              | 0 | 0 | 0 | 0 | 0 |
| KRTAP19-8              | 0 | 0 | 0 | 0 | 0 |
| LINC00159              | 0 | 0 | 0 | 0 | 0 |
| C21orf54               | 0 | 0 | 0 | 0 | 0 |

|              |   |   |   |   |   |
|--------------|---|---|---|---|---|
| LINC00160    | 0 | 0 | 0 | 0 | 0 |
| LOC100506403 | 0 | 0 | 0 | 0 | 0 |
| KCNJ6        | 0 | 0 | 0 | 0 | 0 |
| DSCR4        | 0 | 0 | 0 | 0 | 0 |
| ERG          | 0 | 0 | 0 | 0 | 0 |
| LINC00114    | 0 | 0 | 0 | 0 | 0 |
| C21orf88     | 0 | 0 | 0 | 0 | 0 |
| DSCAM        | 0 | 0 | 0 | 0 | 0 |
| MIR4760      | 0 | 0 | 0 | 0 | 0 |
| DSCAM-IT1    | 0 | 0 | 0 | 0 | 0 |
| LINC00323    | 0 | 0 | 0 | 0 | 0 |
| TMPRSS2      | 0 | 0 | 0 | 0 | 0 |
| C21orf128    | 0 | 0 | 0 | 0 | 0 |
| TFF3         | 0 | 0 | 0 | 0 | 0 |
| TFF2         | 0 | 0 | 0 | 0 | 0 |
| TFF1         | 0 | 0 | 0 | 0 | 0 |
| TMPRSS3      | 0 | 0 | 0 | 0 | 0 |
| KRTAP10-3    | 0 | 0 | 0 | 0 | 0 |
| KRTAP10-5    | 0 | 0 | 0 | 0 | 0 |
| KRTAP10-6    | 0 | 0 | 0 | 0 | 0 |
| KRTAP12-4    | 0 | 0 | 0 | 0 | 0 |
| KRTAP12-2    | 0 | 0 | 0 | 0 | 0 |
| KRTAP12-1    | 0 | 0 | 0 | 0 | 0 |
| LOC100129027 | 0 | 0 | 0 | 0 | 0 |
| S100B        | 0 | 0 | 0 | 0 | 0 |
| TPTEP1       | 0 | 0 | 0 | 0 | 0 |
| HSFY1P1      | 0 | 0 | 0 | 0 | 0 |
| FLJ41941     | 0 | 0 | 0 | 0 | 0 |
| MIR185       | 0 | 0 | 0 | 0 | 0 |
| POM121L4P    | 0 | 0 | 0 | 0 | 0 |
| MIR301B      | 0 | 0 | 0 | 0 | 0 |
| MIR130B      | 0 | 0 | 0 | 0 | 0 |
| VPREB1       | 0 | 0 | 0 | 0 | 0 |
| MIR650       | 0 | 0 | 0 | 0 | 0 |
| IGLL5        | 0 | 0 | 0 | 0 | 0 |
| C22orf15     | 0 | 0 | 0 | 0 | 0 |
| TOP1P2       | 0 | 0 | 0 | 0 | 0 |
| IGLL3P       | 0 | 0 | 0 | 0 | 0 |
| SEZ6L        | 0 | 0 | 0 | 0 | 0 |
| MIR3199-2    | 0 | 0 | 0 | 0 | 0 |
| HORMAD2      | 0 | 0 | 0 | 0 | 0 |
| MIR3200      | 0 | 0 | 0 | 0 | 0 |
| AP1B1P1      | 0 | 0 | 0 | 0 | 0 |
| TIMP3        | 0 | 0 | 0 | 0 | 0 |
| ISX          | 0 | 0 | 0 | 0 | 0 |
| MIR3909      | 0 | 0 | 0 | 0 | 0 |
| APOE5        | 0 | 0 | 0 | 0 | 0 |
| LOC100506241 | 0 | 0 | 0 | 0 | 0 |
| MIR4534      | 0 | 0 | 0 | 0 | 0 |
| SYNGR1       | 0 | 0 | 0 | 0 | 0 |
| MCHR1        | 0 | 0 | 0 | 0 | 0 |
| MIR1281      | 0 | 0 | 0 | 0 | 0 |
| MIR33A       | 0 | 0 | 0 | 0 | 0 |
| MPPED1       | 0 | 0 | 0 | 0 | 0 |
| EFCAB6-AS1   | 0 | 0 | 0 | 0 | 0 |
| LINC00207    | 0 | 0 | 0 | 0 | 0 |
| UPK3A        | 0 | 0 | 0 | 0 | 0 |
| FBLN1        | 0 | 0 | 0 | 0 | 0 |
| MIR4762      | 0 | 0 | 0 | 0 | 0 |
| MIR3619      | 0 | 0 | 0 | 0 | 0 |
| MIR3201      | 0 | 0 | 0 | 0 | 0 |
| FAM19A5      | 0 | 0 | 0 | 0 | 0 |
| MIR4535      | 0 | 0 | 0 | 0 | 0 |
| LOC100128946 | 0 | 0 | 0 | 0 | 0 |
| PANX2        | 0 | 0 | 0 | 0 | 0 |
| MIOX         | 0 | 0 | 0 | 0 | 0 |
| POTEH        | 0 | 0 | 0 | 0 | 0 |
| OR11H1       | 0 | 0 | 0 | 0 | 0 |
| CCT8L2       | 0 | 0 | 0 | 0 | 0 |
| GAB4         | 0 | 0 | 0 | 0 | 0 |
| CECR3        | 0 | 0 | 0 | 0 | 0 |
| MIR3198-1    | 0 | 0 | 0 | 0 | 0 |
| GSC2         | 0 | 0 | 0 | 0 | 0 |
| LOC150185    | 0 | 0 | 0 | 0 | 0 |
| LOC388849    | 0 | 0 | 0 | 0 | 0 |
| MIR1286      | 0 | 0 | 0 | 0 | 0 |
| SLC7A4       | 0 | 0 | 0 | 0 | 0 |
| P2RX6P       | 0 | 0 | 0 | 0 | 0 |
| ZNF280B      | 0 | 0 | 0 | 0 | 0 |

|              |   |   |   |   |   |
|--------------|---|---|---|---|---|
| IGLL1        | 0 | 0 | 0 | 0 | 0 |
| GGT5         | 0 | 0 | 0 | 0 | 0 |
| PIWIL3       | 0 | 0 | 0 | 0 | 0 |
| MIR548J      | 0 | 0 | 0 | 0 | 0 |
| CRYBB1       | 0 | 0 | 0 | 0 | 0 |
| MIR3199-1    | 0 | 0 | 0 | 0 | 0 |
| C22orf31     | 0 | 0 | 0 | 0 | 0 |
| MIR3653      | 0 | 0 | 0 | 0 | 0 |
| SEC14L6      | 0 | 0 | 0 | 0 | 0 |
| MIR3928      | 0 | 0 | 0 | 0 | 0 |
| C22orf42     | 0 | 0 | 0 | 0 | 0 |
| BPIFC        | 0 | 0 | 0 | 0 | 0 |
| MIR4764      | 0 | 0 | 0 | 0 | 0 |
| MB           | 0 | 0 | 0 | 0 | 0 |
| APOL3        | 0 | 0 | 0 | 0 | 0 |
| CACNG2       | 0 | 0 | 0 | 0 | 0 |
| PVALB        | 0 | 0 | 0 | 0 | 0 |
| TEX33        | 0 | 0 | 0 | 0 | 0 |
| IL2RB        | 0 | 0 | 0 | 0 | 0 |
| SSTR3        | 0 | 0 | 0 | 0 | 0 |
| ELFN2        | 0 | 0 | 0 | 0 | 0 |
| LGALS2       | 0 | 0 | 0 | 0 | 0 |
| MIR659       | 0 | 0 | 0 | 0 | 0 |
| SNORD83A     | 0 | 0 | 0 | 0 | 0 |
| RNU86        | 0 | 0 | 0 | 0 | 0 |
| SNORD43      | 0 | 0 | 0 | 0 | 0 |
| ENTHD1       | 0 | 0 | 0 | 0 | 0 |
| MIR4766      | 0 | 0 | 0 | 0 | 0 |
| SULT4A1      | 0 | 0 | 0 | 0 | 0 |
| PNPLA5       | 0 | 0 | 0 | 0 | 0 |
| LINC00229    | 0 | 0 | 0 | 0 | 0 |
| PHF21B       | 0 | 0 | 0 | 0 | 0 |
| MIR1249      | 0 | 0 | 0 | 0 | 0 |
| FLJ46257     | 0 | 0 | 0 | 0 | 0 |
| LOC284933    | 0 | 0 | 0 | 0 | 0 |
| CHL1         | 0 | 0 | 0 | 0 | 0 |
| CNTN6        | 0 | 0 | 0 | 0 | 0 |
| LRRN1        | 0 | 0 | 0 | 0 | 0 |
| GRM7         | 0 | 0 | 0 | 0 | 0 |
| CAV3         | 0 | 0 | 0 | 0 | 0 |
| SLC6A11      | 0 | 0 | 0 | 0 | 0 |
| SYN2         | 0 | 0 | 0 | 0 | 0 |
| PPARG        | 0 | 0 | 0 | 0 | 0 |
| FGD5P1       | 0 | 0 | 0 | 0 | 0 |
| MIR563       | 0 | 0 | 0 | 0 | 0 |
| LOC339862    | 0 | 0 | 0 | 0 | 0 |
| VENTXP7      | 0 | 0 | 0 | 0 | 0 |
| UBE2E2       | 0 | 0 | 0 | 0 | 0 |
| MIR548AC     | 0 | 0 | 0 | 0 | 0 |
| THRB-AS1     | 0 | 0 | 0 | 0 | 0 |
| LRRC3B       | 0 | 0 | 0 | 0 | 0 |
| LINC00693    | 0 | 0 | 0 | 0 | 0 |
| RBMS3        | 0 | 0 | 0 | 0 | 0 |
| OSBPL10-AS1  | 0 | 0 | 0 | 0 | 0 |
| TRIM71       | 0 | 0 | 0 | 0 | 0 |
| CCR4         | 0 | 0 | 0 | 0 | 0 |
| ARPP21       | 0 | 0 | 0 | 0 | 0 |
| MIR128-2     | 0 | 0 | 0 | 0 | 0 |
| STAC         | 0 | 0 | 0 | 0 | 0 |
| MIR26A1      | 0 | 0 | 0 | 0 | 0 |
| CCR8         | 0 | 0 | 0 | 0 | 0 |
| ENTPD3       | 0 | 0 | 0 | 0 | 0 |
| KLHL40       | 0 | 0 | 0 | 0 | 0 |
| CCDC13-AS1   | 0 | 0 | 0 | 0 | 0 |
| KRBOX1       | 0 | 0 | 0 | 0 | 0 |
| MIR138-1     | 0 | 0 | 0 | 0 | 0 |
| TOPAZ1       | 0 | 0 | 0 | 0 | 0 |
| CCR3         | 0 | 0 | 0 | 0 | 0 |
| CCR2         | 0 | 0 | 0 | 0 | 0 |
| RTP3         | 0 | 0 | 0 | 0 | 0 |
| LRRC2-AS1    | 0 | 0 | 0 | 0 | 0 |
| TDGF1        | 0 | 0 | 0 | 0 | 0 |
| LOC100132146 | 0 | 0 | 0 | 0 | 0 |
| MIR1226      | 0 | 0 | 0 | 0 | 0 |
| MIR4443      | 0 | 0 | 0 | 0 | 0 |
| CAMP         | 0 | 0 | 0 | 0 | 0 |
| MIR4271      | 0 | 0 | 0 | 0 | 0 |
| MIR4787      | 0 | 0 | 0 | 0 | 0 |
| IQCF4        | 0 | 0 | 0 | 0 | 0 |

|              |   |   |   |   |   |
|--------------|---|---|---|---|---|
| IQCF3        | 0 | 0 | 0 | 0 | 0 |
| IQCF2        | 0 | 0 | 0 | 0 | 0 |
| SNORD19      | 0 | 0 | 0 | 0 | 0 |
| SNORD19B     | 0 | 0 | 0 | 0 | 0 |
| SNORD69      | 0 | 0 | 0 | 0 | 0 |
| CACNA2D3     | 0 | 0 | 0 | 0 | 0 |
| ARHGEF3-AS1  | 0 | 0 | 0 | 0 | 0 |
| LINC00698    | 0 | 0 | 0 | 0 | 0 |
| SYNPR        | 0 | 0 | 0 | 0 | 0 |
| SNTN         | 0 | 0 | 0 | 0 | 0 |
| PRICKLE2-AS1 | 0 | 0 | 0 | 0 | 0 |
| PRICKLE2-AS2 | 0 | 0 | 0 | 0 | 0 |
| ADAMTS9-AS2  | 0 | 0 | 0 | 0 | 0 |
| MIR548A2     | 0 | 0 | 0 | 0 | 0 |
| MAG11-AS1    | 0 | 0 | 0 | 0 | 0 |
| MIR4272      | 0 | 0 | 0 | 0 | 0 |
| FAM19A1      | 0 | 0 | 0 | 0 | 0 |
| GPR27        | 0 | 0 | 0 | 0 | 0 |
| LOC201617    | 0 | 0 | 0 | 0 | 0 |
| MIR4444-1    | 0 | 0 | 0 | 0 | 0 |
| MIR1324      | 0 | 0 | 0 | 0 | 0 |
| MIR4273      | 0 | 0 | 0 | 0 | 0 |
| ROBO2        | 0 | 0 | 0 | 0 | 0 |
| CADM2        | 0 | 0 | 0 | 0 | 0 |
| MIR5688      | 0 | 0 | 0 | 0 | 0 |
| HTR1F        | 0 | 0 | 0 | 0 | 0 |
| LOC255025    | 0 | 0 | 0 | 0 | 0 |
| EPHA6        | 0 | 0 | 0 | 0 | 0 |
| OR5AC2       | 0 | 0 | 0 | 0 | 0 |
| OR5H1        | 0 | 0 | 0 | 0 | 0 |
| OR5H14       | 0 | 0 | 0 | 0 | 0 |
| OR5H15       | 0 | 0 | 0 | 0 | 0 |
| OR5H6        | 0 | 0 | 0 | 0 | 0 |
| OR5H2        | 0 | 0 | 0 | 0 | 0 |
| OR5K4        | 0 | 0 | 0 | 0 | 0 |
| OR5K3        | 0 | 0 | 0 | 0 | 0 |
| OR5K1        | 0 | 0 | 0 | 0 | 0 |
| GPR15        | 0 | 0 | 0 | 0 | 0 |
| COL8A1       | 0 | 0 | 0 | 0 | 0 |
| GPR128       | 0 | 0 | 0 | 0 | 0 |
| TRAT1        | 0 | 0 | 0 | 0 | 0 |
| FLJ22763     | 0 | 0 | 0 | 0 | 0 |
| LINC00488    | 0 | 0 | 0 | 0 | 0 |
| FLJ25363     | 0 | 0 | 0 | 0 | 0 |
| MIR567       | 0 | 0 | 0 | 0 | 0 |
| WDR52-AS1    | 0 | 0 | 0 | 0 | 0 |
| MIR4446      | 0 | 0 | 0 | 0 | 0 |
| TIGIT        | 0 | 0 | 0 | 0 | 0 |
| ZBTB20-AS1   | 0 | 0 | 0 | 0 | 0 |
| GAP43        | 0 | 0 | 0 | 0 | 0 |
| LSAMP-AS3    | 0 | 0 | 0 | 0 | 0 |
| IGSF11-AS1   | 0 | 0 | 0 | 0 | 0 |
| C3orf30      | 0 | 0 | 0 | 0 | 0 |
| PLA1A        | 0 | 0 | 0 | 0 | 0 |
| MAATS1       | 0 | 0 | 0 | 0 | 0 |
| CD86         | 0 | 0 | 0 | 0 | 0 |
| CASR         | 0 | 0 | 0 | 0 | 0 |
| MIR5002      | 0 | 0 | 0 | 0 | 0 |
| ROPN1B       | 0 | 0 | 0 | 0 | 0 |
| ALDH1L1-AS1  | 0 | 0 | 0 | 0 | 0 |
| ALDH1L1-AS2  | 0 | 0 | 0 | 0 | 0 |
| NUP210P1     | 0 | 0 | 0 | 0 | 0 |
| DNAJB8-AS1   | 0 | 0 | 0 | 0 | 0 |
| LOC90246     | 0 | 0 | 0 | 0 | 0 |
| EFCC1        | 0 | 0 | 0 | 0 | 0 |
| GP9          | 0 | 0 | 0 | 0 | 0 |
| RHO          | 0 | 0 | 0 | 0 | 0 |
| H1FOO        | 0 | 0 | 0 | 0 | 0 |
| COL6A5       | 0 | 0 | 0 | 0 | 0 |
| ACPP         | 0 | 0 | 0 | 0 | 0 |
| NPHP3-AS1    | 0 | 0 | 0 | 0 | 0 |
| TMEM108      | 0 | 0 | 0 | 0 | 0 |
| BFSP2        | 0 | 0 | 0 | 0 | 0 |
| MIR4788      | 0 | 0 | 0 | 0 | 0 |
| EPHB1        | 0 | 0 | 0 | 0 | 0 |
| SOX14        | 0 | 0 | 0 | 0 | 0 |
| BPESC1       | 0 | 0 | 0 | 0 | 0 |
| CLSTN2       | 0 | 0 | 0 | 0 | 0 |
| TRIM42       | 0 | 0 | 0 | 0 | 0 |

|              |   |   |   |   |   |
|--------------|---|---|---|---|---|
| SPSB4        | 0 | 0 | 0 | 0 | 0 |
| LOC100507389 | 0 | 0 | 0 | 0 | 0 |
| CHST2        | 0 | 0 | 0 | 0 | 0 |
| SLC9A9-AS1   | 0 | 0 | 0 | 0 | 0 |
| ZIC1         | 0 | 0 | 0 | 0 | 0 |
| AGTR1        | 0 | 0 | 0 | 0 | 0 |
| CPB1         | 0 | 0 | 0 | 0 | 0 |
| CPA3         | 0 | 0 | 0 | 0 | 0 |
| HLTF-AS1     | 0 | 0 | 0 | 0 | 0 |
| TM4SF4       | 0 | 0 | 0 | 0 | 0 |
| CLRN1-AS1    | 0 | 0 | 0 | 0 | 0 |
| MED12L       | 0 | 0 | 0 | 0 | 0 |
| MIR548H2     | 0 | 0 | 0 | 0 | 0 |
| AADACL2      | 0 | 0 | 0 | 0 | 0 |
| LOC201651    | 0 | 0 | 0 | 0 | 0 |
| AADAC        | 0 | 0 | 0 | 0 | 0 |
| SUCNR1       | 0 | 0 | 0 | 0 | 0 |
| MME          | 0 | 0 | 0 | 0 | 0 |
| LOC100498859 | 0 | 0 | 0 | 0 | 0 |
| PTX3         | 0 | 0 | 0 | 0 | 0 |
| C3orf55      | 0 | 0 | 0 | 0 | 0 |
| MLF1         | 0 | 0 | 0 | 0 | 0 |
| MIR3919      | 0 | 0 | 0 | 0 | 0 |
| MIR15B       | 0 | 0 | 0 | 0 | 0 |
| MIR16-2      | 0 | 0 | 0 | 0 | 0 |
| OTOL1        | 0 | 0 | 0 | 0 | 0 |
| LOC646168    | 0 | 0 | 0 | 0 | 0 |
| MIR551B      | 0 | 0 | 0 | 0 | 0 |
| SAMD7        | 0 | 0 | 0 | 0 | 0 |
| NLGN1        | 0 | 0 | 0 | 0 | 0 |
| NAALADL2     | 0 | 0 | 0 | 0 | 0 |
| MIR4789      | 0 | 0 | 0 | 0 | 0 |
| ABCC5-AS1    | 0 | 0 | 0 | 0 | 0 |
| HTR3D        | 0 | 0 | 0 | 0 | 0 |
| HTR3C        | 0 | 0 | 0 | 0 | 0 |
| HTR3E        | 0 | 0 | 0 | 0 | 0 |
| MIR1224      | 0 | 0 | 0 | 0 | 0 |
| SNORD66      | 0 | 0 | 0 | 0 | 0 |
| EHHADH-AS1   | 0 | 0 | 0 | 0 | 0 |
| LOC344887    | 0 | 0 | 0 | 0 | 0 |
| HRG          | 0 | 0 | 0 | 0 | 0 |
| KNG1         | 0 | 0 | 0 | 0 | 0 |
| SNORD2       | 0 | 0 | 0 | 0 | 0 |
| RTP1         | 0 | 0 | 0 | 0 | 0 |
| RTP4         | 0 | 0 | 0 | 0 | 0 |
| LOC100131635 | 0 | 0 | 0 | 0 | 0 |
| TP63         | 0 | 0 | 0 | 0 | 0 |
| MIR944       | 0 | 0 | 0 | 0 | 0 |
| SNAR-1       | 0 | 0 | 0 | 0 | 0 |
| OSTN         | 0 | 0 | 0 | 0 | 0 |
| PYDC2        | 0 | 0 | 0 | 0 | 0 |
| MIR570       | 0 | 0 | 0 | 0 | 0 |
| LOC401109    | 0 | 0 | 0 | 0 | 0 |
| FAM157A      | 0 | 0 | 0 | 0 | 0 |
| CNTN4-AS2    | 0 | 0 | 0 | 0 | 0 |
| IL5RA        | 0 | 0 | 0 | 0 | 0 |
| MIR4790      | 0 | 0 | 0 | 0 | 0 |
| CIDEC        | 0 | 0 | 0 | 0 | 0 |
| MIR885       | 0 | 0 | 0 | 0 | 0 |
| LINC00606    | 0 | 0 | 0 | 0 | 0 |
| SLC6A1-AS1   | 0 | 0 | 0 | 0 | 0 |
| TIMP4        | 0 | 0 | 0 | 0 | 0 |
| WNT7A        | 0 | 0 | 0 | 0 | 0 |
| MIR4270      | 0 | 0 | 0 | 0 | 0 |
| MIR4791      | 0 | 0 | 0 | 0 | 0 |
| ZNF385D      | 0 | 0 | 0 | 0 | 0 |
| LINC00691    | 0 | 0 | 0 | 0 | 0 |
| MIR4792      | 0 | 0 | 0 | 0 | 0 |
| MIR4442      | 0 | 0 | 0 | 0 | 0 |
| LINC00692    | 0 | 0 | 0 | 0 | 0 |
| EOMES        | 0 | 0 | 0 | 0 | 0 |
| GADL1        | 0 | 0 | 0 | 0 | 0 |
| DCLK3        | 0 | 0 | 0 | 0 | 0 |
| SCN5A        | 0 | 0 | 0 | 0 | 0 |
| SCN10A       | 0 | 0 | 0 | 0 | 0 |
| CCK          | 0 | 0 | 0 | 0 | 0 |
| LYZL4        | 0 | 0 | 0 | 0 | 0 |
| HHATL        | 0 | 0 | 0 | 0 | 0 |
| CYP8B1       | 0 | 0 | 0 | 0 | 0 |

|              |   |   |   |   |   |
|--------------|---|---|---|---|---|
| CCR1         | 0 | 0 | 0 | 0 | 0 |
| LTF          | 0 | 0 | 0 | 0 | 0 |
| PRSS46       | 0 | 0 | 0 | 0 | 0 |
| PRSS45       | 0 | 0 | 0 | 0 | 0 |
| PRSS42       | 0 | 0 | 0 | 0 | 0 |
| MYL3         | 0 | 0 | 0 | 0 | 0 |
| MIR425       | 0 | 0 | 0 | 0 | 0 |
| MIR191       | 0 | 0 | 0 | 0 | 0 |
| LOC646498    | 0 | 0 | 0 | 0 | 0 |
| BSN-AS2      | 0 | 0 | 0 | 0 | 0 |
| CDHR4        | 0 | 0 | 0 | 0 | 0 |
| CAMKV        | 0 | 0 | 0 | 0 | 0 |
| IQCF6        | 0 | 0 | 0 | 0 | 0 |
| IQCF5        | 0 | 0 | 0 | 0 | 0 |
| MIRLET7G     | 0 | 0 | 0 | 0 | 0 |
| MIR135A1     | 0 | 0 | 0 | 0 | 0 |
| CACNA2D3-AS1 | 0 | 0 | 0 | 0 | 0 |
| LRTM1        | 0 | 0 | 0 | 0 | 0 |
| WNT5A        | 0 | 0 | 0 | 0 | 0 |
| ERC2-IT1     | 0 | 0 | 0 | 0 | 0 |
| MIR3938      | 0 | 0 | 0 | 0 | 0 |
| FAM3D        | 0 | 0 | 0 | 0 | 0 |
| C3orf67      | 0 | 0 | 0 | 0 | 0 |
| FEZF2        | 0 | 0 | 0 | 0 | 0 |
| SYNPR-AS1    | 0 | 0 | 0 | 0 | 0 |
| LOC100287879 | 0 | 0 | 0 | 0 | 0 |
| PRICKLE2     | 0 | 0 | 0 | 0 | 0 |
| FAM19A4      | 0 | 0 | 0 | 0 | 0 |
| MIR3136      | 0 | 0 | 0 | 0 | 0 |
| MIR1284      | 0 | 0 | 0 | 0 | 0 |
| PROK2        | 0 | 0 | 0 | 0 | 0 |
| PDZRN3       | 0 | 0 | 0 | 0 | 0 |
| CNTN3        | 0 | 0 | 0 | 0 | 0 |
| LOC440970    | 0 | 0 | 0 | 0 | 0 |
| CADM2-AS2    | 0 | 0 | 0 | 0 | 0 |
| RNU6-69      | 0 | 0 | 0 | 0 | 0 |
| VGLL3        | 0 | 0 | 0 | 0 | 0 |
| MIR4795      | 0 | 0 | 0 | 0 | 0 |
| POU1F1       | 0 | 0 | 0 | 0 | 0 |
| GABRR3       | 0 | 0 | 0 | 0 | 0 |
| ST3GAL6-AS1  | 0 | 0 | 0 | 0 | 0 |
| MIR548G      | 0 | 0 | 0 | 0 | 0 |
| MIR3921      | 0 | 0 | 0 | 0 | 0 |
| MIR548A3     | 0 | 0 | 0 | 0 | 0 |
| LINC00635    | 0 | 0 | 0 | 0 | 0 |
| RETNLB       | 0 | 0 | 0 | 0 | 0 |
| GUCA1C       | 0 | 0 | 0 | 0 | 0 |
| MORC1        | 0 | 0 | 0 | 0 | 0 |
| DPPA2        | 0 | 0 | 0 | 0 | 0 |
| DPPA4        | 0 | 0 | 0 | 0 | 0 |
| ZBED2        | 0 | 0 | 0 | 0 | 0 |
| CD200R1L     | 0 | 0 | 0 | 0 | 0 |
| DRD3         | 0 | 0 | 0 | 0 | 0 |
| MIR568       | 0 | 0 | 0 | 0 | 0 |
| MIR4796      | 0 | 0 | 0 | 0 | 0 |
| CD80         | 0 | 0 | 0 | 0 | 0 |
| ILDR1        | 0 | 0 | 0 | 0 | 0 |
| SEMA5B       | 0 | 0 | 0 | 0 | 0 |
| ROPN1        | 0 | 0 | 0 | 0 | 0 |
| MIR5092      | 0 | 0 | 0 | 0 | 0 |
| MIR548I1     | 0 | 0 | 0 | 0 | 0 |
| C3orf22      | 0 | 0 | 0 | 0 | 0 |
| C3orf27      | 0 | 0 | 0 | 0 | 0 |
| KIAA1257     | 0 | 0 | 0 | 0 | 0 |
| MIR5704      | 0 | 0 | 0 | 0 | 0 |
| C3orf36      | 0 | 0 | 0 | 0 | 0 |
| SLCO2A1      | 0 | 0 | 0 | 0 | 0 |
| FOXL2        | 0 | 0 | 0 | 0 | 0 |
| PRR23B       | 0 | 0 | 0 | 0 | 0 |
| PISRT1       | 0 | 0 | 0 | 0 | 0 |
| RBP2         | 0 | 0 | 0 | 0 | 0 |
| RBP1         | 0 | 0 | 0 | 0 | 0 |
| PCOLCE2      | 0 | 0 | 0 | 0 | 0 |
| PAQR9        | 0 | 0 | 0 | 0 | 0 |
| PLOD2        | 0 | 0 | 0 | 0 | 0 |
| PLSCR5       | 0 | 0 | 0 | 0 | 0 |
| ZIC4         | 0 | 0 | 0 | 0 | 0 |
| TM4SF18      | 0 | 0 | 0 | 0 | 0 |
| ANKUB1       | 0 | 0 | 0 | 0 | 0 |



|              |   |   |   |   |   |
|--------------|---|---|---|---|---|
| GPR171       | 0 | 0 | 0 | 0 | 0 |
| P2RY14       | 0 | 0 | 0 | 0 | 0 |
| P2RY13       | 0 | 0 | 0 | 0 | 0 |
| P2RY12       | 0 | 0 | 0 | 0 | 0 |
| IGSF10       | 0 | 0 | 0 | 0 | 0 |
| MIR5186      | 0 | 0 | 0 | 0 | 0 |
| GPR149       | 0 | 0 | 0 | 0 | 0 |
| KCNAB1-AS2   | 0 | 0 | 0 | 0 | 0 |
| KCNAB1-AS1   | 0 | 0 | 0 | 0 | 0 |
| SPTSSB       | 0 | 0 | 0 | 0 | 0 |
| CT64         | 0 | 0 | 0 | 0 | 0 |
| SI           | 0 | 0 | 0 | 0 | 0 |
| SLITRK3      | 0 | 0 | 0 | 0 | 0 |
| BCHE         | 0 | 0 | 0 | 0 | 0 |
| ZBBX         | 0 | 0 | 0 | 0 | 0 |
| LRRC31       | 0 | 0 | 0 | 0 | 0 |
| SLC2A2       | 0 | 0 | 0 | 0 | 0 |
| MIR569       | 0 | 0 | 0 | 0 | 0 |
| GHSR         | 0 | 0 | 0 | 0 | 0 |
| TNFSF10      | 0 | 0 | 0 | 0 | 0 |
| NAALADL2-AS3 | 0 | 0 | 0 | 0 | 0 |
| FLJ46066     | 0 | 0 | 0 | 0 | 0 |
| LOC253573    | 0 | 0 | 0 | 0 | 0 |
| ADIPOQ-AS1   | 0 | 0 | 0 | 0 | 0 |
| RPL39L       | 0 | 0 | 0 | 0 | 0 |
| MASP1        | 0 | 0 | 0 | 0 | 0 |
| SST          | 0 | 0 | 0 | 0 | 0 |
| RTP2         | 0 | 0 | 0 | 0 | 0 |
| CLDN1        | 0 | 0 | 0 | 0 | 0 |
| TMEM207      | 0 | 0 | 0 | 0 | 0 |
| GMNC         | 0 | 0 | 0 | 0 | 0 |
| FGF12        | 0 | 0 | 0 | 0 | 0 |
| LOC647323    | 0 | 0 | 0 | 0 | 0 |
| DPPA2P3      | 0 | 0 | 0 | 0 | 0 |
| CPN2         | 0 | 0 | 0 | 0 | 0 |
| MIR5692C1    | 0 | 0 | 0 | 0 | 0 |
| APOD         | 0 | 0 | 0 | 0 | 0 |
| MIR4797      | 0 | 0 | 0 | 0 | 0 |
| ZNF141       | 0 | 0 | 0 | 0 | 0 |
| FLJ35424     | 0 | 0 | 0 | 0 | 0 |
| STK32B       | 0 | 0 | 0 | 0 | 0 |
| LOC285484    | 0 | 0 | 0 | 0 | 0 |
| MIR4798      | 0 | 0 | 0 | 0 | 0 |
| MIR4274      | 0 | 0 | 0 | 0 | 0 |
| HTRA3        | 0 | 0 | 0 | 0 | 0 |
| GPR78        | 0 | 0 | 0 | 0 | 0 |
| LOC650293    | 0 | 0 | 0 | 0 | 0 |
| USP17L10     | 0 | 0 | 0 | 0 | 0 |
| USP17L18     | 0 | 0 | 0 | 0 | 0 |
| USP17L21     | 0 | 0 | 0 | 0 | 0 |
| USP17L13     | 0 | 0 | 0 | 0 | 0 |
| USP17L15     | 0 | 0 | 0 | 0 | 0 |
| USP17L17     | 0 | 0 | 0 | 0 | 0 |
| USP17L18     | 0 | 0 | 0 | 0 | 0 |
| USP17L19     | 0 | 0 | 0 | 0 | 0 |
| USP17L22     | 0 | 0 | 0 | 0 | 0 |
| USP17L12     | 0 | 0 | 0 | 0 | 0 |
| USP17L22     | 0 | 0 | 0 | 0 | 0 |
| USP17L28     | 0 | 0 | 0 | 0 | 0 |
| USP17L26     | 0 | 0 | 0 | 0 | 0 |
| USP17L24     | 0 | 0 | 0 | 0 | 0 |
| USP17L28     | 0 | 0 | 0 | 0 | 0 |
| USP17L25     | 0 | 0 | 0 | 0 | 0 |
| USP17L30     | 0 | 0 | 0 | 0 | 0 |
| USP17L27     | 0 | 0 | 0 | 0 | 0 |
| USP17L9P     | 0 | 0 | 0 | 0 | 0 |
| USP17L27     | 0 | 0 | 0 | 0 | 0 |
| USP17L6P     | 0 | 0 | 0 | 0 | 0 |
| DRD5         | 0 | 0 | 0 | 0 | 0 |
| MIR572       | 0 | 0 | 0 | 0 | 0 |
| MIR5091      | 0 | 0 | 0 | 0 | 0 |
| LOC152742    | 0 | 0 | 0 | 0 | 0 |
| C1QTNF7      | 0 | 0 | 0 | 0 | 0 |
| CD38         | 0 | 0 | 0 | 0 | 0 |
| CLRN2        | 0 | 0 | 0 | 0 | 0 |
| SLIT2        | 0 | 0 | 0 | 0 | 0 |
| SLIT2-IT1    | 0 | 0 | 0 | 0 | 0 |
| MIR218-1     | 0 | 0 | 0 | 0 | 0 |
| GBA3         | 0 | 0 | 0 | 0 | 0 |

|              |   |   |   |   |   |
|--------------|---|---|---|---|---|
| SOD3         | 0 | 0 | 0 | 0 | 0 |
| SLC34A2      | 0 | 0 | 0 | 0 | 0 |
| MIR4275      | 0 | 0 | 0 | 0 | 0 |
| DTHD1        | 0 | 0 | 0 | 0 | 0 |
| KIAA1239     | 0 | 0 | 0 | 0 | 0 |
| MIR574       | 0 | 0 | 0 | 0 | 0 |
| CHRNA9       | 0 | 0 | 0 | 0 | 0 |
| UCHL1        | 0 | 0 | 0 | 0 | 0 |
| SHISA3       | 0 | 0 | 0 | 0 | 0 |
| GRXCR1       | 0 | 0 | 0 | 0 | 0 |
| GABRB1       | 0 | 0 | 0 | 0 | 0 |
| ZAR1         | 0 | 0 | 0 | 0 | 0 |
| CWH43        | 0 | 0 | 0 | 0 | 0 |
| SPATA18      | 0 | 0 | 0 | 0 | 0 |
| MIR4449      | 0 | 0 | 0 | 0 | 0 |
| LOC152578    | 0 | 0 | 0 | 0 | 0 |
| LNX1-AS1     | 0 | 0 | 0 | 0 | 0 |
| LNX1-AS2     | 0 | 0 | 0 | 0 | 0 |
| GSX2         | 0 | 0 | 0 | 0 | 0 |
| PDGFRA       | 0 | 0 | 0 | 0 | 0 |
| KIT          | 0 | 0 | 0 | 0 | 0 |
| LOC644145    | 0 | 0 | 0 | 0 | 0 |
| THEGL        | 0 | 0 | 0 | 0 | 0 |
| LOC255130    | 0 | 0 | 0 | 0 | 0 |
| LPHN3        | 0 | 0 | 0 | 0 | 0 |
| LOC100144602 | 0 | 0 | 0 | 0 | 0 |
| LOC550113    | 0 | 0 | 0 | 0 | 0 |
| FTLP10       | 0 | 0 | 0 | 0 | 0 |
| TMPRSS11E    | 0 | 0 | 0 | 0 | 0 |
| UGT2B10      | 0 | 0 | 0 | 0 | 0 |
| UGT2B7       | 0 | 0 | 0 | 0 | 0 |
| UGT2B28      | 0 | 0 | 0 | 0 | 0 |
| CSN1S1       | 0 | 0 | 0 | 0 | 0 |
| STATH        | 0 | 0 | 0 | 0 | 0 |
| HTN3         | 0 | 0 | 0 | 0 | 0 |
| HTN1         | 0 | 0 | 0 | 0 | 0 |
| CSN1S2AP     | 0 | 0 | 0 | 0 | 0 |
| CSN1S2BP     | 0 | 0 | 0 | 0 | 0 |
| ODAM         | 0 | 0 | 0 | 0 | 0 |
| FDCSP        | 0 | 0 | 0 | 0 | 0 |
| CSN3         | 0 | 0 | 0 | 0 | 0 |
| CABS1        | 0 | 0 | 0 | 0 | 0 |
| SMR3A        | 0 | 0 | 0 | 0 | 0 |
| SMR3B        | 0 | 0 | 0 | 0 | 0 |
| PROL1        | 0 | 0 | 0 | 0 | 0 |
| MUC7         | 0 | 0 | 0 | 0 | 0 |
| AMTN         | 0 | 0 | 0 | 0 | 0 |
| AMBN         | 0 | 0 | 0 | 0 | 0 |
| SLC4A4       | 0 | 0 | 0 | 0 | 0 |
| AFP          | 0 | 0 | 0 | 0 | 0 |
| AFM          | 0 | 0 | 0 | 0 | 0 |
| LOC728040    | 0 | 0 | 0 | 0 | 0 |
| CXCL6        | 0 | 0 | 0 | 0 | 0 |
| PF4V1        | 0 | 0 | 0 | 0 | 0 |
| AREG         | 0 | 0 | 0 | 0 | 0 |
| AREG         | 0 | 0 | 0 | 0 | 0 |
| LOC441025    | 0 | 0 | 0 | 0 | 0 |
| ART3         | 0 | 0 | 0 | 0 | 0 |
| MIR4450      | 0 | 0 | 0 | 0 | 0 |
| GDEP         | 0 | 0 | 0 | 0 | 0 |
| MIR4451      | 0 | 0 | 0 | 0 | 0 |
| DSPP         | 0 | 0 | 0 | 0 | 0 |
| DMP1         | 0 | 0 | 0 | 0 | 0 |
| IBSP         | 0 | 0 | 0 | 0 | 0 |
| MEPE         | 0 | 0 | 0 | 0 | 0 |
| LOC644248    | 0 | 0 | 0 | 0 | 0 |
| MMRN1        | 0 | 0 | 0 | 0 | 0 |
| CCSER1       | 0 | 0 | 0 | 0 | 0 |
| GRID2        | 0 | 0 | 0 | 0 | 0 |
| ATOH1        | 0 | 0 | 0 | 0 | 0 |
| BMPR1B       | 0 | 0 | 0 | 0 | 0 |
| PDHA2        | 0 | 0 | 0 | 0 | 0 |
| MIR3684      | 0 | 0 | 0 | 0 | 0 |
| C4orf17      | 0 | 0 | 0 | 0 | 0 |
| BANK1        | 0 | 0 | 0 | 0 | 0 |
| ARHGEF38-JT1 | 0 | 0 | 0 | 0 | 0 |
| NPNT         | 0 | 0 | 0 | 0 | 0 |
| MIR1243      | 0 | 0 | 0 | 0 | 0 |
| MIR577       | 0 | 0 | 0 | 0 | 0 |

|              |   |   |   |   |   |
|--------------|---|---|---|---|---|
| MIR1973      | 0 | 0 | 0 | 0 | 0 |
| NDST3        | 0 | 0 | 0 | 0 | 0 |
| CEP170P1     | 0 | 0 | 0 | 0 | 0 |
| PP12613      | 0 | 0 | 0 | 0 | 0 |
| LOC285419    | 0 | 0 | 0 | 0 | 0 |
| FAT4         | 0 | 0 | 0 | 0 | 0 |
| MIR2054      | 0 | 0 | 0 | 0 | 0 |
| PCDH10       | 0 | 0 | 0 | 0 | 0 |
| LINC00499    | 0 | 0 | 0 | 0 | 0 |
| SCOC         | 0 | 0 | 0 | 0 | 0 |
| GUSBP5       | 0 | 0 | 0 | 0 | 0 |
| EDNRA        | 0 | 0 | 0 | 0 | 0 |
| MIR4799      | 0 | 0 | 0 | 0 | 0 |
| TLR2         | 0 | 0 | 0 | 0 | 0 |
| FGB          | 0 | 0 | 0 | 0 | 0 |
| RBM46        | 0 | 0 | 0 | 0 | 0 |
| NPY2R        | 0 | 0 | 0 | 0 | 0 |
| GUCY1A3      | 0 | 0 | 0 | 0 | 0 |
| GUCY1B3      | 0 | 0 | 0 | 0 | 0 |
| TDO2         | 0 | 0 | 0 | 0 | 0 |
| GLRB         | 0 | 0 | 0 | 0 | 0 |
| GRIA2        | 0 | 0 | 0 | 0 | 0 |
| LOC340017    | 0 | 0 | 0 | 0 | 0 |
| RXFP1        | 0 | 0 | 0 | 0 | 0 |
| MIR3688-2    | 0 | 0 | 0 | 0 | 0 |
| NPY5R        | 0 | 0 | 0 | 0 | 0 |
| MIR5684      | 0 | 0 | 0 | 0 | 0 |
| LOC100506013 | 0 | 0 | 0 | 0 | 0 |
| FAM218A      | 0 | 0 | 0 | 0 | 0 |
| CPE          | 0 | 0 | 0 | 0 | 0 |
| MIR578       | 0 | 0 | 0 | 0 | 0 |
| TLL1         | 0 | 0 | 0 | 0 | 0 |
| ANXA10       | 0 | 0 | 0 | 0 | 0 |
| LOC100506122 | 0 | 0 | 0 | 0 | 0 |
| GALNTL6      | 0 | 0 | 0 | 0 | 0 |
| NBLA00301    | 0 | 0 | 0 | 0 | 0 |
| MIR4276      | 0 | 0 | 0 | 0 | 0 |
| ADAM29       | 0 | 0 | 0 | 0 | 0 |
| WDR17        | 0 | 0 | 0 | 0 | 0 |
| LOC285501    | 0 | 0 | 0 | 0 | 0 |
| MIR1305      | 0 | 0 | 0 | 0 | 0 |
| HELT         | 0 | 0 | 0 | 0 | 0 |
| F11          | 0 | 0 | 0 | 0 | 0 |
| LOC401164    | 0 | 0 | 0 | 0 | 0 |
| DUX2         | 0 | 0 | 0 | 0 | 0 |
| DUX4L4       | 0 | 0 | 0 | 0 | 0 |
| DUX4L5       | 0 | 0 | 0 | 0 | 0 |
| DUX4L6       | 0 | 0 | 0 | 0 | 0 |
| DUX4L4       | 0 | 0 | 0 | 0 | 0 |
| DUX4         | 0 | 0 | 0 | 0 | 0 |
| DUX4L3       | 0 | 0 | 0 | 0 | 0 |
| DUX4         | 0 | 0 | 0 | 0 | 0 |
| RNF212       | 0 | 0 | 0 | 0 | 0 |
| TMED11P      | 0 | 0 | 0 | 0 | 0 |
| HTT-AS1      | 0 | 0 | 0 | 0 | 0 |
| LOC100133461 | 0 | 0 | 0 | 0 | 0 |
| CYTL1        | 0 | 0 | 0 | 0 | 0 |
| EVC2         | 0 | 0 | 0 | 0 | 0 |
| MIR378D1     | 0 | 0 | 0 | 0 | 0 |
| JAKMIP1      | 0 | 0 | 0 | 0 | 0 |
| PSAPL1       | 0 | 0 | 0 | 0 | 0 |
| HMX1         | 0 | 0 | 0 | 0 | 0 |
| MIR3138      | 0 | 0 | 0 | 0 | 0 |
| CLNK         | 0 | 0 | 0 | 0 | 0 |
| HS3ST1       | 0 | 0 | 0 | 0 | 0 |
| LOC285547    | 0 | 0 | 0 | 0 | 0 |
| NKX3-2       | 0 | 0 | 0 | 0 | 0 |
| LOC285548    | 0 | 0 | 0 | 0 | 0 |
| LOC441009    | 0 | 0 | 0 | 0 | 0 |
| FGFBP1       | 0 | 0 | 0 | 0 | 0 |
| FGFBP2       | 0 | 0 | 0 | 0 | 0 |
| LDB2         | 0 | 0 | 0 | 0 | 0 |
| MIR548AX     | 0 | 0 | 0 | 0 | 0 |
| KCNIP4-IT1   | 0 | 0 | 0 | 0 | 0 |
| MIR548AJ2    | 0 | 0 | 0 | 0 | 0 |
| MIR573       | 0 | 0 | 0 | 0 | 0 |
| CCKAR        | 0 | 0 | 0 | 0 | 0 |
| MIR4801      | 0 | 0 | 0 | 0 | 0 |
| MIR4802      | 0 | 0 | 0 | 0 | 0 |

|              |   |   |   |   |   |
|--------------|---|---|---|---|---|
| PHOX2B       | 0 | 0 | 0 | 0 | 0 |
| KCTD8        | 0 | 0 | 0 | 0 | 0 |
| GABRA2       | 0 | 0 | 0 | 0 | 0 |
| GABRA4       | 0 | 0 | 0 | 0 | 0 |
| ERVMER34-1   | 0 | 0 | 0 | 0 | 0 |
| KDR          | 0 | 0 | 0 | 0 | 0 |
| HOPX         | 0 | 0 | 0 | 0 | 0 |
| SPINK2       | 0 | 0 | 0 | 0 | 0 |
| TECRL        | 0 | 0 | 0 | 0 | 0 |
| LOC401134    | 0 | 0 | 0 | 0 | 0 |
| EPHA5        | 0 | 0 | 0 | 0 | 0 |
| TMPRSS11A    | 0 | 0 | 0 | 0 | 0 |
| TMPRSS11GP   | 0 | 0 | 0 | 0 | 0 |
| TMPRSS11F    | 0 | 0 | 0 | 0 | 0 |
| SYT14L       | 0 | 0 | 0 | 0 | 0 |
| TMPRSS11BNL  | 0 | 0 | 0 | 0 | 0 |
| TMPRSS11B    | 0 | 0 | 0 | 0 | 0 |
| UGT2B17      | 0 | 0 | 0 | 0 | 0 |
| UGT2B15      | 0 | 0 | 0 | 0 | 0 |
| UGT2A3       | 0 | 0 | 0 | 0 | 0 |
| UGT2B10      | 0 | 0 | 0 | 0 | 0 |
| UGT2B11      | 0 | 0 | 0 | 0 | 0 |
| UGT2B4       | 0 | 0 | 0 | 0 | 0 |
| SULT1B1      | 0 | 0 | 0 | 0 | 0 |
| SULT1E1      | 0 | 0 | 0 | 0 | 0 |
| CSN2         | 0 | 0 | 0 | 0 | 0 |
| GC           | 0 | 0 | 0 | 0 | 0 |
| ADAMTS3      | 0 | 0 | 0 | 0 | 0 |
| RASSF6       | 0 | 0 | 0 | 0 | 0 |
| PF4          | 0 | 0 | 0 | 0 | 0 |
| PPBP         | 0 | 0 | 0 | 0 | 0 |
| CXCL5        | 0 | 0 | 0 | 0 | 0 |
| PBPPP2       | 0 | 0 | 0 | 0 | 0 |
| CXCL9        | 0 | 0 | 0 | 0 | 0 |
| CXCL10       | 0 | 0 | 0 | 0 | 0 |
| CXCL11       | 0 | 0 | 0 | 0 | 0 |
| NAA11        | 0 | 0 | 0 | 0 | 0 |
| GK2          | 0 | 0 | 0 | 0 | 0 |
| PRKG2        | 0 | 0 | 0 | 0 | 0 |
| LINC00575    | 0 | 0 | 0 | 0 | 0 |
| MIR575       | 0 | 0 | 0 | 0 | 0 |
| NKX6-1       | 0 | 0 | 0 | 0 | 0 |
| MAPK10       | 0 | 0 | 0 | 0 | 0 |
| MIR5705      | 0 | 0 | 0 | 0 | 0 |
| GPRIN3       | 0 | 0 | 0 | 0 | 0 |
| SNCA         | 0 | 0 | 0 | 0 | 0 |
| HPGDS        | 0 | 0 | 0 | 0 | 0 |
| UNC5C        | 0 | 0 | 0 | 0 | 0 |
| ADH4         | 0 | 0 | 0 | 0 | 0 |
| ADH1A        | 0 | 0 | 0 | 0 | 0 |
| ADH1B        | 0 | 0 | 0 | 0 | 0 |
| ADH1C        | 0 | 0 | 0 | 0 | 0 |
| ADH7         | 0 | 0 | 0 | 0 | 0 |
| DDIT4L       | 0 | 0 | 0 | 0 | 0 |
| EMCN         | 0 | 0 | 0 | 0 | 0 |
| EMCN-IT3     | 0 | 0 | 0 | 0 | 0 |
| TACR3        | 0 | 0 | 0 | 0 | 0 |
| GIMD1        | 0 | 0 | 0 | 0 | 0 |
| DKK2         | 0 | 0 | 0 | 0 | 0 |
| AGXT2L1      | 0 | 0 | 0 | 0 | 0 |
| CFI          | 0 | 0 | 0 | 0 | 0 |
| MIR367       | 0 | 0 | 0 | 0 | 0 |
| MIR302D      | 0 | 0 | 0 | 0 | 0 |
| MIR302A      | 0 | 0 | 0 | 0 | 0 |
| MIR302C      | 0 | 0 | 0 | 0 | 0 |
| MIR302B      | 0 | 0 | 0 | 0 | 0 |
| NDST4        | 0 | 0 | 0 | 0 | 0 |
| TRAM1L1      | 0 | 0 | 0 | 0 | 0 |
| TNIP3        | 0 | 0 | 0 | 0 | 0 |
| QRFPR        | 0 | 0 | 0 | 0 | 0 |
| TMEM155      | 0 | 0 | 0 | 0 | 0 |
| TRPC3        | 0 | 0 | 0 | 0 | 0 |
| IL2          | 0 | 0 | 0 | 0 | 0 |
| IL21         | 0 | 0 | 0 | 0 | 0 |
| PABPC4L      | 0 | 0 | 0 | 0 | 0 |
| LINC00616    | 0 | 0 | 0 | 0 | 0 |
| LOC100129858 | 0 | 0 | 0 | 0 | 0 |
| CLGN         | 0 | 0 | 0 | 0 | 0 |
| UCP1         | 0 | 0 | 0 | 0 | 0 |

|              |   |   |   |   |   |
|--------------|---|---|---|---|---|
| TBC1D9       | 0 | 0 | 0 | 0 | 0 |
| TNRC18P1     | 0 | 0 | 0 | 0 | 0 |
| RNF150       | 0 | 0 | 0 | 0 | 0 |
| INPP4B       | 0 | 0 | 0 | 0 | 0 |
| FREM3        | 0 | 0 | 0 | 0 | 0 |
| GYPE         | 0 | 0 | 0 | 0 | 0 |
| GYPB         | 0 | 0 | 0 | 0 | 0 |
| GYP A        | 0 | 0 | 0 | 0 | 0 |
| LOC100505545 | 0 | 0 | 0 | 0 | 0 |
| TTC29        | 0 | 0 | 0 | 0 | 0 |
| MIR3140      | 0 | 0 | 0 | 0 | 0 |
| TMEM154      | 0 | 0 | 0 | 0 | 0 |
| RNF175       | 0 | 0 | 0 | 0 | 0 |
| SFRP2        | 0 | 0 | 0 | 0 | 0 |
| DCHS2        | 0 | 0 | 0 | 0 | 0 |
| FGA          | 0 | 0 | 0 | 0 | 0 |
| FGG          | 0 | 0 | 0 | 0 | 0 |
| MAP9         | 0 | 0 | 0 | 0 | 0 |
| ASIC5        | 0 | 0 | 0 | 0 | 0 |
| PDGFC        | 0 | 0 | 0 | 0 | 0 |
| C4orf45      | 0 | 0 | 0 | 0 | 0 |
| MIR3688-1    | 0 | 0 | 0 | 0 | 0 |
| NPY1R        | 0 | 0 | 0 | 0 | 0 |
| TKTL2        | 0 | 0 | 0 | 0 | 0 |
| ANP32C       | 0 | 0 | 0 | 0 | 0 |
| SCRG1        | 0 | 0 | 0 | 0 | 0 |
| HAND2        | 0 | 0 | 0 | 0 | 0 |
| GLRA3        | 0 | 0 | 0 | 0 | 0 |
| ASB5         | 0 | 0 | 0 | 0 | 0 |
| VEGFC        | 0 | 0 | 0 | 0 | 0 |
| LINC00290    | 0 | 0 | 0 | 0 | 0 |
| MIR3945      | 0 | 0 | 0 | 0 | 0 |
| LOC100506229 | 0 | 0 | 0 | 0 | 0 |
| PDLIM3       | 0 | 0 | 0 | 0 | 0 |
| SORBS2       | 0 | 0 | 0 | 0 | 0 |
| LOC285441    | 0 | 0 | 0 | 0 | 0 |
| MTNR1A       | 0 | 0 | 0 | 0 | 0 |
| LOC339975    | 0 | 0 | 0 | 0 | 0 |
| SLC6A19      | 0 | 0 | 0 | 0 | 0 |
| SLC6A18      | 0 | 0 | 0 | 0 | 0 |
| IRX1         | 0 | 0 | 0 | 0 | 0 |
| LOC340094    | 0 | 0 | 0 | 0 | 0 |
| UBE2QL1      | 0 | 0 | 0 | 0 | 0 |
| LOC255167    | 0 | 0 | 0 | 0 | 0 |
| ADCY2        | 0 | 0 | 0 | 0 | 0 |
| LOC100505806 | 0 | 0 | 0 | 0 | 0 |
| SNORD123     | 0 | 0 | 0 | 0 | 0 |
| CT49         | 0 | 0 | 0 | 0 | 0 |
| FBXL7        | 0 | 0 | 0 | 0 | 0 |
| BASP1        | 0 | 0 | 0 | 0 | 0 |
| PMCHL1       | 0 | 0 | 0 | 0 | 0 |
| PRDM9        | 0 | 0 | 0 | 0 | 0 |
| LSP1P3       | 0 | 0 | 0 | 0 | 0 |
| LOC340113    | 0 | 0 | 0 | 0 | 0 |
| RXFP3        | 0 | 0 | 0 | 0 | 0 |
| IL7R         | 0 | 0 | 0 | 0 | 0 |
| SLC1A3       | 0 | 0 | 0 | 0 | 0 |
| EGFLAM       | 0 | 0 | 0 | 0 | 0 |
| CCDC152      | 0 | 0 | 0 | 0 | 0 |
| NNT          | 0 | 0 | 0 | 0 | 0 |
| HSPB3        | 0 | 0 | 0 | 0 | 0 |
| SNX18        | 0 | 0 | 0 | 0 | 0 |
| GZMK         | 0 | 0 | 0 | 0 | 0 |
| GZMA         | 0 | 0 | 0 | 0 | 0 |
| GAPT         | 0 | 0 | 0 | 0 | 0 |
| RAB3C        | 0 | 0 | 0 | 0 | 0 |
| RNF180       | 0 | 0 | 0 | 0 | 0 |
| RGS7BP       | 0 | 0 | 0 | 0 | 0 |
| FAM159B      | 0 | 0 | 0 | 0 | 0 |
| SERF1A       | 0 | 0 | 0 | 0 | 0 |
| CARTPT       | 0 | 0 | 0 | 0 | 0 |
| MIR4803      | 0 | 0 | 0 | 0 | 0 |
| MIR4804      | 0 | 0 | 0 | 0 | 0 |
| TMEM171      | 0 | 0 | 0 | 0 | 0 |
| TMEM174      | 0 | 0 | 0 | 0 | 0 |
| SV2C         | 0 | 0 | 0 | 0 | 0 |
| F2RL1        | 0 | 0 | 0 | 0 | 0 |
| S100Z        | 0 | 0 | 0 | 0 | 0 |
| CRHBP        | 0 | 0 | 0 | 0 | 0 |

|              |   |   |   |   |   |
|--------------|---|---|---|---|---|
| BHMT         | 0 | 0 | 0 | 0 | 0 |
| SPZ1         | 0 | 0 | 0 | 0 | 0 |
| RNU5E-1      | 0 | 0 | 0 | 0 | 0 |
| MIR3977      | 0 | 0 | 0 | 0 | 0 |
| VCAN         | 0 | 0 | 0 | 0 | 0 |
| NBPF22P      | 0 | 0 | 0 | 0 | 0 |
| MIR3607      | 0 | 0 | 0 | 0 | 0 |
| MIR548AO     | 0 | 0 | 0 | 0 | 0 |
| GPR150       | 0 | 0 | 0 | 0 | 0 |
| MIR583       | 0 | 0 | 0 | 0 | 0 |
| RAB9BP1      | 0 | 0 | 0 | 0 | 0 |
| LOC100289673 | 0 | 0 | 0 | 0 | 0 |
| CAMK4        | 0 | 0 | 0 | 0 | 0 |
| NREP-AS1     | 0 | 0 | 0 | 0 | 0 |
| FLJ11235     | 0 | 0 | 0 | 0 | 0 |
| KCNN2        | 0 | 0 | 0 | 0 | 0 |
| ARL14EPL     | 0 | 0 | 0 | 0 | 0 |
| MIR1244-2    | 0 | 0 | 0 | 0 | 0 |
| PRR16        | 0 | 0 | 0 | 0 | 0 |
| FTMT         | 0 | 0 | 0 | 0 | 0 |
| MEGF10       | 0 | 0 | 0 | 0 | 0 |
| CTXN3        | 0 | 0 | 0 | 0 | 0 |
| SLC27A6      | 0 | 0 | 0 | 0 | 0 |
| MIR4633      | 0 | 0 | 0 | 0 | 0 |
| ADAMTS19     | 0 | 0 | 0 | 0 | 0 |
| KIAA1024L    | 0 | 0 | 0 | 0 | 0 |
| CHSY3        | 0 | 0 | 0 | 0 | 0 |
| IL3          | 0 | 0 | 0 | 0 | 0 |
| PDLIM4       | 0 | 0 | 0 | 0 | 0 |
| IL4          | 0 | 0 | 0 | 0 | 0 |
| SOWAHA       | 0 | 0 | 0 | 0 | 0 |
| FBXL21       | 0 | 0 | 0 | 0 | 0 |
| NPY6R        | 0 | 0 | 0 | 0 | 0 |
| MYOT         | 0 | 0 | 0 | 0 | 0 |
| PKD2L2       | 0 | 0 | 0 | 0 | 0 |
| WNT8A        | 0 | 0 | 0 | 0 | 0 |
| VTRNA1-1     | 0 | 0 | 0 | 0 | 0 |
| VTRNA1-2     | 0 | 0 | 0 | 0 | 0 |
| PCDHB1       | 0 | 0 | 0 | 0 | 0 |
| PCDHB17      | 0 | 0 | 0 | 0 | 0 |
| MIR5197      | 0 | 0 | 0 | 0 | 0 |
| HMH1B        | 0 | 0 | 0 | 0 | 0 |
| POU4F3       | 0 | 0 | 0 | 0 | 0 |
| STK32A       | 0 | 0 | 0 | 0 | 0 |
| JAKMIP2-AS1  | 0 | 0 | 0 | 0 | 0 |
| SCGB3A2      | 0 | 0 | 0 | 0 | 0 |
| SPINK5       | 0 | 0 | 0 | 0 | 0 |
| SPINK14      | 0 | 0 | 0 | 0 | 0 |
| SPINK6       | 0 | 0 | 0 | 0 | 0 |
| SPINK13      | 0 | 0 | 0 | 0 | 0 |
| SPINK7       | 0 | 0 | 0 | 0 | 0 |
| SPINK9       | 0 | 0 | 0 | 0 | 0 |
| ADRB2        | 0 | 0 | 0 | 0 | 0 |
| CDX1         | 0 | 0 | 0 | 0 | 0 |
| KIF4B        | 0 | 0 | 0 | 0 | 0 |
| ITK          | 0 | 0 | 0 | 0 | 0 |
| NIPAL4       | 0 | 0 | 0 | 0 | 0 |
| C5orf52      | 0 | 0 | 0 | 0 | 0 |
| ADRA1B       | 0 | 0 | 0 | 0 | 0 |
| MIR3142      | 0 | 0 | 0 | 0 | 0 |
| MIR146A      | 0 | 0 | 0 | 0 | 0 |
| GABRA6       | 0 | 0 | 0 | 0 | 0 |
| GABRA1       | 0 | 0 | 0 | 0 | 0 |
| GABRG2       | 0 | 0 | 0 | 0 | 0 |
| MIR103B1     | 0 | 0 | 0 | 0 | 0 |
| DOCK2        | 0 | 0 | 0 | 0 | 0 |
| MIR378E      | 0 | 0 | 0 | 0 | 0 |
| FOX11        | 0 | 0 | 0 | 0 | 0 |
| C5orf58      | 0 | 0 | 0 | 0 | 0 |
| KCNIP1       | 0 | 0 | 0 | 0 | 0 |
| GABRP        | 0 | 0 | 0 | 0 | 0 |
| TLX3         | 0 | 0 | 0 | 0 | 0 |
| C5orf47      | 0 | 0 | 0 | 0 | 0 |
| MIR4634      | 0 | 0 | 0 | 0 | 0 |
| CPLX2        | 0 | 0 | 0 | 0 | 0 |
| FAM153B      | 0 | 0 | 0 | 0 | 0 |
| LOC100507387 | 0 | 0 | 0 | 0 | 0 |
| EIF4E1B      | 0 | 0 | 0 | 0 | 0 |
| SLC34A1      | 0 | 0 | 0 | 0 | 0 |

|              |   |   |   |   |   |
|--------------|---|---|---|---|---|
| ZNF879       | 0 | 0 | 0 | 0 | 0 |
| ZNF354C      | 0 | 0 | 0 | 0 | 0 |
| LINC00847    | 0 | 0 | 0 | 0 | 0 |
| BTNL8        | 0 | 0 | 0 | 0 | 0 |
| BTNL3        | 0 | 0 | 0 | 0 | 0 |
| OR2V2        | 0 | 0 | 0 | 0 | 0 |
| OR4F3        | 0 | 0 | 0 | 0 | 0 |
| MIR4456      | 0 | 0 | 0 | 0 | 0 |
| LOC100506688 | 0 | 0 | 0 | 0 | 0 |
| MIR4635      | 0 | 0 | 0 | 0 | 0 |
| MIR4457      | 0 | 0 | 0 | 0 | 0 |
| MIR4277      | 0 | 0 | 0 | 0 | 0 |
| LOC285577    | 0 | 0 | 0 | 0 | 0 |
| MIR4278      | 0 | 0 | 0 | 0 | 0 |
| MIR4454      | 0 | 0 | 0 | 0 | 0 |
| C5orf49      | 0 | 0 | 0 | 0 | 0 |
| MIR4636      | 0 | 0 | 0 | 0 | 0 |
| TAS2R1       | 0 | 0 | 0 | 0 | 0 |
| LOC285692    | 0 | 0 | 0 | 0 | 0 |
| CTNND2       | 0 | 0 | 0 | 0 | 0 |
| MIR4637      | 0 | 0 | 0 | 0 | 0 |
| MARCH11      | 0 | 0 | 0 | 0 | 0 |
| LOC285696    | 0 | 0 | 0 | 0 | 0 |
| LOC401177    | 0 | 0 | 0 | 0 | 0 |
| CDH18        | 0 | 0 | 0 | 0 | 0 |
| CDH10        | 0 | 0 | 0 | 0 | 0 |
| LOC340107    | 0 | 0 | 0 | 0 | 0 |
| CDH9         | 0 | 0 | 0 | 0 | 0 |
| MIR4279      | 0 | 0 | 0 | 0 | 0 |
| ADAMTS12     | 0 | 0 | 0 | 0 | 0 |
| SLC45A2      | 0 | 0 | 0 | 0 | 0 |
| PRLR         | 0 | 0 | 0 | 0 | 0 |
| CAPSL        | 0 | 0 | 0 | 0 | 0 |
| UGT3A2       | 0 | 0 | 0 | 0 | 0 |
| MIR580       | 0 | 0 | 0 | 0 | 0 |
| GDNF         | 0 | 0 | 0 | 0 | 0 |
| EGFLAM-AS4   | 0 | 0 | 0 | 0 | 0 |
| LIFR         | 0 | 0 | 0 | 0 | 0 |
| MIR3650      | 0 | 0 | 0 | 0 | 0 |
| FYB          | 0 | 0 | 0 | 0 | 0 |
| C9           | 0 | 0 | 0 | 0 | 0 |
| SNORD72      | 0 | 0 | 0 | 0 | 0 |
| MROH2B       | 0 | 0 | 0 | 0 | 0 |
| C6           | 0 | 0 | 0 | 0 | 0 |
| CCL28        | 0 | 0 | 0 | 0 | 0 |
| FGF10        | 0 | 0 | 0 | 0 | 0 |
| HCN1         | 0 | 0 | 0 | 0 | 0 |
| MIR581       | 0 | 0 | 0 | 0 | 0 |
| ESM1         | 0 | 0 | 0 | 0 | 0 |
| MIR449A      | 0 | 0 | 0 | 0 | 0 |
| MIR449B      | 0 | 0 | 0 | 0 | 0 |
| MIR449C      | 0 | 0 | 0 | 0 | 0 |
| MIR5687      | 0 | 0 | 0 | 0 | 0 |
| ANKRD55      | 0 | 0 | 0 | 0 | 0 |
| ACTBL2       | 0 | 0 | 0 | 0 | 0 |
| HTR1A        | 0 | 0 | 0 | 0 | 0 |
| CD180        | 0 | 0 | 0 | 0 | 0 |
| ZNF366       | 0 | 0 | 0 | 0 | 0 |
| F2RL2        | 0 | 0 | 0 | 0 | 0 |
| LOC644936    | 0 | 0 | 0 | 0 | 0 |
| ANKRD34B     | 0 | 0 | 0 | 0 | 0 |
| HAPLN1       | 0 | 0 | 0 | 0 | 0 |
| EDIL3        | 0 | 0 | 0 | 0 | 0 |
| MIR4280      | 0 | 0 | 0 | 0 | 0 |
| MIR3660      | 0 | 0 | 0 | 0 | 0 |
| LIX1         | 0 | 0 | 0 | 0 | 0 |
| SLCO4C1      | 0 | 0 | 0 | 0 | 0 |
| SLCO6A1      | 0 | 0 | 0 | 0 | 0 |
| TSSK1B       | 0 | 0 | 0 | 0 | 0 |
| ZNF608       | 0 | 0 | 0 | 0 | 0 |
| FBN2         | 0 | 0 | 0 | 0 | 0 |
| MIR4460      | 0 | 0 | 0 | 0 | 0 |
| MIR3936      | 0 | 0 | 0 | 0 | 0 |
| IL5          | 0 | 0 | 0 | 0 | 0 |
| MIR1289-2    | 0 | 0 | 0 | 0 | 0 |
| LOC340073    | 0 | 0 | 0 | 0 | 0 |
| C5orf20      | 0 | 0 | 0 | 0 | 0 |
| TIFAB        | 0 | 0 | 0 | 0 | 0 |
| NEUROG1      | 0 | 0 | 0 | 0 | 0 |

|              |   |   |   |   |   |
|--------------|---|---|---|---|---|
| CXCL14       | 0 | 0 | 0 | 0 | 0 |
| IL9          | 0 | 0 | 0 | 0 | 0 |
| LECT2        | 0 | 0 | 0 | 0 | 0 |
| TRPC7        | 0 | 0 | 0 | 0 | 0 |
| SPOCK1       | 0 | 0 | 0 | 0 | 0 |
| MIR874       | 0 | 0 | 0 | 0 | 0 |
| NME5         | 0 | 0 | 0 | 0 | 0 |
| SNORD63      | 0 | 0 | 0 | 0 | 0 |
| LOC729080    | 0 | 0 | 0 | 0 | 0 |
| ARHGAP26-AS1 | 0 | 0 | 0 | 0 | 0 |
| GRXCR2       | 0 | 0 | 0 | 0 | 0 |
| GPR151       | 0 | 0 | 0 | 0 | 0 |
| PPP2R2B      | 0 | 0 | 0 | 0 | 0 |
| PPP2R2B-IT1  | 0 | 0 | 0 | 0 | 0 |
| DPYSL3       | 0 | 0 | 0 | 0 | 0 |
| JAKMIP2      | 0 | 0 | 0 | 0 | 0 |
| C5orf46      | 0 | 0 | 0 | 0 | 0 |
| HTR4         | 0 | 0 | 0 | 0 | 0 |
| CAMK2A       | 0 | 0 | 0 | 0 | 0 |
| ZNF300P1     | 0 | 0 | 0 | 0 | 0 |
| SLC36A3      | 0 | 0 | 0 | 0 | 0 |
| SPARC        | 0 | 0 | 0 | 0 | 0 |
| GLRA1        | 0 | 0 | 0 | 0 | 0 |
| NMUR2        | 0 | 0 | 0 | 0 | 0 |
| HAND1        | 0 | 0 | 0 | 0 | 0 |
| MIR3141      | 0 | 0 | 0 | 0 | 0 |
| TIMD4        | 0 | 0 | 0 | 0 | 0 |
| HAVCR1       | 0 | 0 | 0 | 0 | 0 |
| FAM71B       | 0 | 0 | 0 | 0 | 0 |
| ADAM19       | 0 | 0 | 0 | 0 | 0 |
| SOX30        | 0 | 0 | 0 | 0 | 0 |
| IL12B        | 0 | 0 | 0 | 0 | 0 |
| LOC285627    | 0 | 0 | 0 | 0 | 0 |
| ATP10B       | 0 | 0 | 0 | 0 | 0 |
| LOC285629    | 0 | 0 | 0 | 0 | 0 |
| GABRB2       | 0 | 0 | 0 | 0 | 0 |
| MIR103A1     | 0 | 0 | 0 | 0 | 0 |
| SLIT3        | 0 | 0 | 0 | 0 | 0 |
| MIR218-2     | 0 | 0 | 0 | 0 | 0 |
| MIR585       | 0 | 0 | 0 | 0 | 0 |
| FAM196B      | 0 | 0 | 0 | 0 | 0 |
| LCP2         | 0 | 0 | 0 | 0 | 0 |
| KCNMB1       | 0 | 0 | 0 | 0 | 0 |
| MIR3912      | 0 | 0 | 0 | 0 | 0 |
| STC2         | 0 | 0 | 0 | 0 | 0 |
| FLJ16171     | 0 | 0 | 0 | 0 | 0 |
| DRD1         | 0 | 0 | 0 | 0 | 0 |
| SNCB         | 0 | 0 | 0 | 0 | 0 |
| MIR4281      | 0 | 0 | 0 | 0 | 0 |
| FAM153A      | 0 | 0 | 0 | 0 | 0 |
| PROP1        | 0 | 0 | 0 | 0 | 0 |
| MIR1229      | 0 | 0 | 0 | 0 | 0 |
| MIR340       | 0 | 0 | 0 | 0 | 0 |
| RASGEF1C     | 0 | 0 | 0 | 0 | 0 |
| SCGB3A1      | 0 | 0 | 0 | 0 | 0 |
| OR2Y1        | 0 | 0 | 0 | 0 | 0 |
| OR2V1        | 0 | 0 | 0 | 0 | 0 |
| MIR4638      | 0 | 0 | 0 | 0 | 0 |
| SNORD96A     | 0 | 0 | 0 | 0 | 0 |
| FOXQ1        | 0 | 0 | 0 | 0 | 0 |
| FOXF2        | 0 | 0 | 0 | 0 | 0 |
| FAM50B       | 0 | 0 | 0 | 0 | 0 |
| PPP1R3G      | 0 | 0 | 0 | 0 | 0 |
| LY86         | 0 | 0 | 0 | 0 | 0 |
| MIR5689      | 0 | 0 | 0 | 0 | 0 |
| TMEM170B     | 0 | 0 | 0 | 0 | 0 |
| RNF182       | 0 | 0 | 0 | 0 | 0 |
| MIR4639      | 0 | 0 | 0 | 0 | 0 |
| STMND1       | 0 | 0 | 0 | 0 | 0 |
| RBM24        | 0 | 0 | 0 | 0 | 0 |
| MIR548A1     | 0 | 0 | 0 | 0 | 0 |
| ID4          | 0 | 0 | 0 | 0 | 0 |
| LINC00340    | 0 | 0 | 0 | 0 | 0 |
| HDGFL1       | 0 | 0 | 0 | 0 | 0 |
| SCGN         | 0 | 0 | 0 | 0 | 0 |
| HIST1H2BA    | 0 | 0 | 0 | 0 | 0 |
| HIST1H2APS1  | 0 | 0 | 0 | 0 | 0 |
| SLC17A4      | 0 | 0 | 0 | 0 | 0 |
| HIST1H3C     | 0 | 0 | 0 | 0 | 0 |



|              |   |   |   |   |   |
|--------------|---|---|---|---|---|
| HIST1H4F     | 0 | 0 | 0 | 0 | 0 |
| BTN1A1       | 0 | 0 | 0 | 0 | 0 |
| MIR3143      | 0 | 0 | 0 | 0 | 0 |
| VN1R10P      | 0 | 0 | 0 | 0 | 0 |
| HIST1H2AL    | 0 | 0 | 0 | 0 | 0 |
| GPX5         | 0 | 0 | 0 | 0 | 0 |
| LOC100129636 | 0 | 0 | 0 | 0 | 0 |
| OR2J3        | 0 | 0 | 0 | 0 | 0 |
| OR2J2        | 0 | 0 | 0 | 0 | 0 |
| OR14J1       | 0 | 0 | 0 | 0 | 0 |
| OR12D2       | 0 | 0 | 0 | 0 | 0 |
| OR10C1       | 0 | 0 | 0 | 0 | 0 |
| LOC100507362 | 0 | 0 | 0 | 0 | 0 |
| SNORD32B     | 0 | 0 | 0 | 0 | 0 |
| MOG          | 0 | 0 | 0 | 0 | 0 |
| MIR877       | 0 | 0 | 0 | 0 | 0 |
| MIR4640      | 0 | 0 | 0 | 0 | 0 |
| MUC21        | 0 | 0 | 0 | 0 | 0 |
| MUC22        | 0 | 0 | 0 | 0 | 0 |
| HCG22        | 0 | 0 | 0 | 0 | 0 |
| HCG26        | 0 | 0 | 0 | 0 | 0 |
| AIF1         | 0 | 0 | 0 | 0 | 0 |
| LY6G6F       | 0 | 0 | 0 | 0 | 0 |
| LY6G6D       | 0 | 0 | 0 | 0 | 0 |
| SNORD48      | 0 | 0 | 0 | 0 | 0 |
| SNORD52      | 0 | 0 | 0 | 0 | 0 |
| STK19        | 0 | 0 | 0 | 0 | 0 |
| HCG23        | 0 | 0 | 0 | 0 | 0 |
| HLA-DRA      | 0 | 0 | 0 | 0 | 0 |
| HLA-DQA1     | 0 | 0 | 0 | 0 | 0 |
| HLA-DQA2     | 0 | 0 | 0 | 0 | 0 |
| HLA-DPB1     | 0 | 0 | 0 | 0 | 0 |
| HLA-DPB2     | 0 | 0 | 0 | 0 | 0 |
| MIR219-1     | 0 | 0 | 0 | 0 | 0 |
| CLPSL2       | 0 | 0 | 0 | 0 | 0 |
| CLPSL1       | 0 | 0 | 0 | 0 | 0 |
| PI16         | 0 | 0 | 0 | 0 | 0 |
| FGD2         | 0 | 0 | 0 | 0 | 0 |
| DNAH8        | 0 | 0 | 0 | 0 | 0 |
| GLP1R        | 0 | 0 | 0 | 0 | 0 |
| DAAM2        | 0 | 0 | 0 | 0 | 0 |
| TDRG1        | 0 | 0 | 0 | 0 | 0 |
| TREML4       | 0 | 0 | 0 | 0 | 0 |
| TREML5P      | 0 | 0 | 0 | 0 | 0 |
| NCR2         | 0 | 0 | 0 | 0 | 0 |
| MIR4641      | 0 | 0 | 0 | 0 | 0 |
| ATP6V0CP3    | 0 | 0 | 0 | 0 | 0 |
| PTCRA        | 0 | 0 | 0 | 0 | 0 |
| TTBK1        | 0 | 0 | 0 | 0 | 0 |
| SLC22A7      | 0 | 0 | 0 | 0 | 0 |
| CAPN11       | 0 | 0 | 0 | 0 | 0 |
| MIR4642      | 0 | 0 | 0 | 0 | 0 |
| ANKRD66      | 0 | 0 | 0 | 0 | 0 |
| MEP1A        | 0 | 0 | 0 | 0 | 0 |
| GPR111       | 0 | 0 | 0 | 0 | 0 |
| OPN5         | 0 | 0 | 0 | 0 | 0 |
| GLYATL3      | 0 | 0 | 0 | 0 | 0 |
| TFAP2D       | 0 | 0 | 0 | 0 | 0 |
| TFAP2B       | 0 | 0 | 0 | 0 | 0 |
| MIR206       | 0 | 0 | 0 | 0 | 0 |
| MIR133B      | 0 | 0 | 0 | 0 | 0 |
| IL17A        | 0 | 0 | 0 | 0 | 0 |
| MIR5685      | 0 | 0 | 0 | 0 | 0 |
| MLIP-IT1     | 0 | 0 | 0 | 0 | 0 |
| MLIP         | 0 | 0 | 0 | 0 | 0 |
| TINAG        | 0 | 0 | 0 | 0 | 0 |
| HCRTR2       | 0 | 0 | 0 | 0 | 0 |
| GFRAL        | 0 | 0 | 0 | 0 | 0 |
| BEND6        | 0 | 0 | 0 | 0 | 0 |
| SLC25A51P1   | 0 | 0 | 0 | 0 | 0 |
| BAI3         | 0 | 0 | 0 | 0 | 0 |
| COL19A1      | 0 | 0 | 0 | 0 | 0 |
| FAM135A      | 0 | 0 | 0 | 0 | 0 |
| KHDC3L       | 0 | 0 | 0 | 0 | 0 |
| RNY4         | 0 | 0 | 0 | 0 | 0 |
| PRSS35       | 0 | 0 | 0 | 0 | 0 |
| RIPPLY2      | 0 | 0 | 0 | 0 | 0 |
| HTR1E        | 0 | 0 | 0 | 0 | 0 |
| SPACA1       | 0 | 0 | 0 | 0 | 0 |

|              |   |   |   |   |   |
|--------------|---|---|---|---|---|
| GJA10        | 0 | 0 | 0 | 0 | 0 |
| MIR4464      | 0 | 0 | 0 | 0 | 0 |
| MIR4643      | 0 | 0 | 0 | 0 | 0 |
| TSG1         | 0 | 0 | 0 | 0 | 0 |
| FUT9         | 0 | 0 | 0 | 0 | 0 |
| FHL5         | 0 | 0 | 0 | 0 | 0 |
| MIR2113      | 0 | 0 | 0 | 0 | 0 |
| POU3F2       | 0 | 0 | 0 | 0 | 0 |
| PRDM13       | 0 | 0 | 0 | 0 | 0 |
| LOC728012    | 0 | 0 | 0 | 0 | 0 |
| GRIK2        | 0 | 0 | 0 | 0 | 0 |
| LIN28B       | 0 | 0 | 0 | 0 | 0 |
| BVES-AS1     | 0 | 0 | 0 | 0 | 0 |
| NR2E1        | 0 | 0 | 0 | 0 | 0 |
| CCDC162P     | 0 | 0 | 0 | 0 | 0 |
| GPR6         | 0 | 0 | 0 | 0 | 0 |
| RFPL4B       | 0 | 0 | 0 | 0 | 0 |
| FLJ34503     | 0 | 0 | 0 | 0 | 0 |
| FAM26D       | 0 | 0 | 0 | 0 | 0 |
| RFX6         | 0 | 0 | 0 | 0 | 0 |
| VGLL2        | 0 | 0 | 0 | 0 | 0 |
| LOC100287632 | 0 | 0 | 0 | 0 | 0 |
| CLVS2        | 0 | 0 | 0 | 0 | 0 |
| HEY2         | 0 | 0 | 0 | 0 | 0 |
| RSPO3        | 0 | 0 | 0 | 0 | 0 |
| TMEM200A     | 0 | 0 | 0 | 0 | 0 |
| LOC100507254 | 0 | 0 | 0 | 0 | 0 |
| TAAR9        | 0 | 0 | 0 | 0 | 0 |
| TAAR8        | 0 | 0 | 0 | 0 | 0 |
| TAAR6        | 0 | 0 | 0 | 0 | 0 |
| SNORD101     | 0 | 0 | 0 | 0 | 0 |
| SNORD100     | 0 | 0 | 0 | 0 | 0 |
| LINC00326    | 0 | 0 | 0 | 0 | 0 |
| EYA4         | 0 | 0 | 0 | 0 | 0 |
| MGC34034     | 0 | 0 | 0 | 0 | 0 |
| TCF21        | 0 | 0 | 0 | 0 | 0 |
| LOC154092    | 0 | 0 | 0 | 0 | 0 |
| LINC00271    | 0 | 0 | 0 | 0 | 0 |
| LOC100132735 | 0 | 0 | 0 | 0 | 0 |
| MIR3668      | 0 | 0 | 0 | 0 | 0 |
| MIR4465      | 0 | 0 | 0 | 0 | 0 |
| ZC2HC1B      | 0 | 0 | 0 | 0 | 0 |
| GRM1         | 0 | 0 | 0 | 0 | 0 |
| RAB32        | 0 | 0 | 0 | 0 | 0 |
| ADGB         | 0 | 0 | 0 | 0 | 0 |
| PPP1R14C     | 0 | 0 | 0 | 0 | 0 |
| IYD          | 0 | 0 | 0 | 0 | 0 |
| ESR1         | 0 | 0 | 0 | 0 | 0 |
| OPRM1        | 0 | 0 | 0 | 0 | 0 |
| MIR3692      | 0 | 0 | 0 | 0 | 0 |
| SYNJ2-IT1    | 0 | 0 | 0 | 0 | 0 |
| FNDC1        | 0 | 0 | 0 | 0 | 0 |
| MAS1         | 0 | 0 | 0 | 0 | 0 |
| LINC00602    | 0 | 0 | 0 | 0 | 0 |
| TCP10L2      | 0 | 0 | 0 | 0 | 0 |
| UNC93A       | 0 | 0 | 0 | 0 | 0 |
| TTLL2        | 0 | 0 | 0 | 0 | 0 |
| KIF25        | 0 | 0 | 0 | 0 | 0 |
| MIR4644      | 0 | 0 | 0 | 0 | 0 |
| LOC285768    | 0 | 0 | 0 | 0 | 0 |
| MIR4645      | 0 | 0 | 0 | 0 | 0 |
| PXDC1        | 0 | 0 | 0 | 0 | 0 |
| MIR3691      | 0 | 0 | 0 | 0 | 0 |
| F13A1        | 0 | 0 | 0 | 0 | 0 |
| LY86-AS1     | 0 | 0 | 0 | 0 | 0 |
| SCARNA27     | 0 | 0 | 0 | 0 | 0 |
| ELOVL2       | 0 | 0 | 0 | 0 | 0 |
| NHLRC1       | 0 | 0 | 0 | 0 | 0 |
| LOC729177    | 0 | 0 | 0 | 0 | 0 |
| PRL          | 0 | 0 | 0 | 0 | 0 |
| CMAHP        | 0 | 0 | 0 | 0 | 0 |
| HIST1H2AA    | 0 | 0 | 0 | 0 | 0 |
| SLC17A1      | 0 | 0 | 0 | 0 | 0 |
| SLC17A3      | 0 | 0 | 0 | 0 | 0 |
| SLC17A2      | 0 | 0 | 0 | 0 | 0 |
| HIST1H1A     | 0 | 0 | 0 | 0 | 0 |
| HIST1H2BB    | 0 | 0 | 0 | 0 | 0 |
| HIST1H1T     | 0 | 0 | 0 | 0 | 0 |
| HIST1H4G     | 0 | 0 | 0 | 0 | 0 |

|              |   |   |   |   |   |
|--------------|---|---|---|---|---|
| POM121L2     | 0 | 0 | 0 | 0 | 0 |
| HIST1H4L     | 0 | 0 | 0 | 0 | 0 |
| OR2B2        | 0 | 0 | 0 | 0 | 0 |
| ZSCAN23      | 0 | 0 | 0 | 0 | 0 |
| GPX6         | 0 | 0 | 0 | 0 | 0 |
| ZNF311       | 0 | 0 | 0 | 0 | 0 |
| OR2W1        | 0 | 0 | 0 | 0 | 0 |
| OR2B3        | 0 | 0 | 0 | 0 | 0 |
| OR5V1        | 0 | 0 | 0 | 0 | 0 |
| OR12D3       | 0 | 0 | 0 | 0 | 0 |
| OR11A1       | 0 | 0 | 0 | 0 | 0 |
| MAS1L        | 0 | 0 | 0 | 0 | 0 |
| UBD          | 0 | 0 | 0 | 0 | 0 |
| ZFP57        | 0 | 0 | 0 | 0 | 0 |
| HCG4         | 0 | 0 | 0 | 0 | 0 |
| TRIM10       | 0 | 0 | 0 | 0 | 0 |
| SFTA2        | 0 | 0 | 0 | 0 | 0 |
| C6orf15      | 0 | 0 | 0 | 0 | 0 |
| SNORD84      | 0 | 0 | 0 | 0 | 0 |
| LTB          | 0 | 0 | 0 | 0 | 0 |
| MIR4646      | 0 | 0 | 0 | 0 | 0 |
| LY6G6E       | 0 | 0 | 0 | 0 | 0 |
| MIR1236      | 0 | 0 | 0 | 0 | 0 |
| TNXB         | 0 | 0 | 0 | 0 | 0 |
| C6orf10      | 0 | 0 | 0 | 0 | 0 |
| BTNL2        | 0 | 0 | 0 | 0 | 0 |
| HLA-DQB1     | 0 | 0 | 0 | 0 | 0 |
| HLA-DQB2     | 0 | 0 | 0 | 0 | 0 |
| HLA-DOA      | 0 | 0 | 0 | 0 | 0 |
| IP6K3        | 0 | 0 | 0 | 0 | 0 |
| MLN          | 0 | 0 | 0 | 0 | 0 |
| LOC100507584 | 0 | 0 | 0 | 0 | 0 |
| MIR1275      | 0 | 0 | 0 | 0 | 0 |
| GRM4         | 0 | 0 | 0 | 0 | 0 |
| MIR5690      | 0 | 0 | 0 | 0 | 0 |
| C6orf222     | 0 | 0 | 0 | 0 | 0 |
| ETV7         | 0 | 0 | 0 | 0 | 0 |
| MIR3925      | 0 | 0 | 0 | 0 | 0 |
| MIR4462      | 0 | 0 | 0 | 0 | 0 |
| MDGA1        | 0 | 0 | 0 | 0 | 0 |
| LOC100131047 | 0 | 0 | 0 | 0 | 0 |
| KCNK17       | 0 | 0 | 0 | 0 | 0 |
| KCNK16       | 0 | 0 | 0 | 0 | 0 |
| KIF6         | 0 | 0 | 0 | 0 | 0 |
| MOCS1        | 0 | 0 | 0 | 0 | 0 |
| FLJ41649     | 0 | 0 | 0 | 0 | 0 |
| LRFN2        | 0 | 0 | 0 | 0 | 0 |
| TREML1       | 0 | 0 | 0 | 0 | 0 |
| TREML2       | 0 | 0 | 0 | 0 | 0 |
| TREML3P      | 0 | 0 | 0 | 0 | 0 |
| PGC          | 0 | 0 | 0 | 0 | 0 |
| CRIP3        | 0 | 0 | 0 | 0 | 0 |
| MIR586       | 0 | 0 | 0 | 0 | 0 |
| PLA2G7       | 0 | 0 | 0 | 0 | 0 |
| GPR116       | 0 | 0 | 0 | 0 | 0 |
| RHAG         | 0 | 0 | 0 | 0 | 0 |
| CRISP2       | 0 | 0 | 0 | 0 | 0 |
| CRISP3       | 0 | 0 | 0 | 0 | 0 |
| PGK2         | 0 | 0 | 0 | 0 | 0 |
| CRISP1       | 0 | 0 | 0 | 0 | 0 |
| DEFB133      | 0 | 0 | 0 | 0 | 0 |
| DEFB114      | 0 | 0 | 0 | 0 | 0 |
| DEFB113      | 0 | 0 | 0 | 0 | 0 |
| DEFB110      | 0 | 0 | 0 | 0 | 0 |
| DEFB112      | 0 | 0 | 0 | 0 | 0 |
| PKHD1        | 0 | 0 | 0 | 0 | 0 |
| GSTA7P       | 0 | 0 | 0 | 0 | 0 |
| GSTA2        | 0 | 0 | 0 | 0 | 0 |
| GSTA1        | 0 | 0 | 0 | 0 | 0 |
| GSTA5        | 0 | 0 | 0 | 0 | 0 |
| GSTA3        | 0 | 0 | 0 | 0 | 0 |
| RPS16P5      | 0 | 0 | 0 | 0 | 0 |
| HMGCLL1      | 0 | 0 | 0 | 0 | 0 |
| BMP5         | 0 | 0 | 0 | 0 | 0 |
| COL21A1      | 0 | 0 | 0 | 0 | 0 |
| RNU6-71      | 0 | 0 | 0 | 0 | 0 |
| KHDRBS2      | 0 | 0 | 0 | 0 | 0 |
| COL9A1       | 0 | 0 | 0 | 0 | 0 |
| MIR30C2      | 0 | 0 | 0 | 0 | 0 |

|              |   |   |   |   |   |
|--------------|---|---|---|---|---|
| MIR30A       | 0 | 0 | 0 | 0 | 0 |
| MIR4282      | 0 | 0 | 0 | 0 | 0 |
| KCNQ5-AS1    | 0 | 0 | 0 | 0 | 0 |
| KHDC1L       | 0 | 0 | 0 | 0 | 0 |
| KHDC1        | 0 | 0 | 0 | 0 | 0 |
| DPPA5        | 0 | 0 | 0 | 0 | 0 |
| HTR1B        | 0 | 0 | 0 | 0 | 0 |
| C6orf7       | 0 | 0 | 0 | 0 | 0 |
| ELOVL4       | 0 | 0 | 0 | 0 | 0 |
| ME1          | 0 | 0 | 0 | 0 | 0 |
| SNAP91       | 0 | 0 | 0 | 0 | 0 |
| TBX18        | 0 | 0 | 0 | 0 | 0 |
| SNORD50B     | 0 | 0 | 0 | 0 | 0 |
| CGA          | 0 | 0 | 0 | 0 | 0 |
| CNR1         | 0 | 0 | 0 | 0 | 0 |
| GABRR1       | 0 | 0 | 0 | 0 | 0 |
| RRAGD        | 0 | 0 | 0 | 0 | 0 |
| EPHA7        | 0 | 0 | 0 | 0 | 0 |
| MIR548H3     | 0 | 0 | 0 | 0 | 0 |
| MCHR2        | 0 | 0 | 0 | 0 | 0 |
| SIM1         | 0 | 0 | 0 | 0 | 0 |
| LINC00577    | 0 | 0 | 0 | 0 | 0 |
| POPDC3       | 0 | 0 | 0 | 0 | 0 |
| LOC100422737 | 0 | 0 | 0 | 0 | 0 |
| SCML4        | 0 | 0 | 0 | 0 | 0 |
| SLC22A16     | 0 | 0 | 0 | 0 | 0 |
| LOC285758    | 0 | 0 | 0 | 0 | 0 |
| HS3ST5       | 0 | 0 | 0 | 0 | 0 |
| BET3L        | 0 | 0 | 0 | 0 | 0 |
| FAM162B      | 0 | 0 | 0 | 0 | 0 |
| GPRC6A       | 0 | 0 | 0 | 0 | 0 |
| ROS1         | 0 | 0 | 0 | 0 | 0 |
| FAM184A      | 0 | 0 | 0 | 0 | 0 |
| MIR548B      | 0 | 0 | 0 | 0 | 0 |
| LOC285762    | 0 | 0 | 0 | 0 | 0 |
| TRDN         | 0 | 0 | 0 | 0 | 0 |
| MIR5695      | 0 | 0 | 0 | 0 | 0 |
| THEMIS       | 0 | 0 | 0 | 0 | 0 |
| TMEM244      | 0 | 0 | 0 | 0 | 0 |
| SAMD3        | 0 | 0 | 0 | 0 | 0 |
| TAAR5        | 0 | 0 | 0 | 0 | 0 |
| TAAR3        | 0 | 0 | 0 | 0 | 0 |
| TAAR2        | 0 | 0 | 0 | 0 | 0 |
| TAAR1        | 0 | 0 | 0 | 0 | 0 |
| VNN1         | 0 | 0 | 0 | 0 | 0 |
| VNN3         | 0 | 0 | 0 | 0 | 0 |
| VNN2         | 0 | 0 | 0 | 0 | 0 |
| HMG1P7       | 0 | 0 | 0 | 0 | 0 |
| MIR3662      | 0 | 0 | 0 | 0 | 0 |
| IL22RA2      | 0 | 0 | 0 | 0 | 0 |
| OLIG3        | 0 | 0 | 0 | 0 | 0 |
| LOC100130476 | 0 | 0 | 0 | 0 | 0 |
| MIR3145      | 0 | 0 | 0 | 0 | 0 |
| TXLNB        | 0 | 0 | 0 | 0 | 0 |
| LOC645434    | 0 | 0 | 0 | 0 | 0 |
| LOC153910    | 0 | 0 | 0 | 0 | 0 |
| LOC100128176 | 0 | 0 | 0 | 0 | 0 |
| NOX3         | 0 | 0 | 0 | 0 | 0 |
| MIR4466      | 0 | 0 | 0 | 0 | 0 |
| MIR3918      | 0 | 0 | 0 | 0 | 0 |
| TAGAP        | 0 | 0 | 0 | 0 | 0 |
| SNORA29      | 0 | 0 | 0 | 0 | 0 |
| SLC22A2      | 0 | 0 | 0 | 0 | 0 |
| PACRG-AS1    | 0 | 0 | 0 | 0 | 0 |
| DKFZp451B082 | 0 | 0 | 0 | 0 | 0 |
| CAHM         | 0 | 0 | 0 | 0 | 0 |
| C6orf118     | 0 | 0 | 0 | 0 | 0 |
| PDE10A       | 0 | 0 | 0 | 0 | 0 |
| LINC00473    | 0 | 0 | 0 | 0 | 0 |
| T            | 0 | 0 | 0 | 0 | 0 |
| RPS6KA2-IT1  | 0 | 0 | 0 | 0 | 0 |
| MIR1913      | 0 | 0 | 0 | 0 | 0 |
| MIR3939      | 0 | 0 | 0 | 0 | 0 |
| GPR31        | 0 | 0 | 0 | 0 | 0 |
| TCP10        | 0 | 0 | 0 | 0 | 0 |
| HGC6.3       | 0 | 0 | 0 | 0 | 0 |
| FRMD1        | 0 | 0 | 0 | 0 | 0 |
| DACT2        | 0 | 0 | 0 | 0 | 0 |
| LOC154449    | 0 | 0 | 0 | 0 | 0 |

|              |   |   |   |   |   |
|--------------|---|---|---|---|---|
| FAM20C       | 0 | 0 | 0 | 0 | 0 |
| LOC100288524 | 0 | 0 | 0 | 0 | 0 |
| LOC442497    | 0 | 0 | 0 | 0 | 0 |
| UNCX         | 0 | 0 | 0 | 0 | 0 |
| SDK1         | 0 | 0 | 0 | 0 | 0 |
| NXPB1        | 0 | 0 | 0 | 0 | 0 |
| PER4         | 0 | 0 | 0 | 0 | 0 |
| LOC100506025 | 0 | 0 | 0 | 0 | 0 |
| LRRC72       | 0 | 0 | 0 | 0 | 0 |
| MACC1-AS1    | 0 | 0 | 0 | 0 | 0 |
| IL6          | 0 | 0 | 0 | 0 | 0 |
| SNORD93      | 0 | 0 | 0 | 0 | 0 |
| NPY          | 0 | 0 | 0 | 0 | 0 |
| C7orf71      | 0 | 0 | 0 | 0 | 0 |
| EVX1         | 0 | 0 | 0 | 0 | 0 |
| WIPF3        | 0 | 0 | 0 | 0 | 0 |
| MIR550A1     | 0 | 0 | 0 | 0 | 0 |
| GHRHR        | 0 | 0 | 0 | 0 | 0 |
| CCDC129      | 0 | 0 | 0 | 0 | 0 |
| PPP1R17      | 0 | 0 | 0 | 0 | 0 |
| BMPER        | 0 | 0 | 0 | 0 | 0 |
| NPSR1        | 0 | 0 | 0 | 0 | 0 |
| LOC401324    | 0 | 0 | 0 | 0 | 0 |
| GPR141       | 0 | 0 | 0 | 0 | 0 |
| NME8         | 0 | 0 | 0 | 0 | 0 |
| EPDR1        | 0 | 0 | 0 | 0 | 0 |
| POU6F2       | 0 | 0 | 0 | 0 | 0 |
| INHBA-AS1    | 0 | 0 | 0 | 0 | 0 |
| MIR3943      | 0 | 0 | 0 | 0 | 0 |
| MIR4649      | 0 | 0 | 0 | 0 | 0 |
| RAMP3        | 0 | 0 | 0 | 0 | 0 |
| IGFBP1       | 0 | 0 | 0 | 0 | 0 |
| C7orf65      | 0 | 0 | 0 | 0 | 0 |
| C7orf69      | 0 | 0 | 0 | 0 | 0 |
| VWC2         | 0 | 0 | 0 | 0 | 0 |
| C7orf72      | 0 | 0 | 0 | 0 | 0 |
| IKZF1        | 0 | 0 | 0 | 0 | 0 |
| LOC100129427 | 0 | 0 | 0 | 0 | 0 |
| POM121L12    | 0 | 0 | 0 | 0 | 0 |
| VSTM2A       | 0 | 0 | 0 | 0 | 0 |
| LOC285878    | 0 | 0 | 0 | 0 | 0 |
| DKFZp434L192 | 0 | 0 | 0 | 0 | 0 |
| MIR3147      | 0 | 0 | 0 | 0 | 0 |
| ZNF716       | 0 | 0 | 0 | 0 | 0 |
| LOC100287704 | 0 | 0 | 0 | 0 | 0 |
| MIR4283-2    | 0 | 0 | 0 | 0 | 0 |
| ZNF727       | 0 | 0 | 0 | 0 | 0 |
| ZNF735       | 0 | 0 | 0 | 0 | 0 |
| ZNF679       | 0 | 0 | 0 | 0 | 0 |
| ZNF736       | 0 | 0 | 0 | 0 | 0 |
| LOC641746    | 0 | 0 | 0 | 0 | 0 |
| WBSR17       | 0 | 0 | 0 | 0 | 0 |
| MIR3914-2    | 0 | 0 | 0 | 0 | 0 |
| MIR4650-1    | 0 | 0 | 0 | 0 | 0 |
| FZD9         | 0 | 0 | 0 | 0 | 0 |
| MIR4284      | 0 | 0 | 0 | 0 | 0 |
| ELN          | 0 | 0 | 0 | 0 | 0 |
| GATSL1       | 0 | 0 | 0 | 0 | 0 |
| SPDYE8P      | 0 | 0 | 0 | 0 | 0 |
| SPDYE8P      | 0 | 0 | 0 | 0 | 0 |
| MIR4651      | 0 | 0 | 0 | 0 | 0 |
| SNORA14A     | 0 | 0 | 0 | 0 | 0 |
| RPL13AP17    | 0 | 0 | 0 | 0 | 0 |
| MAG12-AS2    | 0 | 0 | 0 | 0 | 0 |
| MIR548M      | 0 | 0 | 0 | 0 | 0 |
| ZNF804B      | 0 | 0 | 0 | 0 | 0 |
| MIR4652      | 0 | 0 | 0 | 0 | 0 |
| GNGT1        | 0 | 0 | 0 | 0 | 0 |
| GNG11        | 0 | 0 | 0 | 0 | 0 |
| COL1A2       | 0 | 0 | 0 | 0 | 0 |
| PEG10        | 0 | 0 | 0 | 0 | 0 |
| DLX6         | 0 | 0 | 0 | 0 | 0 |
| TAC1         | 0 | 0 | 0 | 0 | 0 |
| NPTX2        | 0 | 0 | 0 | 0 | 0 |
| MIR3609      | 0 | 0 | 0 | 0 | 0 |
| ZAN          | 0 | 0 | 0 | 0 | 0 |
| MIR4653      | 0 | 0 | 0 | 0 | 0 |
| MIR4285      | 0 | 0 | 0 | 0 | 0 |
| MIR4467      | 0 | 0 | 0 | 0 | 0 |

|                |   |   |   |   |   |
|----------------|---|---|---|---|---|
| SPDYE2L        | 0 | 0 | 0 | 0 | 0 |
| LHFPL3         | 0 | 0 | 0 | 0 | 0 |
| PIK3CG         | 0 | 0 | 0 | 0 | 0 |
| PRKAR2B        | 0 | 0 | 0 | 0 | 0 |
| MIR3666        | 0 | 0 | 0 | 0 | 0 |
| MDFIC          | 0 | 0 | 0 | 0 | 0 |
| ANKRD7         | 0 | 0 | 0 | 0 | 0 |
| KCND2          | 0 | 0 | 0 | 0 | 0 |
| PTPRZ1         | 0 | 0 | 0 | 0 | 0 |
| HYALP1         | 0 | 0 | 0 | 0 | 0 |
| HYAL4          | 0 | 0 | 0 | 0 | 0 |
| SPAM1          | 0 | 0 | 0 | 0 | 0 |
| MIR593         | 0 | 0 | 0 | 0 | 0 |
| MIR129-1       | 0 | 0 | 0 | 0 | 0 |
| CPA5           | 0 | 0 | 0 | 0 | 0 |
| CPA1           | 0 | 0 | 0 | 0 | 0 |
| MIR335         | 0 | 0 | 0 | 0 | 0 |
| FLJ40288       | 0 | 0 | 0 | 0 | 0 |
| AKR1B15        | 0 | 0 | 0 | 0 | 0 |
| STRA8          | 0 | 0 | 0 | 0 | 0 |
| CHRM2          | 0 | 0 | 0 | 0 | 0 |
| MIR490         | 0 | 0 | 0 | 0 | 0 |
| LOC100130880   | 0 | 0 | 0 | 0 | 0 |
| AKR1D1         | 0 | 0 | 0 | 0 | 0 |
| MIR4468        | 0 | 0 | 0 | 0 | 0 |
| CLEC2L         | 0 | 0 | 0 | 0 | 0 |
| OR9A4          | 0 | 0 | 0 | 0 | 0 |
| LOC93432       | 0 | 0 | 0 | 0 | 0 |
| PRSS2          | 0 | 0 | 0 | 0 | 0 |
| C7orf34        | 0 | 0 | 0 | 0 | 0 |
| OR6V1          | 0 | 0 | 0 | 0 | 0 |
| PIP            | 0 | 0 | 0 | 0 | 0 |
| TAS2R39        | 0 | 0 | 0 | 0 | 0 |
| TAS2R40        | 0 | 0 | 0 | 0 | 0 |
| TAS2R60        | 0 | 0 | 0 | 0 | 0 |
| TAS2R41        | 0 | 0 | 0 | 0 | 0 |
| OR2F2          | 0 | 0 | 0 | 0 | 0 |
| OR2F1          | 0 | 0 | 0 | 0 | 0 |
| OR6B1          | 0 | 0 | 0 | 0 | 0 |
| OR2A5          | 0 | 0 | 0 | 0 | 0 |
| OR2A25         | 0 | 0 | 0 | 0 | 0 |
| OR2A12         | 0 | 0 | 0 | 0 | 0 |
| OR2A2          | 0 | 0 | 0 | 0 | 0 |
| OR2A14         | 0 | 0 | 0 | 0 | 0 |
| OR2A20P,OR2A9P | 0 | 0 | 0 | 0 | 0 |
| RNU6-57        | 0 | 0 | 0 | 0 | 0 |
| MIR548AQ       | 0 | 0 | 0 | 0 | 0 |
| MIR548F3       | 0 | 0 | 0 | 0 | 0 |
| MIR548T        | 0 | 0 | 0 | 0 | 0 |
| C7orf33        | 0 | 0 | 0 | 0 | 0 |
| KRBA1          | 0 | 0 | 0 | 0 | 0 |
| RNU6-33        | 0 | 0 | 0 | 0 | 0 |
| LOC285972      | 0 | 0 | 0 | 0 | 0 |
| GIMAP8         | 0 | 0 | 0 | 0 | 0 |
| GIMAP7         | 0 | 0 | 0 | 0 | 0 |
| GIMAP4         | 0 | 0 | 0 | 0 | 0 |
| TMEM176A       | 0 | 0 | 0 | 0 | 0 |
| WDR86-AS1      | 0 | 0 | 0 | 0 | 0 |
| GALNTL5        | 0 | 0 | 0 | 0 | 0 |
| DPP6           | 0 | 0 | 0 | 0 | 0 |
| HTR5A          | 0 | 0 | 0 | 0 | 0 |
| LOC100506585   | 0 | 0 | 0 | 0 | 0 |
| MIR5707        | 0 | 0 | 0 | 0 | 0 |
| LINC00689      | 0 | 0 | 0 | 0 | 0 |
| MIR339         | 0 | 0 | 0 | 0 | 0 |
| MIR4655        | 0 | 0 | 0 | 0 | 0 |
| CARD11         | 0 | 0 | 0 | 0 | 0 |
| MIR4656        | 0 | 0 | 0 | 0 | 0 |
| RADIL          | 0 | 0 | 0 | 0 | 0 |
| PAPOLB         | 0 | 0 | 0 | 0 | 0 |
| MIR589         | 0 | 0 | 0 | 0 | 0 |
| COL28A1        | 0 | 0 | 0 | 0 | 0 |
| THSD7A         | 0 | 0 | 0 | 0 | 0 |
| VWDE           | 0 | 0 | 0 | 0 | 0 |
| AGMO           | 0 | 0 | 0 | 0 | 0 |
| MEOX2          | 0 | 0 | 0 | 0 | 0 |
| AGR2           | 0 | 0 | 0 | 0 | 0 |
| AGR3           | 0 | 0 | 0 | 0 | 0 |
| PRPS1L1        | 0 | 0 | 0 | 0 | 0 |

|              |   |   |   |   |   |
|--------------|---|---|---|---|---|
| TWIST1       | 0 | 0 | 0 | 0 | 0 |
| FERD3L       | 0 | 0 | 0 | 0 | 0 |
| MIR3146      | 0 | 0 | 0 | 0 | 0 |
| TMEM196      | 0 | 0 | 0 | 0 | 0 |
| CLK2P        | 0 | 0 | 0 | 0 | 0 |
| NPVF         | 0 | 0 | 0 | 0 | 0 |
| RNU6-16      | 0 | 0 | 0 | 0 | 0 |
| MIR148A      | 0 | 0 | 0 | 0 | 0 |
| TRIL         | 0 | 0 | 0 | 0 | 0 |
| MIR550A3     | 0 | 0 | 0 | 0 | 0 |
| NEUROD6      | 0 | 0 | 0 | 0 | 0 |
| PDE1C        | 0 | 0 | 0 | 0 | 0 |
| LOC100130673 | 0 | 0 | 0 | 0 | 0 |
| MIR550B2     | 0 | 0 | 0 | 0 | 0 |
| NPSR1-AS1    | 0 | 0 | 0 | 0 | 0 |
| TBX20        | 0 | 0 | 0 | 0 | 0 |
| AOAH         | 0 | 0 | 0 | 0 | 0 |
| AOAH-IT1     | 0 | 0 | 0 | 0 | 0 |
| ELMO1        | 0 | 0 | 0 | 0 | 0 |
| MIR1200      | 0 | 0 | 0 | 0 | 0 |
| SFRP4        | 0 | 0 | 0 | 0 | 0 |
| TARP         | 0 | 0 | 0 | 0 | 0 |
| AMPH         | 0 | 0 | 0 | 0 | 0 |
| POU6F2-AS1   | 0 | 0 | 0 | 0 | 0 |
| GLI3         | 0 | 0 | 0 | 0 | 0 |
| MYL7         | 0 | 0 | 0 | 0 | 0 |
| GCK          | 0 | 0 | 0 | 0 | 0 |
| IGFBP3       | 0 | 0 | 0 | 0 | 0 |
| ZPBP         | 0 | 0 | 0 | 0 | 0 |
| FLJ45974     | 0 | 0 | 0 | 0 | 0 |
| HPVC1        | 0 | 0 | 0 | 0 | 0 |
| EGFR-AS1     | 0 | 0 | 0 | 0 | 0 |
| LOC650226    | 0 | 0 | 0 | 0 | 0 |
| LOC100130849 | 0 | 0 | 0 | 0 | 0 |
| MIR4283-2    | 0 | 0 | 0 | 0 | 0 |
| GUSBP10      | 0 | 0 | 0 | 0 | 0 |
| LOC100287834 | 0 | 0 | 0 | 0 | 0 |
| LOC100506050 | 0 | 0 | 0 | 0 | 0 |
| MIR4650-1    | 0 | 0 | 0 | 0 | 0 |
| MIR3914-1    | 0 | 0 | 0 | 0 | 0 |
| CCL24        | 0 | 0 | 0 | 0 | 0 |
| MIR548AU     | 0 | 0 | 0 | 0 | 0 |
| GNAT3        | 0 | 0 | 0 | 0 | 0 |
| ABCB4        | 0 | 0 | 0 | 0 | 0 |
| ABCB1        | 0 | 0 | 0 | 0 | 0 |
| STEAP4       | 0 | 0 | 0 | 0 | 0 |
| C7orf62      | 0 | 0 | 0 | 0 | 0 |
| MTERF        | 0 | 0 | 0 | 0 | 0 |
| MIR653       | 0 | 0 | 0 | 0 | 0 |
| MIR489       | 0 | 0 | 0 | 0 | 0 |
| TFPI2        | 0 | 0 | 0 | 0 | 0 |
| MIR591       | 0 | 0 | 0 | 0 | 0 |
| C7orf76      | 0 | 0 | 0 | 0 | 0 |
| DLX6-AS1     | 0 | 0 | 0 | 0 | 0 |
| DLX5         | 0 | 0 | 0 | 0 | 0 |
| OCM2         | 0 | 0 | 0 | 0 | 0 |
| MIR93        | 0 | 0 | 0 | 0 | 0 |
| MIR106B      | 0 | 0 | 0 | 0 | 0 |
| LHFPL3-AS1   | 0 | 0 | 0 | 0 | 0 |
| LHFPL3-AS2   | 0 | 0 | 0 | 0 | 0 |
| LAMB4        | 0 | 0 | 0 | 0 | 0 |
| NRCAM        | 0 | 0 | 0 | 0 | 0 |
| C7orf66      | 0 | 0 | 0 | 0 | 0 |
| EIF3IP1      | 0 | 0 | 0 | 0 | 0 |
| PPP1R3A      | 0 | 0 | 0 | 0 | 0 |
| TFEC         | 0 | 0 | 0 | 0 | 0 |
| ST7-AS2      | 0 | 0 | 0 | 0 | 0 |
| WNT2         | 0 | 0 | 0 | 0 | 0 |
| TAS2R16      | 0 | 0 | 0 | 0 | 0 |
| TMEM229A     | 0 | 0 | 0 | 0 | 0 |
| GPR37        | 0 | 0 | 0 | 0 | 0 |
| LOC154872    | 0 | 0 | 0 | 0 | 0 |
| MIR592       | 0 | 0 | 0 | 0 | 0 |
| PAX4         | 0 | 0 | 0 | 0 | 0 |
| MIR182       | 0 | 0 | 0 | 0 | 0 |
| MIR96        | 0 | 0 | 0 | 0 | 0 |
| MIR183       | 0 | 0 | 0 | 0 | 0 |
| KLF14        | 0 | 0 | 0 | 0 | 0 |
| MIR29A       | 0 | 0 | 0 | 0 | 0 |

|                   |   |   |   |   |   |
|-------------------|---|---|---|---|---|
| MIR29B1           | 0 | 0 | 0 | 0 | 0 |
| PLXNA4            | 0 | 0 | 0 | 0 | 0 |
| FAM180A           | 0 | 0 | 0 | 0 | 0 |
| LOC349160         | 0 | 0 | 0 | 0 | 0 |
| SVOPL             | 0 | 0 | 0 | 0 | 0 |
| KLRG2             | 0 | 0 | 0 | 0 | 0 |
| CLEC5A            | 0 | 0 | 0 | 0 | 0 |
| TAS2R38           | 0 | 0 | 0 | 0 | 0 |
| MOXD2P            | 0 | 0 | 0 | 0 | 0 |
| PRSS58            | 0 | 0 | 0 | 0 | 0 |
| LOC730441         | 0 | 0 | 0 | 0 | 0 |
| TRPV5             | 0 | 0 | 0 | 0 | 0 |
| OR9A2             | 0 | 0 | 0 | 0 | 0 |
| RNU6-57           | 0 | 0 | 0 | 0 | 0 |
| NOBOX             | 0 | 0 | 0 | 0 | 0 |
| MIR548I4          | 0 | 0 | 0 | 0 | 0 |
| MIR548F4          | 0 | 0 | 0 | 0 | 0 |
| RARRES2           | 0 | 0 | 0 | 0 | 0 |
| GBX1              | 0 | 0 | 0 | 0 | 0 |
| ASB10             | 0 | 0 | 0 | 0 | 0 |
| WDR86             | 0 | 0 | 0 | 0 | 0 |
| MIR3907           | 0 | 0 | 0 | 0 | 0 |
| LOC100128264      | 0 | 0 | 0 | 0 | 0 |
| SHH               | 0 | 0 | 0 | 0 | 0 |
| MIR153-2          | 0 | 0 | 0 | 0 | 0 |
| MIR595            | 0 | 0 | 0 | 0 | 0 |
| ERICH1-AS1        | 0 | 0 | 0 | 0 | 0 |
| DLGAP2            | 0 | 0 | 0 | 0 | 0 |
| MIR596            | 0 | 0 | 0 | 0 | 0 |
| MIR4659A          | 0 | 0 | 0 | 0 | 0 |
| LOC100652791      | 0 | 0 | 0 | 0 | 0 |
| DEFB109P1B        | 0 | 0 | 0 | 0 | 0 |
| USP17L1P          | 0 | 0 | 0 | 0 | 0 |
| USP17L4           | 0 | 0 | 0 | 0 | 0 |
| DEFB105B          | 0 | 0 | 0 | 0 | 0 |
| DEFB107A          | 0 | 0 | 0 | 0 | 0 |
| FAM90A10P         | 0 | 0 | 0 | 0 | 0 |
| DEFB106B          | 0 | 0 | 0 | 0 | 0 |
| DEFB104B          | 0 | 0 | 0 | 0 | 0 |
| SPAG11A,SPAG11B   | 0 | 0 | 0 | 0 | 0 |
| DEFB103A,DEFB103B | 0 | 0 | 0 | 0 | 0 |
| DEFB4A            | 0 | 0 | 0 | 0 | 0 |
| ZNF705B           | 0 | 0 | 0 | 0 | 0 |
| FAM66E            | 0 | 0 | 0 | 0 | 0 |
| MIR4660           | 0 | 0 | 0 | 0 | 0 |
| MIR597            | 0 | 0 | 0 | 0 | 0 |
| C8orf74           | 0 | 0 | 0 | 0 | 0 |
| BLK               | 0 | 0 | 0 | 0 | 0 |
| LINC00208         | 0 | 0 | 0 | 0 | 0 |
| ZNF705D           | 0 | 0 | 0 | 0 | 0 |
| FAM66D            | 0 | 0 | 0 | 0 | 0 |
| FAM66A            | 0 | 0 | 0 | 0 | 0 |
| MIR3926-2         | 0 | 0 | 0 | 0 | 0 |
| TUSC3             | 0 | 0 | 0 | 0 | 0 |
| EFHA2             | 0 | 0 | 0 | 0 | 0 |
| LPL               | 0 | 0 | 0 | 0 | 0 |
| LZTS1-AS1         | 0 | 0 | 0 | 0 | 0 |
| LOC286114         | 0 | 0 | 0 | 0 | 0 |
| ADAM28            | 0 | 0 | 0 | 0 | 0 |
| ADAMDEC1          | 0 | 0 | 0 | 0 | 0 |
| ADAM7             | 0 | 0 | 0 | 0 | 0 |
| NEFM              | 0 | 0 | 0 | 0 | 0 |
| MIR3622A          | 0 | 0 | 0 | 0 | 0 |
| PNOC              | 0 | 0 | 0 | 0 | 0 |
| LOC286135         | 0 | 0 | 0 | 0 | 0 |
| NRG1              | 0 | 0 | 0 | 0 | 0 |
| NRG1-IT3          | 0 | 0 | 0 | 0 | 0 |
| UNC5D             | 0 | 0 | 0 | 0 | 0 |
| KCNU1             | 0 | 0 | 0 | 0 | 0 |
| ADAM5             | 0 | 0 | 0 | 0 | 0 |
| LOC100130964      | 0 | 0 | 0 | 0 | 0 |
| ADAM18            | 0 | 0 | 0 | 0 | 0 |
| IDO2              | 0 | 0 | 0 | 0 | 0 |
| C8orf4            | 0 | 0 | 0 | 0 | 0 |
| CHRNA3            | 0 | 0 | 0 | 0 | 0 |
| POTEA             | 0 | 0 | 0 | 0 | 0 |
| LINC00293         | 0 | 0 | 0 | 0 | 0 |
| C8orf22           | 0 | 0 | 0 | 0 | 0 |
| SNTG1             | 0 | 0 | 0 | 0 | 0 |



|              |   |   |   |   |   |
|--------------|---|---|---|---|---|
| NPBWR1       | 0 | 0 | 0 | 0 | 0 |
| RP1          | 0 | 0 | 0 | 0 | 0 |
| XKR4         | 0 | 0 | 0 | 0 | 0 |
| LOC100507651 | 0 | 0 | 0 | 0 | 0 |
| LOC286177    | 0 | 0 | 0 | 0 | 0 |
| LINC00588    | 0 | 0 | 0 | 0 | 0 |
| MIR4470      | 0 | 0 | 0 | 0 | 0 |
| NKAIN3       | 0 | 0 | 0 | 0 | 0 |
| UG0898H09    | 0 | 0 | 0 | 0 | 0 |
| LOC100130155 | 0 | 0 | 0 | 0 | 0 |
| MIR124-2     | 0 | 0 | 0 | 0 | 0 |
| BHLHE22      | 0 | 0 | 0 | 0 | 0 |
| LOC100505659 | 0 | 0 | 0 | 0 | 0 |
| PREX2        | 0 | 0 | 0 | 0 | 0 |
| LOC100132891 | 0 | 0 | 0 | 0 | 0 |
| RNU6-83      | 0 | 0 | 0 | 0 | 0 |
| KCNB2        | 0 | 0 | 0 | 0 | 0 |
| MIR5681A     | 0 | 0 | 0 | 0 | 0 |
| FLJ39080     | 0 | 0 | 0 | 0 | 0 |
| MIR2052      | 0 | 0 | 0 | 0 | 0 |
| PI15         | 0 | 0 | 0 | 0 | 0 |
| CRISPLD1     | 0 | 0 | 0 | 0 | 0 |
| PKIA         | 0 | 0 | 0 | 0 | 0 |
| MIR5708      | 0 | 0 | 0 | 0 | 0 |
| ZBTB10       | 0 | 0 | 0 | 0 | 0 |
| RALYL        | 0 | 0 | 0 | 0 | 0 |
| REXO1L2P     | 0 | 0 | 0 | 0 | 0 |
| REXO1L2P     | 0 | 0 | 0 | 0 | 0 |
| CNBD1        | 0 | 0 | 0 | 0 | 0 |
| LINC00534    | 0 | 0 | 0 | 0 | 0 |
| MIR4661      | 0 | 0 | 0 | 0 | 0 |
| MIR3150A     | 0 | 0 | 0 | 0 | 0 |
| KCNS2        | 0 | 0 | 0 | 0 | 0 |
| MIR4471      | 0 | 0 | 0 | 0 | 0 |
| FLJ42969     | 0 | 0 | 0 | 0 | 0 |
| NACAP1       | 0 | 0 | 0 | 0 | 0 |
| GRHL2        | 0 | 0 | 0 | 0 | 0 |
| MIR5680      | 0 | 0 | 0 | 0 | 0 |
| ODF1         | 0 | 0 | 0 | 0 | 0 |
| MIR3151      | 0 | 0 | 0 | 0 | 0 |
| DCSTAMP      | 0 | 0 | 0 | 0 | 0 |
| PKHD1L1      | 0 | 0 | 0 | 0 | 0 |
| MIR2053      | 0 | 0 | 0 | 0 | 0 |
| AARD         | 0 | 0 | 0 | 0 | 0 |
| SLC30A8      | 0 | 0 | 0 | 0 | 0 |
| MAL2         | 0 | 0 | 0 | 0 | 0 |
| COL14A1      | 0 | 0 | 0 | 0 | 0 |
| FER1L6       | 0 | 0 | 0 | 0 | 0 |
| LOC157381    | 0 | 0 | 0 | 0 | 0 |
| MIR1204      | 0 | 0 | 0 | 0 | 0 |
| MIR1205      | 0 | 0 | 0 | 0 | 0 |
| MIR1206      | 0 | 0 | 0 | 0 | 0 |
| MIR1207      | 0 | 0 | 0 | 0 | 0 |
| MIR1208      | 0 | 0 | 0 | 0 | 0 |
| WISP1        | 0 | 0 | 0 | 0 | 0 |
| LOC286094    | 0 | 0 | 0 | 0 | 0 |
| KHDRBS3      | 0 | 0 | 0 | 0 | 0 |
| LOC731779    | 0 | 0 | 0 | 0 | 0 |
| MIR4472-1    | 0 | 0 | 0 | 0 | 0 |
| LINC00051    | 0 | 0 | 0 | 0 | 0 |
| GML          | 0 | 0 | 0 | 0 | 0 |
| SCXB         | 0 | 0 | 0 | 0 | 0 |
| SCXA         | 0 | 0 | 0 | 0 | 0 |
| OR4F21       | 0 | 0 | 0 | 0 | 0 |
| LOC286083    | 0 | 0 | 0 | 0 | 0 |
| CSMD1        | 0 | 0 | 0 | 0 | 0 |
| MIR4659B     | 0 | 0 | 0 | 0 | 0 |
| XKR5         | 0 | 0 | 0 | 0 | 0 |
| DEFB1        | 0 | 0 | 0 | 0 | 0 |
| DEFA4        | 0 | 0 | 0 | 0 | 0 |
| DEFA8P       | 0 | 0 | 0 | 0 | 0 |
| DEFA9P       | 0 | 0 | 0 | 0 | 0 |
| DEFA10P      | 0 | 0 | 0 | 0 | 0 |
| DEFA1B       | 0 | 0 | 0 | 0 | 0 |
| DEFT1P2      | 0 | 0 | 0 | 0 | 0 |
| DEFA1        | 0 | 0 | 0 | 0 | 0 |
| DEFT1P2      | 0 | 0 | 0 | 0 | 0 |
| DEFA1        | 0 | 0 | 0 | 0 | 0 |
| DEFA11P      | 0 | 0 | 0 | 0 | 0 |

|                   |   |   |   |   |   |
|-------------------|---|---|---|---|---|
| LOC349196         | 0 | 0 | 0 | 0 | 0 |
| LOC349196         | 0 | 0 | 0 | 0 | 0 |
| LOC349196         | 0 | 0 | 0 | 0 | 0 |
| FAM66B            | 0 | 0 | 0 | 0 | 0 |
| ZNF705G           | 0 | 0 | 0 | 0 | 0 |
| DEFB4B            | 0 | 0 | 0 | 0 | 0 |
| DEFB103A,DEFB103B | 0 | 0 | 0 | 0 | 0 |
| SPAG11B           | 0 | 0 | 0 | 0 | 0 |
| DEFB104A          | 0 | 0 | 0 | 0 | 0 |
| DEFB106B          | 0 | 0 | 0 | 0 | 0 |
| FAM90A7P          | 0 | 0 | 0 | 0 | 0 |
| FAM90A7P          | 0 | 0 | 0 | 0 | 0 |
| DEFB107B          | 0 | 0 | 0 | 0 | 0 |
| DEFB105A          | 0 | 0 | 0 | 0 | 0 |
| USP17L8           | 0 | 0 | 0 | 0 | 0 |
| DEFB109P1B        | 0 | 0 | 0 | 0 | 0 |
| MIR548I3          | 0 | 0 | 0 | 0 | 0 |
| LINC00599         | 0 | 0 | 0 | 0 | 0 |
| MIR124-1          | 0 | 0 | 0 | 0 | 0 |
| MIR1322           | 0 | 0 | 0 | 0 | 0 |
| MIR598            | 0 | 0 | 0 | 0 | 0 |
| LOC100133267      | 0 | 0 | 0 | 0 | 0 |
| LOC392196         | 0 | 0 | 0 | 0 | 0 |
| USP17L7           | 0 | 0 | 0 | 0 | 0 |
| USP17L2           | 0 | 0 | 0 | 0 | 0 |
| DEFB130           | 0 | 0 | 0 | 0 | 0 |
| LOC649352         | 0 | 0 | 0 | 0 | 0 |
| DEFB109P1         | 0 | 0 | 0 | 0 | 0 |
| MIR3926-1         | 0 | 0 | 0 | 0 | 0 |
| LOC340357         | 0 | 0 | 0 | 0 | 0 |
| MIR383            | 0 | 0 | 0 | 0 | 0 |
| FGF20             | 0 | 0 | 0 | 0 | 0 |
| FGL1              | 0 | 0 | 0 | 0 | 0 |
| LOC100128993      | 0 | 0 | 0 | 0 | 0 |
| SLC18A1           | 0 | 0 | 0 | 0 | 0 |
| LZTS1             | 0 | 0 | 0 | 0 | 0 |
| GFRA2             | 0 | 0 | 0 | 0 | 0 |
| LG13              | 0 | 0 | 0 | 0 | 0 |
| PEBP4             | 0 | 0 | 0 | 0 | 0 |
| NKX2-6            | 0 | 0 | 0 | 0 | 0 |
| NEFL              | 0 | 0 | 0 | 0 | 0 |
| EBF2              | 0 | 0 | 0 | 0 | 0 |
| CHRNA2            | 0 | 0 | 0 | 0 | 0 |
| MIR3622B          | 0 | 0 | 0 | 0 | 0 |
| MIR4287           | 0 | 0 | 0 | 0 | 0 |
| MIR4288           | 0 | 0 | 0 | 0 | 0 |
| LINC00589         | 0 | 0 | 0 | 0 | 0 |
| MIR3148           | 0 | 0 | 0 | 0 | 0 |
| MIR548O2          | 0 | 0 | 0 | 0 | 0 |
| TEX15             | 0 | 0 | 0 | 0 | 0 |
| DUSP26            | 0 | 0 | 0 | 0 | 0 |
| GOT1L1            | 0 | 0 | 0 | 0 | 0 |
| ADRB3             | 0 | 0 | 0 | 0 | 0 |
| C8orf86           | 0 | 0 | 0 | 0 | 0 |
| ADAM3A            | 0 | 0 | 0 | 0 | 0 |
| ADAM2             | 0 | 0 | 0 | 0 | 0 |
| ZMAT4             | 0 | 0 | 0 | 0 | 0 |
| SFRP1             | 0 | 0 | 0 | 0 | 0 |
| NKX6-3            | 0 | 0 | 0 | 0 | 0 |
| MIR486            | 0 | 0 | 0 | 0 | 0 |
| CHRNA6            | 0 | 0 | 0 | 0 | 0 |
| EFCAB1            | 0 | 0 | 0 | 0 | 0 |
| SBF1P1            | 0 | 0 | 0 | 0 | 0 |
| SNORD54           | 0 | 0 | 0 | 0 | 0 |
| MOS               | 0 | 0 | 0 | 0 | 0 |
| SDR16C5           | 0 | 0 | 0 | 0 | 0 |
| PENK              | 0 | 0 | 0 | 0 | 0 |
| LOC100507632      | 0 | 0 | 0 | 0 | 0 |
| CYP7A1            | 0 | 0 | 0 | 0 | 0 |
| TOX               | 0 | 0 | 0 | 0 | 0 |
| CA8               | 0 | 0 | 0 | 0 | 0 |
| LOC100130298      | 0 | 0 | 0 | 0 | 0 |
| LOC401463         | 0 | 0 | 0 | 0 | 0 |
| CYP7B1            | 0 | 0 | 0 | 0 | 0 |
| LINC00251         | 0 | 0 | 0 | 0 | 0 |
| CRH               | 0 | 0 | 0 | 0 | 0 |
| PTTG3P            | 0 | 0 | 0 | 0 | 0 |
| SNORD87           | 0 | 0 | 0 | 0 | 0 |
| TCF24             | 0 | 0 | 0 | 0 | 0 |

|              |   |   |   |   |   |
|--------------|---|---|---|---|---|
| PPP1R42      | 0 | 0 | 0 | 0 | 0 |
| CPA6         | 0 | 0 | 0 | 0 | 0 |
| LOC286189    | 0 | 0 | 0 | 0 | 0 |
| EYA1         | 0 | 0 | 0 | 0 | 0 |
| MSC          | 0 | 0 | 0 | 0 | 0 |
| TRPA1        | 0 | 0 | 0 | 0 | 0 |
| LOC392232    | 0 | 0 | 0 | 0 | 0 |
| MIR5681B     | 0 | 0 | 0 | 0 | 0 |
| ZFHX4-AS1    | 0 | 0 | 0 | 0 | 0 |
| PMP2         | 0 | 0 | 0 | 0 | 0 |
| FABP9        | 0 | 0 | 0 | 0 | 0 |
| FABP4        | 0 | 0 | 0 | 0 | 0 |
| CA1          | 0 | 0 | 0 | 0 | 0 |
| REXO1L2P     | 0 | 0 | 0 | 0 | 0 |
| REXO1L1      | 0 | 0 | 0 | 0 | 0 |
| REXO1L2P     | 0 | 0 | 0 | 0 | 0 |
| REXO1L1      | 0 | 0 | 0 | 0 | 0 |
| REXO1L2P     | 0 | 0 | 0 | 0 | 0 |
| REXO1L2P     | 0 | 0 | 0 | 0 | 0 |
| REXO1L2P     | 0 | 0 | 0 | 0 | 0 |
| REXO1L2P     | 0 | 0 | 0 | 0 | 0 |
| PSKH2        | 0 | 0 | 0 | 0 | 0 |
| SLC7A13      | 0 | 0 | 0 | 0 | 0 |
| CNGB3        | 0 | 0 | 0 | 0 | 0 |
| MMP16        | 0 | 0 | 0 | 0 | 0 |
| CALB1        | 0 | 0 | 0 | 0 | 0 |
| FLJ46284     | 0 | 0 | 0 | 0 | 0 |
| C8orf87      | 0 | 0 | 0 | 0 | 0 |
| MIR378D2     | 0 | 0 | 0 | 0 | 0 |
| LOC100288748 | 0 | 0 | 0 | 0 | 0 |
| MIR3150B     | 0 | 0 | 0 | 0 | 0 |
| C8orf69      | 0 | 0 | 0 | 0 | 0 |
| LOC100500773 | 0 | 0 | 0 | 0 | 0 |
| TSPYL5       | 0 | 0 | 0 | 0 | 0 |
| MIR599       | 0 | 0 | 0 | 0 | 0 |
| MIR875       | 0 | 0 | 0 | 0 | 0 |
| RGS22        | 0 | 0 | 0 | 0 | 0 |
| DPYS         | 0 | 0 | 0 | 0 | 0 |
| ANGPT1       | 0 | 0 | 0 | 0 | 0 |
| RSPO2        | 0 | 0 | 0 | 0 | 0 |
| KCNV1        | 0 | 0 | 0 | 0 | 0 |
| LINC00536    | 0 | 0 | 0 | 0 | 0 |
| TNFRSF11B    | 0 | 0 | 0 | 0 | 0 |
| MIR4663      | 0 | 0 | 0 | 0 | 0 |
| ANXA13       | 0 | 0 | 0 | 0 | 0 |
| FER1L6-AS1   | 0 | 0 | 0 | 0 | 0 |
| LOC727677    | 0 | 0 | 0 | 0 | 0 |
| LOC728724    | 0 | 0 | 0 | 0 | 0 |
| GSDMC        | 0 | 0 | 0 | 0 | 0 |
| MIR5194      | 0 | 0 | 0 | 0 | 0 |
| ADCY8        | 0 | 0 | 0 | 0 | 0 |
| OC90         | 0 | 0 | 0 | 0 | 0 |
| HHLA1        | 0 | 0 | 0 | 0 | 0 |
| SLA          | 0 | 0 | 0 | 0 | 0 |
| MIR30B       | 0 | 0 | 0 | 0 | 0 |
| MIR30D       | 0 | 0 | 0 | 0 | 0 |
| FAM135B      | 0 | 0 | 0 | 0 | 0 |
| COL22A1      | 0 | 0 | 0 | 0 | 0 |
| GPR20        | 0 | 0 | 0 | 0 | 0 |
| MROH5        | 0 | 0 | 0 | 0 | 0 |
| SLURP1       | 0 | 0 | 0 | 0 | 0 |
| LYPD2        | 0 | 0 | 0 | 0 | 0 |
| LY6D         | 0 | 0 | 0 | 0 | 0 |
| CYP11B1      | 0 | 0 | 0 | 0 | 0 |
| CYP11B2      | 0 | 0 | 0 | 0 | 0 |
| LY6H         | 0 | 0 | 0 | 0 | 0 |
| MIR4664      | 0 | 0 | 0 | 0 | 0 |
| MIR661       | 0 | 0 | 0 | 0 | 0 |
| DMRT3        | 0 | 0 | 0 | 0 | 0 |
| VLDLR        | 0 | 0 | 0 | 0 | 0 |
| MIR101-2     | 0 | 0 | 0 | 0 | 0 |
| INSL4        | 0 | 0 | 0 | 0 | 0 |
| PDCD1LG2     | 0 | 0 | 0 | 0 | 0 |
| MIR4665      | 0 | 0 | 0 | 0 | 0 |
| IL33         | 0 | 0 | 0 | 0 | 0 |
| TPD52L3      | 0 | 0 | 0 | 0 | 0 |
| LINC00583    | 0 | 0 | 0 | 0 | 0 |
| LOC389705    | 0 | 0 | 0 | 0 | 0 |
| MIR3152      | 0 | 0 | 0 | 0 | 0 |

|              |   |   |   |   |   |
|--------------|---|---|---|---|---|
| MIR491       | 0 | 0 | 0 | 0 | 0 |
| IFNA1        | 0 | 0 | 0 | 0 | 0 |
| C9orf53      | 0 | 0 | 0 | 0 | 0 |
| DMRTA1       | 0 | 0 | 0 | 0 | 0 |
| IFNK         | 0 | 0 | 0 | 0 | 0 |
| TMEM215      | 0 | 0 | 0 | 0 | 0 |
| SPINK4       | 0 | 0 | 0 | 0 | 0 |
| SNORD121B    | 0 | 0 | 0 | 0 | 0 |
| LOC415056    | 0 | 0 | 0 | 0 | 0 |
| MIR4667      | 0 | 0 | 0 | 0 | 0 |
| RECK         | 0 | 0 | 0 | 0 | 0 |
| GLIPR2       | 0 | 0 | 0 | 0 | 0 |
| SPATA31A2    | 0 | 0 | 0 | 0 | 0 |
| SPATA31A2    | 0 | 0 | 0 | 0 | 0 |
| FAM74A1      | 0 | 0 | 0 | 0 | 0 |
| SPATA31A3    | 0 | 0 | 0 | 0 | 0 |
| FAM74A3      | 0 | 0 | 0 | 0 | 0 |
| SPATA31A5    | 0 | 0 | 0 | 0 | 0 |
| LOC643648    | 0 | 0 | 0 | 0 | 0 |
| FAM95B1      | 0 | 0 | 0 | 0 | 0 |
| FOXD4L4      | 0 | 0 | 0 | 0 | 0 |
| CNTNAP3B     | 0 | 0 | 0 | 0 | 0 |
| LOC643648    | 0 | 0 | 0 | 0 | 0 |
| FAM27A       | 0 | 0 | 0 | 0 | 0 |
| LOC643648    | 0 | 0 | 0 | 0 | 0 |
| ANKRD20A4    | 0 | 0 | 0 | 0 | 0 |
| C9orf135     | 0 | 0 | 0 | 0 | 0 |
| TMC1         | 0 | 0 | 0 | 0 | 0 |
| RORB         | 0 | 0 | 0 | 0 | 0 |
| PCA3         | 0 | 0 | 0 | 0 | 0 |
| FOXB2        | 0 | 0 | 0 | 0 | 0 |
| SPATA31D5P   | 0 | 0 | 0 | 0 | 0 |
| SPATA31D4    | 0 | 0 | 0 | 0 | 0 |
| SPATA31D3    | 0 | 0 | 0 | 0 | 0 |
| SPATA31D1    | 0 | 0 | 0 | 0 | 0 |
| C9orf170     | 0 | 0 | 0 | 0 | 0 |
| CTSL3P       | 0 | 0 | 0 | 0 | 0 |
| CTSL1P8      | 0 | 0 | 0 | 0 | 0 |
| SPATA31E1    | 0 | 0 | 0 | 0 | 0 |
| SPATA31C1    | 0 | 0 | 0 | 0 | 0 |
| MIR3153      | 0 | 0 | 0 | 0 | 0 |
| UNQ6494      | 0 | 0 | 0 | 0 | 0 |
| MIR3910-1    | 0 | 0 | 0 | 0 | 0 |
| LINC00475    | 0 | 0 | 0 | 0 | 0 |
| SUSD3        | 0 | 0 | 0 | 0 | 0 |
| MIR4291      | 0 | 0 | 0 | 0 | 0 |
| MIRLET7A1    | 0 | 0 | 0 | 0 | 0 |
| MIRLET7F1    | 0 | 0 | 0 | 0 | 0 |
| MIR2278      | 0 | 0 | 0 | 0 | 0 |
| MIR23B       | 0 | 0 | 0 | 0 | 0 |
| MIR27B       | 0 | 0 | 0 | 0 | 0 |
| MIR24-1      | 0 | 0 | 0 | 0 | 0 |
| LOC441455    | 0 | 0 | 0 | 0 | 0 |
| FOXE1        | 0 | 0 | 0 | 0 | 0 |
| COL15A1      | 0 | 0 | 0 | 0 | 0 |
| LPPR1        | 0 | 0 | 0 | 0 | 0 |
| CYLC2        | 0 | 0 | 0 | 0 | 0 |
| OR13F1       | 0 | 0 | 0 | 0 | 0 |
| OR13C8       | 0 | 0 | 0 | 0 | 0 |
| OR13D1       | 0 | 0 | 0 | 0 | 0 |
| MUSK         | 0 | 0 | 0 | 0 | 0 |
| MIR4668      | 0 | 0 | 0 | 0 | 0 |
| BSPRY        | 0 | 0 | 0 | 0 | 0 |
| MIR455       | 0 | 0 | 0 | 0 | 0 |
| DEC1         | 0 | 0 | 0 | 0 | 0 |
| LOC100128505 | 0 | 0 | 0 | 0 | 0 |
| TLR4         | 0 | 0 | 0 | 0 | 0 |
| OR1J2        | 0 | 0 | 0 | 0 | 0 |
| OR1J4        | 0 | 0 | 0 | 0 | 0 |
| OR1N2        | 0 | 0 | 0 | 0 | 0 |
| OR1L1        | 0 | 0 | 0 | 0 | 0 |
| OR1L3        | 0 | 0 | 0 | 0 | 0 |
| OR1L4        | 0 | 0 | 0 | 0 | 0 |
| OR5C1        | 0 | 0 | 0 | 0 | 0 |
| OR1K1        | 0 | 0 | 0 | 0 | 0 |
| LHX2         | 0 | 0 | 0 | 0 | 0 |
| GPR144       | 0 | 0 | 0 | 0 | 0 |
| MIR181A2HG   | 0 | 0 | 0 | 0 | 0 |
| MIR181A2     | 0 | 0 | 0 | 0 | 0 |

|                     |   |   |   |   |   |
|---------------------|---|---|---|---|---|
| MIR181B2            | 0 | 0 | 0 | 0 | 0 |
| MIR2861,MIR3960     | 0 | 0 | 0 | 0 | 0 |
| MIR2964A            | 0 | 0 | 0 | 0 | 0 |
| C9orf106            | 0 | 0 | 0 | 0 | 0 |
| PRRX2               | 0 | 0 | 0 | 0 | 0 |
| SNORD62A            | 0 | 0 | 0 | 0 | 0 |
| SNORD62B            | 0 | 0 | 0 | 0 | 0 |
| CELP                | 0 | 0 | 0 | 0 | 0 |
| SNORD24             | 0 | 0 | 0 | 0 | 0 |
| SNORD36B            | 0 | 0 | 0 | 0 | 0 |
| SNORD36A            | 0 | 0 | 0 | 0 | 0 |
| SNORD36C            | 0 | 0 | 0 | 0 | 0 |
| DBH                 | 0 | 0 | 0 | 0 | 0 |
| MIR4669             | 0 | 0 | 0 | 0 | 0 |
| FCN2                | 0 | 0 | 0 | 0 | 0 |
| OLFM1               | 0 | 0 | 0 | 0 | 0 |
| LOC401557           | 0 | 0 | 0 | 0 | 0 |
| C9orf62             | 0 | 0 | 0 | 0 | 0 |
| OBP2A               | 0 | 0 | 0 | 0 | 0 |
| LCN9                | 0 | 0 | 0 | 0 | 0 |
| MIR126              | 0 | 0 | 0 | 0 | 0 |
| MIR4292             | 0 | 0 | 0 | 0 | 0 |
| MIR4479             | 0 | 0 | 0 | 0 | 0 |
| PTGDS               | 0 | 0 | 0 | 0 | 0 |
| LCNL1               | 0 | 0 | 0 | 0 | 0 |
| MIR602              | 0 | 0 | 0 | 0 | 0 |
| FAM138C             | 0 | 0 | 0 | 0 | 0 |
| INSL6               | 0 | 0 | 0 | 0 | 0 |
| PTPRD               | 0 | 0 | 0 | 0 | 0 |
| MPDZ                | 0 | 0 | 0 | 0 | 0 |
| CER1                | 0 | 0 | 0 | 0 | 0 |
| FREM1               | 0 | 0 | 0 | 0 | 0 |
| MIR4473             | 0 | 0 | 0 | 0 | 0 |
| MIR4474             | 0 | 0 | 0 | 0 | 0 |
| IFNB1               | 0 | 0 | 0 | 0 | 0 |
| IFNW1               | 0 | 0 | 0 | 0 | 0 |
| IFNA21              | 0 | 0 | 0 | 0 | 0 |
| IFNA4               | 0 | 0 | 0 | 0 | 0 |
| IFNA7               | 0 | 0 | 0 | 0 | 0 |
| IFNA10              | 0 | 0 | 0 | 0 | 0 |
| IFNA16              | 0 | 0 | 0 | 0 | 0 |
| IFNA14              | 0 | 0 | 0 | 0 | 0 |
| IFNA22P             | 0 | 0 | 0 | 0 | 0 |
| IFNA5               | 0 | 0 | 0 | 0 | 0 |
| IFNA6               | 0 | 0 | 0 | 0 | 0 |
| IFNA13              | 0 | 0 | 0 | 0 | 0 |
| IFNA2               | 0 | 0 | 0 | 0 | 0 |
| MIR31               | 0 | 0 | 0 | 0 | 0 |
| ELAVL2              | 0 | 0 | 0 | 0 | 0 |
| IZUMO3              | 0 | 0 | 0 | 0 | 0 |
| LINGO2              | 0 | 0 | 0 | 0 | 0 |
| MIR876              | 0 | 0 | 0 | 0 | 0 |
| MIR873              | 0 | 0 | 0 | 0 | 0 |
| LOC401497           | 0 | 0 | 0 | 0 | 0 |
| TAF1L               | 0 | 0 | 0 | 0 | 0 |
| AQP7                | 0 | 0 | 0 | 0 | 0 |
| SUGT1P1             | 0 | 0 | 0 | 0 | 0 |
| SNORD121A           | 0 | 0 | 0 | 0 | 0 |
| CCL27               | 0 | 0 | 0 | 0 | 0 |
| CCL19               | 0 | 0 | 0 | 0 | 0 |
| CCL21               | 0 | 0 | 0 | 0 | 0 |
| FAM205A             | 0 | 0 | 0 | 0 | 0 |
| FAM205B             | 0 | 0 | 0 | 0 | 0 |
| SIT1                | 0 | 0 | 0 | 0 | 0 |
| FAM221B             | 0 | 0 | 0 | 0 | 0 |
| OR2S2               | 0 | 0 | 0 | 0 | 0 |
| MIR4475             | 0 | 0 | 0 | 0 | 0 |
| PAX5                | 0 | 0 | 0 | 0 | 0 |
| MIR4540             | 0 | 0 | 0 | 0 | 0 |
| MIR4476             | 0 | 0 | 0 | 0 | 0 |
| CNTNAP3             | 0 | 0 | 0 | 0 | 0 |
| SPATA31A4           | 0 | 0 | 0 | 0 | 0 |
| LOC653501,ZNF658B   | 0 | 0 | 0 | 0 | 0 |
| FAM95B1             | 0 | 0 | 0 | 0 | 0 |
| ANKRD20A2,ANKRD20A3 | 0 | 0 | 0 | 0 | 0 |
| LOC642929           | 0 | 0 | 0 | 0 | 0 |
| SPATA31A6           | 0 | 0 | 0 | 0 | 0 |
| FAM74A2,FAM74A4     | 0 | 0 | 0 | 0 | 0 |
| SPATA31A5           | 0 | 0 | 0 | 0 | 0 |

|                   |   |   |   |   |   |
|-------------------|---|---|---|---|---|
| LOC286297         | 0 | 0 | 0 | 0 | 0 |
| FAM27B            | 0 | 0 | 0 | 0 | 0 |
| FOXDL4            | 0 | 0 | 0 | 0 | 0 |
| PRKACG            | 0 | 0 | 0 | 0 | 0 |
| LOC494558         | 0 | 0 | 0 | 0 | 0 |
| MIR204            | 0 | 0 | 0 | 0 | 0 |
| C9orf57           | 0 | 0 | 0 | 0 | 0 |
| MIR548H3          | 0 | 0 | 0 | 0 | 0 |
| VPS13A-AS1        | 0 | 0 | 0 | 0 | 0 |
| MIR7-1            | 0 | 0 | 0 | 0 | 0 |
| LOC494127         | 0 | 0 | 0 | 0 | 0 |
| LOC392364         | 0 | 0 | 0 | 0 | 0 |
| SPATA31C2         | 0 | 0 | 0 | 0 | 0 |
| LOC286238         | 0 | 0 | 0 | 0 | 0 |
| MIR4289           | 0 | 0 | 0 | 0 | 0 |
| LOC286370         | 0 | 0 | 0 | 0 | 0 |
| MIR4290           | 0 | 0 | 0 | 0 | 0 |
| LOC340515         | 0 | 0 | 0 | 0 | 0 |
| DIRAS2            | 0 | 0 | 0 | 0 | 0 |
| LOC100129316      | 0 | 0 | 0 | 0 | 0 |
| MIR3910-2         | 0 | 0 | 0 | 0 | 0 |
| ROR2              | 0 | 0 | 0 | 0 | 0 |
| MIR4670           | 0 | 0 | 0 | 0 | 0 |
| FBP1              | 0 | 0 | 0 | 0 | 0 |
| MIR3074           | 0 | 0 | 0 | 0 | 0 |
| LINC00092         | 0 | 0 | 0 | 0 | 0 |
| LOC158434         | 0 | 0 | 0 | 0 | 0 |
| LOC286359         | 0 | 0 | 0 | 0 | 0 |
| HEMGN             | 0 | 0 | 0 | 0 | 0 |
| PPP3R2            | 0 | 0 | 0 | 0 | 0 |
| OR13C4            | 0 | 0 | 0 | 0 | 0 |
| OR13C3            | 0 | 0 | 0 | 0 | 0 |
| OR13C5            | 0 | 0 | 0 | 0 | 0 |
| OR13C2            | 0 | 0 | 0 | 0 | 0 |
| OR13C9            | 0 | 0 | 0 | 0 | 0 |
| MIR548Q           | 0 | 0 | 0 | 0 | 0 |
| MIR32             | 0 | 0 | 0 | 0 | 0 |
| FRRS1L            | 0 | 0 | 0 | 0 | 0 |
| TXNDC8            | 0 | 0 | 0 | 0 | 0 |
| LPAR1             | 0 | 0 | 0 | 0 | 0 |
| OR2K2             | 0 | 0 | 0 | 0 | 0 |
| LRRC37A5P         | 0 | 0 | 0 | 0 | 0 |
| AMBP              | 0 | 0 | 0 | 0 | 0 |
| LOC100505478      | 0 | 0 | 0 | 0 | 0 |
| TNFSF8            | 0 | 0 | 0 | 0 | 0 |
| TNC               | 0 | 0 | 0 | 0 | 0 |
| LINC00474         | 0 | 0 | 0 | 0 | 0 |
| SNORA70C          | 0 | 0 | 0 | 0 | 0 |
| DBC1              | 0 | 0 | 0 | 0 | 0 |
| MIR147A           | 0 | 0 | 0 | 0 | 0 |
| MIR4478           | 0 | 0 | 0 | 0 | 0 |
| LHX6              | 0 | 0 | 0 | 0 | 0 |
| OR1J1             | 0 | 0 | 0 | 0 | 0 |
| OR1N1             | 0 | 0 | 0 | 0 | 0 |
| OR1L8             | 0 | 0 | 0 | 0 | 0 |
| OR1B1             | 0 | 0 | 0 | 0 | 0 |
| SNORD90           | 0 | 0 | 0 | 0 | 0 |
| MIR601            | 0 | 0 | 0 | 0 | 0 |
| MIR4672           | 0 | 0 | 0 | 0 | 0 |
| MIR199B           | 0 | 0 | 0 | 0 | 0 |
| MIR3154           | 0 | 0 | 0 | 0 | 0 |
| MIR219-2          | 0 | 0 | 0 | 0 | 0 |
| GBGT1             | 0 | 0 | 0 | 0 | 0 |
| OBP2B             | 0 | 0 | 0 | 0 | 0 |
| TMEM8C            | 0 | 0 | 0 | 0 | 0 |
| FAM163B           | 0 | 0 | 0 | 0 | 0 |
| MIR3689A,MIR3689E | 0 | 0 | 0 | 0 | 0 |
| MIR3689C          | 0 | 0 | 0 | 0 | 0 |
| MIR3689D1         | 0 | 0 | 0 | 0 | 0 |
| MIR3689B          | 0 | 0 | 0 | 0 | 0 |
| MIR3689D2         | 0 | 0 | 0 | 0 | 0 |
| MIR3689F          | 0 | 0 | 0 | 0 | 0 |
| FCN1              | 0 | 0 | 0 | 0 | 0 |
| GLT6D1            | 0 | 0 | 0 | 0 | 0 |
| SOHLH1            | 0 | 0 | 0 | 0 | 0 |
| MIR4673           | 0 | 0 | 0 | 0 | 0 |
| MIR4674           | 0 | 0 | 0 | 0 | 0 |
| LCN6              | 0 | 0 | 0 | 0 | 0 |
| LCN8              | 0 | 0 | 0 | 0 | 0 |

|                          |   |   |   |   |   |
|--------------------------|---|---|---|---|---|
| MIR3621                  | 0 | 0 | 0 | 0 | 0 |
| PLCXD1                   | 0 | 0 | 0 | 0 | 0 |
| LINC00685                | 0 | 0 | 0 | 0 | 0 |
| SHOX                     | 0 | 0 | 0 | 0 | 0 |
| CSF2RA                   | 0 | 0 | 0 | 0 | 0 |
| MIR3690                  | 0 | 0 | 0 | 0 | 0 |
| IL3RA                    | 0 | 0 | 0 | 0 | 0 |
| ASMTL-AS1                | 0 | 0 | 0 | 0 | 0 |
| AKAP17A,ASMT             | 0 | 0 | 0 | 0 | 0 |
| CD99P1                   | 0 | 0 | 0 | 0 | 0 |
| CD99                     | 0 | 0 | 0 | 0 | 0 |
| GYG2                     | 0 | 0 | 0 | 0 | 0 |
| ARSH                     | 0 | 0 | 0 | 0 | 0 |
| ARSF                     | 0 | 0 | 0 | 0 | 0 |
| MIR4767                  | 0 | 0 | 0 | 0 | 0 |
| MIR651                   | 0 | 0 | 0 | 0 | 0 |
| CLCN4                    | 0 | 0 | 0 | 0 | 0 |
| AMELX                    | 0 | 0 | 0 | 0 | 0 |
| FRMPD4                   | 0 | 0 | 0 | 0 | 0 |
| TLR8                     | 0 | 0 | 0 | 0 | 0 |
| LOC100093698             | 0 | 0 | 0 | 0 | 0 |
| LOC100133123             | 0 | 0 | 0 | 0 | 0 |
| EGFL6                    | 0 | 0 | 0 | 0 | 0 |
| BMX                      | 0 | 0 | 0 | 0 | 0 |
| S100G                    | 0 | 0 | 0 | 0 | 0 |
| MIR4768                  | 0 | 0 | 0 | 0 | 0 |
| CNKSR2                   | 0 | 0 | 0 | 0 | 0 |
| ZNF645                   | 0 | 0 | 0 | 0 | 0 |
| DDX53                    | 0 | 0 | 0 | 0 | 0 |
| PTCHD1                   | 0 | 0 | 0 | 0 | 0 |
| SUPT20HL1                | 0 | 0 | 0 | 0 | 0 |
| SCARNA23                 | 0 | 0 | 0 | 0 | 0 |
| MAGEB18                  | 0 | 0 | 0 | 0 | 0 |
| MAGEB5                   | 0 | 0 | 0 | 0 | 0 |
| VENTXP1                  | 0 | 0 | 0 | 0 | 0 |
| DCAF8L2                  | 0 | 0 | 0 | 0 | 0 |
| IL1RAPL1                 | 0 | 0 | 0 | 0 | 0 |
| MAGEB3                   | 0 | 0 | 0 | 0 | 0 |
| MAGEB1,MAGEB4            | 0 | 0 | 0 | 0 | 0 |
| FAM47B                   | 0 | 0 | 0 | 0 | 0 |
| MAGEB16                  | 0 | 0 | 0 | 0 | 0 |
| FAM47C                   | 0 | 0 | 0 | 0 | 0 |
| CXorf27                  | 0 | 0 | 0 | 0 | 0 |
| SYTL5                    | 0 | 0 | 0 | 0 | 0 |
| MPC1L                    | 0 | 0 | 0 | 0 | 0 |
| DUSP21                   | 0 | 0 | 0 | 0 | 0 |
| RGN                      | 0 | 0 | 0 | 0 | 0 |
| ZNF157                   | 0 | 0 | 0 | 0 | 0 |
| SNORA11C                 | 0 | 0 | 0 | 0 | 0 |
| MIR4769                  | 0 | 0 | 0 | 0 | 0 |
| CXXC1P1                  | 0 | 0 | 0 | 0 | 0 |
| SPACA5,SPACA5B           | 0 | 0 | 0 | 0 | 0 |
| SSX6                     | 0 | 0 | 0 | 0 | 0 |
| SPACA5,SPACA5B           | 0 | 0 | 0 | 0 | 0 |
| SSX1                     | 0 | 0 | 0 | 0 | 0 |
| SSX4B                    | 0 | 0 | 0 | 0 | 0 |
| GLOD5                    | 0 | 0 | 0 | 0 | 0 |
| GATA1                    | 0 | 0 | 0 | 0 | 0 |
| GAGE10                   | 0 | 0 | 0 | 0 | 0 |
| GAGE12J                  | 0 | 0 | 0 | 0 | 0 |
| GAGE12D,GAGE12F,GAGE13,G | 0 | 0 | 0 | 0 | 0 |
| GAGE12D                  | 0 | 0 | 0 | 0 | 0 |
| GAGE12D,GAGE12F          | 0 | 0 | 0 | 0 | 0 |
| GAGE12D,GAGE12F          | 0 | 0 | 0 | 0 | 0 |
| GAGE12D                  | 0 | 0 | 0 | 0 | 0 |
| GAGE2A                   | 0 | 0 | 0 | 0 | 0 |
| GAGE1                    | 0 | 0 | 0 | 0 | 0 |
| MIR532                   | 0 | 0 | 0 | 0 | 0 |
| MIR188                   | 0 | 0 | 0 | 0 | 0 |
| MIR500A                  | 0 | 0 | 0 | 0 | 0 |
| MIR362                   | 0 | 0 | 0 | 0 | 0 |
| MIR501                   | 0 | 0 | 0 | 0 | 0 |
| MIR500B                  | 0 | 0 | 0 | 0 | 0 |
| MIR660                   | 0 | 0 | 0 | 0 | 0 |
| MIR502                   | 0 | 0 | 0 | 0 | 0 |
| BMP15                    | 0 | 0 | 0 | 0 | 0 |
| NUDT10                   | 0 | 0 | 0 | 0 | 0 |
| CENPV2                   | 0 | 0 | 0 | 0 | 0 |
| MAGED4                   | 0 | 0 | 0 | 0 | 0 |

|                 |   |   |   |   |   |
|-----------------|---|---|---|---|---|
| XAGE2,XAGE2B    | 0 | 0 | 0 | 0 | 0 |
| XAGE1C,XAGE1E   | 0 | 0 | 0 | 0 | 0 |
| XAGE1B,XAGE1C   | 0 | 0 | 0 | 0 | 0 |
| SSX8            | 0 | 0 | 0 | 0 | 0 |
| SSX2,SSX2B      | 0 | 0 | 0 | 0 | 0 |
| XAGE5           | 0 | 0 | 0 | 0 | 0 |
| FAM156A,FAM156B | 0 | 0 | 0 | 0 | 0 |
| PAGE5           | 0 | 0 | 0 | 0 | 0 |
| MIR4536-1       | 0 | 0 | 0 | 0 | 0 |
| MAGEH1          | 0 | 0 | 0 | 0 | 0 |
| FOXR2           | 0 | 0 | 0 | 0 | 0 |
| MIR223          | 0 | 0 | 0 | 0 | 0 |
| FAM155B         | 0 | 0 | 0 | 0 | 0 |
| EDA             | 0 | 0 | 0 | 0 | 0 |
| MIR676          | 0 | 0 | 0 | 0 | 0 |
| AWAT1           | 0 | 0 | 0 | 0 | 0 |
| ARR3            | 0 | 0 | 0 | 0 | 0 |
| GJB1            | 0 | 0 | 0 | 0 | 0 |
| FLJ46446        | 0 | 0 | 0 | 0 | 0 |
| CXorf49B        | 0 | 0 | 0 | 0 | 0 |
| NHSL2           | 0 | 0 | 0 | 0 | 0 |
| FLJ44635        | 0 | 0 | 0 | 0 | 0 |
| DMRTC1B         | 0 | 0 | 0 | 0 | 0 |
| LINC00684       | 0 | 0 | 0 | 0 | 0 |
| PABPC1L2B       | 0 | 0 | 0 | 0 | 0 |
| CDX4            | 0 | 0 | 0 | 0 | 0 |
| MIR374C         | 0 | 0 | 0 | 0 | 0 |
| ZCCHC13         | 0 | 0 | 0 | 0 | 0 |
| MAGEE1          | 0 | 0 | 0 | 0 | 0 |
| FGF16           | 0 | 0 | 0 | 0 | 0 |
| LPAR4           | 0 | 0 | 0 | 0 | 0 |
| P2RY10          | 0 | 0 | 0 | 0 | 0 |
| GPR174          | 0 | 0 | 0 | 0 | 0 |
| TBX22           | 0 | 0 | 0 | 0 | 0 |
| FAM46D          | 0 | 0 | 0 | 0 | 0 |
| POU3F4          | 0 | 0 | 0 | 0 | 0 |
| CYLC1           | 0 | 0 | 0 | 0 | 0 |
| UBE2DNL         | 0 | 0 | 0 | 0 | 0 |
| DACH2           | 0 | 0 | 0 | 0 | 0 |
| KLHL4           | 0 | 0 | 0 | 0 | 0 |
| CPXCR1          | 0 | 0 | 0 | 0 | 0 |
| TGIF2LX         | 0 | 0 | 0 | 0 | 0 |
| PABPC5          | 0 | 0 | 0 | 0 | 0 |
| TNMD            | 0 | 0 | 0 | 0 | 0 |
| NXF2B           | 0 | 0 | 0 | 0 | 0 |
| NXF4            | 0 | 0 | 0 | 0 | 0 |
| TCEAL7          | 0 | 0 | 0 | 0 | 0 |
| PLP1            | 0 | 0 | 0 | 0 | 0 |
| TMSB15B         | 0 | 0 | 0 | 0 | 0 |
| H2BFXP          | 0 | 0 | 0 | 0 | 0 |
| H2BFM           | 0 | 0 | 0 | 0 | 0 |
| ZCCHC18         | 0 | 0 | 0 | 0 | 0 |
| IL1RAPL2        | 0 | 0 | 0 | 0 | 0 |
| NRK             | 0 | 0 | 0 | 0 | 0 |
| MUM1L1          | 0 | 0 | 0 | 0 | 0 |
| RNF128          | 0 | 0 | 0 | 0 | 0 |
| COL4A5          | 0 | 0 | 0 | 0 | 0 |
| MIR3978         | 0 | 0 | 0 | 0 | 0 |
| TDGF1P3         | 0 | 0 | 0 | 0 | 0 |
| PAK3            | 0 | 0 | 0 | 0 | 0 |
| DKFZp686D0853   | 0 | 0 | 0 | 0 | 0 |
| TRPC5OS         | 0 | 0 | 0 | 0 | 0 |
| HTR2C           | 0 | 0 | 0 | 0 | 0 |
| SNORA35         | 0 | 0 | 0 | 0 | 0 |
| MIR764          | 0 | 0 | 0 | 0 | 0 |
| MIR1912         | 0 | 0 | 0 | 0 | 0 |
| MIR1264         | 0 | 0 | 0 | 0 | 0 |
| MIR1298         | 0 | 0 | 0 | 0 | 0 |
| MIR1911         | 0 | 0 | 0 | 0 | 0 |
| MIR448          | 0 | 0 | 0 | 0 | 0 |
| RBMXL3          | 0 | 0 | 0 | 0 | 0 |
| SLC6A14         | 0 | 0 | 0 | 0 | 0 |
| MIR1277         | 0 | 0 | 0 | 0 | 0 |
| AKAP14          | 0 | 0 | 0 | 0 | 0 |
| RHOXF2B         | 0 | 0 | 0 | 0 | 0 |
| ATP1B4          | 0 | 0 | 0 | 0 | 0 |
| LOC100129520    | 0 | 0 | 0 | 0 | 0 |
| CXorf64         | 0 | 0 | 0 | 0 | 0 |
| XPNPEP2         | 0 | 0 | 0 | 0 | 0 |



|                      |   |   |   |   |   |
|----------------------|---|---|---|---|---|
| SASH3                | 0 | 0 | 0 | 0 | 0 |
| ARHGAP36             | 0 | 0 | 0 | 0 | 0 |
| OR13H1               | 0 | 0 | 0 | 0 | 0 |
| HS6ST2-AS1           | 0 | 0 | 0 | 0 | 0 |
| CCDC160              | 0 | 0 | 0 | 0 | 0 |
| SMIM10               | 0 | 0 | 0 | 0 | 0 |
| FAM127A              | 0 | 0 | 0 | 0 | 0 |
| LINC00086            | 0 | 0 | 0 | 0 | 0 |
| CT45A1               | 0 | 0 | 0 | 0 | 0 |
| CT45A2,CT45A3,CT45A4 | 0 | 0 | 0 | 0 | 0 |
| SAGE1                | 0 | 0 | 0 | 0 | 0 |
| GPR112               | 0 | 0 | 0 | 0 | 0 |
| BRS3                 | 0 | 0 | 0 | 0 | 0 |
| VGLL1                | 0 | 0 | 0 | 0 | 0 |
| MIR934               | 0 | 0 | 0 | 0 | 0 |
| LOC100128420         | 0 | 0 | 0 | 0 | 0 |
| ZIC3                 | 0 | 0 | 0 | 0 | 0 |
| FGF13-AS1            | 0 | 0 | 0 | 0 | 0 |
| SRD5A1P1             | 0 | 0 | 0 | 0 | 0 |
| F9                   | 0 | 0 | 0 | 0 | 0 |
| LOC389895            | 0 | 0 | 0 | 0 | 0 |
| RP1-177G6.2          | 0 | 0 | 0 | 0 | 0 |
| SPANXB2              | 0 | 0 | 0 | 0 | 0 |
| SPANXB1              | 0 | 0 | 0 | 0 | 0 |
| SPANXA2-OT1          | 0 | 0 | 0 | 0 | 0 |
| SPANXA2              | 0 | 0 | 0 | 0 | 0 |
| MAGEC3               | 0 | 0 | 0 | 0 | 0 |
| MAGEC1               | 0 | 0 | 0 | 0 | 0 |
| SPANXN4              | 0 | 0 | 0 | 0 | 0 |
| UBE2NL               | 0 | 0 | 0 | 0 | 0 |
| SPANXN1              | 0 | 0 | 0 | 0 | 0 |
| TMEM257              | 0 | 0 | 0 | 0 | 0 |
| CXorf51B             | 0 | 0 | 0 | 0 | 0 |
| AFF2                 | 0 | 0 | 0 | 0 | 0 |
| MAGEA11              | 0 | 0 | 0 | 0 | 0 |
| HSFX2                | 0 | 0 | 0 | 0 | 0 |
| MAGEA9B              | 0 | 0 | 0 | 0 | 0 |
| MIR2114              | 0 | 0 | 0 | 0 | 0 |
| MIR4330              | 0 | 0 | 0 | 0 | 0 |
| GPR50                | 0 | 0 | 0 | 0 | 0 |
| PASD1                | 0 | 0 | 0 | 0 | 0 |
| PRRG3                | 0 | 0 | 0 | 0 | 0 |
| FATE1                | 0 | 0 | 0 | 0 | 0 |
| CNGA2                | 0 | 0 | 0 | 0 | 0 |
| GABRQ                | 0 | 0 | 0 | 0 | 0 |
| MAGEA6               | 0 | 0 | 0 | 0 | 0 |
| MAGEA2,MAGEA2B       | 0 | 0 | 0 | 0 | 0 |
| CSAG2,CSAG3          | 0 | 0 | 0 | 0 | 0 |
| PNMA3                | 0 | 0 | 0 | 0 | 0 |
| PNMA6C,PNMA6D        | 0 | 0 | 0 | 0 | 0 |
| ZFP92                | 0 | 0 | 0 | 0 | 0 |
| DUSP9                | 0 | 0 | 0 | 0 | 0 |
| AVPR2                | 0 | 0 | 0 | 0 | 0 |
| MIR3202-1            | 0 | 0 | 0 | 0 | 0 |
| OPN1MW               | 0 | 0 | 0 | 0 | 0 |
| OPN1MW               | 0 | 0 | 0 | 0 | 0 |
| FAM223B              | 0 | 0 | 0 | 0 | 0 |
| CTAG1B               | 0 | 0 | 0 | 0 | 0 |
| SNORA56              | 0 | 0 | 0 | 0 | 0 |
| H2AFB1               | 0 | 0 | 0 | 0 | 0 |
| H2AFB3               | 0 | 0 | 0 | 0 | 0 |
| F8A1                 | 0 | 0 | 0 | 0 | 0 |
| MIR1184-3            | 0 | 0 | 0 | 0 | 0 |
| TMLHE-AS1            | 0 | 0 | 0 | 0 | 0 |
| SPRY3                | 0 | 0 | 0 | 0 | 0 |
| VAMP7                | 0 | 0 | 0 | 0 | 0 |
| IL9R                 | 0 | 0 | 0 | 0 | 0 |
| GTPBP6               | 0 | 0 | 0 | 0 | 0 |
| PPP2R3B              | 0 | 0 | 0 | 0 | 0 |
| CRLF2                | 0 | 0 | 0 | 0 | 0 |
| SLC25A6              | 0 | 0 | 0 | 0 | 0 |
| ASMTL                | 0 | 0 | 0 | 0 | 0 |
| P2RY8                | 0 | 0 | 0 | 0 | 0 |
| DHRX,ZBED1           | 0 | 0 | 0 | 0 | 0 |
| ARSE                 | 0 | 0 | 0 | 0 | 0 |
| MXRA5                | 0 | 0 | 0 | 0 | 0 |
| NLGN4X               | 0 | 0 | 0 | 0 | 0 |
| MIR4770              | 0 | 0 | 0 | 0 | 0 |
| VCX2                 | 0 | 0 | 0 | 0 | 0 |

|                |   |   |   |   |   |
|----------------|---|---|---|---|---|
| KAL1           | 0 | 0 | 0 | 0 | 0 |
| FAM9A          | 0 | 0 | 0 | 0 | 0 |
| FAM9B          | 0 | 0 | 0 | 0 | 0 |
| ARHGAP6        | 0 | 0 | 0 | 0 | 0 |
| TLR8-AS1       | 0 | 0 | 0 | 0 | 0 |
| FAM9C          | 0 | 0 | 0 | 0 | 0 |
| ATXN3L         | 0 | 0 | 0 | 0 | 0 |
| ASB9           | 0 | 0 | 0 | 0 | 0 |
| ASB11          | 0 | 0 | 0 | 0 | 0 |
| RAI2           | 0 | 0 | 0 | 0 | 0 |
| SCML2          | 0 | 0 | 0 | 0 | 0 |
| MIR23C         | 0 | 0 | 0 | 0 | 0 |
| KLHL34         | 0 | 0 | 0 | 0 | 0 |
| SMPX           | 0 | 0 | 0 | 0 | 0 |
| PHEX-AS1       | 0 | 0 | 0 | 0 | 0 |
| LOC100873065   | 0 | 0 | 0 | 0 | 0 |
| SUPT20HL2      | 0 | 0 | 0 | 0 | 0 |
| PCYT1B         | 0 | 0 | 0 | 0 | 0 |
| SMEK3P         | 0 | 0 | 0 | 0 | 0 |
| DCAF8L1        | 0 | 0 | 0 | 0 | 0 |
| NR0B1          | 0 | 0 | 0 | 0 | 0 |
| CXorf21        | 0 | 0 | 0 | 0 | 0 |
| FTHL17         | 0 | 0 | 0 | 0 | 0 |
| DMD            | 0 | 0 | 0 | 0 | 0 |
| FAM47A         | 0 | 0 | 0 | 0 | 0 |
| TMEM47         | 0 | 0 | 0 | 0 | 0 |
| LOC286442      | 0 | 0 | 0 | 0 | 0 |
| LOC100132831   | 0 | 0 | 0 | 0 | 0 |
| PPP1R2P9       | 0 | 0 | 0 | 0 | 0 |
| MAOB           | 0 | 0 | 0 | 0 | 0 |
| NDP            | 0 | 0 | 0 | 0 | 0 |
| EFHC2          | 0 | 0 | 0 | 0 | 0 |
| MIR222         | 0 | 0 | 0 | 0 | 0 |
| SSX5           | 0 | 0 | 0 | 0 | 0 |
| SSX9           | 0 | 0 | 0 | 0 | 0 |
| SSX3           | 0 | 0 | 0 | 0 | 0 |
| SSX4B          | 0 | 0 | 0 | 0 | 0 |
| CACNA1F        | 0 | 0 | 0 | 0 | 0 |
| PAGE1          | 0 | 0 | 0 | 0 | 0 |
| AKAP4          | 0 | 0 | 0 | 0 | 0 |
| DGKK           | 0 | 0 | 0 | 0 | 0 |
| NUDT11         | 0 | 0 | 0 | 0 | 0 |
| CENPVP2        | 0 | 0 | 0 | 0 | 0 |
| MAGED4,MAGED4B | 0 | 0 | 0 | 0 | 0 |
| SNORA11D       | 0 | 0 | 0 | 0 | 0 |
| SNORA11E       | 0 | 0 | 0 | 0 | 0 |
| XAGE1B,XAGE1D  | 0 | 0 | 0 | 0 | 0 |
| XAGE2,XAGE2B   | 0 | 0 | 0 | 0 | 0 |
| XAGE1C         | 0 | 0 | 0 | 0 | 0 |
| XAGE1A,XAGE1C  | 0 | 0 | 0 | 0 | 0 |
| SSX7           | 0 | 0 | 0 | 0 | 0 |
| SSX2           | 0 | 0 | 0 | 0 | 0 |
| SPANXN5        | 0 | 0 | 0 | 0 | 0 |
| XAGE3          | 0 | 0 | 0 | 0 | 0 |
| MIR98          | 0 | 0 | 0 | 0 | 0 |
| MIRLET7F2      | 0 | 0 | 0 | 0 | 0 |
| ITIH6          | 0 | 0 | 0 | 0 | 0 |
| PAGE3          | 0 | 0 | 0 | 0 | 0 |
| USP51          | 0 | 0 | 0 | 0 | 0 |
| ZXDA           | 0 | 0 | 0 | 0 | 0 |
| MIR1468        | 0 | 0 | 0 | 0 | 0 |
| ASB12          | 0 | 0 | 0 | 0 | 0 |
| MTMR8          | 0 | 0 | 0 | 0 | 0 |
| FRMD8P1        | 0 | 0 | 0 | 0 | 0 |
| VSIG4          | 0 | 0 | 0 | 0 | 0 |
| TEX11          | 0 | 0 | 0 | 0 | 0 |
| SLC7A3         | 0 | 0 | 0 | 0 | 0 |
| CXorf65        | 0 | 0 | 0 | 0 | 0 |
| CXCR3          | 0 | 0 | 0 | 0 | 0 |
| CXorf49B       | 0 | 0 | 0 | 0 | 0 |
| LINC00684      | 0 | 0 | 0 | 0 | 0 |
| DMRTC1B        | 0 | 0 | 0 | 0 | 0 |
| PABPC1L2A      | 0 | 0 | 0 | 0 | 0 |
| MIR421         | 0 | 0 | 0 | 0 | 0 |
| MIR374B        | 0 | 0 | 0 | 0 | 0 |
| MIR545         | 0 | 0 | 0 | 0 | 0 |
| MIR374A        | 0 | 0 | 0 | 0 | 0 |
| KIAA2022       | 0 | 0 | 0 | 0 | 0 |
| MAGEE2         | 0 | 0 | 0 | 0 | 0 |

|                      |   |   |   |   |   |
|----------------------|---|---|---|---|---|
| MIR384               | 0 | 0 | 0 | 0 | 0 |
| CYSLTR1              | 0 | 0 | 0 | 0 | 0 |
| ZCCHC5               | 0 | 0 | 0 | 0 | 0 |
| MIR4328              | 0 | 0 | 0 | 0 | 0 |
| ITM2A                | 0 | 0 | 0 | 0 | 0 |
| HDX                  | 0 | 0 | 0 | 0 | 0 |
| NAP1L3               | 0 | 0 | 0 | 0 | 0 |
| LOC643486            | 0 | 0 | 0 | 0 | 0 |
| LOC442459            | 0 | 0 | 0 | 0 | 0 |
| NXF5                 | 0 | 0 | 0 | 0 | 0 |
| NXF2                 | 0 | 0 | 0 | 0 | 0 |
| TMSB15A              | 0 | 0 | 0 | 0 | 0 |
| BEX1                 | 0 | 0 | 0 | 0 | 0 |
| NXF3                 | 0 | 0 | 0 | 0 | 0 |
| BEX2                 | 0 | 0 | 0 | 0 | 0 |
| GLRA4                | 0 | 0 | 0 | 0 | 0 |
| H2BFWT               | 0 | 0 | 0 | 0 | 0 |
| H2BFXP               | 0 | 0 | 0 | 0 | 0 |
| ESX1                 | 0 | 0 | 0 | 0 | 0 |
| TEX13A               | 0 | 0 | 0 | 0 | 0 |
| SERPINA7             | 0 | 0 | 0 | 0 | 0 |
| NUP62CL              | 0 | 0 | 0 | 0 | 0 |
| IRS4                 | 0 | 0 | 0 | 0 | 0 |
| GUCY2F               | 0 | 0 | 0 | 0 | 0 |
| SNORD96B             | 0 | 0 | 0 | 0 | 0 |
| CHRDL1               | 0 | 0 | 0 | 0 | 0 |
| RNU6-28              | 0 | 0 | 0 | 0 | 0 |
| LHFPL1               | 0 | 0 | 0 | 0 | 0 |
| MIR4329              | 0 | 0 | 0 | 0 | 0 |
| LRCH2                | 0 | 0 | 0 | 0 | 0 |
| CXorf61              | 0 | 0 | 0 | 0 | 0 |
| KLHL13               | 0 | 0 | 0 | 0 | 0 |
| MIR766               | 0 | 0 | 0 | 0 | 0 |
| RHOXF2B              | 0 | 0 | 0 | 0 | 0 |
| RHOXF1               | 0 | 0 | 0 | 0 | 0 |
| CT47B1               | 0 | 0 | 0 | 0 | 0 |
| CT47A1,CT47A4        | 0 | 0 | 0 | 0 | 0 |
| CT47A8               | 0 | 0 | 0 | 0 | 0 |
| CT47A11              | 0 | 0 | 0 | 0 | 0 |
| CT47A5               | 0 | 0 | 0 | 0 | 0 |
| CT47A3               | 0 | 0 | 0 | 0 | 0 |
| CT47A7               | 0 | 0 | 0 | 0 | 0 |
| CT47A1,CT47A2,CT47A6 | 0 | 0 | 0 | 0 | 0 |
| CT47A2               | 0 | 0 | 0 | 0 | 0 |
| CT47A9               | 0 | 0 | 0 | 0 | 0 |
| CT47A8               | 0 | 0 | 0 | 0 | 0 |
| CT47A6               | 0 | 0 | 0 | 0 | 0 |
| TENM1                | 0 | 0 | 0 | 0 | 0 |
| DCAF12L2             | 0 | 0 | 0 | 0 | 0 |
| DCAF12L1             | 0 | 0 | 0 | 0 | 0 |
| ACTRT1               | 0 | 0 | 0 | 0 | 0 |
| SMARCA1              | 0 | 0 | 0 | 0 | 0 |
| GPR119               | 0 | 0 | 0 | 0 | 0 |
| FRMD7                | 0 | 0 | 0 | 0 | 0 |
| HS6ST2               | 0 | 0 | 0 | 0 | 0 |
| USP26                | 0 | 0 | 0 | 0 | 0 |
| TFDP3                | 0 | 0 | 0 | 0 | 0 |
| GPC3                 | 0 | 0 | 0 | 0 | 0 |
| MIR363               | 0 | 0 | 0 | 0 | 0 |
| MIR92A2              | 0 | 0 | 0 | 0 | 0 |
| MIR19B2              | 0 | 0 | 0 | 0 | 0 |
| MIR20B               | 0 | 0 | 0 | 0 | 0 |
| MIR18B               | 0 | 0 | 0 | 0 | 0 |
| MIR106A              | 0 | 0 | 0 | 0 | 0 |
| MIR450B              | 0 | 0 | 0 | 0 | 0 |
| MIR450A1             | 0 | 0 | 0 | 0 | 0 |
| MIR450A2             | 0 | 0 | 0 | 0 | 0 |
| MIR542               | 0 | 0 | 0 | 0 | 0 |
| MGC16121,MIR424      | 0 | 0 | 0 | 0 | 0 |
| MIR503               | 0 | 0 | 0 | 0 | 0 |
| FAM127C              | 0 | 0 | 0 | 0 | 0 |
| FAM127B              | 0 | 0 | 0 | 0 | 0 |
| LINC00087            | 0 | 0 | 0 | 0 | 0 |
| CT45A4               | 0 | 0 | 0 | 0 | 0 |
| CT45A6               | 0 | 0 | 0 | 0 | 0 |
| SNORD61              | 0 | 0 | 0 | 0 | 0 |
| GPR101               | 0 | 0 | 0 | 0 | 0 |
| LOC158696            | 0 | 0 | 0 | 0 | 0 |
| MIR504               | 0 | 0 | 0 | 0 | 0 |

|                   |   |   |   |   |   |
|-------------------|---|---|---|---|---|
| MIR505            | 0 | 0 | 0 | 0 | 0 |
| CXorf66           | 0 | 0 | 0 | 0 | 0 |
| SOX3              | 0 | 0 | 0 | 0 | 0 |
| CDR1              | 0 | 0 | 0 | 0 | 0 |
| MIR320D2          | 0 | 0 | 0 | 0 | 0 |
| LDOC1             | 0 | 0 | 0 | 0 | 0 |
| SPANXC            | 0 | 0 | 0 | 0 | 0 |
| SPANXA2           | 0 | 0 | 0 | 0 | 0 |
| MAGEC2            | 0 | 0 | 0 | 0 | 0 |
| SPANXN3           | 0 | 0 | 0 | 0 | 0 |
| SLITRK4           | 0 | 0 | 0 | 0 | 0 |
| SPANXN2           | 0 | 0 | 0 | 0 | 0 |
| MIR890            | 0 | 0 | 0 | 0 | 0 |
| MIR888            | 0 | 0 | 0 | 0 | 0 |
| MIR892A           | 0 | 0 | 0 | 0 | 0 |
| MIR892B           | 0 | 0 | 0 | 0 | 0 |
| MIR891B           | 0 | 0 | 0 | 0 | 0 |
| MIR891A           | 0 | 0 | 0 | 0 | 0 |
| CXorf51A          | 0 | 0 | 0 | 0 | 0 |
| MIR506            | 0 | 0 | 0 | 0 | 0 |
| MIR507            | 0 | 0 | 0 | 0 | 0 |
| MIR508            | 0 | 0 | 0 | 0 | 0 |
| MIR514B           | 0 | 0 | 0 | 0 | 0 |
| MIR509-1          | 0 | 0 | 0 | 0 | 0 |
| MIR509-3          | 0 | 0 | 0 | 0 | 0 |
| MIR509-1          | 0 | 0 | 0 | 0 | 0 |
| MIR510            | 0 | 0 | 0 | 0 | 0 |
| MIR514A1          | 0 | 0 | 0 | 0 | 0 |
| MIR514A2          | 0 | 0 | 0 | 0 | 0 |
| MIR514A3          | 0 | 0 | 0 | 0 | 0 |
| MAGEA9B           | 0 | 0 | 0 | 0 | 0 |
| HSFX2             | 0 | 0 | 0 | 0 | 0 |
| GABRE             | 0 | 0 | 0 | 0 | 0 |
| MIR452            | 0 | 0 | 0 | 0 | 0 |
| GABRA3            | 0 | 0 | 0 | 0 | 0 |
| MIR105-1          | 0 | 0 | 0 | 0 | 0 |
| MIR767            | 0 | 0 | 0 | 0 | 0 |
| MIR105-2          | 0 | 0 | 0 | 0 | 0 |
| CSAG2,CSAG3       | 0 | 0 | 0 | 0 | 0 |
| MAGEA2,MAGEA2B    | 0 | 0 | 0 | 0 | 0 |
| MAGEA3            | 0 | 0 | 0 | 0 | 0 |
| PNMA5             | 0 | 0 | 0 | 0 | 0 |
| PNMA6D            | 0 | 0 | 0 | 0 | 0 |
| MAGEA1            | 0 | 0 | 0 | 0 | 0 |
| PDZD4             | 0 | 0 | 0 | 0 | 0 |
| MIR3202-2         | 0 | 0 | 0 | 0 | 0 |
| MIR718            | 0 | 0 | 0 | 0 | 0 |
| TEX28             | 0 | 0 | 0 | 0 | 0 |
| CTAG1A            | 0 | 0 | 0 | 0 | 0 |
| CTAG2             | 0 | 0 | 0 | 0 | 0 |
| MIR1184-1         | 0 | 0 | 0 | 0 | 0 |
| MIR1184-3         | 0 | 0 | 0 | 0 | 0 |
| F8A1              | 0 | 0 | 0 | 0 | 0 |
| H2AFB3            | 0 | 0 | 0 | 0 | 0 |
| PLCXD1            | 0 | 0 | 0 | 0 | 0 |
| LINC00685         | 0 | 0 | 0 | 0 | 0 |
| SHOX              | 0 | 0 | 0 | 0 | 0 |
| CSF2RA            | 0 | 0 | 0 | 0 | 0 |
| MIR3690           | 0 | 0 | 0 | 0 | 0 |
| IL3RA             | 0 | 0 | 0 | 0 | 0 |
| ASMTL-AS1         | 0 | 0 | 0 | 0 | 0 |
| AKAP17A,ASMT      | 0 | 0 | 0 | 0 | 0 |
| CD99P1            | 0 | 0 | 0 | 0 | 0 |
| CD99              | 0 | 0 | 0 | 0 | 0 |
| XGPY2             | 0 | 0 | 0 | 0 | 0 |
| RPS4Y1            | 0 | 0 | 0 | 0 | 0 |
| ZFY               | 0 | 0 | 0 | 0 | 0 |
| LINC00278         | 0 | 0 | 0 | 0 | 0 |
| TGIF2LY           | 0 | 0 | 0 | 0 | 0 |
| TSPY2             | 0 | 0 | 0 | 0 | 0 |
| TTY1B             | 0 | 0 | 0 | 0 | 0 |
| TTY21             | 0 | 0 | 0 | 0 | 0 |
| TTY7,TTY7B        | 0 | 0 | 0 | 0 | 0 |
| TBL1Y             | 0 | 0 | 0 | 0 | 0 |
| PRKY              | 0 | 0 | 0 | 0 | 0 |
| TTY12             | 0 | 0 | 0 | 0 | 0 |
| TTY19             | 0 | 0 | 0 | 0 | 0 |
| TSPY3,TSPY4,TSPY8 | 0 | 0 | 0 | 0 | 0 |
| TSPY1             | 0 | 0 | 0 | 0 | 0 |

|                 |   |   |   |   |   |
|-----------------|---|---|---|---|---|
| TTY8B           | 0 | 0 | 0 | 0 | 0 |
| TTY2            | 0 | 0 | 0 | 0 | 0 |
| TTY22           | 0 | 0 | 0 | 0 | 0 |
| TTY23B          | 0 | 0 | 0 | 0 | 0 |
| TTY15           | 0 | 0 | 0 | 0 | 0 |
| USP9Y           | 0 | 0 | 0 | 0 | 0 |
| DDX3Y           | 0 | 0 | 0 | 0 | 0 |
| TMSB4Y          | 0 | 0 | 0 | 0 | 0 |
| VCY             | 0 | 0 | 0 | 0 | 0 |
| NLGN4Y          | 0 | 0 | 0 | 0 | 0 |
| FAM41AY1        | 0 | 0 | 0 | 0 | 0 |
| CDY2A,CDY2B     | 0 | 0 | 0 | 0 | 0 |
| XKRY            | 0 | 0 | 0 | 0 | 0 |
| FAM224A,FAM224B | 0 | 0 | 0 | 0 | 0 |
| HSFY1,HSFY2     | 0 | 0 | 0 | 0 | 0 |
| TTY9A           | 0 | 0 | 0 | 0 | 0 |
| TXLNG2P         | 0 | 0 | 0 | 0 | 0 |
| EIF1AY          | 0 | 0 | 0 | 0 | 0 |
| RPS4Y2          | 0 | 0 | 0 | 0 | 0 |
| RBM1B           | 0 | 0 | 0 | 0 | 0 |
| RBM1B           | 0 | 0 | 0 | 0 | 0 |
| TTY6,TTY6B      | 0 | 0 | 0 | 0 | 0 |
| RBM1F,RBM1J     | 0 | 0 | 0 | 0 | 0 |
| PRY2            | 0 | 0 | 0 | 0 | 0 |
| TTY17C          | 0 | 0 | 0 | 0 | 0 |
| TTY4            | 0 | 0 | 0 | 0 | 0 |
| BPY2            | 0 | 0 | 0 | 0 | 0 |
| DAZ2,DAZ3,DAZ4  | 0 | 0 | 0 | 0 | 0 |
| TTY17C          | 0 | 0 | 0 | 0 | 0 |
| TTY4            | 0 | 0 | 0 | 0 | 0 |
| BPY2            | 0 | 0 | 0 | 0 | 0 |
| DAZ2,DAZ3,DAZ4  | 0 | 0 | 0 | 0 | 0 |
| GOLGA2P2Y       | 0 | 0 | 0 | 0 | 0 |
| CSPG4P1Y        | 0 | 0 | 0 | 0 | 0 |
| CDY1            | 0 | 0 | 0 | 0 | 0 |
| TTY3            | 0 | 0 | 0 | 0 | 0 |
| SPRY3           | 0 | 0 | 0 | 0 | 0 |
| VAMP7           | 0 | 0 | 0 | 0 | 0 |
| IL9R            | 0 | 0 | 0 | 0 | 0 |
| GTPBP6          | 0 | 0 | 0 | 0 | 0 |
| PPP2R3B         | 0 | 0 | 0 | 0 | 0 |
| CRLF2           | 0 | 0 | 0 | 0 | 0 |
| SLC25A6         | 0 | 0 | 0 | 0 | 0 |
| ASMTL           | 0 | 0 | 0 | 0 | 0 |
| P2RY8           | 0 | 0 | 0 | 0 | 0 |
| DHRX,ZBED1      | 0 | 0 | 0 | 0 | 0 |
| SRY             | 0 | 0 | 0 | 0 | 0 |
| TTY23B          | 0 | 0 | 0 | 0 | 0 |
| TTY2            | 0 | 0 | 0 | 0 | 0 |
| TTY8B           | 0 | 0 | 0 | 0 | 0 |
| AMELY           | 0 | 0 | 0 | 0 | 0 |
| TTY16           | 0 | 0 | 0 | 0 | 0 |
| TTY18           | 0 | 0 | 0 | 0 | 0 |
| TTY11           | 0 | 0 | 0 | 0 | 0 |
| RBM1A3P         | 0 | 0 | 0 | 0 | 0 |
| TTY20           | 0 | 0 | 0 | 0 | 0 |
| FAM197Y5        | 0 | 0 | 0 | 0 | 0 |
| FAM197Y5        | 0 | 0 | 0 | 0 | 0 |
| FAM197Y2        | 0 | 0 | 0 | 0 | 0 |
| FAM197Y2        | 0 | 0 | 0 | 0 | 0 |
| FAM197Y2        | 0 | 0 | 0 | 0 | 0 |
| RBM3AP          | 0 | 0 | 0 | 0 | 0 |
| TTY7,TTY7B      | 0 | 0 | 0 | 0 | 0 |
| TTY21           | 0 | 0 | 0 | 0 | 0 |
| TTY1B           | 0 | 0 | 0 | 0 | 0 |
| VCY             | 0 | 0 | 0 | 0 | 0 |
| NLGN4Y-AS1      | 0 | 0 | 0 | 0 | 0 |
| FAM224A,FAM224B | 0 | 0 | 0 | 0 | 0 |
| XKRY2           | 0 | 0 | 0 | 0 | 0 |
| CDY2A,CDY2B     | 0 | 0 | 0 | 0 | 0 |
| FAM41AY2        | 0 | 0 | 0 | 0 | 0 |
| TTY9B           | 0 | 0 | 0 | 0 | 0 |
| HSFY1,HSFY2     | 0 | 0 | 0 | 0 | 0 |
| NCRNA00185      | 0 | 0 | 0 | 0 | 0 |
| TTY14           | 0 | 0 | 0 | 0 | 0 |
| BCORP1          | 0 | 0 | 0 | 0 | 0 |
| KDM5D           | 0 | 0 | 0 | 0 | 0 |
| TTY10           | 0 | 0 | 0 | 0 | 0 |
| RBM2EP          | 0 | 0 | 0 | 0 | 0 |

|            |          |          |           |          |          |
|------------|----------|----------|-----------|----------|----------|
| TTY13      | 0        | 0        | 0         | 0        | 0        |
| RBM1B      | 0        | 0        | 0         | 0        | 0        |
| RBM1B      | 0        | 0        | 0         | 0        | 0        |
| PRY        | 0        | 0        | 0         | 0        | 0        |
| RBM1J      | 0        | 0        | 0         | 0        | 0        |
| TTY5       | 0        | 0        | 0         | 0        | 0        |
| TTY6,TTY6B | 0        | 0        | 0         | 0        | 0        |
| DAZ1,DAZ4  | 0        | 0        | 0         | 0        | 0        |
| TTY3B      | 0        | 0        | 0         | 0        | 0        |
| CDY1       | 0        | 0        | 0         | 0        | 0        |
| CSPG4P1Y   | 0        | 0        | 0         | 0        | 0        |
| GOLGA2P2Y  | 0        | 0        | 0         | 0        | 0        |
| DAZ3,DAZ4  | 0        | 0        | 0         | 0        | 0        |
| BPY2C      | 0        | 0        | 0         | 0        | 0        |
| TTY4B      | 0        | 0        | 0         | 0        | 0        |
| TTY17B     | 0        | 0        | 0         | 0        | 0        |
| KIF26A     | 2.88718  | 2.53761  | 2.9022    | 3.4244   | 2.51024  |
| CDK19      | 1.33316  | 1.82348  | 1.69195   | 1.33688  | 1.7966   |
| RPP38      | 22.8127  | 27.5767  | 28.2942   | 24.6684  | 25.9247  |
| ALDH1B1    | 18.0637  | 24.6417  | 18.4427   | 18.4107  | 23.8967  |
| ASPHD2     | 3.28333  | 3.96414  | 3.8563    | 3.48458  | 3.91365  |
| SASS6      | 1.65656  | 1.34517  | 1.63159   | 1.73709  | 1.2605   |
| PTK2       | 27.4655  | 26.9021  | 26.262    | 25.707   | 29.2936  |
| DOCK7      | 3.76441  | 3.20212  | 3.23758   | 3.68831  | 3.27503  |
| UBE2L6     | 28.7152  | 33.5105  | 24.073    | 29.1533  | 33.1871  |
| FZD3       | 1.20137  | 1.61287  | 1.11795   | 1.07142  | 1.68431  |
| DNAJC5     | 13.9876  | 14.1371  | 12.7577   | 13.2881  | 14.8143  |
| ESPL1      | 5.85775  | 4.79406  | 5.17498   | 6.29164  | 4.56625  |
| RBL2       | 3.85163  | 3.33931  | 4.28657   | 4.18294  | 3.6427   |
| EHMT1      | 12.0266  | 10.7616  | 12.0648   | 12.6762  | 10.9544  |
| ZNF430     | 1.10642  | 1.2599   | 1.21293   | 0.991446 | 1.61538  |
| NUDT7      | 5.23232  | 3.76536  | 4.79089   | 5.27641  | 3.88036  |
| RPS15A     | 3983.22  | 5581.08  | 4329.74   | 4026.66  | 4813.86  |
| PAX2       | 1.7604   | 2.20038  | 1.46549   | 1.63554  | 2.0077   |
| URM1       | 68.2515  | 72.5653  | 80.1214   | 70.8047  | 68.3968  |
| MESDC1     | 16.7098  | 13.6868  | 20.8066   | 17.9221  | 14.2118  |
| FBXL15     | 11.5655  | 10.8057  | 13.8686   | 11.8636  | 11.2665  |
| PARPBP     | 1.6318   | 1.36727  | 1.91978   | 1.68303  | 1.42987  |
| ABHD5      | 2.86709  | 2.12911  | 3.09452   | 2.83236  | 2.55704  |
| CBWD6      | 3.94509  | 3.20213  | 3.48151   | 3.90819  | 3.27247  |
| SLC35E3    | 5.08524  | 5.82719  | 5.58493   | 5.11157  | 5.76936  |
| DMWD       | 10.2702  | 9.6681   | 10.9552   | 10.6847  | 9.46944  |
| DDX54      | 35.9515  | 32.8739  | 32.1217   | 34.5127  | 32.3556  |
| SAMD9      | 0.203633 | 0.227841 | 0.15154   | 0.14412  | 0.313585 |
| PPFIA3     | 4.23827  | 4.4338   | 4.61161   | 4.64731  | 4.27511  |
| GPAM       | 1.09753  | 1.29704  | 1.3489    | 1.30713  | 1.2763   |
| FHL2       | 393.035  | 389.546  | 376.621   | 357.883  | 413.34   |
| CASD1      | 3.41356  | 3.9837   | 3.84232   | 3.47047  | 4.09095  |
| RNF220     | 40.2731  | 41.9064  | 40.6465   | 39.1484  | 42.803   |
| TRAPPC5    | 210.441  | 187.951  | 215.732   | 195.721  | 198.414  |
| TMEM98     | 43.757   | 47.4568  | 48.3273   | 47.9769  | 47.4895  |
| ZNF180     | 2.04707  | 3.13375  | 1.92447   | 2.06074  | 2.89782  |
| DDX6       | 9.61637  | 12.7949  | 11.8376   | 10.5232  | 13.1008  |
| SUGT1      | 27.3837  | 25.9334  | 29.3964   | 27.429   | 25.5512  |
| MAD2L1BP   | 31.4373  | 35.1418  | 39.2154   | 33.2049  | 31.4712  |
| SS18L1     | 3.37101  | 2.99837  | 2.65455   | 2.95616  | 3.29913  |
| NKD2       | 16.5351  | 11.6797  | 15.3814   | 16.1939  | 12.9001  |
| GPR137C    | 0.139828 | 0.154868 | 0.0484751 | 0.080843 | 0.195132 |
| CD164      | 35.9573  | 39.7075  | 42.6651   | 36.8074  | 39.6124  |
| ZNF480     | 1.90946  | 1.71642  | 1.28223   | 1.83173  | 1.74702  |
| TEAD1      | 4.89346  | 4.37136  | 4.53646   | 4.49268  | 4.70103  |
| NKTR       | 1.82709  | 1.87624  | 1.23442   | 1.78396  | 1.97691  |
| PLSCR1     | 5.26895  | 5.30231  | 6.42943   | 6.36535  | 4.74662  |
| RNF25      | 24.0543  | 29.2991  | 27.0349   | 26.3765  | 27.0037  |
| NDUFA11    | 462.684  | 451.891  | 498.981   | 468.172  | 429.327  |
| NRG4       | 0.533428 | 0.583626 | 0.463239  | 0.556561 | 0.735182 |
| ZFP69      | 1.74535  | 1.24306  | 2.1552    | 1.77227  | 1.75201  |
| LSM14A     | 26.464   | 27.3079  | 26.2389   | 25.7601  | 28.447   |
| TGFB3      | 2.01883  | 2.11756  | 1.3747    | 1.68779  | 2.2845   |
| ARHGAP17   | 8.82947  | 10.4077  | 9.95998   | 9.54474  | 10.2531  |
| APEH       | 96.907   | 101.217  | 99.4392   | 95.9988  | 102.801  |
| C7orf26    | 16.5264  | 19.6017  | 20.3099   | 17.6477  | 17.248   |
| JRKL       | 1.56619  | 1.26609  | 2.16915   | 1.78784  | 1.43747  |
| FAM49B     | 21.0775  | 21.1411  | 22.99     | 20.7937  | 21.7072  |
| AGAP5      | 0.92845  | 0.615528 | 0.737148  | 0.889119 | 0.626383 |
| TOP2A      | 11.2581  | 11.0479  | 11.0177   | 11.8871  | 11.0813  |
| SNN        | 6.09156  | 9.52584  | 7.22432   | 7.06106  | 8.88426  |
| BRD4       | 9.65598  | 8.7206   | 8.99965   | 9.87402  | 9.13889  |
| PIGV       | 4.18206  | 5.28641  | 5.77928   | 4.86161  | 5.38697  |

|                   |           |           |           |           |           |
|-------------------|-----------|-----------|-----------|-----------|-----------|
| SESN3             | 0.179715  | 0.131601  | 0.134776  | 0.209278  | 0.114025  |
| UBR5              | 6.64579   | 5.81908   | 6.43638   | 6.4164    | 6.48962   |
| DGKQ              | 5.89677   | 6.50572   | 5.63287   | 5.99623   | 6.8694    |
| OSGIN2            | 9.90603   | 8.96059   | 9.87159   | 9.29993   | 9.55945   |
| WASH1             | 6.0996    | 6.21356   | 6.01022   | 6.37836   | 5.58972   |
| GATC              | 7.28763   | 7.38245   | 9.26593   | 7.92214   | 6.86248   |
| UBE2W             | 4.60763   | 3.99665   | 5.32096   | 4.27752   | 4.61986   |
| ZNF442            | 0.618776  | 0.465037  | 0.370928  | 0.532262  | 0.521104  |
| CBL               | 3.35037   | 2.9538    | 3.56435   | 3.3892    | 3.1258    |
| DENND5A           | 9.6692    | 9.82266   | 8.75003   | 9.00953   | 10.2163   |
| CEP250            | 12.4939   | 11.4167   | 7.90021   | 11.6696   | 11.4129   |
| ZNF337            | 4.98447   | 4.28287   | 4.05148   | 5.06171   | 4.22193   |
| RNF19A            | 7.39896   | 6.71129   | 7.63749   | 6.82208   | 7.88822   |
| ATG14             | 3.5726    | 3.05564   | 3.01878   | 3.06332   | 3.30274   |
| PTGR2             | 2.46386   | 2.3405    | 2.62304   | 2.4366    | 2.7818    |
| STAG3             | 0.144092  | 0.178682  | 0.192609  | 0.216172  | 0.130142  |
| ACBD3             | 8.65939   | 8.04912   | 7.84093   | 7.44217   | 8.48996   |
| TEAD2             | 8.54431   | 10.8489   | 8.98252   | 9.73092   | 9.58605   |
| SETDB1            | 4.96134   | 4.20264   | 4.53217   | 4.83371   | 4.14275   |
| HDGF              | 165.856   | 177.047   | 168.409   | 163.499   | 174.605   |
| TMEM55B           | 27.8046   | 27.3177   | 30.534    | 30.0111   | 25.2811   |
| WNT3              | 1.08141   | 1.08971   | 1.35654   | 1.32233   | 1.11335   |
| MTMR12            | 3.48294   | 4.01843   | 3.78458   | 3.51752   | 4.02855   |
| DKFZP58611420     | 0.823332  | 1.05046   | 1.05913   | 0.904455  | 1.03491   |
| HTRA2             | 17.7715   | 16.5384   | 20.3307   | 17.772    | 17.8803   |
| IWS1              | 12.6574   | 11.8456   | 11.0555   | 11.9859   | 12.482    |
| GSTO2             | 37.287    | 38.5005   | 39.622    | 37.1414   | 38.4055   |
| SPG7              | 25.1922   | 24.962    | 17.6701   | 22.5366   | 25.0491   |
| ATP6V1B2          | 31.0759   | 30.7593   | 33.6269   | 29.3506   | 32.6041   |
| ZNF296            | 23.02     | 19.3401   | 26.1234   | 24.3914   | 19.1005   |
| ZNF182            | 1.42606   | 1.20741   | 1.31223   | 1.55315   | 1.11531   |
| UBAC1             | 38.5481   | 41.9502   | 38.9283   | 40.4697   | 38.6312   |
| CTCF              | 11.6179   | 11.7633   | 11.3132   | 11.829    | 12.1417   |
| ZBTB49            | 1.29746   | 1.90188   | 1.60949   | 1.43413   | 1.80019   |
| CREB3L4           | 5.64154   | 5.86317   | 5.75695   | 5.59547   | 5.76027   |
| CDC25B            | 21.6476   | 20.8004   | 23.2504   | 24.4609   | 20.0258   |
| RUNDC1            | 7.20412   | 6.02056   | 4.83757   | 5.90711   | 6.60311   |
| IDH1              | 11.5802   | 12.2222   | 14.5745   | 13.5396   | 12.558    |
| MRPS28            | 40.5762   | 39.1586   | 42.347    | 42.5895   | 39.5736   |
| IL21R-AS1         | 0.0520817 | 0         | 0.139776  | 0.103679  | 0.0517717 |
| PLK1              | 73.7909   | 54.7006   | 74.6413   | 75.701    | 52.8512   |
| LOC728554         | 27.5543   | 28.5079   | 26.699    | 27.4644   | 28.4332   |
| IMMT              | 41.3511   | 37.3795   | 40.974    | 41.3112   | 40.1098   |
| KIF23             | 9.65029   | 9.07837   | 12.3659   | 11.5574   | 8.6648    |
| DNASE2            | 37.3281   | 39.3146   | 42.973    | 41.3594   | 36.0786   |
| RBM27             | 3.02893   | 2.826     | 2.80654   | 2.87808   | 3.05153   |
| SCRIB             | 39.1106   | 34.7318   | 35.822    | 38.4731   | 36.0028   |
| GLT25D1           | 55.8574   | 50.3383   | 56.5395   | 56.1443   | 53.5585   |
| ERMAP             | 1.79826   | 2.11493   | 1.94119   | 1.83765   | 2.14812   |
| UQCRCF51          | 122.326   | 133.193   | 121.523   | 125.845   | 120.664   |
| FAM50A            | 75.2197   | 94.0883   | 84.1979   | 80.1979   | 84.1123   |
| UBQLN1            | 32.311    | 31.7241   | 35.3453   | 34.0329   | 30.9284   |
| NDUFAF5           | 5.57761   | 5.92391   | 5.27158   | 5.02251   | 6.05425   |
| SOX8              | 17.2941   | 18.9839   | 17.4322   | 17.7913   | 17.3116   |
| CCDC159           | 2.63203   | 2.88811   | 3.45337   | 3.29282   | 2.28431   |
| STRBP             | 9.06876   | 8.3999    | 9.94866   | 9.16071   | 9.00989   |
| SPATA9            | 0         | 0.0271449 | 0.094164  | 0.0622452 | 0.025687  |
| BIN1              | 36.4607   | 29.2861   | 35.6419   | 33.6337   | 30.3524   |
| SOGA2             | 4.39546   | 3.65727   | 3.63411   | 3.82339   | 3.79236   |
| SPOCK2            | 0.0414924 | 0.0164532 | 0.0295728 | 0.0404846 | 0.0151272 |
| ASPH              | 51.1551   | 47.0259   | 46.2304   | 46.0191   | 53.778    |
| PRSS27            | 0.563136  | 1.34582   | 1.89753   | 1.11211   | 1.09973   |
| LOC284454.MIR24-2 | 8.80367   | 15.8304   | 7.90419   | 10.5186   | 12.6655   |
| COPS6             | 155.155   | 174.538   | 154.83    | 154.306   | 168.53    |
| PARP2             | 14.4133   | 11.7409   | 13.9577   | 15.3144   | 11.7204   |
| PPHLN1            | 20.4456   | 21.4345   | 18.8663   | 18.9334   | 23.2322   |
| DSTYK             | 1.79591   | 1.98078   | 1.73482   | 1.7337    | 1.97775   |
| KRTCAP2           | 338.159   | 374.426   | 342.788   | 332.693   | 363.428   |
| C17orf89          | 74.3459   | 83.4722   | 85.4274   | 87.0148   | 73.9504   |
| ANO7              | 2.68094   | 2.87156   | 2.38058   | 2.63075   | 2.51108   |
| SAPCD2            | 59.0252   | 49.1836   | 57.2884   | 60.628    | 43.5206   |
| CYC1              | 227.679   | 234.318   | 223.114   | 215.701   | 225.039   |
| ALG3              | 73.2929   | 58.4163   | 65.1353   | 66.3166   | 65.2231   |
| SFT2D2            | 3.07322   | 3.6826    | 3.05372   | 2.92707   | 2.94467   |
| TPT1              | 3575.77   | 5948.48   | 3785.07   | 3645.7    | 5125.51   |
| FECH              | 1.61465   | 2.14127   | 1.84253   | 1.81052   | 2.00033   |
| XPNPEP1           | 33.3734   | 29.5295   | 31.4336   | 30.9827   | 31.6155   |
| MRPL47            | 33.4082   | 37.6598   | 34.3657   | 33.6547   | 35.2952   |
| FAM213B           | 17.9539   | 22.4152   | 19.0228   | 19.1427   | 22.3698   |

|                     |           |           |           |           |           |
|---------------------|-----------|-----------|-----------|-----------|-----------|
| NME1,NME1-NME2,NME2 | 1584.82   | 1968.84   | 1657.11   | 1568.78   | 1792.9    |
| EFCAB14             | 6.00867   | 6.86529   | 6.12647   | 5.97375   | 6.95508   |
| ZDHC13              | 7.28282   | 6.12759   | 7.90797   | 7.73071   | 6.3573    |
| SNAPIN              | 39.6096   | 39.0196   | 35.2994   | 32.947    | 44.7104   |
| C6orf1              | 46.7724   | 43.4766   | 43.1185   | 46.6381   | 39.095    |
| PGD                 | 108.073   | 116.441   | 113.996   | 106.911   | 119.162   |
| BOK                 | 50.655    | 53.4292   | 64.0613   | 52.744    | 53.6045   |
| MMGT1               | 5.25577   | 7.6484    | 6.23513   | 6.19926   | 7.33805   |
| PPP1R21             | 3.59183   | 3.85439   | 3.77741   | 3.52902   | 4.19458   |
| MSH4                | 0.673727  | 0.537986  | 0.612836  | 0.677354  | 0.676906  |
| PPAP2C              | 80.1041   | 72.7282   | 87.1256   | 82.1588   | 68.5837   |
| CRADD               | 8.1792    | 9.88813   | 9.23739   | 7.2474    | 10.2723   |
| IQSEC1              | 6.88033   | 7.08362   | 5.77378   | 6.85116   | 6.27474   |
| KCTD6               | 6.38865   | 5.66925   | 6.64948   | 6.96847   | 6.20445   |
| RFK                 | 9.21009   | 10.3845   | 10.4707   | 8.74      | 11.368    |
| UBE2K               | 13.9751   | 13.1772   | 14.8962   | 13.3753   | 13.9103   |
| TLE4                | 0.46958   | 0.634497  | 0.561722  | 0.588317  | 0.564141  |
| IFRD2               | 77.184    | 73.6784   | 89.5362   | 83.1529   | 73.4321   |
| UGT8                | 2.8108    | 3.17919   | 3.09637   | 2.65027   | 3.76868   |
| TAF1                | 2.52756   | 2.00582   | 2.14121   | 2.44798   | 1.92774   |
| SERP1               | 40.123    | 44.544    | 46.5353   | 39.7859   | 44.7567   |
| DNAJC14             | 9.98267   | 10.4973   | 10.0611   | 10.3856   | 9.74094   |
| RELL2               | 6.32207   | 5.7311    | 7.71504   | 7.26153   | 6.0977    |
| TSSK4               | 0.115518  | 0.0943704 | 0.0851672 | 0.113392  | 0.0595205 |
| PTOV1-AS1           | 1.71108   | 2.26252   | 2.73694   | 2.2495    | 2.50624   |
| LGALS3              | 44.4661   | 65.1927   | 48.2005   | 46.3084   | 61.0956   |
| BET1                | 10.0738   | 8.3002    | 11.1087   | 9.63119   | 9.63332   |
| CHMP4C              | 39.4521   | 37.7614   | 59.5673   | 44.7487   | 41.397    |
| SF3B1               | 33.4877   | 33.1603   | 32.7946   | 33.2535   | 34.1013   |
| LGR4                | 1.2549    | 1.26706   | 1.05491   | 1.1667    | 1.31515   |
| RBFA                | 4.96586   | 6.0916    | 5.03638   | 4.97819   | 6.23275   |
| SLC25A35            | 1.7343    | 2.05355   | 1.64652   | 2.17801   | 1.94557   |
| KRI1                | 22.6204   | 19.6045   | 20.9706   | 22.5803   | 19.1583   |
| RNF166              | 15.6037   | 18.9525   | 15.4564   | 15.7523   | 17.4516   |
| KPNA6               | 8.38762   | 8.88717   | 7.59558   | 8.27223   | 8.86145   |
| TET3                | 1.35313   | 0.98652   | 1.19593   | 1.37807   | 1.0327    |
| ZNF175              | 1.93691   | 1.60901   | 1.3917    | 1.73088   | 1.55619   |
| RARA                | 10.3266   | 10.0824   | 9.28934   | 10.2249   | 10.7696   |
| C19orf54            | 9.04309   | 7.98183   | 9.64926   | 10.2739   | 7.55384   |
| MROH6               | 7.84337   | 3.87254   | 4.56849   | 7.9866    | 4.67774   |
| NR2C2AP             | 40.2148   | 44.8621   | 45.5114   | 43.0561   | 44.7913   |
| ZBTB42              | 3.81157   | 5.27758   | 4.65359   | 4.43258   | 4.74087   |
| SLBP                | 43.1789   | 49.705    | 46.0846   | 44.847    | 49.806    |
| RNF2                | 9.00022   | 9.12028   | 9.50061   | 7.90417   | 10.6125   |
| SH3PXD2A            | 1.42946   | 1.21197   | 1.22479   | 1.41142   | 1.28912   |
| FAM149A             | 0.835165  | 1.36896   | 1.26998   | 1.06567   | 1.23156   |
| TOP2B               | 14.1627   | 12.6659   | 14.4902   | 14.0696   | 13.6381   |
| BRE                 | 34.9424   | 36.0468   | 31.2153   | 31.1109   | 39.5302   |
| SLC36A4             | 3.10669   | 4.23163   | 3.25877   | 3.07653   | 4.39162   |
| POLR3H              | 19.1075   | 18.6388   | 22.1665   | 20.3008   | 17.9356   |
| C17orf53            | 5.74754   | 4.06068   | 4.96226   | 5.61845   | 3.93444   |
| ZC3H12A             | 2.84588   | 4.7412    | 2.37042   | 2.5478    | 4.53055   |
| SHANK3              | 6.95648   | 6.65711   | 6.14463   | 6.65934   | 7.10221   |
| KIAA0907            | 8.67726   | 6.7055    | 9.56945   | 9.30387   | 6.74634   |
| GRIK1-AS2           | 0         | 0.067814  | 0.175809  | 0.116653  | 0.127947  |
| PNKP                | 42.6406   | 38.0337   | 33.6578   | 44.5758   | 32.4876   |
| C9orf16             | 398.055   | 412.683   | 333.491   | 347.182   | 436.851   |
| WDR89               | 3.55219   | 2.69016   | 3.29377   | 2.99028   | 2.96368   |
| EIF2AK4             | 8.5353    | 8.55458   | 7.54863   | 8.15538   | 8.9744    |
| GRIN3A              | 0.0472006 | 0.0583076 | 0.0236504 | 0.0210423 | 0.0750469 |
| NUP35               | 5.55378   | 5.44221   | 7.80208   | 6.29792   | 4.80607   |
| STAT5A              | 9.07353   | 9.44051   | 7.94361   | 8.51314   | 9.02232   |
| NOP56               | 64.2386   | 79.8364   | 72.2454   | 69.1377   | 79.0794   |
| RPL38               | 4094.38   | 5741.45   | 4042.54   | 4063.07   | 4937.99   |
| NFU1                | 34.2975   | 36.5626   | 37.5063   | 34.6649   | 37.0411   |
| KIAA1609            | 6.09893   | 5.35551   | 5.53119   | 5.45341   | 6.02129   |
| CCDC109B            | 37.0648   | 37.8332   | 33.147    | 31.8615   | 43.6988   |
| ENTPD5              | 0.454316  | 0.378398  | 0.37422   | 0.483076  | 0.419223  |
| MTF1                | 0.903345  | 1.0503    | 1.18461   | 1.01361   | 1.02788   |
| GFOD2               | 16.9067   | 12.455    | 17.6265   | 16.5531   | 13.6825   |
| LRRC14              | 9.15584   | 11.7265   | 9.57818   | 11.3323   | 10.8222   |
| KIF27               | 0.475073  | 0.266259  | 0.363566  | 0.347091  | 0.343081  |
| CHTOP               | 56.3256   | 59.783    | 54.0717   | 53.5733   | 61.117    |
| ALDH18A1            | 40.3819   | 44.157    | 39.0374   | 38.3099   | 47.548    |
| GPN3                | 22.871    | 22.7725   | 21.4734   | 20.7866   | 25.2199   |
| FAM96A              | 49.3279   | 47.9685   | 54.4304   | 49.2687   | 50.1268   |
| BMP2K               | 2.09567   | 2.1214    | 2.26821   | 2.03176   | 2.24297   |
| C18orf21            | 20.2487   | 19.9466   | 20.361    | 19.7652   | 18.5441   |
| BTBD1               | 21.3194   | 25.0629   | 21.0834   | 20.7478   | 25.476    |



|                         |          |          |          |          |          |
|-------------------------|----------|----------|----------|----------|----------|
| RPL28                   | 1820.92  | 2476.5   | 1738.79  | 1783.36  | 2280.12  |
| GLTP                    | 35.0997  | 40.9172  | 35.8846  | 32.9727  | 41.6011  |
| WVOX                    | 5.81034  | 5.33971  | 6.17167  | 6.38109  | 5.61763  |
| ARHGEF11                | 3.05205  | 3.13186  | 2.67805  | 3.10271  | 2.93174  |
| CCP110                  | 1.7826   | 1.95493  | 1.76609  | 1.94709  | 1.89448  |
| ZNF646                  | 2.46917  | 2.41138  | 2.55118  | 2.61535  | 2.24396  |
| NR2F6                   | 108.589  | 103.43   | 118.053  | 112.812  | 99.8815  |
| GALNT2                  | 10.0629  | 9.58437  | 8.29624  | 9.30703  | 10.0776  |
| NT5DC2                  | 91.2887  | 98.6151  | 98.6745  | 94.7743  | 96.9815  |
| MAST3                   | 3.9993   | 3.85328  | 2.92864  | 3.88133  | 3.77658  |
| MTHFSD                  | 4.92161  | 5.13518  | 5.44392  | 5.62052  | 4.79237  |
| WBP11                   | 27.114   | 30.6061  | 23.1347  | 26.9506  | 30.2193  |
| ZNF652                  | 1.07897  | 0.977093 | 0.809982 | 0.897309 | 1.04463  |
| PEX26                   | 6.55444  | 7.29263  | 7.79537  | 7.00545  | 7.29522  |
| MAPK14                  | 9.11462  | 10.9702  | 8.73229  | 8.93806  | 11.4246  |
| RPS15                   | 4523.3   | 5795.41  | 4507.91  | 4417.28  | 5223.07  |
| PON2                    | 35.0198  | 32.9977  | 34.9112  | 34.6203  | 34.4062  |
| TNFRSF10B               | 32.0206  | 35.1988  | 38.4376  | 35.6175  | 33.9275  |
| MRPL51                  | 196.194  | 202.809  | 217.611  | 208.322  | 181.428  |
| HERC2                   | 2.95234  | 2.9343   | 2.49779  | 2.99075  | 2.81169  |
| MRPL19                  | 7.41861  | 7.89594  | 7.127    | 6.72934  | 8.21228  |
| PRIM2                   | 8.68236  | 7.92139  | 9.70533  | 9.71716  | 8.63401  |
| RPL14                   | 2758.73  | 3536.44  | 2875.85  | 2723.77  | 3215.8   |
| EMC6                    | 132.891  | 148.38   | 151.949  | 135.023  | 139.094  |
| KREMEN2                 | 23.2931  | 18.6987  | 19.4668  | 22.3242  | 20.3545  |
| KLF3                    | 3.2921   | 3.28432  | 3.13743  | 3.16709  | 3.38404  |
| ANKRD13B                | 12.4259  | 7.84584  | 9.64369  | 11.9779  | 8.61103  |
| GPHN                    | 6.61029  | 4.88033  | 5.99477  | 6.0213   | 5.70585  |
| CAMKMT                  | 3.77479  | 2.63294  | 2.6909   | 2.76874  | 3.41007  |
| NUDT13                  | 0.992727 | 0.851698 | 1.05629  | 1.2302   | 0.796702 |
| PHAX                    | 5.58519  | 6.68046  | 5.31649  | 5.35485  | 6.91094  |
| USP14                   | 10.5542  | 9.21796  | 12.8437  | 10.8623  | 9.8485   |
| CDC27                   | 7.07991  | 6.30692  | 7.81297  | 7.05039  | 6.72064  |
| LUST                    | 0.302404 | 0.105655 | 0.113415 | 0.326785 | 0.099915 |
| LOC100129034            | 19.2914  | 16.8554  | 18.4962  | 17.8492  | 17.9635  |
| ASF1B                   | 30.3145  | 39.0543  | 34.1282  | 36.9159  | 35.9757  |
| MEF2A                   | 4.32893  | 3.42861  | 4.44334  | 4.1212   | 3.51083  |
| PARP3                   | 11.2871  | 12.7569  | 12.2272  | 11.777   | 13.2165  |
| ZNF585B                 | 0.950397 | 0.869023 | 0.978155 | 1.07003  | 0.825666 |
| NSDHL                   | 23.1815  | 24.9322  | 23.1429  | 23.2413  | 24.4101  |
| PKMYT1                  | 58.6424  | 46.3809  | 64.9015  | 69.1578  | 44.9004  |
| FAM58A                  | 32.1295  | 39.8076  | 38.3824  | 36.4723  | 37.2069  |
| PAX9                    | 1.7171   | 1.49261  | 1.92061  | 1.88968  | 1.45831  |
| CTBP2                   | 14.0353  | 11.9463  | 16.475   | 14.44    | 12.3047  |
| LMNB1                   | 11.9017  | 10.7365  | 10.568   | 12.6809  | 11.3728  |
| LOC100133315            | 0.542415 | 0.475398 | 0.276092 | 0.520017 | 0.298361 |
| MTR                     | 2.03595  | 2.00048  | 1.51869  | 1.83881  | 2.10711  |
| PFDN4                   | 25.7251  | 25.3965  | 30.6645  | 24.2702  | 24.5958  |
| E4F1                    | 16.5396  | 17.5531  | 18.4956  | 18.4522  | 16.9924  |
| HCCS                    | 9.66283  | 11.1955  | 12.0705  | 10.977   | 10.7399  |
| RBM18                   | 6.3902   | 6.91082  | 7.83971  | 6.20536  | 7.34997  |
| VAMP8                   | 1.32095  | 0.964113 | 1.16236  | 0.757286 | 1.83672  |
| MPP6                    | 3.77134  | 2.64412  | 3.41699  | 3.39879  | 3.14308  |
| MDM4                    | 3.81161  | 3.96239  | 4.13532  | 3.74369  | 4.27939  |
| LOC646278               | 0.3421   | 0.419188 | 0.383424 | 0.457297 | 0.240605 |
| TWF2                    | 111.307  | 119.702  | 101.79   | 103.348  | 119.597  |
| CD55                    | 18.3925  | 16.5696  | 20.1493  | 18.4231  | 16.4705  |
| EV15                    | 1.67405  | 1.44292  | 1.68362  | 1.45919  | 1.53958  |
| CACNB1                  | 5.05828  | 4.86499  | 4.69452  | 4.76802  | 5.39171  |
| STAU1                   | 30.6876  | 29.1123  | 33.2755  | 30.1446  | 32.1677  |
| CWC22                   | 4.47462  | 3.95442  | 3.80877  | 3.98039  | 4.5399   |
| NKIRAS1                 | 4.36123  | 3.90058  | 4.43952  | 4.10223  | 3.96065  |
| TMEM57                  | 4.6451   | 4.70034  | 5.43367  | 5.20902  | 4.73481  |
| UBA5                    | 11.4392  | 10.5372  | 9.92135  | 11.1354  | 11.3387  |
| RPL36AL                 | 606.856  | 615.698  | 538.62   | 594.535  | 588.962  |
| RPL31                   | 4018.07  | 5915.29  | 4335.01  | 4090.4   | 5196.65  |
| PURB                    | 3.48497  | 4.12851  | 3.93307  | 3.51893  | 4.12048  |
| ACVR1                   | 4.35071  | 4.95601  | 4.30586  | 4.43511  | 5.36695  |
| LOC100506990            | 3.46326  | 4.6907   | 4.14249  | 3.8306   | 4.23068  |
| ZNF354A                 | 5.8078   | 5.80484  | 6.96481  | 5.75414  | 6.31175  |
| OAZ1                    | 835.601  | 822.412  | 946.089  | 855.09   | 781.907  |
| RTKN                    | 19.9884  | 16.914   | 21.5739  | 20.9172  | 17.5758  |
| PEX19                   | 14.3118  | 16.6767  | 13.9196  | 13.3643  | 17.8494  |
| BMI1,COMMD3,COMMD3-BMI1 | 67.2607  | 81.7293  | 79.4644  | 64.2135  | 84.1833  |
| MPG                     | 183.256  | 200.778  | 186.705  | 171.274  | 196.589  |
| RPL37                   | 857.722  | 1247.46  | 973.503  | 831.059  | 1193.27  |
| SLC25A44                | 4.73361  | 6.11105  | 6.52047  | 5.45775  | 5.71001  |
| SETD4                   | 8.60125  | 9.53624  | 7.98477  | 8.30664  | 8.91851  |
| TRAPPC10                | 2.55748  | 2.4949   | 2.90567  | 3.02989  | 2.48669  |

|                           |           |          |           |          |          |
|---------------------------|-----------|----------|-----------|----------|----------|
| RPL7A                     | 9818.47   | 13652.7  | 9834.84   | 9845.33  | 12257.9  |
| C8orf76,ZHX1,ZHX1-C8ORF76 | 34.9839   | 26.5381  | 40.9772   | 33.8508  | 27.9463  |
| PIK3C2A                   | 3.11998   | 2.85694  | 2.4864    | 2.61139  | 3.03037  |
| AMFR                      | 28.7186   | 34.5746  | 29.5464   | 27.5325  | 35.9153  |
| SERPINF1                  | 0.223049  | 0.240595 | 0.269321  | 0.147724 | 0.277638 |
| SMC3                      | 10.8161   | 9.63265  | 9.76237   | 11.2844  | 10.7396  |
| USF2                      | 100.536   | 84.1609  | 104.752   | 100.184  | 89.3097  |
| RBM22                     | 20.3115   | 21.5545  | 21.8109   | 20.407   | 22.0729  |
| PRPF38A                   | 13.8897   | 12.463   | 15.0901   | 14.4027  | 11.5975  |
| CHD1                      | 3.48699   | 2.76566  | 3.1703    | 3.1588   | 3.35955  |
| PKI55                     | 0.884885  | 1.31094  | 1.31728   | 0.887844 | 1.56541  |
| KIF14                     | 1.90152   | 1.11657  | 1.35318   | 1.84097  | 1.16912  |
| TSPAN4                    | 58.2059   | 51.0315  | 49.4521   | 53.8323  | 55.6173  |
| CASP9                     | 4.31574   | 4.20593  | 4.10001   | 4.32477  | 4.49611  |
| FAM73A                    | 1.23083   | 0.986309 | 1.0576    | 1.13197  | 0.992167 |
| RALA                      | 11.665    | 13.101   | 13.7661   | 11.7962  | 13.7357  |
| WDR52                     | 0.171659  | 0.319789 | 0.198467  | 0.239159 | 0.268368 |
| HOXA5                     | 8.21935   | 9.9038   | 8.05132   | 8.19128  | 10.0944  |
| GATA4                     | 8.83962   | 7.81028  | 6.75854   | 8.43425  | 7.28556  |
| CITED2                    | 7.91012   | 7.77457  | 6.07005   | 6.54235  | 8.69094  |
| MAP2K5                    | 13.174    | 11.8314  | 13.816    | 12.2598  | 12.6898  |
| FAXC                      | 0.477901  | 0.456732 | 0.552231  | 0.592402 | 0.42702  |
| RNF139                    | 14.3929   | 19.2028  | 16.0857   | 13.6531  | 21.0996  |
| VANGL1                    | 1.4102    | 1.67381  | 1.62109   | 1.4966   | 1.61978  |
| METRN                     | 145.118   | 135.824  | 146.61    | 146.875  | 132.488  |
| NRBP2                     | 12.3475   | 15.2262  | 9.46168   | 12.2412  | 16.4458  |
| PRPF39                    | 7.40209   | 6.2269   | 6.29105   | 6.57123  | 6.68824  |
| C1QTNF9B                  | 0.352748  | 0.512063 | 0.214751  | 0.502685 | 0.31927  |
| TMEM14C                   | 139.295   | 177.561  | 157.078   | 139.408  | 179.736  |
| PAK2                      | 11.9439   | 11.7255  | 11.3775   | 11.3541  | 11.8285  |
| NUDT8                     | 40.7655   | 57.165   | 34.6533   | 44.3226  | 52.3703  |
| MATN1                     | 0.0368718 | 0.132484 | 0.0364409 | 0        | 0.10325  |
| RPL22                     | 307.092   | 395.045  | 331.038   | 321.262  | 350.051  |
| ERCC3                     | 22.2967   | 23.5552  | 21.3822   | 22.8629  | 23.5695  |
| DHX40                     | 5.99673   | 6.36345  | 6.21367   | 5.97476  | 6.63436  |
| HOXB7                     | 16.9288   | 21.7342  | 23.4005   | 19.7256  | 19.5435  |
| MED9                      | 8.74764   | 9.8879   | 8.98314   | 9.01545  | 9.61241  |
| PHF23                     | 16.4365   | 16.7382  | 19.168    | 17.7583  | 16.1313  |
| RASA4                     | 4.90985   | 5.51189  | 4.51767   | 4.47109  | 5.79677  |
| RHBDL3                    | 0.876323  | 0.910438 | 1.12269   | 1.14876  | 0.805466 |
| YES1                      | 10.3152   | 7.94733  | 10.0246   | 9.67348  | 9.30149  |
| CDK5RAP2                  | 5.33605   | 4.71987  | 4.45949   | 5.28677  | 5.00238  |
| C11orf73                  | 26.3436   | 29.0752  | 29.8002   | 25.7668  | 30.1473  |
| SND1                      | 85.2731   | 90.4525  | 94.7174   | 85.9189  | 89.5065  |
| SUPT5H                    | 33.3153   | 33.8997  | 31.709    | 31.7382  | 33.5351  |
| ATP1A3                    | 8.27934   | 10.2396  | 8.57434   | 9.0506   | 9.84573  |
| CEP170B                   | 12.4607   | 12.3563  | 11.2946   | 12.7676  | 12.2279  |
| UBASH3B                   | 1.70187   | 1.41885  | 1.97938   | 1.71806  | 1.74768  |
| RPL13A                    | 8126.74   | 12395.7  | 9094.05   | 8449.13  | 11032.1  |
| TUBA8                     | 5.44205   | 6.28599  | 5.37841   | 5.73285  | 5.86679  |
| TXNRD1                    | 24.245    | 19.9504  | 27.3869   | 24.1125  | 22.7604  |
| SPTLC1                    | 24.895    | 25.2241  | 26.3525   | 23.5853  | 26.9685  |
| VPRBP                     | 2.14949   | 2.50275  | 2.63765   | 2.42933  | 2.668    |
| PFDN5                     | 417.15    | 608.649  | 427.758   | 418.006  | 543.856  |
| ZNF76                     | 8.46022   | 8.52     | 10.6875   | 9.60125  | 8.35567  |
| ISL1                      | 0.0827427 | 0.222027 | 0.180672  | 0.137899 | 0.222944 |
| C9orf3                    | 2.33966   | 1.80294  | 2.28868   | 2.58558  | 1.72872  |
| MKS1                      | 9.21217   | 10.0296  | 9.18819   | 9.06675  | 10.3721  |
| KIAA0922                  | 2.52721   | 2.1729   | 2.50243   | 2.86571  | 2.15319  |
| PARP4                     | 14.2255   | 12.574   | 15.377    | 13.8801  | 13.5347  |
| PARVG                     | 0.0640959 | 0.172838 | 0.109515  | 0.106762 | 0.157867 |
| PIGM                      | 1.71649   | 2.11206  | 2.6622    | 2.21359  | 2.1915   |
| PTRH2                     | 40.5829   | 43.9658  | 45.2728   | 39.4162  | 43.5573  |
| NFYB                      | 5.13579   | 5.09412  | 5.76925   | 5.54063  | 4.94127  |
| FDP5                      | 70.072    | 75.8763  | 59.7731   | 70.0215  | 76.1887  |
| ULK3                      | 26.0355   | 28.0296  | 22.0586   | 25.6445  | 27.8426  |
| ARAP3                     | 7.48423   | 6.75374  | 6.30449   | 7.72779  | 6.60149  |
| HOOK2                     | 10.5499   | 9.0491   | 10.3389   | 11.0266  | 9.43514  |
| ACTL10                    | 1.49139   | 2.57842  | 2.94146   | 1.98017  | 2.38649  |
| RNF113A                   | 36.7321   | 30.4999  | 35.1005   | 34.4153  | 30.0217  |
| LOC541471                 | 371.09    | 457.889  | 357.969   | 366.195  | 393.837  |
| SZT2                      | 1.48054   | 1.71371  | 1.23601   | 1.69931  | 1.54978  |
| HPCAL1                    | 46.6861   | 47.6637  | 45.2251   | 43.1278  | 46.5698  |
| NOL12                     | 7.19574   | 6.42389  | 6.51907   | 7.81814  | 5.58194  |
| MLST8                     | 71.1272   | 70.8576  | 79.9303   | 72.7293  | 70.2948  |
| SNAPC1                    | 6.92879   | 5.6539   | 6.02138   | 6.60566  | 5.77176  |
| ICOSLG                    | 2.4904    | 2.80375  | 2.76994   | 2.46003  | 2.99463  |
| FRMD6                     | 21.3584   | 17.8466  | 17.4901   | 19.3045  | 16.9696  |
| NAA50                     | 16.0797   | 16.6882  | 17.402    | 15.7211  | 18.5356  |

|                           |            |           |           |           |            |
|---------------------------|------------|-----------|-----------|-----------|------------|
| CLTC                      | 24.3641    | 21.4059   | 23.6835   | 23.505    | 23.0492    |
| MPND                      | 22.2882    | 25.4682   | 22.841    | 23.6762   | 22.3239    |
| VRK3                      | 12.5905    | 12.7978   | 10.9112   | 12.8227   | 11.6932    |
| ATG4B                     | 22.6955    | 23.5965   | 24.7178   | 23.9032   | 24.2198    |
| NOL10                     | 7.195      | 5.61652   | 6.52997   | 6.50194   | 6.57425    |
| UTP23                     | 6.69257    | 7.22428   | 7.83263   | 6.56093   | 8.32694    |
| JMY                       | 1.74494    | 1.28797   | 1.89729   | 1.82957   | 1.50222    |
| ZDHHC9                    | 13.8967    | 14.908    | 14.2255   | 13.3988   | 15.7136    |
| LEP                       | 0.0136992  | 0.0288796 | 0.0169886 | 0.011405  | 0          |
| TMEM147                   | 191.942    | 214.715   | 191.774   | 185.238   | 216.458    |
| KPNA1                     | 5.27181    | 5.77366   | 5.92366   | 5.3256    | 5.78767    |
| TNFRSF10A                 | 5.62452    | 6.05742   | 5.58768   | 5.66952   | 5.94905    |
| SP2                       | 4.65851    | 4.44775   | 4.1579    | 4.0838    | 4.99325    |
| COX5A                     | 346.73     | 335.214   | 335.245   | 336.641   | 343.564    |
| ARIH2                     | 15.2256    | 16.0969   | 17.9013   | 16.3117   | 16.7054    |
| ARF6                      | 15.8699    | 19.9785   | 19.2968   | 16.5556   | 20.8232    |
| TTL5                      | 3.03469    | 2.6448    | 2.27659   | 2.70246   | 2.972      |
| EEF1G                     | 3346.15    | 5607.48   | 3584.12   | 3499.46   | 4958.87    |
| CD63                      | 561.62     | 615.863   | 626.869   | 579.646   | 591.685    |
| CHMP3,RNF103,RNF103-CHMP3 | 20.2299    | 23.5946   | 22.9654   | 21.0032   | 22.9493    |
| RPS26                     | 1973.66    | 2638.77   | 1950.01   | 1993.08   | 2275.88    |
| C10orf68,CCDC7            | 0.545679   | 0.462009  | 0.803395  | 0.599811  | 0.626924   |
| TEX10                     | 32.5621    | 29.0335   | 39.8879   | 33.5231   | 30.9356    |
| ALPK1                     | 1.60908    | 1.58694   | 1.76535   | 1.9339    | 1.48982    |
| ZNF232                    | 9.87562    | 8.30271   | 12.1058   | 9.98608   | 8.35234    |
| MAU2                      | 7.1165     | 6.84912   | 7.10338   | 7.20065   | 7.42808    |
| RNU12                     | 4.81996    | 0         | 0         | 2.6303    | 2.22588    |
| RAB33B                    | 1.09747    | 1.52617   | 1.24483   | 1.09799   | 1.44492    |
| FAS                       | 3.64313    | 4.7758    | 3.59463   | 3.46957   | 5.43702    |
| C1orf85                   | 30.0901    | 38.0528   | 27.266    | 31.3987   | 33.7685    |
| SGOL2                     | 3.23388    | 2.61021   | 1.94307   | 3.26774   | 2.41089    |
| C4orf29                   | 1.13063    | 0.742042  | 0.654312  | 0.810473  | 1.09417    |
| SEPT7L                    | 0.129314   | 0.0901269 | 0         | 0.107253  | 0          |
| URB2                      | 1.95686    | 2.70514   | 2.64376   | 2.06785   | 2.58955    |
| HADHA                     | 88.7106    | 96.4841   | 94.1041   | 91.3457   | 97.6429    |
| THSD4                     | 0.157313   | 0.120835  | 0.12085   | 0.109985  | 0.150318   |
| EFHD2                     | 53.3249    | 50.4907   | 50.1411   | 52.043    | 52.1549    |
| TBC1D30                   | 0.10362    | 0.129616  | 0.0545791 | 0.115412  | 0.118092   |
| HIBADH                    | 14.866     | 15.0664   | 12.2896   | 13.4539   | 15.1016    |
| TMEM123                   | 36.8974    | 48.1993   | 41.0729   | 36.9559   | 51.1415    |
| LINC00654                 | 0.00702348 | 0         | 0.0262657 | 0.0117343 | 0.00929846 |
| PVR                       | 15.8767    | 14.5245   | 17.987    | 17.2639   | 14.2786    |
| PCM1                      | 5.28298    | 5.09926   | 5.27949   | 5.44644   | 5.44519    |
| PDIA3P                    | 0.985766   | 1.09768   | 1.54323   | 1.27442   | 1.18258    |
| KIAA1429                  | 5.93584    | 6.3943    | 5.79945   | 6.10623   | 6.2476     |
| OVOL2                     | 2.93       | 3.20264   | 4.36387   | 3.59415   | 3.01238    |
| ATP2A2                    | 14.101     | 13.5407   | 15.1481   | 14.3253   | 14.6657    |
| TRMT2A                    | 17.5161    | 15.0557   | 16.6373   | 17.9568   | 15.0883    |
| EFCAB12                   | 0.145417   | 0.0969501 | 0.122081  | 0.143776  | 0.071475   |
| ZNF281                    | 1.18571    | 1.64041   | 2.16276   | 1.37944   | 1.64159    |
| PSIP1                     | 27.9691    | 29.3881   | 27.8937   | 30.2492   | 30.1163    |
| AMPD3                     | 4.23486    | 4.35688   | 2.52292   | 3.04829   | 5.18098    |
| FHIT                      | 14.651     | 17.9412   | 13.2874   | 13.9386   | 17.2926    |
| DNA2                      | 1.22675    | 0.901146  | 1.19411   | 1.48767   | 0.7764     |
| BCL10                     | 37.8378    | 19.8748   | 35.8329   | 35.127    | 24.1908    |
| BAG5                      | 4.82056    | 5.53808   | 5.74484   | 4.90817   | 5.92106    |
| TMEM165                   | 43.0593    | 39.0117   | 48.4196   | 42.2881   | 43.1073    |
| FAM83F                    | 29.568     | 28.9259   | 31.9057   | 29.459    | 30.6695    |
| PPP1R15A                  | 211.582    | 128.272   | 246.479   | 211.838   | 129.902    |
| C10orf114                 | 7.92888    | 6.79044   | 10.3326   | 9.17916   | 6.2163     |
| POLE3                     | 33.106     | 42.6476   | 39.8736   | 37.0783   | 42.5328    |
| RAB22A                    | 3.79478    | 3.7818    | 3.75676   | 3.6279    | 3.88453    |
| XRCC1                     | 20.1953    | 16.1642   | 19.1513   | 20.2522   | 15.6471    |
| RETSAT                    | 14.4535    | 21.372    | 13.8977   | 15.0202   | 20.4643    |
| TEFM                      | 8.84126    | 7.4259    | 9.00677   | 9.00624   | 7.2333     |
| COL4A3BP                  | 4.66017    | 5.07732   | 4.56936   | 4.38712   | 5.47887    |
| HSD17B4                   | 12.4065    | 11.2446   | 11.19     | 11.9882   | 12.5309    |
| NUBP2                     | 94.373     | 95.2569   | 102.907   | 97.0328   | 99.1705    |
| GTF2H1                    | 8.57903    | 7.52066   | 12.002    | 9.97076   | 7.92759    |
| NDRG4                     | 4.87206    | 5.63483   | 3.89015   | 4.74791   | 6.22157    |
| MTMR2                     | 7.11058    | 5.37656   | 6.42916   | 6.45177   | 6.10375    |
| RPP14                     | 3.92593    | 6.81015   | 5.64845   | 4.50506   | 7.23189    |
| MTA2                      | 35.2452    | 36.9015   | 36.0393   | 36.884    | 37.0137    |
| CHID1                     | 23.7982    | 24.5181   | 20.7651   | 20.4576   | 26.719     |
| SLC6A12                   | 0.0595167  | 0.151072  | 0.121399  | 0.0829889 | 0.164547   |
| RPS6KA5                   | 0.395254   | 0.255063  | 0.415524  | 0.396712  | 0.304424   |
| HACE1                     | 0.943898   | 1.14383   | 0.764783  | 1.07233   | 1.03203    |
| DDHD2                     | 3.62299    | 3.62526   | 3.30245   | 3.01852   | 4.11901    |
| CA2                       | 8.53192    | 8.47619   | 6.59456   | 8.14984   | 9.5359     |

|                          |            |            |            |            |           |
|--------------------------|------------|------------|------------|------------|-----------|
| SGMS1                    | 2.27082    | 2.20466    | 2.7935     | 2.29812    | 2.30633   |
| LOC100505783             | 0.832057   | 1.14723    | 1.35874    | 0.89045    | 1.07836   |
| ENDOG                    | 33.746     | 34.9682    | 38.935     | 33.6916    | 38.5095   |
| SUPT4H1                  | 29.7032    | 40.7713    | 35.5511    | 31.7655    | 38.8463   |
| RAH14                    | 6.18397    | 4.64541    | 6.13331    | 6.44206    | 5.09334   |
| EPC2                     | 2.40077    | 2.14935    | 3.01238    | 2.21776    | 2.40699   |
| CHERP                    | 20.0693    | 19.5371    | 19.6022    | 19.1842    | 19.301    |
| NPIPL3                   | 4.47451    | 3.93387    | 3.76589    | 4.50895    | 4.10124   |
| SLC25A17                 | 11.4275    | 11.3439    | 13.242     | 10.6658    | 12.9705   |
| TRAPPC12                 | 16.0594    | 15.532     | 19.1746    | 18.1866    | 14.8092   |
| UBXN1                    | 136.031    | 140.884    | 160.435    | 145.989    | 132.214   |
| STK16                    | 9.38628    | 13.2768    | 10.5395    | 9.94158    | 12.887    |
| ZNF816,ZNF816-ZNF321P    | 2.89988    | 3.70745    | 3.23498    | 3.36754    | 3.3894    |
| XPA                      | 7.05553    | 7.36304    | 9.60826    | 8.55953    | 7.03365   |
| APIP                     | 14.3729    | 11.3523    | 15.6682    | 15.4285    | 11.9895   |
| LINC00674                | 2.39847    | 2.38235    | 2.77718    | 2.44808    | 2.66072   |
| PIP5K1C                  | 9.35921    | 7.75675    | 8.55631    | 9.55222    | 7.66311   |
| C3orf37                  | 37.0439    | 38.5692    | 36.9311    | 38.7698    | 39.7813   |
| UBR1                     | 1.38653    | 1.20034    | 1.32535    | 1.46118    | 1.26241   |
| ZC3H3                    | 23.2925    | 16.2813    | 19.4227    | 21.272     | 16.8314   |
| ST7                      | 8.98905    | 8.82054    | 10.5978    | 9.77172    | 8.91201   |
| PAPD4                    | 6.249      | 6.39278    | 5.41782    | 5.81737    | 6.24619   |
| ZNF583                   | 0.780786   | 0.983147   | 0.850509   | 0.705094   | 0.840568  |
| MZT2B                    | 394.331    | 390.489    | 439.275    | 394.876    | 418.646   |
| NANP                     | 2.57413    | 2.73672    | 2.4368     | 2.34601    | 3.17013   |
| GLYR1                    | 11.4063    | 11.0241    | 12.2208    | 12.0614    | 11.2692   |
| NDC80                    | 10.4173    | 9.60626    | 12.7905    | 13.1712    | 8.618     |
| C3orf17                  | 8.59943    | 8.36693    | 10.3033    | 9.31745    | 8.31279   |
| GADD45B                  | 42.836     | 67.8253    | 54.0505    | 41.9657    | 63.9503   |
| MRPS12                   | 109.734    | 115.786    | 120.852    | 107.064    | 111.355   |
| CHMP5                    | 32.3696    | 30.5487    | 37.0287    | 31.5228    | 32.9611   |
| PRRC2C                   | 5.12462    | 4.19535    | 4.79919    | 4.96332    | 4.55851   |
| DHX35                    | 3.40581    | 3.98639    | 3.38193    | 3.49728    | 4.02725   |
| C9orf142                 | 143.028    | 160.101    | 146.25     | 152.18     | 142.018   |
| TBL1XR1                  | 16.6841    | 16.66      | 17.2158    | 15.989     | 17.6656   |
| COIL                     | 5.2313     | 5.66341    | 4.92052    | 5.20089    | 5.66611   |
| DAPK1                    | 2.81898    | 2.2081     | 2.82236    | 2.74673    | 2.5336    |
| ZNF74                    | 8.44794    | 7.47481    | 8.01884    | 8.23792    | 7.1473    |
| RNF217                   | 0.591804   | 0.534852   | 0.373922   | 0.49337    | 0.537051  |
| ZNF706                   | 38.5645    | 39.5225    | 39.4485    | 38.475     | 39.4799   |
| CLEC4A                   | 0.822193   | 0.709591   | 0.61836    | 0.677801   | 0.698691  |
| NCEH1                    | 2.2097     | 1.75825    | 2.03507    | 2.10095    | 1.91459   |
| SSH1                     | 6.34983    | 6.75592    | 5.45891    | 6.52376    | 6.17967   |
| SSFA2                    | 6.57656    | 6.60392    | 6.15531    | 5.80789    | 7.43758   |
| ECE1                     | 14.2101    | 13.6481    | 13.8836    | 14.5403    | 13.797    |
| DEAF1                    | 37.5316    | 47.1999    | 31.7224    | 35.6619    | 45.4242   |
| LONP1                    | 103.699    | 89.9944    | 109.347    | 110.179    | 84.0763   |
| SEP15                    | 48.6453    | 52.407     | 55.3211    | 48.4122    | 55.5625   |
| BRI3                     | 338.425    | 358.723    | 316.626    | 342.501    | 313.753   |
| AFTPH                    | 5.99419    | 5.85111    | 6.34427    | 5.85649    | 5.95467   |
| GPIHBP1                  | 0.105475   | 0.120594   | 0.0545851  | 0.201768   | 0.0549222 |
| SLC4A7                   | 2.04496    | 1.17448    | 1.58915    | 1.79678    | 1.47535   |
| TAPT1                    | 1.9355     | 2.17897    | 2.24462    | 2.09287    | 2.21675   |
| NDUFAF3                  | 72.99      | 64.6919    | 71.4302    | 72.3228    | 66.474    |
| CHORDC1                  | 9.24078    | 8.6087     | 9.85293    | 9.35996    | 9.17318   |
| MXD1                     | 6.01246    | 5.54025    | 7.43391    | 6.45612    | 5.53111   |
| CCDC47                   | 19.4898    | 20.2178    | 19.7977    | 18.1985    | 22.8933   |
| PRKRIR                   | 9.22801    | 11.1912    | 12.4819    | 10.0497    | 11.1367   |
| XRCC6                    | 197.376    | 212.401    | 183.881    | 199.298    | 209.983   |
| IQGAP3                   | 10.0356    | 9.02292    | 10.2263    | 12.0569    | 8.08763   |
| MRPS24,URGCP,URGCP-MRPS: | 298.535    | 305.214    | 304.284    | 292.74     | 298.156   |
| NAA35                    | 9.46778    | 7.2277     | 10.4965    | 9.15281    | 7.80293   |
| DEPDC1                   | 6.32268    | 4.11549    | 6.86901    | 6.76485    | 4.09093   |
| DSE                      | 2.8006     | 3.0492     | 2.82909    | 2.66005    | 3.33668   |
| PSMD7                    | 49.5232    | 53.5024    | 39.6438    | 48.0714    | 50.0526   |
| H3F3A                    | 397.717    | 424.638    | 382.178    | 395.58     | 425.3     |
| MYO9B                    | 13.873     | 14.099     | 11.4714    | 13.4325    | 14.1692   |
| ZC3H15                   | 28.9377    | 25.1857    | 32.635     | 30.3065    | 26.1568   |
| MAVS                     | 3.85377    | 3.39736    | 4.15314    | 3.97953    | 3.27757   |
| BTF3                     | 801.484    | 940.188    | 825.395    | 821.112    | 899.613   |
| SLC4A2                   | 70.1167    | 60.307     | 66.3331    | 68.036     | 61.3517   |
| GLUL                     | 19.2583    | 22.477     | 22.8157    | 21.0075    | 22.298    |
| CLSPN                    | 0.989339   | 1.13574    | 0.711464   | 1.11503    | 1.06387   |
| USH2A                    | 0.00332321 | 0.00159585 | 0.00278338 | 0.00184757 | 0         |
| C14orf2                  | 349.623    | 340.457    | 379.711    | 348.52     | 331.072   |
| ADAM10                   | 2.76187    | 2.23489    | 2.67893    | 2.16729    | 3.10895   |
| FAM20B                   | 8.04799    | 8.10051    | 7.37359    | 7.44839    | 8.40982   |
| SLC16A11                 | 0.122167   | 0.267986   | 0.241254   | 0.0686515  | 0.14678   |
| PRPF4                    | 16.8316    | 16.3042    | 16.9284    | 17.0683    | 17.0552   |

|                               |            |           |            |           |           |
|-------------------------------|------------|-----------|------------|-----------|-----------|
| RPL21                         | 3263.02    | 4693.7    | 3661.26    | 3385.33   | 4167.16   |
| TAF1C                         | 16.1012    | 16.3459   | 13.1767    | 17.1776   | 14.6153   |
| MDK                           | 669.015    | 624.877   | 616.386    | 662.616   | 618.264   |
| RBBP4                         | 6.38288    | 7.70269   | 8.52323    | 7.1726    | 8.26984   |
| AOC2                          | 2.0312     | 1.79328   | 2.55405    | 2.48973   | 2.01842   |
| TUBA1C                        | 456.839    | 417.392   | 511.303    | 481.213   | 392.763   |
| PITHD1                        | 27.2042    | 34.3878   | 30.2406    | 29.6072   | 33.9564   |
| WDR48                         | 4.92792    | 5.839     | 5.33572    | 5.09702   | 5.94448   |
| TYSND1                        | 15.0139    | 15.722    | 16.4667    | 15.6762   | 16.3511   |
| C19orf52                      | 16.8921    | 18.6705   | 17.29      | 17.0188   | 17.4827   |
| SLC35D2                       | 21.7449    | 25.655    | 27.3785    | 25.2843   | 23.8984   |
| EML2                          | 17.5897    | 15.82     | 14.6778    | 16.0446   | 16.5432   |
| SRP9                          | 118.982    | 114.256   | 124.1      | 115.105   | 123.42    |
| XG                            | 0.00751202 | 0         | 0.01914    | 0         | 0         |
| ASH1L                         | 0.99943    | 0.977316  | 1.1333     | 1.11299   | 0.949348  |
| RPS24                         | 3047.61    | 3998.75   | 3281.41    | 3101.8    | 3699.74   |
| SCARNA2                       | 4.51515    | 2.93287   | 2.42572    | 3.95016   | 3.13279   |
| ZNF554                        | 1.02184    | 1.4616    | 1.32451    | 1.13638   | 1.49993   |
| DNAJC13                       | 2.6208     | 2.09972   | 2.64914    | 2.42513   | 2.66385   |
| PLCH1                         | 0.491408   | 0.407305  | 0.331278   | 0.376492  | 0.433921  |
| PCDH1                         | 5.16892    | 5.45279   | 4.57953    | 5.4032    | 4.82096   |
| PDDC1                         | 15.8657    | 14.8614   | 17.4909    | 16.2671   | 14.4524   |
| ZNF215                        | 1.75898    | 1.64649   | 1.69389    | 1.6595    | 1.70294   |
| PHYH                          | 34.7589    | 41.7975   | 31.1144    | 33.1781   | 41.3671   |
| TCTN3                         | 19.5223    | 24.7525   | 20.6503    | 20.8842   | 24.2295   |
| THRAP3                        | 27.6058    | 23.6534   | 25.708     | 26.1837   | 26.1342   |
| CMTM6                         | 11.9087    | 14.2459   | 12.9374    | 12.1971   | 14.7893   |
| BRAP                          | 5.03401    | 5.43469   | 4.93516    | 5.21874   | 5.49895   |
| C18orf32,RPL17,RPL17-C18orf32 | 3417.6     | 4675.56   | 3793.59    | 3503.82   | 4333.22   |
| CDAN1                         | 5.55082    | 5.0892    | 5.22836    | 5.87534   | 5.28246   |
| VASH2                         | 0.492707   | 0.485486  | 0.493258   | 0.495474  | 0.625471  |
| ANKRD27                       | 7.49995    | 5.37732   | 8.00956    | 7.08337   | 5.62455   |
| BTN2A3P                       | 0.204846   | 0.311528  | 0.168211   | 0.177371  | 0.343714  |
| CBWD3                         | 0.388522   | 0.273469  | 0.371786   | 0.449625  | 0.25976   |
| PRRG4                         | 1.856      | 2.6843    | 2.31047    | 2.07366   | 2.80835   |
| BMS1P1                        | 0.0701015  | 0.0952237 | 0.1079     | 0.0917073 | 0.104137  |
| DCTN6                         | 19.1286    | 15.9989   | 17.349     | 17.0119   | 17.2903   |
| PARN                          | 9.35153    | 9.3589    | 10.3879    | 10.1713   | 9.58118   |
| WNT2B                         | 1.00667    | 0.869172  | 0.937731   | 1.03813   | 0.882507  |
| RPL9                          | 3921.13    | 6133.32   | 4612.97    | 3987.02   | 5626.83   |
| ADK                           | 17.661     | 16.8065   | 17.4341    | 17.0488   | 18.1983   |
| CDK9                          | 40.5645    | 58.5356   | 42.6817    | 42.9566   | 55.1113   |
| ERC1                          | 2.63235    | 2.44895   | 2.35965    | 2.70885   | 2.39597   |
| UBXN4                         | 17.4134    | 15.9553   | 15.0779    | 15.309    | 18.0628   |
| COA5                          | 7.91131    | 9.65948   | 10.5181    | 9.3189    | 8.62977   |
| PTPN2                         | 20.4831    | 17.3013   | 21.4842    | 20.3601   | 18.6698   |
| LANCL2                        | 1.71106    | 3.11864   | 2.39735    | 2.30981   | 2.94013   |
| PIH1D1                        | 95.4914    | 95.9904   | 91.668     | 91.8936   | 94.739    |
| TPM3                          | 64.7107    | 72.8159   | 62.612     | 68.6089   | 71.1949   |
| POU2F1                        | 1.06537    | 0.725574  | 1.02704    | 1.0537    | 0.808175  |
| UBE2MP1                       | 3.28806    | 3.26127   | 3.08034    | 2.83782   | 3.14731   |
| ZNF546                        | 0.239913   | 0.397061  | 0.226061   | 0.334557  | 0.307793  |
| DNAJB13                       | 0.0694332  | 0.0969988 | 0.103238   | 0.139133  | 0.109056  |
| TBC1D19                       | 1.93327    | 1.66846   | 1.90236    | 1.89882   | 2.16627   |
| TNFAIP2                       | 7.01639    | 7.70643   | 6.65628    | 7.44094   | 7.68505   |
| TMEM38B                       | 11.2663    | 11.5212   | 11.8752    | 10.817    | 12.1199   |
| LOC100505718                  | 4.07196    | 3.91867   | 4.3371     | 3.99311   | 3.66692   |
| AURKAIP1                      | 251.571    | 244.906   | 224.906    | 262.01    | 224.295   |
| PSMA6                         | 127.366    | 149.207   | 145.206    | 126.346   | 149.456   |
| AMOTL2                        | 17.0163    | 24.2572   | 15.5132    | 15.6137   | 24.6682   |
| TIAL1                         | 18.6075    | 15.074    | 18.1087    | 18.0619   | 15.9772   |
| HAVCR2                        | 0.0593361  | 0.0280816 | 0.0369389  | 0.0164557 | 0.0392141 |
| ALKBH3                        | 17.1743    | 19.1032   | 20.59      | 17.3646   | 18.6633   |
| U2SURP                        | 9.63146    | 7.56715   | 8.58013    | 9.33352   | 8.20992   |
| SRC                           | 20.6683    | 19.3823   | 18.3557    | 19.7952   | 18.6609   |
| FAM103A1                      | 14.9228    | 17.6677   | 19.1523    | 14.8296   | 18.7234   |
| RPUSD1                        | 69.1632    | 70.7754   | 85.5512    | 75.4432   | 69.0338   |
| NEAT1                         | 99.5882    | 77.9843   | 55.8058    | 104.892   | 77.6997   |
| COX18                         | 3.97659    | 4.62963   | 3.94038    | 3.87496   | 4.83256   |
| PDCD2L                        | 27.202     | 23.4347   | 28.726     | 27.358    | 24.0482   |
| FADD                          | 26.5925    | 29.1206   | 34.7412    | 29.6222   | 29.6026   |
| QARS                          | 77.2001    | 109.888   | 85.6689    | 85.9036   | 97.9325   |
| RAVER2                        | 4.93131    | 4.81052   | 5.41802    | 4.66268   | 5.50907   |
| SHARPIN                       | 82.9685    | 94.7361   | 92.3317    | 94.0957   | 79.898    |
| EIF4G2                        | 87.135     | 102.099   | 98.9879    | 92.1782   | 103.148   |
| TUBB2A                        | 12.7456    | 14.7511   | 10.9294    | 12.0003   | 13.4232   |
| ZC3HC1                        | 19.954     | 17.7719   | 20.6301    | 18.9702   | 19.2895   |
| GLDC                          | 0.00664076 | 0.0276863 | 0.00818812 | 0.0110638 | 0.0085664 |
| ABR                           | 20.2244    | 20.1693   | 18.9946    | 21.7155   | 18.7782   |

|                         |           |           |           |           |           |
|-------------------------|-----------|-----------|-----------|-----------|-----------|
| KLF16                   | 47.2818   | 45.6882   | 56.8313   | 51.1009   | 45.7314   |
| TPM4                    | 274.025   | 207.42    | 277.981   | 260.451   | 223.792   |
| ATP11B                  | 3.96905   | 3.60384   | 3.73922   | 3.69049   | 4.09746   |
| CCDC43                  | 8.9151    | 7.59275   | 7.65722   | 9.16357   | 8.15803   |
| CNOT7                   | 26.091    | 28.3669   | 27.051    | 25.2379   | 29.7136   |
| REEP4                   | 46.6205   | 47.909    | 55.7568   | 58.5524   | 38.683    |
| ZFAND6                  | 29.3878   | 24.603    | 27.5531   | 26.7491   | 27.1009   |
| ACAD10                  | 2.24828   | 2.00719   | 2.53219   | 2.51959   | 2.0804    |
| MRPL36                  | 85.9011   | 113.965   | 106.298   | 93.1745   | 98.8156   |
| RFWD2                   | 8.37968   | 8.49603   | 10.2168   | 9.51091   | 8.57301   |
| CLTB                    | 123.51    | 120.631   | 126.385   | 129.42    | 115.607   |
| KCTD20                  | 5.73919   | 5.27983   | 5.8374    | 5.52277   | 6.11633   |
| DIMT1                   | 26.1841   | 22.9741   | 31.1537   | 26.3825   | 28.0011   |
| FAHD2A                  | 25.3242   | 24.5825   | 24.2502   | 27.8794   | 23.8432   |
| GGA1                    | 33.1534   | 28.1056   | 30.5218   | 34.5969   | 27.0211   |
| SDHD                    | 51.6844   | 54.1233   | 56.1662   | 51.7864   | 57.0767   |
| TAF7L                   | 0.0191363 | 0.0817777 | 0.119785  | 0.0952747 | 0.0773218 |
| ZCCHC8                  | 4.37558   | 4.10923   | 5.52014   | 5.16332   | 4.10698   |
| MGST1                   | 138.373   | 144.719   | 132.895   | 131.483   | 154.272   |
| RPL35                   | 7729.08   | 12456.1   | 8688.11   | 8033.78   | 10963     |
| PDHX                    | 12.3797   | 9.79958   | 9.72223   | 10.7463   | 12.362    |
| OGFOD3                  | 6.01253   | 6.64216   | 5.22719   | 5.83175   | 6.96015   |
| LRTOMT                  | 1.10787   | 1.42538   | 1.24839   | 1.32052   | 1.35401   |
| MMP19                   | 2.29746   | 2.41597   | 1.95238   | 2.44904   | 2.54467   |
| KAAG1                   | 0.782481  | 0.735456  | 0.481529  | 0.565538  | 0.717837  |
| ZNF211                  | 1.22083   | 1.63076   | 1.31426   | 1.28967   | 1.73642   |
| PDE8A                   | 4.94547   | 5.25839   | 5.40288   | 5.4979    | 5.10947   |
| PEX16                   | 23.934    | 25.0508   | 23.8964   | 24.3725   | 23.1684   |
| ADNP                    | 11.5529   | 10.4457   | 11.1468   | 11.2678   | 11.0489   |
| PRCC                    | 20.6834   | 23.5933   | 22.5591   | 22.2354   | 24.0193   |
| ZFYVE21                 | 25.6046   | 29.2561   | 26.4307   | 25.9455   | 30.7178   |
| NTPCR                   | 39.6146   | 48.7319   | 33.1242   | 37.5195   | 46.7488   |
| APMAP                   | 44.7325   | 55.308    | 48.3801   | 48.2879   | 53.3433   |
| CCT6P1                  | 2.45712   | 4.2341    | 2.82966   | 2.90466   | 3.9663    |
| MACF1                   | 5.17141   | 3.96126   | 4.56373   | 5.05993   | 4.41897   |
| RAD52                   | 4.09612   | 3.72989   | 2.73369   | 3.99057   | 3.47998   |
| VTA1                    | 7.53751   | 7.68564   | 6.64219   | 6.41142   | 8.52618   |
| AKT1                    | 64.3555   | 70.6265   | 66.559    | 66.6276   | 68.269    |
| ZNF263                  | 12.0685   | 10.4892   | 13.0042   | 12.5003   | 10.0595   |
| WDR3                    | 12.2602   | 11.2463   | 13.2887   | 11.9848   | 12.2765   |
| POMP                    | 79.4536   | 87.4976   | 80.4579   | 79.653    | 86.9868   |
| RHOT2                   | 40.7223   | 42.2175   | 40.6263   | 41.6261   | 40.4723   |
| TMEM249                 | 1.79195   | 1.37854   | 1.25175   | 1.6359    | 1.59703   |
| ERGIC3                  | 127.838   | 162.548   | 137.593   | 127.201   | 160.437   |
| NUP155                  | 6.46791   | 4.8936    | 6.04118   | 6.15798   | 5.35285   |
| MBOAT4                  | 0.0367184 | 0.026029  | 0         | 0.0306985 | 0         |
| RHOA                    | 238.552   | 265.496   | 277.725   | 246.58    | 266.536   |
| MYO9A                   | 0.227551  | 0.186791  | 0.236439  | 0.196773  | 0.243469  |
| FXYD5                   | 452.231   | 482.665   | 426.357   | 440.129   | 462.042   |
| UBE2J2                  | 29.5006   | 28.3267   | 34.8067   | 30.3156   | 29.9092   |
| ANKRD13D                | 19.9778   | 18.2868   | 17.4503   | 21.1659   | 17.0689   |
| USP9X                   | 6.53256   | 5.94222   | 6.45958   | 6.23901   | 6.82301   |
| WBP2                    | 162.632   | 144.789   | 133.38    | 158.333   | 138.523   |
| UBTF                    | 17.3488   | 17.9366   | 18.6158   | 17.687    | 17.5486   |
| ZNF668                  | 9.13953   | 8.95446   | 8.89039   | 9.08693   | 8.04781   |
| LOC440434               | 8.76592   | 8.24673   | 10.9173   | 8.59099   | 9.16328   |
| TMEM230                 | 49.2456   | 67.345    | 60.5352   | 53.1577   | 64.9588   |
| TDP2                    | 14.3414   | 13.5567   | 15.2323   | 14.689    | 14.0121   |
| RAI1                    | 4.49028   | 4.02927   | 4.63802   | 5.22085   | 3.83327   |
| PROSER2                 | 4.14493   | 3.88328   | 3.82126   | 4.11749   | 4.08938   |
| ZNF259                  | 37.0249   | 33.5964   | 41.0649   | 37.5296   | 33.36     |
| CDCP1                   | 25.3791   | 22.7649   | 26.1278   | 27.5347   | 22.6605   |
| ARHGEF18                | 10.8157   | 9.17814   | 9.53779   | 10.3336   | 9.20392   |
| FAM179B                 | 0.633893  | 0.750086  | 0.641443  | 0.601131  | 0.735452  |
| FJX1                    | 23.1529   | 32.5578   | 27.6754   | 24.3976   | 31.8757   |
| KIAA0146                | 8.46243   | 9.30389   | 8.09703   | 8.79833   | 9.78123   |
| GPLD1                   | 0.294641  | 0.266115  | 0.404437  | 0.268181  | 0.354994  |
| CDKN2AIP                | 3.83913   | 5.42993   | 5.28825   | 4.05848   | 6.4242    |
| UBR2                    | 2.81321   | 2.82544   | 2.5476    | 3.03781   | 2.7794    |
| CPLX3                   | 0.0900951 | 0         | 0.162971  | 0.17398   | 0.0559481 |
| ATP5G2                  | 778.735   | 863.248   | 792.036   | 784.335   | 790.591   |
| PURA                    | 4.43781   | 3.59151   | 4.31388   | 4.3581    | 3.66159   |
| GOLGA2P5                | 1.41505   | 1.53758   | 1.40351   | 1.64463   | 1.64258   |
| KCNQ1OT1                | 0.0722017 | 0.0816298 | 0.0633249 | 0.0853379 | 0.0712359 |
| P2RY11,PPAN,PPAN-P2RY11 | 45.3035   | 45.4107   | 43.6707   | 46.4331   | 45.3591   |
| GPX8                    | 12.0154   | 15.2611   | 14.0305   | 13.5681   | 15.1127   |
| ARF1                    | 288.471   | 301.77    | 290.865   | 287.516   | 303.885   |
| DHDH                    | 5.68008   | 9.18577   | 4.3255    | 4.40666   | 9.54749   |
| FAM22G                  | 0.131469  | 0.126117  | 0.0873009 | 0.131585  | 0.0623261 |

|              |           |           |           |           |           |
|--------------|-----------|-----------|-----------|-----------|-----------|
| GLE1         | 35.5148   | 33.4771   | 32.6719   | 33.8825   | 35.8519   |
| FDXACB1      | 1.38621   | 1.7568    | 1.46773   | 1.33409   | 1.90398   |
| PCNXL4       | 13.4936   | 9.6958    | 12.9559   | 12.2227   | 11.1898   |
| PCNT         | 2.25765   | 1.85663   | 2.38955   | 2.55643   | 1.83461   |
| RPL29        | 4703.12   | 6525.13   | 4906.94   | 4643.63   | 5910.01   |
| MAP3K8       | 0.891222  | 1.41376   | 0.667367  | 0.770244  | 1.49435   |
| TCEAL1       | 8.84836   | 11.807    | 11.7039   | 9.89333   | 12.5175   |
| PLAC4        | 0.126557  | 0.126187  | 0.0495935 | 0.105817  | 0.130402  |
| MBD1         | 13.5414   | 14.8434   | 13.783    | 13.9024   | 14.7845   |
| PREP         | 15.3476   | 14.1181   | 14.3853   | 14.5079   | 15.9222   |
| NDUFV3       | 28.5955   | 28.97     | 29.993    | 27.4084   | 28.5965   |
| COQ5         | 16.5563   | 14.209    | 16.9769   | 16.8623   | 15.8078   |
| SYDE2        | 1.58753   | 1.73587   | 1.25735   | 1.26918   | 2.06552   |
| ZNF140       | 7.03253   | 6.23941   | 8.17315   | 7.3098    | 6.76564   |
| RRP7B        | 4.76834   | 4.9994    | 4.72401   | 5.55642   | 4.47797   |
| LOC100190986 | 0.84415   | 1.20108   | 0.875085  | 1.20204   | 1.06601   |
| COMMD2       | 3.01647   | 3.79883   | 4.23346   | 3.3181    | 3.97669   |
| TBRG1        | 3.55263   | 4.83333   | 4.7861    | 4.45308   | 4.48024   |
| IL17D        | 2.16891   | 3.04903   | 2.59804   | 2.87102   | 2.60539   |
| NEK6         | 31.3243   | 35.0053   | 26.2242   | 28.3392   | 35.9234   |
| AK2          | 70.8253   | 68.3113   | 72.7934   | 68.3769   | 74.1377   |
| SLC12A6      | 1.3281    | 1.07695   | 1.09681   | 1.14634   | 1.13052   |
| SEC62        | 9.00464   | 9.51567   | 7.87935   | 8.04193   | 10.4629   |
| NUDCD1       | 21.4175   | 17.2136   | 23.3681   | 20.1818   | 19.6884   |
| UROS         | 19.3951   | 23.3322   | 24.8807   | 20.3023   | 24.9804   |
| RPUSD4       | 21.7862   | 21.4781   | 24.4763   | 23.1259   | 20.1747   |
| HLA-E        | 139.003   | 162.514   | 139.788   | 137.747   | 153.055   |
| POLD2        | 148.182   | 162.312   | 148.651   | 152.494   | 161.853   |
| REEP2        | 42.5334   | 55.7702   | 39.1177   | 39.1904   | 57.8402   |
| ZC3H12B      | 0.255697  | 0.283752  | 0.249557  | 0.26064   | 0.293553  |
| MCCD1        | 0         | 0         | 0.0700656 | 0         | 0.0713455 |
| ZMYND19      | 85.8885   | 83.2875   | 84.5845   | 88.0086   | 85.0332   |
| LOC648987    | 0.888978  | 1.45052   | 1.63191   | 1.19535   | 1.40202   |
| TOR4A        | 51.1385   | 51.5898   | 58.888    | 56.0417   | 50.8009   |
| DCTN2        | 59.3529   | 62.8015   | 62.992    | 60.6949   | 60.6377   |
| KIAA1731     | 0.957193  | 0.800826  | 0.772877  | 0.946837  | 0.888449  |
| ACE          | 4.74102   | 3.89674   | 3.91079   | 4.50546   | 4.61134   |
| CSK          | 75.2265   | 62.3956   | 76.082    | 70.7326   | 65.5464   |
| RPRD1A       | 9.85704   | 9.33684   | 10.4736   | 9.56318   | 9.48819   |
| MRPL40       | 75.2243   | 75.861    | 81.2932   | 74.7155   | 80.2199   |
| HLA-C        | 609.486   | 726.509   | 638.174   | 604.398   | 722.004   |
| ZNF407       | 0.856898  | 0.620994  | 0.864739  | 0.824506  | 0.73121   |
| C16orf70     | 4.91463   | 5.07958   | 5.32009   | 4.70059   | 5.43717   |
| LONRF3       | 3.03766   | 1.73939   | 2.41602   | 2.3417    | 2.16641   |
| CD7          | 0.0749994 | 0.0493821 | 0.0900768 | 0.0631524 | 0.0893624 |
| SORT1        | 4.80058   | 5.42872   | 6.0154    | 5.02609   | 5.80983   |
| KIAA1598     | 4.12673   | 3.27535   | 3.96157   | 4.42585   | 3.35262   |
| KIAA0141     | 10.7616   | 12.0132   | 13.1305   | 11.8083   | 11.8554   |
| SPG21        | 78.0121   | 83.8395   | 79.5767   | 76.9424   | 89.1105   |
| SAR1B        | 2.67555   | 3.38454   | 2.95064   | 2.86499   | 3.31043   |
| EMB          | 1.65372   | 2.17494   | 1.97999   | 1.55072   | 2.49903   |
| SENP1        | 3.36261   | 2.71783   | 3.5561    | 3.54681   | 3.02692   |
| OCRL         | 9.07912   | 8.2264    | 8.2957    | 8.6091    | 8.71728   |
| UGGT1        | 3.47338   | 3.54913   | 3.72665   | 3.60784   | 3.36529   |
| TRIP6        | 303.25    | 285.881   | 281.109   | 289.899   | 285.997   |
| PCSK7        | 8.26268   | 7.97252   | 7.92931   | 8.8011    | 7.41601   |
| KARS         | 70.4567   | 77.3535   | 77.9477   | 72.9467   | 73.9204   |
| SLC19A1      | 22.1321   | 18.4767   | 22.7097   | 22.0593   | 18.5619   |
| EIF4H        | 199.4     | 182.921   | 190.49    | 196.619   | 188.427   |
| MRAP2        | 1.36546   | 1.18294   | 1.37532   | 1.28053   | 1.35316   |
| NTN1         | 2.94481   | 2.71889   | 2.90532   | 2.98672   | 3.11251   |
| ZNF564       | 1.89952   | 1.90477   | 2.04246   | 2.02123   | 1.75743   |
| RXRA         | 15.9158   | 16.9166   | 14.8993   | 16.5283   | 16.2631   |
| MFSD8        | 1.18218   | 1.03678   | 1.3139    | 1.28112   | 1.16359   |
| HEXIM2       | 5.65299   | 6.34602   | 5.54283   | 5.91093   | 5.17799   |
| RLIM         | 4.54129   | 4.31833   | 4.24748   | 4.11698   | 4.74773   |
| VPS13D       | 0.889943  | 0.813983  | 0.836661  | 0.921384  | 0.807021  |
| KIAA0825     | 0.0114237 | 0.0287905 | 0.0230953 | 0.0143052 | 0.0160401 |
| LOC440311    | 0.235582  | 0.265387  | 0.244073  | 0.244375  | 0.209018  |
| RPL24        | 3797.31   | 5370.96   | 4024.89   | 3966.63   | 4703.12   |
| ZNF503-AS2   | 1.58538   | 1.62238   | 2.63127   | 1.92543   | 1.56228   |
| BCAR1        | 25.6705   | 24.4028   | 26.2483   | 25.8166   | 25.6923   |
| FSTL3        | 30.2839   | 37.0662   | 36.6104   | 27.9064   | 39.7267   |
| VTI1A        | 3.49428   | 3.37366   | 4.6168    | 3.8092    | 3.45823   |
| HYAL2        | 15.8559   | 21.2909   | 16.6998   | 14.8898   | 21.4353   |
| PRPS2        | 27.886    | 29.6033   | 26.4226   | 26.7184   | 32.3124   |
| AHCY         | 168.833   | 200.599   | 190.113   | 176.634   | 190.207   |
| KIAA1614     | 0.0367803 | 0.0361459 | 0.0219225 | 0.0305806 | 0.0659155 |
| SIM2         | 3.48425   | 3.23556   | 3.63268   | 3.76575   | 3.47732   |

|              |           |           |           |           |           |
|--------------|-----------|-----------|-----------|-----------|-----------|
| LZIC         | 10.6407   | 9.9438    | 10.5941   | 9.48582   | 10.8871   |
| ARHGAP11A    | 6.48703   | 4.9676    | 6.649     | 6.94239   | 5.00122   |
| PLD2         | 10.3653   | 12.6253   | 9.90521   | 10.9541   | 12.189    |
| ZFAND5       | 12.2304   | 14.4998   | 12.4665   | 12.7635   | 13.875    |
| CKAP5        | 15.2846   | 12.4636   | 15.9815   | 15.5624   | 13.566    |
| ATP6V1F      | 614.118   | 634.314   | 588.005   | 590.055   | 601.341   |
| SEPT6        | 7.12249   | 8.15225   | 7.25751   | 7.4268    | 8.00315   |
| APOO         | 13.411    | 12.3099   | 11.7115   | 13.7973   | 12.0304   |
| TRPM7        | 2.44208   | 2.2728    | 2.80548   | 2.67304   | 2.28662   |
| AFF1         | 2.46719   | 2.27404   | 1.99004   | 2.44791   | 2.47045   |
| CASP2        | 11.0725   | 12.6731   | 11.6836   | 12.4112   | 12.8208   |
| CHRNA5       | 1.75297   | 1.44136   | 2.04915   | 1.873     | 1.63284   |
| HAUS1        | 36.9971   | 34.7198   | 39.5377   | 37.4949   | 36.2191   |
| GNPTAB       | 2.60877   | 2.88411   | 2.1597    | 2.48278   | 2.98089   |
| ZNF563       | 0.881371  | 1.06197   | 0.88388   | 0.984173  | 1.03303   |
| C8orf59      | 138.909   | 136.517   | 165.827   | 138.641   | 134.534   |
| ANKRD32      | 1.11967   | 0.714989  | 0.819094  | 1.14757   | 0.92074   |
| HERC4        | 6.48156   | 5.69428   | 5.9928    | 6.43899   | 6.03787   |
| CIAPIN1      | 19.8347   | 24.3404   | 24.8516   | 22.2143   | 23.935    |
| CHD9         | 1.78618   | 1.93122   | 1.75007   | 1.95517   | 1.91793   |
| LSG1         | 6.69484   | 6.1327    | 7.98503   | 6.72707   | 6.53369   |
| DDX39A       | 61.9      | 53.8027   | 73.0279   | 71.5831   | 46.0403   |
| FAM21B       | 1.18143   | 1.09392   | 1.00633   | 1.09683   | 1.11947   |
| WAPAL        | 5.52447   | 4.46679   | 6.02707   | 5.90856   | 4.80971   |
| LONP2        | 14.9099   | 13.5558   | 13.3606   | 13.7058   | 14.9344   |
| TMEM181      | 4.6438    | 3.96791   | 4.62338   | 4.89517   | 3.97856   |
| USP42        | 2.30676   | 2.43836   | 2.59992   | 2.7424    | 2.21961   |
| PRPF3        | 9.38538   | 7.28523   | 11.0682   | 11.0092   | 7.50903   |
| PPP2R3C      | 15.5067   | 17.6805   | 19.6212   | 18.3261   | 16.8139   |
| BRCA2        | 0.167345  | 0.220481  | 0.100415  | 0.188094  | 0.217515  |
| ERCC8        | 2.80586   | 2.63642   | 3.94559   | 3.09408   | 2.62674   |
| CHTF18       | 18.5228   | 16.3201   | 13.7891   | 19.9665   | 16.7507   |
| SPIN1        | 8.35377   | 9.37263   | 8.70872   | 8.06832   | 10.0442   |
| TMEM127      | 7.94119   | 11.0177   | 9.37013   | 8.84975   | 9.85445   |
| ZNF746       | 11.7896   | 12.7168   | 12.4003   | 12.5418   | 12.3645   |
| CCDC28A      | 18.1883   | 16.7415   | 18.9513   | 18.3024   | 18.2909   |
| NOSIP        | 62.0843   | 64.4436   | 83.5557   | 69.571    | 61.6465   |
| IRAK1        | 133.8     | 146.185   | 138.583   | 134.535   | 142.88    |
| FAM217B      | 1.58313   | 2.41128   | 1.7783    | 1.70489   | 2.37844   |
| KCTD3        | 5.38698   | 4.25195   | 4.90956   | 5.39823   | 4.51554   |
| DYNLL2       | 17.1661   | 25.5534   | 21.1185   | 18.1824   | 26.0455   |
| NUS1         | 10.3577   | 11.3437   | 10.9727   | 10.3744   | 11.7005   |
| TRIM35       | 3.99954   | 5.23904   | 6.12807   | 4.47317   | 5.65946   |
| KIAA1211L    | 0.242659  | 0.139855  | 0.330056  | 0.227177  | 0.259207  |
| HOMER3       | 85.2382   | 80.6512   | 91.0594   | 82.6369   | 81.543    |
| PFN2         | 43.521    | 50.7332   | 46.4753   | 43.8554   | 55.2412   |
| LRRC16B      | 0.418518  | 0.450661  | 0.32132   | 0.496478  | 0.402892  |
| LOC152217    | 17.5403   | 30.7128   | 24.9196   | 21.0783   | 28.0219   |
| YAF2         | 2.55047   | 2.38223   | 2.83543   | 2.46671   | 2.85623   |
| MTMR14       | 20.0844   | 21.527    | 23.3922   | 21.964    | 22.2019   |
| ABCC1        | 11.4307   | 10.5645   | 10.4375   | 11.3387   | 11.1867   |
| RNASE7       | 0.0185096 | 0.025908  | 0.114972  | 0         | 0.0961964 |
| VWCE         | 0.411051  | 0.49859   | 0.449043  | 0.501118  | 0.556163  |
| AP1M1        | 18.7629   | 17.7618   | 18.8279   | 19.6923   | 18.6987   |
| FAM117B      | 1.33054   | 1.3751    | 1.33656   | 1.15539   | 1.67106   |
| ADAR         | 20.6204   | 21.2683   | 20.9049   | 22.2083   | 21.329    |
| TWF1         | 25.4864   | 29.0775   | 26.2514   | 24.1711   | 31.3196   |
| SNX8         | 18.1329   | 17.0828   | 14.6496   | 17.6126   | 16.1      |
| UBXN2A       | 4.07106   | 4.51725   | 4.89712   | 4.15244   | 5.00142   |
| BAIAP3       | 1.95752   | 2.26483   | 1.89903   | 2.01517   | 2.21021   |
| CMTM2        | 0.167012  | 0.219541  | 0.0807088 | 0.166333  | 0.166996  |
| FAM182A      | 0.0344888 | 0.0243208 | 0.026581  | 0.0144402 | 0.034243  |
| ANKRA2       | 3.02613   | 2.66455   | 2.81886   | 2.85481   | 3.19131   |
| SF3B3        | 26.36     | 23.4973   | 23.1201   | 24.6788   | 25.3778   |
| ERCC6L2      | 0.342253  | 0.426904  | 0.354865  | 0.362284  | 0.416576  |
| SPATA2L      | 15.3508   | 15.6184   | 16.3323   | 16.7242   | 13.4976   |
| TBCD         | 12.8096   | 16.0505   | 10.8386   | 14.3209   | 14.8273   |
| TIGD6        | 0.850222  | 1.09127   | 1.05772   | 0.869212  | 1.04055   |
| COPG2,TSGA13 | 14.3886   | 13.2205   | 14.6544   | 15.9989   | 12.2938   |
| MICALL1      | 18.8011   | 19.9598   | 23.6626   | 20.4922   | 18.8725   |
| MTERFD1      | 36.8881   | 28.8568   | 36.3336   | 34.8724   | 32.6608   |
| CEBPA        | 15.114    | 28.3718   | 21.2708   | 18.4931   | 25.9574   |
| DCTN1        | 30.7322   | 33.7975   | 29.4109   | 30.4891   | 34.2183   |
| AP1G1        | 5.99204   | 5.77868   | 5.48785   | 5.40621   | 6.61875   |
| RAPGEF5      | 1.06373   | 0.789278  | 1.031     | 1.06538   | 0.917005  |
| TJP1         | 4.81113   | 4.18316   | 5.76194   | 5.2915    | 4.35686   |
| ANGPTL4      | 152.075   | 110.093   | 80.9168   | 115.571   | 120.714   |
| RPS2         | 10505.4   | 14320.5   | 11248.2   | 10831.2   | 13007.7   |
| GTF3C1       | 6.57808   | 7.03566   | 6.29299   | 7.1039    | 6.8226    |



|                           |          |          |          |          |          |
|---------------------------|----------|----------|----------|----------|----------|
| MCCC1                     | 14.5622  | 13.5641  | 16.3656  | 15.0088  | 13.7343  |
| CEP290                    | 0.777687 | 0.91743  | 0.288642 | 0.754618 | 0.996475 |
| C5orf51                   | 4.28796  | 4.22015  | 4.87851  | 4.49911  | 4.39703  |
| LOC90784                  | 2.89177  | 2.18815  | 3.85267  | 3.35755  | 2.73985  |
| JDP2                      | 3.34897  | 4.47614  | 11.2409  | 6.58635  | 4.74073  |
| UBE2D2                    | 30.3479  | 31.7631  | 38.9167  | 31.7564  | 32.7036  |
| NUP214                    | 8.42036  | 7.31279  | 8.47634  | 8.74211  | 7.76408  |
| WASL                      | 9.21191  | 8.71392  | 10.4244  | 9.46285  | 9.6997   |
| SKA1                      | 8.21449  | 7.24274  | 11.0047  | 11.004   | 6.79168  |
| CALM1                     | 33.1092  | 44.2572  | 35.9103  | 33.4935  | 47.4176  |
| C17orf96                  | 21.5229  | 21.949   | 27.1472  | 24.4198  | 21.3164  |
| HOXA11                    | 3.57109  | 5.55232  | 6.42945  | 4.80716  | 5.70773  |
| PPIA                      | 615.074  | 609.451  | 645.224  | 618.145  | 617.151  |
| CP                        | 1.84344  | 1.7954   | 1.29821  | 1.65746  | 1.78538  |
| MTBP                      | 3.26957  | 1.88187  | 2.7073   | 3.04198  | 2.30477  |
| ZMYND12                   | 0.130225 | 0.34722  | 0.110517 | 0.108313 | 0.172737 |
| DNAJC9                    | 30.2175  | 35.5555  | 42.6045  | 37.8601  | 37.1088  |
| RABL3                     | 4.16755  | 4.38115  | 3.91054  | 3.72039  | 4.76158  |
| ZNF75A                    | 0.772136 | 1.56591  | 1.24725  | 1.10607  | 1.58748  |
| DNM1L                     | 11.3666  | 10.4953  | 10.9983  | 11.8766  | 9.69425  |
| LRRC71                    | 0.928982 | 0.416737 | 0.330136 | 0.5888   | 0.671886 |
| EFNA2                     | 4.86267  | 5.62258  | 3.77913  | 4.7887   | 5.04914  |
| B4GALT6                   | 2.6175   | 3.61595  | 3.94443  | 3.11449  | 3.66876  |
| FKBP4                     | 64.4559  | 65.9065  | 71.4551  | 67.7471  | 67.6409  |
| C9orf85                   | 6.77319  | 6.91246  | 9.13219  | 7.16776  | 6.79629  |
| PPP2R2A                   | 18.7402  | 18.7346  | 18.0571  | 16.8671  | 20.8553  |
| KLHL22                    | 8.48962  | 6.5783   | 8.64768  | 8.84554  | 7.48049  |
| MTMR6                     | 3.11033  | 3.13871  | 3.90974  | 3.59371  | 3.16383  |
| NAAA                      | 8.41591  | 12.1696  | 8.42183  | 8.57508  | 12.7806  |
| CPMK1                     | 26.2456  | 28.2105  | 27.3918  | 28.2629  | 28.8032  |
| PDCD10                    | 31.5148  | 30.1488  | 34.5783  | 30.2638  | 34.0213  |
| ABT1                      | 19.182   | 25.9741  | 22.1892  | 19.4704  | 25.5577  |
| AKAP1                     | 12.6691  | 10.8606  | 13.7602  | 12.6521  | 11.9664  |
| SNTB2                     | 1.53093  | 1.40412  | 1.51408  | 1.58082  | 1.36713  |
| UBAP1L                    | 2.0722   | 0.553712 | 1.50324  | 1.97647  | 1.16001  |
| SNRPC                     | 105.811  | 108.158  | 115.43   | 117.827  | 104.37   |
| CLTA                      | 258.658  | 256.13   | 289.487  | 275.494  | 245.155  |
| SLC35E4                   | 8.82886  | 10.811   | 11.0602  | 9.65676  | 11.0907  |
| POLR3G                    | 3.90032  | 3.23597  | 4.17108  | 3.58635  | 4.18261  |
| CHRNA3                    | 0.144794 | 0.203813 | 0.154648 | 0.127031 | 0.322527 |
| ERAL1                     | 49.7693  | 52.597   | 45.8843  | 49.8345  | 51.6545  |
| VPS13A                    | 1.7138   | 1.41976  | 1.14807  | 1.56649  | 1.53097  |
| SMC1A                     | 5.80341  | 4.69912  | 4.64351  | 5.65025  | 5.36589  |
| TEP1                      | 1.11685  | 1.22926  | 1.01628  | 1.10248  | 1.39496  |
| ANKDD1A                   | 1.09177  | 1.5095   | 0.965283 | 1.10011  | 1.37262  |
| TST                       | 62.9205  | 77.6352  | 90.0511  | 73.8233  | 76.8261  |
| PHLDB1                    | 3.45627  | 3.39248  | 2.79406  | 3.36444  | 3.34884  |
| TMEM133                   | 0.400948 | 0.724457 | 0.559876 | 0.690726 | 0.611805 |
| RBPJ                      | 8.81154  | 10.0781  | 6.99173  | 7.24753  | 10.997   |
| CCSER2                    | 1.5797   | 1.56015  | 1.69995  | 1.5066   | 1.7632   |
| SNRNP200                  | 28.0346  | 25.2959  | 27.2977  | 29.9003  | 25.5078  |
| BTAF1                     | 3.75495  | 3.4263   | 3.37672  | 3.76749  | 3.44259  |
| MRPS33                    | 26.2176  | 29.9537  | 30.2303  | 27.7083  | 26.5113  |
| BAI2                      | 3.66037  | 2.82923  | 3.18466  | 3.32266  | 3.64886  |
| PRDM4                     | 9.97028  | 10.5767  | 10.1008  | 10.6805  | 10.2877  |
| USP16                     | 5.25077  | 5.51418  | 5.94622  | 5.42652  | 5.83879  |
| CDRT4,TVP23C,TVP23C-CDRT4 | 9.82565  | 7.73046  | 9.16061  | 9.76052  | 8.44523  |
| SFT2D3                    | 4.81469  | 8.39229  | 6.47993  | 5.78169  | 7.73965  |
| FAM208A                   | 4.80902  | 4.2694   | 5.25913  | 4.90212  | 4.99628  |
| TSPAN17                   | 21.9085  | 29.2363  | 24.8353  | 25.3825  | 26.6608  |
| METTL23                   | 22.6217  | 27.5518  | 21.4443  | 21.4278  | 27.5853  |
| SAP30BP                   | 25.1605  | 23.6841  | 25.9605  | 28.1804  | 22.769   |
| PEMT                      | 72.7277  | 63.6262  | 68.1694  | 63.698   | 70.8429  |
| SLC22A5                   | 2.58076  | 2.71262  | 3.26803  | 3.40684  | 2.63342  |
| ZNF57                     | 3.31896  | 3.40499  | 3.29725  | 3.33227  | 4.22677  |
| GALE                      | 93.6714  | 78.0849  | 91.2123  | 91.464   | 76.8088  |
| NEK2                      | 10.6704  | 10.1085  | 12.0607  | 10.9094  | 11.0074  |
| TIMP1                     | 504.603  | 597.406  | 456.631  | 462.574  | 630.939  |
| SETD1A                    | 8.51761  | 8.61044  | 7.19131  | 8.15621  | 8.67405  |
| ABCA10,ABCA5              | 0.532841 | 0.46535  | 0.434788 | 0.468492 | 0.537454 |
| CPNE3                     | 21.3397  | 23.7746  | 20.4304  | 20.1649  | 26.1233  |
| KIAA0100                  | 14.2865  | 15.9703  | 14.2884  | 14.5658  | 16.3379  |
| PLEKHH1                   | 2.50096  | 2.19439  | 1.92994  | 2.34428  | 2.6512   |
| STAM                      | 6.01313  | 6.50451  | 6.88946  | 6.2864   | 6.3522   |
| DOCK1                     | 6.01001  | 5.51243  | 5.75372  | 5.47582  | 6.51886  |
| SLC10A3                   | 24.1726  | 31.7382  | 28.3933  | 26.2061  | 30.7571  |
| DYNLT1                    | 77.5868  | 87.0652  | 82.3344  | 76.3091  | 89.8111  |
| ICAM3                     | 9.55252  | 10.3153  | 8.64981  | 8.89109  | 10.4296  |
| BEND7                     | 8.3171   | 7.07603  | 8.32363  | 8.50437  | 8.28203  |

|              |          |            |           |           |           |
|--------------|----------|------------|-----------|-----------|-----------|
| METTL13      | 11.5348  | 11.6854    | 12.2724   | 12.4259   | 11.6619   |
| SLMO1        | 6.70993  | 6.06125    | 8.8238    | 7.79138   | 5.08386   |
| GCC2         | 0.999646 | 0.896591   | 0.578915  | 0.979432  | 0.897114  |
| CBWD1        | 8.34418  | 8.27335    | 10.1816   | 8.64145   | 9.31905   |
| DENND4A      | 1.25845  | 1.04724    | 1.18215   | 1.18094   | 1.08303   |
| ZNF100       | 1.55271  | 1.72632    | 1.46227   | 1.49243   | 1.93133   |
| PLD1         | 0.266975 | 0.144068   | 0.202023  | 0.177545  | 0.238188  |
| FPGS         | 122.53   | 133.687    | 124.409   | 125.451   | 131.426   |
| NLRX1        | 7.34529  | 7.29159    | 7.51019   | 7.67685   | 7.16143   |
| ABHD15       | 4.83054  | 6.42105    | 5.80492   | 5.10123   | 6.34035   |
| PPP2R5C      | 38.7532  | 32.9854    | 37.4968   | 36.1349   | 35.6641   |
| KRAS         | 5.07709  | 4.52995    | 4.94841   | 5.23462   | 4.76038   |
| NCOA5        | 6.53972  | 8.34266    | 12.0504   | 8.20746   | 8.60074   |
| SERINC5      | 1.78355  | 1.63397    | 1.52135   | 1.62378   | 1.52683   |
| SLC39A13     | 34.3686  | 29.779     | 34.5231   | 33.8225   | 31.7386   |
| TULP4        | 1.44208  | 1.50047    | 1.50778   | 1.54575   | 1.41997   |
| IGF2BP2      | 32.0019  | 26.9572    | 33.0424   | 30.9363   | 29.7394   |
| BCL7A        | 8.12901  | 8.54854    | 8.35768   | 8.87617   | 7.83138   |
| STARD7       | 32.9932  | 36.8089    | 37.9124   | 37.0613   | 35.9237   |
| SLC30A6      | 3.07118  | 3.54847    | 3.96739   | 3.22883   | 3.81035   |
| PEX12        | 0.995179 | 1.06128    | 1.61453   | 1.27949   | 1.25086   |
| ARF4         | 58.0402  | 66.3139    | 74.6481   | 62.7598   | 68.1613   |
| CCDC88B      | 5.02891  | 5.79364    | 4.6734    | 5.60504   | 4.90863   |
| MAP6D1       | 7.60884  | 9.43082    | 6.96399   | 7.76628   | 10.3186   |
| UBFD1        | 7.23787  | 7.1085     | 7.63945   | 7.15464   | 7.35633   |
| NAB1         | 4.75259  | 4.92382    | 4.50801   | 4.62226   | 5.45959   |
| KCTD19       | 0        | 0          | 0.0112923 | 0         | 0.0115532 |
| CSNK1E       | 75.4229  | 70.2637    | 66.8663   | 71.8821   | 74.4075   |
| NPHP1        | 1.03984  | 1.29467    | 0.887933  | 1.26698   | 1.06976   |
| LOC100272228 | 0.101443 | 0.141346   | 0.11487   | 0.0988123 | 0.131103  |
| MBLAC1       | 2.60321  | 4.00611    | 3.64359   | 3.82218   | 3.5527    |
| KPNA3        | 6.4997   | 6.68216    | 7.35286   | 6.75245   | 7.36883   |
| SART3        | 12.8942  | 11.1105    | 11.301    | 12.9002   | 11.9055   |
| VBP1         | 25.9645  | 27.4497    | 29.6958   | 24.9255   | 31.01     |
| ZBTB14       | 1.6513   | 1.65646    | 1.70282   | 1.6328    | 1.92376   |
| MRPS18A      | 69.3892  | 61.5351    | 69.5061   | 69.2668   | 57.0423   |
| AGPAT9       | 5.61914  | 5.60433    | 5.60425   | 5.94175   | 6.37952   |
| FBXO48       | 0.143824 | 0.102468   | 0.213709  | 0.215321  | 0.0762152 |
| RPP25        | 56.6956  | 63.5371    | 63.262    | 62.1017   | 57.2392   |
| TDP1         | 8.78985  | 8.13286    | 8.13271   | 8.88387   | 8.0935    |
| DISP1        | 0.284517 | 0.141073   | 0.198461  | 0.241096  | 0.111495  |
| MERTK        | 0.795586 | 0.694301   | 1.09413   | 0.905422  | 0.683059  |
| SIPA1L1      | 6.11434  | 5.14429    | 4.81196   | 5.72103   | 5.53193   |
| NEIL2        | 20.9976  | 24.545     | 20.7884   | 20.6268   | 23.9707   |
| MIP          | 0        | 0          | 0.0600671 | 0.0482072 | 0.0129475 |
| MYL12A       | 362.215  | 362.623    | 386.392   | 356.76    | 366.753   |
| STK35        | 6.96242  | 7.32739    | 6.59726   | 7.6074    | 7.00201   |
| ACSL4        | 9.983    | 9.24056    | 9.86901   | 9.77959   | 10.1544   |
| ZNF277       | 11.292   | 10.5794    | 13.2699   | 11.8771   | 10.9297   |
| FAM72D       | 2.03626  | 0.823472   | 1.73771   | 1.83898   | 1.03161   |
| NGAMT1       | 2.40077  | 2.91277    | 3.14372   | 2.31966   | 2.72471   |
| FAM84A       | 0        | 0.00598607 | 0.0051275 | 0         | 0.0113805 |
| UBL3         | 3.66582  | 4.85253    | 4.26798   | 3.49881   | 5.22736   |
| CERK         | 11.4517  | 12.7999    | 10.9528   | 11.0764   | 13.5562   |
| CWC27        | 10.1604  | 9.59786    | 8.57095   | 10.1379   | 9.83559   |
| C6orf226     | 7.51111  | 13.1549    | 12.3582   | 9.57724   | 12.7249   |
| UFC1         | 88.7681  | 101.579    | 94.3263   | 91.6743   | 94.7271   |
| SUOX         | 5.08182  | 6.48324    | 5.31647   | 5.99945   | 6.85302   |
| PRPF6        | 32.3289  | 32.1197    | 30.1219   | 33.1105   | 31.0292   |
| TAF5L        | 6.13796  | 6.48791    | 6.7022    | 6.32251   | 6.92827   |
| FBXO41       | 7.07633  | 7.10224    | 5.47232   | 6.82715   | 7.18988   |
| IPO13        | 5.09704  | 5.38713    | 6.21494   | 5.59199   | 5.45654   |
| STRIP1       | 5.56736  | 7.17337    | 6.75635   | 6.54065   | 6.85319   |
| ERCC1        | 250.277  | 187.222    | 251.772   | 236.25    | 209.505   |
| ASGR1        | 14.9481  | 14.3528    | 14.596    | 13.3043   | 16.0482   |
| PIM3         | 45.6234  | 36.1035    | 52.6537   | 51.0914   | 32.2767   |
| MBTD1        | 2.64756  | 2.57495    | 2.52817   | 2.68256   | 2.52126   |
| TRIP13       | 8.54188  | 6.80949    | 8.67142   | 9.55339   | 6.76631   |
| RBM12B-AS1   | 1.34239  | 0.433671   | 1.51516   | 1.45733   | 0.80707   |
| RPL19        | 5198.7   | 6654.96    | 5433.12   | 5265.68   | 5915.13   |
| PCSK4        | 1.19163  | 1.22463    | 0.803751  | 1.11542   | 1.58609   |
| HLA-B        | 368.128  | 518.029    | 396.927   | 370.43    | 503.567   |
| ACTR2        | 34.9597  | 33.9339    | 36.1916   | 35.0136   | 35.9663   |
| DPM2         | 146.125  | 151.882    | 131.924   | 150.258   | 140.503   |
| VAPB         | 6.94265  | 6.1152     | 6.85974   | 6.7839    | 6.76136   |
| SFR1         | 5.08073  | 4.2095     | 5.24372   | 5.03818   | 4.58315   |
| TGFBRAP1     | 1.14787  | 1.25212    | 1.59375   | 1.186     | 1.48359   |
| PITRM1       | 22.6088  | 24.438     | 21.6091   | 23.2283   | 23.9324   |
| PIP4K2A      | 8.00789  | 6.95053    | 7.7599    | 7.96961   | 7.39798   |

|             |           |            |           |           |           |
|-------------|-----------|------------|-----------|-----------|-----------|
| USP54       | 1.01066   | 0.85785    | 1.04633   | 1.07696   | 0.863777  |
| FAM129B     | 120.192   | 137.684    | 81.2754   | 98.2202   | 152.699   |
| C20orf27    | 120.034   | 127.396    | 126.138   | 120.401   | 123.877   |
| USP5        | 31.5557   | 31.7045    | 28.6963   | 31.7589   | 32.8183   |
| KPNA5       | 0.486604  | 0.695403   | 0.602784  | 0.545326  | 0.592866  |
| C15orf57    | 18.1655   | 19.9354    | 20.8206   | 17.8612   | 21.2957   |
| TERF2IP     | 26.0447   | 23.555     | 24.9877   | 25.8052   | 25.9133   |
| C1orf122    | 57.0231   | 62.4731    | 70.8796   | 64.6553   | 58.3594   |
| KLHL26      | 5.49644   | 5.60866    | 5.87447   | 5.55996   | 6.54855   |
| ASPSCR1     | 23.9042   | 22.7418    | 23.383    | 25.7553   | 21.3503   |
| APH1A       | 98.2427   | 114.017    | 108.678   | 102.611   | 113.034   |
| COG6        | 3.67883   | 2.9987     | 2.84143   | 2.90328   | 3.58346   |
| GGPS1       | 8.74572   | 8.61309    | 8.81113   | 7.78118   | 9.3117    |
| OTUD4       | 4.0191    | 3.89854    | 3.96736   | 3.95328   | 4.36706   |
| AMZ2        | 44.1238   | 53.775     | 43.8854   | 44.5315   | 53.4806   |
| DPP7        | 343.289   | 408.163    | 298.667   | 357.684   | 366.682   |
| NOL11       | 16.0864   | 15.4546    | 18.4871   | 16.5009   | 16.9489   |
| HIATL1      | 16.4167   | 15.7422    | 19.8336   | 19.2037   | 15.7245   |
| ARL16       | 22.1035   | 22.8186    | 25.7564   | 23.5503   | 23.032    |
| CTR9        | 8.94325   | 8.14791    | 8.80452   | 8.78217   | 9.15405   |
| EAPP        | 20.829    | 24.7926    | 21.3571   | 19.6717   | 26.2041   |
| MAFG        | 9.61316   | 7.58939    | 11.26     | 10.6908   | 6.70076   |
| MBD2        | 10.5876   | 10.7794    | 11.6747   | 11.2511   | 11.2649   |
| ATP7A       | 0.550176  | 0.610777   | 0.430335  | 0.478132  | 0.663157  |
| FTSJ3       | 15.7117   | 15.7852    | 13.9873   | 16.1892   | 15.822    |
| DNAH10      | 0.0671627 | 0.0783513  | 0.098575  | 0.0849238 | 0.0756101 |
| TNNI3       | 10.4017   | 10.0581    | 7.80536   | 10.0371   | 8.5947    |
| UBE3C       | 17.2405   | 15.3273    | 19.6543   | 18.3893   | 16.5847   |
| KCNJ13      | 0.0323811 | 0.00967201 | 0.0385717 | 0.0431474 | 0.0169929 |
| TRAPPC2     | 9.80664   | 11.5694    | 11.3853   | 10.5739   | 11.3261   |
| TJP2        | 4.93717   | 4.99355    | 3.80624   | 4.26257   | 5.99247   |
| SLC20A1     | 7.61985   | 10.6332    | 8.32807   | 8.45553   | 10.7308   |
| LPHN1       | 14.2621   | 11.6545    | 12.1957   | 14.0867   | 11.9201   |
| IAH1        | 39.7611   | 41.6404    | 41.6768   | 35.6267   | 42.4201   |
| FRMD4A      | 16.6294   | 12.6627    | 11.3672   | 14.5731   | 14.0901   |
| SMIM8       | 1.98631   | 1.48418    | 2.4048    | 2.02495   | 1.81129   |
| C1orf170    | 1.0159    | 1.02263    | 0.974841  | 1.20433   | 0.853019  |
| NSUN4       | 6.20187   | 6.23167    | 7.63408   | 6.22783   | 6.75568   |
| ISOC2       | 80.2863   | 88.3881    | 82.9995   | 81.9009   | 84.3455   |
| FOCAD       | 2.19482   | 2.22701    | 1.93355   | 2.12616   | 2.32119   |
| TRIP12      | 10.0524   | 8.39445    | 9.46251   | 9.98316   | 8.89114   |
| SLC18B1     | 8.52189   | 8.94495    | 9.33284   | 8.42708   | 9.95386   |
| TTC7A       | 3.29503   | 3.57839    | 2.54433   | 3.35833   | 3.36803   |
| MACROD1     | 95.0686   | 86.0326    | 106.563   | 94.0414   | 93.1043   |
| SNAP29      | 7.15711   | 6.96829    | 6.37774   | 7.03823   | 7.12266   |
| ERI3        | 51.8247   | 56.9997    | 51.1962   | 54.2541   | 57.0157   |
| PEPD        | 37.9881   | 41.1633    | 38.7969   | 37.8795   | 41.1356   |
| RNF152      | 0.838174  | 1.10839    | 0.70176   | 0.80088   | 1.05673   |
| DISC1,TSNAX | 10.5254   | 9.51083    | 10.049    | 10.0254   | 10.4334   |
| STAG3L2     | 1.22967   | 1.79465    | 1.40973   | 1.28346   | 1.54241   |
| IARS2       | 32.4636   | 27.2674    | 27.3282   | 29.5857   | 31.3912   |
| SLC22A18    | 16.8417   | 14.8926    | 13.6198   | 17.4621   | 13.9661   |
| ATP6AP2     | 32.1609   | 33.7196    | 33.5981   | 31.3941   | 35.8868   |
| KDM6A       | 2.26448   | 2.18972    | 2.46315   | 2.49019   | 2.38027   |
| DERA        | 16.3347   | 17.3058    | 14.6471   | 14.7743   | 20.8435   |
| RPS7        | 3639.88   | 4909.01    | 4285.79   | 3827.05   | 4309.15   |
| TMCO1       | 11.1056   | 12.2787    | 14.3763   | 12.2385   | 12.9681   |
| NAGK        | 14.2826   | 12.2521    | 15.114    | 15.8308   | 11.9244   |
| OGDH        | 7.74597   | 7.23988    | 6.47056   | 7.88253   | 7.65921   |
| PDX1        | 1.65137   | 2.69492    | 2.29219   | 2.04464   | 2.35208   |
| RNF41       | 9.66858   | 9.59647    | 12.1208   | 10.071    | 9.39237   |
| ARMC10      | 34.978    | 33.8771    | 38.7194   | 34.5945   | 37.512    |
| LOC646626   | 1.4774    | 2.71397    | 2.66313   | 2.20929   | 2.31934   |
| TCF12       | 8.581     | 7.36999    | 8.72405   | 8.61041   | 7.63307   |
| TMEM179B    | 57.0626   | 60.5394    | 59.5      | 58.3468   | 58.4431   |
| CYTH2       | 19.7514   | 20.3131    | 17.8641   | 19.3545   | 20.7362   |
| ZNF444      | 24.3133   | 18.5133    | 27.715    | 24.2473   | 20.7424   |
| ILKAP       | 30.1356   | 26.9232    | 37.3959   | 35.5536   | 25.5983   |
| TSSC1       | 13.9577   | 13.75      | 15.5302   | 15.2097   | 11.8055   |
| GARNL3      | 1.42592   | 2.25562    | 0.887535  | 1.31315   | 1.9143    |
| ARID3A      | 6.42201   | 4.88428    | 5.19636   | 5.50363   | 4.78668   |
| CIDECP      | 3.27865   | 5.48215    | 5.07174   | 3.40906   | 4.88635   |
| TFPT        | 9.02483   | 12.2772    | 10.8337   | 10.0873   | 11.3928   |
| FLVCR1-AS1  | 2.589     | 2.16275    | 2.03743   | 2.03175   | 2.56101   |
| CAPS        | 1.78223   | 2.22353    | 2.46591   | 2.03784   | 2.74103   |
| NDUFV1      | 171.528   | 177.904    | 162.519   | 170.376   | 176.506   |
| FBXO34      | 4.20899   | 4.79388    | 4.80522   | 4.40089   | 4.91006   |
| ZDHC23      | 3.03373   | 3.42904    | 3.79495   | 3.51769   | 3.29185   |
| REXO2       | 78.4122   | 69.2876    | 87.6963   | 80.9526   | 76.7168   |

|             |            |            |            |            |            |
|-------------|------------|------------|------------|------------|------------|
| FAM111A     | 4.24374    | 4.02146    | 5.48055    | 5.32046    | 4.07701    |
| SUCLG2      | 24.3783    | 28.4208    | 23.4132    | 21.967     | 31.539     |
| DDB1        | 64.4227    | 66.351     | 63.5311    | 65.5922    | 69.1565    |
| NRDE2       | 1.59134    | 2.1323     | 1.88484    | 1.74092    | 2.29938    |
| HAUS6       | 5.57823    | 4.25018    | 5.16562    | 5.70273    | 4.7146     |
| MGA         | 1.28508    | 0.900254   | 1.3262     | 1.22936    | 1.02247    |
| CRNKL1      | 4.27065    | 4.92037    | 5.20733    | 4.94435    | 4.91063    |
| USP22       | 38.1165    | 37.0518    | 35.7834    | 37.7187    | 39.1621    |
| NSMCE1      | 74.4723    | 70.4502    | 80.1707    | 74.2697    | 74.5699    |
| AFG3L1P     | 3.63356    | 4.88501    | 4.21657    | 4.70777    | 4.89461    |
| PUS3        | 9.21427    | 9.1444     | 10.0516    | 8.63813    | 10.4357    |
| MRPS26      | 141.954    | 141.695    | 133.269    | 143.818    | 145.848    |
| TAF4        | 4.63456    | 3.94388    | 4.85207    | 4.98692    | 4.14069    |
| DYSF        | 0.146189   | 0.115884   | 0.163806   | 0.114277   | 0.169492   |
| PWWP2B      | 27.3265    | 16.9552    | 27.9777    | 26.2107    | 17.7616    |
| LACC1       | 1.05616    | 1.06452    | 1.00712    | 1.06915    | 1.07655    |
| PRDX3       | 89.6681    | 83.961     | 90.7859    | 87.1439    | 92.4865    |
| LOC730183   | 1.84619    | 2.59797    | 2.61198    | 1.83045    | 2.4284     |
| MFSD5       | 19.9332    | 25.7823    | 21.9731    | 23.2463    | 23.1386    |
| POLR3F      | 3.90638    | 4.10466    | 4.60823    | 4.6333     | 3.3958     |
| CSDA        | 123.418    | 130.845    | 145.245    | 133.508    | 130.363    |
| SAMD4B      | 11.6749    | 10.4676    | 10.3128    | 11.5327    | 11.1153    |
| GOLGA1      | 5.62678    | 4.98888    | 5.18905    | 5.58072    | 5.88354    |
| CORO1B      | 131.667    | 121.462    | 129.429    | 136.16     | 115.773    |
| GOLGA8B     | 6.06836    | 6.12239    | 3.75422    | 5.93352    | 6.83278    |
| RAD18       | 3.92867    | 3.04639    | 3.36303    | 3.76737    | 3.40428    |
| VASH1       | 2.1003     | 2.0952     | 2.37725    | 2.03794    | 2.19608    |
| NFATC1      | 2.94728    | 2.80049    | 3.46476    | 3.39509    | 3.21375    |
| CHMP4A      | 33.0421    | 31.8784    | 38.0499    | 37.1801    | 29.7528    |
| PSMB2       | 32.4795    | 30.5428    | 31.6572    | 32.9526    | 32.4093    |
| SMCR7L      | 7.93309    | 9.7054     | 10.158     | 9.07061    | 9.70763    |
| SKA3        | 11.1509    | 7.45782    | 13.9687    | 12.7014    | 8.11674    |
| SYAP1       | 22.7156    | 23.8775    | 22.0956    | 21.0927    | 26.0665    |
| NEK3        | 8.8102     | 7.73302    | 8.47448    | 9.56757    | 8.3227     |
| ITCH        | 4.3683     | 3.97994    | 4.77042    | 4.45006    | 4.32458    |
| COPB1       | 21.426     | 20.6765    | 21.9978    | 19.8901    | 22.8729    |
| COA4        | 94.7408    | 95.1968    | 108.965    | 99.7353    | 90.8728    |
| PSMC2       | 29.2959    | 31.2698    | 31.8333    | 31.0906    | 31.284     |
| UBE2A       | 24.3737    | 26.1607    | 29.5984    | 25.3359    | 27.0785    |
| CHMP6       | 8.59401    | 15.9307    | 14.3065    | 12.6759    | 14.5442    |
| C14orf80    | 16.1289    | 13.4694    | 19.4918    | 21.0794    | 11.7169    |
| PPCS        | 38.086     | 44.0225    | 38.0898    | 37.9173    | 43.6562    |
| MARCH5      | 8.97867    | 10.0719    | 10.9741    | 9.6212     | 10.4293    |
| ARIH1       | 9.74801    | 9.20432    | 9.03366    | 9.22585    | 9.9852     |
| MIDN        | 10.2711    | 19.5552    | 9.87501    | 12.9431    | 17.2094    |
| SATB1       | 3.79456    | 3.59323    | 3.399      | 3.64984    | 3.7421     |
| STXBP5      | 0.586253   | 0.393039   | 0.614958   | 0.572753   | 0.529867   |
| PRSS53      | 4.00784    | 4.97997    | 4.08686    | 4.86797    | 4.73941    |
| SNORA48     | 17.7769    | 44.2408    | 6.18967    | 12.5299    | 48.1371    |
| OAF         | 49.116     | 45.5807    | 50.1164    | 52.5988    | 45.3882    |
| SLC15A4     | 9.12054    | 9.51842    | 9.74776    | 9.53782    | 10.0807    |
| ANXA7       | 22.2873    | 24.929     | 26.9203    | 24.4404    | 25.587     |
| RNF144A-AS1 | 0.0209458  | 0.0147555  | 0.012924   | 0.0173446  | 0.0138355  |
| FDX1        | 7.01025    | 7.45782    | 7.92253    | 7.05196    | 7.78596    |
| AURKA       | 25.7309    | 21.2332    | 28.2438    | 28.833     | 19.9016    |
| TRIM32      | 8.14928    | 8.34672    | 8.38214    | 7.93989    | 8.73843    |
| EML6        | 0.519177   | 0.586989   | 0.453547   | 0.59814    | 0.560672   |
| ECT2        | 10.8699    | 8.59513    | 11.3304    | 11.3195    | 8.93979    |
| MCM5        | 32.7577    | 39.6038    | 34.2841    | 40.9186    | 36.035     |
| DHX30       | 36.3252    | 30.6425    | 35.3544    | 36.4311    | 31.892     |
| SDC1        | 21.9866    | 25.0038    | 24.0315    | 23.6656    | 24.841     |
| SMUG1       | 32.1343    | 31.3071    | 36.7019    | 33.8471    | 30.3688    |
| FAM221A     | 6.20688    | 4.35582    | 6.17166    | 6.15888    | 3.91867    |
| YY1         | 17.2091    | 14.8717    | 18.2893    | 16.1971    | 17.309     |
| FAM192A     | 18.3022    | 15.9639    | 17.5956    | 19.8595    | 16.2372    |
| PRUNE       | 6.04209    | 4.98218    | 5.26261    | 5.90516    | 5.20146    |
| UBE2R2      | 17.0545    | 17.0276    | 14.9404    | 16.483     | 17.5714    |
| KIAA1024    | 0.225144   | 0.136037   | 0.220226   | 0.156803   | 0.192324   |
| CACNB4      | 0.600435   | 0.631515   | 0.424942   | 0.474298   | 0.709621   |
| SMARCE1     | 31.0943    | 36.4821    | 34.483     | 33.0156    | 37.352     |
| SMA4        | 0.56047    | 0.596892   | 0.4292     | 0.721197   | 0.373434   |
| ALDH1L2     | 0.00555376 | 0.00405322 | 0.00350159 | 0.00463236 | 0.00380144 |
| ZNF252P     | 3.03885    | 3.22958    | 4.79906    | 3.70521    | 3.4729     |
| ZNF513      | 10.5074    | 10.0609    | 9.18135    | 11.2767    | 8.5868     |
| SMARCAD1    | 2.26921    | 2.17756    | 2.35721    | 2.43308    | 1.96028    |
| GSGL        | 0.0296485  | 0.033079   | 0.021967   | 0.0579101  | 0.00759964 |
| GNPNAT1     | 18.7002    | 19.0054    | 21.5024    | 18.8688    | 20.648     |
| INPP5K      | 11.6394    | 13.0691    | 15.0885    | 13.2322    | 12.2714    |
| AKT1S1      | 53.0048    | 47.1128    | 50.7706    | 53.8944    | 49.2939    |

|                            |           |           |           |           |           |
|----------------------------|-----------|-----------|-----------|-----------|-----------|
| SMU1                       | 9.24171   | 10.0322   | 9.29268   | 9.33646   | 9.99411   |
| DGCR5                      | 0.106139  | 0.124819  | 0.105758  | 0.112731  | 0.0969282 |
| INPP1                      | 8.80027   | 10.8669   | 11.7471   | 10.7916   | 9.9961    |
| CATSPER2P1                 | 0.273475  | 0.487249  | 0.305541  | 0.297077  | 0.391726  |
| UBE2D3                     | 103.85    | 107.547   | 123.455   | 110.023   | 110.201   |
| MRPS31                     | 8.15521   | 8.18984   | 10.885    | 10.3118   | 7.65598   |
| MFSD4                      | 0.0665342 | 0.10566   | 0.0501768 | 0.066932  | 0.125418  |
| EIF3I                      | 228.107   | 240.14    | 228.546   | 230.25    | 238.024   |
| SCAF8                      | 5.35536   | 6.79504   | 6.68977   | 5.70789   | 6.87424   |
| RHOV                       | 4.23378   | 8.5243    | 3.86218   | 4.38412   | 7.94065   |
| BET1L                      | 19.614    | 22.6554   | 21.7531   | 20.8631   | 22.7926   |
| RNF169                     | 1.68031   | 1.18255   | 1.07317   | 1.30402   | 1.51058   |
| SBNO1                      | 3.04934   | 2.98394   | 3.57973   | 3.19768   | 3.12364   |
| CCDC127                    | 11.9555   | 9.8724    | 13.9855   | 11.8575   | 11.2119   |
| CEP97                      | 0.481378  | 0.524036  | 0.464408  | 0.524286  | 0.504998  |
| PEA15                      | 91.8742   | 92.2284   | 114.632   | 95.5844   | 93.5215   |
| SREBF1                     | 20.4364   | 26.1435   | 22.8568   | 24.1861   | 25.1308   |
| MSANTD2                    | 1.86122   | 1.18159   | 2.38784   | 2.44728   | 1.4517    |
| NHP2L1                     | 136.33    | 140.653   | 146.628   | 135.55    | 146.068   |
| FAM101A,ZNF664,ZNF664-FAM1 | 14.6994   | 15.1055   | 21.006    | 17.5212   | 15.8485   |
| SDE2                       | 4.31443   | 4.04109   | 4.04552   | 4.2174    | 3.68884   |
| FTH1                       | 524.537   | 644.063   | 566.103   | 564.567   | 605.936   |
| MST4                       | 11.6777   | 10.643    | 11.2129   | 11.3155   | 11.9816   |
| KIAA1217                   | 2.65206   | 2.83625   | 1.75463   | 2.30791   | 3.04452   |
| KAT6B                      | 1.27221   | 1.19421   | 1.08582   | 1.17726   | 1.44503   |
| GPATCH2L                   | 1.59202   | 1.17005   | 1.27744   | 1.26421   | 1.42339   |
| FRAT2                      | 14.0864   | 15.0443   | 15.4374   | 15.3579   | 15.4705   |
| TBCK                       | 1.6936    | 1.71851   | 1.40572   | 1.77723   | 1.80261   |
| SNX14                      | 11.6197   | 10.4818   | 12.458    | 12.0238   | 10.9296   |
| NUP37                      | 32.5301   | 27.2943   | 36.2249   | 30.3697   | 31.8063   |
| HSPE1,HSPE1-MOB4,MOB4      | 403.941   | 330.947   | 343.142   | 381.32    | 342.568   |
| PCNP                       | 38.8816   | 45.7312   | 43.0137   | 39.821    | 48.6392   |
| RINL                       | 0.731936  | 1.36198   | 0.913326  | 0.821917  | 1.32516   |
| TALDO1                     | 141.314   | 147.531   | 135.704   | 138.242   | 151.606   |
| ZNF329                     | 2.53311   | 3.37248   | 3.07811   | 2.66736   | 3.62927   |
| DECR1                      | 124.143   | 119.798   | 117.747   | 122.989   | 123.188   |
| NOP10                      | 442.634   | 435.36    | 508.891   | 453.084   | 425.531   |
| ENTPD1                     | 0.889278  | 1.02944   | 1.20114   | 1.08141   | 0.949865  |
| ITSN1                      | 1.74041   | 1.61503   | 1.43501   | 1.61196   | 1.58863   |
| SC5DL                      | 2.55752   | 2.50332   | 2.57472   | 2.60903   | 2.71068   |
| GLYCTK                     | 9.57449   | 8.79839   | 8.71686   | 9.44352   | 9.18077   |
| LOC441454                  | 0.399715  | 0.263839  | 0.297827  | 0.332807  | 0.326331  |
| ZNF34                      | 1.54444   | 2.33356   | 1.23796   | 1.68521   | 2.15118   |
| NEU4                       | 0.0266918 | 0.0351258 | 0.0317379 | 0         | 0.0962208 |
| ITFG3                      | 24.6777   | 23.3995   | 21.9268   | 24.037    | 23.019    |
| MAPK12                     | 56.4719   | 60.0356   | 57.6907   | 59.5945   | 58.7298   |
| BSN                        | 0.0511152 | 0.0455395 | 0.0437905 | 0.0427477 | 0.0414478 |
| ACTR5                      | 4.62044   | 5.32965   | 5.05023   | 4.66827   | 5.49147   |
| ALDH4A1                    | 15.5922   | 14.2254   | 14.1612   | 15.5432   | 15.5908   |
| FBXO21                     | 4.17176   | 4.59858   | 4.03584   | 3.97869   | 4.8109    |
| PSD                        | 1.10457   | 0.826399  | 1.13042   | 0.969849  | 1.069     |
| USP7                       | 16.6139   | 14.4256   | 16.9645   | 17.2855   | 15.4569   |
| TMEM117                    | 0.930782  | 1.01887   | 0.853407  | 1.04595   | 1.0486    |
| TRIM37                     | 4.20082   | 4.14259   | 4.42121   | 4.41321   | 4.41228   |
| RANBP10                    | 5.22376   | 4.96685   | 5.32089   | 5.51031   | 5.03249   |
| AAK1                       | 0.805457  | 0.818811  | 1.08476   | 0.944688  | 0.847976  |
| BSCL2,HNRNPUL2             | 28.3995   | 33.5408   | 23.6383   | 29.1485   | 32.5595   |
| RPL5                       | 1901.17   | 2643.15   | 2265.59   | 2042.72   | 2455.27   |
| CPNE2                      | 26.6774   | 31.3536   | 28.6673   | 28.6842   | 31.5984   |
| SHOC2                      | 4.95328   | 4.18196   | 5.10034   | 4.53796   | 4.97331   |
| ARRDC2                     | 12.8692   | 18.4409   | 14.9923   | 14.692    | 16.799    |
| LRG1                       | 0.130073  | 0.0292767 | 0.0523577 | 0.108584  | 0.108497  |
| EFNA1                      | 20.4406   | 20.0249   | 18.5919   | 19.7061   | 18.9988   |
| RNPEP                      | 34.7556   | 34.763    | 34.3617   | 35.9865   | 35.9054   |
| ZCCHC17                    | 13.5296   | 15.1543   | 13.389    | 14.5329   | 15.201    |
| DUSP2                      | 14.2666   | 25.3228   | 21.5047   | 17.8296   | 23.8617   |
| RPL35A                     | 3580.89   | 4888.29   | 3806.78   | 3670.89   | 4459.07   |
| DTWD1                      | 8.1763    | 8.10909   | 7.99771   | 7.66766   | 9.42794   |
| CLPTM1L                    | 40.2146   | 44.0242   | 49.2136   | 47.0103   | 43.3321   |
| SERPIN9                    | 18.2724   | 10.6219   | 12.3445   | 16.3974   | 12.0807   |
| LOC100134868               | 0.506527  | 0.779847  | 0.461711  | 0.563435  | 0.933255  |
| EMC8                       | 26.3149   | 26.0459   | 30.1231   | 28.2256   | 26.2322   |
| ARL1                       | 13.7366   | 15.4559   | 14.0245   | 12.9723   | 16.9217   |
| GRSF1                      | 24.1549   | 21.3966   | 25.2539   | 24.3641   | 22.2746   |
| NSUN6                      | 3.94143   | 3.61766   | 4.02286   | 3.78527   | 3.93331   |
| RAP1GDS1                   | 10.1588   | 9.93977   | 11.059    | 10.1938   | 10.7611   |
| TPR                        | 7.02864   | 6.20542   | 3.25354   | 6.72605   | 6.94751   |
| WDR77                      | 12.6991   | 11.176    | 18.3866   | 14.3423   | 11.835    |
| ZDHC3                      | 2.48334   | 3.16428   | 2.88231   | 2.8646    | 3.08274   |

|                           |          |           |           |           |            |
|---------------------------|----------|-----------|-----------|-----------|------------|
| LOC643837                 | 1.7776   | 2.21643   | 2.29078   | 2.07825   | 2.37466    |
| NAV2                      | 7.52269  | 5.75214   | 4.92811   | 6.77111   | 6.27484    |
| HSD11B1L                  | 0.841325 | 1.43535   | 0.818753  | 0.715526  | 1.67346    |
| RTF1                      | 13.6813  | 13.3279   | 12.4108   | 13.5756   | 13.7447    |
| CUX2                      | 0        | 0         | 0.0056859 | 0         | 0.00585335 |
| AGAP6                     | 5.16998  | 4.02939   | 4.24672   | 5.60579   | 4.15633    |
| GIGYF1                    | 24.8491  | 22.2426   | 20.7288   | 26.0943   | 22.0985    |
| BTRC                      | 2.91794  | 2.59511   | 2.9431    | 3.16929   | 2.66407    |
| LOC100131067              | 1.16571  | 1.10968   | 1.48093   | 1.43811   | 1.02694    |
| RPL23                     | 4101.9   | 5320.96   | 4321.27   | 4158.69   | 4885       |
| GIGYF2                    | 6.23634  | 6.29037   | 5.08694   | 6.17485   | 6.21277    |
| TMEM164                   | 2.40153  | 2.14954   | 2.15917   | 2.25315   | 2.52764    |
| INPP4A                    | 2.5516   | 2.26369   | 2.41915   | 2.74885   | 2.35916    |
| ACRBP                     | 0.27832  | 0.26472   | 0.0988571 | 0.351582  | 0.163246   |
| KRT86                     | 0.173014 | 0.0561249 | 0         | 0.0715003 | 0.052144   |
| PHF16                     | 2.632    | 1.92201   | 2.75941   | 2.79258   | 1.9959     |
| SPAST                     | 1.43946  | 1.61351   | 2.15731   | 1.84258   | 1.52394    |
| RNFT1                     | 5.57341  | 7.00553   | 8.10026   | 5.91765   | 7.79618    |
| KLHL20                    | 1.66503  | 1.83251   | 1.87874   | 1.93314   | 1.52284    |
| CTNNA1                    | 53.0778  | 55.336    | 55.0027   | 54.2063   | 58.6595    |
| SCAMP1                    | 5.85191  | 6.2876    | 6.14541   | 5.60862   | 7.04449    |
| ELOVL1                    | 78.1993  | 98.3331   | 86.3555   | 84.0805   | 97.3603    |
| CCND2                     | 22.7999  | 22.6529   | 22.4107   | 22.0319   | 24.006     |
| C1D                       | 19.0031  | 19.5687   | 19.4323   | 18.1731   | 20.2693    |
| BCAT2                     | 106.417  | 90.5627   | 89.3029   | 99.7371   | 100.738    |
| TMEM101                   | 36.4032  | 43.5061   | 38        | 35.6082   | 44.4831    |
| DFFB                      | 4.05673  | 4.03892   | 4.00165   | 4.55426   | 4.2968     |
| VWA5B2                    | 3.35929  | 3.093     | 3.25809   | 3.33551   | 3.73326    |
| SNX13                     | 2.87482  | 2.88532   | 2.47511   | 2.75188   | 2.9565     |
| SRPRB                     | 17.8285  | 21.608    | 23.5707   | 19.6238   | 22.058     |
| FBRSL1                    | 20.8295  | 17.8472   | 20.4715   | 22.4652   | 17.431     |
| B3GALNT2                  | 5.63078  | 5.59569   | 7.20003   | 6.62498   | 5.87058    |
| ANO8                      | 2.44253  | 2.53904   | 1.91844   | 2.42541   | 2.55865    |
| PSMB5                     | 223.776  | 245.778   | 229.152   | 232.054   | 234.501    |
| ZNF35                     | 1.5527   | 2.82481   | 1.95936   | 1.8125    | 2.78416    |
| LNX2                      | 1.87614  | 1.39132   | 1.47793   | 1.52676   | 1.54281    |
| GRAMD4                    | 9.00318  | 9.38686   | 8.86895   | 9.538     | 8.93911    |
| DDN                       | 5.86616  | 4.36798   | 5.42924   | 6.35817   | 4.48106    |
| SREK1                     | 4.14791  | 4.14785   | 3.38941   | 3.85613   | 4.92569    |
| SHROOM1                   | 9.55206  | 8.229     | 9.49624   | 9.56284   | 9.54834    |
| OAT                       | 46.1765  | 45.4432   | 52.9729   | 47.4677   | 47.0912    |
| ZNF33A                    | 3.07623  | 2.56544   | 2.88991   | 3.34891   | 2.45201    |
| EMC1                      | 5.50858  | 5.24519   | 5.43644   | 5.81956   | 5.43715    |
| ELP2                      | 27.5364  | 25.7259   | 28.4789   | 26.4154   | 27.7503    |
| LOC254100                 | 0.636063 | 0.714679  | 0.867696  | 0.862841  | 0.71287    |
| NPM3                      | 154.159  | 157.061   | 170.293   | 155.34    | 162.532    |
| ZNF791                    | 1.11315  | 1.27262   | 1.14755   | 1.22715   | 1.27852    |
| ZNF10                     | 2.36302  | 2.99557   | 1.874     | 2.38023   | 3.01413    |
| C11orf91                  | 1.96937  | 1.65877   | 2.20294   | 2.25327   | 1.80539    |
| PTGES3                    | 177.432  | 182.212   | 167.656   | 173.653   | 192.128    |
| FBXO31                    | 12.054   | 12.7315   | 15.5536   | 14.1319   | 13.3436    |
| RPS6KA4                   | 39.0362  | 41.5467   | 35.6418   | 40.4498   | 40.9415    |
| RPF2                      | 51.1788  | 52.6392   | 49.0838   | 54.2725   | 50.6725    |
| C1orf198                  | 9.1167   | 9.12821   | 8.24173   | 8.54493   | 10.0694    |
| TMBIM1                    | 64.884   | 73.3155   | 63.7172   | 65.2498   | 74.1625    |
| ARHGAP1                   | 17.5653  | 19.1622   | 18.8511   | 19.1638   | 18.8428    |
| IL17RA                    | 3.489    | 3.33676   | 3.65543   | 3.83634   | 3.23338    |
| NR6A1                     | 1.04182  | 0.742886  | 0.900889  | 1.28409   | 0.465119   |
| PPM1G                     | 109.616  | 107.677   | 116.293   | 122.4     | 100.389    |
| TIGD5                     | 25.7     | 26.6104   | 29.5866   | 28.0338   | 25.7019    |
| NDFIP1                    | 25.0227  | 26.2488   | 27.3863   | 27.2614   | 26.1138    |
| ATP13A1                   | 24.0574  | 22.5513   | 21.0374   | 23.132    | 23.5588    |
| LCOR                      | 1.64564  | 1.35301   | 1.38565   | 1.36901   | 1.7817     |
| KCTD2                     | 6.26817  | 8.04177   | 7.63609   | 7.1837    | 8.36504    |
| HERPUD2                   | 6.03734  | 6.20669   | 6.76692   | 6.1227    | 6.7712     |
| LOC100131096              | 1.04489  | 0.947044  | 1.13367   | 1.14197   | 1.09508    |
| LOC148413                 | 8.35883  | 9.76813   | 10.5872   | 10.3033   | 9.8575     |
| C3orf35                   | 0.293968 | 0.348212  | 0.176977  | 0.263791  | 0.39601    |
| RWDD3, TMEM56, TMEM56-RWD | 10.5654  | 11.5189   | 10.9502   | 10.7363   | 11.753     |
| RRM1                      | 29.732   | 26.4859   | 27.9457   | 30.752    | 27.8903    |
| PLEKHA8                   | 2.74791  | 1.95      | 2.3573    | 2.41186   | 2.05419    |
| SMCR7                     | 20.21    | 27.5853   | 17.8417   | 19.0997   | 28.434     |
| RAP1A                     | 20.374   | 20.315    | 19.8234   | 18.8287   | 22.4821    |
| SPHK2                     | 9.83623  | 7.43798   | 10.3368   | 10.1293   | 8.30059    |
| LYRM4                     | 19.734   | 23.3123   | 20.5383   | 19.6997   | 22.647     |
| VPS45                     | 5.2333   | 4.87972   | 6.38926   | 6.29201   | 4.50928    |
| RSK3A                     | 45.0991  | 41.0037   | 48.8275   | 45.9961   | 42.35      |
| RBFOX2                    | 15.8472  | 15.3765   | 17.251    | 15.7466   | 17.7389    |
| MKNK1                     | 9.17089  | 7.50113   | 8.81203   | 9.04612   | 8.75879    |

|                         |           |           |           |           |          |
|-------------------------|-----------|-----------|-----------|-----------|----------|
| CDCA2                   | 2.36009   | 2.02363   | 1.99122   | 2.60053   | 1.97258  |
| YIPF6                   | 4.75834   | 4.5014    | 5.05233   | 4.72341   | 5.00561  |
| FOPNL                   | 11.5017   | 12.8417   | 14.5244   | 12.9289   | 12.9288  |
| HPRT1                   | 67.7796   | 73.3096   | 72.1734   | 63.1361   | 82.9002  |
| RPL4                    | 2788.61   | 4071.13   | 3194.25   | 2999.3    | 3912.36  |
| KIAA1841                | 0.411758  | 0.382723  | 0.363736  | 0.51252   | 0.40274  |
| GPFR                    | 0.0682243 | 0.18118   | 0.152829  | 0.0285051 | 0.26686  |
| LRRC59                  | 42.3473   | 44.0716   | 40.8387   | 45.2471   | 44.1705  |
| SLC12A8                 | 4.81267   | 3.80323   | 4.75524   | 4.63928   | 4.171    |
| PPP1R8                  | 19.5818   | 21.4859   | 20.0333   | 20.1257   | 21.5394  |
| SOD1                    | 333.997   | 337.539   | 333.959   | 331.685   | 344.652  |
| PRDX6                   | 278.076   | 293.74    | 258.938   | 268.844   | 311.008  |
| RANBP6                  | 4.15756   | 5.34769   | 4.71215   | 4.59382   | 5.43     |
| MRPL2                   | 50.0428   | 46.0921   | 40.654    | 50.4752   | 47.4233  |
| AKAP2,PALM2,PALM2-AKAP2 | 6.08653   | 5.95135   | 5.68095   | 5.47315   | 6.33845  |
| BAIAP2L2                | 0.244129  | 0.144853  | 0.131005  | 0.220986  | 0.160039 |
| INPP5E                  | 22.5029   | 26.3371   | 19.2722   | 25.1563   | 24.312   |
| KIF1B                   | 4.34182   | 3.64782   | 3.54424   | 3.8818    | 4.06568  |
| YBX2                    | 0.0507559 | 0.0337912 | 0         | 0.0424844 | 0        |
| CDC6                    | 6.89085   | 8.91566   | 8.1965    | 8.47507   | 9.27562  |
| SLC12A9                 | 24.2351   | 27.8892   | 23.5471   | 25.9901   | 27.2144  |
| POLRMT                  | 49.6307   | 36.9732   | 38.3713   | 49.0275   | 37.4351  |
| RHNO1                   | 7.37093   | 6.63858   | 9.16896   | 8.4181    | 6.50009  |
| SLC37A3                 | 9.59965   | 9.82623   | 9.90094   | 9.72179   | 10.3878  |
| SLC20A2                 | 6.16174   | 5.20557   | 5.73729   | 6.3054    | 5.4027   |
| ZDHC2                   | 5.98045   | 6.02512   | 7.07636   | 6.20993   | 6.02035  |
| TCEB3                   | 1.71445   | 1.86517   | 1.8768    | 1.80084   | 1.8687   |
| TBC1D16                 | 5.04375   | 4.35312   | 4.42753   | 4.78995   | 4.89366  |
| GGACT                   | 1.57936   | 1.24422   | 1.62861   | 1.74783   | 1.3829   |
| CS                      | 64.3741   | 68.4246   | 63.1265   | 67.5835   | 68.5599  |
| ICA1                    | 3.74997   | 3.02653   | 3.37736   | 3.26911   | 3.43243  |
| FAM111B                 | 1.03839   | 1.91982   | 0.801747  | 1.1325    | 2.18521  |
| LACTB                   | 7.34755   | 7.41228   | 6.71041   | 6.87193   | 8.06404  |
| PSMA2                   | 91.9757   | 91.7382   | 96.5452   | 92.6141   | 97.3079  |
| SON                     | 12.9976   | 12.5294   | 12.389    | 12.4401   | 13.6074  |
| SOLH                    | 30.1678   | 27.0564   | 31.3      | 31.8506   | 29.1941  |
| PKDCC                   | 7.02823   | 6.96356   | 7.59654   | 8.01719   | 6.18811  |
| TSR3                    | 100.52    | 107.387   | 100.243   | 104.133   | 101.901  |
| SGSH                    | 16.6481   | 19.1254   | 13.5297   | 16.2712   | 17.7749  |
| PSMC1                   | 78.6138   | 81.0863   | 74.0526   | 74.449    | 86.6652  |
| MRPS18B                 | 74.4918   | 72.6995   | 84.4371   | 76.3921   | 75.5538  |
| CBX7                    | 9.39989   | 12.0479   | 9.94131   | 10.4326   | 11.9805  |
| LRRC23                  | 5.86602   | 8.73202   | 5.2718    | 6.1659    | 7.86315  |
| FHOD1                   | 10.5036   | 10.1778   | 7.95515   | 10.5975   | 10.4542  |
| PDP2                    | 2.42576   | 1.89561   | 2.47199   | 2.39985   | 2.10176  |
| TSTD2                   | 4.47964   | 4.61451   | 5.71275   | 4.93895   | 4.8349   |
| RRNAD1                  | 12.4285   | 15.6254   | 12.903    | 12.5764   | 14.9648  |
| PRKAB1                  | 6.82942   | 11.3363   | 9.17566   | 8.82942   | 10.3061  |
| UBE4A                   | 6.12551   | 5.84624   | 5.99322   | 6.39016   | 6.1407   |
| ANKRD40                 | 9.51064   | 9.102     | 11.2185   | 10.1818   | 10.0587  |
| HSF2                    | 6.99688   | 5.703     | 6.59014   | 6.50563   | 6.33418  |
| PPP2CA                  | 39.455    | 46.7399   | 49.0915   | 44.6148   | 48.665   |
| B3GNT5                  | 2.47262   | 2.33032   | 2.87522   | 2.64666   | 2.56234  |
| DECR2                   | 17.6334   | 20.5051   | 18.5714   | 19.1443   | 19.7726  |
| QTRT1                   | 52.3925   | 59.0139   | 46.4727   | 55.9998   | 54.9068  |
| RPS4X                   | 2889.96   | 3811.45   | 3070.5    | 2915.83   | 3641.68  |
| MAT2B                   | 18.047    | 17.087    | 21.96     | 20.7218   | 18.1892  |
| EMC2                    | 42.6303   | 29.1345   | 31.8443   | 38.6658   | 30.7383  |
| CMTM8                   | 16.9726   | 11.8931   | 18.2671   | 17.7634   | 15.0511  |
| NDUFB10                 | 127.229   | 118.756   | 113.346   | 127.064   | 114.457  |
| BCORL1                  | 2.96699   | 2.62434   | 2.73324   | 3.28125   | 2.5603   |
| SLC27A2                 | 12.9009   | 12.0074   | 13.6262   | 13.7027   | 11.6675  |
| NGRN                    | 46.6346   | 61.2272   | 65.2075   | 56.2734   | 59.6339  |
| KLHL42                  | 2.94628   | 3.27861   | 3.38674   | 3.15948   | 3.35682  |
| HCN2                    | 0         | 0.0726051 | 0.0657648 | 0         | 0.110775 |
| BCAM                    | 27.4715   | 46.3586   | 27.0314   | 29.7847   | 43.3     |
| NDUFA7                  | 174.785   | 154.339   | 160.211   | 160.54    | 166.265  |
| CEP95                   | 6.47317   | 8.2853    | 5.97961   | 6.94771   | 7.57959  |
| SBDSP1                  | 13.2868   | 16.306    | 15.9356   | 15.3005   | 17.334   |
| DCAF16                  | 8.41224   | 8.21903   | 10.5903   | 9.41763   | 8.97154  |
| FBR3                    | 25.6816   | 21.7437   | 23.2998   | 24.9515   | 23.2552  |
| UBA2                    | 22.2295   | 25.4707   | 21.5757   | 21.8869   | 27.2872  |
| ARHGAP22                | 45.0667   | 34.5723   | 30.3317   | 37.4915   | 43.9519  |
| ITPA                    | 66.6291   | 70.518    | 81.4625   | 76.1207   | 62.7335  |
| SSSCA1                  | 66.409    | 61.1559   | 71.8176   | 73.3201   | 56.6858  |
| STUB1                   | 53.4391   | 59.2015   | 55.3292   | 54.671    | 59.1128  |
| LOC100133445            | 0.984063  | 2.02863   | 1.35134   | 0.59883   | 2.24928  |
| LOC202181               | 0.540103  | 0.536577  | 0.705255  | 0.691914  | 0.52826  |
| CTBP1                   | 39.9738   | 39.2003   | 44.7179   | 42.3486   | 43.0705  |

|              |            |           |           |          |           |
|--------------|------------|-----------|-----------|----------|-----------|
| BIN3         | 13.9583    | 15.6747   | 16.7646   | 14.431   | 15.1299   |
| KDM1A        | 54.7095    | 51.4915   | 52.6043   | 55.5119  | 53.8071   |
| BTK          | 0.00895777 | 0.0250632 | 0         | 0        | 0.0351395 |
| LINC00152    | 447.106    | 495.135   | 481.507   | 456.995  | 438.605   |
| CUL9         | 2.43597    | 2.33645   | 1.94838   | 2.38187  | 2.44832   |
| RPS3         | 2442.02    | 3894.47   | 2630.24   | 2540.94  | 3579.01   |
| EIF2A        | 17.9695    | 18.4112   | 21.0642   | 17.8171  | 18.7479   |
| CCDC149      | 1.30568    | 1.19205   | 1.42646   | 1.46051  | 1.00346   |
| FAM193A      | 4.77356    | 3.85704   | 4.53943   | 4.77274  | 4.05231   |
| LAT          | 0.748422   | 1.10633   | 1.39082   | 1.59375  | 0.915685  |
| ZNF502       | 1.25854    | 1.85696   | 1.39719   | 1.40739  | 1.86082   |
| ZSWIM5       | 0.26713    | 0.142685  | 0.183842  | 0.162374 | 0.26856   |
| TTC1         | 41.7122    | 38.5324   | 43.8894   | 40.4861  | 42.7141   |
| SCLT1        | 2.38948    | 1.64008   | 2.19479   | 2.18956  | 1.99258   |
| PROS1        | 10.3814    | 12.9812   | 11.8936   | 11.0083  | 14.1722   |
| PMM2         | 14.5542    | 17.0879   | 23.0265   | 18.8289  | 16.4883   |
| NUP43        | 10.1203    | 6.91608   | 12.0696   | 10.8282  | 8.24584   |
| SLC46A1      | 5.27985    | 5.74144   | 5.75404   | 6.09543  | 5.34238   |
| NDUFB8       | 258.853    | 241.846   | 256.305   | 248.287  | 261.301   |
| MFSD2A       | 7.86173    | 9.81551   | 10.9628   | 9.27132  | 8.80379   |
| ZNF286A      | 2.28654    | 1.99562   | 2.47681   | 2.23826  | 2.39684   |
| HNRNPK       | 178.622    | 184.588   | 194.359   | 183.908  | 196.148   |
| UBE2J1       | 8.25035    | 10.5175   | 10.7038   | 8.85904  | 10.8295   |
| FBXO5        | 8.31012    | 7.61698   | 9.30746   | 8.66854  | 9.21003   |
| NUFIP1       | 2.0501     | 2.88822   | 2.24717   | 2.15467  | 2.94782   |
| PPM1L        | 0.434616   | 0.332141  | 0.292053  | 0.320475 | 0.353159  |
| PPP1R3D      | 1.72523    | 2.09404   | 1.63889   | 1.70498  | 2.16258   |
| TLE3         | 9.79943    | 8.84996   | 7.77243   | 9.70104  | 9.11413   |
| PITX2        | 7.75193    | 8.26865   | 8.97558   | 8.8573   | 8.72189   |
| CMC1         | 55.2634    | 46.3466   | 39.8446   | 49.8071  | 47.9431   |
| CSRNP1       | 11.1772    | 6.60791   | 8.50105   | 9.97662  | 6.26118   |
| LOC100130000 | 0.121882   | 0.0746103 | 0.0999808 | 0.111795 | 0.122002  |
| MFN2         | 9.62945    | 9.69258   | 10.0393   | 10.3855  | 9.78745   |
| GAS5         | 1194.53    | 1760.15   | 1338.22   | 1303.31  | 1564.56   |
| ATP1B1       | 7.68153    | 10.6866   | 6.28483   | 7.13006  | 12.5886   |
| TRIP11       | 1.33644    | 1.41906   | 0.50298   | 1.47126  | 1.41263   |
| ZFP36L2      | 6.23008    | 8.29185   | 6.7504    | 6.9798   | 8.02291   |
| KDSR         | 19.8017    | 20.9687   | 20.7597   | 19.8826  | 22.7797   |
| OCEL1        | 25.0734    | 30.6543   | 20.4331   | 21.7928  | 31.4125   |
| LAMTOR2      | 93.5473    | 103.897   | 79.0095   | 94.801   | 95.0329   |
| PTDSS2       | 42.1144    | 50.1833   | 45.7776   | 43.9229  | 50.0871   |
| HMG1         | 200.974    | 202.127   | 210.206   | 207.201  | 209.081   |
| TTC3         | 2.95489    | 3.05257   | 2.45853   | 2.98036  | 3.02417   |
| BCL11B       | 0.135257   | 0.186084  | 0.11377   | 0.199299 | 0.102052  |
| BLOC1S2      | 13.2363    | 17.8036   | 14.5247   | 14.4109  | 17.3591   |
| SPTLC2       | 5.94898    | 6.75792   | 6.36088   | 6.13673  | 7.03197   |
| PYURF        | 44.3949    | 61.0244   | 69.1949   | 52.7874  | 59.8022   |
| SUZ12        | 10.009     | 9.21802   | 9.93078   | 10.0181  | 9.63814   |
| LOC100130705 | 0.448366   | 0.617123  | 1.28118   | 0.874567 | 0.559905  |
| ZNRD1        | 88.2365    | 96.737    | 91.6847   | 90.3138  | 92.1049   |
| BYSL         | 32.1358    | 32.3875   | 42.6638   | 35.6183  | 30.8893   |
| MMEL1        | 2.966      | 2.9481    | 2.93357   | 2.83879  | 3.40955   |
| E2F7         | 3.15081    | 2.8105    | 3.74402   | 3.88033  | 2.94954   |
| CYSTM1       | 85.7112    | 86.0904   | 85.4365   | 87.1311  | 83.7297   |
| IL37         | 0.120527   | 0.159154  | 0.0744455 | 0.10043  | 0.157103  |
| TCERG1       | 13.2607    | 11.5836   | 9.47646   | 11.4123  | 14.3732   |
| SNF8         | 81.6198    | 75.9144   | 84.6922   | 88.4082  | 71.6883   |
| FAM177A1     | 4.33046    | 4.37254   | 4.55753   | 4.14103  | 4.60095   |
| PDHA1        | 32.232     | 29.0287   | 28.2889   | 31.7508  | 31.9112   |
| GRWD1        | 27.7744    | 32.3202   | 33.5739   | 29.8221  | 32.4384   |
| S1PR2        | 6.14244    | 5.84823   | 5.48004   | 6.03796  | 6.10941   |
| REPS1        | 16.1403    | 14.1935   | 16.9629   | 16.6592  | 14.8475   |
| SMARCC1      | 18.2558    | 16.1141   | 20.3126   | 19.1022  | 18.3435   |
| TBC1D2B      | 3.58141    | 3.18768   | 3.5897    | 4.00344  | 3.08691   |
| CD44         | 72.2349    | 81.4949   | 77.1453   | 68.9773  | 87.9338   |
| STAT6        | 31.8469    | 33.6354   | 32.7144   | 34.1194  | 33.8196   |
| SLC9A1       | 8.36412    | 8.48343   | 9.17582   | 9.03664  | 8.93148   |
| LOC255512    | 2.72047    | 3.4521    | 2.62216   | 2.67165  | 3.48379   |
| RNF170       | 4.81395    | 5.14991   | 5.85124   | 5.20448  | 4.96868   |
| PP7080       | 8.92917    | 16.0683   | 12.7351   | 11.6861  | 13.828    |
| METTL21A     | 8.31368    | 8.35274   | 8.93048   | 9.26902  | 8.10199   |
| EPS15        | 6.37581    | 5.24198   | 6.14711   | 5.80428  | 6.43187   |
| NKD1         | 1.22286    | 1.10039   | 1.14729   | 1.29535  | 1.02232   |
| ZNF574       | 9.89324    | 11.4221   | 10.4603   | 10.5902  | 11.7804   |
| ZNF394       | 11.8897    | 14.231    | 12.809    | 13.2528  | 13.7404   |
| SMARCA5      | 8.69108    | 7.93823   | 10.0567   | 9.64657  | 8.73078   |
| SNX9         | 12.5464    | 11.9203   | 12.0134   | 12.3898  | 13.2383   |
| POLD3        | 2.08032    | 2.13483   | 1.64631   | 2.22868  | 2.32422   |
| E2F5         | 7.3243     | 6.68856   | 10.7284   | 7.9708   | 7.50114   |



|                |           |           |           |           |           |
|----------------|-----------|-----------|-----------|-----------|-----------|
| CHCHD2         | 755.597   | 715.488   | 795.465   | 765.287   | 752.691   |
| YTHDF1         | 15.8224   | 18.7276   | 17.4489   | 17.1359   | 17.997    |
| ZNF512         | 4.15973   | 3.38498   | 5.52952   | 5.06674   | 3.9578    |
| EEF1B2         | 1702.23   | 2808.63   | 1991.08   | 1853.65   | 2538.16   |
| LRRC39         | 0.50699   | 0.554144  | 0.496139  | 0.559767  | 0.665518  |
| TMEM241        | 2.82446   | 2.80261   | 2.70246   | 2.84924   | 2.92482   |
| SDCCAG3        | 95.6597   | 113.962   | 112.18    | 104.694   | 118.038   |
| RBM17          | 37.6361   | 33.566    | 35.6115   | 38.2183   | 34.8687   |
| MED14          | 5.3274    | 4.28253   | 5.0467    | 5.26223   | 5.10163   |
| LOC100144603   | 1.17125   | 1.99345   | 2.52156   | 2.34266   | 1.70513   |
| SNHG15         | 94.2237   | 158.311   | 142.356   | 116.204   | 136.326   |
| AK1            | 45.4851   | 58.5476   | 47.1239   | 48.8628   | 58.7767   |
| CSGALNACT1     | 0.0834649 | 0.155801  | 0.0401064 | 0.0856156 | 0.111275  |
| R3HDM2         | 8.27236   | 6.88227   | 8.5089    | 9.22813   | 6.34513   |
| ZNF618         | 2.08663   | 2.42168   | 1.94762   | 2.31249   | 2.26225   |
| FKBP3          | 38.5994   | 35.3195   | 32.7517   | 35.7652   | 39.9117   |
| SLC13A3,TP53RK | 6.57949   | 6.11624   | 6.43856   | 6.18245   | 7.09646   |
| RPSA           | 3392.26   | 4721.14   | 3818.26   | 3510.18   | 4423.59   |
| FAM43A         | 3.01085   | 3.94792   | 2.29859   | 2.9236    | 3.95167   |
| NPR2           | 2.17903   | 1.81567   | 2.33675   | 2.57001   | 1.66905   |
| PAIP2          | 49.4655   | 45.5551   | 46.9815   | 48.7071   | 52.1788   |
| MSI1           | 18.0332   | 15.4193   | 19.7797   | 20.4416   | 15.586    |
| TRAPPC11       | 6.18338   | 5.8059    | 5.60244   | 6.70439   | 6.16184   |
| PDPK1          | 2.5984    | 2.63736   | 2.61031   | 2.76117   | 2.71757   |
| DCP1B          | 10.5568   | 8.58025   | 10.2948   | 10.6601   | 9.05036   |
| NIT2           | 62.3118   | 66.0888   | 66.0462   | 65.541    | 65.5595   |
| GAA            | 56.4237   | 62.3188   | 54.0739   | 56.6357   | 65.5809   |
| KIAA1967       | 39.2194   | 37.5061   | 37.211    | 39.8074   | 39.8058   |
| SMIM15         | 12.249    | 13.5737   | 14.6211   | 13.1441   | 14.5708   |
| TRIM11         | 18.873    | 18.9664   | 22.8858   | 22.6278   | 17.4881   |
| ACSS2          | 6.28123   | 6.74497   | 6.2338    | 6.71472   | 7.03251   |
| TM2D1          | 24.1061   | 24.9378   | 26.7702   | 25.2419   | 25.4262   |
| HM13           | 110.263   | 112.821   | 125.625   | 116.649   | 114.934   |
| ZNF404         | 2.654     | 3.07065   | 1.57181   | 2.78393   | 2.95652   |
| GNB1           | 90.1055   | 99.8676   | 100.725   | 95.5727   | 102.021   |
| ANKRD16        | 13.5354   | 12.3165   | 11.0462   | 11.8617   | 13.8369   |
| MGAT1          | 29.3624   | 30.7574   | 32.6672   | 30.1976   | 32.3484   |
| NCAPH          | 5.9302    | 4.4891    | 5.36879   | 6.45678   | 4.77236   |
| TTC38          | 15.8088   | 18.7091   | 14.9676   | 14.4297   | 19.8788   |
| UNKL           | 5.20876   | 4.01494   | 4.3445    | 5.18738   | 4.17074   |
| PORCN          | 14.5579   | 19.113    | 13.4355   | 13.0336   | 19.4864   |
| ACOT11         | 0.310441  | 0.286697  | 0.207044  | 0.34016   | 0.340375  |
| C1GALT1C1      | 8.1837    | 8.81104   | 7.62063   | 7.4202    | 10.0098   |
| FASTKD5,UBOX5  | 9.60046   | 11.2001   | 10.3193   | 9.78738   | 11.1694   |
| ENKD1          | 2.56258   | 1.69511   | 2.16463   | 2.35085   | 1.7299    |
| MRPL13         | 107.026   | 94.9932   | 105.135   | 108.096   | 102.742   |
| NXT2           | 1.80571   | 2.00986   | 1.87386   | 1.88932   | 2.11004   |
| MAK16          | 7.19566   | 7.00185   | 9.25604   | 7.82197   | 7.57673   |
| LILRB3         | 0.0815231 | 0.0137422 | 0.0371392 | 0.0679179 | 0.0507681 |
| TSPYL2         | 11.5994   | 16.4671   | 10.6706   | 11.9807   | 17.1595   |
| AAR2           | 14.9632   | 16.9483   | 18.2799   | 16.3333   | 16.4796   |
| COX7A1         | 0         | 0         | 0.0888765 | 0         | 0.0920236 |
| PANK2          | 15.2348   | 13.1844   | 14.5692   | 16.7161   | 12.5341   |
| DYNC112        | 13.011    | 13.0809   | 13.4177   | 13.0432   | 14.4973   |
| FTSJ1          | 28.832    | 30.6009   | 29.887    | 29.8015   | 30.3709   |
| RINT1          | 9.30664   | 8.40128   | 9.84893   | 9.4529    | 8.93507   |
| TFCP2          | 2.80861   | 2.4291    | 2.95409   | 3.10429   | 2.6205    |
| CDC5L          | 5.28815   | 5.684     | 5.26445   | 5.33245   | 5.99637   |
| CANT1          | 20.118    | 22.5902   | 23.8038   | 22.6049   | 22.2959   |
| MAP3K14-AS1    | 0.867667  | 0.642029  | 1.08107   | 0.522834  | 1.2837    |
| NQO1           | 22.5387   | 19.446    | 19.5448   | 20.688    | 23.2441   |
| AGGF1          | 4.25584   | 4.01033   | 4.38777   | 4.51346   | 4.51731   |
| MRPL39         | 53.891    | 46.2306   | 43.872    | 49.3934   | 51.8665   |
| TMEM115        | 29.9102   | 38.6022   | 38.1722   | 36.5419   | 34.1001   |
| DDI2,RSC1A1    | 2.21169   | 1.92658   | 2.37369   | 2.25093   | 2.54807   |
| COL18A1        | 2.69489   | 3.1118    | 2.62042   | 3.27818   | 3.03847   |
| NCOA4          | 45.2864   | 51.5005   | 57.7209   | 48.8512   | 53.0268   |
| MPHOSPH9       | 1.57604   | 1.37259   | 1.51625   | 1.96016   | 1.23192   |
| ARL17A         | 0.360082  | 0.236884  | 0.180025  | 0.222866  | 0.268944  |
| GPN2           | 21.966    | 23.45     | 27.8939   | 22.6243   | 22.8423   |
| TBC1D22A       | 14.2635   | 13.9996   | 13.549    | 13.8245   | 14.8207   |
| GLI4           | 30.8387   | 24.8201   | 38.3245   | 39.1438   | 27.0346   |
| PTGES2         | 161.93    | 160.384   | 159.239   | 161.096   | 154.893   |
| ATPAF1         | 26.3156   | 22.1176   | 26.0336   | 25.7759   | 24.9725   |
| GRPEL1         | 74.6975   | 59.8944   | 62.2838   | 69.2052   | 67.9846   |
| ANKFY1         | 3.92686   | 3.78341   | 4.01964   | 4.07122   | 4.2607    |
| S100A16        | 856.679   | 847.386   | 756.171   | 806.891   | 879.324   |
| SPRED3         | 1.75963   | 1.52344   | 1.86114   | 1.78079   | 1.74145   |
| PTGR1          | 77.3205   | 74.6674   | 75.6741   | 74.1247   | 85.7782   |

|                  |          |           |           |          |           |
|------------------|----------|-----------|-----------|----------|-----------|
| IFRD1            | 13.365   | 11.8638   | 24.3857   | 17.1521  | 12.5156   |
| PDE4C            | 0.172723 | 0.157166  | 0.0666307 | 0.11148  | 0.137953  |
| GJD3             | 1.97708  | 3.36503   | 3.4437    | 2.90701  | 3.09138   |
| TDRD3            | 4.79823  | 3.88505   | 4.83232   | 4.60328  | 4.06371   |
| MAFK             | 8.48688  | 7.92336   | 9.25878   | 9.62095  | 7.58723   |
| MFNG             | 0.175689 | 0.0710805 | 0.169864  | 0.235164 | 0.105423  |
| FKBP1A,SDCBP2    | 113.389  | 125.286   | 128.949   | 121.204  | 129.148   |
| RCBTB2           | 0.172428 | 0.2704    | 0.366076  | 0.333943 | 0.291973  |
| TIMM17A          | 32.9866  | 35.5021   | 38.6176   | 34.4194  | 35.803    |
| PLAGL2           | 3.84479  | 4.90266   | 4.47762   | 4.80625  | 4.56612   |
| C8orf47          | 6.99241  | 6.84465   | 6.68162   | 5.99427  | 7.27089   |
| FNTA             | 59.9635  | 48.3552   | 63.1102   | 56.5559  | 51.5293   |
| TOMM5            | 94.1212  | 101.61    | 102.665   | 95.4159  | 96.7725   |
| DPY19L1          | 2.86479  | 2.70283   | 3.05512   | 3.06716  | 2.9498    |
| C19orf12         | 3.99061  | 4.89366   | 4.94664   | 4.55626  | 5.05844   |
| BRF1             | 16.3113  | 14.8445   | 16.1186   | 17.078   | 14.8294   |
| WDR37            | 5.1526   | 7.08583   | 4.45142   | 4.98594  | 7.2516    |
| ATE1             | 1.28036  | 1.12214   | 1.33517   | 1.45809  | 1.27147   |
| NUB1             | 18.4946  | 17.1692   | 19.3423   | 19.3812  | 18.0746   |
| MGRN1            | 18.3951  | 18.3953   | 17.6726   | 19.4116  | 19.2829   |
| C21orf15         | 0.558004 | 0.654069  | 0.138194  | 0.557933 | 0.401895  |
| ANKRD46          | 3.66972  | 3.27019   | 3.46917   | 3.42832  | 3.19936   |
| WDR82            | 13.9001  | 15.8644   | 16.2108   | 14.744   | 16.992    |
| INTS4            | 7.00888  | 6.3377    | 8.10005   | 7.55086  | 6.78891   |
| ANXA2P2          | 3.90885  | 4.39332   | 3.73952   | 3.65718  | 5.25223   |
| GAREM            | 0.336241 | 0.258718  | 0.438166  | 0.367296 | 0.24842   |
| RRP36            | 24.1952  | 28.8943   | 26.5142   | 29.0507  | 28.0802   |
| VPS37A           | 3.65862  | 2.73615   | 3.78728   | 3.49342  | 3.11278   |
| APEX1            | 184.304  | 189.369   | 204.79    | 192.849  | 186.078   |
| NMT1             | 20.8444  | 21.1863   | 19.307    | 21.2569  | 21.4902   |
| STK10            | 7.47941  | 7.14939   | 6.67491   | 7.42525  | 7.09501   |
| TGFB1            | 96.4421  | 110.198   | 91.4109   | 92.084   | 114.616   |
| MRPL11           | 35.9966  | 45.1873   | 37.2945   | 36.6117  | 44.8988   |
| FUCA1            | 7.31412  | 7.84309   | 7.35143   | 7.55277  | 8.6055    |
| LZTR1            | 13.1477  | 12.9899   | 11.2406   | 13.176   | 13.0838   |
| STRADA           | 14.1903  | 12.462    | 13.3876   | 13.8336  | 14.2871   |
| LRFN4            | 44.3023  | 37.8852   | 47.5019   | 46.3152  | 39.8781   |
| VAMP4            | 2.36587  | 2.88594   | 2.60672   | 2.38135  | 2.85042   |
| SEC14L2          | 8.76816  | 9.90633   | 6.7885    | 8.12205  | 9.8932    |
| SRA1             | 25.9504  | 31.7253   | 31.4334   | 28.8877  | 29.8947   |
| GPS2             | 37.1817  | 40.7296   | 36.3391   | 40.2513  | 37.8848   |
| PSTK             | 2.42827  | 3.54482   | 2.19426   | 2.1124   | 3.95172   |
| DHX15            | 35.3886  | 31.5455   | 35.8832   | 35.4084  | 34.3979   |
| MRPL12           | 141.856  | 143.248   | 150.533   | 153.974  | 138.384   |
| STXBP3           | 6.54571  | 6.56923   | 6.3711    | 6.11061  | 7.1183    |
| LOC100287042     | 0.082816 | 0.220009  | 0.31598   | 0.160583 | 0.287025  |
| TRIM14           | 9.9341   | 9.65816   | 12.5326   | 11.9141  | 9.73784   |
| DEPDC5           | 1.37436  | 1.32855   | 1.41483   | 1.56131  | 1.28614   |
| G6PD             | 24.6385  | 24.2013   | 21.7861   | 26.8578  | 23.4261   |
| ZFYVE27          | 14.5636  | 14.0674   | 16.1522   | 16.676   | 14.5492   |
| BZW1             | 61.1943  | 72.1335   | 62.4383   | 55.5785  | 80.5315   |
| CAPZA1           | 75.0206  | 68.9129   | 76.7442   | 72.9242  | 78.54     |
| KIF13A           | 1.21194  | 1.52726   | 1.30563   | 1.17497  | 1.48878   |
| ZNF619           | 0.538517 | 0.64584   | 0.650539  | 0.507957 | 0.878151  |
| SLC35D1          | 0.90264  | 1.24045   | 0.997731  | 0.926423 | 1.16942   |
| NDUFAF7          | 8.21857  | 6.49578   | 8.43195   | 8.16759  | 7.34565   |
| COX11            | 18.1765  | 20.7498   | 22.4432   | 20.2239  | 21.9265   |
| RSPH3            | 2.15686  | 2.13238   | 1.35223   | 1.66158  | 2.36482   |
| GYG1             | 30.0432  | 32.2962   | 34.854    | 32.8185  | 32.189    |
| MT1IP            | 0        | 0         | 0.0216364 | 0        | 0.0224536 |
| IRGQ             | 1.94613  | 2.18236   | 2.42155   | 2.32023  | 1.9868    |
| ENAH             | 3.57628  | 3.7015    | 3.74313   | 3.54929  | 3.86016   |
| CDC42BPB         | 9.59382  | 9.45867   | 10.0226   | 10.0752  | 9.66338   |
| AGTRAP           | 74.6869  | 71.5633   | 70.4149   | 77.0463  | 65.1305   |
| INVS             | 5.25431  | 4.53358   | 4.49327   | 5.14201  | 4.7801    |
| SYPL1            | 40.3364  | 42.7337   | 47.2619   | 41.9796  | 47.9841   |
| CCDC132          | 2.34671  | 2.28115   | 2.39506   | 2.56141  | 2.20681   |
| TMC7             | 1.05823  | 1.14133   | 1.04007   | 1.24627  | 1.10238   |
| PLEKHG5,TNFRSF25 | 20.7729  | 17.4275   | 14.8448   | 19.947   | 19.3516   |
| CLDN12           | 13.9929  | 13.1412   | 12.4596   | 14.2277  | 12.8435   |
| SEL1L3           | 9.5554   | 9.44996   | 10.6316   | 11.1027  | 9.71364   |
| GFER             | 29.6472  | 27.1117   | 32.2043   | 31.6981  | 25.2135   |
| PPP1R32          | 0.965771 | 0.793349  | 0.548917  | 0.686231 | 0.822634  |
| DHX16            | 19.0615  | 17.537    | 17.055    | 20.5331  | 16.3223   |
| MRPL34           | 78.438   | 87.2394   | 84.2324   | 86.0114  | 84.0572   |
| SRP19            | 16.671   | 18.742    | 19.2246   | 18.3752  | 18.6781   |
| CD27-AS1         | 4.84006  | 4.65666   | 3.08604   | 4.24731  | 4.97681   |
| TM2D2            | 7.39031  | 9.3216    | 8.07834   | 7.40469  | 9.76637   |
| PITRM1-AS1       | 0.363905 | 0.450484  | 0.343728  | 0.437179 | 0.421704  |

|              |           |           |           |            |           |
|--------------|-----------|-----------|-----------|------------|-----------|
| PAPSS1       | 14.7507   | 16.0816   | 14.708    | 14.3407    | 18.3634   |
| LRRRC29      | 0.844715  | 0.890288  | 1.18065   | 0.904634   | 0.64317   |
| CNOT6        | 5.07441   | 4.41862   | 5.33544   | 5.21674    | 4.92439   |
| METTL25      | 0.663019  | 0.659751  | 0.519583  | 0.613356   | 0.657051  |
| KANSL1       | 6.55447   | 6.01769   | 6.41649   | 7.27175    | 5.84322   |
| RAB4A,SPHAR  | 8.11406   | 9.87728   | 9.68627   | 8.77191    | 10.1886   |
| PITPNB       | 16.9576   | 16.4381   | 20.0499   | 18.233     | 16.9849   |
| HIGD1A       | 13.0863   | 14.3534   | 15.4246   | 14.248     | 15.1052   |
| GPT2         | 18.1404   | 16.1766   | 28.322    | 23.4244    | 17.886    |
| UACA         | 1.30053   | 1.23921   | 0.827154  | 1.35916    | 1.35289   |
| HES6         | 123.143   | 123.428   | 164.675   | 158.257    | 109.553   |
| ACVR1C       | 0         | 0.0150788 | 0.012777  | 0.00823038 | 0.0072445 |
| SRRT         | 46.1377   | 41.1238   | 44.3715   | 48.9157    | 42.2024   |
| WBSCR27      | 13.0807   | 9.71169   | 14.8132   | 13.0878    | 11.2466   |
| LOC100132832 | 0.564382  | 0.685993  | 0.832462  | 0.888607   | 0.645526  |
| SS18         | 12.9214   | 12.8342   | 15.3841   | 14.1562    | 13.9917   |
| PRDM16       | 1.49912   | 1.50553   | 1.45372   | 1.48617    | 1.58003   |
| CYP2E1       | 2.58256   | 2.93485   | 1.33175   | 2.63968    | 2.93262   |
| GAS2L3       | 0.32052   | 0.390264  | 0.289204  | 0.282551   | 0.396146  |
| KIAA1586     | 2.61384   | 2.90619   | 2.85671   | 2.44113    | 3.71402   |
| LNSTRN       | 22.2845   | 19.1872   | 24.291    | 24.2404    | 17.7496   |
| LMBR1        | 7.78324   | 7.68652   | 8.84707   | 8.42096    | 8.36787   |
| RPA1         | 15.0325   | 13.5301   | 14.0181   | 15.3383    | 14.496    |
| C11orf48     | 46.2656   | 51.904    | 49.7985   | 48.618     | 48.7497   |
| PTMS         | 182.799   | 225.93    | 217.197   | 211.72     | 218.469   |
| FAM84B       | 3.19438   | 4.87889   | 8.24898   | 5.56139    | 4.73009   |
| ZCCHC4       | 2.79248   | 1.67283   | 2.64672   | 2.98655    | 1.95828   |
| TRMT44       | 4.29412   | 4.30344   | 4.4191    | 4.69562    | 4.35252   |
| TRIM4        | 8.6574    | 8.85526   | 9.81576   | 9.46258    | 8.70956   |
| FADS3        | 64.5116   | 53.9417   | 74.8872   | 66.6812    | 54.9317   |
| BLOC1S4      | 22.0371   | 23.9588   | 26.64     | 24.7497    | 24.5733   |
| AP3B1        | 5.97115   | 5.69985   | 5.74192   | 6.18334    | 5.87028   |
| RQCD1        | 17.3287   | 16.4905   | 18.0208   | 17.3219    | 18.6616   |
| SUMF1        | 7.02698   | 8.80711   | 7.70747   | 7.69307    | 8.52494   |
| MCM3AP       | 8.59277   | 7.99442   | 8.4522    | 9.1348     | 8.6115    |
| SAP18        | 42.0003   | 43.1509   | 39.417    | 42.1617    | 42.7721   |
| SMS          | 211.834   | 203.179   | 173.233   | 183.438    | 223.222   |
| EXD3         | 3.44791   | 2.82664   | 1.98813   | 2.69918    | 3.51979   |
| ANKRD52      | 5.4567    | 5.09566   | 5.34982   | 6.01039    | 5.09077   |
| SLIRP        | 285.82    | 270.929   | 299.718   | 291.013    | 251.201   |
| ADCY3        | 15.4484   | 16.1784   | 17.068    | 17.7928    | 15.5022   |
| ATP1A1       | 71.3471   | 82.6308   | 74.374    | 76.8492    | 81.5055   |
| TMEM242      | 3.28476   | 3.44678   | 3.41095   | 3.23646    | 3.93374   |
| FOXK2        | 18.2744   | 15.9353   | 20.518    | 20.8047    | 14.946    |
| TMEM18       | 15.6204   | 18.526    | 16.6305   | 16.0237    | 19.1391   |
| CCDC82       | 2.15429   | 1.56162   | 2.35613   | 2.49089    | 1.7731    |
| TMEM14B      | 75.3099   | 95.0388   | 80.4712   | 77.1498    | 98.2441   |
| NCOA7        | 2.74392   | 2.63439   | 4.75254   | 3.71338    | 2.84358   |
| ZNF518A      | 1.29133   | 1.51868   | 0.992483  | 1.31677    | 1.61302   |
| GIPC1        | 124.209   | 120.824   | 145.901   | 134.57     | 120.62    |
| OTUD5        | 22.6816   | 23.2464   | 22.5897   | 23.6559    | 23.4259   |
| SAE1         | 60.6883   | 60.3278   | 71.0712   | 70.3564    | 61.6957   |
| GATA6        | 2.72414   | 3.29662   | 2.71343   | 2.96756    | 3.38996   |
| MX11         | 13.7273   | 13.9772   | 9.12279   | 11.5546    | 15.533    |
| BAMBI        | 4.769     | 7.83845   | 4.19321   | 4.59333    | 7.64884   |
| PSMD4        | 158.08    | 154.725   | 170.234   | 165.162    | 154.404   |
| VWA1         | 5.26418   | 5.07946   | 4.25645   | 4.76688    | 5.87389   |
| KIAA0513     | 0.933657  | 0.690019  | 0.564724  | 0.91953    | 0.696349  |
| ZNF268       | 1.40334   | 1.80686   | 1.72123   | 1.75618    | 1.66428   |
| CHD7         | 2.05417   | 1.5751    | 1.80814   | 2.22507    | 1.6786    |
| SUB1         | 25.4105   | 26.6981   | 27.444    | 26.5244    | 27.109    |
| RNF19B       | 9.73124   | 9.8619    | 12.1147   | 9.8701     | 10.0794   |
| ZNF273       | 1.31681   | 1.07913   | 1.02719   | 1.20512    | 1.27099   |
| PRDM2        | 2.11584   | 2.27808   | 2.23971   | 2.35455    | 2.13917   |
| IFNAR2       | 7.61394   | 9.60957   | 7.07282   | 7.68376    | 9.65419   |
| POLR3A       | 4.93708   | 4.82904   | 4.89378   | 5.34055    | 4.70281   |
| SMTN         | 98.396    | 84.1587   | 79.8599   | 93.5468    | 91.7716   |
| KRR1         | 15.2383   | 16.0962   | 18.1492   | 17.2458    | 17.9835   |
| ACN9         | 10.2342   | 11.3159   | 12.079    | 10.6238    | 12.4928   |
| KIAA0355     | 1.5243    | 1.31162   | 1.06106   | 1.48055    | 1.27166   |
| CD9          | 250.241   | 236.359   | 292.066   | 260.157    | 244.153   |
| PTPLA        | 4.09249   | 3.56736   | 5.64668   | 5.69138    | 3.31483   |
| OSR2         | 7.43146   | 12.3221   | 7.97148   | 8.28921    | 12.794    |
| PKD1         | 4.95176   | 4.64094   | 4.70008   | 5.5338     | 4.97186   |
| SLC26A4      | 0.0590529 | 0.066919  | 0.0808552 | 0.0910956  | 0.0827645 |
| NHP2         | 223.774   | 244.283   | 214.965   | 230.899    | 237.911   |
| HIPK2        | 1.83177   | 1.71521   | 1.68971   | 1.93454    | 1.8359    |
| PMPCB        | 24.8374   | 24.3774   | 30.9613   | 27.6844    | 26.0016   |
| SAMM50       | 19.3126   | 23.0796   | 22.4459   | 22.3543    | 23.7674   |

|              |           |           |           |          |           |
|--------------|-----------|-----------|-----------|----------|-----------|
| MMP11        | 7.47498   | 8.33409   | 7.43257   | 6.93644  | 9.94018   |
| DGUOK        | 59.4364   | 56.9498   | 57.1535   | 57.7717  | 55.9225   |
| UPF2         | 4.44031   | 4.03089   | 5.57165   | 4.85682  | 4.18795   |
| DIAPH2       | 5.00068   | 5.11445   | 4.90052   | 4.86744  | 5.94546   |
| LOX          | 1.16085   | 1.31994   | 0.954491  | 1.27624  | 1.2803    |
| CCDC73       | 3.5361    | 3.52216   | 4.20497   | 3.6982   | 3.25056   |
| FAM227B      | 0.50285   | 0.63067   | 0.532459  | 0.58876  | 0.52539   |
| ARL6IP1      | 57.0487   | 65.2006   | 71.8338   | 60.5141  | 68.2997   |
| IQCG         | 8.68583   | 10.6871   | 10.0337   | 9.22276  | 11.3618   |
| CDKN1A       | 67.3675   | 69.9388   | 79.2908   | 77.9639  | 66.2118   |
| GEMIN4       | 16.5127   | 20.9043   | 18.7622   | 18.7388  | 21.7896   |
| GPSM1        | 56.3543   | 50.7526   | 49.4427   | 57.0672  | 52.8813   |
| TPST1        | 2.14162   | 2.1863    | 2.7972    | 2.50103  | 2.40865   |
| NEK7         | 3.44556   | 2.44173   | 3.26563   | 3.23465  | 2.82803   |
| KATNA1       | 11.4779   | 10.2415   | 12.9542   | 12.1619  | 10.6425   |
| PAXBP1       | 12.9814   | 10.4137   | 10.5527   | 12.57    | 11.4079   |
| CDC16        | 24.631    | 26.6253   | 27.7084   | 26.94    | 26.6625   |
| SLC25A46     | 5.68535   | 5.36601   | 5.77032   | 5.36422  | 5.80387   |
| AHSA1        | 154.311   | 140.478   | 151.967   | 155.425  | 145.873   |
| POLG2        | 7.06887   | 4.72042   | 5.50343   | 6.38555  | 5.02465   |
| CACNG7       | 0.908967  | 1.13872   | 0.293436  | 0.645006 | 1.32011   |
| SMIM12       | 4.22466   | 5.76017   | 5.53785   | 4.92205  | 5.59439   |
| NPEPPS       | 15.7219   | 16.1988   | 15.2468   | 15.1948  | 17.8738   |
| HNRPLL       | 7.86808   | 7.2099    | 7.91285   | 7.6463   | 8.23825   |
| UHRF1BP1     | 2.66191   | 2.36085   | 4.09922   | 3.58961  | 2.32305   |
| ZFP30        | 0.955438  | 0.890772  | 1.45049   | 1.36043  | 1.00098   |
| DHX58        | 0.0394089 | 0.0346215 | 0.0156353 | 0        | 0.0477384 |
| ITGB1        | 334.553   | 268.268   | 340.401   | 328.72   | 303.619   |
| PYGO2        | 9.75075   | 11.3675   | 10.2686   | 11.4539  | 10.3874   |
| C17orf103    | 4.20708   | 4.28466   | 4.71228   | 5.36267  | 3.85137   |
| CCNH         | 28.0079   | 27.2038   | 27.2096   | 28.3972  | 26.7333   |
| ZNF644       | 7.0478    | 6.0015    | 7.28765   | 7.13405  | 7.25289   |
| FOSL1        | 373.128   | 273.93    | 386.01    | 399.323  | 249.9     |
| MGC27345     | 1.67932   | 2.08153   | 1.92756   | 1.97419  | 2.18808   |
| USO1         | 9.88782   | 8.93226   | 9.49822   | 9.71334  | 10.2638   |
| POMGNT1      | 27.6929   | 32.8478   | 28.2653   | 28.9705  | 33.8205   |
| ZNF575       | 1.09778   | 0.677201  | 1.01978   | 0.910916 | 1.2142    |
| NSUN5P2      | 8.16955   | 6.86169   | 6.56197   | 8.35855  | 6.84959   |
| FAM131B      | 4.44542   | 5.95289   | 5.33882   | 5.07578  | 6.28871   |
| PQLC3        | 7.58926   | 10        | 7.4552    | 7.14253  | 10.4571   |
| TM7SF2,VPS51 | 59.9902   | 66.8954   | 57.9476   | 53.0569  | 69.8979   |
| SERBP1       | 38.6728   | 38.5655   | 40.263    | 39.3141  | 42.5782   |
| ZNF593       | 125.471   | 139.532   | 151.498   | 139.711  | 126.684   |
| PDAP1        | 96.4981   | 96.0268   | 96.1033   | 105.37   | 95.8096   |
| HSD11B2      | 7.70386   | 11.4859   | 7.2341    | 8.46613  | 10.5495   |
| POLDIP2      | 46.6465   | 56.9165   | 54.6981   | 52.5995  | 53.9863   |
| KIAA1279     | 5.91332   | 5.53551   | 6.92884   | 6.92751  | 5.65766   |
| PER3         | 0.21444   | 0.304107  | 0.206335  | 0.295727 | 0.215884  |
| RPS23        | 389.022   | 523.519   | 450.295   | 418.911  | 476.363   |
| MEAF6        | 12.3821   | 12.4464   | 10.2794   | 11.3853  | 13.7909   |
| WBSR16       | 36.2296   | 35.2688   | 31.6086   | 35.7452  | 37.9722   |
| SLC25A5      | 470.831   | 448.277   | 521.455   | 497.213  | 442.793   |
| MSRB3        | 0.565215  | 0.444911  | 0.434425  | 0.484925 | 0.602378  |
| C19orf43     | 253.962   | 268.214   | 298.044   | 285.555  | 277.934   |
| INTS7        | 3.41116   | 2.47989   | 4.22567   | 4.0385   | 2.5298    |
| PIP4K2C      | 9.50848   | 11.2257   | 9.79995   | 10.7875  | 10.776    |
| PRR22        | 9.32539   | 5.91639   | 13.0682   | 12.2971  | 7.12578   |
| GINS3        | 4.22896   | 5.25367   | 6.15052   | 5.92274  | 5.12029   |
| LRRC8A       | 11.2696   | 14.1311   | 12.0805   | 12.6253  | 13.7458   |
| POLR2D       | 10.4191   | 12.2586   | 11.2821   | 10.6667  | 13.0771   |
| MMP24        | 4.37254   | 5.41046   | 4.38993   | 3.98432  | 6.1391    |
| ZFYVE26      | 1.67306   | 1.8547    | 1.45638   | 1.92924  | 1.67204   |
| HNRNPD       | 124.264   | 111.192   | 130.319   | 138.5    | 117.016   |
| TTC9B        | 1.33341   | 1.39342   | 2.15253   | 2.07105  | 1.57551   |
| RANGAP1      | 96.9501   | 86.1955   | 105.451   | 108.29   | 81.1202   |
| AIDA         | 20.4426   | 22.1317   | 21.2406   | 20.8718  | 24.9438   |
| DOHH         | 15.8228   | 15.1804   | 19.5013   | 18.7401  | 14.8237   |
| TAF1D        | 33.9329   | 36.7091   | 34.8244   | 35.046   | 35.5563   |
| IL13RA1      | 6.14438   | 7.85238   | 7.17479   | 7.00149  | 7.95929   |
| ZSWIM8       | 5.37043   | 5.28653   | 4.40495   | 5.8933   | 4.91502   |
| C2orf42      | 2.33562   | 2.24333   | 2.47438   | 2.36478  | 2.24863   |
| PPP4R2       | 4.36443   | 3.84998   | 3.97269   | 3.87352  | 4.87478   |
| PPT1         | 38.926    | 46.3472   | 44.2762   | 45.4109  | 45.3305   |
| WDR11        | 4.06521   | 3.75789   | 4.0412    | 4.34578  | 4.11966   |
| USP3         | 9.64076   | 8.81747   | 10.0273   | 9.9092   | 10.1262   |
| ARHGAP27     | 2.8824    | 3.52268   | 3.9228    | 3.56078  | 2.41919   |
| NAGS         | 6.27891   | 6.46937   | 5.71029   | 5.24976  | 7.34471   |
| PPWD1        | 10.5667   | 8.60019   | 9.16003   | 10.6238  | 9.26677   |
| ZNF19        | 0.650168  | 0.685415  | 0.954089  | 0.835115 | 0.465422  |

|                              |           |           |          |          |          |
|------------------------------|-----------|-----------|----------|----------|----------|
| SPATS2L                      | 7.64347   | 7.37809   | 9.32087  | 8.44786  | 8.1089   |
| C11orf58                     | 21.9473   | 24.6293   | 26.8667  | 23.5388  | 25.8087  |
| CCDC71                       | 12.911    | 19.1258   | 13.2434  | 14.0325  | 18.7142  |
| GOLGA6L9                     | 0.326663  | 0.254083  | 0.140654 | 0.352899 | 0.180865 |
| FBXO3                        | 6.62457   | 6.02125   | 7.17435  | 6.59129  | 6.66613  |
| NYAP1                        | 2.77915   | 1.99907   | 1.77979  | 1.98869  | 2.54818  |
| STK3                         | 5.99012   | 5.55152   | 5.70392  | 5.6812   | 6.20508  |
| LINC00667                    | 2.58044   | 3.30312   | 3.58885  | 3.13692  | 3.4295   |
| ALMS1P                       | 0.0296711 | 0.0204471 | 0        | 0        | 0        |
| AKD1                         | 0.520167  | 0.582799  | 0.70507  | 0.527159 | 0.750577 |
| DNAJB6                       | 64.5703   | 67.5241   | 76.4709  | 72.6893  | 71.2657  |
| SIN3B                        | 9.81763   | 8.73611   | 8.9329   | 10.273   | 8.9613   |
| CENPL                        | 3.31956   | 3.42842   | 4.56033  | 3.842    | 3.38541  |
| G3BP2                        | 13.2214   | 15.7252   | 14.535   | 13.0555  | 17.8015  |
| TMEM189, TMEM189-UBE2V1, UBE | 77.9888   | 73.483    | 85.0553  | 84.6981  | 74.6252  |
| UCK1                         | 38.9102   | 43.4181   | 45.3328  | 45.4367  | 40.2023  |
| GPR19                        | 0.258673  | 0.304847  | 0.30399  | 0.48153  | 0.202115 |
| FILIP1L                      | 3.38602   | 2.52269   | 3.06742  | 3.26652  | 2.56536  |
| MRPL32                       | 68.2353   | 53.8356   | 64.738   | 66.9746  | 57.4144  |
| ZFAND1                       | 36.8403   | 39.8964   | 55.3212  | 44.9913  | 42.1412  |
| RIC8A                        | 70.1168   | 62.4019   | 68.0549  | 70.1261  | 64.1644  |
| ROGDI                        | 9.74113   | 10.9158   | 8.27328  | 10.9431  | 10.6996  |
| B3GALNT1                     | 5.54408   | 5.68989   | 6.81257  | 6.34613  | 5.58375  |
| TERF1                        | 11.2767   | 11.425    | 13.3738  | 13.5388  | 11.3275  |
| GRHPR                        | 106.13    | 120.424   | 113.09   | 112.045  | 114.213  |
| TM9SF2                       | 13.5595   | 14.019    | 16.0921  | 14.3994  | 15.821   |
| NAV1                         | 1.53776   | 1.64526   | 1.15653  | 1.48108  | 1.66045  |
| CERS6-AS1                    | 5.76258   | 6.02914   | 5.97641  | 5.85189  | 6.99163  |
| HDLBP                        | 29.4031   | 31.2033   | 30.1496  | 31.1566  | 31.2566  |
| TMPO                         | 26.7034   | 25.5418   | 27.1585  | 29.5858  | 27.8522  |
| HECTD3                       | 10.5413   | 10.259    | 10.1594  | 12.0577  | 9.81733  |
| AZIN1                        | 25.6436   | 24.9458   | 32.0892  | 27.4087  | 26.6968  |
| CD46                         | 8.63323   | 9.57159   | 8.1781   | 8.36487  | 10.9308  |
| MANEA                        | 1.40114   | 1.55022   | 1.22811  | 1.40648  | 1.6391   |
| ERI1                         | 6.5307    | 6.29501   | 6.08327  | 6.89584  | 6.41307  |
| ZFYVE9                       | 2.75695   | 2.54033   | 3.08783  | 3.2198   | 2.83117  |
| NAIP                         | 0.62002   | 0.59261   | 0.598991 | 0.872509 | 0.502525 |
| NT5C3B                       | 48.7882   | 53.152    | 57.6852  | 51.881   | 53.1123  |
| SLC25A32                     | 13.7064   | 14.4987   | 19.152   | 15.6225  | 15.4413  |
| ANP32A                       | 50.0231   | 45.7827   | 51.3091  | 55.4859  | 49.4897  |
| WRNIP1                       | 36.869    | 31.3284   | 37.2319  | 37.9052  | 33.6908  |
| ANXA4                        | 18.3954   | 20.9497   | 19.3635  | 18.3087  | 21.6308  |
| TMEM161B                     | 4.1561    | 3.82393   | 5.1531   | 4.56663  | 4.39566  |
| MRRF                         | 41.716    | 38.1482   | 47.0618  | 45.2394  | 37.5808  |
| AP5Z1                        | 10.0228   | 11.1098   | 10.9684  | 11.7108  | 10.3725  |
| ZNF486                       | 1.78169   | 1.17357   | 1.89159  | 1.65607  | 1.49784  |
| ADCY9                        | 1.49488   | 1.39642   | 1.3182   | 1.4383   | 1.56661  |
| LOC100630918                 | 1.304     | 2.56753   | 1.71037  | 1.53997  | 2.45803  |
| WDR70                        | 9.52351   | 7.99403   | 9.3256   | 9.62408  | 7.99325  |
| ZNF443                       | 1.65869   | 1.42754   | 1.61632  | 1.77146  | 1.51656  |
| TEX22                        | 0.25112   | 0.318814  | 0.25394  | 0.375593 | 0.13724  |
| CDK5RAP3                     | 32.5593   | 36.0914   | 27.9098  | 37.2471  | 33.8853  |
| NSMAF                        | 17.2929   | 16.6199   | 18.6285  | 17.3186  | 18.052   |
| ZNF416                       | 3.00961   | 4.46055   | 3.71628  | 3.7202   | 4.37377  |
| TFDP2                        | 2.97971   | 3.30116   | 3.04667  | 2.6695   | 3.77019  |
| PRPS1                        | 23.5693   | 25.4164   | 23.5814  | 25.0259  | 24.2941  |
| RNF115                       | 6.66321   | 6.74335   | 7.71844  | 7.27497  | 6.4195   |
| MCF2L2                       | 0.144794  | 0.145853  | 0.121238 | 0.143596 | 0.152661 |
| ACP5                         | 0.0694131 | 0.250676  | 0.140085 | 0.115905 | 0.201453 |
| FH                           | 53.0142   | 44.8232   | 51.3643  | 54.4079  | 49.4775  |
| LINC00339                    | 9.79075   | 12.3202   | 11.2953  | 12.1491  | 11.583   |
| STIP1                        | 145.48    | 135.922   | 134.707  | 153.476  | 136.389  |
| FAM189B                      | 67.4862   | 58.6186   | 55.3624  | 62.4932  | 64.0721  |
| RAB7L1                       | 7.46347   | 7.81737   | 9.04849  | 7.92649  | 8.86092  |
| GUSBP4                       | 0.56259   | 0.535269  | 0.420356 | 0.288047 | 0.385153 |
| H6PD                         | 2.99849   | 3.89844   | 3.12213  | 3.11255  | 4.04388  |
| HARBI1                       | 1.21403   | 1.48417   | 1.56526  | 1.46787  | 1.27901  |
| TMM22                        | 19.1887   | 26.8796   | 21.9589  | 22.0402  | 24.7581  |
| ERP29                        | 87.6882   | 92.1127   | 113.814  | 109.794  | 84.2036  |
| LARP4B                       | 10.1735   | 7.67933   | 9.68638  | 10.3408  | 8.1458   |
| EVA1C                        | 8.13219   | 9.5644    | 8.38319  | 9.35242  | 8.63045  |
| SUCLA2                       | 8.1114    | 7.11877   | 6.97679  | 7.60038  | 8.24008  |
| LOC92249                     | 4.38315   | 5.21098   | 4.93792  | 4.83904  | 5.28327  |
| WDR13                        | 34.2232   | 32.5549   | 34.2528  | 34.6658  | 34.0644  |
| SLC35C2                      | 27.6884   | 26.3579   | 33.9798  | 30.6412  | 28.9683  |
| PRAME                        | 15.7134   | 15.3662   | 13.7166  | 15.5849  | 17.1893  |
| SHF                          | 5.18881   | 5.5612    | 4.88848  | 5.6745   | 5.14855  |
| CEP104                       | 3.78349   | 2.69614   | 3.33616  | 3.60657  | 3.3801   |
| LTA4H                        | 78.622    | 107.369   | 90.3373  | 80.5432  | 113.228  |

|              |          |           |           |          |            |
|--------------|----------|-----------|-----------|----------|------------|
| CLASP2       | 2.3465   | 2.05348   | 2.38166   | 2.39371  | 2.16962    |
| SEPSECS      | 0.844418 | 0.888162  | 1.21955   | 1.2444   | 0.85886    |
| PET112       | 13.8908  | 14.0779   | 13.9947   | 15.287   | 13.9702    |
| SENP5        | 4.169    | 3.25388   | 4.4407    | 4.80524  | 3.23237    |
| CAND1        | 16.6077  | 15.0931   | 16.7176   | 16.3009  | 17.6982    |
| RANBP1       | 158.352  | 156.093   | 139.118   | 173.872  | 150.408    |
| C12orf10     | 40.1036  | 35.5008   | 47.9513   | 40.3243  | 39.7583    |
| AQR          | 4.37744  | 3.56805   | 4.76948   | 4.25014  | 4.20574    |
| CLP1         | 7.99665  | 12.5516   | 10.0128   | 8.33876  | 12.2514    |
| GOLT1B       | 7.46689  | 8.28789   | 9.2863    | 8.06148  | 9.05643    |
| TRIM41       | 11.1163  | 10.7939   | 9.82057   | 12.9872  | 10.2808    |
| SMIM13       | 2.08799  | 2.18556   | 3.15049   | 2.61912  | 2.29367    |
| CDX2         | 10.8031  | 13.8652   | 11.7769   | 10.9214  | 14.7904    |
| CHUK         | 2.89507  | 3.16053   | 3.06827   | 3.01883  | 3.1672     |
| PRR14L       | 1.96665  | 1.38914   | 1.80067   | 1.9703   | 1.62933    |
| FLNA         | 95.5916  | 63.0308   | 90.5694   | 99.0337  | 57.0148    |
| EIF3G        | 301.359  | 308.581   | 317.476   | 318.683  | 295.827    |
| TAK2         | 10.738   | 10.5787   | 11.8873   | 12.2091  | 11.1126    |
| ZNF555       | 0.497809 | 0.508149  | 0.514765  | 0.475816 | 0.620408   |
| ZBTB7A       | 8.24727  | 8.05008   | 8.5978    | 9.28203  | 7.87471    |
| PTPN7        | 24.8034  | 23.1108   | 27.9957   | 27.6869  | 22.5574    |
| LOC100507564 | 0.104617 | 0.0733527 | 0.385667  | 0.217399 | 0.137648   |
| TIMM21       | 15.057   | 14.4092   | 15.9535   | 15.1921  | 15.9446    |
| ZSCAN22      | 1.34929  | 1.03366   | 1.42552   | 1.32572  | 1.20618    |
| KTN1         | 15.591   | 17.117    | 9.73366   | 15.099   | 18.9885    |
| CALM2        | 240.377  | 260.746   | 282.406   | 259.359  | 269.303    |
| ZMIZ2        | 13.015   | 14.5867   | 11.5902   | 13.3419  | 15.0065    |
| EFHA1        | 13.4073  | 11.6187   | 12.9505   | 13.1165  | 14.1144    |
| TFE3         | 29.0247  | 27.5689   | 28.2284   | 30.0972  | 27.7085    |
| ZBTB45       | 12.1052  | 10.6742   | 11.7747   | 10.7157  | 12.5733    |
| GEMIN8       | 8.37204  | 7.11358   | 7.61725   | 8.61558  | 6.74553    |
| FANCD2       | 3.01039  | 2.22894   | 2.84278   | 3.26652  | 2.32719    |
| ZNF767       | 2.80517  | 1.93837   | 3.23143   | 3.84059  | 1.63975    |
| SF1          | 77.1619  | 72.875    | 84.9242   | 84.4827  | 75.3689    |
| TCEAL4       | 48.8654  | 48.0554   | 48.9595   | 51.0413  | 52.622     |
| TERF2        | 11.3753  | 10.3256   | 11.4598   | 11.7342  | 10.9005    |
| TACC2        | 8.87956  | 6.73512   | 8.9739    | 9.26605  | 7.45866    |
| EEF1D        | 1206.72  | 1492.71   | 1233.68   | 1324.72  | 1288.1     |
| TBC1D8       | 1.74174  | 2.28445   | 2.12434   | 2.40247  | 2.20974    |
| HSPA12A      | 1.55332  | 1.44099   | 1.60789   | 1.72569  | 1.61188    |
| KANSL2       | 7.68127  | 13.115    | 10.7233   | 8.90239  | 12.8007    |
| ENOX2        | 1.31925  | 0.991738  | 1.3831    | 1.45722  | 0.860794   |
| SYNGAP1      | 3.905    | 4.54551   | 2.89785   | 4.62143  | 4.53977    |
| GRAMD1A      | 83.6871  | 71.8418   | 79.0744   | 83.9087  | 70.4601    |
| RPL12        | 8398.66  | 10601.7   | 9245.09   | 8747.58  | 9800       |
| CAMLG        | 46.7928  | 50.1813   | 58.7498   | 52.156   | 48.4192    |
| DGKH         | 0.376672 | 0.206586  | 0.293371  | 0.260385 | 0.251784   |
| ASCC3        | 3.36938  | 3.96719   | 3.1386    | 3.08337  | 4.49177    |
| ZBTB33       | 3.88761  | 3.21477   | 4.49195   | 4.05518  | 3.52409    |
| ERICH1       | 11.2124  | 10.4062   | 8.59412   | 11.2684  | 10.9079    |
| BCL9L        | 6.39381  | 5.81175   | 4.86845   | 6.6925   | 5.18196    |
| NAA30        | 3.92573  | 2.8562    | 3.9811    | 3.57686  | 3.76831    |
| PNPLA2       | 65.3364  | 70.4027   | 67.9254   | 73.0836  | 72.0771    |
| AFG3L2       | 35.0539  | 33.2027   | 35.2427   | 35.8231  | 36.1979    |
| LOC282997    | 1.98595  | 1.91824   | 2.29847   | 2.08029  | 2.08961    |
| B3GALT6      | 8.9506   | 10.9596   | 17.8893   | 12.8848  | 11.2975    |
| EXOSC6       | 26.0372  | 30.5841   | 25.7033   | 30.0338  | 28.2961    |
| FBXO36       | 0.646444 | 0.749104  | 0.399221  | 0.687115 | 0.617654   |
| IDH3B        | 46.2044  | 44.9747   | 45.8443   | 47.5362  | 47.5911    |
| CETN3        | 21.4371  | 18.3996   | 20.696    | 21.876   | 21.0434    |
| ACAT1        | 48.0433  | 51.8266   | 49.156    | 47.2001  | 55.9078    |
| PSMC5        | 80.8189  | 87.1384   | 85.0627   | 88.2421  | 81.4411    |
| HMMR         | 1.83352  | 1.484     | 1.8938    | 1.93568  | 1.39544    |
| TRAPPC13     | 4.8536   | 5.10416   | 6.08645   | 5.63687  | 5.60229    |
| FKBP11       | 136.758  | 160.766   | 143.407   | 138.198  | 154.106    |
| PIGF         | 20.7682  | 19.4628   | 21.1897   | 21.9822  | 20.0826    |
| MAP3K12      | 6.83342  | 7.38548   | 7.21009   | 7.37952  | 7.74483    |
| SYNE4        | 0.267026 | 0.0646876 | 0.145557  | 0.161902 | 0.2082     |
| SMPD4        | 19.42    | 19.3496   | 21.402    | 21.4144  | 20.7092    |
| DHODH        | 6.66119  | 6.3035    | 6.89773   | 6.34903  | 7.60015    |
| LOC100127983 | 0.223748 | 0.0731435 | 0.186571  | 0.206511 | 0.208709   |
| OBSL1        | 14.9986  | 15.3105   | 11.0088   | 15.4909  | 15.1581    |
| LRP8         | 3.13661  | 2.13587   | 2.82043   | 3.14725  | 2.26108    |
| ZFX          | 1.94894  | 2.22873   | 2.16344   | 2.29841  | 2.34011    |
| ITGA9        | 0        | 0         | 0.0082704 | 0        | 0.00864909 |
| YRDC         | 22.64    | 25.1938   | 28.0836   | 25.3698  | 26.3322    |
| H2AFY        | 73.6234  | 63.6707   | 73.0357   | 79.7257  | 66.4332    |
| YIPF5        | 6.69512  | 6.67952   | 7.19772   | 6.27256  | 7.36696    |
| PRKAR1B      | 17.6392  | 17.0471   | 20.8158   | 19.8061  | 16.0132    |

|              |           |          |          |          |           |
|--------------|-----------|----------|----------|----------|-----------|
| APBA3        | 12.2023   | 12.2088  | 11.1615  | 11.7245  | 12.3386   |
| ATP5G1       | 175.766   | 197.145  | 140.525  | 173.441  | 193.084   |
| FBXO2        | 1.86825   | 1.9194   | 2.16099  | 1.75141  | 1.90079   |
| ARL2BP       | 27.5333   | 38.5851  | 32.7087  | 29.2316  | 41.6248   |
| SPC25        | 15.3      | 13.5877  | 15.011   | 18.609   | 13.248    |
| TRAPPC3      | 51.3299   | 65.6758  | 63.092   | 58.6438  | 61.8062   |
| LOC100506710 | 6.25958   | 6.82768  | 7.36686  | 6.26706  | 7.96841   |
| RAB7A        | 99.9242   | 95.0369  | 101.758  | 103.751  | 98.6453   |
| CC2D2A       | 3.07185   | 2.97471  | 3.75965  | 3.06369  | 3.01492   |
| CSNK1D       | 40.1838   | 40.2876  | 40.5771  | 41.6909  | 41.9273   |
| DNPH1        | 181.643   | 188.732  | 176.607  | 175.354  | 195.294   |
| RAB3IP       | 3.46284   | 2.92716  | 3.52977  | 3.90341  | 3.189     |
| TMEM185B     | 8.99185   | 10.4456  | 12.2894  | 11.0261  | 10.0707   |
| HIF1A        | 2.00224   | 1.96933  | 2.23947  | 2.16136  | 2.56213   |
| WNK4         | 1.99219   | 0.979717 | 1.13766  | 2.03909  | 0.990739  |
| HEATR1       | 6.52069   | 5.23692  | 6.00049  | 6.07795  | 5.73643   |
| UBAP2L       | 23.7291   | 21.1541  | 23.3225  | 24.0635  | 23.5087   |
| DDX21        | 20.0383   | 19.5062  | 29.4714  | 25.0921  | 19.434    |
| BRD1         | 5.89052   | 5.61154  | 6.03224  | 6.7436   | 5.86249   |
| FAM108B1     | 3.82718   | 4.0749   | 4.84406  | 3.81952  | 4.9304    |
| VPS25        | 85.4067   | 88.5432  | 68.6474  | 81.6998  | 92.787    |
| YWHAH        | 51.0773   | 54.7369  | 67.2386  | 56.6791  | 57.8317   |
| ATAD3C       | 0.171122  | 0.109838 | 0.164222 | 0.18066  | 0.0785509 |
| NAA10        | 122.896   | 134.706  | 134.286  | 132.643  | 129.767   |
| MRTO4        | 38.4846   | 45.2456  | 45.3001  | 41.9727  | 44.9492   |
| SMAD5        | 3.90875   | 2.94314  | 4.14519  | 3.80076  | 3.43712   |
| LRRFIP1      | 11.9242   | 8.5838   | 12.7967  | 13.0926  | 9.1061    |
| DNAJC8       | 81.1114   | 86.5683  | 79.0331  | 84.8388  | 88.6085   |
| FBXO22-AS1   | 52.129    | 44.9186  | 42.9407  | 45.0086  | 44.2008   |
| KRBOX4       | 4.27991   | 3.71107  | 4.06509  | 3.7528   | 4.22536   |
| PDCL         | 4.22845   | 4.49253  | 3.93987  | 4.02883  | 5.04001   |
| INTU         | 1.24018   | 1.13359  | 0.431086 | 0.950439 | 1.37821   |
| SLC35F2      | 19.4791   | 19.5554  | 23.2748  | 21.4972  | 20.3596   |
| RPL7         | 5734.1    | 7741.77  | 6517.71  | 6237.4   | 7129.46   |
| PLD6         | 11.7811   | 13.0971  | 14.4648  | 12.92    | 13.7869   |
| STAMPB       | 6.13764   | 5.21833  | 6.07133  | 5.50074  | 6.58005   |
| UTP18        | 37.5629   | 32.2008  | 41.034   | 39.2096  | 34.5578   |
| DCAKD        | 16.2386   | 14.7528  | 16.9683  | 17.4679  | 13.9026   |
| POLQ         | 0.757625  | 0.532074 | 0.656845 | 0.779633 | 0.69884   |
| DUSP11       | 15.4151   | 16.8376  | 18.577   | 16.6249  | 18.5962   |
| GAS5-AS1     | 0.822207  | 0.559865 | 0.846734 | 0.899227 | 0.525983  |
| KLHL17       | 20.5286   | 18.5534  | 13.7124  | 19.9981  | 19.3503   |
| MORC2        | 4.8894    | 4.37285  | 4.15182  | 5.2184   | 4.12213   |
| ZNF333       | 1.1319    | 1.08886  | 0.751141 | 0.982534 | 1.06207   |
| OGFR         | 41.5272   | 40.8125  | 32.3374  | 39.5895  | 40.8575   |
| RMI1         | 1.90881   | 1.66958  | 2.16363  | 2.03692  | 1.81238   |
| ASTE1        | 1.70446   | 2.10024  | 2.12729  | 2.03111  | 2.10241   |
| KHDRBS1      | 88.904    | 76.97    | 97.3748  | 96.9766  | 78.0881   |
| ATOX1        | 118.616   | 118.672  | 104.95   | 115.449  | 116.656   |
| ZNF24        | 4.83499   | 5.0899   | 6.12653  | 5.46254  | 5.37915   |
| MT1E         | 1624.78   | 1475.78  | 1639.92  | 1960.49  | 1160.7    |
| ATAD2B       | 0.414222  | 0.341022 | 0.40421  | 0.390242 | 0.412096  |
| BPNT1        | 8.67008   | 8.46697  | 9.48595  | 7.88303  | 9.09156   |
| IMMP1L       | 3.98005   | 3.70755  | 5.47663  | 5.52863  | 2.93922   |
| CLPX         | 11.3046   | 10.6982  | 10.19    | 9.90835  | 12.896    |
| ELOF1        | 93.9267   | 103.708  | 103.406  | 107.38   | 94.5255   |
| ZNF681       | 0.473298  | 0.469103 | 0.389619 | 0.482443 | 0.452569  |
| PRMT1        | 267.817   | 277.601  | 287.242  | 283.87   | 279.705   |
| AZI1         | 10.6904   | 10.3813  | 9.90592  | 12.0347  | 10.1766   |
| ZBTB9        | 5.07112   | 7.52628  | 6.79324  | 6.83397  | 7.02778   |
| NFKB2        | 45.7196   | 35.2611  | 44.4965  | 45.7881  | 37.3525   |
| SSBP4        | 65.0953   | 59.4827  | 66.1392  | 69.8927  | 64.5645   |
| PAIP1        | 32.1385   | 33.3433  | 34.4532  | 32.0998  | 36.1987   |
| NACA         | 1075.11   | 1238.71  | 1145.47  | 1151.6   | 1176.07   |
| MED23        | 2.11545   | 1.99221  | 1.76986  | 1.88805  | 2.37773   |
| EBAG9        | 14.3302   | 15.3868  | 19.453   | 15.8564  | 17.8085   |
| INTS8        | 15.6303   | 14.3207  | 14.0081  | 14.6283  | 16.1711   |
| MTRNR2L3     | 0.0330334 | 0.145    | 0.104891 | 0.137796 | 0.068522  |
| DOLK         | 12.0062   | 21.0575  | 17.1889  | 15.2226  | 19.0933   |
| ERCC6L       | 1.91708   | 1.706    | 1.88028  | 1.84741  | 2.00013   |
| MFAP3        | 2.60092   | 2.4529   | 3.10723  | 2.85326  | 2.70459   |
| ARL14EP      | 5.16254   | 5.29866  | 5.83865  | 5.52931  | 5.71994   |
| MEN1         | 33.5295   | 32.7068  | 33.2943  | 35.4406  | 34.9769   |
| NPTN         | 19.48     | 16.6944  | 22.6355  | 21.1488  | 18.5061   |
| USP11        | 10.5305   | 10.8952  | 12.3613  | 11.9826  | 11.835    |
| FAM161A      | 1.1698    | 1.02215  | 0.985293 | 1.34908  | 0.93747   |
| DYRK4        | 10.7834   | 13.7011  | 10.9785  | 12.1336  | 12.6787   |
| ATAD2        | 12.0992   | 9.06014  | 12.2182  | 14.0246  | 9.92544   |
| PSMA4        | 103.642   | 99.9944  | 100.257  | 104.818  | 109.946   |

|                     |          |          |            |          |           |
|---------------------|----------|----------|------------|----------|-----------|
| PRRT3               | 1.1525   | 1.40233  | 1.22563    | 1.41668  | 1.34159   |
| MIB1                | 2.37539  | 1.88247  | 1.99623    | 2.18355  | 2.06816   |
| BCAP31              | 223.607  | 232.874  | 219.188    | 224.087  | 235.356   |
| AMD1                | 14.203   | 18.9598  | 21.923     | 16.891   | 20.1445   |
| GPAA1               | 127.271  | 132.208  | 125.405    | 144.285  | 128.473   |
| ARSB                | 0.746217 | 0.673679 | 0.699063   | 0.624563 | 0.88361   |
| PARG                | 3.80395  | 3.33503  | 4.34129    | 4.19993  | 3.65875   |
| ANKRD54             | 14.3469  | 13.9185  | 13.3184    | 16.2177  | 13.3677   |
| NPLOC4              | 19.6182  | 20.6841  | 19.9383    | 21.1632  | 21.0472   |
| CPPED1              | 1.32816  | 1.34906  | 1.22306    | 1.14108  | 1.61752   |
| OXCT1               | 23.5136  | 15.835   | 21.0609    | 23.5818  | 19.327    |
| WDR85               | 29.3873  | 33.6278  | 38.0706    | 34.3709  | 32.2186   |
| CYP2U1              | 1.53015  | 1.57437  | 2.17816    | 1.59007  | 1.97746   |
| SPTBN2              | 14.3273  | 12.4187  | 12.0866    | 14.4151  | 13.0322   |
| SHANK2              | 0.63126  | 0.624958 | 0.531164   | 0.557371 | 0.64298   |
| NAPB                | 1.97966  | 1.74624  | 1.85007    | 2.20078  | 1.70539   |
| MCM6                | 14.9402  | 16.2527  | 16.6327    | 16.9213  | 18.8924   |
| TMCO6               | 9.78724  | 9.74437  | 9.26171    | 10.2096  | 9.33081   |
| SLK                 | 4.23513  | 4.25486  | 3.43194    | 3.69072  | 4.81704   |
| LOC440354,LOC595101 | 1.85057  | 1.97936  | 1.99698    | 2.06139  | 2.03282   |
| FARS2               | 7.9945   | 8.64267  | 7.60812    | 8.47632  | 9.21967   |
| TRAPPC8             | 2.12947  | 1.97598  | 2.10287    | 2.23012  | 2.17549   |
| TM9SF3              | 22.4256  | 23.3815  | 25.4102    | 24.0954  | 24.6793   |
| LBR                 | 10.0697  | 8.51247  | 13.197     | 12.4076  | 9.05185   |
| LTBP3               | 8.40231  | 8.89332  | 8.33361    | 9.41035  | 8.742     |
| SLC39A6             | 18.0818  | 18.207   | 21.2778    | 19.4091  | 19.4722   |
| DEF6                | 20.9988  | 19.7456  | 18.827     | 21.2692  | 19.0822   |
| GLOD4               | 34.322   | 31.5425  | 34.1587    | 33.906   | 35.2728   |
| DCXR                | 209.131  | 274.409  | 176.738    | 209.468  | 225.911   |
| GON4L               | 1.91296  | 2.45618  | 1.77006    | 2.19759  | 2.28264   |
| PHF20L1             | 2.98555  | 3.3986   | 3.50611    | 3.47533  | 3.49282   |
| PGAM5               | 38.5114  | 38.4458  | 44.284     | 43.4859  | 38.9667   |
| CPSF2               | 6.44327  | 6.36238  | 6.7001     | 6.73942  | 6.98712   |
| CAPN8               | 0        | 0.057467 | 0          | 0        | 0.0355338 |
| SGTB                | 2.38704  | 2.02769  | 2.77871    | 2.43333  | 2.21935   |
| FBXO22              | 7.40485  | 6.91555  | 7.49011    | 7.50277  | 8.00104   |
| PHB                 | 154.273  | 162.696  | 159.617    | 160.127  | 170.857   |
| SURF6               | 59.7967  | 56.5421  | 62.1371    | 65.2505  | 57.6157   |
| PTDSS1              | 83.172   | 83.03    | 101.649    | 93.152   | 85.7796   |
| PDLIM5              | 3.00909  | 2.98004  | 2.9182     | 3.00049  | 3.17593   |
| ZNF233              | 0.34075  | 0.555982 | 0.345452   | 0.552333 | 0.419861  |
| SPATA5              | 0.814372 | 0.457477 | 0.849905   | 0.887513 | 0.585809  |
| NELFE               | 69.5339  | 74.816   | 77.124     | 78.6723  | 69.3578   |
| IQCH                | 0.602346 | 0.980882 | 0.757411   | 0.640979 | 0.808923  |
| ADPRM               | 5.91628  | 5.82996  | 6.81883    | 5.38205  | 6.16151   |
| ZNF234              | 0.958179 | 0.7589   | 1.14346    | 0.981174 | 0.881946  |
| TEX261              | 22.8969  | 26.7677  | 29.9793    | 26.241   | 28.9067   |
| TTC8                | 4.96499  | 5.712    | 5.36973    | 5.61134  | 5.80699   |
| ZSCAN21             | 1.04662  | 1.59352  | 1.67728    | 1.63358  | 1.63525   |
| CUEDC2              | 90.0963  | 97.3789  | 77.5291    | 95.4588  | 87.5903   |
| TTPA                | 0.257488 | 0.357082 | 0.270376   | 0.261813 | 0.301047  |
| RBM10               | 37.0576  | 32.1377  | 37.8745    | 39.089   | 32.7874   |
| YLP1                | 3.04477  | 2.81851  | 2.97475    | 3.37242  | 2.87983   |
| GAL                 | 126.966  | 140.519  | 131.812    | 145.906  | 126.71    |
| SKP1                | 96.7639  | 113.745  | 103.918    | 98.4321  | 121.621   |
| SOX13               | 4.38948  | 4.68754  | 4.08713    | 4.7302   | 5.04416   |
| FAM160B2            | 19.4732  | 19.715   | 16.8023    | 19.6189  | 20.1252   |
| GRPEL2              | 6.74154  | 6.58788  | 12.9587    | 8.78925  | 7.70688   |
| CSNK1G3             | 5.85066  | 6.03824  | 6.27327    | 6.52843  | 6.17937   |
| INTS5               | 9.9461   | 12.2508  | 13.4428    | 11.6721  | 12.9511   |
| CNNM1               | 0        | 0        | 0.00612729 | 0        | 0.0064305 |
| RCC1                | 91.4855  | 102.235  | 111.032    | 101.21   | 105.129   |
| LUZP1               | 3.06954  | 3.54228  | 3.50622    | 3.3775   | 3.77976   |
| ABHD11              | 16.8767  | 20.9515  | 15.1413    | 20.1449  | 19.5121   |
| DDA1                | 9.27088  | 10.6825  | 11.741     | 10.8521  | 10.6729   |
| PARP1               | 27.216   | 25.7513  | 24.738     | 29.0545  | 27.4053   |
| YDJC                | 101.961  | 94.7367  | 134.073    | 117.826  | 96.7649   |
| BECN1               | 16.1613  | 21.7836  | 19.292     | 19.8469  | 19.3297   |
| COPZ1               | 90.0371  | 90.8087  | 98.2238    | 96.3817  | 95.0883   |
| LOC401397           | 63.9388  | 65.1426  | 81.9733    | 72.5516  | 65.8182   |
| FAM204A             | 10.3806  | 11.8432  | 10.7949    | 11.4704  | 11.7233   |
| NEURL1B             | 0.366583 | 0.42914  | 0.338418   | 0.46852  | 0.339828  |
| HIST1H4J            | 0.842317 | 1.0944   | 1.22818    | 0.347983 | 1.53688   |
| CUL2                | 7.93696  | 8.08247  | 8.43955    | 8.47683  | 8.81049   |
| MRPS35              | 32.5998  | 33.2841  | 38.1826    | 36.5414  | 34.8945   |
| SPRED1              | 3.6727   | 3.04119  | 3.63275    | 3.55258  | 3.46757   |
| MOSPD1              | 2.10146  | 2.87987  | 3.53799    | 2.67308  | 2.75444   |
| XPO5                | 17.1656  | 15.4517  | 19.6277    | 19.3489  | 15.9866   |
| ISG15               | 113.354  | 114.706  | 91.9445    | 104.389  | 110.232   |



|           |            |            |           |            |            |
|-----------|------------|------------|-----------|------------|------------|
| SUMO1     | 58.1289    | 59.1217    | 68.2525   | 64.1952    | 64.5749    |
| CSAD      | 2.50775    | 2.76607    | 1.81068   | 3.09444    | 2.25952    |
| SH3RF1    | 1.84429    | 1.35777    | 2.31119   | 2.06611    | 1.48441    |
| MAP4K5    | 10.0327    | 9.39577    | 7.96296   | 9.63694    | 10.6819    |
| RAB11FIP1 | 4.59299    | 5.1452     | 3.87271   | 4.47734    | 5.84169    |
| PTPN14    | 1.94363    | 1.56378    | 1.57693   | 1.81223    | 1.67201    |
| AHCYL1    | 22.6426    | 22.8764    | 23.9272   | 25.1016    | 23.8284    |
| EP300     | 1.13264    | 1.369      | 1.30324   | 1.25457    | 1.54024    |
| SLCO1B3   | 8.60247    | 8.17641    | 8.40417   | 7.63597    | 9.27505    |
| TTC39A    | 5.09057    | 4.06765    | 5.33092   | 5.24002    | 4.5665     |
| NUFIP2    | 4.33644    | 4.41949    | 4.68311   | 4.58732    | 4.54207    |
| ANAPC5    | 44.205     | 49.0929    | 43.3739   | 46.1316    | 50.7305    |
| ASB1      | 25.9456    | 28.2608    | 33.6055   | 29.8554    | 29.3348    |
| SNORA53   | 2.06996    | 2.24944    | 0.947006  | 0.421053   | 3.26175    |
| ECD       | 10.5592    | 9.24693    | 12.7866   | 11.8119    | 9.4248     |
| ACAP3     | 6.70438    | 7.50061    | 5.82394   | 7.19999    | 7.70875    |
| SNX4      | 4.72346    | 4.92459    | 4.76388   | 5.13877    | 4.98632    |
| RCN3      | 4.84875    | 4.96063    | 1.87862   | 3.32297    | 6.05947    |
| RHEBL1    | 8.80929    | 9.86891    | 11.5011   | 11.186     | 9.47721    |
| RASGRP2   | 0.664918   | 0.878641   | 0.467261  | 0.709951   | 0.566087   |
| NPDC1     | 256.225    | 270.929    | 246.496   | 270.19     | 260.481    |
| DGCR14    | 4.58171    | 4.6358     | 4.62259   | 5.05587    | 4.70898    |
| MLH3      | 1.31573    | 1.00856    | 1.44388   | 1.5126     | 1.07572    |
| ZNF343    | 2.8171     | 2.67562    | 3.06181   | 3.10662    | 2.62999    |
| NLN       | 3.35947    | 3.49545    | 3.10973   | 3.11142    | 4.11403    |
| MCIN      | 2.0715     | 1.62502    | 1.67392   | 2.12404    | 1.54264    |
| TMEM106B  | 3.11462    | 3.61859    | 3.53473   | 3.35531    | 3.97076    |
| ZNF85     | 2.26873    | 1.3838     | 1.27582   | 2.08142    | 1.74885    |
| SFXN5     | 0.608125   | 0.70903    | 0.89562   | 0.723783   | 0.961136   |
| ANXA5     | 233.11     | 256.687    | 263.317   | 246.733    | 275.996    |
| ZNF146    | 14.2273    | 14.7209    | 16.3876   | 14.0149    | 17.673     |
| THBS4     | 0.374747   | 0.338003   | 0.174558  | 0.279623   | 0.412176   |
| TMEM237   | 3.30011    | 3.72133    | 3.61788   | 3.32647    | 4.13958    |
| PLEKHB2   | 35.4036    | 33.3914    | 35.5885   | 35.4983    | 35.5327    |
| BLZF1     | 0.848835   | 0.790146   | 1.44613   | 1.09893    | 1.0088     |
| ZNF711    | 1.326      | 1.32479    | 0.939555  | 1.20953    | 1.68015    |
| SLU7      | 8.86219    | 9.84072    | 8.28166   | 9.57576    | 9.41216    |
| STOX1     | 2.38669    | 2.54519    | 2.58116   | 2.47725    | 2.19248    |
| ZNF33B    | 2.05652    | 2.15252    | 2.95999   | 2.73822    | 1.72203    |
| TSIX      | 0.00423459 | 0.00699255 | 0.0107874 | 0.00618098 | 0.00737023 |
| ALKBH1    | 4.65106    | 3.90279    | 5.07735   | 4.85357    | 4.54887    |
| DZIP1L    | 2.1457     | 2.35582    | 1.8364    | 2.09704    | 2.30434    |
| C21orf59  | 37.9894    | 34.8502    | 37.8982   | 40.7716    | 40.0312    |
| PRKAA1    | 4.89325    | 4.62925    | 5.47091   | 5.06696    | 5.12297    |
| TXN       | 725.049    | 754.172    | 804.463   | 747.821    | 771.389    |
| TBC1D23   | 10.2251    | 9.823      | 9.20542   | 9.78756    | 10.9294    |
| ZBTB39    | 1.38928    | 1.91686    | 1.38305   | 1.44248    | 1.79605    |
| GSPT1     | 19.2315    | 18.6328    | 22.3972   | 20.4968    | 20.273     |
| EXOSC3    | 19.1015    | 14.5786    | 20.09     | 19.53      | 15.8762    |
| METTL1    | 6.99143    | 8.7692     | 7.74456   | 7.60285    | 8.40304    |
| ZNF491    | 0.213712   | 0.328389   | 0.287699  | 0.305245   | 0.27697    |
| NOMO2     | 0.543289   | 0.994838   | 0.766866  | 0.630007   | 1.00053    |
| IST1      | 22.6696    | 26.7341    | 23.1673   | 23.1369    | 28.6664    |
| CXCL3     | 0.255053   | 0.483788   | 0.224556  | 0.2127     | 0.388325   |
| SLC16A5   | 5.7641     | 6.77714    | 5.64582   | 6.16881    | 6.34141    |
| PLAUR     | 115.406    | 105.806    | 99.6425   | 114.525    | 108.559    |
| LOC401320 | 0.66255    | 0.593251   | 0.60669   | 0.705829   | 0.591685   |
| TTF1      | 8.90234    | 9.69599    | 8.0339    | 10.1066    | 9.73773    |
| SNHG16    | 115.039    | 132.595    | 123.802   | 118.449    | 129.279    |
| FAM175B   | 4.35626    | 4.84808    | 4.82835   | 4.73169    | 5.17476    |
| LTV1      | 11.5952    | 14.7871    | 13.9967   | 13.0879    | 14.3043    |
| MGAT2     | 12.6939    | 15.2542    | 17.6067   | 14.8691    | 15.8244    |
| EXOG      | 3.04326    | 3.59445    | 3.66933   | 4.08437    | 3.1614     |
| ABLIM3    | 0.0430565  | 0.0340142  | 0.0226481 | 0.0511343  | 0.0315335  |
| SLC12A2   | 1.41861    | 1.45327    | 1.62291   | 1.50771    | 1.45671    |
| LOC493754 | 3.31539    | 5.99332    | 3.96562   | 3.31692    | 6.38805    |
| CCS       | 36.1955    | 41.4339    | 32.8939   | 39.7154    | 39.8623    |
| BRCC3     | 3.02194    | 2.83693    | 3.04922   | 3.11755    | 3.19229    |
| NUDT16    | 5.66056    | 7.20817    | 5.85094   | 5.55417    | 7.31097    |
| KDM4A     | 5.31271    | 5.36416    | 8.19312   | 6.96405    | 5.60829    |
| REPIN1    | 109.324    | 104.984    | 101.989   | 117.487    | 103.826    |
| ZNF697    | 1.58029    | 1.40377    | 2.14487   | 1.86485    | 1.63366    |
| HSPBP1    | 38.601     | 35.1758    | 41.7349   | 43.5453    | 35.3072    |
| CHMP1B    | 13.8086    | 18.1569    | 17.6178   | 14.9489    | 19.3666    |
| HSCB      | 19.9464    | 19.4879    | 22.5582   | 21.9345    | 18.0463    |
| RUFY1     | 10.1319    | 10.6041    | 11.6047   | 11.0631    | 10.6056    |
| GNB2L1    | 2802.9     | 3467.39    | 3165.38   | 3061.19    | 3243.38    |
| CHAC1     | 2.26848    | 12.7052    | 58.7627   | 24.0586    | 14.9898    |
| CCDC88A   | 1.59113    | 1.71851    | 0.71164   | 1.58586    | 1.76979    |

|               |            |           |           |            |            |
|---------------|------------|-----------|-----------|------------|------------|
| ZNF44         | 1.97308    | 1.85514   | 2.19926   | 2.30305    | 2.05716    |
| MNS1          | 0.531325   | 0.60192   | 0.412512  | 0.937489   | 0.34703    |
| ZNF107        | 0.928519   | 0.991897  | 0.488056  | 1.03029    | 0.880377   |
| CCDC104       | 51.1962    | 60.2077   | 45.3116   | 48.4619    | 65.1241    |
| NLGN3         | 0.745517   | 0.901277  | 0.821835  | 0.846676   | 0.93285    |
| VAPA          | 16.5018    | 16.6668   | 15.1926   | 15.0194    | 19.5381    |
| SIAH1         | 9.99942    | 10.2433   | 11.4118   | 10.7455    | 10.4702    |
| PEX3          | 9.624      | 7.54199   | 7.35293   | 7.999      | 10.1237    |
| ZNF709        | 1.00248    | 1.10545   | 0.731858  | 0.99263    | 1.03823    |
| SRRM3         | 12.3649    | 12.9231   | 11.5369   | 12.4757    | 12.6734    |
| PLEKHA3       | 4.89252    | 6.04432   | 6.01208   | 5.35236    | 6.26932    |
| AIMP1         | 17.9146    | 18.8174   | 21.1077   | 19.9318    | 19.0342    |
| TRIM47        | 13.0876    | 17.268    | 15.0948   | 15.8011    | 17.0234    |
| TGM1          | 0.296595   | 0.365346  | 0.270953  | 0.395467   | 0.334955   |
| ADSS          | 10.284     | 9.4579    | 11.0199   | 11.0334    | 10.4571    |
| LRIG3         | 0.952423   | 1.00233   | 0.869676  | 1.10255    | 1.10641    |
| DAGLB         | 19.3151    | 20.409    | 18.0624   | 18.8143    | 21.5853    |
| PALD1         | 10.3899    | 9.31999   | 9.71035   | 10.3462    | 10.4174    |
| DNAJC12       | 30.3541    | 28.6946   | 32.2474   | 29.8654    | 29.314     |
| PARVB         | 35.5333    | 42.1697   | 32.9954   | 35.2023    | 42.3064    |
| TMEM187       | 7.40406    | 5.82218   | 7.94106   | 7.24105    | 6.57547    |
| TAMM41        | 7.83218    | 7.24438   | 7.17423   | 7.49408    | 8.70553    |
| GSTCD         | 1.69452    | 1.39719   | 1.89272   | 1.76046    | 1.62178    |
| PHLDB2,PLCXD2 | 0.434128   | 0.654457  | 0.511698  | 0.482906   | 0.795659   |
| LMNB2         | 43.0535    | 43.9549   | 42.1141   | 48.0763    | 43.9889    |
| LINC00662     | 0.225715   | 0.070562  | 0.869504  | 0.536931   | 0.617016   |
| UFM1          | 11.1965    | 13.6575   | 15.4538   | 13.7114    | 13.8296    |
| NXF1          | 20.7702    | 26.1015   | 26.3102   | 23.1039    | 27.6744    |
| OPA1          | 9.10229    | 8.62786   | 8.07355   | 9.01992    | 9.00785    |
| GALNT11       | 12.39      | 12.7079   | 12.7568   | 13.7434    | 12.7314    |
| NDUFAB1       | 172.292    | 155.925   | 177.623   | 173.714    | 172.079    |
| TMEM66        | 46.6223    | 53.88     | 54.1329   | 50.2316    | 59.1297    |
| LIX1L         | 9.48138    | 7.98914   | 8.01502   | 8.2486     | 9.9186     |
| FAM225A       | 0.907285   | 0.735561  | 0.725901  | 0.906087   | 0.660089   |
| STIM2         | 0.880669   | 0.841613  | 1.10866   | 1.15693    | 0.939467   |
| MCFD2         | 19.46      | 21.8736   | 22.53     | 20.4666    | 23.8847    |
| DNASE1L2      | 2.37561    | 1.86387   | 2.35543   | 2.85917    | 1.80783    |
| XRCC2         | 0.780726   | 0.694094  | 1.15285   | 1.24168    | 0.674025   |
| A1CF          | 0.00449941 | 0.0101519 | 0.0203167 | 0.00755052 | 0.0128586  |
| SOCS2-AS1     | 0.199549   | 0.799095  | 0.398615  | 0.326138   | 0.33708    |
| TRMT2B        | 2.46179    | 2.59603   | 3.06352   | 2.81971    | 2.46805    |
| MRPS27        | 37.1827    | 38.2562   | 40.863    | 39.7239    | 40.9442    |
| USP12         | 6.29799    | 6.56804   | 6.08713   | 6.09138    | 7.04556    |
| RAB10         | 25.0419    | 24.6321   | 27.7719   | 25.8401    | 27.4041    |
| PHF11         | 9.1796     | 7.37076   | 10.248    | 9.65405    | 8.31733    |
| ESCO2         | 3.19119    | 2.48219   | 2.65082   | 3.68227    | 2.69115    |
| ALMS1         | 0.66576    | 0.521686  | 0.592023  | 0.722129   | 0.571039   |
| GBA           | 11.5014    | 18.2289   | 13.6577   | 16.4972    | 14.9147    |
| RAD50         | 4.10759    | 3.26423   | 2.65142   | 4.01711    | 3.75664    |
| ALDH9A1       | 32.6879    | 30.3885   | 35.4558   | 33.8899    | 33.7882    |
| LOC389641     | 4.68812    | 4.75448   | 5.52209   | 4.82569    | 5.38316    |
| XRCC4         | 6.86705    | 5.48792   | 6.25038   | 6.88529    | 6.1079     |
| ZNF16         | 11.7518    | 11.7096   | 12.3204   | 12.0485    | 12.34      |
| C2CD4C        | 9.26567    | 9.62336   | 10.052    | 11.1074    | 9.95776    |
| SNORA10       | 27.3813    | 57.0195   | 32.0453   | 24.9466    | 49.2884    |
| CIAO1         | 19.934     | 19.6618   | 20.9385   | 21.2812    | 21.3797    |
| NEURL4        | 3.47486    | 3.49562   | 3.45535   | 4.20076    | 3.39809    |
| TMEM178B      | 0          | 0.0062144 | 0         | 0.00360228 | 0.00292118 |
| RTCA          | 15.799     | 14.8796   | 17.3244   | 17.294     | 15.4899    |
| ANKRD11       | 11.2327    | 9.21982   | 16.5433   | 15.2306    | 8.72619    |
| GMEB1         | 2.33384    | 1.81493   | 1.60635   | 1.84033    | 1.88388    |
| DSCC1         | 5.76604    | 4.69321   | 6.42666   | 7.16618    | 5.12563    |
| TIMM50        | 50.3709    | 52.4945   | 50.3171   | 52.5607    | 51.0502    |
| GTPBP10       | 3.44331    | 3.56649   | 3.76723   | 3.68951    | 3.65125    |
| TDRKH         | 1.99046    | 1.68473   | 2.57624   | 2.29167    | 2.05537    |
| SLC35C1       | 7.98851    | 10.1967   | 10.1146   | 9.62665    | 9.9263     |
| CKAP4         | 18.3155    | 20.132    | 22.9122   | 19.9688    | 22.6875    |
| COPA          | 20.5524    | 18.7265   | 21.5431   | 21.7626    | 20.4295    |
| BAZ2B         | 1.10022    | 1.01548   | 0.833058  | 1.07891    | 1.18788    |
| CTPS2         | 3.9145     | 3.75739   | 4.22227   | 4.45692    | 4.07559    |
| ZCCHC11       | 2.08706    | 2.11493   | 1.88197   | 2.17126    | 2.36555    |
| MRPS18C       | 15.4962    | 16.6659   | 19.4846   | 18.5812    | 17.3234    |
| WNK1          | 4.09196    | 3.30754   | 3.59728   | 4.08699    | 3.87058    |
| ERGIC2        | 18.3264    | 16.46     | 15.1886   | 16.5493    | 19.6415    |
| TBK1          | 7.35036    | 6.17125   | 6.55871   | 6.69377    | 7.37118    |
| BAX           | 172.279    | 239.864   | 158.562   | 190.652    | 215.954    |
| ACTR10        | 12.3938    | 12.7244   | 14.174    | 13.7507    | 13.1884    |
| GPC2          | 1.61474    | 2.01126   | 1.55352   | 1.64149    | 2.07736    |
| ALS2          | 3.66125    | 3.75726   | 3.72913   | 3.70531    | 4.20526    |

|           |           |           |           |           |           |
|-----------|-----------|-----------|-----------|-----------|-----------|
| S100A13   | 423.105   | 582.774   | 386.557   | 393.277   | 590.734   |
| SPDYE3    | 0.289586  | 0.231326  | 0.395241  | 0.348324  | 0.340289  |
| PHKA1     | 5.85821   | 6.12468   | 5.7754    | 6.19723   | 6.80844   |
| ABCC4     | 3.31801   | 2.97891   | 3.9115    | 3.77021   | 3.1819    |
| DZIP3     | 1.04563   | 1.08381   | 1.03071   | 1.12511   | 1.21427   |
| ESD       | 56.201    | 61.2881   | 58.4883   | 57.465    | 62.945    |
| VGf       | 28.6224   | 28.1621   | 26.1405   | 26.5696   | 33.6363   |
| CCDC64    | 1.3801    | 0.78488   | 1.57063   | 1.40901   | 0.891985  |
| MICAL1    | 18.7522   | 16.848    | 16.8829   | 19.2933   | 17.7656   |
| GTF2F1    | 58.0851   | 56.9296   | 54.8414   | 62.611    | 52.2286   |
| C12orf29  | 3.75703   | 3.93104   | 5.00917   | 4.30705   | 4.22114   |
| DOCK5     | 0.755812  | 0.656575  | 0.576161  | 0.777949  | 0.652043  |
| POFUT1    | 6.40136   | 6.09742   | 7.55978   | 6.87447   | 6.77842   |
| RPLP0     | 5995.4    | 8447.78   | 6575.17   | 6488.17   | 7890.18   |
| PSENIEN   | 79.8769   | 88.7743   | 78.0129   | 86.4157   | 83.5675   |
| UROD      | 124.254   | 125.53    | 147.518   | 141.758   | 127.118   |
| LENG8     | 11.9572   | 10.4473   | 10.376    | 14.5087   | 10.9455   |
| STOML2    | 270.138   | 329.426   | 277.052   | 287.31    | 313.388   |
| C2CD2L    | 6.70469   | 5.20552   | 7.91556   | 7.93235   | 5.19834   |
| YARS2     | 30.1072   | 28.3707   | 35.1049   | 33.192    | 28.0758   |
| FAM161B   | 0.371677  | 0.371183  | 0.455942  | 0.578579  | 0.328517  |
| LOC116437 | 0         | 0         | 0.0133025 | 0         | 0.0140228 |
| ZNF598    | 42.2413   | 32.8767   | 49.282    | 49.318    | 34.238    |
| RBM19     | 13.9541   | 11.9162   | 12.354    | 14.5986   | 11.8923   |
| ASB7      | 1.9709    | 2.3606    | 2.47723   | 2.5721    | 2.28767   |
| ITPKB     | 2.50775   | 1.98791   | 1.98318   | 2.38345   | 2.3511    |
| TRUB1     | 4.13876   | 3.77065   | 4.37352   | 4.22198   | 4.42909   |
| TIA1      | 6.76067   | 6.86642   | 6.34859   | 6.88606   | 8.51045   |
| HDAC7     | 19.9588   | 18.2249   | 16.9882   | 20.8313   | 18.4212   |
| IRF2BP1   | 8.11355   | 10.1768   | 9.02557   | 9.47385   | 10.587    |
| POLI      | 2.94628   | 2.47509   | 2.70632   | 2.86843   | 2.73835   |
| KCTD17    | 19.8116   | 25.1355   | 19.6964   | 20.7373   | 25.2246   |
| SLC9A7    | 5.18277   | 5.33439   | 4.30665   | 4.52137   | 6.17072   |
| YTHDF3    | 6.85917   | 7.89318   | 7.58631   | 7.17839   | 8.19351   |
| C11orf96  | 0.0715414 | 0.0925596 | 0         | 0         | 0.173079  |
| FRG1      | 29.9974   | 31.7135   | 30.1789   | 31.8873   | 31.8945   |
| ALG2      | 13.2384   | 14.9881   | 17.9197   | 14.972    | 16.4906   |
| RCOR1     | 5.51189   | 4.71393   | 5.62906   | 5.61554   | 5.38353   |
| GATAD1    | 14.2572   | 11.6629   | 15.7817   | 14.0108   | 13.7154   |
| PARK7     | 313.879   | 332.877   | 295.001   | 324.011   | 340.92    |
| GLUD1     | 36.7277   | 36.8654   | 41.5541   | 40.6592   | 41.3662   |
| LRRC49    | 1.21294   | 1.50215   | 1.38715   | 1.60019   | 1.32606   |
| THUMP2    | 8.88787   | 9.64797   | 8.36759   | 8.94889   | 10.7716   |
| CALCOCO2  | 11.5239   | 10.4995   | 15.1179   | 13.4165   | 11.3229   |
| NLK       | 2.69986   | 2.10304   | 3.16158   | 2.81959   | 2.40662   |
| SHISA9    | 1.01846   | 1.11331   | 0.889883  | 1.3025    | 1.06624   |
| CEP68     | 2.34735   | 2.88435   | 2.46959   | 2.6128    | 3.06023   |
| MAP3K5    | 0.726025  | 0.671956  | 0.60291   | 0.629006  | 0.803251  |
| SEC23B    | 10.6898   | 10.0877   | 11.8654   | 11.6797   | 11.0498   |
| CCT7      | 304.662   | 319.297   | 319.996   | 322.317   | 325.422   |
| MRPL20    | 149.101   | 129.32    | 147.816   | 162.899   | 123.387   |
| ZFAND3    | 21.0987   | 18.9659   | 22.3226   | 22.5318   | 18.4084   |
| ATP5C1    | 210.36    | 201.789   | 235.647   | 206.401   | 227.936   |
| ADM5      | 2.39898   | 3.30716   | 2.40247   | 3.35904   | 3.43788   |
| OBFC1     | 2.04456   | 2.67897   | 2.00292   | 2.01523   | 2.71214   |
| ZW10      | 3.98741   | 4.21311   | 4.66047   | 4.66865   | 4.16648   |
| ST13      | 83.4607   | 99.8459   | 90.7297   | 87.9641   | 105.287   |
| TBX6      | 0.777578  | 1.23692   | 0.959249  | 0.784238  | 1.25741   |
| PAAF1     | 15.8151   | 15.8125   | 14.4536   | 15.6985   | 16.7724   |
| PPP3R1    | 11.1709   | 11.422    | 13.7609   | 12.7478   | 12.1586   |
| LSM5      | 18.449    | 20.1101   | 21.0709   | 19.8601   | 20.8001   |
| CA5BP1    | 9.93588   | 10.0228   | 13.5992   | 11.476    | 10.3043   |
| NEIL1     | 10.9557   | 10.4837   | 8.46239   | 10.887    | 10.9478   |
| MED29     | 7.96662   | 9.89774   | 9.4343    | 9.64488   | 9.58963   |
| TRANK1    | 0.0308326 | 0.0262141 | 0.0525166 | 0.0550711 | 0.0182831 |
| TRIM36    | 2.57982   | 1.70324   | 2.28287   | 2.34607   | 2.18737   |
| USP33     | 6.53003   | 5.98979   | 6.51092   | 6.77835   | 6.11672   |
| NDUFS2    | 59.4328   | 55.1091   | 53.4043   | 60.9414   | 60.4761   |
| SGK1      | 1.2402    | 4.3422    | 1.11366   | 1.54135   | 4.21284   |
| COG5      | 12.4161   | 11.6537   | 12.4439   | 13.0691   | 12.6855   |
| PGAP2     | 20.5793   | 21.0216   | 20.3227   | 22.5404   | 20.8499   |
| LOC254128 | 1.24426   | 1.4909    | 1.95994   | 1.43918   | 1.55941   |
| WDFY1     | 4.70461   | 4.65438   | 4.23762   | 4.44622   | 5.48314   |
| SIK3      | 3.34813   | 2.3821    | 3.34525   | 3.61734   | 2.5202    |
| PARP14    | 3.06103   | 2.80338   | 2.82712   | 3.30571   | 3.09854   |
| CPNE7     | 50.1933   | 55.2174   | 33.531    | 54.6332   | 53.0237   |
| PAPLN     | 0.0947224 | 0.170097  | 0.0723015 | 0.0893767 | 0.192826  |
| FKBP15    | 28.9772   | 22.6829   | 27.3584   | 28.1712   | 25.1056   |
| VIPR1     | 0.763694  | 0.856845  | 0.739293  | 0.681739  | 1.09393   |

|                           |           |           |           |           |           |
|---------------------------|-----------|-----------|-----------|-----------|-----------|
| TMEM168                   | 4.19551   | 3.61977   | 4.59869   | 4.71768   | 4.32671   |
| C8orf40                   | 43.7823   | 50.4941   | 49.5928   | 45.8912   | 53.3142   |
| PRPF38B                   | 10.3163   | 9.6593    | 10.3768   | 11.0327   | 10.3282   |
| SSBP1                     | 239.1     | 211.853   | 287.198   | 270.534   | 221.948   |
| SUZ12P1                   | 4.78026   | 5.1306    | 3.84193   | 5.62049   | 4.71828   |
| EEF2K                     | 5.18105   | 5.01061   | 4.94314   | 5.71839   | 4.85155   |
| FBXW10                    | 0.0465646 | 0.0835475 | 0.0480774 | 0.0881884 | 0.0522917 |
| NT5C1B,NT5C1B-RDH14,RDH14 | 10.1593   | 10.5891   | 10.7814   | 11.3052   | 10.7089   |
| PAX8                      | 0.927342  | 1.40296   | 1.12776   | 1.14976   | 1.15656   |
| CBX5                      | 4.38334   | 3.94809   | 4.1325    | 4.66541   | 4.00045   |
| TTF2                      | 4.41598   | 3.73946   | 5.02927   | 5.19574   | 3.8636    |
| POLR2B                    | 22.1459   | 19.8287   | 25.6569   | 23.8592   | 23.3744   |
| PMVK                      | 24.1613   | 26.6611   | 26.3901   | 30.1105   | 25.5844   |
| TJAP1                     | 16.2439   | 15.5234   | 18.2914   | 18.9276   | 15.8473   |
| TMOD3                     | 4.74072   | 4.82891   | 3.77889   | 3.8294    | 5.80759   |
| TRABD                     | 56.4708   | 46.4954   | 57.2494   | 58.1839   | 52.1986   |
| LOC642846                 | 4.13648   | 3.91209   | 3.18394   | 4.86185   | 3.93342   |
| CRY1                      | 8.01047   | 6.64953   | 11.4408   | 9.60627   | 6.9745    |
| CCDC58                    | 47.1444   | 36.5552   | 41.9713   | 42.7127   | 40.8584   |
| TECPR1                    | 5.55176   | 4.30633   | 4.95412   | 5.70026   | 5.03258   |
| CDPF1                     | 5.22927   | 4.981     | 5.39032   | 5.57438   | 4.76201   |
| KLHDC4                    | 19.4346   | 16.0395   | 18.8288   | 20.3973   | 17.1585   |
| FBXW2                     | 8.12422   | 8.53043   | 8.16213   | 8.48185   | 8.99922   |
| WDR7                      | 0.812906  | 0.62237   | 0.603303  | 0.830557  | 0.656039  |
| MED12                     | 3.21137   | 3.43671   | 3.36898   | 3.80165   | 3.09967   |
| TBCA                      | 289.888   | 267.627   | 314.978   | 302.967   | 266.637   |
| ZSCAN29                   | 2.86727   | 3.04551   | 3.75187   | 3.44401   | 2.91984   |
| OTX1                      | 2.03477   | 2.31698   | 1.76404   | 1.64265   | 2.91893   |
| UBE3A                     | 8.98618   | 8.00621   | 9.61592   | 10.1271   | 8.12837   |
| GSKIP                     | 3.82683   | 4.70469   | 5.57486   | 4.50507   | 5.27611   |
| AK3                       | 7.96965   | 8.35704   | 7.37863   | 8.02768   | 8.68815   |
| DLC1                      | 22.4758   | 22.6162   | 19.8708   | 22.4933   | 22.7692   |
| PNMA1                     | 19.008    | 21.7652   | 23.8114   | 21.6074   | 23.369    |
| PSMG3                     | 48.1205   | 59.9564   | 62.615    | 60.3424   | 57.1688   |
| COPSS5                    | 60.0954   | 53.9529   | 67.9575   | 63.259    | 56.4749   |
| RUFY2                     | 2.1171    | 1.91536   | 1.83261   | 2.1671    | 2.24616   |
| N4BP2L2                   | 11.3727   | 12.9327   | 15.9117   | 16.1025   | 12.7164   |
| MGC45800                  | 0.58194   | 0.494187  | 1.00797   | 0.800684  | 0.65873   |
| EIF2S1                    | 16.8339   | 16.4255   | 20.5894   | 17.608    | 18.4383   |
| SLC6A9                    | 0.479302  | 0.600404  | 6.89923   | 3.97994   | 0.453441  |
| TNNC1                     | 0.361579  | 0.654706  | 0.535735  | 0.739231  | 0.662125  |
| MORF4L2                   | 71.9947   | 66.5853   | 68.1094   | 71.0221   | 73.4672   |
| TYRO3P                    | 0.0751151 | 0.15555   | 0         | 0.0630324 | 0.0474879 |
| PPAPDC2                   | 2.92604   | 4.58498   | 4.71884   | 4.16758   | 4.43335   |
| RCN2                      | 21.7467   | 26.0427   | 24.9378   | 24.4294   | 26.1392   |
| PRR11                     | 5.76282   | 4.63372   | 7.5045    | 6.33607   | 4.61283   |
| RAD51AP1                  | 5.5885    | 5.48254   | 4.85152   | 5.92275   | 6.09612   |
| AGPAT5                    | 9.26321   | 7.98258   | 10.135    | 9.65155   | 8.88747   |
| PEX10                     | 16.5675   | 19.42     | 23.0786   | 21.0437   | 19.21     |
| PPA2                      | 40.2904   | 39.3297   | 40.7976   | 40.4398   | 42.3725   |
| PDPR                      | 1.57775   | 2.09534   | 1.68063   | 1.77717   | 2.38064   |
| MTCH2                     | 39.1882   | 40.1528   | 40.5252   | 39.5462   | 43.2727   |
| RHBDD2                    | 35.6538   | 49.253    | 40.1566   | 43.9538   | 47.3026   |
| ZNF701                    | 0.128327  | 0.198033  | 0.144712  | 0.162004  | 0.192216  |
| PSMD10                    | 25.7629   | 29.2858   | 26.5903   | 27.1087   | 31.6168   |
| SYBU                      | 5.88748   | 7.03207   | 6.88186   | 7.06348   | 6.76062   |
| SACM1L                    | 4.86605   | 3.98906   | 5.72594   | 5.39318   | 4.32999   |
| LOC283663                 | 0.174305  | 0.149901  | 0.181421  | 0.24559   | 0.192232  |
| ZNF200                    | 2.46089   | 3.40799   | 3.79425   | 3.76641   | 3.67437   |
| CD5                       | 0.0106654 | 0.014398  | 0         | 0         | 0.0265054 |
| TTI1                      | 5.69752   | 5.12422   | 5.52335   | 6.10947   | 5.49248   |
| SPTAN1                    | 31.6561   | 30.5314   | 32.3538   | 33.9642   | 31.2387   |
| NFS1                      | 11.7871   | 11.9967   | 9.96499   | 10.7961   | 15.4543   |
| GNL3                      | 63.2342   | 63.2425   | 64.3558   | 61.9293   | 70.631    |
| NSMF                      | 91.4805   | 105.343   | 95.4347   | 101.864   | 107.605   |
| CD97                      | 24.8782   | 23.1359   | 26.9505   | 29.3908   | 21.4105   |
| RBBP5                     | 3.01493   | 2.83775   | 3.48429   | 3.44515   | 3.29589   |
| SLC25A43                  | 6.89023   | 7.28314   | 8.06063   | 7.21478   | 7.45392   |
| SPECC1                    | 6.953     | 6.60305   | 6.87174   | 7.1595    | 6.6495    |
| VPS4A                     | 55.4752   | 57.9092   | 57.9704   | 59.1619   | 59.9163   |
| SDAD1                     | 8.8378    | 9.0066    | 9.94853   | 10.2598   | 8.9832    |
| MZT1                      | 15.6071   | 13.0992   | 17.7121   | 16.4832   | 15.1869   |
| TRNAU1AP                  | 12.6702   | 13.1047   | 14.2714   | 14.6485   | 12.729    |
| MROH7,TTC4                | 13.0016   | 14.4043   | 13.8576   | 13.5859   | 15.2869   |
| GOPC                      | 4.87402   | 4.6134    | 5.33825   | 5.21812   | 5.59454   |
| ADAP1                     | 17.8753   | 16.8697   | 22.3535   | 22.2238   | 17.1908   |
| SUPV3L1                   | 18.4613   | 17.1087   | 23.0005   | 21.5526   | 19.1555   |
| MUC12                     | 0.299357  | 0.311261  | 0.266209  | 0.292756  | 0.354512  |
| SSRP1                     | 102.334   | 100.938   | 101.424   | 108.618   | 103.123   |

|           |           |          |           |           |           |
|-----------|-----------|----------|-----------|-----------|-----------|
| HKR1      | 6.76193   | 6.74391  | 7.87642   | 7.36771   | 7.32808   |
| TOR1AIP1  | 13.9904   | 14.5825  | 14.322    | 13.5844   | 16.4054   |
| PRKAR1A   | 22.1491   | 22.7353  | 19.9387   | 21.0956   | 26.0439   |
| LMBRD2    | 0.267454  | 0.317556 | 0.306955  | 0.357049  | 0.319797  |
| FAM105A   | 0.812181  | 1.01941  | 0.643608  | 0.88355   | 1.0533    |
| ANKRD18A  | 0.445919  | 0.659357 | 0.261286  | 0.448145  | 0.683123  |
| ATP6V0D1  | 56.187    | 59.9226  | 59.6719   | 63.3265   | 56.7123   |
| NFIC      | 10.218    | 8.31285  | 9.3603    | 10.9789   | 8.95257   |
| RAB11A    | 21.2631   | 22.5262  | 21.5578   | 21.33     | 25.4121   |
| ITPK1     | 30.5732   | 31.6372  | 32.455    | 34.9835   | 31.3945   |
| PHB2      | 409.397   | 488.537  | 453.453   | 452.838   | 470.869   |
| EIF4B     | 138.846   | 177.495  | 158.102   | 154.123   | 172.886   |
| PHF20     | 3.02846   | 2.51331  | 3.01813   | 2.81131   | 2.86315   |
| PHRF1     | 8.7411    | 9.8382   | 8.01169   | 9.79772   | 9.07065   |
| P2RX4     | 12.2355   | 15.4037  | 11.7406   | 12.1675   | 15.3109   |
| RHOQ      | 13.9257   | 15.2873  | 16.6394   | 16.0119   | 15.3974   |
| RAE1      | 23.6919   | 27.1644  | 28.8809   | 27.6438   | 27.1666   |
| ADAM22    | 0.592643  | 0.45969  | 0.50784   | 0.583033  | 0.565488  |
| RPSAP58   | 40.1539   | 59.2438  | 46.7909   | 44.5973   | 56.9523   |
| YTHDF2    | 23.5803   | 32.0833  | 30.2332   | 27.5434   | 31.7452   |
| C21orf91  | 0.999996  | 1.18488  | 1.3811    | 1.17552   | 1.19189   |
| RIPK2     | 39.9327   | 34.7959  | 43.3156   | 41.2329   | 36.9053   |
| ATG2B     | 1.3617    | 1.13024  | 1.14042   | 1.41701   | 1.3126    |
| COX7A2L   | 85.4016   | 117.361  | 121.391   | 104.948   | 110.818   |
| VPS26A    | 18.5734   | 19.7707  | 25.2202   | 23.0569   | 21.1034   |
| C17orf80  | 2.60373   | 2.23658  | 3.55969   | 3.16716   | 1.99993   |
| LIMD1     | 4.55036   | 3.9181   | 4.98986   | 5.06737   | 3.96011   |
| HYOU1     | 17.7745   | 19.1698  | 25.4119   | 23.8336   | 17.7054   |
| GP6       | 0.169967  | 0.161453 | 0.0535828 | 0.0971119 | 0.258236  |
| OXA1L     | 143.88    | 195.802  | 159.877   | 170.376   | 180.564   |
| STRAP     | 71.9691   | 68.3886  | 85.3407   | 78.7942   | 74.8954   |
| AATF      | 48.2303   | 45.7904  | 49.334    | 52.7325   | 47.6947   |
| FHL3      | 36.7578   | 32.2809  | 42.4739   | 41.0526   | 33.209    |
| L3MBTL2   | 8.08002   | 10.4725  | 9.23424   | 10.3213   | 9.22501   |
| ZNF581    | 137.769   | 141.352  | 163.683   | 151.478   | 123.554   |
| AHCTF1    | 2.33417   | 2.11404  | 2.19661   | 2.4586    | 2.31231   |
| YWHAB     | 43.5737   | 46.1605  | 51.9737   | 49.7402   | 48.9175   |
| D2HGDH    | 10.2205   | 10.8767  | 8.29218   | 11.3119   | 10.1965   |
| HNRNPH3   | 35.9306   | 35.3498  | 37.8698   | 39.2203   | 37.8239   |
| ORC6      | 15.2942   | 11.0477  | 16.0365   | 18.481    | 12.2518   |
| SNORD89   | 7.0455    | 9.20254  | 8.44027   | 0         | 0         |
| HSPBAP1   | 6.04833   | 4.73109  | 7.32157   | 7.59557   | 4.19518   |
| CAB39     | 8.51867   | 7.79125  | 10.0592   | 9.30753   | 8.68887   |
| SERAC1    | 3.47137   | 3.15942  | 3.36398   | 3.95103   | 3.33276   |
| PPP1R10   | 9.22694   | 9.55969  | 15.0395   | 12.3965   | 9.93586   |
| PINX1     | 11.894    | 10.3035  | 15.5815   | 13.1066   | 11.1349   |
| MSTO2P    | 0.222026  | 0.412689 | 0.175231  | 0.260439  | 0.364634  |
| CPD       | 3.91229   | 4.36944  | 3.75977   | 3.87496   | 4.8318    |
| KIAA0319  | 0.0577707 | 0.105647 | 0.0408641 | 0.0473736 | 0.132313  |
| LOC400684 | 1.2426    | 1.0671   | 1.81994   | 1.55464   | 0.988418  |
| PROSER1   | 5.75364   | 4.6283   | 7.58776   | 6.73264   | 5.31947   |
| ZNF346    | 3.33221   | 2.70771  | 3.64465   | 3.80792   | 2.46204   |
| SETD1B    | 2.93454   | 2.19742  | 2.68168   | 3.35991   | 2.18028   |
| WDR59     | 13.5162   | 13.3018  | 10.5233   | 12.2774   | 14.6686   |
| DDX60     | 0.225474  | 0.242569 | 0.213993  | 0.198286  | 0.267703  |
| EEF1A1    | 4916.16   | 7509.62  | 5760.29   | 5289.81   | 7574.97   |
| CACTIN    | 12.4175   | 13.0843  | 12.7876   | 13.7094   | 12.7401   |
| RABEPK    | 36.0873   | 40.1862  | 43.6954   | 39.1676   | 42.4817   |
| ZNF883    | 7.6745    | 7.85141  | 7.30489   | 7.48456   | 8.81971   |
| NDE1      | 5.61134   | 4.33094  | 6.64526   | 6.60196   | 4.52308   |
| BST1      | 0.442031  | 0.371433 | 0.459731  | 0.440349  | 0.433952  |
| ZNF597    | 0.757697  | 1.24615  | 0.900101  | 0.729036  | 1.4602    |
| WDR74     | 57.8107   | 56.9477  | 67.0519   | 68.2991   | 55.1245   |
| HSPA14    | 14.8301   | 14.4569  | 17.9319   | 15.4606   | 16.5179   |
| NUP188    | 33.9215   | 31.372   | 29.2229   | 35.0136   | 34.1931   |
| SPRED2    | 9.42665   | 8.48518  | 9.41028   | 9.84361   | 8.82948   |
| STMN3     | 18.4459   | 19.0772  | 17.1179   | 19.4545   | 20.0589   |
| SIKE1     | 4.1476    | 4.11556  | 4.40064   | 4.45149   | 4.12847   |
| CUEDC1    | 5.57996   | 5.28351  | 6.35582   | 6.15835   | 5.27563   |
| ZNF227    | 3.5361    | 3.08716  | 4.0509    | 3.81065   | 3.39602   |
| RNF219    | 3.32953   | 2.88838  | 3.89545   | 3.52894   | 3.48159   |
| DSP       | 2.45928   | 1.97511  | 2.73747   | 2.73892   | 2.05596   |
| TRMT12    | 3.9153    | 5.45596  | 4.54099   | 4.0572    | 5.74499   |
| KIAA0317  | 4.66176   | 4.90338  | 5.07906   | 5.3826    | 5.08743   |
| ACOX1     | 4.0807    | 4.42918  | 3.79487   | 4.3382    | 4.63298   |
| LOC151171 | 0.0273244 | 0        | 0.0333552 | 0.0227242 | 0.0172593 |
| CFLAR     | 4.15474   | 3.95687  | 3.30456   | 4.30417   | 3.63209   |
| ZNF789    | 3.3021    | 3.28201  | 3.9044    | 4.22793   | 2.81119   |
| GOSR2     | 6.32532   | 5.57728  | 7.40818   | 7.10875   | 5.98079   |

|            |           |           |           |           |           |
|------------|-----------|-----------|-----------|-----------|-----------|
| UBL4A      | 23.8115   | 24.5175   | 26.0023   | 26.7105   | 23.785    |
| SCARNA20   | 0         | 5.90605   | 0         | 0         | 6.26275   |
| AAMP       | 118.693   | 117.56    | 135.725   | 130.557   | 119.425   |
| ODF2       | 22.238    | 18.4421   | 21.5018   | 23.2774   | 20.0804   |
| IPPK       | 6.96364   | 6.6211    | 6.68254   | 7.29901   | 6.88249   |
| PKP4       | 8.78338   | 6.91943   | 9.77925   | 9.82255   | 6.7468    |
| SAMD5      | 0.582492  | 0.562632  | 0.647681  | 0.689933  | 0.636076  |
| EFCAB10    | 0.898926  | 0.804289  | 0.53259   | 0.946337  | 0.720195  |
| KLF13      | 6.16633   | 6.46479   | 6.99005   | 7.09958   | 6.45724   |
| CCDC71L    | 1.65017   | 3.39624   | 2.87101   | 2.2448    | 3.51592   |
| INHA       | 0.683544  | 0.38907   | 0.640058  | 0.666417  | 0.864899  |
| ACLY       | 34.3977   | 32.2565   | 33.5849   | 37.8175   | 33.6238   |
| DLG1       | 3.71449   | 3.33432   | 3.50902   | 3.88217   | 3.77168   |
| MAP2K2     | 152.591   | 154.038   | 169.191   | 162.791   | 153.349   |
| ZNF876P    | 0.130993  | 0.0563194 | 0.088502  | 0.141168  | 0.0534497 |
| C9orf173   | 0.264302  | 0.288371  | 0.0587355 | 0.0726123 | 0.317025  |
| CNBP       | 106.906   | 117.769   | 122.316   | 115.403   | 124.542   |
| DHDDS      | 6.80984   | 6.55233   | 6.64781   | 7.05286   | 7.14304   |
| CECR7      | 0.706704  | 0.88336   | 1.37585   | 1.12263   | 0.993356  |
| C10orf88   | 1.12834   | 0.801973  | 1.15528   | 1.0815    | 0.990389  |
| MAG1       | 0.811967  | 0.892164  | 0.686842  | 0.73969   | 1.05332   |
| GFCF2      | 12.4724   | 12.588    | 11.8142   | 12.5695   | 13.2967   |
| CORO1A     | 18.8049   | 21.0912   | 15.4571   | 19.4999   | 22.6345   |
| FLJ43663   | 4.31462   | 5.91464   | 4.81935   | 4.56853   | 6.35782   |
| MPZL1      | 12.8237   | 15.7033   | 13.4157   | 15.1036   | 14.9627   |
| SPATA13    | 1.67853   | 1.31174   | 1.62739   | 1.76803   | 1.58268   |
| TTL6       | 0.0581332 | 0.0396416 | 0.0355897 | 0.0320911 | 0.0748038 |
| PHKA2-AS1  | 0.160249  | 0.0739826 | 0.0982147 | 0.133997  | 0.170083  |
| RPL3       | 3554.43   | 4559.47   | 3766.68   | 3808.61   | 4306.72   |
| PPP1R9A    | 1.59897   | 1.42104   | 1.38696   | 1.73984   | 1.36693   |
| CNOT11     | 22.2212   | 23.6329   | 23.5807   | 23.4539   | 25.2514   |
| CRBN       | 5.41059   | 5.55089   | 7.54259   | 5.95479   | 7.03203   |
| SAAL1      | 19.0038   | 16.5683   | 22.5266   | 21.8365   | 17.7258   |
| RNF126     | 73.6687   | 67.1426   | 84.0026   | 85.1451   | 71.1656   |
| TOLLIP     | 24.9007   | 20.5343   | 24.3948   | 24.2689   | 21.9205   |
| AP1AR      | 7.25329   | 5.07139   | 8.19159   | 7.08786   | 6.61312   |
| RBBP9      | 2.4454    | 2.99534   | 2.6972    | 2.92961   | 2.79175   |
| HSPA6      | 0.100218  | 1.34021   | 0.102894  | 0.118935  | 1.36855   |
| ZFYVE16    | 1.63286   | 1.33947   | 1.38311   | 1.59834   | 1.50166   |
| CAPN2      | 149.967   | 147.365   | 147.911   | 156.218   | 161.98    |
| HERC2P9    | 3.89317   | 3.62969   | 3.12632   | 4.09019   | 3.71792   |
| GEN1       | 1.90597   | 1.43752   | 1.87157   | 2.35804   | 1.36312   |
| RPL10A     | 2718.13   | 3530.14   | 2987.11   | 2956.66   | 3244.9    |
| TTC23      | 3.16284   | 3.27192   | 2.8247    | 3.23508   | 3.12297   |
| HLF        | 0.0129517 | 0.101894  | 0.0329923 | 0.0650402 | 0.0602708 |
| TFB1M      | 6.59052   | 6.3528    | 6.39511   | 6.99802   | 6.623     |
| CYB5D2     | 10.6579   | 15.0881   | 15.5293   | 12.2115   | 16.5088   |
| MAP3K7     | 6.31096   | 5.3348    | 5.74755   | 6.29121   | 5.83915   |
| CDC42EP2   | 21.0946   | 20.7893   | 22.6769   | 24.1694   | 19.8673   |
| RABGAP1    | 4.59438   | 4.40254   | 4.4097    | 4.85422   | 4.48539   |
| HNRNPC     | 144.241   | 157.803   | 157.716   | 151.847   | 164.445   |
| TOMM70A    | 17.6386   | 16.0263   | 20.6397   | 18.8971   | 18.5867   |
| TMEM203    | 51.2723   | 70.1307   | 65.8074   | 63.0411   | 67.7999   |
| DDX27      | 13.2655   | 11.34     | 11.713    | 14.3083   | 11.565    |
| UCK2       | 23.2409   | 22.249    | 24.0827   | 24.3538   | 23.2901   |
| C16orf55   | 6.05811   | 8.90163   | 7.43825   | 8.60847   | 8.20882   |
| TRMT1L     | 3.41446   | 3.04696   | 3.70049   | 3.64898   | 3.59283   |
| GTF3C3     | 11.0379   | 10.3502   | 11.836    | 11.7518   | 10.966    |
| CENPH      | 26.7905   | 22.501    | 25.2227   | 30.2431   | 23.6994   |
| TMEM9B     | 11.766    | 18.1732   | 15.0302   | 14.7516   | 18.6644   |
| TMEM33     | 6.92171   | 6.79794   | 8.46134   | 7.39505   | 6.90332   |
| PUS7L      | 2.85216   | 1.87741   | 1.96963   | 2.26522   | 2.37657   |
| IRS2       | 4.04629   | 3.76594   | 3.68283   | 4.22676   | 3.47204   |
| CSNK1A1P1  | 0         | 0         | 0.0180956 | 0         | 0.0192105 |
| BAIAP2-AS1 | 2.44186   | 3.25265   | 2.72789   | 2.7483    | 3.22681   |
| USMG5      | 378.356   | 339.351   | 375.984   | 368.553   | 341.982   |
| YWHAQ      | 134.362   | 156.234   | 139.625   | 139.024   | 173.422   |
| SLC36A1    | 1.05794   | 0.82768   | 1.44263   | 1.41813   | 0.89045   |
| RAB3GAP1   | 8.29059   | 8.7001    | 8.86954   | 9.31695   | 9.08272   |
| GFM2       | 10.4648   | 11.0409   | 10.9333   | 10.994    | 11.6195   |
| ATMIN      | 3.54071   | 3.99002   | 3.92657   | 3.72147   | 4.4478    |
| TUFM       | 324.42    | 315.902   | 291.51    | 337.473   | 317.199   |
| JTB        | 135.634   | 156.336   | 151.413   | 153.414   | 150.076   |
| PLAC8L1    | 2.16342   | 2.13951   | 3.43403   | 3.48866   | 1.68611   |
| C7orf29    | 9.60372   | 22.3181   | 12.8279   | 12.5942   | 19.2572   |
| SEC16A     | 15.6071   | 15.2183   | 16.3242   | 17.7695   | 15.6973   |
| VWA9       | 26.935    | 28.4616   | 30.1907   | 29.596    | 30.4595   |
| POMZP3     | 6.46011   | 8.56971   | 8.48267   | 7.6956    | 8.15316   |
| CEBPG      | 9.94028   | 12.7967   | 30.0798   | 18.4338   | 12.5715   |

|              |           |          |           |           |           |
|--------------|-----------|----------|-----------|-----------|-----------|
| ZHX2         | 1.83759   | 2.15822  | 2.1662    | 2.22824   | 2.36617   |
| GBP2         | 0         | 0        | 0.0208191 | 0         | 0.0221127 |
| ATP5D        | 364.895   | 349.575  | 388.138   | 420.9     | 321.829   |
| RNF145       | 28.9345   | 28.902   | 28.4626   | 30.0584   | 29.753    |
| CCND1        | 22.5766   | 25.2454  | 27.8607   | 26.6428   | 24.3164   |
| TOMM40L      | 8.22412   | 8.37607  | 9.64614   | 9.07697   | 9.46758   |
| SPRYD4       | 7.52509   | 8.28714  | 8.76038   | 8.50828   | 8.31337   |
| NFYC         | 17.169    | 14.4625  | 19.3513   | 17.9301   | 15.2041   |
| GOT2         | 79.699    | 83.7223  | 76.4363   | 83.5483   | 89.4891   |
| UBE2B        | 21.7041   | 19.1148  | 22.8873   | 20.8625   | 19.9796   |
| CALB2        | 14.8465   | 18.2298  | 12.4939   | 14.217    | 20.6994   |
| WDR5         | 39.6186   | 41.9013  | 41.514    | 44.4881   | 42.6142   |
| PRPF4B       | 3.13952   | 2.90802  | 2.79859   | 3.2909    | 2.99725   |
| RPF1         | 16.5642   | 18.4613  | 21.6008   | 19.1643   | 20.1567   |
| RABL6        | 137.385   | 128.83   | 131.354   | 145.109   | 137.545   |
| FAM211B      | 10.9688   | 10.6119  | 8.35876   | 10.5128   | 11.7377   |
| FLII         | 73.6516   | 67.9119  | 71.481    | 75.4315   | 71.6582   |
| GOSR1        | 5.40404   | 5.54166  | 5.20774   | 5.83138   | 5.63138   |
| LOC253039    | 2.13625   | 2.05031  | 2.85104   | 2.39671   | 2.12446   |
| CTNNB1       | 49.316    | 50.9315  | 58.5923   | 54.1556   | 54.7329   |
| MRPL3        | 49.2311   | 46.3553  | 57.0594   | 52.8314   | 50.8662   |
| AGXT2L2      | 9.75034   | 10.3555  | 9.76035   | 11.0395   | 8.9994    |
| ALG5         | 25.6473   | 31.3693  | 33.2229   | 29.1557   | 32.8192   |
| ARSD         | 4.48704   | 5.06223  | 4.48734   | 4.88389   | 4.78311   |
| ZDBF2        | 0.548666  | 0.5103   | 0.551039  | 0.528237  | 0.565684  |
| TRNP1        | 11.1187   | 13.234   | 17.077    | 14.7826   | 12.61     |
| LOC100505876 | 9.30655   | 10.333   | 11.521    | 10.8014   | 11.0307   |
| ZKSCAN7      | 0.382676  | 0.678779 | 0.694735  | 0.565636  | 0.780121  |
| C4orf27      | 17.6809   | 13.6921  | 16.3842   | 19.63     | 16.297    |
| MATR3        | 37.284    | 40.2785  | 39.7472   | 40.0315   | 43.9605   |
| FAM219B      | 8.78901   | 8.52539  | 9.87489   | 9.96712   | 9.02927   |
| DUSP14       | 29.1171   | 37.2387  | 34.2844   | 29.7309   | 40.4109   |
| ADAM17       | 3.10997   | 2.90508  | 3.5299    | 3.43629   | 3.44417   |
| C14orf119    | 20.7168   | 23.5967  | 26.909    | 23.1517   | 25.1207   |
| SMARCD1      | 20.8569   | 24.488   | 21.8318   | 23.6032   | 24.8815   |
| LYPD6        | 0.917514  | 0.757094 | 1.03737   | 1.12437   | 0.8028    |
| NAA38        | 3.86607   | 3.38301  | 4.77776   | 4.74597   | 3.62001   |
| ADC          | 2.97086   | 4.41026  | 3.04007   | 3.76477   | 3.70838   |
| ZNF765       | 0.782285  | 0.964305 | 1.08296   | 0.894072  | 0.999091  |
| SRM          | 165.451   | 161.912  | 167.01    | 183.454   | 160.353   |
| CXXC5        | 3.92395   | 5.21769  | 3.57647   | 4.03783   | 5.4076    |
| SPATA5L1     | 11.3916   | 8.787    | 11.3755   | 11.3399   | 10.3094   |
| ALG10B       | 0.45643   | 0.48748  | 0.561301  | 0.576293  | 0.518438  |
| LENG9        | 16.5413   | 13.4436  | 18.8754   | 19.0862   | 12.6492   |
| MRPL55       | 69.4593   | 71.121   | 58.7579   | 72.5831   | 69.6988   |
| DNAJC2       | 26.1816   | 19.5737  | 24.0156   | 27.405    | 22.479    |
| SEC22B       | 11.1088   | 10.5415  | 13.4426   | 11.3012   | 12.5041   |
| ZC3H6        | 0.244218  | 0.190341 | 0.131836  | 0.231173  | 0.180768  |
| MSH5,SAPCD1  | 10.8759   | 10.1179  | 7.85707   | 12.1714   | 9.18581   |
| DEK          | 46.0796   | 43.622   | 44.8904   | 51.9311   | 45.9005   |
| FAM184B      | 0.251006  | 0.184841 | 0.197328  | 0.334697  | 0.227773  |
| SLC25A39     | 351.916   | 402.928  | 322.366   | 381.151   | 381.25    |
| ETS2         | 5.77882   | 6.15285  | 7.50766   | 6.75444   | 6.32145   |
| EFHB         | 0.0283984 | 0        | 0.0177157 | 0.0235557 | 0         |
| LOC100507266 | 0.158662  | 0.156359 | 0.199394  | 0.182547  | 0.185158  |
| RPS9         | 3775.85   | 5114.17  | 3890.99   | 4047.9    | 4536.36   |
| RNASEH2B     | 18.3057   | 18.9769  | 21.0759   | 21.0616   | 19.0077   |
| SCCPDH       | 24.9803   | 28.8516  | 27.5483   | 26.0065   | 31.2666   |
| LYSMD4       | 1.8476    | 3.57548  | 2.63181   | 2.6774    | 3.24567   |
| POP7         | 108.824   | 127.34   | 138.283   | 128.262   | 123.546   |
| GCSAM        | 0.132031  | 0.323689 | 0.120349  | 0.0630087 | 0.470041  |
| SLC2A6       | 14.1562   | 16.04    | 19.3938   | 17.6291   | 15.8007   |
| YBX1         | 566.961   | 655.935  | 597.605   | 615.587   | 680.666   |
| ADO          | 6.46052   | 6.65373  | 8.29143   | 7.71544   | 6.97349   |
| CSD1,NRAS    | 33.4277   | 35.4856  | 36.8479   | 34.6131   | 37.6307   |
| RUNX2        | 1.66402   | 1.98885  | 1.59108   | 1.78857   | 1.90607   |
| AARS2        | 6.7303    | 6.70848  | 5.79882   | 7.21268   | 6.81117   |
| KDM4C        | 3.86072   | 3.31153  | 3.26129   | 3.26201   | 4.02779   |
| PPRC1        | 9.282     | 11.7957  | 11.1953   | 11.3425   | 11.84     |
| FAN1         | 2.86016   | 3.41396  | 3.41219   | 3.74744   | 3.21168   |
| TOM1L2       | 4.01295   | 4.30301  | 3.88097   | 4.39209   | 4.64351   |
| FAM131A      | 22.3484   | 13.899   | 17.7448   | 21.3058   | 15.8855   |
| COPB2        | 21.0714   | 21.34    | 22.55     | 22.3101   | 23.5393   |
| IFI30        | 55.5739   | 53.8184  | 44.7681   | 60.8558   | 53.1294   |
| METTL2B      | 5.67776   | 5.85559  | 6.49581   | 5.99777   | 6.14596   |
| SPATA6       | 0.538129  | 0.398891 | 0.749097  | 0.619487  | 0.501836  |
| NKRF         | 4.61822   | 4.43396  | 4.89658   | 4.90547   | 4.76597   |
| PRKCE        | 1.64141   | 1.46141  | 1.0248    | 1.63919   | 1.45295   |
| FAM118B      | 5.01834   | 5.04967  | 7.33901   | 5.72816   | 5.7107    |

|                               |           |           |           |           |           |
|-------------------------------|-----------|-----------|-----------|-----------|-----------|
| NDUFAF2                       | 91.9982   | 86.2257   | 102.374   | 97.7278   | 86.8751   |
| CCDC121                       | 0.245961  | 0.242645  | 0.266418  | 0.30581   | 0.18115   |
| CDK20                         | 7.82034   | 8.26823   | 7.76381   | 8.34429   | 8.41042   |
| PLEK2                         | 45.2999   | 53.1393   | 37.6064   | 46.2011   | 53.279    |
| MRPS30                        | 41.3454   | 36.7143   | 42.7108   | 44.1415   | 37.5212   |
| CCDC86                        | 41.9317   | 39.8229   | 45.4245   | 43.8195   | 42.2682   |
| SLC7A1                        | 12.4666   | 11.4042   | 21.8741   | 18.4109   | 11.5136   |
| GJA3                          | 0.585082  | 0.58166   | 0.837194  | 0.616641  | 0.802542  |
| MKRN2                         | 10.4287   | 9.44372   | 10.8963   | 11.0668   | 10.2198   |
| PNCK                          | 0.133829  | 0.357184  | 0         | 0.269238  | 0.111281  |
| CACYBP                        | 43.5359   | 45.2206   | 44.2867   | 48.2527   | 47.0699   |
| ACTR8                         | 2.91854   | 4.03588   | 3.16509   | 3.32312   | 3.92788   |
| KLC1                          | 18.2601   | 16.6554   | 18.4524   | 18.8805   | 18.6903   |
| SEC14L4                       | 1.21578   | 1.39841   | 1.77231   | 1.64799   | 1.76968   |
| BTG3                          | 25.3923   | 22.5435   | 28.5348   | 27.9297   | 23.1917   |
| AKIRIN1                       | 15.6484   | 17.4366   | 19.4817   | 18.5385   | 17.6331   |
| NFAT5                         | 3.43252   | 3.10111   | 3.03131   | 3.26163   | 3.38158   |
| VPS35                         | 14.5719   | 14.035    | 16.1113   | 16.3091   | 14.4704   |
| RBM15B                        | 10.5434   | 12.3431   | 12.6246   | 12.2666   | 12.0156   |
| ADCK4                         | 22.9653   | 18.3899   | 21.997    | 23.766    | 20.1994   |
| LXN                           | 9.25328   | 7.87078   | 9.18708   | 9.92556   | 8.17669   |
| DNAJC10                       | 5.78544   | 6.33134   | 6.30806   | 6.3876    | 6.87861   |
| KLHDC10                       | 4.63997   | 2.95845   | 4.16176   | 4.58713   | 3.44608   |
| SNRPD1                        | 68.1408   | 59.0826   | 73.7535   | 71.353    | 65.1689   |
| LOC100862671                  | 3.82008   | 4.37999   | 5.19458   | 4.69452   | 4.53411   |
| CASZ1                         | 1.8588    | 2.49127   | 1.70496   | 1.97266   | 2.14103   |
| TOR1B                         | 14.9701   | 17.9538   | 19.8826   | 18.2915   | 19.1265   |
| SNORA61                       | 11.7411   | 46.6755   | 18.3227   | 18.6573   | 27.9459   |
| AP3S2,C15orf38,C15orf38-AP3S2 | 12.3893   | 13.0456   | 13.3563   | 13.4067   | 13.3872   |
| MTM1                          | 0.617793  | 0.863275  | 0.689824  | 0.651745  | 0.988156  |
| PSMD6                         | 73.5865   | 74.3687   | 85.112    | 80.3431   | 78.3679   |
| DHRS4                         | 13.4692   | 17.0989   | 13.7635   | 14.8919   | 17.6542   |
| GMPR2                         | 36.9118   | 41.9578   | 38.4153   | 38.6846   | 42.1153   |
| ING5                          | 3.41322   | 3.34961   | 3.17821   | 3.51348   | 3.9826    |
| CENPV                         | 61.1553   | 69.4465   | 55.8898   | 63.9774   | 72.0995   |
| EXOC3                         | 14.8774   | 11.5439   | 13.2693   | 14.5752   | 11.9556   |
| UBA1                          | 104.012   | 101.953   | 90.738    | 108.043   | 107.079   |
| MIER3                         | 1.6653    | 1.67486   | 1.85105   | 1.75688   | 2.03712   |
| SLC9A2                        | 0.150392  | 0.0915089 | 0.216474  | 0.125257  | 0.115433  |
| FKBP14                        | 2.72025   | 2.21998   | 2.14046   | 2.44009   | 2.82066   |
| IRAK4                         | 3.80206   | 3.73824   | 3.73813   | 3.88173   | 3.94854   |
| CPSF1                         | 30.7139   | 34.6798   | 28.6042   | 34.7056   | 34.2827   |
| PSMG2                         | 72.935    | 69.6179   | 81.3056   | 78.6683   | 72.4382   |
| CRLF3                         | 6.13198   | 5.28383   | 6.38924   | 6.06207   | 6.09356   |
| NR1I3                         | 1.36529   | 1.38728   | 1.66209   | 1.85436   | 1.42005   |
| DDX18                         | 13.6945   | 12.9284   | 15.9574   | 15.2084   | 14.5002   |
| CSTF2T                        | 4.17549   | 4.82967   | 4.93378   | 4.84752   | 4.98496   |
| PEX11B                        | 10.3827   | 10.9101   | 14.1366   | 12.1422   | 11.9826   |
| LARGE                         | 3.6403    | 3.54161   | 3.92617   | 4.35285   | 3.6845    |
| JAM2                          | 0.0536732 | 0.0789699 | 0.050367  | 0.0590786 | 0.0703701 |
| C7orf73                       | 9.54374   | 13.5012   | 12.8361   | 11.7885   | 12.9076   |
| COX15                         | 8.84197   | 8.99877   | 8.93222   | 9.25431   | 9.53941   |
| KIAA0947                      | 2.9776    | 2.54996   | 3.08437   | 3.21977   | 3.01564   |
| LINC00482                     | 0.051297  | 0.136099  | 0.0154548 | 0.0859883 | 0.0621658 |
| EIF4ENIF1                     | 4.10034   | 3.59867   | 4.35062   | 4.42323   | 3.7064    |
| MPP3                          | 5.68706   | 5.69739   | 5.08534   | 5.97398   | 6.01115   |
| LYN                           | 10.2316   | 10.6869   | 10.8971   | 11.0033   | 11.9601   |
| FMNL2                         | 8.16866   | 8.37267   | 6.47922   | 7.93991   | 9.08993   |
| THUMPD1                       | 3.45724   | 4.29361   | 3.74528   | 3.72794   | 4.46442   |
| CCZ1                          | 8.88914   | 8.13596   | 10.2208   | 11.3473   | 7.96206   |
| BAG1                          | 12.5963   | 18.4273   | 15.8053   | 14.3992   | 17.8346   |
| BRD7                          | 27.395    | 24.1688   | 28.3002   | 31.4043   | 25.2564   |
| ZFP106                        | 3.55044   | 3.87776   | 3.39038   | 3.79083   | 3.99032   |
| RNF31                         | 10.6233   | 12.1916   | 8.59888   | 11.9452   | 10.6243   |
| MSX2                          | 1.8845    | 2.663     | 1.79727   | 1.85391   | 3.10336   |
| RAB13                         | 95.3594   | 118.342   | 75.4744   | 93.9501   | 122.179   |
| GTF2IRD1P1                    | 9.51514   | 8.53019   | 9.21083   | 9.20412   | 9.38282   |
| LETMD1                        | 38.9824   | 42.9695   | 46.2116   | 46.3437   | 39.6109   |
| GPR137B                       | 10.1582   | 10.2251   | 9.98239   | 10.6766   | 10.8159   |
| LOC100130357                  | 0.21933   | 0.164194  | 0.187132  | 0.172929  | 0.187063  |
| TBL2                          | 17.1032   | 19.6677   | 19.0127   | 19.0982   | 20.51     |
| SF3B14                        | 239.204   | 265.954   | 239.035   | 232.093   | 284.53    |
| SEC24A                        | 2.42157   | 1.76524   | 2.18796   | 2.17963   | 2.35669   |
| DNAJC21                       | 2.91353   | 3.06482   | 3.37481   | 3.33928   | 3.29904   |
| TRUB2                         | 65.8372   | 68.0804   | 66.0261   | 71.8884   | 68.8347   |
| CDC14A                        | 0.954256  | 0.863532  | 0.973698  | 0.996306  | 0.9352    |
| ZNF761                        | 2.66489   | 3.02166   | 2.98223   | 3.11353   | 3.16635   |
| RBM38                         | 33.3528   | 37.3918   | 35.0473   | 35.7832   | 39.7447   |
| CDCA7                         | 18.1158   | 18.5074   | 20.4869   | 20.871    | 20.0136   |



|                         |           |           |           |          |           |
|-------------------------|-----------|-----------|-----------|----------|-----------|
| DLST                    | 45.3527   | 46.2429   | 43.0452   | 49.7374  | 48.1297   |
| FASN                    | 37.8467   | 39.7585   | 31.3048   | 38.7481  | 41.8515   |
| ORC3                    | 8.97308   | 7.48781   | 9.77984   | 9.64229  | 8.08122   |
| EPHA2                   | 100.023   | 65.2732   | 77.0997   | 102.59   | 69.0785   |
| HOXC11                  | 5.77984   | 6.14235   | 5.96423   | 6.39758  | 6.2827    |
| PRR12                   | 5.63442   | 4.7581    | 4.57177   | 5.71493  | 5.36823   |
| ZSCAN25                 | 1.70774   | 3.97394   | 2.65965   | 2.39418  | 3.81986   |
| VSTM2L                  | 0.0999545 | 0.0661367 | 0.0299256 | 0        | 0.121485  |
| IL6ST                   | 2.55324   | 2.85028   | 2.45751   | 2.40885  | 3.39785   |
| ANKS6                   | 8.89538   | 7.95475   | 10.1255   | 9.82705  | 8.90503   |
| ELMO2                   | 3.893     | 4.58259   | 4.51879   | 4.65336  | 4.39524   |
| VPS18                   | 13.0399   | 14.968    | 13.7226   | 14.9702  | 15.4631   |
| STK24                   | 32.85     | 32.9726   | 36.4793   | 36.735   | 33.6882   |
| ZNF708                  | 1.04011   | 1.51017   | 0.863331  | 1.13421  | 1.66303   |
| ZNF267                  | 2.86222   | 2.4509    | 2.31092   | 2.95699  | 2.66135   |
| TOMM22                  | 70.716    | 94.0809   | 82.3732   | 80.6946  | 91.0137   |
| LEPREL4                 | 23.9176   | 21.8515   | 21.2642   | 24.6359  | 23.089    |
| PAICS                   | 95.5051   | 82.0491   | 105.891   | 103.192  | 93.102    |
| ATP6V1H                 | 36.8184   | 27.4609   | 36.5427   | 37.8808  | 29.2644   |
| SPTSSA                  | 11.7595   | 11.4387   | 11.4167   | 11.4537  | 12.9511   |
| HIP1R                   | 15.3573   | 13.5163   | 14.6674   | 16.8332  | 13.6701   |
| MDM2                    | 12.4612   | 15.0764   | 12.1541   | 12.3886  | 16.4162   |
| ZNF777                  | 14.1757   | 15.049    | 15.7788   | 15.8407  | 15.2481   |
| LDHB                    | 739.397   | 824.441   | 805.414   | 793.957  | 856.914   |
| PIK3CA                  | 1.42448   | 1.08178   | 1.13419   | 1.24294  | 1.40081   |
| RPL34                   | 869.852   | 1237.59   | 1004.92   | 945.677  | 1174.58   |
| ABCE1                   | 18.5787   | 18.6016   | 20.2959   | 19.0058  | 21.5039   |
| ATP5B                   | 426.297   | 455.407   | 454.785   | 459.464  | 474.825   |
| EIF4G3                  | 3.41546   | 3.21186   | 3.24996   | 3.64014  | 3.33872   |
| SCAF11                  | 4.52996   | 4.20575   | 3.56294   | 4.34056  | 4.68388   |
| TCTA                    | 5.65552   | 7.54812   | 10.2734   | 7.90846  | 7.58736   |
| C19orf40                | 1.66819   | 2.31389   | 2.4798    | 2.5708   | 2.38074   |
| PKD1P1                  | 15.6906   | 17.6055   | 16.0272   | 19.0512  | 17.8041   |
| HMGN4                   | 42.9828   | 50.2758   | 48.6116   | 48.0615  | 51.9617   |
| LOC653160               | 0.775912  | 0.944295  | 0.925757  | 0.814917 | 1.17993   |
| LRRC8E                  | 13.7895   | 18.2238   | 13.9521   | 16.0816  | 16.2383   |
| CD2BP2                  | 29.5668   | 31.3038   | 35.5198   | 34.4302  | 29.7813   |
| TAF9                    | 83.8224   | 90.3114   | 105.276   | 101.371  | 87.928    |
| LRP2BP                  | 0.477349  | 0.360406  | 0.283067  | 0.418863 | 0.420464  |
| PTP4A2                  | 34.6204   | 39.7365   | 49.9938   | 42.1299  | 41.5835   |
| DDX3X                   | 24.4414   | 30.396    | 27.2626   | 25.6184  | 32.9553   |
| LOC100506746            | 0.476701  | 0.540776  | 0.689143  | 0.730072 | 0.480329  |
| PRDM1                   | 0.193264  | 0.237296  | 0.154452  | 0.212732 | 0.236741  |
| LYRM9                   | 2.43398   | 3.81586   | 2.24246   | 2.85428  | 3.45065   |
| FOXO1                   | 1.16029   | 1.06916   | 1.28906   | 1.24494  | 1.22126   |
| CUZD1,FAM24B            | 7.75889   | 9.1391    | 10.2768   | 8.55709  | 8.48051   |
| FGFR1OP2                | 7.00352   | 8.5554    | 7.27104   | 7.19229  | 8.79062   |
| ZNF596                  | 0.291755  | 0.433751  | 0.567956  | 0.462869 | 0.42039   |
| PSMD2                   | 317.64    | 285.219   | 300.697   | 318.136  | 324.118   |
| SLC35B4                 | 2.83508   | 3.19069   | 3.22377   | 3.33338  | 3.39848   |
| SLC25A15                | 4.43533   | 4.74582   | 4.9849    | 4.68984  | 4.82164   |
| KIAA0368                | 18.0235   | 16.1171   | 20.3913   | 20.539   | 16.9503   |
| CORO7,CORO7-PAM16,PAM16 | 146.476   | 136.622   | 166.967   | 157.161  | 137.449   |
| WBSR22                  | 107.968   | 102.299   | 101.7     | 110.862  | 106.053   |
| TMEM198B                | 2.13959   | 2.50834   | 2.05727   | 2.33551  | 2.93731   |
| SYF2                    | 33.9865   | 34.7631   | 39.8051   | 38.1041  | 34.6893   |
| SREK1IP1                | 3.25464   | 3.35826   | 3.56206   | 3.50773  | 3.56376   |
| SEC61A2                 | 7.5043    | 8.27945   | 7.1457    | 8.33019  | 8.74516   |
| C9orf41                 | 1.07733   | 0.863501  | 1.01849   | 1.22954  | 0.925877  |
| CUL3                    | 5.47012   | 5.70342   | 6.05468   | 5.79526  | 6.39845   |
| SKIL                    | 1.17365   | 1.23338   | 1.09368   | 1.1063   | 1.30346   |
| DCAF4                   | 7.01859   | 9.28345   | 9.32843   | 9.0318   | 8.49907   |
| CENPBD1                 | 0.86208   | 1.7907    | 1.61031   | 1.53155  | 1.65455   |
| TBC1D20                 | 9.44718   | 9.49325   | 12.0658   | 11.1772  | 9.87357   |
| ACOT2                   | 7.89967   | 8.46601   | 9.36824   | 8.47556  | 8.16425   |
| HMGCL                   | 38.2873   | 43.1126   | 34.8595   | 38.1256  | 46.3277   |
| HIVEP2                  | 2.95818   | 1.8445    | 2.21446   | 2.83556  | 1.92178   |
| PPP3CB                  | 7.96725   | 7.59068   | 9.51605   | 9.37716  | 8.27794   |
| SLC16A14                | 3.2095    | 2.85127   | 1.87483   | 3.40349  | 2.78698   |
| METTL21D                | 3.10935   | 5.22906   | 3.77844   | 3.03939  | 6.17293   |
| EIF5                    | 13.7479   | 20.4394   | 25.2349   | 17.0261  | 21.9651   |
| KSR1                    | 0.136233  | 0.127378  | 0.201169  | 0.10766  | 0.198068  |
| CTNND1,TMX2             | 49.8773   | 56.772    | 65.8764   | 59.4186  | 57.4393   |
| PPAPDC1B                | 32.7386   | 33.5601   | 31.9858   | 33.9396  | 31.9763   |
| GUSBP11                 | 4.36017   | 3.57258   | 4.29976   | 4.49904  | 3.86846   |
| LINC00032               | 0         | 0         | 0.0100266 | 0        | 0.0107151 |
| PPM1F                   | 12.0126   | 12.0231   | 11.8833   | 13.3972  | 11.9499   |
| ANKRD20A12P             | 0.356439  | 0.923606  | 0.398519  | 0.339    | 0.77681   |
| ERF                     | 30.7773   | 21.0697   | 30.8356   | 32.4287  | 24.002    |

|            |           |          |           |           |          |
|------------|-----------|----------|-----------|-----------|----------|
| EMG1       | 29.0777   | 39.149   | 30.6992   | 35.782    | 36.9702  |
| NAT16      | 1.58877   | 3.50385  | 1.41913   | 1.68221   | 3.83336  |
| SLC25A28   | 20.8476   | 18.4222  | 17.7761   | 22.6722   | 17.713   |
| ZSWIM6     | 2.36867   | 2.07751  | 2.31983   | 2.5357    | 2.10983  |
| ZNF616     | 1.36845   | 0.966077 | 1.41178   | 1.49278   | 0.857705 |
| CDCA4      | 30.1848   | 37.9539  | 30.0893   | 32.3933   | 41.0301  |
| TOMM34     | 84.5016   | 92.9785  | 71.3341   | 84.6748   | 100.876  |
| PPOX       | 14.9735   | 15.6544  | 15.2138   | 17.1814   | 14.9097  |
| HES1       | 19.3028   | 17.4782  | 26.4833   | 22.4582   | 16.3086  |
| PI4K2A     | 15.0579   | 16.2747  | 14.107    | 16.335    | 16.3429  |
| FLJ14186   | 2.13202   | 1.61315  | 2.27615   | 2.98838   | 1.88919  |
| CDCA7L     | 33.9411   | 38.7503  | 30.7682   | 32.5131   | 44.6712  |
| RNF123     | 9.7843    | 8.18714  | 8.49133   | 10.2667   | 7.60125  |
| KBTBD8     | 0.722749  | 1.01244  | 0.842573  | 0.901429  | 1.06622  |
| DBNL       | 38.6987   | 37.4397  | 38.4998   | 44.6733   | 37.1663  |
| SH3PXD2B   | 4.33052   | 3.50112  | 3.52136   | 4.59553   | 3.92676  |
| TMEM80     | 9.98827   | 11.9475  | 12.9114   | 11.5279   | 12.8402  |
| KATNBL1    | 6.42584   | 7.15447  | 6.86904   | 6.94747   | 7.93781  |
| BBS7       | 2.25029   | 2.6597   | 2.85833   | 2.84128   | 2.70903  |
| SEPT2      | 40.1515   | 41.2457  | 43.92     | 45.6513   | 44.1379  |
| UNC5A      | 1.83787   | 1.14353  | 1.65659   | 2.17711   | 1.19658  |
| FAM92A1    | 27.8607   | 34.2538  | 31.9002   | 32.6276   | 34.2871  |
| LOC81691   | 6.16156   | 5.27537  | 6.47117   | 7.41253   | 5.62176  |
| USP38      | 2.99278   | 2.77111  | 2.93735   | 2.99094   | 3.03098  |
| LOC400027  | 4.73187   | 7.9005   | 5.08918   | 5.18701   | 7.69126  |
| MON1A      | 9.13533   | 8.70503  | 12.0627   | 10.4381   | 9.11421  |
| PECR       | 3.31979   | 3.18153  | 2.90539   | 3.06155   | 3.50629  |
| ZMYM4      | 3.40267   | 2.79437  | 4.00465   | 3.97822   | 3.13009  |
| LOC401074  | 0.257608  | 0.040065 | 0.168019  | 0.0949227 | 0.301477 |
| MRPS16     | 30.8267   | 36.5301  | 37.3333   | 37.3558   | 37.0256  |
| CLDN9      | 0.338952  | 0.423098 | 0.153477  | 0.17854   | 0.538121 |
| LOC399744  | 2.31234   | 1.94654  | 2.18553   | 2.57572   | 2.04123  |
| EHBP1L1    | 10.1495   | 9.17855  | 9.12798   | 10.2434   | 11.1346  |
| CASC5      | 0.48645   | 0.426857 | 0.427921  | 0.563507  | 0.457588 |
| ZDHC24     | 36.2736   | 32.7345  | 33.1601   | 35.8093   | 33.5023  |
| SMAD1      | 3.52594   | 3.50898  | 3.79694   | 3.57187   | 3.91538  |
| ACACA      | 4.35497   | 4.13329  | 3.96174   | 4.69262   | 4.31935  |
| MTPAP      | 7.55196   | 6.88687  | 8.50671   | 8.29579   | 7.47387  |
| LIMD1-AS1  | 5.52981   | 5.25704  | 5.88596   | 6.51573   | 5.6954   |
| ANP32E     | 16.7219   | 15.4609  | 16.235    | 18.5255   | 16.1879  |
| C9orf91    | 7.17068   | 6.22786  | 11.5711   | 9.74889   | 6.85397  |
| DPCD       | 66.9899   | 92.0586  | 53.8459   | 56.6496   | 105.348  |
| NIPA1      | 5.89651   | 5.4556   | 5.05118   | 5.99076   | 5.56622  |
| RRN3       | 12.2299   | 12.04    | 14.321    | 13.0326   | 14.0883  |
| ZNF276     | 4.94434   | 5.92542  | 5.52366   | 5.92056   | 6.18321  |
| NDUFV2     | 159.706   | 167.89   | 146.644   | 165.332   | 176.598  |
| ACP2       | 8.34932   | 8.83906  | 8.69525   | 9.38215   | 9.65383  |
| GORAB      | 1.56519   | 2.1191   | 1.91178   | 1.82888   | 2.46773  |
| SNORA25    | 11.0719   | 4.95981  | 0         | 11.9808   | 5.09186  |
| MPHOSPH6   | 24.0436   | 19.5798  | 19.6091   | 23.9456   | 22.9215  |
| NUDT17     | 1.39384   | 1.3499   | 1.87422   | 1.61865   | 1.32314  |
| KCNK5      | 3.40257   | 3.91119  | 5.1129    | 4.0621    | 4.58473  |
| AMT,NICN1  | 2.70276   | 2.3402   | 1.39284   | 1.94009   | 3.40676  |
| BRIX1      | 30.729    | 31.0464  | 33.2332   | 34.503    | 31.8169  |
| FAM200A    | 3.14783   | 3.13778  | 3.81827   | 3.93686   | 2.95969  |
| NTN5       | 0.489103  | 0.797895 | 0.54639   | 0.565512  | 0.9148   |
| DLGAP1-AS1 | 2.17588   | 1.67409  | 3.28877   | 2.90346   | 1.11439  |
| USE1       | 35.9112   | 39.5017  | 39.2581   | 38.5658   | 37.6549  |
| SMARCD3    | 52.8443   | 67.4313  | 55.6684   | 58.3963   | 66.1989  |
| PPARGC1B   | 0.575678  | 0.391076 | 0.472386  | 0.538243  | 0.422616 |
| SNRPB2     | 38.3115   | 40.2904  | 43.5987   | 44.2535   | 39.7797  |
| COASY      | 48.7637   | 45.8838  | 48.0602   | 55.9003   | 46.5666  |
| SNX6       | 21.9569   | 23.9258  | 24.2804   | 22.7335   | 27.5614  |
| ZNF207     | 40.6348   | 39.2275  | 57.0606   | 47.789    | 40.7772  |
| CNTLN      | 1.32594   | 1.25106  | 0.72246   | 1.33925   | 1.2638   |
| MBTPS1     | 13.0228   | 14.1785  | 14.9712   | 14.883    | 15.3967  |
| VAC14      | 29.2695   | 30.1358  | 26.4753   | 30.8204   | 30.9262  |
| ATP6V1G1   | 87.4101   | 106.871  | 101.659   | 97.1761   | 105.744  |
| RSBN1      | 2.57005   | 2.0878   | 2.27571   | 2.41396   | 2.33078  |
| GOLGA3     | 5.68737   | 5.00817  | 5.96693   | 6.30361   | 4.91514  |
| SIGLEC10   | 0.0322502 | 0        | 0.0130378 | 0.0481484 | 0        |
| RBM12B     | 2.54125   | 2.288    | 3.34936   | 3.15538   | 2.3933   |
| CTTNBP2NL  | 5.34585   | 3.3215   | 5.80117   | 6.01657   | 3.43249  |
| NCBP2      | 27.6139   | 29.6669  | 31.5392   | 28.7741   | 33.3708  |
| CASP10     | 1.0301    | 0.918791 | 1.00829   | 1.10287   | 0.939245 |
| ZSCAN20    | 0.279256  | 0.432088 | 0.34248   | 0.388799  | 0.410846 |
| TIMM8B     | 38.6229   | 47.0758  | 48.4041   | 44.3741   | 46.5669  |
| NR3C2      | 0.312624  | 0.209187 | 0.208202  | 0.282409  | 0.254663 |
| LOC286467  | 0.612651  | 1.1798   | 0.799456  | 0.940054  | 0.926118 |

|              |            |            |           |           |           |
|--------------|------------|------------|-----------|-----------|-----------|
| RPL6         | 2325.82    | 2811.56    | 2704.64   | 2604.93   | 2710.1    |
| LOC100289137 | 3.58979    | 3.12888    | 2.70433   | 3.96403   | 3.4245    |
| SH3BP2       | 6.0504     | 6.59285    | 6.89586   | 7.2777    | 6.78998   |
| PRKCI        | 7.87235    | 7.79331    | 7.51898   | 8.32699   | 8.51494   |
| LOC440028    | 1.36977    | 1.68422    | 2.152     | 1.83345   | 1.74167   |
| CSGALNACT2   | 4.36199    | 3.88445    | 4.67687   | 4.9605    | 4.20925   |
| PRKCDBP      | 21.4937    | 22.9339    | 25.4962   | 22.7211   | 28.3036   |
| NADK         | 38.3408    | 43.832     | 41.5815   | 44.9679   | 43.1935   |
| ARPC1B       | 149.115    | 144.22     | 151.727   | 164.456   | 149.361   |
| NAA20        | 79.9812    | 77.1046    | 90.545    | 87.3601   | 82.1734   |
| ZNF382       | 0.107713   | 0.115553   | 0.0274315 | 0.107864  | 0.0693271 |
| COPS2        | 15.6681    | 17.4441    | 15.9848   | 16.1643   | 18.3253   |
| TTC14        | 1.27873    | 1.17551    | 1.79156   | 1.6392    | 1.12078   |
| ASL          | 37.9326    | 38.533     | 38.9727   | 39.201    | 42.8452   |
| RAB3GAP2     | 3.09381    | 3.0164     | 3.08789   | 3.40956   | 3.38835   |
| SRCAP        | 5.72708    | 5.65661    | 5.00732   | 6.34165   | 5.52668   |
| MTA1         | 47.4877    | 38.1262    | 47.1644   | 51.3457   | 41.6748   |
| SLC9A4       | 0.0626351  | 0.0738922  | 0.0786489 | 0.0664818 | 0.0617214 |
| NBN          | 10.3802    | 10.2081    | 9.13902   | 10.9458   | 10.7486   |
| ALYREF       | 125.377    | 103.491    | 118.51    | 133.946   | 106.906   |
| GNA12        | 6.7286     | 6.96749    | 7.7458    | 7.49031   | 7.21985   |
| C17orf85     | 2.62246    | 2.43544    | 2.86328   | 2.93317   | 2.71656   |
| NUDT5        | 102.419    | 88.6763    | 107.621   | 110.808   | 96.6244   |
| CCDC122      | 1.01791    | 1.28119    | 1.09598   | 1.25083   | 0.913753  |
| PSME2        | 94.4528    | 106.738    | 94.5776   | 106.458   | 105.321   |
| ADCK5        | 21.5134    | 18.7937    | 19.7706   | 23.0547   | 20.4128   |
| FAM216A      | 34.0093    | 31.4837    | 31.3534   | 31.7434   | 37.0407   |
| CA7          | 0.0708875  | 0.0314561  | 0.0563907 | 0.0699502 | 0.058343  |
| FLYWCH1      | 15.7251    | 15.9543    | 16.1894   | 18.0051   | 15.8206   |
| BUD31        | 53.3322    | 58.4621    | 69.9485   | 68.6427   | 52.2108   |
| SGMS2        | 2.5508     | 2.57016    | 2.75115   | 2.49182   | 2.98497   |
| TSPO         | 382.55     | 354.599    | 431.789   | 397.252   | 399.755   |
| ZNF362       | 1.99947    | 2.60625    | 2.3444    | 2.7669    | 2.29276   |
| MTHFD1       | 32.8902    | 30.3593    | 31.6143   | 34.8773   | 33.0299   |
| ZNF391       | 0.474274   | 0.527186   | 0.730125  | 0.594744  | 0.439326  |
| EPRS         | 20.6217    | 16.3496    | 30.0719   | 27.5431   | 17.8205   |
| ABCD4        | 11.8038    | 13.7965    | 15.7416   | 13.9724   | 13.7299   |
| OLA1         | 40.0641    | 45.7341    | 50.0102   | 44.5783   | 48.287    |
| NBPF10       | 0.229194   | 0.27028    | 0.160732  | 0.227581  | 0.289275  |
| SLC35B3      | 6.46457    | 5.88363    | 8.51326   | 7.74753   | 6.50049   |
| WASH5P       | 2.62174    | 2.97185    | 2.65751   | 3.06988   | 3.22133   |
| RBM8A        | 21.4814    | 20.8939    | 24.3024   | 23.9692   | 20.7543   |
| U2AF2        | 63.4004    | 59.9187    | 59.0201   | 68.3059   | 64.4016   |
| PFKM         | 52.4828    | 52.5369    | 47.8534   | 53.5588   | 57.0147   |
| LANCL1       | 4.16673    | 5.09687    | 4.8632    | 5.04542   | 5.27785   |
| MTHFR        | 0.797333   | 0.853489   | 1.04427   | 1.0163    | 0.814232  |
| GRK5         | 5.72341    | 6.2317     | 4.84828   | 5.67404   | 6.94219   |
| QSOX2        | 19.7732    | 19.379     | 20.8741   | 22.1409   | 20.3351   |
| UNG          | 23.7833    | 37.5346    | 23.5136   | 26.6787   | 40.7598   |
| MVP_PAGR1    | 23.5036    | 30.8184    | 23.0672   | 26.1884   | 30.0689   |
| TNFRSF13C    | 2.09073    | 1.73607    | 1.38068   | 2.48188   | 1.4563    |
| NOP9         | 2.1628     | 2.77984    | 1.92132   | 2.40862   | 2.58803   |
| ZNF507       | 1.4357     | 1.53745    | 1.35069   | 1.58461   | 1.62453   |
| CMSS1        | 36.1837    | 36.8585    | 31.4166   | 40.5173   | 36.1351   |
| HIF1A-AS2    | 8.83836    | 9.74034    | 9.30844   | 9.19263   | 10.4916   |
| CHP1         | 42.2373    | 49.1413    | 42.0326   | 44.8677   | 49.554    |
| SMARCD2      | 42.7694    | 44.9376    | 41.3875   | 48.0794   | 47.317    |
| ARMC6        | 19.7586    | 18.5864    | 24.6283   | 21.7978   | 19.8217   |
| TOB2         | 14.8869    | 13.1737    | 18.2256   | 17.0912   | 13.8916   |
| HAT1         | 22.1676    | 23.1965    | 23.6193   | 26.6846   | 24.7682   |
| GRIPAP1      | 11.4994    | 10.7826    | 10.9765   | 12.835    | 11.3384   |
| CCNO         | 21.4413    | 13.0613    | 21.0552   | 22.2132   | 17.2131   |
| STARD4-AS1   | 0.00778949 | 0.00563078 | 0.0246313 | 0.0195064 | 0.0211721 |
| AHI1         | 1.83944    | 1.51059    | 1.62692   | 2.07134   | 1.81012   |
| RASL11A      | 2.4214     | 4.04521    | 2.12413   | 2.82193   | 4.02061   |
| PAPD5        | 1.66921    | 1.29155    | 1.50773   | 1.68169   | 1.5064    |
| LAS1L        | 23.8932    | 25.3262    | 24.0505   | 26.9902   | 26.1145   |
| C5orf42      | 0.180847   | 0.17919    | 0.17578   | 0.216048  | 0.183853  |
| PPP5C        | 33.3253    | 28.2189    | 31.6028   | 37.1454   | 29.1412   |
| FZD8         | 1.29797    | 2.53413    | 2.10571   | 2.08512   | 2.57956   |
| SNRNP40      | 36.2969    | 31.8286    | 41.4464   | 39.0705   | 34.6947   |
| PHF5A        | 52.2304    | 58.4135    | 73.1892   | 68.0704   | 53.4892   |
| PSMA5        | 27.1907    | 26.3368    | 31.7175   | 30.9737   | 27.5328   |
| RIF1         | 2.68312    | 1.97222    | 1.68255   | 2.64798   | 2.23692   |
| KDELC1       | 4.02121    | 4.39867    | 4.14277   | 4.3481    | 4.62939   |
| SLC25A22     | 22.4681    | 21.3123    | 18.926    | 24.5364   | 20.2067   |
| TTC27        | 7.74566    | 7.15627    | 8.00145   | 7.98126   | 6.90352   |
| ZC3HAV1L     | 1.68069    | 1.32792    | 2.38518   | 2.00229   | 1.79279   |
| DNAL1        | 0.457037   | 0.592699   | 0.535233  | 0.529317  | 0.574204  |

|              |           |           |           |           |           |
|--------------|-----------|-----------|-----------|-----------|-----------|
| HACL1        | 10.8591   | 11.2765   | 12.4271   | 13.0017   | 11.8826   |
| NETO2        | 10.0572   | 12.3171   | 11.8714   | 11.5105   | 12.1485   |
| ELP5         | 40.0648   | 45.3417   | 53.572    | 50.788    | 43.4048   |
| IFT46        | 6.28792   | 7.1808    | 7.38938   | 7.87791   | 6.78695   |
| TM4SF1       | 65.8965   | 70.4435   | 46.3185   | 55.9194   | 84.596    |
| ARV1         | 4.8229    | 5.60319   | 7.81653   | 5.96023   | 6.07851   |
| IFT122       | 3.15537   | 3.08078   | 2.50001   | 3.14919   | 3.0995    |
| NIPA2        | 15.9869   | 16.2034   | 21.4946   | 19.0376   | 16.8842   |
| NFE2L2       | 10.1108   | 8.94789   | 15.6831   | 12.5615   | 9.17169   |
| NCLN         | 48.112    | 45.4797   | 49.7068   | 54.9367   | 46.2684   |
| PCID2        | 25.208    | 30.1535   | 27.8838   | 29.4816   | 29.5392   |
| FBXL5        | 7.29741   | 7.94414   | 8.13143   | 7.57714   | 9.10771   |
| NAP1L4       | 48.0687   | 41.8992   | 50.282    | 53.7673   | 45.9766   |
| LOC388906    | 0.27595   | 0.248081  | 0.2231    | 0.40681   | 0.230879  |
| FBXO28       | 6.34894   | 6.25268   | 6.2699    | 6.9194    | 6.70225   |
| EIF4E        | 16.27     | 15.7524   | 17.8159   | 17.5941   | 16.8864   |
| SERTAD1      | 79.81     | 74.0408   | 79.4602   | 79.682    | 70.4271   |
| AP5B1        | 6.09337   | 7.10868   | 7.94832   | 7.34194   | 7.23328   |
| PIK3R4       | 2.36956   | 2.66653   | 2.43872   | 2.52351   | 2.75465   |
| CDC23        | 7.59531   | 7.34664   | 7.78887   | 7.82626   | 7.92583   |
| SPG11        | 3.65119   | 3.53782   | 3.80144   | 3.85984   | 4.15787   |
| SLC38A10     | 20.7791   | 19.0689   | 26.404    | 25.4846   | 20.046    |
| BCL2L12      | 37.0647   | 37.2544   | 43.599    | 45.8621   | 35.3953   |
| SLC7A6OS     | 11.8931   | 10.3056   | 12.2125   | 12.6716   | 10.8123   |
| RHPN2        | 5.3948    | 4.53656   | 4.20836   | 4.54664   | 5.82437   |
| FIG4         | 4.80714   | 4.48557   | 4.8541    | 5.32148   | 5.28256   |
| DCUN1D5      | 4.18287   | 3.70111   | 4.81843   | 4.18335   | 4.46093   |
| LINC00526    | 1.0417    | 1.75127   | 1.72841   | 1.22777   | 2.36714   |
| POLR3E       | 9.52316   | 7.69673   | 10.8973   | 10.4567   | 7.82346   |
| ZNF20,ZNF625 | 1.94588   | 1.95314   | 1.79083   | 2.08483   | 2.22987   |
| LINC00641    | 0.557951  | 0.786162  | 0.746603  | 0.800134  | 0.813541  |
| UBE2D1       | 9.16531   | 10.0958   | 10.0962   | 9.64835   | 11.1366   |
| RER1         | 33.1136   | 32.884    | 38.6311   | 38.0893   | 34.249    |
| LOC146880    | 10.789    | 11.5636   | 10.919    | 12.9602   | 11.3979   |
| LOC100129148 | 1.52229   | 2.38311   | 1.35745   | 1.8527    | 2.36159   |
| TP53I3       | 10.792    | 12.046    | 15.2056   | 14.5295   | 11.3543   |
| UBQLN4       | 25.912    | 28.1488   | 27.2528   | 29.8492   | 28.4194   |
| MEIS2        | 2.55499   | 2.17012   | 2.7945    | 3.07166   | 2.58721   |
| ARNT2        | 1.59616   | 1.87258   | 1.83379   | 1.92476   | 1.69999   |
| ABHD2        | 2.60231   | 2.79372   | 2.36618   | 2.81385   | 2.91194   |
| ANKRD33B     | 1.92365   | 1.496     | 1.28092   | 1.6256    | 1.95735   |
| SKIV2L2      | 12.4874   | 10.2874   | 13.0243   | 13.1672   | 11.5875   |
| TCTN2        | 1.5732    | 2.72869   | 1.518     | 2.02631   | 2.4564    |
| AFAP1        | 1.16588   | 0.922918  | 1.13504   | 1.11667   | 1.03985   |
| ZNF189       | 5.63138   | 4.82395   | 6.44015   | 5.97144   | 5.54985   |
| PHYHIP       | 0.0960372 | 0.192915  | 0.158935  | 0.120274  | 0.191035  |
| CCNI         | 49.2219   | 57.7224   | 62.0047   | 51.1769   | 71.019    |
| CDC42BPG     | 0.0901125 | 0.0698103 | 0.127526  | 0.134728  | 0.0955371 |
| RUVBL2       | 233.426   | 213.244   | 222.282   | 251.088   | 211.144   |
| PPCDC        | 5.21153   | 5.08289   | 6.67817   | 6.37367   | 5.05607   |
| RIPPLY1      | 0.027573  | 0.0380468 | 0.101737  | 0.0457616 | 0.0355658 |
| ZC3H7B       | 9.7126    | 9.55398   | 9.9921    | 11.465    | 9.63678   |
| LOC100132077 | 0.171564  | 0.126441  | 0.266318  | 0.301882  | 0.221778  |
| DFFA         | 16.5451   | 18.4979   | 13.8766   | 15.2682   | 18.0701   |
| FBXO27       | 0.111513  | 0.152533  | 0.0681707 | 0.11668   | 0.141152  |
| NACC1        | 32.7732   | 31.9508   | 31.2293   | 36.6123   | 32.6188   |
| ASAH1        | 22.1212   | 26.9591   | 25.914    | 25.2153   | 28.6765   |
| NAA25        | 4.66728   | 4.33531   | 4.75152   | 4.83658   | 4.74424   |
| C19orf66     | 8.16193   | 8.13585   | 8.39988   | 10.4414   | 6.8141    |
| OR2D2        | 0         | 0         | 0.0417558 | 0         | 0.0448799 |
| AKAP8        | 10.3231   | 11.623    | 10.3276   | 11.842    | 11.6802   |
| CRNDE        | 13.6623   | 16.4036   | 22.7854   | 21.276    | 15.4038   |
| ICMT         | 9.74159   | 11.7495   | 11.0043   | 11.6033   | 12.3125   |
| PDCD5        | 181.61    | 159.329   | 181.062   | 195.506   | 175.118   |
| THAP5        | 5.68626   | 4.51305   | 6.42163   | 6.27895   | 4.76406   |
| ABAT         | 1.66159   | 1.35906   | 1.75062   | 1.81824   | 1.60763   |
| BMS1         | 7.66809   | 8.26904   | 8.32004   | 8.907     | 8.6618    |
| METTL3       | 13.4536   | 8.97573   | 15.3039   | 16.5012   | 9.50554   |
| RYK          | 17.2917   | 17.3269   | 18.4393   | 18.8248   | 19.006    |
| SLC25A16     | 2.03441   | 2.46407   | 2.63752   | 2.28723   | 2.73036   |
| SNHG5        | 1119.53   | 1437.55   | 1258.59   | 1198.03   | 1317.18   |
| CERS1        | 0.127145  | 0         | 0.1488    | 0.109399  | 0.114609  |
| ZNF503       | 10.1753   | 7.08861   | 9.54384   | 10.4169   | 7.65116   |
| SRSF11       | 32.4877   | 32.5938   | 31.9521   | 33.9281   | 34.995    |
| COX19        | 2.92022   | 4.59853   | 3.63527   | 3.83124   | 4.11081   |
| DYRK1B       | 1.11489   | 1.19134   | 1.01957   | 1.37652   | 1.06472   |
| MRI1         | 11.151    | 12.5361   | 12.0759   | 12.1965   | 13.6074   |
| TOP1         | 17.2348   | 17.0666   | 20.7979   | 20.5447   | 18.4319   |
| RSAD1        | 28.6874   | 26.3503   | 32.1421   | 32.2566   | 26.786    |

|                             |          |           |           |           |           |
|-----------------------------|----------|-----------|-----------|-----------|-----------|
| EPHB2                       | 8.68915  | 7.82482   | 8.04606   | 9.23782   | 8.02735   |
| TMCC2                       | 1.92657  | 1.78297   | 1.4484    | 2.11685   | 1.58678   |
| GLUD1P3                     | 0.238254 | 0.482166  | 0.241539  | 0.261032  | 0.497155  |
| PSMD1                       | 20.3256  | 20.0401   | 19.5263   | 22.909    | 20.875    |
| TECPR2                      | 0.65673  | 0.531743  | 0.869761  | 0.694578  | 0.664896  |
| C9orf78                     | 54.3629  | 62.2124   | 61.3212   | 64.0314   | 61.6405   |
| MPHOSPH10                   | 8.04549  | 9.31916   | 7.92688   | 8.91129   | 9.76835   |
| PIK3AP1                     | 1.963    | 1.70894   | 1.93843   | 2.25075   | 1.90249   |
| ZXDB                        | 4.41557  | 3.41587   | 5.21628   | 4.95512   | 3.74058   |
| CROCCP3                     | 0.361759 | 0.279093  | 0.374459  | 0.373806  | 0.397565  |
| EPB41L4A                    | 0.469315 | 1.09833   | 0.810416  | 0.720864  | 1.07497   |
| ZNF776                      | 0.790033 | 1.44545   | 1.41642   | 1.07369   | 1.63492   |
| VPS28                       | 292.692  | 311.118   | 328.368   | 317.965   | 299.266   |
| NDST1                       | 4.24913  | 4.09925   | 4.66854   | 4.6186    | 4.69264   |
| MCOLN2                      | 7.27367  | 5.9992    | 5.9177    | 7.4618    | 6.83756   |
| DTX4                        | 1.14518  | 1.80441   | 1.03692   | 1.2997    | 1.78473   |
| GTF2IRD2B                   | 0.104413 | 0.0515193 | 0.100162  | 0.0865565 | 0.0966651 |
| DMTF1                       | 3.52116  | 3.07474   | 3.89948   | 3.86222   | 3.5795    |
| CENPB                       | 38.0913  | 41.8412   | 42.1998   | 42.5407   | 41.4619   |
| BRF2                        | 10.0521  | 9.36944   | 12.0847   | 11.7963   | 9.71002   |
| BOP1                        | 67.0731  | 65.8448   | 75.4077   | 76.6969   | 66.0939   |
| MIR17,MIR17HG,MIR18A,MIR19f | 4.21026  | 4.66155   | 4.32547   | 5.14928   | 4.33939   |
| UAP1                        | 176.758  | 140.512   | 250.093   | 199.796   | 179.176   |
| THG1L                       | 19.9186  | 21.3026   | 23.4736   | 22.0352   | 21.8924   |
| SLC5A6                      | 15.526   | 17.266    | 17.6578   | 18.2216   | 16.9652   |
| ZNF490                      | 1.59822  | 1.63815   | 1.75908   | 1.73424   | 1.7835    |
| BRCA1                       | 3.7209   | 3.06746   | 4.17877   | 4.88372   | 3.33797   |
| FGFR3                       | 4.24528  | 5.5409    | 3.88506   | 4.67173   | 5.40726   |
| ZNF615                      | 0.94337  | 0.631011  | 0.678799  | 0.861515  | 0.752294  |
| VCP                         | 52.3291  | 62.2508   | 53.8278   | 58.303    | 64.1971   |
| NR2F2                       | 2.64488  | 2.88441   | 3.26636   | 2.98125   | 3.13261   |
| ADRM1                       | 145.149  | 132.751   | 144.466   | 159.845   | 129.705   |
| TNFRSF10C                   | 1.08989  | 2.09045   | 1.10831   | 1.19785   | 1.81278   |
| DZANK1                      | 0.170809 | 0.278791  | 0.22094   | 0.261443  | 0.2521    |
| PLK1S1                      | 5.153    | 5.09387   | 6.19242   | 5.53575   | 5.99137   |
| NAA40                       | 3.86134  | 4.24467   | 5.59885   | 5.32886   | 4.42092   |
| STK17A                      | 5.40306  | 6.87625   | 6.03567   | 5.75251   | 6.76356   |
| MALAT1                      | 72.0433  | 54.9586   | 54.9487   | 71.0745   | 61.0279   |
| FTX                         | 0.474073 | 0.494909  | 0.61839   | 0.472335  | 0.595642  |
| NR2C2                       | 1.22209  | 1.22423   | 1.55767   | 1.48598   | 1.33132   |
| UPF1                        | 21.3438  | 18.2448   | 23.2069   | 24.8767   | 17.6228   |
| C2orf47                     | 20.3595  | 16.1807   | 18.6939   | 20.569    | 18.119    |
| PEX11A                      | 2.67009  | 3.06181   | 2.8398    | 3.12611   | 3.13768   |
| LOC284385                   | 1.66194  | 2.30136   | 2.28529   | 2.07959   | 2.05679   |
| ATP5F1                      | 76.7572  | 78.8193   | 88.1266   | 83.8779   | 85.6955   |
| CETN2                       | 24.6947  | 30.908    | 23.6521   | 24.6049   | 35.8998   |
| MKL2                        | 0.978564 | 0.814579  | 1.1077    | 1.078     | 0.934921  |
| C11orf74                    | 9.27741  | 9.95408   | 10.325    | 10.8529   | 9.64575   |
| CLCN7                       | 38.3992  | 35.6222   | 42.3545   | 46.9291   | 35.0138   |
| ULBP1                       | 0.477781 | 0.718491  | 1.61667   | 1.38249   | 0.481087  |
| CSNK2A1                     | 37.7791  | 32.6896   | 41.8139   | 41.6049   | 34.7319   |
| CLN8                        | 2.24982  | 2.2241    | 2.1553    | 2.34102   | 2.22892   |
| TMED3                       | 85.8966  | 101.58    | 95.6695   | 86.6669   | 108.931   |
| CCNL2                       | 28.5762  | 32.8564   | 26.7665   | 33.1223   | 33.6203   |
| NBEAL2                      | 6.11305  | 5.59045   | 4.6677    | 6.44564   | 6.33638   |
| MYC                         | 280.535  | 196.513   | 330.663   | 301.069   | 234.237   |
| SERPINE2                    | 0.978206 | 1.40388   | 0.972312  | 1.33319   | 1.07937   |
| TTC5                        | 10.8919  | 8.79433   | 9.57442   | 11.2541   | 9.31839   |
| RARS2                       | 14.0525  | 15.2322   | 16.6077   | 16.432    | 16.4774   |
| C22orf28                    | 44.7876  | 46.9089   | 55.9249   | 52.9241   | 46.8063   |
| PELP1                       | 20.6612  | 19.5503   | 19.1055   | 22.4432   | 20.0545   |
| DIRAS3                      | 0.291852 | 0.259636  | 0.160037  | 0.276241  | 0.391013  |
| WRAP73                      | 25.7926  | 22.7157   | 27.3284   | 30.7052   | 22.811    |
| C1orf56                     | 4.11228  | 4.15728   | 4.24316   | 3.98634   | 4.26288   |
| RARG                        | 12.0518  | 9.22875   | 8.7888    | 10.7596   | 10.5297   |
| PHF8                        | 7.78087  | 7.30612   | 7.91681   | 8.81321   | 8.21217   |
| GLO1                        | 87.2938  | 103.83    | 105.313   | 97.1044   | 112.456   |
| SACS                        | 0.805378 | 0.841178  | 0.738292  | 0.938762  | 0.898989  |
| PPP2R5E                     | 4.00532  | 3.46845   | 4.5553    | 4.3737    | 4.34002   |
| ZNF788                      | 0.06993  | 0.0924808 | 0.0587384 | 0.0776037 | 0.0870016 |
| C14orf169                   | 8.57114  | 12.042    | 11.7337   | 10.8976   | 11.3919   |
| NAP1L1                      | 122.954  | 189.918   | 145.128   | 142.416   | 187.725   |
| A1BG-AS1                    | 0.165244 | 0.201784  | 0.182728  | 0.228348  | 0.218117  |
| SLC37A2                     | 0.321817 | 0.327356  | 0.261556  | 0.316257  | 0.363291  |
| FXR2                        | 46.7789  | 33.6401   | 49.3793   | 50.5463   | 36.4603   |
| ELP6                        | 22.138   | 23.6063   | 29.3576   | 25.784    | 25.8129   |
| LYG1                        | 2.91486  | 2.48101   | 2.83417   | 3.36842   | 2.26878   |
| GMFG                        | 0.352271 | 0.272906  | 0.304171  | 0.331309  | 0.31615   |
| HMGB3                       | 11.1995  | 11.8305   | 12.6962   | 13.5983   | 11.5525   |

|           |            |            |           |           |            |
|-----------|------------|------------|-----------|-----------|------------|
| DOM3Z     | 10.3701    | 9.62092    | 12.7481   | 12.8137   | 8.99646    |
| PTCD3     | 11.1093    | 10.1465    | 10.3403   | 11.348    | 11.6036    |
| CDV3      | 32.9423    | 34.4442    | 37.7879   | 36.2978   | 36.1946    |
| SMARCA4   | 38.4173    | 34.3276    | 30.8285   | 41.3787   | 34.1934    |
| RBM48     | 6.65596    | 7.88725    | 6.61564   | 7.27384   | 8.23731    |
| TGS1      | 6.35479    | 6.41114    | 8.89319   | 7.95027   | 6.73328    |
| NAGPA     | 6.67985    | 9.34366    | 7.81011   | 8.56919   | 8.23225    |
| MROH1     | 21.3766    | 24.6212    | 22.1485   | 24.6417   | 22.5437    |
| SUV420H1  | 4.7984     | 6.78349    | 4.57595   | 5.07913   | 6.82076    |
| TRMT10C   | 18.3541    | 24.5743    | 24.9468   | 21.9798   | 26.3384    |
| C10orf2   | 13.9362    | 19.7359    | 20.6027   | 16.8719   | 20.2476    |
| CEP192    | 0.834117   | 0.856488   | 1.02576   | 0.922189  | 1.03028    |
| SECISBP2  | 6.71539    | 7.34791    | 8.54035   | 8.52094   | 7.43778    |
| C1RL-AS1  | 0.301801   | 0.308178   | 0.31819   | 0.404614  | 0.332358   |
| TPCN1     | 4.55669    | 6.07307    | 5.05231   | 5.75223   | 5.59223    |
| C1S       | 0.401413   | 0.480353   | 0.321845  | 0.487724  | 0.450016   |
| VWA8      | 2.22281    | 1.86055    | 1.88427   | 2.26144   | 2.12765    |
| ALAS1     | 31.216     | 26.1442    | 31.9208   | 35.5725   | 27.8276    |
| DMRTA2    | 5.4783     | 5.68345    | 7.22545   | 6.82759   | 5.99292    |
| ADRBK2    | 0.424972   | 0.393993   | 0.488443  | 0.508285  | 0.373813   |
| PTPLAD1   | 25.9818    | 28.6565    | 30.0372   | 28.5691   | 31.5258    |
| TCF7L2    | 4.06974    | 3.56032    | 4.0257    | 4.08182   | 3.86241    |
| MAP4      | 22.1034    | 21.9009    | 20.5731   | 24.4099   | 22.179     |
| GTF2H2B   | 1.22906    | 1.86085    | 2.37706   | 1.85654   | 1.93857    |
| GPR180    | 1.62263    | 1.5888     | 1.79445   | 1.8566    | 1.7534     |
| BACH1     | 2.45767    | 3.00038    | 2.30124   | 2.57339   | 3.22831    |
| NUP107    | 17.8675    | 12.9378    | 15.532    | 19.564    | 14.626     |
| TMPRSS9   | 0.0431059  | 0.0374056  | 0.0340689 | 0.0722573 | 0.0508671  |
| RHPN1     | 31.8194    | 30.443     | 19.2107   | 32.9524   | 33.4998    |
| HOXA-AS4  | 0.767246   | 0.63939    | 0.893692  | 0.852898  | 0.781418   |
| MRPL24    | 99.2392    | 107.317    | 92.9137   | 107.575   | 106.39     |
| ACTL6A    | 26.9044    | 24.4203    | 31.1136   | 30.2226   | 26.6938    |
| TMEM220   | 0.116836   | 0.065331   | 0.056117  | 0.0732167 | 0.104578   |
| DPY19L4   | 4.32142    | 4.00237    | 4.55527   | 4.49498   | 4.53626    |
| PPTC7     | 0.89488    | 1.07713    | 1.29915   | 1.02109   | 1.15747    |
| JMJD8     | 48.1292    | 56.9864    | 48.4564   | 53.6299   | 57.8887    |
| DNAH3     | 0.00193434 | 0.00267389 | 0         | 0         | 0.00497275 |
| MBD4      | 8.09111    | 7.8908     | 8.35447   | 9.98005   | 7.39516    |
| FAM8A1    | 0.934455   | 1.56982    | 1.2734    | 1.1305    | 1.52968    |
| SLCO5A1   | 2.36357    | 1.73491    | 2.14854   | 2.30928   | 2.04141    |
| EHMT2     | 25.1235    | 22.6947    | 19.0534   | 25.9922   | 22.8822    |
| DHRS4-AS1 | 1.89512    | 2.05152    | 2.67349   | 2.14693   | 2.38503    |
| MIAT      | 0.0396658  | 0.0349549  | 0.0492411 | 0.0455079 | 0.0392028  |
| TARDBP    | 16.0643    | 13.2948    | 18.5814   | 18.8491   | 14.3821    |
| APPL1     | 3.85665    | 3.60617    | 3.89691   | 4.0846    | 4.2468     |
| SCARNA7   | 23.5581    | 11.5583    | 16.4369   | 18.2515   | 13.5737    |
| SGK223    | 2.84285    | 2.32719    | 2.4516    | 2.90203   | 2.6728     |
| ETHE1     | 121.037    | 144.313    | 113.606   | 124.615   | 144.435    |
| UBR7      | 9.44173    | 9.74993    | 8.56906   | 10.4471   | 11.3006    |
| LOC257358 | 0.0495489  | 0          | 0.0461281 | 0.0206114 | 0.0162833  |
| PMAIP1    | 3.22953    | 8.48382    | 15.4384   | 7.58953   | 8.49976    |
| C11orf57  | 7.18998    | 8.94065    | 10.1514   | 8.53975   | 9.17306    |
| ETNK1     | 4.80988    | 5.25348    | 5.25093   | 5.08486   | 5.90994    |
| IFT140    | 4.85965    | 4.87849    | 4.30408   | 4.95167   | 6.00486    |
| ZCCHC7    | 10.3407    | 8.04578    | 11.1081   | 11.1482   | 8.26371    |
| PCSK6     | 5.34221    | 5.56007    | 6.16159   | 6.25533   | 5.82726    |
| TRAPPC4   | 49.75      | 51.1356    | 50.697    | 57.9324   | 48.7869    |
| RGS10     | 139.126    | 151.245    | 162.012   | 157.441   | 159.065    |
| TBC1D8B   | 0.643451   | 0.708379   | 0.472867  | 0.474423  | 0.936111   |
| PGLS      | 125.913    | 122.82     | 144.61    | 139.461   | 118.618    |
| MEPCE     | 53.4622    | 48.6117    | 59.7283   | 63.0134   | 48.6196    |
| ZNF721    | 4.17997    | 3.76754    | 3.30496   | 4.46929   | 3.9292     |
| CARM1     | 47.5401    | 46.492     | 49.4286   | 53.2226   | 47.6036    |
| HSPG2     | 1.73477    | 2.08833    | 1.00701   | 1.83633   | 2.15068    |
| PRRT3-AS1 | 5.01401    | 5.89757    | 3.75509   | 5.66537   | 4.23525    |
| PAQR3     | 3.79844    | 4.2315     | 4.85534   | 4.53967   | 4.83781    |
| EMP3      | 130.431    | 187.155    | 124.597   | 134.401   | 177.101    |
| REST      | 4.10153    | 3.5416     | 4.32213   | 4.35283   | 4.04328    |
| KCNH3     | 0.666117   | 0.841035   | 0.588655  | 0.66201   | 0.866198   |
| SCARNA16  | 1.22908    | 17.7       | 0         | 1.01585   | 16.1242    |
| LEF1-AS1  | 0.431925   | 0.258979   | 0.453868  | 0.453575  | 0.23121    |
| SIGMAR1   | 127.012    | 150.056    | 141.916   | 154.385   | 143.434    |
| TAF2      | 5.50443    | 4.93715    | 5.47808   | 5.84369   | 5.92987    |
| CD109     | 1.05732    | 1.38387    | 1.07407   | 1.24089   | 1.27772    |
| GXYLT1    | 1.40953    | 1.39369    | 1.45073   | 1.52479   | 1.55115    |
| XPC       | 10.3469    | 11.8268    | 11.0074   | 11.0559   | 12.8171    |
| SETDB2    | 1.12098    | 0.933548   | 1.25365   | 1.26863   | 1.01243    |
| ZNF830    | 11.7307    | 9.4685     | 13.0268   | 11.8552   | 10.4057    |
| VRK1      | 13.3068    | 11.8278    | 12.5118   | 16.4522   | 11.3432    |

|                          |           |           |           |           |           |
|--------------------------|-----------|-----------|-----------|-----------|-----------|
| PDK4                     | 0.211841  | 0.330381  | 0.127373  | 0.127413  | 0.446854  |
| LOC100130557             | 0.405599  | 0.423685  | 0.686597  | 0.5824    | 0.47013   |
| REV1                     | 2.67635   | 2.57114   | 2.9583    | 2.89589   | 2.96944   |
| WDFY2                    | 4.45024   | 3.20978   | 3.49023   | 4.18995   | 3.66859   |
| PRPF19                   | 70.7386   | 84.3409   | 80.6952   | 83.1461   | 84.3492   |
| LOC100289230             | 0.479914  | 0.51401   | 0.464222  | 0.53084   | 0.533937  |
| ARL2,SNX15               | 172.27    | 165.952   | 168.713   | 176.756   | 172.42    |
| FBXO32                   | 1.60152   | 1.81741   | 1.55175   | 1.69562   | 2.04226   |
| ZNF131                   | 3.73612   | 2.87855   | 4.1463    | 4.08561   | 3.56621   |
| BCL2L11                  | 1.36292   | 3.13197   | 2.11777   | 2.15248   | 2.94967   |
| EXOSC7                   | 69.9427   | 65.3254   | 65.2385   | 71.7165   | 71.078    |
| POMT2                    | 3.06884   | 2.87194   | 2.83814   | 3.16493   | 2.96166   |
| CIRBP                    | 67.6112   | 133.441   | 95.4849   | 90.7178   | 129.91    |
| RFXANK                   | 38.0678   | 35.4076   | 41.3562   | 41.5824   | 39.6869   |
| TMEM120B                 | 7.08228   | 5.92716   | 6.4762    | 7.14741   | 6.56103   |
| HAUS8                    | 9.86686   | 9.58811   | 10.8941   | 11.5618   | 9.50423   |
| ELF1                     | 7.02229   | 6.26177   | 7.6331    | 7.04883   | 7.01459   |
| ZBTB43                   | 4.37103   | 3.88754   | 3.94871   | 4.29938   | 4.89861   |
| FLJ44511                 | 0.0453453 | 0.159024  | 0.0896379 | 0.0756055 | 0.110765  |
| FES                      | 0.480714  | 0.469264  | 0.349334  | 0.386225  | 0.424267  |
| FTO                      | 2.06411   | 2.03317   | 1.47767   | 1.85547   | 2.14653   |
| NONO                     | 148.182   | 151.71    | 169.049   | 172.395   | 158.302   |
| DCAF12                   | 9.20134   | 9.14711   | 10.2985   | 10.8667   | 9.49962   |
| SHC2                     | 14.7377   | 16.9409   | 18.5334   | 17.9003   | 17.3933   |
| ZMAT2                    | 28.7635   | 38.0838   | 28.9834   | 32.6649   | 35.8676   |
| APOBEC3A,APOBEC3A_B,APOE | 18.6786   | 16.0072   | 17.015    | 21.525    | 14.6514   |
| CEP128                   | 0.391943  | 0.375997  | 0.400092  | 0.538824  | 0.350394  |
| MSL3                     | 12.954    | 12.3308   | 15.7888   | 15.4197   | 12.8676   |
| KGFLP2                   | 0.098608  | 0.135366  | 0.202032  | 0.134685  | 0.149448  |
| LINC00476                | 3.36179   | 3.18813   | 5.55987   | 4.35228   | 4.30704   |
| FLYWCH2                  | 31.3072   | 41.2385   | 41.2747   | 44.0707   | 35.564    |
| BLOC1S5,EEF1E1,TXNDC5    | 95.4341   | 110.499   | 126.36    | 113.46    | 117.4     |
| RAP1B                    | 70.5757   | 78.0854   | 76.773    | 77.0882   | 83.4217   |
| ABCG2                    | 0.477413  | 0.417184  | 0.521986  | 0.438574  | 0.667251  |
| TARSL2                   | 2.75766   | 2.64708   | 3.01945   | 2.79901   | 3.35286   |
| ZNF850                   | 1.70561   | 1.31892   | 1.70732   | 1.97757   | 1.26762   |
| SGPP2                    | 0.235809  | 0.833085  | 0.585681  | 0.297297  | 0.965348  |
| TATDN3                   | 3.84157   | 4.29184   | 4.36165   | 3.72541   | 4.59576   |
| SPATA12                  | 0.0305073 | 0.10019   | 0.101245  | 0.0848486 | 0.0925203 |
| TOM1L1                   | 6.02345   | 5.19813   | 9.05111   | 7.00095   | 6.53522   |
| SMN2                     | 2.03255   | 2.12193   | 2.33201   | 1.98903   | 2.06415   |
| SCO2,TYMP                | 55.6544   | 69.3273   | 72.6998   | 68.746    | 67.7456   |
| SLC39A14                 | 18.9812   | 18.7388   | 28.2075   | 25.2923   | 19.1979   |
| GLRX2                    | 18.3278   | 16.4637   | 19.5828   | 22.0381   | 15.7327   |
| ETAA1                    | 2.66948   | 2.98479   | 2.46552   | 2.90573   | 3.39282   |
| HRH1                     | 1.85491   | 1.40856   | 2.45887   | 2.50288   | 1.21284   |
| SLC24A1                  | 0.987175  | 1.0993    | 1.08925   | 1.22681   | 0.97641   |
| CSPG5                    | 1.13285   | 1.82498   | 0.791067  | 1.43385   | 1.63834   |
| FKBP10                   | 117.575   | 145.01    | 108.233   | 124.822   | 145.147   |
| DUS2L                    | 13.3685   | 11.8495   | 9.84239   | 13.5043   | 12.4276   |
| CLEC18A                  | 0.27105   | 0.211921  | 0.210516  | 0.42501   | 0.155136  |
| ZWILCH                   | 4.03444   | 3.21127   | 5.09041   | 4.72355   | 3.804     |
| FBXW11                   | 8.31123   | 7.37879   | 8.64634   | 9.12704   | 7.5699    |
| NCKAP1                   | 23.8231   | 24.0105   | 25.5637   | 26.3577   | 26.8425   |
| GSDMD                    | 48.2844   | 56.1524   | 41.9961   | 57.1288   | 51.6428   |
| RARB                     | 0.097283  | 0.0587435 | 0.0714225 | 0.0809864 | 0.0772468 |
| XIST                     | 7.19615   | 5.54348   | 6.12445   | 7.98081   | 6.17201   |
| ZNF500                   | 3.64543   | 4.14528   | 4.21861   | 4.38581   | 4.32114   |
| CBWD3,CBWD5              | 2.62699   | 1.5732    | 1.90799   | 2.10711   | 2.31503   |
| SYT11                    | 0.0137128 | 0.0130435 | 0.0114335 | 0.0228315 | 0.0183351 |
| GGNBP2                   | 12.8646   | 11.8081   | 14.527    | 14.1935   | 13.3866   |
| RAB33A                   | 0.0939733 | 0.126474  | 0.188419  | 0.0520312 | 0.116283  |
| CHD3                     | 13.7598   | 13.3783   | 12.6631   | 15.518    | 13.2251   |
| C14orf166                | 168.962   | 171.092   | 189.572   | 186.718   | 174.995   |
| LRP4-AS1                 | 0.333269  | 0.401081  | 0.297172  | 0.424672  | 0.290446  |
| CPNE5                    | 0.121774  | 0.0508017 | 0.0797241 | 0.109927  | 0.0465584 |
| DDX12P                   | 3.51254   | 3.65795   | 2.72595   | 4.02985   | 3.9084    |
| CCT8                     | 174.534   | 157.595   | 185.732   | 180.571   | 176.204   |
| FAM183B                  | 0.273293  | 0.488224  | 0.434177  | 0.38454   | 0.647247  |
| SRPK1                    | 24.7525   | 21.5928   | 26.9395   | 28.8335   | 22.4745   |
| BNIP2                    | 10.7398   | 10.503    | 11.8476   | 12.0295   | 11.3908   |
| ERO1LB                   | 1.48004   | 1.46908   | 1.44847   | 1.51894   | 1.44546   |
| WIPI2                    | 24.5833   | 28.1588   | 26.0748   | 28.5857   | 29.456    |
| HLX                      | 0.332549  | 0.217263  | 0.553173  | 0.411503  | 0.301333  |
| ANKRD36BP1               | 0.0935824 | 0.103923  | 0.0652811 | 0.0513887 | 0.0851029 |
| GRHL3                    | 0.0218819 | 0.0193309 | 0         | 0         | 0         |
| KDELC2                   | 3.6193    | 4.05372   | 3.59187   | 3.7753    | 4.71099   |
| LOC100129931             | 8.96146   | 9.7561    | 10.3162   | 10.4706   | 9.99826   |
| TMEM206                  | 9.43502   | 8.93848   | 11.6329   | 10.9506   | 9.91992   |

|               |           |           |           |           |           |
|---------------|-----------|-----------|-----------|-----------|-----------|
| NIN           | 3.4491    | 3.30779   | 3.41856   | 3.86929   | 3.63201   |
| B4GALT5       | 9.3986    | 9.05429   | 11.4024   | 11.0449   | 9.8554    |
| MVB12A        | 63.0297   | 55.4016   | 68.6964   | 70.6192   | 53.7866   |
| KIF16B        | 1.59962   | 1.11243   | 1.43003   | 1.54908   | 1.43945   |
| RTN4IP1       | 3.33616   | 2.75699   | 3.26477   | 3.98237   | 2.97521   |
| ANP32B        | 204.647   | 175.083   | 194.718   | 229.039   | 177.347   |
| STYXL1        | 15.1879   | 15.6756   | 16.6561   | 16.9043   | 14.7534   |
| MKNK2         | 44.7604   | 39.0464   | 63.0819   | 58.1584   | 39.5923   |
| DHRS12        | 1.60799   | 2.60144   | 2.26507   | 1.88598   | 2.39801   |
| USP10         | 26.8968   | 24.0663   | 26.9829   | 29.8853   | 25.9917   |
| GPR114        | 2.29423   | 1.72414   | 2.25038   | 2.54961   | 2.08694   |
| ZC2HC1C       | 0.223446  | 0.0982218 | 0.17816   | 0.241873  | 0.211836  |
| EPS15L1       | 14.4943   | 13.2663   | 12.8732   | 16.4577   | 13.5478   |
| NCBP1         | 11.1394   | 8.79816   | 13.1794   | 13.3786   | 9.49373   |
| TRIM27        | 28.742    | 27.4877   | 39.8566   | 36.1683   | 27.2638   |
| KANK1         | 2.46173   | 1.88744   | 2.43255   | 2.62495   | 2.14382   |
| ZNF684        | 0.813861  | 0.921451  | 1.08891   | 1.01667   | 0.901635  |
| CDK12         | 4.47892   | 4.26777   | 4.71802   | 4.74818   | 5.0523    |
| FBXL6         | 51.8001   | 53.3966   | 50.9028   | 61.2391   | 53.6538   |
| EIF1          | 591.665   | 599.144   | 961.174   | 774.249   | 567.355   |
| TMC6          | 29.3743   | 32.3859   | 24.3551   | 30.1454   | 30.7369   |
| ST3GAL2       | 3.4891    | 3.38083   | 3.94312   | 4.32568   | 3.49731   |
| PMP22         | 29.689    | 33.318    | 24.3418   | 27.4844   | 35.7009   |
| RANBP2        | 4.17651   | 3.68635   | 4.2185    | 4.96557   | 3.7489    |
| HRSP12        | 47.4641   | 43.3712   | 49.521    | 47.9471   | 49.6211   |
| NOC3L         | 8.97429   | 6.71309   | 8.97801   | 9.54851   | 8.29917   |
| C9orf69       | 36.8281   | 36.1032   | 50.7964   | 46.1937   | 37.4496   |
| JMJD1C        | 5.65183   | 4.71583   | 4.79871   | 5.92302   | 5.47344   |
| EHBP1         | 2.84795   | 2.1359    | 2.24241   | 2.6569    | 2.80777   |
| KIAA1644      | 0.0460536 | 0.0319711 | 0.0332036 | 0.0448834 | 0.0343964 |
| DUS1L         | 53.6003   | 61.3061   | 56.4711   | 64.1488   | 61.3658   |
| DUSP22        | 11.066    | 9.71492   | 14.9684   | 13.7953   | 9.48364   |
| ZKSCAN5       | 3.74988   | 3.85535   | 5.04122   | 4.41732   | 3.93533   |
| H0XB3         | 3.93961   | 3.05928   | 3.64138   | 4.13087   | 3.65337   |
| ZMYND10       | 0.919515  | 0.619938  | 0.723508  | 0.873497  | 0.950199  |
| C2orf50       | 0         | 0.0934202 | 0         | 0.0581244 | 0.0427782 |
| UTP3          | 17.4069   | 23.0664   | 21.6796   | 19.8714   | 25.7546   |
| SEPHS1        | 19.2272   | 19.9449   | 22.5179   | 22.8303   | 21.258    |
| KTI12,TXNDC12 | 45.9929   | 64.4397   | 59.4838   | 58.3574   | 63.2412   |
| TCF25         | 85.0358   | 90.5026   | 93.1781   | 97.4701   | 89.3294   |
| HSPD1         | 407.616   | 362.494   | 418.046   | 441.461   | 410.043   |
| LOC387723     | 0.738263  | 0.831329  | 1.05613   | 1.0614    | 0.959638  |
| ILF3          | 60.6515   | 59.7369   | 61.5589   | 68.1015   | 62.1509   |
| MRPS11        | 21.1334   | 24.4055   | 23.6095   | 24.2394   | 25.1557   |
| CALCOCO1      | 8.48709   | 8.72768   | 8.78918   | 9.10459   | 9.94919   |
| MIOS          | 6.47256   | 5.77108   | 7.2176    | 7.44891   | 6.67489   |
| ZBTB47        | 1.75234   | 1.95268   | 1.49415   | 1.85921   | 1.96743   |
| TMED8         | 0.300311  | 0.121898  | 0.327801  | 0.298022  | 0.302102  |
| TMEM254       | 1.47193   | 1.77776   | 2.11061   | 1.95545   | 1.90382   |
| FCF1          | 9.6941    | 10.41     | 10.564    | 10.4262   | 10.484    |
| ACADVL        | 124.968   | 169.327   | 104.524   | 135.775   | 164.708   |
| HADHB         | 65.8148   | 64.5842   | 66.6493   | 66.2367   | 73.8676   |
| CLINT1        | 7.6916    | 7.16591   | 8.78532   | 8.34632   | 8.07172   |
| PIGZ          | 0.665325  | 0.911533  | 0.812408  | 0.787154  | 0.988164  |
| EIF5A         | 876.648   | 831.243   | 843.05    | 948.936   | 882.804   |
| NIPAL3        | 6.35362   | 5.88579   | 6.03695   | 6.66836   | 6.24583   |
| TNKS1BP1      | 10.3484   | 12.6422   | 9.68152   | 11.98     | 12.5901   |
| DGKE          | 1.96901   | 1.35411   | 2.63226   | 2.48009   | 1.45486   |
| MSANTD4       | 3.06184   | 3.36309   | 4.02756   | 3.44392   | 3.55911   |
| EIF2D         | 25.5542   | 30.6991   | 28.7874   | 28.3041   | 31.5023   |
| CSNK2A2       | 48.063    | 39.6067   | 55.967    | 55.0296   | 40.9365   |
| PFDN2         | 300.125   | 181.932   | 306.136   | 322.913   | 201.365   |
| NDUFA10       | 17.67     | 20.2789   | 18.3085   | 17.9089   | 22.4808   |
| FASTKD1       | 10.0643   | 8.86185   | 9.49094   | 10.1815   | 10.5679   |
| C9orf156      | 4.06997   | 5.6138    | 5.91719   | 5.08167   | 5.65828   |
| WRAP53        | 17.9803   | 18.737    | 21.9671   | 21.9596   | 17.9526   |
| FZD4          | 0.681257  | 1.05541   | 0.69506   | 0.761517  | 1.15182   |
| SPECC1L       | 5.64252   | 5.43389   | 7.57038   | 7.27163   | 5.38195   |
| NUDC          | 456.482   | 355.263   | 413.956   | 486.63    | 388.95    |
| AGFG1         | 4.39403   | 3.64596   | 4.9992    | 4.71598   | 4.34507   |
| RCBTB1        | 4.00749   | 4.10437   | 4.90894   | 5.24678   | 4.01717   |
| MDFI          | 26.6998   | 22.9017   | 34.262    | 32.9389   | 23.3734   |
| PRDX1         | 491.757   | 502.779   | 421.447   | 510.937   | 546.944   |
| ZMYND15       | 1.66666   | 1.71301   | 1.64589   | 1.78484   | 1.61177   |
| MAP4K4        | 7.73766   | 6.68843   | 7.57511   | 8.01715   | 7.6433    |
| DR0SHA        | 4.1317    | 3.35743   | 3.99263   | 4.63943   | 3.70956   |
| MFSD9         | 1.79608   | 1.80309   | 1.64153   | 1.68849   | 2.29605   |
| CLDN15        | 13.976    | 10.7957   | 11.804    | 15.855    | 9.76713   |
| FAM60A        | 28.4871   | 26.5607   | 33.378    | 31.3237   | 29.7026   |



|                           |           |           |            |           |            |
|---------------------------|-----------|-----------|------------|-----------|------------|
| GPCPD1                    | 3.32314   | 3.0391    | 2.54345    | 3.35224   | 3.29528    |
| MRPL9                     | 68.6273   | 68.561    | 64.0559    | 74.0005   | 67.2723    |
| HNRNPA3                   | 43.9405   | 40.5333   | 40.3715    | 48.6931   | 45.5591    |
| TIMM10B                   | 6.58568   | 9.28344   | 8.57078    | 8.78738   | 8.41355    |
| ATPAF2                    | 10.6039   | 12.0686   | 9.07162    | 10.0315   | 12.6352    |
| DLD                       | 24.6144   | 23.2859   | 25.1603    | 26.5012   | 27.3149    |
| LCA5L                     | 0.1461    | 0.232985  | 0.22598    | 0.18313   | 0.198126   |
| ATXN2                     | 6.96566   | 3.87073   | 7.21957    | 7.70415   | 4.6985     |
| ITPKC                     | 5.9321    | 5.69362   | 6.14866    | 6.72765   | 5.63291    |
| NDUFAF6                   | 7.37679   | 10.0936   | 8.7658     | 9.33777   | 9.74883    |
| RHBDF2                    | 6.32022   | 5.54705   | 5.07914    | 6.72932   | 5.4853     |
| ACAP2                     | 3.54745   | 3.43938   | 3.69326    | 3.71667   | 3.97735    |
| PNRC2                     | 33.4808   | 33.1889   | 43.6175    | 38.0199   | 37.2831    |
| SEC14L1                   | 12.5592   | 13.9375   | 14.1084    | 14.1947   | 14.7105    |
| CEP170                    | 0         | 0         | 0.00359375 | 0         | 0.00390009 |
| API5                      | 23.2456   | 25.5816   | 23.8245    | 25.5006   | 28.793     |
| GOLGA7                    | 29.0998   | 32.215    | 31.3788    | 29.6787   | 35.1205    |
| STEAP1                    | 7.58696   | 10.1716   | 9.55722    | 9.35747   | 10.7533    |
| CYFIP1                    | 43.9922   | 41.1186   | 45.6956    | 47.7248   | 46.8504    |
| GTF2B                     | 13.6267   | 14.1627   | 19.2274    | 16.0802   | 15.2754    |
| RFPL2                     | 0.336949  | 0.282579  | 0.149909   | 0.236599  | 0.352617   |
| ZC2HC1A                   | 1.65792   | 1.66968   | 1.82743    | 1.95706   | 1.68485    |
| ZC3H7A                    | 4.17039   | 4.77706   | 5.23319    | 4.84188   | 5.20035    |
| OSBPL7                    | 3.78457   | 3.59103   | 2.70917    | 3.68151   | 4.40964    |
| KATNAL2                   | 0.118666  | 0.167709  | 0.116046   | 0.116046  | 0.100604   |
| IFNGR2                    | 36.5264   | 38.8581   | 42.9087    | 42.0918   | 41.4861    |
| FOXRED1                   | 25.973    | 24.6228   | 25.5482    | 30.1565   | 25.192     |
| MTPN                      | 30.6271   | 34.0416   | 32.5286    | 31.8894   | 38.893     |
| HEMK1                     | 5.00103   | 4.90551   | 4.84062    | 5.39803   | 4.86821    |
| CHD2                      | 6.15434   | 7.5172    | 6.15584    | 6.60133   | 7.6174     |
| SORD                      | 37.7678   | 42.9087   | 39.3243    | 40.2076   | 45.6536    |
| PAK1IP1                   | 12.2755   | 13.4491   | 15.2759    | 13.2144   | 15.6576    |
| NRARP                     | 33.1969   | 49.68     | 39.0211    | 42.0988   | 45.3947    |
| TCOF1                     | 29.8589   | 24.2712   | 25.8863    | 34.3793   | 25.2584    |
| TAPT1-AS1                 | 0.154138  | 0.129198  | 0.468245   | 0.278355  | 0.191088   |
| SLC25A3                   | 395.169   | 486.901   | 450.184    | 456.329   | 470.86     |
| SRBD1                     | 1.43306   | 0.742714  | 1.54483    | 1.53456   | 1.11236    |
| STX1A                     | 16.1412   | 21.9151   | 16.6399    | 19.662    | 20.611     |
| NOC2L                     | 74.775    | 68.3968   | 68.9942    | 84.0645   | 69.7966    |
| MGAM                      | 0.0205907 | 0.0536176 | 0.00856365 | 0.0229453 | 0.0361838  |
| TTL                       | 8.46242   | 9.89147   | 9.99555    | 10.4154   | 9.9957     |
| LOC613037                 | 5.16011   | 4.67047   | 4.52113    | 5.96177   | 4.98542    |
| ZFP36L1                   | 151.865   | 90.7844   | 145.464    | 157.718   | 108.439    |
| UCP2                      | 56.5545   | 62.9729   | 54.6714    | 68.4194   | 61.5933    |
| RUSC1                     | 26.2676   | 25.4998   | 23.8588    | 28.2151   | 26.3716    |
| OSBP2                     | 5.78793   | 5.50724   | 4.87909    | 6.10993   | 6.30729    |
| FAHD1                     | 13.0793   | 14.4764   | 14.2838    | 14.3252   | 15.2752    |
| CCNB1                     | 48.4623   | 46.0855   | 59.2184    | 60.158    | 44.3624    |
| SMARCAL1                  | 7.29216   | 7.41871   | 7.01958    | 7.56844   | 8.12433    |
| FASTKD2                   | 4.77625   | 5.33698   | 5.01611    | 5.13196   | 5.90406    |
| EIF4EBP1                  | 289.27    | 274.837   | 337.883    | 339.168   | 274.757    |
| IRF9                      | 2.3949    | 2.509     | 2.51128    | 3.12806   | 2.13764    |
| NLRCS                     | 1.05492   | 1.13791   | 0.896443   | 1.39665   | 1.08626    |
| HSPA4                     | 39.52     | 37.6611   | 42.5247    | 42.5148   | 41.9565    |
| RFT1                      | 7.64303   | 8.38201   | 7.98254    | 8.01981   | 8.60251    |
| TMEM71                    | 0.236801  | 0.701848  | 0.738197   | 0.733981  | 0.655533   |
| TUG1                      | 6.76841   | 6.68007   | 9.54455    | 8.77659   | 6.79828    |
| MED7                      | 7.12298   | 8.07621   | 7.87955    | 7.90162   | 7.90922    |
| TP53BP1                   | 3.02617   | 2.95262   | 2.78404    | 3.25508   | 3.28403    |
| C7orf43                   | 9.18636   | 9.86166   | 10.7278    | 12.6316   | 8.57491    |
| FLJ27352                  | 1.59772   | 0.848548  | 1.12325    | 1.23597   | 1.16979    |
| STT3A                     | 31.6679   | 34.9301   | 38.9524    | 39.1612   | 35.3903    |
| ISG20L2                   | 10.0943   | 14.4447   | 12.3467    | 13.2698   | 13.2564    |
| LOC401321                 | 1.9047    | 2.29793   | 2.80626    | 2.35179   | 2.43729    |
| SOS2                      | 1.67896   | 1.30182   | 1.75502    | 1.83377   | 1.34015    |
| SLC38A7                   | 1.80331   | 2.29849   | 1.88295    | 2.55899   | 2.02541    |
| C17orf75                  | 2.21787   | 1.88771   | 2.29636    | 2.29523   | 2.2412     |
| TRAP1                     | 173.822   | 170.279   | 172.275    | 186.373   | 179.731    |
| PCDHA1,PCDHA10,PCDHA11,PC | 0.103563  | 0.204769  | 0.12433    | 0.18084   | 0.134309   |
| STX18                     | 14.264    | 11.4341   | 16.6787    | 15.2831   | 13.1886    |
| YAE1D1                    | 8.6705    | 10.1787   | 12.0962    | 10.7307   | 9.71471    |
| DIEXF                     | 3.58827   | 3.82458   | 4.04467    | 3.88749   | 4.09836    |
| FAR2                      | 4.56826   | 2.06142   | 3.45706    | 4.27793   | 2.79325    |
| MAPT                      | 0.0165324 | 0.0151228 | 0.00675722 | 0.0275995 | 0.0139941  |
| NSUN5                     | 28.6078   | 24.4478   | 33.5738    | 33.5358   | 24.4509    |
| TPK1                      | 0.654744  | 0.631556  | 0.520982   | 0.668298  | 0.572742   |
| MRPL46                    | 22.6823   | 21.5862   | 25.4492    | 24.1272   | 24.3586    |
| YWHAG                     | 36.107    | 36.7468   | 37.9558    | 39.6756   | 38.6521    |
| SNAPC5                    | 7.95945   | 8.09032   | 7.75607    | 8.61067   | 8.38309    |

|                           |            |           |           |           |            |
|---------------------------|------------|-----------|-----------|-----------|------------|
| DTNB                      | 14.2863    | 13.1794   | 13.094    | 14.4544   | 14.1907    |
| TOMM40                    | 102.606    | 104.215   | 107.189   | 119.224   | 100.773    |
| DRG2                      | 28.7656    | 23.9416   | 25.8037   | 29.9176   | 25.9853    |
| POLR2F                    | 31.7716    | 34.6604   | 32.7325   | 36.2133   | 33.091     |
| DNAJC17                   | 15.0679    | 15.9317   | 16.5552   | 15.9596   | 17.7147    |
| HOXD-AS2                  | 6.8016     | 5.40603   | 9.78858   | 8.51894   | 7.14088    |
| CXorf56                   | 8.51898    | 10.0291   | 9.69927   | 9.83699   | 9.40556    |
| CAP2                      | 4.60252    | 4.54987   | 3.78992   | 4.44826   | 5.8189     |
| LOC100289511              | 0.153203   | 0.0702502 | 0.0622131 | 0.0421523 | 0          |
| GTF2F2                    | 25.0476    | 18.8893   | 27.5352   | 27.9655   | 21.263     |
| CDK11A,CDK11B             | 17.5771    | 15.392    | 14.9675   | 19.93     | 16.0919    |
| SNHG7,SNORA17,SNORA43     | 380.242    | 409.231   | 500.664   | 445.811   | 355.837    |
| C16orf80                  | 32.3991    | 34.1011   | 43.9788   | 39.2418   | 37.081     |
| DENR                      | 20.8494    | 18.375    | 22.6778   | 22.2259   | 21.5997    |
| RPL23AP53                 | 1.21925    | 1.62241   | 1.68553   | 1.54404   | 1.48766    |
| TMEM218                   | 1.83484    | 2.54034   | 2.41879   | 2.31572   | 2.53476    |
| RWDD4                     | 8.22727    | 9.62812   | 8.98364   | 9.36035   | 10.8894    |
| NDUFS1                    | 10.4194    | 9.64348   | 11.2818   | 12.5769   | 9.68971    |
| MRPS21                    | 353.493    | 326.472   | 372.76    | 401.131   | 318.198    |
| ADSL                      | 55.746     | 58.3201   | 68.1645   | 63.8927   | 61.2156    |
| GFM1                      | 6.62855    | 6.84337   | 7.92875   | 8.22555   | 7.481      |
| ZNF32                     | 20.9946    | 23.0829   | 26.3545   | 23.8711   | 24.7897    |
| TICAM2,TMED7,TMED7-TICAM2 | 11.7252    | 13.9219   | 12.5681   | 11.9405   | 16.6761    |
| AIFM1                     | 37.8116    | 31.1219   | 32.6632   | 41.4025   | 33.0468    |
| RAP2C                     | 5.43713    | 6.72484   | 6.03692   | 6.11418   | 7.26733    |
| EIF5AL1                   | 3.19315    | 2.99051   | 3.01244   | 3.30753   | 2.97624    |
| RSPRY1                    | 2.2514     | 2.11038   | 2.37819   | 2.27474   | 2.44956    |
| C1orf52                   | 17.6001    | 15.2902   | 15.9317   | 17.4147   | 18.3468    |
| SLC43A1                   | 24.6506    | 22.4723   | 29.5975   | 31.8952   | 21.2148    |
| PSMB7                     | 235.371    | 226.532   | 273.127   | 271.955   | 231.244    |
| RAB11B-AS1                | 3.34653    | 3.8266    | 3.99666   | 4.39796   | 4.02741    |
| VMAC                      | 0.78623    | 1.55455   | 0.962719  | 0.812883  | 1.63804    |
| GEMIN5                    | 5.46296    | 4.36962   | 5.92683   | 5.72444   | 4.96879    |
| SBDS                      | 43.145     | 45.5814   | 53.2747   | 48.4938   | 48.8922    |
| TRIB3                     | 32.225     | 27.2671   | 216.162   | 121.474   | 25.9492    |
| LOC100132781              | 0.0201674  | 0         | 0.0389486 | 0.0168546 | 0.0291074  |
| PWP2                      | 19.6351    | 18.8866   | 22.9687   | 22.856    | 19.9782    |
| ARFGAP2                   | 22.6781    | 25.7942   | 26.1659   | 25.8856   | 25.8345    |
| ADSSL1                    | 1.37055    | 3.00678   | 1.53628   | 1.9218    | 2.69371    |
| EIF3E                     | 612.988    | 751.689   | 734.476   | 674.17    | 764.607    |
| ARAP2                     | 0.535712   | 0.432219  | 0.778958  | 0.610708  | 0.581449   |
| ABI3BP                    | 0.00946325 | 0.0410829 | 0.0119175 | 0.0315681 | 0.0193257  |
| OSBPL8                    | 3.81643    | 4.04141   | 3.25924   | 4.03851   | 4.20303    |
| TTYH2                     | 7.93101    | 8.83811   | 8.71165   | 8.68683   | 10.0389    |
| SUGP1                     | 14.5174    | 15.5153   | 15.7617   | 16.3602   | 16.221     |
| ANK3                      | 0.00291287 | 0         | 0         | 0         | 0.00317189 |
| GCNT1                     | 0.798408   | 1.09242   | 0.989445  | 1.08553   | 1.18899    |
| GNAL                      | 2.99665    | 3.6067    | 3.09228   | 3.35043   | 3.85615    |
| MEI1                      | 0.0224507  | 0.0307529 | 0         | 0.0124417 | 0.0188225  |
| MYBBP1A                   | 27.248     | 26.5906   | 24.7713   | 29.428    | 27.6646    |
| TOPORS                    | 2.09874    | 2.40871   | 2.556     | 2.27278   | 2.69713    |
| NOP16                     | 78.1989    | 83.7458   | 94.8218   | 89.7742   | 87.4005    |
| C16orf88                  | 6.30845    | 6.18807   | 5.70816   | 7.02507   | 5.79568    |
| LOC100132273              | 1.33724    | 1.39742   | 1.1146    | 1.36531   | 1.49019    |
| MT1X                      | 2642.56    | 2184.37   | 1061.24   | 2154.66   | 2450.68    |
| MTRF1L                    | 6.94724    | 7.07693   | 8.03505   | 8.3905    | 7.61222    |
| DNAJC30                   | 8.52555    | 10.0256   | 11.5971   | 10.2968   | 10.2039    |
| KIF3B                     | 2.78314    | 2.93438   | 2.64264   | 3.17825   | 2.9734     |
| TNS1                      | 0.18086    | 0.108414  | 0.148847  | 0.207872  | 0.117777   |
| ELF2                      | 3.43764    | 3.86008   | 3.73564   | 3.80605   | 4.42496    |
| ZKSCAN8                   | 0.295433   | 0.232636  | 0.275549  | 0.26557   | 0.272305   |
| DPH5                      | 15.8979    | 17.7004   | 20.1233   | 18.478    | 18.0514    |
| PSMD8                     | 274.749    | 294.684   | 290.428   | 309.342   | 297.108    |
| LOC100289092              | 5.80562    | 7.19154   | 7.2676    | 7.84093   | 6.27872    |
| FANCB                     | 0.339455   | 0.40221   | 0.34062   | 0.41892   | 0.432931   |
| ENO3                      | 4.73004    | 4.00218   | 4.12739   | 5.74486   | 3.98387    |
| GUF1                      | 7.68904    | 8.05143   | 7.77623   | 8.70478   | 8.9631     |
| SLMAP                     | 4.42987    | 4.03793   | 4.86146   | 5.20064   | 4.51711    |
| RAB35                     | 20.6443    | 20.0778   | 22.0485   | 23.0264   | 21.5618    |
| UCN2                      | 0.195112   | 0.0581301 | 0.105558  | 0.181764  | 0.13196    |
| SH3KBP1                   | 4.79397    | 5.19583   | 6.0131    | 5.77696   | 5.22835    |
| MYO5B                     | 1.04148    | 0.96658   | 0.861022  | 1.01802   | 0.948105   |
| MRFAP1L1                  | 29.1151    | 33.3529   | 36.2427   | 32.725    | 36.3207    |
| RPL15                     | 915.798    | 1387.02   | 1070.76   | 1019.44   | 1402.8     |
| SLC16A9                   | 3.29538    | 2.95892   | 3.07452   | 3.4654    | 3.59881    |
| SGSM1                     | 1.11867    | 0.850923  | 0.807423  | 0.911249  | 1.09145    |
| SYCP2L                    | 0.149167   | 0.211284  | 0.0929013 | 0.0859062 | 0.302119   |
| DAP3                      | 71.9012    | 83.214    | 83.0323   | 84.4902   | 84.4733    |
| TACC1                     | 2.90966    | 3.12049   | 3.19649   | 3.31772   | 3.61783    |

|              |           |           |           |           |          |
|--------------|-----------|-----------|-----------|-----------|----------|
| TCTE1        | 0.111738  | 0.0595314 | 0.107041  | 0.0744464 | 0.189475 |
| AP3M2        | 4.02362   | 4.43166   | 5.70691   | 5.23631   | 4.80846  |
| C1orf228     | 0.168561  | 0.332768  | 0.091235  | 0.247524  | 0.166749 |
| PDCL3P4      | 0.230281  | 0.0973879 | 0.14313   | 0.114514  | 0.151653 |
| TYW1         | 3.56703   | 3.37675   | 4.40237   | 4.38108   | 3.56096  |
| MAPK6        | 6.60699   | 7.088     | 7.74058   | 7.08942   | 7.88518  |
| ZNF77        | 1.84876   | 2.80327   | 2.32994   | 2.09487   | 3.12172  |
| IDE          | 3.16651   | 3.45345   | 3.39751   | 3.77151   | 3.59295  |
| DHX33        | 8.68928   | 8.03143   | 9.79753   | 10.0076   | 8.86621  |
| SBNO2        | 16.9091   | 12.4279   | 15.1728   | 17.7166   | 13.9617  |
| POLE2        | 4.90301   | 3.69236   | 5.27872   | 5.42583   | 5.1516   |
| TMEM184A     | 5.02328   | 4.15893   | 4.50498   | 5.5966    | 3.71689  |
| CUTC         | 16.1635   | 18.6166   | 14.2266   | 16.6099   | 19.2511  |
| HNRNPA0      | 40.1011   | 47.214    | 54.4409   | 53.1706   | 45.8718  |
| TSACC        | 0.543374  | 0.48483   | 0.665411  | 0.768845  | 0.454622 |
| TPTE2P3      | 0         | 0         | 0.0111474 | 0         | 0.012162 |
| GTF3A        | 92.7263   | 117.35    | 105.742   | 108.293   | 116.235  |
| ZCCHC9       | 20.8297   | 17.6994   | 20.6341   | 21.3988   | 19.1981  |
| PUS7         | 8.88317   | 7.43104   | 8.09382   | 8.05135   | 8.89678  |
| TMCC1        | 1.16337   | 0.925679  | 1.09514   | 1.19848   | 1.04813  |
| YPEL4        | 0.484332  | 0.526718  | 0.264645  | 0.332382  | 0.791856 |
| APOL2        | 3.88472   | 4.06702   | 4.43935   | 4.7411    | 4.17615  |
| PYCR1        | 164.263   | 173.009   | 222.546   | 206.261   | 176.905  |
| EPB41L4A-AS1 | 59.7368   | 75.0612   | 88.1947   | 77.5992   | 68.0178  |
| URI1         | 11.1669   | 10.9133   | 12.7438   | 12.8572   | 11.5546  |
| TMCO4        | 5.69735   | 4.90859   | 5.39154   | 6.40437   | 4.67122  |
| CLNS1A       | 88.1689   | 99.1231   | 105.806   | 96.1563   | 105.311  |
| STK40        | 10.7504   | 8.8076    | 19.3129   | 15.4428   | 9.50476  |
| CRIPAK       | 1.23357   | 1.26274   | 1.19439   | 1.47387   | 1.47604  |
| UBA3         | 13.4054   | 14.5186   | 14.6525   | 14.59     | 17.133   |
| ARMC8        | 3.36048   | 3.71059   | 3.33479   | 3.46342   | 4.19937  |
| HSP90AB1     | 826.777   | 804.324   | 749.961   | 858.676   | 859.828  |
| MIS18BP1     | 3.37968   | 2.78531   | 2.53534   | 3.76054   | 3.15481  |
| BCAS2        | 19.8334   | 23.8308   | 22.3297   | 25.3134   | 23.3245  |
| TOR1A        | 28.1051   | 36.66     | 39.0085   | 35.0182   | 35.7057  |
| SLC23A2      | 1.08341   | 1.06476   | 0.919559  | 1.0417    | 1.25932  |
| ARL5A        | 10.9648   | 10.7889   | 11.4673   | 10.6045   | 13.5658  |
| TNRC18       | 5.7741    | 6.00225   | 7.90175   | 8.28951   | 6.03045  |
| PABPC4       | 107.105   | 120.914   | 103.432   | 119.197   | 123.521  |
| ANXA2        | 533.161   | 676.658   | 535.196   | 539.546   | 740.111  |
| RPAP3        | 5.93191   | 4.17895   | 4.87017   | 5.83927   | 5.0552   |
| MKI67IP      | 41.2903   | 43.3837   | 53.1052   | 48.3358   | 46.5409  |
| SSX2IP       | 2.81115   | 2.8363    | 3.1587    | 3.195     | 3.32769  |
| CCDC90B      | 17.8986   | 18.022    | 22.051    | 18.0333   | 20.3507  |
| NFE2L3       | 3.2055    | 3.31781   | 3.37318   | 3.85437   | 3.55493  |
| VDR          | 1.57389   | 1.65781   | 1.07821   | 1.70489   | 1.51767  |
| TRAF7        | 31.5449   | 31.8184   | 31.5027   | 34.2896   | 34.4051  |
| S100A14      | 0.390855  | 0.179605  | 0.351546  | 0.39086   | 0.335294 |
| GGT3P        | 0.134483  | 0.1527    | 0.184221  | 0.128583  | 0.18471  |
| TMA16        | 11.499    | 9.21609   | 12.2071   | 12.6401   | 10.8171  |
| TXLNA        | 19.0224   | 18.0072   | 25.2833   | 23.4903   | 19.6022  |
| PPA1         | 171.554   | 174.037   | 196.751   | 184.789   | 194.753  |
| DAZAP1       | 100.281   | 88.2051   | 114.805   | 115.292   | 93.7595  |
| C1orf43      | 128.316   | 143.742   | 148.436   | 146.464   | 143.484  |
| TSTD3        | 0.637454  | 0.81335   | 0.964514  | 0.762506  | 0.687527 |
| ZNF3         | 16.3739   | 18.9842   | 18.8403   | 18.7088   | 20.0374  |
| CAMKK2       | 9.15527   | 9.60645   | 10.5675   | 10.8636   | 10.1402  |
| ZNF324       | 3.46209   | 4.35752   | 5.44887   | 5.02037   | 4.41339  |
| MTHFD2L      | 1.07867   | 0.834427  | 0.88883   | 1.1889    | 0.954482 |
| FAM86C2P     | 0.738928  | 0.902865  | 1.14181   | 1.03614   | 0.987156 |
| CCDC174      | 4.79093   | 4.17075   | 5.93333   | 5.83763   | 4.20387  |
| LMF1         | 27.4008   | 23.9732   | 26.3081   | 28.3288   | 27.6923  |
| MANEAL       | 10.786    | 10.0021   | 11.7557   | 12.0955   | 10.9462  |
| SLC5A10      | 0.76156   | 0.717429  | 0.44707   | 0.69067   | 0.651354 |
| MYH7B        | 0.0524133 | 0.0447646 | 0.0274933 | 0.0385148 | 0.027375 |
| TMEM186      | 11.8158   | 12.8823   | 13.3475   | 14.5451   | 11.9795  |
| ARFGEF2      | 1.73452   | 1.46109   | 1.68708   | 1.8298    | 1.68981  |
| CNTD1        | 0.186886  | 0.200467  | 0.174479  | 0.149437  | 0.302541 |
| NME6         | 13.2931   | 13.0141   | 13.7949   | 14.951    | 12.2667  |
| FAM107B      | 5.48951   | 6.12253   | 9.20295   | 8.5037    | 6.43462  |
| TSG101       | 31.8424   | 32.3147   | 35.333    | 33.8792   | 35.2579  |
| STAT5B       | 7.70373   | 9.70893   | 6.69907   | 8.37979   | 9.38809  |
| FZD6         | 6.49493   | 7.86573   | 9.70038   | 8.3408    | 8.78542  |
| FBXO9        | 3.92975   | 5.3344    | 7.17407   | 5.61562   | 5.67349  |
| EIF3B        | 70.8228   | 73.4918   | 73.2276   | 82.6457   | 75.6326  |
| NEK4         | 2.88177   | 3.00369   | 3.27385   | 3.5753    | 3.19306  |
| THAP6        | 1.90202   | 1.36661   | 1.9304    | 1.962     | 1.35811  |
| CCRN4L       | 11.0989   | 11.0909   | 10.1575   | 10.3716   | 11.6403  |
| MOB1A        | 23.8862   | 19.4718   | 21.4427   | 23.4943   | 23.6571  |

|                         |            |            |            |           |           |
|-------------------------|------------|------------|------------|-----------|-----------|
| YWHAЕ                   | 336.274    | 334.006    | 354.835    | 366.496   | 378.086   |
| NUP160                  | 6.27269    | 5.03434    | 6.51711    | 6.88486   | 5.62185   |
| SMYD2                   | 19.3432    | 18.3515    | 18.8437    | 17.6986   | 23.6742   |
| RNF138                  | 7.64637    | 6.81998    | 8.26681    | 7.75858   | 8.15222   |
| KCNK15                  | 0.0157075  | 0.0213393  | 0.152312   | 0.0262723 | 0.0976309 |
| ACOT7                   | 106.368    | 103.678    | 95.418     | 120.557   | 104.177   |
| CUL5                    | 2.00956    | 2.2626     | 2.07808    | 2.30598   | 2.43322   |
| TMEM129                 | 18.9076    | 24.9744    | 26.8215    | 25.8209   | 25.966    |
| MRPL4                   | 149.706    | 137.939    | 157.833    | 171.495   | 140.062   |
| SBF2-AS1                | 2.24706    | 2.15992    | 2.67556    | 2.39875   | 2.09607   |
| EVPL                    | 5.57619    | 5.50955    | 4.20327    | 6.06449   | 5.49402   |
| RPAP2                   | 5.15209    | 3.90455    | 4.81162    | 5.29826   | 4.42876   |
| PRIM1                   | 11.7541    | 12.2751    | 14.2976    | 15.1652   | 12.9054   |
| MFSД12                  | 61.2007    | 72.12      | 72.7042    | 70.8974   | 71.8446   |
| ATG9B                   | 1.36597    | 1.22633    | 1.19501    | 1.43369   | 1.64648   |
| MTMR7                   | 0.954513   | 0.917673   | 1.0265     | 0.955492  | 1.02559   |
| PLEKHM1                 | 10.8616    | 10.784     | 10.3524    | 11.5097   | 11.515    |
| GIPR                    | 0.705277   | 0.89123    | 0.349894   | 0.935981  | 0.713855  |
| RGS11                   | 15.0271    | 14.0391    | 10.5326    | 16.169    | 15.1963   |
| NOC4L                   | 33.9152    | 31.6443    | 28.9236    | 36.2688   | 31.1559   |
| BAK1                    | 49.2966    | 43.0423    | 52.5427    | 54.689    | 44.0337   |
| ZNF783                  | 1.31691    | 2.44249    | 1.70384    | 1.5881    | 2.51167   |
| SLC25A25                | 11.8888    | 14.8933    | 16.7622    | 14.3881   | 16.6568   |
| SYCP2                   | 0.0227136  | 0.0901446  | 0.00412002 | 0.0428562 | 0.0501503 |
| STK32C                  | 9.22659    | 7.59427    | 11.2664    | 9.89131   | 7.94561   |
| SLC7A2                  | 2.91592    | 2.75544    | 2.8425     | 3.09114   | 2.82018   |
| R3HDM4                  | 85.1037    | 73.8793    | 91.5363    | 95.9886   | 74.5581   |
| USP36                   | 8.60308    | 7.77007    | 8.96647    | 10.2221   | 8.26408   |
| ZNF26                   | 4.04511    | 4.25142    | 4.78665    | 4.52501   | 4.65704   |
| RPRD1B                  | 5.21818    | 6.40881    | 6.04719    | 6.23474   | 7.12785   |
| ZSCAN5A                 | 0.380514   | 0.605738   | 0.578109   | 0.582965  | 0.576675  |
| COQ10B                  | 17.0937    | 17.9964    | 17.9061    | 18.088    | 20.1157   |
| WDR55                   | 15.6591    | 20.3601    | 14.4471    | 17.376    | 19.8477   |
| LTP1                    | 1.41756    | 1.46881    | 1.53095    | 1.50436   | 1.65496   |
| ZNF710                  | 8.76574    | 6.34746    | 7.98536    | 10.0339   | 6.34802   |
| DDX58                   | 0.446704   | 0.504552   | 0.505794   | 0.554943  | 0.578013  |
| FAM20A                  | 0.00622703 | 0.00887277 | 0.0154969  | 0         | 0         |
| CENPC1                  | 2.56396    | 2.16183    | 1.92968    | 2.74468   | 2.36328   |
| ALX3                    | 1.46425    | 1.64942    | 1.49123    | 2.02157   | 1.54939   |
| MAPRE1                  | 23.3722    | 23.5699    | 25.9594    | 26.6444   | 26.0346   |
| CHML                    | 1.63222    | 1.50742    | 1.5786     | 1.84226   | 1.70748   |
| PPARD                   | 13.041     | 12.6899    | 9.33494    | 13.483    | 13.0213   |
| BRAT1                   | 22.2641    | 19.6342    | 22.6863    | 23.7474   | 22.3144   |
| SNHG8                   | 276.909    | 324.047    | 364.979    | 343.298   | 294.819   |
| PPIL4                   | 8.06254    | 6.81277    | 8.05974    | 8.50477   | 8.18996   |
| AP2A2                   | 11.4465    | 12.5979    | 12.9737    | 13.0549   | 12.6743   |
| C2orf73                 | 0          | 0          | 0.0136351  | 0         | 0.0149264 |
| C21orf58                | 1.60934    | 1.73872    | 1.96525    | 2.61035   | 1.60074   |
| MRPL30                  | 15.558     | 16.003     | 16.9314    | 17.7064   | 16.4383   |
| HERC2P7                 | 3.67067    | 3.31909    | 3.67621    | 4.63574   | 3.32262   |
| RFPL1                   | 0.0189724  | 0.026444   | 0          | 0         | 0.0497367 |
| MRPL38                  | 94.055     | 89.3198    | 101.164    | 110.812   | 85.9078   |
| LARS2                   | 5.88189    | 5.15526    | 5.10167    | 6.07052   | 6.10929   |
| GLIPR1                  | 11.9057    | 12.6239    | 15.9909    | 14.6047   | 13.8328   |
| IDI2-AS1                | 1.57857    | 0.807385   | 1.98752    | 2.08107   | 1.19983   |
| HEXA-AS1                | 0.0656054  | 0.0527164  | 0.101238   | 0.120998  | 0.0403348 |
| GATAD2A                 | 15.6137    | 14.981     | 18.4203    | 18.8479   | 15.6113   |
| SPATA20                 | 31.8096    | 38.1356    | 30.6186    | 35.3753   | 38.8904   |
| CLEC16A                 | 2.54244    | 2.26138    | 2.406      | 3.05474   | 2.23458   |
| SLC38A1                 | 24.4263    | 21.8769    | 36.8766    | 34.1524   | 23.2018   |
| TIMM44                  | 25.5294    | 23.5322    | 32.3082    | 34.8103   | 23.3114   |
| CCDC59                  | 18.2678    | 19.2755    | 18.7818    | 21.8154   | 19.1713   |
| AIG1                    | 26.3316    | 23.4925    | 34.6111    | 32.0757   | 25.5355   |
| MGC16275                | 1.80267    | 2.56318    | 2.28143    | 1.96527   | 2.61823   |
| SOCS5                   | 1.78453    | 1.55532    | 1.73436    | 1.75524   | 1.97581   |
| ZSWIM7                  | 7.86638    | 8.2433     | 9.31968    | 9.30188   | 7.92611   |
| CRK                     | 7.27385    | 7.13546    | 8.67916    | 8.7319    | 6.96055   |
| CBY1                    | 29.5944    | 30.5683    | 27.2858    | 31.4752   | 31.9562   |
| MBNL1-AS1               | 0.0658133  | 0.161601   | 0.0921878  | 0.131084  | 0.105196  |
| POLA2                   | 8.72901    | 8.78338    | 9.50877    | 10.7769   | 9.74952   |
| KATNB1                  | 34.9814    | 36.79      | 32.9726    | 39.5247   | 39.2927   |
| DRG1                    | 54.2041    | 57.6481    | 57.334     | 60.9577   | 57.8338   |
| FAM120B                 | 3.10253    | 3.44774    | 2.93409    | 3.55461   | 3.58045   |
| LRRC17                  | 0.0607775  | 0.0582251  | 0.0765778  | 0.117951  | 0.0413328 |
| ZNF584                  | 5.49224    | 5.87512    | 6.36363    | 6.66163   | 6.50548   |
| PSMA3                   | 65.8844    | 63.8912    | 83.7113    | 77.0509   | 70.3086   |
| CUL4A                   | 17.0866    | 15.9626    | 18.6074    | 20.1176   | 17.301    |
| HOXD9                   | 8.70543    | 9.99729    | 9.76384    | 10.2749   | 9.66132   |
| PCDHGA1,PCDHGA10,PCDHGA | 5.03149    | 10.5145    | 4.82826    | 6.34801   | 10.0498   |

|              |           |           |           |           |           |
|--------------|-----------|-----------|-----------|-----------|-----------|
| DHRS1        | 2.78514   | 2.5418    | 1.44077   | 2.38962   | 2.69885   |
| MRPL45       | 44.6621   | 49.5897   | 55.6289   | 52.8758   | 48.9915   |
| FAM199X      | 3.12479   | 3.0535    | 3.18761   | 3.48885   | 3.54125   |
| FAM13A-AS1   | 0.246965  | 0.231928  | 0.152843  | 0.163231  | 0.40635   |
| INPP5B       | 4.47843   | 4.82556   | 5.4634    | 5.6327    | 4.97702   |
| HOXA10,HOXA9 | 21.8133   | 27.9217   | 30.9834   | 28.5056   | 28.321    |
| NOL7         | 109.225   | 106.358   | 113.692   | 127.122   | 106.264   |
| LYRM2        | 3.02964   | 4.00396   | 4.00853   | 3.75619   | 4.18695   |
| HAUS2        | 8.86326   | 8.97068   | 10.0916   | 10.1581   | 10.2542   |
| TMBIM6       | 243.302   | 252.865   | 290.561   | 293.451   | 260.927   |
| CUL1         | 22.0951   | 19.7866   | 23.0732   | 24.5373   | 22.0823   |
| MAP1LC3B     | 50.101    | 52.8351   | 88.0518   | 73.8883   | 55.0227   |
| MSRB2        | 8.94722   | 10.0793   | 8.27476   | 10.2958   | 8.7805    |
| FIS1         | 166.63    | 195.505   | 181.85    | 187.373   | 199.649   |
| CDC37        | 259.627   | 237.784   | 239.018   | 287.54    | 236.055   |
| NT5DC1       | 10.3589   | 9.57987   | 9.44377   | 10.236    | 10.7482   |
| KBTBD6       | 1.07272   | 1.56535   | 1.08629   | 1.34027   | 1.48184   |
| ARFRP1       | 15.77     | 13.6262   | 16.2613   | 18.5583   | 13.8517   |
| DUSP28       | 2.30134   | 2.84685   | 3.10772   | 3.24901   | 3.49079   |
| NARS2        | 7.21904   | 6.5864    | 6.75405   | 7.21375   | 8.42464   |
| ASAP2        | 3.9334    | 3.26947   | 3.09939   | 3.80752   | 3.97998   |
| ZBTB12       | 5.28635   | 4.28689   | 5.98222   | 5.74977   | 4.61852   |
| LRTM2        | 0.0198406 | 0.0266304 | 0.0240509 | 0.0167071 | 0.0605376 |
| MDN1         | 0.790661  | 0.648287  | 0.755944  | 0.91353   | 0.698862  |
| DDX51        | 8.28786   | 8.66439   | 8.53682   | 10.0413   | 8.50286   |
| RPSAP9       | 6.85606   | 10.4825   | 7.7203    | 7.78504   | 9.8479    |
| GRHL1        | 0.461838  | 1.03469   | 1.00486   | 0.94483   | 0.949403  |
| ZC3H13       | 1.02843   | 0.925178  | 0.79971   | 1.00543   | 1.1274    |
| ADARB1       | 3.61414   | 3.81358   | 3.22664   | 3.91248   | 3.9327    |
| C6orf48      | 296.734   | 336.292   | 340.685   | 367.319   | 294.848   |
| CCT4         | 92.1395   | 95.129    | 108.458   | 106.58    | 99.6956   |
| TESC         | 48.3423   | 41.0493   | 49.3447   | 55.6637   | 42.2356   |
| POLR2K       | 44.4519   | 56.1908   | 56.8652   | 55.991    | 55.8918   |
| NUP93        | 22.3336   | 19.1487   | 21.0419   | 24.4272   | 20.7277   |
| EXOSC4       | 91.0526   | 97.4203   | 128.597   | 109.903   | 101.301   |
| LINC00612    | 0.0133349 | 0.0194363 | 0.0338536 | 0         | 0.0731153 |
| DDX49        | 32.6991   | 29.2924   | 37.3863   | 37.5942   | 29.902    |
| UVSSA        | 1.47757   | 1.17952   | 0.888582  | 1.46283   | 1.29877   |
| E2F4         | 49.7288   | 51.3496   | 52.3624   | 58.3765   | 50.48     |
| PRPSAP2      | 20.4524   | 20.7863   | 19.9289   | 21.9589   | 22.8339   |
| FAM210B      | 16.4683   | 25.1934   | 19.5007   | 20.1581   | 24.7081   |
| PAQR8        | 1.55126   | 1.69389   | 1.96646   | 1.88001   | 1.65274   |
| SPRYD3       | 26.9677   | 25.3529   | 25.0467   | 29.2973   | 28.0478   |
| RPH3AL       | 3.1217    | 2.3068    | 3.46601   | 3.27944   | 2.81057   |
| TCP1         | 85.5535   | 76.5494   | 97.4712   | 101.57    | 78.2243   |
| SLC1A5       | 135.079   | 132.824   | 297.76    | 231.32    | 128.659   |
| ACSF3        | 5.0074    | 3.94682   | 5.62417   | 5.98154   | 3.96904   |
| FENDDR       | 0         | 0.0332056 | 0         | 0.0259866 | 0.0103148 |
| ABCA3        | 11.8616   | 13.1014   | 12.3124   | 12.757    | 14.6128   |
| RPRD2        | 2.86923   | 3.07248   | 3.21293   | 3.46469   | 3.30184   |
| PMS1         | 3.84297   | 3.17285   | 3.99217   | 4.2002    | 3.51926   |
| LILRA6       | 0.0384528 | 0.0448209 | 0.0316949 | 0.0107005 | 0.0584918 |
| ELMOD2       | 2.47069   | 2.90156   | 2.7365    | 3.07582   | 2.98464   |
| FERMT1       | 3.87727   | 4.56068   | 5.32111   | 5.11334   | 4.56734   |
| NCOA3        | 1.35083   | 1.07313   | 1.23355   | 1.34076   | 1.28453   |
| LOC100303749 | 0         | 0         | 0.0392902 | 0         | 0.0431404 |
| RRP7A        | 24.0854   | 23.9277   | 25.3407   | 28.8631   | 22.7833   |
| PRKAG1       | 34.6564   | 44.6619   | 44.0411   | 41.9544   | 44.3222   |
| NID2         | 0.0637897 | 0.0368019 | 0.0718852 | 0.0888767 | 0.0340651 |
| POLR3K       | 30.802    | 32.9159   | 33.554    | 35.1261   | 33.1901   |
| NDUFAF4      | 8.57259   | 9.23143   | 10.2987   | 9.71592   | 9.96016   |
| EEF2         | 2074.63   | 2481.43   | 2422.18   | 2444.35   | 2453.4    |
| GALNT6       | 13.7774   | 12.5956   | 15.5511   | 16.7363   | 13.5382   |
| KIAA1143     | 7.26205   | 8.12521   | 8.37678   | 8.29948   | 8.89322   |
| FLJ37035     | 0.0860567 | 0.108881  | 0.0956379 | 0.127512  | 0.139531  |
| ZNF696       | 5.17808   | 6.14721   | 6.87563   | 6.74453   | 6.58775   |
| TIE1         | 0.0556012 | 0.0987106 | 0.0446264 | 0.0773252 | 0.124556  |
| PRMT7        | 11.0173   | 11.2136   | 12.3362   | 12.6721   | 11.3874   |
| EIF4G1       | 36.4564   | 35.5203   | 38.3984   | 41.2112   | 37.8971   |
| HNRNPR       | 47.2859   | 44.8846   | 47.3853   | 52.7175   | 48.9324   |
| NT5DC3       | 2.4503    | 2.72109   | 2.33015   | 2.45764   | 3.15592   |
| LOC155060    | 3.96733   | 4.81902   | 2.80693   | 4.65201   | 4.81123   |
| GABPB2       | 1.24876   | 0.860964  | 1.0732    | 1.31617   | 1.09054   |
| ASF1A        | 4.0544    | 4.39928   | 5.41686   | 5.10689   | 4.72795   |
| TSPYL1       | 16.9716   | 20.9016   | 20.9396   | 19.0192   | 23.3236   |
| RP2          | 1.324     | 1.0609    | 1.30216   | 1.31396   | 1.48147   |
| TSNARE1      | 4.07119   | 5.46844   | 5.01096   | 4.79501   | 5.98184   |
| NCDN         | 7.74764   | 8.71294   | 11.7648   | 9.7037    | 9.88172   |
| IMPDH2       | 240.256   | 338.347   | 272.92    | 278.646   | 324.08    |

|              |           |           |            |            |           |
|--------------|-----------|-----------|------------|------------|-----------|
| ZSWIM3       | 0.996601  | 1.18483   | 1.36906    | 1.24762    | 1.10397   |
| SLCO1B7      | 0.53414   | 0.209768  | 0.312411   | 0.466587   | 0.249739  |
| ZNF573       | 0.145587  | 0.130422  | 0.142356   | 0.14912    | 0.214982  |
| PCCB         | 83.1771   | 72.9279   | 78.1206    | 84.7184    | 81.3038   |
| NME7         | 8.29318   | 8.76467   | 7.73104    | 9.04962    | 9.72405   |
| HDDC2        | 34.4827   | 39.9108   | 37.9927    | 37.806     | 42.92     |
| GTDC1        | 1.51423   | 1.14873   | 1.30644    | 1.33186    | 1.62228   |
| SNX24        | 10.9153   | 7.86171   | 14.9373    | 12.9914    | 9.88626   |
| CXXC4        | 0.0126132 | 0.0063358 | 0.00543276 | 0.00707554 | 0.0120264 |
| ZNF567       | 1.89173   | 2.99094   | 2.52828    | 2.28385    | 3.12377   |
| MCOLN3       | 4.49      | 4.33268   | 5.49973    | 5.73518    | 4.80801   |
| BTBD11       | 0.477354  | 0.411101  | 0.294316   | 0.448635   | 0.428593  |
| MPRIP        | 8.27083   | 8.24879   | 7.74973    | 9.08502    | 8.4675    |
| NUDT4        | 14.5779   | 14.9596   | 16.5525    | 16.4856    | 17.0443   |
| ZFC3H1       | 1.89195   | 1.35147   | 1.8924     | 2.40236    | 1.22725   |
| NVL          | 6.25288   | 5.43031   | 6.56114    | 7.86444    | 5.08577   |
| RSLD1        | 66.2617   | 67.4256   | 66.4637    | 73.5797    | 71.588    |
| XIAP         | 2.20145   | 2.09651   | 2.31948    | 2.36094    | 2.28324   |
| ELP4         | 11.3919   | 10.2994   | 10.7508    | 9.95255    | 14.0558   |
| EXOSC2       | 27.8189   | 29.6863   | 31.584     | 31.9565    | 31.7093   |
| LEPROTL1     | 9.65141   | 7.72179   | 11.8994    | 11.1035    | 9.18163   |
| NINL         | 2.18509   | 1.93833   | 1.96462    | 2.41822    | 2.18247   |
| TYW3         | 9.10841   | 10.1725   | 8.97215    | 9.3553     | 11.9402   |
| NOP2         | 25.0102   | 28.7667   | 30.8264    | 31.8023    | 28.5015   |
| IL15RA       | 15.1158   | 11.462    | 15.1967    | 17.2793    | 11.6825   |
| ANK2         | 0.333452  | 0.382264  | 0.34431    | 0.433473   | 0.36985   |
| NSF          | 6.0432    | 5.11127   | 6.41991    | 6.21625    | 6.63081   |
| MRPL21       | 94.1526   | 97.7603   | 101.71     | 103.971    | 101.665   |
| UMPS         | 4.40724   | 5.10725   | 4.87773    | 5.13611    | 5.30752   |
| ADORA2B      | 28.0191   | 27.3985   | 34.7694    | 29.8367    | 33.6398   |
| ICT1         | 44.5573   | 41.2538   | 49.1255    | 52.3751    | 42.9146   |
| ELMO3        | 2.36825   | 2.29622   | 1.89635    | 2.40979    | 2.73013   |
| MAPKAPK5     | 10.4533   | 9.66206   | 12.5862    | 12.2573    | 10.3759   |
| METTL16      | 4.91418   | 4.28927   | 4.44821    | 4.50793    | 4.84171   |
| KBTBD11      | 2.70589   | 3.23837   | 3.51042    | 3.53651    | 3.16046   |
| TUBAL3       | 0.950501  | 0.802949  | 1.04456    | 1.14113    | 0.771283  |
| PDGFA        | 6.05804   | 6.3246    | 5.64895    | 6.6891     | 5.891     |
| UNC5CL       | 0.553469  | 0.774603  | 0.582923   | 0.831963   | 0.618903  |
| CCBL2,RBMLX1 | 12.523    | 14.4509   | 16.884     | 15.3506    | 16.1849   |
| MEMO1        | 27.0233   | 21.6284   | 29.9257    | 27.5159    | 24.9011   |
| PPAT         | 7.03435   | 6.44259   | 8.28669    | 8.05623    | 7.48868   |
| APLN         | 3.81463   | 6.69943   | 2.43019    | 3.32622    | 7.34299   |
| MYSM1        | 1.77024   | 1.40848   | 1.39274    | 1.78367    | 1.53162   |
| OXLD1        | 35.095    | 46.1134   | 52.2623    | 48.8915    | 47.7996   |
| ZC3H14       | 9.23883   | 7.50098   | 9.73063    | 10.1421    | 8.52023   |
| CDC42SE1     | 27.7179   | 28.962    | 36.6915    | 34.4922    | 30.6736   |
| PBX3         | 25.5588   | 18.4437   | 17.9664    | 23.5726    | 19.8281   |
| LOC100506190 | 9.2308    | 12.4218   | 12.0252    | 10.7481    | 11.7711   |
| BBS5         | 0.656241  | 0.604406  | 0.701845   | 0.835048   | 0.560228  |
| MAPKAPK3     | 65.5879   | 61.3936   | 67.6937    | 72.1317    | 64.5876   |
| FAR1         | 5.93652   | 5.22041   | 7.22097    | 7.40769    | 5.98437   |
| WWC1         | 7.62125   | 6.23759   | 7.88538    | 8.53207    | 6.54823   |
| TANGO6       | 2.52735   | 2.20097   | 2.85123    | 3.0209     | 2.77763   |
| EIF3D        | 173.777   | 189.746   | 232.605    | 206.868    | 197.351   |
| MPV17L2      | 9.90633   | 14.5176   | 14.5926    | 13.9966    | 13.5879   |
| IFITM4P      | 0.519609  | 0         | 0          | 0.567977   | 0         |
| COX6B1       | 361.805   | 385.71    | 332.262    | 355.226    | 427.87    |
| LOC100506668 | 3.5226    | 4.29065   | 4.05856    | 3.77133    | 4.79644   |
| DYNLT3       | 4.8559    | 5.01783   | 5.55913    | 5.39901    | 5.75129   |
| DNMT1        | 20.7487   | 16.1071   | 18.8002    | 24.37      | 17.849    |
| C6orf70      | 6.71472   | 6.61069   | 8.27944    | 8.00623    | 7.21296   |
| FTL          | 8425.59   | 10887.9   | 8069.6     | 9509.32    | 10155.4   |
| C1orf53      | 1.8361    | 2.25802   | 1.57554    | 2.2915     | 1.81564   |
| DMBX1        | 2.10804   | 1.53474   | 1.65421    | 2.92146    | 1.36619   |
| SNRPA        | 142.8     | 106.636   | 144.91     | 152.045    | 129.099   |
| EIF2B1       | 11.2645   | 13.5386   | 12.3799    | 13.5201    | 13.7511   |
| SLC25A14     | 5.31056   | 5.11236   | 6.03774    | 5.93418    | 5.9072    |
| SLC35A2      | 12.8236   | 13.3806   | 18.1352    | 17.1503    | 13.9774   |
| ZNF440       | 2.63615   | 3.13154   | 2.28901    | 2.99199    | 3.13525   |
| ERLIN2       | 4.31138   | 4.2504    | 4.22604    | 4.64246    | 5.40717   |
| BCS1L        | 24.7723   | 23.1254   | 26.8491    | 28.1651    | 25.7168   |
| EFCAB11      | 12.3291   | 11.4548   | 9.73528    | 12.3426    | 11.1904   |
| SLC25A21     | 1.02487   | 0.823648  | 1.1046     | 1.16105    | 0.92948   |
| KHSRP        | 56.1797   | 54.4146   | 63.2762    | 71.1221    | 57.6595   |
| SESN2        | 20.8701   | 24.1256   | 89.5011    | 51.9586    | 25.9209   |
| FLAD1        | 24.4525   | 30.927    | 30.0599    | 31.9551    | 28.7747   |
| ZNF71        | 3.6131    | 4.0658    | 3.77863    | 3.78038    | 4.69307   |
| SNX10        | 9.99759   | 10.88     | 9.83636    | 10.1004    | 12.8564   |
| SIRT5        | 3.90107   | 4.13118   | 4.99511    | 4.7147     | 4.56436   |

|                       |            |           |            |           |           |
|-----------------------|------------|-----------|------------|-----------|-----------|
| LAP3                  | 25.377     | 22.7471   | 25.7687    | 26.3051   | 27.0608   |
| SLC30A9               | 13.5282    | 14.7722   | 14.9032    | 14.3361   | 17.3457   |
| ALDH2                 | 64.4998    | 50.6023   | 67.2011    | 69.6625   | 58.7151   |
| WDR18                 | 89.07      | 75.3601   | 77.8341    | 93.5473   | 83.402    |
| MTHFS,ST20,ST20-MTHFS | 14.1782    | 15.4056   | 18.1604    | 15.6399   | 15.2484   |
| ANGEL2                | 4.23234    | 4.76892   | 5.69475    | 5.72273   | 4.75325   |
| IFIT5                 | 2.3754     | 2.84418   | 3.16138    | 2.92717   | 2.88831   |
| DDX31                 | 14.6417    | 13.4547   | 16.2277    | 16.39     | 15.0978   |
| CDKN2AIPNL            | 26.3709    | 27.8877   | 34.6137    | 31.9693   | 30.4648   |
| AMACR,C1QTNF3         | 1.54388    | 2.7376    | 1.84934    | 1.88245   | 2.70081   |
| MRPS25                | 12.0177    | 11.0225   | 12.5435    | 13.9526   | 11.6458   |
| CCDC17                | 0.292874   | 0.229184  | 0.226635   | 0.314095  | 0.298347  |
| PPP1R37               | 11.169     | 10.3737   | 11.4982    | 12.8845   | 10.6653   |
| FAM49A                | 0.0134804  | 0.0262784 | 0.0227434  | 0.037441  | 0.0311948 |
| C2CD3                 | 0.277186   | 0.266745  | 0.26746    | 0.339279  | 0.32504   |
| ZNF217                | 1.76637    | 1.57932   | 2.1287     | 2.00421   | 1.96571   |
| RNF207                | 2.7582     | 1.81856   | 1.87098    | 3.2501    | 2.13572   |
| NAT10                 | 32.5303    | 30.3296   | 26.2459    | 33.9798   | 32.364    |
| CAMKK1                | 4.99315    | 6.70696   | 4.39321    | 5.73487   | 6.80845   |
| SF3B4                 | 49.4781    | 60.7972   | 60.9647    | 62.2845   | 60.0667   |
| CCDC14                | 6.04596    | 5.15279   | 4.46686    | 7.2583    | 5.26434   |
| GABPB1-AS1            | 0.717223   | 1.54649   | 1.40286    | 1.24579   | 1.27498   |
| DDX56                 | 32.6852    | 38.4543   | 35.7057    | 40.6028   | 37.1278   |
| ACSS1                 | 0.933118   | 1.23988   | 1.15009    | 1.49489   | 0.974841  |
| PRPF31                | 44.3566    | 52.1361   | 40.1772    | 51.7728   | 49.9928   |
| GPATCH4               | 18.5455    | 19.1104   | 20.978     | 22.8692   | 19.0614   |
| FAM45B                | 0.0275416  | 0.0265682 | 0.0579093  | 0.0152897 | 0.0752555 |
| SLC25A53              | 0.00487466 | 0.0284896 | 0.00619368 | 0.0245898 | 0.0100673 |
| TFR2                  | 17.146     | 16.38     | 18.0296    | 20.9395   | 15.1613   |
| PDCD11                | 8.43554    | 7.76304   | 11.3469    | 10.4071   | 8.57722   |
| ZNF781                | 0.0761572  | 0.0187441 | 0.105439   | 0.105596  | 0.0803331 |
| AP3D1                 | 15.0581    | 14.3884   | 14.177     | 17.7511   | 14.5224   |
| ZNF28                 | 1.16498    | 1.45639   | 1.37254    | 1.34687   | 1.55787   |
| TSR1                  | 21.7403    | 19.8492   | 20.5513    | 23.5652   | 22.3926   |
| IK                    | 19.7432    | 21.2221   | 18.2525    | 23.3375   | 21.9298   |
| ZNF766                | 3.36504    | 4.62677   | 4.33416    | 4.09612   | 5.23826   |
| TRIT1                 | 14.1209    | 13.6038   | 15.6919    | 16.0622   | 15.0497   |
| AMER1                 | 0.511425   | 0.689994  | 0.491486   | 0.57361   | 0.701407  |
| PSMC3                 | 68.6991    | 74.7278   | 75.1431    | 82.8394   | 73.953    |
| NQO2                  | 97.2178    | 90.1803   | 94.1863    | 109.167   | 93.403    |
| SLC30A5               | 5.58633    | 4.90606   | 5.92883    | 6.02834   | 6.06584   |
| TMC5                  | 1.50949    | 1.22838   | 1.65542    | 1.88198   | 1.34751   |
| TF                    | 0.0370473  | 0.0127731 | 0          | 0.030914  | 0.0238391 |
| IBA57                 | 1.47283    | 1.66904   | 1.49147    | 1.58857   | 1.85037   |
| FUNDC1                | 12.2001    | 12.9016   | 12.174     | 12.2228   | 14.7682   |
| LUC7L3                | 18.8886    | 11.9895   | 24.5969    | 23.2186   | 12.656    |
| HPS3                  | 3.34496    | 3.07336   | 2.56966    | 3.29736   | 3.75534   |
| C21orf33              | 67.2581    | 68.4432   | 74.0501    | 74.0588   | 78.8329   |
| TXLNG                 | 11.0722    | 10.6757   | 13.7752    | 14.064    | 11.7147   |
| CMAS                  | 18.0025    | 14.314    | 17.5986    | 18.6395   | 17.1703   |
| RBM25                 | 12.4034    | 11.5162   | 11.1732    | 13.9072   | 13.7207   |
| TNKS2                 | 3.42891    | 3.25191   | 3.25698    | 3.79176   | 3.53364   |
| ZNF589                | 4.44052    | 3.61397   | 5.72448    | 5.69183   | 3.78938   |
| LACE1                 | 1.11116    | 0.875649  | 1.01526    | 1.35032   | 0.90642   |
| RMND5A                | 4.32818    | 4.12127   | 4.52803    | 4.64084   | 4.52716   |
| TMEM138               | 12.7153    | 12.6582   | 19.6599    | 17.8339   | 12.1292   |
| POLR1C                | 44.736     | 54.3313   | 56.6881    | 51.9232   | 57.4285   |
| SHPRH                 | 0.76413    | 0.680379  | 0.656813   | 0.879001  | 0.682388  |
| NSUN2                 | 21.8103    | 20.2321   | 26.1476    | 25.9274   | 23.2226   |
| C12orf66              | 0.776299   | 1.14992   | 0.932226   | 0.932016  | 1.06799   |
| ELAC2                 | 26.2251    | 26.1105   | 28.982     | 30.1739   | 27.7713   |
| LOC646214             | 0.184582   | 0.199979  | 0.270951   | 0.287657  | 0.250172  |
| B9D2                  | 5.77278    | 9.09317   | 5.39417    | 6.0259    | 8.56331   |
| UBP1                  | 14.499     | 13.9481   | 17.6552    | 17.4414   | 15.2508   |
| CSNK1A1               | 26.4932    | 28.7683   | 32.0587    | 31.8062   | 30.7275   |
| NEDD9                 | 0.00603838 | 0.0516492 | 0.00754132 | 0         | 0.0720504 |
| LOC100130015          | 3.42444    | 3.60891   | 3.56719    | 4.27217   | 3.95041   |
| SERPINB6              | 93.0289    | 108.437   | 100.1      | 108.724   | 112.128   |
| EZR                   | 56.9678    | 60.1675   | 81.9952    | 73.3749   | 65.9736   |
| KIFAP3                | 1.91402    | 1.93234   | 1.73569    | 2.26134   | 2.03493   |
| NOP14                 | 22.4784    | 22.9282   | 23.4611    | 25.9256   | 25.4416   |
| ZNF121                | 1.22614    | 1.06375   | 1.20914    | 1.07044   | 1.27708   |
| FLVCR1                | 2.93074    | 2.55775   | 3.102      | 3.28493   | 2.93425   |
| ZNF17                 | 1.04971    | 1.43433   | 1.00561    | 1.08675   | 1.7254    |
| ZNF526                | 3.90776    | 3.41222   | 3.89018    | 4.06443   | 3.72202   |
| WHAMMP1               | 0.984213   | 0.670189  | 0.636835   | 0.651772  | 1.19938   |
| RCL1                  | 10.5742    | 12.5702   | 11.335     | 11.258    | 13.9782   |
| FABP3                 | 0.0703015  | 0.0656495 | 0.0573169  | 0.0387571 | 0.091397  |
| ERI2                  | 3.01679    | 3.13554   | 3.92038    | 3.72469   | 3.34574   |

|               |           |           |           |           |           |
|---------------|-----------|-----------|-----------|-----------|-----------|
| TMEM236       | 0.06696   | 0.0499241 | 0.042815  | 0.0770617 | 0.053611  |
| SP110         | 1.29928   | 1.31829   | 1.89973   | 1.68666   | 1.65882   |
| FAM207A       | 88.6398   | 77.8686   | 91.7326   | 98.9245   | 79.268    |
| GALNT12       | 9.27213   | 8.9849    | 7.29512   | 9.84953   | 10.1674   |
| RPUSD2        | 12.0208   | 17.3999   | 17.901    | 15.878    | 18.6864   |
| MIR22.MIR22HG | 0.892341  | 4.99283   | 3.47195   | 1.94808   | 5.40377   |
| DCK           | 5.12316   | 5.25861   | 5.50667   | 6.079     | 6.24263   |
| BAG2          | 19.8208   | 18.4754   | 23.2127   | 22.7095   | 21.9158   |
| AGBL3         | 0.0638785 | 0.0419231 | 0.123628  | 0.105728  | 0.0952757 |
| EXOSC8        | 28.9585   | 26.5508   | 41.0871   | 41.2081   | 26.3707   |
| SLC41A3       | 16.9568   | 17.9986   | 20.229    | 21.8238   | 16.0711   |
| RGS20         | 0.0152604 | 0.0869324 | 0.076151  | 0         | 0.142767  |
| GPD1L         | 2.89099   | 2.67205   | 3.28631   | 3.26981   | 3.23863   |
| SEC22C        | 6.31575   | 7.44518   | 8.04335   | 7.50858   | 8.08446   |
| LAMC2         | 0.123954  | 0.121008  | 0.100126  | 0.120815  | 0.153841  |
| TBC1D7        | 5.4406    | 4.44779   | 7.01152   | 6.0732    | 5.94991   |
| HNRNPA2B1     | 149.049   | 128.103   | 154.65    | 179.462   | 142.993   |
| ACADSB        | 2.27633   | 2.21064   | 2.31056   | 2.46889   | 2.64126   |
| DRP2          | 0.0177461 | 0.034886  | 0.030867  | 0.0355574 | 0.0184431 |
| HNRNPF        | 99.7587   | 93.7678   | 121.095   | 120.676   | 103.998   |
| TBXAS1        | 0.150912  | 0.302367  | 0.234732  | 0.365018  | 0.175752  |
| SURF1         | 35.2737   | 47.6156   | 40.7974   | 43.9628   | 43.3923   |
| CDC42BPA      | 2.05958   | 2.0293    | 2.53544   | 2.67623   | 2.11796   |
| GCN1L1        | 15.6995   | 13.4598   | 14.487    | 17.61     | 14.45     |
| SLC9B2        | 6.15404   | 5.72247   | 8.46899   | 6.94636   | 7.29109   |
| GNL2          | 28.9702   | 25.396    | 31.5063   | 33.9947   | 28.8737   |
| LOC730101     | 1.38903   | 1.34049   | 1.74571   | 1.92378   | 1.25021   |
| NUP88         | 22.8025   | 16.4295   | 30.2083   | 28.3744   | 19.4177   |
| PRKXP1        | 0.0949796 | 0.0862319 | 0.161476  | 0.127936  | 0.080534  |
| OSGEP         | 27.9802   | 24.228    | 30.2543   | 33.6914   | 27.1858   |
| SP8           | 0.311726  | 0.407019  | 0.294623  | 0.457805  | 0.45997   |
| CBLL1         | 5.53438   | 5.11782   | 7.00865   | 6.73975   | 5.66345   |
| REP15         | 0.689197  | 0.640803  | 0.853907  | 0.854257  | 0.866447  |
| UCHL3         | 45.6994   | 41.2173   | 49.315    | 48.4293   | 45.4364   |
| SURF2         | 73.0932   | 65.1226   | 78.5395   | 83.4397   | 68.4116   |
| MB21D2        | 1.60021   | 1.86974   | 1.55215   | 1.51782   | 2.24688   |
| SMG9          | 38.4209   | 29.7217   | 38.4815   | 43.2694   | 31.8066   |
| UGDH-AS1      | 2.66588   | 2.77221   | 2.35792   | 3.41988   | 2.91171   |
| SCAND3        | 0.5351    | 0.384544  | 0.56764   | 0.612616  | 0.458589  |
| SNORA49       | 0         | 4.68037   | 4.05936   | 0         | 9.67071   |
| SKI           | 8.27521   | 8.83629   | 8.62918   | 9.79137   | 9.95355   |
| LOC728537     | 1.15579   | 1.23277   | 0.715498  | 1.28894   | 1.17991   |
| FLJ39051      | 1.73819   | 1.72671   | 2.08      | 1.81965   | 2.36982   |
| HCG18         | 1.03178   | 1.28633   | 1.48223   | 1.3662    | 1.23735   |
| C3orf62       | 2.32832   | 2.58579   | 2.48025   | 2.80057   | 2.56028   |
| DCTD          | 52.4875   | 58.6813   | 58.5685   | 58.4986   | 63.369    |
| EFR3A         | 4.15245   | 4.26767   | 5.49044   | 5.29277   | 4.63127   |
| VPS33A        | 6.77428   | 6.81681   | 8.19223   | 8.93664   | 7.32377   |
| RPTOR         | 5.53313   | 6.13384   | 5.44228   | 6.75208   | 6.4176    |
| FER1L5        | 0.021077  | 0.0171571 | 0.0410219 | 0.02106   | 0.0367182 |
| TWISTNB       | 4.1697    | 5.03174   | 4.92053   | 5.30657   | 5.58291   |
| GFAP          | 0.0559558 | 0         | 0.0123775 | 0         | 0.0377284 |
| THAP7-AS1     | 1.84326   | 4.24789   | 2.21655   | 3.27085   | 3.07656   |
| TNFRSF21      | 2.83958   | 3.62458   | 3.14483   | 3.71707   | 3.56249   |
| WDR53         | 2.60877   | 2.72606   | 2.4807    | 3.0148    | 2.70259   |
| INTS10        | 23.801    | 22.256    | 26.2727   | 26.9152   | 23.7549   |
| AKIP1         | 22.362    | 19.4468   | 24.3527   | 26.7002   | 21.248    |
| DUSP5         | 139.203   | 50.7438   | 153.577   | 159.245   | 51.3568   |
| BCDIN3D       | 1.43062   | 1.89647   | 2.63146   | 2.09902   | 1.83316   |
| LRRC8B        | 1.3798    | 1.22958   | 1.6812    | 1.79688   | 1.31499   |
| NPRL3         | 44.2619   | 38.2848   | 44.8123   | 51.4434   | 37.7723   |
| C6orf211      | 4.7713    | 4.72832   | 4.97333   | 5.06539   | 5.28731   |
| SOBP          | 0.542291  | 0.57688   | 0.497711  | 0.643269  | 0.566518  |
| COG8.PDF      | 23.0354   | 23.4674   | 34.3467   | 31.568    | 24.5752   |
| APOBEC3D      | 0.195117  | 0.101901  | 0.148888  | 0.162231  | 0.158074  |
| FANCF         | 3.53522   | 4.25635   | 4.24716   | 4.58113   | 4.26137   |
| MB21D1        | 4.10045   | 3.73059   | 4.37205   | 5.08461   | 3.16207   |
| KIAA1033      | 2.74657   | 2.33771   | 2.04123   | 2.6339    | 2.92838   |
| PSMG1         | 65.0513   | 55.7352   | 78.3036   | 81.7547   | 60.0229   |
| PDE6D         | 10.1204   | 8.11697   | 10.5783   | 11.0041   | 10.2224   |
| BCAP29        | 8.06444   | 9.6384    | 8.69401   | 8.99665   | 10.8918   |
| PLAA          | 7.91041   | 6.31075   | 9.04466   | 9.52407   | 6.57479   |
| TRIM23        | 2.07178   | 1.36542   | 1.75788   | 2.1652    | 1.72772   |
| DIS3          | 5.91316   | 5.67538   | 6.79095   | 6.90657   | 6.10607   |
| CHSY1         | 3.96461   | 3.09611   | 3.81891   | 4.43242   | 3.33706   |
| STPG1         | 6.52872   | 4.79644   | 5.37346   | 7.39999   | 4.61925   |
| PCDH12        | 0.0109227 | 0.0148004 | 0.0265443 | 0.0181187 | 0.0204298 |
| CTU2          | 17.1381   | 16.9334   | 18.1363   | 19.7501   | 17.082    |
| ESRRA         | 55.4008   | 50.1577   | 60.6081   | 64.397    | 51.3694   |



|              |           |            |           |           |            |
|--------------|-----------|------------|-----------|-----------|------------|
| TTC19        | 18.6606   | 21.8041    | 22.6005   | 22.224    | 22.238     |
| RAB18        | 9.23647   | 9.08061    | 10.7542   | 10.3806   | 10.0116    |
| CNOT10       | 13.0627   | 11.7187    | 13.5869   | 15.252    | 12.6816    |
| RMDN3        | 14.4091   | 15.3619    | 15.0006   | 17.3211   | 16.7089    |
| DVL1         | 76.6822   | 66.1918    | 72.302    | 79.9218   | 70.6354    |
| BTBD2        | 68.6866   | 80.5327    | 67.6899   | 73.4265   | 84.4986    |
| PIEZO1       | 19.6492   | 20.6399    | 16.6928   | 22.0573   | 20.9014    |
| CLUH         | 34.4771   | 27.837     | 32.6601   | 38.7141   | 31.126     |
| C19orf55     | 1.24797   | 1.60958    | 1.38283   | 1.67379   | 1.60462    |
| ODF2L        | 3.47965   | 3.15295    | 2.67292   | 4.02255   | 3.49163    |
| GABPB1       | 6.57501   | 6.5537     | 7.87632   | 7.47027   | 7.31852    |
| SUMF2        | 54.4385   | 67.4449    | 67.1457   | 66.6507   | 68.0519    |
| LAMB1        | 16.719    | 16.5182    | 14.9104   | 18.0244   | 17.8433    |
| USP45        | 1.2866    | 1.11999    | 1.10983   | 1.36044   | 1.16641    |
| TPRG1L       | 13.6203   | 20.1428    | 15.5945   | 16.4942   | 19.6134    |
| CCNT1        | 3.58002   | 3.5552     | 4.21098   | 4.18979   | 3.70596    |
| DDX42        | 16.1788   | 15.3552    | 18.3184   | 19.8436   | 16.0435    |
| ABL2         | 16.3958   | 15.6907    | 18.543    | 16.7377   | 17.2157    |
| CDKN2B       | 2.81691   | 3.42573    | 2.81392   | 3.20895   | 2.92926    |
| PHF14        | 4.66734   | 3.747      | 3.60407   | 4.7258    | 3.57552    |
| TATDN1       | 50.9264   | 53.6607    | 60.7498   | 59.0888   | 53.5727    |
| LRRRC47      | 29.9345   | 30.767     | 30.3212   | 34.8884   | 32.2036    |
| NPRL2        | 15.7692   | 21.0373    | 16.1297   | 20.0547   | 21.0983    |
| ANKK1        | 0.155291  | 0.120172   | 0.296451  | 0.281032  | 0.125058   |
| FAM185A      | 1.69545   | 1.69038    | 2.06825   | 2.05578   | 1.68841    |
| LARP1        | 25.3791   | 22.5014    | 25.667    | 30.056    | 23.1193    |
| C11orf95     | 4.88507   | 5.14283    | 4.86184   | 5.79044   | 5.02716    |
| PSMD12       | 30.8038   | 29.4429    | 30.9196   | 33.8633   | 35.3368    |
| XRCC5        | 69.6034   | 72.3862    | 76.7563   | 83.7119   | 77.1644    |
| LOC100288637 | 1.39715   | 1.00115    | 1.25376   | 1.7076    | 1.00677    |
| LOXL1        | 4.56375   | 6.39009    | 5.39292   | 4.83504   | 7.51507    |
| C9orf131     | 0.0645687 | 0.0110452  | 0.0279532 | 0.0936579 | 0.0206077  |
| LOC149134    | 1.2951    | 1.25368    | 1.46025   | 1.43888   | 1.26691    |
| WDR12        | 14.7395   | 13.5081    | 15.1408   | 16.607    | 14.6489    |
| GSS          | 64.0407   | 58.2613    | 67.1359   | 71.8452   | 65.1045    |
| POGLUT1      | 2.36931   | 3.04767    | 3.42836   | 3.14822   | 3.01909    |
| NT5M         | 7.94998   | 9.63964    | 8.6592    | 8.63427   | 9.70022    |
| PXK          | 1.63002   | 1.71894    | 2.07213   | 2.25666   | 2.16006    |
| MXD4         | 22.5102   | 25.7306    | 28.4354   | 23.6584   | 31.3609    |
| ZNF780B      | 0.793145  | 0.524181   | 0.80274   | 0.999371  | 0.572064   |
| MSRA         | 8.07083   | 9.64265    | 9.53113   | 10.2234   | 8.70283    |
| C1orf74      | 1.27243   | 1.8349     | 1.85473   | 1.62792   | 1.9363     |
| C15orf41     | 2.1818    | 1.9271     | 2.05689   | 2.54583   | 2.11088    |
| S100A6       | 2002.34   | 2536.05    | 2026.55   | 2173.13   | 2554.11    |
| MPZL3        | 0.251732  | 0.155526   | 0.138263  | 0.324463  | 0.179977   |
| ZNF605       | 1.47136   | 1.19121    | 1.76584   | 1.80168   | 1.37163    |
| SRSF8        | 4.51111   | 6.41395    | 7.47591   | 5.94917   | 7.33381    |
| GATM-AS1     | 0.038509  | 0.110691   | 0.0716496 | 0.0639721 | 0.0783795  |
| PIH1D2       | 0.955767  | 1.24823    | 1.11652   | 1.21016   | 1.23074    |
| POLM         | 7.16849   | 6.53505    | 5.77894   | 7.87082   | 6.77727    |
| VPS36        | 3.88379   | 4.26378    | 4.42084   | 4.41121   | 4.25286    |
| LOC728730    | 0.50478   | 0.551378   | 0.33796   | 0.440468  | 0.64277    |
| C8orf33      | 30.6098   | 40.1298    | 32.5432   | 35.8494   | 41.5868    |
| C1orf216     | 6.26784   | 6.82222    | 9.7272    | 8.47297   | 7.59573    |
| MKLN1        | 5.60654   | 5.76037    | 5.16286   | 5.93511   | 6.62588    |
| TMEM106A     | 0.611115  | 0.695399   | 0.550575  | 0.559314  | 0.775719   |
| PPP1CB       | 19.6916   | 20.1554    | 19.1993   | 19.1514   | 24.6005    |
| RASD2        | 0.906573  | 1.63075    | 0.662236  | 1.18428   | 1.735      |
| LBX2         | 4.88323   | 6.54034    | 6.79165   | 8.08342   | 4.67082    |
| UTP20        | 1.62529   | 1.47986    | 1.63739   | 1.887     | 1.55072    |
| GPR83        | 0.126029  | 0.21989    | 0.150276  | 0.16257   | 0.213157   |
| COL5A2       | 0.0260026 | 0.0229298  | 0.0362207 | 0.0323911 | 0.00432866 |
| PCNXL3       | 6.64526   | 7.01831    | 7.9396    | 8.95975   | 6.72386    |
| RBM43        | 1.05023   | 1.64134    | 1.24605   | 1.09396   | 1.85133    |
| SETD8        | 15.6048   | 15.439     | 22.3591   | 22.2233   | 16.5761    |
| FASTKD3      | 7.13516   | 9.61911    | 9.44759   | 9.81309   | 9.18115    |
| RP1L1        | 0.0325506 | 0.00525041 | 0.0145209 | 0.0200732 | 0.0097836  |
| UNC50        | 22.75     | 19.9297    | 32.2988   | 30.8647   | 18.6709    |
| NACC2        | 8.34956   | 6.407      | 8.67414   | 9.69956   | 7.50793    |
| UQCC         | 19.8504   | 17.8318    | 18.2817   | 20.8277   | 19.0557    |
| MNT          | 6.78559   | 6.21538    | 5.90969   | 6.68542   | 8.01354    |
| ATAT1        | 1.21032   | 2.05572    | 1.33408   | 2.02866   | 1.72913    |
| ATF6         | 6.22672   | 6.82364    | 7.9493    | 8.0841    | 7.25519    |
| DHX57        | 2.856     | 3.34944    | 2.8401    | 3.15683   | 3.70514    |
| MFAP1        | 17.1908   | 15.5321    | 17.1193   | 18.7951   | 17.8648    |
| CCDC137      | 21.7207   | 25.0214    | 25.2077   | 28.8799   | 24.0513    |
| DDX19A       | 10.139    | 10.9537    | 12.114    | 11.8495   | 12.1663    |
| ACCS         | 1.40558   | 1.88287    | 1.57496   | 2.16866   | 1.53368    |
| ZFP69B       | 0.776916  | 0.812001   | 1.48787   | 1.28422   | 0.826602   |

|                |           |            |           |            |           |
|----------------|-----------|------------|-----------|------------|-----------|
| EOGT           | 4.32094   | 3.8672     | 4.53614   | 4.86       | 4.86819   |
| DUSP6          | 15.505    | 10.462     | 24.8529   | 18.2127    | 14.7873   |
| AHCTF1P1       | 0.011098  | 0.00325525 | 0.0028301 | 0.00370159 | 0.015371  |
| PNPLA3         | 0.752434  | 0.861328   | 0.748197  | 0.748789   | 1.07332   |
| PPP1R16A       | 38.9269   | 32.6778    | 37.3394   | 46.2145    | 39.9553   |
| LOC100505715   | 0.257165  | 0.175684   | 0.176362  | 0.115646   | 0.29439   |
| AKR7L          | 1.64709   | 2.5399     | 1.50464   | 2.02154    | 2.63036   |
| ADAT3,SCAMP4   | 34.8132   | 33.7606    | 39.476    | 39.7798    | 38.0817   |
| ERRF1          | 78.8443   | 36.2191    | 69.2604   | 72.5766    | 34.8738   |
| BBS10          | 1.9602    | 2.00882    | 2.63979   | 2.40693    | 2.37138   |
| MRPS17         | 58.0823   | 62.854     | 64.0724   | 65.8388    | 62.3573   |
| CHD1L          | 33.2207   | 31.0489    | 27.6205   | 34.1484    | 35.9403   |
| LAG3           | 0.0437772 | 0.207949   | 0.0264677 | 0.109929   | 0.0819946 |
| NEK9           | 4.85065   | 5.73491    | 5.9833    | 6.21829    | 5.975     |
| SEC63          | 4.91992   | 5.59465    | 4.87055   | 5.73818    | 6.06644   |
| ZNF786         | 2.84088   | 3.50593    | 3.12811   | 3.18442    | 3.81551   |
| GLTSCR1L       | 0.657388  | 0.582835   | 0.70239   | 0.851179   | 0.543805  |
| CYB561         | 11.1533   | 12.7996    | 12.3942   | 13.8275    | 12.9101   |
| BRD3           | 7.65279   | 7.34096    | 8.36686   | 9.0046     | 7.99077   |
| AKIRIN2        | 14.9199   | 15.141     | 20.9616   | 20.3283    | 15.0922   |
| DOCK3          | 0.0401669 | 0.032222   | 0.0497191 | 0.0574144  | 0.052445  |
| CTAGE5         | 3.7285    | 3.53977    | 6.32234   | 5.82876    | 3.53626   |
| HIRA           | 5.80095   | 5.34587    | 8.02884   | 8.12123    | 5.521     |
| NDUFAF1        | 14.4522   | 11.9947    | 13.9349   | 16.0928    | 13.6988   |
| XYLB           | 1.85334   | 1.31993    | 1.89025   | 2.1868     | 1.65305   |
| CYLD           | 1.77397   | 1.69574    | 2.21123   | 2.06478    | 2.06084   |
| ST3GAL3        | 2.87954   | 3.41813    | 3.41658   | 3.41435    | 3.76503   |
| LOC729013      | 5.72678   | 5.63077    | 8.10464   | 5.85985    | 7.40961   |
| HGF            | 2.97557   | 3.58381    | 3.20832   | 4.27487    | 2.70452   |
| MRPL10         | 74.2078   | 82.7211    | 83.64     | 88.2881    | 78.0957   |
| WDR20          | 7.38465   | 7.81689    | 9.19465   | 7.85746    | 9.28935   |
| ZNF543         | 0.622765  | 0.705492   | 0.491201  | 0.612814   | 0.643342  |
| ASCC1          | 7.93174   | 7.91327    | 8.31224   | 8.61155    | 9.05407   |
| TM4SF20        | 0         | 0          | 0.0122018 | 0          | 0.0135759 |
| MORN4          | 3.47397   | 3.54871    | 6.45132   | 5.93624    | 3.38549   |
| TK2            | 3.67518   | 4.70589    | 4.79493   | 4.85478    | 5.19163   |
| FHDC1          | 0.343112  | 0.310614   | 0.382655  | 0.389885   | 0.426223  |
| LHX4           | 0.866466  | 0.740357   | 0.619638  | 0.966954   | 0.571642  |
| C4orf32        | 3.01475   | 3.00376    | 5.48144   | 4.24449    | 3.46919   |
| ITPR1P         | 5.88956   | 4.5642     | 5.87435   | 7.14979    | 4.22594   |
| POLR2A         | 8.51621   | 11.7095    | 10.8048   | 11.5033    | 11.6431   |
| LFNG           | 1.91172   | 3.59372    | 1.72876   | 1.92054    | 4.05046   |
| HNRNPAB        | 115.867   | 126.012    | 143.268   | 144.314    | 133.413   |
| FEZ2           | 115.398   | 136.778    | 112.144   | 127.378    | 123.076   |
| ANKMY1         | 1.24734   | 1.21053    | 1.81975   | 1.68894    | 1.44762   |
| DKFZP686115217 | 1.00011   | 1.28598    | 0.792928  | 1.05636    | 1.3117    |
| COP22          | 5.58504   | 7.01793    | 5.59648   | 7.62449    | 6.67379   |
| RABGEF1        | 4.75341   | 4.01765    | 4.87668   | 5.03291    | 4.93622   |
| GDAP2          | 1.20821   | 1.07531    | 1.16052   | 1.0828     | 1.41718   |
| USP35          | 2.3967    | 2.81015    | 2.28871   | 2.96098    | 2.89036   |
| KLHL35         | 10.0287   | 11.7823    | 16.826    | 14.8316    | 12.2345   |
| PSMD9          | 28.1952   | 31.5959    | 32.672    | 33.8371    | 31.7504   |
| WDR83          | 13.9198   | 14.4113    | 14.3427   | 17.9002    | 14.6386   |
| HR             | 0.72672   | 1.79971    | 0.712727  | 0.90496    | 1.63202   |
| XPOT           | 13.3482   | 10.6152    | 22.3967   | 18.0622    | 12.4341   |
| CRYZL1         | 4.8514    | 4.68733    | 5.3154    | 5.12322    | 5.00936   |
| HMOX2          | 34.0248   | 31.7682    | 35.3905   | 36.7299    | 37.2149   |
| GPR125         | 4.92982   | 4.39509    | 5.31175   | 5.76934    | 5.01046   |
| PHLDA2         | 79.9864   | 84.124     | 119.531   | 116.004    | 83.2199   |
| ABHD8          | 9.08667   | 6.72074    | 10.2914   | 10.2634    | 8.34058   |
| FOXP1          | 8.48339   | 7.1465     | 8.44355   | 9.25379    | 7.84793   |
| CBX6           | 5.68557   | 6.0564     | 5.16727   | 7.08246    | 5.38646   |
| NMI            | 8.35514   | 7.22549    | 11.3609   | 11.5217    | 8.71389   |
| SEH1L          | 22.374    | 19.3796    | 23.0716   | 23.8322    | 23.0626   |
| AACS           | 9.72453   | 9.41297    | 9.01471   | 10.3299    | 10.1206   |
| MED28          | 36.4301   | 35.4251    | 36.9277   | 37.5922    | 39.4862   |
| CYP26A1        | 0.0429496 | 0.0618974  | 0.0178516 | 0.0716451  | 0.0390867 |
| E2F6           | 4.9882    | 8.12096    | 7.77753   | 6.91449    | 8.08143   |
| FBXL19-AS1     | 0.250039  | 0.307671   | 0.31685   | 0.380272   | 0.239371  |
| MRPL15         | 50.023    | 61.5787    | 57.4087   | 61.0374    | 64.3174   |
| SET            | 260.532   | 277.498    | 311.126   | 318.36     | 297.017   |
| VSIG10L        | 1.30226   | 1.13673    | 1.13805   | 1.10456    | 1.64206   |
| ATRIP,TREX1    | 5.08828   | 5.37087    | 5.7351    | 6.70959    | 5.28433   |
| MYO5A          | 2.06007   | 1.9614     | 2.22479   | 2.22565    | 2.06928   |
| ZNF770         | 8.48846   | 6.03985    | 8.74168   | 9.0118     | 6.7888    |
| SLC9A3         | 0.536842  | 0.660967   | 0.217655  | 0.641473   | 0.584248  |
| EPN2           | 8.99644   | 8.04457    | 8.45719   | 8.80379    | 10.1432   |
| AGFG2          | 1.57384   | 1.78553    | 1.82653   | 2.28104    | 1.77156   |
| PMS2P5         | 2.23677   | 2.81383    | 3.34672   | 2.82015    | 3.15324   |

|                           |           |          |           |          |           |
|---------------------------|-----------|----------|-----------|----------|-----------|
| APOC1                     | 7.61207   | 13.7489  | 9.17881   | 10.0042  | 12.6736   |
| DIAPH3                    | 6.27017   | 4.42493  | 6.68309   | 6.95502  | 5.08589   |
| HNRNPA1                   | 698.017   | 801.038  | 721.417   | 805.641  | 837.156   |
| BTBD3                     | 2.38699   | 1.92723  | 2.51843   | 2.70964  | 2.28158   |
| LOC153684                 | 0.13549   | 0.138621 | 0.165025  | 0.253878 | 0.0854618 |
| PANK3                     | 4.3345    | 3.01819  | 2.55314   | 3.34557  | 4.11742   |
| FCHO1                     | 8.85537   | 8.22076  | 7.69078   | 9.87353  | 7.92721   |
| FAM222A                   | 0.895098  | 1.20509  | 1.09949   | 1.06493  | 1.46178   |
| MTOR                      | 2.79035   | 2.41371  | 2.97824   | 3.54114  | 2.22552   |
| FAM120C                   | 2.92579   | 2.22856  | 3.16264   | 2.89915  | 3.29647   |
| ZNF614                    | 0.189568  | 0.278407 | 0.0949166 | 0.137939 | 0.280507  |
| TUT1                      | 11.0734   | 9.50117  | 11.3911   | 13.1739  | 9.82917   |
| IFT80                     | 2.18787   | 2.11489  | 2.09477   | 2.72147  | 2.21549   |
| RIOK2                     | 5.21912   | 5.42734  | 7.45789   | 6.33211  | 6.43143   |
| INPP5A                    | 5.69748   | 6.30196  | 6.3445    | 6.91345  | 6.93966   |
| PRR7-AS1                  | 0.423664  | 0.701056 | 0.659066  | 0.483918 | 0.607532  |
| DCLRE1C                   | 2.5277    | 2.54085  | 3.31035   | 3.27224  | 2.96766   |
| NARG2                     | 2.00492   | 1.97367  | 2.46874   | 2.45945  | 2.27906   |
| CYBASC3                   | 6.62728   | 8.99564  | 8.61198   | 8.01279  | 9.70244   |
| RBM26                     | 6.98645   | 6.95558  | 5.94146   | 7.84392  | 6.18987   |
| USB1                      | 26.677    | 29.4524  | 28.6026   | 33.6229  | 30.2554   |
| MICAL3                    | 4.13801   | 3.4462   | 3.95743   | 4.68024  | 3.57955   |
| ZNF773                    | 0.599064  | 1.14351  | 1.14616   | 1.10058  | 1.29335   |
| RAC3                      | 173.074   | 250.131  | 178.349   | 190.88   | 236.555   |
| GAR1                      | 40.5563   | 37.7027  | 49.803    | 47.3901  | 42.1232   |
| SLC27A4                   | 40.9277   | 40.3515  | 51.1974   | 55.1323  | 37.651    |
| ACP6                      | 13.9111   | 15.1116  | 17.731    | 18.6645  | 14.1478   |
| EMILIN1                   | 0.0615216 | 0.236211 | 0.188577  | 0.143512 | 0.143603  |
| MEGF8                     | 1.22658   | 1.7298   | 1.09071   | 1.49297  | 1.81779   |
| MTMR10                    | 1.92456   | 2.18845  | 2.17194   | 2.30588  | 2.36293   |
| ALG8                      | 21.5085   | 18.6741  | 25.7956   | 25.2     | 20.4722   |
| CIRH1A                    | 30.9973   | 31.8298  | 37.9077   | 36.3686  | 34.8676   |
| MTIF2                     | 15.0523   | 13.2168  | 16.6648   | 17.5159  | 15.1809   |
| COBL                      | 4.01769   | 2.89774  | 4.05882   | 4.06706  | 3.77673   |
| NSMCE4A                   | 17.5547   | 15.453   | 21.6406   | 23.0648  | 16.1886   |
| SLC45A3                   | 5.9659    | 5.97088  | 6.10873   | 7.19253  | 5.99974   |
| TFDP1                     | 19.7491   | 20.3785  | 24.1307   | 24.2198  | 22.7846   |
| WDR46                     | 34.6583   | 36.2656  | 38.9133   | 44.3311  | 35.058    |
| BCCIP                     | 56.6443   | 48.128   | 54.8756   | 60.3286  | 55.5499   |
| INTS1                     | 19.0192   | 21.7787  | 15.4904   | 20.3339  | 23.5627   |
| APPL2                     | 4.16118   | 4.25627  | 4.52138   | 4.38602  | 4.98848   |
| TIMM23                    | 96.7582   | 99.7903  | 113.739   | 112.193  | 111.293   |
| DPH3                      | 2.39182   | 3.14347  | 3.49649   | 3.05069  | 3.33887   |
| G3BP1                     | 31.7366   | 29.6739  | 38.2102   | 38.0984  | 31.7863   |
| ORAOV1                    | 4.61781   | 5.67312  | 6.41246   | 5.57475  | 6.1857    |
| MAOA                      | 0.0046355 | 0        | 0.0232711 | 0        | 0.0062616 |
| CTTN                      | 73.8662   | 64.5632  | 71.5538   | 83.1742  | 71.9658   |
| NPHP4                     | 2.78016   | 2.27513  | 2.39488   | 2.75745  | 2.42933   |
| MTA3                      | 12.7518   | 10.3641  | 12.9296   | 14.1876  | 11.5837   |
| CCZ1B                     | 5.64825   | 5.7439   | 7.37923   | 7.55633  | 6.03484   |
| GOLM1                     | 43.782    | 47.2576  | 49.1898   | 54.2171  | 52.018    |
| ARHGAP40                  | 1.53761   | 1.04942  | 1.7172    | 1.72341  | 1.43047   |
| BIVM,BIVM-ERCC5,ERCC5     | 17.1757   | 15.1936  | 18.0533   | 20.3192  | 16.6442   |
| AARSD1,PTGES3L,PTGES3L-AA | 30.1277   | 26.4092  | 34.3237   | 34.9161  | 29.5655   |
| BACE1-AS                  | 0.871912  | 1.0646   | 0.725131  | 1.31513  | 1.05462   |
| OXNAD1                    | 1.45628   | 1.52126  | 2.04538   | 1.9856   | 1.36207   |
| TRMT5                     | 3.90564   | 4.27972  | 4.92902   | 4.72578  | 4.58861   |
| LRPPRC                    | 29.0121   | 24.9172  | 31.1127   | 33.1705  | 27.5882   |
| RIBC1                     | 0.781129  | 0.689276 | 0.458029  | 0.931583 | 0.786824  |
| KRT7                      | 4.67674   | 2.12172  | 4.06238   | 4.83673  | 2.03235   |
| TMEM128                   | 11.3982   | 11.3576  | 14.4881   | 13.3917  | 12.4422   |
| FLJ10038                  | 0.52083   | 0.890399 | 0.935446  | 0.75564  | 0.983706  |
| PYCR2                     | 56.2565   | 51.8911  | 70.8935   | 73.0509  | 52.274    |
| ULK4                      | 0.36023   | 0.317343 | 0.31753   | 0.448973 | 0.375672  |
| MAP3K15                   | 0.528913  | 0.647572 | 0.748749  | 0.792594 | 0.703172  |
| IFT81                     | 1.17646   | 0.971425 | 1.00894   | 1.1512   | 1.22254   |
| MGMT                      | 64.7326   | 81.9216  | 63.639    | 77.9613  | 75.1868   |
| C7orf53                   | 0.670253  | 0.428177 | 0.621007  | 0.844049 | 0.402154  |
| OPRL1                     | 2.07863   | 2.39175  | 1.78667   | 2.35691  | 2.56833   |
| DBT                       | 1.18868   | 1.07125  | 1.24435   | 1.22676  | 1.36013   |
| ATR                       | 0.820921  | 0.920256 | 0.91679   | 1.02775  | 1.01152   |
| SNHG1                     | 99.9371   | 131.837  | 207.504   | 152.697  | 126.249   |
| PSMC6                     | 30.1426   | 24.7577  | 31.8889   | 32.9605  | 29.5897   |
| KAZN                      | 6.20755   | 4.02726  | 6.77088   | 7.24135  | 4.47812   |
| WDR43                     | 18.1432   | 18.7144  | 22.9244   | 21.8934  | 21.0322   |
| DNAJA1                    | 81.9741   | 79.3528  | 88.0906   | 101.195  | 81.6684   |
| FGGY                      | 6.95688   | 9.21267  | 7.87784   | 8.90846  | 9.73001   |
| FLJ26850                  | 1.32157   | 1.71026  | 1.4711    | 1.63339  | 0.948411  |
| MYCL1                     | 4.20005   | 3.23301  | 3.77812   | 5.00202  | 3.35836   |

|                       |            |           |           |           |            |
|-----------------------|------------|-----------|-----------|-----------|------------|
| GPATCH2               | 1.12021    | 0.918116  | 0.80846   | 1.01221   | 1.30094    |
| RPA2                  | 23.2625    | 25.5372   | 28.6311   | 29.1445   | 26.9761    |
| FLJ30403              | 0.498524   | 1.14811   | 0.512863  | 0.630934  | 0.887202   |
| CA13                  | 3.39833    | 3.67738   | 5.2317    | 4.58893   | 3.85655    |
| VPS37B                | 41.3738    | 40.3443   | 46.0341   | 49.353    | 42.2926    |
| HNRPDL                | 39.1476    | 44.6615   | 43.0498   | 48.9566   | 48.498     |
| SLX1B,SULT1A4         | 0.581948   | 0.696416  | 0.442555  | 0.531513  | 0.83352    |
| SLC9A8                | 2.86565    | 2.68202   | 3.26222   | 3.48105   | 2.88428    |
| PSD4                  | 1.56114    | 1.80398   | 1.82765   | 1.94614   | 2.21779    |
| DYNC1LI1              | 17.2095    | 17.7127   | 17.343    | 19.3127   | 20.0087    |
| UGDH                  | 5.44103    | 6.12581   | 7.22279   | 6.83008   | 6.95832    |
| KIAA0020              | 14.0348    | 12.2623   | 15.2368   | 17.1071   | 13.6749    |
| TMED5                 | 6.55399    | 6.34853   | 7.75611   | 7.43472   | 7.99704    |
| SLC16A1               | 27.3467    | 35.8416   | 32.7548   | 32.137    | 38.544     |
| PHKG1                 | 22.3315    | 25.4552   | 24.1134   | 27.3201   | 24.9419    |
| NUDT19                | 12.5868    | 15.5131   | 16.1567   | 15.6332   | 15.9178    |
| SSR3                  | 231.668    | 178.173   | 259.763   | 255.454   | 210.252    |
| C16orf91              | 20.7568    | 30.7385   | 30.8633   | 29.9261   | 29.2249    |
| APLF                  | 0.302073   | 0.2736    | 0.321904  | 0.368199  | 0.281276   |
| PIGQ                  | 32.8426    | 32.4859   | 34.9457   | 40.707    | 34.78      |
| ZNF398                | 2.55095    | 2.89369   | 2.78264   | 2.85007   | 3.19526    |
| NDUFB5                | 65.7015    | 69.5707   | 67.2339   | 69.3418   | 80.3799    |
| SNHG12                | 28.2203    | 24.4619   | 34.0633   | 34.3676   | 22.6604    |
| DYNC2H1               | 1.14004    | 1.00372   | 0.866481  | 1.24319   | 1.21903    |
| PDCD7                 | 16.487     | 14.6343   | 17.057    | 19.8704   | 16.5068    |
| POLK                  | 1.77321    | 1.27589   | 1.40887   | 1.8581    | 1.54443    |
| WDR67                 | 2.62238    | 1.54483   | 3.00721   | 3.60239   | 1.71738    |
| CTSL1                 | 106.442    | 101.505   | 115.042   | 124.958   | 108.535    |
| SMG8                  | 5.23616    | 6.1574    | 6.05441   | 6.29641   | 6.67425    |
| KIAA1147              | 4.05601    | 3.7777    | 3.8388    | 4.10799   | 4.85065    |
| DCAF13                | 46.1737    | 38.7769   | 53.6586   | 53.6244   | 44.8626    |
| ENTPD3-AS1            | 0.123519   | 0.19446   | 0.123115  | 0.20425   | 0.13379    |
| CAMK2N1               | 18.7977    | 24.2037   | 22.7635   | 21.9486   | 26.7147    |
| CCDC111               | 1.95224    | 1.84361   | 2.71182   | 2.711724  | 2.09901    |
| MTRR                  | 3.86352    | 3.71528   | 5.9236    | 4.76755   | 4.3906     |
| AADAT                 | 5.10309    | 5.51291   | 6.19348   | 6.4418    | 6.28511    |
| DNAJA2                | 22.943     | 20.6865   | 28.6943   | 27.1001   | 23.7286    |
| USP50                 | 0.61556    | 0.755217  | 0.915546  | 0.905108  | 0.803135   |
| UBE2N                 | 34.9961    | 32.9638   | 40.7376   | 40.6548   | 38.4079    |
| SEMA3F                | 5.01354    | 6.36155   | 4.73014   | 5.82591   | 7.07487    |
| C7orf41               | 2.53859    | 2.95      | 3.20962   | 3.14345   | 3.19802    |
| NOL8                  | 5.76661    | 6.60662   | 5.89634   | 6.73051   | 6.84224    |
| CACNB2                | 0.0844219  | 0.118612  | 0.0955811 | 0.145959  | 0.13555    |
| CCDC64B               | 0.0978139  | 0.44848   | 0.0755229 | 0.375664  | 0.262791   |
| MRPS23                | 30.7838    | 32.3041   | 39.0984   | 37.8168   | 35.7007    |
| ZC3H12C               | 0.841378   | 0.48526   | 0.96829   | 0.980058  | 0.567348   |
| YAP1                  | 11.0157    | 10.4925   | 10.2898   | 11.2926   | 12.7674    |
| CDK14                 | 0.00426011 | 0         | 0.0270823 | 0.0213129 | 0.00597255 |
| RNMTL1                | 24.0771    | 24.836    | 28.0107   | 27.4411   | 27.322     |
| RBM14,RBM14-RBM4,RBM4 | 72.1923    | 74.0555   | 108.815   | 92.443    | 81.8243    |
| PCBP2                 | 165.216    | 175.993   | 206.18    | 205.935   | 177.705    |
| UNC119B               | 8.70933    | 11.1622   | 10.5875   | 10.7541   | 12.0511    |
| CTNS                  | 3.5959     | 4.40675   | 4.93484   | 4.67423   | 4.2406     |
| FARP2                 | 0.554895   | 0.489387  | 0.682132  | 0.728608  | 0.606529   |
| CREBL2                | 5.10671    | 5.63329   | 5.63367   | 6.101     | 6.12128    |
| LEO1                  | 7.69293    | 7.10627   | 7.15821   | 8.96415   | 8.19138    |
| FGFR4                 | 11.3151    | 15.1423   | 8.36756   | 10.9371   | 16.5241    |
| TLCD2                 | 1.14783    | 1.27398   | 1.51374   | 1.50178   | 1.24026    |
| MCL1                  | 71.1253    | 61.7922   | 78.1428   | 84.1982   | 70.2172    |
| AGPS                  | 3.36733    | 3.15214   | 3.91293   | 4.05432   | 3.83142    |
| ARHGAP39              | 5.1256     | 4.28031   | 6.61916   | 6.56187   | 5.08983    |
| TMEM86A               | 0.523449   | 1.4565    | 1.08254   | 0.853412  | 1.39678    |
| CHTF8                 | 27.5652    | 28.6818   | 40.5171   | 36.5323   | 29.9381    |
| GAS2                  | 0.0645109  | 0.0947599 | 0.027415  | 0.071743  | 0.0595477  |
| RABGGTB               | 63.0796    | 50.9948   | 58.4616   | 67.3731   | 54.2432    |
| HSD17B1               | 24.3658    | 25.2454   | 28.9558   | 26.487    | 30.7564    |
| EIF3M                 | 110.956    | 107.675   | 141.853   | 132.691   | 112.369    |
| ZNF350                | 2.4425     | 2.86645   | 2.21637   | 2.57038   | 2.86555    |
| DLX1                  | 4.45885    | 5.31734   | 4.54144   | 5.74799   | 4.9785     |
| TFAM                  | 5.30632    | 5.57659   | 6.71081   | 6.53584   | 6.35334    |
| UPF3B                 | 4.3137     | 2.88322   | 6.3234    | 5.63591   | 3.20662    |
| G6PC3                 | 59.8445    | 60.4214   | 64.5747   | 68.8193   | 64.1663    |
| CSTF3                 | 14.2382    | 14.5664   | 17.6309   | 17.6214   | 16.0349    |
| HSP90AA1              | 278.517    | 330.398   | 257.84    | 293.147   | 376.303    |
| DOPEY1                | 0.278707   | 0.258948  | 0.322058  | 0.2631    | 0.285565   |
| NRD1                  | 19.5752    | 20.6527   | 22.242    | 24.0636   | 22.6612    |
| KCNQ4                 | 6.60869    | 4.30029   | 6.24235   | 7.63964   | 5.29       |
| SLC35F6               | 14.5895    | 13.7714   | 20.2014   | 19.8173   | 13.4771    |
| DHRS4L2               | 11.8872    | 11.892    | 11.7195   | 12.5552   | 14.4562    |

|              |            |            |            |           |            |
|--------------|------------|------------|------------|-----------|------------|
| CEP63        | 2.02827    | 1.60862    | 2.01975    | 2.03564   | 2.03605    |
| JUNB         | 23.5953    | 25.5499    | 31.5114    | 31.0784   | 25.4609    |
| ZNF181       | 1.31696    | 1.9753     | 2.00673    | 1.6775    | 2.29862    |
| CHIC2        | 18.5992    | 12.7939    | 20.749     | 19.58     | 16.4136    |
| LOC400657    | 1.60898    | 1.82591    | 3.46637    | 2.503     | 2.08347    |
| TMEM41B      | 23.9492    | 22.115     | 27.8832    | 28.0455   | 22.3628    |
| CENPK        | 3.04052    | 2.48619    | 2.95263    | 4.26007   | 2.64272    |
| ATP9B        | 2.47643    | 2.23063    | 1.94663    | 2.50271   | 2.42972    |
| TSTA3        | 165.036    | 200.595    | 161.48     | 203.914   | 192.562    |
| PRPF40A      | 10.148     | 10.054     | 10.0445    | 11.0364   | 11.6286    |
| TSPAN7       | 1.26826    | 0.584163   | 0.787648   | 1.26983   | 0.896399   |
| JAGN1        | 20.5395    | 25.6047    | 31.2513    | 27.5177   | 25.8944    |
| ORC5         | 17.9807    | 15.5399    | 22.3538    | 22.907    | 16.8488    |
| SNORA8       | 31.5359    | 52.1915    | 17.3245    | 39.1805   | 43.3672    |
| C6orf164     | 0.114733   | 0.142699   | 0.126186   | 0.191734  | 0.0568727  |
| GDI2         | 139.818    | 142.902    | 177.09     | 167.439   | 154.864    |
| ZNF497       | 1.71931    | 1.64669    | 1.73811    | 2.03501   | 1.74914    |
| UELD         | 0.884663   | 1.06369    | 1.02983    | 1.1946    | 0.963733   |
| PRMT6        | 4.27927    | 7.03605    | 7.18142    | 6.44791   | 7.26944    |
| C9orf72      | 4.65027    | 3.48051    | 3.31011    | 4.74952   | 4.1596     |
| FRA10AC1     | 5.52888    | 4.8823     | 5.65144    | 6.74876   | 5.15086    |
| PSPC1        | 16.5128    | 15.1469    | 22.4114    | 21.971    | 16.5141    |
| ACAD8        | 12.3339    | 14.0573    | 14.0535    | 15.5539   | 15.2553    |
| CENPQ        | 5.31272    | 5.67499    | 5.1562     | 6.10481   | 6.71071    |
| RPP25L       | 70.3694    | 71.6075    | 85.5366    | 80.5453   | 69.4622    |
| ATXN2L       | 53.1843    | 41.8482    | 55.3768    | 65.694    | 43.6871    |
| TXNDC9       | 2.85136    | 3.90167    | 3.80384    | 4.43056   | 4.27395    |
| ACP1         | 49.8988    | 53.3064    | 64.85      | 62.4527   | 56.2035    |
| GSPT2        | 3.46286    | 4.18002    | 4.62909    | 4.62272   | 4.3704     |
| PPIL1        | 19.3836    | 20.7098    | 24.5712    | 25.0168   | 22.0022    |
| REXO4        | 61.907     | 59.3033    | 76.9467    | 79.4905   | 60.4195    |
| CCDC78       | 4.58361    | 4.01123    | 4.32812    | 5.89475   | 4.07192    |
| MED31        | 7.23262    | 8.30237    | 7.07733    | 8.40424   | 8.72335    |
| FAHD2B       | 17.6646    | 20.2067    | 17.2188    | 21.3809   | 19.4769    |
| C2orf44      | 2.45222    | 2.7319     | 3.44822    | 3.49881   | 2.6715     |
| PLRG1        | 10.1041    | 8.91223    | 15.4122    | 14.3328   | 9.61894    |
| POLR3GL      | 27.3341    | 29.1474    | 22.8323    | 30.6024   | 29.6436    |
| FARSA        | 96.6809    | 82.4752    | 94.3162    | 105.806   | 92.8686    |
| MGME1        | 10.6624    | 8.61165    | 13.0506    | 13.6126   | 10.2673    |
| IDH3A        | 11.8642    | 13.3451    | 15.0783    | 15.7679   | 13.2841    |
| PRMT3        | 3.19579    | 3.42727    | 5.46207    | 4.84102   | 3.72736    |
| CDH3         | 0.0656394  | 0.246666   | 0.123928   | 0.0849776 | 0.263623   |
| PLN          | 0          | 0          | 0.0166327  | 0         | 0.0186857  |
| MOCOS        | 11.7723    | 9.16438    | 18.5297    | 17.0821   | 9.39213    |
| KPNB1        | 35.2236    | 28.1076    | 46.0366    | 43.4609   | 32.1009    |
| TRA2A        | 28.9614    | 30.0293    | 31.1389    | 32.9685   | 33.4912    |
| DUSP7        | 26.6881    | 28.0887    | 24.7831    | 30.923    | 31.0071    |
| ITGA2        | 1.24372    | 1.03744    | 0.89196    | 1.30273   | 1.25308    |
| RPL22L1      | 243.478    | 308.741    | 310.024    | 294.937   | 297.497    |
| SPATC1       | 0.0847068  | 0.11114    | 0.11108    | 0.155808  | 0.150985   |
| TIPARP       | 11.5928    | 9.83386    | 13.0606    | 12.3678   | 12.9143    |
| LOC100506548 | 20.5681    | 28.5264    | 23.574     | 25.2621   | 27.1143    |
| TRIM65       | 13.6173    | 14.41      | 16.4291    | 16.2744   | 15.8939    |
| DNTTIP2      | 17.4085    | 16.4019    | 17.5595    | 19.9747   | 18.9548    |
| PPP2R2C      | 0.0446819  | 0.017981   | 0.00787868 | 0.0424762 | 0.0251986  |
| ZKSCAN1      | 1.78787    | 1.90084    | 1.91084    | 2.10308   | 2.02683    |
| POLR1B       | 8.14475    | 6.65924    | 9.72571    | 8.97339   | 8.05371    |
| C17orf82     | 0.278428   | 0.356811   | 0.387613   | 0.464883  | 0.394091   |
| RECQL        | 4.90328    | 4.55136    | 5.17796    | 5.49064   | 5.69602    |
| PARP9        | 1.98597    | 1.39138    | 1.90976    | 2.3262    | 1.74469    |
| ADPRH        | 0.712435   | 0.746367   | 0.887932   | 0.758962  | 0.912132   |
| GNB4         | 0.0726361  | 0.059793   | 0.0596027  | 0.0498266 | 0.0760554  |
| CPSF6        | 8.21368    | 7.72335    | 10.8598    | 10.4991   | 8.70419    |
| ABCC9        | 0.519042   | 0.524298   | 0.445136   | 0.554564  | 0.618738   |
| RGPD4        | 0.00283816 | 0.00415151 | 0          | 0         | 0.00786078 |
| PA2G4        | 105.335    | 110.194    | 121.029    | 128.916   | 113.68     |
| AHSA2        | 5.88244    | 4.24972    | 4.43854    | 6.40146   | 4.65152    |
| RABEP1       | 7.83358    | 6.54933    | 8.56867    | 9.17066   | 7.58458    |
| ASS1         | 93.6189    | 143.501    | 104.206    | 105.315   | 147.703    |
| ELAC1        | 1.03699    | 2.4356     | 2.20321    | 1.65202   | 2.39099    |
| GUCA1B       | 1.59453    | 1.24214    | 1.10595    | 1.52532   | 1.57527    |
| CYP39A1      | 0.261804   | 0.595665   | 0.309401   | 0.452252  | 0.605056   |
| ZNF517       | 5.10131    | 6.54664    | 6.77262    | 6.11544   | 7.01362    |
| PLBD2        | 9.07825    | 8.53195    | 7.8825     | 9.17792   | 9.36109    |
| DDX1         | 27.7206    | 24.8043    | 31.1464    | 32.0907   | 29.6408    |
| RASGRP1      | 0.86559    | 0.560485   | 0.674868   | 0.823037  | 0.76321    |
| ZNF622       | 27.0772    | 29.4296    | 32.1384    | 36.2036   | 28.0468    |
| CSPP1        | 2.05374    | 1.87928    | 2.28278    | 2.54169   | 2.18584    |
| MYOF         | 13.1461    | 15.694     | 13.4843    | 14.7408   | 16.8148    |

|              |            |            |           |           |           |
|--------------|------------|------------|-----------|-----------|-----------|
| LOC100093631 | 0.335354   | 0.457619   | 0.319487  | 0.403118  | 0.491095  |
| FARSB        | 23.3826    | 23.4228    | 28.3025   | 28.2193   | 25.5245   |
| PEX1         | 4.14196    | 3.81619    | 4.60111   | 5.06198   | 4.03023   |
| STAT2        | 5.35726    | 6.46314    | 4.80519   | 6.44601   | 7.03372   |
| ANAPC13      | 23.3039    | 30.4332    | 32.0638   | 30.3486   | 30.1723   |
| NAP1L5       | 0.928897   | 1.13912    | 1.16368   | 1.49983   | 1.15834   |
| ACYP2        | 2.67224    | 2.94158    | 3.20089   | 2.83165   | 2.76585   |
| RRP9         | 61.9072    | 60.2794    | 78.2763   | 78.2365   | 60.4757   |
| ARGLU1       | 34.8585    | 32.5322    | 41.3415   | 43.7094   | 34.028    |
| SENP6        | 4.99388    | 4.404      | 4.95143   | 5.6981    | 5.23589   |
| POLA1        | 2.29838    | 1.94272    | 2.24387   | 2.92682   | 2.17623   |
| THADA        | 1.7685     | 1.73499    | 1.81197   | 1.94968   | 1.95104   |
| PALB2        | 2.54512    | 2.64406    | 3.50174   | 3.20169   | 3.2389    |
| RAN          | 340.158    | 350.587    | 387.044   | 416.786   | 357.479   |
| PES1         | 76.1479    | 78.3416    | 79.7556   | 89.09     | 78.3559   |
| UBB          | 848.593    | 922.879    | 1167.09   | 1193.4    | 878.662   |
| ZNF429       | 0.595046   | 0.469976   | 0.529126  | 0.513753  | 0.661549  |
| TNPO2        | 14.1884    | 10.7545    | 14.9664   | 17.0762   | 11.2836   |
| XPNPEP3      | 4.54711    | 4.34861    | 4.22009   | 4.99272   | 4.79603   |
| RECQL5       | 6.29128    | 5.77359    | 6.70815   | 8.3611    | 5.42585   |
| CCDC51       | 16.202     | 14.8502    | 16.8733   | 18.9166   | 16.4067   |
| MAN1A1       | 1.05305    | 1.14169    | 1.10168   | 1.17033   | 1.32282   |
| MCA1         | 16.8574    | 15.7189    | 19.8041   | 20.977    | 16.5945   |
| NABP1        | 26.917     | 10.0353    | 27.3895   | 27.7287   | 12.6313   |
| SLC38A9      | 3.39628    | 3.58113    | 4.95128   | 4.96269   | 3.73816   |
| STK4         | 6.59249    | 6.40329    | 6.57225   | 7.50027   | 7.2506    |
| WDR90        | 7.7412     | 7.32922    | 4.72781   | 8.79505   | 8.396     |
| HIVEP3       | 0.247938   | 0.216898   | 0.237461  | 0.341486  | 0.188433  |
| MYO6         | 1.74058    | 2.0035     | 1.65279   | 1.94103   | 2.29705   |
| SLC25A12     | 3.62677    | 3.91079    | 3.81847   | 4.49981   | 4.32708   |
| JAG2         | 19.9493    | 17.6283    | 16.7185   | 22.7618   | 18.5667   |
| SEPHS2       | 38.0376    | 43.432     | 62.6003   | 58.4152   | 42.2262   |
| TUSC2        | 14.6475    | 20.5508    | 17.785    | 19.6292   | 20.0932   |
| FOS          | 2.79717    | 4.50854    | 3.06986   | 3.76578   | 3.20982   |
| ZC3HAV1      | 4.78115    | 6.76675    | 4.82386   | 6.13543   | 6.2834    |
| KMO          | 0.00396092 | 0.0058576  | 0         | 0         | 0.0110639 |
| LOC100289361 | 5.99949    | 7.02581    | 5.71779   | 6.37537   | 7.15956   |
| RPL26L1      | 72.5238    | 60.8962    | 80.7511   | 83.7483   | 61.5497   |
| MTFMT        | 8.49818    | 10.6055    | 9.68192   | 10.2231   | 11.0175   |
| LOC100133161 | 0.0999403  | 0.134993   | 0.121102  | 0.184171  | 0.0738414 |
| MAX          | 34.2225    | 30.6628    | 40.6296   | 41.8334   | 33.0976   |
| RNF13        | 5.04322    | 5.16852    | 6.54366   | 6.35495   | 5.96755   |
| HIST1H2BL    | 1.65668    | 0.843448   | 1.83761   | 1.89739   | 0.311539  |
| TSC2         | 10.2476    | 10.7034    | 9.96832   | 12.3691   | 11.196    |
| CLCA2        | 0          | 0.00731842 | 0.0190209 | 0         | 0.0206926 |
| MOCS3        | 3.05495    | 5.50677    | 4.86752   | 4.41777   | 5.27425   |
| NGDN         | 20.3924    | 21.696     | 20.6708   | 25.0101   | 22.2896   |
| TMEM150A     | 8.73298    | 9.60706    | 12.5177   | 10.0317   | 10.3552   |
| SCNN1D       | 1.82565    | 1.96725    | 1.0433    | 2.33059   | 2.07992   |
| CHRN2        | 0.0163389  | 0.014901   | 0.0133141 | 0.0363249 | 0.0136693 |
| RNF187       | 48.3153    | 52.0268    | 66.0737   | 68.3411   | 52.5525   |
| RRP1         | 48.7304    | 49.7045    | 46.6831   | 57.7042   | 50.6851   |
| MAPK8IP2     | 0.976826   | 1.37792    | 0.765311  | 1.19528   | 1.09843   |
| FYTTD1       | 7.50705    | 7.68161    | 8.85414   | 8.77934   | 9.63276   |
| MDM1         | 2.08635    | 2.42822    | 2.29836   | 2.46184   | 2.77795   |
| ACHE         | 5.06015    | 5.11608    | 4.59119   | 5.42836   | 5.81879   |
| MOAP1        | 14.2493    | 15.5881    | 19.0034   | 17.0992   | 18.6134   |
| LACTB2       | 13.3934    | 12.7944    | 19.6784   | 18.4693   | 14.342    |
| ATXN10       | 19.1058    | 19.7605    | 22.5331   | 22.3491   | 22.7843   |
| UFL1         | 4.11814    | 4.02753    | 3.89981   | 4.62631   | 4.50246   |
| TAX1BP1      | 13.8589    | 12.4973    | 13.9282   | 14.2075   | 15.4566   |
| TBX15        | 0.0210849  | 0.0197704  | 0.0087155 | 0         | 0.0183422 |
| CBR4         | 4.54491    | 4.5669     | 4.78218   | 5.44934   | 5.12106   |
| SLC35F5      | 4.47912    | 4.07821    | 4.09708   | 5.01546   | 4.45113   |
| MTAP         | 36.0814    | 24.3929    | 33.1788   | 39.4198   | 28.5654   |
| PLA2G6       | 2.71957    | 2.42947    | 2.19002   | 3.09063   | 2.85645   |
| PDE12        | 9.26771    | 8.22673    | 8.79018   | 10.7592   | 9.21302   |
| ZNF862       | 1.39049    | 1.20822    | 1.47969   | 1.73989   | 1.27828   |
| CAPRN1       | 33.8305    | 31.0082    | 40.7682   | 40.486    | 33.5006   |
| CTBS         | 3.14995    | 3.64123    | 3.45096   | 3.40547   | 4.26281   |
| LOC440600    | 0.083399   | 0.0744409  | 0.104284  | 0.104518  | 0.0968614 |
| GTPBP2       | 29.0022    | 22.4653    | 52.7786   | 50.9334   | 21.141    |
| LOC100134368 | 0.133204   | 0.153817   | 0.542963  | 0.408929  | 0.169602  |
| SERPINE1     | 407.706    | 368.185    | 400.094   | 450       | 410.915   |
| BAZ1B        | 9.54705    | 7.38446    | 9.66397   | 11.6101   | 8.51821   |
| ZNF720       | 2.06948    | 1.95088    | 1.93413   | 2.26081   | 2.17222   |
| SP140L       | 3.63892    | 3.46332    | 4.39627   | 4.57313   | 4.06726   |
| RHOBTB3      | 6.50788    | 6.67971    | 7.09049   | 7.31032   | 7.86253   |
| GGCX         | 3.97682    | 5.42969    | 7.13575   | 6.40393   | 5.08065   |

|                            |           |            |           |            |           |
|----------------------------|-----------|------------|-----------|------------|-----------|
| PABPC1                     | 798.342   | 849.247    | 898.56    | 941.944    | 913.739   |
| CD24                       | 3.66488   | 5.74407    | 4.55371   | 5.08063    | 5.57563   |
| LOC93622                   | 13.7569   | 20.872     | 21.3671   | 20.6178    | 18.3211   |
| PM20D2                     | 9.37921   | 8.4714     | 10.8064   | 10.0259    | 10.3927   |
| FRMD8                      | 9.27071   | 9.86554    | 12.0616   | 13.4174    | 9.46772   |
| ODF3B                      | 10.123    | 10.9997    | 10.6596   | 11.6559    | 11.0562   |
| MED19                      | 5.55133   | 5.66952    | 5.66398   | 6.84731    | 6.35282   |
| FBXL19                     | 11.0107   | 10.0625    | 10.837    | 13.4791    | 10.3225   |
| YEATS4                     | 21.6183   | 23.8909    | 26.7907   | 25.4179    | 26.9546   |
| SLC10A5                    | 0.620587  | 0.870356   | 1.48039   | 1.37832    | 0.536135  |
| ZNF540                     | 0.20566   | 0.20445    | 0.210877  | 0.22484    | 0.263856  |
| PPP1R2P3                   | 0         | 0.0161882  | 0         | 0.0181738  | 0         |
| LMOD1                      | 0.123716  | 0.0905898  | 0.217376  | 0.194055   | 0.129782  |
| MSH2                       | 8.253     | 7.22184    | 7.57108   | 9.61217    | 8.51887   |
| SPATA7                     | 3.61671   | 4.26838    | 3.59064   | 3.96871    | 4.52496   |
| LYRM7                      | 1.17392   | 1.19745    | 1.63858   | 1.60358    | 1.21552   |
| SNAPC4                     | 11.8195   | 13.9414    | 11.6775   | 15.3082    | 13.9085   |
| ZNF749                     | 0.418261  | 0.797499   | 0.663216  | 0.543766   | 0.91763   |
| CDK17                      | 9.21636   | 7.92686    | 12.9081   | 12.6388    | 8.84087   |
| PCLO                       | 0.0265637 | 0.0137851  | 0.0208003 | 0.0262483  | 0.0209354 |
| AGK                        | 11.4319   | 10.1865    | 10.8313   | 12.5016    | 11.9911   |
| REV3L                      | 0.581922  | 0.620603   | 0.49926   | 0.676742   | 0.748451  |
| FAM206A                    | 15.2134   | 17.288     | 19.0349   | 19.1991    | 18.0758   |
| MLYCD                      | 6.65176   | 5.97417    | 8.9871    | 7.34036    | 7.34316   |
| MLF1IP                     | 8.13911   | 9.72617    | 9.61871   | 11.4609    | 9.88121   |
| PDE4D                      | 2.04873   | 1.52451    | 2.81394   | 2.26798    | 2.02547   |
| CARS2                      | 50.223    | 46.2539    | 57.3317   | 59.1269    | 52.3659   |
| PIIF                       | 46.8653   | 55.2607    | 60.9424   | 60.1191    | 58.1174   |
| SUPT6H                     | 15.8589   | 15.1207    | 16.077    | 18.9159    | 16.7077   |
| BAHCC1                     | 1.37332   | 1.09168    | 1.13805   | 1.67509    | 1.0758    |
| TRA2B                      | 20.0189   | 25.977     | 27.1924   | 25.3237    | 28.4753   |
| C19orf33                   | 225.963   | 314.935    | 253.735   | 238.345    | 338.496   |
| PWP1                       | 25.3868   | 25.9852    | 34.8383   | 30.5532    | 28.7379   |
| RMND1                      | 27.4477   | 24.3021    | 33.3684   | 32.6084    | 27.0727   |
| CCNJ                       | 3.09473   | 3.46234    | 3.8722    | 3.75133    | 3.93145   |
| MARVELD1                   | 11.7448   | 16.2882    | 13.955    | 14.2935    | 18.1705   |
| HEATR5A                    | 0.694416  | 0.739991   | 0.723122  | 0.839243   | 0.779665  |
| ZNF260                     | 2.32548   | 2.31471    | 2.27808   | 2.28733    | 2.79841   |
| ZNF629                     | 5.03829   | 6.29256    | 6.69998   | 7.24012    | 6.05765   |
| LIG4                       | 0.976965  | 0.840442   | 1.07006   | 1.2448     | 0.825103  |
| C1QBP                      | 294.79    | 299.779    | 307.793   | 343.441    | 319.267   |
| C6orf132                   | 3.26897   | 3.14349    | 4.29236   | 3.86971    | 3.33107   |
| ZNF467                     | 1.46382   | 1.91496    | 1.3613    | 1.26991    | 2.29239   |
| ZNF69                      | 2.67971   | 2.78355    | 2.3433    | 3.45569    | 2.75114   |
| ACTN4                      | 50.6503   | 48.557     | 52.9348   | 57.1087    | 57.6538   |
| CD58                       | 5.42751   | 8.08202    | 7.50578   | 7.67254    | 7.70198   |
| CNIH2                      | 0.400757  | 0.641341   | 0.530057  | 0.612944   | 0.775206  |
| PITPNM1                    | 12.6923   | 17.191     | 12.5222   | 16.0578    | 16.1439   |
| TSMF                       | 21.9547   | 24.3686    | 22.4228   | 27.154     | 25.4427   |
| COMT                       | 45.8446   | 41.3876    | 49.9741   | 52.9848    | 42.0552   |
| ZFP112                     | 0.602572  | 0.570319   | 1.0179    | 0.885478   | 0.57523   |
| AURKC                      | 1.21708   | 0.81028    | 0.656558  | 0.811011   | 1.08714   |
| GLS                        | 10.5495   | 8.44639    | 10.5293   | 10.8406    | 11.1363   |
| ZBTB1                      | 4.27911   | 4.01335    | 3.91711   | 4.87869    | 4.4155    |
| SMAGP                      | 139.182   | 120.556    | 184.863   | 179.273    | 128.484   |
| ARHGAP31                   | 1.49895   | 1.26371    | 1.23231   | 1.54871    | 1.56557   |
| ZNF43                      | 0         | 0.00559485 | 0         | 0.00629377 | 0         |
| NCAPG                      | 5.58204   | 4.11422    | 6.6583    | 7.89919    | 3.96473   |
| ZNF611                     | 0.356026  | 0.682816   | 0.312538  | 0.486468   | 0.672625  |
| LPXN                       | 1.08086   | 1.2568     | 1.65183   | 1.16783    | 1.59137   |
| SLC25A20                   | 2.53732   | 2.83784    | 4.08338   | 3.33696    | 3.41849   |
| GADD45A                    | 83.5963   | 109.479    | 154.327   | 116.528    | 123.913   |
| CDH23                      | 0.0231593 | 0.0637087  | 0.0103367 | 0.040965   | 0.0473752 |
| MRS2P2                     | 0.0249142 | 0          | 0.0209245 | 0.0137841  | 0.0231279 |
| CYP1A1                     | 0.210805  | 0.366677   | 0.272101  | 0.296085   | 0.210919  |
| ADAMTS17                   | 0.0800912 | 0.0802086  | 0.0585162 | 0.151361   | 0.0672798 |
| CCDC25                     | 9.16312   | 11.441     | 11.2105   | 10.9464    | 12.3724   |
| IL6R                       | 2.59869   | 2.17147    | 1.83717   | 2.29918    | 2.47519   |
| RNF149                     | 16.8403   | 13.2543    | 16.78     | 18.0212    | 15.7881   |
| DHX29                      | 2.89194   | 3.34631    | 3.28722   | 3.64677    | 3.4617    |
| L3HYPDH                    | 2.01715   | 2.8168     | 2.83755   | 2.44623    | 2.82059   |
| CNPY2,PAN2                 | 87.6863   | 86.7028    | 110.915   | 112.496    | 87.1335   |
| HS2ST1                     | 3.56565   | 3.23196    | 3.73346   | 4.15536    | 3.45977   |
| SLC2A11                    | 2.25715   | 3.17937    | 2.27723   | 2.70216    | 2.6793    |
| BCL2L2,BCL2L2-PABPN1,PABPN | 113.203   | 98.5656    | 129.133   | 138.602    | 101.987   |
| PCBD2                      | 2.56093   | 2.33252    | 3.28532   | 3.5246     | 2.43828   |
| GNN                        | 0.0343329 | 0.0703687  | 0.0306664 | 0.0650659  | 0.0529772 |
| FAM114A2                   | 3.60783   | 3.33619    | 3.73083   | 4.11197    | 3.69578   |
| PLAGL1                     | 10.0167   | 11.4686    | 9.09835   | 10.6983    | 12.4448   |

|                          |           |            |           |           |            |
|--------------------------|-----------|------------|-----------|-----------|------------|
| ZNF197                   | 2.44873   | 2.89605    | 3.03593   | 3.12768   | 2.88886    |
| LINC00673                | 0.144295  | 0.459335   | 0.309301  | 0.262817  | 0.583185   |
| HSD17B10                 | 106.188   | 101.124    | 115.856   | 125.784   | 102.044    |
| FAM13B                   | 1.87702   | 1.91145    | 2.44627   | 1.97521   | 2.38308    |
| GABPA                    | 2.60493   | 2.77953    | 2.72123   | 3.02368   | 2.89428    |
| OSBPL3                   | 1.53549   | 1.55248    | 1.56995   | 1.80833   | 1.77623    |
| HNRNPA1L2                | 7.86099   | 8.96421    | 7.98846   | 9.39468   | 9.59186    |
| GALM                     | 4.51772   | 4.89015    | 4.33862   | 4.93977   | 5.88474    |
| SCP2                     | 30.6212   | 33.5153    | 29.369    | 32.9466   | 40.8621    |
| NLE1                     | 33.032    | 27.961     | 37.3587   | 38.2935   | 29.6151    |
| FGD5-AS1                 | 9.07042   | 10.5608    | 11.6762   | 11.7908   | 11.2481    |
| RRP1B                    | 14.9216   | 14.3596    | 14.3358   | 18.2095   | 14.8692    |
| BICD1                    | 0.247415  | 0.318267   | 0.353274  | 0.326162  | 0.416517   |
| VDAC1                    | 140.369   | 153.018    | 136.737   | 156.377   | 170.861    |
| ARID5B                   | 0.194959  | 0.2084     | 0.173036  | 0.20793   | 0.238087   |
| DPH2                     | 16.7748   | 19.8335    | 22.0288   | 20.1774   | 20.6842    |
| WRB                      | 12.2142   | 17.093     | 17.1627   | 15.9149   | 19.0175    |
| CYCS                     | 17.5024   | 17.2869    | 25.4479   | 23.9981   | 18.3928    |
| ZNF264                   | 1.11746   | 1.20883    | 1.16501   | 1.09603   | 1.31314    |
| LOC645513                | 1.96915   | 1.91202    | 2.43802   | 2.64927   | 2.26696    |
| FLJ42627                 | 2.0438    | 1.9435     | 2.40918   | 2.58739   | 2.01746    |
| LOC100505761             | 8.49613   | 9.34021    | 11.2563   | 12.2436   | 8.44164    |
| POLR3D                   | 28.101    | 16.9702    | 32.3183   | 31.0056   | 19.5124    |
| LINS                     | 1.91777   | 2.17074    | 1.5935    | 2.08508   | 2.12599    |
| TICRR                    | 4.69546   | 2.75413    | 4.29445   | 5.64844   | 3.0098     |
| DHX34                    | 11.784    | 7.90391    | 12.0538   | 13.7137   | 8.46034    |
| VPS53                    | 3.17027   | 2.94198    | 2.45829   | 3.08006   | 3.19736    |
| C9orf139                 | 0.0390128 | 0.0258096  | 0         | 0.0326587 | 0.0235767  |
| LOC100652770             | 0.0242414 | 0.107128   | 0.122898  | 0.121246  | 0.101157   |
| MRPL35                   | 8.84454   | 9.27321    | 9.88509   | 10.5512   | 9.47851    |
| GOLGA6L4                 | 0.241473  | 0.164918   | 0.123836  | 0.231202  | 0.249275   |
| NAA15                    | 7.44962   | 6.76798    | 7.47274   | 8.47645   | 7.96565    |
| GTPBP3                   | 20.0706   | 19.0198    | 19.7532   | 24.0421   | 20.9321    |
| KLHL9                    | 6.66049   | 7.42107    | 7.26664   | 8.20005   | 7.98869    |
| EML3                     | 16.4011   | 20.1462    | 14.0219   | 17.9981   | 22.9605    |
| GUSBP1                   | 1.64642   | 2.18722    | 3.01115   | 2.54624   | 2.24434    |
| DHX9                     | 25.8685   | 26.6969    | 28.9134   | 31.677    | 31.4273    |
| KLHL8                    | 1.2869    | 1.25856    | 1.33641   | 1.48724   | 1.3297     |
| ARRB1                    | 4.20951   | 4.80415    | 4.65356   | 5.02704   | 5.1123     |
| TMEM70                   | 24.6277   | 28.1232    | 30.141    | 30.1006   | 30.5619    |
| MUSTN1,TMEM110,TMEM110-M | 5.10054   | 5.69477    | 4.76556   | 6.43861   | 5.80579    |
| HUNK                     | 0.428808  | 0.302641   | 0.498811  | 0.530428  | 0.438012   |
| CASP3                    | 4.89664   | 5.78817    | 5.92364   | 6.59454   | 6.68985    |
| RFX5                     | 13.8443   | 12.9358    | 15.9637   | 16.9145   | 15.1509    |
| WIPI1                    | 8.23535   | 7.83188    | 10.74     | 10.8468   | 8.09971    |
| LY6K                     | 0.210239  | 0.13737    | 0.206183  | 0.140401  | 0.26477    |
| USP6                     | 0.175339  | 0.166417   | 0.200937  | 0.229379  | 0.166554   |
| TCFL5                    | 6.79934   | 8.22574    | 6.31313   | 7.86042   | 8.6912     |
| ATP11C                   | 2.01044   | 1.50585    | 2.09864   | 2.16131   | 2.14068    |
| CES2                     | 7.25282   | 8.48288    | 8.5533    | 9.42356   | 8.95566    |
| AIMP2                    | 9.14195   | 10.2554    | 12.3575   | 11.917    | 10.6115    |
| HIST1H2BI                | 0.520019  | 0.174755   | 0.473258  | 0         | 0.643534   |
| PNPT1                    | 7.86373   | 7.08364    | 8.78758   | 9.62434   | 7.84859    |
| NOXA1                    | 8.72052   | 9.82525    | 7.3133    | 11.2058   | 9.36975    |
| MORN2                    | 8.04997   | 8.5749     | 7.7378    | 7.88431   | 10.5599    |
| IREB2                    | 4.18482   | 3.23524    | 4.27458   | 4.77543   | 3.69127    |
| DRAM1                    | 4.88773   | 5.25994    | 7.52049   | 6.98982   | 5.27515    |
| ASNSD1                   | 11.9443   | 15.3901    | 17.9056   | 14.5736   | 18.3615    |
| IL17RE                   | 0.525522  | 0.895789   | 0.364344  | 0.425395  | 0.859966   |
| C15orf55                 | 0         | 0.00972208 | 0.0087322 | 0.0118535 | 0.00905321 |
| MEGF6                    | 0.915014  | 1.38918    | 0.712569  | 1.22323   | 1.32938    |
| ISCU                     | 49.6207   | 48.2654    | 60.4615   | 59.6996   | 55.1113    |
| MGLL                     | 25.6088   | 24.5741    | 27.7099   | 29.1329   | 27.1138    |
| DTD1                     | 56.2498   | 59.8684    | 60.6345   | 68.1693   | 64.5654    |
| PLIN1                    | 0.129724  | 0.143036   | 0.126619  | 0.238786  | 0.0989902  |
| C1orf109                 | 4.9504    | 5.63705    | 7.77364   | 6.32998   | 6.00294    |
| NOM1                     | 7.61085   | 6.86104    | 7.10519   | 8.44738   | 7.90914    |
| PEX11G                   | 1.66507   | 2.9497     | 2.85295   | 2.72047   | 2.5057     |
| GHITM                    | 69.6516   | 74.3921    | 87.9201   | 90.7019   | 79.7296    |
| PIGB                     | 2.88792   | 2.62094    | 3.08861   | 3.22193   | 3.28063    |
| RPA4                     | 0.197257  | 0.176807   | 0.331838  | 0.357498  | 0.188287   |
| LOC646762,ZNRF2P2        | 1.88652   | 1.55338    | 2.48026   | 2.71896   | 1.60485    |
| MAGOH                    | 64.5213   | 64.1317    | 63.8913   | 78.4416   | 64.8098    |
| LDOC1L                   | 4.71899   | 6.29118    | 6.61018   | 6.55382   | 7.07189    |
| LOC100129361             | 3.66703   | 4.55056    | 5.09631   | 4.70159   | 5.38426    |
| SH3BP5-AS1               | 0.545561  | 0.889402   | 0.73489   | 0.867825  | 0.934569   |
| TSN                      | 16.9119   | 19.6917    | 20.7924   | 22.8259   | 20.7232    |
| CCT3                     | 279.856   | 274.816    | 319.221   | 341.269   | 285.509    |
| LIN9                     | 1.59677   | 1.19418    | 2.08364   | 2.02457   | 1.12712    |



|            |            |           |           |           |           |
|------------|------------|-----------|-----------|-----------|-----------|
| LRRC58     | 4.13455    | 3.33834   | 4.09181   | 3.89359   | 4.81394   |
| EPHX2      | 5.46743    | 5.89083   | 4.54446   | 6.65724   | 6.69172   |
| ENC1       | 12.3578    | 13.7355   | 12.232    | 13.1002   | 16.7714   |
| CCAR1      | 7.48223    | 5.26009   | 7.09258   | 8.81448   | 6.49495   |
| BPHL       | 17.1615    | 19.945    | 16.47     | 20.8351   | 22.0636   |
| PNPO       | 12.075     | 13.1014   | 12.3005   | 13.5267   | 14.5001   |
| CELF3      | 0.0355913  | 0.0253621 | 0.0074056 | 0.0298209 | 0.0157287 |
| HELB       | 0.371004   | 0.384837  | 0.314044  | 0.384861  | 0.394993  |
| RNF20      | 5.59721    | 6.45448   | 5.66614   | 7.04837   | 6.22612   |
| XRN2       | 18.4658    | 19.204    | 22.9851   | 23.047    | 22.172    |
| AKAP11     | 2.02501    | 1.80594   | 1.94226   | 2.12539   | 2.2152    |
| RAPGEF3    | 0.512347   | 0.442623  | 0.525695  | 0.529085  | 0.445479  |
| CLIC4      | 16.1656    | 16.2688   | 27.1858   | 24.6579   | 16.7655   |
| CCDC77     | 3.45831    | 2.49755   | 3.40592   | 4.18567   | 2.59231   |
| CRLF1      | 0.882373   | 1.22184   | 0.719119  | 1.06144   | 1.28572   |
| KLC2       | 30.5553    | 27.616    | 35.0891   | 39.4099   | 28.0587   |
| GTF2E1     | 4.44348    | 3.38681   | 4.983     | 5.29795   | 3.53886   |
| SCLY_UBE2F | 28.2753    | 26.0632   | 33.0404   | 34.3166   | 27.5808   |
| AQPEP      | 0.00917294 | 0.0134684 | 0.0116645 | 0.0306315 | 0         |
| ETV5       | 9.36624    | 9.27419   | 16.0867   | 15.176    | 10.3632   |
| CCT5       | 73.6398    | 64.9686   | 81.5542   | 90.7495   | 70.124    |
| BTF3L4     | 11.0339    | 13.7866   | 14.541    | 14.6818   | 14.9709   |
| FUBP3      | 18.4457    | 17.9779   | 22.3529   | 23.3679   | 19.3313   |
| LRRC8D     | 4.42647    | 3.53231   | 8.48621   | 7.44053   | 3.68001   |
| DNAAF2     | 5.1636     | 6.65623   | 7.45493   | 6.74846   | 6.56866   |
| TUBB2B     | 0.699844   | 0.822605  | 0.929259  | 0.83846   | 0.979773  |
| NEUROD1    | 0          | 0.0135427 | 0         | 0.0153348 | 0         |
| SPIRE1     | 5.02243    | 4.67589   | 6.1794    | 6.78482   | 5.05019   |
| HEXDC      | 2.66847    | 3.14853   | 2.72205   | 3.44553   | 3.7705    |
| LAT2       | 0.618353   | 0.616288  | 0.569313  | 1.05032   | 0.438699  |
| PSMD14     | 81.7311    | 74.5762   | 76.3327   | 87.9006   | 85.3486   |
| ZNHIT6     | 4.83006    | 4.98802   | 5.29155   | 5.73018   | 5.84743   |
| ST5        | 1.50022    | 1.32125   | 1.67811   | 1.99697   | 1.44935   |
| ALG1       | 4.09579    | 5.0035    | 5.02708   | 5.48671   | 5.16481   |
| UGGT2      | 2.29372    | 1.85207   | 2.4796    | 2.86118   | 2.17183   |
| C4orf22    | 1.76631    | 3.33543   | 1.51241   | 2.61188   | 2.44782   |
| DDX10      | 9.17654    | 7.63096   | 10.0109   | 10.9372   | 8.10012   |
| LYPLAL1    | 12.672     | 9.46256   | 12.9854   | 13.6102   | 11.8065   |
| B4GALNT3   | 1.86356    | 1.87423   | 2.33965   | 2.4794    | 2.36382   |
| CCDC112    | 2.8968     | 2.10691   | 1.91919   | 2.74249   | 2.94358   |
| ME3        | 8.72422    | 9.06205   | 9.46064   | 10.1325   | 9.91833   |
| DPM1       | 37.1763    | 35.056    | 40.2888   | 45.4314   | 36.6901   |
| RARRES1    | 0.969122   | 1.73891   | 1.15285   | 1.26723   | 1.76012   |
| SRGAP3     | 0.0204058  | 0.024573  | 0.0144455 | 0.0241718 | 0.0228483 |
| CLN6       | 41.9241    | 44.9064   | 51.8295   | 59.9189   | 40.7216   |
| APOLD1     | 0.244751   | 0.182893  | 0.289049  | 0.40903   | 0.082691  |
| PTRH1      | 62.9617    | 72.0158   | 66.8243   | 81.1901   | 65.6639   |
| DNAJC11    | 18.6689    | 16.4416   | 18.0759   | 22.0822   | 19.0853   |
| STK36      | 2.9384     | 3.5664    | 2.49996   | 3.58566   | 3.59179   |
| LOC391322  | 3.21134    | 2.24821   | 2.78802   | 2.90703   | 3.10564   |
| NSRP1      | 7.95881    | 7.01306   | 7.96413   | 9.88878   | 7.57049   |
| TLL13      | 0.0754282  | 0.184708  | 0.165617  | 0.22576   | 0.152003  |
| LPCAT1     | 25.6489    | 25.8619   | 27.1803   | 30.7825   | 28.2779   |
| LOC283174  | 1.13889    | 0.86069   | 1.1285    | 1.56102   | 0.971287  |
| PCMTD2     | 4.52395    | 4.84577   | 5.41709   | 5.73372   | 5.33172   |
| CPSF3L     | 76.7387    | 77.6972   | 77.5199   | 92.6121   | 75.7745   |
| DNAJA3     | 32.0529    | 28.2373   | 42.8363   | 43.7293   | 30.0138   |
| ERH        | 208.395    | 197.861   | 246.332   | 258.995   | 220.185   |
| EFTUD2     | 35.4772    | 34.6692   | 34.752    | 43.4266   | 36.8957   |
| TMPRSS6    | 0.137241   | 0.0330088 | 0.0448949 | 0.104494  | 0.0749091 |
| C6orf203   | 12.9114    | 12.8143   | 14.0649   | 14.9086   | 16.0756   |
| LOC645249  | 11.1169    | 12.8041   | 18.5033   | 16.1809   | 14.8614   |
| FAM78A     | 3.55683    | 3.54814   | 3.79534   | 4.84647   | 3.48174   |
| ZNF562     | 2.94055    | 3.08791   | 3.34883   | 3.42874   | 3.36324   |
| UBE2O2     | 10.8838    | 11.9108   | 11.6401   | 12.3715   | 13.9061   |
| DOC2B      | 0.826874   | 0.850529  | 0.873455  | 1.15458   | 1.15208   |
| ARPC5L     | 83.4757    | 93.0874   | 107.196   | 115.212   | 94.1503   |
| ATP11A     | 2.15496    | 1.86447   | 2.1298    | 2.54671   | 2.24962   |
| ABCC10     | 1.83692    | 2.10358   | 1.77872   | 1.88707   | 2.31479   |
| PDCC2      | 30.3292    | 32.2019   | 39.9189   | 39.8626   | 31.4159   |
| SLC35E2B   | 5.01753    | 5.81757   | 6.51036   | 6.72856   | 6.65791   |
| TOB1-AS1   | 0.901959   | 0.831762  | 0.971249  | 1.24225   | 0.628021  |
| IFT52      | 10.3198    | 12.089    | 11.182    | 12.0781   | 12.5292   |
| CCDC125    | 2.00352    | 1.78765   | 1.84477   | 2.04151   | 2.30609   |
| CCDC34     | 10.8585    | 9.38258   | 7.51187   | 10.9585   | 11.5125   |
| CYP26B1    | 0.819282   | 0.828512  | 1.21989   | 1.35356   | 0.890392  |
| FBXO24     | 0.415339   | 0.327121  | 0.25157   | 0.347348  | 0.451217  |
| DNAJC6     | 1.88243    | 1.15476   | 1.89655   | 2.37187   | 1.23622   |
| OCIAD1     | 35.0708    | 32.4782   | 45.5973   | 44.2349   | 37.8406   |

|                       |           |           |           |           |           |
|-----------------------|-----------|-----------|-----------|-----------|-----------|
| LOC284412             | 0.322355  | 0.448441  | 0.298863  | 0.346307  | 0.342149  |
| NOLC1                 | 21.6138   | 23.2176   | 23.2074   | 27.6695   | 24.9095   |
| MPP5                  | 4.37075   | 3.99654   | 3.9827    | 4.72084   | 4.69759   |
| TMEM194B              | 12.7684   | 8.50964   | 10.2096   | 12.3642   | 10.4819   |
| CHD4                  | 14.8586   | 14.2826   | 17.8916   | 19.7311   | 15.1318   |
| KCTD13                | 12.2066   | 9.29879   | 10.1203   | 15.0248   | 8.91372   |
| EWSR1                 | 95.8608   | 91.8775   | 113.9     | 125.99    | 96.8819   |
| CCDC41                | 2.29708   | 1.83625   | 1.4335    | 2.3001    | 2.17208   |
| PION                  | 0.899568  | 0.849856  | 0.971061  | 1.07049   | 0.902592  |
| FAM169A               | 2.00856   | 1.88215   | 2.63964   | 2.49069   | 2.17401   |
| SFMBT1                | 2.4464    | 2.08905   | 2.88759   | 3.04797   | 2.00648   |
| RARS                  | 31.8553   | 30.9551   | 35.4219   | 36.6836   | 35.3717   |
| FCGBP                 | 0.0437523 | 0.0385777 | 0.0291313 | 0.0449911 | 0.0524939 |
| MARS2                 | 4.86526   | 7.86383   | 7.39661   | 7.12139   | 8.46247   |
| EIF4A1,SENP3          | 775.518   | 744.294   | 875.09    | 936.058   | 767.012   |
| TMEM175               | 7.17063   | 6.94982   | 7.40713   | 9.03858   | 7.45526   |
| WDR75                 | 9.12885   | 8.48918   | 10.0939   | 10.6523   | 9.67805   |
| JAZF1-AS1             | 0.0228557 | 0.0977004 | 0.0284997 | 0.0381516 | 0.0909407 |
| C17orf76-AS1,SNORD49B | 1030.09   | 1605.08   | 1144.9    | 1249.88   | 1599.17   |
| ASAP3                 | 4.93902   | 5.71395   | 4.49964   | 5.62119   | 5.96721   |
| UBE2G2                | 17.7733   | 19.8336   | 20.1723   | 22.9061   | 21.6725   |
| EIF6                  | 227.209   | 205.862   | 279.193   | 292.214   | 199.5     |
| KIF3A                 | 1.627     | 1.93762   | 1.45437   | 1.85144   | 1.9809    |
| NUDT12                | 2.81794   | 2.76115   | 2.86926   | 2.90939   | 3.80865   |
| OMA1                  | 6.59667   | 5.51962   | 6.06107   | 7.76926   | 5.34562   |
| WIBG                  | 15.9184   | 14.1958   | 18.9393   | 20.5997   | 15.2776   |
| RNASEH1               | 9.52681   | 8.88865   | 9.08533   | 12.1457   | 9.29152   |
| CNIH                  | 46.0096   | 56.1092   | 68.8872   | 64.1815   | 60.1193   |
| SLC16A13              | 7.3218    | 5.82765   | 14.2535   | 13.0413   | 5.02327   |
| BZW2                  | 81.1853   | 75.6488   | 81.8172   | 92.3062   | 83.062    |
| TMEM69                | 33.9633   | 35.1553   | 44.6569   | 43.3941   | 36.5848   |
| HDHD1                 | 11.4209   | 11.0086   | 13.2676   | 13.6781   | 12.4831   |
| DUSP12                | 17.6611   | 21.5402   | 24.4971   | 23.5122   | 22.741    |
| CALML6                | 0.163825  | 0.255615  | 0.0329587 | 0.136103  | 0.236841  |
| ADCK1                 | 3.27456   | 3.83218   | 3.54801   | 4.42865   | 3.37524   |
| SLC25A33              | 19.0022   | 20.4599   | 23.2137   | 22.6225   | 23.3781   |
| HMX3                  | 0.404653  | 0.201651  | 1.21546   | 0.933194  | 0.18672   |
| THPO                  | 0.205696  | 0.237215  | 0.250467  | 0.285045  | 0.199258  |
| AGAP2                 | 0.356025  | 0.380767  | 0.525791  | 0.412227  | 0.672034  |
| SLC4A11               | 11.3258   | 10.8033   | 10.9839   | 14.7144   | 10.9991   |
| SLC2A10               | 1.51718   | 2.30299   | 2.34413   | 2.09379   | 2.82041   |
| VKORC1L1              | 9.92063   | 7.58389   | 8.50099   | 10.8511   | 8.50135   |
| ACSL1                 | 7.60183   | 7.36408   | 8.09969   | 9.52818   | 7.88174   |
| PPM1N                 | 4.96811   | 4.72331   | 4.64284   | 6.14136   | 4.22355   |
| FAM13C                | 0         | 0.0106038 | 0         | 0.0120613 | 0         |
| ZNF14                 | 2.09951   | 1.7726    | 2.17073   | 2.26851   | 2.28199   |
| ZNF473                | 2.61968   | 2.55725   | 3.5126    | 3.64184   | 2.6386    |
| NMRK1                 | 8.39658   | 8.75794   | 8.42833   | 8.4523    | 11.1822   |
| C12orf76              | 1.56237   | 1.75627   | 1.5747    | 1.76074   | 2.02691   |
| ARHGAP24              | 0.119344  | 0.0149126 | 0.188894  | 0.199019  | 0.0210023 |
| WWC2-AS2              | 1.09621   | 0.731093  | 1.06114   | 1.28414   | 1.0143    |
| BCLAF1                | 8.9175    | 9.57903   | 8.66137   | 9.858     | 11.5022   |
| AS3MT,C10orf32        | 3.41962   | 4.43489   | 5.11921   | 4.1234    | 4.83614   |
| UBQLN2                | 9.83975   | 9.3001    | 11.6299   | 11.3736   | 11.4773   |
| PIK3C3                | 8.07909   | 6.76448   | 8.84824   | 9.41281   | 8.25846   |
| SDR9C7                | 0.063402  | 0.0218481 | 0.0389509 | 0.0528049 | 0.0610659 |
| ARMC2                 | 0.124931  | 0.028507  | 0.124028  | 0.174983  | 0.0359371 |
| PUS1                  | 32.0619   | 31.5465   | 38.6965   | 40.822    | 32.2491   |
| IVD                   | 12.7895   | 16.3133   | 15.8056   | 17.2756   | 17.4658   |
| ARHGEF2               | 27.7023   | 17.4237   | 78.5088   | 55.6733   | 19.3048   |
| SPIN2B                | 2.11103   | 2.10664   | 2.133     | 2.23648   | 2.27118   |
| C7orf25               | 5.42044   | 4.65871   | 6.07088   | 6.69573   | 5.15874   |
| LOC100128881          | 17.1273   | 15.2085   | 20.9677   | 22.1386   | 15.9244   |
| CORO1C                | 114.734   | 96.1405   | 89.3263   | 123.309   | 109.257   |
| PDE4A                 | 1.24813   | 1.39009   | 1.13585   | 1.62429   | 1.09025   |
| TXNL4B                | 4.74598   | 4.33491   | 7.40125   | 6.4471    | 4.49716   |
| ZNF638                | 5.56291   | 4.91971   | 4.65175   | 6.3915    | 5.70909   |
| LINC00657             | 22.8683   | 26.7404   | 25.2332   | 28.0134   | 28.3101   |
| TPMT                  | 3.57648   | 4.20984   | 4.46768   | 4.59685   | 4.63764   |
| ABCB8                 | 5.00134   | 5.61144   | 4.0599    | 5.74707   | 5.26564   |
| ZNF474                | 10.7926   | 6.80889   | 7.84943   | 11.2977   | 6.88221   |
| ERCC4                 | 0.596711  | 0.565778  | 0.721426  | 0.901877  | 0.510067  |
| WNT10A                | 0.839361  | 0.936358  | 1.31545   | 0.898786  | 1.10188   |
| NLRP9                 | 0.0332802 | 0.104489  | 0.0249069 | 0.0997319 | 0.0267278 |
| FAM110D               | 0.583064  | 0.987585  | 0.395458  | 0.556182  | 0.96883   |
| GTF3C6                | 49.0902   | 52.994    | 52.238    | 60.8558   | 54.8281   |
| FERMT3                | 0.259157  | 0.380044  | 0.38185   | 0.381516  | 0.363357  |
| PROCA1                | 1.16456   | 1.23393   | 0.708142  | 1.60844   | 0.908747  |
| PAFAH2                | 2.55114   | 2.62423   | 3.23394   | 3.2325    | 3.02729   |

|              |           |           |           |           |           |
|--------------|-----------|-----------|-----------|-----------|-----------|
| TRMT61B      | 8.33955   | 7.13698   | 9.78639   | 9.493     | 9.54943   |
| ASNA1        | 78.9928   | 91.6706   | 85.5823   | 101.479   | 89.2602   |
| ZNF83        | 3.3072    | 3.36801   | 2.40205   | 3.6486    | 3.68326   |
| RFWD3        | 7.53009   | 7.5407    | 8.22347   | 9.14308   | 8.62506   |
| RRP12        | 11.5928   | 13.3501   | 11.8495   | 15.7515   | 12.8267   |
| PELI2        | 0.559595  | 0.525002  | 0.688351  | 0.73993   | 0.470236  |
| AGER         | 2.52513   | 1.77485   | 1.44605   | 3.17012   | 1.96713   |
| SH2D4A       | 3.26884   | 3.41996   | 3.4799    | 3.83739   | 3.90014   |
| EFCAB2       | 1.66935   | 1.70477   | 1.77727   | 1.94711   | 2.08752   |
| KIAA0247     | 1.45429   | 1.49786   | 1.53921   | 1.63234   | 1.71175   |
| CRYM         | 1.0052    | 0.668522  | 0.602075  | 0.853195  | 0.852467  |
| DDX28        | 10.273    | 17.4846   | 14.6531   | 15.4232   | 17.9893   |
| STYX         | 2.84404   | 3.49906   | 2.79859   | 3.43482   | 3.74689   |
| LOC344595    | 0.543475  | 0.819796  | 0.754695  | 0.722663  | 0.869509  |
| GID4         | 4.46634   | 2.96604   | 4.37924   | 5.03025   | 3.33353   |
| C9orf66      | 0.1871    | 0.30537   | 0.422299  | 0.482346  | 0.252817  |
| TLL11        | 1.35336   | 1.51369   | 2.81868   | 2.34426   | 1.29275   |
| SLC1A4       | 3.55761   | 3.905     | 12.9805   | 9.90814   | 3.76774   |
| SYMPK        | 20.7352   | 15.9643   | 18.4162   | 24.2273   | 17.1233   |
| PMEP1A       | 0.739011  | 0.889259  | 0.91903   | 1.11852   | 0.72244   |
| AUNIP        | 4.75239   | 5.26098   | 6.97931   | 6.54734   | 5.93375   |
| DND1         | 8.23382   | 8.57693   | 9.90895   | 10.922    | 9.4731    |
| DNAJC7       | 30.7934   | 27.1117   | 37.3064   | 39.4217   | 29.213    |
| MUM1         | 7.12723   | 8.7278    | 8.48094   | 9.85062   | 9.11072   |
| POLR1A       | 5.30968   | 4.23356   | 5.0513    | 6.00631   | 4.72356   |
| ZFP90        | 2.48009   | 2.8519    | 2.91415   | 3.01118   | 3.43479   |
| POLR1E       | 35.0024   | 30.9809   | 38.136    | 39.431    | 35.703    |
| NAT9         | 22.1154   | 24.2375   | 30.2887   | 30.2273   | 23.8288   |
| LZTFL1       | 2.53742   | 2.57064   | 2.99107   | 3.02136   | 3.1444    |
| ATP5S        | 4.202     | 5.64201   | 5.81287   | 5.52152   | 5.6776    |
| EXOSC1       | 22.5809   | 24.2464   | 29.0558   | 30.3765   | 22.047    |
| ECHDC1       | 17.1334   | 16.877    | 21.7692   | 21.7671   | 20.0868   |
| NIT1         | 27.7587   | 22.2942   | 39.3635   | 40.5969   | 24.4646   |
| SMARCA2      | 4.53452   | 4.21338   | 5.02354   | 6.30581   | 4.63067   |
| XPO4         | 2.37954   | 2.34966   | 2.42082   | 2.84835   | 2.5035    |
| C15orf37     | 1.15902   | 2.47675   | 1.99506   | 2.01789   | 1.89967   |
| GSTA4        | 9.05373   | 12.1498   | 11.6057   | 11.1922   | 15.6001   |
| MSTO1        | 5.67016   | 7.22716   | 8.55932   | 8.95116   | 6.8181    |
| ZNF7         | 14.5647   | 15.8478   | 18.1358   | 18.757    | 17.5825   |
| KCTD5        | 23.2124   | 24.7764   | 28.364    | 30.1938   | 26.4461   |
| ACAD9        | 12.8621   | 13.5923   | 11.2636   | 15.7651   | 13.6242   |
| PLXNB3       | 0.73244   | 1.64683   | 0.448917  | 0.800687  | 1.85318   |
| KIAA1430     | 7.96038   | 8.611     | 8.32197   | 8.72385   | 10.0657   |
| RNU6ATAC     | 30.6101   | 46.4091   | 28.0995   | 43.3862   | 62.869    |
| KLHL5        | 1.20292   | 1.28753   | 1.42212   | 1.53298   | 1.38375   |
| LOC339874    | 0.0561147 | 0.331891  | 0.100774  | 0.113173  | 0.20408   |
| SSR4P1       | 0.291797  | 0.65248   | 0.412126  | 0.385958  | 0.657312  |
| GRASP        | 0.43119   | 0.281207  | 0.475681  | 0.399662  | 0.581497  |
| POP1         | 5.45884   | 3.00063   | 6.34541   | 6.98037   | 3.66223   |
| HDAC9        | 8.33466   | 4.43786   | 6.54685   | 8.44448   | 4.90933   |
| ACBD6        | 31.0989   | 27.4157   | 29.0958   | 30.8611   | 35.0195   |
| SAMD11       | 1.40397   | 2.34218   | 1.28875   | 1.71732   | 1.83319   |
| LHFPL4       | 1.10114   | 0.971609  | 0.939138  | 0.971178  | 1.42358   |
| DNAH17       | 0.139192  | 0.219216  | 0.210034  | 0.261762  | 0.218104  |
| HIST3H2BB    | 0.378859  | 0         | 0.301493  | 0.624006  | 0.154379  |
| SMKR1        | 4.60285   | 4.76102   | 6.67431   | 5.47933   | 5.95366   |
| DLAT         | 4.33475   | 4.36118   | 4.61028   | 5.28164   | 5.21875   |
| MEST         | 9.66211   | 16.2674   | 11.4614   | 14.0266   | 14.4631   |
| KIAA0232     | 1.42309   | 1.96414   | 1.64258   | 1.82348   | 1.98483   |
| HSPA8        | 529.281   | 592.769   | 637.791   | 672.064   | 582.478   |
| KIAA0895     | 0.574443  | 0.435143  | 0.479349  | 0.519465  | 0.580086  |
| CRB2         | 0.0641187 | 0         | 0.0288823 | 0.0539369 | 0.0386893 |
| KEL          | 0.0244503 | 0.0332497 | 0         | 0.020303  | 0.0459822 |
| MR1          | 0.908169  | 1.06778   | 1.15541   | 1.15868   | 1.08276   |
| PLCG2        | 3.23881   | 2.41173   | 2.89853   | 3.5888    | 2.97785   |
| KCNIP3       | 2.34484   | 2.78934   | 2.57207   | 2.91548   | 2.38275   |
| FUBP1        | 18.651    | 13.7754   | 23.6261   | 23.3896   | 15.8828   |
| HECTD1       | 3.42951   | 3.02087   | 3.54586   | 4.09933   | 3.32813   |
| KIF5B        | 11.6523   | 12.1563   | 14.2988   | 15.2765   | 13.5857   |
| C19orf57     | 0.461255  | 0.685086  | 0.752535  | 0.975323  | 0.763946  |
| RAB23        | 1.62629   | 1.39719   | 2.0809    | 1.88356   | 1.61751   |
| TCTEX1D4     | 0.0399502 | 0         | 0.144428  | 0.0669076 | 0.144959  |
| LOC100129480 | 0.0759867 | 0.07091   | 0.031051  | 0.126408  | 0.0329425 |
| RCAN1        | 7.3236    | 8.79141   | 12.4081   | 10.6616   | 9.93269   |
| LOC100505978 | 0.0669979 | 0.0470264 | 0.123888  | 0.110585  | 0.0442661 |
| SCNN1A       | 1.01134   | 1.33954   | 0.743868  | 1.24508   | 1.39617   |
| KIN          | 1.78309   | 1.4442    | 2.15346   | 2.04443   | 1.85109   |
| PITPNA       | 14.7164   | 16.6009   | 16.528    | 18.7616   | 18.104    |
| CEP72        | 8.59668   | 7.37267   | 7.23377   | 9.86865   | 7.6045    |

|                   |            |            |            |           |            |
|-------------------|------------|------------|------------|-----------|------------|
| FBXL14            | 2.21247    | 1.75511    | 1.96776    | 2.15115   | 2.58443    |
| C5orf55           | 1.7698     | 3.15867    | 3.1862     | 2.63334   | 3.70048    |
| AP4E1             | 1.20614    | 1.01538    | 1.47177    | 1.6093    | 1.12139    |
| NOB1              | 121.698    | 112.771    | 143.846    | 140.335   | 122.295    |
| LCTL              | 0.35169    | 0.491247   | 0.433551   | 0.46346   | 0.427087   |
| OR10H1            | 0.11597    | 0          | 0          | 0.0645558 | 0          |
| RND2              | 0.456113   | 0.574697   | 0.347636   | 0.459202  | 0.637426   |
| MCCC2             | 20.7725    | 18.5745    | 22.3576    | 26.6717   | 20.8432    |
| ZFP62             | 2.23883    | 1.96548    | 2.6917     | 2.87492   | 1.89884    |
| NHLH1             | 0.0550724  | 0.0579707  | 0          | 0.0693312 | 0.0358297  |
| ABHD14A,ACY1      | 83.7718    | 95.0523    | 84.8746    | 98.7123   | 99.2216    |
| NANOS1            | 1.96052    | 2.77163    | 2.47968    | 2.54767   | 2.89892    |
| VIPAS39           | 5.47504    | 5.10522    | 4.97101    | 5.84434   | 5.28882    |
| PIPOX             | 0.100657   | 0.0761896  | 0.0680053  | 0.055514  | 0.128028   |
| PLGRKT            | 12.2339    | 14.0726    | 11.8697    | 14.4704   | 14.7893    |
| LRRC69            | 0.184772   | 0.170381   | 0.104973   | 0.249577  | 0.0693594  |
| FAM167A           | 0.710792   | 0.865265   | 1.14621    | 0.96211   | 1.08998    |
| HIST2H2BF         | 1.55039    | 1.21327    | 1.3888     | 2.766     | 0          |
| SPAG1             | 2.63925    | 3.58132    | 3.64092    | 3.5268    | 3.67232    |
| VAR5              | 60.3188    | 53.2724    | 57.3844    | 69.8271   | 60.1682    |
| TRMT6             | 7.42572    | 9.12636    | 10.0421    | 10.4999   | 9.35505    |
| CLUAP1            | 2.71398    | 3.01886    | 3.08342    | 3.38675   | 3.243      |
| PALLD             | 4.71975    | 4.8058     | 4.91541    | 5.48886   | 5.66683    |
| PRODH             | 0.932978   | 0.979176   | 1.15989    | 1.46645   | 1.01522    |
| MAMSTR            | 0.887215   | 0.93901    | 1.15933    | 1.07417   | 1.17219    |
| NFKBID            | 2.71276    | 1.7934     | 2.53038    | 3.49625   | 2.09252    |
| GK5               | 0.699973   | 0.684657   | 0.590989   | 0.804477  | 0.822649   |
| IL27RA            | 7.01657    | 9.69329    | 8.56347    | 9.03279   | 11.1994    |
| DCUN1D1           | 3.27853    | 3.15902    | 3.81479    | 3.90111   | 3.56582    |
| ANKRD42           | 0.357239   | 0.311812   | 0.314165   | 0.345341  | 0.431137   |
| ABCD1             | 10.6794    | 9.37247    | 11.9545    | 13.011    | 10.7699    |
| AMIGO3            | 2.24337    | 2.39925    | 3.18955    | 3.19307   | 2.58549    |
| FAM188B,INMT      | 0.791797   | 0.926344   | 0.632581   | 0.757469  | 1.00785    |
| WDR25             | 3.28529    | 2.97407    | 5.38195    | 4.51641   | 3.37842    |
| SNORA71A          | 2.67396    | 7.15477    | 9.46467    | 4.33034   | 3.67805    |
| UCKL1-AS1         | 0.178707   | 0.132458   | 0.200465   | 0.260105  | 0.271014   |
| MRPS10            | 16.3412    | 18.9057    | 18.3353    | 20.889    | 19.9093    |
| PDIK1L            | 1.7206     | 2.44162    | 1.91525    | 2.22704   | 2.63363    |
| ZNF627            | 2.97915    | 3.69605    | 3.58441    | 3.65232   | 3.82423    |
| ILF2              | 120.824    | 126.062    | 146.916    | 151.086   | 142.773    |
| LOC100009676      | 1.62416    | 1.68087    | 2.64111    | 2.82903   | 1.53661    |
| PFDN6             | 98.8342    | 90.696     | 104.443    | 117.154   | 98.8272    |
| FLJ31813          | 0.19102    | 0.429525   | 0.41128    | 0.51025   | 0.383295   |
| DAGLA             | 1.55818    | 1.06959    | 1.26009    | 1.58134   | 1.29891    |
| TRAF3             | 3.78139    | 3.6544     | 3.97919    | 4.52856   | 4.0378     |
| HOXC4,HOXC5,HOXC6 | 10.5239    | 11.1374    | 11.3623    | 13.0334   | 11.801     |
| VAX2              | 0          | 0.0625     | 0.0571728  | 0.0805347 | 0.0573516  |
| GPR179            | 0.00664862 | 0          | 0.00401571 | 0         | 0.0123303  |
| SELT              | 21.0419    | 23.2543    | 23.3721    | 23.2722   | 26.9627    |
| HNRNPH1           | 59.4467    | 64.2488    | 68.0259    | 77.2422   | 71.5936    |
| HTR7P1            | 0.460384   | 0.981344   | 0.924455   | 0.82161   | 0.910637   |
| TXNDC15           | 6.70746    | 7.33168    | 8.35952    | 8.88664   | 9.04431    |
| ANAPC7            | 12.075     | 11.2249    | 14.1987    | 14.7494   | 12.5395    |
| CEP89             | 2.33356    | 2.76795    | 2.08519    | 2.68424   | 2.78942    |
| ACOX3             | 5.6172     | 6.31023    | 4.4258     | 6.78154   | 5.60454    |
| C12orf43          | 4.93452    | 6.95016    | 5.26257    | 6.90327   | 6.99922    |
| MRM1              | 7.91147    | 6.99013    | 9.67093    | 9.63621   | 6.90327    |
| IGF2,INS,INS-IGF2 | 0          | 0.00855384 | 0.0076116  | 0         | 0.00767222 |
| TMEM136           | 4.76133    | 3.73909    | 5.04057    | 5.38013   | 4.38131    |
| ACOT9             | 22.7937    | 20.6438    | 27.671     | 26.1231   | 24.2378    |
| ZNF674-AS1        | 0.930686   | 1.79014    | 2.10558    | 1.56135   | 2.25133    |
| GMFB              | 6.0369     | 5.94904    | 7.54953    | 7.84788   | 6.74779    |
| WDR27             | 1.12879    | 1.8087     | 1.20138    | 1.62632   | 1.65726    |
| CDK7              | 35.5962    | 33.7709    | 39.476     | 41.9623   | 35.1098    |
| ZNF101            | 2.70082    | 3.14658    | 2.23581    | 2.73449   | 3.30923    |
| CRYL1             | 22.6055    | 30.0966    | 22.5654    | 24.952    | 32.4278    |
| C15orf40          | 12.2072    | 14.359     | 15.3518    | 13.6886   | 17.0053    |
| L3MBTL3           | 1.03398    | 1.04219    | 1.1572     | 1.59273   | 1.08989    |
| NEXN              | 0.0183701  | 0.00864288 | 0.0229454  | 0.030199  | 0.01661    |
| GBAS              | 24.8693    | 28.4906    | 24.6222    | 26.7049   | 34.78      |
| PTPN11            | 9.11475    | 8.90005    | 10.7288    | 11.5542   | 10.0433    |
| ARMC5             | 4.89181    | 6.95901    | 6.27455    | 6.82768   | 7.2361     |
| ZNF302            | 2.56239    | 4.07011    | 4.32476    | 3.81807   | 4.02925    |
| RFXAP             | 1.5679     | 1.97089    | 3.22698    | 2.81846   | 2.02818    |
| DNAJC22           | 4.13719    | 4.53368    | 4.27188    | 4.07091   | 4.37994    |
| H2AFY2            | 17.2573    | 16.0087    | 19.2452    | 21.7272   | 14.9777    |
| ZNF529            | 1.70727    | 1.65927    | 1.5875     | 2.14328   | 1.86899    |
| HOMER1            | 0.6914     | 0.782549   | 1.00959    | 0.948756  | 1.0637     |
| KIAA1704          | 3.17474    | 2.03006    | 3.01599    | 3.51176   | 2.76082    |

|                     |           |            |           |            |           |
|---------------------|-----------|------------|-----------|------------|-----------|
| NSUN3               | 1.43498   | 1.25243    | 1.42189   | 1.82907    | 1.05032   |
| UFSP1               | 2.12825   | 2.87343    | 4.45428   | 2.98913    | 3.76163   |
| NFXL1               | 3.48772   | 2.554      | 4.35224   | 4.74065    | 3.22964   |
| SOAT1               | 3.05838   | 2.86015    | 3.87356   | 3.92198    | 3.14966   |
| KRTAP4-8            | 0.735443  | 0.395672   | 0.48207   | 0.710022   | 0.272965  |
| DLEU7               | 0.0378515 | 0          | 0.0466281 | 0          | 0.097896  |
| JUN                 | 159.421   | 81.3225    | 196.741   | 194.4      | 101.069   |
| ATP1A1OS            | 2.08497   | 3.21579    | 3.5665    | 2.68369    | 3.76532   |
| DKC1                | 33.9608   | 33.1617    | 45.4942   | 45.0637    | 38.1118   |
| TMLHE-AS1           | 0         | 0.0186114  | 0         | 0.0214443  | 0         |
| CCDC117             | 4.07772   | 4.1757     | 4.38084   | 4.41397    | 5.14515   |
| LAIR1               | 0.0709348 | 0.0139545  | 0.0497873 | 0.0505232  | 0.0515416 |
| NIP7                | 14.259    | 20.621     | 21.7968   | 19.4938    | 22.6101   |
| HEATR2              | 21.7028   | 16.9337    | 18.5243   | 23.9076    | 20.3657   |
| PSMB8               | 51.9303   | 46.9206    | 72.7589   | 60.8296    | 48.991    |
| ANKRD20A2,ANKRD20A3 | 0         | 0.00807634 | 0         | 0.00930738 | 0         |
| KLRAP1              | 0.222761  | 0.209268   | 0.142583  | 0.261755   | 0.201198  |
| MATN3               | 0         | 0.0130099  | 0.0112739 | 0          | 0.012258  |
| THOP1               | 61.7748   | 62.5579    | 68.2863   | 73.1164    | 71.2283   |
| CLIP1               | 5.51804   | 4.16805    | 4.87835   | 6.52896    | 4.80451   |
| IL23A               | 0.741143  | 0.920401   | 0.708457  | 0.864403   | 1.00198   |
| METTL15             | 3.18445   | 3.37485    | 2.64338   | 3.40948    | 4.09933   |
| PIGW                | 2.19283   | 4.67726    | 4.55926   | 3.5959     | 4.95192   |
| IFT57               | 6.49465   | 8.40923    | 6.49311   | 6.97053    | 9.91347   |
| ZBED6               | 0.180847  | 0.0545117  | 0.123352  | 0.114248   | 0.114248  |
| TMEM144             | 6.88001   | 6.48958    | 5.73029   | 6.50358    | 8.34607   |
| PRDM11              | 0.208845  | 0.298473   | 0.225557  | 0.168102   | 0.415531  |
| SNHG10              | 4.22128   | 5.30451    | 5.74968   | 5.95319    | 5.7877    |
| RDH10               | 3.17956   | 3.76311    | 4.64921   | 4.75563    | 3.7718    |
| CISH                | 2.31454   | 2.66116    | 1.96242   | 2.91176    | 2.49411   |
| BRICD5              | 3.98675   | 4.84405    | 4.0944    | 5.36005    | 4.57475   |
| METTL8              | 2.0018    | 2.33116    | 2.26609   | 2.30463    | 2.69198   |
| UTP6                | 18.7535   | 16.402     | 20.9509   | 22.8235    | 19.8773   |
| GMCL1               | 2.31833   | 1.68171    | 1.70549   | 2.31959    | 2.30154   |
| PANX1               | 2.13816   | 3.20133    | 2.89723   | 2.45278    | 3.6488    |
| LYAR                | 25.3258   | 20.8961    | 25.6486   | 29.368     | 25.2729   |
| TRIM25              | 11.6059   | 11.5265    | 26.5141   | 23.517     | 11.8195   |
| S100A11             | 856.689   | 760.496    | 810.328   | 972.775    | 860.037   |
| LOC100268168        | 4.44986   | 1.76537    | 5.18105   | 5.33997    | 2.58564   |
| PIPF5K1             | 3.96126   | 4.13115    | 4.80127   | 5.50827    | 4.68606   |
| SYNCRIP             | 12.1048   | 12.4475    | 14.0846   | 15.3773    | 14.0334   |
| PTPN9               | 5.29614   | 6.09359    | 6.6038    | 7.4966     | 5.61059   |
| ATP6V1G2,DDX39B     | 145.772   | 137.605    | 156.561   | 189.661    | 137.499   |
| STK19               | 4.6981    | 5.26025    | 5.84199   | 5.7457     | 6.53978   |
| NOL6                | 7.33694   | 8.78821    | 9.59429   | 10.0719    | 9.43966   |
| DNAJC27             | 0.710522  | 0.774444   | 0.70591   | 0.75057    | 0.88774   |
| LOXL1-AS1           | 1.00266   | 1.43315    | 1.14762   | 1.4139     | 1.43098   |
| KIAA0754            | 0.210933  | 0.274777   | 0.242719  | 0.329023   | 0.297544  |
| ID3                 | 149.481   | 456.085    | 146.565   | 192.367    | 425.972   |
| USP40               | 2.96209   | 3.18171    | 3.37574   | 3.63592    | 3.74856   |
| IQCH-AS1            | 2.47146   | 4.18623    | 2.66324   | 3.69575    | 4.30107   |
| PRKAG2              | 16.2784   | 17.3754    | 18.0326   | 19.4042    | 18.9915   |
| SH3D19              | 3.4824    | 3.12944    | 3.47974   | 4.39648    | 3.50041   |
| HOXA3               | 0.294409  | 0.706055   | 0.544392  | 0.494614   | 0.824957  |
| LRWD1               | 30.0466   | 24.0034    | 35.3213   | 39.0046    | 25.5871   |
| TMEM63B             | 9.29851   | 9.4699     | 9.05514   | 10.5173    | 11.5755   |
| C19orf48            | 284.777   | 267.041    | 391.609   | 381.785    | 258.397   |
| ZNF420              | 0.8988    | 0.715515   | 1.1242    | 0.970862   | 0.929149  |
| EID2B               | 1.27587   | 2.8621     | 2.1772    | 2.4792     | 2.87259   |
| RHBDD3              | 16.1646   | 19.0061    | 21.094    | 23.5198    | 18.2117   |
| NEURL2              | 1.76091   | 1.81552    | 2.40334   | 2.60532    | 2.36456   |
| HTATSF1             | 6.40028   | 6.55292    | 6.68362   | 8.28227    | 7.19196   |
| DGCR9               | 0.0124066 | 0.0338611  | 0.0604391 | 0.0206165  | 0.0156166 |
| GPANK1              | 15.6566   | 15.6897    | 19.3259   | 19.3118    | 17.4006   |
| HAX1                | 56.0364   | 51.9855    | 87.2091   | 82.1628    | 50.4165   |
| TAP2                | 18.1431   | 13.6282    | 22.2091   | 23.4947    | 16.9358   |
| FBXW8               | 1.48737   | 1.55371    | 1.74267   | 1.95188    | 1.76046   |
| NPM1                | 1321.47   | 1271.96    | 1507.53   | 1599.15    | 1295.83   |
| NT5C3               | 13.3216   | 14.9307    | 15.0352   | 17.3341    | 16.6507   |
| NR1D1               | 9.64506   | 6.36639    | 9.95564   | 10.5071    | 7.07806   |
| MAGEF1              | 25.891    | 27.9519    | 38.1774   | 37.6827    | 31.9263   |
| BIK                 | 5.4606    | 4.74611    | 4.66765   | 4.07058    | 6.85481   |
| C12orf5             | 1.39421   | 2.528      | 2.82262   | 2.47444    | 2.39334   |
| SHC4                | 0.0199489 | 0.0217567  | 0.018845  | 0.0249172  | 0.0274454 |
| PREPL               | 4.39465   | 3.35242    | 5.08749   | 5.62463    | 4.01968   |
| RSL24D1             | 95.28     | 105.425    | 160.805   | 135.341    | 111.965   |
| EVC                 | 5.80119   | 4.99714    | 6.18607   | 7.61441    | 5.19063   |
| BRD9                | 11.6064   | 12.7228    | 11.699    | 14.2316    | 13.382    |
| KCNAB1              | 0.743266  | 0.913479   | 1.31282   | 1.08801    | 1.08664   |

|                         |           |           |            |            |           |
|-------------------------|-----------|-----------|------------|------------|-----------|
| TPX2                    | 30.1417   | 27.2576   | 32.2259    | 38.9919    | 28.3221   |
| GINS4                   | 4.64353   | 4.38693   | 5.24359    | 6.02891    | 4.95717   |
| NR2F1                   | 2.40544   | 4.00703   | 3.87269    | 3.44251    | 5.02504   |
| SPRTN                   | 1.12064   | 1.37262   | 2.07913    | 1.89546    | 1.47313   |
| KDM6B                   | 6.46161   | 5.27935   | 6.65729    | 8.28017    | 5.46217   |
| LRRC28                  | 4.06194   | 5.0194    | 3.41799    | 4.08288    | 5.61332   |
| ICA1L                   | 0.414762  | 0.345128  | 0.478463   | 0.607007   | 0.422028  |
| LTBP4                   | 14.5181   | 16.7885   | 11.1654    | 16.6081    | 18.5541   |
| CCT6A                   | 73.1617   | 70.6971   | 91.1618    | 89.877     | 83.4367   |
| H3F3B                   | 149.617   | 213.092   | 167.728    | 198.047    | 221.375   |
| GCH1                    | 4.7753    | 5.90853   | 6.81794    | 7.28009    | 5.89218   |
| HPX                     | 0.215129  | 0.171659  | 0.283915   | 0.329648   | 0.227379  |
| ABHD14B                 | 34.2785   | 46.9887   | 38.8288    | 44.3853    | 46.38     |
| WDR45                   | 31.2162   | 33.7406   | 39.6935    | 43.5789    | 34.129    |
| POLR3B                  | 0.759861  | 0.825715  | 1.14178    | 1.11892    | 0.82799   |
| MPV17L                  | 0.0404395 | 0         | 0          | 0.0227023  | 0         |
| ADTRP                   | 0.157135  | 0.433286  | 0.261733   | 0.108035   | 0.696982  |
| MGCT2080                | 15.0642   | 13.4324   | 14.1445    | 18.8       | 11.3985   |
| ATPBD4                  | 3.2065    | 2.67989   | 3.50176    | 3.17088    | 2.54741   |
| ECI1                    | 135.19    | 133.097   | 171.871    | 190.957    | 121.473   |
| WDR44                   | 1.33739   | 1.07949   | 1.24273    | 1.30127    | 1.27662   |
| C22orf23                | 3.24574   | 3.94542   | 3.88251    | 3.63153    | 3.63736   |
| MRE11A                  | 2.08429   | 1.37955   | 2.21563    | 2.54649    | 1.63914   |
| QPRT                    | 0.115219  | 0.0620329 | 0.111813   | 0.0772411  | 0.057003  |
| NAE1                    | 37.223    | 35.106    | 44.9575    | 44.4696    | 43.715    |
| FRAT1                   | 2.60382   | 4.9861    | 3.44293    | 4.41721    | 4.33777   |
| LIN52                   | 0.932723  | 0.717061  | 1.28415    | 1.19918    | 1.06739   |
| SCARNA1                 | 1.22818   | 1.71029   | 0          | 0          | 3.42553   |
| ZNF136                  | 0.610757  | 1.14857   | 0.96124    | 0.757571   | 1.18145   |
| FPGT,FPGT-TNNI3K,TNNI3K | 1.59746   | 0.970552  | 1.73497    | 1.90895    | 1.11035   |
| MTMR9LP                 | 3.13502   | 3.10518   | 3.16305    | 4.33096    | 3.39756   |
| SRXN1                   | 31.5324   | 35.8824   | 42.2412    | 41.8692    | 39.3361   |
| VASN                    | 1.32538   | 2.66734   | 1.12234    | 1.11224    | 3.04251   |
| MECR                    | 13.137    | 14.7422   | 15.3386    | 17.1931    | 15.2439   |
| ZXDC                    | 4.52384   | 4.74672   | 6.00154    | 5.97227    | 5.14048   |
| PSMC4                   | 42.9782   | 44.3156   | 47.0795    | 54.1841    | 47.4011   |
| LMO4                    | 2.31082   | 3.03694   | 6.26136    | 4.47064    | 3.10575   |
| SLC13A1                 | 0.016865  | 0.0335743 | 0.0360769  | 0.0282676  | 0.0319285 |
| CPEB4                   | 0.683536  | 0.498296  | 0.574401   | 0.759217   | 0.463717  |
| SNORD21                 | 0         | 46.4508   | 44.7208    | 0          | 106.353   |
| SRSF5                   | 38.9608   | 80.887    | 66.0253    | 55.4589    | 88.5003   |
| ABCC5                   | 5.36845   | 4.52222   | 5.2257     | 6.87685    | 4.39673   |
| DPY19L3                 | 2.30356   | 1.99184   | 2.19528    | 2.8684     | 2.2052    |
| PABPC1L                 | 6.72557   | 5.82468   | 6.22891    | 10.4463    | 5.31664   |
| THTPA                   | 10.2129   | 8.25386   | 10.7068    | 13.1137    | 8.23597   |
| WAC-AS1                 | 12.8934   | 15.5152   | 16.4376    | 16.2827    | 17.7958   |
| KIAA0586                | 0.529202  | 0.442772  | 0.600458   | 0.739778   | 0.476724  |
| SNORA4                  | 0         | 4.66356   | 3.99277    | 5.36451    | 4.70229   |
| TTC21A                  | 0.308746  | 0.384417  | 0.164827   | 0.405924   | 0.355175  |
| CAAP1                   | 3.67085   | 3.87605   | 4.16453    | 4.6937     | 4.44936   |
| TADA2A                  | 3.25785   | 3.04939   | 4.08688    | 4.19386    | 3.14087   |
| ZMYND11                 | 4.90697   | 5.03141   | 6.24917    | 6.58429    | 5.44904   |
| SRSF7                   | 37.3755   | 44.8766   | 45.2536    | 49.1716    | 45.2277   |
| HMG1                    | 1141.36   | 1169.89   | 1120.83    | 1372.13    | 1290.91   |
| SLC51A                  | 0.228571  | 0.125774  | 0.111366   | 0.114423   | 0.145267  |
| CHAMP1                  | 3.50719   | 5.777     | 4.40706    | 4.93987    | 6.21467   |
| METAP2                  | 22.5541   | 21.9129   | 29.1728    | 28.2996    | 26.9211   |
| SNORA70                 | 45.6863   | 75.7819   | 41.7994    | 56.846     | 63.4447   |
| GRB10                   | 6.28918   | 5.4529    | 10.1902    | 10.041     | 5.35255   |
| SATB2                   | 1.49611   | 0.877362  | 1.52889    | 1.73555    | 1.05658   |
| BAZ1A                   | 4.62002   | 3.19654   | 4.66021    | 5.59211    | 3.851     |
| BUB3                    | 97.682    | 92.9974   | 121.615    | 120.326    | 101.792   |
| PPF1B1                  | 3.85781   | 3.56893   | 3.64365    | 4.36405    | 4.439     |
| AGAP1                   | 3.03791   | 3.12549   | 2.95147    | 3.34447    | 3.81772   |
| C2CD4A                  | 0         | 0.0137305 | 0          | 0.0159419  | 0         |
| PASK                    | 2.57683   | 2.07231   | 1.78644    | 3.35993    | 2.14435   |
| ZNF793                  | 0.0139246 | 0.0081964 | 0.00354022 | 0.00929889 | 0.0156264 |
| GCSH                    | 10.6978   | 11.1956   | 12.7796    | 12.3686    | 14.0817   |
| GOLIM4                  | 0.510901  | 0.623925  | 0.643012   | 0.72811    | 0.753909  |
| FAM101B                 | 0.291526  | 0.097208  | 0.180777   | 0.359406   | 0.2272    |
| LOC100133985            | 1.88468   | 1.86545   | 2.03241    | 2.81664    | 2.36347   |
| LBX2-AS1                | 6.91625   | 6.74256   | 9.15848    | 10.0374    | 6.3875    |
| ADAT1                   | 0.476049  | 0.737198  | 0.832361   | 0.918615   | 0.595941  |
| C3orf38                 | 3.96421   | 4.00126   | 4.17923    | 4.23736    | 5.30107   |
| MST1P2                  | 1.16067   | 0.73535   | 0.724101   | 0.956767   | 1.18903   |
| RBM28                   | 24.4493   | 14.1958   | 21.4081    | 28.334     | 17.4276   |
| MAML3                   | 0.620924  | 0.761549  | 0.754058   | 0.682609   | 1.02167   |
| ZMYM1                   | 1.70285   | 2.0804    | 1.68407    | 2.11864    | 2.18893   |
| OVGP1                   | 1.1214    | 1.12283   | 1.11624    | 1.65052    | 0.932351  |

|                   |            |           |            |           |           |
|-------------------|------------|-----------|------------|-----------|-----------|
| LOC284260         | 0.113307   | 0.0986522 | 0.0553172  | 0.033585  | 0.149273  |
| AGMAT             | 6.86095    | 6.93127   | 7.09322    | 8.60371   | 7.02668   |
| PAN3-AS1          | 0.605306   | 0.445166  | 1.20344    | 1.03796   | 0.744417  |
| MFS07             | 0.101882   | 0.438747  | 0.183482   | 0.385924  | 0.369409  |
| ATG2A             | 10.0517    | 11.3124   | 10.6538    | 13.1832   | 11.9776   |
| ID12              | 4.73488    | 7.84976   | 8.10942    | 7.25975   | 8.52527   |
| MYRIP             | 0.00489089 | 0         | 0.00606887 | 0         | 0.0128096 |
| ACR               | 0.104102   | 0.0352836 | 0          | 0         | 0.162947  |
| KITLG             | 0.0906973  | 0.19008   | 0.114544   | 0.0803847 | 0.194241  |
| MRPL50            | 41.5346    | 37.7234   | 44.5526    | 49.0942   | 44.1595   |
| VARS2             | 17.7844    | 15.8597   | 15.9511    | 20.8447   | 17.9027   |
| NDOR1             | 12.6491    | 10.246    | 13.0115    | 19.0474   | 9.31131   |
| RPS6KC1           | 0.962012   | 1.01959   | 1.34883    | 1.32959   | 1.17477   |
| SSBP3             | 11.8024    | 15.082    | 12.8576    | 15.9208   | 14.5679   |
| RACGAP1P          | 0          | 0.0109997 | 0.00964876 | 0         | 0.010344  |
| THBS3             | 1.80678    | 1.97435   | 1.87068    | 2.27863   | 2.24574   |
| PCF11             | 2.95256    | 2.35581   | 3.6626     | 3.64618   | 3.0419    |
| STXBP4            | 0.164004   | 0.289248  | 0.227873   | 0.290936  | 0.293531  |
| JMJD4             | 13.2698    | 13.6432   | 19.8168    | 19.3241   | 13.6761   |
| TMOD2             | 0.713005   | 0.684     | 0.860095   | 0.945677  | 0.706896  |
| HGSNAT            | 4.79158    | 5.98233   | 5.95133    | 6.63833   | 6.19763   |
| GLRX3             | 101.184    | 76.526    | 135.664    | 130.005   | 86.3779   |
| NOTUM             | 4.98656    | 4.64692   | 3.89911    | 6.16733   | 4.54872   |
| PHLDA1            | 62.0965    | 49.9645   | 78.1246    | 78.354    | 57.4541   |
| COX6B2            | 0.450962   | 0.931942  | 0.316164   | 0.715998  | 0.84993   |
| PUS10             | 0.399371   | 0.367248  | 0.427066   | 0.42981   | 0.481537  |
| RFX3              | 0.506286   | 0.534202  | 0.473699   | 0.529979  | 0.601032  |
| DUS4L             | 4.53819    | 4.90761   | 5.86736    | 6.20742   | 5.02551   |
| FKBP7             | 1.24418    | 1.70262   | 1.23347    | 1.59243   | 1.68604   |
| DIS3L2            | 4.69423    | 4.82156   | 3.68015    | 5.19754   | 5.52794   |
| RNF141            | 2.9836     | 3.86655   | 3.00807    | 3.57287   | 4.10163   |
| TCTEX1D2, TM4SF19 | 96.8487    | 64.8977   | 90.9258    | 113.815   | 67.6623   |
| TPD52L2           | 87.2847    | 86.7242   | 98.3413    | 111.083   | 93.0521   |
| KIF7              | 8.84496    | 7.36566   | 8.73445    | 10.9252   | 8.24837   |
| PRKCG             | 6.01151    | 5.60731   | 2.54204    | 5.78854   | 6.64855   |
| LOC554206         | 0.390872   | 0.858273  | 0.95015    | 0.648712  | 1.05708   |
| LOC100506305      | 0          | 0.0240399 | 0.021201   | 0         | 0.0224611 |
| BCL2L13           | 4.8085     | 4.98816   | 5.28824    | 6.14317   | 4.78803   |
| P4HTM             | 13.0725    | 15.1769   | 15.8858    | 18.4354   | 14.8375   |
| UBAP2             | 6.04003    | 6.00943   | 6.11214    | 7.62558   | 6.42815   |
| WDR19             | 2.22367    | 2.57103   | 2.44735    | 2.86354   | 3.07031   |
| POU2F3            | 0          | 0.0138533 | 0.0121535  | 0         | 0.0129019 |
| PRH1, PRR4        | 2.00689    | 2.26812   | 2.3256     | 2.34866   | 2.98317   |
| ADAMTSL5          | 4.59133    | 4.7014    | 4.90963    | 6.39475   | 5.1618    |
| NMNAT1            | 2.57604    | 1.86655   | 2.39744    | 2.91447   | 2.35624   |
| RFC3              | 5.39335    | 5.22843   | 6.78518    | 7.67432   | 5.32122   |
| EID2              | 19.1707    | 24.2098   | 28.5346    | 27.0513   | 27.0691   |
| GLB1L2            | 16.7972    | 16.8542   | 14.6757    | 18.9791   | 20.3071   |
| RGL4              | 0.501405   | 0.591298  | 0.716055   | 0.782949  | 0.754852  |
| ZFAT-AS1          | 0          | 0.150693  | 0.0668701  | 0.134527  | 0.0714356 |
| LOC100133331      | 1.09414    | 0.619542  | 0.91531    | 1.44141   | 0.762039  |
| STXBP1            | 17.855     | 18.343    | 15.9907    | 19.8612   | 20.9988   |
| FBXW4             | 20.6049    | 21.6255   | 21.6223    | 26.2652   | 20.1993   |
| SORBS1            | 0.20763    | 0.164608  | 0.135045   | 0.251603  | 0.144117  |
| TBC1D14           | 0.851832   | 0.873679  | 0.715496   | 0.80868   | 0.999011  |
| TSPAN3            | 42.4375    | 44.889    | 44.8478    | 52.592    | 48.4019   |
| SERINC4           | 0.849301   | 1.20264   | 1.68061    | 1.31038   | 1.52868   |
| SEPT10            | 13.4829    | 14.9776   | 15.508     | 16.7921   | 17.2398   |
| ZNF41             | 0.301043   | 0.206146  | 0.316768   | 0.353038  | 0.269643  |
| MED10             | 36.0922    | 43.3535   | 48.8601    | 47.2834   | 48.0837   |
| ACTR3B            | 10.1461    | 10.868    | 12.3505    | 12.7128   | 12.1466   |
| TMEM38A           | 1.50887    | 1.6538    | 2.09053    | 2.08544   | 1.93124   |
| MED6              | 13.4028    | 16.6139   | 15.8383    | 17.6774   | 18.9969   |
| LINC00282         | 0          | 0.0169428 | 0.0446554  | 0.029795  | 0.0316719 |
| FLJ14107          | 0.0824053  | 0.022969  | 0.0406278  | 0.0825446 | 0         |
| PIBF1             | 1.74967    | 1.57224   | 1.44951    | 2.20395   | 1.8693    |
| LINC00035         | 0.102284   | 0.945744  | 0.243689   | 0.850067  | 0.123955  |
| TARS              | 36.0734    | 30.9804   | 68.5355    | 57.1456   | 35.8758   |
| CEBPA-AS1         | 2.28236    | 3.11078   | 2.86776    | 3.03546   | 3.17523   |
| MEX3A             | 5.25954    | 4.3055    | 4.7055     | 5.87235   | 4.62069   |
| NADKD1            | 3.53915    | 3.37197   | 3.25452    | 4.11836   | 4.11526   |
| GTPBP5            | 5.36993    | 5.37887   | 6.19269    | 7.23708   | 5.26992   |
| CASQ2             | 0          | 0.0117014 | 0          | 0.0136611 | 0         |
| C11orf49          | 18.5895    | 19.0519   | 16.8866    | 21.6178   | 20.8468   |
| PDC               | 0          | 0.026061  | 0          | 0         | 0         |
| CCDC146           | 0.654581   | 0.558784  | 0.2784     | 0.735179  | 0.596667  |
| TRMT1             | 48.418     | 55.1218   | 46.909     | 62.7978   | 57.0791   |
| WDR93             | 0.0733166  | 0.0291821 | 0.0648499  | 0.0870181 | 0.109092  |
| EMR4P             | 0          | 0.0128376 | 0          | 0.0149978 | 0         |

|              |            |           |           |           |           |
|--------------|------------|-----------|-----------|-----------|-----------|
| KCTD18       | 2.01949    | 2.39641   | 2.23055   | 2.5628    | 2.47012   |
| GPATCH11     | 1.26753    | 0.73407   | 0.801727  | 0.944588  | 1.15167   |
| TRIM56       | 1.80836    | 1.0186    | 1.79595   | 2.31734   | 1.5686    |
| STRIP2       | 3.10796    | 3.6768    | 2.9946    | 4.21491   | 3.90784   |
| C3orf58      | 4.04842    | 2.43867   | 2.47717   | 3.88454   | 3.24558   |
| LOC100505875 | 0.29102    | 0.336471  | 0.232283  | 0.132322  | 0.450685  |
| HEG1         | 1.86901    | 2.22613   | 1.48915   | 2.17367   | 2.39204   |
| TTC18        | 0.387037   | 0.51361   | 0.425036  | 0.544727  | 0.495911  |
| KIAA1324     | 0.108561   | 0.128314  | 0.186721  | 0.173281  | 0.145349  |
| CBX3         | 70.6702    | 69.0616   | 76.2648   | 83.8445   | 84.0096   |
| NDEL1        | 4.89972    | 3.91129   | 6.53604   | 6.24445   | 4.9296    |
| TOE1         | 5.58608    | 11.4005   | 10.1578   | 10.455    | 10.6752   |
| ZNF479       | 0          | 0.0137694 | 0         | 0.016101  | 0         |
| ZNF552       | 1.13031    | 2.33532   | 1.25004   | 1.48296   | 2.4176    |
| TPCN2        | 2.5679     | 2.48456   | 3.49397   | 3.52154   | 3.09502   |
| KIAA1984-AS1 | 0.456122   | 0.589983  | 0.934579  | 0.874134  | 0.559756  |
| LOC439994    | 2.03855    | 2.33853   | 4.1696    | 3.58294   | 2.77316   |
| LOC100506730 | 1.93175    | 2.42589   | 1.48922   | 2.00171   | 2.75607   |
| RNF14        | 4.65592    | 4.16007   | 5.49362   | 5.72932   | 4.83932   |
| B3GNT9       | 6.55191    | 8.74881   | 7.04482   | 7.93613   | 9.84014   |
| HMGA2        | 19.724     | 17.3558   | 24.5208   | 28.4198   | 16.3982   |
| ESF1         | 3.2448     | 2.82044   | 1.91844   | 3.6761    | 3.50225   |
| AARS         | 25.9829    | 20.7477   | 61.7189   | 53.5318   | 20.0878   |
| RPL21P44     | 0.0835222  | 0.034247  | 0.0301661 | 0.0397961 | 0.0486219 |
| SNORA20      | 0          | 0         | 5.11702   | 0         | 6.02646   |
| HNRNPU       | 36.996     | 39.5765   | 47.1074   | 54.4349   | 41.2281   |
| LOC100652999 | 0.0859151  | 0.145144  | 0.154066  | 0.110742  | 0.1728    |
| NEMF         | 3.77518    | 3.27931   | 3.01098   | 4.30861   | 3.79195   |
| RIMBP3C      | 0.00724352 | 0.0286523 | 0         | 0.0120755 | 0.0174912 |
| SRSF10       | 19.0898    | 23.0128   | 25.8683   | 26.9051   | 24.462    |
| FAM86C1      | 1.73114    | 3.18467   | 2.71008   | 3.11024   | 2.81614   |
| NRP2         | 0.922566   | 0.699528  | 0.770877  | 1.09938   | 0.784341  |
| DDX46        | 5.18301    | 3.92253   | 5.48544   | 6.53493   | 5.09078   |
| PHTF1        | 1.72536    | 1.80694   | 1.58352   | 1.81325   | 2.16571   |
| OTUD6B       | 3.23984    | 3.10719   | 4.74937   | 4.8132    | 3.68612   |
| MIR612       | 0          | 0         | 37.509    | 0         | 44.2165   |
| TSEN15       | 8.89767    | 7.80293   | 16.611    | 15.277    | 7.94241   |
| UBLCP1       | 6.6398     | 8.15742   | 9.25117   | 10.1543   | 8.43113   |
| HEATR3       | 1.5867     | 1.63116   | 2.1255    | 1.52702   | 2.13052   |
| THOC7        | 35.2847    | 32.2521   | 39.5999   | 43.532    | 35.4215   |
| TMEM182      | 0.400555   | 0.519034  | 0.762499  | 0.550925  | 0.634792  |
| CCDC57       | 4.35525    | 4.19809   | 3.70405   | 5.4901    | 4.62568   |
| ANKRD26      | 0.323733   | 0.385405  | 0.126734  | 0.400343  | 0.428193  |
| HIST1H2AB    | 0.45765    | 0.199173  | 0.541267  | 0         | 0.373702  |
| CARD9        | 0.875522   | 1.28819   | 1.23823   | 1.52122   | 0.987047  |
| ENKUR        | 0.180978   | 0.0944231 | 0.122726  | 0.0755538 | 0.0896638 |
| ZNF587B      | 1.23408    | 2.37849   | 2.46429   | 2.16098   | 2.36816   |
| DNAJC16      | 1.82893    | 1.95701   | 2.24365   | 2.73076   | 2.07266   |
| SRSF3        | 56.4559    | 57.1461   | 79.2642   | 74.6012   | 64.1641   |
| ATAD3A       | 49.0658    | 47.8825   | 51.5542   | 64.7325   | 50.8331   |
| HSDL2        | 16.139     | 15.2976   | 16.4647   | 17.0381   | 19.8331   |
| FBXO30       | 3.40213    | 3.85344   | 4.49826   | 4.13837   | 4.38905   |
| LYPLA1       | 29.8277    | 33.2432   | 35.3463   | 37.1678   | 38.3588   |
| BCDIN3D-AS1  | 0.112453   | 0.12903   | 0.150172  | 0.249017  | 0.171219  |
| LOC100288181 | 0.283762   | 0.335771  | 0.345654  | 0.397082  | 0.365048  |
| ITGA3        | 23.0369    | 51.0076   | 25.9018   | 31.3492   | 52.5483   |
| PLEKHF1      | 4.29333    | 5.84439   | 8.59889   | 7.23235   | 6.49611   |
| EIF2S3       | 76.8734    | 87.1827   | 98.0359   | 111.913   | 84.3779   |
| TFAP2E       | 2.63237    | 3.65081   | 3.36493   | 3.66045   | 3.57575   |
| RAPGEFL1     | 2.84807    | 3.10504   | 2.4889    | 3.79237   | 3.69037   |
| ZNF566       | 1.34189    | 1.53227   | 1.97628   | 1.47965   | 1.77967   |
| PNN          | 14.6705    | 14.791    | 16.4901   | 20.2641   | 17.0147   |
| CRTAM        | 0          | 0.0131035 | 0         | 0.0153859 | 0         |
| HOXA7        | 10.7975    | 11.866    | 13.836    | 14.6198   | 12.9379   |
| TCEA1        | 37.3744    | 38.4353   | 59.5938   | 58.9149   | 41.1349   |
| INTS2        | 1.95028    | 1.43895   | 1.70048   | 2.25042   | 1.96457   |
| RUFY3        | 1.84559    | 1.57555   | 1.93419   | 1.99345   | 1.94752   |
| GLRX         | 589.085    | 463.167   | 542.817   | 582.191   | 613.054   |
| PLEKHA4      | 7.87951    | 10.4321   | 6.30734   | 9.75627   | 10.2346   |
| CTPS1        | 15.8003    | 16.7671   | 21.9156   | 22.5194   | 18.5762   |
| TSC22D1-AS1  | 0.0854026  | 0.139632  | 0.193064  | 0.126976  | 0.213115  |
| HSPA9        | 153.769    | 141.764   | 175.207   | 197.465   | 166.738   |
| SRSF2        | 59.0619    | 68.8585   | 97.8224   | 90.9509   | 71.6369   |
| SMURF2       | 68.9044    | 46.8285   | 89.4291   | 83.9771   | 57.9229   |
| GNL3L        | 2.91673    | 2.75707   | 3.92836   | 3.81024   | 2.95009   |
| CCDC18       | 0.618472   | 0.402472  | 0.338818  | 0.693473  | 0.588004  |
| SLC7A5       | 34.8145    | 40.0312   | 134.958   | 98.3257   | 42.5428   |
| CACNG8       | 0.240131   | 0.170583  | 0.149784  | 0.340977  | 0.190394  |
| SNX5         | 39.6684    | 40.9848   | 45.6785   | 50.9384   | 43.8061   |



|              |           |           |           |           |           |
|--------------|-----------|-----------|-----------|-----------|-----------|
| NCL          | 245.569   | 238.962   | 237.816   | 308.294   | 264.395   |
| ZBTB46       | 2.14077   | 1.83849   | 1.89488   | 2.36919   | 2.22788   |
| PPID         | 24.976    | 22.0281   | 24.3192   | 31.7023   | 24.8499   |
| PTCD2        | 2.24077   | 2.21591   | 2.54183   | 2.67654   | 2.66368   |
| DDX52        | 4.55683   | 3.95877   | 4.90835   | 5.89463   | 4.54546   |
| MTHFD1L      | 26.0223   | 26.7901   | 36.3399   | 39.1187   | 26.3929   |
| C19orf44     | 1.75355   | 1.19046   | 2.26974   | 2.39152   | 1.23007   |
| ZBTB48       | 8.13874   | 9.19225   | 11.4099   | 11.9009   | 10.3043   |
| ZNF37A       | 1.80365   | 1.30751   | 2.37188   | 2.68396   | 1.42188   |
| LOC100289509 | 0.454397  | 0.493845  | 0.184018  | 0.350591  | 0.610576  |
| SCAND2P      | 2.10592   | 2.30106   | 2.79457   | 3.1278    | 2.65667   |
| ZNF155       | 1.18516   | 1.58109   | 1.28208   | 1.375     | 1.98609   |
| EIF5B        | 19.0008   | 15.7927   | 11.8306   | 22.0469   | 19.4779   |
| C2orf74      | 0         | 0.138442  | 0.0308514 | 0         | 0.200453  |
| RGPD3        | 0.0515764 | 0.049843  | 0.0173794 | 0.0458001 | 0.0329475 |
| RAB40B       | 9.7122    | 10.5077   | 12.3636   | 11.3822   | 13.9947   |
| PIGX         | 3.64165   | 3.86546   | 4.35743   | 4.85896   | 4.78637   |
| ZNF251       | 8.17219   | 6.67049   | 6.69042   | 9.67257   | 6.81132   |
| ADRB1        | 0.0298487 | 0.444212  | 0.297262  | 0.225497  | 0.554078  |
| ARL13B       | 0.800031  | 0.485829  | 0.928888  | 1.07409   | 0.788721  |
| GCLM         | 2.29867   | 2.52247   | 2.48514   | 2.66053   | 2.69904   |
| ZNF70        | 0.643445  | 0.451219  | 0.710973  | 0.676704  | 0.763196  |
| RRS1         | 24.2726   | 37.3083   | 38.7589   | 38.5466   | 38.8374   |
| LOC728431    | 0.626038  | 0.718304  | 0.66593   | 0.59473   | 0.982673  |
| MED17        | 6.883     | 6.93251   | 9.81159   | 9.35821   | 7.37656   |
| KIAA0556     | 1.40147   | 1.29328   | 1.66245   | 1.92515   | 1.37553   |
| CIDEB        | 1.45457   | 1.65548   | 1.47147   | 1.94452   | 1.80926   |
| FAM86A       | 7.79351   | 9.72858   | 10.7685   | 10.8072   | 9.95755   |
| CDKN2A       | 2.16824   | 1.99112   | 1.82895   | 1.73415   | 3.95083   |
| CAD          | 11.8168   | 12.4937   | 11.9563   | 15.6893   | 12.8442   |
| HIVEP1       | 0.19977   | 0.178592  | 0.243522  | 0.299118  | 0.176656  |
| GALR2        | 0.130843  | 0.340532  | 0.386565  | 0.332342  | 0.230212  |
| C6orf62      | 23.312    | 26.4224   | 31.85     | 29.9923   | 31.2548   |
| FAM214A      | 1.43215   | 1.51424   | 1.30048   | 1.62826   | 1.80393   |
| NEK8         | 0.818557  | 0.739051  | 0.778955  | 1.05756   | 0.613955  |
| PRR9         | 0         | 0.0296012 | 0         | 0.0348902 | 0         |
| TBCCD1       | 1.92347   | 1.31088   | 1.96203   | 2.03827   | 1.7378    |
| HOTAIR       | 0.442789  | 0.593755  | 0.580404  | 0.636136  | 0.404173  |
| RANBP17      | 0.502959  | 0.402691  | 0.414471  | 0.508552  | 0.488908  |
| GRIN1        | 0.0636055 | 0.046508  | 0.0565132 | 0.0423558 | 0.0893554 |
| NINJ2        | 1.3236    | 0.599108  | 0.946427  | 1.58105   | 0.676572  |
| CASP8AP2     | 0.54284   | 0.503744  | 0.410614  | 0.699654  | 0.673708  |
| EFCAB4B      | 1.27458   | 1.45622   | 1.19915   | 1.65501   | 1.47276   |
| SETD9        | 2.57903   | 2.643     | 2.99076   | 2.811     | 3.36885   |
| DYNC2L1      | 11.462    | 10.487    | 10.9265   | 12.8968   | 13.0206   |
| ABHD3        | 4.41491   | 3.51571   | 3.9285    | 5.45646   | 3.78589   |
| C5orf34      | 3.41577   | 1.82473   | 2.8609    | 4.32044   | 1.8106    |
| DCAF17       | 1.60231   | 1.69219   | 1.81105   | 2.03753   | 1.99353   |
| PNP          | 58.5122   | 64.0444   | 73.1394   | 76.342    | 71.1942   |
| ZNF774       | 0.45869   | 0.35327   | 0.683139  | 0.592466  | 0.620426  |
| ZNF485       | 3.27903   | 3.07519   | 3.02137   | 3.99374   | 3.63357   |
| ATIC         | 57.7027   | 55.823    | 70.9362   | 74.6779   | 63.3782   |
| IFT172       | 2.02371   | 2.0234    | 1.91953   | 2.26052   | 2.57118   |
| DNAJC19      | 12.2422   | 11.2399   | 15.0602   | 16.651    | 11.2389   |
| LINC00085    | 0.763679  | 0.652027  | 0.261452  | 0.719309  | 0.640533  |
| ALDH16A1     | 11.2069   | 9.74457   | 10.4273   | 14.4217   | 11.8349   |
| PGBD2        | 1.14675   | 1.43787   | 1.97835   | 1.82181   | 1.66263   |
| QRFP         | 0.443585  | 0.393096  | 1.94073   | 1.71406   | 0.547481  |
| ENDOU        | 0         | 0.0295259 | 0.0390966 | 0.0348428 | 0.0277308 |
| C20orf202    | 0         | 0.0224444 | 0         | 0.0264906 | 0         |
| XKR9         | 0.113931  | 0.123556  | 0.130723  | 0.13493   | 0.118537  |
| MTG1         | 25.6186   | 28.9284   | 26.7954   | 31.0814   | 31.76     |
| FAM120A      | 39.277    | 36.0497   | 38.6086   | 45.9618   | 44.2051   |
| TLL2         | 0.0263718 | 0.0160467 | 0.0140776 | 0.0251315 | 0.015029  |
| EIF1AX       | 23.99     | 26.697    | 30.4812   | 31.5237   | 30.9087   |
| HMGB1        | 70.7639   | 71.4524   | 79.6455   | 91.8121   | 84.118    |
| TMEM231      | 10.3966   | 11.0906   | 10.7871   | 12.7736   | 11.6987   |
| VIM          | 8.23069   | 7.02625   | 8.13372   | 9.42611   | 7.07766   |
| TSPEAR       | 0.0184813 | 0.0250354 | 0.0111663 | 0         | 0         |
| PMPCA        | 123.852   | 114.048   | 116.346   | 141.405   | 139.19    |
| MIPEP        | 11.4213   | 10.1102   | 10.3994   | 12.6211   | 13.5248   |
| FBXL17       | 1.11017   | 0.98813   | 1.19982   | 1.29485   | 1.21276   |
| TFAP4        | 15.3893   | 11.6285   | 16.5449   | 19.0093   | 13.8522   |
| ORAI2        | 2.90103   | 3.21514   | 3.34257   | 3.78105   | 3.66485   |
| LOC100507577 | 0.393346  | 0.297694  | 0.535972  | 0.585756  | 0.365504  |
| TASP1        | 2.73846   | 2.51384   | 3.36701   | 3.48992   | 3.64973   |
| NPM2         | 15.5239   | 18.1428   | 22.7715   | 24.286    | 17.4076   |
| ATXN7L1      | 1.03566   | 0.932037  | 1.15057   | 1.29497   | 0.999736  |
| CPT1A        | 8.52422   | 7.37342   | 10.1262   | 11.9638   | 7.3234    |

|              |           |           |           |           |           |
|--------------|-----------|-----------|-----------|-----------|-----------|
| C1orf162     | 0.96038   | 0.519036  | 0.568637  | 0.654569  | 1.06506   |
| ZNF446       | 6.1739    | 5.86134   | 7.77355   | 7.95935   | 7.08587   |
| FAM22A       | 0.703543  | 0.740644  | 0.780502  | 0.715104  | 1.0254    |
| CCPG1_DYX1C1 | 3.12537   | 3.35228   | 3.04583   | 3.7274    | 4.25398   |
| MPL          | 0.0573843 | 0.0343462 | 0.050591  | 0.0547739 | 0.0847923 |
| HOXC8        | 1.95107   | 2.30084   | 2.12152   | 2.70905   | 2.13043   |
| LTBP2        | 0.517345  | 0.430016  | 0.74243   | 0.687017  | 0.457066  |
| NLRC3        | 0.0982536 | 0.217739  | 0.108375  | 0.132174  | 0.231928  |
| RHBDD1       | 2.12535   | 2.25414   | 3.60344   | 3.31555   | 2.39386   |
| FAM83H       | 29.2931   | 28.5658   | 35.5511   | 39.9012   | 32.7962   |
| ZNF441       | 0.722991  | 0.561333  | 0.339718  | 0.639531  | 0.760366  |
| TAF15        | 65.7704   | 58.8116   | 71.5516   | 89.5937   | 66.1741   |
| ZNF320       | 2.28898   | 2.03633   | 2.35473   | 2.92993   | 2.40418   |
| DACT3        | 2.33363   | 2.25195   | 2.08163   | 2.31199   | 2.92014   |
| HIST1H2AJ    | 1.44888   | 1.03096   | 1.31572   | 1.85104   | 0.191487  |
| CPT2         | 6.55611   | 9.86813   | 9.38047   | 9.54293   | 10.512    |
| WDR65        | 0.037911  | 0.0221512 | 0         | 0.0177961 | 0.034628  |
| SPPL2B       | 6.81099   | 6.54299   | 5.54837   | 8.87975   | 6.83161   |
| FGF11        | 1.43242   | 1.09618   | 2.11043   | 2.03773   | 1.31425   |
| GPR4         | 0.0228948 | 0.0317451 | 0.0281867 | 0.0191583 | 0.0590013 |
| C9orf169     | 2.43039   | 2.82907   | 3.07682   | 2.6086    | 3.54054   |
| KPNA2        | 75.1001   | 70.8677   | 100.989   | 107.173   | 72.0614   |
| DES1         | 16.182    | 15.4453   | 22.5483   | 22.7743   | 16.3771   |
| SLC22A15     | 0.82686   | 0.555236  | 1.71084   | 1.43841   | 0.743883  |
| FBXL13       | 0.0810546 | 0.132337  | 0.0956025 | 0.125691  | 0.12198   |
| LOC100128338 | 8.15339   | 9.15957   | 11.8376   | 11.2425   | 11.0133   |
| RRP15        | 0.774232  | 0.874201  | 1.01639   | 1.07126   | 1.06213   |
| TSC2D3       | 5.19867   | 6.42179   | 19.5294   | 13.079    | 5.53887   |
| PSMB9        | 14.1556   | 15.4761   | 13.5178   | 18.0912   | 15.5978   |
| TMEM44-AS1   | 1.24423   | 2.01558   | 1.8763    | 2.00451   | 1.96859   |
| SF3A3        | 30.7413   | 29.6411   | 35.9645   | 41.0384   | 35.0659   |
| KLF10        | 8.52937   | 10.1783   | 13.0897   | 12.8083   | 10.0156   |
| TFB2M        | 12.0728   | 13.2567   | 16.1091   | 16.7124   | 15.8978   |
| CPSF3        | 20.6684   | 18.0447   | 23.0251   | 27.032    | 21.0144   |
| ZNFX1        | 2.17402   | 1.89842   | 2.36535   | 2.7951    | 2.00921   |
| UBL4B        | 0.173494  | 0.0875876 | 0.105566  | 0.108349  | 0.213219  |
| KIAA1737     | 2.78423   | 2.49195   | 3.37459   | 3.48805   | 2.90683   |
| EIF2S2       | 65.0089   | 56.5616   | 115.978   | 100.137   | 66.0733   |
| TTC32        | 2.77206   | 2.73739   | 3.29166   | 2.9278    | 3.96322   |
| ID1          | 31.6487   | 81.1473   | 22.5806   | 46.9648   | 66.0771   |
| INO80        | 2.73481   | 2.59782   | 3.1877    | 3.54754   | 2.809     |
| SMO          | 0.0206927 | 0.0694313 | 0.0877041 | 0.0519844 | 0.0506251 |
| ADHFE1       | 0.186045  | 0.322175  | 0.266062  | 0.167422  | 0.374026  |
| CATSPER2     | 0.866969  | 0.753313  | 0.549503  | 1.07988   | 0.876634  |
| LEF1         | 6.62713   | 5.94023   | 8.19754   | 8.51036   | 7.44805   |
| FSCN2        | 0.0952263 | 0.203658  | 0         | 0.158283  | 0.0371138 |
| SLC35G6      | 0         | 0.0936383 | 0.0415944 | 0.0574868 | 0.0430988 |
| AHRR_PDCCD6  | 76.5158   | 81.9368   | 85.699    | 103.798   | 80.2443   |
| MORC4        | 7.1188    | 6.80832   | 7.93275   | 9.96832   | 7.47226   |
| ZMYND8       | 2.13543   | 2.14675   | 2.1105    | 2.69071   | 2.67091   |
| EBNA1BP2     | 70.9087   | 73.7304   | 75.7628   | 95.6605   | 78.9576   |
| WDR61        | 22.5863   | 21.2115   | 24.2463   | 29.2251   | 25.1786   |
| ATP8B1       | 0.0234125 | 0.0226177 | 0         | 0.0195035 | 0.0214015 |
| SCO1         | 16.4432   | 16.8356   | 17.3128   | 21.8206   | 19.8047   |
| STK4-AS1     | 0.0115364 | 0.082971  | 0.0288697 | 0.0385851 | 0.0466235 |
| TIGD2        | 2.35872   | 3.23704   | 3.30502   | 3.7551    | 3.59175   |
| DMRT2        | 2.26568   | 2.0991    | 2.64994   | 3.06662   | 2.32011   |
| SRSF1        | 15.4415   | 15.3697   | 23.4372   | 22.7421   | 17.6173   |
| PLK3         | 10.658    | 17.5312   | 12.6043   | 15.1355   | 18.4494   |
| PCGF6        | 9.03193   | 6.94619   | 10.2249   | 11.9759   | 8.54166   |
| C16orf93     | 3.20359   | 3.08442   | 1.97582   | 4.22861   | 2.32697   |
| B3GNTL1      | 6.45309   | 3.89103   | 5.85169   | 6.97145   | 4.43005   |
| RBM3         | 53.8914   | 58.7342   | 71.3471   | 75.8011   | 59.1635   |
| AMH          | 0.151668  | 0.096846  | 0.401821  | 0.447423  | 0         |
| TTPAL        | 3.35878   | 3.71265   | 3.8511    | 4.23019   | 4.1788    |
| LOC100507032 | 1.58635   | 0.933546  | 2.25185   | 2.11634   | 0.775959  |
| TMED2        | 68.1141   | 83.8462   | 78.2458   | 84.6829   | 102.358   |
| FAM69B       | 2.3962    | 2.37354   | 3.82556   | 3.71745   | 1.99241   |
| PBDC1        | 19.1194   | 20.2608   | 19.7744   | 22.4774   | 23.5087   |
| SSB          | 45.4203   | 40.9325   | 48.3944   | 57.4992   | 47.4008   |
| FAM215A      | 0.189293  | 0.0853437 | 0         | 0.105529  | 0         |
| MAD1L1       | 9.32619   | 8.67576   | 8.82015   | 11.9354   | 9.02523   |
| UTP15        | 2.95515   | 3.20834   | 3.96949   | 3.91799   | 3.87109   |
| KCNAB3       | 0.759738  | 0.592043  | 0.588695  | 0.928368  | 0.583228  |
| LRRC40       | 4.08836   | 2.81818   | 4.07686   | 4.88229   | 3.70712   |
| IFT74        | 3.47141   | 2.93972   | 2.62536   | 3.45152   | 4.14457   |
| TAS2R14      | 0.139689  | 0.293483  | 0.10706   | 0.0931569 | 0.198345  |
| RGL1         | 0.213578  | 0.290634  | 0.322236  | 0.326624  | 0.477568  |
| PFKFB2       | 1.53299   | 1.43226   | 1.65958   | 2.11355   | 1.59205   |

|                  |           |           |            |            |           |
|------------------|-----------|-----------|------------|------------|-----------|
| SATL1            | 0.583452  | 0.367423  | 0.449031   | 0.642344   | 0.602892  |
| AVEN             | 4.08733   | 6.11552   | 6.07967    | 6.3372     | 6.14048   |
| C17orf47         | 0.0233863 | 0.0161871 | 0.0286941  | 0.0193082  | 0         |
| MMRN2            | 0.361143  | 0.231373  | 0.196805   | 0.294133   | 0.417865  |
| ZEB1-AS1         | 3.29756   | 2.20591   | 4.60803    | 4.92378    | 2.33497   |
| VHL              | 14.4279   | 15.2372   | 20.399     | 20.9029    | 16.3383   |
| PTPLB            | 0.496576  | 0.294788  | 0.685121   | 0.415071   | 0.739749  |
| PPIEL            | 0.16754   | 0.121393  | 0.0526352  | 0.157808   | 0.212197  |
| TEX14            | 0.0279956 | 0.0258433 | 0.034463   | 0.0384381  | 0.0422744 |
| ARPP19           | 12.7852   | 15.6733   | 13.2442    | 15.1751    | 19.3181   |
| PDIA5            | 7.48365   | 7.65125   | 7.99752    | 9.04436    | 9.74942   |
| DDX5             | 55.8925   | 63.4615   | 70.7658    | 78.1931    | 72.8502   |
| CARD8            | 2.28292   | 3.09744   | 2.4195     | 2.97607    | 3.04642   |
| REM2             | 0.398611  | 0.398011  | 0.237629   | 0.368553   | 0.435371  |
| SLCO3A1          | 1.87129   | 2.12155   | 1.86487    | 2.34444    | 2.19946   |
| ZNF326           | 4.72134   | 4.37161   | 4.93403    | 5.96498    | 5.18213   |
| CLCF1            | 3.60649   | 7.07239   | 5.24337    | 5.9122     | 7.33016   |
| USP15            | 3.65726   | 3.57694   | 3.57994    | 4.62308    | 4.1647    |
| ANKRD24          | 0.316034  | 0.147271  | 0.135476   | 0.300112   | 0.168628  |
| MYEOV            | 8.14452   | 5.66315   | 9.50702    | 9.2574     | 6.92597   |
| DBN1             | 99.7378   | 93.99     | 107.361    | 130.953    | 104.22    |
| CATSPERG         | 0.191378  | 0.226573  | 0.161857   | 0.319205   | 0.197647  |
| AHNAK            | 15.1949   | 15.9152   | 12.6365    | 17.2063    | 19.0297   |
| MAP7D3           | 4.99619   | 5.00583   | 4.59337    | 6.1142     | 5.53585   |
| METTL9           | 18.7269   | 22.5168   | 21.9953    | 22.2928    | 28.7492   |
| TRDMT1           | 0.419752  | 0.456707  | 0.576176   | 0.573962   | 0.467766  |
| KCTD15           | 8.71345   | 10.5479   | 11.8326    | 12.89      | 11.6594   |
| TXNRD3, TXNRD3NB | 2.66661   | 3.65857   | 3.20392    | 3.86322    | 3.92335   |
| RBM45            | 3.90352   | 3.9294    | 5.78322    | 6.48952    | 4.17391   |
| IPP              | 0.946128  | 1.43571   | 0.768806   | 1.05515    | 1.59282   |
| SOWAHC           | 5.61535   | 5.42457   | 8.16515    | 7.94677    | 6.42397   |
| TMEM67           | 1.00765   | 1.18348   | 1.54202    | 1.56855    | 1.26421   |
| RPL7L1           | 15.8026   | 14.0252   | 17.0433    | 16.8102    | 20.1941   |
| SNAI1            | 9.75166   | 10.1578   | 6.98044    | 11.3253    | 9.40741   |
| GJA9,MYCBP       | 7.66274   | 8.38531   | 8.04444    | 9.74148    | 10.6593   |
| ZBED3            | 0.29884   | 0.776713  | 0.992685   | 0.744616   | 0.962787  |
| NOP14-AS1        | 1.58234   | 3.4994    | 2.63257    | 2.75511    | 3.38908   |
| CPLX1            | 5.95875   | 3.99496   | 6.09908    | 8.5059     | 4.34759   |
| FMNL1            | 0.0618956 | 0.0269462 | 0          | 0.0512187  | 0.0372161 |
| ATP2B1           | 1.35402   | 1.11328   | 1.45645    | 1.44929    | 1.46767   |
| UCHL5            | 10.7595   | 8.79853   | 10.6393    | 14.1067    | 10.652    |
| RIPK1            | 4.15449   | 4.94489   | 6.317      | 5.96211    | 5.69815   |
| ZMIZ1            | 2.06367   | 2.02565   | 1.6836     | 2.54692    | 2.24386   |
| RAC1             | 100.324   | 110.347   | 102.714    | 124.114    | 128.324   |
| PEX5             | 29.1763   | 28.9791   | 32.4606    | 38.7038    | 32.4358   |
| PTPN1            | 19.1495   | 18.7738   | 20.0916    | 23.3712    | 23.6619   |
| STAR             | 0.0600775 | 0.0841408 | 0.0746659  | 0.117162   | 0.0917242 |
| BEST4            | 0         | 0.134027  | 0.143669   | 0.198621   | 0.0989414 |
| NOV              | 2.66922   | 4.12106   | 3.38392    | 3.80312    | 4.21947   |
| NUDT9P1          | 0.176086  | 0.198753  | 0.321619   | 0.426422   | 0.160245  |
| ZNF839           | 4.26309   | 4.33886   | 5.43582    | 6.48065    | 4.45705   |
| NBPF9            | 0.94892   | 0.82517   | 0.977533   | 1.126      | 1.34381   |
| DEPDC7           | 1.52415   | 1.50309   | 1.59197    | 2.07648    | 1.57358   |
| ACAD11, NPHP3    | 8.95308   | 9.01472   | 8.13435    | 9.82502    | 10.9755   |
| C22orf43         | 0.186814  | 0.128891  | 0.184097   | 0.218023   | 0.215849  |
| FIP1L1           | 10.0372   | 8.14397   | 8.79941    | 12.5764    | 8.31184   |
| ELFN1            | 2.27678   | 1.7544    | 2.01449    | 2.38352    | 1.98146   |
| RWDD2B           | 7.81419   | 9.56191   | 8.2737     | 10.4427    | 9.67499   |
| RSU1             | 9.07109   | 10.1365   | 10.4793    | 11.9514    | 11.2718   |
| UXS1             | 8.34625   | 8.49165   | 9.99297    | 11.1712    | 10.1141   |
| HPDL             | 7.07097   | 14.4172   | 10.3358    | 11.704     | 14.3191   |
| LINC00311        | 0.051317  | 0.0469348 | 0.083729   | 0.114332   | 0.0435839 |
| ANKRD6           | 0.061675  | 0.0253124 | 0.0665075  | 0.0732321  | 0.0479713 |
| FN1              | 0.0229877 | 0.0200259 | 0.0269061  | 0.0334894  | 0.0259831 |
| IFNE             | 0.179564  | 0.0885885 | 0.0757712  | 0.223562   | 0         |
| HOXC9            | 1.58388   | 0.965971  | 1.26913    | 1.55705    | 0.97132   |
| PMS2             | 1.14759   | 1.17841   | 1.39332    | 1.58781    | 1.5919    |
| MAGIX            | 1.04193   | 0.810716  | 0.557486   | 0.681344   | 0.90484   |
| B3GNT7           | 0.102743  | 0.249997  | 0.0624887  | 0.172213   | 0.217729  |
| FAM98A           | 9.46918   | 9.23199   | 11.2553    | 12.3254    | 10.639    |
| SUSD5            | 0.0239836 | 0.0547905 | 0.00602001 | 0.00802984 | 0.051142  |
| SRSF6            | 14.9571   | 28.1357   | 25.1013    | 23.3671    | 31.0539   |
| DTWD2            | 0.505034  | 0.447513  | 0.451641   | 0.437451   | 0.690011  |
| SPATA6L          | 0.379326  | 0.414783  | 0.686781   | 0.593249   | 0.512375  |
| ABCB10           | 2.84095   | 2.86495   | 3.07684    | 3.5828     | 3.57013   |
| LINC00094        | 1.85291   | 2.7185    | 2.36834    | 2.51335    | 3.10736   |
| AGSK1, LOC727849 | 0.013776  | 0         | 0          | 0          | 0.0165912 |
| SKIDA1           | 0.141052  | 0.287679  | 0.109125   | 0.173479   | 0.310431  |
| ZNF285           | 0.0224499 | 0         | 0.0281392  | 0.0373168  | 0.0100221 |

|              |           |            |           |           |           |
|--------------|-----------|------------|-----------|-----------|-----------|
| TAF1B        | 3.86165   | 3.23228    | 3.9412    | 4.67311   | 3.94802   |
| SHANK1       | 5.46992   | 4.76458    | 4.51877   | 6.938     | 6.24573   |
| FAM222A-AS1  | 3.43794   | 2.88536    | 3.65739   | 4.9702    | 2.0139    |
| MYO15A       | 0.0127414 | 0.0210557  | 0.0190887 | 0.0106277 | 0.0307682 |
| FBF1         | 1.09614   | 1.1233     | 1.17587   | 1.49152   | 1.40832   |
| C21orf119    | 5.41641   | 6.10757    | 7.53513   | 7.47847   | 7.18623   |
| NGAMT2       | 7.20531   | 6.70685    | 8.18301   | 8.66768   | 9.13733   |
| C5orf24      | 4.30882   | 4.90907    | 5.64777   | 5.72076   | 5.7476    |
| SUPT16H      | 27.4361   | 24.4146    | 26.6948   | 34.8325   | 29.5416   |
| CCDC24       | 7.41873   | 7.11199    | 7.43147   | 9.71252   | 8.87638   |
| NBR2         | 1.19141   | 1.3069     | 2.39142   | 2.09664   | 1.24264   |
| ITPRIPL2     | 2.49187   | 3.31583    | 4.92841   | 4.06259   | 3.65962   |
| VPS13C       | 1.19982   | 1.06934    | 0.995293  | 1.19129   | 1.40554   |
| AUTS2        | 1.6437    | 1.72052    | 1.42183   | 2.20963   | 1.8147    |
| DHX36        | 5.85355   | 5.6244     | 6.22183   | 7.69975   | 6.07061   |
| NUPL2        | 9.61582   | 7.98919    | 12.3446   | 12.9012   | 8.73551   |
| COL10A1      | 0.013956  | 0.0397213  | 0         | 0.0116167 | 0.0281951 |
| ZNF551       | 0.504692  | 0.924165   | 0.723349  | 0.7675    | 1.05401   |
| IGFBP6       | 195.42    | 264.952    | 145.323   | 220.388   | 284.484   |
| RPS10P7      | 1.49098   | 1.32524    | 2.23613   | 2.15451   | 1.37215   |
| DUSP18       | 0.366511  | 0.366836   | 0.191819  | 0.337405  | 0.353505  |
| CSTF2        | 8.78798   | 6.99522    | 9.79702   | 11.0769   | 8.06533   |
| MX1          | 6.70537   | 8.02611    | 7.34087   | 10.4201   | 7.47217   |
| ZDHHC21      | 0.951785  | 0.660797   | 1.05875   | 1.27077   | 0.819752  |
| KLHL21       | 27.9486   | 34.0792    | 33.1789   | 35.4632   | 34.6437   |
| PARS2        | 4.3455    | 4.47675    | 6.17661   | 5.95133   | 5.29175   |
| PANK1        | 0.255545  | 0.136935   | 0.424961  | 0.382967  | 0.277004  |
| LOC100131094 | 0.220866  | 0.380669   | 0.17178   | 0.391816  | 0.334339  |
| PLCD4        | 0.385754  | 0.293401   | 0.441298  | 0.558835  | 0.398248  |
| GART         | 28.9466   | 23.3626    | 34.7523   | 37.7978   | 29.1255   |
| ZC3H8        | 8.59033   | 7.59797    | 12.0169   | 12.0112   | 9.00899   |
| FAM107A      | 0         | 0.011647   | 0         | 0.0139762 | 0         |
| LOC100505549 | 0.530097  | 0.609941   | 1.29483   | 0.884298  | 0.759449  |
| PRR3         | 4.15193   | 4.63731    | 6.05255   | 6.19213   | 5.6464    |
| KLHL29       | 3.8655    | 1.80835    | 4.16211   | 5.2649    | 2.24474   |
| TERT         | 1.20674   | 1.02176    | 0.673041  | 1.37087   | 0.985129  |
| FKBP5        | 6.3554    | 5.36192    | 6.94876   | 8.84396   | 6.39136   |
| NPL          | 0.725458  | 0.798132   | 0.917065  | 1.08664   | 1.04937   |
| ZADH2        | 5.88612   | 6.28957    | 5.25663   | 6.85913   | 8.26872   |
| MCMDC2       | 0.112515  | 0.204072   | 0.149234  | 0.161437  | 0.182303  |
| RNF6         | 11.2288   | 9.02757    | 12.7407   | 14.0011   | 10.6766   |
| CA11         | 11.1749   | 12.1827    | 12.0645   | 14.1479   | 13.3072   |
| ETF1         | 22.16     | 23.7429    | 35.6749   | 33.7884   | 27.4095   |
| CCDC96       | 0.101349  | 1.08834    | 0.262977  | 0.362132  | 0.863879  |
| C17orf97     | 5.79849   | 4.87138    | 7.72044   | 7.72805   | 5.65677   |
| MBTPS2       | 2.29347   | 2.21994    | 2.44733   | 3.04374   | 2.53748   |
| LANCL3       | 0         | 0          | 0.021063  | 0.0139257 | 0.0114398 |
| DNHD1        | 0.79934   | 0.695914   | 0.5811    | 0.830121  | 0.91528   |
| NFKBIZ,NXPE3 | 15.686    | 14.1457    | 15.745    | 17.7701   | 19.3036   |
| TAF12        | 31.2585   | 35.427     | 31.6402   | 41.2796   | 33.5184   |
| CCT2         | 151.686   | 154.765    | 190.65    | 205.606   | 177.44    |
| ZNF514       | 1.13319   | 1.00997    | 1.48715   | 1.63426   | 1.25999   |
| PRNP         | 18.7832   | 21.7607    | 36.0281   | 31.257    | 25.6118   |
| UTP14A       | 8.51342   | 7.75745    | 12.1607   | 11.3754   | 9.33034   |
| CCDC103      | 1.29266   | 1.43963    | 1.29544   | 1.51156   | 1.66231   |
| IMPACT       | 3.22421   | 3.93668    | 4.21871   | 4.25871   | 4.50417   |
| CDH12        | 0.0254411 | 0.0435845  | 0.0445385 | 0.0507179 | 0.068222  |
| LOC100130231 | 0         | 0.00600838 | 0         | 0         | 0         |
| TIMMDC1      | 31.1486   | 30.1215    | 34.8359   | 40.2247   | 35.1535   |
| TRIM72       | 3.43414   | 3.49694    | 5.55855   | 5.77372   | 3.98703   |
| LTB4R,LTB4R2 | 4.86671   | 4.05617    | 3.76645   | 7.23966   | 4.092     |
| LOC399753    | 0.270038  | 0.167974   | 0.120283  | 0.163127  | 0.294864  |
| ZNF691       | 7.71682   | 5.67825    | 9.88681   | 10.7526   | 6.44867   |
| LOC100506714 | 1.03454   | 1.3035     | 1.68592   | 1.79374   | 1.15469   |
| VWA5A        | 3.41782   | 4.16415    | 3.19235   | 4.36866   | 4.61862   |
| HBS1L        | 4.53929   | 5.30312    | 4.54521   | 5.27527   | 6.90955   |
| THNSL1       | 10.2667   | 10.097     | 9.53384   | 11.0405   | 13.3513   |
| PHGDH        | 83.0487   | 75.1276    | 159.076   | 151.872   | 73.7293   |
| SRD5A1       | 2.09522   | 2.78542    | 3.52397   | 3.2059    | 3.24676   |
| PAPL         | 13.4904   | 7.34407    | 17.8462   | 20.9523   | 8.35297   |
| SLC25A37     | 24.5904   | 23.7925    | 20.1497   | 28.746    | 24.6252   |
| UBXN11       | 11.0114   | 12.6877    | 9.70855   | 15.7391   | 13.5589   |
| C21orf67     | 1.21053   | 0.610185   | 2.3534    | 2.35674   | 0.999875  |
| ELOVL6       | 8.26572   | 6.06626    | 6.94556   | 9.64297   | 7.70844   |
| C15orf56     | 1.0224    | 1.86646    | 1.61614   | 1.5163    | 2.03235   |
| ATF7IP       | 2.03213   | 1.68776    | 2.17488   | 2.70366   | 2.04155   |
| SRPR         | 19.108    | 20.9444    | 19.2161   | 22.682    | 27.0634   |
| DNMBP        | 1.65414   | 1.69014    | 1.65573   | 2.18103   | 1.92926   |
| GSTO1        | 535.81    | 512.621    | 612.046   | 680.398   | 542.23    |

|              |            |            |            |           |           |
|--------------|------------|------------|------------|-----------|-----------|
| ZNF846       | 0.233747   | 0.288147   | 0.359244   | 0.35251   | 0.372139  |
| BAIAP2       | 15.9741    | 13.0441    | 18.1849    | 20.7898   | 14.6467   |
| SFXN4        | 39.0099    | 41.6665    | 50.5883    | 50.363    | 49.9949   |
| NOL9         | 5.55002    | 5.1        | 6.90316    | 6.8875    | 6.126     |
| DSEL         | 0          | 0.00331789 | 0          | 0         | 0         |
| MLLT11       | 0.548287   | 0.470753   | 0.672746   | 0.504599  | 0.706138  |
| CCDC138      | 0.969412   | 1.0006     | 0.794772   | 1.13787   | 1.15488   |
| OGFOD1       | 10.5089    | 12.864     | 13.8655    | 15.4801   | 13.3334   |
| THOC5        | 23.2794    | 22.7575    | 27.5404    | 34.4286   | 21.6969   |
| LINC00467    | 8.67658    | 7.19829    | 8.31126    | 9.81605   | 7.65135   |
| LRRC56       | 2.16534    | 2.27216    | 2.2118     | 3.1752    | 2.65191   |
| NOX1         | 0.066355   | 0.0323679  | 0.0276034  | 0.0733843 | 0         |
| GDAP1        | 1.48855    | 1.38316    | 1.54983    | 1.76786   | 1.48012   |
| LYRM5        | 4.67179    | 6.63963    | 7.91957    | 7.06767   | 7.90401   |
| SLC6A10P     | 0.0425951  | 0.011461   | 0.0206425  | 0.014279  | 0.0313152 |
| ZNF747       | 4.39497    | 4.97728    | 7.0828     | 7.44925   | 4.64605   |
| C9orf64      | 7.70777    | 6.67832    | 11.5592    | 11.5457   | 8.86558   |
| CCDC74A      | 11.6589    | 12.5126    | 8.61025    | 13.3625   | 15.0179   |
| SLC18A2      | 0.791942   | 1.16467    | 1.09716    | 1.23719   | 1.01881   |
| LOC145783    | 0.118808   | 0.178751   | 0.145329   | 0.196801  | 0.111329  |
| SHE          | 0.00388854 | 0          | 0.00491754 | 0         | 0.010698  |
| APOE         | 0.456113   | 0.573923   | 0.933788   | 0.85521   | 0.454781  |
| SIAE         | 5.68734    | 8.83981    | 5.88431    | 7.87802   | 8.64304   |
| PPAP2B       | 0.386186   | 0.601742   | 0.225619   | 0.387439  | 0.686099  |
| EFR3B        | 0.205608   | 0.185235   | 0.145723   | 0.254194  | 0.186191  |
| LRRC37A4P    | 1.07817    | 0.926539   | 1.04305    | 1.39026   | 1.12107   |
| SUV39H2      | 4.45814    | 4.18358    | 6.01099    | 6.39085   | 4.52947   |
| SYT7         | 2.31428    | 2.58317    | 2.78027    | 3.43257   | 2.6305    |
| NTSR1        | 7.00973    | 6.28475    | 9.05413    | 11.4767   | 6.32699   |
| TXK          | 0.156237   | 0.0972065  | 0.0374344  | 0.148225  | 0.0716489 |
| COQ4         | 61.3232    | 70.5961    | 77.5226    | 94.4344   | 69.498    |
| VMA21        | 7.65799    | 9.40409    | 11.1252    | 11.0703   | 10.474    |
| CITED1       | 10.3301    | 10.9471    | 10.2926    | 14.0636   | 12.239    |
| CAMTA2       | 13.8665    | 14.9154    | 23.1839    | 24.5064   | 15.186    |
| ELK3         | 7.89285    | 8.76149    | 8.74141    | 8.34592   | 11.1537   |
| STOM         | 0          | 0.013792   | 0          | 0         | 0         |
| SPDYE7P      | 0.984249   | 1.06139    | 1.31019    | 1.41415   | 1.1795    |
| NKAIN1       | 1.83718    | 2.06227    | 1.8868     | 2.75256   | 1.94744   |
| TMEM37       | 0.154008   | 0.216533   | 0.119252   | 0.0971248 | 0.32598   |
| CCNE2        | 1.9338     | 4.155      | 2.5328     | 3.23163   | 4.85635   |
| PODXL        | 24.9895    | 26.6934    | 19.6379    | 31.3863   | 23.6463   |
| DUSP23       | 15.9954    | 33.8229    | 21.8605    | 26.7962   | 32.4523   |
| LOC100130691 | 0.0838989  | 0.1226     | 0.117029   | 0.147128  | 0.109415  |
| NFIA         | 1.08169    | 1.10052    | 0.997436   | 1.38095   | 1.28801   |
| URB1         | 3.8929     | 3.44721    | 4.55005    | 4.9527    | 4.03674   |
| GNRHR2       | 3.34808    | 4.64654    | 5.05735    | 5.24678   | 5.06277   |
| EXPH5        | 0.307096   | 0.214557   | 0.29911    | 0.393296  | 0.247466  |
| WDR60        | 2.20734    | 2.19755    | 1.86644    | 2.67178   | 2.88803   |
| LOC729737    | 0.327646   | 0.155201   | 0.268285   | 0.383897  | 0.222898  |
| HPS5         | 1.67703    | 1.24696    | 1.78504    | 1.89526   | 1.75048   |
| UBXN8        | 4.77045    | 5.2961     | 6.2172     | 7.04191   | 6.04955   |
| FIBCD1       | 3.70448    | 7.18517    | 4.9992     | 4.75096   | 8.08988   |
| BMP3         | 0.0647904  | 0.103998   | 0.0366818  | 0.0884038 | 0.0876596 |
| CLEC17A      | 0          | 0.0173523  | 0          | 0.0210075 | 0         |
| C1QTNF6      | 0.655259   | 0.930899   | 1.14841    | 0.929549  | 1.30464   |
| ACADM        | 9.49246    | 9.62977    | 9.97824    | 12.4547   | 11.4748   |
| LRRC66       | 0.0140708  | 0.0395534  | 0.0956924  | 0.0698804 | 0.074067  |
| ENTPD2       | 126.968    | 150.181    | 118.037    | 164.56    | 156.727   |
| GAPDHS       | 0.0691188  | 0.21817    | 0.279162   | 0.231501  | 0.25543   |
| SHQ1         | 4.29092    | 3.6592     | 4.64799    | 5.35892   | 4.37858   |
| TSPAN1       | 0.215017   | 0.0996378  | 0.374038   | 0.208321  | 0.278007  |
| ZFP2         | 0.225012   | 0.334248   | 0.32385    | 0.483402  | 0.351191  |
| FBXW9        | 9.01279    | 8.36372    | 8.86779    | 9.59304   | 10.6638   |
| HOXD8        | 2.81041    | 2.15786    | 3.12089    | 3.06523   | 3.00616   |
| LRRC27       | 2.83685    | 3.36717    | 2.72255    | 3.36709   | 3.96544   |
| FLJ12825     | 0.157771   | 0.18402    | 0.141033   | 0.224769  | 0.120375  |
| UNC13D       | 0.981423   | 0.617189   | 0.70929    | 1.34738   | 0.730313  |
| PSMG4        | 24.7272    | 28.5268    | 31.2821    | 39.5221   | 27.4718   |
| IPO4         | 31.9382    | 32.5495    | 32.1762    | 40.7276   | 37.3111   |
| TDG          | 3.73639    | 3.93025    | 3.6452     | 4.28901   | 4.94487   |
| KIAA1377     | 0.0734672  | 0.0988     | 0.0574591  | 0.103519  | 0.0898322 |
| BCL2L1       | 104.79     | 116.71     | 119.168    | 149.959   | 117.953   |
| LINC00857    | 0.835784   | 0.917166   | 1.02541    | 1.28067   | 1.04538   |
| PFAS         | 8.92733    | 7.49459    | 9.28509    | 12.1942   | 8.42047   |
| GLI1         | 0.170801   | 0.397634   | 0.186097   | 0.362672  | 0.328488  |
| INHBB        | 0          | 0.015728   | 0          | 0.0190848 | 0         |
| ZBTB21       | 2.99013    | 1.74157    | 2.94101    | 3.74078   | 2.14551   |
| C3orf43      | 0.0249728  | 0.217799   | 0.0793038  | 0.166904  | 0.0679327 |
| FANK1        | 0.801631   | 0.790207   | 0.680789   | 0.854532  | 1.27891   |

|              |            |           |           |           |            |
|--------------|------------|-----------|-----------|-----------|------------|
| MFHAS1       | 1.23932    | 1.49741   | 1.7554    | 1.83781   | 2.02775    |
| CSNK2A3      | 0.237049   | 0.157514  | 0.256903  | 0.288792  | 0.169134   |
| NOP58        | 29.7782    | 33.1734   | 43.6411   | 42.6335   | 38.1527    |
| MUC5B        | 0.0314681  | 0.0690974 | 0.0224755 | 0.0494005 | 0.0970077  |
| EPT1         | 3.2805     | 2.5692    | 3.93778   | 4.26755   | 3.14298    |
| CHM          | 1.74515    | 1.40093   | 1.8062    | 2.04502   | 1.66435    |
| TRNT1        | 6.37322    | 5.51495   | 8.65462   | 8.58201   | 6.88264    |
| ZNF324B      | 1.98074    | 2.62088   | 2.10073   | 2.71528   | 2.68407    |
| MBNL3        | 0.266073   | 0.281838  | 0.261629  | 0.360152  | 0.299971   |
| GRK7         | 0          | 0.0241613 | 0         | 0.0293595 | 0          |
| EXTL2        | 4.45796    | 4.676     | 5.86644   | 6.21669   | 5.95246    |
| SYCE3        | 0.794441   | 0.131702  | 0.117067  | 0.160577  | 0.242147   |
| SPEF2        | 0.440157   | 0.427294  | 0.569811  | 0.613387  | 0.495053   |
| RBMX         | 106.903    | 103.944   | 168.567   | 160.626   | 114.633    |
| MRPL1        | 7.36094    | 7.23346   | 9.65841   | 11.356    | 8.3203     |
| NRBF2        | 5.09047    | 6.07462   | 5.97345   | 7.13853   | 6.26652    |
| PYCRL        | 18.7976    | 18.9504   | 22.979    | 26.0661   | 22.9497    |
| NRIP3        | 0.0252591  | 0         | 0.0158727 | 0.0105101 | 0.0170394  |
| ADAT2        | 2.51606    | 2.10953   | 2.30906   | 3.3118    | 2.29115    |
| SPRY4        | 51.1127    | 34.3398   | 56.37     | 68.4037   | 41.2072    |
| LOC100130894 | 0.147832   | 0.132608  | 0.0261863 | 0.0881095 | 0.13647    |
| RBCK1        | 26.6666    | 24.7338   | 50.974    | 49.4633   | 24.6602    |
| TRIP4        | 6.37105    | 4.72246   | 6.21223   | 8.28798   | 5.98457    |
| LYSMD2       | 9.12038    | 8.70276   | 10.5354   | 12.8161   | 9.27105    |
| PCYOX1L      | 4.56076    | 4.27674   | 4.84526   | 5.54013   | 5.85491    |
| MOGAT3       | 0          | 0.0432752 | 0         | 0.0526482 | 0          |
| TRIM74       | 0.999654   | 0.589029  | 0.698737  | 1.20637   | 0.470381   |
| TRIM59       | 0.0964127  | 0.0725115 | 0.0831483 | 0.0719404 | 0.0611111  |
| FBXL2        | 0          | 0.0373922 | 0.0215996 | 0.0142743 | 0.0117168  |
| EDF1         | 699.254    | 752.364   | 918.156   | 1099.74   | 694.297    |
| SPIN3        | 1.24084    | 1.72964   | 2.1098    | 1.93397   | 2.05816    |
| PXN          | 94.6393    | 95.0957   | 86.5807   | 120.043   | 108.173    |
| C22orf46     | 1.45255    | 1.17311   | 1.74759   | 1.98557   | 1.24412    |
| SMIM6        | 0          | 0.174924  | 0         | 0.139189  | 0          |
| FILIP1       | 0.00441366 | 0.0122241 | 0         | 0.0144947 | 0.00579353 |
| FAM175A      | 4.80678    | 6.20589   | 5.59773   | 5.91122   | 7.44526    |
| FUS          | 32.7232    | 41.9988   | 47.1991   | 56.1543   | 43.1914    |
| CCDC15       | 0.0697867  | 0.0500558 | 0.0933315 | 0.106733  | 0.109413   |
| GAS8         | 3.74277    | 4.62951   | 4.36526   | 6.20375   | 4.44894    |
| DAK          | 8.27291    | 7.26312   | 8.86098   | 10.5916   | 9.06757    |
| ARRDC4       | 0.635631   | 1.59594   | 0.76539   | 0.842339  | 2.13587    |
| SYTL1        | 10.446     | 17.4529   | 12.796    | 16.7654   | 16.8594    |
| B3GNT6       | 0.019317   | 0         | 0         | 0         | 0.0236655  |
| EPHX4        | 3.99032    | 4.90086   | 5.27967   | 5.70847   | 4.60161    |
| LOC100287036 | 0.202381   | 0.172038  | 0.0924277 | 0.251778  | 0.0962636  |
| TSLP         | 1.00368    | 0.583263  | 5.98146   | 3.15943   | 0.989139   |
| ITGAM        | 0.0434006  | 0.0170429 | 0.0151439 | 0.0516851 | 0.00787007 |
| CCNE1        | 10.4008    | 12.1214   | 14.2724   | 14.7105   | 14.8748    |
| RAB6A        | 22.3555    | 20.8435   | 21.35     | 24.8856   | 27.9609    |
| LOC284080    | 0.0895754  | 0.223339  | 0.0988614 | 0.116896  | 0.24501    |
| RNF32        | 1.52781    | 1.43539   | 1.8312    | 2.24823   | 1.78797    |
| TTL1         | 2.74194    | 2.75383   | 2.83425   | 3.60008   | 3.35726    |
| ST7L         | 2.65707    | 2.67265   | 3.81785   | 4.30903   | 2.96235    |
| ABL1         | 35.2881    | 36.1435   | 33.6561   | 44.3921   | 41.6341    |
| LOC100272217 | 0.708464   | 0.393328  | 1.13003   | 1.0275    | 0.357868   |
| UROC1        | 0.00997523 | 0         | 0         | 0         | 0.0122318  |
| AMHR2        | 0.0224068  | 0         | 0         | 0         | 0.027476   |
| TOR1AIP2     | 14.5018    | 16.4272   | 15.8172   | 18.6016   | 19.3502    |
| FN3KRP       | 13.3503    | 16.7872   | 13.221    | 16.0491   | 20.6301    |
| SNAP23       | 18.6442    | 19.299    | 25.0493   | 26.276    | 23.2814    |
| CABP1        | 1.37556    | 0.800099  | 1.58887   | 1.8408    | 0.9963     |
| SLCO1B1      | 0.124407   | 0.0104248 | 0.0800446 | 0.150261  | 0.049941   |
| LRRC73       | 2.71761    | 2.5667    | 2.14999   | 2.99426   | 3.299      |
| CASC4        | 7.82647    | 8.22844   | 8.09532   | 9.45884   | 9.982      |
| AKAP5        | 0.0965377  | 0.106905  | 0.0957254 | 0.104052  | 0.172507   |
| ZGLP1        | 1.82192    | 1.25832   | 2.35      | 3.07286   | 1.4237     |
| PNO1         | 8.97466    | 12.9983   | 13.1955   | 14.6584   | 11.9981    |
| ALKBH8       | 0.818647   | 0.700353  | 0.988248  | 1.06821   | 1.02545    |
| LOC100507501 | 2.67433    | 1.95731   | 2.63929   | 2.86049   | 2.88202    |
| PTGES        | 0.128581   | 0.101598  | 0.112477  | 0.0924037 | 0.165097   |
| ZNF195       | 5.61402    | 6.3919    | 6.08726   | 7.75553   | 7.51788    |
| WDR96        | 0.0486432  | 0.0480268 | 0.056271  | 0.0557127 | 0.0252322  |
| RBM34        | 21.1145    | 23.14     | 22.7359   | 28.5013   | 26.8543    |
| LOC100129794 | 1.1243     | 1.10082   | 1.21515   | 1.28413   | 1.51867    |
| RASL10A      | 0.509873   | 0.219718  | 0.133034  | 0.659981  | 0.200722   |
| LOC100506054 | 4.68542    | 4.69768   | 6.85309   | 6.26462   | 5.50612    |
| UCP3         | 0.291317   | 0.110745  | 0.208232  | 0.402283  | 0.265206   |
| FONG         | 1.15579    | 1.20642   | 1.46657   | 1.4553    | 1.94265    |
| SMPD2        | 9.02785    | 9.64449   | 9.90315   | 12.61     | 10.9509    |

|               |           |           |           |           |           |
|---------------|-----------|-----------|-----------|-----------|-----------|
| UNC5B         | 1.78814   | 2.15812   | 1.59299   | 2.37504   | 2.41454   |
| HOXD3         | 0.906998  | 0.595606  | 1.01455   | 1.0489    | 0.961335  |
| CYB5D1        | 3.83428   | 5.19311   | 4.18018   | 5.01102   | 5.98617   |
| TUBE1         | 4.95591   | 3.81292   | 11.2236   | 9.53906   | 3.86943   |
| LOC100133091  | 3.77909   | 2.6524    | 4.38473   | 5.40294   | 3.46458   |
| MOV10L1       | 0         | 0.0384349 | 0         | 0.0469717 | 0         |
| LIMS1         | 3.28779   | 2.83663   | 3.08245   | 4.18797   | 3.356     |
| GOT1          | 14.9682   | 14.9387   | 50.1002   | 40.2407   | 12.4835   |
| SYTL3         | 0.430523  | 0.446773  | 0.582591  | 0.45951   | 0.692264  |
| ALS2CR11      | 0         | 0.0183997 | 0         | 0         | 0         |
| ZNF37BP       | 1.91305   | 1.67265   | 1.90687   | 3.03877   | 1.97081   |
| EIF3C,EIF3CL  | 0.0277067 | 0.0122436 | 0.0333697 | 0.0304832 | 0.0113448 |
| CHRFAM7A      | 0.0355381 | 0.0164472 | 0.0435975 | 0.0395039 | 0.0153117 |
| VSTM5         | 0         | 0.0848758 | 0         | 0.10385   | 0         |
| ADCY7         | 6.22666   | 5.15691   | 6.02881   | 8.24193   | 5.4706    |
| SOCS4         | 1.96372   | 2.1285    | 2.90355   | 2.97421   | 2.56848   |
| PLEKHN1       | 1.95836   | 1.9993    | 1.73953   | 2.87667   | 1.75021   |
| EPHA10        | 0.817642  | 0.588333  | 0.882774  | 1.05537   | 0.81608   |
| C12orf61      | 0.0511919 | 0.470482  | 0.379981  | 0.429452  | 0.270466  |
| LOC100505622  | 0.0578929 | 0         | 0         | 0         | 0.0712985 |
| HERC5         | 0.0640177 | 0.0276561 | 0.0564335 | 0.0638221 | 0.0610622 |
| NIPAL2        | 0.244958  | 0.137051  | 0.23636   | 0.273453  | 0.192506  |
| MID1IP1       | 19.665    | 23.5077   | 33.8763   | 32.9564   | 26.2314   |
| ZNF738        | 0.696697  | 0.637138  | 0.71426   | 0.937977  | 0.714614  |
| PFKFB1        | 0.134759  | 0.139035  | 0.154609  | 0.195715  | 0.085876  |
| FBXO15        | 0.390493  | 0.539612  | 0.451689  | 0.500981  | 0.340884  |
| DISP2         | 0.601556  | 0.826437  | 0.594424  | 0.684489  | 0.830534  |
| ZNF595,ZNF718 | 0.359018  | 0.408006  | 0.490816  | 0.611605  | 0.573417  |
| ODC1          | 156.978   | 175.445   | 181.503   | 208.493   | 197.913   |
| SAT1          | 100.24    | 85.2591   | 124.231   | 134.257   | 91.4675   |
| AMDHD2        | 22.5809   | 20.145    | 23.9428   | 30.3265   | 22.2513   |
| ISG20         | 45.9462   | 35.2759   | 45.8733   | 50.7962   | 42.1566   |
| LOC401052     | 1.38362   | 1.48783   | 1.74355   | 2.07859   | 1.53894   |
| IGF2BP3       | 5.57507   | 4.36716   | 6.42509   | 7.50958   | 5.72789   |
| CCDC106       | 0.703983  | 0.725273  | 0.827351  | 1.12201   | 0.632284  |
| RAB9B         | 0.12788   | 0.14008   | 0.0924962 | 0.148946  | 0.0940513 |
| LPAR6         | 0         | 0         | 0.0111312 | 0         | 0         |
| SHOX2         | 0.0658267 | 0.147309  | 0.139157  | 0.138607  | 0.0776748 |
| ICAM5         | 2.06708   | 1.9829    | 1.86622   | 3.23129   | 2.11556   |
| ZNF814        | 1.27732   | 1.13751   | 1.41435   | 1.99106   | 1.20323   |
| KIF9-AS1      | 0.213906  | 0.297532  | 0.238119  | 0.249354  | 0.33223   |
| TUBB3         | 69.3907   | 77.2828   | 62.8308   | 80.4273   | 79.5489   |
| SRRM2-AS1     | 0.160496  | 0.390978  | 0.191323  | 0.240238  | 0.336921  |
| SH2B3         | 9.38516   | 9.34633   | 14.0499   | 14.5336   | 11.1397   |
| FAM157B       | 0.0381225 | 0         | 0         | 0         | 0.0470681 |
| MLKL          | 7.32622   | 6.50528   | 6.97768   | 9.21109   | 6.8633    |
| LOC100506124  | 0.386653  | 0.352866  | 0.343178  | 0.357885  | 0.485283  |
| C2CD2         | 26.4332   | 24.4649   | 19.6996   | 29.5842   | 31.073    |
| CDKL3         | 0.711006  | 0.706354  | 0.644871  | 0.828808  | 0.568359  |
| LOC642361     | 1.41651   | 1.47852   | 2.81179   | 2.50632   | 1.89687   |
| MUTYH         | 9.3683    | 9.90898   | 12.3006   | 14.8271   | 10.3437   |
| RPS6KL1       | 1.2974    | 1.334     | 1.1869    | 1.90005   | 1.49778   |
| SCARF1        | 0.620209  | 0.676143  | 0.459888  | 0.636326  | 0.847751  |
| ZFR           | 7.0067    | 6.46102   | 7.55567   | 8.97978   | 7.77439   |
| PSPH          | 6.23892   | 8.49602   | 21.2414   | 16.4323   | 8.9816    |
| PLEC          | 15.6349   | 13.4714   | 15.5642   | 21.5824   | 15.5147   |
| ZNF763        | 0.8153    | 0.97151   | 0.619467  | 1.31463   | 0.893785  |
| PPP3CC        | 0.0471344 | 0.0670816 | 0.05858   | 0.0195541 | 0.110007  |
| LTA           | 0.113715  | 0         | 0.166583  | 0.189187  | 0.116015  |
| PTCHD4        | 0.0695717 | 0.202916  | 0.0792915 | 0.1159    | 0.11853   |
| FLJ33630      | 0.660492  | 0.841857  | 1.01449   | 1.08989   | 0.908626  |
| ZSCAN32       | 3.58462   | 3.87789   | 5.15189   | 5.46114   | 4.41009   |
| CLEC18B       | 0.266512  | 0.0251505 | 0.250786  | 0.253687  | 0.184217  |
| DNAL4         | 9.08487   | 10.2853   | 9.12494   | 11.2675   | 11.1837   |
| ZC3H4         | 4.85638   | 4.73305   | 6.47913   | 7.54103   | 5.03993   |
| AGAP7         | 0.268516  | 0.354459  | 0.474264  | 0.49967   | 0.533335  |
| GIN1          | 0.923641  | 0.825586  | 0.977718  | 1.04691   | 0.920088  |
| ALDH1L1       | 0.0115699 | 0         | 0         | 0         | 0.0143208 |
| TMEM209       | 5.25264   | 4.96847   | 6.49353   | 7.06897   | 5.61622   |
| ADAM9         | 10.9789   | 10.5556   | 10.8354   | 12.6565   | 14.4556   |
| ABHD16B       | 12.3895   | 7.06122   | 18.3814   | 18.9336   | 8.62541   |
| CNDP2         | 12.9528   | 14.0617   | 16.8422   | 19.4001   | 15.4857   |
| GORASP1       | 7.16085   | 7.57122   | 7.20605   | 8.14338   | 10.1951   |
| COX4I1        | 456.273   | 520.976   | 459.723   | 538.722   | 620.802   |
| APOM          | 3.08209   | 3.39746   | 3.85875   | 5.33939   | 3.57501   |
| ARSG          | 0.645483  | 0.924445  | 0.591958  | 0.947159  | 0.789187  |
| IQCK          | 1.99464   | 2.19834   | 2.37797   | 2.57523   | 2.85338   |
| MRS2          | 7.04885   | 6.59195   | 8.91923   | 9.04862   | 8.23788   |
| GPBP1L1       | 10.6604   | 11.4797   | 11.0921   | 12.701    | 14.5158   |

|              |            |            |           |            |            |
|--------------|------------|------------|-----------|------------|------------|
| NRL          | 0.333394   | 0.436075   | 0.521264  | 0.34152    | 0.664036   |
| LOC644961    | 0.137065   | 0.128837   | 0.0909892 | 0.106972   | 0.155773   |
| CAPNS2       | 0.027015   | 0.0380051  | 0         | 0.0446305  | 0.0357642  |
| SNORA63      | 31.0401    | 84.7172    | 36.717    | 44.4237    | 64.4868    |
| DPY19L2P4    | 0.0348359  | 0.0178299  | 0.0300481 | 0.038926   | 0          |
| TCHP         | 3.93367    | 3.20831    | 4.60314   | 5.7935     | 3.59353    |
| DENND2A      | 0.00868463 | 0.011604   | 0         | 0.0142862  | 0.0107988  |
| LOC649395    | 0.0128536  | 0.0370417  | 0         | 0.0215047  | 0.0172297  |
| CCL3L1       | 0.196987   | 0.41836    | 0.121033  | 0.410388   | 0.326164   |
| DHFR1L1      | 0.610159   | 0.716816   | 0.929452  | 0.881945   | 0.778726   |
| LARS         | 26.4553    | 23.412     | 31.7896   | 36.1815    | 28.0381    |
| HLCS         | 2.30706    | 2.33832    | 3.26886   | 3.46125    | 2.64789    |
| RCN1         | 40.1445    | 52.1859    | 57.7062   | 58.4844    | 60.2744    |
| MICALL2      | 2.17012    | 2.74256    | 1.61681   | 2.55378    | 3.12435    |
| ANXA1        | 195.06     | 182.881    | 266.939   | 300.851    | 211.165    |
| RASSF5       | 0.574817   | 0.658526   | 0.340147  | 0.556459   | 0.862039   |
| N4BP2        | 0.408664   | 0.311205   | 0.366264  | 0.485334   | 0.395949   |
| C16orf74     | 48.3233    | 40.003     | 60.3145   | 69.4058    | 42.0222    |
| ATG16L2      | 24.1511    | 22.7603    | 14.5507   | 30.1903    | 24.6752    |
| ZNF556       | 0.721279   | 1.11103    | 1.37371   | 0.765987   | 1.91216    |
| ATCAY        | 0.00600936 | 0.00809106 | 0         | 0.00995793 | 0.00750272 |
| CCDC144A     | 0.00314125 | 0.00452976 | 0         | 0.00518891 | 0.00431251 |
| GAB3         | 0.00488171 | 0.00689046 | 0.0121602 | 0.00810699 | 0.0128756  |
| PSME3        | 22.8706    | 28.0366    | 34.4864   | 36.3224    | 30.9826    |
| GLIPR1L2     | 0.0617864  | 0.056851   | 0.103948  | 0.191934   | 0.0607198  |
| RDX          | 0          | 0.0226572  | 0         | 0          | 0          |
| FAM208B      | 2.21672    | 1.58734    | 3.29595   | 3.53158    | 1.74294    |
| SFPQ         | 39.5103    | 35.7738    | 79.5235   | 70.6884    | 42.6079    |
| NMD3         | 12.19      | 10.8142    | 12.8518   | 15.2408    | 13.1328    |
| OSM          | 0.0205113  | 0.0274935  | 0         | 0.0342134  | 0.0253053  |
| CATSPER3     | 0.595854   | 0.478338   | 0.707255  | 0.921817   | 0.384593   |
| CDC123       | 119.901    | 107.247    | 133.211   | 165.001    | 125.571    |
| CN5H6.4      | 0.121827   | 0.0837958  | 0.149887  | 0.204409   | 0.128623   |
| ARIH2OS      | 0.870515   | 1.61491    | 1.37225   | 1.28421    | 1.82707    |
| SMTNL2       | 0.0194926  | 0          | 0         | 0          | 0.0242614  |
| ZSCAN12      | 0.38813    | 0.429164   | 0.686525  | 0.635932   | 0.463654   |
| ZSCAN12P1    | 0.404184   | 0.375365   | 1.18901   | 0.95163    | 0.361987   |
| GF11         | 1.64859    | 1.96411    | 1.29443   | 2.15073    | 2.40864    |
| ACOX2        | 1.07769    | 0.694888   | 0.780166  | 0.874382   | 1.16882    |
| HNRNPM       | 66.5013    | 58.9411    | 84.0684   | 105.264    | 66.599     |
| CEND1        | 0.0523858  | 0.241453   | 0.0945045 | 0.221471   | 0.0313493  |
| SPDYE6       | 0.22597    | 0.26676    | 0.368181  | 0.532634   | 0.251114   |
| RPP40        | 7.15695    | 9.57432    | 9.35208   | 10.0835    | 10.3551    |
| CDK8         | 3.06699    | 2.4889     | 4.39521   | 4.8255     | 3.50205    |
| MYL5         | 7.16276    | 9.20301    | 3.84907   | 9.14021    | 9.43214    |
| RAC2         | 8.5801     | 9.39047    | 6.71025   | 11.9465    | 8.37452    |
| GK           | 1.13776    | 0.611346   | 1.18602   | 1.34295    | 0.947502   |
| PIWIL4       | 0.25635    | 0.35624    | 0.415347  | 0.415913   | 0.405765   |
| LONRF2       | 0.00172634 | 0.00251552 | 0         | 0.00289301 | 0.00237667 |
| FCRLB        | 0.163345   | 0.48809    | 0.327919  | 0.36367    | 0.279961   |
| SNX19        | 1.57165    | 1.65677    | 2.27109   | 2.56678    | 1.84443    |
| PYGL         | 43.7153    | 49.9757    | 44.3211   | 50.1018    | 65.7909    |
| UTP11L       | 18.0698    | 18.4429    | 20.207    | 26.3207    | 20.9816    |
| GPX7         | 0          | 0          | 0.0591195 | 0          | 0.0312456  |
| SPEF1        | 0.187578   | 0.204418   | 0.0742596 | 0.209141   | 0.262458   |
| ZNF521       | 0.0704541  | 0.0265805  | 0.0410236 | 0.0861041  | 0.0185336  |
| C5orf28      | 1.81918    | 2.28851    | 3.59187   | 3.50141    | 2.52467    |
| SLC9B1       | 0.259569   | 0.238954   | 0.15656   | 0.199341   | 0.124983   |
| ZNHIT2       | 13.3984    | 19.9086    | 25.9641   | 21.9852    | 21.7994    |
| SLTM         | 6.21533    | 6.0938     | 8.2252    | 9.76301    | 6.80069    |
| C1QTNF1      | 10.0877    | 11.1113    | 10.7703   | 14.4113    | 11.8575    |
| DTD2         | 3.06209    | 4.66079    | 4.40685   | 4.60573    | 5.55303    |
| NUBPL        | 1.408      | 1.63859    | 1.40053   | 1.9279     | 2.15517    |
| CXCL1        | 0.094686   | 0.170116   | 0.0596098 | 0.0391782  | 0.323773   |
| LOC100289341 | 0.813918   | 2.23086    | 1.27379   | 1.3816     | 2.53818    |
| TBL3         | 28.3815    | 24.8478    | 26.3566   | 36.2961    | 30.0626    |
| SLITRK2      | 0          | 0.00914032 | 0         | 0          | 0          |
| IARS         | 60.5971    | 44.3294    | 86.5953   | 92.7531    | 52.3857    |
| MCM3AP-AS1   | 0.123285   | 0.125676   | 0.144044  | 0.190499   | 0.14209    |
| CCDC11       | 1.20847    | 1.10581    | 1.37588   | 1.91421    | 1.31371    |
| AMDHD1       | 0.299811   | 0.413477   | 0.392382  | 0.481504   | 0.405606   |
| NARS         | 30.0189    | 28.3474    | 51.6144   | 49.3073    | 33.3983    |
| PRMT5        | 56.8111    | 48.4285    | 72.3985   | 75.9031    | 60.4027    |
| MDH1B        | 0.304971   | 0.159045   | 0.185392  | 0.230195   | 0.25066    |
| MEGF11       | 0.0130295  | 0.0184029  | 0.0271153 | 0.0290877  | 0.0284214  |
| PRRT4        | 12.4111    | 11.2837    | 11.2399   | 17.6107    | 11.0009    |
| GTF2H2       | 0.832376   | 0.498248   | 1.02414   | 1.00265    | 0.895873   |
| SH3BGR       | 2.23777    | 2.94236    | 2.86844   | 2.50812    | 3.30925    |
| DENND6B      | 2.48044    | 4.31057    | 2.02098   | 3.39627    | 4.33069    |



|              |            |            |           |            |            |
|--------------|------------|------------|-----------|------------|------------|
| THBS2        | 0.295563   | 0.315824   | 0.365911  | 0.360784   | 0.336892   |
| NRF1         | 3.80669    | 3.51635    | 4.10814   | 7.09255    | 3.64471    |
| CSE1L        | 42.7312    | 42.7204    | 45.8505   | 57.5859    | 51.2817    |
| C5orf22      | 3.03058    | 3.52418    | 3.13252   | 3.66766    | 4.48038    |
| PTPRE        | 0.792557   | 0.76515    | 0.986624  | 1.07362    | 1.02488    |
| IL11         | 8.43205    | 10.3955    | 9.6726    | 10.8424    | 10.4776    |
| SCRN1        | 0.0133813  | 0.0383878  | 0.0280053 | 0.0596159  | 0.0238453  |
| MTHFD2       | 51.7851    | 41.9245    | 110.571   | 102.593    | 46.1668    |
| CTF1         | 0.471709   | 0.705382   | 0.399802  | 0.365769   | 1.15196    |
| TYRP1        | 0.0150546  | 0          | 0.0479996 | 0.037868   | 0          |
| MCM9         | 0.711417   | 1.08065    | 0.759941  | 0.922997   | 1.21693    |
| PIGP         | 29.186     | 26.5716    | 34.7315   | 34.8247    | 31.6167    |
| HCG27        | 0.439112   | 0.331818   | 0.468139  | 0.706761   | 0.307706   |
| KIF21B       | 0.0858165  | 0.114126   | 0.0714725 | 0.111609   | 0.136498   |
| CCR9         | 0          | 0          | 0.0396748 | 0.0354113  | 0.0140771  |
| WDR5B        | 0.730115   | 0.956554   | 1.1342    | 1.25605    | 0.886345   |
| B9D1         | 28.7006    | 27.7373    | 28.8789   | 36.4807    | 29.5642    |
| LYRM1        | 10.5112    | 10.227     | 13.6129   | 15.589     | 11.3545    |
| LINC00346    | 1.19371    | 1.41637    | 1.86474   | 1.89759    | 1.60443    |
| GDPD1        | 3.18358    | 2.66631    | 3.32117   | 4.32998    | 3.1734     |
| LINC00176    | 0.497832   | 0.360486   | 0.42527   | 0.80291    | 0.398895   |
| SLC4A5       | 2.80316    | 2.63021    | 5.90752   | 5.45787    | 2.73915    |
| MAGOHB       | 2.75535    | 3.02014    | 3.5004    | 4.87651    | 3.02789    |
| ZSWIM8-AS1   | 2.54576    | 3.32573    | 3.08184   | 4.12506    | 3.40071    |
| SLC43A2      | 4.90817    | 3.87509    | 3.50903   | 5.84967    | 4.98526    |
| SETD6        | 4.18947    | 3.72707    | 5.23463   | 6.20694    | 4.30148    |
| LOC100507634 | 0.238756   | 0.585154   | 0.696903  | 0.689775   | 0.754947   |
| TEX19        | 0.424832   | 0.497714   | 0.430183  | 0.706559   | 0.33575    |
| BCL2A1       | 44.7296    | 29.7272    | 33.1431   | 44.7723    | 43.8024    |
| IDUA         | 4.00313    | 5.28423    | 2.98439   | 6.24522    | 6.08934    |
| PP14571      | 0.140102   | 0.0210119  | 0.0376023 | 0.0773994  | 0.116783   |
| LOC100289019 | 1.64916    | 1.27828    | 2.05116   | 2.69269    | 1.77353    |
| GNG12        | 18.2402    | 17.3962    | 24.8315   | 24.6104    | 22.3027    |
| TGM2         | 113.007    | 141.321    | 105.736   | 141.986    | 161.705    |
| FBXL18       | 1.33591    | 1.23977    | 1.64699   | 2.08761    | 1.18584    |
| MMP14        | 13.7269    | 18.0123    | 11.6651   | 18.071     | 21.1917    |
| LOC641367    | 0.0260689  | 0.0253128  | 0.0656822 | 0.0722298  | 0.0119726  |
| LOC100996307 | 0.113248   | 0.27805    | 0.190708  | 0.23261    | 0.206186   |
| BMP4         | 0.989893   | 0.702666   | 0.496213  | 1.47224    | 0.333332   |
| GGT1         | 5.70554    | 5.27098    | 5.58564   | 8.49816    | 4.3413     |
| STX1B        | 0.595411   | 0.648846   | 0.441817  | 0.814779   | 0.694702   |
| SHC3         | 0.0199114  | 0.049429   | 0.0248449 | 0.0124776  | 0.0659218  |
| IER2         | 81.6804    | 86.3054    | 134.876   | 134.066    | 97.9208    |
| RGS9         | 0.0813138  | 0.132406   | 0.0701567 | 0.132933   | 0.101186   |
| TIPIN        | 4.59126    | 4.44434    | 7.23055   | 6.83657    | 5.45955    |
| FRMD3        | 0.0432028  | 0.0233162  | 0.0100824 | 0.0328937  | 0.0276778  |
| KCNK9        | 0          | 0.0493442  | 0         | 0.0616616  | 0          |
| SOCS2        | 5.10682    | 7.67562    | 8.59707   | 8.43088    | 9.13401    |
| CCDC70       | 0.0279482  | 0          | 0         | 0          | 0.0351456  |
| CLCN1        | 0.0104092  | 0          | 0         | 0          | 0.0130901  |
| STAT1        | 5.09243    | 5.45041    | 5.84915   | 7.30014    | 6.49908    |
| WNT7B        | 0          | 0.0141687  | 0         | 0.0177194  | 0          |
| ABTB2        | 2.04493    | 1.61291    | 2.44922   | 2.92192    | 1.88749    |
| HPYR1        | 0          | 0          | 0.0664545 | 0          | 0.0359734  |
| ARMC12       | 0.223273   | 0.453389   | 0.270088  | 0.510978   | 0.383201   |
| ATG7         | 5.01758    | 4.88084    | 4.67465   | 6.52953    | 5.73671    |
| GTPBP4       | 40.0956    | 43.6064    | 44.3668   | 51.5833    | 53.5748    |
| LOC100506469 | 4.32111    | 6.19577    | 6.71462   | 8.29046    | 5.95309    |
| PIK3R5       | 0.00720015 | 0          | 0         | 0          | 0.00906263 |
| KDM1B        | 2.04658    | 1.58549    | 1.76382   | 2.68786    | 1.86969    |
| RAD9B        | 0.203097   | 0.379347   | 0.615867  | 0.582166   | 0.355162   |
| ZFX2         | 0.173552   | 0.177266   | 0.135326  | 0.238651   | 0.18721    |
| EBF4         | 0.847977   | 0.860372   | 0.906748  | 1.09209    | 0.932213   |
| DPH3P1       | 0.804513   | 0.797887   | 1.22762   | 1.1186     | 1.25104    |
| NHEG1        | 0          | 0.0355063  | 0         | 0          | 0          |
| BIRC7        | 0.0350638  | 0          | 0         | 0          | 0.0441607  |
| MYO18B       | 0          | 0.00463511 | 0         | 0.00580484 | 0          |
| ZDHC1        | 2.7743     | 3.93868    | 3.43859   | 4.08496    | 4.4148     |
| WDR92        | 2.16978    | 1.92866    | 2.75386   | 2.93515    | 2.31551    |
| SPTBN5       | 0.0263542  | 0.00842835 | 0.0116452 | 0.0163203  | 0.0307429  |
| ZNF599       | 0.296602   | 0.28647    | 0.361757  | 0.419793   | 0.450348   |
| LINC00244    | 0          | 0.0834027  | 0         | 0          | 0          |
| ITGB2        | 0          | 0.0168012  | 0         | 0.0210668  | 0          |
| CPOX         | 10.6224    | 12.0944    | 9.22209   | 13.211     | 15.4203    |
| C9orf116     | 20.1146    | 23.7471    | 17.4297   | 24.7889    | 27.8904    |
| PLIN4        | 0.27341    | 0.18037    | 0.231773  | 0.474699   | 0.211434   |
| GFRA4        | 0.0356113  | 0          | 0         | 0          | 0.0449364  |
| IPO7         | 11.1633    | 10.4876    | 12.1577   | 15.3666    | 11.9414    |
| HBG2         | 1.0555     | 0.940018   | 0.453476  | 1.31814    | 0.739535   |

|              |            |            |           |            |            |
|--------------|------------|------------|-----------|------------|------------|
| MAP2K3       | 41.3458    | 46.2157    | 55.1984   | 65.6314    | 50.7645    |
| EPM2A        | 0.457646   | 0.3093     | 0.451841  | 0.465858   | 0.35305    |
| TEKT5        | 0.0213701  | 0.0561054  | 0.0509736 | 0          | 0.0517576  |
| OTOP1        | 0.0186179  | 0          | 0         | 0          | 0.0235125  |
| PLA2G2D      | 0.0163209  | 0          | 0         | 0          | 0.020612   |
| OXTR         | 0.229937   | 0.0604866  | 0.0606393 | 0.241656   | 0.114136   |
| CD37         | 0.0394573  | 0.106362   | 0.0473794 | 0.193574   | 0.0493219  |
| PYROXD1      | 2.178      | 2.05527    | 3.32382   | 3.39051    | 2.52489    |
| FAM151B      | 0.314628   | 0.0963182  | 0.166352  | 0.131168   | 0.2922     |
| KANK3        | 3.48413    | 4.22191    | 2.41852   | 3.76973    | 4.90897    |
| IGSF9B       | 0.159977   | 0.132184   | 0.124955  | 0.250778   | 0.101759   |
| RASSF8       | 0.114408   | 0.0289009  | 0.204723  | 0.196705   | 0.054763   |
| C12orf4      | 1.69626    | 1.2493     | 1.91544   | 2.44823    | 1.36778    |
| ANKS4B       | 0.016341   | 0.0229632  | 0         | 0.0135502  | 0.0215412  |
| MAT1A        | 0.00835585 | 0          | 0         | 0          | 0.0105698  |
| C10orf91     | 0          | 0.0866131  | 0         | 0.108928   | 0          |
| LOC100216546 | 0.207135   | 0.161677   | 0.180723  | 0.260723   | 0.209976   |
| TSEN2        | 3.88007    | 3.09542    | 7.62295   | 6.78593    | 4.67848    |
| SLC4A1       | 0.0117357  | 0.0322326  | 0.014341  | 0.00980248 | 0.0223939  |
| ZNF702P      | 1.27977    | 1.10143    | 1.95223   | 1.95195    | 1.30043    |
| SHROOM4      | 0.00436733 | 0          | 0         | 0          | 0.00552743 |
| C11orf93     | 1.0616     | 1.01203    | 0.889611  | 2.07898    | 0.52158    |
| HSF2BP       | 0.778241   | 1.68526    | 0.812456  | 1.16834    | 1.38833    |
| C3orf49      | 0          | 0.0248077  | 0         | 0          | 0          |
| CARD16       | 0          | 0.0530995  | 0         | 0          | 0          |
| MAT2A        | 14.9519    | 22.2153    | 36.4256   | 32.9127    | 24.4978    |
| ZNF124       | 1.35188    | 2.16515    | 2.14382   | 1.90582    | 2.5329     |
| FAM182B      | 0.130083   | 0.0817861  | 0.103954  | 0.167004   | 0.116002   |
| SARDH        | 0.302928   | 0.544992   | 0.404327  | 0.569183   | 0.707736   |
| MYH3         | 0.172648   | 0.119836   | 0.192801  | 0.249515   | 0.142209   |
| TOP1P1       | 0.101128   | 0.0410062  | 0.093908  | 0.10774    | 0.0909853  |
| CHST5        | 0.587221   | 0.261763   | 0.361533  | 0.769056   | 0.361638   |
| PDE3B        | 0.763001   | 0.698211   | 1.04496   | 1.15966    | 0.934605   |
| FAM90A1      | 0.359552   | 0.723425   | 0.414573  | 0.68215    | 0.493242   |
| GALNT15      | 0          | 0.00743591 | 0         | 0          | 0          |
| MIR1282      | 34.8351    | 45.5947    | 0         | 0          | 101.985    |
| CTRC         | 0          | 0.0558606  | 0         | 0.0703901  | 0          |
| PSIMCT-1     | 0.858015   | 1.13939    | 1.07537   | 1.32733    | 1.2001     |
| PDIA2        | 0.171946   | 0.162449   | 0.117385  | 0.20497    | 0.238568   |
| CNKSR1       | 0.448011   | 0.272853   | 0.459798  | 0.661738   | 0.349092   |
| PAMR1        | 0.0102367  | 0          | 0         | 0          | 0.0129839  |
| DCST2        | 0.116359   | 0.198632   | 0.0709222 | 0.219795   | 0.21704    |
| EIF3J        | 12.553     | 11.7641    | 16.2089   | 18.5081    | 13.1726    |
| ADPGK-AS1    | 0.0621957  | 0.0691942  | 0.0609815 | 0.0206575  | 0.113169   |
| PFN4         | 0.190618   | 0.316528   | 0.278636  | 0.378118   | 0.349258   |
| RHOF         | 117.868    | 112.518    | 101.622   | 152.194    | 129.415    |
| ERGIC1       | 62.2625    | 84.4656    | 60.5342   | 83.7069    | 91.9652    |
| IPO11_LRRC70 | 8.91679    | 8.81786    | 8.2119    | 10.9801    | 10.8484    |
| ZRANB2       | 10.7497    | 10.3984    | 14.7819   | 16.3423    | 12.2117    |
| ATF4         | 265.814    | 355.05     | 601.287   | 529.622    | 356.886    |
| ZNF658       | 0.152202   | 0.225863   | 0.225314  | 0.282313   | 0.249754   |
| LOC642852    | 0.822502   | 0.563401   | 0.915668  | 1.18703    | 0.826458   |
| OGT          | 14.3566    | 13.5393    | 17.8575   | 22.2697    | 15.8795    |
| SARS         | 115.439    | 102.151    | 220.961   | 226.923    | 101.651    |
| LDLRAD3      | 2.36231    | 2.52415    | 2.63836   | 2.93107    | 3.27193    |
| KIF24        | 0.482568   | 0.454792   | 0.796482  | 0.963314   | 0.566845   |
| SRCIN1       | 0.600934   | 0.447554   | 0.527843  | 0.845562   | 0.489922   |
| NAPG         | 3.94307    | 4.15848    | 4.59289   | 5.13417    | 5.35731    |
| ZNF280C      | 1.66199    | 1.27325    | 1.96515   | 2.50312    | 1.41133    |
| CASP8        | 4.47128    | 5.09055    | 5.89187   | 6.83008    | 5.85902    |
| CD247        | 0.0364513  | 0.0249654  | 0         | 0          | 0.045845   |
| ZNF32-AS2    | 0.506365   | 0.597431   | 0.311716  | 0.464145   | 0.63283    |
| MGARP        | 0.16531    | 0.372118   | 0.202685  | 0.441327   | 0.244635   |
| HSD17B6      | 0.417599   | 0.526909   | 0.540159  | 0.72106    | 0.362311   |
| PYGB         | 15.9037    | 16.6245    | 22.306    | 25.8491    | 17.5503    |
| SHMT2        | 202.896    | 212.589    | 316.501   | 340.019    | 220.641    |
| TTC30A       | 0.0492843  | 0.087521   | 0.107003  | 0.0577939  | 0.109941   |
| KRTAP2-1     | 0          | 0.108442   | 0         | 0.137331   | 0          |
| TMEM88       | 0.75321    | 0.921294   | 1.57077   | 2.19437    | 0.389036   |
| ANP32A-IT1   | 0.0213456  | 0.0101609  | 0.0178019 | 0.011887   | 0.0381532  |
| EPHA8        | 0.0346481  | 0          | 0         | 0.0438638  | 0          |
| FABP5        | 197.719    | 210.858    | 214.76    | 279.513    | 236.562    |
| IZUMO1       | 0          | 0.0275006  | 0         | 0          | 0          |
| LOC100131691 | 0.243237   | 0.188588   | 0.369186  | 0.419995   | 0.241979   |
| PRKACA       | 18.4688    | 23.2141    | 17.0428   | 28.1229    | 23.754     |
| SV2A         | 0.0198062  | 0.036896   | 0.0326961 | 0.0221797  | 0.0681763  |
| GPR158       | 0.128225   | 0.0498234  | 0.287001  | 0.252941   | 0.103835   |
| PAPSS2       | 0.139659   | 0.145612   | 0.143615  | 0.201426   | 0.19736    |
| KCTD12       | 1.39719    | 1.80721    | 1.62434   | 2.14677    | 1.91249    |

|                       |            |            |            |           |            |
|-----------------------|------------|------------|------------|-----------|------------|
| ZSCAN18               | 0.0351804  | 0.113181   | 0.0254125  | 0.10569   | 0.078624   |
| SEC14L3               | 0          | 0.0169689  | 0          | 0         | 0          |
| LOC100507462          | 0.0585646  | 0.124284   | 0.0750768  | 0.140372  | 0.0820004  |
| THAP2                 | 0.457855   | 0.326367   | 0.709214   | 0.748825  | 0.456997   |
| EHD1                  | 22.273     | 27.0606    | 24.9739    | 33.471    | 30.938     |
| LOC100996291          | 0.01106    | 0.0148585  | 0          | 0         | 0.0136516  |
| ZNF587                | 1.12238    | 1.27243    | 1.45731    | 1.63774   | 1.50402    |
| FSD1L                 | 0.801787   | 1.08721    | 0.89543    | 1.15241   | 1.11196    |
| PLEKHG4               | 4.09979    | 5.02764    | 3.78178    | 6.75556   | 4.49753    |
| AHNAK2                | 1.39183    | 1.60008    | 1.02374    | 1.83524   | 1.68926    |
| FGFR2                 | 0.716439   | 0.892713   | 0.807169   | 1.04855   | 0.848763   |
| DPY19L2P2             | 0.0273416  | 0.0296073  | 0.00857699 | 0.0343354 | 0.0369663  |
| NPW                   | 0.604207   | 0.331932   | 0.403009   | 0.863879  | 0.102063   |
| FGF2                  | 0.00629155 | 0.00964135 | 0.00409487 | 0.0105803 | 0.00923393 |
| CARD6                 | 0.577281   | 1.10994    | 0.95542    | 1.00713   | 1.19459    |
| YARS                  | 48.5659    | 37.4234    | 81.8381    | 88.4512   | 40.5511    |
| HOTTIP                | 0.0625769  | 0.0496975  | 0.0987303  | 0.10485   | 0.0687719  |
| DIS3L                 | 2.81394    | 2.65247    | 4.39438    | 4.55541   | 3.41008    |
| TDRD5                 | 0.457217   | 0.334422   | 0.371231   | 0.663347  | 0.44717    |
| SMN2                  | 3.53247    | 3.26909    | 4.37582    | 4.57276   | 4.4349     |
| MORC2-AS1             | 0.672028   | 0.918867   | 0.670905   | 0.738446  | 1.37842    |
| N4BP2L2-IT2           | 0.259684   | 0.344602   | 0.283982   | 0.284524  | 0.486861   |
| ARL6IP5               | 14.0036    | 17.6931    | 12.5586    | 16.5519   | 22.8156    |
| SIGLEC9               | 0.132936   | 0.084344   | 0.0456415  | 0.0631383 | 0.16358    |
| MYLK                  | 0.0088196  | 0.0130629  | 0.0224279  | 0         | 0.0248244  |
| PNPLA1                | 0.0110953  | 0          | 0          | 0         | 0.0141992  |
| LHFPL5                | 0.0390947  | 0          | 0.0966021  | 0.0649473 | 0.0850715  |
| PDCD1                 | 0.164857   | 0.0540168  | 0.172931   | 0.207476  | 0.221019   |
| EIF3C,EIF3CL          | 0.842246   | 1.11669    | 1.3377     | 1.57423   | 1.15957    |
| LOC100287314          | 4.19414    | 3.22025    | 6.7164     | 7.00541   | 4.15021    |
| TNNC2                 | 0.18223    | 0.315374   | 0.0713351  | 0.200012  | 0.215885   |
| NUP133                | 7.95333    | 7.59329    | 7.84622    | 10.17     | 9.59357    |
| LPP-AS2               | 0.224078   | 0.321343   | 0.339638   | 0.390646  | 0.240441   |
| LINC00570             | 0.0201646  | 0          | 0          | 0         | 0.0258436  |
| ZNF808                | 0.314819   | 0.513453   | 0.404371   | 0.41357   | 0.705985   |
| SFXN2                 | 5.95991    | 4.42455    | 7.16555    | 8.43852   | 4.86114    |
| LOC652276             | 2.97934    | 2.08197    | 4.1547     | 4.48119   | 2.59586    |
| ZNF704                | 0.331863   | 0.271656   | 0.302013   | 0.404208  | 0.372838   |
| HS3ST2                | 0.0188183  | 0          | 0          | 0         | 0.0241349  |
| ACTR6                 | 9.74889    | 9.35446    | 10.8009    | 12.2425   | 13.0554    |
| SLC46A3               | 2.22101    | 2.16945    | 3.75423    | 3.67204   | 2.27711    |
| LRRC37A6P             | 0.00713734 | 0.00498687 | 0.00440302 | 0.0118178 | 0.00931104 |
| TMED6                 | 0.469859   | 0.579835   | 1.12053    | 1.11411   | 0.468171   |
| RUVBL1                | 35.7838    | 34.4344    | 50.0091    | 54.0013   | 41.5943    |
| MGC16142              | 1.17733    | 0.75569    | 0.979484   | 1.39745   | 1.00316    |
| FAM173B               | 1.11403    | 1.1055     | 1.48856    | 1.67622   | 1.17513    |
| SRL                   | 0.00659432 | 0.00917514 | 0          | 0         | 0.00855423 |
| DCHS1                 | 0.0451802  | 0.0302342  | 0.0272294  | 0.0270705 | 0.070577   |
| AP4B1-AS1             | 0.113398   | 0          | 0.0531952  | 0.0235705 | 0.114311   |
| SAMHD1                | 0.924168   | 0.867595   | 1.18304    | 1.40598   | 1.0255     |
| ASRGL1                | 0.785644   | 0.85962    | 1.16689    | 1.35183   | 0.953264   |
| RSG1                  | 1.5049     | 1.47696    | 1.69153    | 2.48325   | 1.4685     |
| SCG5                  | 0.248408   | 0.133565   | 0.304843   | 0.473061  | 0.203963   |
| OSTM1                 | 2.66511    | 2.1375     | 3.64639    | 3.98932   | 2.32962    |
| ACOT6                 | 0.0280746  | 0.0404711  | 0          | 0         | 0.0377497  |
| MKNK1-AS1             | 0.0116001  | 0          | 0          | 0         | 0.0149189  |
| MAEA                  | 21.1467    | 21.4249    | 24.4736    | 30.6775   | 25.4111    |
| PRSS22                | 9.02703    | 6.76388    | 10.3073    | 12.3381   | 8.83782    |
| ZNF778                | 0.193598   | 0.509969   | 0.223954   | 0.382201  | 0.487148   |
| LNP1                  | 0.976531   | 1.67457    | 1.87191    | 1.84296   | 1.82689    |
| GABRB3                | 0.537909   | 0.559589   | 0.782815   | 0.716639  | 0.682449   |
| ASB3,GPR75,GPR75-ASB3 | 3.07419    | 2.96285    | 3.78168    | 4.08944   | 3.72961    |
| C11orf65              | 0.582853   | 0.276829   | 0.428975   | 0.531881  | 0.432922   |
| OAS1                  | 0          | 0          | 0.0399442  | 0         | 0.0514522  |
| INSM1                 | 0.0996895  | 0.226454   | 0.12422    | 0.100758  | 0.478865   |
| NUAK2                 | 0.135677   | 0.297742   | 0.215214   | 0.2773    | 0.353536   |
| LY6G5B                | 2.74799    | 4.10598    | 2.3781     | 2.90312   | 4.74591    |
| BEND3                 | 0.898592   | 1.06196    | 1.47616    | 1.57333   | 1.19056    |
| TERC                  | 2.0643     | 2.30673    | 2.26131    | 0.859222  | 7.08807    |
| FLJ42875              | 5.06025    | 4.23627    | 6.48506    | 7.27164   | 4.39293    |
| USH1G                 | 0.406222   | 0.716898   | 0.366629   | 0.50897   | 0.875758   |
| REL                   | 0.144688   | 0.171785   | 0.138739   | 0.184115  | 0.173627   |
| BVES                  | 0.00395115 | 0.00582928 | 0          | 0         | 0.00551322 |
| ZDHC14                | 1.16839    | 0.542951   | 2.04379    | 1.84498   | 1.19621    |
| CSF1R                 | 0.00765264 | 0.0102966  | 0.00925687 | 0.0254993 | 0.00940602 |
| FAM186B               | 0.125595   | 0.0717698  | 0.119147   | 0.192707  | 0.0881555  |
| CEP164                | 1.84161    | 2.46749    | 1.9934     | 2.95247   | 2.30002    |
| SNORA33               | 10.4539    | 14.2232    | 4.20755    | 5.65674   | 0          |
| LOC100505648          | 0.303913   | 0.190547   | 0.404205   | 0.457652  | 0.215203   |

|              |            |            |           |           |            |
|--------------|------------|------------|-----------|-----------|------------|
| LOC643406    | 0.119783   | 0.100892   | 0.111551  | 0.0998776 | 0.210795   |
| PDSS1        | 5.59154    | 5.00809    | 6.94371   | 8.6728    | 5.91521    |
| ZNF252P-AS1  | 0.0603646  | 0.0874675  | 0.183982  | 0.115223  | 0.142084   |
| ALOX12B      | 2.29454    | 2.75632    | 2.96221   | 3.97467   | 2.87457    |
| EPB41L4B     | 5.15258    | 4.9561     | 4.75981   | 6.75253   | 6.29351    |
| SLC26A2      | 1.03428    | 1.07128    | 1.39607   | 1.48273   | 1.29089    |
| ZKSCAN3      | 0.877379   | 0.873591   | 0.865666  | 1.2051    | 0.831748   |
| PRKAR2A      | 0.829486   | 0.924437   | 0.921532  | 1.01954   | 1.12947    |
| CCDC141      | 0.00231311 | 0.00337822 | 0         | 0         | 0.00319945 |
| TSK3         | 1.31961    | 1.60926    | 0.634783  | 1.32355   | 1.79327    |
| GTF2H3       | 6.8202     | 6.51566    | 8.5832    | 10.1643   | 7.66485    |
| LOC646719    | 1.05118    | 2.17549    | 2.28641   | 2.42125   | 2.51324    |
| TPTE2        | 0.011638   | 0.0170018  | 0         | 0.036778  | 0          |
| LOC100499405 | 0.010488   | 0.0151413  | 0         | 0         | 0.0143277  |
| SLC25A18     | 0.093231   | 0.0215198  | 0.113781  | 0.0775765 | 0.0797544  |
| ASUN         | 9.60143    | 7.10689    | 8.41789   | 11.0724   | 9.53743    |
| ZNF568       | 0.0758611  | 0.0525068  | 0.0725743 | 0.0854991 | 0.108688   |
| MYLK2        | 0.303015   | 0.177769   | 0.364179  | 0.297815  | 0.205089   |
| TEKT3        | 0.185667   | 0.0978257  | 0.191836  | 0.188735  | 0.199706   |
| CYP27B1      | 1.60078    | 2.08745    | 1.59485   | 2.24567   | 2.71726    |
| LOC100129961 | 0.281921   | 0.233441   | 0.204969  | 0.466368  | 0.197624   |
| C5AR2        | 0          | 0.047385   | 0         | 0         | 0          |
| RGPDB        | 0.111499   | 0.0626295  | 0.0834972 | 0.109651  | 0.130656   |
| ACER2        | 0.0448205  | 0.168849   | 0.0112482 | 0.104972  | 0.121065   |
| SARM1        | 0.497733   | 0.585596   | 0.716102  | 0.845872  | 0.685522   |
| ACY3         | 0.0679753  | 0.180674   | 0.0404366 | 0.113329  | 0.0831438  |
| CIRBP-AS1    | 0.36231    | 1.32785    | 0.905392  | 1.00579   | 1.07745    |
| KIAA0753     | 1.96492    | 1.70236    | 1.96572   | 2.57347   | 2.1364     |
| PSEN2        | 4.59014    | 4.67817    | 7.04923   | 6.87052   | 5.81127    |
| TVP23B       | 7.88739    | 7.5255     | 7.51851   | 9.33064   | 9.89494    |
| C1QTNF8      | 0          | 0.0178739  | 0         | 0.0230179 | 0          |
| ANKFN1       | 0.0576454  | 0.0539541  | 0.0828422 | 0.0951636 | 0.0880689  |
| C2orf81      | 3.69465    | 3.47568    | 4.30115   | 4.92019   | 5.11195    |
| CCDC102B     | 0.0415978  | 0.020018   | 0.0610879 | 0.0228567 | 0.0867404  |
| LOC100506123 | 2.63426    | 1.74066    | 1.59378   | 3.40575   | 2.7379     |
| FAM83G       | 9.72242    | 11.2554    | 7.22119   | 11.6423   | 12.5649    |
| PTER         | 4.44949    | 3.72339    | 6.33171   | 7.5839    | 4.12923    |
| TES          | 0          | 0.0129612  | 0.0225594 | 0         | 0          |
| LOC100506599 | 0.40831    | 0.69333    | 0.703649  | 0.789433  | 0.674418   |
| DGKI         | 1.75649    | 1.51438    | 1.94611   | 2.54698   | 1.90147    |
| SLC35G1      | 1.51394    | 2.55507    | 1.69277   | 2.23209   | 3.10537    |
| NEK11        | 0.533593   | 0.58416    | 0.425188  | 0.783147  | 0.601934   |
| ZNF837       | 1.90392    | 2.44615    | 1.91324   | 2.98656   | 2.89375    |
| RPS26P11     | 1.56327    | 0.983651   | 1.65296   | 1.88824   | 1.55047    |
| NUDT16P1     | 2.64185    | 2.92106    | 3.44423   | 3.83328   | 3.81156    |
| IL20RA       | 0.472375   | 0.854924   | 0.721349  | 1.01637   | 0.906678   |
| ZNF577       | 0.20308    | 0.443417   | 0.219971  | 0.368033  | 0.335931   |
| C16orf52     | 1.09447    | 0.688437   | 1.49296   | 1.62183   | 0.845256   |
| REEP6        | 17.1847    | 27.7035    | 13.376    | 23.8968   | 28.9514    |
| USP32P2      | 0.0960107  | 0.0567745  | 0.0918739 | 0.072381  | 0.167087   |
| RCSD1        | 0.0085824  | 0          | 0         | 0         | 0.0111548  |
| C2orf16      | 0.05595    | 0.0879591  | 0.0950714 | 0.0632373 | 0.110879   |
| TRPC1        | 0.111709   | 0.153068   | 0.151609  | 0.186998  | 0.171021   |
| C1RL         | 3.16272    | 3.62358    | 4.39708   | 4.7678    | 3.96633    |
| TCEANC       | 0.226822   | 0.407879   | 0.238745  | 0.477475  | 0.400154   |
| CASC2        | 0.0949735  | 0.246489   | 0.145432  | 0.229504  | 0.139622   |
| CEBPB        | 52.171     | 37.9879    | 139.662   | 104.812   | 46.9875    |
| ARHGAP11B    | 1.13779    | 0.737144   | 1.07772   | 1.44498   | 1.42193    |
| DUSP1        | 108.53     | 34.0587    | 75.1114   | 119.044   | 38.55      |
| FAM209B      | 0.407218   | 1.20385    | 0.563559  | 0.504321  | 1.33454    |
| KBTBD7       | 0.19755    | 0.244727   | 0.157264  | 0.269745  | 0.252519   |
| DEGS1        | 17.1786    | 25.4644    | 21.9605   | 25.9201   | 30.7262    |
| NFIX         | 6.75189    | 6.65672    | 7.87741   | 10.3462   | 7.7503     |
| KANSL1-AS1   | 0.821009   | 0.300677   | 0.632002  | 0.990058  | 0.37144    |
| ALX4         | 0          | 0.00836771 | 0         | 0         | 0          |
| RNF138P1     | 0.00787217 | 0.0594146  | 0.015212  | 0.0264049 | 0.0452917  |
| LOC100507489 | 0.0310732  | 0.0149686  | 0.196116  | 0.0860441 | 0.0990636  |
| LOC389791    | 0.333552   | 0.22014    | 0.470556  | 0.503946  | 0.349013   |
| EFCAB7       | 0.846722   | 0.774835   | 0.684017  | 1.16777   | 0.92225    |
| ZNF790       | 0.269473   | 0.531772   | 0.477645  | 0.654794  | 0.483867   |
| STRC         | 0.104016   | 0.148677   | 0.0982271 | 0.192944  | 0.150988   |
| ENTPD7       | 2.72613    | 1.857      | 3.1798    | 3.87641   | 2.44285    |
| FAIM         | 4.85217    | 5.61219    | 7.49536   | 8.16922   | 6.14921    |
| LOC646329    | 17.1271    | 23.5715    | 15.652    | 25.5032   | 23.2676    |
| TMEM254-AS1  | 0.026545   | 0.0187659  | 0.0330573 | 0.0662128 | 0          |
| TMEM27       | 0.264653   | 0.352346   | 0.357003  | 0.351181  | 0.311772   |
| IFT43        | 26.2825    | 32.5347    | 28.0922   | 38.5849   | 35.2441    |
| RNF5P1       | 0.0656412  | 0          | 0         | 0         | 0.0856237  |
| LRCH3        | 1.32637    | 1.11593    | 1.67638   | 1.76354   | 1.44923    |

|              |           |            |            |            |            |
|--------------|-----------|------------|------------|------------|------------|
| LOC283335    | 0.434593  | 0.349178   | 0.331697   | 0.463419   | 0.372324   |
| COL11A2      | 0.296023  | 0.236698   | 0.21456    | 0.389339   | 0.251714   |
| LOC284023    | 5.07258   | 5.21746    | 5.50753    | 7.08845    | 6.00363    |
| SLC25A45     | 1.73324   | 1.08187    | 1.56213    | 2.09957    | 1.56161    |
| ARHGAP5-AS1  | 1.79398   | 2.44043    | 1.91432    | 2.26676    | 2.92821    |
| RABL5        | 6.15135   | 7.66855    | 7.67355    | 9.9951     | 8.14658    |
| PODNL1       | 0.104743  | 0.172952   | 0.0940092  | 0.17442    | 0.126692   |
| ADAP2        | 0.0505174 | 0.0966336  | 0          | 0.0837946  | 0.0901543  |
| CLTCL1       | 1.34794   | 1.40583    | 1.36742    | 2.07048    | 1.79859    |
| GPR182       | 0.0946538 | 0.064892   | 0          | 0.119184   | 0.0887011  |
| RTBDN        | 0.701433  | 0.520176   | 0.388448   | 0.48209    | 0.856578   |
| SRCRB4D      | 0.448528  | 0.599887   | 0.575792   | 0.58195    | 0.673861   |
| NKX3-1       | 2.09833   | 4.35563    | 2.67677    | 3.66222    | 4.6882     |
| ANKRD18DP    | 0.0474171 | 0.176932   | 0.0689199  | 0.123983   | 0.149943   |
| PSMG3-AS1    | 0.221339  | 0.242367   | 0.388445   | 0.425092   | 0.22612    |
| MYADML       | 0.0188032 | 0          | 0          | 0          | 0.0246019  |
| ROR1         | 0.040776  | 0.0359559  | 0.0515917  | 0.0341422  | 0.0602645  |
| CDC42EP5     | 15.4238   | 25.6255    | 17.9443    | 21.9227    | 32.0529    |
| LINC00515    | 0.0809175 | 0.235059   | 0.101437   | 0          | 0.546579   |
| FOXN3-AS1    | 1.3175    | 1.36691    | 2.15271    | 2.30587    | 1.39595    |
| AQP1         | 0.095117  | 0.230203   | 0.101537   | 0.165287   | 0.286578   |
| RAB36        | 2.37736   | 2.88161    | 2.44723    | 3.22686    | 3.7538     |
| ZSCAN30      | 1.40834   | 1.18885    | 1.48586    | 2.15092    | 1.42921    |
| CDNF         | 1.35112   | 1.37993    | 1.54183    | 1.77206    | 1.68879    |
| ACSL6        | 0         | 0          | 0.0134105  | 0          | 0.004927   |
| TSPYL4       | 1.95085   | 3.02537    | 2.87347    | 3.30127    | 3.43336    |
| FCN3         | 0         | 0.0494527  | 0.0439775  | 0.121626   | 0          |
| KIF26B       | 0.218791  | 0.162112   | 0.247053   | 0.316316   | 0.270794   |
| CLDN6        | 0.132525  | 0.183023   | 0.065211   | 0.267363   | 0.135844   |
| IL18R1       | 0.0776334 | 0.0699779  | 0.197125   | 0.139573   | 0.108031   |
| HIST1H2BE    | 0         | 0.18703    | 0          | 0          | 0          |
| CHRM3        | 0.117862  | 0.118982   | 0.0523689  | 0.106656   | 0.0826184  |
| SCUBE3       | 0.0317944 | 0.00729485 | 0.0130446  | 0.0265692  | 0.0134776  |
| ZNF655       | 15.4239   | 15.146     | 19.8499    | 23.9488    | 17.6959    |
| IFI16        | 29.8618   | 29.0261    | 40.5793    | 48.9377    | 32.2911    |
| TEX30        | 0.134695  | 0.170109   | 0.220757   | 0.224424   | 0.187338   |
| STAMBPL1     | 4.38244   | 2.90237    | 4.64066    | 5.48041    | 3.87902    |
| HIST1H2BF    | 0.870507  | 0.193648   | 0.520439   | 0.958211   | 0.358481   |
| SUN3         | 19.8798   | 14.073     | 31.3773    | 30.907     | 22.1911    |
| CTSO         | 0.123435  | 0.252735   | 0.266669   | 0.167927   | 0.48019    |
| MYH15        | 0.178238  | 0.145234   | 0.125982   | 0.27831    | 0.140374   |
| CTH          | 6.41339   | 5.11611    | 22.7553    | 18.9932    | 5.60193    |
| SPAG8        | 0.0844142 | 0.0769997  | 0.0172171  | 0.0701093  | 0.0898283  |
| CCDC30       | 0.029117  | 0.0494175  | 0.0436092  | 0.0669207  | 0.0312711  |
| KLHL7-AS1    | 0.0268569 | 0.120478   | 0.0229721  | 0.0900431  | 0.100893   |
| C6orf195     | 0.0580292 | 0.224185   | 0.0538528  | 0.193239   | 0.169866   |
| LOC100126784 | 4.60041   | 2.63697    | 2.96349    | 5.38915    | 3.14169    |
| BEST1        | 0.0105958 | 0.0132324  | 0.27746    | 0.167747   | 0.0266161  |
| LOC731223    | 0.105811  | 0.288882   | 0.509269   | 0.176441   | 0.265455   |
| ADAMTS14     | 0         | 0.00868119 | 0          | 0          | 0          |
| GRIK5        | 0.684051  | 0.21664    | 0.482332   | 0.740605   | 0.501516   |
| GOLGA8T      | 0.148568  | 0.21892    | 0.112784   | 0.182085   | 0.299972   |
| MLLT10P1     | 0.117949  | 0.0861972  | 0.0740628  | 0.0969472  | 0.163048   |
| LOC338758    | 0.0331129 | 0.0658358  | 0.0281923  | 0.111292   | 0.0157064  |
| SPDYE2L      | 0.0746081 | 0          | 0.0359995  | 0.0741004  | 0.0186421  |
| BIRC2        | 11.2585   | 11.5317    | 15.8811    | 16.8674    | 12.3701    |
| OPN4         | 0         | 0.022163   | 0          | 0          | 0          |
| MAPKAP1      | 72.2486   | 68.1797    | 64.8657    | 91.6139    | 82.1373    |
| NOMO3        | 0         | 0.0260661  | 0.0231831  | 0.0104905  | 0.0321369  |
| ZNF239       | 1.91478   | 1.431      | 3.05783    | 3.46626    | 1.63625    |
| KIAA1456     | 0.0152927 | 0.00649142 | 0.0027887  | 0.00729113 | 0.00930006 |
| ANTXR2       | 10.2103   | 10.077     | 11.1955    | 14.8655    | 11.2062    |
| EFHC1        | 1.23006   | 1.05726    | 1.15516    | 1.96637    | 1.36073    |
| TTC26        | 1.6406    | 1.82792    | 1.89376    | 2.46036    | 2.27084    |
| ZNF91        | 0.964782  | 0.994306   | 0.665078   | 1.31191    | 1.23619    |
| RPGR         | 1.37979   | 1.16763    | 1.25059    | 1.98932    | 1.554      |
| FAM86DP      | 4.39653   | 4.09991    | 5.22451    | 6.03283    | 4.6381     |
| TYW1B        | 0.859724  | 0.588945   | 1.12581    | 1.34593    | 0.85786    |
| TRIB1        | 13.7788   | 19.5344    | 17.5472    | 22.7882    | 20.8861    |
| CATSPER1     | 1.55513   | 1.9234     | 1.53334    | 2.20662    | 1.70277    |
| GPR113       | 0.0305309 | 0.0198711  | 0.00941644 | 0.025538   | 0.0125276  |
| TOMM20L      | 0.496361  | 1.2948     | 0.842857   | 1.44943    | 0.803543   |
| SULT1A1      | 9.05326   | 8.50737    | 9.73859    | 14.6909    | 9.00431    |
| GDF15        | 106.078   | 44.3155    | 261.645    | 247.79     | 43.6431    |
| CCDC66       | 1.23354   | 1.02879    | 1.80245    | 2.23838    | 1.35427    |
| FLJ38109     | 0.0472758 | 0.0387521  | 0.033812   | 0.0336999  | 0.063938   |
| FAM228B      | 0.645458  | 1.14135    | 1.03658    | 1.11835    | 1.62568    |
| NPAS1        | 2.0547    | 2.00509    | 2.33894    | 2.97497    | 2.43838    |
| EIF3A        | 21.5448   | 19.5509    | 30.563     | 35.337     | 22.489     |

|              |            |            |            |            |            |
|--------------|------------|------------|------------|------------|------------|
| ADAMTS9      | 0.151012   | 0.111276   | 0.131973   | 0.19215    | 0.155676   |
| PROB1        | 0.356511   | 0.323799   | 0.711925   | 0.592945   | 0.523275   |
| ASIP         | 0          | 0.152456   | 0          | 0          | 0          |
| FBLIM1       | 0.45217    | 0.451437   | 0.265294   | 0.507008   | 0.517815   |
| LINC00470    | 0          | 0          | 0.015465   | 0.0203096  | 0          |
| HSD3B7       | 23.5973    | 34.34      | 19.3331    | 34.5982    | 31.9443    |
| KIAA1875     | 0.191109   | 0.126991   | 0.0718015  | 0.20929    | 0.21112    |
| ME2          | 12.7831    | 14.2135    | 14.4022    | 17.3788    | 17.7054    |
| SDSL         | 30.4881    | 29.3462    | 26.6362    | 45.5239    | 30.8711    |
| LTC4S        | 0.929835   | 2.00246    | 0.725908   | 1.55675    | 2.21612    |
| MXRA8        | 0.694605   | 0.337189   | 0.635981   | 1.27985    | 0.393505   |
| MIR31HG      | 0.488547   | 0.369332   | 0.244732   | 0.305226   | 0.561276   |
| ALDH8A1      | 0.107102   | 0.0757237  | 0.200951   | 0.198599   | 0.154904   |
| TANK         | 5.58102    | 5.34517    | 7.1269     | 7.54877    | 7.48898    |
| C14orf183    | 0          | 0.0398018  | 0.0354924  | 0.0482039  | 0          |
| ATG10        | 1.42804    | 1.46514    | 1.55718    | 1.63021    | 2.07823    |
| XXYL1        | 2.18591    | 2.07637    | 3.69844    | 4.07112    | 2.98575    |
| FAM86B2      | 0.773273   | 0.820322   | 1.28012    | 1.09338    | 1.54921    |
| ARHGAP9      | 0.0717834  | 0.0259721  | 0.130323   | 0.0902868  | 0.0180477  |
| FBXO4        | 4.86382    | 5.3863     | 7.42123    | 8.08831    | 6.80323    |
| LOC100506207 | 0.0803244  | 0.152184   | 0.0997791  | 0.0459328  | 0.203602   |
| ERVK13-1     | 0.805811   | 0.842934   | 1.05112    | 1.4416     | 0.913275   |
| LOC100271836 | 0.03689    | 0.0732998  | 0.0755699  | 0.0922098  | 0.0876851  |
| APOC1P1      | 0.0534909  | 0.219416   | 0          | 0.0880429  | 0.0861887  |
| SLC39A3      | 23.1678    | 19.5192    | 33.3348    | 42.8294    | 19.4391    |
| TPP2         | 9.0937     | 6.71951    | 9.87303    | 12.7747    | 9.07164    |
| LINC00174    | 1.00285    | 0.750006   | 1.2127     | 1.81848    | 0.853529   |
| WFDC10B      | 0.214288   | 0.222448   | 0.131304   | 0.359292   | 0.136435   |
| ZNF572       | 1.16348    | 1.3082     | 1.62932    | 2.01326    | 1.62555    |
| LOC728752    | 0.722451   | 1.32933    | 1.04909    | 1.55182    | 1.28271    |
| ABCF2        | 34.8196    | 39.0812    | 52.5715    | 62.6984    | 42.2414    |
| MBLAC2       | 0.86188    | 1.38173    | 1.56285    | 1.7969     | 1.70412    |
| CCDC81       | 0.0559219  | 0.103182   | 0.0345589  | 0.0400106  | 0.0973615  |
| CEP41        | 1.04578    | 0.64099    | 1.54217    | 1.72342    | 0.879661   |
| AQP3         | 0.196483   | 0.0686086  | 0.182054   | 0.193626   | 0.254151   |
| THEM4        | 2.34166    | 3.26614    | 3.07847    | 3.93632    | 3.44681    |
| COL18A1-AS1  | 0.0160523  | 0          | 0.013352   | 0          | 0.0391169  |
| SSTR5        | 0          | 0.0270454  | 0          | 0          | 0          |
| NXPH4        | 28.5817    | 31.8464    | 31.3931    | 43.1697    | 33.3828    |
| HEY1         | 1.05916    | 2.02703    | 3.53745    | 2.9593     | 2.14279    |
| RASA3        | 13.2992    | 14.4832    | 12.5331    | 18.7932    | 15.6481    |
| PCDHB10      | 0.211785   | 0.464244   | 0.196027   | 0.416081   | 0.397411   |
| ENPP2        | 0          | 0          | 0.0138054  | 0.0182726  | 0          |
| VRK2         | 2.50494    | 2.35702    | 2.40466    | 3.37218    | 2.92029    |
| GRK4         | 0.426602   | 0.307469   | 0.540116   | 0.55577    | 0.600271   |
| ATP6V0A2     | 0.685777   | 0.936822   | 1.12242    | 1.49143    | 0.823658   |
| FADS1        | 0.00557075 | 0          | 0.00692785 | 0.00924579 | 0.00735118 |
| LEAP2        | 0.360683   | 0.462844   | 0.553263   | 0.797011   | 0.388057   |
| ROM1         | 1.30499    | 2.14367    | 1.2899     | 1.83044    | 2.06895    |
| STX19        | 0.0171346  | 0.0244068  | 0.0213021  | 0.0832502  | 0          |
| RNF165       | 0.193891   | 0.387791   | 0.124034   | 0.257029   | 0.231438   |
| POU2AF1      | 0.0106576  | 0          | 0.013215   | 0.0178664  | 0.0138431  |
| C9orf117     | 0.337417   | 0.34401    | 0.295541   | 0.321405   | 0.33507    |
| ELAVL3       | 0.00748636 | 0          | 0.00912881 | 0.0125119  | 0.00955874 |
| C9orf43      | 0.248193   | 0.260562   | 0.49058    | 0.514084   | 0.243574   |
| PRRG2        | 0.525598   | 0.821465   | 0.770325   | 0.878326   | 0.866788   |
| AIM1         | 0.00308055 | 0.00439958 | 0.00771133 | 0.00512637 | 0.00412194 |
| UNC79        | 0.00294025 | 0.00414939 | 0.00364557 | 0          | 0.00385728 |
| SLC36A2      | 0.00803752 | 0          | 0.0100392  | 0.0134728  | 0.0105518  |
| KIF21A       | 0.946619   | 0.686079   | 0.848697   | 1.17472    | 0.904396   |
| HOMEZ        | 2.06805    | 1.77397    | 2.67549    | 3.23088    | 1.79172    |
| LOC100130855 | 0.398823   | 0.402593   | 0.418543   | 0.732585   | 0.422331   |
| OTC          | 0          | 0          | 0.0186643  | 0.0247714  | 0          |
| SLC3A1       | 0.0100199  | 0          | 0          | 0          | 0.0133854  |
| TMEM178A     | 0.327017   | 0.220835   | 0.219775   | 0.183825   | 0.722941   |
| LOC100505918 | 0.00905503 | 0          | 0          | 0          | 0.0121056  |
| ZNF724P      | 0.110874   | 0.386363   | 0.135789   | 0.183295   | 0.0739812  |
| FNSJD1       | 4.1391     | 4.39072    | 5.48623    | 5.57624    | 6.33754    |
| ANKRD34A     | 2.10572    | 1.13467    | 2.56546    | 3.19827    | 1.71977    |
| RPGRIP1L     | 0.24434    | 0.237194   | 0.314619   | 0.350898   | 0.35814    |
| PTAFR        | 0.0136572  | 0.028433   | 0.0421173  | 0.0342883  | 0.0175053  |
| GTF2I        | 0.82639    | 0.788791   | 0.829505   | 1.1702     | 1.14354    |
| KRTAP4-9     | 1.05855    | 0.795306   | 0.840378   | 1.01771    | 1.36211    |
| LOC643770    | 0.0577721  | 0.281434   | 0.183913   | 0.0970083  | 0.183392   |
| SLC25A30     | 0.486646   | 0.556702   | 0.44248    | 0.568035   | 0.604517   |
| LAMA4        | 0.00299467 | 0          | 0          | 0          | 0.00401027 |
| ITPR3        | 40.911     | 48.552     | 36.5614    | 62.515     | 48.9958    |
| NRSN1        | 0          | 0          | 0.0125837  | 0.0167494  | 0          |
| NAV3         | 7.39119    | 3.98094    | 6.51031    | 9.3428     | 5.10705    |

|              |            |            |            |            |            |
|--------------|------------|------------|------------|------------|------------|
| WDFY3-AS2    | 0.258174   | 0.218232   | 0.152425   | 0.378699   | 0.0830096  |
| LRRC34       | 1.32216    | 1.04691    | 1.47049    | 1.68433    | 1.29567    |
| HIST1H2BH    | 19.7934    | 12.0188    | 13.8015    | 27.8788    | 8.80909    |
| DDO          | 0          | 0.0401262  | 0          | 0.0535267  | 0          |
| LOC257396    | 1.0978     | 0.919375   | 1.55852    | 1.57061    | 1.18364    |
| C7           | 0.00572514 | 0          | 0          | 0          | 0.00768301 |
| SCN4B        | 0.0486753  | 0.0775332  | 0.0515926  | 0.0349486  | 0.116414   |
| LOC100505912 | 0.119979   | 0.25444    | 0.11103    | 0.196408   | 0.239976   |
| LOC653653    | 0.0471336  | 0.0344936  | 0.0890094  | 0.0778847  | 0.0662551  |
| EID3         | 0.262584   | 0.0803879  | 0.256786   | 0.341579   | 0.22854    |
| CRMP1        | 2.34086    | 1.92329    | 2.7848     | 4.4068     | 1.82218    |
| C12orf69     | 0.0414525  | 0.0456023  | 0.0393239  | 0.103237   | 0.0287548  |
| CCDC151      | 0.505985   | 0.626127   | 0.361872   | 0.831147   | 0.364943   |
| AANAT        | 0.357681   | 0.203016   | 0.0609056  | 0.342166   | 0.312153   |
| TSPAN11      | 0.00526437 | 0.0144186  | 0          | 0          | 0.0264803  |
| VWA8-AS1     | 0.0211675  | 0.0459519  | 0.0267699  | 0.0878566  | 0          |
| OASL         | 0.0178257  | 0          | 0.0214633  | 0.0293766  | 0          |
| ARHGAP4      | 0.204226   | 0.298036   | 0.240968   | 0.271385   | 0.304572   |
| SOCS3        | 14.6318    | 22.6543    | 13.139     | 21.797     | 22.3743    |
| FAM102A      | 12.0079    | 13.8902    | 11.362     | 18.2543    | 14.4838    |
| CCDC157      | 0.257597   | 0.477038   | 0.488376   | 0.592594   | 0.582835   |
| CARNS1       | 0.0322292  | 0.113686   | 0.0258222  | 0.0900473  | 0.103218   |
| VILL         | 0.262983   | 0.301199   | 0.171481   | 0.258195   | 0.377852   |
| HOXB-AS5     | 1.3969     | 1.02628    | 1.90552    | 1.8582     | 2.15776    |
| CASP4        | 112.843    | 102.263    | 152.542    | 175.192    | 112.801    |
| TMPRSS7      | 0          | 0          | 0.0119295  | 0.0159713  | 0          |
| SCN2A        | 0          | 0.0104985  | 0          | 0          | 0.00988711 |
| TMIE         | 0.246168   | 0.130173   | 0.434934   | 0.353053   | 0.281418   |
| LRGUK        | 0.177622   | 0.152972   | 0.088844   | 0.177547   | 0.22789    |
| C10orf25     | 0.193266   | 0.403276   | 0.389097   | 0.358179   | 0.351512   |
| SNX29P2      | 0.022804   | 0          | 0.027444   | 0          | 0.027855   |
| IER3         | 28.7108    | 24.4667    | 63.0787    | 56.3125    | 24.9843    |
| MAP1A        | 0.106282   | 0.126172   | 0.0820596  | 0.143444   | 0.144549   |
| FLJ39639     | 0.0966734  | 0.156118   | 0.235953   | 0.187728   | 0.188922   |
| WDR73        | 8.19858    | 8.45261    | 10.5158    | 13.5516    | 9.56114    |
| LOC389634    | 1.51702    | 1.38555    | 0.627374   | 2.12104    | 1.15405    |
| FAM86EP      | 0.418142   | 0.733261   | 0.717744   | 0.978859   | 0.67834    |
| AP1S3        | 0.0236129  | 0.00881442 | 0.00756409 | 0.00989695 | 0.0334532  |
| PRTFDC1      | 4.3941     | 4.38655    | 5.20038    | 6.72095    | 4.78182    |
| ZNRD1-AS1    | 0.250409   | 0.420161   | 0.623834   | 0.613344   | 0.462362   |
| TRHR         | 0.0178596  | 0          | 0          | 0          | 0.0241595  |
| TMEM17       | 0.51354    | 0.382102   | 0.614469   | 0.859817   | 0.53172    |
| ENO4         | 0.170902   | 0.0932481  | 0.153307   | 0.217759   | 0.0980941  |
| SERPINB1     | 59.5431    | 57.4359    | 60.9323    | 85.779     | 67.2611    |
| MRAS         | 1.14115    | 1.08231    | 1.79749    | 2.26802    | 1.1437     |
| CCDC147      | 0.338055   | 0.261968   | 0.500156   | 0.583794   | 0.32037    |
| SNORD97      | 5.61048    | 11.7527    | 0          | 18.2942    | 0          |
| KLHL31       | 0.0314206  | 0.0176637  | 0.0403518  | 0.0461881  | 0.0391161  |
| MAPK13       | 14.5813    | 13.9585    | 13.1586    | 21.5242    | 15.6465    |
| DNALI1       | 0.0557142  | 0          | 0.0115836  | 0.0619728  | 0.0122363  |
| LOC441242    | 0.0225903  | 0.0613757  | 0.082198   | 0.112529   | 0.11249    |
| OPLAH        | 29.6741    | 41.8794    | 32.0787    | 51.7024    | 46.679     |
| HBEGF        | 26.0564    | 14.2882    | 24.1653    | 32.3941    | 18.7698    |
| CACNA1C      | 0          | 0          | 0.00254192 | 0.003433   | 0          |
| TOB2P1       | 0.265751   | 0.693351   | 0.970851   | 0.867121   | 0.705368   |
| KRTCAP3      | 0.865687   | 0.848009   | 0.689338   | 0.846682   | 1.23198    |
| SNORA62      | 2.96688    | 10.1126    | 1.79232    | 12.1891    | 7.97416    |
| OCLM         | 0.0555501  | 0.130094   | 0.108184   | 0          | 0.247392   |
| TAF13        | 8.01333    | 8.98157    | 9.21568    | 11.3498    | 11.9694    |
| CHAC2        | 2.56332    | 3.71386    | 4.51096    | 5.06771    | 4.0393     |
| MYOZ3        | 0.0227199  | 0          | 0.0560902  | 0.050493   | 0.0295334  |
| CCDC148      | 0.148187   | 0.0595417  | 0.0521211  | 0.146277   | 0.0472897  |
| NPC1L1       | 0          | 0.00974529 | 0.0262368  | 0.0360979  | 0          |
| VEPH1        | 0.64904    | 0.977022   | 1.39673    | 1.82594    | 0.889567   |
| GFPT1        | 5.45666    | 4.9106     | 7.88273    | 9.50741    | 5.46503    |
| GPX2         | 0.0492447  | 0.0357376  | 0.0395921  | 0          | 0.123709   |
| ADAM1A       | 0.263549   | 0.307201   | 0.601759   | 0.388981   | 0.530411   |
| PRRT2        | 0.120055   | 0.100873   | 0.0964915  | 0.107058   | 0.296967   |
| PACRGL       | 2.22572    | 2.1899     | 2.81775    | 3.68683    | 2.41858    |
| EN2          | 0.0422879  | 0          | 0          | 0          | 0.0576994  |
| LIAS         | 6.90549    | 6.89821    | 8.52986    | 11.2468    | 7.32298    |
| CBLN3        | 0.238503   | 0.108355   | 0.242736   | 0.221609   | 0.346424   |
| HDHD2        | 5.41319    | 2.87686    | 4.86845    | 5.69462    | 5.88383    |
| APC2         | 0.524336   | 0.595204   | 0.793831   | 0.727022   | 0.760344   |
| C8G          | 0.177301   | 0.467411   | 0.139007   | 0.39148    | 0.574277   |
| LOC100506713 | 1.17533    | 1.35737    | 1.53136    | 1.50605    | 2.42759    |
| ANKLE1       | 0.449261   | 0.534684   | 0.380735   | 0.594721   | 0.789123   |
| ASB13        | 11.2764    | 14.6056    | 14.046     | 18.0699    | 15.1071    |
| CPSF4L       | 0          | 0          | 0.0638278  | 0.0866456  | 0          |

|              |            |            |            |            |            |
|--------------|------------|------------|------------|------------|------------|
| GCSHP3       | 1.77457    | 1.83622    | 2.18032    | 2.81155    | 2.45181    |
| PRSS36       | 0.375662   | 0.563267   | 0.211878   | 0.467329   | 0.766708   |
| C19orf71     | 0.469753   | 0.407708   | 0.277723   | 0.523073   | 0.647929   |
| PRAF2        | 1.7922     | 2.53392    | 2.76685    | 4.45143    | 2.21807    |
| ITIH4        | 0.293422   | 0.208799   | 0.341864   | 0.421059   | 0.397026   |
| CHPF2        | 27.3109    | 36.9893    | 35.8165    | 60.1366    | 36.349     |
| WDR31        | 0.210915   | 0.285481   | 0.416492   | 0.452311   | 0.419205   |
| SETBP1       | 0.00482357 | 0.00342506 | 0          | 0.00803871 | 0.00320443 |
| FAM53A       | 2.56885    | 2.50499    | 3.64354    | 3.88402    | 3.85278    |
| ZNF713       | 0.140025   | 0.157918   | 0.162386   | 0.215861   | 0.163864   |
| AKAP3        | 0.148561   | 0.216319   | 0.183595   | 0.32366    | 0.120855   |
| MAK          | 0.0639151  | 0.0594884  | 0.0884751  | 0.0388401  | 0.136231   |
| LOC100507053 | 0.0500893  | 0.0183803  | 0.0372776  | 0.0627638  | 0.0290667  |
| RFPL4A       | 0.156011   | 0.172099   | 0.114918   | 0.0518207  | 0.279729   |
| GPSM3,NOTCH4 | 0.276246   | 0.178788   | 0.162755   | 0.395244   | 0.255437   |
| PTBP3        | 9.28854    | 7.96782    | 10.5194    | 12.8047    | 12.0124    |
| TRAF3IP1     | 2.07946    | 1.66109    | 1.87236    | 2.9587     | 1.75314    |
| C14orf142    | 3.986      | 3.64068    | 6.75303    | 7.43334    | 4.45269    |
| PACSIN1      | 0.0797227  | 0.0318086  | 0          | 0.0663866  | 0.0581403  |
| CCNYL1       | 2.07048    | 2.51098    | 3.05388    | 3.64187    | 3.14669    |
| HIGD1B       | 0.150183   | 0.10258    | 0.090487   | 0.181159   | 0          |
| LHB          | 0.908937   | 2.11838    | 1.23683    | 0.960076   | 1.52209    |
| ZNF80        | 0.00786551 | 0          | 0          | 0          | 0.0107991  |
| DYNC1H1      | 21.1113    | 18.6351    | 21.576     | 32.1396    | 20.8713    |
| ZNF397       | 1.97038    | 1.09783    | 2.17951    | 1.53295    | 1.80082    |
| C16orf95     | 3.94668    | 3.42906    | 2.8731     | 4.21852    | 3.22906    |
| CDK2AP1      | 35.9252    | 56.9166    | 44.3556    | 57.3955    | 72.7546    |
| RNF216-IT1   | 0          | 0          | 0.208198   | 0.284189   | 0          |
| C7orf63      | 0.622005   | 0.697098   | 0.560421   | 0.9265     | 0.969077   |
| C10orf95     | 1.08234    | 1.24552    | 1.54895    | 1.91888    | 1.47789    |
| ST6GALNAC4   | 197.87     | 192.74     | 216.61     | 307.162    | 205.179    |
| SNX29        | 0.446378   | 0.559607   | 0.381557   | 0.753311   | 0.489678   |
| ARC          | 3.00997    | 6.24681    | 3.7646     | 5.54594    | 5.57524    |
| METTL20      | 0.277257   | 0.37185    | 0.320981   | 0.401041   | 0.396263   |
| SECTM1       | 6.42956    | 6.35071    | 6.19545    | 9.09647    | 7.65186    |
| PKD2         | 1.46301    | 1.38776    | 1.91307    | 2.46288    | 1.76632    |
| CPS1         | 0.519746   | 0.380519   | 0.57415    | 0.668638   | 0.440507   |
| ZNF417       | 0.34699    | 0.434341   | 0.290646   | 0.478013   | 0.497611   |
| LIF          | 24.272     | 13.3765    | 22.2921    | 34.047     | 17.365     |
| LOC440461    | 0.104115   | 0.140066   | 0.083463   | 0.17402    | 0.215976   |
| ZEB1         | 3.43169    | 2.88076    | 2.97253    | 4.6497     | 3.73567    |
| ZNF785       | 1.42425    | 1.10587    | 1.34855    | 1.19182    | 1.47266    |
| WFDC3        | 0.179977   | 0.0820884  | 0          | 0.0497764  | 0.152632   |
| PRRT1        | 2.28093    | 2.52575    | 1.41115    | 3.12985    | 2.77748    |
| DYRK3        | 9.80905    | 10.5796    | 10.7949    | 14.9795    | 11.6485    |
| TMX3         | 4.03381    | 4.32296    | 5.01312    | 6.68908    | 5.6756     |
| RABL2B       | 4.96204    | 6.45069    | 5.11362    | 8.16651    | 7.48126    |
| SLAMF7       | 0.311806   | 0.100899   | 0.298352   | 0.344211   | 0.209338   |
| STK31        | 0.0423122  | 0.0423573  | 0.0456022  | 0.0601432  | 0.0564997  |
| ZFP82        | 0.0253034  | 0          | 0.0106019  | 0          | 0.0345083  |
| CXorf31      | 0.160546   | 0.149594   | 0.131128   | 0.0876843  | 0.140176   |
| PDE6B        | 0          | 0          | 0.0127625  | 0.017533   | 0          |
| MPZL2        | 0.00814588 | 0          | 0.0208989  | 0.0136687  | 0.0116498  |
| PKIB         | 0.0632974  | 0.0483781  | 0.0500305  | 0.052641   | 0.0774956  |
| FHAD1        | 2.02326    | 1.67365    | 2.01913    | 3.01954    | 1.60665    |
| EGFEM1P      | 0.00617093 | 0.00890177 | 0          | 0.0207223  | 0          |
| ODF3L2       | 0.587444   | 0.527874   | 0.444129   | 0.626283   | 0.664038   |
| WDR4         | 7.90381    | 6.52269    | 7.8955     | 12.3572    | 7.53326    |
| NOXO1        | 0.348013   | 0.0501694  | 0.413052   | 0.324863   | 0.187358   |
| SYT2         | 0.0249454  | 0.0131136  | 0.0154654  | 0.0312443  | 0.0204478  |
| TPGS1        | 16.4008    | 12.0435    | 21.9433    | 25.5175    | 15.6739    |
| C1orf229     | 0.284736   | 0.527185   | 0.43844    | 0.520753   | 0.618342   |
| TMEM40       | 0.0521668  | 0.0475143  | 0.190665   | 0.172805   | 0.0441262  |
| GPAT2        | 0.09328    | 0.0885071  | 0.0803625  | 0.155861   | 0.113171   |
| AGA          | 1.781      | 2.35818    | 2.19435    | 3.33166    | 2.8419     |
| CACNA1A      | 0          | 0          | 0.00515177 | 0.00709944 | 0          |
| DAPP1        | 0.00753675 | 0          | 0          | 0          | 0.0104537  |
| IL10RA       | 0.108071   | 0.15857    | 0.037741   | 0.128613   | 0.156524   |
| SYNPO        | 0.278899   | 0.756193   | 0.302034   | 0.613362   | 0.802214   |
| C9orf9       | 7.24094    | 7.13944    | 8.53872    | 10.1964    | 8.55948    |
| LOC100527964 | 1.40382    | 1.04905    | 1.75933    | 2.56339    | 1.44037    |
| AURKAPS1     | 0.412253   | 0.397458   | 0.715759   | 0.779779   | 0.548091   |
| GGCT         | 29.8054    | 27.1738    | 34.8014    | 44.2277    | 36.0324    |
| FAM65C       | 0          | 0          | 0.00951464 | 0.0131395  | 0          |
| TCTN1        | 5.12765    | 6.37588    | 6.22683    | 7.76476    | 8.37174    |
| SLFN5        | 0.598561   | 0.685572   | 1.54297    | 1.54964    | 0.73935    |
| LOC100133612 | 0.0369121  | 0.050964   | 0.0903368  | 0          | 0.117622   |
| KCNIP2       | 0.291147   | 0.129535   | 0.181854   | 0.314812   | 0.188628   |
| ZNF221       | 0.0834124  | 0.047197   | 0.0828622  | 0.0412729  | 0.121946   |



|                     |            |            |            |            |            |
|---------------------|------------|------------|------------|------------|------------|
| GNAT1               | 0          | 0.0107509  | 0          | 0          | 0.0149663  |
| C5orf4              | 0.026219   | 0.0122291  | 0.0108045  | 0.0145454  | 0.0226888  |
| ITGB1BP2            | 0.420647   | 0.363304   | 0.400788   | 0.763425   | 0.567244   |
| VMO1                | 0.518724   | 0.939392   | 1.13701    | 1.22413    | 1.08163    |
| SIPA1L3             | 2.66834    | 3.02904    | 2.60663    | 3.97671    | 3.64689    |
| RSPH4A              | 0.0616982  | 0.125789   | 0.165653   | 0.0641742  | 0.275104   |
| SDCBP2-AS1          | 0.0891178  | 0.214338   | 0.331472   | 0.276724   | 0.249137   |
| LRRC2               | 0.00421803 | 0          | 0.00532209 | 0          | 0.00574193 |
| CYP4F11             | 0.0554385  | 0.103709   | 0.137058   | 0.138636   | 0.108736   |
| SNORD95             | 0          | 0          | 1469.84    | 0          | 0          |
| RABGAP1L            | 1.80466    | 2.12333    | 1.70674    | 2.27596    | 2.40308    |
| NPR1                | 0          | 0          | 0.0101642  | 0.0140808  | 0          |
| ARGFXP2             | 0.0212465  | 0          | 0.0259033  | 0          | 0.0277695  |
| BNIP3               | 0.0967334  | 0.0470385  | 0.0204472  | 0.0807185  | 0.090154   |
| GPR183              | 0.0132222  | 0          | 0          | 0          | 0.0184389  |
| ADCY5               | 0.0237473  | 0.00810661 | 0.0433953  | 0.0198162  | 0.0223667  |
| UPK3B               | 1.31514    | 0.857292   | 1.50524    | 1.36563    | 0.901356   |
| ANKRD20A1,ANKRD20A3 | 0.0167362  | 0.00804822 | 0          | 0.00927917 | 0.0152795  |
| FUT8-AS1            | 0.0876957  | 0.210764   | 0.109986   | 0.121482   | 0.421841   |
| LOC100506123        | 1.27707    | 0.857248   | 0.65452    | 1.50686    | 1.34592    |
| RMDN2               | 0.165013   | 0.259743   | 0.306026   | 0.320661   | 0.317685   |
| MAPK15              | 5.12308    | 5.58702    | 2.25294    | 6.64972    | 8.14698    |
| C16orf46            | 0.350672   | 0.243987   | 0.378254   | 0.521212   | 0.394187   |
| COX10-AS1           | 1.0388     | 0.864022   | 1.22419    | 1.40473    | 1.20561    |
| MCM7                | 102.595    | 104.176    | 124.392    | 166.459    | 136.127    |
| NANOG               | 0.0133013  | 0          | 0.0164816  | 0          | 0.0178229  |
| C14orf79            | 3.32472    | 6.58249    | 4.86504    | 6.73988    | 7.30287    |
| ACSL5               | 0.0199627  | 0.019619   | 0.0343436  | 0.0569745  | 0.00919477 |
| LOC100505812        | 1.25634    | 2.08248    | 1.34675    | 2.14151    | 2.17807    |
| TRIM69              | 0.13649    | 0.119462   | 0.167495   | 0.0279997  | 0.11062    |
| ST3GAL6             | 0.00671711 | 0          | 0          | 0          | 0.00938717 |
| PAR5                | 0          | 0          | 0.00756651 | 0          | 0          |
| SH2D2A              | 2.88387    | 3.58632    | 3.48788    | 4.37818    | 4.34265    |
| LOC158572           | 0.0247502  | 0.0171422  | 0.0303711  | 0.0410621  | 0.0159266  |
| TTC3P1              | 0.114996   | 0.175033   | 0.0765449  | 0.190264   | 0.165239   |
| PFDN1               | 83.0786    | 72.6708    | 75.5827    | 116.923    | 89.496     |
| SPA17               | 4.51468    | 6.90568    | 4.91343    | 7.42127    | 7.56535    |
| BBS1                | 2.94966    | 3.28345    | 3.03624    | 4.72193    | 4.29628    |
| TMEM143             | 3.04481    | 3.11011    | 2.5178     | 4.5894     | 3.88316    |
| LOC728084           | 0.00850825 | 0          | 0          | 0          | 0.0119177  |
| AIFM3               | 0.753185   | 0.848864   | 0.552483   | 1.40236    | 0.737521   |
| PSG9                | 0.0139493  | 0.0196768  | 0.0172614  | 0.0462604  | 0          |
| SLC7A11             | 0.331302   | 0.217655   | 0.325738   | 2.28282    | 0.254871   |
| F13B                | 0.00832011 | 0          | 0.0105627  | 0          | 0.0115205  |
| SNAI3-AS1           | 0.668356   | 1.07334    | 1.28775    | 1.37304    | 1.07483    |
| ACTR3C              | 0.409608   | 0.633234   | 0.533006   | 0.85937    | 0.624206   |
| ATAD3B              | 33.2234    | 34.5335    | 37.7989    | 57.4165    | 36.7709    |
| LOC152225           | 7.42381    | 5.23157    | 9.04092    | 11.6897    | 5.83407    |
| NAT2                | 0.0177891  | 0          | 0.0225662  | 0          | 0.0245155  |
| STAG3L3             | 0.298899   | 0.434585   | 0.249932   | 0.524627   | 0.381699   |
| PCDHB12             | 0.0160605  | 0.150377   | 0.0705299  | 0.0402208  | 0.120511   |
| C1orf54             | 0.570571   | 0.242285   | 0.141166   | 0.377055   | 0.453854   |
| BTLA                | 0          | 0          | 0.00770925 | 0          | 0          |
| IQCE                | 0.766952   | 0.918836   | 0.873808   | 1.39667    | 0.97602    |
| LOC150197           | 0.236939   | 0.215026   | 0.21206    | 0.318749   | 0.276159   |
| ZNF425              | 0.323056   | 0.683323   | 0.54385    | 0.64543    | 0.595457   |
| FAM86JP             | 0.414423   | 0.986768   | 1.18905    | 0.970649   | 1.53294    |
| LOC100288846        | 0.37619    | 0.250973   | 0.437891   | 0.418012   | 0.270916   |
| PATL2               | 0.133544   | 0.243346   | 0.198415   | 0.319857   | 0.224843   |
| SCARNA14            | 0          | 47.1635    | 0          | 9.15962    | 52.0754    |
| FGF21               | 0          | 0          | 0.0576968  | 0.0806872  | 0          |
| GZMM                | 0.333546   | 0.218886   | 0.198789   | 0.467818   | 0.200365   |
| ERAS                | 0          | 0          | 0.0606905  | 0.0848987  | 0          |
| DCDC2               | 0.719896   | 0.643959   | 0.538414   | 0.735759   | 1.05405    |
| ZNF90               | 0          | 0          | 0.00655695 | 0          | 0          |
| KIF5A               | 0          | 0          | 0.0166962  | 0.0113846  | 0          |
| SNORD15A            | 5.62212    | 5.75655    | 0          | 4.58377    | 3.83821    |
| BRWD1-IT2           | 0.322249   | 0.559135   | 0.592911   | 0.872961   | 0.414967   |
| LOC100130987        | 0.605288   | 0.96696    | 0.798266   | 1.30839    | 0.97153    |
| LOC400927           | 0.88752    | 0.948646   | 1.06211    | 1.60728    | 1.43391    |
| DHRS2               | 0.127135   | 0.0740067  | 0.131773   | 0.210517   | 0.163036   |
| PLCH2               | 0.0597074  | 0.0443678  | 0.101223   | 0.1139     | 0.130979   |
| LAMB3               | 76.6501    | 55.0842    | 74.9254    | 119.029    | 63.9994    |
| EMP1                | 26.7348    | 43.0468    | 40.8525    | 48.2831    | 51.554     |
| CYP4V2              | 0.627826   | 0.703934   | 1.18995    | 1.49798    | 0.66664    |
| LINC00485           | 0          | 0          | 0.00787661 | 0          | 0          |
| SEC61B              | 195.426    | 230.248    | 232.288    | 301.127    | 284.233    |
| HYDIN               | 0.0506047  | 0.0933464  | 0.0761227  | 0.115568   | 0.112844   |
| ARMC9               | 2.21644    | 2.08649    | 2.53144    | 3.88539    | 2.46492    |

|              |            |           |            |            |            |
|--------------|------------|-----------|------------|------------|------------|
| FAM126A      | 0.0300373  | 0.0252577 | 0.0129051  | 0.0502852  | 0.00965751 |
| IFT88        | 0.854176   | 0.820666  | 0.865169   | 1.12161    | 1.16916    |
| PCDHB4       | 0.0302307  | 0.0446071 | 0.0288137  | 0.0635185  | 0.0421354  |
| KIAA1755     | 1.06334    | 1.67744   | 1.54175    | 1.62686    | 2.30406    |
| CARS         | 16.1537    | 12.2547   | 42.2376    | 43.0495    | 13.7589    |
| LOC653712    | 0.0273686  | 0.188776  | 0.167292   | 0.0909326  | 0.210081   |
| BMS1P6       | 0          | 0         | 0.00586757 | 0          | 0          |
| GPR68        | 0.244113   | 0.198666  | 0.375315   | 0.520065   | 0.231669   |
| ARHGEF37     | 0.362297   | 0.417364  | 0.36519    | 0.528017   | 0.578015   |
| TGFBR3L      | 1.08182    | 0.345927  | 0.632534   | 1.6654     | 0.631847   |
| CGB8         | 0.456455   | 1.13567   | 0.27202    | 0.952991   | 0.69904    |
| SMIM16       | 0          | 0         | 0.0439     | 0          | 0          |
| NLRP11       | 0.182062   | 0.284474  | 0.330042   | 0.32242    | 0.368222   |
| UBE2E1       | 48.6374    | 43.4436   | 57.4019    | 66.6872    | 66.3445    |
| CLYBL        | 0.367689   | 0.456346  | 0.515591   | 0.623763   | 0.575507   |
| MARS         | 19.3634    | 15.8849   | 44.9668    | 49.5922    | 16.6236    |
| PNMA2        | 0.0350526  | 0.028653  | 0          | 0.0166795  | 0.0202425  |
| FRMD4B       | 0          | 0         | 0.00540969 | 0          | 0          |
| C1orf180     | 0          | 0         | 0.0103129  | 0          | 0          |
| PSAT1        | 26.3934    | 26.0374   | 104.286    | 91.6466    | 33.9729    |
| ARHGEF19     | 9.62893    | 9.20556   | 8.89987    | 15.0894    | 8.88426    |
| TBX2         | 0.0297063  | 0.0197514 | 0.143342   | 0.149338   | 0.0727436  |
| ZNF132       | 0.0952844  | 0.111574  | 0.275522   | 0.238212   | 0.206827   |
| SNORA38B     | 3.40564    | 0         | 0          | 0          | 4.85688    |
| IDNK         | 1.43346    | 3.19877   | 2.72082    | 4.43133    | 1.97305    |
| EGR2         | 0.082869   | 0.132686  | 0.19806    | 0.277532   | 0.159735   |
| VAMP5        | 0          | 0         | 0.144621   | 0.100039   | 0          |
| ESR2         | 0.0175003  | 0.110456  | 0.0241852  | 0.120234   | 0.0682536  |
| FBLL1        | 0.237899   | 0.0768441 | 0.419142   | 0.395727   | 0.139995   |
| ITGAX        | 1.23392    | 1.11564   | 0.686215   | 1.03417    | 1.96234    |
| FCAR         | 0.0184402  | 0         | 0          | 0          | 0.0263221  |
| SPTY2D1-AS1  | 0.016684   | 0.0242614 | 0.0631457  | 0.0278038  | 0.0906507  |
| NR4A2        | 0.308455   | 0.465173  | 0.256444   | 0.554799   | 0.455167   |
| IAPP         | 0.0116497  | 0         | 0          | 0          | 0.0166405  |
| LOC100294362 | 0.130149   | 0.13111   | 0.0531516  | 0.173991   | 0.121204   |
| PCDHB5       | 0.0228196  | 0.0316316 | 0          | 0.019051   | 0.0587101  |
| ATP5EP2      | 1.08782    | 1.32426   | 0.484418   | 1.11956    | 1.58122    |
| HIST2H2AC    | 5.26852    | 2.47322   | 6.55538    | 10.4481    | 3.96421    |
| CILP2        | 0.0252841  | 0.0165734 | 0.104687   | 0.0847379  | 0.0152126  |
| ARHGAP30     | 0.0428407  | 0.0654737 | 0.044516   | 0.060643   | 0.0609     |
| LOC284751    | 0.300109   | 0.11891   | 0.536696   | 0.620597   | 0.313541   |
| UCA1         | 12.6359    | 7.5992    | 7.57839    | 15.2406    | 6.13749    |
| TNFSF4       | 0.0299666  | 0.0712997 | 0.00767158 | 0.0401166  | 0.0507134  |
| H3F3C        | 0          | 0         | 0.0358661  | 0          | 0          |
| AKNAD1       | 0.0698131  | 0.0293279 | 0          | 0.0237316  | 0.067193   |
| STK33        | 0          | 0.0318141 | 0          | 0.0122946  | 0.0200998  |
| EPGN         | 0.026662   | 0         | 0.0226871  | 0.029688   | 0.024905   |
| IGFL2        | 0          | 0         | 0.0750059  | 0          | 0          |
| MFAP4        | 0.0361942  | 0.0247178 | 0.0661796  | 0.09072    | 0.0912878  |
| PNLDC1       | 0          | 0         | 0.0528487  | 0          | 0          |
| PROSER2-AS1  | 0.0083017  | 0.0115936 | 0          | 0.0137987  | 0          |
| TMEM9B-AS1   | 0.262462   | 0.404002  | 0.217472   | 0.591285   | 0.261243   |
| C6orf163     | 0.19258    | 0.195596  | 0.12954    | 0.371917   | 0.185431   |
| PSD3         | 0.00212476 | 0         | 0.0108338  | 0.00709608 | 0          |
| CYP17A1      | 0          | 0         | 0.0366244  | 0          | 0          |
| PCK2         | 44.2149    | 42.4184   | 76.7932    | 99.8922    | 47.6775    |
| HNF4G        | 0.4782     | 0.326622  | 0.491052   | 0.751296   | 0.263925   |
| ATP2C2       | 0.0947669  | 0.0512202 | 0.0459007  | 0.126178   | 0.0831312  |
| ARL4D        | 0          | 0         | 0.0257784  | 0          | 0          |
| PPP4R1L      | 0.15847    | 0.0631143 | 0.12531    | 0.169304   | 0.0883344  |
| CCRL2        | 1.18722    | 1.47995   | 2.29601    | 2.94596    | 1.98282    |
| TMEM229B     | 0.406501   | 0.275804  | 0.311311   | 0.42455    | 0.527169   |
| ZBED3-AS1    | 0.106391   | 0.147551  | 0.183986   | 0.246483   | 0.0818743  |
| KIF9         | 0.854513   | 0.828266  | 0.908585   | 1.11922    | 1.24221    |
| LOC339166    | 0          | 0         | 0.0225496  | 0          | 0          |
| NAPRT1       | 46.7949    | 56.1754   | 44.6582    | 78.5231    | 55.7523    |
| FLJ42289     | 0          | 0.0253705 | 0.0417828  | 0.0354128  | 0.0235331  |
| FKRP         | 1.74596    | 2.21722   | 2.74414    | 3.26546    | 2.78273    |
| ST8SIA4      | 0.00330537 | 0         | 0          | 0          | 0.00477441 |
| YJEFN3       | 6.54277    | 3.23462   | 4.19416    | 12.6419    | 3.17033    |
| CTXN1        | 25.5421    | 25.2687   | 31.5651    | 40.8814    | 36.5242    |
| APBA2        | 0          | 0         | 0.011223   | 0          | 0          |
| HTATSF1P2    | 1.78668    | 1.45044   | 2.31156    | 3.18677    | 1.6565     |
| FMO5         | 0.157431   | 0.0429152 | 0.137409   | 0.202814   | 0.121932   |
| C19orf80     | 0.0455289  | 0.0588028 | 0.0537738  | 0.14956    | 0          |
| C1orf116     | 0.00460926 | 0         | 0.0114349  | 0.0230714  | 0          |
| SULF2        | 0          | 0         | 0.00914342 | 0          | 0          |
| FLJ30679     | 0.0294156  | 0.184596  | 0.0729402  | 0.0734735  | 0.211076   |
| LOC100272216 | 0.201423   | 0.0835928 | 0.0186843  | 0.129084   | 0.174784   |

|               |            |           |            |           |            |
|---------------|------------|-----------|------------|-----------|------------|
| ABCA4         | 0.0109309  | 0.0100493 | 0.00892839 | 0.018211  | 0.0185631  |
| C9orf172      | 0.525388   | 0.603969  | 0.694869   | 0.746162  | 0.870034   |
| AACSP1        | 0.713253   | 0.787191  | 0.752039   | 1.33755   | 0.907029   |
| DENND1C       | 0.237637   | 0.335267  | 0.111306   | 0.153839  | 0.489081   |
| MREG          | 4.36384    | 4.09084   | 5.76511    | 7.19611   | 5.13374    |
| RCHY1         | 3.61065    | 3.78028   | 4.28802    | 5.08611   | 6.18329    |
| RSPH10B       | 0.0153373  | 0         | 0.0282816  | 0.0126714 | 0.0100555  |
| ISPD          | 0.0823774  | 0.0378861 | 0.0784524  | 0.0857551 | 0.0636901  |
| XK            | 0.222755   | 0.413983  | 0.417149   | 0.373835  | 0.733943   |
| EGR1          | 7.25456    | 7.43395   | 18.8904    | 18.5993   | 9.23934    |
| ZCWPPW1       | 1.44164    | 1.30488   | 0.98187    | 2.2612    | 1.44869    |
| EBLN2         | 0.0669003  | 0.116776  | 0.0338775  | 0.0669041 | 0.128825   |
| SRPK3         | 0.0434709  | 0.0283951 | 0.0258247  | 0         | 0.10441    |
| LOC541473     | 0.653796   | 0.389159  | 0.835794   | 1.4246    | 0.361346   |
| ORM1          | 0          | 0         | 0.0469176  | 0         | 0          |
| RORC          | 0          | 0         | 0.0122821  | 0         | 0          |
| PBLD          | 0.33838    | 0.336794  | 0.500322   | 0.702214  | 0.272617   |
| RNF167        | 58.0923    | 62.3074   | 49.4929    | 79.8507   | 87.1534    |
| CCDC116       | 0.0509157  | 0.0666069 | 0.0811413  | 0.0281767 | 0.142522   |
| GLT25D2       | 0.362562   | 0.418001  | 0.627462   | 0.803979  | 0.424087   |
| HBA1          | 0.425517   | 0.415299  | 0.126104   | 0.707371  | 0.512624   |
| SPATC1L       | 0.102765   | 0         | 0          | 0         | 0.0608548  |
| CTAGE7P       | 0.0399454  | 0.0457898 | 0.0703444  | 0.0794615 | 0.0758634  |
| DDX11L2       | 0.461061   | 0.502956  | 0.422738   | 0.730017  | 0.677556   |
| RABL2A        | 0.899195   | 1.76268   | 1.04151    | 1.98269   | 1.66442    |
| ARHGEF4       | 0          | 0         | 0.0118929  | 0         | 0          |
| NBPF11,NBPF24 | 0.0139949  | 0         | 0.0289227  | 0.0231597 | 0.00606762 |
| HDC           | 0          | 0.0143765 | 0.0255896  | 0         | 0.039777   |
| RASIP1        | 0.307045   | 0.200167  | 0.227196   | 0.449873  | 0.251062   |
| LGALS8-AS1    | 0.511102   | 0.472998  | 0.421907   | 0.852607  | 0.241902   |
| LOC100130452  | 0          | 0         | 0.0977284  | 0         | 0          |
| LOC100506343  | 0          | 0.038116  | 0.0335774  | 0         | 0.080394   |
| SPON1         | 0          | 0.0616121 | 0          | 0         | 0.0385209  |
| BBS12         | 0.747625   | 0.771753  | 0.712164   | 1.02151   | 1.09149    |
| SH3BP5L       | 70.7773    | 40.1453   | 96.622     | 121.693   | 61.3238    |
| LINC00520     | 0.174494   | 0.2658    | 0.0581379  | 0.212782  | 0.290455   |
| C16orf45      | 0.0821671  | 0.0376721 | 0.117888   | 0.114405  | 0.0867484  |
| S1PR4         | 0          | 0         | 0.0463176  | 0         | 0          |
| LOC100132356  | 0.143366   | 0.174222  | 0.149453   | 0.240578  | 0.0980611  |
| LOC100131089  | 2.6993     | 2.99177   | 3.53042    | 2.92584   | 4.36568    |
| KRT19         | 0          | 0         | 0.0379313  | 0         | 0          |
| KRCC1         | 2.02182    | 1.84061   | 3.51261    | 3.79663   | 2.02353    |
| DMBT1         | 0.0227121  | 0.0560127 | 0.0333129  | 0.0304195 | 0.0853228  |
| LRFN1         | 0.0220728  | 0.0287842 | 0          | 0.0739867 | 0          |
| NAGPA-AS1     | 0.0491166  | 0         | 0.0302653  | 0.0410131 | 0.0312679  |
| CHN1          | 0.0784645  | 0.0332916 | 0.0433145  | 0.0817524 | 0.0626672  |
| CASP1         | 0.144896   | 0         | 0.103615   | 0.068615  | 0.108611   |
| NKPD1         | 0.0354561  | 0.0117982 | 0.0320057  | 0.0892173 | 0.0107884  |
| FAM149B1      | 1.34943    | 1.23355   | 1.70215    | 2.19959   | 1.65956    |
| SLC28A2       | 0.0319218  | 0.0301247 | 0.0265414  | 0.0355935 | 0.0559794  |
| GOS2          | 170.778    | 144.332   | 278.344    | 332.005   | 190.115    |
| ZNF235        | 0.266313   | 0.251744  | 0.349566   | 0.460782  | 0.484198   |
| ZNF672        | 141.601    | 61.8089   | 149.663    | 217.484   | 106.401    |
| NLRP1         | 0.279751   | 0.487466  | 0.241462   | 0.676912  | 0.478122   |
| GRID2IP       | 0.0190211  | 0         | 0          | 0         | 0.0113696  |
| AK8           | 0.708481   | 1.1213    | 0.531665   | 1.22937   | 1.34535    |
| TRIM66        | 0.5377     | 0.404489  | 0.579995   | 1.01996   | 0.471662   |
| GAL3ST4       | 0.252157   | 0.289057  | 0.291875   | 0.423104  | 0.422373   |
| C5orf60       | 0.0576008  | 0         | 0          | 0.0476895 | 0.0365462  |
| CD79B         | 0.0732399  | 0         | 0.0439453  | 0         | 0.0440341  |
| HSD17B3       | 0.330124   | 0.39132   | 0.156828   | 0.378713  | 0.596026   |
| IRX6          | 0.0365332  | 0         | 0          | 0         | 0.0219721  |
| LOC100505679  | 0.238579   | 0.553586  | 0.0968589  | 0.658839  | 0.505728   |
| GDPGP1        | 0.668262   | 0.690928  | 0.681643   | 1.02637   | 0.937226   |
| MST1L         | 0.276856   | 0.343202  | 0.232525   | 0.357733  | 0.566148   |
| MORN1         | 0.549573   | 0.9506    | 0.770061   | 1.24444   | 0.936298   |
| TP53TG5       | 0.352294   | 0.774595  | 0.427511   | 0.529069  | 0.923973   |
| CCT6B         | 0.937218   | 1.44414   | 1.31009    | 1.86571   | 1.50104    |
| AEBP1         | 0.00861162 | 0.0111898 | 0          | 0.0142883 | 0          |
| PARP12        | 6.01462    | 7.23425   | 7.03191    | 10.4923   | 9.14386    |
| EGR3          | 0.664603   | 0.810304  | 1.48351    | 1.56519   | 1.10024    |
| TTC30B        | 0.149308   | 0.177762  | 0.121838   | 0.205025  | 0.189896   |
| ATP6V1B1      | 0.0387218  | 0         | 0          | 0         | 0.023568   |
| TSGA10        | 0.0716158  | 0.0870506 | 0.138593   | 0.118305  | 0.203293   |
| LOC619207     | 0.292459   | 0.108374  | 0.0979424  | 0.408334  | 0.227732   |
| SLC25A2       | 0.019606   | 0.0835757 | 0          | 0.0653164 | 0.0523258  |
| DLL3          | 0.0281734  | 0         | 0.0429285  | 0.0610127 | 0.0439727  |
| SNORA27       | 15.8053    | 29.0155   | 12.7568    | 25.5015   | 30.8895    |
| SENP8         | 1.18772    | 0.947164  | 1.31132    | 1.83332   | 1.38461    |

|            |            |            |            |            |            |
|------------|------------|------------|------------|------------|------------|
| C17orf98   | 0.355119   | 0.383513   | 0.169918   | 0.585063   | 0.265564   |
| ZNF665     | 0.0128813  | 0.0185124  | 0.0161814  | 0.0214335  | 0.0260056  |
| LCT        | 0.0128422  | 0.0118123  | 0.0313762  | 0.0568947  | 0.0109398  |
| GSTT2      | 0.803962   | 0.906132   | 0.687742   | 1.17199    | 1.21051    |
| MAP6       | 0          | 0.0185868  | 0.00848962 | 0.0229621  | 0.0171935  |
| FOSB       | 2.66435    | 3.13885    | 3.42849    | 5.88279    | 3.03407    |
| CPEB1      | 0.0269029  | 0          | 0.0224456  | 0.0451028  | 0.0120293  |
| PDZK1      | 0.0351855  | 0.0998406  | 0.043891   | 0.13569    | 0.109209   |
| SH2D5      | 0.573177   | 0.478503   | 0.394397   | 1.02114    | 0.502518   |
| HFE        | 1.39357    | 1.44875    | 0.820328   | 1.4823     | 2.01465    |
| DNAAF1     | 0          | 0          | 0.0398282  | 0.0180973  | 0.0411813  |
| ST6GAL1    | 3.38413    | 3.60211    | 3.5761     | 5.03774    | 5.02601    |
| SLC22A1    | 0.131427   | 0.0538795  | 0.0481215  | 0.198789   | 0.109788   |
| SNORD22    | 35.5521    | 58.5992    | 18.9368    | 37.4145    | 45.0424    |
| C16orf71   | 0.0688949  | 0.0540177  | 0.164614   | 0.274775   | 0.0329355  |
| FAM129C    | 0.133208   | 0.096458   | 0.0971049  | 0.143572   | 0.129549   |
| FAM90A25P  | 0.366293   | 1.094      | 0.552412   | 0.89074    | 1.04036    |
| SNORD17    | 2.04074    | 3.43018    | 1.46492    | 0.663415   | 6.11043    |
| SERPIN8    | 2.99626    | 4.17373    | 7.30635    | 7.59839    | 5.13543    |
| NME9       | 0.145047   | 0.142432   | 0.0974454  | 0.223051   | 0.192088   |
| LCN15      | 0.374174   | 0.355664   | 0.446324   | 0.533994   | 0.852322   |
| ASAH2      | 0.0660836  | 0.0401979  | 0.011713   | 0.0469955  | 0.0624026  |
| RAB9A      | 8.19052    | 7.83175    | 8.57843    | 10.9833    | 12.9711    |
| TMEM140    | 0.336384   | 0.484886   | 0.53776    | 0.803748   | 0.503374   |
| MRPL42P5   | 0.949515   | 0.11503    | 0.547496   | 0.984464   | 0.648972   |
| LNX1       | 0.0789232  | 0.0874042  | 0.0877731  | 0.131791   | 0.09293    |
| FAM66C     | 0          | 0.0332801  | 0.0481168  | 0.0255231  | 0.0416289  |
| FLJ35390   | 0.482108   | 0.612008   | 1.19355    | 1.16193    | 1.38478    |
| TTC12      | 4.48933    | 5.37634    | 5.67513    | 8.102      | 6.8227     |
| MT1G       | 0.771941   | 0.822621   | 0          | 1.2719     | 0.583372   |
| C1orf101   | 0.0132802  | 0          | 0.00891097 | 0.010931   | 0.00981508 |
| CELLF6     | 0.766117   | 0.684061   | 0.645246   | 1.31556    | 0.624252   |
| C20orf203  | 0.00590422 | 0          | 0.0072944  | 0.0197404  | 0          |
| ADAM20P1   | 0.135603   | 0.0624829  | 0.0813819  | 0.119619   | 0.146533   |
| TAS2R5     | 0.414805   | 0.396118   | 0.2745     | 0.691514   | 0.294953   |
| TMC4       | 0.545913   | 0.781334   | 0.381657   | 0.706584   | 1.00214    |
| TREX2      | 0.278801   | 0.243559   | 0.386938   | 0.469394   | 0.335043   |
| RAB37      | 0.116488   | 0.0645047  | 0.114458   | 0.155302   | 0.165335   |
| PLA2G4C    | 0.136854   | 0.123344   | 0.0827934  | 0.189094   | 0.186773   |
| HLA-DRB6   | 0          | 0.0987568  | 0.0583989  | 0          | 0.152619   |
| SLC16A6    | 0.372752   | 0.373978   | 0.398048   | 0.675927   | 0.464656   |
| RBM26-AS1  | 0.170477   | 0.165832   | 0.1855     | 0.243788   | 0.224017   |
| STS        | 0.124441   | 0.217632   | 0.188892   | 0.285317   | 0.228555   |
| ARMCX4     | 0.322122   | 0.292571   | 0.239416   | 0.577734   | 0.385382   |
| SLC6A4     | 0.0366927  | 0.0533749  | 0.0462966  | 0.0798091  | 0.0602588  |
| SSPO       | 0.0110829  | 0.0181201  | 0.0266141  | 0.0422211  | 0.0130958  |
| WDR66      | 0.0875786  | 0.194031   | 0.103695   | 0.217728   | 0.154193   |
| LEKR1      | 0.104845   | 0.117767   | 0.103702   | 0.279528   | 0.0385334  |
| SDC3       | 2.814      | 3.55503    | 3.47026    | 5.60711    | 3.97335    |
| TMEM134    | 26.4397    | 32.053     | 24.4575    | 34.6348    | 50.1057    |
| KLHDC7B    | 0          | 0.0202491  | 0.163676   | 0.126491   | 0.0186881  |
| EXOC3L2    | 0          | 0          | 0.0665477  | 0          | 0.101043   |
| UBAC2-AS1  | 0.169346   | 0.228926   | 0.277169   | 0.307558   | 0.259857   |
| TEX2       | 1.76193    | 1.98473    | 2.16446    | 2.8295     | 3.02255    |
| DNAH6      | 0.0300766  | 0.0136945  | 0.0219342  | 0.0341996  | 0.0257931  |
| FAM86B3P   | 1.41721    | 2.84127    | 1.66667    | 3.41897    | 3.15313    |
| RAB40AL    | 0.0692785  | 0          | 0.0833464  | 0.230642   | 0          |
| SCFD2      | 1.1124     | 0.947512   | 0.775422   | 1.55296    | 0.99668    |
| LOC399815  | 0.299257   | 0.204202   | 0.468023   | 0.468022   | 0.292557   |
| CCDC144B   | 0.00216469 | 0          | 0.00275253 | 0.00358961 | 0          |
| PPP1R36    | 0.0356386  | 0.0250749  | 0          | 0.0294284  | 0          |
| HOXA6      | 0.224447   | 0.297377   | 0.177509   | 0.124353   | 0.553636   |
| SLFNL1-AS1 | 0.125683   | 0.105808   | 0.162624   | 0.257096   | 0.19492    |
| SLC22A20   | 0.132454   | 0.079571   | 0.0535024  | 0.107478   | 0.220067   |
| LOC286059  | 0.0176167  | 0.0386668  | 0.0556884  | 0.0587538  | 0.0486941  |
| LOC440896  | 0.110128   | 0.0858782  | 0.138295   | 0.226573   | 0.115412   |
| SNORD8     | 0          | 0          | 18.1024    | 0          | 0          |
| OPN3       | 0.139183   | 0.130822   | 0.200369   | 0.232088   | 0.21815    |
| KLF7       | 0.0147864  | 0.0130323  | 0.0224576  | 0.0296218  | 0.0205579  |
| ANKRD26P1  | 0.00342495 | 0          | 0.00429614 | 0.00566522 | 0          |
| PRDM7      | 0.00944431 | 0          | 0.0278869  | 0.031286   | 0.0124301  |
| SEC1P      | 0.0538913  | 0.0544047  | 0          | 0          | 0.166149   |
| LOC256880  | 0.0939253  | 0.136249   | 0.0677215  | 0.134809   | 0.128639   |
| BTBD18     | 0          | 0.0103133  | 0.0184605  | 0.0248177  | 0.0191784  |
| FAM22D     | 0.0944725  | 0.123633   | 0.116648   | 0.140912   | 0.147693   |
| SNORA16A   | 0          | 9.66004    | 0          | 0          | 14.8388    |
| BRWD1      | 1.36298    | 1.68012    | 1.02429    | 1.86208    | 2.3236     |
| STARD8     | 0.0514702  | 0.00876868 | 0.0393627  | 0.0215793  | 0.040313   |
| CLHC1      | 0.373278   | 0.23993    | 0.336769   | 0.581128   | 0.357949   |

|              |            |            |            |            |            |
|--------------|------------|------------|------------|------------|------------|
| MMACHC       | 2.6298     | 2.665      | 2.74116    | 4.13606    | 3.70454    |
| INHBE        | 0.27184    | 0.306488   | 1.02423    | 1.00074    | 0.374257   |
| MIR4461      | 5106.16    | 4500.31    | 1637.87    | 4369.05    | 5726.52    |
| KCNH8        | 0.017778   | 0.0382521  | 0.0723583  | 0.0663559  | 0.036061   |
| HRASLS2      | 0.140149   | 0.0631697  | 0          | 0.230915   | 0          |
| CCDC40       | 0.312533   | 0.309308   | 0.354673   | 0.538586   | 0.588108   |
| SAMD13       | 0.0679755  | 0.1785     | 0.0871346  | 0.113808   | 0.217219   |
| DQX1         | 0          | 0.0141996  | 0.0634039  | 0.0518343  | 0.0131475  |
| SELPLG       | 0.215204   | 0.0968605  | 0.101305   | 0.159296   | 0.0590051  |
| SNORA21      | 20.1557    | 21.7673    | 24.3465    | 19.6422    | 38.9379    |
| MIR100HG     | 0.0128954  | 0          | 0          | 0.0107595  | 0.00920523 |
| WNT8B        | 0.0557702  | 0.0255035  | 0          | 0.0928461  | 0          |
| SP7          | 0.0203499  | 0.0142057  | 0          | 0.0170616  | 0          |
| CCDC176      | 0.264324   | 0.45187    | 0.315212   | 0.512117   | 0.593627   |
| ATP8B4       | 0.0339102  | 0.0165128  | 0.0476951  | 0.0941667  | 0.0104531  |
| CDYL2        | 0.128868   | 0.0775686  | 0.191594   | 0.190603   | 0.125011   |
| ACTN3        | 0          | 0.046016   | 0.0140046  | 0.0586249  | 0.0140626  |
| LSP1         | 0.0242461  | 0          | 0.0290277  | 0.0401347  | 0          |
| GRAMD1B      | 0.110658   | 0.0599586  | 0.0401494  | 0.18286    | 0.02774    |
| ZFP3         | 0.0310325  | 0.0129288  | 0.0112208  | 0.00739278 | 0.0304639  |
| BMP8A        | 0.14469    | 0.16774    | 0.206374   | 0.291068   | 0.330542   |
| SEC24B-AS1   | 0.400265   | 0.489375   | 0.419456   | 0.779247   | 0.776002   |
| CCDC113      | 1.04945    | 1.20899    | 1.13537    | 1.90115    | 1.40921    |
| CORO2B       | 1.76097    | 2.05915    | 1.81279    | 3.49978    | 2.7883     |
| AKNA         | 2.09514    | 1.53349    | 5.88339    | 7.05593    | 1.55251    |
| FLJ44313     | 0.329843   | 0.450551   | 0.372748   | 0.718481   | 0.507272   |
| NDUFA4L2     | 1.08436    | 1.17658    | 2.23853    | 3.30198    | 0.982248   |
| LOC100505676 | 0.00477229 | 0.0141292  | 0.012214   | 0.0159367  | 0.0067132  |
| RHCE         | 0.273466   | 0.285729   | 0.253769   | 0.374283   | 0.428162   |
| OR7E37P      | 0.100958   | 0.109862   | 0.221531   | 0.211307   | 0.236705   |
| ST13P4       | 0.0568034  | 0.118359   | 0.0871709  | 0.0939548  | 0.166187   |
| GJC3         | 0.0272505  | 0.151644   | 0          | 0.0905611  | 0.141412   |
| ATP8B5P      | 0          | 0.0105696  | 0.0285803  | 0.0501594  | 0.0109836  |
| LOC100134259 | 0.0460239  | 0.0321803  | 0          | 0          | 0          |
| LOC389247    | 0.478533   | 0.282351   | 0.167165   | 0.228231   | 0.866683   |
| ZNF93        | 0.0912085  | 0.050319   | 0.0444166  | 0.139944   | 0.0760981  |
| GPR82        | 0.00640674 | 0.00960301 | 0.00823956 | 0.0107388  | 0.0273518  |
| PCDHB11      | 0.174912   | 0.422918   | 0.190669   | 0.360266   | 0.421966   |
| ATP6AP1L     | 0.969617   | 0.870547   | 1.18648    | 1.94359    | 1.36051    |
| GPR65        | 0          | 0.0219222  | 0          | 0.00813851 | 0          |
| CASQ1        | 0.012776   | 0.0350327  | 0          | 0.0422713  | 0.032876   |
| FGF5         | 0.572382   | 0.484286   | 0.702045   | 0.953964   | 0.639654   |
| FKBP1B       | 0.0345663  | 0.0946691  | 0          | 0.0577854  | 0.0846169  |
| CCDC62       | 0.108635   | 0.0479361  | 0.161887   | 0.251914   | 0.0635617  |
| FAM86FP      | 0.877867   | 1.455      | 1.77623    | 2.57585    | 1.63523    |
| FRK          | 0.00763275 | 0.0110118  | 0.0191844  | 0.0253213  | 0.0207862  |
| COL4A4       | 0.00949534 | 0.00336581 | 0.0235874  | 0.0237807  | 0.0126687  |
| TCTE3        | 0.0372184  | 0          | 0.0461936  | 0          | 0          |
| JUP          | 0.0236668  | 0.0155991  | 0.0261533  | 0.0198414  | 0.0424153  |
| CSF2         | 0.0458503  | 0          | 0.0553255  | 0          | 0          |
| SLC5A11      | 0.0150283  | 0          | 0.0343697  | 0.0251244  | 0          |
| AMOTL1       | 0.0215487  | 0.0418941  | 0.0402331  | 0.0269243  | 0.0463     |
| CALHM2       | 0.149963   | 0.172088   | 0.394357   | 0.359266   | 0.394497   |
| KRT81        | 0.886998   | 0.308657   | 0.769103   | 1.68492    | 0.233729   |
| FAM122C      | 0.312371   | 0.51713    | 0.442519   | 0.651925   | 0.601281   |
| LAIR2        | 0.713945   | 2.46561    | 0.543319   | 1.0074     | 2.5832     |
| GUSBP2       | 0.322475   | 0.0321154  | 0.056491   | 0.191286   | 0.298819   |
| NLRP6        | 0.093351   | 0.0298587  | 0.0274699  | 0.078035   | 0.0812455  |
| OTUD7A       | 0.150134   | 0.0654952  | 0.0792524  | 0.194569   | 0.158872   |
| GLB1L        | 0.439847   | 0.574945   | 0.580418   | 0.837513   | 0.773248   |
| MIR663A      | 714.423    | 883.399    | 874.882    | 458.663    | 2409.35    |
| RBPMS2       | 0          | 0.027392   | 0.0484267  | 0          | 0.0512709  |
| SLC4A8       | 1.22326    | 0.691142   | 1.0882     | 2.08764    | 1.05936    |
| FLJ45513     | 0.0639967  | 0.0541355  | 0.0477009  | 0.128363   | 0.066845   |
| NEK5         | 0.203701   | 0.165527   | 0.154299   | 0.313453   | 0.224577   |
| FGF1         | 0.0178915  | 0.0405752  | 0.00756977 | 0.0542185  | 0.00821621 |
| RPLP0P2      | 0.664911   | 0.972722   | 1.04936    | 1.19556    | 1.41563    |
| LOC401127    | 0.0514519  | 0.0956385  | 0.06348    | 0.14259    | 0.133944   |
| RBMXL2       | 0          | 0.0255998  | 0.0668937  | 0.0603352  | 0.0241193  |
| ITIH2        | 0.0283121  | 0          | 0.0174312  | 0.0233903  | 0.0374931  |
| C15orf52     | 0.048553   | 0.0584044  | 0          | 0.0447369  | 0.0605461  |
| ASAH2B       | 0          | 0.198113   | 0.0577701  | 0          | 0.245527   |
| ANKRD30BP2   | 0.050856   | 0.0359582  | 0.0158852  | 0.0632843  | 0.067774   |
| EP400NL      | 0.420239   | 0.237842   | 0.34943    | 0.70053    | 0.299705   |
| CYP21A2      | 0.019978   | 0.0265663  | 0.0478873  | 0.0332461  | 0.0486982  |
| FAM166B      | 0.437813   | 0.500242   | 0.89961    | 1.02177    | 0.766399   |
| LOC100506321 | 0.0643602  | 0.045139   | 0.0396842  | 0          | 0.125877   |
| LINC00629    | 0.0727212  | 0          | 0.0233188  | 0.0305252  | 0.0256712  |
| ZNF648       | 0.00851719 | 0.035884   | 0.0210259  | 0.056624   | 0.0335254  |

|                 |            |            |            |            |            |
|-----------------|------------|------------|------------|------------|------------|
| WISP3           | 0          | 0.0531098  | 0.0236015  | 0.0315573  | 0.0248773  |
| LRRC37A         | 0.0543313  | 0.0315101  | 0.0278378  | 0.0448897  | 0.0822279  |
| SLC2A14         | 0          | 0.0757071  | 0.0165669  | 0.0893396  | 0.0352973  |
| SNORA40         | 3.7095     | 21.1725    | 13.6246    | 6.01582    | 22.2621    |
| DNAH2           | 0.00400633 | 0.00811777 | 0.00243154 | 0.0099769  | 0.00998288 |
| CEP19           | 0.321359   | 0.273518   | 0.495161   | 0.569238   | 0.431535   |
| LMLN            | 0.366717   | 0.3662     | 0.474934   | 0.75775    | 0.657408   |
| IGF1            | 0.00595559 | 0          | 0          | 0          | 0.00424869 |
| CARD14          | 0.0563805  | 0.156821   | 0.126347   | 0.196588   | 0.168866   |
| C6orf99         | 0.317018   | 0.0732975  | 0.520388   | 0.528733   | 0.476064   |
| AZGP1           | 0.0616924  | 0.111757   | 0.0498854  | 0.0679482  | 0.0783704  |
| LOC339524       | 0.0161419  | 0.0235582  | 0.0203686  | 0.0538829  | 0          |
| PA2G4P4         | 0.0160738  | 0.0230236  | 0.0100987  | 0.0401298  | 0.0108321  |
| GLIS3           | 0.130049   | 0.103933   | 0.0895642  | 0.204531   | 0.140395   |
| SYCE2           | 0.972269   | 1.17954    | 0.461907   | 1.20442    | 1.60693    |
| PP2D1           | 0.0190865  | 0.0392094  | 0.0170636  | 0.0159038  | 0.0725407  |
| FLJ34208        | 0          | 0.0608156  | 0.0538611  | 0.0744618  | 0.11214    |
| CYP27A1         | 0.0699875  | 0          | 0.0420783  | 0.0876355  | 0.064021   |
| GTF2H2C,GTF2H2D | 0.963651   | 0.919694   | 1.2061     | 1.78105    | 1.22174    |
| GPR56           | 0.0658968  | 0.0127472  | 0.0227852  | 0.0787706  | 0.0697114  |
| PTN             | 0.68308    | 0.33217    | 0.156167   | 0.749856   | 0.523371   |
| ZNF492          | 0          | 0.00696456 | 0.00602788 | 0.00783388 | 0.0133667  |
| PINLYP          | 0.834118   | 0.88504    | 0.694396   | 1.63903    | 1.0352     |
| HGFAC           | 0.0263487  | 0          | 0.0309658  | 0          | 0.0938258  |
| OSCP1           | 1.48186    | 1.91538    | 1.43461    | 2.89408    | 2.74238    |
| GBP4            | 0.0108585  | 0          | 0.0138615  | 0.0121111  | 0.0152243  |
| AK7             | 0.12468    | 0.13204    | 0.116129   | 0.229092   | 0.169374   |
| METTL7B         | 2.11282    | 2.64954    | 1.45899    | 3.55377    | 3.51303    |
| SH3TC2          | 0.115562   | 0.0671486  | 0.093764   | 0.202444   | 0.0674664  |
| ZNF669          | 1.40625    | 2.41819    | 1.48465    | 1.64756    | 2.15307    |
| CHST13          | 0.378629   | 0.382747   | 0.349527   | 0.49554    | 0.596774   |
| CXorf48         | 0.0140121  | 0.0200663  | 0          | 0          | 0.0348758  |
| LOC100131564    | 0.305638   | 0.295127   | 0.266145   | 0.546461   | 0.331685   |
| COL9A3          | 14.2873    | 10.2528    | 15.12      | 24.6455    | 17.9131    |
| PHOSPHO1        | 0.0259568  | 0          | 0          | 0.0423777  | 0          |
| SCARNA22        | 11.7717    | 53.9214    | 6.93068    | 9.34161    | 57.2956    |
| MGC45922        | 0.116704   | 0.234217   | 0.278732   | 0.194624   | 0.43458    |
| CHGB            | 0.00902781 | 0          | 0          | 0.0147808  | 0          |
| SP140           | 0          | 0.151429   | 0.0863082  | 0.111655   | 0.0424885  |
| ANKRD36BP2      | 0.0123307  | 0          | 0          | 0.0202123  | 0          |
| FAM86HP         | 0.4547     | 0.797685   | 1.24482    | 1.65142    | 1.06201    |
| ARMCX1          | 0.0679048  | 0.160906   | 0.0141354  | 0.188299   | 0.0912847  |
| LINC00167       | 0.0205917  | 0.0579193  | 0.0764239  | 0.0686034  | 0.0409237  |
| AGBL2           | 0.0240409  | 0.0430744  | 0.0377853  | 0.059905   | 0.0486422  |
| SLC5A4          | 0.1415     | 0.0599054  | 0.0524877  | 0.0946673  | 0.148319   |
| RNU11           | 20.0877    | 37.8049    | 27.2457    | 37.0386    | 78.1871    |
| VX3B            | 0.026005   | 0          | 0.0307988  | 0          | 0.0939933  |
| DSCR9           | 0.0235051  | 0          | 0.0852059  | 0.0392595  | 0.0583334  |
| LOC338817       | 0.00693102 | 0.0199119  | 0.00868441 | 0.0460948  | 0          |
| LRR1Q4          | 0.0147394  | 0          | 0.0901853  | 0.0243666  | 0.0191899  |
| RAMP2-AS1       | 0.0354375  | 0.049164   | 0          | 0.0294898  | 0.0406966  |
| HSPA2           | 0.0136636  | 0          | 0          | 0.0225202  | 0          |
| C9orf84         | 0.0041575  | 0          | 0.0105977  | 0.00690477 | 0.0175483  |
| MAGO2           | 0.0445888  | 0          | 0          | 0.0735469  | 0          |
| MYOM2           | 0.0108629  | 0.0369754  | 0.0263255  | 0.0360234  | 0.0205348  |
| AKR1B10         | 0.014848   | 0          | 0          | 0.0245084  | 0          |
| PCDHB19P        | 0.0376482  | 0.0158281  | 0          | 0.0179505  | 0.0224907  |
| KRT20           | 0.0135671  | 0          | 0          | 0.0224255  | 0          |
| BTBD8           | 0.102164   | 0.0246311  | 0.0213966  | 0.0846693  | 0.0701678  |
| BMS1P4          | 0.169283   | 0.323992   | 0.269707   | 0.421094   | 0.459639   |
| SIGLEC7         | 0.0188037  | 0          | 0          | 0.0310877  | 0          |
| PADI1           | 0.0508598  | 0.0198736  | 0.0177679  | 0.0242864  | 0.0458231  |
| ABO             | 0.0475451  | 0.0958599  | 0.227953   | 0.27526    | 0.176646   |
| TMEM31          | 0.0379768  | 0          | 0          | 0.0628742  | 0          |
| ST8SIA1         | 0          | 0.00310131 | 0.00267214 | 0          | 0.00587812 |
| C22orf26        | 0.177745   | 0.192109   | 0.260082   | 0.266665   | 0.309918   |
| RSPH6A          | 0.0153338  | 0          | 0          | 0.0254123  | 0          |
| SPDYA           | 0.088936   | 0.0779397  | 0.123652   | 0.165977   | 0.148639   |
| HVCN1           | 0.0634022  | 0          | 0.0983454  | 0.15862    | 0.0820732  |
| FRMPD2          | 0.00504298 | 0          | 0          | 0.00836284 | 0          |
| TBC1D3G         | 0.0159131  | 0          | 0          | 0.0263913  | 0          |
| ZAP70           | 0.148061   | 0.0743441  | 0.140954   | 0.0493523  | 0.350767   |
| KIAA1210        | 0.00297512 | 0          | 0          | 0.00493948 | 0          |
| CD207           | 0.0136642  | 0          | 0          | 0.0226951  | 0          |
| TMEM204         | 0.0304721  | 0          | 0          | 0.0506711  | 0          |
| ACE2            | 0.00566084 | 0          | 0          | 0.00941724 | 0          |
| HUS1B           | 0.186249   | 0.442034   | 0.50696    | 0.30954    | 1.1053     |
| SOX10           | 0.0139132  | 0          | 0          | 0.0231697  | 0          |
| ZIK1            | 0          | 0.0234993  | 0          | 0.0136359  | 0.0109888  |

|              |            |            |            |            |           |
|--------------|------------|------------|------------|------------|-----------|
| GLB1L3       | 0.00997187 | 0          | 0          | 0.016609   | 0         |
| TMEM221      | 0.125042   | 0.141364   | 0.0759904  | 0.139286   | 0.104491  |
| RPL31P11     | 0          | 0.01849    | 0.0161066  | 0          | 0.0355412 |
| BOC          | 0.00753813 | 0          | 0          | 0.0125723  | 0         |
| ESPN         | 0.0167741  | 0          | 0          | 0.0279807  | 0         |
| SMCR5        | 0.00979854 | 0          | 0          | 0.0163579  | 0         |
| STAB2        | 0.00282464 | 0          | 0          | 0.0047157  | 0         |
| LOC285889    | 0.00907615 | 0          | 0          | 0.0151539  | 0         |
| ABHD1        | 0.0239808  | 0          | 0          | 0.0400634  | 0         |
| GATM         | 0.205586   | 0.239215   | 0.246259   | 0.359561   | 0.211633  |
| IKZF2        | 0.0267526  | 0.0156641  | 0.031972   | 0.0448612  | 0.0239714 |
| LINC00535    | 0.0420894  | 0.0780452  | 0.0346188  | 0.070096   | 0.0905013 |
| LOC387895    | 0.212841   | 0.146285   | 0.12946    | 0.261811   | 0.27845   |
| SNORA52      | 7.4104     | 34.0996    | 17.4409    | 35.4861    | 30.9768   |
| IL21R        | 0.00636082 | 0          | 0          | 0.0106519  | 0         |
| C11orf42     | 0.0330723  | 0          | 0          | 0.0553976  | 0         |
| C20orf195    | 0.0432778  | 0          | 0          | 0.072513   | 0         |
| ZNF610       | 0.0332703  | 0.0316744  | 0.051696   | 0.0921763  | 0.0444121 |
| SCARNA9L     | 0.573312   | 0.66143    | 1.28052    | 1.72268    | 0.46542   |
| CELF2        | 0.00305997 | 0          | 0          | 0.00513107 | 0         |
| ASB16        | 0.135446   | 0.209433   | 0.135648   | 0.302614   | 0.19079   |
| LOC101059948 | 0.24234    | 0.222203   | 0.295655   | 0.400748   | 0.312804  |
| FOXE3        | 0.0389743  | 0          | 0          | 0.0654319  | 0         |
| KLHDC1       | 0.0654943  | 0.0880388  | 0.0563834  | 0.109704   | 0.126463  |
| SH3RF3-AS1   | 0.0231984  | 0          | 0.111988   | 0.0777687  | 0.0291124 |
| ESRG         | 0.149231   | 0.0133655  | 0.0811574  | 0.201957   | 0.0750952 |
| TEX38        | 0          | 0.103513   | 0          | 0.126902   | 0.0478701 |
| SLED1        | 0.0445736  | 0.123782   | 0          | 0          | 0.285633  |
| LOC100129083 | 0          | 0.184115   | 0.164677   | 0.228944   | 0         |
| FGF9         | 0.235085   | 0.470322   | 0.191823   | 0.452714   | 0.575093  |
| FOXA3        | 0.0170643  | 0          | 0          | 0.0288211  | 0         |
| C5orf56      | 0.928187   | 0.770044   | 0.488429   | 1.44703    | 1.35877   |
| CRIP1        | 1.09384    | 0          | 0.388368   | 0.902312   | 0.677541  |
| ZNF214       | 0.181416   | 0.263714   | 0.315481   | 0.526734   | 0.345168  |
| RSPH10B2     | 0          | 0.0213638  | 0.00941771 | 0.0253258  | 0         |
| GPRASP1      | 0.0888636  | 0.0574734  | 0.0766017  | 0.135401   | 0.104451  |
| TRIM31       | 0.0537775  | 0.0367103  | 0.0327504  | 0.110894   | 0.0511765 |
| GBAP1        | 1.07038    | 1.04635    | 0.86242    | 1.93878    | 1.18093   |
| DENND5B-AS1  | 0          | 0.20742    | 0          | 0.124278   | 0.0969361 |
| SLA2         | 0.0343332  | 0.0312602  | 0.013957   | 0          | 0.115578  |
| FMN1         | 0.071018   | 0.0826271  | 0.0763229  | 0.141022   | 0.129983  |
| IGDCC4       | 0.0747986  | 0.117616   | 0.147673   | 0.226      | 0.114764  |
| SNORD47      | 751.886    | 0          | 0          | 401.751    | 367.622   |
| TSGA10IP     | 0.443088   | 0.241131   | 0.35949    | 0.464061   | 0.631303  |
| SPNS3        | 0.0683907  | 0.0609433  | 0.573261   | 0.456548   | 0.028043  |
| APOBR        | 0.033181   | 0.0316472  | 0.0293166  | 0.0544591  | 0.0781499 |
| WDR16        | 0.0244295  | 0.0848331  | 0.0450827  | 0.0405246  | 0.0946925 |
| C17orf107    | 0.0542739  | 0.108708   | 0.146204   | 0.135685   | 0.133783  |
| C14orf182    | 0.00905782 | 0.012669   | 0.0781905  | 0.0600796  | 0.0472834 |
| RAB44        | 0.0224982  | 0.0100132  | 0          | 0.0373188  | 0.0185044 |
| C5AR1        | 0.159149   | 0.207975   | 0.409622   | 0.552913   | 0.324439  |
| CEACAM22P    | 0.0166563  | 0.0117053  | 0.0102911  | 0.0554587  | 0.0108713 |
| GHR1         | 0.254147   | 0.0327794  | 0.0586114  | 0.210646   | 0.156386  |
| GLT8D2       | 0.0620456  | 0.0883415  | 0.12336    | 0.124217   | 0.148896  |
| P2RX6        | 0          | 0.031505   | 0          | 0.0193968  | 0.0144922 |
| DMC1         | 0.0176218  | 0.0127778  | 0.0222523  | 0.0146865  | 0.0604798 |
| AP4S1        | 0.335017   | 0.327948   | 0.514615   | 0.768886   | 0.50271   |
| L3MBTL1      | 0.226537   | 0.279717   | 0.20711    | 0.502379   | 0.370848  |
| LOC643201    | 0.016296   | 0.0228222  | 0.0537522  | 0.0360518  | 0.0567971 |
| DFNB59       | 0.771873   | 0.49745    | 0.776224   | 1.19771    | 0.670687  |
| SLC26A7      | 0.00370078 | 0.00562912 | 0.0143916  | 0.00622322 | 0.0213738 |
| IRGC         | 0.0340601  | 0          | 0          | 0          | 0         |
| YY2          | 0.430556   | 0.386067   | 0.617889   | 1.04804    | 0.608305  |
| EMR1         | 0.0196762  | 0          | 0          | 0.0164174  | 0         |
| PLAC1        | 0.0760187  | 0.17929    | 0.28381    | 0.337921   | 0.0997574 |
| AKR7A2P1     | 0.0476688  | 0.0649319  | 0          | 0.0396355  | 0.0301312 |
| LRRC37A3     | 0.0339328  | 0.0470296  | 0.0312399  | 0.0841435  | 0.0658418 |
| SLC2A9       | 0          | 0.0481441  | 0.0431226  | 0.0296157  | 0.0677631 |
| REG3A        | 0.0398194  | 0          | 0          | 0          | 0         |
| PPP4R4       | 0.496291   | 0.382196   | 0.402712   | 0.838754   | 0.807908  |
| GYLTL1B      | 0.0170792  | 0          | 0          | 0          | 0         |
| AOX1         | 0.104899   | 0.0775697  | 0.0854579  | 0.113933   | 0.151183  |
| COL20A1      | 0.0102425  | 0.0266827  | 0.0121013  | 0.0853632  | 0         |
| SPATA25      | 0.178453   | 0.0789483  | 0.14226    | 0.099162   | 0.290291  |
| VSTM1        | 0.032127   | 0          | 0          | 0          | 0         |
| GRIK1        | 0.0224588  | 0.0115497  | 0.0101917  | 0.0137291  | 0.0107557 |
| ANKDD1B      | 0.0179578  | 0          | 0          | 0          | 0         |
| GALNT8       | 0.0120029  | 0          | 0          | 0          | 0         |
| HEPHL1       | 0          | 0.0152357  | 0          | 0          | 0.0143413 |

|              |            |            |            |            |            |
|--------------|------------|------------|------------|------------|------------|
| LST1         | 0.0998085  | 0          | 0          | 0          | 0.0545814  |
| RPL23P8      | 0.122614   | 0          | 0          | 0          | 0          |
| CCIN         | 0.0156097  | 0          | 0          | 0          | 0          |
| LRRC43       | 0          | 0          | 0.0651949  | 0.0298767  | 0.022232   |
| SEZ6         | 0.00765949 | 0          | 0          | 0          | 0          |
| PLEKHB1      | 0.0158879  | 0          | 0          | 0          | 0          |
| AGT          | 0.0121852  | 0          | 0          | 0          | 0          |
| ARL10        | 0.0121035  | 0          | 0          | 0          | 0          |
| HIST1H4C     | 0.775129   | 0.636036   | 1.69309    | 1.28452    | 0.984752   |
| MYO1H        | 0          | 0.0231512  | 0          | 0          | 0.0217958  |
| SOX6         | 0.0101615  | 0.00374037 | 0          | 0.00850385 | 0.0070338  |
| ST8SIA6      | 0.0174445  | 0          | 0          | 0          | 0          |
| LOC100132215 | 0.0866758  | 0.0987681  | 0.150507   | 0.203217   | 0.115191   |
| SIX3         | 0.0169562  | 0          | 0          | 0          | 0          |
| PTPN13       | 0.00509952 | 0          | 0          | 0          | 0          |
| LOC285593    | 0.0140292  | 0          | 0          | 0          | 0          |
| IL31RA       | 0.00742153 | 0.0233864  | 0          | 0          | 0.0109491  |
| OR2H1        | 0.00781074 | 0.0112539  | 0          | 0.0130355  | 0.0209369  |
| LEPREL1      | 0.00774698 | 0          | 0          | 0          | 0          |
| IL10         | 0.0162651  | 0          | 0          | 0          | 0          |
| CPO          | 0.0189535  | 0          | 0          | 0          | 0          |
| TMCO2        | 0.0415562  | 0          | 0          | 0          | 0          |
| LEMD1-AS1    | 0.00959589 | 0          | 0          | 0          | 0          |
| SMIM17       | 0.146124   | 0.208101   | 0.0881564  | 0.229032   | 0.297485   |
| ZFPM2        | 0.00495698 | 0          | 0          | 0          | 0          |
| ADH6         | 0.015758   | 0.0225569  | 0          | 0.0263953  | 0.0421742  |
| SNCAIP       | 0.376735   | 0.232394   | 0.275289   | 0.636355   | 0.322006   |
| RGPD5, RGPD6 | 0.002854   | 0          | 0          | 0          | 0          |
| KRTAP2-3     | 0.791614   | 0.868051   | 1.79972    | 2.62913    | 1.98191    |
| VWA7         | 0.0251531  | 0.0843979  | 0.105909   | 0.188825   | 0.108266   |
| SOX7         | 0.0284173  | 0.0944118  | 0.0946101  | 0.0951887  | 0.176614   |
| GPM6B        | 0.00770218 | 0.0115682  | 0.0098823  | 0.0129138  | 0.025464   |
| DISC2        | 0.00472887 | 0          | 0          | 0          | 0          |
| RAG2         | 0.0160825  | 0          | 0          | 0          | 0          |
| CDH6         | 0.00241628 | 0          | 0          | 0          | 0          |
| GSG1         | 0          | 0.0415644  | 0.0366183  | 0.0623673  | 0.0254059  |
| FLJ36777     | 0.0206452  | 0.0149499  | 0.0259514  | 0.0171475  | 0.0567515  |
| PLGLB2       | 0.00720254 | 0          | 0          | 0          | 0          |
| C14orf23     | 0.0143052  | 0          | 0.0273379  | 0.0119629  | 0.050118   |
| DCC2B        | 0.0906073  | 0.0304995  | 0          | 0.03778    | 0.140235   |
| RLTPR        | 0.0682445  | 0.0126951  | 0          | 0.0486414  | 0.0462403  |
| LOC100129534 | 0.350683   | 0.360663   | 0.578267   | 1.02644    | 0.5769     |
| DCAF4L1      | 0.0570812  | 0.0386717  | 0.117483   | 0.139249   | 0.0551346  |
| LOC100507537 | 0.0336533  | 0          | 0          | 0          | 0          |
| NLRC4        | 0.0619065  | 0.116706   | 0.171103   | 0.170968   | 0.181856   |
| BCAR4        | 0.131813   | 0.0571955  | 0.379808   | 0.437653   | 0.118761   |
| GPD1         | 0.0590753  | 0.117039   | 0.105058   | 0.303562   | 0.0369311  |
| ACTL7B       | 0          | 0.0481242  | 0          | 0          | 0.0875855  |
| SNORA50      | 0          | 3.85048    | 3.36053    | 0          | 8.11657    |
| LY96         | 0.574388   | 0.391367   | 1.45488    | 2.11934    | 0.671467   |
| HRNR         | 0          | 0.00862532 | 0          | 0.0102348  | 0          |
| SCARNA5      | 0.442883   | 1.25678    | 1.07566    | 0.728713   | 1.19992    |
| TAS2R19      | 0          | 0.0909981  | 0.0784006  | 0.153947   | 0.0433614  |
| XAF1         | 0          | 0.00854214 | 0.00749469 | 0          | 0.00800136 |
| GRAP2        | 0.0184047  | 0.0253873  | 0.0225304  | 0          | 0.0236087  |
| ACTL8        | 1.30754    | 1.4949     | 1.80316    | 3.354      | 1.58186    |
| FAM154B      | 0.0473536  | 0.0100718  | 0.0607566  | 0.0340309  | 0.0477123  |
| RNF222       | 0          | 0.0294867  | 0.0132645  | 0.0182261  | 0.0409108  |
| KIAA1407     | 0.257412   | 0.23006    | 0.192277   | 0.46711    | 0.419082   |
| SNORA1       | 3.4572     | 0          | 0          | 0          | 0          |
| HSPB9        | 0          | 0.109198   | 0.0988298  | 0.138316   | 0.100612   |
| TMEM14E      | 0.0206527  | 0.0304712  | 0.0521601  | 0.103003   | 0.0862648  |
| MMP23B       | 0.0561224  | 0.0721074  | 0          | 0          | 0.132522   |
| GRAP         | 0.0681311  | 0.0680181  | 0.0818625  | 0.226522   | 0.0835985  |
| COL2A1       | 0          | 0.00919873 | 0.0083508  | 0          | 0.00802775 |
| LINC00242    | 0.132746   | 0.502771   | 0.17913    | 0.343043   | 0.818286   |
| LOC494141    | 0.0131713  | 0.0191124  | 0          | 0.0384873  | 0          |
| PRSS54       | 0.4514     | 0.508792   | 0.452427   | 1.10301    | 0.720561   |
| DLG1-AS1     | 0.0761521  | 0.129858   | 0.189857   | 0.329      | 0.18268    |
| FAM57B       | 0.190351   | 0.0960146  | 0.287132   | 0.439502   | 0.322798   |
| PRAM1        | 0.103606   | 0.161218   | 0.195675   | 0.376992   | 0.149213   |
| CDH20        | 0.0757065  | 0.169051   | 0.173577   | 0.298655   | 0.155762   |
| CPNE9        | 0.030958   | 0.0627602  | 0.0374208  | 0.102741   | 0.0580363  |
| C9orf24      | 0.198048   | 0          | 0          | 0.165151   | 0.0371329  |
| KCNT1        | 0.00871415 | 0.0114681  | 0.0207446  | 0.0290969  | 0.0313049  |
| C3orf72      | 0          | 0          | 0.0258628  | 0.0230413  | 0          |
| S100A3       | 2.78538    | 5.08975    | 3.22195    | 7.69225    | 3.76652    |
| MATN4        | 0.093405   | 0.0719335  | 0.0364849  | 0.155718   | 0.164506   |
| FEZ1         | 0.061917   | 0.0222882  | 0.0385034  | 0.0780384  | 0.062316   |



|                           |            |            |            |            |            |
|---------------------------|------------|------------|------------|------------|------------|
| AQP7P3                    | 0.397501   | 0.555408   | 0.14041    | 0.466009   | 1.26076    |
| CALCB                     | 0          | 0          | 0.11116    | 0.0997099  | 0          |
| STXBP6                    | 0.488835   | 0.555687   | 0.466294   | 0.762422   | 1.06223    |
| ALS2CR8                   | 0.105268   | 0.0844817  | 0.135119   | 0.188646   | 0.172277   |
| MLANA                     | 0          | 0          | 0.0418846  | 0.0551557  | 0.0227724  |
| KRTAP4-7                  | 0.0823308  | 0.230678   | 0.30677    | 0.482652   | 0.379631   |
| PTHLH                     | 0          | 0.0349225  | 0          | 0          | 0.0654697  |
| EPHX3                     | 0          | 0.0283356  | 0.0759323  | 0.0695927  | 0.0520091  |
| SMG1P1                    | 0.0281598  | 0.067699   | 0.0295435  | 0.101667   | 0.0827064  |
| ALDH3B1                   | 0.0432975  | 0.114996   | 0.0173254  | 0.144301   | 0.134105   |
| ADCYAP1R1                 | 0.032179   | 0.00564149 | 0.029981   | 0.0538807  | 0.0156718  |
| PCAT1                     | 0.0371237  | 0.0171242  | 0.0457323  | 0.0408701  | 0.0159905  |
| C15orf48                  | 0.0403837  | 0          | 0.20106    | 0.135073   | 0.101723   |
| PTPRVP                    | 0          | 0.0337772  | 0.0202855  | 0.056117   | 0.0307049  |
| TPRG1                     | 0          | 0.00919067 | 0          | 0          | 0.0173373  |
| VN1R5                     | 0          | 0.0397214  | 0          | 0          | 0.0749627  |
| LOC338963                 | 0          | 0.0643531  | 0          | 0.0790392  | 0          |
| LPAR3                     | 0          | 0.0529683  | 0          | 0          | 0          |
| SEMA4A                    | 0.0404565  | 0.0277192  | 0.0246918  | 0.0169083  | 0.140541   |
| COL6A3                    | 0.00315536 | 0.00428089 | 0.00382151 | 0.0156794  | 0          |
| HSPA1L                    | 0.0671323  | 0.106654   | 0.166187   | 0.256182   | 0.198151   |
| MRO                       | 0          | 0.00676797 | 0          | 0          | 0.0128179  |
| ARRDC3-AS1                | 0.0439678  | 0.0784042  | 0.101001   | 0.206027   | 0.136705   |
| PDZD9                     | 0          | 0.0312316  | 0          | 0          | 0.0593197  |
| C19orf38                  | 0.0991627  | 0.267647   | 0.119319   | 0.10976    | 0.291051   |
| CDHR5                     | 0.0584622  | 0.019365   | 0.0174706  | 0.0975124  | 0.0421301  |
| CABP7                     | 0.0345503  | 0.0307233  | 0.0277253  | 0.019267   | 0.0563171  |
| LGR6                      | 0.0111791  | 0.0303054  | 0.0406972  | 0.0685043  | 0.0280081  |
| MALL                      | 0.0208725  | 0.0292616  | 0.0256655  | 0.0523129  | 0.0544629  |
| ZNF426                    | 0.0351319  | 0.0374507  | 0          | 0.0437394  | 0.0470661  |
| CNIH3                     | 0.0410115  | 0.019086   | 0.0163994  | 0.0676827  | 0.0534098  |
| ZMAT1                     | 0.0906828  | 0.113983   | 0.0999706  | 0.288974   | 0.139571   |
| LOC100130301              | 0          | 0          | 0.133317   | 0.0878718  | 0.0712868  |
| MAP4K1                    | 0.144348   | 0.156673   | 0.0873251  | 0.181457   | 0.220816   |
| ITIH5                     | 0.0114976  | 0          | 0          | 0.00701834 | 0          |
| CCDC158                   | 0.0227013  | 0          | 0.00701907 | 0.00929458 | 0.00748197 |
| KCNJ10                    | 0.00433001 | 0.00620615 | 0.00545055 | 0.00725349 | 0          |
| PTPRM                     | 0.00877463 | 0.0122003  | 0.0108185  | 0.00728676 | 0.0227524  |
| FAM227A                   | 0.0827438  | 0.11563    | 0.137892   | 0.275979   | 0.186991   |
| SAG                       | 0          | 0          | 0.0408872  | 0.0277918  | 0.0210643  |
| TNFSF13B                  | 0.00834639 | 0.0374623  | 0.0321971  | 0.0418988  | 0.0473114  |
| MYLK-AS1                  | 0.0482005  | 0.196431   | 0.116846   | 0.319232   | 0.121585   |
| LOC100128568              | 0          | 0          | 0.13268    | 0.0902838  | 0.0684431  |
| TRIML2                    | 0.189957   | 0.833473   | 0.152697   | 0.309133   | 1.65852    |
| UTS2D                     | 0.0196613  | 0.0286637  | 0.0249211  | 0.0823729  | 0.0404893  |
| LINC00507                 | 0.0484545  | 0.0427265  | 0.0370862  | 0.113096   | 0.080987   |
| LOC100507156              | 0          | 0          | 0.0148654  | 0.0099945  | 0.00791003 |
| LOC283683                 | 0.111891   | 0.0544733  | 0.0943324  | 0.124536   | 0.0775876  |
| TRIM55                    | 0.00911811 | 0          | 0          | 0          | 0.0175937  |
| LRRC46                    | 0.316893   | 0.0716116  | 0.234627   | 0.525321   | 0.330638   |
| ANKRD31                   | 0.0246249  | 0.0311021  | 0.0506152  | 0.0815337  | 0.0463623  |
| MFAP2                     | 0          | 0.101867   | 0.727273   | 1.00463    | 0          |
| TEX12                     | 0.0638381  | 0.0646673  | 0.0824642  | 0.0355612  | 0.21859    |
| LINC00636                 | 0.0263641  | 0.0370553  | 0          | 0.0875663  | 0.0347628  |
| FAM153C                   | 0.0765666  | 0          | 0.0308629  | 0.0421348  | 0.0324724  |
| ZNF853                    | 0.034431   | 0.0759543  | 0.0816489  | 0.133079   | 0.179109   |
| HECW1                     | 0.0478086  | 0.0359263  | 0.0477603  | 0.129838   | 0.0555003  |
| FAM196A                   | 0.0113098  | 0.00817449 | 0.00710793 | 0.0282905  | 0.0231414  |
| HSD52                     | 0.150043   | 0.0710093  | 0.0310887  | 0.04134    | 0.135411   |
| KLLN                      | 0.140172   | 0.0667279  | 0.191485   | 0.211205   | 0.251614   |
| GTF2A1L,STON1,STON1-GTF2A | 0.0150136  | 0.00566352 | 0.00485791 | 0.0254775  | 0          |
| LRRN4CL                   | 0.0860718  | 0.0197914  | 0.0878022  | 0.14392    | 0.0554447  |
| DCDC5                     | 0          | 0.0126593  | 0.0110435  | 0.0146072  | 0.0237944  |
| GNG3                      | 0.149399   | 0          | 0.13783    | 0.187533   | 0.238589   |
| KIAA0408,SOGA3            | 0.0024288  | 0.00582074 | 0.00505127 | 0.0132812  | 0.00550161 |
| BDNF                      | 0.0352482  | 0.0416916  | 0.0299136  | 0.0787084  | 0.0241934  |
| CCDC39                    | 0.0191832  | 0.0138622  | 0          | 0.0079131  | 0.0398061  |
| HLA-DMA                   | 0.357971   | 0.346867   | 0.373757   | 0.645972   | 0.779828   |
| KGFLP1                    | 0.110624   | 0.115862   | 0.16605    | 0.209039   | 0.216259   |
| ABCA12                    | 0          | 0          | 0.00656167 | 0          | 0.00353759 |
| TMEM132B                  | 0.0143734  | 0          | 0.0180373  | 0.0288167  | 0.0193496  |
| VWF                       | 0.0103786  | 0.00465952 | 0          | 0.0173781  | 0          |
| IL13                      | 0          | 0.0331534  | 0.0877472  | 0          | 0.154561   |
| SPATA17                   | 0.0621515  | 0.264063   | 0.102792   | 0.341773   | 0.247942   |
| CYP3A43                   | 0.0323392  | 0.0157008  | 0.0136228  | 0.0359232  | 0.0274502  |
| GSTM2                     | 0.179413   | 0.247257   | 0.0938582  | 0.383644   | 0.417383   |
| TDRD6                     | 0.0248353  | 0.0232987  | 0.0318593  | 0.0832976  | 0.0381732  |
| NHS                       | 0.00519717 | 0.0188633  | 0.0230557  | 0.0390722  | 0.0355091  |
| PRSS57                    | 0.105553   | 0          | 0.0617927  | 0.0880185  | 0.0628024  |

|              |            |            |            |            |            |
|--------------|------------|------------|------------|------------|------------|
| LCN1         | 0.0499468  | 0.064342   | 0          | 0.0817183  | 0.0607545  |
| TMEM173      | 0.10773    | 0.0844284  | 0.037508   | 0.205846   | 0.0585929  |
| LINC00264    | 0.0286631  | 0.0790458  | 0.0351147  | 0.0473788  | 0.185809   |
| GRM2         | 0.0214246  | 0.0576401  | 0.0259822  | 0          | 0.208991   |
| GTF2IRD2     | 0.0671247  | 0.113404   | 0.0909217  | 0.135897   | 0.154461   |
| PAPPA        | 0.00423414 | 0          | 0.00265696 | 0.00706783 | 0.00284196 |
| LOC646903    | 0.065267   | 0.0390741  | 0.134057   | 0.196637   | 0.112974   |
| IGLON5       | 0.0315917  | 0          | 0.0128567  | 0.0176788  | 0.0524623  |
| GP1BA        | 0.159714   | 0.151901   | 0.0902581  | 0.288031   | 0.340451   |
| ZNF880       | 0.00897041 | 0.0128349  | 0.0450873  | 0.0297697  | 0.0239677  |
| C12orf70     | 0.140909   | 0.0494847  | 0.0437716  | 0.203525   | 0.139904   |
| LOC653786    | 0.0373621  | 0          | 0.0352724  | 0.078068   | 0.0504171  |
| CD4          | 0.0400838  | 0.0410263  | 0.0244083  | 0.0734371  | 0.0846301  |
| MIRLET7D     | 88.7439    | 0          | 0          | 0          | 0          |
| TTC25        | 0.0466149  | 0.0463638  | 0.0419568  | 0.11384    | 0.116658   |
| HMG2P46      | 0.0487689  | 0          | 0          | 0.0813546  | 0.0163038  |
| RENBP        | 0.24394    | 0.323252   | 0.195317   | 0.682093   | 0.423829   |
| CFP          | 0.0978105  | 0.258836   | 0.176184   | 0.494177   | 0.235548   |
| LOC642366    | 0.0468599  | 0.0196997  | 0.0384199  | 0.0838222  | 0.0374017  |
| DIO1         | 0.0140669  | 0.020149   | 0.0175833  | 0.0234152  | 0.0560449  |
| LPAR5        | 0.0302769  | 0          | 0.0186508  | 0.0253079  | 0.0196429  |
| FLRT1        | 0.047591   | 0.0317467  | 0.15731    | 0.23805    | 0.116512   |
| TMEM253      | 0.273095   | 0.409533   | 0.180868   | 0.664677   | 0.296533   |
| LG4          | 0          | 0.0555069  | 0          | 0.0466625  | 0.0170283  |
| GRB7         | 0.100827   | 0.0270111  | 0.121241   | 0.168628   | 0.123705   |
| HLA-DMB      | 0.0193584  | 0.0267072  | 0          | 0          | 0.0249541  |
| LOC100506388 | 0.14983    | 0.123888   | 0.134909   | 0.249932   | 0.233029   |
| EME2         | 0.372336   | 0.0683363  | 0.439478   | 0.803375   | 0.432796   |
| PPIL6        | 0.217956   | 0.257933   | 0.207941   | 0.442642   | 0.377686   |
| SNORA3       | 0          | 10.4388    | 4.70293    | 12.7945    | 10.9384    |
| SNORA65      | 3.14661    | 8.2603     | 3.66149    | 15.1796    | 4.34202    |
| ADAM21       | 0.0636201  | 0.0344075  | 0.0400184  | 0.106025   | 0.0751664  |
| PTH2         | 0.378091   | 0          | 0          | 0.319823   | 0.44871    |
| PAEP         | 0          | 0.0523443  | 0.0469432  | 0.0646667  | 0          |
| POU5F1B      | 0.659836   | 0.347295   | 0.463299   | 1.02695    | 0.430421   |
| ATF5         | 17.8762    | 21.1164    | 49.2804    | 74.9907    | 21.0428    |
| RRN3P2       | 0.0425537  | 0.0452792  | 0.0660588  | 0.105995   | 0.113283   |
| NUP210L      | 0.0150471  | 0          | 0          | 0.00628233 | 0.00506548 |
| LIMS2        | 0          | 0.0314827  | 0.0286847  | 0.039809   | 0          |
| OR51B4       | 0.0616006  | 0.0449764  | 0.0388383  | 0.10299    | 0.0843441  |
| ZNF835       | 0.0355404  | 0          | 0          | 0.0295511  | 0.0433262  |
| TMEM169      | 0.0136751  | 0          | 0.0170867  | 0.0113309  | 0.0274689  |
| KCND3        | 0.0717248  | 0          | 0.0342719  | 0.0476302  | 0.0705476  |
| HCG4B        | 0.318193   | 0.237917   | 0.0681625  | 0.401067   | 0.263692   |
| KIAA1751     | 0          | 0          | 0.00843153 | 0          | 0.0174727  |
| BCAS1        | 0          | 0          | 0.0169126  | 0.0228269  | 0          |
| DNAJC9-AS1   | 0          | 0.0366353  | 0.0317111  | 0.0276894  | 0.0690866  |
| SNORD33      | 93.0235    | 116.037    | 0          | 298.191    | 134.047    |
| TMC2         | 0.00859493 | 0          | 0.0105419  | 0.0286172  | 0.0109815  |
| LOC100506385 | 0.0275539  | 0.0134644  | 0.0116126  | 0.0462573  | 0.0630806  |
| MEIG1        | 0.047086   | 0.266892   | 0.058474   | 0.311641   | 0.37957    |
| FOXD3        | 0          | 0          | 0.0451812  | 0          | 0.0943071  |
| SUSD4        | 0.186162   | 0.350236   | 0.16214    | 0.447094   | 0.505074   |
| GLTPD2       | 0.165527   | 0.208321   | 0.191077   | 0.276923   | 0.761089   |
| SYN1         | 0.0245618  | 0          | 0.0297214  | 0.0822157  | 0.0308463  |
| APOL1        | 0.0272665  | 0.0498618  | 0.0221534  | 0.0301588  | 0.081499   |
| ANKRD63      | 0          | 0.114814   | 0.106052   | 0.306101   | 0          |
| FBLN2        | 0.0277443  | 0          | 0          | 0.0309152  | 0.0110515  |
| PIANP        | 0.0356068  | 0.0486211  | 0.105841   | 0.145425   | 0.200773   |
| IZUMO4       | 0.232015   | 0.153215   | 0.138678   | 0.476215   | 0.418459   |
| GOLGA6C      | 0.00397992 | 0.00576648 | 0          | 0.0132759  | 0          |
| CDC65        | 0          | 0          | 0.0159488  | 0          | 0.0335388  |
| WEE2         | 0          | 0.0106465  | 0          | 0.0122639  | 0.0100562  |
| BEST3        | 0.45675    | 0.207546   | 0.385432   | 1.07412    | 0.284969   |
| AIPL1        | 0          | 0          | 0.0132487  | 0          | 0.0279651  |
| B3GNT8       | 0.0274212  | 0          | 0.0328218  | 0.0461109  | 0.032783   |
| EDN1         | 0          | 0.0364562  | 0          | 0.0423455  | 0.0344423  |
| GPR22        | 0.00658752 | 0.00994529 | 0          | 0.0110272  | 0          |
| FLJ40292     | 0          | 0.0291374  | 0          | 0.0347455  | 0.0268407  |
| KCNC1        | 0.0114617  | 0          | 0.0140593  | 0.0195026  | 0.0142118  |
| LOC440173    | 0.0119197  | 0.0349319  | 0.0150909  | 0.0595506  | 0.0500922  |
| SLC4A9       | 0.0714763  | 0.0284948  | 0.0619908  | 0.146343   | 0.088273   |
| KRTAP5-9     | 0.154599   | 0.0846687  | 0.0761677  | 0.259952   | 0.0773796  |
| APOA2        | 0.26365    | 0.589293   | 0.736064   | 1.28752    | 0.550117   |
| CRYAB        | 0.0497665  | 0.48161    | 0          | 0.164312   | 0.965374   |
| KCNMB2       | 0.00857634 | 0          | 0.0219877  | 0.0286741  | 0.036364   |
| C2orf66      | 0.19131    | 0.0966863  | 0.150087   | 0.550316   | 0.168552   |
| HSD3BP4      | 0          | 0          | 0.003244   | 0          | 0.00693855 |
| SLC7A11-AS1  | 0.00481453 | 0          | 0.0183876  | 0.0321055  | 0          |

|              |            |            |            |            |            |
|--------------|------------|------------|------------|------------|------------|
| RAD21L1      | 0          | 0.0165082  | 0.0143271  | 0.018832   | 0.0471578  |
| DCD          | 0          | 0          | 0.0845081  | 0          | 0.181337   |
| PREX1        | 0.0391124  | 0.0130472  | 0.0117748  | 0.0650486  | 0.0119989  |
| RYR3         | 0.00154204 | 0.00213422 | 0.00379597 | 0.00511738 | 0          |
| IGFN1        | 0.00787939 | 0          | 0          | 0.00652849 | 0          |
| LOC283731    | 0.0282608  | 0          | 0          | 0          | 0.0359587  |
| KCNH6        | 0.174106   | 0.0808848  | 0.0318298  | 0.0444634  | 0.254665   |
| HHIPL1       | 0          | 0          | 0.0172358  | 0.0371016  | 0          |
| SNORA31      | 7.24892    | 10.0959    | 0          | 17.563     | 0          |
| WDR78        | 0.148101   | 0.0737027  | 0.164681   | 0.372913   | 0.19622    |
| MACROD2      | 0.0135577  | 0.0130666  | 0          | 0.0150406  | 0.0185276  |
| SLC15A1      | 0          | 0.0114609  | 0          | 0          | 0.0106427  |
| LURAP1       | 0.0325335  | 0          | 0.0201549  | 0.0273066  | 0          |
| TSNAXIP1     | 0.0798487  | 0.0609301  | 0.0137322  | 0.0563711  | 0.1416     |
| GLT1D1       | 0.0108028  | 0.0149215  | 0          | 0.0180218  | 0          |
| TMEM61       | 0          | 0.0611198  | 0          | 0.0778391  | 0.0557653  |
| INHBC        | 0.0425337  | 0.0197749  | 0.0176075  | 0.0475652  | 0          |
| BATF2        | 0.282745   | 0.255655   | 0.172038   | 0.497811   | 0.391841   |
| ERVV-1       | 0          | 0.0143989  | 0.0253181  | 0.0507576  | 0          |
| CD3D         | 0          | 0.0538602  | 0          | 0          | 0.0503292  |
| MYO1F        | 0.0348225  | 0.046087   | 0.0830974  | 0.129939   | 0.0954504  |
| CAMK2B       | 0.0357604  | 0.0361455  | 0          | 0.0298783  | 0.0664769  |
| DNMBP-AS1    | 0.00861926 | 0.0123448  | 0.0107856  | 0.0429916  | 0.0116529  |
| STAT4        | 0.0158388  | 0.0112647  | 0.0198187  | 0.0263337  | 0.0210155  |
| AMN          | 0.0555237  | 0          | 0.128665   | 0.0926842  | 0.127399   |
| C14orf178    | 0          | 0.0826113  | 0          | 0          | 0.0769279  |
| LOC284009    | 0          | 0          | 0.167512   | 0.114464   | 0.257037   |
| MTTP         | 0.0213951  | 0.00770518 | 0.00670697 | 0.0266439  | 0.014524   |
| LOC100506071 | 0.010857   | 0          | 0.0137359  | 0.0543464  | 0          |
| NBPF7        | 0.126624   | 0          | 0.0782491  | 0.189388   | 0.131209   |
| TMEM89       | 0          | 0.288151   | 0          | 0          | 0.266218   |
| SLC35F1      | 0.00489636 | 0.00725517 | 0.00623782 | 0.0164478  | 0.00682777 |
| BIN2         | 0.010751   | 0          | 0.0131704  | 0.0531714  | 0          |
| LOC100507557 | 0.0163607  | 0.0165765  | 0.0141727  | 0.0364965  | 0.02197    |
| MATN2        | 0          | 0.0242763  | 0          | 0.0190131  | 0.0149355  |
| ALDOB        | 0.0396622  | 0.0566531  | 0.0371805  | 0.0990111  | 0.0935111  |
| ABCA9        | 0.00328041 | 0.0048037  | 0.0124532  | 0.0219566  | 0.0180637  |
| NUPR1        | 0.240384   | 0.587976   | 3.23183    | 4.02446    | 0.616832   |
| LOC100506082 | 0          | 0.364884   | 0          | 0.43152    | 0.230421   |
| WDR63        | 0.0325665  | 0.0744158  | 0.04905234 | 0.0972374  | 0.113878   |
| KRT79        | 0.100681   | 0.516579   | 0.241211   | 0.50084    | 0.829101   |
| SNORA11B     | 0          | 0          | 5.36398    | 0          | 12.1452    |
| CPB2-AS1     | 0.00588822 | 0          | 0.00745082 | 0.0195513  | 0          |
| LCE1B        | 0          | 0          | 0.102366   | 0          | 0.0363341  |
| CYP4F2       | 0          | 0.0170622  | 0.0151217  | 0.0412522  | 0.0315843  |
| SNORA71D     | 2.88554    | 7.71301    | 0          | 4.70897    | 3.95406    |
| TAL2         | 0.213344   | 0.146218   | 0.1304     | 0.528725   | 0.202811   |
| C3AR1        | 0.0692009  | 0.218496   | 0.0863409  | 0.231094   | 0.370268   |
| CACNA1G-AS1  | 0.0220381  | 0          | 0.0269632  | 0          | 0.111437   |
| C9orf152     | 0.0314032  | 0          | 0.026283   | 0          | 0.055723   |
| C19orf59     | 0.0197671  | 0          | 0.0731633  | 0.0660463  | 0.076004   |
| PLVAP        | 0.0150219  | 0.0589654  | 0          | 0.124844   | 0.0177695  |
| RFPL1-AS1    | 0          | 0.00653658 | 0.00572303 | 0.00762655 | 0.0122315  |
| IQUB         | 0.0129831  | 0.0284623  | 0          | 0.0215513  | 0.0270714  |
| OLFML2A      | 0.00951773 | 0.00655143 | 0          | 0.00795208 | 0.0120845  |
| SLC46A2      | 0.0133879  | 0.0186042  | 0          | 0.0224232  | 0.0512661  |
| PABPN1L      | 0.0607254  | 0          | 0          | 0.0505708  | 0.0364906  |
| HLA-DOB      | 0.1108     | 0.103182   | 0.0455371  | 0.215407   | 0.119851   |
| DPF3         | 0.0527254  | 0.0725771  | 0.0484869  | 0.152798   | 0.084712   |
| SCUBE2       | 0.0215415  | 0.00843944 | 0          | 0.0503589  | 0.0078635  |
| LOC158435    | 0.0105413  | 0.0144992  | 0          | 0.0175953  | 0.0402961  |
| EPN3         | 0          | 0          | 0.0361203  | 0.0167023  | 0.0493117  |
| LOC100302640 | 0.16791    | 0.0778776  | 0.27284    | 0.369082   | 0.4362     |
| LOC100505624 | 0.0354761  | 0.0489338  | 0.0871943  | 0.117406   | 0.0919572  |
| TAS2R43      | 0          | 0.0358881  | 0          | 0.039834   | 0          |
| SPI1         | 0          | 0.0484352  | 0.0441492  | 0.0621313  | 0.0886443  |
| HCP5         | 0.0181792  | 0          | 0          | 0.0304947  | 0.0119134  |
| HPD          | 0.0458048  | 0          | 0          | 0.0240602  | 0.0488265  |
| SLC39A2      | 0.0212848  | 0          | 0.0262044  | 0.035393   | 0          |
| SMIM5        | 0.0244112  | 0.0311129  | 0.0913281  | 0.123512   | 0.0854905  |
| WNT16        | 0.0156072  | 0.011562   | 0.0100083  | 0.0261036  | 0.033159   |
| ZNF528       | 0          | 0.015376   | 0.0201774  | 0          | 0.0359411  |
| LDB3         | 0          | 0.00743576 | 0.0319916  | 0.0175236  | 0.0477786  |
| ITGB7        | 0.0634514  | 0.0170546  | 0.0459639  | 0.10591    | 0.0155338  |
| RIMBP2       | 0.00435464 | 0.00611926 | 0          | 0          | 0.0171352  |
| RSPH1        | 0.213936   | 0.263133   | 0.236174   | 0.838403   | 0.342766   |
| STEAP1B      | 0          | 0          | 0.0242951  | 0.0320125  | 0.0255761  |
| SLFN13       | 0          | 0.00364724 | 0          | 0.00417041 | 0          |
| SLC22A9      | 0.0109182  | 0.0153819  | 0.0135461  | 0.0181978  | 0.0570781  |

|                           |            |            |            |            |            |
|---------------------------|------------|------------|------------|------------|------------|
| BFSP1                     | 0.146771   | 0.252254   | 0.212947   | 0.659402   | 0.329887   |
| SUMO4                     | 0.0364878  | 0.0530405  | 0          | 0          | 0.147858   |
| FOXP3                     | 0.134155   | 0.0994001  | 0.251689   | 0.546693   | 0.235331   |
| MEP1B                     | 0.00895631 | 0.0128652  | 0.0111312  | 0.0148347  | 0          |
| CECR5-AS1                 | 0.10182    | 0.547675   | 0          | 0.507344   | 0.649892   |
| CALN1                     | 0.00519195 | 0          | 0          | 0.00431875 | 0.00345339 |
| CHRM1                     | 0          | 0          | 0.0165967  | 0.0230567  | 0.016607   |
| S100A1                    | 0.411432   | 0.23579    | 0.0708116  | 0.581925   | 0.728062   |
| PHACTR1                   | 0          | 0          | 0.0127793  | 0.017322   | 0.0132616  |
| C2orf26                   | 0          | 0.0183405  | 0          | 0          | 0          |
| EDAR                      | 0          | 0          | 0.00728117 | 0.00979771 | 0.00764221 |
| MINOS1P1                  | 0.0177977  | 0.0130327  | 0.022545   | 0.0593408  | 0.0369163  |
| ZYG11A                    | 0          | 0          | 0.00745828 | 0.00994752 | 0.00799213 |
| PPIAL4G                   | 0.188031   | 0.106623   | 0          | 0.31147    | 0.199129   |
| OCM                       | 0.0416646  | 0.0575531  | 0.0512013  | 0          | 0.216692   |
| MYCT1                     | 0.0227737  | 0          | 0.0388845  | 0.0888763  | 0.0324989  |
| CYP4F3                    | 0          | 0.0124435  | 0          | 0.0146003  | 0          |
| LINC00854                 | 0          | 0.036443   | 0.0328313  | 0.134906   | 0.0333635  |
| PLG                       | 0.0129006  | 0          | 0.0159626  | 0.0107406  | 0.0253936  |
| FAM71F2                   | 0.0241687  | 0.066407   | 0.0294507  | 0.182802   | 0.0616703  |
| ARHGEF38                  | 0          | 0.00516833 | 0          | 0          | 0          |
| BTBD19                    | 0          | 0          | 0.0416329  | 0          | 0.0420707  |
| KRTAP4-6                  | 0.072983   | 0          | 0.2281     | 0.368012   | 0.0477817  |
| MCAM                      | 0.00905862 | 0          | 0          | 0          | 0.0223927  |
| HGD                       | 0          | 0.0174541  | 0.0153406  | 0.020571   | 0.0164239  |
| PLA2G10                   | 0          | 0          | 0.0634242  | 0          | 0.0650994  |
| LMX1B                     | 0.00579964 | 0          | 0          | 0          | 0.0143828  |
| LOC100132062,LOC100133331 | 0          | 0          | 0.0129829  | 0          | 0.0132315  |
| ITGB2-AS1                 | 0.0139717  | 0.0188918  | 0          | 0.0467604  | 0.034662   |
| NFASC                     | 0.00551882 | 0.00377648 | 0          | 0          | 0          |
| LOC100507299              | 0          | 0.0437085  | 0          | 0.0527739  | 0          |
| LCE1F                     | 0.0785817  | 0          | 0.378487   | 0.260376   | 0.196687   |
| ZNF365                    | 0          | 0          | 0.00720041 | 0          | 0.00783795 |
| LOC729059                 | 0          | 0          | 0.0938535  | 0          | 0.100057   |
| CNTN4                     | 0          | 0          | 0.00521368 | 0          | 0.00569663 |
| ADAM32                    | 0          | 0          | 0.020226   | 0          | 0.0220831  |
| CHST11                    | 0.00858094 | 0          | 0.0108203  | 0.0215878  | 0.0115161  |
| SLC38A8                   | 0.0671451  | 0          | 0.0407821  | 0.169342   | 0.0417824  |
| PLAC8                     | 0.0221572  | 0.0324115  | 0.10876    | 0.138944   | 0.153098   |
| ACER1                     | 0.381914   | 0.287542   | 0.465755   | 0.872611   | 0.702752   |
| SLC19A3                   | 0.00616193 | 0.00894669 | 0          | 0.0103158  | 0.016816   |
| C6orf58                   | 0.0391473  | 0.0866345  | 0          | 0.130665   | 0.0819218  |
| FLJ46361                  | 0          | 0.00875693 | 0          | 0          | 0          |
| BDNF-AS                   | 0.240492   | 0.0777869  | 0.123438   | 0.408808   | 0.221891   |
| HIGD2B                    | 0          | 0.0439283  | 0          | 0          | 0          |
| TMEM119                   | 0.0347391  | 0.0159859  | 0          | 0.0585026  | 0.0295004  |
| CCDC135                   | 0.0318478  | 0.0696353  | 0.0254242  | 0.123042   | 0.0897883  |
| SLC22A18AS                | 0.28707    | 0.47206    | 0.37478    | 0.88462    | 0.813057   |
| GPR135                    | 0.171702   | 0.112804   | 0.101856   | 0.361854   | 0.254916   |
| LOC643723                 | 0.0564195  | 0          | 0.0358715  | 0.0236227  | 0.137093   |
| NLRP14                    | 0.0163419  | 0.0155335  | 0          | 0.0451776  | 0.00736285 |
| RNF183                    | 0.0878347  | 0.122283   | 0          | 0.29491    | 0.0377093  |
| LIN28A                    | 0.00610796 | 0          | 0.00768742 | 0          | 0.024661   |
| CASC1                     | 0          | 0          | 0.0101757  | 0          | 0.0114472  |
| CXADR                     | 0.00842898 | 0.0210315  | 0.0182534  | 0.0313206  | 0.0659966  |
| C4orf26                   | 0          | 0.0191981  | 0.0324904  | 0.0205907  | 0.0894     |
| OR5K2                     | 0          | 0          | 0.0353464  | 0          | 0.0399764  |
| LOC101101776              | 0          | 0.221511   | 0.0480897  | 0.128077   | 0.159027   |
| DLEU7-AS1                 | 0.0130552  | 0          | 0.0330128  | 0.0652699  | 0.0544724  |
| CCNI2                     | 0.0138262  | 0.0193805  | 0.0171732  | 0.0461854  | 0.0360002  |
| SAMD15                    | 0.0511633  | 0.0414985  | 0.0374577  | 0.166457   | 0.0658562  |
| NEFH                      | 0.0154549  | 0          | 0          | 0.012644   | 0.0276939  |
| SNORA78                   | 0          | 8.56584    | 0          | 10.675     | 0          |
| NFATC2                    | 0.00784434 | 0          | 0.00489237 | 0.0261825  | 0          |
| XYLT1                     | 0.00297889 | 0.00839569 | 0.00369166 | 0.024894   | 0.00389454 |
| NRN1L                     | 0.390387   | 0.128564   | 0          | 0.6511     | 0.709706   |
| PHEX                      | 0.0165231  | 0          | 0.0206012  | 0.013731   | 0.0549993  |
| CFL1P1                    | 0.0341975  | 0          | 0.0145181  | 0          | 0.0464796  |
| EFCAB6                    | 0.0281744  | 0.0263963  | 0.0126384  | 0.0676673  | 0.055733   |
| LOC100996455              | 0.0227697  | 0          | 0.0278908  | 0.0756415  | 0.0581593  |
| STAB1                     | 0.00486238 | 0          | 0.00585037 | 0.00819119 | 0.0116652  |
| ZNF99                     | 0          | 0          | 0.00624219 | 0.0121184  | 0          |
| HTR2B                     | 0.0311925  | 0.0453035  | 0.0131432  | 0.121115   | 0.0426186  |
| NRAP                      | 0.00446289 | 0          | 0.00544926 | 0.00738173 | 0.011207   |
| KRBA2                     | 0          | 0.0319144  | 0.0141135  | 0.0375819  | 0.0450597  |
| FOXN4                     | 0.0198718  | 0.0135561  | 0.0120719  | 0.0166183  | 0.087284   |
| C15orf27                  | 0          | 0.020082   | 0.0179537  | 0.0494423  | 0          |
| TPTE2P6                   | 0.00853003 | 0.012585   | 0.0108484  | 0.042794   | 0.0119452  |
| TAS1R1                    | 0.0171199  | 0          | 0.0209966  | 0.0287512  | 0.0429831  |

|              |            |            |            |            |            |
|--------------|------------|------------|------------|------------|------------|
| MTUS2-AS1    | 0.0503082  | 0.0345125  | 0.0607198  | 0.0413646  | 0.129071   |
| KCTD16       | 0.00400003 | 0.00591303 | 0          | 0.00667843 | 0.00560046 |
| RD3          | 0          | 0          | 0.00789045 | 0.0212276  | 0          |
| KRTAP3-3     | 0          | 0          | 0.0577216  | 0.155484   | 0          |
| PIP5K1P1     | 0.00604166 | 0.00868393 | 0          | 0.0100763  | 0.00816087 |
| MYEF2        | 0          | 0          | 0.00498198 | 0.00648489 | 0          |
| GPR98        | 0.00103841 | 0          | 0          | 0          | 0.00282214 |
| CD8A         | 0.0118207  | 0.0909908  | 0.0322295  | 0.151974   | 0.068385   |
| NLRP12       | 0.0107983  | 0          | 0.0131633  | 0          | 0.0272526  |
| LOC100505933 | 0.0203527  | 0.058239   | 0.0256508  | 0.102071   | 0.108505   |
| TAS2R10      | 0          | 0          | 0.0375246  | 0.0489043  | 0          |
| SEMA5A       | 0.00203543 | 0          | 0          | 0          | 0.00555097 |
| EXOC3L1      | 0.0659413  | 0.0216464  | 0.039576   | 0.0553359  | 0.176172   |
| ECT2L        | 0.0595733  | 0.0287131  | 0.0187477  | 0.0908032  | 0.0340559  |
| FCER2        | 0.16185    | 0.0614406  | 0.0825546  | 0.342767   | 0.255239   |
| RNF133       | 0          | 0          | 0.0202967  | 0.0267821  | 0          |
| RPS15AP10    | 0.0540129  | 0          | 0.0672319  | 0.0444375  | 0.147832   |
| LOC401242    | 0          | 0.027307   | 0          | 0.062217   | 0.0129162  |
| DSG3         | 0.00392653 | 0.0171172  | 0.00992895 | 0.039385   | 0.0323023  |
| DDX43        | 0.00804225 | 0          | 0.0100955  | 0          | 0.0219376  |
| RPGRI1       | 0          | 0.00782455 | 0.00698249 | 0.00937954 | 0.0218659  |
| CDC164       | 0          | 0          | 0.0117229  | 0.0158442  | 0          |
| LOC100288842 | 0.380092   | 0.0879804  | 0.468172   | 0.631042   | 0.759928   |
| COL17A1      | 0          | 0.0139711  | 0.00625379 | 0.0256733  | 0.0129238  |
| C6orf165     | 0.0477835  | 0.0274347  | 0.0120002  | 0.142915   | 0          |
| LSAMP        | 0.00641575 | 0          | 0.00273506 | 0.00357552 | 0.00299854 |
| IL15         | 0          | 0.0163668  | 0          | 0.0184411  | 0.0279086  |
| WDR11-AS1    | 0          | 0.0387668  | 0          | 0.029674   | 0.0488476  |
| SOWAHD       | 0.036284   | 0          | 0          | 0.0602415  | 0.0434025  |
| LRRTM2       | 0.00362479 | 0          | 0.013869   | 0.0181642  | 0.0253498  |
| RNASE3       | 0          | 0          | 0.0513986  | 0          | 0          |
| OLFM2        | 0.0227236  | 0          | 0.0548809  | 0.114341   | 0.028635   |
| CGB5         | 0.179548   | 0.237728   | 0.142677   | 0.80135    | 0.291919   |
| CHAD         | 0.0469472  | 0.0311465  | 0          | 0.196165   | 0.0284895  |
| KLF1         | 0.0338718  | 0          | 0          | 0.0564313  | 0.0411731  |
| SSTR5-AS1    | 0.0142345  | 0          | 0          | 0.0236275  | 0.0174199  |
| SNCG         | 0          | 0          | 0.0566285  | 0          | 0          |
| CELA1        | 0          | 0          | 0.044211   | 0          | 0          |
| TRPV4        | 0.0133644  | 0          | 0          | 0.0223755  | 0.0162593  |
| GPR61        | 0          | 0          | 0.0131835  | 0          | 0          |
| ACPT         | 0          | 0          | 0.0464533  | 0          | 0          |
| NCF4         | 0          | 0          | 0.0308369  | 0          | 0          |
| C21orf49     | 0.0219664  | 0          | 0.027481   | 0          | 0.0288935  |
| SDC4P        | 0.0720213  | 0          | 0          | 0.117726   | 0.0927433  |
| FLT1         | 0          | 0.00436593 | 0          | 0.0127486  | 0          |
| C14orf180    | 0.0215439  | 0          | 0          | 0          | 0.0258949  |
| PDGFB        | 0.0279091  | 0          | 0          | 0.0466694  | 0.035108   |
| FLJ42102     | 0.0132963  | 0          | 0          | 0.022108   | 0.0169859  |
| LINC00592    | 0.029686   | 0          | 0          | 0.0497032  | 0.0378983  |
| TCEA3        | 0.0171481  | 0.0459046  | 0.0415715  | 0.197763   | 0.0215546  |
| LOC400558    | 0.0315978  | 0          | 0          | 0          | 0.0384488  |
| GAL3ST1      | 0.0668933  | 0.0436286  | 0          | 0.111686   | 0.158562   |
| PRR23C       | 0.0116843  | 0.0172429  | 0.0148363  | 0.0393673  | 0.0485494  |
| SCN4A        | 0.0159188  | 0.00538818 | 0.0144955  | 0.0732336  | 0.00493211 |
| NOS2         | 0.00701963 | 0          | 0          | 0          | 0.00869749 |
| SLFN14       | 0.00710816 | 0          | 0          | 0.0118239  | 0.00941234 |
| EMR2         | 0.00427488 | 0          | 0          | 0.00712858 | 0.00565205 |
| BCL6B        | 0.0083002  | 0          | 0          | 0.0138977  | 0.010929   |
| C21orf7      | 0.0596692  | 0.0867914  | 0.181123   | 0.379586   | 0.260898   |
| METTL21EP    | 0          | 0.0145721  | 0          | 0.0163176  | 0.0274533  |
| OR7E12P      | 0          | 0.0360335  | 0          | 0.0414593  | 0.0668948  |
| GNRH2        | 0          | 0          | 0.154396   | 0          | 0.466527   |
| PLB1         | 0.0106366  | 0          | 0          | 0          | 0.0133883  |
| TDRD12       | 0.013984   | 0          | 0          | 0.0233744  | 0.0187731  |
| CEACAM8      | 0.0107897  | 0          | 0          | 0.0179894  | 0.0145588  |
| C3orf65      | 0.0249365  | 0.0524888  | 0.0154381  | 0.0825873  | 0.0653265  |
| PARK2        | 0.0290804  | 0          | 0.027203   | 0.0728482  | 0.0386619  |
| ASTL         | 0.0319003  | 0.0427079  | 0.0382887  | 0.0532886  | 0.234064   |
| PCBP3        | 0.0176484  | 0          | 0.0427378  | 0.0586405  | 0.0631514  |
| LOC339894    | 0.0130162  | 0          | 0          | 0          | 0.0168864  |
| FGF13        | 0.0109485  | 0          | 0          | 0.0183503  | 0.0152091  |
| C16orf3      | 0.0361247  | 0.049092   | 0          | 0          | 0.134998   |
| SLC51B       | 0          | 0.0432256  | 0          | 0.052904   | 0.0800787  |
| MAB21L2      | 0          | 0          | 0.0292211  | 0.0596262  | 0.0302742  |
| SCT          | 0          | 0.172472   | 0          | 0.222197   | 0.315486   |
| CGB          | 0          | 0.0753372  | 0          | 0          | 0.13835    |
| CTAGE10P     | 0          | 0.0109413  | 0          | 0          | 0.0208096  |
| CHADL        | 0.0252336  | 0.0324473  | 0.0297833  | 0.0847969  | 0.0590904  |
| AFAP1-AS1    | 0.00381758 | 0.00536481 | 0.00472723 | 0.0318139  | 0.00498546 |

|              |            |            |            |            |            |
|--------------|------------|------------|------------|------------|------------|
| PPL          | 0.0159983  | 0.00687958 | 0          | 0.0350917  | 0          |
| RSAD2        | 0.00618407 | 0          | 0          | 0          | 0.00842312 |
| CD84         | 0.00269701 | 0          | 0          | 0          | 0.00367775 |
| LOC100506776 | 0.0065028  | 0          | 0          | 0          | 0.00896133 |
| CNTD2        | 0          | 0.0381448  | 0.0683659  | 0.237591   | 0          |
| CCBP2        | 0          | 0.0310594  | 0          | 0.0364934  | 0.0428494  |
| SSC5D        | 0.0150467  | 0          | 0.00903163 | 0.0631743  | 0          |
| FBLN7        | 0.0381005  | 0          | 0          | 0.064174   | 0.0236621  |
| ANPEP        | 0.00888975 | 0.0237784  | 0.0106833  | 0.0445234  | 0.0327254  |
| DIRAS1       | 0.0370432  | 0.0128744  | 0          | 0.108925   | 0.035549   |
| ROBO4        | 0.028152   | 0          | 0.0339931  | 0.0941869  | 0.0573522  |
| MPP4         | 0          | 0          | 0.0225812  | 0.0454313  | 0.0119223  |
| SEMA3G       | 0.00660344 | 0.00890593 | 0          | 0.0110061  | 0.0164868  |
| SGCZ         | 0.0222022  | 0          | 0          | 0.0183997  | 0.0148682  |
| SLC22A13     | 0.0361168  | 0          | 0          | 0          | 0.0759167  |
| MMP10        | 0.025576   | 0          | 0.0159892  | 0          | 0.068734   |
| LINC00652    | 0.017184   | 0.0245687  | 0          | 0          | 0.0455834  |
| USP44        | 0          | 0          | 0.00788023 | 0          | 0.0261364  |
| TEKT2        | 0.0214094  | 0          | 0          | 0.0705387  | 0          |
| GCNT2        | 0          | 0.00706712 | 0          | 0.00808049 | 0.00669991 |
| SLC39A5      | 0          | 0.0536279  | 0.0240236  | 0.0668264  | 0.122562   |
| SNORA36A     | 0          | 3.95065    | 0          | 0          | 7.91866    |
| GDF5         | 0.0147508  | 0          | 0          | 0.0491653  | 0          |
| SNORA71C     | 5.91404    | 0          | 0          | 14.461     | 0          |
| UPK1B        | 0.0118872  | 0          | 0          | 0.0396582  | 0          |
| LOC100507244 | 0.0140613  | 0          | 0          | 0.0470187  | 0          |
| SPATA4       | 0          | 0          | 0.0522089  | 0.0346065  | 0.0288053  |
| OLFML1       | 0.00823994 | 0.0116156  | 0          | 0.0410887  | 0.0108306  |
| SLC26A8      | 0          | 0.0109517  | 0          | 0.0129046  | 0.010295   |
| LOC100129269 | 0.0329862  | 0.0225888  | 0.0404803  | 0.109485   | 0.128027   |
| MFSDB2       | 0.0272972  | 0          | 0          | 0.0921368  | 0          |
| LRRC10       | 0.0106242  | 0.0149273  | 0.0131658  | 0.0708242  | 0.0414672  |
| MT1H         | 0.157703   | 0          | 0          | 0.25925    | 0          |
| CD200R1      | 0.0184339  | 0          | 0          | 0          | 0.0128886  |
| LILRB1       | 0          | 0.013856   | 0.0123751  | 0.0170942  | 0          |
| KRT222       | 0.182192   | 0.0353283  | 0.092109   | 0.482938   | 0.202539   |
| GSDMA        | 0          | 0          | 0.0168487  | 0.022947   | 0.0346504  |
| FBN3         | 0.00407842 | 0          | 0          | 0.00685704 | 0          |
| PLK5         | 0.024912   | 0          | 0          | 0.0418795  | 0          |
| NR5A1        | 0.0128321  | 0          | 0.0154766  | 0.021424   | 0.031547   |
| FLJ40852     | 0.0206747  | 0          | 0.0642998  | 0.119796   | 0.0823652  |
| PLEKHH2      | 0.00293822 | 0          | 0.00371198 | 0.00977231 | 0.0080329  |
| PTPRG-AS1    | 0          | 0.0133952  | 0          | 0.0302055  | 0          |
| CD200        | 0.0107665  | 0          | 0          | 0.0179996  | 0          |
| UQCRBP1      | 0.0285246  | 0          | 0          | 0.0478166  | 0          |
| HOGA1        | 0.0466855  | 0.0215016  | 0.0309565  | 0.155425   | 0.0810009  |
| ZNF671       | 0.00960473 | 0.0134554  | 0          | 0          | 0.0124479  |
| TMEM176B     | 0.0300862  | 0          | 0          | 0          | 0          |
| C12orf50     | 0          | 0          | 0.0155697  | 0.0206326  | 0.0340287  |
| TM6SF2       | 0.0263314  | 0          | 0          | 0          | 0          |
| ZACN         | 0          | 0.0354109  | 0          | 0          | 0.0326152  |
| CXorf58      | 0          | 0          | 0.0204658  | 0.0271753  | 0.0450642  |
| PNLIPRP1     | 0.017776   | 0          | 0          | 0          | 0          |
| TNS4         | 0.0145997  | 0          | 0.00890183 | 0.0610083  | 0.0090704  |
| CLDN20       | 0          | 0          | 0.025484   | 0          | 0.05383    |
| CEACAM1      | 0.0201685  | 0          | 0          | 0.0123438  | 0.0196439  |
| NNAT         | 0.0650836  | 0          | 0          | 0.109462   | 0.122678   |
| CHRM5        | 0.00792591 | 0          | 0.00987071 | 0.0132251  | 0.051459   |
| SNORA68      | 0          | 13.255     | 3.8846     | 15.5535    | 23.5214    |
| MYBPC2       | 0.0256102  | 0.0226093  | 0          | 0.0141428  | 0.0728742  |
| STON2        | 0.00535354 | 0          | 0          | 0          | 0.0139668  |
| HSPB6        | 0.0305809  | 0          | 0.0368519  | 0.101751   | 0.0384173  |
| MYO1A        | 0.0141244  | 0.00964763 | 0.0172691  | 0.0351824  | 0.0177789  |
| STAC2        | 0.00968375 | 0          | 0          | 0          | 0.0360497  |
| UOX          | 0.0138353  | 0          | 0.0174439  | 0.0917533  | 0          |
| RUFY4        | 0.0223088  | 0          | 0          | 0.0367865  | 0.0273816  |
| L1CAM        | 0          | 0          | 0.00801198 | 0.0222769  | 0.00809721 |
| FLG          | 0          | 0.00246048 | 0          | 0.00301299 | 0          |
| ITGA2B       | 0          | 0.0147511  | 0          | 0.0370941  | 0          |
| GPA33        | 0          | 0          | 0.0125816  | 0.0171304  | 0.0129599  |
| LOC650368    | 0.0705437  | 0          | 0          | 0.117381   | 0.0295649  |
| NARR,RAB34   | 0.053615   | 0.0367011  | 0.127704   | 0.334393   | 0.284218   |
| NRADDP       | 0.0655151  | 0          | 0          | 0.0547723  | 0.081667   |
| LOC100240735 | 0          | 0          | 0.0437518  | 0.0585014  | 0.0473464  |
| LOC100128573 | 0          | 0          | 0.0963544  | 0.131617   | 0.10333    |
| GJD4         | 0          | 0          | 0.0391949  | 0.0547802  | 0.0403151  |
| CRSP8P       | 0          | 0          | 0.0268959  | 0          | 0.027777   |
| LOC100287072 | 0          | 0          | 0.0125401  | 0          | 0.0135581  |
| SLC52A3      | 0          | 0.0184076  | 0          | 0.0227385  | 0.050396   |

|              |            |            |            |            |            |
|--------------|------------|------------|------------|------------|------------|
| LINC00336    | 0          | 0.0188854  | 0.0169762  | 0.046165   | 0          |
| PRICKLE2-AS3 | 0          | 0.0113304  | 0          | 0          | 0.031859   |
| LINC00161    | 0          | 0          | 0.0628119  | 0.179711   | 0.0729583  |
| AFF3         | 0          | 0.00888589 | 0          | 0          | 0.0248148  |
| CXCR2        | 0          | 0.0134129  | 0          | 0          | 0.0374587  |
| MILR1        | 0.10652    | 0          | 0          | 0.17622    | 0.0692218  |
| LOC348761    | 0.0243071  | 0.0111779  | 0.0198484  | 0.0808516  | 0.0311552  |
| PPP1R27      | 0.129305   | 0.0855165  | 0          | 0.539788   | 0.23507    |
| IL12RB2      | 0.0192703  | 0          | 0.00797512 | 0.0535074  | 0.0250554  |
| CCBE1        | 0.00753934 | 0          | 0          | 0.00629346 | 0.00513005 |
| FSIP1        | 0.00719758 | 0.0104096  | 0.00908006 | 0.0595768  | 0.0398145  |
| LRRC4        | 0.020066   | 0.00941234 | 0          | 0.0448028  | 0.0436697  |
| CCR6         | 0.0285671  | 0.0208035  | 0.0180467  | 0.11941    | 0.0877749  |
| PHYHD1       | 0.0386926  | 0          | 0          | 0.0323222  | 0.0972358  |
| CCM2L        | 0.0188829  | 0.0252239  | 0.0226186  | 0.0943825  | 0.0232284  |
| SYNPO2L      | 0.0076152  | 0          | 0.00933802 | 0.0254416  | 0.0193191  |
| SNORA14B     | 0          | 0          | 4.59193    | 0          | 5.69326    |
| APOBEC3H     | 0.0625234  | 0          | 0          | 0.154656   | 0          |
| RSPH9        | 0          | 0.0556479  | 0.100267   | 0.205484   | 0.102629   |
| MSR1         | 0.00775113 | 0          | 0          | 0.0225306  | 0.0107904  |
| FLT4         | 0          | 0          | 0.0103235  | 0.0144149  | 0          |
| DSCR6        | 0.0146205  | 0          | 0          | 0.0243767  | 0.0388988  |
| COL24A1      | 0          | 0          | 0.00768852 | 0.0153887  | 0.0124512  |
| TSPAN18      | 0          | 0.00972675 | 0          | 0.0118158  | 0.0179823  |
| LOC100128164 | 0.00360426 | 0.0051996  | 0          | 0          | 0.0384437  |
| SLC13A4      | 0          | 0.0141131  | 0          | 0.0173196  | 0.026026   |
| SNORD55      | 297.71     | 0          | 0          | 0          | 1301.93    |
| LOC728989    | 0          | 0          | 0.0364767  | 0.049528   | 0.112977   |
| TMIGD2       | 0          | 0.0393494  | 0          | 0          | 0.0721554  |
| NOX4         | 0          | 0.00759952 | 0          | 0.00854953 | 0.00722952 |
| MC2R         | 0.00581844 | 0          | 0          | 0          | 0.015789   |
| LINC00598    | 0.00681406 | 0          | 0          | 0          | 0.0308256  |
| LOC100505817 | 0.0190257  | 0          | 0          | 0          | 0.0524864  |
| OPCML        | 0          | 0.00502096 | 0          | 0.00578562 | 0.0047076  |
| MIR637       | 0          | 39.8706    | 0          | 50.2642    | 133.111    |
| SNORD83B     | 0          | 0          | 60.4028    | 0          | 0          |
| GDAP1L1      | 0          | 0          | 0.0140808  | 0.0209764  | 0          |
| C1orf227     | 0          | 0          | 0.0858507  | 0          | 0.271811   |
| CIB4         | 0.0454635  | 0          | 0          | 0.151339   | 0.0574147  |
| FAM179A      | 0.0104637  | 0          | 0          | 0.0173276  | 0.0126362  |
| CCDC87       | 0.0319945  | 0.0290502  | 0.0130667  | 0.124448   | 0.0669998  |
| HAS1         | 0.0281952  | 0          | 0          | 0.0474181  | 0.0343112  |
| FAM223B      | 0.0471002  | 0          | 0          | 0.155878   | 0.0619266  |
| LOC100506274 | 0.0265187  | 0          | 0          | 0.087735   | 0.0352561  |
| ZNF667       | 0.00540196 | 0          | 0          | 0.0179229  | 0.00732845 |
| NUGGC        | 0.00673751 | 0          | 0          | 0.0111346  | 0.00858776 |
| PSD2         | 0.00664176 | 0          | 0          | 0.0111098  | 0.00839132 |
| SPAG6        | 0.00938981 | 0          | 0          | 0.0312145  | 0.0128995  |
| ZNF582-AS1   | 0          | 0.0474275  | 0.0320355  | 0.166821   | 0.0891357  |
| MARCH4       | 0.0073121  | 0          | 0          | 0.0122789  | 0.00925292 |
| CECR1        | 0.00990845 | 0          | 0          | 0.0165904  | 0.0130723  |
| TEX40        | 0          | 0          | 0.0705051  | 0.196963   | 0.141907   |
| LOC730227    | 0.00996103 | 0.0142483  | 0          | 0.0332357  | 0.0124908  |
| SNAI2        | 0.0124078  | 0          | 0          | 0.0206776  | 0.0170743  |
| MEIOB        | 0.0123689  | 0          | 0          | 0.0205108  | 0.0172103  |
| PDZRN4       | 0          | 0          | 0.00869966 | 0.0114151  | 0.0183533  |
| P2RX2        | 0.0237133  | 0          | 0          | 0.0733319  | 0          |
| KCNMB4       | 0.00537222 | 0          | 0          | 0.0089668  | 0.0074818  |
| FNDC7        | 0.00764076 | 0          | 0.00949263 | 0.0127229  | 0.0299274  |
| FAM90A2P     | 0          | 0.115872   | 0          | 0.217365   | 0.272817   |
| PSG3         | 0.0121581  | 0          | 0          | 0          | 0.0161645  |
| TMEM236      | 0.00417653 | 0          | 0          | 0.00699006 | 0.00594617 |
| C10orf62     | 0          | 0          | 0.0291824  | 0          | 0.0591057  |
| GRM6         | 0          | 0          | 0.00647805 | 0.00880183 | 0.0136762  |
| NECAB2       | 0.0220417  | 0.0880557  | 0.132616   | 0.476694   | 0.297212   |
| LOC145474    | 0.0117308  | 0          | 0          | 0.0196895  | 0.0169766  |
| SAMD14       | 0.0133669  | 0.0176252  | 0.0160105  | 0.133698   | 0.0322614  |
| NODAL        | 0.0136253  | 0          | 0          | 0          | 0.0687614  |
| KRT16        | 0.0226353  | 0          | 0          | 0.0748216  | 0          |
| GGTLC1       | 0.0397464  | 0.0523353  | 0.0470097  | 0.329248   | 0.0958955  |
| PROK1        | 0          | 0.0323118  | 0          | 0.0387721  | 0          |
| ITGB8        | 0.00237962 | 0          | 0          | 0          | 0.00341574 |
| GGNBP1       | 0          | 0.0421062  | 0          | 0.157202   | 0          |
| TBC1D3P2     | 0.0162236  | 0          | 0          | 0.0539927  | 0          |
| TRO          | 0.00772155 | 0          | 0          | 0.0258111  | 0          |
| INGX         | 0.0327597  | 0          | 0          | 0.0544955  | 0          |
| GUCY2C       | 0          | 0.00789344 | 0          | 0.0184138  | 0.0222126  |
| PACRG        | 0          | 0          | 0.0234326  | 0.0628143  | 0.024867   |
| MEFV         | 0.00955082 | 0          | 0.0116863  | 0.0158889  | 0.0610446  |

|                  |            |            |            |            |            |
|------------------|------------|------------|------------|------------|------------|
| GSTM2P1          | 0.0242502  | 0          | 0          | 0.0403234  | 0          |
| PPARGC1A         | 0.00336786 | 0          | 0          | 0.005634   | 0          |
| KCNJ12,KCNJ18    | 0          | 0          | 0.00882123 | 0.033874   | 0          |
| SCRT1            | 0          | 0          | 0.0206477  | 0          | 0.0206893  |
| TRAF3IP3         | 0.0112201  | 0          | 0          | 0.0184895  | 0.0418923  |
| LOC100130451     | 0.01356    | 0          | 0          | 0          | 0          |
| DUOX2            | 0.00489429 | 0          | 0          | 0.00816797 | 0.018505   |
| FLJ46300         | 0          | 0          | 0.0110625  | 0.0451556  | 0          |
| KRTAP3-2         | 0.0975825  | 0.0678399  | 0          | 0.485672   | 0          |
| C12orf71         | 0          | 0.0437193  | 0          | 0.105292   | 0.0811076  |
| C21orf62         | 0          | 0.0165478  | 0          | 0.0383504  | 0.0234767  |
| CD300C           | 0          | 0          | 0.0259563  | 0.107331   | 0          |
| INSC             | 0          | 0          | 0.0123878  | 0.0166024  | 0          |
| NRXN2            | 0.0286599  | 0.0378835  | 0.0171001  | 0.238896   | 0.0347424  |
| SPACA4           | 0          | 0          | 0.0584435  | 0.163036   | 0          |
| SH2D6            | 0          | 0.0643255  | 0          | 0.0804446  | 0.117539   |
| DHH              | 0.028678   | 0          | 0          | 0.0481444  | 0.0690885  |
| TNFRSF4          | 0          | 0.0571935  | 0          | 0.0745494  | 0.261233   |
| CCDC173          | 0.00886228 | 0          | 0.0110861  | 0.0582093  | 0.0120372  |
| LDLRAD2          | 0.00961992 | 0          | 0          | 0.0160938  | 0.0235965  |
| PCOLCE-AS1       | 0.0281313  | 0          | 0          | 0.0703585  | 0.0702077  |
| LOC100133669     | 0          | 0.0800789  | 0          | 0.400342   | 0.0725787  |
| TMEM232          | 0.00612051 | 0          | 0          | 0          | 0.025945   |
| LOC100131655     | 0.0253413  | 0          | 0          | 0.0419825  | 0.0663999  |
| CLDN5            | 0.0282318  | 0          | 0          | 0.0715057  | 0.102465   |
| GRID1            | 0          | 0.00658858 | 0          | 0.0238182  | 0          |
| KBTBD12          | 0          | 0          | 0.011291   | 0.0301626  | 0.0238838  |
| PAPPA2           | 0          | 0          | 0.013839   | 0.0344646  | 0.021986   |
| S100P            | 0.0713703  | 0          | 0          | 0.117833   | 0.0895893  |
| WDR87            | 0          | 0          | 0.00272907 | 0.0145729  | 0.00283983 |
| SNX29P1          | 0.0685313  | 0          | 0.0417173  | 0.341516   | 0.128597   |
| PCDH19           | 0.00297915 | 0          | 0          | 0.00998223 | 0.004022   |
| MESTIT1          | 0          | 0.00946864 | 0          | 0.0445893  | 0.0176885  |
| TREM1            | 0          | 0          | 0.0374258  | 0.0503264  | 0.0925757  |
| KCNMA1           | 0.00412208 | 0          | 0.00521577 | 0.0624835  | 0          |
| RPS2P32          | 0.0457228  | 0          | 0          | 0.227842   | 0          |
| CERS3            | 0.0125897  | 0          | 0          | 0.0315253  | 0.0425656  |
| ADAMTS16         | 0          | 0.00785766 | 0          | 0.0189679  | 0.0145065  |
| OGN              | 0.00724373 | 0          | 0          | 0.0363031  | 0          |
| ANXA2P1          | 0.0171819  | 0          | 0          | 0.0567603  | 0          |
| LOC100507066     | 0          | 0          | 0.0381495  | 0.15294    | 0          |
| DMGDH            | 0          | 0          | 0.00858541 | 0.0227796  | 0          |
| GPR1             | 0          | 0          | 0.0146266  | 0          | 0.0641371  |
| CRB1             | 0.00484455 | 0          | 0          | 0.0112355  | 0.0130056  |
| BZRAP1-AS1       | 0.0343491  | 0          | 0          | 0.14431    | 0.022533   |
| LY6G6C           | 0          | 0.063184   | 0          | 0.302609   | 0.176857   |
| HCG11            | 0.0037386  | 0          | 0          | 0.0125792  | 0.0106043  |
| SEMA3E           | 0          | 0.00501507 | 0.00432098 | 0.0337559  | 0.0239576  |
| TIAM1            | 0.00388499 | 0          | 0          | 0.0129337  | 0.00505899 |
| LOC388553        | 0          | 0          | 0.0322387  | 0.221839   | 0          |
| MAGEB2           | 0.033169   | 0.0471395  | 0.0621418  | 0.800574   | 0.311196   |
| GPR39            | 0.0122662  | 0          | 0          | 0.0204099  | 0.0154012  |
| LOC100507173     | 0.019296   | 0          | 0          | 0.041363   | 0.196765   |
| TMEM156          | 0          | 0          | 0.0293106  | 0.231836   | 0.0645249  |
| TBC1D3P1-DHX40P1 | 0.0188002  | 0          | 0.0469378  | 0.311695   | 0.0253868  |
| ZFR2             | 0.00906942 | 0          | 0          | 0          | 0.0585882  |
| MUC4             | 0.00191615 | 0          | 0          | 0.00319669 | 0.0333844  |
| DDX11L1          | 0          | 0          | 0          | 0          | 0.0234812  |
| CLCNKA           | 0          | 0          | 0          | 0.0253157  | 0.0186059  |
| CDA              | 0          | 0          | 0          | 0.0623778  | 0.0465826  |
| ALPL             | 0          | 0          | 0          | 0.0256359  | 0.0376128  |
| NCMAP            | 0          | 0          | 0          | 0.0101254  | 0          |
| TINAGL1          | 0          | 0          | 0          | 0.0361762  | 0          |
| HCRTR1           | 0          | 0          | 0          | 0          | 0.0248517  |
| FAM159A          | 0          | 0          | 0          | 0          | 0          |
| PRKAA2           | 0          | 0          | 0          | 0          | 0          |
| LOC100131060     | 0          | 0          | 0          | 0.0536358  | 0          |
| IL23R            | 0          | 0          | 0          | 0          | 0.00977045 |
| ST6GALNAC3       | 0          | 0          | 0          | 0          | 0.0296639  |
| GIPC2            | 0          | 0          | 0          | 0.0129128  | 0          |
| DNASE2B          | 0          | 0          | 0          | 0          | 0.0350717  |
| FLJ31662         | 0          | 0          | 0          | 0          | 0          |
| LOC643355        | 0          | 0          | 0          | 0.0131703  | 0.0323143  |
| TDRD10           | 0          | 0          | 0          | 0          | 0          |
| POU5F1P4         | 0          | 0          | 0          | 0          | 0.0387106  |
| RXFP4            | 0          | 0          | 0          | 0.0665733  | 0.0982173  |
| RAB25            | 0          | 0          | 0          | 0          | 0.0815541  |
| RHBG             | 0          | 0          | 0          | 0.0327133  | 0          |
| KCNJ9            | 0          | 0          | 0          | 0.0488071  | 0.0122762  |



|              |   |   |   |            |          |            |
|--------------|---|---|---|------------|----------|------------|
| VANGL2       | 0 | 0 | 0 | 0          | 0        | 0          |
| FCGR2A       | 0 | 0 | 0 | 0          | 0        | 0          |
| SNORA77      | 0 | 0 | 0 | 0          | 8.14356  | 0          |
| LINC00260    | 0 | 0 | 0 | 0          | 0        | 0.0282964  |
| IL24         | 0 | 0 | 0 | 0.0202658  | 0        | 0          |
| CR1          | 0 | 0 | 0 | 0          | 0        | 0.00371078 |
| CAMK1G       | 0 | 0 | 0 | 0.0191045  | 0        | 0          |
| HSD11B1      | 0 | 0 | 0 | 0          | 0        | 0.0228907  |
| TGFB2        | 0 | 0 | 0 | 0.00677712 | 0        | 0.022931   |
| LINC00184    | 0 | 0 | 0 | 0          | 0        | 0          |
| C1orf233     | 0 | 0 | 0 | 0          | 0        | 0.0758974  |
| TTC34        | 0 | 0 | 0 | 0          | 0        | 0.0339444  |
| SLC2A7       | 0 | 0 | 0 | 0          | 0        | 0.0374607  |
| SPATA21      | 0 | 0 | 0 | 0          | 0        | 0          |
| LOC339505    | 0 | 0 | 0 | 0.0109813  | 0        | 0          |
| HTR1D        | 0 | 0 | 0 | 0.0166908  | 0        | 0.0133603  |
| RUNX3        | 0 | 0 | 0 | 0.0152126  | 0        | 0          |
| LAPTM5       | 0 | 0 | 0 | 0          | 0        | 0.0166439  |
| COL16A1      | 0 | 0 | 0 | 0          | 0        | 0.0219361  |
| DLGAP3       | 0 | 0 | 0 | 0          | 0        | 0          |
| POU3F1       | 0 | 0 | 0 | 0          | 0.105418 | 0          |
| CYP4A11      | 0 | 0 | 0 | 0          | 0        | 0.0296828  |
| C1orf141     | 0 | 0 | 0 | 0          | 0        | 0.0270689  |
| PTPN22       | 0 | 0 | 0 | 0.0101351  | 0        | 0.00810193 |
| AMPD1        | 0 | 0 | 0 | 0          | 0        | 0.0132891  |
| REG4         | 0 | 0 | 0 | 0          | 0        | 0.0256936  |
| FCGR1B       | 0 | 0 | 0 | 0          | 0        | 0.0195324  |
| LINC00624    | 0 | 0 | 0 | 0.0105023  | 0        | 0          |
| SCARNA4      | 0 | 0 | 0 | 0          | 0        | 4.03649    |
| ADAMTS4      | 0 | 0 | 0 | 0.0132537  | 0        | 0.0296283  |
| FCGR3A       | 0 | 0 | 0 | 0.0171272  | 0        | 0          |
| C1orf111     | 0 | 0 | 0 | 0.0509392  | 0        | 0          |
| LOC400794    | 0 | 0 | 0 | 0          | 0        | 0.0436865  |
| F5           | 0 | 0 | 0 | 0          | 0        | 0.00593101 |
| SELL         | 0 | 0 | 0 | 0          | 0        | 0.0136067  |
| SELE         | 0 | 0 | 0 | 0.00933123 | 0        | 0          |
| SNORD76      | 0 | 0 | 0 | 0          | 0        | 240.024    |
| ASTN1        | 0 | 0 | 0 | 0          | 0        | 0.00455461 |
| ANGPTL1      | 0 | 0 | 0 | 0          | 0        | 0.0226381  |
| NMNAT2       | 0 | 0 | 0 | 0          | 0        | 0.00582378 |
| APOBEC4      | 0 | 0 | 0 | 0          | 0        | 0.0113506  |
| FAM129A      | 0 | 0 | 0 | 0          | 0        | 0          |
| LOC100131234 | 0 | 0 | 0 | 0          | 0        | 0.0623913  |
| MYOG         | 0 | 0 | 0 | 0          | 0        | 0.0296863  |
| IRF6         | 0 | 0 | 0 | 0          | 0        | 0.00730515 |
| AKR1C3       | 0 | 0 | 0 | 0.0390165  | 0        | 0.0267429  |
| LINC00707    | 0 | 0 | 0 | 0.011644   | 0        | 0.00964148 |
| GATA3        | 0 | 0 | 0 | 0.019018   | 0        | 0          |
| ZNF32-AS3    | 0 | 0 | 0 | 0          | 0        | 0.0323799  |
| GLUD1P7      | 0 | 0 | 0 | 0.0192588  | 0        | 0          |
| GPRIN2       | 0 | 0 | 0 | 0          | 0        | 0.0258327  |
| LINC00595    | 0 | 0 | 0 | 0.197606   | 0        | 0          |
| FFAR4        | 0 | 0 | 0 | 0          | 0        | 0          |
| CYP2C9       | 0 | 0 | 0 | 0          | 0        | 0          |
| TLX1         | 0 | 0 | 0 | 0.0331452  | 0        | 0          |
| ELOVL3       | 0 | 0 | 0 | 0.0342642  | 0        | 0          |
| PLEKHS1      | 0 | 0 | 0 | 0          | 0        | 0.0102955  |
| ARMS2        | 0 | 0 | 0 | 0          | 0        | 0          |
| MIR4484      | 0 | 0 | 0 | 0          | 0        | 254.617    |
| VENTX        | 0 | 0 | 0 | 0          | 0        | 0.0192177  |
| TUBB8        | 0 | 0 | 0 | 0.0361768  | 0        | 0          |
| LOC441666    | 0 | 0 | 0 | 0          | 0        | 0.00403904 |
| LINC00842    | 0 | 0 | 0 | 0          | 0        | 0.0113885  |
| ANXA8        | 0 | 0 | 0 | 0          | 0        | 0.0377601  |
| RBP3         | 0 | 0 | 0 | 0          | 0        | 0          |
| CRTAC1       | 0 | 0 | 0 | 0          | 0        | 0.015568   |
| CALHM3       | 0 | 0 | 0 | 0          | 0        | 0.0347644  |
| MMP21        | 0 | 0 | 0 | 0.0285031  | 0        | 0          |
| LOC338651    | 0 | 0 | 0 | 0.0222795  | 0        | 0.0164968  |
| ART1         | 0 | 0 | 0 | 0.0501358  | 0        | 0          |
| OR5112       | 0 | 0 | 0 | 0          | 0        | 0          |
| OR52D1       | 0 | 0 | 0 | 0          | 0        | 0.0379592  |
| OR10A2       | 0 | 0 | 0 | 0          | 0        | 0.0473613  |
| OR10A4       | 0 | 0 | 0 | 0.0506911  | 0        | 0          |
| MRV11-AS1    | 0 | 0 | 0 | 0          | 0        | 0          |
| OR7E14P      | 0 | 0 | 0 | 0          | 0        | 0.0357694  |
| LDHAL6A      | 0 | 0 | 0 | 0          | 0        | 0          |
| FSHB         | 0 | 0 | 0 | 0          | 0        | 0.0172383  |
| LOC221122    | 0 | 0 | 0 | 0.0424903  | 0        | 0          |

|              |   |   |   |            |            |
|--------------|---|---|---|------------|------------|
| FAM180B      | 0 | 0 | 0 | 0          | 0.0284602  |
| MS4A7        | 0 | 0 | 0 | 0          | 0.0117042  |
| SLC22A10     | 0 | 0 | 0 | 0          | 0.0119964  |
| TBC1D10C     | 0 | 0 | 0 | 0.0489686  | 0          |
| SHANK2-AS1   | 0 | 0 | 0 | 0.0184582  | 0.0142978  |
| SHANK2-AS3   | 0 | 0 | 0 | 0.0241299  | 0          |
| FAT3         | 0 | 0 | 0 | 0.00187193 | 0          |
| FOLR4        | 0 | 0 | 0 | 0          | 0          |
| C11orf53     | 0 | 0 | 0 | 0          | 0.0505052  |
| CXCR5        | 0 | 0 | 0 | 0          | 0          |
| PDZD3        | 0 | 0 | 0 | 0          | 0.0373522  |
| GRIK4        | 0 | 0 | 0 | 0.0196396  | 0          |
| PANX3        | 0 | 0 | 0 | 0.0295749  | 0          |
| FLI1         | 0 | 0 | 0 | 0          | 0          |
| ADAMTS15     | 0 | 0 | 0 | 0.00995009 | 0.0148092  |
| HBB          | 0 | 0 | 0 | 0.0844277  | 0          |
| ASCL3        | 0 | 0 | 0 | 0          | 0          |
| PLEKHA7      | 0 | 0 | 0 | 0.0104692  | 0          |
| MUC15        | 0 | 0 | 0 | 0          | 0          |
| DCDC1        | 0 | 0 | 0 | 0.0224744  | 0          |
| ELF5         | 0 | 0 | 0 | 0          | 0.0153271  |
| MYBPC3       | 0 | 0 | 0 | 0.0140059  | 0          |
| DKFZP434K028 | 0 | 0 | 0 | 0          | 0.0420912  |
| SNORD31      | 0 | 0 | 0 | 0          | 894.199    |
| GAL3ST3      | 0 | 0 | 0 | 0          | 0          |
| TBX10        | 0 | 0 | 0 | 0          | 0          |
| MRGPRD       | 0 | 0 | 0 | 0.0738519  | 0          |
| PHOX2A       | 0 | 0 | 0 | 0          | 0          |
| P4HA3        | 0 | 0 | 0 | 0          | 0.0148746  |
| TENM4        | 0 | 0 | 0 | 0          | 0          |
| SNORD6       | 0 | 0 | 0 | 0          | 0          |
| TRPC6        | 0 | 0 | 0 | 0.00826581 | 0          |
| MMP7         | 0 | 0 | 0 | 0          | 0.030806   |
| MMP3         | 0 | 0 | 0 | 0          | 0.0488488  |
| GUCY1A2      | 0 | 0 | 0 | 0          | 0          |
| LOC100131626 | 0 | 0 | 0 | 0          | 0          |
| SCN3B        | 0 | 0 | 0 | 0          | 0.00606649 |
| RIMKB        | 0 | 0 | 0 | 0          | 0.00516051 |
| H1FNT        | 0 | 0 | 0 | 0          | 0.0806413  |
| ARHGEF25     | 0 | 0 | 0 | 0.0211883  | 0          |
| SYT1         | 0 | 0 | 0 | 0          | 0          |
| OTOGL        | 0 | 0 | 0 | 0          | 0          |
| PLEKHG7      | 0 | 0 | 0 | 0          | 0.00860596 |
| RPH3A        | 0 | 0 | 0 | 0.020863   | 0          |
| DTX1         | 0 | 0 | 0 | 0          | 0          |
| MIR3908      | 0 | 0 | 0 | 0          | 6.31761    |
| FLJ37505     | 0 | 0 | 0 | 0          | 0.0146205  |
| GPR133       | 0 | 0 | 0 | 0.00958896 | 0          |
| LOC100271702 | 0 | 0 | 0 | 0          | 0.0190631  |
| ANO2         | 0 | 0 | 0 | 0          | 0          |
| AICDA        | 0 | 0 | 0 | 0.0143694  | 0          |
| TAS2R13      | 0 | 0 | 0 | 0.0221373  | 0          |
| TAS2R50      | 0 | 0 | 0 | 0          | 0          |
| PRB3         | 0 | 0 | 0 | 0          | 0.0371471  |
| SLCO1A2      | 0 | 0 | 0 | 0          | 0          |
| FAM186A      | 0 | 0 | 0 | 0          | 0.00817028 |
| KRT73        | 0 | 0 | 0 | 0.0235656  | 0          |
| KRT1         | 0 | 0 | 0 | 0          | 0.0136115  |
| CMKLR1       | 0 | 0 | 0 | 0.00775633 | 0          |
| NOS1         | 0 | 0 | 0 | 0          | 0          |
| HCAR3        | 0 | 0 | 0 | 0          | 0          |
| SPERT        | 0 | 0 | 0 | 0          | 0.0332891  |
| MLNR         | 0 | 0 | 0 | 0          | 0          |
| FAM124A      | 0 | 0 | 0 | 0          | 0          |
| NALCN-AS1    | 0 | 0 | 0 | 0.0141913  | 0          |
| GPR12        | 0 | 0 | 0 | 0          | 0          |
| LINC00571    | 0 | 0 | 0 | 0.10651    | 0          |
| KCTD4        | 0 | 0 | 0 | 0          | 0.0152149  |
| CPB2         | 0 | 0 | 0 | 0.0225747  | 0          |
| LINC00563    | 0 | 0 | 0 | 0          | 0.0232128  |
| LECT1        | 0 | 0 | 0 | 0.0311179  | 0          |
| POU4F1       | 0 | 0 | 0 | 0          | 0.0113344  |
| LINC00410    | 0 | 0 | 0 | 0.0177839  | 0          |
| RNASE2       | 0 | 0 | 0 | 0          | 0.0501123  |
| NYNRIN       | 0 | 0 | 0 | 0          | 0          |
| SSTR1        | 0 | 0 | 0 | 0          | 0.0112517  |
| PLEKHD1      | 0 | 0 | 0 | 0.031044   | 0.0228566  |
| SLC24A4      | 0 | 0 | 0 | 0.00453506 | 0          |
| SNORA28      | 0 | 0 | 0 | 12.4364    | 0          |

|               |   |   |   |            |            |
|---------------|---|---|---|------------|------------|
| TDRD9         | 0 | 0 | 0 | 0.00805885 | 0          |
| MYH6          | 0 | 0 | 0 | 0          | 0          |
| PRKD1         | 0 | 0 | 0 | 0          | 0          |
| EGLN3         | 0 | 0 | 0 | 0          | 0.0136913  |
| OTX2          | 0 | 0 | 0 | 0          | 0          |
| SLC35F4       | 0 | 0 | 0 | 0.0252645  | 0          |
| SNORA79       | 0 | 0 | 0 | 0          | 25.1518    |
| NPAP1         | 0 | 0 | 0 | 0.00498006 | 0          |
| SNRPN,SNURF   | 0 | 0 | 0 | 0          | 0          |
| PAR-SN        | 0 | 0 | 0 | 0          | 0.0191773  |
| FGF7          | 0 | 0 | 0 | 0.0166401  | 0.00722365 |
| SCG3          | 0 | 0 | 0 | 0          | 0.00890852 |
| LDHAL6B       | 0 | 0 | 0 | 0.0222417  | 0          |
| CYP1A2        | 0 | 0 | 0 | 0          | 0.0127078  |
| LOC646938     | 0 | 0 | 0 | 0          | 0.127395   |
| SH3GL3        | 0 | 0 | 0 | 0          | 0          |
| SV2B          | 0 | 0 | 0 | 0.00357217 | 0          |
| ULK4P1,ULK4P3 | 0 | 0 | 0 | 0          | 0.0302775  |
| PPP1R14D      | 0 | 0 | 0 | 0          | 0.0616058  |
| PLA2G4E       | 0 | 0 | 0 | 0          | 0          |
| BCL2L10       | 0 | 0 | 0 | 0.216691   | 0.244059   |
| CILP          | 0 | 0 | 0 | 0          | 0.00731839 |
| STRA6         | 0 | 0 | 0 | 0.0228295  | 0          |
| LINC00597     | 0 | 0 | 0 | 0          | 0          |
| TMC3          | 0 | 0 | 0 | 0.0133565  | 0          |
| PRR25         | 0 | 0 | 0 | 0          | 0.0560341  |
| SYT17         | 0 | 0 | 0 | 0          | 0.02321    |
| ACSM5         | 0 | 0 | 0 | 0          | 0          |
| VWA3A         | 0 | 0 | 0 | 0.00944387 | 0.00720062 |
| FLJ21408      | 0 | 0 | 0 | 0.170315   | 0          |
| CD19          | 0 | 0 | 0 | 0.0287889  | 0          |
| SNORA30       | 0 | 0 | 0 | 0          | 6.91842    |
| NOD2          | 0 | 0 | 0 | 0.0231569  | 0          |
| MT1A          | 0 | 0 | 0 | 0          | 0.385381   |
| GPR97         | 0 | 0 | 0 | 0          | 0.0148873  |
| CLEC18C       | 0 | 0 | 0 | 0          | 0.0228045  |
| CDH13         | 0 | 0 | 0 | 0.0107975  | 0          |
| FOXC2         | 0 | 0 | 0 | 0          | 0.0556128  |
| IL17C         | 0 | 0 | 0 | 0          | 0.0561349  |
| LINC00235     | 0 | 0 | 0 | 0.268228   | 0          |
| PTX4          | 0 | 0 | 0 | 0          | 0.0418413  |
| ERN2          | 0 | 0 | 0 | 0.048389   | 0          |
| LOC388242     | 0 | 0 | 0 | 0          | 0.0356369  |
| CSDAP1        | 0 | 0 | 0 | 0.0301614  | 0          |
| CNGB1         | 0 | 0 | 0 | 0          | 0          |
| CDH11         | 0 | 0 | 0 | 0          | 0          |
| DPEP2         | 0 | 0 | 0 | 0.0326067  | 0.0240783  |
| TUSC5         | 0 | 0 | 0 | 0          | 0.0129075  |
| GUCY2D        | 0 | 0 | 0 | 0.0217704  | 0          |
| ALOX15B       | 0 | 0 | 0 | 0.0222826  | 0.0166299  |
| SNORD65       | 0 | 0 | 0 | 638.443    | 0          |
| KRT16P1       | 0 | 0 | 0 | 0.034015   | 0          |
| GRAPL         | 0 | 0 | 0 | 0.0654518  | 0.0493283  |
| SNORD4B       | 0 | 0 | 0 | 0          | 0          |
| MIR4523       | 0 | 0 | 0 | 0          | 855.952    |
| LHX1          | 0 | 0 | 0 | 0          | 0          |
| IGFBP4        | 0 | 0 | 0 | 0.0293947  | 0          |
| CD300LG       | 0 | 0 | 0 | 0          | 0.0151368  |
| IGF2BP1       | 0 | 0 | 0 | 0          | 0.0041699  |
| ABI3          | 0 | 0 | 0 | 0.0289171  | 0          |
| MYCBPAP       | 0 | 0 | 0 | 0          | 0.0106956  |
| EPX           | 0 | 0 | 0 | 0          | 0.032918   |
| C17orf64      | 0 | 0 | 0 | 0.0576868  | 0          |
| SNORD104      | 0 | 0 | 0 | 0          | 235.303    |
| SOX9          | 0 | 0 | 0 | 0          | 0          |
| OTOP2         | 0 | 0 | 0 | 0          | 0          |
| P2RX1         | 0 | 0 | 0 | 0          | 0.0136395  |
| GGT6          | 0 | 0 | 0 | 0.0214556  | 0          |
| CDRT15        | 0 | 0 | 0 | 0.123507   | 0          |
| FAM106A       | 0 | 0 | 0 | 0          | 0.0147718  |
| EPN2-AS1      | 0 | 0 | 0 | 0          | 0.0291523  |
| KRT16P3       | 0 | 0 | 0 | 0.0277344  | 0          |
| KRT18P55      | 0 | 0 | 0 | 0          | 0.0379492  |
| OMG           | 0 | 0 | 0 | 0.0355819  | 0          |
| GAS2L2        | 0 | 0 | 0 | 0          | 0.0128996  |
| C17orf66      | 0 | 0 | 0 | 0.0196931  | 0          |
| TBC1D3H       | 0 | 0 | 0 | 0          | 0.0176858  |
| HNF1B         | 0 | 0 | 0 | 0          | 0          |
| LOC284100     | 0 | 0 | 0 | 0.0184448  | 0          |

|              |   |   |   |            |            |
|--------------|---|---|---|------------|------------|
| NEUROD2      | 0 | 0 | 0 | 0.0296441  | 0          |
| KRT12        | 0 | 0 | 0 | 0.0247815  | 0          |
| KRTAP1-1     | 0 | 0 | 0 | 0.071964   | 0          |
| KRT42P       | 0 | 0 | 0 | 0          | 0.0131511  |
| TAC4         | 0 | 0 | 0 | 0          | 0          |
| DLX3         | 0 | 0 | 0 | 0.0434312  | 0          |
| MIR3064      | 0 | 0 | 0 | 0          | 0          |
| SDK2         | 0 | 0 | 0 | 0          | 0.00373235 |
| BTBD17       | 0 | 0 | 0 | 0          | 0.0518444  |
| FOXJ1        | 0 | 0 | 0 | 0          | 0          |
| NPTX1        | 0 | 0 | 0 | 0          | 0.00760767 |
| LOC100130370 | 0 | 0 | 0 | 0          | 0.0552662  |
| GREB1L       | 0 | 0 | 0 | 0.00651231 | 0          |
| SIGLEC15     | 0 | 0 | 0 | 0          | 0.054123   |
| ST8SIA3      | 0 | 0 | 0 | 0          | 0          |
| SERPINB5     | 0 | 0 | 0 | 0.0141087  | 0          |
| DLGAP1       | 0 | 0 | 0 | 0.00806979 | 0          |
| SLC25A52     | 0 | 0 | 0 | 0          | 0.0304337  |
| SNORD58A     | 0 | 0 | 0 | 0          | 1481.21    |
| GRIN3B       | 0 | 0 | 0 | 0.0383311  | 0.0524508  |
| CREB3L3      | 0 | 0 | 0 | 0          | 0.0137847  |
| FSD1         | 0 | 0 | 0 | 0          | 0.0250457  |
| CLEC4GP1     | 0 | 0 | 0 | 0.0326771  | 0.0248909  |
| CASP14       | 0 | 0 | 0 | 0          | 0          |
| F2RL3        | 0 | 0 | 0 | 0.0227362  | 0          |
| NCAN         | 0 | 0 | 0 | 0.00715494 | 0          |
| CD22         | 0 | 0 | 0 | 0.0701359  | 0          |
| LOC644189    | 0 | 0 | 0 | 0.0357307  | 0          |
| ZNF570       | 0 | 0 | 0 | 0          | 0.0135923  |
| LOC644554    | 0 | 0 | 0 | 0          | 0          |
| CYP2G1P      | 0 | 0 | 0 | 0          | 0.0134677  |
| IGSF23       | 0 | 0 | 0 | 0          | 0          |
| CGB2         | 0 | 0 | 0 | 0          | 0.0901022  |
| SNAR-F       | 0 | 0 | 0 | 0          | 0          |
| GPR32        | 0 | 0 | 0 | 0          | 0.0418404  |
| KLK3         | 0 | 0 | 0 | 0.0320192  | 0          |
| ZNF818P      | 0 | 0 | 0 | 0          | 0          |
| TTYH1        | 0 | 0 | 0 | 0          | 0          |
| LILRA2       | 0 | 0 | 0 | 0          | 0.0218174  |
| TMEM190      | 0 | 0 | 0 | 0.1484     | 0.21255    |
| ZNF542       | 0 | 0 | 0 | 0          | 0.00892288 |
| ZFP28        | 0 | 0 | 0 | 0          | 0.0143087  |
| ZNF304       | 0 | 0 | 0 | 0.00791839 | 0          |
| TUBB4A       | 0 | 0 | 0 | 0          | 0          |
| CD70         | 0 | 0 | 0 | 0          | 0.0672707  |
| PTGER1       | 0 | 0 | 0 | 0          | 0.0862129  |
| PRODH2       | 0 | 0 | 0 | 0.0398018  | 0          |
| RASGRP4      | 0 | 0 | 0 | 0          | 0          |
| CYP2A6       | 0 | 0 | 0 | 0          | 0.0494886  |
| CXCL17       | 0 | 0 | 0 | 0.065714   | 0          |
| PGLYRP1      | 0 | 0 | 0 | 0.0814429  | 0.0589915  |
| PTGIR        | 0 | 0 | 0 | 0.037587   | 0          |
| GNG8         | 0 | 0 | 0 | 0          | 0          |
| CABP5        | 0 | 0 | 0 | 0          | 0          |
| TULP2        | 0 | 0 | 0 | 0.0296131  | 0.0222311  |
| KLKP1        | 0 | 0 | 0 | 0          | 0.0332175  |
| KLK7         | 0 | 0 | 0 | 0.0220368  | 0          |
| SIGLEC14     | 0 | 0 | 0 | 0.0255187  | 0          |
| ZNF677       | 0 | 0 | 0 | 0          | 0.0151364  |
| LILRA5       | 0 | 0 | 0 | 0.039963   | 0          |
| TMEM150B     | 0 | 0 | 0 | 0          | 0.0653103  |
| ZSCAN5B      | 0 | 0 | 0 | 0.0283669  | 0.0213087  |
| SNTG2        | 0 | 0 | 0 | 0.0564679  | 0          |
| VSNL1        | 0 | 0 | 0 | 0          | 0.0162371  |
| DPYSL5       | 0 | 0 | 0 | 0          | 0          |
| TRIM54       | 0 | 0 | 0 | 0          | 0.0234182  |
| LBH          | 0 | 0 | 0 | 0          | 0          |
| QPCT         | 0 | 0 | 0 | 0          | 0.0209682  |
| TMEM247      | 0 | 0 | 0 | 0          | 0          |
| ARHGAP25     | 0 | 0 | 0 | 0          | 0          |
| C2orf78      | 0 | 0 | 0 | 0.06559    | 0          |
| LOC284950    | 0 | 0 | 0 | 0          | 0.0106359  |
| IL1RL1       | 0 | 0 | 0 | 0          | 0.0118365  |
| IL18RAP      | 0 | 0 | 0 | 0          | 0          |
| C2orf40      | 0 | 0 | 0 | 0          | 0.0700528  |
| RNU4ATAC     | 0 | 0 | 0 | 0          | 0          |
| PROC         | 0 | 0 | 0 | 0.0377537  | 0.0273659  |
| CCDC74B-AS1  | 0 | 0 | 0 | 0          | 0.0485369  |
| AMER3        | 0 | 0 | 0 | 0.00810035 | 0          |

|                   |   |   |   |            |            |
|-------------------|---|---|---|------------|------------|
| SLC4A10           | 0 | 0 | 0 | 0.00624211 | 0          |
| LOC100506134      | 0 | 0 | 0 | 0.137421   | 0          |
| B3GALT1           | 0 | 0 | 0 | 0          | 0.0134534  |
| SATB2-AS1         | 0 | 0 | 0 | 0          | 0.0126918  |
| TUBA4B            | 0 | 0 | 0 | 0.0357905  | 0          |
| LOC151484         | 0 | 0 | 0 | 0.0271386  | 0          |
| AQP12A            | 0 | 0 | 0 | 0.0898723  | 0          |
| AGXT              | 0 | 0 | 0 | 0.043152   | 0          |
| CYS1              | 0 | 0 | 0 | 0.0268192  | 0          |
| OTOF              | 0 | 0 | 0 | 0.0121825  | 0          |
| XDH               | 0 | 0 | 0 | 0          | 0          |
| CDKL4             | 0 | 0 | 0 | 0.0486019  | 0          |
| FLJ16341          | 0 | 0 | 0 | 0.0283605  | 0          |
| RGPD1,RGPD2       | 0 | 0 | 0 | 0          | 0.00392197 |
| FABP1             | 0 | 0 | 0 | 0          | 0          |
| LOC442028         | 0 | 0 | 0 | 0          | 0          |
| ADRA2B            | 0 | 0 | 0 | 0          | 0          |
| TUBA3E            | 0 | 0 | 0 | 0          | 0.0274182  |
| LYPD1             | 0 | 0 | 0 | 0.0572729  | 0          |
| ZNF385B           | 0 | 0 | 0 | 0          | 0          |
| HECW2             | 0 | 0 | 0 | 0          | 0          |
| DIRC3             | 0 | 0 | 0 | 0          | 0          |
| EPHA4             | 0 | 0 | 0 | 0          | 0          |
| FAM124B           | 0 | 0 | 0 | 0.0370039  | 0          |
| GPR55             | 0 | 0 | 0 | 0          | 0.0175534  |
| NMUR1             | 0 | 0 | 0 | 0.0178366  | 0          |
| C2orf54           | 0 | 0 | 0 | 0          | 0.0215531  |
| OXT               | 0 | 0 | 0 | 0          | 0.21632    |
| SNAP25            | 0 | 0 | 0 | 0.0190628  | 0          |
| OTOR              | 0 | 0 | 0 | 0.0243666  | 0          |
| CST7              | 0 | 0 | 0 | 0          | 0.0460886  |
| HCK               | 0 | 0 | 0 | 0.0252059  | 0.0186892  |
| LOC100287792      | 0 | 0 | 0 | 0          | 0.0171414  |
| SLC32A1           | 0 | 0 | 0 | 0.0347372  | 0          |
| HNF4A             | 0 | 0 | 0 | 0          | 0          |
| RBPJL             | 0 | 0 | 0 | 0.0286665  | 0          |
| WFDC2             | 0 | 0 | 0 | 0          | 0.103171   |
| SLC12A5           | 0 | 0 | 0 | 0          | 0.00711754 |
| LINC00494         | 0 | 0 | 0 | 0.0113181  | 0          |
| LINC00658         | 0 | 0 | 0 | 0          | 0.0231743  |
| CD93              | 0 | 0 | 0 | 0          | 0.00497829 |
| GHRH              | 0 | 0 | 0 | 0.168579   | 0          |
| MAFB              | 0 | 0 | 0 | 0          | 0.0158625  |
| GTSF1L            | 0 | 0 | 0 | 0          | 0.0484272  |
| KCNS1             | 0 | 0 | 0 | 0          | 0.00857249 |
| KCNQ2             | 0 | 0 | 0 | 0          | 0          |
| CHODL             | 0 | 0 | 0 | 0          | 0.0143532  |
| GRIK1-AS1         | 0 | 0 | 0 | 0.0382747  | 0          |
| B3GALT5           | 0 | 0 | 0 | 0          | 0          |
| IGSF5             | 0 | 0 | 0 | 0          | 0          |
| ZNF295-AS1        | 0 | 0 | 0 | 0          | 0.0478321  |
| ABCG1             | 0 | 0 | 0 | 0          | 0.0137146  |
| COL6A2            | 0 | 0 | 0 | 0          | 0.0166878  |
| ADAMTS5           | 0 | 0 | 0 | 0          | 0.00330379 |
| CBS               | 0 | 0 | 0 | 0.0264558  | 0          |
| DNMT3L            | 0 | 0 | 0 | 0          | 0          |
| KRTAP10-1         | 0 | 0 | 0 | 0.102526   | 0          |
| KRTAP10-2         | 0 | 0 | 0 | 0.0867236  | 0          |
| FTCD              | 0 | 0 | 0 | 0          | 0.0310027  |
| UPB1              | 0 | 0 | 0 | 0          | 0.0164462  |
| CRYBA4            | 0 | 0 | 0 | 0          | 0.066912   |
| SLC5A1            | 0 | 0 | 0 | 0          | 0.0129977  |
| CSF2RB            | 0 | 0 | 0 | 0.0104282  | 0          |
| MGAT3             | 0 | 0 | 0 | 0          | 0.00885834 |
| WBP2NL            | 0 | 0 | 0 | 0          | 0.0132352  |
| ANKRD62P1-PARP4P3 | 0 | 0 | 0 | 0.0230548  | 0          |
| TUBA3FP           | 0 | 0 | 0 | 0.026401   | 0          |
| GSTTP1            | 0 | 0 | 0 | 0          | 0.0528176  |
| LOC100128531      | 0 | 0 | 0 | 0          | 0.0464304  |
| SYN3              | 0 | 0 | 0 | 0          | 0          |
| A4GALT            | 0 | 0 | 0 | 0          | 0.0251659  |
| MLC1              | 0 | 0 | 0 | 0          | 0.0120609  |
| MLH1              | 0 | 0 | 0 | 0.0168541  | 0          |
| MOBP              | 0 | 0 | 0 | 0.013676   | 0.00957984 |
| ZNF662            | 0 | 0 | 0 | 0          | 0.00552749 |
| FAM198A           | 0 | 0 | 0 | 0.0146151  | 0.0112934  |
| CCR5              | 0 | 0 | 0 | 0.0107787  | 0          |
| CCDC36            | 0 | 0 | 0 | 0          | 0.0111386  |
| SLC38A3           | 0 | 0 | 0 | 0.0227378  | 0          |

|                        |   |   |   |            |            |
|------------------------|---|---|---|------------|------------|
| GPR62                  | 0 | 0 | 0 | 0          | 0.0526927  |
| ITIH1                  | 0 | 0 | 0 | 0          | 0.014904   |
| TMEM30C                | 0 | 0 | 0 | 0          | 0          |
| CCDC54                 | 0 | 0 | 0 | 0.0267591  | 0          |
| SIDT1                  | 0 | 0 | 0 | 0.00928208 | 0          |
| NR1I2                  | 0 | 0 | 0 | 0          | 0.0135926  |
| ARGFX                  | 0 | 0 | 0 | 0          | 0.00596579 |
| FBXO40                 | 0 | 0 | 0 | 0          | 0.00533277 |
| CCDC37                 | 0 | 0 | 0 | 0.0250852  | 0          |
| TRH                    | 0 | 0 | 0 | 0.0336821  | 0          |
| ALG1L2                 | 0 | 0 | 0 | 0          | 0.137545   |
| C3orf79                | 0 | 0 | 0 | 0          | 0          |
| C3orf80                | 0 | 0 | 0 | 0          | 0.0175625  |
| ARL14                  | 0 | 0 | 0 | 0          | 0          |
| EPHB3                  | 0 | 0 | 0 | 0.0150435  | 0          |
| FETUB                  | 0 | 0 | 0 | 0          | 0.023153   |
| LOC100507391           | 0 | 0 | 0 | 0          | 0.00894371 |
| FANCD2OS               | 0 | 0 | 0 | 0.0516033  | 0          |
| DAZL                   | 0 | 0 | 0 | 0.0115303  | 0          |
| XIRP1                  | 0 | 0 | 0 | 0          | 0.00592313 |
| XCR1                   | 0 | 0 | 0 | 0.0544438  | 0          |
| PRSS50                 | 0 | 0 | 0 | 0          | 0          |
| SPINK8                 | 0 | 0 | 0 | 0.138357   | 0          |
| IQCF1                  | 0 | 0 | 0 | 0.0834038  | 0          |
| ERC2                   | 0 | 0 | 0 | 0.00580862 | 0          |
| CADPS                  | 0 | 0 | 0 | 0.00833844 | 0          |
| IGSF11                 | 0 | 0 | 0 | 0          | 0.0187428  |
| DNAJB8                 | 0 | 0 | 0 | 0          | 0.0172335  |
| GATA2                  | 0 | 0 | 0 | 0          | 0.0144957  |
| SNORA7B                | 0 | 0 | 0 | 4.39345    | 3.7186     |
| SNORA58                | 0 | 0 | 0 | 0          | 0          |
| PLSCR2                 | 0 | 0 | 0 | 0.0236227  | 0          |
| GPR87                  | 0 | 0 | 0 | 0.026719   | 0          |
| SERPINI2               | 0 | 0 | 0 | 0          | 0.0174121  |
| KLHL6                  | 0 | 0 | 0 | 0.00632905 | 0          |
| LIPH                   | 0 | 0 | 0 | 0          | 0.0243498  |
| ATP13A5                | 0 | 0 | 0 | 0          | 0.00820962 |
| LOC100131551           | 0 | 0 | 0 | 0.0152925  | 0          |
| ZDHHC19                | 0 | 0 | 0 | 0          | 0          |
| SORCS2                 | 0 | 0 | 0 | 0          | 0          |
| C4orf19                | 0 | 0 | 0 | 0          | 0          |
| RHOH                   | 0 | 0 | 0 | 0          | 0          |
| STAP1                  | 0 | 0 | 0 | 0          | 0.0180819  |
| ENAM                   | 0 | 0 | 0 | 0          | 0.00506695 |
| NPFFR2                 | 0 | 0 | 0 | 0.0214767  | 0          |
| ALB                    | 0 | 0 | 0 | 0          | 0          |
| CXCL13                 | 0 | 0 | 0 | 0          | 0          |
| ANXA3                  | 0 | 0 | 0 | 0          | 0.019383   |
| LOC100505702           | 0 | 0 | 0 | 0.0088186  | 0          |
| LOC100506035           | 0 | 0 | 0 | 0          | 0          |
| MYOZ2                  | 0 | 0 | 0 | 0          | 0          |
| ADAD1                  | 0 | 0 | 0 | 0          | 0.0155886  |
| POU4F2                 | 0 | 0 | 0 | 0          | 0.0145338  |
| LRAT                   | 0 | 0 | 0 | 0          | 0          |
| FAM92A1P2              | 0 | 0 | 0 | 0.0154046  | 0.0255918  |
| STOX2                  | 0 | 0 | 0 | 0.0119133  | 0          |
| TRIML1                 | 0 | 0 | 0 | 0          | 0          |
| ZNF518B                | 0 | 0 | 0 | 0          | 0          |
| TLR10                  | 0 | 0 | 0 | 0          | 0          |
| GABRG1                 | 0 | 0 | 0 | 0.00963686 | 0          |
| UGT2A1,UGT2A2          | 0 | 0 | 0 | 0          | 0.0116807  |
| SLC10A6                | 0 | 0 | 0 | 0.0301791  | 0          |
| COL25A1                | 0 | 0 | 0 | 0.0173795  | 0.00626327 |
| SPOCK3                 | 0 | 0 | 0 | 0          | 0          |
| CLDN24                 | 0 | 0 | 0 | 0.0781736  | 0.127024   |
| LOC731424              | 0 | 0 | 0 | 0          | 0.00963151 |
| TTC23L                 | 0 | 0 | 0 | 0          | 0.0223258  |
| GHR                    | 0 | 0 | 0 | 0          | 0.00674782 |
| DDX4                   | 0 | 0 | 0 | 0          | 0.0125313  |
| C5orf64                | 0 | 0 | 0 | 0.0122224  | 0          |
| CKMT2                  | 0 | 0 | 0 | 0.0324104  | 0          |
| LOC728342              | 0 | 0 | 0 | 0          | 0.00992842 |
| FAM170A                | 0 | 0 | 0 | 0          | 0          |
| GRAMD3                 | 0 | 0 | 0 | 0.0143884  | 0          |
| C5orf48                | 0 | 0 | 0 | 0          | 0.105427   |
| SLC25A48               | 0 | 0 | 0 | 0          | 0          |
| LOC100505658           | 0 | 0 | 0 | 0.0135409  | 0.0113305  |
| MIR143,MIR143HG,MIR145 | 0 | 0 | 0 | 0.00450213 | 0.00704521 |
| SLC6A7                 | 0 | 0 | 0 | 0.0156018  | 0          |

|              |   |   |   |            |            |
|--------------|---|---|---|------------|------------|
| SGCD         | 0 | 0 | 0 | 0.00356574 | 0          |
| TENM2        | 0 | 0 | 0 | 0          | 0          |
| SLC6A3       | 0 | 0 | 0 | 0.0302597  | 0          |
| LOC442132    | 0 | 0 | 0 | 0          | 0          |
| CDC20B       | 0 | 0 | 0 | 0.0308971  | 0.0124428  |
| PLK2         | 0 | 0 | 0 | 0.0141449  | 0.0113308  |
| OTP          | 0 | 0 | 0 | 0.028748   | 0          |
| MEF2C        | 0 | 0 | 0 | 0          | 0          |
| PCSK1        | 0 | 0 | 0 | 0.00736111 | 0.00603314 |
| MGC32805     | 0 | 0 | 0 | 0.0290981  | 0          |
| FSTL4        | 0 | 0 | 0 | 0.00856806 | 0          |
| LOC389332    | 0 | 0 | 0 | 0.066836   | 0.0479184  |
| ECSCR        | 0 | 0 | 0 | 0.0671846  | 0.0525342  |
| NR3C1        | 0 | 0 | 0 | 0.00874944 | 0          |
| EBF1         | 0 | 0 | 0 | 0          | 0          |
| GMCL1P1      | 0 | 0 | 0 | 0.0126774  | 0          |
| FOXC1        | 0 | 0 | 0 | 0          | 0.0138661  |
| C6orf201     | 0 | 0 | 0 | 0          | 0.0215091  |
| HULC         | 0 | 0 | 0 | 0          | 0.241587   |
| TRIM40       | 0 | 0 | 0 | 0          | 0          |
| C6orf25      | 0 | 0 | 0 | 0.0493689  | 0.0393813  |
| GUCA1A       | 0 | 0 | 0 | 0          | 0.0210944  |
| GPR115       | 0 | 0 | 0 | 0.023886   | 0          |
| FAM83B       | 0 | 0 | 0 | 0          | 0          |
| NKAIN2       | 0 | 0 | 0 | 0.0113374  | 0          |
| ARG1         | 0 | 0 | 0 | 0          | 0.0409618  |
| QKI          | 0 | 0 | 0 | 0.00384895 | 0          |
| SMOC2        | 0 | 0 | 0 | 0.0161396  | 0.0125365  |
| MYLK4        | 0 | 0 | 0 | 0.0139189  | 0          |
| CAGE1        | 0 | 0 | 0 | 0          | 0.00959368 |
| LINC00518    | 0 | 0 | 0 | 0.0119753  | 0.0101894  |
| FAM65B       | 0 | 0 | 0 | 0          | 0.00553234 |
| HIST1H3I     | 0 | 0 | 0 | 0          | 0.190322   |
| SNORD117     | 0 | 0 | 0 | 0          | 0          |
| HLA-DPA1     | 0 | 0 | 0 | 0.0248046  | 0          |
| DLK2         | 0 | 0 | 0 | 0          | 0.0342601  |
| IL17F        | 0 | 0 | 0 | 0          | 0          |
| GCM1         | 0 | 0 | 0 | 0.0462839  | 0          |
| LGSN         | 0 | 0 | 0 | 0          | 0.00538782 |
| LINC00472    | 0 | 0 | 0 | 0          | 0          |
| COL12A1      | 0 | 0 | 0 | 0          | 0.00747712 |
| SRSF12       | 0 | 0 | 0 | 0          | 0.00883106 |
| BACH2        | 0 | 0 | 0 | 0          | 0          |
| OR2A4        | 0 | 0 | 0 | 0          | 0.0482188  |
| MOXD1        | 0 | 0 | 0 | 0.0126302  | 0          |
| IPCEF1       | 0 | 0 | 0 | 0.00524606 | 0          |
| LPA          | 0 | 0 | 0 | 0.0193042  | 0.00487869 |
| CYP2W1       | 0 | 0 | 0 | 0          | 0.0580259  |
| TFAMP1       | 0 | 0 | 0 | 0          | 0.0150412  |
| LOC100506497 | 0 | 0 | 0 | 0.00878491 | 0          |
| ABCA13       | 0 | 0 | 0 | 0          | 0          |
| PMS2L2       | 0 | 0 | 0 | 0.0878449  | 0          |
| MAGI2-AS3    | 0 | 0 | 0 | 0.00404511 | 0          |
| GRM3         | 0 | 0 | 0 | 0          | 0.00840723 |
| RUNDC3B      | 0 | 0 | 0 | 0.00945811 | 0.0161317  |
| LMOD2        | 0 | 0 | 0 | 0          | 0.0138498  |
| FSCN3        | 0 | 0 | 0 | 0.0272815  | 0.0206327  |
| LOC407835    | 0 | 0 | 0 | 0.0888802  | 0          |
| CPA2         | 0 | 0 | 0 | 0          | 0          |
| RAB19        | 0 | 0 | 0 | 0          | 0.0419163  |
| OR2A1        | 0 | 0 | 0 | 0          | 0.0552526  |
| CNTNAP2      | 0 | 0 | 0 | 0          | 0          |
| CRHR2        | 0 | 0 | 0 | 0.0201144  | 0          |
| DPY19L2P1    | 0 | 0 | 0 | 0.0130676  | 0          |
| INHBA        | 0 | 0 | 0 | 0          | 0.0150049  |
| NUPR1L       | 0 | 0 | 0 | 0.175129   | 0          |
| NCF1C        | 0 | 0 | 0 | 0          | 0.0387325  |
| GATSL2       | 0 | 0 | 0 | 0.0669386  | 0          |
| PMS2L2       | 0 | 0 | 0 | 0.0878449  | 0          |
| CCL26        | 0 | 0 | 0 | 0          | 0.0855305  |
| CALCR        | 0 | 0 | 0 | 0          | 0          |
| CYP3A4       | 0 | 0 | 0 | 0.0125877  | 0          |
| RELN         | 0 | 0 | 0 | 0          | 0          |
| OR2A1        | 0 | 0 | 0 | 0.072081   | 0          |
| LOC157273    | 0 | 0 | 0 | 0          | 0.0175469  |
| SFTPC        | 0 | 0 | 0 | 0          | 0.0441328  |
| PIWIL2       | 0 | 0 | 0 | 0          | 0          |
| SOX17        | 0 | 0 | 0 | 0          | 0.0240279  |
| LOC286184    | 0 | 0 | 0 | 0.00955411 | 0          |

|                          |            |           |           |            |            |
|--------------------------|------------|-----------|-----------|------------|------------|
| ATP6V0D2                 | 0          | 0         | 0         | 0          | 0.0275214  |
| SDC2                     | 0          | 0         | 0         | 0          | 0          |
| FAM150A                  | 0          | 0         | 0         | 0          | 0          |
| LOC286186                | 0          | 0         | 0         | 0.0155782  | 0          |
| FABP12                   | 0          | 0         | 0         | 0.13098    | 0.105109   |
| CDH17                    | 0          | 0         | 0         | 0          | 0          |
| NCALD                    | 0          | 0         | 0         | 0          | 0          |
| CSMD3                    | 0          | 0         | 0         | 0          | 0.00657208 |
| CCDC166                  | 0          | 0         | 0         | 0          | 0.0831085  |
| MIR1234                  | 0          | 0         | 0         | 0          | 168.138    |
| GLIS3-AS1                | 0          | 0         | 0         | 0.0789317  | 0          |
| TEK                      | 0          | 0         | 0         | 0          | 0.00602954 |
| ANKRD18B                 | 0          | 0         | 0         | 0          | 0.00727103 |
| FAM189A2                 | 0          | 0         | 0         | 0          | 0.0186866  |
| MAMDC2                   | 0          | 0         | 0         | 0          | 0.00909201 |
| OR1Q1                    | 0          | 0         | 0         | 0          | 0.0424902  |
| GPR21                    | 0          | 0         | 0         | 0.0316841  | 0          |
| TTC16                    | 0          | 0         | 0         | 0.0194427  | 0.0141738  |
| ADAMTSL2                 | 0          | 0         | 0         | 0.0172722  | 0.0124006  |
| LOC100128593             | 0          | 0         | 0         | 0          | 0.037392   |
| FLJ35024                 | 0          | 0         | 0         | 0          | 0          |
| C9orf92                  | 0          | 0         | 0         | 0.173127   | 0          |
| LOC653501.ZNF658B        | 0          | 0         | 0         | 0          | 0.00606094 |
| TMEM252                  | 0          | 0         | 0         | 0          | 0.0297128  |
| TRPM3                    | 0          | 0         | 0         | 0          | 0          |
| GNA14                    | 0          | 0         | 0         | 0.0180253  | 0          |
| RASEF                    | 0          | 0         | 0         | 0          | 0.00557138 |
| OMD                      | 0          | 0         | 0         | 0          | 0.0110699  |
| BARX1                    | 0          | 0         | 0         | 0.0808988  | 0          |
| FAM22F                   | 0          | 0         | 0         | 0.0237245  | 0.017343   |
| MIR3911                  | 0          | 0         | 0         | 0          | 28.1269    |
| LOC100288814             | 0          | 0         | 0         | 0          | 0.149468   |
| TLR7                     | 0          | 0         | 0         | 0          | 0.00596299 |
| GRPR                     | 0          | 0         | 0         | 0.0156955  | 0.0127408  |
| MAGEB10                  | 0          | 0         | 0         | 0.0193104  | 0          |
| NYX                      | 0          | 0         | 0         | 0          | 0          |
| GPR173                   | 0          | 0         | 0         | 0.0108777  | 0.00836156 |
| SNORA11                  | 0          | 0         | 0         | 5.39454    | 0          |
| OTUD6A                   | 0          | 0         | 0         | 0.0409302  | 0          |
| PCDH11X                  | 0          | 0         | 0         | 0          | 0.00621878 |
| FAM133A                  | 0          | 0         | 0         | 0          | 0.00903261 |
| TMEM35                   | 0          | 0         | 0         | 0.020402   | 0          |
| TCEAL2                   | 0          | 0         | 0         | 0          | 0.026223   |
| PIH1D3                   | 0          | 0         | 0         | 0          | 0.018433   |
| ZCCHC16                  | 0          | 0         | 0         | 0.013338   | 0          |
| SH2D1A                   | 0          | 0         | 0         | 0          | 0          |
| FMR1NB                   | 0          | 0         | 0         | 0.0500498  | 0          |
| MAGEA8                   | 0          | 0         | 0         | 0          | 0.0197039  |
| MAGEA4                   | 0          | 0         | 0         | 0.0544389  | 0          |
| OPN1LW                   | 0          | 0         | 0         | 0          | 0          |
| VCX3A                    | 0          | 0         | 0         | 0          | 0.0418738  |
| BEND2                    | 0          | 0         | 0         | 0.00834895 | 0          |
| LOC729609                | 0          | 0         | 0         | 0.0714286  | 0          |
| MIR221                   | 0          | 0         | 0         | 0          | 34.5676    |
| RGAG4                    | 0          | 0         | 0         | 0          | 0.0168097  |
| NAP1L2                   | 0          | 0         | 0         | 0.0143406  | 0          |
| RPS6KA6                  | 0          | 0         | 0         | 0.00396303 | 0.00343916 |
| TCEAL5                   | 0          | 0         | 0         | 0.0346651  | 0          |
| COL4A6                   | 0          | 0         | 0         | 0.00655597 | 0.00505056 |
| TRPC5                    | 0          | 0         | 0         | 0.00694319 | 0          |
| SNORA69                  | 0          | 0         | 0         | 0          | 5.90911    |
| IGSF1                    | 0          | 0         | 0         | 0          | 0          |
| SPANXE                   | 0          | 0         | 0         | 0          | 0          |
| MAGEA10.MAGEA10-MAGEA5.M | 0          | 0         | 0         | 0.0148838  | 0.0120532  |
| MPP1                     | 0          | 0         | 0         | 0          | 0.0353551  |
| RAB39B                   | 0          | 0         | 0         | 0.0102521  | 0.0167721  |
| UTY                      | 0          | 0         | 0         | 0.00571432 | 0          |
| RBP7                     | 0.0444726  | 0.0606563 | 0         | 0          | 0          |
| PADI4                    | 0.013565   | 0         | 0         | 0          | 0          |
| VWA5B1                   | 0.00768984 | 0         | 0         | 0          | 0          |
| CD52                     | 0          | 0.109562  | 0         | 0          | 0          |
| THEMIS2                  | 0.0187499  | 0.0256008 | 0.0227139 | 0          | 0          |
| GJB5                     | 0          | 0         | 0.0309895 | 0          | 0          |
| SNORD46                  | 22.0637    | 0         | 0         | 0          | 0          |
| BSND                     | 0          | 0         | 0.0300471 | 0          | 0          |
| PCSK9                    | 0          | 0.0144624 | 0         | 0          | 0          |
| IFI44                    | 0.0121662  | 0         | 0         | 0          | 0          |
| CLCA1                    | 0.00674116 | 0         | 0         | 0          | 0          |
| SRG7                     | 0          | 0         | 0.0913443 | 0          | 0          |



|              |            |            |            |   |   |
|--------------|------------|------------|------------|---|---|
| SLC6A17      | 0.00479567 | 0          | 0.00588779 | 0 | 0 |
| CHIAP2       | 0.007704   | 0          | 0          | 0 | 0 |
| HSD3B2       | 0          | 0.021266   | 0          | 0 | 0 |
| LCE1D        | 0.138954   | 0          | 0          | 0 | 0 |
| LENEP        | 0          | 0.0761994  | 0          | 0 | 0 |
| DCST1        | 0.0330117  | 0.0221143  | 0          | 0 | 0 |
| SLAMF8       | 0.00758049 | 0          | 0          | 0 | 0 |
| FCGR2C       | 0          | 0          | 0.012145   | 0 | 0 |
| FCRLA        | 0          | 0          | 0.0181014  | 0 | 0 |
| FAM163A      | 0          | 0          | 0.0143522  | 0 | 0 |
| CFHR1        | 0.0158496  | 0          | 0          | 0 | 0 |
| PTPRC        | 0          | 0.0251787  | 0          | 0 | 0 |
| GPR25        | 0          | 0          | 0.0986611  | 0 | 0 |
| PKP1         | 0          | 0          | 0.00659319 | 0 | 0 |
| LOC641515    | 0.0274288  | 0          | 0          | 0 | 0 |
| LAX1         | 0.00745519 | 0          | 0          | 0 | 0 |
| CNTN2        | 0.00374486 | 0          | 0          | 0 | 0 |
| IL19         | 0          | 0          | 0.0310619  | 0 | 0 |
| LINC00538    | 0.0123954  | 0          | 0          | 0 | 0 |
| FAM177B      | 0          | 0          | 0.0201275  | 0 | 0 |
| MIXL1        | 0          | 0.132      | 0          | 0 | 0 |
| C1orf95      | 0          | 0          | 0.00460804 | 0 | 0 |
| SLC35F3      | 0          | 0          | 0.0240922  | 0 | 0 |
| LOC100506810 | 0          | 0.0179881  | 0          | 0 | 0 |
| SDCCAG8      | 0          | 0.01135    | 0          | 0 | 0 |
| TP73-AS1     | 0          | 0.0275399  | 0          | 0 | 0 |
| NPPB         | 0.138039   | 0          | 0          | 0 | 0 |
| MYOM3        | 0          | 0.00671084 | 0          | 0 | 0 |
| C1orf172     | 0.0204911  | 0          | 0          | 0 | 0 |
| HEYL         | 0          | 0.010096   | 0          | 0 | 0 |
| EDN2         | 0.0339284  | 0          | 0.0402867  | 0 | 0 |
| C1orf210     | 0          | 0.0677971  | 0          | 0 | 0 |
| TAL1         | 0.00579749 | 0          | 0          | 0 | 0 |
| SLC1A7       | 0.0140758  | 0          | 0          | 0 | 0 |
| CDCP2        | 0.0164604  | 0          | 0          | 0 | 0 |
| LINC00466    | 0.0137039  | 0          | 0          | 0 | 0 |
| INSL5        | 0.0397353  | 0          | 0          | 0 | 0 |
| PTGER3       | 0.0172681  | 0.0331434  | 0          | 0 | 0 |
| GBP1         | 0.027422   | 0.0386532  | 0.0340827  | 0 | 0 |
| C1orf194     | 0          | 0          | 0.0469218  | 0 | 0 |
| MYBPHL       | 0.0234432  | 0          | 0          | 0 | 0 |
| LRIF1        | 0          | 0          | 0.0155468  | 0 | 0 |
| ADORA3       | 0          | 0          | 0.014879   | 0 | 0 |
| VTCN1        | 0.00997281 | 0          | 0          | 0 | 0 |
| GJA5         | 0          | 0          | 0.0100442  | 0 | 0 |
| S100A5       | 0          | 0          | 0.0500288  | 0 | 0 |
| KCNN3        | 0.00362857 | 0          | 0          | 0 | 0 |
| C1orf61      | 0          | 0          | 0.0457644  | 0 | 0 |
| SCARNA3      | 0          | 2.48178    | 6.55243    | 0 | 0 |
| SEC16B       | 0.00657437 | 0          | 0          | 0 | 0 |
| NPHS2        | 0.0331108  | 0          | 0          | 0 | 0 |
| TEDDM1       | 0          | 0          | 0.0271901  | 0 | 0 |
| B3GALT2      | 0.0166488  | 0.016608   | 0.00712309 | 0 | 0 |
| GOLT1A       | 0          | 0.0611247  | 0          | 0 | 0 |
| LOC284578    | 0          | 0.0146173  | 0          | 0 | 0 |
| MIR29C       | 0          | 0          | 106.854    | 0 | 0 |
| CD34         | 0.0111329  | 0          | 0          | 0 | 0 |
| LOC100506795 | 0.0083474  | 0          | 0          | 0 | 0 |
| MRC1         | 0          | 0          | 0.00511289 | 0 | 0 |
| LINC00839    | 0          | 0          | 0.0144642  | 0 | 0 |
| RET          | 0          | 0.00751519 | 0          | 0 | 0 |
| FXD4         | 0          | 0.0899151  | 0          | 0 | 0 |
| CTSL1P2      | 0.0246478  | 0          | 0.0303795  | 0 | 0 |
| WDFY4        | 0          | 0          | 0.00347485 | 0 | 0 |
| MSMB         | 0.102097   | 0          | 0          | 0 | 0 |
| FAM133CP     | 0          | 0.0122873  | 0          | 0 | 0 |
| SH2D4B       | 0.00659295 | 0          | 0          | 0 | 0 |
| MARK2P9      | 0.0834164  | 0.115812   | 0          | 0 | 0 |
| CYP2C19      | 0.0166139  | 0          | 0          | 0 | 0 |
| ADRA2A       | 0          | 0.01705    | 0.015125   | 0 | 0 |
| HABP2        | 0.0169303  | 0          | 0          | 0 | 0 |
| PNLIPRP2     | 0          | 0          | 0.0220108  | 0 | 0 |
| PRAP1        | 0.0543087  | 0          | 0.0645247  | 0 | 0 |
| LINC00704    | 0.0171378  | 0          | 0          | 0 | 0 |
| SFMBT2       | 0.00323109 | 0          | 0          | 0 | 0 |
| CCDC3        | 0.0238319  | 0.0494525  | 0          | 0 | 0 |
| NEBL         | 0.00301917 | 0          | 0          | 0 | 0 |
| ARMC4        | 0          | 0          | 0.00745513 | 0 | 0 |
| RASGEF1A     | 0.00887583 | 0          | 0          | 0 | 0 |

|              |            |            |            |   |   |
|--------------|------------|------------|------------|---|---|
| HNRNPA3P1    | 0.0189583  | 0.00942885 | 0.00812849 | 0 | 0 |
| HNRNPA1P33   | 0          | 0.0782716  | 0          | 0 | 0 |
| GDF2         | 0          | 0.0209821  | 0          | 0 | 0 |
| VSTM4        | 0.0111107  | 0.0104794  | 0.00463168 | 0 | 0 |
| PLA2G12B     | 0.0271017  | 0          | 0          | 0 | 0 |
| DUSP13       | 0.0448503  | 0.060165   | 0          | 0 | 0 |
| SFTPA2       | 0.0122634  | 0          | 0          | 0 | 0 |
| DYDC1        | 0.033865   | 0          | 0          | 0 | 0 |
| FAS-AS1      | 0.0151728  | 0.044986   | 0.0387146  | 0 | 0 |
| BLNK         | 0.0175686  | 0          | 0.0257819  | 0 | 0 |
| CPN1         | 0.0185809  | 0.0254034  | 0          | 0 | 0 |
| AFAP1L2      | 0          | 0          | 0.00840958 | 0 | 0 |
| GFRA1        | 0          | 0          | 0.00332113 | 0 | 0 |
| KRTAP5-6     | 0          | 0.120025   | 0          | 0 | 0 |
| KCNQ1DN      | 0          | 0.0491662  | 0          | 0 | 0 |
| TRPC2        | 0          | 0.0398499  | 0          | 0 | 0 |
| OR52I1       | 0          | 0          | 0.0383809  | 0 | 0 |
| OR52B6       | 0.0359125  | 0          | 0          | 0 | 0 |
| OR56B4       | 0          | 0          | 0.0389644  | 0 | 0 |
| OR2D3        | 0.0306911  | 0          | 0          | 0 | 0 |
| SYT9         | 0.0122286  | 0          | 0          | 0 | 0 |
| F2           | 0.016804   | 0          | 0          | 0 | 0 |
| OR10V2P      | 0          | 0.0680228  | 0.0594123  | 0 | 0 |
| MS4A10       | 0.013573   | 0          | 0          | 0 | 0 |
| ZP1          | 0.0343305  | 0          | 0          | 0 | 0 |
| CD6          | 0.0124779  | 0          | 0          | 0 | 0 |
| KCNK4        | 0.134918   | 0          | 0.0400202  | 0 | 0 |
| SNX32        | 0          | 0          | 0.0259385  | 0 | 0 |
| CTSW         | 0.0250619  | 0.0332528  | 0          | 0 | 0 |
| TMEM151A     | 0.0222596  | 0.0585526  | 0          | 0 | 0 |
| C11orf86     | 0.0337515  | 0          | 0.0406084  | 0 | 0 |
| KRTAP5-7     | 0.0434752  | 0.0598414  | 0          | 0 | 0 |
| LOC100129216 | 0          | 0          | 0.577415   | 0 | 0 |
| P2RY6        | 0          | 0.0408009  | 0          | 0 | 0 |
| C11orf70     | 0          | 0          | 0.0147328  | 0 | 0 |
| ELMOD1       | 0.00843673 | 0          | 0.0106797  | 0 | 0 |
| NNMT         | 0          | 0          | 0.0236792  | 0 | 0 |
| CD3G         | 0          | 0          | 0.0237834  | 0 | 0 |
| TTC36        | 0.0909583  | 0          | 0          | 0 | 0 |
| UPK2         | 0          | 0.120728   | 0          | 0 | 0 |
| DDX25        | 0          | 0.0187967  | 0          | 0 | 0 |
| NTM          | 0          | 0.0117483  | 0          | 0 | 0 |
| LOC100128239 | 0.0127394  | 0          | 0          | 0 | 0 |
| IFITM5       | 0          | 0.0887358  | 0          | 0 | 0 |
| KRTAP5-2     | 0.0351073  | 0          | 0          | 0 | 0 |
| HBD          | 0.0361049  | 0          | 0          | 0 | 0 |
| UBQLNL       | 0.0326478  | 0          | 0          | 0 | 0 |
| OR2AG2       | 0          | 0.0448145  | 0          | 0 | 0 |
| OR6A2        | 0          | 0          | 0.025795   | 0 | 0 |
| LOC283299    | 0.00911852 | 0          | 0          | 0 | 0 |
| USH1C        | 0.149511   | 0.0723534  | 0.114361   | 0 | 0 |
| PTPN5        | 0.0231185  | 0          | 0          | 0 | 0 |
| SYT13        | 0.00483695 | 0.013832   | 0.00604967 | 0 | 0 |
| SNORD29      | 0          | 1280.56    | 0          | 0 | 0 |
| LOC100130348 | 0          | 0.143859   | 0          | 0 | 0 |
| ANGPTL5      | 0          | 0.0360385  | 0          | 0 | 0 |
| CASP5        | 0.0333051  | 0.0460106  | 0          | 0 | 0 |
| SCN2B        | 0          | 0.00775715 | 0.0068919  | 0 | 0 |
| AMICA1       | 0          | 0          | 0.0147079  | 0 | 0 |
| TREH         | 0          | 0.0226926  | 0          | 0 | 0 |
| THY1         | 0          | 0          | 0.0166957  | 0 | 0 |
| CLMP         | 0.00959485 | 0.0135507  | 0          | 0 | 0 |
| PATE2        | 0.0140086  | 0          | 0          | 0 | 0 |
| KIRREL3      | 0.0436567  | 0          | 0          | 0 | 0 |
| ADAMTS8      | 0          | 0          | 0.0127843  | 0 | 0 |
| CLEC4D       | 0          | 0.0324141  | 0.0138062  | 0 | 0 |
| A2ML1        | 0.00633967 | 0.00890326 | 0          | 0 | 0 |
| C12orf39     | 0.0667377  | 0          | 0.241215   | 0 | 0 |
| PCED1B       | 0.0174885  | 0          | 0          | 0 | 0 |
| OR8S1        | 0          | 0.0426837  | 0          | 0 | 0 |
| LOC255411    | 0          | 0          | 0.0712188  | 0 | 0 |
| ACVRL1       | 0.0303204  | 0          | 0.0277229  | 0 | 0 |
| LOC100240734 | 0.082784   | 0          | 0          | 0 | 0 |
| IRAK3        | 0.00263644 | 0.00389901 | 0.00672795 | 0 | 0 |
| LOC100507206 | 0          | 0.0143201  | 0          | 0 | 0 |
| CACNA2D4     | 0.0103927  | 0          | 0          | 0 | 0 |
| CLECL1       | 0.014888   | 0          | 0          | 0 | 0 |
| CLEC7A       | 0.010132   | 0          | 0          | 0 | 0 |
| KLRC2        | 0          | 0          | 0.0259454  | 0 | 0 |

|                   |            |            |            |   |   |
|-------------------|------------|------------|------------|---|---|
| TAS2R30           | 0.027151   | 0          | 0          | 0 | 0 |
| BCAT1             | 0.00212645 | 0          | 0          | 0 | 0 |
| LALBA             | 0          | 0.106402   | 0          | 0 | 0 |
| SNORA2A           | 0          | 3.81039    | 0          | 0 | 0 |
| SNORA2B           | 0          | 7.44124    | 0          | 0 | 0 |
| WNT10B            | 0.0316429  | 0          | 0.0193817  | 0 | 0 |
| FAIM2             | 0          | 0          | 0.008572   | 0 | 0 |
| LOC283403         | 0.0429051  | 0          | 0.0265265  | 0 | 0 |
| KRT83             | 0.0204575  | 0.0531466  | 0.0242605  | 0 | 0 |
| KRT85             | 0.0151098  | 0          | 0          | 0 | 0 |
| KRT4              | 0.0268887  | 0          | 0          | 0 | 0 |
| GPR84             | 0          | 0.0293117  | 0          | 0 | 0 |
| APOF              | 0.0146817  | 0          | 0          | 0 | 0 |
| SVOP              | 0          | 0          | 0.0107353  | 0 | 0 |
| SDS               | 0.0220897  | 0          | 0          | 0 | 0 |
| HNF1A-AS1         | 0.0107317  | 0          | 0.0134633  | 0 | 0 |
| GALNT9            | 0.0224225  | 0.0587822  | 0          | 0 | 0 |
| SGCG              | 0.0160581  | 0          | 0          | 0 | 0 |
| WASF3             | 0.00542782 | 0          | 0.00685064 | 0 | 0 |
| RXFP2             | 0.00875633 | 0          | 0          | 0 | 0 |
| FREM2             | 0          | 0.00195828 | 0          | 0 | 0 |
| OR7E156P          | 0.0133022  | 0.0186733  | 0          | 0 | 0 |
| POU4F1-AS1        | 0.0107422  | 0          | 0          | 0 | 0 |
| GPC5              | 0          | 0.0238763  | 0          | 0 | 0 |
| MYO16             | 0.00386812 | 0          | 0.00481228 | 0 | 0 |
| COL4A2            | 0.00527596 | 0          | 0.00626772 | 0 | 0 |
| F7                | 0.010057   | 0          | 0          | 0 | 0 |
| ANKRD20A19P       | 0.0116374  | 0          | 0          | 0 | 0 |
| LINC00426         | 0          | 0          | 0.022095   | 0 | 0 |
| LINC00330         | 0.0113198  | 0          | 0          | 0 | 0 |
| SIAH3             | 0          | 0.00983545 | 0          | 0 | 0 |
| PCDH8             | 0          | 0.0193134  | 0          | 0 | 0 |
| COL4A1            | 0          | 0          | 0.00511493 | 0 | 0 |
| OR11H4            | 0.0287559  | 0          | 0          | 0 | 0 |
| ECRP              | 0          | 0.0706105  | 0          | 0 | 0 |
| NPAS3             | 0          | 0          | 0.00602087 | 0 | 0 |
| INSM2             | 0.013457   | 0          | 0          | 0 | 0 |
| DACT1             | 0.0172599  | 0.0123534  | 0          | 0 | 0 |
| PRKCH             | 0.00721674 | 0.0101586  | 0          | 0 | 0 |
| LINC00238         | 0          | 0          | 0.0258662  | 0 | 0 |
| RDH12             | 0          | 0.0231829  | 0.0412045  | 0 | 0 |
| GALNT16           | 0.0321453  | 0.0288817  | 0.0129968  | 0 | 0 |
| NRXN3             | 0.00272617 | 0.00402802 | 0          | 0 | 0 |
| LOC283587         | 0          | 0.0460556  | 0          | 0 | 0 |
| FOXN3-AS2         | 0.0225205  | 0          | 0          | 0 | 0 |
| CHGA              | 0          | 0          | 0.0229137  | 0 | 0 |
| SERPINA3          | 0.0168886  | 0          | 0          | 0 | 0 |
| PLD4              | 0.0244199  | 0          | 0          | 0 | 0 |
| OR11H2            | 0          | 0.0379977  | 0          | 0 | 0 |
| KLHL33            | 0.0183813  | 0          | 0          | 0 | 0 |
| RNASE11,RNASE12   | 0          | 0.01747    | 0          | 0 | 0 |
| SNORD9            | 22.01      | 0          | 0          | 0 | 0 |
| ADCY4             | 0.010659   | 0          | 0          | 0 | 0 |
| TRIM9             | 0          | 0          | 0.00709301 | 0 | 0 |
| TBPL2             | 0.0198952  | 0          | 0          | 0 | 0 |
| SIX1              | 0.020865   | 0          | 0          | 0 | 0 |
| SLC10A1           | 0.0662894  | 0.0232033  | 0.0205233  | 0 | 0 |
| DIO2              | 0.00339389 | 0          | 0.00435828 | 0 | 0 |
| LINC00341         | 0.00912712 | 0          | 0          | 0 | 0 |
| GOLGA8EP          | 0.00409577 | 0.00590339 | 0          | 0 | 0 |
| DKFZP434L187      | 0          | 0          | 0.00647717 | 0 | 0 |
| ATPBD4-AS1        | 0.034562   | 0          | 0          | 0 | 0 |
| DCAF13P3          | 0.00752657 | 0          | 0          | 0 | 0 |
| NR2E3             | 0.0333569  | 0.0229945  | 0.040961   | 0 | 0 |
| LOC729739         | 0          | 0.0988169  | 0.08538    | 0 | 0 |
| LMAN1L            | 0          | 0          | 0.0276674  | 0 | 0 |
| ISL2              | 0          | 0.0417092  | 0          | 0 | 0 |
| C15orf26          | 0.0150551  | 0          | 0.0189261  | 0 | 0 |
| UBE2Q2P2,UBE2Q2P3 | 0.0213438  | 0          | 0          | 0 | 0 |
| ASB9P1            | 0          | 0.0219167  | 0          | 0 | 0 |
| LOC145820         | 0          | 0.0139707  | 0          | 0 | 0 |
| NBEAP1            | 0.0788569  | 0          | 0          | 0 | 0 |
| GOLGA8DP          | 0.00403952 | 0          | 0          | 0 | 0 |
| OCA2              | 0          | 0          | 0.0116824  | 0 | 0 |
| ACTC1             | 0.00637182 | 0          | 0          | 0 | 0 |
| GPR176            | 0.00679803 | 0          | 0          | 0 | 0 |
| PLA2G4D           | 0.00920332 | 0          | 0.0111674  | 0 | 0 |
| DUOXA1            | 0.03563    | 0.0164651  | 0.0440743  | 0 | 0 |
| TNFAIP8L3         | 0          | 0.0159876  | 0          | 0 | 0 |

|           |            |            |            |   |   |
|-----------|------------|------------|------------|---|---|
| ONECUT1   | 0          | 0.0236017  | 0          | 0 | 0 |
| IGDCC3    | 0          | 0          | 0.00910036 | 0 | 0 |
| ITGA11    | 0          | 0          | 0.00704354 | 0 | 0 |
| LOC91948  | 0          | 0.035377   | 0          | 0 | 0 |
| HBZ       | 0.120242   | 0          | 0          | 0 | 0 |
| C16orf11  | 0          | 0          | 0.0314916  | 0 | 0 |
| NHLRC4    | 0.0377274  | 0.025154   | 0          | 0 | 0 |
| C16orf96  | 0.00862878 | 0          | 0          | 0 | 0 |
| SEC14L5   | 0          | 0          | 0.0056399  | 0 | 0 |
| CIITA     | 0.0079238  | 0          | 0          | 0 | 0 |
| TNFRSF17  | 0.0306263  | 0          | 0          | 0 | 0 |
| PRKCB     | 0.00279876 | 0          | 0          | 0 | 0 |
| ITGAL     | 0.0114313  | 0          | 0          | 0 | 0 |
| MIR762    | 0          | 0          | 222.59     | 0 | 0 |
| ITGAD     | 0.0073747  | 0.0099923  | 0          | 0 | 0 |
| GNAO1     | 0.0221087  | 0.0308192  | 0          | 0 | 0 |
| CCL22     | 0.0198586  | 0          | 0          | 0 | 0 |
| VAT1L     | 0.00637933 | 0          | 0          | 0 | 0 |
| RPL3L     | 0.0262179  | 0          | 0          | 0 | 0 |
| PRSS33    | 0          | 0.0350603  | 0          | 0 | 0 |
| PRSS30P   | 0          | 0.0155451  | 0.0140496  | 0 | 0 |
| SEPT12    | 0.0241749  | 0          | 0          | 0 | 0 |
| C16orf89  | 0          | 0          | 0.0267505  | 0 | 0 |
| C16orf54  | 0          | 0.016749   | 0          | 0 | 0 |
| ZNF423    | 0.00749477 | 0          | 0          | 0 | 0 |
| SNX20     | 0.013171   | 0          | 0          | 0 | 0 |
| LOC283867 | 0          | 0          | 0.0165856  | 0 | 0 |
| PKD1L3    | 0          | 0          | 0.0168562  | 0 | 0 |
| ATP1B2    | 0.0310401  | 0          | 0          | 0 | 0 |
| DNAH9     | 0          | 0          | 0.0101285  | 0 | 0 |
| MEIS3P1   | 0.00852227 | 0          | 0          | 0 | 0 |
| FAM106CP  | 0          | 0          | 0.0178368  | 0 | 0 |
| CRYBA1    | 0          | 0.0503545  | 0.0887366  | 0 | 0 |
| DPRXP4    | 0          | 0          | 0.0508732  | 0 | 0 |
| SPACA3    | 0          | 0.122186   | 0          | 0 | 0 |
| UNC45B    | 0          | 0.00594152 | 0          | 0 | 0 |
| G6PC      | 0          | 0          | 0.00792279 | 0 | 0 |
| MYL4      | 0          | 0.0541669  | 0.0492206  | 0 | 0 |
| NGFR      | 0.0106703  | 0          | 0          | 0 | 0 |
| NXP3      | 0          | 0          | 0.00681365 | 0 | 0 |
| TCAM1P    | 0.00766164 | 0          | 0.00953974 | 0 | 0 |
| CACNG4    | 0.0103461  | 0          | 0          | 0 | 0 |
| CACNG1    | 0.0659583  | 0          | 0          | 0 | 0 |
| CD300A    | 0.0191999  | 0          | 0          | 0 | 0 |
| ITGB4     | 0          | 0.0177524  | 0          | 0 | 0 |
| ATP2A3    | 0.010174   | 0.0133944  | 0          | 0 | 0 |
| SLC52A1   | 0.0152314  | 0          | 0          | 0 | 0 |
| SLC13A5   | 0.00963507 | 0          | 0.0117669  | 0 | 0 |
| TEKT1     | 0          | 0.0240646  | 0          | 0 | 0 |
| CCDC42    | 0          | 0          | 0.0314939  | 0 | 0 |
| GAS7      | 0.00339952 | 0.00478507 | 0          | 0 | 0 |
| MYH1      | 0          | 0          | 0.00440608 | 0 | 0 |
| ZNF287    | 0.0091413  | 0          | 0.0115623  | 0 | 0 |
| EV12A     | 0.00687588 | 0.0207306  | 0.00886372 | 0 | 0 |
| TBC1D3B   | 0.0159588  | 0          | 0          | 0 | 0 |
| TBC1D3C   | 0.0158976  | 0          | 0          | 0 | 0 |
| KRTAP2-2  | 0.0908136  | 0          | 0.215036   | 0 | 0 |
| KRTAP4-11 | 0.033349   | 0          | 0          | 0 | 0 |
| KRTAP4-5  | 0.0523095  | 0          | 0          | 0 | 0 |
| HCRT      | 0.353454   | 0          | 0          | 0 | 0 |
| MEOX1     | 0          | 0.0176404  | 0          | 0 | 0 |
| PPY       | 0          | 0          | 0.120989   | 0 | 0 |
| PYY       | 0.0799266  | 0.054064   | 0.14527    | 0 | 0 |
| HSF5      | 0          | 0          | 0.00744819 | 0 | 0 |
| NACA2     | 0          | 0.0455349  | 0          | 0 | 0 |
| MIR5047   | 0          | 37.1742    | 0          | 0 | 0 |
| CD300E    | 0          | 0          | 0.00809123 | 0 | 0 |
| FLJ45079  | 0          | 0          | 0.00733302 | 0 | 0 |
| AQP4-AS1  | 0.0103607  | 0          | 0          | 0 | 0 |
| WBP11P1   | 0.00777722 | 0          | 0          | 0 | 0 |
| SLC14A2   | 0.00784298 | 0          | 0.028855   | 0 | 0 |
| SLC14A1   | 0.00559759 | 0          | 0          | 0 | 0 |
| RAB27B    | 0          | 0.00422074 | 0          | 0 | 0 |
| ZNF532    | 0.00368376 | 0          | 0          | 0 | 0 |
| SERPINB2  | 0          | 0.0176286  | 0          | 0 | 0 |
| CDH2      | 0          | 0.0077572  | 0          | 0 | 0 |
| CELF4     | 0.00795963 | 0          | 0          | 0 | 0 |
| SNORA37   | 0          | 12.7986    | 17.1818    | 0 | 0 |
| LINC-ROR  | 0          | 0.0117248  | 0          | 0 | 0 |

|              |             |            |            |   |   |
|--------------|-------------|------------|------------|---|---|
| ALPK2        | 0           | 0          | 0.00367419 | 0 | 0 |
| CD226        | 0           | 0          | 0.0309672  | 0 | 0 |
| AZU1         | 0           | 0          | 0.0749282  | 0 | 0 |
| CLEC4M       | 0           | 0.0268864  | 0          | 0 | 0 |
| MIR181D      | 0           | 7.46402    | 0          | 0 | 0 |
| RLN3         | 0           | 0          | 0.13836    | 0 | 0 |
| SLC5A5       | 0.0208401   | 0          | 0          | 0 | 0 |
| FXVD3        | 0           | 0          | 0.0278891  | 0 | 0 |
| HAMP         | 0           | 0          | 0.135855   | 0 | 0 |
| FFAR2        | 0.0149128   | 0          | 0          | 0 | 0 |
| UPK1A        | 0           | 0.0438887  | 0.0772509  | 0 | 0 |
| OVOL3        | 0.0838108   | 0.111039   | 0.100088   | 0 | 0 |
| NCCRP1       | 0.0195932   | 0          | 0          | 0 | 0 |
| LOC100129935 | 0           | 0.0202528  | 0          | 0 | 0 |
| CYP2S1       | 0.0132931   | 0          | 0          | 0 | 0 |
| TEX101       | 0.0171708   | 0          | 0          | 0 | 0 |
| APOC2,APOC4  | 0.0431495   | 0          | 0          | 0 | 0 |
| CCDC155      | 0.0136618   | 0.054189   | 0          | 0 | 0 |
| LOC100507003 | 0.0197234   | 0          | 0.0239062  | 0 | 0 |
| SNORD35A     | 0           | 127.251    | 0          | 0 | 0 |
| CACNG6       | 0.0562745   | 0.0386214  | 0.0338743  | 0 | 0 |
| NLRP8        | 0.00622434  | 0          | 0          | 0 | 0 |
| USP29        | 0.00559571  | 0.00800439 | 0          | 0 | 0 |
| C19orf77     | 0.0358005   | 0          | 0          | 0 | 0 |
| PTPRS        | 0           | 0          | 0.00688706 | 0 | 0 |
| FUT6         | 0.0118481   | 0          | 0          | 0 | 0 |
| MBD3L3       | 0.0554079   | 0          | 0          | 0 | 0 |
| COL5A3       | 0.00560402  | 0          | 0          | 0 | 0 |
| LYL1         | 0           | 0.0425419  | 0          | 0 | 0 |
| SLC1A6       | 0           | 0          | 0.0127789  | 0 | 0 |
| CIB3         | 0.0534044   | 0          | 0          | 0 | 0 |
| CPAMD8       | 0           | 0          | 0.015016   | 0 | 0 |
| NXNL1        | 0           | 0          | 0.072268   | 0 | 0 |
| ZNF682       | 0           | 0          | 0.0157642  | 0 | 0 |
| ZNF626       | 0.00960506  | 0          | 0          | 0 | 0 |
| ZNF208       | 0.00198684  | 0          | 0.00507588 | 0 | 0 |
| ATP4A        | 0.0109001   | 0          | 0          | 0 | 0 |
| UPK1A-AS1    | 0           | 0          | 0.107386   | 0 | 0 |
| PSG11        | 0.0211119   | 0          | 0          | 0 | 0 |
| PSG4         | 0.0121703   | 0          | 0          | 0 | 0 |
| CKM          | 0           | 0.0530552  | 0.0477866  | 0 | 0 |
| IGFL4        | 0           | 0          | 0.161382   | 0 | 0 |
| PNMAL1       | 0           | 0.0102085  | 0          | 0 | 0 |
| MIR3191      | 329.477     | 0          | 0          | 0 | 0 |
| NKG7         | 0.0540857   | 0          | 0          | 0 | 0 |
| LIM2         | 0.0470268   | 0          | 0          | 0 | 0 |
| SIGLEC5      | 0           | 0          | 0.0143855  | 0 | 0 |
| LOC284379    | 0           | 0          | 0.0292382  | 0 | 0 |
| PEG3,ZIM2    | 0.00251269  | 0          | 0          | 0 | 0 |
| RPL23AP32    | 0.0486706   | 0          | 0          | 0 | 0 |
| MEIS1        | 0           | 0.0325593  | 0          | 0 | 0 |
| CTNNA2       | 0.00656182  | 0          | 0.008147   | 0 | 0 |
| GNLY         | 0.047296    | 0          | 0          | 0 | 0 |
| ITPR1PL1     | 0           | 0          | 0.0210124  | 0 | 0 |
| IL1R1        | 0           | 0.0256206  | 0          | 0 | 0 |
| GPR45        | 0           | 0.0331104  | 0          | 0 | 0 |
| IL36G        | 0.0230324   | 0          | 0          | 0 | 0 |
| RAB6C        | 0           | 0          | 0.010427   | 0 | 0 |
| KYNU         | 0.0177154   | 0          | 0          | 0 | 0 |
| PABPC1P2     | 0.00604211  | 0          | 0.00760703 | 0 | 0 |
| KIF5C        | 0.00314515  | 0          | 0          | 0 | 0 |
| KCNJ3        | 0           | 0.00702182 | 0          | 0 | 0 |
| UPP2         | 0.0174621   | 0          | 0          | 0 | 0 |
| DHRS9        | 0           | 0.0236284  | 0          | 0 | 0 |
| KLHL41       | 0.00886656  | 0          | 0.0224283  | 0 | 0 |
| HOXD13       | 0.0139594   | 0          | 0.0174812  | 0 | 0 |
| FSIP2        | 0.000872567 | 0          | 0          | 0 | 0 |
| AOX2P        | 0           | 0.00897365 | 0.00795683 | 0 | 0 |
| CTLA4        | 0.0125261   | 0          | 0          | 0 | 0 |
| SNORA41      | 0           | 0          | 4.90763    | 0 | 0 |
| DES          | 0           | 0          | 0.0207429  | 0 | 0 |
| COL4A3       | 0           | 0.00396587 | 0          | 0 | 0 |
| CHRND        | 0.0112559   | 0.0307321  | 0.0274887  | 0 | 0 |
| LOC643387    | 0           | 0          | 0.011672   | 0 | 0 |
| PXDN         | 0.00933716  | 0          | 0          | 0 | 0 |
| LOC645949    | 0           | 0.0146563  | 0.025289   | 0 | 0 |
| CYP1B1       | 0.00479988  | 0          | 0          | 0 | 0 |
| C2orf91      | 0.00600387  | 0          | 0          | 0 | 0 |
| OXER1        | 0           | 0          | 0.030739   | 0 | 0 |

|              |            |            |            |   |   |
|--------------|------------|------------|------------|---|---|
| ABCG5        | 0          | 0          | 0.0131294  | 0 | 0 |
| UNQ6975      | 0          | 0.0331907  | 0          | 0 | 0 |
| TSPYL6       | 0.0170018  | 0          | 0          | 0 | 0 |
| DBIL5P2      | 0          | 0.0183736  | 0          | 0 | 0 |
| LOC400958    | 0.00771491 | 0          | 0          | 0 | 0 |
| SNORA36C     | 3.52026    | 0          | 0          | 0 | 0 |
| ADD2         | 0          | 0.00980163 | 0          | 0 | 0 |
| TACR1        | 0          | 0          | 0.019493   | 0 | 0 |
| LYG2         | 0          | 0.0488478  | 0          | 0 | 0 |
| ST6GAL2      | 0.00344631 | 0          | 0.00440443 | 0 | 0 |
| LOC729121    | 0.0143005  | 0          | 0          | 0 | 0 |
| IL1A         | 0.0073835  | 0.0431907  | 0.0280911  | 0 | 0 |
| LOC100216479 | 0.00852066 | 0          | 0.0213691  | 0 | 0 |
| WTH3DI       | 0          | 0          | 0.00836772 | 0 | 0 |
| LOC401010    | 0          | 0          | 0.0150187  | 0 | 0 |
| LOC100144595 | 0.0096569  | 0          | 0          | 0 | 0 |
| SCN3A        | 0          | 0.00335376 | 0          | 0 | 0 |
| CFLAR-AS1    | 0.0482231  | 0          | 0          | 0 | 0 |
| ERBB4        | 0.00166895 | 0          | 0          | 0 | 0 |
| CXCR1        | 0.0110088  | 0          | 0          | 0 | 0 |
| FEV          | 0.0395693  | 0.0525273  | 0          | 0 | 0 |
| CCDC108      | 0          | 0          | 0.0062552  | 0 | 0 |
| SCG2         | 0.0166284  | 0          | 0          | 0 | 0 |
| LOC151475    | 0.0197581  | 0.0140691  | 0.0368807  | 0 | 0 |
| SNORA75      | 0          | 4.84788    | 0          | 0 | 0 |
| MIR4440      | 35.163     | 0          | 0          | 0 | 0 |
| MGC16025     | 0          | 0          | 0.0195324  | 0 | 0 |
| OTOS         | 0          | 0          | 0.203762   | 0 | 0 |
| SNORD110     | 0          | 418.003    | 0          | 0 | 0 |
| UBOX5-AS1    | 0.0464831  | 0          | 0          | 0 | 0 |
| ISM1         | 0.0102874  | 0.0143344  | 0          | 0 | 0 |
| PCSK2        | 0          | 0.0077695  | 0          | 0 | 0 |
| SLC24A3      | 0.0073807  | 0          | 0          | 0 | 0 |
| LBP          | 0.0160819  | 0          | 0          | 0 | 0 |
| SNORA39      | 3.2944     | 0          | 3.90312    | 0 | 0 |
| WISP2        | 0          | 0          | 0.038326   | 0 | 0 |
| PI3          | 0          | 0          | 0.169941   | 0 | 0 |
| WFDC10A      | 0.0721781  | 0.0999129  | 0          | 0 | 0 |
| LOC100131496 | 0          | 0          | 0.0313227  | 0 | 0 |
| CASS4        | 0.0925894  | 0.0250536  | 0.035062   | 0 | 0 |
| APCDD1L-AS1  | 0.0152177  | 0.0207025  | 0          | 0 | 0 |
| CDH26        | 0.0255859  | 0          | 0          | 0 | 0 |
| LOC284757    | 0.0128551  | 0          | 0          | 0 | 0 |
| LOC63930     | 0.0102313  | 0          | 0          | 0 | 0 |
| LOC100144597 | 0          | 0.0391426  | 0          | 0 | 0 |
| MYT1         | 0.00522865 | 0.00713239 | 0          | 0 | 0 |
| RSP04        | 0.029094   | 0          | 0          | 0 | 0 |
| FOX51        | 0.0363651  | 0          | 0          | 0 | 0 |
| PXMP4        | 0          | 0.00656455 | 0.0115083  | 0 | 0 |
| HMGB3P1      | 0.0297487  | 0          | 0          | 0 | 0 |
| FAM83C       | 0.00967492 | 0          | 0          | 0 | 0 |
| SNORA71B     | 0          | 4.19226    | 3.74334    | 0 | 0 |
| JPH2         | 0.0215598  | 0.0113356  | 0.0160116  | 0 | 0 |
| WFDC5        | 0.0772116  | 0.0523916  | 0          | 0 | 0 |
| PTGIS        | 0.0101415  | 0          | 0          | 0 | 0 |
| GCNT7        | 0          | 0          | 0.0151675  | 0 | 0 |
| BMP7         | 0.00840953 | 0          | 0          | 0 | 0 |
| LINC00029    | 0          | 0          | 0.024865   | 0 | 0 |
| MIR3648      | 1.24511    | 0          | 0          | 0 | 0 |
| ABCC13       | 0.00751323 | 0          | 0          | 0 | 0 |
| LINC00189    | 0          | 0.0475975  | 0          | 0 | 0 |
| MRAP         | 0          | 0.0806248  | 0          | 0 | 0 |
| DSCR8        | 0.0591232  | 0          | 0          | 0 | 0 |
| KCNJ15       | 0          | 0.0119346  | 0          | 0 | 0 |
| LINC00158    | 0.0144373  | 0          | 0          | 0 | 0 |
| KCNE1        | 0          | 0          | 0.00984906 | 0 | 0 |
| RUNX1-IT1    | 0          | 0.0232345  | 0          | 0 | 0 |
| LOC100133286 | 0.0835743  | 0.112259   | 0.100678   | 0 | 0 |
| LINC00479    | 0.0295962  | 0          | 0          | 0 | 0 |
| LINC00163    | 0          | 0.0252367  | 0          | 0 | 0 |
| COL18A1-AS2  | 0          | 0.101631   | 0          | 0 | 0 |
| SERPIND1     | 0.0116684  | 0          | 0          | 0 | 0 |
| LOC400891    | 0.00482155 | 0          | 0          | 0 | 0 |
| GGTLC2       | 0.0521829  | 0.138197   | 0          | 0 | 0 |
| RFPL3        | 0          | 0.0337855  | 0          | 0 | 0 |
| CYTH4        | 0.0103902  | 0          | 0          | 0 | 0 |
| RIBC2        | 0.023778   | 0.0316765  | 0          | 0 | 0 |
| ADM2         | 0.00858955 | 0.0114525  | 0          | 0 | 0 |
| XKR3         | 0          | 0          | 0.0175083  | 0 | 0 |

|              |            |            |            |   |   |
|--------------|------------|------------|------------|---|---|
| MIR648       | 45.2292    | 0          | 0          | 0 | 0 |
| LOC284865    | 0.0112453  | 0          | 0          | 0 | 0 |
| ZNF280A      | 0.0109682  | 0.01554    | 0          | 0 | 0 |
| POM121L1P    | 0.00801696 | 0          | 0.0193068  | 0 | 0 |
| CES5AP1      | 0.0401787  | 0          | 0          | 0 | 0 |
| GSTTP2       | 0.0136901  | 0          | 0          | 0 | 0 |
| TMEM211      | 0          | 0          | 0.211062   | 0 | 0 |
| C22orf24     | 0          | 0          | 0.060717   | 0 | 0 |
| SHISA8       | 0          | 0.0947721  | 0          | 0 | 0 |
| ATP5L2       | 0.0380339  | 0          | 0          | 0 | 0 |
| C22orf34     | 0          | 0          | 0.0162353  | 0 | 0 |
| IL17REL      | 0          | 0.0143303  | 0          | 0 | 0 |
| LINC00312    | 0.00741394 | 0          | 0.0190264  | 0 | 0 |
| SLC6A1       | 0          | 0          | 0.00833614 | 0 | 0 |
| TPRXL        | 0          | 0          | 0.0181948  | 0 | 0 |
| FGD5         | 0          | 0.0130964  | 0          | 0 | 0 |
| ITIH3        | 0          | 0          | 0.0107041  | 0 | 0 |
| FRG2C        | 0          | 0.0171533  | 0          | 0 | 0 |
| EPHA3        | 0          | 0.0116409  | 0          | 0 | 0 |
| PARP15       | 0.0110024  | 0          | 0          | 0 | 0 |
| SLC35G2      | 0          | 0          | 0.0182772  | 0 | 0 |
| ESYT3        | 0          | 0          | 0.00712671 | 0 | 0 |
| LINC00578    | 0          | 0          | 0.0231318  | 0 | 0 |
| AHSG         | 0          | 0.0522118  | 0          | 0 | 0 |
| ADIPOQ       | 0.00525656 | 0          | 0          | 0 | 0 |
| CLDN16       | 0          | 0          | 0.00945708 | 0 | 0 |
| EGOT         | 0          | 0.0245585  | 0          | 0 | 0 |
| BHLHE40-AS1  | 0.0278967  | 0          | 0          | 0 | 0 |
| LMCD1-AS1    | 0          | 0          | 0.0145832  | 0 | 0 |
| THRB         | 0.00305712 | 0          | 0          | 0 | 0 |
| EPM2AIP1     | 0.0029671  | 0          | 0          | 0 | 0 |
| CX3CR1       | 0          | 0.0112302  | 0          | 0 | 0 |
| LARS2-AS1    | 0          | 0          | 0.0157128  | 0 | 0 |
| DNASE1L3     | 0          | 0.037526   | 0          | 0 | 0 |
| KY           | 0          | 0          | 0.00597887 | 0 | 0 |
| A4GNT        | 0.0143806  | 0          | 0          | 0 | 0 |
| PRR23A       | 0          | 0.0196808  | 0          | 0 | 0 |
| PLSCR4       | 0          | 0.0114744  | 0          | 0 | 0 |
| FAM194A      | 0.0116253  | 0          | 0          | 0 | 0 |
| CLRN1        | 0          | 0.0272872  | 0          | 0 | 0 |
| WDR49        | 0.00793631 | 0          | 0          | 0 | 0 |
| SLC7A14      | 0.00209161 | 0.00305037 | 0          | 0 | 0 |
| SPATA16      | 0.0102274  | 0          | 0          | 0 | 0 |
| C3orf70      | 0.00409858 | 0          | 0.00517691 | 0 | 0 |
| TPRG1-AS2    | 0          | 0          | 0.0877617  | 0 | 0 |
| OPA1-AS1     | 0          | 0          | 0.0845636  | 0 | 0 |
| LOC402160    | 0          | 0          | 0.0237925  | 0 | 0 |
| NSG1         | 0.0114267  | 0          | 0.0142556  | 0 | 0 |
| C4orf6       | 0.0629211  | 0          | 0          | 0 | 0 |
| PCDH7        | 0.00648056 | 0          | 0          | 0 | 0 |
| NSUN7        | 0.00655406 | 0          | 0          | 0 | 0 |
| C4orf40      | 0          | 0.0068659  | 0          | 0 | 0 |
| EREG         | 0.00435814 | 0.00666983 | 0          | 0 | 0 |
| SPP1         | 0          | 0          | 0.0175627  | 0 | 0 |
| SLC25A31     | 0.0141338  | 0.021407   | 0          | 0 | 0 |
| HHIP         | 0.00672403 | 0          | 0          | 0 | 0 |
| C4orf51      | 0.0330997  | 0          | 0          | 0 | 0 |
| PRSS48       | 0.0248206  | 0          | 0.0615622  | 0 | 0 |
| LOC100505989 | 0          | 0.010527   | 0          | 0 | 0 |
| TRIM60       | 0.0108848  | 0          | 0          | 0 | 0 |
| ZFP42        | 0          | 0.013788   | 0          | 0 | 0 |
| MIR548I2     | 4.30088    | 0          | 0          | 0 | 0 |
| LOC344967    | 0.0243146  | 0          | 0          | 0 | 0 |
| BEND4        | 0          | 0.0039981  | 0          | 0 | 0 |
| YIPF7        | 0.0324262  | 0          | 0          | 0 | 0 |
| COX7B2       | 0          | 0.191107   | 0          | 0 | 0 |
| IGFBP7       | 0          | 0.0928568  | 0          | 0 | 0 |
| TMPRSS11D    | 0          | 0          | 0.00928608 | 0 | 0 |
| IGJ          | 0.0325203  | 0          | 0          | 0 | 0 |
| SOWAHB       | 0          | 0          | 0.0144004  | 0 | 0 |
| SPARCL1      | 0          | 0.00921493 | 0          | 0 | 0 |
| STPG2        | 0          | 0.0202838  | 0.0176398  | 0 | 0 |
| PCNAP1       | 0.0210462  | 0          | 0          | 0 | 0 |
| NEUROG2      | 0          | 0.0246668  | 0          | 0 | 0 |
| FAM198B      | 0          | 0          | 0.00644482 | 0 | 0 |
| FSTL5        | 0          | 0          | 0.00519517 | 0 | 0 |
| TRIM61       | 0          | 0.0228256  | 0          | 0 | 0 |
| LOC100506085 | 0.00481922 | 0          | 0          | 0 | 0 |
| HPGD         | 0          | 0          | 0.0104368  | 0 | 0 |

|                           |            |            |            |   |   |
|---------------------------|------------|------------|------------|---|---|
| LOC728175                 | 0          | 0.0181363  | 0.0157714  | 0 | 0 |
| FRG2                      | 0          | 0.0170701  | 0          | 0 | 0 |
| ROPN1L                    | 0.0430727  | 0.0585942  | 0.0522861  | 0 | 0 |
| OSMR                      | 0.0039483  | 0          | 0          | 0 | 0 |
| NIM1                      | 0.00956806 | 0          | 0.0233811  | 0 | 0 |
| FST                       | 0.0167594  | 0.0467951  | 0          | 0 | 0 |
| PART1                     | 0.0112666  | 0          | 0          | 0 | 0 |
| PMCHL2                    | 0.0361619  | 0          | 0.0154975  | 0 | 0 |
| NCRUPAR                   | 0.100317   | 0          | 0          | 0 | 0 |
| SNORA13                   | 0          | 4.47326    | 0          | 0 | 0 |
| MIR3661                   | 44.6853    | 0          | 0          | 0 | 0 |
| AFAP1L1                   | 0          | 0          | 0.00780078 | 0 | 0 |
| IRGM                      | 0          | 0.0236805  | 0          | 0 | 0 |
| GRIA1                     | 0.00438289 | 0          | 0          | 0 | 0 |
| EFCAB9                    | 0          | 0.05847    | 0.0505951  | 0 | 0 |
| HMP19                     | 0          | 0.0316049  | 0          | 0 | 0 |
| HRH2                      | 0.0093256  | 0          | 0          | 0 | 0 |
| LOC100132062,LOC100133331 | 0.0104974  | 0          | 0          | 0 | 0 |
| IRX4                      | 0.0311804  | 0          | 0          | 0 | 0 |
| LOC729506                 | 0.0150784  | 0          | 0          | 0 | 0 |
| UGT3A1                    | 0          | 0          | 0.011221   | 0 | 0 |
| RANBP3L                   | 0.00773029 | 0          | 0.0298164  | 0 | 0 |
| PLCXD3                    | 0.00249677 | 0          | 0          | 0 | 0 |
| SEPP1                     | 0          | 0.0152356  | 0          | 0 | 0 |
| LOC100652772              | 0          | 0.00998927 | 0.00867585 | 0 | 0 |
| LOC647859                 | 0          | 0          | 0.0538801  | 0 | 0 |
| SNORA47                   | 2.41778    | 9.65668    | 0          | 0 | 0 |
| ACOT12                    | 0          | 0.0173055  | 0          | 0 | 0 |
| LINC00461,MIR9-2          | 0.00690656 | 0          | 0          | 0 | 0 |
| POU5F2                    | 0.110194   | 0          | 0.0996383  | 0 | 0 |
| LOC100133050              | 0          | 0          | 0.0692     | 0 | 0 |
| C5orf63                   | 0          | 0.0048545  | 0          | 0 | 0 |
| LOC340074                 | 0          | 0          | 0.0155451  | 0 | 0 |
| VTRNA2-1                  | 50.4693    | 0          | 0          | 0 | 0 |
| KLHL3                     | 0          | 0          | 0.00886174 | 0 | 0 |
| MZB1                      | 0          | 0.053909   | 0.0485406  | 0 | 0 |
| NRG2                      | 0          | 0          | 0.0151089  | 0 | 0 |
| CD14                      | 0.0542222  | 0.195185   | 0          | 0 | 0 |
| FNDC9                     | 0          | 0.016594   | 0.0435666  | 0 | 0 |
| PFN3                      | 0          | 0.437399   | 0          | 0 | 0 |
| BMP6                      | 0.00917402 | 0          | 0          | 0 | 0 |
| ELOVL2-AS1                | 0          | 0.0213528  | 0          | 0 | 0 |
| HIST1H3A                  | 0.137428   | 0.552588   | 0.498613   | 0 | 0 |
| TRIM15                    | 0.0351409  | 0.0233671  | 0.0210499  | 0 | 0 |
| TNF                       | 0.0187412  | 0.0257939  | 0          | 0 | 0 |
| CFB                       | 0.00952248 | 0.0130125  | 0          | 0 | 0 |
| TSPO2                     | 0          | 0          | 0.0526328  | 0 | 0 |
| SPATS1                    | 0.0255703  | 0          | 0          | 0 | 0 |
| KCNQ5                     | 0          | 0          | 0.00470157 | 0 | 0 |
| FAM26F                    | 0.0625816  | 0.271236   | 0          | 0 | 0 |
| FAM26E                    | 0          | 0.0187356  | 0          | 0 | 0 |
| GJA1                      | 0          | 0.0208128  | 0.0089859  | 0 | 0 |
| FABP7                     | 0          | 0          | 0.0316117  | 0 | 0 |
| SMLR1                     | 0          | 0.0126731  | 0.0109624  | 0 | 0 |
| SLC35D3                   | 0          | 0          | 0.0531775  | 0 | 0 |
| PLEKHG1                   | 0          | 0.00936196 | 0.00410474 | 0 | 0 |
| VIP                       | 0          | 0          | 0.0172747  | 0 | 0 |
| SLC22A3                   | 0          | 0          | 0.0204845  | 0 | 0 |
| LOC100507194              | 0          | 0.0250205  | 0          | 0 | 0 |
| FAM217A                   | 0.0105195  | 0          | 0          | 0 | 0 |
| GCM2                      | 0.0102072  | 0          | 0          | 0 | 0 |
| HIST1H1B                  | 0.0668845  | 0          | 0.0800442  | 0 | 0 |
| HIST1H3J                  | 0          | 0          | 0.164217   | 0 | 0 |
| PSORS1C3                  | 0          | 0.0894418  | 0          | 0 | 0 |
| NCR3                      | 0.0977197  | 0.0592551  | 0.0422274  | 0 | 0 |
| CLPS                      | 0          | 0          | 0.130477   | 0 | 0 |
| PRPH2                     | 0.0359655  | 0.0249392  | 0.0220937  | 0 | 0 |
| CLIC5                     | 0.00419379 | 0          | 0          | 0 | 0 |
| GPR110                    | 0          | 0          | 0.0219894  | 0 | 0 |
| ELOVL5                    | 0.00793673 | 0          | 0          | 0 | 0 |
| IMPG1                     | 0.00670733 | 0          | 0          | 0 | 0 |
| SNORD50A                  | 0          | 350.966    | 0          | 0 | 0 |
| GJB7                      | 0          | 0.0293078  | 0          | 0 | 0 |
| GABRR2                    | 0          | 0.018931   | 0.0167881  | 0 | 0 |
| METTL24                   | 0.0325646  | 0          | 0          | 0 | 0 |
| NMBR                      | 0          | 0.0363608  | 0          | 0 | 0 |
| LOC729176                 | 0.00965514 | 0          | 0          | 0 | 0 |
| PRR18                     | 0          | 0.0244274  | 0          | 0 | 0 |
| ABCB5                     | 0.0100483  | 0.00733053 | 0          | 0 | 0 |



|                            |            |            |            |   |   |
|----------------------------|------------|------------|------------|---|---|
| LOC100506178               | 0          | 0          | 0.0115282  | 0 | 0 |
| ADCY1                      | 0.00228032 | 0          | 0          | 0 | 0 |
| LINC00525                  | 0.0237295  | 0          | 0          | 0 | 0 |
| CDC14C                     | 0          | 0.0108486  | 0          | 0 | 0 |
| SNORA15                    | 0          | 4.60671    | 0          | 0 | 0 |
| NCF1B                      | 0.0280652  | 0          | 0          | 0 | 0 |
| WBCSCR28                   | 0          | 0.0566272  | 0.101414   | 0 | 0 |
| MIR590                     | 0          | 43.6978    | 0          | 0 | 0 |
| CD36                       | 0          | 0.0166124  | 0          | 0 | 0 |
| AZGP1P1                    | 0          | 0          | 0.0275527  | 0 | 0 |
| MUC17                      | 0.00159258 | 0          | 0          | 0 | 0 |
| COL26A1                    | 0.0130191  | 0.0171801  | 0          | 0 | 0 |
| FOXP2                      | 0.00342815 | 0          | 0          | 0 | 0 |
| CFTR                       | 0          | 0.00493316 | 0          | 0 | 0 |
| ASB15                      | 0          | 0          | 0.010808   | 0 | 0 |
| FAM71F1                    | 0          | 0          | 0.0548184  | 0 | 0 |
| C7orf45                    | 0          | 0.0300338  | 0          | 0 | 0 |
| TMEM213                    | 0.0297761  | 0.01058    | 0          | 0 | 0 |
| PRSS1                      | 0.0390856  | 0          | 0          | 0 | 0 |
| GIMAP2                     | 0.0286307  | 0.0206487  | 0.108417   | 0 | 0 |
| GIMAP1,GIMAP1-GIMAP5,GIMAF | 0.0312396  | 0.0213699  | 0          | 0 | 0 |
| ABP1                       | 0          | 0          | 0.0178946  | 0 | 0 |
| MMD2                       | 0          | 0          | 0.0777039  | 0 | 0 |
| ZNF890P                    | 0.0380084  | 0.0255764  | 0          | 0 | 0 |
| DGKB                       | 0.00595993 | 0          | 0.00381284 | 0 | 0 |
| SOSTDC1                    | 0          | 0.0205825  | 0          | 0 | 0 |
| KIAA0087                   | 0          | 0.00721592 | 0          | 0 | 0 |
| MIR196B                    | 125.614    | 0          | 0          | 0 | 0 |
| SNORA9                     | 0          | 24.6699    | 0          | 0 | 0 |
| SNORA5A                    | 0          | 3.85109    | 0          | 0 | 0 |
| SNORA5C                    | 2.25985    | 3.08345    | 2.71878    | 0 | 0 |
| SNORA5B                    | 0          | 10.3671    | 0          | 0 | 0 |
| TNS3                       | 0          | 0          | 0.00467222 | 0 | 0 |
| GTF2IRD2P1                 | 0.00848646 | 0          | 0          | 0 | 0 |
| LOC100093631               | 0          | 0.0101779  | 0.00888371 | 0 | 0 |
| SGCE                       | 0          | 0          | 0.0174635  | 0 | 0 |
| TMEM130                    | 0.0116225  | 0.0159193  | 0          | 0 | 0 |
| CYP3A7,CYP3A7-CYP3AP1      | 0          | 0.0595897  | 0          | 0 | 0 |
| OR2AE1                     | 0.0333064  | 0          | 0.0413768  | 0 | 0 |
| MIR25                      | 138.026    | 0          | 0          | 0 | 0 |
| ACTL6B                     | 0          | 0          | 0.0269646  | 0 | 0 |
| MYL10                      | 0.0324602  | 0          | 0          | 0 | 0 |
| SLC26A5                    | 0.0552247  | 0          | 0          | 0 | 0 |
| SLC26A4-AS1                | 0.00559363 | 0.00852413 | 0          | 0 | 0 |
| SLC26A3                    | 0          | 0.0238206  | 0          | 0 | 0 |
| ASZ1                       | 0          | 0.016662   | 0          | 0 | 0 |
| OR6W1P                     | 0          | 0.0286297  | 0          | 0 | 0 |
| OR2A20P,OR2A9P             | 0          | 0.0545403  | 0          | 0 | 0 |
| ATP6V0E2-AS1               | 0          | 0          | 0.026238   | 0 | 0 |
| CRYGN                      | 0.0610024  | 0          | 0          | 0 | 0 |
| CNPY1                      | 0.00979062 | 0.014816   | 0          | 0 | 0 |
| VIPR2                      | 0.00882611 | 0          | 0.010722   | 0 | 0 |
| PRSS55                     | 0.0267338  | 0          | 0          | 0 | 0 |
| DEFB135                    | 0          | 0.526595   | 0          | 0 | 0 |
| SMIM18                     | 0          | 0          | 0.041098   | 0 | 0 |
| FAM110B                    | 0          | 0.00931319 | 0          | 0 | 0 |
| C8orf34                    | 0.00981251 | 0          | 0          | 0 | 0 |
| STMN2                      | 0.0108684  | 0          | 0          | 0 | 0 |
| BAALC                      | 0          | 0.0124194  | 0          | 0 | 0 |
| CTHRC1                     | 0          | 0.0325893  | 0.0280598  | 0 | 0 |
| RIMS2                      | 0          | 0          | 0.0081538  | 0 | 0 |
| TG                         | 0.00332111 | 0          | 0.00406857 | 0 | 0 |
| FAM203A                    | 0.0190492  | 0          | 0          | 0 | 0 |
| DEFA6                      | 0.185753   | 0          | 0          | 0 | 0 |
| DEFA5                      | 0          | 0          | 0.123667   | 0 | 0 |
| USP17L3                    | 0.0181207  | 0          | 0          | 0 | 0 |
| DEFB136                    | 0          | 0          | 0.846018   | 0 | 0 |
| DOK2                       | 0          | 0.0325156  | 0          | 0 | 0 |
| MIR320A                    | 0          | 255.129    | 0          | 0 | 0 |
| STMN4                      | 0.0230387  | 0          | 0          | 0 | 0 |
| SCARA5                     | 0          | 0.00990236 | 0          | 0 | 0 |
| PURG                       | 0          | 0.0174767  | 0          | 0 | 0 |
| ANK1                       | 0.0111082  | 0.0056008  | 0          | 0 | 0 |
| DKK4                       | 0          | 0.0498474  | 0          | 0 | 0 |
| PXDNL                      | 0          | 0          | 0.00677769 | 0 | 0 |
| ST18                       | 0          | 0.00467608 | 0          | 0 | 0 |
| PRDM14                     | 0.0125018  | 0          | 0          | 0 | 0 |
| DCAF4L2                    | 0          | 0.00983026 | 0          | 0 | 0 |
| GDF6                       | 0          | 0          | 0.0105591  | 0 | 0 |

|               |            |            |            |   |   |
|---------------|------------|------------|------------|---|---|
| C8orf56       | 0.0866787  | 0.117869   | 0          | 0 | 0 |
| LOC100499183  | 0          | 0.101705   | 0.0598641  | 0 | 0 |
| SNTB1         | 0.00957199 | 0.00710496 | 0          | 0 | 0 |
| KLHL38        | 0.0169867  | 0.022988   | 0.0205931  | 0 | 0 |
| LYNX1         | 0          | 0          | 0.10675    | 0 | 0 |
| DDX11L5       | 0.0181021  | 0          | 0          | 0 | 0 |
| IFNA8         | 0          | 0.0354213  | 0          | 0 | 0 |
| FLJ35282      | 0.00914972 | 0          | 0          | 0 | 0 |
| KIAA1045      | 0.00947478 | 0          | 0.00584218 | 0 | 0 |
| HRCT1         | 0          | 0.108069   | 0          | 0 | 0 |
| FAM27C        | 0.056062   | 0          | 0.0672405  | 0 | 0 |
| LOC100133920  | 0.013137   | 0          | 0          | 0 | 0 |
| PGM5          | 0.0158944  | 0.0111979  | 0.00986242 | 0 | 0 |
| GDA           | 0          | 0.0167883  | 0          | 0 | 0 |
| NTRK2         | 0          | 0.0160423  | 0.00695104 | 0 | 0 |
| C9orf47,S1PR3 | 0          | 0.0090627  | 0          | 0 | 0 |
| ACTL7A        | 0          | 0          | 0.0279277  | 0 | 0 |
| ORM2          | 0          | 0          | 0.0470169  | 0 | 0 |
| OR1L6         | 0          | 0.051025   | 0          | 0 | 0 |
| GFI1B         | 0          | 0          | 0.0265346  | 0 | 0 |
| LOC100130954  | 0          | 0.0172347  | 0          | 0 | 0 |
| RNF224        | 0.0570504  | 0          | 0          | 0 | 0 |
| CACNA1B       | 0          | 0.00914524 | 0.00815871 | 0 | 0 |
| TUBBP5        | 0.0108228  | 0.0594479  | 0.0263393  | 0 | 0 |
| FLJ41200      | 0          | 0.0139375  | 0          | 0 | 0 |
| FAM154A       | 0          | 0.0209446  | 0          | 0 | 0 |
| SLC24A2       | 0.00390925 | 0.00286113 | 0          | 0 | 0 |
| IFNA17        | 0          | 0          | 0.0331489  | 0 | 0 |
| CNTFR         | 0          | 0.0270728  | 0.0263682  | 0 | 0 |
| IGFBPL1       | 0.00786781 | 0          | 0          | 0 | 0 |
| LOC286297     | 0          | 0.0147927  | 0          | 0 | 0 |
| BANCR         | 0.0424128  | 0          | 0          | 0 | 0 |
| APBA1         | 0.00442898 | 0          | 0          | 0 | 0 |
| ALDH1A1       | 0          | 0.0142162  | 0          | 0 | 0 |
| LOC340508     | 0.0382351  | 0          | 0          | 0 | 0 |
| TNFSF15       | 0.00335601 | 0.009821   | 0          | 0 | 0 |
| ANGPTL2       | 0.00837712 | 0          | 0          | 0 | 0 |
| C9orf50       | 0          | 0          | 0.0403396  | 0 | 0 |
| CXorf28       | 0          | 0.0598305  | 0          | 0 | 0 |
| VCX           | 0.0368692  | 0          | 0          | 0 | 0 |
| GLRA2         | 0.00727273 | 0          | 0          | 0 | 0 |
| MAGEB6        | 0          | 0.0188619  | 0          | 0 | 0 |
| CXorf22       | 0.0114763  | 0.0169543  | 0.0146072  | 0 | 0 |
| CHDC2         | 0          | 0.0162669  | 0          | 0 | 0 |
| GPR34         | 0          | 0.0179942  | 0          | 0 | 0 |
| PAGE4         | 0          | 0          | 0.0815998  | 0 | 0 |
| PAGE2         | 0.279534   | 0          | 0          | 0 | 0 |
| KLF8          | 0.00472308 | 0          | 0          | 0 | 0 |
| HEPH          | 0          | 0          | 0.00677482 | 0 | 0 |
| AR            | 0.00275271 | 0          | 0          | 0 | 0 |
| ARL13A        | 0          | 0.0317835  | 0          | 0 | 0 |
| RGAG1         | 0          | 0          | 0.0105898  | 0 | 0 |
| AGTR2         | 0          | 0          | 0.0097839  | 0 | 0 |
| ZCCHC12       | 0          | 0.0177648  | 0          | 0 | 0 |
| MAMLD1        | 0          | 0.00933401 | 0          | 0 | 0 |
| CSAG1         | 0          | 0.0614156  | 0.110673   | 0 | 0 |
| BGN           | 0.016014   | 0          | 0          | 0 | 0 |
| ATP2B3        | 0          | 0.00658096 | 0          | 0 | 0 |
| GPR64         | 0          | 0.0071313  | 0.00619446 | 0 | 0 |
| ZFX-AS1       | 0.103843   | 0          | 0.126967   | 0 | 0 |
| ARX           | 0          | 0          | 0.0242073  | 0 | 0 |
| FTH1P18       | 0.0540991  | 0          | 0.128225   | 0 | 0 |
| CXorf36       | 0          | 0          | 0.00725104 | 0 | 0 |
| PCSK1N        | 0          | 0          | 0.250402   | 0 | 0 |
| ALAS2         | 0.0148283  | 0          | 0          | 0 | 0 |
| SPIN2A        | 0.0213233  | 0.0594966  | 0          | 0 | 0 |
| AWAT2         | 0.0132577  | 0.0188359  | 0          | 0 | 0 |
| P2RY4         | 0          | 0          | 0.0822896  | 0 | 0 |
| IL2RG         | 0          | 0          | 0.0421527  | 0 | 0 |
| POF1B         | 0.0047934  | 0          | 0          | 0 | 0 |
| TCEAL6        | 0.033259   | 0          | 0.0205608  | 0 | 0 |
| TEX13B        | 0          | 0          | 0.0342967  | 0 | 0 |
| CAPN6         | 0          | 0          | 0.0082109  | 0 | 0 |
| DCX           | 0.00234983 | 0          | 0          | 0 | 0 |
| LINC00633     | 0.042898   | 0          | 0          | 0 | 0 |
| CT4SA5        | 0          | 0          | 0.0226426  | 0 | 0 |
| FMR1-AS1      | 0.0225593  | 0.0777008  | 0.0154151  | 0 | 0 |
| MAGEA12       | 0          | 0.0231978  | 0          | 0 | 0 |
| SMIM9         | 0          | 0.0419044  | 0          | 0 | 0 |

GYG2P1

0

0

0.057367

0

0

| gene                      | t0_2       |
|---------------------------|------------|
| RPS17L                    | 1.96848    |
| ENG                       | 0.342845   |
| IL13RA2                   | 26.8132    |
| NCAPD3                    | 1.2748     |
| HIST1H1C                  | 41.7318    |
| HCLS1                     | 0.364482   |
| JAM3                      | 0.162607   |
| HIST2H2BE                 | 2.18717    |
| ICAM2                     | 3.53635    |
| HOXB13                    | 0.757536   |
| ADM                       | 76.7917    |
| IFI27                     | 16.1101    |
| TFRC                      | 6.34988    |
| AKAP12                    | 0.976191   |
| CA9                       | 99.2278    |
| CALD1                     | 19.121     |
| STK39                     | 6.50454    |
| RGS4                      | 8.00725    |
| HIST1H2BK                 | 40.1583    |
| C8orf58                   | 24.2951    |
| FAM47E,FAM47E-STBD1,STBD1 | 6.04729    |
| IFFO2                     | 5.60089    |
| SRFBP1                    | 34.0114    |
| AASDHPPT                  | 14.5904    |
| CMBL                      | 16.9542    |
| KLF2                      | 59.564     |
| WDR35                     | 2.74467    |
| VPS4B                     | 9.6939     |
| ZBTB38                    | 3.08046    |
| HMOX1                     | 113.349    |
| RMDN1                     | 13.7783    |
| WARS                      | 77.7423    |
| TFPI                      | 26.4002    |
| GARS                      | 129.804    |
| ASNS                      | 208.429    |
| PIP5KL1                   | 32.5358    |
| MOK                       | 11.7838    |
| NGFRAP1                   | 152.295    |
| ALOXE3                    | 7.92617    |
| FAM86B1                   | 5.48718    |
| LAMA1                     | 17.6285    |
| HINT2                     | 29.6663    |
| STARD3NL                  | 21.5465    |
| S100A2                    | 1396.96    |
| CUBN                      | 1.0547     |
| SNRPD3                    | 83.1736    |
| GFPT2                     | 39.6945    |
| ZNF114                    | 9.84909    |
| SGIP1                     | 1.22601    |
| NPTXR                     | 0.509564   |
| KCNN4                     | 18.8405    |
| TRPV2                     | 1.12504    |
| RAP2B                     | 21.0091    |
| RPS17                     | 0          |
| NBPF11,NBPF24             | 0.00719605 |
| MTUS1                     | 0.0109309  |
| KCNJ1                     | 0.0155643  |
| EFHD1                     | 0          |
| SIGLEC1                   | 0          |
| C20orf144                 | 0          |
| MASP2                     | 0.0192311  |
| SYNDIG1L                  | 0.02191    |
| CGNL1                     | 0.00576332 |
| BEX4                      | 0.0409771  |
| CXorf30                   | 0.0123394  |
| LINC00649                 | 0          |
| LINC00222                 | 0          |
| SCN8A                     | 0          |
| C11orf45                  | 0.0130981  |
| RBM47                     | 0          |
| KCNV2                     | 0          |
| NXNL2                     | 0.0391804  |
| C8orf12,TDH               | 0          |
| USHBP1                    | 0.0268829  |
| LOC100129924              | 0          |

|                |            |
|----------------|------------|
| EDA2R          | 0.0124945  |
| DLEC1          | 0          |
| GRIA3          | 0          |
| C17orf72       | 0.0202867  |
| FBXO17         | 0          |
| PTPN6          | 0          |
| SULT2B1        | 0          |
| GLIS1          | 0          |
| GRIA4          | 0          |
| BCL2L14        | 0          |
| SLC2A1-AS1     | 0          |
| PRF1           | 0          |
| TCP11          | 0          |
| NOSTRIN        | 0          |
| C10orf131      | 0          |
| RIMS4          | 0          |
| CD96           | 0          |
| CLDN11         | 0          |
| TRPV6          | 0          |
| KCNA6          | 0          |
| BARHL1         | 0          |
| RRAD           | 0.0673756  |
| RAET1L         | 0          |
| ZAR1L          | 0          |
| ZNF772         | 0          |
| WFDC13         | 0          |
| TIAM2          | 0          |
| SNX31          | 0          |
| ANKRD30BL      | 0          |
| KLHL32         | 0.0109473  |
| CXCR6          | 0          |
| APOBEC2        | 0          |
| ZNF549         | 0.00970579 |
| FLNC           | 0.00660945 |
| NAALADL1       | 0          |
| CYP2C18        | 0          |
| VTN            | 0          |
| CPNE4          | 0          |
| LOC91450       | 0          |
| C1orf204,VSIG8 | 0.0192453  |
| NLRP4          | 0          |
| LINC00310      | 0          |
| ZNF569         | 0.00857031 |
| FUT5           | 0          |
| GIMAP6         | 0          |
| VSIG2          | 0          |
| LOC100507346   | 0          |
| CCDC79         | 0          |
| CSNK1G2-AS1    | 0          |
| ABRA           | 0          |
| GAS6-AS1       | 0          |
| TMEM150C       | 0.0236493  |
| SCUBE1         | 0          |
| TAS2R3         | 0          |
| RARRES3        | 0          |
| C10orf82       | 0.055665   |
| LOC100506136   | 0.0252739  |
| FRMPD1         | 0          |
| PEX5L          | 0.0043105  |
| FAM228A        | 0          |
| DPYD           | 0          |
| NFE2           | 0          |
| SEPT14         | 0          |
| LOC100505716   | 0.0193177  |
| LOC284276      | 0          |
| CPA4           | 0.0171245  |
| SLC10A4        | 0          |
| MX2            | 0.0165621  |
| KCNQ3          | 0.00353926 |
| LOC100130075   | 0          |
| C3             | 0.0100932  |
| MESP2          | 0          |
| GPR143         | 0.0374429  |
| ATP2B2         | 0          |
| ADRA1A         | 0          |
| TMEM240        | 0.0825347  |
| IDO1           | 0.0225214  |
| GJB3           | 0          |
| RRH            | 0.0819646  |

|              |            |
|--------------|------------|
| LOC100506895 | 0          |
| TEX29        | 0.191258   |
| IGSF22       | 0.0216005  |
| LOC100144604 | 0          |
| NR0B2        | 0.0538257  |
| GP5          | 0          |
| HOOK1        | 0          |
| OVOL1        | 0          |
| LINC00102    | 0          |
| ATOH8        | 0.00951623 |
| GPM6A        | 0          |
| ZNF750       | 0          |
| HIST1H4D     | 0          |
| LOC148696    | 0          |
| KLHL14       | 0          |
| MN1          | 0          |
| CPE1         | 0.00670368 |
| FSTL1        | 0.0325636  |
| HIST1H2BJ    | 1.04503    |
| LOC440900    | 0.110013   |
| VAV1         | 0.0575504  |
| ZNF843       | 0          |
| GNG4         | 0.00955254 |
| HLA-DRB5     | 0.0477126  |
| GLIPR1L1     | 0.0492237  |
| PYCARD       | 0          |
| SRRM4        | 0          |
| TMEM25       | 0          |
| BMP2         | 0.0155268  |
| TNFRSF9      | 0.00698896 |
| DCT          | 0          |
| LINC00640    | 0          |
| GDPD2        | 0          |
| SHROOM3      | 0.00422748 |
| MRC2         | 0          |
| MAP2K4P1     | 0          |
| CALHM1       | 0          |
| RCAN3AS      | 0.214426   |
| TSPY26P      | 0          |
| LOC100505841 | 0          |
| MYO7B        | 0          |
| ARID3C       | 0          |
| KLK15        | 0.0454399  |
| A2M          | 0          |
| LRRC7        | 0.0061698  |
| TP53AIP1     | 0.0160878  |
| MYPN         | 0          |
| C6orf123     | 0          |
| COL8A2       | 0.012997   |
| LOC100506422 | 0          |
| LOXL4        | 0          |
| FNBP1        | 0.00908066 |
| STXBP5L      | 0          |
| VSIG1        | 0          |
| SLC2A5       | 0          |
| AGPAT4-IT1   | 0          |
| PTENP1       | 0          |
| MYO1G        | 0          |
| SLC9A9       | 0          |
| OR13J1       | 0          |
| HIST1H2BN    | 0.237028   |
| DNAJC5B      | 0.0328275  |
| GRM8         | 0          |
| ARHGEF26-AS1 | 0          |
| SYT12        | 0.0173778  |
| TACR2        | 0          |
| C8orf42      | 0          |
| LINC00620    | 0.0500099  |
| STAU2-AS1    | 0          |
| FOLR3        | 0          |
| BOLA1        | 0          |
| DLG2         | 0          |
| CYP2F1       | 0          |
| LOC100128288 | 0.0189463  |
| CBY3         | 0          |
| CC2D2B       | 0          |
| DPEP1        | 0.197361   |
| LOC100506834 | 0          |
| LOC147646    | 0.0477069  |

|                 |            |
|-----------------|------------|
| CRYBB3          | 0.0871887  |
| ZNF813          | 0.00869207 |
| PRSS37          | 0          |
| PVRL3-AS1       | 0.040006   |
| LGI2            | 0.0506316  |
| ACTN1-AS1       | 0          |
| COL9A2          | 0          |
| EFCAB13         | 0.00983424 |
| SNORA46         | 0          |
| SNORA6          | 0          |
| FAM19A2         | 0.0111977  |
| MADCAM1         | 0          |
| ASAP1-IT1       | 0          |
| ECM2            | 0.0152213  |
| LINC00173       | 0.0751073  |
| WWTR1-AS1       | 0.0645682  |
| LOC100506874    | 0          |
| PPM1E           | 0.00615359 |
| MUC13           | 0          |
| SPN             | 0          |
| DPY19L2         | 0          |
| HIST1H3E        | 0.274396   |
| CDIP1           | 0          |
| KRT17           | 0.0404469  |
| WNT5B           | 0          |
| KLHL30          | 0          |
| PLA2G1B         | 0.126912   |
| ALOX12          | 0          |
| SMC1B           | 0.0158802  |
| TRIM67          | 0.00626776 |
| PRPH            | 0          |
| ANP32AP1        | 0          |
| DAND5           | 0.0662946  |
| FOXD4L3         | 0          |
| SCGB1B2P        | 0.37043    |
| KRT15           | 0.0570162  |
| RPL13AP3        | 0.0318783  |
| MIR1248,SNORA81 | 1.63126    |
| CDKL5           | 0          |
| CCL3            | 0          |
| TMEM45B         | 0          |
| CLDN14          | 0.059074   |
| MFAP5           | 0.0142413  |
| KLHDC9          | 0.0637522  |
| FAM35BP         | 0          |
| VN1R2           | 0          |
| M1AP            | 0          |
| KLKB1           | 0.0172541  |
| PPIAP30         | 0          |
| RIN2            | 0          |
| EGF             | 0          |
| KISS1           | 0.131915   |
| COL5A1          | 0.00755261 |
| DEFB131         | 0          |
| FAM71A          | 0          |
| SLC38A4         | 0.0395954  |
| GCNT3           | 0          |
| ENPP3           | 0          |
| JMJD1C-AS1      | 0.259362   |
| C16orf62        | 0.0125383  |
| NAP1L6          | 0.0225154  |
| RIPK4           | 0.0163807  |
| RHBDL2          | 0.0954363  |
| SRPX2           | 0.0208751  |
| HIST1H2BO       | 0.459557   |
| FAM83E          | 0.252861   |
| FBP2            | 0          |
| PYDC1           | 0          |
| C13orf45        | 0          |
| KRTAP5-10       | 0          |
| MAP1B           | 0.00649129 |
| SPTBN4          | 0.106473   |
| BCO2            | 0          |
| C4A,C4B_2       | 0          |
| SLC22A14        | 0          |
| SH2D7           | 0          |
| SERPINA1        | 0.0148197  |
| LOC100653515    | 0          |
| SND1-IT1        | 0.035413   |

|                 |            |
|-----------------|------------|
| LOC643401       | 0          |
| C9orf171        | 0          |
| LINC00319       | 0.0245543  |
| RS1             | 0          |
| RUNX1T1         | 0          |
| DZIP1           | 0.0108701  |
| MIR3651,SNORA84 | 11.4105    |
| TMEM255A        | 0          |
| KRTAP2-4        | 0          |
| LRRC25          | 0          |
| DMRT1           | 0.0254891  |
| TPTE2P1         | 0.00573451 |
| ISM2            | 0          |
| SMAD5-AS1       | 0.0504783  |
| AOC4            | 0.0280624  |
| EQTN            | 0.0758135  |
| KCNN1           | 0.112222   |
| CDHR2           | 0.0133014  |
| CRX             | 0          |
| CETN4P          | 0.237937   |
| MYH16           | 0          |
| TMCC3           | 0.00695028 |
| ARHGDI8         | 0          |
| SERPIN7         | 0.0422371  |
| RYR1            | 0.00405436 |
| MAEL            | 0          |
| NAT8L           | 0.0115813  |
| JAKMIP3         | 0.0468503  |
| STYK1           | 0.0986711  |
| HSD17B13        | 0.0929337  |
| NACAD           | 0          |
| CNDP1           | 0          |
| PCDH18          | 0          |
| LINC00568       | 0          |
| LOC100288432    | 0.321306   |
| RAPGEF4-AS1     | 0          |
| HLA-G           | 0.0424887  |
| ST8SIA5         | 0          |
| EMX2OS          | 0          |
| NWD1            | 0.00631679 |
| TLX2            | 0          |
| LOC100131289    | 0.490698   |
| PRELP           | 0.0181698  |
| C7orf57         | 0          |
| LGR5            | 0.0162945  |
| APOBEC3G        | 0          |
| TIGD4           | 0.106844   |
| C6orf223        | 0.0505165  |
| HAS2-AS1        | 0.0228567  |
| ANKRD53         | 0          |
| LOC100287846    | 0          |
| LOC285626       | 0          |
| LINC00511       | 0          |
| RPL34-AS1       | 0.0103828  |
| POM121L9P       | 0.0198898  |
| RLN1            | 0          |
| STL             | 0          |
| HSPA12B         | 0.0268019  |
| LOC100506655    | 0.0168464  |
| EFNB3           | 0          |
| GNRHR           | 0          |
| CNGA1           | 0.012705   |
| SLCO1C1         | 0          |
| KRTDAP          | 0.530174   |
| CKMT1A          | 0.0283093  |
| SNORA22         | 4.81461    |
| SYCP3           | 0          |
| LOC100129617    | 0.0254403  |
| KRT5            | 0.102667   |
| PSG5            | 0          |
| SLC6A20         | 0          |
| LYZ             | 0          |
| HAPLN3          | 0.0432753  |
| STAG3L1         | 0          |
| C8orf46         | 0          |
| TNFRSF1B        | 0          |
| SERPIN1         | 0          |
| ZNF733P         | 0.020827   |
| SNORD94         | 0          |



|                           |            |
|---------------------------|------------|
| HES2                      | 0          |
| TC2N                      | 0          |
| INTS4L2                   | 0.0274483  |
| JPH3                      | 0.0406342  |
| MAML2                     | 0.00751432 |
| ATP13A4                   | 0          |
| LCN10                     | 0          |
| TMEM59L                   | 0.0494621  |
| ARL17A,ARL17B             | 0.167063   |
| PBOV1                     | 0.0325181  |
| HP                        | 0          |
| CPM                       | 0.0120134  |
| SLC7A5P1                  | 0.497014   |
| C11orf52,HSPB2            | 0          |
| QOEP                      | 0.0920385  |
| FLJ33360                  | 0.0206252  |
| B3GNT4                    | 0.279996   |
| RASGRF1                   | 0          |
| GOLGA7B                   | 0.146134   |
| SNORA45                   | 5.37829    |
| PTGER4                    | 0.0150384  |
| ARL4C                     | 0.104397   |
| OR2B6                     | 0.162494   |
| PIGR                      | 0          |
| SLC16A8                   | 0          |
| PRG2                      | 0          |
| FKBP6                     | 0          |
| XKRX                      | 0          |
| DPYSL4                    | 0.0525285  |
| PRICKLE1                  | 0          |
| HIATL2                    | 0.440471   |
| METTL7A                   | 0.0143808  |
| MDS2                      | 0          |
| ALOX5                     | 0.0240374  |
| S100A4                    | 0.387049   |
| GPR124                    | 0.0250781  |
| KCNMB2-IT1                | 0          |
| CYBRD1                    | 0          |
| KLK1                      | 0          |
| TMEM139                   | 0.0598034  |
| RIMS1                     | 0.0694368  |
| KIAA1683                  | 0.0278296  |
| TRIM34,TRIM6,TRIM6-TRIM34 | 0.169559   |
| SYNM                      | 0          |
| SP5                       | 0.6367     |
| ST14                      | 0.0221284  |
| FKBP1AP1                  | 0          |
| TRIM17                    | 0.0330539  |
| ELANE                     | 0          |
| DNAH7                     | 0          |
| LRRC37A11P                | 0.0122576  |
| CD33                      | 0.0993208  |
| SLC28A3                   | 0          |
| FOXD4L6                   | 0.0518547  |
| COCH                      | 0          |
| COL23A1                   | 0.0230869  |
| KRT34                     | 0          |
| CPXM2                     | 0.0287084  |
| RPL13P5                   | 0.484629   |
| SCARNA6                   | 0.487388   |
| DEFB134                   | 1.08327    |
| RGS17                     | 0          |
| RNF39                     | 0.0791686  |
| PGM5-AS1                  | 0          |
| HRH4                      | 0.0127556  |
| CNBD2                     | 0.0543241  |
| SERPINI1                  | 0.0681248  |
| GPR132                    | 0          |
| BTBD16                    | 0          |
| PXT1                      | 0          |
| PVRL4                     | 0.0292971  |
| MACC1                     | 0.00391178 |
| NDRG2                     | 0          |
| KALRN                     | 0.0302791  |
| GPRC5C                    | 0.294989   |
| SH3RF2                    | 0.442553   |
| IDH1-AS1                  | 0.656275   |
| IL22RA1                   | 0.210269   |
| USP49                     | 0.102543   |

|                    |            |
|--------------------|------------|
| ZNF705A            | 0          |
| PDE1B              | 0          |
| HIST1H2BD          | 9.76384    |
| KCNE2              | 0.377687   |
| POM121L10P         | 0.0113103  |
| OPN1SW             | 0.0651213  |
| SNORA54            | 0          |
| NREP               | 0          |
| C1QTNF9            | 0.0227888  |
| ALOX5AP            | 0          |
| CLDN4              | 0.130123   |
| SPATA32            | 0          |
| KRT80              | 0.58017    |
| LOC728558          | 0.0310582  |
| DAW1               | 0          |
| HOXD1              | 0.0385415  |
| EPN2-IT1           | 0          |
| HCG17              | 0.0778751  |
| LOH12CR2           | 0.216807   |
| SGK2               | 0.159471   |
| SRD5A3-AS1         | 0          |
| SERPINE3           | 0.038092   |
| LOC728024          | 0          |
| KIAA1199           | 0.0789755  |
| ANKRD1             | 0.27254    |
| EPHA1-AS1          | 0          |
| SMOC1              | 0          |
| LOC100289187       | 0.720797   |
| DAB2               | 0.00978533 |
| IGFALS             | 0          |
| HIST1H1D           | 0.746258   |
| LOC100131726       | 0          |
| NRON               | 0          |
| IMPG2              | 0.0131875  |
| NFATC4             | 0.216588   |
| TMEM191C           | 0.188002   |
| HOXA-AS3           | 0.0276555  |
| HHIPL2             | 0.0204082  |
| NDNF               | 0          |
| C20orf118          | 0.0500798  |
| NCF1               | 0          |
| PDCL2              | 0.0496266  |
| NELL2              | 0          |
| SLN                | 0.0696562  |
| SNORA57            | 11.4355    |
| MAP1LC3A           | 0.175531   |
| SCARNA8            | 0          |
| SSUH2              | 0.0983611  |
| GPR52              | 0          |
| SNORA18            | 21.779     |
| TTN-AS1            | 0.153079   |
| DHRS4L1            | 0.0863413  |
| TUBA3D             | 0.0768957  |
| SLC35G5            | 0          |
| TCN2               | 0          |
| FAM81B             | 0          |
| HIST1H2BC          | 1.86573    |
| CSTA               | 0.170078   |
| FXVD7              | 0.137907   |
| ASPDH              | 0          |
| CYP21A2            | 0.0801572  |
| EPO                | 0.100081   |
| ANKRD65            | 0          |
| CDO1               | 0.0264963  |
| ZNF512B            | 0.0738366  |
| KCNA7              | 0          |
| NAPSA              | 0          |
| LINC00665          | 0.0323217  |
| GGT8P              | 0.0210387  |
| LOC100506394       | 0.0941726  |
| SLC8A2             | 0.0154909  |
| OAS2               | 0          |
| ZNRF3-AS1          | 0.0550013  |
| CLIC3              | 0          |
| CLIC2              | 0.0507168  |
| FLJ26245,RNA5SP411 | 0          |
| TPI1P3             | 0          |
| ATP6V0A4           | 0          |
| HIST1H2AM          | 3.41592    |

|                    |            |
|--------------------|------------|
| LOC148709          | 0.127719   |
| LOC100507091       | 0          |
| EXOC3L4            | 0.0396353  |
| LOC100188947       | 0.178482   |
| LOC645638          | 0.211016   |
| ANGPT2             | 0.00721769 |
| RTN1               | 0.0317289  |
| MYLK3              | 0.0103504  |
| VTRNA1-3           | 0          |
| LINC00266-1        | 0.162391   |
| PDGFRB             | 0.0188646  |
| FBXW12             | 0.0298639  |
| ARL9               | 0.132332   |
| SNORD58C           | 0          |
| COX8C              | 0          |
| SOX15              | 0.189958   |
| NPHS1              | 0.066069   |
| ACSM1              | 0          |
| HBBP1              | 0          |
| SH3GL1P2           | 0.0502862  |
| PVRIG              | 0          |
| HRC                | 0.0166577  |
| C16orf86           | 0.0627433  |
| A2M-AS1            | 0.060674   |
| PAGE2B             | 0          |
| AKR1B1             | 0          |
| LOC100128770       | 0.0226135  |
| DACT3-AS1          | 0          |
| OPRK1              | 0          |
| WWC3               | 0.00835028 |
| KCNJ4              | 0          |
| GOLGA6L10          | 0.0223715  |
| HHIP-AS1           | 0.0472128  |
| LGALS4             | 0.10383    |
| TGFBI              | 0          |
| DUSP15             | 0.25378    |
| ZBTB20             | 0.0334145  |
| CGB7               | 0          |
| TRPM5              | 0          |
| LIPT2              | 0.457338   |
| FEZF1              | 0.245829   |
| MRGPRX3            | 0.187628   |
| PDZD2              | 0          |
| C11orf34           | 0          |
| FCGR2B             | 0          |
| PBX1               | 0.171547   |
| RAB3A              | 1.21538    |
| HLA-F-AS1          | 0.993572   |
| KLHL10             | 0.0619714  |
| HM13-AS1           | 0.144898   |
| BHLHB9             | 0.0869399  |
| LRRC3-AS1          | 0.0766743  |
| BEND3P3            | 0.0160282  |
| HIST1H2AH          | 0.687339   |
| FOXL1              | 0.0209354  |
| SNORA76            | 0          |
| BIRC3              | 0.223069   |
| LOC100507300       | 0.0184721  |
| TAT                | 0          |
| MTUS2              | 0.0362828  |
| ALPK3              | 0.018995   |
| RNF112             | 0.252905   |
| SYDE1              | 0          |
| ASIC4              | 0          |
| SLFN1              | 0.0684037  |
| MAGI2              | 0.246123   |
| FOXD4L5            | 0          |
| MTRNR2L1           | 0.56769    |
| CSDC2              | 0.0826678  |
| RNF148             | 0.169277   |
| LUZP4              | 0          |
| FAM132A            | 0.30206    |
| SLC15A2            | 0.0139806  |
| HIST1H2AD,HIST1H3D | 1.67248    |
| HBA2               | 0          |
| PDE7B              | 0.091556   |
| LOC727896          | 0.0105908  |
| COL1A1             | 0.0333613  |
| CSPG4              | 0.0158903  |

|              |            |
|--------------|------------|
| GPR85        | 0          |
| PGAM4        | 0.0873434  |
| LOC145837    | 0.0484864  |
| TAS2R46      | 0          |
| ENDOD1       | 0.261208   |
| PPEF1        | 0.137626   |
| SERTAD4-AS1  | 3.92352    |
| RHOBTB1      | 0.329318   |
| PPEF2        | 0          |
| CERKL        | 0.0278202  |
| UNC5B-AS1    | 1.33785    |
| DACH1        | 0.168893   |
| TPH1         | 0          |
| CCDC114      | 0.0575526  |
| FERMT2       | 0.0333293  |
| ABCC11       | 0.01077    |
| ITGA10       | 0.107714   |
| SPDEF        | 0          |
| TMEM92       | 0.143681   |
| LINC00669    | 0.348645   |
| FUT3         | 0          |
| LYPD3        | 0.248963   |
| EPS8L2       | 0.827788   |
| LOC100128076 | 0          |
| SSTR2        | 0.0291975  |
| GALNT3       | 0          |
| GPR157       | 0          |
| KLK4         | 0          |
| COLEC10      | 0          |
| CYP3A5       | 0.0266186  |
| LRRRC19      | 0.020014   |
| C18orf56     | 4.39489    |
| LINC00441    | 0.0906487  |
| PADI3        | 0          |
| KIAA1958     | 0.303145   |
| SNORA32      | 0          |
| SCN11A       | 0          |
| TAS2R31      | 0          |
| IHH          | 0.0376239  |
| FLJ25758     | 0.0359585  |
| ABCA17P      | 0.073577   |
| GVINP1       | 0.0163316  |
| LOC440925    | 0.0398047  |
| HCG9         | 0          |
| SSPN         | 0.00935731 |
| ZPLD1        | 0.0211791  |
| HIST2H2AB    | 0.263329   |
| GPR162       | 2.03884    |
| PTGER2       | 0          |
| STARD4       | 1.07132    |
| EPHA1        | 0          |
| HNMT         | 0          |
| KLK14        | 0.262608   |
| CCDC80       | 0.69793    |
| C10orf10     | 0          |
| LINC00313    | 0.128711   |
| SLC5A2       | 0.270179   |
| GFR3         | 0.0975634  |
| SLC47A2      | 0          |
| LEMD1        | 0.0804526  |
| C2orf62      | 0.0496995  |
| HIST1H4I     | 1.07073    |
| NKAPL        | 0.0258846  |
| L1TD1        | 0.0167115  |
| FABP6        | 8.02715    |
| APOL6        | 0.063382   |
| C2           | 0.098825   |
| ATP6V1C2     | 0.11955    |
| INSL3        | 0          |
| CHRM4        | 0.0535664  |
| SNORD10      | 3.09976    |
| TRIM46       | 0.023152   |
| ZMIZ1-AS1    | 0          |
| SPEG         | 0          |
| OSBPL1A      | 2.24555    |
| PPP1R12B     | 0.344453   |
| CTAGE9       | 0.0449662  |
| SLC26A1      | 0.221695   |
| CTAGE15P     | 0.119635   |

|                     |           |
|---------------------|-----------|
| EXD1                | 0.014132  |
| PCDHGB8P            | 0         |
| SRMS                | 0         |
| LOC100128750        | 0.47608   |
| ZNF586              | 0.491544  |
| CCDC13              | 0.0185139 |
| PCDHB6              | 0.0184171 |
| GNAT2               | 0.0638156 |
| TGM4                | 0         |
| TMED10P1            | 0.123219  |
| CRB3                | 1.30284   |
| WHAMMP2             | 0.0385618 |
| ANKRD61             | 0.10021   |
| TCERG1L             | 0.0244647 |
| LOC100129055        | 0.0696564 |
| ALS2CR12            | 0.019285  |
| SLC44A4             | 0.047936  |
| LOC100506801        | 0.078639  |
| BRD7P3              | 0         |
| BOK-AS1             | 0         |
| FLJ42351            | 0.773559  |
| WFIKKN1             | 0.236365  |
| FLJ27354            | 0.641232  |
| PTCSC3              | 0         |
| B3GAT2              | 1.20623   |
| TNFSF14             | 0         |
| PRR26               | 0.107387  |
| LOC100652739        | 0.124626  |
| CMYA5               | 0         |
| GCKR                | 0.0650828 |
| HOXA2               | 0.0336691 |
| ADORA2A-AS1         | 0.021591  |
| RASAL2-AS1          | 0         |
| CACNA1H             | 0         |
| ZNF790-AS1          | 0.0566585 |
| MLLT4-AS1           | 0.11229   |
| DKKL1               | 0.867442  |
| C21orf90            | 0.688185  |
| LOC285740           | 0.0214679 |
| FSD2                | 0         |
| CORO6               | 0.0282537 |
| C5orf27             | 0         |
| NCOR1P1             | 0         |
| ST7-OT4             | 0.0956905 |
| CLDN2               | 0.0163248 |
| HPCA                | 0.182166  |
| ALDH1A3             | 0.0269592 |
| FUT7                | 0.0308554 |
| HIST2H3D            | 0.586599  |
| DNM3                | 0.0196314 |
| AQP8                | 0.105125  |
| LSM11               | 1.43487   |
| COLEC11             | 0.385558  |
| RPL13AP6            | 0.115274  |
| GPBAR1              | 0.201816  |
| PRSS16              | 2.03298   |
| SYT3                | 0.0894307 |
| PTTG2               | 0         |
| LINC00623,LOC728875 | 0.442757  |
| TCAP                | 0.0699632 |
| MID1                | 0.0134737 |
| GPR146              | 3.24166   |
| LRRN2               | 0.0200678 |
| FAM69A              | 1.61981   |
| LOC100129138        | 0.103697  |
| OR2H2               | 0.170559  |
| HIST1H2BG           | 1.81804   |
| LOC729444           | 0.0133998 |
| SIGLEC16            | 0.206023  |
| MEX3B               | 0.848332  |
| CACNA11             | 0         |
| RAPSN               | 0         |
| PLGLB2              | 0         |
| RASL11B             | 0         |
| MORF4L2-AS1         | 0.101658  |
| HIST1H1E            | 2.89972   |
| UBA7                | 0.0940236 |
| C1orf189            | 0.161767  |
| ZNF860              | 0.0346268 |

|              |            |
|--------------|------------|
| LOC554223    | 0.0480029  |
| SVEP1        | 0          |
| NDRG1        | 224.351    |
| SPAG5-AS1    | 0.409388   |
| TAS1R3       | 0.0729663  |
| ZRANB2-AS2   | 0.154235   |
| CA14         | 0          |
| ZSCAN10      | 0.0451426  |
| ZBTB26       | 0.598691   |
| ARSI         | 0.0215614  |
| FNDC5        | 0.0478102  |
| INPP5D       | 0.110465   |
| SPNS2        | 0.516171   |
| ADAMTS6      | 0.0259168  |
| MSLN         | 0.0398892  |
| REN          | 0          |
| PRUNE2       | 0.00296321 |
| CSTF3-AS1    | 0.0254701  |
| ZNF205-AS1   | 0.283193   |
| BCL3         | 7.31309    |
| DGCR10       | 0          |
| FAM226A      | 0.478092   |
| LOC729683    | 0.5638     |
| IL7          | 0.356336   |
| ETV3         | 0.374366   |
| HAS2         | 0.344403   |
| FAM83A       | 0.0502015  |
| NPFF         | 1.6406     |
| SEMA7A       | 0.221947   |
| SAMD12-AS1   | 0          |
| CLDN3        | 1.21689    |
| USP32P1      | 0.136637   |
| IQGAP2       | 0.0120279  |
| OLFML2B      | 0.262465   |
| GOLGA6L10    | 0.0445775  |
| HIST1H4A     | 1.04231    |
| NAALAD2      | 0.0454041  |
| FTH1P3       | 0.314196   |
| CADPS2       | 0.402237   |
| RNF223       | 0.296551   |
| LOC100507250 | 0.11318    |
| GCNT4        | 0.0106932  |
| CDHR3        | 0.034315   |
| TRIM58       | 0.00961833 |
| DYNC111      | 0.0891282  |
| LOC79015     | 0          |
| DNAI1        | 0          |
| GRIN2C       | 0.0796638  |
| FLJ37201     | 0.0373707  |
| RRAS         | 23.166     |
| ANAPC1P1     | 0          |
| SSBP2        | 1.22775    |
| CACNA1G      | 0.00887676 |
| C10orf55     | 0.0707305  |
| SBSN         | 0.0964102  |
| OR13A1       | 0          |
| FPR3         | 0          |
| HIST1H2AE    | 9.9536     |
| LINC00239    | 0.306415   |
| GDPD3        | 1.27147    |
| ACSBG1       | 0.127297   |
| RPL19P12     | 0.0474624  |
| ENPP6        | 0.0338143  |
| LCN12        | 0.121866   |
| KIF17        | 0.608333   |
| ZNF732       | 0.0151725  |
| TMEM74       | 0          |
| LOC730091    | 0          |
| TCF7L1       | 0.0491822  |
| APOA1        | 0          |
| IQCD         | 0.186919   |
| RAB30        | 0.0552969  |
| SPDYE8P      | 0.0319299  |
| LMOD3        | 0          |
| MAF          | 0.00703887 |
| PSTPIP1      | 0          |
| RPRML        | 0.127141   |
| ALLC         | 0.033562   |
| SYCE1        | 0.0345452  |

|                 |            |
|-----------------|------------|
| DLEU2L          | 0.0979783  |
| EAF2            | 1.08964    |
| PON3            | 0.779455   |
| RPS6KA2         | 0.214374   |
| PIN4P1          | 0.0176605  |
| C1orf106        | 0.188854   |
| ANKRD37         | 10.6217    |
| DRD4            | 1.16783    |
| DUXA            | 0          |
| SPRY1           | 2.61345    |
| ALG1L9P         | 0          |
| SLC28A1         | 0          |
| SLC34A3         | 0.0423816  |
| ENO1-AS1        | 0          |
| CBR3-AS1        | 0.57355    |
| IL17B           | 0.105336   |
| CREB3L2         | 2.5386     |
| DNM1P35         | 0.128037   |
| TACSTD2         | 0.0392201  |
| DENND2D         | 0.0404993  |
| IL1RAP          | 1.3203     |
| PRCD            | 0.0713902  |
| PCDHB18         | 0          |
| C6orf52         | 1.63927    |
| IRAK2           | 0.759058   |
| NOS1AP          | 0.126881   |
| CBX3P2          | 0.217931   |
| C12orf60        | 1.37747    |
| FHOD3           | 0.0383113  |
| GABBR2          | 0          |
| GNMT            | 0.285337   |
| LRRN3           | 0.0103967  |
| MORN5           | 0          |
| DKK3            | 0.128662   |
| LCN2            | 0.135749   |
| RASA4CP         | 0.1484     |
| ENPEP           | 0.0152308  |
| RHD             | 0.134452   |
| CLIP4           | 0.0190918  |
| INSIG1          | 9.57394    |
| HIF3A           | 0          |
| CD82            | 1.50774    |
| CALCRL          | 0.00591231 |
| ZNF841          | 1.28228    |
| LGALS9          | 0.0755497  |
| EYS             | 0.0163793  |
| DDAH2           | 31.3028    |
| HIST1H2AC       | 4.89686    |
| DERL3           | 0.910195   |
| MTRNR2L10       | 0.843716   |
| RIMKLA          | 1.58061    |
| ALDOC           | 113.488    |
| ARHGEF33        | 0.0204422  |
| REPS2           | 0.348016   |
| ATXN1           | 0.242608   |
| ARMCX2          | 0.106007   |
| SHISA7          | 0.00966793 |
| HERC2P3         | 0.441367   |
| NRP1            | 0.682711   |
| AGSK1,LOC727849 | 0.191738   |
| CXCL2           | 0.268759   |
| KRTAP5-8        | 0          |
| SNORA44         | 0          |
| CLEC2B          | 0.155473   |
| MIR210HG        | 10.1872    |
| N4BP2L1         | 0.510045   |
| NOXRED1         | 0.145165   |
| HIST2H2BC       | 6.27035    |
| FAM46A          | 0.243959   |
| LOC115110       | 0.591433   |
| LOC143666       | 0.882002   |
| DNAH11          | 0.00532961 |
| CYP46A1         | 0.033193   |
| HSPA5           | 162.196    |
| HSP90B2P        | 0.0128505  |
| FOSL2           | 3.74948    |
| LCE1E           | 0.109558   |
| TMEM191B        | 1.27126    |
| RBP5            | 0.18472    |

|                 |            |
|-----------------|------------|
| C1orf110        | 0.186359   |
| JSRP1           | 25.5124    |
| SLC5A12         | 0          |
| ADAMTSL1        | 0.262507   |
| C17orf74        | 0.293386   |
| PARP10          | 2.85761    |
| CAV1            | 4.81759    |
| PAR6G-AS1       | 0.315331   |
| PGPEP1L         | 0          |
| ASIC3           | 0.705613   |
| ACSM3           | 0.415157   |
| CD274           | 0.70033    |
| ZNF550          | 0.122183   |
| ANGPTL3         | 0          |
| LINC00634       | 0.204663   |
| BTC             | 0.0380229  |
| NLRP3           | 0.0708545  |
| TMSB4X          | 248.388    |
| SYNE1           | 0.01255    |
| C4A,C4B         | 0.0211326  |
| CLUHP3          | 0.198668   |
| PRSS8           | 0.313325   |
| RASGEF1B        | 0          |
| SNORD15B        | 23.3728    |
| SNORA23         | 1.08499    |
| LIPG            | 0.055881   |
| LOC100499489    | 1.36261    |
| CERS5           | 19.6393    |
| AGPAT4          | 0.313872   |
| ZDHH8P1         | 0.533922   |
| LNPEP           | 0.557699   |
| FGL2            | 0          |
| OR51B5          | 0.354979   |
| EDARADD         | 0.561082   |
| C11orf16        | 0.052472   |
| CSRP2           | 20.0842    |
| CACNA2D1        | 0.048327   |
| CCRL1           | 0.0315199  |
| ASPN            | 0          |
| LOC100270746    | 2.22183    |
| C19orf35        | 0          |
| C2orf15         | 1.04664    |
| LINC00304       | 0.0309412  |
| LINC00628       | 0          |
| UCN             | 2.21592    |
| FRMD5           | 1.18453    |
| MYB             | 0.68741    |
| TUFT1           | 9.40589    |
| MPP7            | 0.1166     |
| FAAH2           | 0.598159   |
| TINCR           | 0.271781   |
| GPRC5D          | 0.365021   |
| AGSK1,LOC727849 | 0.0790058  |
| TCP10L          | 0.411989   |
| ANXA9           | 0.339576   |
| C10orf12        | 0.427093   |
| LINC00162       | 0          |
| MAGI3           | 0.327226   |
| PIPSL           | 0.011958   |
| FOXP3           | 2.25335    |
| DOC2GP          | 0          |
| CCDC167         | 20.6122    |
| INSIG2          | 7.12166    |
| TUBB1           | 0.0644495  |
| HOXA1           | 1.34337    |
| CCDC19          | 0.143414   |
| SERPINC1        | 0.0306226  |
| DEGS2           | 0          |
| MYO7A           | 0.137713   |
| TRIM5           | 1.82936    |
| TNFAIP3         | 0.2388     |
| COL6A6          | 0.00901183 |
| F3              | 1.6655     |
| FABP2           | 0          |
| LHPP            | 8.12933    |
| LOC286190       | 0.0204848  |
| PKLR            | 0.406452   |
| DDC             | 0          |
| GNG12-AS1       | 0.0191507  |



|                      |           |
|----------------------|-----------|
| LOC730668            | 0.0403162 |
| CDRT1                | 0.0456053 |
| TSPAN15              | 4.39389   |
| TAGLN2               | 60.9474   |
| PFKFB4               | 30.8396   |
| ANGPT4               | 0.0316169 |
| SNORA64              | 12.6285   |
| LINC00622            | 0.136945  |
| HIST1H4K             | 0.361739  |
| PROM1                | 0.0416871 |
| CD74                 | 0.0414059 |
| LOC339666            | 0.184841  |
| ERVFRD-1             | 0.0138237 |
| GSTM1                | 16.3881   |
| CES4A                | 0         |
| SVIP                 | 4.64675   |
| TMEM121              | 0.58137   |
| ETV2                 | 0.432986  |
| C17orf50             | 0         |
| FDPSSL2A             | 0.0346109 |
| KCP                  | 0         |
| LRRRC33              | 0.0878051 |
| SPAG4                | 18.2809   |
| CALR3                | 0.0359728 |
| LOC283177            | 0         |
| HILPDA               | 20.7844   |
| SLC29A1              | 57.8853   |
| NPPA                 | 0.160449  |
| KCNMB3               | 0.447848  |
| NEK10                | 0         |
| HTRA1                | 0.248743  |
| PFN1P2               | 0.30385   |
| GRIP2                | 0.0339001 |
| BOLA3-AS1            | 3.30879   |
| DLEU2                | 0.169261  |
| LOC154761            | 1.4848    |
| SCD                  | 54.6705   |
| ZNF829               | 0.0067266 |
| ARL6                 | 0.756206  |
| LOC100128361         | 0.437543  |
| RPL23AP64            | 0.274994  |
| GAS1                 | 0.301982  |
| LOC440356            | 0.198541  |
| CREB5                | 1.97782   |
| LOC283038            | 0.0532876 |
| TLR1                 | 0.0411763 |
| MAP7D2               | 0.0216654 |
| C17orf78             | 0.0211304 |
| RUNDC3A              | 0.689098  |
| ZDHC15               | 0         |
| LDHC                 | 0.0675312 |
| LOC100505738,MIR4458 | 2.30361   |
| RASD1                | 0.0570723 |
| NIPAL1               | 0.0389361 |
| PLEKHG4B             | 0         |
| FXYD1                | 1.20746   |
| ATL1                 | 0.510072  |
| TMTC2                | 0.124628  |
| KBTBD3               | 0.462992  |
| CDKN2C               | 8.57718   |
| MARCH1               | 0.114546  |
| ZNF274               | 0         |
| HFE2                 | 0.0308784 |
| TPPP3                | 0.193246  |
| SNX33                | 19.5532   |
| GEMIN8P4             | 1.00671   |
| GLUD2                | 0         |
| PLA2G3               | 0.0213192 |
| FOXDL1               | 0.472429  |
| JAK2                 | 0.263202  |
| C3orf20              | 0         |
| MAP1LC3C             | 0.878532  |
| TSSK6                | 1.50186   |
| HIST1H3G             | 0.774622  |
| CPEB2                | 0.114507  |
| TAGLN                | 30.5041   |
| RTN4                 | 98.8718   |
| BEAN1                | 0.151922  |
| RAB20                | 16.8928   |

|              |           |
|--------------|-----------|
| RNF144B      | 0.107765  |
| CCDC171      | 0.404259  |
| PHF19        | 64.021    |
| RAET1G       | 0.304728  |
| CDH5         | 0.0121936 |
| FAM63B       | 0.327111  |
| SEPT4        | 0.290071  |
| PHF1         | 22.0402   |
| PDE5A        | 0.250106  |
| ING2         | 5.45047   |
| CLK3         | 16.218    |
| FABP5P3      | 0         |
| AMZ1         | 0.0135805 |
| NEU3         | 0.246337  |
| HOXA11-AS    | 1.63834   |
| SEMA3D       | 2.66563   |
| HEIH         | 0.0439554 |
| LRRRC26      | 3.89656   |
| HIPK3        | 0.305257  |
| HIST1H2BM    | 0.211044  |
| XKR6         | 0.195425  |
| MANF         | 71.5919   |
| SMIM1        | 6.55768   |
| GADD45G      | 1.18231   |
| TBX19        | 0.307753  |
| ADORA2A      | 1.24518   |
| C1orf51      | 0.148738  |
| EFNA5        | 0.613942  |
| NRGN         | 9.61079   |
| SLC43A3      | 0.165523  |
| HLA-DRB1     | 0.0482169 |
| CDKL2        | 0.116232  |
| LINC00671    | 0         |
| FAM160A1     | 0.9626    |
| IFI6         | 3.5355    |
| IL34         | 0         |
| THAP8        | 2.98566   |
| LOC100129917 | 0.0402195 |
| HCAR2        | 0         |
| ADAM11       | 2.56516   |
| DUSP8        | 4.15521   |
| CDADC1       | 1.53746   |
| C1orf192     | 0         |
| SOX2-OT      | 0.688789  |
| KLF9         | 0.87052   |
| OSBPL10      | 5.65675   |
| MICALCL      | 0.195286  |
| RFTN2        | 0.0255268 |
| FAM167B      | 0.803108  |
| SGPP1        | 3.72062   |
| COX17        | 108.276   |
| PNKD         | 40.9314   |
| IRS1         | 0.377418  |
| LINC00696    | 0         |
| FAM219A      | 6.6158    |
| TMEM8B       | 3.44051   |
| PIAS1        | 3.98719   |
| KCNE1L       | 0.381466  |
| GPRC5A       | 5.11434   |
| ACTA1        | 0.370303  |
| SERHL        | 0         |
| RIMBP3       | 0.0360475 |
| NRN1         | 24.0271   |
| VPS9D1       | 1.31617   |
| LOC100506195 | 0         |
| PCSK5        | 1.19128   |
| FGD6         | 0.0719042 |
| PAX6         | 0.0623193 |
| LOC285819    | 0.231115  |
| DNAJB4       | 2.18072   |
| SFTPB        | 0         |
| SNORA26      | 21.7919   |
| LOC728875    | 0.277654  |
| C3orf45      | 0         |
| EGFR         | 0.825317  |
| LHX3         | 0.343749  |
| SPDYE5       | 0.0920317 |
| P2RY1        | 0.0838721 |
| LOC150381    | 2.87017   |

|           |            |
|-----------|------------|
| HOXA4     | 3.40978    |
| PLOD1     | 86.2111    |
| PER1      | 3.68437    |
| FRZB      | 0          |
| LPAL2     | 0.214606   |
| SEMA3C    | 0.145876   |
| FGD4      | 0.123772   |
| PLEKHH3   | 7.4036     |
| SEMA3A    | 1.0142     |
| DDR2      | 0.0408827  |
| PMS2P4    | 1.199      |
| PRSS12    | 1.18483    |
| HOXD4     | 1.01928    |
| WHSC1     | 9.80979    |
| TULP1     | 0.0977731  |
| OTOA      | 0.0945844  |
| MAP3K9    | 0.338654   |
| TBC1D3    | 0.252324   |
| CNGA4     | 0.0297012  |
| MST1      | 0.911925   |
| TP53TG1   | 4.79114    |
| ZNF821    | 3.69767    |
| ABHD12B   | 0.0298316  |
| MLLT3     | 2.43456    |
| ARAF      | 14.9686    |
| EFCAB5    | 0.00896265 |
| ROCK1P1   | 0.384737   |
| FNDC3B    | 1.80295    |
| MAPRE3    | 0.646418   |
| MLK7-AS1  | 0          |
| GMPR      | 12.0904    |
| ZNF878    | 0.208191   |
| PGF       | 12.6237    |
| ZNF414    | 10.5214    |
| MBD5      | 0.129398   |
| SLC22A31  | 0          |
| SEC24D    | 2.76025    |
| SPINK1    | 0          |
| LINC00672 | 0.0525284  |
| TECTA     | 0.00785303 |
| CCDC144C  | 0          |
| LINC00273 | 0.0960848  |
| TENM3     | 0.0980063  |
| MATN1-AS1 | 1.0417     |
| GSDMB     | 1.6706     |
| ASH1L-AS1 | 1.37288    |
| SEMA6A    | 0.0330982  |
| HMSD      | 3.9004     |
| HP07349   | 2.41257    |
| CLEC3B    | 2.0779     |
| PDLIM2    | 117.947    |
| CHST7     | 0.928576   |
| SMAD3     | 3.78023    |
| OLAH      | 0.0263537  |
| TK1       | 83.444     |
| LPCAT3    | 7.10422    |
| ZNF461    | 0.250462   |
| RORA      | 1.07082    |
| CTDSP1    | 39.6654    |
| HRASLS    | 0.177297   |
| LCE1C     | 0.262809   |
| CHRNA     | 0          |
| GGN       | 0.408789   |
| TXNDC16   | 0.378129   |
| BHLHE41   | 2.85115    |
| TET1      | 0.00405885 |
| ANKRD45   | 0.016081   |
| CXorf57   | 1.25489    |
| C14orf105 | 0.029891   |
| PRDM10    | 1.21039    |
| ZNF620    | 0.471064   |
| FBLN5     | 2.13698    |
| EFEMP2    | 1.47801    |
| LLGL2     | 26.9093    |
| LOC113230 | 3.93194    |
| P4HA2     | 20.5257    |
| RAET1K    | 1.47102    |
| HMGNS     | 1.22767    |
| EEF1A2    | 0          |

|              |           |
|--------------|-----------|
| PPP5D1       | 0.0801207 |
| STAC3        | 0.317013  |
| DFNA5        | 0         |
| ARHGAP42     | 0.164985  |
| LINC00115    | 1.84503   |
| RBM44        | 0.0643044 |
| ZNF154       | 0.0141787 |
| HIST1H2AK    | 0.239442  |
| RNF122       | 2.70139   |
| AATK         | 0.416667  |
| DBP          | 12.6135   |
| RALGAPS2     | 1.99341   |
| AXDND1       | 0.562524  |
| CD163L1      | 0.188805  |
| C9orf163     | 0.294676  |
| GPR18        | 0         |
| ACSBG2       | 0         |
| C12orf73     | 2.9841    |
| C1orf114     | 0.0191259 |
| PCYOX1       | 4.30941   |
| CLUL1        | 0.039515  |
| HIST1H2AI    | 1.47559   |
| LMBR1L       | 8.52206   |
| LOC100131434 | 0.0204257 |
| RDH16        | 0.116239  |
| HYAL1        | 0.0378887 |
| LMTK3        | 0.492162  |
| RPSAP52      | 2.41762   |
| FAM19A3      | 0.925353  |
| SEC14L1P1    | 0.184246  |
| PYY2         | 0.775083  |
| RASSF2       | 0.0236198 |
| CTSL2        | 2.01847   |
| PMS2CL       | 2.21484   |
| ARTN         | 0.217167  |
| ZNF204P      | 0.948374  |
| IL20RB       | 0.230694  |
| CAPN5        | 3.8011    |
| PVRL3        | 1.00926   |
| SLC44A3      | 0.508736  |
| YY1P2        | 0         |
| IQSEC2       | 7.47561   |
| FLJ42709     | 0.466326  |
| SCARNA10     | 1.20577   |
| ZNF717       | 0.135388  |
| PC           | 1.30222   |
| MAPK8IP1     | 0.858779  |
| LYSMD1       | 1.89648   |
| ILK          | 58.6386   |
| SEMA4B       | 11.022    |
| TMEM53       | 1.33295   |
| MIER2        | 12.63     |
| SH3BGR2L2    | 1.39901   |
| LINC00565    | 0.625071  |
| GLCC1        | 0.534683  |
| KLF5         | 1.23531   |
| STARD5       | 0.996534  |
| CLDN23       | 0.42297   |
| HS3ST3B1     | 0.0933758 |
| HSH2D        | 0.220282  |
| LOC100292680 | 0         |
| SMIM14       | 1.09042   |
| NRM          | 18.5469   |
| SLC23A1      | 0.0244448 |
| DHCR7        | 31.2044   |
| SULF1        | 0.0213378 |
| PYGM         | 0.0525158 |
| FAM209A      | 0.090008  |
| HSD17B7P2    | 0.611987  |
| KIRREL       | 0.706293  |
| AP1M2        | 3.11509   |
| LRIT3        | 0.0810444 |
| KDM5B-AS1    | 16.8266   |
| KLHL36       | 9.77683   |
| RFPL3S       | 1.51957   |
| KLF11        | 1.26868   |
| FOXJ2        | 1.83852   |
| CCDC28B      | 5.43341   |
| SYNGR4       | 0.0821348 |

|                     |            |
|---------------------|------------|
| ANKRD36B            | 0.168842   |
| REC8                | 0.39331    |
| LOC400043           | 0.0487601  |
| SCARF2              | 1.54152    |
| RASGRP3             | 0.0357856  |
| KCNK3               | 0          |
| MGAT4A              | 0.987336   |
| IGFLR1              | 2.01831    |
| TEC                 | 0.78339    |
| PLA2G4A             | 0.798417   |
| OBSCN               | 0.527861   |
| SNTA1               | 11.9534    |
| CLVS1               | 0.0424044  |
| LYPD5               | 0.270246   |
| MGC12916            | 2.22738    |
| ACBD7               | 1.34847    |
| C2orf48             | 2.37896    |
| TMEM81              | 2.74662    |
| CRTC2               | 15.215     |
| HSD17B8             | 4.74327    |
| LOC100505666        | 0.663816   |
| DFNB31              | 9.11555    |
| ESRRB               | 0.252639   |
| WDTC1               | 0.946875   |
| MAP2                | 0.11521    |
| CAND2               | 0.0635338  |
| BTN3A1              | 1.10531    |
| SLC9C1              | 0.00844937 |
| ZNF469              | 0.00573187 |
| DUOX1               | 0.022094   |
| ZFAND2B             | 25.2811    |
| C11orf68            | 52.1516    |
| FAM115C             | 1.09193    |
| LOC100505695        | 3.17955    |
| PCIF1               | 9.44027    |
| LOC728228           | 0.103279   |
| HCG25               | 0.226292   |
| DEPTOR              | 0.625333   |
| SLC7A5P2            | 0.433307   |
| FUT11               | 2.62745    |
| RYR2                | 0.150063   |
| UTS2                | 5.44657    |
| LIPE                | 3.27171    |
| C2orf82             | 4.07344    |
| LOC100131257        | 0.00164476 |
| MTRNR2L5            | 0.0220577  |
| SNORA80B            | 5.53669    |
| GJC1                | 7.78732    |
| KIF12               | 0.802053   |
| ASB4                | 0.00964038 |
| KNDC1               | 0.736021   |
| GCHFR               | 59.456     |
| SH2D3A              | 6.31706    |
| ETV1                | 0.4513     |
| BTD                 | 1.04509    |
| SDF2L1              | 57.0666    |
| GAMT                | 0.296162   |
| FRRS1               | 0.429677   |
| FOXP4               | 8.54752    |
| TMEM163             | 0.0286146  |
| MAGT1               | 7.50264    |
| SPINT1              | 41.654     |
| USPL1               | 2.33865    |
| TMSB10              | 4890.71    |
| FAM63A              | 5.20546    |
| PDGFRL              | 4.03951    |
| KLHL25              | 2.64998    |
| KDM4A-AS1           | 0.385124   |
| PPP1R3F             | 0.571706   |
| TLR9                | 0.0182142  |
| RFX2                | 2.50086    |
| SLC22A11            | 0.0287137  |
| LOC100616530        | 0.300547   |
| MGAT5B              | 1.78009    |
| IRF7                | 0.0454952  |
| NT5E                | 0.593728   |
| LRRC3               | 1.00053    |
| KIAA1244            | 2.23759    |
| RBAK,RBAK-LOC389458 | 26.7659    |

|              |            |
|--------------|------------|
| SNAPC3       | 2.64613    |
| F2R          | 0.685187   |
| ZNF488       | 0.22176    |
| FEM1B        | 0.933239   |
| RTN4R        | 14.7167    |
| CMPK2        | 0.223318   |
| GAD1         | 7.65063    |
| CPEB3        | 0.189665   |
| LONRF1       | 4.11487    |
| ZCCHC2       | 1.21505    |
| FRAS1        | 0.631294   |
| ZNF284       | 0.968136   |
| FGF18        | 0.176613   |
| FP588        | 0.155434   |
| KCNJ14       | 0.446293   |
| ESAM         | 7.72149    |
| ATOH7        | 0.163343   |
| ZNRF2        | 1.3606     |
| CDK2AP2      | 43.4055    |
| ARPC5        | 22.7339    |
| SMPDL3B      | 1.10017    |
| NRSN2        | 0.188644   |
| HK3          | 0          |
| FLJ43681     | 0.493995   |
| CRYM-AS1     | 0.242774   |
| LOC100133957 | 1.98263    |
| IFITM1       | 0.827503   |
| RGS12        | 1.83869    |
| VPS37D       | 17.6309    |
| BTN3A3       | 0.645851   |
| E2F8         | 0.692695   |
| PRH2         | 0.00885937 |
| SGOL1-AS1    | 1.5727     |
| CBWD2        | 1.28499    |
| PRORS1P      | 0.299135   |
| ETNK2        | 0.991009   |
| SNORA74A     | 0.829775   |
| ACAP1        | 0.709273   |
| KIAA1467     | 1.46382    |
| ALDOA        | 3825.08    |
| SH3D21       | 3.49472    |
| MFGE8        | 13.5116    |
| WTIP         | 1.47125    |
| THRA         | 6.72878    |
| OXCT2        | 1.07191    |
| SLC16A4      | 0.0221082  |
| LOC729970    | 1.80188    |
| FUZ          | 1.81591    |
| MSS51        | 0.710148   |
| IFLTD1       | 0          |
| JUND         | 91.145     |
| CCDC154      | 0.300465   |
| LOC220729    | 0.949074   |
| CRISPLD2     | 0.0106258  |
| MSMO1        | 16.8062    |
| HKDC1        | 1.1304     |
| CYBB         | 0.0444722  |
| BEX5         | 11.7911    |
| C19orf81     | 1.40941    |
| TIGD3        | 1.69664    |
| SYTL2        | 0.436377   |
| BRIP1        | 1.63463    |
| SAP30        | 28.9419    |
| POU2F2       | 0.0827868  |
| TMEM170A     | 4.39652    |
| IFIT3        | 0.276704   |
| C20orf196    | 2.33889    |
| PLAT         | 0.576419   |
| RNF157       | 0.415675   |
| FGFBP3       | 1.4625     |
| MT1JP        | 0.787551   |
| ANKRD50      | 0.844657   |
| TMPO-AS1     | 0.880996   |
| SAT2         | 116.891    |
| DBIL5P       | 0.219729   |
| NMU          | 15.8532    |
| TBC1D28      | 0.0252998  |
| DNAJC3       | 5.06256    |
| TNFRSF8      | 0.280596   |

|              |           |
|--------------|-----------|
| HSD17B7      | 6.51434   |
| ZKSCAN4      | 1.53213   |
| CRYBG3       | 0.216069  |
| CABYR        | 0.441496  |
| TRABD2B      | 0.0477229 |
| ATF3         | 15.5979   |
| ATP6V0E2     | 0         |
| RTN4RL2      | 19.9497   |
| SLC2A1       | 68.4202   |
| PDIA4        | 50.7208   |
| PHF7         | 1.27538   |
| SYP          | 0.315893  |
| MRPL27       | 66.3957   |
| SPEM1        | 0.479687  |
| NTN4         | 0.458195  |
| LOC553103    | 0.150245  |
| PHLDA3       | 79.7015   |
| SREBF2       | 22.9703   |
| ITGAE        | 2.95931   |
| PVRL2        | 36.0616   |
| ZNF815P      | 0.58108   |
| LOC728743    | 0.579289  |
| AMIGO1       | 2.0386    |
| PFKFB3       | 17.3564   |
| LOC100129046 | 0         |
| GPR89A       | 3.95604   |
| TSPAN10      | 1.12238   |
| SLC11A1      | 0.175955  |
| NS3BP        | 1.47399   |
| LINC00460    | 0.495585  |
| DMXL1        | 0.655691  |
| LOC400752    | 0.775114  |
| SNAI3        | 1.77524   |
| AKT3         | 1.39114   |
| STARD13-AS   | 0         |
| LDLRAD4      | 0.0453313 |
| TFEB         | 1.64287   |
| LOC100130238 | 0.0162575 |
| BREA2        | 0.664253  |
| FLVCR2       | 0.714811  |
| NFAM1        | 0         |
| FAM162A      | 273.203   |
| ARHGAP33     | 1.21466   |
| MBOAT1       | 1.06507   |
| RAB6B        | 0.365533  |
| LOC284837    | 0         |
| PSCA         | 0.481893  |
| TAS2R4       | 0.0610477 |
| ENPP1        | 0.58808   |
| KPNA7        | 0.0316489 |
| RASSF7       | 32.8231   |
| TRPM6        | 0.0412637 |
| STX11        | 0.195457  |
| MCF2         | 0.0100574 |
| TMEM120A     | 29.5846   |
| ABHD4        | 6.30395   |
| NUCB2        | 8.58893   |
| PARP16       | 7.69801   |
| POU5F1P3     | 0.0561044 |
| LRIG2        | 1.53124   |
| JPX          | 3.38661   |
| ITGA1,PELO   | 15.3159   |
| TXNIP        | 16.6037   |
| ARHGEF5      | 3.55897   |
| FADS2        | 6.12012   |
| E2F1         | 10.8428   |
| PROSAPIP1    | 3.00001   |
| ICAM4        | 0.207918  |
| PITPNA-AS1   | 13.39     |
| MPP2         | 2.97038   |
| HAPLN2       | 0         |
| H2AFX        | 167.741   |
| KRT10        | 14.3835   |
| ERMP1        | 2.99715   |
| DUSP10       | 0.438004  |
| BAAT         | 0.0684741 |
| PDZD7        | 1.92452   |
| TRAPPC6B     | 3.61353   |
| UNC13B       | 1.11361   |

|              |            |
|--------------|------------|
| CALR         | 365.244    |
| MNF1         | 24.8601    |
| ZNF224       | 0.0149834  |
| SLC25A5-AS1  | 0.295282   |
| CD27         | 0.190674   |
| TBC1D2       | 9.14665    |
| MYBL2        | 12.6587    |
| EIF1B-AS1    | 0.107277   |
| PCDH11Y      | 0.0249668  |
| CNPY3        | 48.5003    |
| IFIH1        | 0.46459    |
| HAL          | 0.0575554  |
| RBFOX3       | 0.02823    |
| SMAD6        | 0.533155   |
| MYL9         | 64.8852    |
| LYSMD3       | 2.03676    |
| SLC39A10     | 3.17485    |
| MSI2         | 4.59084    |
| PTGS1        | 0.00932742 |
| LOC100506804 | 0.136499   |
| EMILIN3      | 2.31934    |
| HBE1         | 93.4513    |
| MYH10        | 0.0738871  |
| FOXP1        | 2.10937    |
| PJA2         | 2.58269    |
| USP30-AS1    | 0          |
| RGMB         | 6.10167    |
| CFDP1        | 20.857     |
| FBXO16       | 0.797075   |
| PLIN5        | 1.23009    |
| OLFML3       | 0          |
| LOC648691    | 0          |
| CACFD1       | 4.76893    |
| CARHSP1      | 20.2361    |
| CABLES2      | 1.03227    |
| KTN1-AS1     | 1.61375    |
| PCDHB15      | 0.0471376  |
| TMED1        | 28.33      |
| ASCL5        | 0.504664   |
| GPX3         | 0.0281582  |
| RASA2        | 0.387635   |
| FITM1        | 0.815982   |
| GNAQ         | 0.55608    |
| SMAP1        | 2.24405    |
| RAVER1       | 24.8883    |
| CTAGE6P      | 0.0292417  |
| NCOA6        | 3.40232    |
| SRGAP1       | 0.390141   |
| SMPD3        | 0.36332    |
| PLAU         | 23.5535    |
| SBSPON       | 0.233366   |
| U2AF1L4      | 3.14537    |
| SEPT1        | 0.948305   |
| UQCRHL       | 1.40025    |
| ATP2B4       | 0.955791   |
| ZIC2         | 5.16674    |
| ANKRD20A5P   | 0.0478753  |
| FAM110C      | 1.18283    |
| KDM3A        | 15.0905    |
| DKFZP434A062 | 0.0120195  |
| CCDC175      | 0.274418   |
| TFAP2A       | 2.44889    |
| TNFAIP8      | 2.38717    |
| ZFP14        | 0.272763   |
| ZNF649       | 0.107918   |
| ZNF30        | 0.505655   |
| PAG1         | 0.0761262  |
| OIP5-AS1     | 8.13645    |
| LOC284581    | 0.0274423  |
| FAM72B       | 1.5713     |
| DAZAP2       | 24.0899    |
| LPAR2        | 11.9708    |
| LDHD         | 2.32734    |
| PRELID2      | 5.67471    |
| MT1L         | 1046.54    |
| SLC39A9      | 11.9447    |
| BCOR         | 1.55466    |
| IGSF3        | 1.25747    |
| TTC37        | 1.19812    |



|              |           |
|--------------|-----------|
| DNASE1       | 0.460493  |
| STXBP5-AS1   | 0.0256474 |
| FBXL8,HSF4   | 6.04887   |
| WEE1         | 21.064    |
| HIPK4        | 0.0909805 |
| NBPF1        | 0.803393  |
| FNDC4        | 9.44494   |
| PIK3IP1      | 1.80128   |
| SLC10A7      | 0.500582  |
| LOC100129250 | 13.3639   |
| CYB5A        | 9.59121   |
| LINC00324    | 0.710597  |
| DIP2A-IT1    | 0         |
| FAM72A       | 1.27539   |
| RAD54L2      | 0.219679  |
| CDCA3        | 26.3001   |
| MMAA         | 0.389428  |
| REEP1        | 0.487842  |
| FANCM        | 0.334477  |
| LURAP1L      | 4.70427   |
| ANAPC15      | 19.2799   |
| RSBN1L-AS1   | 4.50887   |
| PGAP3        | 1.36856   |
| VCL          | 10.2903   |
| EFNA4        | 28.8298   |
| HDAC6        | 1.57272   |
| MYOM1        | 0.122381  |
| RHOG         | 56.4679   |
| NKX2-5       | 22.6703   |
| RAB11FIP5    | 18.2887   |
| IFI35        | 4.59538   |
| ABCA1        | 0.0115021 |
| TEF          | 1.78804   |
| AGAP9        | 0.138247  |
| CECR6        | 0.390403  |
| ZNF143       | 4.64816   |
| LEPREL2      | 16.8691   |
| DSTNP2       | 3.0066    |
| FBXO6        | 15.2551   |
| USP18        | 2.35092   |
| FAM64A       | 15.9984   |
| KCNH1        | 0         |
| SPAG5        | 15.7107   |
| SHBG         | 0.352606  |
| SKOR1        | 0.372666  |
| LCP1         | 77.3194   |
| HLTF         | 0.0390387 |
| MAP3K3       | 4.00454   |
| KHK          | 5.44349   |
| FANCG        | 12.8058   |
| KLF4         | 4.91965   |
| PIM2         | 17.1862   |
| RGS2         | 2.08085   |
| TIMP2        | 5.8377    |
| STX8         | 40.1972   |
| KIAA2013     | 47.5801   |
| SOCS1        | 2.32863   |
| CCNG2        | 6.27942   |
| KIAA0430     | 1.49584   |
| ERN1         | 0.172591  |
| HCN3         | 0.519128  |
| SHCBP1       | 4.93358   |
| PPAPDC3      | 0.113318  |
| JHDM1D       | 1.68829   |
| CCSAP        | 1.75378   |
| PPP1R3E      | 1.75103   |
| MYL2         | 0         |
| DAPK3        | 113.566   |
| HYLS1        | 2.93415   |
| PLCB2        | 0.118659  |
| BACE1        | 2.1044    |
| CACNA1D      | 0.0058724 |
| CYTH1        | 3.71258   |
| CA5B         | 0.518721  |
| C19orf73     | 2.82037   |
| TPP1         | 28.729    |
| DPCR1        | 0         |
| FGF17        | 2.28076   |
| RPP30        | 5.12749   |

|            |            |
|------------|------------|
| RELB       | 12.4502    |
| CRYBB2     | 6.52717    |
| MOV10      | 24.0579    |
| PARD6A     | 14.2497    |
| TUBGCP4    | 7.02417    |
| AKAP9      | 0.282047   |
| ZNF784     | 7.29402    |
| CROT       | 0.515344   |
| N4BP3      | 4.40965    |
| FAM3B      | 0.17647    |
| ATP1B3     | 73.305     |
| DNAH5      | 0.00980845 |
| RRAGB      | 2.69854    |
| CNTNAP1    | 4.52355    |
| RNASEL     | 0.412564   |
| CCDC120    | 0.203196   |
| ATP8A1     | 0.214765   |
| CAMK2D     | 3.01461    |
| PAIP2B     | 1.67336    |
| YPEL3      | 16.8591    |
| FKBP2      | 72.339     |
| SNORA72    | 21.1032    |
| ORC1       | 3.06191    |
| TSSK2      | 0.768284   |
| NES        | 5.01822    |
| WDR54      | 79.4539    |
| MURC       | 0.195056   |
| LINC00263  | 13.65      |
| TIPARP-AS1 | 0.30668    |
| PHLDB3     | 9.13613    |
| DYDC2      | 0          |
| C5orf45    | 53.0705    |
| DRAP1      | 442.354    |
| C1orf220   | 0.066976   |
| CLDN22     | 1.25914    |
| C10orf118  | 0.233137   |
| TMEM91     | 5.80588    |
| TTC13      | 1.27397    |
| CTGF       | 10.1219    |
| IKZF3      | 0.00928112 |
| CSF1       | 2.06088    |
| LOC441461  | 1.69663    |
| HERC2P10   | 0          |
| NCKIPSD    | 19.8494    |
| LRRIQ3     | 0.171349   |
| CGRRF1     | 6.75161    |
| C6orf106   | 12.8127    |
| DNMT3A     | 1.11199    |
| C14orf1    | 25.7071    |
| LGALS1     | 1981.53    |
| CTSS       | 0.0283502  |
| PDXP       | 42.5083    |
| WDR62      | 6.05308    |
| SUCO       | 2.78905    |
| CREB1      | 1.72363    |
| NR5A2      | 0.0475484  |
| CDH24      | 7.47072    |
| DHRS13     | 29.2678    |
| PMFBP1     | 0.0608268  |
| FIGF,PIR   | 0.586084   |
| GPT        | 0.196747   |
| GLB1,TMPPE | 25.5406    |
| ART5       | 0.384127   |
| CCBL1      | 9.40136    |
| C1R        | 0.331368   |
| BMS1P5     | 0.14502    |
| GCAT       | 100.209    |
| PAF1       | 13.766     |
| CRHR1      | 7.47355    |
| RASAL1     | 0          |
| CTAGE4     | 0.341651   |
| NUDT22     | 48.9707    |
| ANKS1B     | 2.27812    |
| SLC29A4    | 10.7216    |
| ARVCF      | 12.2991    |
| MTMR11     | 1.82618    |
| PRR15      | 1.81974    |
| LOC400680  | 0.527061   |
| RAB3IL1    | 5.9429     |

|                     |           |
|---------------------|-----------|
| ARMC7               | 6.40009   |
| FHL1                | 0.0552926 |
| SLC25A13            | 4.7684    |
| B3GALTL             | 1.28146   |
| GLCE                | 0.998633  |
| ZNF33BP1            | 0         |
| TVP23A              | 0.014745  |
| CTSK                | 0.509182  |
| SYT15               | 0.877204  |
| EBP                 | 54.9825   |
| GGTA1P              | 0.168611  |
| TMEM184B            | 16.0123   |
| ERP44               | 13.7797   |
| HOXC10              | 7.32748   |
| ARRDC3              | 5.92511   |
| CCDC61              | 6.85465   |
| CTAGE4              | 0.0147389 |
| EHHADH              | 0.497505  |
| CTDSPL              | 5.43093   |
| AVP1                | 14.1816   |
| RDH11               | 15.4845   |
| TRAF6               | 1.41787   |
| ZNF624              | 0.322877  |
| OST4                | 448.43    |
| KCNJ5               | 0         |
| CGN                 | 1.17577   |
| FOXF1               | 1.61593   |
| ANKRD10             | 8.9709    |
| CYP2D6              | 1.34323   |
| PGK1                | 650.748   |
| MTRNR2L6            | 0.626745  |
| POT1                | 2.90078   |
| C10orf111           | 0.149937  |
| ANKAR               | 0.187317  |
| CCDC107             | 11.6614   |
| HCFC1R1             | 314.592   |
| LAMA2               | 0         |
| GSTM4               | 11.9107   |
| UBTD1               | 32.0336   |
| TUBB6               | 4.70896   |
| HMBOX1              | 0.816892  |
| SLC22A4             | 0.215241  |
| SERPINF2            | 0.191539  |
| MICB                | 6.8542    |
| PLEKHA2             | 7.84466   |
| LOC643623           | 0         |
| RAD54L              | 7.52312   |
| LOC388152,LOC642423 | 13.3346   |
| PKD1L1              | 0.0816207 |
| TIGD7               | 0.13605   |
| UAP1L1              | 30.5445   |
| JMJD6               | 22.8117   |
| TMEM200B            | 6.21637   |
| SLC27A5             | 18.1779   |
| ODF3L1              | 0         |
| SLC35G3             | 0         |
| NKAPP1              | 0.321208  |
| FAM229A             | 3.12319   |
| SLC48A1             | 8.66637   |
| SEPT8               | 8.24191   |
| MESP1               | 34.5947   |
| DKFZp779M0652       | 1.09016   |
| NFIL3               | 32.0466   |
| ESYT1               | 31.0564   |
| SRGAP2D             | 0.17917   |
| SNX30               | 2.29215   |
| PTPLAD2             | 0         |
| HEPACAM             | 0         |
| LINC00574           | 0.0796086 |
| SPDYE1              | 0.127629  |
| SLC39A8             | 9.53388   |
| C4orf3              | 75.2455   |
| PAK4                | 32.2718   |
| ANKRD36             | 0.225243  |
| FOXD1               | 75.9076   |
| DPM3                | 101.702   |
| WNK3                | 0         |
| AMN1                | 1.07098   |
| LRP5L               | 5.27622   |

|              |           |
|--------------|-----------|
| TFCP2L1      | 0.748939  |
| BCL9         | 1.30278   |
| SVIL         | 1.40118   |
| PTGFRN       | 6.35171   |
| PDE11A       | 0.0764403 |
| LASP1        | 51.3076   |
| DPYSL2       | 4.37971   |
| TTC39B       | 0.277949  |
| MNX1         | 19.3579   |
| ERO1L        | 30.3157   |
| HIST1H4E     | 6.75934   |
| CDC25A       | 4.64994   |
| PIKFYVE      | 1.52548   |
| TMEM48       | 5.53502   |
| ZNF248       | 1.50115   |
| KIF20A       | 6.60821   |
| SUN2         | 17.1603   |
| CLCN6        | 2.09741   |
| SAP25        | 1.09829   |
| ANG,RNASE4   | 16.3156   |
| ITGA6        | 1.85074   |
| OSTCP1       | 0         |
| GPNMB        | 0.11653   |
| FOXN2        | 2.92198   |
| RGS9BP       | 0.198735  |
| CCDC50       | 7.06738   |
| KCNK7        | 0.392835  |
| PRMT8        | 0.690032  |
| CABP4        | 0         |
| TMEM106C     | 84.0444   |
| SLC2A12      | 0.440464  |
| MYADML2      | 0.113129  |
| LOC100130417 | 0.145254  |
| NECAB1       | 0.0283323 |
| FAM193B      | 6.96034   |
| CCDC23       | 11.0259   |
| TTLL7        | 0.0908211 |
| HERC2P2      | 1.76565   |
| PBXIP1       | 6.51958   |
| ERAP2        | 2.60651   |
| CBX1         | 43.4276   |
| H1FX         | 203.358   |
| ANXA2R       | 3.44564   |
| INCENP       | 5.59294   |
| ZBTB25       | 2.52007   |
| CXorf40A     | 6.36176   |
| SPRY2        | 6.25353   |
| CSF3         | 0         |
| APOBEC3F     | 2.82594   |
| DCUN1D3      | 1.74492   |
| MECP2        | 27.7913   |
| NEO1         | 4.99799   |
| HCAR1        | 0         |
| SLC45A1      | 2.80091   |
| WDFY3        | 0.812588  |
| PDIA6        | 110.329   |
| MVD          | 32.257    |
| CASP6        | 9.02502   |
| TBC1D12      | 1.6263    |
| CCDC9        | 5.78807   |
| TMEM116      | 3.15055   |
| GUSBP3       | 0.0337573 |
| C1GALT1      | 2.92392   |
| RAB3D        | 9.77326   |
| LOC100507117 | 0.020276  |
| AQP6         | 0.0212488 |
| TECR         | 92.809    |
| VEGFB        | 65.83     |
| PPP1R11      | 40.2856   |
| ING1         | 5.51853   |
| SCAMP2       | 34.333    |
| COLQ         | 0.492579  |
| BPGM         | 3.13856   |
| ETV6         | 1.87433   |
| C1orf213     | 1.14547   |
| ZNF292       | 1.1862    |
| MANBA        | 8.80551   |
| MIF          | 3310.04   |
| KIAA1324L    | 0.215212  |

|              |            |
|--------------|------------|
| TEKT4        | 0.525226   |
| IRF1         | 2.16918    |
| UTRN         | 0.852973   |
| BMF          | 0.234436   |
| C11orf92     | 0.0920963  |
| RRP8         | 11.5843    |
| BAG6         | 58.1975    |
| INE2         | 1.69117    |
| MOB3A        | 7.78342    |
| SRPX         | 9.72234    |
| NTNG2        | 1.27089    |
| PDP1         | 4.30895    |
| DBNDD1       | 36.0718    |
| MAPK7        | 7.88233    |
| TIFA         | 6.56833    |
| COQ2         | 13.5155    |
| RYBP         | 5.97472    |
| BRPF1        | 5.04665    |
| TGFA         | 2.06525    |
| GREB1        | 0.0708579  |
| ZNF641       | 2.22784    |
| ARHGEF26     | 0.0928894  |
| C6orf47      | 8.41703    |
| CCDC110      | 0.0874385  |
| ANKRD23      | 1.16152    |
| MAP3K4       | 1.89623    |
| GALR3        | 1.4098     |
| CREBRF       | 1.78652    |
| BANP         | 5.73682    |
| BLVRB        | 168.964    |
| CACNA2D2     | 0.136334   |
| AP2S1        | 171.602    |
| MTFP1        | 145.707    |
| TP73         | 3.10216    |
| AKAP7        | 0.816274   |
| CEP55        | 13.5009    |
| MET          | 6.98201    |
| TAF5         | 2.63938    |
| KLF12        | 0.359233   |
| PCDHB3       | 0.156394   |
| MAP2K7       | 19.0293    |
| MT1B         | 0.266044   |
| PELI3        | 9.51943    |
| PPP2R5B      | 13.9899    |
| COX8A        | 864.789    |
| PHPT1        | 95.7817    |
| BCYRN1       | 16.47      |
| ITGAV        | 2.09375    |
| SGK196       | 0.315514   |
| TUBA4A       | 72.1059    |
| NBPF3        | 5.18227    |
| BTN2A2       | 2.77971    |
| ARHGAP32     | 1.24716    |
| SLX4IP       | 0.353477   |
| HLA-L        | 0.00844234 |
| BAD          | 67.552     |
| MYO1D        | 2.95208    |
| RFC1         | 6.54327    |
| ENPP5        | 0.330093   |
| LOC100271722 | 2.62722    |
| FOXD2-AS1    | 3.36828    |
| LINC00853    | 1.89451    |
| CSRP1        | 86.5311    |
| SCFD1        | 7.1815     |
| MKL1         | 4.25266    |
| KCNJ11       | 5.61513    |
| KLHDC2       | 16.5758    |
| NAIF1        | 2.94528    |
| MEF2D        | 9.62044    |
| FKBP9L       | 0.380814   |
| GRN          | 132.684    |
| EIF2AK3      | 1.78555    |
| COX7A2       | 271.569    |
| SMTNL1       | 0.0586743  |
| PRSS23       | 2.23568    |
| ALG12        | 5.44247    |
| TRIQK        | 2.1694     |
| TNXB         | 0.0445007  |
| LOC729041    | 1.87387    |

|                         |           |
|-------------------------|-----------|
| LRRN4                   | 1.31426   |
| PHKB                    | 3.80379   |
| PROX1                   | 0.0387076 |
| BST2                    | 326.655   |
| PGM5P2                  | 0.102188  |
| C17orf104               | 0.0779639 |
| COX20                   | 4.5426    |
| DDT                     | 250.03    |
| EME1                    | 2.05025   |
| LOC284801               | 0.0739913 |
| ZNF487P                 | 0.26858   |
| CYR61                   | 189.987   |
| AGBL5                   | 10.5382   |
| ZSCAN2                  | 6.013     |
| CAPN7                   | 2.8424    |
| GBA2                    | 8.76153   |
| ALKBH7                  | 66.8317   |
| LINC00659               | 0.519477  |
| DMAP1                   | 12.6722   |
| CELSR3                  | 0.589624  |
| COL7A1                  | 0.373646  |
| GAN                     | 0.200915  |
| TLN1                    | 12.5874   |
| ZNF548                  | 1.24811   |
| IQCJ,IQCJ-SCHIP1,SCHIP1 | 5.95432   |
| PLA2G12A                | 3.78634   |
| SCARA3                  | 8.17482   |
| FUT1                    | 3.06637   |
| ISCA2                   | 28.6007   |
| TNNI2                   | 0.0899711 |
| PLK4                    | 3.7467    |
| GPR156                  | 0         |
| SLC44A2                 | 14.73     |
| CDC42EP4                | 6.93274   |
| MDC1                    | 4.03182   |
| HOXA13                  | 0.872515  |
| YOD1                    | 1.55763   |
| PSMB10                  | 44.5416   |
| ITPR1                   | 2.04937   |
| ARID5A                  | 7.98351   |
| KIAA1715                | 3.52918   |
| LIME1                   | 7.43733   |
| ZNF844                  | 0.965323  |
| BNIP3L                  | 38.8941   |
| CRTC3                   | 6.70385   |
| PMCH                    | 1.07545   |
| MAP3K11                 | 16.7824   |
| FLJ13224                | 0         |
| DPP8                    | 0.664004  |
| TBC1D5                  | 3.32673   |
| TBC1D22B                | 3.75831   |
| YPEL2                   | 1.31028   |
| CAPS2                   | 0.0481141 |
| GHDC                    | 12.9453   |
| TPI1                    | 945.425   |
| GLS2                    | 8.84767   |
| HSP90B1                 | 83.902    |
| NFKBIE                  | 9.76042   |
| XKR8                    | 8.19426   |
| THEM6                   | 72.2395   |
| BLCAP                   | 29.9952   |
| CDKN2D                  | 8.49902   |
| IRF2BP2                 | 24.7376   |
| SNRNP70                 | 107.992   |
| TAF3                    | 2.14083   |
| PANK4                   | 8.6999    |
| LPP                     | 1.92084   |
| MPC2                    | 12.4138   |
| LOC100506314            | 0.603482  |
| PMM1                    | 50.8087   |
| PDE8B                   | 0.097557  |
| USP30                   | 1.99624   |
| TANC2                   | 1.34472   |
| TMEM151B                | 0.0290158 |
| CASP7                   | 3.92941   |
| IL10RB                  | 17.143    |
| CDON                    | 0.183815  |
| KIAA1328                | 0.389473  |
| MBIP                    | 4.72328   |

|              |            |
|--------------|------------|
| EXOC2        | 3.44866    |
| IFT27        | 11.5352    |
| XRCC6BP1     | 4.47716    |
| MICA         | 26.6957    |
| TPT1-AS1     | 5.14513    |
| HSPA1B       | 35.7896    |
| METTL12      | 5.73072    |
| MIEN1        | 89.1596    |
| CLK4         | 4.30932    |
| GPI          | 253.335    |
| LINC00294    | 3.00053    |
| FAM46C       | 0.155329   |
| FLJ20021     | 2.50326    |
| GKAP1        | 2.22312    |
| PARD6B       | 2.33686    |
| AVIL         | 0.212725   |
| ZNF585A      | 0.828794   |
| GMEB2        | 5.34606    |
| LOC100506233 | 3.08628    |
| DSC3         | 0          |
| CAV2         | 2.13492    |
| TSC22D2      | 8.01534    |
| GPR126       | 2.11693    |
| TMUB1        | 146.047    |
| F11R         | 4.22934    |
| DTX2         | 11.0708    |
| GM2A         | 8.23392    |
| ACACB        | 0.374727   |
| TET2         | 0.543245   |
| FAM212A      | 7.70212    |
| GOLGA8S      | 0.24644    |
| RTDR1        | 0.0489315  |
| KIAA1191     | 29.7031    |
| ACOT4        | 0          |
| PEX2         | 6.47896    |
| ASPRV1       | 0.780125   |
| DENND3       | 0.734641   |
| CLDN7        | 0.182873   |
| LDLR         | 12.5297    |
| HK2          | 35.4657    |
| ANKZF1       | 37.1408    |
| SIRT2        | 37.7514    |
| LINC00663    | 1.51639    |
| MED13L       | 1.61353    |
| GJC2         | 0.122702   |
| UBE2Q2P1     | 0.163412   |
| GAB2         | 2.78325    |
| ALDH6A1      | 2.34627    |
| MRPL17       | 42.4341    |
| HMHA1        | 18.865     |
| NIPSNAP3B    | 0.412234   |
| PSORS1C1     | 0.954093   |
| FUNDC2       | 18.1853    |
| VOPP1        | 20.9015    |
| ENO1         | 2086.15    |
| CEP152       | 0.892438   |
| CHRNE        | 3.48637    |
| MAP3K1       | 0.91588    |
| KIFC1        | 28.8271    |
| AMOT         | 0.17109    |
| SNORA80      | 17.1679    |
| SLC17A5      | 7.83602    |
| MLXIP        | 4.38611    |
| ABCB6        | 6.56746    |
| PSPN         | 0.680571   |
| TAF11        | 13.6457    |
| PCP2         | 0.543637   |
| ANKRD12      | 0.27665    |
| MED15        | 20.1099    |
| LMAN1        | 1.77645    |
| UNC119       | 61.333     |
| GMNN         | 16.1852    |
| DBI          | 148.261    |
| MUC6         | 0.0151848  |
| C14orf28     | 0.890237   |
| FAM229B      | 2.21417    |
| DNAJC27-AS1  | 0.00971213 |
| TMEM74B      | 12.0904    |
| PI4KAP1      | 10.4398    |

|                     |           |
|---------------------|-----------|
| RBM33               | 3.07369   |
| BROX                | 1.08059   |
| MOB3B               | 0.374812  |
| HBG1                | 0         |
| LOC151009,LOC440894 | 3.39855   |
| IPMK                | 1.68101   |
| SLC25A40            | 2.04329   |
| KIAA1432            | 1.23798   |
| ARSK                | 0.756206  |
| MGC2889             | 0.0558901 |
| PABPC3              | 0         |
| ACAT2               | 10.5939   |
| YY1AP1              | 18.2938   |
| SENP7               | 0.900465  |
| GSTM5               | 0.0332805 |
| NDUFAF4P1           | 0         |
| DOK7                | 0.0381166 |
| RNF38               | 2.90035   |
| GOLPH3L             | 5.39504   |
| TNFSF9              | 16.9212   |
| AR SJ               | 1.58399   |
| LOC441204           | 0.054219  |
| MAPK3               | 63.9337   |
| PRKCQ-AS1           | 2.89391   |
| DDIT4               | 222.431   |
| QRICH2              | 0.817767  |
| TCP11L2             | 0.313386  |
| SLC25A1             | 139.09    |
| ZNF700              | 3.321     |
| IMPDH1              | 85.8896   |
| UQCRQ               | 85.9236   |
| DTL                 | 2.60473   |
| CEP78               | 3.21428   |
| ZNRF1               | 9.91797   |
| ATP8B3              | 0.295989  |
| ZNF460              | 0.379071  |
| ID2                 | 1.48245   |
| LOC388692           | 0.278302  |
| CCDC170             | 0.0218897 |
| DDIT3               | 133.884   |
| ZBTB32              | 0.103036  |
| TCF19               | 5.90891   |
| AIP                 | 61.9884   |
| TMEM55A             | 6.35329   |
| GNAI2               | 47.9999   |
| SFTA1P              | 392.267   |
| ALKBH5              | 41.9203   |
| LOC645166           | 4.90922   |
| RAB27A              | 1.51814   |
| CDKN2B-AS1          | 0.165842  |
| TMEM63C             | 1.1156    |
| TMEM135             | 1.99239   |
| ZBTB34              | 2.33978   |
| CLDN18              | 0.0252272 |
| FEM1A               | 14.6336   |
| INTS12              | 12.8288   |
| NGLY1               | 14.933    |
| HSPB11              | 34.2873   |
| ZDHHC18             | 25.2008   |
| CCNG1               | 49.2736   |
| ALG14               | 5.15301   |
| MKI67               | 8.37252   |
| MAP3K6              | 1.55177   |
| PGM1                | 34.0121   |
| ARID4A              | 0.520729  |
| RMRP                | 116.318   |
| ZNF674              | 0.663611  |
| ROCK1               | 2.20942   |
| HSD17B11            | 27.8672   |
| SPOPL               | 1.31889   |
| STX5                | 28.9102   |
| LOC100216545        | 1.94519   |
| MARCH9              | 13.8504   |
| CHRNA1              | 30.5389   |
| SNORA38             | 19.214    |
| MTSS1L              | 13.8845   |
| YEATS2              | 11.3496   |
| CAMSAP3             | 12.803    |
| RRN3P3              | 0.84879   |



|                       |           |
|-----------------------|-----------|
| LOC729732             | 1.246     |
| KATNAL1               | 0.292832  |
| MAST4                 | 0.466394  |
| CCNJL                 | 5.35079   |
| LEPR,LEPROT           | 6.33519   |
| WDR41                 | 12.295    |
| DST                   | 0.756728  |
| SPTB                  | 0.659267  |
| FAHD2CP               | 5.29624   |
| HLA-F                 | 64.8716   |
| RALGAPA2              | 0.913114  |
| CBR3                  | 13.3976   |
| LAMC3                 | 0.0687821 |
| SEC61G                | 338.961   |
| RNF216P1              | 9.36008   |
| INPP5J                | 2.8686    |
| RTKN2                 | 0.16054   |
| ZNF185                | 0.157517  |
| SLC26A11              | 5.33364   |
| C5orf38               | 5.37456   |
| GAB1                  | 0.25614   |
| ACTA2                 | 2.35535   |
| HSPA1A                | 2.66041   |
| RNF43                 | 0.0428855 |
| NEURL                 | 6.85826   |
| EXT1                  | 9.8605    |
| CLK1                  | 31.0999   |
| CD40                  | 14.2047   |
| TSPAN14               | 4.28264   |
| MYL6                  | 750.758   |
| HMGCS1                | 2.37381   |
| USP28                 | 4.57919   |
| CAMK2N2               | 53.9766   |
| ATF7                  | 3.24687   |
| PIM1                  | 18.7863   |
| FGFRL1                | 11.1409   |
| ULBP2                 | 12.4477   |
| SLC7A10               | 0.158299  |
| LOC100128822          | 7.52686   |
| ATL3                  | 8.79133   |
| LAMTOR4               | 266.989   |
| LCA5                  | 0.272124  |
| HDAC5                 | 14.6683   |
| SMIM7                 | 26.3443   |
| TM7SF3                | 7.96376   |
| EHD4                  | 12.2945   |
| LENG1                 | 12.8443   |
| PTPRG                 | 1.19238   |
| NR1H2                 | 28.7555   |
| MED16                 | 24.4214   |
| NCAPG2                | 8.24141   |
| GPC4                  | 5.4118    |
| TRIM50                | 0.0388761 |
| CCDC134               | 3.71081   |
| ZNF484                | 0.767804  |
| ZNF81                 | 0.108312  |
| MEX3C                 | 6.68854   |
| IGSF8                 | 12.2545   |
| C1QTNF2               | 0.982022  |
| SPC24                 | 7.05664   |
| ANKRD9                | 14.8488   |
| PRICKLE3              | 14.9039   |
| ADORA1                | 1.9667    |
| PLCG1                 | 11.5653   |
| CCDC150               | 0.99534   |
| TPM2                  | 59.826    |
| PI4KAP2               | 10.4033   |
| C1QTNF9B-AS1          | 0.223471  |
| RBM15                 | 4.27113   |
| BGLAP,PMF1,PMF1-BGLAP | 42.174    |
| BTG2                  | 8.99122   |
| NPC2                  | 232.351   |
| SLC16A7               | 0.157011  |
| ACBD4                 | 9.88858   |
| TPBG                  | 9.67379   |
| ITPKA                 | 29.3907   |
| PIGA                  | 2.54528   |
| PIAS2                 | 7.92863   |
| MICAL2                | 3.61888   |

|                           |           |
|---------------------------|-----------|
| ERBB3                     | 4.01814   |
| LOC100379224              | 1.86635   |
| ECM1                      | 1.0156    |
| MMD                       | 2.00947   |
| CRELD1                    | 10.5327   |
| RAG1                      | 0.0601319 |
| ARHGAP23                  | 2.0107    |
| B4GALT3                   | 30.1739   |
| ERCC6,PGBD3               | 1.3532    |
| FOXO3                     | 5.15026   |
| PHF17                     | 6.42661   |
| SCPEP1                    | 8.84584   |
| NARF                      | 69.2357   |
| BHLHA15                   | 2.23964   |
| CACNB3                    | 20.4628   |
| RASSF4                    | 2.71263   |
| ARHGEF35                  | 1.64124   |
| H1FO                      | 182.33    |
| INADL                     | 1.81286   |
| DCLRE1B                   | 2.35159   |
| CRY2                      | 3.50836   |
| LOC100130776              | 72.8296   |
| IFFO1                     | 0.0537056 |
| POU6F1                    | 1.41578   |
| NDUFS4                    | 68.7942   |
| MT1F                      | 74.8999   |
| WBP1L                     | 5.02805   |
| ARHGAP19,SLIT1            | 1.95884   |
| SULT1A2                   | 0.0518709 |
| PITPNM3                   | 0.138913  |
| FAM109A                   | 6.72607   |
| BBC3                      | 56.3549   |
| SMPD1                     | 5.18175   |
| P4HA1                     | 25.6763   |
| SMYD3                     | 20.1641   |
| UPRT                      | 4.20047   |
| LOC729603                 | 0.262591  |
| PTPRR                     | 0.356424  |
| LSMD1                     | 44.7475   |
| USP37                     | 1.1528    |
| UBXN2B                    | 6.05664   |
| PVT1                      | 30.0294   |
| DTX3L                     | 1.7468    |
| PSRC1                     | 31.1766   |
| RILP                      | 18.6205   |
| DPY19L2P3                 | 0.288332  |
| ASB8                      | 4.59075   |
| ZDHHC16                   | 23.5427   |
| TJP3                      | 0.574979  |
| CORO2A                    | 4.76031   |
| POP5                      | 25.4703   |
| PET100                    | 147.592   |
| TNFRSF14                  | 13.4108   |
| KIAA1109                  | 0.733956  |
| FAM187B                   | 0.0547496 |
| RPIA                      | 16.5587   |
| KIF18B                    | 9.52568   |
| LDHA                      | 885.448   |
| C17orf67                  | 1.53012   |
| MOSPD3                    | 38.6724   |
| POMT1                     | 20.9522   |
| COX16,SYNJ2BP,SYNJ2BP-COX | 28.6308   |
| LOC399715                 | 0.194292  |
| HIST1H3H                  | 1.8612    |
| FBXO8                     | 3.84854   |
| PTPRK                     | 1.21012   |
| CADM1                     | 4.91721   |
| ZNF571                    | 0.63433   |
| PTTG1                     | 207.947   |
| CCM2                      | 18.3381   |
| DOK3                      | 2.66715   |
| STAM2                     | 1.66926   |
| CCDC124                   | 218.483   |
| MADD                      | 5.66818   |
| CLDND1                    | 23.4736   |
| ARNTL                     | 3.69337   |
| VN1R1                     | 0.202987  |
| HUS1                      | 4.9996    |
| ZNF165                    | 10.6333   |

|                       |           |
|-----------------------|-----------|
| LOC100288069          | 0.949651  |
| CD302.LY75.LY75-CD302 | 0.371565  |
| LOC100507547          | 1.95564   |
| MAGED2                | 32.662    |
| SLC26A6               | 7.21215   |
| HAS3                  | 0.87733   |
| RHBDL1                | 0.685813  |
| DGKG                  | 1.80948   |
| LCLAT1                | 2.72897   |
| POLDIP3               | 27.8438   |
| SRF                   | 25.4232   |
| TP53I11               | 11.5158   |
| MOSPD2                | 0.868957  |
| NUDT15                | 8.16668   |
| ZFPL1                 | 35.9136   |
| CKAP2L                | 2.18298   |
| CYP51A1               | 24.267    |
| AGAP4                 | 0.805179  |
| ECSIT.ZNF653          | 46.6624   |
| MTERFD2               | 7.73105   |
| AKAP6                 | 0.0104298 |
| NUPL1                 | 10.3947   |
| LSR                   | 45.2724   |
| CHN2                  | 0.486956  |
| ERAP1                 | 2.21996   |
| PLCD1                 | 3.164     |
| SELK                  | 54.2157   |
| DAPK2                 | 0.688087  |
| HOXB-AS3              | 0.497942  |
| PPP1R13L              | 2.60211   |
| MRPL33                | 119.759   |
| ARID1A                | 3.92132   |
| IMP3                  | 129.905   |
| CLIP2                 | 14.4528   |
| ADCK2                 | 39.3833   |
| TMEM234               | 3.83902   |
| CDS1                  | 1.48268   |
| PEF1                  | 34.0912   |
| TMC8                  | 0.0982137 |
| SCYL1                 | 44.0686   |
| GAS2L1                | 13.5194   |
| KCTD11                | 14.8676   |
| COBLL1                | 0.113373  |
| PTPDC1                | 1.60644   |
| PON1                  | 0.0221634 |
| HSP90AB4P             | 0.0138768 |
| KIAA0226              | 2.56077   |
| FMR1                  | 5.05172   |
| ZSWIM1                | 4.02819   |
| GNAI1                 | 3.21117   |
| FBXO42                | 6.36126   |
| BCAR3                 | 5.82068   |
| RNFT2                 | 1.74557   |
| GADD45GIP1            | 209.051   |
| CNNM2                 | 3.3374    |
| ZNF395                | 10.7419   |
| PDE7A                 | 1.4918    |
| LAPTM4B               | 1.01323   |
| CNN2                  | 117.182   |
| TMEM185A              | 5.12914   |
| SLC41A2               | 0.616663  |
| DDOST                 | 156.016   |
| SOAT2                 | 0.115705  |
| SORBS3                | 98.0068   |
| NCAPD2                | 30.8665   |
| PDK3                  | 5.69685   |
| GIT1                  | 36.3133   |
| PPP1R3B               | 21.3678   |
| ESCO1                 | 1.49413   |
| UHRF2                 | 4.65714   |
| RIT1                  | 4.53636   |
| LOC440894             | 1.6668    |
| TAB1                  | 11.9711   |
| ELL2                  | 3.05428   |
| ARHGEF28              | 11.2006   |
| MTL5                  | 1.71025   |
| ACSL3                 | 9.00871   |
| RNASEH2C              | 19.9475   |
| AHR                   | 0.29623   |

|                            |           |
|----------------------------|-----------|
| SIAH2                      | 19.0675   |
| SNX12                      | 14.2312   |
| LOC283693                  | 0.0612203 |
| PLIN2                      | 33.8179   |
| FAM104B                    | 6.21      |
| ARHGEF6                    | 0.280011  |
| HOMER2                     | 0.208795  |
| ARFGAP3                    | 5.60192   |
| MYO1E                      | 5.27853   |
| POLR2J3                    | 2.62357   |
| TNRC6C                     | 0.521078  |
| LSS                        | 14.4667   |
| IVNS1ABP                   | 13.505    |
| CRKL                       | 11.8162   |
| C7orf61                    | 0.319212  |
| ZNF22                      | 8.94695   |
| SLC6A16                    | 0.114432  |
| HEPACAM2                   | 0         |
| KIAA1211                   | 2.12311   |
| ATG16L1                    | 5.33215   |
| C15orf39                   | 5.51483   |
| MARVELD3                   | 1.0635    |
| PRADC1                     | 14.096    |
| STARD3                     | 25.5913   |
| CENPO                      | 3.3737    |
| MLL3                       | 1.25978   |
| TMEM52                     | 36.361    |
| RNF144A                    | 1.99528   |
| FAM102B                    | 1.54842   |
| OR7D2                      | 0.0567822 |
| ZNF582                     | 0.0320179 |
| GRAMD1C                    | 0.647331  |
| NBPF16                     | 4.53937   |
| ICAM1                      | 28.733    |
| EMC9                       | 36.8812   |
| DDB2                       | 19.7471   |
| PCMTD1                     | 2.53598   |
| ELMSAN1                    | 2.62219   |
| SIN3A                      | 4.27624   |
| KIF15                      | 2.28553   |
| CAMTA1                     | 58.8278   |
| GFOD1                      | 0.92802   |
| PAQR5                      | 2.07754   |
| ACADS                      | 46.8568   |
| PNRC1                      | 32.0688   |
| RASGRF2                    | 0.0704086 |
| FAM151A                    | 0.199006  |
| EPB41L1                    | 4.13954   |
| C1QTNF4                    | 0.632565  |
| TMEM39A                    | 3.61682   |
| DDX26B                     | 0.97386   |
| SCRN2                      | 40.2013   |
| ZDHC4                      | 39.2998   |
| UBE2C                      | 310.603   |
| SPSB2                      | 8.58755   |
| DIP2A                      | 3.35299   |
| PRCP                       | 31.0704   |
| KDM2A                      | 9.49517   |
| LOC100129726               | 0         |
| SCAND1                     | 161.81    |
| RNF34                      | 9.83584   |
| HERC3                      | 2.09715   |
| WDR45B                     | 39.5666   |
| EZH2                       | 17.2158   |
| PGRMC2                     | 14.3131   |
| SNX22                      | 0.420668  |
| STRA13                     | 71.1209   |
| MIR155,MIR155HG            | 4.98277   |
| TAS2R20                    | 0.173433  |
| STAG3L4                    | 6.30437   |
| GBE1                       | 24.5116   |
| MLL4                       | 5.97549   |
| RPS6KA1                    | 16.7839   |
| PGAM1                      | 400.034   |
| CD79A                      | 0.894626  |
| PEAR1                      | 1.20666   |
| TNFSF12,TNFSF12-TNFSF13,TN | 16.2646   |
| HTT                        | 3.59841   |
| ARHGEF40                   | 2.35401   |

|              |           |
|--------------|-----------|
| ARL15        | 1.22198   |
| SAV1         | 12.6552   |
| TMEM258      | 500.817   |
| RLF          | 4.19869   |
| TSPAN13      | 4.5396    |
| CTNNBIP1     | 6.89854   |
| LOC389906    | 19.3535   |
| FAM71E1      | 5.12228   |
| POLE4        | 80.1001   |
| MMS22L       | 0.987544  |
| PRKD2        | 14.2683   |
| MYO15B       | 0.318847  |
| B4GALNT4     | 12.5089   |
| LTN1         | 1.14597   |
| CD276        | 22.8174   |
| ZFYVE20      | 3.28288   |
| PLAG1        | 0.855963  |
| PDIA3        | 93.6793   |
| IFIT1        | 0.0691379 |
| EGLN1        | 14.0464   |
| FOXM1        | 21.201    |
| TTC9C        | 25.9627   |
| AXIN2        | 0.394764  |
| ZFAT         | 1.27654   |
| NCOR2        | 9.47722   |
| EVI5L        | 6.67328   |
| FOXA1        | 0.93279   |
| ARHGAP44     | 2.48742   |
| PRKAG2-AS1   | 14.3351   |
| RING1        | 36.1273   |
| RNF213       | 1.04141   |
| ZNF223       | 0.798902  |
| KLF6         | 10.2446   |
| TMEM65       | 4.56394   |
| MEIS3        | 57.1956   |
| PKD1L2       | 0.093843  |
| WNT4         | 0.323134  |
| IRF2BP1      | 21.943    |
| ST6GALNAC6   | 92.4567   |
| SEL1L        | 3.80726   |
| TMEM59       | 64.8399   |
| KXD1         | 135.379   |
| KAT2B        | 1.41386   |
| C6orf141     | 1.20567   |
| GPC1         | 30.4687   |
| TAF9B        | 7.1629    |
| C19orf10     | 137.31    |
| STAG1        | 2.97824   |
| SMG7-AS1     | 0.037701  |
| LOC646471    | 0.249322  |
| DGCR6        | 20.497    |
| LRP1         | 5.3287    |
| RND1         | 0.805187  |
| MFSD3        | 41.9631   |
| TMEM214      | 24.6318   |
| DYRK2        | 2.79185   |
| SAP30L       | 2.51726   |
| TROAP        | 41.891    |
| LOC100270804 | 0.450112  |
| CPQ          | 8.46764   |
| EXD2         | 3.77306   |
| PRR19        | 6.72558   |
| GPR161       | 2.31558   |
| DLX2         | 2.1434    |
| LATS2        | 3.59596   |
| ZNF630       | 0.490875  |
| GOLGA4       | 1.01052   |
| C6orf89      | 4.61228   |
| TMUB2        | 9.80683   |
| SLC25A42     | 3.76324   |
| DCP1A        | 3.59575   |
| BAIAP2L1     | 22.5428   |
| ZNF511       | 29.4256   |
| CBX4         | 19.8016   |
| WHSC1L1      | 4.29134   |
| C18orf25     | 1.77084   |
| SLC2A8       | 25.2983   |
| C6orf136     | 26.4008   |
| HPCAL4       | 0.906778  |

|                     |            |
|---------------------|------------|
| RAP1GAP             | 3.47419    |
| LOC654342           | 12.7073    |
| KREMEN1             | 2.31418    |
| RTN2                | 14.8477    |
| EVI2B               | 0.0368546  |
| FZD5                | 2.25194    |
| PIDD                | 10.5164    |
| CDK2                | 26.1311    |
| BICD2               | 9.66502    |
| LOC728613           | 0.511068   |
| ACER3               | 1.16113    |
| SHB                 | 8.05379    |
| ALS2CL              | 5.29246    |
| C8orf82,LRRC24      | 90.2397    |
| PTOV1               | 52.5621    |
| UNK                 | 7.01291    |
| CDK6                | 2.33708    |
| LOC100652768        | 1.10134    |
| FZR1                | 23.6893    |
| HEATR6              | 2.65399    |
| COQ7                | 3.17786    |
| SLC2A4RG            | 47.117     |
| CKS1B               | 161.925    |
| PACSIN3             | 35.7745    |
| LOC644656           | 1.80505    |
| BLM                 | 1.93304    |
| EXTL3               | 13.7171    |
| RAB1B               | 139.079    |
| C11orf24            | 17.4219    |
| RAPH1               | 0.728837   |
| SH3GL2              | 0.0501407  |
| MICU1               | 27.9481    |
| DCUN1D2             | 2.94198    |
| MEX3D               | 24.0351    |
| SHKBP1              | 75.3439    |
| DNAJB9              | 7.74541    |
| MCM3                | 23.0552    |
| TP53I13             | 55.0141    |
| PRKAB2              | 2.87483    |
| GABARAPL1           | 7.10231    |
| FEM1C               | 2.79319    |
| ZER1                | 26.5079    |
| CYP2D7P1            | 0.352023   |
| CHST6               | 0.0349702  |
| ZNF493              | 0.763105   |
| ELMOD3              | 3.71355    |
| AKAP8L              | 22.9291    |
| MARCH3              | 0.263317   |
| PRR14               | 27.5115    |
| PLCE1               | 0.0503461  |
| GPR160              | 16.8465    |
| SERTAD2             | 6.02137    |
| ZNF433              | 0.998769   |
| THAP9               | 0.834555   |
| NFIB                | 2.39645    |
| BTG1,LOC256021      | 17.5504    |
| RAET1E              | 0.0209729  |
| HSBP1L1             | 81.2228    |
| FAM160B1            | 1.74962    |
| UQCR10              | 77.0025    |
| SLC39A4             | 37.1221    |
| LETM2               | 3.04367    |
| SLC17A7             | 0.495647   |
| ZCCHC10             | 3.92316    |
| LPIN3               | 2.53133    |
| CRYBB2P1            | 21.7347    |
| FLJ45445            | 0.0752309  |
| SLAIN2              | 3.35659    |
| EIF2AK2             | 2.31992    |
| AP3S1               | 40.079     |
| HDAC2               | 5.83083    |
| CLSTN3              | 6.06211    |
| PPIB                | 617.775    |
| HERC2P4             | 0.811221   |
| ATRX                | 0.757869   |
| ANKRD20A8P,LOC90499 | 0.00916733 |
| PRDM5               | 1.32536    |
| SYNE2               | 1.33555    |
| LIG1                | 13.9598    |

|              |           |
|--------------|-----------|
| MTMR4        | 6.26851   |
| GDPD5        | 6.65581   |
| STX6         | 5.38678   |
| ACAA2        | 31.6669   |
| PTP4A3       | 10.1368   |
| PHF21A       | 2.90726   |
| MPI          | 45.1483   |
| WAS          | 0.206601  |
| CDC26        | 58.2473   |
| FAM110A      | 11.1539   |
| ARG2         | 21.6434   |
| TNPO3        | 15.5443   |
| C11orf71     | 8.02896   |
| VPS41        | 2.93741   |
| TMEM60       | 26.1881   |
| LRRC1        | 2.85539   |
| CGGBP1       | 7.70812   |
| FBNP1L       | 4.40764   |
| GK3P         | 0.0383659 |
| MSL1         | 5.66618   |
| LINC00637    | 0         |
| COX14        | 51.2304   |
| ABTB1        | 16.1141   |
| CYB5B        | 11.045    |
| ZNF613       | 1.5411    |
| RGS5         | 0.408979  |
| CISD3        | 14.1238   |
| TBX1         | 1.48867   |
| ADD3         | 2.57994   |
| AGL          | 1.57853   |
| TMEM132A     | 26.4608   |
| C14orf37     | 1.16557   |
| PFN1         | 1156.05   |
| CCNA2        | 17.1798   |
| ZNF438       | 1.31589   |
| DLG5-AS1     | 0.757873  |
| CHKA         | 23.7869   |
| SERGEF       | 19.6488   |
| OPHN1        | 1.7264    |
| AP4M1        | 20.9046   |
| MASTL        | 5.79144   |
| MUC20        | 0.0456507 |
| ACTG1        | 3376.17   |
| NCAPH2       | 18.3348   |
| NUP85        | 22.0429   |
| FEZF1-AS1    | 2.11002   |
| SEPT3        | 7.41852   |
| SAMD10       | 3.52843   |
| SMEK1        | 9.60906   |
| COMMD9       | 5.80391   |
| BBS9         | 0.865193  |
| UBE3B        | 5.74051   |
| TRIM22       | 0.0398423 |
| TAPBP.ZBTB22 | 26.6143   |
| PCGF1        | 19.0245   |
| C9orf40      | 11.6954   |
| CFL1         | 630.61    |
| TBC1D10B     | 21.1099   |
| EMID1        | 7.78579   |
| NBEAL1       | 0.0515413 |
| LOC729852    | 2.57768   |
| MCF2L        | 1.40932   |
| GMPPB        | 6.63531   |
| STEAP2       | 2.2102    |
| LRRC45       | 7.41771   |
| CCDC74B      | 0.747047  |
| MIRLET7DHG   | 0.623274  |
| TP53BP2      | 10.3713   |
| TRIM2        | 1.72755   |
| ARNT         | 4.52087   |
| ZBTB44       | 2.86515   |
| SIRT1        | 4.15463   |
| ARHGDI3      | 0.674945  |
| LOC100288911 | 9.99287   |
| CARD10       | 7.24544   |
| PCDHB8       | 0.891475  |
| TICAM1       | 14.8736   |
| KIAA1984     | 0.16097   |
| NUDT1        | 46.2362   |

|           |            |
|-----------|------------|
| HELZ2     | 2.24594    |
| FBXL16    | 23.4526    |
| OPA3      | 3.15812    |
| YIPF4     | 15.3571    |
| RGS14     | 4.30789    |
| PAN3      | 3.18587    |
| FAM171B   | 0.12538    |
| LAMB2     | 10.361     |
| R3HCC1    | 40.8766    |
| SLC16A2   | 3.72759    |
| SLC2A3    | 13.3271    |
| AQP7P1    | 0          |
| PLEKHA5   | 1.49245    |
| CENPA     | 20.4358    |
| PIP4K2B   | 7.24865    |
| DNAH14    | 4.10767    |
| TTC9      | 0.564714   |
| SAP130    | 6.02757    |
| UBAP1     | 17.5593    |
| REXO1     | 14.7328    |
| NMNAT3    | 2.75213    |
| USP53     | 0.842147   |
| CDH4      | 0.00970742 |
| PIK3C2B   | 1.15428    |
| NENF      | 130.958    |
| TAF6      | 36.2587    |
| TAB3      | 1.59629    |
| SLC25A41  | 0.834251   |
| APLP1     | 11.6349    |
| IFI27L1   | 17.6349    |
| PPIL2     | 6.79562    |
| RHBDF1    | 17.3089    |
| FOXH1     | 8.28101    |
| NCK2      | 17.3935    |
| C7orf50   | 91.3664    |
| TTC39C    | 22.8302    |
| SLC7A9    | 0.149103   |
| RGS3      | 6.85938    |
| HSD17B14  | 26.7913    |
| PRR24     | 21.4678    |
| FLJ35946  | 0.258571   |
| HRAS      | 40.645     |
| MTX3      | 1.12386    |
| CDK16     | 41.1349    |
| MAN2C1    | 10.5666    |
| RABEP2    | 21.0335    |
| TMED9     | 157.137    |
| SESTD1    | 0.347624   |
| DENND4C   | 2.31134    |
| ZNF331    | 0.337871   |
| ZNF496    | 6.74512    |
| SLC16A10  | 1.09967    |
| UBE2O     | 8.73918    |
| PPIH      | 81.7155    |
| ENTHD2    | 13.3967    |
| MAFF      | 43.1698    |
| CCDC102A  | 4.81479    |
| NEB       | 0.00679654 |
| PARP11    | 1.13607    |
| XRN1      | 1.20591    |
| RIMS3     | 0.735997   |
| MSMP      | 1.60325    |
| STARD10   | 26.2455    |
| ELF4      | 7.47611    |
| NELFB     | 96.5473    |
| LIPA      | 10.4836    |
| NDUFB4    | 254.265    |
| ACTB      | 1714.87    |
| NCOR1     | 1.46875    |
| SLC25A10  | 61.9414    |
| RAB11FIP4 | 3.76596    |
| RAPGEF2   | 1.50108    |
| LOC285074 | 10.997     |
| MYPOP     | 11.1876    |
| FA2H      | 1.99821    |
| CYP20A1   | 1.26071    |
| LAMB2P1   | 0.403755   |
| C17orf58  | 14.9076    |
| ZFYVE19   | 20.3097    |



|              |            |
|--------------|------------|
| SAMD9L       | 0.053508   |
| ZNF579       | 37.2312    |
| ZNF451       | 3.65216    |
| CBFA2T3      | 1.32891    |
| RECQL4       | 22.7953    |
| BTBD7        | 2.62083    |
| H1FX-AS1     | 0.206119   |
| ZBTB2        | 4.59828    |
| ZNF680       | 1.35776    |
| TNIP1        | 61.6953    |
| HINFP        | 11.501     |
| ATP13A3      | 7.21764    |
| LEMD2        | 28.2262    |
| AGO4         | 1.62119    |
| COA3         | 52.4232    |
| SEPT7P2      | 1.28819    |
| RUSC1-AS1    | 7.59314    |
| FLJ42393     | 0.0227428  |
| KDM8         | 0.537853   |
| AP1G2,JPH4   | 12.9057    |
| UGCG         | 6.25152    |
| BCRP3        | 0.251921   |
| PATL1        | 13.4722    |
| RFC5         | 10.9533    |
| DOK1         | 18.7671    |
| PROX2        | 0          |
| TRIOBP       | 9.3561     |
| INF2         | 38.5246    |
| CMTM3        | 51.7155    |
| ZDHHC20      | 3.57218    |
| SERTAD3      | 17.0003    |
| SPTY2D1      | 2.4323     |
| CRIP2        | 23.2618    |
| NTMT1        | 129.068    |
| DPY19L1P1    | 0.578912   |
| DUSP16       | 2.82033    |
| NOTCH2       | 4.19611    |
| KIF3C        | 2.23417    |
| HIST1H3F     | 2.51519    |
| PLXND1       | 8.33509    |
| COL6A1       | 16.4761    |
| GGH          | 42.269     |
| GNB2         | 420.823    |
| EPB41L5      | 1.4382     |
| CDKN3        | 41.3028    |
| SURF4        | 144.167    |
| ICK          | 2.11706    |
| CAPN3        | 1.54451    |
| LOC100132354 | 0.0228641  |
| ZNF827       | 0.169718   |
| SIPA1        | 12.626     |
| SUSD2        | 0.0651994  |
| PDE4B        | 0.977736   |
| CHPF         | 46.5039    |
| MAN2A2       | 6.46397    |
| METTL6       | 3.98599    |
| CDR2         | 7.83707    |
| C4orf52      | 32.8207    |
| FAM122B      | 5.19783    |
| KCNAB2       | 33.7585    |
| GTF2IRD1     | 19.3932    |
| CRABP2       | 143.918    |
| DHRS3        | 0.294041   |
| ANO10        | 8.16362    |
| ACTG2        | 0.0403629  |
| MAPK11       | 12.5049    |
| RSF1         | 1.78674    |
| ZNF341       | 1.56269    |
| PDS5B        | 1.75561    |
| ULK1         | 5.3528     |
| CTSC         | 37.744     |
| BCRP2        | 3.02267    |
| COMMD10      | 8.12886    |
| COL6A4P2     | 0.00436398 |
| CASKIN2      | 4.14524    |
| SETD5        | 6.68868    |
| EPHB6        | 0.141042   |
| KNTC1        | 1.6415     |
| QPCTL        | 16.9094    |

|              |           |
|--------------|-----------|
| NOL3         | 19.499    |
| LCAT_SLC12A4 | 22.1118   |
| ATAD5        | 0.449065  |
| PIK3R3       | 1.10569   |
| PDE6G        | 0.0808265 |
| MLEC         | 18.5851   |
| CYB5R1       | 23.2269   |
| C4orf46      | 3.82971   |
| RANGRF       | 67.257    |
| HN1          | 114.993   |
| C9orf153     | 0         |
| TMEM167B     | 6.99688   |
| GPSM2        | 1.49802   |
| LOC285540    | 0.0395573 |
| MYLIP        | 3.43      |
| BAHD1        | 10.0341   |
| ENHO         | 13.7415   |
| PRX          | 1.25234   |
| NUDCD2       | 37.661    |
| MTRF1L       | 20.3406   |
| MGC21881     | 1.26512   |
| MT1M         | 179.609   |
| CCDC94       | 14.9796   |
| CHCHD6       | 63.3739   |
| KHNYN        | 11.4093   |
| COX5B        | 461.857   |
| IRAK1BP1     | 1.27022   |
| TESK1        | 23.5885   |
| EPHX1        | 13.0776   |
| LOH12CR1     | 4.1171    |
| ZDHC17       | 2.17993   |
| FAM35DP      | 0.176325  |
| ZNF699       | 0.092167  |
| LIMD2        | 6.84108   |
| ANAPC11      | 112.896   |
| IDI1         | 16.4436   |
| ETS1         | 24.605    |
| CDK10        | 32.0169   |
| ATP12A       | 0.0129363 |
| SBF1         | 8.71182   |
| SNX21        | 9.92104   |
| ARL3         | 5.53093   |
| DNM1         | 7.8998    |
| SEMA4G       | 3.30494   |
| CAPZB        | 84.6108   |
| OSTC         | 67.4048   |
| FLCN         | 15.1219   |
| TMEM184C     | 3.51398   |
| RFESD        | 1.72916   |
| DNAJB1       | 61.8869   |
| ZNF775       | 9.26429   |
| ZBTB17       | 12.7476   |
| BCKDK        | 108.71    |
| PPP1R12A     | 4.33246   |
| ZNF169       | 0.643335  |
| SNX16        | 3.25422   |
| DNAJB2       | 35.9958   |
| FAM134A      | 24.0061   |
| PSEN1        | 5.80987   |
| RUSC2        | 10.0224   |
| PROZ         | 0.14482   |
| NUP210       | 12.3068   |
| MRPL22       | 11.8785   |
| FRMD6-AS1    | 0.263321  |
| ZNF449       | 0.463408  |
| PRR15L       | 0.0328736 |
| GSTT1        | 47.8108   |
| GPX4         | 372.653   |
| YIPF1        | 10.5835   |
| DESI2        | 14.0311   |
| PIK3CD       | 2.26456   |
| STRN         | 0.913957  |
| RBL1         | 0.442993  |
| CHCHD7       | 18.3684   |
| DLGAP4       | 24.3975   |
| NEDD4        | 1.50099   |
| TOR2A        | 36.8538   |
| LINC00265    | 3.2531    |
| ESYT2        | 6.63972   |

|                             |           |
|-----------------------------|-----------|
| IL12A                       | 1.19522   |
| EML5                        | 0.190789  |
| ZNF628                      | 4.42061   |
| MAP7                        | 4.54124   |
| MAPKAPK5-AS1                | 9.32537   |
| CUTA                        | 306.999   |
| MAN2A1                      | 0.519038  |
| GEMIN6                      | 32.4257   |
| CALML4                      | 2.08635   |
| ATHL1                       | 16.892    |
| TPD52                       | 26.91     |
| AASS                        | 4.71516   |
| WASH3P                      | 12.3809   |
| PER2                        | 2.05097   |
| ITPR2                       | 0.343903  |
| TIMM8A                      | 9.30904   |
| BIRC5                       | 40.8461   |
| C19orf21                    | 0.510028  |
| CLIP3                       | 0.238517  |
| EFNB1                       | 8.06799   |
| NDUFB2-AS1                  | 1.00199   |
| PRPF40B                     | 0.619785  |
| TMEM191A                    | 0.758971  |
| ENO2                        | 194.9     |
| C2orf27A                    | 0.226825  |
| THOC6                       | 135.805   |
| ZBTB5                       | 2.37615   |
| ZNF439                      | 1.4309    |
| CDKN1B                      | 10.8668   |
| LRP11                       | 4.90251   |
| OPTN                        | 26.4927   |
| MIS12                       | 7.70186   |
| RCAN3                       | 2.41641   |
| STAP2                       | 16.9162   |
| IRF4                        | 0.0782464 |
| PLEKHO1                     | 22.7387   |
| SHD                         | 0.258104  |
| C3orf18                     | 5.5841    |
| GLUD1P7                     | 0.020833  |
| C10orf137                   | 1.86094   |
| PPFIBP2                     | 1.82949   |
| PLCL2                       | 0.982875  |
| GMDS                        | 18.0729   |
| TAPBPL                      | 1.60694   |
| ST6GALNAC2                  | 0.135519  |
| CACHD1                      | 1.06207   |
| PICK1                       | 16.3656   |
| MST1R                       | 3.97655   |
| FAM117A                     | 10.5848   |
| IMPAD1                      | 9.75847   |
| OTUD7B                      | 2.16294   |
| CDS2                        | 4.23074   |
| NFRKB                       | 5.1239    |
| IGF2R                       | 4.41891   |
| HTRA4                       | 0.0229324 |
| ANKRD20A9P                  | 0.0653402 |
| SAMD12                      | 1.59077   |
| ZNF703                      | 5.97304   |
| SPCS2                       | 24.2956   |
| B4GALT4                     | 4.8462    |
| TRPS1                       | 0.530725  |
| MAB21L3                     | 0.149256  |
| YPEL1                       | 2.89024   |
| MIR4763,MIRLET7A3,MIRLET7B, | 0.392198  |
| FBXL22                      | 0.0983468 |
| TRAF4                       | 18.6706   |
| ZNF283                      | 1.5873    |
| PLSCR3,TMEM256              | 265.033   |
| EXT2                        | 18.1116   |
| KRTAP5-1                    | 0.166573  |
| HHLA3                       | 31.4535   |
| SH3BP4                      | 3.19676   |
| SIGLEC11                    | 0.0191957 |
| LINGO3                      | 0         |
| SGCB                        | 2.93738   |
| RNPEPL1                     | 44.1954   |
| ZSCAN16                     | 4.92986   |
| AP1S2                       | 12.6035   |
| TUBGCP3                     | 3.49485   |

|               |            |
|---------------|------------|
| DPY30         | 53.6957    |
| PKP2          | 2.74002    |
| HY1           | 20.2748    |
| C1orf145      | 0.562558   |
| SCYL2         | 4.67049    |
| FAM21A,FAM21B | 1.76177    |
| RAB11B        | 84.1276    |
| ZFHX4         | 0.00894319 |
| TMEM217       | 0.266      |
| KDM5C         | 17.9932    |
| ZFAND2A       | 18.978     |
| LMBRD1        | 7.73229    |
| SUGP2         | 6.98081    |
| ABHD13        | 1.47887    |
| GLTSCR1       | 2.21396    |
| CTDSP2        | 21.128     |
| MZF1          | 11.53      |
| MON2          | 1.13742    |
| GNA13         | 5.58643    |
| SNORA74B      | 0          |
| TAB2          | 8.33346    |
| SP6           | 2.22351    |
| DENND5B       | 0.45268    |
| LOC100130899  | 5.15748    |
| TMEM79        | 3.75377    |
| PI4KA         | 12.4289    |
| STC1          | 0.0219318  |
| ABCA2         | 16.7011    |
| STK38         | 5.27488    |
| GSG2          | 3.713      |
| ALCAM         | 5.60524    |
| TCF20         | 4.32204    |
| CCNK          | 15.6466    |
| ZSCAN31       | 1.10129    |
| PPIE          | 43.3456    |
| LOC100507424  | 0.816523   |
| SHROOM2       | 0.48976    |
| ACYP1         | 14.3911    |
| ITGB5         | 22.2804    |
| C1orf63       | 13.2717    |
| PHTF2         | 2.35079    |
| ZNF639        | 8.8669     |
| KDM2B         | 7.8295     |
| MPST          | 163.507    |
| ALKBH4        | 10.0919    |
| ATF2          | 4.2219     |
| CENPN         | 18.6969    |
| SLC25A26      | 18.2857    |
| AFF4          | 3.01784    |
| KLRG1         | 0.207775   |
| KLHL7         | 10.4817    |
| KLF15         | 4.87687    |
| TMA7          | 450.6      |
| PITX1         | 28.8151    |
| LOC374443     | 0.848837   |
| FAM76B        | 1.5493     |
| GSTM3         | 14.2095    |
| DAAM1         | 0.482271   |
| OAZ2          | 33.1136    |
| MAN1B1        | 38.2404    |
| LOC440300     | 0.0920769  |
| USP1          | 9.4045     |
| SRSF9         | 267.345    |
| DET1          | 3.59729    |
| MAP4K3        | 2.78487    |
| ANXA6         | 43.6328    |
| TSHZ1         | 1.36539    |
| ABCF1         | 12.8984    |
| PTPRCAP       | 2.10736    |
| KIAA0895L     | 4.42971    |
| TMEM126A      | 28.6193    |
| GINM1         | 13.1749    |
| EPN1          | 92.8798    |
| USP19         | 7.34818    |
| HYDIN2        | 0.00158712 |
| TMLHE         | 7.03829    |
| KCTD1         | 2.60819    |
| PLD3          | 48.9596    |
| SNORA24       | 34.7807    |

|               |          |
|---------------|----------|
| TXNRD2        | 21.8943  |
| MLL           | 0.925215 |
| COMMD1        | 21.3273  |
| SPSB3         | 39.296   |
| SPATS2        | 9.28096  |
| LYST          | 0.26022  |
| C12orf75      | 21.419   |
| CHMP7         | 15.703   |
| ERLIN1        | 13.8362  |
| C7orf60       | 3.1813   |
| NFATC3        | 3.93274  |
| FAM212B       | 0.858612 |
| UFSP2         | 10.3403  |
| FARP1         | 12.2312  |
| C11orf83      | 15.473   |
| TRIM3         | 3.4177   |
| EPS8          | 1.77754  |
| TOR3A         | 14.2659  |
| ATG9A         | 21.9465  |
| LMO2          | 1.9028   |
| THAP11        | 24.437   |
| NOTCH2NL      | 5.51101  |
| RNF26         | 21.5001  |
| MMP15         | 6.63021  |
| CREBBP        | 3.26458  |
| SIDT2         | 2.9241   |
| HESX1         | 0.471514 |
| XRRA1         | 10.8346  |
| CTTNBP2       | 0.5014   |
| NDUFA3        | 196.499  |
| CEPT1         | 10.675   |
| LOC100294145  | 2.0959   |
| CENPE         | 0.235749 |
| PIGL          | 4.27478  |
| CST3          | 203.979  |
| LOC144486     | 0.145235 |
| CXorf23       | 0.398989 |
| ST3GAL5       | 1.29023  |
| CHEK2         | 11.4041  |
| WDR38         | 0        |
| ZNF692        | 20.6805  |
| HIGD2A        | 248.379  |
| ZNF670,ZNF695 | 4.75178  |
| C19orf53      | 131.224  |
| OAS3          | 1.33802  |
| HARS2         | 8.86706  |
| GLA           | 16.9174  |
| MAN1C1        | 0.114738 |
| PLEKHJ1       | 110.028  |
| TOM1          | 17.0466  |
| RASL10B       | 10.2599  |
| FRG1B         | 6.83367  |
| HPS1          | 31.753   |
| PDZD11        | 17.4866  |
| CD59          | 14.2034  |
| BANF1         | 234.887  |
| TMEM39B       | 17.0687  |
| PAXIP1        | 5.23526  |
| FUK           | 4.01617  |
| MIPEPP3       | 0.435066 |
| PAM           | 10.018   |
| PCDHB16       | 1.01609  |
| KIF11         | 7.91112  |
| SERPINH1      | 107.111  |
| PAOX          | 5.92684  |
| RAD9A         | 3.86875  |
| GSN           | 31.665   |
| RNF208        | 47.8256  |
| LRRC14B       | 0        |
| ZNF792        | 0.946923 |
| FBXL20        | 2.19143  |
| DNAJC1        | 6.25549  |
| MRPS9         | 29.1268  |
| PKP3          | 39.0306  |
| CIC           | 8.631    |
| NDUFA2        | 101.107  |
| ECH1          | 119.872  |
| PRPSAP1       | 22.6375  |
| ZFYVE1        | 6.2759   |

|                           |           |
|---------------------------|-----------|
| COX6C                     | 332.179   |
| ACOT13                    | 7.01481   |
| MCU                       | 6.23502   |
| GCA                       | 2.14101   |
| RNF121                    | 8.92793   |
| ZCCHC6                    | 2.85608   |
| C1orf151-NBL1,MINOS1,NBL1 | 91.5947   |
| PLXNB2                    | 18.1094   |
| SYNGR2                    | 95.1313   |
| VPS11                     | 9.59844   |
| SH3BGR3                   | 247.062   |
| DICER1-AS1                | 3.77958   |
| PALM3                     | 10.9901   |
| MBP                       | 3.6582    |
| CASKIN1                   | 11.7112   |
| NSMCE2                    | 23.0255   |
| FOXJ3                     | 8.23941   |
| DOLPP1                    | 16.0234   |
| QSOX1                     | 48.5362   |
| GULP1                     | 1.76222   |
| RERE                      | 3.00351   |
| DTNBP1                    | 22.0022   |
| ARHGAP26                  | 0.443182  |
| KAT8                      | 19.0385   |
| LATS1                     | 1.84305   |
| SMIM4                     | 69.0317   |
| PCDHB2                    | 1.7486    |
| SCRN3                     | 1.72451   |
| STXB2                     | 59.9757   |
| BBIP1                     | 8.40045   |
| PACS2                     | 9.50222   |
| ECI2                      | 26.4187   |
| ANKRD39                   | 18.3995   |
| NFE2L1                    | 20.8165   |
| C17orf100                 | 0.31644   |
| HHLA2                     | 0.0296195 |
| CLCC1                     | 5.58023   |
| TM9SF4                    | 12.9383   |
| ACTR1A                    | 30.1446   |
| PPM1J                     | 19.8669   |
| RPL23AP7                  | 7.43609   |
| OCLN                      | 5.08461   |
| GOLGA8A                   | 11.5311   |
| CYGB                      | 0.177467  |
| C2orf49                   | 9.24779   |
| SDHAP3                    | 3.1731    |
| DNAJB7                    | 0.235036  |
| PRDM8                     | 18.4059   |
| C10orf11                  | 14.3868   |
| TMEM160                   | 56.6729   |
| ORMDL2                    | 20.79     |
| DIP2B                     | 2.81047   |
| EXOC6B                    | 0.308263  |
| LIMK2                     | 8.299     |
| NTRK1                     | 0.0281129 |
| CHIC1                     | 0.849003  |
| SWSAP1                    | 2.1384    |
| PPP2R5D                   | 18.8191   |
| UBE2H                     | 10.269    |
| MROH8                     | 0.0517616 |
| ASTN2                     | 2.90376   |
| LSM3                      | 98.3016   |
| YIPF2                     | 31.6098   |
| OGG1                      | 14.6169   |
| PCNA-AS1                  | 35.8219   |
| SEPW1                     | 173.515   |
| RPP21,TRIM39,TRIM39-RPP21 | 157.94    |
| TMEM8A                    | 31.9261   |
| FDFT1                     | 55.5844   |
| CHST14                    | 20.8912   |
| SZRD1                     | 36.0139   |
| OGFOD2                    | 7.40857   |
| ELK1                      | 26.304    |
| GNRH1                     | 0.804115  |
| CLN3                      | 23.3532   |
| CECR5                     | 107.541   |
| PKM                       | 1180.18   |
| RBMS1                     | 0.161416  |
| C1QL3                     | 0.277133  |

|                        |          |
|------------------------|----------|
| TBC1D4                 | 4.3093   |
| PPP2R5A                | 10.1029  |
| FAM122A                | 2.70436  |
| IL17RB                 | 2.27369  |
| RTEL1,TNFRSF6B         | 5.86277  |
| PCNA                   | 60.674   |
| HID1                   | 15.7975  |
| LRRC42                 | 27.2402  |
| UXT                    | 125.143  |
| MEA1                   | 122.641  |
| C20orf111              | 31.9338  |
| VPS54                  | 3.03032  |
| WDHD1                  | 1.87418  |
| PTCH1                  | 1.55164  |
| OTUD1                  | 3.63036  |
| PRKCQ                  | 1.41871  |
| RELL1                  | 4.83121  |
| BRWD3                  | 0.571178 |
| RALY                   | 42.9216  |
| SH3GL1                 | 64.6974  |
| SAYSD1                 | 3.91926  |
| ESRP2                  | 10.1785  |
| TNFRSF11A              | 0.704156 |
| LMTK2                  | 3.44076  |
| TPGS2                  | 32.7921  |
| LGMN                   | 26.3299  |
| LMAN2                  | 106.612  |
| SETD2                  | 2.60135  |
| GNG13                  | 0        |
| DEF8                   | 40.5157  |
| BUD13                  | 11.6626  |
| ASXL1                  | 11.133   |
| RAB40A                 | 0.551043 |
| FAM210A                | 6.19606  |
| AES                    | 194.079  |
| CENPW                  | 63.8812  |
| P4HB                   | 386.826  |
| MAD2L2                 | 121.155  |
| FAM81A                 | 0.606599 |
| TNNT1                  | 153.535  |
| TRIB2                  | 0.602213 |
| CD101                  | 0.292193 |
| CHEK1                  | 10.5591  |
| LPCAT2                 | 1.70627  |
| MANSC1                 | 3.02812  |
| SYNPO2                 | 0        |
| CUL7                   | 5.67992  |
| B2M                    | 737.602  |
| FBXO7                  | 64.9639  |
| POLR2L                 | 166.291  |
| SRGAP2,SRGAP2C,SRGAP2D | 4.64852  |
| MAP3K10                | 8.39223  |
| TBC1D9B                | 25.7773  |
| PTPRF                  | 20.3701  |
| KLK6                   | 0        |
| CDK3,TEN1              | 35.1547  |
| ST3GAL1                | 5.57575  |
| EIF4A2                 | 134.828  |
| IER5                   | 16.0082  |
| LMO7                   | 2.28692  |
| NT5C                   | 140.976  |
| AKR7A3                 | 10.674   |
| MTCH1                  | 29.2217  |
| CORIN                  | 0.135005 |
| MVB12B                 | 6.26211  |
| XPO7                   | 13.4293  |
| CAT                    | 5.38141  |
| SYNJ1                  | 0.630739 |
| NDUFB2                 | 336.089  |
| CCNT2                  | 2.56894  |
| TSC22D4                | 40.715   |
| NDUFA8                 | 139.745  |
| FLJ38576               | 0.102606 |
| C12orf23               | 10.3039  |
| LY6E                   | 417.597  |
| FCGRT                  | 34.5181  |
| TGFBR3                 | 0.366848 |
| RNF181                 | 166.658  |
| BHLHE40                | 53.9308  |

|              |           |
|--------------|-----------|
| POM121C      | 9.75634   |
| ZC3H10       | 3.56603   |
| C18orf8      | 10.2779   |
| ZNF367       | 2.41475   |
| LOC375295    | 20.0485   |
| VPS8         | 3.22134   |
| XYLT2        | 14.1235   |
| TSSC4        | 38.8232   |
| HSPA7        | 0         |
| PTK7         | 25.0794   |
| IGF1R        | 2.09884   |
| TNFRSF1A     | 28.3915   |
| SUSD1        | 5.29055   |
| STX17        | 2.75657   |
| EDEM2        | 10.1871   |
| PREB         | 40.054    |
| TPST2        | 15.3954   |
| NTAN1        | 21.7101   |
| USP32        | 3.19666   |
| STT3B        | 6.948     |
| EEPD1        | 1.44174   |
| SH3BP1       | 18.4662   |
| OTUD3        | 1.17741   |
| MCOLN1       | 8.93123   |
| OTUB2        | 0.945417  |
| WDR76        | 4.64054   |
| SLC39A1      | 113.069   |
| SH2B2        | 16.5133   |
| ZNF137P      | 0.228542  |
| ANKRD35      | 0         |
| NF2          | 8.19919   |
| SRRD         | 15.9625   |
| EXO1         | 4.32544   |
| LOC642236    | 0.217592  |
| ZNF184       | 2.24778   |
| BAZ2A        | 9.34488   |
| LIN7B        | 3.22285   |
| CUL4B        | 6.67371   |
| CITED4       | 86.9761   |
| WDR1         | 134.346   |
| HCFC2        | 0.698408  |
| SPNS1        | 28.6066   |
| PIGO         | 9.18673   |
| HELLS        | 2.93273   |
| MIR7-3HG     | 0         |
| TOX2         | 10.2438   |
| SNHG11       | 12.8099   |
| FAF1         | 27.21     |
| IER5L        | 26.1085   |
| PMEL         | 0.910651  |
| MFSD10       | 166.759   |
| VGLL4        | 9.33246   |
| GSK3B        | 4.61569   |
| XBP1         | 75.0433   |
| TBC1D1       | 14.4159   |
| MLL5         | 4.18383   |
| CLMN         | 1.05182   |
| AAMDC        | 25.3007   |
| KCMF1        | 11.1354   |
| KLB          | 0.0413892 |
| HELZ         | 1.74977   |
| RTTN         | 0.856139  |
| WSB1         | 32.7779   |
| PEX13        | 3.12826   |
| COMMD4       | 119.337   |
| ADD1         | 17.9195   |
| NUDT16L1     | 26.472    |
| FAM108A1     | 105.825   |
| PITPNM2      | 2.51578   |
| DCP2         | 2.2411    |
| FAM96B       | 171.635   |
| SLC39A7      | 41.8911   |
| LRRC8C       | 3.37489   |
| ZSCAN9       | 8.05843   |
| LOC100508120 | 0.572706  |
| LIMCH1       | 1.51768   |
| INPL1        | 15.8633   |
| GUCD1        | 19.9822   |
| AHDC1        | 1.3263    |



|                            |            |
|----------------------------|------------|
| LRIG1                      | 2.56524    |
| HAUS7                      | 18.9678    |
| LOC728323                  | 0.285269   |
| FAM172BP                   | 0.15305    |
| ZMYM2                      | 1.73549    |
| ILVBL                      | 39.5283    |
| RC3H1                      | 1.15967    |
| EMD                        | 125.89     |
| SCN1B                      | 3.82062    |
| MVK                        | 14.6756    |
| RPL13AP20                  | 2.81706    |
| ROBO1                      | 0.731622   |
| AGAP3                      | 38.7599    |
| PTPN3                      | 5.16905    |
| SNRPA1                     | 45.6139    |
| SNAPC2                     | 53.9741    |
| PHF2                       | 4.51739    |
| HSF1                       | 127.246    |
| TPRN                       | 49.2631    |
| CDK18                      | 8.6646     |
| JMJD7,JMJD7-PLA2G4B,PLA2G4 | 16.6304    |
| TMEM86B                    | 1.39728    |
| LUC7L                      | 20.1708    |
| IFNGR1                     | 6.74853    |
| NUF2                       | 11.4675    |
| IRX5                       | 0.406058   |
| RELA                       | 54.6531    |
| LINC00116                  | 13.0042    |
| ZNF805                     | 1.04372    |
| PRDM12                     | 1.15508    |
| SHFM1                      | 407.327    |
| CAMSAP2                    | 2.34765    |
| PIAS3                      | 5.81608    |
| YIF1A                      | 66.8547    |
| BUB1B,PAK6                 | 16.8068    |
| OSBPL5                     | 5.12352    |
| ROMO1                      | 408.05     |
| SYNGR3                     | 8.57821    |
| ALG9                       | 3.5638     |
| COMMD7                     | 29.2217    |
| ITSN2                      | 1.30195    |
| TUBA1B                     | 695.29     |
| C2orf72                    | 6.2861     |
| SMAD4                      | 4.07594    |
| ENTPD8                     | 0.102612   |
| TMEM198                    | 2.40812    |
| FLJ45340                   | 3.58826    |
| NDUFC1                     | 199.903    |
| CACTIN-AS1                 | 0.112608   |
| MAML1                      | 5.36087    |
| MARC1                      | 7.80806    |
| MYOZ1                      | 0          |
| GBF1                       | 5.66323    |
| FRY                        | 0.00400665 |
| SIPA1L2                    | 0.340407   |
| TEX264                     | 98.0068    |
| ZKSCAN2                    | 1.07131    |
| PGAM2                      | 0.685807   |
| SWI5                       | 39.1054    |
| TADA1                      | 6.51656    |
| BTN2A1                     | 5.27368    |
| NLGN2                      | 18.528     |
| DENND6A                    | 3.07706    |
| PAR3                       | 18.0232    |
| ZCCHC24                    | 1.33214    |
| CCND3                      | 27.1715    |
| C22orf39                   | 13.2691    |
| LOC731275                  | 0.432748   |
| SLC25A4                    | 13.5205    |
| INO80E                     | 59.2844    |
| LRRC4B                     | 0.809388   |
| ZFPM1                      | 2.53914    |
| TAZ                        | 19.4952    |
| MED13                      | 2.72137    |
| SMAD2                      | 5.71034    |
| DERL2                      | 26.811     |
| LOC440354                  | 0.253717   |
| PLA2G15                    | 9.7541     |
| MAN1A2                     | 0.801101   |

|                               |           |
|-------------------------------|-----------|
| PPP2R3A                       | 0.888832  |
| TMEM68                        | 9.07702   |
| AJUBA                         | 12.7065   |
| HIP1                          | 3.43402   |
| ATP6V0B                       | 174.098   |
| TAGLN3                        | 0         |
| MIB2                          | 8.43344   |
| PSTPIP2                       | 0.013184  |
| SEMA3B                        | 0.479502  |
| PLEKHG2                       | 5.14751   |
| PPARA                         | 1.15582   |
| HDAC3                         | 59.2466   |
| ZNF654                        | 1.62014   |
| FLT3LG                        | 8.38884   |
| SYNJ2                         | 1.06068   |
| CST6                          | 0         |
| UBXN7                         | 1.93114   |
| C19orf47                      | 7.48064   |
| LAPTM4A                       | 76.5546   |
| SDHAF1                        | 35.6456   |
| C17orf62                      | 33.6052   |
| NRIP1                         | 0.526448  |
| DCAF5                         | 4.80415   |
| GP1BB,SEPT5                   | 7.36946   |
| SBF2                          | 2.1634    |
| TRPT1                         | 65.3439   |
| CHMP2A                        | 101.825   |
| APP                           | 65.3243   |
| PEAK1                         | 1.16581   |
| GNB5                          | 8.00036   |
| SNAP47                        | 19.3574   |
| SLC30A1                       | 2.12754   |
| EAF1                          | 5.43399   |
| PPIG                          | 5.54836   |
| LOC100130093                  | 0.655421  |
| ZNF385C                       | 0.0444688 |
| EGLN2,MIA,RAB4B               | 49.3267   |
| C22orf32                      | 26.2417   |
| STK11IP                       | 2.34838   |
| FANCC                         | 3.0617    |
| RRM2B                         | 7.76819   |
| C20orf24,TGIF2,TGIF2-C20orf24 | 77.8853   |
| SERINC3                       | 16.3704   |
| LRRC37A2                      | 0.177383  |
| ZNF330                        | 25.5235   |
| FAM41C                        | 0.272288  |
| C4orf33                       | 4.6754    |
| SMARCB1                       | 82.0939   |
| CRYGS                         | 1.88694   |
| LOC100506844                  | 15.9506   |
| TMEM159                       | 45.3835   |
| MESDC2                        | 6.96771   |
| NCAM1                         | 0         |
| GDE1                          | 20.6186   |
| CTNNA1                        | 25.6064   |
| FAM78B                        | 4.11835   |
| EDEM1                         | 9.32404   |
| C12orf65                      | 10.0447   |
| RHOU                          | 0.281446  |
| CD83                          | 3.06628   |
| MTFR2                         | 10.3121   |
| CREB3L1                       | 0         |
| NDUFS8                        | 179.195   |
| FAM89A                        | 24.5394   |
| NPAS2                         | 7.50545   |
| EIF4EBP2                      | 3.82494   |
| ACBD5                         | 5.84522   |
| NEIL3                         | 1.69659   |
| LOC388948                     | 0         |
| RAD51B                        | 5.20401   |
| TNFRSF10D                     | 28.284    |
| NKIRAS2                       | 14.5705   |
| ANKIB1                        | 2.6837    |
| GPATCH3                       | 7.0993    |
| PIK3CB                        | 2.85506   |
| CPZ                           | 22.1899   |
| TREM2                         | 0.0718739 |
| EMILIN2                       | 0         |
| GNS                           | 8.28552   |

|              |           |
|--------------|-----------|
| ITFG1        | 8.8874    |
| LRRC37B      | 1.61117   |
| FAM214B      | 3.64426   |
| RRAS2        | 18.394    |
| C5           | 0.315681  |
| TESK2        | 2.37755   |
| AGPHD1       | 1.99392   |
| PTPRJ        | 3.38862   |
| NCKAP5L      | 6.00046   |
| TMEM2        | 0.423073  |
| NDUFA9       | 47.4699   |
| PCGF3        | 4.4662    |
| GTPBP8       | 7.69989   |
| RILPL2       | 26.5032   |
| LRRC20       | 5.98423   |
| PLXDC1       | 0.0964849 |
| ARHGEF17     | 3.12503   |
| ZZZ3         | 3.32099   |
| GEMIN7       | 22.2269   |
| EFCAB3       | 0.717188  |
| HIBCH        | 2.1491    |
| PBK          | 26.0696   |
| DHCR24       | 35.5165   |
| TBCEL        | 1.37301   |
| COX6A1       | 590.364   |
| LINC00638    | 0.340781  |
| HERPUD1      | 58.2869   |
| FAM134C      | 16.1102   |
| C20orf112    | 1.32679   |
| CCNB2        | 46.1238   |
| CELF5        | 0.52675   |
| PPP6C        | 16.0139   |
| CSRNP2       | 5.55766   |
| GTF2E2       | 22.6849   |
| MRPL45P2     | 2.59883   |
| SLC30A4      | 0.0821449 |
| SOC56        | 1.99227   |
| USP43        | 1.08947   |
| PGM2L1       | 0.391703  |
| ZYX          | 345.345   |
| TKTL1        | 0         |
| CDC48        | 32.5736   |
| NXN          | 9.8295    |
| SCAMP3       | 46.5921   |
| KCNQ1        | 10.6918   |
| HMG2         | 182.835   |
| FNBP4        | 8.03977   |
| LOC100132352 | 5.3547    |
| AXL          | 195.006   |
| FAF2         | 9.21698   |
| CEP57L1      | 1.81749   |
| FAM174A      | 6.99685   |
| DNAH12       | 0.0111634 |
| RNF111       | 2.61636   |
| TRAPPC9      | 7.13924   |
| SPEN         | 2.92277   |
| SH3GL1P1     | 0.298388  |
| ARHGAP18     | 1.06499   |
| TEX9         | 0.376238  |
| DIDO1        | 5.20597   |
| ZNF558       | 4.46156   |
| SEMA4C       | 12.9424   |
| NUDT14       | 40.3115   |
| SOX2         | 0.0249749 |
| COPE         | 252.828   |
| KCNIP4       | 0.230826  |
| GSTZ1        | 24.9124   |
| LIMK1        | 17.8965   |
| NEURL3       | 0         |
| KCTD9        | 5.89771   |
| ITM2C        | 96.5123   |
| MTFR1        | 14.4602   |
| LAGE3        | 17.0094   |
| UBALD2       | 100.84    |
| TCIRG1       | 34.4744   |
| IGIP         | 0.909647  |
| HAVCR1P1     | 0.0679516 |
| LMAN2L       | 6.13108   |
| ARL4A        | 2.60489   |

|              |            |
|--------------|------------|
| SNRPG        | 258.932    |
| PPP1R2       | 9.00495    |
| TLN2         | 0.963496   |
| ZRSR2        | 6.04587    |
| HMG2         | 176.478    |
| CRIM1        | 8.69267    |
| KIAA0101     | 25.8198    |
| RRAGC        | 12.4451    |
| DIRC2        | 9.81932    |
| CNNM4        | 2.70915    |
| PDK1         | 20.6119    |
| CCDC84       | 15.4415    |
| BRSK2        | 9.89974    |
| CLIC1        | 527.757    |
| ITM2B        | 45.9753    |
| RAB24        | 27.2576    |
| LSM1         | 37.4864    |
| RBPMS        | 27.9568    |
| KANSL3       | 7.65672    |
| TRAK1        | 3.45426    |
| TIMM17B      | 108.828    |
| FITM2        | 1.01744    |
| BCKDHA       | 111.064    |
| LOC441155    | 0.139486   |
| CTSH         | 16.7677    |
| RCOR2        | 13.988     |
| ZNF524       | 31.9773    |
| SNRNP35      | 9.23918    |
| NUCKS1       | 15.2421    |
| OSBPL9       | 14.3655    |
| ZDHHC12      | 72.6247    |
| SPAG16       | 6.64671    |
| TMEM11       | 22.7128    |
| FAM225B      | 0.375636   |
| ZNF836       | 1.72983    |
| AMZ2P1       | 1.99697    |
| HERC1        | 0.627623   |
| DCPS         | 31.4821    |
| HEBP1        | 61.4068    |
| LOC100288198 | 0.452215   |
| RAB8B        | 4.50138    |
| SWAP70       | 5.61157    |
| SLC35A1      | 6.51389    |
| TMEM50B      | 6.46447    |
| LRCH4        | 10.8274    |
| LDB1         | 15.3375    |
| SDHAP2       | 0.77262    |
| CAMK1D       | 3.62098    |
| WDR88        | 0.0607397  |
| GGA3         | 10.292     |
| RAF1         | 17.5376    |
| NDUFB7       | 233.727    |
| CTSB         | 45.5784    |
| ZNF2         | 1.54456    |
| KCNRG,TRIM13 | 3.6867     |
| NADSYN1      | 31.3589    |
| MGST2        | 60.7943    |
| DSTN         | 53.7441    |
| SOD2         | 30.5032    |
| CD72         | 0.43956    |
| GUSB         | 24.0157    |
| ARHGEF7      | 7.89294    |
| EPHB4        | 33.7202    |
| ARHGEF9      | 2.13021    |
| ARSA         | 7.36957    |
| ZNF225       | 0.632472   |
| POLB         | 22.9095    |
| PPP1R14B     | 431.008    |
| LRFN3        | 11.33      |
| B3GAT3       | 34.5932    |
| NF1          | 0.996806   |
| BLOC1S3      | 11.8897    |
| TMEM19       | 2.69149    |
| AGPAT2       | 271.65     |
| FAM21C       | 5.62813    |
| OSGEPL1      | 1.9807     |
| RAB38        | 20.5138    |
| UNC13A       | 0.00984441 |
| CCDC85B      | 324.486    |

|                 |           |
|-----------------|-----------|
| ZNF565          | 0.683548  |
| NAMPT           | 20.4987   |
| SESN1           | 3.15108   |
| TMEM45A         | 11.4958   |
| ZNF707          | 8.94798   |
| MSN             | 0         |
| PNPLA6          | 24.8116   |
| PCMT1           | 51.5363   |
| EHD2            | 6.4234    |
| PPIC            | 12.7836   |
| PPP1CA          | 188.684   |
| FGD3            | 3.94214   |
| PAQR7           | 17.5109   |
| GPR89B,GPR89C   | 0.059724  |
| SP3             | 5.73541   |
| RFTN1           | 0.0164306 |
| RUNX1           | 7.47956   |
| ITGA7           | 2.36286   |
| TMEM141         | 157.76    |
| LOC100131347    | 0.0613786 |
| ZNF254          | 0.822939  |
| NOTCH1          | 7.31689   |
| ZNF782          | 0.573342  |
| MMS19           | 23.0821   |
| RALGAPA1        | 1.1683    |
| CDT1            | 82.7731   |
| TRIM24          | 3.80956   |
| B3GNT2          | 3.79604   |
| HLA-J           | 1.22004   |
| C20orf96        | 8.14123   |
| LETM1           | 12.8427   |
| ABI2            | 7.28309   |
| TNK1            | 9.96794   |
| GNA15           | 7.07965   |
| FOXO4           | 1.16697   |
| RNF10           | 28.4088   |
| MGAT4B          | 98.6491   |
| CA12            | 5.37478   |
| CYB561D2        | 32.5369   |
| C17orf49,RNASEK | 403.585   |
| PXMP2           | 14.8264   |
| MYO18A,TIAF1    | 9.24364   |
| C11orf82        | 2.0219    |
| SLC2A4          | 0.491614  |
| MIR1291,SNORA34 | 4.23156   |
| ABCC6           | 1.06918   |
| ZBTB4           | 6.73023   |
| ZNF79           | 4.88114   |
| INO80C          | 11.1379   |
| ZNF660          | 0.0489665 |
| APOPT1          | 25.7517   |
| MRPS34          | 164.164   |
| C4orf48         | 57.187    |
| CLCN2           | 5.90924   |
| TRERF1          | 2.22319   |
| ING4            | 7.10667   |
| DMXL2           | 1.80512   |
| LAMC1           | 9.24824   |
| LOC100506100    | 5.08202   |
| SCAPER          | 2.10456   |
| GABARAP         | 359.547   |
| ZFP64           | 5.66975   |
| SUMO1P3         | 0.033267  |
| QSER1           | 2.6642    |
| EFNB2           | 1.02043   |
| CDC42EP3        | 1.95334   |
| HS1BP3          | 19.8434   |
| KDM5A           | 2.15846   |
| MYL12B          | 577.748   |
| ITGB3BP         | 14.4472   |
| OSTF1           | 14.6045   |
| ST7-AS1         | 3.25378   |
| SLC38A2         | 33.9004   |
| RNF185          | 17.5157   |
| FAM65A          | 18.7828   |
| SOCS7           | 2.1786    |
| FBXO44          | 21.2349   |
| ULBP3           | 2.41824   |
| NEK1            | 0.968688  |

|              |            |
|--------------|------------|
| POM121L8P    | 0.283118   |
| VEZT         | 5.48394    |
| ZNF431       | 1.89233    |
| SCARNA12     | 9.78155    |
| MFAP3L       | 0.215809   |
| PPM1A        | 3.7447     |
| LINC00240    | 0.505601   |
| POLR2J       | 105.043    |
| HYPK,SERF2   | 148.52     |
| SEC61A1      | 78.9794    |
| TBC1D10A     | 14.258     |
| SLC6A8       | 56.6092    |
| ALKBH6       | 15.0627    |
| MOGS         | 41.0342    |
| ACD          | 39.0816    |
| EMC3         | 26.3491    |
| BARX2        | 0          |
| PLBD1        | 13.6134    |
| TSEN34       | 51.3929    |
| KIF20B       | 0.502925   |
| KCND1        | 0.240371   |
| SPIB         | 0.0311882  |
| RAB21        | 12.2136    |
| CEP76        | 1.66995    |
| PHLPP1       | 2.72224    |
| MAN2B1       | 23.0583    |
| SSH2         | 0.965195   |
| C1orf115     | 2.71731    |
| NARFL        | 12.589     |
| TMEM131      | 4.18486    |
| PHKA2        | 3.65333    |
| CADM4        | 10.4147    |
| DUT          | 35.9914    |
| CDK4         | 189.801    |
| ABRACL       | 91.7502    |
| GTSE1        | 10.609     |
| SEMA4F       | 3.10042    |
| RNF5         | 66.5694    |
| LOC100505839 | 0          |
| RAB41        | 0          |
| ZFP1         | 2.11297    |
| ITPK1-AS1    | 0.0100247  |
| C1orf226     | 1.51113    |
| C16orf72     | 8.11358    |
| INSR         | 2.59078    |
| AGTPBP1      | 4.91637    |
| ASB14        | 0.255479   |
| LOC646999    | 0.0336733  |
| LOC158376    | 0          |
| RILPL1       | 9.20916    |
| DNAJB14      | 1.13727    |
| ABHD6        | 5.03212    |
| COA6         | 73.4029    |
| SLC16A3      | 197.472    |
| SH3TC1       | 3.35651    |
| HOXB4        | 6.27263    |
| FAM166A      | 8.48002    |
| ASPHD1       | 37.8834    |
| WNK2         | 5.54146    |
| THAP7        | 28.0695    |
| PHIP         | 1.559      |
| CDH15        | 0.479305   |
| TENC1        | 0.953775   |
| GUSBP9,SMA5  | 0.569651   |
| CNKSR3       | 1.4441     |
| MAP4K2       | 15.5145    |
| ANO6         | 8.76966    |
| ENTPD4       | 3.33408    |
| COL6A4P1     | 0.0201586  |
| DR1          | 16.069     |
| PTPRB        | 0.00722716 |
| DPF1         | 2.21208    |
| NFKBIL1      | 44.3514    |
| DLG4         | 18.9202    |
| LY6G5C       | 2.08825    |
| OS9          | 58.3713    |
| SUV420H2     | 6.92665    |
| CERS6        | 2.95137    |
| EBF3         | 0.0633077  |

|              |           |
|--------------|-----------|
| LRP6         | 1.02918   |
| DCTN3        | 98.3042   |
| PTPRN        | 0.131307  |
| DGCR2        | 16.4005   |
| PLEKHA1      | 4.00301   |
| KLC4         | 5.25168   |
| USP46        | 1.0993    |
| CIT          | 4.13304   |
| CD99L2       | 6.22038   |
| CHRD         | 1.75109   |
| ANGEL1       | 5.69448   |
| RAD21-AS1    | 0.0800384 |
| STX7         | 5.19889   |
| PDXK         | 16.7308   |
| MLLT10       | 9.3651    |
| PTPN23       | 7.57743   |
| FNIP2        | 0.29406   |
| MAP3K2       | 1.44421   |
| KIAA1161     | 0.851716  |
| FBXW5        | 144.019   |
| VEZF1        | 6.25959   |
| ATN1         | 37.8987   |
| KIAA0195     | 9.74899   |
| LGALSL       | 5.29154   |
| FGFR1        | 19.6987   |
| FRS3         | 4.4839    |
| CHCHD1       | 70.2208   |
| MON1B,SYCE1L | 9.11586   |
| ZMYM5        | 4.38527   |
| SETD5-AS1    | 3.71752   |
| SERPINA10    | 0         |
| SDF2         | 18.0574   |
| LIN54        | 2.00274   |
| CLDND2       | 0.154173  |
| SLC52A2      | 108.543   |
| SUDS3        | 5.84103   |
| ENDOV        | 10.3931   |
| TSPAN9       | 2.32605   |
| DAG1         | 9.14622   |
| DALRD3       | 34.4042   |
| SIK2         | 1.8403    |
| NFKBIA       | 19.1294   |
| MAP7D1       | 36.8544   |
| TRIO         | 2.2988    |
| NUSAP1       | 32.7166   |
| LOC96610     | 2.56515   |
| HOXB8        | 3.12592   |
| RAB40C       | 16.9345   |
| SLC2A13      | 0.375253  |
| HDAC8        | 10.0204   |
| SELM         | 382.272   |
| LEPRE1       | 15.7755   |
| JAZF1        | 2.23648   |
| RPS19BP1     | 135.772   |
| MTMR1        | 3.38424   |
| MTMR3        | 3.67461   |
| IFITM3       | 336.201   |
| VPS37C       | 13.4087   |
| SMCHD1       | 2.89028   |
| DNAH1        | 0.15881   |
| SLC25A24     | 4.03641   |
| MED21        | 5.33397   |
| RICTOR       | 1.63502   |
| BTBD10       | 10.2986   |
| RRAGA        | 59.4947   |
| TMEM14A      | 20.6677   |
| LOC388796    | 124.036   |
| SBK1         | 3.87324   |
| TUBB         | 462.2     |
| STAT3        | 7.64061   |
| IL17RC       | 13.3753   |
| TUBG1        | 39.7973   |
| ATP5I        | 741.489   |
| LINC00852    | 0.415683  |
| PTMA         | 1052.01   |
| RFX1         | 3.02283   |
| WWC2         | 0.814229  |
| TXNDC11      | 7.99794   |
| ARF5         | 306.775   |

|                |           |
|----------------|-----------|
| RALBP1         | 14.0979   |
| CKS2           | 462.623   |
| ETFDH          | 2.68653   |
| BLOC1S1,RDH5   | 111.283   |
| MRPS7          | 37.9332   |
| MCC            | 0.0213904 |
| RBM42          | 61.161    |
| CRAMP1L        | 1.97598   |
| LRRC16A        | 1.40172   |
| ORC4           | 4.31115   |
| C4orf21        | 0.465569  |
| HSPB1          | 822.616   |
| NAA60          | 21.6679   |
| STK25          | 73.2352   |
| PAPD7          | 10.7751   |
| ULK2           | 1.46908   |
| ZGPAT          | 11.5439   |
| POLR2J2,UPK3BL | 45.5508   |
| SDR39U1        | 47.744    |
| OFD1           | 5.13652   |
| APOL4          | 0.0127383 |
| RHPN1-AS1      | 2.28712   |
| C1orf131       | 4.10555   |
| FXN            | 9.10794   |
| MYNN           | 2.22139   |
| NDUFB11        | 123.441   |
| MAP1S          | 21.4978   |
| RPN2           | 68.7243   |
| RB1            | 4.64772   |
| TRAF2          | 38.6371   |
| SPOCD1         | 13.4358   |
| SAMD1          | 47.1227   |
| TP53           | 26.0827   |
| POLL           | 24.7497   |
| FSBP,RAD54B    | 3.84499   |
| TRAF1          | 0.918033  |
| PROSC          | 27.5917   |
| RAB12          | 11.8746   |
| SRRM1          | 16.6358   |
| GPR108         | 37.7308   |
| CYP4F35P       | 0.309533  |
| NECAP2         | 24.8887   |
| PIGN           | 2.87782   |
| H2AFV          | 40.7759   |
| LOC440288      | 2.28859   |
| CNPPD1         | 46.9979   |
| DSN1           | 7.76758   |
| NUAK1          | 0.906247  |
| MRPL48         | 23.2164   |
| ZNF519         | 0.357091  |
| CAMK2G         | 5.32314   |
| PSMD6-AS2      | 0.119722  |
| SOX12          | 19.6224   |
| MELK           | 10.7706   |
| ZNF384         | 14.9648   |
| LZTS2          | 51.5292   |
| BHMT2          | 0         |
| TTC21B         | 1.58513   |
| HPS4           | 6.13823   |
| KAZALD1        | 2.72528   |
| NCKAP1L        | 0         |
| SLC35E1        | 13.8806   |
| CEL            | 0.58547   |
| ILF3-AS1       | 5.64675   |
| CTU1           | 13.853    |
| GLG1           | 15.6523   |
| DEPDC4         | 0.29256   |
| LPCAT4         | 26.2859   |
| ATP5E,SLMO2    | 691.006   |
| KCTD10         | 9.83554   |
| ORAI1          | 35.154    |
| KIAA1522       | 12.8999   |
| IDH3G          | 65.5199   |
| SH2B1          | 13.1247   |
| ADAM21P1       | 0         |
| PIP5K1B        | 0.0443825 |
| FAM114A1       | 4.23332   |
| FAM46B         | 0.494409  |
| KAT5           | 9.75464   |



|           |           |
|-----------|-----------|
| FAM104A   | 12.6394   |
| BBX       | 1.9925    |
| PRMT2     | 18.3696   |
| FLJ22184  | 13.1269   |
| MRPL43    | 88.0207   |
| C7orf49   | 17.7234   |
| PPP1R13B  | 2.59335   |
| OSBPL11   | 1.32071   |
| ATP5J     | 158.597   |
| STIM1     | 8.04734   |
| CCDC42B   | 0.200056  |
| ATRAID    | 106.136   |
| NAB2      | 39.8485   |
| AQP11     | 0.652965  |
| DGAT2     | 5.1841    |
| MRGBP     | 38.3619   |
| C1orf27   | 2.74765   |
| RNF8      | 5.69783   |
| AKR7A2    | 35.8175   |
| ATG12     | 9.26547   |
| RAB15     | 9.94067   |
| DIP2C     | 2.02192   |
| GRIN2D    | 18.3882   |
| ZMPSTE24  | 7.75451   |
| SRSF4     | 43.6987   |
| CEBPD     | 27.646    |
| FURIN     | 19.8449   |
| RAP2A     | 3.26705   |
| TDRD7     | 5.50027   |
| ZNF219    | 19.5608   |
| SMIM11    | 18.4014   |
| PNPLA7    | 1.80883   |
| KIAA0319L | 7.0079    |
| TXN2      | 96.2484   |
| ZRANB3    | 0.487987  |
| DDX59     | 5.27415   |
| TMEM183A  | 34.6186   |
| GALT      | 14.451    |
| ATXN1L    | 1.91608   |
| PLXNA3    | 4.44528   |
| RAPGEF4   | 0.0660793 |
| NME4      | 76.1253   |
| TSC1      | 3.94488   |
| TMOD1     | 0.912595  |
| BOD1      | 37.9882   |
| PGM3      | 4.28627   |
| CNOT6L    | 2.337     |
| FAM195A   | 114.17    |
| EXOC1     | 6.63882   |
| PLS1      | 2.37794   |
| PTCHD3P1  | 4.86074   |
| ZNF212    | 7.60675   |
| HDDC3     | 16.7977   |
| DSCR3     | 14.9828   |
| GTF3C2    | 11.7636   |
| PAFAH1B3  | 102.177   |
| DYNLRB1   | 165.747   |
| B3GAT1    | 7.25624   |
| SGSM2     | 8.14635   |
| MT2A      | 6101.48   |
| SPRN      | 2.39626   |
| MTMR9     | 1.08149   |
| CCNF      | 9.68027   |
| NTHL1     | 34.6597   |
| ZNF483    | 0.179928  |
| LPPR2     | 18.2997   |
| MITD1     | 19.1215   |
| C19orf60  | 55.9153   |
| TCEA2     | 0.0980565 |
| UFD1L     | 26.2747   |
| HLA-A     | 1064.01   |
| MANBAL    | 56.2282   |
| TTC31     | 5.18002   |
| DAD1      | 205.186   |
| PCCA      | 1.10285   |
| PHLPP2    | 1.32149   |
| PIGH      | 15.7438   |
| AGXT2     | 0         |
| TPRA1     | 50.401    |

|            |           |
|------------|-----------|
| SLC24A6    | 9.94799   |
| ADNP2      | 9.73366   |
| OGFRL1     | 14.4027   |
| KIAA0040   | 1.68545   |
| CDC45      | 34.6252   |
| LAMTOR5    | 139.205   |
| RPS27L     | 73.2451   |
| KCTD21     | 1.00026   |
| MGST3      | 75.5093   |
| SCIN       | 0         |
| HSD17B12   | 25.9987   |
| PPIL3      | 14.7795   |
| CLEC2D     | 0.514346  |
| GET4       | 43.4608   |
| SNX25      | 4.62059   |
| MAST2      | 17.3773   |
| SPTBN1     | 8.06699   |
| CRTAP      | 32.4021   |
| ANKRD49    | 5.33879   |
| NPC1       | 10.2784   |
| PBRM1      | 1.69691   |
| LMCD1      | 0.0648765 |
| SSNA1      | 201.36    |
| TEX21P     | 0.0791875 |
| LLPH       | 46.8691   |
| HDAC10     | 9.83865   |
| ELAVL1     | 16.2731   |
| SSR2       | 311.956   |
| CBLB       | 0.504351  |
| ABHD10     | 10.9022   |
| CTSA       | 51.5336   |
| TMEM97     | 20.5736   |
| SEC11C     | 28.7171   |
| ETV4       | 64.9618   |
| TCF3       | 30.0769   |
| DCLK2      | 0.60898   |
| CPT1C      | 3.9847    |
| CTIF       | 10.3745   |
| DHPS       | 48.8753   |
| SNRPD2     | 577.409   |
| FKTN       | 3.741     |
| EEFSEC     | 14.8043   |
| REEP3      | 3.67479   |
| ST3GAL4    | 20.4773   |
| UBR4       | 5.22756   |
| ANXA11     | 63.2964   |
| ARRB2      | 89.1555   |
| PICALM     | 23.1381   |
| NRIP2      | 0.180782  |
| C2orf43    | 3.27232   |
| SH2D3C     | 0.133801  |
| TOX4       | 11.3314   |
| GRIP1      | 0.420553  |
| C1orf21    | 2.15024   |
| DOCK11     | 0.789057  |
| ARHGEF39   | 6.82523   |
| C3orf52    | 5.76602   |
| PTTG1IP    | 74.8964   |
| GMPPA      | 29.5506   |
| CAB39L     | 3.18916   |
| SCML1      | 3.05457   |
| TMEM42     | 12.7643   |
| TMEM251    | 24.7565   |
| SLC35A5    | 3.34063   |
| NUCB1      | 98.9312   |
| UNC45A     | 30.6229   |
| HMG3       | 24.0058   |
| POC5       | 4.19521   |
| TMEM238    | 23.066    |
| RHOC       | 272.79    |
| GAPDH      | 7927.64   |
| BRSK1      | 9.29382   |
| BRI3BP     | 13.0598   |
| HNRNPU-AS1 | 5.7205    |
| CD40LG     | 0         |
| SPIRE2     | 8.50076   |
| C4orf36    | 0.341658  |
| FOXRED2    | 9.21139   |
| VPREB3     | 0.595211  |

|                    |            |
|--------------------|------------|
| TNK2               | 8.55352    |
| RELT               | 10.2318    |
| KIFC2              | 11.3885    |
| CANX               | 76.5752    |
| BATF3              | 25.0539    |
| MPC1               | 16.5914    |
| GNAZ               | 3.37816    |
| ASIC1              | 5.92306    |
| POLG               | 13.7354    |
| GABARAPL2          | 121.3      |
| TRAF5              | 3.77161    |
| PPP1R35            | 78.1021    |
| FAM76A             | 1.08897    |
| CHST12             | 11.1772    |
| ENY2               | 36.9153    |
| FAM98B             | 4.73724    |
| MMAB               | 6.59166    |
| SLC9A3R1           | 52.1572    |
| MCM10              | 3.2393     |
| VPS26B             | 15.5684    |
| CYTH3              | 4.7342     |
| ZNF229             | 0          |
| GEMIN2             | 9.73335    |
| STAU2              | 6.63377    |
| HERC6              | 2.52703    |
| CELSR2             | 2.03627    |
| SGK494             | 0.554135   |
| SQRDL              | 10.083     |
| MED4               | 13.3485    |
| PRKD3              | 1.90525    |
| SNPH               | 1.45002    |
| HMGXB3             | 15.1983    |
| LIPT1              | 7.30499    |
| IKZF4              | 1.07841    |
| GCOM1,MYZAP,POLR2M | 9.98351    |
| SEC24C             | 10.4742    |
| AGAP8              | 0.812839   |
| ALG1L              | 0.231863   |
| ZNRF2P1            | 0.807685   |
| TOMM7              | 345.513    |
| PMS2P1             | 11.6224    |
| AUP1               | 175.634    |
| ATP9A              | 2.8756     |
| METTL14            | 2.83316    |
| RAB26              | 8.4615     |
| LOC100507140       | 0          |
| MARK2              | 10.041     |
| ARL5B              | 2.87226    |
| PERP               | 27.4597    |
| ZNF282             | 26.2923    |
| NCOA2              | 0.308414   |
| HBP1               | 5.2316     |
| IFI27L2            | 202.18     |
| PAWR               | 16.9177    |
| CENPJ              | 1.18903    |
| AP4B1              | 5.69841    |
| MCF2L-AS1          | 0.885703   |
| CLK2               | 14.5858    |
| C12orf45           | 51.0055    |
| FXR1               | 6.57721    |
| QRICH1             | 16.7547    |
| AMMECR1            | 1.32966    |
| EPAS1              | 2.12331    |
| WARS2              | 4.96085    |
| LARP1B             | 4.87388    |
| SIRPA              | 3.4224     |
| RAB3B              | 2.97585    |
| PRR5L              | 1.4016     |
| CCDC88C            | 3.51018    |
| NPR3               | 0.00575869 |
| TMEM63A            | 4.95256    |
| MALT1              | 4.53464    |
| HOXB2              | 21.3157    |
| SNUPN              | 18.7351    |
| ATP6V1A            | 6.21736    |
| RRBP1              | 14.9836    |
| ZYG11B             | 1.44718    |
| IFIT2              | 0.0630405  |
| DERL1              | 27.9319    |

|                             |           |
|-----------------------------|-----------|
| ZNF177,ZNF559,ZNF559-ZNF177 | 2.41531   |
| GIT2                        | 6.42978   |
| UBL5                        | 520.173   |
| DAXX                        | 34.2413   |
| MINK1                       | 17.1631   |
| TRIM38                      | 1.82729   |
| NEDD4L                      | 7.74275   |
| C9orf37                     | 6.49616   |
| DNAJB11                     | 20.7323   |
| CIB1                        | 175.198   |
| SPR                         | 72.2003   |
| KLHL15                      | 1.20263   |
| RAB2A                       | 24.4341   |
| CLCN5                       | 0.651481  |
| MTRNR2L8                    | 32.176    |
| IP6K1                       | 9.27679   |
| TRPM4                       | 7.06585   |
| BNIP1                       | 16.3688   |
| NDUFA12                     | 99.2376   |
| SHISA5                      | 93.2173   |
| FNDC3A                      | 4.6542    |
| SMC2                        | 3.73214   |
| PDSS2                       | 2.07112   |
| C15orf62                    | 0.368924  |
| SPAG7                       | 34.2104   |
| ADAM20                      | 0.0127913 |
| ISOC1                       | 7.87433   |
| ZNF48                       | 11.9879   |
| PARL                        | 44.9385   |
| SGSM3                       | 14.7262   |
| TMEM161B-AS1                | 2.21229   |
| TMEM30A                     | 11.567    |
| STX2                        | 3.94956   |
| BAG4                        | 3.98098   |
| MRPL18                      | 69.3609   |
| ABLIM2                      | 0.518965  |
| C17orf59                    | 15.7243   |
| LSM7                        | 251.12    |
| C9orf96                     | 0.0774581 |
| CNN3                        | 63.8557   |
| MYO19                       | 12.8927   |
| IDH2                        | 49.8728   |
| USP39                       | 28.5416   |
| TULP3                       | 8.52574   |
| ZNF275                      | 2.97334   |
| TRMT13                      | 2.30139   |
| RNASET2                     | 53.1327   |
| PPDPF                       | 558.334   |
| WASF1                       | 3.11707   |
| RPA3                        | 16.7003   |
| KDM4D                       | 0.308872  |
| TP53INP2                    | 6.06078   |
| DBF4B                       | 6.59953   |
| C10orf76                    | 3.8995    |
| UBE3D                       | 1.59786   |
| ARHGEF3                     | 1.26568   |
| SLC11A2                     | 6.76959   |
| AKT2                        | 15.4128   |
| CCDC38                      | 0         |
| RGL2                        | 24.165    |
| WDR24                       | 6.09945   |
| RAD1                        | 4.74223   |
| MKRN1                       | 41.7417   |
| SH3GLB1                     | 8.869     |
| VAT1                        | 177.199   |
| CHRAC1                      | 27.6832   |
| C10orf35                    | 22.3672   |
| R3HDM1                      | 4.10886   |
| WDSUB1                      | 5.90586   |
| TRAF3IP2-AS1                | 3.49339   |
| COPG1                       | 38.2812   |
| PNPLA8                      | 1.85312   |
| NIPBL                       | 1.26369   |
| FAM173A                     | 79.6264   |
| ZNF354B                     | 1.46578   |
| CNST                        | 3.51392   |
| CD320                       | 255.574   |
| PRKX                        | 5.29137   |
| LCMT1                       | 38.361    |

|              |           |
|--------------|-----------|
| COO6         | 17.4402   |
| HIPK1        | 2.28531   |
| TOMM6        | 128.239   |
| PSMF1        | 36.3498   |
| HSPA4L       | 2.15273   |
| CKB          | 6.57229   |
| RCAN2        | 0.0479579 |
| EXO5         | 3.82334   |
| NDUFB6       | 56.9881   |
| GUJ1         | 259.795   |
| RBM7         | 11.6152   |
| ENPP4        | 1.37539   |
| MARCKS       | 11.3668   |
| RDH13        | 10.0717   |
| PHC3         | 1.61253   |
| RPL23AP82    | 4.44966   |
| LOC100129518 | 0.194857  |
| OSCAR        | 1.91213   |
| MRPS22       | 41.6911   |
| DGAT2L6      | 0.0276847 |
| KIAA1804     | 3.04676   |
| MED20        | 3.70806   |
| RPN1         | 73.9688   |
| ELL          | 11.5941   |
| CREBZF       | 5.94597   |
| B3GALT4      | 0         |
| PCED1A       | 15.0381   |
| PIGC         | 10.9668   |
| DDX50        | 27.9481   |
| PARP6        | 6.74419   |
| VAMP1        | 2.51656   |
| RBM23        | 24.3474   |
| BCL6         | 3.64022   |
| PTAR1        | 1.51776   |
| QDPR         | 31.0149   |
| EMC10        | 32.6655   |
| CINP         | 22.8493   |
| MCM8         | 1.92146   |
| AIF1L        | 39.4657   |
| ZBTB40       | 2.48603   |
| CDRT15P1     | 0.405236  |
| ADAMTS2      | 0.105314  |
| ZC4H2        | 3.38942   |
| SNX3         | 125.784   |
| FAM220A      | 6.6269    |
| DDX60L       | 0.336217  |
| HECTD4       | 0.759157  |
| DOCK8        | 0.368913  |
| RGS16        | 4.15955   |
| SAC3D1       | 44.415    |
| TPM1         | 51.767    |
| STARD9       | 0.378501  |
| C21orf2      | 4.55929   |
| POLR2G       | 120.169   |
| BCL2         | 1.53999   |
| KLHDC3       | 46.7896   |
| LRRC1        | 1.02687   |
| MYBL1        | 1.16916   |
| SAFB2        | 11.7515   |
| SPDL1        | 3.53023   |
| DHRS11       | 11.1929   |
| TAOK1        | 3.59868   |
| TXNDC17      | 31.7268   |
| AMPD2        | 30.7472   |
| AIRN         | 0.0118261 |
| TTLL4        | 6.09505   |
| PRG4         | 0.0509576 |
| NSD1         | 2.00193   |
| LAMP3        | 0.908562  |
| GOLGB1       | 1.35727   |
| CHAF1B       | 7.36073   |
| SIMC1        | 10.4313   |
| SHMT1        | 15.5191   |
| ZBTB3        | 1.19752   |
| CCR10        | 21.7686   |
| ZDHHC8       | 10.8195   |
| HYAL3,NAT6   | 24.4723   |
| HIST4H4      | 0.963649  |
| TKT          | 314.879   |

|           |          |
|-----------|----------|
| NME3      | 71.6835  |
| DEPDC1B   | 7.81453  |
| ALDH7A1   | 13.959   |
| APOA1BP   | 140.254  |
| ZBTB41    | 0.438407 |
| PPFIA1    | 5.94794  |
| KIAA1549L | 1.13218  |
| TNFAIP1   | 12.0937  |
| RDM1      | 2.17235  |
| ONECUT2   | 0.388319 |
| FTSJD2    | 8.91291  |
| VPS72     | 37.1284  |
| ZC3H12D   | 0.012015 |
| MED1      | 4.83345  |
| PTPN12    | 8.38839  |
| NUDT18    | 13.5717  |
| VAV2      | 15.0293  |
| WDR47     | 1.79663  |
| ARL8A     | 25.1377  |
| PRTN3     | 0        |
| CENPI     | 0.558443 |
| PRSS56    | 0.210575 |
| LDLRAP1   | 8.64176  |
| YPEL5     | 16.3406  |
| AIFM2     | 21.1883  |
| PCOLCE    | 16.4087  |
| RAD23A    | 126.771  |
| PLCD3     | 16.2554  |
| SPPL3     | 13.297   |
| TBC1D17   | 10.4125  |
| DCAF7     | 26.0977  |
| FMO4      | 0.31475  |
| CD3EAP    | 2.05087  |
| MPLKIP    | 27.8195  |
| HEXB      | 66.7308  |
| C14orf159 | 6.83258  |
| DUS3L     | 41.8165  |
| ANAPC16   | 23.787   |
| SUFU      | 3.99723  |
| TLE6      | 5.24929  |
| SLC1A1    | 2.02318  |
| ETFA      | 96.1415  |
| FAM98C    | 51.1401  |
| NDUFA6    | 59.4585  |
| TRIM45    | 0.383001 |
| KCTD7     | 1.41797  |
| AAAS      | 22.6097  |
| ENTPD6    | 33.345   |
| MYO5C     | 0.589326 |
| C7orf13   | 1.02113  |
| GLTPD1    | 20.294   |
| GNPDA2    | 3.80832  |
| LCORL     | 3.26984  |
| FAM89B    | 31.9362  |
| CDK5R1    | 2.36768  |
| JPH1      | 2.74408  |
| MRPL14    | 120.855  |
| ZNF525    | 1.12773  |
| RAD51C    | 20.0828  |
| RSBN1L    | 2.72289  |
| ATXN3     | 1.63876  |
| F12       | 34.3492  |
| SEC31A    | 6.22346  |
| NIPSNAP1  | 70.5922  |
| THAP3     | 27.0923  |
| UQCRC2    | 91.2221  |
| MMP1      | 0.178254 |
| SRI       | 65.1541  |
| ATP5SL    | 27.4954  |
| ZNF845    | 1.25627  |
| KIAA1009  | 0.180404 |
| ACOT8     | 18.5666  |
| PROM2     | 0.149079 |
| ZMYM3     | 5.29914  |
| NELFA     | 37.9448  |
| NUMA1     | 17.7194  |
| PPM1B     | 8.69469  |
| PINK1     | 17.5427  |
| BFAR      | 19.2044  |

|                       |           |
|-----------------------|-----------|
| PIF1                  | 6.09649   |
| MSRB1                 | 24.2453   |
| NIPSNAP3A             | 6.02984   |
| TAF10                 | 135.751   |
| CKLF,CKLF-CMTM1,CMTM1 | 52.7149   |
| LIG3                  | 5.57483   |
| CCDC126               | 1.14984   |
| RND3                  | 5.91389   |
| C9orf129              | 2.1252    |
| KLC3                  | 35.4969   |
| ASCC2                 | 20.7904   |
| IMPA2                 | 24.1837   |
| TBC1D15               | 5.36204   |
| RALGAPB               | 3.18249   |
| ERLEC1                | 11.6645   |
| SLX4                  | 1.5222    |
| TYMS                  | 15.5867   |
| MOB3C                 | 4.69025   |
| NHLRC2                | 1.13723   |
| TNIP2                 | 47.9947   |
| ACVR2A                | 0.722421  |
| ZNF740                | 6.87209   |
| B4GALT7               | 32.5365   |
| ZNF75D                | 0.987387  |
| SEC22A                | 4.10884   |
| NBPF15,NBPF16         | 6.13822   |
| LOC100506060          | 1.16935   |
| ZNF92                 | 1.53288   |
| IRF2                  | 4.92913   |
| SNX2                  | 24.8988   |
| MYH9                  | 58.9822   |
| GTDC2                 | 8.17587   |
| REEP5                 | 25.3015   |
| SLC25A34              | 0.208835  |
| EXOSC10               | 21.6048   |
| LRRC6                 | 0.734506  |
| IL11RA                | 0.548221  |
| VAMP3                 | 20.4679   |
| TLR6                  | 0.676425  |
| SNX7                  | 10.2146   |
| C11orf30              | 0.634956  |
| CLASP1                | 2.7719    |
| N4BP1                 | 2.6648    |
| RANBP9                | 9.93939   |
| NCS1                  | 48.4539   |
| METAP1                | 29.1347   |
| PARM1                 | 1.29647   |
| ZNF780A               | 1.92363   |
| CCDC69                | 3.2167    |
| COG2                  | 5.86489   |
| ASPM                  | 1.39509   |
| AGPAT1                | 33.0793   |
| ACTRT3                | 0.911234  |
| RALGDS                | 46.9602   |
| CFL2                  | 12.2643   |
| RNF40                 | 14.942    |
| VPS52                 | 8.23548   |
| MRPS14                | 10.6823   |
| TTC33                 | 1.61378   |
| PIN1                  | 91.1799   |
| SERHL2                | 0.0818446 |
| COQ3                  | 10.7359   |
| DPP3                  | 14.7726   |
| FOXD4                 | 0.98416   |
| NAGA                  | 11.7006   |
| CTC1                  | 2.48227   |
| FAM83D                | 16.1426   |
| WIPF2                 | 4.30426   |
| RBM41                 | 0.769125  |
| SQLE                  | 17.9875   |
| IRF5                  | 25.7844   |
| FN3K                  | 32.7852   |
| SOS1                  | 1.94986   |
| ELF3                  | 0.0315747 |
| CHRNA7                | 1.26302   |
| FBXL4                 | 3.38489   |
| ZNF592                | 3.22525   |
| RBM6                  | 12.2853   |
| LSM2                  | 114.24    |

|                           |           |
|---------------------------|-----------|
| TRIM62                    | 2.60772   |
| EFCAB4A                   | 5.30761   |
| PLP2                      | 424.447   |
| BCKDHB                    | 7.13855   |
| SCARNA18                  | 4.98728   |
| SDC4                      | 44.7014   |
| EIF4E3                    | 2.85394   |
| MRPS5                     | 38.1437   |
| FBXO18                    | 19.8095   |
| CNTROB                    | 12.8844   |
| HMG20B                    | 109.309   |
| TUBGCP5                   | 4.37838   |
| ATP5H                     | 291.264   |
| ARID1B                    | 2.88063   |
| PGBD4                     | 0.384063  |
| PWWP2A                    | 5.63472   |
| KLHL24                    | 2.63477   |
| TMEM259                   | 72.1643   |
| UPP1                      | 568.691   |
| MRPL28                    | 109.381   |
| STEAP3                    | 15.2341   |
| SLC44A1                   | 9.21032   |
| PRKDC                     | 9.24735   |
| MAF1                      | 205.806   |
| GPR153                    | 4.53511   |
| TUBB4B                    | 805.852   |
| C19orf24                  | 124.016   |
| PCDHB9                    | 0.332434  |
| NR1H3                     | 3.90188   |
| FAM172A                   | 1.98851   |
| RBKS                      | 2.44078   |
| SUV39H1                   | 8.68328   |
| MSTN                      | 0.0262475 |
| METTL21B                  | 2.89952   |
| RHOB                      | 29.1202   |
| RTN3                      | 46.8865   |
| COG3                      | 2.47666   |
| GTF2A1                    | 3.382     |
| ISYNA1                    | 4.76305   |
| AP2A1                     | 25.7444   |
| GPX1                      | 694.383   |
| DVL3                      | 17.0823   |
| NR1D2                     | 3.36449   |
| CMC4.MTCP1                | 13.4791   |
| SMG7                      | 8.47965   |
| C4orf47                   | 0.692446  |
| CDSN                      | 0.0916561 |
| MTSS1                     | 1.85399   |
| PPP1R15B                  | 8.25204   |
| LOC284889                 | 1.95792   |
| NDUFS5                    | 359.56    |
| BTBD6                     | 45.4472   |
| NCK1                      | 6.87438   |
| FKBPL                     | 5.44855   |
| SCARB2                    | 20.4613   |
| ATP10D                    | 0.812511  |
| WDYHV1                    | 13.0565   |
| MRPL42                    | 12.2902   |
| ARHGAP29                  | 34.9698   |
| SIRT4                     | 1.80119   |
| ZNF266                    | 8.32473   |
| DDX17                     | 67.3814   |
| MED30                     | 32.1867   |
| MCTP2                     | 0.535187  |
| CA3                       | 0.601739  |
| CLPTM1                    | 40.0098   |
| CENPM                     | 34.6027   |
| TSKU                      | 15.4145   |
| DOCK4                     | 0.387023  |
| ORAI3                     | 15.562    |
| PLEKHG3                   | 12.0786   |
| ACSF2                     | 6.03906   |
| HNRNPH2,RPL36A,RPL36A-HNR | 1770.76   |
| LOC654433                 | 2.9323    |
| FBXL3                     | 5.43417   |
| USP25                     | 4.05983   |
| CEP350                    | 1.14121   |
| LAMTOR1                   | 94.2303   |
| FAM3C                     | 17.3229   |



|              |          |
|--------------|----------|
| NDUFB1       | 180.887  |
| MIR497HG     | 1.33605  |
| MYH11        | 0.107283 |
| ZNF335       | 5.80614  |
| IKBKE        | 2.64486  |
| TMF1         | 2.84056  |
| ATP6V0E1     | 208.634  |
| MED26        | 5.67876  |
| RNASEH2A     | 62.067   |
| CNTRL        | 1.73273  |
| IKZF5        | 3.53845  |
| ZNF280D      | 2.85132  |
| IFNAR1       | 5.33013  |
| SERINC1      | 16.1824  |
| PCTP         | 8.4541   |
| WHAMM        | 5.12678  |
| FCHSD1       | 10.1442  |
| NET1         | 7.04753  |
| ACAA1        | 37.3424  |
| LOC285033    | 1.60029  |
| SMNDC1       | 45.6521  |
| HHAT         | 0.391062 |
| SUCLG1       | 50.4399  |
| EMP2         | 2.99244  |
| MAP2K4       | 6.00768  |
| HNF1A        | 0.430478 |
| ARHGEF10     | 6.15133  |
| RPL13        | 918.653  |
| ZNF516       | 2.63705  |
| B3GNT1       | 8.168    |
| FAM118A      | 5.5145   |
| UQCRC1       | 225.822  |
| USP31        | 1.75484  |
| PXN-AS1      | 2.77985  |
| SPINT2       | 2.06246  |
| SIGIRR       | 44.4103  |
| GPATCH8      | 4.62761  |
| PIK3R1       | 0.901508 |
| BAI1         | 0.442858 |
| ARF3         | 39.5188  |
| PCDHB13      | 1.7658   |
| CNOT8        | 25.1791  |
| NMRAL1       | 37.4214  |
| CCDC163P     | 0.919191 |
| TRIM68       | 0.923148 |
| GPRIN1       | 5.27041  |
| LOC100288778 | 14.7681  |
| TMEM219      | 114.608  |
| SUMO2        | 320.568  |
| CNOT3        | 17.3743  |
| ARL6IP4      | 199.554  |
| SNRPE        | 58.9001  |
| GOLGA5       | 6.54726  |
| RABIF        | 2.61758  |
| PTPN18       | 14.4328  |
| RANBP3       | 23.0992  |
| HOXB5        | 2.14598  |
| TATDN2       | 7.53729  |
| TSPAN12      | 1.3691   |
| UBE4B        | 5.30686  |
| HECA         | 4.25533  |
| BNC2         | 0.701972 |
| GRB2         | 36.7283  |
| PSMC3IP      | 22.9481  |
| SLC19A2      | 9.05639  |
| ZBTB7B       | 11.0107  |
| LRP4         | 1.29418  |
| TBRG4        | 69.6574  |
| C5orf30      | 4.43992  |
| EXTL1        | 0        |
| GOLGA6L5     | 0.180814 |
| BCL7C        | 97.3031  |
| ZNF236       | 0.787986 |
| ZNF205       | 20.2153  |
| LRP3         | 33.8114  |
| OSBP         | 14.4942  |
| C8orf48      | 2.38836  |
| ABCB7        | 14.9807  |
| PMS2P3       | 1.01694  |

|                           |           |
|---------------------------|-----------|
| ATG4D                     | 20.1879   |
| IMP4                      | 131.929   |
| TMEM199                   | 7.41604   |
| POLR2H                    | 230.791   |
| LEMD3                     | 3.14794   |
| SLC22A23                  | 1.68162   |
| SNX17                     | 44.731    |
| ZCWPW2                    | 0.0432652 |
| PLXNB1                    | 3.73234   |
| ZDHHC6                    | 14.891    |
| FAM105B                   | 2.1132    |
| GUSBP9                    | 0.105864  |
| SPON2                     | 0.349798  |
| KDM4B                     | 11.2362   |
| OCIAD2                    | 253.037   |
| JARID2                    | 2.04211   |
| PEX14                     | 24.2827   |
| TANC1                     | 1.81349   |
| LMNA                      | 83.639    |
| GLT8D1                    | 13.6935   |
| VAMP2                     | 26.1265   |
| C3orf33                   | 2.9439    |
| BCL2L15                   | 0.0491313 |
| DNAJC25,DNAJC25-GNG10,GNC | 98.5102   |
| PARD3B                    | 0.285545  |
| C1orf159                  | 13.1151   |
| TBCE                      | 5.19412   |
| CCNB3                     | 0.453741  |
| ASAP1                     | 12.452    |
| GPBP1                     | 12.9694   |
| TSEN54                    | 30.1807   |
| ZNF737                    | 0.450786  |
| PIGK                      | 3.02263   |
| MCM4                      | 31.5699   |
| RASSF1                    | 22.7481   |
| MYEOV2                    | 220.281   |
| CWF19L1                   | 11.4109   |
| PIGS                      | 16.4086   |
| LOC100335030              | 0.305518  |
| PCGF5                     | 10.2261   |
| ENOSF1                    | 12.9037   |
| TRIM33                    | 3.23419   |
| POLR2C                    | 48.7419   |
| MIP                       | 39.039    |
| SEC23A                    | 4.22975   |
| BUB1                      | 17.1794   |
| PSMB3                     | 297.893   |
| ZNF544                    | 4.74529   |
| MED18                     | 12.6511   |
| TTN                       | 0.0198626 |
| ATP6AP1                   | 66.0306   |
| PPM1D                     | 1.92961   |
| COMMD6                    | 65.7182   |
| C2orf88                   | 0.880716  |
| STRN4                     | 45.1652   |
| G2E3                      | 0.956781  |
| ARHGAP21                  | 4.24408   |
| INCA1                     | 0.402725  |
| CENPP                     | 1.88441   |
| NDFIP2                    | 6.05922   |
| ZNF317                    | 9.38907   |
| IMMP2L                    | 11.9673   |
| SMAP2                     | 12.7433   |
| GALK2                     | 9.06005   |
| UBN1                      | 5.49861   |
| NDNL2                     | 15.8474   |
| FAM168A                   | 1.64926   |
| FKBP8                     | 273.53    |
| ATF1                      | 6.23956   |
| METTL22                   | 6.35446   |
| CPVL                      | 13.2599   |
| ZNF383                    | 1.82647   |
| GOLGA8I                   | 0.0242268 |
| CTBP1-AS1                 | 3.4913    |
| PKD2                      | 17.015    |
| NCR3LG1                   | 0.250416  |
| SEPT11                    | 12.5395   |
| CASK                      | 1.33259   |
| KPTN                      | 3.30481   |

|                               |           |
|-------------------------------|-----------|
| ZNF445                        | 1.06588   |
| CNTF,ZFP91                    | 6.18683   |
| BTN3A2                        | 6.673     |
| RASA1                         | 3.19333   |
| CSTF1                         | 12.7386   |
| DCAF15                        | 30.2897   |
| CFD                           | 26.0775   |
| C12orf44                      | 72.9331   |
| CSTB                          | 265.844   |
| IL16                          | 0.0281414 |
| UGP2                          | 14.2201   |
| MDH1                          | 91.5671   |
| WFS1                          | 11        |
| CDC42EP1                      | 128.549   |
| HDAC11                        | 9.33905   |
| C5orf54                       | 1.42982   |
| MRP63                         | 28.8291   |
| KDELR3                        | 10.9779   |
| FZD7                          | 3.17797   |
| RGP1                          | 1.24169   |
| POLR1D                        | 276.074   |
| NUP54                         | 12.3861   |
| PLCB3                         | 21.6008   |
| MAPK1IP1L                     | 10.0007   |
| C7orf55,C7orf55-LUC7L2,LUC7L2 | 44.5586   |
| NGEF                          | 12.1157   |
| NBPF14                        | 2.34729   |
| TRIM8                         | 35.2676   |
| TIGD1                         | 1.61993   |
| RBMS2                         | 7.6246    |
| ZNF687                        | 6.47142   |
| ZFH3                          | 1.15432   |
| SPCS3                         | 13.6236   |
| ISY1,ISY1-RAB43,RAB43         | 20.439    |
| GBP3                          | 1.75379   |
| FANCA                         | 6.06377   |
| FRS2                          | 1.62629   |
| KIAA2026                      | 0.518542  |
| TTYH3                         | 19.02     |
| C17orf51                      | 2.75794   |
| SYPL2                         | 0.0151656 |
| SIVA1                         | 143.886   |
| NAGLU                         | 19.3547   |
| OXR1                          | 10.0588   |
| E2F3                          | 4.39183   |
| LOC654433                     | 2.9319    |
| FBXW4P1                       | 0.237415  |
| MTERFD3                       | 3.43191   |
| MRPS6,SLC5A3                  | 57.9192   |
| WWTR1                         | 2.06758   |
| CASC3                         | 25.8838   |
| SASH1                         | 1.19875   |
| STX3                          | 14.0487   |
| LRPAP1                        | 15.3271   |
| DNM2                          | 41.9895   |
| C11orf54                      | 4.66361   |
| RNF135                        | 6.06942   |
| SCAF4                         | 9.34386   |
| CALU                          | 26.383    |
| SEC13                         | 71.9815   |
| TMEM87A                       | 8.63336   |
| MAPKAPK2                      | 32.2638   |
| LOC100130275                  | 1.75258   |
| ESPNL                         | 0.0501911 |
| DOK4                          | 12.8283   |
| TMEM180                       | 5.72074   |
| RAPGEF1                       | 17.9022   |
| PPP2R4                        | 160.672   |
| COQ10A                        | 12.8702   |
| PIK3R2                        | 25.1873   |
| SP4                           | 0.63417   |
| TACO1                         | 16.7693   |
| CUX1                          | 22.9224   |
| SYTL4                         | 0.666357  |
| ZMAT3                         | 2.58574   |
| VKORC1                        | 368.169   |
| FAT2                          | 0.0147717 |
| LPIN1                         | 7.31102   |
| F8A1                          | 5.82924   |

|                       |          |
|-----------------------|----------|
| ZP3                   | 13.1092  |
| NDST2                 | 6.03923  |
| LOC150776             | 7.52824  |
| IPO8                  | 6.76726  |
| SLC25A29              | 43.1606  |
| SRRM2                 | 37.7114  |
| LSM10                 | 61.2593  |
| IL18BP                | 1.03319  |
| MLL2                  | 1.74441  |
| CNIH4                 | 132.07   |
| CCDC6                 | 10.319   |
| NDRG3                 | 5.80946  |
| HK1                   | 66.5712  |
| RFC2                  | 27.0303  |
| UOCR11                | 78.2907  |
| PTEN                  | 7.90973  |
| PLEKHM2               | 35.4311  |
| CEP135                | 1.30918  |
| NDUFA13               | 599.511  |
| CDYL                  | 7.22218  |
| ZNF230                | 0.845174 |
| C11orf35              | 1.64778  |
| DHFR                  | 10.8672  |
| HIC1                  | 5.98689  |
| UIMC1                 | 11.2641  |
| GALNT10               | 1.8742   |
| PARD6G                | 2.39359  |
| DYRK1A                | 4.77055  |
| IRX2                  | 9.06454  |
| DUSP19                | 0.435037 |
| NOD1                  | 1.38916  |
| C19orf25              | 37.2659  |
| LTBR                  | 43.1258  |
| OSGIN1                | 19.8258  |
| SF3B5                 | 279.466  |
| SRRM5                 | 0.728112 |
| INO80D                | 0.515642 |
| ZNF771                | 13.3418  |
| USP4                  | 3.44463  |
| SLC27A1               | 5.1237   |
| WLS                   | 35.0639  |
| WWP2                  | 11.647   |
| NBR1                  | 22.1413  |
| WASF2                 | 18.2196  |
| RSRC2                 | 19.3876  |
| CDC25C                | 6.27813  |
| SUPT3H                | 4.00349  |
| APAF1                 | 1.37639  |
| PRPF8                 | 35.3575  |
| AURKB                 | 93.006   |
| MARCH2                | 12.9142  |
| DYM                   | 9.70421  |
| ZNF623                | 4.7909   |
| WDR83OS               | 192.099  |
| SHPK,TRPV1            | 4.13986  |
| FUT4                  | 3.25473  |
| BOD1L1                | 0.5147   |
| NBAS                  | 7.27883  |
| ARPC3                 | 283.053  |
| ANKS1A                | 4.06145  |
| CHST15                | 8.11241  |
| MYH14                 | 5.12712  |
| EIF1B                 | 65.5592  |
| ACO2                  | 20.8708  |
| MTF2                  | 4.77736  |
| SELO                  | 23.3634  |
| DUSP4                 | 0.438497 |
| MC1R                  | 1.73338  |
| POP4                  | 12.4905  |
| PLIN3                 | 67.5229  |
| MDP1,NEDD8,NEDD8-MDP1 | 292.471  |
| TUBGCP2               | 20.8912  |
| PBX2                  | 26.5835  |
| AASDH                 | 2.0538   |
| ZNF428                | 11.795   |
| GABBR1                | 3.01013  |
| PCBP4                 | 42.0405  |
| LRRC61                | 42.4664  |
| CDKN1C                | 11.6303  |

|             |           |
|-------------|-----------|
| RAPGEF6     | 0.985618  |
| ZNF345      | 0.315311  |
| NUDCD3      | 11.8964   |
| CYB561D1    | 3.55458   |
| TRMT10B     | 2.81221   |
| BCAN        | 3.12796   |
| SMG5        | 18.9407   |
| RALB        | 19.1501   |
| ZZEF1       | 1.89767   |
| B4GALT1     | 7.90525   |
| CNOT4       | 4.93994   |
| GSE1        | 5.49262   |
| OR2A7       | 0.568875  |
| TGFBR1      | 6.11114   |
| FAM211A     | 2.76878   |
| RAB8A       | 27.3252   |
| ZHX3        | 1.83607   |
| FAM171A1    | 14.4496   |
| UBE2Q1      | 20.349    |
| MLXIPL      | 4.5172    |
| SLC7A7      | 0.207485  |
| TTC17       | 8.35959   |
| NUTF2       | 253.674   |
| RIMBP3C     | 0.0254513 |
| ORMDL3      | 15.4951   |
| MLLT1       | 27.2662   |
| ACOT1       | 3.22296   |
| GTPBP1      | 12.458    |
| HDHD3       | 30.5977   |
| C9orf123    | 28.9503   |
| POLD4       | 27.6745   |
| PGPEP1      | 7.41815   |
| COMTD1      | 53.3078   |
| FBXO25      | 15.9378   |
| CALM3       | 74.2845   |
| SOX4        | 7.96844   |
| RPS19       | 5859.43   |
| CC2D1B      | 4.70624   |
| IER3IP1     | 39.4543   |
| PPAP2A      | 9.46577   |
| FUCA2       | 39.5283   |
| PEBP1       | 155.492   |
| HOXB9       | 23.446    |
| ATG13       | 11.5536   |
| SCD5        | 13.0671   |
| MFI2        | 30.7342   |
| TMEM51      | 4.80178   |
| GTF2H5      | 3.78866   |
| ANO9        | 0.0706889 |
| SLC35B1     | 41.5565   |
| ECHDC2      | 9.52437   |
| DBNDD2,SYS1 | 229.499   |
| MARCH6      | 9.24216   |
| RMI2        | 6.45031   |
| PLXNC1      | 0.56322   |
| DRAM2       | 20.955    |
| IKKB        | 12.5247   |
| GNA11       | 7.40017   |
| GEM         | 1.6823    |
| APOOL       | 2.07683   |
| PRKRA       | 19.0979   |
| CCNC        | 22.6759   |
| SPRYD7      | 5.41375   |
| DNAJB5      | 3.42227   |
| ADIPOR2     | 10.5768   |
| CDC45       | 13.2399   |
| PIGG        | 5.58826   |
| C11orf63    | 0.54602   |
| TP1P2       | 0.228617  |
| SRP72       | 19.844    |
| PAK1        | 19.5241   |
| NEU1        | 83.6071   |
| VT11B       | 71.4303   |
| RIN1        | 53.9671   |
| COPS7B      | 21.2122   |
| SNED1       | 0.360647  |
| CEP85L      | 0.546761  |
| ALDH3A2     | 6.76977   |
| DHX8        | 6.48473   |

|              |           |
|--------------|-----------|
| ZNF468       | 1.95069   |
| SLC50A1      | 38.1525   |
| NAF1         | 8.85206   |
| CDR2L        | 16.0194   |
| ARHGAP35     | 4.17647   |
| LIMA1        | 3.83732   |
| PDCL3        | 14.6078   |
| GSTP1        | 901.065   |
| CECR2        | 0.0400182 |
| NSFL1C       | 19.3028   |
| TBC1D26      | 0.0783717 |
| MBOAT2       | 4.69688   |
| UNC93B1      | 33.2957   |
| JAK3         | 1.07407   |
| KRT18        | 215.61    |
| NCSTN        | 22.7579   |
| NSUN5P1      | 8.39112   |
| TRAPPC1      | 140.184   |
| TAF8         | 5.124     |
| UCKL1        | 31.5033   |
| OTUB1        | 57.4192   |
| SF3A2        | 119.316   |
| PTBP1        | 130.387   |
| PTGDR2       | 0.999433  |
| ARHGEF10L    | 5.77317   |
| TOPBP1       | 6.00223   |
| DEDD         | 19.6471   |
| ZNF410       | 17.4908   |
| MEGF9        | 0.89034   |
| EXOC4        | 16.8613   |
| FLNB         | 9.05515   |
| KIF4A        | 6.69272   |
| CMC2         | 56.1869   |
| DDRK1        | 87.3706   |
| FOXI3        | 0.0850106 |
| ZFP36        | 17.4149   |
| LOC100505865 | 0.0515796 |
| SMAD7        | 2.38427   |
| RIOK3        | 10.3272   |
| HMGCR        | 5.70215   |
| GLIS2        | 14.9578   |
| KLHDC8B      | 8.16607   |
| ADPGK        | 17.4194   |
| GTF2A2       | 26.4212   |
| HOTAIRM1     | 13.0269   |
| UBC          | 544.267   |
| KIF1C        | 19.7142   |
| FBXW7        | 2.55903   |
| TONSL        | 21.5053   |
| MXD3         | 30.3307   |
| NSA2         | 158.13    |
| TIMM10       | 65.438    |
| POM121       | 11.0004   |
| MPDU1        | 49.9111   |
| C1orf35      | 29.3291   |
| ITGB1BP1     | 27.8056   |
| GATSL3       | 3.73543   |
| FIZ1         | 6.72082   |
| HSBP1        | 52.7271   |
| KIAA1549     | 1.33804   |
| TMEM126B     | 39.1352   |
| TEAD4        | 49.9921   |
| SEZ6L2       | 24.5206   |
| MRPS31P5     | 1.93843   |
| FAM57A       | 23.856    |
| ZNF506       | 2.06081   |
| GDF11        | 4.55655   |
| MORC3        | 3.34439   |
| SCAI         | 1.06962   |
| TNRC6A       | 1.30703   |
| COTL1        | 227.379   |
| C16orf59     | 8.78171   |
| ABCC2        | 0.136806  |
| TANGO2       | 9.89862   |
| HAGHL        | 88.0419   |
| UBIAD1       | 9.23537   |
| RPL23A       | 2539.72   |
| ZMYM6        | 1.58344   |
| MT1DP        | 4.9569    |

|                           |           |
|---------------------------|-----------|
| GIN51                     | 6.38324   |
| PARVA                     | 3.54342   |
| LRRC37BP1                 | 4.03548   |
| ACVR1B                    | 6.00392   |
| TRMT112                   | 431.692   |
| RPL36                     | 5998.92   |
| EXOC5                     | 2.79386   |
| LMF2                      | 46.9106   |
| FANCI                     | 6.4054    |
| HMBS                      | 23.5651   |
| ACTR1B                    | 76.7815   |
| RBX1                      | 62.2867   |
| SKP2                      | 5.65129   |
| LOXL2                     | 0.502161  |
| NDUFA1                    | 285.065   |
| TMEM44                    | 15.2087   |
| GMPS                      | 43.0817   |
| DGKA                      | 8.75035   |
| JAK1                      | 13.4428   |
| DPH1,OVCA2                | 112.496   |
| TBCC                      | 16.7354   |
| MXRA7                     | 42.5088   |
| NRTN                      | 8.87021   |
| LSM4                      | 144.855   |
| MRPL23                    | 116.849   |
| XPO6                      | 30.0419   |
| SIRT7                     | 21.2583   |
| STMN1                     | 174.327   |
| ANKH                      | 3.75556   |
| WAC                       | 25.0929   |
| PEX7                      | 7.80926   |
| AAGAB                     | 12.0278   |
| C11orf80,RCE1             | 24.1007   |
| MYO1B                     | 8.7527    |
| SEC23IP                   | 3.00958   |
| CDKAL1                    | 2.91373   |
| FDX1L                     | 32.1674   |
| HN1L                      | 20.187    |
| TRIM52                    | 1.54908   |
| EIF1AD                    | 10.9432   |
| CAPN12                    | 15.2532   |
| CELSR1                    | 0.0420972 |
| TNFRSF12A                 | 580.776   |
| AP5M1                     | 4.28271   |
| GNB3                      | 1.6993    |
| CCHCR1                    | 8.32829   |
| STX10                     | 95.7062   |
| RPAIN                     | 45.7292   |
| CBX2                      | 5.65849   |
| ARID3B                    | 4.12519   |
| DLGAP5                    | 7.43244   |
| MARC2                     | 4.52718   |
| CXXC1                     | 20.8858   |
| KDELRL1                   | 268.443   |
| PRR13                     | 84.6905   |
| CBR1                      | 41.2198   |
| PNISR                     | 5.78673   |
| MYO10                     | 5.53445   |
| TBC1D13                   | 17.5394   |
| LRSAM1                    | 14.5122   |
| DNAJB12                   | 15.6807   |
| DDX24                     | 32.8867   |
| YKT6                      | 31.1235   |
| FBXO45                    | 3.43257   |
| LRRK1                     | 1.28427   |
| LRRD1                     | 0.0398646 |
| GTF3C4                    | 4.71778   |
| MRPL16                    | 61.0306   |
| ELK4                      | 4.18696   |
| CYFIP2                    | 8.97729   |
| ZMAT5                     | 31.5921   |
| IQCC                      | 0.957495  |
| TMEM222                   | 37.9909   |
| L2HGDH                    | 2.76434   |
| C8orf44,C8orf44-SGK3,SGK3 | 2.21862   |
| ADI1                      | 20.2826   |
| SYVN1                     | 15.9641   |
| EFNA3                     | 31.9491   |
| THOC1                     | 8.65583   |

|                             |          |
|-----------------------------|----------|
| GAS6                        | 22.294   |
| C19orf45                    | 0.62019  |
| AK4                         | 13.7373  |
| CREB3                       | 29.5245  |
| XAB2                        | 34.2552  |
| TAF4B                       | 2.00374  |
| ANAPC2                      | 26.1968  |
| SMC4                        | 6.30066  |
| VASP                        | 60.2964  |
| ENOX1                       | 0        |
| DCBLD2                      | 2.54625  |
| HES4                        | 88.155   |
| PRRG1                       | 2.0481   |
| RAP1GAP2                    | 6.55398  |
| STOML1                      | 4.46045  |
| CTSD                        | 168.929  |
| TRIM21                      | 6.30132  |
| TMPRSS5                     | 0.230708 |
| FKBP9                       | 8.81597  |
| E2F2                        | 1.57482  |
| FUT2                        | 0.186102 |
| SF3B2                       | 80.4985  |
| PLEKHF2                     | 5.85162  |
| ZNF823                      | 1.65511  |
| ECHS1                       | 138.425  |
| MBD6                        | 13.0905  |
| ASB6                        | 38.8027  |
| TACC3                       | 38.4101  |
| AKTIP                       | 6.43576  |
| SH3GLB2                     | 149.957  |
| MAP3K13                     | 8.48584  |
| RNF7                        | 56.8705  |
| RBBP7                       | 40.1649  |
| DNAJC4                      | 18.3454  |
| KLHL18                      | 4.84431  |
| DDX11-AS1                   | 0.881435 |
| RNF214                      | 4.25799  |
| SLC25A23                    | 32.5898  |
| SCARB1                      | 54.3177  |
| COG4                        | 10.0853  |
| KLHL11                      | 0.367799 |
| LPGAT1                      | 4.5951   |
| LTK                         | 42.1253  |
| IDS                         | 10.5059  |
| CES3                        | 5.19123  |
| PLEKHG6                     | 0        |
| PCYT2                       | 14.0809  |
| TLR3                        | 0.156534 |
| SYNRG                       | 3.42867  |
| CDK5                        | 33.0246  |
| MAPK1                       | 10.1861  |
| TWSG1                       | 7.3311   |
| TTK                         | 5.52507  |
| ZFYVE28                     | 5.07636  |
| POFUT2                      | 8.27455  |
| ITFG2                       | 4.0724   |
| TMEM43                      | 16.581   |
| MYADM                       | 41.2841  |
| LOC283922                   | 0.343066 |
| BCAS3                       | 2.72818  |
| PI4KB                       | 17.7295  |
| TFAP2C                      | 0.242964 |
| KCNH2                       | 19.5022  |
| PHC2                        | 133.854  |
| CCDC91                      | 4.65672  |
| QRSL1                       | 5.01312  |
| MATK                        | 1.16664  |
| DPP9                        | 14.4109  |
| GALNS                       | 9.96597  |
| NANS                        | 127.599  |
| PLL                         | 1.01231  |
| TUBGCP6                     | 4.84004  |
| SDHA                        | 51.7395  |
| TTC28                       | 0.443301 |
| HRK                         | 1.8855   |
| SCNM1,TNFAIP8L2,TNFAIP8L2-5 | 12.2287  |
| OXSM                        | 19.2084  |
| PDXDC2P                     | 2.26659  |
| DDX23                       | 19.9557  |



|              |           |
|--------------|-----------|
| HINT1        | 744.88    |
| GCDH         | 26.5835   |
| RP9P         | 9.27862   |
| PPM1M        | 9.69596   |
| ERBB2        | 14.7244   |
| PACS1        | 18.3946   |
| PSMD13       | 109.561   |
| MTDH         | 27.6644   |
| ADIRF,AGAP11 | 47.4483   |
| MAP3K14      | 2.57145   |
| ZNF576       | 6.01603   |
| ACTG1P4      | 0.0473991 |
| ATP8B2       | 0.651536  |
| NDUFA4       | 66.9009   |
| ECE2         | 47.9999   |
| PTPMT1       | 17.1659   |
| SLC6A6       | 3.33908   |
| SIX5         | 13.231    |
| RTFDC1       | 47.8708   |
| SEMA6B       | 17.8524   |
| NIF3L1       | 21.2903   |
| WBP4         | 3.90805   |
| PTRHD1       | 49.6446   |
| SQSTM1       | 233.225   |
| TRAIIP       | 6.37626   |
| VEGFA        | 27.3499   |
| DHX37        | 13.6851   |
| CDC14B       | 4.27199   |
| ARFIP1       | 5.52348   |
| VMP1         | 67.7023   |
| ZBTB18       | 2.04292   |
| AKR1A1       | 136.615   |
| APEX2        | 22.1442   |
| COQ9         | 28.2873   |
| PTCH2        | 0.163121  |
| DVL2         | 33.1629   |
| RPS18        | 13360.5   |
| GCC1         | 6.69895   |
| FRYL         | 1.1673    |
| CCDC53       | 21.0745   |
| SMG6         | 11.2257   |
| EPOR         | 4.80999   |
| HELQ         | 2.17483   |
| GALNT18      | 32.7686   |
| ANKLE2       | 13.2433   |
| DTL          | 5.52225   |
| TCEAL3       | 13.5467   |
| TMED10       | 22.9808   |
| RPL30        | 6886.78   |
| ZMYM6NB      | 31.9274   |
| SUMO3        | 29.6805   |
| ZNF578       | 1.54772   |
| MKKS         | 13.5974   |
| RPL32P3      | 2.20818   |
| TINF2        | 15.1351   |
| MINPP1       | 7.21849   |
| SLC25A36     | 14.4035   |
| NT5C2        | 7.02475   |
| ZNF800       | 2.66435   |
| DOC2A        | 14.5336   |
| CDIPT        | 55.6428   |
| RAD51D,RFFL  | 13.3831   |
| SNIP1        | 3.57329   |
| YWHAZ        | 234.487   |
| NUMB         | 10.735    |
| POGK         | 14.4847   |
| ZNF408       | 10.522    |
| NUDT9        | 6.8541    |
| SETMAR       | 4.71548   |
| USP2         | 0.495585  |
| MIF4GD       | 25.3217   |
| ZNF833P      | 0.473004  |
| C9orf174     | 0.428069  |
| PAPOLA       | 22.8898   |
| THAP9-AS1    | 12.5823   |
| BOLA3        | 78.2583   |
| HAUS4        | 42.2462   |
| LOC100286793 | 0.640373  |
| SHC1         | 132.833   |

|              |            |
|--------------|------------|
| FBXL12       | 11.8171    |
| HDAC4        | 0.553995   |
| TMED4        | 35.3667    |
| SRPK2        | 9.15151    |
| NOMO1        | 12.5135    |
| LAMTOR3      | 4.87142    |
| CNPY4        | 1.38899    |
| DIABLO       | 40.5712    |
| MTX1         | 45.171     |
| RPL18        | 3596.33    |
| LGALS3BP     | 34.7931    |
| PAFAH1B1     | 13.5107    |
| NBEA         | 0.00338513 |
| LOC100507118 | 5.89125    |
| SP100        | 15.4675    |
| PBX4         | 1.48284    |
| SDF4         | 82.9688    |
| RBBP6        | 6.45904    |
| IFITM2       | 551.062    |
| COA1         | 50.9251    |
| COMMD8       | 9.61774    |
| FAM222B      | 5.12563    |
| EIF5A2       | 1.21254    |
| FBXO10       | 2.68125    |
| C1orf112     | 3.07625    |
| SNX27        | 3.39572    |
| TGFBR2       | 0.853527   |
| ZDHHC5       | 17.2661    |
| RSRC1        | 3.50659    |
| KDM5B        | 7.27668    |
| C11orf75     | 14.7481    |
| METRNL       | 60.6468    |
| GIN52        | 22.635     |
| PPFIA4       | 0.0722896  |
| PHF3         | 4.74804    |
| ZNF527       | 0.827016   |
| AHCYL2       | 2.31788    |
| SGOL1        | 3.6157     |
| GYS2         | 0          |
| ZNF688       | 6.11446    |
| MIA3         | 3.75029    |
| LRRC41       | 31.8455    |
| TRPC4AP      | 39.8094    |
| HES7         | 12.8371    |
| TGFB111      | 59.6898    |
| FUT10        | 2.91965    |
| MSH3         | 0.434403   |
| ATG4A        | 1.62897    |
| DGKD         | 4.20342    |
| CHKB,CPT1B   | 13.6819    |
| FAM53C       | 13.9303    |
| LOC728392    | 0.549194   |
| PML          | 15.8253    |
| PTPRU        | 11.8881    |
| HSPA13       | 7.16001    |
| WDR33        | 10.9394    |
| HIAT1        | 11.9586    |
| USP6NL       | 3.09202    |
| LRCH1        | 2.76571    |
| ACVR2B       | 1.44636    |
| TMX1         | 17.7951    |
| PHF10        | 17.9793    |
| NUBP1        | 15.5831    |
| FZD2         | 5.29809    |
| LOC550112    | 7.01813    |
| INO80B,WBP1  | 76.0512    |
| XPR1         | 1.72681    |
| SCAP         | 26.5304    |
| IRF3         | 61.4812    |
| CCNDBP1      | 10.3292    |
| TIRAP        | 1.85661    |
| PAFAH1B2     | 18.3385    |
| DUSP3        | 22.9842    |
| VIMP         | 42.2269    |
| DMPK         | 13.4237    |
| CERS2        | 80.5607    |
| NHEJ1        | 7.93923    |
| FGF8         | 0.986326   |
| IP6K2        | 53.5705    |

|                          |           |
|--------------------------|-----------|
| PRSS3                    | 56.7139   |
| TTC28-AS1                | 15.9065   |
| TLK1                     | 6.42707   |
| MUT                      | 5.48547   |
| KBTBD4                   | 6.23767   |
| ATG5                     | 8.0053    |
| ZBTB6                    | 3.17115   |
| CAP1                     | 74.0473   |
| GSTK1                    | 128.974   |
| MFSD1                    | 10.0716   |
| SPHK1                    | 229.326   |
| PPP3CA                   | 1.82423   |
| UBE2V2                   | 22.2904   |
| HIST3H2A                 | 43.9254   |
| SNHG6                    | 1076.71   |
| MOCS2                    | 16.853    |
| COL27A1                  | 4.16046   |
| SH3BP5                   | 6.13894   |
| NR4A3                    | 0.222062  |
| DCTN5                    | 6.04441   |
| ARMCX5,ARMCX5-GPRASP2,GF | 2.90832   |
| KIF2C                    | 33.7959   |
| ATP2C1                   | 13.4523   |
| DCBLD1                   | 0.650931  |
| NOTCH3                   | 0.0572756 |
| ZBTB37                   | 0.23929   |
| PPP4R1                   | 8.83982   |
| TPPP                     | 1.08327   |
| AEBP2                    | 1.74818   |
| MIR600HG                 | 0.806279  |
| CWF19L2                  | 1.80047   |
| BNIP1                    | 0.304398  |
| INTS6                    | 1.78959   |
| AP5S1                    | 5.07025   |
| CBFA2T2                  | 2.25859   |
| PIN4                     | 12.2437   |
| PIGU                     | 18.3541   |
| PHF15                    | 3.49551   |
| CHURC1,CHURC1-FNTB,FNTB  | 25.362    |
| FAM160A2                 | 8.85263   |
| ARID4B                   | 1.25527   |
| LSM14B                   | 23.127    |
| HDAC1                    | 63.6147   |
| MIER1                    | 5.87418   |
| TTI2                     | 5.93376   |
| NAT14                    | 2.1289    |
| DLG5                     | 4.43398   |
| DDX19B                   | 11.3085   |
| DDHD1                    | 1.30445   |
| RNF24                    | 2.443     |
| ATL2                     | 11.0764   |
| CDC42SE2                 | 4.98492   |
| MTRNR2L2                 | 48.8636   |
| IQGAP1                   | 7.93368   |
| SEMA6C                   | 1.80282   |
| NUP205                   | 16.4744   |
| MARK4                    | 12.4409   |
| PTRF                     | 58.9252   |
| PCNX                     | 2.80033   |
| UBL7                     | 53.9727   |
| ATP5O                    | 340.276   |
| TRMT10A                  | 0.603872  |
| MSL2                     | 5.41089   |
| OARD1                    | 12.0348   |
| APBB1                    | 15.7477   |
| ANKRD19P                 | 0.875894  |
| TBX3                     | 1.47068   |
| EID1                     | 23.9074   |
| PRRC2B                   | 20.3421   |
| SLC38A5                  | 172.544   |
| MECOM                    | 1.81738   |
| ZNF322                   | 3.80745   |
| TNKS                     | 3.59608   |
| ZBTB8A                   | 1.72405   |
| ADRA2C                   | 17.674    |
| SRP14                    | 205.835   |
| HCFC1                    | 8.01496   |
| JRK                      | 8.05262   |
| FAM133B                  | 11.8765   |

|                          |          |
|--------------------------|----------|
| LRRFIP2                  | 8.49193  |
| ZNF142                   | 2.51749  |
| EIF2B4                   | 28.7401  |
| TMEM208                  | 82.2322  |
| PPP1R18                  | 64.5541  |
| GXYLT2                   | 0.583907 |
| GNPAT                    | 16.99    |
| SPOP                     | 13.3018  |
| NUMBL                    | 9.58169  |
| CSRP2BP,PET117           | 18.2355  |
| KAT6A                    | 3.23562  |
| LOC100132247             | 2.06008  |
| SOGA1                    | 0.51646  |
| LOC100287177             | 26.8617  |
| ARHGEF1                  | 42.0732  |
| SAMD8                    | 3.5378   |
| TTBK2                    | 0.410405 |
| EIF2B5                   | 21.3919  |
| HGS                      | 89.058   |
| CDC7                     | 2.1889   |
| ATF7IP2                  | 1.53321  |
| PEX6                     | 7.08981  |
| PLEKHM3                  | 0.376674 |
| SFI1                     | 5.91013  |
| IKBK2                    | 12.2243  |
| COG7                     | 5.22672  |
| HNRNPL                   | 170.693  |
| ZNF213                   | 8.53903  |
| CEP44                    | 2.2853   |
| ZCCHC3                   | 15.5702  |
| DOCK9                    | 0.885421 |
| CENPT                    | 16.4354  |
| CAPRIN2                  | 19.0945  |
| MFF                      | 28.5064  |
| SMOX                     | 18.5944  |
| STX4                     | 46.9469  |
| DKFZP434I0714            | 1.01046  |
| ARL8B                    | 21.4046  |
| DYNLL1                   | 341.378  |
| NPIP                     | 44.4007  |
| ATG3                     | 33.5747  |
| C5orf15                  | 10.3849  |
| LOC338799                | 2.06656  |
| DOCK6                    | 12.0169  |
| HIRIP3                   | 8.66687  |
| ZNF768                   | 53.3925  |
| GATAD2B                  | 5.95366  |
| TBXA2R                   | 3.3617   |
| MND1                     | 38.9337  |
| LSM6                     | 25.0343  |
| SRP54                    | 8.71395  |
| ABHD12                   | 37.8096  |
| ANAPC1                   | 6.50961  |
| SRP68                    | 41.4345  |
| CDC73                    | 4.98473  |
| ERV3-1,ZNF117            | 0.763218 |
| TGIF1                    | 49.2596  |
| ADPRHL2                  | 33.942   |
| MBNL2                    | 2.88135  |
| CEACAM19                 | 12.1021  |
| INPP5F                   | 4.39562  |
| ANKMY2                   | 5.30145  |
| ARHGAP8,PRR5,PRR5-ARHGAP | 35.051   |
| KDEL2                    | 53.532   |
| BCL7B                    | 45.4452  |
| RPE                      | 5.85963  |
| PCGF2                    | 43.9546  |
| TSPAN33                  | 28.598   |
| ATXN7L3B                 | 15.3613  |
| DLG3                     | 6.85432  |
| PLCB4                    | 0.553131 |
| ELL3                     | 1.33694  |
| JAG1                     | 1.28243  |
| FGFR1OP                  | 6.61813  |
| KRIT1                    | 4.62045  |
| SUN1                     | 15.3409  |
| PKIG                     | 22.2985  |
| MAGED1                   | 19.3849  |
| GPR35                    | 0.451782 |

|             |           |
|-------------|-----------|
| GOLGA2      | 22.4274   |
| CAPG        | 139.304   |
| CCDC92      | 2.97818   |
| MGC2752     | 12.2299   |
| GNL1        | 13.4748   |
| POLR2J4     | 0.797235  |
| SARNP       | 43.7294   |
| RPS5        | 5137.4    |
| AUH         | 8.24327   |
| GPR3        | 4.78158   |
| INTS3       | 7.41409   |
| EGFL7       | 211.094   |
| DNPEP       | 47.1566   |
| ASB16-AS1   | 4.39721   |
| MBD3        | 66.7644   |
| COPS4       | 25.1163   |
| HNRNPUL1    | 57.5269   |
| PQLC1       | 38.9623   |
| SKAP2       | 3.75567   |
| UBAC2       | 21.819    |
| AGO3        | 1.28305   |
| SUPT20H     | 10.2175   |
| UQCRB       | 54.8321   |
| CLSTN1      | 26.2516   |
| ZNF600      | 4.52454   |
| TMEM54      | 139.62    |
| USF1        | 20.1437   |
| CHCHD4      | 17.3448   |
| IFITM10     | 0.601323  |
| CLPB        | 6.12237   |
| CEP120      | 3.28721   |
| SLC29A3     | 6.43573   |
| CKAP2       | 14.6574   |
| PIGT        | 58.8483   |
| ARFIP2      | 9.34444   |
| STIL        | 3.77922   |
| SYT5        | 0.0426471 |
| ATP5L       | 147.888   |
| TUBG2       | 12.502    |
| DBF4        | 6.21002   |
| TMEM158     | 28.304    |
| STRN3       | 5.40065   |
| FCHO2       | 1.74023   |
| RNF146      | 7.4377    |
| TMEM109     | 28.4182   |
| FAM201A     | 3.1985    |
| VPS13B      | 1.543     |
| RHOD        | 78.9201   |
| IFNLR1      | 1.60801   |
| POGZ        | 5.14994   |
| FAM115A     | 7.52591   |
| PTPRA,VPS16 | 29.4592   |
| ARRDC1      | 98.3837   |
| PSORS1C2    | 0.0605965 |
| TLE1        | 6.00269   |
| CEMP1       | 9.08149   |
| SRR         | 0.735081  |
| ACPL2       | 3.43642   |
| THAP4       | 89.2425   |
| PPP2R1B     | 6.17402   |
| MSX1        | 18.8833   |
| EXOC7       | 26.4185   |
| SLC9A3R2    | 38.9973   |
| DAB2IP      | 6.04705   |
| THAP1       | 6.56629   |
| FOXD2       | 1.47504   |
| HARS        | 40.5587   |
| MPV17       | 46.1873   |
| UBN2        | 1.25101   |
| ACRV1       | 0.104307  |
| RAB17       | 0.0298862 |
| DDX11       | 10.908    |
| TELO2       | 26.3377   |
| IMPA1       | 9.44152   |
| APLP2       | 73.8876   |
| APC         | 0.838954  |
| GAK         | 19.4816   |
| WASH7P      | 9.46877   |
| WDR34       | 125.892   |

|                            |            |
|----------------------------|------------|
| EIF4E2                     | 42.7832    |
| CCDC22                     | 18.695     |
| ADIPOR1                    | 49.4485    |
| RPS21                      | 7463.43    |
| ZBTB24                     | 2.80648    |
| SIK1                       | 12.647     |
| TMEM201                    | 8.09443    |
| METAP1D                    | 1.2631     |
| EFTUD1                     | 15.0849    |
| TRAF3IP2                   | 4.13234    |
| MED11                      | 22.6912    |
| PHKG2                      | 6.34992    |
| EPB41L2                    | 13.4403    |
| MSANTD3,MSANTD3-TMEFF1,TI  | 75.1113    |
| ANKHD1,ANKHD1-EIF4EBP3,EIF | 33.8242    |
| TMEM243                    | 16.0378    |
| RB1CC1                     | 5.32462    |
| SLC39A11                   | 4.20114    |
| RNF44                      | 9.04024    |
| RBM4B                      | 10.2306    |
| GNG7                       | 1.85979    |
| MCEE                       | 4.36774    |
| CTRL                       | 1.23255    |
| DGCR8                      | 5.1959     |
| AKAP13                     | 1.50374    |
| TLK2                       | 4.73131    |
| CTDP1                      | 11.0053    |
| ARHGAP5                    | 2.39277    |
| SART1                      | 25.0754    |
| MAPKBP1                    | 2.24965    |
| SLC4A1AP                   | 7.07353    |
| UBALD1                     | 46.8635    |
| ATP5J2,ATP5J2-PTCD1,PTCD1  | 732.674    |
| TUBA1A                     | 38.398     |
| CHDH                       | 3.92624    |
| NINJ1                      | 57.9789    |
| TIMM9                      | 54.5712    |
| METTL2A                    | 10.4671    |
| CYB5RL                     | 0.40865    |
| C8orf31                    | 1.17272    |
| LOC100134229               | 4.9755     |
| FAM73B                     | 16.7158    |
| AEN                        | 26.1556    |
| PRC1                       | 19.751     |
| CIZ1                       | 110.608    |
| RABAC1                     | 137.896    |
| RPAP1                      | 7.44642    |
| MED22                      | 46.578     |
| DDX41                      | 41.4465    |
| SLC17A9                    | 17.7324    |
| NUDT3,RPS10,RPS10-NUDT3    | 5929.55    |
| TCAIM                      | 6.33064    |
| BRMS1                      | 50.3959    |
| KIAA0930                   | 11.1926    |
| DONSON                     | 10.0022    |
| RWDD2A                     | 2.75767    |
| RNF216                     | 9.36683    |
| BDP1                       | 0.828482   |
| LOC100130581               | 0.753273   |
| RPL41                      | 14181.7    |
| TRIP10                     | 45.1571    |
| TGDS                       | 6.4403     |
| PACSN2                     | 15.9025    |
| SCARNA9                    | 5.6239     |
| CCDC136                    | 5.99384    |
| GDI1                       | 48.2503    |
| PTPRN2                     | 2.42166    |
| PDE6A                      | 0.00747101 |
| FYN                        | 6.54758    |
| ERBB2IP                    | 6.28046    |
| ATP13A2                    | 19.5802    |
| HABP4                      | 14.8553    |
| EMC4                       | 90.4178    |
| TAP1                       | 23.3864    |
| MCM2                       | 28.8295    |
| MPPE1                      | 7.89065    |
| LOC100289495               | 0.229372   |
| C9orf89                    | 61.3183    |
| RPL26                      | 6113.07    |

|              |           |
|--------------|-----------|
| SMCR8        | 2.2193    |
| IGHMBP2      | 6.11758   |
| POLH         | 2.17869   |
| PRKCA        | 0.939649  |
| DNMT3B       | 1.56768   |
| ANAPC4       | 5.81678   |
| ZNF561       | 4.4704    |
| TMEM223      | 15.2818   |
| MAFG-AS1     | 6.47408   |
| SPICE1       | 1.11002   |
| MNAT1        | 20.5306   |
| PITPNC1      | 6.23967   |
| BRD2         | 33.3167   |
| GALK1        | 49.5933   |
| CWC25        | 6.34931   |
| FZD1         | 1.14463   |
| LRRC57       | 3.40191   |
| PFKP         | 85.6214   |
| CYP2R1       | 9.95697   |
| ELP3         | 11.1778   |
| WRN          | 1.69739   |
| BID          | 32.2978   |
| TRAFD1       | 10.1682   |
| JOSD1        | 20.2347   |
| ZNF454       | 0.0757537 |
| CCDC153      | 0.501993  |
| CISD2        | 6.85827   |
| PHF12        | 3.76137   |
| HIST1H2AG    | 2.24191   |
| CDC34        | 135.539   |
| DBR1         | 4.07616   |
| CGREF1       | 20.3139   |
| SRD5A3       | 4.1259    |
| R3HCC1L      | 6.79002   |
| KIAA2018     | 0.508881  |
| MCRS1        | 33.198    |
| JOSD2        | 55.9499   |
| MFSD6        | 1.71683   |
| FAM178A      | 3.30256   |
| USP24        | 3.15881   |
| RNH1         | 110.27    |
| C2orf69      | 4.0034    |
| FBL          | 540.374   |
| DOPEY2       | 1.58914   |
| SLC27A3      | 4.62779   |
| PPP1CC       | 98.9127   |
| SSR1         | 8.85058   |
| TMTCS3       | 0.961305  |
| ZNF609       | 3.64976   |
| LOC100129722 | 0.275056  |
| CXorf40B     | 15.7912   |
| SLC25A38     | 50.6608   |
| SWT1         | 0.777323  |
| FAM131C      | 25.4288   |
| DTYMK        | 73.1263   |
| IL4I1,NUP62  | 23.0542   |
| CHMP2B       | 16.6489   |
| EPC1         | 4.92307   |
| UHRF1        | 15.4165   |
| SEMA4D       | 6.8142    |
| PDE2A        | 0.0704164 |
| C2orf68      | 4.04035   |
| ARHGAP12     | 5.39562   |
| UBE2D4       | 3.79114   |
| LOC100287015 | 1.89118   |
| TSR2         | 24.4239   |
| ABCD3        | 8.74325   |
| TYW5         | 1.55227   |
| DYNC1LI2     | 7.39409   |
| EYA3         | 4.17742   |
| MUL1         | 16.5339   |
| PUF60        | 207.007   |
| CHPT1        | 13.9721   |
| WDR81        | 13.5466   |
| GMIP         | 15.3199   |
| MAPK9        | 10.4151   |
| TRIM26       | 14.3546   |
| DIAPH1       | 10.6448   |
| SLC6A13      | 0.512785  |

|                        |          |
|------------------------|----------|
| PCNXL2                 | 1.19025  |
| METTL18                | 4.53143  |
| KCNK1                  | 15.5083  |
| ZNF787                 | 88.3712  |
| PCDHB7                 | 0.457911 |
| POC1A                  | 18.8698  |
| UVRAG                  | 1.46383  |
| KIF18A                 | 1.39335  |
| PPP1R7                 | 59.4001  |
| C7orf31                | 1.73105  |
| ATXN7                  | 1.80566  |
| FAM91A1                | 10.8246  |
| C7orf10                | 0.3421   |
| WSB2                   | 20.6728  |
| CYB5R4                 | 4.10423  |
| SIL1                   | 37.1672  |
| FBXO46                 | 15.3543  |
| BLOC1S6                | 9.94575  |
| MTIF3                  | 34.5937  |
| FASTK                  | 49.6831  |
| SH3YL1                 | 6.36576  |
| RPS29                  | 11321.1  |
| EIF3H                  | 599.021  |
| CRLS1                  | 16.8326  |
| BDH2                   | 5.60748  |
| PPM1K                  | 2.81177  |
| A1BG                   | 0.465737 |
| RPL37A                 | 10999    |
| FAM3A                  | 15.4993  |
| TMEM64                 | 6.63888  |
| PILRA                  | 0.74513  |
| MAZ                    | 138.404  |
| LOC100132707           | 0.51391  |
| TMEM50A                | 33.8232  |
| GAREML                 | 8.11295  |
| CAPN1                  | 87.5632  |
| RNF215                 | 18.6349  |
| NR4A1                  | 15.7551  |
| KIAA1468               | 2.22195  |
| PLA2G16                | 72.2932  |
| C8orf37                | 0.448205 |
| YIF1B                  | 23.1415  |
| CBX8                   | 13.889   |
| DTX2P1-UPK3BP1-PMS2P11 | 0.388626 |
| CLEC11A                | 199.626  |
| RCOR3                  | 3.58082  |
| ABCF3                  | 20.0331  |
| LINC00630              | 0.182177 |
| HCST                   | 2.92334  |
| FGD1                   | 10.3219  |
| GZF1                   | 2.37619  |
| ZNF84                  | 3.94197  |
| TMEM245                | 5.34416  |
| AGO2                   | 19.4738  |
| C11orf1                | 18.0287  |
| RNF114                 | 33.8348  |
| PARP8                  | 2.31426  |
| DGCR6L                 | 73.5655  |
| LOC645212              | 4.80794  |
| ORC2                   | 3.11925  |
| LRP12                  | 3.62324  |
| ZNF436                 | 1.41903  |
| EDC4                   | 14.7362  |
| ARHGDI1A               | 266.929  |
| YBEY                   | 19.6863  |
| DCAF11                 | 16.9106  |
| MAP1LC3B2              | 3.7031   |
| FIGNL1                 | 2.64795  |
| ZNF8                   | 2.3488   |
| RAB11FIP3              | 15.7697  |
| GPR155                 | 0.2683   |
| PDRG1                  | 29.2027  |
| SLC35A3                | 2.31548  |
| H2AFZ                  | 440.252  |
| SDCBP                  | 74.0093  |
| PPP1R26                | 19.7212  |
| TMEM102                | 25.8237  |
| RPS16                  | 5798.39  |
| FSCN1                  | 159.319  |



|                          |           |
|--------------------------|-----------|
| OAZ3                     | 2.93874   |
| SNRNP48                  | 3.60163   |
| KLHL23,PHOSPHO2,PHOSPHO2 | 6.98702   |
| MAP2K1                   | 44.5507   |
| NXT1                     | 34.7842   |
| NHLH2                    | 0.569664  |
| MOB1B                    | 1.72017   |
| SLC9A5                   | 4.4106    |
| TMEM51-AS1               | 0.0795801 |
| POLR2E                   | 82.1547   |
| TAF1A                    | 3.93665   |
| LRP10                    | 41.0293   |
| MRPS2                    | 296.204   |
| SDHAP1                   | 0.865534  |
| DHX32                    | 12.9427   |
| THUMPD3                  | 10.6827   |
| HIC2                     | 1.47309   |
| ZNF675                   | 1.41995   |
| PCDHB14                  | 2.94122   |
| SAFB                     | 36.8289   |
| SP1                      | 7.27038   |
| TEKT4P2                  | 10.2005   |
| NOS3                     | 7.64336   |
| GATS                     | 1.52855   |
| MRPL37                   | 184.897   |
| TGOLN2                   | 12.0224   |
| RPLP2                    | 7200.39   |
| SDHC                     | 34.1759   |
| ZSCAN26                  | 6.1426    |
| NFX1                     | 7.09995   |
| APH1B                    | 3.90794   |
| RNMT                     | 8.173     |
| LITAF                    | 25.4687   |
| SLC25A11                 | 70.0607   |
| ABCA7                    | 1.86956   |
| TBCB                     | 79.1604   |
| AKAP10                   | 4.10516   |
| YTHDC2                   | 1.98059   |
| APPBP2                   | 3.26001   |
| EXOSC5                   | 156.999   |
| C2CD5                    | 3.80105   |
| CENPF                    | 3.03003   |
| UBE2L3                   | 42.7766   |
| PIP5K1A                  | 25.4267   |
| SPSB1                    | 15.6635   |
| SLC25A51                 | 3.17114   |
| CTDNEP1                  | 112.842   |
| UBR3                     | 1.75241   |
| FMNL3                    | 3.47441   |
| TARBP2                   | 23.5693   |
| C19orf70                 | 107.602   |
| DNM1P41                  | 0.257469  |
| CAPZA2                   | 44.5036   |
| SLC25A27                 | 1.377     |
| CTNBL1                   | 25.2535   |
| PFKL                     | 58.8911   |
| BRPF3                    | 4.24126   |
| LIN37                    | 9.80249   |
| ZRANB2-AS1               | 0         |
| MALSU1                   | 57.3296   |
| RPS8                     | 5775.38   |
| AFMID                    | 18.8782   |
| CNOT1                    | 16.2193   |
| CEP85                    | 5.50158   |
| TM9SF1                   | 17.0904   |
| UBE2E3                   | 48.594    |
| PPP2CB                   | 40.3138   |
| MCPH1                    | 3.13556   |
| FAM13A                   | 1.33833   |
| TSPAN6                   | 16.0365   |
| C22orf29,GNB1L           | 14.7139   |
| PGAP1                    | 0.715672  |
| CDC37L1                  | 6.2703    |
| BTBD9                    | 1.32138   |
| RBM5                     | 22.6018   |
| PILRB                    | 41.3486   |
| FER                      | 0.847817  |
| WDR91                    | 2.20465   |
| TMEM62                   | 8.69574   |

|                          |          |
|--------------------------|----------|
| LPIN2                    | 3.85582  |
| PKN3                     | 79.9266  |
| SETX                     | 3.83651  |
| HOXD-AS1                 | 1.99168  |
| RBBP8                    | 4.4803   |
| MBNL1                    | 6.44816  |
| RFX7                     | 1.92676  |
| NMB                      | 34.4055  |
| COL13A1                  | 2.93337  |
| ZNF419                   | 2.69253  |
| MEF2B,MEF2BNB,MEF2BNB-ME | 14.4296  |
| INTS9                    | 10.7539  |
| SCYL3                    | 0.597862 |
| TBKBP1                   | 6.31626  |
| ING3                     | 6.3689   |
| SHISA4                   | 12.4178  |
| CD81                     | 334.349  |
| ROCK2                    | 0.97741  |
| PDS5A                    | 7.65486  |
| MED8                     | 19.7397  |
| CEP57                    | 10.4415  |
| DNAJC28                  | 0.270948 |
| BSDC1                    | 18.3296  |
| ARID2                    | 1.91197  |
| CCDC97                   | 17.0201  |
| STK17B                   | 2.95871  |
| RPL10                    | 1894.81  |
| CBFB                     | 16.3478  |
| ASXL2                    | 0.3971   |
| RPL11                    | 4398.31  |
| FICD                     | 0.701896 |
| LOC100507463             | 1.22141  |
| CXCL16                   | 39.3145  |
| ADA                      | 19.8871  |
| TOP3B                    | 7.38021  |
| PRDM15                   | 0.819579 |
| VPS29                    | 53.5114  |
| GLTSCR2                  | 776.474  |
| KAT2A                    | 34.3938  |
| SLC33A1                  | 4.19871  |
| RAB14                    | 21.1166  |
| METTL17                  | 36.9627  |
| HOXB6                    | 7.15052  |
| GGA2                     | 8.91777  |
| HIST1H4B                 | 0.552481 |
| ZNF23                    | 7.36515  |
| RNGTT                    | 3.01     |
| UST                      | 2.71902  |
| CCDC115                  | 15.952   |
| RPL39                    | 8910.84  |
| RWDD1                    | 38.4799  |
| SYNC                     | 28.6772  |
| C14orf93                 | 6.53075  |
| WASH2P                   | 9.03356  |
| LOC100499227             | 1.05339  |
| ZNF714                   | 0.397824 |
| MTRF1                    | 2.74288  |
| RNF4                     | 16.1149  |
| TP53INP1                 | 1.57284  |
| DLEU1                    | 7.51852  |
| FAM120AOS                | 19.2951  |
| SERF1A                   | 0.105468 |
| PSMB1                    | 227.782  |
| DLL1                     | 5.7934   |
| LINC00514                | 0.354162 |
| TPRKB                    | 51.5431  |
| RGS19                    | 24.1818  |
| ARPC4,ARPC4-TTL3,TTL3    | 121.558  |
| TCEB1                    | 61.4536  |
| GANC                     | 0.412857 |
| LGALS8                   | 7.5574   |
| MARCH8                   | 0.731037 |
| UBXN6                    | 154.534  |
| CCDC85C                  | 17.5025  |
| BRK1                     | 86.2057  |
| SEPT9                    | 38.0551  |
| ZDHC11                   | 2.85846  |
| NPB                      | 1.95926  |
| ZNF271                   | 3.52509  |

|                 |          |
|-----------------|----------|
| TMEM104         | 2.09282  |
| LARP7           | 7.08006  |
| NAPEPLD         | 2.24514  |
| FLJ46906        | 4.97558  |
| PQBP1           | 90.7645  |
| SPIN4           | 1.31624  |
| RPL8            | 12197.2  |
| ZNF138          | 3.16087  |
| RIC8B           | 1.67497  |
| UBE2I           | 79.2937  |
| MCTP1           | 4.34732  |
| PRDX2           | 537.321  |
| TIMELESS        | 5.94381  |
| SLC3A2          | 224.955  |
| SKA2            | 18.4621  |
| SMG1            | 2.54214  |
| BMPR2           | 0.648523 |
| TCEB2           | 492.708  |
| HOXC13          | 0.438209 |
| C12orf52        | 22.922   |
| LOC100130744    | 0.614121 |
| RPLP1           | 10830.9  |
| HTATIP2         | 35.8377  |
| ARMCX6          | 32.8951  |
| KIAA0196        | 11.2266  |
| ZNF462          | 0.927325 |
| C6orf57         | 13.1948  |
| IKBKAP          | 4.51781  |
| GPN1            | 25.5937  |
| ARMCX3          | 8.48857  |
| DGAT1           | 32.4333  |
| NAPA            | 45.3714  |
| DENND4B         | 9.55281  |
| EIF2AK1         | 28.9844  |
| TNIK            | 4.64096  |
| RAB5B           | 10.9267  |
| CLOCK           | 0.663472 |
| EIF4A3          | 69.997   |
| RALGAP1         | 0.873647 |
| C14orf101       | 3.66572  |
| KIAA1524        | 2.33752  |
| CROCCP2         | 20.0556  |
| FCHSD2          | 4.21887  |
| LOC100507217    | 38.2853  |
| FYCO1           | 2.54383  |
| UBE2T           | 45.0284  |
| COPRS           | 112.317  |
| MED24           | 20.731   |
| FANCE           | 15.4039  |
| CHAF1A          | 10.9824  |
| ANLN            | 9.47669  |
| MFSD11          | 3.43928  |
| MRPL54          | 77.2089  |
| QTRTD1          | 5.88307  |
| LRRC48          | 0.191398 |
| OXR1            | 8.46347  |
| PSAP            | 224.788  |
| FAM200B         | 3.83975  |
| CDC42           | 73.4865  |
| M6PR            | 71.7289  |
| RACGAP1         | 16.8389  |
| ZBTB80S         | 14.5496  |
| SLC4A3          | 3.85392  |
| RPL18A          | 5814.26  |
| SIRT3           | 11.2005  |
| ORMDL1          | 21.436   |
| FDXR            | 42.1432  |
| CCL5            | 1.26553  |
| PPME1           | 41.0713  |
| DSG2            | 9.55448  |
| SUGT1P3,TPTE2P5 | 0.344974 |
| ARAP1           | 13.8477  |
| YME1L1          | 25.0792  |
| NEDD1           | 3.79988  |
| DNAAF3          | 25.1665  |
| DCTPP1          | 97.7668  |
| DANCR           | 114.024  |
| EEA1            | 0.828658 |
| PUM1            | 9.25056  |

|               |           |
|---------------|-----------|
| ENGASE        | 3.89157   |
| USP13         | 1.63388   |
| INIP          | 5.02616   |
| PLTP          | 9.37983   |
| EPB41         | 3.56002   |
| SIRT6         | 30.3251   |
| NCOA1         | 1.87047   |
| TMEM99        | 10.9203   |
| TSPAN31       | 7.94132   |
| HEBP2         | 52.5304   |
| ZNF133        | 5.95294   |
| HAGH          | 41.2561   |
| BLMH          | 15.9393   |
| UHMK1         | 10.1624   |
| BRMS1L        | 1.97682   |
| UBE2Z         | 43.7227   |
| FIBP          | 86.7645   |
| TMEM167A      | 7.6533    |
| SFXN3         | 32.6746   |
| RPS13         | 3699.7    |
| PPP4C         | 156.751   |
| ADAMTS13      | 3.20073   |
| MRPS15        | 119.547   |
| SPATA2        | 4.55352   |
| HJURP         | 17.029    |
| THOC3         | 16.5709   |
| USP34         | 2.87199   |
| GNG5          | 291.299   |
| HAUS5         | 5.35295   |
| OIP5          | 11.8757   |
| TMEM192       | 3.5682    |
| KIAA1919      | 0.581494  |
| KCNC4         | 4.1971    |
| MRPS36        | 23.0032   |
| SCMH1         | 13.9921   |
| KIF2A         | 5.38806   |
| KLHL2         | 2.5656    |
| MMADHC        | 77.3459   |
| SETD7         | 6.60186   |
| GCLC          | 5.90617   |
| SLC7A6        | 4.72223   |
| TRMU          | 19.4643   |
| EDEM3         | 0.841438  |
| MZT2A         | 382.283   |
| HECTD2        | 0.584277  |
| GLMN          | 4.86754   |
| MYRF          | 3.52882   |
| TMEM87B       | 3.0912    |
| RPS11         | 6124.99   |
| RAD23B        | 51.781    |
| ANKRD44       | 0.502645  |
| C2orf76       | 1.48636   |
| CAMSAP1       | 8.37803   |
| ZC3H11A       | 16.8237   |
| GPR137        | 14.1826   |
| MARK3         | 21.1332   |
| TMOD4         | 0.0656429 |
| MRFAP1        | 137.943   |
| UBA6          | 6.3167    |
| CTSZ          | 85.6386   |
| LOC728190     | 24.0928   |
| BIRC6         | 1.89273   |
| ZNF160        | 4.27089   |
| CRAT          | 79.0834   |
| EPB49         | 18.8665   |
| ZNF678        | 0.464075  |
| WDR26         | 7.66496   |
| HMGXB4        | 4.40829   |
| P2RX5,TAX1BP3 | 94.3345   |
| TBL1X         | 5.15303   |
| C12orf49      | 6.19786   |
| UQCRH         | 937.038   |
| CD47          | 6.68642   |
| KANSL1L       | 3.49091   |
| TYRO3         | 15.9647   |
| GPKOW         | 8.67539   |
| TRIM7         | 13.1993   |
| TLR5          | 0.0196742 |
| KIAA1551      | 0.48956   |

|              |          |
|--------------|----------|
| MLLT4        | 4.73621  |
| ZNF580       | 94.8807  |
| HSPH1        | 3.74375  |
| CSNK1G2      | 36.2415  |
| C9orf114     | 32.4898  |
| TSTD1        | 99.6944  |
| SH3RF3       | 0.789139 |
| TRIM44       | 4.8596   |
| ERCC2        | 25.6013  |
| HIF1AN       | 6.0781   |
| DNTTIP1      | 88.8997  |
| GALNT1       | 4.69327  |
| NUP153       | 6.56955  |
| USP21        | 15.0046  |
| MAFA         | 4.84345  |
| RPL27        | 5284.48  |
| C15orf61     | 13.5574  |
| ZNF501       | 0.741816 |
| PVRL1        | 8.04014  |
| C17orf70     | 13.8027  |
| SSH3         | 18.2946  |
| PPP2R1A      | 203.6    |
| NRBP1        | 54.7306  |
| SLC45A4      | 4.71727  |
| ACIN1        | 61.7331  |
| RAB5A        | 14.2931  |
| AOC3         | 0.81547  |
| MMP25        | 2.39756  |
| HEXA         | 53.2104  |
| UHRF1BP1L    | 1.41883  |
| IBTK         | 4.55563  |
| CDK1         | 40.9719  |
| MRPL49       | 32.5606  |
| MID2         | 1.19422  |
| LOC286367    | 0.454057 |
| TRABD2A      | 16.1947  |
| NPAT         | 1.36749  |
| EI24         | 46.3058  |
| BDH1         | 21.5428  |
| NANOS3       | 2.78074  |
| TOP3A        | 4.04216  |
| LSM12        | 62.2239  |
| LOC100506963 | 3.13919  |
| ANKRD13A     | 28.8632  |
| MRPL41       | 584.471  |
| SNX1         | 5.88994  |
| ALG10        | 1.08014  |
| ATF6B        | 43.8175  |
| TMEM5        | 10.1107  |
| LINC00493    | 146.29   |
| CRTC1        | 3.66209  |
| TOP1MT       | 122.028  |
| DCAF6        | 5.56403  |
| CDC20        | 163.21   |
| SLC15A3      | 1.09903  |
| STX12        | 9.50746  |
| CYHR1        | 73.6994  |
| CCDC93       | 4.48285  |
| DDX20        | 6.65454  |
| TNFAIP8L1    | 7.56066  |
| APBB2        | 0.988985 |
| KIAA1671     | 1.83937  |
| BBS4         | 5.20582  |
| TBP          | 11.1189  |
| HINT3        | 5.73157  |
| S100PBP      | 4.05842  |
| CRHR1-IT1    | 4.06234  |
| NASP         | 40.6333  |
| CHCHD10      | 316.474  |
| LAMP2        | 12.9156  |
| COX7C        | 1258.05  |
| BARD1        | 0.20859  |
| NTF4         | 1.58586  |
| EGFL8,PPT2   | 37.1921  |
| MYLPF        | 0.190494 |
| HP1BP3       | 27.7888  |
| KIF13B       | 1.58131  |
| CDK5RAP1     | 16.8661  |
| HLA-H        | 11.5426  |

|                 |            |
|-----------------|------------|
| KDM3B           | 7.41472    |
| RABGGTA         | 16.0413    |
| PRMT10          | 2.05616    |
| METTL5          | 62.6415    |
| KBTBD2          | 8.9273     |
| NUDT6           | 5.12213    |
| AGPAT3          | 7.74614    |
| UBA52           | 405.399    |
| SKIV2L          | 6.91912    |
| RPL32           | 1478.86    |
| CEBPZ           | 7.97237    |
| SMURF1          | 6.83214    |
| ZNF385A         | 15.5204    |
| CHFR            | 0.173591   |
| PSME1           | 165.071    |
| LIN7C           | 6.12411    |
| DCAF10          | 3.22372    |
| AP2B1           | 44.6405    |
| IL4R            | 6.47338    |
| KIAA1107        | 0.17792    |
| COPS7A          | 52.4849    |
| GSTT2           | 0.782307   |
| NISCH           | 16.1949    |
| C11orf84        | 48.8392    |
| ZNF621          | 2.86081    |
| CACUL1          | 7.75415    |
| HUWE1           | 7.09439    |
| KIDINS220       | 2.03698    |
| KANK2           | 1.84188    |
| SLC35A4         | 25.3406    |
| PIAS4           | 9.76947    |
| TARBP1          | 3.94342    |
| JKAMP           | 12.8449    |
| MF12-AS1        | 2.42444    |
| COX7B           | 341.146    |
| FBXO43          | 0.160907   |
| TMEM107         | 8.67139    |
| POLE            | 5.78133    |
| ZNF347          | 0.00822943 |
| MGEA5           | 19.4645    |
| CROCC           | 5.62594    |
| PPP6R3          | 12.6648    |
| MSH6            | 6.11307    |
| SSU72           | 150.733    |
| GNPDA1          | 107.748    |
| ZNF12           | 5.32213    |
| PTK2B           | 0.545028   |
| APRT            | 241.402    |
| CREM            | 19.574     |
| ZNF865          | 8.18111    |
| GNPTG           | 19.2041    |
| SNX11           | 7.87073    |
| TPD52L1         | 26.7317    |
| ZNF764          | 3.34545    |
| GSR             | 19.1519    |
| DARS2           | 6.49102    |
| PJA1            | 8.21311    |
| SGPL1           | 7.14548    |
| CD151           | 369.321    |
| IFT20           | 29.4242    |
| WNT11           | 6.81675    |
| ZNF319          | 2.98677    |
| RAB1A           | 40.5618    |
| SFXN1           | 13.1939    |
| NUDT21          | 23.3159    |
| CNP             | 20.0693    |
| ZNHIT1          | 159.623    |
| SS18L2          | 18.2485    |
| TTLL12          | 53.667     |
| STAG2           | 8.88587    |
| CREG1           | 38.205     |
| AP3M1           | 7.35141    |
| ATP6V0C         | 243.196    |
| FAM156A,FAM156B | 0.546271   |
| PSMB6           | 232.746    |
| LOC283070       | 7.29593    |
| TMEM177         | 35.2219    |
| COPS3           | 39.6241    |
| CCNL1           | 18.6791    |

|                      |           |
|----------------------|-----------|
| CD160                | 0.0503467 |
| IQCB1                | 13.6203   |
| CAPN10               | 12.0765   |
| HEATR4               | 0.0260097 |
| ALG13                | 3.85634   |
| HADH                 | 41.3015   |
| ACTR3                | 41.36     |
| AZI2                 | 16.2      |
| LRP5                 | 12.6468   |
| LINC00202-1          | 0.0921571 |
| RPS25                | 5035.63   |
| PROCR                | 158.368   |
| DEDD2                | 39.4921   |
| NAPA-AS1             | 4.07922   |
| RPS28                | 7186.65   |
| DCTN4                | 12.9477   |
| PTPN21               | 1.55478   |
| TUSC1                | 10.4567   |
| ZNF607               | 1.47493   |
| MIPOL1               | 0.313803  |
| PLEKHA8P1            | 2.2482    |
| ZBED4                | 4.27562   |
| ZSWIM4               | 6.00872   |
| ZNF286B              | 2.81573   |
| EIF3F                | 420.761   |
| FAM35A               | 4.47949   |
| RCC2                 | 23.6797   |
| LOC100289561,PRKRIP1 | 29.7075   |
| PKN2                 | 3.86218   |
| FAM174B              | 7.7827    |
| MYL6B                | 119.989   |
| SLC35B2              | 43.1697   |
| PLEKHA6              | 1.67816   |
| BABAM1               | 54.3972   |
| ZNF18                | 1.79293   |
| FBXO33               | 2.28665   |
| SFT2D1               | 105.991   |
| VCPIP1               | 2.58297   |
| GRTP1                | 11.6228   |
| FAAH                 | 9.3514    |
| DHX38                | 12.0588   |
| GPR107               | 15.1608   |
| RGL3                 | 11.6349   |
| FUT8                 | 2.2316    |
| EIF3L                | 270.491   |
| CIB2                 | 21.9781   |
| CSNK1G1              | 1.99369   |
| ADRBK1               | 35.119    |
| LYPLA2               | 96.1444   |
| FLJ13197             | 0         |
| TYK2                 | 17.1557   |
| PSMA7                | 277.263   |
| GRINA                | 347.739   |
| MRPL44               | 27.7271   |
| ILDR2                | 0.649242  |
| APOBEC3C             | 13.8792   |
| IPO9                 | 5.14246   |
| CD68                 | 403.112   |
| ATP7B                | 1.01216   |
| SYK                  | 8.85472   |
| PTK6                 | 4.26589   |
| DCAF8                | 14.3554   |
| WBP5                 | 42.6746   |
| AP1B1                | 23.9358   |
| ACVR2B-AS1           | 0.465927  |
| LHFPL2               | 2.71508   |
| BMPR1A               | 2.70586   |
| TMEM216              | 29.8202   |
| C1orf174             | 14.9348   |
| EXOSC9               | 17.3208   |
| RPS6KB1              | 2.80677   |
| USP48                | 7.37643   |
| PSME4                | 9.16602   |
| LOC389765            | 0.736372  |
| CCT6P3               | 2.9674    |
| USP27X               | 0.936971  |
| SFN                  | 59.7157   |
| BEGAIN               | 3.68531   |
| NDUFB3               | 65.1342   |

|           |           |
|-----------|-----------|
| ZNF202    | 3.57067   |
| TNRC6B    | 1.22618   |
| PDXDC1    | 11.6764   |
| ZDHC7     | 10.7281   |
| ADH5      | 45.5651   |
| ATAD1     | 10.5851   |
| ZNF148    | 1.99866   |
| PDCD4     | 14.7138   |
| SERINC2   | 31.997    |
| TFG       | 64.3587   |
| SMPDL3A   | 1.47478   |
| KEAP1     | 40.6257   |
| TCEANC2   | 0.820464  |
| PDE4DIP   | 0.460904  |
| PPP1R9B   | 15.6956   |
| SLCO4A1   | 24.925    |
| TLCD1     | 13.3171   |
| MAPRE2    | 2.69626   |
| AP1S1     | 162.499   |
| PRELID1   | 178.592   |
| TEAD3     | 12.2306   |
| PHF13     | 5.13083   |
| ABCG4     | 1.4037    |
| PSMD11    | 25.591    |
| ANAPC10   | 7.13241   |
| LOC550643 | 87.3359   |
| METTL4    | 2.00262   |
| ZNF222    | 3.56      |
| ABLIM1    | 8.36967   |
| ATP6V1E2  | 2.57965   |
| ATRN      | 3.47254   |
| ZFP41     | 4.92      |
| GPS1      | 76.5971   |
| PTP4A1    | 14.2627   |
| EED       | 12.2439   |
| SF3A1     | 20.4323   |
| ZCRB1     | 23.1255   |
| MSANTD1   | 0.191422  |
| LOC643669 | 0.295018  |
| PGP       | 9.61725   |
| NUP50     | 10.4081   |
| MCMBP     | 15.314    |
| SEC24B    | 6.60644   |
| PGGT1B    | 4.87831   |
| SMC6      | 1.60677   |
| SNHG9     | 47.7167   |
| NDUFS7    | 171.738   |
| PDZD8     | 1.83771   |
| VSIG10    | 3.83907   |
| SDHB      | 122.706   |
| PODXL2    | 47.8245   |
| PDHB      | 29.024    |
| WTAP      | 35.2687   |
| CLPP      | 200.285   |
| CNN1      | 0.0804463 |
| BAP1      | 23.0433   |
| RHOT1     | 5.45776   |
| IL8       | 0         |
| ALDH5A1   | 3.51134   |
| MORF4L1   | 72.9536   |
| FAM126B   | 1.11298   |
| DNAJC24   | 2.96984   |
| DAP       | 35.8479   |
| BCL11A    | 0.765778  |
| EVA1B     | 26.8501   |
| C1orf50   | 12.7366   |
| HMG20A    | 6.59249   |
| GTF3C5    | 91.922    |
| CNFN      | 5.28394   |
| PPP6R1    | 40.2556   |
| TSPAN5    | 2.69769   |
| LAMP1     | 68.9469   |
| ZNF432    | 0.688766  |
| ZC3H18    | 8.16814   |
| MAD2L1    | 47.1361   |
| EIF3K     | 314.213   |
| PRRC2A    | 34.9854   |
| TARS2     | 25.359    |
| POLD1     | 29.1331   |



|           |           |
|-----------|-----------|
| WDR6      | 24.8085   |
| DHTKD1    | 3.46      |
| RPS27     | 12123.3   |
| KIFC3     | 44.1273   |
| MINA      | 8.17826   |
| TRADD     | 11.475    |
| CCDC130   | 22.7647   |
| ZRANB1    | 4.10163   |
| RAB11FIP2 | 1.43948   |
| COX10     | 8.1212    |
| ARPC1A    | 119.662   |
| ADAMTSL4  | 2.27961   |
| SLC12A7   | 13.3779   |
| ATXN7L2   | 6.58635   |
| ZNHIT3    | 85.9524   |
| DIXDC1    | 0.679755  |
| AMMECR1L  | 6.30562   |
| EXOC8     | 2.08822   |
| RREB1     | 2.88181   |
| ZWINT     | 28.7691   |
| HOOK3     | 1.02199   |
| STK11     | 23.1727   |
| FAM109B   | 2.99019   |
| NDUFA5    | 32.5097   |
| ARNTL2    | 3.09823   |
| MYCBP2    | 1.45736   |
| CMTM7     | 79.7294   |
| SLC37A4   | 22.9344   |
| VPS39     | 7.71836   |
| C11orf31  | 168.992   |
| PAQR6     | 3.18992   |
| ARL6IP6   | 4.50919   |
| TM2D3     | 18.6371   |
| CLCN3     | 6.57969   |
| TRAM1     | 40.9069   |
| PDCD6IP   | 16.4043   |
| SLC23A3   | 0.662679  |
| ELOVL7    | 3.98778   |
| ACTN1     | 68.2738   |
| ZNF25     | 1.51641   |
| MYO1C     | 49.2113   |
| SLC37A1   | 6.78597   |
| TADA3     | 70.719    |
| NFKB1     | 7.38716   |
| BSG       | 614.32    |
| LOC440335 | 0.120772  |
| ZNF799    | 1.23236   |
| PSMB4     | 518.766   |
| EARS2     | 10.2854   |
| SH3BGR1   | 16.098    |
| ARCN1     | 27.139    |
| CHCHD5    | 39.4728   |
| OSBPL2    | 8.71068   |
| CDKL1     | 0.846774  |
| C6orf170  | 0.270324  |
| CAMK1     | 31.1118   |
| NDUFB9    | 621.426   |
| MAST1     | 4.99311   |
| ZNF547    | 10.7622   |
| CTDSPL2   | 2.55484   |
| NMT2      | 3.57886   |
| SIX4      | 2.19258   |
| THSD1     | 0.992852  |
| ROBO3     | 2.91274   |
| PRPF18    | 9.24982   |
| FBN1      | 0.0066697 |
| SELRC1    | 4.94599   |
| RAD21     | 57.2058   |
| PRRC1     | 6.96143   |
| TBC1D25   | 5.86984   |
| ZBTB11    | 2.02329   |
| APBB3     | 7.65687   |
| TBC1D24   | 3.91016   |
| TROVE2    | 5.76886   |
| MED25     | 20.292    |
| RFC4      | 29.3039   |
| ZNF300    | 5.90894   |
| DDR1      | 9.52465   |
| SAR1A     | 24.0366   |

|                           |          |
|---------------------------|----------|
| TLE2                      | 31.467   |
| POPOC2                    | 0.226417 |
| FAM203A                   | 1.80715  |
| TIMM13                    | 91.29    |
| BBS2                      | 12.822   |
| CWC15                     | 24.5944  |
| BACE2                     | 17.0283  |
| TAF6L                     | 10.9861  |
| RAB28                     | 8.67534  |
| CHRNA10                   | 1.37286  |
| ADAM8                     | 0.766314 |
| TRMT61A                   | 15.3984  |
| RFNG                      | 69.7636  |
| RAB5C                     | 78.3196  |
| FAH                       | 26.7725  |
| SMC5                      | 2.83307  |
| SEPN1                     | 67.6238  |
| CPSF4                     | 72.1139  |
| PRR7                      | 41.8777  |
| LOC286437                 | 0.285492 |
| LOXL3                     | 6.42901  |
| MAPK8IP3                  | 7.99554  |
| ZNF358                    | 62.7673  |
| EPG5                      | 1.31974  |
| FAM171A2                  | 8.24282  |
| AP2M1                     | 198.214  |
| FLJ31306                  | 10.8754  |
| SLC31A1                   | 14.1338  |
| LRBA                      | 4.10086  |
| AGPAT6                    | 14.4514  |
| XRCC3                     | 12.0266  |
| KLHL28                    | 0.712572 |
| TSC22D1                   | 15.3721  |
| RPS3A                     | 3829.89  |
| APTX                      | 16.6374  |
| C16orf13                  | 176.153  |
| PQLC2                     | 30.0775  |
| EPS8L1                    | 9.26618  |
| FAM195B                   | 70.987   |
| KCTD14,NDUFC2,NDUFC2-KCTI | 20.3822  |
| SCARNA17                  | 6.16979  |
| MLX                       | 32.3494  |
| FAU                       | 2066.84  |
| CRYZ                      | 16.5861  |
| CDK13                     | 2.05059  |
| LRR1                      | 15.5268  |
| SCAMP5                    | 20.716   |
| PPP2R2D                   | 14.8515  |
| AAED1                     | 31.7094  |
| ZNF318                    | 2.23665  |
| ADCY6                     | 6.43963  |
| SNRPB                     | 492.99   |
| SEC31B                    | 0.318264 |
| MED27                     | 53.0808  |
| TCF7                      | 5.71942  |
| NECAB3                    | 32.3189  |
| TRRAP                     | 5.59052  |
| RNPS1                     | 141.335  |
| SNRK-AS1                  | 0.137211 |
| SDHAF2                    | 30.0828  |
| STARD13                   | 1.43498  |
| PSMD3                     | 83.2495  |
| CNNM3                     | 6.87531  |
| FTSJ2                     | 15.4716  |
| C3orf14                   | 0        |
| TOB1                      | 9.91898  |
| FAM108C1                  | 9.38198  |
| GNAS                      | 452.143  |
| PGM2                      | 7.79079  |
| BRAF                      | 2.33153  |
| BLVRA                     | 43.6105  |
| PSMD5                     | 18.0714  |
| COG1                      | 7.95519  |
| MDH2                      | 343.829  |
| CISD1                     | 11.7093  |
| CHD8                      | 3.48804  |
| CHMP4B                    | 61.7979  |
| YIPF3                     | 73.3012  |
| CHMP1A                    | 47.3075  |

|                           |            |
|---------------------------|------------|
| RPS6KA3                   | 3.41348    |
| DDX55                     | 9.08097    |
| GAPVD1                    | 6.34122    |
| C1QL2                     | 0          |
| LOC100288123              | 0.0864539  |
| MUS81                     | 30.8367    |
| TAF7                      | 31.2447    |
| RXR8                      | 24.2251    |
| AMBRA1                    | 6.26568    |
| P2RY2                     | 0.544824   |
| ZNF557                    | 1.92698    |
| RRN3P1                    | 5.13518    |
| SMYD5                     | 20.5971    |
| ANGPTL6                   | 3.48913    |
| DCUN1D4                   | 5.95366    |
| TMTC4                     | 3.96371    |
| F8                        | 2.83919    |
| ZNF253                    | 1.35622    |
| ANKRD17                   | 5.78243    |
| TRIM16                    | 3.71938    |
| CC2D1A                    | 19.7455    |
| FNDC8                     | 1.44838    |
| LOC202781                 | 7.42632    |
| TRAK2                     | 1.34083    |
| CCNB1IP1                  | 171.458    |
| LRRC15                    | 0.00843321 |
| C18orf54                  | 1.28212    |
| BORA                      | 4.87564    |
| ZUFSP                     | 5.83315    |
| ASH2L                     | 8.78286    |
| SLC31A2                   | 8.08077    |
| KIAA1656                  | 0.502839   |
| RLN2                      | 0.0644513  |
| CERCAM                    | 68.7161    |
| KIAA0391                  | 13.4498    |
| DPF2                      | 30.9791    |
| CYBA                      | 387.442    |
| GALNT7                    | 3.73229    |
| PUSL1                     | 41.6417    |
| MITF                      | 0.553021   |
| TXNL4A                    | 75.0756    |
| DLX4                      | 0.827888   |
| ATP6V0A1                  | 10.8943    |
| PPP6R2                    | 12.9953    |
| ATXN7L3                   | 16.633     |
| ANKS3                     | 8.73496    |
| CHD6                      | 1.2319     |
| EPPK1                     | 0          |
| AGO1                      | 3.02864    |
| ATP5G3                    | 63.3611    |
| RHEB                      | 87.1007    |
| ITGA5                     | 24.196     |
| RASAL2                    | 0.783114   |
| ANKRD28                   | 4.07159    |
| CCDC101                   | 13.6867    |
| SEPT7                     | 17.9018    |
| IL17RD                    | 1.49632    |
| PKDREJ                    | 0.00580001 |
| NDUFS6                    | 137.317    |
| AMY2B,RNPC3               | 2.95785    |
| GALNT4,POC1B,POC1B-GALNT4 | 5.16637    |
| CCDC90A                   | 4.89104    |
| MTX2                      | 40.0566    |
| RPS14                     | 4739.83    |
| ZIC5                      | 1.40751    |
| CIR1                      | 11.4137    |
| RPS6KB2                   | 46.5345    |
| DNAJA4                    | 5.73426    |
| UBTD2                     | 7.7846     |
| PSMA1                     | 136.919    |
| CLN5                      | 6.13118    |
| MARCKSL1                  | 244.931    |
| EZH1                      | 4.24668    |
| GNE                       | 2.4679     |
| USP8                      | 4.3788     |
| TMEM248                   | 16.2777    |
| GID8                      | 15.4234    |
| MARVELD2                  | 0.381978   |
| SGTA                      | 76.7974    |

|                         |           |
|-------------------------|-----------|
| LLGL1                   | 16.0051   |
| GYS1                    | 50.8148   |
| DNAJC18                 | 2.05632   |
| RPPH1                   | 46.7284   |
| C19orf26                | 3.46445   |
| PGBD1                   | 1.52854   |
| SMIM3                   | 9.52471   |
| HEXIM1                  | 9.56514   |
| FLJ37453                | 2.55697   |
| UBE2G1                  | 11.3186   |
| CHCHD3                  | 77.7062   |
| PLS3                    | 11.384    |
| GANAB                   | 82.2084   |
| RPL27A                  | 435.196   |
| TMEM246                 | 28.129    |
| HDGFRP2                 | 37.3035   |
| RCCD1                   | 10.0301   |
| CCDC12                  | 36.616    |
| ALAD                    | 7.03734   |
| CNOT2                   | 17.3614   |
| SNORA12                 | 0         |
| S100A10                 | 176.734   |
| DCLRE1A                 | 2.6257    |
| MYD88                   | 12.7362   |
| STRADB                  | 15.5789   |
| EP400                   | 2.6866    |
| CEP112                  | 1.1908    |
| LAMA5                   | 2.50938   |
| SNRPF                   | 145.197   |
| B4GALT2                 | 47.1499   |
| RPS27A                  | 2055.13   |
| APITD1,APITD1-CORT,CORT | 9.37638   |
| MCTS1                   | 3.23371   |
| TXNL1                   | 84.9366   |
| PIIP5K2                 | 2.16699   |
| AXIN1                   | 33.0774   |
| CPNE1,RBM12             | 89.2718   |
| PTPRH                   | 0.932576  |
| PTS                     | 14.8364   |
| RNF168                  | 5.28411   |
| TRAPPC2L                | 82.9981   |
| SMARCC2                 | 15.2476   |
| LOC100505687            | 3.11247   |
| ZNRF3                   | 1.77995   |
| GRK6                    | 26.9078   |
| GPD2                    | 3.45951   |
| PGS1                    | 11.0899   |
| THYN1                   | 59.1573   |
| PKN1                    | 119.098   |
| HSDL1                   | 6.10912   |
| MIR4315-1,PLEKHM1P      | 2.10817   |
| TNPO1                   | 10.4346   |
| SMEK2                   | 7.0293    |
| UBE2M                   | 139.476   |
| TRIAP1                  | 23.0014   |
| NR2C1                   | 5.20832   |
| SPAG9                   | 4.12334   |
| ATPIF1                  | 266.971   |
| PRDM6                   | 0.0642457 |
| BMP8B                   | 0.68217   |
| PAPOLG                  | 1.74218   |
| NFATC2IP                | 8.40443   |
| ARFGAP1                 | 29.5453   |
| CRELD2                  | 8.65991   |
| CSMD2                   | 0.015832  |
| CDC40                   | 4.55048   |
| TMEM212                 | 0.0376603 |
| LOC100127888            | 0.777316  |
| TUBD1                   | 2.14238   |
| F10                     | 0.197315  |
| PRKCZ                   | 18.453    |
| PHACTR4                 | 4.27238   |
| C1orf86                 | 149.849   |
| ZNF250                  | 1.60064   |
| FAM213A                 | 16.5373   |
| SECISBP2L               | 1.90524   |
| PLOD3                   | 44.6136   |
| ADAM15                  | 91.5896   |
| WIZ                     | 16.9478   |

|              |           |
|--------------|-----------|
| AVL9         | 4.52607   |
| RPS6         | 4884.61   |
| DENND1A      | 12.6976   |
| CAPNS1       | 270.288   |
| ACO1         | 14.2225   |
| PAQR4        | 25.3505   |
| EIF2B2       | 19.1318   |
| TMCO3        | 9.37579   |
| GTF2H4       | 26.3272   |
| SAMD4A       | 2.88861   |
| FLOT2        | 34.6357   |
| WHAMMP3      | 0.213438  |
| RP9          | 13.8691   |
| TMBIM4       | 33.1573   |
| FEN1         | 17.2432   |
| DLL4         | 0.502495  |
| NSL1         | 0.722189  |
| FBXO11       | 8.47684   |
| UBE2S        | 644.994   |
| MPHOSPH8     | 8.87272   |
| ATP6V1E1     | 52.1327   |
| NECAP1       | 7.96116   |
| MED4-AS1     | 3.07077   |
| ACRC         | 0.206579  |
| POLR2I       | 94.9594   |
| HEATR5B      | 2.00591   |
| RBMX2        | 21.1614   |
| PRKCD        | 13.566    |
| TADA2B       | 5.23509   |
| CCNY         | 26.5049   |
| FAM168B      | 9.72741   |
| CEP70        | 2.76201   |
| MTRNR2L4     | 0.145984  |
| ARHGAP10     | 4.35551   |
| SLC41A1      | 11.5487   |
| FAM32A       | 42.2452   |
| TBPL1        | 8.94234   |
| ATM          | 1.48905   |
| BTNL9        | 2.48256   |
| RC3H2        | 2.93886   |
| IL32         | 368.572   |
| ZNF174       | 3.83069   |
| TMEM145      | 24.1019   |
| ARHGEF16     | 14.2179   |
| KPNA4        | 8.78886   |
| PAXBP1-AS1   | 0.112092  |
| VPS33B       | 6.72353   |
| ADCK3        | 21.1735   |
| ZCCHC14      | 2.75909   |
| METTL10      | 3.70821   |
| DHRS7        | 53.1862   |
| HS6ST1       | 11.2856   |
| CNEP1R1      | 5.11101   |
| PHC1         | 3.72544   |
| SLC30A7      | 2.22681   |
| NUDT2        | 56.3902   |
| TRMT11       | 8.11619   |
| PELI1        | 1.86343   |
| BCR          | 9.03611   |
| LOC100506023 | 0.0345765 |
| USP47        | 5.36246   |
| RNF125       | 2.06432   |
| NOA1         | 44.9988   |
| KCNK6        | 12.1573   |
| ESRP1        | 0.0115088 |
| TMEM41A      | 8.00048   |
| CAST         | 35.3984   |
| NHSL1        | 0.682206  |
| U2AF1        | 206.433   |
| MARCH7       | 13.3312   |
| EML4         | 4.79257   |
| DOT1L        | 7.08819   |
| FAM53B       | 6.87844   |
| GOLPH3       | 18.1124   |
| STK38L       | 2.89656   |
| XPO1         | 25.3269   |
| DPAGT1       | 23.258    |
| TOMM20       | 59.089    |
| PNPLA4       | 9.18996   |

|                |          |
|----------------|----------|
| WDPCP          | 0.406659 |
| CARKD          | 22.5771  |
| TMPRSS13       | 0        |
| MAPK8          | 8.30806  |
| PLXNA2         | 0.381663 |
| ATP6V1D        | 27.6507  |
| DNASE1L1       | 15.1856  |
| ZFP37          | 1.95469  |
| CKMT1B         | 12.4686  |
| BMP1           | 7.76969  |
| RNF130         | 49.6426  |
| PTH1R          | 4.87207  |
| TRAPPC6A       | 36.1587  |
| RASSF3         | 5.49273  |
| GPR63          | 1.03179  |
| NFKBIB         | 25.3666  |
| CSNK2B         | 256.981  |
| PRKCSH         | 230.529  |
| KLHL12         | 10.5769  |
| LINC00471      | 0.21856  |
| TAOK3          | 1.23603  |
| DARS           | 63.3633  |
| BRD8           | 11.3901  |
| DDX47          | 30.9458  |
| MGC39372       | 2.1422   |
| SFSWAP         | 8.83186  |
| ZNF689         | 3.77033  |
| ISCA1          | 23.4338  |
| ADPRHL1        | 3.63922  |
| HIST1H3B       | 1.91115  |
| MLLT6          | 16.1632  |
| C12orf57       | 325.504  |
| PPP1R12C       | 21.5279  |
| DMKN           | 87.1498  |
| EDC3           | 10.0502  |
| ALKBH2         | 36.3013  |
| PRICKLE4       | 1.9809   |
| SNRNP25        | 26.9928  |
| PHF6           | 3.92323  |
| TMEM194A       | 6.47223  |
| TFIP11         | 11.6458  |
| MBOAT7         | 91.2849  |
| SLC35E2        | 3.99297  |
| SPPL2A         | 3.16587  |
| CMTM4          | 12.3976  |
| BCAS4          | 30.5362  |
| SARS2          | 15.8707  |
| EMC7           | 90.0469  |
| EBI3           | 0.598877 |
| PDLIM7         | 84.5506  |
| ABCB9          | 3.50019  |
| WDR36          | 6.51607  |
| CABIN1         | 7.62618  |
| HAUS3,POLN     | 1.62258  |
| UPF3A          | 14.6873  |
| USP20          | 11.9808  |
| FANCL          | 9.15934  |
| YTHDC1         | 5.07229  |
| SSR4           | 440.939  |
| ARFGEF1        | 4.27131  |
| SNRK           | 0.417939 |
| MFN1           | 6.46067  |
| TMEM161A       | 50.4824  |
| MAMDC4         | 1.53101  |
| GNAI3          | 14.9666  |
| BAG3           | 26.9747  |
| FAM136A        | 33.4491  |
| LARP4          | 3.00071  |
| DNLZ           | 91.4784  |
| CCDC142,MRPL53 | 111.408  |
| RPUSD3         | 65.5372  |
| NDUFS3         | 97.5633  |
| RNF11          | 16.729   |
| HPS6           | 17.4599  |
| NUP98          | 8.09911  |
| PTBP2          | 2.96326  |
| GDF9           | 0.196251 |
| FNIP1          | 6.67144  |
| EXOC6          | 3.03017  |

|              |           |
|--------------|-----------|
| CABLES1      | 1.6669    |
| GORASP2      | 34.5551   |
| AGRN         | 11.3746   |
| SLC29A2      | 13.1897   |
| FAT1         | 1.15407   |
| HPSE         | 2.51514   |
| FCER1G       | 0.867458  |
| MSL3P1       | 4.81103   |
| PHACTR2      | 1.8709    |
| RHOBTB2      | 3.89147   |
| RBM39        | 41.1811   |
| CLU          | 36.3511   |
| SENP2        | 6.21189   |
| ANKRD13C     | 1.8202    |
| PRDX4        | 213.389   |
| FAM188A      | 11.743    |
| SETD3        | 10.7595   |
| RPS20        | 4032.12   |
| THOC2        | 3.44234   |
| SNW1         | 31.8179   |
| PI4K2B       | 2.29021   |
| PPM1H        | 1.54528   |
| CELF1        | 19.4499   |
| WWP1         | 6.51841   |
| ETFB         | 94.6418   |
| RAD51        | 7.40431   |
| MAN2B2       | 10.6807   |
| TRIM28       | 182.627   |
| NPEPL1.STX16 | 32.8014   |
| ZAK          | 5.47763   |
| NABP2        | 56.3804   |
| SMYD4        | 2.43951   |
| CHD5         | 0.0242885 |
| ZBED5        | 10.5464   |
| LOC100129550 | 1.13535   |
| SLC38A6      | 4.00797   |
| ARHGAP27     | 6.89055   |
| MRPL52       | 71.3294   |
| ABI1         | 17.7586   |
| ZNF45        | 1.6887    |
| CLASRP       | 19.5103   |
| MRPL23-AS1   | 0.147025  |
| PISD         | 20.2753   |
| IGFBP2       | 38.4371   |
| NKAP         | 18.5445   |
| POLR3C       | 16.232    |
| TMEM9        | 63.1352   |
| SLC25A19     | 25.6812   |
| LOC441081    | 0.0821015 |
| HIST1H4H     | 4.59975   |
| TRIM16L      | 5.70441   |
| H19.MIR675   | 1.60853   |
| CRIP1        | 7.24201   |
| SPCS1        | 159.329   |
| NAA16        | 2.13913   |
| ABHD16A      | 26.79     |
| RRM2         | 38.8966   |
| ENSA         | 127.647   |
| C6orf120     | 6.52304   |
| C1orf123     | 30.713    |
| IGBP1        | 74.0486   |
| PSKH1        | 6.40337   |
| ARMC1        | 11.5483   |
| PYROXD2      | 0.0573472 |
| C16orf87     | 3.05066   |
| MLF2         | 197.962   |
| PGRMC1       | 88.9752   |
| ALG6         | 2.05947   |
| SMAD9        | 3.29464   |
| SEC11A       | 173.288   |
| NAT1         | 1.58104   |
| MGAT5        | 3.9107    |
| FLOT1        | 111.942   |
| ATP6V1C1     | 14.9569   |
| PCBD1        | 214.308   |
| ZNF32-AS1    | 18.6446   |
| MUC1         | 3.80519   |
| SCAF1        | 16.9297   |
| FAM134B      | 0.540498  |

|                    |           |
|--------------------|-----------|
| MOB2               | 28.4929   |
| POU5F1             | 0.0894314 |
| ATP5A1             | 271.995   |
| COMMD5             | 63.3592   |
| EBPL               | 135.681   |
| PKNOX1             | 2.16863   |
| GLRX5              | 49.2013   |
| RIOK1              | 12.9108   |
| SLC9A6             | 1.93486   |
| KIF22              | 65.3109   |
| VDAC3              | 106.379   |
| TRAM2              | 2.67529   |
| IKBIP              | 13.0367   |
| ENOPH1             | 19.9872   |
| DGKZ               | 26.9217   |
| EIF2B3             | 5.95535   |
| MTO1               | 5.80036   |
| FAM91A2,LINC00623  | 4.4786    |
| ZNF510             | 1.4005    |
| FAM45A             | 7.23925   |
| DHRS7B             | 10.4042   |
| LOC100506083       | 0.373918  |
| KAT7               | 8.56449   |
| TMEM205            | 90.3101   |
| PTGER4P2-CDK2AP2P2 | 0.0726655 |
| ATG4C              | 1.99084   |
| DEXI               | 31.2241   |
| ARPC2              | 209.472   |
| COPS8              | 29.5459   |
| RAMP1              | 46.4023   |
| C16orf58           | 44.3326   |
| ATP2A1             | 0.924887  |
| NHLRC3             | 3.49063   |
| SPATA24            | 2.17054   |
| RMND5B             | 22.9142   |
| TMX4               | 6.50085   |
| PATZ1              | 21.0345   |
| MIS18A             | 16.0119   |
| TCP11L1            | 4.01207   |
| CXorf38            | 2.24872   |
| PTPN4              | 0.624591  |
| KRT8               | 25.3616   |
| RIN3               | 10.5927   |
| PLXNA1             | 6.45294   |
| CPSF7              | 15.1513   |
| RAB2B              | 3.91499   |
| THAP10             | 1.05169   |
| PCBP1              | 206.686   |
| PRDX5              | 410.964   |
| RPS12              | 9451.84   |
| PUM2               | 13.6541   |
| VDAC2              | 185.773   |
| LOC100507373       | 0.38292   |
| ZFAS1              | 745.43    |
| NELFCD             | 38.1063   |
| CRCP               | 11.9082   |
| SUPT7L             | 9.36048   |
| TCEAL8             | 43.7938   |
| PLEKHO2            | 5.23022   |
| NFYA               | 3.57056   |
| RAD17              | 7.88093   |
| BPTF               | 1.52934   |
| FBXO38             | 6.30998   |
| CD2AP              | 5.72571   |
| POR                | 44.8793   |
| SNRNP27            | 19.5747   |
| ALG11,UTP14C       | 1.81343   |
| CMIP               | 8.6207    |
| ARHGEF12           | 5.2772    |
| IPO5               | 27.4734   |
| DDAH1              | 18.9246   |
| TIPRL              | 10.8959   |
| CYB5R3             | 52.4253   |
| DICER1             | 1.75109   |
| ZNF226             | 3.53599   |
| GPATCH1            | 1.69533   |
| PCYT1A             | 6.5498    |
| OR4F5              | 0         |
| OR4F3              | 0         |



|                   |   |
|-------------------|---|
| LOC254099         | 0 |
| MIR200B           | 0 |
| MIR200A           | 0 |
| MIR429            | 0 |
| TLL10             | 0 |
| TMEM88B           | 0 |
| MMP23A            | 0 |
| GABRD             | 0 |
| ACTRT2            | 0 |
| MIR4251           | 0 |
| CCDC27            | 0 |
| LOC728716         | 0 |
| LOC284661         | 0 |
| AJAP1             | 0 |
| MIR4417           | 0 |
| HES3              | 0 |
| CA6               | 0 |
| MTOR-AS1          | 0 |
| ANGPTL7           | 0 |
| PTCHD2            | 0 |
| DRAXIN            | 0 |
| SNORA59A          | 0 |
| AADA4L4           | 0 |
| AADA4L3           | 0 |
| C1orf158          | 0 |
| PRAMEF12          | 0 |
| PRAMEF1           | 0 |
| PRAMEF2           | 0 |
| PRAMEF7,PRAMEF8   | 0 |
| PRAMEF22          | 0 |
| PRAMEF5           | 0 |
| PRAMEF9           | 0 |
| PRAMEF16          | 0 |
| PRAMEF20,PRAMEF21 | 0 |
| PRAMEF9           | 0 |
| PRAMEF17          | 0 |
| PRAMEF20,PRAMEF21 | 0 |
| PDPN              | 0 |
| CELA2A            | 0 |
| CELA2B            | 0 |
| TMEM82            | 0 |
| C1orf64           | 0 |
| CLCNKB            | 0 |
| MIR3675           | 0 |
| MIR3675           | 0 |
| PADI6             | 0 |
| IGSF21            | 0 |
| KLHDC7A           | 0 |
| PAX7              | 0 |
| HTR6              | 0 |
| PLA2G5            | 0 |
| PLA2G2F           | 0 |
| UBXN10            | 0 |
| FAM43B            | 0 |
| CELA3B            | 0 |
| CELA3A            | 0 |
| C1QA              | 0 |
| C1QC              | 0 |
| C1QB              | 0 |
| MIR4684           | 0 |
| MIR3115           | 0 |
| MIR378F           | 0 |
| LOC284632         | 0 |
| CATSPER4          | 0 |
| MIR1976           | 0 |
| RAB42             | 0 |
| OPRD1             | 0 |
| LOC149086         | 0 |
| LOC284551         | 0 |
| LCK               | 0 |
| ZBTB8B            | 0 |
| HMGB4             | 0 |
| LOC402779         | 0 |
| C1orf94           | 0 |
| GJB4              | 0 |
| GJA4              | 0 |
| MIR4255           | 0 |
| MIR3659           | 0 |
| MIR30E            | 0 |

|              |   |
|--------------|---|
| MIR30C1      | 0 |
| GUCA2B       | 0 |
| FAM183A      | 0 |
| TMEM125      | 0 |
| KLF17        | 0 |
| MIR5584      | 0 |
| SNORD38A     | 0 |
| SNORD38B     | 0 |
| EFCAB14-AS1  | 0 |
| CYP4B1       | 0 |
| CYP4X1       | 0 |
| CYP4Z1       | 0 |
| CYP4A22      | 0 |
| SLC5A9       | 0 |
| ELAVL4       | 0 |
| C1orf185     | 0 |
| PODN         | 0 |
| DMRTB1       | 0 |
| MIR4781      | 0 |
| C1orf177     | 0 |
| MIR4422      | 0 |
| C8A          | 0 |
| MGC34796     | 0 |
| UBE2U        | 0 |
| MIR4794      | 0 |
| MIR3117      | 0 |
| TCTEX1D1     | 0 |
| PIN1P1       | 0 |
| LHX8         | 0 |
| SNORD45C     | 0 |
| SNORD45A     | 0 |
| SNORD45B     | 0 |
| ST6GALNAC5   | 0 |
| AK5          | 0 |
| MGC27382     | 0 |
| PTGFR        | 0 |
| IFI44L       | 0 |
| LPHN2        | 0 |
| PRKACB       | 0 |
| MIR4423      | 0 |
| CLCA4        | 0 |
| CLCA3P       | 0 |
| GBP6         | 0 |
| GBP1P1       | 0 |
| BRDT         | 0 |
| C1orf146     | 0 |
| SNORA66      | 0 |
| MIR760       | 0 |
| DPYD-AS1     | 0 |
| LOC729987    | 0 |
| LOC100129620 | 0 |
| LPPR4        | 0 |
| PALMD        | 0 |
| MIR553       | 0 |
| GPR88        | 0 |
| VCAM1        | 0 |
| S1PR1        | 0 |
| DNAJA1P5     | 0 |
| AMY2A        | 0 |
| AMY1A        | 0 |
| AMY1A        | 0 |
| NTNG1        | 0 |
| VAV3-AS1     | 0 |
| NBPF6        | 0 |
| MIR197       | 0 |
| CYMP         | 0 |
| CD53         | 0 |
| CHI3L2       | 0 |
| CHIA         | 0 |
| PIFO         | 0 |
| SYCP1        | 0 |
| TSHB         | 0 |
| MIR320B1     | 0 |
| CD2          | 0 |
| MIR942       | 0 |
| HAO2         | 0 |
| HSD3B1       | 0 |
| HIST2H2BA    | 0 |
| EMBP1        | 0 |

|              |   |
|--------------|---|
| GPR89C       | 0 |
| GJA8         | 0 |
| PPIAL4E      | 0 |
| PPIAL4D      | 0 |
| FCGR1C       | 0 |
| PPIAL4B      | 0 |
| FCGR1A       | 0 |
| HIST2H4B     | 0 |
| HIST2H2AA3   | 0 |
| HIST2H3C     | 0 |
| MIR4257      | 0 |
| MIR554       | 0 |
| RIAD1        | 0 |
| LOC100132111 | 0 |
| LCE5A        | 0 |
| CRCT1        | 0 |
| LCE3C        | 0 |
| LCE3B        | 0 |
| LCE2D        | 0 |
| LCE2C        | 0 |
| LCE2B        | 0 |
| LCE2A        | 0 |
| LCE4A        | 0 |
| C1orf68      | 0 |
| KPRP         | 0 |
| LCE1A        | 0 |
| LCE6A        | 0 |
| SMCP         | 0 |
| IVL          | 0 |
| SPRR4        | 0 |
| SPRR1A       | 0 |
| SPRR3        | 0 |
| SPRR1B       | 0 |
| LELP1        | 0 |
| LOR          | 0 |
| S100A9       | 0 |
| S100A7A      | 0 |
| AQP10        | 0 |
| MIR4258      | 0 |
| MIR92B       | 0 |
| TTC24        | 0 |
| CYCSP52      | 0 |
| CD1D         | 0 |
| CD1A         | 0 |
| CD1C         | 0 |
| CD1E         | 0 |
| OR10K1       | 0 |
| OR10R2       | 0 |
| OR10Z1       | 0 |
| OR6K6        | 0 |
| MNDA         | 0 |
| PYHIN1       | 0 |
| CADM3        | 0 |
| DARC         | 0 |
| FCER1A       | 0 |
| OR10J1       | 0 |
| APCS         | 0 |
| FCRL6        | 0 |
| LOC100505633 | 0 |
| ATP1A2       | 0 |
| ATP1A4       | 0 |
| LY9          | 0 |
| PCP4L1       | 0 |
| MIR4654      | 0 |
| MIR556       | 0 |
| LRRC52       | 0 |
| LOC440700    | 0 |
| FMO9P        | 0 |
| DUSP27       | 0 |
| MIR557       | 0 |
| XCL1         | 0 |
| LINC00626    | 0 |
| METTL11B     | 0 |
| PRRX1        | 0 |
| MROH9        | 0 |
| FMO3         | 0 |
| MIR1295B     | 0 |
| FMO6P        | 0 |
| FMO2         | 0 |

|              |   |
|--------------|---|
| FMO1         | 0 |
| MIR3120      | 0 |
| C1orf105     | 0 |
| FASLG        | 0 |
| LOC730159    | 0 |
| TNN          | 0 |
| FAM5B        | 0 |
| TEX35        | 0 |
| MIR4424      | 0 |
| GM140        | 0 |
| CACNA1E      | 0 |
| LINC00272    | 0 |
| RGSL1        | 0 |
| LOC284648    | 0 |
| HMCN1        | 0 |
| LOC440704    | 0 |
| RGS18        | 0 |
| RGS21        | 0 |
| RGS1         | 0 |
| RGS13        | 0 |
| MIR1278      | 0 |
| CFH          | 0 |
| CFHR3        | 0 |
| CFHR4        | 0 |
| CFHR2        | 0 |
| CFHR5        | 0 |
| LHX9         | 0 |
| MIR5191      | 0 |
| MIR1231      | 0 |
| GPR37L1      | 0 |
| OPTC         | 0 |
| AVPR1B       | 0 |
| CTSE         | 0 |
| IL20         | 0 |
| C4BPB        | 0 |
| C4BPA        | 0 |
| CR2          | 0 |
| CR1L         | 0 |
| MIR205HG     | 0 |
| SYT14        | 0 |
| SERTAD4      | 0 |
| MIR3122      | 0 |
| SNORA16B     | 0 |
| KCNK2        | 0 |
| LINC00210    | 0 |
| RNU5F-1      | 0 |
| MARK1        | 0 |
| C1orf65      | 0 |
| PRSS38       | 0 |
| WNT3A        | 0 |
| MIR3620      | 0 |
| MIR4666A     | 0 |
| CAPN9        | 0 |
| MAP10        | 0 |
| MIR4427      | 0 |
| MIR4671      | 0 |
| ACTN2        | 0 |
| LOC100130331 | 0 |
| RPS7P5       | 0 |
| FMN2         | 0 |
| MIR3123      | 0 |
| WDR64        | 0 |
| MIR4677      | 0 |
| LOC339529    | 0 |
| C1orf100     | 0 |
| OR2W5        | 0 |
| GCSAML       | 0 |
| OR2G2        | 0 |
| OR2G3        | 0 |
| OR2W3        | 0 |
| OR2T8        | 0 |
| OR2L13       | 0 |
| OR2L8        | 0 |
| OR2AK2       | 0 |
| OR2L1P       | 0 |
| OR2L5        | 0 |
| OR2L2        | 0 |
| OR2L3        | 0 |
| OR2M1P       | 0 |

|                    |   |
|--------------------|---|
| OR2M5              | 0 |
| OR2M2              | 0 |
| OR2M3              | 0 |
| OR2M4              | 0 |
| OR14C36            | 0 |
| OR2T4              | 0 |
| OR2T6              | 0 |
| OR2T1              | 0 |
| OR2T2              | 0 |
| OR2T3              | 0 |
| OR2T5              | 0 |
| OR2G6              | 0 |
| MIR3124            | 0 |
| FAM138F            | 0 |
| OR4F3              | 0 |
| TNFRSF18           | 0 |
| HES5               | 0 |
| MIR551A            | 0 |
| MIR4689            | 0 |
| MIR4252            | 0 |
| MIR34A             | 0 |
| C1orf200           | 0 |
| C1orf127           | 0 |
| PRAMEF11           | 0 |
| HNRNPCL1,LOC649330 | 0 |
| PRAMEF4            | 0 |
| PRAMEF10           | 0 |
| PRAMEF6            | 0 |
| PRAMEF5            | 0 |
| LOC440563          | 0 |
| PRAMEF3            | 0 |
| PRAMEF8            | 0 |
| PRAMEF13,PRAMEF14  | 0 |
| PRAMEF18           | 0 |
| PRAMEF7,PRAMEF8    | 0 |
| PRAMEF14           | 0 |
| PRAMEF18           | 0 |
| LRRC38             | 0 |
| HSPB7              | 0 |
| ESPNP              | 0 |
| MIR3675            | 0 |
| PADI2              | 0 |
| TAS1R2             | 0 |
| MIR4695            | 0 |
| RNF186             | 0 |
| PLA2G2E            | 0 |
| PLA2G2A            | 0 |
| PLA2G2C            | 0 |
| MIR4253            | 0 |
| CNR2               | 0 |
| SLC30A2            | 0 |
| TRIM63             | 0 |
| AIM1L              | 0 |
| ZNF683             | 0 |
| CD164L2            | 0 |
| FGR                | 0 |
| SNORD99            | 0 |
| MIR4420            | 0 |
| SNORD103A          | 0 |
| SNORD103A          | 0 |
| SNORD85            | 0 |
| MIR4254            | 0 |
| CSF3R              | 0 |
| GRIK3              | 0 |
| MIR5581            | 0 |
| RSPO1              | 0 |
| LOC339442          | 0 |
| SNORA55            | 0 |
| NT5C1A             | 0 |
| GUCA2A             | 0 |
| CLDN19             | 0 |
| KCNK               | 0 |
| CYP4Z2P            | 0 |
| PDZK1IP1           | 0 |
| SKINTL             | 0 |
| AGBL4              | 0 |
| BEND5              | 0 |
| SLC25A3P1          | 0 |
| LDLRAD1            | 0 |

|                 |   |
|-----------------|---|
| TTC22           | 0 |
| C1orf168        | 0 |
| C8B             | 0 |
| DAB1            | 0 |
| MIR4711         | 0 |
| CYP2J2          | 0 |
| C1orf87         | 0 |
| KANK4           | 0 |
| MIR3671         | 0 |
| MIR101-1        | 0 |
| MIR1262         | 0 |
| RPE65           | 0 |
| MIR186          | 0 |
| NEGR1           | 0 |
| NEGR1-IT1       | 0 |
| C1orf173        | 0 |
| SLC44A5         | 0 |
| ASB17           | 0 |
| ELTD1           | 0 |
| MIR548AP        | 0 |
| LOC100505768    | 0 |
| GBP7            | 0 |
| GBP5            | 0 |
| BARHL2          | 0 |
| HFM1            | 0 |
| MIR137_MIR137HG | 0 |
| MIR2682         | 0 |
| LPPR5           | 0 |
| LOC100128787    | 0 |
| RNU6-6          | 0 |
| OLFM3           | 0 |
| COL11A1         | 0 |
| AMY1A           | 0 |
| VAV3            | 0 |
| NBPF4           | 0 |
| HENMT1          | 0 |
| EPS8L3          | 0 |
| KCNA10          | 0 |
| KCNA2           | 0 |
| KCNA3           | 0 |
| PGCP1           | 0 |
| MIR4256         | 0 |
| LOC643441       | 0 |
| SYT6            | 0 |
| DENND2C         | 0 |
| TSPAN2          | 0 |
| NGF             | 0 |
| SPAG17          | 0 |
| HMGCS2          | 0 |
| ADAM30          | 0 |
| PPIAL4B         | 0 |
| LOC653513       | 0 |
| PDZK1P1         | 0 |
| PDZK1P1         | 0 |
| MIR5087         | 0 |
| FLJ39739        | 0 |
| PPIAL4B         | 0 |
| PPIAL4D         | 0 |
| HIST2H3A        | 0 |
| HIST2H2AA3      | 0 |
| HIST2H4A        | 0 |
| HORMAD1         | 0 |
| SELENBP1        | 0 |
| LINGO4          | 0 |
| C2CD4D          | 0 |
| THEM5           | 0 |
| TCHHL1          | 0 |
| TCHH            | 0 |
| RPTN            | 0 |
| FLG2            | 0 |
| CRNN            | 0 |
| LCE3E           | 0 |
| LCE3D           | 0 |
| LCE3A           | 0 |
| SPRR2D          | 0 |
| SPRR2A          | 0 |
| SPRR2B          | 0 |
| SPRR2E          | 0 |
| SPRR2F          | 0 |

|              |   |
|--------------|---|
| SPRR2C       | 0 |
| SPRR2G       | 0 |
| PGLYRP3      | 0 |
| PGLYRP4      | 0 |
| S100A12      | 0 |
| S100A8       | 0 |
| S100A7L2     | 0 |
| S100A7       | 0 |
| MIR190B      | 0 |
| SNORA42      | 0 |
| VHLL         | 0 |
| MIR9-1       | 0 |
| INSRR        | 0 |
| MIR765       | 0 |
| ETV3L        | 0 |
| FCRL5        | 0 |
| FCRL4        | 0 |
| FCRL3        | 0 |
| FCRL2        | 0 |
| FCRL1        | 0 |
| CD5L         | 0 |
| LOC646268    | 0 |
| CD1B         | 0 |
| OR10T2       | 0 |
| OR10K2       | 0 |
| OR6Y1        | 0 |
| OR6P1        | 0 |
| OR10X1       | 0 |
| SPTA1        | 0 |
| OR6K2        | 0 |
| OR6K3        | 0 |
| OR6N1        | 0 |
| OR6N2        | 0 |
| AIM2         | 0 |
| LOC100131825 | 0 |
| OR10J3       | 0 |
| OR10J5       | 0 |
| CRP          | 0 |
| IGSF9        | 0 |
| SLAMF9       | 0 |
| SLAMF6       | 0 |
| SLAMF1       | 0 |
| CD48         | 0 |
| CD244        | 0 |
| ITLN1        | 0 |
| ITLN2        | 0 |
| MPZ          | 0 |
| FCGR3B       | 0 |
| SH2D1B       | 0 |
| LOC100505795 | 0 |
| LMX1A        | 0 |
| RXRG         | 0 |
| MIR921       | 0 |
| ADCY10       | 0 |
| XCL2         | 0 |
| DPT          | 0 |
| SELP         | 0 |
| MIR3119-1    | 0 |
| LOC284688    | 0 |
| MIR1295A     | 0 |
| MYOC         | 0 |
| DNM3OS       | 0 |
| TNFSF18      | 0 |
| SLC9C2       | 0 |
| SNORD81      | 0 |
| SNORD80      | 0 |
| SNORD79      | 0 |
| SNORD78      | 0 |
| SNORD44      | 0 |
| SNORD77      | 0 |
| SNORD75      | 0 |
| SNORD74      | 0 |
| TNR          | 0 |
| MIR488       | 0 |
| LOC730102    | 0 |
| MIR3121      | 0 |
| RGS8         | 0 |
| SHCBP1L      | 0 |
| NCF2         | 0 |

|                 |   |
|-----------------|---|
| LOC100288079    | 0 |
| MIR548F1        | 0 |
| PTGS2           | 0 |
| FAM5C           | 0 |
| KCNT2           | 0 |
| MIR4735         | 0 |
| DENND1B         | 0 |
| ATP6V1G3        | 0 |
| MIR181B1        | 0 |
| MIR181A1        | 0 |
| CACNA1S         | 0 |
| TNNT2           | 0 |
| LAD1            | 0 |
| TNNI1           | 0 |
| RNU6-79         | 0 |
| LOC401980       | 0 |
| MYBPH           | 0 |
| CHI3L1          | 0 |
| CHIT1           | 0 |
| FMOD            | 0 |
| LINC00303       | 0 |
| KLHDC8A         | 0 |
| MIR135B         | 0 |
| PM20D1          | 0 |
| SLC26A9         | 0 |
| C1orf186        | 0 |
| FAIM3           | 0 |
| FCAMR           | 0 |
| MIR29B2         | 0 |
| ESRRG           | 0 |
| LOC728463       | 0 |
| SLC30A10        | 0 |
| MIR215          | 0 |
| MIR194-1        | 0 |
| MIR664,SNORA36B | 0 |
| C1orf140        | 0 |
| MIR320B2        | 0 |
| MIR4742         | 0 |
| LEFTY1          | 0 |
| LEFTY2          | 0 |
| ZNF847P         | 0 |
| WNT9A           | 0 |
| MIR5008         | 0 |
| HIST3H3         | 0 |
| PGBD5           | 0 |
| LOC149373       | 0 |
| SNRPD2P2        | 0 |
| LINC00582       | 0 |
| MIR4753         | 0 |
| MIR1537         | 0 |
| NID1            | 0 |
| MT1P2           | 0 |
| ZP4             | 0 |
| LOC339535       | 0 |
| GREM2           | 0 |
| RGS7            | 0 |
| PLD5            | 0 |
| LOC255654       | 0 |
| MIR3916         | 0 |
| OR2B11          | 0 |
| OR2C3           | 0 |
| OR13G1          | 0 |
| OR6F1           | 0 |
| OR1C1           | 0 |
| OR14A16         | 0 |
| OR11L1          | 0 |
| OR2T33          | 0 |
| OR2T12          | 0 |
| OR2M7           | 0 |
| OR2T29          | 0 |
| OR2T34          | 0 |
| OR2T10          | 0 |
| OR2T11          | 0 |
| OR2T35          | 0 |
| OR2T27          | 0 |
| OR14I1          | 0 |
| LYPD8           | 0 |
| LINC00200       | 0 |
| ADARB2-AS1      | 0 |



|                    |   |
|--------------------|---|
| LINC00705          | 0 |
| AKR1E2             | 0 |
| AKR1C1             | 0 |
| AKR1C4             | 0 |
| UCN3               | 0 |
| CALML3             | 0 |
| MIR3155A           | 0 |
| ECHDC3             | 0 |
| MIR4480            | 0 |
| MIR1265            | 0 |
| ST8SIA6-AS1        | 0 |
| MIR511-1           | 0 |
| MRC1               | 0 |
| MIR511-2           | 0 |
| SLC39A12           | 0 |
| PLXDC2             | 0 |
| MIR4675            | 0 |
| NEBL-AS1           | 0 |
| LOC100130992       | 0 |
| ARMC3              | 0 |
| PTF1A              | 0 |
| MIR603             | 0 |
| MYO3A              | 0 |
| GAD2               | 0 |
| APBB1IP            | 0 |
| LINC00202-2        | 0 |
| MIR5586            | 0 |
| LYZL1              | 0 |
| ANKRD30A           | 0 |
| ACTR3BP5           | 0 |
| MIR5100            | 0 |
| LINC00619          | 0 |
| LINC00840          | 0 |
| LINC00841          | 0 |
| LOC100130539       | 0 |
| TMEM72             | 0 |
| ANKRD30BP3         | 0 |
| MIR3156-1          | 0 |
| PPYR1              | 0 |
| ANXA8L2            | 0 |
| BMS1P2             | 0 |
| FAM25C             | 0 |
| ANXA8              | 0 |
| FAM170B-AS1        | 0 |
| C10orf71           | 0 |
| CHAT               | 0 |
| SLC18A3            | 0 |
| C10orf53           | 0 |
| PRKG1              | 0 |
| MIR605             | 0 |
| DKK1               | 0 |
| BICC1              | 0 |
| PHYHIPL            | 0 |
| C10orf107          | 0 |
| MIR548AV           | 0 |
| ANXA2P3            | 0 |
| LRRTM3             | 0 |
| SNORD98            | 0 |
| SRGN               | 0 |
| CHST3              | 0 |
| MIR4676            | 0 |
| OIT3               | 0 |
| ZNF503-AS1         | 0 |
| LINC00856          | 0 |
| SFTPA1             | 0 |
| LOC100288974,MBL1P | 0 |
| PLAC9              | 0 |
| NRG3               | 0 |
| C10orf99           | 0 |
| CDHR1              | 0 |
| RGR                | 0 |
| LINC00858          | 0 |
| GRID1-AS1          | 0 |
| FAM25A             | 0 |
| MIR4678            | 0 |
| LIPJ               | 0 |
| LIPF               | 0 |
| LIPK               | 0 |
| LIPN               | 0 |

|                  |   |
|------------------|---|
| LIPM             | 0 |
| MIR4679-1        | 0 |
| IFIT1B           | 0 |
| LOC643529        | 0 |
| LINC00502        | 0 |
| HHEX             | 0 |
| CYP26C1          | 0 |
| PDE6C            | 0 |
| LG1              | 0 |
| C10orf129        | 0 |
| DNMT             | 0 |
| LOC100505540     | 0 |
| ANKRD2           | 0 |
| MIR5692C2        | 0 |
| NKX2-3           | 0 |
| MIR608           | 0 |
| FLJ41350         | 0 |
| MIR146B          | 0 |
| LOC729020        | 0 |
| INA              | 0 |
| SORCS3           | 0 |
| RNU6-53          | 0 |
| RBM20            | 0 |
| TECTB            | 0 |
| MIR4295          | 0 |
| TDRD1            | 0 |
| VWA2             | 0 |
| ATRNL1           | 0 |
| CCDC172          | 0 |
| PNLIPRP3         | 0 |
| PNLIP            | 0 |
| KCNK18           | 0 |
| EMX2             | 0 |
| MIR4681          | 0 |
| MIR4682          | 0 |
| PPAPDC1A         | 0 |
| MIR5694          | 0 |
| MIR3941          | 0 |
| FAM24A           | 0 |
| HMX2             | 0 |
| GPR26            | 0 |
| LOC100169752     | 0 |
| NPS              | 0 |
| FOXI2            | 0 |
| LOC399829        | 0 |
| GPR123           | 0 |
| UTF1             | 0 |
| DUX2,DUX4,DUX4L2 | 0 |
| MIR5699          | 0 |
| ADARB2           | 0 |
| LINC00700        | 0 |
| LINC00701        | 0 |
| AKR1C6P          | 0 |
| AKR1C2           | 0 |
| AKR1CL1          | 0 |
| CALML5           | 0 |
| IL2RA            | 0 |
| MIR3155B         | 0 |
| GATA3-AS1        | 0 |
| LINC00710        | 0 |
| CELF2-AS2        | 0 |
| UCMA             | 0 |
| ITGA8            | 0 |
| LOC100129213     | 0 |
| C10orf113        | 0 |
| MIR1915          | 0 |
| EBLN1            | 0 |
| C10orf67         | 0 |
| GPR158-AS1       | 0 |
| PTCHD3           | 0 |
| MKX              | 0 |
| LINC00837        | 0 |
| MIR604           | 0 |
| MIR938           | 0 |
| KIAA1462         | 0 |
| LYZL2            | 0 |
| LINC00838        | 0 |
| MTRNR2L7         | 0 |
| CXCL12           | 0 |

|                 |   |
|-----------------|---|
| TMEM72-AS1      | 0 |
| RSU1P2          | 0 |
| ZFAND4          | 0 |
| PTPN20A,PTPN20B | 0 |
| FAM25C          | 0 |
| AGAP9           | 0 |
| GDF10           | 0 |
| PTPN20A,PTPN20B | 0 |
| FRMPD2P1        | 0 |
| FAM25C          | 0 |
| LRRC18          | 0 |
| MIR4294         | 0 |
| FAM170B         | 0 |
| C10orf128       | 0 |
| DRGX            | 0 |
| OGDHL           | 0 |
| PRKG1-AS1       | 0 |
| MBL2            | 0 |
| PCDH15          | 0 |
| MIR3924         | 0 |
| M1              | 0 |
| C10orf40        | 0 |
| TMEM26          | 0 |
| MIR1296         | 0 |
| CTNNA3          | 0 |
| NEUROG3         | 0 |
| NPPFR1          | 0 |
| TBATA           | 0 |
| C10orf105       | 0 |
| C10orf54        | 0 |
| MIR1256         | 0 |
| DUPD1           | 0 |
| SFTPD           | 0 |
| LRIT2           | 0 |
| LRIT1           | 0 |
| MIR346          | 0 |
| LOC728218       | 0 |
| RNLS            | 0 |
| ANKRD22         | 0 |
| MIR4679-2       | 0 |
| CH25H           | 0 |
| SLC16A12        | 0 |
| MIR107          | 0 |
| HTR7            | 0 |
| PPP1R3C         | 0 |
| RBP4            | 0 |
| LOC100128054    | 0 |
| CYP2C8          | 0 |
| PDLIM1          | 0 |
| MIR3157         | 0 |
| OPALIN          | 0 |
| SFRP5           | 0 |
| MIR4685         | 0 |
| HPSE2           | 0 |
| PKD2L1          | 0 |
| TLX1NB          | 0 |
| LBX1            | 0 |
| MIR3158-2       | 0 |
| PITX3           | 0 |
| MIR609          | 0 |
| MIR4482-1       | 0 |
| SORCS1          | 0 |
| GUCY2GP         | 0 |
| MIR4483         | 0 |
| VAX1            | 0 |
| MIR3663         | 0 |
| PRLHR           | 0 |
| SNORA19         | 0 |
| C10orf120       | 0 |
| NKX1-2          | 0 |
| MIR4296         | 0 |
| TEX36           | 0 |
| ADAM12          | 0 |
| LINC00601       | 0 |
| C10orf90        | 0 |
| CLRN3           | 0 |
| MIR4297         | 0 |
| MIR378C         | 0 |
| NKX6-2          | 0 |

|               |   |
|---------------|---|
| TTC40         | 0 |
| MIR202        | 0 |
| CALY          | 0 |
| FUOM          | 0 |
| MIR3944       | 0 |
| FRG2B         | 0 |
| SCGB1C1       | 0 |
| ODF3          | 0 |
| MUC2          | 0 |
| KRTAP5-5      | 0 |
| FAM99A        | 0 |
| SYT8          | 0 |
| TNNT3         | 0 |
| IGF2-AS       | 0 |
| MIR4686       | 0 |
| TSPAN32       | 0 |
| MRGPRG-AS1    | 0 |
| OR52K2        | 0 |
| OR52K1        | 0 |
| OR52M1        | 0 |
| OR52I2        | 0 |
| OR51D1        | 0 |
| OR51E1        | 0 |
| OR51F2        | 0 |
| OR51T1        | 0 |
| OR51A7        | 0 |
| MMP26         | 0 |
| OR51L1        | 0 |
| OR52J3        | 0 |
| OR51B6        | 0 |
| OR51M1        | 0 |
| OR51Q1        | 0 |
| OR56B1        | 0 |
| OR52N4        | 0 |
| OR52N2        | 0 |
| OR52E4        | 0 |
| OR56A3        | 0 |
| OR52W1        | 0 |
| CCKBR         | 0 |
| OR2AG1        | 0 |
| OR10A5        | 0 |
| OR5E1P        | 0 |
| TUB           | 0 |
| KRT8P41       | 0 |
| RASSF10       | 0 |
| MYOD1         | 0 |
| MRGPRX4       | 0 |
| SAA1          | 0 |
| MIR4486       | 0 |
| SLC6A5        | 0 |
| NELL1         | 0 |
| ANO5          | 0 |
| SLC17A6       | 0 |
| LUZP2         | 0 |
| ANO3          | 0 |
| FIBIN         | 0 |
| BBOX1         | 0 |
| MIR610        | 0 |
| DKFZp686K1684 | 0 |
| WT1-AS        | 0 |
| EHF           | 0 |
| MIR1343       | 0 |
| MIR3973       | 0 |
| MIR670        | 0 |
| MIR129-2      | 0 |
| ACCSL         | 0 |
| LOC100507384  | 0 |
| MIR4688       | 0 |
| MIR3160-2     | 0 |
| OR4B1         | 0 |
| OR4X2         | 0 |
| OR4X1         | 0 |
| OR4S1         | 0 |
| OR4C3         | 0 |
| OR4A47        | 0 |
| TRIM49B       | 0 |
| LOC440040     | 0 |
| OR4C13        | 0 |
| LOC646813     | 0 |

|             |   |
|-------------|---|
| OR4C46      | 0 |
| TRIM48      | 0 |
| OR4A16      | 0 |
| OR4A15      | 0 |
| OR4C15      | 0 |
| OR4C16      | 0 |
| OR4P4       | 0 |
| OR4S2       | 0 |
| OR4C6       | 0 |
| OR5D13      | 0 |
| OR5D14      | 0 |
| OR5L1       | 0 |
| OR5D18      | 0 |
| OR5L2       | 0 |
| OR5D16      | 0 |
| TRIM51      | 0 |
| OR5AS1      | 0 |
| OR8I2       | 0 |
| OR8H2       | 0 |
| OR8H3       | 0 |
| OR5J2       | 0 |
| OR5T3       | 0 |
| OR5T1       | 0 |
| OR8K3       | 0 |
| OR8K1       | 0 |
| OR8J1       | 0 |
| OR8U1,OR8U8 | 0 |
| OR5AR1      | 0 |
| OR9G9       | 0 |
| OR5AK2      | 0 |
| OR5AK4P     | 0 |
| LRRC55      | 0 |
| P2RX3       | 0 |
| MIR130A     | 0 |
| OR9Q1       | 0 |
| OR6Q1       | 0 |
| OR9Q2       | 0 |
| OR1S1       | 0 |
| GLYATL1     | 0 |
| OR5AN1      | 0 |
| OR5A1       | 0 |
| OR4D6       | 0 |
| OR4D10      | 0 |
| OR4D11      | 0 |
| OR4D9       | 0 |
| PLAC1L      | 0 |
| MS4A3       | 0 |
| MS4A2       | 0 |
| MS4A4A      | 0 |
| MS4A6E      | 0 |
| MS4A14      | 0 |
| MS4A5       | 0 |
| MS4A1       | 0 |
| MS4A12      | 0 |
| MS4A13      | 0 |
| LINC00301   | 0 |
| MS4A8B      | 0 |
| MS4A15      | 0 |
| PGA3        | 0 |
| PGA4        | 0 |
| PGA5        | 0 |
| MIR4488     | 0 |
| LRRC10B     | 0 |
| SCGB1D1     | 0 |
| SCGB2A1     | 0 |
| SCGB1D2     | 0 |
| SCGB2A2     | 0 |
| SCGB1A1     | 0 |
| LGALS12     | 0 |
| MIR1237     | 0 |
| SLC22A12    | 0 |
| SPDYC       | 0 |
| MIR548AR    | 0 |
| MIR4690     | 0 |
| MIR4489     | 0 |
| NPAS4       | 0 |
| MIR4691     | 0 |
| ANO1        | 0 |
| MIR548K     | 0 |

|                     |   |
|---------------------|---|
| DEFB108B            | 0 |
| FOLR1               | 0 |
| FOLR2               | 0 |
| MIR4692             | 0 |
| SLCO2B1             | 0 |
| TPBGL               | 0 |
| MOGAT2              | 0 |
| OMP                 | 0 |
| THRSP               | 0 |
| CCDC83              | 0 |
| GRM5-AS1            | 0 |
| TYR                 | 0 |
| FOLH1B              | 0 |
| TRIM77              | 0 |
| MIR5692A1           | 0 |
| TRIM53AP            | 0 |
| TRIM49D1P,TRIM49D2P | 0 |
| TRIM64              | 0 |
| TRIM49C             | 0 |
| UBTFL1              | 0 |
| MTNR1B              | 0 |
| CCDC67              | 0 |
| LOC643037           | 0 |
| KDM4E               | 0 |
| MIR1260B            | 0 |
| CNTN5               | 0 |
| LOC101054525        | 0 |
| WTAPP1              | 0 |
| MIR4693             | 0 |
| DDI1                | 0 |
| LOC643923           | 0 |
| RAB39A              | 0 |
| C11orf87            | 0 |
| MIR4491             | 0 |
| MIR34B              | 0 |
| MIR34C              | 0 |
| C11orf88            | 0 |
| LAYN                | 0 |
| CLDN25              | 0 |
| HTR3B               | 0 |
| HTR3A               | 0 |
| ZBTB16              | 0 |
| NXPE2               | 0 |
| APOC3               | 0 |
| TMPRSS4             | 0 |
| CD3E                | 0 |
| MIR4492             | 0 |
| FOXR1               | 0 |
| SORL1               | 0 |
| LOC341056           | 0 |
| OR8D4               | 0 |
| OR4D5               | 0 |
| OR10G4              | 0 |
| OR10G9              | 0 |
| OR10G8              | 0 |
| OR8G2               | 0 |
| OR8G1,OR8G5         | 0 |
| OR8A1               | 0 |
| HEPN1               | 0 |
| PKNOX2              | 0 |
| PATE1               | 0 |
| PATE3               | 0 |
| PATE4               | 0 |
| KIRREL3-AS2         | 0 |
| KIRREL3-AS3         | 0 |
| C11orf44            | 0 |
| MIR210              | 0 |
| KRTAP5-3            | 0 |
| KRTAP5-4            | 0 |
| FAM99B              | 0 |
| MIR4298             | 0 |
| MIR483              | 0 |
| TH                  | 0 |
| ASCL2               | 0 |
| C11orf21            | 0 |
| MRGPRG              | 0 |
| MRGPRE              | 0 |
| OR52B4              | 0 |
| C11orf40            | 0 |

|                     |   |
|---------------------|---|
| OR51E2              | 0 |
| OR51F1              | 0 |
| OR52R1              | 0 |
| OR51S1              | 0 |
| OR51G2              | 0 |
| OR51G1              | 0 |
| OR51A4              | 0 |
| OR51A2              | 0 |
| OR52E2              | 0 |
| OR52A5              | 0 |
| OR52A1              | 0 |
| OR51V1              | 0 |
| OR51B2              | 0 |
| OR51I1              | 0 |
| UBQLN3              | 0 |
| OR52H1              | 0 |
| OR52N5              | 0 |
| OR52N1              | 0 |
| OR52E6              | 0 |
| OR52E8              | 0 |
| OR56A5              | 0 |
| OR52L1              | 0 |
| OR56A4              | 0 |
| OR56A1              | 0 |
| OR52B2              | 0 |
| CYB5R2              | 0 |
| OVCH2               | 0 |
| OR5P2               | 0 |
| OR5P3               | 0 |
| OR10A6              | 0 |
| OR10A3              | 0 |
| NLRP10              | 0 |
| RIC3                | 0 |
| LMO1                | 0 |
| MIR5691             | 0 |
| LYVE1               | 0 |
| MRV11               | 0 |
| MIR4299             | 0 |
| PTH                 | 0 |
| CALCA               | 0 |
| ABCC8               | 0 |
| SAA3P               | 0 |
| SAA2,SAA2-SAA4,SAA4 | 0 |
| MRGPRX1             | 0 |
| MRGPRX2             | 0 |
| CSRP3               | 0 |
| NAV2-AS5            | 0 |
| NAV2-AS4            | 0 |
| MIR4694             | 0 |
| DBX1                | 0 |
| CCDC179             | 0 |
| KCNA4               | 0 |
| MPPED2              | 0 |
| WT1                 | 0 |
| SLC1A2              | 0 |
| LRRC4C              | 0 |
| LOC100507205        | 0 |
| HNRNPKP3            | 0 |
| CHST1               | 0 |
| C11orf94            | 0 |
| MIR3160-1           | 0 |
| MIR5582             | 0 |
| SNORD67             | 0 |
| OR4C45              | 0 |
| TRIM64C             | 0 |
| FOLH1               | 0 |
| OR4C12              | 0 |
| LOC441601           | 0 |
| OR4A5               | 0 |
| TRIM51HP            | 0 |
| OR4C11              | 0 |
| OR5W2               | 0 |
| OR5I1               | 0 |
| OR10AG1             | 0 |
| OR7E5P              | 0 |
| OR5F1               | 0 |
| OR8J3               | 0 |
| OR8K5               | 0 |
| OR5T2               | 0 |

|           |   |
|-----------|---|
| OR8H1     | 0 |
| OR5R1     | 0 |
| OR5M9     | 0 |
| OR5M3     | 0 |
| OR5M8     | 0 |
| OR5M11    | 0 |
| OR5M10    | 0 |
| OR5M1     | 0 |
| OR5AP2    | 0 |
| OR9G4     | 0 |
| APLNR     | 0 |
| PRG3      | 0 |
| OR9I1     | 0 |
| OR1S2     | 0 |
| OR10Q1    | 0 |
| OR10W1    | 0 |
| OR5B17    | 0 |
| OR5B3     | 0 |
| OR5B2     | 0 |
| OR5B12    | 0 |
| OR5B21    | 0 |
| GLYAT     | 0 |
| GLYATL2   | 0 |
| LOC283194 | 0 |
| MPEG1     | 0 |
| OR5A2     | 0 |
| MIR3162   | 0 |
| OR10V1    | 0 |
| GIF       | 0 |
| TCN1      | 0 |
| MS4A6A    | 0 |
| MIR1908   | 0 |
| SCGB1D4   | 0 |
| SNORD30   | 0 |
| SNORD28   | 0 |
| SNORD27   | 0 |
| SNORD26   | 0 |
| SNORD25   | 0 |
| SLC22A6   | 0 |
| SLC22A8   | 0 |
| SLC22A24  | 0 |
| SLC22A25  | 0 |
| MIR3680-2 | 0 |
| HRASLS5   | 0 |
| MIR192    | 0 |
| MIR194-2  | 0 |
| GPHA2     | 0 |
| C11orf85  | 0 |
| CD248     | 0 |
| CTSF      | 0 |
| GPR152    | 0 |
| CABP2     | 0 |
| ALDH3B2   | 0 |
| MRGPRF    | 0 |
| FGF19     | 0 |
| FGF4      | 0 |
| FGF3      | 0 |
| MIR3664   | 0 |
| KRTAP5-11 | 0 |
| MIR3165   | 0 |
| MIR139    | 0 |
| KCNE3     | 0 |
| CHRD2     | 0 |
| MIR4696   | 0 |
| OR2AT4    | 0 |
| MIR326    | 0 |
| LOC283214 | 0 |
| LRRC32    | 0 |
| GUCY2EP   | 0 |
| GDPD4     | 0 |
| RNU6-83   | 0 |
| MIR708    | 0 |
| MIR5579   | 0 |
| MIR4300   | 0 |
| FAM181B   | 0 |
| SNORA70E  | 0 |
| CCDC89    | 0 |
| OR7E2P    | 0 |
| GRM5      | 0 |



|                         |   |
|-------------------------|---|
| TRIM49                  | 0 |
| TRIM64B                 | 0 |
| TRIM49D1P,TRIM49D2P     | 0 |
| TRIM53AP                | 0 |
| MIR4490                 | 0 |
| SNORD5                  | 0 |
| MIR1304                 | 0 |
| JRKL-AS1                | 0 |
| PGR                     | 0 |
| MIR3920                 | 0 |
| MMP20                   | 0 |
| MMP27                   | 0 |
| MMP8                    | 0 |
| MMP12                   | 0 |
| MMP13                   | 0 |
| PDGFD                   | 0 |
| CASP12                  | 0 |
| LOC643733               | 0 |
| CARD17                  | 0 |
| CARD18                  | 0 |
| ARHGAP20                | 0 |
| LOC100132078            | 0 |
| BTG4                    | 0 |
| IL18                    | 0 |
| LOC100288346            | 0 |
| DRD2                    | 0 |
| MIR4301                 | 0 |
| NXPE1                   | 0 |
| NXPE4                   | 0 |
| LOC283143               | 0 |
| APOA5                   | 0 |
| APOA4                   | 0 |
| DSCAML1                 | 0 |
| FXYD2,FXYD6,FXYD6-FXYD2 | 0 |
| TMPRSS4-AS1             | 0 |
| MFRP                    | 0 |
| TRIM29                  | 0 |
| LOC649133               | 0 |
| MIR125B1                | 0 |
| BLID                    | 0 |
| MIRLET7A2               | 0 |
| MIR100                  | 0 |
| BSX                     | 0 |
| MIR4493                 | 0 |
| OR6X1                   | 0 |
| OR6M1                   | 0 |
| TMEM225                 | 0 |
| OR6T1                   | 0 |
| OR10S1                  | 0 |
| OR10G7                  | 0 |
| OR8D1                   | 0 |
| OR8D2                   | 0 |
| OR8B2                   | 0 |
| OR8B3                   | 0 |
| OR8B4                   | 0 |
| OR8B8                   | 0 |
| OR8B12                  | 0 |
| MIR3167                 | 0 |
| FLI1-AS1                | 0 |
| SPATA19                 | 0 |
| IQSEC3                  | 0 |
| CACNA1C-IT3             | 0 |
| KCNA1                   | 0 |
| KCNA5                   | 0 |
| NTF3                    | 0 |
| MIR200C                 | 0 |
| MIR141                  | 0 |
| ACSM4                   | 0 |
| DPPA3                   | 0 |
| NANOGNB                 | 0 |
| CLEC6A                  | 0 |
| KLRF1                   | 0 |
| KLRF2                   | 0 |
| CLEC12A                 | 0 |
| CLEC12B                 | 0 |
| CLEC9A                  | 0 |
| TMEM52B                 | 0 |
| KLRD1                   | 0 |
| MIR1244-2               | 0 |

|                |   |
|----------------|---|
| MIR613         | 0 |
| MIR614         | 0 |
| H2AFJ          | 0 |
| PDE6H          | 0 |
| PTPRO          | 0 |
| SKP1P2         | 0 |
| MIR3974        | 0 |
| PIK3C2G        | 0 |
| CAPZA3         | 0 |
| LOC100506393   | 0 |
| PDE3A          | 0 |
| MIR920         | 0 |
| LRMP           | 0 |
| LOC101055625   | 0 |
| C12orf40       | 0 |
| LRRK2          | 0 |
| CNTN1          | 0 |
| MIR4698        | 0 |
| C12orf68       | 0 |
| ANP32D         | 0 |
| C12orf54       | 0 |
| WNT1           | 0 |
| AQP2           | 0 |
| AQP5           | 0 |
| TMPRSS12       | 0 |
| HIGD1C         | 0 |
| ANKRD33        | 0 |
| HOXC12         | 0 |
| MIR196A2       | 0 |
| MIR615         | 0 |
| MIR148B        | 0 |
| MUCL1          | 0 |
| NEUROD4        | 0 |
| OR9K2          | 0 |
| OR10A7         | 0 |
| OR6C74         | 0 |
| OR6C1          | 0 |
| OR6C3          | 0 |
| OR6C75         | 0 |
| OR6C65         | 0 |
| OR6C76         | 0 |
| OR6C2          | 0 |
| OR6C68         | 0 |
| OR6C4          | 0 |
| OR2AP1         | 0 |
| OR10P1         | 0 |
| MIR1228        | 0 |
| DTX3           | 0 |
| SLC26A10       | 0 |
| MIRLET71       | 0 |
| MIR548C        | 0 |
| FLJ41278       | 0 |
| MIR3913-2      | 0 |
| TPH2           | 0 |
| TRHDE          | 0 |
| MIR1252        | 0 |
| MIR5692B       | 0 |
| PTPRQ          | 0 |
| MYF6           | 0 |
| MYF5           | 0 |
| ACSS3          | 0 |
| MIR4699        | 0 |
| LRRIQ1         | 0 |
| ALX1           | 0 |
| NTS            | 0 |
| LINC00615      | 0 |
| CLLU1          | 0 |
| C12orf74       | 0 |
| MIR5700        | 0 |
| KRT19P2.MIR492 | 0 |
| MIR331         | 0 |
| MIR3685        | 0 |
| PGAM1P5        | 0 |
| RMST           | 0 |
| MIR1251        | 0 |
| MIR135A2       | 0 |
| FAM71C         | 0 |
| MIR1827        | 0 |
| SLC17A8        | 0 |

|                         |   |
|-------------------------|---|
| NR1H4                   | 0 |
| ANO4                    | 0 |
| SPIC                    | 0 |
| MYBPC1                  | 0 |
| ASCL1                   | 0 |
| MIR3922                 | 0 |
| RFX4                    | 0 |
| ASCL4                   | 0 |
| WSCD2                   | 0 |
| DAO                     | 0 |
| MIR4497                 | 0 |
| CCDC63                  | 0 |
| LOC100131138            | 0 |
| TBX5-AS1                | 0 |
| HSPB8                   | 0 |
| CCDC60                  | 0 |
| TMEM233                 | 0 |
| P2RX7                   | 0 |
| MIR5188                 | 0 |
| LOC100128554            | 0 |
| TMEM132C                | 0 |
| MIR3612                 | 0 |
| FZD10                   | 0 |
| PIWIL1                  | 0 |
| MMP17                   | 0 |
| FAM138D                 | 0 |
| LOC574538               | 0 |
| MIR3649                 | 0 |
| CACNA1C-AS4             | 0 |
| CACNA1C-AS1             | 0 |
| LOC283440               | 0 |
| FGF23                   | 0 |
| FGF6                    | 0 |
| SCARNA11                | 0 |
| CD163                   | 0 |
| APOBEC1                 | 0 |
| GDF3                    | 0 |
| CLEC4C                  | 0 |
| CLEC4E                  | 0 |
| PZP                     | 0 |
| A2MP1                   | 0 |
| MIR1244-1               | 0 |
| KLRB1                   | 0 |
| CD69                    | 0 |
| CLEC2A                  | 0 |
| CLEC1B                  | 0 |
| CLEC1A                  | 0 |
| OLR1                    | 0 |
| KLRC4,KLRC4-KLRK1,KLRK1 | 0 |
| KLRC3                   | 0 |
| KLRC1                   | 0 |
| TAS2R7                  | 0 |
| TAS2R8                  | 0 |
| TAS2R9                  | 0 |
| TAS2R42                 | 0 |
| PRB4                    | 0 |
| PRB1                    | 0 |
| PRB2                    | 0 |
| RNU6-19                 | 0 |
| C12orf36                | 0 |
| GRIN2B                  | 0 |
| ART4                    | 0 |
| MGP                     | 0 |
| ERP27                   | 0 |
| RERG                    | 0 |
| SLC15A5                 | 0 |
| LMO3                    | 0 |
| REGL                    | 0 |
| PLCZ1                   | 0 |
| KCNJ8                   | 0 |
| SOX5                    | 0 |
| LINC00477               | 0 |
| C12orf77                | 0 |
| MIR4302                 | 0 |
| LOC100506451            | 0 |
| MANSC4                  | 0 |
| OVCH1                   | 0 |
| TMTC1                   | 0 |
| RNU6-78                 | 0 |

|              |   |
|--------------|---|
| SYT10        | 0 |
| CPNE8        | 0 |
| ABCD2        | 0 |
| ADAMTS20     | 0 |
| DBX2         | 0 |
| RNY5         | 0 |
| AMIGO2       | 0 |
| PCED1B-AS1   | 0 |
| OR10AD1      | 0 |
| MIR4701      | 0 |
| C1QL4        | 0 |
| LOC283332    | 0 |
| MIR1293      | 0 |
| FIGNL2       | 0 |
| KRT84        | 0 |
| KRT82        | 0 |
| KRT75        | 0 |
| KRT6B        | 0 |
| KRT6C        | 0 |
| KRT6A        | 0 |
| KRT71        | 0 |
| KRT74        | 0 |
| KRT72        | 0 |
| KRT2         | 0 |
| KRT77        | 0 |
| KRT76        | 0 |
| KRT3         | 0 |
| KRT78        | 0 |
| HOXC-AS5     | 0 |
| GTSF1        | 0 |
| PPP1R1A      | 0 |
| GLYCAM1      | 0 |
| LACRT        | 0 |
| TESPA1       | 0 |
| OR6C6        | 0 |
| OR6C70       | 0 |
| SNORD59B     | 0 |
| SNORD59A     | 0 |
| TAC3         | 0 |
| B4GALNT1     | 0 |
| MIR26A2      | 0 |
| AVPR1A       | 0 |
| C12orf56     | 0 |
| WIF1         | 0 |
| IFNG         | 0 |
| IL26         | 0 |
| IL22         | 0 |
| SNORA70G     | 0 |
| MIR1279      | 0 |
| MIR3913-1    | 0 |
| TSPAN8       | 0 |
| TRHDE-AS1    | 0 |
| LOC100507377 | 0 |
| KCNC2        | 0 |
| LIN7A        | 0 |
| MIR617       | 0 |
| MIR618       | 0 |
| PPFIA2       | 0 |
| SLC6A15      | 0 |
| TSPAN19      | 0 |
| RASSF9       | 0 |
| MGAT4C       | 0 |
| MIR548AL     | 0 |
| MKRN9P       | 0 |
| CCER1        | 0 |
| EPYC         | 0 |
| KERA         | 0 |
| LUM          | 0 |
| DCN          | 0 |
| CLLU1OS      | 0 |
| LOC643339    | 0 |
| MIR4303      | 0 |
| SLC9A7P1     | 0 |
| SLC5A8       | 0 |
| PAH          | 0 |
| C12orf42     | 0 |
| LOC100287944 | 0 |
| LOC728739    | 0 |
| LHX5         | 0 |

|              |   |
|--------------|---|
| TBX5         | 0 |
| MIR620       | 0 |
| MIR4472-2    | 0 |
| KSR2         | 0 |
| LOC144742    | 0 |
| MIR4498      | 0 |
| MORN3        | 0 |
| IL31         | 0 |
| MIR4304      | 0 |
| LOC400084    | 0 |
| LOC440117    | 0 |
| TMEM132D     | 0 |
| LOC100190940 | 0 |
| FLJ31485     | 0 |
| LRCOL1       | 0 |
| ANHX         | 0 |
| LINC00442    | 0 |
| RNU6-52      | 0 |
| LINC00421    | 0 |
| LINC00327    | 0 |
| TNFRSF19     | 0 |
| MIR2276      | 0 |
| RNF17        | 0 |
| ATP8A2       | 0 |
| SNORD102     | 0 |
| GSX1         | 0 |
| LINC00544    | 0 |
| LINC00398    | 0 |
| MEDAG        | 0 |
| TEX26        | 0 |
| EEF1DP3      | 0 |
| KL           | 0 |
| SPG20OS      | 0 |
| CCNA1        | 0 |
| SERTM1       | 0 |
| LINC00547    | 0 |
| LINC00366    | 0 |
| LINC00332    | 0 |
| RGCC         | 0 |
| TNFSF11      | 0 |
| FAM216B      | 0 |
| DNAJC15      | 0 |
| LINC00284    | 0 |
| SERP2        | 0 |
| CYSLTR2      | 0 |
| ARL11        | 0 |
| MIR4703      | 0 |
| MIR759       | 0 |
| OLFM4        | 0 |
| LINC00558    | 0 |
| MIR5007      | 0 |
| PRR20B       | 0 |
| PRR20D       | 0 |
| PRR20E       | 0 |
| PRR20A       | 0 |
| PCDH17       | 0 |
| DIAPH3-AS1   | 0 |
| DIAPH3-AS2   | 0 |
| PCDH9-AS2    | 0 |
| PCDH9-AS3    | 0 |
| ATXN8OS      | 0 |
| LINC00348    | 0 |
| LINC00381    | 0 |
| LINC00347    | 0 |
| BTF3P11      | 0 |
| IRG1         | 0 |
| MYCBP2-AS1   | 0 |
| SCEL         | 0 |
| SLAIN1       | 0 |
| LINC00446    | 0 |
| LINC00333    | 0 |
| LINC00351    | 0 |
| SLITRK5      | 0 |
| LINC00433    | 0 |
| MIR622       | 0 |
| GPC6         | 0 |
| CLDN10       | 0 |
| HS6ST3       | 0 |

|                           |   |
|---------------------------|---|
| MIR3170                   | 0 |
| FKSG29                    | 0 |
| MIR623                    | 0 |
| MIR4306                   | 0 |
| ITGBL1                    | 0 |
| FGF14-AS2                 | 0 |
| DAOA                      | 0 |
| LINC00343                 | 0 |
| LINC00551                 | 0 |
| LINC00443                 | 0 |
| SOX1                      | 0 |
| SPACA7                    | 0 |
| C13orf35                  | 0 |
| GRK1                      | 0 |
| TMEM255B                  | 0 |
| TUBA3C                    | 0 |
| ANKRD26P3                 | 0 |
| GJB2                      | 0 |
| GJB6                      | 0 |
| MIR4499                   | 0 |
| LINC00424                 | 0 |
| BASP1P1                   | 0 |
| SPATA13-AS1               | 0 |
| AMER2                     | 0 |
| SHISA2                    | 0 |
| PRHOXNB                   | 0 |
| FLT3                      | 0 |
| LINC00297                 | 0 |
| TEX26-AS1                 | 0 |
| LINC00423                 | 0 |
| LINC00457                 | 0 |
| MAB21L1                   | 0 |
| DCLK1                     | 0 |
| CCDC169,CCDC169-SOHLH2,SC | 0 |
| SPG20                     | 0 |
| CSNK1A1L                  | 0 |
| POSTN                     | 0 |
| TRPC4                     | 0 |
| STOML3                    | 0 |
| LHFP                      | 0 |
| MIR4305                   | 0 |
| LINC00548                 | 0 |
| MIR320D1                  | 0 |
| EPST11                    | 0 |
| SMIM2-IT1                 | 0 |
| FAM194B                   | 0 |
| KIAA0226L                 | 0 |
| HTR2A                     | 0 |
| LINC00462                 | 0 |
| MIR3613                   | 0 |
| MIR16-1                   | 0 |
| MIR15A                    | 0 |
| RNASEH2B-AS1              | 0 |
| GUCY1B2                   | 0 |
| MIR5693                   | 0 |
| MIR1297                   | 0 |
| MIR3169                   | 0 |
| PCDH20                    | 0 |
| PCDH9                     | 0 |
| LINC00550                 | 0 |
| KLHL1                     | 0 |
| CTAGE11P                  | 0 |
| MIR3665                   | 0 |
| EDNRB                     | 0 |
| LINC00331                 | 0 |
| NDFIP2-AS1                | 0 |
| SLITRK1                   | 0 |
| SLITRK6                   | 0 |
| MIR4500HG                 | 0 |
| MIR4500                   | 0 |
| LINC00353                 | 0 |
| LINC00559                 | 0 |
| LINC00379                 | 0 |
| GPC5-AS1                  | 0 |
| GPC6-AS2                  | 0 |
| SOX21                     | 0 |
| CLDN10-AS1                | 0 |
| LINC00359                 | 0 |
| OXGR1                     | 0 |

|              |   |
|--------------|---|
| RNF113B      | 0 |
| MIR548AN     | 0 |
| PCCA-AS1     | 0 |
| NALCN        | 0 |
| FGF14        | 0 |
| MIR2681      | 0 |
| MIR4705      | 0 |
| FGF14-IT1    | 0 |
| METTL21C     | 0 |
| CCDC168      | 0 |
| SLC10A2      | 0 |
| MIR548AS     | 0 |
| DAOA-AS1     | 0 |
| FAM155A      | 0 |
| MYO16-AS1    | 0 |
| COL4A2-AS1   | 0 |
| ATP4B        | 0 |
| LINC00552    | 0 |
| OR11H12      | 0 |
| POTEG        | 0 |
| LOC101101776 | 0 |
| OR4Q3        | 0 |
| OR4M1        | 0 |
| OR4N2        | 0 |
| OR4K2        | 0 |
| OR4K5        | 0 |
| OR4K1        | 0 |
| OR4K15       | 0 |
| OR4L1        | 0 |
| OR4K17       | 0 |
| OR4N5        | 0 |
| OR11G2       | 0 |
| OR11H6       | 0 |
| RNASE10      | 0 |
| EDDM3A       | 0 |
| EDDM3B       | 0 |
| RNASE6       | 0 |
| TPPP2        | 0 |
| RNASE8       | 0 |
| OR4E2        | 0 |
| PSMB11       | 0 |
| IL25         | 0 |
| CMTM5        | 0 |
| CPNE6        | 0 |
| MIR4307      | 0 |
| LINC00645    | 0 |
| FOXP1        | 0 |
| IGBP1P1      | 0 |
| LINC00609    | 0 |
| MIA2         | 0 |
| LRFN5        | 0 |
| SNORD127     | 0 |
| GNG2         | 0 |
| PTGDR        | 0 |
| OTX2-AS1     | 0 |
| LRRC9        | 0 |
| SIX6         | 0 |
| FLJ22447     | 0 |
| SYT16        | 0 |
| LINC00643    | 0 |
| RHOJ         | 0 |
| MIR4706      | 0 |
| FAM71D       | 0 |
| SNORD56B     | 0 |
| RGS6         | 0 |
| MIR4505      | 0 |
| VSX2         | 0 |
| VRTN         | 0 |
| BATF         | 0 |
| C14orf166B   | 0 |
| MIR1260A     | 0 |
| DIO2-AS1     | 0 |
| TSHR         | 0 |
| FLRT2        | 0 |
| LOC283585    | 0 |
| KCNK13       | 0 |
| LINC00642    | 0 |
| FAM181A      | 0 |
| LINC00521    | 0 |

|             |   |
|-------------|---|
| SERPINA4    | 0 |
| SERPINA5    | 0 |
| SERPINA13P  | 0 |
| TCL6        | 0 |
| TCL1B       | 0 |
| LINC00617   | 0 |
| C14orf132   | 0 |
| BDKRB2      | 0 |
| BDKRB1      | 0 |
| C14orf177   | 0 |
| MIR5698     | 0 |
| EML1        | 0 |
| EVL         | 0 |
| MIR345      | 0 |
| SLC25A47    | 0 |
| LINC00523   | 0 |
| DLK1        | 0 |
| MIR2392     | 0 |
| MEG3,MIR770 | 0 |
| MIR493      | 0 |
| MIR337      | 0 |
| MIR665      | 0 |
| MIR431      | 0 |
| MIR433      | 0 |
| MIR127      | 0 |
| MIR432      | 0 |
| MIR136      | 0 |
| MEG8        | 0 |
| SNORD113-1  | 0 |
| SNORD113-2  | 0 |
| SNORD113-4  | 0 |
| SNORD113-5  | 0 |
| SNORD113-6  | 0 |
| SNORD113-7  | 0 |
| SNORD113-9  | 0 |
| SNORD114-1  | 0 |
| SNORD114-2  | 0 |
| SNORD114-3  | 0 |
| SNORD114-4  | 0 |
| SNORD114-5  | 0 |
| SNORD114-6  | 0 |
| SNORD114-7  | 0 |
| SNORD114-8  | 0 |
| SNORD114-9  | 0 |
| SNORD114-10 | 0 |
| SNORD114-11 | 0 |
| SNORD114-12 | 0 |
| SNORD114-13 | 0 |
| SNORD114-14 | 0 |
| SNORD114-15 | 0 |
| SNORD114-16 | 0 |
| SNORD114-17 | 0 |
| SNORD114-18 | 0 |
| SNORD114-19 | 0 |
| SNORD114-20 | 0 |
| SNORD114-21 | 0 |
| SNORD114-22 | 0 |
| SNORD114-23 | 0 |
| SNORD114-24 | 0 |
| SNORD114-25 | 0 |
| SNORD114-26 | 0 |
| SNORD114-27 | 0 |
| SNORD114-28 | 0 |
| SNORD114-29 | 0 |
| SNORD114-30 | 0 |
| SNORD114-31 | 0 |
| MIR379      | 0 |
| MIR411      | 0 |
| MIR299      | 0 |
| MIR380      | 0 |
| MIR1197     | 0 |
| MIR323A     | 0 |
| MIR758      | 0 |
| MIR329-1    | 0 |
| MIR329-2    | 0 |
| MIR494      | 0 |
| MIR1193     | 0 |
| MIR543      | 0 |
| MIR495      | 0 |



|              |   |
|--------------|---|
| MIR376C      | 0 |
| MIR376A2     | 0 |
| MIR654       | 0 |
| MIR376B      | 0 |
| MIR376A1     | 0 |
| MIR300       | 0 |
| MIR1185-1    | 0 |
| MIR1185-2    | 0 |
| MIR381       | 0 |
| MIR487B      | 0 |
| MIR539       | 0 |
| MIR889       | 0 |
| MIR655       | 0 |
| MIR487A      | 0 |
| MIR382       | 0 |
| MIR134       | 0 |
| MIR668       | 0 |
| MIR485       | 0 |
| MIR323B      | 0 |
| MIR154       | 0 |
| MIR496       | 0 |
| MIR377       | 0 |
| MIR541       | 0 |
| MIR409       | 0 |
| MIR412       | 0 |
| MIR369       | 0 |
| MIR410       | 0 |
| MIR656       | 0 |
| MEG9         | 0 |
| DIO3         | 0 |
| MIR4309      | 0 |
| ASPG         | 0 |
| MIR203       | 0 |
| KIAA0125     | 0 |
| LINC00226    | 0 |
| LINC00221    | 0 |
| LOC642426    | 0 |
| LOC101101776 | 0 |
| POTEM        | 0 |
| OR4K14       | 0 |
| OR4K13       | 0 |
| SNORD126     | 0 |
| RNASE9       | 0 |
| OR6S1        | 0 |
| RNASE1       | 0 |
| RNASE13      | 0 |
| OR5AU1       | 0 |
| SALL2        | 0 |
| OR10G3       | 0 |
| OR10G2       | 0 |
| CEBPE        | 0 |
| SLC7A8       | 0 |
| SLC22A17     | 0 |
| EFS          | 0 |
| MIR208A      | 0 |
| MYH7         | 0 |
| MIR208B      | 0 |
| RIPK3        | 0 |
| CMA1         | 0 |
| CTSG         | 0 |
| GZMH         | 0 |
| GZMB         | 0 |
| NOVA1        | 0 |
| MIR548A1     | 0 |
| MIR624       | 0 |
| GPR33        | 0 |
| SFTA3        | 0 |
| NKX2-1       | 0 |
| NKX2-8       | 0 |
| MIR4503      | 0 |
| CLEC14A      | 0 |
| LINC00639    | 0 |
| FSCB         | 0 |
| RPL10L       | 0 |
| MDGA2        | 0 |
| MIR548Y      | 0 |
| LINC00648    | 0 |
| FRMD6-AS2    | 0 |
| MIR5580      | 0 |

|              |   |
|--------------|---|
| MIR4308      | 0 |
| C14orf39     | 0 |
| TMEM30B      | 0 |
| KCNH5        | 0 |
| GPHB5        | 0 |
| MIR4708      | 0 |
| CCDC177      | 0 |
| SLC8A3       | 0 |
| RNU6-6       | 0 |
| ZDHC22       | 0 |
| NGB          | 0 |
| GALC         | 0 |
| KCNK10       | 0 |
| TTC7B        | 0 |
| CATSPERB     | 0 |
| PRIMA1       | 0 |
| FAM181A-AS1  | 0 |
| ASB2         | 0 |
| SERPINA6     | 0 |
| SERPINA11    | 0 |
| SERPINA9     | 0 |
| SERPINA12    | 0 |
| GSC          | 0 |
| MIR3173      | 0 |
| SYNE3        | 0 |
| TCL1A        | 0 |
| LOC100129345 | 0 |
| C14orf64     | 0 |
| RTL1         | 0 |
| DIO3OS       | 0 |
| MIR1247      | 0 |
| LINC00605    | 0 |
| RD3L         | 0 |
| MIR3545      | 0 |
| TMEM179      | 0 |
| MIR4710      | 0 |
| ELK2AP       | 0 |
| ADAM6        | 0 |
| CHEK2P2      | 0 |
| GOLGA8CP     | 0 |
| CT60         | 0 |
| OR4M2        | 0 |
| OR4N4        | 0 |
| OR4N3P       | 0 |
| REREP3       | 0 |
| GOLGA6L1     | 0 |
| MKRN3        | 0 |
| PWRN1        | 0 |
| SNORD109A    | 0 |
| SNORD116-1   | 0 |
| SNORD116-2   | 0 |
| SNORD116-9   | 0 |
| SNORD116-4   | 0 |
| SNORD116-5   | 0 |
| SNORD116-6   | 0 |
| SNORD116-7   | 0 |
| SNORD116-8   | 0 |
| SNORD116-9   | 0 |
| SNORD116-10  | 0 |
| SNORD116-11  | 0 |
| SNORD116-12  | 0 |
| SNORD116-13  | 0 |
| SNORD116-14  | 0 |
| SNORD116-15  | 0 |
| SNORD116-16  | 0 |
| SNORD116-17  | 0 |
| SNORD116-18  | 0 |
| SNORD116-19  | 0 |
| SNORD116-20  | 0 |
| SNORD116-21  | 0 |
| SNORD116-22  | 0 |
| SNORD116-23  | 0 |
| SNORD116-24  | 0 |
| SNORD116-25  | 0 |
| SNORD116-26  | 0 |
| SNORD116-27  | 0 |
| SNORD116-28  | 0 |
| SNORD116-29  | 0 |
| IPW          | 0 |

|                            |   |
|----------------------------|---|
| PAR1                       | 0 |
| SNORD115-1                 | 0 |
| SNORD115-2                 | 0 |
| SNORD115-3                 | 0 |
| SNORD115-4                 | 0 |
| SNORD115-5                 | 0 |
| SNORD115-6                 | 0 |
| SNORD115-7                 | 0 |
| SNORD115-8                 | 0 |
| SNORD115-9                 | 0 |
| SNORD115-10                | 0 |
| SNORD115-43                | 0 |
| SNORD115-10                | 0 |
| SNORD115-13                | 0 |
| SNORD115-14                | 0 |
| SNORD115-16                | 0 |
| SNORD115-18                | 0 |
| SNORD115-18                | 0 |
| SNORD115-17                | 0 |
| SNORD115-15,SNORD115-20,SN | 0 |
| SNORD115-22                | 0 |
| PAR4                       | 0 |
| SNORD115-24                | 0 |
| SNORD115-25                | 0 |
| SNORD115-26                | 0 |
| SNORD115-27                | 0 |
| SNORD115-28                | 0 |
| SNORD115-11                | 0 |
| SNORD115-30                | 0 |
| SNORD115-31                | 0 |
| SNORD115-32                | 0 |
| SNORD115-33                | 0 |
| SNORD115-35                | 0 |
| SNORD115-11                | 0 |
| SNORD115-37                | 0 |
| SNORD115-38                | 0 |
| SNORD115-39                | 0 |
| SNORD115-40                | 0 |
| SNORD115-41                | 0 |
| SNORD115-10                | 0 |
| SNORD115-11                | 0 |
| SNORD115-44                | 0 |
| SNORD115-45                | 0 |
| SNORD115-47                | 0 |
| SNORD115-48                | 0 |
| SNORD109B                  | 0 |
| LOC100128714               | 0 |
| LOC503519                  | 0 |
| GABRA5                     | 0 |
| GABRG3                     | 0 |
| GOLGA8F,GOLGA8G            | 0 |
| MIR4509-1                  | 0 |
| LOC100289656               | 0 |
| ULK4P3                     | 0 |
| ULK4P2                     | 0 |
| GREM1                      | 0 |
| MIR4510                    | 0 |
| TMCO5A                     | 0 |
| C15orf53                   | 0 |
| C15orf54                   | 0 |
| THBS1                      | 0 |
| PHGR1                      | 0 |
| MIR626                     | 0 |
| ADAL                       | 0 |
| RNU6-28                    | 0 |
| C15orf43                   | 0 |
| DUXA2                      | 0 |
| SEMA6D                     | 0 |
| SLC24A5                    | 0 |
| CTXN2                      | 0 |
| SLC12A1                    | 0 |
| MIR4712                    | 0 |
| MIR4713                    | 0 |
| GLDN                       | 0 |
| UNC13C                     | 0 |
| AQP9                       | 0 |
| LIPC                       | 0 |
| FOXB1                      | 0 |
| MIR190A                    | 0 |

|                   |   |
|-------------------|---|
| KBTBD13           | 0 |
| MIR4311           | 0 |
| MIR548H4          | 0 |
| NOX5,SPESP1       | 0 |
| LINC00277         | 0 |
| LINC00593         | 0 |
| TMEM202           | 0 |
| MIR630            | 0 |
| GOLGA6B           | 0 |
| C15orf60          | 0 |
| TBC1D21           | 0 |
| ISLR2             | 0 |
| ISLR              | 0 |
| CCDC33            | 0 |
| GOLGA6D           | 0 |
| LOC253044         | 0 |
| MIR5003           | 0 |
| CRABP1            | 0 |
| MIR184            | 0 |
| ANKRD34C          | 0 |
| LOC390660         | 0 |
| UBE2Q2P2,UBE2Q2P3 | 0 |
| GOLGA6L9          | 0 |
| LOC440297         | 0 |
| LOC390660         | 0 |
| LOC440297         | 0 |
| LOC283692         | 0 |
| SCARNA15          | 0 |
| MIR4515           | 0 |
| TM6SF1            | 0 |
| ADAMTSL3          | 0 |
| EFTUD1P1          | 0 |
| AGBL1             | 0 |
| LINC00052         | 0 |
| NTRK3-AS1         | 0 |
| MIR1179           | 0 |
| MIR7-2            | 0 |
| ACAN              | 0 |
| MIR9-3            | 0 |
| LOC254559         | 0 |
| ST8SIA2           | 0 |
| C15orf32          | 0 |
| MIR3175           | 0 |
| MIR1469           | 0 |
| SPATA8            | 0 |
| MIR4714           | 0 |
| OR4F6             | 0 |
| OR4F15            | 0 |
| OR4F13P           | 0 |
| FAM138E           | 0 |
| GOLGA6L6          | 0 |
| POTEB             | 0 |
| NF1P2             | 0 |
| CXADRP2           | 0 |
| POTEB             | 0 |
| NF1P2             | 0 |
| MIR4509-3         | 0 |
| LOC440243         | 0 |
| MIR4508           | 0 |
| MAGEL2            | 0 |
| NDN               | 0 |
| PWRN2             | 0 |
| ATP10A            | 0 |
| MIR4715           | 0 |
| MIR4509-1         | 0 |
| GOLGA8F,GOLGA8G   | 0 |
| GOLGA6L7P         | 0 |
| FAM189A1          | 0 |
| TRPM1             | 0 |
| MIR211            | 0 |
| LOC283710         | 0 |
| TMCO5B            | 0 |
| MIR1233-2         | 0 |
| MIR1233-1         | 0 |
| GJD2              | 0 |
| MIR3942           | 0 |
| LOC145845         | 0 |
| MIR4310           | 0 |
| PLA2G4F           | 0 |

|           |   |
|-----------|---|
| MIR627    | 0 |
| EPB42     | 0 |
| TGM5      | 0 |
| TGM7      | 0 |
| LCMT2     | 0 |
| MIR4716   | 0 |
| CYP19A1   | 0 |
| MIR1266   | 0 |
| WDR72     | 0 |
| MIR628    | 0 |
| PYGO1     | 0 |
| PRTG      | 0 |
| ALDH1A2   | 0 |
| MIR2116   | 0 |
| C2CD4B    | 0 |
| MGC15885  | 0 |
| MIR1272   | 0 |
| RASL12    | 0 |
| MIR4511   | 0 |
| SNORD18C  | 0 |
| SNORD18B  | 0 |
| SNORD16   | 0 |
| SNORD18A  | 0 |
| MIR4312   | 0 |
| MIR629    | 0 |
| LARP6     | 0 |
| CT62      | 0 |
| GRAMD2    | 0 |
| HCN4      | 0 |
| C15orf59  | 0 |
| GOLGA6A   | 0 |
| CYP11A1   | 0 |
| MIR4513   | 0 |
| MIR631    | 0 |
| MIR4313   | 0 |
| LINGO1    | 0 |
| LOC645752 | 0 |
| CHRNA4    | 0 |
| ADAMTS7   | 0 |
| LOC729911 | 0 |
| LOC283688 | 0 |
| MIR549    | 0 |
| MIR4514   | 0 |
| LOC440297 | 0 |
| AP3B2     | 0 |
| HDGFRP3   | 0 |
| BNC1      | 0 |
| LOC642423 | 0 |
| MIR1276   | 0 |
| LOC727915 | 0 |
| NTRK3     | 0 |
| MIR3529   | 0 |
| RLBP1     | 0 |
| RHCG      | 0 |
| LOC283761 | 0 |
| MIR5094   | 0 |
| GABARAPL3 | 0 |
| RGMA      | 0 |
| LOC400456 | 0 |
| FAM169B   | 0 |
| DNM1P46   | 0 |
| OR4F4     | 0 |
| DDX11L9   | 0 |
| DDX11L10  | 0 |
| HBM       | 0 |
| HBQ1      | 0 |
| MIR5587   | 0 |
| MIR3176   | 0 |
| MIR662    | 0 |
| TPSAB1    | 0 |
| TPSD1     | 0 |
| MIR3177   | 0 |
| RNF151    | 0 |
| MIR4516   | 0 |
| MIR3677   | 0 |
| MIR940    | 0 |
| MIR4717   | 0 |
| NTN3      | 0 |
| PRSS41    | 0 |

|                     |   |
|---------------------|---|
| PRSS21              | 0 |
| ZG16B               | 0 |
| OR1F1               | 0 |
| OR1F2P              | 0 |
| OR2C1               | 0 |
| RBF0X1              | 0 |
| MIR548X             | 0 |
| MIR4718             | 0 |
| MIR193B             | 0 |
| MIR365A             | 0 |
| MIR3179-3           | 0 |
| MIR3180-3           | 0 |
| MIR3179-1           | 0 |
| MIR3180-1           | 0 |
| ABCC6P1             | 0 |
| CLEC19A             | 0 |
| ACSM2A              | 0 |
| MIR548D2            | 0 |
| SCNN1G              | 0 |
| SCNN1B              | 0 |
| CHP2                | 0 |
| CACNG3              | 0 |
| HS3ST4              | 0 |
| C16orf82            | 0 |
| MIR4517             | 0 |
| LOC606724           | 0 |
| SLX1A,SLX1B,SULT1A3 | 0 |
| ZG16                | 0 |
| C16orf92            | 0 |
| MIR4518             | 0 |
| AHSP                | 0 |
| TP53TG3D            | 0 |
| TP53TG3,TP53TG3B    | 0 |
| TP53TG3,TP53TG3B    | 0 |
| LOC283914           | 0 |
| MIR548AE2           | 0 |
| C16orf78            | 0 |
| MMP2                | 0 |
| SLC6A2              | 0 |
| CES1P2              | 0 |
| CES1P1              | 0 |
| MIR3935             | 0 |
| MT4                 | 0 |
| MT3                 | 0 |
| MIR138-2            | 0 |
| SLC12A3             | 0 |
| CETP                | 0 |
| CX3CL1              | 0 |
| CCL17               | 0 |
| TEPP                | 0 |
| LRRC36              | 0 |
| CDH1                | 0 |
| MIR140              | 0 |
| MIR1972-2           | 0 |
| SNORD111B           | 0 |
| SNORD111            | 0 |
| CHST4               | 0 |
| HPR                 | 0 |
| HTA                 | 0 |
| LOC100506172        | 0 |
| CTRB1               | 0 |
| CNTNAP4             | 0 |
| MIR4719             | 0 |
| CLEC3A              | 0 |
| DYNLRB2             | 0 |
| BCMO1               | 0 |
| MIR4720             | 0 |
| HSD17B2             | 0 |
| MIR3182             | 0 |
| ADAD2               | 0 |
| WFDC1               | 0 |
| LOC400548           | 0 |
| IRF8                | 0 |
| LOC146513           | 0 |
| MIR5189             | 0 |
| TPSG1               | 0 |
| TPSB2               | 0 |
| LINC00254           | 0 |
| HS3ST6              | 0 |

|              |   |
|--------------|---|
| MIR1225      | 0 |
| MIR3180-5    | 0 |
| SNORD60      | 0 |
| MIR3178      | 0 |
| C16orf90     | 0 |
| TMEM114      | 0 |
| GRIN2A       | 0 |
| TNP2         | 0 |
| PRM3         | 0 |
| PRM2         | 0 |
| PRM1         | 0 |
| ABCC6P2      | 0 |
| MIR3180-4    | 0 |
| MIR3180-1    | 0 |
| MIR3179-1    | 0 |
| GPRC5B       | 0 |
| GPR139       | 0 |
| GP2          | 0 |
| UMOD         | 0 |
| PDILT        | 0 |
| ACSM2B       | 0 |
| ZP2          | 0 |
| IGSF6        | 0 |
| MIR548AA2    | 0 |
| IL27         | 0 |
| BOLA2B       | 0 |
| LOC388242    | 0 |
| BOLA2B       | 0 |
| MIR4519      | 0 |
| COX6A2       | 0 |
| LOC390705    | 0 |
| TP53TG3      | 0 |
| LOC390705    | 0 |
| RNU6-76      | 0 |
| LOC146481    | 0 |
| LOC100130700 | 0 |
| ABCC12       | 0 |
| CBLN1        | 0 |
| SALL1        | 0 |
| C16orf97     | 0 |
| LOC100505619 | 0 |
| TOX3         | 0 |
| LOC643714    | 0 |
| LOC643802    | 0 |
| IRX3         | 0 |
| CES1         | 0 |
| CES5A        | 0 |
| LOC283856    | 0 |
| DKFZP434H168 | 0 |
| LOC644649    | 0 |
| CDH8         | 0 |
| CDH16        | 0 |
| MIR328       | 0 |
| AGRP         | 0 |
| DPEP3        | 0 |
| MIR1538      | 0 |
| SNORA70D     | 0 |
| SNORD71      | 0 |
| CTRB2        | 0 |
| ADAMTS18     | 0 |
| SDR42E1      | 0 |
| KCNG4        | 0 |
| FAM92B       | 0 |
| MIR5093      | 0 |
| MIR1910      | 0 |
| LOC732275    | 0 |
| CA5A         | 0 |
| MIR4722      | 0 |
| LOC100506388 | 0 |
| BHLHA9       | 0 |
| OR1A2        | 0 |
| OR1A1        | 0 |
| OR1D4        | 0 |
| OR3A4P       | 0 |
| OR3A3        | 0 |
| ASPA         | 0 |
| TM4SF5       | 0 |
| LOC100130950 | 0 |
| WSCD1        | 0 |

|              |   |
|--------------|---|
| MIR4520B     | 0 |
| ALOX15P1     | 0 |
| FBXO39       | 0 |
| ALOX12P2     | 0 |
| TMEM95       | 0 |
| RPL29P2      | 0 |
| SCARNA21     | 0 |
| MIR4314      | 0 |
| MIR4521      | 0 |
| MIR3676      | 0 |
| ARHGEF15     | 0 |
| ODF4         | 0 |
| GLP2R        | 0 |
| TMEM220-AS1  | 0 |
| SHISA6       | 0 |
| MIR744       | 0 |
| LINC00670    | 0 |
| MYOCD        | 0 |
| CDRT7        | 0 |
| CDRT15P2     | 0 |
| MIR1288      | 0 |
| SNORD49A     | 0 |
| SMCR9        | 0 |
| EVPLL        | 0 |
| LOC339240    | 0 |
| LGALS9C      | 0 |
| SLC47A1      | 0 |
| SNORA59B     | 0 |
| CDRT15L2     | 0 |
| FAM27L       | 0 |
| FLJ36000     | 0 |
| TBC1D3P5     | 0 |
| PPY2         | 0 |
| MIR4723      | 0 |
| SLC13A2      | 0 |
| FOXN1        | 0 |
| SNORD42B     | 0 |
| SNORD4A      | 0 |
| SNORD42A     | 0 |
| MIR451B      | 0 |
| MIR423       | 0 |
| TBC1D29      | 0 |
| MIR193A      | 0 |
| MIR4725      | 0 |
| MIR365B      | 0 |
| CCL2         | 0 |
| CCL7         | 0 |
| CCL11        | 0 |
| CCL8         | 0 |
| CCL13        | 0 |
| TMEM132E     | 0 |
| SNORD7       | 0 |
| CCL18        | 0 |
| CCL4         | 0 |
| CCL4L1       | 0 |
| CCL4L2       | 0 |
| MIR2909      | 0 |
| MIR4726      | 0 |
| MIR4727      | 0 |
| PPP1R1B      | 0 |
| PNMT         | 0 |
| MIR4728      | 0 |
| ZPBP2        | 0 |
| LRRC3C       | 0 |
| SNORD124     | 0 |
| KRTAP9-1     | 0 |
| KRTAP9-2     | 0 |
| KRTAP9-3     | 0 |
| KRTAP9-8     | 0 |
| KRTAP9-4     | 0 |
| KRTAP9-9     | 0 |
| LOC100505782 | 0 |
| GAST         | 0 |
| RAMP2        | 0 |
| MIR2117      | 0 |
| C17orf105    | 0 |
| SPPL2C       | 0 |
| MAPT-IT1     | 0 |
| STH          | 0 |



|              |   |
|--------------|---|
| NSFP1        | 0 |
| WNT9B        | 0 |
| MIR5089      | 0 |
| ITGB3        | 0 |
| TBX21        | 0 |
| B4GALNT2     | 0 |
| FLJ40194     | 0 |
| SGCA         | 0 |
| ABCC3        | 0 |
| WFIKKN2      | 0 |
| C17orf112    | 0 |
| KIF2B        | 0 |
| NOG          | 0 |
| RNF126P1     | 0 |
| OR4D1        | 0 |
| MSX2P1       | 0 |
| OR4D2        | 0 |
| LPO          | 0 |
| MIR4729      | 0 |
| MIR21        | 0 |
| CA4          | 0 |
| TBX4         | 0 |
| MIR548W      | 0 |
| MIR634       | 0 |
| CACNG5       | 0 |
| MIR4524B     | 0 |
| MAP2K6       | 0 |
| KCNJ16       | 0 |
| KCNJ2        | 0 |
| LOC400620    | 0 |
| DNAI2        | 0 |
| KIF19        | 0 |
| GPR142       | 0 |
| C17orf77     | 0 |
| OTOP3        | 0 |
| MIR3678      | 0 |
| RNF157-AS1   | 0 |
| SNORD1C      | 0 |
| SNORD1B      | 0 |
| SNORD1A      | 0 |
| LOC100507351 | 0 |
| C17orf99     | 0 |
| TMEM235      | 0 |
| ENPP7        | 0 |
| MIR4730      | 0 |
| MIR3065      | 0 |
| AATK-AS1     | 0 |
| GCCR         | 0 |
| UTS2R        | 0 |
| MIR3183      | 0 |
| RTN4RL1      | 0 |
| MIR132       | 0 |
| MIR212       | 0 |
| SNORD91B     | 0 |
| SNORD91A     | 0 |
| MIR1253      | 0 |
| OR1D5        | 0 |
| OR1D2        | 0 |
| OR1G1        | 0 |
| OR3A2        | 0 |
| OR3A1        | 0 |
| OR1E1        | 0 |
| OR1E2        | 0 |
| SPATA22      | 0 |
| TRPV3        | 0 |
| ALOX15       | 0 |
| ZNF594       | 0 |
| SCIMP        | 0 |
| MIR4520A     | 0 |
| MIR195       | 0 |
| MIR497       | 0 |
| CLEC10A      | 0 |
| ASGR2        | 0 |
| MIR324       | 0 |
| SPDYE4       | 0 |
| MFS6L        | 0 |
| PIK3R6       | 0 |
| DHRSTC       | 0 |
| RCVRN        | 0 |

|             |   |
|-------------|---|
| MYH13       | 0 |
| MYH8        | 0 |
| MYH4        | 0 |
| MYH2        | 0 |
| LINC00675   | 0 |
| PIRT        | 0 |
| HS3ST3A1    | 0 |
| MIR4731     | 0 |
| KRT16P2     | 0 |
| TNFRSF13B   | 0 |
| MIR33B      | 0 |
| MIR1180     | 0 |
| ALDH3A1     | 0 |
| LGALS9B     | 0 |
| CCDC144NL   | 0 |
| MIR4522     | 0 |
| SEBOX       | 0 |
| MIR451A     | 0 |
| MIR144      | 0 |
| MIR4732     | 0 |
| MIR3184     | 0 |
| TMIGD1      | 0 |
| MIR4733     | 0 |
| ASIC2       | 0 |
| AA06        | 0 |
| CCL1        | 0 |
| C17orf102   | 0 |
| SLFN11      | 0 |
| SLFN12      | 0 |
| SLFN12L     | 0 |
| MMP28       | 0 |
| LYZL6       | 0 |
| CCL16       | 0 |
| CCL14,CCL15 | 0 |
| CCL23       | 0 |
| CCL3L1      | 0 |
| TBC1D3      | 0 |
| MIR4734     | 0 |
| FBXO47      | 0 |
| ARL5C       | 0 |
| CCR7        | 0 |
| KRT24       | 0 |
| KRT25       | 0 |
| KRT26       | 0 |
| KRT27       | 0 |
| KRT28       | 0 |
| KRT23       | 0 |
| KRT39       | 0 |
| KRT40       | 0 |
| KRTAP3-1    | 0 |
| KRTAP1-5    | 0 |
| KRTAP1-4    | 0 |
| KRTAP1-3    | 0 |
| KRTAP4-12   | 0 |
| KRTAP4-4    | 0 |
| KRTAP4-3    | 0 |
| KRTAP4-2    | 0 |
| KRTAP4-1    | 0 |
| KRTAP29-1   | 0 |
| KRTAP16-1   | 0 |
| KRTAP17-1   | 0 |
| KRT33A      | 0 |
| KRT33B      | 0 |
| KRT31       | 0 |
| KRT37       | 0 |
| KRT38       | 0 |
| KRT32       | 0 |
| KRT35       | 0 |
| KRT36       | 0 |
| KRT13       | 0 |
| LOC147093   | 0 |
| KRT9        | 0 |
| KRT14       | 0 |
| HAP1        | 0 |
| KCNH4       | 0 |
| SOST        | 0 |
| C1QL1       | 0 |
| LOC644172   | 0 |
| MAPT-AS1    | 0 |

|              |   |
|--------------|---|
| MIR152       | 0 |
| SKAP1        | 0 |
| MIR1203      | 0 |
| HOXB1        | 0 |
| MIR10A       | 0 |
| MIR196A1     | 0 |
| PRAC         | 0 |
| MIR3185      | 0 |
| GIP          | 0 |
| GNGT2        | 0 |
| HILS1        | 0 |
| LINC00483    | 0 |
| CA10         | 0 |
| TMEM100      | 0 |
| MTVR2        | 0 |
| MPO          | 0 |
| BZRAP1       | 0 |
| MIR142       | 0 |
| MIR4736      | 0 |
| MIR454       | 0 |
| MIR301A      | 0 |
| MIR4737      | 0 |
| MARCH10      | 0 |
| CSH2         | 0 |
| GH2          | 0 |
| CSH1         | 0 |
| CSHL1        | 0 |
| GH1          | 0 |
| PECAM1       | 0 |
| APOH         | 0 |
| MIR635       | 0 |
| ABCA8        | 0 |
| ABCA6        | 0 |
| MIR4524A     | 0 |
| KCNJ2-AS1    | 0 |
| LINC00469    | 0 |
| CD300LB      | 0 |
| CD300LD      | 0 |
| CD300LF      | 0 |
| FADS6        | 0 |
| MIR4738      | 0 |
| ST6GALNAC1   | 0 |
| MIR4316      | 0 |
| LOC100507410 | 0 |
| MIR4739      | 0 |
| MIR657       | 0 |
| MIR338       | 0 |
| MIR1250      | 0 |
| TMEM105      | 0 |
| MIR4740      | 0 |
| MIR3186      | 0 |
| CETN1        | 0 |
| ADCYAP1      | 0 |
| DLGAP1-AS3   | 0 |
| DLGAP1-AS5   | 0 |
| LOC645355    | 0 |
| MIR3976      | 0 |
| LOC100130480 | 0 |
| ARHGAP28     | 0 |
| LRRC30       | 0 |
| RAB31        | 0 |
| TXNDC2       | 0 |
| APCDD1       | 0 |
| C18orf61     | 0 |
| CIDEA        | 0 |
| MIR5190      | 0 |
| MIR4526      | 0 |
| MCSR         | 0 |
| ANKRD30B     | 0 |
| MIR3156-2    | 0 |
| MIR320C1     | 0 |
| LAMA3        | 0 |
| MIR320C2     | 0 |
| LOC729950    | 0 |
| PSMA8        | 0 |
| MIR302F      | 0 |
| DSG1         | 0 |
| DSG4         | 0 |
| TTR          | 0 |

|              |   |
|--------------|---|
| ASXL3        | 0 |
| DTNA         | 0 |
| MIR3975      | 0 |
| MIR4318      | 0 |
| MIR5583-1    | 0 |
| MIR4743      | 0 |
| MIR1539      | 0 |
| MAPK4        | 0 |
| LOC100287225 | 0 |
| DCC          | 0 |
| DYNAP        | 0 |
| MIR4529      | 0 |
| BOD1L2       | 0 |
| MIR122       | 0 |
| OACYLP       | 0 |
| GRP          | 0 |
| SERPINB12    | 0 |
| SERPINB13    | 0 |
| SERPINB11    | 0 |
| SERPINB10    | 0 |
| LOC284294    | 0 |
| CDH7         | 0 |
| MIR5011      | 0 |
| LOC643542    | 0 |
| DOK6         | 0 |
| C18orf63     | 0 |
| LOC339298    | 0 |
| GALR1        | 0 |
| SALL3        | 0 |
| KCNG2        | 0 |
| COLEC12      | 0 |
| C18orf42     | 0 |
| EPB41L3      | 0 |
| TMEM200C     | 0 |
| L3MBTL4      | 0 |
| MIR4317      | 0 |
| LINC00668    | 0 |
| LOC100192426 | 0 |
| PIEZO2       | 0 |
| LOC100288122 | 0 |
| CXADRP3      | 0 |
| POTEC        | 0 |
| LOC644669    | 0 |
| MIR133A1     | 0 |
| MIR1-2       | 0 |
| CTAGE1       | 0 |
| ANKRD29      | 0 |
| LOC728606    | 0 |
| AQP4         | 0 |
| CHST9        | 0 |
| DSC2         | 0 |
| DSC1         | 0 |
| CCDC178      | 0 |
| NOL4         | 0 |
| ZNF396       | 0 |
| MIR187       | 0 |
| MIR5583-2    | 0 |
| KC6          | 0 |
| RIT2         | 0 |
| SYT4         | 0 |
| MIR4319      | 0 |
| LOXHD1       | 0 |
| TCEB3CL2     | 0 |
| TCEB3CL2     | 0 |
| TCEB3C       | 0 |
| TCEB3B       | 0 |
| ZBTB7C       | 0 |
| MIR4744      | 0 |
| MIR4320      | 0 |
| STARD6       | 0 |
| CCDC68       | 0 |
| TCF4         | 0 |
| LOC100505474 | 0 |
| MIR3591      | 0 |
| RAX          | 0 |
| CPLX4        | 0 |
| MC4R         | 0 |
| SERPINB4     | 0 |
| SERPINB3     | 0 |

|               |   |
|---------------|---|
| LINC00305     | 0 |
| LOC400654     | 0 |
| CDH19         | 0 |
| LOC100505776  | 0 |
| CBLN2         | 0 |
| NETO1         | 0 |
| LOC400655     | 0 |
| FAM69C        | 0 |
| C18orf62      | 0 |
| OR4F17        | 0 |
| FGF22         | 0 |
| PALM          | 0 |
| MIR4745       | 0 |
| MIR3187       | 0 |
| KISS1R        | 0 |
| ONECUT3       | 0 |
| GIPC3         | 0 |
| NMRK2         | 0 |
| MIR4746       | 0 |
| MIR7-3        | 0 |
| MIR4747       | 0 |
| ZNRF4         | 0 |
| CATSPERD      | 0 |
| MBD3L5        | 0 |
| MBD3L2        | 0 |
| RETN          | 0 |
| CCL25         | 0 |
| CERS4         | 0 |
| OR2Z1         | 0 |
| MBD3L1        | 0 |
| OR1M1         | 0 |
| OR7E24        | 0 |
| RDH8          | 0 |
| C3P1          | 0 |
| SNORD105      | 0 |
| SNORD105B     | 0 |
| MIR4322       | 0 |
| MIR1238       | 0 |
| MIR638        | 0 |
| MIR4748       | 0 |
| TSPAN16       | 0 |
| BEST2         | 0 |
| MIR181C       | 0 |
| OR7C2         | 0 |
| CCDC105       | 0 |
| OR111         | 0 |
| MIR1470       | 0 |
| CYP4F22       | 0 |
| CYP4F8        | 0 |
| CYP4F12       | 0 |
| OR10H2        | 0 |
| OR10H3        | 0 |
| OR10H5        | 0 |
| OR10H4        | 0 |
| LINC00661     | 0 |
| FLJ25328      | 0 |
| B3GNT3        | 0 |
| MIR3188       | 0 |
| MIR3189       | 0 |
| ZNF257        | 0 |
| ZNF729        | 0 |
| LOC440518     | 0 |
| ZNF726        | 0 |
| LOC148145     | 0 |
| LOC100505835  | 0 |
| VSTM2B        | 0 |
| ZNF536        | 0 |
| DKFZp566F0947 | 0 |
| THEG5         | 0 |
| CHST8         | 0 |
| SCGB2B3P      | 0 |
| HPN           | 0 |
| MAG           | 0 |
| FFAR1         | 0 |
| FFAR3         | 0 |
| LOC100128682  | 0 |
| KIRREL2       | 0 |
| LOC100134317  | 0 |
| LGALS7B       | 0 |

|               |   |
|---------------|---|
| IFNL2         | 0 |
| IFNL1         | 0 |
| SELV          | 0 |
| LGALS13       | 0 |
| LGALS16       | 0 |
| LGALS17A      | 0 |
| LGALS14       | 0 |
| LEUTX         | 0 |
| CYP2B7P1      | 0 |
| CYP2B6        | 0 |
| CYP2A13       | 0 |
| C19orf69      | 0 |
| CEACAM21      | 0 |
| CEACAM5       | 0 |
| CEACAM6       | 0 |
| CEACAM3       | 0 |
| DMRTC2        | 0 |
| LOC100289650  | 0 |
| PRG1          | 0 |
| CD177         | 0 |
| CEACAM16      | 0 |
| CBLC          | 0 |
| MIR642A       | 0 |
| MIR769        | 0 |
| DKFZp434J0226 | 0 |
| IGFL1         | 0 |
| MIR3190       | 0 |
| SNORD23       | 0 |
| SNAR-A13      | 0 |
| SNAR-C2       | 0 |
| SNAR-A2       | 0 |
| SNAR-A8       | 0 |
| SNAR-C5       | 0 |
| SNAR-A2       | 0 |
| SNAR-C4       | 0 |
| SNAR-A13      | 0 |
| SNAR-C3       | 0 |
| SNAR-C5       | 0 |
| ELSPBP1       | 0 |
| SNAR-G1       | 0 |
| SNORD32A      | 0 |
| SNORD34       | 0 |
| SNORD35B      | 0 |
| MIR5088       | 0 |
| MIR4749       | 0 |
| MIR4750       | 0 |
| KLK2          | 0 |
| SIGLEC17P     | 0 |
| SIGLECL1      | 0 |
| CEACAM18      | 0 |
| MIR99B        | 0 |
| MIRLET7E      | 0 |
| MIR125A       | 0 |
| FPR2          | 0 |
| MIR643        | 0 |
| ZNF534        | 0 |
| ERVV-2        | 0 |
| FAM90A27P     | 0 |
| DPRX          | 0 |
| MIR512-2      | 0 |
| MIR512-2      | 0 |
| MIR1323       | 0 |
| MIR498        | 0 |
| MIR520E       | 0 |
| MIR515-2      | 0 |
| MIR519E       | 0 |
| MIR520F       | 0 |
| MIR515-1      | 0 |
| MIR519C       | 0 |
| MIR1283-1     | 0 |
| MIR520A       | 0 |
| MIR526B       | 0 |
| MIR519B       | 0 |
| MIR525        | 0 |
| MIR523        | 0 |
| MIR518F       | 0 |
| MIR520B       | 0 |
| MIR518B       | 0 |
| MIR526A1      | 0 |

|                      |   |
|----------------------|---|
| MIR520C              | 0 |
| MIR518C              | 0 |
| MIR524               | 0 |
| MIR517A              | 0 |
| MIR519D              | 0 |
| MIR521-2             | 0 |
| MIR520D              | 0 |
| MIR517B              | 0 |
| MIR520G              | 0 |
| MIR516B2             | 0 |
| MIR526A2             | 0 |
| MIR518E              | 0 |
| MIR518A1             | 0 |
| MIR518D              | 0 |
| MIR516B1             | 0 |
| MIR518A2             | 0 |
| MIR517C              | 0 |
| MIR520H              | 0 |
| MIR521-1             | 0 |
| MIR522               | 0 |
| MIR519A1             | 0 |
| MIR527               | 0 |
| MIR516A1             | 0 |
| MIR1283-2            | 0 |
| MIR516A2             | 0 |
| MIR519A2             | 0 |
| MIR371A              | 0 |
| MIR372               | 0 |
| MIR373               | 0 |
| MIR4752              | 0 |
| KIR3DX1              | 0 |
| LILRA1               | 0 |
| LILRB4               | 0 |
| LILRP2               | 0 |
| KIR3DL3              | 0 |
| KIR2DL3              | 0 |
| KIR2DL1              | 0 |
| KIR2DL4,LOC100287534 | 0 |
| KIR3DL1              | 0 |
| KIR2DS4              | 0 |
| KIR3DL2              | 0 |
| NCR1                 | 0 |
| NLRP2                | 0 |
| NLRP5                | 0 |
| GALP                 | 0 |
| LOC100128252         | 0 |
| ZNF471               | 0 |
| ZNF470               | 0 |
| PEG3-AS1             | 0 |
| MIMT1                | 0 |
| ZNF530               | 0 |
| ZNF134               | 0 |
| ZSCAN4               | 0 |
| LOC100128398         | 0 |
| ZSCAN1               | 0 |
| ZNF135               | 0 |
| LOC646862            | 0 |
| FAM138A              | 0 |
| THEG                 | 0 |
| LPPR3                | 0 |
| MIR1227              | 0 |
| RAX2                 | 0 |
| SNORD37              | 0 |
| ARRDC5               | 0 |
| MBD3L4               | 0 |
| CLEC4G               | 0 |
| CD209                | 0 |
| LOC388499            | 0 |
| MIR4999              | 0 |
| ADAMTS10             | 0 |
| ACTL9                | 0 |
| MUC16                | 0 |
| OR7G2                | 0 |
| OR7G1                | 0 |
| OR7G3                | 0 |
| OR7D4                | 0 |
| ZNF560               | 0 |
| ZNF812               | 0 |
| S1PR5                | 0 |

|              |   |
|--------------|---|
| MIR199A1     | 0 |
| SNORD41      | 0 |
| MIR27A       | 0 |
| MIR23A       | 0 |
| EMR3         | 0 |
| OR7C1        | 0 |
| OR7A5        | 0 |
| OR7A10       | 0 |
| OR7A17       | 0 |
| RASAL3       | 0 |
| PGLYRP2      | 0 |
| CYP4F24P     | 0 |
| IL12RB1      | 0 |
| LOC729966    | 0 |
| COMP         | 0 |
| HAPLN4       | 0 |
| MIR1270-2    | 0 |
| ZNF826P      | 0 |
| MIR1270-2    | 0 |
| ZNF676       | 0 |
| ZNF98        | 0 |
| ZNF728       | 0 |
| LOC284395    | 0 |
| TSHZ3        | 0 |
| SCGB2B2      | 0 |
| LOC400685    | 0 |
| LOC100652909 | 0 |
| LOC100128675 | 0 |
| TYROBP       | 0 |
| LOC100631378 | 0 |
| PPP1R14A     | 0 |
| LGALS7       | 0 |
| SYCN         | 0 |
| IFNL3        | 0 |
| IFNL4        | 0 |
| MIR4530      | 0 |
| CLC          | 0 |
| MIR641       | 0 |
| CYP2A7       | 0 |
| LOC100505495 | 0 |
| CEACAM4      | 0 |
| CEACAM7      | 0 |
| LYPD4        | 0 |
| MIR4323      | 0 |
| PSG8         | 0 |
| PSG10P       | 0 |
| PSG1         | 0 |
| PSG6         | 0 |
| PSG7         | 0 |
| PSG2         | 0 |
| LOC284344    | 0 |
| CEACAM20     | 0 |
| MIR4531      | 0 |
| MIR330       | 0 |
| MIR642B      | 0 |
| NANOS2       | 0 |
| NOVA2        | 0 |
| IGFL3        | 0 |
| RNU6-66      | 0 |
| CCDC8        | 0 |
| PNMAL2       | 0 |
| MIR320E      | 0 |
| SNAR-E       | 0 |
| ZNF541       | 0 |
| TPRX1        | 0 |
| SULT2A1      | 0 |
| BSPH1        | 0 |
| SNAR-G2      | 0 |
| CGB1         | 0 |
| MIR4324      | 0 |
| MIR150       | 0 |
| TSKS         | 0 |
| SNAR-A8      | 0 |
| SNAR-A4      | 0 |
| SNAR-A10     | 0 |
| SNAR-A7      | 0 |
| SNAR-A14     | 0 |
| SNAR-A3      | 0 |
| SNAR-A6      | 0 |



|              |   |
|--------------|---|
| SNAR-A10     | 0 |
| SNAR-A8      | 0 |
| SNAR-B1      | 0 |
| SNAR-B2      | 0 |
| SNAR-D       | 0 |
| IZUMO2       | 0 |
| KCNC3        | 0 |
| NAPSB        | 0 |
| SNORD88B     | 0 |
| SNORD88A     | 0 |
| SNORD88C     | 0 |
| KLK5         | 0 |
| KLK8         | 0 |
| KLK9         | 0 |
| KLK10        | 0 |
| KLK11        | 0 |
| KLK12        | 0 |
| KLK13        | 0 |
| SIGLEC8      | 0 |
| SIGLEC12     | 0 |
| SIGLEC6      | 0 |
| FPR1         | 0 |
| ZNF415       | 0 |
| VN1R4        | 0 |
| BIRC8        | 0 |
| MIR371B      | 0 |
| TARM1        | 0 |
| LILRB5       | 0 |
| LILRB2       | 0 |
| LILRA3       | 0 |
| LILRA4       | 0 |
| NLRP7        | 0 |
| RNU6-64      | 0 |
| FAM71E2      | 0 |
| SBK2         | 0 |
| SGK110       | 0 |
| NLRP13       | 0 |
| ZIM3         | 0 |
| ZNF418       | 0 |
| ZNF256       | 0 |
| C19orf18     | 0 |
| ZNF606       | 0 |
| MIR4754      | 0 |
| TPO          | 0 |
| LOC730811    | 0 |
| SOX11        | 0 |
| LOC150622    | 0 |
| LOC400940    | 0 |
| KCNF1        | 0 |
| MIR3125      | 0 |
| MYCN         | 0 |
| MSGN1        | 0 |
| KCNS3        | 0 |
| MIR4757      | 0 |
| FLJ12334     | 0 |
| GDF7         | 0 |
| C2orf70      | 0 |
| TCF23        | 0 |
| DNAJC5G      | 0 |
| MIR4263      | 0 |
| SNORD92      | 0 |
| SNORD53      | 0 |
| EHD3         | 0 |
| MIR558       | 0 |
| MIR4765      | 0 |
| LINC00486    | 0 |
| LOC100271832 | 0 |
| VIT          | 0 |
| CYP1B1-AS1   | 0 |
| SLC8A1-AS1   | 0 |
| LOC388942    | 0 |
| ABCG8        | 0 |
| EPCAM        | 0 |
| MIR559       | 0 |
| CCDC85A      | 0 |
| FLJ30838     | 0 |
| MIR5192      | 0 |
| MIR4434      | 0 |
| LOC339807    | 0 |

|                  |   |
|------------------|---|
| PLEK             | 0 |
| PROKR1           | 0 |
| GKN1             | 0 |
| ANTXR1           | 0 |
| MIR3126          | 0 |
| OR7E91P          | 0 |
| EMX1             | 0 |
| NOTO             | 0 |
| DCTN1-AS1        | 0 |
| MIR5000          | 0 |
| REG3G            | 0 |
| REG1A            | 0 |
| LOC1720          | 0 |
| FUNDC2P2         | 0 |
| RGPD1,RGPD2      | 0 |
| MIR4435-1        | 0 |
| SMYD1            | 0 |
| THNSL2           | 0 |
| TEX37            | 0 |
| MIR4436A         | 0 |
| ACTR3BP2         | 0 |
| MAL              | 0 |
| TRIM43           | 0 |
| MIR3127          | 0 |
| VWA3B            | 0 |
| CNGA3            | 0 |
| NMS              | 0 |
| MIR5696          | 0 |
| IL1R2            | 0 |
| IL1RL2           | 0 |
| MIR4772          | 0 |
| LOC150568        | 0 |
| POU3F3           | 0 |
| PLGLA            | 0 |
| SLC5A7           | 0 |
| SULT1C3          | 0 |
| SULT1C2          | 0 |
| SULT1C2P1        | 0 |
| SULT1C4          | 0 |
| LIMS3L           | 0 |
| LOC100507334     | 0 |
| MIR4436B2        | 0 |
| ACOXL            | 0 |
| IL36A            | 0 |
| IL36RN           | 0 |
| IL1F10           | 0 |
| IL1RN            | 0 |
| FAM138B          | 0 |
| DPP10            | 0 |
| MARCO            | 0 |
| PCDP1            | 0 |
| GLI2             | 0 |
| CNTNAP5          | 0 |
| GYPC             | 0 |
| GPR17            | 0 |
| CFC1B            | 0 |
| LOC646743,TISP43 | 0 |
| CYP4F30P         | 0 |
| GPR148           | 0 |
| POTEE            | 0 |
| LOC440910        | 0 |
| LOC389043        | 0 |
| RNU6-81          | 0 |
| MIR3679          | 0 |
| ACMSD            | 0 |
| MIR128-1         | 0 |
| LOC100507600     | 0 |
| THSD7B           | 0 |
| ARHGAP15         | 0 |
| ZEB2-AS1         | 0 |
| DKFZp686O1327    | 0 |
| LYPD6B           | 0 |
| TNFAIP6          | 0 |
| MIR4773-1        | 0 |
| GALNT13          | 0 |
| GALNT5           | 0 |
| CCDC148-AS1      | 0 |
| DAPL1            | 0 |
| TBR1             | 0 |

|                           |   |
|---------------------------|---|
| CSRNP3                    | 0 |
| XIRP2                     | 0 |
| MIR4774                   | 0 |
| G6PC2                     | 0 |
| MYO3B                     | 0 |
| LOC285084                 | 0 |
| SP9                       | 0 |
| HOXD12                    | 0 |
| HOXD11                    | 0 |
| HOXD10                    | 0 |
| MIR10B                    | 0 |
| OSBPL6                    | 0 |
| ITGA4                     | 0 |
| PPP1R1C                   | 0 |
| ZNF804A                   | 0 |
| MIR561                    | 0 |
| COL3A1                    | 0 |
| MIR1245A                  | 0 |
| PCGEM1                    | 0 |
| PLCL1                     | 0 |
| CDK15                     | 0 |
| SNORD70                   | 0 |
| SNORD11B                  | 0 |
| SNORD11                   | 0 |
| CD28                      | 0 |
| ICOS                      | 0 |
| SNORD51                   | 0 |
| ADAM23                    | 0 |
| LOC200726                 | 0 |
| MIR3130-2                 | 0 |
| LOC100507443              | 0 |
| PTH2R                     | 0 |
| UNC80                     | 0 |
| CPS1-IT1                  | 0 |
| VWC2L                     | 0 |
| VWC2L-IT1                 | 0 |
| MIR26B                    | 0 |
| VIL1                      | 0 |
| WNT6                      | 0 |
| CDK5R2                    | 0 |
| LINC00608                 | 0 |
| LOC100129175              | 0 |
| CCDC140                   | 0 |
| MOGAT1                    | 0 |
| KCNE4                     | 0 |
| NYAP2                     | 0 |
| MIR548AR                  | 0 |
| LOC646736                 | 0 |
| CCL20                     | 0 |
| SPATA3                    | 0 |
| MIR4777                   | 0 |
| C2orf57                   | 0 |
| ALPP                      | 0 |
| ALPPL2                    | 0 |
| ALPI                      | 0 |
| NEU2                      | 0 |
| UGT1A1,UGT1A10,UGT1A3,UGT | 0 |
| TRPM8                     | 0 |
| SPP2                      | 0 |
| CXCR7                     | 0 |
| MLPH                      | 0 |
| PRLH                      | 0 |
| TWIST2                    | 0 |
| MIR4269                   | 0 |
| LOC150935                 | 0 |
| MIR149                    | 0 |
| GAL3ST2                   | 0 |
| CXXC11                    | 0 |
| FAM150B                   | 0 |
| LOC339822                 | 0 |
| MYT1L                     | 0 |
| LOC100505964              | 0 |
| LOC727982                 | 0 |
| LINC00487                 | 0 |
| LOC339788                 | 0 |
| LINC00299                 | 0 |
| MIR4261                   | 0 |
| FLJ33534                  | 0 |
| MIR4429                   | 0 |

|              |   |
|--------------|---|
| NTSR2        | 0 |
| MIR4262      | 0 |
| LOC100506474 | 0 |
| MYCNOS       | 0 |
| RAD51AP2     | 0 |
| OSR1         | 0 |
| APOB         | 0 |
| POMC         | 0 |
| MIR1301      | 0 |
| C2orf53      | 0 |
| SLC30A3      | 0 |
| C2orf71      | 0 |
| ALK          | 0 |
| CAPN13       | 0 |
| GALNT14      | 0 |
| CAPN14       | 0 |
| SRD5A2       | 0 |
| SULT6B1      | 0 |
| LOC375196    | 0 |
| SLC8A1       | 0 |
| KCNG3        | 0 |
| HAAO         | 0 |
| LOC728819    | 0 |
| MIR548AD     | 0 |
| SIX2         | 0 |
| C2orf61      | 0 |
| KCNK12       | 0 |
| LHCGR        | 0 |
| FSHR         | 0 |
| NRXN1        | 0 |
| MIR3682      | 0 |
| EFEMP1       | 0 |
| MIR217       | 0 |
| MIR216A      | 0 |
| MIR216B      | 0 |
| MIR4432      | 0 |
| LOC339803    | 0 |
| SNORA70B     | 0 |
| LINC00309    | 0 |
| MIR4778      | 0 |
| MEIS1-AS3    | 0 |
| LOC644838    | 0 |
| CNRIP1       | 0 |
| BMP10        | 0 |
| GKN2         | 0 |
| FIGLA        | 0 |
| CLEC4F       | 0 |
| EGR4         | 0 |
| NAT8         | 0 |
| NAT8B        | 0 |
| EVA1A        | 0 |
| LRRTM4       | 0 |
| SNAR-H       | 0 |
| REG1B        | 0 |
| REG1P        | 0 |
| MIR4264      | 0 |
| LRRTM1       | 0 |
| MIR4779      | 0 |
| CD8B         | 0 |
| MIR4780      | 0 |
| TRIM43B      | 0 |
| FAM178B      | 0 |
| CHST10       | 0 |
| CREG2        | 0 |
| RFX8         | 0 |
| LOC100287010 | 0 |
| LOC284998    | 0 |
| LOC100506421 | 0 |
| LOC285000    | 0 |
| MIR4265      | 0 |
| MIR4266      | 0 |
| MIR4267      | 0 |
| MIR4436B1    | 0 |
| LIMS3        | 0 |
| RGPD5, RGPD6 | 0 |
| MIR4435-1    | 0 |
| IL1B         | 0 |
| IL36B        | 0 |
| MIR4782      | 0 |

|                  |   |
|------------------|---|
| LOC100499194     | 0 |
| LOC389023        | 0 |
| EN1              | 0 |
| SCTR             | 0 |
| LOC84931         | 0 |
| CYP27C1          | 0 |
| MIR4783          | 0 |
| LOC389033        | 0 |
| LOC100131320     | 0 |
| LOC440905        | 0 |
| POTEF            | 0 |
| LOC646743,TISP43 | 0 |
| CFC1,CFC1B       | 0 |
| MIR4784          | 0 |
| C2orf27B         | 0 |
| MIR663B          | 0 |
| NCKAP5           | 0 |
| MAP3K19          | 0 |
| CXCR4            | 0 |
| NXPH2            | 0 |
| LRP1B            | 0 |
| ZEB2             | 0 |
| RPRM             | 0 |
| ERMN             | 0 |
| CYTIP            | 0 |
| PLA2R1           | 0 |
| ITGB6            | 0 |
| MIR4785          | 0 |
| DPP4             | 0 |
| GCG              | 0 |
| FAP              | 0 |
| KCNH7            | 0 |
| FIGN             | 0 |
| GRB14            | 0 |
| SNORA70F         | 0 |
| SLC38A11         | 0 |
| SCN1A            | 0 |
| SCN9A            | 0 |
| SCN7A            | 0 |
| ABCB11           | 0 |
| LRP2             | 0 |
| WIPF1            | 0 |
| CHRNA1           | 0 |
| MIR933           | 0 |
| EVX2             | 0 |
| MIR1246          | 0 |
| MIR3128          | 0 |
| MIR1258          | 0 |
| MIR4437          | 0 |
| PDE1A            | 0 |
| ZSWIM2           | 0 |
| DIRC1            | 0 |
| MIR1245B         | 0 |
| MIR3129          | 0 |
| SLC40A1          | 0 |
| SDPR             | 0 |
| TMEFF2           | 0 |
| BOLL             | 0 |
| DYTN             | 0 |
| MIR2355          | 0 |
| CRYGD            | 0 |
| CRYGC            | 0 |
| CRYGB            | 0 |
| CRYGA            | 0 |
| C2orf80          | 0 |
| ACADL            | 0 |
| MYL1             | 0 |
| MIR548F2         | 0 |
| MIR4776-2        | 0 |
| LINC00607        | 0 |
| IGFBP5           | 0 |
| TNP1             | 0 |
| CXCR2P1          | 0 |
| PRKAG3           | 0 |
| CRYBA2           | 0 |
| MIR375           | 0 |
| MIR3131          | 0 |
| MIR153-1         | 0 |
| RESP18           | 0 |

|              |   |
|--------------|---|
| MIR3132      | 0 |
| MIR4268      | 0 |
| PAX3         | 0 |
| DOCK10       | 0 |
| MIR4439      | 0 |
| MIR5702      | 0 |
| C2orf83      | 0 |
| SPHKAP       | 0 |
| PID1         | 0 |
| DNER         | 0 |
| SNORD20      | 0 |
| SNORD82      | 0 |
| MIR1471      | 0 |
| NPPC         | 0 |
| ECEL1P2      | 0 |
| ECEL1        | 0 |
| DNAJB3       | 0 |
| LOC100286922 | 0 |
| GBX2         | 0 |
| ASB18        | 0 |
| IQCA1        | 0 |
| LOC151174    | 0 |
| FLJ43879     | 0 |
| MIR4441      | 0 |
| MIR2467      | 0 |
| MIR4786      | 0 |
| OR6B2        | 0 |
| PRR21        | 0 |
| OR6B3        | 0 |
| AQP12B       | 0 |
| KIF1A        | 0 |
| LOC200772    | 0 |
| DEFB125      | 0 |
| DEFB126      | 0 |
| DEFB127      | 0 |
| DEFB129      | 0 |
| DEFB132      | 0 |
| TGM3         | 0 |
| TGM6         | 0 |
| SNORA51      | 0 |
| SNORD56      | 0 |
| SNORD57      | 0 |
| C20orf141    | 0 |
| TMEM239      | 0 |
| MIR103A2     | 0 |
| PRND         | 0 |
| PLCB1        | 0 |
| LAMP5        | 0 |
| ANKEF1       | 0 |
| SPTLC3       | 0 |
| BANF2        | 0 |
| LINC00851    | 0 |
| MIR3192      | 0 |
| SCP2D1       | 0 |
| PAX1         | 0 |
| LOC100270679 | 0 |
| SSTR4        | 0 |
| CSTL1        | 0 |
| CST8         | 0 |
| CST13P       | 0 |
| FLJ33581     | 0 |
| SYNDIG1      | 0 |
| DEFB115      | 0 |
| DEFB118      | 0 |
| DEFB123      | 0 |
| REM1         | 0 |
| LINC00028    | 0 |
| MIR3193      | 0 |
| COX4I2       | 0 |
| TTLL9        | 0 |
| XKR7         | 0 |
| LOC149950    | 0 |
| BPIFB2       | 0 |
| BPIFB6       | 0 |
| BPIFB3       | 0 |
| BPIFB4       | 0 |
| BPIFA2       | 0 |
| BPIFA4P      | 0 |
| BPIFA3       | 0 |

|                            |   |
|----------------------------|---|
| BPIFA1                     | 0 |
| BPIFB1                     | 0 |
| MIR4755                    | 0 |
| MIR644A                    | 0 |
| MIR499A                    | 0 |
| BPI                        | 0 |
| SNORA60                    | 0 |
| ADIG                       | 0 |
| PPP1R16B                   | 0 |
| R3HDML                     | 0 |
| MIR3646                    | 0 |
| SEMG1                      | 0 |
| SEMG2                      | 0 |
| SPINT4                     | 0 |
| MMP9                       | 0 |
| EYA2                       | 0 |
| MIR3616                    | 0 |
| SNORD12C                   | 0 |
| SNORD12B                   | 0 |
| SNORD12                    | 0 |
| MIR645                     | 0 |
| TSHZ2                      | 0 |
| DOK5                       | 0 |
| MC3R                       | 0 |
| SPO11                      | 0 |
| MIR5095                    | 0 |
| PCK1                       | 0 |
| MIR4532                    | 0 |
| C20orf85                   | 0 |
| ZNF831                     | 0 |
| EDN3                       | 0 |
| PHACTR3                    | 0 |
| C20orf197                  | 0 |
| MIR4533                    | 0 |
| C20orf166                  | 0 |
| MIR1-1                     | 0 |
| HAR1A                      | 0 |
| MIR124-3                   | 0 |
| MIR3196                    | 0 |
| FLJ16779                   | 0 |
| MIR4326                    | 0 |
| MIR941-1,MIR941-3,MIR941-4 | 0 |
| MIR941-2,MIR941-3,MIR941-4 | 0 |
| DEFB128                    | 0 |
| TCF15                      | 0 |
| SCRT2                      | 0 |
| SIRPB2                     | 0 |
| SIRPD                      | 0 |
| SIRPB1                     | 0 |
| SIRPG                      | 0 |
| LOC100289473               | 0 |
| PDYN                       | 0 |
| SNORD119                   | 0 |
| CPXM1                      | 0 |
| AVP                        | 0 |
| C20orf194                  | 0 |
| ADAM33                     | 0 |
| MIR103B2                   | 0 |
| ADRA1D                     | 0 |
| PRNT                       | 0 |
| PROKR2                     | 0 |
| HAO1                       | 0 |
| PAK7                       | 0 |
| SNAP25-AS1                 | 0 |
| LOC339593                  | 0 |
| ISM1-AS1                   | 0 |
| SEL1L2                     | 0 |
| FLRT3                      | 0 |
| MACROD2-AS1                | 0 |
| C20orf78                   | 0 |
| LOC100130264               | 0 |
| NKX2-4                     | 0 |
| NKX2-2                     | 0 |
| LOC284788                  | 0 |
| LINC00261                  | 0 |
| FOXA2                      | 0 |
| THBD                       | 0 |
| LINC00656                  | 0 |
| CST11                      | 0 |

|                         |   |
|-------------------------|---|
| CST9L                   | 0 |
| CST9                    | 0 |
| CST4                    | 0 |
| CST1                    | 0 |
| CST2                    | 0 |
| CST5                    | 0 |
| VSX1                    | 0 |
| LOC284798               | 0 |
| DEFB116                 | 0 |
| DEFB119                 | 0 |
| DEFB121                 | 0 |
| DEFB122                 | 0 |
| DEFB124                 | 0 |
| SUN5                    | 0 |
| GGT7                    | 0 |
| MIR499B                 | 0 |
| C20orf173               | 0 |
| LINC00489               | 0 |
| LOC339568               | 0 |
| PTPRT                   | 0 |
| WFDC12                  | 0 |
| SLPI                    | 0 |
| SPINT3                  | 0 |
| EPPIN,EPPIN-WFDC6,WFDC6 | 0 |
| WFDC8                   | 0 |
| WFDC9                   | 0 |
| WFDC11                  | 0 |
| CDH22                   | 0 |
| ZNF663                  | 0 |
| MKRN7P                  | 0 |
| ZNF334                  | 0 |
| OCSTAMP                 | 0 |
| KCNB1                   | 0 |
| LINC00651               | 0 |
| KCNG1                   | 0 |
| MIR3194                 | 0 |
| SALL4                   | 0 |
| SUMO1P1                 | 0 |
| MIR4756                 | 0 |
| CYP24A1                 | 0 |
| CBLN4                   | 0 |
| MIR4325                 | 0 |
| CTCFL                   | 0 |
| ZBP1                    | 0 |
| APCDD1L                 | 0 |
| MIR296                  | 0 |
| MIR298                  | 0 |
| GNAS-AS1                | 0 |
| LOC100506384            | 0 |
| MIR1257                 | 0 |
| HRH3                    | 0 |
| RBBP8NL                 | 0 |
| GATA5                   | 0 |
| C20orf166-AS1           | 0 |
| BHLHE23                 | 0 |
| HAR1B                   | 0 |
| NKAIN4                  | 0 |
| CHRNA4                  | 0 |
| MIR1914                 | 0 |
| MIR647                  | 0 |
| SOX18                   | 0 |
| C20orf201               | 0 |
| NPBWR2                  | 0 |
| MIR3687                 | 0 |
| POTED                   | 0 |
| RBM11                   | 0 |
| SAMSN1-AS1              | 0 |
| LINC00478               | 0 |
| MIR99A                  | 0 |
| MIRLET7C                | 0 |
| MIR125B2                | 0 |
| C21orf37                | 0 |
| NCAM2                   | 0 |
| RNU6-67                 | 0 |
| LINC00308               | 0 |
| LOC339622               | 0 |
| MIR4759                 | 0 |
| LINC00113               | 0 |
| LINC00314               | 0 |



|                        |   |
|------------------------|---|
| KRTAP13-1              | 0 |
| KRTAP13-4              | 0 |
| KRTAP15-1              | 0 |
| KRTAP6-3               | 0 |
| KRTAP22-1              | 0 |
| KRTAP20-1              | 0 |
| KRTAP20-4              | 0 |
| KRTAP20-2              | 0 |
| KRTAP20-3              | 0 |
| OLIG2                  | 0 |
| OLIG1                  | 0 |
| CLIC6                  | 0 |
| MIR802                 | 0 |
| DSCR10                 | 0 |
| BRWD1-AS1              | 0 |
| PCP4                   | 0 |
| DSCAM-AS1              | 0 |
| MIR3197                | 0 |
| LINC00111              | 0 |
| LINC00112              | 0 |
| UMODL1                 | 0 |
| UBASH3A                | 0 |
| PDE9A                  | 0 |
| CRYAA                  | 0 |
| AIRE                   | 0 |
| TRPM2                  | 0 |
| KRTAP10-4              | 0 |
| KRTAP10-7              | 0 |
| KRTAP10-8              | 0 |
| KRTAP10-9              | 0 |
| KRTAP10-10             | 0 |
| KRTAP10-11             | 0 |
| KRTAP12-3              | 0 |
| KRTAP10-12             | 0 |
| TPTE                   | 0 |
| BAGE,BAGE3,BAGE4,BAGE5 | 0 |
| MIR3156-3              | 0 |
| ANKRD20A11P            | 0 |
| LIPI                   | 0 |
| SAMSN1                 | 0 |
| LOC388813              | 0 |
| CHODL-AS1              | 0 |
| TMPRSS15               | 0 |
| LINC00320              | 0 |
| LINC00317              | 0 |
| D21S2088E              | 0 |
| CYYR1                  | 0 |
| ADAMTS1                | 0 |
| MIR5009                | 0 |
| CLDN17                 | 0 |
| LINC00307              | 0 |
| CLDN8                  | 0 |
| KRTAP24-1              | 0 |
| KRTAP25-1              | 0 |
| KRTAP26-1              | 0 |
| KRTAP27-1              | 0 |
| KRTAP23-1              | 0 |
| KRTAP13-2              | 0 |
| MIR4327                | 0 |
| KRTAP13-3              | 0 |
| KRTAP19-1              | 0 |
| KRTAP19-2              | 0 |
| KRTAP19-3              | 0 |
| KRTAP19-4              | 0 |
| KRTAP19-5              | 0 |
| KRTAP19-6              | 0 |
| KRTAP19-7              | 0 |
| KRTAP22-2              | 0 |
| KRTAP6-2               | 0 |
| KRTAP6-1               | 0 |
| KRTAP21-3              | 0 |
| KRTAP21-2              | 0 |
| KRTAP21-1              | 0 |
| KRTAP8-1               | 0 |
| KRTAP7-1               | 0 |
| KRTAP11-1              | 0 |
| KRTAP19-8              | 0 |
| LINC00159              | 0 |
| C21orf54               | 0 |

|              |   |
|--------------|---|
| LINC00160    | 0 |
| LOC100506403 | 0 |
| KCNJ6        | 0 |
| DSCR4        | 0 |
| ERG          | 0 |
| LINC00114    | 0 |
| C21orf88     | 0 |
| DSCAM        | 0 |
| MIR4760      | 0 |
| DSCAM-IT1    | 0 |
| LINC00323    | 0 |
| TMPRSS2      | 0 |
| C21orf128    | 0 |
| TFF3         | 0 |
| TFF2         | 0 |
| TFF1         | 0 |
| TMPRSS3      | 0 |
| KRTAP10-3    | 0 |
| KRTAP10-5    | 0 |
| KRTAP10-6    | 0 |
| KRTAP12-4    | 0 |
| KRTAP12-2    | 0 |
| KRTAP12-1    | 0 |
| LOC100129027 | 0 |
| S100B        | 0 |
| TPTEP1       | 0 |
| HSFY1P1      | 0 |
| FLJ41941     | 0 |
| MIR185       | 0 |
| POM121L4P    | 0 |
| MIR301B      | 0 |
| MIR130B      | 0 |
| VPREB1       | 0 |
| MIR650       | 0 |
| IGLL5        | 0 |
| C22orf15     | 0 |
| TOP1P2       | 0 |
| IGLL3P       | 0 |
| SEZ6L        | 0 |
| MIR3199-2    | 0 |
| HORMAD2      | 0 |
| MIR3200      | 0 |
| AP1B1P1      | 0 |
| TIMP3        | 0 |
| ISX          | 0 |
| MIR3909      | 0 |
| APOE5        | 0 |
| LOC100506241 | 0 |
| MIR4534      | 0 |
| SYNGR1       | 0 |
| MCHR1        | 0 |
| MIR1281      | 0 |
| MIR33A       | 0 |
| MPPED1       | 0 |
| EFCAB6-AS1   | 0 |
| LINC00207    | 0 |
| UPK3A        | 0 |
| FBLN1        | 0 |
| MIR4762      | 0 |
| MIR3619      | 0 |
| MIR3201      | 0 |
| FAM19A5      | 0 |
| MIR4535      | 0 |
| LOC100128946 | 0 |
| PANX2        | 0 |
| MIOX         | 0 |
| POTEH        | 0 |
| OR11H1       | 0 |
| CCT8L2       | 0 |
| GAB4         | 0 |
| CECR3        | 0 |
| MIR3198-1    | 0 |
| GSC2         | 0 |
| LOC150185    | 0 |
| LOC388849    | 0 |
| MIR1286      | 0 |
| SLC7A4       | 0 |
| P2RX6P       | 0 |
| ZNF280B      | 0 |

|              |   |
|--------------|---|
| IGLL1        | 0 |
| GGT5         | 0 |
| PIWIL3       | 0 |
| MIR548J      | 0 |
| CRYBB1       | 0 |
| MIR3199-1    | 0 |
| C22orf31     | 0 |
| MIR3653      | 0 |
| SEC14L6      | 0 |
| MIR3928      | 0 |
| C22orf42     | 0 |
| BPIFC        | 0 |
| MIR4764      | 0 |
| MB           | 0 |
| APOL3        | 0 |
| CACNG2       | 0 |
| PVALB        | 0 |
| TEX33        | 0 |
| IL2RB        | 0 |
| SSTR3        | 0 |
| ELFN2        | 0 |
| LGALS2       | 0 |
| MIR659       | 0 |
| SNORD83A     | 0 |
| RNU86        | 0 |
| SNORD43      | 0 |
| ENTHD1       | 0 |
| MIR4766      | 0 |
| SULT4A1      | 0 |
| PNPLA5       | 0 |
| LINC00229    | 0 |
| PHF21B       | 0 |
| MIR1249      | 0 |
| FLJ46257     | 0 |
| LOC284933    | 0 |
| CHL1         | 0 |
| CNTN6        | 0 |
| LRRN1        | 0 |
| GRM7         | 0 |
| CAV3         | 0 |
| SLC6A11      | 0 |
| SYN2         | 0 |
| PPARG        | 0 |
| FGD5P1       | 0 |
| MIR563       | 0 |
| LOC339862    | 0 |
| VENTXP7      | 0 |
| UBE2E2       | 0 |
| MIR548AC     | 0 |
| THRBS-AS1    | 0 |
| LRRC3B       | 0 |
| LINC00693    | 0 |
| RBMS3        | 0 |
| OSBPL10-AS1  | 0 |
| TRIM71       | 0 |
| CCR4         | 0 |
| ARPP21       | 0 |
| MIR128-2     | 0 |
| STAC         | 0 |
| MIR26A1      | 0 |
| CCR8         | 0 |
| ENTPD3       | 0 |
| KLHL40       | 0 |
| CCDC13-AS1   | 0 |
| KRBOX1       | 0 |
| MIR138-1     | 0 |
| TOPAZ1       | 0 |
| CCR3         | 0 |
| CCR2         | 0 |
| RTP3         | 0 |
| LRRC2-AS1    | 0 |
| TDGF1        | 0 |
| LOC100132146 | 0 |
| MIR1226      | 0 |
| MIR4443      | 0 |
| CAMP         | 0 |
| MIR4271      | 0 |
| MIR4787      | 0 |
| IQCF4        | 0 |

|              |   |
|--------------|---|
| IQCF3        | 0 |
| IQCF2        | 0 |
| SNORD19      | 0 |
| SNORD19B     | 0 |
| SNORD69      | 0 |
| CACNA2D3     | 0 |
| ARHGEF3-AS1  | 0 |
| LINC00698    | 0 |
| SYNPR        | 0 |
| SNTN         | 0 |
| PRICKLE2-AS1 | 0 |
| PRICKLE2-AS2 | 0 |
| ADAMTS9-AS2  | 0 |
| MIR548A2     | 0 |
| MAG11-AS1    | 0 |
| MIR4272      | 0 |
| FAM19A1      | 0 |
| GPR27        | 0 |
| LOC201617    | 0 |
| MIR4444-1    | 0 |
| MIR1324      | 0 |
| MIR4273      | 0 |
| ROBO2        | 0 |
| CADM2        | 0 |
| MIR5688      | 0 |
| HTR1F        | 0 |
| LOC255025    | 0 |
| EPHA6        | 0 |
| OR5AC2       | 0 |
| OR5H1        | 0 |
| OR5H14       | 0 |
| OR5H15       | 0 |
| OR5H6        | 0 |
| OR5H2        | 0 |
| OR5K4        | 0 |
| OR5K3        | 0 |
| OR5K1        | 0 |
| GPR15        | 0 |
| COL8A1       | 0 |
| GPR128       | 0 |
| TRAT1        | 0 |
| FLJ22763     | 0 |
| LINC00488    | 0 |
| FLJ25363     | 0 |
| MIR567       | 0 |
| WDR52-AS1    | 0 |
| MIR4446      | 0 |
| TIGIT        | 0 |
| ZBTB20-AS1   | 0 |
| GAP43        | 0 |
| LSAMP-AS3    | 0 |
| IGSF11-AS1   | 0 |
| C3orf30      | 0 |
| PLA1A        | 0 |
| MAATS1       | 0 |
| CD86         | 0 |
| CASR         | 0 |
| MIR5002      | 0 |
| ROPN1B       | 0 |
| ALDH1L1-AS1  | 0 |
| ALDH1L1-AS2  | 0 |
| NUP210P1     | 0 |
| DNAJB8-AS1   | 0 |
| LOC90246     | 0 |
| EFCC1        | 0 |
| GP9          | 0 |
| RHO          | 0 |
| H1FOO        | 0 |
| COL6A5       | 0 |
| ACPP         | 0 |
| NPHP3-AS1    | 0 |
| TMEM108      | 0 |
| BFSP2        | 0 |
| MIR4788      | 0 |
| EPHB1        | 0 |
| SOX14        | 0 |
| BPESC1       | 0 |
| CLSTN2       | 0 |
| TRIM42       | 0 |

|              |   |
|--------------|---|
| SPSB4        | 0 |
| LOC100507389 | 0 |
| CHST2        | 0 |
| SLC9A9-AS1   | 0 |
| ZIC1         | 0 |
| AGTR1        | 0 |
| CPB1         | 0 |
| CPA3         | 0 |
| HLTF-AS1     | 0 |
| TM4SF4       | 0 |
| CLRN1-AS1    | 0 |
| MED12L       | 0 |
| MIR548H2     | 0 |
| AADACL2      | 0 |
| LOC201651    | 0 |
| AADAC        | 0 |
| SUCNR1       | 0 |
| MME          | 0 |
| LOC100498859 | 0 |
| PTX3         | 0 |
| C3orf55      | 0 |
| MLF1         | 0 |
| MIR3919      | 0 |
| MIR15B       | 0 |
| MIR16-2      | 0 |
| OTOL1        | 0 |
| LOC646168    | 0 |
| MIR551B      | 0 |
| SAMD7        | 0 |
| NLGN1        | 0 |
| NAALADL2     | 0 |
| MIR4789      | 0 |
| ABCC5-AS1    | 0 |
| HTR3D        | 0 |
| HTR3C        | 0 |
| HTR3E        | 0 |
| MIR1224      | 0 |
| SNORD66      | 0 |
| EHHADH-AS1   | 0 |
| LOC344887    | 0 |
| HRG          | 0 |
| KNG1         | 0 |
| SNORD2       | 0 |
| RTP1         | 0 |
| RTP4         | 0 |
| LOC100131635 | 0 |
| TP63         | 0 |
| MIR944       | 0 |
| SNAR-1       | 0 |
| OSTN         | 0 |
| PYDC2        | 0 |
| MIR570       | 0 |
| LOC401109    | 0 |
| FAM157A      | 0 |
| CNTN4-AS2    | 0 |
| IL5RA        | 0 |
| MIR4790      | 0 |
| CIDEC        | 0 |
| MIR885       | 0 |
| LINC00606    | 0 |
| SLC6A1-AS1   | 0 |
| TIMP4        | 0 |
| WNT7A        | 0 |
| MIR4270      | 0 |
| MIR4791      | 0 |
| ZNF385D      | 0 |
| LINC00691    | 0 |
| MIR4792      | 0 |
| MIR4442      | 0 |
| LINC00692    | 0 |
| EOMES        | 0 |
| GADL1        | 0 |
| DCLK3        | 0 |
| SCN5A        | 0 |
| SCN10A       | 0 |
| CCK          | 0 |
| LYZL4        | 0 |
| HHATL        | 0 |
| CYP8B1       | 0 |

|              |   |
|--------------|---|
| CCR1         | 0 |
| LTF          | 0 |
| PRSS46       | 0 |
| PRSS45       | 0 |
| PRSS42       | 0 |
| MYL3         | 0 |
| MIR425       | 0 |
| MIR191       | 0 |
| LOC646498    | 0 |
| BSN-AS2      | 0 |
| CDHR4        | 0 |
| CAMKV        | 0 |
| IQCF6        | 0 |
| IQCF5        | 0 |
| MIRLET7G     | 0 |
| MIR135A1     | 0 |
| CACNA2D3-AS1 | 0 |
| LRTM1        | 0 |
| WNT5A        | 0 |
| ERC2-IT1     | 0 |
| MIR3938      | 0 |
| FAM3D        | 0 |
| C3orf67      | 0 |
| FEZF2        | 0 |
| SYNPR-AS1    | 0 |
| LOC100287879 | 0 |
| PRICKLE2     | 0 |
| FAM19A4      | 0 |
| MIR3136      | 0 |
| MIR1284      | 0 |
| PROK2        | 0 |
| PDZRN3       | 0 |
| CNTN3        | 0 |
| LOC440970    | 0 |
| CADM2-AS2    | 0 |
| RNU6-69      | 0 |
| VGLL3        | 0 |
| MIR4795      | 0 |
| POU1F1       | 0 |
| GABRR3       | 0 |
| ST3GAL6-AS1  | 0 |
| MIR548G      | 0 |
| MIR3921      | 0 |
| MIR548A3     | 0 |
| LINC00635    | 0 |
| RETNLB       | 0 |
| GUCA1C       | 0 |
| MORC1        | 0 |
| DPPA2        | 0 |
| DPPA4        | 0 |
| ZBED2        | 0 |
| CD200R1L     | 0 |
| DRD3         | 0 |
| MIR568       | 0 |
| MIR4796      | 0 |
| CD80         | 0 |
| ILDR1        | 0 |
| SEMA5B       | 0 |
| ROPN1        | 0 |
| MIR5092      | 0 |
| MIR548I1     | 0 |
| C3orf22      | 0 |
| C3orf27      | 0 |
| KIAA1257     | 0 |
| MIR5704      | 0 |
| C3orf36      | 0 |
| SLCO2A1      | 0 |
| FOXL2        | 0 |
| PRR23B       | 0 |
| PISRT1       | 0 |
| RBP2         | 0 |
| RBP1         | 0 |
| PCOLCE2      | 0 |
| PAQR9        | 0 |
| PLOD2        | 0 |
| PLSCR5       | 0 |
| ZIC4         | 0 |
| TM4SF18      | 0 |
| ANKUB1       | 0 |

|              |   |
|--------------|---|
| GPR171       | 0 |
| P2RY14       | 0 |
| P2RY13       | 0 |
| P2RY12       | 0 |
| IGSF10       | 0 |
| MIR5186      | 0 |
| GPR149       | 0 |
| KCNAB1-AS2   | 0 |
| KCNAB1-AS1   | 0 |
| SPTSSB       | 0 |
| CT64         | 0 |
| SI           | 0 |
| SLITRK3      | 0 |
| BCHE         | 0 |
| ZBBX         | 0 |
| LRRC31       | 0 |
| SLC2A2       | 0 |
| MIR569       | 0 |
| GHSR         | 0 |
| TNFSF10      | 0 |
| NAALADL2-AS3 | 0 |
| FLJ46066     | 0 |
| LOC253573    | 0 |
| ADIPOQ-AS1   | 0 |
| RPL39L       | 0 |
| MASP1        | 0 |
| SST          | 0 |
| RTP2         | 0 |
| CLDN1        | 0 |
| TMEM207      | 0 |
| GMNC         | 0 |
| FGF12        | 0 |
| LOC647323    | 0 |
| DPPA2P3      | 0 |
| CPN2         | 0 |
| MIR5692C1    | 0 |
| APOD         | 0 |
| MIR4797      | 0 |
| ZNF141       | 0 |
| FLJ35424     | 0 |
| STK32B       | 0 |
| LOC285484    | 0 |
| MIR4798      | 0 |
| MIR4274      | 0 |
| HTRA3        | 0 |
| GPR78        | 0 |
| LOC650293    | 0 |
| USP17L10     | 0 |
| USP17L18     | 0 |
| USP17L21     | 0 |
| USP17L13     | 0 |
| USP17L15     | 0 |
| USP17L17     | 0 |
| USP17L18     | 0 |
| USP17L19     | 0 |
| USP17L22     | 0 |
| USP17L12     | 0 |
| USP17L22     | 0 |
| USP17L28     | 0 |
| USP17L26     | 0 |
| USP17L24     | 0 |
| USP17L28     | 0 |
| USP17L25     | 0 |
| USP17L30     | 0 |
| USP17L27     | 0 |
| USP17L9P     | 0 |
| USP17L27     | 0 |
| USP17L6P     | 0 |
| DRD5         | 0 |
| MIR572       | 0 |
| MIR5091      | 0 |
| LOC152742    | 0 |
| C1QTNF7      | 0 |
| CD38         | 0 |
| CLRN2        | 0 |
| SLIT2        | 0 |
| SLIT2-IT1    | 0 |
| MIR218-1     | 0 |
| GBA3         | 0 |

|              |   |
|--------------|---|
| SOD3         | 0 |
| SLC34A2      | 0 |
| MIR4275      | 0 |
| DTHD1        | 0 |
| KIAA1239     | 0 |
| MIR574       | 0 |
| CHRNA9       | 0 |
| UCHL1        | 0 |
| SHISA3       | 0 |
| GRXCR1       | 0 |
| GABRB1       | 0 |
| ZAR1         | 0 |
| CWH43        | 0 |
| SPATA18      | 0 |
| MIR4449      | 0 |
| LOC152578    | 0 |
| LNX1-AS1     | 0 |
| LNX1-AS2     | 0 |
| GSX2         | 0 |
| PDGFRA       | 0 |
| KIT          | 0 |
| LOC644145    | 0 |
| THEGL        | 0 |
| LOC255130    | 0 |
| LPHN3        | 0 |
| LOC100144602 | 0 |
| LOC550113    | 0 |
| FTLP10       | 0 |
| TMPRSS11E    | 0 |
| UGT2B10      | 0 |
| UGT2B7       | 0 |
| UGT2B28      | 0 |
| CSN1S1       | 0 |
| STATH        | 0 |
| HTN3         | 0 |
| HTN1         | 0 |
| CSN1S2AP     | 0 |
| CSN1S2BP     | 0 |
| ODAM         | 0 |
| FDCSP        | 0 |
| CSN3         | 0 |
| CABS1        | 0 |
| SMR3A        | 0 |
| SMR3B        | 0 |
| PROL1        | 0 |
| MUC7         | 0 |
| AMTN         | 0 |
| AMBN         | 0 |
| SLC4A4       | 0 |
| AFP          | 0 |
| AFM          | 0 |
| LOC728040    | 0 |
| CXCL6        | 0 |
| PF4V1        | 0 |
| AREG         | 0 |
| AREG         | 0 |
| LOC441025    | 0 |
| ART3         | 0 |
| MIR4450      | 0 |
| GDEP         | 0 |
| MIR4451      | 0 |
| DSPP         | 0 |
| DMP1         | 0 |
| IBSP         | 0 |
| MEPE         | 0 |
| LOC644248    | 0 |
| MMRN1        | 0 |
| CCSER1       | 0 |
| GRID2        | 0 |
| ATOH1        | 0 |
| BMPR1B       | 0 |
| PDHA2        | 0 |
| MIR3684      | 0 |
| C4orf17      | 0 |
| BANK1        | 0 |
| ARHGEF38-JT1 | 0 |
| NPNT         | 0 |
| MIR1243      | 0 |
| MIR577       | 0 |



|              |   |
|--------------|---|
| MIR1973      | 0 |
| NDST3        | 0 |
| CEP170P1     | 0 |
| PP12613      | 0 |
| LOC285419    | 0 |
| FAT4         | 0 |
| MIR2054      | 0 |
| PCDH10       | 0 |
| LINC00499    | 0 |
| SCOC         | 0 |
| GUSBP5       | 0 |
| EDNRA        | 0 |
| MIR4799      | 0 |
| TLR2         | 0 |
| FGB          | 0 |
| RBM46        | 0 |
| NPY2R        | 0 |
| GUCY1A3      | 0 |
| GUCY1B3      | 0 |
| TDO2         | 0 |
| GLRB         | 0 |
| GRIA2        | 0 |
| LOC340017    | 0 |
| RXFP1        | 0 |
| MIR3688-2    | 0 |
| NPY5R        | 0 |
| MIR5684      | 0 |
| LOC100506013 | 0 |
| FAM218A      | 0 |
| CPE          | 0 |
| MIR578       | 0 |
| TLL1         | 0 |
| ANXA10       | 0 |
| LOC100506122 | 0 |
| GALNTL6      | 0 |
| NBLA00301    | 0 |
| MIR4276      | 0 |
| ADAM29       | 0 |
| WDR17        | 0 |
| LOC285501    | 0 |
| MIR1305      | 0 |
| HELT         | 0 |
| F11          | 0 |
| LOC401164    | 0 |
| DUX2         | 0 |
| DUX4L4       | 0 |
| DUX4L5       | 0 |
| DUX4L6       | 0 |
| DUX4L4       | 0 |
| DUX4         | 0 |
| DUX4L3       | 0 |
| DUX4         | 0 |
| RNF212       | 0 |
| TMED11P      | 0 |
| HTT-AS1      | 0 |
| LOC100133461 | 0 |
| CYTL1        | 0 |
| EVC2         | 0 |
| MIR378D1     | 0 |
| JAKMIP1      | 0 |
| PSAPL1       | 0 |
| HMX1         | 0 |
| MIR3138      | 0 |
| CLNK         | 0 |
| HS3ST1       | 0 |
| LOC285547    | 0 |
| NKX3-2       | 0 |
| LOC285548    | 0 |
| LOC441009    | 0 |
| FGFBP1       | 0 |
| FGFBP2       | 0 |
| LDB2         | 0 |
| MIR548AX     | 0 |
| KCNIP4-IT1   | 0 |
| MIR548AJ2    | 0 |
| MIR573       | 0 |
| CCKAR        | 0 |
| MIR4801      | 0 |
| MIR4802      | 0 |

|              |   |
|--------------|---|
| PHOX2B       | 0 |
| KCTD8        | 0 |
| GABRA2       | 0 |
| GABRA4       | 0 |
| ERVMER34-1   | 0 |
| KDR          | 0 |
| HOPX         | 0 |
| SPINK2       | 0 |
| TECRL        | 0 |
| LOC401134    | 0 |
| EPHA5        | 0 |
| TMPRSS11A    | 0 |
| TMPRSS11GP   | 0 |
| TMPRSS11F    | 0 |
| SYT14L       | 0 |
| TMPRSS11BNL  | 0 |
| TMPRSS11B    | 0 |
| UGT2B17      | 0 |
| UGT2B15      | 0 |
| UGT2A3       | 0 |
| UGT2B10      | 0 |
| UGT2B11      | 0 |
| UGT2B4       | 0 |
| SULT1B1      | 0 |
| SULT1E1      | 0 |
| CSN2         | 0 |
| GC           | 0 |
| ADAMTS3      | 0 |
| RASSF6       | 0 |
| PF4          | 0 |
| PPBP         | 0 |
| CXCL5        | 0 |
| PPBPP2       | 0 |
| CXCL9        | 0 |
| CXCL10       | 0 |
| CXCL11       | 0 |
| NAA11        | 0 |
| GK2          | 0 |
| PRKG2        | 0 |
| LINC00575    | 0 |
| MIR575       | 0 |
| NKX6-1       | 0 |
| MAPK10       | 0 |
| MIR5705      | 0 |
| GPRIN3       | 0 |
| SNCA         | 0 |
| HPGDS        | 0 |
| UNC5C        | 0 |
| ADH4         | 0 |
| ADH1A        | 0 |
| ADH1B        | 0 |
| ADH1C        | 0 |
| ADH7         | 0 |
| DDIT4L       | 0 |
| EMCN         | 0 |
| EMCN-IT3     | 0 |
| TACR3        | 0 |
| GIMD1        | 0 |
| DKK2         | 0 |
| AGXT2L1      | 0 |
| CFI          | 0 |
| MIR367       | 0 |
| MIR302D      | 0 |
| MIR302A      | 0 |
| MIR302C      | 0 |
| MIR302B      | 0 |
| NDST4        | 0 |
| TRAM1L1      | 0 |
| TNIP3        | 0 |
| QRFPR        | 0 |
| TMEM155      | 0 |
| TRPC3        | 0 |
| IL2          | 0 |
| IL21         | 0 |
| PABPC4L      | 0 |
| LINC00616    | 0 |
| LOC100129858 | 0 |
| CLGN         | 0 |
| UCP1         | 0 |

|              |   |
|--------------|---|
| TBC1D9       | 0 |
| TNRC18P1     | 0 |
| RNF150       | 0 |
| INPP4B       | 0 |
| FREM3        | 0 |
| GYPE         | 0 |
| GYPB         | 0 |
| GYP A        | 0 |
| LOC100505545 | 0 |
| TTC29        | 0 |
| MIR3140      | 0 |
| TMEM154      | 0 |
| RNF175       | 0 |
| SFRP2        | 0 |
| DCHS2        | 0 |
| FGA          | 0 |
| FGG          | 0 |
| MAP9         | 0 |
| ASIC5        | 0 |
| PDGFC        | 0 |
| C4orf45      | 0 |
| MIR3688-1    | 0 |
| NPY1R        | 0 |
| TKTL2        | 0 |
| ANP32C       | 0 |
| SCRG1        | 0 |
| HAND2        | 0 |
| GLRA3        | 0 |
| ASB5         | 0 |
| VEGFC        | 0 |
| LINC00290    | 0 |
| MIR3945      | 0 |
| LOC100506229 | 0 |
| PDLIM3       | 0 |
| SORBS2       | 0 |
| LOC285441    | 0 |
| MTNR1A       | 0 |
| LOC339975    | 0 |
| SLC6A19      | 0 |
| SLC6A18      | 0 |
| IRX1         | 0 |
| LOC340094    | 0 |
| UBE2OL1      | 0 |
| LOC255167    | 0 |
| ADCY2        | 0 |
| LOC100505806 | 0 |
| SNORD123     | 0 |
| CT49         | 0 |
| FBXL7        | 0 |
| BASP1        | 0 |
| PMCHL1       | 0 |
| PRDM9        | 0 |
| LSP1P3       | 0 |
| LOC340113    | 0 |
| RXFP3        | 0 |
| IL7R         | 0 |
| SLC1A3       | 0 |
| EGFLAM       | 0 |
| CCDC152      | 0 |
| NNT          | 0 |
| HSPB3        | 0 |
| SNX18        | 0 |
| GZMK         | 0 |
| GZMA         | 0 |
| GAPT         | 0 |
| RAB3C        | 0 |
| RNF180       | 0 |
| RGS7BP       | 0 |
| FAM159B      | 0 |
| SERF1A       | 0 |
| CARTPT       | 0 |
| MIR4803      | 0 |
| MIR4804      | 0 |
| TMEM171      | 0 |
| TMEM174      | 0 |
| SV2C         | 0 |
| F2RL1        | 0 |
| S100Z        | 0 |
| CRHBP        | 0 |

|              |   |
|--------------|---|
| BHMT         | 0 |
| SPZ1         | 0 |
| RNU5E-1      | 0 |
| MIR3977      | 0 |
| VCAN         | 0 |
| NBPF22P      | 0 |
| MIR3607      | 0 |
| MIR548AO     | 0 |
| GPR150       | 0 |
| MIR583       | 0 |
| RAB9BP1      | 0 |
| LOC100289673 | 0 |
| CAMK4        | 0 |
| NREP-AS1     | 0 |
| FLJ11235     | 0 |
| KCNN2        | 0 |
| ARL14EPL     | 0 |
| MIR1244-2    | 0 |
| PRR16        | 0 |
| FTMT         | 0 |
| MEGF10       | 0 |
| CTXN3        | 0 |
| SLC27A6      | 0 |
| MIR4633      | 0 |
| ADAMTS19     | 0 |
| KIAA1024L    | 0 |
| CHSY3        | 0 |
| IL3          | 0 |
| PDLIM4       | 0 |
| IL4          | 0 |
| SOWAHA       | 0 |
| FBXL21       | 0 |
| NPY6R        | 0 |
| MYOT         | 0 |
| PKD2L2       | 0 |
| WNT8A        | 0 |
| VTRNA1-1     | 0 |
| VTRNA1-2     | 0 |
| PCDHB1       | 0 |
| PCDHB17      | 0 |
| MIR5197      | 0 |
| HMH1         | 0 |
| POU4F3       | 0 |
| STK32A       | 0 |
| JAKMIP2-AS1  | 0 |
| SCGB3A2      | 0 |
| SPINK5       | 0 |
| SPINK14      | 0 |
| SPINK6       | 0 |
| SPINK13      | 0 |
| SPINK7       | 0 |
| SPINK9       | 0 |
| ADRB2        | 0 |
| CDX1         | 0 |
| KIF4B        | 0 |
| ITK          | 0 |
| NIPAL4       | 0 |
| C5orf52      | 0 |
| ADRA1B       | 0 |
| MIR3142      | 0 |
| MIR146A      | 0 |
| GABRA6       | 0 |
| GABRA1       | 0 |
| GABRG2       | 0 |
| MIR103B1     | 0 |
| DOCK2        | 0 |
| MIR378E      | 0 |
| FOX11        | 0 |
| C5orf58      | 0 |
| KCNIP1       | 0 |
| GABRP        | 0 |
| TLX3         | 0 |
| C5orf47      | 0 |
| MIR4634      | 0 |
| CPLX2        | 0 |
| FAM153B      | 0 |
| LOC100507387 | 0 |
| EIF4E1B      | 0 |
| SLC34A1      | 0 |

|              |   |
|--------------|---|
| ZNF879       | 0 |
| ZNF354C      | 0 |
| LINC00847    | 0 |
| BTNL8        | 0 |
| BTNL3        | 0 |
| OR2V2        | 0 |
| OR4F3        | 0 |
| MIR4456      | 0 |
| LOC100506688 | 0 |
| MIR4635      | 0 |
| MIR4457      | 0 |
| MIR4277      | 0 |
| LOC285577    | 0 |
| MIR4278      | 0 |
| MIR4454      | 0 |
| C5orf49      | 0 |
| MIR4636      | 0 |
| TAS2R1       | 0 |
| LOC285692    | 0 |
| CTNND2       | 0 |
| MIR4637      | 0 |
| MARCH11      | 0 |
| LOC285696    | 0 |
| LOC401177    | 0 |
| CDH18        | 0 |
| CDH10        | 0 |
| LOC340107    | 0 |
| CDH9         | 0 |
| MIR4279      | 0 |
| ADAMTS12     | 0 |
| SLC45A2      | 0 |
| PRLR         | 0 |
| CAPSL        | 0 |
| UGT3A2       | 0 |
| MIR580       | 0 |
| GDNF         | 0 |
| EGFLAM-AS4   | 0 |
| LIFR         | 0 |
| MIR3650      | 0 |
| FYB          | 0 |
| C9           | 0 |
| SNORD72      | 0 |
| MROH2B       | 0 |
| C6           | 0 |
| CCL28        | 0 |
| FGF10        | 0 |
| HCN1         | 0 |
| MIR581       | 0 |
| ESM1         | 0 |
| MIR449A      | 0 |
| MIR449B      | 0 |
| MIR449C      | 0 |
| MIR5687      | 0 |
| ANKRD55      | 0 |
| ACTBL2       | 0 |
| HTR1A        | 0 |
| CD180        | 0 |
| ZNF366       | 0 |
| F2RL2        | 0 |
| LOC644936    | 0 |
| ANKRD34B     | 0 |
| HAPLN1       | 0 |
| EDIL3        | 0 |
| MIR4280      | 0 |
| MIR3660      | 0 |
| LIX1         | 0 |
| SLCO4C1      | 0 |
| SLCO6A1      | 0 |
| TSSK1B       | 0 |
| ZNF608       | 0 |
| FBN2         | 0 |
| MIR4460      | 0 |
| MIR3936      | 0 |
| IL5          | 0 |
| MIR1289-2    | 0 |
| LOC340073    | 0 |
| C5orf20      | 0 |
| TIFAB        | 0 |
| NEUROG1      | 0 |

|              |   |
|--------------|---|
| CXCL14       | 0 |
| IL9          | 0 |
| LECT2        | 0 |
| TRPC7        | 0 |
| SPOCK1       | 0 |
| MIR874       | 0 |
| NME5         | 0 |
| SNORD63      | 0 |
| LOC729080    | 0 |
| ARHGAP26-AS1 | 0 |
| GRXCR2       | 0 |
| GPR151       | 0 |
| PPP2R2B      | 0 |
| PPP2R2B-IT1  | 0 |
| DPYSL3       | 0 |
| JAKMIP2      | 0 |
| C5orf46      | 0 |
| HTR4         | 0 |
| CAMK2A       | 0 |
| ZNF300P1     | 0 |
| SLC36A3      | 0 |
| SPARC        | 0 |
| GLRA1        | 0 |
| NMUR2        | 0 |
| HAND1        | 0 |
| MIR3141      | 0 |
| TIMD4        | 0 |
| HAVCR1       | 0 |
| FAM71B       | 0 |
| ADAM19       | 0 |
| SOX30        | 0 |
| IL12B        | 0 |
| LOC285627    | 0 |
| ATP10B       | 0 |
| LOC285629    | 0 |
| GABRB2       | 0 |
| MIR103A1     | 0 |
| SLIT3        | 0 |
| MIR218-2     | 0 |
| MIR585       | 0 |
| FAM196B      | 0 |
| LCP2         | 0 |
| KCNMB1       | 0 |
| MIR3912      | 0 |
| STC2         | 0 |
| FLJ16171     | 0 |
| DRD1         | 0 |
| SNCB         | 0 |
| MIR4281      | 0 |
| FAM153A      | 0 |
| PROP1        | 0 |
| MIR1229      | 0 |
| MIR340       | 0 |
| RASGEF1C     | 0 |
| SCGB3A1      | 0 |
| OR2Y1        | 0 |
| OR2V1        | 0 |
| MIR4638      | 0 |
| SNORD96A     | 0 |
| FOXQ1        | 0 |
| FOXF2        | 0 |
| FAM50B       | 0 |
| PPP1R3G      | 0 |
| LY86         | 0 |
| MIR5689      | 0 |
| TMEM170B     | 0 |
| RNF182       | 0 |
| MIR4639      | 0 |
| STMND1       | 0 |
| RBM24        | 0 |
| MIR548A1     | 0 |
| ID4          | 0 |
| LINC00340    | 0 |
| HDGFL1       | 0 |
| SCGN         | 0 |
| HIST1H2BA    | 0 |
| HIST1H2APS1  | 0 |
| SLC17A4      | 0 |
| HIST1H3C     | 0 |

|              |   |
|--------------|---|
| HIST1H4F     | 0 |
| BTN1A1       | 0 |
| MIR3143      | 0 |
| VN1R10P      | 0 |
| HIST1H2AL    | 0 |
| GPX5         | 0 |
| LOC100129636 | 0 |
| OR2J3        | 0 |
| OR2J2        | 0 |
| OR14J1       | 0 |
| OR12D2       | 0 |
| OR10C1       | 0 |
| LOC100507362 | 0 |
| SNORD32B     | 0 |
| MOG          | 0 |
| MIR877       | 0 |
| MIR4640      | 0 |
| MUC21        | 0 |
| MUC22        | 0 |
| HCG22        | 0 |
| HCG26        | 0 |
| AIF1         | 0 |
| LY6G6F       | 0 |
| LY6G6D       | 0 |
| SNORD48      | 0 |
| SNORD52      | 0 |
| STK19        | 0 |
| HCG23        | 0 |
| HLA-DRA      | 0 |
| HLA-DQA1     | 0 |
| HLA-DQA2     | 0 |
| HLA-DPB1     | 0 |
| HLA-DPB2     | 0 |
| MIR219-1     | 0 |
| CLPSL2       | 0 |
| CLPSL1       | 0 |
| PI16         | 0 |
| FGD2         | 0 |
| DNAH8        | 0 |
| GLP1R        | 0 |
| DAAM2        | 0 |
| TDRG1        | 0 |
| TREML4       | 0 |
| TREML5P      | 0 |
| NCR2         | 0 |
| MIR4641      | 0 |
| ATP6V0CP3    | 0 |
| PTCRA        | 0 |
| TTBK1        | 0 |
| SLC22A7      | 0 |
| CAPN11       | 0 |
| MIR4642      | 0 |
| ANKRD66      | 0 |
| MEP1A        | 0 |
| GPR111       | 0 |
| OPN5         | 0 |
| GLYATL3      | 0 |
| TFAP2D       | 0 |
| TFAP2B       | 0 |
| MIR206       | 0 |
| MIR133B      | 0 |
| IL17A        | 0 |
| MIR5685      | 0 |
| MLIP-IT1     | 0 |
| MLIP         | 0 |
| TINAG        | 0 |
| HCRTR2       | 0 |
| GFRAL        | 0 |
| BEND6        | 0 |
| SLC25A51P1   | 0 |
| BAI3         | 0 |
| COL19A1      | 0 |
| FAM135A      | 0 |
| KHDC3L       | 0 |
| RNY4         | 0 |
| PRSS35       | 0 |
| RIPPLY2      | 0 |
| HTR1E        | 0 |
| SPACA1       | 0 |

|              |   |
|--------------|---|
| GJA10        | 0 |
| MIR4464      | 0 |
| MIR4643      | 0 |
| TSG1         | 0 |
| FUT9         | 0 |
| FHL5         | 0 |
| MIR2113      | 0 |
| POU3F2       | 0 |
| PRDM13       | 0 |
| LOC728012    | 0 |
| GRIK2        | 0 |
| LIN28B       | 0 |
| BVES-AS1     | 0 |
| NR2E1        | 0 |
| CCDC162P     | 0 |
| GPR6         | 0 |
| RFPL4B       | 0 |
| FLJ34503     | 0 |
| FAM26D       | 0 |
| RFX6         | 0 |
| VGLL2        | 0 |
| LOC100287632 | 0 |
| CLVS2        | 0 |
| HEY2         | 0 |
| RSPO3        | 0 |
| TMEM200A     | 0 |
| LOC100507254 | 0 |
| TAAR9        | 0 |
| TAAR8        | 0 |
| TAAR6        | 0 |
| SNORD101     | 0 |
| SNORD100     | 0 |
| LINC00326    | 0 |
| EYA4         | 0 |
| MGC34034     | 0 |
| TCF21        | 0 |
| LOC154092    | 0 |
| LINC00271    | 0 |
| LOC100132735 | 0 |
| MIR3668      | 0 |
| MIR4465      | 0 |
| ZC2HC1B      | 0 |
| GRM1         | 0 |
| RAB32        | 0 |
| ADGB         | 0 |
| PPP1R14C     | 0 |
| IYD          | 0 |
| ESR1         | 0 |
| OPRM1        | 0 |
| MIR3692      | 0 |
| SYNJ2-IT1    | 0 |
| FNDC1        | 0 |
| MAS1         | 0 |
| LINC00602    | 0 |
| TCP10L2      | 0 |
| UNC93A       | 0 |
| TTLL2        | 0 |
| KIF25        | 0 |
| MIR4644      | 0 |
| LOC285768    | 0 |
| MIR4645      | 0 |
| PXDC1        | 0 |
| MIR3691      | 0 |
| F13A1        | 0 |
| LY86-AS1     | 0 |
| SCARNA27     | 0 |
| ELOVL2       | 0 |
| NHLRC1       | 0 |
| LOC729177    | 0 |
| PRL          | 0 |
| CMAHP        | 0 |
| HIST1H2AA    | 0 |
| SLC17A1      | 0 |
| SLC17A3      | 0 |
| SLC17A2      | 0 |
| HIST1H1A     | 0 |
| HIST1H2BB    | 0 |
| HIST1H1T     | 0 |
| HIST1H4G     | 0 |



|              |   |
|--------------|---|
| POM121L2     | 0 |
| HIST1H4L     | 0 |
| OR2B2        | 0 |
| ZSCAN23      | 0 |
| GPX6         | 0 |
| ZNF311       | 0 |
| OR2W1        | 0 |
| OR2B3        | 0 |
| OR5V1        | 0 |
| OR12D3       | 0 |
| OR11A1       | 0 |
| MAS1L        | 0 |
| UBD          | 0 |
| ZFP57        | 0 |
| HCG4         | 0 |
| TRIM10       | 0 |
| SFTA2        | 0 |
| C6orf15      | 0 |
| SNORD84      | 0 |
| LTB          | 0 |
| MIR4646      | 0 |
| LY6G6E       | 0 |
| MIR1236      | 0 |
| TNXB         | 0 |
| C6orf10      | 0 |
| BTNL2        | 0 |
| HLA-DQB1     | 0 |
| HLA-DQB2     | 0 |
| HLA-DOA      | 0 |
| IP6K3        | 0 |
| MLN          | 0 |
| LOC100507584 | 0 |
| MIR1275      | 0 |
| GRM4         | 0 |
| MIR5690      | 0 |
| C6orf222     | 0 |
| ETV7         | 0 |
| MIR3925      | 0 |
| MIR4462      | 0 |
| MDGA1        | 0 |
| LOC100131047 | 0 |
| KCNK17       | 0 |
| KCNK16       | 0 |
| KIF6         | 0 |
| MOCS1        | 0 |
| FLJ41649     | 0 |
| LRFN2        | 0 |
| TREML1       | 0 |
| TREML2       | 0 |
| TREML3P      | 0 |
| PGC          | 0 |
| CRIP3        | 0 |
| MIR586       | 0 |
| PLA2G7       | 0 |
| GPR116       | 0 |
| RHAG         | 0 |
| CRISP2       | 0 |
| CRISP3       | 0 |
| PGK2         | 0 |
| CRISP1       | 0 |
| DEFB133      | 0 |
| DEFB114      | 0 |
| DEFB113      | 0 |
| DEFB110      | 0 |
| DEFB112      | 0 |
| PKHD1        | 0 |
| GSTA7P       | 0 |
| GSTA2        | 0 |
| GSTA1        | 0 |
| GSTA5        | 0 |
| GSTA3        | 0 |
| RPS16P5      | 0 |
| HMGCLL1      | 0 |
| BMP5         | 0 |
| COL21A1      | 0 |
| RNU6-71      | 0 |
| KHDRBS2      | 0 |
| COL9A1       | 0 |
| MIR30C2      | 0 |

|              |   |
|--------------|---|
| MIR30A       | 0 |
| MIR4282      | 0 |
| KCNQ5-AS1    | 0 |
| KHDC1L       | 0 |
| KHDC1        | 0 |
| DPPA5        | 0 |
| HTR1B        | 0 |
| C6orf7       | 0 |
| ELOVL4       | 0 |
| ME1          | 0 |
| SNAP91       | 0 |
| TBX18        | 0 |
| SNORD50B     | 0 |
| CGA          | 0 |
| CNR1         | 0 |
| GABRR1       | 0 |
| RRAGD        | 0 |
| EPHA7        | 0 |
| MIR548H3     | 0 |
| MCHR2        | 0 |
| SIM1         | 0 |
| LINC00577    | 0 |
| POPDC3       | 0 |
| LOC100422737 | 0 |
| SCML4        | 0 |
| SLC22A16     | 0 |
| LOC285758    | 0 |
| HS3ST5       | 0 |
| BET3L        | 0 |
| FAM162B      | 0 |
| GPRC6A       | 0 |
| ROS1         | 0 |
| FAM184A      | 0 |
| MIR548B      | 0 |
| LOC285762    | 0 |
| TRDN         | 0 |
| MIR5695      | 0 |
| THEMIS       | 0 |
| TMEM244      | 0 |
| SAMD3        | 0 |
| TAAR5        | 0 |
| TAAR3        | 0 |
| TAAR2        | 0 |
| TAAR1        | 0 |
| VNN1         | 0 |
| VNN3         | 0 |
| VNN2         | 0 |
| HMG1P7       | 0 |
| MIR3662      | 0 |
| IL22RA2      | 0 |
| OLIG3        | 0 |
| LOC100130476 | 0 |
| MIR3145      | 0 |
| TXLNB        | 0 |
| LOC645434    | 0 |
| LOC153910    | 0 |
| LOC100128176 | 0 |
| NOX3         | 0 |
| MIR4466      | 0 |
| MIR3918      | 0 |
| TAGAP        | 0 |
| SNORA29      | 0 |
| SLC22A2      | 0 |
| PACRG-AS1    | 0 |
| DKFZp451B082 | 0 |
| CAHM         | 0 |
| C6orf118     | 0 |
| PDE10A       | 0 |
| LINC00473    | 0 |
| T            | 0 |
| RPS6KA2-IT1  | 0 |
| MIR1913      | 0 |
| MIR3939      | 0 |
| GPR31        | 0 |
| TCP10        | 0 |
| HGC6.3       | 0 |
| FRMD1        | 0 |
| DACT2        | 0 |
| LOC154449    | 0 |

|              |   |
|--------------|---|
| FAM20C       | 0 |
| LOC100288524 | 0 |
| LOC442497    | 0 |
| UNCX         | 0 |
| SDK1         | 0 |
| NXPB1        | 0 |
| PER4         | 0 |
| LOC100506025 | 0 |
| LRRC72       | 0 |
| MACC1-AS1    | 0 |
| IL6          | 0 |
| SNORD93      | 0 |
| NPY          | 0 |
| C7orf71      | 0 |
| EVX1         | 0 |
| WIPF3        | 0 |
| MIR550A1     | 0 |
| GHRHR        | 0 |
| CCDC129      | 0 |
| PPP1R17      | 0 |
| BMPER        | 0 |
| NPSR1        | 0 |
| LOC401324    | 0 |
| GPR141       | 0 |
| NME8         | 0 |
| EPDR1        | 0 |
| POU6F2       | 0 |
| INHBA-AS1    | 0 |
| MIR3943      | 0 |
| MIR4649      | 0 |
| RAMP3        | 0 |
| IGFBP1       | 0 |
| C7orf65      | 0 |
| C7orf69      | 0 |
| VWC2         | 0 |
| C7orf72      | 0 |
| IKZF1        | 0 |
| LOC100129427 | 0 |
| POM121L12    | 0 |
| VSTM2A       | 0 |
| LOC285878    | 0 |
| DKFZp434L192 | 0 |
| MIR3147      | 0 |
| ZNF716       | 0 |
| LOC100287704 | 0 |
| MIR4283-2    | 0 |
| ZNF727       | 0 |
| ZNF735       | 0 |
| ZNF679       | 0 |
| ZNF736       | 0 |
| LOC641746    | 0 |
| WBSR17       | 0 |
| MIR3914-2    | 0 |
| MIR4650-1    | 0 |
| FZD9         | 0 |
| MIR4284      | 0 |
| ELN          | 0 |
| GATSL1       | 0 |
| SPDYE8P      | 0 |
| SPDYE8P      | 0 |
| MIR4651      | 0 |
| SNORA14A     | 0 |
| RPL13AP17    | 0 |
| MAG12-AS2    | 0 |
| MIR548M      | 0 |
| ZNF804B      | 0 |
| MIR4652      | 0 |
| GNGT1        | 0 |
| GNG11        | 0 |
| COL1A2       | 0 |
| PEG10        | 0 |
| DLX6         | 0 |
| TAC1         | 0 |
| NPTX2        | 0 |
| MIR3609      | 0 |
| ZAN          | 0 |
| MIR4653      | 0 |
| MIR4285      | 0 |
| MIR4467      | 0 |

|                |   |
|----------------|---|
| SPDYE2L        | 0 |
| LHFPL3         | 0 |
| PIK3CG         | 0 |
| PRKAR2B        | 0 |
| MIR3666        | 0 |
| MDFIC          | 0 |
| ANKRD7         | 0 |
| KCND2          | 0 |
| PTPRZ1         | 0 |
| HYALP1         | 0 |
| HYAL4          | 0 |
| SPAM1          | 0 |
| MIR593         | 0 |
| MIR129-1       | 0 |
| CPA5           | 0 |
| CPA1           | 0 |
| MIR335         | 0 |
| FLJ40288       | 0 |
| AKR1B15        | 0 |
| STRA8          | 0 |
| CHRM2          | 0 |
| MIR490         | 0 |
| LOC100130880   | 0 |
| AKR1D1         | 0 |
| MIR4468        | 0 |
| CLEC2L         | 0 |
| OR9A4          | 0 |
| LOC93432       | 0 |
| PRSS2          | 0 |
| C7orf34        | 0 |
| OR6V1          | 0 |
| PIP            | 0 |
| TAS2R39        | 0 |
| TAS2R40        | 0 |
| TAS2R60        | 0 |
| TAS2R41        | 0 |
| OR2F2          | 0 |
| OR2F1          | 0 |
| OR6B1          | 0 |
| OR2A5          | 0 |
| OR2A25         | 0 |
| OR2A12         | 0 |
| OR2A2          | 0 |
| OR2A14         | 0 |
| OR2A20P,OR2A9P | 0 |
| RNU6-57        | 0 |
| MIR548AQ       | 0 |
| MIR548F3       | 0 |
| MIR548T        | 0 |
| C7orf33        | 0 |
| KRBA1          | 0 |
| RNU6-33        | 0 |
| LOC285972      | 0 |
| GIMAP8         | 0 |
| GIMAP7         | 0 |
| GIMAP4         | 0 |
| TMEM176A       | 0 |
| WDR86-AS1      | 0 |
| GALNTL5        | 0 |
| DPP6           | 0 |
| HTR5A          | 0 |
| LOC100506585   | 0 |
| MIR5707        | 0 |
| LINC00689      | 0 |
| MIR339         | 0 |
| MIR4655        | 0 |
| CARD11         | 0 |
| MIR4656        | 0 |
| RADIL          | 0 |
| PAPOLB         | 0 |
| MIR589         | 0 |
| COL28A1        | 0 |
| THSD7A         | 0 |
| VWDE           | 0 |
| AGMO           | 0 |
| MEOX2          | 0 |
| AGR2           | 0 |
| AGR3           | 0 |
| PRPS1L1        | 0 |

|              |   |
|--------------|---|
| TWIST1       | 0 |
| FERD3L       | 0 |
| MIR3146      | 0 |
| TMEM196      | 0 |
| CLK2P        | 0 |
| NPVF         | 0 |
| RNU6-16      | 0 |
| MIR148A      | 0 |
| TRIL         | 0 |
| MIR550A3     | 0 |
| NEUROD6      | 0 |
| PDE1C        | 0 |
| LOC100130673 | 0 |
| MIR550B2     | 0 |
| NPSR1-AS1    | 0 |
| TBX20        | 0 |
| AOAH         | 0 |
| AOAH-IT1     | 0 |
| ELMO1        | 0 |
| MIR1200      | 0 |
| SFRP4        | 0 |
| TARP         | 0 |
| AMPH         | 0 |
| POU6F2-AS1   | 0 |
| GLI3         | 0 |
| MYL7         | 0 |
| GCK          | 0 |
| IGFBP3       | 0 |
| ZPBP         | 0 |
| FLJ45974     | 0 |
| HPVC1        | 0 |
| EGFR-AS1     | 0 |
| LOC650226    | 0 |
| LOC100130849 | 0 |
| MIR4283-2    | 0 |
| GUSBP10      | 0 |
| LOC100287834 | 0 |
| LOC100506050 | 0 |
| MIR4650-1    | 0 |
| MIR3914-1    | 0 |
| CCL24        | 0 |
| MIR548AU     | 0 |
| GNAT3        | 0 |
| ABCB4        | 0 |
| ABCB1        | 0 |
| STEAP4       | 0 |
| C7orf62      | 0 |
| MTERF        | 0 |
| MIR653       | 0 |
| MIR489       | 0 |
| TFPI2        | 0 |
| MIR591       | 0 |
| C7orf76      | 0 |
| DLX6-AS1     | 0 |
| DLX5         | 0 |
| OCM2         | 0 |
| MIR93        | 0 |
| MIR106B      | 0 |
| LHFPL3-AS1   | 0 |
| LHFPL3-AS2   | 0 |
| LAMB4        | 0 |
| NRCAM        | 0 |
| C7orf66      | 0 |
| EIF3IP1      | 0 |
| PPP1R3A      | 0 |
| TFEC         | 0 |
| ST7-AS2      | 0 |
| WNT2         | 0 |
| TAS2R16      | 0 |
| TMEM229A     | 0 |
| GPR37        | 0 |
| LOC154872    | 0 |
| MIR592       | 0 |
| PAX4         | 0 |
| MIR182       | 0 |
| MIR96        | 0 |
| MIR183       | 0 |
| KLF14        | 0 |
| MIR29A       | 0 |

|                   |   |
|-------------------|---|
| MIR29B1           | 0 |
| PLXNA4            | 0 |
| FAM180A           | 0 |
| LOC349160         | 0 |
| SVOPL             | 0 |
| KLRG2             | 0 |
| CLEC5A            | 0 |
| TAS2R38           | 0 |
| MOXD2P            | 0 |
| PRSS58            | 0 |
| LOC730441         | 0 |
| TRPV5             | 0 |
| OR9A2             | 0 |
| RNU6-57           | 0 |
| NOBOX             | 0 |
| MIR548I4          | 0 |
| MIR548F4          | 0 |
| RARRES2           | 0 |
| GBX1              | 0 |
| ASB10             | 0 |
| WDR86             | 0 |
| MIR3907           | 0 |
| LOC100128264      | 0 |
| SHH               | 0 |
| MIR153-2          | 0 |
| MIR595            | 0 |
| ERICH1-AS1        | 0 |
| DLGAP2            | 0 |
| MIR596            | 0 |
| MIR4659A          | 0 |
| LOC100652791      | 0 |
| DEFB109P1B        | 0 |
| USP17L1P          | 0 |
| USP17L4           | 0 |
| DEFB105B          | 0 |
| DEFB107A          | 0 |
| FAM90A10P         | 0 |
| DEFB106B          | 0 |
| DEFB104B          | 0 |
| SPAG11A,SPAG11B   | 0 |
| DEFB103A,DEFB103B | 0 |
| DEFB4A            | 0 |
| ZNF705B           | 0 |
| FAM66E            | 0 |
| MIR4660           | 0 |
| MIR597            | 0 |
| C8orf74           | 0 |
| BLK               | 0 |
| LINC00208         | 0 |
| ZNF705D           | 0 |
| FAM66D            | 0 |
| FAM66A            | 0 |
| MIR3926-2         | 0 |
| TUSC3             | 0 |
| EFHA2             | 0 |
| LPL               | 0 |
| LZTS1-AS1         | 0 |
| LOC286114         | 0 |
| ADAM28            | 0 |
| ADAMDEC1          | 0 |
| ADAM7             | 0 |
| NEFM              | 0 |
| MIR3622A          | 0 |
| PNOC              | 0 |
| LOC286135         | 0 |
| NRG1              | 0 |
| NRG1-IT3          | 0 |
| UNC5D             | 0 |
| KCNU1             | 0 |
| ADAM5             | 0 |
| LOC100130964      | 0 |
| ADAM18            | 0 |
| IDO2              | 0 |
| C8orf4            | 0 |
| CHRNA3            | 0 |
| POTEA             | 0 |
| LINC00293         | 0 |
| C8orf22           | 0 |
| SNTG1             | 0 |

|              |   |
|--------------|---|
| NPBWR1       | 0 |
| RP1          | 0 |
| XKR4         | 0 |
| LOC100507651 | 0 |
| LOC286177    | 0 |
| LINC00588    | 0 |
| MIR4470      | 0 |
| NKAIN3       | 0 |
| UG0898H09    | 0 |
| LOC100130155 | 0 |
| MIR124-2     | 0 |
| BHLHE22      | 0 |
| LOC100505659 | 0 |
| PREX2        | 0 |
| LOC100132891 | 0 |
| RNU6-83      | 0 |
| KCNB2        | 0 |
| MIR5681A     | 0 |
| FLJ39080     | 0 |
| MIR2052      | 0 |
| PI15         | 0 |
| CRISPLD1     | 0 |
| PKIA         | 0 |
| MIR5708      | 0 |
| ZBTB10       | 0 |
| RALYL        | 0 |
| REXO1L2P     | 0 |
| REXO1L2P     | 0 |
| CNBD1        | 0 |
| LINC00534    | 0 |
| MIR4661      | 0 |
| MIR3150A     | 0 |
| KCNS2        | 0 |
| MIR4471      | 0 |
| FLJ42969     | 0 |
| NACAP1       | 0 |
| GRHL2        | 0 |
| MIR5680      | 0 |
| ODF1         | 0 |
| MIR3151      | 0 |
| DCSTAMP      | 0 |
| PKHD1L1      | 0 |
| MIR2053      | 0 |
| AARD         | 0 |
| SLC30A8      | 0 |
| MAL2         | 0 |
| COL14A1      | 0 |
| FER1L6       | 0 |
| LOC157381    | 0 |
| MIR1204      | 0 |
| MIR1205      | 0 |
| MIR1206      | 0 |
| MIR1207      | 0 |
| MIR1208      | 0 |
| WISP1        | 0 |
| LOC286094    | 0 |
| KHDRBS3      | 0 |
| LOC731779    | 0 |
| MIR4472-1    | 0 |
| LINC00051    | 0 |
| GML          | 0 |
| SCXB         | 0 |
| SCXA         | 0 |
| OR4F21       | 0 |
| LOC286083    | 0 |
| CSMD1        | 0 |
| MIR4659B     | 0 |
| XKR5         | 0 |
| DEFB1        | 0 |
| DEFA4        | 0 |
| DEFA8P       | 0 |
| DEFA9P       | 0 |
| DEFA10P      | 0 |
| DEFA1B       | 0 |
| DEFT1P2      | 0 |
| DEFA1        | 0 |
| DEFT1P2      | 0 |
| DEFA1        | 0 |
| DEFA11P      | 0 |

|                   |   |
|-------------------|---|
| LOC349196         | 0 |
| LOC349196         | 0 |
| LOC349196         | 0 |
| FAM66B            | 0 |
| ZNF705G           | 0 |
| DEFB4B            | 0 |
| DEFB103A,DEFB103B | 0 |
| SPAG11B           | 0 |
| DEFB104A          | 0 |
| DEFB106B          | 0 |
| FAM90A7P          | 0 |
| FAM90A7P          | 0 |
| DEFB107B          | 0 |
| DEFB105A          | 0 |
| USP17L8           | 0 |
| DEFB109P1B        | 0 |
| MIR548I3          | 0 |
| LINC00599         | 0 |
| MIR124-1          | 0 |
| MIR1322           | 0 |
| MIR598            | 0 |
| LOC100133267      | 0 |
| LOC392196         | 0 |
| USP17L7           | 0 |
| USP17L2           | 0 |
| DEFB130           | 0 |
| LOC649352         | 0 |
| DEFB109P1         | 0 |
| MIR3926-1         | 0 |
| LOC340357         | 0 |
| MIR383            | 0 |
| FGF20             | 0 |
| FGL1              | 0 |
| LOC100128993      | 0 |
| SLC18A1           | 0 |
| LZTS1             | 0 |
| GFR2              | 0 |
| LG13              | 0 |
| PEBP4             | 0 |
| NKX2-6            | 0 |
| NEFL              | 0 |
| EBF2              | 0 |
| CHRNA2            | 0 |
| MIR3622B          | 0 |
| MIR4287           | 0 |
| MIR4288           | 0 |
| LINC00589         | 0 |
| MIR3148           | 0 |
| MIR54802          | 0 |
| TEX15             | 0 |
| DUSP26            | 0 |
| GOT1L1            | 0 |
| ADRB3             | 0 |
| C8orf86           | 0 |
| ADAM3A            | 0 |
| ADAM2             | 0 |
| ZMAT4             | 0 |
| SFRP1             | 0 |
| NKX6-3            | 0 |
| MIR486            | 0 |
| CHRNA6            | 0 |
| EFCAB1            | 0 |
| SBF1P1            | 0 |
| SNORD54           | 0 |
| MOS               | 0 |
| SDR16C5           | 0 |
| PENK              | 0 |
| LOC100507632      | 0 |
| CYP7A1            | 0 |
| TOX               | 0 |
| CA8               | 0 |
| LOC100130298      | 0 |
| LOC401463         | 0 |
| CYP7B1            | 0 |
| LINC00251         | 0 |
| CRH               | 0 |
| PTTG3P            | 0 |
| SNORD87           | 0 |
| TCF24             | 0 |



|              |   |
|--------------|---|
| PPP1R42      | 0 |
| CPA6         | 0 |
| LOC286189    | 0 |
| EYA1         | 0 |
| MSC          | 0 |
| TRPA1        | 0 |
| LOC392232    | 0 |
| MIR5681B     | 0 |
| ZFHX4-AS1    | 0 |
| PMP2         | 0 |
| FABP9        | 0 |
| FABP4        | 0 |
| CA1          | 0 |
| REXO1L2P     | 0 |
| REXO1L1      | 0 |
| REXO1L2P     | 0 |
| REXO1L1      | 0 |
| REXO1L2P     | 0 |
| REXO1L2P     | 0 |
| REXO1L2P     | 0 |
| REXO1L2P     | 0 |
| PSKH2        | 0 |
| SLC7A13      | 0 |
| CNGB3        | 0 |
| MMP16        | 0 |
| CALB1        | 0 |
| FLJ46284     | 0 |
| C8orf87      | 0 |
| MIR378D2     | 0 |
| LOC100288748 | 0 |
| MIR3150B     | 0 |
| C8orf69      | 0 |
| LOC100500773 | 0 |
| TSPYL5       | 0 |
| MIR599       | 0 |
| MIR875       | 0 |
| RGS22        | 0 |
| DPYS         | 0 |
| ANGPT1       | 0 |
| RSPQ2        | 0 |
| KCNV1        | 0 |
| LINC00536    | 0 |
| TNFRSF11B    | 0 |
| MIR4663      | 0 |
| ANXA13       | 0 |
| FER1L6-AS1   | 0 |
| LOC727677    | 0 |
| LOC728724    | 0 |
| GSDMC        | 0 |
| MIR5194      | 0 |
| ADCY8        | 0 |
| OC90         | 0 |
| HHLA1        | 0 |
| SLA          | 0 |
| MIR30B       | 0 |
| MIR30D       | 0 |
| FAM135B      | 0 |
| COL22A1      | 0 |
| GPR20        | 0 |
| MROH5        | 0 |
| SLURP1       | 0 |
| LYPD2        | 0 |
| LY6D         | 0 |
| CYP11B1      | 0 |
| CYP11B2      | 0 |
| LY6H         | 0 |
| MIR4664      | 0 |
| MIR661       | 0 |
| DMRT3        | 0 |
| VLDLR        | 0 |
| MIR101-2     | 0 |
| INSL4        | 0 |
| PDCD1LG2     | 0 |
| MIR4665      | 0 |
| IL33         | 0 |
| TPD52L3      | 0 |
| LINC00583    | 0 |
| LOC389705    | 0 |
| MIR3152      | 0 |

|              |   |
|--------------|---|
| MIR491       | 0 |
| IFNA1        | 0 |
| C9orf53      | 0 |
| DMRTA1       | 0 |
| IFNK         | 0 |
| TMEM215      | 0 |
| SPINK4       | 0 |
| SNORD121B    | 0 |
| LOC415056    | 0 |
| MIR4667      | 0 |
| RECK         | 0 |
| GLIPR2       | 0 |
| SPATA31A2    | 0 |
| SPATA31A2    | 0 |
| FAM74A1      | 0 |
| SPATA31A3    | 0 |
| FAM74A3      | 0 |
| SPATA31A5    | 0 |
| LOC643648    | 0 |
| FAM95B1      | 0 |
| FOXD4L4      | 0 |
| CNTNAP3B     | 0 |
| LOC643648    | 0 |
| FAM27A       | 0 |
| LOC643648    | 0 |
| ANKRD20A4    | 0 |
| C9orf135     | 0 |
| TMC1         | 0 |
| RORB         | 0 |
| PCA3         | 0 |
| FOXB2        | 0 |
| SPATA31D5P   | 0 |
| SPATA31D4    | 0 |
| SPATA31D3    | 0 |
| SPATA31D1    | 0 |
| C9orf170     | 0 |
| CTSL3P       | 0 |
| CTSL1P8      | 0 |
| SPATA31E1    | 0 |
| SPATA31C1    | 0 |
| MIR3153      | 0 |
| UNQ6494      | 0 |
| MIR3910-1    | 0 |
| LINC00475    | 0 |
| SUSD3        | 0 |
| MIR4291      | 0 |
| MIRLET7A1    | 0 |
| MIRLET7F1    | 0 |
| MIR2278      | 0 |
| MIR23B       | 0 |
| MIR27B       | 0 |
| MIR24-1      | 0 |
| LOC441455    | 0 |
| FOXE1        | 0 |
| COL15A1      | 0 |
| LPPR1        | 0 |
| CYLC2        | 0 |
| OR13F1       | 0 |
| OR13C8       | 0 |
| OR13D1       | 0 |
| MUSK         | 0 |
| MIR4668      | 0 |
| BSPRY        | 0 |
| MIR455       | 0 |
| DEC1         | 0 |
| LOC100128505 | 0 |
| TLR4         | 0 |
| OR1J2        | 0 |
| OR1J4        | 0 |
| OR1N2        | 0 |
| OR1L1        | 0 |
| OR1L3        | 0 |
| OR1L4        | 0 |
| OR5C1        | 0 |
| OR1K1        | 0 |
| LHX2         | 0 |
| GPR144       | 0 |
| MIR181A2HG   | 0 |
| MIR181A2     | 0 |

|                     |   |
|---------------------|---|
| MIR181B2            | 0 |
| MIR2861,MIR3960     | 0 |
| MIR2964A            | 0 |
| C9orf106            | 0 |
| PRRX2               | 0 |
| SNORD62A            | 0 |
| SNORD62B            | 0 |
| CELP                | 0 |
| SNORD24             | 0 |
| SNORD36B            | 0 |
| SNORD36A            | 0 |
| SNORD36C            | 0 |
| DBH                 | 0 |
| MIR4669             | 0 |
| FCN2                | 0 |
| OLFM1               | 0 |
| LOC401557           | 0 |
| C9orf62             | 0 |
| OBP2A               | 0 |
| LCN9                | 0 |
| MIR126              | 0 |
| MIR4292             | 0 |
| MIR4479             | 0 |
| PTGDS               | 0 |
| LCNL1               | 0 |
| MIR602              | 0 |
| FAM138C             | 0 |
| INSL6               | 0 |
| PTPRD               | 0 |
| MPDZ                | 0 |
| CER1                | 0 |
| FREM1               | 0 |
| MIR4473             | 0 |
| MIR4474             | 0 |
| IFNB1               | 0 |
| IFNW1               | 0 |
| IFNA21              | 0 |
| IFNA4               | 0 |
| IFNA7               | 0 |
| IFNA10              | 0 |
| IFNA16              | 0 |
| IFNA14              | 0 |
| IFNA22P             | 0 |
| IFNA5               | 0 |
| IFNA6               | 0 |
| IFNA13              | 0 |
| IFNA2               | 0 |
| MIR31               | 0 |
| ELAVL2              | 0 |
| IZUMO3              | 0 |
| LINGO2              | 0 |
| MIR876              | 0 |
| MIR873              | 0 |
| LOC401497           | 0 |
| TAF1L               | 0 |
| AQP7                | 0 |
| SUGT1P1             | 0 |
| SNORD121A           | 0 |
| CCL27               | 0 |
| CCL19               | 0 |
| CCL21               | 0 |
| FAM205A             | 0 |
| FAM205B             | 0 |
| SIT1                | 0 |
| FAM221B             | 0 |
| OR2S2               | 0 |
| MIR4475             | 0 |
| PAX5                | 0 |
| MIR4540             | 0 |
| MIR4476             | 0 |
| CNTNAP3             | 0 |
| SPATA31A4           | 0 |
| LOC653501,ZNF658B   | 0 |
| FAM95B1             | 0 |
| ANKRD20A2,ANKRD20A3 | 0 |
| LOC642929           | 0 |
| SPATA31A6           | 0 |
| FAM74A2,FAM74A4     | 0 |
| SPATA31A5           | 0 |

|                   |   |
|-------------------|---|
| LOC286297         | 0 |
| FAM27B            | 0 |
| FOXD4L4           | 0 |
| PRKACG            | 0 |
| LOC494558         | 0 |
| MIR204            | 0 |
| C9orf57           | 0 |
| MIR548H3          | 0 |
| VPS13A-AS1        | 0 |
| MIR7-1            | 0 |
| LOC494127         | 0 |
| LOC392364         | 0 |
| SPATA31C2         | 0 |
| LOC286238         | 0 |
| MIR4289           | 0 |
| LOC286370         | 0 |
| MIR4290           | 0 |
| LOC340515         | 0 |
| DIRAS2            | 0 |
| LOC100129316      | 0 |
| MIR3910-2         | 0 |
| ROR2              | 0 |
| MIR4670           | 0 |
| FBP1              | 0 |
| MIR3074           | 0 |
| LINC00092         | 0 |
| LOC158434         | 0 |
| LOC286359         | 0 |
| HEMGN             | 0 |
| PPP3R2            | 0 |
| OR13C4            | 0 |
| OR13C3            | 0 |
| OR13C5            | 0 |
| OR13C2            | 0 |
| OR13C9            | 0 |
| MIR548Q           | 0 |
| MIR32             | 0 |
| FRRS1L            | 0 |
| TXNDC8            | 0 |
| LPAR1             | 0 |
| OR2K2             | 0 |
| LRRC37A5P         | 0 |
| AMBP              | 0 |
| LOC100505478      | 0 |
| TNFSF8            | 0 |
| TNC               | 0 |
| LINC00474         | 0 |
| SNORA70C          | 0 |
| DBC1              | 0 |
| MIR147A           | 0 |
| MIR4478           | 0 |
| LHX6              | 0 |
| OR1J1             | 0 |
| OR1N1             | 0 |
| OR1L8             | 0 |
| OR1B1             | 0 |
| SNORD90           | 0 |
| MIR601            | 0 |
| MIR4672           | 0 |
| MIR199B           | 0 |
| MIR3154           | 0 |
| MIR219-2          | 0 |
| GBGT1             | 0 |
| OBP2B             | 0 |
| TMEM8C            | 0 |
| FAM163B           | 0 |
| MIR3689A,MIR3689E | 0 |
| MIR3689C          | 0 |
| MIR3689D1         | 0 |
| MIR3689B          | 0 |
| MIR3689D2         | 0 |
| MIR3689F          | 0 |
| FCN1              | 0 |
| GLT6D1            | 0 |
| SOHLH1            | 0 |
| MIR4673           | 0 |
| MIR4674           | 0 |
| LCN6              | 0 |
| LCN8              | 0 |

|                          |   |
|--------------------------|---|
| MIR3621                  | 0 |
| PLCXD1                   | 0 |
| LINC00685                | 0 |
| SHOX                     | 0 |
| CSF2RA                   | 0 |
| MIR3690                  | 0 |
| IL3RA                    | 0 |
| ASMTL-AS1                | 0 |
| AKAP17A,ASMT             | 0 |
| CD99P1                   | 0 |
| CD99                     | 0 |
| GYG2                     | 0 |
| ARSH                     | 0 |
| ARSF                     | 0 |
| MIR4767                  | 0 |
| MIR651                   | 0 |
| CLCN4                    | 0 |
| AMELX                    | 0 |
| FRMPD4                   | 0 |
| TLR8                     | 0 |
| LOC100093698             | 0 |
| LOC100133123             | 0 |
| EGFL6                    | 0 |
| BMX                      | 0 |
| S100G                    | 0 |
| MIR4768                  | 0 |
| CNKSR2                   | 0 |
| ZNF645                   | 0 |
| DDX53                    | 0 |
| PTCHD1                   | 0 |
| SUPT20HL1                | 0 |
| SCARNA23                 | 0 |
| MAGEB18                  | 0 |
| MAGEB5                   | 0 |
| VENTXP1                  | 0 |
| DCAF8L2                  | 0 |
| IL1RAPL1                 | 0 |
| MAGEB3                   | 0 |
| MAGEB1,MAGEB4            | 0 |
| FAM47B                   | 0 |
| MAGEB16                  | 0 |
| FAM47C                   | 0 |
| CXorf27                  | 0 |
| SYTL5                    | 0 |
| MPC1L                    | 0 |
| DUSP21                   | 0 |
| RGN                      | 0 |
| ZNF157                   | 0 |
| SNORA11C                 | 0 |
| MIR4769                  | 0 |
| CXXC1P1                  | 0 |
| SPACA5,SPACA5B           | 0 |
| SSX6                     | 0 |
| SPACA5,SPACA5B           | 0 |
| SSX1                     | 0 |
| SSX4B                    | 0 |
| GLOD5                    | 0 |
| GATA1                    | 0 |
| GAGE10                   | 0 |
| GAGE12J                  | 0 |
| GAGE12D,GAGE12F,GAGE13,G | 0 |
| GAGE12D                  | 0 |
| GAGE12D,GAGE12F          | 0 |
| GAGE12D,GAGE12F          | 0 |
| GAGE12D                  | 0 |
| GAGE2A                   | 0 |
| GAGE1                    | 0 |
| MIR532                   | 0 |
| MIR188                   | 0 |
| MIR500A                  | 0 |
| MIR362                   | 0 |
| MIR501                   | 0 |
| MIR500B                  | 0 |
| MIR660                   | 0 |
| MIR502                   | 0 |
| BMP15                    | 0 |
| NUDT10                   | 0 |
| CENPV2                   | 0 |
| MAGED4                   | 0 |

|                 |   |
|-----------------|---|
| XAGE2,XAGE2B    | 0 |
| XAGE1C,XAGE1E   | 0 |
| XAGE1B,XAGE1C   | 0 |
| SSX8            | 0 |
| SSX2,SSX2B      | 0 |
| XAGE5           | 0 |
| FAM156A,FAM156B | 0 |
| PAGE5           | 0 |
| MIR4536-1       | 0 |
| MAGEH1          | 0 |
| FOXR2           | 0 |
| MIR223          | 0 |
| FAM155B         | 0 |
| EDA             | 0 |
| MIR676          | 0 |
| AWAT1           | 0 |
| ARR3            | 0 |
| GJB1            | 0 |
| FLJ46446        | 0 |
| CXorf49B        | 0 |
| NHSL2           | 0 |
| FLJ4635         | 0 |
| DMRTC1B         | 0 |
| LINC00684       | 0 |
| PABPC1L2B       | 0 |
| CDX4            | 0 |
| MIR374C         | 0 |
| ZCCHC13         | 0 |
| MAGEE1          | 0 |
| FGF16           | 0 |
| LPAR4           | 0 |
| P2RY10          | 0 |
| GPR174          | 0 |
| TBX22           | 0 |
| FAM46D          | 0 |
| POU3F4          | 0 |
| CYLC1           | 0 |
| UBE2DNL         | 0 |
| DACH2           | 0 |
| KLHL4           | 0 |
| CPXCR1          | 0 |
| TGIF2LX         | 0 |
| PABPC5          | 0 |
| TNMD            | 0 |
| NXF2B           | 0 |
| NXF4            | 0 |
| TCEAL7          | 0 |
| PLP1            | 0 |
| TMSB15B         | 0 |
| H2BFXP          | 0 |
| H2BFM           | 0 |
| ZCCHC18         | 0 |
| IL1RAPL2        | 0 |
| NRK             | 0 |
| MUM1L1          | 0 |
| RNF128          | 0 |
| COL4A5          | 0 |
| MIR3978         | 0 |
| TDGF1P3         | 0 |
| PAK3            | 0 |
| DKFZp686D0853   | 0 |
| TRPC5OS         | 0 |
| HTR2C           | 0 |
| SNORA35         | 0 |
| MIR764          | 0 |
| MIR1912         | 0 |
| MIR1264         | 0 |
| MIR1298         | 0 |
| MIR1911         | 0 |
| MIR448          | 0 |
| RBMXL3          | 0 |
| SLC6A14         | 0 |
| MIR1277         | 0 |
| AKAP14          | 0 |
| RHOXF2B         | 0 |
| ATP1B4          | 0 |
| LOC100129520    | 0 |
| CXorf64         | 0 |
| XPNPEP2         | 0 |

|                      |   |
|----------------------|---|
| SASH3                | 0 |
| ARHGAP36             | 0 |
| OR13H1               | 0 |
| HS6ST2-AS1           | 0 |
| CCDC160              | 0 |
| SMIM10               | 0 |
| FAM127A              | 0 |
| LINC00086            | 0 |
| CT45A1               | 0 |
| CT45A2,CT45A3,CT45A4 | 0 |
| SAGE1                | 0 |
| GPR112               | 0 |
| BRS3                 | 0 |
| VGLL1                | 0 |
| MIR934               | 0 |
| LOC100128420         | 0 |
| ZIC3                 | 0 |
| FGF13-AS1            | 0 |
| SRD5A1P1             | 0 |
| F9                   | 0 |
| LOC389895            | 0 |
| RP1-177G6.2          | 0 |
| SPANXB2              | 0 |
| SPANXB1              | 0 |
| SPANXA2-OT1          | 0 |
| SPANXA2              | 0 |
| MAGEC3               | 0 |
| MAGEC1               | 0 |
| SPANXN4              | 0 |
| UBE2NL               | 0 |
| SPANXN1              | 0 |
| TMEM257              | 0 |
| CXorf51B             | 0 |
| AFF2                 | 0 |
| MAGEA11              | 0 |
| HSFX2                | 0 |
| MAGEA9B              | 0 |
| MIR2114              | 0 |
| MIR4330              | 0 |
| GPR50                | 0 |
| PASD1                | 0 |
| PRRG3                | 0 |
| FATE1                | 0 |
| CNGA2                | 0 |
| GABRQ                | 0 |
| MAGEA6               | 0 |
| MAGEA2,MAGEA2B       | 0 |
| CSAG2,CSAG3          | 0 |
| PNMA3                | 0 |
| PNMA6C,PNMA6D        | 0 |
| ZFP92                | 0 |
| DUSP9                | 0 |
| AVPR2                | 0 |
| MIR3202-1            | 0 |
| OPN1MW               | 0 |
| OPN1MW               | 0 |
| FAM223B              | 0 |
| CTAG1B               | 0 |
| SNORA56              | 0 |
| H2AFB1               | 0 |
| H2AFB3               | 0 |
| F8A1                 | 0 |
| MIR1184-3            | 0 |
| TMLHE-AS1            | 0 |
| SPRY3                | 0 |
| VAMP7                | 0 |
| IL9R                 | 0 |
| GTPBP6               | 0 |
| PPP2R3B              | 0 |
| CRLF2                | 0 |
| SLC25A6              | 0 |
| ASMTL                | 0 |
| P2RY8                | 0 |
| DHRX,ZBED1           | 0 |
| ARSE                 | 0 |
| MXRA5                | 0 |
| NLGN4X               | 0 |
| MIR4770              | 0 |
| VCX2                 | 0 |

|                |   |
|----------------|---|
| KAL1           | 0 |
| FAM9A          | 0 |
| FAM9B          | 0 |
| ARHGAP6        | 0 |
| TLR8-AS1       | 0 |
| FAM9C          | 0 |
| ATXN3L         | 0 |
| ASB9           | 0 |
| ASB11          | 0 |
| RAI2           | 0 |
| SCML2          | 0 |
| MIR23C         | 0 |
| KLHL34         | 0 |
| SMPX           | 0 |
| PHEX-AS1       | 0 |
| LOC100873065   | 0 |
| SUPT20HL2      | 0 |
| PCYT1B         | 0 |
| SMEK3P         | 0 |
| DCAF8L1        | 0 |
| NR0B1          | 0 |
| CXorf21        | 0 |
| FTHL17         | 0 |
| DMD            | 0 |
| FAM47A         | 0 |
| TMEM47         | 0 |
| LOC286442      | 0 |
| LOC100132831   | 0 |
| PPP1R2P9       | 0 |
| MAOB           | 0 |
| NDP            | 0 |
| EFHC2          | 0 |
| MIR222         | 0 |
| SSX5           | 0 |
| SSX9           | 0 |
| SSX3           | 0 |
| SSX4B          | 0 |
| CACNA1F        | 0 |
| PAGE1          | 0 |
| AKAP4          | 0 |
| DGKK           | 0 |
| NUDT11         | 0 |
| CENPVP2        | 0 |
| MAGED4,MAGED4B | 0 |
| SNORA11D       | 0 |
| SNORA11E       | 0 |
| XAGE1B,XAGE1D  | 0 |
| XAGE2,XAGE2B   | 0 |
| XAGE1C         | 0 |
| XAGE1A,XAGE1C  | 0 |
| SSX7           | 0 |
| SSX2           | 0 |
| SPANXN5        | 0 |
| XAGE3          | 0 |
| MIR98          | 0 |
| MIRLET7F2      | 0 |
| ITIH6          | 0 |
| PAGE3          | 0 |
| USP51          | 0 |
| ZXDA           | 0 |
| MIR1468        | 0 |
| ASB12          | 0 |
| MTMR8          | 0 |
| FRMD8P1        | 0 |
| VSIG4          | 0 |
| TEX11          | 0 |
| SLC7A3         | 0 |
| CXorf65        | 0 |
| CXCR3          | 0 |
| CXorf49B       | 0 |
| LINC00684      | 0 |
| DMRTC1B        | 0 |
| PABPC1L2A      | 0 |
| MIR421         | 0 |
| MIR374B        | 0 |
| MIR545         | 0 |
| MIR374A        | 0 |
| KIAA2022       | 0 |
| MAGEE2         | 0 |



|                      |   |
|----------------------|---|
| MIR384               | 0 |
| CYSLTR1              | 0 |
| ZCCHC5               | 0 |
| MIR4328              | 0 |
| ITM2A                | 0 |
| HDX                  | 0 |
| NAP1L3               | 0 |
| LOC643486            | 0 |
| LOC442459            | 0 |
| NXF5                 | 0 |
| NXF2                 | 0 |
| TMSB15A              | 0 |
| BEX1                 | 0 |
| NXF3                 | 0 |
| BEX2                 | 0 |
| GLRA4                | 0 |
| H2BFWT               | 0 |
| H2BFXP               | 0 |
| ESX1                 | 0 |
| TEX13A               | 0 |
| SERPINA7             | 0 |
| NUP62CL              | 0 |
| IRS4                 | 0 |
| GUCY2F               | 0 |
| SNORD96B             | 0 |
| CHRD1                | 0 |
| RNU6-28              | 0 |
| LHFPL1               | 0 |
| MIR4329              | 0 |
| LRCH2                | 0 |
| CXorf61              | 0 |
| KLHL13               | 0 |
| MIR766               | 0 |
| RHOXF2B              | 0 |
| RHOXF1               | 0 |
| CT47B1               | 0 |
| CT47A1,CT47A4        | 0 |
| CT47A8               | 0 |
| CT47A11              | 0 |
| CT47A5               | 0 |
| CT47A3               | 0 |
| CT47A7               | 0 |
| CT47A1,CT47A2,CT47A6 | 0 |
| CT47A2               | 0 |
| CT47A9               | 0 |
| CT47A8               | 0 |
| CT47A6               | 0 |
| TENM1                | 0 |
| DCAF12L2             | 0 |
| DCAF12L1             | 0 |
| ACTRT1               | 0 |
| SMARCA1              | 0 |
| GPR119               | 0 |
| FRMD7                | 0 |
| HS6ST2               | 0 |
| USP26                | 0 |
| TFDP3                | 0 |
| GPC3                 | 0 |
| MIR363               | 0 |
| MIR92A2              | 0 |
| MIR19B2              | 0 |
| MIR20B               | 0 |
| MIR18B               | 0 |
| MIR106A              | 0 |
| MIR450B              | 0 |
| MIR450A1             | 0 |
| MIR450A2             | 0 |
| MIR542               | 0 |
| MGC16121,MIR424      | 0 |
| MIR503               | 0 |
| FAM127C              | 0 |
| FAM127B              | 0 |
| LINC00087            | 0 |
| CT45A4               | 0 |
| CT45A6               | 0 |
| SNORD61              | 0 |
| GPR101               | 0 |
| LOC158696            | 0 |
| MIR504               | 0 |

|                   |   |
|-------------------|---|
| MIR505            | 0 |
| CXorf66           | 0 |
| SOX3              | 0 |
| CDR1              | 0 |
| MIR320D2          | 0 |
| LDOC1             | 0 |
| SPANXC            | 0 |
| SPANXA2           | 0 |
| MAGEC2            | 0 |
| SPANXN3           | 0 |
| SLITRK4           | 0 |
| SPANXN2           | 0 |
| MIR890            | 0 |
| MIR888            | 0 |
| MIR892A           | 0 |
| MIR892B           | 0 |
| MIR891B           | 0 |
| MIR891A           | 0 |
| CXorf51A          | 0 |
| MIR506            | 0 |
| MIR507            | 0 |
| MIR508            | 0 |
| MIR514B           | 0 |
| MIR509-1          | 0 |
| MIR509-3          | 0 |
| MIR509-1          | 0 |
| MIR510            | 0 |
| MIR514A1          | 0 |
| MIR514A2          | 0 |
| MIR514A3          | 0 |
| MAGEA9B           | 0 |
| HSFX2             | 0 |
| GABRE             | 0 |
| MIR452            | 0 |
| GABRA3            | 0 |
| MIR105-1          | 0 |
| MIR767            | 0 |
| MIR105-2          | 0 |
| CSAG2,CSAG3       | 0 |
| MAGEA2,MAGEA2B    | 0 |
| MAGEA3            | 0 |
| PNMA5             | 0 |
| PNMA6D            | 0 |
| MAGEA1            | 0 |
| PDZD4             | 0 |
| MIR3202-2         | 0 |
| MIR718            | 0 |
| TEX28             | 0 |
| CTAG1A            | 0 |
| CTAG2             | 0 |
| MIR1184-1         | 0 |
| MIR1184-3         | 0 |
| F8A1              | 0 |
| H2AFB3            | 0 |
| PLCXD1            | 0 |
| LINC00685         | 0 |
| SHOX              | 0 |
| CSF2RA            | 0 |
| MIR3690           | 0 |
| IL3RA             | 0 |
| ASMTL-AS1         | 0 |
| AKAP17A,ASMT      | 0 |
| CD99P1            | 0 |
| CD99              | 0 |
| XGPY2             | 0 |
| RPS4Y1            | 0 |
| ZFY               | 0 |
| LINC00278         | 0 |
| TGIF2LY           | 0 |
| TSPY2             | 0 |
| TTY1B             | 0 |
| TTY21             | 0 |
| TTY7,TTY7B        | 0 |
| TBL1Y             | 0 |
| PRKY              | 0 |
| TTY12             | 0 |
| TTY19             | 0 |
| TSPY3,TSPY4,TSPY8 | 0 |
| TSPY1             | 0 |

|                 |   |
|-----------------|---|
| TTY8B           | 0 |
| TTY2            | 0 |
| TTY22           | 0 |
| TTY23B          | 0 |
| TTY15           | 0 |
| USP9Y           | 0 |
| DDX3Y           | 0 |
| TMSB4Y          | 0 |
| VCY             | 0 |
| NLGN4Y          | 0 |
| FAM41AY1        | 0 |
| CDY2A,CDY2B     | 0 |
| XKRY            | 0 |
| FAM224A,FAM224B | 0 |
| HSFY1,HSFY2     | 0 |
| TTY9A           | 0 |
| TXLNG2P         | 0 |
| EIF1AY          | 0 |
| RPS4Y2          | 0 |
| RBM1B           | 0 |
| RBM1B           | 0 |
| TTY6,TTY6B      | 0 |
| RBM1F,RBM1J     | 0 |
| PRY2            | 0 |
| TTY17C          | 0 |
| TTY4            | 0 |
| BPY2            | 0 |
| DAZ2,DAZ3,DAZ4  | 0 |
| TTY17C          | 0 |
| TTY4            | 0 |
| BPY2            | 0 |
| DAZ2,DAZ3,DAZ4  | 0 |
| GOLGA2P2Y       | 0 |
| CSPG4P1Y        | 0 |
| CDY1            | 0 |
| TTY3            | 0 |
| SPRY3           | 0 |
| VAMP7           | 0 |
| IL9R            | 0 |
| GTPBP6          | 0 |
| PPP2R3B         | 0 |
| CRLF2           | 0 |
| SLC25A6         | 0 |
| ASMTL           | 0 |
| P2RY8           | 0 |
| DHRX,ZBED1      | 0 |
| SRY             | 0 |
| TTY23B          | 0 |
| TTY2            | 0 |
| TTY8B           | 0 |
| AMELY           | 0 |
| TTY16           | 0 |
| TTY18           | 0 |
| TTY11           | 0 |
| RBM1A3P         | 0 |
| TTY20           | 0 |
| FAM197Y5        | 0 |
| FAM197Y5        | 0 |
| FAM197Y2        | 0 |
| FAM197Y2        | 0 |
| FAM197Y2        | 0 |
| RBM3AP          | 0 |
| TTY7,TTY7B      | 0 |
| TTY21           | 0 |
| TTY1B           | 0 |
| VCY             | 0 |
| NLGN4Y-AS1      | 0 |
| FAM224A,FAM224B | 0 |
| XKRY2           | 0 |
| CDY2A,CDY2B     | 0 |
| FAM41AY2        | 0 |
| TTY9B           | 0 |
| HSFY1,HSFY2     | 0 |
| NCRNA00185      | 0 |
| TTY14           | 0 |
| BCORP1          | 0 |
| KDM5D           | 0 |
| TTY10           | 0 |
| RBM2EP          | 0 |

|            |           |
|------------|-----------|
| TTY13      | 0         |
| RBM1B      | 0         |
| RBM1B      | 0         |
| PRY        | 0         |
| RBM1J      | 0         |
| TTY5       | 0         |
| TTY6,TTY6B | 0         |
| DAZ1,DAZ4  | 0         |
| TTY3B      | 0         |
| CDY1       | 0         |
| CSPG4P1Y   | 0         |
| GOLGA2P2Y  | 0         |
| DAZ3,DAZ4  | 0         |
| BPY2C      | 0         |
| TTY4B      | 0         |
| TTY17B     | 0         |
| KIF26A     | 2.39654   |
| CDK19      | 1.72245   |
| RPP38      | 28.1902   |
| ALDH1B1    | 18.9257   |
| ASPHD2     | 3.71972   |
| SASS6      | 1.63955   |
| PTK2       | 25.7295   |
| DOCK7      | 3.2505    |
| UBE2L6     | 24.0654   |
| FZD3       | 1.1833    |
| DNAJC5     | 12.835    |
| ESPL1      | 4.98202   |
| RBL2       | 3.66446   |
| EHMT1      | 11.2624   |
| ZNF430     | 0.978753  |
| NUDT7      | 4.64569   |
| RPS15A     | 5077.71   |
| PAX2       | 1.79209   |
| URM1       | 82.0693   |
| MESDC1     | 19.1354   |
| FBXL15     | 13.1426   |
| PARPBP     | 1.81286   |
| ABHD5      | 2.71226   |
| CBWD6      | 3.46141   |
| SLC35E3    | 5.64481   |
| DMWD       | 10.7842   |
| DDX54      | 34.2307   |
| SAMD9      | 0.126584  |
| PPFIA3     | 4.38121   |
| GPAM       | 1.16586   |
| FHL2       | 390.095   |
| CASD1      | 3.6989    |
| RNF220     | 41.0953   |
| TRAPPC5    | 221.085   |
| TMEM98     | 44.3109   |
| ZNF180     | 2.16186   |
| DDX6       | 10.6925   |
| SUGT1      | 29.8845   |
| MAD2L1BP   | 41.3281   |
| SS18L1     | 2.78593   |
| NKD2       | 14.5723   |
| GPR137C    | 0.0681024 |
| CD164      | 42.1637   |
| ZNF480     | 1.33784   |
| TEAD1      | 4.63581   |
| NKTR       | 1.18624   |
| PLSCR1     | 5.91923   |
| RNF25      | 27.1803   |
| NDUFA11    | 519.023   |
| NRG4       | 0.291692  |
| ZFP69      | 1.62953   |
| LSM14A     | 25.9797   |
| TGFB3      | 1.55161   |
| ARHGAP17   | 9.46323   |
| APEH       | 99.423    |
| C7orf26    | 21.672    |
| JRKL       | 1.78586   |
| FAM49B     | 22.8545   |
| AGAP5      | 0.769592  |
| TOP2A      | 10.4228   |
| SNN        | 6.95238   |
| BRD4       | 8.41955   |
| PIGV       | 5.03585   |

|                   |           |
|-------------------|-----------|
| SESN3             | 0.123396  |
| UBR5              | 6.03792   |
| DGKQ              | 5.21229   |
| OSGIN2            | 9.94758   |
| WASH1             | 6.39684   |
| GATC              | 9.20913   |
| UBE2W             | 5.06339   |
| ZNF442            | 0.404515  |
| CBL               | 3.37648   |
| DENND5A           | 9.08741   |
| CEP250            | 8.79848   |
| ZNF337            | 4.06356   |
| RNF19A            | 7.09348   |
| ATG14             | 3.30606   |
| PTGR2             | 2.22803   |
| STAG3             | 0.170093  |
| ACBD3             | 8.68448   |
| TEAD2             | 9.13064   |
| SETDB1            | 4.75327   |
| HDGF              | 174.596   |
| TMEM55B           | 30.5797   |
| WNT3              | 1.10038   |
| MTMR12            | 3.77187   |
| DKFZP586I1420     | 1.00198   |
| HTRA2             | 19.1381   |
| IWS1              | 11.187    |
| GSTO2             | 40.189    |
| SPG7              | 20.4262   |
| ATP6V1B2          | 33.7858   |
| ZNF296            | 25.1701   |
| ZNF182            | 1.28661   |
| UBAC1             | 40.6576   |
| CTCF              | 10.82     |
| ZBTB49            | 1.5895    |
| CREB3L4           | 5.95619   |
| CDC25B            | 21.3817   |
| RUNDC1            | 5.60506   |
| IDH1              | 12.3854   |
| MRPS28            | 40.2591   |
| IL21R-AS1         | 0.0366688 |
| PLK1              | 75.113    |
| LOC728554         | 27.1081   |
| IMMT              | 38.6259   |
| KIF23             | 10.9558   |
| DNASE2            | 42.5229   |
| RBM27             | 2.75762   |
| SCRIB             | 35.508    |
| GLT25D1           | 53.5148   |
| ERMAP             | 1.8875    |
| UQCRCFS1          | 131.698   |
| FAM50A            | 90.02     |
| UBQLN1            | 34.7229   |
| NDUFAF5           | 5.75294   |
| SOX8              | 18.7788   |
| CCDC159           | 3.42317   |
| STRBP             | 9.33418   |
| SPATA9            | 0.0336299 |
| BIN1              | 37.7356   |
| SOGA2             | 4.11027   |
| SPOCK2            | 0.0321139 |
| ASPH              | 45.1139   |
| PRSS27            | 1.60876   |
| LOC284454,MIR24-2 | 9.47112   |
| COPS6             | 163.423   |
| PARP2             | 13.2038   |
| PPHLN1            | 18.8052   |
| DSTYK             | 1.8207    |
| KRTCAP2           | 363.209   |
| C17orf89          | 83.1269   |
| ANO7              | 2.82078   |
| SAPCD2            | 61.9207   |
| CYC1              | 247.018   |
| ALG3              | 66.0322   |
| SFT2D2            | 3.97733   |
| TPT1              | 4594.86   |
| FECH              | 1.80947   |
| XPNPEP1           | 32.1025   |
| MRPL47            | 36.9027   |
| FAM213B           | 18.1179   |

|                     |           |
|---------------------|-----------|
| NME1,NME1-NME2,NME2 | 1870.86   |
| EFCAB14             | 6.14949   |
| ZDHC13              | 7.31123   |
| SNAPIN              | 36.7652   |
| C6orf1              | 48.164    |
| PGD                 | 113.866   |
| BOK                 | 62.5069   |
| MMGT1               | 5.68301   |
| PPP1R21             | 3.5483    |
| MSH4                | 0.477421  |
| PPAP2C              | 90.2061   |
| CRADD               | 9.91322   |
| IQSEC1              | 6.69358   |
| KCTD6               | 5.60822   |
| RFK                 | 10.0934   |
| UBE2K               | 14.9452   |
| TLE4                | 0.520301  |
| IFRD2               | 84.8173   |
| UGT8                | 2.70927   |
| TAF1                | 2.32597   |
| SERP1               | 47.2548   |
| DNAJC14             | 10.5458   |
| RELL2               | 6.48974   |
| TSSK4               | 0.123317  |
| PTOV1-AS1           | 1.98422   |
| LGALS3              | 51.2004   |
| BET1                | 10.3483   |
| CHMP4C              | 51.2394   |
| SF3B1               | 32.525    |
| LGR4                | 1.11098   |
| RBFA                | 4.95709   |
| SLC25A35            | 1.33272   |
| KRI1                | 21.7274   |
| RNF166              | 17.0409   |
| KPNA6               | 7.84889   |
| TET3                | 1.13934   |
| ZNF175              | 1.6723    |
| RARA                | 8.83668   |
| C19orf54            | 8.95886   |
| MROH6               | 3.67606   |
| NR2C2AP             | 43.3454   |
| ZBTB42              | 4.63419   |
| SLBP                | 44.9862   |
| RNF2                | 9.24416   |
| SH3PXD2A            | 1.18327   |
| FAM149A             | 1.19436   |
| TOP2B               | 13.8069   |
| BRE                 | 32.0764   |
| SLC36A4             | 3.18373   |
| POLR3H              | 21.9635   |
| C17orf53            | 5.28405   |
| ZC3H12A             | 2.93396   |
| SHANK3              | 6.09303   |
| KIAA0907            | 9.01718   |
| GRIK1-AS2           | 0         |
| PNKP                | 37.7935   |
| C9orf16             | 366.194   |
| WDR89               | 3.63102   |
| EIF2AK4             | 7.63339   |
| GRIN3A              | 0.0338777 |
| NUP35               | 7.78882   |
| STAT5A              | 9.05958   |
| NOP56               | 69.2382   |
| RPL38               | 4953.26   |
| NFU1                | 37.2288   |
| KIAA1609            | 5.59954   |
| CCDC109B            | 33.074    |
| ENTPD5              | 0.310361  |
| MTF1                | 1.11348   |
| GFOD2               | 16.9921   |
| LRRC14              | 8.46      |
| KIF27               | 0.420609  |
| CHTOP               | 56.4207   |
| ALDH18A1            | 38.4021   |
| GPN3                | 21.4811   |
| FAM96A              | 53.1573   |
| BMP2K               | 2.24655   |
| C18orf21            | 22.5782   |
| BTBD1               | 21.6235   |

|                         |           |
|-------------------------|-----------|
| RPL28                   | 2007.82   |
| GLTP                    | 37.9769   |
| WVOX                    | 5.41438   |
| ARHGEF11                | 2.8758    |
| CCP110                  | 1.69203   |
| ZNF646                  | 2.61308   |
| NR2F6                   | 119.207   |
| GALNT2                  | 8.71585   |
| NT5DC2                  | 98.4564   |
| MAST3                   | 3.18221   |
| MTHFSD                  | 5.17235   |
| WBP11                   | 24.1441   |
| ZNF652                  | 0.940748  |
| PEX26                   | 7.46639   |
| MAPK14                  | 8.62424   |
| RPS15                   | 5275.44   |
| PON2                    | 34.49     |
| TNFRSF10B               | 36.7165   |
| MRPL51                  | 230.386   |
| HERC2                   | 2.62927   |
| MRPL19                  | 7.6356    |
| PRIM2                   | 8.10409   |
| RPL14                   | 3287.55   |
| EMC6                    | 161.709   |
| KREMEN2                 | 19.1265   |
| KLF3                    | 3.22023   |
| ANKRD13B                | 9.48716   |
| GPHN                    | 5.85907   |
| CAMKMT                  | 2.9747    |
| NUDT13                  | 0.889058  |
| PHAX                    | 5.42396   |
| USP14                   | 12.0966   |
| CDC27                   | 7.55373   |
| LUST                    | 0.0967633 |
| LOC100129034            | 18.9533   |
| ASF1B                   | 31.2073   |
| MEF2A                   | 4.64101   |
| PARP3                   | 11.4999   |
| ZNF585B                 | 0.918141  |
| NSDHL                   | 24.0506   |
| PKMYT1                  | 56.8358   |
| FAM58A                  | 37.336    |
| PAX9                    | 1.81326   |
| CTBP2                   | 15.9758   |
| LMNB1                   | 9.35153   |
| LOC100133315            | 0.483137  |
| MTR                     | 1.64489   |
| PFDN4                   | 33.4643   |
| E4F1                    | 17.4757   |
| HCCS                    | 11.4242   |
| RBM18                   | 7.72747   |
| VAMP8                   | 0.878154  |
| MPP6                    | 3.35305   |
| MDM4                    | 3.9658    |
| LOC646278               | 0.453851  |
| TWF2                    | 112.109   |
| CD55                    | 20.5806   |
| EV15                    | 1.83455   |
| CACNB1                  | 4.55603   |
| STAU1                   | 31.3897   |
| CWC22                   | 3.79977   |
| NKIRAS1                 | 4.72397   |
| TMEM57                  | 4.93285   |
| UBA5                    | 9.63494   |
| RPL36AL                 | 589.556   |
| RPL31                   | 5083.77   |
| PURB                    | 3.98828   |
| ACVR1                   | 3.90426   |
| LOC100506990            | 4.32205   |
| ZNF354A                 | 6.64217   |
| OAZ1                    | 985.185   |
| RTKN                    | 20.3775   |
| PEX19                   | 14.0181   |
| BM11,COMMD3,COMMD3-BM11 | 81.7322   |
| MPG                     | 206.993   |
| RPL37                   | 1077.33   |
| SLC25A44                | 6.32192   |
| SETD4                   | 9.08377   |
| TRAPPC10                | 2.49489   |

|                           |           |
|---------------------------|-----------|
| RPL7A                     | 11448.1   |
| C8orf76,ZHX1,ZHX1-C8ORF76 | 41.4233   |
| PIK3C2A                   | 2.88304   |
| AMFR                      | 30.0778   |
| SERPINF1                  | 0.313491  |
| SMC3                      | 8.39508   |
| USF2                      | 101.998   |
| RBM22                     | 21.6596   |
| PRPF38A                   | 15.7362   |
| CHD1                      | 2.97243   |
| PKI55                     | 1.08738   |
| KIF14                     | 1.39001   |
| TSPAN4                    | 50.3823   |
| CASP9                     | 3.89195   |
| FAM73A                    | 1.17412   |
| RALA                      | 13.2894   |
| WDR52                     | 0.187445  |
| HOXA5                     | 8.08515   |
| GATA4                     | 7.85611   |
| CITED2                    | 6.68624   |
| MAP2K5                    | 14.1609   |
| FAXC                      | 0.477776  |
| RNF139                    | 15.3193   |
| VANGL1                    | 1.62429   |
| METRN                     | 151.345   |
| NRBP2                     | 8.6278    |
| PRPF39                    | 6.80958   |
| C1QTNF9B                  | 0.264821  |
| TMEM14C                   | 158.495   |
| PAK2                      | 12.1324   |
| NUDT8                     | 36.9056   |
| MATN1                     | 0.104614  |
| RPL22                     | 369.919   |
| ERCC3                     | 21.3166   |
| DHX40                     | 6.10974   |
| HOXB7                     | 23.2846   |
| MED9                      | 9.20753   |
| PHF23                     | 18.8585   |
| RASA4                     | 4.79292   |
| RHBDL3                    | 0.977032  |
| YES1                      | 9.53378   |
| CDK5RAP2                  | 4.3383    |
| C11orf73                  | 30.001    |
| SND1                      | 97.2006   |
| SUPT5H                    | 34.4507   |
| ATP1A3                    | 8.41468   |
| CEP170B                   | 11.4015   |
| UBASH3B                   | 1.67532   |
| RPL13A                    | 10386.6   |
| TUBA8                     | 5.64573   |
| TXNRD1                    | 25.287    |
| SPTLC1                    | 26.5541   |
| VPRBP                     | 2.25224   |
| PFDN5                     | 504.121   |
| ZNF76                     | 9.93513   |
| ISL1                      | 0.12882   |
| C9orf3                    | 2.16693   |
| MKS1                      | 9.22945   |
| KIAA0922                  | 2.24008   |
| PARP4                     | 15.1126   |
| PARVG                     | 0.0848094 |
| PIGM                      | 2.13945   |
| PTRH2                     | 47.9582   |
| NFYB                      | 5.64962   |
| FDPS                      | 61.2288   |
| ULK3                      | 23.2744   |
| ARAP3                     | 6.37954   |
| HOOK2                     | 9.72105   |
| ACTL10                    | 2.70667   |
| RNF113A                   | 38.7591   |
| LOC541471                 | 437.232   |
| SZT2                      | 1.21757   |
| HPCAL1                    | 51.099    |
| NOL12                     | 6.90481   |
| MLST8                     | 80.8207   |
| SNAPC1                    | 6.38465   |
| ICOSLG                    | 2.68103   |
| FRMD6                     | 20.9104   |
| NAA50                     | 16.3574   |



|                           |           |
|---------------------------|-----------|
| CLTC                      | 23.5011   |
| MPND                      | 25.2133   |
| VRK3                      | 12.0958   |
| ATG4B                     | 23.5054   |
| NOL10                     | 6.43352   |
| UTP23                     | 7.05741   |
| JMY                       | 1.64041   |
| ZDHC9                     | 14.3069   |
| LEP                       | 0.0487569 |
| TMEM147                   | 202.179   |
| KPNA1                     | 6.01028   |
| TNFRSF10A                 | 5.80681   |
| SP2                       | 4.30837   |
| COX5A                     | 346.164   |
| ARIH2                     | 16.652    |
| ARF6                      | 18.2784   |
| TTLL5                     | 2.35316   |
| EEF1G                     | 4198.54   |
| CD63                      | 649.523   |
| CHMP3,RNF103,RNF103-CHMP3 | 23.4529   |
| RPS26                     | 2354.88   |
| C10orf68,CCDC7            | 0.600808  |
| TEX10                     | 37.951    |
| ALPK1                     | 1.58171   |
| ZNF232                    | 12.2263   |
| MAU2                      | 6.63438   |
| RNU12                     | 0         |
| RAB33B                    | 1.3632    |
| FAS                       | 3.22345   |
| C1orf85                   | 31.1425   |
| SGOL2                     | 2.17692   |
| C4orf29                   | 0.646247  |
| SEPT7L                    | 0.114026  |
| URB2                      | 2.72007   |
| HADHA                     | 92.9656   |
| THSD4                     | 0.142621  |
| EFHD2                     | 51.2248   |
| TBC1D30                   | 0.0569604 |
| HIBADH                    | 14.0763   |
| TMEM123                   | 39.3252   |
| LINC00654                 | 0.0125667 |
| PVR                       | 17.3034   |
| PCM1                      | 4.91941   |
| PDIA3P                    | 1.20418   |
| KIAA1429                  | 5.95044   |
| OVOL2                     | 3.99196   |
| ATP2A2                    | 14.2196   |
| TRMT2A                    | 16.6378   |
| EFCAB12                   | 0.152622  |
| ZNF281                    | 2.01913   |
| PSIP1                     | 25.7195   |
| AMPD3                     | 3.00044   |
| FHIT                      | 15.1169   |
| DNA2                      | 1.08846   |
| BCL10                     | 35.129    |
| BAG5                      | 5.43904   |
| TMEM165                   | 46.4122   |
| FAM83F                    | 31.1838   |
| PPP1R15A                  | 250.382   |
| C10orf114                 | 9.90414   |
| POLE3                     | 37.2056   |
| RAB22A                    | 3.93757   |
| XRCC1                     | 20.1676   |
| RETSAT                    | 14.7631   |
| TEFM                      | 9.29079   |
| COL4A3BP                  | 4.59183   |
| HSD17B4                   | 10.6803   |
| NUBP2                     | 99.3785   |
| GTF2H1                    | 10.4919   |
| NDRG4                     | 3.57909   |
| MTMR2                     | 6.55788   |
| RPP14                     | 4.82799   |
| MTA2                      | 35.4252   |
| CHID1                     | 22.6517   |
| SLC6A12                   | 0.0881901 |
| RPS6KA5                   | 0.375652  |
| HACE1                     | 0.777705  |
| DDHD2                     | 3.52887   |
| CA2                       | 6.1666    |

|                          |            |
|--------------------------|------------|
| SGMS1                    | 2.74296    |
| LOC100505783             | 1.40648    |
| ENDOG                    | 36.6135    |
| SUPT4H1                  | 36.5759    |
| RAI14                    | 5.60309    |
| EPC2                     | 3.02091    |
| CHERP                    | 21.3639    |
| NPIPL3                   | 3.69216    |
| SLC25A17                 | 12.7741    |
| TRAPPC12                 | 18.3105    |
| UBXN1                    | 163.885    |
| STK16                    | 10.7431    |
| ZNF816,ZNF816-ZNF321P    | 3.1919     |
| XPA                      | 8.69041    |
| APIP                     | 14.413     |
| LINC00674                | 2.53187    |
| PIP5K1C                  | 8.72913    |
| C3orf37                  | 35.2111    |
| UBR1                     | 1.23026    |
| ZC3H3                    | 21.5254    |
| ST7                      | 10.0333    |
| PAPD4                    | 6.19589    |
| ZNF583                   | 1.09871    |
| MZT2B                    | 424.146    |
| NANP                     | 2.31886    |
| GLYR1                    | 11.7007    |
| NDC80                    | 11.3735    |
| C3orf17                  | 9.94187    |
| GADD45B                  | 60.7317    |
| MRPS12                   | 131.877    |
| CHMP5                    | 36.591     |
| PRRC2C                   | 4.75336    |
| DHX35                    | 3.37127    |
| C9orf142                 | 160.241    |
| TBL1XR1                  | 17.4825    |
| COIL                     | 5.1278     |
| DAPK1                    | 2.65718    |
| ZNF74                    | 8.82691    |
| RNF217                   | 0.487328   |
| ZNF706                   | 40.9299    |
| CLEC4A                   | 0.798573   |
| NCEH1                    | 2.05555    |
| SSH1                     | 6.07269    |
| SSFA2                    | 6.31702    |
| ECE1                     | 13.8807    |
| DEAF1                    | 36.7368    |
| LONP1                    | 112.211    |
| SEP15                    | 54.2337    |
| BRI3                     | 369.235    |
| AFTPH                    | 6.59157    |
| GPIHBP1                  | 0.0265271  |
| SLC4A7                   | 1.59098    |
| TAPT1                    | 2.12409    |
| NDUFAF3                  | 72.7402    |
| CHORDC1                  | 9.49233    |
| MXD1                     | 7.22047    |
| CCDC47                   | 19.1217    |
| PRKRIR                   | 12.1076    |
| XRCC6                    | 191.373    |
| IQGAP3                   | 9.46966    |
| MRPS24,URGCP,URGCP-MRPS: | 327.916    |
| NAA35                    | 10.5559    |
| DEPDC1                   | 6.64842    |
| DSE                      | 2.78661    |
| PSMD7                    | 46.2348    |
| H3F3A                    | 398.016    |
| MYO9B                    | 12.3096    |
| ZC3H15                   | 31.3163    |
| MAVS                     | 4.28178    |
| BTF3                     | 877.267    |
| SLC4A2                   | 69.7027    |
| GLUL                     | 22.0227    |
| CLSPN                    | 0.690568   |
| USH2A                    | 0.00595111 |
| C14orf2                  | 403.075    |
| ADAM10                   | 2.49421    |
| FAM20B                   | 7.94989    |
| SLC16A11                 | 0.424583   |
| PRPF4                    | 16.5431    |

|                               |           |
|-------------------------------|-----------|
| RPL21                         | 4210.19   |
| TAF1C                         | 14.3713   |
| MDK                           | 652.517   |
| RBBP4                         | 7.44524   |
| AOC2                          | 1.94573   |
| TUBA1C                        | 528.367   |
| PITHD1                        | 29.4035   |
| WDR48                         | 5.2607    |
| TYSND1                        | 15.7546   |
| C19orf52                      | 19.0042   |
| SLC35D2                       | 26.5124   |
| EML2                          | 16.093    |
| SRP9                          | 123.251   |
| XG                            | 0.0270358 |
| ASH1L                         | 1.0857    |
| RPS24                         | 3656.96   |
| SCARNA2                       | 2.9083    |
| ZNF554                        | 1.22018   |
| DNAJC13                       | 2.37258   |
| PLCH1                         | 0.435135  |
| PCDH1                         | 5.16509   |
| PDDC1                         | 18.0998   |
| ZNF215                        | 1.8014    |
| PHYH                          | 34.5048   |
| TCTN3                         | 20.6371   |
| THRAP3                        | 25.6156   |
| CMTM6                         | 12.6057   |
| BRAP                          | 4.88091   |
| C18orf32,RPL17,RPL17-C18orf32 | 4203.93   |
| CDAN1                         | 4.90759   |
| VASH2                         | 0.369204  |
| ANKRD27                       | 8.44321   |
| BTN2A3P                       | 0.172678  |
| CBWD3                         | 0.33692   |
| PRRG4                         | 2.05863   |
| BMS1P1                        | 0.080901  |
| DCTN6                         | 18.8528   |
| PARN                          | 9.71786   |
| WNT2B                         | 0.928543  |
| RPL9                          | 5250.19   |
| ADK                           | 17.1235   |
| CDK9                          | 45.5854   |
| ERC1                          | 2.43092   |
| UBXN4                         | 15.7122   |
| COA5                          | 10.5083   |
| PTPN2                         | 21.0133   |
| LANCL2                        | 2.0736    |
| PIH1D1                        | 100.269   |
| TPM3                          | 62.9725   |
| POU2F1                        | 0.992637  |
| UBE2MP1                       | 3.77531   |
| ZNF546                        | 0.231947  |
| DNAJB13                       | 0.0247567 |
| TBC1D19                       | 1.51185   |
| TNFAIP2                       | 6.53651   |
| TMEM38B                       | 12.194    |
| LOC100505718                  | 4.83335   |
| AURKAIP1                      | 244.592   |
| PSMA6                         | 151.739   |
| AMOTL2                        | 17.294    |
| TIAL1                         | 18.4407   |
| HAVCR2                        | 0.0705176 |
| ALKBH3                        | 21.6176   |
| U2SURP                        | 8.57715   |
| SRC                           | 20.737    |
| FAM103A1                      | 18.9074   |
| RPUSD1                        | 84.0661   |
| NEAT1                         | 53.7641   |
| COX18                         | 4.01157   |
| PDCD2L                        | 29.0245   |
| FADD                          | 32.4626   |
| QARS                          | 92.679    |
| RAVER2                        | 5.19679   |
| SHARPIN                       | 99.6955   |
| EIF4G2                        | 96.8544   |
| TUBB2A                        | 13.5333   |
| ZC3HC1                        | 20.8956   |
| GLDC                          | 0.0234991 |
| ABR                           | 19.6978   |

|                         |           |
|-------------------------|-----------|
| KLF16                   | 55.019    |
| TPM4                    | 285.556   |
| ATP11B                  | 3.68031   |
| CCDC43                  | 7.16887   |
| CNOT7                   | 27.6964   |
| REEP4                   | 55.0688   |
| ZFAND6                  | 28.8213   |
| ACAD10                  | 2.27967   |
| MRPL36                  | 118.48    |
| RFWD2                   | 9.38014   |
| CLTB                    | 130.592   |
| KCTD20                  | 5.45166   |
| DIMT1                   | 27.0435   |
| FAHD2A                  | 23.4428   |
| GGA1                    | 31.4138   |
| SDHD                    | 55.3859   |
| TAF7L                   | 0.051059  |
| ZCCHC8                  | 4.927     |
| MGST1                   | 136.109   |
| RPL35                   | 10295.2   |
| PDHX                    | 9.24043   |
| OGFOD3                  | 5.34325   |
| LRTOMT                  | 1.16024   |
| MMP19                   | 1.76495   |
| KAAG1                   | 0.745058  |
| ZNF211                  | 1.19967   |
| PDE8A                   | 5.21886   |
| PEX16                   | 26.379    |
| ADNP                    | 11.2998   |
| PRCC                    | 21.538    |
| ZFYVE21                 | 25.7994   |
| NTPCR                   | 38.9655   |
| APMAP                   | 48.9264   |
| CCT6P1                  | 2.78893   |
| MACF1                   | 4.4099    |
| RAD52                   | 3.23735   |
| VTA1                    | 7.24849   |
| AKT1                    | 69.553    |
| ZNF263                  | 13.5093   |
| WDR3                    | 13.0667   |
| POMP                    | 84.369    |
| RHOT2                   | 43.2538   |
| TMEM249                 | 1.25227   |
| ERGIC3                  | 146.698   |
| NUP155                  | 6.1435    |
| MBOAT4                  | 0.0329032 |
| RHOA                    | 280.233   |
| MYO9A                   | 0.220279  |
| FXYD5                   | 479.37    |
| UBE2J2                  | 33.7881   |
| ANKRD13D                | 18.2901   |
| USP9X                   | 6.15421   |
| WBP2                    | 150.441   |
| UBTF                    | 19.4746   |
| ZNF668                  | 10.2532   |
| LOC440434               | 10.5984   |
| TMEM230                 | 61.7268   |
| TDP2                    | 15.0794   |
| RAI1                    | 4.29696   |
| PROSER2                 | 3.82136   |
| ZNF259                  | 42.4929   |
| CDCP1                   | 25.1894   |
| ARHGEF18                | 10.4407   |
| FAM179B                 | 0.720314  |
| FJX1                    | 28.415    |
| KIAA0146                | 7.67911   |
| GPLD1                   | 0.357155  |
| CDKN2AIP                | 4.30451   |
| UBR2                    | 2.49309   |
| CPLX3                   | 0.0263869 |
| ATP5G2                  | 896.843   |
| PURA                    | 4.51199   |
| GOLGA2P5                | 1.13499   |
| KCNQ1OT1                | 0.0638585 |
| P2RY11,PPAN,PPAN-P2RY11 | 44.6727   |
| GPX8                    | 13.2721   |
| ARF1                    | 303.492   |
| DHDH                    | 5.5517    |
| FAM22G                  | 0.156248  |

|              |           |
|--------------|-----------|
| GLE1         | 33.517    |
| FDXACB1      | 1.44638   |
| PCNXL4       | 13.2959   |
| PCNT         | 2.2119    |
| RPL29        | 5840.53   |
| MAP3K8       | 0.756173  |
| TCEAL1       | 10.4651   |
| PLAC4        | 0.0708564 |
| MBD1         | 14.1469   |
| PREP         | 14.1122   |
| NDUFV3       | 32.9463   |
| COQ5         | 15.8181   |
| SYDE2        | 1.32023   |
| ZNF140       | 7.70689   |
| RRP7B        | 4.68163   |
| LOC100190986 | 0.697067  |
| COMMD2       | 3.93134   |
| TBRG1        | 4.44719   |
| IL17D        | 2.46226   |
| NEK6         | 29.7798   |
| AK2          | 72.7969   |
| SLC12A6      | 1.28082   |
| SEC62        | 8.32216   |
| NUDCD1       | 23.1217   |
| UROS         | 23.4251   |
| RPUSD4       | 25.5221   |
| HLA-E        | 157.672   |
| POLD2        | 152.192   |
| REEP2        | 42.655    |
| ZC3H12B      | 0.247577  |
| MCCD1        | 0         |
| ZMYND19      | 84.806    |
| LOC648987    | 1.43945   |
| TOR4A        | 57.3779   |
| DCTN2        | 66.8271   |
| KIAA1731     | 0.735986  |
| ACE          | 3.63352   |
| CSK          | 80.9083   |
| RPRD1A       | 11.1022   |
| MRPL40       | 81.2542   |
| HLA-C        | 680.439   |
| ZNF407       | 0.824788  |
| C16orf70     | 5.42997   |
| LONRF3       | 2.80275   |
| CD7          | 0.0655119 |
| SORT1        | 5.67938   |
| KIAA1598     | 3.76791   |
| KIAA0141     | 12.8351   |
| SPG21        | 79.3881   |
| SAR1B        | 2.98545   |
| EMB          | 1.85768   |
| SENP1        | 3.21982   |
| OCRL         | 8.69799   |
| UGGT1        | 3.95432   |
| TRIP6        | 308.825   |
| PCSK7        | 8.34588   |
| KARS         | 82.6823   |
| SLC19A1      | 23.7507   |
| EIF4H        | 197.391   |
| MRAP2        | 1.35637   |
| NTN1         | 2.61382   |
| ZNF564       | 2.16655   |
| RXRA         | 15.7451   |
| MFSD8        | 1.14722   |
| HEXIM2       | 6.75029   |
| RLIM         | 4.46636   |
| VPS13D       | 0.854772  |
| KIAA0825     | 0.0340916 |
| LOC440311    | 0.304361  |
| RPL24        | 4751.45   |
| ZNF503-AS2   | 2.45129   |
| BCAR1        | 26.119    |
| FSTL3        | 38.1596   |
| VTI1A        | 4.41449   |
| HYAL2        | 18.4696   |
| PRPS2        | 26.3333   |
| AHCY         | 202.409   |
| KIAA1614     | 0         |
| SIM2         | 3.28636   |

|              |           |
|--------------|-----------|
| LZIC         | 11.3513   |
| ARHGAP11A    | 6.46719   |
| PLD2         | 10.3254   |
| ZFAND5       | 13.2434   |
| CKAP5        | 15.3548   |
| ATP6V1F      | 677.246   |
| SEPT6        | 7.49725   |
| APOO         | 12.2505   |
| TRPM7        | 2.69141   |
| AFF1         | 1.92962   |
| CASP2        | 10.8168   |
| CHRNA5       | 1.82916   |
| HAUS1        | 39.5032   |
| GNPTAB       | 2.32488   |
| ZNF563       | 0.85984   |
| C8orf59      | 175.937   |
| ANKRD32      | 0.630642  |
| HERC4        | 6.01164   |
| CIAPIN1      | 24.1131   |
| CHD9         | 1.69094   |
| LSG1         | 7.92437   |
| DDX39A       | 74.4164   |
| FAM21B       | 1.12398   |
| WAPAL        | 5.58224   |
| LONP2        | 13.94     |
| TMEM181      | 4.59652   |
| USP42        | 2.51358   |
| PRPF3        | 9.70886   |
| PPP2R3C      | 18.6211   |
| BRCA2        | 0.0913499 |
| ERCC8        | 3.8373    |
| CHTF18       | 12.7716   |
| SPIN1        | 8.80784   |
| TMEM127      | 10.1446   |
| ZNF746       | 12.6699   |
| CCDC28A      | 18.2644   |
| NOSIP        | 82.7      |
| IRAK1        | 148.834   |
| FAM217B      | 1.79669   |
| KCTD3        | 4.89667   |
| DYNLL2       | 20.8031   |
| NUS1         | 11.2028   |
| TRIM35       | 5.521     |
| KIAA1211L    | 0.23929   |
| HOMER3       | 97.5098   |
| PFN2         | 44.2484   |
| LRRC16B      | 0.312515  |
| LOC152217    | 25.4542   |
| YAF2         | 2.5897    |
| MTMR14       | 22.0396   |
| ABCC1        | 10.5044   |
| RNASE7       | 0.066495  |
| VWCE         | 0.326352  |
| AP1M1        | 17.9852   |
| FAM117B      | 1.29248   |
| ADAR         | 20.4201   |
| TWF1         | 26.8563   |
| SNX8         | 17.0792   |
| UBXN2A       | 4.5865    |
| BAIAP3       | 2.01096   |
| CMTM2        | 0.14266   |
| FAM182A      | 0.0383991 |
| ANKRA2       | 2.6228    |
| SF3B3        | 24.287    |
| ERCC6L2      | 0.366451  |
| SPATA2L      | 17.9679   |
| TBCD         | 11.296    |
| TIGD6        | 1.14718   |
| COPG2,TSGA13 | 15.6635   |
| MICALL1      | 24.2437   |
| MTERFD1      | 36.4705   |
| CEBPA        | 21.5616   |
| DCTN1        | 31.0236   |
| AP1G1        | 5.56351   |
| RAPGEF5      | 0.955583  |
| TJP1         | 5.38549   |
| ANGPTL4      | 113.315   |
| RPS2         | 12932.4   |
| GTF3C1       | 6.35683   |

|                           |           |
|---------------------------|-----------|
| MCCC1                     | 16.5951   |
| CEP290                    | 0.270028  |
| C5orf51                   | 4.7457    |
| LOC90784                  | 3.00277   |
| JDP2                      | 8.10145   |
| UBE2D2                    | 38.5144   |
| NUP214                    | 8.16173   |
| WASL                      | 9.73041   |
| SKA1                      | 9.15886   |
| CALM1                     | 34.5741   |
| C17orf96                  | 26.2355   |
| HOXA11                    | 5.34076   |
| PPIA                      | 670.502   |
| CP                        | 1.58936   |
| MTBP                      | 2.66013   |
| ZMYND12                   | 0.318951  |
| DNAJC9                    | 35.4902   |
| RABL3                     | 4.22086   |
| ZNF75A                    | 0.96209   |
| DNM1L                     | 11.9198   |
| LRRC71                    | 0.447334  |
| EFNA2                     | 4.70437   |
| B4GALT6                   | 3.59527   |
| FKBP4                     | 70.3619   |
| C9orf85                   | 9.30165   |
| PPP2R2A                   | 18.9043   |
| KLHL22                    | 7.84538   |
| MTMR6                     | 3.59815   |
| NAAA                      | 8.22868   |
| CMPK1                     | 26.3793   |
| PDCD10                    | 33.8543   |
| ABT1                      | 23.6619   |
| AKAP1                     | 13.4029   |
| SNTB2                     | 1.58805   |
| UBAP1L                    | 1.06936   |
| SNRPC                     | 113.646   |
| CLTA                      | 299.444   |
| SLC35E4                   | 10.5636   |
| POLR3G                    | 3.76286   |
| CHRNA3                    | 0.0639553 |
| ERAL1                     | 49.6955   |
| VPS13A                    | 1.26794   |
| SMC1A                     | 4.42537   |
| TEP1                      | 0.931922  |
| ANKDD1A                   | 1.16575   |
| TST                       | 84.5829   |
| PHLDB1                    | 3.121     |
| TMEM133                   | 0.415669  |
| RBPJ                      | 8.16373   |
| CCSER2                    | 1.66739   |
| SNRNP200                  | 26.8109   |
| BTA1                      | 3.55726   |
| MRPS33                    | 33.9216   |
| BAI2                      | 2.8958    |
| PRDM4                     | 10.2922   |
| USP16                     | 5.78251   |
| CDRT4,TVP23C,TVP23C-CDRT4 | 9.04137   |
| SFT2D3                    | 6.56864   |
| FAM208A                   | 4.72696   |
| TSPAN17                   | 25.471    |
| METTL23                   | 24.0683   |
| SAP30BP                   | 25.3429   |
| PEMT                      | 74.1411   |
| SLC22A5                   | 2.69047   |
| ZNF57                     | 2.66497   |
| GALE                      | 99.9849   |
| NEK2                      | 11.5878   |
| TIMP1                     | 497.132   |
| SETD1A                    | 7.98185   |
| ABCA10,ABCA5              | 0.456127  |
| CPNE3                     | 20.6007   |
| KIAA0100                  | 14.5516   |
| PLEKHH1                   | 1.76386   |
| STAM                      | 7.16556   |
| DOCK1                     | 5.63544   |
| SLC10A3                   | 29.0781   |
| DYNLT1                    | 85.9595   |
| ICAM3                     | 9.78494   |
| BEND7                     | 7.4112    |

|              |          |
|--------------|----------|
| METTL13      | 12.1277  |
| SLMO1        | 9.15759  |
| GCC2         | 0.648385 |
| CBWD1        | 9.3905   |
| DENND4A      | 1.29536  |
| ZNF100       | 1.41575  |
| PLD1         | 0.210128 |
| FPGS         | 131.633  |
| NLRX1        | 7.76478  |
| ABHD15       | 5.97226  |
| PPP2R5C      | 39.6953  |
| KRAS         | 4.85931  |
| NCOA5        | 10.6889  |
| SERINC5      | 1.89091  |
| SLC39A13     | 35.1499  |
| TULP4        | 1.57677  |
| IGF2BP2      | 33.2353  |
| BCL7A        | 8.84549  |
| STARD7       | 36.9685  |
| SLC30A6      | 3.77076  |
| PEX12        | 1.21686  |
| ARF4         | 72.2671  |
| CCDC88B      | 5.30405  |
| MAP6D1       | 6.42416  |
| UBFD1        | 7.93683  |
| NAB1         | 4.40104  |
| KCTD19       | 0        |
| CSNK1E       | 70.7214  |
| NPHP1        | 0.952387 |
| LOC100272228 | 0.135427 |
| MBLAC1       | 3.09214  |
| KPNA3        | 6.84807  |
| SART3        | 11.2381  |
| VBP1         | 28.9504  |
| ZBTB14       | 1.56024  |
| MRPS18A      | 78.3406  |
| AGPAT9       | 4.86071  |
| FBXO48       | 0.177768 |
| RPP25        | 68.045   |
| TDP1         | 8.60607  |
| DISP1        | 0.28444  |
| MERTK        | 1.05011  |
| SIPA1L1      | 5.1568   |
| NEIL2        | 23.1607  |
| MIP          | 0        |
| MYL12A       | 411.588  |
| STK35        | 6.72098  |
| ACSL4        | 9.78368  |
| ZNF277       | 13.0897  |
| FAM72D       | 1.82326  |
| N6AMT1       | 3.59883  |
| FAM84A       | 0        |
| UBL3         | 4.34189  |
| CERK         | 11.3382  |
| CWC27        | 8.96444  |
| C6orf226     | 11.4491  |
| UFC1         | 104.469  |
| SUOX         | 4.39427  |
| PRPF6        | 32.4814  |
| TAF5L        | 6.49982  |
| FBXO41       | 6.06088  |
| IPO13        | 6.01476  |
| STRIP1       | 6.53008  |
| ERCC1        | 258.547  |
| ASGR1        | 15.5157  |
| PIM3         | 53.9144  |
| MBTD1        | 2.71632  |
| TRIP13       | 8.21979  |
| RBM12B-AS1   | 1.09632  |
| RPL19        | 6490.81  |
| PCSK4        | 0.589509 |
| HLA-B        | 437.936  |
| ACTR2        | 36.4305  |
| DPM2         | 148.652  |
| VAPB         | 6.81224  |
| SFR1         | 5.23292  |
| TGFBRAP1     | 1.41371  |
| PITRM1       | 23.0169  |
| PIP4K2A      | 7.85219  |



|             |           |
|-------------|-----------|
| USP54       | 1.03807   |
| FAM129B     | 95.8862   |
| C20orf27    | 137.637   |
| USP5        | 29.4216   |
| KPNA5       | 0.686868  |
| C15orf57    | 21.0954   |
| TERF2IP     | 24.5307   |
| C1orf122    | 71.6157   |
| KLHL26      | 5.25206   |
| ASPSR1      | 24.4755   |
| APH1A       | 112.522   |
| COG6        | 3.24717   |
| GGPS1       | 9.67026   |
| OTUD4       | 3.8317    |
| AMZ2        | 46.981    |
| DPP7        | 349.367   |
| NOL11       | 17.7046   |
| HIATL1      | 18.2214   |
| ARL16       | 25.6881   |
| CTR9        | 8.54177   |
| EAPP        | 22.6322   |
| MAFG        | 11.7034   |
| MBD2        | 11.2692   |
| ATP7A       | 0.486317  |
| FTSJ3       | 14.4954   |
| DNAH10      | 0.0903794 |
| TNNI3       | 10.2714   |
| UBE3C       | 18.4286   |
| KCNJ13      | 0.0221986 |
| TRAPPC2     | 11.6099   |
| TJP2        | 3.79716   |
| SLC20A1     | 8.00599   |
| LPHN1       | 12.9662   |
| IAH1        | 47.8828   |
| FRMD4A      | 12.9178   |
| SMIM8       | 2.17275   |
| C1orf170    | 1.02376   |
| NSUN4       | 7.54757   |
| ISOC2       | 91.2213   |
| FOCAD       | 2.0542    |
| TRIP12      | 9.67184   |
| SLC18B1     | 9.03903   |
| TTC7A       | 2.90722   |
| MACROD1     | 107.158   |
| SNAP29      | 6.81385   |
| ERI3        | 52.4414   |
| PEPD        | 41.6743   |
| RNF152      | 0.852727  |
| DISC1,TSNAX | 10.3234   |
| STAG3L2     | 1.71263   |
| IARS2       | 28.0971   |
| SLC22A18    | 14.9632   |
| ATP6AP2     | 34.5228   |
| KDM6A       | 2.20664   |
| DERA        | 13.8045   |
| RPS7        | 5001.45   |
| TMCO1       | 13.4377   |
| NAGK        | 14.8519   |
| OGDH        | 6.4122    |
| PDX1        | 2.39948   |
| RNF41       | 12.6639   |
| ARMC10      | 38.0089   |
| LOC646626   | 2.48829   |
| TCF12       | 9.01018   |
| TMEM179B    | 64.4962   |
| CYTH2       | 19.2049   |
| ZNF444      | 27.2086   |
| ILKAP       | 35.5023   |
| TSSC1       | 17.2375   |
| GARNL3      | 1.45148   |
| ARID3A      | 6.60231   |
| CIDECP      | 5.87371   |
| TFPT        | 11.4228   |
| FLVCR1-AS1  | 2.35902   |
| CAPS        | 1.84754   |
| NDUFV1      | 177.245   |
| FBXO34      | 4.827     |
| ZDHHC23     | 3.69203   |
| REXO2       | 83.3153   |

|             |            |
|-------------|------------|
| FAM111A     | 4.67078    |
| SUCLG2      | 24.549     |
| DDB1        | 64.1936    |
| NRDE2       | 1.70332    |
| HAUS6       | 4.9301     |
| MGA         | 1.3432     |
| CRNKL1      | 4.88751    |
| USP22       | 36.7358    |
| NSMCE1      | 81.674     |
| AFG3L1P     | 3.43677    |
| PUS3        | 10.026     |
| MRFS26      | 137.26     |
| TAF4        | 4.6228     |
| DYSF        | 0.152545   |
| PWWP2B      | 30.0114    |
| LACC1       | 1.05741    |
| PRDX3       | 91.1699    |
| LOC730183   | 2.97141    |
| MFSD5       | 22.9369    |
| POLR3F      | 4.89227    |
| CSDA        | 145.296    |
| SAMD4B      | 10.5873    |
| GOLGA1      | 4.72066    |
| CORO1B      | 139.831    |
| GOLGA8B     | 3.56129    |
| RAD18       | 3.41453    |
| VASH1       | 2.49913    |
| NFATC1      | 2.82528    |
| CHMP4A      | 38.5258    |
| PSMB2       | 31.6142    |
| SMCR7L      | 9.69782    |
| SKA3        | 12.54      |
| SYAP1       | 23.2192    |
| NEK3        | 7.73026    |
| ITCH        | 4.66395    |
| COPB1       | 22.9137    |
| COA4        | 115.602    |
| PSMC2       | 32.2836    |
| UBE2A       | 29.6888    |
| CHMP6       | 12.5662    |
| C14orf80    | 17.4632    |
| PPCS        | 41.5908    |
| MARCH5      | 10.7139    |
| ARIH1       | 9.46277    |
| MIDN        | 10.5305    |
| SATB1       | 3.65939    |
| STXBP5      | 0.530434   |
| PRSS53      | 3.78593    |
| SNORA48     | 9.30144    |
| OAF         | 50.3591    |
| SLC15A4     | 9.46769    |
| ANXA7       | 25.9396    |
| RNF144A-AS1 | 0.0186356  |
| FDX1        | 8.10833    |
| AURKA       | 28.3038    |
| TRIM32      | 8.81805    |
| EML6        | 0.439061   |
| ECT2        | 11.2912    |
| MCM5        | 32.3034    |
| DHX30       | 36.5186    |
| SDC1        | 24.2784    |
| SMUG1       | 38.4113    |
| FAM221A     | 7.06823    |
| YY1         | 18.121     |
| FAM192A     | 17.0389    |
| PRUNE       | 5.58279    |
| UBE2R2      | 16.1901    |
| KIAA1024    | 0.246993   |
| CACNB4      | 0.514922   |
| SMARCE1     | 34.2552    |
| SMA4        | 0.530399   |
| ALDH1L2     | 0.00500077 |
| ZNF252P     | 4.16632    |
| ZNF513      | 10.6226    |
| SMARCAD1    | 2.58016    |
| GSG1L       | 0.021114   |
| GNPNAT1     | 21.1869    |
| INPP5K      | 15.2955    |
| AKT1S1      | 51.4915    |

|                            |           |
|----------------------------|-----------|
| SMU1                       | 9.96316   |
| DGCR5                      | 0.135615  |
| INPP1                      | 11.4231   |
| CATSPER2P1                 | 0.405107  |
| UBE2D3                     | 123.17    |
| MRPS31                     | 9.9477    |
| MFSD4                      | 0.0357638 |
| EIF3I                      | 246.323   |
| SCAF8                      | 6.74437   |
| RHOV                       | 4.73071   |
| BET1L                      | 22.0146   |
| RNF169                     | 1.22239   |
| SBNO1                      | 3.53886   |
| CCDC127                    | 13.6647   |
| CEP97                      | 0.478159  |
| PEA15                      | 117.344   |
| SREBF1                     | 21.9035   |
| MSANTD2                    | 1.66704   |
| NHP2L1                     | 152.956   |
| FAM101A,ZNF664,ZNF664-FAM1 | 18.7473   |
| SDE2                       | 4.81409   |
| FTH1                       | 609.113   |
| MST4                       | 11.1021   |
| KIAA1217                   | 2.07874   |
| KAT6B                      | 1.02184   |
| GPATCH2L                   | 1.45689   |
| FRAT2                      | 14.8913   |
| TBCK                       | 1.36196   |
| SNX14                      | 12.4991   |
| NUP37                      | 36.3791   |
| HSPE1,HSPE1-MOB4,MOB4      | 382.01    |
| PCNP                       | 42.5079   |
| RINL                       | 0.939945  |
| TALDO1                     | 145.78    |
| ZNF329                     | 2.92353   |
| DECR1                      | 124.921   |
| NOP10                      | 544.528   |
| ENTPD1                     | 1.16984   |
| ITSN1                      | 1.71504   |
| SC5DL                      | 2.51519   |
| GLYCTK                     | 9.17144   |
| LOC441454                  | 0.327277  |
| ZNF34                      | 1.41419   |
| NEU4                       | 0         |
| ITFG3                      | 24.7801   |
| MAPK12                     | 60.4446   |
| BSN                        | 0.0599768 |
| ACTR5                      | 5.23856   |
| ALDH4A1                    | 13.9981   |
| FBXO21                     | 4.35695   |
| PSD                        | 1.1037    |
| USP7                       | 16.522    |
| TMEM117                    | 0.782033  |
| TRIM37                     | 4.2762    |
| RANBP10                    | 5.37774   |
| AAK1                       | 0.987953  |
| BSCL2,HNRNPUL2             | 26.1419   |
| RPL5                       | 2495.5    |
| CPNE2                      | 28.7367   |
| SHOC2                      | 5.10595   |
| ARRDC2                     | 16.0583   |
| LRG1                       | 0         |
| EFNA1                      | 21.9377   |
| RNPEP                      | 34.769    |
| ZCCHC17                    | 13.4674   |
| DUSP2                      | 21.0678   |
| RPL35A                     | 4479.95   |
| DTWD1                      | 7.84454   |
| CLPTM1L                    | 46.6946   |
| SERPINB9                   | 13.8534   |
| LOC100134868               | 0.298888  |
| EMC8                       | 30.2498   |
| ARL1                       | 14.5025   |
| GRSF1                      | 26.0758   |
| NSUN6                      | 4.17723   |
| RAP1GDS1                   | 11.0473   |
| TPR                        | 3.2524    |
| WDR77                      | 17.2277   |
| ZDHHC3                     | 2.81573   |

|                         |          |
|-------------------------|----------|
| LOC643837               | 2.00385  |
| NAV2                    | 5.64909  |
| HSD11B1L                | 0.793444 |
| RTF1                    | 13.1741  |
| CUX2                    | 0        |
| AGAP6                   | 4.04402  |
| GIGYF1                  | 21.4602  |
| BTRC                    | 2.85194  |
| LOC100131067            | 1.39295  |
| RPL23                   | 5081.13  |
| GIGYF2                  | 5.70819  |
| TMEM164                 | 2.11374  |
| INPP4A                  | 2.32323  |
| ACRBP                   | 0.143908 |
| KRT86                   | 0.111824 |
| PHF16                   | 2.72454  |
| SPAST                   | 1.98728  |
| RNFT1                   | 7.54493  |
| KLHL20                  | 2.06828  |
| CTNNA1                  | 55.0844  |
| SCAMP1                  | 6.14229  |
| ELOVL1                  | 88.7776  |
| CCND2                   | 23.7136  |
| C1D                     | 21.181   |
| BCAT2                   | 93.7283  |
| TMEM101                 | 41.1286  |
| DFFB                    | 3.57996  |
| VWA5B2                  | 2.91153  |
| SNX13                   | 2.75654  |
| SRPRB                   | 23.0936  |
| FBRSL1                  | 20.8829  |
| B3GALNT2                | 6.44215  |
| ANO8                    | 2.10795  |
| PSMB5                   | 251.686  |
| ZNF35                   | 1.91985  |
| LNX2                    | 1.80858  |
| GRAMD4                  | 9.54073  |
| DDN                     | 5.25355  |
| SREK1                   | 3.23071  |
| SHROOM1                 | 8.92651  |
| OAT                     | 54.0901  |
| ZNF33A                  | 2.96621  |
| EMC1                    | 5.38528  |
| ELP2                    | 29.8769  |
| LOC254100               | 0.704252 |
| NPM3                    | 177.219  |
| ZNF791                  | 1.12685  |
| ZNF10                   | 2.04241  |
| C11orf91                | 1.93439  |
| PTGES3                  | 176.4    |
| FBXO31                  | 13.9964  |
| RPS6KA4                 | 38.1031  |
| RPF2                    | 52.2478  |
| C1orf198                | 8.6229   |
| TMBIM1                  | 68.2424  |
| ARHGAP1                 | 19.1453  |
| IL17RA                  | 3.70696  |
| NR6A1                   | 1.0101   |
| PPM1G                   | 120.219  |
| TIGD5                   | 30.492   |
| NDFIP1                  | 27.5222  |
| ATP13A1                 | 22.883   |
| LCOR                    | 1.35931  |
| KCTD2                   | 7.02584  |
| HERPUD2                 | 6.66243  |
| LOC100131096            | 0.977311 |
| LOC148413               | 9.37088  |
| C3orf35                 | 0.182919 |
| RWDD3,TMEM56,TMEM56-RWD | 11.4941  |
| RRM1                    | 27.9166  |
| PLEKHA8                 | 2.79086  |
| SMCR7                   | 20.0113  |
| RAP1A                   | 20.9499  |
| SPHK2                   | 9.96777  |
| LYRM4                   | 23.079   |
| VPS45                   | 6.17022  |
| GSK3A                   | 50.4643  |
| RBFOX2                  | 16.3905  |
| MKNK1                   | 8.41073  |

|                         |           |
|-------------------------|-----------|
| CDCA2                   | 1.98278   |
| YIPF6                   | 4.99692   |
| FOPNL                   | 14.2354   |
| HPRT1                   | 73.4529   |
| RPL4                    | 3436.28   |
| KIAA1841                | 0.275645  |
| GPFR                    | 0.119277  |
| LRRC59                  | 41.5153   |
| SLC12A8                 | 4.94778   |
| PPP1R8                  | 21.2145   |
| SOD1                    | 358.422   |
| PRDX6                   | 275.124   |
| RANBP6                  | 4.60851   |
| MRPL2                   | 42.8393   |
| AKAP2,PALM2,PALM2-AKAP2 | 6.42641   |
| BAIAP2L2                | 0.15376   |
| INPP5E                  | 20.6147   |
| KIF1B                   | 3.92212   |
| YBX2                    | 0.0444295 |
| CDC6                    | 6.94982   |
| SLC12A9                 | 24.6733   |
| POLRMT                  | 42.11     |
| RHNO1                   | 8.93284   |
| SLC37A3                 | 10.0752   |
| SLC20A2                 | 5.89233   |
| ZDHHC2                  | 7.4111    |
| TCEB3                   | 1.94695   |
| TBC1D16                 | 4.54452   |
| GGACT                   | 1.45009   |
| CS                      | 65.5149   |
| ICA1                    | 3.75063   |
| FAM111B                 | 0.553831  |
| LACTB                   | 7.16666   |
| PSMA2                   | 98.5745   |
| SON                     | 12.9853   |
| SOLH                    | 30.067    |
| PKDCC                   | 8.01301   |
| TSR3                    | 111.187   |
| SGSH                    | 16.7122   |
| PSMC1                   | 79.5519   |
| MRPS18B                 | 86.5158   |
| CBX7                    | 9.90373   |
| LRRC23                  | 6.43234   |
| FHOD1                   | 8.4241    |
| PDP2                    | 2.4914    |
| TSTD2                   | 5.47098   |
| RRNAD1                  | 14.6366   |
| PRKAB1                  | 9.02006   |
| UBE4A                   | 5.96388   |
| ANKRD40                 | 10.4733   |
| HSF2                    | 7.0213    |
| PPP2CA                  | 46.0296   |
| B3GNT5                  | 2.69651   |
| DECR2                   | 19.4771   |
| QTRT1                   | 51.6455   |
| RPS4X                   | 3508.51   |
| MAT2B                   | 19.8749   |
| EMC2                    | 37.2652   |
| CMTM8                   | 15.7091   |
| NDUFB10                 | 128.515   |
| BCORL1                  | 2.72912   |
| SLC27A2                 | 14.3142   |
| NGRN                    | 62.3698   |
| KLHL42                  | 3.38423   |
| HCN2                    | 0.032089  |
| BCAM                    | 30.8427   |
| NDUFA7                  | 177.249   |
| CEP95                   | 6.83589   |
| SBDSP1                  | 14.2656   |
| DCAF16                  | 9.65067   |
| FBRS                    | 24.6408   |
| UBA2                    | 22.2011   |
| ARHGAP22                | 31.8391   |
| ITPA                    | 86.3413   |
| SSSCA1                  | 75.3642   |
| STUB1                   | 59.2854   |
| LOC100133445            | 1.65435   |
| LOC202181               | 0.615087  |
| CTBP1                   | 42.2243   |

|              |           |
|--------------|-----------|
| BIN3         | 18.2534   |
| KDM1A        | 54.291    |
| BTK          | 0         |
| LINC00152    | 571.552   |
| CUL9         | 2.09396   |
| RPS3         | 3123.08   |
| EIF2A        | 22.6356   |
| CCDC149      | 1.57876   |
| FAM193A      | 4.74407   |
| LAT          | 0.832031  |
| ZNF502       | 1.38343   |
| ZSWIM5       | 0.18107   |
| TTC1         | 44.7356   |
| SCLT1        | 2.23157   |
| PROS1        | 11.1618   |
| PMM2         | 21.0222   |
| NUP43        | 10.9143   |
| SLC46A1      | 5.84876   |
| NDUFB8       | 270.675   |
| MFSD2A       | 11.4475   |
| ZNF286A      | 2.33164   |
| HNRNPK       | 194.685   |
| UBE2J1       | 10.6974   |
| FBXO5        | 8.13092   |
| NUFIP1       | 2.30629   |
| PPM1L        | 0.417982  |
| PPP1R3D      | 1.75981   |
| TLE3         | 8.41501   |
| PITX2        | 8.18428   |
| CMC1         | 48.0472   |
| CSRNP1       | 10.85     |
| LOC100130000 | 0.0717381 |
| MFN2         | 10.0929   |
| GAS5         | 1559.01   |
| ATP1B1       | 5.70881   |
| TRIP11       | 0.473403  |
| ZFP36L2      | 6.93253   |
| KDSR         | 20.7854   |
| OCEL1        | 25.3511   |
| LAMTOR2      | 95.2145   |
| PTDSS2       | 48.3829   |
| HMG1         | 216.114   |
| TTC3         | 2.72442   |
| BCL11B       | 0.14699   |
| BLOC1S2      | 15.2243   |
| SPTLC2       | 6.49647   |
| PYURF        | 67.5294   |
| SUZ12        | 10.4129   |
| LOC100130705 | 0.985107  |
| ZNRD1        | 102.953   |
| BYSL         | 44.0505   |
| MMEL1        | 2.87858   |
| E2F7         | 3.17658   |
| CYSTM1       | 94.4857   |
| IL37         | 0.107913  |
| TCERG1       | 9.61874   |
| SNF8         | 89.7343   |
| FAM177A1     | 4.93989   |
| PDHA1        | 28.708    |
| GRWD1        | 34.3843   |
| S1PR2        | 5.87502   |
| REPS1        | 17.2824   |
| SMARCC1      | 18.9643   |
| TBC1D2B      | 3.59345   |
| CD44         | 81.3557   |
| STAT6        | 33.3689   |
| SLC9A1       | 8.87977   |
| LOC255512    | 2.9209    |
| RNF170       | 6.14558   |
| PP7080       | 13.4289   |
| METTL21A     | 9.03631   |
| EPS15        | 6.09498   |
| NKD1         | 1.26257   |
| ZNF574       | 10.4206   |
| ZNF394       | 13.1791   |
| SMARCA5      | 9.15615   |
| SNX9         | 12.0168   |
| POLD3        | 1.4943    |
| E2F5         | 10.0634   |

|                |           |
|----------------|-----------|
| CHCHD2         | 821.281   |
| YTHDF1         | 18.5408   |
| ZNF512         | 4.46512   |
| EEF1B2         | 2322.1    |
| LRRC39         | 0.381945  |
| TMEM241        | 2.82353   |
| SDCCAG3        | 109.473   |
| RBM17          | 37.1641   |
| MED14          | 4.76429   |
| LOC100144603   | 1.81999   |
| SNHG15         | 155.295   |
| AK1            | 48.436    |
| CSGALNACT1     | 0.0916357 |
| R3HDM2         | 8.84859   |
| ZNF618         | 2.08994   |
| FKBP3          | 34.4564   |
| SLC13A3,TP53RK | 6.47879   |
| RPSA           | 4390.23   |
| FAM43A         | 2.68527   |
| NPR2           | 2.29557   |
| PAIP2          | 45.7398   |
| MSI1           | 18.9231   |
| TRAPPC11       | 5.29422   |
| PDPK1          | 2.62276   |
| DCP1B          | 10.6767   |
| NIT2           | 69.7045   |
| GAA            | 56.2666   |
| KIAA1967       | 38.0425   |
| SMIM15         | 14.0572   |
| TRIM11         | 22.584    |
| ACSS2          | 6.1428    |
| TM2D1          | 27.6342   |
| HM13           | 128.565   |
| ZNF404         | 1.79362   |
| GNB1           | 102.677   |
| ANKRD16        | 12.4163   |
| MGAT1          | 33.2993   |
| NCAPH          | 5.07006   |
| TTC38          | 16.8234   |
| UNKL           | 4.65267   |
| PORCN          | 16.161    |
| ACOT11         | 0.149703  |
| C1GALT1C1      | 8.00419   |
| FASTKD5,UBOX5  | 11.1974   |
| ENKD1          | 2.55233   |
| MRPL13         | 106.439   |
| NXT2           | 1.87866   |
| MAK16          | 8.83155   |
| LILRB3         | 0.0179189 |
| TSPYL2         | 10.8925   |
| AAR2           | 19.0528   |
| COX7A1         | 0         |
| PANK2          | 15.1534   |
| DYNC1I2        | 13.2876   |
| FTSJ1          | 32.1279   |
| RINT1          | 10.0874   |
| TFCP2          | 2.73859   |
| CDC5L          | 5.45268   |
| CANT1          | 23.8402   |
| MAP3K14-AS1    | 0.873312  |
| NQO1           | 19.6606   |
| AGGF1          | 4.04595   |
| MRPL39         | 47.56     |
| TMEM115        | 39.6259   |
| DDI2,RSC1A1    | 1.93135   |
| COL18A1        | 2.3915    |
| NCOA4          | 57.8572   |
| MPHOSPH9       | 1.42031   |
| ARL17A         | 0.311621  |
| GPN2           | 30.3329   |
| TBC1D22A       | 14.5845   |
| GLI4           | 30.9337   |
| PTGES2         | 181.886   |
| ATPAF1         | 26.2348   |
| GRPEL1         | 66.3324   |
| ANKFY1         | 3.79468   |
| S100A16        | 857.561   |
| SPRED3         | 1.79589   |
| PTGR1          | 75.4968   |

|                  |           |
|------------------|-----------|
| IFRD1            | 21.6251   |
| PDE4C            | 0.160705  |
| GJD3             | 3.08701   |
| TDRD3            | 5.30739   |
| MAFK             | 9.32698   |
| MFNG             | 0.0895539 |
| FKBP1A,SDCBP2    | 129.828   |
| RCBTB2           | 0.21024   |
| TIMM17A          | 40.5609   |
| PLAGL2           | 4.3037    |
| C8orf47          | 7.9627    |
| FNTA             | 69.2247   |
| TOMM5            | 116.481   |
| DPY19L1          | 2.90042   |
| C19orf12         | 4.69207   |
| BRF1             | 16.9831   |
| WDR37            | 5.03153   |
| ATE1             | 1.13535   |
| NUB1             | 19.4377   |
| MGRN1            | 17.6371   |
| C21orf15         | 0.436357  |
| ANKRD46          | 4.14032   |
| WDR82            | 15.8299   |
| INTS4            | 7.84388   |
| ANXA2P2          | 3.55159   |
| GAREM            | 0.452956  |
| RRP36            | 25.2189   |
| VPS37A           | 3.92827   |
| APEX1            | 219.674   |
| NMT1             | 20.7249   |
| STK10            | 7.52445   |
| TGFB1            | 101.817   |
| MRPL11           | 41.1315   |
| FUCA1            | 7.13695   |
| LZTR1            | 12.4238   |
| STRADA           | 13.3211   |
| LRFN4            | 48.0263   |
| VAMP4            | 2.90458   |
| SEC14L2          | 8.3457    |
| SRA1             | 33.4693   |
| GPS2             | 40.123    |
| PSTK             | 2.39551   |
| DHX15            | 36.6282   |
| MRPL12           | 158.601   |
| STXBP3           | 6.94796   |
| LOC100287042     | 0.193401  |
| TRIM14           | 11.5993   |
| DEPDC5           | 1.41475   |
| G6PD             | 22.8208   |
| ZFYVE27          | 15.1326   |
| BZW1             | 66.6635   |
| CAPZA1           | 77.0357   |
| KIF13A           | 1.52591   |
| ZNF619           | 0.514639  |
| SLC35D1          | 1.15745   |
| NDUFAF7          | 8.45198   |
| COX11            | 21.4038   |
| RSPH3            | 1.81748   |
| GYG1             | 35.6442   |
| MT1IP            | 0         |
| IRGQ             | 2.47581   |
| ENAH             | 4.00568   |
| CDC42BPB         | 10.3721   |
| AGTRAP           | 82.1961   |
| INVS             | 4.86657   |
| SYPL1            | 45.041    |
| CCDC132          | 2.50477   |
| TMC7             | 1.006     |
| PLEKHG5,TNFRSF25 | 15.632    |
| CLDN12           | 13.9357   |
| SEL1L3           | 9.87561   |
| GFER             | 35.2307   |
| PPP1R32          | 0.882958  |
| DHX16            | 18.7171   |
| MRPL34           | 88.8556   |
| SRP19            | 19.5578   |
| CD27-AS1         | 3.8133    |
| TM2D2            | 8.52219   |
| PITRM1-AS1       | 0.340822  |



|              |           |
|--------------|-----------|
| PAPSS1       | 14.4906   |
| LRRC29       | 1.47381   |
| CNOT6        | 5.22193   |
| METTL25      | 0.638698  |
| KANSL1       | 6.55513   |
| RAB4A,SPHAR  | 9.7238    |
| PITPNB       | 20.161    |
| HIGD1A       | 15.0661   |
| GPT2         | 23.5849   |
| UACA         | 0.775805  |
| HES6         | 158.268   |
| ACVR1C       | 0.0134086 |
| SRRT         | 45.2759   |
| WBSCR27      | 14.6371   |
| LOC100132832 | 0.623589  |
| SS18         | 14.4934   |
| PRDM16       | 1.5553    |
| CYP2E1       | 1.52558   |
| GAS2L3       | 0.358289  |
| KIAA1586     | 2.53112   |
| KNSTRN       | 26.1661   |
| LMBR1        | 8.41742   |
| RPA1         | 14.3002   |
| C11orf48     | 56.0361   |
| PTMS         | 218.721   |
| FAM84B       | 6.63014   |
| ZCCHC4       | 2.42403   |
| TRMT44       | 4.44526   |
| TRIM4        | 10.1603   |
| FADS3        | 78.8261   |
| BLOC1S4      | 25.988    |
| AP3B1        | 6.00008   |
| RQCD1        | 17.7724   |
| SUMF1        | 8.19581   |
| MCM3AP       | 8.21357   |
| SAP18        | 44.2464   |
| SMS          | 203.473   |
| EXD3         | 2.35062   |
| ANKRD52      | 5.38668   |
| SLIRP        | 346.023   |
| ADCY3        | 17.1997   |
| ATP1A1       | 78.4896   |
| TMEM242      | 3.35088   |
| FO XK2       | 20.9965   |
| TMEM18       | 17.5135   |
| CCDC82       | 2.0309    |
| TMEM14B      | 84.8262   |
| NCOA7        | 3.94911   |
| ZNF518A      | 1.01454   |
| GIPC1        | 150.313   |
| OTUD5        | 23.9904   |
| SAE1         | 67.1923   |
| GATA6        | 2.70403   |
| MX1          | 11.1286   |
| BAMBI        | 5.19792   |
| PSMD4        | 181.605   |
| VWA1         | 4.50973   |
| KIAA0513     | 0.653592  |
| ZNF268       | 1.69626   |
| CHD7         | 1.73578   |
| SUB1         | 28.9228   |
| RNF19B       | 12.9602   |
| ZNF273       | 1.07605   |
| PRDM2        | 2.39008   |
| IFNAR2       | 7.8827    |
| POLR3A       | 5.16901   |
| SMTN         | 86.9985   |
| KRR1         | 16.1258   |
| ACN9         | 11.7942   |
| KIAA0355     | 1.29155   |
| CD9          | 303.931   |
| PTPLA        | 4.79744   |
| OSR2         | 7.70618   |
| PKD1         | 4.32687   |
| SLC26A4      | 0.040732  |
| NHP2         | 240.332   |
| HIPK2        | 1.66531   |
| PMPCB        | 29.5539   |
| SAMM50       | 21.1968   |

|              |           |
|--------------|-----------|
| MMP11        | 7.26169   |
| DGUOK        | 66.4991   |
| UPF2         | 5.53543   |
| DIAPH2       | 4.78016   |
| LOX          | 1.00994   |
| CCDC73       | 4.74758   |
| FAM227B      | 0.615762  |
| ARL6IP1      | 72.7714   |
| IQCG         | 9.95909   |
| CDKN1A       | 80.7317   |
| GEMIN4       | 17.8195   |
| GPSM1        | 52.6048   |
| TPST1        | 2.48937   |
| NEK7         | 3.44159   |
| KATNA1       | 13.2032   |
| PAXBP1       | 11.2719   |
| CDC16        | 28.41     |
| SLC25A46     | 6.30576   |
| AHSA1        | 162.694   |
| POLG2        | 6.54722   |
| CACNG7       | 0.467941  |
| SMIM12       | 5.61204   |
| NPEPPS       | 15.9387   |
| HNRPLL       | 8.00206   |
| UHRF1BP1     | 3.56084   |
| ZFP30        | 1.06201   |
| DHX58        | 0.0456292 |
| ITGB1        | 347.596   |
| PYGO2        | 10.7662   |
| C17orf103    | 4.49997   |
| CCNH         | 30.5083   |
| ZNF644       | 6.74272   |
| FOSL1        | 423.866   |
| MGC27345     | 1.74856   |
| USO1         | 9.44957   |
| POMGNT1      | 29.5149   |
| ZNF575       | 0.779541  |
| NSUN5P2      | 7.22641   |
| FAM131B      | 4.99407   |
| PQLC3        | 8.44038   |
| TM7SF2,VPS51 | 69.2279   |
| SERBP1       | 40.2421   |
| ZNF593       | 166.533   |
| PDAP1        | 98.7726   |
| HSD11B2      | 8.45483   |
| POLDIP2      | 57.9241   |
| KIAA1279     | 6.5123    |
| PER3         | 0.241573  |
| RPS23        | 521.669   |
| MEAF6        | 11.3204   |
| WBSR16       | 33.4518   |
| SLC25A5      | 557.317   |
| MSRB3        | 0.414235  |
| C19orf43     | 289.059   |
| INTS7        | 3.94331   |
| PIP4K2C      | 10.1752   |
| PRR22        | 9.98689   |
| GINS3        | 5.20492   |
| LRRC8A       | 12.5959   |
| POLR2D       | 11.5672   |
| MMP24        | 4.61729   |
| ZFYVE26      | 1.57904   |
| HNRNPD       | 124.666   |
| TTC9B        | 1.42361   |
| RANGAP1      | 110.568   |
| AIDA         | 20.5421   |
| DOHH         | 18.9368   |
| TAF1D        | 39.0668   |
| IL13RA1      | 7.05523   |
| ZSWIM8       | 4.84905   |
| C2orf42      | 2.72141   |
| PPP4R2       | 3.9266    |
| PPT1         | 43.9719   |
| WDR11        | 3.87086   |
| USP3         | 9.58825   |
| ARHGAP27     | 4.76111   |
| NAGS         | 6.61006   |
| PPWD1        | 9.56323   |
| ZNF19        | 1.08061   |

|                             |           |
|-----------------------------|-----------|
| SPATS2L                     | 8.7618    |
| C11orf58                    | 27.0564   |
| CCDC71                      | 14.3668   |
| GOLGA6L9                    | 0.21592   |
| FBXO3                       | 7.36076   |
| NYAP1                       | 2.28663   |
| STK3                        | 6.05538   |
| LINC00667                   | 3.28864   |
| ALMS1P                      | 0.0522513 |
| AKD1                        | 0.603879  |
| DNAJB6                      | 73.0181   |
| SIN3B                       | 9.35548   |
| CENPL                       | 4.53757   |
| G3BP2                       | 14.3943   |
| TMEM189, TMEM189-UBE2V1, UE | 86.7324   |
| UCK1                        | 47.1703   |
| GPR19                       | 0.217705  |
| FILIP1L                     | 3.50538   |
| MRPL32                      | 69.9524   |
| ZFAND1                      | 50.2738   |
| RIC8A                       | 74.3978   |
| ROGDI                       | 8.45421   |
| B3GALNT1                    | 6.8476    |
| TERF1                       | 12.6648   |
| GRHPR                       | 127.205   |
| TM9SF2                      | 15.2265   |
| NAV1                        | 1.37438   |
| CERS6-AS1                   | 5.64837   |
| HDLBP                       | 32.0342   |
| TMPO                        | 25.1791   |
| HECTD3                      | 10.3349   |
| AZIN1                       | 31.9466   |
| CD46                        | 8.16893   |
| MANEA                       | 1.30479   |
| ERI1                        | 6.36955   |
| ZFYVE9                      | 2.67471   |
| NAIP                        | 0.509145  |
| NT5C3B                      | 61.1961   |
| SLC25A32                    | 18.2394   |
| ANP32A                      | 48.1433   |
| WRNIP1                      | 38.1482   |
| ANXA4                       | 21.195    |
| TMEM161B                    | 4.70992   |
| MRRF                        | 49.3094   |
| AP5Z1                       | 11.3353   |
| ZNF486                      | 1.89247   |
| ADCY9                       | 1.37846   |
| LOC100630918                | 1.81789   |
| WDR70                       | 10.3329   |
| ZNF443                      | 1.60808   |
| TEX22                       | 0.344578  |
| CDK5RAP3                    | 29.4105   |
| NSMAF                       | 19.3561   |
| ZNF416                      | 3.5583    |
| TFDP2                       | 3.27882   |
| PRPS1                       | 26.2609   |
| RNF115                      | 8.30769   |
| MCF2L2                      | 0.132729  |
| ACP5                        | 0.162307  |
| FH                          | 51.4926   |
| LINC00339                   | 11.0595   |
| STIP1                       | 143.501   |
| FAM189B                     | 62.4593   |
| RAB7L1                      | 8.55881   |
| GUSBP4                      | 0.909906  |
| H6PD                        | 3.28329   |
| HARBI1                      | 1.69455   |
| TIMM22                      | 24.0823   |
| ERP29                       | 111.821   |
| LARP4B                      | 10.1972   |
| EVA1C                       | 9.18577   |
| SUCLA2                      | 7.29542   |
| LOC92249                    | 5.01995   |
| WDR13                       | 36.5334   |
| SLC35C2                     | 32.102    |
| PRAME                       | 13.8994   |
| SHF                         | 5.46973   |
| CEP104                      | 3.23903   |
| LTA4H                       | 94.2678   |

|              |          |
|--------------|----------|
| CLASP2       | 2.50261  |
| SEPSECS      | 0.971447 |
| PET112       | 14.4667  |
| SENP5        | 4.32053  |
| CAND1        | 16.4611  |
| RANBP1       | 148.288  |
| C12orf10     | 48.6943  |
| AQR          | 4.79576  |
| CLP1         | 11.2771  |
| GOLT1B       | 8.98433  |
| TRIM41       | 9.78877  |
| SMIM13       | 2.82429  |
| CDX2         | 12.286   |
| CHUK         | 3.32446  |
| PRR14L       | 1.77342  |
| FLNA         | 103.59   |
| EIF3G        | 352.2    |
| TAK2         | 11.2839  |
| ZNF555       | 0.489287 |
| ZBTB7A       | 8.7892   |
| PTPN7        | 28.8741  |
| LOC100507564 | 0.232301 |
| TIMM21       | 16.2133  |
| ZSCAN22      | 1.43796  |
| KTN1         | 10.1556  |
| CALM2        | 288.234  |
| ZMIZ2        | 12.5109  |
| EFHA1        | 12.3592  |
| TFE3         | 30.619   |
| ZBTB45       | 12.7433  |
| GEMIN8       | 8.72053  |
| FANCD2       | 2.82896  |
| ZNF767       | 2.82744  |
| SF1          | 85.1263  |
| TCEAL4       | 48.4519  |
| TERF2        | 11.9428  |
| TACC2        | 8.91027  |
| EEF1D        | 1489.08  |
| TBC1D8       | 1.80021  |
| HSPA12A      | 1.46087  |
| KANSL2       | 11.1832  |
| ENOX2        | 1.5331   |
| SYNGAP1      | 2.6704   |
| GRAMD1A      | 90.291   |
| RPL12        | 10920.1  |
| CAMLG        | 61.8599  |
| DGKH         | 0.402395 |
| ASCC3        | 3.35477  |
| ZBTB33       | 4.51436  |
| ERICH1       | 9.33384  |
| BCL9L        | 5.93086  |
| NAA30        | 3.88295  |
| PNPLA2       | 67.2834  |
| AFG3L2       | 35.9473  |
| LOC282997    | 2.30118  |
| B3GALT6      | 15.2529  |
| EXOSC6       | 27.5482  |
| FBXO36       | 0.567289 |
| IDH3B        | 47.8253  |
| CETN3        | 20.2276  |
| ACAT1        | 52.4054  |
| PSMC5        | 94.2979  |
| HMMR         | 2.10497  |
| TRAPP13      | 5.5003   |
| FKBP11       | 167.861  |
| PIGF         | 22.015   |
| MAP3K12      | 7.23555  |
| SYNE4        | 0.127828 |
| SMPD4        | 20.6578  |
| DHODH        | 6.78063  |
| LOC100127983 | 0.089452 |
| OBSL1        | 12.4611  |
| LRP8         | 3.03425  |
| ZFX          | 1.97837  |
| ITGA9        | 0        |
| YRDC         | 27.539   |
| H2AFY        | 73.3137  |
| YIPF5        | 7.83792  |
| PRKAR1B      | 22.1072  |

|              |          |
|--------------|----------|
| APBA3        | 13.0714  |
| ATP5G1       | 169.44   |
| FBXO2        | 2.55956  |
| ARL2BP       | 32.3473  |
| SPC25        | 13.9453  |
| TRAPPC3      | 67.5867  |
| LOC100506710 | 7.1225   |
| RAB7A        | 107.353  |
| CC2D2A       | 4.16063  |
| CSNK1D       | 42.7515  |
| DNPH1        | 200.538  |
| RAB3IP       | 3.26118  |
| TMEM185B     | 12.029   |
| HIF1A        | 1.76131  |
| WNK4         | 1.25646  |
| HEATR1       | 6.72691  |
| UBAP2L       | 23.638   |
| DDX21        | 27.5263  |
| BRD1         | 5.69779  |
| FAM108B1     | 4.56314  |
| VPS25        | 78.8575  |
| YWHAH        | 66.2176  |
| ATAD3C       | 0.205455 |
| NAA10        | 146.841  |
| MRTO4        | 47.8395  |
| SMAD5        | 4.24546  |
| LRRFIP1      | 12.5726  |
| DNAJC8       | 84.2291  |
| FBXO22-AS1   | 57.0173  |
| KRBOX4       | 4.61598  |
| PDCL         | 4.15729  |
| INTU         | 0.60115  |
| SLC35F2      | 23.225   |
| RPL7         | 7522.96  |
| PLD6         | 14.3942  |
| STAMPB       | 6.12671  |
| UTP18        | 41.9664  |
| DCAKD        | 18.727   |
| POLQ         | 0.554449 |
| DUSP11       | 17.8928  |
| GAS5-AS1     | 0.902488 |
| KLHL17       | 15.8017  |
| MORC2        | 4.67148  |
| ZNF333       | 1.06115  |
| OGFR         | 39.3854  |
| RMI1         | 2.15036  |
| ASTE1        | 2.06566  |
| KHDRBS1      | 100.012  |
| ATOX1        | 125.601  |
| ZNF24        | 5.93493  |
| MT1E         | 1831.2   |
| ATAD2B       | 0.409543 |
| BPNT1        | 10.8602  |
| IMMP1L       | 5.28497  |
| CLPX         | 10.8532  |
| ELOF1        | 112.739  |
| ZNF681       | 0.457198 |
| PRMT1        | 306.835  |
| AZI1         | 10.162   |
| ZBTB9        | 6.40997  |
| NFKB2        | 48.0161  |
| SSBP4        | 64.905   |
| PAIP1        | 36.2     |
| NACA         | 1289.52  |
| MED23        | 1.88047  |
| EBAG9        | 17.7535  |
| INTS8        | 15.1668  |
| MTRNR2L3     | 0.089284 |
| DOLK         | 18.2463  |
| ERCC6L       | 1.90722  |
| MFAP3        | 2.97568  |
| ARL14EP      | 5.796    |
| MEN1         | 33.6543  |
| NPTN         | 21.8357  |
| USP11        | 11.5115  |
| FAM161A      | 1.03421  |
| DYRK4        | 12.2746  |
| ATAD2        | 10.9357  |
| PSMA4        | 103.028  |

|                     |           |
|---------------------|-----------|
| PRRT3               | 1.19453   |
| MIB1                | 2.28821   |
| BCAP31              | 247.254   |
| AMD1                | 20.5909   |
| GPAA1               | 129.702   |
| ARSB                | 0.708654  |
| PARG                | 4.14753   |
| ANKRD54             | 13.8989   |
| NPLOC4              | 20.8      |
| CPPED1              | 1.32266   |
| OXCT1               | 20.2607   |
| WDR85               | 39.1572   |
| CYP2U1              | 1.96004   |
| SPTBN2              | 13.1678   |
| SHANK2              | 0.669877  |
| NAPB                | 1.92534   |
| MCM6                | 14.2194   |
| TMCO6               | 10.5832   |
| SLK                 | 3.96885   |
| LOC440354,LOC595101 | 2.0024    |
| FARS2               | 7.6732    |
| TRAPPC8             | 2.09016   |
| TM9SF3              | 25.7519   |
| LBR                 | 11.7843   |
| LTBP3               | 8.66334   |
| SLC39A6             | 21.362    |
| DEF6                | 21.9851   |
| GLOD4               | 35.5007   |
| DCXR                | 255.78    |
| GON4L               | 1.94461   |
| PHF20L1             | 3.3828    |
| PGAM5               | 44.4294   |
| CPSF2               | 6.69096   |
| CAPN8               | 0.0247813 |
| SGTB                | 2.87727   |
| FBXO22              | 7.3274    |
| PHB                 | 167.956   |
| SURF6               | 63.9437   |
| PTDSS1              | 101.462   |
| PDLIM5              | 3.14879   |
| ZNF233              | 0.327517  |
| SPATA5              | 0.746747  |
| NELFE               | 83.8237   |
| IQCH                | 1.00192   |
| ADPRM               | 7.90025   |
| ZNF234              | 1.13171   |
| TEX261              | 28.2475   |
| TTC8                | 5.38266   |
| ZSCAN21             | 1.25086   |
| CUEDC2              | 94.4006   |
| TTPA                | 0.36407   |
| RBM10               | 40.2182   |
| YLPM1               | 2.99998   |
| GAL                 | 145.452   |
| SKP1                | 109.273   |
| SOX13               | 4.01007   |
| FAM160B2            | 18.8878   |
| GRPEL2              | 11.0343   |
| CSNK1G3             | 6.31079   |
| INTS5               | 12.707    |
| CNNM1               | 0         |
| RCC1                | 112.862   |
| LUZP1               | 3.44043   |
| ABHD11              | 15.8092   |
| DDA1                | 11.6706   |
| PARP1               | 24.9109   |
| YDJC                | 131.83    |
| BECN1               | 20.7767   |
| COPZ1               | 100.835   |
| LOC401397           | 82.6971   |
| FAM204A             | 11.3938   |
| NEURL1B             | 0.379224  |
| HIST1H4J            | 1.43555   |
| CUL2                | 8.33519   |
| MRPS35              | 37.5779   |
| SPRED1              | 3.81865   |
| MOSPD1              | 3.49958   |
| XPO5                | 19.3888   |
| ISG15               | 120.69    |

|           |            |
|-----------|------------|
| SUMO1     | 65.5804    |
| CSAD      | 2.06453    |
| SH3RF1    | 2.22446    |
| MAP4K5    | 8.37872    |
| RAB11FIP1 | 3.94434    |
| PTPN14    | 1.8426     |
| AHCYL1    | 23.8358    |
| EP300     | 1.19297    |
| SLCO1B3   | 9.48655    |
| TTC39A    | 5.37575    |
| NUFIP2    | 4.9551     |
| ANAPC5    | 46.3855    |
| ASB1      | 32.8447    |
| SNORA53   | 1.84629    |
| ECD       | 12.9182    |
| ACAP3     | 6.08165    |
| SNX4      | 4.97873    |
| RCN3      | 2.87287    |
| RHEBL1    | 10.9626    |
| RASGRP2   | 0.831608   |
| NPDC1     | 280.211    |
| DGCR14    | 4.73977    |
| MLH3      | 1.35975    |
| ZNF343    | 3.2288     |
| NLN       | 3.22161    |
| MCIN      | 1.96067    |
| TMEM106B  | 3.43853    |
| ZNF85     | 1.33305    |
| SFXN5     | 0.63494    |
| ANXA5     | 266.834    |
| ZNF146    | 15.8471    |
| THBS4     | 0.238536   |
| TMEM237   | 3.68971    |
| PLEKHB2   | 38.3995    |
| BLZF1     | 1.1262     |
| ZNF711    | 0.874533   |
| SLU7      | 9.30155    |
| STOX1     | 3.20784    |
| ZNF33B    | 3.0542     |
| TSIX      | 0.00954083 |
| ALKBH1    | 4.88876    |
| DZIP1L    | 2.24485    |
| C21orf59  | 35.2915    |
| PRKAA1    | 5.53224    |
| TXN       | 875.685    |
| TBC1D23   | 9.95961    |
| ZBTB39    | 1.67998    |
| GSPT1     | 22.4227    |
| EXOSC3    | 20.9693    |
| METTL1    | 8.64688    |
| ZNF491    | 0.287886   |
| NOMO2     | 0.787947   |
| IST1      | 24.3158    |
| CXCL3     | 0.41027    |
| SLC16A5   | 6.56527    |
| PLAUR     | 113.405    |
| LOC401320 | 0.655478   |
| TTF1      | 8.08374    |
| SNHG16    | 141.942    |
| FAM175B   | 4.81355    |
| LTV1      | 14.9695    |
| MGAT2     | 17.0984    |
| EXOG      | 3.56278    |
| ABLIM3    | 0.0218259  |
| SLC12A2   | 1.75121    |
| LOC493754 | 4.23099    |
| CCS       | 36.3675    |
| BRCC3     | 3.03547    |
| NUDT16    | 6.78218    |
| KDM4A     | 7.22343    |
| REPIN1    | 110.505    |
| ZNF697    | 1.88236    |
| HSPBP1    | 42.3314    |
| CHMP1B    | 17.7331    |
| HSCB      | 25.0708    |
| RUFY1     | 12.2729    |
| GNB2L1    | 3600.05    |
| CHAC1     | 38.3496    |
| CCDC88A   | 0.86386    |

|               |           |
|---------------|-----------|
| ZNF44         | 1.9646    |
| MNS1          | 0.335303  |
| ZNF107        | 0.61614   |
| CCDC104       | 50.959    |
| NLGN3         | 0.811865  |
| VAPA          | 16.2183   |
| SIAH1         | 12.0137   |
| PEX3          | 7.61809   |
| ZNF709        | 0.950278  |
| SRRM3         | 13.511    |
| PLEKHA3       | 6.17525   |
| AIMP1         | 21.7564   |
| TRIM47        | 14.894    |
| TGM1          | 0.248552  |
| ADSS          | 10.8028   |
| LRIG3         | 0.755631  |
| DAGLB         | 20.2806   |
| PALD1         | 10.1249   |
| DNAJC12       | 36.6884   |
| PARVB         | 38.7465   |
| TMEM187       | 8.40844   |
| TAMM41        | 7.16467   |
| GSTCD         | 1.85099   |
| PHLDB2,PLCXD2 | 0.402381  |
| LMNB2         | 43.4975   |
| LINC00662     | 0.700859  |
| UFM1          | 14.7866   |
| NXF1          | 26.0861   |
| OPA1          | 9.06817   |
| GALNT11       | 13.2727   |
| NDUFAB1       | 185.4     |
| TMEM66        | 53.0535   |
| LIX1L         | 8.6004    |
| FAM225A       | 0.920979  |
| STIM2         | 0.87564   |
| MCFD2         | 22.7351   |
| DNASE1L2      | 2.25552   |
| XRCC2         | 0.84202   |
| A1CF          | 0.0163521 |
| SOCS2-AS1     | 0.805789  |
| TRMT2B        | 3.24282   |
| MRPS27        | 41.4996   |
| USP12         | 6.77489   |
| RAB10         | 28.1131   |
| PHF11         | 10.1751   |
| ESCO2         | 2.36502   |
| ALMS1         | 0.575288  |
| GBA           | 14.1601   |
| RAD50         | 2.75207   |
| ALDH9A1       | 35.8354   |
| LOC389641     | 5.51539   |
| XRCC4         | 6.55152   |
| ZNF16         | 13.2094   |
| C2CD4C        | 9.336     |
| SNORA10       | 48.2333   |
| CIAO1         | 20.9409   |
| NEURL4        | 3.35188   |
| TMEM178B      | 0         |
| RTCA          | 17.6531   |
| ANKRD11       | 14.9013   |
| GMEB1         | 2.32433   |
| DSCC1         | 5.44356   |
| TIMM50        | 57.3697   |
| GTPBP10       | 3.9853    |
| TDRKH         | 2.2218    |
| SLC35C1       | 10.1907   |
| CKAP4         | 21.8405   |
| COPA          | 21.7265   |
| BAZ2B         | 0.832549  |
| CTPS2         | 3.96824   |
| ZCCHC11       | 1.85828   |
| MRPS18C       | 18.383    |
| WNK1          | 3.60072   |
| ERGIC2        | 16.351    |
| TBK1          | 7.04657   |
| BAX           | 193.467   |
| ACTR10        | 14.3684   |
| GPC2          | 1.72788   |
| ALS2          | 3.81113   |



|           |           |
|-----------|-----------|
| S100A13   | 480.711   |
| SPDYE3    | 0.274411  |
| PHKA1     | 5.66587   |
| ABCC4     | 3.77971   |
| DZIP3     | 0.983469  |
| ESD       | 64.666    |
| VGf       | 27.0091   |
| CCDC64    | 1.6262    |
| MICAL1    | 18.1233   |
| GTF2F1    | 63.7537   |
| C12orf29  | 4.82466   |
| DOCK5     | 0.660682  |
| POFUT1    | 7.44269   |
| RPLP0     | 7733.93   |
| PSENNEN   | 89.4447   |
| UROD      | 148.959   |
| LENG8     | 9.00218   |
| STOML2    | 321.467   |
| C2CD2L    | 7.71535   |
| YARS2     | 37.1651   |
| FAM161B   | 0.352858  |
| LOC116437 | 0         |
| ZNF598    | 47.2607   |
| RBM19     | 13.7107   |
| ASB7      | 2.30198   |
| ITPKB     | 2.08035   |
| TRUB1     | 4.27129   |
| TIA1      | 6.67464   |
| HDAC7     | 18.7806   |
| IRF2BP1   | 8.67936   |
| POLI      | 2.9439    |
| KCTD17    | 22.0695   |
| SLC9A7    | 4.9101    |
| YTHDF3    | 8.13802   |
| C11orf96  | 0         |
| FRG1      | 32.9166   |
| ALG2      | 17.1059   |
| RCOR1     | 5.68456   |
| GATAD1    | 16.1608   |
| PARK7     | 326.198   |
| GLUD1     | 39.1581   |
| LRRC49    | 1.39018   |
| THUMP2    | 8.59829   |
| CALCOCO2  | 14.3487   |
| NLK       | 3.1565    |
| SHISA9    | 0.810245  |
| CEP68     | 2.43451   |
| MAP3K5    | 0.674464  |
| SEC23B    | 11.6303   |
| CCT7      | 346.072   |
| MRPL20    | 162.355   |
| ZFAND3    | 24.7372   |
| ATP5C1    | 247.816   |
| ADM5      | 1.73786   |
| OBFC1     | 2.35776   |
| ZW10      | 4.70597   |
| ST13      | 95.3951   |
| TBX6      | 1.09215   |
| PAAF1     | 16.0638   |
| PPP3R1    | 13.3815   |
| LSM5      | 22.1503   |
| CA5BP1    | 13.5651   |
| NEIL1     | 9.65587   |
| MED29     | 9.51746   |
| TRANK1    | 0.0419303 |
| TRIM36    | 2.38187   |
| USP33     | 7.14954   |
| NDUFS2    | 55.4707   |
| SGK1      | 1.30607   |
| COG5      | 12.7065   |
| PGAP2     | 21.8365   |
| LOC254128 | 1.94878   |
| WDFY1     | 4.39592   |
| SIK3      | 3.41965   |
| PARP14    | 2.75011   |
| CPNE7     | 38.682    |
| PAPLN     | 0.0731876 |
| FKBP15    | 29.9663   |
| VIPR1     | 0.711623  |

|                           |           |
|---------------------------|-----------|
| TMEM168                   | 4.03204   |
| C8orf40                   | 52.4075   |
| PRPF38B                   | 10.6156   |
| SSBP1                     | 285.155   |
| SUZ12P1                   | 4.14661   |
| EEF2K                     | 5.37476   |
| FBXW10                    | 0.0471258 |
| NT5C1B,NT5C1B-RDH14,RDH14 | 11.2088   |
| PAX8                      | 1.33839   |
| CBX5                      | 4.46659   |
| TTF2                      | 4.83079   |
| POLR2B                    | 24.036    |
| PMVK                      | 25.6554   |
| TJAP1                     | 17.971    |
| TMOD3                     | 4.43711   |
| TRABD                     | 58.4558   |
| LOC642846                 | 3.03696   |
| CRY1                      | 10.9238   |
| CCDC58                    | 48.8865   |
| TECPR1                    | 4.8749    |
| CDPF1                     | 6.10576   |
| KLHDC4                    | 19.6697   |
| FBXW2                     | 8.67852   |
| WDR7                      | 0.661397  |
| MED12                     | 3.65614   |
| TBCA                      | 350.171   |
| ZSCAN29                   | 3.82422   |
| OTX1                      | 1.88959   |
| UBE3A                     | 9.79125   |
| GSKIP                     | 5.09424   |
| AK3                       | 8.27972   |
| DLC1                      | 23.2328   |
| PNMA1                     | 23.1262   |
| PSMG3                     | 62.4612   |
| COPSS                     | 72.1677   |
| RUFY2                     | 1.76995   |
| N4BP2L2                   | 13.573    |
| MGC45800                  | 0.737552  |
| EIF2S1                    | 20.7466   |
| SLC6A9                    | 3.97248   |
| TNNC1                     | 0.234293  |
| MORF4L2                   | 73.5023   |
| TYRO3P                    | 0.132926  |
| PPAPDC2                   | 4.29938   |
| RCN2                      | 26.1459   |
| PRR11                     | 7.9305    |
| RAD51AP1                  | 4.77293   |
| AGPAT5                    | 10.3418   |
| PEX10                     | 22.0495   |
| PPA2                      | 44.2196   |
| PDPR                      | 1.49049   |
| MTCH2                     | 43.64     |
| RHBDD2                    | 40.6779   |
| ZNF701                    | 0.142765  |
| PSMD10                    | 27.4088   |
| SYBU                      | 7.06452   |
| SACM1L                    | 5.65646   |
| LOC283663                 | 0.0951182 |
| ZNF200                    | 2.7518    |
| CD5                       | 0         |
| TTI1                      | 5.64038   |
| SPTAN1                    | 34.5402   |
| NFS1                      | 9.36531   |
| GNL3                      | 68.8307   |
| NSMF                      | 98.9349   |
| CD97                      | 28.2813   |
| RBBP5                     | 3.11038   |
| SLC25A43                  | 8.79769   |
| SPECC1                    | 7.74738   |
| VPS4A                     | 61.7642   |
| SDAD1                     | 10.0853   |
| MZT1                      | 17.3164   |
| TRNAU1AP                  | 14.8833   |
| MROH7,TTC4                | 14.6843   |
| GOPC                      | 4.83441   |
| ADAP1                     | 20.8345   |
| SUPV3L1                   | 21.1028   |
| MUC12                     | 0.278301  |
| SSRP1                     | 109.845   |

|           |           |
|-----------|-----------|
| HKR1      | 7.87353   |
| TOR1AIP1  | 15.296    |
| PRKAR1A   | 21.2956   |
| LMBRD2    | 0.264419  |
| FAM105A   | 0.675941  |
| ANKRD18A  | 0.311592  |
| ATP6V0D1  | 65.5039   |
| NFIC      | 9.50177   |
| RAB11A    | 22.2514   |
| ITPK1     | 33.5419   |
| PHB2      | 503.072   |
| EIF4B     | 173.947   |
| PHF20     | 3.36311   |
| PHRF1     | 9.20119   |
| P2RX4     | 14.1082   |
| RHOQ      | 16.9992   |
| RAE1      | 29.3748   |
| ADAM22    | 0.498362  |
| RPSAP58   | 52.8576   |
| YTHDF2    | 31.4269   |
| C21orf91  | 1.39847   |
| RIPK2     | 46.5055   |
| ATG2B     | 1.10494   |
| COX7A2L   | 126.602   |
| VPS26A    | 22.96     |
| C17orf80  | 3.70226   |
| LIMD1     | 5.18341   |
| HYOU1     | 24.3045   |
| GP6       | 0.0515328 |
| OXA1L     | 176.722   |
| STRAP     | 84.6876   |
| AATF      | 50.9694   |
| FHL3      | 43.5054   |
| L3MBTL2   | 9.802     |
| ZNF581    | 192.728   |
| AHCTF1    | 2.24711   |
| YWHAB     | 51.0343   |
| D2HGDH    | 9.53071   |
| HNRNPH3   | 38.2519   |
| ORC6      | 14.0086   |
| SNORD89   | 26.1397   |
| HSPBAP1   | 7.32283   |
| CAB39     | 9.86033   |
| SERAC1    | 3.27228   |
| PPP1R10   | 13.4002   |
| PINX1     | 15.6717   |
| MSTO2P    | 0.230925  |
| CPD       | 4.01863   |
| KIAA0319  | 0.0363467 |
| LOC400684 | 1.81957   |
| PROSER1   | 6.93289   |
| ZNF346    | 3.96132   |
| SETD1B    | 2.71259   |
| WDR59     | 12.5223   |
| DDX60     | 0.255078  |
| EEF1A1    | 6363.13   |
| CACTIN    | 14.0146   |
| RABEPK    | 45.1616   |
| ZNF883    | 7.82905   |
| NDE1      | 6.40042   |
| BST1      | 0.471402  |
| ZNF597    | 0.882292  |
| WDR74     | 68.7217   |
| HSPA14    | 17.9441   |
| NUP188    | 30.6958   |
| SPRED2    | 10.2079   |
| STMN3     | 18.2515   |
| SIKE1     | 4.80816   |
| CUEDC1    | 6.7694    |
| ZNF227    | 4.07779   |
| RNF219    | 3.68166   |
| DSP       | 2.78599   |
| TRMT12    | 4.91327   |
| KIAA0317  | 5.01267   |
| ACOX1     | 4.03961   |
| LOC151171 | 0.0241546 |
| CFLAR     | 4.13366   |
| ZNF789    | 4.04817   |
| GOSR2     | 7.32829   |

|            |           |
|------------|-----------|
| UBL4A      | 28.1045   |
| SCARNA20   | 0         |
| AAMP       | 143.4     |
| ODF2       | 22.3924   |
| IPPK       | 7.25329   |
| PKP4       | 10.3755   |
| SAMD5      | 0.569823  |
| EFCAB10    | 0.697225  |
| KLF13      | 7.19593   |
| CCDC71L    | 2.6185    |
| INHA       | 0.279758  |
| ACLY       | 34.5744   |
| DLG1       | 3.51325   |
| MAP2K2     | 187.256   |
| ZNF876P    | 0.0968542 |
| C9orf173   | 0.258203  |
| CNBP       | 127.216   |
| DHDDS      | 6.9745    |
| CECR7      | 1.02151   |
| C10orf88   | 1.19261   |
| MAG1       | 0.737449  |
| GCFC2      | 13.1557   |
| CORO1A     | 16.4412   |
| FLJ43663   | 5.00386   |
| MPZL1      | 14.3191   |
| SPATA13    | 1.53487   |
| TTL6       | 0.0343372 |
| PHKA2-AS1  | 0.0476061 |
| RPL3       | 4461.64   |
| PPP1R9A    | 1.55609   |
| CNOT11     | 24.7904   |
| CRBN       | 6.60125   |
| SAAL1      | 21.9192   |
| RNF126     | 81.5994   |
| TOLLIP     | 27.7225   |
| AP1AR      | 8.01456   |
| RBBP9      | 2.89249   |
| HSPA6      | 0.149601  |
| ZFYVE16    | 1.5101    |
| CAPN2      | 153.143   |
| HERC2P9    | 3.4634    |
| GEN1       | 1.79608   |
| RPL10A     | 3578      |
| TTC23      | 3.44515   |
| HLF        | 0.0311668 |
| TFB1M      | 6.85267   |
| CYB5D2     | 14.9991   |
| MAP3K7     | 6.28635   |
| CDC42EP2   | 24.3192   |
| RABGAP1    | 4.8562    |
| HNRNPC     | 170.643   |
| TOMM70A    | 20.0249   |
| TMEM203    | 67.4419   |
| DDX27      | 12.5775   |
| UCK2       | 26.036    |
| C16orf55   | 6.89941   |
| TRMT1L     | 3.51973   |
| GTF3C3     | 12.4703   |
| CENPH      | 24.9513   |
| TMEM9B     | 14.2271   |
| TMEM33     | 9.19956   |
| PUS7L      | 2.45464   |
| IRS2       | 4.47679   |
| CSNK1A1P1  | 0         |
| BAIAP2-AS1 | 2.94923   |
| USMG5      | 448.214   |
| YWHAQ      | 143.427   |
| SLC36A1    | 1.21574   |
| RAB3GAP1   | 8.99757   |
| GFM2       | 11.7584   |
| ATMIN      | 3.97209   |
| TUFM       | 332.587   |
| JTB        | 166.333   |
| PLAC8L1    | 3.01835   |
| C7orf29    | 15.5946   |
| SEC16A     | 16.4876   |
| VWA9       | 30.6424   |
| POMZP3     | 9.07155   |
| CEBPG      | 24.9663   |

|              |           |
|--------------|-----------|
| ZHX2         | 1.9363    |
| GBP2         | 0         |
| ATP5D        | 425.713   |
| RNF145       | 31.6609   |
| CCND1        | 29.2594   |
| TOMM40L      | 9.27603   |
| SPRYD4       | 9.2254    |
| NFYC         | 20.906    |
| GOT2         | 81.2205   |
| UBE2B        | 26.7004   |
| CALB2        | 13.4059   |
| WDR5         | 43.319    |
| PRPF4B       | 3.08917   |
| RPF1         | 20.7195   |
| RABL6        | 138.831   |
| FAM211B      | 9.49398   |
| FLII         | 78.7939   |
| GOSR1        | 5.65798   |
| LOC253039    | 2.94121   |
| CTNNB1       | 59.5457   |
| MRPL3        | 58.167    |
| AGXTL2       | 11.6277   |
| ALG5         | 33.7389   |
| ARSD         | 5.21901   |
| ZDBF2        | 0.61386   |
| TRNP1        | 16.5463   |
| LOC100505876 | 11.2191   |
| ZKSCAN7      | 0.51744   |
| C4orf27      | 14.708    |
| MATR3        | 40.4517   |
| FAM219B      | 9.84361   |
| DUSP14       | 36.6634   |
| ADAM17       | 3.24467   |
| C14orf119    | 27.298    |
| SMARCD1      | 22.7836   |
| LYPD6        | 0.94868   |
| NAA38        | 4.38957   |
| ADC          | 3.58313   |
| ZNF765       | 1.1096    |
| SRM          | 180.65    |
| CXXC5        | 4.05272   |
| SPATA5L1     | 11.8292   |
| ALG10B       | 0.502131  |
| LENG9        | 20.0973   |
| MRPL55       | 69.2311   |
| DNAJC2       | 24.1321   |
| SEC22B       | 13.4411   |
| ZC3H6        | 0.188887  |
| MSH5,SAPCD1  | 9.24624   |
| DEK          | 44.9771   |
| FAM184B      | 0.108801  |
| SLC25A39     | 380.956   |
| ETS2         | 7.55834   |
| EFHB         | 0.0253314 |
| LOC100507266 | 0.178323  |
| RPS9         | 4986.6    |
| RNASEH2B     | 21.8756   |
| SCCPDH       | 29.1335   |
| LYSMD4       | 2.62935   |
| POP7         | 145.718   |
| GCSAM        | 0.0795402 |
| SLC2A6       | 19.2145   |
| YBX1         | 636.688   |
| ADO          | 8.03509   |
| CSDE1,NRAS   | 40.058    |
| RUNX2        | 1.87335   |
| AARS2        | 6.39842   |
| KDM4C        | 3.10731   |
| PPRC1        | 11.0841   |
| FAN1         | 3.32371   |
| TOM1L2       | 3.91457   |
| FAM131A      | 20.1188   |
| COPB2        | 23.1315   |
| IFI30        | 49.6662   |
| METTL2B      | 7.00149   |
| SPATA6       | 0.668876  |
| NKRF         | 5.14091   |
| PRKCE        | 1.28981   |
| FAM118B      | 7.04899   |

|                               |           |
|-------------------------------|-----------|
| NDUFAF2                       | 113.383   |
| CCDC121                       | 0.31461   |
| CDK20                         | 8.57803   |
| PLEK2                         | 45.0278   |
| MRPS30                        | 46.5934   |
| CCDC86                        | 48.9975   |
| SLC7A1                        | 18.6471   |
| GJA3                          | 0.710096  |
| MKRN2                         | 11.3962   |
| PNCK                          | 0.140571  |
| CACYBP                        | 46.0038   |
| ACTR8                         | 3.5015    |
| KLC1                          | 19.1255   |
| SEC14L4                       | 1.24187   |
| BTG3                          | 30.116    |
| AKIRIN1                       | 19.6786   |
| NFAT5                         | 3.51993   |
| VPS35                         | 16.729    |
| RBM15B                        | 13.4506   |
| ADCK4                         | 23.3404   |
| LXN                           | 9.85146   |
| DNAJC10                       | 6.33366   |
| KLHDC10                       | 4.46088   |
| SNRPD1                        | 77.071    |
| LOC100862671                  | 5.00777   |
| CASZ1                         | 2.32316   |
| TOR1B                         | 18.7091   |
| SNORA61                       | 35.0324   |
| AP3S2,C15orf38,C15orf38-AP3S2 | 14.4384   |
| MTM1                          | 0.668419  |
| PSMD6                         | 89.0492   |
| DHRS4                         | 14.5851   |
| GMPR2                         | 43.901    |
| ING5                          | 3.07233   |
| CENPV                         | 62.2027   |
| EXOC3                         | 15.6599   |
| UBA1                          | 100.32    |
| MIER3                         | 1.72601   |
| SLC9A2                        | 0.246884  |
| FKBP14                        | 2.26817   |
| IRAK4                         | 4.16273   |
| CPSF1                         | 30.9525   |
| PSMG2                         | 86.9282   |
| CRLF3                         | 6.77842   |
| NR1I3                         | 1.41793   |
| DDX18                         | 15.5677   |
| CSTF2T                        | 4.99032   |
| PEX11B                        | 13.5518   |
| LARGE                         | 3.77185   |
| JAM2                          | 0.0652122 |
| C7orf73                       | 13.4676   |
| COX15                         | 9.67934   |
| KIAA0947                      | 2.92163   |
| LINC00482                     | 0.0675274 |
| EIF4ENIF1                     | 4.68362   |
| MPP3                          | 5.53045   |
| LYN                           | 10.8769   |
| FMNL2                         | 7.45675   |
| THUMPD1                       | 4.03778   |
| CCZ1                          | 9.6592    |
| BAG1                          | 17.5948   |
| BRD7                          | 28.271    |
| ZFP106                        | 3.72758   |
| RNF31                         | 10.8428   |
| MSX2                          | 1.79519   |
| RAB13                         | 91.5602   |
| GTF2IRD1P1                    | 10.4106   |
| LETMD1                        | 50.3927   |
| GPR137B                       | 10.8151   |
| LOC100130357                  | 0.247325  |
| TBL2                          | 19.7506   |
| SF3B14                        | 275.419   |
| SEC24A                        | 2.24788   |
| DNAJC21                       | 3.31384   |
| TRUB2                         | 72.0278   |
| CDC14A                        | 1.03916   |
| ZNF761                        | 2.94574   |
| RBM38                         | 37.0748   |
| CDCA7                         | 19.8909   |

|                         |           |
|-------------------------|-----------|
| DLST                    | 45.4152   |
| FASN                    | 35.3146   |
| ORC3                    | 10.2023   |
| EPHA2                   | 86.1978   |
| HOXC11                  | 6.35783   |
| PRR12                   | 4.84289   |
| ZSCAN25                 | 2.6702    |
| VSTM2L                  | 0.0876344 |
| IL6ST                   | 2.56423   |
| ANKS6                   | 9.98264   |
| ELMO2                   | 4.78467   |
| VPS18                   | 13.9912   |
| STK24                   | 38.4909   |
| ZNF708                  | 0.837894  |
| ZNF267                  | 2.49692   |
| TOMM22                  | 91.5139   |
| LEPREL4                 | 23.6405   |
| PAICS                   | 105.474   |
| ATP6V1H                 | 40.1872   |
| SPTSSA                  | 12.4573   |
| HIP1R                   | 15.8488   |
| MDM2                    | 13.4718   |
| ZNF777                  | 16.8341   |
| LDHB                    | 872.418   |
| PIK3CA                  | 1.23307   |
| RPL34                   | 1195.31   |
| ABCE1                   | 20.7091   |
| ATP5B                   | 489.201   |
| EIF4G3                  | 3.53961   |
| SCAF11                  | 4.07563   |
| TCTA                    | 9.51533   |
| C19orf40                | 1.93014   |
| PKD1P1                  | 15.676    |
| HMGN4                   | 51.1324   |
| LOC653160               | 0.82493   |
| LRRRC8E                 | 16.658    |
| CD2BP2                  | 38.4876   |
| TAF9                    | 108.395   |
| LRP2BP                  | 0.354762  |
| PTP4A2                  | 48.8025   |
| DDX3X                   | 28.9345   |
| LOC100506746            | 0.607314  |
| PRDM1                   | 0.173923  |
| LYRM9                   | 2.74649   |
| FOXO1                   | 1.28322   |
| CUZD1,FAM24B            | 11.9308   |
| FGFR10P2                | 8.35471   |
| ZNF596                  | 0.495251  |
| PSMD2                   | 320.732   |
| SLC35B4                 | 3.12618   |
| SLC25A15                | 5.58995   |
| KIAA0368                | 20.6253   |
| CORO7,CORO7-PAM16,PAM16 | 185.136   |
| WBSR22                  | 115.617   |
| TMEM198B                | 1.8751    |
| SYF2                    | 42.9243   |
| SREK1IP1                | 3.77535   |
| SEC61A2                 | 7.36596   |
| C9orf41                 | 0.997939  |
| CUL3                    | 6.17442   |
| SKIL                    | 1.32315   |
| DCAF4                   | 9.79433   |
| CENPBD1                 | 1.359     |
| TBC1D20                 | 12.0039   |
| ACOT2                   | 10.8009   |
| HMGCL                   | 39.5265   |
| HIVEP2                  | 2.72161   |
| PPP3CB                  | 9.07548   |
| SLC16A14                | 2.26678   |
| METTL21D                | 3.71675   |
| EIF5                    | 24.4013   |
| KSR1                    | 0.190258  |
| CTNND1,TMX2             | 67.1289   |
| PPAPDC1B                | 38.8972   |
| GUSBP11                 | 4.67567   |
| LINC00032               | 0         |
| PPM1F                   | 12.9532   |
| ANKRD20A12P             | 0.676334  |
| ERF                     | 31.7268   |

|            |          |
|------------|----------|
| EMG1       | 32.764   |
| NAT16      | 1.4353   |
| SLC25A28   | 20.453   |
| ZSWIM6     | 2.57137  |
| ZNF616     | 1.64486  |
| CDC44      | 31.3904  |
| TOMM34     | 79.9323  |
| PPOX       | 16.8104  |
| HES1       | 28.7275  |
| PI4K2A     | 15.8022  |
| FLJ14186   | 1.54081  |
| CDC47L     | 33.2359  |
| RNF123     | 10.3614  |
| KBTBD8     | 0.783057 |
| DBNL       | 40.4544  |
| SH3PXD2B   | 3.58759  |
| TMEM80     | 12.8213  |
| KATNBL1    | 6.9378   |
| BBS7       | 2.73856  |
| SEPT2      | 43.9317  |
| UNC5A      | 1.57184  |
| FAM92A1    | 33.427   |
| LOC81691   | 6.07026  |
| USP38      | 3.26491  |
| LOC400027  | 6.04379  |
| MON1A      | 12.3635  |
| PECR       | 3.47384  |
| ZMYM4      | 3.77732  |
| LOC401074  | 0.101009 |
| MRPS16     | 37.3646  |
| CLDN9      | 0.261613 |
| LOC399744  | 2.2597   |
| EHBP1L1    | 8.99549  |
| CASC5      | 0.409975 |
| ZDHC24     | 39.7509  |
| SMAD1      | 4.07737  |
| ACACA      | 4.27664  |
| MTPAP      | 8.72367  |
| LIMD1-AS1  | 5.58341  |
| ANP32E     | 16.965   |
| C9orf91    | 10.0463  |
| DPCD       | 65.4181  |
| NIPA1      | 5.95361  |
| RRN3       | 14.0836  |
| ZNF276     | 5.39832  |
| NDUFV2     | 164.42   |
| ACP2       | 8.59783  |
| GORAB      | 1.67938  |
| SNORA25    | 0        |
| MPHOSPH6   | 20.6333  |
| NUDT17     | 1.98898  |
| KCNK5      | 4.62404  |
| AMT,NICN1  | 1.5273   |
| BRIX1      | 35.1229  |
| FAM200A    | 3.88971  |
| NTN5       | 0.478069 |
| DLGAP1-AS1 | 3.60199  |
| USE1       | 46.2439  |
| SMARCD3    | 63.328   |
| PPARGC1B   | 0.575722 |
| SNRPB2     | 46.4584  |
| COASY      | 49.9105  |
| SNX6       | 24.6573  |
| ZNF207     | 57.6786  |
| CNTLN      | 0.920066 |
| MBTPS1     | 14.7665  |
| VAC14      | 29.9835  |
| ATP6V1G1   | 113.249  |
| RSBN1      | 2.66169  |
| GOLGA3     | 6.57708  |
| SIGLEC10   | 0        |
| RBM12B     | 3.18594  |
| CTTNBP2NL  | 5.99951  |
| NCBP2      | 32.7535  |
| CASP10     | 1.11671  |
| ZSCAN20    | 0.326167 |
| TIMM8B     | 52.355   |
| NR3C2      | 0.242662 |
| LOC286467  | 0.903286 |



|              |           |
|--------------|-----------|
| RPL6         | 3065.26   |
| LOC100289137 | 2.67564   |
| SH3BP2       | 6.80789   |
| PRKCI        | 7.93216   |
| LOC440028    | 1.98815   |
| CSGALNACT2   | 4.63772   |
| PRKCDBP      | 23.7131   |
| NADK         | 44.0868   |
| ARPC1B       | 161.766   |
| NAA20        | 95.1206   |
| ZNF382       | 0.0906295 |
| COPS2        | 17.9935   |
| TTC14        | 1.77685   |
| ASL          | 41.3461   |
| RAB3GAP2     | 3.03251   |
| SRCAP        | 5.64827   |
| MTA1         | 48.8724   |
| SLC9A4       | 0.101869  |
| NBN          | 10.0795   |
| ALYREF       | 130.397   |
| GNA12        | 8.21148   |
| C17orf85     | 2.81698   |
| NUDT5        | 111.856   |
| CCDC122      | 1.46469   |
| PSME2        | 104.403   |
| ADCK5        | 20.7454   |
| FAM216A      | 34.7684   |
| CA7          | 0.0412978 |
| FLYWCH1      | 17.3439   |
| BUD31        | 73.4229   |
| SGMS2        | 2.9414    |
| TSPO         | 452.911   |
| ZNF362       | 2.36988   |
| MTHFD1       | 33.5148   |
| ZNF391       | 0.817579  |
| EPRS         | 26.2957   |
| ABCD4        | 16.5095   |
| OLA1         | 52.3828   |
| NBPF10       | 0.189195  |
| SLC35B3      | 8.05721   |
| WASH5P       | 2.53158   |
| RBM8A        | 26.5778   |
| U2AF2        | 62.2707   |
| PFKM         | 52.9252   |
| LANCL1       | 4.78582   |
| MTHFR        | 1.05161   |
| GRK5         | 5.35834   |
| QSOX2        | 21.722    |
| UNG          | 23.3278   |
| MVP,PAGR1    | 26.5335   |
| TNFRSF13C    | 1.62786   |
| NOP9         | 2.34637   |
| ZNF507       | 1.41601   |
| CMSS1        | 35.0722   |
| HIF1A-AS2    | 10.1574   |
| CHP1         | 48.3385   |
| SMARCD2      | 42.7149   |
| ARMC6        | 25.7658   |
| TOB2         | 18.5389   |
| HAT1         | 22.351    |
| GRIPAP1      | 11.4092   |
| CCNO         | 20.0057   |
| STARD4-AS1   | 0         |
| AHI1         | 1.4426    |
| RASL11A      | 2.35409   |
| PAPD5        | 1.59368   |
| LAS1L        | 25.3117   |
| C5orf42      | 0.173428  |
| PPP5C        | 33.3828   |
| FZD8         | 1.69194   |
| SNRNP40      | 43.52     |
| PHF5A        | 75.2101   |
| PSMA5        | 32.751    |
| RIF1         | 1.89766   |
| KDELC1       | 4.47327   |
| SLC25A22     | 22.3792   |
| TTC27        | 9.63791   |
| ZC3HAV1L     | 1.9791    |
| DNAL1        | 0.593772  |

|              |           |
|--------------|-----------|
| HACL1        | 12.1168   |
| NETO2        | 13.0139   |
| ELP5         | 54.6057   |
| IFT46        | 7.66773   |
| TM4SF1       | 55.156    |
| ARV1         | 7.50184   |
| IFT122       | 3.10721   |
| NIPA2        | 21.574    |
| NFE2L2       | 15.4747   |
| NCLN         | 52.2554   |
| PCID2        | 30.1507   |
| FBXL5        | 8.3582    |
| NAP1L4       | 50.47     |
| LOC388906    | 0.161761  |
| FBXO28       | 6.59399   |
| EIF4E        | 18.912    |
| SERTAD1      | 99.8613   |
| AP5B1        | 8.08577   |
| PIK3R4       | 2.73108   |
| CDC23        | 8.60259   |
| SPG11        | 3.75762   |
| SLC38A10     | 25.4396   |
| BCL2L12      | 45.059    |
| SLC7A6OS     | 13.3831   |
| RHPN2        | 4.78294   |
| FIG4         | 4.55253   |
| DCUN1D5      | 4.969     |
| LINC00526    | 1.25287   |
| POLR3E       | 11.8456   |
| ZNF20.ZNF625 | 1.78247   |
| LINC00641    | 0.626587  |
| UBE2D1       | 10.6847   |
| RER1         | 39.7931   |
| LOC146880    | 11.2952   |
| LOC100129148 | 1.42708   |
| TP53I3       | 14.8894   |
| UBQLN4       | 28.8979   |
| MEIS2        | 2.3998    |
| ARNT2        | 2.05983   |
| ABHD2        | 2.59576   |
| ANKRD33B     | 1.45675   |
| SKIV2L2      | 13.6251   |
| TCTN2        | 1.75829   |
| AFAP1        | 1.30023   |
| ZNF189       | 6.59493   |
| PHYHIP       | 0.169255  |
| CCNI         | 59.03     |
| CDC42BPG     | 0.0777519 |
| RUVBL2       | 255.036   |
| PPCDC        | 6.76889   |
| RIPPLY1      | 0.0982353 |
| ZC3H7B       | 10.2688   |
| LOC100132077 | 0.0808421 |
| DFFA         | 19.1428   |
| FBXO27       | 0.0985022 |
| NACC1        | 33.6637   |
| ASAH1        | 26.5529   |
| NAA25        | 5.1711    |
| C19orf66     | 9.2228    |
| OR2D2        | 0         |
| AKAP8        | 11.0923   |
| CRNDE        | 19.992    |
| ICMT         | 10.9403   |
| PDCD5        | 189.217   |
| THAP5        | 6.78216   |
| ABAT         | 1.69108   |
| BMS1         | 8.4495    |
| METTL3       | 14.4455   |
| RYK          | 19.0851   |
| SLC25A16     | 2.63919   |
| SNHG5        | 1579.24   |
| CERS1        | 0.0718723 |
| ZNF503       | 10.6829   |
| SRSF11       | 35.176    |
| COX19        | 4.02632   |
| DYRK1B       | 1.12577   |
| MRI1         | 12.5707   |
| TOP1         | 20.1341   |
| RSAD1        | 34.4936   |

|                             |           |
|-----------------------------|-----------|
| EPHB2                       | 9.08587   |
| TMCC2                       | 1.82939   |
| GLUD1P3                     | 0.274763  |
| PSMD1                       | 20.4759   |
| TECPR2                      | 0.84944   |
| C9orf78                     | 65.233    |
| MPHOSPH10                   | 8.46621   |
| PIK3AP1                     | 1.86662   |
| ZXDB                        | 5.30644   |
| CROCCP3                     | 0.318337  |
| EPB41L4A                    | 0.757937  |
| ZNF776                      | 1.21327   |
| VPS28                       | 383.535   |
| NDST1                       | 4.66254   |
| MCOLN2                      | 6.2976    |
| DTX4                        | 1.19638   |
| GTF2IRD2B                   | 0.091715  |
| DMTF1                       | 3.82474   |
| CENPB                       | 47.1235   |
| BRF2                        | 12.3152   |
| BOP1                        | 80.8569   |
| MIR17,MIR17HG,MIR18A,MIR19f | 4.67769   |
| UAP1                        | 230.172   |
| THG1L                       | 25.5398   |
| SLC5A6                      | 18.98     |
| ZNF490                      | 1.84622   |
| BRCA1                       | 3.54706   |
| FGFR3                       | 4.60324   |
| ZNF615                      | 0.805218  |
| VCP                         | 58.361    |
| NR2F2                       | 3.33262   |
| ADRM1                       | 163.962   |
| TNFRSF10C                   | 1.5977    |
| DZANK1                      | 0.206456  |
| PLK1S1                      | 6.13075   |
| NAA40                       | 4.96674   |
| STK17A                      | 7.16099   |
| MALAT1                      | 63.2827   |
| FTX                         | 0.637683  |
| NR2C2                       | 1.48336   |
| UPF1                        | 24.9452   |
| C2orf47                     | 20.6509   |
| PEX11A                      | 2.94607   |
| LOC284385                   | 2.57906   |
| ATP5F1                      | 92.3119   |
| CETN2                       | 24.6875   |
| MKL2                        | 1.10426   |
| C11orf74                    | 11.2643   |
| CLCN7                       | 43.0903   |
| ULBP1                       | 1.15708   |
| CSNK2A1                     | 44.3303   |
| CLN8                        | 2.55529   |
| TMED3                       | 108.833   |
| CCNL2                       | 28.0469   |
| NBEAL2                      | 4.81029   |
| MYC                         | 332.732   |
| SERPINE2                    | 1.19228   |
| TTC5                        | 10.8727   |
| RARS2                       | 16.4236   |
| C22orf28                    | 58.957    |
| PELP1                       | 21.2593   |
| DIRAS3                      | 0.0975065 |
| WRAP73                      | 27.9857   |
| C1orf56                     | 5.20608   |
| RARG                        | 11.0384   |
| PHF8                        | 7.70339   |
| GLO1                        | 109.243   |
| SACS                        | 0.725992  |
| PPP2R5E                     | 4.21996   |
| ZNF788                      | 0.0732206 |
| C14orf169                   | 12.5007   |
| NAP1L1                      | 162.549   |
| A1BG-AS1                    | 0.14453   |
| SLC37A2                     | 0.2999    |
| FXR2                        | 52.5416   |
| ELP6                        | 29.1771   |
| LYG1                        | 3.21068   |
| GMFG                        | 0.351978  |
| HMGB3                       | 13.2662   |

|           |           |
|-----------|-----------|
| DOM3Z     | 13.3944   |
| PTCD3     | 11.0311   |
| CDV3      | 40.6453   |
| SMARCA4   | 35.8046   |
| RBM48     | 7.25084   |
| TGS1      | 8.61356   |
| NAGPA     | 8.83784   |
| MROH1     | 26.1225   |
| SUV420H1  | 5.48822   |
| TRMT10C   | 24.7211   |
| C10orf2   | 21.2898   |
| CEP192    | 0.970217  |
| SECISBP2  | 8.35664   |
| C1RL-AS1  | 0.261119  |
| TPCN1     | 5.52625   |
| C1S       | 0.356897  |
| VWA8      | 2.03071   |
| ALAS1     | 32.6404   |
| DMRTA2    | 6.96379   |
| ADRBK2    | 0.52464   |
| PTPLAD1   | 31.0496   |
| TCF7L2    | 4.60068   |
| MAP4      | 22.9053   |
| GTF2H2B   | 2.08981   |
| GPR180    | 1.77738   |
| BACH1     | 2.55139   |
| NUP107    | 15.6631   |
| TMPRSS9   | 0         |
| RHPN1     | 21.2225   |
| HOXA-AS4  | 0.841587  |
| MRPL24    | 108.406   |
| ACTL6A    | 31.8205   |
| TMEM220   | 0.0787768 |
| DPY19L4   | 4.83365   |
| PPTC7     | 1.34401   |
| JMJD8     | 53.8211   |
| DNAH3     | 0         |
| MBD4      | 8.81675   |
| FAM8A1    | 1.40865   |
| SLCO5A1   | 2.37478   |
| EHMT2     | 23.1163   |
| DHRS4-AS1 | 2.59786   |
| MIAT      | 0.0486501 |
| TARDBP    | 18.3774   |
| APPL1     | 3.90043   |
| SCARNA7   | 23.685    |
| SGK223    | 2.6313    |
| ETHE1     | 139.138   |
| UBR7      | 8.14633   |
| LOC257358 | 0.0662117 |
| PMAIP1    | 13.1679   |
| C11orf57  | 10.5988   |
| ETNK1     | 5.50132   |
| IFT140    | 4.16754   |
| ZCCHC7    | 12.3488   |
| PCSK6     | 6.29505   |
| TRAPPC4   | 56.5199   |
| RGS10     | 170.813   |
| TBC1D8B   | 0.556245  |
| PGLS      | 165.626   |
| MEPCE     | 62.6221   |
| ZNF721    | 3.71959   |
| CARM1     | 53.7019   |
| HSPG2     | 1.21574   |
| PRRT3-AS1 | 5.897     |
| PAQR3     | 4.50427   |
| EMP3      | 165.048   |
| REST      | 4.49348   |
| KCNH3     | 0.730348  |
| SCARNA16  | 3.3007    |
| LEF1-AS1  | 0.548168  |
| SIGMAR1   | 153.611   |
| TAF2      | 5.37892   |
| CD109     | 1.26949   |
| GXYLT1    | 1.50795   |
| XPC       | 11.8889   |
| SETDB2    | 1.28315   |
| ZNF830    | 14.6234   |
| VRK1      | 12.7558   |

|                          |           |
|--------------------------|-----------|
| PDK4                     | 0.148208  |
| LOC100130557             | 0.580964  |
| REV1                     | 2.9791    |
| WDFY2                    | 4.15764   |
| PRPF19                   | 86.6583   |
| LOC100289230             | 0.506915  |
| ARL2,SNX15               | 197.29    |
| FBXO32                   | 1.62094   |
| ZNF131                   | 3.94651   |
| BCL2L11                  | 2.0286    |
| EXOSC7                   | 73.3551   |
| POMT2                    | 3.33726   |
| CIRBP                    | 99.1895   |
| RFXANK                   | 42.5229   |
| TMEM120B                 | 7.29817   |
| HAUS8                    | 11.6514   |
| ELF1                     | 8.49223   |
| ZBTB43                   | 3.96443   |
| FLJ44511                 | 0.130917  |
| FES                      | 0.59119   |
| FTO                      | 2.01107   |
| NONO                     | 174.986   |
| DCAF12                   | 10.5237   |
| SHC2                     | 18.8603   |
| ZMAT2                    | 34.8399   |
| APOBEC3A,APOBEC3A_B,APOE | 19.565    |
| CEP128                   | 0.369789  |
| MSL3                     | 16.01     |
| KGFLP2                   | 0.186303  |
| LINC00476                | 4.40238   |
| FLYWCH2                  | 43.1225   |
| BLOC1S5,EEF1E1,TXNDC5    | 127.63    |
| RAP1B                    | 82.702    |
| ABCG2                    | 0.42278   |
| TARSL2                   | 2.9374    |
| ZNF850                   | 1.85745   |
| SGPP2                    | 0.524594  |
| TATDN3                   | 5.16466   |
| SPATA12                  | 0.0729025 |
| TOM1L1                   | 8.33814   |
| SMN2                     | 2.94774   |
| SCO2,TYMP                | 76.8199   |
| SLC39A14                 | 26.6313   |
| GLRX2                    | 20.8805   |
| ETAA1                    | 2.46292   |
| HRH1                     | 2.45563   |
| SLC24A1                  | 1.22314   |
| CSPG5                    | 0.973025  |
| FKBP10                   | 130.271   |
| DUS2L                    | 11.8978   |
| CLEC18A                  | 0.167051  |
| ZWILCH                   | 4.78305   |
| FBXW11                   | 9.56392   |
| NCKAP1                   | 26.0205   |
| GSDMD                    | 49.255    |
| RARB                     | 0.0872513 |
| XIST                     | 6.19989   |
| ZNF500                   | 4.25617   |
| CBWD3,CBWD5              | 2.17151   |
| SYT11                    | 0         |
| GGNBP2                   | 14.7382   |
| RAB33A                   | 0.273753  |
| CHD3                     | 14.2204   |
| C14orf166                | 210.131   |
| LRP4-AS1                 | 0.398293  |
| CPNE5                    | 0.115771  |
| DDX12P                   | 2.74486   |
| CCT8                     | 202.434   |
| FAM183B                  | 0.259737  |
| SRPK1                    | 27.8179   |
| BNIP2                    | 12.3155   |
| ERO1LB                   | 1.7854    |
| WIPI2                    | 27.0826   |
| HLX                      | 0.478263  |
| ANKRD36BP1               | 0.147632  |
| GRHL3                    | 0.0446147 |
| KDELC2                   | 3.6833    |
| LOC100129931             | 10.8918   |
| TMEM206                  | 11.5403   |

|                |           |
|----------------|-----------|
| NIN            | 3.48869   |
| B4GALT5        | 11.3477   |
| MVB12A         | 77.7177   |
| KIF16B         | 1.48588   |
| RTN4IP1        | 3.14858   |
| ANP32B         | 214.106   |
| STYXL1         | 19.6858   |
| MKNK2          | 60.915    |
| DHRS12         | 2.71487   |
| USP10          | 28.3271   |
| GPR114         | 2.13444   |
| ZC2HC1C        | 0.085912  |
| EPS15L1        | 13.8898   |
| NCBP1          | 12.9043   |
| TRIM27         | 40.3924   |
| KANK1          | 2.55917   |
| ZNF684         | 1.13409   |
| CDK12          | 4.75287   |
| FBXL6          | 53.7972   |
| EIF1           | 984.421   |
| TMC6           | 32.2084   |
| ST3GAL2        | 3.86207   |
| PMP22          | 31.2618   |
| RANBP2         | 4.34051   |
| HRS12          | 54.1686   |
| NOC3L          | 8.80983   |
| C9orf69        | 50.1011   |
| JMJD1C         | 4.99627   |
| EHBP1          | 2.34691   |
| KIAA1644       | 0.0409394 |
| DUS1L          | 59.7633   |
| DUSP22         | 15.3664   |
| ZKSCAN5        | 5.32212   |
| HOXB3          | 3.7183    |
| ZMYND10        | 0.622703  |
| C2orf50        | 0         |
| UTP3           | 21.6006   |
| SEPHS1         | 22.6151   |
| KTI12, TXNDC12 | 62.1753   |
| TCF25          | 103.813   |
| HSPD1          | 433.407   |
| LOC387723      | 0.818064  |
| ILF3           | 66.5181   |
| MRPS11         | 25.4002   |
| CALCOCO1       | 9.07405   |
| MIOS           | 6.92262   |
| ZBTB47         | 1.79725   |
| TMED8          | 0.210862  |
| TMEM254        | 1.93883   |
| FCF1           | 12.2691   |
| ACADVL         | 131.046   |
| HADHB          | 73.1014   |
| CLINT1         | 9.16258   |
| PIGZ           | 0.810372  |
| EIF5A          | 928.205   |
| NIPAL3         | 6.86054   |
| TNKS1BP1       | 10.7821   |
| DGKE           | 2.50646   |
| MSANTD4        | 4.30988   |
| EIF2D          | 32.2358   |
| CSNK2A2        | 59.4443   |
| PFDN2          | 328.394   |
| NDUFA10        | 20.511    |
| FASTKD1        | 10.0048   |
| C9orf156       | 6.1487    |
| WRAP53         | 23.595    |
| FZD4           | 0.719447  |
| SPECC1L        | 7.52384   |
| NUDC           | 450.699   |
| AGFG1          | 5.05128   |
| RCBTB1         | 4.8253    |
| MDFI           | 34.437    |
| PRDX1          | 474.759   |
| ZMYND15        | 2.04339   |
| MAP4K4         | 8.15342   |
| DROSHA         | 4.07599   |
| MFSD9          | 1.68979   |
| CLDN15         | 13.9531   |
| FAM60A         | 34.7019   |

|                           |           |
|---------------------------|-----------|
| GPCPD1                    | 2.99247   |
| MRPL9                     | 76.5836   |
| HNRNPA3                   | 40.8831   |
| TIMM10B                   | 9.2599    |
| ATPAF2                    | 11.7137   |
| DLD                       | 25.2872   |
| LCA5L                     | 0.274167  |
| ATXN2                     | 7.13974   |
| ITPKC                     | 6.88439   |
| NDUFAF6                   | 9.326     |
| RHBDF2                    | 6.132     |
| ACAP2                     | 3.87225   |
| PNRC2                     | 44.1387   |
| SEC14L1                   | 15.0716   |
| CEP170                    | 0         |
| API5                      | 24.3912   |
| GOLGA7                    | 35.6137   |
| STEAP1                    | 9.47762   |
| CYFIP1                    | 47.1017   |
| GTF2B                     | 19.5762   |
| RFPL2                     | 0.244509  |
| ZC2HC1A                   | 1.94188   |
| ZC3H7A                    | 5.32228   |
| OSBPL7                    | 2.8343    |
| KATNAL2                   | 0.166351  |
| IFNGR2                    | 44.5899   |
| FOXRED1                   | 27.1382   |
| MTPN                      | 34.5596   |
| HEMK1                     | 5.71271   |
| CHD2                      | 7.27004   |
| SORD                      | 44.1971   |
| PAK1IP1                   | 15.5717   |
| NRARP                     | 44.6386   |
| TCOF1                     | 27.0448   |
| TAPT1-AS1                 | 0.345027  |
| SLC25A3                   | 517.048   |
| SRBD1                     | 1.3845    |
| STX1A                     | 19.0208   |
| NOC2L                     | 76.0786   |
| MGAM                      | 0.0306657 |
| TTL                       | 10.321    |
| LOC613037                 | 4.60611   |
| ZFP36L1                   | 154.459   |
| UCP2                      | 58.8118   |
| RUSC1                     | 27.3974   |
| OSBP2                     | 5.11786   |
| FAHD1                     | 15.7703   |
| CCNB1                     | 62.1696   |
| SMARCAL1                  | 7.8709    |
| FASTKD2                   | 5.37078   |
| EIF4EBP1                  | 364.036   |
| IRF9                      | 2.77197   |
| NLR5                      | 0.865248  |
| HSPA4                     | 45.343    |
| RFT1                      | 9.41869   |
| TMEM71                    | 0.428356  |
| TUG1                      | 9.35773   |
| MED7                      | 9.22255   |
| TP53BP1                   | 2.96422   |
| C7orf43                   | 11.0778   |
| FLJ27352                  | 1.46619   |
| STT3A                     | 39.9403   |
| ISG20L2                   | 13.4902   |
| LOC401321                 | 2.81597   |
| SOS2                      | 1.96282   |
| SLC38A7                   | 1.90615   |
| C17orf75                  | 2.40913   |
| TRAP1                     | 194.159   |
| PCDHA1,PCDHA10,PCDHA11,PC | 0.154202  |
| STX18                     | 17.5095   |
| YAE1D1                    | 13.138    |
| DIEXF                     | 4.44898   |
| FAR2                      | 3.86911   |
| MAPT                      | 0         |
| NSUN5                     | 36.0061   |
| TPK1                      | 0.720146  |
| MRPL46                    | 27.1802   |
| YWHAG                     | 41.9305   |
| SNAPC5                    | 8.84229   |

|                           |           |
|---------------------------|-----------|
| DTNB                      | 15.3751   |
| TOMM40                    | 120.764   |
| DRG2                      | 29.2938   |
| POLR2F                    | 38.3197   |
| DNAJC17                   | 17.9488   |
| HOXD-AS2                  | 8.20959   |
| CXorf56                   | 11.4232   |
| CAP2                      | 3.78358   |
| LOC100289511              | 0.268351  |
| GTF2F2                    | 28.3516   |
| CDK11A,CDK11B             | 16.0061   |
| SNHG7,SNORA17,SNORA43     | 599.229   |
| C16orf80                  | 43.6417   |
| DENR                      | 23.3893   |
| RPL23AP53                 | 1.88511   |
| TMEM218                   | 2.5285    |
| RWDD4                     | 8.89996   |
| NDUFS1                    | 11.765    |
| MRPS21                    | 423.782   |
| ADSL                      | 72.8086   |
| GFM1                      | 7.53159   |
| ZNF32                     | 27.847    |
| TICAM2,TMED7,TMED7-TICAM2 | 12.9056   |
| AIFM1                     | 35.8694   |
| RAP2C                     | 6.3916    |
| EIF5AL1                   | 3.70611   |
| RSPRY1                    | 2.5985    |
| C1orf52                   | 17.2762   |
| SLC43A1                   | 30.2074   |
| PSMB7                     | 295.27    |
| RAB11B-AS1                | 3.71029   |
| VMAC                      | 1.14102   |
| GEMIN5                    | 6.42768   |
| SBDS                      | 56.9156   |
| TRIB3                     | 151.9     |
| LOC100132781              | 0.0182841 |
| PWP2                      | 23.9733   |
| ARFGAP2                   | 29.39     |
| ADSSL1                    | 1.81248   |
| EIF3E                     | 842.819   |
| ARAP2                     | 0.70624   |
| ABI3BP                    | 0.016944  |
| OSBPL8                    | 3.83992   |
| TTYH2                     | 8.97234   |
| SUGP1                     | 17.1935   |
| ANK3                      | 0         |
| GCNT1                     | 0.855922  |
| GNAL                      | 3.3334    |
| MEI1                      | 0.0266209 |
| MYBBP1A                   | 28.3525   |
| TOPORS                    | 2.71137   |
| NOP16                     | 102.001   |
| C16orf88                  | 6.96948   |
| LOC100132273              | 1.33001   |
| MT1X                      | 1796.73   |
| MTRF1L                    | 7.97993   |
| DNAJC30                   | 12.2858   |
| KIF3B                     | 2.93854   |
| TNS1                      | 0.150421  |
| ELF2                      | 3.76897   |
| ZKSCAN8                   | 0.336253  |
| DPH5                      | 21.9042   |
| PSMD8                     | 328.787   |
| LOC100289092              | 7.91841   |
| FANCB                     | 0.325191  |
| ENO3                      | 4.25127   |
| GUF1                      | 7.91079   |
| SLMAP                     | 4.77813   |
| RAB35                     | 23.6904   |
| UCN2                      | 0.0761724 |
| SH3KBP1                   | 6.40308   |
| MYO5B                     | 1.15518   |
| MRFAP1L1                  | 38.36     |
| RPL15                     | 1249.52   |
| SLC16A9                   | 3.0842    |
| SGSM1                     | 1.0192    |
| SYCP2L                    | 0.105802  |
| DAP3                      | 90.1757   |
| TACC1                     | 3.10402   |



|              |           |
|--------------|-----------|
| TCTE1        | 0.0390578 |
| AP3M2        | 5.3644    |
| C1orf228     | 0.230419  |
| PDCL3P4      | 0.246471  |
| TYW1         | 4.40351   |
| MAPK6        | 8.35852   |
| ZNF77        | 2.38533   |
| IDE          | 3.53709   |
| DHX33        | 9.9842    |
| SBNO2        | 16.7593   |
| POLE2        | 4.52294   |
| TMEM184A     | 5.58211   |
| CUTC         | 17.4984   |
| HNRNPA0      | 55.2676   |
| TSACC        | 0.619204  |
| TPTE2P3      | 0         |
| GTF3A        | 119.371   |
| ZCCHC9       | 23.8156   |
| PUS7         | 9.63075   |
| TMCC1        | 1.21981   |
| YPEL4        | 0.265641  |
| APOL2        | 4.57245   |
| PYCR1        | 226.341   |
| EPB41L4A-AS1 | 97.2057   |
| URI1         | 13.5058   |
| TMCO4        | 6.33979   |
| CLNS1A       | 117.777   |
| STK40        | 17.3706   |
| CRIPAK       | 1.06846   |
| UBA3         | 14.6513   |
| ARMC8        | 3.67311   |
| HSP90AB1     | 874.887   |
| MIS18BP1     | 2.55673   |
| BCAS2        | 23.2362   |
| TOR1A        | 42.3396   |
| SLC23A2      | 1.04135   |
| ARL5A        | 12.0292   |
| TNRC18       | 7.11151   |
| PABPC4       | 118.437   |
| ANXA2        | 622.374   |
| RPAP3        | 5.42518   |
| MKI67IP      | 55.2591   |
| SSX2IP       | 3.07298   |
| CCDC90B      | 24.8057   |
| NFE2L3       | 3.37304   |
| VDR          | 1.4733    |
| TRAF7        | 34.6923   |
| S100A14      | 0.2782    |
| GGT3P        | 0.200778  |
| TMA16        | 12.419    |
| TXLNA        | 24.8164   |
| PPA1         | 211.662   |
| DAZAP1       | 121.49    |
| C1orf43      | 168.467   |
| TSTD3        | 1.18367   |
| ZNF3         | 20.3424   |
| CAMKK2       | 10.9665   |
| ZNF324       | 5.02952   |
| MTHFD2L      | 0.909862  |
| FAM86C2P     | 1.01115   |
| CCDC174      | 6.19511   |
| LMF1         | 28.6773   |
| MANEAL       | 12.4467   |
| SLC5A10      | 0.758548  |
| MYH7B        | 0.0701196 |
| TMEM186      | 14.9649   |
| ARFGEF2      | 1.80539   |
| CNTD1        | 0.161193  |
| NME6         | 16.5194   |
| FAM107B      | 7.75913   |
| TSG101       | 39.3966   |
| STAT5B       | 8.53577   |
| FZD6         | 9.12179   |
| FBXO9        | 6.6445    |
| EIF3B        | 79        |
| NEK4         | 3.22135   |
| THAP6        | 2.35044   |
| CCRN4L       | 13.2835   |
| MOB1A        | 23.5359   |

|                         |           |
|-------------------------|-----------|
| YWHAE                   | 373.818   |
| NUP160                  | 6.93551   |
| SMYD2                   | 20.3288   |
| RNF138                  | 8.89396   |
| KCNK15                  | 0.0829686 |
| ACOT7                   | 108.482   |
| CUL5                    | 2.18958   |
| TMEM129                 | 25.3585   |
| MRPL4                   | 174.44    |
| SBF2-AS1                | 3.2343    |
| EVPL                    | 5.12158   |
| RPAP2                   | 5.40372   |
| PRIM1                   | 13.7459   |
| MFSD12                  | 82.1247   |
| ATG9B                   | 1.05262   |
| MTMR7                   | 1.18301   |
| PLEKHM1                 | 11.8973   |
| GIPR                    | 0.470722  |
| RGS11                   | 11.84     |
| NOC4L                   | 35.6788   |
| BAK1                    | 59.3925   |
| ZNF783                  | 1.86638   |
| SLC25A25                | 16.4937   |
| SYCP2                   | 0.0347114 |
| STK32C                  | 12.8218   |
| SLC7A2                  | 3.38186   |
| R3HDM4                  | 102.87    |
| USP36                   | 9.16957   |
| ZNF26                   | 5.10247   |
| RPRD1B                  | 5.93539   |
| ZSCAN5A                 | 0.548404  |
| COQ10B                  | 19.6713   |
| WDR55                   | 17.8926   |
| LTBP1                   | 1.66504   |
| ZNF710                  | 8.83037   |
| DDX58                   | 0.458077  |
| FAM20A                  | 0.0334892 |
| CENPC1                  | 2.1582    |
| ALX3                    | 1.45621   |
| MAPRE1                  | 26.9435   |
| CHML                    | 1.60278   |
| PPARD                   | 11.7923   |
| BRAT1                   | 24.4788   |
| SNHG8                   | 417.072   |
| PPIL4                   | 8.35649   |
| AP2A2                   | 14.7118   |
| C2orf73                 | 0         |
| C21orf58                | 1.58888   |
| MRPL30                  | 18.8331   |
| HERC2P7                 | 3.68956   |
| RFPL1                   | 0         |
| MRPL38                  | 114.106   |
| LARS2                   | 5.45245   |
| GLIPR1                  | 15.8469   |
| IDI2-AS1                | 1.49507   |
| HEXA-AS1                | 0.0783581 |
| GATAD2A                 | 19.1064   |
| SPATA20                 | 35.6631   |
| CLEC16A                 | 2.58817   |
| SLC38A1                 | 33.5483   |
| TIMM44                  | 30.7954   |
| CCDC59                  | 20.5798   |
| AIG1                    | 34.6832   |
| MGC16275                | 2.68719   |
| SOCS5                   | 1.81699   |
| ZSWIM7                  | 10.5735   |
| CRK                     | 9.54815   |
| CBY1                    | 32.181    |
| MBNL1-AS1               | 0.113125  |
| POLA2                   | 9.01455   |
| KATNB1                  | 35.7153   |
| DRG1                    | 66.2272   |
| FAM120B                 | 3.23619   |
| LRRC17                  | 0.0542799 |
| ZNF584                  | 6.22232   |
| PSMA3                   | 86.1158   |
| CUL4A                   | 19.0649   |
| HOXD9                   | 11.1971   |
| PCDHGA1,PCDHGA10,PCDHGA | 5.89483   |

|              |           |
|--------------|-----------|
| DHRS1        | 2.31392   |
| MRPL45       | 62.0706   |
| FAM199X      | 3.21307   |
| FAM13A-AS1   | 0.121829  |
| INPP5B       | 5.54089   |
| HOXA10,HOXA9 | 31.4711   |
| NOL7         | 126.749   |
| LYRM2        | 4.13769   |
| HAUS2        | 10.1347   |
| TMBIM6       | 306.162   |
| CUL1         | 24.4276   |
| MAP1LC3B     | 79.9806   |
| MSRB2        | 10.7874   |
| FIS1         | 208.233   |
| CDC37        | 282       |
| NT5DC1       | 11.1678   |
| KBTBD6       | 1.25393   |
| ARFRP1       | 17.5402   |
| DUSP28       | 2.29348   |
| NARS2        | 6.86304   |
| ASAP2        | 3.48649   |
| ZBTB12       | 6.65454   |
| LRTM2        | 0         |
| MDN1         | 0.7892    |
| DDX51        | 9.35012   |
| RPSAP9       | 9.80689   |
| GRHL1        | 0.843933  |
| ZC3H13       | 0.881203  |
| ADARB1       | 3.81833   |
| C6orf48      | 403.713   |
| CCT4         | 117.474   |
| TESC         | 53.9446   |
| POLR2K       | 60.5744   |
| NUP93        | 23.2908   |
| EXOSC4       | 136.008   |
| LINC00612    | 0         |
| DDX49        | 41.3091   |
| UVSSA        | 1.11967   |
| E2F4         | 59.1456   |
| PRPSAP2      | 22.1917   |
| FAM210B      | 22.1335   |
| PAQR8        | 2.17515   |
| SPRYD3       | 27.3797   |
| RPH3AL       | 3.65054   |
| TCP1         | 104.448   |
| SLC1A5       | 259.368   |
| ACSF3        | 6.01471   |
| FENDRR       | 0         |
| ABCA3        | 13.4718   |
| RPRD2        | 3.26182   |
| PMS1         | 4.33863   |
| LILRA6       | 0.0569774 |
| ELMOD2       | 2.8233    |
| FERMT1       | 5.3942    |
| NCOA3        | 1.38198   |
| LOC100303749 | 0         |
| RRP7A        | 28.7159   |
| PRKAG1       | 48.9185   |
| NID2         | 0.0658616 |
| POLR3K       | 38.274    |
| NDUFAF4      | 11.1237   |
| EEF2         | 2750.64   |
| GALNT6       | 15.6625   |
| KIAA1143     | 8.85503   |
| FLJ37035     | 0.05129   |
| ZNF696       | 6.61532   |
| TIE1         | 0.01616   |
| PRMT7        | 13.8301   |
| EIF4G1       | 41.8736   |
| HNRNPR       | 51.3135   |
| NT5DC3       | 2.61146   |
| LOC155060    | 3.24297   |
| GABPB2       | 1.08146   |
| ASF1A        | 5.37124   |
| TSPYL1       | 22.156    |
| RP2          | 1.24725   |
| TSNARE1      | 5.18147   |
| NCDN         | 11.3685   |
| IMPDH2       | 331.257   |

|              |            |
|--------------|------------|
| ZSWIM3       | 1.54206    |
| SLCO1B7      | 0.441343   |
| ZNF573       | 0.0947112  |
| PCCB         | 90.8469    |
| NME7         | 8.41226    |
| HDDC2        | 42.551     |
| GTDC1        | 1.39979    |
| SNX24        | 14.0936    |
| CXXC4        | 0.00765116 |
| ZNF567       | 2.72532    |
| MCOLN3       | 5.16523    |
| BTBD11       | 0.420221   |
| MPRIP        | 9.07135    |
| NUDT4        | 17.0376    |
| ZFC3H1       | 2.00112    |
| NVL          | 7.0573     |
| RSL1D1       | 74.4186    |
| XIAP         | 2.61667    |
| ELP4         | 11.5997    |
| EXOSC2       | 34.0886    |
| LEPROTL1     | 11.8329    |
| NINL         | 2.0786     |
| TYW3         | 9.71517    |
| NOP2         | 32.5378    |
| IL15RA       | 16.868     |
| ANK2         | 0.359811   |
| NSF          | 6.44235    |
| MRPL21       | 116.661    |
| UMPS         | 5.35484    |
| ADORA2B      | 35.5366    |
| ICT1         | 52.8015    |
| ELMO3        | 2.0618     |
| MAPKAPK5     | 13.2638    |
| METTL16      | 5.64029    |
| KBTBD11      | 3.68215    |
| TUBAL3       | 1.15843    |
| PDGFA        | 7.24907    |
| UNC5CL       | 0.646642   |
| CCBL2,RBML1  | 16.6263    |
| MEMO1        | 33.8683    |
| PPAT         | 8.35116    |
| APLN         | 3.55546    |
| MYSM1        | 1.70373    |
| OXLD1        | 49.8846    |
| ZC3H14       | 10.4029    |
| CDC42SE1     | 37.37      |
| PBX3         | 24.6451    |
| LOC100506190 | 14.4781    |
| BBS5         | 0.759203   |
| MAPKAPK3     | 77.0737    |
| FAR1         | 6.78686    |
| WWC1         | 8.79668    |
| TANGO6       | 2.52425    |
| EIF3D        | 250.591    |
| MPV17L2      | 15.2722    |
| IFITM4P      | 0          |
| COX6B1       | 403.199    |
| LOC100506668 | 4.47625    |
| DYNLT3       | 5.80332    |
| DNMT1        | 18.8868    |
| C6orf70      | 8.51186    |
| FTL          | 10423.9    |
| C1orf53      | 2.12095    |
| DMBX1        | 1.5254     |
| SNRPA        | 152.057    |
| EIF2B1       | 13.5851    |
| SLC25A14     | 6.24514    |
| SLC35A2      | 17.585     |
| ZNF440       | 2.72555    |
| ERLIN2       | 4.00257    |
| BCS1L        | 28.2552    |
| EFCAB11      | 13.3055    |
| SLC25A21     | 1.15458    |
| KHSRP        | 62.2747    |
| SESN2        | 69.9284    |
| FLAD1        | 33.18      |
| ZNF71        | 4.12321    |
| SNX10        | 10.8129    |
| SIRT5        | 5.04133    |

|                       |            |
|-----------------------|------------|
| LAP3                  | 27.8653    |
| SLC30A9               | 15.8207    |
| ALDH2                 | 72         |
| WDR18                 | 89.3413    |
| MTHFS,ST20,ST20-MTHFS | 21.6138    |
| ANGEL2                | 5.6789     |
| IFIT5                 | 3.40004    |
| DDX31                 | 17.243     |
| CDKN2AIPNL            | 35.2829    |
| AMACR,C1QTNF3         | 2.16081    |
| MRPS25                | 13.5208    |
| CCDC17                | 0.210492   |
| PPP1R37               | 12.7751    |
| FAM49A                | 0          |
| C2CD3                 | 0.227611   |
| ZNF217                | 2.04992    |
| RNF207                | 1.69886    |
| NAT10                 | 31.6424    |
| CAMKK1                | 5.15775    |
| SF3B4                 | 65.9818    |
| CCDC14                | 4.696      |
| GABPB1-AS1            | 1.51313    |
| DDX56                 | 39.7908    |
| ACSS1                 | 1.18394    |
| PRPF31                | 48.5706    |
| GPATCH4               | 22.5637    |
| FAM45B                | 0.0328689  |
| SLC25A53              | 0.00881195 |
| TFR2                  | 20.6107    |
| PDCD11                | 11.3216    |
| ZNF781                | 0.0342609  |
| AP3D1                 | 15.7214    |
| ZNF28                 | 1.49141    |
| TSR1                  | 22.4222    |
| IK                    | 19.8945    |
| ZNF766                | 4.23526    |
| TRIT1                 | 16.6747    |
| AMER1                 | 0.588806   |
| PSMC3                 | 83.7774    |
| NQO2                  | 107.35     |
| SLC30A5               | 5.98207    |
| TMC5                  | 1.60483    |
| TF                    | 0          |
| IBA57                 | 1.66288    |
| FUNDC1                | 14.058     |
| LUC7L3                | 25.18      |
| HPS3                  | 2.84367    |
| C21orf33              | 78.0803    |
| TXLNG                 | 13.3306    |
| CMAS                  | 19.1513    |
| RBM25                 | 11.0111    |
| TNKS2                 | 3.6179     |
| ZNF589                | 5.68855    |
| LACE1                 | 1.0479     |
| RMND5A                | 5.12584    |
| TMEM138               | 19.6266    |
| POLR1C                | 62.2359    |
| SHPRH                 | 0.752578   |
| NSUN2                 | 25.9585    |
| C12orf66              | 1.14979    |
| ELAC2                 | 31.6325    |
| LOC646214             | 0.184004   |
| B9D2                  | 7.74251    |
| UBP1                  | 18.0964    |
| CSNK1A1               | 33.6727    |
| NEDD9                 | 0          |
| LOC100130015          | 3.4543     |
| SERPINB6              | 111.426    |
| EZR                   | 80.0467    |
| KIFAP3                | 1.85257    |
| NOP14                 | 24.5073    |
| ZNF121                | 1.50941    |
| FLVCR1                | 3.24569    |
| ZNF17                 | 1.03479    |
| ZNF526                | 4.56706    |
| WHAMMP1               | 0.674953   |
| RCL1                  | 12.7777    |
| FABP3                 | 0.0830885  |
| ERI2                  | 4.03211    |

|               |           |
|---------------|-----------|
| TMEM236       | 0.045231  |
| SP110         | 1.63406   |
| FAM207A       | 106.455   |
| GALNT12       | 8.14889   |
| RPUSD2        | 17.6164   |
| MIR22.MIR22HG | 2.97599   |
| DCK           | 5.19408   |
| BAG2          | 23.1882   |
| AGBL3         | 0.0517869 |
| EXOSC8        | 38.8856   |
| SLC41A3       | 22.942    |
| RGS20         | 0.0543622 |
| GPD1L         | 3.24981   |
| SEC22C        | 8.45629   |
| LAMC2         | 0.105949  |
| TBC1D7        | 6.61449   |
| HNRNPA2B1     | 153.589   |
| ACADSB        | 2.38771   |
| DRP2          | 0.0380759 |
| HNRNPF        | 122.33    |
| TBXAS1        | 0.217494  |
| SURF1         | 49.1007   |
| CDC42BPA      | 2.5122    |
| GCN1L1        | 16.0804   |
| SLC9B2        | 8.21183   |
| GNL2          | 31.8553   |
| LOC730101     | 1.76158   |
| NUP88         | 28.7981   |
| PRKXP1        | 0.169596  |
| OSGEP         | 30.086    |
| SP8           | 0.19985   |
| CBLL1         | 7.08185   |
| REP15         | 0.688781  |
| UCHL3         | 56.478    |
| SURF2         | 87.3245   |
| MB21D2        | 1.77997   |
| SMG9          | 42.5755   |
| UGDH-AS1      | 2.26993   |
| SCAND3        | 0.569965  |
| SNORA49       | 0         |
| SKI           | 8.66704   |
| LOC728537     | 0.957171  |
| FLJ39051      | 1.93394   |
| HCG18         | 1.59268   |
| C3orf62       | 2.80339   |
| DCTD          | 65.5885   |
| EFR3A         | 5.43563   |
| VPS33A        | 7.78819   |
| RPTOR         | 5.72126   |
| FER1L5        | 0.0297971 |
| TWISTNB       | 4.70613   |
| GFAP          | 0.0378834 |
| THAP7-AS1     | 2.82785   |
| TNFRSF21      | 3.3327    |
| WDR53         | 2.91417   |
| INTS10        | 29.2168   |
| AKIP1         | 25.1123   |
| DUSP5         | 168.572   |
| BCDIN3D       | 2.65048   |
| LRRC8B        | 1.62623   |
| NPRL3         | 51.455    |
| C6orf211      | 5.63856   |
| SOBP          | 0.576367  |
| COG8,PDF      | 33.1735   |
| APOBEC3D      | 0.172351  |
| FANCF         | 4.46039   |
| MB21D1        | 5.23477   |
| KIAA1033      | 2.31239   |
| PSMG1         | 78.205    |
| PDE6D         | 10.6189   |
| BCAP29        | 9.293     |
| PLAA          | 9.61143   |
| TRIM23        | 1.84769   |
| DIS3          | 7.30631   |
| CHSY1         | 4.25609   |
| STPG1         | 6.4345    |
| PCDH12        | 0.0192493 |
| CTU2          | 20.89     |
| ESRRA         | 67.9387   |

|              |           |
|--------------|-----------|
| TTC19        | 25.279    |
| RAB18        | 11.7561   |
| CNOT10       | 14.4861   |
| RMDN3        | 15.475    |
| DVL1         | 87.3897   |
| BTBD2        | 82.0048   |
| PIEZO1       | 20.0528   |
| CLUH         | 35.1679   |
| C19orf55     | 1.41074   |
| ODF2L        | 2.77363   |
| GABPB1       | 8.4453    |
| SUMF2        | 74.4054   |
| LAMB1        | 17.3872   |
| USP45        | 1.36259   |
| TPRG1L       | 18.5099   |
| CCNT1        | 4.65633   |
| DDX42        | 19.2574   |
| ABL2         | 22.081    |
| CDKN2B       | 3.88419   |
| PHF14        | 4.99641   |
| TATDN1       | 70.3292   |
| LRRC47       | 33.6341   |
| NPRL2        | 17.4308   |
| ANKK1        | 0.226347  |
| FAM185A      | 2.29163   |
| LARP1        | 28.2034   |
| C11orf95     | 5.66113   |
| PSMD12       | 31.7042   |
| XRCC5        | 81.2335   |
| LOC100288637 | 1.32551   |
| LOXL1        | 5.75516   |
| C9orf131     | 0         |
| LOC149134    | 1.73298   |
| WDR12        | 16.777    |
| GSS          | 72.7966   |
| POGLUT1      | 3.62807   |
| NT5M         | 10.7401   |
| PXK          | 1.5851    |
| MXD4         | 29.9315   |
| ZNF780B      | 0.775016  |
| MSRA         | 11.2479   |
| C1orf74      | 1.9332    |
| C15orf41     | 2.17056   |
| S100A6       | 2546.35   |
| MPZL3        | 0.0989486 |
| ZNF605       | 1.73061   |
| SRSF8        | 7.10554   |
| GATM-AS1     | 0.102432  |
| PIH1D2       | 1.23745   |
| POLM         | 6.92851   |
| VPS36        | 5.26033   |
| LOC728730    | 0.461659  |
| C8orf33      | 36.9968   |
| C1orf216     | 9.20778   |
| MKLN1        | 5.75243   |
| TMEM106A     | 0.7233    |
| PPP1CB       | 21.6847   |
| RASD2        | 0.626343  |
| LBX2         | 7.42052   |
| UTP20        | 1.81652   |
| GPR83        | 0.174296  |
| COL5A2       | 0.0576353 |
| PCNXL3       | 8.25019   |
| RBM43        | 1.42113   |
| SETD8        | 20.3685   |
| FASTKD3      | 10.0465   |
| RP1L1        | 0.028121  |
| UNC50        | 33.55     |
| NACC2        | 8.75722   |
| UQCC         | 22.1523   |
| MNT          | 6.2661    |
| ATAT1        | 1.33997   |
| ATF6         | 7.94006   |
| DHX57        | 3.16835   |
| MFAP1        | 18.597    |
| CCDC137      | 26.8291   |
| DDX19A       | 12.8065   |
| ACCS         | 1.6885    |
| ZFP69B       | 1.30027   |

|                |           |
|----------------|-----------|
| EOGT           | 4.38201   |
| DUSP6          | 23.3604   |
| AHCTF1P1       | 0         |
| PNPLA3         | 0.798478  |
| PPP1R16A       | 34.6199   |
| LOC100505715   | 0.266398  |
| AKR7L          | 1.66246   |
| ADAT3,SCAMP4   | 41.9909   |
| ERRF1          | 96.9615   |
| BBS10          | 2.55299   |
| MRPS17         | 77.0675   |
| CHD1L          | 31.8509   |
| LAG3           | 0.116743  |
| NEK9           | 6.18884   |
| SEC63          | 5.26461   |
| ZNF786         | 3.51487   |
| GLTSCR1L       | 0.759486  |
| CYB561         | 13.7894   |
| BRD3           | 8.92167   |
| AKIRIN2        | 21.1812   |
| DOCK3          | 0.0255423 |
| CTAGE5         | 5.70934   |
| HIRA           | 7.62828   |
| NDUFAF1        | 15.0115   |
| XYLB           | 1.77724   |
| CYLD           | 2.17978   |
| ST3GAL3        | 3.60385   |
| LOC729013      | 8.34038   |
| HGF            | 3.85817   |
| MRPL10         | 100.645   |
| WDR20          | 9.94017   |
| ZNF543         | 0.763977  |
| ASCC1          | 9.15317   |
| TM4SF20        | 0         |
| MORN4          | 5.6315    |
| TK2            | 4.58396   |
| FHDC1          | 0.334671  |
| LHX4           | 0.932953  |
| C4orf32        | 5.05786   |
| ITPRIP         | 6.7505    |
| POLR2A         | 11.319    |
| LFNG           | 2.07008   |
| HNRNPAB        | 150.057   |
| FEZ2           | 154.277   |
| ANKMY1         | 1.61453   |
| DKFZP686I15217 | 1.05311   |
| COP22          | 5.91449   |
| RABGEF1        | 5.19326   |
| GDAP2          | 1.32761   |
| USP35          | 2.47532   |
| KLHL35         | 15.8569   |
| PSMD9          | 37.1452   |
| WDR83          | 14.8598   |
| HR             | 1.06461   |
| XPOT           | 21.0077   |
| CRYZL1         | 6.37504   |
| HMOX2          | 38.4916   |
| GPR125         | 5.48264   |
| PHLDA2         | 115.921   |
| ABHD8          | 10.3953   |
| FOXK1          | 9.65063   |
| CBX6           | 6.31934   |
| NMI            | 9.69699   |
| SEH1L          | 25.1554   |
| AACS           | 10.8428   |
| MED28          | 43.8593   |
| CYP26A1        | 0.0255062 |
| E2F6           | 8.23089   |
| FBXL19-AS1     | 0.352289  |
| MRPL15         | 62.5638   |
| SET            | 328.679   |
| VSIG10L        | 1.23171   |
| ATRIP,TREX1    | 6.00656   |
| MYO5A          | 2.65034   |
| ZNF770         | 10.0697   |
| SLC9A3         | 0.347504  |
| EPN2           | 9.40907   |
| AGFG2          | 1.71212   |
| PMS2P5         | 3.3672    |



|                           |           |
|---------------------------|-----------|
| APOC1                     | 11.2975   |
| DIAPH3                    | 7.28154   |
| HNRNPA1                   | 826.866   |
| BTBD3                     | 2.60639   |
| LOC153684                 | 0.148469  |
| PANK3                     | 3.55627   |
| FCHO1                     | 9.74256   |
| FAM222A                   | 1.03337   |
| MTOR                      | 3.33125   |
| FAM120C                   | 3.05655   |
| ZNF614                    | 0.208228  |
| TUT1                      | 12.5468   |
| IFT80                     | 2.17758   |
| RIOK2                     | 7.37929   |
| INPP5A                    | 6.55402   |
| PRR7-AS1                  | 0.894328  |
| DCLRE1C                   | 3.08049   |
| NARG2                     | 2.43398   |
| CYBASC3                   | 9.25997   |
| RBM26                     | 7.68723   |
| USB1                      | 30.398    |
| MICAL3                    | 4.58137   |
| ZNF773                    | 0.820897  |
| RAC3                      | 242.343   |
| GAR1                      | 53.037    |
| SLC27A4                   | 54.6423   |
| ACP6                      | 19.2274   |
| EMILIN1                   | 0.254595  |
| MEGF8                     | 1.19521   |
| MTMR10                    | 2.32887   |
| ALG8                      | 27.7791   |
| CIRH1A                    | 40.9297   |
| MTIF2                     | 17.3275   |
| COBL                      | 4.3752    |
| NSMCE4A                   | 21.5796   |
| SLC45A3                   | 6.89917   |
| TFDP1                     | 24.554    |
| WDR46                     | 42.9107   |
| BCCIP                     | 61.9081   |
| INTS1                     | 18.7996   |
| APPL2                     | 5.03959   |
| TIMM23                    | 122.134   |
| DPH3                      | 3.6727    |
| G3BP1                     | 41.0716   |
| ORAOV1                    | 6.85156   |
| MAOA                      | 0.0248906 |
| CTTN                      | 78.7442   |
| NPHP4                     | 3.11267   |
| MTA3                      | 14.379    |
| CCZ1B                     | 7.31723   |
| GOLM1                     | 49.9965   |
| ARHGAP40                  | 1.64153   |
| BIVM,BIVM-ERCC5,ERCC5     | 19.2162   |
| AARSD1,PTGES3L,PTGES3L-AA | 36.7666   |
| BACE1-AS                  | 0.594543  |
| OXNAD1                    | 2.24949   |
| TRMT5                     | 5.30285   |
| LRPPRC                    | 34.0116   |
| RIBC1                     | 0.429587  |
| KRT7                      | 5.22985   |
| TMEM128                   | 15.6816   |
| FLJ10038                  | 0.877271  |
| PYCR2                     | 74.1971   |
| ULK4                      | 0.284032  |
| MAP3K15                   | 0.649834  |
| IFT81                     | 1.14531   |
| MGMT                      | 81.283    |
| C7orf53                   | 0.66907   |
| OPRL1                     | 2.05105   |
| DBT                       | 1.32064   |
| ATR                       | 0.924058  |
| SNHG1                     | 210.942   |
| PSMC6                     | 34.2169   |
| KAZN                      | 7.23567   |
| WDR43                     | 23.7384   |
| DNAJA1                    | 95.2085   |
| FGGY                      | 8.18159   |
| FLJ26850                  | 2.44053   |
| MYCL1                     | 4.13719   |

|                       |            |
|-----------------------|------------|
| GPATCH2               | 0.862342   |
| RPA2                  | 30.245     |
| FLJ30403              | 0.892289   |
| CA13                  | 5.28363    |
| VPS37B                | 50.865     |
| HNRPDL                | 44.0678    |
| SLX1B,SULT1A4         | 0.555738   |
| SLC9A8                | 3.46317    |
| PSD4                  | 1.63053    |
| DYNC1LI1              | 19.0017    |
| UGDH                  | 7.18007    |
| KIAA0020              | 15.5575    |
| TMED5                 | 7.62488    |
| SLC16A1               | 36.1988    |
| PHKG1                 | 27.9816    |
| NUDT19                | 17.8538    |
| SSR3                  | 281.632    |
| C16orf91              | 32.7984    |
| APLF                  | 0.352299   |
| PIGQ                  | 36.4345    |
| ZNF398                | 3.14201    |
| NDUFB5                | 76.4466    |
| SNHG12                | 39.8221    |
| DYNC2H1               | 0.898472   |
| PDCD7                 | 17.4115    |
| POLK                  | 1.5744     |
| WDR67                 | 2.68551    |
| CTSL1                 | 127.19     |
| SMG8                  | 6.51789    |
| KIAA1147              | 4.07943    |
| DCAF13                | 56.3086    |
| ENTPD3-AS1            | 0.154401   |
| CAMK2N1               | 24.8147    |
| CCDC111               | 2.45157    |
| MTRR                  | 5.92777    |
| AADAT                 | 6.05152    |
| DNAJA2                | 29.9687    |
| USP50                 | 0.845793   |
| UBE2N                 | 42.3789    |
| SEMA3F                | 5.09643    |
| C7orf41               | 3.37839    |
| NOL8                  | 6.84253    |
| CACNB2                | 0.0519541  |
| CCDC64B               | 0.0553551  |
| MRPS23                | 40.6855    |
| ZC3H12C               | 1.01646    |
| YAP1                  | 11.4842    |
| CDK14                 | 0.00767905 |
| RNMTL1                | 31.2303    |
| RBM14,RBM14-RBM4,RBM4 | 110.856    |
| PCBP2                 | 228.225    |
| UNC119B               | 11.2477    |
| CTNS                  | 5.54931    |
| FARP2                 | 0.594242   |
| CREBL2                | 6.08257    |
| LEO1                  | 7.38664    |
| FGFR4                 | 11.4898    |
| TLCD2                 | 1.65781    |
| MCL1                  | 81.5178    |
| AGPS                  | 3.77695    |
| ARHGAP39              | 6.26167    |
| TMEM86A               | 1.17653    |
| CHTF8                 | 41.7324    |
| GAS2                  | 0.0774847  |
| RABGGTB               | 71.3056    |
| HSD17B1               | 30.6418    |
| EIF3M                 | 158.111    |
| ZNF350                | 2.98303    |
| DLX1                  | 5.28596    |
| TFAM                  | 6.79044    |
| UPF3B                 | 6.27648    |
| G6PC3                 | 73.7915    |
| CSTF3                 | 18.2901    |
| HSP90AA1              | 300.516    |
| DOPEY1                | 0.41362    |
| NRD1                  | 23.1685    |
| KCNQ4                 | 6.25179    |
| SLC35F6               | 21.033     |
| DHRS4L2               | 12.7158    |

|              |           |
|--------------|-----------|
| CEP63        | 2.25834   |
| JUNB         | 33.7202   |
| ZNF181       | 1.95659   |
| CHIC2        | 22.3582   |
| LOC400657    | 3.13761   |
| TMEM41B      | 32.3495   |
| CENPK        | 2.57993   |
| ATP9B        | 2.51446   |
| TSTA3        | 193.461   |
| PRPF40A      | 11.1909   |
| TSPAN7       | 0.78679   |
| JAGN1        | 33.2409   |
| ORC5         | 22.7801   |
| SNORA8       | 30.5931   |
| C6orf164     | 0.180653  |
| GDI2         | 192.61    |
| ZNF497       | 1.93045   |
| UEVLD        | 1.17635   |
| PRMT6        | 7.0011    |
| C9orf72      | 3.9007    |
| FRA10AC1     | 6.08482   |
| PSPC1        | 22.066    |
| ACAD8        | 14.4918   |
| CENPQ        | 5.26754   |
| RPP25L       | 104.87    |
| ATXN2L       | 59.0333   |
| TXNDC9       | 3.11917   |
| ACP1         | 69.6392   |
| GSPT2        | 4.75692   |
| PPIL1        | 25.4312   |
| REXO4        | 82.0897   |
| CCDC78       | 4.50814   |
| MED31        | 8.21523   |
| FAHD2B       | 20.8804   |
| C2orf44      | 3.50261   |
| PLRG1        | 14.6269   |
| POLR3GL      | 28.6506   |
| FARSA        | 107.847   |
| MGME1        | 12.3435   |
| IDH3A        | 16.1055   |
| PRMT3        | 4.97678   |
| CDH3         | 0.141049  |
| PLN          | 0         |
| MOCOS        | 17.7569   |
| KPNB1        | 47.0378   |
| TRA2A        | 34.601    |
| DUSP7        | 27.2712   |
| ITGA2        | 1.00128   |
| RPL22L1      | 374.589   |
| SPATC1       | 0.0371203 |
| TIPARP       | 13.3931   |
| LOC100506548 | 29.1287   |
| TRIM65       | 17.6864   |
| DNTTIP2      | 18.671    |
| PPP2R2C      | 0.0113151 |
| ZKSCAN1      | 2.14961   |
| POLR1B       | 10.4823   |
| C17orf82     | 0.287655  |
| RECQL        | 5.22537   |
| PARP9        | 1.85704   |
| ADPRH        | 0.962318  |
| GNB4         | 0.0896886 |
| CPSF6        | 10.8572   |
| ABCC9        | 0.496721  |
| RGPD4        | 0         |
| PA2G4        | 135.02    |
| AHSA2        | 5.29072   |
| RABEP1       | 8.99556   |
| ASS1         | 130.185   |
| ELAC1        | 2.33002   |
| GUCA1B       | 1.3233    |
| CYP39A1      | 0.252234  |
| ZNF517       | 7.55274   |
| PLBD2        | 10.0778   |
| DDX1         | 32.1822   |
| RASGRP1      | 0.771692  |
| ZNF622       | 35.2365   |
| CSPP1        | 2.24907   |
| MYOF         | 15.969    |

|              |            |
|--------------|------------|
| LOC100093631 | 0.3549     |
| FARSB        | 30.5792    |
| PEX1         | 5.00602    |
| STAT2        | 5.18594    |
| ANAPC13      | 35.8272    |
| NAP1L5       | 0.968694   |
| ACYP2        | 4.30333    |
| RRP9         | 86.3599    |
| ARGLU1       | 44.3377    |
| SENP6        | 5.17842    |
| POLA1        | 2.17658    |
| THADA        | 2.0693     |
| PALB2        | 3.32066    |
| RAN          | 436.14     |
| PES1         | 95.6485    |
| UBB          | 1228.13    |
| ZNF429       | 0.616021   |
| TNPO2        | 16.4595    |
| XPNPEP3      | 4.94799    |
| RECQL5       | 7.29926    |
| CCDC51       | 18.5248    |
| MAN1A1       | 1.21166    |
| MCAT         | 21.281     |
| NABP1        | 31.9122    |
| SLC38A9      | 4.70168    |
| STK4         | 7.23934    |
| WDR90        | 5.05102    |
| HIVEP3       | 0.258864   |
| MYO6         | 1.82855    |
| SLC25A12     | 3.93589    |
| JAG2         | 19.686     |
| SEPHS2       | 61.272     |
| TUSC2        | 19.8386    |
| FOS          | 4.68925    |
| ZC3HAV1      | 5.98634    |
| KMO          | 0          |
| LOC100289361 | 7.54264    |
| RPL26L1      | 95.4667    |
| MTFMT        | 11.1288    |
| LOC100133161 | 0.141984   |
| MAX          | 43.6904    |
| RNF13        | 6.51666    |
| HIST1H2BL    | 2.66646    |
| TSC2         | 11.1997    |
| CLCA2        | 0.00899844 |
| MOCS3        | 5.41879    |
| NGDN         | 23.2879    |
| TMEM150A     | 14.3372    |
| SCNN1D       | 1.0269     |
| CHRNA2       | 0          |
| RNF187       | 66.3005    |
| RRP1         | 54.8681    |
| MAPK8IP2     | 1.21689    |
| FYTTD1       | 8.64134    |
| MDM1         | 2.42683    |
| ACHE         | 5.37034    |
| MOAP1        | 19.2603    |
| LACTB2       | 18.7997    |
| ATXN10       | 23.9795    |
| UFL1         | 4.42853    |
| TAX1BP1      | 15.6846    |
| TBX15        | 0.0375798  |
| CBR4         | 5.06826    |
| SLC35F5      | 4.77827    |
| MTAP         | 37.4208    |
| PLA2G6       | 2.31352    |
| PDE12        | 9.61567    |
| ZNF862       | 1.57227    |
| CAPRIN1      | 44.9111    |
| CTBS         | 3.8672     |
| LOC440600    | 0.0937318  |
| GTPBP2       | 45.2279    |
| LOC100134368 | 0.355442   |
| SERPINE1     | 463.332    |
| BAZ1B        | 9.81046    |
| ZNF720       | 2.27301    |
| SP140L       | 4.30794    |
| RHOBTB3      | 7.66809    |
| GGCX         | 7.14718    |

|                            |           |
|----------------------------|-----------|
| PABPC1                     | 1012.37   |
| CD24                       | 5.07389   |
| LOC93622                   | 24.147    |
| PM20D2                     | 11.8703   |
| FRMD8                      | 12.2512   |
| ODF3B                      | 13.0968   |
| MED19                      | 5.82024   |
| FBXL19                     | 12.144    |
| YEATS4                     | 29.1148   |
| SLC10A5                    | 1.43242   |
| ZNF540                     | 0.211195  |
| PPP1R2P3                   | 0         |
| LMOD1                      | 0.162488  |
| MSH2                       | 7.83839   |
| SPATA7                     | 4.44448   |
| LYRM7                      | 1.7004    |
| SNAPC4                     | 12.982    |
| ZNF749                     | 0.658246  |
| CDK17                      | 12.3905   |
| PCLO                       | 0.0217342 |
| AGK                        | 12.0929   |
| REV3L                      | 0.493509  |
| FAM206A                    | 20.8387   |
| MLYCD                      | 9.69415   |
| MLF1IP                     | 9.64576   |
| PDE4D                      | 2.9101    |
| CARS2                      | 61.9511   |
| PPIF                       | 65.6877   |
| SUPT6H                     | 17.4524   |
| BAHCC1                     | 1.31152   |
| TRA2B                      | 28.7895   |
| C19orf33                   | 320.16    |
| PWP1                       | 37.9945   |
| RMND1                      | 36.3575   |
| CCNJ                       | 4.08668   |
| MARVELD1                   | 14.9275   |
| HEATR5A                    | 0.815552  |
| ZNF260                     | 2.72376   |
| ZNF629                     | 7.04922   |
| LIG4                       | 1.18782   |
| C1QBP                      | 355.735   |
| C6orf132                   | 4.88234   |
| ZNF467                     | 1.79182   |
| ZNF69                      | 2.60175   |
| ACTN4                      | 56.9888   |
| CD58                       | 8.35334   |
| CNIH2                      | 0.386705  |
| PITPNM1                    | 15.6758   |
| TFSM                       | 25.0119   |
| COMT                       | 59.8656   |
| ZFP112                     | 1.01246   |
| AURKC                      | 1.13347   |
| GLS                        | 11.3628   |
| ZBTB1                      | 4.49075   |
| SMAGP                      | 194.191   |
| ARHGAP31                   | 1.39679   |
| ZNF43                      | 0         |
| NCAPG                      | 6.59397   |
| ZNF611                     | 0.367594  |
| LPXN                       | 1.74952   |
| SLC25A20                   | 3.93136   |
| GADD45A                    | 152.13    |
| CDH23                      | 0.0214816 |
| MRS2P2                     | 0.0148919 |
| CYP1A1                     | 0.453203  |
| ADAMTS17                   | 0.028164  |
| CCDC25                     | 12.6415   |
| IL6R                       | 2.69418   |
| RNF149                     | 19.1639   |
| DHX29                      | 3.65706   |
| L3HYPDH                    | 3.40714   |
| CNPY2,PAN2                 | 122.82    |
| HS2ST1                     | 4.28733   |
| SLC2A11                    | 3.34022   |
| BCL2L2,BCL2L2-PABPN1,PABPN | 144.72    |
| PCBD2                      | 3.2803    |
| GNN                        | 0.0349329 |
| FAM114A2                   | 4.26071   |
| PLAGL1                     | 11.4437   |

|                          |           |
|--------------------------|-----------|
| ZNF197                   | 3.46119   |
| LINC00673                | 0.187104  |
| HSD17B10                 | 137.628   |
| FAM13B                   | 2.69552   |
| GABPA                    | 3.24997   |
| OSBPL3                   | 1.68334   |
| HNRNPA1L2                | 9.08022   |
| GALM                     | 4.72717   |
| SCP2                     | 31.9855   |
| NLE1                     | 43.347    |
| FGD5-AS1                 | 12.3808   |
| RRP1B                    | 16.2552   |
| BICD1                    | 0.29714   |
| VDAC1                    | 159.448   |
| ARID5B                   | 0.206269  |
| DPH2                     | 25.5053   |
| WRB                      | 17.6686   |
| CYCS                     | 25.7824   |
| ZNF264                   | 1.5442    |
| LOC645513                | 2.23569   |
| FLJ42627                 | 2.6354    |
| LOC100505761             | 12.2424   |
| POLR3D                   | 37.0781   |
| LINS                     | 2.22237   |
| TICRR                    | 4.62982   |
| DHX34                    | 13.7532   |
| VPS53                    | 3.42815   |
| C9orf139                 | 0.0171232 |
| LOC100652770             | 0.0654481 |
| MRPL35                   | 11.6876   |
| GOLGA6L4                 | 0.119908  |
| NAA15                    | 8.12652   |
| GTPBP3                   | 21.6725   |
| KLHL9                    | 7.99494   |
| EML3                     | 16.3486   |
| GUSBP1                   | 2.96531   |
| DHX9                     | 29.2158   |
| KLHL8                    | 1.58194   |
| ARRB1                    | 5.35034   |
| TMEM70                   | 33.2915   |
| MUSTN1,TMEM110,TMEM110-M | 5.38797   |
| HUNK                     | 0.42544   |
| CASP3                    | 5.53811   |
| RFX5                     | 16.3758   |
| WIPI1                    | 11.4337   |
| LY6K                     | 0.223082  |
| USP6                     | 0.219167  |
| TCFL5                    | 7.6425    |
| ATP11C                   | 2.06519   |
| CES2                     | 9.16585   |
| AIMP2                    | 13.4865   |
| HIST1H2BI                | 0.684016  |
| PNPT1                    | 9.44525   |
| NOXA1                    | 8.74852   |
| MORN2                    | 9.20045   |
| IREB2                    | 4.79624   |
| DRAM1                    | 7.77529   |
| ASNSD1                   | 18.4025   |
| IL17RE                   | 0.74222   |
| C15orf55                 | 0         |
| MEGF6                    | 0.869639  |
| ISCU                     | 64.8346   |
| MGLL                     | 32.1326   |
| DTD1                     | 67.8094   |
| PLIN1                    | 0.114802  |
| C1orf109                 | 8.50511   |
| NOM1                     | 8.1243    |
| PEX11G                   | 3.24883   |
| GHITM                    | 92.7774   |
| PIGB                     | 3.254     |
| RPA4                     | 0.254649  |
| LOC646762,ZNRF2P2        | 2.39105   |
| MAGOH                    | 75.2201   |
| LDOC1L                   | 6.37233   |
| LOC100129361             | 5.02745   |
| SH3BP5-AS1               | 0.66017   |
| TSN                      | 21.5894   |
| CCT3                     | 365.096   |
| LIN9                     | 2.38021   |

|            |            |
|------------|------------|
| LRRC58     | 4.42366    |
| EPHX2      | 4.70028    |
| ENC1       | 13.6475    |
| CCAR1      | 7.19981    |
| BPHL       | 17.9288    |
| PNPO       | 14.529     |
| CELF3      | 0.0320407  |
| HELB       | 0.435162   |
| RNF20      | 6.84344    |
| XRN2       | 23.6627    |
| AKAP11     | 2.21656    |
| RAPGEF3    | 0.707379   |
| CLIC4      | 26.281     |
| CCDC77     | 3.85092    |
| CRLF1      | 0.860395   |
| KLC2       | 38.4489    |
| GTF2E1     | 5.71639    |
| SCLY_UBE2F | 37.3788    |
| AQPEP      | 0.00823408 |
| ETV5       | 13.9069    |
| CCT5       | 89.2681    |
| BTF3L4     | 15.0877    |
| FUBP3      | 24.103     |
| LRRC8D     | 7.56325    |
| DNAAF2     | 8.59686    |
| TUBB2B     | 0.969477   |
| NEUROD1    | 0          |
| SPIRE1     | 6.21005    |
| HEXDC      | 2.49052    |
| LAT2       | 0.559404   |
| PSMD14     | 91.2535    |
| ZNHIT6     | 5.60219    |
| ST5        | 1.66793    |
| ALG1       | 5.41281    |
| UGGT2      | 2.49923    |
| C4orf22    | 2.46283    |
| DDX10      | 11.4589    |
| LYPLAL1    | 14.5259    |
| B4GALNT3   | 2.06868    |
| CCDC112    | 2.18776    |
| ME3        | 10.9492    |
| DPM1       | 45.8731    |
| RARRES1    | 1.36744    |
| SRGAP3     | 0.020595   |
| CLN6       | 57.1029    |
| APOLD1     | 0.322906   |
| PTRH1      | 82.7738    |
| DNAJC11    | 19.3515    |
| STK36      | 3.07073    |
| LOC391322  | 3.37598    |
| NSRP1      | 8.63901    |
| TTLL13     | 0.106476   |
| LPCAT1     | 30.5048    |
| LOC283174  | 1.02603    |
| PCMTD2     | 5.76765    |
| CPSF3L     | 95.6589    |
| DNAJA3     | 43.6317    |
| ERH        | 263.736    |
| EFTUD2     | 39.0877    |
| TMPRSS6    | 0.065359   |
| C6orf203   | 14.3223    |
| LOC645249  | 17.2628    |
| FAM78A     | 4.07945    |
| ZNF562     | 3.88733    |
| UBE2Q2     | 12.9428    |
| DOC2B      | 0.597096   |
| ARPC5L     | 113.749    |
| ATP11A     | 2.20588    |
| ABCC10     | 2.31432    |
| PDCD2      | 45.4086    |
| SLC35E2B   | 6.37012    |
| TOB1-AS1   | 1.20934    |
| IFT52      | 13.6597    |
| CCDC125    | 2.07276    |
| CCDC34     | 9.13915    |
| CYP26B1    | 1.02191    |
| FBXO24     | 0.334322   |
| DNAJC6     | 2.0103     |
| OCIAD1     | 46.8531    |

|                       |           |
|-----------------------|-----------|
| LOC284412             | 0.531018  |
| NOLC1                 | 24.9484   |
| MPP5                  | 4.65627   |
| TMEM194B              | 13.0363   |
| CHD4                  | 18.7286   |
| KCTD13                | 12.0865   |
| EWSR1                 | 120.869   |
| CCDC41                | 1.87207   |
| PION                  | 1.12792   |
| FAM169A               | 2.77957   |
| SFMBT1                | 3.40604   |
| RARS                  | 39.935    |
| FCGBP                 | 0.0295718 |
| MARS2                 | 7.36611   |
| EIF4A1,SENP3          | 1027.59   |
| TMEM175               | 8.04793   |
| WDR75                 | 11.2684   |
| JAZF1-AS1             | 0.0410541 |
| C17orf76-AS1,SNORD49B | 1463.46   |
| ASAP3                 | 5.69416   |
| UBE2G2                | 21.3129   |
| EIF6                  | 320.489   |
| KIF3A                 | 1.89286   |
| NUDT12                | 2.92052   |
| OMA1                  | 7.61301   |
| WIBG                  | 20.0661   |
| RNASEH1               | 9.92897   |
| CNIH                  | 70.825    |
| SLC16A13              | 13.1831   |
| BZW2                  | 96.9227   |
| TMEM69                | 49.84     |
| HDHD1                 | 14.5749   |
| DUSP12                | 26.4456   |
| CALML6                | 0.143663  |
| ADCK1                 | 4.35378   |
| SLC25A33              | 25.5386   |
| HMX3                  | 0.95742   |
| THPO                  | 0.306926  |
| AGAP2                 | 0.357193  |
| SLC4A11               | 12.0668   |
| SLC2A10               | 2.12405   |
| VKORC1L1              | 10.3241   |
| ACSL1                 | 8.91319   |
| PPM1N                 | 5.99818   |
| FAM13C                | 0         |
| ZNF14                 | 2.35168   |
| ZNF473                | 3.64271   |
| NMRK1                 | 9.59705   |
| C12orf76              | 1.80274   |
| ARHGAP24              | 0.148613  |
| WWC2-AS2              | 1.00038   |
| BCLAF1                | 9.67331   |
| AS3MT,C10orf32        | 5.87019   |
| UBQLN2                | 12.3088   |
| PIK3C3                | 9.39633   |
| SDR9C7                | 0.0280026 |
| ARMC2                 | 0.105648  |
| PUS1                  | 43.8297   |
| IVD                   | 16.583    |
| ARHGEF2               | 66.2494   |
| SPIN2B                | 2.75157   |
| C7orf25               | 6.59885   |
| LOC100128881          | 22.8467   |
| CORO1C                | 110.521   |
| PDE4A                 | 1.59845   |
| TXNL4B                | 7.89568   |
| ZNF638                | 5.19773   |
| LINC00657             | 29.2467   |
| TPMT                  | 4.7763    |
| ABCB8                 | 5.76296   |
| ZNF474                | 10.9079   |
| ERCC4                 | 0.740978  |
| WNT10A                | 1.53595   |
| NLRP9                 | 0.0593802 |
| FAM110D               | 0.725356  |
| GTF3C6                | 60.8355   |
| FERMT3                | 0.423293  |
| PROCA1                | 1.03418   |
| PAFAH2                | 3.36219   |



|              |           |
|--------------|-----------|
| TRMT61B      | 9.86673   |
| ASNA1        | 102.504   |
| ZNF83        | 3.05606   |
| RFWD3        | 8.8914    |
| RRP12        | 13.5251   |
| PELI2        | 0.818905  |
| AGER         | 1.43524   |
| SH2D4A       | 3.90695   |
| EFCAB2       | 1.86438   |
| KIAA0247     | 1.79967   |
| CRYM         | 0.900565  |
| DDX28        | 15.1656   |
| STYX         | 3.28986   |
| LOC344595    | 0.834515  |
| GID4         | 5.16156   |
| C9orf66      | 0.311805  |
| TTLL11       | 2.87466   |
| SLC1A4       | 9.727     |
| SYMPK        | 21.7638   |
| PMEPA1       | 1.07635   |
| AUNIP        | 6.98701   |
| DND1         | 10.214    |
| DNAJC7       | 40.4524   |
| MUM1         | 8.92896   |
| POLR1A       | 5.99497   |
| ZFP90        | 3.00841   |
| POLR1E       | 44.2323   |
| NAT9         | 33.815    |
| LZTFL1       | 3.12154   |
| ATP5S        | 6.7579    |
| EXOSC1       | 34.5812   |
| ECHDC1       | 22.1131   |
| NIT1         | 37.4423   |
| SMARCA2      | 4.85161   |
| XPO4         | 2.84884   |
| C15orf37     | 2.54288   |
| GSTA4        | 10.8578   |
| MSTO1        | 8.84255   |
| ZNF7         | 19.3632   |
| KCTD5        | 30.9623   |
| ACAD9        | 13.881    |
| PLXNB3       | 0.593764  |
| KIAA1430     | 9.78015   |
| RNU6ATAC     | 14.355    |
| KLHL5        | 1.57283   |
| LOC339874    | 0.24429   |
| SSR4P1       | 0.514481  |
| GRASP        | 0.382683  |
| POP1         | 6.33896   |
| HDAC9        | 8.81159   |
| ACBD6        | 34.6943   |
| SAMD11       | 2.2306    |
| LHFPL4       | 1.06374   |
| DNAH17       | 0.172389  |
| HIST3H2BB    | 0         |
| SMKR1        | 6.98249   |
| DLAT         | 4.77367   |
| MEST         | 14.4418   |
| KIAA0232     | 1.96748   |
| HSPA8        | 766.127   |
| KIAA0895     | 0.610341  |
| CRB2         | 0.0140171 |
| KEL          | 0         |
| MR1          | 1.35543   |
| PLCG2        | 3.25015   |
| KCNIP3       | 3.55423   |
| FUBP1        | 25.1024   |
| HECTD1       | 4.05421   |
| KIF5B        | 14.9163   |
| C19orf57     | 0.441096  |
| RAB23        | 2.3648    |
| TCTEX1D4     | 0         |
| LOC100129480 | 0.0447737 |
| RCAN1        | 12.1891   |
| LOC100505978 | 0.118449  |
| SCNN1A       | 0.916263  |
| KIN          | 2.29016   |
| PITPNA       | 18.1439   |
| CEP72        | 9.20126   |

|                   |           |
|-------------------|-----------|
| FBXL14            | 2.09072   |
| C5orf55           | 3.00357   |
| AP4E1             | 1.51599   |
| NOB1              | 172.572   |
| LCTL              | 0.578397  |
| OR10H1            | 0.0686968 |
| RND2              | 0.490054  |
| MCCC2             | 23.4658   |
| ZFP62             | 3.15982   |
| NHLH1             | 0.0247609 |
| ABHD14A,ACY1      | 105.569   |
| NANOS1            | 2.85514   |
| VIPAS39           | 6.76605   |
| PIPOX             | 0.0985351 |
| PLGRKT            | 14.6863   |
| LRRC69            | 0.210227  |
| FAM167A           | 1.08208   |
| HIST2H2BF         | 2.00627   |
| SPAG1             | 4.15561   |
| VAR5              | 66.8217   |
| TRMT6             | 10.7624   |
| CLUAP1            | 3.52095   |
| PALLD             | 5.47233   |
| PRODH             | 1.05369   |
| MAMSTR            | 1.19286   |
| NFKBID            | 2.51128   |
| GK5               | 0.648772  |
| IL27RA            | 8.89399   |
| DCUN1D1           | 4.34721   |
| ANKRD42           | 0.35687   |
| ABCD1             | 13.101    |
| AMIGO3            | 3.2471    |
| FAM188B,INMT      | 0.945671  |
| WDR25             | 5.52458   |
| SNORA71A          | 14.2553   |
| UCKL1-AS1         | 0.0583152 |
| MRPS10            | 20.9826   |
| PDIK1L            | 2.14862   |
| ZNF627            | 4.35684   |
| ILF2              | 160.266   |
| LOC100009676      | 2.48805   |
| PFDN6             | 123.013   |
| FLJ31813          | 0.295888  |
| DAGLA             | 1.60328   |
| TRAF3             | 4.60036   |
| HOXC4,HOXC5,HOXC6 | 13.2631   |
| VAX2              | 0         |
| GPR179            | 0         |
| SELT              | 27.8724   |
| HNRNPH1           | 72.3874   |
| HTR7P1            | 0.999414  |
| TXNDC15           | 7.9245    |
| ANAPC7            | 16.002    |
| CEP89             | 2.82473   |
| ACOX3             | 6.49243   |
| C12orf43          | 5.89552   |
| MRM1              | 11.8318   |
| IGF2,INS,INS-IGF2 | 0.0110394 |
| TMEM136           | 5.87334   |
| ACOT9             | 31.7616   |
| ZNF674-AS1        | 1.7633    |
| GMFB              | 7.96457   |
| WDR27             | 1.4969    |
| CDK7              | 48.6388   |
| ZNF101            | 3.29581   |
| CRYL1             | 29.5931   |
| C15orf40          | 17.7489   |
| L3MBTL3           | 1.05058   |
| NEXN              | 0.0108305 |
| GBAS              | 28.6492   |
| PTPN11            | 11.6146   |
| ARMC5             | 6.88424   |
| ZNF302            | 4.81846   |
| RFXAP             | 2.97162   |
| DNAJC22           | 6.51605   |
| H2AFY2            | 23.9838   |
| ZNF529            | 1.71282   |
| HOMER1            | 0.858514  |
| KIAA1704          | 3.22782   |

|                     |           |
|---------------------|-----------|
| NSUN3               | 1.86967   |
| UFSP1               | 4.1859    |
| NFXL1               | 4.04113   |
| SOAT1               | 4.25068   |
| KRTAP4-8            | 0.881779  |
| DLEU7               | 0         |
| JUN                 | 210.277   |
| ATP1A1OS            | 3.81234   |
| DKC1                | 47.0675   |
| TMLHE-AS1           | 0         |
| CCDC117             | 5.05928   |
| LAIR1               | 0.0537159 |
| NIP7                | 23.4824   |
| HEATR2              | 21.8448   |
| PSMB8               | 88.7564   |
| ANKRD20A2,ANKRD20A3 | 0         |
| KLRAP1              | 0.201606  |
| MATN3               | 0.0159072 |
| THOP1               | 78.563    |
| CLIP1               | 5.51498   |
| IL23A               | 0.877364  |
| METTL15             | 3.145     |
| PIGW                | 4.68905   |
| IFT57               | 7.89501   |
| ZBED6               | 0.175998  |
| TMEM144             | 7.2678    |
| PRDM11              | 0.265629  |
| SNHG10              | 5.94374   |
| RDH10               | 4.89102   |
| CISH                | 2.62537   |
| BRICD5              | 5.0273    |
| METTL8              | 2.64589   |
| UTP6                | 22.2542   |
| GMCL1               | 1.98422   |
| PANX1               | 3.44176   |
| LYAR                | 28.5713   |
| TRIM25              | 22.1232   |
| S100A11             | 978.2     |
| LOC100268168        | 5.26609   |
| PIIP5K1             | 4.73874   |
| SYNCRIP             | 15.351    |
| PTPN9               | 7.74144   |
| ATP6V1G2,DDX39B     | 182.536   |
| STK19               | 6.02819   |
| NOL6                | 10.2952   |
| DNAJC27             | 0.901628  |
| LOXL1-AS1           | 1.24059   |
| KIAA0754            | 0.217485  |
| ID3                 | 254.439   |
| USP40               | 3.65219   |
| IQCH-AS1            | 2.80981   |
| PRKAG2              | 21.5322   |
| SH3D19              | 3.79948   |
| HOXA3               | 0.472636  |
| LRWD1               | 39.0063   |
| TMEM63B             | 10.1722   |
| C19orf48            | 453.672   |
| ZNF420              | 1.27604   |
| EID2B               | 1.972     |
| RHBDD3              | 23.504    |
| NEURL2              | 1.96326   |
| HTATSF1             | 7.30105   |
| DGCR9               | 0.0877034 |
| GPANK1              | 22.0758   |
| HAX1                | 93.883    |
| TAP2                | 22.1838   |
| FBXW8               | 1.83794   |
| NPM1                | 1863.74   |
| NT5C3               | 16.2446   |
| NR1D1               | 12.5435   |
| MAGEF1              | 37.169    |
| BIK                 | 6.34837   |
| C12orf5             | 2.96162   |
| SHC4                | 0.0179056 |
| PREPL               | 5.24802   |
| RSL24D1             | 172.369   |
| EVC                 | 6.90377   |
| BRD9                | 14.2086   |
| KCNAB1              | 1.27361   |

|                         |            |
|-------------------------|------------|
| TPX2                    | 36.7214    |
| GINS4                   | 5.58456    |
| NR2F1                   | 3.47979    |
| SPRTN                   | 1.9405     |
| KDM6B                   | 7.61558    |
| LRRRC28                 | 4.82542    |
| ICA1L                   | 0.408215   |
| LTBP4                   | 14.1637    |
| CCT6A                   | 99.6427    |
| H3F3B                   | 196.764    |
| GCH1                    | 7.15597    |
| HPX                     | 0.221674   |
| ABHD14B                 | 48.7819    |
| WDR45                   | 43.8769    |
| POLR3B                  | 1.22191    |
| MPV17L                  | 0.0242279  |
| ADTRP                   | 0.186973   |
| MGC72080                | 19.3444    |
| ATPBD4                  | 5.19672    |
| ECI1                    | 199.114    |
| WDR44                   | 1.67716    |
| C22orf23                | 5.61103    |
| MRE11A                  | 2.41532    |
| QPRT                    | 0.202068   |
| NAE1                    | 48.1947    |
| FRAT1                   | 4.07487    |
| LIN52                   | 1.14498    |
| SCARNA1                 | 0          |
| ZNF136                  | 1.22746    |
| FPGT,FPGT-TNNI3K,TNNI3K | 1.98415    |
| MTMR9LP                 | 3.20602    |
| SRXN1                   | 46.3702    |
| VASN                    | 1.80272    |
| MECR                    | 17.8411    |
| ZXDC                    | 6.65569    |
| PSMC4                   | 54.7556    |
| LMO4                    | 5.93197    |
| SLC13A1                 | 0.0405226  |
| CPEB4                   | 0.820188   |
| SNORD21                 | 0          |
| SRSF5                   | 72.4806    |
| ABCC5                   | 6.31191    |
| DPY19L3                 | 2.47794    |
| PABPC1L                 | 6.07362    |
| THTPA                   | 12.594     |
| WAC-AS1                 | 18.1323    |
| KIAA0586                | 0.613254   |
| SNORA4                  | 0          |
| TTC21A                  | 0.237957   |
| CAAP1                   | 4.49933    |
| TADA2A                  | 4.77291    |
| ZMYND11                 | 6.82399    |
| SRSF7                   | 54.1585    |
| HMGA1                   | 1335.39    |
| SLC51A                  | 0.283375   |
| CHAMP1                  | 4.80345    |
| METAP2                  | 30.5967    |
| SNORA70                 | 70.0439    |
| GRB10                   | 10.1557    |
| SATB2                   | 1.75405    |
| BAZ1A                   | 5.09257    |
| BUB3                    | 141.873    |
| PPFIBP1                 | 4.09951    |
| AGAP1                   | 3.46364    |
| C2CD4A                  | 0          |
| PASK                    | 1.9919     |
| ZNF793                  | 0.00499146 |
| GCSH                    | 13.9777    |
| GOLIM4                  | 0.590336   |
| FAM101B                 | 0.0763026  |
| LOC100133985            | 1.55724    |
| LBX2-AS1                | 10.1671    |
| ADAT1                   | 0.869644   |
| C3orf38                 | 4.6242     |
| MST1P2                  | 0.909582   |
| RBM28                   | 24.2268    |
| MAML3                   | 0.788164   |
| ZMYM1                   | 2.06849    |
| OVGP1                   | 1.33417    |

|                   |           |
|-------------------|-----------|
| LOC284260         | 0.129347  |
| AGMAT             | 8.72654   |
| PAN3-AS1          | 0.845278  |
| MFS7              | 0.0887372 |
| ATG2A             | 12.1804   |
| ID12              | 8.3595    |
| MYRIP             | 0         |
| ACR               | 0         |
| KITLG             | 0.187158  |
| MRPL50            | 51.1985   |
| VAR2              | 19.1115   |
| NDOR1             | 13.5039   |
| RPS6KC1           | 1.38165   |
| SSBP3             | 15.886    |
| RACGAP1P          | 0.0138116 |
| THBS3             | 2.07096   |
| PCF11             | 3.78049   |
| STXBP4            | 0.210416  |
| JMJD4             | 21.5356   |
| TMOD2             | 0.981713  |
| HGSNAT            | 6.69118   |
| GLRX3             | 149.433   |
| NOTUM             | 5.07836   |
| PHLDA1            | 86.2278   |
| COX6B2            | 0.418369  |
| PUS10             | 0.482995  |
| RFX3              | 0.637899  |
| DUS4L             | 6.65113   |
| FKBP7             | 1.60501   |
| DIS3L2            | 4.68933   |
| RNF141            | 3.84673   |
| TCTEX1D2, TM4SF19 | 113.646   |
| TPD52L2           | 114.074   |
| KIF7              | 9.96861   |
| PRKCG             | 4.11064   |
| LOC554206         | 0.866035  |
| LOC100506305      | 0.0305435 |
| BCL2L13           | 6.69785   |
| P4HTM             | 18.3074   |
| UBAP2             | 7.17105   |
| WDR19             | 2.53339   |
| POU2F3            | 0.0175827 |
| PRH1, PRR4        | 2.38824   |
| ADAMTSL5          | 5.04819   |
| NMNAT1            | 2.72709   |
| RFC3              | 7.3574    |
| EID2              | 30.003    |
| GLB1L2            | 17.2408   |
| RGL4              | 0.577429  |
| ZFAT-AS1          | 0.0482757 |
| LOC100133331      | 0.869154  |
| STXBP1            | 20.2045   |
| FBXW4             | 28.2351   |
| SORBS1            | 0.197524  |
| TBC1D14           | 1.04985   |
| TSPAN3            | 53.6811   |
| SERINC4           | 1.53042   |
| SEPT10            | 17.4344   |
| ZNF41             | 0.341563  |
| MED10             | 54.8876   |
| ACTR3B            | 14.2102   |
| TMEM38A           | 2.13422   |
| MED6              | 17.029    |
| LINC00282         | 0.0106422 |
| FLJ14107          | 0.088257  |
| PIBF1             | 1.51354   |
| LINC00035         | 0.537255  |
| TARS              | 65.7768   |
| CEBPA-AS1         | 3.46844   |
| MEX3A             | 6.22479   |
| NADKD1            | 3.67869   |
| GTPBP5            | 7.34351   |
| CASQ2             | 0         |
| C11orf49          | 21.447    |
| PDC               | 0.0306292 |
| CCDC146           | 0.416501  |
| TRMT1             | 56.5436   |
| WDR93             | 0         |
| EMR4P             | 0         |

|              |           |
|--------------|-----------|
| KCTD18       | 2.76426   |
| GPATCH11     | 1.19328   |
| TRIM56       | 1.53383   |
| STRIP2       | 3.34878   |
| C3orf58      | 3.38444   |
| LOC100505875 | 0.427213  |
| HEG1         | 1.98743   |
| TTC18        | 0.514929  |
| KIAA1324     | 0.178426  |
| CBX3         | 85.6533   |
| NDEL1        | 6.83929   |
| TOE1         | 10.7389   |
| ZNF479       | 0         |
| ZNF552       | 1.63913   |
| TPCN2        | 3.4168    |
| KIAA1984-AS1 | 0.891201  |
| LOC439994    | 3.68082   |
| LOC100506730 | 2.11323   |
| RNF14        | 6.24212   |
| B3GNT9       | 8.48505   |
| HMGA2        | 27.5293   |
| ESF1         | 2.19864   |
| AARS         | 53.7342   |
| RPL21P44     | 0.0855203 |
| SNORA20      | 0         |
| HNRNPU       | 49.6734   |
| LOC100652999 | 0.169439  |
| NEMF         | 3.72848   |
| RIMBP3C      | 0.0126608 |
| SRSF10       | 28.5626   |
| FAM86C1      | 3.04136   |
| NRP2         | 0.929435  |
| DDX46        | 5.52846   |
| PHTF1        | 2.04026   |
| OTUD6B       | 4.5503    |
| MIR612       | 0         |
| TSEN15       | 15.95     |
| UBLCP1       | 9.70706   |
| HEATR3       | 2.63368   |
| THOC7        | 47.1304   |
| TMEM182      | 0.794816  |
| CCDC57       | 4.30698   |
| ANKRD26      | 0.154956  |
| HIST1H2AB    | 1.03966   |
| CARD9        | 1.49577   |
| ENKUR        | 0.304013  |
| ZNF587B      | 2.62763   |
| DNAJC16      | 2.29337   |
| SRSF3        | 88.3414   |
| ATAD3A       | 59.2564   |
| HSDL2        | 19.5474   |
| FBXO30       | 5.31719   |
| LYPLA1       | 40.3827   |
| BCDIN3D-AS1  | 0.0403871 |
| LOC100288181 | 0.374669  |
| ITGA3        | 33.9105   |
| PLEKHF1      | 8.34548   |
| EIF2S3       | 112.447   |
| TFAP2E       | 4.13417   |
| RAPGEFL1     | 2.46233   |
| ZNF566       | 2.45983   |
| PNN          | 16.8635   |
| CRTAM        | 0         |
| HOXA7        | 15.4704   |
| TCEA1        | 59.539    |
| INTS2        | 1.78348   |
| RUFY3        | 2.3742    |
| GLRX         | 686.087   |
| PLEKHA4      | 9.04426   |
| CTPS1        | 23.1563   |
| TSC22D1-AS1  | 0.153324  |
| HSPA9        | 190.957   |
| SRSF2        | 103.675   |
| SMURF2       | 100.071   |
| GNL3L        | 4.56671   |
| CCDC18       | 0.32168   |
| SLC7A5       | 106.576   |
| CACNG8       | 0.129164  |
| SNX5         | 54.3188   |

|              |           |
|--------------|-----------|
| NCL          | 279.551   |
| ZBTB46       | 2.33467   |
| PPID         | 27.5977   |
| PTCD2        | 2.92038   |
| DDX52        | 5.4018    |
| MTHFD1L      | 39.7025   |
| C19orf44     | 2.53051   |
| ZBTB48       | 11.7203   |
| ZNF37A       | 2.3632    |
| LOC100289509 | 0.376229  |
| SCAND2P      | 2.71623   |
| ZNF155       | 1.42036   |
| EIF5B        | 13.5029   |
| C2orf74      | 0         |
| RGPD3        | 0.0615642 |
| RAB40B       | 13.1154   |
| PIGX         | 4.36671   |
| ZNF251       | 8.95051   |
| ADRB1        | 0.132653  |
| ARL13B       | 0.753019  |
| GCLM         | 3.27699   |
| ZNF70        | 0.694361  |
| RRS1         | 41.2329   |
| LOC728431    | 0.800214  |
| MED17        | 11.1959   |
| KIAA0556     | 1.84921   |
| CIDEB        | 1.66474   |
| FAM86A       | 12.703    |
| CDKN2A       | 1.40322   |
| CAD          | 14.3618   |
| HIVEP1       | 0.259633  |
| GALR2        | 0.452663  |
| C6orf62      | 35.2968   |
| FAM214A      | 1.59314   |
| NEK8         | 1.0924    |
| PRR9         | 0         |
| TBCCD1       | 2.37289   |
| HOTAIR       | 0.873228  |
| RANBP17      | 0.564838  |
| GRIN1        | 0.0656275 |
| NINJ2        | 1.13465   |
| CASP8AP2     | 0.350736  |
| EFCAB4B      | 1.52387   |
| SETD9        | 3.54528   |
| DYNC2L1      | 13.0061   |
| ABHD3        | 4.79298   |
| C5orf34      | 3.45376   |
| DCAF17       | 2.01532   |
| PNP          | 84.2545   |
| ZNF774       | 0.557862  |
| ZNF485       | 3.47652   |
| ATIC         | 80.4419   |
| IFT172       | 2.23702   |
| DNAJC19      | 17.7567   |
| LINC00085    | 0.626655  |
| ALDH16A1     | 10.9057   |
| PGBD2        | 1.92158   |
| QRFP         | 1.02475   |
| ENDOU        | 0.0186939 |
| C20orf202    | 0         |
| XKR9         | 0.182928  |
| MTG1         | 33.5611   |
| FAM120A      | 44.8439   |
| TLL2         | 0.0267698 |
| EIF1AX       | 33.7657   |
| HMGB1        | 86.9937   |
| TMEM231      | 13.7805   |
| VIM          | 11.2186   |
| TSPEAR       | 0.0649781 |
| PMPCA        | 139.371   |
| MIPEP        | 11.7104   |
| FBXL17       | 1.40292   |
| TFAP4        | 18.7792   |
| ORAI2        | 3.76986   |
| LOC100507577 | 0.502967  |
| TASP1        | 3.08179   |
| NPM2         | 25.2328   |
| ATXN7L1      | 1.40337   |
| CPT1A        | 11.5695   |

|              |           |
|--------------|-----------|
| C1orf162     | 0.710797  |
| ZNF446       | 8.45577   |
| FAM22A       | 0.900731  |
| CCPG1,DYX1C1 | 3.32107   |
| MPL          | 0.029334  |
| HOXC8        | 2.72334   |
| LTBP2        | 0.861206  |
| NLRC3        | 0.139943  |
| RHBDD1       | 3.76714   |
| FAM83H       | 38.188    |
| ZNF441       | 0.528383  |
| TAF15        | 77.1294   |
| ZNF320       | 2.59895   |
| DACT3        | 2.69043   |
| HIST1H2AJ    | 2.46425   |
| CPT2         | 10.6115   |
| WDR65        | 0.0189812 |
| SPPL2B       | 6.74172   |
| FGF11        | 2.15928   |
| GPR4         | 0.0203687 |
| C9orf169     | 3.76263   |
| KPNA2        | 114.224   |
| DES1         | 25.2546   |
| SLC22A15     | 1.49363   |
| FBXL13       | 0.11987   |
| LOC100128338 | 12.4216   |
| RRP15        | 1.03672   |
| TSC22D3      | 18.4338   |
| PSMB9        | 17.6412   |
| TMEM44-AS1   | 2.13889   |
| SF3A3        | 38.5253   |
| KLF10        | 15.0204   |
| TFB2M        | 16.709    |
| CPSF3        | 25.4166   |
| ZNFX1        | 2.85685   |
| UBL4B        | 0.115102  |
| KIAA1737     | 3.90335   |
| EIF2S2       | 116.603   |
| TTC32        | 3.59395   |
| ID1          | 48.2576   |
| INO80        | 3.78956   |
| SMO          | 0.10932   |
| ADHFE1       | 0.381796  |
| CATSPER2     | 0.626504  |
| LEF1         | 8.77507   |
| FSCN2        | 0.160461  |
| SLC35G6      | 0.0605371 |
| AHRR,PDCC6   | 106.778   |
| MORC4        | 8.59568   |
| ZMYND8       | 2.25413   |
| EBNA1BP2     | 87.9416   |
| WDR61        | 26.6698   |
| ATP8B1       | 0.0139535 |
| SCO1         | 18.6733   |
| STK4-AS1     | 0.0619959 |
| TIGD2        | 3.26625   |
| DMRT2        | 2.97735   |
| SRSF1        | 24.3313   |
| PLK3         | 15.0796   |
| PCGF6        | 10.7234   |
| C16orf93     | 3.29481   |
| B3GNTL1      | 7.9112    |
| RBM3         | 84.4598   |
| AMH          | 0.327112  |
| TTPAL        | 4.62372   |
| LOC100507032 | 2.79938   |
| TMED2        | 87.6949   |
| FAM69B       | 4.54465   |
| PBDC1        | 24.611    |
| SSB          | 55.8664   |
| FAM215A      | 0.222197  |
| MAD1L1       | 11.0416   |
| UTP15        | 4.30505   |
| KCNAB3       | 0.803531  |
| LRRC40       | 4.51677   |
| IFT74        | 3.19155   |
| TAS2R14      | 0.354308  |
| RGL1         | 0.182466  |
| PFKFB2       | 1.81365   |



|                 |           |
|-----------------|-----------|
| SATL1           | 0.425388  |
| AVEN            | 6.96448   |
| C17orf47        | 0.0622473 |
| MMRN2           | 0.2307    |
| ZEB1-AS1        | 4.81009   |
| VHL             | 22.5427   |
| PTPLB           | 0.609554  |
| PPIEL           | 0.0378549 |
| TEX14           | 0.0247434 |
| ARPP19          | 15.3392   |
| PDIA5           | 8.84832   |
| DDX5            | 76.1314   |
| CARD8           | 3.30116   |
| REM2            | 0.43256   |
| SLCO3A1         | 2.45851   |
| ZNF326          | 5.61857   |
| CLCF1           | 5.79647   |
| USP15           | 4.13805   |
| ANKRD24         | 0.246714  |
| MYEOV           | 11.6919   |
| DBN1            | 124.813   |
| CATSPERG        | 0.175977  |
| AHNAK           | 16.0837   |
| MAP7D3          | 5.80649   |
| METTL9          | 24.6266   |
| TRDMT1          | 0.696016  |
| KCTD15          | 12.6561   |
| TXNRD3,TXNRD3NB | 3.6167    |
| RBM45           | 5.62379   |
| IPP             | 1.12473   |
| SOWAHC          | 8.61491   |
| TMEM67          | 1.63573   |
| RPL7L1          | 19.1298   |
| SNAI1           | 11.4634   |
| GJA9,MYCBP      | 8.44881   |
| ZBED3           | 0.770227  |
| NOP14-AS1       | 3.09839   |
| CPLX1           | 6.35952   |
| FMNL1           | 0.0178812 |
| ATP2B1          | 1.78444   |
| UCHL5           | 11.4075   |
| RIPK1           | 6.81274   |
| ZMIZ1           | 2.1261    |
| RAC1            | 123.159   |
| PEX5            | 37.4597   |
| PTPN1           | 22.5052   |
| STAR            | 0.053305  |
| BEST4           | 0.0347991 |
| NOV             | 4.17678   |
| NUDT9P1         | 0.247467  |
| ZNF839          | 5.88984   |
| NBPF9           | 0.829588  |
| DEPDC7          | 1.88889   |
| ACAD11,NPHP3    | 10.5143   |
| C22orf43        | 0.165628  |
| FIP1L1          | 11.4732   |
| ELFN1           | 2.8897    |
| RWDD2B          | 10.6619   |
| RSU1            | 12.4029   |
| UXS1            | 10.9114   |
| HPDL            | 12.1844   |
| LINC00311       | 0.0602771 |
| ANKRD6          | 0.0629897 |
| FN1             | 0.0244384 |
| IFNE            | 0.188775  |
| HOXC9           | 2.05713   |
| PMS2            | 1.2875    |
| MAGIX           | 1.31105   |
| B3GNT7          | 0.108999  |
| FAM98A          | 13.0287   |
| SUSD5           | 0.0429145 |
| SRSF6           | 27.5631   |
| DTWD2           | 0.560924  |
| SPATA6L         | 0.674338  |
| ABCB10          | 3.40388   |
| LINC00094       | 2.7238    |
| AGSK1,LOC727849 | 0         |
| SKIDA1          | 0.163085  |
| ZNF285          | 0.0133568 |

|              |            |
|--------------|------------|
| TAF1B        | 4.64458    |
| SHANK1       | 4.54977    |
| FAM222A-AS1  | 5.01103    |
| MYO15A       | 0.0222778  |
| FBF1         | 1.18257    |
| C21orf119    | 8.25765    |
| NGAMT2       | 8.76996    |
| C5orf24      | 6.41282    |
| SUPT16H      | 30.0806    |
| CCDC24       | 7.82531    |
| NBR2         | 2.5424     |
| ITPR1PL2     | 5.19638    |
| VPS13C       | 1.33161    |
| AUTS2        | 1.73315    |
| DHX36        | 7.52475    |
| NUPL2        | 14.3965    |
| COL10A1      | 0.0248695  |
| ZNF551       | 0.769708   |
| IGFBP6       | 224.372    |
| RPS10P7      | 2.55359    |
| DUSP18       | 0.423157   |
| CSTF2        | 11.6478    |
| MX1          | 8.67208    |
| ZDHC21       | 1.12416    |
| KLHL21       | 44.5444    |
| PARS2        | 6.81652    |
| PANK1        | 0.323892   |
| LOC100131094 | 0.20466    |
| PLCD4        | 0.391783   |
| GART         | 37.9277    |
| ZC3H8        | 12.9518    |
| FAM107A      | 0          |
| LOC100505549 | 1.29069    |
| PRR3         | 6.04424    |
| KLHL29       | 4.33567    |
| TERT         | 1.13999    |
| FKBP5        | 7.25544    |
| NPL          | 0.805436   |
| ZADH2        | 5.89012    |
| MCMDC2       | 0.218098   |
| RNF6         | 15.0993    |
| CA11         | 15.2559    |
| ETF1         | 37.1589    |
| CCDC96       | 0.527841   |
| C17orf97     | 8.79065    |
| MBTPS2       | 2.81266    |
| LANCL3       | 0          |
| DNHD1        | 0.759664   |
| NFKBIZ,NXPE3 | 17.9233    |
| TAF12        | 43.8505    |
| CCT2         | 216.832    |
| ZNF514       | 1.4861     |
| PRNP         | 35.5599    |
| UTP14A       | 13.6144    |
| CCDC103      | 1.68943    |
| IMPACT       | 4.97894    |
| CDH12        | 0.0181545  |
| LOC100130231 | 0.00727428 |
| TIMMDC1      | 40.6618    |
| TRIM72       | 5.31609    |
| LTB4R,LTB4R2 | 3.97844    |
| LOC399753    | 0.216683   |
| ZNF691       | 10.9098    |
| LOC100506714 | 1.91181    |
| VWA5A        | 4.02938    |
| HBS1L        | 5.20294    |
| THNSL1       | 11.7387    |
| PHGDH        | 157.665    |
| SRD5A1       | 3.7073     |
| PAPL         | 17.4184    |
| SLC25A37     | 29.477     |
| UBXN11       | 11.0779    |
| C21orf67     | 1.68571    |
| ELOVL6       | 8.37287    |
| C15orf56     | 1.90223    |
| ATF7IP       | 2.38173    |
| SRPR         | 21.9492    |
| DNMBP        | 1.93643    |
| GSTO1        | 785.889    |

|              |            |
|--------------|------------|
| ZNF846       | 0.341444   |
| BAIAP2       | 21.6722    |
| SFXN4        | 58.5798    |
| NOL9         | 8.24205    |
| DSEL         | 0.00402882 |
| MLLT11       | 0.839272   |
| CCDC138      | 1.05607    |
| OGFOD1       | 16.292     |
| THOC5        | 32.9696    |
| LINC00467    | 11.8332    |
| LRRC56       | 2.22576    |
| NOX1         | 0.0795217  |
| GDAP1        | 2.11049    |
| LYRM5        | 8.34003    |
| SLC6A10P     | 0.0450297  |
| ZNF747       | 7.84251    |
| C9orf64      | 11.0259    |
| CCDC74A      | 11.3563    |
| SLC18A2      | 1.446      |
| LOC145783    | 0.228737   |
| SHE          | 0          |
| APOE         | 1.07058    |
| SIAE         | 8.23383    |
| PPAP2B       | 0.398991   |
| EFR3B        | 0.210125   |
| LRRC37A4P    | 1.18422    |
| SUV39H2      | 6.84961    |
| SYT7         | 3.24833    |
| NTSR1        | 9.291      |
| TXK          | 0.132816   |
| COQ4         | 90.1324    |
| VMA21        | 12.6594    |
| CITED1       | 11.9966    |
| CAMTA2       | 23.3453    |
| ELK3         | 11.3326    |
| STOM         | 0.0167832  |
| SPDYE7P      | 1.47899    |
| NKAIN1       | 2.32033    |
| TMEM37       | 0.172118   |
| CCNE2        | 2.38052    |
| PODXL        | 31.5461    |
| DUSP23       | 27.8225    |
| LOC100130691 | 0.136301   |
| NFIA         | 1.19229    |
| URB1         | 5.45139    |
| GNRHR2       | 5.54463    |
| EXPH5        | 0.355754   |
| WDR60        | 2.05726    |
| LOC729737    | 0.305132   |
| HPS5         | 2.07536    |
| UBXN8        | 6.69006    |
| FIBCD1       | 5.8692     |
| BMP3         | 0.0736154  |
| CLEC17A      | 0          |
| C1QTNF6      | 1.09087    |
| ACADM        | 11.4386    |
| LRRC66       | 0.0374945  |
| ENTPD2       | 159.07     |
| GAPDHS       | 0.201668   |
| SHQ1         | 5.57512    |
| TSPAN1       | 0.351399   |
| ZFP2         | 0.238359   |
| FBXW9        | 11.6609    |
| HOXD8        | 3.768      |
| LRRC27       | 3.52686    |
| FLJ12825     | 0.241989   |
| UNC13D       | 0.727761   |
| PSMG4        | 35.8422    |
| IPO4         | 39.5873    |
| TDG          | 4.53445    |
| KIAA1377     | 0.086173   |
| BCL2L1       | 146.629    |
| LINC00857    | 1.05503    |
| PFAS         | 10.6663    |
| GLI1         | 0.227525   |
| INHBB        | 0          |
| ZBTB21       | 3.45671    |
| C3orf43      | 0.157474   |
| FANK1        | 0.636767   |

|              |            |
|--------------|------------|
| MFHAS1       | 1.61011    |
| CSNK2A3      | 0.336014   |
| NOP58        | 49.1894    |
| MUC5B        | 0.00366245 |
| EPT1         | 4.52367    |
| CHM          | 2.33038    |
| TRNT1        | 9.58932    |
| ZNF324B      | 2.77649    |
| MBNL3        | 0.327262   |
| GRK7         | 0          |
| EXTL2        | 6.12989    |
| SYCE3        | 0.871505   |
| SPEF2        | 0.644927   |
| RBMX         | 187.615    |
| MRPL1        | 9.9066     |
| NRBF2        | 7.51202    |
| PYCRL        | 25.0975    |
| NRIP3        | 0.0226868  |
| ADAT2        | 2.85872    |
| SPRY4        | 63.4468    |
| LOC100130894 | 0.150053   |
| RBCK1        | 50.8352    |
| TRIP4        | 6.85181    |
| LYSMD2       | 12.5375    |
| PCYOX1L      | 5.31657    |
| MOGAT3       | 0          |
| TRIM74       | 1.11525    |
| TRIM59       | 0.175116   |
| FBXL2        | 0.0461714  |
| EDF1         | 1100.55    |
| SPIN3        | 2.21655    |
| PXN          | 109.372    |
| C22orf46     | 2.11305    |
| SMIM6        | 0.0742466  |
| FILIP1       | 0          |
| FAM175A      | 6.95119    |
| FUS          | 49.628     |
| CCDC15       | 0.044315   |
| GAS8         | 4.91351    |
| DAK          | 10.1661    |
| ARRDC4       | 0.689358   |
| SYTL1        | 16.1375    |
| B3GNT6       | 0          |
| EPHX4        | 7.02011    |
| LOC100287036 | 0.222476   |
| TSLP         | 5.10618    |
| ITGAM        | 0.0327397  |
| CCNE1        | 15.4193    |
| RAB6A        | 26.1108    |
| LOC284080    | 0.14228    |
| RNF32        | 1.8274     |
| TTL1         | 3.23374    |
| ST7L         | 3.91944    |
| ABL1         | 42.5712    |
| LOC100272217 | 1.34507    |
| UROC1        | 0          |
| AMHR2        | 0          |
| TOR1AIP2     | 19.2743    |
| FN3KRP       | 16.4112    |
| SNAP23       | 27.559     |
| CABP1        | 1.7699     |
| SLCO1B1      | 0.0624759  |
| LRRC73       | 2.81186    |
| CASC4        | 10.1397    |
| AKAP5        | 0.0899746  |
| ZGLP1        | 2.14816    |
| PN01         | 16.4177    |
| ALKBH8       | 0.976845   |
| LOC100507501 | 3.16429    |
| PTGES        | 0.162621   |
| ZNF195       | 6.89224    |
| WDR96        | 0.106496   |
| RBM34        | 26.7237    |
| LOC100129794 | 1.41393    |
| RASL10A      | 0.195088   |
| LOC100506054 | 8.14482    |
| UCP3         | 0.07996    |
| FONG         | 1.29907    |
| SMPD2        | 11.484     |

|               |           |
|---------------|-----------|
| UNC5B         | 2.0047    |
| HOXD3         | 1.07729   |
| CYB5D1        | 5.20891   |
| TUBE1         | 11.1072   |
| LOC100133091  | 4.39459   |
| MOV10L1       | 0         |
| LIMS1         | 3.75178   |
| GOT1          | 45.4219   |
| SYTL3         | 0.641179  |
| ALS2CR11      | 0.0226489 |
| ZNF37BP       | 1.7295    |
| EIF3C,EIF3CL  | 0.0481995 |
| CHRFAM7A      | 0.0625708 |
| VSTM5         | 0         |
| ADCY7         | 7.67257   |
| SOCS4         | 3.05258   |
| PLEKHN1       | 2.37102   |
| EPHA10        | 0.94041   |
| C12orf61      | 0.408019  |
| LOC100505622  | 0         |
| HERC5         | 0.0571467 |
| NIPAL2        | 0.294151  |
| MID1IP1       | 35.5391   |
| ZNF738        | 0.865279  |
| PFKFB1        | 0.245312  |
| FBXO15        | 0.858652  |
| DISP2         | 0.974385  |
| ZNF595,ZNF718 | 0.361963  |
| ODC1          | 225.954   |
| SAT1          | 155.342   |
| AMDHD2        | 29.4403   |
| ISG20         | 63.452    |
| LOC401052     | 2.06107   |
| IGF2BP3       | 6.90353   |
| CCDC106       | 1.02229   |
| RAB9B         | 0.200755  |
| LPAR6         | 0.0137343 |
| SHOX2         | 0.217579  |
| ICAM5         | 1.93334   |
| ZNF814        | 1.51862   |
| KIF9-AS1      | 0.342128  |
| TUBB3         | 98.1592   |
| SRRM2-AS1     | 0.338644  |
| SH2B3         | 14.7144   |
| FAM157B       | 0         |
| MLKL          | 9.56829   |
| LOC100506124  | 0.491861  |
| C2CD2         | 26.3575   |
| CDKL3         | 1.14536   |
| LOC642361     | 2.63126   |
| MUTYH         | 13.748    |
| RPS6KL1       | 1.30801   |
| SCARF1        | 0.682047  |
| ZFR           | 9.16643   |
| PSPH          | 18.9508   |
| PLEC          | 17.9862   |
| ZNF763        | 0.758029  |
| PPP3CC        | 0.083972  |
| LTA           | 0.0400778 |
| PTCHD4        | 0.199978  |
| FLJ33630      | 1.10799   |
| ZSCAN32       | 5.70163   |
| CLEC18B       | 0.231561  |
| DNAL4         | 12.7391   |
| ZC3H4         | 7.25537   |
| AGAP7         | 0.321681  |
| GIN1          | 1.40225   |
| ALDH1L1       | 0         |
| TMEM209       | 7.96368   |
| ADAM9         | 12.8847   |
| ABHD16B       | 19.1644   |
| CNDP2         | 19.3      |
| GORASP1       | 8.7799    |
| COX4I1        | 616.981   |
| APOM          | 3.8578    |
| ARSG          | 0.936987  |
| IQCK          | 2.69934   |
| MRS2          | 10.6332   |
| GPBP1L1       | 13.9309   |

|              |            |
|--------------|------------|
| NRL          | 0.593827   |
| LOC644961    | 0.179402   |
| CAPNS2       | 0          |
| SNORA63      | 80.029     |
| DPY19L2P4    | 0.0634441  |
| TCHP         | 5.14832    |
| DENND2A      | 0          |
| LOC649395    | 0.0230586  |
| CCL3L1       | 0.174705   |
| DHFRL1       | 1.13425    |
| LARS         | 36.8961    |
| HLCS         | 3.69243    |
| RCN1         | 67.139     |
| MICALL2      | 2.41493    |
| ANXA1        | 286.923    |
| RASSF5       | 0.532539   |
| N4BP2        | 0.464697   |
| C16orf74     | 72.7666    |
| ATG16L2      | 21.3106    |
| ZNF556       | 1.30132    |
| ATCAY        | 0          |
| CCDC144A     | 0          |
| GAB3         | 0.00871252 |
| PSME3        | 38.6332    |
| GLIPR1L2     | 0.0228753  |
| RDX          | 0.0281956  |
| FAM208B      | 3.53462    |
| SFPQ         | 78.8364    |
| NMD3         | 16.1399    |
| OSM          | 0          |
| CATSPER3     | 0.904871   |
| CDC123       | 156.921    |
| CN5H6.4      | 0.108185   |
| ARIH2OS      | 1.68368    |
| SMTNL2       | 0          |
| ZSCAN12      | 0.768751   |
| ZSCAN12P1    | 1.13135    |
| GF11         | 1.53769    |
| ACOX2        | 1.12997    |
| HNRNPM       | 88.36      |
| CEND1        | 0.229528   |
| SPDYE6       | 0.285236   |
| RPP40        | 11.9925    |
| CDK8         | 4.03866    |
| MYL5         | 6.55857    |
| RAC2         | 10.3611    |
| GK           | 1.35886    |
| PIWIL4       | 0.456979   |
| LONRF2       | 0          |
| FCRLB        | 0.575077   |
| SNX19        | 2.4287     |
| PYGL         | 55.881     |
| UTP11L       | 23.2536    |
| GPX7         | 0.0424873  |
| SPEF1        | 0.108706   |
| ZNF521       | 0.0670188  |
| C5orf28      | 3.55886    |
| SLC9B1       | 0.492012   |
| ZNHIT2       | 30.0555    |
| SLTM         | 9.00407    |
| C1QTNF1      | 13.5492    |
| DTD2         | 4.95531    |
| NUBPL        | 1.45772    |
| CXCL1        | 0.0419646  |
| LOC100289341 | 1.46533    |
| TBL3         | 32.8061    |
| SLITRK2      | 0.0114259  |
| IARS         | 93.5401    |
| MCM3AP-AS1   | 0.157225   |
| CCDC11       | 1.37042    |
| AMDHD1       | 0.491516   |
| NARS         | 54.4122    |
| PRMT5        | 85.1907    |
| MDH1B        | 0.329235   |
| MEGF11       | 0.0154849  |
| PRRT4        | 14.9595    |
| GTF2H2       | 1.0397     |
| SH3BGR       | 4.23279    |
| DENND6B      | 3.27379    |

|              |           |
|--------------|-----------|
| THBS2        | 0.52238   |
| NRF1         | 3.5146    |
| CSE1L        | 54.9962   |
| C5orf22      | 3.94587   |
| PTPRE        | 1.07872   |
| IL11         | 14.2843   |
| SCRN1        | 0.0160133 |
| MTHFD2       | 106.276   |
| CTF1         | 0.455152  |
| TYRP1        | 0.0408514 |
| MCM9         | 1.05127   |
| PIGP         | 46.7252   |
| HCG27        | 0.533688  |
| KIF21B       | 0.0913635 |
| CCR9         | 0         |
| WDR5B        | 1.38519   |
| B9D1         | 40.6678   |
| LYRM1        | 16.0265   |
| LINC00346    | 2.09738   |
| GDPD1        | 3.97091   |
| LINC00176    | 0.402832  |
| SLC4A5       | 5.994     |
| MAGOHB       | 3.70061   |
| ZSWIM8-AS1   | 3.68027   |
| SLC43A2      | 4.55135   |
| SETD6        | 5.95667   |
| LOC100507634 | 0.460107  |
| TEX19        | 0.651424  |
| BCL2A1       | 46.2179   |
| IDUA         | 3.03457   |
| PP14571      | 0.0547922 |
| LOC100289019 | 1.76811   |
| GNG12        | 28.8634   |
| TGM2         | 147.592   |
| FBXL18       | 2.0161    |
| MMP14        | 15.1391   |
| LOC641367    | 0.062373  |
| LOC100996307 | 0.290898  |
| BMP4         | 0.93482   |
| GGT1         | 7.91781   |
| STX1B        | 0.604141  |
| SHC3         | 0.0399178 |
| IER2         | 147.79    |
| RGS9         | 0.121907  |
| TIPIN        | 8.10726   |
| FRMD3        | 0.0355047 |
| KCNK9        | 0         |
| SOCS2        | 9.26953   |
| CCDC70       | 0         |
| CLCN1        | 0         |
| STAT1        | 6.77548   |
| WNT7B        | 0         |
| ABTB2        | 2.85584   |
| HPYR1        | 0.0476436 |
| ARMC12       | 0.293972  |
| ATG7         | 6.03384   |
| GTPBP4       | 55.7421   |
| LOC100506469 | 7.39813   |
| PIK3R5       | 0         |
| KDM1B        | 2.21907   |
| RAD9B        | 0.568133  |
| ZFHX2        | 0.184936  |
| EBF4         | 1.2626    |
| DPH3P1       | 1.18832   |
| NHEG1        | 0.0447556 |
| BIRC7        | 0         |
| MYO18B       | 0         |
| ZDHC1        | 4.26603   |
| WDR92        | 3.36558   |
| SPTBN5       | 0.0113373 |
| ZNF599       | 0.318134  |
| LINC00244    | 0.105245  |
| ITGB2        | 0         |
| CPOX         | 11.5815   |
| C9orf116     | 24.5116   |
| PLIN4        | 0.175957  |
| GFRA4        | 0         |
| IPO7         | 15.2793   |
| HBG2         | 1.02685   |

|              |            |
|--------------|------------|
| MAP2K3       | 63.4974    |
| EPM2A        | 0.71746    |
| TEKT5        | 0.110524   |
| OTOP1        | 0          |
| PLA2G2D      | 0          |
| OXTR         | 0.0861116  |
| CD37         | 0          |
| PYROXD1      | 3.61198    |
| FAM151B      | 0.305209   |
| KANK3        | 4.09249    |
| IGSF9B       | 0.173193   |
| RASSF8       | 0.187352   |
| C12orf4      | 2.31693    |
| ANKS4B       | 0.0145573  |
| MAT1A        | 0          |
| C10orf91     | 0          |
| LOC100216546 | 0.222997   |
| TSEN2        | 6.96717    |
| SLC4A1       | 0.0415602  |
| ZNF702P      | 2.22057    |
| SHROOM4      | 0          |
| C11orf93     | 1.13791    |
| HSF2BP       | 1.5854     |
| C3orf49      | 0.0314387  |
| CARD16       | 0.0672947  |
| MAT2A        | 35.5955    |
| ZNF124       | 2.7202     |
| FAM182B      | 0.115964   |
| SARDH        | 0.305897   |
| MYH3         | 0.221444   |
| TOP1P1       | 0.0996288  |
| CHST5        | 0.398095   |
| PDE3B        | 1.07435    |
| FAM90A1      | 0.718766   |
| GALNT15      | 0.00943209 |
| MIR1282      | 0          |
| CTRC         | 0          |
| PSIMCT-1     | 1.36021    |
| PDIA2        | 0.127992   |
| CNKSR1       | 0.482181   |
| PAMR1        | 0          |
| DCST2        | 0.0514821  |
| EIF3J        | 19.6239    |
| ADPGK-AS1    | 0.110177   |
| PFN4         | 0.26763    |
| RHOF         | 138.838    |
| ERGIC1       | 86.8934    |
| IPO11.LRRC70 | 11.0373    |
| ZRANB2       | 16.9769    |
| ATF4         | 662.486    |
| ZNF658       | 0.232575   |
| LOC642852    | 0.902845   |
| OGT          | 19.8546    |
| SARS         | 227.33     |
| LDLRAD3      | 3.34315    |
| KIF24        | 0.668052   |
| SRCIN1       | 0.663487   |
| NAPG         | 5.62713    |
| ZNF280C      | 2.30441    |
| CASP8        | 6.93198    |
| CD247        | 0.032319   |
| ZNF32-AS2    | 0.701598   |
| MGARP        | 0.253245   |
| HSD17B6      | 0.801855   |
| PYGB         | 26.238     |
| SHMT2        | 369.139    |
| TTC30A       | 0.142519   |
| KRTAP2-1     | 0          |
| TMEM88       | 1.5384     |
| ANP32A-IT1   | 0.012736   |
| EPHA8        | 0          |
| FABP5        | 276.826    |
| IZUMO1       | 0.0350808  |
| LOC100131691 | 0.356545   |
| PRKACA       | 22.8308    |
| SV2A         | 0.0235794  |
| GPR158       | 0.235202   |
| PAPSS2       | 0.147452   |
| KCTD12       | 2.09179    |



|                       |            |
|-----------------------|------------|
| ZSCAN18               | 0.0369243  |
| SEC14L3               | 0.0216798  |
| LOC100507462          | 0.106112   |
| THAP2                 | 0.696673   |
| EHD1                  | 30.3058    |
| LOC100996291          | 0.0194669  |
| ZNF587                | 1.76927    |
| FSD1L                 | 1.28599    |
| PLEKHG4               | 5.20125    |
| AHNAK2                | 1.59601    |
| FGFR2                 | 1.18423    |
| DPY19L2P2             | 0.0122469  |
| NPW                   | 0.740277   |
| FGF2                  | 0.00572797 |
| CARD6                 | 1.17114    |
| YARS                  | 85.0313    |
| HOTTIP                | 0.0955313  |
| DIS3L                 | 4.61583    |
| TDRD5                 | 0.372373   |
| SMN2                  | 5.25972    |
| MORC2-AS1             | 0.771741   |
| N4BP2L2-IT2           | 0.363151   |
| ARL6IP5               | 17.1429    |
| SIGLEC9               | 0.109236   |
| MYLK                  | 0.031894   |
| PNPLA1                | 0          |
| LHFPL5                | 0.0233478  |
| PDCD1                 | 0.0720925  |
| EIF3C,EIF3CL          | 1.48103    |
| LOC100287314          | 6.90801    |
| TNNC2                 | 0.312146   |
| NUP133                | 10.1554    |
| LPP-AS2               | 0.500982   |
| LINC00570             | 0          |
| ZNF808                | 0.458468   |
| SFXN2                 | 8.68673    |
| LOC652276             | 4.71402    |
| ZNF704                | 0.381862   |
| HS3ST2                | 0          |
| ACTR6                 | 12.99      |
| SLC46A3               | 4.47686    |
| LRRC37A6P             | 0          |
| TMED6                 | 1.19606    |
| RUVBL1                | 58.3742    |
| MGC16142              | 1.32916    |
| FAM173B               | 1.8983     |
| SRL                   | 0.0116961  |
| DCHS1                 | 0.0339854  |
| AP4B1-AS1             | 0.0758788  |
| SAMHD1                | 1.38042    |
| ASRGL1                | 1.29945    |
| RSG1                  | 2.03785    |
| SCG5                  | 0.202842   |
| OSTM1                 | 4.52034    |
| ACOT6                 | 0.0504503  |
| MKNK1-AS1             | 0          |
| MAEA                  | 29.9876    |
| PRSS22                | 12.3342    |
| ZNF778                | 0.322365   |
| LNP1                  | 2.14137    |
| GABRB3                | 1.01702    |
| ASB3,GPR75,GPR75-ASB3 | 4.80003    |
| C11orf65              | 0.691386   |
| OAS1                  | 0          |
| INSM1                 | 0          |
| NUAK2                 | 0.203083   |
| LY6G5B                | 4.22819    |
| BEND3                 | 1.65431    |
| TERC                  | 0.59477    |
| FLJ42875              | 8.6256     |
| USH1G                 | 0.532193   |
| REL                   | 0.227767   |
| BVES                  | 0.00709529 |
| ZDHC14                | 1.7864     |
| CSF1R                 | 0          |
| FAM186B               | 0.125988   |
| CEP164                | 2.85588    |
| SNORA33               | 31.5612    |
| LOC100505648          | 0.483157   |

|              |            |
|--------------|------------|
| LOC643406    | 0.117295   |
| PDSS1        | 7.99881    |
| ZNF252P-AS1  | 0.17029    |
| ALOX12B      | 3.46946    |
| EPB41L4B     | 6.10725    |
| SLC26A2      | 1.73788    |
| ZKSCAN3      | 1.33392    |
| PRKAR2A      | 1.30128    |
| CCDC141      | 0.00415682 |
| TSSK3        | 1.48039    |
| GTF2H3       | 10.4334    |
| LOC646719    | 2.17568    |
| TPTE2        | 0          |
| LOC100499405 | 0.0188086  |
| SLC25A18     | 0.13758    |
| ASUN         | 11.8038    |
| ZNF568       | 0.0650952  |
| MYLK2        | 0.58824    |
| TEKT3        | 0.22525    |
| CYP27B1      | 1.85895    |
| LOC100129961 | 0.26504    |
| C5AR2        | 0.0613552  |
| RGPDB        | 0.0923631  |
| ACER2        | 0.0644507  |
| SARM1        | 0.792026   |
| ACY3         | 0.177121   |
| CIRBP-AS1    | 1.27166    |
| KIAA0753     | 2.56779    |
| PSEN2        | 8.40868    |
| TVP23B       | 10.4257    |
| C1QTNF8      | 0          |
| ANKFN1       | 0.0680927  |
| C2orf81      | 4.80104    |
| CCDC102B     | 0.0492691  |
| LOC100506123 | 1.56962    |
| FAM83G       | 12.2747    |
| PTER         | 7.04094    |
| TES          | 0.0460709  |
| LOC100506599 | 0.873289   |
| DGKI         | 2.30428    |
| SLC35G1      | 2.12557    |
| NEK11        | 0.612197   |
| ZNF837       | 2.23164    |
| RPS26P11     | 2.00241    |
| NUDT16P1     | 4.0277     |
| IL20RA       | 0.731069   |
| ZNF577       | 0.419592   |
| C16orf52     | 1.77978    |
| REEP6        | 22.7452    |
| USP32P2      | 0.0780968  |
| RCSD1        | 0          |
| C2orf16      | 0.136204   |
| TRPC1        | 0.182176   |
| C1RL         | 5.77842    |
| TCEANC       | 0.255418   |
| CASC2        | 0.262971   |
| CEBPB        | 146.523    |
| ARHGAP11B    | 0.966188   |
| DUSP1        | 124.952    |
| FAM209B      | 0.98907    |
| KBTBD7       | 0.2565     |
| DEGS1        | 27.3013    |
| NFIX         | 9.54984    |
| KANSL1-AS1   | 0.915453   |
| ALX4         | 0.0109038  |
| RNF138P1     | 0.0356285  |
| LOC100507489 | 0.129758   |
| LOC389791    | 0.478298   |
| EFCAB7       | 0.906793   |
| ZNF790       | 0.523835   |
| STRC         | 0.112286   |
| ENTPD7       | 3.77483    |
| FAIM         | 9.04493    |
| LOC646329    | 24.545     |
| TMEM254-AS1  | 0.0355436  |
| TMEM27       | 0.605568   |
| IFT43        | 39.3201    |
| RNF5P1       | 0          |
| LRCH3        | 2.15003    |

|              |           |
|--------------|-----------|
| LOC283335    | 0.617025  |
| COL11A2      | 0.331697  |
| LOC284023    | 7.48315   |
| SLC25A45     | 2.04044   |
| ARHGAP5-AS1  | 2.82003   |
| RABL5        | 9.87932   |
| PODNL1       | 0.183528  |
| ADAP2        | 0.0178371 |
| CLTCL1       | 1.50509   |
| GPR182       | 0         |
| RTBDN        | 0.764033  |
| SRCRB4D      | 0.864902  |
| NKX3-1       | 3.57038   |
| ANKRD18DP    | 0.108982  |
| PSMG3-AS1    | 0.461176  |
| MYADML       | 0         |
| ROR1         | 0.0733255 |
| CDC42EP5     | 23.1138   |
| LINC00515    | 0         |
| FOXN3-AS1    | 2.61567   |
| AQP1         | 0.105978  |
| RAB36        | 3.08864   |
| ZSCAN30      | 1.75362   |
| CDNF         | 2.12438   |
| ACSL6        | 0.012639  |
| TSPYL4       | 3.52828   |
| FCN3         | 0         |
| KIF26B       | 0.233656  |
| CLDN6        | 0.0940431 |
| IL18R1       | 0.203439  |
| HIST1H2BE    | 0.245357  |
| CHRM3        | 0.189349  |
| SCUBE3       | 0.0281535 |
| ZNF655       | 24.3627   |
| IFI16        | 49.0168   |
| TEX30        | 0.276804  |
| STAMBPL1     | 6.2613    |
| HIST1H2BF    | 0.757635  |
| SUN3         | 32.5138   |
| CTSO         | 0.19546   |
| MYH15        | 0.170025  |
| CTH          | 20.3373   |
| SPAG8        | 0.0743968 |
| CCDC30       | 0.0619389 |
| KLHL7-AS1    | 0.0325837 |
| C6orf195     | 0.0778584 |
| LOC100126784 | 4.85688   |
| BEST1        | 0.201032  |
| LOC731223    | 0.747001  |
| ADAMTS14     | 0.0114343 |
| GRIK5        | 0.573599  |
| GOLGA8T      | 0.149138  |
| MLLT10P1     | 0.105658  |
| LOC338758    | 0.039718  |
| SPDYE2L      | 0.0523909 |
| BIRC2        | 21.5955   |
| OPN4         | 0.0292152 |
| MAPKAP1      | 96.1332   |
| NOMO3        | 0.0222158 |
| ZNF239       | 3.31463   |
| KIAA1456     | 0.0157547 |
| ANTXR2       | 15.339    |
| EFHC1        | 1.19977   |
| TTC26        | 2.32489   |
| ZNF91        | 0.904331  |
| RPGR         | 1.45314   |
| FAM86DP      | 7.38858   |
| TYW1B        | 1.18431   |
| TRIB1        | 23.2937   |
| CATSPER1     | 2.69102   |
| GPR113       | 0.040729  |
| TOMM20L      | 1.21534   |
| SULT1A1      | 12.2532   |
| GDF15        | 251.001   |
| CCDC66       | 1.76039   |
| FLJ38109     | 0.0604129 |
| FAM228B      | 0.978328  |
| NPAS1        | 3.02057   |
| EIF3A        | 36.6164   |

|              |           |
|--------------|-----------|
| ADAMTS9      | 0.171806  |
| PROB1        | 0.719514  |
| ASIP         | 0.201559  |
| FBLIM1       | 0.51679   |
| LINC00470    | 0         |
| HSD3B7       | 35.4081   |
| KIAA1875     | 0.0939019 |
| ME2          | 19.5624   |
| SDSL         | 37.7273   |
| LTC4S        | 1.0608    |
| MXRA8        | 0.526046  |
| MIR31HG      | 0.59214   |
| ALDH8A1      | 0.153579  |
| TANK         | 8.82906   |
| C14orf183    | 0.0512568 |
| ATG10        | 2.18021   |
| XXYL1        | 3.46897   |
| FAM86B2      | 1.15991   |
| ARHGAP9      | 0.193473  |
| FBXO4        | 8.48796   |
| LOC100506207 | 0.190907  |
| ERVK13-1     | 1.21689   |
| LOC100271836 | 0.0659685 |
| APOC1P1      | 0.187389  |
| SLC39A3      | 38.4216   |
| TPP2         | 12.1896   |
| LINC00174    | 1.2555    |
| WFDC10B      | 0.256588  |
| ZNF572       | 1.7966    |
| LOC728752    | 1.27673   |
| ABCF2        | 62.7333   |
| MBLAC2       | 1.54685   |
| CCDC81       | 0.119927  |
| CEP41        | 1.67946   |
| AQP3         | 0.145545  |
| THEM4        | 4.14574   |
| COL18A1-AS1  | 0         |
| SSTR5        | 0.036008  |
| NXPH4        | 45.3729   |
| HEY1         | 3.69674   |
| RASA3        | 19.1301   |
| PCDHB10      | 0.345928  |
| ENPP2        | 0         |
| VRK2         | 3.36969   |
| GRK4         | 0.538627  |
| ATP6V0A2     | 1.3344    |
| FADS1        | 0         |
| LEAP2        | 0.645136  |
| ROM1         | 2.40686   |
| STX19        | 0         |
| RNF165       | 0.451043  |
| POU2AF1      | 0         |
| C9orf117     | 0.644285  |
| ELAVL3       | 0         |
| C9orf43      | 0.57176   |
| PRRG2        | 1.07353   |
| AIM1         | 0.0109843 |
| UNC79        | 0.0104652 |
| SLC36A2      | 0         |
| KIF21A       | 1.22684   |
| HOMEZ        | 3.66051   |
| LOC100130855 | 0.469927  |
| OTC          | 0         |
| SLC3A1       | 0         |
| TMEM178A     | 0.117959  |
| LOC100505918 | 0         |
| ZNF724P      | 0.588394  |
| FTSJD1       | 6.79811   |
| ANKRD34A     | 2.82825   |
| RPGRIP1L     | 0.354155  |
| PTAFR        | 0.0606982 |
| GTF2I        | 0.951717  |
| KRTAP4-9     | 1.2219    |
| LOC643770    | 0.419744  |
| SLC25A30     | 0.813837  |
| LAMA4        | 0         |
| ITPR3        | 56.9178   |
| NRSN1        | 0         |
| NAV3         | 9.45192   |

|              |            |
|--------------|------------|
| WDFY3-AS2    | 0.378674   |
| LRRC34       | 2.15987    |
| HIST1H2BH    | 24.3208    |
| DDO          | 0          |
| LOC257396    | 2.03503    |
| C7           | 0          |
| SCN4B        | 0.0871838  |
| LOC100505912 | 0.213358   |
| LOC653653    | 0.0845314  |
| EID3         | 0.233171   |
| CRMP1        | 3.21154    |
| C12orf69     | 0.0371727  |
| CCDC151      | 0.806482   |
| AANAT        | 0.17922    |
| TSPAN11      | 0          |
| VWA8-AS1     | 0.0379238  |
| OASL         | 0.0233116  |
| ARHGAP4      | 0.423031   |
| SOCS3        | 23.6117    |
| FAM102A      | 17.3314    |
| CCDC157      | 0.468322   |
| CARNS1       | 0.0375861  |
| VILL         | 0.353506   |
| HOXB-AS5     | 1.80383    |
| CASP4        | 206.292    |
| TMPRSS7      | 0          |
| SCN2A        | 0.00427215 |
| TMIE         | 0.456844   |
| LRGUK        | 0.158877   |
| C10orf25     | 0.617392   |
| SNX29P2      | 0.0399196  |
| IER3         | 75.3428    |
| MAP1A        | 0.136002   |
| FLJ39639     | 0.282942   |
| WDR73        | 13.5336    |
| LOC389634    | 1.48432    |
| FAM86EP      | 0.864189   |
| AP1S3        | 0.0106606  |
| PRTFDC1      | 7.36559    |
| ZNRD1-AS1    | 0.671442   |
| TRHR         | 0          |
| TMEM17       | 0.647316   |
| ENO4         | 0.247956   |
| SERPINB1     | 87.3357    |
| MRAS         | 2.01922    |
| CCDC147      | 0.582075   |
| SNORD97      | 5.11059    |
| KLHL31       | 0.0355658  |
| MAPK13       | 19.2224    |
| DNALI1       | 0.0166307  |
| LOC441242    | 0          |
| OPLAH        | 42.0831    |
| HBEGF        | 36.3135    |
| CACNA1C      | 0          |
| TOB2P1       | 1.04701    |
| KRTCAP3      | 1.18553    |
| SNORA62      | 0          |
| OCLM         | 0.152591   |
| TAF13        | 12.2895    |
| CHAC2        | 5.54803    |
| MYOZ3        | 0.0269485  |
| CCDC148      | 0.159328   |
| NPC1L1       | 0.0127034  |
| VEPH1        | 1.39222    |
| GFPT1        | 9.85193    |
| GPX2         | 0.0461927  |
| ADAM1A       | 0.677243   |
| PRRT2        | 0.028316   |
| PACRGL       | 3.73927    |
| EN2          | 0          |
| LIAS         | 11.844     |
| CBLN3        | 0.235517   |
| HDHD2        | 6.35269    |
| APC2         | 1.12091    |
| C8G          | 0.102425   |
| LOC100506713 | 1.6102     |
| ANKLE1       | 0.477194   |
| ASB13        | 21.2725    |
| CPSF4L       | 0          |

|              |           |
|--------------|-----------|
| GCSHP3       | 2.63507   |
| PRSS36       | 0.336357  |
| C19orf71     | 0.404947  |
| PRAF2        | 3.00014   |
| ITIH4        | 0.333797  |
| CHPF2        | 40.1036   |
| WDR31        | 0.374672  |
| SETBP1       | 0         |
| FAM53A       | 4.18083   |
| ZNF713       | 0.249674  |
| AKAP3        | 0.305106  |
| MAK          | 0.115077  |
| LOC100507053 | 0.0526817 |
| RFPL4A       | 0.275559  |
| GPSM3,NOTCH4 | 0.193714  |
| PTBP3        | 13.1823   |
| TRAF3IP1     | 2.96574   |
| C14orf142    | 7.78594   |
| PACSIN1      | 0.0280432 |
| CCNYL1       | 3.66645   |
| HIGD1B       | 0.288729  |
| LHB          | 3.36819   |
| ZNF80        | 0         |
| DYNC1H1      | 31.0035   |
| ZNF397       | 3.86356   |
| C16orf95     | 6.60175   |
| CDK2AP1      | 58.0109   |
| RNF216-IT1   | 0         |
| C7orf63      | 0.681437  |
| C10orf95     | 1.92023   |
| ST6GALNAC4   | 320.58    |
| SNX29        | 0.660637  |
| ARC          | 6.75565   |
| METTL20      | 0.534523  |
| SECTM1       | 9.29445   |
| PKD2         | 2.30938   |
| CPS1         | 0.915324  |
| ZNF417       | 0.496724  |
| LIF          | 30.9281   |
| LOC440461    | 0.0605792 |
| ZEB1         | 4.39611   |
| ZNF785       | 2.68046   |
| WFDC3        | 0.158966  |
| PRRT1        | 2.65517   |
| DYRK3        | 16.352    |
| TMX3         | 6.06481   |
| RABL2B       | 7.13889   |
| SLAMF7       | 0.42675   |
| STK31        | 0.0630279 |
| ZFP82        | 0.0151216 |
| CXorf31      | 0.381699  |
| PDE6B        | 0         |
| MPZL2        | 0.0147565 |
| PKIB         | 0.0931805 |
| FHAD1        | 3.26185   |
| EGFEM1P      | 0         |
| ODF3L2       | 0.863543  |
| WDR4         | 10.9232   |
| NOXO1        | 0.608557  |
| SYT2         | 0.0222144 |
| TPGS1        | 28.4447   |
| C1orf229     | 0.59003   |
| TMEM40       | 0.184448  |
| GPAT2        | 0.0934063 |
| AGA          | 2.59005   |
| CACNA1A      | 0         |
| DAPP1        | 0         |
| IL10RA       | 0.136645  |
| SYNPO        | 0.437301  |
| C9orf9       | 13.0062   |
| LOC100527964 | 1.83191   |
| AURKAPS1     | 0.786989  |
| GGCT         | 47.0141   |
| FAM65C       | 0         |
| TCTN1        | 8.46551   |
| SLFN5        | 1.63191   |
| LOC100133612 | 0.130259  |
| KCNIP2       | 0.332522  |
| ZNF221       | 0.133497  |

|                     |            |
|---------------------|------------|
| GNAT1               | 0          |
| C5orf4              | 0.0311999  |
| ITGB1BP2            | 0.313094   |
| VMO1                | 1.29892    |
| SIPA1L3             | 3.91274    |
| RSPH4A              | 0.152216   |
| SDCBP2-AS1          | 0.356883   |
| LRRC2               | 0.00754865 |
| CYP4F11             | 0.164495   |
| SNORD95             | 2048.13    |
| RABGAP1L            | 3.16301    |
| NPR1                | 0          |
| ARGFXP2             | 0.0379817  |
| BNIP3               | 0.0576439  |
| GPR183              | 0          |
| ADCY5               | 0.0626669  |
| UPK3B               | 2.8555     |
| ANKRD20A1,ANKRD20A3 | 0.00996692 |
| FUT8-AS1            | 0.0260478  |
| LOC100506123        | 1.02996    |
| RMDN2               | 0.379672   |
| MAPK15              | 3.25566    |
| C16orf46            | 0.439289   |
| COX10-AS1           | 1.74586    |
| MCM7                | 158.813    |
| NANOG               | 0.0237671  |
| C14orf79            | 6.55818    |
| ACSL5               | 0.0367618  |
| LOC100505812        | 2.2151     |
| TRIM69              | 0.45312    |
| ST3GAL6             | 0          |
| PAR5                | 0.0105829  |
| SH2D2A              | 5.187      |
| LOC158572           | 0.0438817  |
| TTC3P1              | 0.156386   |
| PFDN1               | 116.921    |
| SPA17               | 7.85172    |
| BBS1                | 3.93872    |
| TMEM143             | 3.64933    |
| LOC728084           | 0          |
| AIFM3               | 0.86998    |
| PSG9                | 0.0247486  |
| SLC7A11             | 2.78297    |
| F13B                | 0.0149729  |
| SNAI3-AS1           | 1.79478    |
| ACTR3C              | 0.722568   |
| ATAD3B              | 53.6105    |
| LOC152225           | 12.855     |
| NAT2                | 0.0321358  |
| STAG3L3             | 0.471289   |
| PCDHB12             | 0.171889   |
| C1orf54             | 0.506387   |
| BTLA                | 0.0108305  |
| IQCE                | 1.21532    |
| LOC150197           | 0.336523   |
| ZNF425              | 0.935116   |
| FAM86JP             | 1.13305    |
| LOC100288846        | 0.806359   |
| PATL2               | 0.262816   |
| SCARNA14            | 5.12819    |
| FGF21               | 0          |
| GZMM                | 0.386537   |
| ERAS                | 0          |
| DCDC2               | 0.885226   |
| ZNF90               | 0.00923898 |
| KIF5A               | 0.0120688  |
| SNORD15A            | 7.59188    |
| BRWD1-IT2           | 0.785234   |
| LOC100130987        | 1.05502    |
| LOC400927           | 1.03972    |
| DHRS2               | 0.0951168  |
| PLCH2               | 0.0442981  |
| LAMB3               | 108.04     |
| EMP1                | 56.1375    |
| CYP4V2              | 1.39024    |
| LINC00485           | 0.0111366  |
| SEC61B              | 343.122    |
| HYDIN               | 0.0820778  |
| ARMC9               | 3.29917    |

|              |            |
|--------------|------------|
| FAM126A      | 0.0363083  |
| IFT88        | 1.30124    |
| PCDHB4       | 0.0408852  |
| KIAA1755     | 2.13173    |
| CARS         | 43.1042    |
| LOC653712    | 0.242648   |
| BMS1P6       | 0.00832929 |
| GPR68        | 0.406274   |
| ARHGEF37     | 0.516138   |
| TGFBR3L      | 0.617438   |
| CGB8         | 0.991579   |
| SMIM16       | 0.0623876  |
| NLRP11       | 0.439782   |
| UBE2E1       | 79.107     |
| CLYBL        | 0.702284   |
| MARS         | 47.5806    |
| PNMA2        | 0.0536401  |
| FRMD4B       | 0.00769895 |
| C1orf180     | 0.014687   |
| PSAT1        | 96.9987    |
| ARHGEF19     | 15.4669    |
| TBX2         | 0.0518182  |
| ZNF132       | 0.241262   |
| SNORA38B     | 0          |
| IDNK         | 4.05894    |
| EGR2         | 0.15121    |
| VAMP5        | 0.105701   |
| ESR2         | 0.0279495  |
| FBLL1        | 0.509189   |
| ITGAX        | 1.33065    |
| FCAR         | 0          |
| SPTY2D1-AS1  | 0.0300282  |
| NR4A2        | 0.458156   |
| IAPP         | 0          |
| LOC100294362 | 0.153017   |
| PCDHB5       | 0          |
| ATP5EP2      | 1.43471    |
| HIST2H2AC    | 5.97064    |
| CILP2        | 0.109178   |
| ARHGAP30     | 0.0968041  |
| LOC284751    | 0.429689   |
| UCA1         | 18.3687    |
| TNFSF4       | 0.0650972  |
| H3F3C        | 0.0514476  |
| AKNAD1       | 0.0511938  |
| STK33        | 0.0132169  |
| EPGN         | 0.0160397  |
| IGFL2        | 0.107691   |
| MFAP4        | 0          |
| PNLDC1       | 0.0759682  |
| PROSER2-AS1  | 0.0147189  |
| TMEM9B-AS1   | 0.414603   |
| C6orf163     | 0.184688   |
| PSD3         | 0.0114946  |
| CYP17A1      | 0.0527055  |
| PCK2         | 87.0865    |
| HNF4G        | 0.846054   |
| ATP2C2       | 0.0662733  |
| ARL4D        | 0.0371396  |
| PPP4R1L      | 0.241059   |
| CCRL2        | 2.20988    |
| TMEM229B     | 0.478726   |
| ZBED3-AS1    | 0.301757   |
| KIF9         | 1.37103    |
| LOC339166    | 0.0325588  |
| NAPRT1       | 78.4361    |
| FLJ42289     | 0.0378259  |
| FKRP         | 3.62157    |
| ST8SIA4      | 0          |
| YJEFN3       | 4.29218    |
| CTXN1        | 41.4228    |
| APBA2        | 0.016228   |
| HTATSF1P2    | 3.16125    |
| FMO5         | 0.162774   |
| C19orf80     | 0.0783632  |
| C1orf116     | 0          |
| SULF2        | 0.013238   |
| FLJ30679     | 0.130646   |
| LOC100272216 | 0.135281   |



|               |            |
|---------------|------------|
| ABCA4         | 0.00645507 |
| C9orf172      | 1.02378    |
| AACSP1        | 1.01349    |
| DENND1C       | 0.348545   |
| MREG          | 8.25671    |
| RCHY1         | 5.64868    |
| RSPH10B       | 0.0405194  |
| ISPD          | 0.138531   |
| XK            | 0.420551   |
| EGR1          | 20.8096    |
| ZCWPW1        | 1.69158    |
| EBLN2         | 0.119965   |
| SRPK3         | 0.0375414  |
| LOC541473     | 0.936184   |
| ORM1          | 0.0682225  |
| RORC          | 0.0178709  |
| PBLD          | 0.731427   |
| RNF167        | 79.7763    |
| CCDC116       | 0.11831    |
| GLT25D2       | 0.816358   |
| HBA1          | 0.183095   |
| SPATC1L       | 0.088764   |
| CTAGE7P       | 0.0714988  |
| DDX11L2       | 0.608145   |
| RABL2A        | 1.7373     |
| ARHGEF4       | 0.0173331  |
| NBPF11,NBPF24 | 0.033165   |
| HDC           | 0.0184866  |
| RASIP1        | 0.36679    |
| LGALS8-AS1    | 0.949804   |
| LOC100130452  | 0.142529   |
| LOC100506343  | 0.0242207  |
| SPON1         | 0.0514384  |
| BBS12         | 1.1372     |
| SH3BP5L       | 119.123    |
| LINC00520     | 0.223162   |
| C16orf45      | 0.145292   |
| S1PR4         | 0.0677002  |
| LOC100132356  | 0.342525   |
| LOC100131089  | 6.17289    |
| KRT19         | 0.055468   |
| KRCC1         | 4.94763    |
| DMBT1         | 0.0480554  |
| LRFN1         | 0          |
| NAGPA-AS1     | 0.0436877  |
| CHN1          | 0.0821617  |
| CASP1         | 0.186305   |
| NKPD1         | 0.0155146  |
| FAM149B1      | 2.40622    |
| SLC28A2       | 0.0380579  |
| G0S2          | 346.315    |
| ZNF235        | 0.324902   |
| ZNF672        | 192.676    |
| NLRP1         | 0.320681   |
| GRID2IP       | 0.016543   |
| AK8           | 0.884347   |
| TRIM66        | 0.736452   |
| GAL3ST4       | 0.374977   |
| C5orf60       | 0          |
| CD79B         | 0.128054   |
| HSD17B3       | 0.314147   |
| IRX6          | 0.031737   |
| LOC100505679  | 0.140943   |
| GDPGP1        | 1.03642    |
| MST1L         | 0.331018   |
| MORN1         | 1.16408    |
| TP53TG5       | 0.840148   |
| CCT6B         | 2.07762    |
| AEBP1         | 0.0149044  |
| PARP12        | 10.2891    |
| EGR3          | 1.70115    |
| TTC30B        | 0.26793    |
| ATP6V1B1      | 0.0337107  |
| TSGA10        | 0.117577   |
| LOC619207     | 0.0994141  |
| SLC25A2       | 0.0348049  |
| DLL3          | 0          |
| SNORA27       | 28.8716    |
| SENP8         | 1.88264    |

|           |            |
|-----------|------------|
| C17orf98  | 0.494712   |
| ZNF665    | 0.0230781  |
| LCT       | 0.0151167  |
| GSTT2     | 1.17794    |
| MAP6      | 0          |
| FOSB      | 4.79821    |
| CPEB1     | 0.0160813  |
| PDZK1     | 0.0208715  |
| SH2D5     | 0.625853   |
| HFE       | 1.95515    |
| DNAAF1    | 0          |
| ST6GAL1   | 5.66344    |
| SLC22A1   | 0.038485   |
| SNORD22   | 86.2131    |
| C16orf71  | 0.120079   |
| FAM129C   | 0.214357   |
| FAM90A25P | 1.07347    |
| SNORD17   | 3.59877    |
| SERPIN8   | 8.87685    |
| NME9      | 0.160162   |
| LCN15     | 0.372845   |
| ASAH2     | 0.0671368  |
| RAB9A     | 12.8513    |
| TMEM140   | 0.726899   |
| MRPL42P5  | 0.780744   |
| LNX1      | 0.156138   |
| FAM66C    | 0.054994   |
| FLJ35390  | 0.88343    |
| TTC12     | 8.39283    |
| MT1G      | 0.536607   |
| C1orf101  | 0.0125826  |
| CELF6     | 1.2065     |
| C20orf203 | 0          |
| ADAM20P1  | 0.15409    |
| TAS2R5    | 0.644471   |
| TMC4      | 0.864814   |
| TREX2     | 0.565068   |
| RAB37     | 0.124347   |
| PLA2G4C   | 0.140744   |
| HLA-DRB6  | 0.0848752  |
| SLC16A6   | 0.584777   |
| RBM26-AS1 | 0.320148   |
| STS       | 0.288334   |
| ARMCX4    | 0.32666    |
| SLC6A4    | 0.065962   |
| SSPO      | 0.029032   |
| WDR66     | 0.211034   |
| LEKR1     | 0.175164   |
| SDC3      | 5.31181    |
| TMEM134   | 40.8961    |
| KLHDC7B   | 0.133103   |
| EXOC3L2   | 0          |
| UBAC2-AS1 | 0.456298   |
| TEX2      | 3.11148    |
| DNAH6     | 0.039618   |
| FAM86B3P  | 2.41953    |
| RAB40AL   | 0          |
| SCFD2     | 1.75785    |
| LOC399815 | 0.72387    |
| CCDC144B  | 0.00388447 |
| PPP1R36   | 0.0630307  |
| HOXA6     | 0.389652   |
| SLFN1-AS1 | 0.148379   |
| SLC22A20  | 0.0774955  |
| LOC286059 | 0.0633409  |
| LOC440896 | 0.167671   |
| SNORD8    | 27.7031    |
| OPN3      | 0.268513   |
| KLF7      | 0.0266129  |
| ANKRD26P1 | 0.00611872 |
| PRDM7     | 0.0133341  |
| SEC1P     | 0          |
| LOC256880 | 0.192721   |
| BTBD18    | 0          |
| FAM22D    | 0.224221   |
| SNORA16A  | 0          |
| BRWD1     | 2.05291    |
| STARD8    | 0.0910069  |
| CLHC1     | 0.519155   |

|              |           |
|--------------|-----------|
| MMACHC       | 4.50387   |
| INHBE        | 1.0888    |
| MIR4461      | 7210.53   |
| KCNH8        | 0.0953102 |
| HRASLS2      | 0.081684  |
| CCDC40       | 0.381669  |
| SAMD13       | 0.185154  |
| DQX1         | 0.0551228 |
| SELPLG       | 0.422463  |
| SNORA21      | 44.2485   |
| MIR100HG     | 0         |
| WNT8B        | 0.0328528 |
| SP7          | 0.0365455 |
| CCDC176      | 0.494704  |
| ATP8B4       | 0.0473058 |
| CDYL2        | 0.302054  |
| ACTN3        | 0.020389  |
| LSP1         | 0.0425188 |
| GRAMD1B      | 0.116395  |
| ZFP3         | 0.0480373 |
| BMP8A        | 0.184672  |
| SEC24B-AS1   | 0.482984  |
| CCDC113      | 1.9753    |
| CORO2B       | 2.48493   |
| AKNA         | 6.20359   |
| FLJ44313     | 0.57207   |
| NDUFA4L2     | 2.72976   |
| LOC100505676 | 0.0259303 |
| RHCE         | 0.468147  |
| OR7E37P      | 0.228684  |
| ST13P4       | 0.15074   |
| GJC3         | 0.0483108 |
| ATP8B5P      | 0         |
| LOC100134259 | 0.1228    |
| LOC389247    | 0.361012  |
| ZNF93        | 0.0755602 |
| GPR82        | 0         |
| PCDHB11      | 0.45644   |
| ATP6AP1L     | 1.45454   |
| GPR65        | 0.0264021 |
| CASQ1        | 0         |
| FGF5         | 1.17517   |
| FKBP1B       | 0.0612726 |
| CCDC62       | 0.185952  |
| FAM86FP      | 2.26802   |
| FRK          | 0.0136172 |
| COL4A4       | 0.0211494 |
| TCTE3        | 0.132187  |
| JUP          | 0.0413606 |
| CSF2         | 0.160484  |
| SLC5A11      | 0.053087  |
| AMOTL1       | 0.0912901 |
| CALHM2       | 0.381792  |
| KRT81        | 1.19596   |
| FAM122C      | 0.766787  |
| LAIR2        | 2.32906   |
| GUSBP2       | 0.163059  |
| NLRP6        | 0.0803919 |
| OTUD7A       | 0.115395  |
| GLB1L        | 0.928199  |
| MIR663A      | 1075.98   |
| RBPMS2       | 0.0698272 |
| SLC4A8       | 1.64035   |
| FLJ45513     | 0.069159  |
| NEK5         | 0.297878  |
| FGF1         | 0.042952  |
| RPLP0P2      | 1.69176   |
| LOC401127    | 0.0605387 |
| RBMXL2       | 0.0637573 |
| ITIH2        | 0.0124952 |
| C15orf52     | 0.0665703 |
| ASAH2B       | 0.166642  |
| ANKRD30BP2   | 0.0339401 |
| EP400NL      | 0.618423  |
| CYP21A2      | 0.0700526 |
| FAM166B      | 1.16894   |
| LOC100506321 | 0.114752  |
| LINC00629    | 0.0985468 |
| ZNF648       | 0.015134  |

|                 |            |
|-----------------|------------|
| WISP3           | 0.0673055  |
| LRRC37A         | 0.0562451  |
| SLC2A14         | 0.0239365  |
| SNORA40         | 33.9495    |
| DNAH2           | 0.00351711 |
| CEP19           | 0.760001   |
| MLN             | 0.536909   |
| IGF1            | 0.0054017  |
| CARD14          | 0.183821   |
| C6orf99         | 0.469139   |
| AZGP1           | 0.216188   |
| LOC339524       | 0.0433814  |
| PA2G4P4         | 0.0287416  |
| GLIS3           | 0.180645   |
| SYCE2           | 1.43932    |
| PP2D1           | 0.0342979  |
| FLJ34208        | 0          |
| CYP27A1         | 0.0305363  |
| GTF2H2C,GTF2H2D | 2.0278     |
| GPR56           | 0.0166663  |
| PTN             | 0.635681   |
| ZNF492          | 0          |
| PINLYP          | 1.26411    |
| HGFAC           | 0          |
| OSCP1           | 2.25696    |
| GBP4            | 0.0130748  |
| AK7             | 0.210952   |
| METTL7B         | 3.10943    |
| SH3TC2          | 0.182111   |
| ZNF669          | 4.90476    |
| CHST13          | 0.729847   |
| CXorf48         | 0.0211336  |
| LOC100131564    | 0.542841   |
| COL9A3          | 22.4503    |
| PHOSPHO1        | 0          |
| SCARNA22        | 52.7519    |
| MGC45922        | 0.407388   |
| CHGB            | 0          |
| SP140           | 0.237421   |
| ANKRD36BP2      | 0          |
| FAM86HP         | 1.39922    |
| ARMCX1          | 0.120417   |
| LINC00167       | 0.146078   |
| AGBL2           | 0.0644898  |
| SLC5A4          | 0.176379   |
| RNU11           | 25.4199    |
| VCX3B           | 0          |
| DSCR9           | 0.0821197  |
| LOC338817       | 0.0124388  |
| LRR1Q4          | 0.130238   |
| RAMP2-AS1       | 0.0699681  |
| HSPA2           | 0          |
| C9orf84         | 0          |
| MAGOH2          | 0          |
| MYOM2           | 0.0664162  |
| AKR1B10         | 0          |
| PCDHB19P        | 0.0484124  |
| KRT20           | 0          |
| BTBD8           | 0.0912584  |
| BMS1P4          | 0.386771   |
| SIGLEC7         | 0          |
| PADI1           | 0.0772444  |
| ABO             | 0.165355   |
| TMEM31          | 0          |
| ST8SIA1         | 0.00375559 |
| C22orf26        | 0.472758   |
| RSPH6A          | 0          |
| SPDYA           | 0.169142   |
| HVCN1           | 0.0282426  |
| FRMPD2          | 0          |
| TBC1D3G         | 0          |
| ZAP70           | 0.20677    |
| KIAA1210        | 0          |
| CD207           | 0          |
| TMEM204         | 0          |
| ACE2            | 0          |
| HUS1B           | 0.486435   |
| SOX10           | 0          |
| ZIK1            | 0.0147155  |

|              |           |
|--------------|-----------|
| GLB1L3       | 0         |
| TMEM221      | 0.330014  |
| RPL31P11     | 0.0225491 |
| BOC          | 0         |
| ESPN         | 0         |
| SMCR5        | 0         |
| STAB2        | 0         |
| LOC285889    | 0         |
| ABHD1        | 0         |
| GATM         | 0.58937   |
| IKZF2        | 0.0561203 |
| LINC00535    | 0.0995642 |
| LOC387895    | 0.281653  |
| SNORA52      | 32.7073   |
| IL21R        | 0         |
| C11orf42     | 0         |
| C20orf195    | 0         |
| ZNF610       | 0.059607  |
| SCARNA9L     | 2.0464    |
| CELF2        | 0         |
| ASB16        | 0.316301  |
| LOC101059948 | 0.567983  |
| FOXE3        | 0         |
| KLHDC1       | 0.118535  |
| SH3RF3-AS1   | 0.121484  |
| ESRG         | 0.134729  |
| TEX38        | 0         |
| SLED1        | 0         |
| LOC100129083 | 0.362159  |
| FGF9         | 0.495415  |
| FOXA3        | 0         |
| C5orf56      | 0.907115  |
| CRIP1        | 0.937022  |
| ZNF214       | 0.420555  |
| RSPH10B2     | 0.0269796 |
| GPRASP1      | 0.139168  |
| TRIM31       | 0.0472244 |
| GBAP1        | 1.94832   |
| DENND5B-AS1  | 0.132337  |
| SLA2         | 0.020278  |
| FMN1         | 0.121015  |
| IGDCC4       | 0.239343  |
| SNORD47      | 513.539   |
| TSGA10IP     | 0.68799   |
| SPNS3        | 0.716343  |
| APOBR        | 0.0285004 |
| WDR16        | 0.129294  |
| C17orf107    | 0.260495  |
| C14orf182    | 0.0641804 |
| RAB44        | 0         |
| C5AR1        | 0.459177  |
| CEACAM22P    | 0         |
| GHRL         | 0.227723  |
| GLT8D2       | 0.199096  |
| P2RX6        | 0.0204537 |
| DMC1         | 0.0157709 |
| AP4S1        | 0.759835  |
| L3MBTL1      | 0.357271  |
| LOC643201    | 0.0675654 |
| DFNB59       | 1.666     |
| SLC26A7      | 0.0134493 |
| IRGC         | 0.0590277 |
| YY2          | 0.82454   |
| EMR1         | 0.0176448 |
| PLAC1        | 0.499647  |
| AKR7A2P1     | 0.126259  |
| LRRC37A3     | 0.0450687 |
| SLC2A9       | 0.0615881 |
| REG3A        | 0.0694893 |
| PPP4R4       | 0.590422  |
| GYLTL1B      | 0.0298997 |
| AOX1         | 0.20334   |
| COL20A1      | 0         |
| SPATA25      | 0.310384  |
| VSTM1        | 0.0564623 |
| GRIK1        | 0.0531344 |
| ANKDD1B      | 0.0316194 |
| GALNT8       | 0.0211577 |
| HEPHL1       | 0.0125439 |

|              |            |
|--------------|------------|
| LST1         | 0.121529   |
| RPL23P8      | 0.216485   |
| CCIN         | 0.0275706  |
| LRRC43       | 0.0630179  |
| SEZ6         | 0.0135731  |
| PLEKHB1      | 0.028174   |
| AGT          | 0.0216218  |
| ARL10        | 0.0215089  |
| HIST1H4C     | 3.24405    |
| MYO1H        | 0.0194166  |
| SOX6         | 0.00914717 |
| ST8SIA6      | 0.0310409  |
| LOC100132215 | 0.278627   |
| SIX3         | 0.0302095  |
| PTPN13       | 0.00908602 |
| LOC285593    | 0.0250384  |
| IL31RA       | 0.0440871  |
| OR2H1        | 0          |
| LEPREL1      | 0.0138458  |
| IL10         | 0.0290824  |
| CPO          | 0.0339165  |
| TMCO2        | 0.0744241  |
| LEMD1-AS1    | 0.0171881  |
| SMIM17       | 0.264877   |
| ZFPM2        | 0.00888836 |
| ADH6         | 0          |
| SNCAIP       | 0.624846   |
| RGPD5,RGPD6  | 0.00512237 |
| KRTAP2-3     | 1.58285    |
| VWA7         | 0.0886912  |
| SOX7         | 0.11839    |
| GPM6B        | 0.0139333  |
| DISC2        | 0.00849985 |
| RAG2         | 0.0289421  |
| CDH6         | 0.00435031 |
| GSG1         | 0.0526978  |
| FLJ36777     | 0.0368827  |
| PLGLB2       | 0.0129738  |
| C14orf23     | 0.0128798  |
| DCDC2B       | 0.040008   |
| RLTPR        | 0.050694   |
| LOC100129534 | 0.715345   |
| DCAF4L1      | 0.189296   |
| LOC100507537 | 0.0607232  |
| NLRC4        | 0.281512   |
| BCAR4        | 0.474194   |
| GPD1         | 0.168911   |
| ACTL7B       | 0          |
| SNORA50      | 5.02868    |
| LY96         | 1.61136    |
| HRNR         | 0.00545624 |
| SCARNA5      | 3.13924    |
| TAS2R19      | 0.11157    |
| XAF1         | 0.0213423  |
| GRAP2        | 0.0977884  |
| ACTL8        | 3.48136    |
| FAM154B      | 0.134692   |
| RNF222       | 0.0191792  |
| KIAA1407     | 0.359529   |
| SNORA1       | 6.35035    |
| HSPB9        | 0.142738   |
| TMEM14E      | 0          |
| MMP23B       | 0.103393   |
| GRAP         | 0.0895268  |
| COL2A1       | 0.0242936  |
| LINC00242    | 0.337594   |
| LOC494141    | 0.0207713  |
| PRSS54       | 0.776585   |
| DLG1-AS1     | 0.216907   |
| FAM57B       | 0.294144   |
| PRAM1        | 0.322563   |
| CDH20        | 0.317007   |
| CPNE9        | 0.0812518  |
| C9orf24      | 0.16305    |
| KCNT1        | 0.0151592  |
| C3orf72      | 0.0246945  |
| S100A3       | 9.08026    |
| MATN4        | 0.0533145  |
| FEZ1         | 0.0869071  |

|                           |            |
|---------------------------|------------|
| AQP7P3                    | 0.302461   |
| CALCB                     | 0.106241   |
| STXBP6                    | 0.985527   |
| ALS2CR8                   | 0.244599   |
| MLANA                     | 0          |
| KRTAP4-7                  | 0.294934   |
| PTHLH                     | 0          |
| EPHX3                     | 0.0734187  |
| SMG1P1                    | 0.0503303  |
| ALDH3B1                   | 0.0504181  |
| ADCYAP1R1                 | 0.0576025  |
| PCAT1                     | 0.130974   |
| C15orf48                  | 0.216636   |
| PTPRVP                    | 0.0147615  |
| TPRG1                     | 0          |
| VN1R5                     | 0          |
| LOC338963                 | 0.0419798  |
| LPAR3                     | 0.10011    |
| SEMA4A                    | 0.0179697  |
| COL6A3                    | 0.00551653 |
| HSPA1L                    | 0.187229   |
| MRO                       | 0          |
| ARRDC3-AS1                | 0.0791155  |
| PDZD9                     | 0          |
| C19orf38                  | 0.522035   |
| CDHR5                     | 0.0407847  |
| CABP7                     | 0.101134   |
| LGR6                      | 0.0593371  |
| MALL                      | 0.0371342  |
| ZNF426                    | 0.047083   |
| CNIH3                     | 0.0241664  |
| ZMAT1                     | 0.151207   |
| LOC100130301              | 0.095      |
| MAP4K1                    | 0.339074   |
| ITIH5                     | 0.01495    |
| CCDC158                   | 0.0400743  |
| KCNJ10                    | 0.0233874  |
| PTPRM                     | 0.0309684  |
| FAM227A                   | 0.181228   |
| SAG                       | 0.0295327  |
| TNFSF13B                  | 0.060464   |
| MYLK-AS1                  | 0.252584   |
| LOC100128568              | 0.0961393  |
| TRIML2                    | 0.296823   |
| UTS2D                     | 0.0177325  |
| LINC00507                 | 0.052529   |
| LOC100507156              | 0.010703   |
| LOC283683                 | 0.299998   |
| TRIM55                    | 0          |
| LRRC46                    | 0.343678   |
| ANKRD31                   | 0.0770501  |
| MFAP2                     | 0.594205   |
| TEX12                     | 0.154391   |
| LINC00636                 | 0          |
| FAM153C                   | 0.133563   |
| ZNF853                    | 0.0597133  |
| HECW1                     | 0.0690364  |
| FAM196A                   | 0          |
| HSD52                     | 0.312692   |
| KLLN                      | 0.309565   |
| GTF2A1L,STON1,STON1-GTF2A | 0.0240476  |
| LRRN4CL                   | 0.177208   |
| DCDC5                     | 0.00786802 |
| GNG3                      | 0.134292   |
| KIAA0408,SOGA3            | 0.00715061 |
| BDNF                      | 0.105745   |
| CCDC39                    | 0.0170967  |
| HLA-DMA                   | 0.68793    |
| KGFLP1                    | 0.344382   |
| ABCA12                    | 0.00935413 |
| TMEM132B                  | 0.0154219  |
| VWF                       | 0.0121506  |
| IL13                      | 0.0845021  |
| SPATA17                   | 0.256848   |
| CYP3A43                   | 0.0583905  |
| GSTM2                     | 0.227418   |
| TDRD6                     | 0.0365766  |
| NHS                       | 0.0186659  |
| PRSS57                    | 0.180599   |

|              |            |
|--------------|------------|
| LCN1         | 0.0838607  |
| TMEM173      | 0.190439   |
| LINC00264    | 0.0504134  |
| GRM2         | 0          |
| GTF2IRD2     | 0.249143   |
| PAPPA        | 0.00378861 |
| LOC646903    | 0.164706   |
| IGLON5       | 0.0186691  |
| GP1BA        | 0.174814   |
| ZNF880       | 0.0802428  |
| C12orf70     | 0.124895   |
| LOC653786    | 0.0167941  |
| CD4          | 0.0533213  |
| MIRLET7D     | 178.174    |
| TTC25        | 0.0403945  |
| HMG2P46      | 0          |
| RENBP        | 0.426344   |
| CFP          | 0.341395   |
| LOC642366    | 0.0904414  |
| DIO1         | 0.0251517  |
| LPAR5        | 0.0540064  |
| FLRT1        | 0.124513   |
| TMEM253      | 0.789188   |
| LG14         | 0.0488823  |
| GRB7         | 0.212827   |
| HLA-DMB      | 0.0687539  |
| LOC100506368 | 0.346793   |
| EME2         | 0.549026   |
| PPIL6        | 0.568894   |
| SNORA3       | 7.04928    |
| SNORA65      | 11.0992    |
| ADAM21       | 0.0995612  |
| PTH2         | 0          |
| PAEP         | 0.137534   |
| POU5F1B      | 1.53811    |
| ATF5         | 83.8843    |
| RRN3P2       | 0.0945907  |
| NUP210L      | 0.0194865  |
| LIMS2        | 0.0834726  |
| OR51B4       | 0.11097    |
| ZNF835       | 0          |
| TMEM169      | 0.0243978  |
| KCND3        | 0.0995958  |
| HCG4B        | 0.625411   |
| KIAA1751     | 0          |
| BCAS1        | 0.0121254  |
| DNAJC9-AS1   | 0.0449962  |
| SNORD33      | 0          |
| TMC2         | 0          |
| LOC100506385 | 0          |
| MEIG1        | 0.0831234  |
| FOXD3        | 0          |
| SUSD4        | 0.503679   |
| GLTPD2       | 0.139969   |
| SYN1         | 0          |
| APOL1        | 0.0960823  |
| ANKRD63      | 0.155031   |
| FBLN2        | 0.0160095  |
| PIANP        | 0.0516726  |
| IZUMO4       | 0.201771   |
| GOLGA6C      | 0.00713543 |
| CCDC65       | 0          |
| WEE2         | 0          |
| BEST3        | 0.844458   |
| AIPL1        | 0          |
| B3GNT8       | 0.0480147  |
| EDN1         | 0          |
| GPR22        | 0.0238822  |
| FLJ40292     | 0          |
| KCNC1        | 0.0202706  |
| LOC440173    | 0.021459   |
| SLC4A9       | 0.108267   |
| KRTAP5-9     | 0.331382   |
| APOA2        | 1.53331    |
| CRYAB        | 0          |
| KCNMB2       | 0          |
| C2orf66      | 0.212748   |
| HSD3BP4      | 0          |
| SLC7A11-AS1  | 0.0173577  |



|              |            |
|--------------|------------|
| RAD21L1      | 0          |
| DCD          | 0          |
| PREX1        | 0.0597186  |
| RYR3         | 0.0109225  |
| IGFN1        | 0.0103858  |
| LOC283731    | 0.0249725  |
| KCNH6        | 0.319856   |
| HHIPL1       | 0          |
| SNORA31      | 19.9978    |
| WDR78        | 0.268888   |
| MACROD2      | 0.0242654  |
| SLC15A1      | 0.0143505  |
| LURAP1       | 0.0875877  |
| TSNAXIP1     | 0.139454   |
| GLT1D1       | 0.0381627  |
| TMEM61       | 0          |
| INHBC        | 0.127507   |
| BATF2        | 0.669304   |
| ERVV-1       | 0.0363185  |
| CD3D         | 0.0686244  |
| MYO1F        | 0.136171   |
| CAMK2B       | 0.0624371  |
| DNMBP-AS1    | 0.0153723  |
| STAT4        | 0.056561   |
| AMN          | 0.188176   |
| C14orf178    | 0.106635   |
| LOC284009    | 0          |
| MTTP         | 0.0382482  |
| LOC100506071 | 0          |
| NBPF7        | 0.13518    |
| TMEM89       | 0.37747    |
| SLC35F1      | 0.017727   |
| BIN2         | 0          |
| LOC100507557 | 0.0468415  |
| MATN2        | 0.0203866  |
| ALDOB        | 0.10623    |
| ABCA9        | 0.00591023 |
| NUPR1        | 4.44826    |
| LOC100506082 | 0.154963   |
| WDR63        | 0.139203   |
| KRT79        | 0.600743   |
| SNORA11B     | 0          |
| CPB2-AS1     | 0.0105494  |
| LCE1B        | 0.195998   |
| CYP4F2       | 0          |
| SNORA71D     | 15.3991    |
| TAL2         | 0.379083   |
| C3AR1        | 0.248069   |
| CACNA1G-AS1  | 0          |
| C9orf152     | 0.0759603  |
| C19orf59     | 0.0697526  |
| PLVAP        | 0.026108   |
| RFPL1-AS1    | 0.00819487 |
| IQUB         | 0.0465665  |
| OLFML2A      | 0.016895   |
| SLC46A2      | 0          |
| PABPN1L      | 0.0527686  |
| HLA-DOB      | 0.262801   |
| DPF3         | 0.163041   |
| SCUBE2       | 0.0107159  |
| LOC158435    | 0          |
| EPN3         | 0.0175828  |
| LOC100302640 | 0.394389   |
| LOC100505624 | 0.188902   |
| TAS2R43      | 0.0434671  |
| SPI1         | 0.0648514  |
| HCP5         | 0          |
| HPD          | 0.0344172  |
| SLC39A2      | 0.0760354  |
| SMIM5        | 0.135579   |
| WNT16        | 0.0280994  |
| ZNF528       | 0.0479221  |
| LDB3         | 0.0280934  |
| ITGB7        | 0.177851   |
| RIMBP2       | 0.007729   |
| RSPH1        | 0.509035   |
| STEAP1B      | 0          |
| SLFN13       | 0.00448984 |
| SLC22A9      | 0.0194871  |

|                           |            |
|---------------------------|------------|
| BFSP1                     | 0.465186   |
| SUMO4                     | 0.0656276  |
| FOXP3                     | 0.37431    |
| MEP1B                     | 0.0638682  |
| CECR5-AS1                 | 0.39549    |
| CALN1                     | 0.00463824 |
| CHRM1                     | 0          |
| S100A1                    | 0.409759   |
| PHACTR1                   | 0          |
| C20orf26                  | 0.0441085  |
| EDAR                      | 0          |
| MINOS1P1                  | 0.0320521  |
| ZYG11A                    | 0          |
| PPIAL4G                   | 0.200068   |
| OCM                       | 0.147616   |
| MYCT1                     | 0.0275664  |
| CYP4F3                    | 0.0156037  |
| LINC00854                 | 0          |
| PLG                       | 0.0343201  |
| FAM71F2                   | 0.0484644  |
| ARHGEF38                  | 0.0126787  |
| BTBD19                    | 0.0605645  |
| KRTAP4-6                  | 0.324689   |
| MCAM                      | 0          |
| HGD                       | 0.0440404  |
| PLA2G10                   | 0.0919272  |
| LMX1B                     | 0          |
| LOC100132062,LOC100133331 | 0.0190231  |
| ITGB2-AS1                 | 0          |
| NFASC                     | 0.0231412  |
| LOC100507299              | 0.0561096  |
| LCE1F                     | 0.684993   |
| ZNF365                    | 0.0102     |
| LOC729059                 | 0.135226   |
| CNTN4                     | 0.00737813 |
| ADAM32                    | 0.0286635  |
| CHST11                    | 0.0154686  |
| SLC38A8                   | 0.0593214  |
| PLAC8                     | 0.119094   |
| ACER1                     | 1.29257    |
| SLC19A3                   | 0.0110626  |
| C6orf58                   | 0.106167   |
| FLJ46361                  | 0.022366   |
| BDNF-AS                   | 0.494048   |
| HIGD2B                    | 0.112228   |
| TMEM119                   | 0.0411873  |
| CCDC135                   | 0.110958   |
| SLC22A18AS                | 1.20326    |
| GPR135                    | 0.371488   |
| LOC643723                 | 0.0762606  |
| NLRP14                    | 0.0291587  |
| RNF183                    | 0.207522   |
| LIN28A                    | 0.010966   |
| CASC1                     | 0.0148459  |
| CXADR                     | 0.0259002  |
| C4orf26                   | 0.0237129  |
| OR5K2                     | 0.0516983  |
| LOC101101776              | 0.41489    |
| DLEU7-AS1                 | 0          |
| CCNI2                     | 0.0492826  |
| SAMD15                    | 0.107001   |
| NEFH                      | 0          |
| SNORA78                   | 11.7091    |
| NFATC2                    | 0.00700798 |
| XYLT1                     | 0.0106256  |
| NRN1L                     | 0          |
| PHEX                      | 0.0294463  |
| CFL1P1                    | 0.0825278  |
| EFCAB6                    | 0.0542892  |
| LOC100996455              | 0          |
| STAB1                     | 0.00849741 |
| ZNF99                     | 0.00437892 |
| HTR2B                     | 0.074648   |
| NRAP                      | 0.0078215  |
| KRBA2                     | 0.0401557  |
| FOXN4                     | 0.0176121  |
| C15orf27                  | 0.0521919  |
| TPTE2P6                   | 0.0306784  |
| TAS1R1                    | 0.0303789  |

|              |            |
|--------------|------------|
| MTUS2-AS1    | 0.221596   |
| KCTD16       | 0.0144049  |
| RD3          | 0          |
| KRTAP3-3     | 0          |
| PIP5K1P1     | 0.0216616  |
| MYEF2        | 0.00700326 |
| GPR98        | 0          |
| CD8A         | 0.146099   |
| NLRP12       | 0.0379748  |
| LOC100505933 | 0.0730693  |
| TAS2R10      | 0.0531286  |
| SEMA5A       | 0          |
| EXOC3L1      | 0.115053   |
| ECT2L        | 0.16859    |
| FCER2        | 0.241815   |
| RNF133       | 0.0289726  |
| RPS15AP10    | 0.142491   |
| LOC401242    | 0          |
| DSG3         | 0.0140863  |
| DDX43        | 0.028596   |
| RPGRI1       | 0.0100421  |
| CCDC164      | 0.0168968  |
| LOC100288842 | 1.23327    |
| COL17A1      | 0.0181325  |
| C6orf165     | 0.102081   |
| LSAMP        | 0.0193255  |
| IL15         | 0          |
| WDR11-AS1    | 0.0318966  |
| SOWAHD       | 0          |
| LRRTM2       | 0.00654995 |
| RNASE3       | 0.147954   |
| OLFM2        | 0.080005   |
| CGB5         | 0.520158   |
| CHAD         | 0          |
| KLF1         | 0          |
| SSTR5-AS1    | 0          |
| SNCG         | 0.164039   |
| CELA1        | 0.128116   |
| TRPV4        | 0          |
| GPR61        | 0.0382963  |
| ACPT         | 0.135821   |
| NCF4         | 0.0903802  |
| C21orf49     | 0.116024   |
| SDC4P        | 0          |
| FLT1         | 0          |
| C14orf180    | 0.0374283  |
| PDGFB        | 0          |
| FLJ42102     | 0          |
| LINC00592    | 0          |
| TCEA3        | 0.0896627  |
| LOC400558    | 0.055351   |
| GAL3ST1      | 0.0578931  |
| PRR23C       | 0.0422335  |
| SCN4A        | 0.0280779  |
| NOS2         | 0.0123101  |
| SLFN14       | 0          |
| EMR2         | 0          |
| BCL6B        | 0          |
| C21orf7      | 0.342571   |
| METTL21EP    | 0          |
| OR7E12P      | 0          |
| GNRH2        | 0          |
| PLB1         | 0.018769   |
| TDRD12       | 0          |
| CEACAM8      | 0          |
| C3orf65      | 0.133234   |
| PARK2        | 0.0588977  |
| ASTL         | 0.0559186  |
| PCBP3        | 0.0619067  |
| LOC339894    | 0.0231189  |
| FGF13        | 0          |
| C16orf3      | 0.127442   |
| SLC51B       | 0          |
| MAB21L2      | 0          |
| SCT          | 0          |
| CGB          | 0.098903   |
| CTAGE10P     | 0.0136559  |
| CHADL        | 0.13095    |
| AFAP1-AS1    | 0.0067906  |

|              |            |
|--------------|------------|
| PPL          | 0.0367646  |
| RSAD2        | 0.011064   |
| CD84         | 0.00485559 |
| LOC100506776 | 0.0117121  |
| CNTD2        | 0.0997938  |
| CCBP2        | 0.0195574  |
| SSC5D        | 0.0132363  |
| FBLN7        | 0.0335469  |
| ANPEP        | 0.0622922  |
| DIRAS1       | 0.0164209  |
| ROBO4        | 0.0497118  |
| MPP4         | 0.0161598  |
| SEMA3G       | 0.0232249  |
| SGCZ         | 0.0394615  |
| SLC22A13     | 0.0427503  |
| MMP10        | 0.0686027  |
| LINC00652    | 0.0927675  |
| USP44        | 0          |
| TEKT2        | 0          |
| GCNT2        | 0.00872351 |
| SLC39A5      | 0.0698194  |
| SNORA36A     | 5.34471    |
| GDF5         | 0          |
| SNORA71C     | 5.28821    |
| UPK1B        | 0          |
| LOC100507244 | 0          |
| SPATA4       | 0.112153   |
| OLFML1       | 0.0147587  |
| SLC26A8      | 0.0137894  |
| LOC100129269 | 0.086923   |
| MFSD2B       | 0          |
| LRRC10       | 0.0189907  |
| MT1H         | 0.275964   |
| CD200R1      | 0.0498773  |
| LILRB1       | 0.0723858  |
| KRT222       | 0.370092   |
| GSDMA        | 0          |
| FBN3         | 0.00709693 |
| PLK5         | 0.0433622  |
| NR5A1        | 0.0449478  |
| FLJ40852     | 0.0918898  |
| PLEKHH2      | 0.00527359 |
| PTPRG-AS1    | 0.0162992  |
| CD200        | 0.0194037  |
| UQCRBP1      | 0.051775   |
| HOGA1        | 0.110005   |
| ZNF671       | 0.0684363  |
| TMEM176B     | 0.105576   |
| C12orf50     | 0          |
| TM6SF2       | 0.0928977  |
| ZACN         | 0.0927176  |
| CXorf58      | 0          |
| PNLIPRP1     | 0.0629263  |
| TNS4         | 0.0129635  |
| CLDN20       | 0.03675    |
| CEACAM1      | 0.0399847  |
| NNAT         | 0          |
| CHRM5        | 0          |
| SNORA68      | 23.3407    |
| MYBPC2       | 0.0888486  |
| STON2        | 0.00574601 |
| HSPB6        | 0.108501   |
| MYO1A        | 0.0995807  |
| STAC2        | 0          |
| UOX          | 0.0248357  |
| RUFY4        | 0.0195103  |
| L1CAM        | 0          |
| FLG          | 0.0064135  |
| ITGA2B       | 0.019371   |
| GPA33        | 0.0182259  |
| LOC650368    | 0.124034   |
| NARR,RAB34   | 0.220081   |
| NRADDP       | 0.115863   |
| LOC100240735 | 0.0629278  |
| LOC100128573 | 0.139656   |
| GJD4         | 0.0573948  |
| CRSP8P       | 0.0774306  |
| LOC100287072 | 0.0357257  |
| SLC52A3      | 0          |

|              |            |
|--------------|------------|
| LINC00336    | 0.0979324  |
| PRICKLE2-AS3 | 0.013854   |
| LINC00161    | 0          |
| AFF3         | 0.0111346  |
| CXCR2        | 0.0168778  |
| MILR1        | 0.189171   |
| LOC348761    | 0.114912   |
| PPP1R27      | 0.11217    |
| IL12RB2      | 0.0343883  |
| CCBE1        | 0.020303   |
| FSIP1        | 0.0128372  |
| LRRC4        | 0.0357475  |
| CCR6         | 0.0768244  |
| PHYHD1       | 0.0341236  |
| CCM2L        | 0.164953   |
| SYNPO2L      | 0.0270125  |
| SNORA14B     | 13.8795    |
| APOBEC3H     | 0.111421   |
| RSPH9        | 0.362586   |
| MSR1         | 0          |
| FLT4         | 0.0300869  |
| DSCR6        | 0          |
| COL24A1      | 0.00549532 |
| TSPAN18      | 0.0125941  |
| LOC100128164 | 0          |
| SLC13A4      | 0.0182899  |
| SNORD55      | 0          |
| LOC728989    | 0          |
| TMIGD2       | 0.104066   |
| NOX4         | 0.0184529  |
| MC2R         | 0.010486   |
| LINC00598    | 0          |
| LOC100505817 | 0.0339535  |
| OPCML        | 0.0124871  |
| MIR637       | 0          |
| SNORD83B     | 278.186    |
| GDAP1L1      | 0.0437878  |
| C1orf227     | 0.12396    |
| CIB4         | 0          |
| FAM179A      | 0.0182141  |
| CCDC87       | 0.151423   |
| HAS1         | 0.0489266  |
| FAM223B      | 0          |
| LOC100506274 | 0          |
| ZNF667       | 0          |
| NUGGC        | 0.0118563  |
| PSD2         | 0.0117574  |
| SPAG6        | 0          |
| ZNF582-AS1   | 0.118327   |
| MARCH4       | 0.0130637  |
| CECR1        | 0.0178479  |
| TEX40        | 0          |
| LOC730227    | 0.0713692  |
| SNAI2        | 0.0222829  |
| MEIOB        | 0.0221552  |
| PDZRN4       | 0.0124577  |
| P2RX2        | 0.0415624  |
| KCNMB4       | 0.00965652 |
| FNDC7        | 0.0407838  |
| FAM90A2P     | 0.0764322  |
| PSG3         | 0.0433915  |
| TMEM236      | 0.00752379 |
| C10orf62     | 0.0844651  |
| GRM6         | 0.00934085 |
| NECAB2       | 0.423527   |
| LOC145474    | 0.0213267  |
| SAMD14       | 0.0703326  |
| NODAL        | 0          |
| KRT16        | 0.038949   |
| GGTLC1       | 0.275238   |
| PROK1        | 0.124427   |
| ITGB8        | 0.00862296 |
| GGNBP1       | 0.0555153  |
| TBC1D3P2     | 0.0284222  |
| TRO          | 0.0136442  |
| INGX         | 0.113598   |
| GUCY2C       | 0          |
| PACRG        | 0.0336597  |
| MEFV         | 0.0337712  |

|                  |            |
|------------------|------------|
| GSTM2P1          | 0.0864274  |
| PPARGC1A         | 0.0121365  |
| KCNJ12,KCNJ18    | 0.0127749  |
| SCRT1            | 0.0906312  |
| TRAF3IP3         | 0          |
| LOC100130451     | 0.0732528  |
| DUOX2            | 0          |
| FLJ46300         | 0.0159568  |
| KRTAP3-2         | 0.430899   |
| C12orf71         | 0.0565506  |
| C21orf62         | 0.0307568  |
| CD300C           | 0.0379911  |
| INSC             | 0.0532754  |
| NRXN2            | 0.199286   |
| SPACA4           | 0.169971   |
| SH2D6            | 0.169665   |
| DHH              | 0.0499513  |
| TNFRSF4          | 0          |
| CCDC173          | 0.0469187  |
| LDLRAD2          | 0.0169369  |
| PCOLCE-AS1       | 0.0249329  |
| LOC100133669     | 0          |
| TMEM232          | 0.011015   |
| LOC100131655     | 0.0450681  |
| CLDN5            | 0          |
| GRID1            | 0.0168574  |
| KBTD12           | 0.0161578  |
| PAPPA2           | 0.0305962  |
| S100P            | 0.249444   |
| WDR87            | 0          |
| SNX29P1          | 0.241693   |
| PCDH19           | 0.00534461 |
| MESTIT1          | 0          |
| TREM1            | 0.107441   |
| KCNMA1           | 0          |
| RPS2P32          | 0.0795777  |
| CERS3            | 0.0112958  |
| ADAMTS16         | 0.0201214  |
| OGN              | 0.0131444  |
| ANXA2P1          | 0.0610322  |
| LOC100507066     | 0.109926   |
| DMGDH            | 0.0365825  |
| GPR1             | 0.0418157  |
| CRB1             | 0.012014   |
| BZRAP1-AS1       | 0.092229   |
| LY6G6C           | 0          |
| HCG11            | 0.00678538 |
| SEMA3E           | 0.0182238  |
| TIAM1            | 0.0137873  |
| LOC388553        | 0.0471104  |
| MAGEB2           | 0.444854   |
| GPR39            | 0.108053   |
| LOC100507173     | 0          |
| TMEM156          | 0.125437   |
| TBC1D3P1-DHX40P1 | 0.635752   |
| ZFR2             | 0.0844718  |
| MUC4             | 0          |
| DDX11L1          | 0          |
| CLCNKA           | 0          |
| CDA              | 0          |
| ALPL             | 0          |
| NCMAP            | 0          |
| TINAGL1          | 0          |
| HCRTR1           | 0          |
| FAM159A          | 0.135451   |
| PRKAA2           | 0.00389077 |
| LOC100131060     | 0.115657   |
| IL23R            | 0          |
| ST6GALNAC3       | 0          |
| GIPC2            | 0          |
| DNASE2B          | 0          |
| FLJ31662         | 0.0132653  |
| LOC643355        | 0.0142101  |
| TDRD10           | 0.0283987  |
| POU5F1P4         | 0.0543696  |
| RXFP4            | 0          |
| RAB25            | 0          |
| RHBG             | 0          |
| KCNJ9            | 0          |

|              |            |
|--------------|------------|
| VANGL2       | 0.0107609  |
| FCGR2A       | 0.0177961  |
| SNORA77      | 0          |
| LINC00260    | 0.0375309  |
| IL24         | 0          |
| CR1          | 0.00488392 |
| CAMK1G       | 0          |
| HSD11B1      | 0.0317999  |
| TGFB2        | 0.00730878 |
| LINC00184    | 0.0171615  |
| C1orf233     | 0          |
| TTC34        | 0          |
| SLC2A7       | 0          |
| SPATA21      | 0.0275513  |
| LOC339505    | 0          |
| HTR1D        | 0          |
| RUNX3        | 0          |
| LAPTM5       | 0.0226621  |
| COL16A1      | 0          |
| DLGAP3       | 0.0249137  |
| POU3F1       | 0          |
| CYP4A11      | 0          |
| C1orf141     | 0.0170882  |
| PTPN22       | 0.0105713  |
| AMPD1        | 0          |
| REG4         | 0          |
| FCGR1B       | 0          |
| LINC00624    | 0          |
| SCARNA4      | 0          |
| ADAMTS4      | 0          |
| FCGR3A       | 0          |
| C1orf111     | 0          |
| LOC400794    | 0          |
| F5           | 0          |
| SELL         | 0          |
| SELE         | 0          |
| SNORD76      | 0          |
| ASTN1        | 0          |
| ANGPTL1      | 0.00966433 |
| NMNAT2       | 0          |
| APOBEC4      | 0.0148932  |
| FAM129A      | 0.0059155  |
| LOC100131234 | 0          |
| MYOG         | 0          |
| IRF6         | 0          |
| AKR1C3       | 0          |
| LINC00707    | 0          |
| GATA3        | 0          |
| ZNF32-AS3    | 0          |
| GLUD1P7      | 0.0104273  |
| GPRIN2       | 0          |
| LINC00595    | 0.142377   |
| FFAR4        | 0.0260511  |
| CYP2C9       | 0.0465779  |
| TLX1         | 0          |
| ELOVL3       | 0          |
| PLEKHS1      | 0.0140962  |
| ARMS2        | 0.069273   |
| MIR4484      | 0          |
| VENTX        | 0          |
| TUBB8        | 0          |
| LOC441666    | 0          |
| LINC00842    | 0          |
| ANXA8        | 0.026378   |
| RBP3         | 0.0145631  |
| CRTAC1       | 0          |
| CALHM3       | 0          |
| MMP21        | 0          |
| LOC338651    | 0          |
| ART1         | 0          |
| OR5112       | 0.0546026  |
| OR52D1       | 0          |
| OR10A2       | 0.0639934  |
| OR10A4       | 0          |
| MRV11-AS1    | 0.235179   |
| OR7E14P      | 0.0481029  |
| LDHAL6A      | 0.0217644  |
| FSHB         | 0          |
| LOC221122    | 0          |

|              |            |
|--------------|------------|
| FAM180B      | 0.0400691  |
| MS4A7        | 0          |
| SLC22A10     | 0          |
| TBC1D10C     | 0          |
| SHANK2-AS1   | 0.0195297  |
| SHANK2-AS3   | 0          |
| FAT3         | 0          |
| FOLR4        | 0.0830833  |
| C11orf53     | 0          |
| CXCR5        | 0.0211971  |
| PDZD3        | 0          |
| GRIK4        | 0          |
| PANX3        | 0          |
| FLI1         | 0.0129339  |
| ADAMTS15     | 0          |
| HBB          | 0          |
| ASCL3        | 0.116722   |
| PLEKHA7      | 0.0110825  |
| MUC15        | 0.0228477  |
| DCDC1        | 0          |
| ELF5         | 0          |
| MYBPC3       | 0          |
| DKFZP434K028 | 0          |
| SNORD31      | 0          |
| GAL3ST3      | 0.0199956  |
| TBX10        | 0.0386641  |
| MRGPRD       | 0          |
| PHOX2A       | 0.0726015  |
| P4HA3        | 0          |
| TENM4        | 0.003537   |
| SNORD6       | 997.2      |
| TRPC6        | 0.00886127 |
| MMP7         | 0          |
| MMP3         | 0          |
| GUCY1A2      | 0.00228885 |
| LOC100131626 | 0.115719   |
| SCN3B        | 0          |
| RIMKLB       | 0          |
| H1FNT        | 0          |
| ARHGEF25     | 0          |
| SYT1         | 0.0161082  |
| OTOGL        | 0.00417531 |
| PLEKHG7      | 0          |
| RPH3A        | 0          |
| DTX1         | 0.0226912  |
| MIR3908      | 0          |
| FLJ37505     | 0          |
| GPR133       | 0.0202881  |
| LOC100271702 | 0.0273523  |
| ANO2         | 0.0384228  |
| AICDA        | 0          |
| TAS2R13      | 0          |
| TAS2R50      | 0.0477804  |
| PRB3         | 0          |
| SLCO1A2      | 0.00484861 |
| FAM186A      | 0          |
| KRT73        | 0          |
| KRT1         | 0          |
| CMKLR1       | 0          |
| NOS1         | 0.00427144 |
| HCAR3        | 0.0240049  |
| SPERT        | 0.048633   |
| MLNR         | 0.113505   |
| FAM124A      | 0.0103443  |
| NALCN-AS1    | 0          |
| GPR12        | 0.00902116 |
| LINC00571    | 0          |
| KCTD4        | 0          |
| CPB2         | 0          |
| LINC00563    | 0          |
| LECT1        | 0          |
| POU4F1       | 0          |
| LINC00410    | 0          |
| RNASE2       | 0          |
| NYNRIN       | 0.00698297 |
| SSTR1        | 0          |
| PLEKHD1      | 0          |
| SLC24A4      | 0.00969629 |
| SNORA28      | 0          |



|               |            |
|---------------|------------|
| TDRD9         | 0          |
| MYH6          | 0.00883359 |
| PRKD1         | 0.0117407  |
| EGLN3         | 0          |
| OTX2          | 0.0211498  |
| SLC35F4       | 0.0540438  |
| SNORA79       | 10.5495    |
| NPAP1         | 0          |
| SNRPN,SNURF   | 0.0410784  |
| PAR-SN        | 0          |
| FGF7          | 0.00903062 |
| SCG3          | 0          |
| LDHAL6B       | 0          |
| CYP1A2        | 0.0175962  |
| LOC646938     | 0          |
| SH3GL3        | 0.0251468  |
| SV2B          | 0          |
| ULK4P1,ULK4P3 | 0          |
| PPP1R14D      | 0.0862636  |
| PLA2G4E       | 0.0102754  |
| BCL2L10       | 0          |
| CILP          | 0.0101737  |
| STRA6         | 0          |
| LINC00597     | 0.0241561  |
| TMC3          | 0          |
| PRR25         | 0          |
| SYT17         | 0          |
| ACSM5         | 0.0207654  |
| VWA3A         | 0          |
| FLJ21408      | 0.0904005  |
| CD19          | 0          |
| SNORA30       | 0          |
| NOD2          | 0.0122721  |
| MT1A          | 0          |
| GPR97         | 0          |
| CLEC18C       | 0          |
| CDH13         | 0.0115414  |
| FOXC2         | 0          |
| IL17C         | 0.078005   |
| LINC00235     | 0.277588   |
| PTX4          | 0.122166   |
| ERN2          | 0.0508171  |
| LOC388242     | 0          |
| CSDAP1        | 0          |
| CNGB1         | 0.00911588 |
| CDH11         | 0.0111036  |
| DPEP2         | 0          |
| TUSC5         | 0          |
| GUCY2D        | 0          |
| ALOX15B       | 0          |
| SNORD65       | 0          |
| KRT16P1       | 0          |
| GRAPL         | 0          |
| SNORD4B       | 769.081    |
| MIR4523       | 0          |
| LHX1          | 0.0205264  |
| IGFBP4        | 0          |
| CD300LG       | 0          |
| IGF2BP1       | 0          |
| ABI3          | 0.0303502  |
| MYCBPAP       | 0          |
| EPX           | 0          |
| C17orf64      | 0.0611304  |
| SNORD104      | 0          |
| SOX9          | 0.015651   |
| OTOP2         | 0.0316573  |
| P2RX1         | 0          |
| GGT6          | 0          |
| CDRT15        | 0          |
| FAM106A       | 0          |
| EPN2-AS1      | 0          |
| KRT16P3       | 0          |
| KRT18P55      | 0          |
| OMG           | 0          |
| GAS2L2        | 0          |
| C17orf66      | 0          |
| TBC1D3H       | 0          |
| HNF1B         | 0.0200166  |
| LOC284100     | 0          |

|              |            |
|--------------|------------|
| NEUROD2      | 0.0309883  |
| KRT12        | 0          |
| KRTAP1-1     | 0          |
| KRT42P       | 0.0187787  |
| TAC4         | 0.123624   |
| DLX3         | 0          |
| MIR3064      | 1930.67    |
| SDK2         | 0          |
| BTBD17       | 0          |
| FOXJ1        | 0.0296642  |
| NPTX1        | 0          |
| LOC100130370 | 0          |
| GREB1L       | 0.0069719  |
| SIGLEC15     | 0          |
| ST8SIA3      | 0.00373368 |
| SERPINB5     | 0          |
| DLGAP1       | 0          |
| SLC25A52     | 0          |
| SNORD58A     | 0          |
| GRIN3B       | 0          |
| CREB3L3      | 0          |
| FSD1         | 0          |
| CLEC4GP1     | 0.0342084  |
| CASP14       | 0.0144788  |
| F2RL3        | 0          |
| NCAN         | 0          |
| CD22         | 0          |
| LOC644189    | 0          |
| ZNF570       | 0.0181123  |
| LOC644554    | 0.0463185  |
| CYP2G1P      | 0          |
| IGSF23       | 0.0546434  |
| CGB2         | 0          |
| SNAR-F       | 24.0838    |
| GPR32        | 0          |
| KLK3         | 0          |
| ZNF818P      | 0.01277    |
| TTYH1        | 0.0895071  |
| LILRA2       | 0          |
| TMEM190      | 0          |
| ZNF542       | 0          |
| ZFP28        | 0          |
| ZNF304       | 0.00850555 |
| TUBB4A       | 0.0319831  |
| CD70         | 0          |
| PTGER1       | 0.126919   |
| PRODH2       | 0          |
| RASGRP4      | 0.0235772  |
| CYP2A6       | 0          |
| CXCL17       | 0          |
| PGLYRP1      | 0          |
| PTGIR        | 0          |
| GNG8         | 0.785966   |
| CABP5        | 0.0278506  |
| TULP2        | 0          |
| KLKP1        | 0          |
| KLK7         | 0          |
| SIGLEC14     | 0          |
| ZNF677       | 0          |
| LILRA5       | 0          |
| TMEM150B     | 0.0920279  |
| ZSCAN5B      | 0.0902916  |
| SNTG2        | 0          |
| VSNL1        | 0.0216313  |
| DPYSL5       | 0.0107088  |
| TRIM54       | 0          |
| LBH          | 0.0181767  |
| QPCT         | 0          |
| TMEM247      | 0.123208   |
| ARHGAP25     | 0.015761   |
| C2orf78      | 0          |
| LOC284950    | 0          |
| IL1RL1       | 0          |
| IL18RAP      | 0.0145987  |
| C2orf40      | 0          |
| RNU4ATAC     | 9.64205    |
| PROC         | 0          |
| CCDC74B-AS1  | 0          |
| AMER3        | 0          |

|                   |            |
|-------------------|------------|
| SLC4A10           | 0          |
| LOC100506134      | 0          |
| B3GALT1           | 0          |
| SATB2-AS1         | 0          |
| TUBA4B            | 0.0377521  |
| LOC151484         | 0          |
| AQP12A            | 0          |
| AGXT              | 0          |
| CYS1              | 0          |
| OTOF              | 0          |
| XDH               | 0.00734833 |
| CDKL4             | 0          |
| FLJ16341          | 0          |
| RGPD1,RGPD2       | 0          |
| FABP1             | 0.0942972  |
| LOC442028         | 0.0152976  |
| ADRA2B            | 0.0195749  |
| TUBA3E            | 0.0393827  |
| LYPD1             | 0          |
| ZNF385B           | 0.0315696  |
| HECW2             | 0.00586369 |
| DIRC3             | 0.00971841 |
| EPHA4             | 0.00625723 |
| FAM124B           | 0.019765   |
| GPR55             | 0          |
| NMUR1             | 0          |
| C2orf54           | 0.0488022  |
| OXT               | 0          |
| SNAP25            | 0.0204319  |
| OTOR              | 0          |
| CST7              | 0          |
| HCK               | 0          |
| LOC100287792      | 0          |
| SLC32A1           | 0          |
| HNF4A             | 0.0109019  |
| RBPJL             | 0          |
| WFDC2             | 0          |
| SLC12A5           | 0          |
| LINC00494         | 0          |
| LINC00658         | 0          |
| CD93              | 0          |
| GHRH              | 0          |
| MAFB              | 0          |
| GTSF1L            | 0          |
| KCNS1             | 0.011939   |
| KCNQ2             | 0.0288662  |
| CHODL             | 0          |
| GRIK1-AS1         | 0          |
| B3GALT5           | 0.0177413  |
| IGSF5             | 0.0424668  |
| ZNF295-AS1        | 0.0669487  |
| ABCG1             | 0          |
| COL6A2            | 0          |
| ADAMTS5           | 0          |
| CBS               | 0          |
| DNMT3L            | 0.0395484  |
| KRTAP10-1         | 0          |
| KRTAP10-2         | 0          |
| FTCD              | 0          |
| UPB1              | 0          |
| CRYBA4            | 0          |
| SLC5A1            | 0.0173544  |
| CSF2RB            | 0          |
| MGAT3             | 0          |
| WBP2NL            | 0          |
| ANKRD62P1-PARP4P3 | 0          |
| TUBA3FP           | 0          |
| GSTTP1            | 0          |
| LOC100128531      | 0.0648102  |
| SYN3              | 0.035304   |
| A4GALT            | 0          |
| MLC1              | 0          |
| MLH1              | 0          |
| MOBP              | 0          |
| ZNF662            | 0          |
| FAM198A           | 0          |
| CCR5              | 0          |
| CCDC36            | 0          |
| SLC38A3           | 0          |

|                        |            |
|------------------------|------------|
| GPR62                  | 0          |
| ITIH1                  | 0          |
| TMEM30C                | 0.194161   |
| CCDC54                 | 0          |
| SIDT1                  | 0          |
| NR1I2                  | 0          |
| ARGFX                  | 0          |
| FBXO40                 | 0          |
| CCDC37                 | 0          |
| TRH                    | 0          |
| ALG1L2                 | 0.0642256  |
| C3orf79                | 0.0908317  |
| C3orf80                | 0          |
| ARL14                  | 0.0297787  |
| EPHB3                  | 0          |
| FETUB                  | 0          |
| LOC100507391           | 0          |
| FANCD2OS               | 0          |
| DAZL                   | 0          |
| XIRP1                  | 0          |
| XCR1                   | 0          |
| PRSS50                 | 0.0504078  |
| SPINK8                 | 0          |
| IQCF1                  | 0          |
| ERC2                   | 0          |
| CADPS                  | 0          |
| IGSF11                 | 0          |
| DNAJB8                 | 0.0243141  |
| GATA2                  | 0          |
| SNORA7B                | 0          |
| SNORA58                | 0.608216   |
| PLSCR2                 | 0          |
| GPR87                  | 0.0862104  |
| SERPINI2               | 0          |
| KLHL6                  | 0.00676189 |
| LIPH                   | 0.0164219  |
| ATP13A5                | 0          |
| LOC100131551           | 0          |
| ZDHC19                 | 0.0558415  |
| SORCS2                 | 0.0103565  |
| C4orf19                | 0.0108743  |
| RHOH                   | 0.0485908  |
| STAP1                  | 0          |
| ENAM                   | 0          |
| NPFFR2                 | 0          |
| ALB                    | 0.0194841  |
| CXCL13                 | 0.0347547  |
| ANXA3                  | 0          |
| LOC100505702           | 0          |
| LOC100506035           | 0.0199613  |
| MYOZ2                  | 0.0136832  |
| ADAD1                  | 0          |
| POU4F2                 | 0          |
| LRAT                   | 0.00778796 |
| FAM92A1P2              | 0          |
| STOX2                  | 0          |
| TRIML1                 | 0.0285581  |
| ZNF518B                | 0.00541128 |
| TLR10                  | 0.010348   |
| GABRG1                 | 0          |
| UGT2A1,UGT2A2          | 0          |
| SLC10A6                | 0.0323082  |
| COL25A1                | 0.00822995 |
| SPOCK3                 | 0.0131692  |
| CLDN24                 | 0          |
| LOC731424              | 0          |
| TTC23L                 | 0          |
| GHR                    | 0          |
| DDX4                   | 0.0155315  |
| C5orf64                | 0          |
| CKMT2                  | 0          |
| LOC728342              | 0          |
| FAM170A                | 0.0349364  |
| GRAMD3                 | 0          |
| C5orf48                | 0          |
| SLC25A48               | 0.112798   |
| LOC100505658           | 0          |
| MIR143,MIR143HG,MIR145 | 0          |
| SLC6A7                 | 0          |

|              |            |
|--------------|------------|
| SGCD         | 0          |
| TENM2        | 0.00486113 |
| SLC6A3       | 0.0159076  |
| LOC442132    | 0.0221968  |
| CDC20B       | 0.0332622  |
| PLK2         | 0.0151857  |
| OTP          | 0          |
| MEF2C        | 0.00610195 |
| PCSK1        | 0          |
| MGC32805     | 0          |
| FSTL4        | 0          |
| LOC389332    | 0          |
| ECSCR        | 0          |
| NR3C1        | 0          |
| EBF1         | 0.00866192 |
| GMCL1P1      | 0.013726   |
| FOXC1        | 0          |
| C6orf201     | 0          |
| HULC         | 0          |
| TRIM40       | 0.0248651  |
| C6orf25      | 0          |
| GUCA1A       | 0          |
| GPR115       | 0          |
| FAM83B       | 0.00572493 |
| NKAIN2       | 0          |
| ARG1         | 0          |
| QKI          | 0.012476   |
| SMOC2        | 0          |
| MYLK4        | 0          |
| CAGE1        | 0          |
| LINC00518    | 0          |
| FAM65B       | 0          |
| HIST1H3I     | 0          |
| SNORD117     | 476.363    |
| HLA-DPA1     | 0.0265898  |
| DLK2         | 0          |
| IL17F        | 0.0736273  |
| GCM1         | 0          |
| LGSN         | 0          |
| LINC00472    | 0.0163869  |
| COL12A1      | 0          |
| SRSF12       | 0.0110637  |
| BACH2        | 0.00490276 |
| OR2A4        | 0          |
| MOXD1        | 0          |
| IPCEF1       | 0          |
| LPA          | 0          |
| CYP2W1       | 0.0422843  |
| TFAMP1       | 0          |
| LOC100506497 | 0          |
| ABCA13       | 0.00226492 |
| PMS2L2       | 0          |
| MAGI2-AS3    | 0          |
| GRM3         | 0          |
| RUNDC3B      | 0          |
| LMOD2        | 0          |
| FSCN3        | 0.0288608  |
| LOC407835    | 0.0923728  |
| CPA2         | 0.0331874  |
| RAB19        | 0          |
| OR2A1        | 0          |
| CNTNAP2      | 0.00414067 |
| CRHR2        | 0          |
| DPY19L2P1    | 0          |
| INHBA        | 0          |
| NUPR1L       | 0          |
| NCF1C        | 0          |
| GATSL2       | 0.0705287  |
| PMS2L2       | 0          |
| CCL26        | 0.11745    |
| CALCR        | 0.0119579  |
| CYP3A4       | 0          |
| RELN         | 0.0034062  |
| OR2A1        | 0          |
| LOC157273    | 0.0116962  |
| SFTPC        | 0          |
| PIWIL2       | 0.0121395  |
| SOX17        | 0          |
| LOC286184    | 0          |

|                          |            |
|--------------------------|------------|
| ATP6V0D2                 | 0          |
| SDC2                     | 0.0127809  |
| FAM150A                  | 0.0498361  |
| LOC286186                | 0          |
| FABP12                   | 0.140819   |
| CDH17                    | 0.0104011  |
| NCALD                    | 0.0118536  |
| CSMD3                    | 0          |
| CCDC166                  | 0.120972   |
| MIR1234                  | 0          |
| GLIS3-AS1                | 0          |
| TEK                      | 0          |
| ANKRD18B                 | 0          |
| FAM189A2                 | 0          |
| MAMDC2                   | 0          |
| OR1Q1                    | 0          |
| GPR21                    | 0          |
| TTC16                    | 0          |
| ADAMTSL2                 | 0          |
| LOC100128593             | 0          |
| FLJ35024                 | 0.0657337  |
| C9orf92                  | 0          |
| LOC653501.ZNF658B        | 0          |
| TMEM252                  | 0          |
| TRPM3                    | 0.00748824 |
| GNA14                    | 0          |
| RASEF                    | 0          |
| OMD                      | 0          |
| BARX1                    | 0          |
| FAM22F                   | 0          |
| MIR3911                  | 0          |
| LOC100288814             | 0          |
| TLR7                     | 0.00777033 |
| GRPR                     | 0          |
| MAGEB10                  | 0          |
| NYX                      | 0.0323296  |
| GPR173                   | 0          |
| SNORA11                  | 0          |
| OTUD6A                   | 0          |
| PCDH11X                  | 0          |
| FAM133A                  | 0          |
| TMEM35                   | 0          |
| TCEAL2                   | 0          |
| PIH1D3                   | 0          |
| ZCCHC16                  | 0          |
| SH2D1A                   | 0.0159581  |
| FMR1NB                   | 0          |
| MAGEA8                   | 0          |
| MAGEA4                   | 0          |
| OPN1LW                   | 0.0555918  |
| VCX3A                    | 0          |
| BEND2                    | 0          |
| LOC729609                | 0          |
| MIR221                   | 0          |
| RGAG4                    | 0          |
| NAP1L2                   | 0          |
| RPS6KA6                  | 0.00428905 |
| TCEAL5                   | 0.0368801  |
| COL4A6                   | 0          |
| TRPC5                    | 0          |
| SNORA69                  | 0          |
| IGSF1                    | 0.00977318 |
| SPANXE                   | 0.209055   |
| MAGEA10,MAGEA10-MAGEA5,M | 0          |
| MPP1                     | 0          |
| RAB39B                   | 0.0109994  |
| UTY                      | 0          |
| RBP7                     | 0          |
| PADI4                    | 0          |
| VWA5B1                   | 0          |
| CD52                     | 0          |
| THEMIS2                  | 0          |
| GJB5                     | 0          |
| SNORD46                  | 0          |
| BSND                     | 0          |
| PCSK9                    | 0          |
| IFI44                    | 0          |
| CLCA1                    | 0          |
| SRG7                     | 0          |

|              |   |
|--------------|---|
| SLC6A17      | 0 |
| CHIAP2       | 0 |
| HSD3B2       | 0 |
| LCE1D        | 0 |
| LENEP        | 0 |
| DCST1        | 0 |
| SLAMF8       | 0 |
| FCGR2C       | 0 |
| FCRLA        | 0 |
| FAM163A      | 0 |
| CFHR1        | 0 |
| PTPRC        | 0 |
| GPR25        | 0 |
| PKP1         | 0 |
| LOC641515    | 0 |
| LAX1         | 0 |
| CNTN2        | 0 |
| IL19         | 0 |
| LINC00538    | 0 |
| FAM177B      | 0 |
| MIXL1        | 0 |
| C1orf95      | 0 |
| SLC35F3      | 0 |
| LOC100506810 | 0 |
| SDCCAG8      | 0 |
| TP73-AS1     | 0 |
| NPPB         | 0 |
| MYOM3        | 0 |
| C1orf172     | 0 |
| HEYL         | 0 |
| EDN2         | 0 |
| C1orf210     | 0 |
| TAL1         | 0 |
| SLC1A7       | 0 |
| CDCP2        | 0 |
| LINC00466    | 0 |
| INSL5        | 0 |
| PTGER3       | 0 |
| GBP1         | 0 |
| C1orf194     | 0 |
| MYBPHL       | 0 |
| LRIF1        | 0 |
| ADORA3       | 0 |
| VTCN1        | 0 |
| GJA5         | 0 |
| S100A5       | 0 |
| KCNN3        | 0 |
| C1orf61      | 0 |
| SCARNA3      | 0 |
| SEC16B       | 0 |
| NPHS2        | 0 |
| TEDDM1       | 0 |
| B3GALT2      | 0 |
| GOLT1A       | 0 |
| LOC284578    | 0 |
| MIR29C       | 0 |
| CD34         | 0 |
| LOC100506795 | 0 |
| MRC1         | 0 |
| LINC00839    | 0 |
| RET          | 0 |
| FXYD4        | 0 |
| CTSL1P2      | 0 |
| WDFY4        | 0 |
| MSMB         | 0 |
| FAM133CP     | 0 |
| SH2D4B       | 0 |
| MARK2P9      | 0 |
| CYP2C19      | 0 |
| ADRA2A       | 0 |
| HABP2        | 0 |
| PNLIPRP2     | 0 |
| PRAP1        | 0 |
| LINC00704    | 0 |
| SFMBT2       | 0 |
| CCDC3        | 0 |
| NEBL         | 0 |
| ARMC4        | 0 |
| RASGEF1A     | 0 |

|              |   |
|--------------|---|
| HNRNPA3P1    | 0 |
| HNRNPA1P33   | 0 |
| GDF2         | 0 |
| VSTM4        | 0 |
| PLA2G12B     | 0 |
| DUSP13       | 0 |
| SFTPA2       | 0 |
| DYDC1        | 0 |
| FAS-AS1      | 0 |
| BLNK         | 0 |
| CPN1         | 0 |
| AFAP1L2      | 0 |
| GFRA1        | 0 |
| KRTAP5-6     | 0 |
| KCNQ1DN      | 0 |
| TRPC2        | 0 |
| OR52I1       | 0 |
| OR52B6       | 0 |
| OR56B4       | 0 |
| OR2D3        | 0 |
| SYT9         | 0 |
| F2           | 0 |
| OR10V2P      | 0 |
| MS4A10       | 0 |
| ZP1          | 0 |
| CD6          | 0 |
| KCNK4        | 0 |
| SNX32        | 0 |
| CTSW         | 0 |
| TMEM151A     | 0 |
| C11orf86     | 0 |
| KRTAP5-7     | 0 |
| LOC100129216 | 0 |
| P2RY6        | 0 |
| C11orf70     | 0 |
| ELMOD1       | 0 |
| NNMT         | 0 |
| CD3G         | 0 |
| TTC36        | 0 |
| UPK2         | 0 |
| DDX25        | 0 |
| NTM          | 0 |
| LOC100128239 | 0 |
| IFITM5       | 0 |
| KRTAP5-2     | 0 |
| HBD          | 0 |
| UBQLNL       | 0 |
| OR2AG2       | 0 |
| OR6A2        | 0 |
| LOC283299    | 0 |
| USH1C        | 0 |
| PTPN5        | 0 |
| SYT13        | 0 |
| SNORD29      | 0 |
| LOC100130348 | 0 |
| ANGPTL5      | 0 |
| CASP5        | 0 |
| SCN2B        | 0 |
| AMICA1       | 0 |
| TREH         | 0 |
| THY1         | 0 |
| CLMP         | 0 |
| PATE2        | 0 |
| KIRREL3      | 0 |
| ADAMTS8      | 0 |
| CLEC4D       | 0 |
| A2ML1        | 0 |
| C12orf39     | 0 |
| PCED1B       | 0 |
| OR8S1        | 0 |
| LOC255411    | 0 |
| ACVRL1       | 0 |
| LOC100240734 | 0 |
| IRAK3        | 0 |
| LOC100507206 | 0 |
| CACNA2D4     | 0 |
| CLECL1       | 0 |
| CLEC7A       | 0 |
| KLRC2        | 0 |



|                   |   |
|-------------------|---|
| TAS2R30           | 0 |
| BCAT1             | 0 |
| LALBA             | 0 |
| SNORA2A           | 0 |
| SNORA2B           | 0 |
| WNT10B            | 0 |
| FAIM2             | 0 |
| LOC283403         | 0 |
| KRT83             | 0 |
| KRT85             | 0 |
| KRT4              | 0 |
| GPR84             | 0 |
| APOF              | 0 |
| SVOP              | 0 |
| SDS               | 0 |
| HNF1A-AS1         | 0 |
| GALNT9            | 0 |
| SGCG              | 0 |
| WASF3             | 0 |
| RXFP2             | 0 |
| FREM2             | 0 |
| OR7E156P          | 0 |
| POU4F1-AS1        | 0 |
| GPC5              | 0 |
| MYO16             | 0 |
| COL4A2            | 0 |
| F7                | 0 |
| ANKRD20A19P       | 0 |
| LINC00426         | 0 |
| LINC00330         | 0 |
| SIAH3             | 0 |
| PCDH8             | 0 |
| COL4A1            | 0 |
| OR11H4            | 0 |
| ECRP              | 0 |
| NPAS3             | 0 |
| INSM2             | 0 |
| DACT1             | 0 |
| PRKCH             | 0 |
| LINC00238         | 0 |
| RDH12             | 0 |
| GALNT16           | 0 |
| NRXN3             | 0 |
| LOC283587         | 0 |
| FOXN3-AS2         | 0 |
| CHGA              | 0 |
| SERPINA3          | 0 |
| PLD4              | 0 |
| OR11H2            | 0 |
| KLHL33            | 0 |
| RNASE11,RNASE12   | 0 |
| SNORD9            | 0 |
| ADCY4             | 0 |
| TRIM9             | 0 |
| TBPL2             | 0 |
| SIX1              | 0 |
| SLC10A1           | 0 |
| DIO2              | 0 |
| LINC00341         | 0 |
| GOLGA8EP          | 0 |
| DKFZP434L187      | 0 |
| ATPBD4-AS1        | 0 |
| DCAF13P3          | 0 |
| NR2E3             | 0 |
| LOC729739         | 0 |
| LMAN1L            | 0 |
| ISL2              | 0 |
| C15orf26          | 0 |
| UBE2Q2P2,UBE2Q2P3 | 0 |
| ASB9P1            | 0 |
| LOC145820         | 0 |
| NBEAP1            | 0 |
| GOLGA8DP          | 0 |
| OCA2              | 0 |
| ACTC1             | 0 |
| GPR176            | 0 |
| PLA2G4D           | 0 |
| DUOXA1            | 0 |
| TNFAIP8L3         | 0 |

|           |   |
|-----------|---|
| ONECUT1   | 0 |
| IGDCC3    | 0 |
| ITGA11    | 0 |
| LOC91948  | 0 |
| HBZ       | 0 |
| C16orf11  | 0 |
| NHLRC4    | 0 |
| C16orf96  | 0 |
| SEC14L5   | 0 |
| CIITA     | 0 |
| TNFRSF17  | 0 |
| PRKCB     | 0 |
| ITGAL     | 0 |
| MIR762    | 0 |
| ITGAD     | 0 |
| GNAO1     | 0 |
| CCL22     | 0 |
| VAT1L     | 0 |
| RPL3L     | 0 |
| PRSS33    | 0 |
| PRSS30P   | 0 |
| SEPT12    | 0 |
| C16orf89  | 0 |
| C16orf54  | 0 |
| ZNF423    | 0 |
| SNX20     | 0 |
| LOC283867 | 0 |
| PKD1L3    | 0 |
| ATP1B2    | 0 |
| DNAH9     | 0 |
| MEIS3P1   | 0 |
| FAM106CP  | 0 |
| CRYBA1    | 0 |
| DPRXP4    | 0 |
| SPACA3    | 0 |
| UNC45B    | 0 |
| G6PC      | 0 |
| MYL4      | 0 |
| NGFR      | 0 |
| NXP3      | 0 |
| TCAM1P    | 0 |
| CACNG4    | 0 |
| CACNG1    | 0 |
| CD300A    | 0 |
| ITGB4     | 0 |
| ATP2A3    | 0 |
| SLC52A1   | 0 |
| SLC13A5   | 0 |
| TEKT1     | 0 |
| CCDC42    | 0 |
| GAS7      | 0 |
| MYH1      | 0 |
| ZNF287    | 0 |
| EVI2A     | 0 |
| TBC1D3B   | 0 |
| TBC1D3C   | 0 |
| KRTAP2-2  | 0 |
| KRTAP4-11 | 0 |
| KRTAP4-5  | 0 |
| HCRT      | 0 |
| MEOX1     | 0 |
| PPY       | 0 |
| PYY       | 0 |
| HSF5      | 0 |
| NACA2     | 0 |
| MIR5047   | 0 |
| CD300E    | 0 |
| FLJ45079  | 0 |
| AQP4-AS1  | 0 |
| WBP11P1   | 0 |
| SLC14A2   | 0 |
| SLC14A1   | 0 |
| RAB27B    | 0 |
| ZNF532    | 0 |
| SERPINB2  | 0 |
| CDH2      | 0 |
| CELF4     | 0 |
| SNORA37   | 0 |
| LINC-ROR  | 0 |

|              |   |
|--------------|---|
| ALPK2        | 0 |
| CD226        | 0 |
| AZU1         | 0 |
| CLEC4M       | 0 |
| MIR181D      | 0 |
| RLN3         | 0 |
| SLC5A5       | 0 |
| FXYD3        | 0 |
| HAMP         | 0 |
| FFAR2        | 0 |
| UPK1A        | 0 |
| OVOL3        | 0 |
| NCCRP1       | 0 |
| LOC100129935 | 0 |
| CYP2S1       | 0 |
| TEX101       | 0 |
| APOC2,APOC4  | 0 |
| CCDC155      | 0 |
| LOC100507003 | 0 |
| SNORD35A     | 0 |
| CACNG6       | 0 |
| NLRP8        | 0 |
| USP29        | 0 |
| C19orf77     | 0 |
| PTPRS        | 0 |
| FUT6         | 0 |
| MBD3L3       | 0 |
| COL5A3       | 0 |
| LYL1         | 0 |
| SLC1A6       | 0 |
| CIB3         | 0 |
| CPAMD8       | 0 |
| NXNL1        | 0 |
| ZNF682       | 0 |
| ZNF626       | 0 |
| ZNF208       | 0 |
| ATP4A        | 0 |
| UPK1A-AS1    | 0 |
| PSG11        | 0 |
| PSG4         | 0 |
| CKM          | 0 |
| IGFL4        | 0 |
| PNMAL1       | 0 |
| MIR3191      | 0 |
| NKG7         | 0 |
| LIM2         | 0 |
| SIGLEC5      | 0 |
| LOC284379    | 0 |
| PEG3,ZIM2    | 0 |
| RPL23AP32    | 0 |
| MEIS1        | 0 |
| CTNNA2       | 0 |
| GNLY         | 0 |
| ITPR1PL1     | 0 |
| IL1R1        | 0 |
| GPR45        | 0 |
| IL36G        | 0 |
| RAB6C        | 0 |
| KYNU         | 0 |
| PABPC1P2     | 0 |
| KIF5C        | 0 |
| KCNJ3        | 0 |
| UPP2         | 0 |
| DHRS9        | 0 |
| KLHL41       | 0 |
| HOXD13       | 0 |
| FSIP2        | 0 |
| AOX2P        | 0 |
| CTLA4        | 0 |
| SNORA41      | 0 |
| DES          | 0 |
| COL4A3       | 0 |
| CHRND        | 0 |
| LOC643387    | 0 |
| PXDN         | 0 |
| LOC645949    | 0 |
| CYP1B1       | 0 |
| C2orf91      | 0 |
| OXER1        | 0 |

|              |   |
|--------------|---|
| ABCG5        | 0 |
| UNQ6975      | 0 |
| TSPYL6       | 0 |
| DBIL5P2      | 0 |
| LOC400958    | 0 |
| SNORA36C     | 0 |
| ADD2         | 0 |
| TACR1        | 0 |
| LYG2         | 0 |
| ST6GAL2      | 0 |
| LOC729121    | 0 |
| IL1A         | 0 |
| LOC100216479 | 0 |
| WTH3DI       | 0 |
| LOC401010    | 0 |
| LOC100144595 | 0 |
| SCN3A        | 0 |
| CFLAR-AS1    | 0 |
| ERBB4        | 0 |
| CXCR1        | 0 |
| FEV          | 0 |
| CCDC108      | 0 |
| SCG2         | 0 |
| LOC151475    | 0 |
| SNORA75      | 0 |
| MIR4440      | 0 |
| MGC16025     | 0 |
| OTOS         | 0 |
| SNORD110     | 0 |
| UBOX5-AS1    | 0 |
| ISM1         | 0 |
| PCSK2        | 0 |
| SLC24A3      | 0 |
| LBP          | 0 |
| SNORA39      | 0 |
| WISP2        | 0 |
| PI3          | 0 |
| WFDC10A      | 0 |
| LOC100131496 | 0 |
| CASS4        | 0 |
| APCDD1L-AS1  | 0 |
| CDH26        | 0 |
| LOC284757    | 0 |
| LOC63930     | 0 |
| LOC100144597 | 0 |
| MYT1         | 0 |
| RSP04        | 0 |
| FOXS1        | 0 |
| PXMP4        | 0 |
| HMGB3P1      | 0 |
| FAM83C       | 0 |
| SNORA71B     | 0 |
| JPH2         | 0 |
| WFDC5        | 0 |
| PTGIS        | 0 |
| GCNT7        | 0 |
| BMP7         | 0 |
| LINC00029    | 0 |
| MIR3648      | 0 |
| ABCC13       | 0 |
| LINC00189    | 0 |
| MRAP         | 0 |
| DSCR8        | 0 |
| KCNJ15       | 0 |
| LINC00158    | 0 |
| KCNE1        | 0 |
| RUNX1-IT1    | 0 |
| LOC100133286 | 0 |
| LINC00479    | 0 |
| LINC00163    | 0 |
| COL18A1-AS2  | 0 |
| SERPIND1     | 0 |
| LOC400891    | 0 |
| GGTLC2       | 0 |
| RFPL3        | 0 |
| CYTH4        | 0 |
| RIBC2        | 0 |
| ADM2         | 0 |
| XKR3         | 0 |

|              |   |
|--------------|---|
| MIR648       | 0 |
| LOC284865    | 0 |
| ZNF280A      | 0 |
| POM121L1P    | 0 |
| CES5AP1      | 0 |
| GSTTP2       | 0 |
| TMEM211      | 0 |
| C22orf24     | 0 |
| SHISA8       | 0 |
| ATP5L2       | 0 |
| C22orf34     | 0 |
| IL17REL      | 0 |
| LINC00312    | 0 |
| SLC6A1       | 0 |
| TPRXL        | 0 |
| FGD5         | 0 |
| ITIH3        | 0 |
| FRG2C        | 0 |
| EPHA3        | 0 |
| PARP15       | 0 |
| SLC35G2      | 0 |
| ESYT3        | 0 |
| LINC00578    | 0 |
| AHSG         | 0 |
| ADIPOQ       | 0 |
| CLDN16       | 0 |
| EGOT         | 0 |
| BHLHE40-AS1  | 0 |
| LMCD1-AS1    | 0 |
| THRB         | 0 |
| EPM2AIP1     | 0 |
| CX3CR1       | 0 |
| LARS2-AS1    | 0 |
| DNASE1L3     | 0 |
| KY           | 0 |
| A4GNT        | 0 |
| PRR23A       | 0 |
| PLSCR4       | 0 |
| FAM194A      | 0 |
| CLRN1        | 0 |
| WDR49        | 0 |
| SLC7A14      | 0 |
| SPATA16      | 0 |
| C3orf70      | 0 |
| TPRG1-AS2    | 0 |
| OPA1-AS1     | 0 |
| LOC402160    | 0 |
| NSG1         | 0 |
| C4orf6       | 0 |
| PCDH7        | 0 |
| NSUN7        | 0 |
| C4orf40      | 0 |
| EREG         | 0 |
| SPP1         | 0 |
| SLC25A31     | 0 |
| HHIP         | 0 |
| C4orf51      | 0 |
| PRSS48       | 0 |
| LOC100505989 | 0 |
| TRIM60       | 0 |
| ZFP42        | 0 |
| MIR548I2     | 0 |
| LOC344967    | 0 |
| BEND4        | 0 |
| YIPF7        | 0 |
| COX7B2       | 0 |
| IGFBP7       | 0 |
| TMPRSS11D    | 0 |
| IGJ          | 0 |
| SOWAHB       | 0 |
| SPARCL1      | 0 |
| STPG2        | 0 |
| PCNAP1       | 0 |
| NEUROG2      | 0 |
| FAM198B      | 0 |
| FSTL5        | 0 |
| TRIM61       | 0 |
| LOC100506085 | 0 |
| HPGD         | 0 |

|                           |   |
|---------------------------|---|
| LOC728175                 | 0 |
| FRG2                      | 0 |
| ROPN1L                    | 0 |
| OSMR                      | 0 |
| NIM1                      | 0 |
| FST                       | 0 |
| PART1                     | 0 |
| PMCHL2                    | 0 |
| NCRUPAR                   | 0 |
| SNORA13                   | 0 |
| MIR3661                   | 0 |
| AFAP1L1                   | 0 |
| IRGM                      | 0 |
| GRIA1                     | 0 |
| EFCAB9                    | 0 |
| HMP19                     | 0 |
| HRH2                      | 0 |
| LOC100132062,LOC100133331 | 0 |
| IRX4                      | 0 |
| LOC729506                 | 0 |
| UGT3A1                    | 0 |
| RANBP3L                   | 0 |
| PLCXD3                    | 0 |
| SEPP1                     | 0 |
| LOC100652772              | 0 |
| LOC647859                 | 0 |
| SNORA47                   | 0 |
| ACOT12                    | 0 |
| LINC00461,MIR9-2          | 0 |
| POU5F2                    | 0 |
| LOC100133050              | 0 |
| C5orf63                   | 0 |
| LOC340074                 | 0 |
| VTRNA2-1                  | 0 |
| KLHL3                     | 0 |
| MZB1                      | 0 |
| NRG2                      | 0 |
| CD14                      | 0 |
| FNDC9                     | 0 |
| PFN3                      | 0 |
| BMP6                      | 0 |
| ELOVL2-AS1                | 0 |
| HIST1H3A                  | 0 |
| TRIM15                    | 0 |
| TNF                       | 0 |
| CFB                       | 0 |
| TSPO2                     | 0 |
| SPATS1                    | 0 |
| KCNQ5                     | 0 |
| FAM26F                    | 0 |
| FAM26E                    | 0 |
| GJA1                      | 0 |
| FABP7                     | 0 |
| SMLR1                     | 0 |
| SLC35D3                   | 0 |
| PLEKHG1                   | 0 |
| VIP                       | 0 |
| SLC22A3                   | 0 |
| LOC100507194              | 0 |
| FAM217A                   | 0 |
| GCM2                      | 0 |
| HIST1H1B                  | 0 |
| HIST1H3J                  | 0 |
| PSORS1C3                  | 0 |
| NCR3                      | 0 |
| CLPS                      | 0 |
| PRPH2                     | 0 |
| CLIC5                     | 0 |
| GPR110                    | 0 |
| ELOVL5                    | 0 |
| IMPG1                     | 0 |
| SNORD50A                  | 0 |
| GJB7                      | 0 |
| GABRR2                    | 0 |
| METTL24                   | 0 |
| NMBR                      | 0 |
| LOC729176                 | 0 |
| PRR18                     | 0 |
| ABCB5                     | 0 |

|                            |   |
|----------------------------|---|
| LOC100506178               | 0 |
| ADCY1                      | 0 |
| LINC00525                  | 0 |
| CDC14C                     | 0 |
| SNORA15                    | 0 |
| NCF1B                      | 0 |
| WBSCR28                    | 0 |
| MIR590                     | 0 |
| CD36                       | 0 |
| AZGP1P1                    | 0 |
| MUC17                      | 0 |
| COL26A1                    | 0 |
| FOXP2                      | 0 |
| CFTR                       | 0 |
| ASB15                      | 0 |
| FAM71F1                    | 0 |
| C7orf45                    | 0 |
| TMEM213                    | 0 |
| PRSS1                      | 0 |
| GIMAP2                     | 0 |
| GIMAP1,GIMAP1-GIMAP5,GIMAF | 0 |
| ABP1                       | 0 |
| MMD2                       | 0 |
| ZNF890P                    | 0 |
| DGKB                       | 0 |
| SOSTDC1                    | 0 |
| KIAA0087                   | 0 |
| MIR196B                    | 0 |
| SNORA9                     | 0 |
| SNORA5A                    | 0 |
| SNORA5C                    | 0 |
| SNORA5B                    | 0 |
| TNS3                       | 0 |
| GTF2IRD2P1                 | 0 |
| LOC100093631               | 0 |
| SGCE                       | 0 |
| TMEM130                    | 0 |
| CYP3A7,CYP3A7-CYP3AP1      | 0 |
| OR2AE1                     | 0 |
| MIR25                      | 0 |
| ACTL6B                     | 0 |
| MYL10                      | 0 |
| SLC26A5                    | 0 |
| SLC26A4-AS1                | 0 |
| SLC26A3                    | 0 |
| ASZ1                       | 0 |
| OR6W1P                     | 0 |
| OR2A20P,OR2A9P             | 0 |
| ATP6V0E2-AS1               | 0 |
| CRYGN                      | 0 |
| CNPY1                      | 0 |
| VIPR2                      | 0 |
| PRSS55                     | 0 |
| DEFB135                    | 0 |
| SMIM18                     | 0 |
| FAM110B                    | 0 |
| C8orf34                    | 0 |
| STMN2                      | 0 |
| BAALC                      | 0 |
| CTHRC1                     | 0 |
| RIMS2                      | 0 |
| TG                         | 0 |
| FAM203A                    | 0 |
| DEFA6                      | 0 |
| DEFA5                      | 0 |
| USP17L3                    | 0 |
| DEFB136                    | 0 |
| DOK2                       | 0 |
| MIR320A                    | 0 |
| STMN4                      | 0 |
| SCARA5                     | 0 |
| PURG                       | 0 |
| ANK1                       | 0 |
| DKK4                       | 0 |
| PXDNL                      | 0 |
| ST18                       | 0 |
| PRDM14                     | 0 |
| DCAF4L2                    | 0 |
| GDF6                       | 0 |

|               |   |
|---------------|---|
| C8orf56       | 0 |
| LOC100499183  | 0 |
| SNTB1         | 0 |
| KLHL38        | 0 |
| LYNX1         | 0 |
| DDX11L5       | 0 |
| IFNA8         | 0 |
| FLJ35282      | 0 |
| KIAA1045      | 0 |
| HRCT1         | 0 |
| FAM27C        | 0 |
| LOC100133920  | 0 |
| PGM5          | 0 |
| GDA           | 0 |
| NTRK2         | 0 |
| C9orf47,S1PR3 | 0 |
| ACTL7A        | 0 |
| ORM2          | 0 |
| OR1L6         | 0 |
| GFI1B         | 0 |
| LOC100130954  | 0 |
| RNF224        | 0 |
| CACNA1B       | 0 |
| TUBBP5        | 0 |
| FLJ41200      | 0 |
| FAM154A       | 0 |
| SLC24A2       | 0 |
| IFNA17        | 0 |
| CNTFR         | 0 |
| IGFBPL1       | 0 |
| LOC286297     | 0 |
| BANCR         | 0 |
| APBA1         | 0 |
| ALDH1A1       | 0 |
| LOC340508     | 0 |
| TNFSF15       | 0 |
| ANGPTL2       | 0 |
| C9orf50       | 0 |
| CXorf28       | 0 |
| VCX           | 0 |
| GLRA2         | 0 |
| MAGEB6        | 0 |
| CXorf22       | 0 |
| CHDC2         | 0 |
| GPR34         | 0 |
| PAGE4         | 0 |
| PAGE2         | 0 |
| KLF8          | 0 |
| HEPH          | 0 |
| AR            | 0 |
| ARL13A        | 0 |
| RGAG1         | 0 |
| AGTR2         | 0 |
| ZCCHC12       | 0 |
| MAML1         | 0 |
| CSAG1         | 0 |
| BGN           | 0 |
| ATP2B3        | 0 |
| GPR64         | 0 |
| ZFX-AS1       | 0 |
| ARX           | 0 |
| FTH1P18       | 0 |
| CXorf36       | 0 |
| PCSK1N        | 0 |
| ALAS2         | 0 |
| SPIN2A        | 0 |
| AWAT2         | 0 |
| P2RY4         | 0 |
| IL2RG         | 0 |
| POF1B         | 0 |
| TCEAL6        | 0 |
| TEX13B        | 0 |
| CAPN6         | 0 |
| DCX           | 0 |
| LINC00633     | 0 |
| CT45A5        | 0 |
| FMR1-AS1      | 0 |
| MAGEA12       | 0 |
| SMIM9         | 0 |





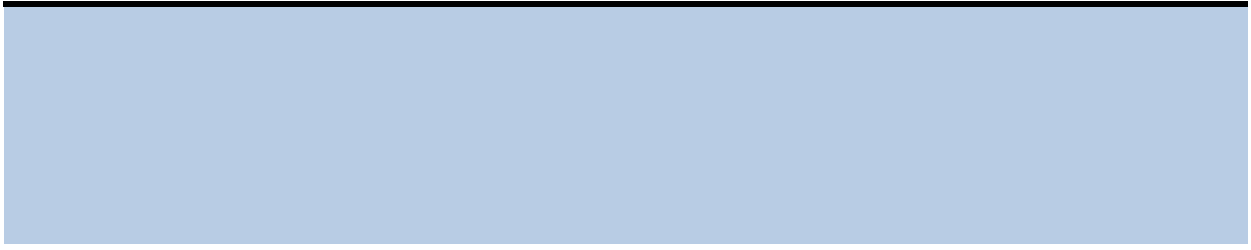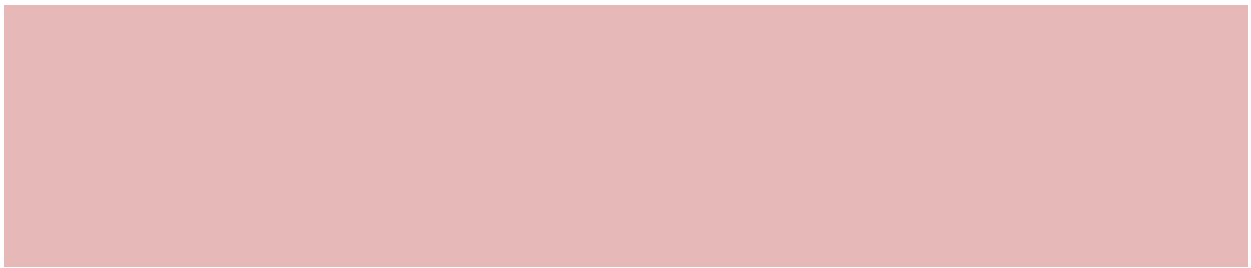

Supplemental Table 3a. Analysis of genes that are differentially expressed in control shRNA expressing HT-29 cells as a result of infection.

| gene_id     | gene              | locus                     | Uninfected 1/2hr - time 0 |          | log2(fold_change) | q_value    |
|-------------|-------------------|---------------------------|---------------------------|----------|-------------------|------------|
|             |                   |                           | c0                        | c5       |                   |            |
| XLOC_008678 | LDHD              | chr16:75145757-75150670   | 4.62273                   | 1.16223  | -1.99185          | 0.00134142 |
| XLOC_010137 | CYP4F35P          | chr18:14337421-14342523   | 0.350662                  | 0.103307 | -1.76315          | 0.0459324  |
| XLOC_003613 | NEAT1             | chr11:65190268-65194003   | 66.3176                   | 22.5857  | -1.55398          | 0.00134142 |
| XLOC_001755 | ANKRD20A12P       | chr1:142697420-142713605  | 0.655425                  | 0.228543 | -1.51997          | 0.0288382  |
| XLOC_007705 | NRG4              | chr15:76234327-76304785   | 0.518903                  | 0.18288  | -1.50457          | 0.0386414  |
| XLOC_017426 | SYNPO             | chr5:149980641-150038795  | 0.524608                  | 0.185765 | -1.49776          | 0.00509212 |
| XLOC_016722 | ATP8A1            | chr4:42410391-42659122    | 0.41728                   | 0.14823  | -1.49318          | 0.00134142 |
| XLOC_016875 | CENPE             | chr4:104026962-104119566  | 0.535614                  | 0.193499 | -1.46887          | 0.00134142 |
| XLOC_008923 | MTRNR2L1          | chr17:22022436-22023991   | 1.0828                    | 0.398709 | -1.44135          | 0.0274653  |
| XLOC_022336 | CA9               | chr9:35673914-35681154    | 281.359                   | 104.024  | -1.4355           | 0.00134142 |
| XLOC_001333 | KIF17             | chr1:20990506-21044317    | 0.89589                   | 0.332878 | -1.42833          | 0.0120701  |
| XLOC_020601 | AKAP9             | chr7:91570188-91739987    | 0.913939                  | 0.343759 | -1.4107           | 0.00134142 |
| XLOC_021901 | HR                | chr8:21971931-21988565    | 1.24553                   | 0.470458 | -1.40462          | 0.00134142 |
| XLOC_023696 | PLXNB3            | chrX:153029650-15304480   | 1.03902                   | 0.411198 | -1.33731          | 0.00743393 |
| XLOC_008462 | LOC100190986      | chr16:21443344-21445776   | 1.02912                   | 0.431032 | -1.25554          | 0.0266793  |
| XLOC_001226 | MEGF6             | chr1:3404505-3528059      | 1.04188                   | 0.43824  | -1.24939          | 0.00243047 |
| XLOC_013582 | ID1               | chr20:30193085-30194317   | 51.4255                   | 21.6917  | -1.24534          | 0.00134142 |
| XLOC_003944 | LOC143666         | chr11:573807-575885       | 1.59787                   | 0.698321 | -1.19419          | 0.0447795  |
| XLOC_011472 | LOC284454,MIR24-2 | chr19:13945329-13947173   | 11.7658                   | 5.14236  | -1.19409          | 0.00134142 |
| XLOC_009306 | MGAT5B            | chr17:74864797-74946471   | 3.50244                   | 1.54524  | -1.18053          | 0.00134142 |
| XLOC_010358 | SMAD7             | chr18:46446222-46477081   | 3.50931                   | 1.57974  | -1.1515           | 0.00509212 |
| XLOC_010113 | ANKRD12           | chr18:9136750-9285983     | 0.667542                  | 0.307884 | -1.11647          | 0.00337323 |
| XLOC_021225 | NAT16             | chr7:100813773-100823557  | 2.44053                   | 1.13805  | -1.10062          | 0.0288382  |
| XLOC_010598 | ZNF627            | chr19:11708234-11729974   | 3.60856                   | 1.70313  | -1.08324          | 0.00134142 |
| XLOC_001351 | ID3               | chr1:23884420-23886285    | 298.771                   | 141.728  | -1.07592          | 0.00134142 |
| XLOC_015463 | SOX2-OT           | chr3:180774467-181460015  | 1.60204                   | 0.768464 | -1.05986          | 0.0156972  |
| XLOC_015716 | AMT,NICN1         | chr3:49454210-49466757    | 1.85048                   | 0.898547 | -1.04223          | 0.0101293  |
| XLOC_003229 | EPS8L2            | chr11:706119-727727       | 1.94221                   | 0.949089 | -1.03309          | 0.0398899  |
| XLOC_014114 | MIR155,MIR155HG   | chr21:26934456-26947480   | 4.46838                   | 2.23158  | -1.00169          | 0.0386414  |
| XLOC_006984 | CKB               | chr14:103985994-103989195 | 7.60246                   | 3.79851  | -1.00103          | 0.0245451  |
| XLOC_006994 | AHNAK2            | chr14:105403590-10544465  | 1.30062                   | 0.650152 | -1.00035          | 0.00134142 |
| XLOC_011005 | DHDH              | chr19:49436938-49448226   | 6.69791                   | 3.37443  | -0.989066         | 0.0403066  |
| XLOC_002510 | DDIT4             | chr10:74033676-74035797   | 160.213                   | 81.5535  | -0.974174         | 0.00134142 |
| XLOC_011596 | ZNF792            | chr19:35447257-35454953   | 1.24719                   | 0.638663 | -0.965559         | 0.0270114  |
| XLOC_006719 | PPP1R3E           | chr14:23765111-23772057   | 1.64142                   | 0.863976 | -0.925877         | 0.0322484  |
| XLOC_000287 | SH3D21            | chr1:36771993-36786948    | 6.10116                   | 3.2233   | -0.920545         | 0.010797   |
| XLOC_015109 | FAM212A           | chr3:49840686-49842463    | 9.6546                    | 5.14508  | -0.908024         | 0.0377654  |
| XLOC_022941 | ZNF484            | chr9:95607312-95640320    | 1.0254                    | 0.5465   | -0.907897         | 0.0410573  |
| XLOC_010801 | ARHGAP33          | chr19:36266416-36279724   | 2.97442                   | 1.61558  | -0.880557         | 0.0377654  |
| XLOC_023940 | XIST              | chrX:73012039-73072588    | 5.78304                   | 3.15718  | -0.873194         | 0.00134142 |
| XLOC_013304 | CLK1              | chr2:201717731-201729467  | 25.6702                   | 14.1494  | -0.859357         | 0.00134142 |
| XLOC_015012 | GOLGA4            | chr3:37284681-37408370    | 2.60231                   | 1.435    | -0.858737         | 0.00593755 |
| XLOC_001092 | OBSCN             | chr1:228391206-228566575  | 0.9513                    | 0.525173 | -0.857108         | 0.0189207  |
| XLOC_014775 | PIK3IP1           | chr22:31677578-31688520   | 3.73956                   | 2.066    | -0.856026         | 0.036526   |
| XLOC_018726 | GABBR1            | chr6:29570004-29600962    | 4.30705                   | 2.43942  | -0.820159         | 0.0172978  |
| XLOC_018274 | PIM1              | chr6:37137921-37143204    | 18.9237                   | 10.9827  | -0.784958         | 0.00672555 |
| XLOC_023961 | BRWD3             | chrX:79924986-80065233    | 0.602387                  | 0.354879 | -0.763363         | 0.0474163  |
| XLOC_020707 | CAV1              | chr7:116164838-116201235  | 13.1861                   | 7.78267  | -0.760683         | 0.0101293  |
| XLOC_022228 | NRBP2             | chr8:144915754-144923146  | 12.2378                   | 7.27828  | -0.749672         | 0.0101293  |
| XLOC_018064 | MYLIP             | chr6:16129316-16148478    | 5.46051                   | 3.2491   | -0.748997         | 0.0292254  |
| XLOC_021321 | LOC646329         | chr7:130565750-130598065  | 19.4428                   | 11.7513  | -0.726416         | 0.009453   |
| XLOC_003218 | ATHL1             | chr11:289137-295688       | 28.6671                   | 17.3742  | -0.722454         | 0.00593755 |
| XLOC_009159 | ITGA3             | chr17:48133339-48167849   | 38.1255                   | 23.1558  | -0.719386         | 0.00882987 |
| XLOC_010099 | TGIF1             | chr18:3412071-3458406     | 43.338                    | 26.3485  | -0.717912         | 0.0150729  |
| XLOC_014922 | BHLHE40           | chr3:5021096-5026865      | 33.1827                   | 20.3029  | -0.708747         | 0.0189207  |
| XLOC_006666 | CRIP2             | chr14:105939274-10594657  | 33.5712                   | 20.5764  | -0.706235         | 0.0382315  |
| XLOC_016071 | ZMAT3             | chr3:178735010-178789656  | 3.27701                   | 2.02147  | -0.696974         | 0.0200038  |
| XLOC_013828 | PROSAP1P1         | chr20:3143272-3149207     | 5.24217                   | 3.23607  | -0.695923         | 0.0407579  |
| XLOC_014921 | ITPR1             | chr3:4535031-4889524      | 2.63231                   | 1.63853  | -0.683929         | 0.0349222  |
| XLOC_013811 | TMEM74B           | chr20:1161214-1165117     | 16.4793                   | 10.2759  | -0.681387         | 0.0331269  |
| XLOC_007696 | MAN2C1            | chr15:75648132-75660968   | 13.2258                   | 8.37533  | -0.659138         | 0.0423316  |
| XLOC_011819 | HSD17B14          | chr19:49316273-49339934   | 28.9188                   | 18.3986  | -0.652413         | 0.0481547  |
| XLOC_022188 | NDRG1             | chr8:134249413-134309547  | 447.149                   | 284.632  | -0.651657         | 0.036526   |
| XLOC_001826 | S100A10           | chr1:151955385-151966714  | 220.061                   | 140.721  | -0.645068         | 0.0326415  |
| XLOC_015708 | LAMB2             | chr3:49158546-49170599    | 15.0793                   | 9.74895  | -0.62925          | 0.036526   |
| XLOC_007490 | GOLGA8A           | chr15:34671269-34729667   | 16.9676                   | 11.0735  | -0.615678         | 0.0386414  |
| XLOC_004936 | LRP1              | chr12:57522281-57607125   | 7.36291                   | 4.81887  | -0.611579         | 0.0423316  |
| XLOC_006159 | COMMD6            | chr13:76099349-76111991   | 74.5355                   | 49.7952  | -0.581921         | 0.042771   |
| XLOC_010555 | HNRNPM            | chr19:8509802-8554002     | 70.8767                   | 106.918  | -0.593117         | 0.0398899  |
| XLOC_006973 | WARS              | chr14:100800124-10084268  | 45.9431                   | 72.4734  | 0.657603          | 0.049309   |
| XLOC_000486 | CYR61             | chr1:86046443-86049648    | 200.876                   | 317.53   | 0.660583          | 0.0227017  |
| XLOC_010849 | ZFP36             | chr19:39897486-39900052   | 13.7287                   | 22.0116  | 0.681064          | 0.0470437  |
| XLOC_021181 | ASNS              | chr7:97481428-97501854    | 116.771                   | 210.558  | 0.850531          | 0.00743393 |
| XLOC_013045 | DUSP2             | chr2:96808907-96811179    | 23.2108                   | 42.0587  | 0.85761           | 0.00425224 |
| XLOC_003130 | ITPRIP            | chr10:106069453-10609825  | 5.17355                   | 10.2418  | 0.985241          | 0.00134142 |
| XLOC_010943 | FOSB              | chr19:45971252-45978437   | 3.25502                   | 6.44844  | 0.986284          | 0.00134142 |

|             |                 |                          |            |            |          |            |
|-------------|-----------------|--------------------------|------------|------------|----------|------------|
| XLOC_010623 | IER2            | chr19:13261281-13265718  | 109.617    | 226.127    | 1.04466  | 0.00134142 |
| XLOC_007426 | ARRDC4          | chr15:98503932-98517068  | 1.17057    | 2.49025    | 1.08908  | 0.00243047 |
| XLOC_000637 | TXNIP           | chr1:145438461-145442621 | 30.5512    | 65.595     | 1.10235  | 0.00134142 |
| XLOC_010614 | JUNB            | chr19:12902309-12904125  | 28.2809    | 64.8805    | 1.19796  | 0.00134142 |
| XLOC_016139 | TFRC            | chr3:195776154-195809031 | 9.24691    | 21.9745    | 1.24879  | 0.00134142 |
| XLOC_021453 | CLDN23          | chr8:8559665-8561617     | 0.596655   | 1.53162    | 1.36009  | 0.0354094  |
| XLOC_021908 | EGR3            | chr8:22545173-22550815   | 1.13677    | 3.48212    | 1.61502  | 0.00134142 |
| XLOC_019081 | CTGF            | chr6:132269316-132272511 | 15.0013    | 47.5376    | 1.66399  | 0.00134142 |
| XLOC_016793 | CXCL2           | chr4:74962753-74964997   | 0.51233    | 1.62607    | 1.66624  | 0.0139368  |
| XLOC_002957 | EGR2            | chr10:64571755-64578927  | 0.163919   | 0.557903   | 1.76703  | 0.00509212 |
| XLOC_016052 | TERC            | chr3:169482397-169482841 | 2.26415    | 8.22856    | 1.86167  | 0.021138   |
| XLOC_006453 | FOS             | chr14:75745480-75748937  | 3.75654    | 15.9207    | 2.08343  | 0.00134142 |
| XLOC_017345 | EGR1            | chr5:137801180-137805001 | 13.045     | 73.8399    | 2.5009   | 0.00134142 |
| XLOC_015569 | GHRL            | chr3:10290176-10335133   | 0.0452918  | 0.408319   | 3.17237  | 0.0150729  |
| XLOC_022797 | C9orf24         | chr9:34379016-34397849   | 0          | 0.393535   | inf      | 0.00134142 |
| XLOC_007737 | RPS17           | chr15:82821160-82824865  | 273.248    | 0          | #NAME?   | 0.00134142 |
| XLOC_007741 | RPS17L          | chr15:83205503-83209208  | 274.475    | 0.045967   | -12.5438 | 0.686668   |
| XLOC_001780 | NBPF11,NBPF24   | chr1:147574322-147624601 | 0.0626642  | 0.00445045 | -3.81562 | 1          |
| XLOC_017090 | LOC643401       | chr5:27472398-27496508   | 0.17492    | 0.014851   | -3.55806 | 1          |
| XLOC_024176 | PNCK            | chrX:152935187-152939811 | 0.177117   | 0.0155999  | -3.5051  | 1          |
| XLOC_018902 | RCAN2           | chr6:46188466-46459804   | 0.0432136  | 0.00386438 | -3.48318 | 1          |
| XLOC_016278 | PTTG2           | chr4:37892704-38140796   | 0.332446   | 0.0327484  | -3.34362 | 1          |
| XLOC_021626 | SULF1           | chr8:70378858-70573147   | 0.0219299  | 0.0021933  | -3.32172 | 1          |
| XLOC_023911 | EDA2R           | chrX:65815481-65859140   | 0.0365881  | 0.00384456 | -3.25048 | 1          |
| XLOC_012322 | ZAP70           | chr2:98330030-98356323   | 0.106697   | 0.0112282  | -3.24832 | 1          |
| XLOC_000325 | LOC100129924    | chr1:43253660-43263901   | 0.162602   | 0.0186049  | -3.12759 | 1          |
| XLOC_001362 | RCAN3AS         | chr1:24822822-24863510   | 0.583699   | 0.0669748  | -3.12353 | 0.637163   |
| XLOC_024150 | FMR1-AS1        | chrX:146990948-147032641 | 0.0461665  | 0.00535986 | -3.10658 | 1          |
| XLOC_008147 | CCDC135         | chr16:57728712-57765367  | 0.0471258  | 0.00585838 | -3.00794 | 1          |
| XLOC_017413 | ABLIM3          | chr5:148521053-148639991 | 0.0280871  | 0.00360233 | -2.9629  | 1          |
| XLOC_006528 | CYP46A1         | chr14:100150754-10019361 | 0.081429   | 0.0111082  | -2.87392 | 1          |
| XLOC_017726 | SCARNA18        | chr5:82348664-82373272   | 11.1879    | 1.57326    | -2.83011 | 0.892632   |
| XLOC_023427 | PAGE2B          | chrX:55101488-55105336   | 0.246403   | 0.0347045  | -2.82783 | 1          |
| XLOC_010560 | OR7D2           | chr19:9296269-9299493    | 0.0954843  | 0.0135913  | -2.81258 | 1          |
| XLOC_014435 | RIMBP3C         | chr22:21737662-21743455  | 0.0276867  | 0.00407098 | -2.76574 | 1          |
| XLOC_018551 | LOC100652739    | chr6:150139893-150244211 | 0.268861   | 0.0408278  | -2.71924 | 1          |
| XLOC_010154 | HRH4            | chr18:22040592-22059921  | 0.0252006  | 0.00389628 | -2.69329 | 1          |
| XLOC_018135 | OR2B6           | chr6:27925018-27925960   | 0.215377   | 0.0339073  | -2.6672  | 1          |
| XLOC_013425 | KCNJ13          | chr2:233562014-233725281 | 0.0239054  | 0.00378509 | -2.65894 | 1          |
| XLOC_019110 | PBOV1           | chr6:138483052-138665800 | 0.0303425  | 0.00495075 | -2.61562 | 1          |
| XLOC_011879 | KLK15           | chr19:51328544-51334779  | 0.107697   | 0.01774    | -2.6019  | 1          |
| XLOC_022131 | LOC100499183    | chr8:104145190-104242531 | 0.0800907  | 0.0132385  | -2.59689 | 1          |
| XLOC_015954 | CPNE4           | chr3:131253576-131753841 | 0.0329354  | 0.00544441 | -2.59679 | 1          |
| XLOC_023285 | CDKL5           | chrX:18443724-18690223   | 0.0227497  | 0.00377583 | -2.59098 | 1          |
| XLOC_012314 | FER1L5          | chr2:97308573-97370624   | 0.028831   | 0.00481983 | -2.58057 | 1          |
| XLOC_005122 | LINC00173       | chr12:116971226-11697431 | 0.641037   | 0.108158   | -2.56727 | 0.290771   |
| XLOC_005264 | SLC2A14         | chr12:7966396-8025495    | 0.0457485  | 0.00774462 | -2.56246 | 1          |
| XLOC_014862 | NFAM1           | chr22:42776413-42828401  | 0.0180415  | 0.00307833 | -2.5511  | 1          |
| XLOC_012004 | ZSCAN18         | chr19:58595208-58629793  | 0.0687132  | 0.0118553  | -2.53506 | 1          |
| XLOC_022433 | LOC100128076    | chr9:94895115-94900911   | 0.169788   | 0.0293421  | -2.53269 | 1          |
| XLOC_021241 | DPY19L2P2       | chr7:102815461-102920911 | 0.0189306  | 0.0033241  | -2.50969 | 1          |
| XLOC_013997 | WFDC10B         | chr20:44313289-44337456  | 0.175357   | 0.0310676  | -2.49681 | 1          |
| XLOC_010373 | SNORA37         | chr18:51677970-51751158  | 14.8587    | 2.65905    | -2.48232 | 0.822719   |
| XLOC_011227 | ZNF549          | chr19:58038692-58052244  | 0.0332945  | 0.0059614  | -2.48156 | 1          |
| XLOC_015501 | MIR1248,SNORA81 | chr3:186501360-186524481 | 20.0816    | 3.60881    | -2.47628 | 0.653375   |
| XLOC_013513 | LOC728228       | chr20:4173736-4176600    | 0.188862   | 0.0341372  | -2.46792 | 1          |
| XLOC_011824 | LOC101059948    | chr19:49521504-49522741  | 0.256658   | 0.0465342  | -2.46349 | 1          |
| XLOC_003950 | CEND1           | chr11:787109-790126      | 0.166549   | 0.0305306  | -2.44762 | 1          |
| XLOC_008037 | PRRT2           | chr16:29823408-29827202  | 0.0978242  | 0.0180387  | -2.4391  | 1          |
| XLOC_008540 | ZNF843          | chr16:31446884-31454348  | 0.0809905  | 0.0149764  | -2.43506 | 1          |
| XLOC_000328 | SLC2A1-AS1      | chr1:43391045-43449029   | 0.166134   | 0.0308337  | -2.42977 | 1          |
| XLOC_002436 | FAM35BP         | chr10:466897640-46939145 | 0.0177814  | 0.00333269 | -2.41561 | 1          |
| XLOC_003240 | MUC5B           | chr11:1244294-1283406    | 0.0453983  | 0.0085577  | -2.40734 | 1          |
| XLOC_003938 | ANO9            | chr11:417929-442011      | 0.122061   | 0.0232266  | -2.39375 | 1          |
| XLOC_023666 | LOC100272228    | chrX:149106765-149185011 | 0.126999   | 0.0241908  | -2.39228 | 1          |
| XLOC_015343 | CCRL1           | chr3:132276981-132593051 | 0.0260976  | 0.00506426 | -2.36549 | 1          |
| XLOC_022087 | RUNX1T1         | chr8:92967194-93115454   | 0.00907359 | 0.00177314 | -2.35537 | 1          |
| XLOC_004777 | SSPN            | chr12:26348268-26387708  | 0.0142977  | 0.00284986 | -2.32682 | 1          |
| XLOC_007818 | PDIA2           | chr16:333117-337209      | 0.138709   | 0.0279541  | -2.31093 | 1          |
| XLOC_003037 | FAS-AS1         | chr10:90694830-90775542  | 0.0414873  | 0.00838623 | -2.30658 | 1          |
| XLOC_008610 | CCDC79          | chr16:66788878-66835523  | 0.0223328  | 0.00451649 | -2.30589 | 1          |
| XLOC_016733 | CNGA1           | chr4:47937993-48014961   | 0.0586328  | 0.0119006  | -2.30067 | 1          |
| XLOC_015165 | C3orf14         | chr3:62305395-62319320   | 0.0932657  | 0.0191168  | -2.2865  | 1          |
| XLOC_004128 | DCDC5           | chr11:30885149-31014233  | 0.0117486  | 0.00241508 | -2.28234 | 1          |
| XLOC_015059 | ZNF660          | chr3:44626455-44637557   | 0.0498004  | 0.0102717  | -2.27748 | 1          |
| XLOC_022717 | RLN1            | chr9:5334931-5339873     | 0.0790291  | 0.0163171  | -2.276   | 1          |
| XLOC_018539 | LOC100507557    | chr6:145946439-146285231 | 0.0152413  | 0.00316045 | -2.26978 | 1          |
| XLOC_013311 | ALS2CR11        | chr2:202352143-202483901 | 0.00912385 | 0.0018962  | -2.26653 | 1          |
| XLOC_015243 | HHLA2           | chr3:108021331-108097121 | 0.0228905  | 0.0047758  | -2.26093 | 1          |

|             |              |                          |            |            |          |           |
|-------------|--------------|--------------------------|------------|------------|----------|-----------|
| XLOC_021198 | GJC3         | chr7:99520891-99527243   | 0.0751956  | 0.015859   | -2.24534 | 1         |
| XLOC_021099 | SPDYE8P      | chr7:72476588-72519691   | 0.0230736  | 0.00489646 | -2.23643 | 1         |
| XLOC_018010 | HEIH         | chr5:180256953-18026272  | 0.0651098  | 0.0138895  | -2.22888 | 1         |
| XLOC_011633 | ZNF569       | chr19:37902059-37958339  | 0.0259451  | 0.00554479 | -2.22626 | 1         |
| XLOC_002313 | PRR26        | chr10:320129-735608      | 0.0890965  | 0.0190744  | -2.22373 | 1         |
| XLOC_018566 | TIAM2        | chr6:155411422-155635617 | 0.035064   | 0.00758565 | -2.20864 | 1         |
| XLOC_001428 | FNDC5        | chr1:33327868-33338082   | 0.0691391  | 0.0149656  | -2.20785 | 1         |
| XLOC_013409 | LOC151475    | chr2:231555635-23156524  | 0.0252481  | 0.00547539 | -2.20514 | 1         |
| XLOC_013800 | LINC00266-1  | chr20:62921737-62934707  | 0.117983   | 0.0256109  | -2.20374 | 1         |
| XLOC_001240 | HES2         | chr1:6475293-6479979     | 0.0188742  | 0.00409994 | -2.20274 | 1         |
| XLOC_014395 | CECR5-AS1    | chr22:17618409-17646335  | 0.271576   | 0.0593429  | -2.19421 | 1         |
| XLOC_008479 | LOC100506655 | chr16:25123046-25189551  | 0.0247273  | 0.00556515 | -2.15161 | 1         |
| XLOC_006118 | LINC00441    | chr13:48870648-48877797  | 0.129232   | 0.0290998  | -2.15089 | 1         |
| XLOC_020657 | EPO          | chr7:100318422-10032132  | 0.217616   | 0.0491043  | -2.14786 | 1         |
| XLOC_001661 | ABCA4        | chr1:94458393-94586705   | 0.00940651 | 0.00212363 | -2.14713 | 1         |
| XLOC_010997 | SULT2B1      | chr19:49055428-49102684  | 0.186271   | 0.0421174  | -2.14492 | 1         |
| XLOC_012272 | TCF7L1       | chr2:85360582-85537511   | 0.105272   | 0.0238464  | -2.14229 | 1         |
| XLOC_018107 | HIST1H2BI    | chr6:26273203-26273640   | 0.321119   | 0.0727927  | -2.14124 | 1         |
| XLOC_002732 | BTBD16       | chr10:124030820-1240976  | 0.0376905  | 0.00856478 | -2.13771 | 1         |
| XLOC_006007 | GAS6-AS1     | chr13:114518582-1145670  | 0.121008   | 0.0276366  | -2.13045 | 1         |
| XLOC_003297 | CNGA4        | chr11:6260321-6265707    | 0.0428621  | 0.0098859  | -2.11626 | 1         |
| XLOC_011828 | CGB8         | chr19:49550894-49552368  | 0.697909   | 0.161862   | -2.10828 | 0.263024  |
| XLOC_007323 | PSTPIP1      | chr15:77287464-77329671  | 0.0532893  | 0.0123665  | -2.1074  | 1         |
| XLOC_017776 | CDO1         | chr5:115140429-11515240  | 0.0699236  | 0.0163503  | -2.09647 | 1         |
| XLOC_003945 | IRF7         | chr11:612554-615999      | 0.0629319  | 0.014825   | -2.08576 | 1         |
| XLOC_013090 | SH3RF3-AS1   | chr2:109743783-11026220  | 0.0554814  | 0.0130701  | -2.08574 | 1         |
| XLOC_016145 | C3orf43      | chr3:196233749-19624223  | 0.147289   | 0.0353505  | -2.05885 | 1         |
| XLOC_023199 | ENTPD8       | chr9:140317846-14033590  | 0.234007   | 0.0562013  | -2.05788 | 1         |
| XLOC_017525 | ZNF454       | chr5:178368193-17839321  | 0.049405   | 0.0120101  | -2.04041 | 1         |
| XLOC_013608 | C20orf144    | chr20:32244892-32262264  | 0.307381   | 0.075069   | -2.03374 | 1         |
| XLOC_004888 | LOC400043    | chr12:54519854-54526626  | 0.128641   | 0.0314779  | -2.03095 | 1         |
| XLOC_006478 | GPR65        | chr14:88471467-88481155  | 0.0108706  | 0.00267862 | -2.02086 | 1         |
| XLOC_017381 | PCDHB12      | chr5:140588290-14059169  | 0.10951    | 0.0270102  | -2.01948 | 1         |
| XLOC_015446 | TMEM212      | chr3:171561138-17157710  | 0.145361   | 0.0360727  | -2.01066 | 1         |
| XLOC_015530 | MUC20        | chr3:195447752-19546454  | 0.0792798  | 0.0196831  | -2.01    | 1         |
| XLOC_007817 | ARHGDI3      | chr16:330605-333003      | 0.555933   | 0.138291   | -2.00721 | 0.263143  |
| XLOC_014885 | SMC1B        | chr22:45739944-45809500  | 0.0201793  | 0.00503317 | -2.00334 | 1         |
| XLOC_010620 | DAND5        | chr19:13080431-13085567  | 0.166664   | 0.0418705  | -1.99294 | 1         |
| XLOC_007106 | WHAMMP2      | chr15:28982728-29003508  | 0.0474529  | 0.0120326  | -1.97955 | 1         |
| XLOC_023613 | FAM45B       | chrX:129628914-12963142  | 0.041864   | 0.0106284  | -1.97779 | 1         |
| XLOC_000349 | C1orf228     | chr1:45140393-45191263   | 0.21021    | 0.0534838  | -1.97466 | 1         |
| XLOC_017907 | FAT2         | chr5:150883652-15094850  | 0.0185084  | 0.00471267 | -1.97356 | 1         |
| XLOC_009545 | GRAP         | chr17:18853988-18950336  | 0.0742848  | 0.0189538  | -1.97058 | 1         |
| XLOC_002940 | A1CF         | chr10:52559168-52645435  | 0.0150994  | 0.00386109 | -1.96741 | 1         |
| XLOC_007605 | HSP90AB4P    | chr15:58888509-59042177  | 0.0353581  | 0.00910232 | -1.95773 | 1         |
| XLOC_023196 | LOC100129722 | chr9:140144670-14014794  | 0.593907   | 0.153152   | -1.95527 | 0.0972878 |
| XLOC_011829 | CGB7         | chr19:49557530-49558997  | 1.33518    | 0.34743    | -1.94224 | 0.108704  |
| XLOC_018474 | GJA1         | chr6:121756744-12177087  | 0.0147723  | 0.00388759 | -1.92594 | 1         |
| XLOC_012488 | SCN2A        | chr2:166095911-16624882  | 0.00520588 | 0.00137552 | -1.92017 | 1         |
| XLOC_004707 | ZNF705A      | chr12:8325149-8332642    | 0.0125872  | 0.00332755 | -1.91942 | 1         |
| XLOC_002899 | C10orf10     | chr10:45455218-45490172  | 0.127649   | 0.0338074  | -1.91677 | 1         |
| XLOC_023937 | NAP1L6       | chrX:72345875-72347919   | 0.0265333  | 0.00703691 | -1.91479 | 1         |
| XLOC_022991 | ABCA1        | chr9:107543283-10769052  | 0.045219   | 0.0120667  | -1.9059  | 1         |
| XLOC_005273 | MFA5         | chr12:8798539-8815433    | 0.0173114  | 0.00462773 | -1.90335 | 1         |
| XLOC_004997 | GLIPR1L1     | chr12:75728462-75764169  | 0.0593047  | 0.0159136  | -1.89789 | 1         |
| XLOC_016029 | PA2G4P4      | chr3:156465131-15653485  | 0.0164198  | 0.00441673 | -1.89439 | 1         |
| XLOC_002817 | CCDC3        | chr10:12938624-13043704  | 0.024522   | 0.00660019 | -1.8935  | 1         |
| XLOC_001787 | HIST2H3D     | chr1:149784779-14978523  | 0.730816   | 0.197359   | -1.88869 | 0.61154   |
| XLOC_021814 | C8orf42      | chr8:439789-495781       | 0.0602579  | 0.0163294  | -1.88368 | 1         |
| XLOC_001272 | DHRS3        | chr1:12627938-12677820   | 0.474866   | 0.129189   | -1.87803 | 0.138263  |
| XLOC_022412 | NTRK2        | chr9:87283465-87638505   | 0.0113986  | 0.00310578 | -1.87583 | 1         |
| XLOC_004793 | FLJ13224     | chr12:31433519-31479159  | 0.236174   | 0.0650764  | -1.85964 | 1         |
| XLOC_018750 | PSORS1C2     | chr6:31082607-31107869   | 0.138095   | 0.0381553  | -1.8557  | 1         |
| XLOC_004511 | SLN          | chr11:107578100-1075827  | 0.0786898  | 0.0217509  | -1.8551  | 1         |
| XLOC_015578 | LOC100129480 | chr3:12581279-12586963   | 0.0505456  | 0.0139824  | -1.85398 | 1         |
| XLOC_000671 | CA14         | chr1:150230217-15023748  | 0.0299157  | 0.00829281 | -1.85097 | 1         |
| XLOC_018451 | WISP3        | chr6:112375277-11239088  | 0.0380283  | 0.0105497  | -1.84988 | 1         |
| XLOC_005643 | LOC643770    | chr12:98879321-98897633  | 0.230669   | 0.0643648  | -1.84148 | 1         |
| XLOC_020329 | FLJ44511     | chr7:560027-564869       | 0.123264   | 0.0344646  | -1.83856 | 1         |
| XLOC_005662 | GNN          | chr12:104237526-1043239  | 0.0500866  | 0.0140293  | -1.83598 | 1         |
| XLOC_003044 | FLJ37201     | chr10:91451056-91457685  | 0.063103   | 0.0176852  | -1.83517 | 1         |
| XLOC_023998 | SLC25A53     | chrX:103139054-10340170  | 0.0171956  | 0.00482768 | -1.83264 | 1         |
| XLOC_015336 | COL6A6       | chr3:130279177-13039588  | 0.00489877 | 0.00138855 | -1.81884 | 1         |
| XLOC_014965 | C3orf20      | chr3:14716605-14814543   | 0.0188717  | 0.00534957 | -1.81873 | 1         |
| XLOC_010932 | APOC1P1      | chr19:45430059-45434643  | 0.108802   | 0.0308823  | -1.81685 | 1         |
| XLOC_022091 | LINC00535    | chr8:94358694-94712661   | 0.0558513  | 0.0158801  | -1.81437 | 1         |
| XLOC_006181 | DCT          | chr13:95091840-95131936  | 0.0210711  | 0.00599334 | -1.81383 | 1         |
| XLOC_012714 | INPP5D       | chr2:233925035-23411654  | 0.334915   | 0.0952766  | -1.8136  | 1         |
| XLOC_022948 | FBP2         | chr9:97321002-97356075   | 0.0476785  | 0.0135638  | -1.81358 | 1         |

|             |                        |                          |            |            |          |           |
|-------------|------------------------|--------------------------|------------|------------|----------|-----------|
| XLOC_004730 | LOC338817              | chr12:11700963-11717335  | 0.0141762  | 0.0040417  | -1.81043 | 1         |
| XLOC_009934 | FAM20A                 | chr17:66507920-66597095  | 0.0120773  | 0.00345011 | -1.80758 | 1         |
| XLOC_013930 | PXMP4                  | chr20:32290549-32308136  | 0.00895664 | 0.00255985 | -1.8069  | 1         |
| XLOC_011091 | ERVV-1                 | chr19:53517343-53519833  | 0.01968231 | 0.00563646 | -1.8041  | 1         |
| XLOC_000573 | GSTM5                  | chr1:110254863-110260890 | 0.188223   | 0.0539452  | -1.80287 | 1         |
| XLOC_006186 | DZIP1                  | chr13:96085852-96296960  | 0.0122699  | 0.00352059 | -1.80124 | 1         |
| XLOC_021810 | ZNF252P-AS1            | chr8:146198974-146231433 | 0.134521   | 0.0386588  | -1.79897 | 1         |
| XLOC_022862 | PGM5P2                 | chr9:69080243-69147854   | 0.14242    | 0.0409984  | -1.79651 | 1         |
| XLOC_009839 | LOC284080              | chr17:48127712-48133103  | 0.159726   | 0.0460773  | -1.79347 | 1         |
| XLOC_008950 | CRYBA1                 | chr17:27573874-27581502  | 0.0689315  | 0.0198896  | -1.79315 | 1         |
| XLOC_004728 | PRH2                   | chr12:10998447-11328619  | 0.0132244  | 0.00382163 | -1.79094 | 1         |
| XLOC_000819 | KLHDC9                 | chr1:161068150-161070138 | 0.428319   | 0.123899   | -1.78952 | 0.123604  |
| XLOC_016655 | PPP2R2C                | chr4:6322304-6565327     | 0.0128195  | 0.00370926 | -1.78914 | 1         |
| XLOC_003580 | FLRT1                  | chr11:63766029-63933585  | 0.0936776  | 0.0271387  | -1.78735 | 1         |
| XLOC_007327 | SH2D7                  | chr15:78384926-78396393  | 0.0320253  | 0.00928148 | -1.78679 | 1         |
| XLOC_016885 | RPL34-AS1              | chr4:109459345-109541613 | 0.0109127  | 0.00316335 | -1.78648 | 1         |
| XLOC_016604 | KLKB1                  | chr4:187148671-187179625 | 0.0550026  | 0.0159598  | -1.78505 | 1         |
| XLOC_004009 | HBBP1                  | chr11:5263184-5264822    | 0.174697   | 0.0507055  | -1.78464 | 1         |
| XLOC_022669 | KIAA1984               | chr9:139690789-139735633 | 0.181994   | 0.0528811  | -1.78307 | 1         |
| XLOC_022692 | C9orf173               | chr9:140144670-140147945 | 0.172093   | 0.0501053  | -1.78016 | 1         |
| XLOC_022265 | KCNV2                  | chr9:2717525-2730037     | 0.0777735  | 0.0226571  | -1.77932 | 1         |
| XLOC_011878 | KLK1                   | chr19:51322403-51327043  | 0.151705   | 0.0443108  | -1.77554 | 1         |
| XLOC_009170 | CACNA1G                | chr17:48633567-48704832  | 0.0101448  | 0.00296406 | -1.7751  | 1         |
| XLOC_006852 | TEX21P                 | chr14:64812190-64814329  | 0.082816   | 0.0242606  | -1.7713  | 1         |
| XLOC_008562 | ABCC11                 | chr16:48200821-48269088  | 0.0351405  | 0.0103288  | -1.76646 | 1         |
| XLOC_011997 | FKBP1AP1               | chr19:58336666-58338830  | 0.0339438  | 0.00999963 | -1.7632  | 1         |
| XLOC_002390 | LINC00264              | chr10:26878793-26883251  | 0.0565932  | 0.0167028  | -1.76053 | 1         |
| XLOC_017705 | SNORA47                | chr5:76372531-76444176   | 4.78846    | 1.41399    | -1.75979 | 0.874709  |
| XLOC_004211 | PRG2                   | chr11:57154833-57158130  | 0.0754308  | 0.0222941  | -1.75849 | 1         |
| XLOC_006300 | TSSK4                  | chr14:24674925-24677454  | 0.0889894  | 0.0263721  | -1.75462 | 1         |
| XLOC_008820 | SLC35G6                | chr17:7362684-7387568    | 0.0670393  | 0.0198852  | -1.75331 | 1         |
| XLOC_013663 | SGK2                   | chr20:42187634-42214273  | 0.34775    | 0.103491   | -1.74854 | 0.0718958 |
| XLOC_020542 | LINC00035              | chr7:73149398-73150330   | 0.589695   | 0.175794   | -1.74608 | 0.532349  |
| XLOC_018220 | C4A,C4B_2              | chr6:31982571-32003195   | 0.0112414  | 0.0033523  | -1.7456  | 1         |
| XLOC_022678 | LCN12                  | chr9:139846767-139849945 | 0.262967   | 0.0785388  | -1.74341 | 1         |
| XLOC_018430 | AIM1                   | chr6:106959729-107018334 | 0.006002   | 0.00179332 | -1.74281 | 1         |
| XLOC_007661 | ANP32A-IT1             | chr15:69070874-69113261  | 0.013858   | 0.00414076 | -1.74275 | 1         |
| XLOC_008667 | PKD1L3                 | chr16:71928310-72033877  | 0.00835098 | 0.00250138 | -1.73922 | 1         |
| XLOC_014362 | TSPEAR                 | chr21:45917774-46131495  | 0.0179464  | 0.00537832 | -1.73846 | 1         |
| XLOC_011598 | LG14                   | chr19:35615416-35626178  | 0.0275242  | 0.00826873 | -1.73496 | 1         |
| XLOC_022323 | DNAI1                  | chr9:34458810-34520982   | 0.0384032  | 0.0115645  | -1.73152 | 1         |
| XLOC_000332 | TIE1                   | chr1:43766565-43788781   | 0.0710566  | 0.0214681  | -1.72678 | 1         |
| XLOC_004059 | C11orf16               | chr11:8932700-8954553    | 0.0288993  | 0.00876017 | -1.722   | 1         |
| XLOC_008080 | CLUHP3                 | chr16:31711933-31718745  | 0.416817   | 0.126687   | -1.71815 | 0.11933   |
| XLOC_020747 | SMO                    | chr7:128828712-128853385 | 0.0778797  | 0.0237534  | -1.71311 | 1         |
| XLOC_007627 | RBPMS2                 | chr15:65032094-65067770  | 0.0375746  | 0.0114737  | -1.71143 | 1         |
| XLOC_008217 | IL34                   | chr16:70613797-70694585  | 0.0418201  | 0.0128006  | -1.70798 | 1         |
| XLOC_008618 | EXOC3L1                | chr16:67218281-67224107  | 0.0303407  | 0.00929447 | -1.70681 | 1         |
| XLOC_010667 | NWD1                   | chr19:16830786-16928774  | 0.00679977 | 0.00209022 | -1.70183 | 1         |
| XLOC_009875 | C17orf47               | chr17:56618947-56621733  | 0.0222424  | 0.00684039 | -1.70117 | 1         |
| XLOC_018253 | SCUBE3                 | chr6:35182189-35218609   | 0.0100799  | 0.00311352 | -1.69486 | 1         |
| XLOC_016305 | SLC10A4                | chr4:48485359-48491541   | 0.0293197  | 0.0090593  | -1.6944  | 1         |
| XLOC_017826 | SMAD5-AS1              | chr5:135465202-135518423 | 0.101961   | 0.0315275  | -1.69333 | 1         |
| XLOC_020409 | HOXA-AS3               | chr7:27179982-27196296   | 0.0568335  | 0.0175848  | -1.69241 | 1         |
| XLOC_000516 | LOC100129046           | chr1:94027342-94312706   | 0.035429   | 0.0109796  | -1.69011 | 1         |
| XLOC_011675 | CNTD2                  | chr19:40728114-40732597  | 0.052785   | 0.0164414  | -1.68828 | 1         |
| XLOC_023555 | VSIG1                  | chrX:107288199-107322414 | 0.0138916  | 0.00432731 | -1.68267 | 1         |
| XLOC_001566 | FAM151A                | chr1:55013806-55100417   | 0.3034     | 0.0946897  | -1.67994 | 1         |
| XLOC_012075 | FAM228A                | chr2:24397971-24414567   | 0.168809   | 0.0526944  | -1.67967 | 1         |
| XLOC_006629 | LINC00239              | chr14:102196773-10219886 | 0.217567   | 0.0682361  | -1.67285 | 1         |
| XLOC_022937 | ECM2                   | chr9:95059639-95432547   | 0.0266444  | 0.00837471 | -1.66972 | 1         |
| XLOC_005304 | TAS2R14                | chr12:10998447-11328619  | 0.19857    | 0.0624537  | -1.66879 | 1         |
| XLOC_013842 | RASSF2                 | chr20:4760668-4804291    | 0.00815318 | 0.00256997 | -1.66561 | 1         |
| XLOC_008162 | CA7                    | chr16:66878281-66888049  | 0.0435354  | 0.0137462  | -1.66316 | 1         |
| XLOC_006838 | RTN1                   | chr14:60062693-60337557  | 0.0311407  | 0.00985853 | -1.65936 | 1         |
| XLOC_023683 | CSAG1                  | chrX:151903227-151909511 | 0.0852843  | 0.027027   | -1.65788 | 1         |
| XLOC_017427 | MYOZ3                  | chr5:150040402-150058930 | 0.0277884  | 0.00881171 | -1.65699 | 1         |
| XLOC_003921 | ST14                   | chr11:130029681-13008025 | 0.0233437  | 0.00740992 | -1.6555  | 1         |
| XLOC_003015 | ZMIZ1-AS1              | chr10:80703082-80827205  | 0.06615    | 0.0210977  | -1.64866 | 1         |
| XLOC_020740 | FLNC                   | chr7:128470482-128499325 | 0.0695941  | 0.0222135  | -1.64753 | 1         |
| XLOC_020857 | GIMAP1,GIMAP1-GIMAP5,C | chr7:150413644-150440733 | 0.0105967  | 0.00338365 | -1.64696 | 1         |
| XLOC_004466 | SNORA8                 | chr11:93465526-93465665  | 34.4632    | 11.031     | -1.64349 | 0.244643  |
| XLOC_004041 | GVINP1                 | chr11:6734380-6743110    | 0.0121829  | 0.00391185 | -1.63893 | 1         |
| XLOC_005869 | VWA8-AS1               | chr13:42535304-42555701  | 0.0360486  | 0.0116094  | -1.63465 | 1         |
| XLOC_008166 | CES4A                  | chr16:67022491-67043659  | 0.026482   | 0.00855152 | -1.63076 | 1         |
| XLOC_022536 | PTGS1                  | chr9:125132808-125157982 | 0.0178466  | 0.00576689 | -1.62979 | 1         |
| XLOC_017961 | LOC643201              | chr5:175570087-175626295 | 0.037947   | 0.0123077  | -1.62443 | 1         |
| XLOC_013213 | GALNT3                 | chr2:166604312-166650803 | 0.0220498  | 0.00718912 | -1.61688 | 1         |
| XLOC_006348 | ABHD12B                | chr14:51338877-51371688  | 0.056332   | 0.0183897  | -1.61505 | 1         |

|              |                |                          |            |            |          |           |
|--------------|----------------|--------------------------|------------|------------|----------|-----------|
| XLOC_003233  | SNORA52        | chr11:809935-812876      | 25.5496    | 8.36614    | -1.61067 | 0.840585  |
| XLOC_011654  | LOC643669      | chr19:39399619-39402798  | 0.417991   | 0.137596   | -1.60303 | 0.292729  |
| XLOC_001948  | C1orf204,VSIG8 | chr1:159796478-159832447 | 0.133337   | 0.0439069  | -1.60256 | 1         |
| XLOC_008294  | LOC100287036   | chr16:89334028-89556969  | 0.131099   | 0.0436435  | -1.58682 | 1         |
| XLOC_005226  | NRIP2          | chr12:2934513-2944221    | 0.173919   | 0.0580183  | -1.58384 | 1         |
| XLOC_003689  | KRTAP5-10      | chr11:71276608-71277666  | 0.139859   | 0.0475412  | -1.55672 | 1         |
| XLOC_014437  | TMEM191C       | chr22:21821458-21824224  | 0.643238   | 0.220229   | -1.54635 | 0.348936  |
| XLOC_013905  | FAM182B        | chr20:25744101-25781927  | 0.0920566  | 0.031522   | -1.54616 | 1         |
| XLOC_010022  | AATK           | chr17:79008946-79156964  | 0.587076   | 0.201108   | -1.54558 | 0.82576   |
| XLOC_007012  | GOLGA8I        | chr15:23255241-23262743  | 0.0442596  | 0.0152085  | -1.54111 | 1         |
| XLOC_005992  | TEX29          | chr13:111973014-11199655 | 0.715109   | 0.246355   | -1.53742 | 0.302989  |
| XLOC_019168  | AIRN           | chr6:160390130-160527583 | 0.033422   | 0.0115205  | -1.53659 | 1         |
| XLOC_023610  | RAB33A         | chrX:129305772-12931884  | 0.156062   | 0.0538197  | -1.53591 | 1         |
| XLOC_012698  | B3GNT7         | chr2:232260334-232265871 | 0.154924   | 0.0534618  | -1.53498 | 1         |
| XLOC_012851  | LOC100505716   | chr2:28004265-28561767   | 0.0707267  | 0.0244425  | -1.53286 | 1         |
| XLOC_004364  | ACY3           | chr11:67410025-67418130  | 0.109624   | 0.0379777  | -1.52934 | 1         |
| XLOC_002485  | TET1           | chr10:70320116-70454239  | 0.0109832  | 0.00380669 | -1.52869 | 1         |
| XLOC_009352  | TEX19          | chr17:80317122-80321652  | 0.459924   | 0.161084   | -1.51359 | 0.10104   |
| XLOC_012706  | PRSS56         | chr2:233385172-233390421 | 0.299879   | 0.105055   | -1.51323 | 1         |
| XLOC_000975  | PTPRVP         | chr1:202137178-202158571 | 0.0267991  | 0.00940848 | -1.51015 | 1         |
| XLOC_008377  | CCDC64B        | chr16:3077867-3089133    | 0.259658   | 0.0912299  | -1.50903 | 1         |
| XLOC_006350  | LINC00640      | chr14:51800110-51832275  | 0.135134   | 0.0474941  | -1.50857 | 1         |
| XLOC_010977  | CRX            | chr19:48325098-48346586  | 0.0405178  | 0.0142802  | -1.50454 | 1         |
| XLOC_017745  | SPATA9         | chr5:94994019-95018714   | 0.0601114  | 0.0212149  | -1.50256 | 1         |
| XLOC_002507  | CDH23          | chr10:73156690-73575704  | 0.0367123  | 0.0129698  | -1.50111 | 1         |
| XLOC_008955  | EFCAB5         | chr17:27952964-28435470  | 0.0352344  | 0.0125551  | -1.48871 | 1         |
| XLOC_015625  | SUSD5          | chr3:33191536-33260707   | 0.0301515  | 0.0107525  | -1.48756 | 1         |
| XLOC_001772  | NBPF11,NBPF24  | chr1:146032541-146082761 | 0.014329   | 0.00511451 | -1.48627 | 1         |
| XLOC_011345  | FUT3           | chr19:5842898-5851485    | 0.0592989  | 0.0211944  | -1.48432 | 1         |
| XLOC_018134  | HIST1H2BO      | chr6:27861202-27861669   | 1.67242    | 0.598288   | -1.48303 | 0.30251   |
| XLOC_006971  | DEGS2          | chr14:100612752-10062601 | 0.121668   | 0.0435869  | -1.48098 | 1         |
| XLOC_018613  | C6orf195       | chr6:2622971-2635298     | 0.137847   | 0.0493979  | -1.48054 | 1         |
| XLOC_003064  | LOC728558      | chr10:97471535-97849992  | 0.0274714  | 0.00984755 | -1.48009 | 1         |
| XLOC_009457  | CLDN7          | chr17:7155371-7166512    | 0.164078   | 0.0588431  | -1.47944 | 1         |
| XLOC_003193  | EBF3           | chr10:131633495-13176205 | 0.0551849  | 0.0198245  | -1.47699 | 1         |
| XLOC_010817  | ZNF790-AS1     | chr19:37288451-37407193  | 0.0736783  | 0.0264864  | -1.47599 | 1         |
| XLOC_002103  | ASCL5          | chr1:201083080-201084501 | 0.53726    | 0.193182   | -1.47566 | 0.357264  |
| XLOC_007193  | GATM-AS1       | chr15:45653321-45672321  | 0.0903856  | 0.0325061  | -1.47538 | 1         |
| XLOC_003046  | ANKRD1         | chr10:92671856-92681032  | 0.406956   | 0.146577   | -1.47321 | 0.0799746 |
| XLOC_006859  | FUT8-AS1       | chr14:65877309-66210839  | 0.159001   | 0.0573339  | -1.47158 | 1         |
| XLOC_001708  | DENND2D        | chr1:111728590-111747161 | 0.0359254  | 0.0129656  | -1.47031 | 1         |
| XLOC_001557  | GLIS1          | chr1:53971905-54199877   | 0.053547   | 0.0193293  | -1.47002 | 1         |
| XLOC_009248  | LOC440461      | chr17:66194800-66196443  | 0.110804   | 0.0400023  | -1.46986 | 1         |
| XLOC_013034  | FOXI3          | chr2:88747725-88752053   | 0.153098   | 0.0554201  | -1.46598 | 1         |
| XLOC_021725  | COLEC10        | chr8:120079423-120119201 | 0.0624952  | 0.0226577  | -1.46375 | 1         |
| XLOC_005180  | TMEM132B       | chr12:125811161-12614351 | 0.00893609 | 0.00325322 | -1.45778 | 1         |
| XLOC_003967  | MRPL23-AS1     | chr11:2004438-20111150   | 0.0647864  | 0.0236114  | -1.4562  | 1         |
| XLOC_021362  | TRPV6          | chr7:142568959-142583491 | 0.0346522  | 0.0126312  | -1.45596 | 1         |
| XLOC_014823  | KCNJ4          | chr22:38822332-38851205  | 0.0782691  | 0.0287952  | -1.44261 | 1         |
| XLOC_017766  | NREP           | chr5:110834021-111353001 | 0.0783403  | 0.0289268  | -1.43735 | 1         |
| XLOC_016629  | SPON2          | chr4:1160720-1202750     | 0.519807   | 0.192145   | -1.43578 | 0.159174  |
| XLOC_022626  | BARHL1         | chr9:135457992-135465641 | 0.111208   | 0.0412045  | -1.43238 | 1         |
| XLOC_008250  | LOC100129617   | chr16:81478774-81745367  | 0.0651071  | 0.0241627  | -1.43003 | 1         |
| XLOC_018437  | LINC00222      | chr6:109072856-109091141 | 0.0642232  | 0.0238994  | -1.42612 | 1         |
| XLOC_023977  | TAF7L          | chrX:100523240-100548051 | 0.0998957  | 0.0372189  | -1.42439 | 1         |
| XLOC_003667  | ALDH3B1        | chr11:67776047-67796743  | 0.0656065  | 0.0245368  | -1.41889 | 1         |
| XLOC_012730  | RBM44          | chr2:238707387-238751451 | 0.120803   | 0.0453212  | -1.41444 | 1         |
| XLOC_010012  | RBFOX3         | chr17:77085426-77478563  | 0.050266   | 0.0188811  | -1.41264 | 1         |
| XLOC_008535  | PRSS8          | chr16:31142753-31147151  | 0.392861   | 0.147947   | -1.40894 | 0.212722  |
| XLOC_006809  | FRMD6-AS1      | chr14:51921229-52197444  | 0.377828   | 0.14232    | -1.40859 | 0.943606  |
| XLOC_013728  | CASS4          | chr20:54987167-55034396  | 0.0297939  | 0.0112504  | -1.40504 | 1         |
| XLOC_006000  | PROZ           | chr13:113812967-11382661 | 0.24749    | 0.093787   | -1.39991 | 1         |
| XLOC_023031  | TNFSF15        | chr9:117546914-117568401 | 0.00486994 | 0.00184852 | -1.39754 | 1         |
| XLOC_008195  | CDH3           | chr16:68678150-68732957  | 0.183712   | 0.0698489  | -1.39513 | 1         |
| XLOC_008730  | SLC22A31       | chr16:89262168-89266529  | 0.0780962  | 0.0297783  | -1.39099 | 1         |
| XLOC_006196  | GPR18          | chr13:99848627-100058554 | 0.0269069  | 0.0103196  | -1.38259 | 1         |
| XLOC_020856  | GIMAP2         | chr7:150382793-150390721 | 0.0639516  | 0.0245409  | -1.38179 | 1         |
| XLOC_010704  | TMEM59L        | chr19:18723681-18731849  | 0.125051   | 0.0480968  | -1.37851 | 1         |
| XLOC_014301  | C21orf62       | chr21:34144410-34186053  | 0.00820557 | 0.00316367 | -1.375   | 1         |
| XLOC_021129  | FDPSSL2A       | chr7:76090971-76135312   | 0.0356775  | 0.0137793  | -1.37251 | 1         |
| XLOC_019121  | LOC100507489   | chr6:143287558-143358711 | 0.104583   | 0.0404032  | -1.37211 | 1         |
| XLOC_012510  | CYBRD1         | chr2:172378756-172414643 | 0.0154275  | 0.00596573 | -1.37073 | 1         |
| XLOC_003309  | NLRP14         | chr11:7041699-7092757    | 0.00770262 | 0.00297963 | -1.37022 | 1         |
| XLOC_014525  | LOC100506195   | chr22:33669061-34316416  | 0.0335848  | 0.0130857  | -1.35981 | 1         |
| XLOC_016798  | PPEF2          | chr4:76781025-76823681   | 0.067863   | 0.0264472  | -1.35951 | 1         |
| XLOC_016986  | MARCH1         | chr4:164445449-165304407 | 0.234624   | 0.0915409  | -1.35786 | 1         |
| XLOC_011649  | LGALS4         | chr19:39292310-39303740  | 0.213141   | 0.0831797  | -1.3575  | 1         |
| XLOC_0022341 | FP588          | chr9:35860270-35865515   | 0.196402   | 0.0767351  | -1.35585 | 1         |
| XLOC_002764  | JAKMIP3        | chr10:133918312-13399831 | 0.168972   | 0.0661349  | -1.3533  | 1         |

|              |                 |                         |            |             |          |          |
|--------------|-----------------|-------------------------|------------|-------------|----------|----------|
| XLOC_003744  | CCDC81          | chr11:86085777-86134151 | 0.0682862  | 0.0267808   | -1.35039 | 1        |
| XLOC_007902  | LOC100128770    | chr16:3077867-3089133   | 0.0919515  | 0.0362667   | -1.34223 | 1        |
| XLOC_017451  | LOC285626       | chr5:158758525-15878984 | 0.022992   | 0.00907916  | -1.3405  | 1        |
| XLOC_008661  | TAT             | chr16:71600753-71610998 | 0.0135498  | 0.00535364  | -1.33968 | 1        |
| XLOC_000547  | LOC100129138    | chr1:104615644-10461969 | 0.170053   | 0.0673839   | -1.33551 | 1        |
| XLOC_002679  | LOC100505839    | chr10:105353783-1056151 | 0.0176396  | 0.00699732  | -1.33394 | 1        |
| XLOC_006891  | SYNDIG1L        | chr14:74872595-74892805 | 0.0878859  | 0.0348986   | -1.33246 | 1        |
| XLOC_017285  | LOC100505841    | chr5:121495870-12151835 | 0.683363   | 0.27149     | -1.33176 | 0.466904 |
| XLOC_007356  | AGSK1,LOC727849 | chr15:82944792-82986427 | 0.0576952  | 0.0229269   | -1.33141 | 1        |
| XLOC_012281  | ATOH8           | chr2:85980908-86018506  | 0.0386945  | 0.0153861   | -1.3305  | 1        |
| XLOC_018716  | LOC401242       | chr6:28827401-28831454  | 0.0135407  | 0.00538508  | -1.33027 | 1        |
| XLOC_012150  | TMEM178A        | chr2:39892637-39945104  | 0.218387   | 0.0868955   | -1.32953 | 1        |
| XLOC_002896  | HNRNPA3P1       | chr10:44282859-44285865 | 0.00870254 | 0.00347432  | -1.3247  | 1        |
| XLOC_007421  | LOC440311       | chr15:95398591-95400293 | 0.252517   | 0.100819    | -1.32461 | 1        |
| XLOC_000902  | C1orf220        | chr1:178511930-17851802 | 0.106791   | 0.0426512   | -1.32413 | 1        |
| XLOC_005349  | ST8SIA1         | chr12:22346324-22487648 | 0.00286169 | 0.00114403  | -1.32274 | 1        |
| XLOC_016877  | CXXC4           | chr4:105389462-10541605 | 0.00583325 | 0.00233238  | -1.3225  | 1        |
| XLOC_015188  | EBLN2           | chr3:73046118-73115011  | 0.0746892  | 0.0298733   | -1.32204 | 1        |
| XLOC_003709  | DNAJB13         | chr11:73661363-73681332 | 0.0992455  | 0.0397497   | -1.32006 | 1        |
| XLOC_000339  | ARTN            | chr1:44398991-44402912  | 0.319389   | 0.128429    | -1.31434 | 1        |
| XLOC_014566  | APOBEC3G        | chr22:39473009-39483748 | 0.0205941  | 0.00828239  | -1.31411 | 1        |
| XLOC_002291  | PTENP1          | chr9:33673501-33677418  | 0.00759025 | 0.00306072  | -1.31028 | 1        |
| XLOC_002041  | SERPINC1        | chr1:173872941-17388651 | 0.0472797  | 0.0190913   | -1.30831 | 1        |
| XLOC_000830  | HSPA6           | chr1:161494035-16149668 | 0.715547   | 0.288992    | -1.30802 | 0.101333 |
| XLOC_0022974 | GABBR2          | chr9:101050363-10147147 | 0.0140105  | 0.00566994  | -1.3051  | 1        |
| XLOC_001499  | C1orf210        | chr1:43747556-43751288  | 0.0336186  | 0.0136139   | -1.30418 | 1        |
| XLOC_019067  | STL             | chr6:125229391-12528417 | 0.0430425  | 0.0174658   | -1.30123 | 1        |
| XLOC_014714  | C22orf43        | chr22:23950638-23974508 | 0.155119   | 0.0629554   | -1.30097 | 1        |
| XLOC_018831  | TULP1           | chr6:35465650-35480647  | 0.105587   | 0.042855    | -1.30089 | 1        |
| XLOC_017643  | LOC100652772    | chr5:43573286-43705668  | 0.00925161 | 0.00375529  | -1.30078 | 1        |
| XLOC_005332  | C12orf69        | chr12:14956505-14976791 | 0.0420948  | 0.0171049   | -1.29923 | 1        |
| XLOC_010191  | RNF165          | chr18:43914186-44040783 | 0.253743   | 0.103135    | -1.29884 | 1        |
| XLOC_018986  | GJB7            | chr6:87992696-88052043  | 0.0145329  | 0.00591259  | -1.29746 | 1        |
| XLOC_000137  | PADI3           | chr1:17575592-17610727  | 0.0120759  | 0.00492749  | -1.29321 | 1        |
| XLOC_020415  | JAZF1-AS1       | chr7:27870192-28280996  | 0.0625662  | 0.0255576   | -1.29163 | 1        |
| XLOC_009434  | LOC728392       | chr17:5402746-5404319   | 0.73853    | 0.301741    | -1.29134 | 0.207506 |
| XLOC_001253  | GPR157          | chr1:9164475-9189229    | 0.398756   | 0.163008    | -1.29056 | 0.61004  |
| XLOC_013746  | TUBB1           | chr20:57594308-57601709 | 0.13966    | 0.0571543   | -1.28899 | 1        |
| XLOC_019192  | C6orf123        | chr6:168185218-16819753 | 0.025785   | 0.0106189   | -1.2799  | 1        |
| XLOC_012710  | EFHD1           | chr2:233470766-23354749 | 0.156967   | 0.0648084   | -1.27621 | 1        |
| XLOC_022892  | PRUNE2          | chr9:79226291-79521003  | 0.00219836 | 0.000910397 | -1.27186 | 1        |
| XLOC_023777  | RS1             | chrX:18443724-18690223  | 0.0121214  | 0.00502521  | -1.2703  | 1        |
| XLOC_009286  | MYO15B          | chr17:73584138-73663269 | 0.565246   | 0.234397    | -1.26992 | 0.577945 |
| XLOC_014471  | BCRP3           | chr22:25028881-25055114 | 0.316125   | 0.131232    | -1.26838 | 1        |
| XLOC_016027  | TIPARP-AS1      | chr3:156390959-15642455 | 0.400759   | 0.166514    | -1.26709 | 0.949303 |
| XLOC_008158  | BEAN1           | chr16:66461199-66527432 | 0.269167   | 0.112006    | -1.26492 | 1        |
| XLOC_008669  | PMFBP1          | chr16:72152995-72206349 | 0.108996   | 0.0454248   | -1.26273 | 1        |
| XLOC_023979  | BTK             | chrX:100604434-10064121 | 0.0124281  | 0.00518844  | -1.26203 | 1        |
| XLOC_023761  | GPM6B           | chrX:13789061-13956831  | 0.0106322  | 0.00444568  | -1.25797 | 1        |
| XLOC_023076  | NRON            | chr9:129089122-12926932 | 0.0124613  | 0.00521368  | -1.25708 | 1        |
| XLOC_014446  | LOC648691       | chr22:22901755-22909007 | 0.010315   | 0.00432838  | -1.25284 | 1        |
| XLOC_015989  | SLC9A9          | chr3:142984063-14356737 | 0.0177641  | 0.00745925  | -1.25186 | 1        |
| XLOC_012776  | RNF144A-AS1     | chr2:7052406-7184309    | 0.0137196  | 0.00576441  | -1.251   | 1        |
| XLOC_014977  | KCNH8           | chr3:19190016-19577135  | 0.0548161  | 0.0230344   | -1.25081 | 1        |
| XLOC_001229  | PTD3-AS1        | chr1:3569128-3663937    | 0.0136562  | 0.00576124  | -1.24511 | 1        |
| XLOC_017388  | PCDHGB8P        | chr5:140710251-14089254 | 0.0179054  | 0.00756031  | -1.24388 | 1        |
| XLOC_009888  | LOC653653       | chr17:58179120-58180280 | 0.0612017  | 0.025867    | -1.24246 | 1        |
| XLOC_008832  | DNAH2           | chr17:7623038-7737058   | 0.00523    | 0.00221085  | -1.24221 | 1        |
| XLOC_011656  | FBXO17          | chr19:39432041-39466380 | 0.0399246  | 0.0168964   | -1.24056 | 1        |
| XLOC_003154  | EMX2OS          | chr10:119243803-1193090 | 0.00432271 | 0.00182953  | -1.24046 | 1        |
| XLOC_000189  | RHD             | chr1:25598980-25656936  | 0.117487   | 0.0497336   | -1.24021 | 1        |
| XLOC_023975  | XKRX            | chrX:100168430-10018389 | 0.0361869  | 0.0153236   | -1.23971 | 1        |
| XLOC_014465  | POM121L9P       | chr22:24647588-24661492 | 0.0152184  | 0.00644922  | -1.23862 | 1        |
| XLOC_020795  | TAS2R5          | chr7:141490016-14149116 | 0.332417   | 0.1411194   | -1.23531 | 1        |
| XLOC_014447  | GGTLC2          | chr22:22988781-22990368 | 0.0685276  | 0.0291379   | -1.23379 | 1        |
| XLOC_005416  | MIR1291,SNORA34 | chr12:49046994-49076035 | 3.13532    | 1.33455     | -1.23226 | 0.922006 |
| XLOC_010253  | LOC284276       | chr18:74240611-74271784 | 0.0175655  | 0.0074885   | -1.22999 | 1        |
| XLOC_011600  | KRTDAP          | chr19:35978225-35981433 | 0.832326   | 0.355046    | -1.22914 | 0.498057 |
| XLOC_002614  | CC2D2B          | chr10:97471535-97849992 | 0.0162096  | 0.00691582  | -1.22888 | 1        |
| XLOC_011066  | CD33            | chr19:51728334-51743274 | 0.102189   | 0.0436719   | -1.22646 | 1        |
| XLOC_007976  | ACSM3           | chr16:20775311-20860990 | 0.368796   | 0.157683    | -1.22579 | 0.936256 |
| XLOC_007960  | NOMO3           | chr16:16326388-16388668 | 0.0244108  | 0.0104418   | -1.22515 | 1        |
| XLOC_018734  | TRIM31          | chr6:30070673-30080867  | 0.0344289  | 0.0147503   | -1.22288 | 1        |
| XLOC_009568  | VYN             | chr17:26694298-26697373 | 0.0554594  | 0.023808    | -1.21999 | 1        |
| XLOC_020635  | CTP3A43         | chr7:99425635-99464173  | 0.0145346  | 0.00625138  | -1.21724 | 1        |
| XLOC_011165  | LAIR2           | chr19:55014012-55021900 | 1.49179    | 0.641706    | -1.21707 | 0.210375 |
| XLOC_017691  | GUSBP9          | chr5:70516052-70555122  | 0.0774341  | 0.033327    | -1.21628 | 1        |
| XLOC_021393  | GIMAP6          | chr7:150322463-15032973 | 0.0188137  | 0.00811008  | -1.21399 | 1        |
| XLOC_009290  | ITGB4           | chr17:73717515-73753899 | 0.00880287 | 0.00379488  | -1.21392 | 1        |



|             |              |                          |            |             |          |          |
|-------------|--------------|--------------------------|------------|-------------|----------|----------|
| XLOC_021188 | KPNA7        | chr7:98771196-98805089   | 0.0242461  | 0.0104562   | -1.2134  | 1        |
| XLOC_012256 | TLX2         | chr2:74741595-74744275   | 0.0375847  | 0.016225    | -1.21193 | 1        |
| XLOC_000592 | LOC100506343 | chr1:112264685-112310195 | 0.0355356  | 0.0153537   | -1.21068 | 1        |
| XLOC_003319 | SNORA45      | chr11:8703994-8711419    | 3.91455    | 1.69475     | -1.20777 | 0.927627 |
| XLOC_009936 | ABCA9        | chr17:66970772-67057136  | 0.00855163 | 0.00370236  | -1.20776 | 1        |
| XLOC_000743 | CHRN2        | chr1:154540256-15455235  | 0.0139851  | 0.00606562  | -1.20517 | 1        |
| XLOC_015642 | EIF1B-AS1    | chr3:39851302-40353915   | 0.0945608  | 0.0410148   | -1.2051  | 1        |
| XLOC_004559 | MPZL2        | chr11:118124130-1181352  | 0.0103538  | 0.00449176  | -1.20481 | 1        |
| XLOC_007278 | LOC145837    | chr15:69854058-69863779  | 0.0718709  | 0.0311942   | -1.20413 | 1        |
| XLOC_015464 | SOX2         | chr3:180774467-18146001  | 0.0740093  | 0.0321518   | -1.20281 | 1        |
| XLOC_007644 | MEGF11       | chr15:66187633-66546075  | 0.022559   | 0.00980153  | -1.20263 | 1        |
| XLOC_005198 | SNORA49      | chr12:132434464-1325650  | 4.33196    | 1.88351     | -1.2016  | 0.926446 |
| XLOC_011346 | FUT5         | chr19:5865836-5870551    | 0.0803985  | 0.0349607   | -1.20143 | 1        |
| XLOC_003392 | CSTF3-AS1    | chr11:33183202-33213142  | 0.019013   | 0.00826819  | -1.20134 | 1        |
| XLOC_014431 | P2RX6        | chr22:21369441-21382302  | 0.0156224  | 0.00679576  | -1.20091 | 1        |
| XLOC_017762 | HP07349      | chr5:108063525-10806396  | 4.61573    | 2.00929     | -1.19987 | 0.231003 |
| XLOC_002517 | GLUD1P3      | chr10:75491298-75495367  | 0.358756   | 0.156192    | -1.19968 | 0.165739 |
| XLOC_005418 | SNORA2B      | chr12:49046994-49076035  | 3.68989    | 1.60684     | -1.19935 | 0.933417 |
| XLOC_014340 | RIPK4        | chr21:43159528-43187249  | 0.0369791  | 0.016127    | -1.19723 | 1        |
| XLOC_000471 | NEXN         | chr1:78354199-78409578   | 0.0156535  | 0.00683669  | -1.19511 | 1        |
| XLOC_017021 | LOC728175    | chr4:185262183-18527513  | 0.0168068  | 0.00734673  | -1.19387 | 1        |
| XLOC_007290 | ADPGK-AS1    | chr15:73043707-73090540  | 0.0645231  | 0.0282206   | -1.19307 | 1        |
| XLOC_009759 | LINC00854    | chr17:41373436-41381062  | 0.0343364  | 0.0150201   | -1.19285 | 1        |
| XLOC_017545 | SLC9A3       | chr5:473333-524549       | 0.435585   | 0.190559    | -1.19272 | 0.233946 |
| XLOC_007924 | C16orf71     | chr16:4746510-4799397    | 0.10834    | 0.0473961   | -1.19272 | 1        |
| XLOC_008683 | CHST6        | chr16:75507021-75528926  | 0.0310615  | 0.0135948   | -1.19207 | 1        |
| XLOC_014752 | RFP11-AS1    | chr22:29833003-29838444  | 0.00607662 | 0.00265981  | -1.19194 | 1        |
| XLOC_009775 | SLC4A1       | chr17:42325757-42345502  | 0.0230881  | 0.0101075   | -1.19173 | 1        |
| XLOC_009482 | LOC100128288 | chr17:8261730-8263859    | 0.0404577  | 0.0177146   | -1.19148 | 1        |
| XLOC_002186 | LOC643723    | chr1:219254316-21934713  | 0.0177716  | 0.00779347  | -1.18924 | 1        |
| XLOC_018877 | PRPH2        | chr6:42664332-42690358   | 0.0233124  | 0.010225    | -1.18899 | 1        |
| XLOC_012998 | M1AP         | chr2:74785009-74785164   | 0.0269699  | 0.0118299   | -1.18891 | 1        |
| XLOC_015693 | TMEM89       | chr3:48658274-48659189   | 0.142886   | 0.0627225   | -1.18781 | 1        |
| XLOC_002696 | ACSL5        | chr10:114133915-1141881  | 0.0267431  | 0.0117457   | -1.18704 | 1        |
| XLOC_019193 | MLLT4-AS1    | chr6:168224569-16822747  | 0.201715   | 0.0886946   | -1.1854  | 1        |
| XLOC_000895 | GPR52        | chr1:174128551-17496444  | 0.0218019  | 0.00958806  | -1.18514 | 1        |
| XLOC_010232 | SERPINB7     | chr18:61420280-61472610  | 0.0896062  | 0.0394093   | -1.18506 | 1        |
| XLOC_011994 | ZNF154       | chr19:58211809-58220579  | 0.0605938  | 0.0266737   | -1.18376 | 1        |
| XLOC_018167 | TRIM15       | chr6:30130982-30140473   | 0.0220157  | 0.00971687  | -1.17997 | 1        |
| XLOC_003493 | SERPING1     | chr11:57365026-57382326  | 0.0621458  | 0.0274435   | -1.17919 | 1        |
| XLOC_009198 | PPM1E        | chr17:56833229-57184266  | 0.0168074  | 0.0074234   | -1.17894 | 1        |
| XLOC_002701 | CACNA1B      | chr9:140772240-14101907  | 0.00857687 | 0.00378957  | -1.17842 | 1        |
| XLOC_000093 | TNFRSF1B     | chr1:12227059-12269277   | 0.0114221  | 0.00504819  | -1.17798 | 1        |
| XLOC_017211 | CMYA5        | chr5:78985658-79096049   | 0.00200023 | 0.000884597 | -1.17708 | 1        |
| XLOC_024005 | RIPPLY1      | chrX:106143292-10617409  | 0.0692693  | 0.0306416   | -1.17672 | 1        |
| XLOC_012708 | CHRG         | chr2:233404436-23341103  | 0.0207586  | 0.00918391  | -1.17653 | 1        |
| XLOC_021463 | SLC35G5      | chr8:11188494-11189695   | 0.0848881  | 0.0375608   | -1.17634 | 1        |
| XLOC_013432 | ARL4C        | chr2:235401685-23540569  | 0.224024   | 0.0992058   | -1.17516 | 1        |
| XLOC_002922 | LOC399753    | chr10:49218158-49239658  | 0.142884   | 0.06331     | -1.17434 | 1        |
| XLOC_003514 | OR10V2P      | chr11:59516284-59517054  | 0.0631647  | 0.0280129   | -1.17303 | 1        |
| XLOC_014262 | GRIK1        | chr21:30909253-31312282  | 0.0107764  | 0.00478165  | -1.17229 | 1        |
| XLOC_014229 | DIP2A-IT1    | chr21:47878861-47989926  | 0.100501   | 0.044616    | -1.17158 | 1        |
| XLOC_015649 | CCDC13       | chr3:42749873-42814745   | 0.0132158  | 0.00586873  | -1.17115 | 1        |
| XLOC_023293 | PHEX         | chrX:22050920-22266478   | 0.0102063  | 0.00453239  | -1.17112 | 1        |
| XLOC_013466 | BOK-AS1      | chr2:242483800-24251355  | 0.0699254  | 0.0310609   | -1.17072 | 1        |
| XLOC_018588 | SLC22A3      | chr6:160769404-16087361  | 0.0101485  | 0.00451228  | -1.16934 | 1        |
| XLOC_011526 | INSL3        | chr19:17927321-17932383  | 0.0779497  | 0.0346993   | -1.16764 | 1        |
| XLOC_023339 | MAOA         | chrX:43514154-43606071   | 0.0115291  | 0.00513229  | -1.1676  | 1        |
| XLOC_021510 | TNFRSF10C    | chr8:22941867-22974950   | 1.58567    | 0.706373    | -1.16659 | 0.116841 |
| XLOC_017008 | SPATA4       | chr4:177105724-17711682  | 0.0258655  | 0.0115304   | -1.16559 | 1        |
| XLOC_001642 | GBP2         | chr1:89573309-89591799   | 0.0103143  | 0.00459995  | -1.16496 | 1        |
| XLOC_009312 | TMC8         | chr17:76108998-76139049  | 0.202403   | 0.0903203   | -1.16411 | 1        |
| XLOC_015591 | COL6A4P1     | chr3:15206868-15247466   | 0.0848165  | 0.0378605   | -1.16365 | 1        |
| XLOC_018092 | HIST1H3A     | chr6:26020717-26021186   | 0.521036   | 0.232596    | -1.16356 | 0.7741   |
| XLOC_010460 | LOC100288123 | chr19:1815244-1848452    | 0.248712   | 0.111083    | -1.16284 | 1        |
| XLOC_018794 | HLA-DRB5     | chr6:32485153-32498006   | 0.0709547  | 0.0317052   | -1.16218 | 1        |
| XLOC_022121 | SNX31        | chr8:101585111-10166189  | 0.0254502  | 0.0113843   | -1.16064 | 1        |
| XLOC_012707 | CHRD         | chr2:233390869-23340137  | 0.0288577  | 0.0129127   | -1.16017 | 1        |
| XLOC_002228 | TRIM17       | chr1:228595635-22860458  | 0.0485025  | 0.021772    | -1.15558 | 1        |
| XLOC_014405 | DGCR9        | chr22:19005346-19007761  | 0.0467337  | 0.0210017   | -1.15396 | 1        |
| XLOC_021199 | AZGP1        | chr7:99564349-99573735   | 0.0801311  | 0.0360652   | -1.15176 | 1        |
| XLOC_022682 | C9orf139     | chr9:139901685-13993123  | 0.0127982  | 0.00576912  | -1.14952 | 1        |
| XLOC_013896 | GGTLC1       | chr20:23965689-23969416  | 0.0492412  | 0.0222096   | -1.14868 | 1        |
| XLOC_015892 | GPR156       | chr3:119884327-11996314  | 0.00726462 | 0.00327983  | -1.14727 | 1        |
| XLOC_016924 | CETN4P       | chr4:123651343-12365361  | 0.435314   | 0.19666     | -1.14635 | 0.539856 |
| XLOC_005878 | TSC22D1-AS1  | chr13:45006278-45154568  | 0.164888   | 0.0746033   | -1.14417 | 1        |
| XLOC_008613 | RRAD         | chr16:66955581-66959439  | 0.748663   | 0.339696    | -1.14007 | 0.323837 |
| XLOC_008268 | LINC00311    | chr16:85316563-85321685  | 0.0647549  | 0.0294395   | -1.13723 | 1        |
| XLOC_002226 | C1orf145     | chr1:228391206-22856657  | 0.707985   | 0.321888    | -1.13716 | 0.816683 |

|             |                |                          |            |            |          |           |
|-------------|----------------|--------------------------|------------|------------|----------|-----------|
| XLOC_006827 | LINC00520      | chr14:56247852-56263392  | 0.160605   | 0.0730364  | -1.13683 | 1         |
| XLOC_018382 | LOC100506804   | chr6:75994729-76001580   | 0.231685   | 0.105444   | -1.13568 | 1         |
| XLOC_015150 | CACNA1D        | chr3:53529075-53846492   | 0.0124788  | 0.00567968 | -1.1356  | 1         |
| XLOC_008414 | TEK7           | chr16:10721360-10788802  | 0.0530746  | 0.0241762  | -1.13443 | 1         |
| XLOC_012032 | COLEC11        | chr2:3642421-3692234     | 0.669108   | 0.304922   | -1.1338  | 0.105061  |
| XLOC_010796 | ZBTB32         | chr19:36203829-36207940  | 0.121208   | 0.0552415  | -1.13367 | 1         |
| XLOC_010318 | DSC3           | chr18:28570051-28622781  | 0.00375165 | 0.00171    | -1.13353 | 1         |
| XLOC_013485 | SDCBP2-AS1     | chr20:1290554-1373816    | 0.270503   | 0.123341   | -1.133   | 1         |
| XLOC_021193 | CYP3A5         | chr7:99245812-99277621   | 0.0965203  | 0.0440616  | -1.13131 | 1         |
| XLOC_023011 | C9orf84        | chr9:114448900-114545775 | 0.00525036 | 0.00239778 | -1.13072 | 1         |
| XLOC_007559 | DUOXA1         | chr15:45406522-45422075  | 0.03       | 0.0137137  | -1.12934 | 1         |
| XLOC_000402 | LOC100507564   | chr1:53692563-53793821   | 0.227442   | 0.104009   | -1.12879 | 1         |
| XLOC_007127 | C15orf55       | chr15:34638065-34649931  | 0.00914703 | 0.00418786 | -1.12709 | 1         |
| XLOC_012718 | SAG            | chr2:234216308-234255701 | 0.0202565  | 0.0092867  | -1.12515 | 1         |
| XLOC_002288 | C1orf229       | chr1:247273461-247275715 | 0.478629   | 0.219687   | -1.12346 | 0.366421  |
| XLOC_013028 | PLGLB2         | chr2:87140934-87248973   | 0.00907308 | 0.00416614 | -1.12288 | 1         |
| XLOC_013442 | LOC1511171     | chr2:239419330-239464140 | 0.0165249  | 0.00759629 | -1.12128 | 1         |
| XLOC_005578 | CPM            | chr12:69244955-69357020  | 0.0208031  | 0.00957292 | -1.11977 | 1         |
| XLOC_021560 | ADAM32         | chr8:38965049-39142436   | 0.0100205  | 0.0046115  | -1.11964 | 1         |
| XLOC_015996 | HLTF           | chr3:148747903-148820610 | 0.080333   | 0.0369927  | -1.11875 | 1         |
| XLOC_018702 | HIST1H2AK      | chr6:27805657-27806117   | 0.341561   | 0.157292   | -1.1187  | 1         |
| XLOC_002028 | ANKRD45        | chr1:173577474-173639001 | 0.0111724  | 0.00515065 | -1.11711 | 1         |
| XLOC_023174 | LCN10          | chr9:139632618-139637411 | 0.0190009  | 0.00876043 | -1.11699 | 1         |
| XLOC_013378 | PTPRN          | chr2:220154344-220174295 | 0.135674   | 0.0625939  | -1.11605 | 1         |
| XLOC_016762 | GNRHR          | chr4:68603098-68621804   | 0.00438889 | 0.002026   | -1.11522 | 1         |
| XLOC_009992 | ST6GALNAC2     | chr17:74561460-74582145  | 0.169267   | 0.0781825  | -1.11438 | 1         |
| XLOC_011620 | LINC00665      | chr19:36803962-36822620  | 0.113285   | 0.0523802  | -1.11286 | 1         |
| XLOC_005901 | DLEU7-AS1      | chr13:51286758-51424041  | 0.0163553  | 0.00756419 | -1.1125  | 1         |
| XLOC_021032 | RASA4CP        | chr7:44068485-44083895   | 0.211423   | 0.0978093  | -1.11209 | 1         |
| XLOC_013549 | LOC100270804   | chr20:18768614-18776709  | 0.483428   | 0.223677   | -1.11189 | 0.158467  |
| XLOC_009522 | ZNF287         | chr17:16453630-16472520  | 0.00572822 | 0.00265247 | -1.11075 | 1         |
| XLOC_005738 | PLA2G1B        | chr12:120759913-12076555 | 0.0867792  | 0.0402022  | -1.11007 | 1         |
| XLOC_009912 | ERN1           | chr17:62120389-62207502  | 0.192624   | 0.0892715  | -1.10951 | 1         |
| XLOC_002409 | LOC100129055   | chr10:38464598-38503273  | 0.122508   | 0.0568065  | -1.10875 | 1         |
| XLOC_014222 | PCBP3          | chr21:47269874-47362368  | 0.0211733  | 0.00982057 | -1.10837 | 1         |
| XLOC_012006 | A1BG           | chr19:58858171-58874214  | 0.434652   | 0.20201    | -1.10543 | 0.869283  |
| XLOC_005613 | CEP290         | chr12:88429267-88535993  | 0.597926   | 0.278037   | -1.10469 | 0.507208  |
| XLOC_021769 | PSCA           | chr8:143751725-143764145 | 0.787331   | 0.367071   | -1.10091 | 0.337134  |
| XLOC_000755 | TRIM46         | chr1:155146262-155157444 | 0.100894   | 0.0470488  | -1.10062 | 1         |
| XLOC_017892 | CSF1R          | chr5:149432853-149492935 | 0.00969186 | 0.00452215 | -1.09976 | 1         |
| XLOC_008863 | CDRT15P1       | chr17:13927814-13928915  | 0.368784   | 0.17208    | -1.0997  | 0.529626  |
| XLOC_014418 | LOC150197      | chr22:20193854-20196060  | 0.211684   | 0.0989825  | -1.09667 | 1         |
| XLOC_015539 | MF12-AS1       | chr3:196728611-196756687 | 3.04507    | 1.4256     | -1.09491 | 0.958201  |
| XLOC_013074 | SNORD89        | chr2:101889397-101889511 | 8.74477    | 4.09483    | -1.09462 | 0.851389  |
| XLOC_007747 | HOMER2         | chr15:83517728-83621476  | 0.239827   | 0.112304   | -1.09458 | 1         |
| XLOC_022690 | SLC34A3        | chr9:140125208-140131006 | 0.0304163  | 0.0142545  | -1.09342 | 1         |
| XLOC_012345 | SLC9A4         | chr2:103089761-103150431 | 0.0756055  | 0.0354395  | -1.09313 | 1         |
| XLOC_014318 | CBR3-AS1       | chr21:37504064-37528606  | 1.0629     | 0.49843    | -1.09254 | 0.781453  |
| XLOC_021307 | KCP            | chr7:128516918-128550775 | 0.0234114  | 0.0109798  | -1.09235 | 1         |
| XLOC_000712 | LCE1F          | chr1:152748847-152749445 | 0.187511   | 0.0880229  | -1.09103 | 1         |
| XLOC_003815 | C11orf52.HSPB2 | chr11:111783459-11179755 | 0.0579601  | 0.027219   | -1.09044 | 1         |
| XLOC_011515 | CPAMD8         | chr19:17003761-17137625  | 0.0074393  | 0.00349569 | -1.08959 | 1         |
| XLOC_018687 | HIST1H3F       | chr6:26250369-26250835   | 2.45171    | 1.15247    | -1.08906 | 0.408933  |
| XLOC_000425 | L1TD1          | chr1:62660473-62678001   | 0.0274683  | 0.012912   | -1.08905 | 1         |
| XLOC_004361 | DOC2GP         | chr11:67380994-67383135  | 0.130827   | 0.0615813  | -1.08709 | 1         |
| XLOC_011773 | IGFL4          | chr19:46543005-46544274  | 0.0799525  | 0.0376384  | -1.08694 | 1         |
| XLOC_020975 | HOUA2          | chr7:27139972-27142394   | 0.273064   | 0.128577   | -1.08661 | 1         |
| XLOC_007754 | UBE2Q2P1       | chr15:85070426-85123412  | 0.206759   | 0.0973606  | -1.08654 | 1         |
| XLOC_004658 | PRMT8          | chr12:3490514-3703138    | 1.05335    | 0.497154   | -1.08322 | 0.0723126 |
| XLOC_002977 | PRF1           | chr10:72357103-72362531  | 0.089564   | 0.0422916  | -1.08255 | 1         |
| XLOC_004672 | CD27           | chr12:6548166-6560884    | 0.293809   | 0.138861   | -1.08124 | 1         |
| XLOC_013523 | BMP2           | chr20:6748744-6760910    | 0.031332   | 0.0148144  | -1.08064 | 1         |
| XLOC_015116 | SEMA3B         | chr3:50305039-50314572   | 0.789486   | 0.373667   | -1.07916 | 0.127236  |
| XLOC_005237 | SCNN1A         | chr12:6456008-6500737    | 1.03277    | 0.490085   | -1.07542 | 0.911876  |
| XLOC_008549 | LINC00273      | chr16:33961051-33962503  | 0.0674781  | 0.0320417  | -1.07447 | 1         |
| XLOC_013026 | CD8A           | chr2:87011727-87035519   | 0.0610869  | 0.0290332  | -1.07316 | 1         |
| XLOC_001434 | CSMD2          | chr1:33979608-34631443   | 0.0216441  | 0.010292   | -1.07245 | 1         |
| XLOC_002259 | GNG4           | chr1:235710984-235814054 | 0.0383614  | 0.0182458  | -1.0721  | 1         |
| XLOC_002980 | UNC5B-AS1      | chr10:72972291-73062635  | 2.24978    | 1.07068    | -1.07126 | 0.903682  |
| XLOC_020711 | ST7-OT4        | chr7:116592500-116870075 | 0.166884   | 0.0795363  | -1.06916 | 1         |
| XLOC_016404 | C4orf22        | chr4:81256873-81884910   | 2.40322    | 1.14721    | -1.06684 | 0.0786602 |
| XLOC_022503 | ZNF483         | chr9:114287446-114362135 | 0.263044   | 0.125635   | -1.06607 | 1         |
| XLOC_007899 | CLDN9          | chr16:3062456-3064506    | 0.285838   | 0.136527   | -1.06601 | 1         |
| XLOC_021866 | DEFB136        | chr8:11831445-11832108   | 0.419138   | 0.20058    | -1.06324 | 1         |
| XLOC_006008 | LOC100506394   | chr13:114567149-11456980 | 0.324173   | 0.155338   | -1.06136 | 1         |
| XLOC_001247 | TNFRSF9        | chr1:7975930-8003225     | 0.014089   | 0.00676616 | -1.05816 | 1         |
| XLOC_022770 | LRRC19         | chr9:26903367-27062931   | 0.019589   | 0.00941607 | -1.05685 | 1         |
| XLOC_010192 | KATNAL2        | chr18:44526786-44628614  | 0.140654   | 0.067716   | -1.05458 | 1         |
| XLOC_003652 | SYT12          | chr11:66790189-66818334  | 0.0236438  | 0.0113971  | -1.0528  | 1         |

|             |              |                          |            |            |           |           |
|-------------|--------------|--------------------------|------------|------------|-----------|-----------|
| XLOC_017386 | PCDHB15      | chr5:140625146-14062780  | 0.123598   | 0.0595994  | -1.05228  | 1         |
| XLOC_014806 | C1QTNF6      | chr22:37576205-37584330  | 1.03056    | 0.496991   | -1.05213  | 0.157287  |
| XLOC_001096 | RHOU         | chr1:228780393-22888241  | 0.333676   | 0.160943   | -1.0519   | 1         |
| XLOC_017685 | GUSBP3       | chr5:68935289-69006272   | 0.112718   | 0.0544279  | -1.0503   | 1         |
| XLOC_014390 | LOC101101776 | chr22:16162065-16172265  | 0.133666   | 0.0645569  | -1.04999  | 1         |
| XLOC_004316 | NAALADL1     | chr11:64808375-64826009  | 0.0925065  | 0.0447108  | -1.04893  | 1         |
| XLOC_011001 | FUT2         | chr19:49199227-49209191  | 0.225066   | 0.108964   | -1.0465   | 1         |
| XLOC_018646 | NEDD9        | chr6:11183530-11382581   | 0.0293475  | 0.0142362  | -1.04367  | 1         |
| XLOC_016975 | CTSO         | chr4:156845269-15687504  | 0.257438   | 0.124989   | -1.04242  | 1         |
| XLOC_022827 | OR13J1       | chr9:35869459-35870398   | 0.0530607  | 0.0257622  | -1.04239  | 1         |
| XLOC_011674 | TTC9B        | chr19:40721964-40724306  | 1.75737    | 0.854899   | -1.03959  | 0.365811  |
| XLOC_013679 | PI3          | chr20:43803539-43805185  | 0.0841929  | 0.0409865  | -1.03855  | 1         |
| XLOC_023561 | RGAG1        | chrX:109437413-10969956  | 0.00524644 | 0.00255572 | -1.03761  | 1         |
| XLOC_008182 | C16orf86     | chr16:67700716-67702661  | 0.517009   | 0.251884   | -1.03743  | 0.483389  |
| XLOC_010136 | ANKRD20A5P   | chr18:141179095-14227049 | 0.0880463  | 0.0429288  | -1.03632  | 1         |
| XLOC_023141 | SARDH        | chr9:136528683-136605077 | 0.470559   | 0.229569   | -1.03545  | 0.17761   |
| XLOC_008484 | GSGL1L       | chr16:27798849-28074830  | 0.0272858  | 0.0133316  | -1.0333   | 1         |
| XLOC_017041 | TRIML2       | chr4:189012426-18902640  | 0.488944   | 0.239013   | -1.03258  | 0.365353  |
| XLOC_012642 | SLC11A1      | chr2:219246751-219261617 | 0.232299   | 0.113566   | -1.03245  | 1         |
| XLOC_015250 | CD96         | chr3:111260925-11137120  | 0.0223581  | 0.0109332  | -1.03208  | 1         |
| XLOC_007557 | PATL2        | chr15:44957929-44969086  | 0.218967   | 0.107335   | -1.0286   | 1         |
| XLOC_009871 | RNF43        | chr17:56378587-56494931  | 0.0489159  | 0.0240165  | -1.02628  | 1         |
| XLOC_004393 | PDE2A        | chr11:72287183-72385497  | 0.0932781  | 0.0458276  | -1.02532  | 1         |
| XLOC_024181 | ARHGAP4      | chrX:153172829-15319171  | 0.267168   | 0.131412   | -1.02366  | 1         |
| XLOC_008869 | TBC1D26      | chr17:15635590-15648098  | 0.173561   | 0.0855275  | -1.02098  | 1         |
| XLOC_010162 | DSG3         | chr18:29027731-29058665  | 0.013407   | 0.00660684 | -1.02095  | 1         |
| XLOC_024045 | TMEM255A     | chrX:119392504-11944539  | 0.0432693  | 0.0213966  | -1.01596  | 1         |
| XLOC_023517 | DRP2         | chrX:100474932-10051948  | 0.0325912  | 0.0161228  | -1.01538  | 1         |
| XLOC_007879 | ABCA17P      | chr16:2390922-2476700    | 0.164685   | 0.0815883  | -1.01327  | 1         |
| XLOC_011525 | UNC13A       | chr19:17712136-17799008  | 0.0157474  | 0.0078059  | -1.01248  | 1         |
| XLOC_013496 | EBF4         | chr20:2673523-2740754    | 0.875858   | 0.435437   | -1.00823  | 0.165928  |
| XLOC_007554 | PIN4P1       | chr15:44165729-44487429  | 0.0337531  | 0.0167817  | -1.00813  | 1         |
| XLOC_015106 | BSN          | chr3:49591921-49708982   | 0.0442766  | 0.0220381  | -1.00654  | 1         |
| XLOC_020732 | LEP          | chr7:127881330-12789768  | 0.0227371  | 0.0113246  | -1.00559  | 1         |
| XLOC_008378 | ZSCAN10      | chr16:3138894-3142861    | 0.0306137  | 0.0152485  | -1.00551  | 1         |
| XLOC_008335 | CCDC154      | chr16:1484388-1494490    | 0.351388   | 0.175068   | -1.00515  | 0.433739  |
| XLOC_009325 | CARD14       | chr17:78143790-78194199  | 0.140358   | 0.0699968  | -1.00375  | 1         |
| XLOC_023984 | ZMAT1        | chrX:101137259-10118703  | 0.106049   | 0.0528962  | -1.00349  | 1         |
| XLOC_021156 | LRRD1        | chr7:91774197-91794590   | 0.0414978  | 0.0207428  | -1.00043  | 1         |
| XLOC_018783 | TNXB         | chr6:32006092-32077151   | 0.0396354  | 0.0198139  | -1.00027  | 1         |
| XLOC_004178 | AGBL2        | chr11:47681142-47736928  | 0.0400791  | 0.0200457  | -0.999558 | 1         |
| XLOC_011966 | COX6B2       | chr19:55861069-55866182  | 0.618757   | 0.309696   | -0.998519 | 0.375577  |
| XLOC_001403 | MATN1        | chr1:31184123-31199593   | 0.0837485  | 0.0419432  | -0.997626 | 1         |
| XLOC_002765 | DPYSL4       | chr10:134000413-1340192  | 0.068121   | 0.0341412  | -0.996587 | 1         |
| XLOC_020843 | SSPO         | chr7:149473130-14953105  | 0.0221705  | 0.0111153  | -0.996096 | 1         |
| XLOC_014691 | RIMBP3       | chr22:20455993-20461786  | 0.0702264  | 0.0352301  | -0.995205 | 1         |
| XLOC_006936 | TC2N         | chr14:92246266-92333880  | 0.0180411  | 0.00907286 | -0.991657 | 1         |
| XLOC_000045 | SMIM1        | chr1:3689351-3692546     | 7.25288    | 3.65409    | -0.98904  | 0.116542  |
| XLOC_014115 | JAM2         | chr21:27011593-27089874  | 0.0641118  | 0.0323218  | -0.988082 | 1         |
| XLOC_018845 | TMEM217      | chr6:37179953-37300746   | 0.200942   | 0.10134    | -0.987577 | 1         |
| XLOC_005112 | OAS1         | chr12:113344738-1133577  | 0.0197893  | 0.00998344 | -0.987112 | 1         |
| XLOC_001341 | WNT4         | chr1:22443797-22469519   | 0.393161   | 0.198381   | -0.986849 | 0.19325   |
| XLOC_003881 | GRAMD1B      | chr11:123396527-1234935  | 0.0496226  | 0.0250522  | -0.986061 | 1         |
| XLOC_007177 | MAP1A        | chr15:43663312-43910998  | 0.103219   | 0.052182   | -0.984085 | 1         |
| XLOC_020465 | FLJ35390     | chr7:44068485-44083895   | 0.894791   | 0.452543   | -0.983495 | 0.489231  |
| XLOC_001710 | OVGP1        | chr1:111956936-11197039  | 1.10979    | 0.561487   | -0.982956 | 0.0908564 |
| XLOC_013191 | ACVR1C       | chr2:158383278-15848539  | 0.0138071  | 0.0069959  | -0.980833 | 1         |
| XLOC_002052 | RASAL2-AS1   | chr1:178060642-17844864  | 0.11083    | 0.0562611  | -0.978144 | 1         |
| XLOC_024075 | LOC286467    | chrX:130836677-13096467  | 0.981097   | 0.498413   | -0.977054 | 0.068174  |
| XLOC_007546 | STRC         | chr15:43663312-43910998  | 0.122388   | 0.062224   | -0.975923 | 1         |
| XLOC_013424 | TIGD1        | chr2:233412778-23341528  | 2.20096    | 1.11951    | -0.975267 | 0.0925999 |
| XLOC_010272 | CBX3P2       | chr18:2652168-2655394    | 0.517057   | 0.263097   | -0.974725 | 0.346589  |
| XLOC_008962 | SH3GL1P2     | chr17:28903482-28964484  | 0.115272   | 0.0587949  | -0.971281 | 1         |
| XLOC_011990 | VN1R1        | chr19:57966541-57968107  | 0.352145   | 0.179644   | -0.971026 | 0.393497  |
| XLOC_007372 | DNM1P41      | chr15:85045805-85060078  | 0.334706   | 0.170927   | -0.969508 | 1         |
| XLOC_010920 | ZNF233       | chr19:44764032-44779470  | 0.44684    | 0.229075   | -0.963938 | 0.132685  |
| XLOC_005562 | DPY19L2      | chr12:63952692-64062354  | 0.0112951  | 0.00580129 | -0.961251 | 1         |
| XLOC_012304 | PROM2        | chr2:95940200-95957055   | 0.260074   | 0.13386    | -0.9582   | 1         |
| XLOC_000883 | DNM3         | chr1:171810620-172381857 | 0.0212554  | 0.0109511  | -0.956757 | 1         |
| XLOC_002166 | C1orf74      | chr1:209929393-20995789  | 1.82875    | 0.943508   | -0.954751 | 0.0862993 |
| XLOC_011060 | MGC45922     | chr19:51320936-51322134  | 0.254232   | 0.131173   | -0.954677 | 1         |
| XLOC_008124 | MT1DP        | chr16:56677598-56678853  | 5.8556     | 3.02305    | -0.953811 | 0.272073  |
| XLOC_010971 | NAPA-AS1     | chr19:47987538-48018515  | 3.73123    | 1.92719    | -0.953155 | 0.945946  |
| XLOC_014424 | TMEM191A     | chr22:21055401-21058891  | 0.977502   | 0.505414   | -0.951636 | 0.229068  |
| XLOC_023769 | TMEM27       | chrX:15645440-15683154   | 0.351586   | 0.181977   | -0.950118 | 0.37325   |
| XLOC_000879 | FMO4         | chr1:171283485-17131122  | 0.507426   | 0.26282    | -0.949124 | 0.281159  |
| XLOC_014793 | APOL4        | chr22:36585175-36600879  | 0.0237149  | 0.012294   | -0.947837 | 1         |
| XLOC_011912 | ZNFE14       | chr19:52516576-52531680  | 0.185078   | 0.0959466  | -0.947829 | 1         |
| XLOC_017248 | LOC100289230 | chr5:98264837-98266713   | 0.484869   | 0.251747   | -0.945619 | 0.33121   |

|             |              |                         |           |           |           |           |
|-------------|--------------|-------------------------|-----------|-----------|-----------|-----------|
| XLOC_000006 | SAMD11       | chr1:861120-894679      | 1.7999    | 0.935982  | -0.943363 | 0.958814  |
| XLOC_008008 | AQP8         | chr16:25228284-25240253 | 0.131708  | 0.0685906 | -0.941264 | 1         |
| XLOC_001083 | LOC100130093 | chr1:227916239-22796893 | 0.747872  | 0.389574  | -0.940893 | 0.958814  |
| XLOC_017993 | ADAMTS2      | chr5:178537851-17877243 | 0.106835  | 0.0556526 | -0.94086  | 1         |
| XLOC_016621 | MFSD7        | chr4:671710-682973      | 0.308463  | 0.160717  | -0.940577 | 1         |
| XLOC_011805 | CCDC114      | chr19:48799708-48823332 | 0.133059  | 0.0694246 | -0.938543 | 1         |
| XLOC_004331 | EFEMP2       | chr11:65627871-65640405 | 2.45203   | 1.28222   | -0.935332 | 0.938194  |
| XLOC_015709 | LAMB2P1      | chr3:49190291-49191834  | 0.948583  | 0.496183  | -0.934902 | 0.209943  |
| XLOC_015379 | TRPC1        | chr3:142443265-14252672 | 0.151013  | 0.0790313 | -0.934173 | 1         |
| XLOC_015738 | CACNA2D2     | chr3:50400230-50540892  | 0.185806  | 0.0972846 | -0.933514 | 1         |
| XLOC_011652 | RINL         | chr19:39358471-39368919 | 1.12785   | 0.590715  | -0.933039 | 0.0909525 |
| XLOC_004407 | LIPT2        | chr11:74202922-74204755 | 2.48405   | 1.30105   | -0.933017 | 0.213813  |
| XLOC_021768 | BAI1         | chr8:143545376-14362636 | 0.61161   | 0.320439  | -0.932562 | 0.163378  |
| XLOC_017354 | IGIP         | chr5:139505520-13950839 | 1.04385   | 0.54732   | -0.931446 | 0.0658487 |
| XLOC_008865 | HS3ST3B1     | chr17:14204505-14249492 | 0.374496  | 0.196453  | -0.930762 | 0.929635  |
| XLOC_004304 | PYGM         | chr11:64513860-64528187 | 0.0882121 | 0.0462964 | -0.930075 | 1         |
| XLOC_011084 | ZNF880       | chr19:52873169-52889046 | 0.0287018 | 0.0150828 | -0.928235 | 1         |
| XLOC_007571 | ATPB84       | chr15:50150434-50411419 | 0.0318175 | 0.0167274 | -0.927607 | 1         |
| XLOC_008122 | MT1JP        | chr16:56669650-56670998 | 1.80782   | 0.950594  | -0.927346 | 0.585481  |
| XLOC_009287 | SMIM5        | chr17:73584138-73663269 | 0.0606741 | 0.0319041 | -0.927341 | 1         |
| XLOC_023892 | MTRNR2L10    | chrX:55207823-55208944  | 1.70722   | 0.898685  | -0.925762 | 0.140643  |
| XLOC_005306 | TAS2R20      | chr12:10998447-11328619 | 0.315444  | 0.166388  | -0.922828 | 1         |
| XLOC_014462 | LOC391322    | chr22:24373116-24374043 | 2.49607   | 1.31715   | -0.922234 | 0.368125  |
| XLOC_015951 | LOC339874    | chr3:130745693-13110031 | 0.214501  | 0.113341  | -0.920313 | 1         |
| XLOC_005405 | ENDOU        | chr12:48103517-48119355 | 0.0340104 | 0.0179856 | -0.919133 | 1         |
| XLOC_008463 | LOC100271836 | chr16:21458003-21513602 | 0.0737864 | 0.0390433 | -0.91828  | 1         |
| XLOC_011610 | NPHS1        | chr19:36316273-36342895 | 0.0756841 | 0.0400641 | -0.917681 | 1         |
| XLOC_016815 | RASGEF1B     | chr4:82348218-82393061  | 0.0801976 | 0.0424545 | -0.917643 | 1         |
| XLOC_003661 | CARNS1       | chr11:67183148-67193078 | 0.0691663 | 0.0366165 | -0.917576 | 1         |
| XLOC_004715 | A2M-AS1      | chr12:9217772-9268558   | 0.168246  | 0.0891037 | -0.917018 | 1         |
| XLOC_021550 | GPR124       | chr8:37654400-37707431  | 0.0926929 | 0.0491202 | -0.916141 | 1         |
| XLOC_006050 | PAN3-AS1     | chr13:28710979-28869475 | 0.816959  | 0.433109  | -0.915533 | 0.872554  |
| XLOC_015908 | ADCY5        | chr3:123001142-12316739 | 0.0255189 | 0.0135294 | -0.915463 | 1         |
| XLOC_004385 | ALG1L9P      | chr11:71498556-71524905 | 0.184429  | 0.09781   | -0.915012 | 1         |
| XLOC_002419 | ZNF487P      | chr10:43932573-43978007 | 0.430147  | 0.228389  | -0.913334 | 0.339144  |
| XLOC_002608 | CYP2C18      | chr10:96443250-96495947 | 0.020191  | 0.010731  | -0.91193  | 1         |
| XLOC_007766 | HAPLN3       | chr15:89420518-89438770 | 0.88509   | 0.47046   | -0.911751 | 0.355027  |
| XLOC_021085 | LOC441242    | chr7:65111923-65235797  | 0.0711573 | 0.0378494 | -0.910742 | 1         |
| XLOC_013662 | L3MBTL1      | chr20:42136319-42170535 | 0.241311  | 0.128389  | -0.910369 | 1         |
| XLOC_014303 | LOC100288432 | chr21:34637936-34638565 | 1.1708    | 0.623362  | -0.909354 | 0.585388  |
| XLOC_018787 | LOC100507547 | chr6:32120578-32145888  | 2.88041   | 1.53402   | -0.908952 | 0.873144  |
| XLOC_014589 | CSDC2        | chr22:41957013-41972670 | 0.0673315 | 0.035865  | -0.908705 | 1         |
| XLOC_023287 | PHKA2-AS1    | chrX:18908413-19002480  | 0.0853437 | 0.0454708 | -0.908343 | 1         |
| XLOC_011909 | ZNF649       | chr19:52392487-52408305 | 0.157216  | 0.0837907 | -0.907889 | 1         |
| XLOC_018647 | ADTRP        | chr6:11713887-11779280  | 0.344523  | 0.183707  | -0.90719  | 1         |
| XLOC_013796 | TCEA2        | chr20:62688438-62703700 | 0.0913379 | 0.0488092 | -0.904059 | 1         |
| XLOC_022283 | TYRP1        | chr9:12693385-12710266  | 0.0237801 | 0.0127121 | -0.90356  | 1         |
| XLOC_000483 | WDR63        | chr1:85527992-85598821  | 0.0612023 | 0.0328002 | -0.89988  | 1         |
| XLOC_002935 | AGAP7        | chr10:51464150-51486327 | 0.410728  | 0.220151  | -0.899686 | 0.284553  |
| XLOC_019142 | RAET1L       | chr6:150341265-15034666 | 0.072849  | 0.0390775 | -0.898572 | 1         |
| XLOC_010019 | LOC100294362 | chr17:78234659-78411884 | 0.0913462 | 0.0490749 | -0.896359 | 1         |
| XLOC_015937 | LOC653712    | chr3:128580350-12859038 | 0.176489  | 0.0949639 | -0.894123 | 1         |
| XLOC_021177 | LOC100506136 | chr7:96250968-96293650  | 0.0752025 | 0.0404869 | -0.893325 | 1         |
| XLOC_005088 | MYO1H        | chr12:109826523-1098861 | 0.01148   | 0.0061811 | -0.893185 | 1         |
| XLOC_002130 | REN          | chr1:204123943-20413546 | 0.0673247 | 0.0362533 | -0.893023 | 1         |
| XLOC_002856 | LINC00202-1  | chr10:27220134-27230930 | 0.13425   | 0.0723219 | -0.892424 | 1         |
| XLOC_021785 | MAPK15       | chr8:144798506-14480463 | 3.8866    | 2.09494   | -0.891599 | 0.074638  |
| XLOC_008802 | ALOX12       | chr17:6888441-6915653   | 0.0420301 | 0.0226666 | -0.890857 | 1         |
| XLOC_020515 | INTS4L2      | chr7:65111923-65235797  | 0.0646218 | 0.0348828 | -0.889504 | 1         |
| XLOC_002761 | CTAGE7P      | chr10:131862161-1319090 | 0.0575561 | 0.0311039 | -0.887875 | 1         |
| XLOC_020335 | GPFR         | chr7:1036622-1177893    | 0.165557  | 0.0895243 | -0.886973 | 1         |
| XLOC_014250 | LINC00515    | chr21:26955086-26955536 | 0.166813  | 0.0903064 | -0.885333 | 1         |
| XLOC_013918 | DUSP15       | chr20:30448869-30458479 | 0.305493  | 0.165654  | -0.882969 | 1         |
| XLOC_015718 | MST1         | chr3:49721379-49726196  | 2.0733    | 1.12451   | -0.882633 | 0.128214  |
| XLOC_003640 | CNIH2        | chr11:66045671-66051685 | 0.580625  | 0.315083  | -0.881875 | 0.506721  |
| XLOC_017895 | ARSI         | chr5:149675908-14968252 | 0.0529635 | 0.028748  | -0.881536 | 1         |
| XLOC_017482 | NEURL1B      | chr5:172068275-17211853 | 0.380458  | 0.20651   | -0.881266 | 0.181132  |
| XLOC_001001 | MFSD4        | chr1:205538111-20557204 | 0.0772525 | 0.0419356 | -0.881405 | 1         |
| XLOC_017661 | RNF138P1     | chr5:54603575-54830873  | 0.0369983 | 0.0201113 | -0.879452 | 1         |
| XLOC_015853 | LOC100302640 | chr3:106828636-10695948 | 0.173789  | 0.094545  | -0.87826  | 1         |
| XLOC_012188 | PRORSD1P     | chr2:55509454-55511607  | 0.705657  | 0.383895  | -0.878253 | 0.192415  |
| XLOC_023162 | DKFZP434A062 | chr9:139216997-13922177 | 0.0214455 | 0.0116678 | -0.878136 | 1         |
| XLOC_021238 | FBXL13       | chr7:102453307-10271528 | 0.112986  | 0.0614724 | -0.87813  | 1         |
| XLOC_018376 | RIMS1        | chr6:72596405-73112845  | 1.134519  | 0.0732512 | -0.876883 | 1         |
| XLOC_005256 | C1R          | chr12:7187514-7245043   | 0.694585  | 0.378264  | -0.876761 | 0.248226  |
| XLOC_021742 | ZNF572       | chr8:125985538-12599163 | 1.4559    | 0.793241  | -0.876083 | 0.0547855 |
| XLOC_008722 | SNAI3        | chr16:88729780-88753594 | 2.87773   | 1.5711    | -0.873154 | 0.272094  |
| XLOC_021098 | STAG3L3      | chr7:72467988-72476448  | 0.33932   | 0.185531  | -0.870984 | 1         |
| XLOC_022677 | C8G          | chr9:139839697-13984142 | 0.300643  | 0.164843  | -0.866961 | 1         |

|             |              |                         |            |            |           |           |
|-------------|--------------|-------------------------|------------|------------|-----------|-----------|
| XLOC_006436 | ACOT4        | chr14:74058409-74062470 | 0.0729194  | 0.0399975  | -0.866392 | 1         |
| XLOC_023784 | MAP7D2       | chrX:20024830-20135114  | 0.044725   | 0.0245469  | -0.865541 | 1         |
| XLOC_021283 | FEZF1        | chr7:121941447-12195013 | 0.308748   | 0.169497   | -0.865173 | 1         |
| XLOC_013966 | SNORA71A     | chr20:37049238-37064018 | 8.23686    | 4.52398    | -0.864502 | 0.958814  |
| XLOC_023935 | FAM226A      | chrX:72161567-72163589  | 0.630459   | 0.34638    | -0.864045 | 0.305621  |
| XLOC_020799 | MTRNR2L6     | chr7:142374130-14237552 | 0.953948   | 0.524368   | -0.863329 | 0.207314  |
| XLOC_013529 | SLX4IP       | chr20:10415950-10604027 | 0.313808   | 0.172498   | -0.863305 | 1         |
| XLOC_013630 | CNBD2        | chr20:34556528-34618622 | 0.124468   | 0.0684331  | -0.86301  | 1         |
| XLOC_002516 | DNAJC9-AS1   | chr10:75007124-75118617 | 0.0338768  | 0.0186272  | -0.862887 | 1         |
| XLOC_021275 | ST7-AS1      | chr7:116592500-11687007 | 5.72095    | 3.14568    | -0.862884 | 0.61004   |
| XLOC_010518 | CAPS         | chr19:5914192-5978320   | 2.32425    | 1.27914    | -0.861594 | 0.898214  |
| XLOC_009957 | GRIN2C       | chr17:72838167-72856007 | 0.214979   | 0.118313   | -0.861593 | 1         |
| XLOC_014056 | SYCP2        | chr20:58438617-58507209 | 0.0467412  | 0.0257549  | -0.859845 | 1         |
| XLOC_006884 | HEATR4       | chr14:73945188-74025651 | 0.036763   | 0.0202887  | -0.857581 | 1         |
| XLOC_022911 | GAS1         | chr9:89559276-89562104  | 0.759258   | 0.419281   | -0.856672 | 0.297857  |
| XLOC_001854 | S100A4       | chr1:153516094-15351828 | 0.896185   | 0.49517    | -0.855873 | 0.591558  |
| XLOC_022491 | LOC286367    | chr9:107536632-10754004 | 0.627027   | 0.346731   | -0.854712 | 0.159417  |
| XLOC_012685 | DAW1         | chr2:228736326-22878902 | 0.0748939  | 0.0414386  | -0.853874 | 1         |
| XLOC_007819 | LOC100134368 | chr16:432240-442960     | 0.34527    | 0.191168   | -0.852882 | 1         |
| XLOC_008262 | ATP2C2       | chr16:84402132-84497793 | 0.0481389  | 0.0266713  | -0.851916 | 1         |
| XLOC_010880 | TMEM91       | chr19:41860321-41889987 | 7.05542    | 3.91462    | -0.849859 | 0.409651  |
| XLOC_005392 | NELL2        | chr12:44902057-45307711 | 0.0137786  | 0.0076488  | -0.849125 | 1         |
| XLOC_022118 | FBXO43       | chr8:101145587-10115809 | 0.132047   | 0.0733479  | -0.848223 | 1         |
| XLOC_006137 | LINC00282    | chr13:52387482-52419286 | 0.0305247  | 0.0169673  | -0.847219 | 1         |
| XLOC_007707 | TYRO3P       | chr15:76508628-76603810 | 0.0771324  | 0.0428828  | -0.846939 | 1         |
| XLOC_004681 | GPR162       | chr12:6930962-6936583   | 5.60028    | 3.11796    | -0.844898 | 0.0566185 |
| XLOC_011813 | NTN5         | chr19:49141271-49185502 | 0.666347   | 0.371227   | -0.843972 | 0.855053  |
| XLOC_012414 | LOC254128    | chr2:122407229-12249450 | 1.71029    | 0.953458   | -0.843002 | 0.92969   |
| XLOC_001367 | LOC646471    | chr1:26146396-26159433  | 0.308396   | 0.172045   | -0.841995 | 1         |
| XLOC_016494 | SPRY1        | chr4:124317949-12432491 | 2.2111     | 1.23384    | -0.841607 | 0.0637115 |
| XLOC_000359 | LOC400752    | chr1:45769581-45771291  | 0.884453   | 0.493641   | -0.841322 | 0.315472  |
| XLOC_010472 | ZNF554       | chr19:2819871-2836733   | 1.38096    | 0.771616   | -0.839716 | 0.074638  |
| XLOC_002963 | ATOH7        | chr10:69990351-69991870 | 0.215943   | 0.120701   | -0.839216 | 1         |
| XLOC_002594 | MARK2P9      | chr10:94178417-94179363 | 0.0574276  | 0.0321015  | -0.839103 | 1         |
| XLOC_023739 | LINC00102    | chrX:2527305-2575270    | 0.0352058  | 0.0196906  | -0.838301 | 1         |
| XLOC_017384 | PCDH18       | chr5:140613937-14061710 | 0.0391528  | 0.0219031  | -0.837981 | 1         |
| XLOC_009700 | KRTAP4-8     | chr17:39253233-39254375 | 0.435031   | 0.243388   | -0.837863 | 0.650127  |
| XLOC_000442 | PDE4B        | chr1:66258192-66840262  | 1.27085    | 0.711055   | -0.837761 | 0.0640789 |
| XLOC_005479 | KRT79        | chr12:53215230-53228077 | 0.375658   | 0.2104     | -0.836287 | 0.458935  |
| XLOC_014906 | DENND6B      | chr22:50750391-50765489 | 3.13873    | 1.75887    | -0.835536 | 0.102638  |
| XLOC_012540 | TTN-AS1      | chr2:179059207-17967215 | 0.207669   | 0.116386   | -0.835368 | 1         |
| XLOC_005495 | HOHAIR       | chr12:54356091-54370203 | 0.581972   | 0.326212   | -0.835139 | 0.730282  |
| XLOC_016405 | BMP3         | chr4:81952118-81978685  | 0.0697427  | 0.0391276  | -0.833854 | 1         |
| XLOC_007898 | LINC00514    | chr16:3039054-3044510   | 0.30729    | 0.172419   | -0.833684 | 1         |
| XLOC_023939 | MAP2K4P1     | chrX:72744110-72782921  | 0.0174237  | 0.00977856 | -0.833355 | 1         |
| XLOC_004706 | CLEC4A       | chr12:8276227-8291203   | 0.658216   | 0.369734   | -0.832073 | 0.369034  |
| XLOC_009843 | COL1A1       | chr17:48261456-48279000 | 0.109894   | 0.0617957  | -0.830528 | 1         |
| XLOC_002182 | USH2A        | chr1:215796235-21659673 | 0.00217029 | 0.00122056 | -0.830339 | 1         |
| XLOC_012865 | LOC100288911 | chr2:36581891-36582713  | 11.1425    | 6.2711     | -0.829279 | 0.089488  |
| XLOC_023754 | GPR143       | chrX:9693452-9734005    | 0.0418261  | 0.0235584  | -0.828163 | 1         |
| XLOC_002927 | VSTM4        | chr10:50222332-50323559 | 0.00749106 | 0.00422192 | -0.827272 | 1         |
| XLOC_023755 | MID1         | chrX:10413349-10851809  | 0.0531878  | 0.0299871  | -0.826755 | 1         |
| XLOC_012761 | LOC728323    | chr2:243030843-24310246 | 0.301675   | 0.170137   | -0.826299 | 1         |
| XLOC_010184 | LOC284260    | chr18:39766632-40271389 | 0.0763242  | 0.0430742  | -0.825315 | 1         |
| XLOC_001745 | TBX15        | chr1:119425665-11953217 | 0.0141214  | 0.00797725 | -0.823923 | 1         |
| XLOC_002857 | ANKRD26      | chr10:27293044-27389427 | 0.253898   | 0.143506   | -0.823135 | 1         |
| XLOC_011361 | C3           | chr19:6677845-6720662   | 0.0229754  | 0.012988   | -0.822905 | 1         |
| XLOC_011557 | LINC00663    | chr19:19867180-19887222 | 1.76464    | 0.998954   | -0.820887 | 0.113208  |
| XLOC_008439 | XYLT1        | chr16:17196180-17564738 | 0.00599211 | 0.00339239 | -0.820759 | 1         |
| XLOC_003126 | COL17A1      | chr10:105791045-1058456 | 0.0100261  | 0.00569539 | -0.815901 | 1         |
| XLOC_001969 | ARHGAP30     | chr1:161016731-16103976 | 0.0545208  | 0.0309856  | -0.815209 | 1         |
| XLOC_020698 | LRRN3        | chr7:110303105-11120257 | 0.0114794  | 0.0065244  | -0.81513  | 1         |
| XLOC_018403 | C6orf164     | chr6:88106841-88109459  | 0.133276   | 0.0758063  | -0.814027 | 1         |
| XLOC_007402 | ZNF774       | chr15:90895476-90904715 | 0.51362    | 0.292271   | -0.813396 | 0.369887  |
| XLOC_010473 | ZNF555       | chr19:2841432-2860472   | 0.507003   | 0.288538   | -0.813234 | 0.0755921 |
| XLOC_015723 | UBA7         | chr3:49842637-49851391  | 0.213594   | 0.121594   | -0.812797 | 1         |
| XLOC_018259 | ARMC12       | chr6:35704858-35716685  | 0.35863    | 0.204276   | -0.811981 | 0.651258  |
| XLOC_020794 | TASC2R4      | chr7:141478288-14147918 | 0.0670828  | 0.038222   | -0.81154  | 1         |
| XLOC_013755 | CDH4         | chr20:59827481-60515673 | 0.0499394  | 0.0284734  | -0.810565 | 1         |
| XLOC_014845 | DNAJB7       | chr22:41253084-41328823 | 0.240613   | 0.137464   | -0.80766  | 1         |
| XLOC_002845 | SKIDA1       | chr10:21802408-21814611 | 0.196715   | 0.112414   | -0.807283 | 1         |
| XLOC_001978 | C1orf192     | chr1:161284165-16133767 | 0.0803187  | 0.0459215  | -0.806566 | 1         |
| XLOC_018188 | HCG27        | chr6:31165536-31171745  | 0.396466   | 0.227148   | -0.803563 | 0.52114   |
| XLOC_015237 | ZPLD1        | chr3:102153858-10219868 | 0.0174108  | 0.00998687 | -0.801875 | 1         |
| XLOC_008640 | SMPD3        | chr16:68392229-68482409 | 0.403234   | 0.231349   | -0.801543 | 0.307167  |
| XLOC_009485 | RNF222       | chr17:8294022-8301144   | 0.0211931  | 0.0121662  | -0.800714 | 1         |
| XLOC_002780 | CYP2E1       | chr10:135340866-1353526 | 2.11508    | 1.21464    | -0.800189 | 0.147496  |
| XLOC_011626 | ZNF461       | chr19:37128282-37157739 | 0.494647   | 0.284196   | -0.799513 | 0.240188  |
| XLOC_008497 | LOC440354    | chr16:29538928-29577540 | 0.333035   | 0.191474   | -0.79852  | 1         |

|             |              |                          |            |            |           |           |
|-------------|--------------|--------------------------|------------|------------|-----------|-----------|
| XLOC_014355 | HSF2BP       | chr21:44949071-45079374  | 1.23818    | 0.712318   | -0.797628 | 0.211887  |
| XLOC_019170 | LPAL2        | chr6:160887586-160932156 | 0.287044   | 0.165136   | -0.797617 | 1         |
| XLOC_022842 | LOC100289137 | chr9:38540563-38545369   | 2.89131    | 1.66356    | -0.797448 | 0.0608269 |
| XLOC_005631 | TMCC3        | chr12:94960899-95044324  | 0.00762466 | 0.00438915 | -0.79673  | 1         |
| XLOC_009181 | HLF          | chr17:53342320-53402426  | 0.0668714  | 0.0385384  | -0.795093 | 1         |
| XLOC_012712 | C2orf82      | chr2:233734993-233741101 | 5.75556    | 3.31845    | -0.794447 | 0.407645  |
| XLOC_008751 | SERPINF2     | chr17:1646129-1658559    | 0.161054   | 0.0929807  | -0.792541 | 1         |
| XLOC_011984 | ZNF582       | chr19:56894647-56904889  | 0.0343692  | 0.0198461  | -0.79226  | 1         |
| XLOC_013014 | LOC100630918 | chr2:85764589-85766009   | 2.12052    | 1.22473    | -0.791951 | 0.23541   |
| XLOC_005323 | GPRC5D       | chr12:13093708-13103318  | 0.532052   | 0.307326   | -0.791795 | 0.6189    |
| XLOC_023537 | MORF4L2-AS1  | chrX:102930425-10294748  | 0.156433   | 0.0904227  | -0.790784 | 1         |
| XLOC_001152 | TRIM58       | chr1:248020500-24804343  | 0.0309355  | 0.0178842  | -0.790577 | 1         |
| XLOC_008298 | DPEP1        | chr16:89679715-89704839  | 0.425947   | 0.24632    | -0.790141 | 0.52259   |
| XLOC_007171 | STARD9       | chr15:42867856-43013196  | 0.455388   | 0.263523   | -0.789171 | 0.0576801 |
| XLOC_007332 | AGPHD1       | chr15:78799905-78829715  | 3.49468    | 2.02259    | -0.788954 | 0.183901  |
| XLOC_015910 | MYLK         | chr3:123304402-12360314  | 0.0175888  | 0.0101799  | -0.788934 | 1         |
| XLOC_010862 | ZNF546       | chr19:40502942-40523514  | 0.308886   | 0.17879    | -0.788809 | 1         |
| XLOC_021804 | GPT          | chr8:145729464-14573255  | 0.365783   | 0.211832   | -0.788068 | 0.654699  |
| XLOC_015155 | SPATA12      | chr3:56761445-57113336   | 0.0998408  | 0.0578653  | -0.786931 | 1         |
| XLOC_021070 | SEPT14       | chr7:55861236-55930482   | 0.010958   | 0.00635243 | -0.786601 | 1         |
| XLOC_000683 | ANXA9        | chr1:150954498-15096811  | 0.473833   | 0.274716   | -0.786438 | 0.44885   |
| XLOC_009014 | TBC1D3       | chr17:36283959-36295098  | 0.250294   | 0.145121   | -0.786363 | 1         |
| XLOC_018052 | SYCP2L       | chr6:10887063-10974541   | 0.150795   | 0.0874615  | -0.785868 | 1         |
| XLOC_003352 | MRGPRX3      | chr11:18142501-18160027  | 0.163119   | 0.0946339  | -0.785494 | 1         |
| XLOC_015013 | C3orf35      | chr3:37440967-37476988   | 0.260347   | 0.151049   | -0.785422 | 1         |
| XLOC_011018 | CCDC155      | chr19:49891474-49921256  | 0.0268707  | 0.0155989  | -0.784588 | 1         |
| XLOC_021389 | ZNF467       | chr7:149461452-14947029  | 1.62399    | 0.943046   | -0.784143 | 0.322381  |
| XLOC_007125 | PGBD4        | chr15:34394273-34396591  | 0.593546   | 0.344745   | -0.78383  | 0.314308  |
| XLOC_017850 | TMEM173      | chr5:138855112-13886234  | 0.0604479  | 0.0351317  | -0.782918 | 1         |
| XLOC_003318 | SNORA3       | chr11:8703994-87111419   | 7.50626    | 4.36506    | -0.782091 | 0.960698  |
| XLOC_007813 | HBA2         | chr16:222845-223709      | 0.701856   | 0.408287   | -0.781592 | 0.791105  |
| XLOC_023889 | PFKFB1       | chrX:54959566-55024967   | 0.14554    | 0.0846872  | -0.781201 | 1         |
| XLOC_019141 | RAET1K       | chr6:150319154-15032628  | 2.14772    | 1.25237    | -0.778147 | 0.11933   |
| XLOC_013107 | RGPD8        | chr2:113125945-11319122  | 0.0724226  | 0.0422346  | -0.778015 | 1         |
| XLOC_004553 | TMPRSS13     | chr11:117771355-1178001  | 0.0089768  | 0.00523706 | -0.777444 | 1         |
| XLOC_016166 | IDUA         | chr4:972862-998317       | 4.09883    | 2.39189    | -0.777063 | 0.184116  |
| XLOC_000450 | GNG12-AS1    | chr1:68167148-68698284   | 0.062788   | 0.0366611  | -0.776237 | 1         |
| XLOC_012339 | IL1R1        | chr2:102770401-10279633  | 0.0127045  | 0.00742    | -0.775846 | 1         |
| XLOC_018320 | LOC100132354 | chr6:43858764-43905944   | 0.0244521  | 0.0142835  | -0.775605 | 1         |
| XLOC_018238 | HCG25        | chr6:33217312-33239662   | 0.328991   | 0.192332   | -0.774448 | 1         |
| XLOC_016251 | TAPT1-AS1    | chr4:16228285-16259810   | 0.296045   | 0.173146   | -0.773826 | 1         |
| XLOC_023520 | ARMCX1       | chrX:100805513-10080967  | 0.0867914  | 0.0507743  | -0.773454 | 1         |
| XLOC_005028 | LOC144486    | chr12:94853778-94856344  | 0.188136   | 0.110064   | -0.773435 | 1         |
| XLOC_004212 | SLC43A3      | chr11:57174426-57195053  | 0.227959   | 0.133418   | -0.772819 | 1         |
| XLOC_000848 | PBX1         | chr1:164528596-16482106  | 0.28471    | 0.166639   | -0.772766 | 1         |
| XLOC_011089 | ZNF701       | chr19:53073525-53090427  | 0.169892   | 0.0995512  | -0.771109 | 1         |
| XLOC_000838 | NOS1AP       | chr1:162039580-16233981  | 0.333509   | 0.19556    | -0.770116 | 1         |
| XLOC_006682 | RPPH1        | chr14:20811229-20811570  | 48.9104    | 28.7177    | -0.768204 | 0.0780546 |
| XLOC_007839 | MSLN         | chr16:810764-818865      | 0.0446203  | 0.026205   | -0.767857 | 1         |
| XLOC_004445 | SYTL2        | chr11:85405264-85522178  | 0.83422    | 0.489942   | -0.767816 | 0.186401  |
| XLOC_004095 | USH1C        | chr11:17515441-17565963  | 0.0925351  | 0.0543742  | -0.767079 | 1         |
| XLOC_006797 | C14orf182    | chr14:50448429-50474238  | 0.0450196  | 0.0264539  | -0.767071 | 1         |
| XLOC_014613 | PARVG        | chr22:44568835-44603035  | 0.139961   | 0.0822783  | -0.766445 | 1         |
| XLOC_023527 | BHLHB9       | chrX:101975641-10200736  | 0.187053   | 0.109972   | -0.76631  | 1         |
| XLOC_010889 | CD79A        | chr19:42381189-42385439  | 1.06048    | 0.623725   | -0.765733 | 0.414075  |
| XLOC_018860 | UNC5CL       | chr6:40994639-41006938   | 0.672897   | 0.395989   | -0.764924 | 0.305208  |
| XLOC_009874 | SEPT4        | chr17:56597610-56618179  | 0.476832   | 0.280694   | -0.764482 | 0.380852  |
| XLOC_009654 | C17orf98     | chr17:36991340-36997642  | 0.274354   | 0.161703   | -0.762691 | 1         |
| XLOC_013110 | IL1A         | chr2:113531491-11354297  | 0.035334   | 0.0208412  | -0.761619 | 1         |
| XLOC_022640 | ADAMTS13     | chr9:136243283-13632450  | 4.01456    | 2.3682     | -0.761453 | 0.85843   |
| XLOC_016838 | HSD17B13     | chr4:88224940-88244056   | 0.0979301  | 0.057775   | -0.761305 | 1         |
| XLOC_005484 | CSAD         | chr12:53551446-53584654  | 2.26866    | 1.33855    | -0.761174 | 0.761735  |
| XLOC_014354 | LINC00313    | chr21:44881973-44898103  | 0.137288   | 0.0810374  | -0.760546 | 1         |
| XLOC_000982 | PPFIA4       | chr1:203020310-20304786  | 0.10727    | 0.063336   | -0.760153 | 1         |
| XLOC_005546 | DDIT3        | chr12:57881735-57914300  | 122.472    | 72.3132    | -0.760122 | 0.290073  |
| XLOC_016660 | FLJ36777     | chr4:7099150-7105103     | 0.0202702  | 0.0119736  | -0.759506 | 1         |
| XLOC_011823 | LHB          | chr19:49519236-49520347  | 1.6632     | 0.982796   | -0.758996 | 0.667938  |
| XLOC_006336 | C14orf28     | chr14:4536506-45376460   | 1.47287    | 0.870371   | -0.758924 | 0.128341  |
| XLOC_017868 | PCDH12       | chr5:141324529-14133862  | 0.0204898  | 0.0121173  | -0.757843 | 1         |
| XLOC_011521 | PLVAP        | chr19:17462263-17488137  | 0.0292392  | 0.0172956  | -0.757498 | 1         |
| XLOC_001509 | PTCH2        | chr1:45285515-45308616   | 0.313471   | 0.185576   | -0.756324 | 1         |
| XLOC_016157 | ANKRD18DP    | chr3:197784403-19780754  | 0.12188    | 0.072204   | -0.755309 | 1         |
| XLOC_018537 | STX11        | chr6:144471653-14451307  | 0.271018   | 0.160645   | -0.754508 | 1         |
| XLOC_010832 | CATSPERG     | chr19:38826442-38861589  | 0.192539   | 0.114192   | -0.753684 | 1         |
| XLOC_005849 | STARD13-AS   | chr13:33677271-34250932  | 0.0828734  | 0.0491681  | -0.753186 | 1         |
| XLOC_007262 | SMAD6        | chr15:66994673-67074337  | 1.08378    | 0.643606   | -0.751824 | 0.481568  |
| XLOC_022639 | C9orf96      | chr9:136243283-13632450  | 0.147552   | 0.0876293  | -0.751736 | 1         |
| XLOC_016466 | LRI1T3       | chr4:110769357-11079347  | 0.103186   | 0.0613131  | -0.750979 | 1         |
| XLOC_017803 | GDF9         | chr5:132196877-13220047  | 0.117622   | 0.069955   | -0.749663 | 1         |

|              |                           |                          |           |            |           |           |
|--------------|---------------------------|--------------------------|-----------|------------|-----------|-----------|
| XLOC_022772  | EQTN                      | chr9:27284653-27297137   | 0.0620704 | 0.0369261  | -0.749265 | 1         |
| XLOC_003227  | DRD4                      | chr11:637304-640705      | 2.13481   | 1.27186    | -0.747162 | 0.506591  |
| XLOC_009668  | GSDMB                     | chr17:38060847-38074903  | 2.08271   | 1.24115    | -0.746779 | 0.188519  |
| XLOC_004526  | CRYAB                     | chr11:111779349-11178247 | 0.238816  | 0.142418   | -0.745771 | 1         |
| XLOC_005535  | SDRC97                    | chr12:57316937-57328189  | 0.0301311 | 0.0179748  | -0.745278 | 1         |
| XLOC_006512  | DICER1-AS1                | chr14:95624024-95646270  | 3.40076   | 2.02996    | -0.744411 | 0.277248  |
| XLOC_018710  | ZKSCAN4                   | chr6:28212489-28220002   | 1.81903   | 1.08613    | -0.743976 | 0.147496  |
| XLOC_018018  | TRIM52                    | chr5:180683385-180688115 | 1.95638   | 1.1683     | -0.743781 | 0.119771  |
| XLOC_001185  | FAM41C                    | chr1:803450-812182       | 0.54673   | 0.326635   | -0.743149 | 0.474273  |
| XLOC_010826  | ZNF540                    | chr19:38039850-38105079  | 0.205854  | 0.123021   | -0.74272  | 1         |
| XLOC_013781  | COL20A1                   | chr20:61924537-61962285  | 0.0192264 | 0.0115038  | -0.740977 | 1         |
| XLOC_013300  | FONG                      | chr2:200625258-200715895 | 1.3248    | 0.793049   | -0.740296 | 0.503305  |
| XLOC_017261  | STAR4-AS1                 | chr5:110834021-111353003 | 0.0149951 | 0.00898332 | -0.73917  | 1         |
| XLOC_011867  | NAPSA                     | chr19:50861733-50868931  | 0.0971325 | 0.0582092  | -0.738707 | 1         |
| XLOC_021775  | GPIHBP1                   | chr8:144295067-144299044 | 0.0868418 | 0.0520612  | -0.738181 | 1         |
| XLOC_012156  | LOC100129726              | chr2:43454349-43455994   | 0.0379265 | 0.022737   | -0.738165 | 1         |
| XLOC_000620  | FAM46C                    | chr1:118148603-118171017 | 0.355871  | 0.213354   | -0.738106 | 0.289884  |
| XLOC_013058  | ANKRD36B                  | chr2:98121260-98206428   | 0.394221  | 0.236432   | -0.737558 | 0.206979  |
| XLOC_011532  | KIAA1683                  | chr19:18367905-18385319  | 0.0344094 | 0.0206417  | -0.737242 | 1         |
| XLOC_007685  | SEMA7A                    | chr15:74701629-74726299  | 0.309077  | 0.185469   | -0.736784 | 1         |
| XLOC_007849  | BAlAP3                    | chr16:1383605-1401873    | 2.06389   | 1.23949    | -0.735618 | 0.827004  |
| XLOC_019095  | ALDH8A1                   | chr6:135238527-135271260 | 0.137105  | 0.0823627  | -0.735221 | 1         |
| XLOC_023275  | CA5B                      | chrX:15756411-15805748   | 0.909138  | 0.546563   | -0.734111 | 0.237032  |
| XLOC_008006  | LOC554206                 | chr16:25043061-25044098  | 0.896319  | 0.539118   | -0.733411 | 0.527104  |
| XLOC_012378  | ZC3H6                     | chr2:113033177-113097640 | 0.159699  | 0.0960739  | -0.73314  | 1         |
| XLOC_011615  | CLIP3                     | chr19:36505561-36523797  | 0.368528  | 0.221762   | -0.732763 | 0.407645  |
| XLOC_011996  | ZNF552                    | chr19:58318449-58326281  | 1.77731   | 1.07108    | -0.730633 | 0.134521  |
| XLOC_014154  | KCNE2                     | chr21:35736322-35743440  | 0.295876  | 0.178441   | -0.729546 | 1         |
| XLOC_018972  | FAM46A                    | chr6:82455446-82464248   | 0.562347  | 0.339226   | -0.729211 | 0.200886  |
| XLOC_021384  | ZNF786                    | chr7:148766732-148787865 | 3.28823   | 1.98434    | -0.72865  | 0.0732879 |
| XLOC_007510  | PLCB2                     | chr15:40580097-40600174  | 0.229479  | 0.138552   | -0.72793  | 1         |
| XLOC_012046  | KLF11                     | chr2:10183681-10194963   | 2.2357    | 1.35006    | -0.727704 | 0.064193  |
| XLOC_021656  | CA3                       | chr8:86351055-86361267   | 0.657516  | 0.397358   | -0.726587 | 0.422156  |
| XLOC_018908  | PTCHD4                    | chr6:47845763-48036425   | 0.139903  | 0.0845818  | -0.726005 | 1         |
| XLOC_010540  | C19orf59                  | chr19:7741942-7744719    | 0.0362469 | 0.0219192  | -0.725662 | 1         |
| XLOC_011940  | TMC4                      | chr19:54663833-54676944  | 0.576522  | 0.348636   | -0.725656 | 0.508132  |
| XLOC_017173  | LOC441081                 | chr5:69776869-69881549   | 0.233518  | 0.141265   | -0.725128 | 1         |
| XLOC_009797  | ARL17A,ARL17B             | chr17:44372496-44439163  | 0.267201  | 0.161772   | -0.723968 | 1         |
| XLOC_015944  | EFCAB12                   | chr3:129120163-129147494 | 0.108557  | 0.0657302  | -0.723819 | 1         |
| XLOC_015291  | CSTA                      | chr3:122044010-122060815 | 0.587907  | 0.356104   | -0.723288 | 0.641082  |
| XLOC_000241  | MATN1-AS1                 | chr1:31184123-31199593   | 1.33601   | 0.81014    | -0.721689 | 0.355027  |
| XLOC_018826  | SPDEF                     | chr6:34505578-34524110   | 0.0447119 | 0.0271156  | -0.721537 | 1         |
| XLOC_013398  | IRS1                      | chr2:227596032-227663500 | 0.63798   | 0.386923   | -0.721464 | 0.13292   |
| XLOC_021385  | ZNF425                    | chr7:148799877-148823430 | 0.608276  | 0.369016   | -0.721045 | 0.333586  |
| XLOC_015094  | FBXW12                    | chr3:48413708-48436190   | 0.0767724 | 0.0466021  | -0.720193 | 1         |
| XLOC_002638  | ABCC2                     | chr10:101542462-10161166 | 0.151863  | 0.0922019  | -0.719905 | 1         |
| XLOC_014337  | PLAC4                     | chr21:42539727-42648524  | 0.0871421 | 0.0529286  | -0.719321 | 1         |
| XLOC_018398  | NT5E                      | chr6:86159301-86205509   | 1.07374   | 0.652612   | -0.718351 | 0.163378  |
| XLOC_004770  | C12orf39                  | chr12:21679255-21684210  | 0.119504  | 0.0726438  | -0.718146 | 1         |
| XLOC_019198  | WDR27                     | chr6:169857302-170102155 | 1.49207   | 0.907026   | -0.7181   | 0.17761   |
| XLOC_020680  | LRRC17                    | chr7:102453307-102715288 | 0.0668105 | 0.040627   | -0.717637 | 1         |
| XLOC_010606  | ZNF763                    | chr19:12075868-12091198  | 0.788641  | 0.479695   | -0.717251 | 0.23541   |
| XLOC_0007834 | RHBDL1                    | chr16:726074-728267      | 2.29943   | 1.39992    | -0.715928 | 0.319972  |
| XLOC_000783  | NTRK1                     | chr1:156776034-156851642 | 0.0614846 | 0.0374628  | -0.714768 | 1         |
| XLOC_000765  | MSTO2P                    | chr1:155715558-155826972 | 0.291454  | 0.177651   | -0.71422  | 1         |
| XLOC_005307  | TAS2R19                   | chr12:10998447-11328619  | 0.0839648 | 0.0511841  | -0.714088 | 1         |
| XLOC_011083  | ZNF610                    | chr19:52839497-52870376  | 0.0413178 | 0.0251972  | -0.713499 | 1         |
| XLOC_008169  | FBXL8,HSF4                | chr16:67193890-67203848  | 11.0284   | 6.73287    | -0.711926 | 0.117923  |
| XLOC_022490  | NIPSNAP3B                 | chr9:107526450-107536297 | 0.52155   | 0.318646   | -0.71085  | 0.48098   |
| XLOC_007507  | BMF                       | chr15:40380090-40401085  | 0.448628  | 0.274139   | -0.710612 | 0.296574  |
| XLOC_015365  | C3orf72                   | chr3:138666075-138672830 | 0.0128131 | 0.0078304  | -0.710459 | 1         |
| XLOC_010151  | CABYR                     | chr18:21718954-21741564  | 0.685833  | 0.419334   | -0.709755 | 0.463307  |
| XLOC_003096  | SEC31B                    | chr10:102246402-10227955 | 0.573996  | 0.35096    | -0.709734 | 0.264637  |
| XLOC_000157  | LOC100506801              | chr1:21543739-21672034   | 0.0930108 | 0.0569263  | -0.708304 | 1         |
| XLOC_000603  | AP4B1-AS1                 | chr1:114356432-114447747 | 0.0263542 | 0.0161307  | -0.708219 | 1         |
| XLOC_008810  | ACAP1                     | chr17:7239847-7254793    | 0.734719  | 0.44971    | -0.708198 | 0.381075  |
| XLOC_010517  | VMAC                      | chr19:5904851-5910263    | 1.24781   | 0.764314   | -0.707158 | 0.398607  |
| XLOC_017387  | PCDHGA1,PCDHGA10,PCDHGA11 | chr5:140710251-140892548 | 7.60588   | 4.66157    | -0.7063   | 0.0885273 |
| XLOC_005135  | PXN-AS1                   | chr12:120639093-12070357 | 2.91921   | 1.79018    | -0.705471 | 0.967901  |
| XLOC_021922  | PNMA2                     | chr8:26362195-26371483   | 0.0142082 | 0.0087145  | -0.705233 | 1         |
| XLOC_022878  | KLF9                      | chr9:72999512-73029573   | 1.73582   | 1.06476    | -0.70508  | 0.0938606 |
| XLOC_008482  | IL21R-AS1                 | chr16:27413482-27464714  | 0.0692484 | 0.0424865  | -0.704775 | 1         |
| XLOC_008062  | CTF1                      | chr16:30907927-30914881  | 0.547849  | 0.336213   | -0.704406 | 0.690353  |
| XLOC_022619  | PPAPDC3                   | chr9:134165080-134184645 | 0.341788  | 0.209962   | -0.702972 | 1         |
| XLOC_018131  | HIST1H4J                  | chr6:27791902-27792258   | 1.15115   | 0.707267   | -0.702746 | 0.852947  |
| XLOC_014208  | C21orf90                  | chr21:45917774-46131495  | 1.08481   | 0.666754   | -0.702208 | 0.525686  |
| XLOC_0003839 | BACE1-AS                  | chr11:117103403-11718697 | 0.88715   | 0.545354   | -0.701983 | 0.970053  |
| XLOC_000035  | PLCH2                     | chr1:2407753-2436964     | 0.072149  | 0.0443705  | -0.701377 | 1         |
| XLOC_022761  | IFNE                      | chr9:21454266-21559697   | 0.0814673 | 0.0501076  | -0.701193 | 1         |

|             |                         |                         |           |            |           |           |
|-------------|-------------------------|-------------------------|-----------|------------|-----------|-----------|
| XLOC_003036 | ACTA2                   | chr10:90694830-90775542 | 3.10413   | 1.91007    | -0.700562 | 0.614583  |
| XLOC_000571 | GSTM2                   | chr1:110210643-11022661 | 0.169107  | 0.104142   | -0.699387 | 1         |
| XLOC_005982 | LINC00460               | chr13:107028910-1070301 | 0.741595  | 0.456726   | -0.699303 | 0.602912  |
| XLOC_014625 | MIR4763,MIRLET7A3,MIRL1 | chr22:46481876-46509808 | 0.846815  | 0.521611   | -0.699074 | 0.788214  |
| XLOC_018155 | OR2H2                   | chr6:29555682-29556745  | 0.237248  | 0.146169   | -0.69876  | 1         |
| XLOC_002751 | LOC283038               | chr10:127371811-1274080 | 0.0596687 | 0.0367679  | -0.698526 | 1         |
| XLOC_022850 | KGFLP2                  | chr9:41958801-42019584  | 0.167215  | 0.10305    | -0.69836  | 1         |
| XLOC_016389 | SHROOM3                 | chr4:77356252-77704405  | 0.015222  | 0.00938127 | -0.698302 | 1         |
| XLOC_014817 | SLC16A8                 | chr22:38474143-38479170 | 0.0725994 | 0.0447568  | -0.697851 | 1         |
| XLOC_011563 | ZNF737                  | chr19:20720797-20748626 | 0.751877  | 0.463886   | -0.696728 | 0.0873591 |
| XLOC_017582 | DNAH5                   | chr5:13690436-13944589  | 0.022675  | 0.0139939  | -0.696297 | 1         |
| XLOC_010865 | SPTBN4                  | chr19:40973125-41082365 | 0.174158  | 0.107508   | -0.695951 | 1         |
| XLOC_016990 | GK3P                    | chr4:166128769-16624430 | 0.049427  | 0.0305213  | -0.695485 | 1         |
| XLOC_008771 | SPNS2                   | chr17:4402128-4458681   | 1.24156   | 0.766897   | -0.695049 | 0.915715  |
| XLOC_011565 | ZNF708                  | chr19:21473962-21512212 | 1.17656   | 0.726903   | -0.694745 | 0.137767  |
| XLOC_015616 | NEK10                   | chr3:27257096-27410912  | 0.0221246 | 0.0136744  | -0.694175 | 1         |
| XLOC_000980 | LOC148709               | chr1:202830881-20284436 | 0.332441  | 0.205614   | -0.693157 | 1         |
| XLOC_019173 | AGPAT4-IT1              | chr6:161551056-16169510 | 0.0315675 | 0.019529   | -0.692819 | 1         |
| XLOC_002585 | KIF20B                  | chr10:91461366-91534700 | 1.12025   | 0.693759   | -0.691313 | 0.0963541 |
| XLOC_001318 | AKRL7                   | chr1:19592475-19600568  | 2.0049    | 1.24194    | -0.690929 | 0.174284  |
| XLOC_024067 | APLN                    | chrX:128779235-12878893 | 4.52602   | 2.80378    | -0.690872 | 0.0912351 |
| XLOC_023198 | EXD3                    | chr9:140201347-14031771 | 2.38661   | 1.47942    | -0.689931 | 0.215748  |
| XLOC_004176 | C1QTNF4                 | chr11:47611215-47615961 | 0.688021  | 0.426633   | -0.689455 | 0.785515  |
| XLOC_022158 | LOC100131726            | chr8:124194751-12422231 | 0.116106  | 0.0719995  | -0.689387 | 1         |
| XLOC_001741 | TRIM45                  | chr1:117653676-11766441 | 0.476229  | 0.295406   | -0.688954 | 0.386954  |
| XLOC_015731 | HYAL1                   | chr3:50337319-50349812  | 0.0536853 | 0.0333031  | -0.688869 | 1         |
| XLOC_018046 | LOC100130275            | chr6:10396915-10419797  | 2.55675   | 1.58706    | -0.687955 | 0.822284  |
| XLOC_007482 | FMN1                    | chr15:33057746-33360085 | 0.0787845 | 0.0489298  | -0.687198 | 1         |
| XLOC_016690 | KCNIP4                  | chr4:20730238-21950374  | 0.25656   | 0.159362   | -0.686992 | 1         |
| XLOC_003099 | PDZD7                   | chr10:102756863-1027909 | 2.48227   | 1.5427     | -0.686199 | 0.928653  |
| XLOC_012113 | FOSL2                   | chr2:28615778-28637516  | 6.07104   | 3.77347    | -0.686053 | 0.066512  |
| XLOC_011204 | ZNF582-AS1              | chr19:56950544-56910544 | 0.039389  | 0.0244975  | -0.685156 | 1         |
| XLOC_017676 | ADAMTS6                 | chr5:64444562-64777704  | 0.0504429 | 0.031377   | -0.684946 | 1         |
| XLOC_024032 | SLC25A5-AS1             | chrX:118599995-11860535 | 0.445572  | 0.277173   | -0.684872 | 0.964222  |
| XLOC_020456 | C7orf10                 | chr7:40174574-40900366  | 0.464944  | 0.289318   | -0.684401 | 0.506539  |
| XLOC_004352 | CLCF1                   | chr11:67085309-67159158 | 6.10468   | 3.79952    | -0.6841   | 0.606953  |
| XLOC_003730 | MYO7A                   | chr11:76839309-76926286 | 0.185476  | 0.115565   | -0.682534 | 1         |
| XLOC_001184 | LINC00115               | chr1:761585-762902      | 1.96015   | 1.22224    | -0.681439 | 0.366979  |
| XLOC_013163 | TMEM163                 | chr2:135213329-13547657 | 0.0296979 | 0.0185243  | -0.680945 | 1         |
| XLOC_020464 | SPDYE1                  | chr7:43966034-44058748  | 0.137142  | 0.0855892  | -0.680165 | 1         |
| XLOC_019149 | RGS17                   | chr6:153332031-15345238 | 0.057189  | 0.0356956  | -0.679992 | 1         |
| XLOC_012319 | LOC100506123            | chr2:97948228-97957632  | 0.749349  | 0.467915   | -0.67939  | 0.275732  |
| XLOC_012734 | KLHL30                  | chr2:239047362-23906154 | 0.0411939 | 0.0257257  | -0.679218 | 1         |
| XLOC_000198 | FAM110D                 | chr1:26485510-26489119  | 0.685633  | 0.428221   | -0.67908  | 0.691839  |
| XLOC_021045 | MYO1G                   | chr7:45002259-45018704  | 0.0207232 | 0.0129434  | -0.679034 | 1         |
| XLOC_023437 | FAAH2                   | chrX:57313109-57515629  | 1.0277    | 0.642093   | -0.678567 | 0.300705  |
| XLOC_017073 | LOC100505738,MIR4458    | chr5:8457799-8463209    | 3.41631   | 2.13451    | -0.678532 | 0.158666  |
| XLOC_016658 | CCDC96                  | chr4:6911170-7059677    | 0.669961  | 0.419446   | -0.675592 | 0.974044  |
| XLOC_011707 | CNFN                    | chr19:42891170-42894444 | 5.43863   | 3.40527    | -0.675474 | 0.483752  |
| XLOC_014361 | LRRRC3-AS1              | chr21:45870868-45875167 | 0.0817862 | 0.0512105  | -0.675418 | 1         |
| XLOC_010608 | ZNF788                  | chr19:12203077-12225494 | 0.0749589 | 0.0469485  | -0.675021 | 1         |
| XLOC_015072 | CCR9                    | chr3:45864809-45957216  | 0.0196559 | 0.012311   | -0.675015 | 1         |
| XLOC_010426 | HCN2                    | chr19:589892-617159     | 0.0685842 | 0.0429704  | -0.674532 | 1         |
| XLOC_020544 | WBSCR28                 | chr7:73275488-73280223  | 0.0783229 | 0.0490816  | -0.674251 | 1         |
| XLOC_011235 | ZNF586                  | chr19:58281019-58291984 | 0.552058  | 0.345957   | -0.674225 | 0.407326  |
| XLOC_013233 | MLK7-AS1                | chr2:173940564-17414676 | 0.0495007 | 0.0310405  | -0.6733   | 1         |
| XLOC_009577 | PROCA1                  | chr17:27030533-27038872 | 0.9627    | 0.603684   | -0.673294 | 0.525846  |
| XLOC_014551 | GALR3                   | chr22:38219388-38221502 | 1.4357    | 0.900715   | -0.672613 | 0.669697  |
| XLOC_011834 | SLC6A16                 | chr19:49792891-49828474 | 0.274097  | 0.172022   | -0.672097 | 1         |
| XLOC_004876 | LOC100652999            | chr12:53901639-54020199 | 0.148301  | 0.0930794  | -0.671991 | 1         |
| XLOC_010267 | C18orf56                | chr18:596997-712662     | 8.65143   | 5.43062    | -0.671821 | 0.912767  |
| XLOC_023268 | TCEANC                  | chrX:13671306-13682247  | 0.320535  | 0.20132    | -0.670993 | 1         |
| XLOC_008828 | SHBG                    | chr17:7494547-7536700   | 0.730786  | 0.459106   | -0.670622 | 0.915696  |
| XLOC_021784 | BREA2                   | chr8:144779284-14478058 | 0.618137  | 0.38843    | -0.670272 | 0.69673   |
| XLOC_001880 | DCST2                   | chr1:154991002-15500625 | 0.133632  | 0.0839926  | -0.669932 | 1         |
| XLOC_006343 | KLHDC1                  | chr14:50159822-50219870 | 0.0715895 | 0.0450262  | -0.668983 | 1         |
| XLOC_001508 | TCTEX1D4                | chr1:45266035-45272957  | 0.0715529 | 0.0450197  | -0.668453 | 1         |
| XLOC_006066 | N4BP2L2-IT2             | chr13:33006929-33112936 | 0.311569  | 0.196098   | -0.667982 | 1         |
| XLOC_021322 | FLJ43663                | chr7:130628918-13079356 | 5.32052   | 3.34994    | -0.66743  | 0.0838642 |
| XLOC_012505 | SP5                     | chr2:171571856-17157449 | 1.09675   | 0.690684   | -0.667138 | 0.580086  |
| XLOC_009134 | EFCAB13                 | chr17:45401326-45518677 | 0.0395945 | 0.0249543  | -0.666012 | 1         |
| XLOC_013920 | TSPY26P                 | chr20:30776948-30778163 | 0.070661  | 0.0445573  | -0.665252 | 1         |
| XLOC_005754 | LOC338799               | chr12:122233172-1222413 | 2.9537    | 1.865      | -0.663345 | 0.294361  |
| XLOC_004696 | C1S                     | chr12:7167979-7178335   | 0.397642  | 0.251116   | -0.663117 | 0.443332  |
| XLOC_000321 | CCDC30                  | chr1:43000559-43120335  | 0.0461097 | 0.0291325  | -0.662442 | 1         |
| XLOC_020809 | TMEM139                 | chr7:142982039-14298514 | 0.0913435 | 0.0577239  | -0.662132 | 1         |
| XLOC_022648 | COL5A1                  | chr9:137533651-13773668 | 0.0154691 | 0.00978645 | -0.660534 | 1         |
| XLOC_009437 | PITPNM3                 | chr17:6354582-6459877   | 0.206196  | 0.130459   | -0.660414 | 1         |
| XLOC_011616 | THAP8                   | chr19:36525886-36545664 | 4.14799   | 2.62636    | -0.659348 | 0.202966  |



|              |              |                         |            |            |           |           |
|--------------|--------------|-------------------------|------------|------------|-----------|-----------|
| XLOC_017969  | HK3          | chr5:176237559-17632633 | 0.0225105  | 0.0142601  | -0.658616 | 1         |
| XLOC_009857  | C17orf67     | chr17:54869273-54911256 | 1.69869    | 1.07616    | -0.658529 | 0.268118  |
| XLOC_017989  | CLK4         | chr5:178029664-17805405 | 4.65538    | 2.94994    | -0.658214 | 0.0730091 |
| XLOC_010100  | DLGAP1-AS1   | chr18:3496029-4455266   | 2.45947    | 1.55949    | -0.657269 | 0.373764  |
| XLOC_005536  | RDH16        | chr12:57345215-57351418 | 0.263535   | 0.16736    | -0.655045 | 1         |
| XLOC_010947  | GIPR         | chr19:46171501-46185717 | 0.614236   | 0.390104   | -0.654932 | 0.595511  |
| XLOC_017741  | POU5F2       | chr5:92919042-93447404  | 0.0493632  | 0.0313531  | -0.654829 | 1         |
| XLOC_014855  | TNFRSF13C    | chr22:42321035-42322821 | 1.54489    | 0.981352   | -0.65466  | 0.596611  |
| XLOC_021369  | CTAGE6P      | chr7:143452181-14345484 | 0.0636798  | 0.0404703  | -0.653972 | 1         |
| XLOC_007981  | CRYM-AS1     | chr16:21269838-21329912 | 0.205815   | 0.130845   | -0.653492 | 1         |
| XLOC_010729  | LOC400680    | chr19:21666516-21686040 | 0.571369   | 0.363397   | -0.652875 | 0.318762  |
| XLOC_023045  | C5           | chr9:123714613-12381255 | 0.376813   | 0.239798   | -0.652032 | 0.323343  |
| XLOC_020845  | ATP6V0E2     | chr7:149564782-14957778 | 0.0314429  | 0.0200135  | -0.651757 | 1         |
| XLOC_010248  | CNDP1        | chr18:72201691-72252261 | 0.0749418  | 0.0477049  | -0.651634 | 1         |
| XLOC_002632  | GOLGA7B      | chr10:99609994-99790585 | 0.199389   | 0.126952   | -0.651295 | 1         |
| XLOC_011529  | RAB3A        | chr19:18307610-18314874 | 2.32929    | 1.48528    | -0.649154 | 0.337134  |
| XLOC_006851  | ESR2         | chr14:64693750-64805268 | 0.0667539  | 0.0425948  | -0.648175 | 1         |
| XLOC_010789  | GAPDHS       | chr19:36024313-36038429 | 0.246488   | 0.157358   | -0.647462 | 1         |
| XLOC_004228  | LPXN         | chr11:58294343-58345639 | 1.44156    | 0.920309   | -0.647446 | 0.332919  |
| XLOC_011593  | ZNF599       | chr19:35248978-35264134 | 0.321275   | 0.205134   | -0.64724  | 1         |
| XLOC_004708  | FAM66C       | chr12:8332804-8353596   | 0.0403408  | 0.0257652  | -0.646814 | 1         |
| XLOC_015122  | DOCK3        | chr3:50712671-51421629  | 0.0406099  | 0.0259495  | -0.646128 | 1         |
| XLOC_019164  | LOC100129518 | chr6:160181290-16021073 | 0.275292   | 0.176171   | -0.643989 | 1         |
| XLOC_001663  | F3           | chr1:94994731-95007413  | 3.2044     | 2.05114    | -0.643628 | 0.159812  |
| XLOC_004679  | LAG3         | chr12:6881669-6887621   | 0.116228   | 0.0744012  | -0.643564 | 1         |
| XLOC_008523  | ZNF785       | chr16:30591993-30597092 | 1.21647    | 0.77902    | -0.642973 | 0.3074    |
| XLOC_005209  | ZNF10        | chr12:133707213-1337360 | 2.41384    | 1.5464     | -0.64241  | 0.0947123 |
| XLOC_023119  | FIBCD1       | chr9:133777824-13381445 | 5.79228    | 3.71227    | -0.641829 | 0.131187  |
| XLOC_020784  | TBXAS1       | chr7:139478046-13972012 | 0.266227   | 0.170709   | -0.641118 | 1         |
| XLOC_002561  | ADIRF,AGAP11 | chr10:88728187-88769960 | 54.4136    | 34.8988    | -0.640789 | 0.068174  |
| XLOC_011830  | NTF4         | chr19:49564396-49567124 | 1.48743    | 0.954064   | -0.640666 | 0.605597  |
| XLOC_013732  | TFAP2C       | chr20:55204357-55214338 | 0.478353   | 0.306958   | -0.640034 | 0.536951  |
| XLOC_014719  | DERL3        | chr22:24129149-24181199 | 1.76214    | 1.13079    | -0.639992 | 0.957925  |
| XLOC_010914  | ZNF284       | chr19:44576296-44591623 | 0.774791   | 0.497216   | -0.639936 | 0.370038  |
| XLOC_011226  | ZNF773       | chr19:58011308-58019510 | 1.13487    | 0.728298   | -0.639924 | 0.318762  |
| XLOC_016735  | TEC          | chr4:48137799-48271814  | 1.0624     | 0.681817   | -0.639865 | 0.241608  |
| XLOC_007358  | GOLGA6L9     | chr15:83098709-83108111 | 0.195676   | 0.12559    | -0.639745 | 1         |
| XLOC_013252  | LOC100130691 | chr2:178148235-17825741 | 0.118773   | 0.0762348  | -0.639681 | 1         |
| XLOC_011552  | PBX4         | chr19:19672515-19729725 | 1.53381    | 0.984568   | -0.639558 | 0.449724  |
| XLOC_018070  | FAM8A1       | chr6:17600517-17611950  | 1.4093     | 0.904797   | -0.63931  | 0.152398  |
| XLOC_020876  | LOC202781    | chr7:154795142-15479741 | 8.75277    | 5.62151    | -0.638782 | 0.066512  |
| XLOC_000985  | PRELP        | chr1:203444882-20346047 | 0.00935845 | 0.00601138 | -0.638572 | 1         |
| XLOC_014623  | LOC730668    | chr22:46402495-46406657 | 0.0597829  | 0.0384196  | -0.637891 | 1         |
| XLOC_004967  | TBC1D30      | chr12:65218351-65274798 | 0.0913123  | 0.0586843  | -0.637835 | 1         |
| XLOC_003105  | FGF8         | chr10:103529886-1035401 | 1.17792    | 0.75716    | -0.637573 | 0.63816   |
| XLOC_001222  | LOC100133445 | chr1:2487207-2495267    | 1.67543    | 1.07703    | -0.637468 | 0.92073   |
| XLOC_012374  | BCL2L11      | chr2:111878490-11192602 | 2.60225    | 1.67305    | -0.637276 | 0.134248  |
| XLOC_007395  | WDR93        | chr15:90234027-90286869 | 0.0465988  | 0.0299633  | -0.637095 | 1         |
| XLOC_018326  | TMEM151B     | chr6:44238479-44247182  | 0.0660188  | 0.0424514  | -0.637064 | 1         |
| XLOC_012390  | LOC654433    | chr2:113973573-11403649 | 3.92616    | 2.52494    | -0.636873 | 0.660874  |
| XLOC_015027  | TTC21A       | chr3:39149151-39180394  | 0.27228    | 0.1754     | -0.634441 | 1         |
| XLOC_010605  | ZNF700       | chr19:12035882-12061588 | 3.98821    | 2.56949    | -0.634262 | 0.0875912 |
| XLOC_010481  | CELF5        | chr19:3224700-3297073   | 0.402506   | 0.25939    | -0.63389  | 0.541784  |
| XLOC_005153  | WDR66        | chr12:122356462-1224418 | 0.147587   | 0.0951193  | -0.63376  | 1         |
| XLOC_002410  | HSD17B7P2    | chr10:38645307-38667433 | 0.85698    | 0.552399   | -0.633549 | 0.51921   |
| XLOC_015137  | DNAH1        | chr3:52350334-52434513  | 0.178584   | 0.115125   | -0.633404 | 1         |
| XLOC_009165  | ACSF2        | chr17:48503518-48552200 | 7.10906    | 4.58437    | -0.632935 | 0.0844105 |
| XLOC_022042  | SBSPON       | chr8:73976777-74005507  | 0.317516   | 0.204885   | -0.632017 | 1         |
| XLOC_015759  | TNNC1        | chr3:52485106-52488057  | 0.590065   | 0.380788   | -0.631885 | 0.746773  |
| XLOC_015870  | CCDC80       | chr3:112323408-11235997 | 1.66715    | 1.07598    | -0.631739 | 0.178765  |
| XLOC_013609  | ACTL10       | chr20:32244892-32262264 | 2.73584    | 1.76584    | -0.631631 | 0.908288  |
| XLOC_005098  | RAD9B        | chr12:110940004-1109698 | 0.493222   | 0.31849    | -0.63099  | 0.544179  |
| XLOC_011749  | TRAPPC6A     | chr19:45666185-45681501 | 35.0698    | 22.6526    | -0.630555 | 0.0914856 |
| XLOC_0011275 | GAMT         | chr19:1397024-1401569   | 0.265317   | 0.171537   | -0.629204 | 1         |
| XLOC_000835  | FCRLB        | chr1:161692456-16169793 | 0.404488   | 0.261542   | -0.629057 | 0.742477  |
| XLOC_007446  | LOC646214    | chr15:21932513-21940739 | 0.233399   | 0.150994   | -0.628305 | 1         |
| XLOC_007972  | C16orf62     | chr16:19566736-19712485 | 0.0370217  | 0.0239527  | -0.628183 | 1         |
| XLOC_011701  | POU2F2       | chr19:42590261-42636625 | 0.101659   | 0.0658127  | -0.627303 | 1         |
| XLOC_012506  | LOC100505695 | chr2:171627603-17163475 | 3.94699    | 2.55578    | -0.626992 | 0.330501  |
| XLOC_001348  | TCEA3        | chr1:23707554-23751261  | 0.0433582  | 0.0281027  | -0.625595 | 1         |
| XLOC_002907  | BMS1P5       | chr10:46737612-46762892 | 0.225157   | 0.146011   | -0.624854 | 1         |
| XLOC_017380  | PCDHB11      | chr5:140579347-14058261 | 0.304174   | 0.197255   | -0.624836 | 1         |
| XLOC_021672  | SLC26A7      | chr8:92261515-92410378  | 0.00992127 | 0.00643737 | -0.624053 | 1         |
| XLOC_004886  | FLJ12825     | chr12:54452037-54516018 | 0.161121   | 0.104546   | -0.624016 | 1         |
| XLOC_016714  | SMIM14       | chr4:39529458-39640481  | 1.9449     | 1.26215    | -0.623821 | 0.644266  |
| XLOC_020560  | TRIM74       | chr7:75024902-75034888  | 0.638253   | 0.414218   | -0.623737 | 0.65754   |
| XLOC_021945  | LOC100128750 | chr8:30239634-30429734  | 0.694885   | 0.450974   | -0.62373  | 0.965515  |
| XLOC_009516  | CDRT1        | chr17:15491976-15523018 | 0.0736757  | 0.0478526  | -0.622593 | 1         |
| XLOC_003825  | ANKK1        | chr11:113258512-1132711 | 0.206459   | 0.134134   | -0.622176 | 1         |

|             |                 |                          |           |            |           |           |
|-------------|-----------------|--------------------------|-----------|------------|-----------|-----------|
| XLOC_008292 | CDH15           | chr16:89238162-89261900  | 0.719522  | 0.467508   | -0.622048 | 0.525846  |
| XLOC_009887 | LOC645638       | chr17:58160926-58165828  | 0.154733  | 0.10064    | -0.620581 | 1         |
| XLOC_010602 | ZNF440          | chr19:11925106-11946016  | 2.68687   | 1.74843    | -0.619864 | 0.0957181 |
| XLOC_016537 | DKFZP43410714   | chr4:153457415-153460411 | 0.967105  | 0.630151   | -0.617977 | 0.332289  |
| XLOC_015632 | PLCD1           | chr3:38048986-38071154   | 4.3659    | 2.84739    | -0.616664 | 0.146724  |
| XLOC_021248 | LOC100216546    | chr7:104622193-104631612 | 0.169706  | 0.110722   | -0.616096 | 1         |
| XLOC_023281 | REPS2           | chrX:16964813-17171403   | 0.504735  | 0.329367   | -0.615831 | 0.25146   |
| XLOC_008694 | PKD1L2          | chr16:81134483-81253975  | 0.0990562 | 0.0646434  | -0.615745 | 1         |
| XLOC_015695 | CELSR3          | chr3:48673895-48700348   | 1.15213   | 0.751927   | -0.615644 | 0.56677   |
| XLOC_015794 | FHIT            | chr3:59735035-61237133   | 15.4794   | 10.1045    | -0.615353 | 0.115185  |
| XLOC_003975 | KCNQ1OT1        | chr11:2466220-2870340    | 0.0718505 | 0.046904   | -0.615288 | 1         |
| XLOC_009728 | KRT17           | chr17:39775691-39780882  | 0.405346  | 0.26471    | -0.614744 | 0.718598  |
| XLOC_001421 | MTMR9LP         | chr1:32697260-32707311   | 3.10682   | 2.02891    | -0.614733 | 0.25971   |
| XLOC_014946 | LINC00852       | chr3:10290176-10335133   | 0.98889   | 0.645834   | -0.614646 | 0.973723  |
| XLOC_014235 | C21orf15        | chr21:15215453-15220685  | 0.392798  | 0.256554   | -0.614522 | 0.745168  |
| XLOC_011218 | ZNF460          | chr19:57791852-57805436  | 0.440417  | 0.287752   | -0.614046 | 0.449166  |
| XLOC_022695 | NOXA1           | chr9:140317846-140335901 | 8.49523   | 5.55177    | -0.613705 | 0.201781  |
| XLOC_012090 | MAPRE3          | chr2:27193524-27250087   | 1.30125   | 0.850906   | -0.612823 | 0.429337  |
| XLOC_010532 | C19orf45        | chr19:7562444-7573336    | 0.872537  | 0.570572   | -0.612808 | 0.626609  |
| XLOC_022568 | GARNL3          | chr9:130026755-130155821 | 1.5582    | 1.01903    | -0.612682 | 0.224272  |
| XLOC_004634 | LOC283174       | chr11:133766329-13377161 | 0.985878  | 0.644939   | -0.612246 | 0.2331    |
| XLOC_015284 | STXBP5L         | chr3:120627049-121143601 | 0.0111314 | 0.00728487 | -0.611656 | 1         |
| XLOC_020847 | C7orf29         | chr7:149944300-150035241 | 17.4221   | 11.4061    | -0.611121 | 0.41836   |
| XLOC_001120 | EDARADD         | chr1:236557679-236648001 | 0.889744  | 0.58256    | -0.610985 | 0.358376  |
| XLOC_002996 | MSS51           | chr10:75183336-75193319  | 0.699487  | 0.458038   | -0.610831 | 0.452642  |
| XLOC_004468 | SNORA18         | chr11:93466631-93466763  | 51.1507   | 33.4979    | -0.610683 | 0.785206  |
| XLOC_020389 | DNAH11          | chr7:21582832-21985542   | 0.0064839 | 0.00424999 | -0.609402 | 1         |
| XLOC_009927 | LOC729683       | chr17:61777697-61780045  | 0.840829  | 0.551987   | -0.607177 | 0.564053  |
| XLOC_011757 | GPR4            | chr19:46093022-46105466  | 0.0297058 | 0.0195116  | -0.606417 | 1         |
| XLOC_008314 | RGS11           | chr16:318309-325914      | 12.1797   | 8.00031    | -0.606345 | 0.0851035 |
| XLOC_020976 | HOXA3           | chr7:27145808-27166639   | 0.619816  | 0.407841   | -0.603834 | 0.556835  |
| XLOC_013326 | KLF7            | chr2:207938861-208031971 | 0.0175884 | 0.0115747  | -0.603643 | 1         |
| XLOC_021047 | SNORA9          | chr7:45022626-45026259   | 12.2331   | 8.05271    | -0.603239 | 0.974392  |
| XLOC_005213 | SLC6A12         | chr12:299242-323371      | 0.135056  | 0.0889262  | -0.602876 | 1         |
| XLOC_012398 | LOC440900       | chr2:114735245-114764881 | 0.16485   | 0.10856    | -0.602663 | 1         |
| XLOC_001507 | BEST4           | chr1:45249256-45253426   | 0.137637  | 0.0906866  | -0.601907 | 1         |
| XLOC_021335 | PTN             | chr7:136912091-137028541 | 0.242082  | 0.159546   | -0.601523 | 1         |
| XLOC_007702 | DNM1P35         | chr15:76016318-76032418  | 0.258532  | 0.170553   | -0.600118 | 1         |
| XLOC_006998 | NUDT14          | chr14:105639273-10564761 | 42.1546   | 27.8139    | -0.599885 | 0.0857334 |
| XLOC_003358 | LDHC            | chr11:18433852-18472793  | 0.0963199 | 0.0636157  | -0.598451 | 1         |
| XLOC_021135 | MAGI2           | chr7:77646373-79100524   | 0.410919  | 0.271434   | -0.598254 | 0.38867   |
| XLOC_013108 | FLJ42351        | chr2:113399406-113401751 | 0.989565  | 0.653742   | -0.598074 | 0.787681  |
| XLOC_020513 | CCT6P3          | chr7:64498731-64535091   | 3.42615   | 2.26557    | -0.596713 | 0.161828  |
| XLOC_011507 | CYP4F11         | chr19:16023179-16045676  | 0.119328  | 0.0789231  | -0.596413 | 1         |
| XLOC_021686 | CPG             | chr8:97657498-98155722   | 9.15117   | 6.05454    | -0.595938 | 0.0912351 |
| XLOC_011591 | SCGB1B2P        | chr19:35067637-35068596  | 0.619058  | 0.409908   | -0.594775 | 0.836102  |
| XLOC_008368 | PRSS27          | chr16:2762422-2770552    | 1.60744   | 1.06439    | -0.594733 | 0.554567  |
| XLOC_013178 | RBM43           | chr2:152104727-152118381 | 1.43122   | 0.947788   | -0.594607 | 0.240188  |
| XLOC_022260 | DMRT1           | chr9:841689-969090       | 0.0481782 | 0.0319056  | -0.594572 | 1         |
| XLOC_000937 | OCLM            | chr1:185703682-186446651 | 0.118107  | 0.0782289  | -0.594316 | 1         |
| XLOC_008342 | IGFALS          | chr16:1840413-1844909    | 0.195654  | 0.12966    | -0.593571 | 1         |
| XLOC_004105 | IGSF22          | chr11:18720350-18747777  | 0.0479493 | 0.0317769  | -0.593533 | 1         |
| XLOC_018639 | TFAP2A          | chr6:10396915-10419797   | 3.92245   | 2.60042    | -0.593009 | 0.203854  |
| XLOC_012303 | ZNF2            | chr2:95831182-95850064   | 1.42045   | 0.941939   | -0.592645 | 0.250722  |
| XLOC_008536 | PRSS36          | chr16:31150246-31161415  | 0.384277  | 0.254844   | -0.592532 | 0.671358  |
| XLOC_017636 | ANXA2R          | chr5:43039181-43040447   | 3.89846   | 2.58997    | -0.58997  | 0.358044  |
| XLOC_022570 | ZNF79           | chr9:130186652-130207651 | 4.38375   | 2.91268    | -0.589819 | 0.202476  |
| XLOC_008648 | PDXDC2P         | chr16:70010201-70099851  | 2.91066   | 1.93404    | -0.589728 | 0.142344  |
| XLOC_022254 | ZNF250          | chr8:146102335-146126841 | 1.62724   | 1.08131    | -0.589655 | 0.136959  |
| XLOC_015038 | ZNF619          | chr3:40518603-40531728   | 0.642545  | 0.426974   | -0.58965  | 0.369185  |
| XLOC_016498 | INTU            | chr4:128554086-128637931 | 0.775684  | 0.515643   | -0.589096 | 0.369215  |
| XLOC_006090 | SUGT1P3,TPTE2P5 | chr13:41363546-41495910  | 0.344535  | 0.229041   | -0.589046 | 1         |
| XLOC_011724 | LYPD3           | chr19:43964945-43969831  | 0.973356  | 0.647098   | -0.588984 | 0.614219  |
| XLOC_022480 | MURC            | chr9:103340335-103350171 | 0.215832  | 0.143529   | -0.588562 | 1         |
| XLOC_006279 | REM2            | chr14:23352431-23356889  | 0.315089  | 0.209555   | -0.588435 | 1         |
| XLOC_005723 | HRK             | chr12:117298224-11731921 | 2.30413   | 1.53248    | -0.588347 | 0.41086   |
| XLOC_012775 | CMPK2           | chr2:6980683-7006766     | 0.442721  | 0.294577   | -0.587752 | 0.575816  |
| XLOC_008461 | NPIPL3          | chr16:21413454-21436658  | 3.8164    | 2.53992    | -0.587429 | 0.169001  |
| XLOC_020556 | GTF2IRD2B       | chr7:74508346-74565623   | 0.0751698 | 0.0500363  | -0.587177 | 1         |
| XLOC_020735 | FLJ45340        | chr7:128281294-128301051 | 4.66756   | 3.10784    | -0.586753 | 0.0569429 |
| XLOC_002580 | IFIT2           | chr10:91061705-91069033  | 0.129522  | 0.0862643  | -0.586366 | 1         |
| XLOC_015874 | WDR52           | chr3:112931374-113160361 | 0.256899  | 0.17114    | -0.586026 | 1         |
| XLOC_000978 | KDMSB-AS1       | chr1:202780073-202781041 | 26.9131   | 17.93      | -0.58593  | 0.203111  |
| XLOC_023953 | ATRX            | chrX:76760355-77041719   | 1.5133    | 1.00843    | -0.585579 | 0.121426  |
| XLOC_007429 | SYNM            | chr15:99645285-99675800  | 0.0100954 | 0.00672861 | -0.585318 | 1         |
| XLOC_012787 | SNORA80B        | chr2:10580507-10588453   | 7.75909   | 5.1738     | -0.584662 | 0.979484  |
| XLOC_015686 | PLXNB1          | chr3:48445260-48471460   | 5.33578   | 3.55952    | -0.584016 | 0.077181  |
| XLOC_020435 | ZNRF2P1         | chr7:32767561-32769595   | 0.712003  | 0.475267   | -0.583143 | 0.651698  |
| XLOC_011811 | DBP             | chr19:49133816-49140639  | 17.7906   | 11.8756    | -0.583111 | 0.137767  |

|             |              |                         |           |           |           |           |
|-------------|--------------|-------------------------|-----------|-----------|-----------|-----------|
| XLOC_011951 | CDC42EP5     | chr19:54976209-54984422 | 21.597    | 14.4175   | -0.583008 | 0.291655  |
| XLOC_007714 | LOC91450     | chr15:78285574-78286567 | 0.103315  | 0.0689773 | -0.582855 | 1         |
| XLOC_018560 | CCDC170      | chr6:151815174-15194232 | 0.0280632 | 0.0187392 | -0.582618 | 1         |
| XLOC_019033 | AKD1         | chr6:109814058-11001241 | 0.638301  | 0.426314  | -0.582323 | 0.475849  |
| XLOC_022353 | FRMPD1       | chr9:37651051-37746901  | 0.0182433 | 0.0121876 | -0.58196  | 1         |
| XLOC_001423 | FAM229A      | chr1:32826870-32827844  | 3.46236   | 2.31325   | -0.581834 | 0.668862  |
| XLOC_011219 | ZNF543       | chr9:57831864-57842144  | 0.593185  | 0.396358  | -0.581677 | 0.441032  |
| XLOC_023127 | AK8          | chr9:135600964-13575419 | 0.819419  | 0.547797  | -0.580961 | 0.580655  |
| XLOC_013095 | MALL         | chr2:110841446-11087414 | 0.0272253 | 0.0182026 | -0.580804 | 1         |
| XLOC_014420 | TMEM191B     | chr22:20377668-20380440 | 1.99907   | 1.3377    | -0.57957  | 0.617509  |
| XLOC_001493 | ZMYND12      | chr1:42896000-42921938  | 0.226929  | 0.151893  | -0.579186 | 1         |
| XLOC_003758 | NAALAD2      | chr11:89867817-89925779 | 0.095386  | 0.0638505 | -0.579079 | 1         |
| XLOC_001502 | HY1          | chr1:43855555-43919918  | 25.2584   | 16.9104   | -0.578855 | 0.286255  |
| XLOC_014721 | GSTT2        | chr22:24299600-24303393 | 1.19288   | 0.799352  | -0.577548 | 0.615252  |
| XLOC_023512 | SRPX2        | chrX:99899162-99926296  | 0.0593273 | 0.0397659 | -0.577166 | 1         |
| XLOC_021788 | SPATC1       | chr8:145086581-14510201 | 0.110143  | 0.0738667 | -0.57638  | 1         |
| XLOC_020516 | CCT6P1       | chr7:65111923-65235797  | 3.50145   | 2.34862   | -0.576135 | 0.2318    |
| XLOC_013991 | TP53TG5      | chr20:43990576-44039250 | 0.595897  | 0.399889  | -0.575466 | 0.975414  |
| XLOC_007731 | STARD5       | chr15:81489218-81616524 | 1.84654   | 1.23966   | -0.574878 | 0.483354  |
| XLOC_005846 | BRCA2        | chr13:32889616-32923809 | 0.159078  | 0.106811  | -0.574672 | 1         |
| XLOC_010728 | ZNF493       | chr19:21579920-21610296 | 1.13651   | 0.763465  | -0.573981 | 0.516248  |
| XLOC_003611 | TIGD3        | chr11:65122281-65125082 | 2.95903   | 1.98913   | -0.572991 | 0.354937  |
| XLOC_005239 | VAMP1        | chr12:6561176-6579843   | 4.17881   | 2.80932   | -0.572871 | 0.530257  |
| XLOC_011441 | ZNF823       | chr19:11832079-11849760 | 1.81043   | 1.21716   | -0.57282  | 0.28733   |
| XLOC_012749 | SNED1        | chr2:241938254-24204174 | 0.481534  | 0.323792  | -0.572568 | 0.857872  |
| XLOC_011623 | ZNF566       | chr19:36936020-36980463 | 1.7389    | 1.16984   | -0.571865 | 0.175545  |
| XLOC_009991 | CYGB         | chr17:74523429-74541458 | 0.22277   | 0.149913  | -0.571426 | 1         |
| XLOC_010927 | BCAM         | chr19:45312315-45324678 | 36.3799   | 24.4821   | -0.571411 | 0.0730091 |
| XLOC_006785 | KLHL28       | chr14:45393526-45431179 | 0.736047  | 0.495638  | -0.57051  | 0.275061  |
| XLOC_000136 | PADI1        | chr1:17531620-17572501  | 0.0186574 | 0.0125641 | -0.570435 | 1         |
| XLOC_013049 | NEURL3       | chr2:97163382-97173846  | 0.062066  | 0.0418011 | -0.570262 | 1         |
| XLOC_014225 | MCM3AP-AS1   | chr21:47649157-47705236 | 0.133682  | 0.0900488 | -0.570027 | 1         |
| XLOC_001891 | PKLR         | chr1:155247217-15527122 | 0.549686  | 0.37031   | -0.569875 | 0.769283  |
| XLOC_004822 | CACNB3       | chr12:49208214-49222726 | 23.9012   | 16.1049   | -0.569577 | 0.0584113 |
| XLOC_011017 | DKKL1        | chr19:49866986-49878373 | 0.865715  | 0.583815  | -0.568382 | 0.684325  |
| XLOC_006021 | CRYL1        | chr13:20977805-21100012 | 26.1034   | 17.6116   | -0.567715 | 0.0757506 |
| XLOC_003418 | ACCS         | chr11:44087728-44105569 | 1.71393   | 1.15652   | -0.567516 | 0.410986  |
| XLOC_005649 | DEPDC4       | chr12:100646041-1006608 | 0.290842  | 0.196299  | -0.567187 | 1         |
| XLOC_023713 | PLXNA3       | chrX:153686622-15370198 | 6.46112   | 4.36357   | -0.566276 | 0.119771  |
| XLOC_015922 | ALG1L        | chr3:125635443-12565588 | 0.434924  | 0.293881  | -0.565532 | 0.946274  |
| XLOC_014439 | CCDC116      | chr22:21987085-21991616 | 0.0732277 | 0.0494878 | -0.565317 | 1         |
| XLOC_011666 | EID2B        | chr19:40021629-40023494 | 2.49787   | 1.68912   | -0.564422 | 0.367602  |
| XLOC_001870 | C1orf189     | chr1:154171561-15417884 | 0.118194  | 0.079929  | -0.564362 | 1         |
| XLOC_017991 | AACSP1       | chr5:178191863-17820327 | 0.762923  | 0.516169  | -0.563694 | 0.525846  |
| XLOC_002530 | C1orf11      | chr10:77542518-78317126 | 14.7556   | 9.98355   | -0.563635 | 0.18287   |
| XLOC_011164 | LENG8        | chr19:54960064-54974894 | 10.321    | 6.98466   | -0.563325 | 0.252563  |
| XLOC_010772 | ZNF30        | chr19:35417806-35436076 | 0.816428  | 0.552608  | -0.56307  | 0.435505  |
| XLOC_012917 | CCDC88A      | chr2:55514977-55647057  | 1.20472   | 0.815756  | -0.56249  | 0.158666  |
| XLOC_010597 | CNN1         | chr19:11649578-11661138 | 0.154592  | 0.104706  | -0.562127 | 1         |
| XLOC_011585 | SLCTA9       | chr19:33321418-33360683 | 0.160106  | 0.10848   | -0.561602 | 1         |
| XLOC_001673 | LRRC39       | chr1:100598705-10064382 | 0.520583  | 0.352799  | -0.56128  | 0.898815  |
| XLOC_015691 | COL7A1       | chr3:48601505-48632593  | 0.673497  | 0.456432  | -0.561273 | 0.823658  |
| XLOC_011069 | LOC100129083 | chr19:51913274-51921057 | 0.172882  | 0.117168  | -0.561204 | 1         |
| XLOC_016287 | UGDH-AS1     | chr4:39529458-39640481  | 2.54283   | 1.72378   | -0.560859 | 0.308227  |
| XLOC_011735 | ZNF404       | chr19:44376514-44384288 | 2.30135   | 1.56033   | -0.560634 | 0.3163    |
| XLOC_002539 | BEND3P3      | chr10:81442730-81448650 | 0.0187786 | 0.0127325 | -0.560579 | 1         |
| XLOC_014331 | LCA5L        | chr21:40777769-40816128 | 0.227486  | 0.154284  | -0.560193 | 1         |
| XLOC_009281 | LOC100287042 | chr17:73267379-73285530 | 0.26564   | 0.180178  | -0.560047 | 1         |
| XLOC_022000 | PLAG1        | chr8:57073467-57123859  | 1.21297   | 0.822741  | -0.560031 | 0.197629  |
| XLOC_008297 | CPNE7        | chr16:89642175-89663654 | 43.9927   | 29.8654   | -0.558789 | 0.0608269 |
| XLOC_012559 | ANKAR        | chr2:190540710-19061137 | 0.240549  | 0.16345   | -0.557486 | 1         |
| XLOC_021001 | DPY19L1P1    | chr7:32535175-32758780  | 0.662417  | 0.450434  | -0.556425 | 0.906895  |
| XLOC_012847 | FNDC4        | chr2:27714749-27718126  | 14.1374   | 9.61429   | -0.556261 | 0.131898  |
| XLOC_010720 | ZNF93        | chr19:20011721-20046382 | 0.0469568 | 0.0319418 | -0.555887 | 1         |
| XLOC_022238 | TMEM249      | chr8:145576885-14557857 | 1.30372   | 0.887416  | -0.554954 | 0.715731  |
| XLOC_005684 | USP30-AS1    | chr12:109489845-1095258 | 0.111288  | 0.0757524 | -0.554937 | 1         |
| XLOC_007717 | ACSBG1       | chr15:78463186-78527049 | 0.138601  | 0.0943498 | -0.554844 | 1         |
| XLOC_002196 | DUSP10       | chr1:221874763-22191551 | 1.08342   | 0.73768   | -0.554522 | 0.498673  |
| XLOC_011993 | ZNF416       | chr19:58082933-58090243 | 4.05298   | 2.76119   | -0.553695 | 0.189877  |
| XLOC_017738 | ARRDC3       | chr5:90664540-90716532  | 4.79791   | 3.26958   | -0.553299 | 0.109667  |
| XLOC_004719 | CLEC2D       | chr12:9822303-9852151   | 0.589044  | 0.401464  | -0.553106 | 0.342414  |
| XLOC_011217 | ZNF805       | chr19:57752052-57774106 | 1.2559    | 0.856004  | -0.553035 | 0.162786  |
| XLOC_008417 | SOCS1        | chr16:11348273-11350039 | 3.52223   | 2.40094   | -0.552892 | 0.573076  |
| XLOC_014305 | DNAJC28      | chr21:34860237-34864023 | 0.32019   | 0.218305  | -0.552582 | 1         |
| XLOC_004555 | SCN4B        | chr11:118004091-1180236 | 0.0640066 | 0.0436451 | -0.552401 | 1         |
| XLOC_014458 | SLC2A11      | chr22:24199058-24227725 | 2.70475   | 1.84444   | -0.552309 | 0.316648  |
| XLOC_013797 | OPRL1        | chr20:62711470-62731996 | 2.07116   | 1.41251   | -0.552172 | 0.326632  |
| XLOC_007191 | DUOX1        | chr15:45422191-45457774 | 0.0478028 | 0.0326035 | -0.552067 | 1         |
| XLOC_009986 | RNF157       | chr17:74132414-74236390 | 0.670665  | 0.457663  | -0.551306 | 0.416474  |

|             |              |                          |           |           |           |           |
|-------------|--------------|--------------------------|-----------|-----------|-----------|-----------|
| XLOC_024001 | LOC286437    | chrX:103139054-103401701 | 0.220964  | 0.150791  | -0.551268 | 1         |
| XLOC_020411 | HOXA11-AS    | chr7:27225026-27228912   | 2.88897   | 1.97172   | -0.5511   | 0.457397  |
| XLOC_004832 | PRPF40B      | chr12:50017196-50101197  | 0.953972  | 0.651289  | -0.55065  | 0.921047  |
| XLOC_003777 | ENDOD1       | chr11:94822973-94865815  | 0.519943  | 0.354974  | -0.550642 | 0.450904  |
| XLOC_011733 | KCNN4        | chr19:44270684-44285409  | 9.2222    | 6.30286   | -0.549105 | 0.175368  |
| XLOC_017379 | PCDHB10      | chr5:140571951-140575213 | 0.327321  | 0.223761  | -0.548747 | 1         |
| XLOC_005693 | C12orf76     | chr12:110478982-11050550 | 1.65103   | 1.12917   | -0.548098 | 0.383398  |
| XLOC_022284 | LURAP1L      | chr9:127750111-12823059  | 4.8537    | 3.32016   | -0.547835 | 0.308227  |
| XLOC_020382 | AHR          | chr7:17338275-17385775   | 0.346294  | 0.2369    | -0.54772  | 1         |
| XLOC_003547 | RPLP0P2      | chr11:61382507-61406921  | 1.00222   | 0.685943  | -0.547044 | 0.430709  |
| XLOC_010925 | BCL3         | chr19:45251977-45263301  | 9.95021   | 6.81126   | -0.546804 | 0.236474  |
| XLOC_022508 | KIAA1958     | chr9:115249247-115422700 | 0.848761  | 0.581089  | -0.5466   | 0.501458  |
| XLOC_001347 | ZNF436       | chr1:23685940-23698330   | 1.74495   | 1.19467   | -0.546567 | 0.255557  |
| XLOC_010636 | LOC100507373 | chr19:14247963-14316997  | 0.496302  | 0.33995   | -0.545896 | 0.969963  |
| XLOC_000036 | TNFRSF14     | chr1:2487207-2495267     | 20.8536   | 14.2846   | -0.545836 | 0.138798  |
| XLOC_018631 | NRN1         | chr6:5998232-6007633     | 38.0494   | 26.0727   | -0.545332 | 0.0810244 |
| XLOC_017684 | LOC100272216 | chr5:68926979-68929028   | 0.0507078 | 0.0347508 | -0.545162 | 1         |
| XLOC_004749 | C12orf60     | chr12:14956505-14976791  | 1.69186   | 1.1596    | -0.544985 | 0.493243  |
| XLOC_016618 | ZNF732       | chr4:264463-289944       | 0.0212495 | 0.0145675 | -0.544675 | 1         |
| XLOC_003231 | NS3BP        | chr11:779453-780755      | 2.61056   | 1.78998   | -0.544416 | 0.487217  |
| XLOC_021628 | XKR9         | chr8:71581599-71648177   | 0.126031  | 0.0864282 | -0.544203 | 1         |
| XLOC_021506 | C8orf58      | chr8:22457113-22461662   | 36.6445   | 25.1328   | -0.544023 | 0.0906031 |
| XLOC_011451 | ZNF564       | chr19:12636183-12662356  | 1.9564    | 1.34213   | -0.543684 | 0.280816  |
| XLOC_001812 | TMOD4        | chr1:151129104-15114854  | 0.152753  | 0.104807  | -0.54347  | 1         |
| XLOC_004605 | V5IG2        | chr11:124617369-12462210 | 0.073422  | 0.0503788 | -0.543394 | 1         |
| XLOC_005881 | TPT1-AS1     | chr13:45915479-45965618  | 6.61587   | 4.54052   | -0.543074 | 0.272073  |
| XLOC_015942 | RPL32P3      | chr3:129101676-12911828  | 2.27886   | 1.56418   | -0.542902 | 0.362161  |
| XLOC_009523 | ZNF624       | chr17:16524047-16557167  | 0.355131  | 0.243974  | -0.541627 | 0.517621  |
| XLOC_010952 | CCDC61       | chr19:46498718-46521874  | 8.95237   | 6.15058   | -0.541548 | 0.263349  |
| XLOC_011637 | ZNF607       | chr19:38187263-38210691  | 1.58258   | 1.08732   | -0.541501 | 0.248124  |
| XLOC_014860 | CYP2D7P1     | chr22:42536213-42540575  | 0.958327  | 0.658462  | -0.541417 | 0.685558  |
| XLOC_017649 | ARL15        | chr5:53180613-53606403   | 1.41895   | 0.97545   | -0.540681 | 0.372752  |
| XLOC_011968 | IL11         | chr19:55875749-55881831  | 9.94687   | 6.8405    | -0.540142 | 0.131898  |
| XLOC_018243 | PHF1         | chr6:33378772-33384230   | 35.0747   | 24.122    | -0.540083 | 0.0803445 |
| XLOC_022963 | HIATL2       | chr9:99708326-99775862   | 1.44715   | 0.995286  | -0.540028 | 0.744243  |
| XLOC_007613 | RORA         | chr15:60780482-61521502  | 1.53203   | 1.05425   | -0.539231 | 0.156099  |
| XLOC_015086 | KIF9-AS1     | chr3:47205859-47388306   | 0.265507  | 0.18284   | -0.538166 | 1         |
| XLOC_011748 | NKPD1        | chr19:45653007-45663408  | 0.0217068 | 0.0149573 | -0.537298 | 1         |
| XLOC_015393 | VWTR1-AS1    | chr3:149235021-149421060 | 0.119203  | 0.0821905 | -0.536378 | 1         |
| XLOC_012284 | SNORD94      | chr2:86333304-86369280   | 7.08176   | 4.88583   | -0.535504 | 0.979701  |
| XLOC_013887 | NAPB         | chr20:23355155-23402156  | 1.78248   | 1.23006   | -0.535151 | 0.261311  |
| XLOC_003780 | JRKL         | chr11:96123157-96126727  | 1.70247   | 1.17506   | -0.534886 | 0.292417  |
| XLOC_006394 | SYNE2        | chr14:64319682-64693167  | 3.00437   | 2.07382   | -0.534775 | 0.381451  |
| XLOC_002030 | GAS5         | chr1:173832385-17383712  | 1535.79   | 1060.2    | -0.534648 | 0.102585  |
| XLOC_000944 | RGS2         | chr1:192778168-192781400 | 6.17797   | 4.26732   | -0.533804 | 0.272073  |
| XLOC_011453 | MAN2B1       | chr19:12757321-12777591  | 29.9308   | 20.6809   | -0.533331 | 0.0972878 |
| XLOC_014492 | EMID1        | chr22:29601900-29655586  | 9.86565   | 6.81948   | -0.532751 | 0.206941  |
| XLOC_011194 | CCDC106      | chr19:56158953-56164526  | 0.76953   | 0.53205   | -0.532416 | 0.738135  |
| XLOC_017284 | ZNF474       | chr5:121465214-12148926  | 7.26512   | 5.02853   | -0.530851 | 0.18287   |
| XLOC_022110 | SNORA72      | chr8:99053937-99057818   | 24.9685   | 17.2837   | -0.530694 | 0.972601  |
| XLOC_004689 | ENO2         | chr12:7023613-7032859    | 242.163   | 167.666   | -0.530391 | 0.117923  |
| XLOC_023420 | RIBC1        | chrX:53449804-53458063   | 0.56871   | 0.393774  | -0.530325 | 0.700083  |
| XLOC_008302 | ZNF276       | chr16:89773540-89883065  | 5.67479   | 3.92996   | -0.530054 | 0.638092  |
| XLOC_011527 | JAK3         | chr19:17935592-17958841  | 1.39559   | 0.966521  | -0.530007 | 0.34589   |
| XLOC_005583 | PTPRB        | chr12:70910631-71031220  | 0.0148053 | 0.0102568 | -0.529529 | 1         |
| XLOC_000804 | DUSP23       | chr1:159750758-159752333 | 27.602    | 19.1265   | -0.529201 | 0.273254  |
| XLOC_016536 | FAM160A1     | chr4:152330397-15258478  | 1.73715   | 1.20387   | -0.529036 | 0.293234  |
| XLOC_023152 | LOC100506599 | chr9:138354564-13836409  | 0.692406  | 0.479932  | -0.528788 | 0.524554  |
| XLOC_004271 | ZBTB3        | chr11:62518434-62521656  | 1.2774    | 0.885525  | -0.528603 | 0.46195   |
| XLOC_003361 | TMEM86A      | chr11:18720350-1874777   | 1.25855   | 0.872622  | -0.528335 | 0.383684  |
| XLOC_008889 | LRRC48       | chr17:17876126-17920189  | 0.234566  | 0.162676  | -0.527989 | 1         |
| XLOC_023029 | DFNB31       | chr9:117164359-11726773  | 15.7052   | 10.8946   | -0.527623 | 0.131385  |
| XLOC_013627 | SPAG4        | chr20:34203808-34208965  | 27.55     | 19.1208   | -0.526913 | 0.14313   |
| XLOC_003407 | RAG1         | chr11:36589562-36601310  | 0.0785777 | 0.0545397 | -0.526814 | 1         |
| XLOC_000174 | C1orf213     | chr1:23685940-23698330   | 1.21992   | 0.846739  | -0.526797 | 0.942472  |
| XLOC_000908 | AXDND1       | chr1:179334854-17954508  | 0.760845  | 0.528216  | -0.526474 | 0.442617  |
| XLOC_021765 | PTP4A3       | chr8:142432006-142441620 | 13.6837   | 9.50038   | -0.526397 | 0.276007  |
| XLOC_000382 | LINC00853    | chr1:47644921-47646011   | 1.90399   | 1.32216   | -0.526126 | 0.695626  |
| XLOC_011740 | ZFP112       | chr19:44830705-44860856  | 0.787096  | 0.546658  | -0.525902 | 0.410394  |
| XLOC_018118 | LINC00240    | chr6:26924771-26991753   | 0.782815  | 0.544144  | -0.524683 | 0.861353  |
| XLOC_014730 | POM121L10P   | chr22:25028881-25055114  | 0.037317  | 0.0259424 | -0.524524 | 1         |
| XLOC_002382 | OTUD1        | chr10:23728197-23731310  | 4.13443   | 2.87459   | -0.524333 | 0.236307  |
| XLOC_013057 | LOC100506123 | chr2:98081675-98091049   | 1.65274   | 1.14922   | -0.52421  | 0.346844  |
| XLOC_018127 | LOC100131289 | chr6:27729522-27730966   | 1.39021   | 0.966761  | -0.524074 | 0.714805  |
| XLOC_013542 | ZNF133       | chr20:18269120-18297640  | 5.91987   | 4.11905   | -0.523255 | 0.205713  |
| XLOC_010052 | DCXR         | chr17:79993756-79995573  | 223.631   | 155.619   | -0.523099 | 0.0917667 |
| XLOC_009572 | ALDOC        | chr17:26900132-26903951  | 197.983   | 137.797   | -0.522837 | 0.109906  |
| XLOC_001002 | LOC284581    | chr1:205831206-20586521  | 0.0307055 | 0.0213798 | -0.522247 | 1         |
| XLOC_010475 | ZNF57        | chr19:2900895-2918474    | 3.32197   | 2.31327   | -0.522103 | 0.283519  |

|             |                |                          |            |            |           |          |
|-------------|----------------|--------------------------|------------|------------|-----------|----------|
| XLOC_008588 | PLLP           | chr16:57290008-57318584  | 1.39394    | 0.971091   | -0.521493 | 0.624337 |
| XLOC_021495 | FGF17          | chr8:21900427-21906319   | 3.667      | 2.55492    | -0.521321 | 0.513989 |
| XLOC_006074 | SMAD9          | chr13:37418967-37494409  | 3.76395    | 2.62267    | -0.52121  | 0.153604 |
| XLOC_023182 | ABC2A2         | chr9:139901685-139931234 | 23.8918    | 16.6483    | -0.521138 | 0.102638 |
| XLOC_011891 | KLK14          | chr19:51581153-51587502  | 0.185958   | 0.129598   | -0.520937 | 1        |
| XLOC_016427 | FAM13A-AS1     | chr4:89630939-89978346   | 0.190728   | 0.132926   | -0.520897 | 1        |
| XLOC_017310 | SLC22A4        | chr5:131630144-131731306 | 0.446721   | 0.311437   | -0.520434 | 0.931471 |
| XLOC_005808 | FGF9           | chr13:22245214-22278640  | 0.328252   | 0.228887   | -0.520166 | 1        |
| XLOC_010088 | ROCK1P1        | chr18:109064-122222      | 0.458109   | 0.319586   | -0.519487 | 0.617065 |
| XLOC_004216 | YPEL4          | chr11:57412559-57417417  | 0.392295   | 0.27368    | -0.519448 | 0.75569  |
| XLOC_001535 | TRABD2B        | chr1:48226199-48462562   | 0.0562803  | 0.0392721  | -0.519125 | 1        |
| XLOC_023632 | FHL1           | chrX:135228860-135293511 | 0.127947   | 0.0892823  | -0.519103 | 1        |
| XLOC_009419 | VMO1           | chr17:4688579-4689729    | 1.02912    | 0.718143   | -0.519066 | 0.79799  |
| XLOC_020960 | KLHL7-AS1      | chr7:23140846-23145322   | 0.0711225  | 0.0496352  | -0.518941 | 1        |
| XLOC_012074 | FAM228B        | chr2:24346349-24392507   | 1.07951    | 0.753493   | -0.518708 | 0.571535 |
| XLOC_011262 | SHC2           | chr19:416582-460996      | 17.5824    | 12.2724    | -0.518707 | 0.160581 |
| XLOC_011153 | PRKCG          | chr19:54385466-54410901  | 4.03989    | 2.82004    | -0.518601 | 0.294176 |
| XLOC_011288 | BTBD2          | chr19:1985446-2015702    | 73.469     | 51.2877    | -0.518522 | 0.090094 |
| XLOC_023286 | PPEF1          | chrX:18709044-18846034   | 0.234475   | 0.163709   | -0.5183   | 1        |
| XLOC_001186 | LOC100130417   | chr1:852952-854817       | 0.406352   | 0.283716   | -0.518284 | 0.919413 |
| XLOC_014734 | LRP5L          | chr22:25747384-25777544  | 6.67009    | 4.65924    | -0.517612 | 0.280352 |
| XLOC_008507 | YPEL3          | chr16:30103634-30107537  | 24.8933    | 17.3915    | -0.517379 | 0.227355 |
| XLOC_003144 | C10orf118      | chr10:115881973-11593436 | 0.301771   | 0.210868   | -0.517114 | 1        |
| XLOC_009451 | DLG4           | chr17:7093209-7128586    | 20.5365    | 14.3523    | -0.516907 | 0.796801 |
| XLOC_011802 | PLA2G4C        | chr19:48551099-48614109  | 0.102181   | 0.0714143  | -0.516837 | 1        |
| XLOC_021750 | PVT1           | chr8:128902873-129113495 | 35.4433    | 24.7866    | -0.515954 | 0.105061 |
| XLOC_006658 | LINC00638      | chr14:105287537-10529005 | 0.303699   | 0.212466   | -0.515412 | 1        |
| XLOC_006461 | ESRRB          | chr14:76837689-76968180  | 0.211963   | 0.148306   | -0.515241 | 1        |
| XLOC_021040 | NPC1L1         | chr7:44552134-44580914   | 0.0178307  | 0.0124789  | -0.514878 | 1        |
| XLOC_022582 | DNM1           | chr9:130928343-131017527 | 10.8204    | 7.57318    | -0.514779 | 0.90314  |
| XLOC_017018 | LOC389247      | chr4:184415889-184425668 | 0.222827   | 0.155984   | -0.514532 | 1        |
| XLOC_007909 | FLJ39639       | chr16:3313767-3317566    | 0.194311   | 0.136041   | -0.514331 | 1        |
| XLOC_018026 | DKFZP686115217 | chr6:2988200-2991405     | 1.03052    | 0.721601   | -0.514094 | 0.598176 |
| XLOC_012040 | ID2            | chr2:8822112-8824583     | 3.4161     | 2.39374    | -0.513082 | 0.439482 |
| XLOC_000631 | LOC100130000   | chr1:143687129-143714186 | 0.0865299  | 0.060647   | -0.512762 | 1        |
| XLOC_018901 | ENPP5          | chr6:46127761-46138717   | 0.363826   | 0.255103   | -0.512171 | 0.642142 |
| XLOC_023117 | LOC100272217   | chr9:133452736-133454887 | 0.754885   | 0.529315   | -0.512131 | 0.610107 |
| XLOC_009613 | CCT6B          | chr17:33254877-33288528  | 1.36516    | 0.957231   | -0.512127 | 0.505355 |
| XLOC_015882 | ZBTB20         | chr3:114056946-114866127 | 0.0756603  | 0.0530894  | -0.511111 | 1        |
| XLOC_015634 | ACVR2B-AS1     | chr3:38492517-38534633   | 0.558056   | 0.391658   | -0.510817 | 0.943545 |
| XLOC_004714 | KLRG1          | chr12:9142220-9163340    | 0.155016   | 0.108806   | -0.510658 | 1        |
| XLOC_007671 | PARP6          | chr15:72533521-72563628  | 7.48085    | 5.25324    | -0.509993 | 0.169001 |
| XLOC_013984 | STK4-AS1       | chr20:43592439-43595099  | 0.0554456  | 0.0389484  | -0.509509 | 1        |
| XLOC_022823 | MSMP           | chr9:35749276-35754274   | 2.56128    | 1.79922    | -0.509497 | 0.827004 |
| XLOC_001063 | HLX            | chr1:221052742-221058400 | 0.38179    | 0.26821    | -0.509417 | 0.832722 |
| XLOC_003354 | LOC494141      | chr11:18230684-18235111  | 0.00947727 | 0.00665918 | -0.509126 | 1        |
| XLOC_007168 | CAPN3          | chr15:42651697-42704515  | 2.55176    | 1.79299    | -0.509125 | 0.501695 |
| XLOC_017627 | LOC100506548   | chr5:40825364-40829244   | 25.8245    | 18.1463    | -0.509066 | 0.108427 |
| XLOC_020429 | AQP1           | chr7:30951414-30965131   | 0.164455   | 0.115579   | -0.50881  | 1        |
| XLOC_009658 | PLXDC1         | chr17:37213271-37307902  | 0.108889   | 0.0765318  | -0.508728 | 1        |
| XLOC_003919 | LINC00167      | chr11:129769600-12987538 | 0.0665827  | 0.0467985  | -0.508686 | 1        |
| XLOC_012203 | OTX1           | chr2:63277191-63284966   | 2.02287    | 1.42235    | -0.50813  | 0.451265 |
| XLOC_022328 | DNAJB5         | chr9:34989637-34998430   | 3.99624    | 2.81025    | -0.507947 | 0.270682 |
| XLOC_011954 | GP6            | chr19:55525074-55549632  | 0.106606   | 0.0749707  | -0.507891 | 1        |
| XLOC_021114 | STAG3L2        | chr7:74298262-74306731   | 1.58833    | 1.11712    | -0.507719 | 0.544271 |
| XLOC_003774 | KDM4D          | chr11:94706844-94732676  | 0.398171   | 0.280071   | -0.507593 | 0.664752 |
| XLOC_011998 | ZNF814         | chr19:58380746-58400442  | 1.26476    | 0.889994   | -0.506995 | 0.263143 |
| XLOC_020588 | CROT           | chr7:86974950-87029112   | 0.803739   | 0.565786   | -0.506472 | 0.631673 |
| XLOC_008965 | ADAP2          | chr17:29248753-29286211  | 0.0479177  | 0.0337398  | -0.506107 | 1        |
| XLOC_018677 | HIST1H2AB      | chr6:26033319-26033796   | 0.36692    | 0.258402   | -0.505848 | 0.959465 |
| XLOC_009025 | LRRRC37A11P    | chr17:37186158-37209458  | 0.0220057  | 0.0154982  | -0.50577  | 1        |
| XLOC_017512 | RGS14          | chr5:176784843-176799595 | 6.05033    | 4.26377    | -0.504883 | 0.293234 |
| XLOC_004736 | CDKN1B         | chr12:12870301-12875305  | 10.3398    | 7.28785    | -0.504647 | 0.185354 |
| XLOC_013227 | LOC440925      | chr2:171568948-171571077 | 0.219566   | 0.154772   | -0.504503 | 1        |
| XLOC_005970 | CLYBL          | chr13:100258918-10054938 | 0.481725   | 0.339653   | -0.504146 | 0.536091 |
| XLOC_017920 | HAVCR2         | chr5:156512842-156536248 | 0.0322252  | 0.0227407  | -0.502911 | 1        |
| XLOC_013519 | C20orf196      | chr20:5731042-5844559    | 2.22381    | 1.56949    | -0.502737 | 0.547489 |
| XLOC_022624 | NTNG2          | chr9:135037333-135118220 | 2.03687    | 1.43802    | -0.502272 | 0.504447 |
| XLOC_005511 | ITGA7          | chr12:56075329-56106089  | 3.81152    | 2.6936     | -0.500831 | 0.366894 |
| XLOC_006136 | DHRS12         | chr13:52342128-52378298  | 2.41215    | 1.706      | -0.499698 | 0.57289  |
| XLOC_012850 | RBKS           | chr2:28004265-28561767   | 2.86455    | 2.02607    | -0.499625 | 0.945961 |
| XLOC_011338 | TINCR          | chr19:5558177-5568005    | 0.242719   | 0.171683   | -0.49954  | 1        |
| XLOC_004697 | C1RL-AS1       | chr12:7247145-7274447    | 0.310455   | 0.219604   | -0.499481 | 1        |
| XLOC_020797 | MGAM           | chr7:141695678-141806547 | 0.03083    | 0.0218083  | -0.499457 | 1        |
| XLOC_008198 | HAS3           | chr16:69139466-69166493  | 1.55852    | 1.10255    | -0.499338 | 0.945783 |
| XLOC_011406 | ZNF846         | chr19:9868150-9879410    | 0.320862   | 0.227097   | -0.498642 | 1        |
| XLOC_000611 | MAB21L3        | chr1:116654375-116677867 | 0.115377   | 0.0816628  | -0.498607 | 1        |
| XLOC_000787 | KIRREL         | chr1:157963062-158065844 | 1.01468    | 0.71847    | -0.498021 | 0.525666 |
| XLOC_006718 | HOMEZ          | chr14:23742843-23755309  | 2.20516    | 1.56154    | -0.497911 | 0.319344 |

|             |                       |                          |           |            |           |          |
|-------------|-----------------------|--------------------------|-----------|------------|-----------|----------|
| XLOC_015058 | ZKSCAN7               | chr3:44596712-44624973   | 0.680775  | 0.482178   | -0.497611 | 0.598645 |
| XLOC_002616 | ZNF518A               | chr10:97889471-97923517  | 1.24477   | 0.881729   | -0.497469 | 0.243246 |
| XLOC_018186 | PSORS1C1              | chr6:31082607-31107869   | 0.837277  | 0.593274   | -0.497007 | 0.853208 |
| XLOC_023439 | ZC3H12B               | chrX:64708614-64727767   | 0.26434   | 0.187318   | -0.49691  | 1        |
| XLOC_014712 | ZDHHC8P1              | chr22:23732791-23744799  | 1.02392   | 0.72563    | -0.496795 | 0.605975 |
| XLOC_012050 | ATPV1C2               | chr2:10861774-10952960   | 0.377202  | 0.267376   | -0.496467 | 0.979484 |
| XLOC_000256 | FAM167B               | chr1:32712817-32714461   | 0.957591  | 0.678857   | -0.496302 | 0.790283 |
| XLOC_021147 | TP53TG1               | chr7:86954663-86974808   | 7.46656   | 5.29486    | -0.49585  | 0.469503 |
| XLOC_016751 | AASDH                 | chr4:57204456-57253638   | 2.31679   | 1.64316    | -0.495652 | 0.285855 |
| XLOC_008296 | RPL13                 | chr16:89627064-89633237  | 1048.56   | 743.802    | -0.495418 | 0.224982 |
| XLOC_008506 | TBX6                  | chr16:30097114-30103205  | 1.08858   | 0.772588   | -0.494682 | 0.68726  |
| XLOC_016101 | CRYGS                 | chr3:186256231-186262161 | 2.1602    | 1.53317    | -0.494644 | 0.619231 |
| XLOC_015783 | HESX1                 | chr3:57231943-57234280   | 0.488244  | 0.346701   | -0.49391  | 0.79185  |
| XLOC_020755 | CPA4                  | chr7:129932973-129964021 | 0.03803   | 0.0270166  | -0.493293 | 1        |
| XLOC_022760 | MIR31HG               | chr9:21454266-21559697   | 0.304387  | 0.216393   | -0.49225  | 1        |
| XLOC_002640 | SCD                   | chr10:102106771-10212451 | 112.622   | 80.0755    | -0.492056 | 0.179646 |
| XLOC_005284 | CLEC2B                | chr12:10004967-10022458  | 0.289583  | 0.205911   | -0.491956 | 1        |
| XLOC_000659 | LOC388692             | chr1:149279475-149291741 | 0.402131  | 0.285967   | -0.49182  | 0.427321 |
| XLOC_006655 | ADSSL1                | chr14:105190533-10521361 | 2.25208   | 1.6017     | -0.491659 | 0.525354 |
| XLOC_004116 | FANCF                 | chr11:22644078-22647387  | 4.21474   | 2.99761    | -0.491633 | 0.254449 |
| XLOC_009544 | FAM83G                | chr17:18853988-18950336  | 9.15879   | 6.51419    | -0.491571 | 0.229068 |
| XLOC_010004 | DNAH17                | chr17:76374734-76573476  | 0.212759  | 0.151334   | -0.49148  | 1        |
| XLOC_023904 | AMER1                 | chrX:63404996-63425624   | 0.585641  | 0.416651   | -0.491179 | 0.41086  |
| XLOC_003048 | LOC100188947          | chr10:93066718-93371217  | 0.185862  | 0.132246   | -0.49101  | 1        |
| XLOC_009563 | LYRM9                 | chr17:26205339-26220409  | 3.00314   | 2.13689    | -0.490959 | 0.494356 |
| XLOC_015643 | ENTPD3-AS1            | chr3:40428672-40494799   | 0.157421  | 0.112052   | -0.490464 | 1        |
| XLOC_002334 | LOC399715             | chr10:6319649-6377937    | 0.303757  | 0.216246   | -0.490242 | 1        |
| XLOC_016602 | FAM149A               | chr4:187065994-187093817 | 1.30801   | 0.931308   | -0.490039 | 0.493884 |
| XLOC_008032 | SPN                   | chr16:29674270-29681823  | 0.0128933 | 0.00918497 | -0.489278 | 1        |
| XLOC_007618 | CA12                  | chr15:63615729-63674075  | 8.83659   | 6.29558    | -0.489152 | 0.205713 |
| XLOC_008232 | ZFP1                  | chr16:75182420-75206132  | 2.3488    | 1.67355    | -0.489017 | 0.295777 |
| XLOC_014434 | POM121L8P             | chr22:21636713-21652015  | 0.369634  | 0.263608   | -0.487703 | 0.565929 |
| XLOC_020562 | SPDYE5                | chr7:75124298-75133628   | 0.211962  | 0.15117    | -0.487639 | 1        |
| XLOC_011923 | ZNF816,ZNF816-ZNF321P | chr19:53430387-53466164  | 3.4411    | 2.45448    | -0.487455 | 0.29367  |
| XLOC_013067 | LYG1                  | chr2:99900700-99917639   | 2.63438   | 1.87909    | -0.487428 | 0.562531 |
| XLOC_007371 | GOLGA6L4              | chr15:84904524-84914120  | 0.143129  | 0.102098   | -0.487369 | 1        |
| XLOC_014887 | LOC100271722          | chr22:46435786-46440748  | 2.5427    | 1.81422    | -0.487009 | 0.488842 |
| XLOC_022611 | ASS1                  | chr9:133320093-133376661 | 122.784   | 87.6254    | -0.486704 | 0.123893 |
| XLOC_021524 | DPYSL2                | chr8:26371708-26515693   | 8.96205   | 6.39611    | -0.486635 | 0.169001 |
| XLOC_007990 | SMG1P1                | chr16:22430866-22503541  | 0.0482065 | 0.0344142  | -0.486226 | 1        |
| XLOC_006777 | FOXA1                 | chr14:38058756-38064325  | 1.52178   | 1.08674    | -0.485759 | 0.460102 |
| XLOC_012286 | KDM3A                 | chr2:86668270-86719839   | 19.8731   | 14.192     | -0.48574  | 0.167979 |
| XLOC_021802 | KIFC2                 | chr8:145691737-145701711 | 16.3819   | 11.6991    | -0.485711 | 0.33121  |
| XLOC_000713 | LCE1E                 | chr1:152758752-152760901 | 0.196681  | 0.140495   | -0.485343 | 1        |
| XLOC_009435 | NLRP1                 | chr17:5404718-5487832    | 0.361346  | 0.258132   | -0.48527  | 0.610406 |
| XLOC_010488 | TJP3                  | chr19:3708334-3761673    | 0.644984  | 0.461222   | -0.483801 | 0.921047 |
| XLOC_016708 | TLR1                  | chr4:38797875-38806412   | 0.0540439 | 0.0386486  | -0.483716 | 1        |
| XLOC_012839 | UCN                   | chr2:27505296-27531130   | 3.88847   | 2.78082    | -0.483693 | 0.761353 |
| XLOC_004765 | SLCO1B7               | chr12:21168629-21243040  | 0.258793  | 0.185118   | -0.483357 | 1        |
| XLOC_017544 | PP7080                | chr5:470624-473080       | 14.2771   | 10.213     | -0.483299 | 0.227422 |
| XLOC_016171 | CRIPAK                | chr4:1385339-1389782     | 1.21789   | 0.871248   | -0.483227 | 0.433739 |
| XLOC_018645 | ERVFRD-1              | chr6:11094265-11138969   | 0.0312225 | 0.0223401  | -0.482951 | 1        |
| XLOC_014512 | INPP5J                | chr22:31518960-31530683  | 3.34994   | 2.39732    | -0.482715 | 0.411593 |
| XLOC_020729 | SND1-IT1              | chr7:127292201-127732651 | 0.0548348 | 0.0392437  | -0.482633 | 1        |
| XLOC_021795 | MROH1                 | chr8:145202918-145316841 | 23.1819   | 16.5911    | -0.48259  | 0.19102  |
| XLOC_017319 | LEAP2                 | chr5:132209357-132210582 | 0.50361   | 0.360455   | -0.482488 | 0.86583  |
| XLOC_003942 | MIR210HG              | chr11:565656-568457      | 14.5278   | 10.4018    | -0.481991 | 0.207647 |
| XLOC_018213 | C2                    | chr6:31865561-31913449   | 0.182947  | 0.130995   | -0.481912 | 1        |
| XLOC_021668 | NECAB1                | chr8:91803920-91997485   | 0.0431677 | 0.0309216  | -0.48134  | 1        |
| XLOC_014859 | CYP2D6                | chr22:42522500-42526883  | 1.70518   | 1.22186    | -0.480849 | 0.6442   |
| XLOC_007454 | LOC283683             | chr15:23094330-23115254  | 0.0737462 | 0.052864   | -0.480284 | 1        |
| XLOC_018882 | CUL7                  | chr6:43005354-43021683   | 6.68171   | 4.79147    | -0.47975  | 0.182485 |
| XLOC_001985 | C1orf110              | chr1:162824086-162838601 | 0.311101  | 0.223103   | -0.479672 | 1        |
| XLOC_003745 | PRSS23                | chr11:86511490-86522273  | 3.83373   | 2.74983    | -0.479405 | 0.255861 |
| XLOC_007773 | PLIN1                 | chr15:90207599-90222648  | 0.133658  | 0.0958918  | -0.479062 | 1        |
| XLOC_011478 | PALM3                 | chr19:14164178-14169971  | 14.3192   | 10.2751    | -0.478807 | 0.195403 |
| XLOC_011255 | WASH5P                | chr19:60950-70966        | 2.79024   | 2.00231    | -0.478728 | 0.576801 |
| XLOC_019064 | C6orf170              | chr6:121400626-121655644 | 0.286713  | 0.205761   | -0.478641 | 1        |
| XLOC_009266 | GPRC5C                | chr17:72427666-72443568  | 0.471938  | 0.338758   | -0.478341 | 0.78631  |
| XLOC_001197 | ACAP3                 | chr1:1227763-1243269     | 6.60465   | 4.74122    | -0.478222 | 0.265659 |
| XLOC_020366 | PMS2CL                | chr7:6774935-6791232     | 2.71804   | 1.95118    | -0.478218 | 0.44093  |
| XLOC_011842 | RRAS                  | chr19:50138551-50143400  | 41.681    | 29.9242    | -0.478078 | 0.207314 |
| XLOC_007492 | GOLGA8B               | chr15:34817483-34875771  | 4.89584   | 3.51609    | -0.477584 | 0.211321 |
| XLOC_011447 | ZNF442                | chr19:12460184-12476475  | 0.414365  | 0.29759    | -0.477577 | 0.664504 |
| XLOC_001126 | CHRM3                 | chr1:239792372-240072711 | 0.0849446 | 0.0610064  | -0.477562 | 1        |
| XLOC_004371 | MTL5                  | chr11:68474907-68518988  | 1.99457   | 1.4326     | -0.477441 | 0.434696 |
| XLOC_011450 | ZNF709                | chr19:12571997-12595632  | 0.91074   | 0.654176   | -0.47736  | 0.41836  |
| XLOC_018945 | EYS                   | chr6:64429875-66417118   | 0.0100514 | 0.00722077 | -0.477171 | 1        |
| XLOC_007991 | LOC100132247          | chr16:22524843-22547841  | 2.25692   | 1.62181    | -0.476744 | 0.402127 |

|             |            |                          |            |            |           |          |
|-------------|------------|--------------------------|------------|------------|-----------|----------|
| XLOC_002641 | LINC00263  | chr10:102133332-10214811 | 15.2806    | 10.981     | -0.476694 | 0.287528 |
| XLOC_001784 | NBPF14     | chr1:148003641-14802584  | 3.02554    | 2.17469    | -0.476386 | 0.275337 |
| XLOC_021388 | ZNF767     | chr7:149244244-14932188  | 2.56211    | 1.84238    | -0.475765 | 0.42494  |
| XLOC_022672 | C9orf172   | chr9:139738866-13974179  | 0.643745   | 0.462969   | -0.475575 | 0.831797 |
| XLOC_022326 | IL11RA     | chr9:34652181-34662689   | 1.08572    | 0.780951   | -0.475346 | 0.646497 |
| XLOC_008968 | NF1        | chr17:29421944-29704695  | 1.06685    | 0.767518   | -0.475088 | 0.396027 |
| XLOC_020559 | STAG3L1    | chr7:74988428-74996914   | 0.0941582  | 0.0677402  | -0.475075 | 1        |
| XLOC_002499 | COL13A1    | chr10:71561643-71718904  | 2.95053    | 1.22293    | -0.474915 | 0.377846 |
| XLOC_004692 | PTPN6      | chr12:7055739-7070479    | 0.035545   | 0.0255783  | -0.474725 | 1        |
| XLOC_017780 | LOX        | chr5:121398889-12141405  | 1.12739    | 0.811457   | -0.474407 | 0.386954 |
| XLOC_017624 | DAB2       | chr5:39371775-39425335   | 0.0466354  | 0.033612   | -0.472493 | 1        |
| XLOC_006231 | DCUN1D2    | chr13:114110133-1141450  | 4.2451     | 3.06012    | -0.472208 | 0.294113 |
| XLOC_004057 | TRIM66     | chr11:8633583-8680383    | 0.487917   | 0.351817   | -0.471809 | 0.461481 |
| XLOC_024183 | RENBP      | chrX:153200721-15321023  | 0.257056   | 0.185431   | -0.4712   | 1        |
| XLOC_011918 | ZNF611     | chr19:53206065-53238307  | 0.493427   | 0.356021   | -0.470875 | 0.548577 |
| XLOC_024207 | CLIC2      | chrX:154505499-15456398  | 0.210047   | 0.151567   | -0.470757 | 1        |
| XLOC_011257 | FLJ45445   | chr19:197015-202209      | 0.0514097  | 0.037109   | -0.470271 | 1        |
| XLOC_012405 | TMEM37     | chr2:120189445-12019609  | 0.166453   | 0.120201   | -0.46966  | 1        |
| XLOC_001810 | SEMA6C     | chr1:151104162-15111914  | 2.72851    | 1.9704     | -0.469626 | 0.410733 |
| XLOC_023088 | ST6GALNAC6 | chr9:130647600-13066187  | 113.78     | 82.1854    | -0.469294 | 0.150679 |
| XLOC_022100 | TP53INP1   | chr8:95938199-95961615   | 2.14384    | 1.54855    | -0.469284 | 0.265949 |
| XLOC_001236 | RASA4      | chr7:102220092-10225720  | 4.97135    | 3.591      | -0.469252 | 0.216565 |
| XLOC_022186 | TMEM71     | chr8:133722191-13377291  | 0.713746   | 0.515583   | -0.469207 | 0.660278 |
| XLOC_011630 | ZNF585A    | chr19:37641000-37663615  | 0.984053   | 0.710859   | -0.469173 | 0.46196  |
| XLOC_011690 | B9D2       | chr19:41860321-41889987  | 7.18144    | 5.18844    | -0.468973 | 0.642487 |
| XLOC_023201 | PNPLA7     | chr9:140354404-14044498  | 1.92159    | 1.38864    | -0.468634 | 0.41212  |
| XLOC_006311 | G2E3       | chr14:31028328-31089046  | 1.09492    | 0.791259   | -0.468603 | 0.361524 |
| XLOC_011634 | ZNF571     | chr19:38039850-38105079  | 0.858001   | 0.620249   | -0.468132 | 0.637163 |
| XLOC_000219 | SYTL1      | chr1:27668482-27680423   | 14.9939    | 10.8404    | -0.467953 | 0.272435 |
| XLOC_012362 | GCC2       | chr2:109065576-10912585  | 0.731401   | 0.529118   | -0.467074 | 0.398607 |
| XLOC_001301 | CROCCP3    | chr1:16793930-16819196   | 0.32391    | 0.234504   | -0.465981 | 1        |
| XLOC_014430 | THAP7-AS1  | chr22:21354060-21368576  | 3.20453    | 2.32011    | -0.465921 | 0.938305 |
| XLOC_014564 | APOBEC3D   | chr22:39417117-39429256  | 0.124292   | 0.0899953  | -0.465813 | 1        |
| XLOC_011223 | ZNF17      | chr19:57922528-57933307  | 1.20945    | 0.876589   | -0.464375 | 0.507313 |
| XLOC_017579 | CMBL       | chr5:10277706-10308168   | 11.9224    | 8.64149    | -0.464318 | 0.177119 |
| XLOC_010635 | LOC113230  | chr19:14183820-14185874  | 5.12736    | 3.71654    | -0.464255 | 0.603292 |
| XLOC_022329 | C9orf131   | chr9:35041101-35045988   | 0.0193257  | 0.0140082  | -0.464252 | 1        |
| XLOC_017461 | CCNG1      | chr5:162864576-16287202  | 62.0986    | 45.0128    | -0.464227 | 0.145048 |
| XLOC_017688 | NAIP       | chr5:70264309-70320941   | 0.590612   | 0.428123   | -0.464186 | 0.496089 |
| XLOC_007984 | OTOA       | chr16:21689834-21772050  | 0.0671893  | 0.0487053  | -0.464152 | 1        |
| XLOC_023749 | PNPLA4     | chrX:7866803-7895780     | 9.4185     | 6.82911    | -0.4638   | 0.19939  |
| XLOC_000065 | ENO1-AS1   | chr1:8921058-8939943     | 0.455959   | 0.330621   | -0.463723 | 0.979701 |
| XLOC_014428 | AIFM3      | chr22:21319417-21335649  | 0.69464    | 0.503709   | -0.463674 | 0.670347 |
| XLOC_008632 | CTRL       | chr16:67927174-67965778  | 1.35969    | 0.985991   | -0.463634 | 0.954559 |
| XLOC_015899 | GOLGB1     | chr3:121382045-12146861  | 2.67322    | 1.93868    | -0.463501 | 0.244434 |
| XLOC_023836 | ZNF182     | chrX:47834249-47863394   | 1.24883    | 0.9057     | -0.46347  | 0.413738 |
| XLOC_022816 | CD72       | chr9:35605280-35618424   | 0.683704   | 0.495853   | -0.463459 | 0.982497 |
| XLOC_016351 | C4orf40    | chr4:71019903-71032326   | 0.00340459 | 0.00246939 | -0.463328 | 1        |
| XLOC_006889 | ALDH6A1    | chr14:74486058-74551196  | 2.8287     | 2.05251    | -0.462747 | 0.495952 |
| XLOC_011573 | ZNF724P    | chr19:23406606-23433172  | 0.258859   | 0.187866   | -0.462466 | 1        |
| XLOC_022357 | FAM201A    | chr9:38621084-38623277   | 4.12515    | 2.99543    | -0.461683 | 0.496089 |
| XLOC_007269 | FEM1B      | chr15:68570140-68583640  | 1.78039    | 1.29292    | -0.461562 | 0.539251 |
| XLOC_013253 | TTC30B     | chr2:178414880-17841752  | 0.148508   | 0.10787    | -0.461248 | 1        |
| XLOC_014783 | SLC55A4    | chr22:32614462-32651318  | 0.0557089  | 0.0404704  | -0.461043 | 1        |
| XLOC_017069 | SRD5A1     | chr5:6633499-6669675     | 3.12706    | 2.27246    | -0.460552 | 0.447323 |
| XLOC_021125 | TMEM120A   | chr7:75544419-75623992   | 39.3308    | 28.5833    | -0.460488 | 0.682587 |
| XLOC_016149 | PIGZ       | chr3:196673213-19669570  | 0.854489   | 0.62103    | -0.460399 | 0.651194 |
| XLOC_003841 | IL10RA     | chr11:117857105-1178721  | 0.0973277  | 0.0707431  | -0.460262 | 1        |
| XLOC_000601 | LRRIG2     | chr1:113615830-11366734  | 2.17455    | 1.58107    | -0.459815 | 0.362623 |
| XLOC_004572 | CCDC153    | chr11:119060962-1190665  | 0.264214   | 0.192114   | -0.459747 | 1        |
| XLOC_010408 | FBXO15     | chr18:71740587-71815100  | 0.491355   | 0.357334   | -0.459492 | 0.745821 |
| XLOC_022126 | RRM2B      | chr8:103216728-10325134  | 10.0174    | 7.2887     | -0.45878  | 0.170977 |
| XLOC_005099 | TCTN1      | chr12:111051831-1111276  | 6.24653    | 4.54518    | -0.458719 | 0.322381 |
| XLOC_021087 | LINC00174  | chr7:65841030-65865395   | 0.972705   | 0.707957   | -0.458342 | 0.590605 |
| XLOC_018654 | ATXN1      | chr6:16299342-16761721   | 0.397025   | 0.289019   | -0.458065 | 0.500097 |
| XLOC_011193 | ZNF581     | chr19:56154985-56156989  | 151.185    | 110.057    | -0.458058 | 0.173927 |
| XLOC_003821 | BCO2       | chr11:112046207-1120896  | 0.065271   | 0.0475151  | -0.458057 | 1        |
| XLOC_006836 | L3HYPDH    | chr14:59939405-59951073  | 2.80256    | 2.04118    | -0.457341 | 0.580078 |
| XLOC_002015 | SCYL3      | chr1:169764549-16986310  | 0.86224    | 0.628091   | -0.457116 | 0.872525 |
| XLOC_017837 | GFRA3      | chr5:137588068-13761025  | 0.101021   | 0.0735944  | -0.456993 | 1        |
| XLOC_002141 | NUAK2      | chr1:205271190-20529088  | 0.254263   | 0.185261   | -0.456766 | 1        |
| XLOC_002885 | ZNF248     | chr10:38065453-38147012  | 1.72262    | 1.25513    | -0.456758 | 0.368292 |
| XLOC_008521 | ZNF764     | chr16:30565084-30569642  | 3.70764    | 2.70227    | -0.45633  | 0.419017 |
| XLOC_015135 | PPM1M      | chr3:52279808-52284615   | 9.47641    | 6.9091     | -0.455842 | 0.272775 |
| XLOC_000977 | PPP1R12B   | chr1:202317829-20255769  | 0.556399   | 0.40583    | -0.455243 | 0.656018 |
| XLOC_018125 | ZNF391     | chr6:27356523-27369227   | 0.623137   | 0.454594   | -0.45497  | 0.730513 |
| XLOC_000443 | SGIP1      | chr1:66999824-67210768   | 0.5404     | 0.394509   | -0.453969 | 0.574636 |
| XLOC_005523 | STAT2      | chr12:56735381-56754037  | 5.58548    | 4.07925    | -0.453377 | 0.229068 |
| XLOC_005515 | MMP19      | chr12:56211805-56236767  | 2.16526    | 1.58218    | -0.452625 | 0.907688 |

|             |                     |                          |            |            |           |           |
|-------------|---------------------|--------------------------|------------|------------|-----------|-----------|
| XLOC_013372 | SLC23A3             | chr2:220026180-220034817 | 0.699518   | 0.511309   | -0.452166 | 0.69673   |
| XLOC_011838 | SLC17A7             | chr19:49932654-49944808  | 0.365795   | 0.267396   | -0.452058 | 0.778384  |
| XLOC_001291 | UQCRHL              | chr1:16133656-16134194   | 2.52485    | 1.84579    | -0.451961 | 0.734493  |
| XLOC_021222 | UFSP1               | chr7:100486343-100487333 | 3.63161    | 2.65532    | -0.45172  | 0.690388  |
| XLOC_014600 | C22orf32            | chr22:42475694-42480288  | 29.2367    | 21.3792    | -0.451575 | 0.19939   |
| XLOC_009293 | GALR2               | chr17:74070891-74073573  | 0.360373   | 0.263593   | -0.45118  | 0.931949  |
| XLOC_000356 | PLK3                | chrX:45266035-45272957   | 14.9377    | 10.9261    | -0.451178 | 0.261311  |
| XLOC_023669 | MTM1                | chrX:149737046-149841611 | 0.769828   | 0.563132   | -0.451062 | 0.576801  |
| XLOC_001714 | FAM212B             | chr1:112264685-112310195 | 1.17172    | 0.857338   | -0.450691 | 0.811389  |
| XLOC_005091 | FAM222A             | chr12:110152186-11021125 | 1.14229    | 0.835821   | -0.450658 | 0.778858  |
| XLOC_008512 | LOC613037           | chr16:30234349-30256932  | 4.55582    | 3.33396    | -0.450474 | 0.348936  |
| XLOC_020837 | ZNF398              | chr7:148823507-148880111 | 2.81348    | 2.05953    | -0.450044 | 0.290899  |
| XLOC_003560 | ROM1                | chr11:62369690-62382592  | 1.70203    | 1.24612    | -0.449814 | 0.950929  |
| XLOC_011446 | ZNF563              | chr19:12428303-12444534  | 0.964497   | 0.706198   | -0.449703 | 0.553879  |
| XLOC_008280 | ZNF469              | chr16:88493878-88507165  | 0.00794542 | 0.00581882 | -0.449398 | 1         |
| XLOC_010743 | PLEKHF1             | chr19:30156326-30166383  | 7.15815    | 5.24235    | -0.449373 | 0.441032  |
| XLOC_003127 | WDR96               | chr10:105889645-10599212 | 0.0516931  | 0.0378601  | -0.449291 | 1         |
| XLOC_015903 | WDR5B               | chr3:122130699-122134882 | 1.03624    | 0.759149   | -0.448897 | 0.496195  |
| XLOC_014548 | TRIOBP              | chr22:38092994-38172563  | 11.857     | 8.68697    | -0.448817 | 0.387388  |
| XLOC_020334 | GPR146              | chr7:1036622-1177893     | 5.59931    | 4.10236    | -0.448796 | 0.944724  |
| XLOC_010595 | SWSAP1              | chr19:11485382-11487627  | 3.00899    | 2.20503    | -0.44848  | 0.541415  |
| XLOC_011576 | ZNF681              | chr19:23921996-23941693  | 0.425641   | 0.311954   | -0.448303 | 0.548564  |
| XLOC_010777 | FXYP1               | chr19:35629731-35633954  | 1.61539    | 1.18408    | -0.44811  | 0.822284  |
| XLOC_018239 | RPS18               | chr6:33239851-33244281   | 14910.4    | 10930.9    | -0.447903 | 0.407645  |
| XLOC_018400 | ZNF292              | chr6:87865268-87973406   | 1.76955    | 1.29739    | -0.447773 | 0.290965  |
| XLOC_010990 | ZNF114              | chr19:48774653-48790863  | 4.02988    | 2.95512    | -0.447522 | 0.388744  |
| XLOC_007752 | LOC388152,LOC642423 | chr15:84860599-84898920  | 15.5525    | 11.4076    | -0.447161 | 0.202871  |
| XLOC_014532 | RASD2               | chr22:35937351-35950045  | 1.13673    | 0.833926   | -0.446896 | 0.624874  |
| XLOC_022604 | LOC100506190        | chr9:132250938-132275961 | 12.1172    | 8.89002    | -0.446797 | 0.274388  |
| XLOC_008749 | PITPNA-AS1          | chr17:1420212-1466110    | 16.3407    | 11.9924    | -0.446348 | 0.895479  |
| XLOC_005173 | TCTN2               | chr12:124155659-12419291 | 2.10513    | 1.54526    | -0.446055 | 0.471178  |
| XLOC_005372 | DDX11-AS1           | chr12:31173696-31257725  | 0.993363   | 0.72923    | -0.445947 | 0.963209  |
| XLOC_003224 | LRRC56              | chr11:537521-560779      | 2.22248    | 1.63164    | -0.445848 | 0.61004   |
| XLOC_019104 | IL20RA              | chr6:137321107-137366291 | 0.781305   | 0.573599   | -0.445842 | 0.596611  |
| XLOC_007967 | ITPR1L2             | chr16:19125253-19132952  | 4.08587    | 2.99984    | -0.445757 | 0.241449  |
| XLOC_003562 | SNORA57             | chr11:62430288-62441162  | 23.3515    | 17.151     | -0.445225 | 0.981044  |
| XLOC_003288 | TRIM22              | chr11:5710816-5732093    | 0.134546   | 0.0988526  | -0.444746 | 1         |
| XLOC_014500 | MTMR3               | chr22:30279157-30426857  | 4.67075    | 3.43171    | -0.444726 | 0.215563  |
| XLOC_014818 | BAIAP2L2            | chr22:38480895-38506676  | 0.136731   | 0.100483   | -0.444391 | 1         |
| XLOC_017742 | KIAA0825            | chr5:93486555-93954309   | 0.0257183  | 0.0189074  | -0.443846 | 0.0189074 |
| XLOC_003042 | PANK1               | chr10:91339253-91405329  | 0.278438   | 0.204726   | -0.443366 | 1         |
| XLOC_003423 | PRDM11              | chr11:45115563-45256675  | 0.25975    | 0.191073   | -0.443003 | 1         |
| XLOC_017547 | TPPP                | chr5:659976-693510       | 1.52719    | 1.12358    | -0.442775 | 0.436187  |
| XLOC_016489 | KIAA1109            | chr4:123091757-123283914 | 0.959368   | 0.706002   | -0.442412 | 0.282566  |
| XLOC_021306 | OPN1SW              | chr7:128379345-128415844 | 0.257526   | 0.189514   | -0.442412 | 1         |
| XLOC_022375 | PTGER4P2-CDK2AP2P2  | chr9:66494268-66503030   | 0.0565187  | 0.0415965  | -0.442266 | 1         |
| XLOC_010738 | ZNF254              | chr19:24269975-24312654  | 0.933413   | 0.687085   | -0.442027 | 0.505561  |
| XLOC_008022 | ATP2A1              | chr16:28889808-28936532  | 1.24064    | 0.913313   | -0.441903 | 0.931473  |
| XLOC_003836 | SIDT2               | chr11:117049938-11707551 | 3.99497    | 2.94096    | -0.441894 | 0.808776  |
| XLOC_021413 | CNPY1               | chr7:155293952-155326531 | 0.00734681 | 0.00540852 | -0.441883 | 1         |
| XLOC_022956 | HSD17B3             | chr9:98997588-99064434   | 0.27174    | 0.200068   | -0.44174  | 1         |
| XLOC_016950 | HHIP-AS1            | chr4:145564067-145659881 | 0.104657   | 0.0770677  | -0.441477 | 1         |
| XLOC_016902 | CAMK2D              | chr4:114372187-114683081 | 4.50354    | 3.31727    | -0.441063 | 0.255424  |
| XLOC_007370 | LOC440300           | chr15:84860599-84898920  | 0.171859   | 0.126638   | -0.440519 | 1         |
| XLOC_004260 | EEF1G               | chr11:62327072-62341460  | 4556.24    | 3357.71    | -0.440367 | 0.347004  |
| XLOC_006707 | SLC7A7              | chr14:23242431-23289020  | 0.19796    | 0.145892   | -0.44031  | 1         |
| XLOC_002827 | C10orf111           | chr10:15137383-15146256  | 0.167306   | 0.123311   | -0.440184 | 1         |
| XLOC_008231 | ZNRF1               | chr16:75032914-75144892  | 15.0693    | 11.1072    | -0.440117 | 0.223576  |
| XLOC_022229 | EPPK1               | chr8:144939911-144947434 | 0.0128136  | 0.00944655 | -0.439821 | 1         |
| XLOC_015396 | TSC22D2             | chr3:150126787-150177611 | 9.25607    | 6.82466    | -0.439642 | 0.266934  |
| XLOC_015515 | IL1RAP              | chr3:190231839-190374981 | 3.18709    | 2.35022    | -0.439444 | 0.449603  |
| XLOC_003898 | SLC37A2             | chr11:124933012-12496041 | 0.291907   | 0.215409   | -0.438429 | 1         |
| XLOC_010690 | KCNN1               | chr19:18062110-18109930  | 0.237632   | 0.175359   | -0.43842  | 1         |
| XLOC_009922 | LRRC37A3            | chr17:62850487-62914903  | 0.0387976  | 0.028631   | -0.438387 | 1         |
| XLOC_007277 | RPLP1               | chr15:69745158-69747884  | 11841.4    | 8738.64    | -0.438361 | 0.315903  |
| XLOC_022908 | C9orf153            | chr9:88835179-88874572   | 0.0592014  | 0.0436918  | -0.438268 | 1         |
| XLOC_008382 | TIGD7               | chr16:3348807-3368576    | 0.131965   | 0.0974383  | -0.43759  | 1         |
| XLOC_007911 | ZNF75A              | chr16:3348807-3368576    | 1.39441    | 1.02965    | -0.437493 | 0.624684  |
| XLOC_007013 | HERC2P7             | chr15:23390721-23393943  | 3.46712    | 2.56068    | -0.43721  | 0.48881   |
| XLOC_004439 | RAB30               | chr11:82692477-82782884  | 0.359443   | 0.265526   | -0.436907 | 0.836982  |
| XLOC_002280 | HNRNPU-AS1          | chr1:244998638-245010241 | 6.25682    | 4.62206    | -0.436895 | 0.32849   |
| XLOC_003544 | PPP1R32             | chr11:61248584-61258400  | 0.665345   | 0.492057   | -0.435278 | 0.79263   |
| XLOC_001620 | TLLL7               | chr1:84259597-84464833   | 0.171518   | 0.12686    | -0.435119 | 1         |
| XLOC_008436 | MYH11               | chr16:15737123-15950887  | 0.0878395  | 0.0649822  | -0.434826 | 1         |
| XLOC_005330 | HIST4H4             | chr12:14923653-14924065  | 0.750426   | 0.555293   | -0.434461 | 0.941637  |
| XLOC_014587 | TEF                 | chr22:41763336-41795332  | 2.74996    | 2.035      | -0.434381 | 0.400128  |
| XLOC_010387 | LMAN1               | chr18:56995055-57026508  | 2.34273    | 1.73374    | -0.434301 | 0.349665  |
| XLOC_015580 | TMEM40              | chr3:12775391-12800808   | 0.118021   | 0.087345   | -0.434242 | 1         |
| XLOC_001320 | LOC100506730        | chr1:19619740-19622230   | 1.94072    | 1.4363     | -0.43424  | 0.513155  |



|             |                       |                          |            |           |           |          |
|-------------|-----------------------|--------------------------|------------|-----------|-----------|----------|
| XLOC_003507 | DTX4                  | chr11:58939811-58980494  | 1.40847    | 1.04254   | -0.434021 | 0.453988 |
| XLOC_001725 | BCL2L15               | chr1:114356432-11444774  | 0.0621947  | 0.0460379 | -0.43397  | 1        |
| XLOC_010911 | ZNF230                | chr19:44507076-44518072  | 0.784132   | 0.580617  | -0.433511 | 0.550446 |
| XLOC_018024 | LOC100508120          | chr6:2245986-2413825     | 0.64289    | 0.476091  | -0.433334 | 0.771224 |
| XLOC_003427 | CRY2                  | chr11:45868668-45904799  | 4.89122    | 3.62256   | -0.433185 | 0.326714 |
| XLOC_006104 | TP1                   | chr13:45911303-45915297  | 4824.89    | 3575.13   | -0.432499 | 0.332289 |
| XLOC_023518 | HNRNPH2,RPL36A,RPL36A | chrX:100645877-100669121 | 1930.74    | 1430.69   | -0.432442 | 0.287528 |
| XLOC_000844 | DDR2                  | chr1:162602227-162750247 | 0.112589   | 0.0834373 | -0.432302 | 1        |
| XLOC_022479 | MSANTD3,MSANTD3-TMEF  | chr9:103189494-103339918 | 83.3707    | 61.8171   | -0.431535 | 0.215563 |
| XLOC_010736 | RPSAP58               | chr19:23945815-24010919  | 52.5585    | 38.9712   | -0.431516 | 0.212399 |
| XLOC_008175 | PLEKHG4               | chr16:67311412-67360661  | 4.36664    | 3.23906   | -0.430949 | 0.348909 |
| XLOC_022095 | GEM                   | chr8:95261484-95274547   | 1.80764    | 1.3409    | -0.430906 | 0.582884 |
| XLOC_008306 | TUBB3                 | chr16:89988416-90002505  | 69.4501    | 51.5374   | -0.430357 | 0.200886 |
| XLOC_016468 | ENPEP                 | chr4:111397228-111484493 | 0.0416169  | 0.0308867 | -0.430184 | 1        |
| XLOC_018516 | PDE7B                 | chr6:136172833-136516708 | 0.145475   | 0.107974  | -0.430087 | 1        |
| XLOC_010547 | TGFB3R3L              | chr19:7981031-7983980    | 0.484907   | 0.360073  | -0.429418 | 0.938194 |
| XLOC_003440 | DDB2                  | chr11:47236492-47260769  | 28.0993    | 20.8666   | -0.429339 | 0.236139 |
| XLOC_008666 | ZNF821                | chr16:71893582-71918093  | 5.85488    | 4.34891   | -0.428986 | 0.425831 |
| XLOC_008594 | ZNF319                | chr16:58028572-58033762  | 3.49655    | 2.59776   | -0.428666 | 0.398538 |
| XLOC_012055 | GREB1                 | chr2:11674241-11782912   | 0.0723646  | 0.0537747 | -0.428356 | 1        |
| XLOC_010804 | HCS2                  | chr19:36393381-36395173  | 2.09378    | 1.55593   | -0.428335 | 0.848789 |
| XLOC_020872 | LOC100128822          | chr7:152161208-152162630 | 9.15626    | 6.80555   | -0.428047 | 0.477937 |
| XLOC_008806 | ACADVL                | chr17:7093209-7128586    | 135.748    | 100.903   | -0.427954 | 0.356483 |
| XLOC_016600 | C4orf47               | chr4:186350544-186392913 | 1.37391    | 1.02129   | -0.427904 | 0.759967 |
| XLOC_002670 | CUX1                  | chr7:101459183-101927250 | 27.6477    | 20.5573   | -0.427506 | 0.343608 |
| XLOC_018374 | SMAP1                 | chr6:71377478-71666788   | 3.93398    | 2.9252    | -0.427452 | 0.381306 |
| XLOC_000758 | HCN3                  | chr1:155247217-155271228 | 0.849307   | 0.631592  | -0.427293 | 0.731633 |
| XLOC_023686 | ZNF185                | chrX:152082985-152142028 | 0.166882   | 0.12411   | -0.427213 | 1        |
| XLOC_002994 | TTC18                 | chr10:75007124-75118617  | 0.465257   | 0.34602   | -0.427172 | 0.931372 |
| XLOC_007701 | CSPG4                 | chr15:75966662-76005189  | 0.0176129  | 0.0130992 | -0.427156 | 1        |
| XLOC_023378 | CCDC120               | chrX:48910960-48927510   | 0.359293   | 0.267402  | -0.42615  | 0.739919 |
| XLOC_011950 | LENG9                 | chr19:54960064-54974894  | 16.0176    | 11.9226   | -0.425956 | 0.650855 |
| XLOC_012178 | PPP1R21               | chr2:48667907-48742531   | 3.7827     | 2.81593   | -0.425805 | 0.34222  |
| XLOC_000319 | RIMKLA                | chr1:42846467-42889900   | 2.92393    | 2.1769    | -0.425637 | 0.280427 |
| XLOC_001796 | MTMR11                | chr1:149900542-149908793 | 2.93798    | 2.18783   | -0.425325 | 0.471178 |
| XLOC_022183 | KCNQ3                 | chr8:133133104-133493004 | 0.00881967 | 0.0065682 | -0.425226 | 1        |
| XLOC_020840 | ZNF783                | chr7:148959261-148982088 | 2.05528    | 1.53068   | -0.425158 | 0.476185 |
| XLOC_021904 | PHYHIP                | chr8:22077215-22089851   | 0.174401   | 0.129904  | -0.424966 | 1        |
| XLOC_010778 | FXYD7                 | chr19:35634153-35645205  | 0.304668   | 0.226964  | -0.424775 | 1        |
| XLOC_000916 | KIAA1614              | chr1:180882312-180915238 | 0.0287846  | 0.0214446 | -0.424684 | 1        |
| XLOC_016491 | BBS12                 | chr4:123653856-123666098 | 0.735512   | 0.547979  | -0.42463  | 0.624281 |
| XLOC_011434 | EPOR                  | chr19:11487880-11495018  | 6.3471     | 4.72939   | -0.424443 | 0.397842 |
| XLOC_022032 | LOC100505718          | chr8:69824037-70016425   | 4.09186    | 3.04896   | -0.42444  | 0.401852 |
| XLOC_010672 | OCEL1                 | chr19:17337054-17340028  | 25.3236    | 18.872    | -0.424238 | 0.33202  |
| XLOC_009468 | LOC284023             | chr17:7816639-7819265    | 5.31575    | 3.96155   | -0.424208 | 0.373169 |
| XLOC_020416 | CREB5                 | chr7:28338939-28865511   | 3.31328    | 2.46931   | -0.424152 | 0.258126 |
| XLOC_015439 | LRRIQ4                | chr3:169539709-169555560 | 0.0446799  | 0.0333043 | -0.423918 | 1        |
| XLOC_020841 | LOC155060             | chr7:148982371-148994403 | 3.78023    | 2.81804   | -0.42378  | 0.442443 |
| XLOC_007753 | GOLGA6L5              | chr15:85045805-85060078  | 0.236098   | 0.176038  | -0.423503 | 1        |
| XLOC_015894 | FSTL1                 | chr3:120113060-120169918 | 0.0371775  | 0.0277212 | -0.423441 | 1        |
| XLOC_007210 | GABPB1-AS1            | chr15:50569388-50650503  | 1.46187    | 1.09047   | -0.42286  | 0.867538 |
| XLOC_004913 | TMEM198B              | chr12:56211805-56236767  | 2.26304    | 1.68824   | -0.422738 | 0.931355 |
| XLOC_005831 | PDX1                  | chr13:28494167-28500451  | 2.47194    | 1.84494   | -0.422069 | 0.590605 |
| XLOC_008400 | ZNF500                | chr16:4800814-4817166    | 4.14552    | 3.09453   | -0.421835 | 0.433992 |
| XLOC_008660 | ZNF19                 | chr16:71507975-71523254  | 0.812556   | 0.606603  | -0.421714 | 0.657414 |
| XLOC_022846 | ZNF658                | chr9:40771401-40792112   | 0.223625   | 0.166946  | -0.421704 | 1        |
| XLOC_024037 | RPL39                 | chrX:118920468-118925601 | 9537.85    | 7121.28   | -0.421528 | 0.309063 |
| XLOC_005594 | NAP1L1                | chr12:76438671-76478738  | 166.074    | 124.006   | -0.421418 | 0.263143 |
| XLOC_014411 | TBX1                  | chr22:19744225-19771112  | 2.09966    | 1.56798   | -0.421245 | 0.728031 |
| XLOC_000409 | ACOT11                | chr1:55013806-55100417   | 0.244739   | 0.182768  | -0.421229 | 1        |
| XLOC_015825 | GBE1                  | chr3:81538849-81810950   | 31.0307    | 23.1746   | -0.421154 | 0.229414 |
| XLOC_020844 | ZNF862                | chr7:149535508-149564568 | 1.33219    | 0.995078  | -0.420923 | 0.461971 |
| XLOC_018538 | UTRN                  | chr6:144612872-145174170 | 1.19509    | 0.892696  | -0.420883 | 0.326673 |
| XLOC_021403 | SMARCD3               | chr7:150936058-150974231 | 61.0166    | 45.5953   | -0.420317 | 0.235468 |
| XLOC_016712 | RPL9                  | chr4:39455744-39460568   | 5326.71    | 3980.98   | -0.420122 | 0.345217 |
| XLOC_018825 | NUDT3,RPS10,RPS10-NUD | chr6:34254972-34393902   | 6470.17    | 4835.64   | -0.420095 | 0.332187 |
| XLOC_022464 | FAM22G                | chr9:99691285-99704572   | 0.105789   | 0.0790912 | -0.419598 | 1        |
| XLOC_011155 | CACNG8                | chr19:54466289-54493469  | 0.158793   | 0.118727  | -0.419504 | 1        |
| XLOC_010444 | HMHA1                 | chr19:1065921-1095391    | 25.5715    | 19.124    | -0.419155 | 0.850795 |
| XLOC_002965 | RUFY2                 | chr10:70103274-70167051  | 1.85769    | 1.38948   | -0.418965 | 0.416586 |
| XLOC_007779 | IDH2                  | chr15:90627211-90645708  | 59.4212    | 44.446    | -0.418923 | 0.234679 |
| XLOC_011249 | ZNF324B               | chr19:58962970-58969199  | 2.34037    | 1.75074   | -0.418772 | 0.551547 |
| XLOC_022663 | C9orf163              | chr9:139334547-139380518 | 0.500572   | 0.37467   | -0.417959 | 0.985095 |
| XLOC_022251 | ZNF34                 | chr8:145998500-146012728 | 1.77046    | 1.32519   | -0.417922 | 0.6289   |
| XLOC_010201 | ELAC1                 | chr18:48494386-48514490  | 2.29927    | 1.72128   | -0.417688 | 0.522318 |
| XLOC_010823 | ZNF527                | chr19:37862058-37883966  | 1.02893    | 0.770397  | -0.417471 | 0.501695 |
| XLOC_000762 | ASH1L-AS1             | chr1:155305051-155533738 | 2.80339    | 2.09929   | -0.417271 | 0.921486 |
| XLOC_008066 | HSD3B7                | chr16:3096518-31000473   | 26.6062    | 19.9251   | -0.417181 | 0.262818 |
| XLOC_014986 | NR1D2                 | chr3:23986750-24022109   | 3.65835    | 2.73986   | -0.417089 | 0.310429 |

|             |                       |                          |            |            |           |          |
|-------------|-----------------------|--------------------------|------------|------------|-----------|----------|
| XLOC_004173 | RAPSN                 | chr11:47459307-47470730  | 0.150902   | 0.11303    | -0.416902 | 1        |
| XLOC_000197 | PDIK1L                | chr1:26437655-26452039   | 2.15959    | 1.61762    | -0.416885 | 0.40089  |
| XLOC_012092 | AGBL5                 | chr2:27274490-27294567   | 14.3672    | 10.762     | -0.416832 | 0.849948 |
| XLOC_001437 | LOC653160             | chr1:35441299-35444307   | 0.92689    | 0.694336   | -0.416763 | 0.792779 |
| XLOC_000017 | SCNN1D                | chr1:1215815-1227409     | 1.49237    | 1.11819    | -0.416443 | 0.667938 |
| XLOC_012333 | NPAS2                 | chr2:101436612-101613287 | 8.92716    | 6.68911    | -0.416386 | 0.293231 |
| XLOC_003053 | MYOF                  | chr10:95066185-95242074  | 14.4626    | 10.8372    | -0.416333 | 0.217274 |
| XLOC_013870 | SNORD17               | chr20:17922243-17949490  | 2.42668    | 1.81851    | -0.41623  | 0.982907 |
| XLOC_012236 | DYSF                  | chr2:71680752-71913893   | 0.138617   | 0.103883   | -0.416139 | 1        |
| XLOC_014558 | KDEL3                 | chr22:38864082-38902345  | 15.7951    | 11.8387    | -0.415963 | 0.93165  |
| XLOC_018244 | SYNGAP1               | chr6:33387846-33421466   | 3.68965    | 2.76639    | -0.415479 | 0.41186  |
| XLOC_020733 | HILPDA                | chr7:128095883-128098472 | 30.4092    | 22.804     | -0.415222 | 0.29172  |
| XLOC_001252 | SLC2A5                | chr1:9097004-9129887     | 0.0610137  | 0.0457652  | -0.414882 | 1        |
| XLOC_011575 | ZNF675                | chr19:23835707-23870017  | 2.05967    | 1.54517    | -0.414646 | 0.520144 |
| XLOC_004954 | METTL21B              | chr12:58166382-58176324  | 3.35024    | 2.51368    | -0.414462 | 0.475737 |
| XLOC_000846 | RGS4                  | chr1:163038395-163046592 | 16.8679    | 12.6564    | -0.414412 | 0.267105 |
| XLOC_009320 | ENGASE                | chr17:77071018-77084685  | 4.82086    | 3.61769    | -0.414222 | 0.366979 |
| XLOC_006473 | NRXN3                 | chr14:78636715-80334633  | 0.00199738 | 0.00149933 | -0.413785 | 1        |
| XLOC_008910 | RNF112                | chr17:19314490-19320589  | 0.354334   | 0.266023   | -0.413557 | 0.804017 |
| XLOC_018969 | LCA5                  | chr6:80194707-80247147   | 0.304527   | 0.228692   | -0.413116 | 1        |
| XLOC_005073 | TCP11L2               | chr12:106696580-10674075 | 0.597426   | 0.448665   | -0.413122 | 0.734977 |
| XLOC_001647 | GEMIN8P4              | chr1:90458823-90460525   | 1.31754    | 0.989663   | -0.412841 | 0.715655 |
| XLOC_016534 | RPS3A                 | chr4:152020724-152025802 | 4041.82    | 3036.89    | -0.412413 | 0.361524 |
| XLOC_007434 | ALDH1A3               | chr15:101420008-10145682 | 0.0340314  | 0.0255766  | -0.412038 | 1        |
| XLOC_000648 | HYDIN2                | chr1:146310551-146334210 | 0.00404031 | 0.00303688 | -0.411877 | 1        |
| XLOC_016796 | CDKL2                 | chr4:76501703-76555721   | 0.201847   | 0.151789   | -0.411191 | 1        |
| XLOC_022024 | SNHG6                 | chr8:67782983-67837777   | 1129.62    | 849.572    | -0.411024 | 0.253547 |
| XLOC_010931 | APOC1                 | chr19:45417920-45422606  | 11.365     | 8.54866    | -0.411083 | 0.641082 |
| XLOC_020596 | C7orf63               | chr7:89874487-89940377   | 0.623316   | 0.468957   | -0.410508 | 0.638499 |
| XLOC_016829 | FAM175A               | chr4:84377117-84406290   | 5.85056    | 4.40195    | -0.410433 | 0.618966 |
| XLOC_015689 | PFKFB4                | chr3:48555116-48594227   | 58.3141    | 43.8803    | -0.410271 | 0.311376 |
| XLOC_001737 | NHLH2                 | chr1:116378998-116383747 | 0.587298   | 0.441996   | -0.410058 | 0.744334 |
| XLOC_001761 | LOC728875             | chr1:144480745-144521965 | 0.160534   | 0.120852   | -0.409629 | 1        |
| XLOC_007639 | IGDCC4                | chr15:65673824-65715410  | 0.131483   | 0.0990013  | -0.409358 | 1        |
| XLOC_002655 | DPCD                  | chr10:103348088-10336941 | 72.3257    | 54.4661    | -0.40915  | 0.278399 |
| XLOC_013196 | CD302.LY75.LY75-CD302 | chr2:160625138-160761267 | 0.431652   | 0.32514    | -0.408805 | 0.686668 |
| XLOC_024203 | F8                    | chrX:154064063-154250991 | 3.19186    | 2.4043     | -0.408782 | 0.610093 |
| XLOC_010679 | SLC27A1               | chr19:17581299-17616977  | 6.18046    | 4.6558     | -0.408684 | 0.393354 |
| XLOC_001609 | LRRIQ3                | chr1:74491701-74663871   | 0.19222    | 0.144823   | -0.408469 | 1        |
| XLOC_010888 | RPS19                 | chr19:42363987-42375484  | 6513.93    | 4907.84    | -0.408441 | 0.355297 |
| XLOC_003301 | DNHD1                 | chr11:6518525-6593254    | 0.632974   | 0.476997   | -0.408167 | 0.709891 |
| XLOC_016286 | LOC401127             | chr4:39481874-39483523   | 0.0788738  | 0.0594385  | -0.408148 | 1        |
| XLOC_010867 | LTBP4                 | chr19:41099071-41135725  | 13.8565    | 10.4469    | -0.407484 | 0.295409 |
| XLOC_003946 | CDHR5                 | chr11:616564-625067      | 0.0182579  | 0.0137686  | -0.407135 | 1        |
| XLOC_011013 | LIN7B                 | chr19:49617617-49622397  | 2.97444    | 2.24339    | -0.406938 | 0.883938 |
| XLOC_017383 | PCDHB14               | chr5:140603077-140605860 | 3.11922    | 2.35263    | -0.406913 | 0.488875 |
| XLOC_006061 | HSPH1                 | chr13:31710762-31736117  | 4.64663    | 3.50481    | -0.406847 | 0.378081 |
| XLOC_021505 | PDLIM2                | chr8:22436253-22455538   | 156.722    | 118.228    | -0.406634 | 0.261311 |
| XLOC_005157 | B3GNT4                | chr12:122688227-12269208 | 2.34509    | 1.76927    | -0.406489 | 0.687296 |
| XLOC_004962 | SRGAP1                | chr12:64238540-64541613  | 0.533765   | 0.402968   | -0.405554 | 0.571112 |
| XLOC_002386 | GPR158                | chr10:25447000-25891157  | 0.166893   | 0.126031   | -0.405144 | 1        |
| XLOC_015265 | GRAMD1C               | chr3:113557680-113666027 | 0.767636   | 0.579689   | -0.405143 | 0.618378 |
| XLOC_006911 | NOXRRED1              | chr14:77860364-77889399  | 0.192163   | 0.145115   | -0.405141 | 1        |
| XLOC_010513 | HSD11B1L              | chr19:5678432-5688534    | 1.11738    | 0.84407    | -0.404683 | 0.977103 |
| XLOC_008878 | C17orf76-AS1.SNORD49B | chr17:16342300-16395505  | 1363.12    | 1029.78    | -0.404578 | 0.311553 |
| XLOC_016748 | CLOCK                 | chr4:56294067-56413076   | 0.800389   | 0.604708   | -0.404462 | 0.461321 |
| XLOC_018869 | FRS3                  | chr6:41737913-41747630   | 4.42949    | 3.34695    | -0.404295 | 0.525846 |
| XLOC_003717 | RPS3                  | chr11:75110534-75133345  | 3234.23    | 2443.88    | -0.404253 | 0.459823 |
| XLOC_016926 | ANKRD50               | chr4:125585203-125633887 | 1.15056    | 0.869403   | -0.404238 | 0.419017 |
| XLOC_005065 | HCFC2                 | chr12:104458235-10450030 | 0.730784   | 0.552601   | -0.403206 | 0.56075  |
| XLOC_002583 | IFIT1                 | chr10:91152302-91166244  | 0.163434   | 0.123611   | -0.402907 | 1        |
| XLOC_002948 | FAM13C                | chr10:60936347-61122661  | 0.00525809 | 0.00397755 | -0.402656 | 1        |
| XLOC_009818 | HOXB5                 | chr17:46667822-46683774  | 2.49772    | 1.88973    | -0.402432 | 0.85843  |
| XLOC_004244 | SLC15A3               | chr11:60691912-60719257  | 2.6854     | 2.03212    | -0.402147 | 0.965573 |
| XLOC_011625 | ZNF529                | chr19:37034516-37096178  | 1.60927    | 1.21873    | -0.401023 | 0.487618 |
| XLOC_004067 | LOC644656             | chr11:9481102-9482245    | 2.03265    | 1.53939    | -0.401005 | 0.716614 |
| XLOC_014902 | HDAC10                | chr22:50683612-50689834  | 13.3848    | 10.1403    | -0.400493 | 0.373076 |
| XLOC_017954 | LOC100268168          | chr5:172381785-172386377 | 3.44221    | 2.60832    | -0.400214 | 0.654501 |
| XLOC_001000 | CDK18                 | chr1:205473683-205501927 | 8.75912    | 6.63909    | -0.3998   | 0.366894 |
| XLOC_021526 | EPHX2                 | chr8:27348518-27402439   | 5.17252    | 3.92073    | -0.399746 | 0.44532  |
| XLOC_000030 | CALML6                | chr1:1846265-1848733     | 0.143081   | 0.108474   | -0.399484 | 1        |
| XLOC_023770 | INE2                  | chrX:15756411-15805748   | 2.43428    | 1.84568    | -0.399342 | 0.738894 |
| XLOC_018452 | FAM229B               | chr6:112391859-112423993 | 2.73408    | 2.07309    | -0.399271 | 0.913628 |
| XLOC_014824 | DDX17                 | chr22:38864082-38902345  | 65.9137    | 49.981     | -0.399199 | 0.334482 |
| XLOC_006012 | ANKRD20A9P            | chr13:19408542-19446109  | 0.0870303  | 0.0660108  | -0.398815 | 1        |
| XLOC_004744 | HTR7P1                | chr12:13153375-13157764  | 0.944616   | 0.71652    | -0.398721 | 0.638092 |
| XLOC_022246 | FOXH1                 | chr8:145691737-145701718 | 11.4427    | 8.67974    | -0.398698 | 0.694038 |
| XLOC_008881 | CCDC144A              | chr17:16593638-16678311  | 0.00224617 | 0.00170419 | -0.398383 | 1        |
| XLOC_016076 | CCDC39                | chr3:180331795-180397282 | 0.00687386 | 0.00521558 | -0.398294 | 1        |

|             |                     |                          |            |            |           |          |
|-------------|---------------------|--------------------------|------------|------------|-----------|----------|
| XLOC_007252 | ANKDD1A             | chr15:65204100-65251041  | 1.22674    | 0.930926   | -0.39809  | 0.620054 |
| XLOC_022843 | ANKRD18A            | chr9:38571360-38620360   | 0.456403   | 0.34636    | -0.398035 | 0.711277 |
| XLOC_012743 | DUSP28              | chr2:241499470-241503431 | 2.95131    | 2.23978    | -0.397996 | 0.710885 |
| XLOC_011078 | ZNF613              | chr19:52430687-52449011  | 1.75083    | 1.32912    | -0.397571 | 0.580082 |
| XLOC_016692 | LOC100505912        | chr4:22328989-22341289   | 0.180814   | 0.137263   | -0.397566 | 1        |
| XLOC_014624 | LOC150381           | chr22:46446338-46454402  | 4.56883    | 3.46844    | -0.397536 | 0.535638 |
| XLOC_007708 | SCAPER              | chr15:76640526-77176217  | 2.2796     | 1.73083    | -0.397314 | 0.441206 |
| XLOC_000351 | RPS8                | chr1:45241245-45244412   | 6297.59    | 4782.34    | -0.397084 | 0.377699 |
| XLOC_021728 | DEPTOR              | chr8:120885899-121063151 | 0.908387   | 0.68983    | -0.397066 | 0.693737 |
| XLOC_002772 | KNDC1               | chr10:134973970-13503991 | 1.125      | 0.854388   | -0.396964 | 0.603222 |
| XLOC_023177 | LCN15               | chr9:139654085-139658961 | 0.397483   | 0.301881   | -0.396914 | 0.933023 |
| XLOC_016823 | THAP9-AS1           | chr4:83814604-83841284   | 14.1471    | 10.7455    | -0.396784 | 0.364043 |
| XLOC_009714 | KRT34               | chr17:39533920-39538636  | 0.0844596  | 0.0641518  | -0.396773 | 1        |
| XLOC_001950 | TAGLN2              | chr1:159887902-159895281 | 99.1896    | 75.3559    | -0.396469 | 0.281427 |
| XLOC_012641 | C2orf62             | chr2:219221578-219232811 | 0.125499   | 0.0953474  | -0.396411 | 1        |
| XLOC_007580 | DMXL2               | chr15:51739920-51914967  | 2.08042    | 1.58075    | -0.396263 | 0.354217 |
| XLOC_007941 | SNN                 | chr16:11762288-11836648  | 8.30269    | 6.31046    | -0.395833 | 0.619184 |
| XLOC_016687 | FAM184B             | chr4:17633708-17783135   | 0.189418   | 0.143978   | -0.395727 | 1        |
| XLOC_014316 | SETD4               | chr21:37406838-37432819  | 8.68458    | 6.60311    | -0.395312 | 0.525846 |
| XLOC_023106 | CCBL1               | chr9:131595391-131644351 | 11.8945    | 9.04423    | -0.395228 | 0.402402 |
| XLOC_011425 | ILF3-AS1            | chr19:10762537-10764548  | 7.44458    | 5.66113    | -0.3951   | 0.44532  |
| XLOC_014826 | FAM227A             | chr22:38974124-39052634  | 0.125653   | 0.0955662  | -0.394869 | 1        |
| XLOC_010974 | GLTSCR2             | chr19:48248792-48260323  | 813.019    | 618.378    | -0.3948   | 0.2823   |
| XLOC_019160 | OSTCP1              | chr6:159262157-159278661 | 0.125337   | 0.0953408  | -0.394642 | 1        |
| XLOC_020954 | SP8                 | chr7:208218938-20826508  | 0.347792   | 0.264619   | -0.394307 | 1        |
| XLOC_021877 | FAM90A25P           | chr8:12272029-12275541   | 0.816159   | 0.621006   | -0.394242 | 0.806008 |
| XLOC_000577 | UBL4B               | chr1:110655061-110656561 | 0.0957322  | 0.0728507  | -0.394061 | 1        |
| XLOC_011551 | TSSK6               | chr19:19625027-19626469  | 1.92784    | 1.46713    | -0.393983 | 0.805942 |
| XLOC_022566 | ZBTB34              | chr9:129622943-129648151 | 2.71469    | 2.06678    | -0.393403 | 0.381083 |
| XLOC_016322 | SRD5A3              | chr4:56212387-56251747   | 4.85423    | 3.69629    | -0.393164 | 0.363804 |
| XLOC_018235 | HSD17B8             | chr6:33172413-33174608   | 8.11047    | 6.17588    | -0.393142 | 0.553778 |
| XLOC_021145 | KIAA1324L           | chr7:86506222-86689014   | 0.335788   | 0.255694   | -0.393135 | 1        |
| XLOC_007664 | UACA                | chr15:70946892-71055850  | 1.02428    | 0.779994   | -0.393078 | 0.484559 |
| XLOC_001885 | THBS3               | chr1:155165378-155177771 | 1.9058     | 1.4514     | -0.392955 | 0.568271 |
| XLOC_000736 | RPS27               | chr1:153963238-153964631 | 12345.8    | 9402.34    | -0.392933 | 0.377699 |
| XLOC_001305 | MST1L               | chr1:17081128-17090975   | 0.285382   | 0.217364   | -0.392783 | 1        |
| XLOC_006739 | DHRS1               | chr14:24759803-24769039  | 1.9742     | 1.50368    | -0.39277  | 0.713567 |
| XLOC_015374 | RASA2               | chr3:141205925-141331191 | 0.643091   | 0.489973   | -0.39232  | 0.721145 |
| XLOC_011917 | ZNF83               | chr19:53115617-53193886  | 2.86013    | 2.17916    | -0.392309 | 0.474838 |
| XLOC_018112 | BTN3A3              | chr6:26440699-26453643   | 1.07575    | 0.819708   | -0.392161 | 0.668888 |
| XLOC_003006 | C10orf55            | chr10:75669726-75682535  | 0.265143   | 0.202036   | -0.392153 | 1        |
| XLOC_020438 | BBS9                | chr7:33169151-33645680   | 1.8617     | 0.904052   | -0.391828 | 0.585471 |
| XLOC_006364 | LGALS3              | chr14:55595934-55612148  | 56.2068    | 42.8463    | -0.391573 | 0.294176 |
| XLOC_001646 | FLJ27354            | chr1:90090407-90098453   | 1.04888    | 0.799568   | -0.391553 | 0.855739 |
| XLOC_010913 | ZNF223              | chr19:44556163-44572142  | 1.15548    | 0.880925   | -0.391399 | 0.658298 |
| XLOC_009031 | TCAP                | chr17:37821598-37822807  | 0.244633   | 0.186512   | -0.39135  | 1        |
| XLOC_006639 | EXOC3L4             | chr14:103566480-10357681 | 0.0683359  | 0.0521225  | -0.390736 | 1        |
| XLOC_010514 | RPL36               | chr19:5690271-5691678    | 6241.27    | 4760.67    | -0.390673 | 0.346844 |
| XLOC_002129 | ETNK2               | chr1:204100189-204121301 | 1.59817    | 1.21916    | -0.390536 | 0.687296 |
| XLOC_021138 | SEMA3C              | chr7:80371853-80548667   | 0.373358   | 0.28482    | -0.39051  | 0.72508  |
| XLOC_000984 | BTG2                | chr1:203274663-203278721 | 11.7071    | 8.93206    | -0.390313 | 0.330411 |
| XLOC_021088 | LOC493754           | chr7:66018552-66043498   | 4.93657    | 3.76655    | -0.390268 | 0.410394 |
| XLOC_015848 | SENP7               | chr3:101043117-101232081 | 1.22789    | 0.93691    | -0.390196 | 0.511589 |
| XLOC_010816 | ZNF567              | chr19:37180301-37212225  | 2.73569    | 2.08742    | -0.390181 | 0.499123 |
| XLOC_008293 | ZNF778              | chr16:89284110-89295965  | 0.363831   | 0.277632   | -0.390092 | 0.769283 |
| XLOC_003788 | BIRC3               | chr11:102188180-10221011 | 0.803735   | 0.613361   | -0.389983 | 0.625    |
| XLOC_020928 | ZNF12               | chr7:6728063-6746566     | 4.44271    | 3.39068    | -0.389868 | 0.334851 |
| XLOC_002644 | PAX2                | chr10:102505467-10258961 | 1.81715    | 1.38724    | -0.389452 | 0.636434 |
| XLOC_013303 | LOC100507140        | chr2:201560445-201658941 | 0.00954883 | 0.00729038 | -0.389331 | 1        |
| XLOC_008376 | HCFC1R1             | chr16:3072625-3077756    | 401.005    | 306.196    | -0.389166 | 0.590525 |
| XLOC_001866 | RAB13               | chr1:153954092-153958851 | 96.0739    | 73.3614    | -0.389124 | 0.308112 |
| XLOC_022365 | ANKRD20A2,ANKRD20A3 | chr9:42368302-42411863   | 0.00400481 | 0.00305844 | -0.38894  | 1        |
| XLOC_011225 | ZNF419              | chr19:57999078-58006048  | 2.8249     | 2.15751    | -0.388835 | 0.515524 |
| XLOC_014759 | GATSL3              | chr22:30681106-30685616  | 3.95911    | 3.02444    | -0.388511 | 0.650674 |
| XLOC_024151 | IDS                 | chrX:148560294-148586881 | 12.7304    | 9.72749    | -0.388142 | 0.551547 |
| XLOC_001031 | HHAT                | chr1:210501595-210849631 | 0.576575   | 0.440618   | -0.387978 | 0.711382 |
| XLOC_018665 | KIAA0319            | chr6:24544331-24646383   | 0.0726325  | 0.0555279  | -0.387403 | 1        |
| XLOC_022255 | ZNF16               | chr8:146155743-146176271 | 11.9103    | 9.10747    | -0.387086 | 0.345378 |
| XLOC_000590 | C1orf162            | chr1:112016603-112021131 | 0.539091   | 0.412272   | -0.386932 | 0.885624 |
| XLOC_023359 | ZNF81               | chrX:47696300-47781655   | 0.150088   | 0.114791   | -0.386799 | 1        |
| XLOC_001567 | PARS2               | chr1:55222570-55230226   | 5.27992    | 4.03875    | -0.386607 | 0.461971 |
| XLOC_002824 | CDFN                | chr10:14861250-14879983  | 1.44813    | 1.10796    | -0.386277 | 0.719177 |
| XLOC_024110 | ARHGFE6             | chrX:135747711-135863501 | 0.395138   | 0.302344   | -0.386167 | 0.701222 |
| XLOC_000557 | GPSM2               | chr1:109419602-109506111 | 1.74343    | 1.33417    | -0.385989 | 0.908129 |
| XLOC_008620 | LRRCC29             | chr16:67241041-67260901  | 1.02639    | 0.785545   | -0.385813 | 0.829409 |
| XLOC_009250 | ARSG                | chr17:66255322-66417000  | 0.751675   | 0.575308   | -0.385774 | 0.8501   |
| XLOC_020550 | CLIP2               | chr7:73703804-73820273   | 18.5491    | 14.1977    | -0.385698 | 0.293988 |
| XLOC_020694 | SLC26A4             | chr7:107296960-107358251 | 0.0732407  | 0.0560625  | -0.385611 | 1        |
| XLOC_018959 | EEF1A1              | chr6:74225472-74230755   | 6577.58    | 5035.02    | -0.385561 | 0.736262 |

|             |               |                         |            |            |           |          |
|-------------|---------------|-------------------------|------------|------------|-----------|----------|
| XLOC_021097 | NSUN5P2       | chr7:72349935-72425302  | 6.65347    | 5.09378    | -0.385369 | 0.926446 |
| XLOC_012105 | GCKR          | chr2:27719705-27746550  | 0.154528   | 0.118312   | -0.385276 | 1        |
| XLOC_010233 | SERPIN2       | chr18:61554938-61571124 | 0.0087415  | 0.00669328 | -0.385168 | 1        |
| XLOC_000360 | HPDL          | chr1:45792544-45794346  | 12.2697    | 9.39556    | -0.385048 | 0.43694  |
| XLOC_013059 | ACTR1B        | chr2:98272401-98280561  | 85.2547    | 65.303     | -0.38463  | 0.2815   |
| XLOC_013825 | PCED1A        | chr20:2815960-3019315   | 16.2388    | 12.4387    | -0.384615 | 0.857925 |
| XLOC_008204 | NFAT5         | chr16:69599868-69738569 | 3.03953    | 2.32835    | -0.384541 | 0.300649 |
| XLOC_001049 | CENPF         | chr1:214776531-21483791 | 4.87178    | 3.73199    | -0.384505 | 0.355274 |
| XLOC_018175 | ATAT1         | chr6:30594612-30614598  | 1.68031    | 1.28723    | -0.384446 | 0.724812 |
| XLOC_013954 | SOGA1         | chr20:35405844-35492087 | 0.519966   | 0.398412   | -0.384156 | 0.766404 |
| XLOC_022233 | OPLAH         | chr8:145106166-14511558 | 36.6593    | 28.0935    | -0.383943 | 0.29688  |
| XLOC_016035 | RARRES1       | chr3:158414896-15845027 | 1.43342    | 1.09905    | -0.383204 | 0.754022 |
| XLOC_022089 | TRIQK         | chr8:93895757-93978372  | 2.43776    | 1.86938    | -0.383    | 0.474273 |
| XLOC_008811 | KCTD11        | chr17:7255207-7258262   | 15.0173    | 11.5163    | -0.382951 | 0.351158 |
| XLOC_021289 | IQB           | chr7:123092235-12317471 | 0.0141136  | 0.010824   | -0.382857 | 1        |
| XLOC_006098 | CCDC122       | chr13:44410488-44468068 | 1.17828    | 0.903647   | -0.382855 | 0.8576   |
| XLOC_005804 | IL17D         | chr13:21277441-21297237 | 2.79906    | 2.14718    | -0.382496 | 0.670347 |
| XLOC_009920 | LOC146880     | chr17:62745779-62778117 | 11.1436    | 8.54937    | -0.382328 | 0.430709 |
| XLOC_002108 | PHLDA3        | chr1:201434606-20143829 | 111.055    | 85.2039    | -0.382281 | 0.315903 |
| XLOC_021781 | TIGD5         | chr8:144680073-14468248 | 27.8532    | 21.37      | -0.382258 | 0.367131 |
| XLOC_010726 | ZNF431        | chr19:21324839-21368805 | 2.13634    | 1.63924    | -0.382112 | 0.494645 |
| XLOC_019032 | ZBTB24        | chr6:109783718-10980444 | 3.9189     | 3.00743    | -0.381917 | 0.778901 |
| XLOC_002584 | IFIT5         | chr10:91174324-91180759 | 2.97657    | 2.28434    | -0.381871 | 0.451265 |
| XLOC_001471 | RHBDL2        | chr1:39351478-39407456  | 0.0986634  | 0.0757328  | -0.381597 | 1        |
| XLOC_017411 | FBXO38        | chr5:147763497-14782239 | 6.24949    | 4.79737    | -0.381495 | 0.355297 |
| XLOC_023070 | RPL35         | chr9:127615695-12762424 | 10480.9    | 8047.42    | -0.381164 | 0.407462 |
| XLOC_004519 | C11orf92      | chr11:111164113-1111794 | 0.113275   | 0.0869952  | -0.380823 | 1        |
| XLOC_000333 | MPL           | chr1:43803474-43820135  | 0.0420953  | 0.0323313  | -0.380729 | 1        |
| XLOC_000420 | FGGY          | chr1:59762624-60228402  | 8.47116    | 6.50629    | -0.380725 | 0.45016  |
| XLOC_020561 | NSUN5P1       | chr7:75039623-75115568  | 8.39607    | 6.4493     | -0.380572 | 0.900578 |
| XLOC_003337 | PARVA         | chr11:12399025-12556903 | 4.24393    | 3.26006    | -0.380503 | 0.314596 |
| XLOC_002645 | FAM178A       | chr10:102672325-1027248 | 3.85679    | 2.96314    | -0.380277 | 0.833863 |
| XLOC_001292 | FLJ37453      | chr1:16160709-16266950  | 2.81015    | 2.15904    | -0.380253 | 0.935939 |
| XLOC_009354 | HEXDC         | chr17:80347085-80408707 | 2.90983    | 2.23593    | -0.380062 | 0.962618 |
| XLOC_012305 | KCNIP3        | chr2:95963071-96051825  | 2.65742    | 2.0422     | -0.3799   | 0.585652 |
| XLOC_015251 | PHLDB2,PLCXD2 | chr3:111393522-11169536 | 0.578033   | 0.444225   | -0.379863 | 0.733942 |
| XLOC_002439 | FAM35DP       | chr10:47379719-47421238 | 0.209868   | 0.161305   | -0.379692 | 1        |
| XLOC_010317 | CDH2          | chr18:25530929-25757445 | 0.00384657 | 0.00295678 | -0.379545 | 1        |
| XLOC_021235 | POLR2J3       | chr7:102178365-10221306 | 3.06904    | 2.36115    | -0.3783   | 0.66067  |
| XLOC_016563 | LOC100505989  | chr4:165675282-16572494 | 0.00522004 | 0.00401615 | -0.378246 | 1        |
| XLOC_007010 | TUBGCP5       | chr15:22833394-22873891 | 5.04724    | 3.88334    | -0.378195 | 0.392999 |
| XLOC_000010 | AGRN          | chr1:955502-991499      | 13.8825    | 10.6866    | -0.377473 | 0.345568 |
| XLOC_008265 | CRISPLD2      | chr16:84853586-84943116 | 0.040168   | 0.030928   | -0.377133 | 1        |
| XLOC_023326 | CYBB          | chrX:37639269-37672714  | 0.053581   | 0.0412569  | -0.377086 | 1        |
| XLOC_012564 | NAB1          | chr2:191513847-19155749 | 4.67495    | 3.60071    | -0.376671 | 0.372739 |
| XLOC_004624 | C11orf45      | chr11:128761312-1287879 | 0.131423   | 0.101245   | -0.376372 | 1        |
| XLOC_014985 | RPL15         | chr3:23933571-23965187  | 1218.26    | 938.706    | -0.376078 | 0.409587 |
| XLOC_000552 | FAM102B       | chr1:109102970-10918194 | 2.0449     | 1.57628    | -0.375511 | 0.475737 |
| XLOC_002197 | HMIPL2        | chr1:222695601-22272144 | 0.177922   | 0.13716    | -0.375391 | 1        |
| XLOC_017274 | COMMD10       | chr5:115420726-11562897 | 7.06478    | 5.44763    | -0.375016 | 0.502424 |
| XLOC_022413 | LOC389765     | chr9:88420916-88457794  | 0.51739    | 0.398985   | -0.374917 | 0.819681 |
| XLOC_009484 | RPL26         | chr17:8280833-8286565   | 6452.9     | 4976.29    | -0.374877 | 0.436312 |
| XLOC_021256 | CCDC71L       | chr7:106297210-10630163 | 3.10646    | 2.39578    | -0.374775 | 0.475961 |
| XLOC_013962 | TGM2          | chr20:36756863-36793700 | 122.461    | 94.4489    | -0.374718 | 0.33875  |
| XLOC_012318 | ANKRD36       | chr2:97779232-97930257  | 0.324706   | 0.250458   | -0.374567 | 1        |
| XLOC_002799 | ASB13         | chr10:5680819-5708558   | 14.2012    | 10.9592    | -0.373869 | 0.3802   |
| XLOC_001249 | RERE          | chr1:8412463-8877699    | 4.13108    | 3.18804    | -0.373851 | 0.428495 |
| XLOC_021474 | LOC100506990  | chr8:12294521-12523120  | 4.37827    | 3.37892    | -0.373798 | 0.621207 |
| XLOC_013040 | ZNF514        | chr2:95813399-95825263  | 1.23758    | 0.955119   | -0.373769 | 0.634201 |
| XLOC_015857 | MYH15         | chr3:108099215-10824816 | 0.134432   | 0.103757   | -0.373668 | 1        |
| XLOC_017628 | RPL37         | chr5:40831429-40835387  | 1100.88    | 849.909    | -0.373272 | 0.397842 |
| XLOC_018332 | SLC25A27      | chr6:46620651-46645927  | 1.26787    | 0.979311   | -0.372573 | 0.665039 |
| XLOC_001506 | TMEM53        | chr1:45119500-45140099  | 2.50099    | 1.93195    | -0.372443 | 0.703567 |
| XLOC_009327 | RNF213        | chr17:78234659-78411884 | 1.32144    | 1.02078    | -0.372428 | 0.580078 |
| XLOC_014205 | PFKL          | chr21:45719924-45747261 | 62.4562    | 48.2622    | -0.37195  | 0.317612 |
| XLOC_023187 | LOC100289341  | chr9:139979397-13998126 | 1.73728    | 1.34252    | -0.371892 | 0.75494  |
| XLOC_010939 | BLOC1S3       | chr19:45682002-45685058 | 12.4927    | 9.65859    | -0.371197 | 0.430326 |
| XLOC_010476 | TMEM53        | chr19:2977535-2995182   | 6.99047    | 5.40468    | -0.371178 | 0.525846 |
| XLOC_014992 | ZCWPW2        | chr3:28431986-28566632  | 0.140497   | 0.108632   | -0.371086 | 1        |
| XLOC_008784 | ENO3          | chr17:4854383-4860426   | 4.02937    | 3.11603    | -0.370847 | 0.631256 |
| XLOC_015991 | PLSCR4        | chr3:145910123-14596896 | 0.00568981 | 0.00440177 | -0.370298 | 1        |
| XLOC_015823 | ZNF717        | chr3:75786028-75834255  | 0.175032   | 0.135459   | -0.369763 | 1        |
| XLOC_022953 | LINC00476     | chr9:98568369-98731122  | 4.33539    | 3.35527    | -0.369731 | 0.827857 |
| XLOC_002021 | VAMP4         | chr1:171669295-17171137 | 2.72249    | 2.10711    | -0.369661 | 0.536951 |
| XLOC_022820 | TPM2          | chr9:35681989-35690053  | 98.0124    | 75.8789    | -0.369266 | 0.34477  |
| XLOC_017763 | PJA2          | chr5:108670409-10874567 | 3.84116    | 2.97383    | -0.369223 | 0.40453  |
| XLOC_012606 | EEF1B2        | chr2:207024317-20702765 | 2379.15    | 1842.12    | -0.369075 | 0.40089  |
| XLOC_022232 | PARP10        | chr8:145051319-14506063 | 5.42642    | 4.20173    | -0.36902  | 0.516201 |
| XLOC_010765 | GPI           | chr19:34855644-34893318 | 339.207    | 262.661    | -0.368963 | 0.38398  |

|             |              |                         |            |            |           |          |
|-------------|--------------|-------------------------|------------|------------|-----------|----------|
| XLOC_016459 | LEF1-AS1     | chr4:108968700-10909758 | 0.353277   | 0.273571   | -0.368888 | 0.988657 |
| XLOC_013272 | TFPI         | chr2:188328957-18841921 | 16.6022    | 12.8568    | -0.36884  | 0.530771 |
| XLOC_004297 | MACROD1      | chr11:63766029-63933585 | 95.4551    | 73.9338    | -0.368589 | 0.350775 |
| XLOC_013761 | RPS21        | chr20:60962120-60963576 | 7926.78    | 6140.95    | -0.368273 | 0.404874 |
| XLOC_023782 | CXorf23      | chrX:19930979-19988382  | 0.526684   | 0.408178   | -0.367738 | 0.648914 |
| XLOC_012634 | RPL37A       | chr2:217363519-21736618 | 11584.7    | 8978.48    | -0.367677 | 0.440427 |
| XLOC_005329 | GUCY2C       | chr12:14765567-14849519 | 0.00391412 | 0.00303391 | -0.36751  | 1        |
| XLOC_011444 | ZNF20,ZNF625 | chr19:12242167-12267546 | 1.85572    | 1.4386     | -0.367316 | 0.580411 |
| XLOC_004507 | KBTD3        | chr11:105921824-1059694 | 0.747188   | 0.579268   | -0.36724  | 0.942472 |
| XLOC_023178 | KIAA1984-AS1 | chr9:139690789-13973563 | 0.755568   | 0.58584    | -0.367054 | 0.987693 |
| XLOC_015065 | TMEM42       | chr3:44903379-44907154  | 13.399     | 10.39      | -0.366923 | 0.558681 |
| XLOC_003897 | CCDC15       | chr11:124824016-1249113 | 0.0710599  | 0.0551074  | -0.366788 | 1        |
| XLOC_015594 | COLQ         | chr3:15491639-15563258  | 0.602224   | 0.467039   | -0.366758 | 0.773127 |
| XLOC_009322 | CBX2         | chr17:77751976-77761449 | 7.8546     | 6.09144    | -0.366754 | 0.42091  |
| XLOC_022674 | MMDC4        | chr9:139746818-13975525 | 2.60716    | 2.02198    | -0.36671  | 0.62544  |
| XLOC_018420 | KLHL32       | chr6:97372495-97862283  | 0.0311571  | 0.0241687  | -0.366421 | 1        |
| XLOC_014649 | LOC100144603 | chr22:51021454-51022355 | 2.23773    | 1.73641    | -0.365932 | 0.881391 |
| XLOC_008177 | HSD11B2      | chr16:67465035-67471454 | 9.27945    | 7.20056    | -0.365929 | 0.532841 |
| XLOC_012604 | PARD3B       | chr2:205410515-20648488 | 0.378886   | 0.294044   | -0.365729 | 0.69673  |
| XLOC_001736 | CASQ2        | chr1:116242625-11631142 | 0.0058024  | 0.00450329 | -0.365671 | 1        |
| XLOC_013537 | PCSK2        | chr20:17206751-17465222 | 0.00385266 | 0.00299044 | -0.365499 | 1        |
| XLOC_023044 | TRAF1        | chr9:123664670-12369145 | 1.04523    | 0.811478   | -0.365203 | 0.688363 |
| XLOC_013836 | SPEF1        | chr20:3758150-3762102   | 0.138153   | 0.107291   | -0.36474  | 1        |
| XLOC_018321 | C6orf223     | chr6:43968336-43973694  | 0.13826    | 0.107386   | -0.364573 | 1        |
| XLOC_005053 | GASL2L3      | chr12:100967488-1010186 | 0.336799   | 0.261605   | -0.364497 | 1        |
| XLOC_014450 | GNAZ         | chr22:23401592-23484241 | 4.51744    | 3.50904    | -0.364428 | 0.535638 |
| XLOC_016925 | NUDT6        | chr4:123747862-12384415 | 5.36655    | 4.16906    | -0.364271 | 0.621135 |
| XLOC_011022 | RPL13A       | chr19:49990810-49995564 | 10652.1    | 8275.72    | -0.364178 | 0.59496  |
| XLOC_006906 | IRF2BPL      | chr14:77490885-77495042 | 9.51786    | 7.39478    | -0.364131 | 0.440376 |
| XLOC_002688 | MXI1         | chr10:111967362-1120471 | 11.4505    | 8.89791    | -0.363873 | 0.384339 |
| XLOC_007739 | GOLGA6L10    | chr15:83009406-83018198 | 0.0592449  | 0.0460387  | -0.363842 | 1        |
| XLOC_007430 | LRRC28       | chr15:99791651-99926498 | 4.18233    | 3.25058    | -0.363609 | 0.648914 |
| XLOC_010973 | EHD2         | chr19:48216600-48246391 | 8.26191    | 6.42158    | -0.363547 | 0.461481 |
| XLOC_005591 | CASP2        | chr12:75669758-75723836 | 0.0595149  | 0.0462591  | -0.363514 | 1        |
| XLOC_021078 | ZNF479       | chr7:57187325-57207571  | 0.00682786 | 0.00530714 | -0.363499 | 1        |
| XLOC_001340 | HSPG2        | chr1:22138757-22263750  | 1.53444    | 1.19278    | -0.363381 | 0.498433 |
| XLOC_022849 | MGC21881     | chr9:41952398-41955076  | 1.39712    | 1.08615    | -0.363233 | 0.707157 |
| XLOC_013858 | JAG1         | chr20:10618331-10654694 | 1.62332    | 1.26219    | -0.363021 | 0.557793 |
| XLOC_005481 | KRT8         | chr12:53290970-53346685 | 22.409     | 17.4242    | -0.362985 | 0.925753 |
| XLOC_013904 | ZNF337       | chr20:25654850-25677469 | 4.13095    | 3.21249    | -0.362783 | 0.480093 |
| XLOC_017237 | FAM81B       | chr5:94727047-94786144  | 0.0102165  | 0.00794544 | -0.362705 | 1        |
| XLOC_013573 | FAM182A      | chr20:26035249-26067553 | 0.0252288  | 0.0196223  | -0.362577 | 1        |
| XLOC_002684 | CCDC147      | chr10:106113521-1062148 | 0.377691   | 0.293767   | -0.362536 | 0.804518 |
| XLOC_008591 | CCDC102A     | chr16:57546089-57570477 | 5.90108    | 4.59249    | -0.361702 | 0.575149 |
| XLOC_022215 | RHPN1-AS1    | chr8:144448792-14445080 | 2.89       | 2.24939    | -0.361535 | 0.674625 |
| XLOC_002026 | LOC100506023 | chr1:173204198-17344629 | 0.0468905  | 0.0365003  | -0.361386 | 1        |
| XLOC_010445 | GPX4         | chr19:1103935-1106787   | 429.141    | 334.056    | -0.361363 | 0.360818 |
| XLOC_014724 | GSST1        | chr22:24376138-24384284 | 56.8148    | 44.2267    | -0.36135  | 0.3703   |
| XLOC_021452 | FAM86B3P     | chr8:8086091-8102387    | 2.23461    | 1.73958    | -0.361282 | 0.763481 |
| XLOC_001855 | S100A3       | chr1:153519808-15352173 | 4.12009    | 3.20746    | -0.361243 | 0.762454 |
| XLOC_013743 | NPEPL1,STX16 | chr20:57226308-57290900 | 35.4065    | 27.5702    | -0.360906 | 0.476932 |
| XLOC_015710 | CCDC71       | chr3:49199967-49203785  | 16.045     | 12.4944    | -0.360843 | 0.447957 |
| XLOC_006714 | CDH24        | chr14:23516269-23526747 | 11.6696    | 9.09027    | -0.360363 | 0.432653 |
| XLOC_006657 | ZBTB42       | chr14:105266932-1052710 | 4.9225     | 3.83516    | -0.360106 | 0.499257 |
| XLOC_000019 | GLTPD1       | chr1:1260142-1264276    | 23.8217    | 18.5641    | -0.35976  | 0.409651 |
| XLOC_000226 | SMPDL3B      | chr1:28261503-28285663  | 2.06316    | 1.60787    | -0.359712 | 0.71913  |
| XLOC_014460 | DDTL         | chr22:24309025-24322019 | 2.30395    | 1.79554    | -0.359687 | 0.977103 |
| XLOC_018128 | HIST1H2AI    | chr6:27775976-27776445  | 1.04381    | 0.813487   | -0.35967  | 0.948088 |
| XLOC_016109 | BCL6         | chr3:187416046-18746351 | 3.40228    | 2.65155    | -0.359665 | 0.558681 |
| XLOC_001915 | CRABP2       | chr1:156669399-15667560 | 180.184    | 140.438    | -0.359532 | 0.36192  |
| XLOC_021688 | LAPTM4B      | chr8:98787808-98864830  | 1.41674    | 1.1044     | -0.359314 | 0.721549 |
| XLOC_014002 | NEURL2       | chr20:44517110-44541003 | 2.09093    | 1.63039    | -0.358927 | 0.989365 |
| XLOC_002478 | JMJD1C-AS1   | chr10:64926987-65226322 | 0.952864   | 0.743036   | -0.358837 | 0.986822 |
| XLOC_004923 | ZC3H10       | chr12:56512029-56516278 | 3.3452     | 2.60908    | -0.358548 | 0.619804 |
| XLOC_018586 | LOC729603    | chr6:160390130-16052758 | 0.282793   | 0.220567   | -0.358528 | 1        |
| XLOC_017509 | FGFR4        | chr5:176513920-17652512 | 11.6541    | 9.08994    | -0.358496 | 0.466056 |
| XLOC_016075 | PEX5L        | chr3:179512746-17975484 | 0.010319   | 0.00804887 | -0.358451 | 1        |
| XLOC_012513 | METAP1D      | chr2:172864803-17294558 | 1.0314     | 0.804531   | -0.358388 | 0.796546 |
| XLOC_007508 | C15orf56     | chr15:40453209-40569688 | 1.7262     | 1.34681    | -0.358051 | 0.979701 |
| XLOC_007570 | FAM227B      | chr15:49447975-49913118 | 0.576524   | 0.449907   | -0.357755 | 0.979316 |
| XLOC_007410 | RCCD1        | chr15:91498105-91506355 | 10.4165    | 8.12993    | -0.357549 | 0.44093  |
| XLOC_000062 | PER3         | chr1:7844762-7905237    | 0.253021   | 0.197501   | -0.357394 | 1        |
| XLOC_015178 | SLC25A26     | chr3:66119284-66550845  | 21.3007    | 16.6314    | -0.356991 | 0.511691 |
| XLOC_010601 | ZNF491       | chr19:11909390-11919306 | 0.305372   | 0.238466   | -0.356781 | 1        |
| XLOC_005637 | CCDC38       | chr12:96260825-96336428 | 0.00806422 | 0.00629867 | -0.356488 | 1        |
| XLOC_023479 | TSIX         | chrX:73012039-73072588  | 0.00881171 | 0.00688283 | -0.356421 | 1        |
| XLOC_013874 | LINC00652    | chr20:18768614-18776709 | 0.0121829  | 0.00951756 | -0.356192 | 1        |
| XLOC_008533 | PRSS53       | chr16:31085742-31100130 | 4.49415    | 3.51106    | -0.356143 | 0.805925 |
| XLOC_009463 | SOX15        | chr17:7486964-7493488   | 0.504211   | 0.393916   | -0.356142 | 0.987693 |

|             |              |                          |            |            |           |          |
|-------------|--------------|--------------------------|------------|------------|-----------|----------|
| XLOC_005815 | C1QTNF9      | chr13:24883715-24896669  | 0.0180648  | 0.0141146  | -0.355999 | 1        |
| XLOC_015704 | IMPDH2       | chr3:49061761-49066875   | 302.987    | 236.755    | -0.355861 | 0.374085 |
| XLOC_014971 | BTD          | chr3:15643254-15687325   | 1.50949    | 1.1796     | -0.355758 | 0.713982 |
| XLOC_004145 | TRAF6        | chr11:36505316-36531863  | 1.96787    | 1.53815    | -0.355439 | 0.470298 |
| XLOC_015587 | GRIP2        | chr3:14444105-14583588   | 0.0729053  | 0.0569881  | -0.355364 | 1        |
| XLOC_020753 | C7orf45      | chr7:129847703-129856684 | 0.0148929  | 0.0116439  | -0.355043 | 1        |
| XLOC_012561 | C2orf88      | chr2:191002485-191068210 | 1.09356    | 0.85504    | -0.354966 | 0.616141 |
| XLOC_016248 | FAM200B      | chr4:15683351-15692070   | 3.86218    | 3.0198     | -0.354963 | 0.44532  |
| XLOC_000472 | DNAJB4       | chr1:78470635-78482995   | 3.73968    | 2.9251     | -0.354443 | 0.5728   |
| XLOC_002423 | ZNF32-AS2    | chr10:44124264-44170147  | 0.45068    | 0.352524   | -0.354381 | 0.980171 |
| XLOC_000424 | INADL        | chr1:62208148-62629591   | 1.90093    | 1.48694    | -0.354361 | 0.457397 |
| XLOC_007553 | FRMD5        | chr15:44165729-44487429  | 2.47851    | 1.9388     | -0.354313 | 0.663296 |
| XLOC_010382 | ATP8B1       | chr18:55297533-55470327  | 0.0112155  | 0.0087736  | -0.354248 | 1        |
| XLOC_005979 | METTL21EP    | chr13:103532448-10354831 | 0.00722588 | 0.0056527  | -0.354233 | 1        |
| XLOC_023188 | DPP7         | chr9:140004991-140009191 | 350.362    | 274.174    | -0.353757 | 0.373913 |
| XLOC_009075 | TUBG2        | chr17:40811265-40819024  | 14.8827    | 11.6477    | -0.353587 | 0.482701 |
| XLOC_013708 | ZFAS1        | chr20:47862438-47905795  | 729.653    | 571.093    | -0.353483 | 0.425888 |
| XLOC_002519 | FUT11        | chr10:75532048-75535976  | 3.88698    | 3.04334    | -0.352995 | 0.667938 |
| XLOC_016736 | FRYL         | chr4:48499379-48782316   | 1.26566    | 0.991293   | -0.352503 | 0.48321  |
| XLOC_022739 | RPS6         | chr9:19376253-19380235   | 5195.04    | 4069.24    | -0.352376 | 0.501458 |
| XLOC_005712 | IQCD         | chr12:113633245-11365881 | 0.216896   | 0.169906   | -0.352272 | 1        |
| XLOC_002666 | LOC100505761 | chr10:104209573-10421601 | 10.2082    | 7.99733    | -0.352132 | 0.545771 |
| XLOC_009462 | ZBTB4        | chr17:7362684-7387568    | 8.14839    | 6.38414    | -0.352024 | 0.393212 |
| XLOC_000280 | AGO4         | chr1:36273827-36323490   | 2.0427     | 1.60112    | -0.351392 | 0.504419 |
| XLOC_014808 | RAC2         | chr22:37621309-37640305  | 7.98087    | 6.25596    | -0.351316 | 0.598722 |
| XLOC_011041 | PTOV1        | chr19:50341902-50363999  | 67.015     | 52.5328    | -0.351265 | 0.406031 |
| XLOC_021693 | OSR2         | chr8:99956630-99964326   | 10.0594    | 7.88598    | -0.351186 | 0.545222 |
| XLOC_017615 | C5orf42      | chr5:37106329-37249530   | 0.175941   | 0.137944   | -0.351005 | 1        |
| XLOC_022289 | CNTLN        | chr9:17135037-17503917   | 0.978286   | 0.767087   | -0.350867 | 0.657414 |
| XLOC_001003 | FAM72A       | chr1:206138910-206155074 | 1.48529    | 1.16471    | -0.350769 | 0.731968 |
| XLOC_008387 | NLR3         | chr16:3550944-3627392    | 0.161662   | 0.126772   | -0.350739 | 1        |
| XLOC_022961 | ZNF510       | chr9:99518146-99540328   | 1.66483    | 1.3056     | -0.350659 | 0.532954 |
| XLOC_015017 | VILL         | chr3:38035077-38048676   | 0.234311   | 0.183758   | -0.350617 | 1        |
| XLOC_003878 | CRTAM        | chr11:122709254-12274334 | 0.00649765 | 0.00509639 | -0.350442 | 1        |
| XLOC_008808 | SLC2A4       | chr17:7185053-7191367    | 0.768337   | 0.602642   | -0.350437 | 0.790844 |
| XLOC_009125 | LRRRC37A     | chr17:44372496-44439163  | 0.0294164  | 0.0230753  | -0.350275 | 1        |
| XLOC_011305 | TLE2         | chr19:2997635-3047633    | 34.2931    | 26.9046    | -0.350066 | 0.423022 |
| XLOC_023900 | SPIN4        | chrX:62567106-62571218   | 1.65452    | 1.29869    | -0.349355 | 0.615694 |
| XLOC_008538 | PYDC1        | chr16:31225341-31236510  | 0.499441   | 0.392084   | -0.349151 | 0.978703 |
| XLOC_008011 | KDM8         | chr16:27214806-27233089  | 0.607781   | 0.477146   | -0.34912  | 0.823658 |
| XLOC_016441 | LOC100507053 | chr4:100010007-100222513 | 0.0275824  | 0.0216548  | -0.349066 | 1        |
| XLOC_015581 | RPL32        | chr3:12876443-12883081   | 1514.1     | 1188.84    | -0.348908 | 0.469423 |
| XLOC_000955 | C1orf53      | chr1:197871681-197876497 | 1.90024    | 1.4921     | -0.348844 | 0.881851 |
| XLOC_015297 | LOC100129550 | chr3:122605359-122611263 | 1.09825    | 0.86246    | -0.348668 | 0.612206 |
| XLOC_007843 | SOX8         | chr16:1031807-1036979    | 18.0499    | 14.1767    | -0.348464 | 0.436636 |
| XLOC_011027 | RPS11        | chr19:49999621-50002969  | 6469.08    | 5080.97    | -0.348457 | 0.469005 |
| XLOC_004477 | FAM76B       | chr11:95502105-95522954  | 1.97667    | 1.55256    | -0.348422 | 0.585654 |
| XLOC_003731 | AQP11        | chr11:77300679-77321401  | 1.10101    | 0.864816   | -0.348336 | 0.774191 |
| XLOC_008068 | ZNF646       | chr16:31085742-31100130  | 2.45965    | 1.93212    | -0.348267 | 0.657239 |
| XLOC_006192 | SLC15A1      | chr13:99336054-99404929  | 0.00568311 | 0.00446426 | -0.348259 | 1        |
| XLOC_017247 | RGMB         | chr5:98104998-98132198   | 9.14715    | 7.18615    | -0.348102 | 0.40453  |
| XLOC_014677 | C22orf39     | chr22:19428409-19435755  | 13.7177    | 10.7771    | -0.348079 | 0.488875 |
| XLOC_007555 | LOC645212    | chr15:44826702-44829121  | 4.76619    | 3.74446    | -0.348078 | 0.611988 |
| XLOC_000324 | C1orf50      | chr1:43232915-43241413   | 12.0513    | 9.46962    | -0.347814 | 0.544793 |
| XLOC_020956 | RAPGEF5      | chr7:22157907-22396533   | 0.902161   | 0.70892    | -0.347762 | 0.620336 |
| XLOC_004941 | INHBE        | chr12:57849095-57851791  | 0.659406   | 0.518195   | -0.347672 | 0.827341 |
| XLOC_011961 | PTPRH        | chr19:55692614-55720874  | 0.893023   | 0.701985   | -0.347257 | 0.734664 |
| XLOC_000067 | H6PD         | chr1:9294862-9331394     | 3.4799     | 2.73547    | -0.347256 | 0.458581 |
| XLOC_002902 | OR13A1       | chr10:45798101-45811056  | 0.00967895 | 0.00760954 | -0.347041 | 1        |
| XLOC_008757 | SGSM2        | chr17:2240805-2284348    | 10.2335    | 8.04613    | -0.346932 | 0.409587 |
| XLOC_018159 | HLA-G        | chr6:29794755-29798899   | 0.105891   | 0.0832705  | -0.346696 | 1        |
| XLOC_004838 | ASIC1        | chr12:50451419-50477405  | 7.50915    | 5.90528    | -0.346644 | 0.46196  |
| XLOC_010825 | ZNF793       | chr19:37997840-38034239  | 0.00581826 | 0.00457617 | -0.346449 | 1        |
| XLOC_023445 | STARD8       | chrX:67867510-67945684   | 0.0238493  | 0.0187624  | -0.346104 | 1        |
| XLOC_005302 | PRH1,PRR4    | chr12:10998447-11328619  | 2.27685    | 1.7917     | -0.345707 | 0.972989 |
| XLOC_002874 | ZEB1-AS1     | chr10:31605456-31608024  | 3.37677    | 2.65735    | -0.345655 | 0.631187 |
| XLOC_015629 | TRANK1       | chr3:36868307-36986548   | 0.0390168  | 0.0307055  | -0.345597 | 1        |
| XLOC_007303 | CLK3         | chr15:74900712-74922542  | 20.0454    | 15.7764    | -0.345502 | 0.456016 |
| XLOC_014651 | SHANK3       | chr22:51113069-51171640  | 6.34526    | 4.99469    | -0.345283 | 0.458817 |
| XLOC_008074 | ITGAX        | chr16:31366508-31394318  | 0.893182   | 0.70308    | -0.345265 | 0.730513 |
| XLOC_013959 | BLCAP        | chr20:36145818-36156333  | 41.5207    | 32.6885    | -0.345046 | 0.400064 |
| XLOC_004688 | LRRRC23      | chr12:7013896-7023406    | 6.94173    | 5.4651     | -0.345046 | 0.565586 |
| XLOC_008505 | FAM57B       | chr16:30034654-30042186  | 0.189863   | 0.149504   | -0.344778 | 1        |
| XLOC_008045 | ALDOA        | chr16:30064410-30081741  | 4874.08    | 3838.87    | -0.344447 | 0.550662 |
| XLOC_010516 | NRTN         | chr19:5823817-5828335    | 9.4435     | 7.43875    | -0.344262 | 0.731633 |
| XLOC_011246 | RPS5         | chr19:58898635-58906171  | 5384.58    | 4241.66    | -0.344204 | 0.498673 |
| XLOC_019040 | REV3L        | chr6:111620233-111804414 | 0.555084   | 0.437293   | -0.344107 | 0.627251 |
| XLOC_018207 | MSH5,SAPCD1  | chr6:31707724-31732624   | 8.90976    | 7.01947    | -0.344024 | 0.684267 |
| XLOC_004846 | METTL7A      | chr12:51318533-51326300  | 0.0115185  | 0.00907535 | -0.343924 | 1        |

|             |              |                           |            |            |           |          |
|-------------|--------------|---------------------------|------------|------------|-----------|----------|
| XLOC_020344 | LFNG         | chr7:2552162-2568810      | 2.63849    | 2.07892    | -0.343881 | 0.76657  |
| XLOC_015045 | NKTR         | chr3:42589458-42690233    | 1.54194    | 1.21494    | -0.343856 | 0.848172 |
| XLOC_013209 | COBLL1       | chr2:165541257-165697921  | 0.106457   | 0.0838813  | -0.343854 | 1        |
| XLOC_012848 | CCDC121      | chr2:27848505-27917847    | 0.252311   | 0.19881    | -0.343807 | 1        |
| XLOC_015713 | USP4         | chr3:49314576-49377536    | 3.63216    | 2.86209    | -0.343756 | 0.516969 |
| XLOC_010686 | RPL18A       | chr19:17970686-17974133   | 6120.84    | 4823.28    | -0.343717 | 0.46116  |
| XLOC_022291 | ADAMTSL1     | chr9:18474078-18910947    | 0.813735   | 0.641325   | -0.343502 | 0.845969 |
| XLOC_000523 | PTBP2        | chr1:97187174-97280605    | 3.55533    | 2.8023     | -0.343374 | 0.527259 |
| XLOC_010830 | C19orf33     | chr19:38794199-38806606   | 281.873    | 222.234    | -0.342967 | 0.627251 |
| XLOC_001699 | ALX3         | chr1:110602996-110613322  | 1.55669    | 1.22739    | -0.342892 | 0.824676 |
| XLOC_023627 | DDX26B       | chrX:134654554-134716461  | 1.16044    | 0.915044   | -0.34276  | 0.66589  |
| XLOC_012757 | D2HGDH       | chr2:242674029-242708237  | 9.5016     | 7.49354    | -0.342522 | 0.543551 |
| XLOC_018648 | LOC100130357 | chr6:12717036-13295818    | 0.174129   | 0.13734    | -0.342403 | 1        |
| XLOC_020354 | SLC29A4      | chr7:5322560-5343704      | 15.3591    | 12.1154    | -0.342258 | 0.466328 |
| XLOC_022155 | SNTB1        | chr8:121547984-121824301  | 0.00352314 | 0.00277911 | -0.342237 | 1        |
| XLOC_007561 | GATM         | chr15:45653321-45672321   | 0.240622   | 0.189811   | -0.342206 | 1        |
| XLOC_004120 | SLCSA12      | chr11:26688565-26743574   | 0.00458667 | 0.00361824 | -0.342159 | 1        |
| XLOC_023722 | FUNDC2       | chrX:154255063-15428519   | 23.7104    | 18.7043    | -0.342149 | 0.403849 |
| XLOC_021748 | MYC          | chr8:128748314-128753681  | 261.263    | 206.111    | -0.342086 | 0.428495 |
| XLOC_010029 | LINC00482    | chr17:79276623-79283048   | 0.0751441  | 0.0592817  | -0.342074 | 1        |
| XLOC_012822 | DNAJC27      | chr2:25166504-25194963    | 0.733748   | 0.579075   | -0.341535 | 0.710727 |
| XLOC_016245 | CPEB2        | chr4:15004297-15071777    | 0.241459   | 0.190614   | -0.34112  | 1        |
| XLOC_004567 | RPS25        | chr11:118868851-11888901  | 5098.63    | 4025.53    | -0.340929 | 0.471178 |
| XLOC_020570 | ZP3          | chr7:76018645-76071388    | 12.6687    | 10.0029    | -0.340855 | 0.545981 |
| XLOC_005664 | GLT8D2       | chr12:104382764-104443397 | 0.104921   | 0.0828438  | -0.340842 | 1        |
| XLOC_010706 | CRTC1        | chr19:18794424-18893143   | 3.96109    | 3.12839    | -0.340476 | 0.495922 |
| XLOC_017397 | KCTD16       | chr5:143550436-143856947  | 0.0029321  | 0.00231584 | -0.340397 | 1        |
| XLOC_006878 | ADAM20       | chr14:70989077-71001732   | 0.0154284  | 0.0121857  | -0.340396 | 1        |
| XLOC_014552 | EIF3L        | chr22:38245378-38284789   | 295.124    | 233.123    | -0.340232 | 0.41836  |
| XLOC_014912 | CHKB,CPT1B   | chr22:51007289-51021428   | 18.1593    | 14.3455    | -0.340114 | 0.516847 |
| XLOC_017736 | MBLAC2       | chr5:89754019-89770585    | 1.45943    | 1.15296    | -0.340066 | 0.634328 |
| XLOC_001210 | SLC35E2      | chr1:1656276-1677438      | 3.59099    | 2.8372     | -0.33991  | 0.729625 |
| XLOC_011248 | ZNF584       | chr19:58920062-58929692   | 0.60599    | 4.79285    | -0.339861 | 0.554467 |
| XLOC_013482 | C20orf202    | chr20:1184097-1188918     | 0.0111295  | 0.00879441 | -0.339734 | 1        |
| XLOC_014910 | ODF3B        | chr22:50968837-50971008   | 10.7355    | 8.48303    | -0.339732 | 0.730493 |
| XLOC_021674 | RBM12B-AS1   | chr8:94743730-94753224    | 0.965693   | 0.763212   | -0.339481 | 0.986822 |
| XLOC_021053 | SEPT7P2      | chr7:45763385-45808617    | 1.83211    | 1.4483     | -0.339144 | 0.695626 |
| XLOC_005644 | TMPO-AS1     | chr12:98906750-98944157   | 1.5705     | 1.24168    | -0.338923 | 0.976198 |
| XLOC_013329 | FZD5         | chr2:208627309-208634114  | 2.80297    | 2.21637    | -0.338757 | 0.526177 |
| XLOC_015509 | LPP          | chr3:187868893-188608461  | 2.06845    | 1.6356     | -0.338726 | 0.455302 |
| XLOC_014231 | TEKT4P2      | chr21:9907188-9968593     | 9.46316    | 7.48345    | -0.338618 | 0.707294 |
| XLOC_013624 | MMP24        | chr20:33814538-33864804   | 4.85776    | 3.84153    | -0.338612 | 0.522297 |
| XLOC_014729 | FAM211B      | chr22:24979717-25024972   | 9.40325    | 7.43774    | -0.338295 | 0.811389 |
| XLOC_009760 | LOC100130581 | chr17:41447212-41466266   | 0.668254   | 0.528605   | -0.338206 | 0.814226 |
| XLOC_014660 | CECR6        | chr22:17597188-17602257   | 0.544643   | 0.430869   | -0.338062 | 0.799255 |
| XLOC_022474 | TGFBR1       | chr9:101867411-101916473  | 6.80001    | 5.37959    | -0.33804  | 0.405147 |
| XLOC_006853 | ZBTB25       | chr14:64953554-64970554   | 0.33495    | 2.40132    | -0.337847 | 0.698196 |
| XLOC_003428 | MAPK8IP1     | chr11:45907046-45928016   | 1.07248    | 0.848648   | -0.337711 | 0.79263  |
| XLOC_018209 | HSPA1B       | chr6:31795511-31798031    | 56.4771    | 44.6988    | -0.337429 | 0.471178 |
| XLOC_011810 | RPL18        | chr19:49118583-49133663   | 3832.94    | 3033.73    | -0.337359 | 0.495649 |
| XLOC_022673 | PHPT1        | chr9:139743255-139745491  | 138.998    | 110.033    | -0.337135 | 0.411325 |
| XLOC_008924 | WSB1         | chr17:25621105-25640645   | 42.2928    | 33.4809    | -0.337071 | 0.419411 |
| XLOC_012196 | KIAA1841     | chr2:61293005-61365169    | 0.369984   | 0.292928   | -0.336917 | 0.774943 |
| XLOC_014650 | MAPK8IP2     | chr22:51039130-51049979   | 1.06242    | 0.841312   | -0.336647 | 0.817762 |
| XLOC_002064 | RNASL1       | chr1:182542768-182558397  | 0.541254   | 0.428619   | -0.336609 | 0.763859 |
| XLOC_008274 | FLJ30679     | chr16:86588925-86590905   | 0.127672   | 0.101104   | -0.336604 | 1        |
| XLOC_023248 | STS          | chrX:7137471-7272682      | 0.201499   | 0.159573   | -0.336555 | 1        |
| XLOC_015005 | CRTAP        | chr3:33155449-33189265    | 38.4613    | 30.4617    | -0.336413 | 0.41953  |
| XLOC_014415 | DGCR8        | chr22:20067754-20104818   | 6.32442    | 5.00933    | -0.336316 | 0.751467 |
| XLOC_006120 | RCBTB2       | chr13:49063098-49107316   | 0.315446   | 0.249967   | -0.336564 | 1        |
| XLOC_009925 | AXIN2        | chr17:63524682-63557740   | 0.831084   | 0.658612   | -0.335565 | 0.761735 |
| XLOC_000397 | ZYG11B       | chr1:53192130-53293013    | 1.80077    | 1.42725    | -0.335374 | 0.525846 |
| XLOC_012396 | RABL2A       | chr2:114384816-114400971  | 1.39005    | 1.10194    | -0.335093 | 0.771023 |
| XLOC_008744 | DBIL5P       | chr17:655572-658576       | 0.313443   | 0.248521   | -0.334838 | 1        |
| XLOC_010484 | C19orf71     | chr19:3538262-3557571     | 0.339761   | 0.269391   | -0.334817 | 1        |
| XLOC_003259 | SLC22A18     | chr11:2909326-2946476     | 14.1324    | 11.2078    | -0.334507 | 0.624393 |
| XLOC_018316 | POLH         | chr6:43543877-43596936    | 2.07768    | 1.64781    | -0.334422 | 0.954188 |
| XLOC_013181 | NEB          | chr2:152341852-152591007  | 0.00679723 | 0.00539131 | -0.334311 | 1        |
| XLOC_001496 | CCDC23       | chr1:43272722-43310660    | 13.6304    | 10.8119    | -0.334203 | 0.737375 |
| XLOC_009349 | RAC3         | chr17:79989531-79992080   | 212.391    | 168.515    | -0.333849 | 0.424277 |
| XLOC_017934 | C5orf54      | chr5:159820154-159827061  | 1.4047     | 1.11467    | -0.333647 | 0.714703 |
| XLOC_012818 | PFN4         | chr2:24338243-24346151    | 0.295      | 0.234106   | -0.333552 | 1        |
| XLOC_011567 | ZNF43        | chr19:21987750-22034870   | 0.00277432 | 0.00220199 | -0.333328 | 1        |
| XLOC_023707 | RPL10        | chrX:153626570-153650061  | 1967.81    | 1561.98    | -0.33322  | 0.55945  |
| XLOC_005207 | ZNF84        | chr12:133613877-13363981  | 3.94741    | 3.13339    | -0.333181 | 0.443332 |
| XLOC_018245 | ZBTB9        | chr6:33422355-33425320    | 7.09759    | 5.63467    | -0.332998 | 0.531362 |
| XLOC_000276 | ZMYM1        | chr1:35544971-35581455    | 1.86594    | 1.48152    | -0.332825 | 0.618093 |
| XLOC_001904 | PAQR6        | chr1:156182778-156217901  | 3.40409    | 2.70291    | -0.332758 | 0.954907 |
| XLOC_007316 | SNX33        | chr15:75941347-75950968   | 27.1115    | 21.5296    | -0.33258  | 0.453823 |

|             |                    |                          |            |            |           |          |
|-------------|--------------------|--------------------------|------------|------------|-----------|----------|
| XLOC_005652 | SYCP3              | chr12:102091416-1021332  | 0.146866   | 0.116638   | -0.332455 | 1        |
| XLOC_023891 | FAM104B            | chrX:55169534-55187628   | 7.4116     | 5.88708    | -0.332232 | 0.622934 |
| XLOC_004357 | TMEM134            | chr11:67231818-67236748  | 28.0109    | 22.2507    | -0.332141 | 0.585223 |
| XLOC_008624 | ZDHHC1             | chr16:67428321-67450339  | 3.65663    | 2.90493    | -0.33201  | 0.738182 |
| XLOC_013572 | LOC100134868       | chr20:25990434-26002430  | 0.615446   | 0.488981   | -0.331854 | 0.871957 |
| XLOC_023528 | LINC00630          | chrX:102024094-10214033  | 0.25704    | 0.204234   | -0.331769 | 1        |
| XLOC_010893 | ZNF526             | chr19:42724491-42732353  | 3.61931    | 2.87606    | -0.331621 | 0.580744 |
| XLOC_008339 | NME3               | chr16:1820320-1821710    | 76.8043    | 61.0633    | -0.330881 | 0.479982 |
| XLOC_009465 | SAT2               | chr17:7494547-7536700    | 132.071    | 105.01     | -0.330787 | 0.787831 |
| XLOC_000327 | ZNF691             | chr1:43312243-43318146   | 7.71384    | 6.13368    | -0.330696 | 0.601685 |
| XLOC_022109 | RPL30              | chr8:99053937-99057818   | 7432.26    | 5910.17    | -0.330602 | 0.53984  |
| XLOC_018888 | LRRC73             | chr6:43474702-43478081   | 2.33791    | 1.85938    | -0.330399 | 0.80741  |
| XLOC_020972 | KIAA0087           | chr7:26572739-26578444   | 0.00357816 | 0.00284599 | -0.330286 | 1        |
| XLOC_021554 | DDHD2              | chr8:38089008-38120287   | 3.43377    | 2.73123    | -0.330242 | 0.519452 |
| XLOC_011937 | OSCAR              | chr19:54597932-54604148  | 2.55748    | 2.03427    | -0.330207 | 0.7741   |
| XLOC_009063 | KLHL10             | chr17:39994042-40004599  | 0.0909793  | 0.0723691  | -0.330164 | 1        |
| XLOC_012516 | PDK1               | chr2:173420778-17346386  | 22.2745    | 17.72      | -0.330019 | 0.424017 |
| XLOC_014207 | LRRC3              | chr21:45875392-45878739  | 1.79186    | 1.42557    | -0.330919 | 0.753475 |
| XLOC_009939 | ABCA10,ABCA5       | chr17:67144147-67323323  | 0.446158   | 0.354972   | -0.329848 | 0.701805 |
| XLOC_018656 | KIF13A             | chr6:17759413-17987854   | 1.40417    | 1.1172     | -0.329833 | 0.669766 |
| XLOC_023514 | ARL13A             | chrX:100224696-10024582  | 0.0157605  | 0.0125403  | -0.329747 | 1        |
| XLOC_023950 | TTC3P1             | chrX:74960372-74962914   | 0.124716   | 0.0992383  | -0.329675 | 1        |
| XLOC_007227 | CGNL1              | chr15:57668702-57842925  | 0.0282561  | 0.0224862  | -0.329521 | 1        |
| XLOC_004834 | BCDIN3D-AS1        | chr12:50222325-50236912  | 0.138381   | 0.110134   | -0.329379 | 1        |
| XLOC_009408 | CAMKK1             | chr17:3763616-3796337    | 5.50228    | 4.37957    | -0.329242 | 0.556835 |
| XLOC_005638 | HAL                | chr12:96366439-96390143  | 0.109275   | 0.086985   | -0.329123 | 1        |
| XLOC_000863 | TBX19              | chr1:168250277-16828366  | 0.623627   | 0.496433   | -0.329086 | 0.820804 |
| XLOC_009921 | MIR4315-1,PLEKHM1P | chr17:62780958-62833302  | 1.81018    | 1.44105    | -0.329011 | 0.833863 |
| XLOC_014378 | SSRP1              | chr21:46490870-46493126  | 0.527723   | 0.420187   | -0.32875  | 0.871877 |
| XLOC_012898 | UNQ6975            | chr2:45401479-45482080   | 0.0164583  | 0.0131058  | -0.328605 | 1        |
| XLOC_005018 | LOC338758          | chr12:90102731-90105729  | 0.0466131  | 0.0371264  | -0.328292 | 1        |
| XLOC_001657 | LOC100131564       | chr1:93775665-93811368   | 0.2782     | 0.221598   | -0.328176 | 1        |
| XLOC_015062 | ZNF502             | chr3:44754134-44765323   | 1.61301    | 1.2849     | -0.328107 | 0.669472 |
| XLOC_014495 | RFPL1              | chr22:29833003-29838444  | 0.0131128  | 0.0104461  | -0.328014 | 1        |
| XLOC_022250 | ZNF251             | chr8:145946293-14598097  | 6.62229    | 5.27612    | -0.327851 | 0.520462 |
| XLOC_017429 | IRGM               | chr5:150226084-15022823  | 0.0117424  | 0.00935568 | -0.327818 | 1        |
| XLOC_008739 | LOC100130015       | chr16:90089007-90114191  | 3.55682    | 2.83394    | -0.327778 | 0.910156 |
| XLOC_020508 | LOC649395          | chr7:63894070-63895895   | 0.0183679  | 0.0146395  | -0.327323 | 1        |
| XLOC_018203 | LY6G5B             | chr6:31638727-31640227   | 3.2142     | 2.56185    | -0.327274 | 0.815739 |
| XLOC_015984 | XRN1               | chr3:142025448-14216685  | 1.46022    | 1.16386    | -0.32727  | 0.532936 |
| XLOC_008963 | SUZ12P1            | chr17:29036625-29097068  | 4.4475     | 3.54551    | -0.327002 | 0.772259 |
| XLOC_002833 | C1QL3              | chr10:16478941-16564004  | 0.379556   | 0.302612   | -0.326843 | 0.981596 |
| XLOC_012334 | RPL31              | chr2:101618690-10176784  | 5080.88    | 4051.28    | -0.326702 | 0.510424 |
| XLOC_001534 | FOXD2-AS1          | chr1:47897806-47900313   | 3.58925    | 2.86207    | -0.326626 | 0.69673  |
| XLOC_006938 | TRIP11             | chr14:92434242-92506403  | 0.952857   | 0.759896   | -0.326458 | 0.637446 |
| XLOC_023433 | RRAGB              | chrX:55744109-55785207   | 3.5767     | 2.85247    | -0.326415 | 0.650855 |
| XLOC_016717 | RBM47              | chr4:40425271-40631883   | 0.0298354  | 0.0238037  | -0.325835 | 1        |
| XLOC_000770 | LMNA               | chr1:156052368-15610988  | 89.3997    | 71.3283    | -0.325795 | 0.482701 |
| XLOC_017686 | SMA4               | chr5:69423288-69586004   | 0.508617   | 0.405833   | -0.325691 | 0.847215 |
| XLOC_010944 | PPM1N              | chr19:46001730-46005764  | 4.64233    | 3.70575    | -0.325082 | 0.716439 |
| XLOC_000670 | PLEKHO1            | chr1:150122169-15013182  | 25.4191    | 20.2915    | -0.325036 | 0.495952 |
| XLOC_010055 | FASN               | chr17:80036213-80056106  | 35.2242    | 28.119     | -0.325022 | 0.441206 |
| XLOC_007422 | LOC145820          | chr15:95976321-96051076  | 0.00692767 | 0.00553036 | -0.324997 | 1        |
| XLOC_008866 | MGC12916           | chr17:14204505-14249492  | 3.25554    | 2.59902    | -0.324928 | 0.714291 |
| XLOC_015486 | CHRD               | chr3:184097860-184107617 | 2.45318    | 1.95876    | -0.324709 | 0.704733 |
| XLOC_011913 | ZNF432             | chr19:52536676-52552073  | 1.27208    | 1.01574    | -0.324654 | 0.725998 |
| XLOC_001242 | PLEKHG5, TNFRSF25  | chr1:6521213-6580121     | 15.9962    | 12.7731    | -0.324623 | 0.677615 |
| XLOC_017634 | SEPP1              | chr5:42756919-42812024   | 0.00755489 | 0.00603283 | -0.324575 | 1        |
| XLOC_010799 | LIN37              | chr19:36239261-36245420  | 9.89364    | 7.90122    | -0.324426 | 0.647944 |
| XLOC_000965 | RPS10P7            | chr1:201489031-20148972  | 1.76498    | 1.40956    | -0.324402 | 0.872117 |
| XLOC_011038 | CPT1C              | chr19:50194364-50216988  | 5.08442    | 4.06173    | -0.323987 | 0.63524  |
| XLOC_002990 | P4HA1              | chr10:74766979-74856732  | 32.7213    | 26.144     | -0.323748 | 0.459984 |
| XLOC_011872 | SYT3               | chr19:51125233-51143092  | 0.0862277  | 0.068899   | -0.323669 | 1        |
| XLOC_014939 | CRELD1             | chr3:9975523-9987097     | 12.8026    | 10.2301    | -0.323608 | 0.520462 |
| XLOC_022460 | HABP4              | chr9:99212413-99253618   | 16.32      | 13.0411    | -0.323575 | 0.45994  |
| XLOC_011606 | IGFLR1             | chr19:36230150-36233351  | 3.90232    | 3.11889    | -0.323302 | 0.790283 |
| XLOC_021523 | BNIP3L             | chr8:26240522-26270644   | 49.1566    | 39.2928    | -0.323118 | 0.453509 |
| XLOC_005415 | KANSL2             | chr12:49046994-49076035  | 11.8159    | 9.44544    | -0.323041 | 0.483683 |
| XLOC_001597 | DIRAS3             | chr1:68167148-68698284   | 0.208032   | 0.166308   | -0.322944 | 1        |
| XLOC_000211 | PIGV               | chr1:27114453-27124894   | 5.48456    | 4.38494    | -0.322821 | 0.603292 |
| XLOC_016908 | C4orf3             | chr4:120217573-12022560  | 100.252    | 80.1522    | -0.322818 | 0.455927 |
| XLOC_000336 | PTPRF              | chr1:43996546-44089343   | 25.2438    | 20.1841    | -0.322706 | 0.454392 |
| XLOC_017449 | LSM11              | chr5:157170754-15718374  | 2.13126    | 1.70416    | -0.322646 | 0.708265 |
| XLOC_023027 | KIF12              | chr9:116853917-11686133  | 1.28225    | 1.02535    | -0.322557 | 0.818284 |
| XLOC_021727 | NOV                | chr8:120428551-12043667  | 3.71998    | 2.97557    | -0.322133 | 0.624874 |
| XLOC_005933 | KLIF5              | chr13:73633141-73651676  | 2.05938    | 1.64738    | -0.322036 | 0.679982 |
| XLOC_008949 | PIPOX              | chr17:27369917-27384236  | 0.0714716  | 0.0571758  | -0.321964 | 1        |
| XLOC_011653 | SIRT2              | chr19:39369194-39399534  | 41.9424    | 33.5544    | -0.321905 | 0.618451 |
| XLOC_008509 | MAPK3              | chr16:30125425-30134630  | 79.5461    | 63.6394    | -0.321872 | 0.450569 |



|             |                     |                           |            |            |           |          |
|-------------|---------------------|---------------------------|------------|------------|-----------|----------|
| XLOC_003714 | NEU3                | chr11:74699949-74718743   | 0.627176   | 0.501965   | -0.321283 | 0.828395 |
| XLOC_017635 | LOC648987           | chr5:43014830-43018913    | 1.52776    | 1.22277    | -0.32126  | 0.771117 |
| XLOC_013259 | CCDC141             | chr2:179694483-179914786  | 0.00167516 | 0.00134078 | -0.321223 | 1        |
| XLOC_013166 | ZRANB3              | chr2:135957573-136288806  | 0.592506   | 0.474317   | -0.320977 | 0.781219 |
| XLOC_000058 | PHF13               | chr1:6673755-6684093      | 6.14701    | 4.92122    | -0.320871 | 0.548694 |
| XLOC_007311 | C15orf39            | chr15:75494220-75504510   | 7.75752    | 6.21078    | -0.32082  | 0.540474 |
| XLOC_004501 | CASP5               | chr11:104864966-10489386  | 0.0228153  | 0.0182666  | -0.320796 | 1        |
| XLOC_013721 | MOCS3               | chr20:49575350-49578399   | 5.14213    | 4.11713    | -0.320726 | 0.588286 |
| XLOC_021806 | LRRRC14             | chr8:145743348-145754458  | 10.5601    | 8.45523    | -0.320704 | 0.831797 |
| XLOC_009087 | RPL27               | chr17:41150445-41154971   | 5548.84    | 4443.11    | -0.320617 | 0.530238 |
| XLOC_014160 | CBR3                | chr21:37504064-37528606   | 19.0702    | 15.2704    | -0.320587 | 0.591954 |
| XLOC_012308 | FAHD2CP             | chr2:96676298-96700727    | 5.90205    | 4.72632    | -0.320499 | 0.749513 |
| XLOC_018693 | LOC100270746        | chr6:26924771-26991753    | 3.57043    | 2.85951    | -0.320327 | 0.830384 |
| XLOC_001352 | LOC100506963        | chr1:24069855-24104787    | 3.10024    | 2.48353    | -0.319988 | 0.908566 |
| XLOC_002448 | GLUD1P7             | chr10:48954404-48958083   | 0.0361101  | 0.028928   | -0.319935 | 1        |
| XLOC_008349 | RPS2                | chr16:2012061-2014827     | 12673.8    | 10153.1    | -0.319924 | 0.638545 |
| XLOC_003584 | DNAJC4              | chr11:63997752-64001753   | 21.9201    | 17.561     | -0.319874 | 0.575556 |
| XLOC_021212 | PPP1R35             | chr7:100032911-100034094  | 80.4593    | 64.4657    | -0.319729 | 0.526157 |
| XLOC_008170 | NOL3                | chr16:67204399-67217883   | 20.793     | 16.6601    | -0.319703 | 0.729809 |
| XLOC_013099 | LOC151009,LOC440894 | chr2:111132685-111142113  | 4.43454    | 3.55325    | -0.319642 | 0.617065 |
| XLOC_008734 | VPS9D1              | chr16:89773540-89883065   | 2.6412     | 2.11635    | -0.319611 | 0.962247 |
| XLOC_001831 | HRNR                | chr1:152184551-152196672  | 0.00427704 | 0.00342718 | -0.319588 | 1        |
| XLOC_022530 | LOC253039           | chr9:123605319-123616657  | 2.42916    | 1.94675    | -0.319388 | 0.638374 |
| XLOC_022139 | TMEM74              | chr8:109795345-109799770  | 0.00894508 | 0.00716956 | -0.31921  | 1        |
| XLOC_016677 | BOD1L1              | chr4:13570365-13629328    | 0.739063   | 0.592431   | -0.319105 | 0.639715 |
| XLOC_006887 | FAM161B             | chr14:74399694-74429813   | 0.409943   | 0.328628   | -0.318968 | 0.972601 |
| XLOC_006927 | FOXN3               | chr14:89622515-90085494   | 3.5406     | 2.8384     | -0.318915 | 0.539391 |
| XLOC_015415 | LEKR1               | chr3:156544095-156763911  | 0.109774   | 0.0880078  | -0.318827 | 1        |
| XLOC_021370 | LOC154761           | chr7:143509060-143533810  | 1.91544    | 1.53575    | -0.318735 | 0.74447  |
| XLOC_009113 | ACBD4               | chr17:43209966-43221543   | 10.4083    | 8.34525    | -0.318712 | 0.592192 |
| XLOC_023923 | ZMYM3               | chrX:70430034-70948962    | 7.36046    | 5.90151    | -0.31871  | 0.97314  |
| XLOC_010523 | CRB3                | chr19:6464259-6481798     | 2.14016    | 1.71604    | -0.318631 | 0.917325 |
| XLOC_014089 | ZNF512B             | chr20:62571181-62601223   | 0.0343231  | 0.0275215  | -0.31862  | 1        |
| XLOC_004604 | SIAE                | chr11:124492741-12456468  | 7.29863    | 5.85455    | -0.318066 | 0.821881 |
| XLOC_002910 | HNRNPA1P33          | chr10:47096453-47151400   | 0.0388125  | 0.0311407  | -0.317722 | 1        |
| XLOC_007723 | RASGRF1             | chr15:79252288-79383215   | 0.00380906 | 0.00305624 | -0.317675 | 1        |
| XLOC_020492 | LANCL2              | chr7:55433140-55501435    | 2.73415    | 2.19379    | -0.317667 | 0.618232 |
| XLOC_011443 | ZNF878              | chr19:12154619-12163782   | 0.398564   | 0.319812   | -0.317586 | 0.8877   |
| XLOC_023375 | HDAC6               | chrX:48660486-48683380    | 2.32499    | 1.86574    | -0.317476 | 0.650075 |
| XLOC_013258 | TTN                 | chr2:179059207-179672150  | 0.0173179  | 0.0138981  | -0.317383 | 1        |
| XLOC_013071 | LONRF2              | chr2:100889752-100939198  | 0.00124737 | 0.00100109 | -0.317325 | 1        |
| XLOC_000027 | MIB2                | chr1:1550794-1556590      | 10.4397    | 8.37875    | -0.317273 | 0.602446 |
| XLOC_002370 | CACNB2              | chr10:18429605-18830688   | 0.106169   | 0.0852165  | -0.31716  | 1        |
| XLOC_010463 | IZUMO4              | chr19:2096867-2099583     | 0.144679   | 0.116153   | -0.316822 | 1        |
| XLOC_017344 | REEP2               | chr5:137774689-137782658  | 47.0346    | 37.7715    | -0.316425 | 0.470491 |
| XLOC_021570 | AP3M2               | chr8:42010463-42028701    | 5.02487    | 4.03571    | -0.316264 | 0.549068 |
| XLOC_014771 | MORC2               | chr22:31318294-31364187   | 4.22528    | 3.39376    | -0.31616  | 0.597867 |
| XLOC_021367 | FAM131B             | chr7:143050492-143059840  | 5.59684    | 4.49618    | -0.315912 | 0.545876 |
| XLOC_015784 | ASB14               | chr3:57261764-57326710    | 0.246541   | 0.19812    | -0.315453 | 1        |
| XLOC_013695 | PCIF1               | chr20:44563316-44576662   | 12.9887    | 10.4381    | -0.315397 | 0.541522 |
| XLOC_006127 | DLEU2               | chr13:50556687-50699677   | 0.220176   | 0.176946   | -0.315347 | 1        |
| XLOC_004686 | RPL13P5             | chr12:6993144-6993768     | 1.19251    | 0.95842    | -0.315269 | 0.912776 |
| XLOC_021376 | OR2A7               | chr7:143955788-143983096  | 0.75712    | 0.608515   | -0.315229 | 0.90608  |
| XLOC_009024 | LINC00672           | chr17:37081420-37085637   | 0.15312    | 0.123081   | -0.315055 | 1        |
| XLOC_008501 | SEZ6L2              | chr16:29882479-29910585   | 28.2412    | 22.7031    | -0.314912 | 0.500097 |
| XLOC_014485 | MIAT                | chr22:27053445-27072440   | 0.0417283  | 0.0335486  | -0.314775 | 1        |
| XLOC_018208 | HSPA1A              | chr6:31783290-31785719    | 3.18522    | 2.56087    | -0.314758 | 0.739331 |
| XLOC_015309 | CHST13              | chr3:126243130-126262134  | 0.362957   | 0.291828   | -0.314679 | 0.950929 |
| XLOC_016399 | LOC100505875        | chr4:79892901-80229953    | 0.281924   | 0.226685   | -0.31462  | 1        |
| XLOC_004430 | KCTD21              | chr11:77882297-77899664   | 1.09554    | 0.880987   | -0.314456 | 0.759573 |
| XLOC_013278 | OSGEPL1             | chr2:190611385-190627924  | 2.1097     | 1.69655    | -0.314433 | 0.718723 |
| XLOC_021220 | GIGYF1              | chr7:100277129-100286870  | 21.299     | 17.13      | -0.314261 | 0.463074 |
| XLOC_010770 | ZNF302              | chr19:35168566-35177302   | 4.16084    | 3.34713    | -0.31395  | 0.590843 |
| XLOC_012097 | ATRAID              | chr2:27422454-27440046    | 114.469    | 92.0844    | -0.313934 | 0.651901 |
| XLOC_021689 | MATN2               | chr8:98881310-99048946    | 0.0120379  | 0.00968537 | -0.313702 | 1        |
| XLOC_004764 | SLCO1B3             | chr12:20963637-21069843   | 8.21807    | 6.61267    | -0.313566 | 0.516224 |
| XLOC_021162 | SAMD9L              | chr7:92759367-92777680    | 0.0756863  | 0.0609025  | -0.313531 | 1        |
| XLOC_016183 | NOP14-AS1           | chr4:2937277-2965118      | 3.03949    | 2.44589    | -0.31347  | 0.947716 |
| XLOC_011574 | ZNF91               | chr19:23540497-23578269   | 0.822542   | 0.661936   | -0.313399 | 0.711382 |
| XLOC_005736 | RPLP0               | chr12:120634502-120639017 | 7446.5     | 5992.53    | -0.313397 | 0.671659 |
| XLOC_020539 | VPS37D              | chr7:73082173-73086440    | 21.7381    | 17.5003    | -0.312848 | 0.591479 |
| XLOC_013063 | KIAA1211L           | chr2:99410308-99552684    | 0.232868   | 0.187474   | -0.312817 | 1        |
| XLOC_007151 | C15orf62            | chr15:41060066-41106767   | 0.364119   | 0.293145   | -0.312794 | 0.944284 |
| XLOC_014433 | BCRP2               | chr22:21457304-21476575   | 3.28719    | 2.64683    | -0.31259  | 0.694071 |
| XLOC_009481 | SLC25A35            | chr17:8191081-8198170     | 1.83402    | 1.4768     | -0.312533 | 0.963457 |
| XLOC_018348 | PAQR8               | chr6:52226925-52272575    | 1.81418    | 1.46083    | -0.312526 | 0.654103 |
| XLOC_021634 | STAU2-AS1           | chr8:74332308-74659943    | 0.0298953  | 0.0240747  | -0.312402 | 1        |
| XLOC_008825 | SNORD10             | chr17:7465308-7482324     | 13.518     | 10.8866    | -0.312323 | 0.989098 |
| XLOC_015701 | DALRD3              | chr3:49044636-49060926    | 39.1166    | 31.5079    | -0.312069 | 0.872554 |

|             |                 |                           |            |            |           |          |
|-------------|-----------------|---------------------------|------------|------------|-----------|----------|
| XLOC_017891 | TIGD6           | chr5:149372685-149432704  | 1.06515    | 0.858246   | -0.311595 | 0.973348 |
| XLOC_000959 | NR5A2           | chr1:199996729-200146550  | 0.0276364  | 0.02227    | -0.311472 | 1        |
| XLOC_002707 | FAM160B1        | chr10:116581502-116659581 | 2.19309    | 1.76728    | -0.311432 | 0.607411 |
| XLOC_014601 | LOC100132273    | chr22:42486936-42521354   | 1.24514    | 1.0034     | -0.311415 | 0.842782 |
| XLOC_022740 | SLC24A2         | chr9:19507449-19787017    | 0.00141875 | 0.00114331 | -0.311398 | 1        |
| XLOC_009115 | HEXIM2          | chr17:43238263-43247406   | 5.89286    | 4.74941    | -0.311218 | 0.726892 |
| XLOC_018504 | RPS12           | chr6:133135707-133138703  | 9380.31    | 7560.98    | -0.311062 | 0.582965 |
| XLOC_000059 | THAP3           | chr1:6684924-6761966      | 25.8691    | 20.8528    | -0.310988 | 0.865626 |
| XLOC_020984 | HOXA13          | chr7:27236498-27239725    | 0.751407   | 0.605717   | -0.31095  | 0.850795 |
| XLOC_007672 | CELF6           | chr15:72577067-72612525   | 0.658876   | 0.531183   | -0.310798 | 0.832722 |
| XLOC_022340 | TMEM8B          | chr9:35829221-35854844    | 5.1629     | 4.16289    | -0.310594 | 0.69673  |
| XLOC_016808 | CCNI            | chr4:77969176-77997125    | 59.3414    | 47.8478    | -0.310586 | 0.471178 |
| XLOC_004418 | WNT11           | chr11:75897369-75917574   | 8.31874    | 6.7085     | -0.310375 | 0.656683 |
| XLOC_017104 | SPEF2           | chr5:35617988-35814713    | 0.49418    | 0.398532   | -0.310342 | 0.830132 |
| XLOC_015239 | LOC344595       | chr3:106959538-107045811  | 0.780407   | 0.62937    | -0.310318 | 0.78079  |
| XLOC_004716 | LOC100499405    | chr12:9392598-9395645     | 0.00750812 | 0.00605542 | -0.310224 | 1        |
| XLOC_006680 | CCNB1IP1        | chr14:20779526-20801471   | 168.32     | 135.762    | -0.310129 | 0.50455  |
| XLOC_010918 | ZNF226          | chr19:44669214-44681838   | 4.90973    | 3.96052    | -0.309953 | 0.821849 |
| XLOC_016471 | ALPK1           | chr4:113218498-113363764  | 1.66151    | 1.34033    | -0.309909 | 0.640612 |
| XLOC_002276 | LOC731275       | chr1:243219615-243265046  | 0.400678   | 0.323238   | -0.309846 | 0.846554 |
| XLOC_006892 | NPC2            | chr14:74946642-74960084   | 291.191    | 234.918    | -0.309811 | 0.483354 |
| XLOC_016622 | LOC100129917    | chr4:773936-775636        | 0.311099   | 0.251      | -0.309684 | 1        |
| XLOC_015292 | FAM162A         | chr3:122103022-122128961  | 347.666    | 280.527    | -0.309564 | 0.496301 |
| XLOC_006792 | RFS29           | chr14:50044041-50053094   | 11097.9    | 8954.83    | -0.309548 | 0.551547 |
| XLOC_010577 | PDE4A           | chr19:10527448-10580307   | 1.25203    | 1.01032    | -0.309463 | 0.752981 |
| XLOC_006198 | ZIC5            | chr13:100615274-10062411  | 1.56358    | 1.2619     | -0.309256 | 0.707294 |
| XLOC_022576 | CDK9            | chr9:130548304-130553051  | 50.1716    | 40.496     | -0.309093 | 0.481975 |
| XLOC_010457 | REEP6           | chr19:1491164-1497924     | 20.3642    | 16.4373    | -0.309055 | 0.623055 |
| XLOC_008814 | NLGN2           | chr17:7311501-7323179     | 23.7189    | 19.1463    | -0.308972 | 0.487108 |
| XLOC_005845 | FRY             | chr13:32605436-32870776   | 0.00315763 | 0.00254911 | -0.308851 | 1        |
| XLOC_020817 | FAM115C         | chr7:143318044-143427171  | 1.77186    | 1.43098    | -0.308257 | 0.718723 |
| XLOC_011372 | PCP2            | chr19:7694670-7698634     | 0.882166   | 0.712533   | -0.308093 | 0.989344 |
| XLOC_023466 | OGT             | chrX:70430034-70948962    | 15.5608    | 12.5711    | -0.307801 | 0.927627 |
| XLOC_005125 | FBXW8           | chr12:117348760-11746895  | 1.6338     | 1.31994    | -0.307763 | 0.682587 |
| XLOC_006437 | ACOT6           | chr14:74083547-74086592   | 0.0200684  | 0.0162166  | -0.307453 | 1        |
| XLOC_015057 | TCAIM           | chr3:44379610-44450940    | 6.83546    | 5.52363    | -0.307422 | 0.606953 |
| XLOC_008902 | FBXW10          | chr17:18647325-18682662   | 0.0652474  | 0.0527254  | -0.307422 | 1        |
| XLOC_010759 | CEBPA-AS1       | chr19:33793762-33795963   | 2.9633     | 2.39492    | -0.307227 | 0.760099 |
| XLOC_015771 | ACTR8           | chr3:53901093-53916229    | 3.56933    | 2.88507    | -0.307049 | 0.609543 |
| XLOC_004334 | C11orf68        | chr11:65684282-65686531   | 63.0665    | 50.9901    | -0.306658 | 0.488842 |
| XLOC_018940 | DST             | chr6:56137688-56615138    | 1.21876    | 0.985613   | -0.306315 | 0.575728 |
| XLOC_005252 | SPSB2           | chr12:6976583-6982521     | 10.1926    | 8.24328    | -0.306232 | 0.981197 |
| XLOC_014404 | DGCR5           | chr22:18958010-18982142   | 0.114289   | 0.0924375  | -0.306139 | 1        |
| XLOC_001707 | DRAM2           | chr1:111659953-111727724  | 23.0973    | 18.6841    | -0.305912 | 0.67683  |
| XLOC_003438 | LRP4-AS1        | chr11:46867961-46940173   | 0.34611    | 0.280016   | -0.305724 | 1        |
| XLOC_023490 | PGK1            | chrX:77359665-77382324    | 821.017    | 664.39     | -0.305382 | 0.589166 |
| XLOC_014772 | SELM            | chr22:31500762-31503551   | 404.751    | 327.538    | -0.305374 | 0.495922 |
| XLOC_017252 | C5orf30         | chr5:102594441-102614361  | 4.81785    | 3.89909    | -0.305251 | 0.603368 |
| XLOC_016028 | LOC730091       | chr3:156465131-156534851  | 0.00511823 | 0.00414226 | -0.305227 | 1        |
| XLOC_006480 | SPATA7          | chr14:88851987-88904804   | 3.89545    | 3.15293    | -0.305097 | 0.67146  |
| XLOC_010946 | LOC100287177    | chr19:46112657-46148775   | 23.6138    | 19.1136    | -0.305033 | 0.851815 |
| XLOC_012186 | EML6            | chr2:54952148-55199156    | 0.515769   | 0.417514   | -0.3049   | 0.747687 |
| XLOC_000581 | PROK1           | chr1:110993787-110999976  | 0.0160224  | 0.0129713  | -0.304773 | 1        |
| XLOC_000053 | RNF207          | chr1:6266188-6296044      | 1.8287     | 1.48054    | -0.30469  | 0.950929 |
| XLOC_022869 | PGM5-AS1        | chr9:70970108-71145977    | 0.271658   | 0.21995    | -0.30462  | 1        |
| XLOC_002908 | SYT15           | chr10:46955443-46970601   | 1.01882    | 0.824891   | -0.304619 | 0.869168 |
| XLOC_018373 | C6orf57         | chr6:71276624-71298606    | 14.8006    | 11.9852    | -0.3044   | 0.724791 |
| XLOC_010609 | ZNF136          | chr19:12273871-12300064   | 1.04576    | 0.846838   | -0.304396 | 0.760508 |
| XLOC_022594 | LOC100506100    | chr9:131486740-131534211  | 7.29197    | 5.9055     | -0.30425  | 0.979701 |
| XLOC_010443 | ABCA7           | chr19:1040101-1065570     | 2.36366    | 1.91434    | -0.304173 | 0.68423  |
| XLOC_020662 | MUC12           | chr7:100612903-100662230  | 0.286231   | 0.231828   | -0.304113 | 1        |
| XLOC_008077 | TGFB11          | chr16:31483475-31489281   | 58.0707    | 47.0345    | -0.304093 | 0.505095 |
| XLOC_007736 | AGSK1,LOC727849 | chr15:82753446-82798352   | 0.279303   | 0.22624    | -0.303972 | 1        |
| XLOC_011304 | ZNF77           | chr19:2933215-2944969     | 2.54437    | 2.06104    | -0.303937 | 0.721145 |
| XLOC_013660 | LPIN3           | chr20:39969559-39995498   | 3.7165     | 3.01091    | -0.303746 | 0.751467 |
| XLOC_006031 | SACS            | chr13:23902964-24007841   | 0.782883   | 0.634533   | -0.3031   | 0.615252 |
| XLOC_015748 | RPL29           | chr3:52027643-52029958    | 5666.63    | 4592.88    | -0.303092 | 0.591479 |
| XLOC_014353 | SIK1            | chr21:44834397-44847002   | 12.3346    | 9.99743    | -0.303085 | 0.538134 |
| XLOC_020706 | CAV2            | chr7:116139654-116148591  | 3.20456    | 2.59739    | -0.30306  | 0.649619 |
| XLOC_020958 | TOMM7           | chr7:22852250-22862471    | 365.265    | 296.065    | -0.303027 | 0.517422 |
| XLOC_012942 | SERTAD2         | chr2:64858754-64881046    | 6.11818    | 4.95947    | -0.302917 | 0.535039 |
| XLOC_017042 | FRG2            | chr4:190945522-190948411  | 0.00846454 | 0.00686218 | -0.302764 | 1        |
| XLOC_000018 | PUSL1           | chr1:1243993-1260067      | 43.1423    | 34.9759    | -0.302743 | 0.910376 |
| XLOC_008174 | SLC9A5          | chr16:67282854-67306094   | 4.97018    | 4.02939    | -0.302736 | 0.624281 |
| XLOC_004263 | EML3            | chr11:62369690-62382592   | 16.9367    | 13.7309    | -0.302729 | 0.549171 |
| XLOC_018755 | HLA-B           | chr6:31321648-31324989    | 453.523    | 367.701    | -0.302642 | 0.520659 |
| XLOC_006771 | MBIP            | chr14:36767763-36789882   | 5.69575    | 4.61824    | -0.302543 | 0.651749 |
| XLOC_017351 | CXXC5           | chr5:139028300-139062680  | 4.35917    | 3.53514    | -0.302285 | 0.792593 |
| XLOC_014720 | LOC284889       | chr22:24235896-24241117   | 2.01967    | 1.63794    | -0.302236 | 0.987693 |

|             |                |                          |            |            |           |          |
|-------------|----------------|--------------------------|------------|------------|-----------|----------|
| XLOC_015981 | NMNAT3         | chr3:139279022-139396888 | 2.79234    | 2.26467    | -0.302171 | 0.744728 |
| XLOC_008779 | PLD2           | chr17:4710395-4726727    | 11.1678    | 9.05861    | -0.301981 | 0.544165 |
| XLOC_023451 | IGBP1          | chrX:69353317-69386173   | 71.4472    | 57.9543    | -0.301961 | 0.491654 |
| XLOC_009988 | PRPSAP1        | chr17:74306867-74350230  | 26.2886    | 21.3241    | -0.30195  | 0.511715 |
| XLOC_018367 | PHF3           | chr6:64356430-64424405   | 5.54743    | 4.50063    | -0.301692 | 0.525257 |
| XLOC_003941 | C11orf35       | chr11:537521-560779      | 2.25711    | 1.8312     | -0.301689 | 0.909016 |
| XLOC_003333 | LOC729013      | chr11:10879763-10900823  | 6.80736    | 5.52341    | -0.301536 | 0.721145 |
| XLOC_011075 | LINC00085      | chr19:52196592-52208443  | 0.45285    | 0.36746    | -0.301447 | 0.903682 |
| XLOC_010487 | CACTIN-AS1     | chr19:3607244-3626813    | 0.182664   | 0.148222   | -0.301432 | 1        |
| XLOC_008531 | STX1B          | chr16:31000576-31021829  | 0.54063    | 0.438781   | -0.301141 | 0.825067 |
| XLOC_013769 | DPH3P1         | chr20:61448413-61493115  | 1.00384    | 0.814945   | -0.300755 | 0.984917 |
| XLOC_001188 | C1orf170       | chr1:910578-917473       | 0.990052   | 0.803778   | -0.300708 | 0.827857 |
| XLOC_016426 | HERC3          | chr4:89513573-89629693   | 2.82456    | 2.29325    | -0.300631 | 0.691839 |
| XLOC_007716 | CIB2           | chr15:78396947-78423877  | 22.665     | 18.4045    | -0.300409 | 0.563967 |
| XLOC_004849 | DAZAP2         | chr12:51632507-51664202  | 34.6189    | 28.1127    | -0.30034  | 0.908531 |
| XLOC_000388 | CDKN2C         | chr1:51434366-51440309   | 15.4569    | 12.5526    | -0.300269 | 0.624337 |
| XLOC_020393 | LHLH7          | chr7:23145352-23215038   | 12.128     | 9.8506     | -0.300059 | 0.75896  |
| XLOC_012507 | GAD1           | chr2:171673199-171717655 | 10.3727    | 8.42618    | -0.299843 | 0.759668 |
| XLOC_005449 | CSRNP2         | chr12:51454987-51477454  | 5.86752    | 4.76653    | -0.299811 | 0.563736 |
| XLOC_022325 | GALT           | chr9:34646585-34650595   | 13.7143    | 11.1418    | -0.299708 | 0.637163 |
| XLOC_023337 | GPR34          | chrX:41374188-41782287   | 0.00892278 | 0.00724914 | -0.299682 | 1        |
| XLOC_010504 | LOC100131094   | chr19:4675243-4723855    | 0.273866   | 0.222573   | -0.299193 | 1        |
| XLOC_017462 | HMMR           | chr5:162887516-162918955 | 1.67411    | 1.36061    | -0.299135 | 0.728767 |
| XLOC_006664 | TEX22          | chr14:105864919-10588015 | 0.283898   | 0.230781   | -0.29885  | 1        |
| XLOC_015499 | EIF4A2         | chr3:186501360-186524484 | 158.076    | 128.501    | -0.298841 | 0.609835 |
| XLOC_020395 | GFNMB          | chr7:23286315-23314729   | 0.193508   | 0.157324   | -0.298652 | 1        |
| XLOC_004323 | LTBP3          | chr11:65292547-65325699  | 8.53861    | 6.94238    | -0.298569 | 0.922312 |
| XLOC_012546 | DUSP19         | chr2:183943286-183964722 | 0.472335   | 0.384222   | -0.297872 | 0.806163 |
| XLOC_010710 | SLC25A42       | chr19:19174802-19223841  | 4.06145    | 3.30433    | -0.297636 | 0.690873 |
| XLOC_006929 | NRDE2          | chr14:90744397-90798481  | 1.99114    | 1.62014    | -0.297475 | 0.69426  |
| XLOC_014410 | GP1BB,SEPT5    | chr22:19701986-19712297  | 9.44178    | 7.68288    | -0.297411 | 0.819258 |
| XLOC_006063 | N4BP2L1        | chr13:32974859-33002315  | 0.636709   | 0.518162   | -0.297232 | 0.825012 |
| XLOC_007014 | GOLGA8EP       | chr15:23435069-23448423  | 0.00292732 | 0.00238269 | -0.296987 | 1        |
| XLOC_009507 | ZNF18          | chr17:11880761-11900689  | 1.94581    | 1.5838     | -0.296979 | 0.74078  |
| XLOC_008443 | RPS15A         | chr16:18794276-18801656  | 4912.55    | 3998.79    | -0.296907 | 0.580086 |
| XLOC_005897 | CTAGE10P       | chr13:50464544-50467516  | 0.00542549 | 0.00441639 | -0.296884 | 1        |
| XLOC_005802 | ZMYM2          | chr13:20532809-20665968  | 2.0374     | 1.6585     | -0.296853 | 0.575728 |
| XLOC_008895 | SMCR7          | chr17:18163847-18169095  | 22.5179    | 18.3314    | -0.29676  | 0.544165 |
| XLOC_016217 | CPZ            | chr4:8594386-8621488     | 26.5998    | 21.6553    | -0.296696 | 0.545876 |
| XLOC_023460 | MED12          | chrX:70338405-70362304   | 3.37324    | 2.74627    | -0.29666  | 0.595117 |
| XLOC_014933 | BRPF1          | chr3:9773433-9789699     | 6.49882    | 5.29092    | -0.296659 | 0.57212  |
| XLOC_023461 | NLGN3          | chrX:70364680-70391051   | 0.854073   | 0.695351   | -0.296619 | 0.809695 |
| XLOC_003837 | TAGLN          | chr11:117049938-11707555 | 61.5237    | 50.0938    | -0.29651  | 0.632842 |
| XLOC_004443 | CREBZF         | chr11:85368607-85376182  | 5.86325    | 4.77463    | -0.296313 | 0.572795 |
| XLOC_002488 | STOX1          | chr10:70587293-70655209  | 2.54085    | 2.06945    | -0.296065 | 0.907929 |
| XLOC_021351 | NDUFB2-AS1     | chr7:140395135-140406444 | 1.49231    | 1.21551    | -0.295985 | 0.870747 |
| XLOC_014175 | SH3BGR         | chr21:40817796-40887433  | 2.88012    | 2.34646    | -0.295641 | 0.806008 |
| XLOC_013757 | SS18L1         | chr20:60718821-60757566  | 2.80193    | 2.28278    | -0.295631 | 0.657573 |
| XLOC_009068 | STAT5A         | chr17:40439564-40463960  | 8.61672    | 7.02028    | -0.295611 | 0.563967 |
| XLOC_000656 | NBPF16         | chr1:148739441-148758311 | 5.51358    | 4.49213    | -0.295588 | 0.578272 |
| XLOC_009461 | PLSCR3,TMEM256 | chr17:7284292-7307450    | 285.597    | 232.692    | -0.29556  | 0.73642  |
| XLOC_022438 | FGD3           | chr9:95709600-95798518   | 4.23976    | 3.45457    | -0.295477 | 0.656145 |
| XLOC_006122 | CAB39L         | chr13:49882785-50018221  | 3.3149     | 2.70188    | -0.295005 | 0.648246 |
| XLOC_017263 | EPBA1L4A-AS1   | chr5:111496222-111498198 | 80.9144    | 65.9554    | -0.294906 | 0.516824 |
| XLOC_013506 | HSPA12B        | chr20:3713316-3733758    | 0.183699   | 0.149766   | -0.294628 | 1        |
| XLOC_022888 | C9orf41        | chr9:77597872-77643310   | 0.932771   | 0.760533   | -0.294513 | 0.829595 |
| XLOC_018691 | ZNF322         | chr6:26634610-26659980   | 3.55959    | 2.90295    | -0.294193 | 0.593618 |
| XLOC_008892 | MYO15A         | chr17:18012019-18083116  | 0.0198979  | 0.0162274  | -0.294183 | 1        |
| XLOC_021579 | HGSNAT         | chr8:42995591-43057970   | 5.9149     | 4.82391    | -0.29415  | 0.571112 |
| XLOC_021171 | PON3           | chr7:94989183-95025687   | 0.978286   | 0.797895   | -0.294057 | 0.866497 |
| XLOC_018123 | PRSS16         | chr6:27215501-27224399   | 2.92175    | 2.38328    | -0.293884 | 0.728031 |
| XLOC_005824 | RPL21          | chr13:27825691-27830702  | 4141.34    | 3378.87    | -0.293559 | 0.59338  |
| XLOC_022644 | LINC00094      | chr9:136890560-136933141 | 2.52135    | 2.0574     | -0.293376 | 0.889711 |
| XLOC_018247 | ITPR3          | chr6:33589155-33664348   | 42.1889    | 34.4291    | -0.293232 | 0.535039 |
| XLOC_002090 | ASPM           | chr1:197053256-197115824 | 1.9173     | 1.56484    | -0.293063 | 0.664776 |
| XLOC_016850 | STPG2          | chr4:98480024-99064391   | 0.0187973  | 0.0153427  | -0.292974 | 1        |
| XLOC_011927 | ZNF347         | chr19:53641956-53662322  | 0.0126989  | 0.0103652  | -0.292954 | 1        |
| XLOC_018978 | KIAA1009       | chr6:84833959-84937335   | 0.309299   | 0.252465   | -0.292918 | 1        |
| XLOC_014226 | YBEY           | chr21:47706266-47717665  | 21.6159    | 17.6446    | -0.292864 | 0.620336 |
| XLOC_014166 | TTC3           | chr21:38445570-38575408  | 2.73169    | 2.22988    | -0.292832 | 0.595511 |
| XLOC_023301 | ZFX            | chrX:24164341-24234372   | 2.17698    | 1.77725    | -0.292681 | 0.618166 |
| XLOC_016205 | BLOC1S4        | chr4:6717841-6719387     | 25.0785    | 20.4759    | -0.292525 | 0.579501 |
| XLOC_000548 | PRMT6          | chr1:107599266-107601911 | 7.04682    | 5.75371    | -0.29248  | 0.622576 |
| XLOC_008877 | TRPV2          | chr17:16318855-16340317  | 0.438537   | 0.358106   | -0.292313 | 0.906895 |
| XLOC_021809 | TMED10P1       | chr8:146198974-146231432 | 0.161903   | 0.132212   | -0.29227  | 1        |
| XLOC_006440 | PTGR2          | chr14:74318533-74352168  | 2.4601     | 2.00898    | -0.292257 | 0.716012 |
| XLOC_005636 | NTN4           | chr12:96043030-96184536  | 0.499966   | 0.408293   | -0.292223 | 0.842724 |
| XLOC_011903 | FLJ30403       | chr19:52095035-52097633  | 0.823397   | 0.672454   | -0.292152 | 0.881073 |
| XLOC_017033 | CCDC110        | chr4:186350544-186392912 | 0.0956745  | 0.0781374  | -0.292122 | 1        |

|             |                         |                         |            |            |           |          |
|-------------|-------------------------|-------------------------|------------|------------|-----------|----------|
| XLOC_013922 | C2orf112                | chr20:31030861-31112785 | 1.45591    | 1.18904    | -0.292121 | 0.701805 |
| XLOC_007733 | MEX3B                   | chr15:82334118-82338484 | 1.30789    | 1.06823    | -0.292014 | 0.813314 |
| XLOC_005584 | PTPRR                   | chr12:71031852-71314584 | 0.363473   | 0.296931   | -0.291718 | 0.865541 |
| XLOC_003171 | CUZD1,FAM24B            | chr10:124591670-1246582 | 9.62319    | 7.86168    | -0.291677 | 0.813829 |
| XLOC_009960 | USH1G                   | chr17:72912175-72919351 | 0.537125   | 0.438855   | -0.291512 | 0.877493 |
| XLOC_011914 | ZNF841                  | chr19:52567718-52599018 | 2.01644    | 1.64753    | -0.291499 | 0.690353 |
| XLOC_003287 | TRIM34,TRIM6,TRIM6-TRIM | chr11:5617330-5665625   | 0.435943   | 0.35619    | -0.291492 | 0.869308 |
| XLOC_017897 | RPS14                   | chr5:149823791-14982931 | 4764.69    | 3893.13    | -0.291449 | 0.604919 |
| XLOC_017234 | NR2F1                   | chr5:92919042-93447404  | 3.90559    | 3.19126    | -0.291416 | 0.890999 |
| XLOC_015550 | EGOT                    | chr3:4535031-4889524    | 0.0121778  | 0.0099511  | -0.291329 | 1        |
| XLOC_023204 | C9orf37                 | chr9:140500095-14051330 | 6.19443    | 5.0621     | -0.291234 | 0.965328 |
| XLOC_007441 | HERC2P3                 | chr15:20613649-20711433 | 0.629689   | 0.514605   | -0.291175 | 0.825012 |
| XLOC_011742 | ZNF229                  | chr19:44930425-44952665 | 0.00318401 | 0.00260225 | -0.291084 | 1        |
| XLOC_005411 | ASB8                    | chr12:48541571-48551377 | 6.07       | 4.96096    | -0.291076 | 0.640612 |
| XLOC_010551 | ZNF28                   | chr19:8386383-8387280   | 7383.64    | 6034.64    | -0.291065 | 0.585652 |
| XLOC_001806 | ARNT                    | chr1:150782180-15084924 | 5.59241    | 4.57094    | -0.290978 | 0.585568 |
| XLOC_006504 | OTUB2                   | chr14:94492723-94515276 | 1.18183    | 0.96597    | -0.290966 | 0.773848 |
| XLOC_012495 | NOSTRIN                 | chr2:169643048-16972184 | 0.0311109  | 0.0254291  | -0.290938 | 1        |
| XLOC_011186 | RPL28                   | chr19:55897299-55903451 | 2089.46    | 1707.89    | -0.290917 | 0.778996 |
| XLOC_015812 | LMOD3                   | chr3:69156038-69171746  | 0.00367178 | 0.00300198 | -0.290567 | 1        |
| XLOC_017774 | FEM1C                   | chr5:114856607-11488059 | 3.19012    | 2.60826    | -0.290525 | 0.601451 |
| XLOC_004476 | SESN3                   | chr11:94898676-94965705 | 0.132029   | 0.107955   | -0.290419 | 1        |
| XLOC_005667 | ALDH1L2                 | chr12:105413561-1054783 | 0.00374464 | 0.00306341 | -0.289689 | 1        |
| XLOC_006710 | HAUS4                   | chr14:23415436-23426351 | 43.2952    | 35.4199    | -0.289648 | 0.540351 |
| XLOC_020497 | SNORA15                 | chr7:56119377-56131682  | 2.28433    | 1.86916    | -0.289378 | 1        |
| XLOC_000996 | NFASC                   | chr1:204797781-20499195 | 0.00187265 | 0.00153234 | -0.289345 | 1        |
| XLOC_004848 | LETMD1                  | chr12:51442081-51454207 | 44.2016    | 36.171     | -0.289264 | 0.536951 |
| XLOC_003425 | DKFz779M0652            | chr11:45792982-45793909 | 1.18965    | 0.973528   | -0.289237 | 0.936493 |
| XLOC_016268 | RBPJ                    | chr4:26321331-26436752  | 8.46129    | 6.92418    | -0.289235 | 0.550535 |
| XLOC_012977 | RAB11FIP5               | chr2:73300509-73340146  | 22.6269    | 18.5166    | -0.28922  | 0.542138 |
| XLOC_020699 | ZNF277                  | chr7:111846642-11198398 | 11.8202    | 9.67375    | -0.289112 | 0.561012 |
| XLOC_018577 | SYTL3                   | chr6:159071045-15918590 | 0.510171   | 0.41753    | -0.2891   | 0.881802 |
| XLOC_008964 | ATAD5                   | chr17:29159022-2922295  | 0.626976   | 0.513189   | -0.288919 | 0.766669 |
| XLOC_001406 | SDC3                    | chr1:31342312-31381480  | 3.48209    | 2.85022    | -0.288881 | 0.640612 |
| XLOC_000196 | EXTL1                   | chr1:26348270-26362954  | 0.0527365  | 0.0431671  | -0.288869 | 1        |
| XLOC_018292 | PRICKLE4                | chr6:41748499-41755110  | 2.10932    | 1.72676    | -0.28871  | 0.83059  |
| XLOC_015339 | NUDT16P1                | chr3:130745693-13110031 | 3.15482    | 2.58276    | -0.288644 | 0.78908  |
| XLOC_011665 | RPS16                   | chr19:39923846-39926618 | 5870.63    | 4806.17    | -0.288628 | 0.602446 |
| XLOC_012253 | INO80B,WBP1             | chr2:74682149-74688018  | 75.594     | 61.8878    | -0.288616 | 0.550048 |
| XLOC_009261 | RPL38                   | chr17:72199794-72206019 | 4849.79    | 3971.81    | -0.288123 | 0.579174 |
| XLOC_016445 | LOC256880               | chr4:100871635-10087362 | 0.101113   | 0.0828294  | -0.287751 | 1        |
| XLOC_003958 | DUSP8                   | chr11:14906684-1785501  | 5.74857    | 4.71085    | -0.287215 | 0.974335 |
| XLOC_023129 | RALGDS                  | chr9:135973106-13602460 | 50.2504    | 41.185     | -0.287016 | 0.54837  |
| XLOC_003330 | AMPD3                   | chr11:10471867-10529126 | 3.41036    | 2.79542    | -0.286859 | 0.671358 |
| XLOC_003326 | WEE1                    | chr11:9595227-9611313   | 28.1045    | 23.0372    | -0.286831 | 0.549946 |
| XLOC_007111 | GOLGA8T                 | chr15:30427989-30439395 | 0.164432   | 0.134794   | -0.286733 | 1        |
| XLOC_010412 | ZADH2                   | chr18:72909277-72921281 | 5.72307    | 4.69223    | -0.286517 | 0.579009 |
| XLOC_002260 | LYST                    | chr1:235824344-23603022 | 0.265308   | 0.217522   | -0.28651  | 1        |
| XLOC_006898 | MLH3                    | chr14:75480466-75518235 | 1.21545    | 0.996599   | -0.286402 | 0.685308 |
| XLOC_002407 | ZNF33A                  | chr10:38299577-38348995 | 2.70385    | 2.21722    | -0.286265 | 0.61071  |
| XLOC_004396 | STARD10                 | chr11:72465773-72504750 | 31.2224    | 25.6044    | -0.286191 | 0.557674 |
| XLOC_018110 | BTN3A1                  | chr6:26402464-26415444  | 1.37611    | 1.12861    | -0.286058 | 0.764271 |
| XLOC_002509 | ANAPC16                 | chr10:73855789-73995618 | 24.3589    | 19.9782    | -0.286022 | 0.652159 |
| XLOC_021186 | TMEM130                 | chr7:98444110-98467673  | 0.00789391 | 0.00647437 | -0.286001 | 1        |
| XLOC_018381 | CD109                   | chr6:74405507-74538041  | 1.21834    | 0.999255   | -0.285988 | 0.664211 |
| XLOC_009174 | TOB1-AS1                | chr17:48939586-48945732 | 0.893626   | 0.732947   | -0.285962 | 0.979701 |
| XLOC_003317 | RPL27A                  | chr11:8703994-8711419   | 435.928    | 357.56     | -0.285906 | 0.601838 |
| XLOC_016913 | PRDM5                   | chr4:121615928-12184401 | 1.39277    | 1.14249    | -0.285775 | 0.797015 |
| XLOC_006727 | AP1G2,JPH4              | chr14:23980968-24048009 | 15.4293    | 12.6586    | -0.285552 | 0.688363 |
| XLOC_018140 | ZSCAN9                  | chr6:28193028-28201264  | 6.54756    | 5.37181    | -0.285548 | 0.678791 |
| XLOC_011364 | EMR4P                   | chr19:6952510-6990857   | 0.00636579 | 0.00522305 | -0.285448 | 1        |
| XLOC_006344 | KLHDC2                  | chr14:50234786-50249856 | 20.8043    | 17.0701    | -0.285407 | 0.581565 |
| XLOC_006275 | OXA1L                   | chr14:23235730-23240998 | 176.3      | 144.658    | -0.285385 | 0.550445 |
| XLOC_012408 | PTPN4                   | chr2:120517206-12074247 | 0.598188   | 0.490886   | -0.28521  | 0.721145 |
| XLOC_015669 | ALS2CL                  | chr3:46710484-46735194  | 6.60982    | 5.42424    | -0.285189 | 0.629556 |
| XLOC_011101 | ZNF331                  | chr19:54024176-54083523 | 0.437113   | 0.358715   | -0.285169 | 0.830321 |
| XLOC_009169 | SPATA20                 | chr17:48624449-48633213 | 34.0795    | 27.9702    | -0.285013 | 0.545588 |
| XLOC_004336 | CATSPPER1               | chr11:65784222-65793988 | 1.71341    | 1.40641    | -0.284858 | 0.807124 |
| XLOC_011440 | ACP5                    | chr19:11685474-11689801 | 0.193704   | 0.159019   | -0.284656 | 1        |
| XLOC_011184 | SUV420H2                | chr19:55851220-55859489 | 8.65875    | 7.11045    | -0.284219 | 0.691693 |
| XLOC_001957 | TNNT1                   | chr19:55644160-55660606 | 163.755    | 134.489    | -0.284056 | 0.548189 |
| XLOC_004869 | PFDN5                   | chr12:53689234-53693234 | 513.732    | 422.021    | -0.283703 | 0.564578 |
| XLOC_005639 | LTA4H                   | chr12:96394530-96437298 | 97.9962    | 80.5024    | -0.283694 | 0.563372 |
| XLOC_012005 | ZNF329                  | chr19:58637694-58662148 | 3.19728    | 2.62686    | -0.283504 | 0.678263 |
| XLOC_000604 | DCLRE1B                 | chr1:114447914-11445670 | 3.07501    | 2.52645    | -0.28348  | 0.674684 |
| XLOC_010091 | CLUL1                   | chr18:596997-712662     | 0.0294342  | 0.0241835  | -0.283469 | 1        |
| XLOC_010520 | ACSBG2                  | chr19:6135709-6193112   | 0.0276754  | 0.0227398  | -0.283389 | 1        |
| XLOC_000195 | MTFR1L                  | chr1:26146396-26159433  | 24.714     | 20.3087    | -0.283228 | 0.589808 |
| XLOC_002349 | LOC283070               | chr10:12875132-12877545 | 8.5621     | 7.03692    | -0.283021 | 0.637932 |

|             |               |                          |            |            |           |          |
|-------------|---------------|--------------------------|------------|------------|-----------|----------|
| XLOC_011753 | PPP1R13L      | chr19:45882891-45927177  | 3.55694    | 2.92388    | -0.282754 | 0.988154 |
| XLOC_015925 | KLF15         | chr3:126061477-126076236 | 5.10108    | 4.19321    | -0.282748 | 0.72508  |
| XLOC_001447 | EVA1B         | chr1:36787631-36789755   | 28.0344    | 23.0459    | -0.282692 | 0.682297 |
| XLOC_007148 | CASC5         | chr15:40886446-40954881  | 0.423668   | 0.348284   | -0.28267  | 0.78079  |
| XLOC_005374 | DENND5B       | chr12:31535156-31768285  | 0.588758   | 0.484048   | -0.282524 | 0.741667 |
| XLOC_011628 | ZNF790        | chr19:37288451-37407193  | 0.500327   | 0.411347   | -0.282516 | 0.914952 |
| XLOC_004676 | GAPDH         | chr12:6643584-6647537    | 8492.32    | 6982.13    | -0.28249  | 0.782225 |
| XLOC_002014 | METTL18       | chr1:169761669-16976406  | 4.93681    | 4.05896    | -0.28247  | 0.714805 |
| XLOC_008273 | FOXF1         | chr16:86544132-86548070  | 2.3323     | 1.91769    | -0.282383 | 0.814959 |
| XLOC_000267 | ZNF362        | chr1:33722173-33766320   | 2.45384    | 2.0177     | -0.282329 | 0.763481 |
| XLOC_010014 | CBX8          | chr17:77768175-77770915  | 14.951     | 12.2937    | -0.282315 | 0.672595 |
| XLOC_018152 | OR2H1         | chr6:29426229-29432099   | 0.00558048 | 0.00458901 | -0.282206 | 1        |
| XLOC_014513 | RNF185        | chr22:31556137-31603005  | 21.5608    | 17.7304    | -0.282184 | 0.570108 |
| XLOC_015138 | PHF7          | chr3:52444526-52457657   | 1.68186    | 1.3832     | -0.282045 | 0.812655 |
| XLOC_010038 | OXLD1         | chr17:79632065-79633618  | 48.7582    | 40.1008    | -0.282013 | 0.660246 |
| XLOC_010908 | ZNF283        | chr19:44331472-44353050  | 2.02506    | 1.6658     | -0.281754 | 0.763481 |
| XLOC_022489 | NIPSNAP3A     | chr9:107509968-10752240  | 6.06629    | 4.99019    | -0.28172  | 0.704155 |
| XLOC_007871 | RAB26         | chr16:2198650-2204141    | 10.5853    | 8.70821    | -0.28161  | 0.70343  |
| XLOC_012246 | ACTG2         | chr2:74120092-74146780   | 0.0895275  | 0.0736547  | -0.281554 | 1        |
| XLOC_005210 | ZNF268        | chr12:133757994-1337836  | 1.74871    | 1.43871    | -0.281513 | 0.689157 |
| XLOC_022851 | LOC286297     | chr9:42844369-42893137   | 0.00733525 | 0.00603532 | -0.281418 | 1        |
| XLOC_011161 | RPS9          | chr19:54704725-54711515  | 4463.66    | 3673.64    | -0.281015 | 0.621939 |
| XLOC_009477 | C17orf59      | chr17:8091650-8093564    | 14.6612    | 12.0681    | -0.280806 | 0.662283 |
| XLOC_013195 | BAZ2B         | chr2:160175489-16047305  | 0.916265   | 0.754255   | -0.280714 | 0.710179 |
| XLOC_021080 | ZNF733P       | chr7:62751669-62764434   | 0.0154872  | 0.0127492  | -0.280669 | 1        |
| XLOC_000021 | LOC148413     | chr1:1334909-1342693     | 10.0889    | 8.3059     | -0.280553 | 0.933023 |
| XLOC_004959 | MON2          | chr12:62860596-62991363  | 1.18895    | 0.978897   | -0.280457 | 0.664776 |
| XLOC_003421 | TSPAN18       | chr11:44785975-44972857  | 0.0048232  | 0.00397116 | -0.280431 | 1        |
| XLOC_013293 | PGAP1         | chr2:197697727-19779145  | 0.896973   | 0.738525   | -0.280418 | 0.678263 |
| XLOC_000493 | LOC339524     | chr1:87595447-87634886   | 0.0217729  | 0.0179284  | -0.280286 | 1        |
| XLOC_021644 | ZFHX4         | chr8:77523113-77779521   | 0.00708987 | 0.00583937 | -0.279947 | 1        |
| XLOC_004741 | GPRC5A        | chr12:13043955-13066600  | 11.044     | 9.0965     | -0.279881 | 0.664459 |
| XLOC_016073 | GNB4          | chr3:179113875-17916937  | 0.0591782  | 0.0487477  | -0.27973  | 1        |
| XLOC_009471 | ALOX12B       | chr17:7975953-7991021    | 2.83433    | 2.33485    | -0.279678 | 0.788364 |
| XLOC_023455 | RAB41         | chrX:69502021-69504852   | 0.0189121  | 0.0155796  | -0.279656 | 1        |
| XLOC_022711 | RFX3          | chr9:3224646-3525983     | 0.499577   | 0.411602   | -0.279456 | 0.869283 |
| XLOC_001177 | PGBD2         | chr1:249200441-24921334  | 1.69312    | 1.39498    | -0.279441 | 0.805942 |
| XLOC_007551 | SERINC4       | chr15:44038589-44094769  | 1.42897    | 1.17741    | -0.279355 | 0.989841 |
| XLOC_021987 | PCMTD1        | chr8:52730139-52811735   | 2.84934    | 2.34789    | -0.279266 | 0.665442 |
| XLOC_016460 | RPL34         | chr4:109541721-10955163  | 1111.54    | 915.939    | -0.279243 | 0.590286 |
| XLOC_016192 | ZBTB49        | chr4:4291923-4323513     | 1.74046    | 1.43424    | -0.279183 | 0.781722 |
| XLOC_013634 | MYL9          | chr20:35169886-35178226  | 85.7045    | 70.6271    | -0.279149 | 0.557803 |
| XLOC_003658 | LOC100130987  | chr11:67085309-67159158  | 0.874966   | 0.721138   | -0.278953 | 0.98922  |
| XLOC_016698 | CCDC149       | chr4:24807738-24981826   | 1.2978     | 1.06979    | -0.27875  | 0.778704 |
| XLOC_015099 | WDR6          | chr3:49044636-49060926   | 28.8267    | 23.7681    | -0.278377 | 0.782765 |
| XLOC_013963 | KIAA1755      | chr20:36838906-36889174  | 1.59561    | 1.31577    | -0.278204 | 0.726892 |
| XLOC_007648 | RPL4          | chr15:66791652-66797193  | 3601.26    | 2969.88    | -0.278098 | 0.674862 |
| XLOC_010205 | POLI          | chr18:51795848-51824604  | 2.5681     | 2.11798    | -0.278015 | 0.640556 |
| XLOC_000376 | TEX38         | chr1:47137496-47139256   | 0.0513288  | 0.0423331  | -0.277982 | 1        |
| XLOC_007218 | TMOD2         | chr15:52043757-52108558  | 0.765287   | 0.631227   | -0.277841 | 0.724424 |
| XLOC_020522 | KCTD7         | chr7:66093867-66108216   | 1.3874     | 1.14444    | -0.277741 | 0.774191 |
| XLOC_024316 | CD24          | chrY:21094584-21239302   | 5.10433    | 4.21051    | -0.277725 | 0.700083 |
| XLOC_000680 | ADAMTSL4      | chr1:150521897-15053341  | 3.2612     | 2.69058    | -0.277485 | 0.730493 |
| XLOC_015736 | NPRL2         | chr3:50384918-50391496   | 18.4228    | 15.2002    | -0.277405 | 0.812215 |
| XLOC_000658 | LOC645166     | chr1:148928285-14895305  | 4.99783    | 4.12362    | -0.277392 | 0.857254 |
| XLOC_011319 | EEF2          | chr19:3976053-3985461    | 2430.47    | 2005.39    | -0.277354 | 0.691693 |
| XLOC_008940 | RPL23A        | chr17:27046999-27053949  | 2665.38    | 2199.22    | -0.27735  | 0.644333 |
| XLOC_004862 | EIF4B         | chr12:53400061-53435993  | 166.342    | 137.263    | -0.277211 | 0.595511 |
| XLOC_005775 | CCDC92        | chr12:124420954-1244571  | 2.74935    | 2.2689     | -0.277099 | 0.81342  |
| XLOC_021288 | SLC13A1       | chr7:122753587-12284002  | 0.0345219  | 0.0284901  | -0.277048 | 1        |
| XLOC_022130 | C8orf56       | chr8:104145190-10424253  | 0.0584476  | 0.0482355  | -0.277048 | 1        |
| XLOC_017720 | MTRNR2L2      | chr5:79922044-80172634   | 52.7161    | 43.5063    | -0.27702  | 0.841354 |
| XLOC_006234 | GAS6          | chr13:114518582-1145670  | 26.1261    | 21.5621    | -0.276996 | 0.603292 |
| XLOC_017483 | ERGIC1        | chr5:172261222-17237968  | 71.8741    | 59.3242    | -0.276853 | 0.589726 |
| XLOC_006347 | ATL1          | chr14:50999799-51099784  | 0.753749   | 0.622142   | -0.276839 | 0.839431 |
| XLOC_001832 | FLG           | chr1:152274650-15229767  | 0.00122008 | 0.00100716 | -0.276675 | 1        |
| XLOC_002733 | PLEKHA1       | chr10:124134093-1241918  | 4.07532    | 3.36417    | -0.276662 | 0.655465 |
| XLOC_021605 | CLV51         | chr8:62200524-62627199   | 0.0244521  | 0.0201857  | -0.276621 | 1        |
| XLOC_013726 | FAM210B       | chr20:54933982-54943718  | 22.1538    | 18.2911    | -0.276412 | 0.580916 |
| XLOC_020993 | NOD1          | chr7:30464142-30518393   | 1.77731    | 1.46743    | -0.276403 | 0.760503 |
| XLOC_004563 | TREH          | chr11:118528941-1185503  | 0.0112526  | 0.0092907  | -0.276396 | 1        |
| XLOC_009627 | RDM1          | chr17:34245084-34257780  | 1.8413     | 1.52036    | -0.27631  | 0.860362 |
| XLOC_012407 | TMEM177       | chr2:120436742-12043969  | 36.9913    | 30.5453    | -0.276235 | 0.589808 |
| XLOC_015488 | VPS8          | chr3:184529930-18477040  | 3.73425    | 3.08357    | -0.276217 | 0.638545 |
| XLOC_006662 | BTBD6         | chr14:105675622-1058644  | 49.6498    | 41.0014    | -0.276113 | 0.817762 |
| XLOC_017603 | AMACR,C1QTNF3 | chr5:33987090-34124633   | 2.2737     | 1.8777     | -0.276078 | 0.729625 |
| XLOC_001330 | CAMK2N1       | chr1:20808883-20812728   | 23.2795    | 19.2325    | -0.275514 | 0.595117 |
| XLOC_014313 | RUNX1         | chr21:36160097-36421595  | 8.63361    | 7.13349    | -0.275355 | 0.718774 |
| XLOC_012252 | WDR54         | chr2:74648884-74652882   | 100.102    | 82.7226    | -0.275124 | 0.574736 |

|             |                |                           |            |            |           |          |
|-------------|----------------|---------------------------|------------|------------|-----------|----------|
| XLOC_006712 | C14orf93       | chr14:23456109-23479360   | 6.37969    | 5.2731     | -0.274837 | 0.698227 |
| XLOC_004431 | GAB2           | chr11:77926335-78128868   | 2.80208    | 2.31618    | -0.274753 | 0.65543  |
| XLOC_006141 | MRPS31P5       | chr13:52741844-52768602   | 2.15699    | 1.78308    | -0.274645 | 0.779342 |
| XLOC_022410 | IDNK           | chr9:86237963-86259045    | 2.93414    | 2.42553    | -0.274637 | 0.845974 |
| XLOC_022219 | NAPRT1         | chr8:144656954-144660513  | 49.9804    | 41.322     | -0.274453 | 0.60005  |
| XLOC_015833 | PROS1          | chr3:93591880-93692934    | 12.32294   | 10.1949    | -0.274249 | 0.585568 |
| XLOC_008657 | HYDIN          | chr16:70841286-71264625   | 0.0840007  | 0.0694604  | -0.274211 | 1        |
| XLOC_012309 | LOC285033      | chr2:96850602-96908362    | 1.61578    | 1.33613    | -0.274164 | 0.985921 |
| XLOC_000644 | PIAS3          | chr1:145575987-145589435  | 7.23443    | 5.98257    | -0.274114 | 0.67045  |
| XLOC_002704 | ADRB1          | chr10:115803805-11580666  | 0.367542   | 0.303947   | -0.27409  | 0.923575 |
| XLOC_017987 | AGXT2L2        | chr5:177631507-177659803  | 9.97049    | 8.24544    | -0.274068 | 0.970195 |
| XLOC_004548 | LOC100652768   | chr11:117049938-11707556  | 1.81658    | 1.50234    | -0.274011 | 0.982497 |
| XLOC_015505 | ST6GAL1        | chr3:186648314-186796347  | 3.55787    | 2.94247    | -0.273987 | 0.679963 |
| XLOC_002003 | ANKRD36BP1     | chr1:168214818-168216666  | 0.083874   | 0.0693758  | -0.273791 | 1        |
| XLOC_000163 | LINC00339      | chr1:22351706-22357715    | 11.7052    | 9.68226    | -0.273733 | 0.713256 |
| XLOC_010490 | ATCAY          | chr19:3880617-3928080     | 0.00401212 | 0.00331973 | -0.2733   | 1        |
| XLOC_004045 | ZNF214         | chr11:7020548-7041586     | 0.287065   | 0.237537   | -0.273221 | 1        |
| XLOC_023017 | ZFP37          | chr9:115804173-115818996  | 2.25673    | 1.86742    | -0.273183 | 0.734084 |
| XLOC_003071 | ARHGAP19,SLIT1 | chr10:98757794-99052430   | 2.36712    | 1.95934    | -0.272769 | 0.682781 |
| XLOC_003647 | CCS            | chr11:66360689-66373490   | 36.8423    | 30.4969    | -0.272699 | 0.63573  |
| XLOC_010495 | EBI3           | chr19:4229539-4237524     | 0.46637    | 0.386149   | -0.272316 | 0.954287 |
| XLOC_015030 | RPSA           | chr3:39448203-39454032    | 4232.73    | 3504.95    | -0.272192 | 0.689349 |
| XLOC_011007 | FTL            | chr19:49468565-49470136   | 9396.84    | 7782.42    | -0.271956 | 0.713982 |
| XLOC_007793 | LYSMD4         | chr15:100267611-10027362  | 3.07683    | 2.54866    | -0.271708 | 0.752793 |
| XLOC_015543 | RPL35A         | chr3:197615945-197686886  | 4309.93    | 3570.14    | -0.271685 | 0.63475  |
| XLOC_014102 | USP25          | chr21:17102495-17252377   | 4.10336    | 3.39914    | -0.271633 | 0.637163 |
| XLOC_009590 | ABHD15         | chr17:27887688-27894042   | 6.0599     | 5.01995    | -0.271623 | 0.680196 |
| XLOC_015492 | C3orf65        | chr3:185361526-185542827  | 0.033676   | 0.027899   | -0.27151  | 1        |
| XLOC_016934 | ELF2           | chr4:139978870-140060630  | 3.76482    | 3.11907    | -0.271467 | 0.691625 |
| XLOC_010894 | CIC            | chr19:42788816-42799949   | 10.3817    | 8.60221    | -0.27127  | 0.613167 |
| XLOC_007838 | HAGHL          | chr16:777265-779715       | 90.6737    | 75.1347    | -0.271205 | 0.598176 |
| XLOC_018769 | DDAH2          | chr6:31694816-31698039    | 47.9986    | 39.7795    | -0.270967 | 0.612792 |
| XLOC_009479 | LINC00324      | chr17:8123947-8127361     | 0.953454   | 0.790226   | -0.270897 | 0.876899 |
| XLOC_022835 | ZBTB5          | chr9:37438099-37465407    | 2.71362    | 2.24967    | -0.270509 | 0.691613 |
| XLOC_013692 | ZSWIM3         | chr20:44486219-44507769   | 1.26579    | 1.04938    | -0.270493 | 0.830215 |
| XLOC_004879 | HOXC11         | chr12:54356091-54370203   | 6.00063    | 4.97526    | -0.270344 | 0.781453 |
| XLOC_005816 | TPTE2P6        | chr13:25154345-25171812   | 0.0116151  | 0.00963041 | -0.270333 | 1        |
| XLOC_006145 | PCDH8          | chr13:53418108-53422775   | 0.00957694 | 0.00794063 | -0.270312 | 1        |
| XLOC_021350 | DENND2A        | chr7:140218219-140302343  | 0.00575408 | 0.0047713  | -0.270204 | 1        |
| XLOC_021213 | C7orf61        | chr7:100054237-100061894  | 0.302295   | 0.250686   | -0.270072 | 1        |
| XLOC_002514 | NUDT13         | chr10:74870209-74891581   | 0.945641   | 0.784211   | -0.270051 | 0.852163 |
| XLOC_018077 | SOX4           | chr6:21593971-21598849    | 8.6081     | 7.13867    | -0.270004 | 0.638558 |
| XLOC_004068 | LOC440028      | chr11:9776316-10315754    | 1.90131    | 1.57679    | -0.27     | 0.94971  |
| XLOC_024007 | RBM41          | chrX:106305117-106362057  | 0.997703   | 0.82742    | -0.269991 | 0.836371 |
| XLOC_023321 | CXorf30        | chrX:36246895-36403434    | 0.0330062  | 0.0273733  | -0.269967 | 1        |
| XLOC_022818 | RMRP           | chr9:35657747-35658015    | 118.48     | 98.2719    | -0.269793 | 0.726892 |
| XLOC_003125 | OBFC1          | chr10:105637317-10567804  | 2.32071    | 1.92495    | -0.269751 | 0.68423  |
| XLOC_014550 | GCAT           | chr22:38203911-38213183   | 118.84     | 98.5783    | -0.269682 | 0.59243  |
| XLOC_006867 | ZFP36L1        | chr14:69254371-69262960   | 117.083    | 97.1243    | -0.269633 | 0.630184 |
| XLOC_005144 | ACADS          | chr12:121163570-121177787 | 54.3957    | 45.1232    | -0.269624 | 0.585568 |
| XLOC_011029 | FCGRT          | chr19:50015535-50029685   | 41.6314    | 34.5515    | -0.268925 | 0.620054 |
| XLOC_002230 | HIST3H2A       | chr1:228645064-228645566  | 40.3761    | 33.5099    | -0.268911 | 0.782956 |
| XLOC_021756 | PHF20L1        | chr8:133787603-133861052  | 3.42228    | 2.84059    | -0.268765 | 0.685156 |
| XLOC_001817 | POGZ           | chr1:151375199-151431947  | 5.13075    | 4.25868    | -0.268763 | 0.624337 |
| XLOC_021779 | RHPN1          | chr8:144451024-144466396  | 24.6133    | 20.4305    | -0.268708 | 0.609835 |
| XLOC_018429 | PRDM1          | chr6:106534194-106557814  | 0.194187   | 0.161191   | -0.268676 | 1        |
| XLOC_008380 | ZNF200         | chr16:3272324-3285457     | 3.56968    | 2.96321    | -0.268634 | 0.708818 |
| XLOC_024152 | LOC100131434   | chrX:148609131-148621313  | 0.0627255  | 0.052071   | -0.268574 | 1        |
| XLOC_015304 | FAM86JP        | chr3:125635443-125655887  | 1.07839    | 0.895252   | -0.268516 | 0.883756 |
| XLOC_008058 | LOC100862671   | chr16:30751511-30756517   | 4.74542    | 3.93957    | -0.268498 | 0.736403 |
| XLOC_023093 | NAIF1          | chr9:130823511-130829599  | 3.96993    | 3.29627    | -0.268277 | 0.728225 |
| XLOC_012187 | RPS27A         | chr2:55399686-55462989    | 2067.7     | 1716.84    | -0.268266 | 0.663653 |
| XLOC_007945 | SHISA9         | chr16:12995476-13334273   | 0.992926   | 0.824494   | -0.268177 | 0.773848 |
| XLOC_002350 | OPTN           | chr10:13142081-13180276   | 30.5584    | 25.3751    | -0.268156 | 0.59669  |
| XLOC_005217 | RAD52          | chr12:1021254-1058863     | 3.20388    | 2.66044    | -0.268156 | 0.746078 |
| XLOC_015340 | NUDT16         | chr3:131100514-131107674  | 6.47301    | 5.37544    | -0.268056 | 0.923894 |
| XLOC_008383 | MTRNR2L4       | chr16:3421052-3422283     | 0.210508   | 0.174825   | -0.267962 | 1        |
| XLOC_003948 | DEAF1          | chr11:644224-705028       | 39.1211    | 32.4902    | -0.267941 | 0.669515 |
| XLOC_014740 | MN1            | chr22:28144264-28197486   | 0.0119696  | 0.00994126 | -0.26787  | 1        |
| XLOC_017962 | KIAA1191       | chr5:175773065-175788805  | 37.0369    | 30.7618    | -0.267824 | 0.598722 |
| XLOC_011329 | PLIN5          | chr19:4522543-4535208     | 1.57362    | 1.30709    | -0.267727 | 0.848438 |
| XLOC_022658 | LOC100130954   | chr9:138466770-138478958  | 0.00854616 | 0.00709877 | -0.267707 | 1        |
| XLOC_009989 | UBE2O          | chr17:74385612-74449288   | 9.93833    | 8.25521    | -0.267699 | 0.625    |
| XLOC_004091 | RPS13          | chr11:17095938-17099220   | 3827.66    | 3179.48    | -0.267672 | 0.641563 |
| XLOC_001136 | ZBTB18         | chr1:244214560-244220778  | 2.08662    | 1.73351    | -0.267471 | 0.762783 |
| XLOC_007155 | DLL4           | chr15:41221530-41231258   | 1.1871     | 0.986273   | -0.267383 | 0.851389 |
| XLOC_010604 | ZNF69          | chr19:11998669-12025365   | 2.54121    | 2.11147    | -0.267268 | 0.803764 |
| XLOC_001315 | IFFO2          | chr1:19230773-19282826    | 8.84096    | 7.34611    | -0.267222 | 0.622798 |
| XLOC_016870 | MANBA          | chr4:103552642-103682157  | 11.3794    | 9.45555    | -0.26719  | 0.628471 |

|             |                          |                          |            |            |           |          |
|-------------|--------------------------|--------------------------|------------|------------|-----------|----------|
| XLOC_011820 | PLEKHA4                  | chr19:49340353-49371884  | 8.29779    | 6.89597    | -0.266973 | 0.686575 |
| XLOC_011784 | ZNF784                   | chr19:56132106-56135941  | 9.86902    | 8.20185    | -0.266958 | 0.726892 |
| XLOC_011992 | ZNF550                   | chr19:58058342-58067725  | 0.440984   | 0.366489   | -0.266957 | 0.933023 |
| XLOC_010361 | C18orf32,RPL17,RPL17-C18 | chr18:47007547-47018935  | 4197.91    | 3489.81    | -0.266521 | 0.688314 |
| XLOC_023955 | PGAM4                    | chrX:77166193-77305892   | 0.179493   | 0.149222   | -0.266475 | 1        |
| XLOC_020977 | HOXA4                    | chr7:27168125-27170399   | 5.61184    | 4.66542    | -0.266467 | 0.775379 |
| XLOC_005166 | C12orf65                 | chr12:123717843-12374250 | 10.5496    | 8.77075    | -0.266421 | 0.671133 |
| XLOC_020967 | C7orf31                  | chr7:25174315-25219817   | 1.5548     | 1.29267    | -0.266368 | 0.781725 |
| XLOC_002964 | PBLD                     | chr10:70042416-70102953  | 0.414877   | 0.345003   | -0.266075 | 0.991767 |
| XLOC_016263 | PI4K2B                   | chr4:25235652-25280831   | 3.17175    | 2.63787    | -0.265902 | 0.713542 |
| XLOC_019028 | SESNI                    | chr6:109307639-109415708 | 3.52235    | 2.92949    | -0.26589  | 0.742065 |
| XLOC_002891 | ZNF33B                   | chr10:43084554-43133992  | 2.53382    | 2.10752    | -0.265766 | 0.677086 |
| XLOC_016382 | PARM1                    | chr4:75858284-75975325   | 1.46303    | 1.21698    | -0.265656 | 0.759915 |
| XLOC_023078 | RPL12                    | chr9:130209952-13021371  | 9837.29    | 8183.19    | -0.265598 | 0.711382 |
| XLOC_009242 | PITPNC1                  | chr17:65373396-65693379  | 6.73936    | 5.60734    | -0.265294 | 0.606206 |
| XLOC_014403 | DGCR6                    | chr22:18893735-18899601  | 25.1363    | 20.916     | -0.265163 | 0.68317  |
| XLOC_022633 | RPL7A                    | chr9:136215068-136218280 | 11642.4    | 9687.81    | -0.265143 | 0.78079  |
| XLOC_011925 | ZNF160                   | chr19:53569866-53606687  | 4.68368    | 3.89752    | -0.265088 | 0.654699 |
| XLOC_017324 | PHF15                    | chr5:133861797-133918918 | 3.90665    | 3.25107    | -0.265015 | 0.662283 |
| XLOC_017487 | CREBRF                   | chr5:172483354-17256629  | 2.0429     | 1.70035    | -0.264787 | 0.727727 |
| XLOC_005000 | ZDHHC17                  | chr12:77157853-77247474  | 2.64846    | 2.20442    | -0.264755 | 0.699172 |
| XLOC_001521 | PIK3R3                   | chr1:46505811-46598708   | 1.14902    | 0.956375   | -0.264751 | 0.772137 |
| XLOC_022355 | DCAF10                   | chr9:37800789-37867665   | 2.7262     | 2.26917    | -0.26473  | 0.651582 |
| XLOC_002244 | EGLN1                    | chr1:231499496-231560790 | 18.7644    | 15.6189    | -0.2647   | 0.626327 |
| XLOC_015850 | RPL24                    | chr3:101399933-10140556  | 4657.33    | 3877.02    | -0.264555 | 0.664776 |
| XLOC_001890 | CLK2                     | chr1:155232658-15524328  | 16.6169    | 13.8331    | -0.264523 | 0.656683 |
| XLOC_003949 | PDDC1                    | chr11:767222-777487      | 16.0347    | 13.3494    | -0.264419 | 0.61004  |
| XLOC_009443 | LOC100506713             | chr17:6888441-6915653    | 1.43175    | 1.19217    | -0.26419  | 0.926446 |
| XLOC_003603 | TM7SF2,VPS51             | chr11:64863586-64883707  | 61.8801    | 51.5261    | -0.26417  | 0.711434 |
| XLOC_000064 | SLC45A1                  | chr1:8384389-8404227     | 3.7941     | 3.15943    | -0.264097 | 0.807514 |
| XLOC_022723 | C9orf123                 | chr9:7796490-7799799     | 29.3625    | 24.4515    | -0.264048 | 0.610004 |
| XLOC_009017 | ARHGAP23                 | chr17:36584719-36688628  | 2.50954    | 2.08982    | -0.264044 | 0.745032 |
| XLOC_015408 | RAP2B                    | chr3:152880028-15288626  | 5.71382    | 4.75828    | -0.264015 | 0.626547 |
| XLOC_016532 | DCLK2                    | chr4:150999425-151178608 | 0.649201   | 0.540683   | -0.263884 | 0.855674 |
| XLOC_020419 | PRR15                    | chr7:29603426-29606911   | 2.82189    | 2.35034    | -0.263794 | 0.855701 |
| XLOC_004319 | ZNHIT2                   | chr11:64883874-64885170  | 22.7353    | 18.9372    | -0.263713 | 0.737171 |
| XLOC_012433 | ARHGEF4                  | chr2:131674223-131804830 | 0.00589201 | 0.00490801 | -0.263621 | 1        |
| XLOC_004158 | CHRM4                    | chr11:46406639-46408107  | 0.234235   | 0.195132   | -0.263503 | 1        |
| XLOC_001993 | FAM78B                   | chr1:166039255-166135958 | 3.51685    | 2.92982    | -0.263472 | 0.832742 |
| XLOC_022064 | ZFAND1                   | chr8:82613565-82633539   | 47.1909    | 39.3178    | -0.263327 | 0.634966 |
| XLOC_012833 | OST4                     | chr2:27274490-27294567   | 564.838    | 470.66     | -0.263154 | 0.674163 |
| XLOC_005593 | PHLDA1                   | chr12:76419226-76425556  | 63.4807    | 52.9073    | -0.262853 | 0.63208  |
| XLOC_021034 | POLM                     | chr7:44111846-44122129   | 6.10356    | 5.08724    | -0.26277  | 0.727212 |
| XLOC_002875 | ARHGAP12                 | chr10:32094325-32217804  | 5.61513    | 4.68058    | -0.262631 | 0.648914 |
| XLOC_003016 | ZCCHC24                  | chr10:81142082-81205383  | 1.59764    | 1.33174    | -0.262631 | 0.771183 |
| XLOC_000825 | FCER1G                   | chr1:161185086-161189038 | 0.625732   | 0.521593   | -0.262621 | 0.959465 |
| XLOC_007308 | MPI                      | chr15:75182409-75190565  | 53.0373    | 44.2135    | -0.262522 | 0.613617 |
| XLOC_003536 | CD5                      | chr11:60869929-60895323  | 0.00713956 | 0.00595189 | -0.262487 | 1        |
| XLOC_021197 | TRIM4                    | chr7:99488029-99517223   | 9.25402    | 7.71473    | -0.262465 | 0.643946 |
| XLOC_016880 | TBCK                     | chr4:106967232-10727038  | 1.54859    | 1.29106    | -0.262397 | 0.97028  |
| XLOC_006981 | ANKRD9                   | chr14:102973197-1029761  | 17.4997    | 14.591     | -0.262249 | 0.76657  |
| XLOC_018617 | MGC39372                 | chr6:2854890-2876744     | 2.24271    | 1.87009    | -0.262133 | 0.855266 |
| XLOC_017108 | NIPBL                    | chr5:36876860-37065921   | 1.62656    | 1.35644    | -0.261999 | 0.686574 |
| XLOC_021083 | ZNF680                   | chr7:63980254-64023505   | 1.55586    | 1.29749    | -0.261994 | 0.787604 |
| XLOC_011100 | ZNF813                   | chr19:53970988-53997546  | 0.0130609  | 0.0108931  | -0.261845 | 1        |
| XLOC_009088 | IFI35                    | chr17:41158741-41166476  | 6.46069    | 5.38937    | -0.261571 | 0.788853 |
| XLOC_018520 | KIAA1244                 | chr6:138483052-138665800 | 3.03943    | 2.53548    | -0.261539 | 0.624393 |
| XLOC_007550 | MIR1282                  | chr15:44038589-44094769  | 22.6091    | 18.8606    | -0.261529 | 0.952371 |
| XLOC_018467 | DCBLD1                   | chr6:117803819-117923708 | 0.613143   | 0.511491   | -0.261515 | 0.981044 |
| XLOC_020642 | MBLAC1                   | chr7:99724319-99726121   | 3.79164    | 3.16334    | -0.261372 | 0.851252 |
| XLOC_008103 | RBL2                     | chr16:53468350-53537170  | 3.77953    | 3.15333    | -0.26133  | 0.811389 |
| XLOC_015084 | NBEAL2                   | chr3:46963230-47051194   | 5.08462    | 4.2422     | -0.261328 | 0.799291 |
| XLOC_021143 | SEMA3A                   | chr7:83587658-83824217   | 1.76718    | 1.47456    | -0.261159 | 0.724155 |
| XLOC_000335 | SZT2                     | chr1:43855555-43919918   | 1.46212    | 1.22004    | -0.261132 | 0.832052 |
| XLOC_014079 | PTK6                     | chr20:62159775-62168723  | 4.17672    | 3.48522    | -0.261118 | 0.781066 |
| XLOC_017159 | MAST4                    | chr5:65892175-66465423   | 0.704616   | 0.587967   | -0.261103 | 0.850379 |
| XLOC_016057 | PHC3                     | chr3:169805367-16989953  | 1.59273    | 1.32906    | -0.261094 | 0.661281 |
| XLOC_002252 | IRF2BP2                  | chr1:234740014-23474527  | 22.8541    | 19.0716    | -0.261025 | 0.618233 |
| XLOC_004300 | BAD                      | chr11:64037299-64056972  | 83.6515    | 69.8072    | -0.261016 | 0.728031 |
| XLOC_021121 | PMS2P3                   | chr7:75137068-75157453   | 1.02016    | 0.85146    | -0.26079  | 0.899309 |
| XLOC_017528 | RUFY1                    | chr5:178977561-17903702  | 11.0075    | 9.18874    | -0.260545 | 0.648914 |
| XLOC_004537 | C11orf71                 | chr11:114262169-1142712  | 6.91995    | 5.77769    | -0.260269 | 0.879021 |
| XLOC_015061 | ZNF35                    | chr3:44690232-44702283   | 2.37145    | 1.98001    | -0.26026  | 0.771625 |
| XLOC_015442 | GPR160                   | chr3:169755734-16980318  | 19.1129    | 15.9595    | -0.260131 | 0.638558 |
| XLOC_021110 | CLDN3                    | chr7:73183326-73184600   | 2.40819    | 2.01124    | -0.259865 | 0.904096 |
| XLOC_001303 | CROCCP2                  | chr1:16944750-16957401   | 20.8506    | 17.4145    | -0.259801 | 0.671358 |
| XLOC_002819 | PHYH                     | chr10:13319795-13342130  | 36.141     | 30.1887    | -0.259627 | 0.624337 |
| XLOC_008607 | TK2                      | chr16:66541905-66584315  | 4.70904    | 3.93358    | -0.259587 | 0.67579  |
| XLOC_022190 | ZFAT                     | chr8:135490030-13572529  | 1.58424    | 1.32347    | -0.259465 | 0.778107 |

|             |              |                         |           |            |           |          |
|-------------|--------------|-------------------------|-----------|------------|-----------|----------|
| XLOC_005451 | POU6F1       | chr12:51580718-51611477 | 1.93491   | 1.61653    | -0.259369 | 0.751467 |
| XLOC_008894 | LLGL1        | chr17:18128935-18162230 | 18.1185   | 15.1382    | -0.259271 | 0.931473 |
| XLOC_020412 | HOTTIP       | chr7:27240039-27246130  | 0.0735569 | 0.0614615  | -0.259178 | 1        |
| XLOC_017250 | PAM          | chr5:102201526-10236680 | 12.0591   | 10.0766    | -0.259115 | 0.632634 |
| XLOC_010130 | CEP192       | chr18:12991360-13125051 | 0.932891  | 0.779541   | -0.259083 | 0.754197 |
| XLOC_012078 | DNAJC27-AS1  | chr2:25194980-25262563  | 0.0147738 | 0.0123461  | -0.25899  | 1        |
| XLOC_007850 | GNPTG        | chr16:1401899-1464705   | 21.7943   | 18.2133    | -0.258956 | 0.797816 |
| XLOC_017981 | FAM193B      | chr5:176946789-17698154 | 10.1108   | 8.45177    | -0.258576 | 0.695626 |
| XLOC_009930 | C17orf58     | chr17:65987216-65989765 | 18.5821   | 15.5353    | -0.258363 | 0.671358 |
| XLOC_007267 | SKOR1        | chr15:68112041-68126174 | 0.630227  | 0.526898   | -0.258349 | 0.914275 |
| XLOC_017016 | CLDN22       | chr4:184020462-18424192 | 1.72208   | 1.43997    | -0.258112 | 0.900578 |
| XLOC_017798 | IRF1         | chr5:131817300-13182646 | 3.78622   | 3.16616    | -0.258025 | 0.740534 |
| XLOC_018310 | CUL9         | chr6:43149921-43192325  | 2.12385   | 1.77612    | -0.257951 | 0.721145 |
| XLOC_012260 | HK2          | chr2:75059781-75120481  | 40.8955   | 34.2       | -0.257948 | 0.643468 |
| XLOC_021878 | FAM86B2      | chr8:12283123-12293852  | 1.04098   | 0.870575   | -0.257898 | 0.913628 |
| XLOC_005175 | DNAH10       | chr12:124247041-1244202 | 0.0883239 | 0.0738776  | -0.257668 | 1        |
| XLOC_008172 | ELMO3        | chr16:67233027-67237927 | 2.07812   | 1.73826    | -0.257633 | 0.844212 |
| XLOC_010449 | CIRBP        | chr19:1267469-1274809   | 113.475   | 94.9248    | -0.257514 | 0.657573 |
| XLOC_009277 | SLC16A5      | chr17:73083821-73102255 | 6.15766   | 5.15111    | -0.257497 | 0.786804 |
| XLOC_005077 | C12orf23     | chr12:107349543-1073678 | 11.4837   | 9.60662    | -0.257489 | 0.637571 |
| XLOC_021917 | STC1         | chr8:23699433-23712320  | 0.0371162 | 0.031052   | -0.257363 | 1        |
| XLOC_012197 | C2orf74      | chr2:61372242-61391964  | 0.0839336 | 0.0702268  | -0.257226 | 1        |
| XLOC_020647 | PILRB        | chr7:99905324-99965454  | 46.6937   | 39.0687    | -0.257214 | 0.738943 |
| XLOC_017277 | DMXL1        | chr5:118407083-11858482 | 0.874921  | 0.732148   | -0.257019 | 0.734475 |
| XLOC_013716 | LOC284751    | chr20:48909256-48931456 | 0.324856  | 0.271867   | -0.256899 | 1        |
| XLOC_002848 | LOC100499489 | chr10:22724353-22726858 | 2.89474   | 2.42264    | -0.256853 | 0.823458 |
| XLOC_003918 | TMEM45B      | chr11:129685740-1297298 | 0.0736621 | 0.0616523  | -0.256768 | 1        |
| XLOC_003267 | LOC100506082 | chr11:4208381-4223883   | 0.180935  | 0.151448   | -0.256647 | 1        |
| XLOC_014329 | BRWD1-IT2    | chr21:40685860-40686888 | 0.571001  | 0.47795    | -0.256633 | 0.953271 |
| XLOC_011273 | C19orf26     | chr19:1229946-1237990   | 3.12513   | 2.61619    | -0.256449 | 0.830101 |
| XLOC_014062 | LAMA5        | chr20:60884120-60942368 | 3.21703   | 2.69321    | -0.2564   | 0.792593 |
| XLOC_009380 | TLCD2        | chr17:1606083-1613662   | 1.38167   | 1.15686    | -0.256201 | 0.762783 |
| XLOC_005238 | CD27-AS1     | chr12:6548166-6560884   | 3.838     | 3.21366    | -0.256135 | 0.770777 |
| XLOC_013113 | PAX8         | chr2:113973573-11403649 | 1.25441   | 1.05036    | -0.256119 | 0.939371 |
| XLOC_008385 | ZNF597       | chr16:3486109-3493490   | 1.06386   | 0.890809   | -0.256117 | 0.878089 |
| XLOC_012668 | INHHA        | chr2:220436953-22044043 | 0.510028  | 0.427122   | -0.255927 | 0.939056 |
| XLOC_006092 | KBTBD6       | chr13:41701708-41706936 | 1.31438   | 1.10091    | -0.255686 | 0.780734 |
| XLOC_003637 | PACS1        | chr11:65837823-66012218 | 20.2096   | 16.929     | -0.25555  | 0.633551 |
| XLOC_004517 | RDX          | chr11:110045604-1101674 | 0.011235  | 0.00941152 | -0.255504 | 1        |
| XLOC_008901 | TRIM16L      | chr17:18625401-18639431 | 5.43683   | 4.55505    | -0.255299 | 0.767227 |
| XLOC_002931 | ERCC6,PGBD3  | chr10:50664490-50747147 | 1.61881   | 1.35629    | -0.255275 | 0.832722 |
| XLOC_011455 | DHPS         | chr19:12777617-12792701 | 50.0161   | 41.9062    | -0.255229 | 0.906464 |
| XLOC_007810 | MPG          | chr16:127017-188697     | 192.058   | 160.924    | -0.255158 | 0.787338 |
| XLOC_004626 | ARHGAP32     | chr11:128834954-1290620 | 1.79273   | 1.50218    | -0.255106 | 0.7155   |
| XLOC_013371 | NHEJ1        | chr2:219940045-22002558 | 8.48032   | 7.1061     | -0.255059 | 0.712164 |
| XLOC_011738 | LOC100379224 | chr19:44598481-44617336 | 2.21375   | 1.85557    | -0.254629 | 0.765568 |
| XLOC_007803 | PCSK6        | chr15:101844132-1020301 | 5.80967   | 4.86983    | -0.254585 | 0.768425 |
| XLOC_004070 | MTRNR2L8     | chr11:10529433-10530723 | 39.1137   | 32.787     | -0.25455  | 0.642209 |
| XLOC_014610 | PNPLA3       | chr22:44319618-44343448 | 0.797781  | 0.668764   | -0.254497 | 0.873788 |
| XLOC_021619 | ADHFE1       | chr8:67344717-67381044  | 0.29157   | 0.244425   | -0.254452 | 1        |
| XLOC_020921 | PMS2         | chr7:6012869-6048737    | 1.27462   | 1.0686     | -0.254345 | 0.838297 |
| XLOC_012165 | EPAS1        | chr2:46524540-46613842  | 2.48401   | 2.08256    | -0.254317 | 0.753148 |
| XLOC_000456 | ZRANB2-AS1   | chr1:71318035-71546972  | 0.0307616 | 0.0257919  | -0.254214 | 1        |
| XLOC_002777 | PAOX         | chr10:135192740-1352051 | 6.68852   | 5.6089     | -0.253967 | 0.786348 |
| XLOC_002721 | FAM45A       | chr10:120863610-1208973 | 7.55573   | 6.33615    | -0.253964 | 0.697216 |
| XLOC_011621 | ZFP14        | chr19:36825354-36870105 | 0.274134  | 0.229886   | -0.253963 | 1        |
| XLOC_021368 | EPHA1        | chr7:143078359-14322054 | 0.0130163 | 0.0109177  | -0.253656 | 1        |
| XLOC_006799 | METTL21D     | chr14:50575349-50583297 | 4.46487   | 3.74554    | -0.253445 | 0.789979 |
| XLOC_014599 | FAM109B      | chr22:42470254-42475442 | 3.26338   | 2.73795    | -0.25327  | 0.807124 |
| XLOC_014596 | LINC00634    | chr22:42348190-42354946 | 0.355535  | 0.298292   | -0.253266 | 0.958902 |
| XLOC_023509 | DIAPH2       | chrX:95939661-96855597  | 4.96394   | 4.16492    | -0.253198 | 0.697216 |
| XLOC_012657 | FAM134A      | chr2:220042938-22005019 | 30.5974   | 25.6756    | -0.253011 | 0.632634 |
| XLOC_011315 | MATK         | chr19:3777966-3801810   | 1.32213   | 1.10956    | -0.252873 | 0.892588 |
| XLOC_005705 | MAPKAPK5-AS1 | chr12:112277572-1123312 | 10.3005   | 8.64466    | -0.252828 | 0.891375 |
| XLOC_010324 | TRAPPC8      | chr18:29409135-29523091 | 2.02164   | 1.697      | -0.252541 | 0.729849 |
| XLOC_002077 | IVNS1ABP     | chr1:185265521-18528646 | 17.182    | 14.4232    | -0.252505 | 0.638092 |
| XLOC_007979 | TMEM159      | chr16:20944475-21191937 | 51.8099   | 43.4914    | -0.252498 | 0.62776  |
| XLOC_003704 | ARHGEF17     | chr11:73019662-73080425 | 3.40206   | 2.85618    | -0.252322 | 0.705025 |
| XLOC_017980 | DDX41        | chr5:176938577-17694396 | 46.7402   | 39.2416    | -0.252283 | 0.651749 |
| XLOC_014758 | OSM          | chr22:30658818-30662829 | 0.0136332 | 0.0114471  | -0.252143 | 1        |
| XLOC_001503 | KDM4A-AS1    | chr1:44115796-44173012  | 0.524904  | 0.440816   | -0.251877 | 0.990857 |
| XLOC_019014 | HACE1        | chr6:105175967-10530779 | 0.946085  | 0.794528   | -0.251872 | 0.823379 |
| XLOC_000509 | RPL5         | chr1:93297593-93427079  | 2433.09   | 2043.33    | -0.251865 | 0.707294 |
| XLOC_008834 | KDM6B        | chr17:7743234-7758118   | 5.91605   | 4.96852    | -0.251818 | 0.690873 |
| XLOC_012059 | FAM84A       | chr2:14772809-14780168  | 0.0055086 | 0.0046264  | -0.251795 | 1        |
| XLOC_003242 | BRSK2        | chr11:1411128-1483919   | 11.0601   | 9.28893    | -0.251778 | 0.697381 |
| XLOC_002091 | ZBTB41       | chr1:197122813-19716967 | 0.444223  | 0.373134   | -0.251587 | 0.829181 |
| XLOC_012228 | PCYOX1       | chr2:70485230-70508317  | 6.78117   | 5.69616    | -0.251546 | 0.662533 |
| XLOC_004298 | TRPT1        | chr11:63974151-63993726 | 69.6518   | 58.5077    | -0.251534 | 0.671358 |



|             |                          |                          |            |            |           |           |
|-------------|--------------------------|--------------------------|------------|------------|-----------|-----------|
| XLOC_014690 | PI4KAP1                  | chr22:20383730-20398695  | 13.0834    | 10.9902    | -0.251524 | 0.700392  |
| XLOC_022319 | UBE2R2                   | chr9:33817181-33920401   | 15.8453    | 13.3109    | -0.251452 | 0.639984  |
| XLOC_021621 | C8orf44,C8orf44-SGK3,SGK | chr8:67579786-67774257   | 2.27272    | 1.90936    | -0.251326 | 0.799943  |
| XLOC_021778 | ZNF696                   | chr8:144373558-144382120 | 6.45457    | 5.42298    | -0.251236 | 0.693737  |
| XLOC_012409 | EPB41L5                  | chr2:120770603-120936697 | 1.79825    | 1.51099    | -0.251094 | 0.751417  |
| XLOC_015735 | ZMYND10                  | chr3:50378536-50383156   | 0.665852   | 0.559535   | -0.250972 | 0.917325  |
| XLOC_001379 | NR0B2                    | chr1:27237974-27240567   | 0.0407764  | 0.0342661  | -0.25095  | 1         |
| XLOC_009245 | BPTF                     | chr17:65821779-65980494  | 1.52306    | 1.28003    | -0.250795 | 0.696224  |
| XLOC_021366 | OR6W1P                   | chr7:142759380-142760882 | 0.0141966  | 0.0119326  | -0.250643 | 1         |
| XLOC_010026 | AZI1                     | chr17:79163392-79196751  | 10.0554    | 8.45248    | -0.250526 | 0.700307  |
| XLOC_009552 | ULK2                     | chr17:19674142-19771239  | 1.7185     | 1.44471    | -0.250373 | 0.790283  |
| XLOC_020705 | TES                      | chr7:115850546-115898837 | 0.0176035  | 0.0147992  | -0.250348 | 1         |
| XLOC_004103 | UEVLD                    | chr11:18552949-18610293  | 1.03765    | 0.872403   | -0.250254 | 0.863743  |
| XLOC_015064 | KIF15                    | chr3:44803208-44894748   | 2.5833     | 2.17194    | -0.250232 | 0.733161  |
| XLOC_010522 | ALKBH7                   | chr19:6372443-6375261    | 77.1297    | 64.8538    | -0.250095 | 0.648914  |
| XLOC_022382 | PGM5                     | chr9:70970108-71145977   | 0.0104388  | 0.00877751 | -0.25007  | 1         |
| XLOC_014702 | YPEL1                    | chr22:22020272-22090071  | 3.33632    | 2.80591    | -0.249791 | 0.880115  |
| XLOC_012618 | IDH1-AS1                 | chr2:209119956-209120911 | 1.37842    | 1.15936    | -0.249689 | 0.952344  |
| XLOC_011635 | ZFP30                    | chr19:38123388-38146313  | 1.16031    | 0.975979   | -0.249592 | 0.796801  |
| XLOC_002397 | BAMBI                    | chr10:28966423-28991868  | 5.96427    | 5.01694    | -0.249538 | 0.78475   |
| XLOC_017480 | FGF18                    | chr5:170846666-170884630 | 0.382641   | 0.32188    | -0.249468 | 0.944724  |
| XLOC_003077 | AVP1                     | chr10:99437180-99447015  | 18.7453    | 15.7693    | -0.24941  | 0.728031  |
| XLOC_011893 | VSIQ10L                  | chr19:51834794-51845378  | 1.12749    | 0.948532   | -0.249344 | 0.860963  |
| XLOC_005926 | OR17E156P                | chr13:64311567-64316701  | 0.00925955 | 0.00779031 | -0.249262 | 1         |
| XLOC_003854 | UPK2                     | chr11:118827007-11882920 | 0.0598657  | 0.0503686  | -0.249203 | 1         |
| XLOC_010226 | ZCCHC2                   | chr18:60190657-60245818  | 1.49657    | 1.25918    | -0.249174 | 0.785168  |
| XLOC_012717 | SCARNA6                  | chr2:234160216-234204320 | 0.189898   | 0.159776   | -0.249172 | 1         |
| XLOC_000433 | PGM1                     | chr1:64058946-64125916   | 46.3613    | 39.0142    | -0.248922 | 0.650192  |
| XLOC_017372 | PCDHB5                   | chr5:140514799-140517704 | 0.0156852  | 0.0131998  | -0.248885 | 1         |
| XLOC_009803 | OSBPL7                   | chr17:45884732-45899147  | 3.12287    | 2.62847    | -0.248652 | 0.7854    |
| XLOC_011650 | ECH1                     | chr19:39306061-39322497  | 135.31     | 113.892    | -0.248597 | 0.643946  |
| XLOC_001411 | NKAIN1                   | chr1:31652591-31712734   | 1.95739    | 1.64775    | -0.248434 | 0.846273  |
| XLOC_008893 | ALKBH5                   | chr17:18086866-18113267  | 55.8916    | 47.0536    | -0.248327 | 0.664776  |
| XLOC_020648 | PILRA                    | chr7:99971067-99997722   | 0.572802   | 0.482245   | -0.248273 | 0.937765  |
| XLOC_001295 | FAM131C                  | chr1:16384263-16400127   | 26.0422    | 21.927     | -0.248141 | 0.695395  |
| XLOC_023500 | APOOL                    | chrX:84258897-84363974   | 2.40902    | 2.02838    | -0.248121 | 0.723556  |
| XLOC_016138 | SDHAP1                   | chr3:195686791-195717150 | 1.03602    | 0.872371   | -0.248044 | 1.0872554 |
| XLOC_007574 | FLJ10038                 | chr15:50569388-50650503  | 0.904965   | 0.76205    | -0.247977 | 0.95223   |
| XLOC_021934 | ZNF395                   | chr8:28203101-28243977   | 14.3775    | 12.108     | -0.247846 | 0.669766  |
| XLOC_023063 | MIR600HG                 | chr9:125871772-125877750 | 0.95952    | 0.808092   | -0.247793 | 0.820463  |
| XLOC_003630 | CCDC85B                  | chr11:65657874-65659106  | 294.468    | 248.033    | -0.247579 | 0.643825  |
| XLOC_003107 | MGEA5                    | chr10:103544199-10357822 | 21.5525    | 18.1593    | -0.247151 | 0.63426   |
| XLOC_014913 | ARSA                     | chr22:51061181-51066601  | 8.55668    | 7.21004    | -0.247103 | 0.701805  |
| XLOC_015740 | CISH                     | chr3:50643884-50649262   | 2.29182    | 1.93142    | -0.246832 | 0.846243  |
| XLOC_014597 | SEPT3                    | chr22:42372930-42394225  | 9.19448    | 7.74871    | -0.246812 | 0.71659   |
| XLOC_013574 | FRG1B                    | chr20:29611878-29634007  | 8.30289    | 6.99759    | -0.246755 | 0.788214  |
| XLOC_015063 | ZNF501                   | chr3:44771097-44778575   | 0.67808    | 0.571481   | -0.246751 | 0.865806  |
| XLOC_011096 | ZNF845                   | chr19:53837001-53858122  | 1.28985    | 1.08712    | -0.246698 | 0.797015  |
| XLOC_011646 | MAP4K1                   | chr19:39078280-39108643  | 0.120952   | 0.101944   | -0.24666  | 1         |
| XLOC_011816 | IZUMO1                   | chr19:49244144-49250166  | 0.0136367  | 0.0114941  | -0.2466   | 1         |
| XLOC_022240 | CPSF1                    | chr8:145597730-145634730 | 31.3679    | 26.4407    | -0.246531 | 0.715782  |
| XLOC_006297 | RNF31                    | chr14:24616658-24629870  | 10.3055    | 8.68767    | -0.246379 | 0.69673   |
| XLOC_004036 | RRP8                     | chr11:6621143-6624880    | 13.4912    | 11.3739    | -0.246288 | 0.711382  |
| XLOC_023072 | SCAI                     | chr9:127704887-127905830 | 1.11801    | 0.94256    | -0.246274 | 0.729713  |
| XLOC_011566 | ZNF100                   | chr19:21906842-21950430  | 1.58048    | 1.33247    | -0.246258 | 0.781764  |
| XLOC_011479 | SAMD1                    | chr19:14199228-14201232  | 52.1462    | 43.9642    | -0.246234 | 0.700083  |
| XLOC_005348 | ABCC9                    | chr12:21950323-22089628  | 0.480514   | 0.405122   | -0.246223 | 0.827642  |
| XLOC_021900 | NUDT18                   | chr8:21964382-21966932   | 12.1731    | 10.2634    | -0.246179 | 0.75896   |
| XLOC_002606 | TBC1D12                  | chr10:96162185-96296089  | 1.65828    | 1.39815    | -0.246168 | 0.770784  |
| XLOC_007242 | LACTB                    | chr15:63413998-63434260  | 7.00003    | 5.90207    | -0.246139 | 0.740134  |
| XLOC_015876 | KIAA2018                 | chr3:113367232-113415493 | 0.586931   | 0.494901   | -0.246051 | 0.779728  |
| XLOC_005409 | COL2A1                   | chr12:48366747-48398285  | 0.00869856 | 0.00733466 | -0.246046 | 1         |
| XLOC_006728 | DHRS4-AS1                | chr14:24407939-24438488  | 2.3418     | 1.97487    | -0.245857 | 0.92969   |
| XLOC_016599 | ANKRD37                  | chr4:186317839-186347130 | 10.3106    | 8.69574    | -0.245746 | 0.956604  |
| XLOC_016738 | LRRC66                   | chr4:52859865-52883786   | 0.0670217  | 0.0565306  | -0.245596 | 1         |
| XLOC_017120 | ZNF131                   | chr5:43121641-43175823   | 3.48156    | 2.93662    | -0.245578 | 0.771945  |
| XLOC_001216 | MORN1                    | chr1:2252695-2322993     | 0.852881   | 0.719408   | -0.245534 | 0.952469  |
| XLOC_023896 | SPIN3                    | chrX:57002802-57021988   | 1.90292    | 1.60518    | -0.245485 | 0.863743  |
| XLOC_014576 | LOC100130899             | chr22:40428335-40432581  | 5.8376     | 4.92495    | -0.245266 | 0.71619   |
| XLOC_010723 | ZNF85                    | chr19:21106058-21133503  | 1.31826    | 1.11218    | -0.245235 | 0.85377   |
| XLOC_003858 | VPS11                    | chr11:118938492-11895260 | 12.6389    | 10.6635    | -0.245192 | 0.678791  |
| XLOC_004087 | CYP2R1                   | chr11:14899555-14913751  | 11.3444    | 9.57148    | -0.245164 | 0.726865  |
| XLOC_009757 | VAT1                     | chr17:41166621-41174459  | 187.224    | 157.972    | -0.2451   | 0.666069  |
| XLOC_023661 | CXorf40A                 | chrX:148622518-148632080 | 7.60986    | 6.42094    | -0.245085 | 0.751043  |
| XLOC_020739 | CCDC136                  | chr7:128431463-128462187 | 6.09262    | 5.14086    | -0.245054 | 0.779382  |
| XLOC_017524 | ZFP2                     | chr5:178322915-178360210 | 0.326186   | 0.275313   | -0.244625 | 1         |
| XLOC_010940 | MARK4                    | chr19:45754515-45808541  | 12.3236    | 10.4035    | -0.244364 | 0.669515  |
| XLOC_004919 | RPS26                    | chr12:56435685-56438007  | 2274.57    | 1920.19    | -0.244346 | 0.686575  |
| XLOC_017793 | FNIP1                    | chr5:130977406-131132750 | 5.8403     | 4.93074    | -0.244239 | 0.668888  |

|             |                |                          |            |            |           |          |
|-------------|----------------|--------------------------|------------|------------|-----------|----------|
| XLOC_020767 | CALD1          | chr7:134464163-134655480 | 28.1218    | 23.7432    | -0.244175 | 0.701805 |
| XLOC_001859 | S100A13        | chr1:153591275-153618782 | 480.49     | 405.679    | -0.244169 | 0.797849 |
| XLOC_018157 | HLA-F          | chr6:29691116-29716826   | 71.4393    | 60.3193    | -0.244098 | 0.671254 |
| XLOC_005586 | ZFC3H1         | chr12:72003378-72074428  | 1.6077     | 1.35751    | -0.244027 | 0.790918 |
| XLOC_020762 | EXOC4          | chr7:132937822-133750513 | 17.9395    | 15.1479    | -0.24402  | 0.651901 |
| XLOC_002529 | ZNF503-AS2     | chr10:77157602-77168740  | 2.10809    | 1.78005    | -0.244014 | 0.971098 |
| XLOC_014070 | DID01          | chr20:61509089-61569304  | 6.548      | 5.52949    | -0.24391  | 0.80896  |
| XLOC_007295 | LOXL1          | chr15:74209808-74244478  | 5.84044    | 4.93238    | -0.243792 | 0.851637 |
| XLOC_016402 | PRDM8          | chr4:81106423-81125482   | 23.339     | 19.7109    | -0.243749 | 0.669766 |
| XLOC_010771 | ZNF181         | chr19:35225479-35233774  | 1.97367    | 1.66694    | -0.24368  | 0.793112 |
| XLOC_011684 | NUMBL          | chr19:41171811-41196556  | 11.4645    | 9.68315    | -0.243621 | 0.701805 |
| XLOC_012043 | IAH1           | chr2:9614669-9628591     | 41.2959    | 34.8815    | -0.243539 | 0.695593 |
| XLOC_017377 | PCDHB16        | chr5:140560979-140565796 | 1.12337    | 0.94891    | -0.243491 | 0.83481  |
| XLOC_010966 | CCDC9          | chr19:47759730-47775210  | 7.74908    | 6.54567    | -0.243484 | 0.772137 |
| XLOC_017051 | PLEKHG4B       | chr5:140372-190087       | 0.0051093  | 0.00431686 | -0.243143 | 1        |
| XLOC_003801 | ATM            | chr11:108093558-10823982 | 1.44173    | 1.21816    | -0.24309  | 0.714729 |
| XLOC_017207 | BHMT2          | chr5:78365546-78385897   | 0.00693814 | 0.00586254 | -0.243024 | 1        |
| XLOC_008975 | SH3GL1P1       | chr17:30348154-30380519  | 0.381994   | 0.322783   | -0.242985 | 0.979701 |
| XLOC_018663 | CCDC2          | chr6:24171982-24383520   | 0.586063   | 0.49523    | -0.242957 | 0.877363 |
| XLOC_018161 | HLA-F          | chr6:29910246-29913661   | 1234.94    | 1043.56    | -0.242935 | 0.711487 |
| XLOC_023501 | ZNF711         | chrX:84498996-84528368   | 1.1224     | 0.94846    | -0.242929 | 0.80896  |
| XLOC_002590 | HECTD2         | chr10:93066718-93371217  | 0.843789   | 0.713096   | -0.242785 | 0.873788 |
| XLOC_015806 | SUCLG2         | chr3:67410883-67705038   | 25.6925    | 21.7176    | -0.242485 | 0.653383 |
| XLOC_008410 | CARHSP1        | chr16:8946801-8962863    | 29.8967    | 25.2722    | -0.242433 | 0.67045  |
| XLOC_011080 | ZNF766         | chr19:52772823-52795976  | 4.44152    | 3.75465    | -0.242376 | 0.733942 |
| XLOC_017125 | ISL1           | chr5:50668570-50690563   | 0.199606   | 0.168749   | -0.242279 | 1        |
| XLOC_011683 | BLVRB          | chr19:40953690-40971725  | 188.591    | 159.445    | -0.242206 | 0.653704 |
| XLOC_011191 | ZNF865         | chr19:56124958-56129907  | 8.36968    | 7.07642    | -0.242153 | 0.718598 |
| XLOC_010007 | TIMP2          | chr17:76849058-76921472  | 8.67718    | 7.33736    | -0.241966 | 0.694071 |
| XLOC_014886 | WNT7B          | chr22:46316247-46373008  | 0.00702581 | 0.0059413  | -0.241886 | 1        |
| XLOC_011445 | ZNF44          | chr19:12382624-12405714  | 2.00947    | 1.69934    | -0.24184  | 0.820869 |
| XLOC_008323 | CCDC78         | chr16:771141-776473      | 4.1333     | 3.4956     | -0.241755 | 0.946765 |
| XLOC_022509 | SNX30          | chr9:115513133-115637267 | 2.93298    | 2.48052    | -0.241727 | 0.703942 |
| XLOC_000734 | SLC27A3        | chr1:153747767-153752633 | 7.13084    | 6.03093    | -0.241693 | 0.786804 |
| XLOC_014386 | LSS            | chr21:47608359-47648738  | 16.5915    | 14.0337    | -0.24154  | 0.669515 |
| XLOC_009994 | MXRA7          | chr17:74671808-74707056  | 52.7868    | 44.6536    | -0.241401 | 0.664397 |
| XLOC_011910 | ZNF350         | chr19:52467592-52490079  | 2.51943    | 2.13146    | -0.241254 | 0.811564 |
| XLOC_014047 | PMEP1A         | chr20:56223447-56286592  | 0.896267   | 0.758291   | -0.241177 | 0.854671 |
| XLOC_014419 | LOC729444      | chr22:20325589-20350461  | 0.0155749  | 0.0131788  | -0.241007 | 1        |
| XLOC_007264 | IQCH           | chr15:67493012-67819641  | 0.86163    | 0.729104   | -0.240943 | 0.990994 |
| XLOC_015950 | ASTE1          | chr3:130569368-130745644 | 2.09536    | 1.77323    | -0.240814 | 0.976618 |
| XLOC_021106 | MLXIPL         | chr7:73007523-73038870   | 6.21468    | 5.2594     | -0.240783 | 0.762454 |
| XLOC_023795 | KLHL15         | chrX:24001832-24045303   | 1.60107    | 1.35516    | -0.240572 | 0.771707 |
| XLOC_008041 | TMEM219        | chr16:29973350-29984373  | 113.48     | 96.0513    | -0.24056  | 0.664776 |
| XLOC_001479 | OXCT2          | chr1:40204516-40254533   | 1.85778    | 1.5727     | -0.240343 | 0.990857 |
| XLOC_009236 | RGS9           | chr17:63133455-63223821  | 0.100414   | 0.0850098  | -0.240254 | 1        |
| XLOC_004796 | KIAA1551       | chr12:32112352-32146043  | 0.796926   | 0.674703   | -0.240194 | 0.814926 |
| XLOC_022220 | EEF1D          | chr8:144661866-144679845 | 1351.39    | 1144.31    | -0.239963 | 0.718092 |
| XLOC_023092 | FAM102A        | chr9:130702860-130742812 | 12.5167    | 10.5993    | -0.239886 | 0.694071 |
| XLOC_017062 | C5orf38        | chr5:2752261-2755511     | 6.94206    | 5.8787     | -0.239868 | 0.883756 |
| XLOC_006100 | TSC22D1        | chr13:45006278-45154568  | 16.355     | 13.85      | -0.239849 | 0.687296 |
| XLOC_017180 | MAP1B          | chr5:71403117-71505397   | 0.00848624 | 0.007187   | -0.239735 | 1        |
| XLOC_011938 | TFPT           | chr19:54610319-54635150  | 11.4552    | 9.70161    | -0.239702 | 0.96296  |
| XLOC_010499 | MPND           | chr19:4343523-4360083    | 23.9449    | 20.2813    | -0.23957  | 0.721145 |
| XLOC_013480 | FAM110A        | chr20:814355-826922      | 10.7387    | 9.0959     | -0.239528 | 0.799188 |
| XLOC_003563 | C11orf83       | chr11:62430288-62441162  | 18.155     | 15.3817    | -0.239149 | 0.917325 |
| XLOC_011399 | ZNF266         | chr19:9523101-9546254    | 9.76776    | 8.2769     | -0.238937 | 0.685558 |
| XLOC_004934 | GPR182         | chr12:57388354-57390469  | 0.032178   | 0.0272669  | -0.238925 | 1        |
| XLOC_002658 | HPS6           | chr10:103825123-10382775 | 19.1978    | 16.2687    | -0.238843 | 0.695737 |
| XLOC_011325 | STAP2          | chr19:4324039-4338847    | 18.9268    | 16.0403    | -0.238726 | 0.734037 |
| XLOC_010995 | KCNJ14         | chr19:48958963-48969367  | 0.750835   | 0.636335   | -0.238709 | 0.89982  |
| XLOC_006271 | RPGRI1P1       | chr14:21756135-21819460  | 0.00733925 | 0.00622069 | -0.23856  | 1        |
| XLOC_022596 | ENDOG          | chr9:131580778-131592100 | 36.629     | 31.0467    | -0.238547 | 0.959465 |
| XLOC_000225 | THEMIS2        | chr1:28199054-28213193   | 0.0239477  | 0.0203004  | -0.238379 | 1        |
| XLOC_011629 | ZNF829         | chr19:37288451-37407193  | 0.00775861 | 0.00657725 | -0.238314 | 1        |
| XLOC_002402 | C10orf68,CCDC7 | chr10:32735040-33171792  | 0.627117   | 0.531633   | -0.238304 | 0.908114 |
| XLOC_001897 | KIAA0907       | chr1:155882835-155904188 | 8.06599    | 6.83866    | -0.238139 | 0.711487 |
| XLOC_005556 | LOC100506844   | chr12:58325231-58329947  | 16.2772    | 13.8007    | -0.238112 | 0.790844 |
| XLOC_018265 | BRPF3          | chr6:36164549-36200567   | 4.42537    | 3.75224    | -0.238049 | 0.724988 |
| XLOC_020491 | EGFR           | chr7:55086724-55275031   | 1.30619    | 1.10769    | -0.23782  | 0.817735 |
| XLOC_020873 | ACTR3B         | chr7:152456833-152552464 | 11.5079    | 9.75961    | -0.237727 | 0.727679 |
| XLOC_000775 | TSACC          | chr1:156278751-156316785 | 0.570074   | 0.483469   | -0.237724 | 0.989748 |
| XLOC_002503 | ADAMTS14       | chr10:72432558-72522195  | 0.00430475 | 0.00365079 | -0.237721 | 1        |
| XLOC_016953 | ZNF827         | chr4:146681887-146859607 | 0.250367   | 0.212336   | -0.237697 | 1        |
| XLOC_012715 | ATG16L1        | chr2:234160216-234204320 | 5.56337    | 4.71907    | -0.237457 | 0.754666 |
| XLOC_015747 | ABHD14B        | chr3:52002525-52008646   | 42.537     | 36.0836    | -0.237376 | 0.690127 |
| XLOC_000177 | TCEB3          | chr1:24069855-24104787   | 1.85469    | 1.57349    | -0.237212 | 0.819513 |
| XLOC_001747 | LINC00622      | chr1:120140324-120141914 | 0.181174   | 0.153706   | -0.237203 | 1        |
| XLOC_018218 | CYP21A2        | chr6:31973358-31981050   | 0.132951   | 0.112795   | -0.237193 | 1        |

|             |                        |                           |            |            |           |          |
|-------------|------------------------|---------------------------|------------|------------|-----------|----------|
| XLOC_014645 | ADM2                   | chr22:50919984-50924866   | 0.00567898 | 0.00481824 | -0.237123 | 1        |
| XLOC_012447 | CCNT2                  | chr2:135676391-135716915  | 2.8632     | 2.42926    | -0.237114 | 0.718396 |
| XLOC_007775 | MESP1                  | chr15:90293097-90294540   | 38.5109    | 32.6762    | -0.237029 | 0.763859 |
| XLOC_017700 | ANKRD31                | chr5:74364121-74532703    | 0.0404986  | 0.0343652  | -0.236926 | 1        |
| XLOC_009467 | LSMD1                  | chr17:7760002-7765600     | 56.5092    | 47.9535    | -0.236851 | 0.834479 |
| XLOC_004358 | PITPNM1                | chr11:67259238-67272843   | 14.7283    | 12.4985    | -0.23684  | 0.701805 |
| XLOC_007166 | JMJD7,JMJD7-PLA2G4B,PL | chr15:42120282-42186275   | 20.1054    | 17.0655    | -0.236502 | 0.750467 |
| XLOC_017084 | LOC100130744           | chr5:14704908-14871887    | 0.617109   | 0.52381    | -0.236482 | 0.986822 |
| XLOC_004809 | ANO6                   | chr12:45566816-45834187   | 11.6557    | 9.89476    | -0.236294 | 0.700253 |
| XLOC_013052 | ANKRD23                | chr2:97503650-97509758    | 1.72993    | 1.46858    | -0.236285 | 0.866471 |
| XLOC_022943 | C9orf129               | chr9:95947211-96108696    | 2.20133    | 1.86887    | -0.236208 | 0.979701 |
| XLOC_000635 | NBPF10                 | chr1:145293370-145368684  | 0.213654   | 0.181414   | -0.23599  | 1        |
| XLOC_010485 | HMG20B                 | chr19:3572942-3579081     | 113.653    | 96.5042    | -0.235977 | 0.677556 |
| XLOC_012763 | SH3YL1                 | chr2:218135-264068        | 7.03673    | 5.97563    | -0.235816 | 0.778996 |
| XLOC_015538 | LOC152217              | chr3:196669493-196670884  | 27.5753    | 23.4173    | -0.235804 | 0.711487 |
| XLOC_004864 | IGFBP6                 | chr12:53491435-53496128   | 203.378    | 172.712    | -0.2358   | 0.689087 |
| XLOC_023393 | USP27X                 | chrX:49644469-49647168    | 1.3046     | 1.10792    | -0.235759 | 0.851892 |
| XLOC_001879 | SHC1                   | chr1:154934773-154946955  | 163.82     | 139.127    | -0.235704 | 0.690388 |
| XLOC_018817 | MNF1                   | chr6:33664537-33679528    | 36.1173    | 30.6745    | -0.235649 | 0.69673  |
| XLOC_003420 | CD82                   | chr11:44587140-44641315   | 2.83495    | 2.40794    | -0.235523 | 0.871957 |
| XLOC_014388 | C21orf58               | chr21:47721046-47743785   | 1.83581    | 1.55933    | -0.235491 | 0.86601  |
| XLOC_014436 | HIC2                   | chr22:21771692-21805750   | 1.6369     | 1.3904     | -0.23546  | 0.813173 |
| XLOC_009672 | GJD3                   | chr17:38516904-38520945   | 3.37471    | 2.86689    | -0.235276 | 0.806183 |
| XLOC_014980 | SGOL1-AS1              | chr3:20202084-20227919    | 1.32837    | 1.1285     | -0.235245 | 0.984927 |
| XLOC_013056 | FAHD2B                 | chr2:97749322-97760582    | 18.5505    | 15.7642    | -0.234804 | 0.731633 |
| XLOC_011530 | PDE4C                  | chr19:18318770-18359010   | 0.110945   | 0.0942841  | -0.234753 | 1        |
| XLOC_014528 | TOM1                   | chr22:35695267-35743987   | 18.2909    | 15.545     | -0.234677 | 0.718598 |
| XLOC_017724 | RPS23                  | chr5:81569138-81574235    | 482.684    | 410.228    | -0.234654 | 0.723055 |
| XLOC_017286 | SNCAIP                 | chr5:121647819-121814782  | 0.251622   | 0.213853   | -0.23464  | 1        |
| XLOC_000117 | CTRC                   | chr1:15764937-15773153    | 0.0276996  | 0.0235421  | -0.234624 | 1        |
| XLOC_020621 | BR13                   | chr7:97910978-98030427    | 334.744    | 284.507    | -0.234596 | 0.811724 |
| XLOC_002460 | ASAH2B                 | chr10:52499687-52514569   | 0.126859   | 0.107823   | -0.234562 | 1        |
| XLOC_016392 | CCNG2                  | chr4:78078356-78091213    | 7.14351    | 6.07159    | -0.234558 | 0.688434 |
| XLOC_018450 | TRAF3IP2-AS1           | chr6:111804674-111927477  | 3.82383    | 3.25036    | -0.234418 | 0.972601 |
| XLOC_011231 | ZNF211                 | chr19:58144534-58154147   | 1.45976    | 1.24093    | -0.23431  | 0.850615 |
| XLOC_006826 | KTN1-AS1               | chr14:56042874-56046810   | 1.6837     | 1.43132    | -0.234291 | 0.884958 |
| XLOC_010455 | RPS19                  | chr19:1438362-1440492     | 5107.1     | 4341.63    | -0.234268 | 0.718193 |
| XLOC_017523 | ZNF354B                | chr5:178286953-178311424  | 1.60217    | 1.36206    | -0.234233 | 0.852287 |
| XLOC_023550 | TBC1D8B                | chrX:106045918-10611937   | 0.585534   | 0.497814   | -0.234147 | 0.895195 |
| XLOC_016084 | MAP6D1                 | chr3:183533663-183543393  | 8.12659    | 6.91022    | -0.233917 | 0.778388 |
| XLOC_000784 | PEAR1                  | chr1:156863522-156886224  | 1.52637    | 1.29795    | -0.233868 | 0.832722 |
| XLOC_013927 | SNTA1                  | chr20:31995762-32031698   | 17.0214    | 14.4745    | -0.233836 | 0.729849 |
| XLOC_002738 | FLJ46361               | chr10:124516209-12455711  | 0.0043423  | 0.00369262 | -0.233813 | 1        |
| XLOC_003534 | TMEM132A               | chr11:60691912-60719257   | 34.0975    | 28.9986    | -0.233681 | 0.697734 |
| XLOC_018138 | ZSCAN16                | chr6:28092386-28097856    | 5.50564    | 4.68238    | -0.233668 | 0.815706 |
| XLOC_005833 | PAN3                   | chr13:28710979-28869475   | 3.92331    | 3.33685    | -0.233584 | 0.740994 |
| XLOC_000686 | C1orf56                | chr1:151020258-151032125  | 4.16363    | 3.54132    | -0.233554 | 0.977103 |
| XLOC_004462 | SNORA25                | chr11:93463680-93463812   | 2.45942    | 2.0921     | -0.233366 | 1        |
| XLOC_001354 | HMGCL                  | chr1:24128366-24151949    | 38.6485    | 32.8781    | -0.233285 | 0.690873 |
| XLOC_012866 | FEZ2                   | chr2:36779403-36825332    | 123.383    | 104.967    | -0.233205 | 0.687203 |
| XLOC_013907 | LOC284801              | chr20:26167654-26189869   | 0.0425945  | 0.0362412  | -0.233037 | 1        |
| XLOC_017341 | KIF20A                 | chr5:137514416-137549032  | 7.29272    | 6.20544    | -0.232923 | 0.8501   |
| XLOC_004607 | MSANTD2                | chr11:124636393-12467025  | 1.76891    | 1.5052     | -0.232904 | 0.869283 |
| XLOC_008480 | ZKSCAN2                | chr16:25247321-25268855   | 1.31144    | 1.11597    | -0.232851 | 0.793038 |
| XLOC_008915 | CCDC144C               | chr17:20224486-20305504   | 0.00568183 | 0.00483507 | -0.232819 | 1        |
| XLOC_003934 | SIRT3                  | chr11:208529-236362       | 12.2909    | 10.4596    | -0.232765 | 0.952371 |
| XLOC_007785 | LOC100144604           | chr15:93111047-93115493   | 0.0357495  | 0.0304237  | -0.232728 | 1        |
| XLOC_000158 | NBPF3                  | chr1:21766620-21811393    | 5.7346     | 4.8803     | -0.232722 | 0.732349 |
| XLOC_007307 | CPLX3                  | chr15:75118950-75124136   | 0.0807399  | 0.0687126  | -0.232708 | 1        |
| XLOC_020924 | FAM220A                | chr7:6369039-6388590      | 7.12982    | 6.06839    | -0.232552 | 0.765477 |
| XLOC_009923 | AMZ2P1                 | chr17:62962667-62971703   | 1.95516    | 1.66426    | -0.232411 | 0.813594 |
| XLOC_010752 | RGS9BP                 | chr19:33166312-33169206   | 0.205352   | 0.1748     | -0.232388 | 1        |
| XLOC_004473 | GPR83                  | chr11:94110476-94134585   | 0.183487   | 0.156215   | -0.232149 | 1        |
| XLOC_020633 | LOC100289187           | chr7:99195901-99208456    | 1.74664    | 1.48705    | -0.232132 | 0.913628 |
| XLOC_017278 | TNFAIP8                | chr5:118604417-118730294  | 3.12339    | 2.65947    | -0.231976 | 0.820463 |
| XLOC_004935 | NAB2                   | chr12:57482676-57505196   | 38.9343    | 33.1528    | -0.231911 | 0.913504 |
| XLOC_009304 | METTL23                | chr17:74722911-74729962   | 24.2862    | 20.6806    | -0.231858 | 0.777374 |
| XLOC_011999 | ZNF417                 | chr19:58417141-58427978   | 0.35937    | 0.306047   | -0.231715 | 0.899883 |
| XLOC_003185 | UROS                   | chr10:127477146-127511182 | 23.8962    | 20.3533    | -0.231518 | 0.720295 |
| XLOC_023837 | ZNF630                 | chrX:47917566-47931025    | 0.55662    | 0.474129   | -0.231411 | 0.900578 |
| XLOC_018886 | ZNF318                 | chr6:43303807-43337181    | 2.41038    | 2.05327    | -0.23134  | 0.738927 |
| XLOC_011791 | BBC3                   | chr19:47724078-47736023   | 56.6096    | 48.2229    | -0.231328 | 0.714703 |
| XLOC_021997 | RPS20                  | chr8:56980738-56987140    | 3962.96    | 3375.87    | -0.231318 | 0.756026 |
| XLOC_002433 | ALOX5                  | chr10:45869623-45941567   | 0.0348084  | 0.029653   | -0.231257 | 1        |
| XLOC_009291 | UNK                    | chr17:73780919-73821886   | 9.13702    | 7.78443    | -0.231133 | 0.780695 |
| XLOC_006843 | TRMT5                  | chr14:61438166-61447782   | 4.56414    | 3.88876    | -0.231033 | 0.73058  |
| XLOC_023194 | RNF208                 | chr9:140114698-140115775  | 55.5017    | 47.291     | -0.230964 | 0.723154 |
| XLOC_010103 | LINC00667              | chr18:5238098-5246505     | 3.41592    | 2.9106     | -0.230959 | 0.763481 |
| XLOC_014969 | SH3BP5-AS1             | chr3:15295690-15382901    | 0.80511    | 0.686034   | -0.230906 | 0.950929 |

|             |              |                           |            |            |           |          |
|-------------|--------------|---------------------------|------------|------------|-----------|----------|
| XLOC_005324 | HEBP1        | chr12:13127798-13153243   | 70.2237    | 59.8508    | -0.230587 | 0.69545  |
| XLOC_007265 | C15orf61     | chr15:67493012-67819641   | 13.0072    | 11.0859    | -0.230587 | 0.937235 |
| XLOC_014728 | GUCD1        | chr22:24936405-24951275   | 23.5877    | 20.1039    | -0.230557 | 0.690479 |
| XLOC_019143 | ULBP3        | chr6:150385742-150390202  | 2.71227    | 2.31179    | -0.23049  | 0.905475 |
| XLOC_008334 | C16orf91     | chr16:1469744-1470801     | 30.5327    | 26.0279    | -0.230297 | 0.750048 |
| XLOC_022252 | RPL8         | chr8:146015153-146017802  | 12292.3    | 10478.7    | -0.230296 | 0.810878 |
| XLOC_015468 | KLHL24       | chr3:183353410-183402302  | 2.58381    | 2.20269    | -0.230234 | 0.736215 |
| XLOC_001349 | ASAP3        | chr1:23755055-23810750    | 5.06261    | 4.31586    | -0.230233 | 0.752981 |
| XLOC_001236 | RPL22        | chr1:6245079-6259679      | 359.896    | 306.838    | -0.230103 | 0.718723 |
| XLOC_006434 | ACOT1        | chr14:73945188-74025651   | 3.16924    | 2.70204    | -0.230086 | 0.959465 |
| XLOC_006302 | NOP9         | chr14:24769097-24774374   | 2.33031    | 1.98687    | -0.230022 | 0.866446 |
| XLOC_007520 | EXD1         | chr15:41474930-41522895   | 0.0155023  | 0.0132185  | -0.229917 | 1        |
| XLOC_018163 | HLA-J        | chr6:29968787-30028961    | 1.78849    | 1.52511    | -0.229824 | 0.954399 |
| XLOC_004831 | KCNH3        | chr12:49932939-49952077   | 0.708678   | 0.60432    | -0.229819 | 0.914313 |
| XLOC_004038 | TPP1         | chr11:66633996-6640692    | 39.3114    | 33.5304    | -0.229478 | 0.701805 |
| XLOC_023255 | WWC3         | chrX:9983794-10112518     | 0.0159208  | 0.0135808  | -0.229344 | 1        |
| XLOC_005394 | RACGAP1P     | chr12:45456400-45459194   | 0.0102346  | 0.00873045 | -0.229332 | 1        |
| XLOC_009542 | TBC1D28      | chr17:18538841-18547740   | 0.0388787  | 0.0331648  | -0.229328 | 1        |
| XLOC_009806 | SP6          | chr17:45922279-45933240   | 2.66118    | 2.27026    | -0.229205 | 0.819258 |
| XLOC_000643 | ANKRD35      | chr1:145549208-145568522  | 0.00612552 | 0.00522571 | -0.229205 | 1        |
| XLOC_017565 | FLJ33360     | chr5:6310553-6337405      | 0.106512   | 0.0908706  | -0.22913  | 1        |
| XLOC_014081 | HELZ2        | chr20:62189438-62205592   | 3.00641    | 2.56536    | -0.22888  | 0.790805 |
| XLOC_010451 | EFNA2        | chr19:1286152-1301429     | 4.66034    | 3.97683    | -0.228817 | 0.849027 |
| XLOC_016446 | FLJ20021     | chr4:102268933-102270042  | 3.50812    | 2.99362    | -0.228804 | 0.916838 |
| XLOC_001701 | SLC16A4      | chr1:110905472-110933702  | 0.128459   | 0.109639   | -0.228554 | 1        |
| XLOC_023180 | FBXW5        | chr9:139834884-139839202  | 150.946    | 128.833    | -0.228521 | 0.697734 |
| XLOC_010254 | ZNF236       | chr18:74536115-74682682   | 0.746853   | 0.637522   | -0.228348 | 0.835721 |
| XLOC_010915 | ZNF224       | chr19:44598481-44617336   | 0.0449418  | 0.0383631  | -0.228339 | 1        |
| XLOC_007556 | SPG11        | chr15:44829265-44955876   | 3.63762    | 3.10523    | -0.228296 | 0.885624 |
| XLOC_002256 | ARID4B       | chr1:235330209-235491532  | 1.33114    | 1.13636    | -0.228239 | 0.796801 |
| XLOC_007284 | HEXA-AS1     | chr15:72635777-72671129   | 0.0762964  | 0.0651346  | -0.228191 | 1        |
| XLOC_006360 | CGRRF1       | chr14:54976586-55005334   | 7.6141     | 6.50039    | -0.228148 | 0.799255 |
| XLOC_005148 | RNF34        | chr12:121837885-121862122 | 9.41002    | 8.03374    | -0.228126 | 0.787528 |
| XLOC_013990 | SDC4         | chr20:43953928-43977064   | 60.9712    | 52.0563    | -0.228055 | 0.714805 |
| XLOC_006455 | JDP2         | chr14:75894508-75939404   | 7.78859    | 6.64989    | -0.228031 | 0.771991 |
| XLOC_022204 | JRK          | chr8:143738873-143751402  | 7.89171    | 6.73806    | -0.228006 | 0.782186 |
| XLOC_005397 | LOC400027    | chr12:46119502-46121704   | 6.43893    | 5.49784    | -0.227955 | 0.789792 |
| XLOC_015238 | ALCAM        | chr3:105085556-105295752  | 6.78305    | 5.79201    | -0.227869 | 0.717812 |
| XLOC_008295 | SPG7         | chr16:89574804-89624174   | 21.1321    | 18.0447    | -0.227863 | 0.724424 |
| XLOC_017903 | ANXA6        | chr5:150480266-150537442  | 52.1474    | 44.5422    | -0.227424 | 0.693258 |
| XLOC_010021 | BAIAP2-AS1   | chr17:79002932-79008519   | 2.96435    | 2.53205    | -0.227409 | 0.806389 |
| XLOC_009045 | RAPGEFL1     | chr17:38334241-38351906   | 2.77275    | 2.36848    | -0.227361 | 0.817127 |
| XLOC_004438 | PRCP         | chr11:82535408-82611557   | 39.4594    | 33.7085    | -0.227259 | 0.691198 |
| XLOC_006160 | KCTD12       | chr13:77454303-77460540   | 1.70088    | 1.45302    | -0.227228 | 0.797015 |
| XLOC_018811 | RGL2         | chr6:33259430-33267165    | 26.2493    | 22.4253    | -0.22715  | 0.700075 |
| XLOC_007115 | LOC100288637 | chr15:30938317-31065209   | 1.11758    | 0.954915   | -0.226934 | 0.830693 |
| XLOC_021133 | RSBN1L-AS1   | chr7:77313167-77409120    | 5.04039    | 4.3069     | -0.226884 | 0.926225 |
| XLOC_008723 | RNF166       | chr16:88762902-88772829   | 17.0554    | 14.5735    | -0.226881 | 0.770777 |
| XLOC_011916 | ZNF836       | chr19:52658124-52674896   | 1.73474    | 1.48231    | -0.226871 | 0.835672 |
| XLOC_004369 | SUV420H1     | chr11:67923506-67980784   | 5.63077    | 4.81142    | -0.226869 | 0.778901 |
| XLOC_006877 | ADAM20P1     | chr14:70935595-70950473   | 0.071302   | 0.060927   | -0.22686  | 1        |
| XLOC_014546 | LGALS1       | chr22:38071612-38075809   | 2279.08    | 1947.57    | -0.226778 | 0.722608 |
| XLOC_020620 | BHLHA15      | chr7:97841565-97842271    | 2.29822    | 1.96413    | -0.226625 | 0.949171 |
| XLOC_018390 | BCKDHB       | chr6:80816343-81055987    | 8.59118    | 7.34253    | -0.226579 | 0.799472 |
| XLOC_000266 | ADC          | chr1:33546713-33585995    | 3.69304    | 3.15642    | -0.22652  | 0.845125 |
| XLOC_015252 | ABHD10       | chr3:111697722-111712212  | 13.588     | 11.6144    | -0.22642  | 0.718143 |
| XLOC_011224 | ZNF749       | chr19:57946692-57957191   | 0.724029   | 0.618907   | -0.226325 | 0.89239  |
| XLOC_015060 | ZNF197       | chr3:44666510-44689963    | 2.94014    | 2.51326    | -0.226322 | 0.797744 |
| XLOC_020634 | ZSCAN25      | chr7:99214570-99230030    | 3.28821    | 2.81081    | -0.226316 | 0.790283 |
| XLOC_005360 | BHLHE41      | chr12:26272958-26278003   | 2.94701    | 2.5195     | -0.226117 | 0.808353 |
| XLOC_005275 | LINC00612    | chr12:9208184-9217666     | 0.0264098  | 0.022579   | -0.226088 | 1        |
| XLOC_016935 | MGARP        | chr4:140187316-140201492  | 0.284937   | 0.243622   | -0.225998 | 1        |
| XLOC_023689 | ZNF275       | chrX:152599612-152618382  | 3.26809    | 2.7946     | -0.225806 | 0.75865  |
| XLOC_003791 | DYNC2H1      | chr11:102980159-10335055  | 0.926989   | 0.792714   | -0.225753 | 0.768789 |
| XLOC_015967 | DZIP1L       | chr3:137780826-137834452  | 2.07798    | 1.777      | -0.22574  | 0.832722 |
| XLOC_005558 | FAM19A2      | chr12:62102028-62586620   | 0.00844531 | 0.00722209 | -0.225733 | 1        |
| XLOC_002968 | TACR2        | chr10:71163957-71176674   | 0.0166937  | 0.0142761  | -0.22571  | 1        |
| XLOC_010126 | TUBB6        | chr18:12308256-12326568   | 5.44684    | 4.65802    | -0.225703 | 0.830817 |
| XLOC_012249 | BOLA3-AS1    | chr2:74375107-74379516    | 4.26894    | 3.65084    | -0.225648 | 0.956373 |
| XLOC_022620 | PRRC2B       | chr9:134305476-134375572  | 20.6203    | 17.6349    | -0.225625 | 0.689384 |
| XLOC_009158 | DLX4         | chr17:48046561-48052323   | 0.805049   | 0.688568   | -0.225477 | 0.923433 |
| XLOC_002272 | OPN3         | chr1:241695433-241803702  | 0.164138   | 0.14039    | -0.225469 | 1        |
| XLOC_002243 | EXOC8        | chr1:231468481-231473572  | 2.27534    | 1.94648    | -0.225211 | 0.796582 |
| XLOC_008027 | LAT          | chr16:28996146-29002104   | 1.23764    | 1.05877    | -0.225207 | 0.917861 |
| XLOC_017359 | TMCO6        | chr5:140019011-140027372  | 9.42042    | 8.06025    | -0.224967 | 0.950929 |
| XLOC_007617 | RPS27L       | chr15:63445538-63449741   | 80.2918    | 68.7002    | -0.224939 | 0.703567 |
| XLOC_002080 | TPR          | chr1:185703682-186446652  | 4.68897    | 4.01217    | -0.224886 | 0.863743 |
| XLOC_000176 | RPL11        | chr1:24018268-24022915    | 4565.89    | 3907.13    | -0.224788 | 0.759487 |
| XLOC_015225 | LNP1         | chr3:100082302-100175172  | 1.75776    | 1.50429    | -0.224652 | 0.986822 |

|             |                        |                         |            |            |           |          |
|-------------|------------------------|-------------------------|------------|------------|-----------|----------|
| XLOC_002873 | ZNF438                 | chr10:31133564-31320866 | 1.29183    | 1.10556    | -0.224642 | 0.86815  |
| XLOC_014304 | TMEM50B                | chr21:34775201-34852316 | 8.58368    | 7.34662    | -0.224515 | 0.932264 |
| XLOC_017537 | BTNL9                  | chr5:180467224-18048852 | 2.93602    | 2.51289    | -0.224513 | 0.819546 |
| XLOC_022268 | PPAPDC2                | chr9:4598315-4666674    | 4.61138    | 3.94681    | -0.224512 | 0.819455 |
| XLOC_017065 | ADAMTS16               | chr5:5140442-5320412    | 0.00389638 | 0.00333514 | -0.224386 | 1        |
| XLOC_012137 | CRIM1                  | chr2:36583369-36778278  | 9.74786    | 8.3445     | -0.224226 | 0.714136 |
| XLOC_004944 | MBD6                   | chr12:57916658-57941114 | 13.3353    | 11.4167    | -0.224106 | 0.935917 |
| XLOC_022683 | UAP1L1                 | chr9:139971952-13997899 | 40.1104    | 34.3416    | -0.22402  | 0.716012 |
| XLOC_007830 | WFIKKN1                | chr16:681011-684116     | 0.209188   | 0.179104   | -0.224001 | 1        |
| XLOC_005718 | TBX3                   | chr12:115108058-1151219 | 1.86955    | 1.60076    | -0.223933 | 0.83502  |
| XLOC_018879 | C6orf226               | chr6:42858002-42858554  | 12.6457    | 10.8287    | -0.223785 | 0.895818 |
| XLOC_001299 | FBXO42                 | chr1:16576558-16678948  | 8.25583    | 7.07021    | -0.223661 | 0.752661 |
| XLOC_003104 | FBXW4                  | chr10:103370420-1034547 | 21.4356    | 18.3577    | -0.223626 | 0.728031 |
| XLOC_018752 | POU5F1                 | chr6:31132113-31138451  | 0.115211   | 0.0986768  | -0.223496 | 1        |
| XLOC_008969 | RAB11FIP4              | chr17:29718641-29865232 | 4.30187    | 3.68533    | -0.22317  | 0.763481 |
| XLOC_006346 | ATP5S                  | chr14:50779046-50792946 | 5.67754    | 4.86398    | -0.223129 | 0.829626 |
| XLOC_003874 | TECTA                  | chr11:120973374-1210615 | 0.0740662  | 0.063453   | -0.223126 | 1        |
| XLOC_017431 | GM2A                   | chr5:150632612-15064995 | 12.4449    | 10.6616    | -0.223124 | 0.725802 |
| XLOC_020748 | AHCYL2                 | chr7:128864854-12907005 | 2.46636    | 2.11304    | -0.223059 | 0.793112 |
| XLOC_004012 | HBE1                   | chr11:5289579-5291373   | 157.28     | 134.755    | -0.222995 | 0.720523 |
| XLOC_002250 | TARBP1                 | chr1:234527058-23461484 | 4.45112    | 3.8139     | -0.222901 | 0.754447 |
| XLOC_010864 | PLD3                   | chr19:40826966-40884390 | 53.2348    | 45.616     | -0.222831 | 0.748077 |
| XLOC_022051 | PEX2                   | chr8:77892493-77913280  | 8.52598    | 7.30583    | -0.222818 | 0.718723 |
| XLOC_000542 | AMY2B, RNPC3           | chr1:104068577-10412214 | 3.2815     | 2.81219    | -0.222662 | 0.839607 |
| XLOC_024192 | LAGE3                  | chrX:153705240-15370759 | 19.6558    | 16.8464    | -0.222519 | 0.754666 |
| XLOC_008775 | ZMYND15                | chr17:4643309-4649414   | 1.66485    | 1.42711    | -0.222293 | 0.885624 |
| XLOC_004778 | FGFR10P2               | chr12:27091304-27119581 | 7.84462    | 6.72444    | -0.22229  | 0.849027 |
| XLOC_004556 | SCN2B                  | chr11:118033518-1180473 | 0.00726095 | 0.00622466 | -0.222163 | 1        |
| XLOC_009895 | MED13                  | chr17:60019965-60142643 | 2.76023    | 2.36637    | -0.222116 | 0.728863 |
| XLOC_009753 | COA3                   | chr17:40949635-40950743 | 58.9312    | 50.5254    | -0.222021 | 0.736907 |
| XLOC_002458 | AGAP6                  | chr10:51748077-51770259 | 4.10198    | 3.51698    | -0.221982 | 0.809382 |
| XLOC_017687 | GUSBP9, SMA5           | chr5:69776869-69881549  | 0.685536   | 0.587794   | -0.221922 | 0.945783 |
| XLOC_022861 | LOC642236              | chr9:68427782-68454375  | 0.267671   | 0.229535   | -0.221747 | 1        |
| XLOC_007518 | RHOV                   | chr15:41164411-41166487 | 6.14036    | 5.26568    | -0.221703 | 0.848999 |
| XLOC_004471 | TAF1D                  | chr11:93469095-93474703 | 35.4558    | 30.4062    | -0.221658 | 0.721145 |
| XLOC_016911 | PDE5A                  | chr4:120375937-12054998 | 0.421644   | 0.361613   | -0.221578 | 0.923788 |
| XLOC_005692 | GIT2                   | chr12:110367606-1104341 | 7.37327    | 6.32368    | -0.22154  | 0.816371 |
| XLOC_021284 | CADPS2                 | chr7:121958477-12252681 | 0.904289   | 0.775579   | -0.22151  | 0.855712 |
| XLOC_013764 | SLCO4A1                | chr20:61273796-61303647 | 30.9574    | 26.5536    | -0.221374 | 0.73642  |
| XLOC_015875 | SPICE1                 | chr3:113161564-11323403 | 1.14577    | 0.982792   | -0.221359 | 0.837041 |
| XLOC_023173 | SNHG7, SNORA17, SNORA4 | chr9:139607023-13962263 | 450.966    | 386.828    | -0.221327 | 0.748077 |
| XLOC_017877 | PLAC8L1                | chr5:145463875-14548394 | 2.76222    | 2.36937    | -0.221324 | 0.913628 |
| XLOC_011376 | FLJ22184               | chr19:7933604-7939326   | 13.507     | 11.5863    | -0.221288 | 0.750555 |
| XLOC_012915 | CLHC1                  | chr2:55399686-55462989  | 0.285817   | 0.245181   | -0.221246 | 1        |
| XLOC_002429 | RASSF4                 | chr10:45455218-45490172 | 4.27803    | 3.67027    | -0.221106 | 0.819681 |
| XLOC_015111 | RBM5                   | chr3:50126340-50156397  | 24.7217    | 21.2106    | -0.220994 | 0.720751 |
| XLOC_008300 | CDK10                  | chr16:89753075-89768121 | 37.7649    | 32.4017    | -0.220975 | 0.827718 |
| XLOC_021805 | MFSD3                  | chr8:145734551-14573658 | 52.5519    | 45.1008    | -0.220588 | 0.73899  |
| XLOC_014459 | MIF                    | chr22:24235896-24241117 | 3843.16    | 3298.36    | -0.220545 | 0.729625 |
| XLOC_001808 | FAM63A                 | chr1:150969300-15098085 | 5.86563    | 5.03486    | -0.220336 | 0.814226 |
| XLOC_012609 | ZDBF2                  | chr2:207139522-20717914 | 0.526041   | 0.451543   | -0.22031  | 0.847596 |
| XLOC_008516 | SEPT1                  | chr16:30389453-30411429 | 1.06189    | 0.911584   | -0.220189 | 0.986822 |
| XLOC_013619 | TP53INP2               | chr20:33292147-33301237 | 7.41082    | 6.36212    | -0.220124 | 0.757141 |
| XLOC_007531 | VPS39                  | chr15:42450898-42500502 | 8.61936    | 7.40003    | -0.22005  | 0.726892 |
| XLOC_004922 | RPL41                  | chr12:56510373-56511616 | 14098.8    | 12104.9    | -0.219984 | 0.802508 |
| XLOC_022449 | ZNF169                 | chr9:97021577-97065291  | 0.745444   | 0.640074   | -0.21986  | 0.895818 |
| XLOC_006229 | GRTP1                  | chr13:113978504-1140184 | 11.5664    | 9.93209    | -0.219774 | 0.81342  |
| XLOC_010800 | C19orf55               | chr19:36249043-36260077 | 1.48323    | 1.27368    | -0.219738 | 0.907657 |
| XLOC_005037 | AMDHD1                 | chr12:96337070-96362370 | 0.399426   | 0.343016   | -0.219651 | 0.941621 |
| XLOC_000338 | ST3GAL3                | chr1:44173203-44396837  | 3.3876     | 2.90953    | -0.21948  | 0.855173 |
| XLOC_002883 | FZD8                   | chr10:35927176-35930362 | 2.29982    | 1.9753     | -0.219448 | 0.881073 |
| XLOC_008004 | TNRC6A                 | chr16:24741048-24837547 | 1.44566    | 1.24179    | -0.219305 | 0.792333 |
| XLOC_022384 | FAM122A                | chr9:71320615-71624091  | 3.08081    | 2.64641    | -0.21927  | 0.81235  |
| XLOC_013064 | TSGA10                 | chr2:99613723-99771187  | 0.111828   | 0.096082   | -0.218946 | 1        |
| XLOC_017079 | ANKRD33B               | chr5:10564434-10657928  | 1.37642    | 1.18268    | -0.21886  | 0.808776 |
| XLOC_000404 | DIO1                   | chr1:54359860-54376759  | 0.0187025  | 0.0160708  | -0.218791 | 1        |
| XLOC_017007 | GPM6A                  | chr4:176554087-17692384 | 0.00541941 | 0.00465691 | -0.218762 | 1        |
| XLOC_005174 | ATP6V0A2               | chr12:124196864-1242463 | 1.02062    | 0.877108   | -0.218613 | 0.844123 |
| XLOC_000569 | AMPD2                  | chr1:110162434-11017467 | 37.3418    | 32.0961    | -0.218394 | 0.732349 |
| XLOC_022092 | RBM12B                 | chr8:94743730-94753224  | 2.79391    | 2.40149    | -0.218355 | 0.787528 |
| XLOC_000149 | OTUD3                  | chr1:20208887-20239437  | 1.74875    | 1.5032     | -0.218287 | 0.806843 |
| XLOC_013477 | NRSN2                  | chr20:327369-335512     | 0.339697   | 0.292006   | -0.218249 | 1        |
| XLOC_016016 | TMEM14E                | chr3:151980404-15218356 | 0.0409511  | 0.0352027  | -0.218216 | 1        |
| XLOC_021786 | LOC100128338           | chr8:144816309-14482850 | 10.4066    | 8.94583    | -0.218213 | 0.764991 |
| XLOC_003609 | CDC42EP2               | chr11:65082288-65089900 | 21.5435    | 18.5197    | -0.218189 | 0.75896  |
| XLOC_013104 | LOC541471              | chr2:112124590-11225269 | 404.4      | 347.116    | -0.217874 | 0.723754 |
| XLOC_017036 | FLJ38576               | chr4:187110185-18711264 | 0.0742131  | 0.0638113  | -0.217863 | 1        |
| XLOC_012716 | SCARNA5                | chr2:234160216-23420432 | 1.15611    | 0.994107   | -0.217806 | 0.987423 |
| XLOC_021513 | R3HCC1                 | chr8:23145611-23153792  | 50.9129    | 43.7796    | -0.217772 | 0.73058  |

|             |              |                         |            |            |           |          |
|-------------|--------------|-------------------------|------------|------------|-----------|----------|
| XLOC_006225 | ANKRD10      | chr13:111530886-1115674 | 10.287     | 8.84635    | -0.217674 | 0.766627 |
| XLOC_019005 | FBXL4        | chr6:99321600-99395849  | 3.56011    | 3.06157    | -0.217652 | 0.808353 |
| XLOC_004179 | FBNP4        | chr11:47738068-47788993 | 9.00193    | 7.7415     | -0.217622 | 0.736514 |
| XLOC_013319 | INO80D       | chr2:206858444-20695090 | 0.568021   | 0.488519   | -0.217527 | 0.822187 |
| XLOC_015956 | ACAD11,NPHP3 | chr3:132276981-13259305 | 8.50009    | 7.31088    | -0.217433 | 0.881073 |
| XLOC_001321 | AKR7A2       | chr1:19629201-19638640  | 39.4097    | 33.8969    | -0.217399 | 0.724741 |
| XLOC_011365 | FLJ25758     | chr19:7004963-7006426   | 0.0657577  | 0.0565664  | -0.217215 | 1        |
| XLOC_008367 | ERVK13-1     | chr16:2708389-2723440   | 0.938737   | 0.807534   | -0.217199 | 0.839342 |
| XLOC_004979 | MDM2         | chr12:69201970-69239320 | 13.4974    | 11.6119    | -0.217075 | 0.721145 |
| XLOC_022386 | TJP2         | chr9:71736179-71870124  | 4.36186    | 3.75293    | -0.216926 | 0.780149 |
| XLOC_001221 | LOC115110    | chr1:2481358-2484284    | 1.22592    | 1.05479    | -0.216917 | 0.908233 |
| XLOC_005576 | LOC100507250 | chr12:69068150-69080639 | 0.280174   | 0.241066   | -0.2169   | 1        |
| XLOC_017696 | ENC1         | chr5:73923230-73937249  | 12.8711    | 11.0749    | -0.216832 | 0.737639 |
| XLOC_012660 | STK16        | chr2:220110191-22013691 | 11.8051    | 10.1591    | -0.216635 | 0.947247 |
| XLOC_017990 | ZNF354A      | chr5:178138521-17815770 | 6.32898    | 5.44689    | -0.216539 | 0.775649 |
| XLOC_010563 | LOC284385    | chr19:9732157-9745538   | 2.27337    | 1.95654    | -0.216526 | 0.872554 |
| XLOC_011234 | ZNF776       | chr19:58258163-58269527 | 1.41848    | 1.22101    | -0.216269 | 0.829179 |
| XLOC_008126 | MT1F         | chr16:56691854-56693215 | 95.1267    | 81.8874    | -0.216209 | 0.797958 |
| XLOC_018507 | SNORA33      | chr6:133135707-13313870 | 9.1374     | 7.86571    | -0.216207 | 0.989514 |
| XLOC_018803 | HLA-DMB      | chr6:32902405-32908847  | 0.0132433  | 0.011401   | -0.216102 | 1        |
| XLOC_011725 | PHLDB3       | chr19:43979254-44008985 | 10.2224    | 8.80063    | -0.216052 | 0.802262 |
| XLOC_008927 | LGALS9       | chr17:25958173-25976586 | 0.181235   | 0.156037   | -0.215976 | 1        |
| XLOC_005673 | MTERFD3      | chr12:107371068-1073809 | 3.96665    | 3.41562    | -0.215773 | 0.831797 |
| XLOC_006222 | RAB20        | chr13:111175412-1112140 | 24.8183    | 21.3708    | -0.215769 | 0.783567 |
| XLOC_009276 | KCTD2        | chr17:73043278-73061981 | 7.77078    | 6.69158    | -0.215712 | 0.759977 |
| XLOC_016070 | TBL1XR1      | chr3:176738541-17691504 | 16.7903    | 14.4589    | -0.215676 | 0.726892 |
| XLOC_000579 | KCNC4        | chr1:110753335-11077667 | 3.84394    | 3.3103     | -0.215626 | 0.831797 |
| XLOC_001190 | RNF223       | chr1:1007125-1009687    | 0.309474   | 0.266511   | -0.215624 | 1        |
| XLOC_009814 | HOXB2        | chr17:46620018-46622393 | 22.3708    | 19.2654    | -0.215606 | 0.792519 |
| XLOC_006301 | GMPR2        | chr14:24701647-24708447 | 39.8375    | 34.3075    | -0.215603 | 0.729625 |
| XLOC_017212 | THBS4        | chr5:79331169-79379107  | 0.254086   | 0.21883    | -0.215505 | 1        |
| XLOC_013183 | CACNB4       | chr2:152689285-15295559 | 0.523676   | 0.451086   | -0.215273 | 0.871957 |
| XLOC_016116 | UTS2D        | chr3:190984943-19111645 | 0.02656    | 0.0228808  | -0.215116 | 1        |
| XLOC_003167 | FGFR2        | chr10:123237843-1233579 | 0.842561   | 0.72589    | -0.215103 | 0.873402 |
| XLOC_013672 | TTPAL        | chr20:43104525-43123244 | 3.74892    | 3.22984    | -0.215013 | 0.769187 |
| XLOC_007866 | SYNGR3       | chr16:2039945-2044276   | 9.28833    | 8.00237    | -0.21499  | 0.821193 |
| XLOC_008499 | C16orf54     | chr16:29753785-29757340 | 0.00830535 | 0.00715589 | -0.21491  | 1        |
| XLOC_012498 | BBS5         | chr2:170336005-17036316 | 0.647418   | 0.557816   | -0.214909 | 0.919505 |
| XLOC_023313 | MAGEB2       | chrX:30233674-30238206  | 0.0541616  | 0.0466709  | -0.214746 | 1        |
| XLOC_019188 | RNASET2      | chr6:167343003-16737007 | 58.7264    | 50.6062    | -0.214695 | 0.747687 |
| XLOC_001338 | RAP1GAP      | chr1:21922707-21995856  | 3.98903    | 3.43753    | -0.214666 | 0.829181 |
| XLOC_002890 | ZNF37BP      | chr10:43008960-43048280 | 1.77413    | 1.52889    | -0.214627 | 0.771029 |
| XLOC_012041 | ASAF2        | chr2:9346893-9545812    | 3.15675    | 2.72054    | -0.214545 | 0.789343 |
| XLOC_012810 | HS1BP3       | chr2:20817563-20850864  | 21.4968    | 18.5274    | -0.21446  | 0.747619 |
| XLOC_005972 | ZIC2         | chr13:100634025-1006390 | 5.69944    | 4.91294    | -0.214232 | 0.828589 |
| XLOC_009368 | NXN          | chr17:702552-882998     | 10.4518    | 9.00974    | -0.21419  | 0.778996 |
| XLOC_002649 | LZTS2        | chr10:102756863-1027909 | 56.6933    | 48.8824    | -0.213865 | 0.741208 |
| XLOC_003873 | TBCEL1       | chr11:120894802-1209603 | 1.48372    | 1.27944    | -0.213715 | 0.845125 |
| XLOC_006501 | COX8C        | chr14:93799564-94173689 | 0.117815   | 0.1016     | -0.213631 | 1        |
| XLOC_012214 | ETAA1        | chr2:67624441-67637533  | 2.70155    | 2.32986    | -0.213542 | 0.817795 |
| XLOC_009235 | CEP95        | chr17:62503157-62534062 | 7.07087    | 6.09827    | -0.213489 | 0.770784 |
| XLOC_008885 | NT5M         | chr17:17206679-17250977 | 9.06999    | 7.82266    | -0.213441 | 0.84294  |
| XLOC_020554 | PMS2P5       | chr7:74306893-74336166  | 3.05334    | 2.63362    | -0.213342 | 0.897631 |
| XLOC_002615 | CCNJ         | chr10:97471535-97849992 | 3.63525    | 3.13579    | -0.213228 | 0.883528 |
| XLOC_011743 | ZNF180       | chr19:44979858-45004574 | 2.50737    | 2.16313    | -0.21305  | 0.831797 |
| XLOC_018210 | C6orf48      | chr6:31802692-31807541  | 335.54     | 289.517    | -0.212841 | 0.743589 |
| XLOC_002172 | NEK2         | chr1:211831598-21184897 | 10.9877    | 9.48079    | -0.212809 | 0.771029 |
| XLOC_004031 | PRKCDBP      | chr11:6340175-6341740   | 24.0037    | 20.7125    | -0.212756 | 0.833197 |
| XLOC_021676 | PDP1         | chr8:94929082-94938296  | 6.40494    | 5.52695    | -0.212702 | 0.759967 |
| XLOC_013184 | STAM2        | chr2:152973314-15303250 | 1.83435    | 1.58299    | -0.212613 | 0.811389 |
| XLOC_018230 | LOC100294145 | chr6:32861952-32871535  | 2.57299    | 2.22058    | -0.21251  | 0.830817 |
| XLOC_008064 | ORAI3        | chr16:30960404-30966259 | 16.7699    | 14.4744    | -0.212373 | 0.773687 |
| XLOC_023303 | PKD3         | chrX:24483343-24568583  | 6.40069    | 5.52473    | -0.212323 | 0.910122 |
| XLOC_023080 | FAM129B      | chr9:130267617-13034126 | 108.539    | 93.6866    | -0.212299 | 0.748288 |
| XLOC_008059 | PHKG2        | chr16:30759619-30787628 | 8.35337    | 7.21077    | -0.212204 | 0.956711 |
| XLOC_000842 | UHMK1        | chr1:162466963-16249941 | 10.3103    | 8.90017    | -0.212184 | 0.739159 |
| XLOC_007862 | SNORA78      | chr16:2014996-2015505   | 4.24755    | 3.66668    | -0.212156 | 1        |
| XLOC_016799 | NAAA         | chr4:76831807-76862166  | 10.2069    | 8.81112    | -0.212148 | 0.806389 |
| XLOC_007256 | SLC24A1      | chr15:65914269-65948598 | 1.08475    | 0.93656    | -0.211916 | 0.873414 |
| XLOC_001202 | CCNL2        | chr1:1321090-1334718    | 29.5533    | 25.5169    | -0.211864 | 0.754753 |
| XLOC_018711 | ZSCAN31      | chr6:28292514-28304152  | 1.13303    | 0.978389   | -0.211703 | 0.885618 |
| XLOC_022377 | LOC100132352 | chr9:68726540-68748372  | 5.34365    | 4.61456    | -0.21163  | 0.854415 |
| XLOC_023740 | ARSD         | chrX:2822010-2847416    | 4.73334    | 4.08758    | -0.211614 | 0.784901 |
| XLOC_015444 | SKIL         | chr3:170075472-17011463 | 1.15343    | 0.996183   | -0.21145  | 0.830321 |
| XLOC_017740 | FAM172A      | chr5:92919042-93447404  | 2.24616    | 1.94007    | -0.211353 | 0.902851 |
| XLOC_011154 | CACNG7       | chr19:54415990-54446969 | 0.710033   | 0.613324   | -0.211235 | 0.949535 |
| XLOC_011099 | ZNF761       | chr19:53935226-53961515 | 2.97582    | 2.57052    | -0.211225 | 0.819681 |
| XLOC_015965 | MSL2         | chr3:135867759-13591468 | 4.85177    | 4.19103    | -0.211207 | 0.786804 |
| XLOC_016332 | REST         | chr4:57774041-57802010  | 3.89746    | 3.36689    | -0.211116 | 0.757627 |

|             |                         |                          |            |            |           |          |
|-------------|-------------------------|--------------------------|------------|------------|-----------|----------|
| XLOC_018408 | PNRC1                   | chr6:89790428-89794879   | 29.0624    | 25.107     | -0.211067 | 0.755776 |
| XLOC_006064 | N4BP2L2                 | chr13:33006929-33112936  | 14.296     | 12.3503    | -0.211061 | 0.803587 |
| XLOC_009378 | RILP                    | chr17:1549444-1553392    | 21.6237    | 18.681     | -0.211043 | 0.792036 |
| XLOC_010655 | UCA1                    | chr19:15939756-15947131  | 7.52273    | 6.49974    | -0.210875 | 0.806888 |
| XLOC_015582 | IQSEC1                  | chr3:12938541-13114617   | 6.37302    | 5.50692    | -0.210732 | 0.781066 |
| XLOC_009043 | MSL1                    | chr17:38278789-38293045  | 6.66113    | 5.75595    | -0.210713 | 0.772299 |
| XLOC_022494 | FKTN                    | chr9:108320410-108403395 | 3.85026    | 3.32729    | -0.21061  | 0.839213 |
| XLOC_021323 | PODXL                   | chr7:131185020-131241375 | 22.9656    | 19.8466    | -0.210582 | 0.748064 |
| XLOC_006806 | PYGL                    | chr14:51371934-51411248  | 46.7392    | 40.3928    | -0.210534 | 0.735838 |
| XLOC_009999 | LOC100131096            | chr17:76000317-76107880  | 1.03126    | 0.891265   | -0.21048  | 0.95534  |
| XLOC_013691 | SNX21                   | chr20:44462469-44486048  | 10.5969    | 9.15886    | -0.210397 | 0.842695 |
| XLOC_009822 | HOXB9                   | chr17:46698518-46703835  | 23.9522    | 20.7023    | -0.21037  | 0.744334 |
| XLOC_017792 | RAPGEF6                 | chr5:130759613-130970925 | 1.10469    | 0.954807   | -0.210365 | 0.819877 |
| XLOC_022459 | LOC158435               | chr9:98828120-98864194   | 0.00718971 | 0.00621425 | -0.210353 | 1        |
| XLOC_001262 | MASP2                   | chr1:11086579-11107296   | 0.226696   | 0.195942   | -0.210328 | 1        |
| XLOC_008905 | SLC5A10                 | chr17:18853988-18950336  | 0.577241   | 0.498936   | -0.210319 | 0.980704 |
| XLOC_022738 | PLIN2                   | chr9:19115758-19127604   | 40.2808    | 34.8175    | -0.210282 | 0.750555 |
| XLOC_020760 | MKLN1                   | chr7:130794854-131181395 | 5.4142     | 4.68002    | -0.210233 | 0.753667 |
| XLOC_010045 | PCYT2                   | chr17:79860071-79869340  | 14.0181    | 12.1177    | -0.210175 | 0.761115 |
| XLOC_009121 | MNPT                    | chr17:43920721-44105699  | 0.0108467  | 0.00937651 | -0.210128 | 1        |
| XLOC_006438 | DAL1                    | chr14:74111577-74170431  | 0.559069   | 0.483301   | -0.210106 | 0.868494 |
| XLOC_013719 | PAR6B                   | chr20:49348080-49370278  | 2.04351    | 1.76672    | -0.209974 | 0.829181 |
| XLOC_001082 | ZNF678                  | chr1:227751219-227850164 | 0.478552   | 0.41375    | -0.209916 | 0.868469 |
| XLOC_009062 | FKBP10                  | chr17:39968961-39979469  | 125.527    | 108.535    | -0.209841 | 0.749348 |
| XLOC_005154 | BCL7A                   | chr12:122459860-12249995 | 8.37956    | 7.24532    | -0.209825 | 0.78079  |
| XLOC_023692 | ATP2B3                  | chrX:152801579-15284838  | 0.0032633  | 0.00282173 | -0.209755 | 1        |
| XLOC_004952 | TSPAN31                 | chr12:58138783-58146230  | 7.64578    | 6.61154    | -0.209677 | 0.987334 |
| XLOC_002138 | EIF3E                   | chr8:109213971-10926095  | 736.617    | 637.002    | -0.209618 | 0.774191 |
| XLOC_021759 | ZFAT-AS1                | chr8:135490030-13572529  | 0.107853   | 0.0932804  | -0.209426 | 1        |
| XLOC_017847 | SPATA24                 | chr5:138732455-13873977  | 1.88068    | 1.6266     | -0.209391 | 0.935062 |
| XLOC_007263 | SMAD3                   | chr15:67358194-67487533  | 5.0144     | 4.33704    | -0.209366 | 0.765568 |
| XLOC_013844 | TMEM230                 | chr20:5080483-5093733    | 63.385     | 54.8275    | -0.209241 | 0.738368 |
| XLOC_018594 | LOC100289495            | chr6:166756118-16676495  | 0.266081   | 0.225496   | -0.209189 | 1        |
| XLOC_002999 | MYOZ1                   | chr10:75391369-75401515  | 0.0124333  | 0.0107557  | -0.209109 | 1        |
| XLOC_024041 | NKAP                    | chrX:119059012-11907773  | 18.5928    | 16.0841    | -0.209102 | 0.776981 |
| XLOC_007315 | NEIL1                   | chr15:75639330-75647592  | 9.39105    | 8.12418    | -0.209063 | 0.838994 |
| XLOC_002747 | LHPP                    | chr10:126150340-1263027  | 11.0303    | 9.54249    | -0.20904  | 0.828589 |
| XLOC_014376 | LINC00163               | chr21:46409778-46414001  | 0.0125141  | 0.0108263  | -0.209019 | 1        |
| XLOC_005788 | STX2                    | chr12:131274144-1313238  | 4.26236    | 3.68754    | -0.208994 | 0.804229 |
| XLOC_016664 | ACOX3                   | chr4:8368008-8442452     | 5.3217     | 4.60513    | -0.208646 | 0.827026 |
| XLOC_009454 | PHF23                   | chr17:7138346-7142825    | 17.7963    | 15.4014    | -0.208513 | 0.772218 |
| XLOC_003814 | C11orf1                 | chr11:111744779-11175475 | 19.7197    | 17.0671    | -0.208421 | 0.831797 |
| XLOC_005570 | GRIP1                   | chr12:66741210-67072925  | 0.350568   | 0.303415   | -0.208404 | 0.913628 |
| XLOC_013878 | RALGAPA2                | chr20:20370271-20693266  | 1.22711    | 1.06208    | -0.20836  | 0.825249 |
| XLOC_007692 | FAM219B                 | chr15:75192327-75199462  | 9.11974    | 7.89341    | -0.208344 | 0.769146 |
| XLOC_012206 | LGALS1                  | chr2:64681326-64688517   | 6.04791    | 5.23489    | -0.208278 | 0.782305 |
| XLOC_015614 | NGLY1                   | chr3:25760434-25831530   | 18.1508    | 15.7108    | -0.208277 | 0.74878  |
| XLOC_015037 | RPL14                   | chr3:40498782-40503863   | 3178.38    | 2751.16    | -0.208252 | 0.790283 |
| XLOC_003769 | ANKRD49                 | chr11:94227152-94232744  | 5.83116    | 5.04752    | -0.208209 | 0.810878 |
| XLOC_003670 | TCIRG1                  | chr11:67806461-67818366  | 39.1472    | 33.8867    | -0.208191 | 0.752244 |
| XLOC_005596 | OSBPL8                  | chr12:76745577-76953589  | 3.61872    | 3.13265    | -0.208096 | 0.773848 |
| XLOC_011586 | CEP89                   | chr19:33369903-33462869  | 2.4056     | 2.08282    | -0.207855 | 0.860283 |
| XLOC_018982 | SNHG5                   | chr6:86386724-86388451   | 1336.37    | 1157.08    | -0.207832 | 0.735482 |
| XLOC_001182 | LOC100133331            | chr1:661138-665731       | 0.760679   | 0.658678   | -0.207714 | 0.918898 |
| XLOC_004449 | FZD4                    | chr11:86656716-86666440  | 0.867695   | 0.751366   | -0.207671 | 0.860589 |
| XLOC_010503 | TNFAIP8L1               | chr19:4639526-4655580    | 6.60848    | 5.72291    | -0.20757  | 0.797015 |
| XLOC_000466 | MSH4                    | chr1:76262555-76378923   | 0.570385   | 0.493963   | -0.207531 | 0.913628 |
| XLOC_009886 | HEATR6                  | chr17:58120551-58156292  | 3.46504    | 3.00081    | -0.207521 | 0.811632 |
| XLOC_003573 | RARRES3                 | chr11:63014620-63330855  | 0.055397   | 0.0479795  | -0.20739  | 1        |
| XLOC_009076 | CNTNAP1                 | chr17:40834631-40852011  | 7.56974    | 6.55652    | -0.207312 | 0.780616 |
| XLOC_013673 | PKIG                    | chr20:43160435-43247678  | 26.4596    | 22.9198    | -0.207195 | 0.79103  |
| XLOC_004296 | RCOR2                   | chr11:63678692-63684316  | 13.767     | 11.9265    | -0.207048 | 0.792482 |
| XLOC_013788 | ABHD16B                 | chr20:62492565-62494341  | 12.608     | 10.9225    | -0.207039 | 0.865626 |
| XLOC_001438 | ZMYM6NB                 | chr1:35447126-35450948   | 35.9034    | 31.1049    | -0.206981 | 0.783224 |
| XLOC_013374 | ABCB6                   | chr2:220074487-22008371  | 10.9706    | 9.50441    | -0.206971 | 0.797015 |
| XLOC_023496 | SH3BGRL                 | chrX:80369199-80554046   | 18.5417    | 16.0638    | -0.206962 | 0.807864 |
| XLOC_024205 | CMC4,MTCP1              | chrX:154289899-15429954  | 14.7214    | 12.7552    | -0.206831 | 0.850823 |
| XLOC_009221 | TANC2                   | chr17:60778674-61505067  | 1.81027    | 1.56863    | -0.2067   | 0.79485  |
| XLOC_020816 | CTAGE15P                | chr7:143268893-14327148  | 0.172277   | 0.14932    | -0.206323 | 1        |
| XLOC_014398 | BCL2L13                 | chr22:18121349-18213621  | 5.0934     | 4.41487    | -0.206258 | 0.781375 |
| XLOC_018816 | LINC00336               | chr6:33551475-33561115   | 0.0177752  | 0.0154073  | -0.206248 | 1        |
| XLOC_010213 | ONECUT2                 | chr18:55102916-55158530  | 0.368698   | 0.319633   | -0.206022 | 0.859569 |
| XLOC_016173 | FGFR3                   | chr4:1795038-1810599     | 4.67232    | 4.05061    | -0.205999 | 0.822719 |
| XLOC_010562 | ZNF177,ZNF559,ZNF559-Z1 | chr19:9434447-9493293    | 2.81613    | 2.44158    | -0.2059   | 0.852163 |
| XLOC_013297 | RFTN2                   | chr2:198435526-198540584 | 0.0326734  | 0.0283279  | -0.205892 | 1        |
| XLOC_023711 | GDI1                    | chrX:153665258-15367181  | 51.2906    | 44.4713    | -0.205821 | 0.749883 |
| XLOC_011657 | FBXO27                  | chr19:39514662-39523198  | 0.10941    | 0.094874   | -0.205656 | 1        |
| XLOC_012031 | RPS7                    | chr2:3622852-3628509     | 4557.52    | 3952.03    | -0.205654 | 0.797744 |
| XLOC_003701 | ATG16L2                 | chr11:72525450-72540680  | 18.4949    | 16.0385    | -0.205591 | 0.791515 |

|             |              |                          |           |           |           |          |
|-------------|--------------|--------------------------|-----------|-----------|-----------|----------|
| XLOC_020495 | GBAS         | chr7:56032269-56067875   | 26.3261   | 22.8302   | -0.205552 | 0.752993 |
| XLOC_013952 | NDRG3        | chr20:35280168-35374541  | 6.42303   | 5.57029   | -0.205503 | 0.797744 |
| XLOC_014417 | ZDHHC8       | chr22:20119363-20135530  | 11.255    | 9.76165   | -0.205367 | 0.774577 |
| XLOC_003641 | TMEM151A     | chr11:66059372-66064135  | 0.0290345 | 0.0251843 | -0.205242 | 1        |
| XLOC_020461 | STK17A       | chr7:43622691-43666978   | 6.39994   | 5.55135   | -0.20522  | 0.783567 |
| XLOC_011793 | MEIS3        | chr19:47906374-47922785  | 66.9059   | 58.0366   | -0.20517  | 0.747687 |
| XLOC_014905 | PLXNB2       | chr22:50713407-50746001  | 24.4149   | 21.181    | -0.204993 | 0.756069 |
| XLOC_012169 | SOCS5        | chr2:46926098-46989927   | 1.63048   | 1.41466   | -0.204843 | 0.852072 |
| XLOC_015327 | H1FX-AS1     | chr3:129033613-129043411 | 0.548616  | 0.475999  | -0.204837 | 0.99316  |
| XLOC_006361 | SAMD4A       | chr14:55034329-55260033  | 2.98971   | 2.59399   | -0.204836 | 0.817127 |
| XLOC_000088 | CLCN6        | chr1:11845786-11907840   | 2.73951   | 2.37704   | -0.204754 | 0.915356 |
| XLOC_009355 | NARF         | chr17:80416059-80446143  | 85.8548   | 74.4959   | -0.204738 | 0.752793 |
| XLOC_018490 | RNF146       | chr6:127587826-127609705 | 6.83589   | 5.93152   | -0.204727 | 0.819877 |
| XLOC_018011 | ZFP62        | chr5:180274610-180288286 | 2.30816   | 2.00285   | -0.204684 | 0.826204 |
| XLOC_011431 | DOCK6        | chr19:11309968-11373168  | 11.9714   | 10.3885   | -0.204604 | 0.759967 |
| XLOC_020720 | FEZF1-AS1    | chr7:121941447-121950131 | 2.73158   | 2.37052   | -0.204533 | 0.894319 |
| XLOC_010554 | MARCH2       | chr19:8478186-8503899    | 14.5766   | 12.6516   | -0.204338 | 0.827004 |
| XLOC_018852 | SAYSD1       | chr6:39071839-39082865   | 4.35513   | 3.78048   | -0.204148 | 0.855539 |
| XLOC_002829 | PPIAP30      | chr10:15147770-15210695  | 0.10174   | 0.0883245 | -0.204003 | 1        |
| XLOC_002835 | CUBN         | chr10:16865964-17171816  | 0.514526  | 0.446689  | -0.203974 | 0.860562 |
| XLOC_001514 | TESK2        | chr1:45794913-45956840   | 2.502     | 2.17227   | -0.203875 | 0.965148 |
| XLOC_000215 | TRNP1        | chr1:27320194-27327377   | 15.0227   | 13.0443   | -0.203725 | 0.808353 |
| XLOC_011752 | ERCC2        | chr19:45843997-45873845  | 25.6963   | 22.3124   | -0.203712 | 0.869898 |
| XLOC_007117 | FAN1         | chr15:31196054-31283807  | 3.38336   | 2.93807   | -0.20359  | 0.877263 |
| XLOC_022044 | RPL7         | chr8:74202873-74205869   | 7067.94   | 6137.91   | -0.203542 | 0.84262  |
| XLOC_011050 | NR1H2        | chr19:50879679-50886285  | 38.6937   | 33.6034   | -0.203492 | 0.7741   |
| XLOC_020983 | HOXA11       | chr7:27220775-27224835   | 5.93854   | 5.15751   | -0.203433 | 0.827184 |
| XLOC_006837 | CCDC175      | chr14:59951160-60043549  | 0.41715   | 0.362296  | -0.203395 | 0.989411 |
| XLOC_012940 | PEL1         | chr2:64319785-64371605   | 1.89982   | 1.65004   | -0.203365 | 0.855173 |
| XLOC_021108 | STX1A        | chr7:73113534-73134017   | 19.1109   | 16.5999   | -0.203219 | 0.7854   |
| XLOC_013750 | FAM217B      | chr20:58508818-58523702  | 2.07669   | 1.80387   | -0.203189 | 0.884394 |
| XLOC_013636 | C20orf118    | chr20:35504569-35580246  | 0.0366766 | 0.0318592 | -0.203149 | 1        |
| XLOC_018144 | ZKSCAN3      | chr6:28317690-28336954   | 0.86206   | 0.748916  | -0.202984 | 0.894473 |
| XLOC_010545 | LRRC8E       | chr19:7953389-7966908    | 15.9489   | 13.857    | -0.202843 | 0.768301 |
| XLOC_011004 | NUCB1        | chr19:49403306-49426540  | 111.637   | 97.0018   | -0.202727 | 0.764949 |
| XLOC_014944 | IRAK2        | chr3:10206562-10285427   | 1.20514   | 1.04725   | -0.202584 | 0.901921 |
| XLOC_001998 | CD247        | chr1:167399876-167487847 | 0.0123796 | 0.0107578 | -0.202581 | 1        |
| XLOC_003976 | CDKN1C       | chr11:2904447-2906995    | 12.6851   | 11.0233   | -0.202576 | 0.854415 |
| XLOC_006958 | DICER1       | chr14:95552564-95623759  | 1.72615   | 1.50003   | -0.20257  | 0.799255 |
| XLOC_018201 | APOM         | chr6:31606804-31625987   | 3.59642   | 3.12529   | -0.20257  | 0.993379 |
| XLOC_007375 | SCAND2P      | chr15:85174690-85185694  | 2.52552   | 2.19491   | -0.20242  | 0.8433   |
| XLOC_015112 | SEMA3F       | chr3:50192847-50226508   | 5.49793   | 4.77865   | -0.202287 | 0.831511 |
| XLOC_006143 | VPS36        | chr13:52986736-53024763  | 4.30447   | 3.74166   | -0.202157 | 0.797015 |
| XLOC_006663 | PACS2        | chr14:105675622-10586448 | 10.3007   | 8.95392   | -0.202146 | 0.917379 |
| XLOC_016163 | MYL5         | chr4:671710-682973       | 6.47042   | 5.62499   | -0.202007 | 0.907689 |
| XLOC_009655 | RPL23        | chr17:37006320-37010053  | 4779.37   | 4155.96   | -0.20164  | 0.800595 |
| XLOC_023419 | TSPYL2       | chrX:53111541-53117728   | 13.452    | 11.6978   | -0.201587 | 0.781066 |
| XLOC_011486 | DNAJB1       | chr19:14625581-14629201  | 82.0022   | 71.3101   | -0.201557 | 0.778996 |
| XLOC_004415 | GDPD5        | chr11:75145684-75236599  | 8.85491   | 7.70044   | -0.201536 | 0.812587 |
| XLOC_021807 | ZNF517       | chr8:146024260-146034525 | 6.6016    | 5.74117   | -0.201472 | 0.8586   |
| XLOC_021200 | ZNF3         | chr7:99647416-99679371   | 18.7476   | 16.3067   | -0.201248 | 0.819258 |
| XLOC_019008 | PNISR        | chr6:99847840-99873207   | 6.53404   | 5.68361   | -0.201167 | 0.797015 |
| XLOC_003102 | POLL         | chr10:103338638-10334802 | 23.3627   | 20.324    | -0.201021 | 0.78079  |
| XLOC_003931 | LOC283177    | chr11:134306375-13437555 | 0.023598  | 0.0205289 | -0.201011 | 1        |
| XLOC_022756 | KLHL9        | chr9:21331017-21335429   | 7.27995   | 6.3332    | -0.200994 | 0.78079  |
| XLOC_016053 | ACTRT3       | chr3:169484710-169487683 | 1.36438   | 1.18696   | -0.200973 | 0.914484 |
| XLOC_020851 | LOC728743    | chr7:150102839-150109558 | 0.953174  | 0.829242  | -0.200945 | 0.919186 |
| XLOC_000415 | LOC100507634 | chr1:55681080-55683128   | 0.635423  | 0.552854  | -0.20082  | 0.945946 |
| XLOC_005371 | CAPRIN2      | chr12:30862485-30907448  | 20.7313   | 18.0381   | -0.200759 | 0.778392 |
| XLOC_014090 | SAMD10       | chr20:62605465-62610995  | 3.74094   | 3.25497   | -0.200756 | 0.884981 |
| XLOC_001189 | HES4         | chr1:934341-935552       | 83.4287   | 72.5911   | -0.200751 | 0.81342  |
| XLOC_004414 | KLHL35       | chr11:75133437-75141674  | 14.1785   | 12.3379   | -0.200607 | 0.840026 |
| XLOC_012148 | ARHGEF33     | chr2:39146503-39202590   | 0.0223325 | 0.0194364 | -0.200386 | 1        |
| XLOC_002621 | FRAT1        | chr10:99079021-99081672  | 4.17817   | 3.6364    | -0.20036  | 0.879301 |
| XLOC_004324 | LOC254100    | chr11:65336690-65337884  | 0.784266  | 0.682614  | -0.200272 | 0.959063 |
| XLOC_015207 | CRYBG3       | chr3:97540883-97691295   | 0.293174  | 0.255179  | -0.20025  | 1        |
| XLOC_007855 | MAPK8IP3     | chr16:1756220-1820318    | 9.26318   | 8.0629    | -0.200209 | 0.783569 |
| XLOC_006775 | SLC25A21     | chr14:37147125-37642998  | 0.95567   | 0.831942  | -0.200209 | 0.922312 |
| XLOC_016910 | FLJ14186     | chr4:120326677-120331815 | 1.92757   | 1.67821   | -0.199864 | 0.877493 |
| XLOC_023829 | CXorf31      | chrX:46746853-46759139   | 0.139143  | 0.121148  | -0.199801 | 1        |
| XLOC_017328 | C5orf24      | chr5:134181369-134195425 | 5.2323    | 4.55579   | -0.199745 | 0.789193 |
| XLOC_010193 | CTIF         | chr18:46065426-46389586  | 11.0536   | 9.62586   | -0.199533 | 0.773641 |
| XLOC_011087 | ZNF578       | chr19:52956828-53020131  | 1.56543   | 1.36327   | -0.199489 | 0.832935 |
| XLOC_000912 | CEP350       | chr1:179923907-180084015 | 1.24137   | 1.08106   | -0.199487 | 0.81082  |
| XLOC_000987 | ATP2B4       | chr1:203595914-203713205 | 1.83083   | 1.59445   | -0.199443 | 0.827718 |
| XLOC_010881 | BCKDHA       | chr19:41903693-41930910  | 111.466   | 97.0877   | -0.199241 | 0.760503 |
| XLOC_022764 | CDKN2B       | chr9:21994789-22121093   | 3.0928    | 2.69432   | -0.198991 | 0.844285 |
| XLOC_007670 | PKM          | chr15:72491369-72523727  | 1380.71   | 1202.82   | -0.198983 | 0.822663 |
| XLOC_022482 | ZNF189       | chr9:104161162-104172942 | 5.58266   | 4.86365   | -0.198914 | 0.802478 |



|              |               |                          |            |            |           |          |
|--------------|---------------|--------------------------|------------|------------|-----------|----------|
| XLOC_018781  | DOM3Z         | chr6:31937587-31949223   | 11.0864    | 9.65863    | -0.198906 | 0.877493 |
| XLOC_021233  | ALKBH4        | chr7:102073976-102105321 | 12.3686    | 10.7776    | -0.198644 | 0.922006 |
| XLOC_005251  | CDCA3         | chr12:6957971-6960456    | 29.0298    | 25.2965    | -0.198594 | 0.799084 |
| XLOC_002860  | LRRC37A6P     | chr10:27534781-27541235  | 0.0046542  | 0.00405593 | -0.198503 | 1        |
| XLOC_014627  | PPARA         | chr22:46546498-46639653  | 1.14625    | 0.998911   | -0.198491 | 0.841149 |
| XLOC_006974  | BEGAIN        | chr14:101003483-10103613 | 3.81219    | 3.32281    | -0.198217 | 0.883007 |
| XLOC_004320  | FAU           | chr11:64888098-64902003  | 2130.87    | 1857.55    | -0.198039 | 0.823458 |
| XLOC_008050  | ZNF48         | chr16:30389453-30411429  | 11.8476    | 10.3285    | -0.197964 | 0.798573 |
| XLOC_016267  | C4orf52       | chr4:25915813-25931501   | 32.6678    | 28.4811    | -0.197863 | 0.796801 |
| XLOC_018059  | SIRT5         | chr6:13574760-13615390   | 4.52322    | 3.94367    | -0.197813 | 0.841091 |
| XLOC_023625  | ZNF449        | chrX:134478695-134497331 | 0.61627    | 0.53731    | -0.197809 | 0.905198 |
| XLOC_021004  | RP9P          | chr7:32956426-32982782   | 9.25199    | 8.06702    | -0.197728 | 0.84112  |
| XLOC_016313  | SNORA26       | chr4:53578620-53580305   | 19.685     | 17.164     | -0.19771  | 0.990315 |
| XLOC_024200  | GAB3          | chrX:153903526-153979341 | 0.00944123 | 0.00823231 | -0.197678 | 1        |
| XLOC_007418  | CHD2          | chr15:93443550-93571237  | 6.77731    | 5.90957    | -0.197658 | 0.830569 |
| XLOC_020611  | CASD1         | chr7:94139169-94186328   | 3.87898    | 3.38239    | -0.197633 | 0.826634 |
| XLOC_012886  | COX7A2L       | chr2:42577644-42588356   | 118.336    | 103.188    | -0.197613 | 0.769105 |
| XLOC_006410  | PLEKHH1       | chr14:68000007-68067017  | 2.04428    | 1.78284    | -0.197411 | 0.929635 |
| XLOC_012183  | C2orf73       | chr2:54558070-54588714   | 0.00675516 | 0.0058918  | -0.19728  | 1        |
| XLOC_011883  | KLK6          | chr19:51461886-51472929  | 0.0144901  | 0.0126391  | -0.197173 | 1        |
| XLOC_013808  | SLC52A3       | chr20:740723-749228      | 0.00912776 | 0.00796187 | -0.197153 | 1        |
| XLOC_001359  | IL22RA1       | chr1:24446260-24469775   | 0.705464   | 0.61537    | -0.197118 | 0.931471 |
| XLOC_005658  | LINC00485     | chr12:103203060-10321817 | 0.00390226 | 0.00340401 | -0.197073 | 1        |
| XLOC_005837  | USPL1         | chr13:31191829-31233686  | 3.16538    | 2.76132    | -0.197022 | 0.829791 |
| XLOC_022349  | LOC100506710  | chr9:37079892-37090398   | 7.03536    | 6.13772    | -0.196923 | 0.78844  |
| XLOC_003232  | RPLP2         | chr11:809935-812876      | 7396.96    | 6453.41    | -0.196871 | 0.805942 |
| XLOC_002140  | DSTY2         | chr1:205111630-205180727 | 1.84169    | 1.60676    | -0.196871 | 0.828583 |
| XLOC_003653  | RHOD          | chr11:66824288-66839488  | 73.5435    | 64.1659    | -0.196791 | 0.783567 |
| XLOC_003659  | RAD9A         | chr11:67159422-67169376  | 6.25274    | 5.45577    | -0.196706 | 0.987627 |
| XLOC_012053  | PQLC3         | chr2:11295539-11318998   | 8.65221    | 7.55011    | -0.196657 | 0.832722 |
| XLOC_006842  | SIX4          | chr14:61176255-61190852  | 1.93937    | 1.69237    | -0.196543 | 0.830817 |
| XLOC_023762  | GEMIN8        | chrX:14024844-14048035   | 7.30118    | 6.37159    | -0.196475 | 0.813829 |
| XLOC_005089  | UBE3B         | chr12:109915427-10997457 | 6.87238    | 5.9976     | -0.196424 | 0.880041 |
| XLOC_002168  | SERTAD4-AS1   | chr1:210404803-210416441 | 4.81176    | 4.19932    | -0.196407 | 0.92385  |
| XLOC_017316  | CCN2          | chr5:132083136-132113567 | 0.0181182  | 0.0158123  | -0.196391 | 1        |
| XLOC_018330  | RUNX2         | chr6:44794466-45518819   | 1.77447    | 1.54868    | -0.196351 | 0.949127 |
| XLOC_020884  | LOC645249     | chr7:156803550-156809111 | 15.5162    | 13.5422    | -0.196306 | 0.863259 |
| XLOC_010767  | UBA2          | chr19:34919267-34960798  | 23.3192    | 20.3541    | -0.1962   | 0.774623 |
| XLOC_002879  | NRP1          | chr10:33466418-33623833  | 1.23403    | 1.07725    | -0.196024 | 0.916105 |
| XLOC_015315  | ABTB1         | chr3:127391780-127399761 | 18.6879    | 16.3144    | -0.19596  | 0.811389 |
| XLOC_004117  | SVIP          | chr11:22843597-22851382  | 7.5511     | 6.59306    | -0.195738 | 0.844829 |
| XLOC_008003  | RBBP6         | chr16:24550907-24584183  | 8.02213    | 7.00547    | -0.195504 | 0.898751 |
| XLOC_023878  | IQSEC2        | chrX:53262057-53350522   | 8.27673    | 7.22819    | -0.195427 | 0.897825 |
| XLOC_013340  | LANCL1        | chr2:211295972-211341491 | 4.93674    | 4.31144    | -0.195388 | 0.819258 |
| XLOC_011682  | SERTAD3       | chr19:40946747-40950282  | 17.1301    | 14.9604    | -0.195383 | 0.823458 |
| XLOC_005268  | FAM90A1       | chr12:8373855-8380214    | 0.564114   | 0.492703   | -0.19527  | 0.945783 |
| XLOC_000781  | RRNAD1        | chr1:156698262-156706757 | 14.1406    | 12.3513    | -0.195189 | 0.806781 |
| XLOC_004983  | FRS2          | chr12:69864128-69973562  | 2.06933    | 1.80761    | -0.195082 | 0.825067 |
| XLOC_006329  | MIPOL1        | chr14:37667117-38020464  | 0.309467   | 0.270334   | -0.195039 | 1        |
| XLOC_003402  | FJX1          | chr11:35639734-35642421  | 29.8555    | 26.0813    | -0.194983 | 0.786806 |
| XLOC_004795  | METTL20       | chr12:31800093-31822016  | 0.343411   | 0.300017   | -0.194892 | 1        |
| XLOC_010822  | HKR1          | chr19:37825579-37855357  | 7.24627    | 6.33105    | -0.194794 | 0.813454 |
| XLOC_012194  | REL           | chr2:61108751-61150178   | 0.153918   | 0.134479   | -0.194775 | 1        |
| XLOC_008319  | C16orf13      | chr16:684428-686347      | 171.992    | 150.273    | -0.194755 | 0.79485  |
| XLOC_000654  | NBPF15,NBPF16 | chr1:148558187-148596267 | 6.3773     | 5.57294    | -0.194507 | 0.799762 |
| XLOC_003994  | TRIM68        | chr11:4619901-4629489    | 1.08077    | 0.94454    | -0.194378 | 0.909016 |
| XLOC_019059  | MCM9          | chr6:119134611-119256327 | 0.912354   | 0.797355   | -0.194372 | 0.965573 |
| XLOC_004351  | POLD4         | chr11:67085309-67159158  | 26.9947    | 23.5926    | -0.194342 | 0.830817 |
| XLOC_014125  | GRIK1-AS2     | chr21:30909253-31312282  | 0.120727   | 0.105518   | -0.194263 | 1        |
| XLOC_012563  | MFSO6         | chr2:191273080-191367047 | 1.91659    | 1.67526    | -0.194158 | 0.855212 |
| XLOC_001145  | LOC149134     | chr1:246952918-246954781 | 1.3451     | 1.17577    | -0.194113 | 0.945946 |
| XLOC_020514  | ZNF92         | chr7:64838767-64865998   | 1.84803    | 1.61552    | -0.193989 | 0.872117 |
| XLOC_020758  | MEST          | chr7:130126015-130371401 | 13.7447    | 12.0157    | -0.193962 | 0.897241 |
| XLOC_001260  | CASZ1         | chr11:10696665-10856733  | 2.08003    | 1.81851    | -0.193848 | 0.882983 |
| XLOC_014530  | HMOX1         | chr22:35777059-35790207  | 52.5514    | 45.9458    | -0.193796 | 0.782574 |
| XLOC_018880  | PEX6          | chr6:42928499-42946981   | 7.25636    | 6.34454    | -0.193731 | 0.832448 |
| XLOC_009425  | INCA1         | chr17:4891424-4900905    | 0.639341   | 0.559023   | -0.193679 | 0.95534  |
| XLOC_010477  | GNA11         | chr19:3094407-3121454    | 8.53807    | 7.46565    | -0.193643 | 0.875204 |
| XLOC_004932  | RBMS2         | chr12:56915608-57030163  | 8.01652    | 7.01012    | -0.193537 | 0.910317 |
| XLOC_017056  | CEP72         | chr5:612404-653666       | 7.23967    | 6.33113    | -0.193463 | 0.844212 |
| XLOC_010963  | NPAS1         | chr19:47524142-47549017  | 2.15303    | 1.88294    | -0.193388 | 0.929536 |
| XLOC_015655  | ZNF445        | chr3:44481261-44519162   | 1.1716     | 1.02464    | -0.193364 | 0.842695 |
| XLOC_012820  | PTRHD1        | chr2:25013135-25142055   | 53.902     | 47.1409    | -0.19336  | 0.959465 |
| XLOC_021113  | GTF2IRD2      | chr7:74210483-74267841   | 0.101278   | 0.0885818  | -0.193244 | 1        |
| XLOC_003360  | SPTY2D1-AS1   | chr11:18621350-18656020  | 0.0433144  | 0.0378864  | -0.193166 | 1        |
| XLOC_008281  | ZFPM1         | chr16:88520013-88601574  | 2.45762    | 2.1497     | -0.193127 | 0.917627 |
| XLOC_0021387 | ZNF746        | chr7:149169883-149194891 | 12.4493    | 10.8895    | -0.19312  | 0.793371 |
| XLOC_000602  | MAGI3         | chr1:113933474-114228541 | 0.463715   | 0.405696   | -0.192836 | 0.906626 |
| XLOC_005072  | C12orf75      | chr12:105724413-10576521 | 26.7741    | 23.4253    | -0.192773 | 0.800703 |

|             |              |                          |           |            |           |          |
|-------------|--------------|--------------------------|-----------|------------|-----------|----------|
| XLOC_015007 | PDCD6IP      | chr3:33840062-33911199   | 16.6396   | 14.5584    | -0.192768 | 0.770784 |
| XLOC_004929 | COQ10A       | chr12:56660641-56664750  | 13.5352   | 11.8425    | -0.192752 | 0.827718 |
| XLOC_013241 | ATF2         | chr2:175936977-176032934 | 4.57151   | 3.99989    | -0.19271  | 0.819681 |
| XLOC_004410 | XRRA1        | chr11:74459912-74660232  | 10.2988   | 9.01196    | -0.192556 | 0.819258 |
| XLOC_006980 | CINP         | chr14:102814618-10282921 | 27.2569   | 23.8518    | -0.192523 | 0.817735 |
| XLOC_000007 | KLHL17       | chr1:895966-901099       | 15.9935   | 13.9956    | -0.192518 | 0.821323 |
| XLOC_003887 | VWA5A        | chr11:123986110-12401761 | 3.64644   | 3.19098    | -0.192491 | 0.852672 |
| XLOC_001387 | AHDC1        | chr1:27860755-27930143   | 1.549     | 1.35552    | -0.192489 | 0.891994 |
| XLOC_015706 | QARS         | chr3:49133364-49142562   | 96.9326   | 84.828     | -0.192441 | 0.778388 |
| XLOC_014000 | ACOT8        | chr20:44462469-44486048  | 19.0005   | 16.6278    | -0.19244  | 0.92969  |
| XLOC_006872 | LOC100289511 | chr14:70232999-70238722  | 0.0656569 | 0.0574599  | -0.192392 | 1        |
| XLOC_001986 | RGS5         | chr1:163112088-163291581 | 0.421489  | 0.36888    | -0.192344 | 0.956752 |
| XLOC_018829 | TCP11        | chr6:35085848-35109187   | 0.0398168 | 0.0348476  | -0.19232  | 1        |
| XLOC_002527 | TRIM32       | chr9:119187503-120177311 | 8.2916    | 7.25681    | -0.192316 | 0.830445 |
| XLOC_000900 | RASAL2       | chr1:178060642-178448648 | 0.832185  | 0.728345   | -0.192281 | 0.858101 |
| XLOC_022272 | JAK2         | chr9:4985244-5128183     | 0.375771  | 0.328976   | -0.191872 | 0.920028 |
| XLOC_017313 | RAD50        | chr5:131892615-131980311 | 2.93221   | 2.56709    | -0.191858 | 0.813829 |
| XLOC_009086 | RUNDC1       | chr17:41132581-41145707  | 5.38207   | 4.712      | -0.19182  | 0.830384 |
| XLOC_009744 | STAT5B       | chr17:40351194-40428424  | 8.13325   | 7.12095    | -0.191761 | 0.79912  |
| XLOC_003003 | ZSWIM8-AS1   | chr10:75545381-75561556  | 3.17595   | 2.78068    | -0.191754 | 0.969963 |
| XLOC_008287 | CDT1         | chr16:88870185-88875666  | 77.3812   | 67.7525    | -0.19171  | 0.778908 |
| XLOC_003719 | SNORD15B     | chr11:75110534-75133345  | 17.9604   | 15.7264    | -0.191636 | 0.993379 |
| XLOC_022719 | ERMP1        | chr9:5784571-5833081     | 4.69201   | 4.10875    | -0.191505 | 0.811389 |
| XLOC_015161 | RPP14        | chr3:58291971-58305920   | 6.17532   | 5.40774    | -0.191488 | 0.827004 |
| XLOC_023438 | ZXDB         | chrX:57618268-57623910   | 4.2781    | 3.74702    | -0.191226 | 0.821493 |
| XLOC_023166 | SDCCAG3      | chr9:139296373-139305054 | 112.087   | 98.1803    | -0.191115 | 0.784181 |
| XLOC_006257 | ANG, RNASE4  | chr14:21152335-21168758  | 25.8461   | 22.6399    | -0.191078 | 0.842533 |
| XLOC_019136 | LATS1        | chr6:149979288-150039391 | 2.27127   | 1.9898     | -0.190879 | 0.904448 |
| XLOC_009579 | TLCD1        | chr17:27046999-27053949  | 13.4769   | 11.807     | -0.190847 | 0.989365 |
| XLOC_017663 | IL6ST        | chr5:55230924-55290821   | 2.63088   | 2.3049     | -0.19084  | 0.800452 |
| XLOC_021982 | CEBPD        | chr8:48649475-48650726   | 32.8522   | 28.7856    | -0.19064  | 0.847596 |
| XLOC_017769 | MCC          | chr5:112312406-112824521 | 0.0328957 | 0.0288242  | -0.190617 | 1        |
| XLOC_008038 | MVP, PAGR1   | chr16:29827527-29859360  | 26.7099   | 23.4084    | -0.190352 | 0.797816 |
| XLOC_002115 | SYT2         | chr1:202559724-202679551 | 0.0141646 | 0.0124148  | -0.190228 | 1        |
| XLOC_003246 | KRTAP5-6     | chr11:1490684-1785501    | 0.0595168 | 0.0521664  | -0.190178 | 1        |
| XLOC_012223 | ANXA4        | chr2:69969126-70053596   | 19.9815   | 17.5144    | -0.190118 | 0.796801 |
| XLOC_005595 | BBS10        | chr12:76738265-76742222  | 2.30393   | 2.01951    | -0.190088 | 0.869283 |
| XLOC_021267 | IMMP2L       | chr7:110303105-111202571 | 12.7799   | 11.2022    | -0.190086 | 0.831215 |
| XLOC_016279 | KLF3         | chr4:38614321-38703129   | 3.18296   | 2.79026    | -0.18997  | 0.821654 |
| XLOC_012101 | LOC100505624 | chr2:27548715-27579901   | 0.067463  | 0.0591404  | -0.189951 | 1        |
| XLOC_008952 | TAOK1        | chr17:27717942-27878921  | 3.57792   | 3.13657    | -0.189933 | 0.793371 |
| XLOC_017932 | CCNLJ        | chr5:159678670-159739571 | 6.90916   | 6.05691    | -0.189927 | 0.830184 |
| XLOC_014069 | TCFL5        | chr20:61448413-61493115  | 7.20658   | 6.31778    | -0.189896 | 0.942878 |
| XLOC_021354 | KIAA1147     | chr7:141356527-141401951 | 3.77508   | 3.3095     | -0.189895 | 0.811724 |
| XLOC_006711 | AJUBA        | chr14:23440409-23451848  | 13.0383   | 11.4316    | -0.18973  | 0.797744 |
| XLOC_003686 | KRTAP5-7     | chr11:71238312-71239210  | 0.0296736 | 0.026021   | -0.189501 | 1        |
| XLOC_013666 | TOX2         | chr20:42543491-42698254  | 11.9425   | 10.4725    | -0.189494 | 0.830101 |
| XLOC_001811 | LYSDM1       | chr1:151129104-151148541 | 2.04073   | 1.78963    | -0.18942  | 0.966946 |
| XLOC_013029 | LOC285074    | chr2:87257797-87303536   | 12.9859   | 11.3893    | -0.189265 | 0.821226 |
| XLOC_011250 | ZNF324       | chr19:58978411-58984945  | 4.86026   | 4.26326    | -0.189078 | 0.863873 |
| XLOC_022236 | DGAT1        | chr8:145515269-145550561 | 32.7927   | 28.7681    | -0.188906 | 0.941528 |
| XLOC_021496 | EPB49        | chr8:21911080-21940036   | 20.6177   | 18.0878    | -0.188868 | 0.806843 |
| XLOC_006683 | TEP1         | chr14:20833825-20881579  | 1.11304   | 0.976522   | -0.188788 | 0.852163 |
| XLOC_005104 | ACAD10       | chr12:112123856-11219491 | 2.24981   | 1.9739     | -0.188756 | 0.876899 |
| XLOC_008442 | NOMO2        | chr16:18511181-18573434  | 0.873234  | 0.76626    | -0.188535 | 0.912776 |
| XLOC_000854 | POGK         | chr1:166808723-166823708 | 13.9508   | 12.2428    | -0.188424 | 0.788402 |
| XLOC_009116 | FMNL1        | chr17:43299291-43324683  | 0.0133618 | 0.0117259  | -0.188421 | 1        |
| XLOC_004652 | ITFG2        | chr12:2921786-2934237    | 3.85729   | 3.38511    | -0.188387 | 0.873144 |
| XLOC_014735 | HPS4         | chr22:26846848-26879829  | 6.53496   | 5.73519    | -0.188337 | 0.820463 |
| XLOC_008974 | LRRC37B      | chr17:30348154-30380519  | 1.97372   | 1.73237    | -0.18817  | 0.900578 |
| XLOC_014942 | BRK1         | chr3:10157332-10168874   | 89.0872   | 78.1981    | -0.188086 | 0.788214 |
| XLOC_015370 | SLC25A36     | chr3:140660661-140698781 | 14.8185   | 13.0088    | -0.187913 | 0.790283 |
| XLOC_015592 | SH3BP5       | chr3:15295690-15382901   | 6.79922   | 5.96889    | -0.187908 | 0.845125 |
| XLOC_011589 | CEBPA        | chr19:33790839-33793430  | 24.6068   | 21.602     | -0.187892 | 0.819681 |
| XLOC_000372 | FAAH         | chr1:46859938-46879520   | 9.36727   | 8.22413    | -0.187765 | 0.851389 |
| XLOC_014901 | TUBGCP6      | chr22:50656117-50683400  | 6.0106    | 5.27729    | -0.187712 | 0.824676 |
| XLOC_009827 | TTTTL6       | chr17:46839592-46894469  | 0.0372891 | 0.0327419  | -0.187616 | 1        |
| XLOC_010668 | SIN3B        | chr19:16940208-16991164  | 8.75755   | 7.68963    | -0.187613 | 0.81342  |
| XLOC_012167 | RHOQ         | chr2:46769866-46844251   | 15.8241   | 13.8949    | -0.187572 | 0.844123 |
| XLOC_004366 | FAM86C2P     | chr11:67559237-67572807  | 1.01338   | 0.889872   | -0.187512 | 0.935939 |
| XLOC_022874 | PTFR1        | chr9:72324437-72374876   | 1.55999   | 1.36986    | -0.187508 | 0.833147 |
| XLOC_010610 | ZNF791       | chr19:12721731-12740676  | 1.19958   | 1.05341    | -0.187462 | 0.913628 |
| XLOC_003108 | KCNIP2       | chr10:103578824-10360361 | 0.154327  | 0.135523   | -0.187454 | 1        |
| XLOC_011016 | CD37         | chr19:49838676-49865714  | 0.0762146 | 0.0669297  | -0.187421 | 1        |
| XLOC_000871 | GORAB        | chr1:170501262-170522974 | 1.99794   | 1.7546     | -0.187371 | 0.888528 |
| XLOC_021285 | RNF133       | chr7:121958477-122526811 | 0.0100555 | 0.00883081 | -0.187363 | 1        |
| XLOC_009420 | CHRNE        | chr17:4736634-4806369    | 4.08134   | 3.58428    | -0.187359 | 0.978566 |
| XLOC_012170 | LOC388948    | chr2:47043806-47049799   | 0.0176827 | 0.0155293  | -0.187344 | 1        |
| XLOC_022613 | PRDM12       | chr9:133539980-133558384 | 1.6905    | 1.48464    | -0.18734  | 0.92969  |

|             |                   |                          |            |            |           |          |
|-------------|-------------------|--------------------------|------------|------------|-----------|----------|
| XLOC_007173 | CCNDP1            | chr15:43477465-43489375  | 11.4269    | 10.0374    | -0.187049 | 0.799762 |
| XLOC_003685 | NADSYN1           | chr11:71164216-71212581  | 33.0133    | 28.9993    | -0.18703  | 0.790844 |
| XLOC_015068 | CLEC3B            | chr3:45067758-45077563   | 1.52062    | 1.33584    | -0.18691  | 0.958814 |
| XLOC_018942 | GUSBP4            | chr6:58246158-58287724   | 0.473678   | 0.416144   | -0.186824 | 0.974018 |
| XLOC_001884 | MUC1              | chr1:155158299-155162706 | 3.72212    | 3.27017    | -0.186758 | 0.906895 |
| XLOC_018377 | KCNQ5             | chr6:73331570-73908573   | 0.00232927 | 0.00204646 | -0.186748 | 1        |
| XLOC_000694 | CGN               | chr1:151483861-151511161 | 2.00367    | 1.76056    | -0.186611 | 0.877493 |
| XLOC_015911 | CCDC14            | chr3:123632273-123680251 | 4.7681     | 4.1896     | -0.186603 | 0.827215 |
| XLOC_002535 | ZMIZ1             | chr10:80828791-81076285  | 1.83855    | 1.61562    | -0.186486 | 0.866932 |
| XLOC_010243 | SOCS6             | chr18:67956136-67997434  | 2.44954    | 2.15264    | -0.186403 | 0.845125 |
| XLOC_001545 | RAB3B             | chr1:52373627-52456436   | 3.12445    | 2.74576    | -0.186396 | 0.805942 |
| XLOC_008522 | ZNF688            | chr16:30581018-30583728  | 6.08431    | 5.34732    | -0.186277 | 0.917325 |
| XLOC_022339 | NPR2              | chr9:35792405-35812259   | 2.05802    | 1.80893    | -0.186118 | 0.890466 |
| XLOC_010616 | MAST1             | chr19:12949258-12985766  | 4.96578    | 4.36516    | -0.185986 | 0.852893 |
| XLOC_002914 | BMS1P6            | chr10:47225570-47243511  | 0.00290693 | 0.00255541 | -0.185944 | 1        |
| XLOC_003113 | CUEDC2            | chr10:104183001-10419242 | 86.6971    | 76.2171    | -0.185868 | 0.797744 |
| XLOC_020638 | ZSCAN21           | chr7:99647416-99679371   | 1.62114    | 1.42527    | -0.185777 | 0.981745 |
| XLOC_006758 | DTD2              | chr14:31915242-31926680  | 4.4944     | 3.95181    | -0.185615 | 0.851335 |
| XLOC_003847 | MLL               | chr11:118307204-11839751 | 1.02521    | 0.90149    | -0.185532 | 0.834115 |
| XLOC_012689 | SP100             | chr2:231280870-231410317 | 16.336     | 14.3647    | -0.185524 | 0.845971 |
| XLOC_009958 | FDXR              | chr17:72858618-72869156  | 44.5668    | 39.1894    | -0.185506 | 0.81342  |
| XLOC_003969 | IGF2,INS,INS-IGF2 | chr11:2150341-2182439    | 0.00801256 | 0.00704653 | -0.18535  | 1        |
| XLOC_011430 | KANK2             | chr19:11274942-11308243  | 2.31344    | 2.03506    | -0.18497  | 0.882523 |
| XLOC_002971 | TYSND1            | chr10:71897736-71906496  | 15.954     | 14.0344    | -0.184954 | 0.826268 |
| XLOC_000697 | SNX27             | chr1:151584661-151671551 | 3.51815    | 3.095      | -0.184875 | 0.827184 |
| XLOC_004350 | PC                | chr11:66615996-66725847  | 1.73356    | 1.52509    | -0.184844 | 0.979701 |
| XLOC_006814 | FERMT2            | chr14:53323988-53417815  | 0.0284115  | 0.0249954  | -0.184813 | 1        |
| XLOC_006383 | PPM1A             | chr14:60712469-60765805  | 4.13602    | 3.63881    | -0.184776 | 0.828589 |
| XLOC_007253 | SLC51B            | chr15:65337707-65360388  | 0.0214343  | 0.018859   | -0.18467  | 1        |
| XLOC_002853 | ENKUR             | chr10:25270907-25351208  | 0.107623   | 0.0946924  | -0.184668 | 1        |
| XLOC_003771 | KULK1             | chr11:94277016-94283064  | 3.43692    | 3.0242     | -0.184565 | 0.839607 |
| XLOC_023110 | IER5L             | chr9:131937830-131940541 | 28.6275    | 25.1899    | -0.184555 | 0.825249 |
| XLOC_022505 | UGCG              | chr9:114659205-114695433 | 7.2408     | 6.37167    | -0.184477 | 0.862523 |
| XLOC_003695 | LRTOMT            | chr11:71709957-71823822  | 1.32529    | 1.16625    | -0.184431 | 0.987693 |
| XLOC_003082 | HPS1              | chr10:100175954-10020671 | 34.3213    | 30.2032    | -0.184405 | 0.845812 |
| XLOC_007320 | C15orf27          | chr15:76352298-76497304  | 0.0188528  | 0.0165907  | -0.184405 | 1        |
| XLOC_018698 | ZNF184            | chr6:27418520-27440897   | 1.99102    | 1.75236    | -0.184206 | 0.883505 |
| XLOC_009608 | MYO1D             | chr17:30819627-31203902  | 3.70876    | 3.26429    | -0.184168 | 0.839213 |
| XLOC_010179 | FHOD3             | chr18:33877701-34805288  | 0.0523956  | 0.0461199  | -0.184058 | 1        |
| XLOC_006932 | GPR68             | chr14:91698875-91720224  | 0.284452   | 0.250425   | -0.183812 | 1        |
| XLOC_023113 | PTGES             | chr9:132500614-132515344 | 0.106103   | 0.0934217  | -0.183637 | 1        |
| XLOC_000917 | MR1               | chr1:181002560-181031074 | 1.1019     | 0.970207   | -0.183627 | 0.869168 |
| XLOC_000320 | PPCS              | chr1:42922172-42926086   | 40.7       | 35.843     | -0.183334 | 0.814433 |
| XLOC_022335 | CCDC107           | chr9:35658286-35665278   | 15.4554    | 13.6113    | -0.183309 | 0.942488 |
| XLOC_013659 | PLCG1             | chr20:39766160-39804357  | 14.2526    | 12.5529    | -0.183206 | 0.80341  |
| XLOC_012649 | STK36             | chr2:219528586-219567441 | 3.00701    | 2.64864    | -0.18308  | 0.949812 |
| XLOC_000366 | MAST2             | chr1:46269284-46501796   | 20.394     | 17.967     | -0.1828   | 0.802508 |
| XLOC_012182 | ACYP2             | chr2:54342409-54532435   | 3.04444    | 2.68215    | -0.182785 | 0.921218 |
| XLOC_003315 | EIF3F             | chr11:8008866-8017719    | 433.799    | 382.179    | -0.182779 | 0.806218 |
| XLOC_018436 | FOXO3             | chr6:108881025-109005974 | 5.60288    | 4.93618    | -0.182774 | 0.813342 |
| XLOC_022886 | TRPM6             | chr9:77337410-77503010   | 0.0534236  | 0.0470672  | -0.182755 | 1        |
| XLOC_016505 | C4orf33           | chr4:130014828-130033843 | 5.82423    | 5.13161    | -0.182657 | 0.865379 |
| XLOC_023948 | ABCB7             | chrX:74273006-74376175   | 15.4491    | 13.6133    | -0.182507 | 0.806888 |
| XLOC_012328 | LIPT1             | chr2:99771417-99779613   | 8.35624    | 7.3633     | -0.182502 | 0.865814 |
| XLOC_004690 | ATN1              | chr12:7033625-7051484    | 41.1403    | 36.2538    | -0.182421 | 0.802508 |
| XLOC_020498 | SUMF2             | chr7:56131916-56160689   | 66.7095    | 58.7864    | -0.182409 | 0.8561   |
| XLOC_015929 | TXNRD3, TXNRD3NB  | chr3:126290621-126373967 | 3.40148    | 2.99781    | -0.182254 | 0.872554 |
| XLOC_011006 | BAX               | chr19:49458116-49465055  | 197.497    | 174.064    | -0.182215 | 0.811389 |
| XLOC_016090 | THPO              | chr3:184089772-184095933 | 0.241715   | 0.213039   | -0.182187 | 1        |
| XLOC_001695 | AMIGO1            | chr1:110049445-110052331 | 2.6237     | 2.3127     | -0.18203  | 0.900578 |
| XLOC_009766 | MPP2              | chr17:41952726-41985113  | 5.60313    | 4.93924    | -0.181944 | 0.845974 |
| XLOC_018385 | IRAK1BP1          | chr6:79577188-79608320   | 1.70768    | 1.50536    | -0.181931 | 0.942878 |
| XLOC_010702 | UBA52             | chr19:18682613-18688270  | 403.213    | 355.445    | -0.181915 | 0.828858 |
| XLOC_010202 | SMAD4             | chr18:48556582-48611411  | 4.38607    | 3.86658    | -0.181871 | 0.819258 |
| XLOC_003952 | PIDD              | chr11:799178-805250      | 14.4114    | 12.7053    | -0.181784 | 0.833086 |
| XLOC_010719 | ZNF253            | chr19:19976713-20004293  | 1.54748    | 1.36432    | -0.181736 | 0.912153 |
| XLOC_005236 | TNFRSF1A          | chr12:6437922-6451283    | 31.5131    | 27.7839    | -0.181702 | 0.80896  |
| XLOC_008530 | FBXL19-AS1        | chr16:30930639-30960104  | 0.30954    | 0.272942   | -0.181532 | 1        |
| XLOC_015590 | ZFYVE20           | chr3:15111579-15140655   | 3.93814    | 3.47302    | -0.181326 | 0.832995 |
| XLOC_009142 | CDK5RAP3          | chr17:46048428-46059147  | 31.7238    | 27.9777    | -0.181292 | 0.81526  |
| XLOC_001319 | AKR7A5            | chr1:19609056-19615280   | 11.2882    | 9.95524    | -0.181285 | 0.880833 |
| XLOC_007584 | GNB3              | chr15:52413122-52483565  | 8.78359    | 7.74721    | -0.181134 | 0.831797 |
| XLOC_022714 | AK3               | chr9:4709556-4742043     | 7.79956    | 6.87943    | -0.181102 | 0.826046 |
| XLOC_023116 | FNBP1             | chr9:132649465-132805473 | 0.00979326 | 0.00863874 | -0.180968 | 1        |
| XLOC_012389 | PSD4              | chr2:113931559-113960677 | 1.8        | 1.58787    | -0.180907 | 0.891508 |
| XLOC_003342 | SPON1             | chr11:13984183-14289679  | 0.0305516  | 0.0269518  | -0.180868 | 1        |
| XLOC_012270 | TMSB10            | chr2:85132762-85133799   | 6124.64    | 5403.15    | -0.180826 | 0.842911 |
| XLOC_018350 | LOC730101         | chr6:52529198-52533951   | 1.52957    | 1.34944    | -0.180764 | 0.894516 |
| XLOC_002826 | ACBD7             | chr10:15117473-15130775  | 2.17857    | 1.92211    | -0.180685 | 0.880763 |

|             |              |                          |            |            |           |          |
|-------------|--------------|--------------------------|------------|------------|-----------|----------|
| XLOC_013843 | SLC23A2      | chr20:4833001-4990939    | 0.983553   | 0.867783   | -0.180669 | 0.895499 |
| XLOC_015029 | SLC25A38     | chr3:39424814-39438819   | 50.1941    | 44.2885    | -0.180584 | 0.809695 |
| XLOC_013307 | FAM126B      | chr2:201838440-201936392 | 1.09735    | 0.968481   | -0.180232 | 0.856449 |
| XLOC_018907 | TNFRSF21     | chr6:47199267-47277680   | 3.35535    | 2.96138    | -0.180192 | 0.872961 |
| XLOC_014834 | RPL3         | chr22:39708886-39715670  | 4127.01    | 3642.79    | -0.180053 | 0.869885 |
| XLOC_017701 | COL4A3BP     | chr5:74666927-74895646   | 4.78146    | 4.22096    | -0.179878 | 0.858398 |
| XLOC_020685 | MLL5         | chr7:104654636-104754532 | 5.29637    | 4.67558    | -0.179857 | 0.823379 |
| XLOC_006972 | SLC25A29     | chr14:100757452-10077286 | 45.9487    | 40.5638    | -0.179829 | 0.811724 |
| XLOC_005527 | GLS2         | chr12:56862300-56882181  | 12.1594    | 10.7348    | -0.179772 | 0.89239  |
| XLOC_002701 | CASP7        | chr10:115438920-11549066 | 4.68039    | 4.13218    | -0.179725 | 0.865806 |
| XLOC_009359 | TBCD         | chr17:80709939-80901062  | 13.3287    | 11.768     | -0.179666 | 0.820463 |
| XLOC_022465 | C9orf174     | chr9:100000707-100139572 | 0.46797    | 0.413194   | -0.179598 | 0.933023 |
| XLOC_009592 | CORO6        | chr17:27920526-27948441  | 0.0214466  | 0.0189372  | -0.179523 | 1        |
| XLOC_018132 | HIST1H2BN    | chr6:27806439-27806888   | 1.76186    | 1.55572    | -0.179512 | 0.972989 |
| XLOC_020891 | PDGFA        | chr7:536896-559481       | 5.93481    | 5.24081    | -0.179412 | 0.874709 |
| XLOC_012744 | RNPEPL1      | chr2:241508003-241518148 | 49.7013    | 43.8897    | -0.179402 | 0.810878 |
| XLOC_007832 | WDR90        | chr16:699362-717829      | 5.97661    | 5.27796    | -0.179348 | 0.852163 |
| XLOC_009092 | TMEM106A     | chr17:41363893-41371589  | 0.617596   | 0.54543    | -0.17927  | 0.944724 |
| XLOC_016750 | NMU          | chr4:56461397-56502465   | 20.302     | 17.9305    | -0.179204 | 0.869898 |
| XLOC_009882 | TUBD1        | chr17:57936840-57970306  | 1.79267    | 1.58328    | -0.179195 | 0.919128 |
| XLOC_007274 | GLCE         | chr15:69116302-69564544  | 1.25375    | 1.10732    | -0.179177 | 0.883482 |
| XLOC_024188 | MECP2        | chrX:153287263-153363181 | 29.0255    | 25.6359    | -0.179153 | 0.851815 |
| XLOC_008379 | ZNF205-AS1   | chr16:3160460-3170518    | 0.324435   | 0.286569   | -0.179048 | 1        |
| XLOC_022234 | SHARPIN      | chr8:145153535-145159140 | 92.7202    | 81.9025    | -0.178976 | 0.805942 |
| XLOC_015868 | BTLA         | chr3:112182812-112218408 | 0.00381935 | 0.00337409 | -0.17883  | 1        |
| XLOC_012104 | KRTCAP3      | chr2:27665232-27712571   | 0.762017   | 0.673397   | -0.178368 | 0.993379 |
| XLOC_009455 | GABARAP      | chr17:7143737-7145753    | 379.405    | 335.299    | -0.178294 | 0.816305 |
| XLOC_017759 | NUDT12       | chr5:102884555-102898490 | 2.79067    | 2.46625    | -0.178291 | 0.870173 |
| XLOC_005428 | PRKAG1       | chr12:49396054-49412629  | 43.9655    | 38.8581    | -0.178158 | 0.816305 |
| XLOC_019125 | PLAGL1       | chr6:144261436-144385732 | 10.1945    | 9.01036    | -0.178133 | 0.843587 |
| XLOC_023185 | ENTPDP2      | chr9:139942550-139948502 | 132.949    | 117.507    | -0.178122 | 0.816145 |
| XLOC_023929 | RPS4X        | chrX:71492452-71497141   | 3411.18    | 3015       | -0.178113 | 0.855981 |
| XLOC_001691 | PSRC1        | chr1:109822175-109825790 | 31.1193    | 27.5061    | -0.178058 | 0.823458 |
| XLOC_003732 | AAMDC        | chr11:77532207-77583398  | 27.2622    | 24.0972    | -0.178038 | 0.878785 |
| XLOC_013437 | RAB17        | chr2:238482964-238499768 | 0.0553699  | 0.0489429  | -0.178003 | 1        |
| XLOC_007523 | LTK          | chr15:41795839-41806085  | 42.7368    | 37.7768    | -0.177977 | 0.813829 |
| XLOC_010797 | MLL4         | chr19:36208920-36229779  | 6.72923    | 5.94851    | -0.177913 | 0.822123 |
| XLOC_022515 | C9orf43      | chr9:116169517-116191878 | 0.37225    | 0.32909    | -0.177789 | 0.991902 |
| XLOC_021061 | DDC          | chr7:50526133-50633154   | 0.0313917  | 0.027754   | -0.177687 | 1        |
| XLOC_018164 | ZNRD1        | chr6:30029035-30032686   | 93.3918    | 82.571     | -0.177661 | 0.820283 |
| XLOC_008432 | NTAN1        | chr16:15131709-15149936  | 25.6953    | 22.7191    | -0.177599 | 0.834115 |
| XLOC_013946 | CPNE1_RBM12  | chr20:34213952-34252878  | 91.0385    | 80.4938    | -0.177599 | 0.859262 |
| XLOC_020602 | ANKIB1       | chr7:91875547-92030698   | 2.805      | 2.48022    | -0.177537 | 0.845125 |
| XLOC_009324 | GAA          | chr17:78075354-78093679  | 57.6915    | 51.015     | -0.177439 | 0.821056 |
| XLOC_011671 | FCGBP        | chr19:40353962-40440533  | 0.0335619  | 0.0296788  | -0.177391 | 1        |
| XLOC_013594 | ASXL1        | chr20:30946146-31027122  | 12.3232    | 10.8985    | -0.177238 | 0.896051 |
| XLOC_006834 | TIMM9        | chr14:58862643-59015549  | 47.3186    | 41.85      | -0.177178 | 0.826688 |
| XLOC_016187 | RGS12        | chr4:3315873-3441640     | 2.44779    | 2.16496    | -0.177114 | 0.902309 |
| XLOC_007205 | GALK2        | chr15:49447975-49913118  | 9.65133    | 8.53696    | -0.177006 | 0.837677 |
| XLOC_006017 | ZMYM5        | chr13:20397623-20437776  | 4.85254    | 4.29238    | -0.176965 | 0.900578 |
| XLOC_022310 | LOC100129250 | chr9:32540541-32553015   | 16.7445    | 14.8119    | -0.176936 | 0.970232 |
| XLOC_003629 | CTSW         | chr11:65647283-65656010  | 0.0164891  | 0.0145888  | -0.176646 | 1        |
| XLOC_022287 | SNAPC3       | chr9:15422781-15461627   | 2.86824    | 2.53807    | -0.176433 | 0.87951  |
| XLOC_020436 | LOC401321    | chr7:32797897-32802536   | 2.52977    | 2.23896    | -0.176176 | 0.873414 |
| XLOC_010586 | C19orf38     | chr19:10959105-10980360  | 0.191832   | 0.169784   | -0.176139 | 1        |
| XLOC_023778 | PHKA2        | chrX:18908413-19002480   | 4.20568    | 3.72274    | -0.175976 | 0.849892 |
| XLOC_011432 | RAB3D        | chr19:11406823-11450344  | 13.3719    | 11.837     | -0.175901 | 0.823658 |
| XLOC_017113 | CARD6        | chr5:40841409-40855456   | 1.02372    | 0.906251   | -0.175841 | 0.912101 |
| XLOC_016999 | MFAP3L       | chr4:170907747-170947428 | 0.255987   | 0.226614   | -0.175833 | 1        |
| XLOC_015866 | GCSAM        | chr3:111839687-111852152 | 0.220132   | 0.194884   | -0.175749 | 1        |
| XLOC_014168 | DYRK1A       | chr21:38739858-38887679  | 5.27496    | 4.67016    | -0.17569  | 0.832662 |
| XLOC_008468 | CDR2         | chr16:22357256-22385938  | 8.87429    | 7.85685    | -0.175682 | 0.83716  |
| XLOC_022713 | SPATA6L      | chr9:4598315-4666674     | 0.545926   | 0.483355   | -0.175623 | 0.978945 |
| XLOC_000625 | HSD3BP4      | chr1:120106502-120115198 | 0.00160716 | 0.00142298 | -0.175591 | 1        |
| XLOC_000421 | HOOK1        | chr1:60280532-60342050   | 0.00426976 | 0.00378083 | -0.17545  | 1        |
| XLOC_016834 | C4orf36      | chr4:87797357-87813575   | 0.345968   | 0.306357   | -0.175424 | 1        |
| XLOC_003005 | CAMK2G       | chr10:75572258-75634349  | 6.1962     | 5.48745    | -0.175248 | 0.850392 |
| XLOC_019144 | ZBTB2        | chr6:151685249-151712677 | 5.66005    | 5.01295    | -0.175154 | 0.850392 |
| XLOC_002916 | GDF2         | chr10:48413091-48416853  | 0.0104044  | 0.00921583 | -0.175006 | 1        |
| XLOC_002385 | THNSL1       | chr10:25270907-25351208  | 9.73009    | 8.61859    | -0.175001 | 0.82774  |
| XLOC_001450 | OSCP1        | chr1:36883506-36916086   | 1.66052    | 1.47088    | -0.17496  | 0.950929 |
| XLOC_021409 | MLL3         | chr7:151832009-152133090 | 1.44694    | 1.28174    | -0.174897 | 0.845125 |
| XLOC_007923 | NUDT16L1     | chr16:4743693-4745860    | 31.3136    | 27.7423    | -0.174704 | 0.848508 |
| XLOC_006465 | TMEM63C      | chr14:77648101-77725838  | 1.60303    | 1.42035    | -0.174553 | 0.898418 |
| XLOC_009206 | VMP1         | chr17:57784862-57917952  | 66.2234    | 58.6809    | -0.174451 | 0.823658 |
| XLOC_009006 | DHRS11       | chr17:34948225-34957233  | 13.508     | 11.9696    | -0.174434 | 0.867146 |
| XLOC_018384 | MYO6         | chr6:76458908-76629254   | 1.81231    | 1.60597    | -0.17438  | 0.851815 |
| XLOC_007565 | CEP152       | chr15:49030134-49103343  | 1.19764    | 1.06133    | -0.174317 | 0.891905 |
| XLOC_020350 | AP5Z1        | chr7:4815261-4834026     | 10.943     | 9.6976     | -0.174307 | 0.832418 |

|             |              |                          |            |            |           |          |
|-------------|--------------|--------------------------|------------|------------|-----------|----------|
| XLOC_001537 | SPATA6       | chr1:48761043-48937876   | 0.568919   | 0.50418    | -0.174284 | 0.926423 |
| XLOC_014700 | RIMBP3C      | chr22:21899957-21978323  | 0.0142078  | 0.0125912  | -0.174276 | 1        |
| XLOC_024212 | TMLHE        | chrX:154696200-15484262  | 7.24389    | 6.41968    | -0.174264 | 0.909016 |
| XLOC_006765 | CFL2         | chr14:35179587-35184029  | 14.4646    | 12.8189    | -0.174258 | 0.828589 |
| XLOC_018258 | RPL10A       | chr6:35436177-35438558   | 3230.37    | 2862.95    | -0.174199 | 0.851892 |
| XLOC_004010 | HGB1         | chr11:5269501-5271087    | 0.302791   | 0.268354   | -0.174184 | 1        |
| XLOC_021396 | ATG9B        | chr7:150688143-15072158  | 1.20014    | 1.06366    | -0.174155 | 0.976198 |
| XLOC_011357 | DENND1C      | chr19:6464259-6481798    | 0.221393   | 0.196219   | -0.174146 | 1        |
| XLOC_009815 | HOXB3        | chr17:46626231-46651810  | 3.32103    | 2.94356    | -0.174069 | 0.887208 |
| XLOC_014341 | PRDM15       | chr21:43218384-43299591  | 0.747246   | 0.662317   | -0.174061 | 0.913628 |
| XLOC_014259 | LTN1         | chr21:30300465-30365277  | 1.23618    | 1.09575    | -0.173972 | 0.877363 |
| XLOC_023061 | ZBTB6        | chr9:125670334-125675607 | 2.93092    | 2.59813    | -0.173877 | 0.869071 |
| XLOC_007186 | B2M          | chr15:45003684-45010357  | 817.329    | 724.691    | -0.173552 | 0.837208 |
| XLOC_023104 | ZER1         | chr9:131486740-13153421  | 34.6766    | 30.7466    | -0.173535 | 0.829179 |
| XLOC_006369 | C14orf101    | chr14:57046510-57116232  | 3.7647     | 3.33803    | -0.173535 | 0.868447 |
| XLOC_016679 | FBXL5        | chr4:15606006-15657035   | 7.96777    | 7.06479    | -0.17353  | 0.841266 |
| XLOC_003221 | B4GALNT4     | chr11:369794-382117      | 13.9307    | 12.352     | -0.173516 | 0.85085  |
| XLOC_007679 | LOXL1-AS1    | chr15:74209808-74244478  | 1.27921    | 1.13427    | -0.173494 | 0.962215 |
| XLOC_008435 | KIAA0430     | chr16:15688225-15737023  | 2.09952    | 1.86167    | -0.173459 | 0.858101 |
| XLOC_006055 | UBL3         | chr13:30338544-30424820  | 4.52069    | 4.00892    | -0.173327 | 0.851637 |
| XLOC_009536 | FLI1         | chr17:18128935-18162230  | 69.0889    | 61.2691    | -0.173295 | 0.865541 |
| XLOC_002495 | HKDC1        | chr10:70980058-71027315  | 1.44844    | 1.28451    | -0.173275 | 0.919029 |
| XLOC_007568 | COP2         | chr15:49417470-49447854  | 16.5693    | 14.6949    | -0.173194 | 0.818944 |
| XLOC_000131 | NECAP2       | chr1:16767166-16786584   | 25.1817    | 22.334     | -0.17313  | 0.827857 |
| XLOC_009027 | RPL19        | chr17:37356535-37360980  | 5991.69    | 5314.36    | -0.173068 | 0.860484 |
| XLOC_023912 | OPHN1        | chrX:67262185-67653299   | 1.92292    | 1.70567    | -0.172963 | 0.862722 |
| XLOC_004786 | KLHL42       | chr12:27933186-27955973  | 3.30364    | 2.93077    | -0.172776 | 0.845726 |
| XLOC_007918 | VASN         | chr16:4390251-44666962   | 1.87869    | 1.66667    | -0.172756 | 0.991767 |
| XLOC_021512 | CHMP7        | chr8:23101149-23119512   | 19.1879    | 17.0227    | -0.172741 | 0.823458 |
| XLOC_013073 | TBC1D8       | chr2:101618690-10176784  | 2.18524    | 1.93872    | -0.172688 | 0.99351  |
| XLOC_023366 | PORCN        | chrX:48367370-48379202   | 16.1338    | 14.314     | -0.172665 | 0.851892 |
| XLOC_014995 | TGFBR2       | chr3:30647993-30735633   | 1.01129    | 0.897226   | -0.172658 | 0.916017 |
| XLOC_004807 | IRAK4        | chr12:44152746-44183346  | 3.70564    | 3.28777    | -0.172614 | 0.863571 |
| XLOC_022119 | RNF19A       | chr8:101269287-10132237  | 7.11172    | 6.30984    | -0.172597 | 0.833863 |
| XLOC_011475 | C19orf57     | chr19:13993167-14016909  | 0.712538   | 0.6322     | -0.172587 | 0.950929 |
| XLOC_006913 | ISM2         | chr14:77940737-77965210  | 0.00843244 | 0.00748178 | -0.172568 | 1        |
| XLOC_005027 | PLXNC1       | chr12:94542498-94701451  | 0.643423   | 0.570938   | -0.172432 | 0.930777 |
| XLOC_003657 | SSH3         | chr11:67070918-67080078  | 20.1958    | 17.9213    | -0.172375 | 0.835119 |
| XLOC_001183 | LOC100288069 | chr1:700244-714068       | 0.860335   | 0.763526   | -0.172221 | 0.957343 |
| XLOC_017305 | LYRM7        | chr5:130506640-13054111  | 1.40557    | 1.2475     | -0.172219 | 0.879514 |
| XLOC_011556 | ZNF14        | chr19:19821280-19843921  | 1.95441    | 1.73466    | -0.172086 | 0.901921 |
| XLOC_009518 | ZSWIM7       | chr17:15879874-15932723  | 8.7048     | 7.72611    | -0.172068 | 0.965607 |
| XLOC_016805 | SCARB2       | chr4:77079891-77135052   | 23.3739    | 20.7468    | -0.172008 | 0.828589 |
| XLOC_009924 | GNA13        | chr17:63005406-63052920  | 6.25288    | 5.55022    | -0.171977 | 0.830101 |
| XLOC_012193 | PAPOLG       | chr2:60983364-61029221   | 1.68571    | 1.49657    | -0.171696 | 0.868422 |
| XLOC_001894 | YY1AP1       | chr1:155629232-15565882  | 21.8384    | 19.3891    | -0.171623 | 0.830507 |
| XLOC_004914 | DGKA         | chr12:56324945-56347807  | 10.4815    | 9.30642    | -0.17155  | 0.844123 |
| XLOC_009474 | PER1         | chr17:8043787-8055753    | 5.58752    | 4.96114    | -0.171537 | 0.869168 |
| XLOC_011322 | MAP2K2       | chr19:4090319-4124126    | 160.204    | 142.265    | -0.17133  | 0.829595 |
| XLOC_001193 | TNFRSF4      | chr1:1146705-1149548     | 0.0283605  | 0.0251852  | -0.171306 | 1        |
| XLOC_004975 | DYRK2        | chr12:68042511-68056444  | 3.56259    | 3.16379    | -0.171273 | 0.854087 |
| XLOC_015926 | ZXDC         | chr3:126156443-12619476  | 5.32706    | 4.73093    | -0.171216 | 0.917151 |
| XLOC_004883 | HOXC8        | chr12:54402889-54406545  | 2.19197    | 1.94678    | -0.171139 | 0.918898 |
| XLOC_008219 | CALB2        | chr16:71392615-71424342  | 15.2294    | 13.5273    | -0.170992 | 0.862445 |
| XLOC_000071 | PIK3CD       | chr1:9711789-9884550     | 2.73427    | 2.42877    | -0.170932 | 0.979701 |
| XLOC_016177 | NAT8L        | chr4:2061238-2070816     | 0.0169475  | 0.0150552  | -0.170812 | 1        |
| XLOC_005247 | ING4         | chr12:6759703-6772308    | 6.78976    | 6.03164    | -0.170809 | 0.898922 |
| XLOC_005460 | KRT83        | chr12:52708084-52715182  | 0.0383731  | 0.0340886  | -0.170802 | 1        |
| XLOC_006693 | ZNF219       | chr14:21558204-21572863  | 18.8398    | 16.7375    | -0.170701 | 0.861881 |
| XLOC_018097 | HIST1H2AC    | chr6:26124372-26124918   | 6.33335    | 5.62676    | -0.170665 | 0.954559 |
| XLOC_006669 | TMEM121      | chr14:105992952-1059965  | 1.3809     | 1.22686    | -0.170646 | 0.963629 |
| XLOC_008018 | CCDC101      | chr16:28565248-28603111  | 12.6733    | 11.2597    | -0.170625 | 0.891486 |
| XLOC_021574 | C8orf40      | chr8:42273979-42408140   | 49.608     | 44.0749    | -0.170614 | 0.90314  |
| XLOC_007280 | LRRRC49      | chr15:71184927-71342436  | 1.4321     | 1.27237    | -0.17061  | 0.912696 |
| XLOC_024097 | FAM122B      | chrX:133903595-13398864  | 6.45888    | 5.73871    | -0.170558 | 0.874442 |
| XLOC_024047 | CUL4B        | chrX:119658445-11970968  | 7.47172    | 6.63875    | -0.170528 | 0.825593 |
| XLOC_000753 | EFNA1        | chr1:155100348-15510738  | 19.1407    | 17.0074    | -0.170481 | 0.851815 |
| XLOC_015816 | EIF4E3       | chr3:71728439-71804328   | 3.30691    | 2.93853    | -0.170388 | 0.847596 |
| XLOC_009233 | SNORA76      | chr17:62223698-62223831  | 10.0494    | 8.93001    | -0.17037  | 0.982907 |
| XLOC_022276 | KIAA1432     | chr9:5629118-5776556     | 1.56759    | 1.39299    | -0.170364 | 0.881073 |
| XLOC_013109 | CKAP2L       | chr2:113495443-11352225  | 2.7077     | 2.40612    | -0.17036  | 0.884394 |
| XLOC_013256 | PRKRA        | chr2:179059207-17967215  | 21.0218    | 18.6805    | -0.170351 | 0.907688 |
| XLOC_014456 | MMP11        | chr22:24115035-24126503  | 7.8149     | 6.94485    | -0.170283 | 0.881073 |
| XLOC_013633 | DLGAP4       | chr20:34995443-35157040  | 24.7844    | 22.0259    | -0.170227 | 0.829377 |
| XLOC_011915 | ZNF616       | chr19:52617652-52643191  | 1.17848    | 1.04734    | -0.170196 | 0.920028 |
| XLOC_002755 | FANK1        | chr10:127585107-1276981  | 0.729119   | 0.647998   | -0.170165 | 0.957289 |
| XLOC_001032 | RCOR3        | chr1:211432707-21148972  | 3.80878    | 3.38517    | -0.1701   | 0.886662 |
| XLOC_017608 | UGT3A1       | chr5:35953190-36001130   | 0.00555915 | 0.00494097 | -0.170071 | 1        |
| XLOC_009789 | MAP3K14      | chr17:43325302-43394414  | 3.21588    | 2.85895    | -0.169724 | 0.890511 |

|             |              |                          |            |            |           |          |
|-------------|--------------|--------------------------|------------|------------|-----------|----------|
| XLOC_000572 | GSTM1        | chr1:110230417-110236361 | 36.8419    | 32.7566    | -0.169562 | 0.846526 |
| XLOC_000991 | ZC3H11A      | chr1:203764750-203823256 | 16.5609    | 14.7249    | -0.169527 | 0.830351 |
| XLOC_005898 | KCNRG,TRIM13 | chr13:50556687-50699677  | 4.08989    | 3.63649    | -0.169516 | 0.880508 |
| XLOC_017838 | CDC25C       | chr5:137620958-137667516 | 5.94066    | 5.28232    | -0.169453 | 0.881073 |
| XLOC_018791 | GPSM3,NOTCH4 | chr6:32158542-32191844   | 0.169288   | 0.150527   | -0.169453 | 1        |
| XLOC_001719 | PPM1J        | chr1:113252615-113257956 | 23.0284    | 20.4787    | -0.169291 | 0.849027 |
| XLOC_023536 | TCEAL1       | chrX:102883647-102885871 | 11.6531    | 10.3634    | -0.169211 | 0.882107 |
| XLOC_003985 | ZNF195       | chr11:3379156-3400452    | 6.18533    | 5.50094    | -0.169172 | 0.855212 |
| XLOC_015249 | PVRL3        | chr3:110790605-110913011 | 1.52951    | 1.36028    | -0.169171 | 0.893663 |
| XLOC_020645 | PVRI3        | chr7:99775537-99869855   | 0.0500252  | 0.04449    | -0.169171 | 1        |
| XLOC_012973 | PAIP2B       | chr2:71409867-71454233   | 2.28364    | 2.03107    | -0.169098 | 0.86642  |
| XLOC_014689 | DGCR6L       | chr22:20301760-20307628  | 80.4928    | 71.5903    | -0.169096 | 0.832803 |
| XLOC_006823 | DLGAP5       | chr14:55614833-55658396  | 7.62081    | 6.77849    | -0.168981 | 0.845125 |
| XLOC_023135 | SURF1        | chr9:136218665-136223361 | 43.8232    | 38.9838    | -0.168822 | 0.844001 |
| XLOC_002741 | PSTK         | chr10:124739555-12474990 | 2.84486    | 2.53072    | -0.16881  | 0.92385  |
| XLOC_006698 | CHD8         | chr14:21853352-21905457  | 3.62236    | 3.22297    | -0.168541 | 0.846709 |
| XLOC_008341 | SPSB3        | chr16:1826712-1832581    | 45.5835    | 40.5588    | -0.168496 | 0.845211 |
| XLOC_022641 | CACFD1       | chr9:136325086-136335906 | 6.30868    | 5.61355    | -0.168423 | 0.885278 |
| XLOC_003844 | CD3G         | chr11:118215058-11822448 | 0.0117829  | 0.0104853  | -0.168331 | 1        |
| XLOC_013363 | RNF25        | chr2:219528586-219567446 | 27.9223    | 24.8476    | -0.16831  | 0.883551 |
| XLOC_001895 | GON4L        | chr1:155715558-155826972 | 2.09488    | 1.86423    | -0.168287 | 0.873862 |
| XLOC_010336 | TPGS2        | chr18:33877701-34805288  | 39.2503    | 34.93      | -0.168236 | 0.89272  |
| XLOC_023423 | MAGED2       | chrX:54834170-54842445   | 40.4573    | 36.0043    | -0.168233 | 0.834771 |
| XLOC_002877 | EPC1         | chr10:32556643-32667726  | 5.35859    | 4.76884    | -0.168214 | 0.863571 |
| XLOC_023189 | LRRC26       | chr9:140033608-140064449 | 6.64556    | 5.91433    | -0.168175 | 0.952905 |
| XLOC_020793 | TAS2R3       | chr7:141463896-141464997 | 0.014992   | 0.0133431  | -0.168099 | 1        |
| XLOC_011672 | ZNF780B      | chr19:40534166-40562115  | 0.657622   | 0.585295   | -0.168096 | 0.906464 |
| XLOC_018874 | GUCA1B       | chr6:42151021-42162694   | 1.16386    | 1.03595    | -0.167959 | 0.939261 |
| XLOC_021907 | FLJ14107     | chr8:22462144-22526661   | 0.0315176  | 0.0280554  | -0.167879 | 1        |
| XLOC_011385 | RAB11B-AS1   | chr19:8439259-8469317    | 3.87903    | 3.45313    | -0.167791 | 0.990857 |
| XLOC_004639 | LOC100288778 | chr12:87983-91263        | 13.5055    | 12.0235    | -0.167698 | 0.882107 |
| XLOC_010941 | KLC3         | chr19:45843997-45873845  | 35.7915    | 31.8652    | -0.167632 | 0.922042 |
| XLOC_010724 | ZNF430       | chr19:21203425-21242852  | 1.22566    | 1.09124    | -0.167589 | 0.909694 |
| XLOC_010018 | SGSH         | chr17:78143790-78194199  | 16.1867    | 14.412     | -0.167536 | 0.856449 |
| XLOC_012106 | C2orf16      | chr2:27799388-27805589   | 0.090717   | 0.0807741  | -0.167479 | 1        |
| XLOC_023901 | LOC92249     | chrX:62646438-62780873   | 5.03034    | 4.47901    | -0.167474 | 0.877764 |
| XLOC_016626 | SLC26A1      | chr4:972862-998317       | 0.632413   | 0.563108   | -0.167455 | 0.987858 |
| XLOC_023941 | FTX          | chrX:73164158-73513409   | 0.551776   | 0.491308   | -0.167453 | 0.979701 |
| XLOC_014422 | MED15        | chr22:20861885-20941919  | 22.5764    | 20.1024    | -0.16745  | 0.836851 |
| XLOC_005559 | C12orf61     | chr12:62995530-62997214  | 0.42155    | 0.375375   | -0.167369 | 0.974044 |
| XLOC_001076 | EPHX1        | chr1:225997796-226070426 | 18.2689    | 16.2679    | -0.167358 | 0.923575 |
| XLOC_007408 | MAN2A        | chr15:91447419-91465815  | 8.18246    | 7.28757    | -0.167097 | 0.844458 |
| XLOC_021312 | UBE2H        | chr7:129470572-129592806 | 11.7758    | 10.4882    | -0.167059 | 0.838386 |
| XLOC_022450 | LOC100132077 | chr9:97094757-97123230   | 0.194639   | 0.173358   | -0.16705  | 1        |
| XLOC_012595 | BMPR2        | chr2:203241049-203432474 | 0.738095   | 0.657516   | -0.16678  | 0.885618 |
| XLOC_010843 | PAK4         | chr19:39616419-39670046  | 36.5588    | 32.571     | -0.16663  | 0.841971 |
| XLOC_011435 | RGL3         | chr19:11504731-11530018  | 12.1449    | 10.8204    | -0.166594 | 0.870042 |
| XLOC_003937 | SIGIRR       | chr11:405715-417397      | 45.6256    | 40.6535    | -0.166464 | 0.836371 |
| XLOC_020897 | ZFAND2A      | chr7:1192542-1199855     | 19.6652    | 17.5228    | -0.166412 | 0.877135 |
| XLOC_006230 | ADPRLH1      | chr13:114076259-11410783 | 3.80625    | 3.39165    | -0.166383 | 0.917639 |
| XLOC_017366 | VTRNA1-3     | chr5:140105743-140105831 | 131.847    | 117.489    | -0.166338 | 0.979875 |
| XLOC_013012 | RETSAT       | chr2:85569077-85581821   | 17.483     | 15.5816    | -0.166115 | 0.845726 |
| XLOC_022492 | SLC44A1      | chr9:108006928-108153682 | 11.3052    | 10.0772    | -0.165899 | 0.836851 |
| XLOC_011340 | C19orf70     | chr19:5678432-5688534    | 108.531    | 96.7489    | -0.165789 | 0.845239 |
| XLOC_004970 | MSRB3        | chr12:65672422-65860687  | 0.435843   | 0.388561   | -0.165668 | 0.945946 |
| XLOC_016637 | MXD4         | chr4:2249159-2263739     | 26.8466    | 23.937     | -0.165495 | 0.834859 |
| XLOC_007637 | PARP16       | chr15:65550436-65579018  | 9.35298    | 8.3396     | -0.165447 | 0.871957 |
| XLOC_011448 | ZNF799       | chr19:12500827-12512088  | 1.83393    | 1.63526    | -0.165416 | 0.916337 |
| XLOC_011418 | TYK2         | chr19:10461203-10491248  | 18.6608    | 16.6397    | -0.165389 | 0.840932 |
| XLOC_005781 | LOC387895    | chr12:127215246-12725686 | 0.136676   | 0.121873   | -0.16538  | 1        |
| XLOC_012993 | LBX2         | chr2:74724643-74734821   | 6.60791    | 5.89251    | -0.165313 | 0.976618 |
| XLOC_018263 | MAPK14       | chr6:35995453-36079013   | 9.76598    | 8.70894    | -0.165268 | 0.845125 |
| XLOC_003585 | VEGFB        | chr11:64002055-64006736  | 79.2846    | 70.705     | -0.165229 | 0.838994 |
| XLOC_023831 | ZNF41        | chrX:47305560-47342345   | 0.259156   | 0.231131   | -0.165112 | 1        |
| XLOC_009798 | ARL17A       | chr17:44590075-44657088  | 0.206652   | 0.184308   | -0.16509  | 1        |
| XLOC_023583 | DOCK11       | chrX:117629871-11782012  | 0.791566   | 0.706002   | -0.165037 | 0.913628 |
| XLOC_000398 | ZYG11A       | chr1:53308182-53360247   | 0.00369501 | 0.00329581 | -0.164946 | 1        |
| XLOC_003861 | HINFP        | chr11:118992232-11900576 | 11.3116    | 10.0896    | -0.164937 | 0.868469 |
| XLOC_013507 | CDC25B       | chr20:3776400-3786761    | 21.8331    | 19.4746    | -0.164922 | 0.845125 |
| XLOC_009977 | TRIM47       | chr17:73870244-73874656  | 16.041     | 14.3086    | -0.164883 | 0.870709 |
| XLOC_022983 | TMEM246      | chr9:104237607-104249478 | 27.5976    | 24.6177    | -0.164847 | 0.842969 |
| XLOC_021132 | PION         | chr7:76940067-77045717   | 0.902505   | 0.805074   | -0.164814 | 0.930066 |
| XLOC_014844 | ST13         | chr22:41220600-41252687  | 94.4603    | 84.2657    | -0.164762 | 0.845125 |
| XLOC_021209 | GATS         | chr7:99775537-99869855   | 1.85115    | 1.65152    | -0.16463  | 0.923433 |
| XLOC_018386 | LOC100288198 | chr6:79910961-79946517   | 0.516122   | 0.460468   | -0.164612 | 0.989365 |
| XLOC_021021 | VPSA1        | chr7:38763542-38948800   | 3.07592    | 2.74428    | -0.164591 | 0.87753  |
| XLOC_001484 | RIMS3        | chr1:41086351-41131324   | 0.860299   | 0.767545   | -0.164586 | 0.915432 |
| XLOC_010279 | ZBTB14       | chr18:5289017-5297052    | 1.66501    | 1.48557    | -0.164509 | 0.912643 |
| XLOC_008161 | CMTM3        | chr16:66637934-66647795  | 63.7467    | 56.8819    | -0.16438  | 0.834889 |

|             |              |                          |            |            |           |          |
|-------------|--------------|--------------------------|------------|------------|-----------|----------|
| XLOC_005026 | CRADD        | chr12:94071150-94244531  | 9.47965    | 8.459      | -0.164347 | 0.898355 |
| XLOC_003846 | ATP5L        | chr11:118230295-11828953 | 152.658    | 136.227    | -0.164294 | 0.870516 |
| XLOC_010338 | LINC00669    | chr18:36786887-37331959  | 0.62031    | 0.553549   | -0.164278 | 0.952905 |
| XLOC_004081 | LOC100506305 | chr11:13001080-13011095  | 0.0224242  | 0.0200108  | -0.164277 | 1        |
| XLOC_018796 | HLA-DRB1     | chr6:32546546-32557613   | 0.0348616  | 0.0311106  | -0.164231 | 1        |
| XLOC_004990 | THAP2        | chr12:72003378-72074428  | 0.513197   | 0.458032   | -0.164066 | 0.977332 |
| XLOC_006161 | FBXL3        | chr13:77579388-77601331  | 5.85866    | 5.22936    | -0.163936 | 0.862445 |
| XLOC_022398 | RPSAP9       | chr9:79013514-79014954   | 9.02276    | 8.05397    | -0.163869 | 0.89239  |
| XLOC_018878 | TBCC         | chr6:42712233-42713884   | 20.35      | 18.1674    | -0.163678 | 0.86815  |
| XLOC_004648 | LRTM2        | chr12:1901122-2027870    | 0.0251206  | 0.022427   | -0.163638 | 1        |
| XLOC_008961 | LRRRC37BP1   | chr17:28903482-28964484  | 4.57839    | 4.08784    | -0.163503 | 0.858276 |
| XLOC_011452 | ZNF490       | chr19:12686919-12721623  | 1.6838     | 1.50345    | -0.163443 | 0.895883 |
| XLOC_022057 | PAG1         | chr8:81880045-82024303   | 0.0792007  | 0.0707193  | -0.163408 | 1        |
| XLOC_006322 | KIAA0391     | chr14:35591526-35743284  | 15.2309    | 13.6018    | -0.163205 | 0.873102 |
| XLOC_011911 | ZNF615       | chr19:52494586-52511483  | 0.649193   | 0.579764   | -0.163182 | 0.930447 |
| XLOC_022322 | NUDT2        | chr9:34329503-34343711   | 52.7492    | 47.1099    | -0.16312  | 0.851868 |
| XLOC_022588 | CERCAM       | chr9:131182758-131199631 | 74.8545    | 66.8531    | -0.163096 | 0.846398 |
| XLOC_013465 | STK25        | chr2:242295663-242448987 | 82.0907    | 73.3289    | -0.162835 | 0.846441 |
| XLOC_003866 | RNF26        | chr11:119205209-11920807 | 25.6652    | 22.9262    | -0.16282  | 0.846737 |
| XLOC_018898 | SUPT3H       | chr6:44794466-45518819   | 4.16479    | 3.72068    | -0.162675 | 0.912689 |
| XLOC_009820 | HOXB7        | chr17:46684594-46688383  | 22.3705    | 19.987     | -0.162534 | 0.870747 |
| XLOC_012189 | CCDC104      | chr2:55746739-55772216   | 52.3037    | 46.7324    | -0.162489 | 0.845974 |
| XLOC_002133 | PLEKHA6      | chr1:204187978-204329057 | 1.52052    | 1.35868    | -0.162358 | 0.904734 |
| XLOC_017172 | GTF2H2B      | chr5:69711196-69746189   | 2.10039    | 1.87686    | -0.162336 | 0.897072 |
| XLOC_015254 | TMPRSS7      | chr3:111758464-111800111 | 0.00591017 | 0.00528183 | -0.162161 | 1        |
| XLOC_004925 | MYL6B        | chr12:56546203-56551771  | 116.648    | 104.248    | -0.162143 | 0.839124 |
| XLOC_003004 | NDST2        | chr10:75561668-75571589  | 6.49071    | 5.80081    | -0.162123 | 0.872721 |
| XLOC_011745 | CEACAM22P    | chr19:45041044-45060150  | 0.0109028  | 0.00974447 | -0.162041 | 1        |
| XLOC_012108 | GPN1         | chr2:27848505-27917847   | 29.6209    | 26.475     | -0.161986 | 0.940999 |
| XLOC_009534 | TOM1L2       | chr17:17746821-17875784  | 4.05646    | 3.62565    | -0.161981 | 0.8725   |
| XLOC_014057 | PPP1R3D      | chr20:58508818-58523702  | 1.85032    | 1.6539     | -0.161898 | 0.96103  |
| XLOC_014968 | CAPN7        | chr3:15247732-15294423   | 3.43381    | 3.06937    | -0.161869 | 0.874709 |
| XLOC_020576 | CCDC146      | chr7:76751933-76924521   | 0.41501    | 0.370987   | -0.161778 | 0.952216 |
| XLOC_001863 | CRTC2        | chr1:153920147-153931133 | 19.0427    | 17.0251    | -0.161579 | 0.853057 |
| XLOC_001288 | TMEM51-AS1   | chr1:14925212-15478960   | 0.10923    | 0.0976684  | -0.161401 | 1        |
| XLOC_017081 | TRIO         | chr5:14143828-14509458   | 2.48059    | 2.21808    | -0.161372 | 0.872554 |
| XLOC_022196 | TRAPPC9      | chr8:140742585-141468678 | 8.99942    | 8.04724    | -0.161337 | 0.856449 |
| XLOC_000520 | LOC729970    | chr1:95393583-95428826   | 2.11193    | 1.88849    | -0.161329 | 0.948088 |
| XLOC_017888 | IL17B        | chr5:148753829-148758838 | 0.0754654  | 0.0674856  | -0.161237 | 1        |
| XLOC_010180 | KIAA1328     | chr18:33877701-34805288  | 0.39104    | 0.349712   | -0.161151 | 0.989841 |
| XLOC_016524 | MMAA         | chr4:146540539-146581187 | 0.477089   | 0.426699   | -0.16104  | 0.933023 |
| XLOC_022616 | LAMC3        | chr9:133884503-133968444 | 0.12631    | 0.112971   | -0.161021 | 1        |
| XLOC_020377 | ARL4A        | chr7:12726451-12730558   | 3.37481    | 3.01856    | -0.160946 | 0.895499 |
| XLOC_013318 | RAPH1        | chr2:204298538-204400058 | 0.864031   | 0.772824   | -0.160944 | 0.903682 |
| XLOC_003135 | LOC282997    | chr10:112628647-11263066 | 2.08991    | 1.86935    | -0.160904 | 0.937187 |
| XLOC_001060 | C1orf115     | chr1:220863627-220872495 | 3.39819    | 3.0398     | -0.160789 | 0.900578 |
| XLOC_018619 | SERPINB6     | chr6:2948392-2972399     | 103.363    | 92.4619    | -0.160783 | 0.844167 |
| XLOC_011363 | SH2D3A       | chr19:6752172-6767523    | 7.83288    | 7.00686    | -0.160775 | 0.898333 |
| XLOC_002146 | ELK4         | chr1:205577070-205602000 | 4.30866    | 3.85443    | -0.160721 | 0.915091 |
| XLOC_017625 | TTC33        | chr5:40711677-40756072   | 1.58751    | 1.42025    | -0.160625 | 0.899094 |
| XLOC_012266 | CTNNA2       | chr2:79740059-80875988   | 0.00403622 | 0.00361141 | -0.160441 | 1        |
| XLOC_009450 | ASGR1        | chr17:7076750-7082883    | 14.3483    | 12.8388    | -0.160373 | 0.886165 |
| XLOC_003773 | AMOTL1       | chr11:94501507-94609918  | 0.0407065  | 0.0364285  | -0.16019  | 1        |
| XLOC_003334 | USP47        | chr11:11862969-11980872  | 5.92086    | 5.29868    | -0.160173 | 0.851335 |
| XLOC_014182 | FAM3B        | chr21:42688660-42729654  | 0.225759   | 0.202037   | -0.160165 | 1        |
| XLOC_000610 | SLC22A15     | chr1:116519118-116612678 | 1.12292    | 1.00503    | -0.160008 | 0.925191 |
| XLOC_019057 | GOPC         | chr6:117803819-117923708 | 4.93234    | 4.41464    | -0.15998  | 0.869885 |
| XLOC_016395 | FRAS1        | chr4:78978723-79465423   | 1.07344    | 0.960829   | -0.159895 | 0.879372 |
| XLOC_012960 | ASPRV1       | chr2:70187223-70314147   | 0.791896   | 0.708834   | -0.159864 | 0.96128  |
| XLOC_012462 | ACVR2A       | chr2:148602569-149271044 | 0.757352   | 0.677995   | -0.15969  | 0.979701 |
| XLOC_016931 | PCDH18       | chr4:138440073-138453628 | 0.0682957  | 0.0611411  | -0.159654 | 1        |
| XLOC_005012 | TMTC2        | chr12:83080933-83528067  | 0.198845   | 0.178018   | -0.15962  | 1        |
| XLOC_011021 | FLT3LG       | chr19:49977465-49989488  | 8.53322    | 7.63964    | -0.159586 | 0.926423 |
| XLOC_018015 | GNB2L1       | chr5:180663927-180670900 | 3287.58    | 2943.35    | -0.159565 | 0.876899 |
| XLOC_017614 | LOC646719    | chr5:36871462-36876796   | 2.2115     | 1.98006    | -0.159482 | 0.902188 |
| XLOC_018521 | HEBP2        | chr6:138725335-138734587 | 54.158     | 48.4905    | -0.159472 | 0.851815 |
| XLOC_003150 | KIAA1598     | chr10:118642887-11888608 | 3.86681    | 3.21159    | -0.159412 | 0.877493 |
| XLOC_021990 | RB1CC1       | chr8:53535017-53627026   | 6.12275    | 5.48245    | -0.159359 | 0.855416 |
| XLOC_009852 | MBTD1        | chr17:49254785-49337427  | 2.52936    | 2.26495    | -0.15929  | 0.891883 |
| XLOC_017953 | DUSP1        | chr5:172195092-172198203 | 54.1007    | 48.4498    | -0.159156 | 0.854644 |
| XLOC_009846 | CHAD         | chr17:48503518-48552200  | 0.0154446  | 0.0138316  | -0.159139 | 1        |
| XLOC_012395 | WASH2P       | chr2:114341229-114361294 | 9.89385    | 8.86074    | -0.159105 | 0.897241 |
| XLOC_000995 | MDM4         | chr1:204485506-204527248 | 4.01357    | 3.59506    | -0.158868 | 0.863259 |
| XLOC_017549 | BRD9         | chr5:863849-892939       | 12.1048    | 10.8429    | -0.158826 | 0.873261 |
| XLOC_002760 | MGMT         | chr10:131265453-13156578 | 72.1508    | 64.6299    | -0.158814 | 0.852947 |
| XLOC_001738 | ATP1A1OS     | chr1:116915794-116961244 | 3.36154    | 3.01125    | -0.158759 | 0.990857 |
| XLOC_016590 | WWC2         | chr4:184020462-184241928 | 0.920495   | 0.824599   | -0.158717 | 0.925129 |
| XLOC_003712 | RNF169       | chr11:74459912-74660232  | 1.11807    | 1.00174    | -0.158508 | 0.972176 |
| XLOC_018844 | MTCH1        | chr6:36935910-36954327   | 30.6262    | 27.4404    | -0.158467 | 0.854482 |

|              |                     |                          |            |            |           |          |
|--------------|---------------------|--------------------------|------------|------------|-----------|----------|
| XLOC_005746  | HNF1A-AS1           | chr12:121407640-12141005 | 0.00667006 | 0.00597625 | -0.15846  | 1        |
| XLOC_016890  | PLA2G12A            | chr4:110631144-110651242 | 4.5072     | 4.03837    | -0.158458 | 0.873144 |
| XLOC_007983  | METTL9              | chr16:21610855-21668792  | 22.0624    | 19.7677    | -0.158445 | 0.849725 |
| XLOC_021620  | C8orf46             | chr8:67405490-67430759   | 0.0256548  | 0.0229866  | -0.158433 | 1        |
| XLOC_011015  | TRPM4               | chr19:49661015-49715098  | 8.33887    | 7.47175    | -0.158407 | 0.877692 |
| XLOC_014063  | CABLES2             | chr20:60963685-60982339  | 1.98527    | 1.77901    | -0.158261 | 0.922247 |
| XLOC_013693  | ZSWIM1              | chr20:44509847-44513905  | 4.73778    | 4.24557    | -0.158253 | 0.896051 |
| XLOC_001399  | TAF12               | chr1:28929608-28969604   | 33.2425    | 29.7909    | -0.158156 | 0.865814 |
| XLOC_008590  | DOK4                | chr16:57496550-57520385  | 14.1219    | 12.656     | -0.158114 | 0.960071 |
| XLOC_018029  | BPHL                | chr6:3118925-3153432     | 18.0497    | 16.1769    | -0.158044 | 0.870747 |
| XLOC_017957  | BOD1                | chr5:173034147-173043666 | 38.5361    | 34.5378    | -0.158034 | 0.848508 |
| XLOC_006389  | HIF1A               | chr14:62162118-62215807  | 2.08602    | 1.8696     | -0.158027 | 0.959465 |
| XLOC_001903  | MEX3A               | chr1:156041803-156051785 | 4.46619    | 4.00284    | -0.158021 | 0.870173 |
| XLOC_0016128 | ATP13A3             | chr3:194123402-194188968 | 8.16015    | 7.31358    | -0.158016 | 0.852163 |
| XLOC_011327  | UBXN6               | chr19:4445002-4457791    | 147.554    | 132.254    | -0.157933 | 0.852548 |
| XLOC_018728  | HLA-F-AS1           | chr6:29691116-29716826   | 1.90317    | 1.70586    | -0.157907 | 0.987693 |
| XLOC_023331  | MID1P1              | chrX:38660684-38665783   | 28.4399    | 25.4917    | -0.157889 | 0.873414 |
| XLOC_009646  | LOC440434           | chr17:36351795-36413256  | 9.49798    | 8.51368    | -0.157838 | 0.987209 |
| XLOC_020352  | RBAK,RBAK-LOC389458 | chr7:5085451-5112854     | 38.7046    | 34.6992    | -0.157601 | 0.958201 |
| XLOC_009570  | UNC119              | chr17:26873724-26879646  | 79.7955    | 71.54      | -0.157556 | 0.849892 |
| XLOC_004479  | MAML2               | chr11:95711439-96076344  | 0.0319999  | 0.0286919  | -0.157423 | 1        |
| XLOC_010278  | LINC00526           | chr18:5236722-5238028    | 1.7247     | 1.54652    | -0.157315 | 0.952216 |
| XLOC_015520  | HRASLS              | chr3:192958916-192988642 | 0.235232   | 0.210933   | -0.157298 | 1        |
| XLOC_017030  | KIAA1430            | chr4:186080818-186125182 | 8.39284    | 7.52633    | -0.157213 | 0.8501   |
| XLOC_009476  | TMEM107             | chr17:8076296-8079714    | 9.61906    | 8.62605    | -0.157196 | 0.895818 |
| XLOC_024191  | DNASE1L1            | chrX:153626570-153650062 | 15.7447    | 14.1197    | -0.157158 | 0.990324 |
| XLOC_015331  | LOC100507032        | chr3:129612713-129627752 | 1.57854    | 1.41564    | -0.157131 | 0.920028 |
| XLOC_016625  | DGKQ                | chr4:952671-967348       | 6.01665    | 5.39578    | -0.15713  | 0.885255 |
| XLOC_007585  | MYO5C               | chr15:524844514-52587995 | 0.637518   | 0.571753   | -0.157074 | 0.926423 |
| XLOC_001697  | GSTM3               | chr1:110276553-110283666 | 17.0152    | 15.261     | -0.156971 | 0.858589 |
| XLOC_001472  | PIEL                | chr1:39957317-40025370   | 0.086272   | 0.0773838  | -0.156862 | 1        |
| XLOC_009249  | AMZ2                | chr17:66244144-66253305  | 48.4073    | 43.4202    | -0.156857 | 0.853377 |
| XLOC_010991  | EMP3                | chr19:48828628-48833810  | 154.533    | 138.614    | -0.156845 | 0.857265 |
| XLOC_002097  | SMIM16              | chr1:200311671-200342921 | 0.0217491  | 0.0195093  | -0.156793 | 1        |
| XLOC_004956  | XRCC6BP1            | chr12:58335444-58351052  | 6.08826    | 5.46138    | -0.156765 | 0.916913 |
| XLOC_013932  | AHCY                | chr20:32868070-32899608  | 193.658    | 173.719    | -0.156748 | 0.855173 |
| XLOC_017822  | LOC340074           | chr5:134984371-134989622 | 0.00770141 | 0.00690879 | -0.156689 | 1        |
| XLOC_009406  | ITGAE               | chr17:3617918-3704537    | 3.41158    | 3.06052    | -0.156662 | 0.937757 |
| XLOC_004161  | HARBI1              | chr11:46624855-46638777  | 1.51143    | 1.35594    | -0.156622 | 0.948179 |
| XLOC_011686  | C19orf54            | chr19:41223007-41255828  | 8.73843    | 7.83947    | -0.156616 | 0.925955 |
| XLOC_003080  | LOXL4               | chr10:100007442-10002801 | 0.0104286  | 0.00935587 | -0.156608 | 1        |
| XLOC_015971  | CEP70               | chr3:138213186-138313125 | 3.07941    | 2.76273    | -0.156561 | 0.902188 |
| XLOC_014577  | TNRC6B              | chr22:40440820-40731812  | 1.28739    | 1.15507    | -0.156547 | 0.876899 |
| XLOC_020955  | CDCA7L              | chr7:21582832-21985542   | 34.4584    | 30.9171    | -0.156452 | 0.847468 |
| XLOC_007946  | ERCC4               | chr16:14014013-14046205  | 0.637964   | 0.572414   | -0.156416 | 0.928138 |
| XLOC_009020  | CISD3               | chr17:36886509-36904558  | 15.6362    | 14.0307    | -0.156304 | 0.956807 |
| XLOC_006396  | AKAP5               | chr14:64932216-64941221  | 0.100436   | 0.0901239  | -0.156288 | 1        |
| XLOC_020781  | UBN2                | chr7:138916230-138992982 | 1.17161    | 1.05139    | -0.1562   | 0.874782 |
| XLOC_018574  | GTF2H5              | chr6:158589378-158620376 | 3.77532    | 3.38793    | -0.156196 | 0.86642  |
| XLOC_021682  | PLEKHF2             | chr8:96145948-96168913   | 6.66408    | 5.98054    | -0.156131 | 0.876899 |
| XLOC_011693  | ATP5SL              | chr19:41937222-41945843  | 29.7131    | 26.6663    | -0.156079 | 0.86583  |
| XLOC_014142  | C21orf49            | chr21:34144410-34186053  | 0.0136147  | 0.0122195  | -0.155987 | 1        |
| XLOC_013426  | NGEF                | chr2:233743395-233877952 | 13.5363    | 12.1492    | -0.155971 | 0.871169 |
| XLOC_018709  | TOB2P1              | chr6:28183115-28186707   | 0.824795   | 0.740282   | -0.155961 | 0.947008 |
| XLOC_004259  | AHNAK               | chr11:62201013-62314332  | 14.1523    | 12.7042    | -0.155727 | 0.950929 |
| XLOC_003840  | CEP164              | chr11:117192493-11728398 | 2.21113    | 1.98516    | -0.155533 | 0.90314  |
| XLOC_003345  | INSC                | chr11:15133969-15268754  | 0.00613719 | 0.00551003 | -0.155519 | 1        |
| XLOC_007805  | TARSL2              | chr15:102193954-10226462 | 2.80851    | 2.52159    | -0.155475 | 0.905617 |
| XLOC_016592  | ING2                | chr4:184426219-184432245 | 10.2499    | 9.20304    | -0.155423 | 0.906892 |
| XLOC_010348  | ST8SIA5             | chr18:44259080-44337039  | 0.0729301  | 0.0654869  | -0.155307 | 1        |
| XLOC_013247  | HOXD-AS1            | chr2:177037923-177055635 | 2.35205    | 2.11206    | -0.15527  | 0.915538 |
| XLOC_011706  | PAFAH1B3            | chr19:42801184-42814973  | 107.707    | 96.7178    | -0.155252 | 0.874466 |
| XLOC_014181  | BACE2               | chr21:42539727-42648524  | 18.6415    | 16.7409    | -0.155137 | 0.869071 |
| XLOC_010868  | ITPKC               | chr19:41223007-41255828  | 5.86949    | 5.27151    | -0.155018 | 0.938194 |
| XLOC_003491  | RTN4RL2             | chr11:57228338-57244384  | 26.66      | 23.9454    | -0.154927 | 0.907689 |
| XLOC_018849  | BTBD9               | chr6:38136226-38607924   | 1.48724    | 1.33584    | -0.154894 | 0.908114 |
| XLOC_009208  | RPS6KB1             | chr17:57970406-58027786  | 3.09285    | 2.77801    | -0.154885 | 0.878089 |
| XLOC_002282  | SMYD3               | chr1:245912641-246670644 | 23.8675    | 21.4381    | -0.154872 | 0.864166 |
| XLOC_021432  | ARHGEF10            | chr8:1772148-1906807     | 6.50791    | 5.84572    | -0.154813 | 0.869408 |
| XLOC_014835  | SNORD83B            | chr22:39708886-39715670  | 29.925     | 26.8804    | -0.154798 | 0.945946 |
| XLOC_008752  | SERPINF1            | chr17:1665258-1680859    | 0.252732   | 0.227029   | -0.154728 | 1        |
| XLOC_015787  | DENND6A             | chr3:57611180-57678816   | 3.47983    | 3.12596    | -0.154717 | 0.889598 |
| XLOC_013784  | RTKL1,TNFRSF6B      | chr20:62289162-62367494  | 6.9692     | 6.26052    | -0.154711 | 0.972111 |
| XLOC_001623  | CTBS                | chr1:85018803-85040163   | 3.51526    | 3.15784    | -0.154695 | 0.907651 |
| XLOC_007759  | KLHL25              | chr15:86302558-86338189  | 3.75505    | 3.37343    | -0.154616 | 0.908273 |
| XLOC_020889  | WDR60               | chr7:158649268-158738883 | 2.01438    | 1.80969    | -0.154588 | 0.917325 |
| XLOC_014219  | ADARB1              | chr21:46494492-46646478  | 3.4896     | 3.13508    | -0.154556 | 0.904734 |
| XLOC_016598  | SNX25               | chr4:186131283-186300152 | 5.25006    | 4.71685    | -0.154513 | 0.89239  |
| XLOC_004615  | CDON                | chr11:125826712-12593318 | 0.282095   | 0.253448   | -0.154492 | 1        |



|             |                        |                          |           |           |           |          |
|-------------|------------------------|--------------------------|-----------|-----------|-----------|----------|
| XLOC_005630 | CCDC41                 | chr12:94702055-94853764  | 1.62073   | 1.4562    | -0.154434 | 0.920694 |
| XLOC_003195 | LOC387723              | chr10:131862161-13190901 | 0.935463  | 0.840515  | -0.154407 | 0.950929 |
| XLOC_015694 | SLC26A6                | chr3:48663155-48672926   | 9.32383   | 8.37791   | -0.154332 | 0.891905 |
| XLOC_007105 | HERC2P9                | chr15:28899587-28930410  | 3.34871   | 3.00917   | -0.15424  | 0.907657 |
| XLOC_005195 | ULK1                   | chr12:132379278-13240771 | 7.08719   | 6.36862   | -0.154233 | 0.881073 |
| XLOC_023565 | ALG13                  | chrX:110924345-111003871 | 4.33404   | 3.89466   | -0.154215 | 0.898291 |
| XLOC_017744 | TTC37                  | chr5:94799598-94890709   | 1.50446   | 1.35195   | -0.154209 | 0.908129 |
| XLOC_012590 | FZD7                   | chr2:202899309-202903161 | 4.08444   | 3.67052   | -0.154155 | 0.904096 |
| XLOC_011603 | LOC100506469           | chr19:36024313-36038429  | 6.39888   | 5.75069   | -0.154085 | 0.989268 |
| XLOC_001073 | CNIH3                  | chr1:224804178-224928245 | 0.0175888 | 0.0158073 | -0.154065 | 1        |
| XLOC_001550 | SELR1                  | chr1:53152013-53164038   | 4.90144   | 4.40525   | -0.153984 | 0.905963 |
| XLOC_006443 | CCDC176                | chr14:74486058-74551196  | 0.380232  | 0.34178   | -0.153814 | 0.979701 |
| XLOC_017477 | RANBP17                | chr5:170288895-170727015 | 0.405022  | 0.364075  | -0.153765 | 0.950929 |
| XLOC_022720 | KIAA2026               | chr9:5919007-6008003     | 0.645925  | 0.580639  | -0.153725 | 0.92969  |
| XLOC_010795 | UPK1A                  | chr19:36157714-36169367  | 0.0600351 | 0.0539676 | -0.153712 | 1        |
| XLOC_010625 | MR1                    | chr19:13875336-13885096  | 12.199    | 10.9668   | -0.153618 | 0.874082 |
| XLOC_007748 | C15orf40               | chr15:83654954-83680393  | 14.7258   | 13.2386   | -0.153597 | 0.963209 |
| XLOC_012588 | STRADB                 | chr2:202316391-202345574 | 19.0098   | 17.0902   | -0.153576 | 0.868396 |
| XLOC_010060 | OGFOD3                 | chr17:80347085-80408707  | 5.88333   | 5.28953   | -0.153493 | 0.963773 |
| XLOC_009873 | MTMR4                  | chr17:56566892-56595251  | 7.72138   | 6.94234   | -0.153436 | 0.865379 |
| XLOC_016185 | HTT                    | chr4:3076407-3245687     | 4.6843    | 4.21195   | -0.153346 | 0.865806 |
| XLOC_014874 | SCUBE1                 | chr22:43599228-43739394  | 0.0124852 | 0.0112264 | -0.153321 | 1        |
| XLOC_018393 | RWDD2A                 | chr6:83777384-83906256   | 3.85845   | 3.46956   | -0.153269 | 0.980098 |
| XLOC_005492 | ATP5G2                 | chr12:54058943-54070512  | 820.453   | 737.793   | -0.153204 | 0.863051 |
| XLOC_000689 | SCNM1_TNFAIP8L2_TNFAIP | chr1:151129104-151148547 | 11.6185   | 10.448    | -0.153196 | 0.905157 |
| XLOC_021120 | POM121C                | chr7:75039623-75115568   | 11.4098   | 10.2609   | -0.153125 | 0.880018 |
| XLOC_007875 | DNASE1L2               | chr16:2286467-2288712    | 2.09117   | 1.88069   | -0.153047 | 0.958445 |
| XLOC_009219 | MRC2                   | chr17:60704761-60770962  | 0.0134056 | 0.0120568 | -0.152988 | 1        |
| XLOC_016993 | DDX60L                 | chr4:169277885-169401631 | 0.311933  | 0.280552  | -0.152967 | 1        |
| XLOC_023876 | FAM156A_FAM156B        | chrX:52976463-53024651   | 0.504918  | 0.454153  | -0.152873 | 0.961    |
| XLOC_016137 | TNK2                   | chr3:195590235-195635881 | 8.89415   | 7.99992   | -0.152872 | 0.879274 |
| XLOC_014516 | SF11                   | chr22:31892124-32026810  | 7.03165   | 6.32471   | -0.152862 | 0.958902 |
| XLOC_017093 | C5orf22                | chr5:31532372-31555165   | 3.29946   | 2.96807   | -0.152704 | 0.898814 |
| XLOC_004069 | SBF2                   | chr11:9776316-10315754   | 2.23052   | 2.00651   | -0.152694 | 0.92867  |
| XLOC_020640 | AP4M1                  | chr7:99690403-99723128   | 26.0574   | 23.444    | -0.152474 | 0.986822 |
| XLOC_014533 | APOL6                  | chr22:36044423-36064456  | 0.162861  | 0.146529  | -0.152454 | 1        |
| XLOC_008862 | ARHGAP44               | chr17:12692828-12921381  | 3.15551   | 2.83907   | -0.152451 | 0.979875 |
| XLOC_009007 | MRM1                   | chr17:34958024-34965407  | 8.25741   | 7.42948   | -0.152428 | 0.910788 |
| XLOC_012562 | INPP1                  | chr2:191208195-191236397 | 11.2084   | 10.0847   | -0.152413 | 0.887208 |
| XLOC_012313 | ARID5A                 | chr2:97202463-97218371   | 10.9052   | 9.81246   | -0.152326 | 0.902703 |
| XLOC_008616 | TRADD                  | chr16:67188088-67193812  | 10.6722   | 9.60313   | -0.152282 | 0.919186 |
| XLOC_017146 | ZSWIM6                 | chr5:60628099-60841999   | 2.17948   | 1.96117   | -0.152265 | 0.907651 |
| XLOC_015131 | PARP3                  | chr3:51976360-51982883   | 12.3835   | 11.1436   | -0.152202 | 0.877187 |
| XLOC_014026 | ADNP                   | chr20:49506882-49547527  | 10.7021   | 9.6309    | -0.152155 | 0.863259 |
| XLOC_015460 | USP13                  | chr3:179370932-179507185 | 1.6568    | 1.491     | -0.152125 | 0.898291 |
| XLOC_009015 | MRPL45                 | chr17:36452988-36479101  | 52.1499   | 46.9322   | -0.152089 | 0.863458 |
| XLOC_009535 | ATPAF2                 | chr17:17921333-17942480  | 10.4788   | 9.43089   | -0.152002 | 0.905942 |
| XLOC_013031 | KRCC1                  | chr2:88326723-88355248   | 2.65293   | 2.38773   | -0.151951 | 0.92969  |
| XLOC_002065 | RGS16                  | chr1:182567757-182573548 | 5.08332   | 4.57529   | -0.151906 | 0.909768 |
| XLOC_001108 | NTPCR                  | chr1:233086369-233114215 | 40.5752   | 36.5213   | -0.151861 | 0.881851 |
| XLOC_010150 | TTC39C                 | chr18:21572736-21715574  | 24.7496   | 22.2768   | -0.151861 | 0.943036 |
| XLOC_016835 | LOC100506746           | chr4:87846045-87856002   | 0.609573  | 0.548746  | -0.151659 | 0.959465 |
| XLOC_022485 | SMC2                   | chr9:106856540-106903701 | 4.80581   | 4.32626   | -0.151656 | 0.874709 |
| XLOC_018690 | LOC285819              | chr6:26458152-26482737   | 0.394293  | 0.354956  | -0.151627 | 0.988533 |
| XLOC_012963 | TIA1                   | chr2:70436575-70475779   | 7.04596   | 6.34332   | -0.151559 | 0.872554 |
| XLOC_018496 | AKAP7                  | chr6:131456825-131604671 | 0.927979  | 0.83545   | -0.151539 | 0.948088 |
| XLOC_009050 | TMEM99                 | chr17:38974368-38992526  | 10.0182   | 9.0198    | -0.151453 | 0.952905 |
| XLOC_000932 | RNF2                   | chr1:185014550-185071741 | 9.22931   | 8.31041   | -0.151303 | 0.871957 |
| XLOC_021662 | CPNE3                  | chr8:87526655-87573726   | 21.9108   | 19.73     | -0.151256 | 0.865907 |
| XLOC_007626 | OAZ2                   | chr15:64979772-64995462  | 38.6425   | 34.7976   | -0.151199 | 0.86338  |
| XLOC_020510 | ZNF107                 | chr7:64126510-64171401   | 0.733647  | 0.660673  | -0.151115 | 0.934181 |
| XLOC_007821 | DECR2                  | chr16:451857-462487      | 19.3686   | 17.4427   | -0.151091 | 0.898524 |
| XLOC_009863 | VEZF1                  | chr17:56048909-56065615  | 7.38731   | 6.65431   | -0.150759 | 0.8725   |
| XLOC_015475 | DVL3                   | chr3:183873283-183891314 | 17.4482   | 15.7171   | -0.150746 | 0.867342 |
| XLOC_007567 | SECISBP2L              | chr15:49280834-49338760  | 2.04424   | 1.84143   | -0.150738 | 0.898291 |
| XLOC_012976 | SFXN5                  | chr2:73169164-73298965   | 0.795298  | 0.716451  | -0.150628 | 0.949739 |
| XLOC_000008 | PLEKHN1                | chr1:901876-910484       | 1.8532    | 1.66947   | -0.150627 | 0.950002 |
| XLOC_015163 | KCTD6                  | chr3:58477822-58488087   | 6.10553   | 5.50023   | -0.150624 | 0.916337 |
| XLOC_015024 | ACVR2B                 | chr3:38492517-38534633   | 1.32093   | 1.18999   | -0.1506   | 0.902188 |
| XLOC_008980 | CDK5R1                 | chr17:30814104-30818271  | 2.53797   | 2.2867    | -0.150407 | 0.917687 |
| XLOC_005552 | METTL1                 | chr12:58162350-58165914  | 8.18523   | 7.37516   | -0.150348 | 0.913628 |
| XLOC_019094 | SGK1                   | chr6:134490383-134639196 | 2.7049    | 2.43729   | -0.150298 | 0.931473 |
| XLOC_019078 | MED23                  | chr6:131894343-131949375 | 1.86471   | 1.68024   | -0.150279 | 0.913628 |
| XLOC_015073 | CXCR6                  | chr3:45959390-46037316   | 0.0251473 | 0.0226603 | -0.15024  | 1        |
| XLOC_003870 | TMEM136                | chr11:120195837-12020438 | 4.35133   | 3.92111   | -0.150191 | 0.898291 |
| XLOC_002937 | FLJ31813               | chr10:51780941-51827563  | 0.416747  | 0.37555   | -0.150168 | 0.966946 |
| XLOC_022106 | UQCRR                  | chr8:97238903-97247862   | 56.7257   | 51.1188   | -0.150149 | 0.874179 |
| XLOC_012425 | MZT2B                  | chr2:130908964-130948301 | 411.259   | 370.623   | -0.150096 | 0.909694 |
| XLOC_006472 | ADCK1                  | chr14:78266425-78400297  | 3.65804   | 3.29677   | -0.150017 | 0.92844  |

|             |              |                          |           |           |           |          |
|-------------|--------------|--------------------------|-----------|-----------|-----------|----------|
| XLOC_002783 | DIP2C        | chr10:320129-735608      | 2.3794    | 2.14443   | -0.149999 | 0.897241 |
| XLOC_002111 | LMOD1        | chr1:201865583-201915716 | 0.152614  | 0.137545  | -0.149987 | 1        |
| XLOC_015046 | ZBTB47       | chr3:42695175-42709072   | 1.70852   | 1.53994   | -0.149867 | 0.922365 |
| XLOC_007804 | TM2D3        | chr15:102182048-10219258 | 19.7779   | 17.8266   | -0.149859 | 0.889643 |
| XLOC_014067 | LOC100127888 | chr20:61273796-61303647  | 1.13151   | 1.02003   | -0.149635 | 0.990857 |
| XLOC_009771 | HDAC5        | chr17:42154120-42201014  | 17.2331   | 15.5357   | -0.149599 | 0.866932 |
| XLOC_013348 | FN1          | chr2:216225178-21630079  | 0.0232602 | 0.0209695 | -0.14957  | 1        |
| XLOC_002160 | YOD1         | chr1:207217193-20722632  | 1.9415    | 1.75031   | -0.149565 | 0.902692 |
| XLOC_006351 | FRMD6        | chr14:51921229-52197444  | 17.5146   | 15.7901   | -0.14954  | 0.869283 |
| XLOC_014549 | H1FO         | chr22:38201113-38203443  | 223.672   | 201.652   | -0.149518 | 0.872117 |
| XLOC_014427 | CRKL         | chr22:21271713-21308037  | 13.3994   | 12.0803   | -0.149508 | 0.869885 |
| XLOC_002646 | SEMA4G       | chr10:102732285-1027472  | 4.44485   | 4.00734   | -0.14949  | 0.972989 |
| XLOC_015170 | ATXN7        | chr3:63850232-63989136   | 1.6755    | 1.51059   | -0.149479 | 0.910582 |
| XLOC_007440 | WASH3P       | chr15:102501015-1025192  | 13.5413   | 12.2091   | -0.149411 | 0.887208 |
| XLOC_017448 | THG1L        | chr5:157158322-15716677  | 22.1927   | 20.01     | -0.149367 | 0.88621  |
| XLOC_002360 | VIM          | chr10:17270257-17279592  | 7.51375   | 6.77548   | -0.14921  | 0.912776 |
| XLOC_006661 | C14orf79     | chr14:105452615-1054618  | 5.67432   | 5.1172    | -0.149093 | 0.915898 |
| XLOC_001343 | LOC729059    | chr1:23337326-23342343   | 0.0464973 | 0.0419338 | -0.149032 | 1        |
| XLOC_010329 | ZSCAN30      | chr18:32820993-32870196  | 1.32565   | 1.1957    | -0.148843 | 0.954559 |
| XLOC_018004 | MAPK9        | chr5:179660594-17971907  | 10.8879   | 9.82284   | -0.148521 | 0.872955 |
| XLOC_012928 | PUS10        | chr2:61167547-61279125   | 0.393686  | 0.355217  | -0.148343 | 0.986822 |
| XLOC_015809 | TMF1         | chr3:69068977-69101484   | 3.05679   | 2.75863   | -0.148067 | 0.88884  |
| XLOC_011043 | TBC1D17      | chr19:50380681-50392007  | 11.9963   | 10.8262   | -0.148067 | 0.901475 |
| XLOC_005143 | UNC119B      | chr12:121148237-1211614  | 10.7803   | 9.72941   | -0.147974 | 0.876899 |
| XLOC_008608 | CMTM4        | chr16:66648652-66730610  | 12.2003   | 11.0111   | -0.147969 | 0.877363 |
| XLOC_022572 | STXBP1       | chr9:130374485-13045499  | 17.0179   | 15.3601   | -0.147865 | 0.873414 |
| XLOC_001658 | BCAR3        | chr1:94027342-94312706   | 6.50732   | 5.87349   | -0.147845 | 0.898567 |
| XLOC_013001 | GCFC2        | chr2:75889831-75938111   | 12.0951   | 10.9172   | -0.147819 | 0.926225 |
| XLOC_016822 | SEC31A       | chr4:83739813-83812419   | 6.54373   | 5.90654   | -0.147801 | 0.885255 |
| XLOC_008737 | DBNDD1       | chr16:90071278-90085937  | 43.3373   | 39.1179   | -0.14778  | 0.872554 |
| XLOC_005964 | FRP1         | chr13:98795433-99102023  | 14.2959   | 12.9041   | -0.147777 | 0.872117 |
| XLOC_003241 | LOC255512    | chr11:1330937-1331937    | 3.01088   | 2.71795   | -0.147665 | 0.962439 |
| XLOC_006114 | ESD          | chr13:47345390-47371367  | 59.3675   | 53.5958   | -0.147554 | 0.869746 |
| XLOC_006794 | DNAAF2       | chr14:50091891-50101948  | 6.99398   | 6.31407   | -0.147543 | 0.9061   |
| XLOC_014152 | MRPS6,SLCSA3 | chr21:35445822-35515334  | 63.0759   | 56.9481   | -0.147442 | 0.891905 |
| XLOC_021780 | GSDMD        | chr8:144635556-14464523  | 48.6502   | 43.9265   | -0.147354 | 0.878112 |
| XLOC_009832 | ZNFX2        | chr17:47366567-47439835  | 0.885796  | 0.799825  | -0.14729  | 0.909694 |
| XLOC_009660 | CACNB1       | chr17:37329708-37353956  | 4.73818   | 4.27833   | -0.147287 | 0.907651 |
| XLOC_012765 | TMEM18       | chr2:667972-677439       | 17.4256   | 15.7347   | -0.147258 | 0.879514 |
| XLOC_003830 | NNMT         | chr11:114166534-1141832  | 0.0117312 | 0.0105935 | -0.14717  | 1        |
| XLOC_004125 | KIF18A       | chr11:28042162-28129746  | 1.53113   | 1.38267   | -0.147135 | 0.928457 |
| XLOC_010356 | SMAD2        | chr18:45359465-45457517  | 5.7467    | 5.18968   | -0.147087 | 0.868833 |
| XLOC_020995 | LOC401320    | chr7:30587972-30617395   | 0.594744  | 0.53711   | -0.147052 | 0.950929 |
| XLOC_014228 | DIP2A        | chr21:47878861-47989926  | 4.10233   | 3.70492   | -0.147002 | 0.919029 |
| XLOC_006325 | BRMS1L       | chr14:36295596-36341169  | 2.3022    | 2.07919   | -0.146988 | 0.928035 |
| XLOC_011554 | GMIP         | chr19:19740284-19754455  | 16.2067   | 14.6372   | -0.146945 | 0.877493 |
| XLOC_017437 | SAP30L       | chr5:153825516-15384061  | 3.07669   | 2.77886   | -0.146888 | 0.895926 |
| XLOC_016403 | FGF5         | chr4:81187741-81212171   | 0.587953  | 0.531049  | -0.146856 | 0.943036 |
| XLOC_016503 | LARP1B       | chr4:128982502-12913228  | 5.34365   | 4.82666   | -0.146802 | 0.900578 |
| XLOC_009117 | MAP3K14-AS1  | chr17:43325302-43394414  | 0.853949  | 0.771331  | -0.1468   | 0.991767 |
| XLOC_019122 | ADAT2        | chr6:143743968-14377184  | 2.19002   | 1.97814   | -0.146793 | 0.903682 |
| XLOC_004397 | FCHSD2       | chr11:72547789-72853143  | 4.18548   | 3.78069   | -0.146741 | 0.898376 |
| XLOC_000061 | VAMP3        | chr1:7831328-7841492     | 23.8334   | 21.5303   | -0.146616 | 0.878867 |
| XLOC_008472 | COG7         | chr16:23399813-23464512  | 6.09656   | 5.50753   | -0.146589 | 0.907689 |
| XLOC_022356 | ALDH1B1      | chr9:38392660-38398662   | 21.3561   | 19.2954   | -0.146392 | 0.873144 |
| XLOC_014507 | OSBP2        | chr22:31090792-31303811  | 5.1481    | 4.65137   | -0.146384 | 0.904636 |
| XLOC_000253 | IQCC         | chr1:32671235-32674288   | 1.67406   | 1.51253   | -0.146384 | 0.942519 |
| XLOC_007589 | FAM214A      | chr15:52873517-52970820  | 1.39516   | 1.26054   | -0.146382 | 0.925753 |
| XLOC_013981 | LOC79015     | chr20:43285091-43300380  | 0.0256871 | 0.0232097 | -0.14632  | 1        |
| XLOC_019031 | MICAL1       | chr6:109765265-10977719  | 16.7186   | 15.1066   | -0.14628  | 0.878504 |
| XLOC_001565 | SSBP3        | chr1:54692194-54872092   | 13.8487   | 12.514    | -0.146207 | 0.898751 |
| XLOC_022531 | CNTRL        | chr9:123850573-12393988  | 1.90784   | 1.72412   | -0.146083 | 0.89937  |
| XLOC_023982 | ARMCX2       | chrX:100910267-10091486  | 0.149986  | 0.135553  | -0.145969 | 1        |
| XLOC_011812 | CA11         | chr19:49141271-49185502  | 12.0181   | 10.8619   | -0.145926 | 0.907688 |
| XLOC_016845 | FAM13A       | chr4:89630939-89978346   | 1.44435   | 1.30541   | -0.145925 | 0.922365 |
| XLOC_001009 | DYRK3        | chr1:206808880-20682254  | 10.5942   | 9.57584   | -0.145802 | 0.895818 |
| XLOC_000089 | PLOD1        | chr1:11994723-12035599   | 126.587   | 114.421   | -0.145784 | 0.880112 |
| XLOC_019041 | TRAF3IP2     | chr6:111804674-11192747  | 4.29265   | 3.88015   | -0.145758 | 0.902851 |
| XLOC_009769 | TMEM101      | chr17:42088555-42092345  | 40.3995   | 36.5174   | -0.145753 | 0.877493 |
| XLOC_017863 | HDAC3        | chr5:141000442-14101642  | 72.2794   | 65.3393   | -0.145633 | 0.876899 |
| XLOC_004030 | FAM160A2     | chr11:6232563-6255941    | 9.78659   | 8.84706   | -0.145607 | 0.895904 |
| XLOC_015601 | TBC1D5       | chr3:17198653-17784240   | 3.91187   | 3.53642   | -0.145568 | 0.889643 |
| XLOC_005158 | LOC100507066 | chr12:122755980-1229071  | 0.0189002 | 0.0170862 | -0.145565 | 1        |
| XLOC_006228 | PCID2        | chr13:113831852-1138630  | 28.7665   | 26.0064   | -0.145525 | 0.876899 |
| XLOC_002828 | NMT2         | chr10:15147770-15210695  | 3.77914   | 3.41659   | -0.145498 | 0.896507 |
| XLOC_010967 | PRR24        | chr19:47777658-47778980  | 24.4197   | 22.0798   | -0.145318 | 0.932042 |
| XLOC_004731 | ETV6         | chr12:11802787-12079107  | 2.12879   | 1.92493   | -0.145231 | 0.909435 |
| XLOC_016407 | THAP9        | chr4:83814604-83841284   | 1.02063   | 0.922941  | -0.145146 | 0.979701 |
| XLOC_023109 | CRAT         | chr9:131857072-13187307  | 82.7262   | 74.8085   | -0.145143 | 0.869168 |

|             |                      |                          |            |            |           |          |
|-------------|----------------------|--------------------------|------------|------------|-----------|----------|
| XLOC_012880 | SOS1                 | chr2:39208689-39347604   | 1.95859    | 1.7713     | -0.14501  | 0.902188 |
| XLOC_020985 | HIBADH               | chr7:27565058-27702620   | 13.5596    | 12.2639    | -0.144889 | 0.893751 |
| XLOC_010349 | PIAS2                | chr18:44390022-44497495  | 10.4699    | 9.46967    | -0.144858 | 0.880786 |
| XLOC_016325 | EXOC1                | chr4:56719815-56771244   | 6.21849    | 5.62446    | -0.144851 | 0.89272  |
| XLOC_004698 | CLSTN3               | chr12:7282966-7311530    | 9.42004    | 8.52018    | -0.144849 | 0.892764 |
| XLOC_002377 | BMI1,COMMD3,COMMD3-B | chr10:22605311-22620414  | 79.8957    | 72.2636    | -0.144849 | 0.913628 |
| XLOC_021069 | FKBP9L               | chr7:55748766-55772260   | 0.573403   | 0.518688   | -0.144683 | 0.964511 |
| XLOC_006812 | ERO1L                | chr14:53108604-53162419  | 38.4314    | 34.7649    | -0.144653 | 0.885254 |
| XLOC_014036 | BCAS1                | chr20:52560078-52687304  | 0.0083789  | 0.00757995 | -0.144572 | 1        |
| XLOC_001813 | VPS72                | chr1:151148775-151162685 | 42.6877    | 38.6182    | -0.144541 | 0.877493 |
| XLOC_022399 | GCNT1                | chr9:79056581-79122332   | 1.03189    | 0.933642   | -0.14435  | 0.931471 |
| XLOC_014754 | NIPSNAP1             | chr22:29950797-29977326  | 77.388     | 70.0198    | -0.144347 | 0.872056 |
| XLOC_014223 | COL6A1               | chr21:47401662-47424963  | 21.9802    | 19.888     | -0.14431  | 0.882592 |
| XLOC_015425 | IL12A                | chr3:159706622-159713801 | 1.56299    | 1.41429    | -0.144227 | 0.954866 |
| XLOC_016482 | METTL14              | chr4:119606573-119632071 | 3.33815    | 3.02109    | -0.143979 | 0.922247 |
| XLOC_013872 | DZANK1               | chr20:18364010-18447829  | 0.247703   | 0.224179   | -0.143961 | 1        |
| XLOC_002489 | DDX50                | chr10:70661033-70706603  | 28.3919    | 25.7009    | -0.14366  | 0.877483 |
| XLOC_009018 | MLLT6                | chr17:36861872-36886056  | 17.6539    | 15.9818    | -0.143562 | 0.877493 |
| XLOC_005453 | BIN2                 | chr12:51674821-51717938  | 0.00652496 | 0.00590738 | -0.14345  | 1        |
| XLOC_018790 | PBX2                 | chr6:32152509-32157963   | 29.5926    | 26.7931    | -0.143373 | 0.877191 |
| XLOC_022516 | RGS3                 | chr9:116207008-116360021 | 10.1964    | 9.23248    | -0.143269 | 0.918342 |
| XLOC_017870 | SPRY4                | chr5:141689991-141704621 | 44.9552    | 40.7059    | -0.143249 | 0.877493 |
| XLOC_000032 | PRKCZ                | chr1:1981908-2144159     | 18.8413    | 17.0607    | -0.143222 | 0.959465 |
| XLOC_009750 | CCR10                | chr17:40831419-40833845  | 24.911     | 22.5584    | -0.143123 | 0.918917 |
| XLOC_022708 | C9orf66              | chr9:213107-465259       | 0.360641   | 0.326592   | -0.143075 | 0.986822 |
| XLOC_018352 | FBX09                | chr6:52929795-52965670   | 6.19938    | 5.61416    | -0.143054 | 0.893663 |
| XLOC_000519 | SLC44A3              | chr1:95285897-95360803   | 0.931757   | 0.843843   | -0.142979 | 0.954768 |
| XLOC_008184 | THAP11               | chr16:67862059-67905219  | 27.0441    | 24.4928    | -0.142956 | 0.979701 |
| XLOC_016134 | PPP1R2               | chr3:195241220-195270221 | 10.4929    | 9.50316    | -0.142936 | 0.881368 |
| XLOC_000512 | MTF2                 | chr1:93544791-93604638   | 6.11782    | 5.54095    | -0.142883 | 0.887208 |
| XLOC_005563 | C12orf66             | chr12:64586418-64616076  | 1.03206    | 0.93475    | -0.142874 | 0.95534  |
| XLOC_001097 | RABA4,SPHAR          | chr1:229406808-229441641 | 9.69666    | 8.78267    | -0.142829 | 0.885624 |
| XLOC_012659 | ANKZF1               | chr2:220094478-220101391 | 42.5464    | 38.5366    | -0.142807 | 0.880112 |
| XLOC_021237 | POLR2J2,UPK3BL       | chr7:102277194-102312171 | 49.4938    | 44.84      | -0.142462 | 0.882107 |
| XLOC_007897 | PAQR4                | chr16:3019341-3030540    | 26.5314    | 24.0376    | -0.142408 | 0.960403 |
| XLOC_003623 | SIPA1                | chr11:65405577-65418391  | 14.4134    | 13.0592    | -0.142349 | 0.89952  |
| XLOC_002332 | PFKFB3               | chr10:6186842-6277507    | 20.9989    | 19.0271    | -0.142263 | 0.886345 |
| XLOC_015234 | CEP97                | chr3:101443493-101486181 | 0.489933   | 0.44393    | -0.142252 | 0.952905 |
| XLOC_000976 | LGR6                 | chr1:202163117-202288885 | 0.0351899  | 0.0318865  | -0.142216 | 1        |
| XLOC_010053 | RFNG                 | chr17:80005777-80009650  | 68.4423    | 62.0174    | -0.142214 | 0.876899 |
| XLOC_005255 | LPCAT3               | chr12:7085346-7125842    | 12.1908    | 11.047     | -0.142135 | 0.906895 |
| XLOC_005443 | RACGAP1              | chr12:50382944-50419307  | 15.7068    | 14.2334    | -0.142106 | 0.879396 |
| XLOC_009683 | KRT10                | chr17:38974368-38992526  | 18.4686    | 16.7361    | -0.142105 | 0.928902 |
| XLOC_021139 | HGF                  | chr7:81331443-81399452   | 3.36658    | 3.05079    | -0.142105 | 0.947008 |
| XLOC_006106 | SLC25A30             | chr13:45967453-45992516  | 0.495267   | 0.448857   | -0.141952 | 0.95835  |
| XLOC_001200 | MXRA8                | chr1:1288070-1293915     | 0.482282   | 0.437091   | -0.141944 | 0.977103 |
| XLOC_013069 | REV1                 | chr2:100016937-100106481 | 2.74056    | 2.48386    | -0.141888 | 0.912689 |
| XLOC_011739 | ZNF235               | chr19:44790500-44809178  | 0.298015   | 0.270117   | -0.141802 | 1        |
| XLOC_001335 | HP1BP3               | chr1:21069170-21113181   | 27.0716    | 24.5387    | -0.14172  | 0.879045 |
| XLOC_010417 | PQLC1                | chr18:77662419-77711653  | 41.2269    | 37.3699    | -0.141709 | 0.878666 |
| XLOC_001526 | MOB3C                | chr1:47073386-47082563   | 5.49789    | 4.98378    | -0.141637 | 0.909164 |
| XLOC_000599 | FAM19A3              | chr1:113263188-113269851 | 1.08608    | 0.98454    | -0.141607 | 0.966946 |
| XLOC_001118 | TBCE                 | chr1:235530727-235667781 | 5.14434    | 4.66346    | -0.141588 | 0.971121 |
| XLOC_004035 | ARFIP2               | chr11:6495912-6505911    | 10.1027    | 9.15869    | -0.141524 | 0.929652 |
| XLOC_002278 | AKT3                 | chr1:243419306-244006881 | 1.67943    | 1.52252    | -0.141513 | 0.914427 |
| XLOC_000235 | RNU11                | chr1:28975111-28975246   | 32.2445    | 29.2332    | -0.141442 | 0.981044 |
| XLOC_011631 | ZNF585B              | chr19:37672480-37701451  | 0.915524   | 0.830059   | -0.141384 | 0.933417 |
| XLOC_004678 | PTMS                 | chr12:6875540-6880118    | 219.636    | 199.134    | -0.141379 | 0.883938 |
| XLOC_003186 | DHX32                | chr10:127512103-12756981 | 13.6717    | 12.3967    | -0.141235 | 0.958814 |
| XLOC_021347 | JHDM1D               | chr7:139784545-139876741 | 1.91369    | 1.73534    | -0.141143 | 0.90437  |
| XLOC_001334 | SH2D5                | chr1:21046224-21059133   | 0.432669   | 0.392374   | -0.141033 | 0.965573 |
| XLOC_011356 | SLC25A23             | chr19:6440074-6459781    | 35.3582    | 32.066     | -0.140997 | 0.878089 |
| XLOC_014830 | NPTXR                | chr22:39214455-39240017  | 0.250721   | 0.227387   | -0.140935 | 1        |
| XLOC_014612 | PARVB                | chr22:44395090-44565112  | 37.2575    | 33.7901    | -0.140929 | 0.88245  |
| XLOC_002743 | HMX3                 | chr10:124895566-12489721 | 0.702161   | 0.636869   | -0.140804 | 0.982629 |
| XLOC_017855 | APBB3                | chr5:139937852-139944181 | 7.36403    | 6.67952    | -0.140753 | 0.919921 |
| XLOC_008351 | SNORA64              | chr16:2012061-2014827    | 8.80921    | 7.99057    | -0.140715 | 0.990324 |
| XLOC_000185 | RCAN3                | chr1:2482822-24863510    | 3.32509    | 3.01636    | -0.140586 | 0.930066 |
| XLOC_022718 | PLGRKT               | chr9:5357966-5437937     | 12.8587    | 11.6666    | -0.140371 | 0.919029 |
| XLOC_011011 | CGB5                 | chr19:49547101-49548568  | 0.188568   | 0.17109    | -0.140324 | 1        |
| XLOC_001123 | MTR                  | chr1:236958580-237067281 | 1.74437    | 1.5827     | -0.140323 | 0.907651 |
| XLOC_003020 | ANXA11               | chr10:81914879-81965328  | 70.1063    | 63.6135    | -0.140211 | 0.884392 |
| XLOC_021208 | GNC2                 | chr7:99767228-99774990   | 1.76698    | 1.60339    | -0.140157 | 0.954677 |
| XLOC_011222 | ZNF548               | chr19:57901217-57913919  | 1.5984     | 1.45049    | -0.140093 | 0.928653 |
| XLOC_010627 | ZSWIM4               | chr19:13906273-13943044  | 6.14981    | 5.58148    | -0.139894 | 0.912776 |
| XLOC_007686 | UBL7                 | chr15:74738371-74753529  | 53.5393    | 48.5972    | -0.139725 | 0.88709  |
| XLOC_020599 | CDK14                | chr7:90338711-90839904   | 0.0134172  | 0.0121789  | -0.139705 | 1        |
| XLOC_015199 | ZNF654               | chr3:88101099-88207115   | 1.69119    | 1.53511    | -0.139692 | 0.979484 |
| XLOC_023107 | DOLK                 | chr9:131707808-131769371 | 18.9576    | 17.2089    | -0.139617 | 0.979701 |

|             |              |                          |            |            |           |          |
|-------------|--------------|--------------------------|------------|------------|-----------|----------|
| XLOC_008559 | NETO2        | chr16:47115430-471177936 | 11.9891    | 10.8834    | -0.139589 | 0.890622 |
| XLOC_008138 | ARL2BP       | chr16:57279037-57287545  | 35.3379    | 32.0845    | -0.139339 | 0.887208 |
| XLOC_007560 | SHF          | chr15:45459411-45493373  | 5.17951    | 4.70265    | -0.139339 | 0.922712 |
| XLOC_005817 | ATP12A       | chr13:25254548-25285923  | 0.0138774  | 0.0126004  | -0.139267 | 1        |
| XLOC_011031 | PRRG2        | chr19:50084586-50094265  | 0.788978   | 0.716429   | -0.139116 | 0.974044 |
| XLOC_000634 | NOTCH2NL     | chr1:145209110-145285912 | 6.24565    | 5.67158    | -0.139101 | 0.893535 |
| XLOC_009519 | NCOR1        | chr17:15933407-16118874  | 1.6046     | 1.45714    | -0.13907  | 0.917325 |
| XLOC_021480 | ZDHHC2       | chr8:17013835-17080241   | 6.49347    | 5.89682    | -0.139054 | 0.896116 |
| XLOC_004704 | FOXJ2        | chr12:8185358-8208118    | 2.58137    | 2.34461    | -0.138786 | 0.914446 |
| XLOC_004871 | SP1          | chr12:53773978-53810226  | 8.01515    | 7.28016    | -0.138759 | 0.889553 |
| XLOC_022022 | VCPIP1       | chr8:67542487-67579452   | 2.50988    | 2.27979    | -0.138721 | 0.904636 |
| XLOC_022734 | BNC2         | chr9:16409500-16870786   | 0.834287   | 0.757866   | -0.138602 | 0.917325 |
| XLOC_020428 | FAM188B,INMT | chr7:30791750-30932002   | 0.772743   | 0.702007   | -0.138502 | 0.958201 |
| XLOC_000362 | MMACHC       | chr1:45965855-45988562   | 2.67953    | 2.43434    | -0.138451 | 0.948088 |
| XLOC_018800 | TBC1D9B      | chr5:179289070-179334854 | 29.8404    | 27.1101    | -0.138437 | 0.887208 |
| XLOC_001389 | IFI6         | chr1:27992571-27998724   | 4.36937    | 3.96967    | -0.138406 | 0.958201 |
| XLOC_008617 | KIAA0895L    | chr16:67204399-67217883  | 5.617      | 5.1033     | -0.138369 | 0.954768 |
| XLOC_010996 | CYTH2        | chr19:48972464-48985571  | 18.923     | 17.1928    | -0.138332 | 0.88709  |
| XLOC_021128 | SRCRB4D      | chr7:76018645-76071388   | 0.582727   | 0.529463   | -0.138291 | 0.989879 |
| XLOC_017531 | LTC4S        | chr5:179220985-179223511 | 1.35259    | 1.22902    | -0.138212 | 0.982349 |
| XLOC_008102 | CHD9         | chr16:53088944-53361414  | 1.82466    | 1.658      | -0.138182 | 0.902585 |
| XLOC_013972 | EMILIN3      | chr20:39969559-39995498  | 3.67428    | 3.33889    | -0.138092 | 0.957206 |
| XLOC_011494 | SLC1A6       | chr19:15060844-15121455  | 0.00633099 | 0.00575317 | -0.138075 | 1        |
| XLOC_003747 | TMEM135      | chr11:86748885-87039876  | 2.45132    | 2.22767    | -0.138022 | 0.898626 |
| XLOC_017861 | TAFF7        | chr5:140698056-140700351 | 33.6951    | 30.6229    | -0.137928 | 0.889442 |
| XLOC_010114 | TWSG1        | chr18:9334764-9402418    | 8.7119     | 7.9188     | -0.137707 | 0.895717 |
| XLOC_015586 | XPC          | chr3:14186647-14220172   | 11.3179    | 10.2878    | -0.137673 | 0.89718  |
| XLOC_012878 | DHX57        | chr2:39024875-39103021   | 3.06794    | 2.78872    | -0.137666 | 0.912767 |
| XLOC_002565 | LOC439994    | chr10:88998423-89103331  | 3.22533    | 2.93196    | -0.137579 | 0.985982 |
| XLOC_000047 | LOC100133612 | chr1:3816967-3832011     | 0.0700266  | 0.0636644  | -0.137416 | 1        |
| XLOC_013980 | ADA          | chr20:43248162-43280376  | 22.3013    | 20.2759    | -0.137364 | 0.904448 |
| XLOC_014300 | PAXBP1       | chr21:34100424-34144169  | 10.3919    | 9.44861    | -0.137289 | 0.902188 |
| XLOC_016249 | BST1         | chr4:15704572-15733796   | 0.411944   | 0.37455    | -0.137289 | 0.978981 |
| XLOC_018518 | SLC35D3      | chr6:137243401-137246771 | 0.0263454  | 0.0239548  | -0.137239 | 1        |
| XLOC_023595 | ZBTB33       | chrX:119384606-119392251 | 3.81953    | 3.47311    | -0.137167 | 0.906895 |
| XLOC_003926 | JAM3         | chr11:133938819-13402161 | 0.752619   | 0.684379   | -0.137125 | 0.955758 |
| XLOC_007822 | RAB11FIP3    | chr16:475667-572481      | 15.8365    | 14.4007    | -0.137117 | 0.894473 |
| XLOC_008209 | PDPR         | chr16:70147528-70195184  | 1.87164    | 1.70197    | -0.137092 | 0.917325 |
| XLOC_010483 | FZR1         | chr19:3506294-3536755    | 25.6712    | 23.3457    | -0.136993 | 0.894911 |
| XLOC_005762 | HCAR2        | chr12:123185839-12318791 | 0.00890834 | 0.00810234 | -0.136818 | 1        |
| XLOC_014832 | CBX7         | chr22:39526778-39548538  | 10.8994    | 9.914      | -0.136704 | 0.902351 |
| XLOC_020568 | SRRM3        | chr7:75831215-75916605   | 12.1239    | 11.0279    | -0.13669  | 0.905695 |
| XLOC_023272 | MOSP2D       | chrX:14891526-14939459   | 0.863426   | 0.785432   | -0.136587 | 0.950929 |
| XLOC_013169 | DARS         | chr2:136664253-136743222 | 60.6491    | 55.1717    | -0.136557 | 0.892082 |
| XLOC_017520 | N4BP3        | chr5:177540555-177553101 | 4.89663    | 4.45442    | -0.136549 | 0.909435 |
| XLOC_021317 | COG2,TSGA13  | chr7:130126015-130371401 | 13.8158    | 12.5687    | -0.13649  | 0.954677 |
| XLOC_005206 | ZNF26        | chr12:133562933-13358911 | 4.47958    | 4.07556    | -0.136364 | 0.915538 |
| XLOC_017976 | PRRT-AS1     | chr5:176853686-176883281 | 0.67415    | 0.613356   | -0.136345 | 0.995302 |
| XLOC_016518 | GAB1         | chr4:144257982-144395711 | 0.286953   | 0.261088   | -0.136275 | 1        |
| XLOC_008563 | SIAH1        | chr16:48274602-48420559  | 10.7331    | 9.76667    | -0.136122 | 0.97314  |
| XLOC_002566 | FAM22D       | chr10:89117476-89130452  | 0.119096   | 0.108377   | -0.136071 | 1        |
| XLOC_021777 | GLI4         | chr8:144349606-144359101 | 31.2944    | 28.4787    | -0.136023 | 0.918898 |
| XLOC_023811 | SRPX         | chrX:3800587-38080177    | 13.4111    | 12.2047    | -0.135987 | 0.912308 |
| XLOC_002618 | LCOR         | chr10:98592016-98724198  | 1.3574     | 1.23533    | -0.135958 | 0.921047 |
| XLOC_001047 | PROX1        | chr1:214161277-214214847 | 0.0430509  | 0.0391797  | -0.135938 | 1        |
| XLOC_013042 | GPAT2        | chr2:96676298-96700727   | 0.0837015  | 0.0761752  | -0.135931 | 1        |
| XLOC_009975 | UNC13D       | chr17:73823307-73840798  | 0.657445   | 0.598345   | -0.135892 | 0.958902 |
| XLOC_015358 | IL20RB       | chr3:136676706-136729921 | 0.19819    | 0.18039    | -0.135765 | 1        |
| XLOC_008154 | NDRG4        | chr16:58497548-58547523  | 4.72142    | 4.29787    | -0.135599 | 0.922257 |
| XLOC_018903 | CYP39A1      | chr6:46517444-46620523   | 0.448657   | 0.408417   | -0.135571 | 0.967901 |
| XLOC_010302 | ESCO1        | chr18:19109261-19180693  | 2.07538    | 1.88948    | -0.135383 | 0.925384 |
| XLOC_022403 | CEP78        | chr9:80850990-80881983   | 4.42721    | 4.03069    | -0.13537  | 0.921047 |
| XLOC_016277 | TBC1D1       | chr4:37892704-38140796   | 16.9241    | 15.4084    | -0.135356 | 0.90314  |
| XLOC_001528 | EFCAB14      | chr1:47139707-47184736   | 6.43949    | 5.86303    | -0.1353   | 0.898732 |
| XLOC_007118 | KLF13        | chr15:31619082-31670102  | 6.66874    | 6.07214    | -0.135208 | 0.898524 |
| XLOC_003892 | TBRG1        | chr11:124492741-12456461 | 4.76785    | 4.3416     | -0.135114 | 0.952905 |
| XLOC_021515 | SLC25A37     | chr8:23386362-23430063   | 21.7806    | 19.8337    | -0.13509  | 0.904636 |
| XLOC_017621 | RICTOR       | chr5:38938021-39074501   | 1.58357    | 1.44203    | -0.135076 | 0.914351 |
| XLOC_015288 | SLC15A2      | chr3:121613170-121663031 | 0.0218619  | 0.0199082  | -0.135057 | 1        |
| XLOC_024178 | IDH3G        | chrX:153051220-153063961 | 67.6245    | 61.5856    | -0.134953 | 0.972601 |
| XLOC_009961 | HID1         | chr17:72946838-72968900  | 19.4256    | 17.6909    | -0.13495  | 0.900463 |
| XLOC_015726 | MST1R        | chr3:49924435-49941306   | 5.21786    | 4.75195    | -0.134939 | 0.912776 |
| XLOC_021299 | GCC1         | chr7:127220681-127225651 | 7.23439    | 6.58854    | -0.134913 | 0.906895 |
| XLOC_015088 | PTPN23       | chr3:47422490-47454931   | 7.31131    | 6.65888    | -0.134851 | 0.907651 |
| XLOC_005772 | RILPL2       | chr12:123899935-12392121 | 31.1227    | 28.3461    | -0.134816 | 0.902309 |
| XLOC_003959 | KRTAP5-1     | chr11:1490684-1785501    | 0.20741    | 0.188906   | -0.134816 | 1        |
| XLOC_013133 | MAP3K2       | chr2:128056244-128100801 | 1.53384    | 1.39701    | -0.134812 | 0.909694 |
| XLOC_021770 | LY6K         | chr8:143781528-143808391 | 0.170266   | 0.155076   | -0.13481  | 1        |
| XLOC_006743 | CBLN3        | chr14:24895739-24898731  | 0.173987   | 0.158476   | -0.134712 | 1        |

|             |              |                          |           |           |           |          |
|-------------|--------------|--------------------------|-----------|-----------|-----------|----------|
| XLOC_003210 | SPRN         | chr10:135207620-1352381  | 2.71626   | 2.47417   | -0.134678 | 0.980098 |
| XLOC_003849 | TMEM25       | chr11:118401802-1184367  | 0.057528  | 0.0524027 | -0.134623 | 1        |
| XLOC_003680 | PPF1A1       | chr11:70116805-70230607  | 6.03744   | 5.49961   | -0.134609 | 0.905178 |
| XLOC_006856 | RAB15        | chr14:65381078-65569413  | 12.2829   | 11.1887   | -0.134601 | 0.973348 |
| XLOC_006804 | SAV1         | chr14:51100297-51135071  | 14.6356   | 13.3342   | -0.134351 | 0.89735  |
| XLOC_018771 | VWA7         | chr6:31733370-31745108   | 0.0943203 | 0.085934  | -0.134339 | 1        |
| XLOC_021883 | DLC1         | chr8:12940871-13372429   | 21.0592   | 19.1873   | -0.134297 | 0.896032 |
| XLOC_007656 | CALML4       | chr15:68483042-68498448  | 2.18366   | 1.98958   | -0.134282 | 0.927422 |
| XLOC_004911 | GDF11        | chr12:56137063-56211540  | 4.62966   | 4.21825   | -0.134261 | 0.963266 |
| XLOC_021578 | SGK196       | chr8:42948656-42978323   | 0.435281  | 0.396614  | -0.134212 | 0.976618 |
| XLOC_020785 | LOC100134229 | chr7:139877060-13987944  | 4.83672   | 4.4071    | -0.134197 | 0.929536 |
| XLOC_018884 | DNP1         | chr6:43193366-43197211   | 181.082   | 165.022   | -0.133986 | 0.898524 |
| XLOC_004629 | ZBTB44       | chr11:130096573-1301846  | 2.91886   | 2.66008   | -0.133932 | 0.906545 |
| XLOC_012081 | GAREML       | chr2:26395959-26412532   | 7.68183   | 7.00129   | -0.13383  | 0.913628 |
| XLOC_009836 | FAM117A      | chr17:47787686-47841518  | 11.8151   | 10.7685   | -0.133823 | 0.912689 |
| XLOC_016794 | BTC          | chr4:75671447-75719882   | 0.0263891 | 0.0240521 | -0.13378  | 1        |
| XLOC_001881 | LOC100505666 | chr11:155006281-15504202 | 1.09657   | 0.999492  | -0.13373  | 0.99351  |
| XLOC_008181 | PAR6A        | chr16:67694850-67696681  | 17.4544   | 15.9093   | -0.133722 | 0.926233 |
| XLOC_016129 | TMEM44       | chr3:194304996-19435415  | 15.3868   | 14.025    | -0.1337   | 0.916105 |
| XLOC_015814 | FOXP1        | chr3:71003864-71633140   | 3.46493   | 3.15829   | -0.133681 | 0.974169 |
| XLOC_002057 | LOC100527964 | chr1:180199432-18024418  | 1.39181   | 1.26873   | -0.133572 | 0.959709 |
| XLOC_004423 | PAK1         | chr11:77033059-77185108  | 21.0026   | 19.1457   | -0.133545 | 0.89982  |
| XLOC_007435 | LRRK1        | chr15:101459459-1016103  | 1.37678   | 1.25513   | -0.133463 | 0.931733 |
| XLOC_009475 | VAMP2        | chr17:8062464-8066293    | 31.1243   | 28.3747   | -0.133438 | 0.895479 |
| XLOC_005574 | MDM1         | chr12:68688345-68726161  | 2.34274   | 2.13594   | -0.133325 | 0.935062 |
| XLOC_005862 | COG6         | chr13:40229763-40365802  | 2.89468   | 2.63933   | -0.133234 | 0.919413 |
| XLOC_008163 | PDP2         | chr16:66914382-66925002  | 2.16466   | 1.97373   | -0.133214 | 0.918619 |
| XLOC_014958 | LINC00620    | chr3:13692220-13788132   | 0.0342788 | 0.0312557 | -0.133197 | 1        |
| XLOC_008671 | LOC283922    | chr16:74366303-74402153  | 0.541302  | 0.493604  | -0.133079 | 0.969075 |
| XLOC_018081 | KAAG1        | chr6:24171982-24383520   | 0.603252  | 0.550155  | -0.132924 | 0.987693 |
| XLOC_013871 | OVOL2        | chr20:18004795-18038521  | 3.75006   | 3.42008   | -0.132882 | 0.950929 |
| XLOC_021919 | GNRH1        | chr8:25276773-25282556   | 0.693225  | 0.632246  | -0.132838 | 0.970195 |
| XLOC_005458 | LOC283403    | chr12:52599364-52604639  | 0.0131419 | 0.0119863 | -0.132781 | 1        |
| XLOC_004973 | HELB         | chr12:66696334-66737423  | 0.346414  | 0.315956  | -0.132776 | 1        |
| XLOC_011371 | XAB2         | chr19:7684410-7694439    | 32.5263   | 29.6668   | -0.132755 | 0.898312 |
| XLOC_008543 | HERC2P4      | chr16:32162608-32163874  | 1.09123   | 0.995329  | -0.132715 | 0.970195 |
| XLOC_000606 | OLFML3       | chr1:114522029-11452487  | 0.0198881 | 0.018141  | -0.132655 | 1        |
| XLOC_001234 | NPHP4        | chr1:5922869-6161253     | 2.31465   | 2.11133   | -0.132644 | 0.987693 |
| XLOC_004713 | PHC1         | chr12:9067315-9102357    | 4.20047   | 3.83157   | -0.132614 | 0.985124 |
| XLOC_003112 | PSD          | chr10:104162373-1041828  | 0.969825  | 0.884656  | -0.132607 | 0.903024 |
| XLOC_021039 | NUDCD3       | chr7:44421964-44530385   | 13.0101   | 11.8684   | -0.132498 | 0.896051 |
| XLOC_016861 | TRMT10A      | chr4:100467863-10048518  | 0.629829  | 0.574527  | -0.132473 | 0.956807 |
| XLOC_003155 | RAB11FIP2    | chr10:119764426-1198061  | 1.45502   | 1.32737   | -0.132466 | 0.928755 |
| XLOC_001677 | DPH5         | chr1:101455179-10149136  | 18.7467   | 17.1051   | -0.132208 | 0.902458 |
| XLOC_001956 | DCAF8        | chr1:160185504-16023235  | 14.1734   | 12.9329   | -0.132146 | 0.906935 |
| XLOC_022472 | GALNT12      | chr9:101569980-10161236  | 8.06953   | 7.36333   | -0.132125 | 0.916105 |
| XLOC_000363 | AKR1A1       | chr1:46016454-46035723   | 133.87    | 122.16    | -0.132055 | 0.902188 |
| XLOC_017875 | PRELID2      | chr5:145138581-14521489  | 7.15005   | 6.52523   | -0.131925 | 0.919029 |
| XLOC_003699 | INPPL1       | chr11:71935881-71955220  | 17.5607   | 16.0264   | -0.131899 | 0.895818 |
| XLOC_009527 | FLCN         | chr17:17115526-17140502  | 17.4152   | 15.8938   | -0.131885 | 0.917325 |
| XLOC_000938 | PLA2G4A      | chr1:186798031-18695811  | 1.56767   | 1.43073   | -0.131872 | 0.944724 |
| XLOC_004093 | KCNJ11       | chr11:17406795-17410878  | 6.22262   | 5.67905   | -0.131871 | 0.926423 |
| XLOC_000033 | SKI          | chr1:2160133-2241652     | 8.65676   | 7.90061   | -0.131863 | 0.909489 |
| XLOC_022661 | GFPM1        | chr9:139221931-13925405  | 49.6618   | 45.324    | -0.131862 | 0.90608  |
| XLOC_007655 | IQCH-AS1     | chr15:67493012-67819641  | 3.39526   | 3.09873   | -0.131846 | 0.993379 |
| XLOC_000558 | TMEM167B     | chr1:109633402-10963955  | 8.50547   | 7.76287   | -0.131802 | 0.908471 |
| XLOC_016015 | MBNL1-AS1    | chr3:151980404-15218356  | 0.125805  | 0.114821  | -0.131802 | 1        |
| XLOC_017857 | NDUFA2       | chr5:140019011-14002737  | 124.224   | 113.384   | -0.131724 | 0.922312 |
| XLOC_023978 | TIMM8A       | chrX:100600643-10060395  | 9.92291   | 9.05752   | -0.131647 | 0.944724 |
| XLOC_007913 | ZNF174       | chr16:3451189-3459364    | 4.02449   | 3.67363   | -0.131599 | 0.943036 |
| XLOC_002117 | RAB1F        | chr1:202847409-20285838  | 3.33204   | 3.04159   | -0.131577 | 0.927627 |
| XLOC_003338 | TEAD1        | chr11:12695968-12966284  | 4.4151    | 4.03027   | -0.131569 | 0.905942 |
| XLOC_010942 | CD3EAP       | chr19:45882891-45927177  | 2.10144   | 1.91831   | -0.131546 | 0.956807 |
| XLOC_008932 | TNFAIP1      | chr17:26662547-26684603  | 12.688    | 11.5824   | -0.131533 | 0.972989 |
| XLOC_017753 | CHD1         | chr5:98190907-98262238   | 2.94205   | 2.68569   | -0.13153  | 0.913628 |
| XLOC_021327 | AKR1B1       | chr7:134127106-13414388  | 0.0117559 | 0.0107316 | -0.131518 | 1        |
| XLOC_018050 | TMEM14C      | chr6:10723147-10731362   | 165.868   | 151.419   | -0.131485 | 0.899649 |
| XLOC_020437 | FKBP9        | chr7:32997004-33046543   | 10.1978   | 9.31085   | -0.13127  | 0.904448 |
| XLOC_009821 | HOXB8        | chr17:46689707-46692301  | 3.44706   | 3.14732   | -0.131242 | 0.956807 |
| XLOC_014683 | ARVCF        | chr22:19863039-20004309  | 15.2604   | 13.9341   | -0.131177 | 0.976618 |
| XLOC_011817 | FUT1         | chr19:49251267-49258647  | 3.4433    | 3.14407   | -0.131158 | 0.929635 |
| XLOC_003114 | C10orf95     | chr10:104209573-1042160  | 1.385     | 1.26465   | -0.131148 | 0.991767 |
| XLOC_002887 | ZNF25        | chr10:38238794-38265453  | 1.6076    | 1.46791   | -0.131143 | 0.936616 |
| XLOC_002505 | UNC5B        | chr10:72972291-73062635  | 1.85936   | 1.69786   | -0.131082 | 0.935062 |
| XLOC_010474 | ZNF556       | chr19:2867332-2878501    | 1.2315    | 1.1246    | -0.131004 | 0.96125  |
| XLOC_022972 | CORO2A       | chr9:100883256-10095495  | 6.17023   | 5.63471   | -0.130983 | 0.908129 |
| XLOC_001394 | SNHG12       | chr1:28879528-28908366   | 29.0057   | 26.4885   | -0.130971 | 0.966946 |
| XLOC_002042 | RC3H1        | chr1:173900351-17396221  | 1.39382   | 1.27292   | -0.130908 | 0.920028 |
| XLOC_010593 | CCDC159      | chr19:11457180-11465620  | 3.14301   | 2.87039   | -0.130898 | 0.959465 |

|              |              |                          |            |            |           |          |
|--------------|--------------|--------------------------|------------|------------|-----------|----------|
| XLOC_001723  | RSBN1        | chr1:114304453-114355070 | 2.16272    | 1.9752     | -0.130844 | 0.918434 |
| XLOC_018299  | GLTSCR1L     | chr6:42788793-42836296   | 0.636991   | 0.581779   | -0.130804 | 0.952371 |
| XLOC_003357  | LDHA         | chr11:18415935-18429765  | 1029.45    | 940.22     | -0.130799 | 0.920028 |
| XLOC_010807  | WDR62        | chr19:36545782-36596012  | 7.16413    | 6.54336    | -0.130761 | 0.909694 |
| XLOC_014705  | TOP3B        | chr22:22311402-22337147  | 8.10741    | 7.40505    | -0.130733 | 0.917861 |
| XLOC_014503  | SEC14L2      | chr22:30792929-30821291  | 8.27544    | 7.55855    | -0.130727 | 0.916658 |
| XLOC_005722  | C12orf49     | chr12:117153595-11717584 | 6.75033    | 6.16565    | -0.130706 | 0.920712 |
| XLOC_021602  | SDCBP        | chr8:59465727-59495419   | 78.2864    | 71.5103    | -0.13061  | 0.904096 |
| XLOC_010972  | GLTSCR1      | chr19:48111452-48206534  | 2.60543    | 2.38005    | -0.130532 | 0.944601 |
| XLOC_010530  | ZNF557       | chr19:7069470-7087978    | 1.97536    | 1.80451    | -0.130503 | 0.929256 |
| XLOC_007985  | UQCRC2       | chr16:21964608-21994668  | 94.5789    | 86.4006    | -0.130477 | 0.899778 |
| XLOC_017227  | COX7C        | chr5:85913783-85916583   | 1264       | 1154.72    | -0.130455 | 0.906417 |
| XLOC_017519  | FAM153C      | chr5:177433966-17747608  | 0.0152902  | 0.0139685  | -0.130438 | 1        |
| XLOC_018423  | TSTD3        | chr6:99968869-99981059   | 0.881159   | 0.804997   | -0.13042  | 0.962241 |
| XLOC_015707  | USP19        | chr3:49145478-49158371   | 9.36579    | 8.55645    | -0.130388 | 0.909489 |
| XLOC_007219  | TMOD3        | chr15:52121824-52204331  | 4.26667    | 3.89829    | -0.13027  | 0.913628 |
| XLOC_012873  | CDC42EP3     | chr2:37869024-37899678   | 2.15452    | 1.96856    | -0.130231 | 0.928909 |
| XLOC_017361  | WDR55        | chr5:140044383-14005317  | 17.2534    | 15.7643    | -0.130221 | 0.917639 |
| XLOC_014494  | GAS2L1       | chr22:29702996-29708774  | 17.0431    | 15.5735    | -0.1301   | 0.917325 |
| XLOC_014078  | EEF1A2       | chr20:62119364-62130668  | 0.03371    | 0.0308097  | -0.129791 | 1        |
| XLOC_000699  | OAZ3         | chr1:151732122-15174380  | 3.4704     | 3.17187    | -0.129768 | 0.991767 |
| XLOC_007927  | SEC14L5      | chr16:5008317-5069156    | 0.00279414 | 0.00255399 | -0.129651 | 1        |
| XLOC_003072  | FRAT2        | chr10:99092253-99094458  | 15.1081    | 13.8098    | -0.129634 | 0.917687 |
| XLOC_005742  | LOC100506668 | chr12:120907659-1209362  | 4.13831    | 3.78283    | -0.129577 | 0.990857 |
| XLOC_001246  | UTS2         | chr1:7907671-7913551     | 5.45142    | 4.98327    | -0.129542 | 0.958201 |
| XLOC_005989  | CARKD        | chr13:111267806-11129234 | 23.5597    | 21.5372    | -0.129489 | 0.906545 |
| XLOC_008155  | SETD6        | chr16:58549382-58663790  | 4.4415     | 4.06058    | -0.129363 | 0.988571 |
| XLOC_0011700 | GRIK5        | chr19:42502467-42569957  | 0.346384   | 0.316684   | -0.12933  | 1        |
| XLOC_013677  | PABPC1L      | chr20:43538702-43567962  | 5.97424    | 5.46263    | -0.129158 | 0.937379 |
| XLOC_016951  | ANAPC10      | chr4:145915726-14605067  | 6.67071    | 6.09971    | -0.129101 | 0.986353 |
| XLOC_010469  | TMPRSS9      | chr19:2389783-2427875    | 0.0354269  | 0.0323947  | -0.129087 | 1        |
| XLOC_006337  | FAM179B      | chr14:45431415-45543634  | 0.689731   | 0.6307     | -0.12908  | 0.948179 |
| XLOC_015244  | DZIP3        | chr3:108268717-10841369  | 1.04807    | 0.958388   | -0.129052 | 0.966946 |
| XLOC_000841  | C1orf226     | chr1:162348695-16235660  | 1.72576    | 1.57809    | -0.129051 | 0.942026 |
| XLOC_011410  | ANGPTL6      | chr19:10196805-10213425  | 3.68809    | 3.3727     | -0.128968 | 0.978981 |
| XLOC_0021757 | TG           | chr8:133879204-13414714  | 0.00201567 | 0.00184332 | -0.128948 | 1        |
| XLOC_004940  | INHBC        | chr12:57828542-57844609  | 0.018529   | 0.0169452  | -0.128906 | 1        |
| XLOC_011306  | AES          | chr19:3052907-3062964    | 205.625    | 188.055    | -0.12886  | 0.907874 |
| XLOC_015518  | CCDC50       | chr3:190984943-19111645  | 8.26777    | 7.56209    | -0.128713 | 0.902957 |
| XLOC_002277  | CEP170       | chr1:243287729-24341870  | 0.00178043 | 0.00162856 | -0.128625 | 1        |
| XLOC_009591  | GIT1         | chr17:27900486-27916610  | 42.5389    | 38.9105    | -0.128624 | 0.903682 |
| XLOC_009966  | GBA3         | chr17:73232693-73267311  | 12.0142    | 10.9897    | -0.128592 | 0.966946 |
| XLOC_021210  | PMS2P1       | chr7:99905324-99965454   | 11.6816    | 10.6856    | -0.128563 | 0.979701 |
| XLOC_010674  | ANKLE1       | chr19:17392453-17398454  | 0.453759   | 0.415074   | -0.128557 | 0.971637 |
| XLOC_016297  | SLC30A9      | chr4:41992522-42089551   | 14.7085    | 13.4547    | -0.128537 | 0.906545 |
| XLOC_018275  | TBC1D22B     | chr6:37179953-37300746   | 4.11417    | 3.76379    | -0.128417 | 0.927966 |
| XLOC_003351  | KCNC1        | chr11:17757494-17804602  | 0.0069653  | 0.00637256 | -0.128314 | 1        |
| XLOC_000438  | RAVER2       | chr1:65210777-65432187   | 5.06961    | 4.63829    | -0.128282 | 0.976618 |
| XLOC_014907  | SBF1         | chr22:50781745-50913464  | 9.54314    | 8.73127    | -0.128272 | 0.950929 |
| XLOC_010691  | ARRDC2       | chr19:18111943-18124911  | 16.5718    | 15.1622    | -0.128256 | 0.913019 |
| XLOC_018108  | BTNA3A2      | chr6:26365397-26378548   | 7.17998    | 6.56966    | -0.12816  | 0.918953 |
| XLOC_009067  | HSPB9        | chr17:40274755-40275371  | 0.103111   | 0.0943469  | -0.128148 | 1        |
| XLOC_009805  | SCRN2        | chr17:45908992-45918699  | 46.8136    | 42.8388    | -0.128009 | 0.908551 |
| XLOC_003783  | TMEM133      | chr11:100862810-1008646  | 0.636613   | 0.582569   | -0.127986 | 0.966946 |
| XLOC_015459  | NDUFB5       | chr3:179322574-17934228  | 67.8073    | 62.0515    | -0.127975 | 0.906895 |
| XLOC_013427  | USP40        | chr2:234384164-23447423  | 3.25014    | 2.9744     | -0.127901 | 0.920028 |
| XLOC_017800  | KIF3A        | chr5:132028322-13207326  | 1.68134    | 1.53871    | -0.127886 | 0.930066 |
| XLOC_011703  | DEDD2        | chr19:42702744-42724304  | 40.0271    | 36.6329    | -0.127834 | 0.910891 |
| XLOC_023065  | DENND1A      | chr9:126141932-126692417 | 13.6772    | 12.5177    | -0.127806 | 0.913984 |
| XLOC_018575  | TULP4        | chr6:158733691-15893285  | 1.49103    | 1.3647     | -0.127724 | 0.927627 |
| XLOC_012008  | ZNF837       | chr19:58878989-58892389  | 2.16084    | 1.97776    | -0.127721 | 0.969308 |
| XLOC_010173  | ZNF271       | chr18:32870235-32890730  | 3.5205     | 3.22232    | -0.12768  | 0.918619 |
| XLOC_006277  | MMP14        | chr14:23305792-23316803  | 14.7109    | 13.465     | -0.127676 | 0.908586 |
| XLOC_021939  | DUSP4        | chr8:29190578-29208267   | 0.562811   | 0.515144   | -0.127673 | 0.958814 |
| XLOC_001400  | TMEM200B     | chr1:29213602-29450421   | 6.81233    | 6.23584    | -0.127564 | 0.967901 |
| XLOC_009292  | CDK3, TEN1   | chr17:73937588-74002080  | 40.231     | 36.8273    | -0.127532 | 0.956382 |
| XLOC_010448  | MIDN         | chr19:1248551-1259142    | 14.5891    | 13.3554    | -0.127468 | 0.918898 |
| XLOC_008165  | CES3         | chr16:66995131-67009052  | 6.00939    | 5.50164    | -0.127359 | 0.926446 |
| XLOC_003619  | FAM89B       | chr11:65339819-65341669  | 35.9043    | 32.8708    | -0.127353 | 0.920694 |
| XLOC_016364  | RUFY3        | chr4:71570653-71674336   | 1.73951    | 1.59255    | -0.127341 | 0.937813 |
| XLOC_009532  | SREBF1       | chr17:17584786-17740325  | 24.2876    | 22.238     | -0.127191 | 0.925955 |
| XLOC_010049  | MYADM2       | chr17:79897520-79905109  | 0.0895243  | 0.0819708  | -0.127169 | 1        |
| XLOC_001912  | IQGAP3       | chr1:156495196-15654239  | 9.54055    | 8.73568    | -0.127152 | 0.907651 |
| XLOC_000304  | RLF          | chr1:40627040-40706593   | 4.0114     | 3.67304    | -0.12713  | 0.917325 |
| XLOC_003225  | RASSF7       | chr11:560970-564025      | 38.8319    | 35.5575    | -0.127086 | 0.910769 |
| XLOC_003110  | LDB1         | chr10:103867324-1038802  | 19.244     | 17.6221    | -0.127019 | 0.911837 |
| XLOC_003838  | RNF214       | chr11:117103403-1171869  | 3.35588    | 3.07308    | -0.127006 | 0.965573 |
| XLOC_023105  | C9orf114     | chr9:131580778-13159210  | 34.2686    | 31.3817    | -0.126962 | 0.917325 |
| XLOC_008780  | MINK1        | chr17:4736634-4806369    | 19.2584    | 17.6365    | -0.126921 | 0.912776 |

|             |              |                          |            |            |           |          |
|-------------|--------------|--------------------------|------------|------------|-----------|----------|
| XLOC_017965 | RNF4A        | chr5:175953699-17596442  | 9.83324    | 9.00513    | -0.12692  | 0.913825 |
| XLOC_023269 | RAB9A        | chrX:13707239-13727944   | 8.13349    | 7.44882    | -0.126862 | 0.931471 |
| XLOC_020692 | DUS4L        | chr7:106809405-107218968 | 5.34037    | 4.89101    | -0.126808 | 0.982907 |
| XLOC_010949 | QPCTL        | chr19:46195740-46207248  | 18.3493    | 16.8064    | -0.126715 | 0.912776 |
| XLOC_015849 | ZBTB11       | chr3:101368282-101398057 | 1.84456    | 1.68947    | -0.126708 | 0.950929 |
| XLOC_023760 | TRAPPC2      | chrX:13730360-13752754   | 11.3775    | 10.421     | -0.126685 | 0.914022 |
| XLOC_009316 | BIRC5        | chr17:76210276-76221716  | 43.9258    | 40.2348    | -0.126626 | 0.905942 |
| XLOC_020938 | DGKB         | chr7:14184673-14881075   | 0.00188897 | 0.00173032 | -0.126564 | 1        |
| XLOC_004328 | RNASEH2C     | chr11:65479472-65488409  | 22.9484    | 21.0217    | -0.126516 | 0.932655 |
| XLOC_009673 | TOP2A        | chr17:38544772-38574202  | 10.9367    | 10.0189    | -0.126457 | 0.907185 |
| XLOC_011237 | ZNF587       | chr19:58361180-58376491  | 1.35295    | 1.2395     | -0.126352 | 0.935062 |
| XLOC_004917 | SUOX         | chr12:56391042-56399309  | 5.84875    | 5.35848    | -0.126303 | 0.931355 |
| XLOC_023902 | ARHGEF9      | chrX:62854847-63005426   | 2.11373    | 1.93656    | -0.126294 | 0.935078 |
| XLOC_011934 | NLRP12       | chr19:54296854-54327648  | 0.00652142 | 0.00597506 | -0.126232 | 1        |
| XLOC_013087 | ST6GAL2      | chr2:107418055-107503568 | 0.00218206 | 0.00199927 | -0.126221 | 1        |
| XLOC_012107 | ZNF512       | chr2:27805835-27846082   | 4.41796    | 4.04835    | -0.126048 | 0.926446 |
| XLOC_008993 | SLFN5        | chr17:33570085-33594761  | 1.10438    | 1.01212    | -0.125861 | 0.952385 |
| XLOC_000574 | CSF1         | chr1:110453232-110473618 | 3.16484    | 2.9005     | -0.125832 | 0.943514 |
| XLOC_000165 | ZBTB40       | chr1:22778343-22857650   | 2.40056    | 2.20008    | -0.125809 | 0.919029 |
| XLOC_018319 | VEGFA        | chr6:43737945-43754223   | 24.7694    | 22.7009    | -0.125806 | 0.912308 |
| XLOC_015846 | ABI3BP       | chr3:100468178-100712334 | 0.026276   | 0.0240819  | -0.125798 | 1        |
| XLOC_008190 | NFATC3       | chr16:68119268-68270136  | 4.194      | 3.8439     | -0.125756 | 0.955406 |
| XLOC_022463 | LOC441454    | chr9:99671356-99672737   | 0.278381   | 0.255147   | -0.125729 | 1        |
| XLOC_001466 | FHL3         | chr1:38462441-38471187   | 37.0497    | 33.9603    | -0.125612 | 0.913236 |
| XLOC_002540 | LOC642361    | chr10:81585657-81587358  | 1.26218    | 1.9489     | -0.125607 | 0.967901 |
| XLOC_009652 | PIP4K2B      | chr17:36921943-36956158  | 7.59315    | 6.96026    | -0.125557 | 0.913223 |
| XLOC_013647 | SNHG11       | chr20:37075296-37079564  | 14.1295    | 12.9519    | -0.12554  | 0.932468 |
| XLOC_004660 | C12orf5      | chr12:4430358-4469190    | 2.65196    | 2.431      | -0.125508 | 0.919029 |
| XLOC_005569 | TMBIM4       | chr12:66530716-66563807  | 31.1633    | 28.5669    | -0.125503 | 0.907689 |
| XLOC_012011 | SLC27A5      | chr19:59009699-59023432  | 19.9892    | 18.325     | -0.125407 | 0.918898 |
| XLOC_018615 | SERPINF1     | chr6:2832565-2842283     | 58.668     | 53.7914    | -0.1252   | 0.909179 |
| XLOC_021915 | NKX3-1       | chr8:23536205-23540450   | 3.48597    | 3.1964     | -0.12511  | 0.943036 |
| XLOC_002112 | ARL8A        | chr1:202102531-202113871 | 26.6029    | 24.3942    | -0.125045 | 0.913628 |
| XLOC_013464 | HDLBP        | chr2:242166681-242293441 | 30.4096    | 27.8855    | -0.125013 | 0.957782 |
| XLOC_020808 | GSTK1        | chr7:142960521-142966222 | 136.186    | 124.886    | -0.124972 | 0.909694 |
| XLOC_011449 | ZNF443       | chr19:12540519-12551926  | 1.50864    | 1.38356    | -0.124863 | 0.954559 |
| XLOC_004760 | AEBP2        | chr12:19592607-19675173  | 1.78398    | 1.63615    | -0.124794 | 0.937968 |
| XLOC_022547 | RABGAP1      | chr9:125703287-125867147 | 4.36776    | 4.00606    | -0.12471  | 0.920316 |
| XLOC_002136 | PIK3C2B      | chr1:204391757-204459474 | 1.56213    | 1.43277    | -0.124704 | 0.935939 |
| XLOC_004076 | ZBED5        | chr11:10874250-10879620  | 10.2213    | 9.37521    | -0.124658 | 0.918342 |
| XLOC_016377 | MTHFD2L      | chr4:75023828-75168814   | 0.854115   | 0.783434   | -0.124619 | 0.960403 |
| XLOC_014882 | LOC100506714 | chr22:45529638-45599662  | 1.48161    | 1.35904    | -0.124583 | 0.966946 |
| XLOC_013462 | MTERFD2      | chr2:241938254-242041747 | 9.1199     | 8.36542    | -0.12458  | 0.93549  |
| XLOC_000453 | SRSF11       | chr1:70671364-70717701   | 31.9922    | 29.3466    | -0.124523 | 0.906464 |
| XLOC_022819 | ARHGEF39     | chr9:35658286-35665278   | 7.12496    | 6.53598    | -0.124448 | 0.946274 |
| XLOC_020533 | LOC541473    | chr7:72440191-72443668   | 0.607045   | 0.556877   | -0.124446 | 0.981044 |
| XLOC_002289 | ZNF124       | chr1:247285276-247335318 | 2.13573    | 1.95929    | -0.1244   | 0.95534  |
| XLOC_008525 | LOC730183    | chr16:30709024-30709810  | 2.58229    | 2.36897    | -0.124388 | 0.979701 |
| XLOC_009787 | PLCD3        | chr17:43189007-43209891  | 19.1733    | 17.5898    | -0.124353 | 0.91547  |
| XLOC_008541 | C16orf58     | chr16:31494438-31519706  | 44.1953    | 40.5499    | -0.124194 | 0.907651 |
| XLOC_020846 | LRRRC61      | chr7:149944300-150035248 | 45.607     | 41.8526    | -0.123936 | 0.956373 |
| XLOC_004362 | NUDT8        | chr11:67395408-67397408  | 45.5145    | 41.768     | -0.123927 | 0.928653 |
| XLOC_010262 | RBFA         | chr18:77794345-77810652  | 5.51579    | 5.06183    | -0.123906 | 0.914199 |
| XLOC_008729 | CBFA2T3      | chr16:88941262-89043504  | 1.96982    | 1.80779    | -0.123833 | 0.954148 |
| XLOC_003257 | KCNQ1        | chr11:2466220-2870340    | 11.5147    | 10.5677    | -0.123818 | 0.934345 |
| XLOC_006882 | ZFYVE1       | chr14:73436158-73493920  | 7.54721    | 6.92651    | -0.123814 | 0.92969  |
| XLOC_020418 | CHN2         | chr7:29234120-29553944   | 0.545807   | 0.500921   | -0.12381  | 0.966946 |
| XLOC_006217 | LIG4         | chr13:108859791-10887071 | 0.946885   | 0.869042   | -0.123762 | 0.953061 |
| XLOC_021675 | TMEM67       | chr8:94767071-94831460   | 1.35081    | 1.23982    | -0.123689 | 0.947008 |
| XLOC_005682 | SSH1         | chr12:109176465-10925138 | 6.05453    | 5.55709    | -0.123688 | 0.924804 |
| XLOC_013061 | COA5         | chr2:99215785-99224981   | 10.0008    | 9.17939    | -0.123643 | 0.924847 |
| XLOC_023956 | TAF9B        | chrX:77385244-77395179   | 9.00803    | 8.2684     | -0.123602 | 0.918983 |
| XLOC_015696 | NCKIPSD      | chr3:48711277-48723334   | 23.9978    | 22.0275    | -0.123596 | 0.912776 |
| XLOC_004951 | LOC100130776 | chr12:58118075-58135944  | 75.4735    | 69.2791    | -0.12355  | 0.909435 |
| XLOC_016645 | FAM86EP      | chr4:3943668-3957148     | 0.71919    | 0.660189   | -0.123494 | 0.966442 |
| XLOC_016633 | TMEM129      | chr4:1717678-1723084     | 25.6721    | 23.5668    | -0.123445 | 0.914275 |
| XLOC_003799 | CUL5         | chr11:107879407-10797848 | 2.15149    | 1.97528    | -0.123275 | 0.929635 |
| XLOC_012953 | FBXO48       | chr2:68689504-68694390   | 0.156688   | 0.143858   | -0.123251 | 1        |
| XLOC_005118 | TPCN1        | chr12:113659259-11373638 | 5.51449    | 5.06311    | -0.123204 | 0.923405 |
| XLOC_022741 | MLLT3        | chr9:20344967-20622514   | 3.90962    | 3.58968    | -0.123173 | 0.930066 |
| XLOC_017326 | CAMLG        | chr5:134074169-134087858 | 53.9895    | 49.5728    | -0.12313  | 0.912795 |
| XLOC_021553 | BAG4         | chr8:38020838-38070819   | 4.06127    | 3.72917    | -0.123076 | 0.965607 |
| XLOC_005258 | RBP5         | chr12:7276279-7281466    | 0.197525   | 0.181402   | -0.122848 | 1        |
| XLOC_002154 | EIF2D        | chr1:206764973-206785904 | 29.4848    | 27.078     | -0.122847 | 0.91212  |
| XLOC_009038 | GSDMA        | chr17:38119225-38134019  | 0.00834724 | 0.00766592 | -0.122841 | 1        |
| XLOC_021511 | LOC389641    | chr8:23082733-23088439   | 5.09338    | 4.67783    | -0.122785 | 0.946942 |
| XLOC_006011 | CHAMP1       | chr13:115079964-11509288 | 5.04801    | 4.63673    | -0.122606 | 0.926233 |
| XLOC_011921 | ZNF468       | chr19:53341784-53360902  | 2.40756    | 2.21147    | -0.122565 | 0.934181 |
| XLOC_003163 | RGS10        | chr10:121259338-12130222 | 155.263    | 142.617    | -0.122561 | 0.908114 |

|             |                 |                          |           |            |           |          |
|-------------|-----------------|--------------------------|-----------|------------|-----------|----------|
| XLOC_007374 | ZSCAN2          | chr15:85144248-85166947  | 6.74347   | 6.19444    | -0.122518 | 0.960591 |
| XLOC_012868 | HEATR5B         | chr2:37208152-37311485   | 1.93383   | 1.77664    | -0.122316 | 0.933023 |
| XLOC_019073 | PTPRK           | chr6:128289923-128841870 | 1.49423   | 1.37282    | -0.122259 | 0.93616  |
| XLOC_007954 | NP1P            | chr16:15031299-15045931  | 49.837    | 45.7899    | -0.122188 | 0.913628 |
| XLOC_011736 | LOC100505715    | chr19:44395955-44405955  | 0.17449   | 0.16032    | -0.122188 | 1        |
| XLOC_023697 | SRPK3           | chrX:153046455-15305118  | 0.0268745 | 0.0246931  | -0.12213  | 1        |
| XLOC_022281 | UHRF2           | chr9:6413150-6507051     | 6.06341   | 5.57131    | -0.122112 | 0.920028 |
| XLOC_012814 | ATAD2B          | chr2:23971533-24149936   | 0.369358  | 0.339385   | -0.122098 | 0.958814 |
| XLOC_020839 | ZNF212          | chr7:148936741-148952700 | 9.20071   | 8.4545     | -0.122025 | 0.928285 |
| XLOC_020365 | ZNF853          | chr7:6655526-6663921     | 0.0781143 | 0.0717795  | -0.122015 | 1        |
| XLOC_001492 | FOXJ3           | chr1:42642209-42801548   | 8.82365   | 8.10814    | -0.122005 | 0.913628 |
| XLOC_001921 | ARHGFE11        | chr1:156904631-15701516  | 2.87976   | 2.64625    | -0.121999 | 0.92969  |
| XLOC_007198 | SQRDL           | chr15:45923345-45983492  | 11.4146   | 10.489     | -0.121996 | 0.92385  |
| XLOC_017765 | STARD4          | chr5:110834021-11135300  | 1.80585   | 1.65944    | -0.121981 | 0.956807 |
| XLOC_012511 | DYNC1I2         | chr2:172543918-17260666  | 13.1339   | 12.0695    | -0.121934 | 0.913628 |
| XLOC_015456 | ZNF639          | chr3:179041550-17905332  | 9.92064   | 9.11728    | -0.121829 | 0.918342 |
| XLOC_015410 | ARHGFE26        | chr3:153742189-15397561  | 0.159777  | 0.146845   | -0.12177  | 1        |
| XLOC_009588 | MYO18A, TIAF1   | chr17:27400527-27507407  | 10.3542   | 9.51652    | -0.121715 | 0.938194 |
| XLOC_001773 | LOC728989       | chr1:146490894-14651459  | 0.0180714 | 0.0166098  | -0.121673 | 1        |
| XLOC_011082 | ZNF480          | chr19:52800425-52829174  | 1.48637   | 1.36616    | -0.121661 | 0.938811 |
| XLOC_008685 | TMEM231         | chr16:75572014-75590184  | 10.8437   | 9.96677    | -0.121657 | 0.922006 |
| XLOC_011533 | JUND            | chr19:18390562-18392432  | 138.79    | 127.576    | -0.121542 | 0.916337 |
| XLOC_000042 | TPRG1L          | chr1:3541555-3546694     | 17.7141   | 16.2833    | -0.121503 | 0.919186 |
| XLOC_013731 | FAM209B         | chr20:55108301-55111574  | 0.876155  | 0.805434   | -0.121419 | 0.979875 |
| XLOC_023622 | FAM122C         | chrX:133903595-13398864  | 0.475664  | 0.437286   | -0.121366 | 0.991767 |
| XLOC_021808 | ZNF7            | chr8:146052902-14606860  | 16.8433   | 15.4848    | -0.121321 | 0.919029 |
| XLOC_013235 | OLA1            | chr2:174937174-17511336  | 47.4545   | 43.6275    | -0.121306 | 0.913628 |
| XLOC_014841 | MKL1            | chr22:40766594-41032690  | 4.8162    | 4.42786    | -0.121286 | 0.969075 |
| XLOC_011403 | ZNF561          | chr19:9718001-9731916    | 4.62034   | 4.248      | -0.121216 | 0.92599  |
| XLOC_000263 | KIAA1522        | chr1:33207511-33240571   | 13.7456   | 12.6386    | -0.121137 | 0.925367 |
| XLOC_000261 | ZBTB8A          | chr1:33004771-33071542   | 1.72223   | 1.58354    | -0.121125 | 0.930777 |
| XLOC_006415 | EXD2            | chr14:69658193-69710737  | 4.66744   | 4.2917     | -0.121082 | 0.928755 |
| XLOC_011480 | PRKACA          | chr19:14202506-14228559  | 19.9546   | 18.3485    | -0.121055 | 0.917861 |
| XLOC_010289 | MPPE1           | chr18:11689013-11908796  | 9.25655   | 8.51158    | -0.121049 | 0.978196 |
| XLOC_018697 | ZNF204P         | chr6:27325601-27343153   | 1.81743   | 1.67128    | -0.120944 | 0.950929 |
| XLOC_009423 | SPAG7           | chr17:4862520-4871132    | 39.3062   | 36.1481    | -0.120836 | 0.920505 |
| XLOC_010009 | LGALS3BP        | chr17:76967334-76976061  | 41.6907   | 38.3434    | -0.12075  | 0.916105 |
| XLOC_002253 | TOMM20          | chr1:235272657-23529225  | 61.9867   | 57.011     | -0.120717 | 0.913628 |
| XLOC_009946 | CDC42EP4        | chr17:71279762-71308143  | 9.231     | 8.49081    | -0.120585 | 0.929478 |
| XLOC_005147 | P2RX4           | chr12:121647663-1216719  | 13.4548   | 12.3778    | -0.120371 | 0.929635 |
| XLOC_013377 | TUBA4A          | chr2:220110191-22013691  | 89.4505   | 82.2926    | -0.120327 | 0.935939 |
| XLOC_021270 | C7orf60         | chr7:112459201-11257993  | 3.58592   | 3.29903    | -0.120302 | 0.935062 |
| XLOC_008384 | ZSCAN32         | chr16:3432084-3451025    | 4.4753    | 4.11747    | -0.120226 | 0.935933 |
| XLOC_014681 | C22orf29, GNB1L | chr22:19775933-19842462  | 14.5026   | 13.3437    | -0.120152 | 0.971854 |
| XLOC_012149 | LOC728730       | chr2:39664556-39828484   | 0.440846  | 0.405618   | -0.120151 | 0.972111 |
| XLOC_010582 | QTRT1           | chr19:10812111-10824043  | 52.2869   | 48.1104    | -0.120103 | 0.918898 |
| XLOC_009427 | ZNF232          | chr17:5009030-5026397    | 10.1146   | 9.30667    | -0.120101 | 0.928653 |
| XLOC_008128 | MT1IP           | chr16:56709648-56711653  | 0.0107192 | 0.00986366 | -0.120003 | 1        |
| XLOC_013615 | ITCH            | chr20:32951040-33099198  | 4.33691   | 3.9909     | -0.119956 | 0.920028 |
| XLOC_007629 | PIF1            | chr15:65107832-65117838  | 6.32686   | 5.82218    | -0.11993  | 0.937765 |
| XLOC_003238 | AP2A2           | chr11:925808-1012245     | 12.6744   | 11.664     | -0.119852 | 0.917325 |
| XLOC_005866 | NAA16           | chr13:41885340-41951166  | 2.70183   | 2.48644    | -0.119851 | 0.937757 |
| XLOC_008160 | CMTM2           | chr16:66613350-66622177  | 0.148849  | 0.136987   | -0.119807 | 1        |
| XLOC_016906 | PRSS12          | chr4:119201192-11927392  | 1.68856   | 1.55409    | -0.119727 | 0.947008 |
| XLOC_023108 | SH3GLB2         | chr9:131770312-13179057  | 142.828   | 131.46     | -0.119664 | 0.917687 |
| XLOC_007243 | RAB8B           | chr15:63481727-63559973  | 5.23772   | 4.82093    | -0.119663 | 0.922712 |
| XLOC_020899 | INTS1           | chr7:1509912-1544018     | 18.4738   | 17.0052    | -0.119504 | 0.913628 |
| XLOC_013136 | LIMS2           | chr2:128395995-12843936  | 0.0298224 | 0.0274531  | -0.119426 | 1        |
| XLOC_013915 | HM13-AS1        | chr20:30102240-30161066  | 0.35481   | 0.326622   | -0.119423 | 0.99351  |
| XLOC_005086 | UNG             | chr12:109535398-1095487  | 30.2615   | 27.8575    | -0.119419 | 0.916105 |
| XLOC_016479 | SNHG8           | chr4:119199916-11920097  | 341.504   | 314.375    | -0.119417 | 0.932231 |
| XLOC_009003 | ZNHIT3          | chr17:34842472-34891305  | 81.1577   | 74.7113    | -0.119401 | 0.948179 |
| XLOC_002358 | RPP38           | chr10:15137383-15146256  | 27.6921   | 25.4946    | -0.11928  | 0.925516 |
| XLOC_020604 | RBM48           | chr7:92158086-92166823   | 7.1886    | 6.61913    | -0.119068 | 0.937255 |
| XLOC_013156 | MZT2A           | chr2:132202795-13236046  | 367.213   | 338.137    | -0.11901  | 0.933023 |
| XLOC_006365 | FBXO34          | chr14:55738020-55820329  | 4.75776   | 4.38135    | -0.118908 | 0.931471 |
| XLOC_014909 | SCO2, TYMP      | chr22:50946644-50968514  | 70.3946   | 64.8275    | -0.118859 | 0.959465 |
| XLOC_001627 | MCOLN2          | chr1:85391265-85462796   | 5.9066    | 5.43974    | -0.118789 | 0.92969  |
| XLOC_006087 | FOXO1           | chr13:41129800-41240734  | 1.16879   | 1.07644    | -0.118755 | 0.950929 |
| XLOC_006447 | ISCA2           | chr14:74960422-74962271  | 32.629    | 30.0535    | -0.118624 | 0.923433 |
| XLOC_007601 | ZNF280D         | chr15:56922373-57025787  | 3.25361   | 2.99679    | -0.118622 | 0.950929 |
| XLOC_016080 | MCCC1           | chr3:182733005-18281736  | 14.8339   | 13.6633    | -0.1186   | 0.916456 |
| XLOC_010419 | PAR6D6          | chr18:77905806-78005397  | 2.69656   | 2.48381    | -0.118566 | 0.950104 |
| XLOC_004266 | INTS5           | chr11:62414319-62420774  | 12.7347   | 11.7302    | -0.118539 | 0.924371 |
| XLOC_004208 | TNKS1BP1        | chr11:57067102-57092413  | 11.0654   | 10.1928    | -0.118502 | 0.917627 |
| XLOC_006912 | VIPAS39         | chr14:77893017-77923983  | 4.99428   | 4.60081    | -0.118391 | 0.937765 |
| XLOC_012427 | PTPN18          | chr2:131113579-13113298  | 15.6687   | 14.4343    | -0.118385 | 0.917379 |
| XLOC_009791 | ARHGAP27        | chr17:43506717-43510282  | 3.69024   | 3.39954    | -0.118376 | 0.976149 |
| XLOC_023184 | NPDC1           | chr9:139933908-13994067  | 256.466   | 236.264    | -0.118366 | 0.918342 |



|             |             |                          |            |            |           |          |
|-------------|-------------|--------------------------|------------|------------|-----------|----------|
| XLOC_017128 | LOC257396   | chr5:52405686-52410952   | 1.22802    | 1.1313     | -0.118354 | 0.963457 |
| XLOC_022243 | VPS28       | chr8:145648999-145653927 | 316.956    | 292        | -0.118313 | 0.917639 |
| XLOC_007545 | PPIP5K1     | chr15:43663312-43910998  | 4.42718    | 4.07871    | -0.118275 | 0.976595 |
| XLOC_018221 | CYP21A2     | chr6:32006092-32077151   | 0.0368979  | 0.033995   | -0.118218 | 1        |
| XLOC_009311 | TNRC26C     | chr17:76000317-76107880  | 0.504083   | 0.464436   | -0.118182 | 0.966946 |
| XLOC_013013 | CAPG        | chr2:85621870-85641197   | 137.781    | 126.952    | -0.118099 | 0.915538 |
| XLOC_012809 | PUM2        | chr2:20448452-20527144   | 12.2176    | 11.2576    | -0.118058 | 0.916838 |
| XLOC_010111 | SOGA2       | chr18:8717368-8832775    | 3.61396    | 3.33027    | -0.117941 | 0.931471 |
| XLOC_023202 | WDR85       | chr9:140449360-140473387 | 35.5361    | 32.748     | -0.117879 | 0.916838 |
| XLOC_012994 | PCGF1       | chr2:74724643-74734821   | 18.6541    | 17.1906    | -0.11787  | 0.966921 |
| XLOC_010533 | ZNF358      | chr19:7581003-7585911    | 55.6686    | 51.3063    | -0.117726 | 0.918898 |
| XLOC_010224 | KIAA1468    | chr18:59854523-59974355  | 2.12223    | 1.95612    | -0.117589 | 0.935836 |
| XLOC_002344 | DHTKD1      | chr10:12110933-12165224  | 3.60167    | 3.3199     | -0.117529 | 0.932297 |
| XLOC_017658 | DHX29       | chr5:54552072-54603521   | 3.2879     | 3.0307     | -0.117516 | 0.931822 |
| XLOC_007690 | ULK3        | chr15:75128458-75135552  | 24.8274    | 22.8854    | -0.117506 | 0.919921 |
| XLOC_016597 | SLC25A4     | chr4:186064416-18607153  | 16.6296    | 15.329     | -0.117491 | 0.917379 |
| XLOC_021865 | CTS5        | chr8:11700033-11725646   | 52.0966    | 48.0239    | -0.117437 | 0.918898 |
| XLOC_007784 | VPS33B      | chr15:91541773-91565833  | 8.04166    | 7.41313    | -0.11741  | 0.931822 |
| XLOC_012057 | TRIB2       | chr2:12856997-12882858   | 1.08974    | 1.00465    | -0.11729  | 0.962618 |
| XLOC_004827 | TROAP       | chr12:49716970-49725514  | 47.1796    | 43.4982    | -0.117208 | 0.952905 |
| XLOC_020463 | UBE2D4      | chr7:43966034-44058748   | 3.55935    | 3.2817     | -0.117168 | 0.949303 |
| XLOC_024104 | ZNF75D      | chrX:134419722-13442996  | 1.32541    | 1.22205    | -0.117132 | 0.958201 |
| XLOC_017747 | ELL2        | chr5:95220801-95297775   | 4.19513    | 3.868      | -0.117127 | 0.92969  |
| XLOC_012010 | ZNF132      | chr19:58944180-58951589  | 0.191826   | 0.176871   | -0.117105 | 1        |
| XLOC_023835 | XUT         | chrX:47511190-47519776   | 135.162    | 124.63     | -0.11704  | 0.920028 |
| XLOC_000230 | MED18       | chr1:28655512-28662478   | 12.2415    | 11.2889    | -0.116872 | 0.930414 |
| XLOC_007398 | SEMA4B      | chr15:90728151-90772892  | 15.4351    | 14.2345    | -0.116825 | 0.929631 |
| XLOC_015638 | GORASP1     | chr3:39138090-39149130   | 7.32439    | 6.75473    | -0.116812 | 0.931471 |
| XLOC_003075 | MMS19       | chr10:99218080-99258366  | 24.0837    | 22.2107    | -0.116798 | 0.918619 |
| XLOC_002592 | BTAF1       | chr10:93683735-93790080  | 3.3719     | 3.10969    | -0.116795 | 0.925191 |
| XLOC_010697 | PGPEP1      | chr19:18451407-18480763  | 7.41246    | 6.83605    | -0.116789 | 0.920028 |
| XLOC_001797 | OTUD7B      | chr1:149912231-14998268  | 2.44318    | 2.25328    | -0.116731 | 0.935939 |
| XLOC_016180 | FAM193A     | chr4:2627158-2734302     | 4.16153    | 3.83842    | -0.116603 | 0.934345 |
| XLOC_022968 | XPA         | chr9:100437190-10045969  | 8.41128    | 7.75851    | -0.116545 | 0.941348 |
| XLOC_008743 | FAM57A      | chr17:635846-646075      | 27.7876    | 25.6336    | -0.116407 | 0.922312 |
| XLOC_011741 | ZNF285      | chr19:44889807-44905777  | 0.0139408  | 0.0128605  | -0.116374 | 1        |
| XLOC_010671 | USE1        | chr19:17326154-17330638  | 39.0371    | 36.013     | -0.11633  | 0.930066 |
| XLOC_012597 | ALS2CR8     | chr2:203776977-20385106  | 0.108833   | 0.100409   | -0.116229 | 1        |
| XLOC_006965 | ATG2B       | chr14:96747594-96829678  | 1.12545    | 1.03833    | -0.116228 | 0.938811 |
| XLOC_001339 | USP48       | chr1:22004791-22109688   | 8.19701    | 7.56254    | -0.116227 | 0.930066 |
| XLOC_015117 | C3orf45     | chr3:50316517-50330026   | 0.013423   | 0.0123846  | -0.116158 | 1        |
| XLOC_019050 | TSPYL4      | chr6:116571130-11657526  | 2.92377    | 2.69774    | -0.116078 | 0.944284 |
| XLOC_003222 | PKP3        | chr11:394216-404908      | 45.0673    | 41.5838    | -0.116057 | 0.920028 |
| XLOC_011437 | ELAVL3      | chr19:11562142-11591803  | 0.00452263 | 0.00417313 | -0.116032 | 1        |
| XLOC_022520 | ORM1        | chr9:117085302-11708875  | 0.0232441  | 0.021449   | -0.115958 | 1        |
| XLOC_011894 | ZTF5        | chr19:51848408-51869672  | 94.4926    | 87.2026    | -0.115829 | 0.918898 |
| XLOC_011558 | ENF506      | chr19:19903519-19932560  | 2.20523    | 2.03519    | -0.115768 | 0.945946 |
| XLOC_007547 | CATSPER2    | chr15:43922771-43941039  | 0.645783   | 0.596025   | -0.115675 | 0.976618 |
| XLOC_013017 | C2orf68     | chr2:85829964-85876407   | 4.17713    | 3.85532    | -0.115661 | 0.979701 |
| XLOC_007869 | TSC2        | chr16:2097989-2185899    | 10.246     | 9.45704    | -0.115604 | 0.955406 |
| XLOC_023771 | AP1S2       | chrX:15843928-15873137   | 14.2996    | 13.199     | -0.115549 | 0.923433 |
| XLOC_016689 | LCORL       | chr4:17812435-18023483   | 3.22355    | 2.97589    | -0.115328 | 0.977103 |
| XLOC_006053 | MTUS2-AS1   | chr13:29598747-30080084  | 0.0471958  | 0.0435715  | -0.115271 | 1        |
| XLOC_004040 | MRPL17      | chr11:6701615-6704632    | 49.066     | 45.2991    | -0.115242 | 0.919029 |
| XLOC_007289 | BBS4        | chr15:72978519-73030817  | 5.75044    | 5.30906    | -0.115216 | 0.93632  |
| XLOC_000441 | LEPR_LEPROT | chr1:65886130-66103176   | 8.23198    | 7.60042    | -0.115161 | 0.978555 |
| XLOC_022443 | PHF2        | chr9:96338908-96441869   | 4.74138    | 4.37787    | -0.115078 | 0.931471 |
| XLOC_014356 | CSTB        | chr21:45193545-45196256  | 269.557    | 248.895    | -0.115055 | 0.919029 |
| XLOC_001021 | CD46        | chr1:207925382-20796886  | 8.79789    | 8.12394    | -0.114979 | 0.926225 |
| XLOC_009549 | MFAP4       | chr17:19240866-19290532  | 0.0450438  | 0.0415933  | -0.114977 | 1        |
| XLOC_009373 | ZNF385C     | chr17:40118758-40190044  | 0.00756961 | 0.00699004 | -0.114918 | 1        |
| XLOC_021576 | HOOK3       | chr8:42752032-42885682   | 1.06195    | 0.98069    | -0.114841 | 0.935939 |
| XLOC_009135 | NPEPPS      | chr17:45608443-45700642  | 15.5861    | 14.3945    | -0.114741 | 0.922312 |
| XLOC_000570 | GSTM4       | chr1:110198697-11020812  | 16.1611    | 14.926     | -0.114698 | 0.932202 |
| XLOC_005434 | TUBA1A      | chr12:49578577-49583107  | 43.8766    | 40.5251    | -0.114636 | 0.921047 |
| XLOC_020543 | CLDN4       | chr7:73245192-73247015   | 0.199133   | 0.183929   | -0.114577 | 1        |
| XLOC_005773 | RILPL1      | chr12:123955908-1240182  | 9.92217    | 9.16494    | -0.114531 | 0.931473 |
| XLOC_004034 | TRIM3       | chr11:6469842-6495689    | 3.96634    | 3.66368    | -0.114515 | 0.951559 |
| XLOC_021557 | PLEKHA2     | chr8:38758752-38831430   | 10.9885    | 10.1501    | -0.114503 | 0.926293 |
| XLOC_004274 | STX5        | chr11:62574331-62599563  | 31.486     | 29.0856    | -0.114408 | 0.9212   |
| XLOC_017592 | CDH12       | chr5:21750972-22853731   | 0.0436777  | 0.0403488  | -0.11437  | 1        |
| XLOC_009160 | PDK2        | chr17:48172100-48207246  | 19.5891    | 18.0963    | -0.114356 | 0.933023 |
| XLOC_003977 | SLC22A18AS  | chr11:2909326-2946476    | 0.419755   | 0.387771   | -0.114345 | 0.99351  |
| XLOC_014539 | MPST        | chr22:37406899-37425863  | 160.401    | 148.181    | -0.114321 | 0.950929 |
| XLOC_004509 | CWF19L2     | chr11:107197071-1073285  | 1.68933    | 1.56067    | -0.11429  | 0.950929 |
| XLOC_021653 | LRRC1       | chr8:86019322-86058314   | 1.77185    | 1.63698    | -0.114219 | 0.950929 |
| XLOC_009309 | SEPT9       | chr17:75277491-75496678  | 42.3741    | 39.1509    | -0.114136 | 0.921486 |
| XLOC_015231 | PCNP        | chr3:101293041-10131328  | 43.9868    | 40.6439    | -0.114032 | 0.922312 |
| XLOC_018215 | SKIV2L      | chr6:31919863-31937532   | 7.88346    | 7.28448    | -0.114002 | 0.979701 |

|              |              |                          |            |            |           |          |
|--------------|--------------|--------------------------|------------|------------|-----------|----------|
| XLOC_009127  | LRRC37A2     | chr17:44590075-44657088  | 0.215729   | 0.199357   | -0.113868 | 1        |
| XLOC_018178  | DDR1         | chr6:30851860-30867933   | 10.3035    | 9.52181    | -0.113827 | 0.931471 |
| XLOC_001307  | MFAP2        | chr1:17300998-17308081   | 0.410822   | 0.379672   | -0.113759 | 0.979701 |
| XLOC_008785  | KIF1C        | chr17:4901242-4931694    | 21.0789    | 19.4808    | -0.113753 | 0.924371 |
| XLOC_004659  | CCND2        | chr12:4382901-4414522    | 22.3357    | 20.6431    | -0.113691 | 0.919757 |
| XLOC_008188  | PSKH1        | chr16:67927174-67965778  | 7.22884    | 6.68181    | -0.113526 | 0.939753 |
| XLOC_023972  | TSPAN6       | chrX:99883794-99891794   | 17.7448    | 16.4023    | -0.113504 | 0.927644 |
| XLOC_018285  | NFYA         | chr6:41040706-41108573   | 3.86976    | 3.577      | -0.113492 | 0.931471 |
| XLOC_013631  | EPB41L1      | chr20:34679425-34820721  | 5.12014    | 4.73322    | -0.113364 | 0.931349 |
| XLOC_009559  | C17orf103    | chr17:21142183-21156578  | 4.45921    | 4.12253    | -0.113259 | 0.939091 |
| XLOC_015042  | TRAK1        | chr3:42132745-42267382   | 4.09245    | 3.78351    | -0.113241 | 0.936256 |
| XLOC_022814  | FAM214B      | chr9:35104117-35115893   | 4.1853     | 3.86945    | -0.1132   | 0.949987 |
| XLOC_005229  | PARP11       | chr12:3918026-3982608    | 1.14921    | 1.0625     | -0.113188 | 0.955758 |
| XLOC_007614  | VPS13C       | chr15:62144589-62352664  | 1.02335    | 0.946196   | -0.113083 | 0.937255 |
| XLOC_016965  | TIGD4        | chr4:153690505-153700916 | 0.153579   | 0.142006   | -0.113038 | 1        |
| XLOC_022390  | SMC5         | chr9:72873877-72969789   | 3.20884    | 2.96704    | -0.11303  | 0.932468 |
| XLOC_014643  | SELO         | chr22:50639407-50656045  | 24.6645    | 22.8062    | -0.113012 | 0.931473 |
| XLOC_022882  | FAM108B1     | chr9:74477367-74526148   | 4.42049    | 4.08745    | -0.113005 | 0.945037 |
| XLOC_004256  | RAB31L1      | chr11:61664767-61687741  | 6.2409     | 5.77073    | -0.113001 | 0.947951 |
| XLOC_003565  | TTC9C        | chr11:62495951-62506108  | 23.4727    | 21.7058    | -0.112901 | 0.931816 |
| XLOC_003328  | SBF2-AS1     | chr11:9776316-10315754   | 2.39658    | 2.21633    | -0.112804 | 0.978703 |
| XLOC_002962  | HERC4        | chr10:69681655-69835103  | 5.7926     | 5.35753    | -0.112644 | 0.930157 |
| XLOC_000641  | PEX11B       | chr1:145516164-145523732 | 12.4136    | 11.4815    | -0.112606 | 0.935939 |
| XLOC_001651  | TGFBR3       | chr1:92145899-92371559   | 0.39311    | 0.363595   | -0.1126   | 0.965917 |
| XLOC_000391  | OSBPL9       | chr1:52082545-52344609   | 15.681     | 14.5043    | -0.112539 | 0.967114 |
| XLOC_007152  | ZFYVE19      | chr15:41060066-41106767  | 23.1638    | 21.4266    | -0.112472 | 0.952469 |
| XLOC_008633  | PSMB10       | chr16:67968406-67970780  | 49.8999    | 46.1576    | -0.112469 | 0.934181 |
| XLOC_018624  | SLC22A23     | chr6:3269206-3456793     | 1.7124     | 1.58398    | -0.112466 | 0.952216 |
| XLOC_016092  | C3orf70      | chr3:184795837-184870802 | 0.00256477 | 0.00237247 | -0.11244  | 1        |
| XLOC_017210  | PAPD4        | chr5:78908242-78982471   | 5.85411    | 5.41556    | -0.112339 | 0.933559 |
| XLOC_001308  | ATP13A2      | chr1:17312452-17338423   | 20.5662    | 19.0255    | -0.112338 | 0.924371 |
| XLOC_003796  | ELMOD1       | chr11:107461816-10753750 | 0.00529096 | 0.00489492 | -0.112247 | 1        |
| XLOC_012048  | C2orf48      | chr2:10281980-10350942   | 2.07569    | 1.92048    | -0.112128 | 0.977332 |
| XLOC_007932  | ABAT         | chr16:8768443-8878432    | 1.54122    | 1.42604    | -0.112055 | 0.954768 |
| XLOC_000966  | NAV1         | chr1:201617449-201796102 | 1.38881    | 1.28503    | -0.112042 | 0.940009 |
| XLOC_024077  | RAP2C        | chrX:131337051-131353501 | 6.32548    | 5.85293    | -0.112016 | 0.935062 |
| XLOC_000208  | RPS6KA1      | chr1:26856248-26901520   | 23.1439    | 21.4152    | -0.111993 | 0.925955 |
| XLOC_015101  | KLHDC8B      | chr3:49209017-49213919   | 8.93791    | 8.27076    | -0.111917 | 0.942472 |
| XLOC_012143  | RMDN2        | chr2:38152461-38294285   | 0.280411   | 0.259483   | -0.111905 | 1        |
| XLOC_010359  | DYM          | chr18:46570171-46987079  | 9.61002    | 8.89324    | -0.11183  | 0.931471 |
| XLOC_011495  | ILVBL        | chr19:15218213-15236577  | 40.9618    | 37.9093    | -0.111729 | 0.926258 |
| XLOC_021484  | PCM1         | chr8:17780365-17887457   | 5.14416    | 4.76114    | -0.111628 | 0.926446 |
| XLOC_023744  | LOC389906    | chrX:3735575-3761935     | 20.9588    | 19.3986    | -0.111603 | 0.935062 |
| XLOC_005732  | CIT          | chr12:120123594-12031505 | 4.2494     | 3.93312    | -0.111584 | 0.939371 |
| XLOC_022595  | TBC1D13      | chr9:131549509-131572711 | 20.7904    | 19.2433    | -0.111556 | 0.923894 |
| XLOC_010818  | ZNF345       | chr19:37288451-37407193  | 0.565848   | 0.523783   | -0.111444 | 0.987693 |
| XLOC_002664  | FBXL15       | chr10:104162373-10418285 | 12.2229    | 11.3201    | -0.111428 | 0.946274 |
| XLOC_008615  | B3GNT9       | chr16:67143914-67184902  | 7.82845    | 7.24718    | -0.111308 | 0.966946 |
| XLOC_009774  | UBTF         | chr17:42282400-42298994  | 18.117     | 16.7718    | -0.111304 | 0.926258 |
| XLOC_010721  | ZNF90        | chr19:20188802-20231977  | 0.00324847 | 0.00300747 | -0.111212 | 1        |
| XLOC_003762  | KIAA1731     | chr11:93394815-93463522  | 0.780007   | 0.722173   | -0.111144 | 0.956033 |
| XLOC_004863  | TENC1        | chr12:53436972-53473204  | 0.762235   | 0.705727   | -0.111125 | 0.99351  |
| XLOC_0107739 | FLJ42709     | chr5:92745064-92917003   | 0.530496   | 0.4912     | -0.111033 | 0.980098 |
| XLOC_012140  | LOC100505876 | chr2:37423634-37458740   | 10.8316    | 10.03      | -0.110918 | 0.959465 |
| XLOC_005587  | MRS2P2       | chr12:72233486-72320629  | 0.0103665  | 0.00959948 | -0.110899 | 1        |
| XLOC_014258  | N6AMT1       | chr21:30244512-30257695  | 3.00183    | 2.77979    | -0.110864 | 0.966045 |
| XLOC_016540  | TRIM2        | chr4:154074269-154260474 | 2.04037    | 1.88954    | -0.110797 | 0.943036 |
| XLOC_014086  | UCKL1        | chr20:62571181-62601223  | 31.8847    | 29.5282    | -0.110772 | 0.930066 |
| XLOC_011205  | ZNF583       | chr19:56915382-56936400  | 0.908876   | 0.841763   | -0.110669 | 0.966946 |
| XLOC_017902  | TNIP1        | chr5:150409503-150467221 | 70.9963    | 65.7546    | -0.110652 | 0.926446 |
| XLOC_024156  | CXorf40B     | chrX:149100414-149106711 | 15.9759    | 14.7979    | -0.110505 | 0.942747 |
| XLOC_016467  | EGF          | chr4:110834039-110934118 | 0.00257004 | 0.00238061 | -0.110455 | 1        |
| XLOC_001039  | NENF         | chr1:212606228-212619721 | 146.572    | 135.78     | -0.110347 | 0.926225 |
| XLOC_005749  | CAMKK2       | chr12:121675494-12173611 | 9.99894    | 9.2628     | -0.110326 | 0.929478 |
| XLOC_007888  | FLJ42627     | chr16:2688982-2696130    | 2.15729    | 1.99868    | -0.110169 | 0.947008 |
| XLOC_002069  | SMG7-AS1     | chr1:183430010-183441117 | 0.0456365  | 0.0422839  | -0.11008  | 1        |
| XLOC_007837  | FAM173A      | chr16:771141-776473      | 75.945     | 70.3685    | -0.110025 | 0.949783 |
| XLOC_005702  | FAM109A      | chr12:111798454-11180692 | 8.36055    | 7.74681    | -0.109959 | 0.946956 |
| XLOC_007710  | PEAK1        | chr15:77400497-77712446  | 1.24911    | 1.15745    | -0.109958 | 0.938551 |
| XLOC_016150  | MF12         | chr3:196728611-196756687 | 36.0963    | 33.4475    | -0.109955 | 0.930066 |
| XLOC_023197  | NRARP        | chr9:140194082-140196703 | 43.9668    | 40.7404    | -0.109953 | 0.92856  |
| XLOC_007157  | CHP1         | chr15:41523436-41574083  | 45.1917    | 41.8765    | -0.109916 | 0.928653 |
| XLOC_002571  | PTEN         | chr10:89623194-89728532  | 8.47322    | 7.8521     | -0.10983  | 0.930488 |
| XLOC_010638  | PKN1         | chr19:14544165-14582679  | 112.303    | 104.084    | -0.10965  | 0.927422 |
| XLOC_008882  | USP32P1      | chr17:16690205-16707819  | 0.178369   | 0.165324   | -0.109571 | 1        |
| XLOC_007232  | RNF111       | chr15:59279864-59389618  | 2.33204    | 2.16152    | -0.109547 | 0.942827 |
| XLOC_023090  | PIP5K1L      | chr9:130683807-130693076 | 14.885     | 13.7974    | -0.109455 | 0.953101 |
| XLOC_007620  | HERC1        | chr15:63900816-64126147  | 0.661291   | 0.612994   | -0.109411 | 0.950929 |
| XLOC_017241  | RHOBTB3      | chr5:95066849-95132071   | 6.82507    | 6.32666    | -0.1094   | 0.930066 |

|             |                       |                         |           |           |           |          |
|-------------|-----------------------|-------------------------|-----------|-----------|-----------|----------|
| XLOC_021295 | POT1                  | chr7:124462439-12457003 | 3.38218   | 3.13531   | -0.109346 | 0.943097 |
| XLOC_022532 | GSN                   | chr9:124030379-12409512 | 32.8109   | 30.4162   | -0.109334 | 0.928755 |
| XLOC_000070 | TMEM201               | chr1:9648931-9674935    | 9.43402   | 8.74607   | -0.109239 | 0.935917 |
| XLOC_013097 | NPHP1                 | chr2:110880913-11096263 | 1.08189   | 1.003     | -0.109235 | 0.966946 |
| XLOC_022053 | HEY1                  | chr8:80676244-80680098  | 2.75768   | 2.55661   | -0.109221 | 0.958902 |
| XLOC_013771 | SLC17A9               | chr20:61583998-61599949 | 21.84     | 20.2478   | -0.10921  | 0.934998 |
| XLOC_015782 | IL17RD                | chr3:57124009-57199403  | 1.24466   | 1.15408   | -0.109008 | 0.949156 |
| XLOC_017192 | NSA2                  | chr5:73980968-74072737  | 159.1     | 147.526   | -0.108969 | 0.959465 |
| XLOC_013770 | GID8                  | chr20:61569440-61579827 | 15.6377   | 14.5005   | -0.108927 | 0.926233 |
| XLOC_020981 | HOXA10,HOXA9          | chr7:27202056-27219880  | 29.1955   | 27.0727   | -0.108904 | 0.93165  |
| XLOC_018410 | ANKRD6                | chr6:90142896-90348474  | 0.0455011 | 0.0421956 | -0.10881  | 1        |
| XLOC_009390 | MNT                   | chr17:2287353-2304258   | 6.00983   | 5.57329   | -0.108794 | 0.936493 |
| XLOC_007475 | MTMR10                | chr15:31196054-31283807 | 2.16122   | 2.00423   | -0.108794 | 0.967901 |
| XLOC_004916 | RABS5                 | chr12:56367696-56390467 | 10.9185   | 10.1255   | -0.108772 | 0.930066 |
| XLOC_019185 | RPS6KA2               | chr6:166822853-16727577 | 0.322609  | 0.299186  | -0.108747 | 1        |
| XLOC_022350 | ZCCHC7                | chr9:37120468-37358145  | 9.49286   | 8.80397   | -0.108689 | 0.934394 |
| XLOC_006009 | CDC16                 | chr13:115000361-1150381 | 26.9301   | 24.976    | -0.108679 | 0.928354 |
| XLOC_006647 | ZFYVE21               | chr14:104182080-1042000 | 27.6016   | 25.5988   | -0.108678 | 0.933023 |
| XLOC_015267 | QTRTD1                | chr3:113775581-11380726 | 5.68928   | 5.27668   | -0.108617 | 0.937235 |
| XLOC_023193 | TMEM203               | chr9:140098534-14010009 | 67.3783   | 62.4949   | -0.108545 | 0.927966 |
| XLOC_010898 | LOC100996307          | chr19:42901299-43156507 | 0.232358  | 0.215519  | -0.108533 | 1        |
| XLOC_015115 | GNAI2                 | chr3:50273646-50296786  | 64.435    | 59.7692   | -0.108443 | 0.92856  |
| XLOC_008938 | SPAG5-AS1             | chr17:26926150-26972177 | 0.498726  | 0.462628  | -0.108394 | 0.996015 |
| XLOC_012882 | MAP4K3                | chr2:39476406-39664453  | 2.98476   | 2.76886   | -0.108321 | 0.944724 |
| XLOC_004674 | NCAPD2                | chr12:6603297-6641132   | 32.9486   | 30.5659   | -0.108295 | 0.927914 |
| XLOC_003708 | PAAF1                 | chr11:73583712-73638781 | 15.0016   | 13.917    | -0.108272 | 0.978981 |
| XLOC_013237 | GPR155                | chr2:175296299-17535181 | 0.313438  | 0.290778  | -0.108264 | 1        |
| XLOC_017230 | TMEM161B-AS1          | chr5:87564698-87732491  | 1.91149   | 1.77332   | -0.108244 | 0.978196 |
| XLOC_013044 | ASTL                  | chr2:96789588-96804175  | 0.0401467 | 0.0372461 | -0.108192 | 1        |
| XLOC_003325 | ZNF143                | chr11:9482511-9550071   | 4.44197   | 4.12119   | -0.108139 | 0.947008 |
| XLOC_003013 | DLG5                  | chr10:79550548-79686348 | 4.83624   | 4.48736   | -0.10802  | 0.932231 |
| XLOC_020826 | CTAGE4                | chr7:143880547-14388317 | 0.284056  | 0.263564  | -0.108019 | 1        |
| XLOC_017975 | F12                   | chr5:176829138-17683657 | 34.264    | 31.7928   | -0.107991 | 0.932468 |
| XLOC_003690 | FAM86C1               | chr11:71498556-71524905 | 2.92182   | 2.71123   | -0.107921 | 0.961224 |
| XLOC_010261 | HSBP1L1               | chr18:77724581-77730822 | 82.5633   | 76.6145   | -0.107882 | 0.930447 |
| XLOC_004136 | CD59                  | chr11:33724555-33758025 | 17.0706   | 15.8422   | -0.107743 | 0.931471 |
| XLOC_006362 | SOCS4                 | chr14:55493843-55516206 | 2.49395   | 2.31461   | -0.107664 | 0.94356  |
| XLOC_011868 | FAM71E1               | chr19:50970044-50986608 | 4.47712   | 4.15517   | -0.107663 | 0.991956 |
| XLOC_007719 | CHRNA3                | chr15:78857861-78913637 | 0.177681  | 0.164907  | -0.107638 | 1        |
| XLOC_006359 | CDKN3                 | chr14:54863672-54886934 | 39.7527   | 36.8957   | -0.107602 | 0.933625 |
| XLOC_000970 | SHISA4                | chr1:201857796-20186171 | 11.6297   | 10.7941   | -0.107565 | 0.950929 |
| XLOC_009593 | SSH2                  | chr17:27952964-28435470 | 0.857655  | 0.796054  | -0.107529 | 0.953922 |
| XLOC_011624 | ZNF260                | chr19:37001588-37019248 | 2.27641   | 2.11308   | -0.107412 | 0.947008 |
| XLOC_009044 | CASC3                 | chr17:38296506-38328431 | 25.9424   | 24.0819   | -0.107363 | 0.929635 |
| XLOC_008051 | ZNF771                | chr16:30418734-30429916 | 12.6736   | 11.7649   | -0.10733  | 0.962247 |
| XLOC_023884 | PHF8                  | chrX:53963112-54071569  | 7.54507   | 7.00438   | -0.107276 | 0.935522 |
| XLOC_007630 | SPG21                 | chr15:65255362-65282251 | 80.9977   | 75.1953   | -0.107239 | 0.930157 |
| XLOC_017815 | PITX1                 | chr5:134363423-13436996 | 31.9308   | 29.6446   | -0.107178 | 0.939072 |
| XLOC_022627 | GTF3C4                | chr9:135469675-13556547 | 5.94638   | 5.52067   | -0.107169 | 0.977738 |
| XLOC_021654 | E2F5                  | chr8:86089618-86132643  | 8.63177   | 8.01414   | -0.107108 | 0.990324 |
| XLOC_017783 | CEP120                | chr5:122680578-12275928 | 3.29416   | 3.05865   | -0.107017 | 0.940056 |
| XLOC_013977 | C20orf111             | chr20:42824580-42839546 | 28.7277   | 26.6742   | -0.106999 | 0.92969  |
| XLOC_008966 | RNF135                | chr17:29297955-29326929 | 7.07793   | 6.57212   | -0.10697  | 0.950929 |
| XLOC_019058 | CEP85L                | chr6:118781934-11903123 | 0.495362  | 0.459974  | -0.106932 | 0.977332 |
| XLOC_015536 | PAK2                  | chr3:196466727-19655951 | 11.451    | 10.6338   | -0.106818 | 0.931471 |
| XLOC_022245 | CYHR1                 | chr8:145675314-14569103 | 70.6023   | 65.5639   | -0.106815 | 0.934181 |
| XLOC_011019 | LOC100507003          | chr19:49929687-49932075 | 0.0118437 | 0.0109985 | -0.106807 | 1        |
| XLOC_013175 | ORC4                  | chr2:148602569-14927104 | 4.69383   | 4.35915   | -0.106719 | 0.939261 |
| XLOC_012846 | IFT172                | chr2:27665232-27712571  | 1.95432   | 1.81501   | -0.106688 | 0.953061 |
| XLOC_007266 | MAP2K5                | chr15:67835020-68099455 | 12.7116   | 11.8056   | -0.106679 | 0.944724 |
| XLOC_022103 | C8orf37               | chr8:96257140-96822371  | 0.659088  | 0.612138  | -0.106615 | 0.972053 |
| XLOC_009358 | FN3K                  | chr17:80693451-80709073 | 35.5487   | 33.0172   | -0.106583 | 0.938194 |
| XLOC_022798 | FAM219A               | chr9:34398181-34458568  | 10.2029   | 9.4767    | -0.106529 | 0.938305 |
| XLOC_007774 | PEX11A                | chr15:90224761-90234015 | 2.92517   | 2.71705   | -0.106478 | 0.955406 |
| XLOC_007543 | ZSCAN29               | chr15:43650369-43662258 | 3.36894   | 3.12926   | -0.106474 | 0.942747 |
| XLOC_000268 | ZSCAN20               | chr1:33938231-33961995  | 0.383932  | 0.356621  | -0.106462 | 0.974226 |
| XLOC_005044 | SLC25A3               | chr12:98987402-98995778 | 464.472   | 431.452   | -0.10639  | 0.935539 |
| XLOC_016755 | NOA1                  | chr4:57829515-57843826  | 39.9093   | 37.0737   | -0.106328 | 0.932202 |
| XLOC_015276 | POGLUT1               | chr3:119187784-11921355 | 3.20974   | 2.98173   | -0.106307 | 0.950929 |
| XLOC_003382 | ELP4                  | chr11:31531296-31805329 | 10.4334   | 9.69227   | -0.106303 | 0.948088 |
| XLOC_000773 | BGLAP,PMF1,PMF1-BGLAF | chr1:156182778-15621790 | 48.7806   | 45.3157   | -0.106297 | 0.942827 |
| XLOC_004096 | SERGEF                | chr11:17809596-18034637 | 21.157    | 19.6549   | -0.106242 | 0.939261 |
| XLOC_002624 | UBTD1                 | chr10:99258767-99330960 | 35.9195   | 33.3697   | -0.106227 | 0.93616  |
| XLOC_012979 | FBXO41                | chr2:73481809-73496758  | 6.23291   | 5.79125   | -0.106031 | 0.933641 |
| XLOC_010600 | ZNF441                | chr19:11877814-11894893 | 0.446653  | 0.415009  | -0.10601  | 0.969626 |
| XLOC_016176 | C4orf48               | chr4:2043719-2045697    | 57.5401   | 53.4646   | -0.105984 | 0.959465 |
| XLOC_002532 | RPS24                 | chr10:79793517-79816571 | 3608.55   | 3353.09   | -0.105929 | 0.945247 |
| XLOC_017864 | FCHSD1                | chr5:141016516-14103098 | 12.1275   | 11.2691   | -0.105911 | 0.946765 |
| XLOC_014473 | SGSM1                 | chr22:25202135-25322813 | 0.821964  | 0.763873  | -0.105742 | 0.963457 |

|              |                      |                          |           |           |           |          |
|--------------|----------------------|--------------------------|-----------|-----------|-----------|----------|
| XLOC_011233  | ZNF551               | chr19:58193336-58201169  | 0.81663   | 0.758952  | -0.105673 | 0.966946 |
| XLOC_000673  | C1orf51              | chr1:150255228-150259501 | 0.716085  | 0.66553   | -0.105627 | 0.979701 |
| XLOC_017362  | HARS2                | chr5:140053489-140078890 | 9.82939   | 9.13619   | -0.105509 | 0.979701 |
| XLOC_020957  | STEAP1B              | chr7:22459062-22539901   | 0.0120364 | 0.0111888 | -0.105352 | 1        |
| XLOC_022660  | KCNT1                | chr9:138594030-138684993 | 0.0159641 | 0.0148405 | -0.105287 | 1        |
| XLOC_009543  | ZNF286B              | chr17:18561741-18585572  | 2.6328    | 2.44794   | -0.105031 | 0.948088 |
| XLOC_021889  | MTMR7                | chr8:17104400-17271040   | 0.9636    | 0.895956  | -0.105007 | 0.979866 |
| XLOC_021957  | RAB11FIP1            | chr8:37716464-37757015   | 4.46999   | 4.15627   | -0.104981 | 0.937255 |
| XLOC_011244  | ZSCAN22              | chr19:58838384-58853712  | 1.2188    | 1.13326   | -0.104977 | 0.963457 |
| XLOC_015139  | NISCH                | chr3:52489523-52527088   | 17.0657   | 15.8683   | -0.104953 | 0.939025 |
| XLOC_006316  | ARHGAP5              | chr14:32546494-32628934  | 2.5057    | 2.32992   | -0.104934 | 0.938194 |
| XLOC_020462  | BLVRA                | chr7:43798271-43846941   | 46.6112   | 43.3424   | -0.104898 | 0.935939 |
| XLOC_014260  | RWDD2B               | chr21:30378079-30391685  | 8.84046   | 8.22055   | -0.104887 | 0.95006  |
| XLOC_018745  | FLOT1                | chr6:30695510-30710453   | 110.277   | 102.546   | -0.104859 | 0.935555 |
| XLOC_001547  | CC2D1B               | chr1:52816264-52831877   | 4.82218   | 4.48415   | -0.104851 | 0.942238 |
| XLOC_011160  | TSEN34               | chr19:54694118-54698394  | 57.8763   | 53.8195   | -0.104843 | 0.931471 |
| XLOC_023855  | SYP                  | chrX:49044264-49056661   | 0.309113  | 0.287469  | -0.10473  | 1        |
| XLOC_008527  | ZNF629               | chr16:30789769-30798523  | 6.43963   | 5.98881   | -0.104707 | 0.935939 |
| XLOC_002177  | NSL1                 | chr1:212899494-212965138 | 0.928527  | 0.863614  | -0.104558 | 0.948179 |
| XLOC_011300  | GNG7                 | chr19:2511217-2702746    | 1.4476    | 1.34642   | -0.104532 | 0.966946 |
| XLOC_000495  | PKN2                 | chr1:89149921-89301938   | 4.05988   | 3.77616   | -0.104516 | 0.938194 |
| XLOC_005668  | APPL2                | chr12:105567074-10563000 | 4.35056   | 4.04654   | -0.10451  | 0.950929 |
| XLOC_022727  | NFIB                 | chr9:14081841-14398982   | 2.84295   | 2.64453   | -0.104376 | 0.941348 |
| XLOC_003968  | H19,MIR675           | chr11:2016405-2019065    | 1.993     | 1.85395   | -0.10434  | 0.977332 |
| XLOC_013255  | PDE11A               | chr2:178487976-178973066 | 0.0853214 | 0.0793699 | -0.104315 | 1        |
| XLOC_017311  | SLC22A5              | chr5:131630144-131731306 | 2.96417   | 2.75746   | -0.104286 | 0.958814 |
| XLOC_001218  | PEX10                | chr1:2323213-2344010     | 21.0635   | 19.595    | -0.104262 | 0.979733 |
| XLOC_002799  | ENHO                 | chr9:34521039-34523037   | 17.23     | 16.029    | -0.104235 | 0.954413 |
| XLOC_017158  | SREK1                | chr5:65440045-65479444   | 3.73599   | 3.47569   | -0.10419  | 0.941348 |
| XLOC_020408  | HOTAIRM1             | chr7:27135712-27139877   | 16.4049   | 14.9234   | -0.10418  | 0.952905 |
| XLOC_002366  | TMEM236              | chr10:18041226-18089854  | 0.0459675 | 0.0427695 | -0.104031 | 1        |
| XLOC_005228  | EFCAB4B              | chr12:3724493-3862366    | 1.31619   | 1.2248    | -0.103824 | 0.96926  |
| XLOC_010583  | DNM2                 | chr19:10828728-10942586  | 42.0716   | 39.1507   | -0.103808 | 0.934345 |
| XLOC_023471  | RPS26P11             | chrX:71130937-71363424   | 1.30668   | 1.21597   | -0.103803 | 0.984917 |
| XLOC_022405  | TLE4                 | chr9:82186877-82341656   | 0.592919  | 0.551798  | -0.103694 | 0.97028  |
| XLOC_015690  | UCN2                 | chr3:48599150-48601201   | 0.0811208 | 0.0754992 | -0.103611 | 1        |
| XLOC_016428  | TIGD2                | chr4:90033967-90036052   | 3.24254   | 3.01806   | -0.103504 | 0.958814 |
| XLOC_012872  | PRKD3                | chr2:37477645-37544222   | 2.38331   | 2.21833   | -0.103489 | 0.947716 |
| XLOC_015904  | PKNA1                | chr3:122140747-122233786 | 5.79771   | 5.39702   | -0.103321 | 0.933023 |
| XLOC_010835  | FAM98C               | chr19:38893774-38916945  | 48.8307   | 45.4569   | -0.103288 | 0.937952 |
| XLOC_016952  | OTUD4                | chr4:146054801-146100833 | 3.8987    | 3.62946   | -0.103237 | 0.945022 |
| XLOC_007147  | RPU5D2               | chr15:40861536-40866661  | 17.4967   | 16.2911   | -0.102995 | 0.946971 |
| XLOC_023069  | NR6A1                | chr9:127284702-127533576 | 0.814697  | 0.758585  | -0.102953 | 0.978196 |
| XLOC_009360  | METRNL               | chr17:81037566-81052591  | 59.8177   | 55.6978   | -0.10295  | 0.940056 |
| XLOC_016155  | KIAA0226             | chr3:197398258-197511311 | 3.35818   | 3.1269    | -0.102945 | 0.976618 |
| XLOC_023354  | ARAF                 | chrX:47420498-47479256   | 22.4738   | 20.9265   | -0.10291  | 0.987693 |
| XLOC_004171  | SPI1                 | chr11:47376408-47400127  | 0.0458902 | 0.0427315 | -0.102884 | 1        |
| XLOC_005871  | AKAP11               | chr13:42846288-42897403  | 1.85776   | 1.7299    | -0.102873 | 0.945946 |
| XLOC_003220  | IFITM1               | chr11:313990-315272      | 1.2128    | 1.12937   | -0.102833 | 0.983952 |
| XLOC_011429  | SPC24                | chr19:11257830-11266484  | 9.76233   | 9.09108   | -0.102774 | 0.967282 |
| XLOC_016006  | SIAH2                | chr3:150458909-150481263 | 16.8878   | 15.7267   | -0.10276  | 0.942519 |
| XLOC_023251  | VCX3B                | chrX:8432870-8434551     | 0.0152585 | 0.0142097 | -0.102738 | 1        |
| XLOC_0021140 | CACNA2D1             | chr7:81579417-82073031   | 0.206915  | 0.1927    | -0.102681 | 1        |
| XLOC_009202  | YPEL2                | chr17:57409052-57479095  | 1.30619   | 1.21666   | -0.102429 | 0.959465 |
| XLOC_018170  | HLA-E                | chr6:30457182-30461982   | 149.84    | 139.573   | -0.102404 | 0.935062 |
| XLOC_005533  | NACA                 | chr12:57106210-57119326  | 1181.73   | 1100.83   | -0.102311 | 0.938811 |
| XLOC_003664  | AIP                  | chr11:67250504-67258579  | 64.8729   | 60.4328   | -0.102284 | 0.938123 |
| XLOC_017904  | CCDC69               | chr5:150560612-150603654 | 4.25242   | 3.96139   | -0.102279 | 0.952905 |
| XLOC_020743  | IRF5                 | chr7:128577993-128590088 | 25.0743   | 23.3586   | -0.102256 | 0.935836 |
| XLOC_013016  | TMEM150A             | chr2:85825669-85829822   | 10.9654   | 10.2156   | -0.102181 | 0.954559 |
| XLOC_022617  | AIF1L                | chr9:133971862-133998533 | 43.4983   | 40.5246   | -0.102161 | 0.937347 |
| XLOC_017455  | PTTG1                | chr5:159848864-159855746 | 207.666   | 193.478   | -0.102095 | 0.934426 |
| XLOC_018980  | SNX14                | chr6:86215214-86303629   | 11.3696   | 10.5929   | -0.102084 | 0.935062 |
| XLOC_011282  | TCF3                 | chr19:1609288-1652328    | 30.6104   | 28.5214   | -0.101977 | 0.935939 |
| XLOC_010000  | TMC6                 | chr17:76108998-76139049  | 28.1253   | 26.2088   | -0.101817 | 0.940122 |
| XLOC_017139  | MAP3K1               | chr5:56110899-56191978   | 0.855399  | 0.797137  | -0.101769 | 0.960403 |
| XLOC_017647  | LOC642366            | chr5:50668570-50690563   | 0.0288026 | 0.0268419 | -0.101713 | 1        |
| XLOC_007423  | NR2F2                | chr15:96689156-96883492  | 3.04853   | 2.84113   | -0.101648 | 0.954559 |
| XLOC_019038  | CDK19                | chr6:110931180-111136411 | 1.74244   | 1.62403   | -0.101533 | 0.953271 |
| XLOC_005647  | UHRF1BP1L            | chr12:100430862-10053664 | 1.47539   | 1.37518   | -0.101448 | 0.966946 |
| XLOC_013650  | RALGAPB              | chr20:37101485-37207504  | 3.48891   | 3.25211   | -0.1014   | 0.941345 |
| XLOC_009662  | FBXL20               | chr17:37408896-37557909  | 2.45866   | 2.29195   | -0.101294 | 0.943036 |
| XLOC_005617  | GALNT4,POC1B,POC1B-G | chr12:89813497-89920039  | 5.57961   | 5.20133   | -0.101283 | 0.950929 |
| XLOC_017188  | BTF3                 | chr5:72794249-72801448   | 875.131   | 815.842   | -0.101211 | 0.942747 |
| XLOC_015389  | GYG1                 | chr3:148709194-148745456 | 33.2822   | 31.0277   | -0.101195 | 0.938305 |
| XLOC_015785  | DNAH12               | chr3:57327726-57530071   | 0.0110494 | 0.010301  | -0.101193 | 1        |
| XLOC_001553  | C1orf123             | chr1:53662100-53686289   | 28.0849   | 26.1833   | -0.101147 | 0.962571 |
| XLOC_006412  | RDH12                | chr14:68168602-68201168  | 0.0319094 | 0.0297501 | -0.101089 | 1        |
| XLOC_021423  | ESYT2                | chr7:158523688-158622316 | 8.15574   | 7.60403   | -0.101052 | 0.939088 |

|             |            |                          |            |            |            |          |
|-------------|------------|--------------------------|------------|------------|------------|----------|
| XLOC_001629 | SYDE2      | chr1:85623355-85666728   | 1.48369    | 1.38339    | -0.10098   | 0.959465 |
| XLOC_009099 | NAGS       | chr17:42082031-42086436  | 6.03698    | 5.62945    | -0.100835  | 0.960071 |
| XLOC_004276 | SNHG1      | chr11:62619459-62623360  | 168.176    | 156.825    | -0.100819  | 0.941014 |
| XLOC_019129 | SHPRH      | chr6:145946439-146285233 | 0.66278    | 0.618057   | -0.100791  | 0.985921 |
| XLOC_020643 | LAMTOR4    | chr7:99746529-99751833   | 318.932    | 297.414    | -0.100775  | 0.936256 |
| XLOC_011537 | ELL        | chr19:18553472-18632937  | 11.982     | 11.1738    | -0.100752  | 0.939371 |
| XLOC_001562 | TMEM59     | chr1:54497348-54519111   | 75.7986    | 70.6861    | -0.100745  | 0.937845 |
| XLOC_014879 | LDLOC1L    | chr22:44888449-44894005  | 6.39445    | 5.96348    | -0.100666  | 0.946765 |
| XLOC_022821 | TLN1       | chr9:35697333-35749225   | 16.9831    | 15.8392    | -0.100604  | 0.958902 |
| XLOC_011187 | ZNF628     | chr19:55987698-55995854  | 5.04886    | 4.70904    | -0.100523  | 0.961224 |
| XLOC_002238 | C1orf198   | chr1:230972864-231005333 | 8.60956    | 8.03009    | -0.100522  | 0.943036 |
| XLOC_007400 | TTL13      | chr15:90792763-90802312  | 0.173642   | 0.161969   | -0.100398  | 1        |
| XLOC_003081 | PYROXD2    | chr10:100143321-10017497 | 0.0509682  | 0.0475442  | -0.100328  | 1        |
| XLOC_022801 | RPP25L     | chr9:34610481-34612110   | 77.8849    | 72.663     | -0.100123  | 0.940503 |
| XLOC_004215 | UBE2L6     | chr11:57319127-57335803  | 28.5432    | 26.6318    | -0.100001  | 0.945783 |
| XLOC_010538 | STXBP2     | chr19:7701986-7712760    | 63.4597    | 59.2106    | -0.0999843 | 0.937757 |
| XLOC_011310 | TBXA2R     | chr19:3594503-3606831    | 3.3862     | 3.15979    | -0.0998386 | 0.966946 |
| XLOC_014396 | CECR2      | chr22:17956627-18033845  | 0.0411697  | 0.0384177  | -0.0998122 | 1        |
| XLOC_015564 | PRRT3      | chr3:9987225-9996471     | 1.30258    | 1.21554    | -0.099775  | 0.979701 |
| XLOC_017558 | SDHAF3     | chr5:1572072-1594646     | 3.91993    | 3.65834    | -0.0996418 | 0.970232 |
| XLOC_004368 | CHKA       | chr11:67820325-67888858  | 24.8105    | 23.1558    | -0.0995787 | 0.942519 |
| XLOC_011699 | ATP1A3     | chr19:42470733-42498428  | 9.32545    | 8.70374    | -0.0995372 | 0.950929 |
| XLOC_010437 | CFD        | chr19:859664-863610      | 23.8203    | 22.2324    | -0.0995303 | 0.958201 |
| XLOC_015407 | P2RY1      | chr3:152552735-152555843 | 0.108101   | 0.100895   | -0.0995245 | 1        |
| XLOC_012093 | EMILIN1    | chr2:27301434-27309265   | 0.210556   | 0.196522   | -0.0995106 | 1        |
| XLOC_018487 | TRMT11     | chr6:126307575-126360420 | 7.2371     | 6.75489    | -0.0994794 | 0.952905 |
| XLOC_016096 | IGFBP2     | chr3:185361526-185542827 | 29.7373    | 27.7559    | -0.0994759 | 0.940338 |
| XLOC_001473 | PABPC4     | chr1:40026484-40042521   | 111.2      | 103.792    | -0.0994661 | 0.942778 |
| XLOC_003228 | TMEM80     | chr11:644224-705028      | 12.321     | 11.5003    | -0.0994576 | 0.985921 |
| XLOC_012930 | USP34      | chr2:61404554-61697849   | 2.92472    | 2.72994    | -0.0994292 | 0.952344 |
| XLOC_007697 | SIN3A      | chr15:75661719-75748124  | 4.88917    | 4.56375    | -0.0993705 | 0.942747 |
| XLOC_015558 | SETD5-AS1  | chr3:9430536-9439174     | 4.26612    | 3.98227    | -0.0993322 | 0.959465 |
| XLOC_007178 | CKMT1B     | chr15:43663312-43910998  | 12.8672    | 12.0113    | -0.0993095 | 0.982156 |
| XLOC_007634 | PDCD7      | chr15:65409716-65426174  | 15.7072    | 14.6627    | -0.0992702 | 0.942472 |
| XLOC_004590 | ZNF202     | chr11:123594996-12361236 | 3.68286    | 3.438      | -0.0992583 | 0.954559 |
| XLOC_015741 | VPRBP      | chr3:51428698-51534018   | 2.54779    | 2.37885    | -0.0998942 | 0.984481 |
| XLOC_016203 | LOC93622   | chr4:6675820-6677774     | 20.9355    | 19.548     | -0.0989359 | 0.949958 |
| XLOC_008365 | CEMP1      | chr16:2570362-2581409    | 10.3551    | 9.66934    | -0.0988522 | 0.977332 |
| XLOC_004801 | ALG10B     | chr12:38710556-38723528  | 0.519809   | 0.4854     | -0.0988071 | 0.964431 |
| XLOC_007831 | FAM195A    | chr16:691848-698474      | 111.526    | 104.148    | -0.0987432 | 0.943036 |
| XLOC_011215 | ZNF264     | chr19:57702867-57734214  | 1.1766     | 1.09877    | -0.0987351 | 0.954188 |
| XLOC_007786 | FAM174B    | chr15:93160678-93199031  | 8.47771    | 7.91806    | -0.0985285 | 0.951559 |
| XLOC_008736 | CENPBD1    | chr16:90036182-90067195  | 1.68574    | 1.57451    | -0.0984838 | 0.982703 |
| XLOC_001215 | C1orf86    | chr1:1981908-2144159     | 145.896    | 136.27     | -0.0984767 | 0.965148 |
| XLOC_015602 | SATB1      | chr3:18389132-18480265   | 3.46572    | 3.23717    | -0.0984245 | 0.954559 |
| XLOC_008437 | FOPNL      | chr16:15959576-15982447  | 13.5636    | 12.6692    | -0.0984131 | 0.944616 |
| XLOC_017233 | ARRDC3-AS1 | chr5:90664540-90716532   | 0.0889167  | 0.0830592  | -0.0983159 | 1        |
| XLOC_008715 | FBXO31     | chr16:87362941-87425708  | 14.0188    | 13.0957    | -0.0982664 | 0.944284 |
| XLOC_020423 | C7orf41    | chr7:30174551-30202381   | 3.05294    | 2.85195    | -0.0982514 | 0.952697 |
| XLOC_023700 | TMEM187    | chrX:153237990-153248644 | 6.82124    | 6.37226    | -0.0982291 | 0.963786 |
| XLOC_020398 | CCDC126    | chr7:23636997-23684327   | 1.23112    | 1.1501     | -0.0982154 | 0.971965 |
| XLOC_012098 | CAD        | chr2:27440257-27466654   | 12.1187    | 11.3213    | -0.0981971 | 0.942747 |
| XLOC_017845 | MZB1       | chr5:138723256-138725608 | 0.05078    | 0.047439   | -0.0981879 | 1        |
| XLOC_000187 | SRRM1      | chr1:24969593-24999772   | 18.5145    | 17.297     | -0.0981337 | 0.941348 |
| XLOC_010526 | VAV1       | chr19:6772678-6857377    | 0.208611   | 0.194902   | -0.0980667 | 1        |
| XLOC_024169 | CETN2      | chrX:151995870-15199930  | 27.0442    | 25.2673    | -0.0980482 | 0.948179 |
| XLOC_007109 | APBA2      | chr15:29213839-29410516  | 0.00556017 | 0.00519499 | -0.0980067 | 1        |
| XLOC_012088 | CENPA      | chr2:27008881-27017455   | 21.7652    | 20.3381    | -0.0978375 | 0.950929 |
| XLOC_015354 | PPP2R3A    | chr3:135684514-135866753 | 1.13376    | 1.05943    | -0.0978171 | 0.965573 |
| XLOC_008926 | KSR1       | chr17:25799035-25950718  | 0.162826   | 0.152156   | -0.0977817 | 1        |
| XLOC_013644 | RPRD1B     | chr20:36661947-36720766  | 6.17386    | 5.76935    | -0.0977634 | 0.950408 |
| XLOC_009751 | EZH1       | chr17:40852292-40897071  | 4.22751    | 3.95062    | -0.0977287 | 0.950929 |
| XLOC_007143 | KNSTRN     | chr15:40674921-40686489  | 21.5487    | 20.1379    | -0.0976869 | 0.944631 |
| XLOC_006102 | NUFIP1     | chr13:45513383-45563613  | 2.54549    | 2.37884    | -0.0976857 | 0.956373 |
| XLOC_018389 | TTK        | chr6:80714321-80752244   | 5.57722    | 5.21214    | -0.0976703 | 0.950929 |
| XLOC_016326 | CEP135     | chr4:56814973-56899529   | 1.56863    | 1.46596    | -0.097667  | 0.957925 |
| XLOC_009149 | UBE2Z      | chr17:46985730-47006422  | 45.0677    | 42.1187    | -0.0976341 | 0.940091 |
| XLOC_013155 | LOC401010  | chr2:132199733-132202467 | 0.00744063 | 0.00695386 | -0.097611  | 1        |
| XLOC_011283 | ATP8B3     | chr19:1782073-1812275    | 0.463119   | 0.432844   | -0.0975353 | 0.976214 |
| XLOC_012441 | CCDC74A    | chr2:132202795-132360468 | 10.4703    | 9.7863     | -0.0974714 | 0.993379 |
| XLOC_008821 | POLR2A     | chr17:7387697-7417935    | 11.1593    | 10.4313    | -0.0973365 | 0.942519 |
| XLOC_003327 | SWAP70     | chr11:9685627-9774507    | 6.22837    | 5.82243    | -0.0972333 | 0.944601 |
| XLOC_021801 | ADCK5      | chr8:145597730-145634733 | 19.114     | 17.8691    | -0.0971628 | 0.984917 |
| XLOC_011048 | FLJ26850   | chr19:50553936-50570052  | 1.57688    | 1.47421    | -0.0971368 | 0.977332 |
| XLOC_000282 | AGO3       | chr1:36396682-36522063   | 1.30175    | 1.21701    | -0.097116  | 0.966946 |
| XLOC_012719 | DGKD       | chr2:234263152-234380743 | 4.32555    | 4.04396    | -0.0971151 | 0.950929 |
| XLOC_010820 | ZNF420     | chr19:37569381-37620651  | 0.911761   | 0.852429   | -0.0970762 | 0.972111 |
| XLOC_020751 | NRF1       | chr7:129251554-129396922 | 3.77892    | 3.53329    | -0.0969617 | 0.976198 |
| XLOC_002527 | VDAC2      | chr10:76969911-76991207  | 183.896    | 171.962    | -0.0967979 | 0.942519 |

|             |                    |                          |            |            |            |          |
|-------------|--------------------|--------------------------|------------|------------|------------|----------|
| XLOC_002457 | NCOA4              | chr10:51565107-51590734  | 54.1339    | 50.6214    | -0.0967839 | 0.943036 |
| XLOC_016208 | TADA2B             | chr4:6911170-7059677     | 5.62477    | 5.25982    | -0.0967792 | 0.979701 |
| XLOC_011388 | ZNF414             | chr19:8575461-8579048    | 13.8636    | 12.9649    | -0.096697  | 0.965148 |
| XLOC_021144 | SEMA3D             | chr7:84624871-84751247   | 4.49405    | 4.2028     | -0.0966645 | 0.944284 |
| XLOC_008681 | CFDP1              | chr16:75327607-75467387  | 27.7529    | 25.9545    | -0.0966582 | 0.947247 |
| XLOC_018315 | POLR1C             | chr6:43484776-43489246   | 55.0259    | 51.4604    | -0.0966482 | 0.945783 |
| XLOC_000750 | ADAM15             | chr1:155006281-155042025 | 100.633    | 94.1187    | -0.0965451 | 0.954768 |
| XLOC_012258 | DOK1               | chr2:74753774-74784678   | 22.6633    | 21.1966    | -0.0965301 | 0.987702 |
| XLOC_008065 | SETD1A             | chr16:30968614-30995981  | 7.83241    | 7.32573    | -0.0964842 | 0.949798 |
| XLOC_001893 | ASH1L              | chr1:155305051-155533735 | 1.04608    | 0.978455   | -0.0964212 | 0.979733 |
| XLOC_004614 | PUS3               | chr11:125753508-12577311 | 9.51425    | 8.89949    | -0.0963675 | 0.965148 |
| XLOC_006880 | MAP3K9             | chr14:71194853-71275888  | 0.530346   | 0.496079   | -0.0963651 | 0.976617 |
| XLOC_021418 | MNX1               | chr7:156797546-156803347 | 20.7564    | 19.4162    | -0.0962965 | 0.956033 |
| XLOC_001882 | DPM3               | chr1:155112366-155112996 | 138.062    | 129.148    | -0.0962885 | 0.950929 |
| XLOC_007159 | NUSAP1             | chr15:41624891-41673248  | 37.2423    | 34.8393    | -0.0962271 | 0.944724 |
| XLOC_011846 | PTOV1-AS1          | chr19:50341902-50363999  | 2.47786    | 2.31806    | -0.0961786 | 0.992797 |
| XLOC_008697 | SLC38A8            | chr16:84043388-84075762  | 0.0202044  | 0.0189032  | -0.0960412 | 1        |
| XLOC_021072 | PHKG1              | chr7:56131916-56160689   | 24.5688    | 22.9886    | -0.0959073 | 0.979701 |
| XLOC_002286 | ZNF670,ZNF695      | chr1:247108848-247242115 | 5.00979    | 4.68784    | -0.0958286 | 0.979291 |
| XLOC_018271 | C6orf89            | chr6:36853639-36896740   | 5.45594    | 5.10597    | -0.095643  | 0.948088 |
| XLOC_016894 | TIFA               | chr4:113196781-113207055 | 7.59691    | 7.11105    | -0.0953507 | 0.950929 |
| XLOC_001793 | HIST2H2AB          | chr1:149859018-149859466 | 0.27654    | 0.258865   | -0.0952885 | 1        |
| XLOC_011211 | SMIM17             | chr19:57154526-57168614  | 0.146866   | 0.137493   | -0.0951357 | 1        |
| XLOC_017255 | MAN2A1             | chr5:109025155-109203425 | 0.600631   | 0.562331   | -0.095059  | 0.974392 |
| XLOC_002863 | ARMC4              | chr10:28101096-28287977  | 0.00369345 | 0.00345794 | -0.0950561 | 1        |
| XLOC_011764 | DMPK               | chr19:46272975-46285815  | 13.1598    | 12.3207    | -0.0950524 | 0.956033 |
| XLOC_005142 | MLEC               | chr12:121124948-12113966 | 24.2081    | 22.6648    | -0.0950339 | 0.945247 |
| XLOC_007228 | GCOM1,MYZAP,POLR2M | chr15:57884101-58009755  | 10.2852    | 9.63017    | -0.0949425 | 0.948088 |
| XLOC_010121 | GNAL               | chr18:11689013-11908796  | 3.32044    | 3.10897    | -0.0949373 | 0.981773 |
| XLOC_012653 | WNT10A             | chr2:219745254-21975865  | 1.11602    | 1.04498    | -0.0948929 | 0.979701 |
| XLOC_017583 | ANKH               | chr5:14704908-14871887   | 4.32311    | 4.04822    | -0.0947827 | 0.949958 |
| XLOC_001548 | ORC1               | chr1:52838500-52870143   | 4.0959     | 3.83546    | -0.0947804 | 0.95835  |
| XLOC_001250 | ENO1               | chr1:8921058-8939943     | 2449.4     | 2293.69    | -0.094757  | 0.958814 |
| XLOC_011726 | ETH1               | chr19:44010870-44031396  | 127.844    | 119.721    | -0.0947064 | 0.945171 |
| XLOC_013236 | CIR1               | chr2:175212877-175260443 | 12.2598    | 11.481     | -0.0946876 | 0.950929 |
| XLOC_021185 | BAIAP2L1           | chr7:97910978-98030427   | 26.5651    | 24.8781    | -0.0946556 | 0.974044 |
| XLOC_001871 | C1orf43            | chr1:154179182-154243325 | 144.816    | 135.626    | -0.0945865 | 0.959465 |
| XLOC_013538 | DSTN               | chr20:17550598-17588652  | 67.8796    | 63.5742    | -0.0945374 | 0.946363 |
| XLOC_012205 | UGP2               | chr2:64068097-64118696   | 15.0373    | 14.0852    | -0.0943645 | 0.950929 |
| XLOC_004926 | MYL6               | chr12:56552044-56555366  | 905.745    | 848.415    | -0.0943349 | 0.948088 |
| XLOC_014319 | CLDN14             | chr21:37832919-37948867  | 0.123147   | 0.115359   | -0.0942573 | 1        |
| XLOC_012063 | GEN1               | chr2:17935176-17966632   | 1.64004    | 1.53634    | -0.0942365 | 0.958814 |
| XLOC_014653 | RPL23AP82          | chr22:51195513-51238065  | 5.40197    | 5.06075    | -0.0941354 | 0.979484 |
| XLOC_015311 | CHCHD6             | chr3:126423062-126679263 | 72.9428    | 68.3405    | -0.0940252 | 0.948179 |
| XLOC_021895 | CSGALNACT1         | chr8:19261671-19540261   | 0.0971267  | 0.0910037  | -0.0939423 | 1        |
| XLOC_012541 | UBE2E3             | chr2:181845111-181928150 | 48.7468    | 45.6756    | -0.0938851 | 0.944724 |
| XLOC_014695 | THAP7              | chr22:21354060-21368576  | 31.4723    | 29.4906    | -0.0938274 | 0.959024 |
| XLOC_018676 | HIST1H3B           | chr6:26031816-26032288   | 1.24348    | 1.16521    | -0.0937964 | 0.991938 |
| XLOC_014761 | SF3A1              | chr22:30727976-30773894  | 21.6556    | 20.2929    | -0.0937616 | 0.950104 |
| XLOC_015730 | HYAL3,NAT6         | chr3:50330258-50336899   | 26.7162    | 25.0356    | -0.0937303 | 0.952905 |
| XLOC_013215 | TTC21B             | chr2:166729871-166810348 | 1.74734    | 1.63756    | -0.0936121 | 0.959465 |
| XLOC_017515 | PRR7               | chr5:176853686-176883287 | 41.4509    | 38.8475    | -0.0935788 | 0.98439  |
| XLOC_013450 | NDUFA10            | chr2:240896788-240964815 | 19.1262    | 17.9252    | -0.0935578 | 0.946393 |
| XLOC_010535 | PNPLA6             | chr19:7599037-7626653    | 30.8539    | 28.9166    | -0.0935545 | 0.945946 |
| XLOC_011836 | TEAD2              | chr19:49838676-49865714  | 9.82982    | 9.21265    | -0.0935498 | 0.956373 |
| XLOC_001774 | PRKAB2             | chr1:146626684-146644125 | 3.35943    | 3.14852    | -0.0935431 | 0.952905 |
| XLOC_010877 | AXL                | chr19:41725107-41767671  | 225.877    | 211.707    | -0.0934693 | 0.950929 |
| XLOC_022822 | GBA2               | chr9:35697333-35749225   | 10.3019    | 9.65567    | -0.0934693 | 0.986822 |
| XLOC_011408 | OLFAM2             | chr19:9964393-10047070   | 0.0271893  | 0.025484   | -0.0934463 | 1        |
| XLOC_005829 | POLR1D             | chr13:28194879-28241559  | 254.135    | 238.196    | -0.0934443 | 0.950929 |
| XLOC_014934 | OGG1               | chr3:9791627-9811668     | 15.4285    | 14.4618    | -0.0933467 | 0.979701 |
| XLOC_011520 | ANO8               | chr19:17420336-17445638  | 2.20948    | 2.07114    | -0.093278  | 0.990857 |
| XLOC_023932 | PHKA1              | chrX:71798663-71934029   | 5.89832    | 5.52923    | -0.0932255 | 0.952399 |
| XLOC_019001 | GPR63              | chr6:97241997-97283533   | 0.918021   | 0.860599   | -0.0931862 | 0.966946 |
| XLOC_020471 | ZMIZ2              | chr7:44788529-44809479   | 12.9752    | 12.1639    | -0.0931513 | 0.949914 |
| XLOC_017394 | ARHGAP26           | chr5:142150291-142608572 | 0.437528   | 0.410185   | -0.0931027 | 0.970232 |
| XLOC_016826 | COQ2               | chr4:84184976-84206067   | 17.9527    | 16.8309    | -0.0930909 | 0.952905 |
| XLOC_005489 | MAP3K12            | chr12:53845885-53893444  | 7.23429    | 6.78252    | -0.0930295 | 0.994728 |
| XLOC_000439 | AK4                | chr1:65613231-65697828   | 16.6544    | 15.6145    | -0.0930191 | 0.947247 |
| XLOC_017032 | UFSP2              | chr4:186317839-186347135 | 10.4222    | 9.77151    | -0.0929805 | 0.96099  |
| XLOC_010027 | ENTHD2             | chr17:79202076-79212891  | 14.3012    | 13.4087    | -0.0929583 | 0.956382 |
| XLOC_009361 | FLJ43681           | chr17:81174665-81188573  | 0.734568   | 0.688731   | -0.0929556 | 0.979701 |
| XLOC_009035 | GRB7               | chr17:37894161-37903538  | 0.0734597  | 0.0688784  | -0.0929016 | 1        |
| XLOC_015764 | ITIH4              | chr3:52847005-52864717   | 0.272905   | 0.255899   | -0.0928203 | 1        |
| XLOC_005629 | SOCS2-AS1          | chr12:93959403-93970521  | 0.593731   | 0.556743   | -0.0927979 | 0.987693 |
| XLOC_004250 | SYT7               | chr11:61281187-61348344  | 2.65833    | 2.49277    | -0.0927682 | 0.958814 |
| XLOC_005197 | EP400              | chr12:132434464-13256501 | 2.81322    | 2.63818    | -0.0926781 | 0.950929 |
| XLOC_006269 | ARHGFE40           | chr14:21538526-21558036  | 2.64102    | 2.47673    | -0.0926605 | 0.96128  |
| XLOC_021206 | C7orf43            | chr7:99752042-99756302   | 10.2049    | 9.57013    | -0.092656  | 0.958201 |

|             |                      |                           |            |            |            |          |
|-------------|----------------------|---------------------------|------------|------------|------------|----------|
| XLOC_001271 | KIAA2013             | chr1:11979644-11986485    | 60.3059    | 56.5548    | -0.0926506 | 0.947247 |
| XLOC_010153 | IMPACT               | chr18:22006608-22033494   | 4.04213    | 3.79094    | -0.0925612 | 0.955709 |
| XLOC_002736 | HTRA1                | chr10:124221040-12427442  | 0.470836   | 0.441605   | -0.0924668 | 0.985921 |
| XLOC_009212 | BCAS3                | chr17:58755171-59470199   | 2.68744    | 2.52069    | -0.0924148 | 0.962558 |
| XLOC_008151 | MMP15                | chr16:58059281-58080804   | 7.14788    | 6.70489    | -0.0923022 | 0.955758 |
| XLOC_015266 | ZDHC23               | chr3:113666747-113681827  | 3.58047    | 3.35857    | -0.0923001 | 0.958814 |
| XLOC_022944 | FAM120AOS            | chr9:96208781-96328397    | 18.6087    | 17.4555    | -0.0922952 | 0.984043 |
| XLOC_018194 | NFKB1L1              | chr6:31514627-31526606    | 40.4432    | 37.937     | -0.0922937 | 0.950929 |
| XLOC_014162 | MORC3                | chr21:37692486-37748944   | 3.32141    | 3.11559    | -0.0922909 | 0.954907 |
| XLOC_001919 | SH2D2A               | chr1:156776034-156851642  | 3.50633    | 3.28913    | -0.0922545 | 0.974494 |
| XLOC_009318 | PGS1                 | chr17:76374734-76573476   | 11.0045    | 10.3231    | -0.092222  | 0.958814 |
| XLOC_005554 | CTDSP2               | chr12:58213709-58240747   | 25.0422    | 23.4921    | -0.0921848 | 0.946555 |
| XLOC_011809 | FAM83E               | chr19:49103856-49116694   | 0.48682    | 0.456721   | -0.0920736 | 0.987235 |
| XLOC_010371 | MEX3C                | chr18:48700919-48724051   | 7.46178    | 7.00051    | -0.0920591 | 0.954559 |
| XLOC_014463 | CABIN1               | chr22:24407764-24574596   | 8.89238    | 8.34274    | -0.0920472 | 0.950684 |
| XLOC_005986 | TNFSF13B             | chr13:108921976-10896082  | 0.0345277  | 0.0323949  | -0.0919845 | 1        |
| XLOC_005900 | ST13P4               | chr13:50746153-50747751   | 0.101877   | 0.0955889  | -0.0919173 | 1        |
| XLOC_004062 | NR1P3                | chr11:9002122-9025596     | 0.00786374 | 0.00737837 | -0.0919137 | 1        |
| XLOC_000555 | STXBP3               | chr1:109289284-109352148  | 6.41388    | 6.01843    | -0.091811  | 0.954188 |
| XLOC_012893 | SEPT8                | chr5:132083136-132113567  | 10.4696    | 9.82462    | -0.0917306 | 0.950929 |
| XLOC_015466 | ABCG5                | chr2:44039610-44065958    | 0.0065046  | 0.00610425 | -0.091648  | 1        |
| XLOC_015466 | B3GNT5               | chr3:182895830-183145855  | 2.57999    | 2.42122    | -0.091629  | 0.960099 |
| XLOC_011476 | PODNL1               | chr19:14041999-14072256   | 0.132336   | 0.124195   | -0.0915973 | 1        |
| XLOC_010675 | MRPL34               | chr19:17416476-17417652   | 84.9902    | 79.768     | -0.0914853 | 0.950929 |
| XLOC_000679 | LINC00568            | chr1:150488232-150490508  | 0.209821   | 0.196931   | -0.0914717 | 1        |
| XLOC_008896 | SMCR8                | chr17:18218593-18266856   | 2.27474    | 2.13503    | -0.0914465 | 0.979701 |
| XLOC_009168 | EPN3                 | chr17:48610047-48621111   | 0.0178949  | 0.016796   | -0.0914254 | 1        |
| XLOC_010749 | ZNF507               | chr19:32836513-32878573   | 1.43154    | 1.34366    | -0.091398  | 0.959293 |
| XLOC_018948 | B3GAT2               | chr6:71377478-71666788    | 2.11183    | 1.98221    | -0.0913799 | 0.990324 |
| XLOC_022214 | TOP1MT               | chr8:144391496-144442147  | 113.596    | 106.626    | -0.0913563 | 0.945946 |
| XLOC_003643 | PELI3                | chr11:66233797-66244808   | 11.8465    | 11.1202    | -0.0912723 | 0.956373 |
| XLOC_000457 | ZRANB2-AS2           | chr1:71547006-71703406    | 0.275541   | 0.258679   | -0.0911078 | 1        |
| XLOC_016578 | SAP30                | chr4:174292092-174298682  | 42.2164    | 39.6342    | -0.0910584 | 0.954768 |
| XLOC_007966 | COQ7                 | chr16:19078916-19091417   | 3.99708    | 3.7526     | -0.0910554 | 0.959465 |
| XLOC_001211 | NADK                 | chr1:1682670-1711508      | 42.3355    | 39.7497    | -0.0909221 | 0.950929 |
| XLOC_005776 | NCOR2                | chr12:124808956-12505207  | 10.0885    | 9.47297    | -0.0908223 | 0.950408 |
| XLOC_001662 | ARHGAP29             | chr1:94634462-94703307    | 34.4693    | 32.3664    | -0.0908152 | 0.952371 |
| XLOC_018363 | ZNF451               | chr6:56954807-57035098    | 3.95245    | 3.71134    | -0.0908058 | 0.95534  |
| XLOC_007162 | TYRO3                | chr15:41851219-41871536   | 17.0639    | 16.0231    | -0.0907899 | 0.950929 |
| XLOC_008327 | LMF1                 | chr16:903634-1031318      | 24.9212    | 23.4026    | -0.0907065 | 0.954907 |
| XLOC_017370 | PCDHB3               | chr5:140480233-140483406  | 0.176993   | 0.166209   | -0.0907005 | 1        |
| XLOC_004293 | PLA2G16              | chr11:63341943-63381941   | 69.2336    | 65.0157    | -0.0906849 | 0.950929 |
| XLOC_001518 | GPBP1L1              | chr1:46092975-46152302    | 11.1878    | 10.5062    | -0.0906802 | 0.950929 |
| XLOC_021504 | SORBS3               | chr8:22409250-22433008    | 116.232    | 109.153    | -0.0906592 | 0.950929 |
| XLOC_002464 | MTRNR2L5             | chr10:57358749-57360487   | 0.00772483 | 0.00725439 | -0.0906485 | 1        |
| XLOC_020673 | LOC100289561,PRKRIP1 | chr7:102004307-102067125  | 30.5637    | 28.7029    | -0.0906256 | 0.960403 |
| XLOC_016485 | USP53                | chr4:120133781-120216672  | 1.08888    | 1.02259    | -0.0906215 | 0.965148 |
| XLOC_006018 | GJA3                 | chr13:20712394-20735183   | 0.703194   | 0.660402   | -0.0905784 | 0.974044 |
| XLOC_014800 | IFT27                | chr22:37154245-37172177   | 11.8735    | 11.152     | -0.0904504 | 0.965573 |
| XLOC_023059 | RC3H2                | chr9:125611731-125667562  | 2.9617     | 2.78173    | -0.0904447 | 0.962439 |
| XLOC_005725 | FBXO21               | chr12:117581584-117628302 | 4.27975    | 4.01973    | -0.09043   | 0.956807 |
| XLOC_016206 | KIAA0232             | chr4:6784458-6885899      | 1.78773    | 1.67913    | -0.0904166 | 0.959457 |
| XLOC_017070 | PAPD7                | chr5:6714717-6757161      | 10.6704    | 10.0225    | -0.0903763 | 0.950929 |
| XLOC_007588 | ARPP19               | chr15:52839431-52861213   | 14.3334    | 13.4639    | -0.0902853 | 0.950929 |
| XLOC_004703 | NANOG                | chr12:7941994-7948655     | 0.0081654  | 0.00767014 | -0.0902708 | 1        |
| XLOC_011601 | DMKN                 | chr19:35988118-36004560   | 84.2289    | 79.1228    | -0.090223  | 0.958814 |
| XLOC_014897 | BRD1                 | chr22:50166936-50218452   | 5.77111    | 5.42146    | -0.0901666 | 0.955406 |
| XLOC_022177 | ASAP1                | chr8:131064350-131455902  | 12.8875    | 12.1069    | -0.090142  | 0.950929 |
| XLOC_001014 | PFKFB2               | chr1:207226619-207254362  | 1.53242    | 1.43963    | -0.0901075 | 0.965148 |
| XLOC_003542 | TMEM216              | chr11:61159831-61166335   | 31.6312    | 29.7166    | -0.0900783 | 0.95534  |
| XLOC_023544 | FAM199X              | chrX:103411155-103440582  | 3.09336    | 2.90617    | -0.090057  | 0.954768 |
| XLOC_014979 | KAT2B                | chr3:20081523-20195896    | 1.54435    | 1.45091    | -0.0900422 | 0.966946 |
| XLOC_005517 | PMEL                 | chr12:56347888-56360496   | 0.877446   | 0.824407   | -0.0899539 | 0.979701 |
| XLOC_015832 | CGGBP1               | chr3:88101099-88207115    | 8.73365    | 8.20602    | -0.0899016 | 0.965122 |
| XLOC_010040 | FAM195B              | chr17:79780292-79791167   | 66.725     | 62.6954    | -0.0898693 | 0.951659 |
| XLOC_008700 | TAF1C                | chr16:84178864-84220676   | 14.6335    | 13.7503    | -0.0898066 | 0.953101 |
| XLOC_001140 | COX20                | chr1:244998638-245010242  | 4.98281    | 4.68218    | -0.0897766 | 0.979875 |
| XLOC_017561 | MRPL36               | chr5:1798498-1799956      | 109.174    | 102.588    | -0.0897641 | 0.950929 |
| XLOC_013928 | NECAB3               | chr20:32244892-32262264   | 32.7209    | 30.7483    | -0.0897058 | 0.954677 |
| XLOC_007694 | RPP25                | chr15:75247442-75249775   | 62.8477    | 59.0589    | -0.0897054 | 0.950929 |
| XLOC_014360 | C21orf2              | chr21:45748826-45759285   | 4.94048    | 4.64291    | -0.0896231 | 0.970195 |
| XLOC_010390 | RNF152               | chr18:59482303-59560304   | 0.897289   | 0.843256   | -0.089601  | 0.979875 |
| XLOC_017022 | IRF2                 | chr4:185308875-185395726  | 4.99517    | 4.69452    | -0.0895564 | 0.961432 |
| XLOC_008824 | SNORA48              | chr17:7465308-7482324     | 25.0042    | 23.4997    | -0.0895247 | 0.996453 |
| XLOC_004092 | PIK3C2A              | chr11:17108123-17191354   | 2.68489    | 2.48915    | -0.0895205 | 0.955669 |
| XLOC_011279 | MEX3D                | chr19:1554667-1568057     | 27.5293    | 25.8738    | -0.0894729 | 0.95534  |
| XLOC_015226 | TMEM45A              | chr3:100211462-100296282  | 14.9661    | 14.0662    | -0.0894679 | 0.958814 |
| XLOC_001549 | ZCCHC11              | chr1:52888947-53018762    | 1.9811     | 1.862      | -0.0894502 | 0.959465 |
| XLOC_023252 | TBL1X                | chrX:9431334-9687780      | 5.29945    | 4.98086    | -0.089448  | 0.955758 |

|             |                        |                           |           |           |            |          |
|-------------|------------------------|---------------------------|-----------|-----------|------------|----------|
| XLOC_010291 | SPIRE1                 | chr18:12446510-12657912   | 5.38005   | 5.0569    | -0.0893674 | 0.954677 |
| XLOC_005076 | RIC8B                  | chr12:106751435-10728305  | 1.6424    | 1.54376   | -0.0893603 | 0.974044 |
| XLOC_002720 | NANOS1                 | chr10:120789227-12079385  | 2.60286   | 2.44679   | -0.0892067 | 0.963219 |
| XLOC_022062 | IMPA1                  | chr8:82569150-82598589    | 9.37763   | 8.81539   | -0.0891994 | 0.953936 |
| XLOC_000904 | RALGAP2                | chr1:178694299-178889237  | 2.51433   | 2.36359   | -0.0891954 | 0.959465 |
| XLOC_007455 | WHAMMP3                | chr15:23187728-23208357   | 0.178969  | 0.168247  | -0.0891213 | 1        |
| XLOC_024035 | SEPT6                  | chrX:118749687-118827331  | 7.638     | 7.18071   | -0.0890689 | 0.95534  |
| XLOC_016929 | SCLT1                  | chr4:129805151-130014764  | 1.90062   | 1.78687   | -0.0890306 | 0.966946 |
| XLOC_014561 | GTPBP1                 | chr22:39101806-39129592   | 13.8577   | 13.0286   | -0.0890086 | 0.954768 |
| XLOC_009802 | MRPL45P2               | chr17:45527592-45569986   | 2.56087   | 2.40779   | -0.0889229 | 0.976214 |
| XLOC_022571 | LRSAM1                 | chr9:130213764-130265780  | 16.4597   | 15.4769   | -0.0888197 | 0.954188 |
| XLOC_012805 | WDR35                  | chr2:20110028-20189884    | 1.73929   | 1.63557   | -0.0887102 | 0.959465 |
| XLOC_022423 | SPIN1                  | chr9:91003296-91093622    | 8.96212   | 8.42787   | -0.088672  | 0.950929 |
| XLOC_005908 | ALG11,UTP14C           | chr13:52586522-52607736   | 1.91083   | 1.79701   | -0.0886066 | 0.972111 |
| XLOC_012615 | CREB1                  | chr2:208394615-208470284  | 2.03674   | 1.91546   | -0.088572  | 0.955966 |
| XLOC_020850 | ZNF775                 | chr7:150076405-150095715  | 9.46042   | 8.89722   | -0.0885494 | 0.966442 |
| XLOC_012531 | HOXD3                  | chr2:177028804-177037826  | 0.797974  | 0.750477  | -0.0885343 | 0.981044 |
| XLOC_013509 | MAVS                   | chr20:3827445-3856770     | 3.74221   | 3.51955   | -0.0884995 | 0.95467  |
| XLOC_023525 | ARMCX5,ARMCX5-GPRAS1   | chrX:101854095-101972667  | 3.1463    | 2.95915   | -0.0884743 | 0.965573 |
| XLOC_004065 | DENND5A                | chr11:9160374-9286873     | 9.20574   | 8.6584    | -0.0884326 | 0.951559 |
| XLOC_009589 | NUFIP2                 | chr17:27582853-27621166   | 4.51162   | 4.24345   | -0.0884079 | 0.950929 |
| XLOC_022962 | ZNF782                 | chr9:99579272-99616389    | 0.742043  | 0.697983  | -0.0883123 | 0.976756 |
| XLOC_021146 | TMEM243                | chr7:86781676-86849031    | 15.7875   | 14.8507   | -0.0882451 | 0.976198 |
| XLOC_022435 | CENPP                  | chr9:95059639-95432547    | 1.82857   | 1.72016   | -0.088178  | 0.991767 |
| XLOC_010489 | MRPL54                 | chr19:3762664-3767563     | 75.2664   | 70.8048   | -0.0881593 | 0.956807 |
| XLOC_008222 | ATXN1L                 | chr16:71879893-71891236   | 2.19078   | 2.06093   | -0.0881521 | 0.959465 |
| XLOC_015224 | NIT2                   | chr3:100053561-100074478  | 65.4923   | 61.6148   | -0.0880482 | 0.952469 |
| XLOC_016280 | FAM114A1               | chr4:38869353-38947365    | 4.93573   | 4.64357   | -0.0880294 | 0.959465 |
| XLOC_015896 | RABL3                  | chr3:120405527-120461384  | 4.10986   | 3.8666    | -0.0880217 | 0.959465 |
| XLOC_016182 | ADD1                   | chr4:2845583-2931802      | 21.2972   | 20.0373   | -0.0879819 | 0.952469 |
| XLOC_014536 | NCF4                   | chr22:37257029-37274059   | 0.0152773 | 0.0143743 | -0.0878998 | 1        |
| XLOC_020363 | ZDHHC4                 | chr7:6617064-6628610      | 43.7111   | 41.1277   | -0.0878895 | 0.954677 |
| XLOC_000262 | RBBP4                  | chr1:33116748-33168361    | 8.04214   | 7.56687   | -0.087884  | 0.977332 |
| XLOC_018703 | HIST1H1B               | chr6:27834569-27835359    | 0.0396558 | 0.0373138 | -0.0878203 | 1        |
| XLOC_008136 | CPNE2                  | chr16:57126454-57181878   | 29.7498   | 27.9938   | -0.0877701 | 0.952905 |
| XLOC_022721 | RANBP6                 | chr9:60110118-6015640     | 4.98627   | 4.69212   | -0.0877218 | 0.956711 |
| XLOC_007890 | SRRM2                  | chr16:2787076-2821413     | 39.9792   | 37.6238   | -0.0876044 | 0.952905 |
| XLOC_018929 | GSTA4                  | chr6:52842745-52860178    | 11.7745   | 11.081    | -0.0875782 | 0.960763 |
| XLOC_022840 | SHB                    | chr9:37915894-38069210    | 10.7751   | 10.1405   | -0.0875772 | 0.954559 |
| XLOC_004071 | RNF141                 | chr11:10533224-10562774   | 3.40758   | 3.20695   | -0.0875424 | 0.959465 |
| XLOC_000774 | TMEM79                 | chr1:156252703-156262234  | 3.87604   | 3.64809   | -0.0874406 | 0.972989 |
| XLOC_020882 | RNF32                  | chr7:156433352-156469820  | 1.61899   | 1.52379   | -0.0874299 | 0.977523 |
| XLOC_008402 | ROGD1                  | chr16:4846962-4852951     | 9.51161   | 8.95242   | -0.0874108 | 0.966566 |
| XLOC_019083 | STX7                   | chr6:132778662-132834337  | 5.03691   | 4.74083   | -0.0873987 | 0.957925 |
| XLOC_007319 | FBXO22                 | chr15:76196199-76227608   | 7.13999   | 6.72039   | -0.0873783 | 0.972111 |
| XLOC_012370 | LOC400894              | chr2:110744556-110752858  | 1.72445   | 1.62315   | -0.0873436 | 0.977332 |
| XLOC_016734 | TXK                    | chr4:48068409-48136273    | 0.0667477 | 0.0628272 | -0.0873299 | 1        |
| XLOC_014454 | RGL4                   | chr22:23980674-24059610   | 0.647958  | 0.609899  | -0.0873287 | 0.990857 |
| XLOC_001664 | CNN3                   | chr1:95362506-95392735    | 73.7938   | 69.4655   | -0.0872032 | 0.952216 |
| XLOC_019027 | SNX3                   | chr6:108532716-108582464  | 138.531   | 130.408   | -0.0871801 | 0.954559 |
| XLOC_006633 | ZNF839                 | chr14:102783713-102809574 | 4.84455   | 4.56077   | -0.0870828 | 0.96103  |
| XLOC_010507 | FEM1A                  | chr19:4791727-4795571     | 18.1924   | 17.128    | -0.0869849 | 0.952905 |
| XLOC_005551 | CYP2B1                 | chr12:58156116-58160976   | 1.82523   | 1.71847   | -0.0869596 | 0.977332 |
| XLOC_009521 | FAM211A                | chr17:16342300-16395505   | 2.88011   | 2.71195   | -0.0867906 | 0.996453 |
| XLOC_020587 | DMTF1                  | chr7:86781676-86849031    | 3.45657   | 3.2549    | -0.0867248 | 0.976618 |
| XLOC_004295 | C11orf95               | chr11:63527363-63536113   | 4.95885   | 4.66963   | -0.0866954 | 0.958902 |
| XLOC_018001 | RNF130                 | chr5:179382473-179499105  | 52.3135   | 49.2631   | -0.086675  | 0.951673 |
| XLOC_012900 | ATP6V1E2               | chr2:46738985-46747096    | 2.47851   | 2.334     | -0.0866706 | 0.972111 |
| XLOC_015661 | LIMD1-AS1              | chr3:45636322-45730374    | 5.52286   | 5.2012    | -0.0865712 | 0.979733 |
| XLOC_003549 | MYRF                   | chr11:61520120-61555989   | 4.11228   | 3.87281   | -0.0865597 | 0.959465 |
| XLOC_020455 | CDK13                  | chr7:39989958-40136733    | 1.77285   | 1.66966   | -0.0865172 | 0.964792 |
| XLOC_002752 | C10orf137              | chr10:127408083-127452774 | 1.90088   | 1.79053   | -0.0862829 | 0.966946 |
| XLOC_005648 | GOLGA2P5               | chr12:100550174-100567121 | 1.45777   | 1.37315   | -0.0862732 | 0.977095 |
| XLOC_001649 | ZNF644                 | chr1:91380856-91487812    | 6.58644   | 6.20412   | -0.0862717 | 0.964792 |
| XLOC_023035 | ASTN2                  | chr9:119187503-120177317  | 3.28477   | 3.09428   | -0.0861905 | 0.987693 |
| XLOC_007380 | AKAP13                 | chr15:85923846-86292589   | 1.62116   | 1.52722   | -0.0861229 | 0.961224 |
| XLOC_010034 | ACTG1                  | chr17:79476996-79479892   | 3404.24   | 3207.03   | -0.0860945 | 0.966566 |
| XLOC_008655 | MTSS1L                 | chr16:70695106-70719954   | 14.9884   | 14.1208   | -0.0860229 | 0.954287 |
| XLOC_016828 | HELQ                   | chr4:84328498-84377025    | 2.15407   | 2.02945   | -0.085978  | 0.965573 |
| XLOC_011427 | TMED1                  | chr19:10943113-10946983   | 34.0163   | 32.0495   | -0.0859234 | 0.958201 |
| XLOC_004236 | PATL1                  | chr11:59404191-59436511   | 14.6051   | 13.761    | -0.0858845 | 0.954677 |
| XLOC_011442 | ZNF433                 | chr19:12125531-12146525   | 1.49879   | 1.41219   | -0.0858611 | 0.976618 |
| XLOC_017216 | MSH3                   | chr5:79922044-80172634    | 0.411965  | 0.388163  | -0.0858601 | 0.994615 |
| XLOC_011539 | CRLF1                  | chr19:18704034-18717660   | 0.962141  | 0.906577  | -0.0858182 | 0.984772 |
| XLOC_024082 | GPC4                   | chrX:132435063-132549201  | 6.62718   | 6.24453   | -0.085801  | 0.958814 |
| XLOC_017428 | SMIM3                  | chr5:150157507-150176298  | 9.26553   | 8.73056   | -0.0857994 | 0.959465 |
| XLOC_009335 | C17orf89               | chr17:79213110-79215098   | 83.7141   | 78.8824   | -0.085768  | 0.958814 |
| XLOC_005708 | HECTD4                 | chr12:112597991-11281985  | 0.777029  | 0.732199  | -0.0857328 | 0.959517 |
| XLOC_008822 | TNFSF12,TNFSF12-TNFSF1 | chr17:7452374-7464925     | 17.2247   | 16.2321   | -0.0856312 | 0.964222 |



|             |              |                          |            |            |            |          |
|-------------|--------------|--------------------------|------------|------------|------------|----------|
| XLOC_003725 | TSKU         | chr11:76493356-76509198  | 16.2532    | 15.3182    | -0.0854774 | 0.956382 |
| XLOC_014930 | SETD5        | chr3:9439402-9519838     | 7.30397    | 6.8845     | -0.0853279 | 0.954705 |
| XLOC_009663 | MED1         | chr17:37560537-37607527  | 5.02928    | 4.74049    | -0.0853142 | 0.954559 |
| XLOC_003933 | BET1L        | chr11:202923-207422      | 22.0112    | 20.7475    | -0.0852957 | 0.953101 |
| XLOC_012122 | YPEL5        | chr2:30369749-30383399   | 17.3257    | 16.3314    | -0.085265  | 0.955758 |
| XLOC_023815 | CXorf38      | chrX:40486172-40506819   | 2.24816    | 2.11923    | -0.0852052 | 0.966946 |
| XLOC_003223 | PTDSS2       | chr11:450279-491387      | 47.5638    | 44.8361    | -0.0852011 | 0.954768 |
| XLOC_014230 | PRMT2        | chr21:48055506-48085155  | 19.9523    | 18.809     | -0.0851308 | 0.957507 |
| XLOC_001195 | FAM132A      | chr1:1177825-1182102     | 1.73377    | 1.63452    | -0.0850448 | 0.986919 |
| XLOC_017804 | AFF4         | chr5:132211070-13229935  | 3.39289    | 3.19884    | -0.0849683 | 0.955558 |
| XLOC_002687 | ADD3         | chr10:111705316-11189532 | 3.33416    | 3.14348    | -0.0849605 | 0.961432 |
| XLOC_004953 | MARCH9       | chr12:58148880-58154193  | 15.9134    | 15.0034    | -0.0849481 | 0.955758 |
| XLOC_002578 | FAS          | chr10:90694830-90775542  | 4.14904    | 3.91179    | -0.0849475 | 0.971121 |
| XLOC_005931 | BORA         | chr13:73302041-73590591  | 4.41171    | 4.15955    | -0.0849122 | 0.988154 |
| XLOC_003707 | MRPL48       | chr11:73498916-73575656  | 24.7788    | 23.3628    | -0.0848928 | 0.958814 |
| XLOC_018368 | LOC441155    | chr6:64429875-66417118   | 0.0969797  | 0.0914415  | -0.0848341 | 1        |
| XLOC_005501 | ZNF385A      | chr12:54762919-54785083  | 15.8867    | 14.9795    | -0.0848287 | 0.959465 |
| XLOC_008090 | PHKB         | chr16:47495209-47735434  | 4.14633    | 3.90956    | -0.0848276 | 0.958201 |
| XLOC_004419 | PRKRIR       | chr11:76061003-76091880  | 11.7332    | 11.0633    | -0.0848213 | 0.95534  |
| XLOC_015477 | ABCF3        | chr3:183903862-183911795 | 21.7285    | 20.4879    | -0.0848188 | 0.954768 |
| XLOC_003401 | CD44         | chr11:35160416-35253949  | 78.6305    | 74.1422    | -0.0847941 | 0.95534  |
| XLOC_017244 | CAST         | chr5:95997740-96149848   | 32.7767    | 30.9077    | -0.0847073 | 0.961224 |
| XLOC_011313 | APBA3        | chr19:3708334-3761673    | 11.5837    | 10.9232    | -0.0847052 | 0.965735 |
| XLOC_015541 | FYTTD1       | chr3:197398258-197511317 | 8.19563    | 7.72833    | -0.0846996 | 0.97028  |
| XLOC_015843 | FILIP1L      | chr3:99273152-99897476   | 2.7706     | 2.61268    | -0.0846687 | 0.989268 |
| XLOC_003397 | CAT          | chr11:34460471-34483607  | 7.69648    | 7.25791    | -0.084646  | 0.962618 |
| XLOC_000216 | WDTC1        | chr1:27561006-27635124   | 1.38055    | 1.30197    | -0.0845513 | 0.972989 |
| XLOC_016640 | MFSD10       | chr4:2932287-2936586     | 171.705    | 161.943    | -0.0844411 | 0.954768 |
| XLOC_014031 | ATP9A        | chr20:50213313-50384908  | 3.00183    | 2.83121    | -0.0844239 | 0.959293 |
| XLOC_006496 | CHGA         | chr14:93389444-93401638  | 0.011352   | 0.0107071  | -0.0843755 | 1        |
| XLOC_016172 | TACC3        | chr4:1723216-1746905     | 39.7974    | 37.5383    | -0.0843122 | 0.954768 |
| XLOC_010428 | FSTL3        | chr19:676388-683392      | 36.5177    | 34.4454    | -0.0842858 | 0.95534  |
| XLOC_013638 | MANBAL       | chr20:35918050-35945663  | 59.0488    | 55.6983    | -0.0842759 | 0.954677 |
| XLOC_023981 | ARMCX6       | chrX:100870107-10087299  | 33.262     | 31.3756    | -0.0842314 | 0.962439 |
| XLOC_023877 | KDM5C        | chrX:53220502-53254604   | 21.412     | 20.199     | -0.0841351 | 0.954559 |
| XLOC_018136 | ZNF165       | chr6:28048481-28057340   | 9.74987    | 9.19762    | -0.0841228 | 0.959465 |
| XLOC_008755 | HIC1         | chr17:1958392-1962981    | 5.77118    | 5.44431    | -0.0841159 | 0.973348 |
| XLOC_012826 | DTNB         | chr2:25600066-25896516   | 13.0224    | 12.2848    | -0.0841145 | 0.959465 |
| XLOC_009048 | RARA         | chr17:38465422-38513895  | 9.60173    | 9.05839    | -0.0840396 | 0.960403 |
| XLOC_014504 | MTFP1        | chr22:30821610-30825041  | 152.944    | 144.293    | -0.0840012 | 0.95534  |
| XLOC_014815 | C22orf23     | chr22:38339056-38365319  | 3.87991    | 3.66055    | -0.0839617 | 0.991767 |
| XLOC_004285 | CHRM1        | chr11:62676150-62689012  | 0.00822238 | 0.00775764 | -0.0839381 | 1        |
| XLOC_017758 | GIN1         | chr5:102421703-102455842 | 0.893769   | 0.843258   | -0.0839268 | 0.977332 |
| XLOC_000052 | KCNAB2       | chr1:5922869-6161253     | 38.1514    | 35.9958    | -0.0839081 | 0.957741 |
| XLOC_003679 | FADD         | chr11:70049268-70053508  | 31.6516    | 29.8638    | -0.0838801 | 0.956373 |
| XLOC_015562 | RPUSD3       | chr3:9879532-9885702     | 64.2569    | 60.6302    | -0.083816  | 0.954768 |
| XLOC_002337 | ITH2         | chr10:7745235-7791483    | 0.00863584 | 0.00814874 | -0.0837601 | 1        |
| XLOC_017598 | GOLPH3       | chr5:32124823-32174425   | 17.9142    | 16.9041    | -0.0837328 | 0.956382 |
| XLOC_014766 | SEC14L4      | chr22:30884897-30901698  | 1.57147    | 1.48287    | -0.0837302 | 0.977332 |
| XLOC_005537 | ZBTB39       | chr12:57392616-57400297  | 1.63571    | 1.54353    | -0.0836846 | 0.966946 |
| XLOC_016580 | CEP44        | chr4:175157809-175254537 | 1.92893    | 1.82027    | -0.0836493 | 0.979215 |
| XLOC_006417 | SLC39A9      | chr14:69865095-69929107  | 15.2288    | 14.3718    | -0.0835616 | 0.966946 |
| XLOC_001219 | PANK4        | chr1:2439974-2458035     | 11.1687    | 10.5403    | -0.0835435 | 0.962439 |
| XLOC_005875 | LACC1        | chr13:44410488-44468068  | 1.02681    | 0.969062   | -0.0835133 | 0.978196 |
| XLOC_011975 | ZNF579       | chr19:56088890-56092211  | 33.5739    | 31.6881    | -0.0834001 | 0.959465 |
| XLOC_002542 | TMEM254      | chr10:81805988-81852307  | 1.92718    | 1.81912    | -0.0832538 | 0.976618 |
| XLOC_012290 | LINC00152    | chr2:87754973-87821030   | 484.073    | 456.958    | -0.0831633 | 0.95534  |
| XLOC_022318 | PRSS3        | chr9:33750463-33799229   | 54.3968    | 51.3509    | -0.0831309 | 0.958814 |
| XLOC_009118 | CRHR1        | chr17:43697709-43913194  | 9.13939    | 8.62766    | -0.0831281 | 0.97028  |
| XLOC_022863 | LOC440896    | chr9:69174213-69181041   | 0.111099   | 0.104879   | -0.0831211 | 1        |
| XLOC_021329 | WDR19        | chr7:134868589-134896316 | 2.61097    | 2.46489    | -0.0830626 | 0.966946 |
| XLOC_010909 | ZNF221       | chr19:44445396-44471752  | 0.0644555  | 0.0608509  | -0.0830259 | 1        |
| XLOC_014846 | CHADL        | chr22:41601312-41636935  | 0.030845   | 0.0291201  | -0.0830202 | 1        |
| XLOC_003764 | C11orf54     | chr11:93474792-93496247  | 4.40927    | 4.16298    | -0.0829214 | 0.966946 |
| XLOC_000740 | ATP8B2       | chr1:154298035-154323780 | 0.885385   | 0.835951   | -0.0828877 | 0.974585 |
| XLOC_011822 | GYS1         | chr19:49471381-49496610  | 51.9256    | 49.0268    | -0.0828736 | 0.956807 |
| XLOC_010621 | NFIX         | chr19:13106583-13209610  | 7.20353    | 6.80141    | -0.0828706 | 0.959465 |
| XLOC_003625 | KAT5         | chr11:65479472-65488409  | 12.0476    | 11.3751    | -0.0828684 | 0.981894 |
| XLOC_003964 | IFITM10      | chr11:1490684-1785501    | 0.723279   | 0.682923   | -0.0828294 | 0.996079 |
| XLOC_017321 | TCF7         | chr5:133450401-133483920 | 6.23752    | 5.8901     | -0.0826799 | 0.964792 |
| XLOC_005398 | SCAF11       | chr12:46312913-46384401  | 3.85068    | 3.63666    | -0.0824973 | 0.956807 |
| XLOC_002822 | FRMD4A       | chr10:13685705-14372866  | 11.9107    | 11.2488    | -0.0824857 | 0.957925 |
| XLOC_005024 | MRPL42       | chr12:93861265-93897548  | 13.4007    | 12.6562    | -0.0824665 | 0.958814 |
| XLOC_002650 | SFXN3        | chr10:102790995-10280095 | 36.6742    | 34.6369    | -0.082455  | 0.955642 |
| XLOC_018228 | LOC100507463 | chr6:32808493-32821748   | 1.12941    | 1.06668    | -0.0824473 | 0.969634 |
| XLOC_014034 | ZNF217       | chr20:52183609-52199636  | 1.83774    | 1.73569    | -0.0824246 | 0.967901 |
| XLOC_016153 | BDH1         | chr3:197236653-197300194 | 22.5519    | 21.3005    | -0.0823622 | 0.955531 |
| XLOC_000135 | CROCC        | chr1:17248444-17299474   | 5.65153    | 5.33796    | -0.0823521 | 0.963266 |
| XLOC_017418 | ARHGEF37     | chr5:148961134-149014527 | 0.387883   | 0.366412   | -0.0821538 | 0.979733 |

|             |                 |                          |            |            |            |          |
|-------------|-----------------|--------------------------|------------|------------|------------|----------|
| XLOC_014948 | SLC6A1          | chr3:11034419-11080935   | 0.00412992 | 0.00390138 | -0.0821316 | 1        |
| XLOC_012904 | CALM2           | chr2:47387220-47403740   | 269.207    | 254.316    | -0.0820921 | 0.958814 |
| XLOC_001455 | MEAF6           | chr1:37955560-37980420   | 11.2645    | 10.6415    | -0.0820754 | 0.956373 |
| XLOC_007489 | LPCAT4          | chr15:34651088-34659395  | 30.7927    | 29.0907    | -0.0820277 | 0.958201 |
| XLOC_020700 | IFRD1           | chr7:112063198-112117251 | 17.9642    | 16.9729    | -0.08189   | 0.959063 |
| XLOC_014505 | TCN2            | chr22:31003069-31023047  | 0.0599839  | 0.0566741  | -0.0818865 | 1        |
| XLOC_016874 | BDH2            | chr4:103998781-104021024 | 6.24193    | 5.89765    | -0.0818522 | 0.961224 |
| XLOC_011392 | ZNF558          | chr19:8920381-8933565    | 4.84822    | 4.58116    | -0.0817419 | 0.965735 |
| XLOC_009230 | TCAM1P          | chr17:61934375-61941739  | 0.00472621 | 0.00446615 | -0.0816532 | 1        |
| XLOC_014665 | BID             | chr22:18216905-18257431  | 31.036     | 29.3283    | -0.0816494 | 0.956807 |
| XLOC_022122 | PABPC1          | chr8:101715143-101734311 | 866.285    | 818.662    | -0.0815724 | 0.963219 |
| XLOC_018824 | C6orf1          | chr6:34214156-34216904   | 42.9207    | 40.5621    | -0.081542  | 0.960071 |
| XLOC_011676 | AKT2            | chr19:40736223-40791302  | 16.756     | 15.8361    | -0.0814578 | 0.957925 |
| XLOC_013561 | NXT1            | chr20:23331372-23335408  | 37.3553    | 35.3057    | -0.0814135 | 0.959465 |
| XLOC_014883 | KIAA0930        | chr22:45588122-45636650  | 11.846     | 11.1962    | -0.0813953 | 0.956821 |
| XLOC_020370 | LOC729852       | chr7:7676574-7918851     | 2.81274    | 2.65846    | -0.0813854 | 0.985921 |
| XLOC_015700 | ARIH2OS         | chr3:48955220-49022971   | 1.48063    | 1.39948    | -0.081324  | 0.952371 |
| XLOC_021044 | PURB            | chr7:44915891-44924960   | 3.95754    | 3.77685    | -0.08128   | 0.958201 |
| XLOC_011919 | ZNF600          | chr19:53268747-53290034  | 4.79173    | 4.52926    | -0.0812686 | 0.965735 |
| XLOC_010330 | ZNF24           | chr18:32912177-32924426  | 5.55916    | 5.25492    | -0.0811976 | 0.957925 |
| XLOC_002775 | ZNF511          | chr10:135092133-13512666 | 34.7673    | 32.8648    | -0.081186  | 0.984917 |
| XLOC_006494 | RIN3            | chr14:92980124-93155334  | 11.0163    | 10.4137    | -0.0811592 | 0.961224 |
| XLOC_008276 | FOX11           | chr16:86612114-86615304  | 0.0700986  | 0.0662644  | -0.0811509 | 1        |
| XLOC_001089 | GUK1            | chr1:228327784-228336651 | 273.13     | 258.198    | -0.0811094 | 0.958814 |
| XLOC_005087 | ACACB           | chr12:109577201-10970603 | 0.450119   | 0.425544   | -0.0809995 | 0.978162 |
| XLOC_005549 | AGAP2           | chr12:58118075-58135944  | 0.4493     | 0.424771   | -0.0809937 | 0.994615 |
| XLOC_002023 | PIGC            | chr1:172389827-172437961 | 12.3304    | 11.6576    | -0.0809542 | 0.963266 |
| XLOC_009765 | MP3             | chr17:41878166-41910547  | 5.34457    | 5.0533     | -0.0808463 | 0.966566 |
| XLOC_016365 | MOB1B           | chr4:71768056-71853891   | 1.53399    | 1.45041    | -0.0808286 | 0.966946 |
| XLOC_006993 | AKT1            | chr14:105235686-10526201 | 67.9965    | 64.2929    | -0.0808013 | 0.957865 |
| XLOC_018870 | USP49           | chr6:41765382-41863099   | 0.161709   | 0.152905   | -0.0807676 | 1        |
| XLOC_014379 | POFUT2          | chr21:46683842-46707811  | 9.2992     | 8.79296    | -0.0807562 | 0.965148 |
| XLOC_017185 | FCHO2           | chr5:72251807-72386349   | 1.85865    | 1.75751    | -0.0807243 | 0.967901 |
| XLOC_004810 | ARID2           | chr12:46123619-46301819  | 1.8054     | 1.70716    | -0.0807202 | 0.965148 |
| XLOC_023084 | SH2D3C          | chr9:130500595-130541041 | 0.283368   | 0.267949   | -0.0807193 | 1        |
| XLOC_006736 | TINF2           | chr14:24708850-24711880  | 16.6788    | 15.7717    | -0.0806735 | 0.962215 |
| XLOC_002422 | ZNF32-AS1       | chr10:44124264-44170147  | 19.1146    | 18.0752    | -0.0806577 | 0.989344 |
| XLOC_010468 | SPPL2B          | chr19:2328628-2355100    | 5.99327    | 5.66784    | -0.0805438 | 0.967901 |
| XLOC_012076 | NCOA1           | chr2:24807345-24993570   | 1.91708    | 1.81305    | -0.0804949 | 0.967901 |
| XLOC_004270 | BSC1L2.HNRNPUL2 | chr11:62457733-62494857  | 28.3428    | 26.8062    | -0.080418  | 0.967799 |
| XLOC_013785 | ZGPAT           | chr20:62289162-62367494  | 14.8949    | 14.0877    | -0.0803824 | 0.985283 |
| XLOC_018019 | DUSP2           | chr6:292100-351355       | 12.2331    | 11.5704    | -0.0803427 | 0.966946 |
| XLOC_009326 | SLC26A11        | chr17:78194199-78227308  | 7.89376    | 7.46637    | -0.0803055 | 0.966946 |
| XLOC_009093 | ARL4D           | chr17:41476352-41478504  | 0.0127712  | 0.0120801  | -0.080266  | 1        |
| XLOC_015985 | ATR             | chr3:142168076-142297661 | 0.910527   | 0.861265   | -0.0802445 | 0.970729 |
| XLOC_001429 | TMEM54          | chr1:33352097-33366953   | 141.198    | 133.563    | -0.080204  | 0.958568 |
| XLOC_018712 | ZSCAN12         | chr6:28346597-28367544   | 0.552931   | 0.523034   | -0.0801935 | 0.979701 |
| XLOC_000629 | SRGAP2D         | chr1:121107151-121129827 | 0.323993   | 0.306476   | -0.0801886 | 1        |
| XLOC_005654 | CCDC53          | chr12:102406716-10245581 | 21.0057    | 19.8724    | -0.0800139 | 0.965148 |
| XLOC_014575 | FAM83F          | chr22:40390952-40426043  | 30.1503    | 28.5242    | -0.0799886 | 0.959465 |
| XLOC_009323 | CCDC40          | chr17:78010430-78074412  | 0.32909    | 0.311344   | -0.0799719 | 1        |
| XLOC_015223 | TBC1D23         | chr3:99979660-100044096  | 9.43152    | 8.92312    | -0.0799424 | 0.959465 |
| XLOC_022927 | NFIL3           | chr9:94171326-94186144   | 28.8168    | 27.2635    | -0.0799394 | 0.958814 |
| XLOC_022293 | RRAGA           | chr9:19049371-19051021   | 66.4999    | 62.9169    | -0.0799029 | 0.958814 |
| XLOC_000530 | AGL             | chr1:100315639-100389571 | 1.87179    | 1.77095    | -0.0798977 | 0.965148 |
| XLOC_003772 | PIWIL4          | chr11:94300473-94354587  | 0.382422   | 0.36185    | -0.0797721 | 0.98297  |
| XLOC_022294 | DENND4C         | chr9:19230762-19374137   | 2.57491    | 2.43645    | -0.0797373 | 0.961412 |
| XLOC_015133 | ABHD14A.ACY1    | chr3:52009041-52023218   | 89.1825    | 84.3877    | -0.0797274 | 0.96103  |
| XLOC_000243 | SERINC2         | chr1:31882411-31907527   | 31.9225    | 30.2071    | -0.079683  | 0.959465 |
| XLOC_005493 | CALCOCO1        | chr12:54104901-54121307  | 8.68216    | 8.21615    | -0.0795924 | 0.963209 |
| XLOC_022205 | LOC100288181    | chr8:143781528-143808391 | 0.337744   | 0.319637   | -0.0794965 | 1        |
| XLOC_014893 | CERK            | chr22:47080306-47134152  | 11.7734    | 11.1424    | -0.0794647 | 0.960071 |
| XLOC_009850 | TOB1            | chr17:48939586-48945732  | 11.5219    | 10.9045    | -0.079451  | 0.964963 |
| XLOC_004813 | SLC48A1         | chr12:48166966-48213763  | 9.94636    | 9.41352    | -0.0794331 | 0.982412 |
| XLOC_005215 | KDM5A           | chr12:389222-551806      | 2.30578    | 2.18228    | -0.0794236 | 0.966946 |
| XLOC_001896 | RIT1            | chr1:155867598-155881191 | 5.93648    | 5.61857    | -0.0794059 | 0.963773 |
| XLOC_020728 | SND1            | chr7:127292201-12732651  | 91.778     | 86.8643    | -0.0793848 | 0.958814 |
| XLOC_007867 | NPW             | chr16:2069520-2070756    | 0.364256   | 0.344779   | -0.0792785 | 0.990857 |
| XLOC_018742 | PPP1R18         | chr6:30644165-30655672   | 55.4591    | 52.4945    | -0.0792568 | 0.959063 |
| XLOC_005707 | NAA25           | chr12:112464492-11254663 | 4.50377    | 4.26303    | -0.0792538 | 0.961432 |
| XLOC_016535 | PRSS48          | chr4:152198324-152212601 | 0.0304994  | 0.0288698  | -0.0792191 | 1        |
| XLOC_010416 | MBP             | chr18:74690788-74844774  | 3.56414    | 3.37384    | -0.0791628 | 0.967978 |
| XLOC_015528 | SDHAP2          | chr3:195384909-195415731 | 1.03972    | 0.984282   | -0.0790567 | 0.979906 |
| XLOC_007874 | E4F1            | chr16:2273566-2285743    | 17.8672    | 16.915     | -0.0790111 | 0.965148 |
| XLOC_007836 | METRN           | chr16:765172-767480      | 139.985    | 132.531    | -0.0789483 | 0.959465 |
| XLOC_016700 | SEPSECS         | chr4:25121626-25162204   | 1.04461    | 0.988992   | -0.0789314 | 0.974044 |
| XLOC_016178 | LOC402160       | chr4:2420700-2464690     | 0.0117874  | 0.0111599  | -0.0789197 | 1        |
| XLOC_011673 | ZNF780A         | chr19:40575058-40596845  | 1.63613    | 1.54919    | -0.0787746 | 0.974056 |
| XLOC_013083 | FHL2            | chr2:105972782-106055231 | 379.751    | 359.572    | -0.0787742 | 0.960857 |

|             |                       |                         |            |            |            |          |
|-------------|-----------------------|-------------------------|------------|------------|------------|----------|
| XLOC_006900 | NEK9                  | chr14:75548817-75593778 | 5.80804    | 5.49959    | -0.0787268 | 0.961224 |
| XLOC_004568 | SLC37A4               | chr11:11895060-1189016  | 24.6271    | 23.32      | -0.0786806 | 0.960776 |
| XLOC_009984 | EXOC7                 | chr17:74075262-74099868 | 29.3469    | 27.7896    | -0.0786631 | 0.959465 |
| XLOC_019098 | AH11                  | chr6:135605109-13581890 | 1.55507    | 1.4726     | -0.0786148 | 0.972123 |
| XLOC_012211 | CEP68                 | chr2:65283494-65357435  | 2.65376    | 2.5131     | -0.0785692 | 0.990857 |
| XLOC_000823 | PPOX                  | chr1:161136180-16114101 | 15.2998    | 14.489     | -0.0785576 | 0.966946 |
| XLOC_001585 | DOCK7                 | chr1:62920396-63154039  | 3.19181    | 3.02276    | -0.078511  | 0.96275  |
| XLOC_004815 | PFKM                  | chr12:48436680-48540187 | 49.7593    | 47.1248    | -0.0784798 | 0.964222 |
| XLOC_021250 | SRPK2                 | chr7:104756822-10502934 | 9.15398    | 8.66963    | -0.0784294 | 0.959465 |
| XLOC_009862 | CUEDC1                | chr17:55938603-56032684 | 5.76876    | 5.46368    | -0.0783879 | 0.970232 |
| XLOC_021763 | DENND3                | chr8:142138719-14220590 | 1.09433    | 1.03646    | -0.0783776 | 0.977103 |
| XLOC_014828 | SUN2                  | chr22:39130718-39152024 | 20.0712    | 19.0107    | -0.0783184 | 0.961224 |
| XLOC_008200 | SNTB2                 | chr16:69221049-69342955 | 1.44638    | 1.37002    | -0.0782445 | 0.966946 |
| XLOC_008592 | KIFC3                 | chr16:57792128-57836439 | 44.3687    | 42.0268    | -0.0782327 | 0.959465 |
| XLOC_008519 | ZNF768                | chr16:30535321-30537910 | 50.491     | 47.828     | -0.0781703 | 0.959465 |
| XLOC_002002 | GPR161                | chr1:168048779-16810690 | 2.58273    | 2.44656    | -0.0781394 | 0.966442 |
| XLOC_017157 | ERBB2IP               | chr5:65222381-65376851  | 6.01371    | 5.69687    | -0.0780881 | 0.961224 |
| XLOC_007175 | TUBGCP4               | chr15:43663312-43910998 | 7.51266    | 7.11685    | -0.0780848 | 0.959521 |
| XLOC_010446 | STK11                 | chr19:1205797-1228434   | 21.6466    | 20.5066    | -0.0780542 | 0.961224 |
| XLOC_007403 | IQGAP1                | chr15:90931472-91045475 | 9.51227    | 9.01183    | -0.0779703 | 0.959465 |
| XLOC_008680 | BCAR1                 | chr16:75262927-75301951 | 25.1047    | 23.7846    | -0.0779305 | 0.96128  |
| XLOC_004032 | APBB1                 | chr11:6416354-6440644   | 16.0939    | 15.2482    | -0.0778702 | 0.964963 |
| XLOC_006010 | UPF3A                 | chr13:115047058-1150712 | 14.8532    | 14.0729    | -0.0778526 | 0.961224 |
| XLOC_003052 | IDE                   | chr10:94211440-94333852 | 3.39567    | 3.21745    | -0.0777756 | 0.965607 |
| XLOC_021996 | TMEM68                | chr8:56651319-56738005  | 8.94591    | 8.47678    | -0.0777107 | 0.984917 |
| XLOC_012801 | SMC6                  | chr2:17845078-17935096  | 1.58625    | 1.50309    | -0.0776885 | 0.970693 |
| XLOC_013620 | ACSS2                 | chr20:33462765-33515769 | 6.43301    | 6.09577    | -0.0776852 | 0.965148 |
| XLOC_001688 | WDR47                 | chr1:109512837-10958485 | 1.65534    | 1.56866    | -0.0775896 | 0.97314  |
| XLOC_008322 | FBXL16                | chr16:742499-755825     | 26.9509    | 25.5417    | -0.0774839 | 0.959465 |
| XLOC_013098 | LINC00116             | chr2:110969105-11098051 | 14.2402    | 13.4964    | -0.0773893 | 0.965148 |
| XLOC_009095 | DHX8                  | chr17:41561333-41601680 | 6.78211    | 6.42814    | -0.0773333 | 0.963266 |
| XLOC_012834 | CGREF1                | chr2:27309610-27341995  | 21.4139    | 20.2962    | -0.0773332 | 0.972989 |
| XLOC_001489 | EDN2                  | chr1:41944445-41950344  | 0.019959   | 0.0189177  | -0.0772985 | 1        |
| XLOC_011496 | NOTCH3                | chr19:15270443-15311792 | 0.17335    | 0.164331   | -0.0770807 | 1        |
| XLOC_016003 | PFN2                  | chr3:149682690-14968874 | 48.1821    | 45.6782    | -0.0769901 | 0.959465 |
| XLOC_023292 | SMS                   | chrX:21958690-22012955  | 186.574    | 176.9      | -0.0768144 | 0.961224 |
| XLOC_010891 | ZNF574                | chr19:42580289-42585720 | 10.8462    | 10.284     | -0.0767775 | 0.966946 |
| XLOC_003098 | MRPL43                | chr10:102732285-1027472 | 91.006     | 86.2925    | -0.0767271 | 0.969877 |
| XLOC_007417 | LOC100507217          | chr15:93426072-93441977 | 37.6669    | 35.7166    | -0.0767039 | 0.960698 |
| XLOC_020574 | DTX2P1-UPK3BP1-PMS2P1 | chr7:76610138-76653076  | 0.416004   | 0.394469   | -0.0766687 | 0.989344 |
| XLOC_004843 | DIP2B                 | chr12:50898767-51142450 | 3.21788    | 3.05134    | -0.0766705 | 0.965148 |
| XLOC_009216 | EFCAB3                | chr17:60447578-60493839 | 0.417458   | 0.39588    | -0.0765679 | 0.987693 |
| XLOC_011030 | RCN3                  | chr19:50030874-50046890 | 3.39054    | 3.21529    | -0.0765669 | 0.979701 |
| XLOC_007245 | USP3                  | chr15:63796709-63894620 | 9.34009    | 8.85854    | -0.0763668 | 0.961644 |
| XLOC_001601 | DEPDC1                | chr1:68939834-68962799  | 5.44382    | 5.16318    | -0.0763592 | 0.965573 |
| XLOC_014145 | IFNAR2                | chr21:34602230-34636820 | 8.26914    | 7.84287    | -0.0763567 | 0.972989 |
| XLOC_003173 | IKZF5                 | chr10:124750321-1247683 | 3.55195    | 3.36894    | -0.0763164 | 0.967901 |
| XLOC_008817 | TMEM102               | chr17:7338761-7340998   | 25.7672    | 24.4436    | -0.0760813 | 0.966946 |
| XLOC_009251 | PRKAR1A               | chr17:66507920-66597095 | 21.1519    | 20.0673    | -0.0759416 | 0.967024 |
| XLOC_023325 | XK                    | chrX:37545132-37591383  | 0.411947   | 0.390851   | -0.0758407 | 0.981197 |
| XLOC_013205 | IFIH1                 | chr2:163123588-16317521 | 0.591555   | 0.561264   | -0.0758329 | 0.981044 |
| XLOC_022511 | SLC31A2               | chr9:115913237-11592642 | 8.38469    | 7.95562    | -0.0757841 | 0.970346 |
| XLOC_016657 | LOC100129931          | chr4:6911170-7059677    | 9.94867    | 9.43977    | -0.0757518 | 0.977103 |
| XLOC_004329 | AP5B1                 | chr11:65541368-65548062 | 7.46277    | 7.08106    | -0.0757471 | 0.964327 |
| XLOC_017015 | WWC2-AS2              | chr4:184018173-18402035 | 0.888241   | 0.842833   | -0.0757037 | 0.986822 |
| XLOC_012127 | SLC30A6               | chr2:32390909-32449181  | 3.72512    | 3.53471    | -0.0756943 | 0.96671  |
| XLOC_023024 | ALAD                  | chr9:116148591-11616361 | 7.92605    | 7.52113    | -0.0756522 | 0.965735 |
| XLOC_020532 | POM121                | chr7:72349935-72425302  | 11.7846    | 11.1825    | -0.0756511 | 0.966946 |
| XLOC_014964 | CCDC174               | chr3:14693252-14714166  | 5.00766    | 4.75199    | -0.0756069 | 0.969963 |
| XLOC_014022 | SPATA2                | chr20:48519928-48532080 | 5.04107    | 4.78383    | -0.0755633 | 0.967901 |
| XLOC_011920 | ZNF28                 | chr19:53300660-53324922 | 1.40217    | 1.33062    | -0.0755578 | 0.974762 |
| XLOC_004575 | USP2                  | chr11:119225924-1192524 | 0.575692   | 0.546365   | -0.0754302 | 0.984917 |
| XLOC_002612 | ENTPD1                | chr10:97471535-97849992 | 1.10554    | 1.04927    | -0.0753739 | 0.979701 |
| XLOC_010510 | KDM4B                 | chr19:4969123-5153608   | 12.2216    | 11.6001    | -0.0752879 | 0.965148 |
| XLOC_004993 | TBC1D15               | chr12:72233486-72320629 | 5.81349    | 5.51799    | -0.0752606 | 0.962215 |
| XLOC_010250 | TSHZ1                 | chr18:72922709-73001905 | 1.67984    | 1.59445    | -0.0752599 | 0.976618 |
| XLOC_015034 | MYRIP                 | chr3:39851302-40353915  | 0.00300667 | 0.00285389 | -0.0752365 | 1        |
| XLOC_006265 | SLC39A2               | chr14:21467413-21470034 | 0.0129823  | 0.0123231  | -0.0751797 | 1        |
| XLOC_013947 | NFS1                  | chr20:34256609-34288902 | 10.8857    | 10.333     | -0.0751708 | 0.986353 |
| XLOC_011002 | FGF21                 | chr19:49259343-49261582 | 0.0285844  | 0.0271333  | -0.0751638 | 1        |
| XLOC_014908 | LMF2                  | chr22:50941375-50946135 | 55.199     | 52.3978    | -0.0751344 | 0.962618 |
| XLOC_022501 | AKAP2,PALM2,PALM2-AKA | chr9:112403067-11293479 | 5.76558    | 5.4731     | -0.0751059 | 0.961224 |
| XLOC_014084 | ARFRP1                | chr20:62289162-62367494 | 14.8131    | 14.0617    | -0.0750969 | 0.981135 |
| XLOC_002821 | BEND7                 | chr10:13480483-13544976 | 7.63252    | 7.24567    | -0.075041  | 0.967901 |
| XLOC_001028 | DIEXF                 | chr1:210001311-21003091 | 3.90032    | 3.70266    | -0.0750338 | 0.964792 |
| XLOC_003436 | ZNF408                | chr11:46722316-46727466 | 11.1426    | 10.5786    | -0.0749326 | 0.97028  |
| XLOC_014560 | TOMM22                | chr22:39077953-39080766 | 87.4616    | 83.0426    | -0.0747977 | 0.961224 |
| XLOC_006375 | ARID4A                | chr14:58765221-58840451 | 0.657276   | 0.624073   | -0.0747858 | 0.978196 |
| XLOC_000651 | BCL9                  | chr1:147013181-14709801 | 1.85969    | 1.76575    | -0.0747856 | 0.974044 |

|             |              |                          |           |           |            |          |
|-------------|--------------|--------------------------|-----------|-----------|------------|----------|
| XLOC_008907 | EPN2         | chr17:19140689-19240028  | 8.17896   | 7.76581   | -0.0747809 | 0.965573 |
| XLOC_003587 | PLCB3        | chr11:64018994-64036924  | 22.443    | 21.3095   | -0.0747708 | 0.959465 |
| XLOC_017259 | WDR36        | chr5:110427869-110466200 | 6.67809   | 6.34081   | -0.0747697 | 0.963219 |
| XLOC_007427 | IGF1R        | chr15:99192760-99507759  | 2.34751   | 2.22896   | -0.0747609 | 0.966946 |
| XLOC_011456 | FBXW9        | chr19:12799729-12807455  | 8.54064   | 8.10967   | -0.0747009 | 0.976595 |
| XLOC_013102 | BUB1         | chr2:111395408-111435684 | 15.0823   | 14.3214   | -0.074684  | 0.961224 |
| XLOC_014358 | ICOSLG       | chr21:45646721-45660834  | 2.76259   | 2.62324   | -0.0746708 | 0.976618 |
| XLOC_000299 | KIAA0754     | chr1:39547088-39952810   | 0.256503  | 0.243573  | -0.0746218 | 1        |
| XLOC_008056 | SRCAP        | chr16:30710461-30751450  | 5.28569   | 5.01924   | -0.0746214 | 0.962215 |
| XLOC_010057 | CSNK1D       | chr17:80200536-80231594  | 40.0803   | 38.06     | -0.0746176 | 0.961224 |
| XLOC_003776 | SRSF8        | chr11:94800055-94804388  | 6.88423   | 6.53737   | -0.0745855 | 0.966946 |
| XLOC_007268 | PIAS1        | chr15:68346571-68480404  | 4.5134    | 4.28616   | -0.0745266 | 0.972989 |
| XLOC_007244 | APH1B        | chr15:63569748-63601325  | 4.05629   | 3.8521    | -0.0745152 | 0.968894 |
| XLOC_008996 | RASL10B      | chr17:34058678-34070540  | 10.9391   | 10.3887   | -0.0744817 | 0.966946 |
| XLOC_007749 | BTBD1        | chr15:83685180-83736167  | 22.8732   | 21.7232   | -0.0744194 | 0.962247 |
| XLOC_013254 | TTC30A       | chr2:178479025-178483694 | 0.0964108 | 0.0915637 | -0.0744186 | 1        |
| XLOC_014970 | EAF1         | chr3:15469063-15484120   | 5.70515   | 5.41856   | -0.0743561 | 0.965573 |
| XLOC_013015 | GGCX         | chr2:85766100-85788657   | 6.22764   | 5.91486   | -0.0743428 | 0.982496 |
| XLOC_008976 | RHOT1        | chr17:30469472-30552746  | 5.53551   | 5.25754   | -0.0743274 | 0.967289 |
| XLOC_004424 | CLNS1A       | chr11:77327195-77348851  | 101.571   | 96.4711   | -0.07432   | 0.962618 |
| XLOC_003632 | TSGA10IP     | chr11:65713114-65727434  | 0.29767   | 0.282725  | -0.074312  | 1        |
| XLOC_014628 | TTC38        | chr22:46663860-46689905  | 16.6926   | 15.8562   | -0.0741557 | 0.965607 |
| XLOC_006306 | KHNYN        | chr14:24899140-24912007  | 13.2785   | 12.6134   | -0.0741342 | 0.974044 |
| XLOC_021173 | PKD4         | chr7:95212808-95225925   | 0.22693   | 0.215571  | -0.0740839 | 1        |
| XLOC_011438 | ECSIT,ZNF653 | chr19:11594241-11639987  | 45.4965   | 43.2206   | -0.0740351 | 0.96955  |
| XLOC_005204 | PXMP2        | chr12:133264191-13328151 | 14.6247   | 13.8942   | -0.0739199 | 0.974169 |
| XLOC_006937 | FBLN5        | chr14:92335754-92414046  | 3.20794   | 3.04773   | -0.0739138 | 0.977332 |
| XLOC_015900 | IQCB1        | chr3:121488609-121553921 | 14.1514   | 13.4455   | -0.0738302 | 0.965148 |
| XLOC_001212 | GNB1         | chr1:1716724-1822526     | 99.4227   | 94.4677   | -0.0737547 | 0.964792 |
| XLOC_010095 | SMCHD1       | chr18:2655885-2805015    | 3.13961   | 2.98336   | -0.0736451 | 0.965573 |
| XLOC_010365 | MYO5B        | chr18:47349155-47721451  | 0.90587   | 0.860805  | -0.073617  | 0.975209 |
| XLOC_007146 | CHST14       | chr15:40763159-40765357  | 23.597    | 22.424    | -0.0735608 | 0.966442 |
| XLOC_003553 | INCENP       | chr11:61891444-61920635  | 8.05138   | 7.65182   | -0.0734328 | 0.966946 |
| XLOC_017572 | FASTKD3      | chr5:7859271-7869150     | 9.45039   | 8.98184   | -0.0733624 | 0.978981 |
| XLOC_013499 | PTPRA,VPS16  | chr20:2815960-3019315    | 31.0755   | 29.5354   | -0.0733338 | 0.970232 |
| XLOC_023023 | HDHD3        | chr9:116135697-116138341 | 31.9521   | 30.37     | -0.0732649 | 0.966946 |
| XLOC_011680 | PRX          | chr19:40899670-40919271  | 1.54337   | 1.46696   | -0.0732547 | 0.978196 |
| XLOC_018785 | FKBPL        | chr6:32096483-32098067   | 6.02602   | 5.72793   | -0.0731936 | 0.977332 |
| XLOC_002434 | FAM21C       | chr10:46222647-46288412  | 6.2492    | 5.94009   | -0.0731863 | 0.966946 |
| XLOC_006296 | PSME1        | chr14:24605377-24610797  | 174.929   | 166.279   | -0.0731644 | 0.966946 |
| XLOC_003235 | EFCAB4A      | chr11:827584-831991      | 6.56879   | 6.24399   | -0.07316   | 0.977885 |
| XLOC_003583 | NUDT22       | chr11:63993729-63997488  | 62.485    | 59.3956   | -0.0731534 | 0.966946 |
| XLOC_005109 | TRAF1D       | chr12:112563348-11259140 | 10.9335   | 10.3933   | -0.0730949 | 0.967792 |
| XLOC_005528 | BAZ2A        | chr12:56915608-57030163  | 10.3837   | 9.87087   | -0.0730673 | 0.977332 |
| XLOC_002311 | ZNF692       | chr1:249144202-249153311 | 21.1006   | 20.0591   | -0.0730238 | 0.966946 |
| XLOC_017391 | KIAA0141     | chr5:141303384-141321612 | 12.4622   | 11.8472   | -0.0730058 | 0.965598 |
| XLOC_023368 | TBC1D25      | chrX:48398074-48420997   | 5.83278   | 5.54566   | -0.0728245 | 0.970053 |
| XLOC_004772 | ETNK1        | chr12:22778075-22843608  | 5.20648   | 4.95026   | -0.0728048 | 0.986655 |
| XLOC_012382 | SLC20A1      | chr2:113403433-113421400 | 9.39861   | 8.93695   | -0.0726649 | 0.966946 |
| XLOC_002671 | WBP1L        | chr10:104503726-10457602 | 6.33838   | 6.02708   | -0.0726556 | 0.967901 |
| XLOC_001588 | JAK1         | chr1:65210777-65432187   | 15.2698   | 14.5199   | -0.0726538 | 0.970195 |
| XLOC_008082 | ZNF267       | chr16:31885078-31928629  | 2.36021   | 2.24431   | -0.0726457 | 0.974044 |
| XLOC_002148 | NUCKS1       | chr1:205681946-205719372 | 17.9752   | 17.0933   | -0.0725783 | 0.965148 |
| XLOC_009573 | SPAG5        | chr17:26904582-26926056  | 18.6243   | 17.7111   | -0.0725366 | 0.965148 |
| XLOC_002678 | NEURL        | chr10:105253734-10535230 | 6.75613   | 6.42527   | -0.0724418 | 0.972111 |
| XLOC_019013 | ASCC3        | chr6:100956607-101329224 | 3.52215   | 3.34967   | -0.0724372 | 0.967901 |
| XLOC_008096 | HEATR3       | chr16:50099880-50139375  | 1.86187   | 1.77079   | -0.0723579 | 0.979057 |
| XLOC_023827 | ZNF674       | chrX:46357159-46404892   | 0.584952  | 0.556345  | -0.0723391 | 0.979944 |
| XLOC_000632 | NBPF9        | chr1:144614958-144828810 | 0.893471  | 0.849776  | -0.0723383 | 0.979944 |
| XLOC_015913 | ITGB5        | chr3:124481794-124606144 | 26.6399   | 25.3405   | -0.0721395 | 0.965353 |
| XLOC_013351 | PECR         | chr2:216903110-216946531 | 3.01703   | 2.8699    | -0.0721255 | 0.97854  |
| XLOC_011758 | EML2         | chr19:46112657-46148775  | 15.1164   | 14.3799   | -0.0720621 | 0.975409 |
| XLOC_021433 | KBTBD11      | chr8:1922043-1955109     | 3.34496   | 3.18213   | -0.0719944 | 0.972111 |
| XLOC_003606 | CAPN1        | chr11:64948685-64979477  | 91.0181   | 86.5876   | -0.0719939 | 0.965148 |
| XLOC_009941 | LINC00673    | chr17:70399462-70588943  | 0.381006  | 0.362472  | -0.0719433 | 0.987858 |
| XLOC_021665 | OSGIN2       | chr8:90914095-90940095   | 9.33391   | 8.88018   | -0.0718938 | 0.965573 |
| XLOC_016785 | COX18        | chr4:73920415-73935472   | 4.24785   | 4.04138   | -0.0718847 | 0.970346 |
| XLOC_005665 | NFYB         | chr12:104510857-10453204 | 5.38425   | 5.12258   | -0.0718736 | 0.967901 |
| XLOC_007204 | EID1         | chr15:49115933-49255641  | 27.8571   | 26.5034   | -0.0718687 | 0.964603 |
| XLOC_022767 | TUSC1        | chr9:25676386-25678856   | 10.7024   | 10.1823   | -0.0718591 | 0.970195 |
| XLOC_023712 | FAM50A       | chrX:153672472-153679002 | 88.3692   | 84.077    | -0.0718324 | 0.964792 |
| XLOC_003577 | NAA40        | chr11:63706441-63724446  | 4.87861   | 4.64171   | -0.0718118 | 0.972339 |
| XLOC_010367 | CCDC11       | chr18:47753562-47792865  | 1.22998   | 1.17042   | -0.0716102 | 0.981884 |
| XLOC_015608 | NKIRAS1      | chr3:23933571-23965187   | 4.13363   | 3.9336    | -0.0715576 | 0.997036 |
| XLOC_007700 | IMP3         | chr15:75931425-75932664  | 131.28    | 124.933   | -0.0714884 | 0.964792 |
| XLOC_020838 | ZNF282       | chr7:148892576-148923331 | 25.0671   | 23.857    | -0.0713794 | 0.965573 |
| XLOC_012335 | CNOT11       | chr2:101869344-101886771 | 23.4013   | 22.2746   | -0.071189  | 0.965607 |
| XLOC_010603 | ZNF439       | chr19:11976843-11980306  | 1.36649   | 1.30073   | -0.0711444 | 0.979701 |
| XLOC_018028 | RIPK1        | chr6:3077057-3115421     | 5.58162   | 5.31322   | -0.0710961 | 0.970195 |

|             |                |                          |           |            |            |          |
|-------------|----------------|--------------------------|-----------|------------|------------|----------|
| XLOC_002206 | WDR26          | chr1:224572844-22462200  | 7.65921   | 7.29094    | -0.0710904 | 0.965148 |
| XLOC_017266 | APC            | chr5:112043201-112181936 | 0.946245  | 0.900758   | -0.0710743 | 0.973348 |
| XLOC_021031 | POLR2J4        | chr7:43966034-44058748   | 0.818074  | 0.77875    | -0.0710702 | 0.988165 |
| XLOC_007820 | NME4           | chr16:447191-450754      | 79.0644   | 75.264     | -0.0710676 | 0.966946 |
| XLOC_023465 | TAF1           | chrX:70430034-70948962   | 2.05543   | 1.95668    | -0.0710387 | 0.996453 |
| XLOC_004662 | DYRK4          | chr12:4699243-4723041    | 12.233    | 11.646     | -0.0709439 | 0.97028  |
| XLOC_023588 | SLC25A43       | chrX:118533257-11858843  | 7.60492   | 7.24011    | -0.0709224 | 0.970346 |
| XLOC_013137 | WDR33          | chr2:128461807-12856876  | 11.8495   | 11.2811    | -0.0709209 | 0.966946 |
| XLOC_003002 | BMS1P4         | chr10:75458908-75490272  | 0.294277  | 0.280168   | -0.0708863 | 1        |
| XLOC_012275 | MAT2A          | chr2:85766100-85788657   | 29.062    | 27.6693    | -0.0708479 | 0.977995 |
| XLOC_008299 | C16orf55       | chr16:89710838-89736866  | 8.09914   | 7.71124    | -0.0708049 | 0.993379 |
| XLOC_012737 | ASB1           | chr2:239335625-23936089  | 30.6627   | 29.1952    | -0.0707536 | 0.966946 |
| XLOC_009033 | ERBB2          | chr17:37844392-37884915  | 17.7929   | 16.9423    | -0.070674  | 0.966566 |
| XLOC_000931 | C1orf21        | chr1:184356149-18459815  | 2.6019    | 2.47757    | -0.0706416 | 0.970195 |
| XLOC_013971 | ZHX3           | chr20:39807088-39928739  | 2.05055   | 1.95264    | -0.0705858 | 0.971649 |
| XLOC_013626 | ERGIC3         | chr20:34129777-34145405  | 148.77    | 141.672    | -0.0705256 | 0.965735 |
| XLOC_007343 | FAH            | chr15:80445232-80478924  | 29.4574   | 28.0536    | -0.0704447 | 0.967612 |
| XLOC_001091 | IBA57          | chr1:228353428-22836995  | 1.56654   | 1.492      | -0.0703338 | 0.975008 |
| XLOC_011959 | DNAAF3         | chr19:55670028-55678090  | 27.6774   | 26.3611    | -0.0702979 | 0.966946 |
| XLOC_020493 | ZNF713         | chr7:55980330-56008433   | 0.158757  | 0.151209   | -0.0702714 | 1        |
| XLOC_018069 | CAP2           | chr6:17393735-17558023   | 4.13376   | 3.93725    | -0.0702686 | 0.974169 |
| XLOC_013310 | TRAK2          | chr2:202241929-20231631  | 1.263     | 1.20299    | -0.0702391 | 0.977103 |
| XLOC_000692 | ZNF687         | chr1:151254790-15130019  | 8.02065   | 7.63969    | -0.0702044 | 0.984917 |
| XLOC_017416 | PCYOX1L        | chr5:148737569-14874922  | 4.52116   | 4.30646    | -0.070192  | 0.976618 |
| XLOC_010275 | MYOM1          | chr18:3066804-3220106    | 0.129094  | 0.122966   | -0.0701606 | 1        |
| XLOC_011384 | KANK3          | chr19:8387467-8408146    | 3.29171   | 3.13547    | -0.0701573 | 0.980559 |
| XLOC_004996 | ATXN7L3B       | chr12:74931550-74935232  | 15.901    | 15.1463    | -0.0701522 | 0.965735 |
| XLOC_017646 | EMB            | chr5:49692030-49737234   | 2.05942   | 1.9617     | -0.0701376 | 0.976618 |
| XLOC_017869 | GNPDA1         | chr5:141380233-14139262  | 101.991   | 97.1526    | -0.0701116 | 0.966946 |
| XLOC_011294 | JSRP1          | chr19:2252249-2256422    | 41.4854   | 39.5193    | -0.0700471 | 0.972601 |
| XLOC_002643 | HIF1AN         | chr10:102295640-1023136  | 5.94387   | 5.66248    | -0.0699682 | 0.966946 |
| XLOC_022333 | TESK1          | chr9:35605280-35618424   | 25.1331   | 23.9437    | -0.0699434 | 0.968294 |
| XLOC_023985 | TCEAL6         | chrX:101394932-10139738  | 0.0101863 | 0.00970451 | -0.0699032 | 1        |
| XLOC_016760 | CENPC1         | chr4:68337988-68411256   | 2.028     | 1.93212    | -0.0698716 | 0.977332 |
| XLOC_012797 | NBAS           | chr2:15307031-15701472   | 7.24302   | 6.90065    | -0.0698585 | 0.966946 |
| XLOC_014644 | PPP6R2         | chr22:50781745-50913464  | 13.2882   | 12.6603    | -0.0698311 | 0.980556 |
| XLOC_010763 | LSM14A         | chr19:34663351-34720420  | 26.5406   | 25.2867    | -0.0698205 | 0.965515 |
| XLOC_016530 | ARHGAP10       | chr4:148653452-14899392  | 4.6872    | 4.46583    | -0.0697977 | 0.973076 |
| XLOC_023394 | CLCN5          | chrX:49687224-49683892   | 0.712697  | 0.679065   | -0.0697394 | 0.979316 |
| XLOC_013541 | CSRP2BP,PET117 | chr20:18118498-18169031  | 18.4868   | 17.615     | -0.0696897 | 0.976214 |
| XLOC_016060 | EIF5A2         | chr3:170606203-17062642  | 1.34512   | 1.28174    | -0.069628  | 0.976326 |
| XLOC_018098 | HIST1H1E       | chr6:26156558-26157343   | 3.04593   | 2.90244    | -0.0696179 | 0.987423 |
| XLOC_012176 | MSH6           | chr2:48010220-48132932   | 6.86343   | 6.54033    | -0.0695676 | 0.984387 |
| XLOC_012791 | ROCK2          | chr2:11321777-11484711   | 1.1049    | 1.0529     | -0.0695432 | 0.977103 |
| XLOC_023165 | SNAPC4         | chr9:139270028-13929288  | 12.6985   | 12.1013    | -0.0694914 | 0.969877 |
| XLOC_011538 | FKBP8          | chr19:18642567-18654383  | 282.101   | 268.838    | -0.0694738 | 0.966946 |
| XLOC_017795 | P4HA2          | chr5:131528303-13156355  | 33.5492   | 31.9723    | -0.0694545 | 0.969075 |
| XLOC_001877 | PBXIP1         | chr1:154916558-15492856  | 8.65177   | 8.24607    | -0.0692875 | 0.972111 |
| XLOC_010122 | CHMP1B         | chr18:11689013-11908796  | 17.7317   | 16.9007    | -0.0692482 | 0.979701 |
| XLOC_006636 | RCOR1          | chr14:103058995-1031969  | 5.12627   | 4.88652    | -0.0691013 | 0.968306 |
| XLOC_011728 | IRGQ           | chr19:44088518-44100287  | 2.28186   | 2.17521    | -0.0690556 | 0.972053 |
| XLOC_000326 | ERMAP          | chr1:43272722-43310660   | 2.01044   | 1.9166     | -0.0689638 | 0.984917 |
| XLOC_010954 | IGFL2          | chr19:46651038-46664561  | 0.0371597 | 0.0354263  | -0.0689186 | 1        |
| XLOC_008069 | BCKDK          | chr16:31119614-31124112  | 125.865   | 119.997    | -0.0688813 | 0.967289 |
| XLOC_008213 | FUK            | chr16:70488497-70514177  | 4.54592   | 4.3341     | -0.0688407 | 0.976149 |
| XLOC_017502 | HIGD2A         | chr5:175815783-17581675  | 261.479   | 249.298    | -0.0688257 | 0.967799 |
| XLOC_022889 | NMRK1          | chr9:77676115-77703133   | 8.5184    | 8.12234    | -0.0686871 | 0.976595 |
| XLOC_018304 | PPP2R5D        | chr6:42952236-42981618   | 22.064    | 21.0396    | -0.0685834 | 0.986822 |
| XLOC_006824 | ATG14          | chr14:55833108-55878576  | 3.01078   | 2.87118    | -0.0684905 | 0.974997 |
| XLOC_004157 | PHF21A         | chr11:45950869-46142985  | 3.3509    | 3.19571    | -0.0684106 | 0.970681 |
| XLOC_004257 | FTH1           | chr11:61717355-61735132  | 599.833   | 572.058    | -0.0683994 | 0.968521 |
| XLOC_011647 | CAPN12         | chr19:39138266-39235114  | 15.1468   | 14.4457    | -0.0683784 | 0.99038  |
| XLOC_017846 | PROB1          | chr5:138727634-13873088  | 0.513267  | 0.48951    | -0.068371  | 0.990324 |
| XLOC_018963 | TMEM30A        | chr6:75962637-75994632   | 13.0523   | 12.4485    | -0.0683418 | 0.966946 |
| XLOC_016438 | RAP1GDS1       | chr4:99182526-99365012   | 10.4077   | 9.92631    | -0.0683229 | 0.967901 |
| XLOC_011543 | HOMER3         | chr19:19040009-19052041  | 85.1055   | 81.171     | -0.0682892 | 0.967289 |
| XLOC_009283 | KIAA0195       | chr17:73452663-73511627  | 11.495    | 10.9642    | -0.068209  | 0.976198 |
| XLOC_001391 | EYA3           | chr1:28296854-28415148   | 4.33088   | 4.1309     | -0.0682041 | 0.971086 |
| XLOC_004880 | HOXC10         | chr12:54378945-54384062  | 8.35968   | 7.97386    | -0.0681702 | 0.976618 |
| XLOC_007225 | TCF12          | chr15:57210832-57580714  | 7.97666   | 7.60881    | -0.0681141 | 0.97028  |
| XLOC_007484 | AVEN           | chr15:34158427-34357287  | 6.04452   | 5.76579    | -0.0681093 | 0.977696 |
| XLOC_012842 | EIF2B4         | chr2:27587218-27593324   | 30.7574   | 29.3421    | -0.0679642 | 0.970232 |
| XLOC_002264 | LGALS8-AS1     | chr1:236681513-23676784  | 0.443569  | 0.423158   | -0.0679605 | 0.997036 |
| XLOC_023435 | UBQLN2         | chrX:56590025-56593443   | 10.3734   | 9.89669    | -0.067865  | 0.970195 |
| XLOC_008887 | MED9           | chr17:17380299-17396534  | 9.35358   | 8.92381    | -0.0678588 | 0.974192 |
| XLOC_001441 | KIAA0319L      | chr1:35899090-36023037   | 8.12503   | 7.7519     | -0.0678239 | 0.969075 |
| XLOC_012327 | C2orf15        | chr2:99613723-99771187   | 1.69811   | 1.62016    | -0.0677971 | 0.985607 |
| XLOC_018216 | STK19          | chr6:31937587-31949223   | 5.50266   | 5.25013    | -0.0677776 | 0.987693 |
| XLOC_023916 | PDZD11         | chrX:69506210-69509798   | 20.8      | 19.8455    | -0.0677737 | 0.971865 |

|              |              |                         |            |            |            |          |
|--------------|--------------|-------------------------|------------|------------|------------|----------|
| XLOC_000279  | TFAP2E       | chr1:36038970-36060927  | 3.47739    | 3.31783    | -0.0677678 | 0.980556 |
| XLOC_007619  | LOC100130855 | chr15:63796709-63894620 | 0.40699    | 0.388344   | -0.0676581 | 0.976214 |
| XLOC_001100  | COG2         | chr1:230778201-23082973 | 6.60054    | 6.29833    | -0.0676134 | 0.972601 |
| XLOC_016957  | PRMT10       | chr4:148559533-14860528 | 2.25586    | 2.15259    | -0.067601  | 0.978196 |
| XLOC_015375  | RNF7         | chr3:141457050-14146564 | 55.4141    | 52.8799    | -0.067533  | 0.967282 |
| XLOC_019127  | EPMA2A       | chr6:145946439-14628523 | 0.377225   | 0.359992   | -0.0674607 | 0.995343 |
| XLOC_009444  | MIR497HG     | chr17:6915735-6922973   | 1.33864    | 1.27757    | -0.0673662 | 0.997036 |
| XLOC_015015  | CTDSPL       | chr3:37903668-38025960  | 7.03665    | 6.71565    | -0.0673621 | 0.969963 |
| XLOC_004506  | MSANTD4      | chr11:105878628-1058929 | 3.66301    | 3.49598    | -0.0673315 | 0.974044 |
| XLOC_006861  | PLEK2        | chr14:67853699-67878828 | 44.9813    | 42.9315    | -0.0672914 | 0.968521 |
| XLOC_010641  | ZNF333       | chr19:14800869-14831772 | 0.912067   | 0.870512   | -0.0672763 | 0.981044 |
| XLOC_005729  | VSIG10       | chr12:118501397-1185418 | 4.09757    | 3.91109    | -0.0672013 | 0.971965 |
| XLOC_021416  | C7orf13      | chr7:156431059-15643334 | 1.10371    | 1.05349    | -0.0671882 | 0.986656 |
| XLOC_0011278 | ADAMTSL5     | chr19:1505016-1513188   | 4.76363    | 4.54698    | -0.0671541 | 0.979291 |
| XLOC_000373  | LOC729041    | chr1:46899498-46911374  | 1.97384    | 1.8841     | -0.0671316 | 0.985283 |
| XLOC_005685  | ALKBH2       | chr12:109525992-1095312 | 33.5712    | 32.0457    | -0.0670939 | 0.972064 |
| XLOC_000554  | FND07        | chr1:109255555-10928536 | 0.00470288 | 0.00448943 | -0.0670118 | 1        |
| XLOC_000401  | CPT2         | chr1:53662100-53686289  | 9.54062    | 9.10774    | -0.0669895 | 0.981506 |
| XLOC_015039  | ZNF620       | chr3:40547529-40559712  | 0.724256   | 0.691418   | -0.0669406 | 0.985802 |
| XLOC_013607  | CBFA2T2      | chr20:32077927-32237837 | 2.27053    | 2.16759    | -0.0669323 | 0.974631 |
| XLOC_010806  | SDHAF1       | chr19:36486089-36487220 | 34.3977    | 32.8407    | -0.0668286 | 0.97314  |
| XLOC_013802  | C20orf96     | chr20:251503-271419     | 8.4513     | 8.06921    | -0.0667461 | 0.976618 |
| XLOC_003807  | C11orf93     | chr11:111164113-1111794 | 0.942572   | 0.899988   | -0.0666965 | 0.990857 |
| XLOC_000935  | PRG4         | chr1:185703682-18644665 | 0.0466519  | 0.0445446  | -0.0666853 | 1        |
| XLOC_016416  | AFF1         | chr4:87856153-88062206  | 2.11354    | 2.01808    | -0.0666787 | 0.974169 |
| XLOC_003906  | HYLS1        | chr11:125753508-1257731 | 3.99173    | 3.81149    | -0.0666597 | 0.987858 |
| XLOC_007496  | AQR          | chr15:35148551-35261995 | 4.1322     | 3.94573    | -0.0666189 | 0.973792 |
| XLOC_016465  | RRH          | chr4:110749149-11076586 | 0.109402   | 0.104466   | -0.0666114 | 1        |
| XLOC_010051  | STRA13       | chr17:79976578-79980785 | 85.8815    | 82.0072    | -0.0665966 | 0.967901 |
| XLOC_009949  | MGC16275     | chr17:72206134-72209460 | 2.40128    | 2.293      | -0.066565  | 0.979701 |
| XLOC_021646  | ZC2HC1A      | chr8:79578281-79631997  | 1.7333     | 1.65516    | -0.0665439 | 0.979701 |
| XLOC_009180  | STXBP4       | chr17:53046125-53241449 | 0.256323   | 0.244789   | -0.0664241 | 1        |
| XLOC_000513  | CCDC18       | chr1:93646280-93744287  | 0.367433   | 0.350916   | -0.0663532 | 0.985921 |
| XLOC_005140  | RNF10        | chr12:120972131-1210153 | 30.5777    | 29.2047    | -0.066279  | 0.969963 |
| XLOC_007516  | DNAJC17      | chr15:41060066-41106767 | 16.1019    | 15.3793    | -0.0662384 | 0.988166 |
| XLOC_009411  | ZZEF1        | chr17:3907738-4046253   | 1.9113     | 1.82557    | -0.0662072 | 0.974044 |
| XLOC_016739  | SGCB         | chr4:52886860-52904485  | 3.70599    | 3.53977    | -0.066205  | 0.974044 |
| XLOC_012841  | GTF3C2       | chr2:27548715-27579901  | 12.633     | 12.0664    | -0.0662011 | 0.970346 |
| XLOC_014486  | TTC28-AS1    | chr22:28315363-29075853 | 14.1125    | 13.48      | -0.0661595 | 0.979701 |
| XLOC_007887  | LOC652276    | chr16:2653384-2680495   | 3.09073    | 2.95227    | -0.0661192 | 0.979701 |
| XLOC_005155  | MLXIP        | chr12:122516651-1226289 | 5.41414    | 5.17171    | -0.0660917 | 0.974169 |
| XLOC_006153  | DACH1        | chr13:72012097-72441330 | 0.296188   | 0.282935   | -0.066041  | 1        |
| XLOC_009137  | TBKBP1       | chr17:45772629-45789429 | 6.30137    | 6.0197     | -0.0659757 | 0.974762 |
| XLOC_009978  | TRIM65       | chr17:73885040-73893084 | 15.2848    | 14.6023    | -0.0659052 | 0.970195 |
| XLOC_008164  | CES2         | chr16:66968346-66978994 | 8.44392    | 8.06727    | -0.065833  | 0.972228 |
| XLOC_017141  | GPBP1        | chr5:56469774-56560506  | 13.9161    | 13.296     | -0.0657639 | 0.969963 |
| XLOC_022910  | ZCCHC6       | chr9:88902647-88969402  | 2.78811    | 2.66391    | -0.0657419 | 0.974169 |
| XLOC_006526  | HHIPL1       | chr14:100111479-1001430 | 0.00853903 | 0.00815909 | -0.0656642 | 1        |
| XLOC_014174  | WRB          | chr21:40752212-40769815 | 16.9787    | 16.2243    | -0.065574  | 0.972601 |
| XLOC_008631  | CENPT        | chr16:67862059-67905219 | 17.8048    | 17.014     | -0.0655482 | 0.991767 |
| XLOC_000046  | DFFB         | chr1:3773844-3801993    | 3.98529    | 3.8084     | -0.0655009 | 0.977332 |
| XLOC_019172  | AGPAT4       | chr6:161551056-16169510 | 0.510483   | 0.487834   | -0.0654724 | 0.981044 |
| XLOC_008304  | TCF25        | chr16:89939993-8997792  | 91.0402    | 87.0051    | -0.065405  | 0.969963 |
| XLOC_010546  | MAP2K7       | chr19:7968764-7979363   | 22.1697    | 21.1884    | -0.0653145 | 0.970207 |
| XLOC_002001  | MPC2         | chr1:167885912-16804508 | 16.1786    | 15.4625    | -0.065312  | 0.979701 |
| XLOC_023408  | MAGED1       | chrX:51546154-51645450  | 22.1891    | 21.208     | -0.0652447 | 0.969963 |
| XLOC_021499  | BMP1         | chr8:22022652-22069840  | 8.18415    | 7.82245    | -0.0652114 | 0.976595 |
| XLOC_001084  | SNAP47       | chr1:227916239-22796893 | 19.0369    | 18.1959    | -0.0651826 | 0.984917 |
| XLOC_013522  | CRLS1        | chr20:5986738-6020697   | 17.1372    | 16.3806    | -0.0651414 | 0.967901 |
| XLOC_011369  | LOC100128573 | chr19:7537722-7538247   | 0.0477363  | 0.0456299  | -0.0651083 | 1        |
| XLOC_005783  | SLC15A4      | chr12:129277738-1293085 | 9.54918    | 9.12862    | -0.0649796 | 0.974044 |
| XLOC_002894  | ZNF239       | chr10:44051792-44070066 | 2.22451    | 2.12655    | -0.0649718 | 0.981044 |
| XLOC_001297  | ARHGEF19     | chr1:16524598-16539104  | 8.97397    | 8.57951    | -0.0648522 | 0.976595 |
| XLOC_000264  | S100BPB      | chr1:33240839-33324480  | 3.61999    | 3.46088    | -0.0648453 | 0.994615 |
| XLOC_021126  | STYXL1       | chr7:75625654-75677321  | 16.0249    | 15.3211    | -0.0647976 | 0.973683 |
| XLOC_009258  | COG1         | chr17:71189172-71228533 | 7.98071    | 7.63058    | -0.0647255 | 0.986919 |
| XLOC_018778  | ZBTB12       | chr6:31865561-31913449  | 5.08947    | 4.86642    | -0.064657  | 0.979875 |
| XLOC_006730  | EMC9         | chr14:24605377-24610797 | 39.6796    | 37.9474    | -0.0643984 | 0.992353 |
| XLOC_022884  | ZFAND5       | chr9:74966340-74980163  | 13.3663    | 12.7828    | -0.0643884 | 0.972111 |
| XLOC_008888  | RAI1         | chr17:17584786-17740325 | 4.29578    | 4.10848    | -0.0643154 | 0.989411 |
| XLOC_020452  | LOC646999    | chr7:39649085-39651687  | 0.049822   | 0.0476509  | -0.0642789 | 1        |
| XLOC_013898  | ACSS1        | chr20:24986865-25038818 | 1.1846     | 1.13299    | -0.0642575 | 0.982497 |
| XLOC_012320  | COX5B        | chr2:98262520-98264657  | 504.553    | 482.58     | -0.0642366 | 0.97028  |
| XLOC_007150  | GCHFR        | chr15:41056284-41059911 | 77.8524    | 74.4647    | -0.0641861 | 0.973348 |
| XLOC_010705  | KLHL26       | chr19:18747837-18781302 | 5.69152    | 5.44389    | -0.0641768 | 0.978981 |
| XLOC_001765  | POLR3GL      | chr1:145456235-14547038 | 25.765     | 24.6447    | -0.0641361 | 0.974044 |
| XLOC_010273  | LPIN2        | chr18:2916991-3011945   | 4.23486    | 4.05079    | -0.06411   | 0.974044 |
| XLOC_006288  | DHRS4        | chr14:24407939-24438488 | 15.2976    | 14.6327    | -0.0641083 | 0.980533 |
| XLOC_005387  | ZCRB1        | chr12:42705887-42719932 | 22.6388    | 21.6551    | -0.0640881 | 0.972111 |

|             |              |                          |            |            |            |          |
|-------------|--------------|--------------------------|------------|------------|------------|----------|
| XLOC_000828 | SDHC         | chr1:161284165-16133767: | 36.9598    | 35.354     | -0.0640818 | 0.971485 |
| XLOC_001628 | MCOLN3       | chr1:85483764-85514223   | 4.87314    | 4.66143    | -0.0640785 | 0.976756 |
| XLOC_008874 | PIGL         | chr17:16120508-16229573  | 5.52844    | 5.28848    | -0.0640192 | 0.980177 |
| XLOC_022402 | VPS13A       | chr9:79791671-80032399   | 1.2728     | 1.21758    | -0.0639839 | 0.977103 |
| XLOC_000506 | KIAA1107     | chr1:92632608-92650280   | 0.272917   | 0.261081   | -0.0639633 | 1        |
| XLOC_015283 | GTF2E1       | chr3:120461557-120501911 | 4.14812    | 3.96843    | -0.0638871 | 0.977332 |
| XLOC_000682 | SETDB1       | chr1:150898814-150937221 | 4.32931    | 4.14179    | -0.0638839 | 0.979701 |
| XLOC_021328 | C7orf49      | chr7:134832765-134855571 | 23.6608    | 22.6375    | -0.0637876 | 0.976149 |
| XLOC_016151 | DLG1         | chr3:196769430-197030627 | 3.39184    | 3.24524    | -0.0637427 | 0.975734 |
| XLOC_021346 | PARP12       | chr7:139723548-139763527 | 7.07102    | 6.76563    | -0.0636953 | 0.976122 |
| XLOC_017626 | PRKAA1       | chr5:40759480-40798297   | 5.00593    | 4.78976    | -0.0636838 | 0.974169 |
| XLOC_003056 | PIPSL        | chr10:95717896-95721672  | 0.00412811 | 0.00394985 | -0.0636827 | 1        |
| XLOC_022428 | SECISBP2     | chr9:91933411-91974561   | 7.8747     | 7.53507    | -0.0636054 | 0.976198 |
| XLOC_008634 | LCAT_SLC12A4 | chr16:67973786-68002597  | 24.8005    | 23.7315    | -0.0635633 | 0.978981 |
| XLOC_004875 | TARBP2       | chr12:53894704-53900215  | 24.3392    | 23.2904    | -0.0635451 | 0.976595 |
| XLOC_011692 | B3GNT8       | chr19:41931263-41934635  | 0.0162607  | 0.0155604  | -0.0635052 | 1        |
| XLOC_008721 | MVD          | chr16:88718347-88729495  | 34.2366    | 32.7623    | -0.0635042 | 0.972989 |
| XLOC_017779 | DTWD2        | chr5:118172568-118324241 | 0.445662   | 0.426489   | -0.0634424 | 0.985325 |
| XLOC_005095 | IFT81        | chr12:110562139-11065661 | 0.981553   | 0.939334   | -0.0634285 | 0.984917 |
| XLOC_020405 | SNX10        | chr7:26331514-26413949   | 10.2683    | 9.82727    | -0.0633289 | 0.974044 |
| XLOC_000695 | TUFT1        | chr1:151512780-151556055 | 15.8414    | 15.1615    | -0.0632842 | 0.974044 |
| XLOC_020595 | STEAP2       | chr7:89840999-89866992   | 2.57652    | 2.46597    | -0.0632701 | 0.98038  |
| XLOC_011415 | FDX1L        | chr19:10420890-10426691  | 30.861     | 29.5375    | -0.0632352 | 0.977095 |
| XLOC_004866 | ZNF740       | chr12:53551446-53584654  | 6.88003    | 6.58505    | -0.0632206 | 0.974762 |
| XLOC_015093 | ZNF589       | chr3:48282595-48312479   | 4.6281     | 4.42969    | -0.0632158 | 0.977103 |
| XLOC_007612 | NARG2        | chr15:60711807-60771359  | 2.20176    | 2.10737    | -0.063215  | 0.976756 |
| XLOC_007769 | POLG         | chr15:89787193-89878026  | 15.3197    | 14.6635    | -0.0631617 | 0.981044 |
| XLOC_016458 | HADH         | chr4:108910869-108956337 | 42.9055    | 41.0691    | -0.0631097 | 0.971485 |
| XLOC_010936 | CLASRP       | chr19:45542297-45574214  | 18.9379    | 18.1278    | -0.0630765 | 0.976214 |
| XLOC_002663 | NFKB2        | chr10:104153866-10416221 | 39.5296    | 37.8387    | -0.0630678 | 0.972111 |
| XLOC_020654 | MOSPD3       | chr7:100293100-100213001 | 51.0351    | 48.8554    | -0.062971  | 0.974044 |
| XLOC_004348 | RBM4B        | chr11:66384052-66445275  | 9.71901    | 9.30408    | -0.0629465 | 0.99351  |
| XLOC_002997 | PPP3CB       | chr10:75196562-75255782  | 8.47847    | 8.11672    | -0.0629075 | 0.974029 |
| XLOC_002120 | CYB5R1       | chr1:202931000-202936404 | 28.3589    | 27.1493    | -0.0628844 | 0.972601 |
| XLOC_007187 | TRIM69       | chr15:45028559-45060025  | 0.142219   | 0.136156   | -0.0628521 | 1        |
| XLOC_002413 | LINC00839    | chr10:42970938-42990785  | 0.00716589 | 0.00686042 | -0.0628494 | 1        |
| XLOC_004175 | KBTBD4       | chr11:47586981-47606115  | 7.70543    | 7.37696    | -0.062849  | 0.993379 |
| XLOC_005544 | R3HDM2       | chr12:57647547-57704246  | 7.62823    | 7.30327    | -0.0628039 | 0.974169 |
| XLOC_015575 | VGLL4        | chr3:11314009-11762220   | 9.91787    | 9.49582    | -0.0627383 | 0.981405 |
| XLOC_014328 | BRWD1        | chr21:40557403-40685712  | 1.34058    | 1.28356    | -0.0627123 | 0.98972  |
| XLOC_002054 | ABL2         | chr1:179068461-179198811 | 16.9672    | 16.2459    | -0.0626756 | 0.974044 |
| XLOC_016839 | HSD17B11     | chr4:88257690-88312455   | 35.4825    | 33.9752    | -0.0626244 | 0.972601 |
| XLOC_014890 | PKDREJ       | chr22:46651559-46659219  | 0.0133046  | 0.0127397  | -0.0625954 | 1        |
| XLOC_002209 | ENAH         | chr1:225674533-225840841 | 3.6899     | 3.53348    | -0.0624915 | 0.972989 |
| XLOC_006769 | RALGAPA1     | chr14:36007557-36278432  | 1.18065    | 1.13062    | -0.06247   | 0.978196 |
| XLOC_018117 | ABT1         | chr6:26597170-26600277   | 23.8728    | 22.8618    | -0.062429  | 0.972601 |
| XLOC_024061 | THOC2        | chrX:122734411-122866909 | 3.38897    | 3.24558    | -0.0623724 | 0.974044 |
| XLOC_023350 | CDK16        | chrX:47077527-47089394   | 47.3174    | 45.3164    | -0.0623366 | 0.971877 |
| XLOC_002482 | SIRT1        | chr10:69644426-69678147  | 4.14748    | 3.97256    | -0.0621672 | 0.976618 |
| XLOC_006294 | DCAF11       | chr14:24583905-24594451  | 17.7334    | 16.9858    | -0.0621394 | 0.974142 |
| XLOC_002234 | ABCB10       | chr1:229652328-229694444 | 2.94499    | 2.821      | -0.0620527 | 0.979046 |
| XLOC_017580 | DAP          | chr5:10679341-10761387   | 36.3426    | 34.8126    | -0.0620526 | 0.973348 |
| XLOC_024193 | UBL4A        | chrX:153712055-153714933 | 25.0397    | 23.9863    | -0.0620018 | 0.972601 |
| XLOC_006047 | CDX2         | chr13:28536204-28543505  | 12.7099    | 12.1768    | -0.0618195 | 0.977103 |
| XLOC_007947 | MKL2         | chr16:14165195-14360630  | 0.952704   | 0.912829   | -0.0616837 | 0.979701 |
| XLOC_017970 | UIMC1        | chr5:176332005-176433791 | 11.3517    | 10.8767    | -0.0616668 | 0.974044 |
| XLOC_020577 | PTPN12       | chr7:77166772-77269388   | 8.55613    | 8.19849    | -0.0616003 | 0.975414 |
| XLOC_012988 | DCTN1        | chr2:74588280-74621008   | 31.3301    | 30.0223    | -0.0615121 | 0.973088 |
| XLOC_010905 | ZNF576       | chr19:44100543-44104587  | 5.93476    | 5.68714    | -0.0614859 | 0.979701 |
| XLOC_022551 | NEK6         | chr9:127019884-127114711 | 30.3502    | 29.0843    | -0.0614681 | 0.974044 |
| XLOC_016082 | MCF2L2       | chr3:182895830-183145851 | 0.132389   | 0.126866   | -0.061467  | 1        |
| XLOC_022593 | PKN3         | chr9:131464801-131486401 | 82.236     | 78.8061    | -0.061463  | 0.978981 |
| XLOC_008446 | GDE1         | chr16:19513014-19533450  | 24.5814    | 23.5563    | -0.0614543 | 0.972228 |
| XLOC_013916 | BCL2L1       | chr20:30252260-30310656  | 116.912    | 112.037    | -0.0614476 | 0.974044 |
| XLOC_009073 | MLX          | chr17:40719077-40729849  | 28.2732    | 27.0947    | -0.0614246 | 0.979701 |
| XLOC_006950 | IFI27L2      | chr14:94594117-94595957  | 207.888    | 199.241    | -0.0612874 | 0.974044 |
| XLOC_009026 | LOC100131347 | chr17:37213271-37307902  | 0.0667902  | 0.0640131  | -0.0612682 | 1        |
| XLOC_009517 | TRIM16       | chr17:15531279-15586193  | 3.92526    | 3.76206    | -0.0612669 | 0.979484 |
| XLOC_001838 | LCE1C        | chr1:152777310-152779107 | 0.131774   | 0.126304   | -0.0611626 | 1        |
| XLOC_005127 | PEBP1        | chr12:118573869-11858331 | 178.109    | 170.725    | -0.0610853 | 0.974044 |
| XLOC_006767 | PPP2R3C      | chr14:35554677-35591519  | 18.488     | 17.7218    | -0.0610654 | 0.974169 |
| XLOC_002651 | KAZALD1      | chr10:102820998-10282531 | 3.50241    | 3.35739    | -0.0610094 | 0.981884 |
| XLOC_021033 | PGAM2        | chr7:44102325-44105186   | 1.15059    | 1.10298    | -0.0609774 | 0.991767 |
| XLOC_002476 | ADO          | chr10:64564515-64568239  | 7.40716    | 7.10087    | -0.0609236 | 0.976618 |
| XLOC_022686 | SSNA1        | chr9:140069235-140084822 | 200.785    | 192.492    | -0.0608486 | 0.979701 |
| XLOC_018522 | FLJ46906     | chr6:139012804-139018421 | 5.22683    | 5.0112     | -0.0607815 | 0.983952 |
| XLOC_008935 | SARM1        | chr17:26698986-26733230  | 0.645153   | 0.618543   | -0.0607694 | 0.99351  |
| XLOC_012694 | C2orf72      | chr2:231902280-231914427 | 6.45877    | 6.19237    | -0.0607661 | 0.977103 |
| XLOC_002420 | ZNF485       | chr10:44101854-44113352  | 3.02175    | 2.89721    | -0.0607208 | 0.980129 |

|             |              |                          |            |            |            |          |
|-------------|--------------|--------------------------|------------|------------|------------|----------|
| XLOC_022351 | GRHPR        | chr9:37422706-37436986   | 115.742    | 110.978    | -0.0606393 | 0.974044 |
| XLOC_016001 | COMMD2       | chr3:149456256-149470284 | 3.98108    | 3.81765    | -0.0604756 | 0.97749  |
| XLOC_005202 | FBRSL1       | chr12:133067156-13316177 | 18.992     | 18.2148    | -0.0602836 | 0.974585 |
| XLOC_020988 | CPVL         | chr7:29019582-29186153   | 13.5937    | 13.0376    | -0.060261  | 0.977103 |
| XLOC_012936 | LOC100132215 | chr2:62900985-63275656   | 0.123541   | 0.118489   | -0.060233  | 1        |
| XLOC_010848 | MED29        | chr19:39881962-39891203  | 9.58197    | 9.19038    | -0.0601987 | 0.977103 |
| XLOC_024009 | TSC22D3      | chrX:106956451-10701901  | 12.8597    | 12.3345    | -0.0601608 | 0.979701 |
| XLOC_003820 | TEX12        | chr11:112038094-11204327 | 0.0729213  | 0.0699466  | -0.0600872 | 1        |
| XLOC_002291 | ZNF496       | chr1:247463621-247495045 | 7.28204    | 6.98503    | -0.0600768 | 0.979701 |
| XLOC_007534 | ZFP106       | chr15:42705020-42749730  | 3.60254    | 3.45567    | -0.0600488 | 0.974494 |
| XLOC_023124 | SETX         | chr9:135136826-135230372 | 4.25501    | 4.08159    | -0.0600321 | 0.974489 |
| XLOC_014829 | DNAL4        | chr22:39174512-39190161  | 9.62091    | 9.22947    | -0.0599251 | 0.979701 |
| XLOC_018160 | HLA-H        | chr6:29855382-29858856   | 13.703     | 13.1455    | -0.0599226 | 0.978555 |
| XLOC_012890 | ZFP36L2      | chr2:43449540-43453745   | 7.45599    | 7.15272    | -0.059909  | 0.977995 |
| XLOC_008758 | PAFAH1B1     | chr17:2496922-2588909    | 13.699     | 13.1418    | -0.0599071 | 0.973585 |
| XLOC_021735 | WDYHV1       | chr8:124428964-124454261 | 12.1067    | 11.6147    | -0.0598469 | 0.979388 |
| XLOC_014004 | ZNF335       | chr20:44577291-44600833  | 6.24566    | 5.99207    | -0.0598008 | 0.97814  |
| XLOC_003602 | ZFPL1        | chr11:64851693-64856542  | 42.1664    | 40.4548    | -0.0597838 | 0.976002 |
| XLOC_005909 | CKAP2        | chr13:53029494-53050763  | 14.3322    | 13.7506    | -0.0597658 | 0.974044 |
| XLOC_008194 | ZFP90        | chr16:68573660-68601039  | 2.85791    | 2.74203    | -0.05972   | 0.979291 |
| XLOC_008360 | BRICD5       | chr16:2255177-2261069    | 4.43048    | 4.25093    | -0.0596843 | 0.997036 |
| XLOC_022967 | TSTD2        | chr9:100263461-100436025 | 5.11843    | 4.91115    | -0.0596392 | 0.990795 |
| XLOC_005192 | LOC116437    | chr12:131649555-13169747 | 0.00659037 | 0.00632358 | -0.0596167 | 1        |
| XLOC_010297 | ZNF519       | chr18:14075988-14132489  | 0.399762   | 0.38358    | -0.0596151 | 0.987693 |
| XLOC_020584 | GNAI1        | chr7:79764139-79848725   | 3.81822    | 3.66381    | -0.0595549 | 0.978981 |
| XLOC_002881 | PARD3        | chr10:34398487-35104253  | 19.382     | 18.5988    | -0.0595128 | 0.976595 |
| XLOC_012463 | MBD5         | chr2:148602569-14927104  | 0.186221   | 0.178709   | -0.0594085 | 1        |
| XLOC_020512 | ZNF273       | chr7:64363619-64391955   | 1.044      | 1.0019     | -0.0593892 | 0.981044 |
| XLOC_005164 | ARL6IP4      | chr12:123464879-12346744 | 204.878    | 196.617    | -0.059375  | 0.976326 |
| XLOC_009347 | ASPCR1       | chr17:79935425-79975282  | 22.8615    | 21.9421    | -0.059222  | 0.978703 |
| XLOC_003198 | FLJ46300     | chr10:133604733-13362253 | 0.00548062 | 0.00526025 | -0.059208  | 1        |
| XLOC_009754 | BECN1        | chr17:40950853-40976310  | 20.3595    | 19.5416    | -0.0591547 | 0.976149 |
| XLOC_006833 | FLJ31306     | chr14:58711522-58764855  | 11.6559    | 11.1882    | -0.0590908 | 0.987693 |
| XLOC_022608 | USP20        | chr9:132597695-132644117 | 12.8515    | 12.3364    | -0.0590156 | 0.976214 |
| XLOC_023489 | ATP7A        | chrX:77166193-77305892   | 0.516064   | 0.495383   | -0.0590072 | 0.982813 |
| XLOC_001966 | F11R         | chr1:160965000-160991133 | 5.79101    | 5.59965    | -0.0588196 | 0.976618 |
| XLOC_004775 | LYRM5        | chr12:25348149-25357949  | 7.21594    | 6.92771    | -0.058808  | 0.979875 |
| XLOC_002254 | SNORA14B     | chr1:235272657-235292256 | 2.27495    | 2.18411    | -0.0587889 | 1        |
| XLOC_016154 | LOC220729    | chr3:197340897-197354752 | 1.37556    | 1.32065    | -0.0587787 | 0.986822 |
| XLOC_011500 | AKAP8L       | chr19:15490858-15529833  | 28.5834    | 27.4429    | -0.0587458 | 0.976595 |
| XLOC_008042 | TAOK2        | chr16:29985187-30003582  | 11.1349    | 10.6907    | -0.058737  | 0.976326 |
| XLOC_023854 | PRICKLE3     | chrX:49031905-49042776   | 14.892     | 14.2981    | -0.0587128 | 0.979452 |
| XLOC_015567 | CIDECP       | chr3:10059236-10067820   | 5.2311     | 5.02249    | -0.0587113 | 0.986822 |
| XLOC_004829 | SPATS2       | chr12:49760687-49921207  | 9.52841    | 9.14872    | -0.0586649 | 0.977103 |
| XLOC_006457 | FLVCR2       | chr14:76044939-76114512  | 1.07746    | 1.03455    | -0.0586321 | 0.985921 |
| XLOC_018827 | C6orf106     | chr6:34555065-34664625   | 16.6671    | 16.0039    | -0.0585835 | 0.976214 |
| XLOC_007861 | SNHG9        | chr16:2014996-2015505    | 58.3913    | 56.0683    | -0.0585683 | 0.986353 |
| XLOC_000005 | LOC643837    | chr1:762970-794826       | 2.23397    | 2.14511    | -0.0585558 | 0.979701 |
| XLOC_005847 | PDS5B        | chr13:33160563-33352158  | 2.03424    | 1.95333    | -0.0585499 | 0.978196 |
| XLOC_022569 | SLC2A8       | chr9:130159416-130170171 | 28.7589    | 27.6155    | -0.0585294 | 0.977103 |
| XLOC_014870 | PAC3IN2      | chr22:43265771-43411184  | 16.317     | 15.669     | -0.0584612 | 0.976618 |
| XLOC_016033 | SHOX2        | chr3:157813799-157823952 | 0.141988   | 0.136361   | -0.0583387 | 1        |
| XLOC_003589 | KCNK4        | chr11:64058792-64067503  | 0.019827   | 0.0190417  | -0.0583025 | 1        |
| XLOC_007915 | CLUAP1       | chr16:3550944-3627392    | 3.02456    | 2.90481    | -0.0582809 | 0.979701 |
| XLOC_014309 | ATP5O        | chr21:35275756-35288158  | 334        | 320.787    | -0.0582359 | 0.976618 |
| XLOC_021811 | C8orf33      | chr8:146277823-146281411 | 36.0219    | 34.5969    | -0.0582322 | 0.974044 |
| XLOC_003302 | ILK          | chr11:6624963-6633475    | 77.5096    | 74.4449    | -0.0582009 | 0.979701 |
| XLOC_000946 | CDC73        | chr1:193091087-193223942 | 5.02202    | 4.8236     | -0.0581563 | 0.976214 |
| XLOC_022688 | C9orf169     | chr9:140119643-140120763 | 2.92718    | 2.81154    | -0.0581503 | 0.98972  |
| XLOC_009553 | AKAP10       | chr17:19807764-19881169  | 3.96086    | 3.80511    | -0.0578786 | 0.978196 |
| XLOC_007928 | NAGPA-AS1    | chr16:5074844-5092972    | 0.0149942  | 0.0144045  | -0.057829  | 1        |
| XLOC_017166 | RAD17        | chr5:68647552-68710630   | 7.84752    | 7.53943    | -0.0577807 | 0.991767 |
| XLOC_018807 | COL11A2      | chr6:33130468-33160245   | 0.22367    | 0.214889   | -0.0577774 | 1        |
| XLOC_018051 | TMEM14B      | chr6:10747994-10757214   | 86.9943    | 83.5806    | -0.057752  | 0.977103 |
| XLOC_012325 | INPP4A       | chr2:99061320-99207496   | 2.321      | 2.22995    | -0.0577374 | 0.979701 |
| XLOC_007376 | ZNF592       | chr15:85291817-85349663  | 3.33149    | 3.20093    | -0.0576766 | 0.977652 |
| XLOC_009369 | ABR          | chr17:906757-1090616     | 19.4117    | 18.6514    | -0.0576483 | 0.976618 |
| XLOC_021105 | TBL2         | chr7:72983276-72993013   | 19.172     | 18.4226    | -0.0575207 | 0.976214 |
| XLOC_005698 | PPTC7        | chr12:110972236-11102101 | 1.17775    | 1.13183    | -0.057373  | 0.984917 |
| XLOC_012440 | LOC150776    | chr2:132202795-132360461 | 9.04851    | 8.69609    | -0.0573143 | 0.991767 |
| XLOC_017126 | ITGA1,PELO   | chr5:52083773-52249485   | 16.4392    | 15.7999    | -0.0572182 | 0.977103 |
| XLOC_022337 | CREB3        | chr9:35697333-35749225   | 32.0483    | 30.8039    | -0.0571383 | 0.990857 |
| XLOC_007722 | CTSH         | chr15:79214091-79237420  | 20.4255    | 19.6327    | -0.0571188 | 0.978981 |
| XLOC_005767 | PITPNM2      | chr12:123468026-12359492 | 2.73511    | 2.62896    | -0.0571054 | 0.979701 |
| XLOC_012231 | ANKRD53      | chr2:71205574-71212629   | 0.0368943  | 0.0354648  | -0.0570109 | 1        |
| XLOC_005740 | TRIAP1       | chr12:120881763-12088427 | 22.6958    | 21.8164    | -0.0570104 | 0.978703 |
| XLOC_005550 | CDK4         | chr12:58138783-58146230  | 210.282    | 202.147    | -0.05692   | 0.977103 |
| XLOC_022270 | RCL1         | chr9:4792833-4861064     | 11.8488    | 11.3906    | -0.0568983 | 0.978981 |
| XLOC_004340 | RIN1         | chr11:66099541-66104000  | 50.8168    | 48.8542    | -0.0568245 | 0.976618 |



|             |           |                          |           |           |            |          |
|-------------|-----------|--------------------------|-----------|-----------|------------|----------|
| XLOC_014588 | ACO2      | chr22:41865128-41940479  | 23.459    | 22.553    | -0.0568231 | 0.986832 |
| XLOC_022458 | ERCC6L2   | chr9:98568369-98731122   | 0.387498  | 0.372539  | -0.0567954 | 0.992797 |
| XLOC_001486 | CITED4    | chr1:41326727-41328018   | 103.172   | 99.1908   | -0.0567733 | 0.97749  |
| XLOC_007799 | LINS      | chr15:101109427-10114244 | 1.86586   | 1.79387   | -0.056767  | 0.984692 |
| XLOC_005704 | BRAP      | chr12:112079949-11212375 | 5.1399    | 4.9419    | -0.0566724 | 0.979484 |
| XLOC_022901 | KIF27     | chr9:86451614-86536380   | 0.312149  | 0.300127  | -0.0566632 | 1        |
| XLOC_021260 | LAMB1     | chr7:107564245-107643804 | 15.5778   | 14.9786   | -0.0565952 | 0.976618 |
| XLOC_014760 | TBC1D10A  | chr22:30687978-30722955  | 14.1849   | 13.6393   | -0.0565914 | 0.979701 |
| XLOC_004395 | ARAP1     | chr11:72396113-72463434  | 14.4011   | 13.8474   | -0.0565561 | 0.977103 |
| XLOC_008101 | CYLD      | chr16:50775960-50835846  | 1.93636   | 1.86193   | -0.0565523 | 0.978555 |
| XLOC_009190 | DYNLL2    | chr17:56160779-56167618  | 23.1338   | 22.2453   | -0.056498  | 0.978196 |
| XLOC_005432 | LMBR1L    | chr12:49490922-49504680  | 12.5069   | 12.0267   | -0.0564778 | 0.97915  |
| XLOC_000981 | TMEM183A  | chr1:202976533-202993197 | 36.368    | 34.9719   | -0.0564729 | 0.977103 |
| XLOC_003387 | PRRG4     | chr11:32851480-32879669  | 2.47572   | 2.38071   | -0.0564568 | 0.979701 |
| XLOC_013756 | LSM14B    | chr20:60697516-60710434  | 22.3854   | 21.5266   | -0.0564393 | 0.977332 |
| XLOC_016809 | CNOT6L    | chr4:78634540-78740544   | 2.60989   | 2.50991   | -0.0563504 | 0.978196 |
| XLOC_005222 | DCP1B     | chr12:2055213-2113677    | 9.35498   | 8.99672   | -0.0563357 | 0.979701 |
| XLOC_004446 | PICALM    | chr11:85668213-85780923  | 23.7188   | 22.8108   | -0.0563161 | 0.977103 |
| XLOC_017551 | SLC12A7   | chr5:1050488-1112172     | 12.9493   | 12.4539   | -0.0562733 | 0.976618 |
| XLOC_004486 | TMEM123   | chr11:102267055-10232377 | 44.2491   | 42.5575   | -0.0562326 | 0.977103 |
| XLOC_011581 | C19orf12  | chr19:30189792-30206696  | 4.87731   | 4.69094   | -0.0562064 | 0.978945 |
| XLOC_007233 | CCNB2     | chr15:59397283-59417244  | 46.8441   | 45.0543   | -0.0562023 | 0.977261 |
| XLOC_022029 | ARFGEF1   | chr8:68109883-68255912   | 3.9839    | 3.83172   | -0.0561878 | 0.977652 |
| XLOC_023042 | PSMD5     | chr9:123578331-123605295 | 18.1418   | 17.4491   | -0.0561648 | 0.977103 |
| XLOC_005663 | C12orf3   | chr12:104343980-10435095 | 3.28047   | 3.15521   | -0.0561637 | 0.98468  |
| XLOC_005085 | USP30     | chr12:109489845-10952583 | 2.56468   | 2.46679   | -0.0561449 | 0.979733 |
| XLOC_014945 | TATDN2    | chr3:10290176-10335133   | 8.26505   | 7.95      | -0.056069  | 0.978196 |
| XLOC_007281 | THSD4     | chr15:71433787-72075722  | 0.11979   | 0.115231  | -0.0559819 | 1        |
| XLOC_023156 | CAMSAP1   | chr9:138700332-138799005 | 8.07372   | 7.76708   | -0.0558614 | 0.977103 |
| XLOC_023478 | CHIC1     | chrX:72782983-72906937   | 1.04166   | 1.00212   | -0.0558314 | 0.980401 |
| XLOC_017717 | CRSP8P    | chr5:79646423-79647785   | 0.0133249 | 0.0128192 | -0.0558183 | 1        |
| XLOC_011417 | ICAM3     | chr19:10444451-10450345  | 9.40037   | 9.04391   | -0.0557708 | 0.980177 |
| XLOC_019109 | PERP      | chr6:138409641-138428660 | 32.1162   | 30.8986   | -0.0557591 | 0.976756 |
| XLOC_007420 | MCTP2     | chr15:94841429-95027181  | 0.735484  | 0.707609  | -0.0557402 | 0.986822 |
| XLOC_023881 | HUWE1     | chrX:53559056-53713697   | 7.18404   | 6.91181   | -0.0557316 | 0.976618 |
| XLOC_010906 | SRRM5     | chr19:44111375-44124014  | 0.556012  | 0.534961  | -0.055683  | 0.995302 |
| XLOC_008724 | PIEZO1    | chr16:88772890-88851372  | 18.5047   | 17.8046   | -0.0556416 | 0.979701 |
| XLOC_000301 | PPIE      | chr1:40204516-40254533   | 44.0833   | 42.4156   | -0.0556375 | 0.981763 |
| XLOC_013054 | SEMA4C    | chr2:97525472-9753735    | 13.0131   | 12.5209   | -0.0556255 | 0.977531 |
| XLOC_012364 | RANBP2    | chr2:109335936-109402267 | 3.9179    | 3.76975   | -0.055611  | 0.977283 |
| XLOC_004248 | CYBASC3   | chr11:61066918-61136975  | 8.72725   | 8.3973    | -0.0556009 | 0.996079 |
| XLOC_009065 | CNP       | chr17:40118758-40190044  | 20.6853   | 19.904    | -0.0555497 | 0.985921 |
| XLOC_011460 | HOOK2     | chr19:12873816-12886434  | 9.60932   | 9.24713   | -0.0554287 | 0.979701 |
| XLOC_013525 | PLCB4     | chr20:9049700-9461462    | 0.61353   | 0.590418  | -0.0553974 | 0.98655  |
| XLOC_013036 | LOC654342 | chr2:91824708-91847975   | 12.4067   | 11.9393   | -0.0553946 | 0.984917 |
| XLOC_020974 | HOXA1     | chr7:27132613-27135625   | 1.75511   | 1.689     | -0.0553914 | 0.986822 |
| XLOC_015557 | SRGAP3    | chr3:9022275-9291369     | 0.0193417 | 0.0186136 | -0.0553514 | 1        |
| XLOC_017164 | MRPS36    | chr5:68513572-68525985   | 20.8854   | 20.0995   | -0.055337  | 0.978196 |
| XLOC_015682 | MAP4      | chr3:47892179-48130769   | 21.0524   | 20.261    | -0.0552778 | 0.976618 |
| XLOC_001802 | GOLPH3L   | chr1:150618700-150669672 | 6.32666   | 6.08917   | -0.0551987 | 0.979701 |
| XLOC_013950 | LINC00657 | chr20:34633539-34638882  | 25.7609   | 24.7941   | -0.0551852 | 0.977527 |
| XLOC_018431 | QRSL1     | chr6:107077440-107116292 | 4.76134   | 4.58269   | -0.0551739 | 0.979701 |
| XLOC_007208 | DTWD1     | chr15:49913225-49937333  | 7.98331   | 7.68392   | -0.0551445 | 0.97915  |
| XLOC_011512 | SLC35E1   | chr19:16660647-16683193  | 15.2253   | 14.6547   | -0.0551079 | 0.977103 |
| XLOC_005419 | CCNT1     | chr12:49082240-49110781  | 3.84914   | 3.70496   | -0.0550754 | 0.978945 |
| XLOC_007767 | MFG8      | chr15:89441913-89456663  | 15.8975   | 15.3024   | -0.0550422 | 0.979701 |
| XLOC_005719 | MED13L    | chr12:116396380-11671495 | 1.71882   | 1.65449   | -0.0550312 | 0.979701 |
| XLOC_010962 | ARHGAP35  | chr19:47421932-47508333  | 4.19001   | 4.03336   | -0.0549724 | 0.978981 |
| XLOC_022919 | SHC3      | chr9:91620685-91793682   | 0.0368192 | 0.0354433 | -0.0549417 | 1        |
| XLOC_010016 | TBC1D16   | chr17:77906141-78009657  | 4.35208   | 4.18948   | -0.0549361 | 0.979701 |
| XLOC_005168 | SNRNP35   | chr12:123942650-12395094 | 12.0371   | 11.5876   | -0.054903  | 0.982599 |
| XLOC_006424 | CNRX      | chr14:71374121-71582099  | 2.75053   | 2.64784   | -0.054895  | 0.978196 |
| XLOC_003654 | KDM2A     | chr11:66886739-67025550  | 11.7468   | 11.3087   | -0.0548356 | 0.978945 |
| XLOC_000130 | SZRD1     | chr1:16693524-16724643   | 44.3319   | 42.6811   | -0.0547475 | 0.977332 |
| XLOC_023334 | USP9X     | chrX:40944887-41095832   | 6.1468    | 5.91798   | -0.0547316 | 0.977332 |
| XLOC_000115 | FHAD1     | chr1:15573767-15724622   | 1.83024   | 1.76213   | -0.0547084 | 0.981055 |
| XLOC_001464 | INPP5B    | chr1:38326368-38412729   | 5.09955   | 4.90984   | -0.054695  | 0.979701 |
| XLOC_018255 | DEFB      | chr6:35265594-35289548   | 19.1186   | 18.4075   | -0.054682  | 0.979452 |
| XLOC_022006 | NSMAF     | chr8:59496063-59572404   | 17.4703   | 16.8206   | -0.0546813 | 0.977095 |
| XLOC_007611 | ANXA2     | chr15:60639349-60690185  | 600.683   | 578.356   | -0.0546471 | 0.978703 |
| XLOC_002496 | HK1       | chr10:71029755-71161637  | 74.2564   | 71.4987   | -0.0545971 | 0.977652 |
| XLOC_021929 | CCDC25    | chr8:27590832-27630170   | 11.2272   | 10.8105   | -0.054564  | 0.977358 |
| XLOC_023483 | SLC16A2   | chrX:73641327-73753764   | 4.9521    | 4.76835   | -0.0545482 | 0.979701 |
| XLOC_012741 | GPC1      | chr2:241375114-241407495 | 35.4143   | 34.1004   | -0.0545445 | 0.977995 |
| XLOC_021956 | BRF2      | chr8:37654400-37707431   | 10.6331   | 10.2386   | -0.0545415 | 0.979701 |
| XLOC_001422 | MARCKSL1  | chr1:32799429-32801840   | 253.203   | 243.811   | -0.0545299 | 0.977332 |
| XLOC_016843 | PYURF     | chr4:89442128-89444952   | 64.541    | 62.1473   | -0.0545234 | 0.977103 |
| XLOC_007465 | GABRB3    | chr15:26788693-27018935  | 0.665309  | 0.640637  | -0.0545176 | 0.986725 |
| XLOC_021712 | OXR1      | chr8:107282405-107764927 | 9.54039   | 9.1868    | -0.0544858 | 0.979701 |

|              |                       |                          |            |            |            |          |
|--------------|-----------------------|--------------------------|------------|------------|------------|----------|
| XLOC_005744  | POP5                  | chr12:121016847-12101920 | 31.9753    | 30.7904    | -0.0544808 | 0.979701 |
| XLOC_003615  | MALAT1                | chr11:65265232-65273939  | 54.4752    | 52.4608    | -0.0543597 | 0.978703 |
| XLOC_004691  | C12orf57              | chr12:7053202-7055165    | 332.32     | 320.047    | -0.0542858 | 0.978162 |
| XLOC_016619  | ZNF721                | chr4:419223-533320       | 3.50557    | 3.37618    | -0.0542555 | 0.989841 |
| XLOC_016938  | MAML3                 | chr4:140586921-14107523  | 0.751208   | 0.723488   | -0.0542424 | 0.993783 |
| XLOC_001033  | TAF5                  | chr1:211499956-21154828  | 4.1566     | 4.00326    | -0.054226  | 0.979701 |
| XLOC_008390  | CREBBP                | chr16:3775055-3930121    | 3.38319    | 3.25855    | -0.0541558 | 0.97798  |
| XLOC_013047  | TMEM127               | chr2:96915945-96931751   | 10.1056    | 9.73381    | -0.0540712 | 0.978196 |
| XLOC_001799  | APH1A                 | chr1:150237798-15024160  | 110.38     | 106.323    | -0.0540206 | 0.977527 |
| XLOC_008239  | NUDT7                 | chr16:77756388-77776157  | 4.24065    | 4.08509    | -0.0539169 | 0.986529 |
| XLOC_005557  | LRIG3                 | chr12:59265936-59314319  | 0.927884   | 0.893868   | -0.0538828 | 0.985982 |
| XLOC_008454  | ACSM1                 | chr16:20634558-20702578  | 0.00722421 | 0.00695966 | -0.0538229 | 1        |
| XLOC_006781  | TRAPPC6B              | chr14:39617014-39639634  | 4.43803    | 4.2757     | -0.0537575 | 0.979701 |
| XLOC_007432  | MEF2A                 | chr15:100106132-1002566  | 3.90148    | 3.75889    | -0.0537158 | 0.979701 |
| XLOC_006124  | EBPL                  | chr13:50234809-50265623  | 131.451    | 126.65     | -0.0536827 | 0.977527 |
| XLOC_002830  | FAM171A1              | chr10:15253643-15413058  | 15.8848    | 15.3049    | -0.0536547 | 0.978196 |
| XLOC_003835  | PAFAH1B2              | chr11:117014999-1170475  | 19.8316    | 19.108     | -0.0536242 | 0.97749  |
| XLOC_007780  | CIB1                  | chr15:90773476-9077279   | 193.147    | 186.136    | -0.0533466 | 0.981188 |
| XLOC_018620  | HTATSFP2              | chr6:3020389-3025005     | 1.86443    | 1.79682    | -0.0532871 | 0.984692 |
| XLOC_023605  | OCRL                  | chrX:128674251-12872653  | 8.18911    | 7.89229    | -0.053263  | 0.97749  |
| XLOC_004303  | RASGRP2               | chr11:64494382-64512928  | 0.667184   | 0.643072   | -0.0531054 | 0.990857 |
| XLOC_011254  | MGC2752               | chr19:59086765-59095762  | 11.4251    | 11.0124    | -0.0530802 | 0.979701 |
| XLOC_006876  | COX16,SYNJ2BP,SYNJ2BP | chr14:70791797-70883807  | 35.4724    | 34.1934    | -0.0529795 | 0.979701 |
| XLOC_012598  | NBEAL1                | chr2:203879601-20408271  | 0.0425483  | 0.0410146  | -0.0529627 | 1        |
| XLOC_005963  | IPO5                  | chr13:98605928-98676550  | 28.7581    | 27.7238    | -0.0528384 | 0.978981 |
| XLOC_015754  | WDR22                 | chr3:52288437-52312659   | 15.8979    | 15.3262    | -0.0528324 | 0.978703 |
| XLOC_022518  | COL27A1               | chr9:116918230-11707297  | 4.4366     | 4.27711    | -0.052818  | 0.979906 |
| XLOC_002327  | KIAA1045              | chr9:34958191-34982541   | 0.00289436 | 0.00279034 | -0.0527994 | 1        |
| XLOC_005770  | CDK2AP1               | chr12:123745516-1237568  | 50.1981    | 48.3947    | -0.0527832 | 0.978945 |
| XLOC_018289  | FOXPA                 | chr6:41514163-41570122   | 10.586     | 10.2058    | -0.0527602 | 0.979701 |
| XLOC_020763  | LRGUK                 | chr7:133812104-13394893  | 0.11987    | 0.115565   | -0.0527575 | 1        |
| XLOC_000526  | SNX7                  | chr1:99127235-99226056   | 11.63      | 11.2136    | -0.0526064 | 0.979733 |
| XLOC_010414  | ZNF516                | chr18:74069636-74207146  | 2.53022    | 2.43964    | -0.0525999 | 0.979701 |
| XLOC_0021459 | MSRA                  | chr8:9911829-10286401    | 9.50345    | 9.16348    | -0.0525561 | 0.981197 |
| XLOC_002905  | AGAP4                 | chr10:46321049-46342921  | 1.07816    | 1.03959    | -0.0525521 | 0.988154 |
| XLOC_012177  | FOXN2                 | chr2:48541794-48606434   | 3.05662    | 2.94745    | -0.0524699 | 0.979733 |
| XLOC_002343  | PROSER2               | chr10:11865396-11936709  | 3.81875    | 3.6829     | -0.0522571 | 0.98439  |
| XLOC_007250  | ZNF609                | chr15:64791618-64978266  | 3.61323    | 3.48478    | -0.0522225 | 0.979701 |
| XLOC_016879  | INTS12                | chr4:106603784-10662988  | 14.6082    | 14.0891    | -0.0522043 | 0.979701 |
| XLOC_006811  | TXNDC16               | chr14:52897307-53019301  | 0.599926   | 0.578611   | -0.0521913 | 0.987627 |
| XLOC_021538  | RBPMS                 | chr8:30239634-30429734   | 30.378     | 29.2988    | -0.0521837 | 0.981405 |
| XLOC_000850  | MGST3                 | chr1:165600109-16562537  | 82.242     | 79.3225    | -0.0521445 | 0.978703 |
| XLOC_011411  | EIF3G                 | chr19:10216898-10230599  | 310.301    | 299.289    | -0.0521313 | 0.980533 |
| XLOC_016062  | TNIK                  | chr3:170780291-17117819  | 6.63332    | 6.39805    | -0.0520989 | 0.990857 |
| XLOC_021952  | TTI2                  | chr8:33342684-33370703   | 6.15066    | 5.93259    | -0.0520794 | 0.991003 |
| XLOC_024155  | TMEM185A              | chrX:148678215-14871348  | 6.32117    | 6.09743    | -0.051989  | 0.981044 |
| XLOC_007823  | SOLH                  | chr16:577855-604636      | 28.9232    | 27.9011    | -0.0519075 | 0.97915  |
| XLOC_015897  | POLQ                  | chr3:121150272-12126485  | 0.589256   | 0.568466   | -0.0518217 | 0.985982 |
| XLOC_000371  | NSUN4                 | chr1:46805848-46830824   | 6.87221    | 6.62979    | -0.0518092 | 0.979701 |
| XLOC_001266  | FBXO2                 | chr1:11708417-11723384   | 2.02238    | 1.95106    | -0.0517984 | 0.997036 |
| XLOC_018850  | GLO1                  | chr6:38643701-38670952   | 103.661    | 100.008    | -0.0517642 | 0.979701 |
| XLOC_004450  | RAB38                 | chr11:87846414-87908635  | 23.4816    | 22.6543    | -0.0517452 | 0.979701 |
| XLOC_009199  | PRR11                 | chr17:57232859-57284070  | 6.01564    | 5.80378    | -0.0517255 | 0.979701 |
| XLOC_010722  | ZNF486                | chr19:20278022-20311299  | 1.51908    | 1.46567    | -0.0516332 | 0.985325 |
| XLOC_001559  | YIPF1                 | chr1:54317391-54355487   | 11.9842    | 11.5632    | -0.0515938 | 0.979701 |
| XLOC_007486  | KATNBL1               | chr15:34432874-34502297  | 6.95078    | 6.70706    | -0.0514941 | 0.979701 |
| XLOC_014744  | CHEK2                 | chr22:29083730-29137822  | 13.1093    | 12.6501    | -0.0514406 | 0.979701 |
| XLOC_022146  | EIF3H                 | chr8:117657054-11776806  | 584.503    | 564.053    | -0.0513801 | 0.979701 |
| XLOC_010062  | WDR45B                | chr17:80572437-80606411  | 48.0791    | 46.3985    | -0.0513309 | 0.979701 |
| XLOC_023120  | FAM78A                | chr9:134133464-13415190  | 3.63972    | 3.51251    | -0.0513251 | 0.98297  |
| XLOC_010494  | ANKRD24               | chr19:4183350-4224811    | 0.140145   | 0.135249   | -0.0513024 | 1        |
| XLOC_002138  | TMEM81                | chr1:205052256-20505358  | 3.2884     | 3.17366    | -0.051239  | 0.987334 |
| XLOC_013822  | ZNF343                | chr20:2462466-2489778    | 2.84366    | 2.74465    | -0.0511276 | 0.981753 |
| XLOC_022591  | SPTAN1                | chr9:131314836-13141912  | 31.1684    | 30.0833    | -0.0511247 | 0.985921 |
| XLOC_007792  | TTC23                 | chr15:99676527-99789815  | 3.02187    | 2.9168     | -0.051056  | 0.982156 |
| XLOC_004460  | SLC36A4               | chr11:92880849-92931095  | 3.71281    | 3.58372    | -0.0510545 | 0.984851 |
| XLOC_004787  | CCDC91                | chr12:28410132-28703099  | 4.56309    | 4.40457    | -0.0510098 | 0.981044 |
| XLOC_007456  | HERC2P2               | chr15:23282264-23378259  | 1.78233    | 1.7205     | -0.0509366 | 0.984481 |
| XLOC_016132  | ACAP2                 | chr3:194995464-19516381  | 3.53522    | 3.4126     | -0.0509289 | 0.979701 |
| XLOC_011477  | RFX1                  | chr19:14072341-14117134  | 3.17159    | 3.06158    | -0.0509284 | 0.985154 |
| XLOC_018143  | PGBD1                 | chr6:28249313-28270326   | 2.03978    | 1.96914    | -0.0508446 | 0.984917 |
| XLOC_010837  | EIF3K                 | chr19:39109721-39127595  | 307.019    | 296.395    | -0.0508075 | 0.979701 |
| XLOC_011727  | XRCC1                 | chr19:44047463-44079730  | 17.5034    | 16.8978    | -0.0507973 | 0.979701 |
| XLOC_015720  | GMPPB                 | chr3:49726949-49761384   | 7.35936    | 7.10633    | -0.0504751 | 0.99316  |
| XLOC_001728  | TRIM33                | chr1:114935398-11505378  | 2.89935    | 2.79971    | -0.0504543 | 0.979733 |
| XLOC_004874  | PCBP2                 | chr12:53845885-53893444  | 189.416    | 182.907    | -0.0504534 | 0.979701 |
| XLOC_007901  | THOC6                 | chr16:3072625-3077756    | 146.421    | 141.39     | -0.0504405 | 0.987693 |
| XLOC_007631  | MTFMT                 | chr15:65293849-65321977  | 10.0556    | 9.71032    | -0.0504094 | 0.979733 |
| XLOC_016168  | CTBP1-AS1             | chr4:1243227-1246795     | 3.81919    | 3.68807    | -0.0504002 | 0.98297  |

|             |              |                          |            |            |            |          |
|-------------|--------------|--------------------------|------------|------------|------------|----------|
| XLOC_007698 | PTPN9        | chr15:75759461-75871625  | 6.29331    | 6.07757    | -0.0503262 | 0.979733 |
| XLOC_023200 | NSMF         | chr9:140342022-140353784 | 99.5173    | 96.1127    | -0.0502197 | 0.979701 |
| XLOC_005017 | TMTC3        | chr12:88536072-88593664  | 1.04954    | 1.01364    | -0.0502106 | 0.984917 |
| XLOC_018442 | FIG4         | chr6:110012423-110146634 | 4.6291     | 4.47093    | -0.0501554 | 0.980833 |
| XLOC_005025 | SOCS2        | chr12:93959403-93970521  | 8.06531    | 7.78975    | -0.0501525 | 0.979875 |
| XLOC_014602 | LOC388906    | chr22:42665758-42670868  | 0.233545   | 0.225568   | -0.0501375 | 1        |
| XLOC_014203 | C21orf33     | chr21:45553493-45565605  | 70.6252    | 68.2276    | -0.0498277 | 0.979701 |
| XLOC_003734 | USP35        | chr11:77899857-77925757  | 2.52735    | 2.44156    | -0.049822  | 0.985762 |
| XLOC_000890 | KLHL20       | chr1:173684079-173755840 | 1.83946    | 1.77712    | -0.0497375 | 0.986353 |
| XLOC_018960 | SLC17A5      | chr6:74303101-74363737   | 9.43172    | 9.1126     | -0.0496587 | 0.979733 |
| XLOC_016593 | TRAPPC11     | chr4:184580419-184634747 | 5.65455    | 5.46339    | -0.0496177 | 0.979701 |
| XLOC_013476 | SOX12        | chr20:306214-310872      | 19.8754    | 19.204     | -0.0495813 | 0.979701 |
| XLOC_001144 | SCCPDH       | chr1:246887377-246931440 | 27.9547    | 27.0116    | -0.0495149 | 0.979701 |
| XLOC_014544 | SH3BP1       | chr22:38035683-38052050  | 23.3271    | 22.5404    | -0.0494928 | 0.979733 |
| XLOC_001523 | LRRCC41      | chr1:46713366-46769038   | 31.8107    | 30.74      | -0.0493969 | 0.982256 |
| XLOC_002285 | AHCTF1       | chr1:247002401-247094720 | 2.13654    | 2.06465    | -0.0493813 | 0.979965 |
| XLOC_010811 | ZNF146       | chr19:36673186-36729675  | 15.4185    | 14.9004    | -0.049306  | 0.979701 |
| XLOC_001139 | DES12        | chr1:244816351-244872334 | 16.6826    | 16.1228    | -0.0492435 | 0.979701 |
| XLOC_001756 | LOC100286793 | chr1:143718512-143744587 | 0.913926   | 0.883277   | -0.0492112 | 0.991767 |
| XLOC_011871 | LRRCC4B      | chr19:51020149-51071302  | 0.858729   | 0.829993   | -0.0491028 | 0.990857 |
| XLOC_003299 | SMPD1        | chr11:6411643-6416228    | 6.97489    | 6.74162    | -0.0490735 | 0.984917 |
| XLOC_011465 | SYCE2        | chr19:13001973-13030086  | 0.813739   | 0.78655    | -0.0490274 | 0.956382 |
| XLOC_010853 | DLL3         | chr19:39989556-39999121  | 0.0212678  | 0.0205059  | -0.0489007 | 1        |
| XLOC_013923 | C20orf203    | chr20:31219426-31239783  | 0.00361382 | 0.00349339 | -0.0488975 | 1        |
| XLOC_023096 | CIZ1         | chr9:130928343-131017527 | 115.744    | 111.887    | -0.048896  | 0.979733 |
| XLOC_021485 | NAT1         | chr8:18027970-18081198   | 2.01019    | 1.94323    | -0.0488738 | 0.987693 |
| XLOC_000562 | CELSR2       | chr1:109792640-109818370 | 2.4435     | 2.36223    | -0.0488024 | 0.981753 |
| XLOC_015462 | FXR1         | chr3:180630233-180700530 | 6.3578     | 6.14674    | -0.0487063 | 0.979733 |
| XLOC_023446 | EFNB1        | chrX:68048839-68062006   | 8.8328     | 8.54047    | -0.0485557 | 0.981044 |
| XLOC_021211 | ZCWPW1       | chr7:99998494-100031749  | 1.13349    | 1.09601    | -0.0485183 | 0.997036 |
| XLOC_012670 | SLC4A3       | chr2:220492291-220506702 | 3.93373    | 3.8037     | -0.0484971 | 0.984917 |
| XLOC_003818 | C11orf57     | chr11:111944967-11195752 | 9.46264    | 9.14997    | -0.0484756 | 0.987906 |
| XLOC_008702 | KIAA1609     | chr16:84509965-84538288  | 5.39593    | 5.21771    | -0.0484534 | 0.979733 |
| XLOC_011032 | PRR12        | chr19:50094911-50129696  | 4.62437    | 4.47167    | -0.0484427 | 0.984003 |
| XLOC_007511 | C15orf52     | chr15:40623652-40633168  | 0.028961   | 0.0280049  | -0.0484331 | 1        |
| XLOC_007868 | SLC9A3R2     | chr16:2076868-2089027    | 39.4027    | 38.102     | -0.048428  | 0.979733 |
| XLOC_023041 | FBXW2        | chr9:123519253-123555740 | 8.2737     | 8.00101    | -0.0483511 | 0.979701 |
| XLOC_010895 | PRR19        | chr19:42801184-42814973  | 7.55813    | 7.30908    | -0.0483409 | 0.994615 |
| XLOC_002233 | NUP133       | chr1:229577043-229644080 | 7.65249    | 7.40047    | -0.0483117 | 0.979733 |
| XLOC_002316 | WDR37        | chr10:1102775-1178237    | 5.71899    | 5.53067    | -0.0483072 | 0.979875 |
| XLOC_021589 | RGS20        | chr8:54764367-54871863   | 0.0808342  | 0.078173   | -0.0482951 | 1        |
| XLOC_000515 | FNBP1L       | chr1:93913687-94020218   | 5.03971    | 4.87382    | -0.0482893 | 0.980559 |
| XLOC_006400 | PLEKHG3      | chr14:651171192-65211060 | 11.1734    | 10.8066    | -0.0481511 | 0.979733 |
| XLOC_014097 | ANKRD30BP2   | chr21:14410486-14490571  | 0.0257005  | 0.0248582  | -0.048075  | 1        |
| XLOC_001368 | AUNIP        | chr1:26160496-26185848   | 6.06648    | 5.86777    | -0.0480481 | 0.98297  |
| XLOC_013381 | DNPEP        | chr2:220238179-220252662 | 46.748     | 45.2167    | -0.0480476 | 0.979701 |
| XLOC_009514 | TEKT3        | chr17:15207128-15244958  | 0.143549   | 0.138852   | -0.0479975 | 1        |
| XLOC_011471 | CACNA1A      | chr19:13317255-13617274  | 0.00255231 | 0.00246885 | -0.0479672 | 1        |
| XLOC_022253 | COMMD5       | chr8:146075550-146078932 | 64.7695    | 62.6545    | -0.0478953 | 0.979733 |
| XLOC_001575 | OMA1         | chr1:58946390-59012446   | 5.73981    | 5.55239    | -0.0478951 | 0.983594 |
| XLOC_001520 | IPP          | chr1:46153846-46216485   | 1.09281    | 1.05718    | -0.0478163 | 0.996453 |
| XLOC_007922 | MGRN1        | chr16:4674824-4740975    | 17.8771    | 17.2945    | -0.0478044 | 0.979733 |
| XLOC_004991 | TMEM19       | chr12:72079877-72097839  | 2.77106    | 2.68076    | -0.0477967 | 0.984917 |
| XLOC_023597 | MCTS1        | chrX:119737743-119755011 | 2.89983    | 2.80534    | -0.0477929 | 0.979733 |
| XLOC_015835 | DHFR1        | chr3:93776765-93845630   | 0.81592    | 0.789339   | -0.0477831 | 0.990324 |
| XLOC_012471 | FMNL2        | chr2:153191750-153506340 | 7.36172    | 7.12207    | -0.0477453 | 0.979875 |
| XLOC_009237 | PRKCA        | chr17:64298925-64806862  | 0.905788   | 0.876316   | -0.0477216 | 0.986822 |
| XLOC_018600 | MLLT4        | chr6:168227670-168372700 | 4.99122    | 4.82894    | -0.0476854 | 0.979733 |
| XLOC_015153 | CCDC66       | chr3:56591183-56717135   | 1.40312    | 1.35755    | -0.0476379 | 0.994615 |
| XLOC_016329 | SRP72        | chr4:57333761-57369847   | 20.7073    | 20.0348    | -0.0476305 | 0.979701 |
| XLOC_008774 | MED11        | chr17:4634722-4643223    | 23.6276    | 22.8622    | -0.047508  | 0.993379 |
| XLOC_015818 | RYBP         | chr3:72423743-72495774   | 6.79607    | 6.57603    | -0.0474848 | 0.979875 |
| XLOC_000533 | TRMT13       | chr1:100598705-100643820 | 2.47091    | 2.39093    | -0.0474753 | 0.987334 |
| XLOC_009792 | PLEKHM1      | chr17:43513265-43568146  | 10.4763    | 10.1373    | -0.0474564 | 0.980663 |
| XLOC_007379 | PDE8A        | chr15:85523743-85682376  | 5.2842     | 5.11344    | -0.047389  | 0.982482 |
| XLOC_010292 | CEP76        | chr18:12658737-12725739  | 1.65211    | 1.59876    | -0.0473625 | 0.995957 |
| XLOC_015918 | ZNF148       | chr3:124944512-125094190 | 1.87981    | 1.81911    | -0.0473545 | 0.981753 |
| XLOC_009651 | PCGF2        | chr17:36886509-36904558  | 43.4912    | 42.0875    | -0.0473329 | 0.985283 |
| XLOC_009945 | CPSF4L       | chr17:71228775-71258019  | 0.0316218  | 0.0306017  | -0.0473076 | 1        |
| XLOC_002722 | GRK5         | chr10:120967196-12121513 | 5.49207    | 5.31493    | -0.0472978 | 0.984917 |
| XLOC_021661 | WWP1         | chr8:87354993-87480178   | 6.75905    | 6.54118    | -0.0472716 | 0.980177 |
| XLOC_009981 | ACOX1        | chr17:73937588-74002080  | 4.07637    | 3.94501    | -0.0472543 | 0.986822 |
| XLOC_002958 | JMJD1C       | chr10:64926987-65226322  | 4.71584    | 4.56407    | -0.0471911 | 0.980471 |
| XLOC_007339 | TMED3        | chr15:79603490-79615189  | 97.7677    | 94.6226    | -0.0471723 | 0.979701 |
| XLOC_005670 | CKAP4        | chr12:106631658-10664171 | 21.3341    | 20.648     | -0.0471547 | 0.979875 |
| XLOC_023381 | CCDC22       | chrX:49091926-49121288   | 18.2213    | 17.6364    | -0.0470685 | 0.981044 |
| XLOC_014692 | SCARF2       | chr22:20778873-20792146  | 1.63017    | 1.57788    | -0.0470356 | 0.990857 |
| XLOC_021888 | CNOT7        | chr8:17086739-17104387   | 27.468     | 26.587     | -0.0470331 | 0.979733 |
| XLOC_023167 | INPP5E       | chr9:139323066-139334250 | 22.6077    | 21.8828    | -0.0470155 | 0.979835 |

|             |                       |                          |            |            |            |          |
|-------------|-----------------------|--------------------------|------------|------------|------------|----------|
| XLOC_004671 | LTBR                  | chr12:6456008-6500737    | 39.8518    | 38.5797    | -0.0468033 | 0.979875 |
| XLOC_013657 | DHX35                 | chr20:37590980-37668366  | 3.65222    | 3.53568    | -0.0467836 | 0.985921 |
| XLOC_013229 | METTL8                | chr2:172173912-17234156; | 2.27863    | 2.20597    | -0.0467526 | 0.986822 |
| XLOC_018994 | UBE2J1                | chr6:90036343-90062619   | 10.5182    | 10.183     | -0.0467334 | 0.979701 |
| XLOC_001605 | ZRANB2                | chr1:71318035-71546972   | 12.4796    | 12.0818    | -0.0467315 | 0.98038  |
| XLOC_013314 | ALS2                  | chr2:202564985-20264589; | 3.71061    | 3.59237    | -0.0467205 | 0.985921 |
| XLOC_000847 | NUF2                  | chr1:163291722-16332555; | 12.0056    | 11.6237    | -0.0466373 | 0.981044 |
| XLOC_009469 | KCNAB3                | chr17:7825176-7832753    | 0.58523    | 0.566634   | -0.046588  | 0.991767 |
| XLOC_012567 | NABP1                 | chr2:192542797-19255324; | 18.5456    | 17.9566    | -0.0465605 | 0.982349 |
| XLOC_015502 | SNORA63               | chr3:186501360-18652448; | 60.1992    | 58.2908    | -0.0464757 | 0.99714  |
| XLOC_001259 | DFFA                  | chr1:10520602-10532613   | 16.0474    | 15.539     | -0.0464456 | 0.982517 |
| XLOC_015714 | GPX1                  | chr3:49394608-49395791   | 733.099    | 709.888    | -0.0464176 | 0.980171 |
| XLOC_017077 | MARCH6                | chr5:10353750-10440500   | 9.79417    | 9.48408    | -0.046416  | 0.979701 |
| XLOC_023991 | TCEAL8                | chrX:102507922-10251012  | 44.8169    | 43.3997    | -0.046358  | 0.979701 |
| XLOC_003498 | C11orf31              | chr11:57479994-57586652  | 162.919    | 157.769    | -0.0463417 | 0.988142 |
| XLOC_012552 | FAM171B               | chr2:187558788-18762851; | 0.220759   | 0.213783   | -0.046322  | 1        |
| XLOC_023907 | ZC4H2                 | chrX:64135681-64254624   | 4.875      | 4.72098    | -0.0463159 | 0.985921 |
| XLOC_018331 | ENPP4                 | chr6:46097700-46114436   | 1.65495    | 1.60266    | -0.0463155 | 0.985921 |
| XLOC_007576 | TRPM7                 | chr15:50849351-50979012  | 2.51692    | 2.43751    | -0.0462471 | 0.981753 |
| XLOC_022779 | DDX58                 | chr9:32455299-32526322   | 0.500775   | 0.484979   | -0.0462397 | 0.98972  |
| XLOC_004981 | DYZ2                  | chr12:69742133-69748013  | 0.0564913  | 0.0547163  | -0.0460564 | 1        |
| XLOC_016164 | PCGF3                 | chr4:699572-764427       | 5.13413    | 4.97295    | -0.0460162 | 0.981753 |
| XLOC_009793 | LRRC37A4P             | chr17:43583248-43597889  | 0.976194   | 0.945569   | -0.0459855 | 0.986822 |
| XLOC_016853 | ADH5                  | chr4:99992129-100009931  | 47.4064    | 45.9194    | -0.0459796 | 0.981506 |
| XLOC_005060 | PARBPB                | chr12:102513955-1025916; | 1.62909    | 1.57802    | -0.0459461 | 0.987858 |
| XLOC_000284 | ADPRHL2               | chr1:36554452-36559533   | 36.8355    | 35.6811    | -0.045938  | 0.980556 |
| XLOC_012815 | C2orf44               | chr2:24252205-24270296   | 3.063      | 2.967      | -0.0459372 | 0.984917 |
| XLOC_023276 | ZRSR2                 | chrX:15808573-15841382   | 6.60454    | 6.39771    | -0.0459027 | 0.985921 |
| XLOC_014963 | SLC6A6                | chr3:14444105-14583588   | 3.69913    | 3.58341    | -0.0458522 | 0.986725 |
| XLOC_023377 | PQBP1                 | chrX:48750729-48760422   | 80.7945    | 78.2673    | -0.0458466 | 0.989365 |
| XLOC_004387 | NUMA1                 | chr11:71709957-71823822  | 19.358     | 18.7529    | -0.0458196 | 0.988165 |
| XLOC_023456 | KIF4A                 | chrX:69509878-69640774   | 6.08352    | 5.89365    | -0.0457459 | 0.981905 |
| XLOC_008990 | LIG3                  | chr17:33307516-33332088  | 5.48182    | 5.31077    | -0.0457333 | 0.983594 |
| XLOC_007544 | TP53BP1               | chr15:43663312-43910998  | 2.8434     | 2.75476    | -0.0456907 | 0.992797 |
| XLOC_005962 | RAP2A                 | chr13:98086474-98120252  | 3.24863    | 3.1474     | -0.0456694 | 0.984917 |
| XLOC_018476 | PKIB                  | chr6:122793061-12304751; | 0.0487756  | 0.0472565  | -0.0456479 | 1        |
| XLOC_014161 | DOPEY2                | chr21:37536838-37666572  | 1.58688    | 1.53762    | -0.0454927 | 0.986655 |
| XLOC_010215 | NEDD4L                | chr18:55711609-56068772  | 8.56167    | 8.29597    | -0.0454816 | 0.980556 |
| XLOC_011077 | FPR3                  | chr19:52298410-52329334  | 0.0382391  | 0.0370528  | -0.0454669 | 1        |
| XLOC_013302 | KCTD18                | chr2:201353683-20137479; | 2.29338    | 2.22227    | -0.0454361 | 0.987693 |
| XLOC_012843 | ZNF513                | chr2:27593362-27603611   | 9.53757    | 9.24204    | -0.0454107 | 0.99451  |
| XLOC_023698 | SSR4                  | chrX:153051220-15306396  | 443.534    | 429.822    | -0.0453061 | 0.986353 |
| XLOC_021694 | VPS13B                | chr8:100025493-10088981; | 1.60465    | 1.55516    | -0.0451919 | 0.984917 |
| XLOC_018200 | SNORA38               | chr6:31588449-31605554   | 2.12607    | 2.06058    | -0.0451389 | 1        |
| XLOC_012261 | POLE4                 | chr2:75185774-75196859   | 90.0762    | 87.3043    | -0.045093  | 0.981044 |
| XLOC_017325 | SEC24A                | chr5:133984474-13406360; | 1.9593     | 1.89911    | -0.0450155 | 0.985325 |
| XLOC_021055 | TNS3                  | chr7:47314751-47621742   | 0.00231473 | 0.00224366 | -0.0449902 | 1        |
| XLOC_014904 | MAPK11                | chr22:50702141-50708779  | 15.333     | 14.8624    | -0.0449706 | 0.982907 |
| XLOC_003912 | ST3GAL4               | chr11:126225539-1262845; | 19.3951    | 18.8       | -0.0449579 | 0.982144 |
| XLOC_014819 | PLAZG6                | chr22:38507501-38577836  | 2.28969    | 2.21961    | -0.0448472 | 0.987693 |
| XLOC_013244 | KIAA1715              | chr2:176790409-17686701; | 4.23965    | 4.1099     | -0.0448419 | 0.984401 |
| XLOC_014164 | SIM2                  | chr21:38071990-38122510  | 3.40413    | 3.29995    | -0.0448418 | 0.986353 |
| XLOC_001578 | JUN                   | chr1:59246462-59249785   | 137.796    | 133.59     | -0.0447197 | 0.982379 |
| XLOC_005709 | RPL6                  | chr12:112842993-1128474  | 2734.11    | 2650.68    | -0.0447077 | 0.984917 |
| XLOC_010190 | C18orf25              | chr18:43753987-43846955  | 2.03387    | 1.97183    | -0.0446921 | 0.985921 |
| XLOC_003390 | TCF1L1                | chr11:33060962-33095109  | 3.47823    | 3.37226    | -0.0446379 | 0.986822 |
| XLOC_008313 | LUC7L                 | chr16:238969-279449      | 24.1528    | 23.4177    | -0.0445914 | 0.984063 |
| XLOC_021020 | FAM183B               | chr7:38724945-38726689   | 0.457198   | 0.443331   | -0.0444339 | 0.99351  |
| XLOC_008397 | CDIP1                 | chr16:4560676-4588816    | 0.00755108 | 0.00732219 | -0.0444079 | 1        |
| XLOC_007404 | CRTC3                 | chr15:91073117-91188577  | 6.899      | 6.69008    | -0.0443634 | 0.982907 |
| XLOC_008914 | SPECC1                | chr17:19912648-20218072  | 6.67868    | 6.47652    | -0.0443428 | 0.982907 |
| XLOC_012891 | THADA                 | chr2:43457974-43823185   | 1.75802    | 1.70481    | -0.0443399 | 0.986353 |
| XLOC_013813 | NSFL1C                | chr20:1422806-1448337    | 21.4184    | 20.7703    | -0.0443281 | 0.981207 |
| XLOC_005438 | FMNL3                 | chr12:50017196-50101197  | 3.5338     | 3.42724    | -0.0441732 | 0.98297  |
| XLOC_015295 | PARP14                | chr3:122399671-12244968; | 2.79073    | 2.70674    | -0.0440908 | 0.982937 |
| XLOC_015053 | SNRK                  | chr3:43328003-43393454   | 0.5387     | 0.522489   | -0.0440812 | 0.990857 |
| XLOC_009944 | FAM104A               | chr17:71189172-71228533  | 14.1183    | 13.6935    | -0.0440782 | 0.986822 |
| XLOC_010310 | OSBPL1A               | chr18:21742010-21977833  | 3.82952    | 3.71444    | -0.0440182 | 0.986353 |
| XLOC_002380 | MSRB2                 | chr10:23384426-23410942  | 9.09755    | 8.82468    | -0.0439336 | 0.985567 |
| XLOC_000933 | SWT1                  | chr1:185087217-18526091; | 0.843349   | 0.818064   | -0.0439156 | 0.99451  |
| XLOC_002116 | KDM5B                 | chr1:202696531-2027754;  | 6.49968    | 6.30495    | -0.0438827 | 0.981753 |
| XLOC_012145 | GALM                  | chr2:38893051-38961909   | 4.57433    | 4.43736    | -0.043861  | 0.986822 |
| XLOC_016162 | PDE6B                 | chr4:619362-664681       | 0.00632286 | 0.00613396 | -0.0437582 | 1        |
| XLOC_017346 | CTNNA1                | chr5:138089106-13827072; | 54.6891    | 53.0582    | -0.0436778 | 0.981044 |
| XLOC_023766 | PIGA                  | chrX:15337572-15353676   | 2.88463    | 2.79862    | -0.0436706 | 0.987334 |
| XLOC_015548 | CRBN                  | chr3:3191316-3221401     | 6.4893     | 6.29589    | -0.0436535 | 0.986655 |
| XLOC_003579 | OTUB1                 | chr11:63753324-63765892  | 65.0221    | 63.0851    | -0.0436307 | 0.982412 |
| XLOC_006401 | CHURC1,CHURC1-FNTB,FI | chr14:65381078-65569413  | 24.7334    | 23.9977    | -0.0435635 | 0.990857 |
| XLOC_010322 | B4GALT6               | chr18:29202208-29264686  | 3.74721    | 3.63593    | -0.0434925 | 0.984917 |

|             |                       |                          |            |            |            |          |
|-------------|-----------------------|--------------------------|------------|------------|------------|----------|
| XLOC_022811 | FANCG                 | chr9:35073834-35080013   | 17.9972    | 17.4631    | -0.0434656 | 0.982349 |
| XLOC_018786 | PRRT1                 | chr6:32116139-32119720   | 1.95156    | 1.89377    | -0.0433694 | 0.991767 |
| XLOC_006800 | SOS2                  | chr14:50583845-50698099  | 1.51501    | 1.47016    | -0.0433537 | 0.987334 |
| XLOC_002719 | CASC2                 | chr10:119806331-11996966 | 0.194277   | 0.188536   | -0.0432755 | 1        |
| XLOC_001248 | ERRFI1                | chr1:8071778-8086393     | 52.2732    | 50.7289    | -0.0432658 | 0.984668 |
| XLOC_018199 | PRRC2A                | chr6:31588449-31605554   | 33.406     | 32.4202    | -0.0432178 | 0.982517 |
| XLOC_011588 | SLC7A10               | chr19:33685598-33716756  | 0.18463    | 0.179187   | -0.0431719 | 1        |
| XLOC_008673 | GLG1                  | chr16:74481325-74641042  | 17.6948    | 17.1745    | -0.0430564 | 0.981753 |
| XLOC_001209 | SLC35E2B              | chr1:1571099-1655791     | 6.11015    | 5.93079    | -0.0429842 | 0.990324 |
| XLOC_023094 | LOC100289019          | chr9:130873449-130881013 | 1.65006    | 1.60164    | -0.0429651 | 0.988571 |
| XLOC_013547 | LINC00493             | chr20:18548072-18550203  | 132.972    | 129.07     | -0.0429635 | 0.98439  |
| XLOC_009844 | MRPL27                | chr17:48445227-48450562  | 79.9859    | 77.6487    | -0.0427833 | 0.98439  |
| XLOC_002680 | SLK                   | chr10:105727469-10578734 | 3.81012    | 3.69893    | -0.042729  | 0.984917 |
| XLOC_007128 | ANP32AP1              | chr15:35529526-35530264  | 0.0227135  | 0.0220508  | -0.0427189 | 1        |
| XLOC_015768 | TKT                   | chr3:53258722-53290130   | 302.53     | 293.709    | -0.0426934 | 0.983493 |
| XLOC_009982 | EVPL                  | chr17:74002926-74023507  | 4.81442    | 4.67404    | -0.042692  | 0.986822 |
| XLOC_005827 | RASL11A               | chr13:27844463-27847827  | 3.05825    | 2.96924    | -0.042612  | 0.990857 |
| XLOC_006117 | MED4                  | chr13:48649863-48669277  | 16.4065    | 15.9297    | -0.0425447 | 0.98439  |
| XLOC_002631 | ZFYVE27               | chr10:99496877-99520664  | 14.9778    | 14.5428    | -0.0425133 | 0.984917 |
| XLOC_008456 | ERL2                  | chr16:20775311-20860990  | 3.49707    | 3.39559    | -0.0424847 | 0.990857 |
| XLOC_017692 | MRPS27                | chr5:71515235-71616084   | 39.2146    | 38.0773    | -0.0424617 | 0.98241  |
| XLOC_006868 | ACTN1                 | chr14:69340839-69446083  | 71.3819    | 69.3169    | -0.0423517 | 0.982703 |
| XLOC_023046 | RAB14                 | chr9:123940414-123964365 | 22.2377    | 21.5979    | -0.0421164 | 0.982907 |
| XLOC_021981 | RNF170                | chr8:42704779-42751866   | 5.45254    | 5.2957     | -0.0421055 | 0.986822 |
| XLOC_001256 | CLSTN1                | chr1:9711789-9884550     | 28.7579    | 27.9317    | -0.0420555 | 0.984917 |
| XLOC_023994 | RAB40A                | chrX:102754680-102774411 | 0.574153   | 0.557673   | -0.042017  | 0.993379 |
| XLOC_021892 | ASAH1                 | chr8:17913924-17942507   | 26.2067    | 25.4545    | -0.04201   | 0.982497 |
| XLOC_012910 | ASB3,GPR75,GPR75-ASB3 | chr2:53897116-54087170   | 3.34273    | 3.24687    | -0.0419732 | 0.994615 |
| XLOC_013639 | SRC                   | chr20:35973087-36033821  | 18.7049    | 18.1689    | -0.041947  | 0.984861 |
| XLOC_002046 | RFWD2                 | chr1:175913966-176176370 | 9.27457    | 9.00927    | -0.0418704 | 0.984917 |
| XLOC_003851 | PHLDB1                | chr11:118477212-11852874 | 3.06648    | 2.97893    | -0.0417866 | 0.986822 |
| XLOC_012861 | DPY30                 | chr2:32248971-32264844   | 58.5951    | 56.9271    | -0.0416636 | 0.984481 |
| XLOC_003795 | AASDHPPT              | chr11:105921824-10596941 | 9.84823    | 9.5679     | -0.0416631 | 0.985283 |
| XLOC_003871 | ARHGEF12              | chr11:120207617-12036064 | 5.16484    | 5.01797    | -0.0416186 | 0.982907 |
| XLOC_005107 | ADAM1A                | chr12:112336866-11233970 | 0.450457   | 0.437664   | -0.0415661 | 0.992797 |
| XLOC_018809 | VPSS2                 | chr6:33217312-33239662   | 8.94187    | 8.68818    | -0.041523  | 0.985094 |
| XLOC_017353 | PURA                  | chr5:139493707-139499001 | 3.91812    | 3.80696    | -0.0415213 | 0.985921 |
| XLOC_017971 | RAB24                 | chr5:176728198-176730744 | 28.2398    | 27.4393    | -0.0414844 | 0.985094 |
| XLOC_000926 | LAMC1                 | chr1:182992594-183114727 | 10.3137    | 10.0213    | -0.0414831 | 0.983256 |
| XLOC_014603 | SERHL                 | chr22:42896584-42915829  | 0.014767   | 0.0143485  | -0.0414732 | 1        |
| XLOC_008644 | TERF2                 | chr16:69389463-69419891  | 10.7976    | 10.4917    | -0.0414654 | 0.984917 |
| XLOC_022786 | BAG1                  | chr9:33252469-33264759   | 16.9679    | 16.4874    | -0.0414443 | 0.984917 |
| XLOC_021783 | ZNF707                | chr8:144766621-144777555 | 9.90311    | 9.62275    | -0.0414328 | 0.986822 |
| XLOC_013629 | PHF20                 | chr20:34359922-34538288  | 2.74153    | 2.66403    | -0.0413733 | 0.986529 |
| XLOC_014193 | NDUFV3                | chr21:44313377-44329773  | 29.2246    | 28.3987    | -0.041361  | 0.986655 |
| XLOC_002800 | GDI2                  | chr10:5807185-5855512    | 158.595    | 154.117    | -0.0413293 | 0.98439  |
| XLOC_020674 | ORAI2                 | chr7:102073976-102105321 | 3.25028    | 3.15852    | -0.0413172 | 0.989136 |
| XLOC_021879 | LOC729732             | chr8:12294521-12523120   | 1.49252    | 1.45041    | -0.0412808 | 0.992797 |
| XLOC_002231 | CCSAP                 | chr1:229456751-229478688 | 1.79529    | 1.74467    | -0.0412576 | 0.987693 |
| XLOC_008332 | TSR3                  | chr16:1383605-1401873    | 102.913    | 100.025    | -0.0410603 | 0.985325 |
| XLOC_016512 | MGST2                 | chr4:140586921-141075233 | 71.9656    | 69.9483    | -0.0410185 | 0.985124 |
| XLOC_009046 | WIPF2                 | chr17:38375573-38438439  | 4.5669     | 4.43894    | -0.0409995 | 0.985921 |
| XLOC_000733 | INTS3                 | chr1:153700566-153746555 | 8.55192    | 8.3127     | -0.0409315 | 0.984917 |
| XLOC_008953 | TP5313                | chr17:27895738-27900175  | 59.0693    | 57.4173    | -0.0409208 | 0.984917 |
| XLOC_006995 | CDCA4                 | chr14:105475909-10548742 | 33.7272    | 32.7871    | -0.0407857 | 0.985124 |
| XLOC_012392 | BCWD2                 | chr2:114195267-114253781 | 1.78228    | 1.73264    | -0.0407528 | 0.990324 |
| XLOC_014821 | CSNK1E                | chr22:38686696-38714089  | 67.9689    | 66.0784    | -0.0406951 | 0.983594 |
| XLOC_015750 | LINC00696             | chr3:52096109-52099128   | 0.00561652 | 0.00546038 | -0.0406762 | 1        |
| XLOC_021497 | FAM160B2              | chr8:21946713-21961891   | 18.1004    | 17.6011    | -0.0403529 | 0.984917 |
| XLOC_013228 | TLK1                  | chr2:171847332-172087824 | 6.68218    | 6.49789    | -0.0403468 | 0.984917 |
| XLOC_012007 | ZNF497                | chr19:58858171-58874214  | 1.67764    | 1.63138    | -0.0403416 | 0.990994 |
| XLOC_020687 | CDHR3                 | chr7:105603656-105676877 | 0.0531265  | 0.0516631  | -0.0402987 | 1        |
| XLOC_007833 | RHOT2                 | chr16:718082-724174      | 41.0617    | 39.9307    | -0.0402935 | 0.984772 |
| XLOC_004924 | ESYT1                 | chr12:56521985-56538460  | 42.4402    | 41.2716    | -0.0402845 | 0.984917 |
| XLOC_011768 | IRF2BP1               | chr19:46386865-46389376  | 21.6854    | 21.0884    | -0.040273  | 0.986725 |
| XLOC_000593 | DDX20                 | chr1:112264685-112310195 | 6.6538     | 6.47067    | -0.040265  | 0.987693 |
| XLOC_013793 | UCKL1-AS1             | chr20:62571181-62601223  | 0.164997   | 0.160463   | -0.0402021 | 1        |
| XLOC_000994 | SOX13                 | chr1:204042245-204096871 | 4.34927    | 4.22995    | -0.0401343 | 0.987334 |
| XLOC_022385 | FXN                   | chr9:71650478-71715094   | 9.77318    | 9.50597    | -0.0399946 | 0.991767 |
| XLOC_009480 | CTC1                  | chr17:8128138-8154143    | 2.77302    | 2.69725    | -0.03997   | 0.986529 |
| XLOC_021251 | PUS7                  | chr7:105096959-105162685 | 7.69471    | 7.48519    | -0.0398281 | 0.986822 |
| XLOC_008769 | CYB5D2                | chr17:4046461-4060995    | 15.1753    | 14.7633    | -0.0397136 | 0.987693 |
| XLOC_013457 | ANKMY1                | chr2:241418838-241497405 | 1.50181    | 1.46105    | -0.0397016 | 0.991351 |
| XLOC_004261 | TUT1                  | chr11:62342516-62359109  | 10.3548    | 10.0738    | -0.0396957 | 0.986353 |
| XLOC_007108 | LOC646278             | chr15:29034979-29101720  | 0.397821   | 0.387024   | -0.0396942 | 0.99351  |
| XLOC_003662 | RPS6KB2               | chr11:67195934-67202879  | 51.9921    | 50.5812    | -0.0396911 | 0.984917 |
| XLOC_019051 | TSPYL1                | chr6:116596021-116601280 | 20.7385    | 20.1768    | -0.039609  | 0.985921 |
| XLOC_015746 | PCBP4                 | chr3:51989329-52001482   | 43.8443    | 42.6587    | -0.0395478 | 0.985093 |
| XLOC_012012 | ZBTB45                | chr19:59024896-59030921  | 11.1265    | 10.8261    | -0.0394759 | 0.987693 |

|             |                      |                           |            |            |            |          |
|-------------|----------------------|---------------------------|------------|------------|------------|----------|
| XLOC_018177 | TUBB                 | chr6:30688156-30693195    | 471.499    | 458.777    | -0.0394611 | 0.986822 |
| XLOC_022960 | AAED1                | chr9:99403532-99417599    | 29.6763    | 28.8757    | -0.0394572 | 0.985325 |
| XLOC_023694 | SLC6A8               | chrX:152953751-152962041  | 64.6247    | 62.883     | -0.0394154 | 0.985921 |
| XLOC_008244 | CENPN                | chr16:81009698-81066709   | 19.6803    | 19.1504    | -0.0393801 | 0.991767 |
| XLOC_023612 | RBMX2                | chrX:129535942-129547311  | 19.6414    | 19.1127    | -0.0393721 | 0.986735 |
| XLOC_022836 | FBXO10               | chr9:37510888-37576250    | 2.60464    | 2.53476    | -0.0392338 | 0.987693 |
| XLOC_006970 | CCDC85C              | chr14:99947738-100070721  | 17.9056    | 17.4269    | -0.039095  | 0.988817 |
| XLOC_012514 | DLX1                 | chr2:172950207-172954401  | 4.88665    | 4.75605    | -0.0390839 | 0.98922  |
| XLOC_009231 | C17orf72             | chr17:62075710-62097994   | 0.0819254  | 0.0797368  | -0.0390652 | 1        |
| XLOC_011892 | CTU1                 | chr19:51600862-51611647   | 12.9298    | 12.5858    | -0.0389063 | 0.987858 |
| XLOC_017752 | FLJ35946             | chr5:98104998-98132198    | 0.404312   | 0.393565   | -0.0388683 | 0.997036 |
| XLOC_017785 | ALDH7A1              | chr5:125877532-125931082  | 15.2819    | 14.8759    | -0.038844  | 0.984917 |
| XLOC_021302 | MGC27345             | chr7:127937737-127947811  | 1.98713    | 1.93436    | -0.0388275 | 0.986822 |
| XLOC_008159 | CKLF_CKLF-CMTM1,CMTM | chr16:66586465-66613038   | 60.5588    | 58.9544    | -0.0387373 | 0.986822 |
| XLOC_013010 | TRABD2A              | chr2:85048795-85108252    | 18.1268    | 17.6472    | -0.0386888 | 0.986822 |
| XLOC_007783 | PRC1                 | chr15:91509267-91537881   | 18.7576    | 18.2624    | -0.0386045 | 0.986822 |
| XLOC_019131 | STXBP5-AS1           | chr6:147162524-147711612  | 0.0288689  | 0.0281074  | -0.0385648 | 1        |
| XLOC_008873 | TTC19                | chr17:15879874-15932723   | 22.0089    | 21.4289    | -0.0385257 | 0.987235 |
| XLOC_000076 | PGD                  | chr1:10459084-10480201    | 114.216    | 111.219    | -0.0383682 | 0.985325 |
| XLOC_016283 | GNR19                | chr4:39184023-39287430    | 2.48738    | 2.42225    | -0.038276  | 0.987858 |
| XLOC_004683 | GNB3                 | chr12:6949374-6956557     | 2.01398    | 1.96136    | -0.0381954 | 0.991767 |
| XLOC_022097 | KIAA1429             | chr8:95500004-95565746    | 6.04393    | 5.88636    | -0.0381103 | 0.986822 |
| XLOC_010916 | ZNF225               | chr19:44617547-44637255   | 0.594552   | 0.579065   | -0.0380796 | 0.991767 |
| XLOC_017723 | SSBP2                | chr5:80256507-81047072    | 2.16397    | 2.10789    | -0.0378813 | 0.99351  |
| XLOC_018775 | NEU1                 | chr6:31826828-31830709    | 81.3442    | 79.2366    | -0.0378714 | 0.986822 |
| XLOC_004133 | CCDC73               | chr11:32605312-32816187   | 3.82977    | 3.73059    | -0.037857  | 0.996079 |
| XLOC_013328 | METTL21A             | chr2:208473838-208489973  | 8.56625    | 8.34472    | -0.0377997 | 0.985921 |
| XLOC_003028 | MMRN2                | chr10:88695297-88717425   | 0.212233   | 0.206746   | -0.0377925 | 1        |
| XLOC_005937 | LMO7                 | chr13:76194569-76434006   | 2.75726    | 2.68606    | -0.0377453 | 0.986822 |
| XLOC_006659 | CEP170B              | chr14:105331649-105363111 | 11.7227    | 11.421     | -0.0376177 | 0.986822 |
| XLOC_020375 | TMEM106B             | chr7:12250847-12276890    | 3.54554    | 3.45443    | -0.0375575 | 0.986822 |
| XLOC_008868 | ZNF286A              | chr17:15602890-15624100   | 2.21664    | 2.15971    | -0.0375363 | 0.987693 |
| XLOC_006706 | DAD1                 | chr14:23033806-23058143   | 230.044    | 224.139    | -0.0375145 | 0.986353 |
| XLOC_013698 | CD40                 | chr20:44746905-44758384   | 17.9356    | 17.4755    | -0.0374905 | 0.987423 |
| XLOC_021408 | PRKAG2               | chr7:151253200-151576308  | 17.5497    | 17.0999    | -0.0374604 | 0.988019 |
| XLOC_015148 | ITH3                 | chr3:52828783-52843025    | 0.00530308 | 0.00516734 | -0.0374073 | 1        |
| XLOC_021834 | DEFA5                | chr8:6912828-69144259     | 0.0612678  | 0.0596997  | -0.0374052 | 1        |
| XLOC_012683 | AGFG1                | chr2:228336847-228425938  | 4.28465    | 4.17563    | -0.037183  | 0.989268 |
| XLOC_022610 | NCS1                 | chr9:132934856-132999583  | 50.7682    | 49.4772    | -0.0371603 | 0.986539 |
| XLOC_001449 | LSM10                | chr1:36859030-36863493    | 63.5515    | 61.9359    | -0.0371502 | 0.987334 |
| XLOC_022230 | PLEC                 | chr8:144989320-145050913  | 14.3909    | 14.0252    | -0.0371342 | 0.986353 |
| XLOC_003365 | HTATIP2              | chr11:20385230-20405329   | 37.7416    | 36.7851    | -0.0370337 | 0.986822 |
| XLOC_022477 | STX17                | chr9:102668914-102736811  | 2.99124    | 2.91549    | -0.0370029 | 0.986822 |
| XLOC_012626 | SPAG16               | chr2:214149102-215275221  | 7.67137    | 7.47736    | -0.036956  | 0.989268 |
| XLOC_022437 | ANKRD19P             | chr9:95571892-95600739    | 0.8121     | 0.79157    | -0.0369401 | 0.992841 |
| XLOC_007257 | RAB11A               | chr15:66161796-66184329   | 21.8503    | 21.2985    | -0.0369004 | 0.986822 |
| XLOC_003515 | STX3                 | chr11:59522531-59573355   | 13.576     | 13.2341    | -0.0367984 | 0.986822 |
| XLOC_016831 | WDFY3                | chr4:85590692-85887544    | 1.06824    | 1.04137    | -0.0367598 | 0.987858 |
| XLOC_004677 | COP5A                | chr12:6833149-6841041     | 51.4212    | 50.1281    | -0.036744  | 0.986822 |
| XLOC_017240 | RFESD                | chr5:94982480-94992849    | 1.57059    | 1.53113    | -0.0367127 | 0.991767 |
| XLOC_006304 | NFATC4               | chr14:24836144-24848810   | 0.446736   | 0.435518   | -0.0366916 | 0.99316  |
| XLOC_018808 | RXR8                 | chr6:33161361-33168473    | 23.2028    | 22.6202    | -0.0366884 | 0.986822 |
| XLOC_002657 | LOC100289509         | chr10:103578824-10360361  | 0.33605    | 0.327626   | -0.0366231 | 1        |
| XLOC_005991 | ARHGEF7              | chr13:111767623-11195808  | 8.77413    | 8.55467    | -0.0365438 | 0.986832 |
| XLOC_006254 | APEX1                | chr14:20923289-20925931   | 195.36     | 190.484    | -0.0364657 | 0.987334 |
| XLOC_001081 | ADCK3                | chr1:227127937-227175248  | 22.9502    | 22.3793    | -0.0363438 | 0.986822 |
| XLOC_022909 | ISCA1                | chr9:88879462-88897490    | 26.2037    | 25.5555    | -0.0361373 | 0.986822 |
| XLOC_004312 | ATG2A                | chr11:64662003-64684722   | 10.8876    | 10.6184    | -0.0361311 | 0.986822 |
| XLOC_016529 | TMEM184C             | chr4:148538538-148556672  | 4.43073    | 4.32124    | -0.0361001 | 0.988154 |
| XLOC_008654 | COG4                 | chr16:70514471-70557457   | 10.7824    | 10.5167    | -0.0360003 | 0.987423 |
| XLOC_000565 | CYB561D1             | chr1:110036657-110043063  | 3.9224     | 3.82574    | -0.0359987 | 0.987858 |
| XLOC_015692 | UQCRC1               | chr3:48636431-48647098    | 230.221    | 224.549    | -0.0359894 | 0.986822 |
| XLOC_006803 | MAP4K5               | chr14:50885210-50999376   | 8.60412    | 8.39216    | -0.0359866 | 0.986822 |
| XLOC_015824 | ROBO1                | chr3:78646387-79817059    | 1.07086    | 1.04452    | -0.0359352 | 0.990324 |
| XLOC_001551 | ECHDC2               | chr1:53361581-53387446    | 9.99028    | 9.74471    | -0.0359071 | 0.989344 |
| XLOC_008989 | ZNF830               | chr17:33288548-33290205   | 11.1489    | 10.8749    | -0.0359055 | 0.988165 |
| XLOC_005891 | FNDC3A               | chr13:49550047-49783915   | 5.10404    | 4.97868    | -0.0358775 | 0.986822 |
| XLOC_022958 | ZNF367               | chr9:99148224-99180669    | 3.80706    | 3.7136     | -0.0358578 | 0.98907  |
| XLOC_008355 | PKD1                 | chr16:2097989-2185899     | 4.62984    | 4.51621    | -0.0358502 | 0.991459 |
| XLOC_013795 | LINC00176            | chr20:62665696-62671315   | 0.389443   | 0.379896   | -0.0358096 | 0.99351  |
| XLOC_022517 | ZNF618               | chr9:116638561-116818873  | 2.16574    | 2.11273    | -0.0357522 | 0.987858 |
| XLOC_004084 | RRAS2                | chr11:14299465-14386052   | 19.5038    | 19.0269    | -0.0357108 | 0.986822 |
| XLOC_010003 | SOC3                 | chr17:76352858-76356158   | 17.743     | 17.3095    | -0.035685  | 0.987693 |
| XLOC_017791 | HINT1                | chr5:130494975-130501041  | 740.772    | 722.691    | -0.0356503 | 0.987423 |
| XLOC_021134 | TMEM60               | chr7:77423044-77427747    | 27.0015    | 26.3428    | -0.0356294 | 0.988154 |
| XLOC_009804 | MRPL10               | chr17:45900637-45908907   | 82.4562    | 80.4458    | -0.0356098 | 0.987423 |
| XLOC_021744 | NSMCE2               | chr8:126104082-126379361  | 24.2961    | 23.704     | -0.0355948 | 0.987693 |
| XLOC_009801 | CDC27                | chr17:45195310-45266665   | 6.99815    | 6.82772    | -0.0355693 | 0.987334 |
| XLOC_018777 | EHMT2                | chr6:31847536-31865464    | 20.6931    | 20.1893    | -0.0355623 | 0.986822 |

|              |          |                          |            |           |            |          |
|--------------|----------|--------------------------|------------|-----------|------------|----------|
| XLOC_017599  | MTMR12   | chr5:32227110-32313114   | 3.86759    | 3.7735    | -0.0355311 | 0.987693 |
| XLOC_003601  | SAC3D1   | chr11:64808375-64826009  | 45.6185    | 44.509    | -0.035521  | 0.987627 |
| XLOC_005321  | DUSP16   | chr12:12626215-12715448  | 2.74982    | 2.68297   | -0.0355065 | 0.987858 |
| XLOC_005361  | ITPR2    | chr12:26488284-26986131  | 0.390785   | 0.381291  | -0.0354811 | 0.990857 |
| XLOC_001497  | SLC2A1   | chr1:43391045-434449029  | 99.4958    | 97.0803   | -0.0354571 | 0.987693 |
| XLOC_002362  | STAM     | chr10:17686123-17758821  | 6.6386     | 6.47745   | -0.0354521 | 0.987693 |
| XLOC_004380  | SHANK2   | chr11:70313960-70935808  | 0.573049   | 0.559155  | -0.035411  | 0.991614 |
| XLOC_004135  | C11orf91 | chr11:33719653-33722286  | 1.91393    | 1.86754   | -0.0353956 | 0.99351  |
| XLOC_008257  | OSGIN1   | chr16:83986826-83999937  | 17.5082    | 17.084    | -0.0353865 | 0.988165 |
| XLOC_016538  | ARFIP1   | chr4:153701111-153833063 | 6.05147    | 5.90564   | -0.0351935 | 0.987693 |
| XLOC_019101  | MAP7     | chr6:136663418-136871957 | 5.77609    | 5.63702   | -0.0351599 | 0.987693 |
| XLOC_015915  | HEG1     | chr3:124684553-124774802 | 1.84163    | 1.7973    | -0.035152  | 0.987896 |
| XLOC_022697  | ARRDC1   | chr9:140500095-140513308 | 93.1949    | 90.9568   | -0.0350691 | 0.987693 |
| XLOC_012957  | NFU1     | chr2:69623244-69664760   | 36.7118    | 35.8314   | -0.0350212 | 0.987693 |
| XLOC_009539  | USP32P2  | chr17:18414575-18424566  | 0.0736693  | 0.0719049 | -0.0349749 | 1        |
| XLOC_001995  | TADA1    | chr1:166825748-166845654 | 7.52815    | 7.34785   | -0.0349747 | 0.988165 |
| XLOC_007829  | RAB40C   | chr16:639356-679273      | 16.1603    | 15.7734   | -0.0349674 | 0.987858 |
| XLOC_012883  | THUMP2D  | chr2:39963199-40006416   | 8.92965    | 8.71591   | -0.034951  | 0.987693 |
| XLOC_014796  | TXN2     | chr22:36863092-36877687  | 103.642    | 101.163   | -0.0349215 | 0.987423 |
| XLOC_018362  | KIAA1586 | chr6:56911383-56920023   | 2.85638    | 2.78813   | -0.0348876 | 0.989365 |
| XLOC_004616  | RIPUSD4  | chr11:126071988-12608158 | 22.7765    | 22.2324   | -0.0348836 | 0.987693 |
| XLOC_003992  | TRIM21   | chr11:4406126-4414926    | 6.69394    | 6.53418   | -0.0348486 | 0.989344 |
| XLOC_010588  | C19orf52 | chr19:11039423-11040916  | 17.824     | 17.3987   | -0.0348402 | 0.988165 |
| XLOC_005094  | ANKRD13A | chr12:110437234-11047723 | 27.7836    | 27.1206   | -0.03484   | 0.987334 |
| XLOC_015684  | NME6     | chr3:48335588-48342848   | 13.2876    | 12.9707   | -0.0348257 | 0.989841 |
| XLOC_007344  | ARNT2    | chr15:80696691-80890277  | 1.83706    | 1.79326   | -0.0348109 | 0.989869 |
| XLOC_017669  | DEPDC1B  | chr5:59892738-59995993   | 7.39339    | 7.21718   | -0.0348012 | 0.988166 |
| XLOC_014200  | AGPAT3   | chr21:45285115-45407475  | 8.04934    | 7.85752   | -0.0347955 | 0.986822 |
| XLOC_013862  | ESF1     | chr20:13694968-13765579  | 2.34902    | 2.29307   | -0.0347745 | 0.989663 |
| XLOC_011428  | YIPF2    | chr19:10982252-11039357  | 32.5522    | 31.777    | -0.0347703 | 0.99351  |
| XLOC_020802  | EPHB6    | chr7:142552791-142568884 | 0.135941   | 0.132714  | -0.0346615 | 1        |
| XLOC_008854  | ADPRM    | chr17:10600926-10614875  | 6.26911    | 6.12053   | -0.0346044 | 0.989365 |
| XLOC_009226  | MAP3K3   | chr17:61699800-61777519  | 4.94232    | 4.82531   | -0.0345664 | 0.991767 |
| XLOC_005688  | MMAB     | chr12:109991520-11001133 | 6.35225    | 6.20188   | -0.0345611 | 0.988154 |
| XLOC_002201  | SUSD4    | chr1:223394160-223537544 | 0.254      | 0.247991  | -0.0345383 | 1        |
| XLOC_008072  | TRIM72   | chr16:31225341-31236510  | 4.48787    | 4.38172   | -0.0345333 | 0.991767 |
| XLOC_022055  | TPD52    | chr8:80947104-81083836   | 32.958     | 32.1816   | -0.0343949 | 0.987693 |
| XLOC_011068  | IGLON5   | chr19:51815101-51834102  | 0.00636953 | 0.0062201 | -0.0342494 | 1        |
| XLOC_010762  | KCTD15   | chr19:34287750-34306666  | 11.0925    | 10.8324   | -0.0342388 | 0.987693 |
| XLOC_010257  | ATP9B    | chr18:76829396-77138282  | 2.07051    | 2.02206   | -0.0341591 | 0.990857 |
| XLOC_022628  | C9orf9   | chr9:135754289-135765418 | 7.77052    | 7.58876   | -0.0341476 | 0.992109 |
| XLOC_002100  | DDX59    | chr1:200613164-200639126 | 4.96681    | 4.85069   | -0.0341296 | 0.989365 |
| XLOC_008733  | SPATA2L  | chr16:89753075-89768121  | 15.8361    | 15.4659   | -0.0341243 | 0.99351  |
| XLOC_002988  | MICU1    | chr10:74119697-74385949  | 31.6889    | 30.9492   | -0.0340737 | 0.987693 |
| XLOC_015537  | SENP5    | chr3:196594726-196661584 | 3.81353    | 3.72455   | -0.0340621 | 0.988152 |
| XLOC_002683  | GSTO2    | chr10:106028630-10605917 | 38.7209    | 37.8177   | -0.0340538 | 0.988154 |
| XLOC_013149  | CCDC115  | chr2:131095815-131099922 | 16.5626    | 16.1764   | -0.0340309 | 0.988657 |
| XLOC_007275  | PAQR5    | chr15:69591293-69699976  | 2.99166    | 2.92207   | -0.0339582 | 0.988657 |
| XLOC_006890  | ABCD4    | chr14:74751979-74769767  | 14.64      | 14.2995   | -0.0339544 | 0.987693 |
| XLOC_018545  | SASH1    | chr6:148663728-148873184 | 1.17726    | 1.1499    | -0.033927  | 0.990857 |
| XLOC_001916  | ISG20L2  | chr1:156692412-156697708 | 13.2795    | 12.9709   | -0.0339201 | 0.987693 |
| XLOC_020946  | SNX13    | chr7:17830384-17980131   | 2.65697    | 2.59524   | -0.0339189 | 0.988166 |
| XLOC_0017156 | NLN      | chr5:65018022-65125111   | 3.27393    | 3.19794   | -0.0338783 | 0.987858 |
| XLOC_004739  | DDX47    | chr12:12966279-12982915  | 32.4995    | 31.7458   | -0.0338518 | 0.987693 |
| XLOC_016384  | THAP6    | chr4:76439653-76455236   | 1.63403    | 1.59619   | -0.0338014 | 0.990857 |
| XLOC_003953  | POLR2L   | chr11:839720-842529      | 176.863    | 172.779   | -0.0337032 | 0.987693 |
| XLOC_007951  | NOMO1    | chr16:14927642-14990014  | 14.3676    | 14.0365   | -0.0336349 | 0.987693 |
| XLOC_022167  | TATDN1   | chr8:125487007-125551323 | 56.7056    | 55.4024   | -0.0335446 | 0.992651 |
| XLOC_012751  | ANO7     | chr2:242127923-242164797 | 2.60332    | 2.54349   | -0.0335429 | 0.991459 |
| XLOC_002441  | FAM21B   | chr10:47894022-47949417  | 1.041      | 1.01711   | -0.0334949 | 0.991767 |
| XLOC_017858  | DND1     | chr5:140044383-140053177 | 9.16218    | 8.95194   | -0.0334908 | 0.99584  |
| XLOC_022957  | SLC35D2  | chr9:99082987-99145992   | 26.2855    | 25.6825   | -0.0334838 | 0.987693 |
| XLOC_006982  | CDC42BPB | chr14:103398715-10352374 | 9.65569    | 9.4348    | -0.0333888 | 0.987693 |
| XLOC_012049  | HPCAL1   | chr2:10443029-10567743   | 46.0406    | 44.9874   | -0.0333858 | 0.988142 |
| XLOC_017191  | HEXB     | chr5:73980968-74072737   | 70.2511    | 68.6442   | -0.0333812 | 0.99351  |
| XLOC_017931  | PWWP2A   | chr5:159502891-159546457 | 5.46732    | 5.34236   | -0.0333564 | 0.989514 |
| XLOC_001702  | LAMTOR5  | chr1:110943876-110950548 | 142.539    | 139.289   | -0.0332727 | 0.987693 |
| XLOC_016254  | MED28    | chr4:17616272-17626160   | 35.8611    | 35.0439   | -0.0332588 | 0.987693 |
| XLOC_021525  | PTK2B    | chr8:27168998-27316908   | 0.554616   | 0.542     | -0.0331942 | 0.993379 |
| XLOC_001794  | SV2A     | chr1:149874871-149889434 | 0.034494   | 0.0337097 | -0.0331813 | 1        |
| XLOC_006934  | SMEK1    | chr14:91923955-91976644  | 12.2693    | 11.9904   | -0.0331632 | 0.987693 |
| XLOC_008021  | SH2B1    | chr16:28875077-28885534  | 14.7278    | 14.3935   | -0.0331302 | 0.988019 |
| XLOC_021925  | TRIM35   | chr8:27142403-27168834   | 5.63388    | 5.50606   | -0.0331076 | 0.989268 |
| XLOC_002593  | MARCH5   | chr10:94050919-94113721  | 10.4312    | 10.1945   | -0.0331074 | 0.987693 |
| XLOC_012278  | RNF181   | chr2:85822836-85824831   | 179.814    | 175.748   | -0.0329973 | 0.987693 |
| XLOC_023897  | SPIN2B   | chrX:57146114-57147979   | 2.10136    | 2.05386   | -0.0329865 | 0.99351  |
| XLOC_000560  | KIAA1324 | chr1:109656584-109749402 | 0.156133   | 0.152605  | -0.0329754 | 1        |
| XLOC_000084  | FBXO44   | chr1:11708417-11723384   | 22.0872    | 21.5885   | -0.0329513 | 0.987858 |
| XLOC_009786  | DKAKD    | chr17:43100705-43138473  | 15.722     | 15.367    | -0.0329421 | 0.989126 |

|             |                          |                          |            |            |            |          |
|-------------|--------------------------|--------------------------|------------|------------|------------|----------|
| XLOC_012756 | ING5                     | chr2:242641455-24266889f | 3.23553    | 3.16252    | -0.0329274 | 0.990324 |
| XLOC_014470 | GGT1                     | chr22:24979717-25024972  | 5.38098    | 5.25969    | -0.0328905 | 0.992254 |
| XLOC_009413 | UBE2G1                   | chr17:4172511-4269969    | 11.4506    | 11.1933    | -0.0327872 | 0.987693 |
| XLOC_009764 | DUSP3                    | chr17:41843488-41856368  | 21.9169    | 21.4277    | -0.0325701 | 0.987858 |
| XLOC_022317 | ANXA2P2                  | chr9:33624222-33625532   | 4.03116    | 3.94129    | -0.0325269 | 0.991767 |
| XLOC_004560 | CD3D                     | chr11:118209788-1182134f | 0.0267077  | 0.0261125  | -0.032513  | 1        |
| XLOC_014497 | NF2                      | chr22:29999544-30094589  | 8.72328    | 8.52891    | -0.03251   | 0.988166 |
| XLOC_004168 | PAC3IN3                  | chr11:47199072-47208010  | 42.5623    | 41.6174    | -0.0323877 | 0.987693 |
| XLOC_015982 | TFDP2                    | chr3:141663269-14186838f | 3.14634    | 3.07662    | -0.0323281 | 0.989268 |
| XLOC_007387 | AEN                      | chr15:89164526-89175512  | 29.578     | 28.9229    | -0.0323104 | 0.987858 |
| XLOC_020965 | OSBPL3                   | chr7:24836163-25019760   | 1.54762    | 1.51343    | -0.032233  | 0.990324 |
| XLOC_010774 | SCN1B                    | chr19:35521591-35531353  | 4.67454    | 4.57127    | -0.032227  | 0.992797 |
| XLOC_015544 | LMLN                     | chr3:197687070-19777059f | 0.416881   | 0.407682   | -0.0321921 | 0.992797 |
| XLOC_007537 | TBTK2                    | chr15:43036541-43213007  | 0.367479   | 0.359371   | -0.0321891 | 0.993379 |
| XLOC_010097 | MYL12A                   | chr18:3247527-3256234    | 371.242    | 363.065    | -0.0321311 | 0.988166 |
| XLOC_016207 | TBC1D14                  | chr4:6911170-7059677     | 0.787705   | 0.770374   | -0.0320964 | 0.997082 |
| XLOC_017514 | GRK6                     | chr5:176853686-17688328f | 29.1127    | 28.4735    | -0.0320286 | 0.990857 |
| XLOC_018478 | SMPDL3A                  | chr6:123109970-12313086f | 1.51716    | 1.48411    | -0.0317752 | 0.992797 |
| XLOC_022906 | AGTPBP1                  | chr9:88161453-88356944   | 4.99883    | 4.88998    | -0.0317633 | 0.989869 |
| XLOC_022522 | ATP6V1G1                 | chr9:117349993-11736115f | 103.359    | 101.109    | -0.0317479 | 0.988154 |
| XLOC_022704 | WASH1                    | chr9:11986-29739         | 6.05873    | 5.92708    | -0.031694  | 0.991767 |
| XLOC_004327 | RELA                     | chr11:65421066-65430443  | 61.2599    | 59.932     | -0.0316161 | 0.988154 |
| XLOC_008649 | LOC100506060             | chr16:70253483-70259936f | 1.13288    | 1.10832    | -0.031614  | 0.99351  |
| XLOC_023043 | PHF19                    | chr9:123617930-12363960f | 91.7042    | 89.7218    | -0.0315296 | 0.991459 |
| XLOC_016408 | COPS4                    | chr4:83956238-83996971   | 25.0647    | 24.5229    | -0.0315228 | 0.988571 |
| XLOC_003442 | MADD                     | chr11:47290926-47351582f | 6.53804    | 6.39692    | -0.0314805 | 0.98922  |
| XLOC_008909 | MAPK7                    | chr17:19240866-19290532f | 9.30476    | 9.10401    | -0.031467  | 0.99351  |
| XLOC_017072 | MTRR                     | chr5:7869216-7901235     | 4.77699    | 4.67393    | -0.0314637 | 0.990315 |
| XLOC_018999 | MAP3K7                   | chr6:91223291-91297020f  | 5.49284    | 5.37445    | -0.0314362 | 0.989365 |
| XLOC_008007 | LCMT1                    | chr16:25123046-25189551f | 39.8292    | 38.971     | -0.0314249 | 0.988154 |
| XLOC_013441 | PER2                     | chr2:239152678-23919720f | 2.18691    | 2.1398     | -0.0314198 | 0.990857 |
| XLOC_009456 | CTDNBP1                  | chr17:7146905-7155259    | 117.235    | 114.71     | -0.0314073 | 0.988467 |
| XLOC_015781 | ARHGEF3                  | chr3:56761445-57113336f  | 1.34907    | 1.32006    | -0.0313622 | 0.991911 |
| XLOC_011544 | SUGP2                    | chr19:19101696-19144380f | 7.79517    | 7.62757    | -0.0313571 | 0.989344 |
| XLOC_013690 | UBE2C                    | chr20:44441254-44445596f | 303.902    | 297.369    | -0.0313537 | 0.988533 |
| XLOC_005751 | KDM2B                    | chr12:121866899-1220189f | 9.16371    | 8.96675    | -0.0313476 | 0.988657 |
| XLOC_022716 | RLN2                     | chr9:5299865-5304611     | 0.0623848  | 0.0610481  | -0.0312485 | 1        |
| XLOC_003366 | PRMT3                    | chr11:20409075-20530879f | 4.40552    | 4.31124    | -0.0312092 | 0.990857 |
| XLOC_022436 | LOC100128361             | chr9:95059639-95432547f  | 0.578172   | 0.565834   | -0.03112   | 0.997036 |
| XLOC_006001 | CUL4A                    | chr13:113863085-1139193f | 17.1339    | 16.7688    | -0.0310782 | 0.987693 |
| XLOC_015040 | ZNF621                   | chr3:40566375-40581043f  | 2.47281    | 2.42011    | -0.0310775 | 0.990315 |
| XLOC_001364 | SYF2                     | chr1:25548766-25559013f  | 36.9584    | 36.1711    | -0.0310635 | 0.988176 |
| XLOC_008409 | TMEM186                  | chr16:8889036-8891505    | 13.0006    | 12.7241    | -0.0310226 | 0.990324 |
| XLOC_003656 | ANKRD13D                 | chr11:67056761-67069955f | 17.7132    | 17.3366    | -0.0309998 | 0.989869 |
| XLOC_005031 | VEZT                     | chr12:95611521-95696566f | 6.33988    | 6.20529    | -0.0309562 | 0.988808 |
| XLOC_008223 | IST1                     | chr16:71928310-72033877f | 24.7343    | 24.2095    | -0.0309393 | 0.989268 |
| XLOC_015485 | POLR2H                   | chr3:184081193-18408636f | 233.34     | 228.415    | -0.0307731 | 0.989079 |
| XLOC_019010 | CCNC                     | chr6:99990262-100016690f | 24.5921    | 24.0741    | -0.0307163 | 0.988742 |
| XLOC_007853 | CRAMP1L                  | chr16:1664640-1727909f   | 2.18475    | 2.13874    | -0.0307111 | 0.990857 |
| XLOC_015491 | SEN2                     | chr3:185304030-18534888f | 7.03313    | 6.8862     | -0.0304582 | 0.990324 |
| XLOC_003722 | DGAT2                    | chr11:75479777-75512581f | 6.56428    | 6.42715    | -0.030458  | 0.990921 |
| XLOC_017775 | TICAM2, TMED7, TMED7-TIC | chr5:114914338-11496187f | 13.13      | 12.8557    | -0.0304574 | 0.989365 |
| XLOC_008703 | COTL1                    | chr16:84599203-84651669f | 249.998    | 244.793    | -0.030353  | 0.989365 |
| XLOC_023048 | GGTA1P                   | chr9:124217318-12426230f | 0.201031   | 0.196851   | -0.0303101 | 1        |
| XLOC_020741 | ATP6V1F                  | chr7:128502856-12850590f | 605.85     | 593.257    | -0.0303022 | 0.989514 |
| XLOC_016668 | WDR1                     | chr4:10075962-10118573f  | 135.622    | 132.806    | -0.0302707 | 0.989365 |
| XLOC_006291 | LRRC16B                  | chr14:24521205-24538937f | 0.382659   | 0.374717   | -0.0302571 | 0.994615 |
| XLOC_001402 | MECR                     | chr1:29519384-29557454f  | 14.9094    | 14.6008    | -0.0301699 | 0.989748 |
| XLOC_023997 | RAB9B                    | chrX:103077254-10308721f | 0.115286   | 0.112902   | -0.0301549 | 1        |
| XLOC_007641 | VWA9                     | chr15:65871095-65903627f | 29.0704    | 28.4691    | -0.030154  | 0.989719 |
| XLOC_021157 | KRIT1                    | chr7:91828282-91875414f  | 4.38216    | 4.29186    | -0.0300404 | 0.990324 |
| XLOC_004441 | CCDC90B                  | chr11:82972501-82997377f | 19.8612    | 19.452     | -0.0300307 | 0.990213 |
| XLOC_007341 | C15orf37                 | chr15:80135888-80217196f | 2.21655    | 2.17089    | -0.0300264 | 0.997036 |
| XLOC_013869 | SNX5                     | chr20:17922243-17949490f | 42.9534    | 42.0692    | -0.0300069 | 0.989344 |
| XLOC_015891 | GSK3B                    | chr3:119540801-11981326f | 5.42525    | 5.31389    | -0.0299227 | 0.989365 |
| XLOC_018276 | RNF8                     | chr6:37321747-37362514f  | 6.46895    | 6.33642    | -0.0298637 | 0.990315 |
| XLOC_002181 | PTPN14                   | chr1:214522038-21472502f | 1.55668    | 1.52479    | -0.0298597 | 0.990324 |
| XLOC_012691 | ITM2C                    | chr2:231729620-23174396f | 107.803    | 105.604    | -0.0297362 | 0.989365 |
| XLOC_012745 | CAPN10                   | chr2:241526132-24153852f | 11.6727    | 11.4346    | -0.0297343 | 0.990857 |
| XLOC_011252 | TRIM28                   | chr19:59055835-59062082f | 184.696    | 180.93     | -0.029719  | 0.989344 |
| XLOC_016184 | GRK4                     | chr4:2965342-3042474f    | 0.420051   | 0.411491   | -0.0297046 | 0.995343 |
| XLOC_016455 | AIMP1                    | chr4:106967232-10727038f | 19.7883    | 19.3852    | -0.0296917 | 0.989748 |
| XLOC_007658 | ITGA11                   | chr15:68594041-68724492f | 0.00348954 | 0.00341852 | -0.0296656 | 1        |
| XLOC_008977 | RHBDL3                   | chr17:30593194-30651680f | 1.00767    | 0.987202   | -0.0296026 | 0.993379 |
| XLOC_009366 | GEMIN4                   | chr17:647660-655501      | 19.6611    | 19.2622    | -0.0295683 | 0.989421 |
| XLOC_002214 | SDE2                     | chr1:226170402-22618706f | 4.0081     | 3.92684    | -0.0295514 | 0.990857 |
| XLOC_018030 | PSMG4                    | chr6:3259161-3268300f    | 29.6435    | 29.0429    | -0.0295315 | 0.990857 |
| XLOC_005567 | RPSAP52                  | chr12:66151799-66360071f | 2.68574    | 2.63148    | -0.0294444 | 0.997036 |
| XLOC_015397 | EIF2A                    | chr3:150264573-15030380f | 19.5653    | 19.1705    | -0.0294116 | 0.989268 |



|             |                       |                          |            |            |            |          |
|-------------|-----------------------|--------------------------|------------|------------|------------|----------|
| XLOC_022684 | MANNB1                | chr9:139981378-140003633 | 43.3803    | 42.5052    | -0.0293982 | 0.989278 |
| XLOC_021353 | MRPS33                | chr7:140705960-140714781 | 29.83      | 29.2288    | -0.0293703 | 0.990857 |
| XLOC_000122 | PLEKHM2               | chr1:16010826-16061264   | 33.169     | 32.502     | -0.0293068 | 0.989268 |
| XLOC_004335 | EIF1AD                | chr11:65764015-65771617  | 11.1306    | 10.9069    | -0.0292908 | 0.997036 |
| XLOC_003655 | ADRBK1                | chr11:67033904-67054029  | 36.6502    | 35.914     | -0.0292725 | 0.989869 |
| XLOC_004376 | ORA0V1                | chr11:69480331-69490165  | 5.99001    | 5.87071    | -0.0290232 | 0.991767 |
| XLOC_012951 | PPP3R1                | chr2:68405988-68479651   | 12.4813    | 12.2331    | -0.0289835 | 0.98972  |
| XLOC_015373 | ZBTB38                | chr3:141043054-141168632 | 1.68887    | 1.6553     | -0.0289606 | 0.990857 |
| XLOC_014674 | SLC25A1               | chr22:19163087-19166338  | 164.599    | 161.337    | -0.0288731 | 0.990324 |
| XLOC_009665 | PGAP3                 | chr17:37827374-37844310  | 1.78344    | 1.74815    | -0.028832  | 0.99351  |
| XLOC_020551 | GTF2IRD1              | chr7:73868119-74016920   | 21.7401    | 21.31      | -0.0288312 | 0.98972  |
| XLOC_022149 | SAMD12                | chr8:119201694-119738306 | 1.83896    | 1.80261    | -0.0288051 | 0.990857 |
| XLOC_016412 | WDFY3-AS2             | chr4:85887970-85928168   | 0.18373    | 0.180114   | -0.0286749 | 1        |
| XLOC_020701 | C7orf53               | chr7:112120907-112130943 | 0.519982   | 0.509757   | -0.0286526 | 0.994938 |
| XLOC_012612 | FASTKD2               | chr2:207630111-207660911 | 5.13155    | 5.03065    | -0.0286502 | 0.989869 |
| XLOC_012517 | RAPGEF4               | chr2:173587917-173917620 | 0.0644327  | 0.0631673  | -0.0286158 | 1        |
| XLOC_015337 | ATP2C1                | chr3:130569368-130745644 | 15.2381    | 14.9391    | -0.0285834 | 0.990857 |
| XLOC_003313 | PFIFBP2               | chr11:7534995-7674996    | 1.85878    | 1.8225     | -0.0284399 | 0.992797 |
| XLOC_016018 | DHX36                 | chr3:153993456-154042286 | 5.87142    | 5.75685    | -0.0284297 | 0.990371 |
| XLOC_007145 | BAHD1                 | chr15:40733410-40760441  | 11.0982    | 10.8817    | -0.02842   | 0.990324 |
| XLOC_004726 | GABARAPL1             | chr12:10365488-10375724  | 8.30809    | 8.14673    | -0.0282954 | 0.991459 |
| XLOC_010576 | ICAM5                 | chr19:10400654-10407454  | 1.90783    | 1.87079    | -0.0282839 | 0.99351  |
| XLOC_008735 | FANCA                 | chr16:89773540-89883065  | 7.14518    | 7.00647    | -0.0282825 | 0.994929 |
| XLOC_018391 | TPBG                  | chr6:83072922-83077133   | 12.2295    | 11.9923    | -0.0282659 | 0.990857 |
| XLOC_000521 | RWDD3, TMEM56, TMEM56 | chr1:95558072-95712781   | 11.1369    | 10.9217    | -0.0281536 | 0.993108 |
| XLOC_018499 | ENPP1                 | chr6:132129155-132216295 | 0.962682   | 0.944083   | -0.0281455 | 0.991767 |
| XLOC_014722 | DDT                   | chr22:24309025-24322019  | 297.21     | 291.471    | -0.0281324 | 0.989869 |
| XLOC_020453 | RALA                  | chr7:39663151-39747723   | 13.3164    | 13.0597    | -0.0280886 | 0.990857 |
| XLOC_002920 | BMS1P1                | chr10:48927373-48952629  | 0.100675   | 0.0987416  | -0.0279759 | 1        |
| XLOC_004638 | B3GAT1                | chr11:134248397-13428181 | 8.01262    | 7.85877    | -0.0279712 | 0.990857 |
| XLOC_021130 | POMZP3                | chr7:76178657-76257299   | 8.45198    | 8.28977    | -0.0279568 | 0.994615 |
| XLOC_017116 | FBXO4                 | chr5:41925355-41941672   | 6.34756    | 6.22582    | -0.0279399 | 0.991767 |
| XLOC_013231 | DLX2                  | chr2:172964165-172967478 | 2.13475    | 2.09383    | -0.0279235 | 0.99451  |
| XLOC_013283 | STAT1                 | chr2:191833761-191878976 | 5.60051    | 5.49335    | -0.0278721 | 0.990857 |
| XLOC_003040 | LIPA                  | chr10:90973325-91011660  | 12.9506    | 12.7035    | -0.0278008 | 0.990324 |
| XLOC_023600 | XIAP                  | chrX:122993661-123047821 | 2.18873    | 2.14703    | -0.0277462 | 0.990994 |
| XLOC_003955 | MUC6                  | chr11:1012823-1036706    | 0.0416702  | 0.0408775  | -0.0277094 | 1        |
| XLOC_000082 | UBIAD1                | chr1:11333254-11348491   | 10.2981    | 10.1024    | -0.0276832 | 0.990324 |
| XLOC_001037 | PPP2R5A               | chr1:212458878-212535201 | 11.5105    | 11.292     | -0.0276558 | 0.98972  |
| XLOC_005771 | SBNO1                 | chr12:123773655-12383498 | 3.25313    | 3.19157    | -0.0275631 | 0.990857 |
| XLOC_009189 | MSI2                  | chr17:55333930-55757299  | 5.91559    | 5.80371    | -0.0275466 | 0.992939 |
| XLOC_000575 | AHCYL1                | chr1:110527386-110566364 | 23.1978    | 22.7615    | -0.0273955 | 0.990324 |
| XLOC_000892 | GAS5-AS1              | chr1:173832385-173837121 | 0.697113   | 0.684044   | -0.0273025 | 0.997535 |
| XLOC_005988 | COL4A2                | chr13:110959630-11116537 | 0.00310518 | 0.00304699 | -0.0272913 | 1        |
| XLOC_005384 | SLC2A13               | chr12:40148822-40499661  | 0.471417   | 0.462597   | -0.0272477 | 0.99351  |
| XLOC_011524 | NXNL1                 | chr19:17566233-17571725  | 0.0358033  | 0.0351344  | -0.0272108 | 1        |
| XLOC_000778 | APOA1BP               | chr1:156561557-156564091 | 148.716    | 145.94     | -0.0271826 | 0.990564 |
| XLOC_022792 | UBAP2                 | chr9:33921690-34048947   | 6.008      | 5.89606    | -0.0271332 | 0.990857 |
| XLOC_010626 | C19orf53              | chr19:13885256-13889586  | 150.956    | 148.146    | -0.0271033 | 0.990857 |
| XLOC_000894 | RABGAP1L              | chr1:174128551-174964444 | 1.89846    | 1.86314    | -0.0270927 | 0.994615 |
| XLOC_022127 | UBR5                  | chr8:103264501-103424917 | 6.07425    | 5.96151    | -0.0270283 | 0.990315 |
| XLOC_012624 | CPS1                  | chr2:211342405-211543831 | 0.473136   | 0.464361   | -0.0270076 | 0.99351  |
| XLOC_004252 | TMEM258               | chr11:61556601-61560085  | 526.742    | 516.974    | -0.027006  | 0.990324 |
| XLOC_022222 | TSTA3                 | chr8:144694787-144699732 | 179.47     | 176.143    | -0.0270011 | 0.990857 |
| XLOC_008193 | PRMT7                 | chr16:68344876-68391169  | 11.6721    | 11.4559    | -0.0269779 | 0.991459 |
| XLOC_017856 | CD14                  | chr5:140011312-140013286 | 0.0967867  | 0.0949973  | -0.0269222 | 1        |
| XLOC_022162 | FBXO32                | chr8:124510126-124553493 | 1.66997    | 1.6391     | -0.0269202 | 0.991767 |
| XLOC_013050 | KANSL3                | chr2:97258891-97304116   | 7.97873    | 7.83155    | -0.0268608 | 0.990857 |
| XLOC_001862 | DENND4B               | chr1:153901976-153919154 | 10.8302    | 10.6305    | -0.0268541 | 0.990857 |
| XLOC_008585 | BBS2                  | chr16:56518258-56554008  | 12.314     | 12.0873    | -0.0268053 | 0.990857 |
| XLOC_023519 | ARMCX4                | chrX:100673250-100790971 | 0.26369    | 0.258848   | -0.0267372 | 1        |
| XLOC_007894 | FLYWCH2               | chr16:2933195-2949383    | 40.8974    | 40.1477    | -0.0266908 | 0.991459 |
| XLOC_010607 | ZNF844                | chr19:12175545-12188626  | 1.07041    | 1.05083    | -0.0266631 | 0.99351  |
| XLOC_010680 | PGLS                  | chr19:17622431-17632097  | 132.546    | 130.124    | -0.0266054 | 0.990795 |
| XLOC_020709 | CAPZA2                | chr7:116502562-116559313 | 45.6606    | 44.8263    | -0.026605  | 0.990371 |
| XLOC_010831 | KCNK6                 | chr19:38810483-38819649  | 11.1625    | 10.959     | -0.0265421 | 0.991767 |
| XLOC_004912 | ORMDL2                | chr12:56211805-56236767  | 24.6341    | 24.1851    | -0.0265369 | 0.99441  |
| XLOC_014671 | DGCR2                 | chr22:19023794-19109967  | 18.2142    | 17.8824    | -0.0265182 | 0.990994 |
| XLOC_002766 | LRRC27                | chr10:134145613-13419501 | 3.0185     | 2.96354    | -0.0265063 | 0.99358  |
| XLOC_008247 | GAN                   | chr16:81348570-81413803  | 0.235567   | 0.231282   | -0.0264811 | 1        |
| XLOC_020893 | ADAP1                 | chr7:937536-994289       | 19.4396    | 19.0864    | -0.0264557 | 0.991569 |
| XLOC_017269 | YTHDC2                | chr5:112849390-112930984 | 2.08048    | 2.04272    | -0.0264243 | 0.991767 |
| XLOC_010344 | EPG5                  | chr18:43427573-43547305  | 1.42762    | 1.40175    | -0.0263798 | 0.991767 |
| XLOC_001469 | RRAGC                 | chr1:39303868-39325495   | 13.328     | 13.0866    | -0.0263651 | 0.990857 |
| XLOC_020388 | SP4                   | chr7:21467688-21554151   | 0.609873   | 0.598832   | -0.0263594 | 0.99351  |
| XLOC_010430 | C19orf21              | chr19:751145-764318      | 0.36365    | 0.357073   | -0.0263295 | 0.997036 |
| XLOC_002767 | PWWP2B                | chr10:134210701-13423131 | 22.2684    | 21.8659    | -0.0263167 | 0.991767 |
| XLOC_013902 | NINL                  | chr20:25433337-25566153  | 1.93448    | 1.89952    | -0.0263063 | 0.993108 |
| XLOC_013391 | WDFY1                 | chr2:224740064-224810052 | 4.40739    | 4.32811    | -0.0261877 | 0.991767 |

|             |                     |                          |            |            |            |          |
|-------------|---------------------|--------------------------|------------|------------|------------|----------|
| XLOC_017066 | KIAA0947            | chr5:5422785-5490347     | 2.79252    | 2.74246    | -0.0260971 | 0.991767 |
| XLOC_003908 | FAM118B             | chr11:126081618-12613887 | 6.1399     | 6.02998    | -0.0260605 | 0.996453 |
| XLOC_011729 | ZNF428              | chr19:44111375-44124014  | 12.0454    | 11.83      | -0.026039  | 0.993379 |
| XLOC_001439 | ZMYM6               | chr1:35451766-35497569   | 1.76209    | 1.73061    | -0.0260039 | 0.992797 |
| XLOC_004814 | TMEM106C            | chr12:48357329-48362661  | 111.975    | 109.981    | -0.0259164 | 0.990994 |
| XLOC_001199 | DVL1                | chr1:1270657-1284492     | 68.6427    | 67.4216    | -0.0258948 | 0.990857 |
| XLOC_000390 | RNF11               | chr1:51701944-51739119   | 17.0396    | 16.7368    | -0.0258724 | 0.991459 |
| XLOC_000126 | SPEN                | chr1:16160709-16266950   | 3.36871    | 3.30901    | -0.0257968 | 0.991767 |
| XLOC_008837 | CHD3                | chr17:7788122-7816075    | 12.9075    | 12.6791    | -0.0257499 | 0.990857 |
| XLOC_004655 | TULP3               | chr12:3000032-3050306    | 9.21856    | 9.05555    | -0.0257405 | 0.990857 |
| XLOC_021352 | BRAF                | chr7:140433812-140624564 | 2.05203    | 2.01576    | -0.0257294 | 0.993379 |
| XLOC_008513 | LOC440354,LOC595101 | chr16:30278913-30346695  | 1.97086    | 1.93602    | -0.0257265 | 0.99316  |
| XLOC_010935 | RELB                | chr19:45504706-45541456  | 14.269     | 14.0169    | -0.0257143 | 0.991767 |
| XLOC_021673 | FAM92A1             | chr8:94712772-94740671   | 32.7896    | 32.2118    | -0.0256491 | 0.991459 |
| XLOC_012912 | PSME4               | chr2:54091203-54197977   | 9.41781    | 9.25205    | -0.0256178 | 0.990857 |
| XLOC_013105 | ANAPC1              | chr2:112525213-112641747 | 6.57897    | 6.4633     | -0.0255903 | 0.990857 |
| XLOC_004399 | RAB6A               | chr11:73386682-73472201  | 20.9129    | 20.546     | -0.0255369 | 0.991459 |
| XLOC_006420 | SRSF5               | chr14:70232999-70238722  | 72.82      | 71.5459    | -0.025465  | 0.990857 |
| XLOC_008532 | ZNF668              | chr16:31072163-31085641  | 8.84477    | 8.69074    | -0.0253454 | 0.99316  |
| XLOC_014474 | KIAA1671            | chr22:25423940-25593415  | 1.94031    | 1.90655    | -0.0253241 | 0.991767 |
| XLOC_018307 | KLC4                | chr6:43027371-43042833   | 5.43251    | 5.338      | -0.0253214 | 0.992841 |
| XLOC_012623 | RPE                 | chr2:210867351-211036057 | 6.18698    | 6.07936    | -0.0253156 | 0.99451  |
| XLOC_004630 | ADAMTS8             | chr11:130274817-13029853 | 0.00633366 | 0.0062236  | -0.0252915 | 1        |
| XLOC_011939 | LENG1               | chr19:54641435-54663446  | 13.5085    | 13.274     | -0.0252647 | 0.996453 |
| XLOC_015579 | RAF1                | chr3:12598512-12705700   | 20.5423    | 20.1867    | -0.0251924 | 0.992797 |
| XLOC_005519 | RNF41               | chr12:56596287-56615753  | 10.7636    | 10.5774    | -0.0251673 | 0.991767 |
| XLOC_003378 | METTL15             | chr11:28129797-28355054  | 2.98308    | 2.93159    | -0.0251184 | 0.991767 |
| XLOC_004971 | HMGA2               | chr12:66151799-66360071  | 20.7544    | 20.3973    | -0.0250381 | 0.99351  |
| XLOC_015107 | APEH                | chr3:49711434-49720934   | 99.455     | 97.7475    | -0.0249839 | 0.991767 |
| XLOC_003599 | PPP2R5B             | chr11:64692142-64703360  | 17.7563    | 17.4518    | -0.0249521 | 0.99183  |
| XLOC_021503 | PPP3CC              | chr8:22298482-22398657   | 0.0622857  | 0.0612182  | -0.0249413 | 1        |
| XLOC_022583 | SWI5                | chr9:131038424-131051268 | 39.0612    | 38.392     | -0.0249308 | 0.991767 |
| XLOC_000210 | ARID1A              | chr1:27022521-27108601   | 4.87456    | 4.79138    | -0.0248311 | 0.991767 |
| XLOC_014914 | RABL2B              | chr22:51195513-51238065  | 5.73211    | 5.63438    | -0.0248104 | 0.99351  |
| XLOC_010821 | ZNF383              | chr19:37717365-37734574  | 2.07577    | 2.04039    | -0.0247996 | 0.993519 |
| XLOC_000039 | PRDM16              | chr1:2985741-3355185     | 1.46676    | 1.44183    | -0.02473   | 0.992797 |
| XLOC_018142 | ZSCAN26             | chr6:28234787-28245980   | 5.60461    | 5.50952    | -0.024689  | 0.992651 |
| XLOC_020535 | LOC100093631        | chr7:72569011-72621336   | 0.385201   | 0.378684   | -0.0246151 | 0.9953   |
| XLOC_022496 | TMEM38B             | chr9:108456805-108538892 | 11.5963    | 11.4001    | -0.0246094 | 0.991767 |
| XLOC_011747 | ZNF296              | chr19:45574757-45579688  | 22.5324    | 22.1514    | -0.0246019 | 0.991938 |
| XLOC_011097 | ZNF525              | chr19:53868967-53889841  | 1.04983    | 1.03208    | -0.0245968 | 0.993379 |
| XLOC_001570 | USP24               | chr1:55532031-55681039   | 3.25757    | 3.20264    | -0.0245332 | 0.991459 |
| XLOC_013562 | GZF1                | chr20:23345020-23353683  | 2.47051    | 2.42896    | -0.0244731 | 0.992797 |
| XLOC_018387 | SH3BGRL2            | chr6:80340999-80413369   | 1.69022    | 1.66181    | -0.0244563 | 0.993379 |
| XLOC_014629 | GTSF1               | chr22:46692637-46726707  | 10.4061    | 10.2317    | -0.0243861 | 0.991767 |
| XLOC_012158 | DYNC2L1             | chr2:44001177-44037149   | 10.6135    | 10.4357    | -0.0243736 | 0.992797 |
| XLOC_007865 | GFER                | chr16:2034149-2037750    | 29.3987    | 28.9064    | -0.0243638 | 0.991767 |
| XLOC_002076 | TRMT1L              | chr1:185087217-185260913 | 3.34421    | 3.28832    | -0.0243133 | 0.993379 |
| XLOC_008444 | ARL6IP1             | chr16:18802990-18812857  | 67.9192    | 66.7867    | -0.024259  | 0.991767 |
| XLOC_001732 | CSDE1,NRAS          | chr1:115247084-115300677 | 35.8516    | 35.254     | -0.024251  | 0.991767 |
| XLOC_002255 | RBM34               | chr1:235294497-235324577 | 22.7383    | 22.3593    | -0.0242491 | 0.991767 |
| XLOC_011783 | PRKD2               | chr19:47150868-47220384  | 17.7185    | 17.4239    | -0.0241932 | 0.991767 |
| XLOC_008609 | DYNC1L12            | chr16:66754798-66785525  | 8.08633    | 7.95211    | -0.0241464 | 0.991767 |
| XLOC_012273 | ELMOD3              | chr2:85581842-85618875   | 4.15031    | 4.08144    | -0.0241422 | 0.99351  |
| XLOC_003677 | CCND1               | chr11:69455872-69469242  | 26.3213    | 25.8854    | -0.0240965 | 0.991767 |
| XLOC_006057 | KATNAL1             | chr13:30776766-30881624  | 0.349577   | 0.343794   | -0.0240688 | 0.99451  |
| XLOC_008016 | SBK1                | chr16:28303839-28335170  | 4.29547    | 4.22448    | -0.024044  | 0.993379 |
| XLOC_006997 | JAG2                | chr14:105607317-10563516 | 17.0241    | 16.743     | -0.0240224 | 0.991767 |
| XLOC_005193 | SFSWAP              | chr12:132195631-13228428 | 9.07897    | 8.92933    | -0.0239769 | 0.991767 |
| XLOC_010005 | CYTH1               | chr17:76670129-76778376  | 4.73335    | 4.65551    | -0.023922  | 0.993108 |
| XLOC_001639 | CCBL2,RBML1         | chr1:89401455-89458643   | 15.5305    | 15.2758    | -0.0238583 | 0.992939 |
| XLOC_022309 | ACO1                | chr9:32384600-32450832   | 15.0091    | 14.7632    | -0.0238293 | 0.991767 |
| XLOC_023772 | CTPS2               | chrX:16606121-16731059   | 3.95499    | 3.89054    | -0.0237044 | 0.993108 |
| XLOC_001665 | ALG1                | chr1:95448278-95538507   | 6.58515    | 6.47827    | -0.0236076 | 0.99351  |
| XLOC_018041 | SNRNP48             | chr6:7590431-7612200     | 4.07076    | 4.00487    | -0.023542  | 0.992806 |
| XLOC_006413 | RAD51B              | chr14:68286495-69062738  | 5.59275    | 5.50228    | -0.0235273 | 0.99351  |
| XLOC_004355 | CORO1B              | chr11:67205517-67211292  | 124.351    | 122.346    | -0.0234537 | 0.991767 |
| XLOC_022646 | RXRα                | chr9:137218315-137332437 | 15.7699    | 15.5162    | -0.0233993 | 0.991767 |
| XLOC_014960 | TPRXL               | chr3:13978806-14107481   | 0.00901413 | 0.00886913 | -0.0233955 | 1        |
| XLOC_008362 | ECI1                | chr16:2289872-2301602    | 151.148    | 148.717    | -0.0233903 | 0.991767 |
| XLOC_001044 | VASH2               | chr1:213123886-213164927 | 0.48511    | 0.477328   | -0.0233305 | 0.994615 |
| XLOC_023159 | C9orf69             | chr9:139006426-139010737 | 43.0683    | 42.3785    | -0.0232932 | 0.991767 |
| XLOC_014482 | ASPHD2              | chr22:26825279-26840978  | 3.8762     | 3.81415    | -0.0232821 | 0.993379 |
| XLOC_005961 | MBNL2               | chr13:97874549-98046374  | 3.23706    | 3.18535    | -0.023232  | 0.993379 |
| XLOC_018248 | HMGA1               | chr6:34204576-34214008   | 1135.4     | 1117.31    | -0.0231647 | 0.992797 |
| XLOC_001564 | CYB5RL              | chr1:54638026-54665746   | 0.508512   | 0.500419   | -0.023146  | 0.995957 |
| XLOC_021864 | FAM167A             | chr8:11197145-11324276   | 0.99619    | 0.981067   | -0.0231244 | 0.994615 |
| XLOC_007640 | DPP8                | chr15:65737997-65810035  | 0.903985   | 0.889615   | -0.0231177 | 0.99451  |
| XLOC_012509 | DCAF17              | chr2:172173912-172341562 | 1.73635    | 1.70888    | -0.0230007 | 0.995957 |

|             |              |                          |           |           |            |          |
|-------------|--------------|--------------------------|-----------|-----------|------------|----------|
| XLOC_003650 | LRFN4        | chr11:66615996-66725847  | 42.3197   | 41.6529   | -0.0229113 | 0.992797 |
| XLOC_000393 | ZFYVE9       | chr1:52608045-52812358   | 2.78946   | 2.74556   | -0.0228845 | 0.992797 |
| XLOC_003600 | ARL2,SNX15   | chr11:64781584-64808044  | 165.876   | 163.265   | -0.0228881 | 0.991767 |
| XLOC_000223 | PPP1R8       | chr1:28157251-28178183   | 20.5792   | 20.2563   | -0.0228155 | 0.991767 |
| XLOC_001630 | C1orf52      | chr1:85715636-85725355   | 15.4749   | 15.2327   | -0.0227581 | 0.991767 |
| XLOC_016088 | CAMK2N2      | chr3:183967444-184010811 | 62.2835   | 61.3099   | -0.0227301 | 0.99351  |
| XLOC_009773 | ATXN7L3      | chr17:42269172-42275529  | 16.8229   | 16.56     | -0.0227205 | 0.992797 |
| XLOC_000016 | B3GALT6      | chr1:1167628-1170420     | 14.2973   | 14.074    | -0.0227159 | 0.992939 |
| XLOC_006939 | ATXN3        | chr14:92524895-92572965  | 1.76105   | 1.73356   | -0.0226985 | 0.993108 |
| XLOC_008019 | EIF3C,EIF3CL | chr16:28699878-28747053  | 1.21646   | 1.19747   | -0.0226978 | 0.994615 |
| XLOC_017543 | C5orf55      | chr5:441642-443258       | 3.14481   | 3.09581   | -0.022657  | 0.994615 |
| XLOC_012449 | R3HDM1       | chr2:136289082-136482831 | 4.24626   | 4.18049   | -0.0225223 | 0.992797 |
| XLOC_004085 | COPB1        | chr11:14479048-14521441  | 21.1511   | 20.8257   | -0.0223695 | 0.991938 |
| XLOC_003800 | ACAT1        | chr11:107992257-10801881 | 50.0523   | 49.2823   | -0.0223665 | 0.991767 |
| XLOC_003178 | FAM53B       | chr10:126307862-12643291 | 6.5313    | 6.43095   | -0.0223363 | 0.992797 |
| XLOC_004123 | LIN7C        | chr11:27515964-27528326  | 5.84706   | 5.75786   | -0.0221788 | 0.992797 |
| XLOC_022813 | STOML2       | chr9:35099888-35103154   | 300.611   | 296.027   | -0.0221713 | 0.992272 |
| XLOC_015105 | DAG1         | chr3:49506135-49573051   | 11.4061   | 11.2324   | -0.0221433 | 0.992797 |
| XLOC_015597 | ANKRD28      | chr3:15708743-15901053   | 4.00686   | 3.94589   | -0.0221224 | 0.992797 |
| XLOC_021666 | DECR1        | chr8:91013579-91064227   | 117.739   | 115.947   | -0.0221176 | 0.991902 |
| XLOC_005541 | STAT6        | chr12:57482676-57505196  | 32.8863   | 32.3862   | -0.0221082 | 0.994615 |
| XLOC_008884 | MPRIP        | chr17:16946073-17095962  | 7.92973   | 7.80952   | -0.0220376 | 0.992797 |
| XLOC_008716 | ZCCHC14      | chr16:87439851-87525460  | 2.63453   | 2.59469   | -0.021981  | 0.993379 |
| XLOC_003200 | STK32C       | chr10:134020995-13412147 | 9.34744   | 9.2067    | -0.0218869 | 0.99351  |
| XLOC_013837 | CENPB        | chr20:3764497-3767337    | 41.6546   | 41.0288   | -0.0218393 | 0.99316  |
| XLOC_009224 | DCAF7        | chr17:61627795-61671642  | 28.9921   | 28.5565   | -0.0218384 | 0.994615 |
| XLOC_017203 | AGGF1        | chr5:76326209-76361058   | 4.16241   | 4.09993   | -0.0218184 | 0.993379 |
| XLOC_018342 | C6orf141     | chr6:49518112-49519808   | 1.53943   | 1.51635   | -0.0217917 | 0.996079 |
| XLOC_006390 | SNAPC1       | chr14:62229074-62263146  | 5.78674   | 5.7002    | -0.0217374 | 0.993379 |
| XLOC_011481 | ASF1B        | chr19:14230320-14247440  | 36.2738   | 35.733    | -0.0216707 | 0.992797 |
| XLOC_014795 | MYH9         | chr22:36677322-36784063  | 63.0108   | 62.0736   | -0.0216188 | 0.992797 |
| XLOC_022123 | YWHAZ        | chr8:101930803-101965621 | 248.299   | 244.61    | -0.0215955 | 0.992797 |
| XLOC_022653 | PPP1R26      | chr9:138371647-138380731 | 16.8661   | 16.6158   | -0.0215728 | 0.99192  |
| XLOC_018375 | OGFRL1       | chr6:71998476-72011973   | 14.2921   | 14.0804   | -0.0215217 | 0.993379 |
| XLOC_008192 | SLC7A6       | chr16:68298418-68344868  | 4.97883   | 4.90514   | -0.0215125 | 0.99351  |
| XLOC_015025 | EXOG         | chr3:38537762-38567796   | 3.60026   | 3.54704   | -0.0214825 | 0.99351  |
| XLOC_000961 | GPR25        | chr1:200842082-200843301 | 0.0488791 | 0.0481576 | -0.0214533 | 1        |
| XLOC_023022 | WDR31        | chr9:116077930-116102621 | 0.347902  | 0.342767  | -0.0214524 | 0.997036 |
| XLOC_008849 | NDEL1        | chr17:8339169-8371495    | 5.1776    | 5.1012    | -0.0214481 | 0.99351  |
| XLOC_009626 | CCL5         | chr17:34198495-34207377  | 1.3559    | 1.33591   | -0.0214227 | 0.995528 |
| XLOC_006170 | SPRY2        | chr13:80910111-80915086  | 6.74262   | 6.64356   | -0.0213513 | 0.99351  |
| XLOC_001238 | GPR153       | chr1:6307405-6321035     | 5.82332   | 5.73785   | -0.0213309 | 0.99351  |
| XLOC_014851 | PMM1         | chr22:41972889-41985871  | 60.8508   | 59.9609   | -0.0212545 | 0.992109 |
| XLOC_017194 | POLK         | chr5:74666927-74895646   | 1.33066   | 1.3112    | -0.0212542 | 0.997036 |
| XLOC_002411 | LOC399744    | chr10:38717073-38741081  | 2.048     | 2.01813   | -0.0211917 | 0.994615 |
| XLOC_016643 | LRPAP1       | chr4:3505323-3534224     | 16.3261   | 16.0883   | -0.0211652 | 0.992797 |
| XLOC_011343 | DUS3L        | chr19:5785152-5791249    | 41.6541   | 41.0483   | -0.0211359 | 0.993379 |
| XLOC_000023 | VWA1         | chr1:1370902-1378262     | 4.6275    | 4.56037   | -0.0210816 | 0.99351  |
| XLOC_000252 | CCDC28B      | chr1:32666201-32670991   | 9.52615   | 9.38822   | -0.0210425 | 0.994615 |
| XLOC_003831 | RBM7         | chr11:114271383-11427961 | 11.2736   | 11.1104   | -0.021042  | 0.993379 |
| XLOC_020639 | COP56        | chr7:99686582-99689822   | 163.254   | 160.896   | -0.0209968 | 0.992797 |
| XLOC_012271 | KCMF1        | chr2:85198230-85286595   | 10.3319   | 10.1831   | -0.0209207 | 0.993379 |
| XLOC_002673 | CNNM2        | chr10:104678074-10483831 | 3.36865   | 3.32022   | -0.0208898 | 0.994615 |
| XLOC_013257 | FKBP7        | chr2:179059207-179672151 | 1.45537   | 1.43445   | -0.0208891 | 0.99714  |
| XLOC_006182 | TGDS         | chr13:95226307-95248511  | 5.57469   | 5.49456   | -0.0208868 | 0.99351  |
| XLOC_014669 | GGT3P        | chr22:18761201-18779474  | 0.166987  | 0.164587  | -0.0208801 | 1        |
| XLOC_021269 | TMEM168      | chr7:112405786-112430471 | 4.07324   | 4.01482   | -0.0208388 | 0.99351  |
| XLOC_022577 | FPGS         | chr9:130565153-130576551 | 127.927   | 126.092   | -0.0208374 | 0.993108 |
| XLOC_015447 | RNDC3B       | chr3:171757417-172118491 | 1.99322   | 1.96468   | -0.0208081 | 0.99351  |
| XLOC_006492 | CPSF2        | chr14:92588297-92630543  | 6.47431   | 6.38209   | -0.020697  | 0.993379 |
| XLOC_010144 | GATA6        | chr18:19749403-19782491  | 2.979     | 2.93668   | -0.0206412 | 0.99441  |
| XLOC_009104 | RUNDC3A      | chr17:42385926-42396038  | 0.992981  | 0.978893  | -0.0206141 | 0.99634  |
| XLOC_014631 | GRAMD4       | chr22:47022657-47075688  | 9.04856   | 8.92029   | -0.0205966 | 0.993379 |
| XLOC_009460 | NEURL4       | chr17:7218950-7232638    | 3.44523   | 3.3964    | -0.0205939 | 0.99351  |
| XLOC_017928 | RNF145       | chr5:158584416-158637061 | 28.4327   | 28.0301   | -0.0205734 | 0.99316  |
| XLOC_021207 | GAL3ST4      | chr7:99756864-99766373   | 0.287936  | 0.28386   | -0.0205688 | 1        |
| XLOC_015624 | GLB1,TMPPE   | chr3:33038099-33138694   | 33.0451   | 32.578    | -0.0205395 | 0.992797 |
| XLOC_010976 | SEPW1        | chr19:48281841-48287943  | 196.475   | 193.7     | -0.0205218 | 0.99316  |
| XLOC_003639 | RAB1B        | chr11:66036055-66044963  | 164.244   | 161.94    | -0.0203885 | 0.993379 |
| XLOC_012792 | E2F6         | chr2:11584500-11606297   | 7.88011   | 7.76995   | -0.0203117 | 0.993379 |
| XLOC_018486 | HINT3        | chr6:126277860-126301381 | 6.14852   | 6.06264   | -0.0202929 | 0.99351  |
| XLOC_018223 | RNF5         | chr6:32146161-32148570   | 70.6837   | 69.6966   | -0.0202902 | 0.99351  |
| XLOC_008445 | SMG1         | chr16:18816174-18937726  | 2.3642    | 2.33128   | -0.0202263 | 0.993108 |
| XLOC_022017 | ARMC1        | chr8:66514690-66546452   | 11.101    | 10.9466   | -0.0202016 | 0.993379 |
| XLOC_009851 | SPA69        | chr17:49039534-49198226  | 3.64296   | 3.59239   | -0.0201695 | 0.993379 |
| XLOC_020630 | ZNF789       | chr7:99070514-99085217   | 3.56179   | 3.51236   | -0.0201604 | 0.995957 |
| XLOC_019096 | HBS1L        | chr6:135281516-135376031 | 4.88147   | 4.81376   | -0.0201506 | 0.99351  |
| XLOC_014393 | CECR7        | chr22:17517459-17539682  | 1.11966   | 1.1042    | -0.0200619 | 0.996079 |
| XLOC_017378 | PCDH9B       | chr5:140566892-140571111 | 0.388103  | 0.382773  | -0.019951  | 0.996014 |

|              |                        |                         |            |            |            |          |
|--------------|------------------------|-------------------------|------------|------------|------------|----------|
| XLOC_018462  | RWDD1                  | chr6:116892582-11691443 | 39.0073    | 38.4727    | -0.0199115 | 0.993379 |
| XLOC_002742  | ACADSB                 | chr10:124768428-1248178 | 2.24089    | 2.21024    | -0.0198734 | 0.99351  |
| XLOC_014763  | RNF215                 | chr22:30774802-30783302 | 18.1253    | 17.8786    | -0.0197669 | 0.99351  |
| XLOC_015119  | HEMK1                  | chr3:50595455-50622421  | 4.83066    | 4.76499    | -0.0197469 | 0.994615 |
| XLOC_009723  | KRT19                  | chr17:39679868-39684641 | 0.0187921  | 0.0185368  | -0.0197289 | 1        |
| XLOC_004628  | PRDM10                 | chr11:129769600-1298753 | 1.17841    | 1.16246    | -0.0196675 | 0.994615 |
| XLOC_013301  | TYW5                   | chr2:200793633-20082884 | 1.74578    | 1.72218    | -0.0196406 | 0.996079 |
| XLOC_007241  | TPM1                   | chr15:63334837-63364113 | 50.6968    | 50.0183    | -0.019439  | 0.993379 |
| XLOC_002215  | ACBD3                  | chr1:226332379-22637442 | 7.8759     | 7.77064    | -0.0194116 | 0.99351  |
| XLOC_003865  | CBL                    | chr11:119076985-1191788 | 3.23056    | 3.18747    | -0.0193753 | 0.993379 |
| XLOC_015355  | PCCB                   | chr3:135969166-13604901 | 74.8656    | 73.87      | -0.0193143 | 0.993379 |
| XLOC_003989  | NUP98                  | chr11:3696239-3847601   | 7.6855     | 7.58344    | -0.019287  | 0.994615 |
| XLOC_021349  | MKRN1                  | chr7:140152839-14017936 | 45.6168    | 45.0111    | -0.0192865 | 0.99351  |
| XLOC_0021159 | FAM133B                | chr7:92190071-92219706  | 13.244     | 13.0683    | -0.0192748 | 0.99351  |
| XLOC_000868  | BLZF1                  | chr1:169337193-16939667 | 1.10826    | 1.0937     | -0.0190758 | 0.996096 |
| XLOC_014124  | BACH1                  | chr21:30671219-30734217 | 2.62789    | 2.59344    | -0.0190399 | 0.993651 |
| XLOC_013654  | ACTR5                  | chr20:37377096-37401089 | 5.14482    | 5.0776     | -0.0189733 | 0.994615 |
| XLOC_000812  | PEA15                  | chr1:160175124-16018516 | 102.525    | 101.19     | -0.0189096 | 0.993379 |
| XLOC_016504  | PHF17                  | chr4:129730778-12979637 | 7.30556    | 7.21074    | -0.0188473 | 0.99351  |
| XLOC_011804  | CARD8                  | chr19:48711342-48761450 | 2.73461    | 2.69916    | -0.0188239 | 0.997036 |
| XLOC_006003  | TMCO3                  | chr13:114145307-1142045 | 9.54607    | 9.42252    | -0.0187933 | 0.99351  |
| XLOC_002459  | FAM21A,FAM21B          | chr10:51827683-51893269 | 1.82901    | 1.80535    | -0.0187822 | 0.994615 |
| XLOC_002327  | NET1                   | chr10:5454513-5501019   | 7.72256    | 7.62309    | -0.0187046 | 0.99351  |
| XLOC_009247  | LINC00674              | chr17:66097695-66132070 | 2.55722    | 2.52445    | -0.0186807 | 0.99351  |
| XLOC_007189  | SORD                   | chr15:45315301-45367287 | 40.7593    | 40.2371    | -0.0186058 | 0.993379 |
| XLOC_004564  | DDX6                   | chr11:118618472-1186619 | 12.2092    | 12.0535    | -0.0185109 | 0.99351  |
| XLOC_022581  | C9orf16                | chr9:130922538-13092620 | 369.857    | 365.151    | -0.0184733 | 0.99351  |
| XLOC_013667  | LOC100505783           | chr20:42839599-42854667 | 1.24203    | 1.22625    | -0.018451  | 0.996453 |
| XLOC_008286  | CTU2                   | chr16:88772890-88851372 | 17.3819    | 17.1613    | -0.0184295 | 0.997036 |
| XLOC_020768  | AGBL3                  | chr7:134671258-13482053 | 0.0820365  | 0.0809968  | -0.018401  | 1        |
| XLOC_014241  | NRIP1                  | chr21:16333555-16437126 | 0.50893    | 0.502494   | -0.0183608 | 0.995515 |
| XLOC_013082  | TGFBRAP1               | chr2:105883539-10594614 | 1.41047    | 1.39272    | -0.0182703 | 0.996079 |
| XLOC_014864  | RRP7B                  | chr22:42949924-42978017 | 4.81944    | 4.75884    | -0.0182548 | 0.994615 |
| XLOC_004037  | TAF10                  | chr11:6624963-6633475   | 136.933    | 135.213    | -0.0182409 | 0.997036 |
| XLOC_009375  | PITPNA                 | chr17:1420212-1466110   | 16.4203    | 16.2149    | -0.0181619 | 0.99351  |
| XLOC_018229  | PSMB9                  | chr6:32821937-32827628  | 14.3712    | 14.1915    | -0.0181505 | 0.994615 |
| XLOC_014445  | LOC96610               | chr22:22652462-22677324 | 2.61795    | 2.58523    | -0.0181487 | 0.995481 |
| XLOC_015322  | ACAD9                  | chr3:128598332-12863195 | 12.3203    | 12.1663    | -0.0181427 | 0.99351  |
| XLOC_002258  | DOCK8                  | chr9:213107-465259      | 0.421154   | 0.415903   | -0.0181029 | 0.996453 |
| XLOC_005214  | SLC6A13                | chr12:329786-372039     | 0.663615   | 0.655344   | -0.0180944 | 0.997036 |
| XLOC_015836  | MINA                   | chr3:97540883-97691295  | 7.89867    | 7.80024    | -0.0180895 | 0.99358  |
| XLOC_007306  | LMAN1L                 | chr15:75105193-75118099 | 0.0137071  | 0.0135363  | -0.0180872 | 1        |
| XLOC_005163  | OGFOD2                 | chr12:123459353-1234645 | 8.9342     | 8.82331    | -0.0180196 | 0.994615 |
| XLOC_015469  | YEATS2                 | chr3:183415605-18353041 | 12.0954    | 11.9455    | -0.0179915 | 0.99351  |
| XLOC_002662  | GBF1                   | chr10:104005254-1041426 | 6.30318    | 6.22511    | -0.0179824 | 0.99351  |
| XLOC_012888  | OXER1                  | chr2:42989638-42991401  | 0.0152288  | 0.0150404  | -0.0179587 | 1        |
| XLOC_016883  | PAPSS1                 | chr4:108534821-10864141 | 15.2611    | 15.0728    | -0.0179093 | 0.99351  |
| XLOC_020659  | SLC12A9                | chr7:100450340-10046463 | 25.4952    | 25.1807    | -0.017909  | 0.99351  |
| XLOC_024046  | LAMP2                  | chrX:119560002-11960320 | 12.9878    | 12.8277    | -0.0178896 | 0.99351  |
| XLOC_001443  | C1orf216               | chr1:36179476-36184790  | 8.20202    | 8.10107    | -0.0178668 | 0.99351  |
| XLOC_022198  | PTK2                   | chr8:141668480-14201141 | 26.3508    | 26.0269    | -0.0178408 | 0.99351  |
| XLOC_010050  | NOTUM                  | chr17:79910382-79919057 | 4.23598    | 4.18436    | -0.0176915 | 0.995957 |
| XLOC_013025  | CHMP3,RNF103,RNF103-Cl | chr2:86730552-87005164  | 23.0774    | 22.7969    | -0.0176435 | 0.994615 |
| XLOC_021345  | HIPK2                  | chr7:139246315-13947769 | 1.68765    | 1.66714    | -0.0176376 | 0.99451  |
| XLOC_015749  | DUSP7                  | chr3:52082936-52090461  | 26.2065    | 25.8881    | -0.0176348 | 0.99351  |
| XLOC_022171  | FAM84B                 | chr8:127564682-12757071 | 6.50604    | 6.42703    | -0.0176283 | 0.993589 |
| XLOC_016472  | LARP7                  | chr4:113460488-11357874 | 8.25564    | 8.15568    | -0.017575  | 0.994615 |
| XLOC_015187  | PPP4R2                 | chr3:73046118-73115011  | 3.87726    | 3.83046    | -0.0175169 | 0.995302 |
| XLOC_017222  | ATP6AP1L               | chr5:81601165-81614147  | 1.01949    | 1.00721    | -0.0174751 | 0.997036 |
| XLOC_021559  | ADAM9                  | chr8:38854504-38962779  | 10.6023    | 10.4754    | -0.0173815 | 0.99351  |
| XLOC_017521  | RMND5B                 | chr5:177558027-1775547  | 19.7381    | 19.502     | -0.0173547 | 0.994039 |
| XLOC_005614  | KITLG                  | chr12:88886569-88974250 | 0.151003   | 0.149201   | -0.0173183 | 1        |
| XLOC_003736  | LOC100506233           | chr11:82783107-82784754 | 4.4239     | 4.37139    | -0.017227  | 0.996079 |
| XLOC_016703  | ARAP2                  | chr4:36067619-36245979  | 0.600239   | 0.593115   | -0.0172265 | 0.995957 |
| XLOC_012600  | ABI2                   | chr2:204193002-20429689 | 8.30508    | 8.20677    | -0.017179  | 0.99351  |
| XLOC_009382  | SMYD4                  | chr17:1682828-1733175   | 2.06745    | 2.04299    | -0.0171705 | 0.994978 |
| XLOC_017019  | RWDD4                  | chr4:184560788-18458033 | 9.22501    | 9.11631    | -0.0170999 | 0.994039 |
| XLOC_018642  | MAK                    | chr6:10762955-10838788  | 0.0733312  | 0.0724725  | -0.0169925 | 1        |
| XLOC_009175  | NME1,NME1-NME2,NME2    | chr17:49230896-49249105 | 1797.26    | 1776.35    | -0.0168832 | 0.99451  |
| XLOC_009163  | XYLT2                  | chr17:48423392-48438512 | 16.6037    | 16.4106    | -0.0168712 | 0.99451  |
| XLOC_015140  | STAB1                  | chr3:52529355-52569093  | 0.00289841 | 0.00286491 | -0.0167749 | 1        |
| XLOC_006905  | ANGEL1                 | chr14:77253585-77279283 | 6.71541    | 6.63786    | -0.0167578 | 0.994615 |
| XLOC_017777  | ATG12                  | chr5:115163893-11517754 | 10.0203    | 9.9054     | -0.0166356 | 0.99358  |
| XLOC_013973  | CHD6                   | chr20:40031169-40247133 | 1.1869     | 1.17331    | -0.0166115 | 0.994737 |
| XLOC_016036  | IFT80                  | chr3:159974773-16011732 | 2.08651    | 2.06271    | -0.0165502 | 0.995302 |
| XLOC_009622  | PEX12                  | chr17:33901813-33905656 | 1.32613    | 1.31108    | -0.0164684 | 0.996453 |
| XLOC_017445  | CYFIP2                 | chr5:156693090-15682260 | 9.86084    | 9.74957    | -0.0163718 | 0.99358  |
| XLOC_013505  | ATRN                   | chr20:3451664-3631769   | 3.57716    | 3.53702    | -0.0162809 | 0.99492  |
| XLOC_018627  | ECI2                   | chr6:4068592-4135831    | 33.9295    | 33.5519    | -0.0161455 | 0.994615 |

|             |                       |                          |           |           |            |          |
|-------------|-----------------------|--------------------------|-----------|-----------|------------|----------|
| XLOC_013373 | CNPPD1                | chr2:220036618-220041702 | 46.2209   | 45.7069   | -0.0161333 | 0.99451  |
| XLOC_006931 | RPS6KA5               | chr14:91337166-91526993  | 0.332339  | 0.328663  | -0.0160442 | 1        |
| XLOC_011761 | SNRPD2                | chr19:46190711-46195443  | 614.759   | 607.991   | -0.0159707 | 0.994615 |
| XLOC_017439 | CNOT8                 | chr5:154238197-154256352 | 27.6083   | 27.3047   | -0.0159507 | 0.994615 |
| XLOC_023521 | ARMCX3                | chrX:100878119-100882832 | 8.42618   | 8.33363   | -0.0159337 | 0.994615 |
| XLOC_009928 | HELMX                 | chr17:65066553-65241319  | 1.89994   | 1.87908   | -0.0159269 | 0.994615 |
| XLOC_021216 | LRC4                  | chr7:100171633-100183776 | 12.0425   | 11.9104   | -0.0159203 | 0.994615 |
| XLOC_012867 | STRN                  | chr2:37064840-37193615   | 1.0173    | 1.00617   | -0.0158668 | 0.994978 |
| XLOC_000413 | BSND                  | chr1:55464616-55474465   | 0.014886  | 0.0147237 | -0.0158184 | 1        |
| XLOC_009584 | FLOT2                 | chr17:27206356-27224715  | 36.8297   | 36.4288   | -0.0157917 | 0.99449  |
| XLOC_018609 | EXOC2                 | chr6:485137-693141       | 4.17042   | 4.12509   | -0.0157665 | 0.994615 |
| XLOC_014373 | PTTG1IP               | chr21:46269499-46293818  | 85.1077   | 84.185    | -0.0157268 | 0.994615 |
| XLOC_002227 | TRIM11                | chr1:228581376-228594517 | 20.7431   | 20.5191   | -0.0156628 | 0.994615 |
| XLOC_002756 | DOCK1                 | chr10:128594022-12925078 | 5.58398   | 5.52381   | -0.0156306 | 0.994615 |
| XLOC_012762 | FAM110C               | chr2:38813-46588         | 1.32816   | 1.31386   | -0.0156236 | 0.996079 |
| XLOC_022810 | VCP                   | chr9:35056064-35072739   | 57.5359   | 56.9188   | -0.0155574 | 0.994615 |
| XLOC_002444 | AGAP9                 | chr10:48215723-48237508  | 0.123712  | 0.122387  | -0.0155345 | 1        |
| XLOC_021086 | GUSB                  | chr7:65425672-65447301   | 27.8921   | 27.5951   | -0.0154421 | 0.994615 |
| XLOC_006236 | RASA3                 | chr13:114747193-11489808 | 13.391    | 13.2489   | -0.0153855 | 0.994615 |
| XLOC_006757 | HEATR5A               | chr14:31760993-31889788  | 0.725191  | 0.717518  | -0.015346  | 0.996284 |
| XLOC_010897 | MEGF8                 | chr19:42829760-42882921  | 1.39812   | 1.3834    | -0.0152654 | 0.995528 |
| XLOC_012139 | NAPEPLD               | chr7:102715327-102789566 | 2.21591   | 2.1926    | -0.0152595 | 0.99714  |
| XLOC_022829 | GNE                   | chr9:36214438-36277053   | 2.19146   | 2.16845   | -0.0152302 | 0.995957 |
| XLOC_002622 | PGAM1                 | chr10:99186026-99193198  | 495.595   | 490.422   | -0.0151365 | 0.994615 |
| XLOC_009952 | CD300C                | chr17:72537204-72542310  | 0.0128593 | 0.0127255 | -0.0150921 | 1        |
| XLOC_020682 | PMPCB                 | chr7:102937872-102985320 | 27.427    | 27.1417   | -0.0150835 | 0.996079 |
| XLOC_009331 | CHMP6                 | chr17:78965640-78973933  | 14.9873   | 14.8315   | -0.0150754 | 0.995957 |
| XLOC_013787 | SLC244RG              | chr20:62371210-62436856  | 57.8338   | 57.2329   | -0.0150674 | 0.995221 |
| XLOC_015780 | FAM208A               | chr3:56591183-56717135   | 4.72256   | 4.67373   | -0.0149943 | 0.995302 |
| XLOC_005894 | SETDB2                | chr13:50018428-50069139  | 1.08401   | 1.07822   | -0.0149602 | 0.996079 |
| XLOC_013234 | SP3                   | chr2:174771186-174830430 | 5.72336   | 5.66444   | -0.0149294 | 0.994615 |
| XLOC_010569 | P2RY11,PPAN,PPAN-P2RY | chr19:10216898-10230599  | 44.1534   | 43.6995   | -0.0149075 | 0.997082 |
| XLOC_006802 | CDKL1                 | chr14:50796719-50862617  | 0.926537  | 0.917048  | -0.0148515 | 0.99714  |
| XLOC_017485 | ATP6V0E1              | chr5:172410762-172461900 | 215.567   | 213.362   | -0.0148341 | 0.994615 |
| XLOC_003251 | MRPL23                | chr11:1968501-1977839    | 112.846   | 111.7     | -0.0147275 | 0.994615 |
| XLOC_022249 | ARHGAP39              | chr8:145754562-145838888 | 5.40177   | 5.34696   | -0.0147145 | 0.995957 |
| XLOC_008279 | BANP                  | chr16:87985037-88110924  | 6.13372   | 6.07157   | -0.0146909 | 0.996079 |
| XLOC_020868 | PRKAG2-AS1            | chr7:151253200-151576308 | 18.7049   | 18.5161   | -0.014636  | 0.997036 |
| XLOC_015886 | B4GALT4               | chr3:118930588-118959752 | 5.46653   | 5.41141   | -0.0146195 | 0.996014 |
| XLOC_012153 | PKDCC                 | chr2:42275160-42285668   | 7.21653   | 7.14397   | -0.014579  | 0.995957 |
| XLOC_015438 | MYNN                  | chr3:169490852-169507504 | 2.33504   | 2.31161   | -0.0145462 | 0.995957 |
| XLOC_009671 | NR1D1                 | chr17:38218445-38256978  | 8.08916   | 8.00804   | -0.0145405 | 0.997036 |
| XLOC_007401 | NGRN                  | chr15:90808894-90815443  | 62.6661   | 62.0386   | -0.0145199 | 0.994615 |
| XLOC_013093 | SEPT10                | chr2:110300373-110371782 | 15.11     | 14.9593   | -0.0144561 | 0.994615 |
| XLOC_005543 | STAC3                 | chr12:57637241-57644969  | 0.691408  | 0.684519  | -0.0144466 | 0.99714  |
| XLOC_014413 | TANGO2                | chr22:20008630-20053447  | 11.2285   | 11.1167   | -0.014442  | 0.995302 |
| XLOC_003743 | C11orf73              | chr11:86013252-86056985  | 29.1813   | 28.8919   | -0.0143776 | 0.995309 |
| XLOC_020603 | GATAD1                | chr7:92076761-92089381   | 13.602    | 13.4671   | -0.0143691 | 0.994711 |
| XLOC_005097 | FAM216A               | chr12:110890290-11092818 | 31.1451   | 30.8364   | -0.0143683 | 0.996453 |
| XLOC_018254 | ZNF76                 | chr6:35227509-35263760   | 9.51964   | 9.42548   | -0.0143413 | 0.995318 |
| XLOC_002180 | ANGEL2                | chr1:213165523-213189168 | 5.18608   | 5.13482   | -0.0143323 | 0.995515 |
| XLOC_001615 | ZZZ3                  | chr1:78030189-78148343   | 3.077     | 3.04669   | -0.0142815 | 0.995957 |
| XLOC_007782 | HDDC3                 | chr15:91473409-91497323  | 18.8419   | 18.6574   | -0.0142013 | 0.99714  |
| XLOC_014429 | LZTR1                 | chr22:21336557-21353326  | 12.0102   | 11.8932   | -0.0141232 | 0.994615 |
| XLOC_000194 | SEPN1                 | chr1:26126666-26144713   | 73.6466   | 72.9312   | -0.0140825 | 0.995309 |
| XLOC_023919 | SNX12                 | chrX:70279096-70293276   | 18.1652   | 17.9888   | -0.0140796 | 0.994978 |
| XLOC_017287 | SNX2                  | chr5:122110749-122165802 | 26.9221   | 26.6623   | -0.0139891 | 0.994978 |
| XLOC_010177 | ELP2                  | chr18:33709836-33754688  | 26.8658   | 26.6078   | -0.0139247 | 0.994711 |
| XLOC_013500 | GNRH2                 | chr20:3024267-3026391    | 0.0764914 | 0.075757  | -0.0139179 | 1        |
| XLOC_000584 | CEPT1                 | chr1:111659953-111727724 | 11.7831   | 11.6701   | -0.013898  | 0.997036 |
| XLOC_023370 | WDR13                 | chrX:48455879-48463582   | 33.1126   | 32.7989   | -0.013735  | 0.995302 |
| XLOC_014172 | ETS2                  | chr21:40177230-40196878  | 6.77049   | 6.70643   | -0.0137162 | 0.995464 |
| XLOC_000814 | NCSTN                 | chr1:160258376-160328742 | 23.627    | 23.4038   | -0.0136968 | 0.997036 |
| XLOC_021343 | LOC100129148          | chr7:139025104-139112272 | 1.85422   | 1.83673   | -0.0136742 | 0.997036 |
| XLOC_009211 | PPM1D                 | chr17:58677543-58743640  | 2.16805   | 2.14768   | -0.0136189 | 0.996453 |
| XLOC_004808 | TMEM117               | chr12:44229961-44783541  | 0.928027  | 0.919325  | -0.0135906 | 0.997036 |
| XLOC_001257 | CTNBNIP1              | chr1:9908333-9970316     | 8.3121    | 8.23425   | -0.0135759 | 0.995957 |
| XLOC_022066 | C8orf59               | chr8:86089618-86132643   | 149.849   | 148.457   | -0.0134695 | 0.995597 |
| XLOC_017698 | FAM169A               | chr5:74073398-74162663   | 2.24104   | 2.22029   | -0.013419  | 0.995957 |
| XLOC_012754 | BOK                   | chr2:242483800-242513552 | 58.2314   | 57.693    | -0.0134015 | 0.995309 |
| XLOC_007296 | PML                   | chr15:74287013-74340155  | 13.407    | 13.2837   | -0.0133378 | 0.996079 |
| XLOC_007318 | UBE2Q2                | chr15:76135621-76193388  | 11.673    | 11.5657   | -0.0133269 | 0.995528 |
| XLOC_012259 | SEMA4F                | chr2:74881354-74910981   | 4.25671   | 4.21765   | -0.0132982 | 0.995528 |
| XLOC_002395 | WAC                   | chr10:28821421-28912041  | 23.9125   | 23.6933   | -0.013281  | 0.995709 |
| XLOC_002690 | SMC3                  | chr10:112327448-11236438 | 9.61306   | 9.52553   | -0.0131954 | 0.995309 |
| XLOC_023297 | PRDX4                 | chrX:23685644-23704514   | 223.64    | 221.628   | -0.0130381 | 0.995709 |
| XLOC_007154 | VPS18                 | chr15:41186627-41196173  | 14.2207   | 14.0935   | -0.0129668 | 0.995524 |
| XLOC_010938 | PPP1R37               | chr19:45596430-45650543  | 10.8405   | 10.7435   | -0.0129562 | 0.996079 |
| XLOC_007206 | NDUF4F4P1             | chr15:49447975-49913118  | 0.0294362 | 0.0291731 | -0.0129534 | 1        |

|             |                        |                          |            |           |             |          |
|-------------|------------------------|--------------------------|------------|-----------|-------------|----------|
| XLOC_008288 | TRAPPC2L               | chr16:88923505-88927520  | 80.0739    | 79.3591   | -0.0129352  | 0.995302 |
| XLOC_010701 | KXD1                   | chr19:18668571-18680197  | 144.203    | 142.928   | -0.0128141  | 0.99584  |
| XLOC_019156 | SERAC1                 | chr6:158530535-158589312 | 3.23326    | 3.20488   | -0.0127193  | 0.995957 |
| XLOC_000408 | MRPL37                 | chr1:54665839-54684056   | 186.564    | 184.928   | -0.0127089  | 0.995957 |
| XLOC_017401 | TCERG1                 | chr5:145826872-145891065 | 10.4388    | 10.3473   | -0.0127048  | 0.995464 |
| XLOC_014074 | YTHDF1                 | chr20:61826781-61847538  | 17.931     | 17.7739   | -0.0126997  | 0.995464 |
| XLOC_003928 | ACAD8                  | chr11:134123433-13413574 | 13.933     | 13.8118   | -0.0126097  | 0.996023 |
| XLOC_004163 | CKAP5                  | chr11:46765083-46867859  | 14.098     | 13.9757   | -0.0125662  | 0.995528 |
| XLOC_004958 | USP15                  | chr12:62654120-62803501  | 3.54729    | 3.51653   | -0.0125623  | 0.997036 |
| XLOC_017960 | THOC3                  | chr5:175386533-17539554  | 17.7082    | 17.5547   | -0.0125556  | 0.995957 |
| XLOC_020351 | RNF216P1               | chr7:5013615-5037800     | 11.9143    | 11.8122   | -0.0124157  | 0.996079 |
| XLOC_014556 | PICK1                  | chr22:38453261-38471708  | 17.2401    | 17.0931   | -0.0123614  | 0.996079 |
| XLOC_011272 | SBNO2                  | chr19:1107632-1174282    | 13.6796    | 13.563    | -0.0123546  | 0.996079 |
| XLOC_012871 | CEBPZ                  | chr2:37423634-37458740   | 8.17797    | 8.10898   | -0.0122209  | 0.997036 |
| XLOC_015762 | GLT8D1                 | chr3:52719935-52742197   | 15.8843    | 15.7507   | -0.0121891  | 0.998526 |
| XLOC_000060 | CAMTA1                 | chr1:6845383-7829766     | 63.4418    | 62.9127   | -0.0120822  | 0.996079 |
| XLOC_008245 | ATMIN                  | chr16:81069457-81080951  | 3.92385    | 3.89126   | -0.0120322  | 0.996079 |
| XLOC_016195 | MSX4                   | chr4:4861391-4865660     | 21.6841    | 21.5045   | -0.0119974  | 0.996079 |
| XLOC_003910 | TIRAP                  | chr11:126152981-1261648  | 1.98703    | 1.97059   | -0.0119886  | 0.997036 |
| XLOC_005413 | ZNF641                 | chr12:48733792-48745029  | 2.35586    | 2.33637   | -0.011984   | 0.99647  |
| XLOC_004918 | IKZF4                  | chr12:56414688-56432219  | 1.16151    | 1.15198   | -0.0118918  | 0.997036 |
| XLOC_011423 | CDKN2D                 | chr19:10677137-10679655  | 10.6513    | 10.5639   | -0.0118757  | 0.997036 |
| XLOC_006839 | DHRST                  | chr14:60611499-60632211  | 55.842     | 55.3868   | -0.0118081  | 0.996079 |
| XLOC_023163 | DNLZ                   | chr9:139256351-13925826  | 90.5471    | 89.8225   | -0.0115904  | 0.996079 |
| XLOC_006342 | MGAT2                  | chr14:50087488-50090199  | 16.2869    | 16.1573   | -0.0115236  | 0.99634  |
| XLOC_018667 | C6orf62                | chr6:24667262-24719403   | 28.8813    | 28.6527   | -0.0114668  | 0.997036 |
| XLOC_014937 | IL17RE                 | chr3:9944295-9958084     | 0.6247     | 0.619757  | -0.0114611  | 0.99714  |
| XLOC_009204 | DHX40                  | chr17:57642885-57685713  | 6.23385    | 6.18486   | -0.0113819  | 0.996348 |
| XLOC_017506 | TSPAN17                | chr5:176074387-17608605  | 26.8014    | 26.5914   | -0.0113464  | 0.996079 |
| XLOC_017199 | F2R                    | chr5:76011867-76031595   | 0.912396   | 0.905288  | -0.011284   | 0.997036 |
| XLOC_014579 | SGSM3                  | chr22:40766594-41032690  | 16.5658    | 16.4368   | -0.0112748  | 0.997036 |
| XLOC_009106 | FZD2                   | chr17:42634811-42638630  | 5.8248     | 5.77964   | -0.0112291  | 0.997036 |
| XLOC_009580 | FAM222B                | chr17:27082995-27169841  | 5.14667    | 5.10682   | -0.0112145  | 0.996631 |
| XLOC_011958 | TNNI3                  | chr19:55663135-55669100  | 8.85448    | 8.78613   | -0.0111801  | 0.997036 |
| XLOC_010758 | LRP3                   | chr19:33685598-33716756  | 36.855     | 36.5727   | -0.0110901  | 0.99634  |
| XLOC_009962 | ATP5H                  | chr17:73034954-73043074  | 296.779    | 294.531   | -0.0109705  | 0.996242 |
| XLOC_004717 | LOC642846              | chr12:9436252-9466684    | 3.51729    | 3.49065   | -0.0109665  | 0.997036 |
| XLOC_005126 | RFC5                   | chr12:118454505-1184700  | 14.3779    | 14.2694   | -0.0109337  | 0.996453 |
| XLOC_018169 | RPP21,TRIM39,TRIM39-RP | chr6:30201815-30314635   | 167.4      | 166.136   | -0.0109323  | 0.997036 |
| XLOC_016893 | PITX2                  | chr4:111538579-11156327  | 8.54689    | 8.48255   | -0.0109024  | 0.997036 |
| XLOC_008677 | WDR59                  | chr16:74907470-75019017  | 11.8094    | 11.721    | -0.0108515  | 0.99634  |
| XLOC_017951 | UBTD2                  | chr5:171636649-17171079  | 6.72272    | 6.67244   | -0.0108301  | 0.996453 |
| XLOC_018754 | HLA-C                  | chr6:31236525-31239913   | 676.421    | 671.363   | -0.0108291  | 0.996453 |
| XLOC_009870 | SUPT4H1                | chr17:56378587-56494931  | 37.8301    | 37.549    | -0.0107626  | 0.996453 |
| XLOC_000764 | DAP3                   | chr1:155658881-15570880  | 82.3995    | 81.7873   | -0.0107592  | 0.996453 |
| XLOC_016920 | BBS7                   | chr4:122745483-12279165  | 2.73495    | 2.71468   | -0.0107319  | 0.997036 |
| XLOC_003631 | DRAP1                  | chr11:65686727-65689048  | 530.484    | 526.56    | -0.0107118  | 0.996453 |
| XLOC_009779 | GPATCH8                | chr17:42472644-42580957  | 4.91013    | 4.87406   | -0.010636   | 0.996453 |
| XLOC_004268 | UBXN1                  | chr11:62443971-62446527  | 149.344    | 148.258   | -0.010523   | 0.996453 |
| XLOC_022533 | DAB2IP                 | chr9:124329398-12454780  | 6.44598    | 6.39914   | -0.0105216  | 0.996453 |
| XLOC_005016 | C12orf29               | chr12:88429267-88535993  | 4.43095    | 4.39878   | -0.0105138  | 0.997036 |
| XLOC_017369 | PCDHB2                 | chr5:140474236-14047696  | 2.62906    | 2.60997   | -0.0105119  | 0.997036 |
| XLOC_017802 | SHROOM1                | chr5:132157832-13216659  | 8.78518    | 8.72174   | -0.0104565  | 0.997036 |
| XLOC_024175 | FAM58A                 | chrX:152853382-15286463  | 38.755     | 38.4752   | -0.0104516  | 0.996453 |
| XLOC_017209 | JMY                    | chr5:78531924-78623038   | 1.57863    | 1.56727   | -0.0104197  | 0.997036 |
| XLOC_001999 | CREG1                  | chr1:167510250-16752305  | 39.4766    | 39.1932   | -0.0103965  | 0.99634  |
| XLOC_020690 | HBP1                   | chr7:106809405-10721896  | 5.32029    | 5.28271   | -0.0102274  | 0.998152 |
| XLOC_013249 | LOC375295              | chr2:177494308-17750230  | 22.3257    | 22.1683   | -0.0102053  | 0.997036 |
| XLOC_009598 | CRLF3                  | chr17:29109701-29151778  | 5.78548    | 5.74496   | -0.0101389  | 0.997036 |
| XLOC_005888 | ITM2B                  | chr13:48807273-48836232  | 51.9768    | 51.6139   | -0.0101065  | 0.996453 |
| XLOC_004950 | OS9                    | chr12:58087737-58115340  | 64.8862    | 64.434    | -0.0100884  | 0.997036 |
| XLOC_002855 | ABI1                   | chr10:26986594-27150016  | 16.1159    | 16.0041   | -0.0100392  | 0.997036 |
| XLOC_017702 | POC5                   | chr5:74970023-75013313   | 3.85223    | 3.82559   | -0.01001    | 0.997036 |
| XLOC_003787 | YAP1                   | chr11:101981191-1021041  | 10.3008    | 10.2299   | -0.00996127 | 0.996453 |
| XLOC_017130 | NDUFS4                 | chr5:52856464-52979171   | 73.6476    | 73.1409   | -0.0099608  | 0.997036 |
| XLOC_017713 | HOMER1                 | chr5:78669785-78809700   | 0.888216   | 0.882113  | -0.00994753 | 0.997082 |
| XLOC_005855 | RFXPAP                 | chr13:37393338-37403740  | 2.57603    | 2.55841   | -0.00990237 | 0.997036 |
| XLOC_009185 | DGKE                   | chr17:54911459-54946036  | 1.97555    | 1.96215   | -0.00981662 | 0.997036 |
| XLOC_015705 | QRICH1                 | chr3:49067141-49131504   | 18.6084    | 18.4823   | -0.00981022 | 0.996453 |
| XLOC_008457 | DCUN1D3                | chr16:20869395-20936328  | 2.07738    | 2.06336   | -0.00977473 | 0.997744 |
| XLOC_016040 | B3GALNT1               | chr3:160801670-16082316  | 6.19656    | 6.15479   | -0.00975915 | 0.997036 |
| XLOC_012146 | GEMIN6                 | chr2:39005326-39009106   | 32.0292    | 31.814    | -0.00972661 | 0.997036 |
| XLOC_020338 | PSMG3-AS1              | chr7:1609708-1629261     | 0.312628   | 0.310532  | -0.00970483 | 1        |
| XLOC_007845 | CACNA1H                | chr16:1203240-1275254    | 0.00363444 | 0.0036101 | -0.00969696 | 1        |
| XLOC_007673 | HEXA                   | chr15:72635777-72671129  | 52.4216    | 52.0712   | -0.0096758  | 0.996631 |
| XLOC_006949 | DDX24                  | chr14:94517267-94547558  | 36.5368    | 36.2938   | -0.00962619 | 0.996453 |
| XLOC_008583 | AMFR                   | chr16:56395363-56459450  | 31.7825    | 31.5723   | -0.0095762  | 0.996631 |
| XLOC_011039 | AP2A1                  | chr19:50270179-50316567  | 27.0659    | 26.8871   | -0.00956644 | 0.997036 |
| XLOC_021372 | ARHGEF35               | chr7:143883175-14389279  | 1.82623    | 1.8142    | -0.00953295 | 0.997036 |

|             |               |                          |           |           |             |          |
|-------------|---------------|--------------------------|-----------|-----------|-------------|----------|
| XLOC_007931 | METTL22       | chr16:8715526-8740079    | 7.07044   | 7.02441   | -0.00942219 | 0.997036 |
| XLOC_008638 | ESRP2         | chr16:68119268-68270136  | 11.1479   | 11.0754   | -0.00941083 | 0.997036 |
| XLOC_002430 | ZNF22         | chr10:45493145-45500777  | 9.99624   | 9.93134   | -0.00939758 | 0.997036 |
| XLOC_006915 | ALKBH1        | chr14:78138748-78174356  | 4.45072   | 4.42198   | -0.00934594 | 0.997036 |
| XLOC_009784 | KIF18B        | chr17:43002078-43025079  | 10.5172   | 10.4499   | -0.00926439 | 0.997036 |
| XLOC_002060 | STX6          | chr1:180942175-180992044 | 6.18342   | 6.14384   | -0.00926385 | 0.997036 |
| XLOC_012116 | SPDYA         | chr2:29033699-29093175   | 0.0999083 | 0.0992747 | -0.00917951 | 1        |
| XLOC_017704 | ZBED3         | chr5:76372531-76444176   | 0.876948  | 0.871444  | -0.00908402 | 0.997036 |
| XLOC_009746 | PTRF          | chr17:40554466-40575338  | 61.9899   | 61.6011   | -0.00907637 | 0.997036 |
| XLOC_000730 | CHTOP         | chr1:153591275-153618782 | 56.4331   | 56.08     | -0.00905437 | 0.99714  |
| XLOC_003030 | LOC728190     | chr10:88998423-89103331  | 20.0021   | 19.88     | -0.00883216 | 0.997036 |
| XLOC_013260 | SESTD1        | chr2:179966418-180129350 | 0.432851  | 0.430223  | -0.00878639 | 0.997082 |
| XLOC_001777 | ACP6          | chr1:147119167-147142634 | 16.2778   | 16.1802   | -0.00867243 | 0.997036 |
| XLOC_014672 | DGCR14        | chr22:19117791-19132190  | 4.58889   | 4.56144   | -0.00865584 | 0.997036 |
| XLOC_008218 | LOC100130894  | chr16:70721341-70835061  | 0.0787299 | 0.0782598 | -0.00864094 | 1        |
| XLOC_013384 | OBSL1         | chr2:220415449-220436261 | 13.0461   | 12.9686   | -0.00858648 | 0.997036 |
| XLOC_008389 | TRAP1         | chr16:3702939-3767598    | 169.785   | 168.786   | -0.00851495 | 0.997036 |
| XLOC_021776 | ZFP41         | chr8:144328990-144344871 | 4.73609   | 4.70827   | -0.0085013  | 0.997082 |
| XLOC_002669 | TRIM8         | chr10:104404251-10441807 | 35.4297   | 35.2221   | -0.00847994 | 0.997036 |
| XLOC_013799 | PCMTD2        | chr20:62887047-62907579  | 5.08663   | 5.05701   | -0.00842487 | 0.997036 |
| XLOC_005861 | NHLRC3        | chr13:39612447-39624244  | 2.8201    | 2.80371   | -0.00840449 | 0.997036 |
| XLOC_005159 | KNTC1         | chr12:123011808-12311094 | 1.86849   | 1.85774   | -0.00832748 | 0.997036 |
| XLOC_001611 | CRYZ          | chr1:75171171-75232360   | 16.5623   | 16.4672   | -0.0083095  | 0.99714  |
| XLOC_008515 | TBC1D10B      | chr16:30368421-30381522  | 24.7956   | 24.6533   | -0.00830264 | 0.997036 |
| XLOC_018405 | SLC35A1       | chr6:88182642-88222057   | 6.67282   | 6.63462   | -0.00828306 | 0.997036 |
| XLOC_000596 | WNT2B         | chr1:113010039-113063910 | 0.895571  | 0.890444  | -0.00828265 | 0.998026 |
| XLOC_013120 | CCDC93        | chr2:118673053-118771731 | 4.44324   | 4.41786   | -0.00826658 | 0.997036 |
| XLOC_023965 | SATL1         | chrX:84258897-84363974   | 0.404655  | 0.402354  | -0.00822671 | 0.998564 |
| XLOC_017363 | ZMAT2         | chr5:140080031-140086231 | 33.2437   | 33.0567   | -0.00813692 | 0.997036 |
| XLOC_015633 | ACAA1         | chr3:38080695-38178733   | 38.2486   | 38.0335   | -0.00813389 | 0.997036 |
| XLOC_006864 | VTI1B         | chr14:68086578-68141602  | 71.2501   | 70.8512   | -0.00809844 | 0.99709  |
| XLOC_006358 | STYX          | chr14:53196882-53241705  | 3.12157   | 3.1041    | -0.00809752 | 0.997036 |
| XLOC_004910 | BLOC1S1, RDH5 | chr12:56109817-56118526  | 115.777   | 115.131   | -0.00807279 | 0.997036 |
| XLOC_002941 | CSTF2T        | chr10:52750910-54073888  | 4.8392    | 4.81228   | -0.00804835 | 0.997036 |
| XLOC_017832 | HNRNPA0       | chr5:137087072-137090031 | 50.3833   | 50.1034   | -0.00803602 | 0.997036 |
| XLOC_019128 | FBXO30        | chr6:145946439-146285231 | 4.13935   | 4.11647   | -0.00799594 | 0.997036 |
| XLOC_015443 | PRKCI         | chr3:169940219-170023770 | 7.58956   | 7.54765   | -0.00798819 | 0.997036 |
| XLOC_006045 | MTIF3         | chr13:27998680-28024739  | 32.0973   | 31.9202   | -0.0079792  | 0.998526 |
| XLOC_021096 | SPDYE7P       | chr7:72333317-72339655   | 1.17541   | 1.16904   | -0.00784577 | 0.997082 |
| XLOC_021975 | KAT6A         | chr8:41786996-41909505   | 3.43633   | 3.41771   | -0.00783906 | 0.997036 |
| XLOC_002630 | MARVELD1      | chr10:99473464-99477909  | 14.9905   | 14.9103   | -0.00773285 | 0.997036 |
| XLOC_013362 | ZNF142        | chr2:219502639-219524351 | 2.95961   | 2.94383   | -0.00771385 | 0.997036 |
| XLOC_014699 | PI4KAP2       | chr22:21827286-21871780  | 13.0479   | 12.9784   | -0.00770154 | 0.997036 |
| XLOC_018740 | PPP1R10       | chr6:30568176-30585084   | 12.1913   | 12.1266   | -0.00767879 | 0.997036 |
| XLOC_004078 | CSNK2A3       | chr11:11292420-11643561  | 0.205383  | 0.204299  | -0.00762955 | 1        |
| XLOC_020880 | RBM33         | chr7:155437202-155574171 | 4.01511   | 3.99395   | -0.00762497 | 0.997036 |
| XLOC_008659 | ZNF23         | chr16:71481502-71496117  | 7.60078   | 7.56084   | -0.007601   | 0.997036 |
| XLOC_005747 | C12orf43      | chr12:121440847-12145430 | 6.05358   | 6.02205   | -0.00753473 | 0.997082 |
| XLOC_014967 | NR2C2         | chr3:14984285-15106816   | 1.37877   | 1.37159   | -0.00752677 | 0.99862  |
| XLOC_012916 | MTIF2         | chr2:55463755-55496384   | 14.81     | 14.7329   | -0.00752428 | 0.997036 |
| XLOC_014527 | HMGXB4        | chr22:35653444-35691800  | 4.69319   | 4.66915   | -0.00740977 | 0.997036 |
| XLOC_021089 | GTF2IRD1P1    | chr7:66205642-66309813   | 8.79314   | 8.74816   | -0.0073973  | 0.99714  |
| XLOC_007536 | CDAN1         | chr15:43015759-43029417  | 5.11384   | 5.08772   | -0.00738621 | 0.997036 |
| XLOC_021483 | PDGFRL        | chr8:17433941-17500642   | 5.32273   | 5.29583   | -0.00731059 | 0.99714  |
| XLOC_013399 | COL4A4        | chr2:227867426-228029271 | 0.0133548 | 0.0132875 | -0.00728693 | 1        |
| XLOC_009418 | CXCL16        | chr17:4634722-4643223    | 44.7686   | 44.5439   | -0.00725882 | 0.997036 |
| XLOC_016004 | SERP1         | chr3:150259779-150264421 | 45.1428   | 44.9165   | -0.00724919 | 0.997082 |
| XLOC_017710 | LHFPL2        | chr5:77781037-77944648   | 2.52338   | 2.51084   | -0.0071891  | 0.997082 |
| XLOC_013625 | CEP250        | chr20:34043222-34099803  | 9.57515   | 9.52771   | -0.00716523 | 0.997036 |
| XLOC_001488 | SCMH1         | chr1:41480261-41707815   | 13.3975   | 13.3319   | -0.00707577 | 0.997082 |
| XLOC_009412 | ANKFY1        | chr17:4066664-4167274    | 3.86751   | 3.8486    | -0.00707219 | 0.997036 |
| XLOC_011057 | CLEC11A       | chr19:51226604-51228981  | 226.365   | 225.261   | -0.00705532 | 0.997036 |
| XLOC_014563 | APOBEC3C      | chr22:39410264-39414825  | 15.2421   | 15.1681   | -0.00702073 | 0.997082 |
| XLOC_020746 | SPAN33        | chr7:128784711-128809534 | 28.9846   | 28.8444   | -0.0069935  | 0.997036 |
| XLOC_013140 | SAP130        | chr2:128698790-128784861 | 6.91862   | 6.88523   | -0.00697903 | 0.997036 |
| XLOC_009615 | NLE1          | chr17:33458367-33469322  | 32.3734   | 32.2188   | -0.00690791 | 0.997082 |
| XLOC_002776 | PRAP1         | chr10:135160843-13516611 | 0.0319671 | 0.0318145 | -0.00690053 | 1        |
| XLOC_003063 | TCTN3         | chr10:97423152-97453900  | 22.5046   | 22.3978   | -0.0068675  | 0.997036 |
| XLOC_022078 | RMDN1         | chr8:87484577-87521009   | 8.85061   | 8.80859   | -0.00686611 | 0.997082 |
| XLOC_018084 | ACOT13        | chr6:24667262-24719403   | 7.30585   | 7.27122   | -0.00685569 | 0.9985   |
| XLOC_000668 | BOLA1         | chr1:149871154-149872341 | 0.259044  | 0.257822  | -0.00682235 | 1        |
| XLOC_003444 | PTPMT1        | chr11:47586981-47606115  | 17.9163   | 17.8322   | -0.0067902  | 0.998227 |
| XLOC_004342 | B3GNT1        | chr11:66112842-66115161  | 12.303    | 12.2453   | -0.00677783 | 0.997082 |
| XLOC_017347 | MATR3         | chr5:138609440-138667361 | 39.6646   | 39.48     | -0.00673257 | 0.997036 |
| XLOC_007513 | C15orf57      | chr15:40845297-40857252  | 20.2004   | 20.1067   | -0.0067096  | 0.997082 |
| XLOC_001541 | FAF1          | chr1:50906934-51425936   | 28.2064   | 28.0756   | -0.00670253 | 0.997036 |
| XLOC_011284 | REXO1         | chr19:1815244-1848452    | 16.7612   | 16.6837   | -0.00669018 | 0.997036 |
| XLOC_020749 | STRIP2        | chr7:129074273-129128231 | 3.30681   | 3.29152   | -0.00668617 | 0.997036 |
| XLOC_002044 | KIAA0040      | chr1:175126122-175162221 | 2.01506   | 2.00578   | -0.00665688 | 0.99714  |

|             |                       |                          |          |           |             |          |
|-------------|-----------------------|--------------------------|----------|-----------|-------------|----------|
| XLOC_017398 | SH3RF2                | chr5:145316125-145442871 | 0.552448 | 0.549917  | -0.00662355 | 0.997819 |
| XLOC_010312 | SS18                  | chr18:23596216-23670611  | 13.9857  | 13.9227   | -0.00651794 | 0.997036 |
| XLOC_006760 | ARHGAP5-AS1           | chr14:32544624-32545905  | 2.15854  | 2.14885   | -0.00649137 | 0.998526 |
| XLOC_001316 | UBR4                  | chr1:19400999-19536746   | 5.79533  | 5.76937   | -0.00647824 | 0.997036 |
| XLOC_023103 | ZDHHC12               | chr9:131464801-131486401 | 79.0347  | 78.6873   | -0.00635469 | 0.998526 |
| XLOC_005547 | DCTN2                 | chr12:57916658-57941114  | 62.3491  | 62.0752   | -0.00635256 | 0.99714  |
| XLOC_018475 | HSF2                  | chr6:122720695-122754264 | 6.09286  | 6.06613   | -0.00634457 | 0.99714  |
| XLOC_011368 | INSR                  | chr19:7112265-7294011    | 2.98797  | 2.97487   | -0.00633658 | 0.997082 |
| XLOC_021717 | EBAG9                 | chr8:110551928-110577391 | 17.2674  | 17.1923   | -0.00628682 | 0.99714  |
| XLOC_005513 | SARNP                 | chr12:56137063-56211540  | 43.671   | 43.4843   | -0.00618112 | 0.99714  |
| XLOC_022915 | CDK20                 | chr9:90581358-90589695   | 7.94634  | 7.9124    | -0.00617514 | 0.99714  |
| XLOC_021341 | ZC3HAV1L              | chr7:138710451-138720771 | 1.84015  | 1.83235   | -0.00613179 | 0.998564 |
| XLOC_020959 | FAM126A               | chr7:22980877-23053770   | 0.018918 | 0.0188381 | -0.00610692 | 1        |
| XLOC_011689 | TGFB1                 | chr19:41836811-41859831  | 99.9309  | 99.5092   | -0.00610085 | 0.99714  |
| XLOC_018623 | TUBB2B                | chr6:3224494-3227968     | 0.868283 | 0.864624  | -0.00609135 | 0.997511 |
| XLOC_011832 | C19orf73              | chr19:49617617-49622397  | 2.76605  | 2.75443   | -0.00607378 | 0.997532 |
| XLOC_015020 | OXSRI                 | chr3:38207025-38296979   | 8.47191  | 8.43655   | -0.006033   | 0.99714  |
| XLOC_003204 | ADAM8                 | chr10:135075919-13509040 | 0.78249  | 0.779226  | -0.00603056 | 0.998342 |
| XLOC_017170 | SERF1A                | chr5:69321071-69338940   | 0.109249 | 0.108799  | -0.00595336 | 1        |
| XLOC_022802 | DCTN3                 | chr9:34613547-34620496   | 99.0494  | 98.6453   | -0.00589685 | 0.99714  |
| XLOC_004734 | LOH12CR1              | chr12:12510019-12619838  | 4.39885  | 4.381     | -0.00586515 | 0.997535 |
| XLOC_009770 | LSM12                 | chr17:42112002-42144987  | 61.3026  | 61.0559   | -0.00581885 | 0.99714  |
| XLOC_009365 | VPS53                 | chr17:411907-618096      | 2.67674  | 2.66603   | -0.00578387 | 0.99714  |
| XLOC_003205 | TUBGCP2               | chr10:135092133-13512666 | 22.308   | 22.2195   | -0.00573174 | 0.997519 |
| XLOC_014408 | MRPL40                | chr22:19420035-19423596  | 77.8918  | 77.5895   | -0.00560975 | 0.99714  |
| XLOC_002118 | KLHL12                | chr1:202860229-202896371 | 9.96321  | 9.92496   | -0.00554939 | 0.99714  |
| XLOC_012426 | IMP4                  | chr2:131100488-131104191 | 134.458  | 133.946   | -0.00550853 | 0.997323 |
| XLOC_005179 | AACS                  | chr12:125549924-12562781 | 9.13372  | 9.09897   | -0.00549826 | 0.99714  |
| XLOC_007548 | CATSPER2P1            | chr15:44028145-44038496  | 0.392984 | 0.391496  | -0.0054755  | 0.997036 |
| XLOC_021706 | FZD6                  | chr8:104310660-104345094 | 8.70618  | 8.67378   | -0.00537995 | 0.99714  |
| XLOC_023128 | TSC1                  | chr9:135766734-135820020 | 4.23136  | 4.21568   | -0.00535649 | 0.997342 |
| XLOC_011196 | EPN1                  | chr19:56186560-56207133  | 98.9325  | 98.566    | -0.0053559  | 0.99714  |
| XLOC_005257 | C1RL                  | chr12:7247145-7274447    | 3.97524  | 3.96051   | -0.00535469 | 0.997535 |
| XLOC_004957 | SLC16A7               | chr12:59989820-60183635  | 0.186031 | 0.185346  | -0.00532161 | 1        |
| XLOC_012082 | HADHB                 | chr2:26467615-26513333   | 65.045   | 64.8084   | -0.0052572  | 0.99714  |
| XLOC_006919 | GTF2A1                | chr14:81641795-81687575  | 3.28034  | 3.26844   | -0.00524216 | 0.997342 |
| XLOC_017695 | ANKRA2                | chr5:72848024-72861511   | 2.7178   | 2.70798   | -0.00522145 | 0.997532 |
| XLOC_011277 | PCSK4                 | chr19:1481426-1490407    | 1.00545  | 1.00184   | -0.00519233 | 0.997323 |
| XLOC_008471 | USP31                 | chr16:23072727-23160591  | 1.65093  | 1.64501   | -0.00518375 | 0.997535 |
| XLOC_013288 | STK17B                | chr2:196998306-197036331 | 2.67035  | 2.66078   | -0.00518119 | 0.997892 |
| XLOC_015739 | C3orf18               | chr3:50595455-50622421   | 6.48004  | 6.45684   | -0.00517413 | 0.998564 |
| XLOC_013484 | SNPH                  | chr20:1246959-1289971    | 1.41248  | 1.40751   | -0.00508439 | 0.997593 |
| XLOC_016878 | PPA2                  | chr4:106290233-106395227 | 39.7146  | 39.5751   | -0.00507578 | 0.99714  |
| XLOC_008872 | ADORA2B               | chr17:15848230-15879210  | 30.8117  | 30.704    | -0.00505256 | 0.997323 |
| XLOC_013481 | PSMT1                 | chr20:1093905-1148426    | 34.6077  | 34.4871   | -0.0050359  | 0.997342 |
| XLOC_022504 | DNAJC25,DNAJC25-GNG11 | chr9:114393631-114432521 | 104.812  | 104.457   | -0.00490422 | 0.997503 |
| XLOC_012633 | SMARCAL1              | chr2:217277136-217347774 | 7.15639  | 7.13222   | -0.00488076 | 0.997532 |
| XLOC_009164 | EME1                  | chr17:48450580-48474914  | 2.31319  | 2.30539   | -0.00487088 | 0.999416 |
| XLOC_013214 | LOC100506124          | chr2:166713985-166728451 | 0.344994 | 0.343854  | -0.00477485 | 1        |
| XLOC_018909 | MUT                   | chr6:49398072-49431041   | 5.9477   | 5.92808   | -0.00476655 | 0.997532 |
| XLOC_024157 | CD99L2                | chrX:149934808-150067281 | 6.61804  | 6.59639   | -0.00472772 | 0.997342 |
| XLOC_003593 | CCDC88B               | chr11:64107689-64125006  | 5.1882   | 5.17128   | -0.00471268 | 0.997892 |
| XLOC_021577 | FNTA                  | chr8:42911441-42940932   | 55.2442  | 55.0667   | -0.00464309 | 0.997535 |
| XLOC_001386 | WASF2                 | chr1:27730733-27816678   | 18.3214  | 18.2628   | -0.00462319 | 0.997342 |
| XLOC_013281 | HIBCH                 | chr2:191069359-191184771 | 2.55915  | 2.55109   | -0.00455304 | 0.998514 |
| XLOC_002591 | TNK2                  | chr10:93558150-93625232  | 3.22611  | 3.21596   | -0.00454477 | 0.997811 |
| XLOC_006654 | INF2                  | chr14:105155942-10518594 | 40.5482  | 40.4219   | -0.00450401 | 0.997669 |
| XLOC_005253 | PHB2                  | chr12:7074514-7079916    | 466.903  | 465.475   | -0.0044174  | 0.997342 |
| XLOC_005058 | CHPT1                 | chr12:102091416-10213321 | 14.7727  | 14.7277   | -0.0044035  | 0.998425 |
| XLOC_014478 | CRYBB2P1              | chr22:25844053-25857645  | 21.843   | 21.7768   | -0.00437646 | 0.997752 |
| XLOC_005429 | MLL2                  | chr12:49412757-49449107  | 2.013    | 2.00695   | -0.00434187 | 0.9979   |
| XLOC_018383 | SENP6                 | chr6:76311621-76427994   | 4.63687  | 4.62294   | -0.00434075 | 0.99761  |
| XLOC_010716 | YJEFN3                | chr19:19639669-19648393  | 3.68184  | 3.67083   | -0.00432221 | 0.998558 |
| XLOC_002479 | REEP3                 | chr10:65281122-65384883  | 3.90682  | 3.89516   | -0.00431139 | 0.997532 |
| XLOC_017921 | MED7                  | chr5:156565450-156569921 | 7.90847  | 7.88493   | -0.00430122 | 0.998526 |
| XLOC_000754 | SLC50A1               | chr1:155108287-155111334 | 40.8972  | 40.7756   | -0.00429591 | 0.997535 |
| XLOC_021457 | TNKS                  | chr8:9413444-9639856     | 3.51335  | 3.50324   | -0.00415685 | 0.998409 |
| XLOC_001293 | ZBTB17                | chr1:16268363-16302627   | 12.2151  | 12.18     | -0.00415051 | 0.997892 |
| XLOC_010403 | RTTN                  | chr18:67671042-67872962  | 0.839823 | 0.837484  | -0.00402349 | 0.997908 |
| XLOC_002506 | SLC29A3               | chr10:73079009-73123147  | 7.30572  | 7.28561   | -0.00397722 | 0.998514 |
| XLOC_016424 | HERC6                 | chr4:89299890-89364249   | 3.10168  | 3.09315   | -0.00397326 | 0.998514 |
| XLOC_008637 | DDX28                 | chr16:68055176-68113226  | 15.9296  | 15.8862   | -0.00392943 | 0.998526 |
| XLOC_014611 | SAMM50                | chr22:44351260-44392412  | 22.5647  | 22.505    | -0.003826   | 0.998514 |
| XLOC_021980 | THAP1                 | chr8:42691816-42698474   | 6.33631  | 6.31955   | -0.00382151 | 0.998514 |
| XLOC_015770 | CHDH                  | chr3:53850323-53880420   | 4.48336  | 4.47167   | -0.00376639 | 0.998514 |
| XLOC_012669 | STK11IP               | chr2:220462595-220481171 | 2.42157  | 2.41526   | -0.00376512 | 0.998526 |
| XLOC_008576 | RPGRIIP1L             | chr16:53633817-53737771  | 0.273487 | 0.272786  | -0.00370282 | 1        |
| XLOC_015663 | LZTFL1                | chr3:45864809-45957216   | 2.75655  | 2.74959   | -0.00365036 | 0.998514 |
| XLOC_005280 | DDX12P                | chr12:9570286-9600768    | 3.16437  | 3.15652   | -0.00358248 | 0.998526 |



|             |            |                          |           |           |              |          |
|-------------|------------|--------------------------|-----------|-----------|--------------|----------|
| XLOC_000410 | MROH7,TTC4 | chr1:55107426-55208328   | 14.0081   | 13.9737   | -0.00354803  | 0.998514 |
| XLOC_014253 | APP        | chr21:27252860-27543446  | 79.0356   | 78.8447   | -0.0034884   | 0.998514 |
| XLOC_020343 | CHST12     | chr7:2443194-2474216     | 10.0374   | 10.0135   | -0.00342892  | 0.998526 |
| XLOC_001809 | CDC42SE1   | chr1:151020258-15103212  | 32.5392   | 32.4622   | -0.00341838  | 0.998514 |
| XLOC_001722 | PHTF1      | chr1:114239823-114301777 | 1.68052   | 1.67657   | -0.0033926   | 0.99862  |
| XLOC_007346 | KIAA1199   | chr15:81071711-81243999  | 0.0952211 | 0.0950015 | -0.00332973  | 1        |
| XLOC_007309 | SCAMP5     | chr15:75287875-75313836  | 22.6809   | 22.6287   | -0.0033238   | 0.998526 |
| XLOC_003610 | DPF2       | chr11:65101224-65120451  | 27.6187   | 27.5584   | -0.003151    | 0.998514 |
| XLOC_009356 | FOXK2      | chr17:80477593-80562483  | 18.0669   | 18.0275   | -0.00314977  | 0.998526 |
| XLOC_003394 | KIAA1549L  | chr11:33563876-33695646  | 1.26421   | 1.26146   | -0.00313436  | 0.998526 |
| XLOC_000091 | MHP        | chr1:12079298-12092106   | 35.7083   | 35.6313   | -0.00311404  | 0.998526 |
| XLOC_022694 | TOR4A      | chr9:140172279-140177093 | 54.7564   | 54.6421   | -0.00301523  | 0.998514 |
| XLOC_014820 | TMEM184B   | chr22:38615297-38669040  | 19.7107   | 19.6696   | -0.0030087   | 0.998526 |
| XLOC_020526 | STAG3L4    | chr7:66767624-66786513   | 6.73749   | 6.72352   | -0.00299402  | 0.998564 |
| XLOC_015532 | SLC51A     | chr3:195943382-195960307 | 0.117541  | 0.117301  | -0.002952    | 1        |
| XLOC_006866 | ZFYVE26    | chr14:68213236-68283306  | 1.64121   | 1.63788   | -0.00293076  | 0.998564 |
| XLOC_018629 | LYRM4      | chr6:5108652-5261172     | 21.7351   | 21.6913   | -0.00290527  | 0.998564 |
| XLOC_022012 | TTPA       | chr8:63972047-63998612   | 0.311017  | 0.310394  | -0.00289334  | 1        |
| XLOC_009071 | HSD17B1    | chr17:40703983-40707232  | 26.8638   | 26.8106   | -0.0028628   | 0.998526 |
| XLOC_023257 | HCCS       | chrX:11129405-11141204   | 11.5315   | 11.5093   | -0.00278376  | 0.998564 |
| XLOC_003819 | SDHD       | chr11:111957570-11196657 | 54.6642   | 54.5602   | -0.00274781  | 0.998564 |
| XLOC_020349 | FOXK1      | chr7:4721929-4811074     | 7.72688   | 7.71229   | -0.00272601  | 0.998526 |
| XLOC_022681 | C9orf142   | chr9:139886869-139888428 | 151.845   | 151.561   | -0.00270072  | 0.998526 |
| XLOC_009970 | CASKIN2    | chr17:73452663-73511627  | 4.77761   | 4.769     | -0.0026041   | 0.99926  |
| XLOC_013617 | DYNLRB1    | chr20:33104203-33128762  | 178.775   | 178.456   | -0.00257079  | 0.998526 |
| XLOC_013852 | FERMT1     | chr20:6055491-6104191    | 4.89771   | 4.88903   | -0.00256043  | 0.99862  |
| XLOC_021046 | SNHG15     | chr7:45022626-45026259   | 149.028   | 148.768   | -0.00252212  | 0.998564 |
| XLOC_021435 | MCPH1      | chr8:6264112-6501140     | 3.23949   | 3.23385   | -0.00251071  | 0.99862  |
| XLOC_013744 | GNAS       | chr20:57393972-57486250  | 462.503   | 461.718   | -0.00245258  | 0.998564 |
| XLOC_004565 | BCL9L      | chr11:118754474-11878167 | 5.29382   | 5.28547   | -0.00227765  | 0.99862  |
| XLOC_000905 | FAM20B     | chr1:178995073-179045702 | 7.66986   | 7.65782   | -0.0022666   | 0.998564 |
| XLOC_021738 | TRMT12     | chr8:125463047-125465266 | 4.95516   | 4.94813   | -0.00204903  | 0.998764 |
| XLOC_006272 | TOX4       | chr14:21945334-21979457  | 10.5924   | 10.5775   | -0.00202996  | 0.998951 |
| XLOC_003665 | GSTP1      | chr11:67351065-67354124  | 987.091   | 985.72    | -0.00200445  | 0.99862  |
| XLOC_012237 | SPR        | chr2:73114511-73119289   | 75.9776   | 75.8744   | -0.00195986  | 0.99862  |
| XLOC_006024 | XPO4       | chr13:21351467-21476913  | 2.36446   | 2.3613    | -0.00192882  | 0.99862  |
| XLOC_013454 | MYEOV2     | chr2:241065979-241075764 | 232.412   | 232.117   | -0.00182994  | 0.998764 |
| XLOC_021291 | WASL       | chr7:123321996-123389116 | 9.48547   | 9.47347   | -0.00182651  | 0.998945 |
| XLOC_007880 | CCNF       | chr16:2479394-2508859    | 9.60619   | 9.59458   | -0.00174506  | 0.999033 |
| XLOC_021583 | KIAA0146   | chr8:48173488-48648563   | 8.62498   | 8.61469   | -0.00172344  | 0.998764 |
| XLOC_007144 | IVD        | chr15:40697685-40713512  | 15.9198   | 15.9014   | -0.0016691   | 0.998897 |
| XLOC_018544 | SAMD5      | chr6:147829827-147891157 | 0.599869  | 0.59918   | -0.00165926  | 0.998628 |
| XLOC_003439 | C11orf49   | chr11:46958250-47198676  | 17.8133   | 17.7934   | -0.00160851  | 0.999427 |
| XLOC_014953 | TSEN2      | chr3:12525930-12574820   | 5.31152   | 5.30562   | -0.00160379  | 0.999116 |
| XLOC_014827 | JOSD1      | chr22:39081547-39096459  | 21.5854   | 21.5632   | -0.00148486  | 0.998975 |
| XLOC_007704 | FBXO22-AS1 | chr15:76196199-76227608  | 43.5476   | 43.5036   | -0.00145878  | 0.999427 |
| XLOC_006925 | PTPN21     | chr14:88932121-89021123  | 1.43884   | 1.43743   | -0.00140969  | 0.999427 |
| XLOC_017318 | UQCRCQ     | chr5:132202318-132204536 | 110.353   | 110.247   | -0.00139625  | 0.999214 |
| XLOC_015476 | ACP2M1     | chr3:183892633-183901878 | 207.393   | 207.193   | -0.00139489  | 0.999182 |
| XLOC_006091 | ELF1       | chr13:41506054-41593508  | 6.88665   | 6.88014   | -0.00136472  | 0.999222 |
| XLOC_010794 | COX6B1     | chr19:36139124-36149686  | 355.873   | 355.54    | -0.00134837  | 0.998951 |
| XLOC_013053 | ANKRD39    | chr2:97513723-97523756   | 20.9003   | 20.8827   | -0.00121694  | 0.999427 |
| XLOC_008794 | FAM64A     | chr17:6347734-6354385    | 17.8606   | 17.8459   | -0.00118741  | 0.999416 |
| XLOC_017642 | PAIP1      | chr5:43526369-43557521   | 33.6029   | 33.5753   | -0.00118622  | 0.999416 |
| XLOC_002867 | SVIL       | chr10:29746276-30024730  | 1.74624   | 1.74495   | -0.00106824  | 0.999416 |
| XLOC_006634 | TECPR2     | chr14:102829299-10296887 | 0.694576  | 0.694088  | -0.00101467  | 0.999424 |
| XLOC_000343 | B4GALT2    | chr1:44444873-44456843   | 43.337    | 43.3077   | -0.000975757 | 0.999427 |
| XLOC_018328 | CDC5L      | chr6:44355250-44418161   | 5.42666   | 5.42328   | -0.000899183 | 0.999427 |
| XLOC_011536 | ISYNA1     | chr19:18530145-18549111  | 4.93294   | 4.93011   | -0.000827854 | 0.999929 |
| XLOC_011349 | RFX2       | chr19:5978413-6110664    | 3.06112   | 3.05939   | -0.000816008 | 0.999427 |
| XLOC_011331 | SEMA6B     | chr19:4542599-4559771    | 16.8648   | 16.8561   | -0.000742449 | 0.999427 |
| XLOC_017420 | SLC26A2    | chr5:149340299-149366963 | 1.22286   | 1.22225   | -0.000720185 | 0.999427 |
| XLOC_001522 | POMGNT1    | chr1:46654352-46686928   | 30.2916   | 30.278    | -0.000647502 | 0.999427 |
| XLOC_009082 | AOC2       | chr17:40996608-41002724  | 2.15457   | 2.15363   | -0.000630045 | 0.999427 |
| XLOC_002192 | RAB3GAP2   | chr1:220321609-220445843 | 3.02556   | 3.02431   | -0.000597308 | 0.999427 |
| XLOC_010502 | HDGFRP2    | chr19:4472254-4517716    | 37.7274   | 37.712    | -0.000587642 | 0.999427 |
| XLOC_007184 | CTDSP2     | chr15:44719578-44819429  | 2.61931   | 2.61825   | -0.000586253 | 0.999427 |
| XLOC_015241 | BBX        | chr3:107241782-107530178 | 2.32359   | 2.32269   | -0.000559205 | 0.999427 |
| XLOC_004265 | GANAB      | chr11:62392297-62414104  | 91.0748   | 91.0409   | -0.000537348 | 0.999427 |
| XLOC_013782 | PPDPF      | chr20:62152132-62153524  | 575.547   | 575.338   | -0.000522254 | 0.999427 |
| XLOC_013934 | NCOA6      | chr20:33302577-33413433  | 3.75431   | 3.75315   | -0.00044586  | 0.999427 |
| XLOC_017238 | ARSK       | chr5:94890824-94940806   | 1.01583   | 1.01553   | -0.000432088 | 0.998764 |
| XLOC_021567 | GOLGA7     | chr8:41348080-41368499   | 31.5203   | 31.5109   | -0.000428204 | 0.999485 |
| XLOC_018967 | PHIP       | chr6:79644135-79788011   | 2.19541   | 2.19484   | -0.000375205 | 0.999591 |
| XLOC_001720 | SLC16A1    | chr1:113454469-113498978 | 33.9011   | 33.8929   | -0.000350229 | 0.999567 |
| XLOC_010411 | LOC400657  | chr18:72259009-72265071  | 2.62274   | 2.62219   | -0.000301768 | 0.999427 |
| XLOC_014322 | DSCR3      | chr21:38595725-38639833  | 15.2281   | 15.2249   | -0.000299727 | 0.999799 |
| XLOC_021914 | ENTPD4     | chr8:23286664-23315244   | 3.84131   | 3.84063   | -0.000257357 | 0.999591 |
| XLOC_016573 | PALLD      | chr4:169418216-169849608 | 4.81827   | 4.81775   | -0.00015529  | 0.999929 |

|             |                   |                          |         |         |              |          |
|-------------|-------------------|--------------------------|---------|---------|--------------|----------|
| XLOC_012551 | ITGAV             | chr2:187454789-187545628 | 2.50202 | 2.50178 | -0.000136569 | 0.999929 |
| XLOC_018565 | SCAF8             | chr6:155054511-155155194 | 6.68373 | 6.68343 | -6.40E-05    | 0.999567 |
| XLOC_008670 | ZFH3              | chr16:72816785-73092534  | 1.05779 | 1.05776 | -3.54E-05    | 1        |
| XLOC_021371 | FAM115A           | chr7:143548460-143599278 | 8.54437 | 8.54423 | -2.37E-05    | 1        |
| XLOC_023548 | CXorf57           | chrX:105855159-105922671 | 1.67854 | 1.67852 | -2.04E-05    | 1        |
| XLOC_008318 | LINC00235         | chr16:576846-577407      | 0       | 0       | 0            | 1        |
| XLOC_011055 | SNAR-F            | chr19:51108219-51108342  | 0       | 0       | 0            | 1        |
| XLOC_023825 | MIR221            | chrX:45605584-45605694   | 0       | 0       | 0            | 1        |
| XLOC_001395 | SNORD99           | chr1:28879528-28908366   | 0       | 0       | 0            | 1        |
| XLOC_012413 | RNU4ATAC          | chr2:122095351-122407052 | 0       | 0       | 0            | 1        |
| XLOC_013495 | SNORD57           | chr20:2633177-2639039    | 0       | 0       | 0            | 1        |
| XLOC_000001 | DDX11L1           | chr1:11873-29370         | 0       | 0       | 0            | 1        |
| XLOC_000002 | OR4F5             | chr1:69090-70008         | 0       | 0       | 0            | 1        |
| XLOC_000004 | OR4F3             | chr1:367658-368597       | 0       | 0       | 0            | 1        |
| XLOC_000011 | LOC254099         | chr1:1072396-1079434     | 0       | 0       | 0            | 1        |
| XLOC_000012 | MIR200B           | chr1:1102483-1102578     | 0       | 0       | 0            | 1        |
| XLOC_000013 | MIR200A           | chr1:1103242-1103332     | 0       | 0       | 0            | 1        |
| XLOC_000014 | MIR429            | chr1:1104384-1104467     | 0       | 0       | 0            | 1        |
| XLOC_000015 | TTL10             | chr1:1109285-1133313     | 0       | 0       | 0            | 1        |
| XLOC_000022 | TMEM88B           | chr1:1361507-1363167     | 0       | 0       | 0            | 1        |
| XLOC_000029 | MMP23A            | chr1:1571099-1655791     | 0       | 0       | 0            | 1        |
| XLOC_000031 | GABRD             | chr1:1950767-1962192     | 0       | 0       | 0            | 1        |
| XLOC_000038 | ACTRT2            | chr1:2938045-2939467     | 0       | 0       | 0            | 1        |
| XLOC_000040 | MIR4251           | chr1:2985741-3355185     | 0       | 0       | 0            | 1        |
| XLOC_000044 | CCDC27            | chr1:3668964-3688209     | 0       | 0       | 0            | 1        |
| XLOC_000048 | LOC728716         | chr1:4000671-4012643     | 0       | 0       | 0            | 1        |
| XLOC_000049 | LOC284661         | chr1:4472110-4484744     | 0       | 0       | 0            | 1        |
| XLOC_000050 | AJAP1             | chr1:4715104-4843851     | 0       | 0       | 0            | 1        |
| XLOC_000051 | MIR4417           | chr1:5624130-5624203     | 0       | 0       | 0            | 1        |
| XLOC_000054 | HES3              | chr1:6304251-6305638     | 0       | 0       | 0            | 1        |
| XLOC_000066 | CA6               | chr1:9005892-9035148     | 0       | 0       | 0            | 1        |
| XLOC_000080 | MTOR-AS1          | chr1:11166587-11322608   | 0       | 0       | 0            | 1        |
| XLOC_000081 | ANGPTL7           | chr1:11166587-11322608   | 0       | 0       | 0            | 1        |
| XLOC_000083 | PTCHD2            | chr1:11539294-11597640   | 0       | 0       | 0            | 1        |
| XLOC_000086 | DRAXIN            | chr1:11751780-11780336   | 0       | 0       | 0            | 1        |
| XLOC_000095 | SNORA59A          | chr1:12290112-12572098   | 0       | 0       | 0            | 1        |
| XLOC_000096 | AADA4L4           | chr1:12704565-12727097   | 0       | 0       | 0            | 1        |
| XLOC_000097 | AADA4L3           | chr1:12776117-12788726   | 0       | 0       | 0            | 1        |
| XLOC_000098 | C1orf158          | chr1:12806162-12821102   | 0       | 0       | 0            | 1        |
| XLOC_000099 | PRAMEF12          | chr1:12834983-12838048   | 0       | 0       | 0            | 1        |
| XLOC_000100 | PRAMEF1           | chr1:12851545-12856777   | 0       | 0       | 0            | 1        |
| XLOC_000101 | PRAMEF2           | chr1:12916940-12921764   | 0       | 0       | 0            | 1        |
| XLOC_000102 | PRAMEF7,PRAMEF8   | chr1:12976449-12980568   | 0       | 0       | 0            | 1        |
| XLOC_000103 | PRAMEF22          | chr1:13035542-13038381   | 0       | 0       | 0            | 1        |
| XLOC_000104 | PRAMEF5           | chr1:13359818-13369057   | 0       | 0       | 0            | 1        |
| XLOC_000105 | PRAMEF9           | chr1:13421175-13428191   | 0       | 0       | 0            | 1        |
| XLOC_000106 | PRAMEF16          | chr1:13495253-13498259   | 0       | 0       | 0            | 1        |
| XLOC_000107 | PRAMEF20,PRAMEF21 | chr1:13516065-13526943   | 0       | 0       | 0            | 1        |
| XLOC_000108 | PRAMEF9           | chr1:13641972-13648988   | 0       | 0       | 0            | 1        |
| XLOC_000109 | PRAMEF17          | chr1:13716087-13719064   | 0       | 0       | 0            | 1        |
| XLOC_000110 | PRAMEF20,PRAMEF21 | chr1:13736906-13747803   | 0       | 0       | 0            | 1        |
| XLOC_000111 | PDPN              | chr1:13910251-13944452   | 0       | 0       | 0            | 1        |
| XLOC_000118 | CELA2A            | chr1:15783222-15798586   | 0       | 0       | 0            | 1        |
| XLOC_000119 | CELA2B            | chr1:15802595-15817895   | 0       | 0       | 0            | 1        |
| XLOC_000124 | TMEM82            | chr1:16068986-16074292   | 0       | 0       | 0            | 1        |
| XLOC_000127 | C1orf64           | chr1:16330730-16333184   | 0       | 0       | 0            | 1        |
| XLOC_000128 | CLCNKA            | chr1:16348485-16360545   | 0       | 0       | 0            | 1        |
| XLOC_000129 | CLCNKB            | chr1:16370230-16383821   | 0       | 0       | 0            | 1        |
| XLOC_000132 | MIR3675           | chr1:16875408-16875482   | 0       | 0       | 0            | 1        |
| XLOC_000134 | MIR3675           | chr1:17007749-17007823   | 0       | 0       | 0            | 1        |
| XLOC_000139 | PADI6             | chr1:17698740-17728195   | 0       | 0       | 0            | 1        |
| XLOC_000142 | IGSF21            | chr1:18434239-18704977   | 0       | 0       | 0            | 1        |
| XLOC_000144 | PAX7              | chr1:18957499-19075360   | 0       | 0       | 0            | 1        |
| XLOC_000148 | HTR6              | chr1:19991779-20006055   | 0       | 0       | 0            | 1        |
| XLOC_000150 | PLA2G5            | chr1:20396700-20418394   | 0       | 0       | 0            | 1        |
| XLOC_000151 | PLA2G2F           | chr1:20465822-20476879   | 0       | 0       | 0            | 1        |
| XLOC_000152 | UBXN10            | chr1:20512577-20519942   | 0       | 0       | 0            | 1        |
| XLOC_000153 | VWA5B1            | chr1:20617411-20681387   | 0       | 0       | 0            | 1        |
| XLOC_000154 | FAM43B            | chr1:20878931-20881513   | 0       | 0       | 0            | 1        |
| XLOC_000161 | CELA3B            | chr1:22303417-22315847   | 0       | 0       | 0            | 1        |
| XLOC_000162 | CELA3A            | chr1:22328148-22339035   | 0       | 0       | 0            | 1        |
| XLOC_000167 | C1QA              | chr1:22963117-22966175   | 0       | 0       | 0            | 1        |
| XLOC_000168 | C1QC              | chr1:22970117-22974603   | 0       | 0       | 0            | 1        |
| XLOC_000169 | C1QB              | chr1:22979681-22988029   | 0       | 0       | 0            | 1        |
| XLOC_000171 | MIR4684           | chr1:23037330-23241823   | 0       | 0       | 0            | 1        |
| XLOC_000173 | MIR3115           | chr1:23345940-23410184   | 0       | 0       | 0            | 1        |
| XLOC_000180 | MIR378F           | chr1:24255559-24255637   | 0       | 0       | 0            | 1        |
| XLOC_000182 | LOC284632         | chr1:24526729-24538180   | 0       | 0       | 0            | 1        |
| XLOC_000186 | NCMAP             | chr1:24882566-24935818   | 0       | 0       | 0            | 1        |

|             |              |                          |   |   |   |   |
|-------------|--------------|--------------------------|---|---|---|---|
| XLOC_000209 | MIR1976      | chr1:26856248-26901520   | 0 | 0 | 0 | 1 |
| XLOC_000234 | RAB42        | chr1:28918711-28921088   | 0 | 0 | 0 | 1 |
| XLOC_000238 | OPRD1        | chr1:29138653-29190208   | 0 | 0 | 0 | 1 |
| XLOC_000244 | LOC149086    | chr1:31971838-31974167   | 0 | 0 | 0 | 1 |
| XLOC_000245 | LOC284551    | chr1:31984035-31989846   | 0 | 0 | 0 | 1 |
| XLOC_000246 | TINAGL1      | chr1:32042085-32053287   | 0 | 0 | 0 | 1 |
| XLOC_000247 | HCRTR1       | chr1:32083300-32092919   | 0 | 0 | 0 | 1 |
| XLOC_000257 | LCK          | chr1:32716839-32751766   | 0 | 0 | 0 | 1 |
| XLOC_000269 | HMGB4        | chr1:33979608-34631443   | 0 | 0 | 0 | 1 |
| XLOC_000270 | LOC402779    | chr1:33979608-34631443   | 0 | 0 | 0 | 1 |
| XLOC_000271 | C1orf94      | chr1:34632623-34684731   | 0 | 0 | 0 | 1 |
| XLOC_000273 | GJB4         | chr1:35225341-35229325   | 0 | 0 | 0 | 1 |
| XLOC_000275 | GJA4         | chr1:35258598-35261348   | 0 | 0 | 0 | 1 |
| XLOC_000288 | MIR4255      | chr1:37627163-37627235   | 0 | 0 | 0 | 1 |
| XLOC_000295 | MIR3659      | chr1:38554902-38555001   | 0 | 0 | 0 | 1 |
| XLOC_000313 | MIR30E       | chr1:41154751-41237275   | 0 | 0 | 0 | 1 |
| XLOC_000314 | MIR30C1      | chr1:41154751-41237275   | 0 | 0 | 0 | 1 |
| XLOC_000318 | GUCA2B       | chr1:42619091-42621495   | 0 | 0 | 0 | 1 |
| XLOC_000329 | FAM183A      | chr1:43613593-43622067   | 0 | 0 | 0 | 1 |
| XLOC_000331 | TMEM125      | chr1:43735664-43739673   | 0 | 0 | 0 | 1 |
| XLOC_000345 | KLF17        | chr1:44584521-44600809   | 0 | 0 | 0 | 1 |
| XLOC_000348 | MIR5584      | chr1:44870959-45117396   | 0 | 0 | 0 | 1 |
| XLOC_000354 | SNORD38A     | chr1:45241245-45244412   | 0 | 0 | 0 | 1 |
| XLOC_000355 | SNORD38B     | chr1:45241245-45244412   | 0 | 0 | 0 | 1 |
| XLOC_000375 | MKNK1-AS1    | chr1:47004367-47069966   | 0 | 0 | 0 | 1 |
| XLOC_000377 | EFCAB14-AS1  | chr1:47139707-47184736   | 0 | 0 | 0 | 1 |
| XLOC_000378 | CYP4B1       | chr1:47264669-47285021   | 0 | 0 | 0 | 1 |
| XLOC_000379 | CYP4X1       | chr1:47489239-47516423   | 0 | 0 | 0 | 1 |
| XLOC_000380 | CYP4Z1       | chr1:47533159-47583992   | 0 | 0 | 0 | 1 |
| XLOC_000381 | CYP4A22      | chr1:47603106-47614526   | 0 | 0 | 0 | 1 |
| XLOC_000386 | SLC5A9       | chr1:48688356-48714316   | 0 | 0 | 0 | 1 |
| XLOC_000387 | ELAVL4       | chr1:50513685-50667540   | 0 | 0 | 0 | 1 |
| XLOC_000389 | C1orf185     | chr1:51567905-51613754   | 0 | 0 | 0 | 1 |
| XLOC_000396 | FAM159A      | chr1:53099065-53122737   | 0 | 0 | 0 | 1 |
| XLOC_000400 | PODN         | chr1:53527723-53551174   | 0 | 0 | 0 | 1 |
| XLOC_000403 | DMRTB1       | chr1:53925071-53933158   | 0 | 0 | 0 | 1 |
| XLOC_000407 | MIR4781      | chr1:54519273-54565416   | 0 | 0 | 0 | 1 |
| XLOC_000416 | MIR4422      | chr1:55691313-55691396   | 0 | 0 | 0 | 1 |
| XLOC_000417 | PRKAA2       | chr1:57110989-57181008   | 0 | 0 | 0 | 1 |
| XLOC_000418 | C8A          | chr1:57320442-57383894   | 0 | 0 | 0 | 1 |
| XLOC_000419 | LOC100131060 | chr1:59250822-59365384   | 0 | 0 | 0 | 1 |
| XLOC_000423 | MGC34796     | chr1:62119913-62121800   | 0 | 0 | 0 | 1 |
| XLOC_000427 | ANGPTL3      | chr1:62920396-63154039   | 0 | 0 | 0 | 1 |
| XLOC_000435 | UBE2U        | chr1:64669489-64710027   | 0 | 0 | 0 | 1 |
| XLOC_000437 | MIR4794      | chr1:64936475-65158741   | 0 | 0 | 0 | 1 |
| XLOC_000444 | MIR3117      | chr1:66999824-67210768   | 0 | 0 | 0 | 1 |
| XLOC_000445 | TCTEX1D1     | chr1:67218139-67244730   | 0 | 0 | 0 | 1 |
| XLOC_000447 | IL23R        | chr1:67632168-67725650   | 0 | 0 | 0 | 1 |
| XLOC_000452 | PIN1P1       | chr1:70225857-70589171   | 0 | 0 | 0 | 1 |
| XLOC_000460 | LHX8         | chr1:75594118-75627218   | 0 | 0 | 0 | 1 |
| XLOC_000463 | SNORD45C     | chr1:76251878-76260775   | 0 | 0 | 0 | 1 |
| XLOC_000465 | SNORD45B     | chr1:76251878-76260775   | 0 | 0 | 0 | 1 |
| XLOC_000467 | ST6GALNAC3   | chr1:76540388-77096669   | 0 | 0 | 0 | 1 |
| XLOC_000468 | ST6GALNAC5   | chr1:77333185-77529737   | 0 | 0 | 0 | 1 |
| XLOC_000474 | MGC27382     | chr1:78695282-78835147   | 0 | 0 | 0 | 1 |
| XLOC_000475 | PTGFR        | chr1:78956727-79006386   | 0 | 0 | 0 | 1 |
| XLOC_000476 | IFI44L       | chr1:79086087-79111830   | 0 | 0 | 0 | 1 |
| XLOC_000477 | IFI44        | chr1:79115476-79129763   | 0 | 0 | 0 | 1 |
| XLOC_000478 | LPHN2        | chr1:82266081-82458107   | 0 | 0 | 0 | 1 |
| XLOC_000481 | DNASE2B      | chr1:84864214-84880691   | 0 | 0 | 0 | 1 |
| XLOC_000484 | MIR4423      | chr1:85599476-85599556   | 0 | 0 | 0 | 1 |
| XLOC_000488 | CLCA1        | chr1:86934525-86965974   | 0 | 0 | 0 | 1 |
| XLOC_000489 | CLCA4        | chr1:87012758-87046432   | 0 | 0 | 0 | 1 |
| XLOC_000496 | GBP6         | chr1:89829435-89853719   | 0 | 0 | 0 | 1 |
| XLOC_000497 | GBP1P1       | chr1:89873237-89890493   | 0 | 0 | 0 | 1 |
| XLOC_000507 | C1orf146     | chr1:92683572-92711367   | 0 | 0 | 0 | 1 |
| XLOC_000511 | SNORA66      | chr1:93297593-93427079   | 0 | 0 | 0 | 1 |
| XLOC_000517 | MIR760       | chr1:94027342-94312706   | 0 | 0 | 0 | 1 |
| XLOC_000522 | FLJ31662     | chr1:95940292-95944912   | 0 | 0 | 0 | 1 |
| XLOC_000524 | DPYD-AS1     | chr1:97543299-98386615   | 0 | 0 | 0 | 1 |
| XLOC_000525 | LOC729987    | chr1:98676266-98738214   | 0 | 0 | 0 | 1 |
| XLOC_000527 | LOC100129620 | chr1:99355800-99614408   | 0 | 0 | 0 | 1 |
| XLOC_000528 | LPPR4        | chr1:99729847-99775138   | 0 | 0 | 0 | 1 |
| XLOC_000529 | PALMD        | chr1:100111430-100231345 | 0 | 0 | 0 | 1 |
| XLOC_000535 | MIR553       | chr1:100731713-100758325 | 0 | 0 | 0 | 1 |
| XLOC_000537 | GPR88        | chr1:101003727-101007583 | 0 | 0 | 0 | 1 |
| XLOC_000538 | VCAM1        | chr1:101185195-101204601 | 0 | 0 | 0 | 1 |
| XLOC_000540 | S1PR1        | chr1:101702304-101707076 | 0 | 0 | 0 | 1 |
| XLOC_000541 | DNAJA1P5     | chr1:102268126-102462790 | 0 | 0 | 0 | 1 |

|             |              |                          |   |   |   |   |
|-------------|--------------|--------------------------|---|---|---|---|
| XLOC_000544 | AMY2A        | chr1:104159998-104168400 | 0 | 0 | 0 | 1 |
| XLOC_000545 | AMY1A        | chr1:104198140-104207173 | 0 | 0 | 0 | 1 |
| XLOC_000546 | AMY1A        | chr1:104292278-104301317 | 0 | 0 | 0 | 1 |
| XLOC_000549 | NTNG1        | chr1:107682628-108024475 | 0 | 0 | 0 | 1 |
| XLOC_000550 | VAV3-AS1     | chr1:108113781-108537225 | 0 | 0 | 0 | 1 |
| XLOC_000551 | NBPF6        | chr1:108992903-109013260 | 0 | 0 | 0 | 1 |
| XLOC_000568 | MIR197       | chr1:110141514-110141585 | 0 | 0 | 0 | 1 |
| XLOC_000582 | CYMP         | chr1:111023387-111033897 | 0 | 0 | 0 | 1 |
| XLOC_000583 | CD53         | chr1:111413820-111442555 | 0 | 0 | 0 | 1 |
| XLOC_000585 | CHI3L2       | chr1:111770280-111786062 | 0 | 0 | 0 | 1 |
| XLOC_000586 | CHIAP2       | chr1:111823145-111828730 | 0 | 0 | 0 | 1 |
| XLOC_000587 | CHIA         | chr1:111833473-111863188 | 0 | 0 | 0 | 1 |
| XLOC_000588 | PIFO         | chr1:111889194-111895635 | 0 | 0 | 0 | 1 |
| XLOC_000607 | SYCP1        | chr1:115397454-115537990 | 0 | 0 | 0 | 1 |
| XLOC_000608 | TSHB         | chr1:115572414-115576947 | 0 | 0 | 0 | 1 |
| XLOC_000613 | MIR320B1     | chr1:117214370-117214445 | 0 | 0 | 0 | 1 |
| XLOC_000614 | CD2          | chr1:117297085-117311857 | 0 | 0 | 0 | 1 |
| XLOC_000618 | MIR942       | chr1:117602948-117645497 | 0 | 0 | 0 | 1 |
| XLOC_000622 | HAO2         | chr1:119911401-119936757 | 0 | 0 | 0 | 1 |
| XLOC_000624 | HSD3B1       | chr1:120049825-120057687 | 0 | 0 | 0 | 1 |
| XLOC_000628 | HIST2H2BA    | chr1:120906033-120914842 | 0 | 0 | 0 | 1 |
| XLOC_000630 | EMBP1        | chr1:121260909-121313688 | 0 | 0 | 0 | 1 |
| XLOC_000647 | GPR89C       | chr1:145883867-145924045 | 0 | 0 | 0 | 1 |
| XLOC_000652 | GJA8         | chr1:147374945-147381395 | 0 | 0 | 0 | 1 |
| XLOC_000655 | PPIAL4E      | chr1:148644010-148644795 | 0 | 0 | 0 | 1 |
| XLOC_000657 | PPIAL4D      | chr1:148806014-148806795 | 0 | 0 | 0 | 1 |
| XLOC_000660 | FCGR1C       | chr1:149369293-149378297 | 0 | 0 | 0 | 1 |
| XLOC_000661 | PPIAL4B      | chr1:149553002-149553787 | 0 | 0 | 0 | 1 |
| XLOC_000663 | FCGR1A       | chr1:149754244-149783928 | 0 | 0 | 0 | 1 |
| XLOC_000664 | HIST2H4B     | chr1:149804220-149804616 | 0 | 0 | 0 | 1 |
| XLOC_000666 | HIST2H3C     | chr1:149824180-149824687 | 0 | 0 | 0 | 1 |
| XLOC_000681 | MIR4257      | chr1:150521897-150533417 | 0 | 0 | 0 | 1 |
| XLOC_000696 | MIR554       | chr1:151512780-151556055 | 0 | 0 | 0 | 1 |
| XLOC_000698 | RIIAD1       | chr1:151694012-151702082 | 0 | 0 | 0 | 1 |
| XLOC_000700 | LOC100132111 | chr1:151810338-151816647 | 0 | 0 | 0 | 1 |
| XLOC_000702 | CRCT1        | chr1:152486977-152488487 | 0 | 0 | 0 | 1 |
| XLOC_000703 | LCE3C        | chr1:152573137-152573562 | 0 | 0 | 0 | 1 |
| XLOC_000704 | LCE3B        | chr1:152586286-152586574 | 0 | 0 | 0 | 1 |
| XLOC_000705 | LCE2D        | chr1:152635886-152637135 | 0 | 0 | 0 | 1 |
| XLOC_000706 | LCE2C        | chr1:152647790-152649045 | 0 | 0 | 0 | 1 |
| XLOC_000707 | LCE2B        | chr1:152658598-152659876 | 0 | 0 | 0 | 1 |
| XLOC_000708 | LCE2A        | chr1:152670839-152671918 | 0 | 0 | 0 | 1 |
| XLOC_000709 | LCE4A        | chr1:152681522-152681910 | 0 | 0 | 0 | 1 |
| XLOC_000710 | C1orf68      | chr1:152691997-152692905 | 0 | 0 | 0 | 1 |
| XLOC_000711 | KPRP         | chr1:152730505-152734525 | 0 | 0 | 0 | 1 |
| XLOC_000714 | LCE1D        | chr1:152769226-152770657 | 0 | 0 | 0 | 1 |
| XLOC_000716 | LCE1A        | chr1:152799948-152800573 | 0 | 0 | 0 | 1 |
| XLOC_000717 | LCE6A        | chr1:152815329-152816455 | 0 | 0 | 0 | 1 |
| XLOC_000718 | SMCP         | chr1:152850797-152857522 | 0 | 0 | 0 | 1 |
| XLOC_000719 | IVL          | chr1:152881038-152884362 | 0 | 0 | 0 | 1 |
| XLOC_000720 | SPRR4        | chr1:152943127-152945065 | 0 | 0 | 0 | 1 |
| XLOC_000721 | SPRR1A       | chr1:152956563-152958290 | 0 | 0 | 0 | 1 |
| XLOC_000722 | SPRR3        | chr1:152974222-152976332 | 0 | 0 | 0 | 1 |
| XLOC_000723 | SPRR1B       | chr1:153003678-153005376 | 0 | 0 | 0 | 1 |
| XLOC_000724 | LELP1        | chr1:153175905-153177607 | 0 | 0 | 0 | 1 |
| XLOC_000726 | LOR          | chr1:153232178-153234600 | 0 | 0 | 0 | 1 |
| XLOC_000727 | S100A9       | chr1:153330329-153333505 | 0 | 0 | 0 | 1 |
| XLOC_000728 | S100A7A      | chr1:153388999-153395707 | 0 | 0 | 0 | 1 |
| XLOC_000739 | AQP10        | chr1:154293591-154297807 | 0 | 0 | 0 | 1 |
| XLOC_000742 | TDRD10       | chr1:154474694-154520623 | 0 | 0 | 0 | 1 |
| XLOC_000745 | MIR4258      | chr1:154947117-154951725 | 0 | 0 | 0 | 1 |
| XLOC_000756 | MIR92B       | chr1:155164967-155165063 | 0 | 0 | 0 | 1 |
| XLOC_000776 | RHBG         | chr1:156338979-156355013 | 0 | 0 | 0 | 1 |
| XLOC_000777 | TTC24        | chr1:156549518-156556562 | 0 | 0 | 0 | 1 |
| XLOC_000786 | CYCSF52      | chr1:157094458-157108383 | 0 | 0 | 0 | 1 |
| XLOC_000789 | CD1A         | chr1:158223926-158228058 | 0 | 0 | 0 | 1 |
| XLOC_000790 | CD1C         | chr1:158259562-158264564 | 0 | 0 | 0 | 1 |
| XLOC_000791 | CD1E         | chr1:158323485-158327343 | 0 | 0 | 0 | 1 |
| XLOC_000792 | OR10K1       | chr1:158435351-158436293 | 0 | 0 | 0 | 1 |
| XLOC_000793 | OR10R2       | chr1:158449667-158450675 | 0 | 0 | 0 | 1 |
| XLOC_000794 | OR10Z1       | chr1:158576228-158577170 | 0 | 0 | 0 | 1 |
| XLOC_000795 | OR6K6        | chr1:158724605-158725637 | 0 | 0 | 0 | 1 |
| XLOC_000796 | MNDA         | chr1:158801167-158819270 | 0 | 0 | 0 | 1 |
| XLOC_000797 | PYHIN1       | chr1:158901336-158946845 | 0 | 0 | 0 | 1 |
| XLOC_000799 | CADM3        | chr1:159141376-159172932 | 0 | 0 | 0 | 1 |
| XLOC_000800 | DARC         | chr1:159173802-159176290 | 0 | 0 | 0 | 1 |
| XLOC_000801 | FCER1A       | chr1:159259503-159278014 | 0 | 0 | 0 | 1 |
| XLOC_000802 | OR10J1       | chr1:159409511-159410600 | 0 | 0 | 0 | 1 |
| XLOC_000803 | APCS         | chr1:159557615-159558667 | 0 | 0 | 0 | 1 |

|             |              |                          |   |   |   |   |
|-------------|--------------|--------------------------|---|---|---|---|
| XLOC_000805 | FCRL6        | chr1:159772172-159786047 | 0 | 0 | 0 | 1 |
| XLOC_000806 | SLAMF8       | chr1:159796478-159832447 | 0 | 0 | 0 | 1 |
| XLOC_000807 | LOC100505633 | chr1:159931013-159948876 | 0 | 0 | 0 | 1 |
| XLOC_000810 | ATP1A4       | chr1:160121351-160156767 | 0 | 0 | 0 | 1 |
| XLOC_000816 | VANGL2       | chr1:160370363-160398466 | 0 | 0 | 0 | 1 |
| XLOC_000818 | LY9          | chr1:160765863-160798046 | 0 | 0 | 0 | 1 |
| XLOC_000827 | PCP4L1       | chr1:161228516-161255240 | 0 | 0 | 0 | 1 |
| XLOC_000829 | FCGR2A       | chr1:161475204-161489360 | 0 | 0 | 0 | 1 |
| XLOC_000839 | MIR4654      | chr1:162039580-162339813 | 0 | 0 | 0 | 1 |
| XLOC_000840 | MIR556       | chr1:162039580-162339813 | 0 | 0 | 0 | 1 |
| XLOC_000849 | LRRC52       | chr1:165446078-165551347 | 0 | 0 | 0 | 1 |
| XLOC_000853 | FMO9P        | chr1:166573152-166594473 | 0 | 0 | 0 | 1 |
| XLOC_000856 | DUSP27       | chr1:167064086-167098403 | 0 | 0 | 0 | 1 |
| XLOC_000864 | MIR557       | chr1:168344761-168344856 | 0 | 0 | 0 | 1 |
| XLOC_000866 | LINC00626    | chr1:168756178-168762126 | 0 | 0 | 0 | 1 |
| XLOC_000870 | METTL11B     | chr1:170115187-170136923 | 0 | 0 | 0 | 1 |
| XLOC_000872 | PRRX1        | chr1:170633312-170708547 | 0 | 0 | 0 | 1 |
| XLOC_000873 | MROH9        | chr1:170904611-171033906 | 0 | 0 | 0 | 1 |
| XLOC_000874 | FMO3         | chr1:171060017-171086956 | 0 | 0 | 0 | 1 |
| XLOC_000875 | MIR1295B     | chr1:171060017-171086956 | 0 | 0 | 0 | 1 |
| XLOC_000876 | FMO6P        | chr1:171106878-171130703 | 0 | 0 | 0 | 1 |
| XLOC_000877 | FMO2         | chr1:171154387-171181822 | 0 | 0 | 0 | 1 |
| XLOC_000878 | FMO1         | chr1:171217662-171255113 | 0 | 0 | 0 | 1 |
| XLOC_000884 | MIR3120      | chr1:171810620-172381857 | 0 | 0 | 0 | 1 |
| XLOC_000887 | FASLG        | chr1:172628184-172636012 | 0 | 0 | 0 | 1 |
| XLOC_000889 | LOC730159    | chr1:173577474-173639007 | 0 | 0 | 0 | 1 |
| XLOC_000897 | TNN          | chr1:175036993-175117203 | 0 | 0 | 0 | 1 |
| XLOC_000899 | FAM5B        | chr1:177140632-177251556 | 0 | 0 | 0 | 1 |
| XLOC_000901 | TEX35        | chr1:178482211-178492636 | 0 | 0 | 0 | 1 |
| XLOC_000903 | MIR4424      | chr1:178646883-178646966 | 0 | 0 | 0 | 1 |
| XLOC_000919 | GM140        | chr1:181205523-181207740 | 0 | 0 | 0 | 1 |
| XLOC_000920 | CACNA1E      | chr1:181452685-181775927 | 0 | 0 | 0 | 1 |
| XLOC_000921 | LINC00272    | chr1:182376755-182383946 | 0 | 0 | 0 | 1 |
| XLOC_000922 | RGSL1        | chr1:182419255-182529733 | 0 | 0 | 0 | 1 |
| XLOC_000923 | LOC284648    | chr1:182584274-182585766 | 0 | 0 | 0 | 1 |
| XLOC_000934 | HMCN1        | chr1:185703682-186446656 | 0 | 0 | 0 | 1 |
| XLOC_000939 | LOC440704    | chr1:190594019-190770788 | 0 | 0 | 0 | 1 |
| XLOC_000940 | RGS18        | chr1:192127591-192154946 | 0 | 0 | 0 | 1 |
| XLOC_000941 | RGS21        | chr1:192286121-192336414 | 0 | 0 | 0 | 1 |
| XLOC_000942 | RGS1         | chr1:192544856-192549156 | 0 | 0 | 0 | 1 |
| XLOC_000943 | RGS13        | chr1:192605267-192629446 | 0 | 0 | 0 | 1 |
| XLOC_000947 | MIR1278      | chr1:193091087-193223942 | 0 | 0 | 0 | 1 |
| XLOC_000948 | CFH          | chr1:196621007-196716634 | 0 | 0 | 0 | 1 |
| XLOC_000949 | CFHR3        | chr1:196743929-196763203 | 0 | 0 | 0 | 1 |
| XLOC_000950 | CFHR1        | chr1:196788860-196801316 | 0 | 0 | 0 | 1 |
| XLOC_000951 | CFHR4        | chr1:196857143-196887843 | 0 | 0 | 0 | 1 |
| XLOC_000952 | CFHR2        | chr1:196912933-196928356 | 0 | 0 | 0 | 1 |
| XLOC_000953 | CFHR5        | chr1:196946666-196978803 | 0 | 0 | 0 | 1 |
| XLOC_000954 | CRB1         | chr1:197170591-197447586 | 0 | 0 | 0 | 1 |
| XLOC_000956 | LHX9         | chr1:197881634-197899273 | 0 | 0 | 0 | 1 |
| XLOC_000963 | IGFN1        | chr1:201159952-201198080 | 0 | 0 | 0 | 1 |
| XLOC_000967 | MIR5191      | chr1:201617449-201796103 | 0 | 0 | 0 | 1 |
| XLOC_000968 | MIR1231      | chr1:201617449-201796103 | 0 | 0 | 0 | 1 |
| XLOC_000974 | GPR37L1      | chr1:202092028-202098634 | 0 | 0 | 0 | 1 |
| XLOC_000979 | LOC641515    | chr1:202794328-202795427 | 0 | 0 | 0 | 1 |
| XLOC_000986 | OPTC         | chr1:203463270-203478077 | 0 | 0 | 0 | 1 |
| XLOC_000988 | SNORA77      | chr1:203595914-203713206 | 0 | 0 | 0 | 1 |
| XLOC_000989 | LINC00260    | chr1:203595914-203713206 | 0 | 0 | 0 | 1 |
| XLOC_000999 | LEMD1-AS1    | chr1:205342379-205391214 | 0 | 0 | 0 | 1 |
| XLOC_001004 | AVPR1B       | chr1:206224282-206231482 | 0 | 0 | 0 | 1 |
| XLOC_001005 | CTSE         | chr1:206317458-206332104 | 0 | 0 | 0 | 1 |
| XLOC_001012 | IL20         | chr1:207039153-207042566 | 0 | 0 | 0 | 1 |
| XLOC_001013 | IL24         | chr1:207070787-207095376 | 0 | 0 | 0 | 1 |
| XLOC_001015 | C4BPP        | chr1:207262211-207273337 | 0 | 0 | 0 | 1 |
| XLOC_001016 | C4BPA        | chr1:207277606-207318317 | 0 | 0 | 0 | 1 |
| XLOC_001018 | CR2          | chr1:207627644-207663246 | 0 | 0 | 0 | 1 |
| XLOC_001019 | CR1          | chr1:207669472-207815110 | 0 | 0 | 0 | 1 |
| XLOC_001020 | CR1L         | chr1:207818457-207897036 | 0 | 0 | 0 | 1 |
| XLOC_001023 | MIR205HG     | chr1:209602167-209605892 | 0 | 0 | 0 | 1 |
| XLOC_001024 | CAMK1G       | chr1:209757044-209787284 | 0 | 0 | 0 | 1 |
| XLOC_001026 | HSD11B1      | chr1:209859524-209908296 | 0 | 0 | 0 | 1 |
| XLOC_001027 | TRAF3IP3     | chr1:209929393-209957890 | 0 | 0 | 0 | 1 |
| XLOC_001029 | SYT14        | chr1:210111518-210337633 | 0 | 0 | 0 | 1 |
| XLOC_001030 | SERTAD4      | chr1:210404803-210416440 | 0 | 0 | 0 | 1 |
| XLOC_001036 | MIR3122      | chr1:212113740-212278187 | 0 | 0 | 0 | 1 |
| XLOC_001038 | SNORA16B     | chr1:212458878-212535206 | 0 | 0 | 0 | 1 |
| XLOC_001050 | KCNK2        | chr1:215178884-215410436 | 0 | 0 | 0 | 1 |
| XLOC_001053 | LINC00210    | chr1:218066241-218094146 | 0 | 0 | 0 | 1 |
| XLOC_001057 | RNU5F-1      | chr1:220046618-220321383 | 0 | 0 | 0 | 1 |

|             |                    |                          |   |   |   |   |
|-------------|--------------------|--------------------------|---|---|---|---|
| XLOC_001059 | MARK1              | chr1:220701567-220837795 | 0 | 0 | 0 | 1 |
| XLOC_001068 | C1orf65            | chr1:223566714-223568812 | 0 | 0 | 0 | 1 |
| XLOC_001085 | PRSS38             | chr1:228003417-22803417  | 0 | 0 | 0 | 1 |
| XLOC_001086 | WNT3A              | chr1:228194722-228248972 | 0 | 0 | 0 | 1 |
| XLOC_001088 | MIR3620            | chr1:228270360-228286913 | 0 | 0 | 0 | 1 |
| XLOC_001094 | MIR4666A           | chr1:228649774-228649852 | 0 | 0 | 0 | 1 |
| XLOC_001101 | CAPN9              | chr1:230883129-230937745 | 0 | 0 | 0 | 1 |
| XLOC_001107 | MAP10              | chr1:232940637-232946092 | 0 | 0 | 0 | 1 |
| XLOC_001111 | MIR4427            | chr1:233749749-233808255 | 0 | 0 | 0 | 1 |
| XLOC_001113 | MIR4671            | chr1:234040678-234460262 | 0 | 0 | 0 | 1 |
| XLOC_001115 | LINC00184          | chr1:234765056-234770525 | 0 | 0 | 0 | 1 |
| XLOC_001122 | ACTN2              | chr1:236849769-236927555 | 0 | 0 | 0 | 1 |
| XLOC_001125 | LOC100130331       | chr1:238025474-238091615 | 0 | 0 | 0 | 1 |
| XLOC_001127 | RPS7P5             | chr1:240170823-240176561 | 0 | 0 | 0 | 1 |
| XLOC_001128 | FMN2               | chr1:240255184-240638485 | 0 | 0 | 0 | 1 |
| XLOC_001129 | MIR3123            | chr1:240938816-241520475 | 0 | 0 | 0 | 1 |
| XLOC_001131 | WDR64              | chr1:241815579-241965432 | 0 | 0 | 0 | 1 |
| XLOC_001134 | MIR4677            | chr1:243419306-244006885 | 0 | 0 | 0 | 1 |
| XLOC_001137 | C1orf100           | chr1:244515936-244552385 | 0 | 0 | 0 | 1 |
| XLOC_001148 | OR2W5              | chr1:247654369-24765571  | 0 | 0 | 0 | 1 |
| XLOC_001149 | GCSAML             | chr1:247712450-247739845 | 0 | 0 | 0 | 1 |
| XLOC_001150 | OR2G2              | chr1:247751661-247752615 | 0 | 0 | 0 | 1 |
| XLOC_001151 | OR2G3              | chr1:247768887-247769817 | 0 | 0 | 0 | 1 |
| XLOC_001153 | OR2W3              | chr1:248058888-248059832 | 0 | 0 | 0 | 1 |
| XLOC_001154 | OR2T8              | chr1:248084319-248085255 | 0 | 0 | 0 | 1 |
| XLOC_001155 | OR2L13             | chr1:248100492-248264222 | 0 | 0 | 0 | 1 |
| XLOC_001156 | OR2L8              | chr1:248100492-248264222 | 0 | 0 | 0 | 1 |
| XLOC_001157 | OR2AK2             | chr1:248100492-248264222 | 0 | 0 | 0 | 1 |
| XLOC_001158 | OR2L1P             | chr1:248100492-248264222 | 0 | 0 | 0 | 1 |
| XLOC_001159 | OR2L5              | chr1:248100492-248264222 | 0 | 0 | 0 | 1 |
| XLOC_001160 | OR2L2              | chr1:248100492-248264222 | 0 | 0 | 0 | 1 |
| XLOC_001161 | OR2L3              | chr1:248100492-248264222 | 0 | 0 | 0 | 1 |
| XLOC_001162 | OR2M1P             | chr1:248285437-248286082 | 0 | 0 | 0 | 1 |
| XLOC_001163 | OR2M5              | chr1:248308449-248309385 | 0 | 0 | 0 | 1 |
| XLOC_001164 | OR2M2              | chr1:248343287-248344331 | 0 | 0 | 0 | 1 |
| XLOC_001165 | OR2M3              | chr1:248366369-248367305 | 0 | 0 | 0 | 1 |
| XLOC_001166 | OR2M4              | chr1:248402230-248403166 | 0 | 0 | 0 | 1 |
| XLOC_001167 | OR14C36            | chr1:248512076-248513015 | 0 | 0 | 0 | 1 |
| XLOC_001168 | OR2T4              | chr1:248524882-248525925 | 0 | 0 | 0 | 1 |
| XLOC_001169 | OR2T6              | chr1:248550909-248551835 | 0 | 0 | 0 | 1 |
| XLOC_001170 | OR2T1              | chr1:248569295-248570405 | 0 | 0 | 0 | 1 |
| XLOC_001171 | OR2T2              | chr1:248616098-248617072 | 0 | 0 | 0 | 1 |
| XLOC_001172 | OR2T3              | chr1:248636651-248637605 | 0 | 0 | 0 | 1 |
| XLOC_001173 | OR2T5              | chr1:248651889-248652832 | 0 | 0 | 0 | 1 |
| XLOC_001174 | OR2G6              | chr1:248684947-248685892 | 0 | 0 | 0 | 1 |
| XLOC_001175 | MIR3124            | chr1:249120575-249120642 | 0 | 0 | 0 | 1 |
| XLOC_001179 | FAM138F            | chr1:34610-36081         | 0 | 0 | 0 | 1 |
| XLOC_001181 | OR4F3              | chr1:621095-622034       | 0 | 0 | 0 | 1 |
| XLOC_001192 | TNFRSF18           | chr1:1138887-1142089     | 0 | 0 | 0 | 1 |
| XLOC_001207 | C1orf233           | chr1:1533387-1535476     | 0 | 0 | 0 | 1 |
| XLOC_001220 | HES5               | chr1:2460183-2461684     | 0 | 0 | 0 | 1 |
| XLOC_001227 | MIR551A            | chr1:3404505-3528059     | 0 | 0 | 0 | 1 |
| XLOC_001233 | MIR4689            | chr1:5922731-5922801     | 0 | 0 | 0 | 1 |
| XLOC_001241 | MIR4252            | chr1:6484847-6521004     | 0 | 0 | 0 | 1 |
| XLOC_001251 | SLC2A7             | chr1:9063358-9086404     | 0 | 0 | 0 | 1 |
| XLOC_001254 | MIR34A             | chr1:9211726-9211836     | 0 | 0 | 0 | 1 |
| XLOC_001255 | C1orf200           | chr1:9711789-9884550     | 0 | 0 | 0 | 1 |
| XLOC_001270 | NPPB               | chr1:11917520-11918992   | 0 | 0 | 0 | 1 |
| XLOC_001273 | PRAMEF11           | chr1:12884467-12891264   | 0 | 0 | 0 | 1 |
| XLOC_001274 | HNRNPCL1,LOC649330 | chr1:12907235-12908578   | 0 | 0 | 0 | 1 |
| XLOC_001275 | PRAMEF4            | chr1:12939032-12946025   | 0 | 0 | 0 | 1 |
| XLOC_001276 | PRAMEF10           | chr1:12952726-12958094   | 0 | 0 | 0 | 1 |
| XLOC_001277 | PRAMEF6            | chr1:12998301-13007406   | 0 | 0 | 0 | 1 |
| XLOC_001278 | PRAMEF5            | chr1:13108513-13117751   | 0 | 0 | 0 | 1 |
| XLOC_001279 | LOC440563          | chr1:13182959-13184326   | 0 | 0 | 0 | 1 |
| XLOC_001280 | PRAMEF3            | chr1:13328195-13331692   | 0 | 0 | 0 | 1 |
| XLOC_001281 | PRAMEF8            | chr1:13386646-13390765   | 0 | 0 | 0 | 1 |
| XLOC_001282 | PRAMEF13,PRAMEF14  | chr1:13447413-13452656   | 0 | 0 | 0 | 1 |
| XLOC_001283 | PRAMEF18           | chr1:13474052-13477569   | 0 | 0 | 0 | 1 |
| XLOC_001284 | PRAMEF7,PRAMEF8    | chr1:13607430-13611550   | 0 | 0 | 0 | 1 |
| XLOC_001285 | PRAMEF14           | chr1:13668268-13673511   | 0 | 0 | 0 | 1 |
| XLOC_001286 | PRAMEF18           | chr1:13694888-13698405   | 0 | 0 | 0 | 1 |
| XLOC_001287 | LRRC38             | chr1:13801444-13840242   | 0 | 0 | 0 | 1 |
| XLOC_001294 | HSPB7              | chr1:16340522-16345285   | 0 | 0 | 0 | 1 |
| XLOC_001300 | SPATA21            | chr1:16725137-16763919   | 0 | 0 | 0 | 1 |
| XLOC_001304 | ESPNP              | chr1:17017712-17046652   | 0 | 0 | 0 | 1 |
| XLOC_001306 | MIR3675            | chr1:17185443-17185516   | 0 | 0 | 0 | 1 |
| XLOC_001310 | PADI2              | chr1:17393255-17445948   | 0 | 0 | 0 | 1 |
| XLOC_001312 | TAS1R2             | chr1:19166092-19186155   | 0 | 0 | 0 | 1 |

|             |                 |                          |   |   |   |   |
|-------------|-----------------|--------------------------|---|---|---|---|
| XLOC_001314 | MIR4695         | chr1:19197923-19229293   | 0 | 0 | 0 | 1 |
| XLOC_001324 | RNF186          | chr1:20140521-20141771   | 0 | 0 | 0 | 1 |
| XLOC_001325 | PLA2G2E         | chr1:20246799-20250110   | 0 | 0 | 0 | 1 |
| XLOC_001326 | PLA2G2A         | chr1:20301923-20306932   | 0 | 0 | 0 | 1 |
| XLOC_001327 | PLA2G2D         | chr1:20439142-20446059   | 0 | 0 | 0 | 1 |
| XLOC_001328 | PLA2G2C         | chr1:20490483-20501687   | 0 | 0 | 0 | 1 |
| XLOC_001329 | LOC339505       | chr1:20686293-20755287   | 0 | 0 | 0 | 1 |
| XLOC_001342 | MIR4253         | chr1:23037330-23241823   | 0 | 0 | 0 | 1 |
| XLOC_001356 | CNR2            | chr1:24200459-24239817   | 0 | 0 | 0 | 1 |
| XLOC_001363 | RUNX3           | chr1:25226001-25291501   | 0 | 0 | 0 | 1 |
| XLOC_001372 | SLC30A2         | chr1:26364513-26372604   | 0 | 0 | 0 | 1 |
| XLOC_001373 | TRIM63          | chr1:26377795-26394125   | 0 | 0 | 0 | 1 |
| XLOC_001375 | AIM1L           | chr1:26648349-26680621   | 0 | 0 | 0 | 1 |
| XLOC_001376 | ZNF683          | chr1:26688124-26699266   | 0 | 0 | 0 | 1 |
| XLOC_001380 | C1orf172        | chr1:27276046-27286901   | 0 | 0 | 0 | 1 |
| XLOC_001385 | CD164L2         | chr1:27705595-27709805   | 0 | 0 | 0 | 1 |
| XLOC_001388 | FRG             | chr1:27938800-27961727   | 0 | 0 | 0 | 1 |
| XLOC_001405 | MIR4420         | chr1:31205314-31230683   | 0 | 0 | 0 | 1 |
| XLOC_001408 | SNORD103A       | chr1:31404352-31538564   | 0 | 0 | 0 | 1 |
| XLOC_001409 | SNORD103A       | chr1:31404352-31538564   | 0 | 0 | 0 | 1 |
| XLOC_001410 | SNORD85         | chr1:31404352-31538564   | 0 | 0 | 0 | 1 |
| XLOC_001417 | MIR4254         | chr1:32192717-32229648   | 0 | 0 | 0 | 1 |
| XLOC_001436 | DLGAP3          | chr1:35331036-35370984   | 0 | 0 | 0 | 1 |
| XLOC_001452 | CSF3R           | chr1:36931643-36948915   | 0 | 0 | 0 | 1 |
| XLOC_001453 | GRIK3           | chr1:37261127-37499844   | 0 | 0 | 0 | 1 |
| XLOC_001456 | MIR5581         | chr1:37955560-37980420   | 0 | 0 | 0 | 1 |
| XLOC_001459 | RSPO1           | chr1:38076950-38100595   | 0 | 0 | 0 | 1 |
| XLOC_001467 | POU3F1          | chr1:38509522-38512450   | 0 | 0 | 0 | 1 |
| XLOC_001468 | LOC339442       | chr1:38674705-38680439   | 0 | 0 | 0 | 1 |
| XLOC_001474 | SNORA55         | chr1:40026484-40042521   | 0 | 0 | 0 | 1 |
| XLOC_001476 | NT5C1A          | chr1:40124792-40137710   | 0 | 0 | 0 | 1 |
| XLOC_001494 | CLDN19          | chr1:43198763-43205925   | 0 | 0 | 0 | 1 |
| XLOC_001524 | KNCN            | chr1:47004367-47069966   | 0 | 0 | 0 | 1 |
| XLOC_001529 | CYP4Z2P         | chr1:47308766-47366147   | 0 | 0 | 0 | 1 |
| XLOC_001530 | CYP4A11         | chr1:47394845-47407156   | 0 | 0 | 0 | 1 |
| XLOC_001531 | PDZK1IP1        | chr1:47649260-47655771   | 0 | 0 | 0 | 1 |
| XLOC_001532 | TAL1            | chr1:47681962-47695443   | 0 | 0 | 0 | 1 |
| XLOC_001536 | SKINTL          | chr1:48567386-48648100   | 0 | 0 | 0 | 1 |
| XLOC_001538 | AGBL4           | chr1:48998526-50489626   | 0 | 0 | 0 | 1 |
| XLOC_001539 | BEND5           | chr1:48998526-50489626   | 0 | 0 | 0 | 1 |
| XLOC_001552 | SLC1A7          | chr1:53552854-53608289   | 0 | 0 | 0 | 1 |
| XLOC_001556 | SLC25A3P1       | chr1:53904042-53905693   | 0 | 0 | 0 | 1 |
| XLOC_001563 | CDCP2           | chr1:54604667-54618679   | 0 | 0 | 0 | 1 |
| XLOC_001568 | TTC22           | chr1:55246751-55266941   | 0 | 0 | 0 | 1 |
| XLOC_001572 | C1orf168        | chr1:57184476-57285369   | 0 | 0 | 0 | 1 |
| XLOC_001573 | C8B             | chr1:57394882-57431688   | 0 | 0 | 0 | 1 |
| XLOC_001574 | DAB1            | chr1:57463578-58716211   | 0 | 0 | 0 | 1 |
| XLOC_001580 | MIR4711         | chr1:59762624-60228402   | 0 | 0 | 0 | 1 |
| XLOC_001581 | CYP2J2          | chr1:60358979-60392423   | 0 | 0 | 0 | 1 |
| XLOC_001582 | C1orf87         | chr1:60456065-60539442   | 0 | 0 | 0 | 1 |
| XLOC_001584 | KANK4           | chr1:62701836-62785083   | 0 | 0 | 0 | 1 |
| XLOC_001589 | MIR3671         | chr1:65523437-65523525   | 0 | 0 | 0 | 1 |
| XLOC_001590 | MIR101-1        | chr1:65524116-65524191   | 0 | 0 | 0 | 1 |
| XLOC_001591 | INSL5           | chr1:67263423-67266942   | 0 | 0 | 0 | 1 |
| XLOC_001599 | MIR1262         | chr1:68167148-68698284   | 0 | 0 | 0 | 1 |
| XLOC_001600 | RPE65           | chr1:68894506-68915642   | 0 | 0 | 0 | 1 |
| XLOC_001606 | MIR186          | chr1:71318035-71546972   | 0 | 0 | 0 | 1 |
| XLOC_001607 | NEGR1           | chr1:71868624-72748277   | 0 | 0 | 0 | 1 |
| XLOC_001608 | NEGR1-IT1       | chr1:71868624-72748277   | 0 | 0 | 0 | 1 |
| XLOC_001610 | C1orf173        | chr1:75033794-75139422   | 0 | 0 | 0 | 1 |
| XLOC_001612 | SLC44A5         | chr1:75667815-76076799   | 0 | 0 | 0 | 1 |
| XLOC_001613 | ASB17           | chr1:76384557-76398116   | 0 | 0 | 0 | 1 |
| XLOC_001618 | ELTD1           | chr1:79355448-79472495   | 0 | 0 | 0 | 1 |
| XLOC_001619 | MIR548AP        | chr1:84259597-84464833   | 0 | 0 | 0 | 1 |
| XLOC_001637 | LOC100505768    | chr1:87819209-87837338   | 0 | 0 | 0 | 1 |
| XLOC_001643 | GBP7            | chr1:89597433-89641723   | 0 | 0 | 0 | 1 |
| XLOC_001645 | GBP5            | chr1:89724633-89738544   | 0 | 0 | 0 | 1 |
| XLOC_001648 | BARHL2          | chr1:91177578-91182794   | 0 | 0 | 0 | 1 |
| XLOC_001650 | HFM1            | chr1:91726322-91870426   | 0 | 0 | 0 | 1 |
| XLOC_001667 | MIR137_MIR137HG | chr1:98453555-98515249   | 0 | 0 | 0 | 1 |
| XLOC_001668 | MIR2682         | chr1:98453555-98515249   | 0 | 0 | 0 | 1 |
| XLOC_001669 | LPPR5           | chr1:99355800-99614408   | 0 | 0 | 0 | 1 |
| XLOC_001675 | LOC100128787    | chr1:101092605-101112560 | 0 | 0 | 0 | 1 |
| XLOC_001678 | RNU6-6          | chr1:101806424-101806451 | 0 | 0 | 0 | 1 |
| XLOC_001679 | OLFM3           | chr1:102268126-102462790 | 0 | 0 | 0 | 1 |
| XLOC_001680 | COL11A1         | chr1:103342022-103574052 | 0 | 0 | 0 | 1 |
| XLOC_001681 | AMY1A           | chr1:104230039-104239072 | 0 | 0 | 0 | 1 |
| XLOC_001682 | VAV3            | chr1:108113781-108537222 | 0 | 0 | 0 | 1 |
| XLOC_001684 | NBPF4           | chr1:108765962-108786702 | 0 | 0 | 0 | 1 |

|             |            |                          |   |   |   |   |
|-------------|------------|--------------------------|---|---|---|---|
| XLOC_001685 | HENMT1     | chr1:109190909-109204148 | 0 | 0 | 0 | 1 |
| XLOC_001692 | MYBPHL     | chr1:109834986-109849663 | 0 | 0 | 0 | 1 |
| XLOC_001698 | EPS8L3     | chr1:110292701-110306644 | 0 | 0 | 0 | 1 |
| XLOC_001703 | KCNA10     | chr1:111059838-111061791 | 0 | 0 | 0 | 1 |
| XLOC_001704 | KCNA2      | chr1:111136201-111174096 | 0 | 0 | 0 | 1 |
| XLOC_001705 | KCNA3      | chr1:111214309-111217655 | 0 | 0 | 0 | 1 |
| XLOC_001709 | PGCP1      | chr1:111927140-111932473 | 0 | 0 | 0 | 1 |
| XLOC_001716 | MIR4256    | chr1:113004391-113004453 | 0 | 0 | 0 | 1 |
| XLOC_001721 | LOC643441  | chr1:113739403-113748873 | 0 | 0 | 0 | 1 |
| XLOC_001730 | DENND2C    | chr1:115127195-115212733 | 0 | 0 | 0 | 1 |
| XLOC_001731 | AMPD1      | chr1:115215719-115238233 | 0 | 0 | 0 | 1 |
| XLOC_001734 | TSPAN2     | chr1:115590632-115632121 | 0 | 0 | 0 | 1 |
| XLOC_001735 | NGF        | chr1:115828536-115880851 | 0 | 0 | 0 | 1 |
| XLOC_001744 | SPAG17     | chr1:118472371-118727844 | 0 | 0 | 0 | 1 |
| XLOC_001749 | HMGCS2     | chr1:120290618-120311553 | 0 | 0 | 0 | 1 |
| XLOC_001750 | REG4       | chr1:120336640-120354203 | 0 | 0 | 0 | 1 |
| XLOC_001752 | ADAM30     | chr1:120436155-120439147 | 0 | 0 | 0 | 1 |
| XLOC_001754 | FCGR1B     | chr1:120926127-120935944 | 0 | 0 | 0 | 1 |
| XLOC_001760 | PPIAL4B    | chr1:144363461-144364244 | 0 | 0 | 0 | 1 |
| XLOC_001763 | LOC653513  | chr1:144614958-144828811 | 0 | 0 | 0 | 1 |
| XLOC_001771 | PDZK1P1    | chr1:145924387-145942613 | 0 | 0 | 0 | 1 |
| XLOC_001776 | LINC00624  | chr1:146853913-146989693 | 0 | 0 | 0 | 1 |
| XLOC_001779 | PDZK1P1    | chr1:147466093-147484331 | 0 | 0 | 0 | 1 |
| XLOC_001781 | MIR5087    | chr1:147806602-147806673 | 0 | 0 | 0 | 1 |
| XLOC_001782 | FLJ39739   | chr1:147906021-147931981 | 0 | 0 | 0 | 1 |
| XLOC_001783 | PPIAL4B    | chr1:147954634-147955411 | 0 | 0 | 0 | 1 |
| XLOC_001785 | PPIAL4D    | chr1:148201751-148202531 | 0 | 0 | 0 | 1 |
| XLOC_001788 | HIST2H3A   | chr1:149812258-149812763 | 0 | 0 | 0 | 1 |
| XLOC_001789 | HIST2H2AA3 | chr1:149813784-149814311 | 0 | 0 | 0 | 1 |
| XLOC_001791 | HIST2H4A   | chr1:149832329-149832723 | 0 | 0 | 0 | 1 |
| XLOC_001803 | HORMAD1    | chr1:150670534-150693364 | 0 | 0 | 0 | 1 |
| XLOC_001816 | SELENBP1   | chr1:151336777-151345211 | 0 | 0 | 0 | 1 |
| XLOC_001823 | C2CD4D     | chr1:151810338-151816641 | 0 | 0 | 0 | 1 |
| XLOC_001824 | THEM5      | chr1:151819576-151826173 | 0 | 0 | 0 | 1 |
| XLOC_001828 | TCHHL1     | chr1:152056619-152061541 | 0 | 0 | 0 | 1 |
| XLOC_001829 | TCHH       | chr1:152078792-152087931 | 0 | 0 | 0 | 1 |
| XLOC_001830 | RPTN       | chr1:152126070-152131704 | 0 | 0 | 0 | 1 |
| XLOC_001833 | FLG2       | chr1:152321212-152332483 | 0 | 0 | 0 | 1 |
| XLOC_001834 | CRNN       | chr1:152381718-152386751 | 0 | 0 | 0 | 1 |
| XLOC_001835 | LCE3E      | chr1:152538174-152539223 | 0 | 0 | 0 | 1 |
| XLOC_001836 | LCE3D      | chr1:152551859-152552981 | 0 | 0 | 0 | 1 |
| XLOC_001837 | LCE3A      | chr1:152595309-152595573 | 0 | 0 | 0 | 1 |
| XLOC_001839 | SPRR2D     | chr1:153012200-153013594 | 0 | 0 | 0 | 1 |
| XLOC_001840 | SPRR2A     | chr1:153028595-153029981 | 0 | 0 | 0 | 1 |
| XLOC_001841 | SPRR2B     | chr1:153042717-153044084 | 0 | 0 | 0 | 1 |
| XLOC_001842 | SPRR2E     | chr1:153065610-153067001 | 0 | 0 | 0 | 1 |
| XLOC_001843 | SPRR2F     | chr1:153084612-153085981 | 0 | 0 | 0 | 1 |
| XLOC_001844 | SPRR2C     | chr1:153112593-153113961 | 0 | 0 | 0 | 1 |
| XLOC_001845 | SPRR2G     | chr1:153122057-153123421 | 0 | 0 | 0 | 1 |
| XLOC_001846 | PGLYRP3    | chr1:153270337-153283194 | 0 | 0 | 0 | 1 |
| XLOC_001847 | PGLYRP4    | chr1:153302596-153321023 | 0 | 0 | 0 | 1 |
| XLOC_001848 | S100A12    | chr1:153346183-153348073 | 0 | 0 | 0 | 1 |
| XLOC_001849 | S100A8     | chr1:153362507-153363664 | 0 | 0 | 0 | 1 |
| XLOC_001850 | S100A7L2   | chr1:153409470-153412503 | 0 | 0 | 0 | 1 |
| XLOC_001851 | S100A7     | chr1:153430219-153433131 | 0 | 0 | 0 | 1 |
| XLOC_001869 | MIR190B    | chr1:154166140-154166213 | 0 | 0 | 0 | 1 |
| XLOC_001898 | SNORA42    | chr1:155882835-155904181 | 0 | 0 | 0 | 1 |
| XLOC_001899 | SCARNA4    | chr1:155882835-155904181 | 0 | 0 | 0 | 1 |
| XLOC_001910 | MIR9-1     | chr1:156374054-156399184 | 0 | 0 | 0 | 1 |
| XLOC_001922 | MIR765     | chr1:156904631-157015163 | 0 | 0 | 0 | 1 |
| XLOC_001923 | ETV3L      | chr1:157061834-157069601 | 0 | 0 | 0 | 1 |
| XLOC_001925 | FCRL5      | chr1:157483166-157522311 | 0 | 0 | 0 | 1 |
| XLOC_001926 | FCRL4      | chr1:157543538-157567871 | 0 | 0 | 0 | 1 |
| XLOC_001927 | FCRL3      | chr1:157647977-157670641 | 0 | 0 | 0 | 1 |
| XLOC_001928 | FCRL2      | chr1:157715522-157746923 | 0 | 0 | 0 | 1 |
| XLOC_001929 | FCRL1      | chr1:157764193-157789941 | 0 | 0 | 0 | 1 |
| XLOC_001930 | CD5L       | chr1:157800703-157811634 | 0 | 0 | 0 | 1 |
| XLOC_001931 | LOC646268  | chr1:158101833-158110431 | 0 | 0 | 0 | 1 |
| XLOC_001932 | CD1B       | chr1:158297739-158301321 | 0 | 0 | 0 | 1 |
| XLOC_001933 | OR10T2     | chr1:158368311-158369251 | 0 | 0 | 0 | 1 |
| XLOC_001934 | OR10K2     | chr1:158389717-158390651 | 0 | 0 | 0 | 1 |
| XLOC_001935 | OR6Y1      | chr1:158516917-158517893 | 0 | 0 | 0 | 1 |
| XLOC_001936 | OR6P1      | chr1:158532440-158533394 | 0 | 0 | 0 | 1 |
| XLOC_001937 | OR10X1     | chr1:158548708-158549681 | 0 | 0 | 0 | 1 |
| XLOC_001939 | OR6K2      | chr1:158669467-158670444 | 0 | 0 | 0 | 1 |
| XLOC_001940 | OR6K3      | chr1:158686957-158687901 | 0 | 0 | 0 | 1 |
| XLOC_001941 | OR6N1      | chr1:158735533-158736471 | 0 | 0 | 0 | 1 |
| XLOC_001942 | OR6N2      | chr1:158746471-158747423 | 0 | 0 | 0 | 1 |
| XLOC_001943 | AIM2       | chr1:159032274-159046641 | 0 | 0 | 0 | 1 |



|             |              |                          |   |   |   |   |
|-------------|--------------|--------------------------|---|---|---|---|
| XLOC_001944 | LOC100131825 | chr1:159141376-159172932 | 0 | 0 | 0 | 1 |
| XLOC_001945 | OR10J3       | chr1:159283459-159284445 | 0 | 0 | 0 | 1 |
| XLOC_001946 | OR10J5       | chr1:159504867-159505797 | 0 | 0 | 0 | 1 |
| XLOC_001947 | CRP          | chr1:159682078-159684375 | 0 | 0 | 0 | 1 |
| XLOC_001952 | SLAMF9       | chr1:159921281-159924044 | 0 | 0 | 0 | 1 |
| XLOC_001959 | SLAMF6       | chr1:160454819-160493052 | 0 | 0 | 0 | 1 |
| XLOC_001961 | SLAMF1       | chr1:160579890-160617087 | 0 | 0 | 0 | 1 |
| XLOC_001962 | CD48         | chr1:160648535-160681647 | 0 | 0 | 0 | 1 |
| XLOC_001963 | CD244        | chr1:160799949-160832692 | 0 | 0 | 0 | 1 |
| XLOC_001964 | ITLN1        | chr1:160846329-160854960 | 0 | 0 | 0 | 1 |
| XLOC_001965 | ITLN2        | chr1:160914815-160924585 | 0 | 0 | 0 | 1 |
| XLOC_001979 | FCGR3A       | chr1:161511550-161520413 | 0 | 0 | 0 | 1 |
| XLOC_001980 | FCGR3B       | chr1:161592987-161601752 | 0 | 0 | 0 | 1 |
| XLOC_001984 | SH2D1B       | chr1:162365055-162381921 | 0 | 0 | 0 | 1 |
| XLOC_001987 | LOC100505795 | chr1:164528596-164821060 | 0 | 0 | 0 | 1 |
| XLOC_001988 | LMX1A        | chr1:165171103-165325952 | 0 | 0 | 0 | 1 |
| XLOC_001990 | LOC400794    | chr1:165446078-165551347 | 0 | 0 | 0 | 1 |
| XLOC_001994 | MIR921       | chr1:166039255-166135958 | 0 | 0 | 0 | 1 |
| XLOC_002004 | LOC100505918 | chr1:168369426-168391894 | 0 | 0 | 0 | 1 |
| XLOC_002005 | XCL2         | chr1:168510002-168513231 | 0 | 0 | 0 | 1 |
| XLOC_002006 | DPT          | chr1:168664694-168698442 | 0 | 0 | 0 | 1 |
| XLOC_002011 | SELP         | chr1:169558087-169599377 | 0 | 0 | 0 | 1 |
| XLOC_002012 | SELL         | chr1:169659805-169680843 | 0 | 0 | 0 | 1 |
| XLOC_002013 | SELE         | chr1:169691780-169703220 | 0 | 0 | 0 | 1 |
| XLOC_002017 | MIR3119-1    | chr1:170115187-170136922 | 0 | 0 | 0 | 1 |
| XLOC_002018 | LOC284688    | chr1:170240545-170253345 | 0 | 0 | 0 | 1 |
| XLOC_002019 | MIR1295A     | chr1:171060017-171086952 | 0 | 0 | 0 | 1 |
| XLOC_002020 | MYOC         | chr1:171604556-171621772 | 0 | 0 | 0 | 1 |
| XLOC_002022 | DNM3OS       | chr1:171810620-172381857 | 0 | 0 | 0 | 1 |
| XLOC_002024 | TNFSF18      | chr1:173010359-173020103 | 0 | 0 | 0 | 1 |
| XLOC_002027 | SLC9C2       | chr1:173469603-173572232 | 0 | 0 | 0 | 1 |
| XLOC_002031 | SNORD81      | chr1:173832385-173837122 | 0 | 0 | 0 | 1 |
| XLOC_002033 | SNORD80      | chr1:173832385-173837122 | 0 | 0 | 0 | 1 |
| XLOC_002034 | SNORD79      | chr1:173832385-173837122 | 0 | 0 | 0 | 1 |
| XLOC_002035 | SNORD78      | chr1:173832385-173837122 | 0 | 0 | 0 | 1 |
| XLOC_002036 | SNORD44      | chr1:173832385-173837122 | 0 | 0 | 0 | 1 |
| XLOC_002037 | SNORD77      | chr1:173832385-173837122 | 0 | 0 | 0 | 1 |
| XLOC_002038 | SNORD76      | chr1:173832385-173837122 | 0 | 0 | 0 | 1 |
| XLOC_002039 | SNORD75      | chr1:173832385-173837122 | 0 | 0 | 0 | 1 |
| XLOC_002040 | SNORD74      | chr1:173832385-173837122 | 0 | 0 | 0 | 1 |
| XLOC_002045 | TNR          | chr1:175291934-175712752 | 0 | 0 | 0 | 1 |
| XLOC_002048 | ASTN1        | chr1:176830202-177134024 | 0 | 0 | 0 | 1 |
| XLOC_002049 | MIR488       | chr1:176830202-177134024 | 0 | 0 | 0 | 1 |
| XLOC_002051 | LOC730102    | chr1:177975274-178007142 | 0 | 0 | 0 | 1 |
| XLOC_002053 | ANGPTL1      | chr1:178694299-178889237 | 0 | 0 | 0 | 1 |
| XLOC_002059 | MIR3121      | chr1:180257351-180472022 | 0 | 0 | 0 | 1 |
| XLOC_002066 | RGS8         | chr1:182615791-182642067 | 0 | 0 | 0 | 1 |
| XLOC_002067 | SHCBP1L      | chr1:182868999-182922552 | 0 | 0 | 0 | 1 |
| XLOC_002068 | NMNAT2       | chr1:183217371-183387634 | 0 | 0 | 0 | 1 |
| XLOC_002070 | NCF2         | chr1:183524696-183560056 | 0 | 0 | 0 | 1 |
| XLOC_002078 | LOC100288079 | chr1:185292978-185304177 | 0 | 0 | 0 | 1 |
| XLOC_002079 | MIR548F1     | chr1:185703682-186446652 | 0 | 0 | 0 | 1 |
| XLOC_002082 | PTGS2        | chr1:186640943-186649552 | 0 | 0 | 0 | 1 |
| XLOC_002083 | FAM5C        | chr1:190066796-190446752 | 0 | 0 | 0 | 1 |
| XLOC_002087 | KCNT2        | chr1:196194912-196577492 | 0 | 0 | 0 | 1 |
| XLOC_002088 | MIR4735      | chr1:196194912-196577492 | 0 | 0 | 0 | 1 |
| XLOC_002092 | DENND1B      | chr1:197473878-197744622 | 0 | 0 | 0 | 1 |
| XLOC_002093 | ATP6V1G3     | chr1:198492351-198510072 | 0 | 0 | 0 | 1 |
| XLOC_002094 | LOC100131234 | chr1:198777131-198906552 | 0 | 0 | 0 | 1 |
| XLOC_002095 | MIR181B1     | chr1:198777131-198906552 | 0 | 0 | 0 | 1 |
| XLOC_002096 | MIR181A1     | chr1:198777131-198906552 | 0 | 0 | 0 | 1 |
| XLOC_002102 | CACNA1S      | chr1:201008639-201081694 | 0 | 0 | 0 | 1 |
| XLOC_002105 | TNNT2        | chr1:201328135-201346822 | 0 | 0 | 0 | 1 |
| XLOC_002106 | LAD1         | chr1:201349965-201368662 | 0 | 0 | 0 | 1 |
| XLOC_002107 | TNNI1        | chr1:201372894-201390874 | 0 | 0 | 0 | 1 |
| XLOC_002110 | RNU6-79      | chr1:201617449-201796102 | 0 | 0 | 0 | 1 |
| XLOC_002123 | MYBPH        | chr1:203136938-203144942 | 0 | 0 | 0 | 1 |
| XLOC_002124 | CHI3L1       | chr1:203148058-203155922 | 0 | 0 | 0 | 1 |
| XLOC_002125 | CHIT1        | chr1:203185206-203198862 | 0 | 0 | 0 | 1 |
| XLOC_002127 | FMOD         | chr1:203309751-203320282 | 0 | 0 | 0 | 1 |
| XLOC_002128 | LINC00303    | chr1:204001574-204010392 | 0 | 0 | 0 | 1 |
| XLOC_002142 | KLHDC8A      | chr1:205305192-205326211 | 0 | 0 | 0 | 1 |
| XLOC_002144 | MIR135B      | chr1:205417429-205417522 | 0 | 0 | 0 | 1 |
| XLOC_002151 | PM20D1       | chr1:205797149-205819274 | 0 | 0 | 0 | 1 |
| XLOC_002152 | SLC26A9      | chr1:205882176-205912582 | 0 | 0 | 0 | 1 |
| XLOC_002153 | C1orf186     | chr1:206238881-206288232 | 0 | 0 | 0 | 1 |
| XLOC_002156 | FAIM3        | chr1:207070787-207095371 | 0 | 0 | 0 | 1 |
| XLOC_002158 | FCAMR        | chr1:207131311-207143971 | 0 | 0 | 0 | 1 |
| XLOC_002162 | MIR29B2      | chr1:207975787-207975862 | 0 | 0 | 0 | 1 |

|             |                 |                          |   |   |   |   |
|-------------|-----------------|--------------------------|---|---|---|---|
| XLOC_002163 | CD34            | chr1:208059882-20808468: | 0 | 0 | 0 | 1 |
| XLOC_002167 | IRF6            | chr1:209958967-20997952: | 0 | 0 | 0 | 1 |
| XLOC_002183 | ESRRG           | chr1:216676587-21731109: | 0 | 0 | 0 | 1 |
| XLOC_002185 | LOC728463       | chr1:218517537-21861796: | 0 | 0 | 0 | 1 |
| XLOC_002187 | SLC30A10        | chr1:220046618-22032138: | 0 | 0 | 0 | 1 |
| XLOC_002190 | MIR215          | chr1:220046618-22032138: | 0 | 0 | 0 | 1 |
| XLOC_002191 | MIR194-1        | chr1:220046618-22032138: | 0 | 0 | 0 | 1 |
| XLOC_002193 | MIR664,SNORA36B | chr1:220321609-22044584: | 0 | 0 | 0 | 1 |
| XLOC_002195 | C1orf140        | chr1:221503269-22150963: | 0 | 0 | 0 | 1 |
| XLOC_002205 | MIR320B2        | chr1:224415035-22451789: | 0 | 0 | 0 | 1 |
| XLOC_002207 | MIR4742         | chr1:224572844-22462200: | 0 | 0 | 0 | 1 |
| XLOC_002211 | LEFTY1          | chr1:226073981-22607684: | 0 | 0 | 0 | 1 |
| XLOC_002213 | LEFTY2          | chr1:226124297-22612908: | 0 | 0 | 0 | 1 |
| XLOC_002220 | ZNF847P         | chr1:227884732-22788540: | 0 | 0 | 0 | 1 |
| XLOC_002222 | WNT9A           | chr1:228109164-22813567: | 0 | 0 | 0 | 1 |
| XLOC_002223 | MIR5008         | chr1:228109164-22813567: | 0 | 0 | 0 | 1 |
| XLOC_002229 | HIST3H3         | chr1:228612545-22861302: | 0 | 0 | 0 | 1 |
| XLOC_002236 | PGBD5           | chr1:230457391-23056167: | 0 | 0 | 0 | 1 |
| XLOC_002241 | LOC149373       | chr1:231298673-23135731: | 0 | 0 | 0 | 1 |
| XLOC_002245 | SNRPD2P2        | chr1:231611509-23161227: | 0 | 0 | 0 | 1 |
| XLOC_002246 | LINC00582       | chr1:231664398-23217701: | 0 | 0 | 0 | 1 |
| XLOC_002247 | DISC2           | chr1:231664398-23217701: | 0 | 0 | 0 | 1 |
| XLOC_002251 | LOC100506795    | chr1:234663636-23466752: | 0 | 0 | 0 | 1 |
| XLOC_002257 | MIR4753         | chr1:235330209-23549153: | 0 | 0 | 0 | 1 |
| XLOC_002261 | MIR1537         | chr1:235824344-23603022: | 0 | 0 | 0 | 1 |
| XLOC_002262 | NID1            | chr1:236139131-23622848: | 0 | 0 | 0 | 1 |
| XLOC_002266 | MT1P2           | chr1:237167402-23716771: | 0 | 0 | 0 | 1 |
| XLOC_002267 | ZP4             | chr1:238025474-23809161: | 0 | 0 | 0 | 1 |
| XLOC_002268 | LOC339535       | chr1:238643683-23864931: | 0 | 0 | 0 | 1 |
| XLOC_002269 | GREM2           | chr1:240652872-24077546: | 0 | 0 | 0 | 1 |
| XLOC_002270 | RGS7            | chr1:240938816-24152047: | 0 | 0 | 0 | 1 |
| XLOC_002275 | PLD5            | chr1:242251688-24268799: | 0 | 0 | 0 | 1 |
| XLOC_002283 | LOC255654       | chr1:246679340-24668758: | 0 | 0 | 0 | 1 |
| XLOC_002290 | MIR3916         | chr1:247365268-24736536: | 0 | 0 | 0 | 1 |
| XLOC_002292 | OR2B11          | chr1:247614330-24761528: | 0 | 0 | 0 | 1 |
| XLOC_002293 | OR2C3           | chr1:247687980-24769714: | 0 | 0 | 0 | 1 |
| XLOC_002294 | OR13G1          | chr1:247835419-24783634: | 0 | 0 | 0 | 1 |
| XLOC_002295 | OR6F1           | chr1:247875130-24787605: | 0 | 0 | 0 | 1 |
| XLOC_002296 | OR1C1           | chr1:247920763-24792170: | 0 | 0 | 0 | 1 |
| XLOC_002297 | OR14A16         | chr1:247978101-24797903: | 0 | 0 | 0 | 1 |
| XLOC_002298 | OR11L1          | chr1:248004229-24800519: | 0 | 0 | 0 | 1 |
| XLOC_002299 | OR2T33          | chr1:248436153-24843711: | 0 | 0 | 0 | 1 |
| XLOC_002300 | OR2T12          | chr1:248457917-24845888: | 0 | 0 | 0 | 1 |
| XLOC_002301 | OR2M7           | chr1:248486931-24848787: | 0 | 0 | 0 | 1 |
| XLOC_002302 | OR2T29          | chr1:248721844-24872279: | 0 | 0 | 0 | 1 |
| XLOC_002303 | OR2T34          | chr1:248737101-24873805: | 0 | 0 | 0 | 1 |
| XLOC_002304 | OR2T10          | chr1:248756130-24875706: | 0 | 0 | 0 | 1 |
| XLOC_002305 | OR2T11          | chr1:248789478-24879042: | 0 | 0 | 0 | 1 |
| XLOC_002306 | OR2T35          | chr1:248801587-24880255: | 0 | 0 | 0 | 1 |
| XLOC_002307 | OR2T27          | chr1:248813231-24881418: | 0 | 0 | 0 | 1 |
| XLOC_002308 | OR14I1          | chr1:248844669-24884560: | 0 | 0 | 0 | 1 |
| XLOC_002309 | LYPD8           | chr1:248902716-24890315: | 0 | 0 | 0 | 1 |
| XLOC_002317 | LINC00200       | chr10:1205707-1210612    | 0 | 0 | 0 | 1 |
| XLOC_002318 | ADARB2-AS1      | chr10:1223252-1779670    | 0 | 0 | 0 | 1 |
| XLOC_002321 | LINC00705       | chr10:4692376-4720262    | 0 | 0 | 0 | 1 |
| XLOC_002322 | AKR1E2          | chr10:4868368-4890251    | 0 | 0 | 0 | 1 |
| XLOC_002323 | AKR1C1          | chr10:5005453-5020158    | 0 | 0 | 0 | 1 |
| XLOC_002325 | AKR1C4          | chr10:5238797-5260910    | 0 | 0 | 0 | 1 |
| XLOC_002326 | UCN3            | chr10:5406975-5416169    | 0 | 0 | 0 | 1 |
| XLOC_002328 | CALML3          | chr10:5566923-5568225    | 0 | 0 | 0 | 1 |
| XLOC_002333 | MIR3155A        | chr10:6186842-6277507    | 0 | 0 | 0 | 1 |
| XLOC_002336 | LINC00707       | chr10:6821559-6884868    | 0 | 0 | 0 | 1 |
| XLOC_002340 | GATA3           | chr10:8096666-8117164    | 0 | 0 | 0 | 1 |
| XLOC_002342 | ECHDC3          | chr10:11784355-11806065  | 0 | 0 | 0 | 1 |
| XLOC_002348 | MIR4480         | chr10:12391582-12871733  | 0 | 0 | 0 | 1 |
| XLOC_002353 | MIR1265         | chr10:14478574-14478660  | 0 | 0 | 0 | 1 |
| XLOC_002361 | ST8SIA6-AS1     | chr10:17362675-17496254  | 0 | 0 | 0 | 1 |
| XLOC_002365 | MIR511-1        | chr10:17851361-17953178  | 0 | 0 | 0 | 1 |
| XLOC_002367 | MRC1            | chr10:18098351-18200091  | 0 | 0 | 0 | 1 |
| XLOC_002368 | MIR511-2        | chr10:18098351-18200091  | 0 | 0 | 0 | 1 |
| XLOC_002369 | SLC39A12        | chr10:18240767-18332221  | 0 | 0 | 0 | 1 |
| XLOC_002372 | PLXDC2          | chr10:20105371-20569115  | 0 | 0 | 0 | 1 |
| XLOC_002373 | MIR4675         | chr10:20840898-20840975  | 0 | 0 | 0 | 1 |
| XLOC_002374 | NEBL-AS1        | chr10:21068902-21463852  | 0 | 0 | 0 | 1 |
| XLOC_002376 | LOC100130992    | chr10:22541000-22547477  | 0 | 0 | 0 | 1 |
| XLOC_002378 | SPAG6           | chr10:22634373-22706539  | 0 | 0 | 0 | 1 |
| XLOC_002379 | ARMC3           | chr10:23216953-23326514  | 0 | 0 | 0 | 1 |
| XLOC_002381 | PTF1A           | chr10:23481459-23483181  | 0 | 0 | 0 | 1 |
| XLOC_002384 | MIR603          | chr10:23983674-24836772  | 0 | 0 | 0 | 1 |

|             |                    |                          |   |   |   |   |
|-------------|--------------------|--------------------------|---|---|---|---|
| XLOC_002387 | MYO3A              | chr10:26223001-26501465  | 0 | 0 | 0 | 1 |
| XLOC_002388 | GAD2               | chr10:26505235-26593491  | 0 | 0 | 0 | 1 |
| XLOC_002389 | APBB1IP            | chr10:26727265-26856732  | 0 | 0 | 0 | 1 |
| XLOC_002391 | LINC00202-2        | chr10:26932036-26942383  | 0 | 0 | 0 | 1 |
| XLOC_002396 | MIR5586            | chr10:28821421-28912041  | 0 | 0 | 0 | 1 |
| XLOC_002398 | LYZL1              | chr10:29577989-29600158  | 0 | 0 | 0 | 1 |
| XLOC_002406 | ANKRD30A           | chr10:37414784-37521495  | 0 | 0 | 0 | 1 |
| XLOC_002412 | ACTR3BP5           | chr10:38989726-38991371  | 0 | 0 | 0 | 1 |
| XLOC_002415 | MIR5100            | chr10:43493010-43493129  | 0 | 0 | 0 | 1 |
| XLOC_002421 | ZNF32-AS3          | chr10:44124264-44170147  | 0 | 0 | 0 | 1 |
| XLOC_002424 | LINC00619          | chr10:44340753-44346070  | 0 | 0 | 0 | 1 |
| XLOC_002425 | LINC00840          | chr10:44354858-44390881  | 0 | 0 | 0 | 1 |
| XLOC_002426 | LINC00841          | chr10:44404751-44465355  | 0 | 0 | 0 | 1 |
| XLOC_002427 | LOC100130539       | chr10:44788197-44790097  | 0 | 0 | 0 | 1 |
| XLOC_002428 | TMEM72             | chr10:45306471-45455137  | 0 | 0 | 0 | 1 |
| XLOC_002431 | ANKRD30BP3         | chr10:45650109-45681489  | 0 | 0 | 0 | 1 |
| XLOC_002432 | MIR3156-1          | chr10:45650109-45681489  | 0 | 0 | 0 | 1 |
| XLOC_002435 | GLUD1P7            | chr10:46764667-46768346  | 0 | 0 | 0 | 1 |
| XLOC_002437 | GPRIN2             | chr10:46993545-47000568  | 0 | 0 | 0 | 1 |
| XLOC_002438 | PPYR1              | chr10:47083533-47088320  | 0 | 0 | 0 | 1 |
| XLOC_002443 | BMS1P2             | chr10:48185838-48203780  | 0 | 0 | 0 | 1 |
| XLOC_002445 | FAM25C             | chr10:48247661-48252125  | 0 | 0 | 0 | 1 |
| XLOC_002446 | ANXA8              | chr10:48255203-48271368  | 0 | 0 | 0 | 1 |
| XLOC_002451 | FAM170B-AS1        | chr10:50329883-50359592  | 0 | 0 | 0 | 1 |
| XLOC_002453 | CHAT               | chr10:50817140-50873150  | 0 | 0 | 0 | 1 |
| XLOC_002454 | SLC18A3            | chr10:50817140-50873150  | 0 | 0 | 0 | 1 |
| XLOC_002455 | C10orf53           | chr10:50887683-50916956  | 0 | 0 | 0 | 1 |
| XLOC_002456 | MSMB               | chr10:51549552-51562518  | 0 | 0 | 0 | 1 |
| XLOC_002461 | PRKG1              | chr10:52750910-54073888  | 0 | 0 | 0 | 1 |
| XLOC_002462 | MIR605             | chr10:52750910-54073888  | 0 | 0 | 0 | 1 |
| XLOC_002463 | DKK1               | chr10:54074040-54077417  | 0 | 0 | 0 | 1 |
| XLOC_002468 | BICC1              | chr10:60272903-60588845  | 0 | 0 | 0 | 1 |
| XLOC_002470 | PHYHIPL            | chr10:60936347-61122661  | 0 | 0 | 0 | 1 |
| XLOC_002472 | C10orf107          | chr10:63422718-63526091  | 0 | 0 | 0 | 1 |
| XLOC_002474 | MIR548AV           | chr10:63661012-63856707  | 0 | 0 | 0 | 1 |
| XLOC_002480 | ANXA2P3            | chr10:66585284-66586634  | 0 | 0 | 0 | 1 |
| XLOC_002481 | LRRTM3             | chr10:67679724-69455949  | 0 | 0 | 0 | 1 |
| XLOC_002487 | SNORD98            | chr10:70480970-70551309  | 0 | 0 | 0 | 1 |
| XLOC_002508 | CHST3              | chr10:73724119-73773322  | 0 | 0 | 0 | 1 |
| XLOC_002512 | MIR4676            | chr10:74451888-74647452  | 0 | 0 | 0 | 1 |
| XLOC_002513 | OIT3               | chr10:74653338-74692787  | 0 | 0 | 0 | 1 |
| XLOC_002528 | ZNF503-AS1         | chr10:77056140-77121436  | 0 | 0 | 0 | 1 |
| XLOC_002538 | SFTPA1             | chr10:81370694-81375199  | 0 | 0 | 0 | 1 |
| XLOC_002541 | LOC100288974,MBL1P | chr10:81664653-81691557  | 0 | 0 | 0 | 1 |
| XLOC_002549 | NRG3               | chr10:83635069-84746935  | 0 | 0 | 0 | 1 |
| XLOC_002551 | C10orf99           | chr10:85933553-85945050  | 0 | 0 | 0 | 1 |
| XLOC_002552 | CDHR1              | chr10:85954411-85979376  | 0 | 0 | 0 | 1 |
| XLOC_002553 | RGR                | chr10:86004808-86018944  | 0 | 0 | 0 | 1 |
| XLOC_002554 | LINC00858          | chr10:86039735-86054415  | 0 | 0 | 0 | 1 |
| XLOC_002556 | GRID1-AS1          | chr10:87337487-88126250  | 0 | 0 | 0 | 1 |
| XLOC_002562 | FAM25A             | chr10:88780045-88784487  | 0 | 0 | 0 | 1 |
| XLOC_002567 | MIR4678            | chr10:89263637-89263711  | 0 | 0 | 0 | 1 |
| XLOC_002572 | LIPJ               | chr10:90346518-90366733  | 0 | 0 | 0 | 1 |
| XLOC_002573 | LIPF               | chr10:90424145-90438572  | 0 | 0 | 0 | 1 |
| XLOC_002574 | LIPK               | chr10:90484300-90512513  | 0 | 0 | 0 | 1 |
| XLOC_002575 | LIPN               | chr10:90521162-90537999  | 0 | 0 | 0 | 1 |
| XLOC_002576 | LIPM               | chr10:90562486-90611732  | 0 | 0 | 0 | 1 |
| XLOC_002579 | MIR4679-1          | chr10:90823091-90823168  | 0 | 0 | 0 | 1 |
| XLOC_002582 | IFIT1B             | chr10:91137812-91144962  | 0 | 0 | 0 | 1 |
| XLOC_002586 | LOC643529          | chr10:91589249-91600618  | 0 | 0 | 0 | 1 |
| XLOC_002588 | LINC00502          | chr10:92805564-92821916  | 0 | 0 | 0 | 1 |
| XLOC_002596 | HHEX               | chr10:94449680-94455408  | 0 | 0 | 0 | 1 |
| XLOC_002598 | CYP26C1            | chr10:94821020-94828454  | 0 | 0 | 0 | 1 |
| XLOC_002602 | PDE6C              | chr10:95372344-95425429  | 0 | 0 | 0 | 1 |
| XLOC_002603 | LG11               | chr10:95517565-95557916  | 0 | 0 | 0 | 1 |
| XLOC_002609 | CYP2C19            | chr10:96522462-96612671  | 0 | 0 | 0 | 1 |
| XLOC_002611 | C10orf129          | chr10:96953956-96988686  | 0 | 0 | 0 | 1 |
| XLOC_002617 | DNTT               | chr10:98064084-98098321  | 0 | 0 | 0 | 1 |
| XLOC_002620 | LOC100505540       | chr10:98757794-99052430  | 0 | 0 | 0 | 1 |
| XLOC_002625 | ANKRD2             | chr10:99322255-99343641  | 0 | 0 | 0 | 1 |
| XLOC_002628 | MIR5692C2          | chr10:99344101-99372555  | 0 | 0 | 0 | 1 |
| XLOC_002635 | NKX2-3             | chr10:101292689-10129628 | 0 | 0 | 0 | 1 |
| XLOC_002647 | MIR608             | chr10:102732285-1027472  | 0 | 0 | 0 | 1 |
| XLOC_002652 | TLX1               | chr10:102891060-1028975  | 0 | 0 | 0 | 1 |
| XLOC_002653 | FLJ41350           | chr10:102989350-1029986  | 0 | 0 | 0 | 1 |
| XLOC_002661 | ELOVL3             | chr10:103986142-1039893  | 0 | 0 | 0 | 1 |
| XLOC_002665 | MIR146B            | chr10:104196268-1041963  | 0 | 0 | 0 | 1 |
| XLOC_002674 | LOC729020          | chr10:105005643-1050077  | 0 | 0 | 0 | 1 |
| XLOC_002675 | INA                | chr10:105036919-1050501  | 0 | 0 | 0 | 1 |

|             |                  |                         |   |   |   |   |
|-------------|------------------|-------------------------|---|---|---|---|
| XLOC_002685 | SORCS3           | chr10:106400858-1070249 | 0 | 0 | 0 | 1 |
| XLOC_002686 | RNU6-53          | chr10:110930414-1109994 | 0 | 0 | 0 | 1 |
| XLOC_002691 | RBM20            | chr10:112404154-1125992 | 0 | 0 | 0 | 1 |
| XLOC_002695 | TECTB            | chr10:114043492-1140630 | 0 | 0 | 0 | 1 |
| XLOC_002698 | MIR4295          | chr10:114206755-1145785 | 0 | 0 | 0 | 1 |
| XLOC_002700 | HABP2            | chr10:115310589-1154238 | 0 | 0 | 0 | 1 |
| XLOC_002705 | TDRD1            | chr10:115939028-1159920 | 0 | 0 | 0 | 1 |
| XLOC_002706 | VWA2             | chr10:115999012-1160542 | 0 | 0 | 0 | 1 |
| XLOC_002709 | ATRNL1           | chr10:116853123-1177084 | 0 | 0 | 0 | 1 |
| XLOC_002710 | CCDC172          | chr10:118083939-1181395 | 0 | 0 | 0 | 1 |
| XLOC_002711 | PNLIPRP3         | chr10:118187423-1182374 | 0 | 0 | 0 | 1 |
| XLOC_002712 | PNLIP            | chr10:118305427-1183273 | 0 | 0 | 0 | 1 |
| XLOC_002713 | PNLIPRP1         | chr10:118350489-1183686 | 0 | 0 | 0 | 1 |
| XLOC_002716 | KCNK18           | chr10:118956999-1189698 | 0 | 0 | 0 | 1 |
| XLOC_002718 | EMX2             | chr10:119243803-1193090 | 0 | 0 | 0 | 1 |
| XLOC_002723 | MIR4681          | chr10:120967196-1212151 | 0 | 0 | 0 | 1 |
| XLOC_002727 | MIR4682          | chr10:121718024-1217181 | 0 | 0 | 0 | 1 |
| XLOC_002728 | PPAPDC1A         | chr10:122216465-1228068 | 0 | 0 | 0 | 1 |
| XLOC_002729 | MIR5694          | chr10:122216465-1228068 | 0 | 0 | 0 | 1 |
| XLOC_002734 | MIR3941          | chr10:124134093-1241918 | 0 | 0 | 0 | 1 |
| XLOC_002735 | ARMS2            | chr10:124214178-1242168 | 0 | 0 | 0 | 1 |
| XLOC_002740 | FAM24A           | chr10:124670216-1246726 | 0 | 0 | 0 | 1 |
| XLOC_002746 | GPR26            | chr10:125425870-1254569 | 0 | 0 | 0 | 1 |
| XLOC_002750 | LOC100169752     | chr10:127262939-1272670 | 0 | 0 | 0 | 1 |
| XLOC_002753 | MIR4484          | chr10:127477146-1275118 | 0 | 0 | 0 | 1 |
| XLOC_002757 | NPS              | chr10:129347612-1293509 | 0 | 0 | 0 | 1 |
| XLOC_002758 | FOXI2            | chr10:129535537-1295394 | 0 | 0 | 0 | 1 |
| XLOC_002770 | LOC399829        | chr10:134779037-1347900 | 0 | 0 | 0 | 1 |
| XLOC_002771 | GPR123           | chr10:134901408-1349451 | 0 | 0 | 0 | 1 |
| XLOC_002773 | UTF1             | chr10:135043777-1350450 | 0 | 0 | 0 | 1 |
| XLOC_002774 | VENTX            | chr10:135051407-1350554 | 0 | 0 | 0 | 1 |
| XLOC_002781 | DUX2,DUX4,DUX4L2 | chr10:135480367-1354984 | 0 | 0 | 0 | 1 |
| XLOC_002784 | MIR5699          | chr10:320129-735608     | 0 | 0 | 0 | 1 |
| XLOC_002788 | ADARB2           | chr10:1223252-1779670   | 0 | 0 | 0 | 1 |
| XLOC_002789 | LINC00700        | chr10:2047666-2056542   | 0 | 0 | 0 | 1 |
| XLOC_002790 | LINC00701        | chr10:2342512-2357268   | 0 | 0 | 0 | 1 |
| XLOC_002793 | LINC00704        | chr10:4692376-4720262   | 0 | 0 | 0 | 1 |
| XLOC_002794 | AKR1C6P          | chr10:4913858-4958465   | 0 | 0 | 0 | 1 |
| XLOC_002795 | AKR1C2           | chr10:5029967-5060225   | 0 | 0 | 0 | 1 |
| XLOC_002796 | AKR1CL1          | chr10:5196654-5227150   | 0 | 0 | 0 | 1 |
| XLOC_002798 | CALML5           | chr10:5540657-5541533   | 0 | 0 | 0 | 1 |
| XLOC_002803 | IL2RA            | chr10:6052656-6104333   | 0 | 0 | 0 | 1 |
| XLOC_002804 | MIR3155B         | chr10:6186842-6277507   | 0 | 0 | 0 | 1 |
| XLOC_002809 | GATA3-AS1        | chr10:8092412-8095447   | 0 | 0 | 0 | 1 |
| XLOC_002811 | LINC00710        | chr10:10976902-10994126 | 0 | 0 | 0 | 1 |
| XLOC_002812 | CELF2-AS2        | chr10:11047258-11378672 | 0 | 0 | 0 | 1 |
| XLOC_002818 | UCMA             | chr10:13263766-13276328 | 0 | 0 | 0 | 1 |
| XLOC_002831 | ITGA8            | chr10:15559087-15761770 | 0 | 0 | 0 | 1 |
| XLOC_002837 | ST8SIA6          | chr10:17362675-17496254 | 0 | 0 | 0 | 1 |
| XLOC_002839 | LOC100129213     | chr10:18240767-18332221 | 0 | 0 | 0 | 1 |
| XLOC_002841 | NEBL             | chr10:21068902-21463852 | 0 | 0 | 0 | 1 |
| XLOC_002842 | C10orf113        | chr10:21068902-21463852 | 0 | 0 | 0 | 1 |
| XLOC_002844 | MIR1915          | chr10:21783420-21786213 | 0 | 0 | 0 | 1 |
| XLOC_002850 | C10orf67         | chr10:23605519-23633772 | 0 | 0 | 0 | 1 |
| XLOC_002854 | GPR158-AS1       | chr10:25447000-25891157 | 0 | 0 | 0 | 1 |
| XLOC_002861 | PTCHD3           | chr10:27687116-27703297 | 0 | 0 | 0 | 1 |
| XLOC_002862 | MKX              | chr10:27961802-28034778 | 0 | 0 | 0 | 1 |
| XLOC_002866 | LINC00837        | chr10:29078239-29084979 | 0 | 0 | 0 | 1 |
| XLOC_002868 | MIR604           | chr10:29746276-30024730 | 0 | 0 | 0 | 1 |
| XLOC_002869 | MIR938           | chr10:29746276-30024730 | 0 | 0 | 0 | 1 |
| XLOC_002870 | KIAA1462         | chr10:30301728-30348488 | 0 | 0 | 0 | 1 |
| XLOC_002872 | LYZL2            | chr10:30900707-30918647 | 0 | 0 | 0 | 1 |
| XLOC_002880 | LINC00838        | chr10:34048640-34061608 | 0 | 0 | 0 | 1 |
| XLOC_002884 | MTRNR2L7         | chr10:37890365-37891859 | 0 | 0 | 0 | 1 |
| XLOC_002889 | LOC441666        | chr10:42827313-42863493 | 0 | 0 | 0 | 1 |
| XLOC_002897 | CXCL12           | chr10:44865604-44880545 | 0 | 0 | 0 | 1 |
| XLOC_002904 | ZFAND4           | chr10:46111038-46168251 | 0 | 0 | 0 | 1 |
| XLOC_002906 | PTPN20A,PTPN20B  | chr10:46550122-46641003 | 0 | 0 | 0 | 1 |
| XLOC_002909 | LINC00842        | chr10:47096453-47151400 | 0 | 0 | 0 | 1 |
| XLOC_002911 | ANXA8            | chr10:47157983-47174143 | 0 | 0 | 0 | 1 |
| XLOC_002912 | FAM25C           | chr10:47177221-47181688 | 0 | 0 | 0 | 1 |
| XLOC_002913 | AGAP9            | chr10:47191843-47213626 | 0 | 0 | 0 | 1 |
| XLOC_002915 | RBP3             | chr10:48381486-48390991 | 0 | 0 | 0 | 1 |
| XLOC_002917 | GDF10            | chr10:48425787-48439138 | 0 | 0 | 0 | 1 |
| XLOC_002918 | PTPN20A,PTPN20B  | chr10:48737041-48827924 | 0 | 0 | 0 | 1 |
| XLOC_002919 | FRMPD2P1         | chr10:48844035-48862688 | 0 | 0 | 0 | 1 |
| XLOC_002921 | FAM25C           | chr10:49203372-49207825 | 0 | 0 | 0 | 1 |
| XLOC_002923 | FRMPD2           | chr10:49364600-49482941 | 0 | 0 | 0 | 1 |
| XLOC_002925 | LRRC18           | chr10:49893517-50191001 | 0 | 0 | 0 | 1 |

|             |              |                          |   |   |   |   |
|-------------|--------------|--------------------------|---|---|---|---|
| XLOC_002926 | MIR4294      | chr10:50193556-50193632  | 0 | 0 | 0 | 1 |
| XLOC_002928 | FAM170B      | chr10:50329883-50359592  | 0 | 0 | 0 | 1 |
| XLOC_002929 | C10orf128    | chr10:50363890-50396407  | 0 | 0 | 0 | 1 |
| XLOC_002930 | DRGX         | chr10:50574160-50604062  | 0 | 0 | 0 | 1 |
| XLOC_002932 | OGDHL        | chr10:50942686-50970425  | 0 | 0 | 0 | 1 |
| XLOC_002942 | PRKG1-AS1    | chr10:52750910-54073888  | 0 | 0 | 0 | 1 |
| XLOC_002943 | MBL2         | chr10:54525139-54531460  | 0 | 0 | 0 | 1 |
| XLOC_002944 | PCDH15       | chr10:55562532-56561051  | 0 | 0 | 0 | 1 |
| XLOC_002946 | MIR3924      | chr10:59064238-59064319  | 0 | 0 | 0 | 1 |
| XLOC_002952 | C10orf40     | chr10:61717974-61720671  | 0 | 0 | 0 | 1 |
| XLOC_002955 | TMEM26       | chr10:63166400-63213208  | 0 | 0 | 0 | 1 |
| XLOC_002959 | MIR1296      | chr10:64926987-65226322  | 0 | 0 | 0 | 1 |
| XLOC_002960 | CTNNA3       | chr10:67679724-69455949  | 0 | 0 | 0 | 1 |
| XLOC_002969 | NEUROG3      | chr10:71331790-71333210  | 0 | 0 | 0 | 1 |
| XLOC_002974 | NPPFR1       | chr10:72014712-72043450  | 0 | 0 | 0 | 1 |
| XLOC_002978 | TBATA        | chr10:72530994-72545157  | 0 | 0 | 0 | 1 |
| XLOC_002981 | C10orf105    | chr10:73156690-73575704  | 0 | 0 | 0 | 1 |
| XLOC_002982 | C10orf54     | chr10:73156690-73575704  | 0 | 0 | 0 | 1 |
| XLOC_002987 | MIR1256      | chr10:74119697-74385949  | 0 | 0 | 0 | 1 |
| XLOC_002989 | PLA2G12B     | chr10:74694937-74714510  | 0 | 0 | 0 | 1 |
| XLOC_003008 | DUP1         | chr10:76797593-76818272  | 0 | 0 | 0 | 1 |
| XLOC_003017 | SFTPA2       | chr10:81315607-81320163  | 0 | 0 | 0 | 1 |
| XLOC_003018 | SFTPD        | chr10:81697495-81708861  | 0 | 0 | 0 | 1 |
| XLOC_003022 | DYDC1        | chr10:82095860-82127829  | 0 | 0 | 0 | 1 |
| XLOC_003023 | LRIT2        | chr10:85980248-85985284  | 0 | 0 | 0 | 1 |
| XLOC_003024 | LRIT1        | chr10:85991275-86001217  | 0 | 0 | 0 | 1 |
| XLOC_003026 | MIR346       | chr10:87337487-88126250  | 0 | 0 | 0 | 1 |
| XLOC_003031 | LOC728218    | chr10:89156330-89167457  | 0 | 0 | 0 | 1 |
| XLOC_003034 | RNLS         | chr10:90033620-90343082  | 0 | 0 | 0 | 1 |
| XLOC_003035 | ANKRD22      | chr10:90562486-90611732  | 0 | 0 | 0 | 1 |
| XLOC_003038 | MIR4679-2    | chr10:90823091-90823168  | 0 | 0 | 0 | 1 |
| XLOC_003039 | CH25H        | chr10:90965693-90967071  | 0 | 0 | 0 | 1 |
| XLOC_003041 | SLC16A12     | chr10:91190050-91295313  | 0 | 0 | 0 | 1 |
| XLOC_003043 | MIR107       | chr10:91339253-91405329  | 0 | 0 | 0 | 1 |
| XLOC_003045 | HTR7         | chr10:92500575-92617671  | 0 | 0 | 0 | 1 |
| XLOC_003049 | PPP1R3C      | chr10:93388196-93392858  | 0 | 0 | 0 | 1 |
| XLOC_003054 | RBP4         | chr10:95351592-95360993  | 0 | 0 | 0 | 1 |
| XLOC_003057 | LOC100128054 | chr10:95753745-96088148  | 0 | 0 | 0 | 1 |
| XLOC_003059 | CYP2C8       | chr10:96796528-96829254  | 0 | 0 | 0 | 1 |
| XLOC_003060 | PDLIM1       | chr10:96997324-97050905  | 0 | 0 | 0 | 1 |
| XLOC_003065 | MIR3157      | chr10:97471535-97849992  | 0 | 0 | 0 | 1 |
| XLOC_003067 | OPALIN       | chr10:98102974-98119092  | 0 | 0 | 0 | 1 |
| XLOC_003078 | SFRP5        | chr10:99526507-99531756  | 0 | 0 | 0 | 1 |
| XLOC_003079 | CRTAC1       | chr10:99609994-99790585  | 0 | 0 | 0 | 1 |
| XLOC_003083 | MIR4685      | chr10:100175954-10020670 | 0 | 0 | 0 | 1 |
| XLOC_003095 | PKD2L1       | chr10:102047902-10209024 | 0 | 0 | 0 | 1 |
| XLOC_003100 | TLX1NB       | chr10:102849077-10289090 | 0 | 0 | 0 | 1 |
| XLOC_003101 | LBX1         | chr10:102986732-10298877 | 0 | 0 | 0 | 1 |
| XLOC_003103 | MIR3158-2    | chr10:103348088-10336947 | 0 | 0 | 0 | 1 |
| XLOC_003111 | PITX3        | chr10:103989945-10400123 | 0 | 0 | 0 | 1 |
| XLOC_003123 | CALHM3       | chr10:105232560-10523899 | 0 | 0 | 0 | 1 |
| XLOC_003128 | MIR609       | chr10:105889645-10599217 | 0 | 0 | 0 | 1 |
| XLOC_003129 | MIR4482-1    | chr10:106028093-10602811 | 0 | 0 | 0 | 1 |
| XLOC_003131 | SORCS1       | chr10:108333420-10892444 | 0 | 0 | 0 | 1 |
| XLOC_003139 | GUCY2GP      | chr10:114067935-11411631 | 0 | 0 | 0 | 1 |
| XLOC_003142 | MIR4483      | chr10:115511212-11554211 | 0 | 0 | 0 | 1 |
| XLOC_003151 | VAX1         | chr10:118888031-11889787 | 0 | 0 | 0 | 1 |
| XLOC_003152 | MIR3663      | chr10:118927188-11892721 | 0 | 0 | 0 | 1 |
| XLOC_003157 | PRLHR        | chr10:120352915-12035511 | 0 | 0 | 0 | 1 |
| XLOC_003160 | SNORA19      | chr10:120794540-12084033 | 0 | 0 | 0 | 1 |
| XLOC_003170 | C10orf120    | chr10:124457224-12445933 | 0 | 0 | 0 | 1 |
| XLOC_003177 | NKX1-2       | chr10:126135997-12613851 | 0 | 0 | 0 | 1 |
| XLOC_003181 | MIR4296      | chr10:126676417-12684962 | 0 | 0 | 0 | 1 |
| XLOC_003182 | TEX36        | chr10:127344262-12737177 | 0 | 0 | 0 | 1 |
| XLOC_003187 | ADAM12       | chr10:127702901-12807712 | 0 | 0 | 0 | 1 |
| XLOC_003188 | LINC00601    | chr10:128102437-12811044 | 0 | 0 | 0 | 1 |
| XLOC_003189 | C10orf90     | chr10:128113573-12821007 | 0 | 0 | 0 | 1 |
| XLOC_003191 | CLRN3        | chr10:129676113-12969127 | 0 | 0 | 0 | 1 |
| XLOC_003194 | MIR4297      | chr10:131633495-13176201 | 0 | 0 | 0 | 1 |
| XLOC_003196 | MIR378C      | chr10:132760850-13276093 | 0 | 0 | 0 | 1 |
| XLOC_003201 | NKX6-2       | chr10:134598319-13459953 | 0 | 0 | 0 | 1 |
| XLOC_003202 | TTC40        | chr10:134621895-13475601 | 0 | 0 | 0 | 1 |
| XLOC_003203 | MIR202       | chr10:135061014-13506112 | 0 | 0 | 0 | 1 |
| XLOC_003206 | CALY         | chr10:135138927-13515047 | 0 | 0 | 0 | 1 |
| XLOC_003207 | FUOM         | chr10:135168657-13517152 | 0 | 0 | 0 | 1 |
| XLOC_003209 | MIR3944      | chr10:135175986-13518691 | 0 | 0 | 0 | 1 |
| XLOC_003212 | FRG2B        | chr10:135438602-13544021 | 0 | 0 | 0 | 1 |
| XLOC_003213 | SCGB1C1      | chr11:193079-194573      | 0 | 0 | 0 | 1 |
| XLOC_003214 | ODF3         | chr11:196760-200258      | 0 | 0 | 0 | 1 |

|             |               |                         |   |   |   |   |
|-------------|---------------|-------------------------|---|---|---|---|
| XLOC_003239 | MUC2          | chr11:1074874-1104417   | 0 | 0 | 0 | 1 |
| XLOC_003243 | LOC338651     | chr11:1490684-1785501   | 0 | 0 | 0 | 1 |
| XLOC_003244 | KRTAP5-5      | chr11:1490684-1785501   | 0 | 0 | 0 | 1 |
| XLOC_003245 | FAM99A        | chr11:1490684-1785501   | 0 | 0 | 0 | 1 |
| XLOC_003247 | SYT8          | chr11:1855673-1858750   | 0 | 0 | 0 | 1 |
| XLOC_003248 | TNNI2         | chr11:1860232-1862910   | 0 | 0 | 0 | 1 |
| XLOC_003250 | TNNT3         | chr11:1940798-1959936   | 0 | 0 | 0 | 1 |
| XLOC_003252 | IGF2-AS       | chr11:2150341-2182439   | 0 | 0 | 0 | 1 |
| XLOC_003253 | MIR4686       | chr11:2194292-2194368   | 0 | 0 | 0 | 1 |
| XLOC_003254 | TSPAN32       | chr11:2323242-2339430   | 0 | 0 | 0 | 1 |
| XLOC_003260 | MRGPRG-AS1    | chr11:3239173-3244361   | 0 | 0 | 0 | 1 |
| XLOC_003263 | ART1          | chr11:3666360-3685646   | 0 | 0 | 0 | 1 |
| XLOC_003268 | OR52K2        | chr11:4470524-4471591   | 0 | 0 | 0 | 1 |
| XLOC_003269 | OR52K1        | chr11:4510108-4511138   | 0 | 0 | 0 | 1 |
| XLOC_003270 | OR52M1        | chr11:4566420-4567374   | 0 | 0 | 0 | 1 |
| XLOC_003271 | OR52I2        | chr11:4608020-4609135   | 0 | 0 | 0 | 1 |
| XLOC_003273 | OR51D1        | chr11:4660944-4662068   | 0 | 0 | 0 | 1 |
| XLOC_003274 | OR51E1        | chr11:4665155-4676716   | 0 | 0 | 0 | 1 |
| XLOC_003275 | OR51F2        | chr11:4842615-4843644   | 0 | 0 | 0 | 1 |
| XLOC_003276 | OR51T1        | chr11:4903048-4904113   | 0 | 0 | 0 | 1 |
| XLOC_003277 | OR51A7        | chr11:4928599-4929538   | 0 | 0 | 0 | 1 |
| XLOC_003278 | MMP26         | chr11:5009423-5013659   | 0 | 0 | 0 | 1 |
| XLOC_003279 | OR51L1        | chr11:5020212-5021160   | 0 | 0 | 0 | 1 |
| XLOC_003280 | OR52J3        | chr11:5067755-5068691   | 0 | 0 | 0 | 1 |
| XLOC_003281 | OR51B6        | chr11:5362112-5526882   | 0 | 0 | 0 | 1 |
| XLOC_003282 | OR51M1        | chr11:5362112-5526882   | 0 | 0 | 0 | 1 |
| XLOC_003283 | OR51Q1        | chr11:5362112-5526882   | 0 | 0 | 0 | 1 |
| XLOC_003284 | OR51I2        | chr11:5362112-5526882   | 0 | 0 | 0 | 1 |
| XLOC_003285 | OR52D1        | chr11:5362112-5526882   | 0 | 0 | 0 | 1 |
| XLOC_003286 | OR52B6        | chr11:5602106-5603114   | 0 | 0 | 0 | 1 |
| XLOC_003289 | OR56B1        | chr11:5757677-5758768   | 0 | 0 | 0 | 1 |
| XLOC_003290 | OR52N4        | chr11:5775922-5776959   | 0 | 0 | 0 | 1 |
| XLOC_003291 | OR52N2        | chr11:5841565-5842531   | 0 | 0 | 0 | 1 |
| XLOC_003292 | OR52E4        | chr11:5905522-5906461   | 0 | 0 | 0 | 1 |
| XLOC_003293 | OR56A3        | chr11:5968576-5969524   | 0 | 0 | 0 | 1 |
| XLOC_003295 | OR52W1        | chr11:6220453-6221416   | 0 | 0 | 0 | 1 |
| XLOC_003298 | CCKBR         | chr11:6280903-6293357   | 0 | 0 | 0 | 1 |
| XLOC_003303 | OR2AG1        | chr11:6806247-6807245   | 0 | 0 | 0 | 1 |
| XLOC_003304 | OR10A5        | chr11:6866913-6867867   | 0 | 0 | 0 | 1 |
| XLOC_003305 | OR10A2        | chr11:6890985-6891897   | 0 | 0 | 0 | 1 |
| XLOC_003306 | OR10A4        | chr11:6897855-6898850   | 0 | 0 | 0 | 1 |
| XLOC_003307 | OR2D3         | chr11:6942232-6943225   | 0 | 0 | 0 | 1 |
| XLOC_003311 | SYT9          | chr11:7273180-7490276   | 0 | 0 | 0 | 1 |
| XLOC_003314 | OR5E1P        | chr11:7870597-7871118   | 0 | 0 | 0 | 1 |
| XLOC_003316 | TUB           | chr11:8060179-8190590   | 0 | 0 | 0 | 1 |
| XLOC_003331 | MRV11-AS1     | chr11:10562782-10715535 | 0 | 0 | 0 | 1 |
| XLOC_003339 | RASSF10       | chr11:13030969-13033653 | 0 | 0 | 0 | 1 |
| XLOC_003347 | OR7E14P       | chr11:17073432-17074591 | 0 | 0 | 0 | 1 |
| XLOC_003350 | MYOD1         | chr11:17741109-17743678 | 0 | 0 | 0 | 1 |
| XLOC_003353 | MRGPRX4       | chr11:18194383-18195827 | 0 | 0 | 0 | 1 |
| XLOC_003355 | SAA1          | chr11:18287807-18291523 | 0 | 0 | 0 | 1 |
| XLOC_003364 | MIR4486       | chr11:19372270-20143147 | 0 | 0 | 0 | 1 |
| XLOC_003367 | SLC6A5        | chr11:20620945-20676610 | 0 | 0 | 0 | 1 |
| XLOC_003368 | NELL1         | chr11:20691116-21597229 | 0 | 0 | 0 | 1 |
| XLOC_003369 | ANO5          | chr11:22214721-22304913 | 0 | 0 | 0 | 1 |
| XLOC_003370 | SLC17A6       | chr11:22359666-22401046 | 0 | 0 | 0 | 1 |
| XLOC_003372 | LUZP2         | chr11:24518515-25104186 | 0 | 0 | 0 | 1 |
| XLOC_003373 | ANO3          | chr11:26353677-26684836 | 0 | 0 | 0 | 1 |
| XLOC_003374 | FIBIN         | chr11:27015627-27018632 | 0 | 0 | 0 | 1 |
| XLOC_003375 | BBOX1         | chr11:27062508-27149354 | 0 | 0 | 0 | 1 |
| XLOC_003377 | MIR610        | chr11:28042162-28129746 | 0 | 0 | 0 | 1 |
| XLOC_003379 | FSHB          | chr11:30252562-30256824 | 0 | 0 | 0 | 1 |
| XLOC_003383 | DKFZp686K1684 | chr11:31806339-31908587 | 0 | 0 | 0 | 1 |
| XLOC_003385 | WT1-AS        | chr11:32457284-32461620 | 0 | 0 | 0 | 1 |
| XLOC_003398 | EHF           | chr11:34642587-34684834 | 0 | 0 | 0 | 1 |
| XLOC_003400 | MIR1343       | chr11:34903842-35017675 | 0 | 0 | 0 | 1 |
| XLOC_003405 | MIR3973       | chr11:35965611-36252841 | 0 | 0 | 0 | 1 |
| XLOC_003411 | MIR670        | chr11:43581205-43581303 | 0 | 0 | 0 | 1 |
| XLOC_003412 | MIR129-2      | chr11:43602943-43603033 | 0 | 0 | 0 | 1 |
| XLOC_003417 | ACCSL         | chr11:44069530-44081527 | 0 | 0 | 0 | 1 |
| XLOC_003422 | LOC221122     | chr11:44995452-44999578 | 0 | 0 | 0 | 1 |
| XLOC_003424 | LOC100507384  | chr11:45743857-45746106 | 0 | 0 | 0 | 1 |
| XLOC_003429 | GYLTL1B       | chr11:45943195-45950647 | 0 | 0 | 0 | 1 |
| XLOC_003432 | MIR4688       | chr11:46354454-46402104 | 0 | 0 | 0 | 1 |
| XLOC_003434 | MIR3160-2     | chr11:46417961-46615619 | 0 | 0 | 0 | 1 |
| XLOC_003448 | OR4B1         | chr11:48238361-48239291 | 0 | 0 | 0 | 1 |
| XLOC_003449 | OR4X2         | chr11:48266655-48267567 | 0 | 0 | 0 | 1 |
| XLOC_003450 | OR4X1         | chr11:48285412-48286330 | 0 | 0 | 0 | 1 |
| XLOC_003451 | OR4S1         | chr11:48327774-48328704 | 0 | 0 | 0 | 1 |

|             |             |                         |   |   |   |   |
|-------------|-------------|-------------------------|---|---|---|---|
| XLOC_003452 | OR4C3       | chr11:48346492-48347482 | 0 | 0 | 0 | 1 |
| XLOC_003453 | OR4A47      | chr11:48510344-48511274 | 0 | 0 | 0 | 1 |
| XLOC_003454 | TRIM49B     | chr11:49053151-49059529 | 0 | 0 | 0 | 1 |
| XLOC_003455 | LOC440040   | chr11:49580079-49831969 | 0 | 0 | 0 | 1 |
| XLOC_003456 | OR4C13      | chr11:49973942-49974971 | 0 | 0 | 0 | 1 |
| XLOC_003457 | LOC646813   | chr11:50368317-50379802 | 0 | 0 | 0 | 1 |
| XLOC_003458 | OR4C46      | chr11:51515281-51516211 | 0 | 0 | 0 | 1 |
| XLOC_003459 | TRIM48      | chr11:55029657-55038595 | 0 | 0 | 0 | 1 |
| XLOC_003460 | OR4A16      | chr11:55110676-55111663 | 0 | 0 | 0 | 1 |
| XLOC_003461 | OR4A15      | chr11:55135359-55136394 | 0 | 0 | 0 | 1 |
| XLOC_003462 | OR4C15      | chr11:55321782-55322895 | 0 | 0 | 0 | 1 |
| XLOC_003463 | OR4C16      | chr11:55339603-55340536 | 0 | 0 | 0 | 1 |
| XLOC_003464 | OR4P4       | chr11:55405833-55406772 | 0 | 0 | 0 | 1 |
| XLOC_003465 | OR4S2       | chr11:55418379-55419315 | 0 | 0 | 0 | 1 |
| XLOC_003466 | OR4C6       | chr11:55432642-55433572 | 0 | 0 | 0 | 1 |
| XLOC_003467 | OR5D13      | chr11:55540913-55541858 | 0 | 0 | 0 | 1 |
| XLOC_003468 | OR5D14      | chr11:55563031-55563976 | 0 | 0 | 0 | 1 |
| XLOC_003469 | OR5L1       | chr11:55578942-55579878 | 0 | 0 | 0 | 1 |
| XLOC_003470 | OR5D18      | chr11:55587105-55588047 | 0 | 0 | 0 | 1 |
| XLOC_003471 | OR5L2       | chr11:55594694-55595630 | 0 | 0 | 0 | 1 |
| XLOC_003472 | OR5D16      | chr11:55606227-55607214 | 0 | 0 | 0 | 1 |
| XLOC_003473 | TRIM51      | chr11:55650772-55659284 | 0 | 0 | 0 | 1 |
| XLOC_003474 | OR5AS1      | chr11:55797894-55798869 | 0 | 0 | 0 | 1 |
| XLOC_003475 | OR8I2       | chr11:55860783-55861716 | 0 | 0 | 0 | 1 |
| XLOC_003476 | OR8H2       | chr11:55872518-55873457 | 0 | 0 | 0 | 1 |
| XLOC_003477 | OR8H3       | chr11:55889848-55890787 | 0 | 0 | 0 | 1 |
| XLOC_003478 | OR5J2       | chr11:55944093-55945032 | 0 | 0 | 0 | 1 |
| XLOC_003479 | OR5T3       | chr11:56019675-56020698 | 0 | 0 | 0 | 1 |
| XLOC_003480 | OR5T1       | chr11:56043114-56044095 | 0 | 0 | 0 | 1 |
| XLOC_003481 | OR8K3       | chr11:56085782-56086721 | 0 | 0 | 0 | 1 |
| XLOC_003482 | OR8K1       | chr11:56113514-56114474 | 0 | 0 | 0 | 1 |
| XLOC_003483 | OR8J1       | chr11:56127690-56128764 | 0 | 0 | 0 | 1 |
| XLOC_003484 | OR8U1,OR8U8 | chr11:56143099-56508560 | 0 | 0 | 0 | 1 |
| XLOC_003485 | OR5AR1      | chr11:56143099-56508560 | 0 | 0 | 0 | 1 |
| XLOC_003486 | OR9G9       | chr11:56143099-56508560 | 0 | 0 | 0 | 1 |
| XLOC_003487 | OR5AK2      | chr11:56756388-56757318 | 0 | 0 | 0 | 1 |
| XLOC_003488 | OR5AK4P     | chr11:56805008-56805935 | 0 | 0 | 0 | 1 |
| XLOC_003489 | LRR55       | chr11:56949220-56959188 | 0 | 0 | 0 | 1 |
| XLOC_003494 | MIR130A     | chr11:57408670-57408759 | 0 | 0 | 0 | 1 |
| XLOC_003499 | OR9Q1       | chr11:57791352-57949038 | 0 | 0 | 0 | 1 |
| XLOC_003500 | OR6Q1       | chr11:57791352-57949038 | 0 | 0 | 0 | 1 |
| XLOC_003501 | OR9Q2       | chr11:57957905-57958990 | 0 | 0 | 0 | 1 |
| XLOC_003502 | OR1S1       | chr11:57982216-57983194 | 0 | 0 | 0 | 1 |
| XLOC_003504 | GLYATL1     | chr11:58695101-58825925 | 0 | 0 | 0 | 1 |
| XLOC_003508 | OR5AN1      | chr11:59131931-59132867 | 0 | 0 | 0 | 1 |
| XLOC_003509 | OR5A1       | chr11:59210641-59211589 | 0 | 0 | 0 | 1 |
| XLOC_003510 | OR4D6       | chr11:59224433-59225378 | 0 | 0 | 0 | 1 |
| XLOC_003511 | OR4D10      | chr11:59244902-59245838 | 0 | 0 | 0 | 1 |
| XLOC_003512 | OR4D11      | chr11:59271048-59271984 | 0 | 0 | 0 | 1 |
| XLOC_003513 | OR4D9       | chr11:59282385-59283330 | 0 | 0 | 0 | 1 |
| XLOC_003516 | PLAC1L      | chr11:59807747-59815516 | 0 | 0 | 0 | 1 |
| XLOC_003517 | MS4A3       | chr11:59824100-59838588 | 0 | 0 | 0 | 1 |
| XLOC_003518 | MS4A2       | chr11:59856136-59865940 | 0 | 0 | 0 | 1 |
| XLOC_003519 | MS4A4A      | chr11:60048013-60076445 | 0 | 0 | 0 | 1 |
| XLOC_003520 | MS4A6E      | chr11:60102354-60108441 | 0 | 0 | 0 | 1 |
| XLOC_003521 | MS4A7       | chr11:60145957-60163426 | 0 | 0 | 0 | 1 |
| XLOC_003522 | MS4A14      | chr11:60163486-60185228 | 0 | 0 | 0 | 1 |
| XLOC_003523 | MS4A5       | chr11:60197061-60215265 | 0 | 0 | 0 | 1 |
| XLOC_003524 | MS4A1       | chr11:60223281-60238225 | 0 | 0 | 0 | 1 |
| XLOC_003525 | MS4A12      | chr11:60260250-60274901 | 0 | 0 | 0 | 1 |
| XLOC_003526 | MS4A13      | chr11:60282885-60310191 | 0 | 0 | 0 | 1 |
| XLOC_003527 | LINC00301   | chr11:60383223-60454621 | 0 | 0 | 0 | 1 |
| XLOC_003528 | MS4A8B      | chr11:60467046-60483285 | 0 | 0 | 0 | 1 |
| XLOC_003529 | MS4A15      | chr11:60524339-60544204 | 0 | 0 | 0 | 1 |
| XLOC_003532 | ZP1         | chr11:60635014-60643164 | 0 | 0 | 0 | 1 |
| XLOC_003535 | CD6         | chr11:60739112-60787848 | 0 | 0 | 0 | 1 |
| XLOC_003537 | PGA3        | chr11:60970983-60980350 | 0 | 0 | 0 | 1 |
| XLOC_003538 | PGA4        | chr11:60989820-60999179 | 0 | 0 | 0 | 1 |
| XLOC_003539 | PGA5        | chr11:61008643-61018929 | 0 | 0 | 0 | 1 |
| XLOC_003545 | MIR4488     | chr11:61276067-61276129 | 0 | 0 | 0 | 1 |
| XLOC_003546 | LRR10B      | chr11:61276271-61278490 | 0 | 0 | 0 | 1 |
| XLOC_003554 | SCGB1D1     | chr11:61957709-61961009 | 0 | 0 | 0 | 1 |
| XLOC_003555 | SCGB2A1     | chr11:61976139-61981411 | 0 | 0 | 0 | 1 |
| XLOC_003556 | SCGB1D2     | chr11:62009723-62012280 | 0 | 0 | 0 | 1 |
| XLOC_003557 | SCGB2A2     | chr11:62037629-62040628 | 0 | 0 | 0 | 1 |
| XLOC_003559 | SCGB1A1     | chr11:62186506-62190678 | 0 | 0 | 0 | 1 |
| XLOC_003570 | SLC22A10    | chr11:63014620-63330855 | 0 | 0 | 0 | 1 |
| XLOC_003572 | LGALS12     | chr11:63014620-63330855 | 0 | 0 | 0 | 1 |
| XLOC_003595 | MIR1237     | chr11:64126624-64139687 | 0 | 0 | 0 | 1 |

|             |                     |                          |   |   |   |   |
|-------------|---------------------|--------------------------|---|---|---|---|
| XLOC_003598 | SLC22A12            | chr11:64358281-64369825  | 0 | 0 | 0 | 1 |
| XLOC_003605 | SPDYC               | chr11:64937706-64940688  | 0 | 0 | 0 | 1 |
| XLOC_003616 | MIR548AR            | chr11:65282807-65282828  | 0 | 0 | 0 | 1 |
| XLOC_003622 | MIR4690             | chr11:65383782-65404910  | 0 | 0 | 0 | 1 |
| XLOC_003624 | MIR4489             | chr11:65405577-65418391  | 0 | 0 | 0 | 1 |
| XLOC_003642 | NPAS4               | chr11:66188474-66194177  | 0 | 0 | 0 | 1 |
| XLOC_003669 | MIR4691             | chr11:67798083-67804114  | 0 | 0 | 0 | 1 |
| XLOC_003678 | ANO1                | chr11:69924407-70035652  | 0 | 0 | 0 | 1 |
| XLOC_003681 | MIR548K             | chr11:70116805-70230607  | 0 | 0 | 0 | 1 |
| XLOC_003691 | DEFB108B            | chr11:71544245-71548608  | 0 | 0 | 0 | 1 |
| XLOC_003698 | FOLR2               | chr11:71927818-71932994  | 0 | 0 | 0 | 1 |
| XLOC_003700 | MIR4692             | chr11:72465773-72504750  | 0 | 0 | 0 | 1 |
| XLOC_003715 | SLCO2B1             | chr11:74862031-74917445  | 0 | 0 | 0 | 1 |
| XLOC_003716 | TPBGL               | chr11:74951949-74954749  | 0 | 0 | 0 | 1 |
| XLOC_003721 | MOGAT2              | chr11:75428933-75442331  | 0 | 0 | 0 | 1 |
| XLOC_003727 | B3GNT6              | chr11:76745434-76753005  | 0 | 0 | 0 | 1 |
| XLOC_003733 | THRSP               | chr11:77726760-77850699  | 0 | 0 | 0 | 1 |
| XLOC_003741 | CCDC83              | chr11:85566143-85631051  | 0 | 0 | 0 | 1 |
| XLOC_003748 | GRM5-AS1            | chr11:88237743-88796816  | 0 | 0 | 0 | 1 |
| XLOC_003749 | TYR                 | chr11:88911039-89028927  | 0 | 0 | 0 | 1 |
| XLOC_003750 | FOLH1B              | chr11:89392464-89431886  | 0 | 0 | 0 | 1 |
| XLOC_003751 | TRIM77              | chr11:89443466-89451040  | 0 | 0 | 0 | 1 |
| XLOC_003752 | MIR5692A1           | chr11:89570045-89673722  | 0 | 0 | 0 | 1 |
| XLOC_003753 | TRIM53AP            | chr11:89570045-89673722  | 0 | 0 | 0 | 1 |
| XLOC_003754 | TRIM49D1P,TRIM49D2P | chr11:89570045-89673722  | 0 | 0 | 0 | 1 |
| XLOC_003755 | TRIM64              | chr11:89701671-89707240  | 0 | 0 | 0 | 1 |
| XLOC_003756 | TRIM49C             | chr11:89764273-89775193  | 0 | 0 | 0 | 1 |
| XLOC_003757 | UBTFL1              | chr11:89819117-89820299  | 0 | 0 | 0 | 1 |
| XLOC_003759 | FAT3                | chr11:92085261-92629635  | 0 | 0 | 0 | 1 |
| XLOC_003760 | MTNR1B              | chr11:92702788-92715948  | 0 | 0 | 0 | 1 |
| XLOC_003761 | CCDC67              | chr11:93063882-93171636  | 0 | 0 | 0 | 1 |
| XLOC_003768 | FOLR4               | chr11:94038802-94040858  | 0 | 0 | 0 | 1 |
| XLOC_003770 | LOC643037           | chr11:94245694-94265289  | 0 | 0 | 0 | 1 |
| XLOC_003775 | KDME                | chr11:94758421-94760760  | 0 | 0 | 0 | 1 |
| XLOC_003779 | MIR1260B            | chr11:95711439-96076344  | 0 | 0 | 0 | 1 |
| XLOC_003781 | CNTN5               | chr11:98891705-100229616 | 0 | 0 | 0 | 1 |
| XLOC_003784 | LOC101054525        | chr11:100900354-10103000 | 0 | 0 | 0 | 1 |
| XLOC_003790 | WTAPP1              | chr11:102654406-10271434 | 0 | 0 | 0 | 1 |
| XLOC_003792 | MIR4693             | chr11:103720633-10372071 | 0 | 0 | 0 | 1 |
| XLOC_003793 | DDI1                | chr11:103777913-10403502 | 0 | 0 | 0 | 1 |
| XLOC_003797 | LOC643923           | chr11:107461816-10753750 | 0 | 0 | 0 | 1 |
| XLOC_003798 | RAB39A              | chr11:107799276-10783420 | 0 | 0 | 0 | 1 |
| XLOC_003803 | C11orf87            | chr11:109292845-10929988 | 0 | 0 | 0 | 1 |
| XLOC_003806 | C11orf53            | chr11:111126706-11115697 | 0 | 0 | 0 | 1 |
| XLOC_003808 | MIR4491             | chr11:111218481-11121854 | 0 | 0 | 0 | 1 |
| XLOC_003809 | MIR34B              | chr11:111383662-11138374 | 0 | 0 | 0 | 1 |
| XLOC_003810 | MIR34C              | chr11:111384163-11138424 | 0 | 0 | 0 | 1 |
| XLOC_003811 | C11orf88            | chr11:111385509-11140778 | 0 | 0 | 0 | 1 |
| XLOC_003812 | LAYN                | chr11:111411232-11143247 | 0 | 0 | 0 | 1 |
| XLOC_003826 | CLDN25              | chr11:113650517-11365120 | 0 | 0 | 0 | 1 |
| XLOC_003827 | HTR3B               | chr11:113775517-11381728 | 0 | 0 | 0 | 1 |
| XLOC_003828 | HTR3A               | chr11:113845796-11386103 | 0 | 0 | 0 | 1 |
| XLOC_003829 | ZBTB16              | chr11:113930430-11412138 | 0 | 0 | 0 | 1 |
| XLOC_003833 | NXPE2               | chr11:114549199-11457768 | 0 | 0 | 0 | 1 |
| XLOC_003834 | APOC3               | chr11:116700623-11670378 | 0 | 0 | 0 | 1 |
| XLOC_003842 | TMPRSS4             | chr11:117886486-11799058 | 0 | 0 | 0 | 1 |
| XLOC_003843 | CD3E                | chr11:118175294-11818688 | 0 | 0 | 0 | 1 |
| XLOC_003853 | MIR4492             | chr11:118754474-11878167 | 0 | 0 | 0 | 1 |
| XLOC_003855 | FOXR1               | chr11:118842416-11885198 | 0 | 0 | 0 | 1 |
| XLOC_003864 | PDZD3               | chr11:119056165-11906093 | 0 | 0 | 0 | 1 |
| XLOC_003872 | GRIK4               | chr11:120531027-12085698 | 0 | 0 | 0 | 1 |
| XLOC_003876 | SORL1               | chr11:121322911-12150447 | 0 | 0 | 0 | 1 |
| XLOC_003880 | LOC341056           | chr11:122888273-12289037 | 0 | 0 | 0 | 1 |
| XLOC_003882 | OR8D4               | chr11:123777138-12377808 | 0 | 0 | 0 | 1 |
| XLOC_003883 | OR4D5               | chr11:123810323-12381128 | 0 | 0 | 0 | 1 |
| XLOC_003884 | OR10G4              | chr11:123886281-12388727 | 0 | 0 | 0 | 1 |
| XLOC_003885 | OR10G9              | chr11:123893719-12389468 | 0 | 0 | 0 | 1 |
| XLOC_003886 | OR10G8              | chr11:123900329-12390128 | 0 | 0 | 0 | 1 |
| XLOC_003888 | OR8G2               | chr11:124095397-12409637 | 0 | 0 | 0 | 1 |
| XLOC_003889 | OR8G1,OR8G5         | chr11:124120422-12413578 | 0 | 0 | 0 | 1 |
| XLOC_003890 | OR8A1               | chr11:124439964-12444094 | 0 | 0 | 0 | 1 |
| XLOC_003891 | PANX3               | chr11:124481452-12449028 | 0 | 0 | 0 | 1 |
| XLOC_003896 | HEPN1               | chr11:124789145-12480630 | 0 | 0 | 0 | 1 |
| XLOC_003899 | PKNOX2              | chr11:125034558-12530328 | 0 | 0 | 0 | 1 |
| XLOC_003903 | PATE1               | chr11:125616187-12561974 | 0 | 0 | 0 | 1 |
| XLOC_003904 | PATE3               | chr11:125658005-12566148 | 0 | 0 | 0 | 1 |
| XLOC_003905 | PATE4               | chr11:125703210-12570996 | 0 | 0 | 0 | 1 |
| XLOC_003913 | KIRREL3-AS2         | chr11:126293395-12687078 | 0 | 0 | 0 | 1 |
| XLOC_003914 | KIRREL3-AS3         | chr11:126872804-12687598 | 0 | 0 | 0 | 1 |



|             |                     |                          |   |   |   |   |
|-------------|---------------------|--------------------------|---|---|---|---|
| XLOC_003915 | FLI1                | chr11:128556429-12868316 | 0 | 0 | 0 | 1 |
| XLOC_003922 | ADAMTS15            | chr11:130318868-13034655 | 0 | 0 | 0 | 1 |
| XLOC_003923 | C11orf44            | chr11:130542850-13058725 | 0 | 0 | 0 | 1 |
| XLOC_003925 | LOC100128239        | chr11:133902166-13391125 | 0 | 0 | 0 | 1 |
| XLOC_003929 | GLB1L3              | chr11:134146274-13418945 | 0 | 0 | 0 | 1 |
| XLOC_003943 | MIR210              | chr11:565656-568457      | 0 | 0 | 0 | 1 |
| XLOC_003960 | KRTAP5-2            | chr11:1490684-1785501    | 0 | 0 | 0 | 1 |
| XLOC_003961 | KRTAP5-3            | chr11:1490684-1785501    | 0 | 0 | 0 | 1 |
| XLOC_003962 | KRTAP5-4            | chr11:1490684-1785501    | 0 | 0 | 0 | 1 |
| XLOC_003963 | FAM99B              | chr11:1490684-1785501    | 0 | 0 | 0 | 1 |
| XLOC_003966 | MIR4298             | chr11:1874199-1913493    | 0 | 0 | 0 | 1 |
| XLOC_003970 | MIR483              | chr11:2150341-2182439    | 0 | 0 | 0 | 1 |
| XLOC_003971 | TH                  | chr11:2185158-2193035    | 0 | 0 | 0 | 1 |
| XLOC_003972 | ASCL2               | chr11:2289727-2292182    | 0 | 0 | 0 | 1 |
| XLOC_003973 | C11orf21            | chr11:2317506-2323143    | 0 | 0 | 0 | 1 |
| XLOC_003983 | MRGPRG              | chr11:3239173-3244361    | 0 | 0 | 0 | 1 |
| XLOC_003984 | MRGPRE              | chr11:3249040-3253616    | 0 | 0 | 0 | 1 |
| XLOC_003991 | OR52B4              | chr11:4388492-4389616    | 0 | 0 | 0 | 1 |
| XLOC_003993 | C11orf40            | chr11:4592652-4599050    | 0 | 0 | 0 | 1 |
| XLOC_003995 | OR51E2              | chr11:4701400-4719076    | 0 | 0 | 0 | 1 |
| XLOC_003996 | OR51F1              | chr11:4790208-4791147    | 0 | 0 | 0 | 1 |
| XLOC_003997 | OR52R1              | chr11:4824662-4825610    | 0 | 0 | 0 | 1 |
| XLOC_003998 | OR51S1              | chr11:4869466-4870438    | 0 | 0 | 0 | 1 |
| XLOC_003999 | OR51G2              | chr11:4935948-4936893    | 0 | 0 | 0 | 1 |
| XLOC_004000 | OR51G1              | chr11:4944603-4945569    | 0 | 0 | 0 | 1 |
| XLOC_004001 | OR51A4              | chr11:4967388-4968330    | 0 | 0 | 0 | 1 |
| XLOC_004002 | OR51A2              | chr11:4976001-4976943    | 0 | 0 | 0 | 1 |
| XLOC_004003 | OR52E2              | chr11:5079879-5080857    | 0 | 0 | 0 | 1 |
| XLOC_004004 | OR52A5              | chr11:5152921-5153872    | 0 | 0 | 0 | 1 |
| XLOC_004005 | OR52A1              | chr11:5172660-5173599    | 0 | 0 | 0 | 1 |
| XLOC_004006 | OR51V1              | chr11:5220964-5221930    | 0 | 0 | 0 | 1 |
| XLOC_004007 | HBB                 | chr11:5246695-5248301    | 0 | 0 | 0 | 1 |
| XLOC_004008 | HBD                 | chr11:5254058-5255858    | 0 | 0 | 0 | 1 |
| XLOC_004014 | OR51B2              | chr11:5344527-5345582    | 0 | 0 | 0 | 1 |
| XLOC_004017 | UBQLN3              | chr11:5528529-5531153    | 0 | 0 | 0 | 1 |
| XLOC_004019 | OR52H1              | chr11:5565790-5566753    | 0 | 0 | 0 | 1 |
| XLOC_004021 | OR52N5              | chr11:5798863-5799897    | 0 | 0 | 0 | 1 |
| XLOC_004022 | OR52N1              | chr11:5809083-5810046    | 0 | 0 | 0 | 1 |
| XLOC_004023 | OR52E6              | chr11:5862185-5863127    | 0 | 0 | 0 | 1 |
| XLOC_004024 | OR52E8              | chr11:5877978-5878932    | 0 | 0 | 0 | 1 |
| XLOC_004025 | OR56A5              | chr11:5988782-5989724    | 0 | 0 | 0 | 1 |
| XLOC_004026 | OR52L1              | chr11:6007121-6008215    | 0 | 0 | 0 | 1 |
| XLOC_004027 | OR56A4              | chr11:6023280-6024378    | 0 | 0 | 0 | 1 |
| XLOC_004028 | OR56A1              | chr11:6047900-6048971    | 0 | 0 | 0 | 1 |
| XLOC_004029 | OR52B2              | chr11:6190584-6191556    | 0 | 0 | 0 | 1 |
| XLOC_004047 | OVCH2               | chr11:7710668-7727941    | 0 | 0 | 0 | 1 |
| XLOC_004048 | OR5P2               | chr11:7817520-7818489    | 0 | 0 | 0 | 1 |
| XLOC_004049 | OR5P3               | chr11:7846583-7847519    | 0 | 0 | 0 | 1 |
| XLOC_004050 | LOC283299           | chr11:7872297-7927502    | 0 | 0 | 0 | 1 |
| XLOC_004051 | OR10A6              | chr11:7949264-7950209    | 0 | 0 | 0 | 1 |
| XLOC_004052 | OR10A3              | chr11:7960122-7961067    | 0 | 0 | 0 | 1 |
| XLOC_004053 | NLRP10              | chr11:7981155-7985059    | 0 | 0 | 0 | 1 |
| XLOC_004054 | RIC3                | chr11:8060179-8190590    | 0 | 0 | 0 | 1 |
| XLOC_004055 | LMO1                | chr11:8245850-8290182    | 0 | 0 | 0 | 1 |
| XLOC_004060 | ASCL3               | chr11:8959118-8964580    | 0 | 0 | 0 | 1 |
| XLOC_004064 | MIR5691             | chr11:9041046-9113150    | 0 | 0 | 0 | 1 |
| XLOC_004072 | LYVE1               | chr11:10562782-10715535  | 0 | 0 | 0 | 1 |
| XLOC_004079 | MIR4299             | chr11:11678197-11678269  | 0 | 0 | 0 | 1 |
| XLOC_004083 | PTH                 | chr11:13513600-13517567  | 0 | 0 | 0 | 1 |
| XLOC_004088 | CALCA               | chr11:14988214-14993832  | 0 | 0 | 0 | 1 |
| XLOC_004094 | ABCC8               | chr11:17414431-17498449  | 0 | 0 | 0 | 1 |
| XLOC_004099 | SAA3P               | chr11:18134018-18137679  | 0 | 0 | 0 | 1 |
| XLOC_004100 | SAA2,SAA2-SAA4,SAA4 | chr11:18252901-18270221  | 0 | 0 | 0 | 1 |
| XLOC_004106 | PTPN5               | chr11:18749474-18813389  | 0 | 0 | 0 | 1 |
| XLOC_004107 | MRGPRX1             | chr11:18955359-18956549  | 0 | 0 | 0 | 1 |
| XLOC_004108 | MRGPRX2             | chr11:19076002-19082228  | 0 | 0 | 0 | 1 |
| XLOC_004109 | CSRP3               | chr11:19203576-19232118  | 0 | 0 | 0 | 1 |
| XLOC_004111 | NAV2-AS5            | chr11:19372270-20143147  | 0 | 0 | 0 | 1 |
| XLOC_004112 | NAV2-AS4            | chr11:19372270-20143147  | 0 | 0 | 0 | 1 |
| XLOC_004114 | MIR4694             | chr11:19372270-20143147  | 0 | 0 | 0 | 1 |
| XLOC_004115 | DBX1                | chr11:20177759-20181870  | 0 | 0 | 0 | 1 |
| XLOC_004118 | CCDC179             | chr11:22868467-22881972  | 0 | 0 | 0 | 1 |
| XLOC_004119 | MUC15               | chr11:26353677-26684836  | 0 | 0 | 0 | 1 |
| XLOC_004126 | KCNA4               | chr11:30031287-30038577  | 0 | 0 | 0 | 1 |
| XLOC_004132 | WT1                 | chr11:32409321-32457081  | 0 | 0 | 0 | 1 |
| XLOC_004142 | SLC1A2              | chr11:35272751-35441610  | 0 | 0 | 0 | 1 |
| XLOC_004146 | RAG2                | chr11:36613492-36680817  | 0 | 0 | 0 | 1 |
| XLOC_004147 | LRRRC4C             | chr11:40135750-41481186  | 0 | 0 | 0 | 1 |
| XLOC_004148 | LOC100507205        | chr11:42209292-42275240  | 0 | 0 | 0 | 1 |

|             |              |                         |   |   |   |   |
|-------------|--------------|-------------------------|---|---|---|---|
| XLOC_004149 | HNRNPKP3     | chr11:43283053-43290919 | 0 | 0 | 0 | 1 |
| XLOC_004150 | LOC100507300 | chr11:43902356-43942494 | 0 | 0 | 0 | 1 |
| XLOC_004154 | CHST1        | chr11:45669238-45687206 | 0 | 0 | 0 | 1 |
| XLOC_004160 | MIR3160-1    | chr11:46417961-46615619 | 0 | 0 | 0 | 1 |
| XLOC_004164 | MIR5582      | chr11:46765083-46867859 | 0 | 0 | 0 | 1 |
| XLOC_004165 | SNORD67      | chr11:46765083-46867859 | 0 | 0 | 0 | 1 |
| XLOC_004170 | MYBPC3       | chr11:47352956-47374253 | 0 | 0 | 0 | 1 |
| XLOC_004181 | OR4C45       | chr11:48366899-48373999 | 0 | 0 | 0 | 1 |
| XLOC_004182 | TRIM64C      | chr11:49075265-49080664 | 0 | 0 | 0 | 1 |
| XLOC_004183 | FOLH1        | chr11:49168186-49230222 | 0 | 0 | 0 | 1 |
| XLOC_004184 | OR4C12       | chr11:50003008-50004071 | 0 | 0 | 0 | 1 |
| XLOC_004185 | LOC441601    | chr11:50238998-50257633 | 0 | 0 | 0 | 1 |
| XLOC_004186 | OR4A5        | chr11:51411377-51412448 | 0 | 0 | 0 | 1 |
| XLOC_004187 | TRIM51HP     | chr11:55061178-55065708 | 0 | 0 | 0 | 1 |
| XLOC_004188 | OR4C11       | chr11:55370829-55371874 | 0 | 0 | 0 | 1 |
| XLOC_004189 | OR5W2        | chr11:55681125-55682058 | 0 | 0 | 0 | 1 |
| XLOC_004190 | OR5I1        | chr11:55702931-55703876 | 0 | 0 | 0 | 1 |
| XLOC_004191 | OR10AG1      | chr11:55735033-55735939 | 0 | 0 | 0 | 1 |
| XLOC_004192 | OR7E5P       | chr11:55746178-55753881 | 0 | 0 | 0 | 1 |
| XLOC_004193 | OR5F1        | chr11:55761156-55762101 | 0 | 0 | 0 | 1 |
| XLOC_004194 | OR8J3        | chr11:55904246-55905194 | 0 | 0 | 0 | 1 |
| XLOC_004195 | OR8K5        | chr11:55926869-55927793 | 0 | 0 | 0 | 1 |
| XLOC_004196 | OR5T2        | chr11:55999581-56000661 | 0 | 0 | 0 | 1 |
| XLOC_004197 | OR8H1        | chr11:56057602-56058538 | 0 | 0 | 0 | 1 |
| XLOC_004198 | OR5R1        | chr11:56143099-56508560 | 0 | 0 | 0 | 1 |
| XLOC_004199 | OR5M9        | chr11:56143099-56508560 | 0 | 0 | 0 | 1 |
| XLOC_004200 | OR5M3        | chr11:56143099-56508560 | 0 | 0 | 0 | 1 |
| XLOC_004201 | OR5M8        | chr11:56143099-56508560 | 0 | 0 | 0 | 1 |
| XLOC_004202 | OR5M11       | chr11:56143099-56508560 | 0 | 0 | 0 | 1 |
| XLOC_004203 | OR5M10       | chr11:56143099-56508560 | 0 | 0 | 0 | 1 |
| XLOC_004204 | OR5M1        | chr11:56143099-56508560 | 0 | 0 | 0 | 1 |
| XLOC_004205 | OR5AP2       | chr11:56143099-56508560 | 0 | 0 | 0 | 1 |
| XLOC_004206 | OR9G4        | chr11:56510303-56511287 | 0 | 0 | 0 | 1 |
| XLOC_004207 | APLNR        | chr11:57001051-57004927 | 0 | 0 | 0 | 1 |
| XLOC_004210 | PRG3         | chr11:57144241-57148623 | 0 | 0 | 0 | 1 |
| XLOC_004219 | OR9I1        | chr11:57791352-57949038 | 0 | 0 | 0 | 1 |
| XLOC_004220 | OR1S2        | chr11:57970675-57971653 | 0 | 0 | 0 | 1 |
| XLOC_004221 | OR10Q1       | chr11:57995353-57996390 | 0 | 0 | 0 | 1 |
| XLOC_004222 | OR10W1       | chr11:58034263-58035732 | 0 | 0 | 0 | 1 |
| XLOC_004223 | OR5B17       | chr11:58125597-58126542 | 0 | 0 | 0 | 1 |
| XLOC_004224 | OR5B3        | chr11:58169937-58170882 | 0 | 0 | 0 | 1 |
| XLOC_004225 | OR5B2        | chr11:58189737-58190786 | 0 | 0 | 0 | 1 |
| XLOC_004226 | OR5B12       | chr11:58206592-58207646 | 0 | 0 | 0 | 1 |
| XLOC_004227 | OR5B21       | chr11:58274648-58275578 | 0 | 0 | 0 | 1 |
| XLOC_004229 | GLYAT        | chr11:58476229-58499447 | 0 | 0 | 0 | 1 |
| XLOC_004230 | GLYATL2      | chr11:58601539-58611997 | 0 | 0 | 0 | 1 |
| XLOC_004231 | LOC283194    | chr11:58695101-58825925 | 0 | 0 | 0 | 1 |
| XLOC_004232 | MPEG1        | chr11:58939811-58980494 | 0 | 0 | 0 | 1 |
| XLOC_004233 | OR5A2        | chr11:59189451-59190426 | 0 | 0 | 0 | 1 |
| XLOC_004235 | MIR3162      | chr11:59341870-59383617 | 0 | 0 | 0 | 1 |
| XLOC_004237 | OR10V1       | chr11:59480388-59481318 | 0 | 0 | 0 | 1 |
| XLOC_004239 | GIF          | chr11:59596745-59612974 | 0 | 0 | 0 | 1 |
| XLOC_004240 | TCN1         | chr11:59620280-59634041 | 0 | 0 | 0 | 1 |
| XLOC_004241 | MS4A6A       | chr11:59939079-59952139 | 0 | 0 | 0 | 1 |
| XLOC_004251 | DKFZP434K028 | chr11:61520120-61555989 | 0 | 0 | 0 | 1 |
| XLOC_004254 | MIR1908      | chr11:61567096-61584529 | 0 | 0 | 0 | 1 |
| XLOC_004258 | SCGB1D4      | chr11:62063753-62066536 | 0 | 0 | 0 | 1 |
| XLOC_004278 | SNORD31      | chr11:62619459-62623360 | 0 | 0 | 0 | 1 |
| XLOC_004279 | SNORD30      | chr11:62619459-62623360 | 0 | 0 | 0 | 1 |
| XLOC_004281 | SNORD28      | chr11:62619459-62623360 | 0 | 0 | 0 | 1 |
| XLOC_004282 | SNORD27      | chr11:62619459-62623360 | 0 | 0 | 0 | 1 |
| XLOC_004283 | SNORD26      | chr11:62619459-62623360 | 0 | 0 | 0 | 1 |
| XLOC_004284 | SNORD25      | chr11:62619459-62623360 | 0 | 0 | 0 | 1 |
| XLOC_004286 | SLC22A6      | chr11:62744068-62752495 | 0 | 0 | 0 | 1 |
| XLOC_004287 | SLC22A8      | chr11:62760295-62783317 | 0 | 0 | 0 | 1 |
| XLOC_004288 | SLC22A24     | chr11:62847411-62911693 | 0 | 0 | 0 | 1 |
| XLOC_004289 | SLC22A25     | chr11:62931295-62997124 | 0 | 0 | 0 | 1 |
| XLOC_004290 | MIR3680-2    | chr11:63014620-63330855 | 0 | 0 | 0 | 1 |
| XLOC_004291 | HRASLS5      | chr11:63014620-63330855 | 0 | 0 | 0 | 1 |
| XLOC_004310 | MIR192       | chr11:64658608-64658718 | 0 | 0 | 0 | 1 |
| XLOC_004311 | MIR194-2     | chr11:64658826-64658911 | 0 | 0 | 0 | 1 |
| XLOC_004314 | C11orf85     | chr11:64705928-64727609 | 0 | 0 | 0 | 1 |
| XLOC_004337 | GAL3ST3      | chr11:65808235-65816651 | 0 | 0 | 0 | 1 |
| XLOC_004339 | CD248        | chr11:66081957-66084515 | 0 | 0 | 0 | 1 |
| XLOC_004346 | CTSF         | chr11:66330934-66336047 | 0 | 0 | 0 | 1 |
| XLOC_004356 | GPR152       | chr11:67218771-67220200 | 0 | 0 | 0 | 1 |
| XLOC_004360 | CABP2        | chr11:67286417-67290899 | 0 | 0 | 0 | 1 |
| XLOC_004363 | TBX10        | chr11:67398773-67407031 | 0 | 0 | 0 | 1 |
| XLOC_004365 | ALDH3B2      | chr11:67429632-67448685 | 0 | 0 | 0 | 1 |

|             |                        |                          |   |   |   |   |
|-------------|------------------------|--------------------------|---|---|---|---|
| XLOC_004374 | MRGPRD                 | chr11:68747489-68748455  | 0 | 0 | 0 | 1 |
| XLOC_004375 | MRGPRF                 | chr11:68771861-68780850  | 0 | 0 | 0 | 1 |
| XLOC_004377 | FGF19                  | chr11:69513005-69519106  | 0 | 0 | 0 | 1 |
| XLOC_004378 | FGF4                   | chr11:69587796-69590171  | 0 | 0 | 0 | 1 |
| XLOC_004379 | FGF3                   | chr11:69624735-69634192  | 0 | 0 | 0 | 1 |
| XLOC_004381 | MIR3664                | chr11:70313960-70935808  | 0 | 0 | 0 | 1 |
| XLOC_004384 | KRTAP5-11              | chr11:71292900-71293921  | 0 | 0 | 0 | 1 |
| XLOC_004388 | MIR3165                | chr11:71709957-71823822  | 0 | 0 | 0 | 1 |
| XLOC_004391 | PHOX2A                 | chr11:71935881-71955220  | 0 | 0 | 0 | 1 |
| XLOC_004394 | MIR139                 | chr11:72287183-72385497  | 0 | 0 | 0 | 1 |
| XLOC_004404 | P4HA3                  | chr11:73977701-74022699  | 0 | 0 | 0 | 1 |
| XLOC_004408 | CHRD2                  | chr11:74407473-74442186  | 0 | 0 | 0 | 1 |
| XLOC_004409 | MIR4696                | chr11:74407473-74442186  | 0 | 0 | 0 | 1 |
| XLOC_004411 | OR2AT4                 | chr11:74799795-74800758  | 0 | 0 | 0 | 1 |
| XLOC_004413 | MIR326                 | chr11:74971165-75062875  | 0 | 0 | 0 | 1 |
| XLOC_004417 | LOC283214              | chr11:75469499-75479692  | 0 | 0 | 0 | 1 |
| XLOC_004421 | GUCY2EP                | chr11:76391209-76432833  | 0 | 0 | 0 | 1 |
| XLOC_004422 | GDPD4                  | chr11:76927602-76998463  | 0 | 0 | 0 | 1 |
| XLOC_004428 | RNU6-83                | chr11:77726760-77850699  | 0 | 0 | 0 | 1 |
| XLOC_004433 | TENM4                  | chr11:78364327-79151695  | 0 | 0 | 0 | 1 |
| XLOC_004434 | MIR708                 | chr11:78364327-79151695  | 0 | 0 | 0 | 1 |
| XLOC_004435 | MIR5579                | chr11:78364327-79151695  | 0 | 0 | 0 | 1 |
| XLOC_004436 | MIR4300                | chr11:81601782-81601878  | 0 | 0 | 0 | 1 |
| XLOC_004437 | FAM181B                | chr11:82443045-82444906  | 0 | 0 | 0 | 1 |
| XLOC_004440 | SNORA70E               | chr11:82692477-82782884  | 0 | 0 | 0 | 1 |
| XLOC_004448 | OR7E2P                 | chr11:86567972-86568996  | 0 | 0 | 0 | 1 |
| XLOC_004452 | GRM5                   | chr11:88237743-88796816  | 0 | 0 | 0 | 1 |
| XLOC_004454 | TRIM49                 | chr11:89530822-89541743  | 0 | 0 | 0 | 1 |
| XLOC_004455 | TRIM64B                | chr11:89570045-89673722  | 0 | 0 | 0 | 1 |
| XLOC_004456 | TRIM49D1P,TRIM49D2P    | chr11:89570045-89673722  | 0 | 0 | 0 | 1 |
| XLOC_004457 | TRIM53AP               | chr11:89726708-89735676  | 0 | 0 | 0 | 1 |
| XLOC_004459 | MIR4490                | chr11:90288941-90289025  | 0 | 0 | 0 | 1 |
| XLOC_004464 | SNORD6                 | chr11:93464668-93464739  | 0 | 0 | 0 | 1 |
| XLOC_004467 | SNORD5                 | chr11:93466393-93466466  | 0 | 0 | 0 | 1 |
| XLOC_004469 | MIR1304                | chr11:93466839-93466930  | 0 | 0 | 0 | 1 |
| XLOC_004481 | JRKL-AS1               | chr11:96176445-96240041  | 0 | 0 | 0 | 1 |
| XLOC_004482 | PGR                    | chr11:100900354-10103000 | 0 | 0 | 0 | 1 |
| XLOC_004484 | MIR3920                | chr11:101322294-10145468 | 0 | 0 | 0 | 1 |
| XLOC_004487 | MMP7                   | chr11:102391238-10240147 | 0 | 0 | 0 | 1 |
| XLOC_004488 | MMP20                  | chr11:102447565-10249606 | 0 | 0 | 0 | 1 |
| XLOC_004489 | MMP27                  | chr11:102562414-10257646 | 0 | 0 | 0 | 1 |
| XLOC_004490 | MMP8                   | chr11:102582525-10259568 | 0 | 0 | 0 | 1 |
| XLOC_004494 | MMP12                  | chr11:102733463-10274576 | 0 | 0 | 0 | 1 |
| XLOC_004495 | MMP13                  | chr11:102813720-10282646 | 0 | 0 | 0 | 1 |
| XLOC_004497 | PDGFD                  | chr11:103777913-10403502 | 0 | 0 | 0 | 1 |
| XLOC_004498 | CASP12                 | chr11:104756444-10476938 | 0 | 0 | 0 | 1 |
| XLOC_004504 | CARD17                 | chr11:104963195-10497218 | 0 | 0 | 0 | 1 |
| XLOC_004508 | GUCY1A2                | chr11:106544737-10688917 | 0 | 0 | 0 | 1 |
| XLOC_004518 | ARHGAP20               | chr11:110447758-11058397 | 0 | 0 | 0 | 1 |
| XLOC_004521 | LOC100132078           | chr11:111284966-11128897 | 0 | 0 | 0 | 1 |
| XLOC_004522 | BTG4                   | chr11:111338255-11138307 | 0 | 0 | 0 | 1 |
| XLOC_004531 | LOC100288346           | chr11:112831968-11314918 | 0 | 0 | 0 | 1 |
| XLOC_004532 | DRD2                   | chr11:113280316-11334600 | 0 | 0 | 0 | 1 |
| XLOC_004533 | MIR4301                | chr11:113280316-11334600 | 0 | 0 | 0 | 1 |
| XLOC_004538 | NXPE1                  | chr11:114392436-11443058 | 0 | 0 | 0 | 1 |
| XLOC_004539 | NXPE4                  | chr11:114441312-11446648 | 0 | 0 | 0 | 1 |
| XLOC_004541 | LOC283143              | chr11:115626050-11563097 | 0 | 0 | 0 | 1 |
| XLOC_004544 | APOA5                  | chr11:116660085-11666318 | 0 | 0 | 0 | 1 |
| XLOC_004545 | APOA4                  | chr11:116691417-11669407 | 0 | 0 | 0 | 1 |
| XLOC_004551 | DSCAML1                | chr11:117298488-11766797 | 0 | 0 | 0 | 1 |
| XLOC_004552 | FXYP2,FXYP6,FXYP6-FXYI | chr11:117690789-11774820 | 0 | 0 | 0 | 1 |
| XLOC_004554 | TMPPRS4-AS1            | chr11:117886486-11799058 | 0 | 0 | 0 | 1 |
| XLOC_004574 | MFRP                   | chr11:119209651-11921738 | 0 | 0 | 0 | 1 |
| XLOC_004579 | LOC649133              | chr11:120107348-12019068 | 0 | 0 | 0 | 1 |
| XLOC_004581 | MIR125B1               | chr11:121959810-12207377 | 0 | 0 | 0 | 1 |
| XLOC_004582 | BLID                   | chr11:121959810-12207377 | 0 | 0 | 0 | 1 |
| XLOC_004583 | MIRLET7A2              | chr11:121959810-12207377 | 0 | 0 | 0 | 1 |
| XLOC_004584 | MIR100                 | chr11:121959810-12207377 | 0 | 0 | 0 | 1 |
| XLOC_004585 | BSX                    | chr11:122848356-12285237 | 0 | 0 | 0 | 1 |
| XLOC_004588 | MIR4493                | chr11:123252147-12325222 | 0 | 0 | 0 | 1 |
| XLOC_004589 | SCN3B                  | chr11:123499894-12352537 | 0 | 0 | 0 | 1 |
| XLOC_004591 | OR6X1                  | chr11:123624287-12362522 | 0 | 0 | 0 | 1 |
| XLOC_004592 | OR6M1                  | chr11:123676115-12367708 | 0 | 0 | 0 | 1 |
| XLOC_004593 | TMEM225                | chr11:123753632-12375634 | 0 | 0 | 0 | 1 |
| XLOC_004594 | OR6T1                  | chr11:123813573-12381454 | 0 | 0 | 0 | 1 |
| XLOC_004595 | OR10S1                 | chr11:123847402-12384838 | 0 | 0 | 0 | 1 |
| XLOC_004596 | OR10G7                 | chr11:123908772-12390970 | 0 | 0 | 0 | 1 |
| XLOC_004597 | OR8D1                  | chr11:124179735-12418066 | 0 | 0 | 0 | 1 |
| XLOC_004598 | OR8D2                  | chr11:124189157-12419008 | 0 | 0 | 0 | 1 |

|             |              |                         |   |   |   |   |
|-------------|--------------|-------------------------|---|---|---|---|
| XLOC_004599 | OR8B2        | chr11:124252297-1242532 | 0 | 0 | 0 | 1 |
| XLOC_004600 | OR8B3        | chr11:124266305-1242672 | 0 | 0 | 0 | 1 |
| XLOC_004601 | OR8B4        | chr11:124293837-1242947 | 0 | 0 | 0 | 1 |
| XLOC_004602 | OR8B8        | chr11:124310045-1243109 | 0 | 0 | 0 | 1 |
| XLOC_004603 | OR8B12       | chr11:124412617-1244135 | 0 | 0 | 0 | 1 |
| XLOC_004613 | PATE2        | chr11:125646027-1256487 | 0 | 0 | 0 | 1 |
| XLOC_004619 | KIRREL3      | chr11:126293395-1268707 | 0 | 0 | 0 | 1 |
| XLOC_004620 | MIR3167      | chr11:126293395-1268707 | 0 | 0 | 0 | 1 |
| XLOC_004622 | FLI1-AS1     | chr11:128556429-1286831 | 0 | 0 | 0 | 1 |
| XLOC_004633 | SPATA19      | chr11:133710516-1337153 | 0 | 0 | 0 | 1 |
| XLOC_004640 | IQSEC3       | chr12:176048-287625     | 0 | 0 | 0 | 1 |
| XLOC_004650 | CACNA1C-IT3  | chr12:2162415-2807115   | 0 | 0 | 0 | 1 |
| XLOC_004664 | GALNT8       | chr12:4829751-4881892   | 0 | 0 | 0 | 1 |
| XLOC_004666 | KCNA1        | chr12:5019072-5027422   | 0 | 0 | 0 | 1 |
| XLOC_004667 | KCNA5        | chr12:5153084-5155954   | 0 | 0 | 0 | 1 |
| XLOC_004668 | NTF3         | chr12:5541279-5604465   | 0 | 0 | 0 | 1 |
| XLOC_004670 | PLEKHG6      | chr12:6419601-6437672   | 0 | 0 | 0 | 1 |
| XLOC_004693 | MIR200C      | chr12:7072861-7072929   | 0 | 0 | 0 | 1 |
| XLOC_004694 | MIR141       | chr12:7073259-7073354   | 0 | 0 | 0 | 1 |
| XLOC_004700 | ACSM4        | chr12:7456927-7480969   | 0 | 0 | 0 | 1 |
| XLOC_004701 | DPPA3        | chr12:7864088-7870152   | 0 | 0 | 0 | 1 |
| XLOC_004702 | NANOGNB      | chr12:7917811-7926717   | 0 | 0 | 0 | 1 |
| XLOC_004709 | CLEC6A       | chr12:8608590-8630926   | 0 | 0 | 0 | 1 |
| XLOC_004711 | RIMKLB       | chr12:8850517-8929787   | 0 | 0 | 0 | 1 |
| XLOC_004720 | KLRF1        | chr12:9980076-9997603   | 0 | 0 | 0 | 1 |
| XLOC_004721 | KLRF2        | chr12:10034087-10048432 | 0 | 0 | 0 | 1 |
| XLOC_004722 | CLEC12A      | chr12:10103914-10138194 | 0 | 0 | 0 | 1 |
| XLOC_004723 | CLEC12B      | chr12:10163230-10171399 | 0 | 0 | 0 | 1 |
| XLOC_004724 | CLEC9A       | chr12:10183275-10218565 | 0 | 0 | 0 | 1 |
| XLOC_004725 | TMEM52B      | chr12:10331556-10344403 | 0 | 0 | 0 | 1 |
| XLOC_004733 | MIR1244-2    | chr12:12264885-12264967 | 0 | 0 | 0 | 1 |
| XLOC_004738 | MIR613       | chr12:12878850-12944399 | 0 | 0 | 0 | 1 |
| XLOC_004742 | MIR614       | chr12:13068762-13068852 | 0 | 0 | 0 | 1 |
| XLOC_004750 | PDE6H        | chr12:15125955-15134799 | 0 | 0 | 0 | 1 |
| XLOC_004755 | SKP1P2       | chr12:17141680-17143562 | 0 | 0 | 0 | 1 |
| XLOC_004756 | MIR3974      | chr12:17826232-17826328 | 0 | 0 | 0 | 1 |
| XLOC_004757 | PIK3C2G      | chr12:18414473-18801352 | 0 | 0 | 0 | 1 |
| XLOC_004758 | CAPZA3       | chr12:18891044-18892122 | 0 | 0 | 0 | 1 |
| XLOC_004761 | LOC100506393 | chr12:20167618-20251802 | 0 | 0 | 0 | 1 |
| XLOC_004762 | PDE3A        | chr12:20522178-20837041 | 0 | 0 | 0 | 1 |
| XLOC_004773 | MIR920       | chr12:23685230-24715383 | 0 | 0 | 0 | 1 |
| XLOC_004774 | LRMP         | chr12:25205180-25348094 | 0 | 0 | 0 | 1 |
| XLOC_004789 | LOC101055625 | chr12:29542226-29650619 | 0 | 0 | 0 | 1 |
| XLOC_004802 | C12orf40     | chr12:40019971-40115720 | 0 | 0 | 0 | 1 |
| XLOC_004803 | LRRK2        | chr12:40618812-40763086 | 0 | 0 | 0 | 1 |
| XLOC_004804 | CNTN1        | chr12:41086243-41466213 | 0 | 0 | 0 | 1 |
| XLOC_004811 | MIR4698      | chr12:47581594-47581674 | 0 | 0 | 0 | 1 |
| XLOC_004812 | PCED1B       | chr12:47602202-47630443 | 0 | 0 | 0 | 1 |
| XLOC_004816 | C12orf68     | chr12:48577365-48579709 | 0 | 0 | 0 | 1 |
| XLOC_004818 | ANP32D       | chr12:48866447-48866843 | 0 | 0 | 0 | 1 |
| XLOC_004819 | C12orf54     | chr12:48876285-48890297 | 0 | 0 | 0 | 1 |
| XLOC_004824 | WNT1         | chr12:49372235-49376396 | 0 | 0 | 0 | 1 |
| XLOC_004835 | AQP2         | chr12:50344523-50352664 | 0 | 0 | 0 | 1 |
| XLOC_004836 | AQP5         | chr12:50355278-50359465 | 0 | 0 | 0 | 1 |
| XLOC_004845 | TMPRSS12     | chr12:51236700-51281663 | 0 | 0 | 0 | 1 |
| XLOC_004847 | HIGD1C       | chr12:51347781-51364289 | 0 | 0 | 0 | 1 |
| XLOC_004852 | ANKRD33      | chr12:52281792-52285505 | 0 | 0 | 0 | 1 |
| XLOC_004878 | HOXC12       | chr12:54348713-54350350 | 0 | 0 | 0 | 1 |
| XLOC_004881 | MIR196A2     | chr12:54385521-54385631 | 0 | 0 | 0 | 1 |
| XLOC_004885 | MIR615       | chr12:54410641-54449814 | 0 | 0 | 0 | 1 |
| XLOC_004891 | MIR148B      | chr12:54718873-54745635 | 0 | 0 | 0 | 1 |
| XLOC_004894 | MUCL1        | chr12:55248298-55252174 | 0 | 0 | 0 | 1 |
| XLOC_004895 | NEUROD4      | chr12:55413728-55423801 | 0 | 0 | 0 | 1 |
| XLOC_004896 | OR9K2        | chr12:55523552-55524560 | 0 | 0 | 0 | 1 |
| XLOC_004897 | OR10A7       | chr12:55614808-55615759 | 0 | 0 | 0 | 1 |
| XLOC_004898 | OR6C74       | chr12:55641071-55642010 | 0 | 0 | 0 | 1 |
| XLOC_004899 | OR6C1        | chr12:55714383-55715322 | 0 | 0 | 0 | 1 |
| XLOC_004900 | OR6C3        | chr12:55725484-55726420 | 0 | 0 | 0 | 1 |
| XLOC_004901 | OR6C75       | chr12:55758894-55759833 | 0 | 0 | 0 | 1 |
| XLOC_004902 | OR6C65       | chr12:55794312-55795251 | 0 | 0 | 0 | 1 |
| XLOC_004903 | OR6C76       | chr12:55820037-55820976 | 0 | 0 | 0 | 1 |
| XLOC_004904 | OR6C2        | chr12:55845997-55846936 | 0 | 0 | 0 | 1 |
| XLOC_004905 | OR6C68       | chr12:55886161-55887100 | 0 | 0 | 0 | 1 |
| XLOC_004906 | OR6C4        | chr12:55945010-55945940 | 0 | 0 | 0 | 1 |
| XLOC_004907 | OR2AP1       | chr12:55968198-55969128 | 0 | 0 | 0 | 1 |
| XLOC_004908 | OR10P1       | chr12:56030675-56031617 | 0 | 0 | 0 | 1 |
| XLOC_004937 | MIR1228      | chr12:57522281-57607125 | 0 | 0 | 0 | 1 |
| XLOC_004948 | ARHGEF25     | chr12:58003962-58011028 | 0 | 0 | 0 | 1 |
| XLOC_004949 | SLC26A10     | chr12:58013692-58027022 | 0 | 0 | 0 | 1 |

|             |                |                          |   |   |   |   |
|-------------|----------------|--------------------------|---|---|---|---|
| XLOC_004960 | MIRLET71       | chr12:62997465-62997549  | 0 | 0 | 0 | 1 |
| XLOC_004966 | MIR548C        | chr12:65004292-65091347  | 0 | 0 | 0 | 1 |
| XLOC_004968 | FLJ41278       | chr12:65277553-65371302  | 0 | 0 | 0 | 1 |
| XLOC_004984 | MIR3913-2      | chr12:69978501-69978603  | 0 | 0 | 0 | 1 |
| XLOC_004994 | TPH2           | chr12:72332625-72426221  | 0 | 0 | 0 | 1 |
| XLOC_004995 | TRHDE          | chr12:72647286-73059422  | 0 | 0 | 0 | 1 |
| XLOC_005003 | MIR1252        | chr12:79257772-79845788  | 0 | 0 | 0 | 1 |
| XLOC_005004 | MIR5692B       | chr12:79850650-79852440  | 0 | 0 | 0 | 1 |
| XLOC_005005 | OTOGL          | chr12:80603232-80772870  | 0 | 0 | 0 | 1 |
| XLOC_005006 | PTPRQ          | chr12:80838125-81073968  | 0 | 0 | 0 | 1 |
| XLOC_005007 | MYF6           | chr12:811101407-81103256 | 0 | 0 | 0 | 1 |
| XLOC_005008 | MYF5           | chr12:81110707-81113447  | 0 | 0 | 0 | 1 |
| XLOC_005009 | ACSS3          | chr12:81471808-81649582  | 0 | 0 | 0 | 1 |
| XLOC_005010 | MIR4699        | chr12:81471808-81649582  | 0 | 0 | 0 | 1 |
| XLOC_005013 | LRR1Q1         | chr12:85430098-85638883  | 0 | 0 | 0 | 1 |
| XLOC_005014 | ALX1           | chr12:85674035-85695561  | 0 | 0 | 0 | 1 |
| XLOC_005019 | LINC00615      | chr12:91311799-91342446  | 0 | 0 | 0 | 1 |
| XLOC_005020 | CLU1           | chr12:92813869-92824778  | 0 | 0 | 0 | 1 |
| XLOC_005021 | C12orf74       | chr12:93096618-93102325  | 0 | 0 | 0 | 1 |
| XLOC_005029 | MIR5700        | chr12:94955564-94955635  | 0 | 0 | 0 | 1 |
| XLOC_005030 | KRT19P2,MIR492 | chr12:95228173-95228804  | 0 | 0 | 0 | 1 |
| XLOC_005032 | MIR331         | chr12:95702195-95702289  | 0 | 0 | 0 | 1 |
| XLOC_005033 | MIR3685        | chr12:95703698-95703760  | 0 | 0 | 0 | 1 |
| XLOC_005035 | PGAM1P5        | chr12:96043030-96184536  | 0 | 0 | 0 | 1 |
| XLOC_005040 | RMST           | chr12:97858798-97927544  | 0 | 0 | 0 | 1 |
| XLOC_005041 | MIR1251        | chr12:97858798-97927544  | 0 | 0 | 0 | 1 |
| XLOC_005042 | MIR135A2       | chr12:97957589-97957689  | 0 | 0 | 0 | 1 |
| XLOC_005047 | FAM71C         | chr12:99039077-100378432 | 0 | 0 | 0 | 1 |
| XLOC_005048 | MIR1827        | chr12:100583661-10058372 | 0 | 0 | 0 | 1 |
| XLOC_005052 | NR1H4          | chr12:100867550-10095764 | 0 | 0 | 0 | 1 |
| XLOC_005054 | ANO4           | chr12:101188373-10152224 | 0 | 0 | 0 | 1 |
| XLOC_005056 | SPIC           | chr12:101871334-10188072 | 0 | 0 | 0 | 1 |
| XLOC_005057 | MYBPC1         | chr12:101988708-10207962 | 0 | 0 | 0 | 1 |
| XLOC_005061 | ASCL1          | chr12:103351451-10335422 | 0 | 0 | 0 | 1 |
| XLOC_005069 | MIR3922        | chr12:104850691-10515572 | 0 | 0 | 0 | 1 |
| XLOC_005075 | RFX4           | chr12:106751435-10728302 | 0 | 0 | 0 | 1 |
| XLOC_005080 | ASCL4          | chr12:108168161-10817042 | 0 | 0 | 0 | 1 |
| XLOC_005081 | WSCD2          | chr12:108523510-10864432 | 0 | 0 | 0 | 1 |
| XLOC_005084 | DAO            | chr12:109273856-10929472 | 0 | 0 | 0 | 1 |
| XLOC_005092 | MIR4497        | chr12:110220891-11027122 | 0 | 0 | 0 | 1 |
| XLOC_005100 | CCDC63         | chr12:111284810-11134532 | 0 | 0 | 0 | 1 |
| XLOC_005101 | LOC100131138   | chr12:111374405-11137522 | 0 | 0 | 0 | 1 |
| XLOC_005111 | RPH3A          | chr12:113229548-11333662 | 0 | 0 | 0 | 1 |
| XLOC_005121 | TBX5-AS1       | chr12:114791734-11485062 | 0 | 0 | 0 | 1 |
| XLOC_005130 | HSPB8          | chr12:119616594-11963252 | 0 | 0 | 0 | 1 |
| XLOC_005131 | CCDC60         | chr12:119772516-11997882 | 0 | 0 | 0 | 1 |
| XLOC_005132 | TMEM233        | chr12:120031263-12007932 | 0 | 0 | 0 | 1 |
| XLOC_005146 | P2RX7          | chr12:121570621-12162432 | 0 | 0 | 0 | 1 |
| XLOC_005169 | MIR3908        | chr12:124020955-12402102 | 0 | 0 | 0 | 1 |
| XLOC_005181 | LOC100128554   | chr12:126927026-12695732 | 0 | 0 | 0 | 1 |
| XLOC_005183 | FLJ37505       | chr12:128366161-12838312 | 0 | 0 | 0 | 1 |
| XLOC_005185 | TMEM132C       | chr12:128751947-12919242 | 0 | 0 | 0 | 1 |
| XLOC_005186 | MIR3612        | chr12:128751947-12919242 | 0 | 0 | 0 | 1 |
| XLOC_005188 | FZD10          | chr12:130647003-13065022 | 0 | 0 | 0 | 1 |
| XLOC_005189 | PIWIL1         | chr12:130822432-13085682 | 0 | 0 | 0 | 1 |
| XLOC_005191 | GPR133         | chr12:131438451-13162602 | 0 | 0 | 0 | 1 |
| XLOC_005194 | MMP17          | chr12:132312940-13233632 | 0 | 0 | 0 | 1 |
| XLOC_005211 | FAM138D        | chr12:147945-149412      | 0 | 0 | 0 | 1 |
| XLOC_005212 | LOC574538      | chr12:176048-287625      | 0 | 0 | 0 | 1 |
| XLOC_005219 | MIR3649        | chr12:1769480-1769546    | 0 | 0 | 0 | 1 |
| XLOC_005221 | LOC100271702   | chr12:2038367-2045742    | 0 | 0 | 0 | 1 |
| XLOC_005223 | CACNA1C-AS4    | chr12:2162415-2807115    | 0 | 0 | 0 | 1 |
| XLOC_005224 | CACNA1C-AS1    | chr12:2162415-2807115    | 0 | 0 | 0 | 1 |
| XLOC_005225 | LOC283440      | chr12:2870365-2880835    | 0 | 0 | 0 | 1 |
| XLOC_005231 | FGF6           | chr12:4543307-4554780    | 0 | 0 | 0 | 1 |
| XLOC_005261 | APOBEC1        | chr12:7801995-7818502    | 0 | 0 | 0 | 1 |
| XLOC_005262 | GDF3           | chr12:7842380-7848360    | 0 | 0 | 0 | 1 |
| XLOC_005263 | CLEC4C         | chr12:7882010-7902069    | 0 | 0 | 0 | 1 |
| XLOC_005271 | CLEC4E         | chr12:8685900-8693558    | 0 | 0 | 0 | 1 |
| XLOC_005272 | AICDA          | chr12:8754761-8765442    | 0 | 0 | 0 | 1 |
| XLOC_005277 | PZP            | chr12:9301435-9360966    | 0 | 0 | 0 | 1 |
| XLOC_005278 | A2MP1          | chr12:9381128-9386803    | 0 | 0 | 0 | 1 |
| XLOC_005279 | MIR1244-1      | chr12:9392065-9392147    | 0 | 0 | 0 | 1 |
| XLOC_005281 | KLRB1          | chr12:9747869-9760497    | 0 | 0 | 0 | 1 |
| XLOC_005282 | CLECL1         | chr12:9868455-9885895    | 0 | 0 | 0 | 1 |
| XLOC_005283 | CD69           | chr12:9905081-9913497    | 0 | 0 | 0 | 1 |
| XLOC_005285 | CLEC2A         | chr12:10065825-10084980  | 0 | 0 | 0 | 1 |
| XLOC_005286 | CLEC1B         | chr12:10145661-10151899  | 0 | 0 | 0 | 1 |
| XLOC_005287 | CLEC1A         | chr12:10223079-10251605  | 0 | 0 | 0 | 1 |

|             |              |                         |   |   |   |   |
|-------------|--------------|-------------------------|---|---|---|---|
| XLOC_005288 | CLEC7A       | chr12:10269375-10282868 | 0 | 0 | 0 | 1 |
| XLOC_005289 | OLR1         | chr12:10310898-10324790 | 0 | 0 | 0 | 1 |
| XLOC_005291 | KLRC3        | chr12:10564913-10573194 | 0 | 0 | 0 | 1 |
| XLOC_005293 | KLRC1        | chr12:10598637-10607215 | 0 | 0 | 0 | 1 |
| XLOC_005298 | TAS2R7       | chr12:10954130-10955226 | 0 | 0 | 0 | 1 |
| XLOC_005299 | TAS2R8       | chr12:10958649-10959579 | 0 | 0 | 0 | 1 |
| XLOC_005303 | TAS2R13      | chr12:10998447-11328619 | 0 | 0 | 0 | 1 |
| XLOC_005305 | TAS2R50      | chr12:10998447-11328619 | 0 | 0 | 0 | 1 |
| XLOC_005311 | TAS2R30      | chr12:10998447-11328619 | 0 | 0 | 0 | 1 |
| XLOC_005312 | TAS2R42      | chr12:11338598-11339543 | 0 | 0 | 0 | 1 |
| XLOC_005313 | PRB3         | chr12:11418856-11422641 | 0 | 0 | 0 | 1 |
| XLOC_005314 | PRB4         | chr12:11460014-11463369 | 0 | 0 | 0 | 1 |
| XLOC_005315 | PRB1         | chr12:11504756-11508524 | 0 | 0 | 0 | 1 |
| XLOC_005316 | PRB2         | chr12:11544473-11548498 | 0 | 0 | 0 | 1 |
| XLOC_005317 | RNU6-19      | chr12:11802787-12079107 | 0 | 0 | 0 | 1 |
| XLOC_005327 | GRIN2B       | chr12:13714409-14133022 | 0 | 0 | 0 | 1 |
| XLOC_005333 | ART4         | chr12:14982244-14996413 | 0 | 0 | 0 | 1 |
| XLOC_005334 | MGP          | chr12:15034114-15038853 | 0 | 0 | 0 | 1 |
| XLOC_005335 | ERP27        | chr12:15066975-15091463 | 0 | 0 | 0 | 1 |
| XLOC_005337 | REERG        | chr12:15260715-15374411 | 0 | 0 | 0 | 1 |
| XLOC_005339 | SLC15A5      | chr12:16341418-16430619 | 0 | 0 | 0 | 1 |
| XLOC_005341 | RERGL        | chr12:18233802-18243114 | 0 | 0 | 0 | 1 |
| XLOC_005342 | PLCZ1        | chr12:18836109-18890993 | 0 | 0 | 0 | 1 |
| XLOC_005343 | SLCO1A2      | chr12:21417533-21548371 | 0 | 0 | 0 | 1 |
| XLOC_005347 | KCNJ8        | chr12:21917888-21927755 | 0 | 0 | 0 | 1 |
| XLOC_005351 | SOX5         | chr12:23685230-24715383 | 0 | 0 | 0 | 1 |
| XLOC_005352 | LINC00477    | chr12:24719897-24737102 | 0 | 0 | 0 | 1 |
| XLOC_005354 | C12orf77     | chr12:25146364-25150373 | 0 | 0 | 0 | 1 |
| XLOC_005358 | MIR4302      | chr12:26026952-26027012 | 0 | 0 | 0 | 1 |
| XLOC_005359 | LOC100506451 | chr12:26107587-26232825 | 0 | 0 | 0 | 1 |
| XLOC_005365 | MANSC4       | chr12:27915598-27924209 | 0 | 0 | 0 | 1 |
| XLOC_005368 | OVCH1        | chr12:29542226-29650619 | 0 | 0 | 0 | 1 |
| XLOC_005377 | RNU6-78      | chr12:32146772-32146802 | 0 | 0 | 0 | 1 |
| XLOC_005380 | SYT10        | chr12:33528347-33592754 | 0 | 0 | 0 | 1 |
| XLOC_005381 | CPNE8        | chr12:39046001-39299420 | 0 | 0 | 0 | 1 |
| XLOC_005389 | ADAMTS20     | chr12:43748011-43945724 | 0 | 0 | 0 | 1 |
| XLOC_005393 | DBX2         | chr12:45408538-45444882 | 0 | 0 | 0 | 1 |
| XLOC_005396 | RNY5         | chr12:45566816-45834187 | 0 | 0 | 0 | 1 |
| XLOC_005402 | AMIGO2       | chr12:47469489-47473734 | 0 | 0 | 0 | 1 |
| XLOC_005403 | PCED1B-AS1   | chr12:47602202-47630443 | 0 | 0 | 0 | 1 |
| XLOC_005412 | OR10AD1      | chr12:48596121-48597075 | 0 | 0 | 0 | 1 |
| XLOC_005421 | MIR4701      | chr12:49159974-49182820 | 0 | 0 | 0 | 1 |
| XLOC_005431 | DHH          | chr12:49483205-49488602 | 0 | 0 | 0 | 1 |
| XLOC_005435 | C1QL4        | chr12:49726199-49730971 | 0 | 0 | 0 | 1 |
| XLOC_005442 | LOC283332    | chr12:50302665-50305646 | 0 | 0 | 0 | 1 |
| XLOC_005446 | MIR1293      | chr12:50569562-50677353 | 0 | 0 | 0 | 1 |
| XLOC_005461 | KRT85        | chr12:52753789-52761309 | 0 | 0 | 0 | 1 |
| XLOC_005462 | KRT84        | chr12:52771595-52779417 | 0 | 0 | 0 | 1 |
| XLOC_005463 | KRT82        | chr12:52787734-52800176 | 0 | 0 | 0 | 1 |
| XLOC_005464 | KRT75        | chr12:52817853-52828110 | 0 | 0 | 0 | 1 |
| XLOC_005465 | KRT6B        | chr12:52840434-52845910 | 0 | 0 | 0 | 1 |
| XLOC_005466 | KRT6C        | chr12:52862299-52867569 | 0 | 0 | 0 | 1 |
| XLOC_005467 | KRT6A        | chr12:52880957-52887181 | 0 | 0 | 0 | 1 |
| XLOC_005469 | KRT71        | chr12:52937692-52946931 | 0 | 0 | 0 | 1 |
| XLOC_005470 | KRT74        | chr12:52959602-52967609 | 0 | 0 | 0 | 1 |
| XLOC_005471 | KRT72        | chr12:52979372-52995322 | 0 | 0 | 0 | 1 |
| XLOC_005472 | KRT73        | chr12:53001353-53012343 | 0 | 0 | 0 | 1 |
| XLOC_005473 | KRT2         | chr12:53038341-53045959 | 0 | 0 | 0 | 1 |
| XLOC_005474 | KRT1         | chr12:53068519-53074191 | 0 | 0 | 0 | 1 |
| XLOC_005475 | KRT77        | chr12:53083410-53097247 | 0 | 0 | 0 | 1 |
| XLOC_005476 | KRT76        | chr12:53161938-53171129 | 0 | 0 | 0 | 1 |
| XLOC_005477 | KRT3         | chr12:53183468-53189892 | 0 | 0 | 0 | 1 |
| XLOC_005480 | KRT78        | chr12:53232745-53242778 | 0 | 0 | 0 | 1 |
| XLOC_005503 | GTSF1        | chr12:54849735-54867386 | 0 | 0 | 0 | 1 |
| XLOC_005504 | PPP1R1A      | chr12:54973023-54982443 | 0 | 0 | 0 | 1 |
| XLOC_005505 | GLYCAM1      | chr12:55001970-55004246 | 0 | 0 | 0 | 1 |
| XLOC_005506 | LACRT        | chr12:55024622-55028663 | 0 | 0 | 0 | 1 |
| XLOC_005509 | OR6C6        | chr12:55688071-55689016 | 0 | 0 | 0 | 1 |
| XLOC_005510 | OR6C70       | chr12:55862983-55863922 | 0 | 0 | 0 | 1 |
| XLOC_005530 | SNORD59B     | chr12:57031958-57039852 | 0 | 0 | 0 | 1 |
| XLOC_005531 | SNORD59A     | chr12:57031958-57039852 | 0 | 0 | 0 | 1 |
| XLOC_005548 | B4GALNT1     | chr12:58013692-58027022 | 0 | 0 | 0 | 1 |
| XLOC_005555 | MIR26A2      | chr12:58213709-58240747 | 0 | 0 | 0 | 1 |
| XLOC_005561 | AVPR1A       | chr12:63536538-63546590 | 0 | 0 | 0 | 1 |
| XLOC_005564 | C12orf56     | chr12:64660762-64784345 | 0 | 0 | 0 | 1 |
| XLOC_005566 | WIF1         | chr12:65444403-65515346 | 0 | 0 | 0 | 1 |
| XLOC_005571 | IFNG         | chr12:68548549-68553521 | 0 | 0 | 0 | 1 |
| XLOC_005572 | IL26         | chr12:68595128-68619571 | 0 | 0 | 0 | 1 |
| XLOC_005573 | IL22         | chr12:68642024-68647281 | 0 | 0 | 0 | 1 |

|             |              |                          |   |   |   |   |
|-------------|--------------|--------------------------|---|---|---|---|
| XLOC_005575 | SNORA70G     | chr12:69004618-69054385  | 0 | 0 | 0 | 1 |
| XLOC_005579 | MIR1279      | chr12:69633316-69668138  | 0 | 0 | 0 | 1 |
| XLOC_005580 | MIR3913-1    | chr12:69978501-69978603  | 0 | 0 | 0 | 1 |
| XLOC_005585 | TSPAN8       | chr12:71518876-71551779  | 0 | 0 | 0 | 1 |
| XLOC_005588 | TRHDE-AS1    | chr12:72647286-73059422  | 0 | 0 | 0 | 1 |
| XLOC_005589 | LOC100507377 | chr12:74526955-74686411  | 0 | 0 | 0 | 1 |
| XLOC_005590 | KCNC2        | chr12:75433857-75603528  | 0 | 0 | 0 | 1 |
| XLOC_005601 | LIN7A        | chr12:81191170-81331694  | 0 | 0 | 0 | 1 |
| XLOC_005602 | MIR617       | chr12:81191170-81331694  | 0 | 0 | 0 | 1 |
| XLOC_005603 | MIR618       | chr12:81191170-81331694  | 0 | 0 | 0 | 1 |
| XLOC_005604 | PPFIA2       | chr12:81652044-82153109  | 0 | 0 | 0 | 1 |
| XLOC_005606 | SLC6A15      | chr12:85253266-85306608  | 0 | 0 | 0 | 1 |
| XLOC_005607 | TSPAN19      | chr12:85408093-85430055  | 0 | 0 | 0 | 1 |
| XLOC_005608 | RASSF9       | chr12:86198330-86230318  | 0 | 0 | 0 | 1 |
| XLOC_005609 | MGAT4C       | chr12:86373036-87232681  | 0 | 0 | 0 | 1 |
| XLOC_005610 | MIR548AL     | chr12:86373036-87232681  | 0 | 0 | 0 | 1 |
| XLOC_005611 | MKRN9P       | chr12:88176662-88178488  | 0 | 0 | 0 | 1 |
| XLOC_005615 | LOC728084    | chr12:89404902-89413469  | 0 | 0 | 0 | 1 |
| XLOC_005619 | CCER1        | chr12:91345991-91348953  | 0 | 0 | 0 | 1 |
| XLOC_005620 | EPYC         | chr12:91357455-91398803  | 0 | 0 | 0 | 1 |
| XLOC_005621 | KERA         | chr12:91444270-91452131  | 0 | 0 | 0 | 1 |
| XLOC_005623 | DCN          | chr12:91539034-91576806  | 0 | 0 | 0 | 1 |
| XLOC_005625 | CLLU1OS      | chr12:92813869-92824778  | 0 | 0 | 0 | 1 |
| XLOC_005627 | LOC643339    | chr12:93397533-93771512  | 0 | 0 | 0 | 1 |
| XLOC_005641 | MIR4303      | chr12:98389160-98389226  | 0 | 0 | 0 | 1 |
| XLOC_005642 | SLC9A7P1     | chr12:98847618-98850923  | 0 | 0 | 0 | 1 |
| XLOC_005650 | SLC5A8       | chr12:101549993-10160401 | 0 | 0 | 0 | 1 |
| XLOC_005657 | IGF1         | chr12:102789644-10287431 | 0 | 0 | 0 | 1 |
| XLOC_005659 | PAH          | chr12:103232103-10331138 | 0 | 0 | 0 | 1 |
| XLOC_005660 | C12orf42     | chr12:103695732-10388974 | 0 | 0 | 0 | 1 |
| XLOC_005671 | LOC100287944 | chr12:106751435-10728308 | 0 | 0 | 0 | 1 |
| XLOC_005676 | LOC728739    | chr12:108296926-10829754 | 0 | 0 | 0 | 1 |
| XLOC_005677 | CMKLR1       | chr12:108681820-10873308 | 0 | 0 | 0 | 1 |
| XLOC_005710 | RASAL1       | chr12:113536623-11357404 | 0 | 0 | 0 | 1 |
| XLOC_005715 | LHX5         | chr12:113900693-11390981 | 0 | 0 | 0 | 1 |
| XLOC_005717 | TBX5         | chr12:114791734-11485061 | 0 | 0 | 0 | 1 |
| XLOC_005720 | MIR620       | chr12:116396380-11671498 | 0 | 0 | 0 | 1 |
| XLOC_005721 | MIR4472-2    | chr12:116866056-11686611 | 0 | 0 | 0 | 1 |
| XLOC_005727 | KSR2         | chr12:117890816-11840601 | 0 | 0 | 0 | 1 |
| XLOC_005731 | LOC144742    | chr12:119721629-11974118 | 0 | 0 | 0 | 1 |
| XLOC_005735 | MIR4498      | chr12:120565013-12063251 | 0 | 0 | 0 | 1 |
| XLOC_005752 | MORN3        | chr12:122089292-12210758 | 0 | 0 | 0 | 1 |
| XLOC_005756 | IL31         | chr12:122652265-12268801 | 0 | 0 | 0 | 1 |
| XLOC_005763 | HCAR3        | chr12:123199302-12320141 | 0 | 0 | 0 | 1 |
| XLOC_005764 | HCAR1        | chr12:123212152-12321511 | 0 | 0 | 0 | 1 |
| XLOC_005768 | MIR4304      | chr12:123468026-12359491 | 0 | 0 | 0 | 1 |
| XLOC_005780 | LOC400084    | chr12:126443233-12646791 | 0 | 0 | 0 | 1 |
| XLOC_005782 | LOC440117    | chr12:127354039-12735921 | 0 | 0 | 0 | 1 |
| XLOC_005784 | TMEM132D     | chr12:129556270-13038821 | 0 | 0 | 0 | 1 |
| XLOC_005785 | LOC100190940 | chr12:130518356-13052688 | 0 | 0 | 0 | 1 |
| XLOC_005786 | FLJ31485     | chr12:130636137-13064621 | 0 | 0 | 0 | 1 |
| XLOC_005791 | LRCOL1       | chr12:133179735-13318701 | 0 | 0 | 0 | 1 |
| XLOC_005797 | ANHX         | chr12:133794897-13381241 | 0 | 0 | 0 | 1 |
| XLOC_005798 | LINC00442    | chr13:19582398-19586774  | 0 | 0 | 0 | 1 |
| XLOC_005799 | RNU6-52      | chr13:19717121-19717217  | 0 | 0 | 0 | 1 |
| XLOC_005800 | LINC00421    | chr13:19919188-19920889  | 0 | 0 | 0 | 1 |
| XLOC_005809 | SGCG         | chr13:23755059-23899304  | 0 | 0 | 0 | 1 |
| XLOC_005810 | LINC00327    | chr13:24043650-24061603  | 0 | 0 | 0 | 1 |
| XLOC_005811 | TNFRSF19     | chr13:24144508-24250244  | 0 | 0 | 0 | 1 |
| XLOC_005814 | MIR2276      | chr13:24734860-24881212  | 0 | 0 | 0 | 1 |
| XLOC_005818 | RNF17        | chr13:25338300-25454058  | 0 | 0 | 0 | 1 |
| XLOC_005821 | ATP8A2       | chr13:25946208-26595420  | 0 | 0 | 0 | 1 |
| XLOC_005825 | SNORD102     | chr13:27825691-27830702  | 0 | 0 | 0 | 1 |
| XLOC_005830 | GSX1         | chr13:28366779-28368089  | 0 | 0 | 0 | 1 |
| XLOC_005836 | LINC00544    | chr13:30510667-30524625  | 0 | 0 | 0 | 1 |
| XLOC_005839 | LINC00398    | chr13:31377342-31384782  | 0 | 0 | 0 | 1 |
| XLOC_005840 | MEDAG        | chr13:31456971-31506745  | 0 | 0 | 0 | 1 |
| XLOC_005841 | TEX26        | chr13:31506833-31549153  | 0 | 0 | 0 | 1 |
| XLOC_005843 | RXFP2        | chr13:32313678-32377009  | 0 | 0 | 0 | 1 |
| XLOC_005844 | EEF1DP3      | chr13:32420919-32533721  | 0 | 0 | 0 | 1 |
| XLOC_005848 | KL           | chr13:33590570-33640282  | 0 | 0 | 0 | 1 |
| XLOC_005852 | SPG20OS      | chr13:36875774-36944317  | 0 | 0 | 0 | 1 |
| XLOC_005853 | CCNA1        | chr13:37005966-37017019  | 0 | 0 | 0 | 1 |
| XLOC_005854 | SERTM1       | chr13:37248048-37271975  | 0 | 0 | 0 | 1 |
| XLOC_005857 | LINC00547    | chr13:38109076-38125673  | 0 | 0 | 0 | 1 |
| XLOC_005859 | LINC00366    | chr13:39141860-39153653  | 0 | 0 | 0 | 1 |
| XLOC_005863 | LINC00332    | chr13:40755945-40763167  | 0 | 0 | 0 | 1 |
| XLOC_005868 | RGCC         | chr13:42031541-42045013  | 0 | 0 | 0 | 1 |
| XLOC_005872 | TNFSF11      | chr13:43136871-43182149  | 0 | 0 | 0 | 1 |

|             |                       |                          |   |   |   |   |
|-------------|-----------------------|--------------------------|---|---|---|---|
| XLOC_005873 | FAM216B               | chr13:43355685-43365685  | 0 | 0 | 0 | 1 |
| XLOC_005874 | DNAJC15               | chr13:43597361-43683306  | 0 | 0 | 0 | 1 |
| XLOC_005876 | LINC00284             | chr13:44596470-44604599  | 0 | 0 | 0 | 1 |
| XLOC_005877 | SERP2                 | chr13:44947977-44971850  | 0 | 0 | 0 | 1 |
| XLOC_005883 | SPERT                 | chr13:46276445-46288693  | 0 | 0 | 0 | 1 |
| XLOC_005890 | CYSLTR2               | chr13:49280950-49283498  | 0 | 0 | 0 | 1 |
| XLOC_005892 | MLNR                  | chr13:49794473-49796513  | 0 | 0 | 0 | 1 |
| XLOC_005896 | ARL11                 | chr13:50202434-50208008  | 0 | 0 | 0 | 1 |
| XLOC_005903 | FAM124A               | chr13:51796469-51858377  | 0 | 0 | 0 | 1 |
| XLOC_005905 | MIR4703               | chr13:52126724-52126803  | 0 | 0 | 0 | 1 |
| XLOC_005907 | CCDC70                | chr13:52436116-52440372  | 0 | 0 | 0 | 1 |
| XLOC_005913 | MIR759                | chr13:53384184-53384275  | 0 | 0 | 0 | 1 |
| XLOC_005914 | OLFM4                 | chr13:53602875-53626196  | 0 | 0 | 0 | 1 |
| XLOC_005915 | LINC00558             | chr13:54389553-54450254  | 0 | 0 | 0 | 1 |
| XLOC_005916 | MIR5007               | chr13:55748588-55748683  | 0 | 0 | 0 | 1 |
| XLOC_005917 | PRR20B                | chr13:57715051-57718073  | 0 | 0 | 0 | 1 |
| XLOC_005918 | PRR20D                | chr13:57721621-57724643  | 0 | 0 | 0 | 1 |
| XLOC_005919 | PRR20E                | chr13:57728194-57731216  | 0 | 0 | 0 | 1 |
| XLOC_005920 | PRR20A                | chr13:57734765-57737787  | 0 | 0 | 0 | 1 |
| XLOC_005921 | PRR20A                | chr13:57741330-57744352  | 0 | 0 | 0 | 1 |
| XLOC_005922 | PCDH17                | chr13:58205788-58303065  | 0 | 0 | 0 | 1 |
| XLOC_005923 | DIAPH3-AS1            | chr13:60239720-60738119  | 0 | 0 | 0 | 1 |
| XLOC_005924 | DIAPH3-AS2            | chr13:60239720-60738119  | 0 | 0 | 0 | 1 |
| XLOC_005927 | PCDH9-AS2             | chr13:66876965-67804468  | 0 | 0 | 0 | 1 |
| XLOC_005928 | PCDH9-AS3             | chr13:66876965-67804468  | 0 | 0 | 0 | 1 |
| XLOC_005929 | ATXN8OS               | chr13:70274724-70713885  | 0 | 0 | 0 | 1 |
| XLOC_005930 | LINC00348             | chr13:71589272-71742549  | 0 | 0 | 0 | 1 |
| XLOC_005934 | LINC00381             | chr13:74993309-75009296  | 0 | 0 | 0 | 1 |
| XLOC_005935 | LINC00347             | chr13:75126979-75131257  | 0 | 0 | 0 | 1 |
| XLOC_005939 | BTF3P11               | chr13:77502584-77503224  | 0 | 0 | 0 | 1 |
| XLOC_005940 | IRG1                  | chr13:77526623-77532776  | 0 | 0 | 0 | 1 |
| XLOC_005942 | MYCBP2-AS1            | chr13:77618791-77901177  | 0 | 0 | 0 | 1 |
| XLOC_005943 | SCEL                  | chr13:78109808-78219398  | 0 | 0 | 0 | 1 |
| XLOC_005944 | SLAIN1                | chr13:78271988-78338377  | 0 | 0 | 0 | 1 |
| XLOC_005945 | LINC00446             | chr13:78587017-78627730  | 0 | 0 | 0 | 1 |
| XLOC_005946 | POU4F1-AS1            | chr13:78628989-79233314  | 0 | 0 | 0 | 1 |
| XLOC_005949 | LINC00333             | chr13:84714736-85180903  | 0 | 0 | 0 | 1 |
| XLOC_005950 | LINC00351             | chr13:85937737-86118797  | 0 | 0 | 0 | 1 |
| XLOC_005951 | SLITRK5               | chr13:88324869-88331870  | 0 | 0 | 0 | 1 |
| XLOC_005952 | LINC00433             | chr13:89193083-89197764  | 0 | 0 | 0 | 1 |
| XLOC_005953 | MIR622                | chr13:90883435-90883531  | 0 | 0 | 0 | 1 |
| XLOC_005958 | CLDN10                | chr13:96085852-96296960  | 0 | 0 | 0 | 1 |
| XLOC_005960 | HS6ST3                | chr13:96743092-97491816  | 0 | 0 | 0 | 1 |
| XLOC_005965 | MIR3170               | chr13:98795433-99102023  | 0 | 0 | 0 | 1 |
| XLOC_005967 | FKSG29                | chr13:99848627-100058554 | 0 | 0 | 0 | 1 |
| XLOC_005968 | MIR623                | chr13:99848627-100058554 | 0 | 0 | 0 | 1 |
| XLOC_005971 | MIR4306               | chr13:100258918-10054938 | 0 | 0 | 0 | 1 |
| XLOC_005974 | NALCN-AS1             | chr13:101360578-10206887 | 0 | 0 | 0 | 1 |
| XLOC_005975 | ITGBL1                | chr13:102104943-10305412 | 0 | 0 | 0 | 1 |
| XLOC_005976 | FGF14-AS2             | chr13:102104943-10305412 | 0 | 0 | 0 | 1 |
| XLOC_005980 | DAOA                  | chr13:106111405-10615801 | 0 | 0 | 0 | 1 |
| XLOC_005981 | LINC00343             | chr13:106359217-10641414 | 0 | 0 | 0 | 1 |
| XLOC_005983 | LINC00551             | chr13:107270157-10728401 | 0 | 0 | 0 | 1 |
| XLOC_005984 | LINC00443             | chr13:107306227-10732452 | 0 | 0 | 0 | 1 |
| XLOC_005993 | SOX1                  | chr13:112721912-11272602 | 0 | 0 | 0 | 1 |
| XLOC_005994 | SPACA7                | chr13:113030650-11308901 | 0 | 0 | 0 | 1 |
| XLOC_005995 | C13orf35              | chr13:113301357-11333887 | 0 | 0 | 0 | 1 |
| XLOC_005998 | F7                    | chr13:113760101-11377498 | 0 | 0 | 0 | 1 |
| XLOC_006005 | GRK1                  | chr13:114321596-11443861 | 0 | 0 | 0 | 1 |
| XLOC_006006 | TMEM255B              | chr13:114462215-11451488 | 0 | 0 | 0 | 1 |
| XLOC_006013 | TUBA3C                | chr13:19747909-19755992  | 0 | 0 | 0 | 1 |
| XLOC_006014 | ANKRD26P3             | chr13:19836939-19919113  | 0 | 0 | 0 | 1 |
| XLOC_006019 | GJB2                  | chr13:20761603-20767114  | 0 | 0 | 0 | 1 |
| XLOC_006020 | GJB6                  | chr13:20796100-20806534  | 0 | 0 | 0 | 1 |
| XLOC_006022 | MIR4499               | chr13:20977805-21100012  | 0 | 0 | 0 | 1 |
| XLOC_006029 | LINC00424             | chr13:22446934-22452299  | 0 | 0 | 0 | 1 |
| XLOC_006030 | BASP1P1               | chr13:23471168-23472320  | 0 | 0 | 0 | 1 |
| XLOC_006035 | SPATA13-AS1           | chr13:24734860-24881212  | 0 | 0 | 0 | 1 |
| XLOC_006039 | AMER2                 | chr13:25742671-25745857  | 0 | 0 | 0 | 1 |
| XLOC_006043 | GPR12                 | chr13:27329338-27334922  | 0 | 0 | 0 | 1 |
| XLOC_006048 | PRHOXNB               | chr13:28552242-28562774  | 0 | 0 | 0 | 1 |
| XLOC_006049 | FLT3                  | chr13:28577410-28674729  | 0 | 0 | 0 | 1 |
| XLOC_006056 | LINC00297             | chr13:30446749-30462542  | 0 | 0 | 0 | 1 |
| XLOC_006060 | TEX26-AS1             | chr13:31456971-31506745  | 0 | 0 | 0 | 1 |
| XLOC_006067 | LINC00423             | chr13:33383327-33485790  | 0 | 0 | 0 | 1 |
| XLOC_006069 | LINC00457             | chr13:35009590-35214822  | 0 | 0 | 0 | 1 |
| XLOC_006070 | MAB21L1               | chr13:35516423-36705514  | 0 | 0 | 0 | 1 |
| XLOC_006071 | DCLK1                 | chr13:35516423-36705514  | 0 | 0 | 0 | 1 |
| XLOC_006072 | CCDC169,CCDC169-SOHLI | chr13:36742344-36871992  | 0 | 0 | 0 | 1 |



|             |              |                          |   |   |   |   |
|-------------|--------------|--------------------------|---|---|---|---|
| XLOC_006073 | SPG20        | chr13:36875774-36944317  | 0 | 0 | 0 | 1 |
| XLOC_006077 | CSNK1A1L     | chr13:37677396-37679801  | 0 | 0 | 0 | 1 |
| XLOC_006078 | POSTN        | chr13:38136718-38172981  | 0 | 0 | 0 | 1 |
| XLOC_006079 | TRPC4        | chr13:38210772-38443939  | 0 | 0 | 0 | 1 |
| XLOC_006081 | STOML3       | chr13:39540061-39564996  | 0 | 0 | 0 | 1 |
| XLOC_006083 | LHFP         | chr13:39917028-40177356  | 0 | 0 | 0 | 1 |
| XLOC_006084 | MIR4305      | chr13:40229763-40365802  | 0 | 0 | 0 | 1 |
| XLOC_006085 | LINC00548    | chr13:40768645-40794639  | 0 | 0 | 0 | 1 |
| XLOC_006088 | MIR320D1     | chr13:41301963-41302011  | 0 | 0 | 0 | 1 |
| XLOC_006096 | EPSTI1       | chr13:43460523-43566407  | 0 | 0 | 0 | 1 |
| XLOC_006099 | SMIM2-IT1    | chr13:44720605-44732358  | 0 | 0 | 0 | 1 |
| XLOC_006107 | FAM194B      | chr13:46115431-46189874  | 0 | 0 | 0 | 1 |
| XLOC_006110 | CPB2         | chr13:46626982-46679211  | 0 | 0 | 0 | 1 |
| XLOC_006113 | KIAA0226L    | chr13:46916136-46961635  | 0 | 0 | 0 | 1 |
| XLOC_006115 | HTR2A        | chr13:47405676-47471211  | 0 | 0 | 0 | 1 |
| XLOC_006121 | LINC00462    | chr13:49151109-49155037  | 0 | 0 | 0 | 1 |
| XLOC_006128 | MIR3613      | chr13:50556687-50699677  | 0 | 0 | 0 | 1 |
| XLOC_006129 | MIR16-1      | chr13:50556687-50699677  | 0 | 0 | 0 | 1 |
| XLOC_006130 | MIR15A       | chr13:50556687-50699677  | 0 | 0 | 0 | 1 |
| XLOC_006133 | GUCY1B2      | chr13:51568646-51640293  | 0 | 0 | 0 | 1 |
| XLOC_006134 | MIR5693      | chr13:51915167-52027275  | 0 | 0 | 0 | 1 |
| XLOC_006146 | MIR1297      | chr13:54886106-54886183  | 0 | 0 | 0 | 1 |
| XLOC_006148 | MIR3169      | chr13:61773931-61774014  | 0 | 0 | 0 | 1 |
| XLOC_006149 | PCDH20       | chr13:61983818-61989655  | 0 | 0 | 0 | 1 |
| XLOC_006150 | PCDH9        | chr13:66876965-67804468  | 0 | 0 | 0 | 1 |
| XLOC_006151 | LINC00550    | chr13:69435416-69459457  | 0 | 0 | 0 | 1 |
| XLOC_006152 | KLHL1        | chr13:70274724-70713885  | 0 | 0 | 0 | 1 |
| XLOC_006157 | CTAGE11P     | chr13:75811888-75814517  | 0 | 0 | 0 | 1 |
| XLOC_006163 | MIR3665      | chr13:78271988-78338377  | 0 | 0 | 0 | 1 |
| XLOC_006164 | EDNRB        | chr13:78469615-78549674  | 0 | 0 | 0 | 1 |
| XLOC_006165 | POU4F1       | chr13:78628989-79233314  | 0 | 0 | 0 | 1 |
| XLOC_006167 | LINC00331    | chr13:79361453-79414160  | 0 | 0 | 0 | 1 |
| XLOC_006169 | NDFIP2-AS1   | chr13:80051498-80130212  | 0 | 0 | 0 | 1 |
| XLOC_006171 | SLITRK1      | chr13:844451342-84456528 | 0 | 0 | 0 | 1 |
| XLOC_006172 | SLITRK6      | chr13:86366921-86373483  | 0 | 0 | 0 | 1 |
| XLOC_006173 | MIR4500HG    | chr13:88096241-88323218  | 0 | 0 | 0 | 1 |
| XLOC_006174 | MIR4500      | chr13:88096241-88323218  | 0 | 0 | 0 | 1 |
| XLOC_006175 | LINC00353    | chr13:90201047-90216667  | 0 | 0 | 0 | 1 |
| XLOC_006176 | LINC00559    | chr13:90712500-90771971  | 0 | 0 | 0 | 1 |
| XLOC_006177 | LINC00410    | chr13:91543207-91578851  | 0 | 0 | 0 | 1 |
| XLOC_006178 | LINC00379    | chr13:91779866-91863952  | 0 | 0 | 0 | 1 |
| XLOC_006179 | GPC5-AS1     | chr13:92050934-93519487  | 0 | 0 | 0 | 1 |
| XLOC_006180 | GPC6-AS2     | chr13:93879077-95060273  | 0 | 0 | 0 | 1 |
| XLOC_006183 | SOX21        | chr13:95361878-95364389  | 0 | 0 | 0 | 1 |
| XLOC_006185 | CLDN10-AS1   | chr13:96085852-96296960  | 0 | 0 | 0 | 1 |
| XLOC_006188 | LINC00359    | chr13:97593534-97636426  | 0 | 0 | 0 | 1 |
| XLOC_006189 | OXGR1        | chr13:97637972-97646604  | 0 | 0 | 0 | 1 |
| XLOC_006190 | RNF113B      | chr13:98795433-99102023  | 0 | 0 | 0 | 1 |
| XLOC_006195 | MIR548AN     | chr13:99848627-10005855  | 0 | 0 | 0 | 1 |
| XLOC_006197 | GPR183       | chr13:99848627-10005855  | 0 | 0 | 0 | 1 |
| XLOC_006199 | PCCA-AS1     | chr13:100741268-1012410  | 0 | 0 | 0 | 1 |
| XLOC_006202 | NALCN        | chr13:101360578-1020688  | 0 | 0 | 0 | 1 |
| XLOC_006203 | FGF14        | chr13:102104943-10305412 | 0 | 0 | 0 | 1 |
| XLOC_006204 | MIR2681      | chr13:102104943-10305412 | 0 | 0 | 0 | 1 |
| XLOC_006205 | MIR4705      | chr13:102104943-10305412 | 0 | 0 | 0 | 1 |
| XLOC_006206 | FGF14-IT1    | chr13:102104943-10305412 | 0 | 0 | 0 | 1 |
| XLOC_006207 | METTL21C     | chr13:103338096-10334687 | 0 | 0 | 0 | 1 |
| XLOC_006208 | CCDC168      | chr13:103381716-10341142 | 0 | 0 | 0 | 1 |
| XLOC_006211 | SLC10A2      | chr13:103696347-10371919 | 0 | 0 | 0 | 1 |
| XLOC_006212 | MIR548AS     | chr13:103934828-1039348  | 0 | 0 | 0 | 1 |
| XLOC_006213 | DAOA-AS1     | chr13:106111405-1061580  | 0 | 0 | 0 | 1 |
| XLOC_006216 | FAM155A      | chr13:107820878-10851946 | 0 | 0 | 0 | 1 |
| XLOC_006218 | MYO16-AS1    | chr13:109248499-1098603  | 0 | 0 | 0 | 1 |
| XLOC_006221 | COL4A2-AS1   | chr13:110959630-11116537 | 0 | 0 | 0 | 1 |
| XLOC_006232 | ATP4B        | chr13:114303121-1143125  | 0 | 0 | 0 | 1 |
| XLOC_006233 | LINC00552    | chr13:114451483-11445406 | 0 | 0 | 0 | 1 |
| XLOC_006237 | OR11H12      | chr14:19377593-19378574  | 0 | 0 | 0 | 1 |
| XLOC_006238 | POTEG        | chr14:19553364-19584942  | 0 | 0 | 0 | 1 |
| XLOC_006239 | LOC101101776 | chr14:19894368-19904572  | 0 | 0 | 0 | 1 |
| XLOC_006240 | OR4Q3        | chr14:20215586-20216528  | 0 | 0 | 0 | 1 |
| XLOC_006241 | OR4M1        | chr14:20248481-20249423  | 0 | 0 | 0 | 1 |
| XLOC_006242 | OR4N2        | chr14:20295607-20296531  | 0 | 0 | 0 | 1 |
| XLOC_006243 | OR4K2        | chr14:20344426-20345371  | 0 | 0 | 0 | 1 |
| XLOC_006244 | OR4K5        | chr14:20388765-20389737  | 0 | 0 | 0 | 1 |
| XLOC_006245 | OR4K1        | chr14:20403766-20404842  | 0 | 0 | 0 | 1 |
| XLOC_006246 | OR4K15       | chr14:20443677-20444724  | 0 | 0 | 0 | 1 |
| XLOC_006247 | OR4L1        | chr14:20528203-20529142  | 0 | 0 | 0 | 1 |
| XLOC_006248 | OR4K17       | chr14:20585565-20586597  | 0 | 0 | 0 | 1 |
| XLOC_006249 | OR4N5        | chr14:20611894-20612821  | 0 | 0 | 0 | 1 |

|             |             |                          |   |   |   |   |
|-------------|-------------|--------------------------|---|---|---|---|
| XLOC_006250 | OR11G2      | chr14:20665494-20666532  | 0 | 0 | 0 | 1 |
| XLOC_006251 | OR11H6      | chr14:20691868-20692861  | 0 | 0 | 0 | 1 |
| XLOC_006252 | OR11H4      | chr14:20710950-20711925  | 0 | 0 | 0 | 1 |
| XLOC_006256 | RNASE10     | chr14:20978630-20979281  | 0 | 0 | 0 | 1 |
| XLOC_006258 | EDDM3A      | chr14:21214098-21216539  | 0 | 0 | 0 | 1 |
| XLOC_006259 | EDDM3B      | chr14:21236585-21239107  | 0 | 0 | 0 | 1 |
| XLOC_006260 | RNASE6      | chr14:21249209-21250626  | 0 | 0 | 0 | 1 |
| XLOC_006263 | RNASE2      | chr14:21423629-21424594  | 0 | 0 | 0 | 1 |
| XLOC_006266 | TPPP2       | chr14:21498344-21500332  | 0 | 0 | 0 | 1 |
| XLOC_006268 | RNASE8      | chr14:21526051-21526516  | 0 | 0 | 0 | 1 |
| XLOC_006273 | OR4E2       | chr14:22133296-22134238  | 0 | 0 | 0 | 1 |
| XLOC_006280 | PSMB11      | chr14:23511375-23513269  | 0 | 0 | 0 | 1 |
| XLOC_006283 | IL25        | chr14:23842017-23845612  | 0 | 0 | 0 | 1 |
| XLOC_006284 | CMTM5       | chr14:23846016-23848981  | 0 | 0 | 0 | 1 |
| XLOC_006292 | CPNE6       | chr14:24540755-24547296  | 0 | 0 | 0 | 1 |
| XLOC_006307 | MIR4307     | chr14:27377847-27377931  | 0 | 0 | 0 | 1 |
| XLOC_006308 | LINC00645   | chr14:28081793-28108842  | 0 | 0 | 0 | 1 |
| XLOC_006309 | FOXG1       | chr14:29236277-29239483  | 0 | 0 | 0 | 1 |
| XLOC_006319 | IGBP1P1     | chr14:35409127-35409702  | 0 | 0 | 0 | 1 |
| XLOC_006324 | INSM2       | chr14:36003247-36006260  | 0 | 0 | 0 | 1 |
| XLOC_006326 | LINC00609   | chr14:36539632-36645857  | 0 | 0 | 0 | 1 |
| XLOC_006330 | SSTR1       | chr14:38677203-38682268  | 0 | 0 | 0 | 1 |
| XLOC_006333 | MIA2        | chr14:39703124-39722575  | 0 | 0 | 0 | 1 |
| XLOC_006335 | LRFN5       | chr14:42076763-42373752  | 0 | 0 | 0 | 1 |
| XLOC_006339 | SNORD127    | chr14:45553301-45603732  | 0 | 0 | 0 | 1 |
| XLOC_006354 | PTGDR       | chr14:52734430-52743442  | 0 | 0 | 0 | 1 |
| XLOC_006370 | OTX2-AS1    | chr14:57279900-57397550  | 0 | 0 | 0 | 1 |
| XLOC_006381 | LRRC9       | chr14:60386430-60530277  | 0 | 0 | 0 | 1 |
| XLOC_006384 | SIX6        | chr14:60975937-60978525  | 0 | 0 | 0 | 1 |
| XLOC_006388 | FLJ22447    | chr14:62037257-62121431  | 0 | 0 | 0 | 1 |
| XLOC_006391 | SYT16       | chr14:62462540-62568427  | 0 | 0 | 0 | 1 |
| XLOC_006392 | LINC00643   | chr14:62584074-62600903  | 0 | 0 | 0 | 1 |
| XLOC_006393 | RHOJ        | chr14:63671101-63760230  | 0 | 0 | 0 | 1 |
| XLOC_006402 | MIR4706     | chr14:65381078-65569413  | 0 | 0 | 0 | 1 |
| XLOC_006407 | FAM71D      | chr14:67656109-67695267  | 0 | 0 | 0 | 1 |
| XLOC_006418 | PLEKHD1     | chr14:69951470-69995215  | 0 | 0 | 0 | 1 |
| XLOC_006425 | SNORD56B    | chr14:71865053-71865124  | 0 | 0 | 0 | 1 |
| XLOC_006426 | LOC145474   | chr14:71954577-71956420  | 0 | 0 | 0 | 1 |
| XLOC_006428 | RGS6        | chr14:72398816-73033238  | 0 | 0 | 0 | 1 |
| XLOC_006439 | MIR4505     | chr14:74181824-74253896  | 0 | 0 | 0 | 1 |
| XLOC_006446 | VRTN        | chr14:74815165-74826711  | 0 | 0 | 0 | 1 |
| XLOC_006456 | BATF        | chr14:75988783-76013334  | 0 | 0 | 0 | 1 |
| XLOC_006463 | C14orf166B  | chr14:77292724-77336645  | 0 | 0 | 0 | 1 |
| XLOC_006466 | MIR1260A    | chr14:77731833-77737655  | 0 | 0 | 0 | 1 |
| XLOC_006474 | DIO2-AS1    | chr14:80663867-80921810  | 0 | 0 | 0 | 1 |
| XLOC_006475 | TSHR        | chr14:81421868-81612646  | 0 | 0 | 0 | 1 |
| XLOC_006476 | FLRT2       | chr14:85996487-86094270  | 0 | 0 | 0 | 1 |
| XLOC_006477 | LOC283585   | chr14:87372121-87389099  | 0 | 0 | 0 | 1 |
| XLOC_006484 | FOXN3-AS2   | chr14:89622515-90085494  | 0 | 0 | 0 | 1 |
| XLOC_006486 | KCNK13      | chr14:90528107-90652195  | 0 | 0 | 0 | 1 |
| XLOC_006489 | LINC00642   | chr14:90921573-90925249  | 0 | 0 | 0 | 1 |
| XLOC_006502 | FAM181A     | chr14:94371075-94395954  | 0 | 0 | 0 | 1 |
| XLOC_006508 | SERPINA4    | chr14:95027782-95036243  | 0 | 0 | 0 | 1 |
| XLOC_006509 | SERPINA5    | chr14:95047705-95059457  | 0 | 0 | 0 | 1 |
| XLOC_006510 | SERPINA3    | chr14:95078713-95090390  | 0 | 0 | 0 | 1 |
| XLOC_006511 | SERPINA13P  | chr14:95107061-95113331  | 0 | 0 | 0 | 1 |
| XLOC_006514 | TCL6        | chr14:96117514-96139789  | 0 | 0 | 0 | 1 |
| XLOC_006515 | TCL1B       | chr14:96152753-96158980  | 0 | 0 | 0 | 1 |
| XLOC_006516 | LINC00617   | chr14:96343108-96391908  | 0 | 0 | 0 | 1 |
| XLOC_006517 | C14orf132   | chr14:96505660-96560226  | 0 | 0 | 0 | 1 |
| XLOC_006518 | BDKRB2      | chr14:96671134-96710666  | 0 | 0 | 0 | 1 |
| XLOC_006519 | BDKRB1      | chr14:96722546-96731100  | 0 | 0 | 0 | 1 |
| XLOC_006524 | C14orf177   | chr14:99177949-99184103  | 0 | 0 | 0 | 1 |
| XLOC_006527 | MIR5698     | chr14:100111479-10014301 | 0 | 0 | 0 | 1 |
| XLOC_006529 | EML1        | chr14:100259744-10040838 | 0 | 0 | 0 | 1 |
| XLOC_006530 | EVL         | chr14:100531750-10061057 | 0 | 0 | 0 | 1 |
| XLOC_006532 | MIR345      | chr14:100774195-10077425 | 0 | 0 | 0 | 1 |
| XLOC_006533 | SLC25A47    | chr14:100789678-10079671 | 0 | 0 | 0 | 1 |
| XLOC_006535 | LINC00523   | chr14:101123604-10113908 | 0 | 0 | 0 | 1 |
| XLOC_006536 | DLK1        | chr14:101193201-10120146 | 0 | 0 | 0 | 1 |
| XLOC_006537 | MIR2392     | chr14:101280827-10128091 | 0 | 0 | 0 | 1 |
| XLOC_006538 | MEG3,MIR770 | chr14:101292444-10132736 | 0 | 0 | 0 | 1 |
| XLOC_006539 | MIR493      | chr14:101335396-10133548 | 0 | 0 | 0 | 1 |
| XLOC_006540 | MIR337      | chr14:101340829-10134092 | 0 | 0 | 0 | 1 |
| XLOC_006541 | MIR665      | chr14:101341369-10134144 | 0 | 0 | 0 | 1 |
| XLOC_006542 | MIR431      | chr14:101346991-10135118 | 0 | 0 | 0 | 1 |
| XLOC_006543 | MIR433      | chr14:101346991-10135118 | 0 | 0 | 0 | 1 |
| XLOC_006544 | MIR127      | chr14:101346991-10135118 | 0 | 0 | 0 | 1 |
| XLOC_006545 | MIR432      | chr14:101346991-10135118 | 0 | 0 | 0 | 1 |

|             |             |                          |   |   |   |   |
|-------------|-------------|--------------------------|---|---|---|---|
| XLOC_006546 | MIR136      | chr14:101346991-10135118 | 0 | 0 | 0 | 1 |
| XLOC_006547 | MEG8        | chr14:101361106-10137330 | 0 | 0 | 0 | 1 |
| XLOC_006548 | SNORD113-1  | chr14:101391157-10139122 | 0 | 0 | 0 | 1 |
| XLOC_006549 | SNORD113-2  | chr14:101393678-10139374 | 0 | 0 | 0 | 1 |
| XLOC_006550 | SNORD113-4  | chr14:101402827-10140290 | 0 | 0 | 0 | 1 |
| XLOC_006551 | SNORD113-5  | chr14:101404523-10140460 | 0 | 0 | 0 | 1 |
| XLOC_006552 | SNORD113-6  | chr14:101405892-10140596 | 0 | 0 | 0 | 1 |
| XLOC_006553 | SNORD113-7  | chr14:101407462-10140753 | 0 | 0 | 0 | 1 |
| XLOC_006554 | SNORD113-9  | chr14:101411985-10141205 | 0 | 0 | 0 | 1 |
| XLOC_006555 | SNORD114-1  | chr14:101416169-10141624 | 0 | 0 | 0 | 1 |
| XLOC_006556 | SNORD114-2  | chr14:101418192-10141826 | 0 | 0 | 0 | 1 |
| XLOC_006557 | SNORD114-3  | chr14:101419685-10141975 | 0 | 0 | 0 | 1 |
| XLOC_006558 | SNORD114-4  | chr14:101420680-10142078 | 0 | 0 | 0 | 1 |
| XLOC_006559 | SNORD114-5  | chr14:101421706-10142177 | 0 | 0 | 0 | 1 |
| XLOC_006560 | SNORD114-6  | chr14:101423502-10142357 | 0 | 0 | 0 | 1 |
| XLOC_006561 | SNORD114-7  | chr14:101429390-10142946 | 0 | 0 | 0 | 1 |
| XLOC_006562 | SNORD114-8  | chr14:101431117-10143118 | 0 | 0 | 0 | 1 |
| XLOC_006563 | SNORD114-9  | chr14:101432365-10143243 | 0 | 0 | 0 | 1 |
| XLOC_006564 | SNORD114-10 | chr14:101433388-10143348 | 0 | 0 | 0 | 1 |
| XLOC_006565 | SNORD114-11 | chr14:101434447-10143452 | 0 | 0 | 0 | 1 |
| XLOC_006566 | SNORD114-12 | chr14:101435284-10143538 | 0 | 0 | 0 | 1 |
| XLOC_006567 | SNORD114-13 | chr14:101436215-10143628 | 0 | 0 | 0 | 1 |
| XLOC_006568 | SNORD114-14 | chr14:101438439-10143857 | 0 | 0 | 0 | 1 |
| XLOC_006569 | SNORD114-15 | chr14:101439006-10143907 | 0 | 0 | 0 | 1 |
| XLOC_006570 | SNORD114-16 | chr14:101439931-10144000 | 0 | 0 | 0 | 1 |
| XLOC_006571 | SNORD114-17 | chr14:101441142-10144127 | 0 | 0 | 0 | 1 |
| XLOC_006572 | SNORD114-18 | chr14:101442161-10144223 | 0 | 0 | 0 | 1 |
| XLOC_006573 | SNORD114-19 | chr14:101442813-10144288 | 0 | 0 | 0 | 1 |
| XLOC_006574 | SNORD114-20 | chr14:101447340-10144747 | 0 | 0 | 0 | 1 |
| XLOC_006575 | SNORD114-21 | chr14:101448311-10144838 | 0 | 0 | 0 | 1 |
| XLOC_006576 | SNORD114-22 | chr14:101449262-10144933 | 0 | 0 | 0 | 1 |
| XLOC_006577 | SNORD114-23 | chr14:101450212-10145028 | 0 | 0 | 0 | 1 |
| XLOC_006578 | SNORD114-24 | chr14:101451113-10145118 | 0 | 0 | 0 | 1 |
| XLOC_006579 | SNORD114-25 | chr14:101452393-10145246 | 0 | 0 | 0 | 1 |
| XLOC_006580 | SNORD114-26 | chr14:101453382-10145348 | 0 | 0 | 0 | 1 |
| XLOC_006581 | SNORD114-27 | chr14:101454497-10145456 | 0 | 0 | 0 | 1 |
| XLOC_006582 | SNORD114-28 | chr14:101455466-10145553 | 0 | 0 | 0 | 1 |
| XLOC_006583 | SNORD114-29 | chr14:101456427-10145648 | 0 | 0 | 0 | 1 |
| XLOC_006584 | SNORD114-30 | chr14:101458255-10145832 | 0 | 0 | 0 | 1 |
| XLOC_006585 | SNORD114-31 | chr14:101459572-10145964 | 0 | 0 | 0 | 1 |
| XLOC_006586 | MIR379      | chr14:101488402-10148846 | 0 | 0 | 0 | 1 |
| XLOC_006587 | MIR411      | chr14:101489661-10148978 | 0 | 0 | 0 | 1 |
| XLOC_006588 | MIR299      | chr14:101490130-10149018 | 0 | 0 | 0 | 1 |
| XLOC_006589 | MIR380      | chr14:101491353-10149147 | 0 | 0 | 0 | 1 |
| XLOC_006590 | MIR1197     | chr14:101491900-10149198 | 0 | 0 | 0 | 1 |
| XLOC_006591 | MIR323A     | chr14:101492068-10149218 | 0 | 0 | 0 | 1 |
| XLOC_006592 | MIR758      | chr14:101492356-10149244 | 0 | 0 | 0 | 1 |
| XLOC_006593 | MIR329-1    | chr14:101493121-10149320 | 0 | 0 | 0 | 1 |
| XLOC_006594 | MIR329-2    | chr14:101493436-10149352 | 0 | 0 | 0 | 1 |
| XLOC_006595 | MIR494      | chr14:101495970-10149608 | 0 | 0 | 0 | 1 |
| XLOC_006596 | MIR1193     | chr14:101496388-10149646 | 0 | 0 | 0 | 1 |
| XLOC_006597 | MIR543      | chr14:101498323-10149840 | 0 | 0 | 0 | 1 |
| XLOC_006598 | MIR495      | chr14:101500091-10150017 | 0 | 0 | 0 | 1 |
| XLOC_006599 | MIR376C     | chr14:101506026-10150609 | 0 | 0 | 0 | 1 |
| XLOC_006600 | MIR376A2    | chr14:101506405-10150648 | 0 | 0 | 0 | 1 |
| XLOC_006601 | MIR654      | chr14:101506555-10150663 | 0 | 0 | 0 | 1 |
| XLOC_006602 | MIR376B     | chr14:101506772-10150687 | 0 | 0 | 0 | 1 |
| XLOC_006603 | MIR376A1    | chr14:101507118-10150718 | 0 | 0 | 0 | 1 |
| XLOC_006604 | MIR300      | chr14:101507699-10150778 | 0 | 0 | 0 | 1 |
| XLOC_006605 | MIR1185-1   | chr14:101509313-10150938 | 0 | 0 | 0 | 1 |
| XLOC_006606 | MIR1185-2   | chr14:101510534-10151067 | 0 | 0 | 0 | 1 |
| XLOC_006607 | MIR381      | chr14:101512256-10151233 | 0 | 0 | 0 | 1 |
| XLOC_006608 | MIR487B     | chr14:101512791-10151287 | 0 | 0 | 0 | 1 |
| XLOC_006609 | MIR539      | chr14:101513657-10151373 | 0 | 0 | 0 | 1 |
| XLOC_006610 | MIR889      | chr14:101514237-10151443 | 0 | 0 | 0 | 1 |
| XLOC_006611 | MIR655      | chr14:101515886-10151596 | 0 | 0 | 0 | 1 |
| XLOC_006612 | MIR487A     | chr14:101518782-10151888 | 0 | 0 | 0 | 1 |
| XLOC_006613 | MIR382      | chr14:101520642-10152077 | 0 | 0 | 0 | 1 |
| XLOC_006614 | MIR134      | chr14:101521023-10152108 | 0 | 0 | 0 | 1 |
| XLOC_006615 | MIR668      | chr14:101521594-10152166 | 0 | 0 | 0 | 1 |
| XLOC_006616 | MIR485      | chr14:101521755-10152182 | 0 | 0 | 0 | 1 |
| XLOC_006617 | MIR323B     | chr14:101522555-10152263 | 0 | 0 | 0 | 1 |
| XLOC_006618 | MIR154      | chr14:101526091-10152617 | 0 | 0 | 0 | 1 |
| XLOC_006619 | MIR496      | chr14:101526909-10152707 | 0 | 0 | 0 | 1 |
| XLOC_006620 | MIR377      | chr14:101528386-10152848 | 0 | 0 | 0 | 1 |
| XLOC_006621 | MIR541      | chr14:101530831-10153097 | 0 | 0 | 0 | 1 |
| XLOC_006622 | MIR409      | chr14:101531636-10153177 | 0 | 0 | 0 | 1 |
| XLOC_006623 | MIR412      | chr14:101531783-10153187 | 0 | 0 | 0 | 1 |
| XLOC_006624 | MIR369      | chr14:101531934-10153200 | 0 | 0 | 0 | 1 |

|             |              |                          |         |         |   |   |
|-------------|--------------|--------------------------|---------|---------|---|---|
| XLOC_006625 | MIR410       | chr14:101532248-10153232 | 0       | 0       | 0 | 1 |
| XLOC_006626 | MIR656       | chr14:101533060-10153311 | 0       | 0       | 0 | 1 |
| XLOC_006627 | MEG9         | chr14:101536247-10153927 | 0       | 0       | 0 | 1 |
| XLOC_006628 | DIO3         | chr14:102027687-10202978 | 0       | 0       | 0 | 1 |
| XLOC_006635 | MIR4309      | chr14:103005980-10300606 | 0       | 0       | 0 | 1 |
| XLOC_006650 | ASPG         | chr14:104552022-10457904 | 0       | 0       | 0 | 1 |
| XLOC_006651 | MIR203       | chr14:104583741-10458388 | 0       | 0       | 0 | 1 |
| XLOC_006653 | C14orf180    | chr14:105046055-10505618 | 0       | 0       | 0 | 1 |
| XLOC_006660 | PLD4         | chr14:105391186-10539957 | 0       | 0       | 0 | 1 |
| XLOC_006670 | KIAA0125     | chr14:106383837-10639850 | 0       | 0       | 0 | 1 |
| XLOC_006671 | LINC00226    | chr14:106744268-10674496 | 0       | 0       | 0 | 1 |
| XLOC_006672 | LINC00221    | chr14:106938454-10695152 | 0       | 0       | 0 | 1 |
| XLOC_006673 | LOC642426    | chr14:19407014-19410111  | 0       | 0       | 0 | 1 |
| XLOC_006674 | LOC101101776 | chr14:19670791-19681016  | 0       | 0       | 0 | 1 |
| XLOC_006675 | POTEM        | chr14:19983953-20020272  | 0       | 0       | 0 | 1 |
| XLOC_006677 | OR4K14       | chr14:20482419-20483352  | 0       | 0       | 0 | 1 |
| XLOC_006678 | OR4K13       | chr14:20502002-20502917  | 0       | 0       | 0 | 1 |
| XLOC_006681 | SNORD126     | chr14:20779526-20801471  | 0       | 0       | 0 | 1 |
| XLOC_006684 | KLHL33       | chr14:20896969-20903801  | 0       | 0       | 0 | 1 |
| XLOC_006687 | RNASE9       | chr14:21024251-21029090  | 0       | 0       | 0 | 1 |
| XLOC_006689 | OR6S1        | chr14:21108854-21109850  | 0       | 0       | 0 | 1 |
| XLOC_006690 | RNASE1       | chr14:21269514-21271036  | 0       | 0       | 0 | 1 |
| XLOC_006692 | RNASE13      | chr14:21500978-21502944  | 0       | 0       | 0 | 1 |
| XLOC_006694 | OR5AU1       | chr14:21623095-21624184  | 0       | 0       | 0 | 1 |
| XLOC_006696 | HNRNPC       | chr14:21677295-21737638  | 156.386 | 152.264 | 0 | 1 |
| XLOC_006699 | SNORD9       | chr14:21853352-21905457  | 0       | 0       | 0 | 1 |
| XLOC_006703 | SALL2        | chr14:21989231-22005337  | 0       | 0       | 0 | 1 |
| XLOC_006704 | OR10G3       | chr14:22037933-22038875  | 0       | 0       | 0 | 1 |
| XLOC_006705 | OR10G2       | chr14:22102065-22102998  | 0       | 0       | 0 | 1 |
| XLOC_006716 | CEBPE        | chr14:23586514-23588820  | 0       | 0       | 0 | 1 |
| XLOC_006721 | EFS          | chr14:23825610-23834842  | 0       | 0       | 0 | 1 |
| XLOC_006722 | MYH6         | chr14:23851198-23877486  | 0       | 0       | 0 | 1 |
| XLOC_006723 | MIR208A      | chr14:23851198-23877486  | 0       | 0       | 0 | 1 |
| XLOC_006724 | MYH7         | chr14:23881946-23904870  | 0       | 0       | 0 | 1 |
| XLOC_006725 | MIR208B      | chr14:23881946-23904870  | 0       | 0       | 0 | 1 |
| XLOC_006745 | CMA1         | chr14:24974711-24977471  | 0       | 0       | 0 | 1 |
| XLOC_006746 | CTSG         | chr14:25042723-25045466  | 0       | 0       | 0 | 1 |
| XLOC_006747 | GZMH         | chr14:25075685-25078926  | 0       | 0       | 0 | 1 |
| XLOC_006748 | GZMB         | chr14:25100160-25103432  | 0       | 0       | 0 | 1 |
| XLOC_006751 | MIR548AI     | chr14:29896116-30396899  | 0       | 0       | 0 | 1 |
| XLOC_006752 | PRKD1        | chr14:29896116-30396899  | 0       | 0       | 0 | 1 |
| XLOC_006755 | MIR624       | chr14:31363004-31565656  | 0       | 0       | 0 | 1 |
| XLOC_006759 | GPR33        | chr14:31952149-31957151  | 0       | 0       | 0 | 1 |
| XLOC_006761 | EGLN3        | chr14:34393420-34420284  | 0       | 0       | 0 | 1 |
| XLOC_006772 | SFTA3        | chr14:36942493-36982990  | 0       | 0       | 0 | 1 |
| XLOC_006773 | NKX2-1       | chr14:36985603-36989430  | 0       | 0       | 0 | 1 |
| XLOC_006774 | NKX2-8       | chr14:37049215-37051786  | 0       | 0       | 0 | 1 |
| XLOC_006776 | MIR4503      | chr14:37147125-37642998  | 0       | 0       | 0 | 1 |
| XLOC_006778 | CLEC14A      | chr14:38723204-38725575  | 0       | 0       | 0 | 1 |
| XLOC_006779 | LINC00639    | chr14:39218542-39386086  | 0       | 0       | 0 | 1 |
| XLOC_006784 | FSCB         | chr14:44973353-44976499  | 0       | 0       | 0 | 1 |
| XLOC_006788 | RPL10L       | chr14:47120219-47121028  | 0       | 0       | 0 | 1 |
| XLOC_006790 | MIR548Y      | chr14:48230197-48230307  | 0       | 0       | 0 | 1 |
| XLOC_006791 | LINC00648    | chr14:48234155-48264217  | 0       | 0       | 0 | 1 |
| XLOC_006816 | MIR5580      | chr14:54415144-54415202  | 0       | 0       | 0 | 1 |
| XLOC_006821 | MIR4308      | chr14:55308723-55369542  | 0       | 0       | 0 | 1 |
| XLOC_006825 | TBPL2        | chr14:55880929-55907263  | 0       | 0       | 0 | 1 |
| XLOC_006828 | OTX2         | chr14:57267424-57277194  | 0       | 0       | 0 | 1 |
| XLOC_006840 | C14orf39     | chr14:60902673-60952764  | 0       | 0       | 0 | 1 |
| XLOC_006841 | SIX1         | chr14:61111416-61116155  | 0       | 0       | 0 | 1 |
| XLOC_006844 | TMEM30B      | chr14:61744088-61748530  | 0       | 0       | 0 | 1 |
| XLOC_006846 | KCNH5        | chr14:63173944-63568584  | 0       | 0       | 0 | 1 |
| XLOC_006847 | GPHB5        | chr14:63779548-63785593  | 0       | 0       | 0 | 1 |
| XLOC_006858 | MIR4708      | chr14:65801835-65801901  | 0       | 0       | 0 | 1 |
| XLOC_006871 | CCDC177      | chr14:70036530-70041600  | 0       | 0       | 0 | 1 |
| XLOC_006874 | SLC8A3       | chr14:70510933-70655787  | 0       | 0       | 0 | 1 |
| XLOC_006904 | RNU6-6       | chr14:76737449-76737476  | 0       | 0       | 0 | 1 |
| XLOC_006907 | ZDHHC22      | chr14:77597612-77608134  | 0       | 0       | 0 | 1 |
| XLOC_006923 | GALC         | chr14:88399357-88460009  | 0       | 0       | 0 | 1 |
| XLOC_006924 | KCNK10       | chr14:88646451-88793256  | 0       | 0       | 0 | 1 |
| XLOC_006930 | TTC7B        | chr14:91006931-91282761  | 0       | 0       | 0 | 1 |
| XLOC_006935 | CATSPERB     | chr14:92047117-92198413  | 0       | 0       | 0 | 1 |
| XLOC_006946 | PRIMA1       | chr14:94184643-94254766  | 0       | 0       | 0 | 1 |
| XLOC_006947 | FAM181A-AS1  | chr14:94371075-94395954  | 0       | 0       | 0 | 1 |
| XLOC_006948 | ASB2         | chr14:94400498-94443076  | 0       | 0       | 0 | 1 |
| XLOC_006952 | SERPINA6     | chr14:94770584-94789688  | 0       | 0       | 0 | 1 |
| XLOC_006954 | SERPINA11    | chr14:94908800-94919122  | 0       | 0       | 0 | 1 |
| XLOC_006955 | SERPINA9     | chr14:94929057-94942670  | 0       | 0       | 0 | 1 |
| XLOC_006956 | SERPINA12    | chr14:94953619-94984181  | 0       | 0       | 0 | 1 |

|             |                       |                          |   |   |   |   |
|-------------|-----------------------|--------------------------|---|---|---|---|
| XLOC_006957 | GSC                   | chr14:95234559-95236499  | 0 | 0 | 0 | 1 |
| XLOC_006959 | MIR3173               | chr14:95552564-95623759  | 0 | 0 | 0 | 1 |
| XLOC_006964 | TCL1A                 | chr14:96176303-96180533  | 0 | 0 | 0 | 1 |
| XLOC_006966 | LOC100129345          | chr14:98098983-98152995  | 0 | 0 | 0 | 1 |
| XLOC_006967 | C14orf64              | chr14:98391946-98444461  | 0 | 0 | 0 | 1 |
| XLOC_006975 | RTL1                  | chr14:101346991-10135111 | 0 | 0 | 0 | 1 |
| XLOC_006976 | DIO3OS                | chr14:102018559-10202201 | 0 | 0 | 0 | 1 |
| XLOC_006977 | MIR1247               | chr14:102026623-10202671 | 0 | 0 | 0 | 1 |
| XLOC_006983 | LINC00605             | chr14:103653557-10365531 | 0 | 0 | 0 | 1 |
| XLOC_006989 | RD3L                  | chr14:104394816-10451900 | 0 | 0 | 0 | 1 |
| XLOC_006990 | MIR3545               | chr14:104583741-10458381 | 0 | 0 | 0 | 1 |
| XLOC_006991 | TMEM179               | chr14:105060419-10507101 | 0 | 0 | 0 | 1 |
| XLOC_006992 | MIR4710               | chr14:105144030-10514401 | 0 | 0 | 0 | 1 |
| XLOC_007000 | ELK2AP                | chr14:106135913-10613914 | 0 | 0 | 0 | 1 |
| XLOC_007001 | ADAM6                 | chr14:106435818-10643831 | 0 | 0 | 0 | 1 |
| XLOC_007002 | CHEK2P2               | chr15:20487996-20496811  | 0 | 0 | 0 | 1 |
| XLOC_007003 | GOLGA8CP              | chr15:20767673-20781026  | 0 | 0 | 0 | 1 |
| XLOC_007004 | CT60                  | chr15:21145766-21198633  | 0 | 0 | 0 | 1 |
| XLOC_007005 | OR4M2                 | chr15:22278031-22371088  | 0 | 0 | 0 | 1 |
| XLOC_007006 | OR4N4                 | chr15:22382472-22383815  | 0 | 0 | 0 | 1 |
| XLOC_007007 | OR4N3P                | chr15:22413461-22414395  | 0 | 0 | 0 | 1 |
| XLOC_007008 | REREP3                | chr15:22546564-22570831  | 0 | 0 | 0 | 1 |
| XLOC_007009 | GOLGA6L1              | chr15:22736245-22746002  | 0 | 0 | 0 | 1 |
| XLOC_007016 | MKRN3                 | chr15:23810453-23813166  | 0 | 0 | 0 | 1 |
| XLOC_007017 | PWRN1                 | chr15:24803303-24832926  | 0 | 0 | 0 | 1 |
| XLOC_007020 | PAR-SN                | chr15:25227140-25228937  | 0 | 0 | 0 | 1 |
| XLOC_007022 | SNORD109A             | chr15:25287120-25287187  | 0 | 0 | 0 | 1 |
| XLOC_007023 | SNORD116-1            | chr15:25296622-25296719  | 0 | 0 | 0 | 1 |
| XLOC_007024 | SNORD116-2            | chr15:25299355-25299452  | 0 | 0 | 0 | 1 |
| XLOC_007025 | SNORD116-9            | chr15:25302005-25302102  | 0 | 0 | 0 | 1 |
| XLOC_007026 | SNORD116-4            | chr15:25304683-25304781  | 0 | 0 | 0 | 1 |
| XLOC_007027 | SNORD116-5            | chr15:25307478-25307575  | 0 | 0 | 0 | 1 |
| XLOC_007028 | SNORD116-6            | chr15:25310171-25310269  | 0 | 0 | 0 | 1 |
| XLOC_007029 | SNORD116-7            | chr15:25312933-25313030  | 0 | 0 | 0 | 1 |
| XLOC_007030 | SNORD116-8            | chr15:25315577-25315674  | 0 | 0 | 0 | 1 |
| XLOC_007031 | SNORD116-9            | chr15:25318252-25318349  | 0 | 0 | 0 | 1 |
| XLOC_007032 | SNORD116-10           | chr15:25319259-25319363  | 0 | 0 | 0 | 1 |
| XLOC_007033 | SNORD116-11           | chr15:25321074-25321168  | 0 | 0 | 0 | 1 |
| XLOC_007034 | SNORD116-12           | chr15:25322196-25322290  | 0 | 0 | 0 | 1 |
| XLOC_007035 | SNORD116-13           | chr15:25324203-25324297  | 0 | 0 | 0 | 1 |
| XLOC_007036 | SNORD116-14           | chr15:25325287-25325381  | 0 | 0 | 0 | 1 |
| XLOC_007037 | SNORD116-15           | chr15:25326432-25326526  | 0 | 0 | 0 | 1 |
| XLOC_007038 | SNORD116-16           | chr15:25327913-25328007  | 0 | 0 | 0 | 1 |
| XLOC_007039 | SNORD116-17           | chr15:25328733-25328827  | 0 | 0 | 0 | 1 |
| XLOC_007040 | SNORD116-18           | chr15:25330530-25330624  | 0 | 0 | 0 | 1 |
| XLOC_007041 | SNORD116-19           | chr15:25331672-25331766  | 0 | 0 | 0 | 1 |
| XLOC_007042 | SNORD116-20           | chr15:25332807-25332901  | 0 | 0 | 0 | 1 |
| XLOC_007043 | SNORD116-21           | chr15:25333949-25334043  | 0 | 0 | 0 | 1 |
| XLOC_007044 | SNORD116-22           | chr15:25335068-25335162  | 0 | 0 | 0 | 1 |
| XLOC_007045 | SNORD116-23           | chr15:25336931-25337025  | 0 | 0 | 0 | 1 |
| XLOC_007046 | SNORD116-24           | chr15:25339182-25339276  | 0 | 0 | 0 | 1 |
| XLOC_007047 | SNORD116-25           | chr15:25342808-25342902  | 0 | 0 | 0 | 1 |
| XLOC_007048 | SNORD116-26           | chr15:25344644-25344742  | 0 | 0 | 0 | 1 |
| XLOC_007049 | SNORD116-27           | chr15:25346720-25346814  | 0 | 0 | 0 | 1 |
| XLOC_007050 | SNORD116-28           | chr15:25349787-25349880  | 0 | 0 | 0 | 1 |
| XLOC_007051 | SNORD116-29           | chr15:25351666-25351751  | 0 | 0 | 0 | 1 |
| XLOC_007053 | PAR1                  | chr15:25380788-25383200  | 0 | 0 | 0 | 1 |
| XLOC_007054 | SNORD115-1            | chr15:25415869-25415951  | 0 | 0 | 0 | 1 |
| XLOC_007055 | SNORD115-2            | chr15:25417781-25417863  | 0 | 0 | 0 | 1 |
| XLOC_007056 | SNORD115-3            | chr15:25420073-25420155  | 0 | 0 | 0 | 1 |
| XLOC_007057 | SNORD115-4            | chr15:25421978-25422060  | 0 | 0 | 0 | 1 |
| XLOC_007058 | SNORD115-5            | chr15:25423884-25423966  | 0 | 0 | 0 | 1 |
| XLOC_007059 | SNORD115-6            | chr15:25425643-25425725  | 0 | 0 | 0 | 1 |
| XLOC_007060 | SNORD115-7            | chr15:25427531-25427613  | 0 | 0 | 0 | 1 |
| XLOC_007061 | SNORD115-8            | chr15:25429452-25429534  | 0 | 0 | 0 | 1 |
| XLOC_007062 | SNORD115-9            | chr15:25430777-25430859  | 0 | 0 | 0 | 1 |
| XLOC_007063 | SNORD115-10           | chr15:25432682-25432763  | 0 | 0 | 0 | 1 |
| XLOC_007064 | SNORD115-43           | chr15:25434560-25434642  | 0 | 0 | 0 | 1 |
| XLOC_007065 | SNORD115-10           | chr15:25436562-25436644  | 0 | 0 | 0 | 1 |
| XLOC_007066 | SNORD115-13           | chr15:25438467-25438549  | 0 | 0 | 0 | 1 |
| XLOC_007067 | SNORD115-14           | chr15:25440067-25440148  | 0 | 0 | 0 | 1 |
| XLOC_007068 | SNORD115-16           | chr15:25444594-25444676  | 0 | 0 | 0 | 1 |
| XLOC_007069 | SNORD115-18           | chr15:25446469-25446551  | 0 | 0 | 0 | 1 |
| XLOC_007070 | SNORD115-18           | chr15:25448373-25448455  | 0 | 0 | 0 | 1 |
| XLOC_007071 | SNORD115-17           | chr15:25449503-25449585  | 0 | 0 | 0 | 1 |
| XLOC_007072 | SNORD115-15,SNORD115- | chr15:25451408-25477615  | 0 | 0 | 0 | 1 |
| XLOC_007073 | SNORD115-22           | chr15:25451408-25477615  | 0 | 0 | 0 | 1 |
| XLOC_007074 | PAR4                  | chr15:25451408-25477615  | 0 | 0 | 0 | 1 |
| XLOC_007075 | SNORD115-24           | chr15:25451408-25477615  | 0 | 0 | 0 | 1 |

|             |                 |                         |   |   |   |   |
|-------------|-----------------|-------------------------|---|---|---|---|
| XLOC_007076 | SNORD115-25     | chr15:25451408-25477615 | 0 | 0 | 0 | 1 |
| XLOC_007077 | SNORD115-26     | chr15:25451408-25477615 | 0 | 0 | 0 | 1 |
| XLOC_007078 | SNORD115-27     | chr15:25451408-25477615 | 0 | 0 | 0 | 1 |
| XLOC_007079 | SNORD115-28     | chr15:25451408-25477615 | 0 | 0 | 0 | 1 |
| XLOC_007080 | SNORD115-11     | chr15:25451408-25477615 | 0 | 0 | 0 | 1 |
| XLOC_007081 | SNORD115-30     | chr15:25451408-25477615 | 0 | 0 | 0 | 1 |
| XLOC_007082 | SNORD115-31     | chr15:25451408-25477615 | 0 | 0 | 0 | 1 |
| XLOC_007083 | SNORD115-32     | chr15:25451408-25477615 | 0 | 0 | 0 | 1 |
| XLOC_007084 | SNORD115-33     | chr15:25451408-25477615 | 0 | 0 | 0 | 1 |
| XLOC_007085 | SNORD115-35     | chr15:25479393-25479475 | 0 | 0 | 0 | 1 |
| XLOC_007086 | SNORD115-11     | chr15:25481231-25481313 | 0 | 0 | 0 | 1 |
| XLOC_007087 | SNORD115-37     | chr15:25483132-25483214 | 0 | 0 | 0 | 1 |
| XLOC_007088 | SNORD115-38     | chr15:25484984-25485066 | 0 | 0 | 0 | 1 |
| XLOC_007089 | SNORD115-39     | chr15:25486892-25486974 | 0 | 0 | 0 | 1 |
| XLOC_007090 | SNORD115-40     | chr15:25488760-25488842 | 0 | 0 | 0 | 1 |
| XLOC_007091 | SNORD115-41     | chr15:25490624-25490706 | 0 | 0 | 0 | 1 |
| XLOC_007092 | SNORD115-10     | chr15:25492491-25492573 | 0 | 0 | 0 | 1 |
| XLOC_007093 | SNORD115-11     | chr15:25494344-25494426 | 0 | 0 | 0 | 1 |
| XLOC_007094 | SNORD115-44     | chr15:25496005-25496087 | 0 | 0 | 0 | 1 |
| XLOC_007095 | SNORD115-45     | chr15:25509673-25509726 | 0 | 0 | 0 | 1 |
| XLOC_007096 | SNORD115-47     | chr15:25513663-25513696 | 0 | 0 | 0 | 1 |
| XLOC_007097 | SNORD115-48     | chr15:25514929-25515005 | 0 | 0 | 0 | 1 |
| XLOC_007098 | SNORD109B       | chr15:25523489-25523556 | 0 | 0 | 0 | 1 |
| XLOC_007099 | LOC100128714    | chr15:26147506-26298267 | 0 | 0 | 0 | 1 |
| XLOC_007100 | LOC503519       | chr15:26360959-26378184 | 0 | 0 | 0 | 1 |
| XLOC_007101 | GABRA5          | chr15:27111865-27194357 | 0 | 0 | 0 | 1 |
| XLOC_007102 | GABRG3          | chr15:27216428-27778373 | 0 | 0 | 0 | 1 |
| XLOC_007103 | GOLGA8F,GOLGA8G | chr15:28623783-28637171 | 0 | 0 | 0 | 1 |
| XLOC_007104 | MIR4509-1       | chr15:28671636-28671730 | 0 | 0 | 0 | 1 |
| XLOC_007107 | LOC100289656    | chr15:29033388-29034538 | 0 | 0 | 0 | 1 |
| XLOC_007110 | ULK4P3          | chr15:30395934-30423948 | 0 | 0 | 0 | 1 |
| XLOC_007113 | ULK4P2          | chr15:30864757-30892911 | 0 | 0 | 0 | 1 |
| XLOC_007122 | GREM1           | chr15:33010204-33026870 | 0 | 0 | 0 | 1 |
| XLOC_007129 | ATPBD4-AS1      | chr15:35663169-36151202 | 0 | 0 | 0 | 1 |
| XLOC_007130 | MIR4510         | chr15:36219056-36219124 | 0 | 0 | 0 | 1 |
| XLOC_007132 | TMCO5A          | chr15:38227456-38243623 | 0 | 0 | 0 | 1 |
| XLOC_007135 | C15orf53        | chr15:38988798-38992239 | 0 | 0 | 0 | 1 |
| XLOC_007136 | C15orf54        | chr15:39542884-39547048 | 0 | 0 | 0 | 1 |
| XLOC_007137 | THBS1           | chr15:39873279-39889668 | 0 | 0 | 0 | 1 |
| XLOC_007141 | PHGR1           | chr15:40643233-40648634 | 0 | 0 | 0 | 1 |
| XLOC_007164 | MIR626          | chr15:41952609-42062141 | 0 | 0 | 0 | 1 |
| XLOC_007174 | ADAL            | chr15:43622871-43646096 | 0 | 0 | 0 | 1 |
| XLOC_007176 | RNU6-28         | chr15:43663312-43910998 | 0 | 0 | 0 | 1 |
| XLOC_007188 | C15orf43        | chr15:45248899-45271421 | 0 | 0 | 0 | 1 |
| XLOC_007190 | DUOXA2          | chr15:45406522-45422075 | 0 | 0 | 0 | 1 |
| XLOC_007199 | SEMA6D          | chr15:47476402-48066420 | 0 | 0 | 0 | 1 |
| XLOC_007200 | SLC24A5         | chr15:48413168-48470558 | 0 | 0 | 0 | 1 |
| XLOC_007201 | CTXN2           | chr15:48483866-48495951 | 0 | 0 | 0 | 1 |
| XLOC_007202 | SLC12A1         | chr15:48498497-48596275 | 0 | 0 | 0 | 1 |
| XLOC_007211 | MIR4712         | chr15:50652525-50652607 | 0 | 0 | 0 | 1 |
| XLOC_007215 | MIR4713         | chr15:51500253-51630795 | 0 | 0 | 0 | 1 |
| XLOC_007216 | GLDN            | chr15:51633712-51700209 | 0 | 0 | 0 | 1 |
| XLOC_007217 | SCG3            | chr15:51973549-52013223 | 0 | 0 | 0 | 1 |
| XLOC_007221 | UNC13C          | chr15:54305100-54920806 | 0 | 0 | 0 | 1 |
| XLOC_007229 | AQP9            | chr15:58430407-58478110 | 0 | 0 | 0 | 1 |
| XLOC_007230 | LIPC            | chr15:58724174-58861073 | 0 | 0 | 0 | 1 |
| XLOC_007237 | FOXB1           | chr15:60296420-60298142 | 0 | 0 | 0 | 1 |
| XLOC_007240 | MIR190A         | chr15:62939509-63136829 | 0 | 0 | 0 | 1 |
| XLOC_007258 | MIR4311         | chr15:66187633-66546075 | 0 | 0 | 0 | 1 |
| XLOC_007271 | MIR548H4        | chr15:69116302-69564544 | 0 | 0 | 0 | 1 |
| XLOC_007272 | NOX5,SPESP1     | chr15:69116302-69564544 | 0 | 0 | 0 | 1 |
| XLOC_007273 | LINC00277       | chr15:69116302-69564544 | 0 | 0 | 0 | 1 |
| XLOC_007279 | LINC00593       | chr15:70127572-70135306 | 0 | 0 | 0 | 1 |
| XLOC_007285 | TMEM202         | chr15:72690667-72700708 | 0 | 0 | 0 | 1 |
| XLOC_007287 | MIR630          | chr15:72879557-72879654 | 0 | 0 | 0 | 1 |
| XLOC_007288 | GOLGA6B         | chr15:72947037-72959738 | 0 | 0 | 0 | 1 |
| XLOC_007292 | C15orf60        | chr15:73735498-73925753 | 0 | 0 | 0 | 1 |
| XLOC_007294 | TBC1D21         | chr15:74165967-74181556 | 0 | 0 | 0 | 1 |
| XLOC_007298 | ISLR            | chr15:74466086-74469212 | 0 | 0 | 0 | 1 |
| XLOC_007299 | CCDC33          | chr15:74528629-74628482 | 0 | 0 | 0 | 1 |
| XLOC_007304 | CYP1A2          | chr15:75041183-75048941 | 0 | 0 | 0 | 1 |
| XLOC_007313 | GOLGA6D         | chr15:75575181-75588148 | 0 | 0 | 0 | 1 |
| XLOC_007325 | LOC253044       | chr15:77934105-77941581 | 0 | 0 | 0 | 1 |
| XLOC_007326 | MIR5003         | chr15:78375874-78375901 | 0 | 0 | 0 | 1 |
| XLOC_007330 | CRABP1          | chr15:78632665-78640572 | 0 | 0 | 0 | 1 |
| XLOC_007335 | LOC646938       | chr15:79044378-79045734 | 0 | 0 | 0 | 1 |
| XLOC_007337 | MIR184          | chr15:79484048-79590581 | 0 | 0 | 0 | 1 |
| XLOC_007338 | ANKRD34C        | chr15:79484048-79590581 | 0 | 0 | 0 | 1 |
| XLOC_007351 | LOC390660       | chr15:82585620-82626915 | 0 | 0 | 0 | 1 |

|             |                   |                          |   |   |   |   |
|-------------|-------------------|--------------------------|---|---|---|---|
| XLOC_007352 | UBE2Q2P2,UBE2Q2P3 | chr15:82647285-82708204  | 0 | 0 | 0 | 1 |
| XLOC_007354 | LOC440297         | chr15:82753446-82798352  | 0 | 0 | 0 | 1 |
| XLOC_007355 | LOC390660         | chr15:82882945-82924242  | 0 | 0 | 0 | 1 |
| XLOC_007357 | UBE2Q2P2,UBE2Q2P3 | chr15:83023772-83084729  | 0 | 0 | 0 | 1 |
| XLOC_007359 | LOC440297         | chr15:83130032-83182930  | 0 | 0 | 0 | 1 |
| XLOC_007360 | LOC283692         | chr15:83211950-83378635  | 0 | 0 | 0 | 1 |
| XLOC_007361 | SCARNA15          | chr15:83424696-83424823  | 0 | 0 | 0 | 1 |
| XLOC_007364 | MIR4515           | chr15:83685180-83736167  | 0 | 0 | 0 | 1 |
| XLOC_007365 | TM6SF1            | chr15:83776323-83806111  | 0 | 0 | 0 | 1 |
| XLOC_007366 | SH3GL3            | chr15:84116090-84287493  | 0 | 0 | 0 | 1 |
| XLOC_007367 | ADAMTSL3          | chr15:84322837-84708593  | 0 | 0 | 0 | 1 |
| XLOC_007381 | AGBL1             | chr15:86685241-87572283  | 0 | 0 | 0 | 1 |
| XLOC_007382 | LINC00052         | chr15:88120159-88122917  | 0 | 0 | 0 | 1 |
| XLOC_007383 | NTRK3-AS1         | chr15:88419987-88814297  | 0 | 0 | 0 | 1 |
| XLOC_007385 | MIR1179           | chr15:89151337-89151428  | 0 | 0 | 0 | 1 |
| XLOC_007386 | MIR7-2            | chr15:89155055-89155165  | 0 | 0 | 0 | 1 |
| XLOC_007389 | ACAN              | chr15:89346673-89418585  | 0 | 0 | 0 | 1 |
| XLOC_007392 | MIR9-3            | chr15:89911247-89911337  | 0 | 0 | 0 | 1 |
| XLOC_007393 | LOC254559         | chr15:89921272-89941718  | 0 | 0 | 0 | 1 |
| XLOC_007412 | SV2B              | chr15:91643181-91844539  | 0 | 0 | 0 | 1 |
| XLOC_007414 | ST8SIA2           | chr15:92937139-93011958  | 0 | 0 | 0 | 1 |
| XLOC_007415 | C15orf32          | chr15:93014906-93044347  | 0 | 0 | 0 | 1 |
| XLOC_007419 | MIR3175           | chr15:93443550-93571237  | 0 | 0 | 0 | 1 |
| XLOC_007424 | MIR1469           | chr15:96869156-96883492  | 0 | 0 | 0 | 1 |
| XLOC_007425 | SPATA8            | chr15:97326678-97328845  | 0 | 0 | 0 | 1 |
| XLOC_007428 | MIR4714           | chr15:99192760-99507759  | 0 | 0 | 0 | 1 |
| XLOC_007436 | OR4F6             | chr15:102345922-10234688 | 0 | 0 | 0 | 1 |
| XLOC_007437 | OR4F15            | chr15:102358389-10235932 | 0 | 0 | 0 | 1 |
| XLOC_007438 | OR4F13P           | chr15:102382321-10239052 | 0 | 0 | 0 | 1 |
| XLOC_007439 | FAM138E           | chr15:102495087-10249652 | 0 | 0 | 0 | 1 |
| XLOC_007442 | GOLGA6L6          | chr15:20737093-20747114  | 0 | 0 | 0 | 1 |
| XLOC_007444 | POTEB             | chr15:21040700-21071977  | 0 | 0 | 0 | 1 |
| XLOC_007445 | NF1P2             | chr15:21122020-21134625  | 0 | 0 | 0 | 1 |
| XLOC_007447 | CXADRP2           | chr15:22014419-22016878  | 0 | 0 | 0 | 1 |
| XLOC_007448 | POTEB             | chr15:22051852-22083137  | 0 | 0 | 0 | 1 |
| XLOC_007449 | NF1P2             | chr15:22133180-22145802  | 0 | 0 | 0 | 1 |
| XLOC_007450 | MIR4509-3         | chr15:22675147-22675241  | 0 | 0 | 0 | 1 |
| XLOC_007451 | GOLGA8DP          | chr15:22702284-22715728  | 0 | 0 | 0 | 1 |
| XLOC_007457 | LOC440243         | chr15:23569671-23579379  | 0 | 0 | 0 | 1 |
| XLOC_007458 | MIR4508           | chr15:23807208-23807278  | 0 | 0 | 0 | 1 |
| XLOC_007459 | MAGEL2            | chr15:23888695-23892993  | 0 | 0 | 0 | 1 |
| XLOC_007460 | NDN               | chr15:23930553-23932450  | 0 | 0 | 0 | 1 |
| XLOC_007461 | PWRN2             | chr15:24409925-24415053  | 0 | 0 | 0 | 1 |
| XLOC_007463 | ATP10A            | chr15:25923859-26108349  | 0 | 0 | 0 | 1 |
| XLOC_007464 | MIR4715           | chr15:25923859-26108349  | 0 | 0 | 0 | 1 |
| XLOC_007468 | MIR4509-1         | chr15:28735897-28735991  | 0 | 0 | 0 | 1 |
| XLOC_007469 | GOLGA8F,GOLGA8G   | chr15:28764756-28778143  | 0 | 0 | 0 | 1 |
| XLOC_007471 | FAM189A1          | chr15:29412454-29862927  | 0 | 0 | 0 | 1 |
| XLOC_007476 | TRPM1             | chr15:31293263-31453476  | 0 | 0 | 0 | 1 |
| XLOC_007477 | MIR211            | chr15:31293263-31453476  | 0 | 0 | 0 | 1 |
| XLOC_007478 | LOC283710         | chr15:31514970-31523050  | 0 | 0 | 0 | 1 |
| XLOC_007480 | ULK4P1,ULK4P3     | chr15:32698800-32727250  | 0 | 0 | 0 | 1 |
| XLOC_007483 | TMCO5B            | chr15:33528676-33539756  | 0 | 0 | 0 | 1 |
| XLOC_007491 | MIR1233-2         | chr15:34671269-34729667  | 0 | 0 | 0 | 1 |
| XLOC_007493 | MIR1233-1         | chr15:34817483-34875771  | 0 | 0 | 0 | 1 |
| XLOC_007494 | GJD2              | chr15:35044641-35046782  | 0 | 0 | 0 | 1 |
| XLOC_007495 | ACTC1             | chr15:35080296-35087927  | 0 | 0 | 0 | 1 |
| XLOC_007499 | MIR3942           | chr15:35663169-36151202  | 0 | 0 | 0 | 1 |
| XLOC_007501 | LOC145845         | chr15:37156643-37178734  | 0 | 0 | 0 | 1 |
| XLOC_007526 | MIR4310           | chr15:42120282-42186275  | 0 | 0 | 0 | 1 |
| XLOC_007528 | PLA2G4E           | chr15:42273779-42342901  | 0 | 0 | 0 | 1 |
| XLOC_007530 | PLA2G4F           | chr15:42433331-42448839  | 0 | 0 | 0 | 1 |
| XLOC_007532 | MIR627            | chr15:42450898-42500502  | 0 | 0 | 0 | 1 |
| XLOC_007539 | EPB42             | chr15:43489425-43513323  | 0 | 0 | 0 | 1 |
| XLOC_007540 | TGM5              | chr15:43524792-43559055  | 0 | 0 | 0 | 1 |
| XLOC_007541 | TGM7              | chr15:43568478-43594453  | 0 | 0 | 0 | 1 |
| XLOC_007542 | LCMT2             | chr15:43619973-43622820  | 0 | 0 | 0 | 1 |
| XLOC_007569 | MIR4716           | chr15:49447975-49913118  | 0 | 0 | 0 | 1 |
| XLOC_007579 | CYP19A1           | chr15:51500253-51630795  | 0 | 0 | 0 | 1 |
| XLOC_007586 | MIR1266           | chr15:52484514-52587995  | 0 | 0 | 0 | 1 |
| XLOC_007591 | WDR72             | chr15:53805937-54051859  | 0 | 0 | 0 | 1 |
| XLOC_007595 | MIR628            | chr15:55611132-55800432  | 0 | 0 | 0 | 1 |
| XLOC_007596 | PYGO1             | chr15:55838220-55881050  | 0 | 0 | 0 | 1 |
| XLOC_007597 | PRTG              | chr15:55903738-56035177  | 0 | 0 | 0 | 1 |
| XLOC_007603 | ALDH1A2           | chr15:58245621-58358121  | 0 | 0 | 0 | 1 |
| XLOC_007608 | MIR2116           | chr15:59428167-59665071  | 0 | 0 | 0 | 1 |
| XLOC_007615 | C2CD4B            | chr15:62455736-62457482  | 0 | 0 | 0 | 1 |
| XLOC_007616 | MGC15885          | chr15:62929370-62937380  | 0 | 0 | 0 | 1 |
| XLOC_007628 | MIR1272           | chr15:65032094-65067770  | 0 | 0 | 0 | 1 |

|             |                 |                          |   |   |   |   |
|-------------|-----------------|--------------------------|---|---|---|---|
| XLOC_007632 | RASL12          | chr15:65337707-65360388  | 0 | 0 | 0 | 1 |
| XLOC_007643 | MIR4511         | chr15:65952956-66084631  | 0 | 0 | 0 | 1 |
| XLOC_007649 | SNORD18C        | chr15:66791652-66797193  | 0 | 0 | 0 | 1 |
| XLOC_007650 | SNORD18B        | chr15:66791652-66797193  | 0 | 0 | 0 | 1 |
| XLOC_007652 | SNORD18A        | chr15:66791652-66797193  | 0 | 0 | 0 | 1 |
| XLOC_007660 | MIR4312         | chr15:69070874-69113261  | 0 | 0 | 0 | 1 |
| XLOC_007663 | MIR629          | chr15:70340542-70390256  | 0 | 0 | 0 | 1 |
| XLOC_007678 | C15orf59        | chr15:74032140-74043816  | 0 | 0 | 0 | 1 |
| XLOC_007681 | GOLGA6A         | chr15:74362197-74374891  | 0 | 0 | 0 | 1 |
| XLOC_007684 | CYP11A1         | chr15:74630102-74660081  | 0 | 0 | 0 | 1 |
| XLOC_007689 | MIR4513         | chr15:75074424-75095539  | 0 | 0 | 0 | 1 |
| XLOC_007695 | MIR631          | chr15:75639330-75647592  | 0 | 0 | 0 | 1 |
| XLOC_007703 | MIR4313         | chr15:76054555-76054656  | 0 | 0 | 0 | 1 |
| XLOC_007711 | LINC00597       | chr15:77400497-77712446  | 0 | 0 | 0 | 1 |
| XLOC_007713 | LOC645752       | chr15:78206558-78219188  | 0 | 0 | 0 | 1 |
| XLOC_007720 | CHRNA4          | chr15:78916635-78933587  | 0 | 0 | 0 | 1 |
| XLOC_007721 | ADAMTS7         | chr15:79051544-79103773  | 0 | 0 | 0 | 1 |
| XLOC_007724 | LOC729911       | chr15:79484048-79590581  | 0 | 0 | 0 | 1 |
| XLOC_007728 | MIR549          | chr15:81071711-81243999  | 0 | 0 | 0 | 1 |
| XLOC_007730 | MIR4514         | chr15:81289757-81289814  | 0 | 0 | 0 | 1 |
| XLOC_007732 | TMC3            | chr15:81624759-81666418  | 0 | 0 | 0 | 1 |
| XLOC_007738 | LOC440297       | chr15:82944792-82986427  | 0 | 0 | 0 | 1 |
| XLOC_007740 | AGSK1,LOC727849 | chr15:83130032-83182930  | 0 | 0 | 0 | 1 |
| XLOC_007743 | AP3B2           | chr15:83211950-83378635  | 0 | 0 | 0 | 1 |
| XLOC_007746 | FSD2            | chr15:83428023-83474806  | 0 | 0 | 0 | 1 |
| XLOC_007751 | BNC1            | chr15:83924654-83953468  | 0 | 0 | 0 | 1 |
| XLOC_007758 | LOC642423       | chr15:85747906-85748518  | 0 | 0 | 0 | 1 |
| XLOC_007760 | MIR1276         | chr15:86302558-86338189  | 0 | 0 | 0 | 1 |
| XLOC_007761 | LOC727915       | chr15:86685241-87572283  | 0 | 0 | 0 | 1 |
| XLOC_007765 | MIR3529         | chr15:89155055-89155165  | 0 | 0 | 0 | 1 |
| XLOC_007768 | RLBP1           | chr15:89753097-89764922  | 0 | 0 | 0 | 1 |
| XLOC_007770 | RHCG            | chr15:90014637-90039799  | 0 | 0 | 0 | 1 |
| XLOC_007771 | LOC283761       | chr15:90048160-90067265  | 0 | 0 | 0 | 1 |
| XLOC_007778 | MIR5094         | chr15:90373830-90456222  | 0 | 0 | 0 | 1 |
| XLOC_007787 | RGMA            | chr15:93586635-93632443  | 0 | 0 | 0 | 1 |
| XLOC_007788 | LOC400456       | chr15:95822518-95870329  | 0 | 0 | 0 | 1 |
| XLOC_007790 | FAM169B         | chr15:98980390-99057611  | 0 | 0 | 0 | 1 |
| XLOC_007794 | DNM1P46         | chr15:100330360-10034711 | 0 | 0 | 0 | 1 |
| XLOC_007806 | OR4F4           | chr15:102462344-10246326 | 0 | 0 | 0 | 1 |
| XLOC_007807 | DDX11L9         | chr15:102501015-10251925 | 0 | 0 | 0 | 1 |
| XLOC_007808 | DDX11L10        | chr16:61554-64090        | 0 | 0 | 0 | 1 |
| XLOC_007811 | HBZ             | chr16:202853-204504      | 0 | 0 | 0 | 1 |
| XLOC_007812 | HBM             | chr16:215972-216767      | 0 | 0 | 0 | 1 |
| XLOC_007815 | HBQ1            | chr16:230332-231178      | 0 | 0 | 0 | 1 |
| XLOC_007824 | MIR5587         | chr16:577855-604636      | 0 | 0 | 0 | 1 |
| XLOC_007825 | MIR3176         | chr16:577855-604636      | 0 | 0 | 0 | 1 |
| XLOC_007840 | MIR662          | chr16:820182-820277      | 0 | 0 | 0 | 1 |
| XLOC_007842 | PRR25           | chr16:855442-863861      | 0 | 0 | 0 | 1 |
| XLOC_007846 | TPSAB1          | chr16:1290677-1292555    | 0 | 0 | 0 | 1 |
| XLOC_007847 | TPSD1           | chr16:1306272-1308494    | 0 | 0 | 0 | 1 |
| XLOC_007852 | TMEM204         | chr16:1543351-1662109    | 0 | 0 | 0 | 1 |
| XLOC_007856 | MIR3177         | chr16:1756220-1820318    | 0 | 0 | 0 | 1 |
| XLOC_007870 | MIR4516         | chr16:2097989-2185899    | 0 | 0 | 0 | 1 |
| XLOC_007876 | MIR3677         | chr16:2320713-2320773    | 0 | 0 | 0 | 1 |
| XLOC_007877 | MIR940          | chr16:2321747-2321841    | 0 | 0 | 0 | 1 |
| XLOC_007878 | MIR4717         | chr16:2324620-2324692    | 0 | 0 | 0 | 1 |
| XLOC_007882 | NTN3            | chr16:2521499-2524146    | 0 | 0 | 0 | 1 |
| XLOC_007891 | PRSS41          | chr16:2848485-2855133    | 0 | 0 | 0 | 1 |
| XLOC_007893 | ZG16B           | chr16:2880172-2882285    | 0 | 0 | 0 | 1 |
| XLOC_007907 | OR1F1           | chr16:3254246-3255185    | 0 | 0 | 0 | 1 |
| XLOC_007912 | OR2C1           | chr16:3405888-3406924    | 0 | 0 | 0 | 1 |
| XLOC_007921 | C16orf96        | chr16:4606490-4650318    | 0 | 0 | 0 | 1 |
| XLOC_007930 | RBFOX1          | chr16:6069131-7763340    | 0 | 0 | 0 | 1 |
| XLOC_007935 | MIR548X         | chr16:9328773-9328803    | 0 | 0 | 0 | 1 |
| XLOC_007938 | CIITA           | chr16:10971054-11018840  | 0 | 0 | 0 | 1 |
| XLOC_007942 | TNFRSF17        | chr16:12058963-12061925  | 0 | 0 | 0 | 1 |
| XLOC_007944 | MIR4718         | chr16:12753655-12897744  | 0 | 0 | 0 | 1 |
| XLOC_007948 | MIR193B         | chr16:14397823-14397906  | 0 | 0 | 0 | 1 |
| XLOC_007949 | MIR365A         | chr16:14403141-14403228  | 0 | 0 | 0 | 1 |
| XLOC_007952 | MIR3179-3       | chr16:14995364-14995448  | 0 | 0 | 0 | 1 |
| XLOC_007953 | MIR3180-3       | chr16:15005076-15005170  | 0 | 0 | 0 | 1 |
| XLOC_007961 | MIR3179-1       | chr16:16394015-16394099  | 0 | 0 | 0 | 1 |
| XLOC_007962 | MIR3180-1       | chr16:16403731-16403825  | 0 | 0 | 0 | 1 |
| XLOC_007964 | ABCC6P1         | chr16:18582569-18609607  | 0 | 0 | 0 | 1 |
| XLOC_007969 | CLEC19A         | chr16:19297104-19322269  | 0 | 0 | 0 | 1 |
| XLOC_007974 | ACSM5           | chr16:20420855-20452281  | 0 | 0 | 0 | 1 |
| XLOC_007975 | ACSM2A          | chr16:20462858-20498991  | 0 | 0 | 0 | 1 |
| XLOC_007993 | MIR548D2        | chr16:22729602-22803363  | 0 | 0 | 0 | 1 |
| XLOC_007994 | HS3ST2          | chr16:22825859-22927659  | 0 | 0 | 0 | 1 |



|             |                     |                         |   |   |   |   |
|-------------|---------------------|-------------------------|---|---|---|---|
| XLOC_007995 | SCNN1G              | chr16:23194039-23228200 | 0 | 0 | 0 | 1 |
| XLOC_007996 | SCNN1B              | chr16:23313590-23392620 | 0 | 0 | 0 | 1 |
| XLOC_008000 | CHP2                | chr16:23765947-23770256 | 0 | 0 | 0 | 1 |
| XLOC_008001 | PRKCB               | chr16:23847299-24231932 | 0 | 0 | 0 | 1 |
| XLOC_008002 | CACNG3              | chr16:24266873-24373737 | 0 | 0 | 0 | 1 |
| XLOC_008009 | HS3ST4              | chr16:25703346-26149009 | 0 | 0 | 0 | 1 |
| XLOC_008010 | C16orf82            | chr16:27078218-27080487 | 0 | 0 | 0 | 1 |
| XLOC_008012 | FLJ21408            | chr16:27236314-27301789 | 0 | 0 | 0 | 1 |
| XLOC_008023 | CD19                | chr16:28943259-28950668 | 0 | 0 | 0 | 1 |
| XLOC_008025 | MIR4517             | chr16:28962317-28977767 | 0 | 0 | 0 | 1 |
| XLOC_008030 | LOC606724           | chr16:29460665-29461236 | 0 | 0 | 0 | 1 |
| XLOC_008031 | SLX1A,SLX1B,SULT1A3 | chr16:29464913-29478899 | 0 | 0 | 0 | 1 |
| XLOC_008034 | ZG16                | chr16:29789560-29792969 | 0 | 0 | 0 | 1 |
| XLOC_008044 | C16orf92            | chr16:30034654-30042186 | 0 | 0 | 0 | 1 |
| XLOC_008053 | MIR4518             | chr16:30483982-30534506 | 0 | 0 | 0 | 1 |
| XLOC_008057 | SNORA30             | chr16:30710461-30751450 | 0 | 0 | 0 | 1 |
| XLOC_008083 | TP53TG3D            | chr16:32264649-32267243 | 0 | 0 | 0 | 1 |
| XLOC_008084 | TP53TG3,TP53TG3B    | chr16:33205584-33208179 | 0 | 0 | 0 | 1 |
| XLOC_008085 | TP53TG3,TP53TG3B    | chr16:33262119-33264719 | 0 | 0 | 0 | 1 |
| XLOC_008086 | LOC283914           | chr16:34597786-34626084 | 0 | 0 | 0 | 1 |
| XLOC_008091 | MIR548AE2           | chr16:48274602-48420559 | 0 | 0 | 0 | 1 |
| XLOC_008094 | C16orf78            | chr16:49407807-49433319 | 0 | 0 | 0 | 1 |
| XLOC_008100 | NOD2                | chr16:50731049-50766987 | 0 | 0 | 0 | 1 |
| XLOC_008107 | MMP2                | chr16:55513080-55540586 | 0 | 0 | 0 | 1 |
| XLOC_008110 | SLC6A2              | chr16:55689541-55740104 | 0 | 0 | 0 | 1 |
| XLOC_008111 | CES1P2              | chr16:55758836-55784123 | 0 | 0 | 0 | 1 |
| XLOC_008112 | CES1P1              | chr16:55794510-55808826 | 0 | 0 | 0 | 1 |
| XLOC_008114 | MIR3935             | chr16:56225250-56391356 | 0 | 0 | 0 | 1 |
| XLOC_008116 | MT4                 | chr16:56598960-56602869 | 0 | 0 | 0 | 1 |
| XLOC_008117 | MT3                 | chr16:56623266-56625000 | 0 | 0 | 0 | 1 |
| XLOC_008123 | MT1A                | chr16:56672577-56673999 | 0 | 0 | 0 | 1 |
| XLOC_008131 | MIR138-2            | chr16:56892429-56892513 | 0 | 0 | 0 | 1 |
| XLOC_008132 | SLC12A3             | chr16:56899118-56949762 | 0 | 0 | 0 | 1 |
| XLOC_008139 | CCL22               | chr16:57392694-57400102 | 0 | 0 | 0 | 1 |
| XLOC_008140 | CX3CL1              | chr16:57406413-57418956 | 0 | 0 | 0 | 1 |
| XLOC_008141 | CCL17               | chr16:57438678-57449974 | 0 | 0 | 0 | 1 |
| XLOC_008146 | GPR97               | chr16:57702156-57723290 | 0 | 0 | 0 | 1 |
| XLOC_008149 | TEPP                | chr16:58010338-58022017 | 0 | 0 | 0 | 1 |
| XLOC_008176 | LRRC36              | chr16:67360746-67419109 | 0 | 0 | 0 | 1 |
| XLOC_008196 | CDH1                | chr16:68771194-68869444 | 0 | 0 | 0 | 1 |
| XLOC_008206 | MIR140              | chr16:69796186-69975644 | 0 | 0 | 0 | 1 |
| XLOC_008208 | MIR1972-2           | chr16:70010201-70099851 | 0 | 0 | 0 | 1 |
| XLOC_008210 | CLEC18C             | chr16:70207927-70220798 | 0 | 0 | 0 | 1 |
| XLOC_008215 | SNORD111B           | chr16:70557690-70611571 | 0 | 0 | 0 | 1 |
| XLOC_008216 | SNORD111            | chr16:70557690-70611571 | 0 | 0 | 0 | 1 |
| XLOC_008220 | CHST4               | chr16:71560022-71572493 | 0 | 0 | 0 | 1 |
| XLOC_008226 | HPR                 | chr16:72097124-72111145 | 0 | 0 | 0 | 1 |
| XLOC_008228 | HTA                 | chr16:73126247-73127672 | 0 | 0 | 0 | 1 |
| XLOC_008229 | LOC100506172        | chr16:73420703-73455295 | 0 | 0 | 0 | 1 |
| XLOC_008233 | CTRB1               | chr16:75252883-75258822 | 0 | 0 | 0 | 1 |
| XLOC_008236 | CNTNAP4             | chr16:76311175-76593135 | 0 | 0 | 0 | 1 |
| XLOC_008237 | MIR4719             | chr16:76902832-76902916 | 0 | 0 | 0 | 1 |
| XLOC_008240 | VAT1L               | chr16:77822482-78014001 | 0 | 0 | 0 | 1 |
| XLOC_008241 | CLEC3A              | chr16:78056442-78066001 | 0 | 0 | 0 | 1 |
| XLOC_008243 | DYNLRB2             | chr16:80574853-80584541 | 0 | 0 | 0 | 1 |
| XLOC_008246 | BCMO1               | chr16:81272295-81324747 | 0 | 0 | 0 | 1 |
| XLOC_008248 | MIR4720             | chr16:81418622-81418698 | 0 | 0 | 0 | 1 |
| XLOC_008252 | HSD17B2             | chr16:82068857-82132139 | 0 | 0 | 0 | 1 |
| XLOC_008253 | CDH13               | chr16:82660398-83830215 | 0 | 0 | 0 | 1 |
| XLOC_008254 | MIR3182             | chr16:82660398-83830215 | 0 | 0 | 0 | 1 |
| XLOC_008260 | ADAD2               | chr16:84224722-84230772 | 0 | 0 | 0 | 1 |
| XLOC_008261 | WFDC1               | chr16:84328400-84363450 | 0 | 0 | 0 | 1 |
| XLOC_008267 | LOC400548           | chr16:85170755-85183049 | 0 | 0 | 0 | 1 |
| XLOC_008271 | IRF8                | chr16:85932773-85956211 | 0 | 0 | 0 | 1 |
| XLOC_008272 | LOC146513           | chr16:86320036-86326995 | 0 | 0 | 0 | 1 |
| XLOC_008275 | FOXC2               | chr16:86600856-86602537 | 0 | 0 | 0 | 1 |
| XLOC_008282 | MIR5189             | chr16:88520013-88601574 | 0 | 0 | 0 | 1 |
| XLOC_008330 | TPSG1               | chr16:1203240-1275254   | 0 | 0 | 0 | 1 |
| XLOC_008331 | TPSB2               | chr16:1278335-1280185   | 0 | 0 | 0 | 1 |
| XLOC_008345 | LINC00254           | chr16:1928285-1934232   | 0 | 0 | 0 | 1 |
| XLOC_008346 | HS3ST6              | chr16:1961464-1968231   | 0 | 0 | 0 | 1 |
| XLOC_008348 | RPL3L               | chr16:1994579-2004679   | 0 | 0 | 0 | 1 |
| XLOC_008356 | MIR1225             | chr16:2097989-2185899   | 0 | 0 | 0 | 1 |
| XLOC_008357 | MIR3180-5           | chr16:2185977-2186130   | 0 | 0 | 0 | 1 |
| XLOC_008366 | MIR3178             | chr16:2581922-2582006   | 0 | 0 | 0 | 1 |
| XLOC_008386 | C16orf90            | chr16:3543483-3545421   | 0 | 0 | 0 | 1 |
| XLOC_008408 | TMEM114             | chr16:8619501-8622226   | 0 | 0 | 0 | 1 |
| XLOC_008412 | GRIN2A              | chr16:9847264-10276611  | 0 | 0 | 0 | 1 |
| XLOC_008418 | TNP2                | chr16:11361713-11363160 | 0 | 0 | 0 | 1 |

|             |              |                         |   |   |   |   |
|-------------|--------------|-------------------------|---|---|---|---|
| XLOC_008419 | PRM3         | chr16:11367143-11367452 | 0 | 0 | 0 | 1 |
| XLOC_008420 | PRM2         | chr16:11369492-11370337 | 0 | 0 | 0 | 1 |
| XLOC_008421 | PRM1         | chr16:11374692-11375192 | 0 | 0 | 0 | 1 |
| XLOC_008431 | ABCC6P2      | chr16:14916288-14918559 | 0 | 0 | 0 | 1 |
| XLOC_008434 | MIR3180-4    | chr16:15248706-15248859 | 0 | 0 | 0 | 1 |
| XLOC_008440 | MIR3180-1    | chr16:18496034-18496128 | 0 | 0 | 0 | 1 |
| XLOC_008441 | MIR3179-1    | chr16:18505750-18505834 | 0 | 0 | 0 | 1 |
| XLOC_008448 | GPRC5B       | chr16:19870292-19896151 | 0 | 0 | 0 | 1 |
| XLOC_008449 | GPR139       | chr16:20043042-20085100 | 0 | 0 | 0 | 1 |
| XLOC_008450 | GP2          | chr16:20321810-20338835 | 0 | 0 | 0 | 1 |
| XLOC_008451 | UMOD         | chr16:20344372-20364037 | 0 | 0 | 0 | 1 |
| XLOC_008452 | PDILT        | chr16:20370491-20416033 | 0 | 0 | 0 | 1 |
| XLOC_008453 | ACSM2B       | chr16:20548082-20587695 | 0 | 0 | 0 | 1 |
| XLOC_008459 | ZP2          | chr16:21208772-21222868 | 0 | 0 | 0 | 1 |
| XLOC_008465 | IGSF6        | chr16:21610855-21668792 | 0 | 0 | 0 | 1 |
| XLOC_008470 | MIR548AA2    | chr16:22729602-22803363 | 0 | 0 | 0 | 1 |
| XLOC_008488 | IL27         | chr16:28510682-28518155 | 0 | 0 | 0 | 1 |
| XLOC_008495 | BOLA2B       | chr16:29464913-29478899 | 0 | 0 | 0 | 1 |
| XLOC_008496 | LOC388242    | chr16:29464913-29478899 | 0 | 0 | 0 | 1 |
| XLOC_008510 | BOLA2B       | chr16:30204255-30218248 | 0 | 0 | 0 | 1 |
| XLOC_008511 | LOC388242    | chr16:30204255-30218248 | 0 | 0 | 0 | 1 |
| XLOC_008528 | MIR4519      | chr16:30886586-30886644 | 0 | 0 | 0 | 1 |
| XLOC_008539 | COX6A2       | chr16:31439051-31439749 | 0 | 0 | 0 | 1 |
| XLOC_008544 | LOC390705    | chr16:32300867-32301302 | 0 | 0 | 0 | 1 |
| XLOC_008545 | TP53TG3      | chr16:32684848-32687448 | 0 | 0 | 0 | 1 |
| XLOC_008547 | LOC390705    | chr16:33298267-33298702 | 0 | 0 | 0 | 1 |
| XLOC_008548 | RNU6-76      | chr16:33463506-33563243 | 0 | 0 | 0 | 1 |
| XLOC_008551 | LOC146481    | chr16:34711784-34714967 | 0 | 0 | 0 | 1 |
| XLOC_008552 | LOC100130700 | chr16:34739458-34740840 | 0 | 0 | 0 | 1 |
| XLOC_008561 | ABCC12       | chr16:48116883-48180681 | 0 | 0 | 0 | 1 |
| XLOC_008565 | CBLN1        | chr16:49311828-49315742 | 0 | 0 | 0 | 1 |
| XLOC_008568 | SNX20        | chr16:50700210-50715264 | 0 | 0 | 0 | 1 |
| XLOC_008569 | SALL1        | chr16:51169885-51185183 | 0 | 0 | 0 | 1 |
| XLOC_008570 | C16orf97     | chr16:52060263-52107847 | 0 | 0 | 0 | 1 |
| XLOC_008571 | LOC100505619 | chr16:52116976-52119021 | 0 | 0 | 0 | 1 |
| XLOC_008572 | TOX3         | chr16:52471917-52581714 | 0 | 0 | 0 | 1 |
| XLOC_008573 | LOC643714    | chr16:52585998-52640887 | 0 | 0 | 0 | 1 |
| XLOC_008574 | LOC643802    | chr16:53403273-53405041 | 0 | 0 | 0 | 1 |
| XLOC_008577 | IRX3         | chr16:54317211-54320378 | 0 | 0 | 0 | 1 |
| XLOC_008579 | CES1         | chr16:55836763-55867075 | 0 | 0 | 0 | 1 |
| XLOC_008580 | CES5A        | chr16:55880065-55989943 | 0 | 0 | 0 | 1 |
| XLOC_008581 | LOC283856    | chr16:56126898-56225006 | 0 | 0 | 0 | 1 |
| XLOC_008582 | DKFZP434H168 | chr16:56225250-56391356 | 0 | 0 | 0 | 1 |
| XLOC_008593 | CNGB1        | chr16:57916243-58005020 | 0 | 0 | 0 | 1 |
| XLOC_008603 | LOC644649    | chr16:59788044-59789095 | 0 | 0 | 0 | 1 |
| XLOC_008604 | CDH8         | chr16:61685914-62070739 | 0 | 0 | 0 | 1 |
| XLOC_008605 | CDH11        | chr16:64980682-65155919 | 0 | 0 | 0 | 1 |
| XLOC_008612 | CDH16        | chr16:66942024-66952887 | 0 | 0 | 0 | 1 |
| XLOC_008619 | MIR328       | chr16:67233027-67237927 | 0 | 0 | 0 | 1 |
| XLOC_008626 | AGRP         | chr16:67516473-67517716 | 0 | 0 | 0 | 1 |
| XLOC_008635 | DPEP3        | chr16:68009565-68014452 | 0 | 0 | 0 | 1 |
| XLOC_008645 | MIR1538      | chr16:69599710-69599771 | 0 | 0 | 0 | 1 |
| XLOC_008663 | SNORA70D     | chr16:71678851-71748704 | 0 | 0 | 0 | 1 |
| XLOC_008665 | SNORD71      | chr16:71762904-71842976 | 0 | 0 | 0 | 1 |
| XLOC_008679 | CTRB2        | chr16:75237993-75241072 | 0 | 0 | 0 | 1 |
| XLOC_008688 | ADAMTS18     | chr16:77316024-77469011 | 0 | 0 | 0 | 1 |
| XLOC_008695 | SDR42E1      | chr16:82031250-82045093 | 0 | 0 | 0 | 1 |
| XLOC_008701 | KCNG4        | chr16:84254740-84273356 | 0 | 0 | 0 | 1 |
| XLOC_008705 | FAM92B       | chr16:85131964-85146114 | 0 | 0 | 0 | 1 |
| XLOC_008706 | MIR5093      | chr16:85339831-85339931 | 0 | 0 | 0 | 1 |
| XLOC_008709 | MIR1910      | chr16:85741123-85784689 | 0 | 0 | 0 | 1 |
| XLOC_008711 | LOC732275    | chr16:86365455-86379285 | 0 | 0 | 0 | 1 |
| XLOC_008719 | CA5A         | chr16:87921624-87970112 | 0 | 0 | 0 | 1 |
| XLOC_008725 | MIR4722      | chr16:88772890-88851372 | 0 | 0 | 0 | 1 |
| XLOC_008747 | BHLHA9       | chr17:1173857-1174565   | 0 | 0 | 0 | 1 |
| XLOC_008748 | TUSC5        | chr17:1182956-1204281   | 0 | 0 | 0 | 1 |
| XLOC_008760 | OR1A2        | chr17:3100812-3101742   | 0 | 0 | 0 | 1 |
| XLOC_008761 | OR1A1        | chr17:3118914-3119844   | 0 | 0 | 0 | 1 |
| XLOC_008762 | OR1D4        | chr17:3143969-3144559   | 0 | 0 | 0 | 1 |
| XLOC_008763 | OR3A4P       | chr17:3213538-3214740   | 0 | 0 | 0 | 1 |
| XLOC_008764 | OR3A3        | chr17:3323861-3324827   | 0 | 0 | 0 | 1 |
| XLOC_008765 | ASP          | chr17:3377403-3402700   | 0 | 0 | 0 | 1 |
| XLOC_008776 | TM4SF5       | chr17:4675186-4686506   | 0 | 0 | 0 | 1 |
| XLOC_008788 | LOC100130950 | chr17:5095378-5138931   | 0 | 0 | 0 | 1 |
| XLOC_008793 | WSCD1        | chr17:5973933-6027747   | 0 | 0 | 0 | 1 |
| XLOC_008797 | MIR4520B     | chr17:6558758-6558828   | 0 | 0 | 0 | 1 |
| XLOC_008798 | ALOX15P1     | chr17:6561037-6564701   | 0 | 0 | 0 | 1 |
| XLOC_008800 | FBXO39       | chr17:6679551-6690965   | 0 | 0 | 0 | 1 |
| XLOC_008801 | ALOX12P2     | chr17:6756894-6803668   | 0 | 0 | 0 | 1 |

|             |              |                         |   |   |   |   |
|-------------|--------------|-------------------------|---|---|---|---|
| XLOC_008804 | BCL6B        | chr17:6926368-6932961   | 0 | 0 | 0 | 1 |
| XLOC_008812 | TMEM95       | chr17:7258496-7260538   | 0 | 0 | 0 | 1 |
| XLOC_008829 | ATP1B2       | chr17:7554253-7561089   | 0 | 0 | 0 | 1 |
| XLOC_008833 | RPL29P2      | chr17:7623038-7737058   | 0 | 0 | 0 | 1 |
| XLOC_008840 | GUCY2D       | chr17:7905987-7923658   | 0 | 0 | 0 | 1 |
| XLOC_008842 | MIR4314      | chr17:7991373-7991465   | 0 | 0 | 0 | 1 |
| XLOC_008843 | MIR4521      | chr17:8090262-8090322   | 0 | 0 | 0 | 1 |
| XLOC_008844 | MIR3676      | chr17:8090492-8090577   | 0 | 0 | 0 | 1 |
| XLOC_008847 | ARHGEF15     | chr17:8213555-8225834   | 0 | 0 | 0 | 1 |
| XLOC_008848 | ODF4         | chr17:8243187-8249363   | 0 | 0 | 0 | 1 |
| XLOC_008853 | GLP2R        | chr17:9729380-9793022   | 0 | 0 | 0 | 1 |
| XLOC_008855 | TMEM220-AS1  | chr17:10616638-10718481 | 0 | 0 | 0 | 1 |
| XLOC_008856 | SHISA6       | chr17:11144739-11467380 | 0 | 0 | 0 | 1 |
| XLOC_008859 | MIR744       | chr17:11924134-12047051 | 0 | 0 | 0 | 1 |
| XLOC_008860 | LINC00670    | chr17:12453284-12540504 | 0 | 0 | 0 | 1 |
| XLOC_008861 | MYOCD        | chr17:12569206-12670651 | 0 | 0 | 0 | 1 |
| XLOC_008867 | CDRT7        | chr17:14934291-14935274 | 0 | 0 | 0 | 1 |
| XLOC_008870 | CDRT15P2     | chr17:15668016-15669003 | 0 | 0 | 0 | 1 |
| XLOC_008875 | MIR1288      | chr17:16120508-16229573 | 0 | 0 | 0 | 1 |
| XLOC_008879 | SNORD49A     | chr17:16342300-16395505 | 0 | 0 | 0 | 1 |
| XLOC_008880 | SNORD65      | chr17:16342300-16395505 | 0 | 0 | 0 | 1 |
| XLOC_008886 | SMCR9        | chr17:17322657-17326728 | 0 | 0 | 0 | 1 |
| XLOC_008897 | EVPLL        | chr17:18281078-18292960 | 0 | 0 | 0 | 1 |
| XLOC_008898 | LOC339240    | chr17:18325494-18328647 | 0 | 0 | 0 | 1 |
| XLOC_008899 | KRT16P1      | chr17:18343221-18346208 | 0 | 0 | 0 | 1 |
| XLOC_008900 | LGALS9C      | chr17:18380098-18398259 | 0 | 0 | 0 | 1 |
| XLOC_008906 | GRAPL        | chr17:19030781-19062148 | 0 | 0 | 0 | 1 |
| XLOC_008911 | SLC47A1      | chr17:19437166-19482346 | 0 | 0 | 0 | 1 |
| XLOC_008912 | SNORA59B     | chr17:19437166-19482346 | 0 | 0 | 0 | 1 |
| XLOC_008916 | CDRT15L2     | chr17:20483036-20484224 | 0 | 0 | 0 | 1 |
| XLOC_008921 | FAM27L       | chr17:21825369-21826499 | 0 | 0 | 0 | 1 |
| XLOC_008922 | FLJ36000     | chr17:21904061-21913070 | 0 | 0 | 0 | 1 |
| XLOC_008925 | TBC1D3P5     | chr17:25745030-25758649 | 0 | 0 | 0 | 1 |
| XLOC_008930 | PPY2         | chr17:26574469-26575315 | 0 | 0 | 0 | 1 |
| XLOC_008934 | MIR4723      | chr17:26684686-26689089 | 0 | 0 | 0 | 1 |
| XLOC_008936 | SLC13A2      | chr17:26800663-26824798 | 0 | 0 | 0 | 1 |
| XLOC_008937 | FOXN1        | chr17:26850958-26865175 | 0 | 0 | 0 | 1 |
| XLOC_008941 | SNORD42B     | chr17:27046999-27053949 | 0 | 0 | 0 | 1 |
| XLOC_008942 | SNORD4A      | chr17:27046999-27053949 | 0 | 0 | 0 | 1 |
| XLOC_008943 | SNORD42A     | chr17:27046999-27053949 | 0 | 0 | 0 | 1 |
| XLOC_008944 | SNORD4B      | chr17:27046999-27053949 | 0 | 0 | 0 | 1 |
| XLOC_008948 | MIR451B      | chr17:27188386-27188458 | 0 | 0 | 0 | 1 |
| XLOC_008951 | MIR4523      | chr17:27717679-27717748 | 0 | 0 | 0 | 1 |
| XLOC_008957 | MIR423       | chr17:28443824-28513493 | 0 | 0 | 0 | 1 |
| XLOC_008960 | TBC1D29      | chr17:28886583-28890509 | 0 | 0 | 0 | 1 |
| XLOC_008970 | MIR193A      | chr17:29887014-29887102 | 0 | 0 | 0 | 1 |
| XLOC_008971 | MIR4725      | chr17:29902287-29902377 | 0 | 0 | 0 | 1 |
| XLOC_008972 | MIR365B      | chr17:29902429-29902540 | 0 | 0 | 0 | 1 |
| XLOC_008983 | CCL2         | chr17:32582295-32584220 | 0 | 0 | 0 | 1 |
| XLOC_008984 | CCL7         | chr17:32597234-32599261 | 0 | 0 | 0 | 1 |
| XLOC_008985 | CCL11        | chr17:32612686-32615199 | 0 | 0 | 0 | 1 |
| XLOC_008986 | CCL8         | chr17:32646065-32648421 | 0 | 0 | 0 | 1 |
| XLOC_008987 | CCL13        | chr17:32683470-32685629 | 0 | 0 | 0 | 1 |
| XLOC_008988 | TMEM132E     | chr17:32907767-32966337 | 0 | 0 | 0 | 1 |
| XLOC_008994 | SNORD7       | chr17:33900675-33900772 | 0 | 0 | 0 | 1 |
| XLOC_008999 | CCL18        | chr17:34391642-34398841 | 0 | 0 | 0 | 1 |
| XLOC_009000 | CCL4         | chr17:34431219-34433014 | 0 | 0 | 0 | 1 |
| XLOC_009001 | CCL4L1       | chr17:34538467-34540274 | 0 | 0 | 0 | 1 |
| XLOC_009002 | CCL4L2       | chr17:34640033-34641840 | 0 | 0 | 0 | 1 |
| XLOC_009008 | LHX1         | chr17:35294771-35301915 | 0 | 0 | 0 | 1 |
| XLOC_009010 | MIR2909      | chr17:35306174-35414171 | 0 | 0 | 0 | 1 |
| XLOC_009019 | MIR4726      | chr17:36861872-36886056 | 0 | 0 | 0 | 1 |
| XLOC_009022 | MIR4727      | chr17:36982090-36982145 | 0 | 0 | 0 | 1 |
| XLOC_009032 | PNMT         | chr17:37824233-37826728 | 0 | 0 | 0 | 1 |
| XLOC_009034 | MIR4728      | chr17:37844392-37884915 | 0 | 0 | 0 | 1 |
| XLOC_009036 | ZPBP2        | chr17:38024454-38034149 | 0 | 0 | 0 | 1 |
| XLOC_009037 | LRRC3C       | chr17:38097726-38100987 | 0 | 0 | 0 | 1 |
| XLOC_009040 | CSF3         | chr17:38171613-38174066 | 0 | 0 | 0 | 1 |
| XLOC_009041 | SNORD124     | chr17:38175349-38210889 | 0 | 0 | 0 | 1 |
| XLOC_009049 | IGFBP4       | chr17:38599675-38613982 | 0 | 0 | 0 | 1 |
| XLOC_009053 | KRTAP9-1     | chr17:39346138-39346891 | 0 | 0 | 0 | 1 |
| XLOC_009054 | KRTAP9-2     | chr17:39382899-39383904 | 0 | 0 | 0 | 1 |
| XLOC_009055 | KRTAP9-3     | chr17:39388714-39389706 | 0 | 0 | 0 | 1 |
| XLOC_009056 | KRTAP9-8     | chr17:39394269-39395256 | 0 | 0 | 0 | 1 |
| XLOC_009057 | KRTAP9-4     | chr17:39405938-39406905 | 0 | 0 | 0 | 1 |
| XLOC_009058 | KRTAP9-9     | chr17:39411635-39412616 | 0 | 0 | 0 | 1 |
| XLOC_009059 | LOC100505782 | chr17:39558667-39568840 | 0 | 0 | 0 | 1 |
| XLOC_009061 | GAST         | chr17:39868577-39872221 | 0 | 0 | 0 | 1 |
| XLOC_009077 | RAMP2        | chr17:40905946-40915060 | 0 | 0 | 0 | 1 |

|             |              |                         |   |   |   |   |
|-------------|--------------|-------------------------|---|---|---|---|
| XLOC_009094 | MIR2117      | chr17:41522173-41522253 | 0 | 0 | 0 | 1 |
| XLOC_009096 | C17orf105    | chr17:41857802-41862054 | 0 | 0 | 0 | 1 |
| XLOC_009120 | SPPL2C       | chr17:43920721-44105699 | 0 | 0 | 0 | 1 |
| XLOC_009122 | MAPT-IT1     | chr17:43920721-44105699 | 0 | 0 | 0 | 1 |
| XLOC_009123 | STH          | chr17:43920721-44105699 | 0 | 0 | 0 | 1 |
| XLOC_009126 | NSFP1        | chr17:44450178-44500463 | 0 | 0 | 0 | 1 |
| XLOC_009129 | WNT9B        | chr17:44928967-44954437 | 0 | 0 | 0 | 1 |
| XLOC_009131 | MIR5089      | chr17:45050382-45050466 | 0 | 0 | 0 | 1 |
| XLOC_009133 | ITGB3        | chr17:45331207-45390077 | 0 | 0 | 0 | 1 |
| XLOC_009138 | TBX21        | chr17:45810609-45823485 | 0 | 0 | 0 | 1 |
| XLOC_009150 | IGF2BP1      | chr17:47074773-47133507 | 0 | 0 | 0 | 1 |
| XLOC_009151 | B4GALNT2     | chr17:47209821-47247351 | 0 | 0 | 0 | 1 |
| XLOC_009153 | FLJ40194     | chr17:47325604-47336027 | 0 | 0 | 0 | 1 |
| XLOC_009154 | NGFR         | chr17:47572654-47592382 | 0 | 0 | 0 | 1 |
| XLOC_009161 | SGCA         | chr17:48243365-48253293 | 0 | 0 | 0 | 1 |
| XLOC_009171 | ABCC3        | chr17:48712217-48769063 | 0 | 0 | 0 | 1 |
| XLOC_009173 | WFIKKN2      | chr17:48912604-48919709 | 0 | 0 | 0 | 1 |
| XLOC_009177 | C17orf112    | chr17:51062879-51065012 | 0 | 0 | 0 | 1 |
| XLOC_009178 | KIF2B        | chr17:51900238-51902573 | 0 | 0 | 0 | 1 |
| XLOC_009184 | NOG          | chr17:54671059-54672951 | 0 | 0 | 0 | 1 |
| XLOC_009187 | RNF126P1     | chr17:55122838-55124156 | 0 | 0 | 0 | 1 |
| XLOC_009191 | OR4D1        | chr17:56232514-56233447 | 0 | 0 | 0 | 1 |
| XLOC_009193 | OR4D2        | chr17:56247016-56247940 | 0 | 0 | 0 | 1 |
| XLOC_009195 | LPO          | chr17:56315786-56345879 | 0 | 0 | 0 | 1 |
| XLOC_009203 | MIR4729      | chr17:57409052-57479095 | 0 | 0 | 0 | 1 |
| XLOC_009207 | MIR21        | chr17:57918626-57918698 | 0 | 0 | 0 | 1 |
| XLOC_009209 | CA4          | chr17:58227301-58236906 | 0 | 0 | 0 | 1 |
| XLOC_009220 | MIR548W      | chr17:60778674-61505067 | 0 | 0 | 0 | 1 |
| XLOC_009238 | MIR634       | chr17:64298925-64806862 | 0 | 0 | 0 | 1 |
| XLOC_009239 | CACNG5       | chr17:64873390-64881395 | 0 | 0 | 0 | 1 |
| XLOC_009240 | CACNG4       | chr17:64960979-65029518 | 0 | 0 | 0 | 1 |
| XLOC_009241 | CACNG1       | chr17:65040651-65052911 | 0 | 0 | 0 | 1 |
| XLOC_009244 | SNORA38B     | chr17:65714060-65740266 | 0 | 0 | 0 | 1 |
| XLOC_009252 | MIR4524B     | chr17:67074846-67138015 | 0 | 0 | 0 | 1 |
| XLOC_009254 | KCNJ16       | chr17:68071365-68131746 | 0 | 0 | 0 | 1 |
| XLOC_009255 | KCNJ2        | chr17:68165675-68176183 | 0 | 0 | 0 | 1 |
| XLOC_009256 | SOX9         | chr17:70117160-70122560 | 0 | 0 | 0 | 1 |
| XLOC_009260 | LOC400620    | chr17:71745408-71824676 | 0 | 0 | 0 | 1 |
| XLOC_009264 | KIF19        | chr17:72322350-72351959 | 0 | 0 | 0 | 1 |
| XLOC_009265 | GPR142       | chr17:72363644-72368739 | 0 | 0 | 0 | 1 |
| XLOC_009267 | CD300A       | chr17:72462521-72480937 | 0 | 0 | 0 | 1 |
| XLOC_009268 | C17orf77     | chr17:72576110-72590348 | 0 | 0 | 0 | 1 |
| XLOC_009282 | MIR3678      | chr17:73402149-73402243 | 0 | 0 | 0 | 1 |
| XLOC_009295 | RNF157-AS1   | chr17:74132414-74236390 | 0 | 0 | 0 | 1 |
| XLOC_009301 | SNORD1C      | chr17:74553845-74561430 | 0 | 0 | 0 | 1 |
| XLOC_009302 | SNORD1B      | chr17:74553845-74561430 | 0 | 0 | 0 | 1 |
| XLOC_009303 | SNORD1A      | chr17:74553845-74561430 | 0 | 0 | 0 | 1 |
| XLOC_009310 | LOC100507351 | chr17:75543022-75561103 | 0 | 0 | 0 | 1 |
| XLOC_009313 | C17orf99     | chr17:76142433-76162364 | 0 | 0 | 0 | 1 |
| XLOC_009317 | TMEM235      | chr17:76227390-76237068 | 0 | 0 | 0 | 1 |
| XLOC_009321 | ENPP7        | chr17:77704881-77716021 | 0 | 0 | 0 | 1 |
| XLOC_009329 | MIR4730      | chr17:78234659-78411884 | 0 | 0 | 0 | 1 |
| XLOC_009333 | MIR3065      | chr17:79008946-79156964 | 0 | 0 | 0 | 1 |
| XLOC_009343 | GCGR         | chr17:79762009-79771889 | 0 | 0 | 0 | 1 |
| XLOC_009353 | UTS2R        | chr17:80332200-80333370 | 0 | 0 | 0 | 1 |
| XLOC_009370 | MIR3183      | chr17:906757-1090616    | 0 | 0 | 0 | 1 |
| XLOC_009383 | RTN4RL1      | chr17:1837970-1928178   | 0 | 0 | 0 | 1 |
| XLOC_009384 | MIR132       | chr17:1953201-1953302   | 0 | 0 | 0 | 1 |
| XLOC_009385 | MIR212       | chr17:1953564-1953674   | 0 | 0 | 0 | 1 |
| XLOC_009388 | SNORD91B     | chr17:2207247-2240678   | 0 | 0 | 0 | 1 |
| XLOC_009389 | SNORD91A     | chr17:2207247-2240678   | 0 | 0 | 0 | 1 |
| XLOC_009394 | MIR1253      | chr17:2651371-2651476   | 0 | 0 | 0 | 1 |
| XLOC_009395 | OR1D5        | chr17:2965962-2966901   | 0 | 0 | 0 | 1 |
| XLOC_009396 | OR1D2        | chr17:2995351-2996290   | 0 | 0 | 0 | 1 |
| XLOC_009397 | OR1G1        | chr17:3029903-3030845   | 0 | 0 | 0 | 1 |
| XLOC_009398 | OR3A2        | chr17:3181183-3182268   | 0 | 0 | 0 | 1 |
| XLOC_009399 | OR3A1        | chr17:3194928-3195876   | 0 | 0 | 0 | 1 |
| XLOC_009400 | OR1E1        | chr17:3300759-3301704   | 0 | 0 | 0 | 1 |
| XLOC_009401 | OR1E2        | chr17:3336163-3337135   | 0 | 0 | 0 | 1 |
| XLOC_009402 | SPATA22      | chr17:3343305-3375142   | 0 | 0 | 0 | 1 |
| XLOC_009409 | P2RX1        | chr17:3799884-3819960   | 0 | 0 | 0 | 1 |
| XLOC_009415 | GGT6         | chr17:4460221-4463876   | 0 | 0 | 0 | 1 |
| XLOC_009416 | ALOX15       | chr17:4534213-4544960   | 0 | 0 | 0 | 1 |
| XLOC_009428 | ZNF594       | chr17:5082830-5095178   | 0 | 0 | 0 | 1 |
| XLOC_009429 | SCIMP        | chr17:5095378-5138931   | 0 | 0 | 0 | 1 |
| XLOC_009440 | MIR4520A     | chr17:6558758-6558828   | 0 | 0 | 0 | 1 |
| XLOC_009445 | MIR195       | chr17:6915735-6922973   | 0 | 0 | 0 | 1 |
| XLOC_009446 | MIR497       | chr17:6915735-6922973   | 0 | 0 | 0 | 1 |
| XLOC_009448 | CLEC10A      | chr17:6977855-6983600   | 0 | 0 | 0 | 1 |

|             |             |                         |   |   |   |   |
|-------------|-------------|-------------------------|---|---|---|---|
| XLOC_009449 | ASGR2       | chr17:7004640-7018130   | 0 | 0 | 0 | 1 |
| XLOC_009452 | MIR324      | chr17:7093209-7128586   | 0 | 0 | 0 | 1 |
| XLOC_009488 | SPDYE4      | chr17:8656423-8661877   | 0 | 0 | 0 | 1 |
| XLOC_009489 | MFSD6L      | chr17:8700427-8702667   | 0 | 0 | 0 | 1 |
| XLOC_009490 | PIK3R6      | chr17:8706054-8770994   | 0 | 0 | 0 | 1 |
| XLOC_009493 | DHR57C      | chr17:9674750-9694614   | 0 | 0 | 0 | 1 |
| XLOC_009496 | MYH13       | chr17:10204182-10276322 | 0 | 0 | 0 | 1 |
| XLOC_009497 | MYH8        | chr17:10293641-10325267 | 0 | 0 | 0 | 1 |
| XLOC_009498 | MYH4        | chr17:10346607-10372876 | 0 | 0 | 0 | 1 |
| XLOC_009500 | MYH2        | chr17:10424464-10453017 | 0 | 0 | 0 | 1 |
| XLOC_009506 | PIRT        | chr17:10725791-10741418 | 0 | 0 | 0 | 1 |
| XLOC_009509 | HS3ST3A1    | chr17:13399005-13505244 | 0 | 0 | 0 | 1 |
| XLOC_009511 | CDRT15      | chr17:14139172-14140150 | 0 | 0 | 0 | 1 |
| XLOC_009513 | MIR4731     | chr17:15133095-15168644 | 0 | 0 | 0 | 1 |
| XLOC_009525 | TNFRSF13B   | chr17:16842397-16875402 | 0 | 0 | 0 | 1 |
| XLOC_009533 | MIR33B      | chr17:17584786-17740325 | 0 | 0 | 0 | 1 |
| XLOC_009540 | FAM106A     | chr17:18427879-18430160 | 0 | 0 | 0 | 1 |
| XLOC_009546 | EPN2-AS1    | chr17:19140689-19240028 | 0 | 0 | 0 | 1 |
| XLOC_009548 | MIR1180     | chr17:19240866-19290532 | 0 | 0 | 0 | 1 |
| XLOC_009550 | SLC47A2     | chr17:19581627-19620043 | 0 | 0 | 0 | 1 |
| XLOC_009551 | ALDH3A1     | chr17:19641297-19651746 | 0 | 0 | 0 | 1 |
| XLOC_009554 | LGALS9B     | chr17:20353175-20370848 | 0 | 0 | 0 | 1 |
| XLOC_009555 | KRT16P3     | chr17:20404826-20407811 | 0 | 0 | 0 | 1 |
| XLOC_009556 | CCDC144NL   | chr17:20766707-20799453 | 0 | 0 | 0 | 1 |
| XLOC_009561 | MIR4522     | chr17:25620935-25621022 | 0 | 0 | 0 | 1 |
| XLOC_009564 | KRT18P55    | chr17:26603011-26634408 | 0 | 0 | 0 | 1 |
| XLOC_009567 | SEBOX       | chr17:26691289-26692265 | 0 | 0 | 0 | 1 |
| XLOC_009581 | MIR451A     | chr17:27188386-27188458 | 0 | 0 | 0 | 1 |
| XLOC_009582 | MIR144      | chr17:27188550-27188636 | 0 | 0 | 0 | 1 |
| XLOC_009583 | MIR4732     | chr17:27188672-27188748 | 0 | 0 | 0 | 1 |
| XLOC_009587 | SEZ6        | chr17:27281946-27333081 | 0 | 0 | 0 | 1 |
| XLOC_009594 | MIR3184     | chr17:28443824-28513493 | 0 | 0 | 0 | 1 |
| XLOC_009597 | TMIGD1      | chr17:28643365-28661065 | 0 | 0 | 0 | 1 |
| XLOC_009600 | MIR4733     | chr17:29421367-29421443 | 0 | 0 | 0 | 1 |
| XLOC_009609 | ASIC2       | chr17:31340105-32483825 | 0 | 0 | 0 | 1 |
| XLOC_009610 | AA06        | chr17:31340105-32483825 | 0 | 0 | 0 | 1 |
| XLOC_009611 | CCL1        | chr17:32687398-32690252 | 0 | 0 | 0 | 1 |
| XLOC_009612 | C17orf102   | chr17:32901141-32906388 | 0 | 0 | 0 | 1 |
| XLOC_009616 | SLC35G3     | chr17:33519538-33521412 | 0 | 0 | 0 | 1 |
| XLOC_009617 | SLFN11      | chr17:33677328-33700720 | 0 | 0 | 0 | 1 |
| XLOC_009618 | SLFN12      | chr17:33738080-33759543 | 0 | 0 | 0 | 1 |
| XLOC_009620 | SLFN12L     | chr17:33801941-33814758 | 0 | 0 | 0 | 1 |
| XLOC_009621 | SLFN14      | chr17:33875143-33885110 | 0 | 0 | 0 | 1 |
| XLOC_009623 | GAS2L2      | chr17:34071529-34079897 | 0 | 0 | 0 | 1 |
| XLOC_009624 | MMP28       | chr17:34092875-34122640 | 0 | 0 | 0 | 1 |
| XLOC_009625 | C17orf66    | chr17:34181959-34195895 | 0 | 0 | 0 | 1 |
| XLOC_009628 | LYZL6       | chr17:34261522-34270703 | 0 | 0 | 0 | 1 |
| XLOC_009629 | CCL16       | chr17:34303534-34308523 | 0 | 0 | 0 | 1 |
| XLOC_009630 | CCL14,CCL15 | chr17:34310691-34329084 | 0 | 0 | 0 | 1 |
| XLOC_009631 | CCL23       | chr17:34340096-34345005 | 0 | 0 | 0 | 1 |
| XLOC_009633 | TBC1D3B     | chr17:34493060-34503988 | 0 | 0 | 0 | 1 |
| XLOC_009636 | CCL3L1      | chr17:34623841-34625730 | 0 | 0 | 0 | 1 |
| XLOC_009637 | TBC1D3H     | chr17:34745935-34757050 | 0 | 0 | 0 | 1 |
| XLOC_009643 | HNF1B       | chr17:36046433-36105096 | 0 | 0 | 0 | 1 |
| XLOC_009644 | LOC284100   | chr17:36202572-36244363 | 0 | 0 | 0 | 1 |
| XLOC_009645 | TBC1D3      | chr17:36337527-36348666 | 0 | 0 | 0 | 1 |
| XLOC_009650 | MIR4734     | chr17:36858514-36858584 | 0 | 0 | 0 | 1 |
| XLOC_009657 | FBXO47      | chr17:37092684-37123655 | 0 | 0 | 0 | 1 |
| XLOC_009659 | ARL5C       | chr17:37313146-37322414 | 0 | 0 | 0 | 1 |
| XLOC_009675 | CCR7        | chr17:38710021-38721736 | 0 | 0 | 0 | 1 |
| XLOC_009678 | KRT24       | chr17:38854242-38860002 | 0 | 0 | 0 | 1 |
| XLOC_009679 | KRT25       | chr17:38904272-38911584 | 0 | 0 | 0 | 1 |
| XLOC_009680 | KRT26       | chr17:38922489-38928411 | 0 | 0 | 0 | 1 |
| XLOC_009681 | KRT27       | chr17:38933059-38938786 | 0 | 0 | 0 | 1 |
| XLOC_009682 | KRT28       | chr17:38948447-38956211 | 0 | 0 | 0 | 1 |
| XLOC_009684 | KRT12       | chr17:39017429-39023462 | 0 | 0 | 0 | 1 |
| XLOC_009685 | KRT20       | chr17:39032140-39041495 | 0 | 0 | 0 | 1 |
| XLOC_009686 | KRT23       | chr17:39078951-39093836 | 0 | 0 | 0 | 1 |
| XLOC_009687 | KRT39       | chr17:39114668-39123144 | 0 | 0 | 0 | 1 |
| XLOC_009688 | KRT40       | chr17:39133967-39143387 | 0 | 0 | 0 | 1 |
| XLOC_009691 | KRTAP3-1    | chr17:39164773-39165366 | 0 | 0 | 0 | 1 |
| XLOC_009692 | KRTAP1-5    | chr17:39182278-39183454 | 0 | 0 | 0 | 1 |
| XLOC_009693 | KRTAP1-4    | chr17:39185928-39186377 | 0 | 0 | 0 | 1 |
| XLOC_009694 | KRTAP1-3    | chr17:39190136-39191107 | 0 | 0 | 0 | 1 |
| XLOC_009695 | KRTAP1-1    | chr17:39196810-39197713 | 0 | 0 | 0 | 1 |
| XLOC_009702 | KRTAP4-12   | chr17:39279344-39280419 | 0 | 0 | 0 | 1 |
| XLOC_009704 | KRTAP4-5    | chr17:39305175-39306054 | 0 | 0 | 0 | 1 |
| XLOC_009705 | KRTAP4-4    | chr17:39315905-39316983 | 0 | 0 | 0 | 1 |
| XLOC_009706 | KRTAP4-3    | chr17:39323482-39324424 | 0 | 0 | 0 | 1 |

|             |              |                         |   |   |   |   |
|-------------|--------------|-------------------------|---|---|---|---|
| XLOC_009707 | KRTAP4-2     | chr17:39333697-39334460 | 0 | 0 | 0 | 1 |
| XLOC_009708 | KRTAP4-1     | chr17:39340351-39341147 | 0 | 0 | 0 | 1 |
| XLOC_009709 | KRTAP29-1    | chr17:39458077-39459103 | 0 | 0 | 0 | 1 |
| XLOC_009710 | KRTAP16-1    | chr17:39463951-39465505 | 0 | 0 | 0 | 1 |
| XLOC_009711 | KRTAP17-1    | chr17:39471168-39471947 | 0 | 0 | 0 | 1 |
| XLOC_009712 | KRT33A       | chr17:39502344-39507064 | 0 | 0 | 0 | 1 |
| XLOC_009713 | KRT33B       | chr17:39519745-39526052 | 0 | 0 | 0 | 1 |
| XLOC_009715 | KRT31        | chr17:39549976-39553844 | 0 | 0 | 0 | 1 |
| XLOC_009716 | KRT37        | chr17:39576808-39580822 | 0 | 0 | 0 | 1 |
| XLOC_009717 | KRT38        | chr17:39592620-39597596 | 0 | 0 | 0 | 1 |
| XLOC_009718 | KRT32        | chr17:39615764-39623638 | 0 | 0 | 0 | 1 |
| XLOC_009719 | KRT35        | chr17:39632940-39637392 | 0 | 0 | 0 | 1 |
| XLOC_009720 | KRT36        | chr17:39642387-39646116 | 0 | 0 | 0 | 1 |
| XLOC_009721 | KRT13        | chr17:39657232-39661865 | 0 | 0 | 0 | 1 |
| XLOC_009724 | LOC147093    | chr17:39705857-39710747 | 0 | 0 | 0 | 1 |
| XLOC_009725 | KRT9         | chr17:39722093-39728310 | 0 | 0 | 0 | 1 |
| XLOC_009726 | KRT14        | chr17:39738530-39743147 | 0 | 0 | 0 | 1 |
| XLOC_009727 | KRT16        | chr17:39766030-39769079 | 0 | 0 | 0 | 1 |
| XLOC_009729 | KRT42P       | chr17:39782578-39796451 | 0 | 0 | 0 | 1 |
| XLOC_009730 | HAP1         | chr17:39878890-39890898 | 0 | 0 | 0 | 1 |
| XLOC_009741 | KCNH4        | chr17:40308909-40333296 | 0 | 0 | 0 | 1 |
| XLOC_009785 | C1QL1        | chr17:43037060-43045644 | 0 | 0 | 0 | 1 |
| XLOC_009794 | LOC644172    | chr17:43677490-43679748 | 0 | 0 | 0 | 1 |
| XLOC_009795 | MAPT-AS1     | chr17:43920721-44105699 | 0 | 0 | 0 | 1 |
| XLOC_009809 | MIR152       | chr17:46103532-46115152 | 0 | 0 | 0 | 1 |
| XLOC_009811 | SKAP1        | chr17:46210801-46507594 | 0 | 0 | 0 | 1 |
| XLOC_009812 | MIR1203      | chr17:46210801-46507594 | 0 | 0 | 0 | 1 |
| XLOC_009813 | HOXB1        | chr17:46606806-46608272 | 0 | 0 | 0 | 1 |
| XLOC_009817 | MIR10A       | chr17:46657199-46657309 | 0 | 0 | 0 | 1 |
| XLOC_009823 | MIR196A1     | chr17:46709851-46709921 | 0 | 0 | 0 | 1 |
| XLOC_009824 | PRAC         | chr17:46799081-46799882 | 0 | 0 | 0 | 1 |
| XLOC_009825 | MIR3185      | chr17:46800541-46802119 | 0 | 0 | 0 | 1 |
| XLOC_009829 | GIP          | chr17:47035917-47045955 | 0 | 0 | 0 | 1 |
| XLOC_009830 | GNGT2        | chr17:47283595-47300587 | 0 | 0 | 0 | 1 |
| XLOC_009831 | PHOSPHO1     | chr17:47300731-47308128 | 0 | 0 | 0 | 1 |
| XLOC_009837 | TAC4         | chr17:47915670-47926199 | 0 | 0 | 0 | 1 |
| XLOC_009838 | DLX3         | chr17:48067368-48072588 | 0 | 0 | 0 | 1 |
| XLOC_009842 | HILS1        | chr17:48243365-48253293 | 0 | 0 | 0 | 1 |
| XLOC_009849 | LINC00483    | chr17:48838394-48844876 | 0 | 0 | 0 | 1 |
| XLOC_009853 | CA10         | chr17:49707673-50237377 | 0 | 0 | 0 | 1 |
| XLOC_009856 | TMEM100      | chr17:53796987-53809482 | 0 | 0 | 0 | 1 |
| XLOC_009858 | MTVR2        | chr17:54961462-54962274 | 0 | 0 | 0 | 1 |
| XLOC_009866 | MPO          | chr17:56347216-56358296 | 0 | 0 | 0 | 1 |
| XLOC_009867 | BZRAP1       | chr17:56378587-56494931 | 0 | 0 | 0 | 1 |
| XLOC_009868 | MIR142       | chr17:56378587-56494931 | 0 | 0 | 0 | 1 |
| XLOC_009869 | MIR4736      | chr17:56378587-56494931 | 0 | 0 | 0 | 1 |
| XLOC_009879 | MIR454       | chr17:57187307-57232800 | 0 | 0 | 0 | 1 |
| XLOC_009880 | MIR301A      | chr17:57187307-57232800 | 0 | 0 | 0 | 1 |
| XLOC_009885 | MIR4737      | chr17:58120385-58120466 | 0 | 0 | 0 | 1 |
| XLOC_009896 | TBC1D3P2     | chr17:60342066-60353016 | 0 | 0 | 0 | 1 |
| XLOC_009904 | CSH2         | chr17:61949371-61951089 | 0 | 0 | 0 | 1 |
| XLOC_009905 | GH2          | chr17:61957571-61959302 | 0 | 0 | 0 | 1 |
| XLOC_009906 | CSH1         | chr17:61972267-61974021 | 0 | 0 | 0 | 1 |
| XLOC_009907 | CSHL1        | chr17:61986964-61988618 | 0 | 0 | 0 | 1 |
| XLOC_009908 | GH1          | chr17:61994562-61996198 | 0 | 0 | 0 | 1 |
| XLOC_009917 | MIR3064      | chr17:62494373-62502484 | 0 | 0 | 0 | 1 |
| XLOC_009927 | APOH         | chr17:64208146-64225556 | 0 | 0 | 0 | 1 |
| XLOC_009933 | MIR635       | chr17:66417421-66453653 | 0 | 0 | 0 | 1 |
| XLOC_009935 | ABCA8        | chr17:66863430-66951533 | 0 | 0 | 0 | 1 |
| XLOC_009938 | MIR4524A     | chr17:67074846-67138015 | 0 | 0 | 0 | 1 |
| XLOC_009940 | KCNJ2-AS1    | chr17:68163101-68165543 | 0 | 0 | 0 | 1 |
| XLOC_009948 | LINC00469    | chr17:71745408-71824676 | 0 | 0 | 0 | 1 |
| XLOC_009950 | BTBD17       | chr17:72352554-72357958 | 0 | 0 | 0 | 1 |
| XLOC_009951 | CD300LB      | chr17:72517312-72527613 | 0 | 0 | 0 | 1 |
| XLOC_009953 | CD300LD      | chr17:72576110-72590348 | 0 | 0 | 0 | 1 |
| XLOC_009955 | CD300LF      | chr17:72667255-72743474 | 0 | 0 | 0 | 1 |
| XLOC_009959 | FADS6        | chr17:72873472-72889705 | 0 | 0 | 0 | 1 |
| XLOC_009974 | MIR4738      | chr17:73780601-73780688 | 0 | 0 | 0 | 1 |
| XLOC_009985 | FOXJ1        | chr17:74132414-74236390 | 0 | 0 | 0 | 1 |
| XLOC_009993 | ST6GALNAC1   | chr17:74620844-74639894 | 0 | 0 | 0 | 1 |
| XLOC_009997 | MIR4316      | chr17:75277491-75496678 | 0 | 0 | 0 | 1 |
| XLOC_010013 | MIR4739      | chr17:77680984-77681058 | 0 | 0 | 0 | 1 |
| XLOC_010020 | NPTX1        | chr17:78440632-78450404 | 0 | 0 | 0 | 1 |
| XLOC_010023 | MIR657       | chr17:79008946-79156964 | 0 | 0 | 0 | 1 |
| XLOC_010024 | MIR338       | chr17:79008946-79156964 | 0 | 0 | 0 | 1 |
| XLOC_010025 | MIR1250      | chr17:79008946-79156964 | 0 | 0 | 0 | 1 |
| XLOC_010030 | TMEM105      | chr17:79285071-79304474 | 0 | 0 | 0 | 1 |
| XLOC_010031 | LOC100130370 | chr17:79349698-79359160 | 0 | 0 | 0 | 1 |
| XLOC_010032 | MIR4740      | chr17:79373539-79433358 | 0 | 0 | 0 | 1 |

|             |              |                         |   |   |   |   |
|-------------|--------------|-------------------------|---|---|---|---|
| XLOC_010033 | MIR3186      | chr17:79373539-79433358 | 0 | 0 | 0 | 1 |
| XLOC_010090 | CETN1        | chr18:580368-581524     | 0 | 0 | 0 | 1 |
| XLOC_010093 | ADCYAP1      | chr18:904943-912173     | 0 | 0 | 0 | 1 |
| XLOC_010101 | DLGAP1-AS3   | chr18:3496029-4455266   | 0 | 0 | 0 | 1 |
| XLOC_010102 | DLGAP1-AS5   | chr18:3496029-4455266   | 0 | 0 | 0 | 1 |
| XLOC_010104 | LOC645355    | chr18:5748817-5795900   | 0 | 0 | 0 | 1 |
| XLOC_010105 | MIR3976      | chr18:5840693-5840832   | 0 | 0 | 0 | 1 |
| XLOC_010106 | LOC100130480 | chr18:6511414-6590652   | 0 | 0 | 0 | 1 |
| XLOC_010107 | ARHGAP28     | chr18:6834431-6915712   | 0 | 0 | 0 | 1 |
| XLOC_010108 | LRRC30       | chr18:7231136-7232042   | 0 | 0 | 0 | 1 |
| XLOC_010116 | RAB31        | chr18:9708227-9862553   | 0 | 0 | 0 | 1 |
| XLOC_010117 | TXNDC2       | chr18:9885722-9888156   | 0 | 0 | 0 | 1 |
| XLOC_010119 | APCDD1       | chr18:10454624-10488698 | 0 | 0 | 0 | 1 |
| XLOC_010124 | C18orf61     | chr18:12200777-12224709 | 0 | 0 | 0 | 1 |
| XLOC_010125 | CIDEA        | chr18:12254317-12277594 | 0 | 0 | 0 | 1 |
| XLOC_010132 | MIR5190      | chr18:13218728-13652753 | 0 | 0 | 0 | 1 |
| XLOC_010133 | MIR4526      | chr18:13218728-13652753 | 0 | 0 | 0 | 1 |
| XLOC_010135 | MC5R         | chr18:13825542-13826861 | 0 | 0 | 0 | 1 |
| XLOC_010138 | ANKRD30B     | chr18:14748238-14852737 | 0 | 0 | 0 | 1 |
| XLOC_010139 | MIR3156-2    | chr18:14748238-14852737 | 0 | 0 | 0 | 1 |
| XLOC_010142 | MIR320C1     | chr18:19230857-19284766 | 0 | 0 | 0 | 1 |
| XLOC_010149 | LAMA3        | chr18:21269561-21535029 | 0 | 0 | 0 | 1 |
| XLOC_010152 | MIR320C2     | chr18:21742010-21977833 | 0 | 0 | 0 | 1 |
| XLOC_010155 | LOC729950    | chr18:22208145-22242162 | 0 | 0 | 0 | 1 |
| XLOC_010156 | PSMA8        | chr18:23713815-23773319 | 0 | 0 | 0 | 1 |
| XLOC_010159 | MIR302F      | chr18:27878875-27878926 | 0 | 0 | 0 | 1 |
| XLOC_010160 | DSG1         | chr18:28898051-28937393 | 0 | 0 | 0 | 1 |
| XLOC_010161 | DSG4         | chr18:28956739-28993880 | 0 | 0 | 0 | 1 |
| XLOC_010164 | TTR          | chr18:29171729-29178986 | 0 | 0 | 0 | 1 |
| XLOC_010168 | WBP11P1      | chr18:30091625-30094597 | 0 | 0 | 0 | 1 |
| XLOC_010169 | ASXL3        | chr18:31158540-31327399 | 0 | 0 | 0 | 1 |
| XLOC_010170 | DTNA         | chr18:32073253-32471808 | 0 | 0 | 0 | 1 |
| XLOC_010174 | MIR3975      | chr18:33171700-33171770 | 0 | 0 | 0 | 1 |
| XLOC_010181 | MIR4318      | chr18:35237097-35237178 | 0 | 0 | 0 | 1 |
| XLOC_010182 | MIR5583-1    | chr18:36786887-37331959 | 0 | 0 | 0 | 1 |
| XLOC_010187 | SLC14A1      | chr18:43304091-43332485 | 0 | 0 | 0 | 1 |
| XLOC_010188 | SIGLEC15     | chr18:43405544-43422521 | 0 | 0 | 0 | 1 |
| XLOC_010194 | MIR4743      | chr18:46065426-46389586 | 0 | 0 | 0 | 1 |
| XLOC_010195 | MIR1539      | chr18:47007547-47018935 | 0 | 0 | 0 | 1 |
| XLOC_010199 | MAPK4        | chr18:48086483-48258196 | 0 | 0 | 0 | 1 |
| XLOC_010203 | LOC100287225 | chr18:48918411-49088839 | 0 | 0 | 0 | 1 |
| XLOC_010204 | DCC          | chr18:49866541-51062273 | 0 | 0 | 0 | 1 |
| XLOC_010207 | DYNAP        | chr18:52258389-52266724 | 0 | 0 | 0 | 1 |
| XLOC_010209 | MIR4529      | chr18:52889561-53303188 | 0 | 0 | 0 | 1 |
| XLOC_010211 | BOD1L2       | chr18:54814292-54817639 | 0 | 0 | 0 | 1 |
| XLOC_010216 | MIR122       | chr18:56118305-56118390 | 0 | 0 | 0 | 1 |
| XLOC_010219 | OACYLP       | chr18:56702970-56720446 | 0 | 0 | 0 | 1 |
| XLOC_010221 | GRP          | chr18:56887399-56898002 | 0 | 0 | 0 | 1 |
| XLOC_010228 | SERPINB5     | chr18:61144143-61172318 | 0 | 0 | 0 | 1 |
| XLOC_010229 | SERPINB12    | chr18:61223392-61234244 | 0 | 0 | 0 | 1 |
| XLOC_010230 | SERPINB13    | chr18:61254533-61266433 | 0 | 0 | 0 | 1 |
| XLOC_010231 | SERPINB11    | chr18:61370193-61391122 | 0 | 0 | 0 | 1 |
| XLOC_010234 | SERPINB10    | chr18:61582744-61602476 | 0 | 0 | 0 | 1 |
| XLOC_010237 | LOC284294    | chr18:61747242-62090827 | 0 | 0 | 0 | 1 |
| XLOC_010238 | CDH7         | chr18:63417487-63548175 | 0 | 0 | 0 | 1 |
| XLOC_010239 | MIR5011      | chr18:64748820-64748923 | 0 | 0 | 0 | 1 |
| XLOC_010240 | LOC643542    | chr18:65173818-65566856 | 0 | 0 | 0 | 1 |
| XLOC_010244 | LOC100505817 | chr18:70992175-71017124 | 0 | 0 | 0 | 1 |
| XLOC_010246 | C18orf63     | chr18:71983109-72026422 | 0 | 0 | 0 | 1 |
| XLOC_010251 | LOC339298    | chr18:73834952-73857210 | 0 | 0 | 0 | 1 |
| XLOC_010255 | GALR1        | chr18:74962007-74982096 | 0 | 0 | 0 | 1 |
| XLOC_010256 | SALL3        | chr18:76740274-76758969 | 0 | 0 | 0 | 1 |
| XLOC_010260 | KCNG2        | chr18:77623667-77659816 | 0 | 0 | 0 | 1 |
| XLOC_010266 | COLEC12      | chr18:319354-500729     | 0 | 0 | 0 | 1 |
| XLOC_010276 | DLGAP1       | chr18:3496029-4455266   | 0 | 0 | 0 | 1 |
| XLOC_010280 | EPB41L3      | chr18:5392387-5543986   | 0 | 0 | 0 | 1 |
| XLOC_010281 | TMEM200C     | chr18:5890183-5892103   | 0 | 0 | 0 | 1 |
| XLOC_010282 | L3MBTL4      | chr18:5954704-6414910   | 0 | 0 | 0 | 1 |
| XLOC_010283 | MIR4317      | chr18:5954704-6414910   | 0 | 0 | 0 | 1 |
| XLOC_010284 | LINC00668    | chr18:6925472-6929868   | 0 | 0 | 0 | 1 |
| XLOC_010286 | LOC100192426 | chr18:7567313-8406859   | 0 | 0 | 0 | 1 |
| XLOC_010288 | PIEZO2       | chr18:10670243-11148761 | 0 | 0 | 0 | 1 |
| XLOC_010294 | LOC100288122 | chr18:13218728-13652753 | 0 | 0 | 0 | 1 |
| XLOC_010298 | CXADRP3      | chr18:14477953-14498705 | 0 | 0 | 0 | 1 |
| XLOC_010299 | POTEC        | chr18:14511736-14543599 | 0 | 0 | 0 | 1 |
| XLOC_010300 | LOC644669    | chr18:15313554-15325918 | 0 | 0 | 0 | 1 |
| XLOC_010304 | MIR133A1     | chr18:19321544-19450912 | 0 | 0 | 0 | 1 |
| XLOC_010305 | MIR1-2       | chr18:19321544-19450912 | 0 | 0 | 0 | 1 |
| XLOC_010306 | CTAGE1       | chr18:19993563-19997878 | 0 | 0 | 0 | 1 |

|             |              |                         |   |   |   |   |
|-------------|--------------|-------------------------|---|---|---|---|
| XLOC_010309 | ANKRD29      | chr18:21179977-21242849 | 0 | 0 | 0 | 1 |
| XLOC_010314 | LOC728606    | chr18:24267584-24283602 | 0 | 0 | 0 | 1 |
| XLOC_010316 | CHST9        | chr18:24432007-24765302 | 0 | 0 | 0 | 1 |
| XLOC_010319 | DSC2         | chr18:28645941-28682388 | 0 | 0 | 0 | 1 |
| XLOC_010320 | DSC1         | chr18:28709213-28742819 | 0 | 0 | 0 | 1 |
| XLOC_010323 | SLC25A52     | chr18:29339658-29340843 | 0 | 0 | 0 | 1 |
| XLOC_010327 | CCDC178      | chr18:30517365-31020685 | 0 | 0 | 0 | 1 |
| XLOC_010328 | NOL4         | chr18:31431063-31803515 | 0 | 0 | 0 | 1 |
| XLOC_010333 | MIR187       | chr18:33484780-33484889 | 0 | 0 | 0 | 1 |
| XLOC_010337 | CELF4        | chr18:34823007-35146000 | 0 | 0 | 0 | 1 |
| XLOC_010339 | MIR5583-2    | chr18:36786887-37331959 | 0 | 0 | 0 | 1 |
| XLOC_010340 | KC6          | chr18:39060235-39100561 | 0 | 0 | 0 | 1 |
| XLOC_010341 | RIT2         | chr18:40323182-40695657 | 0 | 0 | 0 | 1 |
| XLOC_010342 | SYT4         | chr18:40847856-40857615 | 0 | 0 | 0 | 1 |
| XLOC_010343 | MIR4319      | chr18:42260137-42648475 | 0 | 0 | 0 | 1 |
| XLOC_010347 | LOXHD1       | chr18:44056934-44236996 | 0 | 0 | 0 | 1 |
| XLOC_010350 | TCEB3CL2     | chr18:44526786-44628614 | 0 | 0 | 0 | 1 |
| XLOC_010351 | TCEB3CL2     | chr18:44526786-44628614 | 0 | 0 | 0 | 1 |
| XLOC_010352 | TCEB3C       | chr18:44526786-44628614 | 0 | 0 | 0 | 1 |
| XLOC_010353 | TCEB3B       | chr18:44526786-44628614 | 0 | 0 | 0 | 1 |
| XLOC_010357 | ZBTB7C       | chr18:45553638-45663680 | 0 | 0 | 0 | 1 |
| XLOC_010360 | MIR4744      | chr18:46570171-46987079 | 0 | 0 | 0 | 1 |
| XLOC_010363 | SNORD58A     | chr18:47007547-47018935 | 0 | 0 | 0 | 1 |
| XLOC_010366 | MIR4320      | chr18:47349155-47721451 | 0 | 0 | 0 | 1 |
| XLOC_010374 | STARD6       | chr18:51851061-51880943 | 0 | 0 | 0 | 1 |
| XLOC_010375 | CCDC68       | chr18:52568739-52626739 | 0 | 0 | 0 | 1 |
| XLOC_010377 | LOC100505474 | chr18:53750586-53804767 | 0 | 0 | 0 | 1 |
| XLOC_010383 | MIR3591      | chr18:56118305-56118390 | 0 | 0 | 0 | 1 |
| XLOC_010385 | RAX          | chr18:56934266-56940625 | 0 | 0 | 0 | 1 |
| XLOC_010386 | CPLX4        | chr18:56962635-56985881 | 0 | 0 | 0 | 1 |
| XLOC_010389 | MC4R         | chr18:58038563-58040001 | 0 | 0 | 0 | 1 |
| XLOC_010395 | SERPINB4     | chr18:61304492-61311502 | 0 | 0 | 0 | 1 |
| XLOC_010396 | SERPINB3     | chr18:61322430-61329197 | 0 | 0 | 0 | 1 |
| XLOC_010397 | LINC00305    | chr18:61747242-62090827 | 0 | 0 | 0 | 1 |
| XLOC_010398 | LOC400654    | chr18:61747242-62090827 | 0 | 0 | 0 | 1 |
| XLOC_010399 | CDH19        | chr18:64168423-64271375 | 0 | 0 | 0 | 1 |
| XLOC_010404 | LOC100505776 | chr18:69187199-69246192 | 0 | 0 | 0 | 1 |
| XLOC_010405 | CBLN2        | chr18:70203914-70211723 | 0 | 0 | 0 | 1 |
| XLOC_010406 | NETO1        | chr18:70409548-70534810 | 0 | 0 | 0 | 1 |
| XLOC_010407 | LOC400655    | chr18:70821292-70931733 | 0 | 0 | 0 | 1 |
| XLOC_010410 | FAM69C       | chr18:72102962-72124503 | 0 | 0 | 0 | 1 |
| XLOC_010413 | C18orf62     | chr18:73121826-73139589 | 0 | 0 | 0 | 1 |
| XLOC_010415 | LOC100131655 | chr18:74506687-74534251 | 0 | 0 | 0 | 1 |
| XLOC_010420 | OR4F17       | chr19:110678-111596     | 0 | 0 | 0 | 1 |
| XLOC_010427 | FGF22        | chr19:639925-643604     | 0 | 0 | 0 | 1 |
| XLOC_010429 | PALM         | chr19:708952-748330     | 0 | 0 | 0 | 1 |
| XLOC_010432 | MIR4745      | chr19:797391-812327     | 0 | 0 | 0 | 1 |
| XLOC_010433 | MIR3187      | chr19:812487-821952     | 0 | 0 | 0 | 1 |
| XLOC_010438 | KISS1R       | chr19:917341-921015     | 0 | 0 | 0 | 1 |
| XLOC_010441 | GRIN3B       | chr19:1000436-1021141   | 0 | 0 | 0 | 1 |
| XLOC_010458 | PLK5         | chr19:1524072-1535455   | 0 | 0 | 0 | 1 |
| XLOC_010459 | ONECUT3      | chr19:1753661-1775444   | 0 | 0 | 0 | 1 |
| XLOC_010486 | GIPC3        | chr19:3585568-3593539   | 0 | 0 | 0 | 1 |
| XLOC_010491 | NMRK2        | chr19:3933100-3942414   | 0 | 0 | 0 | 1 |
| XLOC_010501 | MIR4746      | chr19:4445002-4457791   | 0 | 0 | 0 | 1 |
| XLOC_010506 | MIR7-3       | chr19:4769116-4772568   | 0 | 0 | 0 | 1 |
| XLOC_010509 | MIR4747      | chr19:4909509-4962165   | 0 | 0 | 0 | 1 |
| XLOC_010511 | ZNRF4        | chr19:5455425-5456867   | 0 | 0 | 0 | 1 |
| XLOC_010515 | CATSPERD     | chr19:5720687-5778742   | 0 | 0 | 0 | 1 |
| XLOC_010528 | MBD3L5       | chr19:7030593-7033022   | 0 | 0 | 0 | 1 |
| XLOC_010529 | MBD3L2       | chr19:7049350-7051746   | 0 | 0 | 0 | 1 |
| XLOC_010539 | RETN         | chr19:7733971-7735340   | 0 | 0 | 0 | 1 |
| XLOC_010549 | CCL25        | chr19:8117645-8127547   | 0 | 0 | 0 | 1 |
| XLOC_010556 | OR2Z1        | chr19:8841390-8842335   | 0 | 0 | 0 | 1 |
| XLOC_010557 | MBD3L1       | chr19:8953268-8954016   | 0 | 0 | 0 | 1 |
| XLOC_010558 | OR1M1        | chr19:9203920-9204862   | 0 | 0 | 0 | 1 |
| XLOC_010561 | OR7E24       | chr19:9361719-9362739   | 0 | 0 | 0 | 1 |
| XLOC_010566 | RDH8         | chr19:10123924-10132954 | 0 | 0 | 0 | 1 |
| XLOC_010567 | C3P1         | chr19:10152031-10184813 | 0 | 0 | 0 | 1 |
| XLOC_010570 | SNORD105     | chr19:10216898-10230599 | 0 | 0 | 0 | 1 |
| XLOC_010571 | SNORD105B    | chr19:10216898-10230599 | 0 | 0 | 0 | 1 |
| XLOC_010572 | MIR4322      | chr19:10332108-10341948 | 0 | 0 | 0 | 1 |
| XLOC_010579 | MIR1238      | chr19:10654646-10676702 | 0 | 0 | 0 | 1 |
| XLOC_010584 | MIR638       | chr19:10828728-10942586 | 0 | 0 | 0 | 1 |
| XLOC_010585 | MIR4748      | chr19:10828728-10942586 | 0 | 0 | 0 | 1 |
| XLOC_010592 | TSPAN16      | chr19:11406823-11450344 | 0 | 0 | 0 | 1 |
| XLOC_010613 | BEST2        | chr19:12863406-12869271 | 0 | 0 | 0 | 1 |
| XLOC_010628 | MIR181C      | chr19:13985512-13985622 | 0 | 0 | 0 | 1 |
| XLOC_010642 | OR7C2        | chr19:15052300-15053260 | 0 | 0 | 0 | 1 |



|             |               |                         |   |   |   |   |
|-------------|---------------|-------------------------|---|---|---|---|
| XLOC_010643 | CCDC105       | chr19:15121538-15134083 | 0 | 0 | 0 | 1 |
| XLOC_010644 | CASP14        | chr19:15160290-15169103 | 0 | 0 | 0 | 1 |
| XLOC_010645 | OR111         | chr19:15197876-15198944 | 0 | 0 | 0 | 1 |
| XLOC_010647 | MIR1470       | chr19:15532317-15560762 | 0 | 0 | 0 | 1 |
| XLOC_010648 | CYP4F22       | chr19:15619335-15663128 | 0 | 0 | 0 | 1 |
| XLOC_010649 | CYP4F8        | chr19:15726028-15740447 | 0 | 0 | 0 | 1 |
| XLOC_010651 | CYP4F12       | chr19:15783827-15807984 | 0 | 0 | 0 | 1 |
| XLOC_010652 | OR10H2        | chr19:15838833-15839862 | 0 | 0 | 0 | 1 |
| XLOC_010653 | OR10H3        | chr19:15852202-15853153 | 0 | 0 | 0 | 1 |
| XLOC_010654 | OR10H5        | chr19:15904858-15905806 | 0 | 0 | 0 | 1 |
| XLOC_010656 | OR10H4        | chr19:16059817-16060768 | 0 | 0 | 0 | 1 |
| XLOC_010657 | LINC00661     | chr19:16126443-16138272 | 0 | 0 | 0 | 1 |
| XLOC_010658 | FLJ25328      | chr19:16144522-16152918 | 0 | 0 | 0 | 1 |
| XLOC_010669 | F2RL3         | chr19:16999825-17002830 | 0 | 0 | 0 | 1 |
| XLOC_010685 | B3GNT3        | chr19:17905918-17924385 | 0 | 0 | 0 | 1 |
| XLOC_010688 | SLC5A5        | chr19:17982781-18005983 | 0 | 0 | 0 | 1 |
| XLOC_010696 | MIR3188       | chr19:18392886-18392971 | 0 | 0 | 0 | 1 |
| XLOC_010699 | MIR3189       | chr19:18496967-18499986 | 0 | 0 | 0 | 1 |
| XLOC_010712 | NCAN          | chr19:19322781-19363061 | 0 | 0 | 0 | 1 |
| XLOC_010732 | ZNF257        | chr19:22235265-22273903 | 0 | 0 | 0 | 1 |
| XLOC_010733 | ZNF729        | chr19:22469251-22499978 | 0 | 0 | 0 | 1 |
| XLOC_010734 | LOC440518     | chr19:22779058-22786352 | 0 | 0 | 0 | 1 |
| XLOC_010737 | ZNF726        | chr19:24097683-24116769 | 0 | 0 | 0 | 1 |
| XLOC_010739 | LOC148145     | chr19:29456037-29460055 | 0 | 0 | 0 | 1 |
| XLOC_010740 | LOC100505835  | chr19:29493461-29504862 | 0 | 0 | 0 | 1 |
| XLOC_010741 | VSTM2B        | chr19:30017490-30055226 | 0 | 0 | 0 | 1 |
| XLOC_010746 | ZNF536        | chr19:30863327-31048965 | 0 | 0 | 0 | 1 |
| XLOC_010747 | DKFZp566F0947 | chr19:31640782-31641311 | 0 | 0 | 0 | 1 |
| XLOC_010748 | THEG5         | chr19:32083186-32083945 | 0 | 0 | 0 | 1 |
| XLOC_010761 | CHST8         | chr19:34112860-34264414 | 0 | 0 | 0 | 1 |
| XLOC_010769 | SCGB2B3P      | chr19:35136777-35136957 | 0 | 0 | 0 | 1 |
| XLOC_010775 | HPN           | chr19:35531409-35597208 | 0 | 0 | 0 | 1 |
| XLOC_010783 | MAG           | chr19:35782988-35804709 | 0 | 0 | 0 | 1 |
| XLOC_010785 | FFAR1         | chr19:35842444-35843367 | 0 | 0 | 0 | 1 |
| XLOC_010786 | FFAR3         | chr19:35849487-35851389 | 0 | 0 | 0 | 1 |
| XLOC_010787 | LOC100128682  | chr19:35896508-35907742 | 0 | 0 | 0 | 1 |
| XLOC_010788 | FFAR2         | chr19:35940616-35942669 | 0 | 0 | 0 | 1 |
| XLOC_010802 | KIRREL2       | chr19:36347809-36358048 | 0 | 0 | 0 | 1 |
| XLOC_010812 | LOC100134317  | chr19:36802244-36803570 | 0 | 0 | 0 | 1 |
| XLOC_010813 | LOC644189     | chr19:36912075-36913799 | 0 | 0 | 0 | 1 |
| XLOC_010824 | ZNF570        | chr19:37959981-37976242 | 0 | 0 | 0 | 1 |
| XLOC_010827 | LOC644554     | chr19:38308050-38345836 | 0 | 0 | 0 | 1 |
| XLOC_010839 | LGALS7B       | chr19:39279849-39282394 | 0 | 0 | 0 | 1 |
| XLOC_010845 | IFNL2         | chr19:39759156-39760732 | 0 | 0 | 0 | 1 |
| XLOC_010846 | IFNL1         | chr19:39786964-39789312 | 0 | 0 | 0 | 1 |
| XLOC_010854 | SELV          | chr19:40005752-40011326 | 0 | 0 | 0 | 1 |
| XLOC_010855 | LGALS13       | chr19:40093168-40098114 | 0 | 0 | 0 | 1 |
| XLOC_010857 | LGALS16       | chr19:40146557-40151287 | 0 | 0 | 0 | 1 |
| XLOC_010858 | LGALS17A      | chr19:40170013-40177013 | 0 | 0 | 0 | 1 |
| XLOC_010859 | LGALS14       | chr19:40194945-40200088 | 0 | 0 | 0 | 1 |
| XLOC_010860 | LEUTX         | chr19:40267233-40276775 | 0 | 0 | 0 | 1 |
| XLOC_010871 | CYP2G1P       | chr19:41396730-41406413 | 0 | 0 | 0 | 1 |
| XLOC_010872 | CYP2B7P1      | chr19:41430169-41456565 | 0 | 0 | 0 | 1 |
| XLOC_010873 | CYP2B6        | chr19:41497203-41524301 | 0 | 0 | 0 | 1 |
| XLOC_010874 | CYP2A13       | chr19:41594355-41602100 | 0 | 0 | 0 | 1 |
| XLOC_010876 | CYP2S1        | chr19:41699114-41713444 | 0 | 0 | 0 | 1 |
| XLOC_010882 | C19orf69      | chr19:41949062-41950670 | 0 | 0 | 0 | 1 |
| XLOC_010883 | CEACAM21      | chr19:42082530-42093197 | 0 | 0 | 0 | 1 |
| XLOC_010884 | CEACAM5       | chr19:42212529-42234437 | 0 | 0 | 0 | 1 |
| XLOC_010885 | CEACAM6       | chr19:42259397-42276113 | 0 | 0 | 0 | 1 |
| XLOC_010886 | CEACAM3       | chr19:42300533-42315591 | 0 | 0 | 0 | 1 |
| XLOC_010887 | DMRTC2        | chr19:42349085-42356397 | 0 | 0 | 0 | 1 |
| XLOC_010899 | LOC100289650  | chr19:43326014-43331030 | 0 | 0 | 0 | 1 |
| XLOC_010900 | PRG1          | chr19:43853207-43853700 | 0 | 0 | 0 | 1 |
| XLOC_010901 | CD177         | chr19:43857824-43867480 | 0 | 0 | 0 | 1 |
| XLOC_010902 | TEX101        | chr19:43892762-43922767 | 0 | 0 | 0 | 1 |
| XLOC_010921 | IGSF23        | chr19:45116939-45140081 | 0 | 0 | 0 | 1 |
| XLOC_010924 | CEACAM16      | chr19:45202420-45213986 | 0 | 0 | 0 | 1 |
| XLOC_010926 | CBLC          | chr19:45281125-45303903 | 0 | 0 | 0 | 1 |
| XLOC_010933 | APOC2,APOC4   | chr19:45445494-45452822 | 0 | 0 | 0 | 1 |
| XLOC_010948 | MIR642A       | chr19:46171501-46185717 | 0 | 0 | 0 | 1 |
| XLOC_010953 | MIR769        | chr19:46522189-46522307 | 0 | 0 | 0 | 1 |
| XLOC_010955 | DKFZp434J0226 | chr19:46713498-46718094 | 0 | 0 | 0 | 1 |
| XLOC_010956 | IGFL1         | chr19:46720994-46846690 | 0 | 0 | 0 | 1 |
| XLOC_010965 | MIR3190       | chr19:47724078-47736023 | 0 | 0 | 0 | 1 |
| XLOC_010978 | SNAR-A13      | chr19:48410934-48411056 | 0 | 0 | 0 | 1 |
| XLOC_010979 | SNAR-C2       | chr19:48416307-48416427 | 0 | 0 | 0 | 1 |
| XLOC_010980 | SNAR-A2       | chr19:48421685-48421807 | 0 | 0 | 0 | 1 |
| XLOC_010981 | SNAR-A8       | chr19:48427035-48427156 | 0 | 0 | 0 | 1 |

|             |           |                         |   |   |   |   |
|-------------|-----------|-------------------------|---|---|---|---|
| XLOC_010982 | SNAR-C5   | chr19:48432074-48432194 | 0 | 0 | 0 | 1 |
| XLOC_010983 | SNAR-A2   | chr19:48437437-48437559 | 0 | 0 | 0 | 1 |
| XLOC_010984 | SNAR-C4   | chr19:48442797-48442917 | 0 | 0 | 0 | 1 |
| XLOC_010985 | SNAR-A13  | chr19:48448178-48448300 | 0 | 0 | 0 | 1 |
| XLOC_010986 | SNAR-C3   | chr19:48453552-48453671 | 0 | 0 | 0 | 1 |
| XLOC_010987 | SNAR-C5   | chr19:48458938-48459058 | 0 | 0 | 0 | 1 |
| XLOC_010988 | ELSPBP1   | chr19:48497907-48528410 | 0 | 0 | 0 | 1 |
| XLOC_011009 | CGB2      | chr19:49535129-49536495 | 0 | 0 | 0 | 1 |
| XLOC_011010 | SNAR-G1   | chr19:49540276-49540404 | 0 | 0 | 0 | 1 |
| XLOC_011023 | SNORD32A  | chr19:49990810-49995564 | 0 | 0 | 0 | 1 |
| XLOC_011025 | SNORD34   | chr19:49990810-49995564 | 0 | 0 | 0 | 1 |
| XLOC_011028 | SNORD35B  | chr19:49999621-50002969 | 0 | 0 | 0 | 1 |
| XLOC_011036 | MIR5088   | chr19:50180408-50191707 | 0 | 0 | 0 | 1 |
| XLOC_011042 | MIR4749   | chr19:50341902-50363999 | 0 | 0 | 0 | 1 |
| XLOC_011044 | MIR4750   | chr19:50380681-50392007 | 0 | 0 | 0 | 1 |
| XLOC_011058 | GPR32     | chr19:51273720-51274989 | 0 | 0 | 0 | 1 |
| XLOC_011061 | KLK3      | chr19:51358170-51364020 | 0 | 0 | 0 | 1 |
| XLOC_011062 | KLK2      | chr19:51376688-51383823 | 0 | 0 | 0 | 1 |
| XLOC_011064 | SIGLEC7   | chr19:51645557-51656783 | 0 | 0 | 0 | 1 |
| XLOC_011065 | SIGLEC17P | chr19:51670584-51676780 | 0 | 0 | 0 | 1 |
| XLOC_011067 | SIGLECL1  | chr19:51760963-51772582 | 0 | 0 | 0 | 1 |
| XLOC_011070 | CEACAM18  | chr19:51979837-51986611 | 0 | 0 | 0 | 1 |
| XLOC_011072 | MIR99B    | chr19:52195864-52195934 | 0 | 0 | 0 | 1 |
| XLOC_011073 | MIRLET7E  | chr19:52196038-52196117 | 0 | 0 | 0 | 1 |
| XLOC_011074 | MIR125A   | chr19:52196506-52196592 | 0 | 0 | 0 | 1 |
| XLOC_011076 | FPR2      | chr19:52264452-52273779 | 0 | 0 | 0 | 1 |
| XLOC_011081 | MIR643    | chr19:52772823-52795976 | 0 | 0 | 0 | 1 |
| XLOC_011086 | ZNF534    | chr19:52934666-52942699 | 0 | 0 | 0 | 1 |
| XLOC_011093 | ZNF818P   | chr19:53716200-53719355 | 0 | 0 | 0 | 1 |
| XLOC_011095 | FAM90A27P | chr19:53785542-53787602 | 0 | 0 | 0 | 1 |
| XLOC_011102 | DPRX      | chr19:54135309-54140263 | 0 | 0 | 0 | 1 |
| XLOC_011103 | MIR512-2  | chr19:54169926-54170024 | 0 | 0 | 0 | 1 |
| XLOC_011104 | MIR512-2  | chr19:54172410-54172508 | 0 | 0 | 0 | 1 |
| XLOC_011105 | MIR1323   | chr19:54175221-54175294 | 0 | 0 | 0 | 1 |
| XLOC_011106 | MIR498    | chr19:54177450-54177574 | 0 | 0 | 0 | 1 |
| XLOC_011107 | MIR520E   | chr19:54178964-54179051 | 0 | 0 | 0 | 1 |
| XLOC_011108 | MIR515-2  | chr19:54182256-54182339 | 0 | 0 | 0 | 1 |
| XLOC_011109 | MIR519E   | chr19:54183193-54183277 | 0 | 0 | 0 | 1 |
| XLOC_011110 | MIR520F   | chr19:54185412-54185499 | 0 | 0 | 0 | 1 |
| XLOC_011111 | MIR515-1  | chr19:54188262-54188345 | 0 | 0 | 0 | 1 |
| XLOC_011112 | MIR519C   | chr19:54189722-54189809 | 0 | 0 | 0 | 1 |
| XLOC_011113 | MIR1283-1 | chr19:54191734-54191821 | 0 | 0 | 0 | 1 |
| XLOC_011114 | MIR520A   | chr19:54194134-54194219 | 0 | 0 | 0 | 1 |
| XLOC_011115 | MIR526B   | chr19:54197646-54197729 | 0 | 0 | 0 | 1 |
| XLOC_011116 | MIR519B   | chr19:54198466-54198547 | 0 | 0 | 0 | 1 |
| XLOC_011117 | MIR525    | chr19:54200786-54200871 | 0 | 0 | 0 | 1 |
| XLOC_011118 | MIR523    | chr19:54201638-54201725 | 0 | 0 | 0 | 1 |
| XLOC_011119 | MIR518F   | chr19:54203268-54203355 | 0 | 0 | 0 | 1 |
| XLOC_011120 | MIR520B   | chr19:54204480-54204541 | 0 | 0 | 0 | 1 |
| XLOC_011121 | MIR518B   | chr19:54205990-54206073 | 0 | 0 | 0 | 1 |
| XLOC_011122 | MIR526A1  | chr19:54209505-54209590 | 0 | 0 | 0 | 1 |
| XLOC_011123 | MIR520C   | chr19:54210706-54210793 | 0 | 0 | 0 | 1 |
| XLOC_011124 | MIR518C   | chr19:54211988-54212089 | 0 | 0 | 0 | 1 |
| XLOC_011125 | MIR524    | chr19:54214255-54214342 | 0 | 0 | 0 | 1 |
| XLOC_011126 | MIR517A   | chr19:54215521-54215608 | 0 | 0 | 0 | 1 |
| XLOC_011127 | MIR519D   | chr19:54216600-54216688 | 0 | 0 | 0 | 1 |
| XLOC_011128 | MIR521-2  | chr19:54219847-54219934 | 0 | 0 | 0 | 1 |
| XLOC_011129 | MIR520D   | chr19:54223349-54223436 | 0 | 0 | 0 | 1 |
| XLOC_011130 | MIR517B   | chr19:54224329-54224396 | 0 | 0 | 0 | 1 |
| XLOC_011131 | MIR520G   | chr19:54225419-54225509 | 0 | 0 | 0 | 1 |
| XLOC_011132 | MIR516B2  | chr19:54228695-54228780 | 0 | 0 | 0 | 1 |
| XLOC_011133 | MIR526A2  | chr19:54230175-54230240 | 0 | 0 | 0 | 1 |
| XLOC_011134 | MIR518E   | chr19:54233091-54233179 | 0 | 0 | 0 | 1 |
| XLOC_011135 | MIR518A1  | chr19:54234259-54234344 | 0 | 0 | 0 | 1 |
| XLOC_011136 | MIR518D   | chr19:54238130-54238217 | 0 | 0 | 0 | 1 |
| XLOC_011137 | MIR516B1  | chr19:54240098-54240188 | 0 | 0 | 0 | 1 |
| XLOC_011138 | MIR518A2  | chr19:54242586-54242673 | 0 | 0 | 0 | 1 |
| XLOC_011139 | MIR517C   | chr19:54244566-54244661 | 0 | 0 | 0 | 1 |
| XLOC_011140 | MIR520H   | chr19:54245765-54245853 | 0 | 0 | 0 | 1 |
| XLOC_011141 | MIR521-1  | chr19:54251889-54251976 | 0 | 0 | 0 | 1 |
| XLOC_011142 | MIR522    | chr19:54254464-54254551 | 0 | 0 | 0 | 1 |
| XLOC_011143 | MIR519A1  | chr19:54255650-54255735 | 0 | 0 | 0 | 1 |
| XLOC_011144 | MIR527    | chr19:54257271-54257356 | 0 | 0 | 0 | 1 |
| XLOC_011145 | MIR516A1  | chr19:54259994-54260084 | 0 | 0 | 0 | 1 |
| XLOC_011146 | MIR1283-2 | chr19:54261485-54261572 | 0 | 0 | 0 | 1 |
| XLOC_011147 | MIR516A2  | chr19:54264386-54264476 | 0 | 0 | 0 | 1 |
| XLOC_011148 | MIR519A2  | chr19:54265597-54265684 | 0 | 0 | 0 | 1 |
| XLOC_011149 | MIR371A   | chr19:54290928-54290996 | 0 | 0 | 0 | 1 |
| XLOC_011150 | MIR372    | chr19:54291143-54291210 | 0 | 0 | 0 | 1 |

|             |                      |                         |   |   |   |   |
|-------------|----------------------|-------------------------|---|---|---|---|
| XLOC_011151 | MIR373               | chr19:54291958-54292027 | 0 | 0 | 0 | 1 |
| XLOC_011162 | MIR4752              | chr19:54785963-54786035 | 0 | 0 | 0 | 1 |
| XLOC_011163 | TTYH1                | chr19:54926604-54947899 | 0 | 0 | 0 | 1 |
| XLOC_011166 | KIR3DX1              | chr19:55043908-55055195 | 0 | 0 | 0 | 1 |
| XLOC_011167 | LILRA2               | chr19:55085256-55099027 | 0 | 0 | 0 | 1 |
| XLOC_011168 | LILRA1               | chr19:55105040-55113687 | 0 | 0 | 0 | 1 |
| XLOC_011170 | LILRB4               | chr19:55174123-55179846 | 0 | 0 | 0 | 1 |
| XLOC_011171 | LILRP2               | chr19:55219600-55224887 | 0 | 0 | 0 | 1 |
| XLOC_011172 | KIR3DL3              | chr19:55235983-55248003 | 0 | 0 | 0 | 1 |
| XLOC_011173 | KIR2DL3              | chr19:55249973-55264504 | 0 | 0 | 0 | 1 |
| XLOC_011174 | KIR2DL1              | chr19:55281264-55295778 | 0 | 0 | 0 | 1 |
| XLOC_011175 | KIR2DL4,LOC100287534 | chr19:55304499-55325972 | 0 | 0 | 0 | 1 |
| XLOC_011176 | KIR3DL1              | chr19:55327892-55342233 | 0 | 0 | 0 | 1 |
| XLOC_011177 | KIR2DS4              | chr19:55344173-55360023 | 0 | 0 | 0 | 1 |
| XLOC_011178 | KIR3DL2              | chr19:55361897-55378670 | 0 | 0 | 0 | 1 |
| XLOC_011180 | NCR1                 | chr19:55417507-55424439 | 0 | 0 | 0 | 1 |
| XLOC_011181 | NLRP2                | chr19:55476651-55512510 | 0 | 0 | 0 | 1 |
| XLOC_011199 | NLRP8                | chr19:56459197-56499995 | 0 | 0 | 0 | 1 |
| XLOC_011200 | NLRP5                | chr19:56511091-56573174 | 0 | 0 | 0 | 1 |
| XLOC_011202 | GALP                 | chr19:56687388-56697144 | 0 | 0 | 0 | 1 |
| XLOC_011206 | LOC100128252         | chr19:56989242-57006805 | 0 | 0 | 0 | 1 |
| XLOC_011207 | ZNF471               | chr19:57019211-57040269 | 0 | 0 | 0 | 1 |
| XLOC_011208 | ZFP28                | chr19:57050316-57068170 | 0 | 0 | 0 | 1 |
| XLOC_011209 | ZNF470               | chr19:57078889-57094262 | 0 | 0 | 0 | 1 |
| XLOC_011212 | PEG3-AS1             | chr19:57285922-57352097 | 0 | 0 | 0 | 1 |
| XLOC_011213 | MIMT1                | chr19:57352269-57359922 | 0 | 0 | 0 | 1 |
| XLOC_011229 | ZNF530               | chr19:58111252-58119637 | 0 | 0 | 0 | 1 |
| XLOC_011230 | ZNF134               | chr19:58125829-58133636 | 0 | 0 | 0 | 1 |
| XLOC_011232 | ZSCAN4               | chr19:58180302-58190520 | 0 | 0 | 0 | 1 |
| XLOC_011239 | ZSCAN1               | chr19:58545433-58565999 | 0 | 0 | 0 | 1 |
| XLOC_011240 | ZNF135               | chr19:58570606-58581110 | 0 | 0 | 0 | 1 |
| XLOC_011247 | LOC646862            | chr19:58907456-58908446 | 0 | 0 | 0 | 1 |
| XLOC_011256 | FAM138A              | chr19:76219-77690       | 0 | 0 | 0 | 1 |
| XLOC_011260 | THEG                 | chr19:362056-376013     | 0 | 0 | 0 | 1 |
| XLOC_011293 | MIR1227              | chr19:2233154-2236328   | 0 | 0 | 0 | 1 |
| XLOC_011307 | C19orf77             | chr19:3474404-3480540   | 0 | 0 | 0 | 1 |
| XLOC_011316 | ZFR2                 | chr19:3804021-3869027   | 0 | 0 | 0 | 1 |
| XLOC_011320 | SNORD37              | chr19:3976053-3985461   | 0 | 0 | 0 | 1 |
| XLOC_011336 | ARRDC5               | chr19:4890448-4902879   | 0 | 0 | 0 | 1 |
| XLOC_011358 | TUBB4A               | chr19:6494329-6502330   | 0 | 0 | 0 | 1 |
| XLOC_011359 | CD70                 | chr19:6585849-6591163   | 0 | 0 | 0 | 1 |
| XLOC_011366 | MBD3L4               | chr19:7037754-7040184   | 0 | 0 | 0 | 1 |
| XLOC_011367 | MBD3L3               | chr19:7056215-7058645   | 0 | 0 | 0 | 1 |
| XLOC_011374 | CLEC4G               | chr19:7793842-7797057   | 0 | 0 | 0 | 1 |
| XLOC_011375 | CD209                | chr19:7804880-7812464   | 0 | 0 | 0 | 1 |
| XLOC_011377 | LOC388499            | chr19:7943516-7945117   | 0 | 0 | 0 | 1 |
| XLOC_011386 | MIR4999              | chr19:8439259-8469317   | 0 | 0 | 0 | 1 |
| XLOC_011390 | ADAMTS10             | chr19:8645125-8675588   | 0 | 0 | 0 | 1 |
| XLOC_011391 | ACTL9                | chr19:8807750-8809172   | 0 | 0 | 0 | 1 |
| XLOC_011394 | OR7G2                | chr19:9212944-9213982   | 0 | 0 | 0 | 1 |
| XLOC_011395 | OR7G1                | chr19:9225503-9226439   | 0 | 0 | 0 | 1 |
| XLOC_011396 | OR7G3                | chr19:9236687-9237626   | 0 | 0 | 0 | 1 |
| XLOC_011397 | OR7D4                | chr19:9324525-9325547   | 0 | 0 | 0 | 1 |
| XLOC_011400 | ZNF560               | chr19:9577030-9609279   | 0 | 0 | 0 | 1 |
| XLOC_011405 | ZNF812               | chr19:9800813-9811493   | 0 | 0 | 0 | 1 |
| XLOC_011409 | COL5A3               | chr19:10070236-10121147 | 0 | 0 | 0 | 1 |
| XLOC_011421 | S1PR5                | chr19:10623417-10628668 | 0 | 0 | 0 | 1 |
| XLOC_011426 | MIR199A1             | chr19:10828728-10942586 | 0 | 0 | 0 | 1 |
| XLOC_011458 | SNORD41              | chr19:12810007-12834810 | 0 | 0 | 0 | 1 |
| XLOC_011464 | KLF1                 | chr19:12995236-12998017 | 0 | 0 | 0 | 1 |
| XLOC_011473 | MIR27A               | chr19:13947253-13947331 | 0 | 0 | 0 | 1 |
| XLOC_011474 | MIR23A               | chr19:13947400-13947473 | 0 | 0 | 0 | 1 |
| XLOC_011488 | EMR3                 | chr19:14730050-14785730 | 0 | 0 | 0 | 1 |
| XLOC_011490 | OR7C1                | chr19:14909985-14910948 | 0 | 0 | 0 | 1 |
| XLOC_011491 | OR7A5                | chr19:14937138-14939276 | 0 | 0 | 0 | 1 |
| XLOC_011492 | OR7A10               | chr19:14951759-14952689 | 0 | 0 | 0 | 1 |
| XLOC_011493 | OR7A17               | chr19:14991237-14992167 | 0 | 0 | 0 | 1 |
| XLOC_011502 | RASAL3               | chr19:15562437-15575382 | 0 | 0 | 0 | 1 |
| XLOC_011503 | PGLYRP2              | chr19:15579456-15590315 | 0 | 0 | 0 | 1 |
| XLOC_011504 | CYP4F24P             | chr19:15870143-15890798 | 0 | 0 | 0 | 1 |
| XLOC_011505 | OR10H1               | chr19:15917816-15918936 | 0 | 0 | 0 | 1 |
| XLOC_011531 | LOC729966            | chr19:18360759-18366229 | 0 | 0 | 0 | 1 |
| XLOC_011540 | COMP                 | chr19:18893582-18902114 | 0 | 0 | 0 | 1 |
| XLOC_011560 | MIR1270-2            | chr19:20510080-20510163 | 0 | 0 | 0 | 1 |
| XLOC_011561 | ZNF826P              | chr19:20578625-20607771 | 0 | 0 | 0 | 1 |
| XLOC_011562 | MIR1270-2            | chr19:20578625-20607771 | 0 | 0 | 0 | 1 |
| XLOC_011569 | ZNF676               | chr19:22361902-22379753 | 0 | 0 | 0 | 1 |
| XLOC_011570 | ZNF98                | chr19:22573898-22605148 | 0 | 0 | 0 | 1 |
| XLOC_011572 | ZNF728               | chr19:23157684-23186010 | 0 | 0 | 0 | 1 |

|             |              |                         |   |   |   |   |
|-------------|--------------|-------------------------|---|---|---|---|
| XLOC_011580 | LOC284395    | chr19:29777917-30016659 | 0 | 0 | 0 | 1 |
| XLOC_011582 | TSHZ3        | chr19:31765850-31840190 | 0 | 0 | 0 | 1 |
| XLOC_011594 | LOC400685    | chr19:35307057-35323773 | 0 | 0 | 0 | 1 |
| XLOC_011595 | LOC100652909 | chr19:35382932-35389847 | 0 | 0 | 0 | 1 |
| XLOC_011597 | LOC100128675 | chr19:35531409-35597208 | 0 | 0 | 0 | 1 |
| XLOC_011604 | ATP4A        | chr19:36041094-36054560 | 0 | 0 | 0 | 1 |
| XLOC_011609 | PRODH2       | chr19:36290891-36304201 | 0 | 0 | 0 | 1 |
| XLOC_011612 | TYROBP       | chr19:36395302-36399211 | 0 | 0 | 0 | 1 |
| XLOC_011639 | LOC100631378 | chr19:38308050-38345836 | 0 | 0 | 0 | 1 |
| XLOC_011642 | PPP1R14A     | chr19:38741876-38747231 | 0 | 0 | 0 | 1 |
| XLOC_011648 | LGALS7       | chr19:39261607-39264157 | 0 | 0 | 0 | 1 |
| XLOC_011658 | SYCN         | chr19:39693561-39694906 | 0 | 0 | 0 | 1 |
| XLOC_011659 | IFNL3        | chr19:39734271-39735611 | 0 | 0 | 0 | 1 |
| XLOC_011660 | IFNL4        | chr19:39736953-39739496 | 0 | 0 | 0 | 1 |
| XLOC_011664 | MIR4530      | chr19:39900262-39900318 | 0 | 0 | 0 | 1 |
| XLOC_011668 | CLC          | chr19:40221892-40228669 | 0 | 0 | 0 | 1 |
| XLOC_011677 | MIR641       | chr19:40736223-40791302 | 0 | 0 | 0 | 1 |
| XLOC_011687 | CYP2A6       | chr19:41349442-41356352 | 0 | 0 | 0 | 1 |
| XLOC_011688 | CYP2A7       | chr19:41381343-41388657 | 0 | 0 | 0 | 1 |
| XLOC_011694 | LOC100505495 | chr19:41960073-42006554 | 0 | 0 | 0 | 1 |
| XLOC_011695 | CEACAM4      | chr19:42125343-42133442 | 0 | 0 | 0 | 1 |
| XLOC_011696 | CEACAM7      | chr19:42177234-42192096 | 0 | 0 | 0 | 1 |
| XLOC_011697 | LYPD4        | chr19:42341149-42348508 | 0 | 0 | 0 | 1 |
| XLOC_011702 | MIR4323      | chr19:42636780-42641251 | 0 | 0 | 0 | 1 |
| XLOC_011709 | CXCL17       | chr19:42901299-43156507 | 0 | 0 | 0 | 1 |
| XLOC_011713 | PSG8         | chr19:43256838-43269831 | 0 | 0 | 0 | 1 |
| XLOC_011714 | PSG10P       | chr19:43341148-43359870 | 0 | 0 | 0 | 1 |
| XLOC_011716 | PSG6         | chr19:43406233-43422076 | 0 | 0 | 0 | 1 |
| XLOC_011717 | PSG7         | chr19:43428283-43441330 | 0 | 0 | 0 | 1 |
| XLOC_011718 | PSG11        | chr19:43511808-43530631 | 0 | 0 | 0 | 1 |
| XLOC_011722 | LOC284344    | chr19:43715942-43752798 | 0 | 0 | 0 | 1 |
| XLOC_011746 | MIR4531      | chr19:45147097-45169428 | 0 | 0 | 0 | 1 |
| XLOC_011759 | MIR330       | chr19:46112657-46148775 | 0 | 0 | 0 | 1 |
| XLOC_011760 | MIR642B      | chr19:46171501-46185717 | 0 | 0 | 0 | 1 |
| XLOC_011766 | RSPH6A       | chr19:46298967-46318605 | 0 | 0 | 0 | 1 |
| XLOC_011770 | NANOS2       | chr19:46416472-46418036 | 0 | 0 | 0 | 1 |
| XLOC_011771 | NOVA2        | chr19:46442770-46476657 | 0 | 0 | 0 | 1 |
| XLOC_011772 | PGLYRP1      | chr19:46522411-46526556 | 0 | 0 | 0 | 1 |
| XLOC_011774 | IGFL3        | chr19:46623327-46627931 | 0 | 0 | 0 | 1 |
| XLOC_011775 | RNU6-66      | chr19:46720994-46846690 | 0 | 0 | 0 | 1 |
| XLOC_011776 | CCDC8        | chr19:46913585-46916919 | 0 | 0 | 0 | 1 |
| XLOC_011779 | PNMAL2       | chr19:46984044-47104457 | 0 | 0 | 0 | 1 |
| XLOC_011781 | GNG8         | chr19:47137332-47137939 | 0 | 0 | 0 | 1 |
| XLOC_011784 | MIR320E      | chr19:47150868-47220384 | 0 | 0 | 0 | 1 |
| XLOC_011787 | SNAR-E       | chr19:47333841-47333961 | 0 | 0 | 0 | 1 |
| XLOC_011792 | MIR3191      | chr19:47724078-47736023 | 0 | 0 | 0 | 1 |
| XLOC_011797 | ZNF541       | chr19:48023946-48059113 | 0 | 0 | 0 | 1 |
| XLOC_011798 | TPRX1        | chr19:48304499-48306861 | 0 | 0 | 0 | 1 |
| XLOC_011799 | SULT2A1      | chr19:48373722-48389654 | 0 | 0 | 0 | 1 |
| XLOC_011800 | BSPH1        | chr19:48471302-48495427 | 0 | 0 | 0 | 1 |
| XLOC_011801 | CABP5        | chr19:48532639-48547311 | 0 | 0 | 0 | 1 |
| XLOC_011821 | TULP2        | chr19:49384221-49401996 | 0 | 0 | 0 | 1 |
| XLOC_011826 | SNAR-G2      | chr19:49534925-49535044 | 0 | 0 | 0 | 1 |
| XLOC_011827 | CGB1         | chr19:49538825-49540191 | 0 | 0 | 0 | 1 |
| XLOC_011835 | MIR4324      | chr19:49792891-49828474 | 0 | 0 | 0 | 1 |
| XLOC_011840 | MIR150       | chr19:50004041-50004125 | 0 | 0 | 0 | 1 |
| XLOC_011844 | TSKS         | chr19:50243010-50266515 | 0 | 0 | 0 | 1 |
| XLOC_011852 | SNAR-A8      | chr19:50595745-50595866 | 0 | 0 | 0 | 1 |
| XLOC_011853 | SNAR-A4      | chr19:50601082-50601203 | 0 | 0 | 0 | 1 |
| XLOC_011854 | SNAR-A10     | chr19:50604147-50604268 | 0 | 0 | 0 | 1 |
| XLOC_011855 | SNAR-A7      | chr19:50607211-50607332 | 0 | 0 | 0 | 1 |
| XLOC_011856 | SNAR-A14     | chr19:50610270-50610391 | 0 | 0 | 0 | 1 |
| XLOC_011857 | SNAR-A3      | chr19:50615624-50615745 | 0 | 0 | 0 | 1 |
| XLOC_011858 | SNAR-A6      | chr19:50620976-50621097 | 0 | 0 | 0 | 1 |
| XLOC_011859 | SNAR-A10     | chr19:50626330-50626451 | 0 | 0 | 0 | 1 |
| XLOC_011860 | SNAR-A8      | chr19:50631658-50631779 | 0 | 0 | 0 | 1 |
| XLOC_011861 | SNAR-B1      | chr19:50637001-50637121 | 0 | 0 | 0 | 1 |
| XLOC_011862 | SNAR-B2      | chr19:50642374-50642494 | 0 | 0 | 0 | 1 |
| XLOC_011863 | SNAR-D       | chr19:50643458-50643577 | 0 | 0 | 0 | 1 |
| XLOC_011864 | IZUMO2       | chr19:50655804-50666538 | 0 | 0 | 0 | 1 |
| XLOC_011866 | NAPSB        | chr19:50837056-50848005 | 0 | 0 | 0 | 1 |
| XLOC_011875 | SNORD88B     | chr19:51300960-51307974 | 0 | 0 | 0 | 1 |
| XLOC_011876 | SNORD88A     | chr19:51300960-51307974 | 0 | 0 | 0 | 1 |
| XLOC_011877 | SNORD88C     | chr19:51300960-51307974 | 0 | 0 | 0 | 1 |
| XLOC_011880 | KLKP1        | chr19:51385351-51399654 | 0 | 0 | 0 | 1 |
| XLOC_011882 | KLK5         | chr19:51446558-51456344 | 0 | 0 | 0 | 1 |
| XLOC_011884 | KLK7         | chr19:51479734-51487320 | 0 | 0 | 0 | 1 |
| XLOC_011886 | KLK9         | chr19:51505768-51512890 | 0 | 0 | 0 | 1 |
| XLOC_011887 | KLK10        | chr19:51515999-51523431 | 0 | 0 | 0 | 1 |

|             |              |                         |   |   |   |   |
|-------------|--------------|-------------------------|---|---|---|---|
| XLOC_011888 | KLK11        | chr19:51525486-51531290 | 0 | 0 | 0 | 1 |
| XLOC_011889 | KLK12        | chr19:51532347-51538148 | 0 | 0 | 0 | 1 |
| XLOC_011890 | KLK13        | chr19:51559462-51568367 | 0 | 0 | 0 | 1 |
| XLOC_011896 | NKG7         | chr19:51874873-51875960 | 0 | 0 | 0 | 1 |
| XLOC_011897 | LIM2         | chr19:51883162-51891210 | 0 | 0 | 0 | 1 |
| XLOC_011900 | SIGLEC8      | chr19:51954250-51961708 | 0 | 0 | 0 | 1 |
| XLOC_011901 | SIGLEC12     | chr19:51994612-52005043 | 0 | 0 | 0 | 1 |
| XLOC_011902 | SIGLEC6      | chr19:52022783-52035110 | 0 | 0 | 0 | 1 |
| XLOC_011907 | FPR1         | chr19:52249022-52255150 | 0 | 0 | 0 | 1 |
| XLOC_011926 | ZNF415       | chr19:53611131-53636173 | 0 | 0 | 0 | 1 |
| XLOC_011930 | VN1R4        | chr19:53770012-53770918 | 0 | 0 | 0 | 1 |
| XLOC_011931 | BIRC8        | chr19:53792853-53794875 | 0 | 0 | 0 | 1 |
| XLOC_011933 | MIR371B      | chr19:54290928-54290996 | 0 | 0 | 0 | 1 |
| XLOC_011936 | TARM1        | chr19:54573200-54584634 | 0 | 0 | 0 | 1 |
| XLOC_011944 | LILRB5       | chr19:54754269-54761167 | 0 | 0 | 0 | 1 |
| XLOC_011945 | LILRB2       | chr19:54777674-54785033 | 0 | 0 | 0 | 1 |
| XLOC_011946 | LILRA3       | chr19:54799854-54804265 | 0 | 0 | 0 | 1 |
| XLOC_011948 | LILRA4       | chr19:54844691-54850421 | 0 | 0 | 0 | 1 |
| XLOC_011952 | NLRP7        | chr19:55434876-55458873 | 0 | 0 | 0 | 1 |
| XLOC_011953 | RNU6-64      | chr19:55471012-55471043 | 0 | 0 | 0 | 1 |
| XLOC_011967 | FAM71E2      | chr19:55866275-55874620 | 0 | 0 | 0 | 1 |
| XLOC_011974 | SGK110       | chr19:56052022-56056909 | 0 | 0 | 0 | 1 |
| XLOC_011980 | NLRP13       | chr19:56407310-56443702 | 0 | 0 | 0 | 1 |
| XLOC_011986 | ZNF835       | chr19:57174019-57183123 | 0 | 0 | 0 | 1 |
| XLOC_011987 | PEG3,ZIM2    | chr19:57285922-57352097 | 0 | 0 | 0 | 1 |
| XLOC_011988 | ZIM3         | chr19:57645463-57656570 | 0 | 0 | 0 | 1 |
| XLOC_012000 | ZNF418       | chr19:58433251-58446740 | 0 | 0 | 0 | 1 |
| XLOC_012001 | ZNF256       | chr19:58452200-58459077 | 0 | 0 | 0 | 1 |
| XLOC_012003 | ZNF606       | chr19:58488440-58518574 | 0 | 0 | 0 | 1 |
| XLOC_012009 | MIR4754      | chr19:58898136-58898225 | 0 | 0 | 0 | 1 |
| XLOC_012027 | TPO          | chr2:1417232-1546499    | 0 | 0 | 0 | 1 |
| XLOC_012028 | LOC730811    | chr2:1792884-2335045    | 0 | 0 | 0 | 1 |
| XLOC_012034 | SOX11        | chr2:5832798-5841517    | 0 | 0 | 0 | 1 |
| XLOC_012035 | LOC150622    | chr2:6072818-6120350    | 0 | 0 | 0 | 1 |
| XLOC_012036 | LOC400940    | chr2:6122109-6128364    | 0 | 0 | 0 | 1 |
| XLOC_012051 | KCNF1        | chr2:11052062-11054351  | 0 | 0 | 0 | 1 |
| XLOC_012054 | LINC00570    | chr2:11534106-11543203  | 0 | 0 | 0 | 1 |
| XLOC_012058 | MIR3125      | chr2:12856997-12882858  | 0 | 0 | 0 | 1 |
| XLOC_012061 | MYCN         | chr2:16080019-16087129  | 0 | 0 | 0 | 1 |
| XLOC_012062 | VSNL1        | chr2:17721806-17837706  | 0 | 0 | 0 | 1 |
| XLOC_012064 | MSGN1        | chr2:17997785-17998367  | 0 | 0 | 0 | 1 |
| XLOC_012065 | KCNS3        | chr2:18059944-18114225  | 0 | 0 | 0 | 1 |
| XLOC_012066 | MIR4757      | chr2:19548189-19548266  | 0 | 0 | 0 | 1 |
| XLOC_012067 | FLJ12334     | chr2:20068614-20084808  | 0 | 0 | 0 | 1 |
| XLOC_012069 | GDF7         | chr2:20866423-20871250  | 0 | 0 | 0 | 1 |
| XLOC_012085 | C2orf70      | chr2:26785480-26802395  | 0 | 0 | 0 | 1 |
| XLOC_012089 | DPYSL5       | chr2:27070968-27173219  | 0 | 0 | 0 | 1 |
| XLOC_012096 | TCF23        | chr2:27371944-27375819  | 0 | 0 | 0 | 1 |
| XLOC_012099 | DNAJC5G      | chr2:27498288-27504296  | 0 | 0 | 0 | 1 |
| XLOC_012112 | MIR4263      | chr2:28004265-28561767  | 0 | 0 | 0 | 1 |
| XLOC_012114 | PLB1         | chr2:28718937-28866653  | 0 | 0 | 0 | 1 |
| XLOC_012118 | SNORD92      | chr2:29117532-29171080  | 0 | 0 | 0 | 1 |
| XLOC_012119 | SNORD53      | chr2:29117532-29171080  | 0 | 0 | 0 | 1 |
| XLOC_012123 | LBH          | chr2:30454396-30482899  | 0 | 0 | 0 | 1 |
| XLOC_012125 | EHD3         | chr2:31456879-31491260  | 0 | 0 | 0 | 1 |
| XLOC_012130 | MIR558       | chr2:32582095-32843965  | 0 | 0 | 0 | 1 |
| XLOC_012132 | MIR4765      | chr2:32853086-33046118  | 0 | 0 | 0 | 1 |
| XLOC_012133 | LINC00486    | chr2:33050509-33171202  | 0 | 0 | 0 | 1 |
| XLOC_012134 | LOC100271832 | chr2:33050509-33171202  | 0 | 0 | 0 | 1 |
| XLOC_012138 | VIT          | chr2:36923832-37041937  | 0 | 0 | 0 | 1 |
| XLOC_012144 | CYP1B1-AS1   | chr2:38358246-38408993  | 0 | 0 | 0 | 1 |
| XLOC_012151 | SLC8A1-AS1   | chr2:40144773-40739575  | 0 | 0 | 0 | 1 |
| XLOC_012152 | LOC388942    | chr2:42104694-42121186  | 0 | 0 | 0 | 1 |
| XLOC_012159 | ABCG8        | chr2:44066102-44105605  | 0 | 0 | 0 | 1 |
| XLOC_012163 | SIX3         | chr2:45169036-45173216  | 0 | 0 | 0 | 1 |
| XLOC_012166 | TMEM247      | chr2:46706703-46711564  | 0 | 0 | 0 | 1 |
| XLOC_012174 | MIR559       | chr2:47596286-47614167  | 0 | 0 | 0 | 1 |
| XLOC_012185 | RPL23AP32    | chr2:54683453-54898583  | 0 | 0 | 0 | 1 |
| XLOC_012190 | CCDC85A      | chr2:56411257-56613309  | 0 | 0 | 0 | 1 |
| XLOC_012192 | FLJ30838     | chr2:58747887-59290901  | 0 | 0 | 0 | 1 |
| XLOC_012201 | MIR5192      | chr2:62423261-62451866  | 0 | 0 | 0 | 1 |
| XLOC_012208 | MIR4434      | chr2:64751438-64820138  | 0 | 0 | 0 | 1 |
| XLOC_012209 | LOC339807    | chr2:64834445-64843616  | 0 | 0 | 0 | 1 |
| XLOC_012218 | PROKR1       | chr2:68872953-68882708  | 0 | 0 | 0 | 1 |
| XLOC_012219 | ARHGAP25     | chr2:68961912-69053957  | 0 | 0 | 0 | 1 |
| XLOC_012220 | GKN1         | chr2:69201704-69208112  | 0 | 0 | 0 | 1 |
| XLOC_012221 | ANTXR1       | chr2:69240275-69476459  | 0 | 0 | 0 | 1 |
| XLOC_012222 | MIR3126      | chr2:69240275-69476459  | 0 | 0 | 0 | 1 |
| XLOC_012230 | ATP6V1B1     | chr2:71162997-71192561  | 0 | 0 | 0 | 1 |

|             |                  |                          |   |   |   |   |
|-------------|------------------|--------------------------|---|---|---|---|
| XLOC_012232 | OR7E91P          | chr2:71251204-71257060   | 0 | 0 | 0 | 1 |
| XLOC_012238 | EMX1             | chr2:73144603-73162020   | 0 | 0 | 0 | 1 |
| XLOC_012239 | NOTO             | chr2:73429385-73438340   | 0 | 0 | 0 | 1 |
| XLOC_012251 | DCTN1-AS1        | chr2:74588280-74621008   | 0 | 0 | 0 | 1 |
| XLOC_012262 | MIR5000          | chr2:75273589-75426645   | 0 | 0 | 0 | 1 |
| XLOC_012264 | REG3G            | chr2:79252811-79255630   | 0 | 0 | 0 | 1 |
| XLOC_012265 | REG1A            | chr2:79347583-79350545   | 0 | 0 | 0 | 1 |
| XLOC_012267 | LOC1720          | chr2:83083926-83084893   | 0 | 0 | 0 | 1 |
| XLOC_012268 | FUNDC2P2         | chr2:84517805-84519324   | 0 | 0 | 0 | 1 |
| XLOC_012280 | GNLY             | chr2:85921413-85925875   | 0 | 0 | 0 | 1 |
| XLOC_012282 | LOC284950        | chr2:86042252-86053911   | 0 | 0 | 0 | 1 |
| XLOC_012289 | RGPD1,RGPD2      | chr2:87140934-87248973   | 0 | 0 | 0 | 1 |
| XLOC_012291 | MIR4435-1        | chr2:87929273-87929353   | 0 | 0 | 0 | 1 |
| XLOC_012293 | SMYD1            | chr2:88367298-88412902   | 0 | 0 | 0 | 1 |
| XLOC_012294 | THNSL2           | chr2:88469813-88486156   | 0 | 0 | 0 | 1 |
| XLOC_012295 | TEX37            | chr2:88824168-88829103   | 0 | 0 | 0 | 1 |
| XLOC_012297 | ANKRD36BP2       | chr2:89065418-89106109   | 0 | 0 | 0 | 1 |
| XLOC_012298 | MIR4436A         | chr2:89111883-89111968   | 0 | 0 | 0 | 1 |
| XLOC_012300 | ACTR3BP2         | chr2:92129158-92130496   | 0 | 0 | 0 | 1 |
| XLOC_012302 | MAL              | chr2:95691399-95719737   | 0 | 0 | 0 | 1 |
| XLOC_012307 | TRIM43           | chr2:96257765-96265469   | 0 | 0 | 0 | 1 |
| XLOC_012316 | MIR3127          | chr2:97426638-97477628   | 0 | 0 | 0 | 1 |
| XLOC_012323 | VWA3B            | chr2:98703594-98929410   | 0 | 0 | 0 | 1 |
| XLOC_012324 | CNGA3            | chr2:98962617-99015064   | 0 | 0 | 0 | 1 |
| XLOC_012331 | NMS              | chr2:101086943-101099742 | 0 | 0 | 0 | 1 |
| XLOC_012336 | MIR5696          | chr2:101925911-101925996 | 0 | 0 | 0 | 1 |
| XLOC_012338 | IL1R2            | chr2:102608305-102644884 | 0 | 0 | 0 | 1 |
| XLOC_012340 | IL1RL2           | chr2:102803432-102855817 | 0 | 0 | 0 | 1 |
| XLOC_012344 | MIR4772          | chr2:103035253-103069024 | 0 | 0 | 0 | 1 |
| XLOC_012348 | LOC150568        | chr2:105050804-105129211 | 0 | 0 | 0 | 1 |
| XLOC_012349 | POU3F3           | chr2:105471968-105473477 | 0 | 0 | 0 | 1 |
| XLOC_012354 | C2orf40          | chr2:106682112-106694606 | 0 | 0 | 0 | 1 |
| XLOC_012355 | PLGLA            | chr2:106998569-107007857 | 0 | 0 | 0 | 1 |
| XLOC_012357 | SLC5A7           | chr2:108602994-108630444 | 0 | 0 | 0 | 1 |
| XLOC_012358 | SULT1C3          | chr2:108863650-108881807 | 0 | 0 | 0 | 1 |
| XLOC_012360 | SULT1C2P1        | chr2:108938693-108970254 | 0 | 0 | 0 | 1 |
| XLOC_012368 | RGPD5,RGPD6      | chr2:110550334-110615282 | 0 | 0 | 0 | 1 |
| XLOC_012371 | LOC100507334     | chr2:111003214-111024135 | 0 | 0 | 0 | 1 |
| XLOC_012372 | MIR4436B2        | chr2:111042429-111042520 | 0 | 0 | 0 | 1 |
| XLOC_012373 | ACOXL            | chr2:111490149-111875796 | 0 | 0 | 0 | 1 |
| XLOC_012384 | IL36G            | chr2:113735605-113743227 | 0 | 0 | 0 | 1 |
| XLOC_012385 | IL36A            | chr2:113763448-113765627 | 0 | 0 | 0 | 1 |
| XLOC_012386 | IL36RN           | chr2:113816214-113822320 | 0 | 0 | 0 | 1 |
| XLOC_012387 | IL1F10           | chr2:113825546-113833427 | 0 | 0 | 0 | 1 |
| XLOC_012388 | IL1RN            | chr2:113875469-113891593 | 0 | 0 | 0 | 1 |
| XLOC_012394 | FAM138B          | chr2:114334958-114336425 | 0 | 0 | 0 | 1 |
| XLOC_012399 | DPP10            | chr2:115199898-116602326 | 0 | 0 | 0 | 1 |
| XLOC_012402 | MARCO            | chr2:119699744-119752236 | 0 | 0 | 0 | 1 |
| XLOC_012406 | PCDP1            | chr2:120302007-120414237 | 0 | 0 | 0 | 1 |
| XLOC_012412 | GLI2             | chr2:121554866-121750225 | 0 | 0 | 0 | 1 |
| XLOC_012416 | CNTNAP5          | chr2:124782863-125672863 | 0 | 0 | 0 | 1 |
| XLOC_012417 | GYPC             | chr2:127413510-127454257 | 0 | 0 | 0 | 1 |
| XLOC_012418 | PROC             | chr2:128175995-128186822 | 0 | 0 | 0 | 1 |
| XLOC_012420 | GPR17            | chr2:128395995-128439360 | 0 | 0 | 0 | 1 |
| XLOC_012424 | CCDC74B-AS1      | chr2:130887195-130902707 | 0 | 0 | 0 | 1 |
| XLOC_012428 | CFC1B            | chr2:131278666-131285566 | 0 | 0 | 0 | 1 |
| XLOC_012429 | LOC646743,TISP43 | chr2:131328401-131341734 | 0 | 0 | 0 | 1 |
| XLOC_012430 | CYP4F30P         | chr2:131437622-131443438 | 0 | 0 | 0 | 1 |
| XLOC_012431 | GPR148           | chr2:131486642-131487906 | 0 | 0 | 0 | 1 |
| XLOC_012432 | AMER3            | chr2:131513076-131525707 | 0 | 0 | 0 | 1 |
| XLOC_012435 | POTEE            | chr2:131975923-132022416 | 0 | 0 | 0 | 1 |
| XLOC_012436 | LOC440910        | chr2:132036862-132057392 | 0 | 0 | 0 | 1 |
| XLOC_012437 | LOC389043        | chr2:132160473-132165807 | 0 | 0 | 0 | 1 |
| XLOC_012438 | RNU6-81          | chr2:132202795-132360466 | 0 | 0 | 0 | 1 |
| XLOC_012444 | MIR3679          | chr2:134884695-134884763 | 0 | 0 | 0 | 1 |
| XLOC_012446 | ACMSD            | chr2:135596185-135676176 | 0 | 0 | 0 | 1 |
| XLOC_012450 | MIR128-1         | chr2:136289082-136482833 | 0 | 0 | 0 | 1 |
| XLOC_012453 | THSD7B           | chr2:137748461-138435287 | 0 | 0 | 0 | 1 |
| XLOC_012457 | KYNU             | chr2:143635194-143799888 | 0 | 0 | 0 | 1 |
| XLOC_012458 | ARHGAP15         | chr2:143886898-144525927 | 0 | 0 | 0 | 1 |
| XLOC_012459 | ZEB2-AS1         | chr2:145141941-145278466 | 0 | 0 | 0 | 1 |
| XLOC_012460 | DKFZp686O1327    | chr2:145425533-145834297 | 0 | 0 | 0 | 1 |
| XLOC_012465 | KIF5C            | chr2:149632791-149883272 | 0 | 0 | 0 | 1 |
| XLOC_012466 | LYPD6B           | chr2:149894980-150071777 | 0 | 0 | 0 | 1 |
| XLOC_012468 | TNFAIP6          | chr2:152214105-152236562 | 0 | 0 | 0 | 1 |
| XLOC_012469 | MIR4773-1        | chr2:152214105-152236562 | 0 | 0 | 0 | 1 |
| XLOC_012473 | GALNT13          | chr2:154728425-155313956 | 0 | 0 | 0 | 1 |
| XLOC_012476 | GALNT5           | chr2:158114339-158167913 | 0 | 0 | 0 | 1 |
| XLOC_012477 | UPP2             | chr2:158851690-158992666 | 0 | 0 | 0 | 1 |

|             |                       |                          |   |   |   |   |
|-------------|-----------------------|--------------------------|---|---|---|---|
| XLOC_012478 | CCDC148-AS1           | chr2:159023161-159313265 | 0 | 0 | 0 | 1 |
| XLOC_012480 | DAPL1                 | chr2:159651828-159672496 | 0 | 0 | 0 | 1 |
| XLOC_012486 | SLC4A10               | chr2:162480844-162841786 | 0 | 0 | 0 | 1 |
| XLOC_012489 | CSRNP3                | chr2:166326156-166545917 | 0 | 0 | 0 | 1 |
| XLOC_012491 | XIRP2                 | chr2:167744996-168116267 | 0 | 0 | 0 | 1 |
| XLOC_012492 | B3GALT1               | chr2:168675181-168727366 | 0 | 0 | 0 | 1 |
| XLOC_012494 | MIR4774               | chr2:169312758-169642935 | 0 | 0 | 0 | 1 |
| XLOC_012496 | G6PC2                 | chr2:169757749-169766510 | 0 | 0 | 0 | 1 |
| XLOC_012504 | MYO3B                 | chr2:171034654-171511674 | 0 | 0 | 0 | 1 |
| XLOC_012520 | LOC285084             | chr2:175190754-175195370 | 0 | 0 | 0 | 1 |
| XLOC_012521 | SP9                   | chr2:175199820-175202268 | 0 | 0 | 0 | 1 |
| XLOC_012524 | HOXD12                | chr2:176964529-176965488 | 0 | 0 | 0 | 1 |
| XLOC_012525 | HOXD11                | chr2:176972083-176974316 | 0 | 0 | 0 | 1 |
| XLOC_012526 | HOXD10                | chr2:176981491-176984670 | 0 | 0 | 0 | 1 |
| XLOC_012529 | MIR10B                | chr2:177015030-177015140 | 0 | 0 | 0 | 1 |
| XLOC_012537 | OSBPL6                | chr2:179059207-179672150 | 0 | 0 | 0 | 1 |
| XLOC_012542 | ITGA4                 | chr2:182321618-182521834 | 0 | 0 | 0 | 1 |
| XLOC_012544 | PPP1R1C               | chr2:182818967-182996105 | 0 | 0 | 0 | 1 |
| XLOC_012548 | ZNF804A               | chr2:185463092-185804214 | 0 | 0 | 0 | 1 |
| XLOC_012549 | FSIP2                 | chr2:186603354-186698016 | 0 | 0 | 0 | 1 |
| XLOC_012554 | MIR561                | chr2:189156395-189460652 | 0 | 0 | 0 | 1 |
| XLOC_012555 | COL3A1                | chr2:189839098-189877472 | 0 | 0 | 0 | 1 |
| XLOC_012556 | MIR1245A              | chr2:189839098-189877472 | 0 | 0 | 0 | 1 |
| XLOC_012568 | PCGEM1                | chr2:193614570-193641622 | 0 | 0 | 0 | 1 |
| XLOC_012574 | PLCL1                 | chr2:198669425-199014608 | 0 | 0 | 0 | 1 |
| XLOC_012589 | CDK15                 | chr2:202671151-202760272 | 0 | 0 | 0 | 1 |
| XLOC_012592 | SNORD70               | chr2:203130514-203168384 | 0 | 0 | 0 | 1 |
| XLOC_012593 | SNORD11B              | chr2:203130514-203168384 | 0 | 0 | 0 | 1 |
| XLOC_012594 | SNORD11               | chr2:203130514-203168384 | 0 | 0 | 0 | 1 |
| XLOC_012601 | CD28                  | chr2:204571197-204603636 | 0 | 0 | 0 | 1 |
| XLOC_012602 | CTLA4                 | chr2:204732510-204738683 | 0 | 0 | 0 | 1 |
| XLOC_012603 | ICOS                  | chr2:204801470-204826298 | 0 | 0 | 0 | 1 |
| XLOC_012607 | SNORD51               | chr2:207024317-207027652 | 0 | 0 | 0 | 1 |
| XLOC_012610 | ADAM23                | chr2:207308367-207482675 | 0 | 0 | 0 | 1 |
| XLOC_012611 | LOC200726             | chr2:207507141-207514172 | 0 | 0 | 0 | 1 |
| XLOC_012613 | MIR3130-2             | chr2:207630111-207660917 | 0 | 0 | 0 | 1 |
| XLOC_012617 | LOC100507443          | chr2:208983852-209021488 | 0 | 0 | 0 | 1 |
| XLOC_012620 | PTH2R                 | chr2:209224568-209359237 | 0 | 0 | 0 | 1 |
| XLOC_012625 | CPS1-IT1              | chr2:211342405-211543837 | 0 | 0 | 0 | 1 |
| XLOC_012627 | VWC2L                 | chr2:215276460-215440652 | 0 | 0 | 0 | 1 |
| XLOC_012628 | VWC2L-IT1             | chr2:215276460-215440652 | 0 | 0 | 0 | 1 |
| XLOC_012636 | RUFY4                 | chr2:218899656-218955304 | 0 | 0 | 0 | 1 |
| XLOC_012644 | MIR26B                | chr2:219263060-219270664 | 0 | 0 | 0 | 1 |
| XLOC_012645 | VIL1                  | chr2:219283837-219314248 | 0 | 0 | 0 | 1 |
| XLOC_012652 | WNT6                  | chr2:219724545-219738954 | 0 | 0 | 0 | 1 |
| XLOC_012654 | CDK5R2                | chr2:219824349-219826872 | 0 | 0 | 0 | 1 |
| XLOC_012655 | LINC00608             | chr2:219841005-219842644 | 0 | 0 | 0 | 1 |
| XLOC_012656 | LOC100129175          | chr2:219866936-219906242 | 0 | 0 | 0 | 1 |
| XLOC_012671 | CCDC140               | chr2:223064605-223169936 | 0 | 0 | 0 | 1 |
| XLOC_012673 | MOGAT1                | chr2:223536456-223574645 | 0 | 0 | 0 | 1 |
| XLOC_012675 | KCNE4                 | chr2:223916647-223920357 | 0 | 0 | 0 | 1 |
| XLOC_012677 | NYAP2                 | chr2:226265601-226518734 | 0 | 0 | 0 | 1 |
| XLOC_012678 | MIR548AR              | chr2:226628160-226628187 | 0 | 0 | 0 | 1 |
| XLOC_012679 | LOC646736             | chr2:227007509-227044778 | 0 | 0 | 0 | 1 |
| XLOC_012684 | CCL20                 | chr2:228678557-228682280 | 0 | 0 | 0 | 1 |
| XLOC_012692 | LOC151484             | chr2:231751260-231769232 | 0 | 0 | 0 | 1 |
| XLOC_012693 | SPATA3                | chr2:231860838-231871995 | 0 | 0 | 0 | 1 |
| XLOC_012697 | MIR4777               | chr2:232063293-232238606 | 0 | 0 | 0 | 1 |
| XLOC_012699 | C2orf57               | chr2:232457574-232458994 | 0 | 0 | 0 | 1 |
| XLOC_012703 | ALPP                  | chr2:233243347-233247595 | 0 | 0 | 0 | 1 |
| XLOC_012704 | ALPPL2                | chr2:233271551-233275424 | 0 | 0 | 0 | 1 |
| XLOC_012705 | ALPI                  | chr2:233320832-233324742 | 0 | 0 | 0 | 1 |
| XLOC_012713 | NEU2                  | chr2:233897381-233899767 | 0 | 0 | 0 | 1 |
| XLOC_012720 | UGT1A1,UGT1A10,UGT1A3 | chr2:234526290-234681957 | 0 | 0 | 0 | 1 |
| XLOC_012721 | TRPM8                 | chr2:234826042-234928166 | 0 | 0 | 0 | 1 |
| XLOC_012722 | SPP2                  | chr2:234959345-234985776 | 0 | 0 | 0 | 1 |
| XLOC_012725 | CXCR7                 | chr2:237478379-237490999 | 0 | 0 | 0 | 1 |
| XLOC_012727 | MLPH                  | chr2:238395877-238463967 | 0 | 0 | 0 | 1 |
| XLOC_012728 | PRLH                  | chr2:238475216-238475818 | 0 | 0 | 0 | 1 |
| XLOC_012738 | TWIST2                | chr2:239756672-239832232 | 0 | 0 | 0 | 1 |
| XLOC_012739 | MIR4269               | chr2:239969863-240322642 | 0 | 0 | 0 | 1 |
| XLOC_012740 | LOC150935             | chr2:240684553-240722356 | 0 | 0 | 0 | 1 |
| XLOC_012742 | MIR149                | chr2:241375114-241407495 | 0 | 0 | 0 | 1 |
| XLOC_012747 | AQP12A                | chr2:241631261-241637900 | 0 | 0 | 0 | 1 |
| XLOC_012748 | AGXT                  | chr2:241808161-241818536 | 0 | 0 | 0 | 1 |
| XLOC_012758 | GAL3ST2               | chr2:242716239-242743702 | 0 | 0 | 0 | 1 |
| XLOC_012760 | CXXC11                | chr2:242811885-242815482 | 0 | 0 | 0 | 1 |
| XLOC_012766 | LOC339822             | chr2:779836-864112       | 0 | 0 | 0 | 1 |
| XLOC_012768 | MYT1L                 | chr2:1792884-2335045     | 0 | 0 | 0 | 1 |

|             |                     |                        |   |   |   |   |
|-------------|---------------------|------------------------|---|---|---|---|
| XLOC_012772 | LOC100505964        | chr2:4005244-4021622   | 0 | 0 | 0 | 1 |
| XLOC_012773 | LOC727982           | chr2:4675807-4703812   | 0 | 0 | 0 | 1 |
| XLOC_012774 | LINC00487           | chr2:6869299-6910442   | 0 | 0 | 0 | 1 |
| XLOC_012777 | LOC339788           | chr2:8062555-8116945   | 0 | 0 | 0 | 1 |
| XLOC_012778 | LINC00299           | chr2:8147900-8468549   | 0 | 0 | 0 | 1 |
| XLOC_012784 | CYS1                | chr2:10196925-10220538 | 0 | 0 | 0 | 1 |
| XLOC_012785 | MIR4261             | chr2:10281980-10350942 | 0 | 0 | 0 | 1 |
| XLOC_012790 | FLJ33534            | chr2:11239976-11272302 | 0 | 0 | 0 | 1 |
| XLOC_012793 | MIR4429             | chr2:11674241-11782912 | 0 | 0 | 0 | 1 |
| XLOC_012794 | NTSR2               | chr2:11798303-11810329 | 0 | 0 | 0 | 1 |
| XLOC_012795 | MIR4262             | chr2:11977058-11977112 | 0 | 0 | 0 | 1 |
| XLOC_012796 | LOC100506474        | chr2:13106907-13147138 | 0 | 0 | 0 | 1 |
| XLOC_012798 | MYCNOS              | chr2:16080019-16087129 | 0 | 0 | 0 | 1 |
| XLOC_012800 | RAD51AP2            | chr2:17691985-17699706 | 0 | 0 | 0 | 1 |
| XLOC_012812 | APOB                | chr2:21224300-21266945 | 0 | 0 | 0 | 1 |
| XLOC_012823 | POMC                | chr2:25383721-25391559 | 0 | 0 | 0 | 1 |
| XLOC_012825 | MIR1301             | chr2:25455829-25565459 | 0 | 0 | 0 | 1 |
| XLOC_012832 | CIB4                | chr2:26804072-26864211 | 0 | 0 | 0 | 1 |
| XLOC_012836 | C2orf53             | chr2:27359714-27362332 | 0 | 0 | 0 | 1 |
| XLOC_012838 | SLC30A3             | chr2:27477439-27485960 | 0 | 0 | 0 | 1 |
| XLOC_012853 | C2orf71             | chr2:29284555-29297127 | 0 | 0 | 0 | 1 |
| XLOC_012854 | ALK                 | chr2:29415639-30144477 | 0 | 0 | 0 | 1 |
| XLOC_012855 | CAPN13              | chr2:30945637-31030311 | 0 | 0 | 0 | 1 |
| XLOC_012856 | GALNT14             | chr2:31133330-31361592 | 0 | 0 | 0 | 1 |
| XLOC_012857 | CAPN14              | chr2:31395921-31440411 | 0 | 0 | 0 | 1 |
| XLOC_012858 | XDH                 | chr2:31557187-31637611 | 0 | 0 | 0 | 1 |
| XLOC_012859 | SRD5A2              | chr2:31749655-31806040 | 0 | 0 | 0 | 1 |
| XLOC_012870 | SULT6B1             | chr2:37394962-37415690 | 0 | 0 | 0 | 1 |
| XLOC_012874 | CYP1B1              | chr2:38294745-38303323 | 0 | 0 | 0 | 1 |
| XLOC_012881 | CDKL4               | chr2:39405687-39456673 | 0 | 0 | 0 | 1 |
| XLOC_012884 | SLC8A1              | chr2:40144773-40739575 | 0 | 0 | 0 | 1 |
| XLOC_012885 | C2orf91             | chr2:42162507-42180943 | 0 | 0 | 0 | 1 |
| XLOC_012887 | KCNG3               | chr2:42669156-42721237 | 0 | 0 | 0 | 1 |
| XLOC_012889 | HAAO                | chr2:42994228-43019751 | 0 | 0 | 0 | 1 |
| XLOC_012892 | LOC728819           | chr2:43864438-43995126 | 0 | 0 | 0 | 1 |
| XLOC_012896 | MIR548AD            | chr2:44589042-44999731 | 0 | 0 | 0 | 1 |
| XLOC_012897 | SIX2                | chr2:45232323-45236542 | 0 | 0 | 0 | 1 |
| XLOC_012905 | KCNK12              | chr2:47747914-47797470 | 0 | 0 | 0 | 1 |
| XLOC_012907 | LHCGR               | chr2:48757063-49003656 | 0 | 0 | 0 | 1 |
| XLOC_012908 | FSHR                | chr2:49189295-49381666 | 0 | 0 | 0 | 1 |
| XLOC_012909 | NRXN1               | chr2:50145642-51259674 | 0 | 0 | 0 | 1 |
| XLOC_012911 | MIR3682             | chr2:53897116-54087170 | 0 | 0 | 0 | 1 |
| XLOC_012913 | TSPYL6              | chr2:54342409-54532435 | 0 | 0 | 0 | 1 |
| XLOC_012920 | EFEMP1              | chr2:56093096-56151298 | 0 | 0 | 0 | 1 |
| XLOC_012921 | MIR217              | chr2:56210101-56210211 | 0 | 0 | 0 | 1 |
| XLOC_012922 | MIR216A             | chr2:56216084-56216194 | 0 | 0 | 0 | 1 |
| XLOC_012923 | MIR216B             | chr2:56227848-56227930 | 0 | 0 | 0 | 1 |
| XLOC_012925 | MIR4432             | chr2:60614496-60614580 | 0 | 0 | 0 | 1 |
| XLOC_012931 | SNORA70B            | chr2:61404554-61697849 | 0 | 0 | 0 | 1 |
| XLOC_012941 | LINC00309           | chr2:64412212-64432619 | 0 | 0 | 0 | 1 |
| XLOC_012943 | LOC400958           | chr2:65128973-65159581 | 0 | 0 | 0 | 1 |
| XLOC_012946 | MIR4778             | chr2:66585380-66585460 | 0 | 0 | 0 | 1 |
| XLOC_012947 | MEIS1-AS3           | chr2:66650474-66660602 | 0 | 0 | 0 | 1 |
| XLOC_012948 | LOC644838           | chr2:67350488-67442451 | 0 | 0 | 0 | 1 |
| XLOC_012952 | CNRIP1              | chr2:68511302-68547183 | 0 | 0 | 0 | 1 |
| XLOC_012954 | BMP10               | chr2:69092612-69098649 | 0 | 0 | 0 | 1 |
| XLOC_012955 | GKN2                | chr2:69172363-69180102 | 0 | 0 | 0 | 1 |
| XLOC_012968 | FIGLA               | chr2:71004441-71017775 | 0 | 0 | 0 | 1 |
| XLOC_012969 | CLEC4F              | chr2:71035775-71047732 | 0 | 0 | 0 | 1 |
| XLOC_012970 | CD207               | chr2:71057342-71062953 | 0 | 0 | 0 | 1 |
| XLOC_012980 | EGR4                | chr2:73518056-73520829 | 0 | 0 | 0 | 1 |
| XLOC_012981 | NAT8                | chr2:73867849-73869537 | 0 | 0 | 0 | 1 |
| XLOC_012982 | NAT8B               | chr2:73927635-73928467 | 0 | 0 | 0 | 1 |
| XLOC_013000 | EVA1A               | chr2:75719443-75796848 | 0 | 0 | 0 | 1 |
| XLOC_013002 | LRRTM4              | chr2:76974849-77749502 | 0 | 0 | 0 | 1 |
| XLOC_013003 | SNAR-H              | chr2:78182032-78182152 | 0 | 0 | 0 | 1 |
| XLOC_013004 | REG1B               | chr2:79312148-79315150 | 0 | 0 | 0 | 1 |
| XLOC_013005 | REG1P               | chr2:79362628-79365553 | 0 | 0 | 0 | 1 |
| XLOC_013006 | REG3A               | chr2:79384131-79386880 | 0 | 0 | 0 | 1 |
| XLOC_013007 | MIR4264             | chr2:79740059-80875988 | 0 | 0 | 0 | 1 |
| XLOC_013008 | LRRTM1              | chr2:79740059-80875988 | 0 | 0 | 0 | 1 |
| XLOC_013023 | MIR4779             | chr2:86371054-86422893 | 0 | 0 | 0 | 1 |
| XLOC_013027 | CD8B                | chr2:87042459-87122165 | 0 | 0 | 0 | 1 |
| XLOC_013030 | RGPD1,RGPD2         | chr2:88047605-88285309 | 0 | 0 | 0 | 1 |
| XLOC_013032 | MIR4780             | chr2:88367298-88412902 | 0 | 0 | 0 | 1 |
| XLOC_013033 | FABP1               | chr2:88422507-88427650 | 0 | 0 | 0 | 1 |
| XLOC_013037 | ANKRD20A8P,LOC90499 | chr2:95421070-95522820 | 0 | 0 | 0 | 1 |
| XLOC_013041 | TRIM43B             | chr2:96142714-96150479 | 0 | 0 | 0 | 1 |
| XLOC_013055 | FAM178B             | chr2:97541618-97652301 | 0 | 0 | 0 | 1 |



|             |                   |                          |   |   |   |   |
|-------------|-------------------|--------------------------|---|---|---|---|
| XLOC_013072 | CHST10            | chr2:101008321-101034130 | 0 | 0 | 0 | 1 |
| XLOC_013076 | CREG2             | chr2:101964815-102003965 | 0 | 0 | 0 | 1 |
| XLOC_013077 | RFY8              | chr2:102013822-102091165 | 0 | 0 | 0 | 1 |
| XLOC_013079 | LOC100287010      | chr2:104995307-105024790 | 0 | 0 | 0 | 1 |
| XLOC_013080 | LOC284998         | chr2:105363094-105374177 | 0 | 0 | 0 | 1 |
| XLOC_013081 | LOC100506421      | chr2:105421882-105467934 | 0 | 0 | 0 | 1 |
| XLOC_013084 | LOC285000         | chr2:106209553-106227016 | 0 | 0 | 0 | 1 |
| XLOC_013088 | LOC729121         | chr2:108439519-108442583 | 0 | 0 | 0 | 1 |
| XLOC_013091 | MIR4265           | chr2:109743783-110262207 | 0 | 0 | 0 | 1 |
| XLOC_013092 | MIR4266           | chr2:109743783-110262207 | 0 | 0 | 0 | 1 |
| XLOC_013094 | MIR4267           | chr2:110827537-110827615 | 0 | 0 | 0 | 1 |
| XLOC_013096 | MIR4436B1         | chr2:110841446-110874143 | 0 | 0 | 0 | 1 |
| XLOC_013100 | LIMS3             | chr2:111160495-111230652 | 0 | 0 | 0 | 1 |
| XLOC_013101 | RGPD5, RGPD6      | chr2:111271378-111336305 | 0 | 0 | 0 | 1 |
| XLOC_013103 | MIR4435-1         | chr2:112078588-112078666 | 0 | 0 | 0 | 1 |
| XLOC_013111 | IL1B              | chr2:113587336-113594356 | 0 | 0 | 0 | 1 |
| XLOC_013112 | IL36B             | chr2:113779667-113810440 | 0 | 0 | 0 | 1 |
| XLOC_013117 | MIR4782           | chr2:114471932-114514400 | 0 | 0 | 0 | 1 |
| XLOC_013119 | LOC389023         | chr2:115199898-116602326 | 0 | 0 | 0 | 1 |
| XLOC_013126 | LOC84931          | chr2:121221910-121223925 | 0 | 0 | 0 | 1 |
| XLOC_013131 | CYP27C1           | chr2:127941411-127963343 | 0 | 0 | 0 | 1 |
| XLOC_013134 | MIR4783           | chr2:128175995-128186822 | 0 | 0 | 0 | 1 |
| XLOC_013142 | LOC389033         | chr2:130680434-130691890 | 0 | 0 | 0 | 1 |
| XLOC_013143 | LOC100131320      | chr2:130724164-130740311 | 0 | 0 | 0 | 1 |
| XLOC_013145 | POTEF             | chr2:130831107-130886795 | 0 | 0 | 0 | 1 |
| XLOC_013148 | TUBA3E            | chr2:130949317-130956034 | 0 | 0 | 0 | 1 |
| XLOC_013151 | LOC646743, TISP43 | chr2:131294142-131307488 | 0 | 0 | 0 | 1 |
| XLOC_013152 | CFC1, CFC1B       | chr2:131349737-131357251 | 0 | 0 | 0 | 1 |
| XLOC_013157 | MIR4784           | chr2:132202795-132360468 | 0 | 0 | 0 | 1 |
| XLOC_013158 | C2orf27B          | chr2:132552533-132559234 | 0 | 0 | 0 | 1 |
| XLOC_013160 | MIR663B           | chr2:132905163-133015542 | 0 | 0 | 0 | 1 |
| XLOC_013162 | NCKAP5            | chr2:133429371-134326031 | 0 | 0 | 0 | 1 |
| XLOC_013165 | MAP3K19           | chr2:135722272-135782244 | 0 | 0 | 0 | 1 |
| XLOC_013170 | CXCR4             | chr2:136871918-136875725 | 0 | 0 | 0 | 1 |
| XLOC_013171 | NXPH2             | chr2:139426726-139537811 | 0 | 0 | 0 | 1 |
| XLOC_013172 | LRP1B             | chr2:140988995-142889270 | 0 | 0 | 0 | 1 |
| XLOC_013174 | ZEB2              | chr2:145141941-145278465 | 0 | 0 | 0 | 1 |
| XLOC_013186 | RPRM              | chr2:154333851-154335322 | 0 | 0 | 0 | 1 |
| XLOC_013189 | ERMN              | chr2:158175124-158184146 | 0 | 0 | 0 | 1 |
| XLOC_013190 | CYTIP             | chr2:158271130-158300604 | 0 | 0 | 0 | 1 |
| XLOC_013197 | PLA2R1            | chr2:160797259-160919126 | 0 | 0 | 0 | 1 |
| XLOC_013198 | ITGB6             | chr2:160958232-161056590 | 0 | 0 | 0 | 1 |
| XLOC_013200 | MIR4785           | chr2:161128661-161350318 | 0 | 0 | 0 | 1 |
| XLOC_013202 | DPP4              | chr2:162848754-162931052 | 0 | 0 | 0 | 1 |
| XLOC_013203 | GCG               | chr2:162999378-163008914 | 0 | 0 | 0 | 1 |
| XLOC_013204 | FAP               | chr2:163027199-163100045 | 0 | 0 | 0 | 1 |
| XLOC_013206 | KCNH7             | chr2:163227916-163695257 | 0 | 0 | 0 | 1 |
| XLOC_013208 | GRB14             | chr2:165349322-165478360 | 0 | 0 | 0 | 1 |
| XLOC_013210 | SNORA70F          | chr2:165541257-165697925 | 0 | 0 | 0 | 1 |
| XLOC_013211 | SLC38A11          | chr2:165754708-165812035 | 0 | 0 | 0 | 1 |
| XLOC_013216 | SCN1A             | chr2:166845669-167005642 | 0 | 0 | 0 | 1 |
| XLOC_013217 | SCN9A             | chr2:167051696-167232497 | 0 | 0 | 0 | 1 |
| XLOC_013218 | SCN7A             | chr2:167260082-167343481 | 0 | 0 | 0 | 1 |
| XLOC_013222 | ABCB11            | chr2:169779448-169887833 | 0 | 0 | 0 | 1 |
| XLOC_013232 | RAPGEF4-AS1       | chr2:173587917-173917620 | 0 | 0 | 0 | 1 |
| XLOC_013238 | WIPF1             | chr2:175424301-175547627 | 0 | 0 | 0 | 1 |
| XLOC_013239 | CHRNA1            | chr2:175612322-175629200 | 0 | 0 | 0 | 1 |
| XLOC_013242 | MIR933            | chr2:175936977-176032934 | 0 | 0 | 0 | 1 |
| XLOC_013245 | EVX2              | chr2:176944834-176948690 | 0 | 0 | 0 | 1 |
| XLOC_013248 | MIR1246           | chr2:177465707-177465780 | 0 | 0 | 0 | 1 |
| XLOC_013251 | MIR3128           | chr2:178095030-178129855 | 0 | 0 | 0 | 1 |
| XLOC_013261 | ZNF385B           | chr2:180306710-180726232 | 0 | 0 | 0 | 1 |
| XLOC_013262 | MIR1258           | chr2:180306710-180726232 | 0 | 0 | 0 | 1 |
| XLOC_013264 | MIR4437           | chr2:182170319-182170375 | 0 | 0 | 0 | 1 |
| XLOC_013267 | PDE1A             | chr2:183004761-183387572 | 0 | 0 | 0 | 1 |
| XLOC_013270 | ZSWIM2            | chr2:187692206-187713897 | 0 | 0 | 0 | 1 |
| XLOC_013273 | DIRC1             | chr2:189598464-189654831 | 0 | 0 | 0 | 1 |
| XLOC_013274 | MIR1245B          | chr2:189839098-189877477 | 0 | 0 | 0 | 1 |
| XLOC_013276 | MIR3129           | chr2:189896640-190044605 | 0 | 0 | 0 | 1 |
| XLOC_013277 | SLC40A1           | chr2:190425315-190445537 | 0 | 0 | 0 | 1 |
| XLOC_013285 | SDPR              | chr2:192699031-192712006 | 0 | 0 | 0 | 1 |
| XLOC_013286 | TMEFF2            | chr2:192814746-193059644 | 0 | 0 | 0 | 1 |
| XLOC_013289 | HECW2             | chr2:197063976-197457335 | 0 | 0 | 0 | 1 |
| XLOC_013298 | BOLL              | chr2:198591602-198650938 | 0 | 0 | 0 | 1 |
| XLOC_013308 | CFLAR-AS1         | chr2:201980876-202037411 | 0 | 0 | 0 | 1 |
| XLOC_013323 | DYTN              | chr2:207516344-207583120 | 0 | 0 | 0 | 1 |
| XLOC_013327 | MIR2355           | chr2:207938861-208031970 | 0 | 0 | 0 | 1 |
| XLOC_013331 | CRYGD             | chr2:208983852-209021486 | 0 | 0 | 0 | 1 |
| XLOC_013332 | CRYGC             | chr2:208983852-209021486 | 0 | 0 | 0 | 1 |

|             |              |                          |   |   |   |   |
|-------------|--------------|--------------------------|---|---|---|---|
| XLOC_013333 | CRYGB        | chr2:208983852-209021486 | 0 | 0 | 0 | 1 |
| XLOC_013334 | CRYGA        | chr2:209025463-209028297 | 0 | 0 | 0 | 1 |
| XLOC_013335 | C2orf80      | chr2:209030070-209054777 | 0 | 0 | 0 | 1 |
| XLOC_013338 | ACADL        | chr2:211052715-211090214 | 0 | 0 | 0 | 1 |
| XLOC_013339 | MYL1         | chr2:211154867-211179895 | 0 | 0 | 0 | 1 |
| XLOC_013341 | ERBB4        | chr2:212240441-213403352 | 0 | 0 | 0 | 1 |
| XLOC_013342 | MIR548F2     | chr2:212240441-213403352 | 0 | 0 | 0 | 1 |
| XLOC_013343 | MIR4776-2    | chr2:213790980-213791066 | 0 | 0 | 0 | 1 |
| XLOC_013345 | LOC100130451 | chr2:214141276-214148925 | 0 | 0 | 0 | 1 |
| XLOC_013352 | MARCH4       | chr2:217122584-217236750 | 0 | 0 | 0 | 1 |
| XLOC_013353 | IGFBP5       | chr2:217536827-217560277 | 0 | 0 | 0 | 1 |
| XLOC_013354 | TNP1         | chr2:217724181-217724782 | 0 | 0 | 0 | 1 |
| XLOC_013355 | DIRC3        | chr2:218148745-218621316 | 0 | 0 | 0 | 1 |
| XLOC_013357 | CXCR2P1      | chr2:218899656-218955304 | 0 | 0 | 0 | 1 |
| XLOC_013358 | CXCR1        | chr2:219027567-219031716 | 0 | 0 | 0 | 1 |
| XLOC_013364 | PRKAG3       | chr2:219687105-219696512 | 0 | 0 | 0 | 1 |
| XLOC_013366 | CRYBA2       | chr2:219854911-219858127 | 0 | 0 | 0 | 1 |
| XLOC_013367 | MIR375       | chr2:219866366-219866430 | 0 | 0 | 0 | 1 |
| XLOC_013370 | MIR3131      | chr2:219919141-219925238 | 0 | 0 | 0 | 1 |
| XLOC_013379 | MIR153-1     | chr2:220154344-220174295 | 0 | 0 | 0 | 1 |
| XLOC_013380 | RESP18       | chr2:220192130-220197895 | 0 | 0 | 0 | 1 |
| XLOC_013383 | MIR3132      | chr2:220408744-220415317 | 0 | 0 | 0 | 1 |
| XLOC_013385 | MIR4268      | chr2:220771222-220771286 | 0 | 0 | 0 | 1 |
| XLOC_013387 | PAX3         | chr2:223064605-223169936 | 0 | 0 | 0 | 1 |
| XLOC_013389 | SCG2         | chr2:224461657-224467217 | 0 | 0 | 0 | 1 |
| XLOC_013393 | FAM124B      | chr2:225243414-225266717 | 0 | 0 | 0 | 1 |
| XLOC_013395 | DOCK10       | chr2:225629806-225907330 | 0 | 0 | 0 | 1 |
| XLOC_013396 | MIR4439      | chr2:225629806-225907330 | 0 | 0 | 0 | 1 |
| XLOC_013397 | MIR5702      | chr2:227523425-227523505 | 0 | 0 | 0 | 1 |
| XLOC_013401 | C2orf83      | chr2:228474805-228498036 | 0 | 0 | 0 | 1 |
| XLOC_013403 | SPHKAP       | chr2:228844669-229046367 | 0 | 0 | 0 | 1 |
| XLOC_013404 | PID1         | chr2:229888688-230136057 | 0 | 0 | 0 | 1 |
| XLOC_013405 | DNER         | chr2:230222344-230579286 | 0 | 0 | 0 | 1 |
| XLOC_013410 | GPR55        | chr2:231772042-231789947 | 0 | 0 | 0 | 1 |
| XLOC_013415 | SNORD20      | chr2:232319458-232329205 | 0 | 0 | 0 | 1 |
| XLOC_013416 | SNORD82      | chr2:232319458-232329205 | 0 | 0 | 0 | 1 |
| XLOC_013418 | NMUR1        | chr2:232387870-232395182 | 0 | 0 | 0 | 1 |
| XLOC_013420 | MIR1471      | chr2:232756951-232757008 | 0 | 0 | 0 | 1 |
| XLOC_013421 | NPPC         | chr2:232786804-232791038 | 0 | 0 | 0 | 1 |
| XLOC_013422 | ECEL1P2      | chr2:233250459-233251754 | 0 | 0 | 0 | 1 |
| XLOC_013423 | ECEL1        | chr2:233344536-233352532 | 0 | 0 | 0 | 1 |
| XLOC_013428 | DNAJB3       | chr2:234526290-234681957 | 0 | 0 | 0 | 1 |
| XLOC_013429 | LOC100286922 | chr2:234526290-234681957 | 0 | 0 | 0 | 1 |
| XLOC_013433 | GBX2         | chr2:237074306-237076652 | 0 | 0 | 0 | 1 |
| XLOC_013434 | ASB18        | chr2:237103514-237172988 | 0 | 0 | 0 | 1 |
| XLOC_013435 | IQCA1        | chr2:237232789-237416178 | 0 | 0 | 0 | 1 |
| XLOC_013439 | LOC151174    | chr2:239133753-239140318 | 0 | 0 | 0 | 1 |
| XLOC_013443 | FLJ43879     | chr2:239840997-239847965 | 0 | 0 | 0 | 1 |
| XLOC_013445 | MIR4440      | chr2:239969863-240322642 | 0 | 0 | 0 | 1 |
| XLOC_013446 | MIR4441      | chr2:239969863-240322642 | 0 | 0 | 0 | 1 |
| XLOC_013448 | MIR2467      | chr2:239969863-240322642 | 0 | 0 | 0 | 1 |
| XLOC_013449 | MIR4786      | chr2:240882431-240882517 | 0 | 0 | 0 | 1 |
| XLOC_013451 | OR6B2        | chr2:240968907-240969846 | 0 | 0 | 0 | 1 |
| XLOC_013452 | PRR21        | chr2:240981229-240982395 | 0 | 0 | 0 | 1 |
| XLOC_013453 | OR6B3        | chr2:240984493-240985485 | 0 | 0 | 0 | 1 |
| XLOC_013458 | AQP12B       | chr2:241615834-241622317 | 0 | 0 | 0 | 1 |
| XLOC_013461 | LOC200772    | chr2:241894035-241906866 | 0 | 0 | 0 | 1 |
| XLOC_013470 | DEFB125      | chr20:68350-77296        | 0 | 0 | 0 | 1 |
| XLOC_013471 | DEFB126      | chr20:123251-126392      | 0 | 0 | 0 | 1 |
| XLOC_013472 | DEFB127      | chr20:138110-139804      | 0 | 0 | 0 | 1 |
| XLOC_013473 | DEFB129      | chr20:207898-210527      | 0 | 0 | 0 | 1 |
| XLOC_013474 | DEFB132      | chr20:238376-241736      | 0 | 0 | 0 | 1 |
| XLOC_013489 | TGM6         | chr20:2361553-2413399    | 0 | 0 | 0 | 1 |
| XLOC_013493 | SNORA51      | chr20:2633177-2639039    | 0 | 0 | 0 | 1 |
| XLOC_013494 | SNORD56      | chr20:2633177-2639039    | 0 | 0 | 0 | 1 |
| XLOC_013497 | C20orf141    | chr20:2795632-2796476    | 0 | 0 | 0 | 1 |
| XLOC_013498 | TMEM239      | chr20:2796975-2797804    | 0 | 0 | 0 | 1 |
| XLOC_013502 | OXT          | chr20:3052265-3053162    | 0 | 0 | 0 | 1 |
| XLOC_013511 | MIR103A2     | chr20:3869485-3904502    | 0 | 0 | 0 | 1 |
| XLOC_013515 | PRND         | chr20:4702555-4709106    | 0 | 0 | 0 | 1 |
| XLOC_013520 | CHGB         | chr20:5891973-5906005    | 0 | 0 | 0 | 1 |
| XLOC_013524 | PLCB1        | chr20:8113295-8865547    | 0 | 0 | 0 | 1 |
| XLOC_013526 | LAMP5        | chr20:9495004-9511171    | 0 | 0 | 0 | 1 |
| XLOC_013527 | ANKEF1       | chr20:10004459-10288066  | 0 | 0 | 0 | 1 |
| XLOC_013528 | SNAP25       | chr20:10004459-10288066  | 0 | 0 | 0 | 1 |
| XLOC_013536 | OTOR         | chr20:16729002-16732809  | 0 | 0 | 0 | 1 |
| XLOC_013543 | LINC00851    | chr20:18359692-18362127  | 0 | 0 | 0 | 1 |
| XLOC_013545 | MIR3192      | chr20:18448032-18465286  | 0 | 0 | 0 | 1 |
| XLOC_013550 | SCP2D1       | chr20:18790371-18810839  | 0 | 0 | 0 | 1 |

|             |                          |                         |   |   |   |   |
|-------------|--------------------------|-------------------------|---|---|---|---|
| XLOC_013551 | SLC24A3                  | chr20:19193289-19703541 | 0 | 0 | 0 | 1 |
| XLOC_013559 | LOC100270679             | chr20:22034727-22055292 | 0 | 0 | 0 | 1 |
| XLOC_013560 | SSTR4                    | chr20:23016056-23017314 | 0 | 0 | 0 | 1 |
| XLOC_013563 | CSTL1                    | chr20:23420321-23425567 | 0 | 0 | 0 | 1 |
| XLOC_013564 | CST8                     | chr20:23471765-23476655 | 0 | 0 | 0 | 1 |
| XLOC_013565 | CST13P                   | chr20:23499782-23522655 | 0 | 0 | 0 | 1 |
| XLOC_013566 | FLJ33581                 | chr20:24180402-24205224 | 0 | 0 | 0 | 1 |
| XLOC_013567 | SYNDIG1                  | chr20:24449834-24647167 | 0 | 0 | 0 | 1 |
| XLOC_013568 | CST7                     | chr20:24929865-24940564 | 0 | 0 | 0 | 1 |
| XLOC_013575 | DEFB115                  | chr20:29845466-29847435 | 0 | 0 | 0 | 1 |
| XLOC_013576 | DEFB118                  | chr20:29956420-29961705 | 0 | 0 | 0 | 1 |
| XLOC_013577 | DEFB123                  | chr20:30028410-30038060 | 0 | 0 | 0 | 1 |
| XLOC_013578 | REM1                     | chr20:30063104-30072708 | 0 | 0 | 0 | 1 |
| XLOC_013579 | LINC00028                | chr20:30073580-30075377 | 0 | 0 | 0 | 1 |
| XLOC_013583 | MIR3193                  | chr20:30194988-30195043 | 0 | 0 | 0 | 1 |
| XLOC_013584 | COX4I2                   | chr20:30225690-30232800 | 0 | 0 | 0 | 1 |
| XLOC_013587 | TTL9                     | chr20:30458504-30530858 | 0 | 0 | 0 | 1 |
| XLOC_013588 | XKR7                     | chr20:30555804-30586256 | 0 | 0 | 0 | 1 |
| XLOC_013590 | HCK                      | chr20:30639990-30689657 | 0 | 0 | 0 | 1 |
| XLOC_013595 | LOC149950                | chr20:31175280-31196694 | 0 | 0 | 0 | 1 |
| XLOC_013598 | BPIFB2                   | chr20:31595383-31611515 | 0 | 0 | 0 | 1 |
| XLOC_013599 | BPIFB6                   | chr20:31619453-31631853 | 0 | 0 | 0 | 1 |
| XLOC_013600 | BPIFB3                   | chr20:31643229-31661434 | 0 | 0 | 0 | 1 |
| XLOC_013601 | BPIFB4                   | chr20:31669317-31699557 | 0 | 0 | 0 | 1 |
| XLOC_013602 | BPIFA2                   | chr20:31755959-31769223 | 0 | 0 | 0 | 1 |
| XLOC_013603 | BPIFA4P                  | chr20:31781410-31798268 | 0 | 0 | 0 | 1 |
| XLOC_013604 | BPIFA3                   | chr20:31805134-31815559 | 0 | 0 | 0 | 1 |
| XLOC_013605 | BPIFA1                   | chr20:31823801-31831115 | 0 | 0 | 0 | 1 |
| XLOC_013606 | BPIFB1                   | chr20:31870940-31897684 | 0 | 0 | 0 | 1 |
| XLOC_013613 | MIR4755                  | chr20:32581457-32670991 | 0 | 0 | 0 | 1 |
| XLOC_013616 | MIR644A                  | chr20:32951040-33099198 | 0 | 0 | 0 | 1 |
| XLOC_013622 | MIR499A                  | chr20:33543703-33680618 | 0 | 0 | 0 | 1 |
| XLOC_013641 | LOC100287792             | chr20:36305311-36311636 | 0 | 0 | 0 | 1 |
| XLOC_013645 | BPI                      | chr20:36932551-36965905 | 0 | 0 | 0 | 1 |
| XLOC_013646 | LBP                      | chr20:36974813-37005653 | 0 | 0 | 0 | 1 |
| XLOC_013649 | SNORA60                  | chr20:37075296-37079564 | 0 | 0 | 0 | 1 |
| XLOC_013651 | ADIG                     | chr20:37209837-37217104 | 0 | 0 | 0 | 1 |
| XLOC_013653 | SLC32A1                  | chr20:37353104-37358015 | 0 | 0 | 0 | 1 |
| XLOC_013655 | PPP1R16B                 | chr20:37434347-37551667 | 0 | 0 | 0 | 1 |
| XLOC_013669 | R3HDM1                   | chr20:42965625-42979875 | 0 | 0 | 0 | 1 |
| XLOC_013670 | HNF4A                    | chr20:42984440-43061485 | 0 | 0 | 0 | 1 |
| XLOC_013671 | MIR3646                  | chr20:42984440-43061485 | 0 | 0 | 0 | 1 |
| XLOC_013680 | SEMG1                    | chr20:43835637-43838414 | 0 | 0 | 0 | 1 |
| XLOC_013681 | SEMG2                    | chr20:43850009-43853099 | 0 | 0 | 0 | 1 |
| XLOC_013682 | RBPJL                    | chr20:43922086-43946464 | 0 | 0 | 0 | 1 |
| XLOC_013685 | WFC2                     | chr20:44098393-44110172 | 0 | 0 | 0 | 1 |
| XLOC_013688 | SPINT4                   | chr20:44350987-44354335 | 0 | 0 | 0 | 1 |
| XLOC_013696 | MMP9                     | chr20:44637546-44645200 | 0 | 0 | 0 | 1 |
| XLOC_013700 | EYA2                     | chr20:45523262-45817492 | 0 | 0 | 0 | 1 |
| XLOC_013701 | MIR3616                  | chr20:45523262-45817492 | 0 | 0 | 0 | 1 |
| XLOC_013704 | LINC00494                | chr20:46988653-46999381 | 0 | 0 | 0 | 1 |
| XLOC_013709 | SNORD12C                 | chr20:47862438-47905795 | 0 | 0 | 0 | 1 |
| XLOC_013710 | SNORD12B                 | chr20:47862438-47905795 | 0 | 0 | 0 | 1 |
| XLOC_013711 | SNORD12                  | chr20:47862438-47905795 | 0 | 0 | 0 | 1 |
| XLOC_013718 | MIR645                   | chr20:49202322-49202416 | 0 | 0 | 0 | 1 |
| XLOC_013724 | DOK5                     | chr20:53092265-53267710 | 0 | 0 | 0 | 1 |
| XLOC_013725 | MC3R                     | chr20:54823787-54824871 | 0 | 0 | 0 | 1 |
| XLOC_013733 | SPO11                    | chr20:55904830-55998278 | 0 | 0 | 0 | 1 |
| XLOC_013734 | MIR5095                  | chr20:55904830-55998278 | 0 | 0 | 0 | 1 |
| XLOC_013737 | PCK1                     | chr20:56136136-56141513 | 0 | 0 | 0 | 1 |
| XLOC_013738 | MIR4532                  | chr20:56470449-56470500 | 0 | 0 | 0 | 1 |
| XLOC_013739 | C20orf85                 | chr20:56725982-56736183 | 0 | 0 | 0 | 1 |
| XLOC_013747 | ZNF831                   | chr20:57766074-57834167 | 0 | 0 | 0 | 1 |
| XLOC_013748 | EDN3                     | chr20:57875498-57901047 | 0 | 0 | 0 | 1 |
| XLOC_013749 | PHACTR3                  | chr20:58152563-58422766 | 0 | 0 | 0 | 1 |
| XLOC_013751 | CDH26                    | chr20:58533470-58588168 | 0 | 0 | 0 | 1 |
| XLOC_013752 | C20orf197                | chr20:58630979-58648008 | 0 | 0 | 0 | 1 |
| XLOC_013753 | LOC284757                | chr20:58713547-58897314 | 0 | 0 | 0 | 1 |
| XLOC_013754 | MIR4533                  | chr20:59053168-59053239 | 0 | 0 | 0 | 1 |
| XLOC_013762 | C20orf166                | chr20:61141437-61167971 | 0 | 0 | 0 | 1 |
| XLOC_013763 | MIR1-1                   | chr20:61141437-61167971 | 0 | 0 | 0 | 1 |
| XLOC_013772 | LOC63930                 | chr20:61640734-61716423 | 0 | 0 | 0 | 1 |
| XLOC_013774 | HAR1A                    | chr20:61726844-61735737 | 0 | 0 | 0 | 1 |
| XLOC_013775 | MIR124-3                 | chr20:61809851-61809938 | 0 | 0 | 0 | 1 |
| XLOC_013776 | BIRC7                    | chr20:61867275-61871854 | 0 | 0 | 0 | 1 |
| XLOC_013777 | MIR3196                  | chr20:61867275-61871854 | 0 | 0 | 0 | 1 |
| XLOC_013778 | FLJ16779                 | chr20:61872135-61892967 | 0 | 0 | 0 | 1 |
| XLOC_013780 | MIR4326                  | chr20:61904164-61921142 | 0 | 0 | 0 | 1 |
| XLOC_013791 | MIR941-1,MIR941-3,MIR941 | chr20:62526454-62567384 | 0 | 0 | 0 | 1 |

|             |                          |                         |   |   |   |   |
|-------------|--------------------------|-------------------------|---|---|---|---|
| XLOC_013792 | MIR941-2,MIR941-3,MIR941 | chr20:62526454-62567384 | 0 | 0 | 0 | 1 |
| XLOC_013801 | DEFB128                  | chr20:168526-170264     | 0 | 0 | 0 | 1 |
| XLOC_013805 | TCF15                    | chr20:584636-590910     | 0 | 0 | 0 | 1 |
| XLOC_013807 | SCRT2                    | chr20:642239-656823     | 0 | 0 | 0 | 1 |
| XLOC_013810 | RSPO4                    | chr20:939095-982907     | 0 | 0 | 0 | 1 |
| XLOC_013814 | SIRPB2                   | chr20:1455235-1472233   | 0 | 0 | 0 | 1 |
| XLOC_013815 | SIRPD                    | chr20:1514896-1538343   | 0 | 0 | 0 | 1 |
| XLOC_013816 | SIRPB1                   | chr20:1545028-1600689   | 0 | 0 | 0 | 1 |
| XLOC_013817 | SIRPG                    | chr20:1609797-1638425   | 0 | 0 | 0 | 1 |
| XLOC_013818 | LOC100289473             | chr20:1754010-1760392   | 0 | 0 | 0 | 1 |
| XLOC_013819 | PDYN                     | chr20:1959401-1974931   | 0 | 0 | 0 | 1 |
| XLOC_013821 | SNORD119                 | chr20:2442280-2451499   | 0 | 0 | 0 | 1 |
| XLOC_013826 | AVP                      | chr20:3063201-3065370   | 0 | 0 | 0 | 1 |
| XLOC_013831 | C20orf194                | chr20:3229947-3388309   | 0 | 0 | 0 | 1 |
| XLOC_013832 | GFR4                     | chr20:3639938-3644046   | 0 | 0 | 0 | 1 |
| XLOC_013833 | ADAM33                   | chr20:3648619-3662738   | 0 | 0 | 0 | 1 |
| XLOC_013838 | MIR103B2                 | chr20:3869485-3904502   | 0 | 0 | 0 | 1 |
| XLOC_013840 | ADRA1D                   | chr20:4201277-4229659   | 0 | 0 | 0 | 1 |
| XLOC_013841 | PRNT                     | chr20:4711927-4721314   | 0 | 0 | 0 | 1 |
| XLOC_013846 | PROKR2                   | chr20:5282685-5295015   | 0 | 0 | 0 | 1 |
| XLOC_013847 | LINC00658                | chr20:5412602-5426394   | 0 | 0 | 0 | 1 |
| XLOC_013853 | HAO1                     | chr20:7863630-7921093   | 0 | 0 | 0 | 1 |
| XLOC_013855 | PAK7                     | chr20:9518036-9819687   | 0 | 0 | 0 | 1 |
| XLOC_013856 | SNAP25-AS1               | chr20:10004459-10288066 | 0 | 0 | 0 | 1 |
| XLOC_013859 | LOC339593                | chr20:11247306-11254031 | 0 | 0 | 0 | 1 |
| XLOC_013860 | ISM1-AS1                 | chr20:13202417-13281297 | 0 | 0 | 0 | 1 |
| XLOC_013863 | SEL1L2                   | chr20:13830043-13975979 | 0 | 0 | 0 | 1 |
| XLOC_013865 | MACROD2-AS1              | chr20:13976145-16033841 | 0 | 0 | 0 | 1 |
| XLOC_013875 | C20orf78                 | chr20:18790371-18810839 | 0 | 0 | 0 | 1 |
| XLOC_013876 | LOC100130264             | chr20:19193289-19703541 | 0 | 0 | 0 | 1 |
| XLOC_013879 | NKX2-4                   | chr20:21376004-21378047 | 0 | 0 | 0 | 1 |
| XLOC_013880 | NKX2-2                   | chr20:21491659-21494664 | 0 | 0 | 0 | 1 |
| XLOC_013881 | LOC284788                | chr20:22380970-22401281 | 0 | 0 | 0 | 1 |
| XLOC_013883 | FOXA2                    | chr20:22561641-22566101 | 0 | 0 | 0 | 1 |
| XLOC_013884 | THBD                     | chr20:23026269-23030301 | 0 | 0 | 0 | 1 |
| XLOC_013885 | CD93                     | chr20:23059992-23066977 | 0 | 0 | 0 | 1 |
| XLOC_013886 | LINC00656                | chr20:23105704-23113273 | 0 | 0 | 0 | 1 |
| XLOC_013888 | CST11                    | chr20:23431040-23433482 | 0 | 0 | 0 | 1 |
| XLOC_013889 | CST9L                    | chr20:23545369-23549386 | 0 | 0 | 0 | 1 |
| XLOC_013890 | CST9                     | chr20:23583046-23586610 | 0 | 0 | 0 | 1 |
| XLOC_013892 | CST4                     | chr20:23666276-23669662 | 0 | 0 | 0 | 1 |
| XLOC_013893 | CST1                     | chr20:23728189-23731574 | 0 | 0 | 0 | 1 |
| XLOC_013894 | CST2                     | chr20:23804403-23807312 | 0 | 0 | 0 | 1 |
| XLOC_013895 | CST5                     | chr20:23856571-23860380 | 0 | 0 | 0 | 1 |
| XLOC_013899 | VSX1                     | chr20:25051520-25063015 | 0 | 0 | 0 | 1 |
| XLOC_013900 | LOC284798                | chr20:25121433-25129426 | 0 | 0 | 0 | 1 |
| XLOC_013906 | NCOR1P1                  | chr20:26084051-26094677 | 0 | 0 | 0 | 1 |
| XLOC_013910 | DEFB116                  | chr20:29891014-29896388 | 0 | 0 | 0 | 1 |
| XLOC_013911 | DEFB119                  | chr20:29964965-29978452 | 0 | 0 | 0 | 1 |
| XLOC_013912 | DEFB121                  | chr20:29992647-30000641 | 0 | 0 | 0 | 1 |
| XLOC_013913 | DEFB122                  | chr20:30009241-30016983 | 0 | 0 | 0 | 1 |
| XLOC_013914 | DEFB124                  | chr20:30053308-30060816 | 0 | 0 | 0 | 1 |
| XLOC_013917 | FOX51                    | chr20:30432102-30433420 | 0 | 0 | 0 | 1 |
| XLOC_013925 | SUN5                     | chr20:31571580-31592239 | 0 | 0 | 0 | 1 |
| XLOC_013935 | HMGB3P1                  | chr20:33421377-33422265 | 0 | 0 | 0 | 1 |
| XLOC_013938 | MIR499B                  | chr20:33543703-33680618 | 0 | 0 | 0 | 1 |
| XLOC_013945 | C20orf173                | chr20:34108569-34117481 | 0 | 0 | 0 | 1 |
| XLOC_013958 | GHRH                     | chr20:35879489-35885299 | 0 | 0 | 0 | 1 |
| XLOC_013960 | LINC00489                | chr20:36247699-36251521 | 0 | 0 | 0 | 1 |
| XLOC_013969 | LOC339568                | chr20:37842423-37853391 | 0 | 0 | 0 | 1 |
| XLOC_013974 | PTPRT                    | chr20:40701391-41818557 | 0 | 0 | 0 | 1 |
| XLOC_013975 | GTSF1L                   | chr20:42354800-42355642 | 0 | 0 | 0 | 1 |
| XLOC_013985 | KCNS1                    | chr20:43720949-43729753 | 0 | 0 | 0 | 1 |
| XLOC_013987 | WFDC12                   | chr20:43752066-43753106 | 0 | 0 | 0 | 1 |
| XLOC_013988 | SLPI                     | chr20:43880878-43883206 | 0 | 0 | 0 | 1 |
| XLOC_013992 | SPINT3                   | chr20:44141100-44144264 | 0 | 0 | 0 | 1 |
| XLOC_013993 | EPPIN,EPPIN-WFDC6,WFD    | chr20:44162835-44176065 | 0 | 0 | 0 | 1 |
| XLOC_013994 | WFDC8                    | chr20:44179790-44207965 | 0 | 0 | 0 | 1 |
| XLOC_013995 | WFDC9                    | chr20:44236577-44259907 | 0 | 0 | 0 | 1 |
| XLOC_013996 | WFDC11                   | chr20:44277201-44298878 | 0 | 0 | 0 | 1 |
| XLOC_014006 | CDH22                    | chr20:44802371-44937137 | 0 | 0 | 0 | 1 |
| XLOC_014009 | ZNF663                   | chr20:45085131-45086282 | 0 | 0 | 0 | 1 |
| XLOC_014010 | MKRN7P                   | chr20:45092298-45093931 | 0 | 0 | 0 | 1 |
| XLOC_014011 | ZNF334                   | chr20:45128268-45142198 | 0 | 0 | 0 | 1 |
| XLOC_014012 | OCSTAMP                  | chr20:45169669-45179213 | 0 | 0 | 0 | 1 |
| XLOC_014019 | KCNB1                    | chr20:47988504-48099181 | 0 | 0 | 0 | 1 |
| XLOC_014020 | PTGIS                    | chr20:48120410-48184707 | 0 | 0 | 0 | 1 |
| XLOC_014023 | LINC00651                | chr20:48657243-48658166 | 0 | 0 | 0 | 1 |
| XLOC_014028 | KCNG1                    | chr20:49620192-49639675 | 0 | 0 | 0 | 1 |

|             |               |                         |   |   |   |   |
|-------------|---------------|-------------------------|---|---|---|---|
| XLOC_014030 | MIR3194       | chr20:50003493-50179370 | 0 | 0 | 0 | 1 |
| XLOC_014032 | SALL4         | chr20:50400582-50419048 | 0 | 0 | 0 | 1 |
| XLOC_014035 | SUMO1P1       | chr20:52491039-52492248 | 0 | 0 | 0 | 1 |
| XLOC_014037 | MIR4756       | chr20:52560078-52687304 | 0 | 0 | 0 | 1 |
| XLOC_014038 | CYP24A1       | chr20:52769987-52790516 | 0 | 0 | 0 | 1 |
| XLOC_014039 | CBLN4         | chr20:54572412-54580528 | 0 | 0 | 0 | 1 |
| XLOC_014042 | BMP7          | chr20:55743808-55841707 | 0 | 0 | 0 | 1 |
| XLOC_014043 | MIR4325       | chr20:55896557-55896647 | 0 | 0 | 0 | 1 |
| XLOC_014046 | ZBP1          | chr20:56178901-56195632 | 0 | 0 | 0 | 1 |
| XLOC_014049 | APCDD1L       | chr20:57034425-57089949 | 0 | 0 | 0 | 1 |
| XLOC_014050 | MIR296        | chr20:57392669-57392749 | 0 | 0 | 0 | 1 |
| XLOC_014051 | MIR298        | chr20:57393280-57393368 | 0 | 0 | 0 | 1 |
| XLOC_014055 | LOC100506384  | chr20:58152563-58422766 | 0 | 0 | 0 | 1 |
| XLOC_014058 | MIR1257       | chr20:60528601-60528718 | 0 | 0 | 0 | 1 |
| XLOC_014064 | RBBP8NL       | chr20:60985292-61002629 | 0 | 0 | 0 | 1 |
| XLOC_014065 | GATA5         | chr20:61038552-61051026 | 0 | 0 | 0 | 1 |
| XLOC_014066 | C20orf166-AS1 | chr20:61141437-61167971 | 0 | 0 | 0 | 1 |
| XLOC_014071 | BHLHE23       | chr20:61637330-61638387 | 0 | 0 | 0 | 1 |
| XLOC_014073 | HAR1B         | chr20:61726844-61735737 | 0 | 0 | 0 | 1 |
| XLOC_014076 | CHRNA4        | chr20:61974661-61992748 | 0 | 0 | 0 | 1 |
| XLOC_014077 | KCNQ2         | chr20:62037541-62103993 | 0 | 0 | 0 | 1 |
| XLOC_014087 | MIR1914       | chr20:62571181-62601223 | 0 | 0 | 0 | 1 |
| XLOC_014088 | MIR647        | chr20:62571181-62601223 | 0 | 0 | 0 | 1 |
| XLOC_014091 | SOX18         | chr20:62679078-62680979 | 0 | 0 | 0 | 1 |
| XLOC_014093 | C20orf201     | chr20:62711470-62731996 | 0 | 0 | 0 | 1 |
| XLOC_014094 | NPBWR2        | chr20:62737182-62738184 | 0 | 0 | 0 | 1 |
| XLOC_014095 | MIR3648       | chr21:9825831-9826011   | 0 | 0 | 0 | 1 |
| XLOC_014096 | MIR3687       | chr21:9826202-9826263   | 0 | 0 | 0 | 1 |
| XLOC_014098 | POTED         | chr21:14982497-15013906 | 0 | 0 | 0 | 1 |
| XLOC_014099 | RBM11         | chr21:15588465-15600693 | 0 | 0 | 0 | 1 |
| XLOC_014101 | SAMSN1-AS1    | chr21:15857548-16015428 | 0 | 0 | 0 | 1 |
| XLOC_014103 | LINC00478     | chr21:17442841-17982094 | 0 | 0 | 0 | 1 |
| XLOC_014104 | MIR99A        | chr21:17442841-17982094 | 0 | 0 | 0 | 1 |
| XLOC_014105 | MIRLET7C      | chr21:17442841-17982094 | 0 | 0 | 0 | 1 |
| XLOC_014106 | MIR125B2      | chr21:17442841-17982094 | 0 | 0 | 0 | 1 |
| XLOC_014107 | C21orf37      | chr21:18811207-18821503 | 0 | 0 | 0 | 1 |
| XLOC_014110 | NCAM2         | chr21:22370632-22912517 | 0 | 0 | 0 | 1 |
| XLOC_014111 | RNU6-67       | chr21:22370632-22912517 | 0 | 0 | 0 | 1 |
| XLOC_014112 | LINC00308     | chr21:23470935-23488847 | 0 | 0 | 0 | 1 |
| XLOC_014113 | LOC339622     | chr21:26212863-26430056 | 0 | 0 | 0 | 1 |
| XLOC_014117 | MIR4759       | chr21:28290230-28339439 | 0 | 0 | 0 | 1 |
| XLOC_014118 | LINC00113     | chr21:28659821-29283529 | 0 | 0 | 0 | 1 |
| XLOC_014119 | LINC00314     | chr21:29385681-29395528 | 0 | 0 | 0 | 1 |
| XLOC_014126 | GRIK1-AS1     | chr21:30909253-31312282 | 0 | 0 | 0 | 1 |
| XLOC_014127 | KRTAP13-1     | chr21:31768391-31769138 | 0 | 0 | 0 | 1 |
| XLOC_014128 | KRTAP13-4     | chr21:31802593-31803076 | 0 | 0 | 0 | 1 |
| XLOC_014129 | KRTAP15-1     | chr21:31812645-31813098 | 0 | 0 | 0 | 1 |
| XLOC_014130 | KRTAP6-3      | chr21:31964758-31965374 | 0 | 0 | 0 | 1 |
| XLOC_014131 | KRTAP22-1     | chr21:31973439-31973586 | 0 | 0 | 0 | 1 |
| XLOC_014132 | KRTAP20-1     | chr21:31988773-31988944 | 0 | 0 | 0 | 1 |
| XLOC_014133 | KRTAP20-4     | chr21:31992945-31993169 | 0 | 0 | 0 | 1 |
| XLOC_014134 | KRTAP20-2     | chr21:32007582-32007780 | 0 | 0 | 0 | 1 |
| XLOC_014135 | KRTAP20-3     | chr21:32015182-32015455 | 0 | 0 | 0 | 1 |
| XLOC_014143 | OLIG2         | chr21:34398215-34401503 | 0 | 0 | 0 | 1 |
| XLOC_014144 | OLIG1         | chr21:34442449-34444728 | 0 | 0 | 0 | 1 |
| XLOC_014156 | CLIC6         | chr21:36041687-36090519 | 0 | 0 | 0 | 1 |
| XLOC_014158 | MIR802        | chr21:37093012-37093106 | 0 | 0 | 0 | 1 |
| XLOC_014169 | DSCR8         | chr21:39493544-39528605 | 0 | 0 | 0 | 1 |
| XLOC_014170 | DSCR10        | chr21:39578249-39580738 | 0 | 0 | 0 | 1 |
| XLOC_014173 | BRWD1-AS1     | chr21:40687632-40695144 | 0 | 0 | 0 | 1 |
| XLOC_014176 | B3GALT5       | chr21:41029253-41034815 | 0 | 0 | 0 | 1 |
| XLOC_014177 | IGSF5         | chr21:41117333-41174023 | 0 | 0 | 0 | 1 |
| XLOC_014178 | PCP4          | chr21:41239346-41301322 | 0 | 0 | 0 | 1 |
| XLOC_014179 | DSCAM-AS1     | chr21:41384342-42219039 | 0 | 0 | 0 | 1 |
| XLOC_014180 | MIR3197       | chr21:42539483-42539556 | 0 | 0 | 0 | 1 |
| XLOC_014185 | LINC00111     | chr21:43099461-43117496 | 0 | 0 | 0 | 1 |
| XLOC_014186 | LINC00112     | chr21:43136595-43137742 | 0 | 0 | 0 | 1 |
| XLOC_014189 | ABCG1         | chr21:43619798-43717354 | 0 | 0 | 0 | 1 |
| XLOC_014190 | UBASH3A       | chr21:43823970-43867790 | 0 | 0 | 0 | 1 |
| XLOC_014192 | PDE9A         | chr21:44073861-44195618 | 0 | 0 | 0 | 1 |
| XLOC_014195 | CRYAA         | chr21:44589140-44592913 | 0 | 0 | 0 | 1 |
| XLOC_014204 | AIRE          | chr21:45705720-45718102 | 0 | 0 | 0 | 1 |
| XLOC_014206 | TRPM2         | chr21:45773483-45862964 | 0 | 0 | 0 | 1 |
| XLOC_014209 | KRTAP10-4     | chr21:45917774-46131495 | 0 | 0 | 0 | 1 |
| XLOC_014210 | KRTAP10-7     | chr21:45917774-46131495 | 0 | 0 | 0 | 1 |
| XLOC_014211 | KRTAP10-8     | chr21:45917774-46131495 | 0 | 0 | 0 | 1 |
| XLOC_014212 | KRTAP10-9     | chr21:45917774-46131495 | 0 | 0 | 0 | 1 |
| XLOC_014213 | KRTAP10-10    | chr21:45917774-46131495 | 0 | 0 | 0 | 1 |
| XLOC_014214 | KRTAP10-11    | chr21:45917774-46131495 | 0 | 0 | 0 | 1 |

|             |                  |                         |   |   |   |   |
|-------------|------------------|-------------------------|---|---|---|---|
| XLOC_014215 | KRTAP12-3        | chr21:45917774-46131495 | 0 | 0 | 0 | 1 |
| XLOC_014216 | KRTAP10-12       | chr21:45917774-46131495 | 0 | 0 | 0 | 1 |
| XLOC_014224 | COL6A2           | chr21:47518032-47552763 | 0 | 0 | 0 | 1 |
| XLOC_014232 | TPTE             | chr21:10906742-10990920 | 0 | 0 | 0 | 1 |
| XLOC_014233 | BAGE3,BAGE4,BAGf | chr21:11020841-11098937 | 0 | 0 | 0 | 1 |
| XLOC_014234 | MIR3156-3        | chr21:14778704-14778781 | 0 | 0 | 0 | 1 |
| XLOC_014236 | ANKRD20A11P      | chr21:15316095-15352765 | 0 | 0 | 0 | 1 |
| XLOC_014237 | LIPI             | chr21:15481134-15579254 | 0 | 0 | 0 | 1 |
| XLOC_014239 | SAMSN1           | chr21:15857548-16015428 | 0 | 0 | 0 | 1 |
| XLOC_014240 | LOC388813        | chr21:15857548-16015428 | 0 | 0 | 0 | 1 |
| XLOC_014244 | CHODL-AS1        | chr21:19207988-19257925 | 0 | 0 | 0 | 1 |
| XLOC_014245 | TMPRSS15         | chr21:19641432-19775970 | 0 | 0 | 0 | 1 |
| XLOC_014246 | LINC00320        | chr21:22114912-22175426 | 0 | 0 | 0 | 1 |
| XLOC_014247 | LINC00317        | chr21:23095612-23109639 | 0 | 0 | 0 | 1 |
| XLOC_014248 | D21S2088E        | chr21:24733425-24757156 | 0 | 0 | 0 | 1 |
| XLOC_014255 | ADAMTS1          | chr21:28208605-28217728 | 0 | 0 | 0 | 1 |
| XLOC_014256 | ADAMTS5          | chr21:28290230-28339439 | 0 | 0 | 0 | 1 |
| XLOC_014257 | MIR5009          | chr21:28659821-29283529 | 0 | 0 | 0 | 1 |
| XLOC_014263 | CLDN17           | chr21:31538240-31538971 | 0 | 0 | 0 | 1 |
| XLOC_014264 | LINC00307        | chr21:31581468-31584101 | 0 | 0 | 0 | 1 |
| XLOC_014265 | CLDN8            | chr21:31586323-31588469 | 0 | 0 | 0 | 1 |
| XLOC_014266 | KRTAP24-1        | chr21:31653626-31655276 | 0 | 0 | 0 | 1 |
| XLOC_014267 | KRTAP25-1        | chr21:31661462-31661832 | 0 | 0 | 0 | 1 |
| XLOC_014268 | KRTAP26-1        | chr21:31691449-31692607 | 0 | 0 | 0 | 1 |
| XLOC_014269 | KRTAP27-1        | chr21:31709330-31710012 | 0 | 0 | 0 | 1 |
| XLOC_014270 | KRTAP23-1        | chr21:31720716-31720924 | 0 | 0 | 0 | 1 |
| XLOC_014271 | KRTAP13-2        | chr21:31743708-31744557 | 0 | 0 | 0 | 1 |
| XLOC_014272 | MIR4327          | chr21:31747611-31747696 | 0 | 0 | 0 | 1 |
| XLOC_014273 | KRTAP13-3        | chr21:31797710-31798230 | 0 | 0 | 0 | 1 |
| XLOC_014274 | KRTAP19-1        | chr21:31852363-31852636 | 0 | 0 | 0 | 1 |
| XLOC_014275 | KRTAP19-2        | chr21:31859508-31859667 | 0 | 0 | 0 | 1 |
| XLOC_014276 | KRTAP19-3        | chr21:31863781-31864275 | 0 | 0 | 0 | 1 |
| XLOC_014277 | KRTAP19-4        | chr21:31869173-31869428 | 0 | 0 | 0 | 1 |
| XLOC_014278 | KRTAP19-5        | chr21:31874189-31874408 | 0 | 0 | 0 | 1 |
| XLOC_014279 | KRTAP19-6        | chr21:31913853-31914181 | 0 | 0 | 0 | 1 |
| XLOC_014280 | KRTAP19-7        | chr21:31933416-31933608 | 0 | 0 | 0 | 1 |
| XLOC_014281 | KRTAP22-2        | chr21:31962423-31962716 | 0 | 0 | 0 | 1 |
| XLOC_014282 | KRTAP6-2         | chr21:31971004-31971193 | 0 | 0 | 0 | 1 |
| XLOC_014283 | KRTAP6-1         | chr21:31986004-31986223 | 0 | 0 | 0 | 1 |
| XLOC_014284 | KRTAP21-3        | chr21:32090842-32091095 | 0 | 0 | 0 | 1 |
| XLOC_014285 | KRTAP21-2        | chr21:32119268-32119520 | 0 | 0 | 0 | 1 |
| XLOC_014286 | KRTAP21-1        | chr21:32127456-32127696 | 0 | 0 | 0 | 1 |
| XLOC_014287 | KRTAP8-1         | chr21:32185014-32185570 | 0 | 0 | 0 | 1 |
| XLOC_014288 | KRTAP7-1         | chr21:32201357-32202051 | 0 | 0 | 0 | 1 |
| XLOC_014289 | KRTAP11-1        | chr21:32252963-32253874 | 0 | 0 | 0 | 1 |
| XLOC_014290 | KRTAP19-8        | chr21:32410477-32410795 | 0 | 0 | 0 | 1 |
| XLOC_014293 | LINC00159        | chr21:33452793-33458608 | 0 | 0 | 0 | 1 |
| XLOC_014302 | C21orf54         | chr21:34537775-34542541 | 0 | 0 | 0 | 1 |
| XLOC_014312 | LINC00160        | chr21:36096104-36109479 | 0 | 0 | 0 | 1 |
| XLOC_014315 | LOC100506403     | chr21:36744804-36953062 | 0 | 0 | 0 | 1 |
| XLOC_014323 | KCNJ6            | chr21:38996784-39288741 | 0 | 0 | 0 | 1 |
| XLOC_014324 | DSCR4            | chr21:39426312-39493454 | 0 | 0 | 0 | 1 |
| XLOC_014325 | ERG              | chr21:39739182-40033704 | 0 | 0 | 0 | 1 |
| XLOC_014326 | LINC00114        | chr21:40110878-40145401 | 0 | 0 | 0 | 1 |
| XLOC_014332 | C21orf88         | chr21:40969074-40984749 | 0 | 0 | 0 | 1 |
| XLOC_014333 | DSCAM            | chr21:41384342-42219039 | 0 | 0 | 0 | 1 |
| XLOC_014334 | MIR4760          | chr21:41384342-42219039 | 0 | 0 | 0 | 1 |
| XLOC_014335 | DSCAM-IT1        | chr21:41384342-42219039 | 0 | 0 | 0 | 1 |
| XLOC_014336 | LINC00323        | chr21:42513426-42519991 | 0 | 0 | 0 | 1 |
| XLOC_014338 | TMPRSS2          | chr21:42836477-42880085 | 0 | 0 | 0 | 1 |
| XLOC_014339 | LINC00479        | chr21:43131679-43135935 | 0 | 0 | 0 | 1 |
| XLOC_014344 | C21orf128        | chr21:43483067-43563105 | 0 | 0 | 0 | 1 |
| XLOC_014345 | TFF3             | chr21:43731776-43735706 | 0 | 0 | 0 | 1 |
| XLOC_014346 | TFF2             | chr21:43766466-43771208 | 0 | 0 | 0 | 1 |
| XLOC_014347 | TFF1             | chr21:43782390-43786644 | 0 | 0 | 0 | 1 |
| XLOC_014348 | TMPRSS3          | chr21:43791995-43816955 | 0 | 0 | 0 | 1 |
| XLOC_014359 | DNMT3L           | chr21:45666221-45682099 | 0 | 0 | 0 | 1 |
| XLOC_014363 | KRTAP10-1        | chr21:45917774-46131495 | 0 | 0 | 0 | 1 |
| XLOC_014364 | KRTAP10-2        | chr21:45917774-46131495 | 0 | 0 | 0 | 1 |
| XLOC_014365 | KRTAP10-3        | chr21:45917774-46131495 | 0 | 0 | 0 | 1 |
| XLOC_014366 | KRTAP10-5        | chr21:45917774-46131495 | 0 | 0 | 0 | 1 |
| XLOC_014367 | KRTAP10-6        | chr21:45917774-46131495 | 0 | 0 | 0 | 1 |
| XLOC_014368 | KRTAP12-4        | chr21:45917774-46131495 | 0 | 0 | 0 | 1 |
| XLOC_014369 | KRTAP12-2        | chr21:45917774-46131495 | 0 | 0 | 0 | 1 |
| XLOC_014370 | KRTAP12-1        | chr21:45917774-46131495 | 0 | 0 | 0 | 1 |
| XLOC_014383 | LOC100129027     | chr21:47247754-47256333 | 0 | 0 | 0 | 1 |
| XLOC_014389 | S100B            | chr21:48018530-48025035 | 0 | 0 | 0 | 1 |
| XLOC_014391 | TPTEP1           | chr22:17082800-17129720 | 0 | 0 | 0 | 1 |
| XLOC_014392 | HSFY1P1          | chr22:17308363-17310225 | 0 | 0 | 0 | 1 |

|             |                   |                          |   |   |   |   |
|-------------|-------------------|--------------------------|---|---|---|---|
| XLOC_014399 | FLJ41941          | chr22:18512150-18520734  | 0 | 0 | 0 | 1 |
| XLOC_014414 | MIR185            | chr22:20008630-20053447  | 0 | 0 | 0 | 1 |
| XLOC_014423 | POM121L4P         | chr22:21043842-21046009  | 0 | 0 | 0 | 1 |
| XLOC_014425 | SERPIND1          | chr22:21061978-21213100  | 0 | 0 | 0 | 1 |
| XLOC_014432 | LOC400891         | chr22:21400248-21418457  | 0 | 0 | 0 | 1 |
| XLOC_014441 | MIR301B           | chr22:22007269-22007347  | 0 | 0 | 0 | 1 |
| XLOC_014442 | MIR130B           | chr22:22007592-22007674  | 0 | 0 | 0 | 1 |
| XLOC_014444 | VPREB1            | chr22:22599199-22599926  | 0 | 0 | 0 | 1 |
| XLOC_014448 | MIR650            | chr22:23165269-23165365  | 0 | 0 | 0 | 1 |
| XLOC_014449 | IGLL5             | chr22:23229959-23238013  | 0 | 0 | 0 | 1 |
| XLOC_014455 | C22orf15          | chr22:24105207-24110141  | 0 | 0 | 0 | 1 |
| XLOC_014468 | UPB1              | chr22:244891250-24922553 | 0 | 0 | 0 | 1 |
| XLOC_014472 | TOP1P2            | chr22:25115000-25170687  | 0 | 0 | 0 | 1 |
| XLOC_014477 | IGLL3P            | chr22:25714223-25716193  | 0 | 0 | 0 | 1 |
| XLOC_014481 | SEZ6L             | chr22:26565439-26779563  | 0 | 0 | 0 | 1 |
| XLOC_014484 | CRYBA4            | chr22:27017927-27026636  | 0 | 0 | 0 | 1 |
| XLOC_014487 | MIR3199-2         | chr22:28315363-29075853  | 0 | 0 | 0 | 1 |
| XLOC_014496 | NEFH              | chr22:29876180-29887277  | 0 | 0 | 0 | 1 |
| XLOC_014508 | MIR3200           | chr22:31090792-31303811  | 0 | 0 | 0 | 1 |
| XLOC_014520 | AP1B1P1           | chr22:32517963-32529456  | 0 | 0 | 0 | 1 |
| XLOC_014524 | TIMP3             | chr22:32908539-33454377  | 0 | 0 | 0 | 1 |
| XLOC_014526 | ISX               | chr22:35462129-35483380  | 0 | 0 | 0 | 1 |
| XLOC_014529 | MIR3909           | chr22:35695267-35743987  | 0 | 0 | 0 | 1 |
| XLOC_014534 | APOL5             | chr22:36113918-36125529  | 0 | 0 | 0 | 1 |
| XLOC_014537 | CSF2RB            | chr22:37309674-37336479  | 0 | 0 | 0 | 1 |
| XLOC_014538 | LOC100506241      | chr22:37361288-37364213  | 0 | 0 | 0 | 1 |
| XLOC_014555 | MIR4534           | chr22:38384800-38384860  | 0 | 0 | 0 | 1 |
| XLOC_014568 | SYNGR1            | chr22:39745953-39781593  | 0 | 0 | 0 | 1 |
| XLOC_014570 | MGAT3             | chr22:39853324-39888199  | 0 | 0 | 0 | 1 |
| XLOC_014583 | MIR1281           | chr22:41488516-41488570  | 0 | 0 | 0 | 1 |
| XLOC_014595 | MIR33A            | chr22:42229105-42302375  | 0 | 0 | 0 | 1 |
| XLOC_014608 | MPPED1            | chr22:43808019-43902800  | 0 | 0 | 0 | 1 |
| XLOC_014609 | EFCAB6-AS1        | chr22:43912133-44208217  | 0 | 0 | 0 | 1 |
| XLOC_014614 | LINC00207         | chr22:44965219-44968329  | 0 | 0 | 0 | 1 |
| XLOC_014617 | UPK3A             | chr22:45680867-45691755  | 0 | 0 | 0 | 1 |
| XLOC_014622 | MIR4762           | chr22:46067677-46241187  | 0 | 0 | 0 | 1 |
| XLOC_014626 | MIR3619           | chr22:46481876-46509808  | 0 | 0 | 0 | 1 |
| XLOC_014633 | MIR3201           | chr22:48670175-48670227  | 0 | 0 | 0 | 1 |
| XLOC_014635 | MIR4535           | chr22:49176106-49176165  | 0 | 0 | 0 | 1 |
| XLOC_014636 | LOC100128946      | chr22:49262581-49294198  | 0 | 0 | 0 | 1 |
| XLOC_014641 | PANX2             | chr22:50609159-50618724  | 0 | 0 | 0 | 1 |
| XLOC_014646 | MIOX              | chr22:50925212-50928750  | 0 | 0 | 0 | 1 |
| XLOC_014654 | POTEH             | chr22:16256331-16287937  | 0 | 0 | 0 | 1 |
| XLOC_014655 | OR11H1            | chr22:16448823-16449804  | 0 | 0 | 0 | 1 |
| XLOC_014657 | ANKRD62P1-PARP4P3 | chr22:17134598-17156430  | 0 | 0 | 0 | 1 |
| XLOC_014659 | GAB4              | chr22:17442826-17489112  | 0 | 0 | 0 | 1 |
| XLOC_014662 | CECR1             | chr22:17660191-17690779  | 0 | 0 | 0 | 1 |
| XLOC_014663 | CECR3             | chr22:17737749-17747623  | 0 | 0 | 0 | 1 |
| XLOC_014666 | MIR3198-1         | chr22:18216905-18257431  | 0 | 0 | 0 | 1 |
| XLOC_014668 | MIR648            | chr22:18270415-18507325  | 0 | 0 | 0 | 1 |
| XLOC_014673 | GSC2              | chr22:19136503-19137796  | 0 | 0 | 0 | 1 |
| XLOC_014679 | CLDN5             | chr22:19510546-19512860  | 0 | 0 | 0 | 1 |
| XLOC_014680 | LOC150185         | chr22:19553652-19554362  | 0 | 0 | 0 | 1 |
| XLOC_014685 | LOC388849         | chr22:20136108-20137431  | 0 | 0 | 0 | 1 |
| XLOC_014686 | LOC284865         | chr22:20186252-20192441  | 0 | 0 | 0 | 1 |
| XLOC_014688 | MIR1286           | chr22:20228937-20255816  | 0 | 0 | 0 | 1 |
| XLOC_014697 | SLC7A4            | chr22:21383006-21386847  | 0 | 0 | 0 | 1 |
| XLOC_014698 | P2RX6P            | chr22:21396680-21398538  | 0 | 0 | 0 | 1 |
| XLOC_014706 | ZNF280B           | chr22:22838771-22863505  | 0 | 0 | 0 | 1 |
| XLOC_014711 | CESSAP1           | chr22:23701792-23724313  | 0 | 0 | 0 | 1 |
| XLOC_014713 | IGLL1             | chr22:23915312-23922495  | 0 | 0 | 0 | 1 |
| XLOC_014723 | GSTTP1            | chr22:24340594-24347258  | 0 | 0 | 0 | 1 |
| XLOC_014725 | GSTTP2            | chr22:24385937-24401899  | 0 | 0 | 0 | 1 |
| XLOC_014726 | GGT5              | chr22:24615621-24641110  | 0 | 0 | 0 | 1 |
| XLOC_014733 | LOC100128531      | chr22:25423940-25593415  | 0 | 0 | 0 | 1 |
| XLOC_014738 | MIR548J           | chr22:26921713-26986089  | 0 | 0 | 0 | 1 |
| XLOC_014739 | CRYBB1            | chr22:26995361-27013991  | 0 | 0 | 0 | 1 |
| XLOC_014742 | MIR3199-1         | chr22:28315363-29075853  | 0 | 0 | 0 | 1 |
| XLOC_014747 | C22orf31          | chr22:29454659-29457907  | 0 | 0 | 0 | 1 |
| XLOC_014751 | MIR3653           | chr22:29723668-29784572  | 0 | 0 | 0 | 1 |
| XLOC_014765 | SDC4P             | chr22:30877276-30877743  | 0 | 0 | 0 | 1 |
| XLOC_014767 | SEC14L6           | chr22:30920916-30942669  | 0 | 0 | 0 | 1 |
| XLOC_014774 | MIR3928           | chr22:31556047-31556105  | 0 | 0 | 0 | 1 |
| XLOC_014781 | C22orf42          | chr22:32545518-32555243  | 0 | 0 | 0 | 1 |
| XLOC_014786 | BPIFC             | chr22:32809833-32853373  | 0 | 0 | 0 | 1 |
| XLOC_014787 | SYN3              | chr22:32908539-33454377  | 0 | 0 | 0 | 1 |
| XLOC_014789 | MIR4764           | chr22:33669061-34316416  | 0 | 0 | 0 | 1 |
| XLOC_014790 | MB                | chr22:36002810-36019401  | 0 | 0 | 0 | 1 |
| XLOC_014792 | APOL3             | chr22:36536370-36562225  | 0 | 0 | 0 | 1 |

|             |              |                         |   |   |   |   |
|-------------|--------------|-------------------------|---|---|---|---|
| XLOC_014799 | CACNG2       | chr22:36956915-37098690 | 0 | 0 | 0 | 1 |
| XLOC_014801 | PVALB        | chr22:37196744-37215517 | 0 | 0 | 0 | 1 |
| XLOC_014802 | TEX33        | chr22:37387159-37403877 | 0 | 0 | 0 | 1 |
| XLOC_014805 | IL2RB        | chr22:37521879-37545962 | 0 | 0 | 0 | 1 |
| XLOC_014807 | SSTR3        | chr22:37602244-37608353 | 0 | 0 | 0 | 1 |
| XLOC_014809 | ELFN2        | chr22:37763999-37823505 | 0 | 0 | 0 | 1 |
| XLOC_014812 | LGALS2       | chr22:37966252-37976024 | 0 | 0 | 0 | 1 |
| XLOC_014814 | MIR659       | chr22:38243684-38243781 | 0 | 0 | 0 | 1 |
| XLOC_014816 | SOX10        | chr22:38368318-38380539 | 0 | 0 | 0 | 1 |
| XLOC_014837 | RNU86        | chr22:39708886-39715670 | 0 | 0 | 0 | 1 |
| XLOC_014838 | SNORD43      | chr22:39708886-39715670 | 0 | 0 | 0 | 1 |
| XLOC_014840 | ENTHD1       | chr22:40139048-40289794 | 0 | 0 | 0 | 1 |
| XLOC_014843 | MIR4766      | chr22:41165638-41215392 | 0 | 0 | 0 | 1 |
| XLOC_014867 | ATP5L2       | chr22:43013845-43045405 | 0 | 0 | 0 | 1 |
| XLOC_014868 | A4GALT       | chr22:43088126-43116876 | 0 | 0 | 0 | 1 |
| XLOC_014876 | SULT4A1      | chr22:44220386-44258378 | 0 | 0 | 0 | 1 |
| XLOC_014877 | PNPLA5       | chr22:44275557-44287893 | 0 | 0 | 0 | 1 |
| XLOC_014880 | LINC00229    | chr22:45002207-45021299 | 0 | 0 | 0 | 1 |
| XLOC_014881 | PHF21B       | chr22:45277042-45405809 | 0 | 0 | 0 | 1 |
| XLOC_014884 | MIR1249      | chr22:45588122-45636650 | 0 | 0 | 0 | 1 |
| XLOC_014894 | FLJ46257     | chr22:48016791-48027318 | 0 | 0 | 0 | 1 |
| XLOC_014895 | LOC284933    | chr22:48885287-49147744 | 0 | 0 | 0 | 1 |
| XLOC_014915 | CHL1         | chr3:238278-451097      | 0 | 0 | 0 | 1 |
| XLOC_014916 | CNTN6        | chr3:1134628-1445278    | 0 | 0 | 0 | 1 |
| XLOC_014919 | LRRN1        | chr3:3841120-3889387    | 0 | 0 | 0 | 1 |
| XLOC_014925 | GRM7         | chr3:6902801-7783218    | 0 | 0 | 0 | 1 |
| XLOC_014928 | CAV3         | chr3:8775485-8788451    | 0 | 0 | 0 | 1 |
| XLOC_014947 | SLC6A11      | chr3:10857916-10980146  | 0 | 0 | 0 | 1 |
| XLOC_014951 | SYN2         | chr3:12045861-12233532  | 0 | 0 | 0 | 1 |
| XLOC_014952 | PPARG        | chr3:12329348-12475855  | 0 | 0 | 0 | 1 |
| XLOC_014959 | FGD5P1       | chr3:13974552-13978444  | 0 | 0 | 0 | 1 |
| XLOC_014972 | MIR563       | chr3:15915277-15915356  | 0 | 0 | 0 | 1 |
| XLOC_014976 | LOC339862    | chr3:18004063-18310410  | 0 | 0 | 0 | 1 |
| XLOC_014981 | VENTXP7      | chr3:21447217-21448177  | 0 | 0 | 0 | 1 |
| XLOC_014982 | UBE2E2       | chr3:23244783-23648882  | 0 | 0 | 0 | 1 |
| XLOC_014983 | MIR548AC     | chr3:23244783-23648882  | 0 | 0 | 0 | 1 |
| XLOC_014987 | THRBS-AS1    | chr3:24158644-24541502  | 0 | 0 | 0 | 1 |
| XLOC_014990 | LRRRC3B      | chr3:26664299-26752265  | 0 | 0 | 0 | 1 |
| XLOC_014993 | LINC00693    | chr3:28616768-28799828  | 0 | 0 | 0 | 1 |
| XLOC_014994 | RBMS3        | chr3:29322802-30051886  | 0 | 0 | 0 | 1 |
| XLOC_014997 | OSBPL10-AS1  | chr3:31702316-32033228  | 0 | 0 | 0 | 1 |
| XLOC_015003 | TRIM71       | chr3:32859509-32933771  | 0 | 0 | 0 | 1 |
| XLOC_015004 | CCR4         | chr3:32993065-32996403  | 0 | 0 | 0 | 1 |
| XLOC_015008 | ARPP21       | chr3:35680665-35835988  | 0 | 0 | 0 | 1 |
| XLOC_015009 | MIR128-2     | chr3:35680665-35835988  | 0 | 0 | 0 | 1 |
| XLOC_015010 | STAC         | chr3:36422096-36589496  | 0 | 0 | 0 | 1 |
| XLOC_015011 | MLH1         | chr3:37034840-37092337  | 0 | 0 | 0 | 1 |
| XLOC_015016 | MIR26A1      | chr3:37903668-38025960  | 0 | 0 | 0 | 1 |
| XLOC_015021 | SLC22A13     | chr3:38307297-38319806  | 0 | 0 | 0 | 1 |
| XLOC_015028 | CCR8         | chr3:39371196-39375171  | 0 | 0 | 0 | 1 |
| XLOC_015033 | MOBP         | chr3:39509069-39567857  | 0 | 0 | 0 | 1 |
| XLOC_015036 | ENTPD3       | chr3:40428672-40494799  | 0 | 0 | 0 | 1 |
| XLOC_015047 | KLHL40       | chr3:42727010-42733938  | 0 | 0 | 0 | 1 |
| XLOC_015048 | CCDC13-AS1   | chr3:42749873-42814745  | 0 | 0 | 0 | 1 |
| XLOC_015050 | ZNF662       | chr3:42947401-42960825  | 0 | 0 | 0 | 1 |
| XLOC_015051 | KRBOX1       | chr3:42977833-42984283  | 0 | 0 | 0 | 1 |
| XLOC_015055 | MIR138-1     | chr3:44155703-44155802  | 0 | 0 | 0 | 1 |
| XLOC_015056 | TOPAZ1       | chr3:44283377-44373590  | 0 | 0 | 0 | 1 |
| XLOC_015074 | CCR3         | chr3:46283871-46308197  | 0 | 0 | 0 | 1 |
| XLOC_015075 | CCR2         | chr3:46395234-46402413  | 0 | 0 | 0 | 1 |
| XLOC_015076 | CCR5         | chr3:46411632-46417697  | 0 | 0 | 0 | 1 |
| XLOC_015078 | RTP3         | chr3:46539484-46542439  | 0 | 0 | 0 | 1 |
| XLOC_015079 | LRRRC2-AS1   | chr3:46556877-46608040  | 0 | 0 | 0 | 1 |
| XLOC_015081 | LOC100132146 | chr3:46653924-46668033  | 0 | 0 | 0 | 1 |
| XLOC_015090 | MIR1226      | chr3:47844398-47891686  | 0 | 0 | 0 | 1 |
| XLOC_015091 | MIR4443      | chr3:48238053-48238106  | 0 | 0 | 0 | 1 |
| XLOC_015092 | CAMP         | chr3:48264836-48266981  | 0 | 0 | 0 | 1 |
| XLOC_015103 | MIR4271      | chr3:49306029-49314508  | 0 | 0 | 0 | 1 |
| XLOC_015114 | SLC38A3      | chr3:50242691-50258406  | 0 | 0 | 0 | 1 |
| XLOC_015121 | MIR4787      | chr3:50712510-50712594  | 0 | 0 | 0 | 1 |
| XLOC_015128 | IQCF4        | chr3:51851618-51853651  | 0 | 0 | 0 | 1 |
| XLOC_015129 | IQCF3        | chr3:51860898-51864874  | 0 | 0 | 0 | 1 |
| XLOC_015130 | IQCF2        | chr3:51895644-51897440  | 0 | 0 | 0 | 1 |
| XLOC_015143 | SNORD19      | chr3:52719935-52742197  | 0 | 0 | 0 | 1 |
| XLOC_015144 | SNORD19B     | chr3:52719935-52742197  | 0 | 0 | 0 | 1 |
| XLOC_015145 | SNORD69      | chr3:52719935-52742197  | 0 | 0 | 0 | 1 |
| XLOC_015147 | ITIH1        | chr3:52811601-52826084  | 0 | 0 | 0 | 1 |
| XLOC_015152 | CACNA2D3     | chr3:54156692-55108584  | 0 | 0 | 0 | 1 |
| XLOC_015154 | ARHGEF3-AS1  | chr3:56761445-57113336  | 0 | 0 | 0 | 1 |



|             |              |                         |   |   |   |   |
|-------------|--------------|-------------------------|---|---|---|---|
| XLOC_015166 | LINC00698    | chr3:63088363-63110737  | 0 | 0 | 0 | 1 |
| XLOC_015167 | SYNPR        | chr3:63263913-63602597  | 0 | 0 | 0 | 1 |
| XLOC_015168 | SNTN         | chr3:63638343-63650891  | 0 | 0 | 0 | 1 |
| XLOC_015172 | PRICKLE2-AS1 | chr3:64053639-64211131  | 0 | 0 | 0 | 1 |
| XLOC_015173 | PRICKLE2-AS2 | chr3:64053639-64211131  | 0 | 0 | 0 | 1 |
| XLOC_015175 | ADAMTS9-AS2  | chr3:64501330-64997143  | 0 | 0 | 0 | 1 |
| XLOC_015176 | MIR548A2     | chr3:64501330-64997143  | 0 | 0 | 0 | 1 |
| XLOC_015177 | MAGI1-AS1    | chr3:65339905-66024509  | 0 | 0 | 0 | 1 |
| XLOC_015180 | MIR4272      | chr3:67275887-67275951  | 0 | 0 | 0 | 1 |
| XLOC_015184 | GPR27        | chr3:71728439-71804328  | 0 | 0 | 0 | 1 |
| XLOC_015185 | LOC201617    | chr3:72200407-72223490  | 0 | 0 | 0 | 1 |
| XLOC_015189 | MIR4444-1    | chr3:75263626-75263699  | 0 | 0 | 0 | 1 |
| XLOC_015190 | MIR1324      | chr3:75679913-75680009  | 0 | 0 | 0 | 1 |
| XLOC_015193 | MIR4273      | chr3:75786028-75834255  | 0 | 0 | 0 | 1 |
| XLOC_015194 | ROBO2        | chr3:77089293-77699114  | 0 | 0 | 0 | 1 |
| XLOC_015195 | CADM2        | chr3:85008132-86123579  | 0 | 0 | 0 | 1 |
| XLOC_015196 | MIR5688      | chr3:85008132-86123579  | 0 | 0 | 0 | 1 |
| XLOC_015198 | HTR1F        | chr3:88031725-88042919  | 0 | 0 | 0 | 1 |
| XLOC_015204 | LOC255025    | chr3:94657106-94710169  | 0 | 0 | 0 | 1 |
| XLOC_015205 | EPHA6        | chr3:96533424-97467786  | 0 | 0 | 0 | 1 |
| XLOC_015208 | OR5AC2       | chr3:97806016-97806946  | 0 | 0 | 0 | 1 |
| XLOC_015209 | OR5H1        | chr3:97851541-97852483  | 0 | 0 | 0 | 1 |
| XLOC_015210 | OR5H14       | chr3:97868229-97869162  | 0 | 0 | 0 | 1 |
| XLOC_015211 | OR5H15       | chr3:97887543-97888485  | 0 | 0 | 0 | 1 |
| XLOC_015212 | OR5H6        | chr3:97983128-97984106  | 0 | 0 | 0 | 1 |
| XLOC_015213 | OR5H2        | chr3:98001731-98002676  | 0 | 0 | 0 | 1 |
| XLOC_015214 | OR5K4        | chr3:98072697-98073663  | 0 | 0 | 0 | 1 |
| XLOC_015215 | OR5K3        | chr3:98109509-98110475  | 0 | 0 | 0 | 1 |
| XLOC_015216 | OR5K1        | chr3:98188420-98189372  | 0 | 0 | 0 | 1 |
| XLOC_015218 | GPR15        | chr3:98250742-98251994  | 0 | 0 | 0 | 1 |
| XLOC_015219 | ST3GAL6      | chr3:98433176-98514689  | 0 | 0 | 0 | 1 |
| XLOC_015220 | COL8A1       | chr3:99273152-99897476  | 0 | 0 | 0 | 1 |
| XLOC_015227 | GPR128       | chr3:100328432-10041432 | 0 | 0 | 0 | 1 |
| XLOC_015245 | TRAT1        | chr3:108541630-10857371 | 0 | 0 | 0 | 1 |
| XLOC_015246 | FLJ22763     | chr3:108855560-10886895 | 0 | 0 | 0 | 1 |
| XLOC_015247 | LINC00488    | chr3:108897011-10890410 | 0 | 0 | 0 | 1 |
| XLOC_015248 | FLJ25363     | chr3:109128836-10921401 | 0 | 0 | 0 | 1 |
| XLOC_015256 | MIR567       | chr3:111805181-11183707 | 0 | 0 | 0 | 1 |
| XLOC_015261 | WDR52-AS1    | chr3:112931374-11316036 | 0 | 0 | 0 | 1 |
| XLOC_015262 | SIDT1        | chr3:113251217-11334842 | 0 | 0 | 0 | 1 |
| XLOC_015263 | MIR4446      | chr3:113251217-11334842 | 0 | 0 | 0 | 1 |
| XLOC_015268 | TIGIT        | chr3:114012832-11402913 | 0 | 0 | 0 | 1 |
| XLOC_015269 | ZBTB20-AS1   | chr3:114056946-11486612 | 0 | 0 | 0 | 1 |
| XLOC_015270 | GAP43        | chr3:115342150-11544033 | 0 | 0 | 0 | 1 |
| XLOC_015271 | LSAMP-AS3    | chr3:116428634-11643588 | 0 | 0 | 0 | 1 |
| XLOC_015272 | IGSF11-AS1   | chr3:118619478-11886489 | 0 | 0 | 0 | 1 |
| XLOC_015273 | C3orf30      | chr3:118864996-11887030 | 0 | 0 | 0 | 1 |
| XLOC_015279 | PLA1A        | chr3:119316694-11934865 | 0 | 0 | 0 | 1 |
| XLOC_015280 | MAATS1       | chr3:119421868-11948594 | 0 | 0 | 0 | 1 |
| XLOC_015281 | NR112        | chr3:119499330-11953733 | 0 | 0 | 0 | 1 |
| XLOC_015286 | FBXO40       | chr3:121312169-12134913 | 0 | 0 | 0 | 1 |
| XLOC_015289 | CD86         | chr3:121774208-12183998 | 0 | 0 | 0 | 1 |
| XLOC_015290 | CASR         | chr3:121902529-12200534 | 0 | 0 | 0 | 1 |
| XLOC_015294 | PARP15       | chr3:122296448-12235553 | 0 | 0 | 0 | 1 |
| XLOC_015302 | MIR5002      | chr3:123813557-12444003 | 0 | 0 | 0 | 1 |
| XLOC_015305 | ROPN1B       | chr3:125688027-12570229 | 0 | 0 | 0 | 1 |
| XLOC_015306 | ALDH1L1-AS1  | chr3:125822403-12592901 | 0 | 0 | 0 | 1 |
| XLOC_015307 | ALDH1L1-AS2  | chr3:125822403-12592901 | 0 | 0 | 0 | 1 |
| XLOC_015310 | NUP210P1     | chr3:126380923-12639078 | 0 | 0 | 0 | 1 |
| XLOC_015319 | DNAJB8-AS1   | chr3:128181274-12819116 | 0 | 0 | 0 | 1 |
| XLOC_015320 | LOC90246     | chr3:128226677-12822942 | 0 | 0 | 0 | 1 |
| XLOC_015323 | EFCC1        | chr3:128720471-12875958 | 0 | 0 | 0 | 1 |
| XLOC_015324 | GP9          | chr3:128779644-12878125 | 0 | 0 | 0 | 1 |
| XLOC_015329 | RHO          | chr3:129247481-12925418 | 0 | 0 | 0 | 1 |
| XLOC_015330 | H1FOO        | chr3:129262056-12927020 | 0 | 0 | 0 | 1 |
| XLOC_015332 | TRH          | chr3:129693113-12969677 | 0 | 0 | 0 | 1 |
| XLOC_015334 | COL6A4P2     | chr3:129931662-12999264 | 0 | 0 | 0 | 1 |
| XLOC_015335 | COL6A5       | chr3:130064358-13020368 | 0 | 0 | 0 | 1 |
| XLOC_015341 | ACPP         | chr3:132036210-13208714 | 0 | 0 | 0 | 1 |
| XLOC_015345 | NPHP3-AS1    | chr3:132276981-13259305 | 0 | 0 | 0 | 1 |
| XLOC_015346 | TMEM108      | chr3:132757170-13311661 | 0 | 0 | 0 | 1 |
| XLOC_015347 | BFSP2        | chr3:133118789-13319405 | 0 | 0 | 0 | 1 |
| XLOC_015351 | MIR4788      | chr3:134156668-13415674 | 0 | 0 | 0 | 1 |
| XLOC_015359 | SOX14        | chr3:137483133-13748517 | 0 | 0 | 0 | 1 |
| XLOC_015366 | BPESC1       | chr3:138823026-13884400 | 0 | 0 | 0 | 1 |
| XLOC_015368 | CLSTN2       | chr3:139654026-14028691 | 0 | 0 | 0 | 1 |
| XLOC_015369 | TRIM42       | chr3:140396865-14041999 | 0 | 0 | 0 | 1 |
| XLOC_015371 | SPSB4        | chr3:140770742-14086745 | 0 | 0 | 0 | 1 |
| XLOC_015380 | LOC100507389 | chr3:142645516-14266137 | 0 | 0 | 0 | 1 |

|             |              |                          |   |   |   |   |
|-------------|--------------|--------------------------|---|---|---|---|
| XLOC_015382 | CHST2        | chr3:142838617-142842856 | 0 | 0 | 0 | 1 |
| XLOC_015383 | SLC9A9-AS1   | chr3:142984063-143567371 | 0 | 0 | 0 | 1 |
| XLOC_015385 | ZIC1         | chr3:147127180-147134506 | 0 | 0 | 0 | 1 |
| XLOC_015386 | AGTR1        | chr3:148415657-148460790 | 0 | 0 | 0 | 1 |
| XLOC_015387 | CPB1         | chr3:148545587-148577972 | 0 | 0 | 0 | 1 |
| XLOC_015388 | CPA3         | chr3:148583042-148614872 | 0 | 0 | 0 | 1 |
| XLOC_015390 | HLTF-AS1     | chr3:148747903-148820610 | 0 | 0 | 0 | 1 |
| XLOC_015392 | TM4SF4       | chr3:149192367-149221181 | 0 | 0 | 0 | 1 |
| XLOC_015399 | CLRN1-AS1    | chr3:150643949-150797617 | 0 | 0 | 0 | 1 |
| XLOC_015400 | MED12L       | chr3:150804675-151176497 | 0 | 0 | 0 | 1 |
| XLOC_015401 | MIR548H2     | chr3:151347319-151546276 | 0 | 0 | 0 | 1 |
| XLOC_015402 | AADAACL2     | chr3:151347319-151546276 | 0 | 0 | 0 | 1 |
| XLOC_015404 | AADAC        | chr3:151347319-151546276 | 0 | 0 | 0 | 1 |
| XLOC_015405 | SUCNR1       | chr3:151591430-151599876 | 0 | 0 | 0 | 1 |
| XLOC_015409 | C3orf79      | chr3:153202283-153220486 | 0 | 0 | 0 | 1 |
| XLOC_015411 | MME          | chr3:154797435-154901516 | 0 | 0 | 0 | 1 |
| XLOC_015416 | LOC100498859 | chr3:156799455-156840791 | 0 | 0 | 0 | 1 |
| XLOC_015417 | PTX3         | chr3:156977531-157221416 | 0 | 0 | 0 | 1 |
| XLOC_015424 | MIR3919      | chr3:158787040-159615151 | 0 | 0 | 0 | 1 |
| XLOC_015426 | C3orf80      | chr3:159943422-159946000 | 0 | 0 | 0 | 1 |
| XLOC_015428 | MIR15B       | chr3:160117429-160152741 | 0 | 0 | 0 | 1 |
| XLOC_015429 | MIR16-2      | chr3:160117429-160152741 | 0 | 0 | 0 | 1 |
| XLOC_015430 | ARL14        | chr3:160394947-160396231 | 0 | 0 | 0 | 1 |
| XLOC_015433 | OTOL1        | chr3:161214595-161221730 | 0 | 0 | 0 | 1 |
| XLOC_015435 | LOC646168    | chr3:167613735-167641797 | 0 | 0 | 0 | 1 |
| XLOC_015437 | MIR551B      | chr3:167967309-168548374 | 0 | 0 | 0 | 1 |
| XLOC_015440 | SAMD7        | chr3:169629481-169656946 | 0 | 0 | 0 | 1 |
| XLOC_015449 | NLGN1        | chr3:173116243-174001116 | 0 | 0 | 0 | 1 |
| XLOC_015450 | NAALADL2     | chr3:174577110-175523426 | 0 | 0 | 0 | 1 |
| XLOC_015451 | MIR4789      | chr3:174577110-175523426 | 0 | 0 | 0 | 1 |
| XLOC_015470 | ABCC5-AS1    | chr3:183637723-183735727 | 0 | 0 | 0 | 1 |
| XLOC_015471 | HTR3D        | chr3:183749331-183757157 | 0 | 0 | 0 | 1 |
| XLOC_015472 | HTR3C        | chr3:183770834-183778461 | 0 | 0 | 0 | 1 |
| XLOC_015473 | HTR3E        | chr3:183814851-183824783 | 0 | 0 | 0 | 1 |
| XLOC_015479 | MIR1224      | chr3:183948316-183967311 | 0 | 0 | 0 | 1 |
| XLOC_015483 | SNORD66      | chr3:184032282-184053146 | 0 | 0 | 0 | 1 |
| XLOC_015487 | EPHB3        | chr3:184279586-184300196 | 0 | 0 | 0 | 1 |
| XLOC_015489 | EHHADH-AS1   | chr3:184880688-184971886 | 0 | 0 | 0 | 1 |
| XLOC_015493 | LOC344887    | chr3:185677757-185698661 | 0 | 0 | 0 | 1 |
| XLOC_015497 | HRG          | chr3:186383797-186396023 | 0 | 0 | 0 | 1 |
| XLOC_015498 | KNG1         | chr3:186435097-186462196 | 0 | 0 | 0 | 1 |
| XLOC_015500 | SNORD2       | chr3:186501360-186524448 | 0 | 0 | 0 | 1 |
| XLOC_015504 | ADIPOQ       | chr3:186560462-186576257 | 0 | 0 | 0 | 1 |
| XLOC_015506 | RTP1         | chr3:186915273-186919253 | 0 | 0 | 0 | 1 |
| XLOC_015507 | RTP4         | chr3:187086167-187089366 | 0 | 0 | 0 | 1 |
| XLOC_015508 | LOC100131635 | chr3:187416046-187463511 | 0 | 0 | 0 | 1 |
| XLOC_015512 | TP63         | chr3:189349215-189615066 | 0 | 0 | 0 | 1 |
| XLOC_015513 | MIR944       | chr3:189349215-189615066 | 0 | 0 | 0 | 1 |
| XLOC_015516 | SNAR-I       | chr3:190595718-190595836 | 0 | 0 | 0 | 1 |
| XLOC_015517 | OSTN         | chr3:190930321-190967910 | 0 | 0 | 0 | 1 |
| XLOC_015519 | PYDC2        | chr3:191178951-191179241 | 0 | 0 | 0 | 1 |
| XLOC_015527 | LOC100507391 | chr3:194429149-194502897 | 0 | 0 | 0 | 1 |
| XLOC_015529 | MIR570       | chr3:195426271-195426366 | 0 | 0 | 0 | 1 |
| XLOC_015531 | LOC401109    | chr3:195869506-195887761 | 0 | 0 | 0 | 1 |
| XLOC_015545 | FAM157A      | chr3:197879236-197907726 | 0 | 0 | 0 | 1 |
| XLOC_015546 | CNTN4-AS2    | chr3:2140549-3099645     | 0 | 0 | 0 | 1 |
| XLOC_015547 | IL5RA        | chr3:3108007-3152058     | 0 | 0 | 0 | 1 |
| XLOC_015552 | MIR4790      | chr3:5291861-5291940     | 0 | 0 | 0 | 1 |
| XLOC_015568 | FANCD2OS     | chr3:10068112-10149915   | 0 | 0 | 0 | 1 |
| XLOC_015572 | MIR885       | chr3:10365706-10547268   | 0 | 0 | 0 | 1 |
| XLOC_015573 | LINC00606    | chr3:10801168-10805877   | 0 | 0 | 0 | 1 |
| XLOC_015574 | SLC6A1-AS1   | chr3:11034419-11080935   | 0 | 0 | 0 | 1 |
| XLOC_015577 | TIMP4        | chr3:12045861-12233532   | 0 | 0 | 0 | 1 |
| XLOC_015584 | WNT7A        | chr3:13860081-13921618   | 0 | 0 | 0 | 1 |
| XLOC_015595 | MIR4270      | chr3:15491639-15563258   | 0 | 0 | 0 | 1 |
| XLOC_015600 | DAZL         | chr3:16628300-16647006   | 0 | 0 | 0 | 1 |
| XLOC_015603 | MIR4791      | chr3:19190016-19577135   | 0 | 0 | 0 | 1 |
| XLOC_015607 | ZNF385D      | chr3:21462489-21792816   | 0 | 0 | 0 | 1 |
| XLOC_015609 | LINC00691    | chr3:24141464-24144738   | 0 | 0 | 0 | 1 |
| XLOC_015610 | THRB         | chr3:24158644-24541502   | 0 | 0 | 0 | 1 |
| XLOC_015611 | MIR4792      | chr3:24562852-24562926   | 0 | 0 | 0 | 1 |
| XLOC_015615 | LINC00692    | chr3:25900022-25915186   | 0 | 0 | 0 | 1 |
| XLOC_015618 | EOMES        | chr3:27757885-27763785   | 0 | 0 | 0 | 1 |
| XLOC_015620 | GADL1        | chr3:30767691-30936153   | 0 | 0 | 0 | 1 |
| XLOC_015628 | DCLK3        | chr3:36753912-36781352   | 0 | 0 | 0 | 1 |
| XLOC_015635 | SCN5A        | chr3:38589552-38691164   | 0 | 0 | 0 | 1 |
| XLOC_015636 | SCN10A       | chr3:38738836-38835501   | 0 | 0 | 0 | 1 |
| XLOC_015645 | CCK          | chr3:42299317-42307662   | 0 | 0 | 0 | 1 |
| XLOC_015646 | LYZL4        | chr3:42438574-42452065   | 0 | 0 | 0 | 1 |

|             |              |                          |   |   |   |   |
|-------------|--------------|--------------------------|---|---|---|---|
| XLOC_015648 | HHATL        | chr3:42734154-42744319   | 0 | 0 | 0 | 1 |
| XLOC_015651 | CYP8B1       | chr3:42913683-42917633   | 0 | 0 | 0 | 1 |
| XLOC_015666 | CCR1         | chr3:46243199-46249832   | 0 | 0 | 0 | 1 |
| XLOC_015667 | LTF          | chr3:46477495-46506598   | 0 | 0 | 0 | 1 |
| XLOC_015670 | PRSS50       | chr3:46753605-46759373   | 0 | 0 | 0 | 1 |
| XLOC_015671 | PRSS46       | chr3:46761072-46777921   | 0 | 0 | 0 | 1 |
| XLOC_015672 | PRSS45       | chr3:46783580-46786245   | 0 | 0 | 0 | 1 |
| XLOC_015673 | PRSS42       | chr3:46871893-46875585   | 0 | 0 | 0 | 1 |
| XLOC_015674 | MYL3         | chr3:46899356-46904973   | 0 | 0 | 0 | 1 |
| XLOC_015685 | SPINK8       | chr3:48348335-48369831   | 0 | 0 | 0 | 1 |
| XLOC_015702 | MIR425       | chr3:49044636-49060926   | 0 | 0 | 0 | 1 |
| XLOC_015703 | MIR191       | chr3:49044636-49060926   | 0 | 0 | 0 | 1 |
| XLOC_015711 | LOC646498    | chr3:49215068-49229291   | 0 | 0 | 0 | 1 |
| XLOC_015717 | BSN-AS2      | chr3:49586738-49591799   | 0 | 0 | 0 | 1 |
| XLOC_015722 | CDHR4        | chr3:49828166-49837254   | 0 | 0 | 0 | 1 |
| XLOC_015725 | CAMKV        | chr3:49895421-49907369   | 0 | 0 | 0 | 1 |
| XLOC_015742 | IQCF6        | chr3:51812576-51813203   | 0 | 0 | 0 | 1 |
| XLOC_015755 | MIRLET7G     | chr3:52288437-52312659   | 0 | 0 | 0 | 1 |
| XLOC_015756 | MIR135A1     | chr3:52321835-52329272   | 0 | 0 | 0 | 1 |
| XLOC_015774 | CACNA2D3-AS1 | chr3:54156692-55108584   | 0 | 0 | 0 | 1 |
| XLOC_015775 | LRTM1        | chr3:54156692-55108584   | 0 | 0 | 0 | 1 |
| XLOC_015776 | WNT5A        | chr3:55499742-55521670   | 0 | 0 | 0 | 1 |
| XLOC_015777 | ERC2         | chr3:55542335-56502391   | 0 | 0 | 0 | 1 |
| XLOC_015778 | ERC2-IT1     | chr3:55542335-56502391   | 0 | 0 | 0 | 1 |
| XLOC_015779 | MIR3938      | chr3:55542335-56502391   | 0 | 0 | 0 | 1 |
| XLOC_015792 | FAM3D        | chr3:58619669-58652561   | 0 | 0 | 0 | 1 |
| XLOC_015793 | C3orf67      | chr3:58727736-59035715   | 0 | 0 | 0 | 1 |
| XLOC_015796 | FEZF2        | chr3:62355346-62359190   | 0 | 0 | 0 | 1 |
| XLOC_015797 | CADPS        | chr3:62384020-62861064   | 0 | 0 | 0 | 1 |
| XLOC_015798 | SYNPR-AS1    | chr3:63263913-63602597   | 0 | 0 | 0 | 1 |
| XLOC_015801 | LOC100287879 | chr3:64053639-64211131   | 0 | 0 | 0 | 1 |
| XLOC_015802 | PRICKLE2     | chr3:64053639-64211131   | 0 | 0 | 0 | 1 |
| XLOC_015807 | FAM19A4      | chr3:68780914-68981761   | 0 | 0 | 0 | 1 |
| XLOC_015810 | MIR3136      | chr3:69068977-69101484   | 0 | 0 | 0 | 1 |
| XLOC_015815 | MIR1284      | chr3:71003864-71633140   | 0 | 0 | 0 | 1 |
| XLOC_015817 | PROK2        | chr3:71820805-71834357   | 0 | 0 | 0 | 1 |
| XLOC_015821 | CNTN3        | chr3:74311721-74570343   | 0 | 0 | 0 | 1 |
| XLOC_015827 | CADM2-AS2    | chr3:85008132-86123579   | 0 | 0 | 0 | 1 |
| XLOC_015828 | RNU6-69      | chr3:86490313-86490361   | 0 | 0 | 0 | 1 |
| XLOC_015829 | VGLL3        | chr3:86987122-87040257   | 0 | 0 | 0 | 1 |
| XLOC_015830 | MIR4795      | chr3:87275338-87275427   | 0 | 0 | 0 | 1 |
| XLOC_015831 | POU1F1       | chr3:87308782-87325737   | 0 | 0 | 0 | 1 |
| XLOC_015837 | GABRR3       | chr3:97705526-97754148   | 0 | 0 | 0 | 1 |
| XLOC_015840 | ST3GAL6-AS1  | chr3:98433176-98514689   | 0 | 0 | 0 | 1 |
| XLOC_015842 | MIR548G      | chr3:99273152-99897476   | 0 | 0 | 0 | 1 |
| XLOC_015844 | MIR3921      | chr3:99273152-99897476   | 0 | 0 | 0 | 1 |
| XLOC_015851 | MIR548A3     | chr3:103903475-103946108 | 0 | 0 | 0 | 1 |
| XLOC_015854 | LINC00635    | chr3:107560508-107596918 | 0 | 0 | 0 | 1 |
| XLOC_015859 | RETNLB       | chr3:108474485-108476138 | 0 | 0 | 0 | 1 |
| XLOC_015860 | GUCA1C       | chr3:108626641-108672677 | 0 | 0 | 0 | 1 |
| XLOC_015861 | MORC1        | chr3:108677086-108836998 | 0 | 0 | 0 | 1 |
| XLOC_015862 | DPPA2        | chr3:109012634-109035364 | 0 | 0 | 0 | 1 |
| XLOC_015863 | DPPA4        | chr3:109044987-109056418 | 0 | 0 | 0 | 1 |
| XLOC_015865 | ZBED2        | chr3:111260925-111371208 | 0 | 0 | 0 | 1 |
| XLOC_015871 | CD200R1L     | chr3:112534555-112564797 | 0 | 0 | 0 | 1 |
| XLOC_015879 | DRD3         | chr3:113847556-113897898 | 0 | 0 | 0 | 1 |
| XLOC_015881 | MIR568       | chr3:114035321-114035418 | 0 | 0 | 0 | 1 |
| XLOC_015883 | MIR4796      | chr3:114056946-114866127 | 0 | 0 | 0 | 1 |
| XLOC_015901 | ILDR1        | chr3:121706169-121741127 | 0 | 0 | 0 | 1 |
| XLOC_015907 | SEMA5B       | chr3:122628039-122747452 | 0 | 0 | 0 | 1 |
| XLOC_015912 | ROPN1        | chr3:123687878-123710198 | 0 | 0 | 0 | 1 |
| XLOC_015917 | MIR5092      | chr3:124801479-124931608 | 0 | 0 | 0 | 1 |
| XLOC_015921 | MIR54811     | chr3:125509246-125509398 | 0 | 0 | 0 | 1 |
| XLOC_015927 | UROC1        | chr3:126200007-126236618 | 0 | 0 | 0 | 1 |
| XLOC_015928 | C3orf22      | chr3:126268518-126277758 | 0 | 0 | 0 | 1 |
| XLOC_015933 | DNAJB8       | chr3:128181274-128191168 | 0 | 0 | 0 | 1 |
| XLOC_015935 | C3orf27      | chr3:128290842-128294928 | 0 | 0 | 0 | 1 |
| XLOC_015938 | KIAA1257     | chr3:128689781-128712988 | 0 | 0 | 0 | 1 |
| XLOC_015953 | SNORA58      | chr3:131181044-131221868 | 0 | 0 | 0 | 1 |
| XLOC_015955 | MIR5704      | chr3:131253576-131753844 | 0 | 0 | 0 | 1 |
| XLOC_015959 | C3orf36      | chr3:133646989-133648658 | 0 | 0 | 0 | 1 |
| XLOC_015960 | SLCO2A1      | chr3:133651539-133748928 | 0 | 0 | 0 | 1 |
| XLOC_015968 | A4GNT        | chr3:137842559-137851228 | 0 | 0 | 0 | 1 |
| XLOC_015973 | FOXL2        | chr3:138663065-138665982 | 0 | 0 | 0 | 1 |
| XLOC_015975 | PRR23B       | chr3:138737872-138739768 | 0 | 0 | 0 | 1 |
| XLOC_015977 | PISRT1       | chr3:138951833-138952364 | 0 | 0 | 0 | 1 |
| XLOC_015979 | RBP2         | chr3:139171725-139195354 | 0 | 0 | 0 | 1 |
| XLOC_015980 | RBP1         | chr3:139236275-139258677 | 0 | 0 | 0 | 1 |
| XLOC_015986 | PCOLCE2      | chr3:142536701-142608048 | 0 | 0 | 0 | 1 |

|             |              |                          |   |   |   |   |
|-------------|--------------|--------------------------|---|---|---|---|
| XLOC_015987 | PAQR9        | chr3:142680073-142682178 | 0 | 0 | 0 | 1 |
| XLOC_015990 | PLOD2        | chr3:145787227-145879282 | 0 | 0 | 0 | 1 |
| XLOC_015992 | PLSCR2       | chr3:146151074-146213778 | 0 | 0 | 0 | 1 |
| XLOC_015994 | PLSCR5       | chr3:146303624-146324002 | 0 | 0 | 0 | 1 |
| XLOC_015995 | ZIC4         | chr3:147103834-147124596 | 0 | 0 | 0 | 1 |
| XLOC_015998 | TM4SF18      | chr3:149036284-149051548 | 0 | 0 | 0 | 1 |
| XLOC_016002 | ANKUB1       | chr3:149478889-149510610 | 0 | 0 | 0 | 1 |
| XLOC_016008 | GPR171       | chr3:150804675-151176497 | 0 | 0 | 0 | 1 |
| XLOC_016009 | P2RY14       | chr3:150804675-151176497 | 0 | 0 | 0 | 1 |
| XLOC_016011 | P2RY13       | chr3:150804675-151176497 | 0 | 0 | 0 | 1 |
| XLOC_016012 | P2RY12       | chr3:150804675-151176497 | 0 | 0 | 0 | 1 |
| XLOC_016013 | IGSF10       | chr3:150804675-151176497 | 0 | 0 | 0 | 1 |
| XLOC_016014 | MIR5186      | chr3:151283663-151283782 | 0 | 0 | 0 | 1 |
| XLOC_016019 | GPR149       | chr3:154055460-154147504 | 0 | 0 | 0 | 1 |
| XLOC_016020 | LOC100507537 | chr3:155008020-155011488 | 0 | 0 | 0 | 1 |
| XLOC_016024 | KCNAB1-AS2   | chr3:155838336-156256927 | 0 | 0 | 0 | 1 |
| XLOC_016025 | KCNAB1-AS1   | chr3:155838336-156256927 | 0 | 0 | 0 | 1 |
| XLOC_016030 | LOC339894    | chr3:156799455-156840797 | 0 | 0 | 0 | 1 |
| XLOC_016041 | SPTSSB       | chr3:161062579-161089877 | 0 | 0 | 0 | 1 |
| XLOC_016042 | CT64         | chr3:162895030-163021088 | 0 | 0 | 0 | 1 |
| XLOC_016043 | SI           | chr3:164696685-164796282 | 0 | 0 | 0 | 1 |
| XLOC_016044 | SLITRK3      | chr3:164904507-164914468 | 0 | 0 | 0 | 1 |
| XLOC_016045 | BCHE         | chr3:165490691-165555252 | 0 | 0 | 0 | 1 |
| XLOC_016046 | ZBBX         | chr3:166958076-167098088 | 0 | 0 | 0 | 1 |
| XLOC_016047 | SERPINI2     | chr3:167159576-167191920 | 0 | 0 | 0 | 1 |
| XLOC_016048 | WDR49        | chr3:167196472-167371288 | 0 | 0 | 0 | 1 |
| XLOC_016055 | LRRC31       | chr3:169557028-169587660 | 0 | 0 | 0 | 1 |
| XLOC_016061 | SLC2A2       | chr3:170714136-170744768 | 0 | 0 | 0 | 1 |
| XLOC_016063 | MIR569       | chr3:170780291-171178197 | 0 | 0 | 0 | 1 |
| XLOC_016065 | GHSR         | chr3:172161080-172166246 | 0 | 0 | 0 | 1 |
| XLOC_016066 | TNFSF10      | chr3:172232397-172241297 | 0 | 0 | 0 | 1 |
| XLOC_016068 | SPATA16      | chr3:172607146-172859058 | 0 | 0 | 0 | 1 |
| XLOC_016069 | NAALADL2-AS3 | chr3:174577110-175523428 | 0 | 0 | 0 | 1 |
| XLOC_016078 | FLJ46066     | chr3:182164757-182204150 | 0 | 0 | 0 | 1 |
| XLOC_016083 | KLHL6        | chr3:183205318-183273498 | 0 | 0 | 0 | 1 |
| XLOC_016095 | LIPH         | chr3:185225569-185270368 | 0 | 0 | 0 | 1 |
| XLOC_016100 | LOC253573    | chr3:186172769-186211450 | 0 | 0 | 0 | 1 |
| XLOC_016104 | ADIPOQ-AS1   | chr3:186560462-186576252 | 0 | 0 | 0 | 1 |
| XLOC_016105 | RPL39L       | chr3:186838740-186857262 | 0 | 0 | 0 | 1 |
| XLOC_016106 | MASP1        | chr3:186933872-187009810 | 0 | 0 | 0 | 1 |
| XLOC_016107 | SST          | chr3:187386693-187388207 | 0 | 0 | 0 | 1 |
| XLOC_016108 | RTP2         | chr3:187416046-187463512 | 0 | 0 | 0 | 1 |
| XLOC_016112 | LEPREL1      | chr3:189674516-189840226 | 0 | 0 | 0 | 1 |
| XLOC_016113 | CLDN1        | chr3:190023489-190040238 | 0 | 0 | 0 | 1 |
| XLOC_016114 | TMEM207      | chr3:190146443-190167668 | 0 | 0 | 0 | 1 |
| XLOC_016115 | GMNC         | chr3:190570525-190580468 | 0 | 0 | 0 | 1 |
| XLOC_016119 | ATP13A5      | chr3:192992830-193096514 | 0 | 0 | 0 | 1 |
| XLOC_016122 | LOC647323    | chr3:193675160-193721448 | 0 | 0 | 0 | 1 |
| XLOC_016123 | DPPA2P3      | chr3:193675160-193721448 | 0 | 0 | 0 | 1 |
| XLOC_016124 | LOC100131551 | chr3:194018988-194030592 | 0 | 0 | 0 | 1 |
| XLOC_016125 | CPN2         | chr3:194060493-194072057 | 0 | 0 | 0 | 1 |
| XLOC_016133 | MIR5692C1    | chr3:195208644-195208667 | 0 | 0 | 0 | 1 |
| XLOC_016135 | APOD         | chr3:195295572-195311078 | 0 | 0 | 0 | 1 |
| XLOC_016140 | ZDHHC19      | chr3:195924322-195938300 | 0 | 0 | 0 | 1 |
| XLOC_016152 | MIR4797      | chr3:196769430-197030627 | 0 | 0 | 0 | 1 |
| XLOC_016160 | ZNF141       | chr4:331595-367691       | 0 | 0 | 0 | 1 |
| XLOC_016190 | FLJ35424     | chr4:3578595-3592712     | 0 | 0 | 0 | 1 |
| XLOC_016196 | STK32B       | chr4:5053526-5502725     | 0 | 0 | 0 | 1 |
| XLOC_016199 | LOC285484    | chr4:6202459-6235663     | 0 | 0 | 0 | 1 |
| XLOC_016209 | SORCS2       | chr4:7194373-7744564     | 0 | 0 | 0 | 1 |
| XLOC_016210 | MIR4798      | chr4:7194373-7744564     | 0 | 0 | 0 | 1 |
| XLOC_016211 | MIR4274      | chr4:7194373-7744564     | 0 | 0 | 0 | 1 |
| XLOC_016214 | HTRA3        | chr4:8271488-8308838     | 0 | 0 | 0 | 1 |
| XLOC_016216 | GPR78        | chr4:8581963-8591750     | 0 | 0 | 0 | 1 |
| XLOC_016218 | LOC650293    | chr4:8951476-8952127     | 0 | 0 | 0 | 1 |
| XLOC_016219 | USP17L10     | chr4:9212382-9213975     | 0 | 0 | 0 | 1 |
| XLOC_016220 | USP17L18     | chr4:9217130-9218723     | 0 | 0 | 0 | 1 |
| XLOC_016221 | USP17L21     | chr4:9221877-9223470     | 0 | 0 | 0 | 1 |
| XLOC_016222 | USP17L13     | chr4:9226621-9228214     | 0 | 0 | 0 | 1 |
| XLOC_016223 | USP17L15     | chr4:9236110-9238060     | 0 | 0 | 0 | 1 |
| XLOC_016224 | USP17L17     | chr4:9245604-9247197     | 0 | 0 | 0 | 1 |
| XLOC_016225 | USP17L18     | chr4:9250355-9251948     | 0 | 0 | 0 | 1 |
| XLOC_016226 | USP17L19     | chr4:9255103-9256696     | 0 | 0 | 0 | 1 |
| XLOC_016227 | USP17L22     | chr4:9259849-9261442     | 0 | 0 | 0 | 1 |
| XLOC_016228 | USP17L12     | chr4:9264597-9266190     | 0 | 0 | 0 | 1 |
| XLOC_016229 | USP17L22     | chr4:9269344-9270937     | 0 | 0 | 0 | 1 |
| XLOC_016230 | USP17L28     | chr4:9326890-9328483     | 0 | 0 | 0 | 1 |
| XLOC_016231 | USP17L26     | chr4:9331636-9333229     | 0 | 0 | 0 | 1 |
| XLOC_016232 | USP17L24     | chr4:9336383-9337976     | 0 | 0 | 0 | 1 |

|             |              |                        |   |   |   |   |
|-------------|--------------|------------------------|---|---|---|---|
| XLOC_016233 | USP17L28     | chr4:9341128-9342721   | 0 | 0 | 0 | 1 |
| XLOC_016234 | USP17L25     | chr4:9345873-9347466   | 0 | 0 | 0 | 1 |
| XLOC_016235 | USP17L30     | chr4:9350618-9352211   | 0 | 0 | 0 | 1 |
| XLOC_016236 | USP17L27     | chr4:9355363-9356956   | 0 | 0 | 0 | 1 |
| XLOC_016237 | USP17L9P     | chr4:9360107-9361700   | 0 | 0 | 0 | 1 |
| XLOC_016238 | USP17L27     | chr4:9364854-9366447   | 0 | 0 | 0 | 1 |
| XLOC_016239 | USP17L6P     | chr4:9369599-9370796   | 0 | 0 | 0 | 1 |
| XLOC_016242 | MIR572       | chr4:11370450-11370545 | 0 | 0 | 0 | 1 |
| XLOC_016243 | MIR5091      | chr4:13629488-13629581 | 0 | 0 | 0 | 1 |
| XLOC_016244 | LOC152742    | chr4:14113591-14141676 | 0 | 0 | 0 | 1 |
| XLOC_016246 | C1QTNF7      | chr4:15341559-15447791 | 0 | 0 | 0 | 1 |
| XLOC_016250 | CD38         | chr4:15779930-15850706 | 0 | 0 | 0 | 1 |
| XLOC_016252 | CLRN2        | chr4:17516787-17528727 | 0 | 0 | 0 | 1 |
| XLOC_016256 | SLIT2        | chr4:20255234-20620788 | 0 | 0 | 0 | 1 |
| XLOC_016257 | SLIT2-IT1    | chr4:20255234-20620788 | 0 | 0 | 0 | 1 |
| XLOC_016258 | MIR218-1     | chr4:20255234-20620788 | 0 | 0 | 0 | 1 |
| XLOC_016260 | GBA3         | chr4:22694547-22821192 | 0 | 0 | 0 | 1 |
| XLOC_016261 | SOD3         | chr4:24797084-24802467 | 0 | 0 | 0 | 1 |
| XLOC_016266 | SLC34A2      | chr4:25657434-25680368 | 0 | 0 | 0 | 1 |
| XLOC_016271 | MIR4275      | chr4:28821203-28821290 | 0 | 0 | 0 | 1 |
| XLOC_016272 | PCDH7        | chr4:30722029-31148423 | 0 | 0 | 0 | 1 |
| XLOC_016273 | DTHD1        | chr4:36283236-36346407 | 0 | 0 | 0 | 1 |
| XLOC_016274 | KIAA1239     | chr4:37246689-37451087 | 0 | 0 | 0 | 1 |
| XLOC_016281 | MIR574       | chr4:38869353-38947365 | 0 | 0 | 0 | 1 |
| XLOC_016290 | RHOH         | chr4:40198526-40246281 | 0 | 0 | 0 | 1 |
| XLOC_016291 | CHRNA9       | chr4:40337345-40357234 | 0 | 0 | 0 | 1 |
| XLOC_016293 | UCHL1        | chr4:41258897-41270446 | 0 | 0 | 0 | 1 |
| XLOC_016298 | SHISA3       | chr4:42399855-42404504 | 0 | 0 | 0 | 1 |
| XLOC_016301 | GABRB1       | chr4:47033294-47428447 | 0 | 0 | 0 | 1 |
| XLOC_016306 | ZAR1         | chr4:48492308-48496422 | 0 | 0 | 0 | 1 |
| XLOC_016308 | CWH43        | chr4:48988264-49064095 | 0 | 0 | 0 | 1 |
| XLOC_016310 | SPATA18      | chr4:52917592-52963458 | 0 | 0 | 0 | 1 |
| XLOC_016312 | MIR4449      | chr4:53578620-53580305 | 0 | 0 | 0 | 1 |
| XLOC_016314 | LOC152578    | chr4:53656160-53681631 | 0 | 0 | 0 | 1 |
| XLOC_016315 | RASL11B      | chr4:53728494-53733002 | 0 | 0 | 0 | 1 |
| XLOC_016317 | LNX1-AS1     | chr4:54326436-54457753 | 0 | 0 | 0 | 1 |
| XLOC_016318 | LNX1-AS2     | chr4:54459122-54471548 | 0 | 0 | 0 | 1 |
| XLOC_016319 | GSX2         | chr4:54966247-54968122 | 0 | 0 | 0 | 1 |
| XLOC_016321 | KIT          | chr4:55524094-55606881 | 0 | 0 | 0 | 1 |
| XLOC_016324 | LOC644145    | chr4:56686236-56703430 | 0 | 0 | 0 | 1 |
| XLOC_016331 | THEGL        | chr4:57396774-57469489 | 0 | 0 | 0 | 1 |
| XLOC_016334 | LOC255130    | chr4:57845108-58071465 | 0 | 0 | 0 | 1 |
| XLOC_016335 | LPHN3        | chr4:62362838-62938168 | 0 | 0 | 0 | 1 |
| XLOC_016336 | LOC100144602 | chr4:66535678-66559104 | 0 | 0 | 0 | 1 |
| XLOC_016339 | LOC550113    | chr4:68918915-68995587 | 0 | 0 | 0 | 1 |
| XLOC_016340 | FTLP10       | chr4:69048009-69083798 | 0 | 0 | 0 | 1 |
| XLOC_016341 | TMPRSS11E    | chr4:69313166-69363322 | 0 | 0 | 0 | 1 |
| XLOC_016342 | UGT2B10      | chr4:69681712-69697741 | 0 | 0 | 0 | 1 |
| XLOC_016343 | UGT2B7       | chr4:69962192-69978705 | 0 | 0 | 0 | 1 |
| XLOC_016344 | UGT2B28      | chr4:70146216-70160768 | 0 | 0 | 0 | 1 |
| XLOC_016345 | CSN1S1       | chr4:70796798-70812288 | 0 | 0 | 0 | 1 |
| XLOC_016346 | STATH        | chr4:70861647-70868173 | 0 | 0 | 0 | 1 |
| XLOC_016347 | HTN3         | chr4:70894129-70902255 | 0 | 0 | 0 | 1 |
| XLOC_016348 | HTN1         | chr4:70916158-70924559 | 0 | 0 | 0 | 1 |
| XLOC_016349 | CSN1S2AP     | chr4:70933102-70950988 | 0 | 0 | 0 | 1 |
| XLOC_016350 | CSN1S2BP     | chr4:70999320-71012421 | 0 | 0 | 0 | 1 |
| XLOC_016352 | ODAM         | chr4:71062243-71070293 | 0 | 0 | 0 | 1 |
| XLOC_016353 | FDCSP        | chr4:71091787-71100968 | 0 | 0 | 0 | 1 |
| XLOC_016354 | CSN3         | chr4:71108332-71117145 | 0 | 0 | 0 | 1 |
| XLOC_016355 | CABS1        | chr4:71200670-71202833 | 0 | 0 | 0 | 1 |
| XLOC_016356 | SMR3A        | chr4:71226492-71232823 | 0 | 0 | 0 | 1 |
| XLOC_016357 | SMR3B        | chr4:71248794-71255961 | 0 | 0 | 0 | 1 |
| XLOC_016358 | PROL1        | chr4:71263598-71275914 | 0 | 0 | 0 | 1 |
| XLOC_016359 | MUC7         | chr4:71296208-71348714 | 0 | 0 | 0 | 1 |
| XLOC_016360 | AMTN         | chr4:71384297-71398459 | 0 | 0 | 0 | 1 |
| XLOC_016361 | AMBN         | chr4:71457974-71473004 | 0 | 0 | 0 | 1 |
| XLOC_016362 | ENAM         | chr4:71494460-71512536 | 0 | 0 | 0 | 1 |
| XLOC_016368 | NPFFR2       | chr4:72897520-73013918 | 0 | 0 | 0 | 1 |
| XLOC_016369 | ALB          | chr4:74269971-74287129 | 0 | 0 | 0 | 1 |
| XLOC_016370 | AFP          | chr4:74301932-74321492 | 0 | 0 | 0 | 1 |
| XLOC_016371 | AFM          | chr4:74347461-74369718 | 0 | 0 | 0 | 1 |
| XLOC_016372 | LOC728040    | chr4:74374519-74394250 | 0 | 0 | 0 | 1 |
| XLOC_016374 | CXCL6        | chr4:74702272-74704477 | 0 | 0 | 0 | 1 |
| XLOC_016375 | PF4V1        | chr4:74719012-74720198 | 0 | 0 | 0 | 1 |
| XLOC_016380 | AREG         | chr4:75310852-75320726 | 0 | 0 | 0 | 1 |
| XLOC_016381 | AREG         | chr4:75480628-75490485 | 0 | 0 | 0 | 1 |
| XLOC_016383 | LOC441025    | chr4:76279285-76287776 | 0 | 0 | 0 | 1 |
| XLOC_016387 | ART3         | chr4:76932332-77033955 | 0 | 0 | 0 | 1 |
| XLOC_016390 | MIR4450      | chr4:77356252-77704405 | 0 | 0 | 0 | 1 |

|             |              |                          |   |   |   |   |
|-------------|--------------|--------------------------|---|---|---|---|
| XLOC_016393 | CXCL13       | chr4:78432906-78532988   | 0 | 0 | 0 | 1 |
| XLOC_016396 | ANXA3        | chr4:79472741-79531605   | 0 | 0 | 0 | 1 |
| XLOC_016397 | LOC100505702 | chr4:79567147-79605655   | 0 | 0 | 0 | 1 |
| XLOC_016400 | LOC100506035 | chr4:80413746-80497614   | 0 | 0 | 0 | 1 |
| XLOC_016401 | GDEP         | chr4:80748624-80784401   | 0 | 0 | 0 | 1 |
| XLOC_016414 | MIR4451      | chr4:86396283-86923823   | 0 | 0 | 0 | 1 |
| XLOC_016418 | DSPP         | chr4:88529680-88538025   | 0 | 0 | 0 | 1 |
| XLOC_016420 | IBSP         | chr4:88720701-88733601   | 0 | 0 | 0 | 1 |
| XLOC_016421 | MEPE         | chr4:88742562-88767968   | 0 | 0 | 0 | 1 |
| XLOC_016429 | LOC644248    | chr4:90645249-90763142   | 0 | 0 | 0 | 1 |
| XLOC_016430 | MMRN1        | chr4:90816051-90875780   | 0 | 0 | 0 | 1 |
| XLOC_016431 | CCSER1       | chr4:91048683-92523370   | 0 | 0 | 0 | 1 |
| XLOC_016432 | GRID2        | chr4:93225549-94693649   | 0 | 0 | 0 | 1 |
| XLOC_016433 | ATOH1        | chr4:94750077-94751142   | 0 | 0 | 0 | 1 |
| XLOC_016436 | BMPR1B       | chr4:95679127-96079601   | 0 | 0 | 0 | 1 |
| XLOC_016437 | PDHA2        | chr4:96761238-96762625   | 0 | 0 | 0 | 1 |
| XLOC_016440 | MIR3684      | chr4:99916787-99983960   | 0 | 0 | 0 | 1 |
| XLOC_016442 | C4orf17      | chr4:100432160-100463460 | 0 | 0 | 0 | 1 |
| XLOC_016444 | DAPP1        | chr4:100737980-100791346 | 0 | 0 | 0 | 1 |
| XLOC_016447 | BANK1        | chr4:102711763-102995965 | 0 | 0 | 0 | 1 |
| XLOC_016452 | ARHGEF38-IT1 | chr4:106473776-106602070 | 0 | 0 | 0 | 1 |
| XLOC_016474 | MIR1243      | chr4:113739238-114304896 | 0 | 0 | 0 | 1 |
| XLOC_016476 | MIR577       | chr4:115519610-115598202 | 0 | 0 | 0 | 1 |
| XLOC_016477 | MIR1973      | chr4:117220880-117220924 | 0 | 0 | 0 | 1 |
| XLOC_016478 | NDST3        | chr4:118955499-119179785 | 0 | 0 | 0 | 1 |
| XLOC_016481 | CEP170P1     | chr4:119437494-119475355 | 0 | 0 | 0 | 1 |
| XLOC_016484 | MYOZ2        | chr4:120056938-120108944 | 0 | 0 | 0 | 1 |
| XLOC_016487 | PP12613      | chr4:122680084-122687965 | 0 | 0 | 0 | 1 |
| XLOC_016490 | ADAD1        | chr4:123300120-123350947 | 0 | 0 | 0 | 1 |
| XLOC_016495 | LOC285419    | chr4:124573939-124851515 | 0 | 0 | 0 | 1 |
| XLOC_016496 | FAT4         | chr4:126237566-126414087 | 0 | 0 | 0 | 1 |
| XLOC_016497 | MIR2054      | chr4:126428413-126428465 | 0 | 0 | 0 | 1 |
| XLOC_016506 | PCDH10       | chr4:134070469-134112732 | 0 | 0 | 0 | 1 |
| XLOC_016508 | LINC00499    | chr4:139230864-139345495 | 0 | 0 | 0 | 1 |
| XLOC_016513 | SCOC         | chr4:141178439-141303710 | 0 | 0 | 0 | 1 |
| XLOC_016521 | HHIP         | chr4:145564067-145659887 | 0 | 0 | 0 | 1 |
| XLOC_016525 | C4orf51      | chr4:146601355-146653945 | 0 | 0 | 0 | 1 |
| XLOC_016527 | POU4F2       | chr4:147560044-147563625 | 0 | 0 | 0 | 1 |
| XLOC_016528 | EDNRA        | chr4:148402068-148466106 | 0 | 0 | 0 | 1 |
| XLOC_016531 | MIR4799      | chr4:148653452-148993927 | 0 | 0 | 0 | 1 |
| XLOC_016543 | TLR2         | chr4:154605440-154627242 | 0 | 0 | 0 | 1 |
| XLOC_016546 | RBM46        | chr4:155702426-155749965 | 0 | 0 | 0 | 1 |
| XLOC_016547 | NPY2R        | chr4:156129780-156138225 | 0 | 0 | 0 | 1 |
| XLOC_016548 | GUCY1A3      | chr4:156587861-156658214 | 0 | 0 | 0 | 1 |
| XLOC_016549 | GUCY1B3      | chr4:156680125-156728778 | 0 | 0 | 0 | 1 |
| XLOC_016551 | GLRB         | chr4:157997276-158093242 | 0 | 0 | 0 | 1 |
| XLOC_016552 | GRIA2        | chr4:158141735-158287225 | 0 | 0 | 0 | 1 |
| XLOC_016553 | LOC340017    | chr4:158493641-158497303 | 0 | 0 | 0 | 1 |
| XLOC_016555 | RXFP1        | chr4:159442865-159574527 | 0 | 0 | 0 | 1 |
| XLOC_016558 | MIR3688-2    | chr4:160049953-160050046 | 0 | 0 | 0 | 1 |
| XLOC_016560 | NPY5R        | chr4:164265090-164273085 | 0 | 0 | 0 | 1 |
| XLOC_016562 | MIR5684      | chr4:165426541-165630646 | 0 | 0 | 0 | 1 |
| XLOC_016564 | LOC100506013 | chr4:165798155-165818675 | 0 | 0 | 0 | 1 |
| XLOC_016565 | FAM218A      | chr4:165875597-165898815 | 0 | 0 | 0 | 1 |
| XLOC_016566 | TRIM60       | chr4:165953150-165962896 | 0 | 0 | 0 | 1 |
| XLOC_016569 | CPE          | chr4:166300096-166419482 | 0 | 0 | 0 | 1 |
| XLOC_016570 | MIR578       | chr4:166300096-166419482 | 0 | 0 | 0 | 1 |
| XLOC_016571 | TLL1         | chr4:166794409-167025605 | 0 | 0 | 0 | 1 |
| XLOC_016572 | ANXA10       | chr4:169013687-169108893 | 0 | 0 | 0 | 1 |
| XLOC_016575 | LOC100506122 | chr4:171961752-171980317 | 0 | 0 | 0 | 1 |
| XLOC_016576 | GALNTL6      | chr4:172734574-173961555 | 0 | 0 | 0 | 1 |
| XLOC_016579 | NBLA00301    | chr4:174451608-174462987 | 0 | 0 | 0 | 1 |
| XLOC_016581 | MIR4276      | chr4:175344945-175345015 | 0 | 0 | 0 | 1 |
| XLOC_016582 | ADAM29       | chr4:175839508-175899337 | 0 | 0 | 0 | 1 |
| XLOC_016583 | WDR17        | chr4:176986984-177103975 | 0 | 0 | 0 | 1 |
| XLOC_016586 | LOC285501    | chr4:178649910-178911904 | 0 | 0 | 0 | 1 |
| XLOC_016587 | MIR1305      | chr4:183090445-183090537 | 0 | 0 | 0 | 1 |
| XLOC_016589 | FAM92A1P2    | chr4:183958817-183961272 | 0 | 0 | 0 | 1 |
| XLOC_016594 | STOX2        | chr4:184826508-184938875 | 0 | 0 | 0 | 1 |
| XLOC_016596 | HELT         | chr4:185940082-185941925 | 0 | 0 | 0 | 1 |
| XLOC_016605 | F11          | chr4:187187117-187422212 | 0 | 0 | 0 | 1 |
| XLOC_016607 | TRIML1       | chr4:189060597-189068645 | 0 | 0 | 0 | 1 |
| XLOC_016608 | LOC401164    | chr4:189376731-189523062 | 0 | 0 | 0 | 1 |
| XLOC_016610 | DUX2         | chr4:190988866-190990406 | 0 | 0 | 0 | 1 |
| XLOC_016611 | DUX4L4       | chr4:190992092-190993703 | 0 | 0 | 0 | 1 |
| XLOC_016612 | DUX4L5       | chr4:190995385-190996995 | 0 | 0 | 0 | 1 |
| XLOC_016613 | DUX4L6       | chr4:190998678-191000285 | 0 | 0 | 0 | 1 |
| XLOC_016614 | DUX4L4       | chr4:191001978-191003583 | 0 | 0 | 0 | 1 |
| XLOC_016615 | DUX4         | chr4:191005266-191006883 | 0 | 0 | 0 | 1 |

|             |               |                          |   |   |   |   |
|-------------|---------------|--------------------------|---|---|---|---|
| XLOC_016616 | DUX4L3        | chr4:191008565-191010176 | 0 | 0 | 0 | 1 |
| XLOC_016617 | DUX4          | chr4:191011859-191013476 | 0 | 0 | 0 | 1 |
| XLOC_016627 | RNF212        | chr4:1065265-1107352     | 0 | 0 | 0 | 1 |
| XLOC_016628 | TMED11P       | chr4:1108984-1116952     | 0 | 0 | 0 | 1 |
| XLOC_016642 | HTT-AS1       | chr4:3064972-3076241     | 0 | 0 | 0 | 1 |
| XLOC_016644 | LOC100133461  | chr4:3675319-3679582     | 0 | 0 | 0 | 1 |
| XLOC_016646 | OTOP1         | chr4:4190529-4228621     | 0 | 0 | 0 | 1 |
| XLOC_016650 | CYTL1         | chr4:5016313-5021197     | 0 | 0 | 0 | 1 |
| XLOC_016651 | EVC2          | chr4:5564145-5711275     | 0 | 0 | 0 | 1 |
| XLOC_016653 | MIR378D1      | chr4:5925001-5925055     | 0 | 0 | 0 | 1 |
| XLOC_016654 | JAKMIP1       | chr4:6027925-6202318     | 0 | 0 | 0 | 1 |
| XLOC_016661 | PSAPL1        | chr4:7194373-7744564     | 0 | 0 | 0 | 1 |
| XLOC_016665 | HMX1          | chr4:8868772-8873543     | 0 | 0 | 0 | 1 |
| XLOC_016666 | MIR548I2      | chr4:9557788-9557937     | 0 | 0 | 0 | 1 |
| XLOC_016669 | MIR3138       | chr4:10075962-10118573   | 0 | 0 | 0 | 1 |
| XLOC_016670 | ZNF518B       | chr4:10441503-10459032   | 0 | 0 | 0 | 1 |
| XLOC_016671 | CLNK          | chr4:10491837-10686386   | 0 | 0 | 0 | 1 |
| XLOC_016672 | HS3ST1        | chr4:11399987-11430537   | 0 | 0 | 0 | 1 |
| XLOC_016674 | LOC285547     | chr4:13527942-13533041   | 0 | 0 | 0 | 1 |
| XLOC_016675 | NKX3-2        | chr4:13542453-13546114   | 0 | 0 | 0 | 1 |
| XLOC_016676 | LOC285548     | chr4:13547699-13549448   | 0 | 0 | 0 | 1 |
| XLOC_016678 | LOC441009     | chr4:14911584-15003669   | 0 | 0 | 0 | 1 |
| XLOC_016680 | FGFBP1        | chr4:15937192-15940363   | 0 | 0 | 0 | 1 |
| XLOC_016681 | FGFBP2        | chr4:15961862-15964859   | 0 | 0 | 0 | 1 |
| XLOC_016684 | LDB2          | chr4:16503164-16900424   | 0 | 0 | 0 | 1 |
| XLOC_016685 | MIR548AX      | chr4:16503164-16900424   | 0 | 0 | 0 | 1 |
| XLOC_016691 | KCNIP4-IT1    | chr4:20730238-21950374   | 0 | 0 | 0 | 1 |
| XLOC_016694 | MIR548AJ2     | chr4:23199716-23464726   | 0 | 0 | 0 | 1 |
| XLOC_016695 | PPARGC1A      | chr4:23793643-23891700   | 0 | 0 | 0 | 1 |
| XLOC_016696 | MIR573        | chr4:24521814-24521913   | 0 | 0 | 0 | 1 |
| XLOC_016702 | CCKAR         | chr4:26483017-26492042   | 0 | 0 | 0 | 1 |
| XLOC_016704 | MIR4801       | chr4:37243531-37243613   | 0 | 0 | 0 | 1 |
| XLOC_016707 | TLR10         | chr4:38773859-38784611   | 0 | 0 | 0 | 1 |
| XLOC_016718 | MIR4802       | chr4:40425271-40631883   | 0 | 0 | 0 | 1 |
| XLOC_016720 | PHOX2B        | chr4:41746098-41750987   | 0 | 0 | 0 | 1 |
| XLOC_016723 | KCTD8         | chr4:44175919-44450824   | 0 | 0 | 0 | 1 |
| XLOC_016724 | YIPF7         | chr4:44624353-44653658   | 0 | 0 | 0 | 1 |
| XLOC_016726 | GABRG1        | chr4:46037786-46126082   | 0 | 0 | 0 | 1 |
| XLOC_016727 | GABRA2        | chr4:46251580-46392056   | 0 | 0 | 0 | 1 |
| XLOC_016729 | GABRA4        | chr4:46920916-46996424   | 0 | 0 | 0 | 1 |
| XLOC_016741 | ERVMER34-1    | chr4:53609683-53617807   | 0 | 0 | 0 | 1 |
| XLOC_016746 | KDR           | chr4:55944425-55991762   | 0 | 0 | 0 | 1 |
| XLOC_016753 | HOPX          | chr4:57514153-57547872   | 0 | 0 | 0 | 1 |
| XLOC_016754 | SPINK2        | chr4:57676025-57688035   | 0 | 0 | 0 | 1 |
| XLOC_016757 | TECRL         | chr4:65144176-65275178   | 0 | 0 | 0 | 1 |
| XLOC_016758 | LOC401134     | chr4:65779988-65870218   | 0 | 0 | 0 | 1 |
| XLOC_016759 | EPHA5         | chr4:66185280-66535653   | 0 | 0 | 0 | 1 |
| XLOC_016764 | TMPRSS11A     | chr4:68776018-68829232   | 0 | 0 | 0 | 1 |
| XLOC_016765 | TMPRSS11GP    | chr4:68857529-68863157   | 0 | 0 | 0 | 1 |
| XLOC_016766 | TMPRSS11F     | chr4:68918915-68995587   | 0 | 0 | 0 | 1 |
| XLOC_016767 | SYT14L        | chr4:68918915-68995587   | 0 | 0 | 0 | 1 |
| XLOC_016768 | TMPRSS11BNL   | chr4:69048009-69083798   | 0 | 0 | 0 | 1 |
| XLOC_016769 | TMPRSS11B     | chr4:69092370-69111412   | 0 | 0 | 0 | 1 |
| XLOC_016772 | UGT2B15       | chr4:69512314-69536494   | 0 | 0 | 0 | 1 |
| XLOC_016773 | UGT2A3        | chr4:69794176-69817509   | 0 | 0 | 0 | 1 |
| XLOC_016774 | UGT2B10       | chr4:69870294-69886113   | 0 | 0 | 0 | 1 |
| XLOC_016775 | UGT2B11       | chr4:70066050-70080449   | 0 | 0 | 0 | 1 |
| XLOC_016776 | UGT2B4        | chr4:70345882-70361626   | 0 | 0 | 0 | 1 |
| XLOC_016777 | UGT2A1,UGT2A2 | chr4:70454134-70518967   | 0 | 0 | 0 | 1 |
| XLOC_016778 | SULT1B1       | chr4:70592685-70626430   | 0 | 0 | 0 | 1 |
| XLOC_016779 | SULT1E1       | chr4:70706929-70725870   | 0 | 0 | 0 | 1 |
| XLOC_016780 | CSN2          | chr4:70820973-70826726   | 0 | 0 | 0 | 1 |
| XLOC_016783 | GC            | chr4:72607410-72671237   | 0 | 0 | 0 | 1 |
| XLOC_016784 | ADAMTS3       | chr4:73146685-73434516   | 0 | 0 | 0 | 1 |
| XLOC_016787 | RASSF6        | chr4:74437266-74486348   | 0 | 0 | 0 | 1 |
| XLOC_016788 | PF4           | chr4:74846541-74847841   | 0 | 0 | 0 | 1 |
| XLOC_016789 | PPBP          | chr4:74852155-74853907   | 0 | 0 | 0 | 1 |
| XLOC_016790 | CXCL5         | chr4:74861358-74864416   | 0 | 0 | 0 | 1 |
| XLOC_016792 | PPBPP2        | chr4:74919754-74921116   | 0 | 0 | 0 | 1 |
| XLOC_016801 | CXCL9         | chr4:76922622-76928641   | 0 | 0 | 0 | 1 |
| XLOC_016802 | CXCL10        | chr4:76932332-77033955   | 0 | 0 | 0 | 1 |
| XLOC_016803 | CXCL11        | chr4:76932332-77033955   | 0 | 0 | 0 | 1 |
| XLOC_016811 | NAA11         | chr4:80238271-80247171   | 0 | 0 | 0 | 1 |
| XLOC_016812 | GK2           | chr4:80327506-80329372   | 0 | 0 | 0 | 1 |
| XLOC_016814 | PRKG2         | chr4:82009836-82126215   | 0 | 0 | 0 | 1 |
| XLOC_016819 | LINC00575     | chr4:83534265-83542590   | 0 | 0 | 0 | 1 |
| XLOC_016821 | MIR575        | chr4:83550689-83720010   | 0 | 0 | 0 | 1 |
| XLOC_016830 | NKX6-1        | chr4:85414435-85419387   | 0 | 0 | 0 | 1 |
| XLOC_016832 | MAPK10        | chr4:86936275-87374283   | 0 | 0 | 0 | 1 |

|             |              |                          |   |   |   |   |
|-------------|--------------|--------------------------|---|---|---|---|
| XLOC_016837 | MIR5705      | chr4:88221646-88221735   | 0 | 0 | 0 | 1 |
| XLOC_016846 | GPRIN3       | chr4:90165428-90229161   | 0 | 0 | 0 | 1 |
| XLOC_016847 | SNCA         | chr4:90645249-90763142   | 0 | 0 | 0 | 1 |
| XLOC_016848 | HPGDS        | chr4:95219706-95264027   | 0 | 0 | 0 | 1 |
| XLOC_016849 | UNC5C        | chr4:96083655-96470361   | 0 | 0 | 0 | 1 |
| XLOC_016854 | ADH4         | chr4:100010007-10022251: | 0 | 0 | 0 | 1 |
| XLOC_016855 | PCNAP1       | chr4:100010007-10022251: | 0 | 0 | 0 | 1 |
| XLOC_016857 | ADH1A        | chr4:100010007-10022251: | 0 | 0 | 0 | 1 |
| XLOC_016858 | ADH1B        | chr4:100227526-10024257: | 0 | 0 | 0 | 1 |
| XLOC_016859 | ADH1C        | chr4:100257648-10027391: | 0 | 0 | 0 | 1 |
| XLOC_016860 | ADH7         | chr4:100333417-10035666: | 0 | 0 | 0 | 1 |
| XLOC_016866 | EMCN         | chr4:101316497-10143925: | 0 | 0 | 0 | 1 |
| XLOC_016867 | EMCN-IT3     | chr4:101581435-10159627: | 0 | 0 | 0 | 1 |
| XLOC_016876 | TACR3        | chr4:104510624-10464097: | 0 | 0 | 0 | 1 |
| XLOC_016881 | GIMD1        | chr4:107279339-10728859: | 0 | 0 | 0 | 1 |
| XLOC_016882 | DKK2         | chr4:107842958-10795745: | 0 | 0 | 0 | 1 |
| XLOC_016886 | AGXT2L1      | chr4:109663201-10968423: | 0 | 0 | 0 | 1 |
| XLOC_016887 | COL25A1      | chr4:109731876-11022379: | 0 | 0 | 0 | 1 |
| XLOC_016891 | CFI          | chr4:110661847-11072333: | 0 | 0 | 0 | 1 |
| XLOC_016897 | MIR367       | chr4:113460488-11357874: | 0 | 0 | 0 | 1 |
| XLOC_016898 | MIR302D      | chr4:113460488-11357874: | 0 | 0 | 0 | 1 |
| XLOC_016899 | MIR302A      | chr4:113460488-11357874: | 0 | 0 | 0 | 1 |
| XLOC_016900 | MIR302C      | chr4:113460488-11357874: | 0 | 0 | 0 | 1 |
| XLOC_016901 | MIR302B      | chr4:113460488-11357874: | 0 | 0 | 0 | 1 |
| XLOC_016904 | NDST4        | chr4:115748926-11603503: | 0 | 0 | 0 | 1 |
| XLOC_016905 | TRAM1L1      | chr4:118004709-11800673: | 0 | 0 | 0 | 1 |
| XLOC_016909 | FABP2        | chr4:120238404-12024331: | 0 | 0 | 0 | 1 |
| XLOC_016915 | TNIP3        | chr4:122052563-12214862: | 0 | 0 | 0 | 1 |
| XLOC_016916 | QRFRP        | chr4:122249796-12230218: | 0 | 0 | 0 | 1 |
| XLOC_016918 | TMEM155      | chr4:122680084-12268796: | 0 | 0 | 0 | 1 |
| XLOC_016921 | TRPC3        | chr4:122800182-12287290: | 0 | 0 | 0 | 1 |
| XLOC_016922 | IL2          | chr4:123372625-12337765: | 0 | 0 | 0 | 1 |
| XLOC_016923 | IL21         | chr4:123533782-12354221: | 0 | 0 | 0 | 1 |
| XLOC_016930 | PABPC4L      | chr4:135117488-13512290: | 0 | 0 | 0 | 1 |
| XLOC_016932 | LINC00616    | chr4:138948576-13916350: | 0 | 0 | 0 | 1 |
| XLOC_016939 | LOC100129858 | chr4:141178439-14130371: | 0 | 0 | 0 | 1 |
| XLOC_016940 | CLGN         | chr4:141309606-14134881: | 0 | 0 | 0 | 1 |
| XLOC_016941 | UCP1         | chr4:141481049-14148995: | 0 | 0 | 0 | 1 |
| XLOC_016942 | TBC1D9       | chr4:141541935-14167747: | 0 | 0 | 0 | 1 |
| XLOC_016943 | TNRC18P1     | chr4:141541935-14167747: | 0 | 0 | 0 | 1 |
| XLOC_016944 | RNF150       | chr4:141786724-14205461: | 0 | 0 | 0 | 1 |
| XLOC_016945 | INPP4B       | chr4:142949181-14376760: | 0 | 0 | 0 | 1 |
| XLOC_016946 | FREM3        | chr4:144498560-14462182: | 0 | 0 | 0 | 1 |
| XLOC_016947 | GYPE         | chr4:144792018-14482671: | 0 | 0 | 0 | 1 |
| XLOC_016948 | GYPB         | chr4:144917256-14494049: | 0 | 0 | 0 | 1 |
| XLOC_016949 | GYPB         | chr4:145030455-14506190: | 0 | 0 | 0 | 1 |
| XLOC_016954 | LOC100505545 | chr4:147030606-14704306: | 0 | 0 | 0 | 1 |
| XLOC_016963 | MIR3140      | chr4:153242409-15345639: | 0 | 0 | 0 | 1 |
| XLOC_016964 | TMEM154      | chr4:153547265-15360131: | 0 | 0 | 0 | 1 |
| XLOC_016967 | RNF175       | chr4:154631311-15468138: | 0 | 0 | 0 | 1 |
| XLOC_016968 | SFRP2        | chr4:154701741-15471022: | 0 | 0 | 0 | 1 |
| XLOC_016969 | DCHS2        | chr4:155155526-15541293: | 0 | 0 | 0 | 1 |
| XLOC_016971 | FGA          | chr4:155504279-15551189: | 0 | 0 | 0 | 1 |
| XLOC_016972 | FGG          | chr4:155525285-15553390: | 0 | 0 | 0 | 1 |
| XLOC_016973 | MAP9         | chr4:156263811-15629812: | 0 | 0 | 0 | 1 |
| XLOC_016974 | ASIC5        | chr4:156750880-15678742: | 0 | 0 | 0 | 1 |
| XLOC_016976 | PDGFC        | chr4:157682762-15789254: | 0 | 0 | 0 | 1 |
| XLOC_016980 | C4orf45      | chr4:159690181-15995633: | 0 | 0 | 0 | 1 |
| XLOC_016981 | MIR3688-1    | chr4:160049953-16005004: | 0 | 0 | 0 | 1 |
| XLOC_016984 | NPY1R        | chr4:164245116-16425394: | 0 | 0 | 0 | 1 |
| XLOC_016985 | TKTL2        | chr4:164392246-16439504: | 0 | 0 | 0 | 1 |
| XLOC_016987 | ANP32C       | chr4:164445449-16530440: | 0 | 0 | 0 | 1 |
| XLOC_016991 | SPOCK3       | chr4:167654535-16815574: | 0 | 0 | 0 | 1 |
| XLOC_016998 | LOC100506085 | chr4:170838911-17089705: | 0 | 0 | 0 | 1 |
| XLOC_017002 | SCRG1        | chr4:174309298-17432061: | 0 | 0 | 0 | 1 |
| XLOC_017003 | HAND2        | chr4:174447651-17445137: | 0 | 0 | 0 | 1 |
| XLOC_017006 | GLRA3        | chr4:175563197-17575046: | 0 | 0 | 0 | 1 |
| XLOC_017009 | ASB5         | chr4:177134825-17719037: | 0 | 0 | 0 | 1 |
| XLOC_017010 | VEGFC        | chr4:177604690-17771389: | 0 | 0 | 0 | 1 |
| XLOC_017012 | LINC00290    | chr4:181985242-18208030: | 0 | 0 | 0 | 1 |
| XLOC_017028 | MIR3945      | chr4:185772166-18577226: | 0 | 0 | 0 | 1 |
| XLOC_017029 | LOC100506229 | chr4:185814153-18582061: | 0 | 0 | 0 | 1 |
| XLOC_017034 | PDLIM3       | chr4:186421814-18645671: | 0 | 0 | 0 | 1 |
| XLOC_017037 | LOC285441    | chr4:187187117-18742221: | 0 | 0 | 0 | 1 |
| XLOC_017038 | MTNR1A       | chr4:187454808-18747653: | 0 | 0 | 0 | 1 |
| XLOC_017040 | LOC339975    | chr4:188225236-18842676: | 0 | 0 | 0 | 1 |
| XLOC_017059 | SLC6A19      | chr5:1201709-1225230     | 0 | 0 | 0 | 1 |
| XLOC_017060 | SLC6A18      | chr5:1225469-1246304     | 0 | 0 | 0 | 1 |
| XLOC_017063 | IRX1         | chr5:3596167-3601517     | 0 | 0 | 0 | 1 |



|             |              |                          |   |   |   |   |
|-------------|--------------|--------------------------|---|---|---|---|
| XLOC_017064 | LOC340094    | chr5:5034471-5070115     | 0 | 0 | 0 | 1 |
| XLOC_017067 | UBE2QL1      | chr5:6448735-6496834     | 0 | 0 | 0 | 1 |
| XLOC_017068 | LOC255167    | chr5:6582286-6588613     | 0 | 0 | 0 | 1 |
| XLOC_017071 | ADCY2        | chr5:7396342-7830194     | 0 | 0 | 0 | 1 |
| XLOC_017074 | LOC100505806 | chr5:9546311-9550409     | 0 | 0 | 0 | 1 |
| XLOC_017075 | SNORD123     | chr5:9546311-9550409     | 0 | 0 | 0 | 1 |
| XLOC_017080 | CT49         | chr5:12574968-12805295   | 0 | 0 | 0 | 1 |
| XLOC_017085 | FBXL7        | chr5:15500304-15939900   | 0 | 0 | 0 | 1 |
| XLOC_017086 | BASP1        | chr5:17130136-17276954   | 0 | 0 | 0 | 1 |
| XLOC_017088 | PMCHL1       | chr5:21750972-22853731   | 0 | 0 | 0 | 1 |
| XLOC_017089 | PRDM9        | chr5:23507723-23528706   | 0 | 0 | 0 | 1 |
| XLOC_017091 | LSP1P3       | chr5:28926976-28927420   | 0 | 0 | 0 | 1 |
| XLOC_017097 | LOC340113    | chr5:32947548-32962573   | 0 | 0 | 0 | 1 |
| XLOC_017099 | RXFP3        | chr5:33936490-33939023   | 0 | 0 | 0 | 1 |
| XLOC_017101 | TTC23L       | chr5:34839268-34899564   | 0 | 0 | 0 | 1 |
| XLOC_017105 | IL7R         | chr5:35856976-35879705   | 0 | 0 | 0 | 1 |
| XLOC_017107 | SLC1A3       | chr5:36606456-36688436   | 0 | 0 | 0 | 1 |
| XLOC_017110 | EGFLAM       | chr5:38258510-38465582   | 0 | 0 | 0 | 1 |
| XLOC_017118 | CCDC152      | chr5:42756919-42812024   | 0 | 0 | 0 | 1 |
| XLOC_017122 | NNT          | chr5:43573286-43705668   | 0 | 0 | 0 | 1 |
| XLOC_017131 | HSPB3        | chr5:53751430-53752214   | 0 | 0 | 0 | 1 |
| XLOC_017132 | SNX18        | chr5:53813588-53842416   | 0 | 0 | 0 | 1 |
| XLOC_017133 | GZMK         | chr5:54320106-54329960   | 0 | 0 | 0 | 1 |
| XLOC_017134 | GZMA         | chr5:54398473-54406080   | 0 | 0 | 0 | 1 |
| XLOC_017137 | DDX4         | chr5:55033844-55112974   | 0 | 0 | 0 | 1 |
| XLOC_017142 | GAPT         | chr5:57787329-57792185   | 0 | 0 | 0 | 1 |
| XLOC_017143 | RAB3C        | chr5:57878938-58147406   | 0 | 0 | 0 | 1 |
| XLOC_017144 | PART1        | chr5:58264865-59843484   | 0 | 0 | 0 | 1 |
| XLOC_017147 | C5orf64      | chr5:60933635-61002362   | 0 | 0 | 0 | 1 |
| XLOC_017150 | RNF180       | chr5:63461670-63668696   | 0 | 0 | 0 | 1 |
| XLOC_017151 | RGS7BP       | chr5:63801773-63908121   | 0 | 0 | 0 | 1 |
| XLOC_017152 | FAM159B      | chr5:63986134-64064496   | 0 | 0 | 0 | 1 |
| XLOC_017174 | SERF1A       | chr5:70196489-70214357   | 0 | 0 | 0 | 1 |
| XLOC_017179 | CARTPT       | chr5:71014989-71016875   | 0 | 0 | 0 | 1 |
| XLOC_017181 | MIR4803      | chr5:71403117-71505397   | 0 | 0 | 0 | 1 |
| XLOC_017184 | MIR4804      | chr5:72112417-72210215   | 0 | 0 | 0 | 1 |
| XLOC_017186 | TMEM171      | chr5:72416387-72427644   | 0 | 0 | 0 | 1 |
| XLOC_017187 | TMEM174      | chr5:72469022-72470970   | 0 | 0 | 0 | 1 |
| XLOC_017195 | ANKDD1B      | chr5:74916139-74966865   | 0 | 0 | 0 | 1 |
| XLOC_017196 | SV2C         | chr5:75379304-75621416   | 0 | 0 | 0 | 1 |
| XLOC_017198 | NCRUPAR      | chr5:76008227-76008713   | 0 | 0 | 0 | 1 |
| XLOC_017200 | F2RL1        | chr5:76114832-76131140   | 0 | 0 | 0 | 1 |
| XLOC_017201 | S100Z        | chr5:76145825-76217056   | 0 | 0 | 0 | 1 |
| XLOC_017202 | CRHBP        | chr5:76248679-76265299   | 0 | 0 | 0 | 1 |
| XLOC_017208 | BHMT         | chr5:78407603-78428113   | 0 | 0 | 0 | 1 |
| XLOC_017213 | SPZ1         | chr5:79615789-79617660   | 0 | 0 | 0 | 1 |
| XLOC_017218 | RNU5E-1      | chr5:80256507-81047072   | 0 | 0 | 0 | 1 |
| XLOC_017219 | CKMT2        | chr5:80256507-81047072   | 0 | 0 | 0 | 1 |
| XLOC_017223 | MIR3977      | chr5:82135973-82136043   | 0 | 0 | 0 | 1 |
| XLOC_017226 | NBPF22P      | chr5:85578261-85593365   | 0 | 0 | 0 | 1 |
| XLOC_017228 | MIR3607      | chr5:85913783-85916583   | 0 | 0 | 0 | 1 |
| XLOC_017235 | MIR548AO     | chr5:92919042-93447404   | 0 | 0 | 0 | 1 |
| XLOC_017239 | GPR150       | chr5:94955979-94957284   | 0 | 0 | 0 | 1 |
| XLOC_017243 | MIR583       | chr5:95414841-95414916   | 0 | 0 | 0 | 1 |
| XLOC_017253 | RAB9BP1      | chr5:104435174-104435798 | 0 | 0 | 0 | 1 |
| XLOC_017256 | LOC100289673 | chr5:109218882-109221200 | 0 | 0 | 0 | 1 |
| XLOC_017260 | CAMK4        | chr5:110559946-110820748 | 0 | 0 | 0 | 1 |
| XLOC_017262 | NREP-AS1     | chr5:110834021-111353000 | 0 | 0 | 0 | 1 |
| XLOC_017265 | FLJ11235     | chr5:111755279-111756677 | 0 | 0 | 0 | 1 |
| XLOC_017273 | ARL14EPL     | chr5:115387162-115394827 | 0 | 0 | 0 | 1 |
| XLOC_017275 | LOC728342    | chr5:116751207-116915438 | 0 | 0 | 0 | 1 |
| XLOC_017276 | MIR1244-2    | chr5:118172568-118324240 | 0 | 0 | 0 | 1 |
| XLOC_017280 | FAM170A      | chr5:118965253-118971517 | 0 | 0 | 0 | 1 |
| XLOC_017281 | PRR16        | chr5:119800018-120022964 | 0 | 0 | 0 | 1 |
| XLOC_017282 | FTMT         | chr5:121187649-121188520 | 0 | 0 | 0 | 1 |
| XLOC_017291 | GRAMD3       | chr5:125695787-125829850 | 0 | 0 | 0 | 1 |
| XLOC_017295 | MEGF10       | chr5:126626455-126796910 | 0 | 0 | 0 | 1 |
| XLOC_017297 | CTXN3        | chr5:126984712-126994320 | 0 | 0 | 0 | 1 |
| XLOC_017299 | SLC27A6      | chr5:128301209-128369330 | 0 | 0 | 0 | 1 |
| XLOC_017301 | MIR4633      | chr5:128430441-128449710 | 0 | 0 | 0 | 1 |
| XLOC_017302 | ADAMTS19     | chr5:128796102-129074370 | 0 | 0 | 0 | 1 |
| XLOC_017303 | KIAA1024L    | chr5:129083883-129100750 | 0 | 0 | 0 | 1 |
| XLOC_017304 | CHSY3        | chr5:129240522-129522327 | 0 | 0 | 0 | 1 |
| XLOC_017307 | IL3          | chr5:131396346-131398890 | 0 | 0 | 0 | 1 |
| XLOC_017309 | PDLIM4       | chr5:131593350-131609147 | 0 | 0 | 0 | 1 |
| XLOC_017315 | IL4          | chr5:132009677-132018370 | 0 | 0 | 0 | 1 |
| XLOC_017317 | SOWAHA       | chr5:132149032-132152480 | 0 | 0 | 0 | 1 |
| XLOC_017322 | MIR3661      | chr5:133532147-133561950 | 0 | 0 | 0 | 1 |
| XLOC_017333 | SLC25A48     | chr5:135170364-135224320 | 0 | 0 | 0 | 1 |

|             |                        |                          |   |   |   |   |
|-------------|------------------------|--------------------------|---|---|---|---|
| XLOC_017334 | FBXL21                 | chr5:135266005-135277361 | 0 | 0 | 0 | 1 |
| XLOC_017337 | NPY6R                  | chr5:137136881-137146435 | 0 | 0 | 0 | 1 |
| XLOC_017338 | MYOT                   | chr5:137203544-137223540 | 0 | 0 | 0 | 1 |
| XLOC_017339 | PKD2L2                 | chr5:137225124-137368800 | 0 | 0 | 0 | 1 |
| XLOC_017340 | WNT8A                  | chr5:137419773-137427195 | 0 | 0 | 0 | 1 |
| XLOC_017352 | PSD2                   | chr5:139175405-139224048 | 0 | 0 | 0 | 1 |
| XLOC_017365 | VTRNA1-2               | chr5:140098510-140098598 | 0 | 0 | 0 | 1 |
| XLOC_017368 | PCDHB1                 | chr5:140430978-140433512 | 0 | 0 | 0 | 1 |
| XLOC_017395 | MIR5197                | chr5:143059424-143059536 | 0 | 0 | 0 | 1 |
| XLOC_017396 | HMHB1                  | chr5:143191725-143200284 | 0 | 0 | 0 | 1 |
| XLOC_017400 | POU4F3                 | chr5:145718586-145720083 | 0 | 0 | 0 | 1 |
| XLOC_017402 | STK32A                 | chr5:146614578-146763768 | 0 | 0 | 0 | 1 |
| XLOC_017403 | JAKMIP2-AS1            | chr5:146939556-147162411 | 0 | 0 | 0 | 1 |
| XLOC_017404 | SCGB3A2                | chr5:147258273-147261756 | 0 | 0 | 0 | 1 |
| XLOC_017405 | SPINK5                 | chr5:147443534-147516925 | 0 | 0 | 0 | 1 |
| XLOC_017406 | SPINK14                | chr5:147549295-147554961 | 0 | 0 | 0 | 1 |
| XLOC_017407 | SPINK6                 | chr5:147582356-147594700 | 0 | 0 | 0 | 1 |
| XLOC_017408 | SPINK13                | chr5:147648422-147665770 | 0 | 0 | 0 | 1 |
| XLOC_017409 | SPINK7                 | chr5:147691989-147695481 | 0 | 0 | 0 | 1 |
| XLOC_017410 | SPINK9                 | chr5:147715121-147719412 | 0 | 0 | 0 | 1 |
| XLOC_017412 | ADRB2                  | chr5:148206155-148208190 | 0 | 0 | 0 | 1 |
| XLOC_017422 | CDX1                   | chr5:149546343-149564112 | 0 | 0 | 0 | 1 |
| XLOC_017423 | SLC6A7                 | chr5:149569519-149590635 | 0 | 0 | 0 | 1 |
| XLOC_017434 | GRIA1                  | chr5:152870083-153193425 | 0 | 0 | 0 | 1 |
| XLOC_017441 | KIF4B                  | chr5:154393259-154397685 | 0 | 0 | 0 | 1 |
| XLOC_017442 | SGCD                   | chr5:155753766-156194798 | 0 | 0 | 0 | 1 |
| XLOC_017444 | ITK                    | chr5:156607906-156682105 | 0 | 0 | 0 | 1 |
| XLOC_017446 | NIPAL4                 | chr5:156887026-156901730 | 0 | 0 | 0 | 1 |
| XLOC_017447 | C5orf52                | chr5:157098560-157107162 | 0 | 0 | 0 | 1 |
| XLOC_017452 | ADRA1B                 | chr5:159343739-159400017 | 0 | 0 | 0 | 1 |
| XLOC_017456 | MIR3142                | chr5:159901408-159901490 | 0 | 0 | 0 | 1 |
| XLOC_017457 | MIR146A                | chr5:159912358-159912457 | 0 | 0 | 0 | 1 |
| XLOC_017458 | GABRA6                 | chr5:161112657-161129598 | 0 | 0 | 0 | 1 |
| XLOC_017459 | GABRA1                 | chr5:161274196-161326965 | 0 | 0 | 0 | 1 |
| XLOC_017460 | GABRG2                 | chr5:161494647-161582545 | 0 | 0 | 0 | 1 |
| XLOC_017464 | TENM2                  | chr5:166711842-167691162 | 0 | 0 | 0 | 1 |
| XLOC_017468 | MIR103B1               | chr5:167982627-168006614 | 0 | 0 | 0 | 1 |
| XLOC_017470 | DOCK2                  | chr5:169064250-169510386 | 0 | 0 | 0 | 1 |
| XLOC_017471 | MIR378E                | chr5:169064250-169510386 | 0 | 0 | 0 | 1 |
| XLOC_017472 | FOXI1                  | chr5:169532916-169536725 | 0 | 0 | 0 | 1 |
| XLOC_017473 | C5orf58                | chr5:169659949-169673233 | 0 | 0 | 0 | 1 |
| XLOC_017475 | KCNIP1                 | chr5:169780880-170163636 | 0 | 0 | 0 | 1 |
| XLOC_017476 | GABRP                  | chr5:170210722-170241050 | 0 | 0 | 0 | 1 |
| XLOC_017478 | TLX3                   | chr5:170736287-170739138 | 0 | 0 | 0 | 1 |
| XLOC_017491 | C5orf47                | chr5:173416161-173433143 | 0 | 0 | 0 | 1 |
| XLOC_017494 | MIR4634                | chr5:174178736-174178790 | 0 | 0 | 0 | 1 |
| XLOC_017496 | HRH2                   | chr5:175085039-175113245 | 0 | 0 | 0 | 1 |
| XLOC_017497 | CPLX2                  | chr5:175223609-175311023 | 0 | 0 | 0 | 1 |
| XLOC_017498 | FAM153B                | chr5:175490711-175541801 | 0 | 0 | 0 | 1 |
| XLOC_017505 | EIF4E1B                | chr5:176057682-176073642 | 0 | 0 | 0 | 1 |
| XLOC_017513 | SLC34A1                | chr5:176811431-176825845 | 0 | 0 | 0 | 1 |
| XLOC_017526 | ZNF879                 | chr5:178450775-178461385 | 0 | 0 | 0 | 1 |
| XLOC_017527 | ZNF354C                | chr5:178487606-178507691 | 0 | 0 | 0 | 1 |
| XLOC_017534 | LINC00847              | chr5:180256953-180262726 | 0 | 0 | 0 | 1 |
| XLOC_017535 | BTNL8                  | chr5:180326076-180377906 | 0 | 0 | 0 | 1 |
| XLOC_017536 | BTNL3                  | chr5:180415844-180433727 | 0 | 0 | 0 | 1 |
| XLOC_017538 | OR2V2                  | chr5:180581942-180582890 | 0 | 0 | 0 | 1 |
| XLOC_017540 | LOC100132062,LOC100133 | chr5:180750506-180755196 | 0 | 0 | 0 | 1 |
| XLOC_017541 | OR4F3                  | chr5:180794287-180795226 | 0 | 0 | 0 | 1 |
| XLOC_017546 | MIR4456                | chr5:535954-535997       | 0 | 0 | 0 | 1 |
| XLOC_017550 | LOC100506688           | chr5:988424-997455       | 0 | 0 | 0 | 1 |
| XLOC_017552 | MIR4635                | chr5:1050488-1112172     | 0 | 0 | 0 | 1 |
| XLOC_017554 | MIR4457                | chr5:1309424-1309492     | 0 | 0 | 0 | 1 |
| XLOC_017556 | SLC6A3                 | chr5:1392904-1445543     | 0 | 0 | 0 | 1 |
| XLOC_017560 | MIR4277                | chr5:1708899-1708983     | 0 | 0 | 0 | 1 |
| XLOC_017562 | IRX4                   | chr5:1877540-1882880     | 0 | 0 | 0 | 1 |
| XLOC_017564 | LOC285577              | chr5:3417265-3536208     | 0 | 0 | 0 | 1 |
| XLOC_017568 | MIR4278                | chr5:6827965-6828034     | 0 | 0 | 0 | 1 |
| XLOC_017569 | MIR4454                | chr5:7269415-7269467     | 0 | 0 | 0 | 1 |
| XLOC_017570 | LOC442132              | chr5:7299486-7306827     | 0 | 0 | 0 | 1 |
| XLOC_017571 | C5orf49                | chr5:7830490-7851603     | 0 | 0 | 0 | 1 |
| XLOC_017575 | MIR4636                | chr5:9035137-9546233     | 0 | 0 | 0 | 1 |
| XLOC_017576 | TAS2R1                 | chr5:9629108-9630463     | 0 | 0 | 0 | 1 |
| XLOC_017577 | LOC285692              | chr5:9641426-9903936     | 0 | 0 | 0 | 1 |
| XLOC_017581 | CTNND2                 | chr5:10971951-11904110   | 0 | 0 | 0 | 1 |
| XLOC_017584 | MIR4637                | chr5:14704908-14871887   | 0 | 0 | 0 | 1 |
| XLOC_017585 | MARCH11                | chr5:16067473-16179897   | 0 | 0 | 0 | 1 |
| XLOC_017590 | LOC401177              | chr5:17379014-17387419   | 0 | 0 | 0 | 1 |
| XLOC_017591 | CDH18                  | chr5:19473154-19988353   | 0 | 0 | 0 | 1 |

|             |                  |                          |   |   |   |   |
|-------------|------------------|--------------------------|---|---|---|---|
| XLOC_017593 | CDH10            | chr5:24487208-24645085   | 0 | 0 | 0 | 1 |
| XLOC_017594 | LOC340107        | chr5:24835388-24840692   | 0 | 0 | 0 | 1 |
| XLOC_017595 | CDH9             | chr5:26880708-27038689   | 0 | 0 | 0 | 1 |
| XLOC_017597 | MIR4279          | chr5:31799030-32111038   | 0 | 0 | 0 | 1 |
| XLOC_017601 | ADAMTS12         | chr5:33527286-33892124   | 0 | 0 | 0 | 1 |
| XLOC_017606 | PRLR             | chr5:35048860-35230823   | 0 | 0 | 0 | 1 |
| XLOC_017607 | CAPSL            | chr5:35904397-35938881   | 0 | 0 | 0 | 1 |
| XLOC_017609 | UGT3A2           | chr5:36035118-36067023   | 0 | 0 | 0 | 1 |
| XLOC_017611 | MIR580           | chr5:36103413-36152015   | 0 | 0 | 0 | 1 |
| XLOC_017617 | GDNF             | chr5:37812778-37839782   | 0 | 0 | 0 | 1 |
| XLOC_017618 | EGFLAM-AS4       | chr5:38258510-38465582   | 0 | 0 | 0 | 1 |
| XLOC_017619 | LIFR             | chr5:38475064-38595507   | 0 | 0 | 0 | 1 |
| XLOC_017620 | MIR3650          | chr5:38475064-38595507   | 0 | 0 | 0 | 1 |
| XLOC_017622 | FYB              | chr5:39105353-39270759   | 0 | 0 | 0 | 1 |
| XLOC_017623 | C9               | chr5:39284377-39364655   | 0 | 0 | 0 | 1 |
| XLOC_017629 | SNORD72          | chr5:40831429-40835387   | 0 | 0 | 0 | 1 |
| XLOC_017630 | MROH2B           | chr5:40998121-41071444   | 0 | 0 | 0 | 1 |
| XLOC_017631 | C6               | chr5:41142247-41261540   | 0 | 0 | 0 | 1 |
| XLOC_017632 | PLCXD3           | chr5:41307047-41510730   | 0 | 0 | 0 | 1 |
| XLOC_017639 | CCL28            | chr5:43381599-43412488   | 0 | 0 | 0 | 1 |
| XLOC_017644 | FGF10            | chr5:44305096-44388784   | 0 | 0 | 0 | 1 |
| XLOC_017645 | HCN1             | chr5:45255051-45696220   | 0 | 0 | 0 | 1 |
| XLOC_017650 | MIR581           | chr5:53180613-53606403   | 0 | 0 | 0 | 1 |
| XLOC_017651 | ESM1             | chr5:54273694-54281414   | 0 | 0 | 0 | 1 |
| XLOC_017653 | MIR449A          | chr5:54408798-54469005   | 0 | 0 | 0 | 1 |
| XLOC_017654 | MIR449B          | chr5:54408798-54469005   | 0 | 0 | 0 | 1 |
| XLOC_017655 | MIR449C          | chr5:54408798-54469005   | 0 | 0 | 0 | 1 |
| XLOC_017660 | MIR5687          | chr5:54603575-54830873   | 0 | 0 | 0 | 1 |
| XLOC_017664 | ANKRD55          | chr5:55395506-55529186   | 0 | 0 | 0 | 1 |
| XLOC_017666 | ACTBL2           | chr5:56775842-56778636   | 0 | 0 | 0 | 1 |
| XLOC_017674 | HTR1A            | chr5:63255874-63258119   | 0 | 0 | 0 | 1 |
| XLOC_017681 | CD180            | chr5:66478103-66492617   | 0 | 0 | 0 | 1 |
| XLOC_017693 | ZNF366           | chr5:71739233-71803249   | 0 | 0 | 0 | 1 |
| XLOC_017703 | F2RL2            | chr5:75699148-76003957   | 0 | 0 | 0 | 1 |
| XLOC_017707 | OTP              | chr5:76924536-76934522   | 0 | 0 | 0 | 1 |
| XLOC_017716 | LOC644936        | chr5:79594916-79596297   | 0 | 0 | 0 | 1 |
| XLOC_017718 | ANKRD34B         | chr5:79852573-79866304   | 0 | 0 | 0 | 1 |
| XLOC_017727 | HAPLN1           | chr5:82934016-83016896   | 0 | 0 | 0 | 1 |
| XLOC_017728 | EDIL3            | chr5:83238125-83680611   | 0 | 0 | 0 | 1 |
| XLOC_017729 | MIR4280          | chr5:86410695-86410771   | 0 | 0 | 0 | 1 |
| XLOC_017732 | LINC00461,MIR9-2 | chr5:87836596-87980620   | 0 | 0 | 0 | 1 |
| XLOC_017733 | MEF2C            | chr5:88014057-88199922   | 0 | 0 | 0 | 1 |
| XLOC_017734 | MIR3660          | chr5:89312437-89312537   | 0 | 0 | 0 | 1 |
| XLOC_017748 | PCSK1            | chr5:95726039-95768985   | 0 | 0 | 0 | 1 |
| XLOC_017750 | LIX1             | chr5:96427573-96478520   | 0 | 0 | 0 | 1 |
| XLOC_017756 | SLCO4C1          | chr5:101569691-101632253 | 0 | 0 | 0 | 1 |
| XLOC_017757 | SLCO6A1          | chr5:101707651-101834720 | 0 | 0 | 0 | 1 |
| XLOC_017764 | TMEM232          | chr5:109755197-110062450 | 0 | 0 | 0 | 1 |
| XLOC_017770 | TSSK1B           | chr5:112312406-112824527 | 0 | 0 | 0 | 1 |
| XLOC_017781 | MGC32805         | chr5:121647819-121814782 | 0 | 0 | 0 | 1 |
| XLOC_017784 | ZNF608           | chr5:123972609-124080805 | 0 | 0 | 0 | 1 |
| XLOC_017789 | FBN2             | chr5:127593600-127873735 | 0 | 0 | 0 | 1 |
| XLOC_017790 | MIR4460          | chr5:128732754-128732840 | 0 | 0 | 0 | 1 |
| XLOC_017797 | MIR3936          | chr5:131630144-131731306 | 0 | 0 | 0 | 1 |
| XLOC_017799 | IL5              | chr5:131877135-131879214 | 0 | 0 | 0 | 1 |
| XLOC_017806 | FSTL4            | chr5:132532151-132948222 | 0 | 0 | 0 | 1 |
| XLOC_017807 | MIR1289-2        | chr5:132532151-132948222 | 0 | 0 | 0 | 1 |
| XLOC_017816 | LOC340073        | chr5:134571923-134583867 | 0 | 0 | 0 | 1 |
| XLOC_017818 | C5orf20          | chr5:134779903-134783038 | 0 | 0 | 0 | 1 |
| XLOC_017819 | TIFAB            | chr5:134784557-134788085 | 0 | 0 | 0 | 1 |
| XLOC_017823 | IL9              | chr5:135227934-135231516 | 0 | 0 | 0 | 1 |
| XLOC_017824 | LECT2            | chr5:135282599-135290722 | 0 | 0 | 0 | 1 |
| XLOC_017825 | VTRNA2-1         | chr5:135416186-135416286 | 0 | 0 | 0 | 1 |
| XLOC_017828 | TRPC7            | chr5:135548998-135701116 | 0 | 0 | 0 | 1 |
| XLOC_017831 | MIR874           | chr5:136953188-137071775 | 0 | 0 | 0 | 1 |
| XLOC_017834 | NME5             | chr5:137450860-137475132 | 0 | 0 | 0 | 1 |
| XLOC_017841 | SNORD63          | chr5:137890570-137911311 | 0 | 0 | 0 | 1 |
| XLOC_017867 | LOC729080        | chr5:141275190-141276260 | 0 | 0 | 0 | 1 |
| XLOC_017872 | ARHGAP26-AS1     | chr5:142150291-142608572 | 0 | 0 | 0 | 1 |
| XLOC_017873 | NR3C1            | chr5:142657495-142815077 | 0 | 0 | 0 | 1 |
| XLOC_017876 | GRXCR2           | chr5:145239295-145252537 | 0 | 0 | 0 | 1 |
| XLOC_017880 | PPP2R2B          | chr5:145969066-146461082 | 0 | 0 | 0 | 1 |
| XLOC_017881 | PPP2R2B-IT1      | chr5:145969066-146461082 | 0 | 0 | 0 | 1 |
| XLOC_017885 | C5orf46          | chr5:147272270-147286107 | 0 | 0 | 0 | 1 |
| XLOC_017886 | HTR4             | chr5:147830594-148033735 | 0 | 0 | 0 | 1 |
| XLOC_017894 | CAMK2A           | chr5:149599053-149669402 | 0 | 0 | 0 | 1 |
| XLOC_017905 | SLC36A3          | chr5:150655925-150683332 | 0 | 0 | 0 | 1 |
| XLOC_017908 | SPARC            | chr5:151040656-151066612 | 0 | 0 | 0 | 1 |
| XLOC_017910 | GLRA1            | chr5:151202073-151304397 | 0 | 0 | 0 | 1 |

|             |              |                         |   |   |   |   |
|-------------|--------------|-------------------------|---|---|---|---|
| XLOC_017911 | NMUR2        | chr5:151771101-15178484 | 0 | 0 | 0 | 1 |
| XLOC_017914 | HAND1        | chr5:153854531-15385782 | 0 | 0 | 0 | 1 |
| XLOC_017915 | MIR3141      | chr5:153975571-15397563 | 0 | 0 | 0 | 1 |
| XLOC_017922 | FAM71B       | chr5:156589343-15659327 | 0 | 0 | 0 | 1 |
| XLOC_017925 | SOX30        | chr5:157052686-15707942 | 0 | 0 | 0 | 1 |
| XLOC_017927 | EBF1         | chr5:158122922-15852678 | 0 | 0 | 0 | 1 |
| XLOC_017929 | IL12B        | chr5:158741790-15875748 | 0 | 0 | 0 | 1 |
| XLOC_017930 | LOC285627    | chr5:158875563-15889328 | 0 | 0 | 0 | 1 |
| XLOC_017936 | ATP10B       | chr5:159990126-16027921 | 0 | 0 | 0 | 1 |
| XLOC_017937 | LOC285629    | chr5:160358785-16036563 | 0 | 0 | 0 | 1 |
| XLOC_017938 | GABRB2       | chr5:160715435-16097513 | 0 | 0 | 0 | 1 |
| XLOC_017941 | MIR103A1     | chr5:167982627-16800661 | 0 | 0 | 0 | 1 |
| XLOC_017942 | SLIT3        | chr5:168088737-16872813 | 0 | 0 | 0 | 1 |
| XLOC_017943 | MIR218-2     | chr5:168088737-16872813 | 0 | 0 | 0 | 1 |
| XLOC_017944 | MIR585       | chr5:168088737-16872813 | 0 | 0 | 0 | 1 |
| XLOC_017945 | FAM196B      | chr5:169064250-16951038 | 0 | 0 | 0 | 1 |
| XLOC_017946 | LCP2         | chr5:169675087-16972482 | 0 | 0 | 0 | 1 |
| XLOC_017948 | MIR3912      | chr5:170813659-17081376 | 0 | 0 | 0 | 1 |
| XLOC_017956 | STC2         | chr5:172741725-17275650 | 0 | 0 | 0 | 1 |
| XLOC_017958 | FLJ16171     | chr5:174346084-17442273 | 0 | 0 | 0 | 1 |
| XLOC_017959 | DRD1         | chr5:174867674-17487116 | 0 | 0 | 0 | 1 |
| XLOC_017967 | SNCB         | chr5:176047209-17605755 | 0 | 0 | 0 | 1 |
| XLOC_017968 | MIR4281      | chr5:176047209-17605755 | 0 | 0 | 0 | 1 |
| XLOC_017983 | FAM153A      | chr5:177150364-17720750 | 0 | 0 | 0 | 1 |
| XLOC_017984 | PROP1        | chr5:177419235-17742324 | 0 | 0 | 0 | 1 |
| XLOC_017998 | MIR1229      | chr5:179224597-17928584 | 0 | 0 | 0 | 1 |
| XLOC_018002 | MIR340       | chr5:179382473-17949910 | 0 | 0 | 0 | 1 |
| XLOC_018006 | SCGB3A1      | chr5:180017104-18001848 | 0 | 0 | 0 | 1 |
| XLOC_018008 | OR2Y1        | chr5:180166122-18016705 | 0 | 0 | 0 | 1 |
| XLOC_018012 | OR2V1        | chr5:180551356-18055230 | 0 | 0 | 0 | 1 |
| XLOC_018014 | MIR4638      | chr5:180649565-18064963 | 0 | 0 | 0 | 1 |
| XLOC_018016 | SNORD96A     | chr5:180663927-18067090 | 0 | 0 | 0 | 1 |
| XLOC_018021 | FOXQ1        | chr6:1312674-1314993    | 0 | 0 | 0 | 1 |
| XLOC_018022 | FOXF2        | chr6:1390068-1395832    | 0 | 0 | 0 | 1 |
| XLOC_018031 | FAM50B       | chr6:3849631-3851551    | 0 | 0 | 0 | 1 |
| XLOC_018033 | C6orf201     | chr6:4068592-4135831    | 0 | 0 | 0 | 1 |
| XLOC_018035 | PPP1R3G      | chr6:5085719-5087455    | 0 | 0 | 0 | 1 |
| XLOC_018037 | LY86         | chr6:6346697-6655216    | 0 | 0 | 0 | 1 |
| XLOC_018045 | HULC         | chr6:8435855-8785678    | 0 | 0 | 0 | 1 |
| XLOC_018047 | MIR5689      | chr6:10439949-10440027  | 0 | 0 | 0 | 1 |
| XLOC_018055 | TMEM170B     | chr6:11538459-11583757  | 0 | 0 | 0 | 1 |
| XLOC_018061 | RNF182       | chr6:13924676-13980240  | 0 | 0 | 0 | 1 |
| XLOC_018065 | MIR4639      | chr6:16129316-16148478  | 0 | 0 | 0 | 1 |
| XLOC_018067 | STMND1       | chr6:17102488-17131603  | 0 | 0 | 0 | 1 |
| XLOC_018068 | RBM24        | chr6:17281808-17294099  | 0 | 0 | 0 | 1 |
| XLOC_018073 | MIR548A1     | chr6:18572014-18572111  | 0 | 0 | 0 | 1 |
| XLOC_018074 | ID4          | chr6:19837600-19842431  | 0 | 0 | 0 | 1 |
| XLOC_018078 | LINC00340    | chr6:21666674-22194616  | 0 | 0 | 0 | 1 |
| XLOC_018079 | HDGFL1       | chr6:22569677-22570750  | 0 | 0 | 0 | 1 |
| XLOC_018087 | SCGN         | chr6:25652428-25702008  | 0 | 0 | 0 | 1 |
| XLOC_018088 | HIST1H2BA    | chr6:25727136-25727573  | 0 | 0 | 0 | 1 |
| XLOC_018089 | HIST1H2APS1  | chr6:25732660-25733089  | 0 | 0 | 0 | 1 |
| XLOC_018090 | SLC17A4      | chr6:25754926-25781403  | 0 | 0 | 0 | 1 |
| XLOC_018094 | HIST1H3C     | chr6:26045638-26046097  | 0 | 0 | 0 | 1 |
| XLOC_018105 | HIST1H4F     | chr6:26240653-26241021  | 0 | 0 | 0 | 1 |
| XLOC_018114 | BTN1A1       | chr6:26501494-26510652  | 0 | 0 | 0 | 1 |
| XLOC_018115 | HCG11        | chr6:26521933-26527612  | 0 | 0 | 0 | 1 |
| XLOC_018122 | MIR3143      | chr6:27115404-27115467  | 0 | 0 | 0 | 1 |
| XLOC_018124 | VN1R10P      | chr6:27292539-27293741  | 0 | 0 | 0 | 1 |
| XLOC_018126 | LOC100507173 | chr6:27661813-27678001  | 0 | 0 | 0 | 1 |
| XLOC_018133 | HIST1H2AL    | chr6:27833106-27833576  | 0 | 0 | 0 | 1 |
| XLOC_018145 | GPX5         | chr6:28493788-28502728  | 0 | 0 | 0 | 1 |
| XLOC_018146 | LOC100129636 | chr6:29003999-29044517  | 0 | 0 | 0 | 1 |
| XLOC_018147 | OR2J3        | chr6:29079667-29080603  | 0 | 0 | 0 | 1 |
| XLOC_018148 | OR2J2        | chr6:29141310-29142351  | 0 | 0 | 0 | 1 |
| XLOC_018149 | OR14J1       | chr6:29274466-29275432  | 0 | 0 | 0 | 1 |
| XLOC_018150 | OR12D2       | chr6:29364415-29365448  | 0 | 0 | 0 | 1 |
| XLOC_018151 | OR10C1       | chr6:29407715-29408754  | 0 | 0 | 0 | 1 |
| XLOC_018153 | LOC100507362 | chr6:29497182-29501345  | 0 | 0 | 0 | 1 |
| XLOC_018154 | SNORD32B     | chr6:29550028-29550105  | 0 | 0 | 0 | 1 |
| XLOC_018156 | MOG          | chr6:29624757-29640149  | 0 | 0 | 0 | 1 |
| XLOC_018173 | MIR877       | chr6:30539169-30559309  | 0 | 0 | 0 | 1 |
| XLOC_018179 | MIR4640      | chr6:30851860-30867933  | 0 | 0 | 0 | 1 |
| XLOC_018183 | MUC21        | chr6:30951484-30957675  | 0 | 0 | 0 | 1 |
| XLOC_018184 | MUC22        | chr6:30973728-31003179  | 0 | 0 | 0 | 1 |
| XLOC_018185 | HCG22        | chr6:31021226-31027655  | 0 | 0 | 0 | 1 |
| XLOC_018191 | HCG26        | chr6:31439005-31440185  | 0 | 0 | 0 | 1 |
| XLOC_018198 | AIF1         | chr6:31582993-31584798  | 0 | 0 | 0 | 1 |
| XLOC_018204 | LY6G6F       | chr6:31674683-31678372  | 0 | 0 | 0 | 1 |

|             |              |                          |   |   |   |   |
|-------------|--------------|--------------------------|---|---|---|---|
| XLOC_018211 | SNORD48      | chr6:31802692-31807541   | 0 | 0 | 0 | 1 |
| XLOC_018212 | SNORD52      | chr6:31802692-31807541   | 0 | 0 | 0 | 1 |
| XLOC_018219 | STK19        | chr6:31981517-31981961   | 0 | 0 | 0 | 1 |
| XLOC_018224 | HCG23        | chr6:32358286-32361468   | 0 | 0 | 0 | 1 |
| XLOC_018225 | HLA-DRA      | chr6:32407618-32412826   | 0 | 0 | 0 | 1 |
| XLOC_018226 | HLA-DQA1     | chr6:32605182-32611429   | 0 | 0 | 0 | 1 |
| XLOC_018227 | HLA-DQA2     | chr6:32709162-32714664   | 0 | 0 | 0 | 1 |
| XLOC_018232 | HLA-DPB1     | chr6:33032345-33057473   | 0 | 0 | 0 | 1 |
| XLOC_018233 | HLA-DPB2     | chr6:33080292-33096890   | 0 | 0 | 0 | 1 |
| XLOC_018236 | MIR219-1     | chr6:33175611-33175721   | 0 | 0 | 0 | 1 |
| XLOC_018260 | CLPSL2       | chr6:35744391-35747329   | 0 | 0 | 0 | 1 |
| XLOC_018261 | CLPSL1       | chr6:35748830-35755841   | 0 | 0 | 0 | 1 |
| XLOC_018272 | PH16         | chr6:36916038-36932613   | 0 | 0 | 0 | 1 |
| XLOC_018273 | FGD2         | chr6:36973422-36996845   | 0 | 0 | 0 | 1 |
| XLOC_018279 | DNAH8        | chr6:38683116-38998574   | 0 | 0 | 0 | 1 |
| XLOC_018280 | GLP1R        | chr6:39016556-39055520   | 0 | 0 | 0 | 1 |
| XLOC_018281 | DAAM2        | chr6:39760158-39902290   | 0 | 0 | 0 | 1 |
| XLOC_018282 | TDRG1        | chr6:40346162-40347631   | 0 | 0 | 0 | 1 |
| XLOC_018286 | TREML4       | chr6:41196061-41206120   | 0 | 0 | 0 | 1 |
| XLOC_018287 | TREML5P      | chr6:41217114-41217327   | 0 | 0 | 0 | 1 |
| XLOC_018288 | NCR2         | chr6:41303527-41318625   | 0 | 0 | 0 | 1 |
| XLOC_018290 | MIR4641      | chr6:41514163-41570122   | 0 | 0 | 0 | 1 |
| XLOC_018298 | ATP6V0CP3    | chr6:42695313-42695932   | 0 | 0 | 0 | 1 |
| XLOC_018301 | PTCRA        | chr6:42883726-42893575   | 0 | 0 | 0 | 1 |
| XLOC_018311 | TTBK1        | chr6:43211221-43255997   | 0 | 0 | 0 | 1 |
| XLOC_018312 | SLC22A7      | chr6:43265997-43276530   | 0 | 0 | 0 | 1 |
| XLOC_018327 | SPATS1       | chr6:44310396-44344904   | 0 | 0 | 0 | 1 |
| XLOC_018329 | MIR4642      | chr6:44355250-44418161   | 0 | 0 | 0 | 1 |
| XLOC_018334 | ANKRD66      | chr6:46714653-46726954   | 0 | 0 | 0 | 1 |
| XLOC_018335 | MEP1A        | chr6:46761093-46807519   | 0 | 0 | 0 | 1 |
| XLOC_018338 | GPR115       | chr6:47666288-47689757   | 0 | 0 | 0 | 1 |
| XLOC_018339 | OPN5         | chr6:47749774-47794116   | 0 | 0 | 0 | 1 |
| XLOC_018341 | GLYATL3      | chr6:49467670-49495777   | 0 | 0 | 0 | 1 |
| XLOC_018343 | TFAP2D       | chr6:50681256-50740746   | 0 | 0 | 0 | 1 |
| XLOC_018344 | TFAP2B       | chr6:50786438-50815326   | 0 | 0 | 0 | 1 |
| XLOC_018345 | MIR206       | chr6:52009146-52009232   | 0 | 0 | 0 | 1 |
| XLOC_018346 | MIR133B      | chr6:52013720-52013839   | 0 | 0 | 0 | 1 |
| XLOC_018347 | IL17A        | chr6:52051184-52055436   | 0 | 0 | 0 | 1 |
| XLOC_018353 | MIR5685      | chr6:53132195-53213977   | 0 | 0 | 0 | 1 |
| XLOC_018355 | MLIP-IT1     | chr6:53863687-53871950   | 0 | 0 | 0 | 1 |
| XLOC_018356 | MLIP         | chr6:53883713-54131078   | 0 | 0 | 0 | 1 |
| XLOC_018357 | TINAG        | chr6:54173202-54254950   | 0 | 0 | 0 | 1 |
| XLOC_018359 | HCRTR2       | chr6:55039070-55147418   | 0 | 0 | 0 | 1 |
| XLOC_018360 | GFRAL        | chr6:55192266-55267291   | 0 | 0 | 0 | 1 |
| XLOC_018361 | BEND6        | chr6:56819772-56892142   | 0 | 0 | 0 | 1 |
| XLOC_018369 | SLC25A51P1   | chr6:66497771-66499376   | 0 | 0 | 0 | 1 |
| XLOC_018370 | BAI3         | chr6:69345631-70099403   | 0 | 0 | 0 | 1 |
| XLOC_018372 | FAM135A      | chr6:71123106-71270877   | 0 | 0 | 0 | 1 |
| XLOC_018378 | KHDC3L       | chr6:74072399-74073898   | 0 | 0 | 0 | 1 |
| XLOC_018388 | RNY4         | chr6:80451635-80451669   | 0 | 0 | 0 | 1 |
| XLOC_018394 | PRSS35       | chr6:84222193-84235421   | 0 | 0 | 0 | 1 |
| XLOC_018395 | RIPPLY2      | chr6:84562984-84567234   | 0 | 0 | 0 | 1 |
| XLOC_018399 | HTR1E        | chr6:87647023-87726397   | 0 | 0 | 0 | 1 |
| XLOC_018407 | SPACA1       | chr6:88757506-88776550   | 0 | 0 | 0 | 1 |
| XLOC_018412 | GJA10        | chr6:90604187-90605819   | 0 | 0 | 0 | 1 |
| XLOC_018413 | MIR4464      | chr6:91022460-91022552   | 0 | 0 | 0 | 1 |
| XLOC_018414 | MIR4643      | chr6:92231377-92231455   | 0 | 0 | 0 | 1 |
| XLOC_018417 | FUT9         | chr6:96463844-96663488   | 0 | 0 | 0 | 1 |
| XLOC_018419 | FHL5         | chr6:97010423-97064512   | 0 | 0 | 0 | 1 |
| XLOC_018421 | MIR2113      | chr6:98472406-98472495   | 0 | 0 | 0 | 1 |
| XLOC_018422 | POU3F2       | chr6:99282579-99286666   | 0 | 0 | 0 | 1 |
| XLOC_018425 | LOC728012    | chr6:100367785-100524295 | 0 | 0 | 0 | 1 |
| XLOC_018426 | GRIK2        | chr6:101846860-102517955 | 0 | 0 | 0 | 1 |
| XLOC_018427 | LIN28B       | chr6:105404922-105531207 | 0 | 0 | 0 | 1 |
| XLOC_018428 | BVES-AS1     | chr6:105585561-105627855 | 0 | 0 | 0 | 1 |
| XLOC_018434 | NR2E1        | chr6:108487214-108510013 | 0 | 0 | 0 | 1 |
| XLOC_018440 | CCDC162P     | chr6:109615505-109629423 | 0 | 0 | 0 | 1 |
| XLOC_018443 | GPR6         | chr6:110300297-110301924 | 0 | 0 | 0 | 1 |
| XLOC_018453 | RFPL4B       | chr6:112668531-112672495 | 0 | 0 | 0 | 1 |
| XLOC_018455 | FLJ34503     | chr6:114225550-114242805 | 0 | 0 | 0 | 1 |
| XLOC_018461 | FAM26D       | chr6:116817650-116880037 | 0 | 0 | 0 | 1 |
| XLOC_018465 | RFX6         | chr6:117198375-117253325 | 0 | 0 | 0 | 1 |
| XLOC_018466 | VGLL2        | chr6:117586720-117594725 | 0 | 0 | 0 | 1 |
| XLOC_018472 | LOC100287632 | chr6:119103870-119104587 | 0 | 0 | 0 | 1 |
| XLOC_018479 | CLVS2        | chr6:123317581-123385063 | 0 | 0 | 0 | 1 |
| XLOC_018480 | NKAIN2       | chr6:124125068-125146785 | 0 | 0 | 0 | 1 |
| XLOC_018483 | LOC643623    | chr6:125995498-126041364 | 0 | 0 | 0 | 1 |
| XLOC_018489 | RSP03        | chr6:127440047-127518184 | 0 | 0 | 0 | 1 |
| XLOC_018494 | TMEM200A     | chr6:130687425-130764210 | 0 | 0 | 0 | 1 |

|             |              |                          |   |   |   |   |
|-------------|--------------|--------------------------|---|---|---|---|
| XLOC_018497 | ARG1         | chr6:131894343-131949378 | 0 | 0 | 0 | 1 |
| XLOC_018500 | LOC100507254 | chr6:132455117-132490514 | 0 | 0 | 0 | 1 |
| XLOC_018501 | TAAR9        | chr6:132859426-132860478 | 0 | 0 | 0 | 1 |
| XLOC_018502 | TAAR8        | chr6:132873831-132874860 | 0 | 0 | 0 | 1 |
| XLOC_018503 | TAAR6        | chr6:132891460-132892498 | 0 | 0 | 0 | 1 |
| XLOC_018505 | SNORD101     | chr6:133135707-133138703 | 0 | 0 | 0 | 1 |
| XLOC_018506 | SNORD100     | chr6:133135707-133138703 | 0 | 0 | 0 | 1 |
| XLOC_018508 | LINC00326    | chr6:133409218-133427717 | 0 | 0 | 0 | 1 |
| XLOC_018509 | EYA4         | chr6:133562494-133853258 | 0 | 0 | 0 | 1 |
| XLOC_018510 | MGC34034     | chr6:134142284-134175130 | 0 | 0 | 0 | 1 |
| XLOC_018511 | TCF21        | chr6:134210258-134216678 | 0 | 0 | 0 | 1 |
| XLOC_018513 | LOC154092    | chr6:134758853-134825158 | 0 | 0 | 0 | 1 |
| XLOC_018515 | LINC00271    | chr6:135818938-136011978 | 0 | 0 | 0 | 1 |
| XLOC_018527 | LOC100132735 | chr6:140092209-140181608 | 0 | 0 | 0 | 1 |
| XLOC_018528 | MIR3668      | chr6:140526388-140526463 | 0 | 0 | 0 | 1 |
| XLOC_018529 | MIR4465      | chr6:141004950-141005020 | 0 | 0 | 0 | 1 |
| XLOC_018536 | ZC2HC1B      | chr6:144185572-144259483 | 0 | 0 | 0 | 1 |
| XLOC_018540 | GRM1         | chr6:146348781-146758737 | 0 | 0 | 0 | 1 |
| XLOC_018541 | RAB32        | chr6:146864827-146876088 | 0 | 0 | 0 | 1 |
| XLOC_018542 | ADGB         | chr6:146920135-147136597 | 0 | 0 | 0 | 1 |
| XLOC_018554 | PPP1R14C     | chr6:150464187-150571528 | 0 | 0 | 0 | 1 |
| XLOC_018555 | IYD          | chr6:150690027-150725768 | 0 | 0 | 0 | 1 |
| XLOC_018561 | ESR1         | chr6:152011630-152424408 | 0 | 0 | 0 | 1 |
| XLOC_018564 | OPRM1        | chr6:154331630-154677900 | 0 | 0 | 0 | 1 |
| XLOC_018570 | MIR3692      | chr6:157802556-158094977 | 0 | 0 | 0 | 1 |
| XLOC_018573 | SYNJ2-IT1    | chr6:158402887-158520207 | 0 | 0 | 0 | 1 |
| XLOC_018579 | FNDC1        | chr6:159590428-159693140 | 0 | 0 | 0 | 1 |
| XLOC_018584 | MAS1         | chr6:160327973-160329107 | 0 | 0 | 0 | 1 |
| XLOC_018593 | LINC00602    | chr6:166337535-166403103 | 0 | 0 | 0 | 1 |
| XLOC_018597 | TCP10L2      | chr6:167584080-167596396 | 0 | 0 | 0 | 1 |
| XLOC_018598 | UNC93A       | chr6:167704802-167729502 | 0 | 0 | 0 | 1 |
| XLOC_018599 | TTL2         | chr6:167738573-167756177 | 0 | 0 | 0 | 1 |
| XLOC_018601 | KIF25        | chr6:168418552-168445768 | 0 | 0 | 0 | 1 |
| XLOC_018602 | SMOC2        | chr6:168841830-169068674 | 0 | 0 | 0 | 1 |
| XLOC_018607 | MIR4644      | chr6:170615843-170714237 | 0 | 0 | 0 | 1 |
| XLOC_018611 | LOC285768    | chr6:961240-1101567      | 0 | 0 | 0 | 1 |
| XLOC_018616 | MIR4645      | chr6:2854264-2854341     | 0 | 0 | 0 | 1 |
| XLOC_018625 | PXDC1        | chr6:3722835-3752246     | 0 | 0 | 0 | 1 |
| XLOC_018626 | FAM217A      | chr6:4068592-4135831     | 0 | 0 | 0 | 1 |
| XLOC_018630 | MIR3691      | chr6:5108652-5261172     | 0 | 0 | 0 | 1 |
| XLOC_018632 | F13A1        | chr6:6144310-6320924     | 0 | 0 | 0 | 1 |
| XLOC_018633 | LY86-AS1     | chr6:6346697-6655216     | 0 | 0 | 0 | 1 |
| XLOC_018635 | CAGE1        | chr6:7326886-7389942     | 0 | 0 | 0 | 1 |
| XLOC_018637 | SCARNA27     | chr6:7727010-8102828     | 0 | 0 | 0 | 1 |
| XLOC_018643 | GCM2         | chr6:10873455-10882098   | 0 | 0 | 0 | 1 |
| XLOC_018644 | ELOVL2       | chr6:10980992-11079377   | 0 | 0 | 0 | 1 |
| XLOC_018657 | NHLRC1       | chr6:18120717-18122851   | 0 | 0 | 0 | 1 |
| XLOC_018661 | LOC729177    | chr6:21666674-22194616   | 0 | 0 | 0 | 1 |
| XLOC_018662 | PRL          | chr6:22287472-22303082   | 0 | 0 | 0 | 1 |
| XLOC_018668 | FAM65B       | chr6:24804512-24911195   | 0 | 0 | 0 | 1 |
| XLOC_018669 | CMAHP        | chr6:25081294-25138620   | 0 | 0 | 0 | 1 |
| XLOC_018670 | HIST1H2AA    | chr6:25726290-25726790   | 0 | 0 | 0 | 1 |
| XLOC_018671 | SLC17A1      | chr6:25783125-25832287   | 0 | 0 | 0 | 1 |
| XLOC_018672 | SLC17A3      | chr6:25845327-25874471   | 0 | 0 | 0 | 1 |
| XLOC_018673 | SLC17A2      | chr6:25912983-25930946   | 0 | 0 | 0 | 1 |
| XLOC_018678 | HIST1H2BB    | chr6:26043454-26043885   | 0 | 0 | 0 | 1 |
| XLOC_018686 | HIST1H4G     | chr6:26246838-26247205   | 0 | 0 | 0 | 1 |
| XLOC_018696 | POM121L2     | chr6:27276841-27280011   | 0 | 0 | 0 | 1 |
| XLOC_018701 | HIST1H4K     | chr6:27798951-27799305   | 0 | 0 | 0 | 1 |
| XLOC_018705 | HIST1H4L     | chr6:27840925-27841289   | 0 | 0 | 0 | 1 |
| XLOC_018708 | OR2B2        | chr6:27878962-27880174   | 0 | 0 | 0 | 1 |
| XLOC_018713 | ZSCAN23      | chr6:28400431-28411279   | 0 | 0 | 0 | 1 |
| XLOC_018714 | GPX6         | chr6:28471072-28483570   | 0 | 0 | 0 | 1 |
| XLOC_018718 | ZNF311       | chr6:28962593-28973037   | 0 | 0 | 0 | 1 |
| XLOC_018719 | OR2W1        | chr6:29003999-29044517   | 0 | 0 | 0 | 1 |
| XLOC_018721 | OR5V1        | chr6:29323006-29324054   | 0 | 0 | 0 | 1 |
| XLOC_018722 | OR12D3       | chr6:29341199-29343068   | 0 | 0 | 0 | 1 |
| XLOC_018723 | OR11A1       | chr6:29393280-29395509   | 0 | 0 | 0 | 1 |
| XLOC_018724 | MAS1L        | chr6:29454542-29455679   | 0 | 0 | 0 | 1 |
| XLOC_018725 | UBD          | chr6:29523388-29527702   | 0 | 0 | 0 | 1 |
| XLOC_018727 | ZFP57        | chr6:29640168-29644931   | 0 | 0 | 0 | 1 |
| XLOC_018729 | IFITM4P      | chr6:29718583-29718925   | 0 | 0 | 0 | 1 |
| XLOC_018730 | HCG4         | chr6:29758807-29765584   | 0 | 0 | 0 | 1 |
| XLOC_018735 | TRIM10       | chr6:30119722-30128711   | 0 | 0 | 0 | 1 |
| XLOC_018747 | SFTA2        | chr6:30899126-30899952   | 0 | 0 | 0 | 1 |
| XLOC_018748 | C6orf15      | chr6:31078999-31080332   | 0 | 0 | 0 | 1 |
| XLOC_018757 | SNORD117     | chr6:31496738-31514625   | 0 | 0 | 0 | 1 |
| XLOC_018758 | SNORD84      | chr6:31496738-31514625   | 0 | 0 | 0 | 1 |
| XLOC_018766 | MIR4646      | chr6:31654725-31671137   | 0 | 0 | 0 | 1 |

|             |              |                        |   |   |   |   |
|-------------|--------------|------------------------|---|---|---|---|
| XLOC_018767 | LY6G6E       | chr6:31679752-31681842 | 0 | 0 | 0 | 1 |
| XLOC_018780 | MIR1236      | chr6:31919863-31937532 | 0 | 0 | 0 | 1 |
| XLOC_018782 | TNXB         | chr6:31973358-31981050 | 0 | 0 | 0 | 1 |
| XLOC_018792 | C6orf10      | chr6:32260474-32339656 | 0 | 0 | 0 | 1 |
| XLOC_018793 | BTNL2        | chr6:32362512-32374900 | 0 | 0 | 0 | 1 |
| XLOC_018797 | HLA-DQB1     | chr6:32627240-32634466 | 0 | 0 | 0 | 1 |
| XLOC_018798 | HLA-DQB2     | chr6:32723874-32731330 | 0 | 0 | 0 | 1 |
| XLOC_018805 | HLA-DOA      | chr6:32971959-32977389 | 0 | 0 | 0 | 1 |
| XLOC_018818 | IP6K3        | chr6:33689442-33714762 | 0 | 0 | 0 | 1 |
| XLOC_018820 | MLN          | chr6:33762448-33771793 | 0 | 0 | 0 | 1 |
| XLOC_018821 | LOC100507584 | chr6:33857287-33864684 | 0 | 0 | 0 | 1 |
| XLOC_018822 | MIR1275      | chr6:33967748-33967828 | 0 | 0 | 0 | 1 |
| XLOC_018823 | GRM4         | chr6:33989622-34123399 | 0 | 0 | 0 | 1 |
| XLOC_018833 | MIR5690      | chr6:35541361-35704724 | 0 | 0 | 0 | 1 |
| XLOC_018837 | C6orf222     | chr6:36283534-36304662 | 0 | 0 | 0 | 1 |
| XLOC_018838 | ETV7         | chr6:36321997-36355577 | 0 | 0 | 0 | 1 |
| XLOC_018841 | MIR3925      | chr6:36590212-36590289 | 0 | 0 | 0 | 1 |
| XLOC_018847 | MIR4462      | chr6:37523140-37523198 | 0 | 0 | 0 | 1 |
| XLOC_018848 | MDGA1        | chr6:37600283-37665766 | 0 | 0 | 0 | 1 |
| XLOC_018851 | LOC100131047 | chr6:38683116-38998574 | 0 | 0 | 0 | 1 |
| XLOC_018854 | KCNK17       | chr6:39266776-39282237 | 0 | 0 | 0 | 1 |
| XLOC_018855 | KCNK16       | chr6:39282473-39290330 | 0 | 0 | 0 | 1 |
| XLOC_018856 | KIF6         | chr6:39302875-39693181 | 0 | 0 | 0 | 1 |
| XLOC_018857 | MOCS1        | chr6:39760158-39902290 | 0 | 0 | 0 | 1 |
| XLOC_018858 | FLJ41649     | chr6:40312083-40323745 | 0 | 0 | 0 | 1 |
| XLOC_018859 | LRFN2        | chr6:40359372-40555126 | 0 | 0 | 0 | 1 |
| XLOC_018862 | TREML1       | chr6:41116998-41122087 | 0 | 0 | 0 | 1 |
| XLOC_018864 | TREML2       | chr6:41157551-41168925 | 0 | 0 | 0 | 1 |
| XLOC_018865 | TREML3P      | chr6:41176291-41185685 | 0 | 0 | 0 | 1 |
| XLOC_018868 | PGC          | chr6:41704448-41715139 | 0 | 0 | 0 | 1 |
| XLOC_018885 | CRIP3        | chr6:43265997-43276530 | 0 | 0 | 0 | 1 |
| XLOC_018887 | DLK2         | chr6:43395291-43423786 | 0 | 0 | 0 | 1 |
| XLOC_018899 | MIR586       | chr6:44794466-45518819 | 0 | 0 | 0 | 1 |
| XLOC_018900 | CLIC5        | chr6:45866189-46048085 | 0 | 0 | 0 | 1 |
| XLOC_018904 | PLA2G7       | chr6:46655611-46703430 | 0 | 0 | 0 | 1 |
| XLOC_018905 | GPR116       | chr6:46820241-46922675 | 0 | 0 | 0 | 1 |
| XLOC_018910 | RHAG         | chr6:49572889-49604587 | 0 | 0 | 0 | 1 |
| XLOC_018911 | CRISP2       | chr6:49660070-49681303 | 0 | 0 | 0 | 1 |
| XLOC_018912 | CRISP3       | chr6:49695091-49712168 | 0 | 0 | 0 | 1 |
| XLOC_018913 | PGK2         | chr6:49753363-49755053 | 0 | 0 | 0 | 1 |
| XLOC_018914 | CRISP1       | chr6:49801978-49844809 | 0 | 0 | 0 | 1 |
| XLOC_018915 | DEFB133      | chr6:49913813-49917157 | 0 | 0 | 0 | 1 |
| XLOC_018916 | DEFB114      | chr6:49928004-49931818 | 0 | 0 | 0 | 1 |
| XLOC_018917 | DEFB113      | chr6:49936389-49937338 | 0 | 0 | 0 | 1 |
| XLOC_018918 | DEFB110      | chr6:49976850-49989694 | 0 | 0 | 0 | 1 |
| XLOC_018919 | DEFB112      | chr6:50011287-50016364 | 0 | 0 | 0 | 1 |
| XLOC_018920 | PKHD1        | chr6:51480144-51952423 | 0 | 0 | 0 | 1 |
| XLOC_018921 | IL17F        | chr6:52101483-52109298 | 0 | 0 | 0 | 1 |
| XLOC_018924 | GSTA7P       | chr6:52604260-52609957 | 0 | 0 | 0 | 1 |
| XLOC_018925 | GSTA2        | chr6:52614884-52628361 | 0 | 0 | 0 | 1 |
| XLOC_018926 | GSTA1        | chr6:52656177-52668664 | 0 | 0 | 0 | 1 |
| XLOC_018927 | GSTA5        | chr6:52696540-52710893 | 0 | 0 | 0 | 1 |
| XLOC_018928 | GSTA3        | chr6:52761438-52774496 | 0 | 0 | 0 | 1 |
| XLOC_018932 | ELOVL5       | chr6:53132195-53213977 | 0 | 0 | 0 | 1 |
| XLOC_018933 | RPS16P5      | chr6:53132195-53213977 | 0 | 0 | 0 | 1 |
| XLOC_018936 | HMGCLL1      | chr6:55299170-55444012 | 0 | 0 | 0 | 1 |
| XLOC_018937 | BMP5         | chr6:55620237-55740375 | 0 | 0 | 0 | 1 |
| XLOC_018938 | COL21A1      | chr6:55921387-56112378 | 0 | 0 | 0 | 1 |
| XLOC_018939 | RNU6-71      | chr6:56137688-56615138 | 0 | 0 | 0 | 1 |
| XLOC_018943 | KHDRBS2      | chr6:62389864-62996100 | 0 | 0 | 0 | 1 |
| XLOC_018947 | COL9A1       | chr6:70925742-71012786 | 0 | 0 | 0 | 1 |
| XLOC_018949 | MIR30C2      | chr6:72086662-72086734 | 0 | 0 | 0 | 1 |
| XLOC_018950 | MIR30A       | chr6:72113253-72113324 | 0 | 0 | 0 | 1 |
| XLOC_018951 | LINC00472    | chr6:72124148-72130448 | 0 | 0 | 0 | 1 |
| XLOC_018952 | MIR4282      | chr6:73331570-73908573 | 0 | 0 | 0 | 1 |
| XLOC_018953 | KCNQ5-AS1    | chr6:73331570-73908573 | 0 | 0 | 0 | 1 |
| XLOC_018954 | KHDC1L       | chr6:73933267-73935175 | 0 | 0 | 0 | 1 |
| XLOC_018955 | KHDC1        | chr6:73951037-74020088 | 0 | 0 | 0 | 1 |
| XLOC_018956 | DPPA5        | chr6:74062784-74063999 | 0 | 0 | 0 | 1 |
| XLOC_018961 | COL12A1      | chr6:75794041-75915623 | 0 | 0 | 0 | 1 |
| XLOC_018966 | HTR1B        | chr6:78171947-78173120 | 0 | 0 | 0 | 1 |
| XLOC_018970 | C6orf7       | chr6:80513303-80580137 | 0 | 0 | 0 | 1 |
| XLOC_018971 | ELOVL4       | chr6:80624528-80657315 | 0 | 0 | 0 | 1 |
| XLOC_018976 | ME1          | chr6:83920109-84140938 | 0 | 0 | 0 | 1 |
| XLOC_018977 | SNAP91       | chr6:84262604-84419127 | 0 | 0 | 0 | 1 |
| XLOC_018979 | TBX18        | chr6:85442215-85473954 | 0 | 0 | 0 | 1 |
| XLOC_018984 | SNORD50B     | chr6:86386724-86388451 | 0 | 0 | 0 | 1 |
| XLOC_018985 | CGA          | chr6:87795215-87804865 | 0 | 0 | 0 | 1 |
| XLOC_018989 | CNR1         | chr6:88849584-88875767 | 0 | 0 | 0 | 1 |

|             |              |                         |   |   |   |   |
|-------------|--------------|-------------------------|---|---|---|---|
| XLOC_018992 | GABRR1       | chr6:89887222-89941007  | 0 | 0 | 0 | 1 |
| XLOC_018998 | BACH2        | chr6:90636246-91006627  | 0 | 0 | 0 | 1 |
| XLOC_019000 | EPHA7        | chr6:93949739-94129300  | 0 | 0 | 0 | 1 |
| XLOC_019003 | MIR548H3     | chr6:97372495-97862283  | 0 | 0 | 0 | 1 |
| XLOC_019011 | MCHR2        | chr6:100367785-10052429 | 0 | 0 | 0 | 1 |
| XLOC_019012 | SIM1         | chr6:100836749-10091155 | 0 | 0 | 0 | 1 |
| XLOC_019015 | LINC00577    | chr6:105384168-10538840 | 0 | 0 | 0 | 1 |
| XLOC_019017 | POPDC3       | chr6:105585561-10562785 | 0 | 0 | 0 | 1 |
| XLOC_019021 | LOC100422737 | chr6:107165326-10723530 | 0 | 0 | 0 | 1 |
| XLOC_019024 | SCML4        | chr6:108023363-10814552 | 0 | 0 | 0 | 1 |
| XLOC_019035 | METTL24      | chr6:110567148-11067947 | 0 | 0 | 0 | 1 |
| XLOC_019037 | SLC22A16     | chr6:110745891-11079784 | 0 | 0 | 0 | 1 |
| XLOC_019039 | GSTM2P1      | chr6:111367621-11136875 | 0 | 0 | 0 | 1 |
| XLOC_019044 | LAMA4        | chr6:112429133-11257591 | 0 | 0 | 0 | 1 |
| XLOC_019045 | LOC285758    | chr6:114189178-11419451 | 0 | 0 | 0 | 1 |
| XLOC_019047 | HS3ST5       | chr6:114376749-11438404 | 0 | 0 | 0 | 1 |
| XLOC_019052 | BET3L        | chr6:116817650-11688003 | 0 | 0 | 0 | 1 |
| XLOC_019054 | FAM162B      | chr6:117073359-11708688 | 0 | 0 | 0 | 1 |
| XLOC_019055 | GPRC6A       | chr6:117113247-11715019 | 0 | 0 | 0 | 1 |
| XLOC_019056 | ROS1         | chr6:117609529-11774701 | 0 | 0 | 0 | 1 |
| XLOC_019060 | FAM184A      | chr6:119280995-11947035 | 0 | 0 | 0 | 1 |
| XLOC_019061 | MIR548B      | chr6:119280995-11947035 | 0 | 0 | 0 | 1 |
| XLOC_019063 | LOC285762    | chr6:119773711-11981246 | 0 | 0 | 0 | 1 |
| XLOC_019066 | TRDN         | chr6:123537483-12395823 | 0 | 0 | 0 | 1 |
| XLOC_019069 | MIR5695      | chr6:126433836-12644376 | 0 | 0 | 0 | 1 |
| XLOC_019072 | THEMIS       | chr6:128029338-12823977 | 0 | 0 | 0 | 1 |
| XLOC_019075 | TMEM244      | chr6:130152388-13018241 | 0 | 0 | 0 | 1 |
| XLOC_019076 | SAMD3        | chr6:130465446-13068657 | 0 | 0 | 0 | 1 |
| XLOC_019079 | OR2A4        | chr6:131958441-13206855 | 0 | 0 | 0 | 1 |
| XLOC_019082 | MOXD1        | chr6:132617193-13272266 | 0 | 0 | 0 | 1 |
| XLOC_019084 | TAAR5        | chr6:132909730-13291087 | 0 | 0 | 0 | 1 |
| XLOC_019085 | TAAR3        | chr6:132929363-13293044 | 0 | 0 | 0 | 1 |
| XLOC_019086 | TAAR2        | chr6:132938288-13294541 | 0 | 0 | 0 | 1 |
| XLOC_019087 | TAAR1        | chr6:132966122-13296714 | 0 | 0 | 0 | 1 |
| XLOC_019088 | VNN1         | chr6:133001996-13303519 | 0 | 0 | 0 | 1 |
| XLOC_019089 | VNN3         | chr6:133043925-13305590 | 0 | 0 | 0 | 1 |
| XLOC_019090 | VNN2         | chr6:133065008-13308459 | 0 | 0 | 0 | 1 |
| XLOC_019093 | HMGA1P7      | chr6:134435110-13443881 | 0 | 0 | 0 | 1 |
| XLOC_019097 | MIR3662      | chr6:135281516-13537603 | 0 | 0 | 0 | 1 |
| XLOC_019105 | IL22RA2      | chr6:137464956-13749478 | 0 | 0 | 0 | 1 |
| XLOC_019107 | OLIG3        | chr6:137813335-13781553 | 0 | 0 | 0 | 1 |
| XLOC_019108 | LOC100130476 | chr6:138144806-13820445 | 0 | 0 | 0 | 1 |
| XLOC_019112 | MIR3145      | chr6:138743180-13889366 | 0 | 0 | 0 | 1 |
| XLOC_019115 | TXLNB        | chr6:139561198-13961320 | 0 | 0 | 0 | 1 |
| XLOC_019117 | LOC645434    | chr6:139790131-13979573 | 0 | 0 | 0 | 1 |
| XLOC_019119 | LOC153910    | chr6:142847591-14295902 | 0 | 0 | 0 | 1 |
| XLOC_019130 | LOC729176    | chr6:146920135-14713659 | 0 | 0 | 0 | 1 |
| XLOC_019132 | LOC100128176 | chr6:149068270-14939812 | 0 | 0 | 0 | 1 |
| XLOC_019153 | NOX3         | chr6:155716501-15577703 | 0 | 0 | 0 | 1 |
| XLOC_019154 | MIR4466      | chr6:157099063-15753191 | 0 | 0 | 0 | 1 |
| XLOC_019158 | MIR3918      | chr6:159071045-15918590 | 0 | 0 | 0 | 1 |
| XLOC_019162 | TAGAP        | chr6:159456026-15946618 | 0 | 0 | 0 | 1 |
| XLOC_019167 | SNORA29      | chr6:160181290-16021073 | 0 | 0 | 0 | 1 |
| XLOC_019169 | SLC22A2      | chr6:160637793-16067996 | 0 | 0 | 0 | 1 |
| XLOC_019171 | LPA          | chr6:160952514-16108740 | 0 | 0 | 0 | 1 |
| XLOC_019175 | PACRG-AS1    | chr6:161768589-16374550 | 0 | 0 | 0 | 1 |
| XLOC_019176 | DKFZp451B082 | chr6:163759373-16376806 | 0 | 0 | 0 | 1 |
| XLOC_019177 | CAHM         | chr6:163834096-16383498 | 0 | 0 | 0 | 1 |
| XLOC_019178 | C6orf118     | chr6:165693152-16572311 | 0 | 0 | 0 | 1 |
| XLOC_019179 | PDE10A       | chr6:165740775-16607558 | 0 | 0 | 0 | 1 |
| XLOC_019180 | LINC00473    | chr6:166337535-16640310 | 0 | 0 | 0 | 1 |
| XLOC_019181 | T            | chr6:166571145-16658215 | 0 | 0 | 0 | 1 |
| XLOC_019186 | RPS6KA2-IT1  | chr6:166822853-16727577 | 0 | 0 | 0 | 1 |
| XLOC_019187 | MIR1913      | chr6:166822853-16727577 | 0 | 0 | 0 | 1 |
| XLOC_019189 | MIR3939      | chr6:167411294-16741140 | 0 | 0 | 0 | 1 |
| XLOC_019190 | GPR31        | chr6:167570359-16757131 | 0 | 0 | 0 | 1 |
| XLOC_019191 | TCP10        | chr6:167786576-16779799 | 0 | 0 | 0 | 1 |
| XLOC_019194 | HGC6.3       | chr6:168376603-16837761 | 0 | 0 | 0 | 1 |
| XLOC_019195 | FRMD1        | chr6:168456463-16847983 | 0 | 0 | 0 | 1 |
| XLOC_019196 | DACT2        | chr6:168707583-16872040 | 0 | 0 | 0 | 1 |
| XLOC_019202 | LOC154449    | chr6:170563421-17057165 | 0 | 0 | 0 | 1 |
| XLOC_020326 | FAM20C       | chr7:192968-300740      | 0 | 0 | 0 | 1 |
| XLOC_020327 | LOC100288524 | chr7:330135-331454      | 0 | 0 | 0 | 1 |
| XLOC_020328 | LOC442497    | chr7:419390-422845      | 0 | 0 | 0 | 1 |
| XLOC_020336 | UNCX         | chr7:1272653-1276613    | 0 | 0 | 0 | 1 |
| XLOC_020339 | TFAMP1       | chr7:1654105-1656328    | 0 | 0 | 0 | 1 |
| XLOC_020372 | NXP1         | chr7:8473584-8792593    | 0 | 0 | 0 | 1 |
| XLOC_020373 | PER4         | chr7:9673899-9675447    | 0 | 0 | 0 | 1 |
| XLOC_020378 | LOC100506025 | chr7:16127151-16460947  | 0 | 0 | 0 | 1 |



|             |              |                          |   |   |   |   |
|-------------|--------------|--------------------------|---|---|---|---|
| XLOC_020379 | LRRC72       | chr7:16566504-16621114   | 0 | 0 | 0 | 1 |
| XLOC_020384 | MACC1-AS1    | chr7:20174278-20257013   | 0 | 0 | 0 | 1 |
| XLOC_020385 | ITGB8        | chr7:20370724-20455382   | 0 | 0 | 0 | 1 |
| XLOC_020391 | IL6          | chr7:22766765-22771621   | 0 | 0 | 0 | 1 |
| XLOC_020392 | SNORD93      | chr7:22896231-22896305   | 0 | 0 | 0 | 1 |
| XLOC_020401 | NPY          | chr7:24323806-24331484   | 0 | 0 | 0 | 1 |
| XLOC_020407 | C7orf71      | chr7:26677489-26686924   | 0 | 0 | 0 | 1 |
| XLOC_020413 | EVX1         | chr7:27282163-27286192   | 0 | 0 | 0 | 1 |
| XLOC_020417 | LOC100506497 | chr7:29019582-29186153   | 0 | 0 | 0 | 1 |
| XLOC_020421 | WIPF3        | chr7:29846169-29956682   | 0 | 0 | 0 | 1 |
| XLOC_020425 | MIR550A1     | chr7:30323922-30407308   | 0 | 0 | 0 | 1 |
| XLOC_020430 | GHRHR        | chr7:31003635-31019146   | 0 | 0 | 0 | 1 |
| XLOC_020432 | CCDC129      | chr7:31553684-31698334   | 0 | 0 | 0 | 1 |
| XLOC_020433 | PPP1R17      | chr7:31726630-31748069   | 0 | 0 | 0 | 1 |
| XLOC_020440 | NPSR1        | chr7:34386123-34917944   | 0 | 0 | 0 | 1 |
| XLOC_020441 | LOC401324    | chr7:35353465-35416086   | 0 | 0 | 0 | 1 |
| XLOC_020445 | GPR141       | chr7:37779995-37780913   | 0 | 0 | 0 | 1 |
| XLOC_020446 | NME8         | chr7:37888198-37940002   | 0 | 0 | 0 | 1 |
| XLOC_020447 | EPDR1        | chr7:37960162-37991542   | 0 | 0 | 0 | 1 |
| XLOC_020449 | LOC100506776 | chr7:38381177-38418238   | 0 | 0 | 0 | 1 |
| XLOC_020450 | POU6F2       | chr7:39017608-39504390   | 0 | 0 | 0 | 1 |
| XLOC_020457 | INHBA-AS1    | chr7:41728600-41818976   | 0 | 0 | 0 | 1 |
| XLOC_020460 | MIR3943      | chr7:43152197-43602938   | 0 | 0 | 0 | 1 |
| XLOC_020468 | MIR4649      | chr7:44143959-44154159   | 0 | 0 | 0 | 1 |
| XLOC_020474 | RAMP3        | chr7:45197366-45223850   | 0 | 0 | 0 | 1 |
| XLOC_020475 | ADCY1        | chr7:45614124-45762714   | 0 | 0 | 0 | 1 |
| XLOC_020476 | IGFBP1       | chr7:45927958-45933267   | 0 | 0 | 0 | 1 |
| XLOC_020477 | C7orf65      | chr7:47694841-47701246   | 0 | 0 | 0 | 1 |
| XLOC_020478 | LINC00525    | chr7:47801073-47806370   | 0 | 0 | 0 | 1 |
| XLOC_020479 | C7orf69      | chr7:47814249-47988071   | 0 | 0 | 0 | 1 |
| XLOC_020484 | VWVC2        | chr7:49813256-49952138   | 0 | 0 | 0 | 1 |
| XLOC_020485 | C7orf72      | chr7:50135681-50198852   | 0 | 0 | 0 | 1 |
| XLOC_020486 | IKZF1        | chr7:50344377-50472798   | 0 | 0 | 0 | 1 |
| XLOC_020487 | LOC100129427 | chr7:50526133-50633154   | 0 | 0 | 0 | 1 |
| XLOC_020488 | POM121L12    | chr7:53103348-53104618   | 0 | 0 | 0 | 1 |
| XLOC_020489 | VSTM2A       | chr7:54610018-54639419   | 0 | 0 | 0 | 1 |
| XLOC_020490 | LOC285878    | chr7:54610018-54639419   | 0 | 0 | 0 | 1 |
| XLOC_020499 | DKFZp434L192 | chr7:56563915-56564977   | 0 | 0 | 0 | 1 |
| XLOC_020500 | MIR3147      | chr7:57472730-57472796   | 0 | 0 | 0 | 1 |
| XLOC_020501 | ZNF716       | chr7:57509882-57533265   | 0 | 0 | 0 | 1 |
| XLOC_020502 | LOC100287704 | chr7:62809447-62812152   | 0 | 0 | 0 | 1 |
| XLOC_020503 | MIR4283-2    | chr7:63081467-63081547   | 0 | 0 | 0 | 1 |
| XLOC_020504 | ZNF727       | chr7:63505820-63538927   | 0 | 0 | 0 | 1 |
| XLOC_020505 | ZNF735       | chr7:63667580-63680668   | 0 | 0 | 0 | 1 |
| XLOC_020506 | ZNF679       | chr7:63688851-63727309   | 0 | 0 | 0 | 1 |
| XLOC_020507 | ZNF736       | chr7:63773185-63810017   | 0 | 0 | 0 | 1 |
| XLOC_020509 | LOC641746    | chr7:64042987-64044129   | 0 | 0 | 0 | 1 |
| XLOC_020528 | WBSCR17      | chr7:70597522-71178586   | 0 | 0 | 0 | 1 |
| XLOC_020529 | MIR3914-2    | chr7:70597522-71178586   | 0 | 0 | 0 | 1 |
| XLOC_020530 | MIR4650-1    | chr7:72023728-72298813   | 0 | 0 | 0 | 1 |
| XLOC_020534 | PMS2L2       | chr7:72476588-72519691   | 0 | 0 | 0 | 1 |
| XLOC_020538 | FZD9         | chr7:72848108-72850450   | 0 | 0 | 0 | 1 |
| XLOC_020541 | MIR4284      | chr7:73113534-73134017   | 0 | 0 | 0 | 1 |
| XLOC_020545 | ELN          | chr7:73442426-73484236   | 0 | 0 | 0 | 1 |
| XLOC_020555 | GATSL1       | chr7:74379082-74438803   | 0 | 0 | 0 | 1 |
| XLOC_020557 | SPDYE8P      | chr7:74936532-74946587   | 0 | 0 | 0 | 1 |
| XLOC_020558 | SPDYE8P      | chr7:74964559-74988306   | 0 | 0 | 0 | 1 |
| XLOC_020565 | MIR4651      | chr7:75544419-75623992   | 0 | 0 | 0 | 1 |
| XLOC_020566 | SNORA14A     | chr7:75544419-75623992   | 0 | 0 | 0 | 1 |
| XLOC_020580 | RPL13AP17    | chr7:77646373-79100524   | 0 | 0 | 0 | 1 |
| XLOC_020581 | MAGI2-AS2    | chr7:77646373-79100524   | 0 | 0 | 0 | 1 |
| XLOC_020582 | MAGI2-AS3    | chr7:77646373-79100524   | 0 | 0 | 0 | 1 |
| XLOC_020583 | MIR548M      | chr7:79400571-79400606   | 0 | 0 | 0 | 1 |
| XLOC_020586 | GRM3         | chr7:86273229-86494192   | 0 | 0 | 0 | 1 |
| XLOC_020592 | ZNF804B      | chr7:88388752-88966346   | 0 | 0 | 0 | 1 |
| XLOC_020607 | MIR4652      | chr7:93346239-93346317   | 0 | 0 | 0 | 1 |
| XLOC_020608 | GNGT1        | chr7:93535819-93540485   | 0 | 0 | 0 | 1 |
| XLOC_020609 | GNG11        | chr7:93551015-93555826   | 0 | 0 | 0 | 1 |
| XLOC_020610 | COL1A2       | chr7:94023872-94060544   | 0 | 0 | 0 | 1 |
| XLOC_020612 | PEG10        | chr7:94285636-94299006   | 0 | 0 | 0 | 1 |
| XLOC_020616 | DLX6         | chr7:96597826-96643377   | 0 | 0 | 0 | 1 |
| XLOC_020618 | TAC1         | chr7:97361270-97369784   | 0 | 0 | 0 | 1 |
| XLOC_020622 | NPTX2        | chr7:98246596-98259181   | 0 | 0 | 0 | 1 |
| XLOC_020624 | MIR3609      | chr7:98476112-98610866   | 0 | 0 | 0 | 1 |
| XLOC_020658 | ZAN          | chr7:100331248-100395411 | 0 | 0 | 0 | 1 |
| XLOC_020663 | MUC17        | chr7:100663363-100702140 | 0 | 0 | 0 | 1 |
| XLOC_020667 | MIR4653      | chr7:100797685-100804551 | 0 | 0 | 0 | 1 |
| XLOC_020672 | MIR4285      | chr7:101928404-101962171 | 0 | 0 | 0 | 1 |
| XLOC_020676 | MIR4467      | chr7:102105389-102119381 | 0 | 0 | 0 | 1 |

|             |              |                          |   |   |   |   |
|-------------|--------------|--------------------------|---|---|---|---|
| XLOC_020678 | SPDYE2L      | chr7:102277194-102312176 | 0 | 0 | 0 | 1 |
| XLOC_020684 | LHFPL3       | chr7:103969103-104567092 | 0 | 0 | 0 | 1 |
| XLOC_020688 | PIK3CG       | chr7:106505923-106547592 | 0 | 0 | 0 | 1 |
| XLOC_020689 | PRKAR2B      | chr7:106685177-106802256 | 0 | 0 | 0 | 1 |
| XLOC_020702 | FOXP2        | chr7:113726364-114333827 | 0 | 0 | 0 | 1 |
| XLOC_020703 | MIR3666      | chr7:113726364-114333827 | 0 | 0 | 0 | 1 |
| XLOC_020704 | MDFIC        | chr7:114562208-114659970 | 0 | 0 | 0 | 1 |
| XLOC_020714 | ANKRD7       | chr7:117864711-117882784 | 0 | 0 | 0 | 1 |
| XLOC_020715 | KCND2        | chr7:119913721-120390387 | 0 | 0 | 0 | 1 |
| XLOC_020723 | HYALP1       | chr7:123454192-123459484 | 0 | 0 | 0 | 1 |
| XLOC_020724 | HYAL4        | chr7:123485222-123517537 | 0 | 0 | 0 | 1 |
| XLOC_020725 | SPAM1        | chr7:123565285-123611467 | 0 | 0 | 0 | 1 |
| XLOC_020730 | MIR593       | chr7:127292201-127732656 | 0 | 0 | 0 | 1 |
| XLOC_020731 | MIR129-1     | chr7:127847924-127847996 | 0 | 0 | 0 | 1 |
| XLOC_020754 | CPA2         | chr7:129906702-129929637 | 0 | 0 | 0 | 1 |
| XLOC_020756 | CPA5         | chr7:129984629-130008577 | 0 | 0 | 0 | 1 |
| XLOC_020757 | CPA1         | chr7:130020289-130027946 | 0 | 0 | 0 | 1 |
| XLOC_020759 | MIR335       | chr7:130126015-130371406 | 0 | 0 | 0 | 1 |
| XLOC_020761 | FLJ40288     | chr7:132333552-132413526 | 0 | 0 | 0 | 1 |
| XLOC_020764 | AKR1B10      | chr7:134212343-134226166 | 0 | 0 | 0 | 1 |
| XLOC_020765 | AKR1B15      | chr7:134233848-134264592 | 0 | 0 | 0 | 1 |
| XLOC_020770 | STRA8        | chr7:134916730-134943244 | 0 | 0 | 0 | 1 |
| XLOC_020773 | CHRM2        | chr7:136553398-136849086 | 0 | 0 | 0 | 1 |
| XLOC_020774 | MIR490       | chr7:136553398-136849086 | 0 | 0 | 0 | 1 |
| XLOC_020775 | LOC100130880 | chr7:137559724-137686847 | 0 | 0 | 0 | 1 |
| XLOC_020776 | AKR1D1       | chr7:137761177-137803050 | 0 | 0 | 0 | 1 |
| XLOC_020777 | MIR4468      | chr7:137808503-137808567 | 0 | 0 | 0 | 1 |
| XLOC_020783 | CLEC2L       | chr7:139208673-139229737 | 0 | 0 | 0 | 1 |
| XLOC_020796 | OR9A4        | chr7:141618675-141619620 | 0 | 0 | 0 | 1 |
| XLOC_020798 | LOC93432     | chr7:141811548-141843783 | 0 | 0 | 0 | 1 |
| XLOC_020800 | PRSS1        | chr7:142457318-142460927 | 0 | 0 | 0 | 1 |
| XLOC_020801 | PRSS2        | chr7:142478756-142482396 | 0 | 0 | 0 | 1 |
| XLOC_020803 | C7orf34      | chr7:142636602-142637957 | 0 | 0 | 0 | 1 |
| XLOC_020804 | OR6V1        | chr7:142749437-142750376 | 0 | 0 | 0 | 1 |
| XLOC_020805 | PIP          | chr7:142829173-142836834 | 0 | 0 | 0 | 1 |
| XLOC_020806 | TAS2R39      | chr7:142880511-142881526 | 0 | 0 | 0 | 1 |
| XLOC_020807 | TAS2R40      | chr7:142919171-142920143 | 0 | 0 | 0 | 1 |
| XLOC_020814 | TAS2R60      | chr7:143078359-143220546 | 0 | 0 | 0 | 1 |
| XLOC_020815 | TAS2R41      | chr7:143078359-143220546 | 0 | 0 | 0 | 1 |
| XLOC_020818 | OR2F2        | chr7:143632325-143633276 | 0 | 0 | 0 | 1 |
| XLOC_020819 | OR2F1        | chr7:143657019-143658106 | 0 | 0 | 0 | 1 |
| XLOC_020820 | OR6B1        | chr7:143701089-143702026 | 0 | 0 | 0 | 1 |
| XLOC_020821 | OR2A5        | chr7:143747494-143748430 | 0 | 0 | 0 | 1 |
| XLOC_020822 | OR2A25       | chr7:143771312-143772246 | 0 | 0 | 0 | 1 |
| XLOC_020823 | OR2A12       | chr7:143792200-143793133 | 0 | 0 | 0 | 1 |
| XLOC_020824 | OR2A2        | chr7:143806675-143807632 | 0 | 0 | 0 | 1 |
| XLOC_020825 | OR2A14       | chr7:143826205-143827138 | 0 | 0 | 0 | 1 |
| XLOC_020828 | OR2A1        | chr7:144015217-144016150 | 0 | 0 | 0 | 1 |
| XLOC_020829 | RNU6-57      | chr7:144038210-144038237 | 0 | 0 | 0 | 1 |
| XLOC_020832 | MIR548AQ     | chr7:145813452-148118086 | 0 | 0 | 0 | 1 |
| XLOC_020833 | MIR548F3     | chr7:145813452-148118086 | 0 | 0 | 0 | 1 |
| XLOC_020834 | MIR548T      | chr7:145813452-148118086 | 0 | 0 | 0 | 1 |
| XLOC_020835 | C7orf33      | chr7:148287656-148312952 | 0 | 0 | 0 | 1 |
| XLOC_020842 | KRBA1        | chr7:149412147-149431664 | 0 | 0 | 0 | 1 |
| XLOC_020848 | RNU6-33      | chr7:150064035-150064063 | 0 | 0 | 0 | 1 |
| XLOC_020852 | LOC285972    | chr7:150130741-150145226 | 0 | 0 | 0 | 1 |
| XLOC_020853 | GIMAP8       | chr7:150147961-150176483 | 0 | 0 | 0 | 1 |
| XLOC_020854 | GIMAP7       | chr7:150211944-150218167 | 0 | 0 | 0 | 1 |
| XLOC_020855 | GIMAP4       | chr7:150264457-150271047 | 0 | 0 | 0 | 1 |
| XLOC_020858 | TMEM176A     | chr7:150488375-150502206 | 0 | 0 | 0 | 1 |
| XLOC_020867 | WDR86-AS1    | chr7:151078206-151110132 | 0 | 0 | 0 | 1 |
| XLOC_020869 | GALNTL5      | chr7:151653463-151717016 | 0 | 0 | 0 | 1 |
| XLOC_020877 | HTR5A        | chr7:154858778-154879102 | 0 | 0 | 0 | 1 |
| XLOC_020879 | EN2          | chr7:155250823-155257526 | 0 | 0 | 0 | 1 |
| XLOC_020887 | LOC100506585 | chr7:157331749-158380482 | 0 | 0 | 0 | 1 |
| XLOC_020888 | MIR5707      | chr7:158384307-158384386 | 0 | 0 | 0 | 1 |
| XLOC_020890 | LINC00689    | chr7:158801044-158818926 | 0 | 0 | 0 | 1 |
| XLOC_020896 | MIR339       | chr7:1036622-1177893     | 0 | 0 | 0 | 1 |
| XLOC_020903 | MIR4655      | chr7:1855427-2272583     | 0 | 0 | 0 | 1 |
| XLOC_020908 | CARD11       | chr7:2945709-3083509     | 0 | 0 | 0 | 1 |
| XLOC_020909 | MIR4656      | chr7:4815261-4834026     | 0 | 0 | 0 | 1 |
| XLOC_020910 | RADIL        | chr7:4838739-4923335     | 0 | 0 | 0 | 1 |
| XLOC_020911 | PAPOLB       | chr7:4838739-4923335     | 0 | 0 | 0 | 1 |
| XLOC_020916 | MIR589       | chr7:5515427-5553399     | 0 | 0 | 0 | 1 |
| XLOC_020927 | GRID2IP      | chr7:6536408-6591067     | 0 | 0 | 0 | 1 |
| XLOC_020931 | COL28A1      | chr7:7398243-7575460     | 0 | 0 | 0 | 1 |
| XLOC_020935 | THSD7A       | chr7:11410061-11871824   | 0 | 0 | 0 | 1 |
| XLOC_020936 | VWDE         | chr7:12370508-12443852   | 0 | 0 | 0 | 1 |
| XLOC_020939 | AGMO         | chr7:15239942-15601640   | 0 | 0 | 0 | 1 |

|             |              |                          |   |   |   |   |
|-------------|--------------|--------------------------|---|---|---|---|
| XLOC_020944 | AGR2         | chr7:16832263-16844738   | 0 | 0 | 0 | 1 |
| XLOC_020945 | AGR3         | chr7:16899029-16921613   | 0 | 0 | 0 | 1 |
| XLOC_020947 | PRPS1L1      | chr7:18066399-18067486   | 0 | 0 | 0 | 1 |
| XLOC_020948 | TWIST1       | chr7:19155090-19157295   | 0 | 0 | 0 | 1 |
| XLOC_020949 | FERD3L       | chr7:19184404-19185044   | 0 | 0 | 0 | 1 |
| XLOC_020951 | MIR3146      | chr7:19735084-19748660   | 0 | 0 | 0 | 1 |
| XLOC_020952 | TMEM196      | chr7:19758937-19812404   | 0 | 0 | 0 | 1 |
| XLOC_020963 | CLK2P        | chr7:23624334-23626146   | 0 | 0 | 0 | 1 |
| XLOC_020968 | NPVF         | chr7:25264190-25268105   | 0 | 0 | 0 | 1 |
| XLOC_020969 | RNU6-16      | chr7:25880600-25880630   | 0 | 0 | 0 | 1 |
| XLOC_020970 | MIR148A      | chr7:25989538-25989606   | 0 | 0 | 0 | 1 |
| XLOC_020982 | MIR196B      | chr7:27202056-27219880   | 0 | 0 | 0 | 1 |
| XLOC_020987 | TRIL         | chr7:28992973-28998029   | 0 | 0 | 0 | 1 |
| XLOC_020990 | MIR550A3     | chr7:29685537-29727859   | 0 | 0 | 0 | 1 |
| XLOC_020997 | NEUROD6      | chr7:31377074-31380538   | 0 | 0 | 0 | 1 |
| XLOC_020998 | PDE1C        | chr7:31792631-32338383   | 0 | 0 | 0 | 1 |
| XLOC_021002 | MIR550B2     | chr7:32772592-32772689   | 0 | 0 | 0 | 1 |
| XLOC_021007 | NPSR1-AS1    | chr7:34386123-34917944   | 0 | 0 | 0 | 1 |
| XLOC_021010 | TBX20        | chr7:35242041-35293711   | 0 | 0 | 0 | 1 |
| XLOC_021013 | AOAH         | chr7:36552548-36764154   | 0 | 0 | 0 | 1 |
| XLOC_021014 | AOAH-IT1     | chr7:36552548-36764154   | 0 | 0 | 0 | 1 |
| XLOC_021016 | MIR1200      | chr7:36892510-37488895   | 0 | 0 | 0 | 1 |
| XLOC_021017 | SFRP4        | chr7:37945534-37956525   | 0 | 0 | 0 | 1 |
| XLOC_021018 | TARP         | chr7:38299243-38313248   | 0 | 0 | 0 | 1 |
| XLOC_021019 | AMPH         | chr7:38423296-38671167   | 0 | 0 | 0 | 1 |
| XLOC_021022 | POU6F2-AS1   | chr7:39017608-39504390   | 0 | 0 | 0 | 1 |
| XLOC_021024 | INHBA        | chr7:41728600-41818976   | 0 | 0 | 0 | 1 |
| XLOC_021025 | GLI3         | chr7:42000547-42276618   | 0 | 0 | 0 | 1 |
| XLOC_021036 | MYL7         | chr7:44178462-44180916   | 0 | 0 | 0 | 1 |
| XLOC_021037 | GCK          | chr7:44183869-44229022   | 0 | 0 | 0 | 1 |
| XLOC_021054 | IGFBP3       | chr7:45951843-45960871   | 0 | 0 | 0 | 1 |
| XLOC_021059 | ZPBP         | chr7:49977023-50132860   | 0 | 0 | 0 | 1 |
| XLOC_021064 | FLJ45974     | chr7:53723201-53879624   | 0 | 0 | 0 | 1 |
| XLOC_021065 | HPVC1        | chr7:54268916-54270114   | 0 | 0 | 0 | 1 |
| XLOC_021074 | NUPR1L       | chr7:56182373-56184090   | 0 | 0 | 0 | 1 |
| XLOC_021075 | LOC650226    | chr7:56491396-56516068   | 0 | 0 | 0 | 1 |
| XLOC_021076 | LOC100130849 | chr7:56943077-56949839   | 0 | 0 | 0 | 1 |
| XLOC_021077 | MIR4283-2    | chr7:57023491-57023571   | 0 | 0 | 0 | 1 |
| XLOC_021079 | GUSBP10      | chr7:57233376-57247863   | 0 | 0 | 0 | 1 |
| XLOC_021081 | LOC100287834 | chr7:62856717-62859419   | 0 | 0 | 0 | 1 |
| XLOC_021082 | LOC100506050 | chr7:63484795-63490480   | 0 | 0 | 0 | 1 |
| XLOC_021091 | MIR4650-1    | chr7:66461791-66704507   | 0 | 0 | 0 | 1 |
| XLOC_021093 | MIR3914-1    | chr7:70597522-71178586   | 0 | 0 | 0 | 1 |
| XLOC_021094 | CALN1        | chr7:71244475-71877360   | 0 | 0 | 0 | 1 |
| XLOC_021100 | GTF2IRD2P1   | chr7:72656901-72685658   | 0 | 0 | 0 | 1 |
| XLOC_021118 | GATSL2       | chr7:74807604-74867341   | 0 | 0 | 0 | 1 |
| XLOC_021119 | PMS2L2       | chr7:74964559-74988306   | 0 | 0 | 0 | 1 |
| XLOC_021123 | CCL26        | chr7:75398841-75419064   | 0 | 0 | 0 | 1 |
| XLOC_021124 | CCL24        | chr7:75441113-75443033   | 0 | 0 | 0 | 1 |
| XLOC_021131 | FGL2         | chr7:76751933-76924521   | 0 | 0 | 0 | 1 |
| XLOC_021136 | MIR548AU     | chr7:77646373-79100524   | 0 | 0 | 0 | 1 |
| XLOC_021137 | GNAT3        | chr7:80087986-80141242   | 0 | 0 | 0 | 1 |
| XLOC_021148 | ABCB4        | chr7:87031360-87105019   | 0 | 0 | 0 | 1 |
| XLOC_021149 | ABCB1        | chr7:87133178-87461613   | 0 | 0 | 0 | 1 |
| XLOC_021152 | STEAP4       | chr7:87905743-87936228   | 0 | 0 | 0 | 1 |
| XLOC_021153 | C7orf62      | chr7:88388752-88966346   | 0 | 0 | 0 | 1 |
| XLOC_021154 | MTERF        | chr7:91502020-91510016   | 0 | 0 | 0 | 1 |
| XLOC_021164 | CALCR        | chr7:93053798-93204042   | 0 | 0 | 0 | 1 |
| XLOC_021165 | MIR653       | chr7:93053798-93204042   | 0 | 0 | 0 | 1 |
| XLOC_021166 | MIR489       | chr7:93053798-93204042   | 0 | 0 | 0 | 1 |
| XLOC_021167 | TFPI2        | chr7:93514708-93520303   | 0 | 0 | 0 | 1 |
| XLOC_021175 | MIR591       | chr7:95749531-95951459   | 0 | 0 | 0 | 1 |
| XLOC_021176 | C7orf76      | chr7:96110937-96132835   | 0 | 0 | 0 | 1 |
| XLOC_021179 | DLX6-AS1     | chr7:96597826-96643377   | 0 | 0 | 0 | 1 |
| XLOC_021180 | DLX5         | chr7:96649701-96654143   | 0 | 0 | 0 | 1 |
| XLOC_021183 | OCM2         | chr7:97614012-97619416   | 0 | 0 | 0 | 1 |
| XLOC_021195 | CYP3A4       | chr7:99354582-99381811   | 0 | 0 | 0 | 1 |
| XLOC_021202 | MIR25        | chr7:99690403-99723128   | 0 | 0 | 0 | 1 |
| XLOC_021203 | MIR93        | chr7:99690403-99723128   | 0 | 0 | 0 | 1 |
| XLOC_021204 | MIR106B      | chr7:99690403-99723128   | 0 | 0 | 0 | 1 |
| XLOC_021217 | PCOLCE-AS1   | chr7:100183955-100205798 | 0 | 0 | 0 | 1 |
| XLOC_021231 | MYL10        | chr7:101256604-101272576 | 0 | 0 | 0 | 1 |
| XLOC_021243 | SLC26A5      | chr7:102987970-103086624 | 0 | 0 | 0 | 1 |
| XLOC_021244 | RELN         | chr7:103112230-103629965 | 0 | 0 | 0 | 1 |
| XLOC_021246 | LHFPL3-AS1   | chr7:103969103-104567092 | 0 | 0 | 0 | 1 |
| XLOC_021247 | LHFPL3-AS2   | chr7:103969103-104567092 | 0 | 0 | 0 | 1 |
| XLOC_021261 | LAMB4        | chr7:107663995-107770801 | 0 | 0 | 0 | 1 |
| XLOC_021262 | NRCAM        | chr7:107788070-108096841 | 0 | 0 | 0 | 1 |
| XLOC_021265 | C7orf66      | chr7:108524037-108524637 | 0 | 0 | 0 | 1 |

|             |                   |                          |   |   |   |   |
|-------------|-------------------|--------------------------|---|---|---|---|
| XLOC_021266 | EIF3IP1           | chr7:109599283-109600270 | 0 | 0 | 0 | 1 |
| XLOC_021273 | PPP1R3A           | chr7:113516881-113559082 | 0 | 0 | 0 | 1 |
| XLOC_021274 | TFEC              | chr7:115575201-115670867 | 0 | 0 | 0 | 1 |
| XLOC_021277 | WNT2              | chr7:116916685-116963343 | 0 | 0 | 0 | 1 |
| XLOC_021287 | TAS2R16           | chr7:122634758-122635754 | 0 | 0 | 0 | 1 |
| XLOC_021292 | TMEM229A          | chr7:123670969-123673523 | 0 | 0 | 0 | 1 |
| XLOC_021293 | GPR37             | chr7:124385654-124406079 | 0 | 0 | 0 | 1 |
| XLOC_021294 | LOC154872         | chr7:124417345-124430864 | 0 | 0 | 0 | 1 |
| XLOC_021297 | MIR592            | chr7:126078651-126892428 | 0 | 0 | 0 | 1 |
| XLOC_021300 | PAX4              | chr7:127250345-127255780 | 0 | 0 | 0 | 1 |
| XLOC_021309 | MIR182            | chr7:129410222-129410333 | 0 | 0 | 0 | 1 |
| XLOC_021310 | MIR96             | chr7:129414532-129414609 | 0 | 0 | 0 | 1 |
| XLOC_021311 | MIR183            | chr7:129414744-129414854 | 0 | 0 | 0 | 1 |
| XLOC_021318 | KLF14             | chr7:130417395-130418888 | 0 | 0 | 0 | 1 |
| XLOC_021319 | MIR29A            | chr7:130561505-130561569 | 0 | 0 | 0 | 1 |
| XLOC_021320 | MIR29B1           | chr7:130562217-130562296 | 0 | 0 | 0 | 1 |
| XLOC_021324 | PLXNA4            | chr7:131808090-132333447 | 0 | 0 | 0 | 1 |
| XLOC_021334 | LOC349160         | chr7:136553398-136849088 | 0 | 0 | 0 | 1 |
| XLOC_021338 | SVOPL             | chr7:138279029-138363790 | 0 | 0 | 0 | 1 |
| XLOC_021344 | KLRG2             | chr7:139138087-139168457 | 0 | 0 | 0 | 1 |
| XLOC_021357 | CLEC5A            | chr7:141627156-141646783 | 0 | 0 | 0 | 1 |
| XLOC_021358 | TAS2R38           | chr7:141672430-141673573 | 0 | 0 | 0 | 1 |
| XLOC_021359 | MOXD2P            | chr7:141940555-141946888 | 0 | 0 | 0 | 1 |
| XLOC_021360 | PRSS58            | chr7:141951957-141957879 | 0 | 0 | 0 | 1 |
| XLOC_021361 | LOC730441         | chr7:141968100-141972068 | 0 | 0 | 0 | 1 |
| XLOC_021363 | TRPV5             | chr7:142605647-142630820 | 0 | 0 | 0 | 1 |
| XLOC_021365 | OR9A2             | chr7:142723286-142724219 | 0 | 0 | 0 | 1 |
| XLOC_021373 | RNU6-57           | chr7:143906939-143906966 | 0 | 0 | 0 | 1 |
| XLOC_021378 | NOBOX             | chr7:144094332-144107320 | 0 | 0 | 0 | 1 |
| XLOC_021380 | MIR54814          | chr7:145813452-148118088 | 0 | 0 | 0 | 1 |
| XLOC_021381 | MIR548F4          | chr7:145813452-148118088 | 0 | 0 | 0 | 1 |
| XLOC_021392 | RARRES2           | chr7:150035406-150038763 | 0 | 0 | 0 | 1 |
| XLOC_021400 | GBX1              | chr7:150845675-150864867 | 0 | 0 | 0 | 1 |
| XLOC_021401 | ASB10             | chr7:150872784-150884919 | 0 | 0 | 0 | 1 |
| XLOC_021406 | MIR3907           | chr7:151127055-151137099 | 0 | 0 | 0 | 1 |
| XLOC_021412 | LOC100128264      | chr7:154858778-154879102 | 0 | 0 | 0 | 1 |
| XLOC_021414 | SHH               | chr7:155595557-155604967 | 0 | 0 | 0 | 1 |
| XLOC_021415 | LOC285889         | chr7:156230482-156238282 | 0 | 0 | 0 | 1 |
| XLOC_021420 | MIR153-2          | chr7:157331749-158380482 | 0 | 0 | 0 | 1 |
| XLOC_021421 | MIR595            | chr7:157331749-158380482 | 0 | 0 | 0 | 1 |
| XLOC_021429 | DLGAP2            | chr8:1449568-1656642     | 0 | 0 | 0 | 1 |
| XLOC_021431 | MIR596            | chr8:1765396-1765473     | 0 | 0 | 0 | 1 |
| XLOC_021437 | MIR4659A          | chr8:6565877-6619021     | 0 | 0 | 0 | 1 |
| XLOC_021438 | LOC100652791      | chr8:6666040-6699975     | 0 | 0 | 0 | 1 |
| XLOC_021439 | DEFB109P1B        | chr8:7159132-7212876     | 0 | 0 | 0 | 1 |
| XLOC_021440 | USP17L1P          | chr8:7159132-7212876     | 0 | 0 | 0 | 1 |
| XLOC_021441 | USP17L4           | chr8:7159132-7212876     | 0 | 0 | 0 | 1 |
| XLOC_021442 | DEFB105B          | chr8:7345242-7347073     | 0 | 0 | 0 | 1 |
| XLOC_021443 | DEFB107A          | chr8:7353367-7366833     | 0 | 0 | 0 | 1 |
| XLOC_021445 | DEFB106B          | chr8:7682693-7686575     | 0 | 0 | 0 | 1 |
| XLOC_021446 | DEFB104B          | chr8:7693992-7698764     | 0 | 0 | 0 | 1 |
| XLOC_021447 | SPAG11A,SPAG11B   | chr8:7705401-7721319     | 0 | 0 | 0 | 1 |
| XLOC_021448 | DEFB103A,DEFB103B | chr8:7738725-7740180     | 0 | 0 | 0 | 1 |
| XLOC_021449 | DEFB4A            | chr8:7752198-7754237     | 0 | 0 | 0 | 1 |
| XLOC_021450 | ZNF705B           | chr8:7783858-7809935     | 0 | 0 | 0 | 1 |
| XLOC_021451 | FAM66E            | chr8:7812534-7866277     | 0 | 0 | 0 | 1 |
| XLOC_021455 | MIR4660           | chr8:8905954-8906028     | 0 | 0 | 0 | 1 |
| XLOC_021456 | LOC157273         | chr8:9182560-9192590     | 0 | 0 | 0 | 1 |
| XLOC_021458 | MIR597            | chr8:9413444-9639856     | 0 | 0 | 0 | 1 |
| XLOC_021460 | PRSS55            | chr8:10383055-10411676   | 0 | 0 | 0 | 1 |
| XLOC_021461 | C8orf74           | chr8:10530146-10558103   | 0 | 0 | 0 | 1 |
| XLOC_021465 | BLK               | chr8:11351520-11422108   | 0 | 0 | 0 | 1 |
| XLOC_021466 | LINC00208         | chr8:11434043-11438850   | 0 | 0 | 0 | 1 |
| XLOC_021471 | ZNF705D           | chr8:11946846-11973025   | 0 | 0 | 0 | 1 |
| XLOC_021473 | FAM66A            | chr8:12219527-12268510   | 0 | 0 | 0 | 1 |
| XLOC_021475 | MIR3926-2         | chr8:12579405-12612992   | 0 | 0 | 0 | 1 |
| XLOC_021478 | TUSC3             | chr8:15397595-15624158   | 0 | 0 | 0 | 1 |
| XLOC_021479 | EFHA2             | chr8:16884746-16980148   | 0 | 0 | 0 | 1 |
| XLOC_021489 | LPL               | chr8:19796581-19824770   | 0 | 0 | 0 | 1 |
| XLOC_021491 | LZTS1-AS1         | chr8:20133283-20147969   | 0 | 0 | 0 | 1 |
| XLOC_021492 | LOC286114         | chr8:20831496-20852630   | 0 | 0 | 0 | 1 |
| XLOC_021498 | SFTPC             | chr8:22019183-22021991   | 0 | 0 | 0 | 1 |
| XLOC_021517 | ADAMDEC1          | chr8:24241797-24263526   | 0 | 0 | 0 | 1 |
| XLOC_021518 | ADAM7             | chr8:24298508-24367077   | 0 | 0 | 0 | 1 |
| XLOC_021519 | NEFM              | chr8:24771273-24776606   | 0 | 0 | 0 | 1 |
| XLOC_021528 | MIR3622A          | chr8:27559189-27559284   | 0 | 0 | 0 | 1 |
| XLOC_021531 | PNOC              | chr8:28174648-28200868   | 0 | 0 | 0 | 1 |
| XLOC_021535 | LOC286135         | chr8:29779028-29811123   | 0 | 0 | 0 | 1 |
| XLOC_021542 | NRG1              | chr8:31497267-32622558   | 0 | 0 | 0 | 1 |

|             |              |                          |   |   |   |   |
|-------------|--------------|--------------------------|---|---|---|---|
| XLOC_021543 | NRG1-IT3     | chr8:31497267-32622558   | 0 | 0 | 0 | 1 |
| XLOC_021546 | KCNU1        | chr8:36641841-36793643   | 0 | 0 | 0 | 1 |
| XLOC_021561 | ADAM5        | chr8:39172181-39260375   | 0 | 0 | 0 | 1 |
| XLOC_021562 | LOC100130964 | chr8:39420630-39437653   | 0 | 0 | 0 | 1 |
| XLOC_021563 | ADAM18       | chr8:39442086-39587583   | 0 | 0 | 0 | 1 |
| XLOC_021565 | IDO2         | chr8:39792473-39873910   | 0 | 0 | 0 | 1 |
| XLOC_021566 | C8orf4       | chr8:40010986-40012827   | 0 | 0 | 0 | 1 |
| XLOC_021575 | CHRN3        | chr8:42552561-42592209   | 0 | 0 | 0 | 1 |
| XLOC_021580 | POTEA        | chr8:43147584-43218328   | 0 | 0 | 0 | 1 |
| XLOC_021581 | LINC00293    | chr8:47752507-47767407   | 0 | 0 | 0 | 1 |
| XLOC_021586 | C8orf22      | chr8:49966894-49988642   | 0 | 0 | 0 | 1 |
| XLOC_021587 | SNTG1        | chr8:50824596-51705427   | 0 | 0 | 0 | 1 |
| XLOC_021588 | NPBWR1       | chr8:53852467-53853454   | 0 | 0 | 0 | 1 |
| XLOC_021591 | SOX17        | chr8:55370494-55373456   | 0 | 0 | 0 | 1 |
| XLOC_021592 | RP1          | chr8:55528626-55543394   | 0 | 0 | 0 | 1 |
| XLOC_021593 | XKR4         | chr8:56015016-56438710   | 0 | 0 | 0 | 1 |
| XLOC_021597 | LOC100507651 | chr8:58131647-58145388   | 0 | 0 | 0 | 1 |
| XLOC_021598 | LOC286177    | chr8:58173784-58179170   | 0 | 0 | 0 | 1 |
| XLOC_021599 | LINC00588    | chr8:58192101-58197290   | 0 | 0 | 0 | 1 |
| XLOC_021606 | MIR4470      | chr8:62627346-62627418   | 0 | 0 | 0 | 1 |
| XLOC_021607 | NKAIN3       | chr8:63161500-63903628   | 0 | 0 | 0 | 1 |
| XLOC_021608 | UG0898H09    | chr8:63161500-63903628   | 0 | 0 | 0 | 1 |
| XLOC_021610 | LOC286184    | chr8:64681987-64698054   | 0 | 0 | 0 | 1 |
| XLOC_021611 | LOC100130155 | chr8:65285774-65291386   | 0 | 0 | 0 | 1 |
| XLOC_021612 | MIR124-2     | chr8:65291705-65291814   | 0 | 0 | 0 | 1 |
| XLOC_021613 | BHLHE22      | chr8:65492794-65496191   | 0 | 0 | 0 | 1 |
| XLOC_021617 | LOC100505659 | chr8:67104348-67109554   | 0 | 0 | 0 | 1 |
| XLOC_021624 | PREX2        | chr8:68864602-69143897   | 0 | 0 | 0 | 1 |
| XLOC_021625 | C8orf34      | chr8:69215702-69731258   | 0 | 0 | 0 | 1 |
| XLOC_021629 | LOC100132891 | chr8:72753776-72987819   | 0 | 0 | 0 | 1 |
| XLOC_021630 | RNU6-83      | chr8:72753776-72987819   | 0 | 0 | 0 | 1 |
| XLOC_021631 | KCNB2        | chr8:73449625-73850584   | 0 | 0 | 0 | 1 |
| XLOC_021638 | MIR5681A     | chr8:75460777-75460852   | 0 | 0 | 0 | 1 |
| XLOC_021639 | FLJ39080     | chr8:75512100-75670587   | 0 | 0 | 0 | 1 |
| XLOC_021640 | MIR2052      | chr8:75512100-75670587   | 0 | 0 | 0 | 1 |
| XLOC_021641 | PI15         | chr8:75736771-75767264   | 0 | 0 | 0 | 1 |
| XLOC_021642 | CRISPLD1     | chr8:75896707-75946793   | 0 | 0 | 0 | 1 |
| XLOC_021645 | PKIA         | chr8:79428335-79517502   | 0 | 0 | 0 | 1 |
| XLOC_021647 | STMN2        | chr8:80523048-80578410   | 0 | 0 | 0 | 1 |
| XLOC_021648 | MIR5708      | chr8:81153623-81153708   | 0 | 0 | 0 | 1 |
| XLOC_021649 | ZBTB10       | chr8:81398447-81434610   | 0 | 0 | 0 | 1 |
| XLOC_021652 | RALYL        | chr8:85095452-85834078   | 0 | 0 | 0 | 1 |
| XLOC_021658 | REXO1L2P     | chr8:86727072-86728150   | 0 | 0 | 0 | 1 |
| XLOC_021659 | REXO1L2P     | chr8:86748526-86749604   | 0 | 0 | 0 | 1 |
| XLOC_021660 | ATP6V0D2     | chr8:87111138-87166454   | 0 | 0 | 0 | 1 |
| XLOC_021663 | CNBD1        | chr8:87878675-88394955   | 0 | 0 | 0 | 1 |
| XLOC_021671 | MIR4661      | chr8:92114846-92231464   | 0 | 0 | 0 | 1 |
| XLOC_021681 | MIR3150A     | chr8:96085138-96085224   | 0 | 0 | 0 | 1 |
| XLOC_021685 | SDC2         | chr8:97505881-97624037   | 0 | 0 | 0 | 1 |
| XLOC_021692 | KCNS2        | chr8:99439249-99443023   | 0 | 0 | 0 | 1 |
| XLOC_021697 | MIR4471      | chr8:101394990-101395071 | 0 | 0 | 0 | 1 |
| XLOC_021698 | FLJ42969     | chr8:102064281-102088471 | 0 | 0 | 0 | 1 |
| XLOC_021701 | MIR5680      | chr8:103137659-103137741 | 0 | 0 | 0 | 1 |
| XLOC_021702 | ODF1         | chr8:103563847-103573241 | 0 | 0 | 0 | 1 |
| XLOC_021705 | MIR3151      | chr8:104145190-104242531 | 0 | 0 | 0 | 1 |
| XLOC_021710 | DCSTAMP      | chr8:105352023-105368917 | 0 | 0 | 0 | 1 |
| XLOC_021714 | TRHR         | chr8:110099652-110131811 | 0 | 0 | 0 | 1 |
| XLOC_021716 | PKHD1L1      | chr8:110374705-110543501 | 0 | 0 | 0 | 1 |
| XLOC_021718 | MIR2053      | chr8:113235158-114449241 | 0 | 0 | 0 | 1 |
| XLOC_021721 | AARD         | chr8:117950463-117956231 | 0 | 0 | 0 | 1 |
| XLOC_021722 | SLC30A8      | chr8:117962511-118188951 | 0 | 0 | 0 | 1 |
| XLOC_021726 | MAL2         | chr8:120220609-120257911 | 0 | 0 | 0 | 1 |
| XLOC_021737 | FER1L6       | chr8:124864226-125132301 | 0 | 0 | 0 | 1 |
| XLOC_021741 | LOC157381    | chr8:125954249-125963331 | 0 | 0 | 0 | 1 |
| XLOC_021749 | MIR1204      | chr8:128808207-128808271 | 0 | 0 | 0 | 1 |
| XLOC_021751 | MIR1205      | chr8:128902873-129113491 | 0 | 0 | 0 | 1 |
| XLOC_021752 | MIR1206      | chr8:128902873-129113491 | 0 | 0 | 0 | 1 |
| XLOC_021753 | MIR1207      | chr8:128902873-129113491 | 0 | 0 | 0 | 1 |
| XLOC_021754 | MIR1208      | chr8:129162361-129162431 | 0 | 0 | 0 | 1 |
| XLOC_021758 | WISP1        | chr8:134203281-134243931 | 0 | 0 | 0 | 1 |
| XLOC_021760 | LOC286094    | chr8:136246373-136311961 | 0 | 0 | 0 | 1 |
| XLOC_021761 | KHDRBS3      | chr8:136469715-136659841 | 0 | 0 | 0 | 1 |
| XLOC_021764 | LOC731779    | chr8:142350647-142354721 | 0 | 0 | 0 | 1 |
| XLOC_021766 | MIR4472-1    | chr8:143257699-143257771 | 0 | 0 | 0 | 1 |
| XLOC_021772 | GML          | chr8:143916216-143928261 | 0 | 0 | 0 | 1 |
| XLOC_021796 | SCXB         | chr8:145321516-145323041 | 0 | 0 | 0 | 1 |
| XLOC_021798 | SCXA         | chr8:145486055-145515121 | 0 | 0 | 0 | 1 |
| XLOC_021812 | OR4F21       | chr8:116085-117024       | 0 | 0 | 0 | 1 |
| XLOC_021816 | LOC286083    | chr8:1244293-1250827     | 0 | 0 | 0 | 1 |

|             |                   |                        |   |   |   |   |
|-------------|-------------------|------------------------|---|---|---|---|
| XLOC_021817 | CSMD1             | chr8:2792874-4852328   | 0 | 0 | 0 | 1 |
| XLOC_021820 | MIR4659B          | chr8:6565877-6619021   | 0 | 0 | 0 | 1 |
| XLOC_021821 | XKR5              | chr8:6666040-6699975   | 0 | 0 | 0 | 1 |
| XLOC_021822 | DEFB1             | chr8:6728096-6735529   | 0 | 0 | 0 | 1 |
| XLOC_021823 | DEFA6             | chr8:6782215-6783598   | 0 | 0 | 0 | 1 |
| XLOC_021824 | DEFA4             | chr8:6793344-6795786   | 0 | 0 | 0 | 1 |
| XLOC_021825 | DEFA8P            | chr8:6808247-6809121   | 0 | 0 | 0 | 1 |
| XLOC_021826 | DEFA9P            | chr8:6816810-6817683   | 0 | 0 | 0 | 1 |
| XLOC_021827 | DEFA10P           | chr8:6825662-6826635   | 0 | 0 | 0 | 1 |
| XLOC_021828 | DEFA1B            | chr8:6835170-6837614   | 0 | 0 | 0 | 1 |
| XLOC_021829 | DEFT1P2           | chr8:6844699-6847243   | 0 | 0 | 0 | 1 |
| XLOC_021830 | DEFA1             | chr8:6854287-6856724   | 0 | 0 | 0 | 1 |
| XLOC_021831 | DEFT1P2           | chr8:6863802-6866346   | 0 | 0 | 0 | 1 |
| XLOC_021832 | DEFA1             | chr8:6873390-6875823   | 0 | 0 | 0 | 1 |
| XLOC_021833 | DEFA11P           | chr8:6886122-6887011   | 0 | 0 | 0 | 1 |
| XLOC_021835 | LOC349196         | chr8:7118140-7121014   | 0 | 0 | 0 | 1 |
| XLOC_021836 | LOC349196         | chr8:7125762-7128636   | 0 | 0 | 0 | 1 |
| XLOC_021837 | LOC349196         | chr8:7141006-7143880   | 0 | 0 | 0 | 1 |
| XLOC_021838 | FAM66B            | chr8:7159132-7212876   | 0 | 0 | 0 | 1 |
| XLOC_021839 | ZNF705G           | chr8:7215497-7220490   | 0 | 0 | 0 | 1 |
| XLOC_021840 | DEFB4B            | chr8:7272384-7274354   | 0 | 0 | 0 | 1 |
| XLOC_021841 | DEFB103A,DEFB103B | chr8:7286415-7287870   | 0 | 0 | 0 | 1 |
| XLOC_021842 | SPAG11B           | chr8:7305275-7321192   | 0 | 0 | 0 | 1 |
| XLOC_021843 | DEFB104A          | chr8:7327829-7332604   | 0 | 0 | 0 | 1 |
| XLOC_021844 | DEFB106B          | chr8:7340025-7343909   | 0 | 0 | 0 | 1 |
| XLOC_021845 | FAM90A7P          | chr8:7413659-7416626   | 0 | 0 | 0 | 1 |
| XLOC_021846 | FAM90A7P          | chr8:7421309-7431920   | 0 | 0 | 0 | 1 |
| XLOC_021847 | DEFB107B          | chr8:7669241-7673238   | 0 | 0 | 0 | 1 |
| XLOC_021848 | DEFB105A          | chr8:7679529-7681360   | 0 | 0 | 0 | 1 |
| XLOC_021849 | USP17L8           | chr8:7812534-7866277   | 0 | 0 | 0 | 1 |
| XLOC_021850 | USP17L3           | chr8:7812534-7866277   | 0 | 0 | 0 | 1 |
| XLOC_021851 | DEFB109P1B        | chr8:7812534-7866277   | 0 | 0 | 0 | 1 |
| XLOC_021852 | MIR548I3          | chr8:7946462-7946611   | 0 | 0 | 0 | 1 |
| XLOC_021856 | LINC00599         | chr8:9757573-9760839   | 0 | 0 | 0 | 1 |
| XLOC_021857 | MIR124-1          | chr8:9760897-9760982   | 0 | 0 | 0 | 1 |
| XLOC_021861 | MIR1322           | chr8:10622883-10697299 | 0 | 0 | 0 | 1 |
| XLOC_021863 | MIR598            | chr8:10753656-11058875 | 0 | 0 | 0 | 1 |
| XLOC_021868 | LOC100133267      | chr8:11921897-11929256 | 0 | 0 | 0 | 1 |
| XLOC_021869 | LOC392196         | chr8:11973290-12008698 | 0 | 0 | 0 | 1 |
| XLOC_021870 | USP17L7           | chr8:11973290-12008698 | 0 | 0 | 0 | 1 |
| XLOC_021871 | USP17L2           | chr8:11973290-12008698 | 0 | 0 | 0 | 1 |
| XLOC_021874 | DEFB130           | chr8:12168470-12175825 | 0 | 0 | 0 | 1 |
| XLOC_021875 | LOC649352         | chr8:12219527-12268510 | 0 | 0 | 0 | 1 |
| XLOC_021876 | DEFB109P1         | chr8:12219527-12268510 | 0 | 0 | 0 | 1 |
| XLOC_021881 | MIR3926-1         | chr8:12579405-12612992 | 0 | 0 | 0 | 1 |
| XLOC_021882 | LOC340357         | chr8:12623570-12668910 | 0 | 0 | 0 | 1 |
| XLOC_021885 | MIR383            | chr8:13947372-15095792 | 0 | 0 | 0 | 1 |
| XLOC_021887 | FGF20             | chr8:16850333-16859674 | 0 | 0 | 0 | 1 |
| XLOC_021891 | FGL1              | chr8:17721899-17753047 | 0 | 0 | 0 | 1 |
| XLOC_021894 | LOC100128993      | chr8:19041185-19103032 | 0 | 0 | 0 | 1 |
| XLOC_021896 | SLC18A1           | chr8:20002365-20040717 | 0 | 0 | 0 | 1 |
| XLOC_021898 | GFRA2             | chr8:21549529-21646346 | 0 | 0 | 0 | 1 |
| XLOC_021909 | PEBP4             | chr8:22570764-22785421 | 0 | 0 | 0 | 1 |
| XLOC_021916 | NKX2-6            | chr8:23559963-23564111 | 0 | 0 | 0 | 1 |
| XLOC_021918 | NEFL              | chr8:24808468-24814383 | 0 | 0 | 0 | 1 |
| XLOC_021921 | EBF2              | chr8:25699245-25902640 | 0 | 0 | 0 | 1 |
| XLOC_021928 | MIR3622B          | chr8:27559189-27559284 | 0 | 0 | 0 | 1 |
| XLOC_021932 | MIR4287           | chr8:27727398-27850369 | 0 | 0 | 0 | 1 |
| XLOC_021933 | NUGGC             | chr8:27879480-27941388 | 0 | 0 | 0 | 1 |
| XLOC_021936 | MIR4288           | chr8:28351721-28431785 | 0 | 0 | 0 | 1 |
| XLOC_021940 | LINC00589         | chr8:29578775-29605625 | 0 | 0 | 0 | 1 |
| XLOC_021941 | MIR3148           | chr8:29814787-29814864 | 0 | 0 | 0 | 1 |
| XLOC_021942 | MIR548O2          | chr8:29920257-30108213 | 0 | 0 | 0 | 1 |
| XLOC_021949 | TEX15             | chr8:30689059-30706533 | 0 | 0 | 0 | 1 |
| XLOC_021954 | DUSP26            | chr8:33448853-33457439 | 0 | 0 | 0 | 1 |
| XLOC_021958 | GOT1L1            | chr8:37791799-37797647 | 0 | 0 | 0 | 1 |
| XLOC_021959 | ADRB3             | chr8:37820513-37824184 | 0 | 0 | 0 | 1 |
| XLOC_021968 | ADAM3A            | chr8:39308563-39380508 | 0 | 0 | 0 | 1 |
| XLOC_021969 | ADAM2             | chr8:39601254-39695779 | 0 | 0 | 0 | 1 |
| XLOC_021970 | ZMAT4             | chr8:40388110-40755343 | 0 | 0 | 0 | 1 |
| XLOC_021972 | NKX6-3            | chr8:41503828-41504878 | 0 | 0 | 0 | 1 |
| XLOC_021974 | MIR486            | chr8:41510743-41754280 | 0 | 0 | 0 | 1 |
| XLOC_021979 | CHRNA6            | chr8:42607779-42623929 | 0 | 0 | 0 | 1 |
| XLOC_021984 | EFCAB1            | chr8:49627473-49647870 | 0 | 0 | 0 | 1 |
| XLOC_021989 | FAM150A           | chr8:53446596-53478021 | 0 | 0 | 0 | 1 |
| XLOC_021995 | SBF1P1            | chr8:56015016-56438710 | 0 | 0 | 0 | 1 |
| XLOC_021998 | SNORD54           | chr8:56980738-56987140 | 0 | 0 | 0 | 1 |
| XLOC_021999 | MOS               | chr8:57025500-57026541 | 0 | 0 | 0 | 1 |
| XLOC_022001 | SDR16C5           | chr8:57212569-57233241 | 0 | 0 | 0 | 1 |

|             |              |                          |   |   |   |   |
|-------------|--------------|--------------------------|---|---|---|---|
| XLOC_022002 | PENK         | chr8:57353512-57359282   | 0 | 0 | 0 | 1 |
| XLOC_022003 | LOC100507632 | chr8:57430877-57472382   | 0 | 0 | 0 | 1 |
| XLOC_022005 | CYP7A1       | chr8:59402736-59412720   | 0 | 0 | 0 | 1 |
| XLOC_022007 | TOX          | chr8:59717976-60031767   | 0 | 0 | 0 | 1 |
| XLOC_022008 | CA8          | chr8:61101422-61193954   | 0 | 0 | 0 | 1 |
| XLOC_022009 | LOC100130298 | chr8:61878679-61880307   | 0 | 0 | 0 | 1 |
| XLOC_022013 | LOC401463    | chr8:65486865-65489820   | 0 | 0 | 0 | 1 |
| XLOC_022014 | CYP7B1       | chr8:65508528-65711348   | 0 | 0 | 0 | 1 |
| XLOC_022015 | LINC00251    | chr8:66073379-66092575   | 0 | 0 | 0 | 1 |
| XLOC_022016 | LOC286186    | chr8:66439242-66474901   | 0 | 0 | 0 | 1 |
| XLOC_022019 | CRH          | chr8:67088611-67090846   | 0 | 0 | 0 | 1 |
| XLOC_022023 | PTTG3P       | chr8:67579786-67774257   | 0 | 0 | 0 | 1 |
| XLOC_022025 | SNORD87      | chr8:67782983-67837777   | 0 | 0 | 0 | 1 |
| XLOC_022026 | TCF24        | chr8:67858735-67874825   | 0 | 0 | 0 | 1 |
| XLOC_022027 | PPP1R42      | chr8:67900366-67940786   | 0 | 0 | 0 | 1 |
| XLOC_022030 | CPA6         | chr8:68334404-68658620   | 0 | 0 | 0 | 1 |
| XLOC_022031 | LOC286189    | chr8:69215702-69731258   | 0 | 0 | 0 | 1 |
| XLOC_022034 | PRDM14       | chr8:70963885-70983562   | 0 | 0 | 0 | 1 |
| XLOC_022038 | EYA1         | chr8:72109667-72274467   | 0 | 0 | 0 | 1 |
| XLOC_022039 | MSC          | chr8:72753776-72987819   | 0 | 0 | 0 | 1 |
| XLOC_022040 | TRPA1        | chr8:72753776-72987819   | 0 | 0 | 0 | 1 |
| XLOC_022041 | LOC392232    | chr8:73117533-73163869   | 0 | 0 | 0 | 1 |
| XLOC_022049 | MIR5681B     | chr8:75460777-75460852   | 0 | 0 | 0 | 1 |
| XLOC_022050 | ZFX4-AS1     | chr8:77523113-77779521   | 0 | 0 | 0 | 1 |
| XLOC_022058 | PMP2         | chr8:82352563-82359719   | 0 | 0 | 0 | 1 |
| XLOC_022059 | FABP9        | chr8:82370617-82373758   | 0 | 0 | 0 | 1 |
| XLOC_022060 | FABP4        | chr8:82390731-82395473   | 0 | 0 | 0 | 1 |
| XLOC_022061 | FABP12       | chr8:82437280-82443550   | 0 | 0 | 0 | 1 |
| XLOC_022067 | CA1          | chr8:86240457-86290342   | 0 | 0 | 0 | 1 |
| XLOC_022068 | REXO1L2P     | chr8:86566827-86567905   | 0 | 0 | 0 | 1 |
| XLOC_022069 | REXO1L1      | chr8:86568694-86575726   | 0 | 0 | 0 | 1 |
| XLOC_022070 | REXO1L2P     | chr8:86756683-86757761   | 0 | 0 | 0 | 1 |
| XLOC_022071 | REXO1L1      | chr8:86758550-86789306   | 0 | 0 | 0 | 1 |
| XLOC_022072 | REXO1L2P     | chr8:86758550-86789306   | 0 | 0 | 0 | 1 |
| XLOC_022073 | REXO1L2P     | chr8:86802519-86803597   | 0 | 0 | 0 | 1 |
| XLOC_022074 | REXO1L2P     | chr8:86814712-86815790   | 0 | 0 | 0 | 1 |
| XLOC_022075 | REXO1L2P     | chr8:86839093-86840171   | 0 | 0 | 0 | 1 |
| XLOC_022076 | PSKH2        | chr8:87060690-87081851   | 0 | 0 | 0 | 1 |
| XLOC_022077 | SLC7A13      | chr8:87226287-87242604   | 0 | 0 | 0 | 1 |
| XLOC_022079 | CNGB3        | chr8:87586162-87755903   | 0 | 0 | 0 | 1 |
| XLOC_022081 | MMP16        | chr8:89049459-89339717   | 0 | 0 | 0 | 1 |
| XLOC_022083 | CALB1        | chr8:91070837-91095107   | 0 | 0 | 0 | 1 |
| XLOC_022088 | FLJ46284     | chr8:93725189-93798288   | 0 | 0 | 0 | 1 |
| XLOC_022090 | C8orf87      | chr8:94146323-94179079   | 0 | 0 | 0 | 1 |
| XLOC_022093 | MIR378D2     | chr8:94928249-94928347   | 0 | 0 | 0 | 1 |
| XLOC_022094 | CDH17        | chr8:95139393-95229531   | 0 | 0 | 0 | 1 |
| XLOC_022098 | LOC100288748 | chr8:95649512-95651695   | 0 | 0 | 0 | 1 |
| XLOC_022101 | MIR3150B     | chr8:96085138-96085224   | 0 | 0 | 0 | 1 |
| XLOC_022102 | C8orf69      | chr8:96219234-96228602   | 0 | 0 | 0 | 1 |
| XLOC_022104 | LOC100500773 | chr8:96959212-96960576   | 0 | 0 | 0 | 1 |
| XLOC_022108 | TSPYL5       | chr8:98285713-98290176   | 0 | 0 | 0 | 1 |
| XLOC_022114 | MIR599       | chr8:100025493-100889814 | 0 | 0 | 0 | 1 |
| XLOC_022115 | MIR875       | chr8:100025493-100889814 | 0 | 0 | 0 | 1 |
| XLOC_022117 | RGS22        | chr8:100973275-101118344 | 0 | 0 | 0 | 1 |
| XLOC_022125 | NCALD        | chr8:102698769-103137131 | 0 | 0 | 0 | 1 |
| XLOC_022133 | DPYS         | chr8:105391651-105479277 | 0 | 0 | 0 | 1 |
| XLOC_022136 | ANGPT1       | chr8:108261709-108510254 | 0 | 0 | 0 | 1 |
| XLOC_022137 | RSPO2        | chr8:108911543-109095913 | 0 | 0 | 0 | 1 |
| XLOC_022142 | KCNV1        | chr8:110979232-110986951 | 0 | 0 | 0 | 1 |
| XLOC_022143 | CSMD3        | chr8:113235158-114449242 | 0 | 0 | 0 | 1 |
| XLOC_022145 | LINC00536    | chr8:116962735-117337297 | 0 | 0 | 0 | 1 |
| XLOC_022150 | TNFRSF11B    | chr8:119935795-119964381 | 0 | 0 | 0 | 1 |
| XLOC_022159 | MIR4663      | chr8:124228027-124228101 | 0 | 0 | 0 | 1 |
| XLOC_022164 | ANXA13       | chr8:124693033-124749647 | 0 | 0 | 0 | 1 |
| XLOC_022165 | FER1L6-AS1   | chr8:124864226-125132301 | 0 | 0 | 0 | 1 |
| XLOC_022172 | LOC727677    | chr8:128455594-128494384 | 0 | 0 | 0 | 1 |
| XLOC_022173 | LOC728724    | chr8:130228712-130253481 | 0 | 0 | 0 | 1 |
| XLOC_022174 | GSDMC        | chr8:130760441-130799134 | 0 | 0 | 0 | 1 |
| XLOC_022176 | MIR5194      | chr8:130851838-131028897 | 0 | 0 | 0 | 1 |
| XLOC_022180 | ADCY8        | chr8:131792546-132052831 | 0 | 0 | 0 | 1 |
| XLOC_022181 | OC90         | chr8:133036466-133071627 | 0 | 0 | 0 | 1 |
| XLOC_022182 | HHLA1        | chr8:133073732-133117512 | 0 | 0 | 0 | 1 |
| XLOC_022187 | SLA          | chr8:133879204-134147141 | 0 | 0 | 0 | 1 |
| XLOC_022191 | MIR30B       | chr8:135812762-135812851 | 0 | 0 | 0 | 1 |
| XLOC_022192 | MIR30D       | chr8:135817118-135817181 | 0 | 0 | 0 | 1 |
| XLOC_022193 | FAM135B      | chr8:139142265-139509061 | 0 | 0 | 0 | 1 |
| XLOC_022194 | COL22A1      | chr8:139600477-139926231 | 0 | 0 | 0 | 1 |
| XLOC_022200 | GPR20        | chr8:142366586-142377361 | 0 | 0 | 0 | 1 |
| XLOC_022201 | MROH5        | chr8:142443928-142517331 | 0 | 0 | 0 | 1 |

|             |            |                          |   |   |   |   |
|-------------|------------|--------------------------|---|---|---|---|
| XLOC_022206 | SLURP1     | chr8:143822361-14382382  | 0 | 0 | 0 | 1 |
| XLOC_022207 | LYPD2      | chr8:143831627-14383395  | 0 | 0 | 0 | 1 |
| XLOC_022209 | LY6D       | chr8:143866297-14386800  | 0 | 0 | 0 | 1 |
| XLOC_022210 | CYP11B1    | chr8:143953772-14396123  | 0 | 0 | 0 | 1 |
| XLOC_022211 | CYP11B2    | chr8:143991974-14399925  | 0 | 0 | 0 | 1 |
| XLOC_022213 | LY6H       | chr8:144239330-14424205  | 0 | 0 | 0 | 1 |
| XLOC_022223 | CCDC166    | chr8:144788863-14479027  | 0 | 0 | 0 | 1 |
| XLOC_022225 | MIR4664    | chr8:144806102-14481591  | 0 | 0 | 0 | 1 |
| XLOC_022231 | MIR661     | chr8:144989320-14505091  | 0 | 0 | 0 | 1 |
| XLOC_022241 | MIR1234    | chr8:145597730-14563473  | 0 | 0 | 0 | 1 |
| XLOC_022257 | DDX11L5    | chr9:11986-29739         | 0 | 0 | 0 | 1 |
| XLOC_022261 | DMRT3      | chr9:976967-991732       | 0 | 0 | 0 | 1 |
| XLOC_022266 | GLIS3-AS1  | chr9:3824127-4300035     | 0 | 0 | 0 | 1 |
| XLOC_022271 | MIR101-2   | chr9:4792833-4861064     | 0 | 0 | 0 | 1 |
| XLOC_022273 | INSL4      | chr9:5231418-5233967     | 0 | 0 | 0 | 1 |
| XLOC_022275 | PDCD1LG2   | chr9:5510544-5571282     | 0 | 0 | 0 | 1 |
| XLOC_022278 | MIR4665    | chr9:5919007-6008003     | 0 | 0 | 0 | 1 |
| XLOC_022279 | IL33       | chr9:6215785-6257983     | 0 | 0 | 0 | 1 |
| XLOC_022280 | TPD52L3    | chr9:6328348-6331900     | 0 | 0 | 0 | 1 |
| XLOC_022285 | LINC00583  | chr9:13927969-13945606   | 0 | 0 | 0 | 1 |
| XLOC_022286 | LOC389705  | chr9:14993324-15019722   | 0 | 0 | 0 | 1 |
| XLOC_022292 | MIR3152    | chr9:18474078-18910947   | 0 | 0 | 0 | 1 |
| XLOC_022297 | MIR491     | chr9:20658308-20995954   | 0 | 0 | 0 | 1 |
| XLOC_022299 | IFNA1      | chr9:21440452-21441315   | 0 | 0 | 0 | 1 |
| XLOC_022301 | C9orf53    | chr9:21967137-21994490   | 0 | 0 | 0 | 1 |
| XLOC_022303 | DMRTA1     | chr9:22446839-22452472   | 0 | 0 | 0 | 1 |
| XLOC_022304 | FLJ35282   | chr9:22646198-22824212   | 0 | 0 | 0 | 1 |
| XLOC_022308 | IFNK       | chr9:27325206-27529850   | 0 | 0 | 0 | 1 |
| XLOC_022311 | TMEM215    | chr9:32783496-32789199   | 0 | 0 | 0 | 1 |
| XLOC_022313 | SPINK4     | chr9:33240195-33248565   | 0 | 0 | 0 | 1 |
| XLOC_022320 | SNORD121B  | chr9:33921690-34048947   | 0 | 0 | 0 | 1 |
| XLOC_022324 | LOC415056  | chr9:34551429-34590138   | 0 | 0 | 0 | 1 |
| XLOC_022334 | MIR4667    | chr9:35605280-35618424   | 0 | 0 | 0 | 1 |
| XLOC_022345 | GLIPR2     | chr9:36136741-36163903   | 0 | 0 | 0 | 1 |
| XLOC_022346 | CCIN       | chr9:36169388-36171331   | 0 | 0 | 0 | 1 |
| XLOC_022358 | SPATA31A2  | chr9:39355698-39361959   | 0 | 0 | 0 | 1 |
| XLOC_022359 | SPATA31A2  | chr9:39884974-39891210   | 0 | 0 | 0 | 1 |
| XLOC_022360 | FAM74A1    | chr9:39900199-39907240   | 0 | 0 | 0 | 1 |
| XLOC_022361 | SPATA31A3  | chr9:40700290-40706537   | 0 | 0 | 0 | 1 |
| XLOC_022362 | FAM74A3    | chr9:40715523-40722679   | 0 | 0 | 0 | 1 |
| XLOC_022363 | SPATA31A5  | chr9:41500678-41506925   | 0 | 0 | 0 | 1 |
| XLOC_022364 | LOC643648  | chr9:41958801-42019584   | 0 | 0 | 0 | 1 |
| XLOC_022366 | FAM95B1    | chr9:42468588-42474238   | 0 | 0 | 0 | 1 |
| XLOC_022367 | FOXD4L4    | chr9:42717233-42720342   | 0 | 0 | 0 | 1 |
| XLOC_022369 | CNTNAP3B   | chr9:43684884-43922473   | 0 | 0 | 0 | 1 |
| XLOC_022370 | LOC643648  | chr9:44387386-44391416   | 0 | 0 | 0 | 1 |
| XLOC_022374 | LOC643648  | chr9:46829289-46833319   | 0 | 0 | 0 | 1 |
| XLOC_022378 | ANKRD20A4  | chr9:69381980-69425109   | 0 | 0 | 0 | 1 |
| XLOC_022388 | C9orf135   | chr9:72435730-72521148   | 0 | 0 | 0 | 1 |
| XLOC_022393 | TMC1       | chr9:75136716-75451267   | 0 | 0 | 0 | 1 |
| XLOC_022395 | RORB       | chr9:77112251-77302117   | 0 | 0 | 0 | 1 |
| XLOC_022400 | PCA3       | chr9:79226291-79521003   | 0 | 0 | 0 | 1 |
| XLOC_022401 | FOXB2      | chr9:79634570-79635869   | 0 | 0 | 0 | 1 |
| XLOC_022406 | SPATA31D5P | chr9:84528351-84534842   | 0 | 0 | 0 | 1 |
| XLOC_022407 | SPATA31D4  | chr9:84543342-84549913   | 0 | 0 | 0 | 1 |
| XLOC_022408 | SPATA31D3  | chr9:84558414-84565009   | 0 | 0 | 0 | 1 |
| XLOC_022409 | SPATA31D1  | chr9:84603686-84610171   | 0 | 0 | 0 | 1 |
| XLOC_022416 | C9orf170   | chr9:89763558-89774641   | 0 | 0 | 0 | 1 |
| XLOC_022419 | CTSL3P     | chr9:90387829-90401799   | 0 | 0 | 0 | 1 |
| XLOC_022420 | CTSL1P8    | chr9:90459659-90462339   | 0 | 0 | 0 | 1 |
| XLOC_022421 | SPATA31E1  | chr9:90497771-90503814   | 0 | 0 | 0 | 1 |
| XLOC_022422 | SPATA31C1  | chr9:90532876-90538572   | 0 | 0 | 0 | 1 |
| XLOC_022427 | MIR3153    | chr9:91926112-91931618   | 0 | 0 | 0 | 1 |
| XLOC_022430 | UNQ6494    | chr9:92254697-92334674   | 0 | 0 | 0 | 1 |
| XLOC_022432 | MIR3910-1  | chr9:94398532-94398643   | 0 | 0 | 0 | 1 |
| XLOC_022434 | LINC00475  | chr9:94903748-94921890   | 0 | 0 | 0 | 1 |
| XLOC_022439 | SUSD3      | chr9:95820988-95847415   | 0 | 0 | 0 | 1 |
| XLOC_022444 | MIR4291    | chr9:96581638-96581703   | 0 | 0 | 0 | 1 |
| XLOC_022446 | MIRLET7A1  | chr9:96938238-96938318   | 0 | 0 | 0 | 1 |
| XLOC_022447 | MIRLET7F1  | chr9:96938628-96938715   | 0 | 0 | 0 | 1 |
| XLOC_022448 | MIRLET7D   | chr9:96938851-96966848   | 0 | 0 | 0 | 1 |
| XLOC_022453 | MIR2278    | chr9:97488950-97849500   | 0 | 0 | 0 | 1 |
| XLOC_022455 | MIR27B     | chr9:97488950-97849500   | 0 | 0 | 0 | 1 |
| XLOC_022456 | MIR24-1    | chr9:97488950-97849500   | 0 | 0 | 0 | 1 |
| XLOC_022461 | LOC441455  | chr9:99488102-99489749   | 0 | 0 | 0 | 1 |
| XLOC_022469 | FOXE1      | chr9:100615536-100618997 | 0 | 0 | 0 | 1 |
| XLOC_022473 | COL15A1    | chr9:101706137-10183306  | 0 | 0 | 0 | 1 |
| XLOC_022481 | LPPR1      | chr9:103791030-104087417 | 0 | 0 | 0 | 1 |
| XLOC_022484 | CYLC2      | chr9:105757592-10578077  | 0 | 0 | 0 | 1 |



|             |                 |                          |   |   |   |   |
|-------------|-----------------|--------------------------|---|---|---|---|
| XLOC_022486 | OR13F1          | chr9:107266543-107267503 | 0 | 0 | 0 | 1 |
| XLOC_022487 | OR13C8          | chr9:107331448-107332411 | 0 | 0 | 0 | 1 |
| XLOC_022488 | OR13D1          | chr9:107456702-107457743 | 0 | 0 | 0 | 1 |
| XLOC_022502 | MUSK            | chr9:113431050-113563278 | 0 | 0 | 0 | 1 |
| XLOC_022506 | MIR4668         | chr9:114659205-114695433 | 0 | 0 | 0 | 1 |
| XLOC_022519 | MIR455          | chr9:116918230-117072978 | 0 | 0 | 0 | 1 |
| XLOC_022524 | DEC1            | chr9:117904096-118164923 | 0 | 0 | 0 | 1 |
| XLOC_022526 | LOC100128505    | chr9:119187503-120177317 | 0 | 0 | 0 | 1 |
| XLOC_022528 | TLR4            | chr9:120466452-120479768 | 0 | 0 | 0 | 1 |
| XLOC_022537 | OR1J2           | chr9:125273080-125274022 | 0 | 0 | 0 | 1 |
| XLOC_022538 | OR1J4           | chr9:125281419-125282367 | 0 | 0 | 0 | 1 |
| XLOC_022539 | OR1N2           | chr9:125315448-125316447 | 0 | 0 | 0 | 1 |
| XLOC_022540 | OR1Q1           | chr9:125377016-125377967 | 0 | 0 | 0 | 1 |
| XLOC_022541 | OR1L1           | chr9:125423994-125424927 | 0 | 0 | 0 | 1 |
| XLOC_022542 | OR1L3           | chr9:125437408-125438383 | 0 | 0 | 0 | 1 |
| XLOC_022543 | OR1L4           | chr9:125486268-125487204 | 0 | 0 | 0 | 1 |
| XLOC_022545 | OR5C1           | chr9:125551211-125552174 | 0 | 0 | 0 | 1 |
| XLOC_022546 | OR1K1           | chr9:125562401-125563352 | 0 | 0 | 0 | 1 |
| XLOC_022548 | GPR21           | chr9:125703287-125867147 | 0 | 0 | 0 | 1 |
| XLOC_022550 | LHX2            | chr9:126773888-126795444 | 0 | 0 | 0 | 1 |
| XLOC_022553 | GPR144          | chr9:127213422-127239378 | 0 | 0 | 0 | 1 |
| XLOC_022554 | MIR181A2HG      | chr9:127284702-127533578 | 0 | 0 | 0 | 1 |
| XLOC_022555 | MIR181A2        | chr9:127284702-127533578 | 0 | 0 | 0 | 1 |
| XLOC_022556 | MIR181B2        | chr9:127284702-127533578 | 0 | 0 | 0 | 1 |
| XLOC_022575 | MIR2861,MIR3960 | chr9:130548111-130548288 | 0 | 0 | 0 | 1 |
| XLOC_022587 | MIR2964A        | chr9:131154896-131154993 | 0 | 0 | 0 | 1 |
| XLOC_022603 | C9orf106        | chr9:132083294-132084882 | 0 | 0 | 0 | 1 |
| XLOC_022606 | PRRX2           | chr9:132427919-132484957 | 0 | 0 | 0 | 1 |
| XLOC_022621 | SNORD62A        | chr9:134305476-134375578 | 0 | 0 | 0 | 1 |
| XLOC_022622 | SNORD62B        | chr9:134305476-134375578 | 0 | 0 | 0 | 1 |
| XLOC_022632 | CELP            | chr9:135957925-135962478 | 0 | 0 | 0 | 1 |
| XLOC_022634 | SNORD24         | chr9:136215068-136218280 | 0 | 0 | 0 | 1 |
| XLOC_022635 | SNORD36B        | chr9:136215068-136218280 | 0 | 0 | 0 | 1 |
| XLOC_022637 | SNORD36C        | chr9:136215068-136218280 | 0 | 0 | 0 | 1 |
| XLOC_022642 | ADAMTSL2        | chr9:136397285-136440647 | 0 | 0 | 0 | 1 |
| XLOC_022643 | DBH             | chr9:136501484-136524466 | 0 | 0 | 0 | 1 |
| XLOC_022647 | MIR4669         | chr9:137218315-137332437 | 0 | 0 | 0 | 1 |
| XLOC_022649 | FCN2            | chr9:137772657-137779366 | 0 | 0 | 0 | 1 |
| XLOC_022650 | OLFM1           | chr9:137967088-138013003 | 0 | 0 | 0 | 1 |
| XLOC_022651 | LOC401557       | chr9:138073454-138079152 | 0 | 0 | 0 | 1 |
| XLOC_022652 | C9orf62         | chr9:138235094-138238404 | 0 | 0 | 0 | 1 |
| XLOC_022656 | OBP2A           | chr9:138437984-138441811 | 0 | 0 | 0 | 1 |
| XLOC_022659 | LCN9            | chr9:138555167-138557758 | 0 | 0 | 0 | 1 |
| XLOC_022665 | MIR126          | chr9:139553307-139567130 | 0 | 0 | 0 | 1 |
| XLOC_022671 | MIR4292         | chr9:139690789-139735638 | 0 | 0 | 0 | 1 |
| XLOC_022676 | MIR4479         | chr9:139780964-139821067 | 0 | 0 | 0 | 1 |
| XLOC_022679 | PTGDS           | chr9:139871955-139876194 | 0 | 0 | 0 | 1 |
| XLOC_022680 | LCNL1           | chr9:139877444-139880210 | 0 | 0 | 0 | 1 |
| XLOC_022700 | MIR602          | chr9:140732870-140732968 | 0 | 0 | 0 | 1 |
| XLOC_022703 | FAM157B         | chr9:141106636-141134172 | 0 | 0 | 0 | 1 |
| XLOC_022705 | FAM138C         | chr9:34393-35864         | 0 | 0 | 0 | 1 |
| XLOC_022715 | INSL6           | chr9:5163862-5185618     | 0 | 0 | 0 | 1 |
| XLOC_022724 | PTPRD           | chr9:8314245-10612723    | 0 | 0 | 0 | 1 |
| XLOC_022725 | MPDZ            | chr9:13105702-13279563   | 0 | 0 | 0 | 1 |
| XLOC_022729 | CER1            | chr9:14719731-14722715   | 0 | 0 | 0 | 1 |
| XLOC_022730 | FREM1           | chr9:14734663-14910993   | 0 | 0 | 0 | 1 |
| XLOC_022742 | MIR4473         | chr9:20344967-20622514   | 0 | 0 | 0 | 1 |
| XLOC_022743 | MIR4474         | chr9:20344967-20622514   | 0 | 0 | 0 | 1 |
| XLOC_022745 | IFNB1           | chr9:21077103-21077943   | 0 | 0 | 0 | 1 |
| XLOC_022746 | IFNW1           | chr9:21140630-21142144   | 0 | 0 | 0 | 1 |
| XLOC_022747 | IFNA21          | chr9:21165635-21166659   | 0 | 0 | 0 | 1 |
| XLOC_022748 | IFNA4           | chr9:21186617-21187598   | 0 | 0 | 0 | 1 |
| XLOC_022749 | IFNA7           | chr9:21201467-21202204   | 0 | 0 | 0 | 1 |
| XLOC_022750 | IFNA10          | chr9:21206179-21207142   | 0 | 0 | 0 | 1 |
| XLOC_022751 | IFNA16          | chr9:21216371-21217310   | 0 | 0 | 0 | 1 |
| XLOC_022753 | IFNA14          | chr9:21239200-21239978   | 0 | 0 | 0 | 1 |
| XLOC_022754 | IFNA22P         | chr9:21277686-21278562   | 0 | 0 | 0 | 1 |
| XLOC_022755 | IFNA5           | chr9:21304612-21305312   | 0 | 0 | 0 | 1 |
| XLOC_022757 | IFNA6           | chr9:21350316-21350886   | 0 | 0 | 0 | 1 |
| XLOC_022758 | IFNA13          | chr9:21367370-21368075   | 0 | 0 | 0 | 1 |
| XLOC_022759 | IFNA2           | chr9:21384253-21385396   | 0 | 0 | 0 | 1 |
| XLOC_022762 | MIR31           | chr9:21454266-21559697   | 0 | 0 | 0 | 1 |
| XLOC_022765 | ELAVL2          | chr9:23690102-23826063   | 0 | 0 | 0 | 1 |
| XLOC_022766 | IZUMO3          | chr9:24543212-24545674   | 0 | 0 | 0 | 1 |
| XLOC_022775 | LINGO2          | chr9:27948083-29212998   | 0 | 0 | 0 | 1 |
| XLOC_022776 | MIR876          | chr9:27948083-29212998   | 0 | 0 | 0 | 1 |
| XLOC_022777 | MIR873          | chr9:27948083-29212998   | 0 | 0 | 0 | 1 |
| XLOC_022778 | LOC401497       | chr9:30388932-30408452   | 0 | 0 | 0 | 1 |
| XLOC_022782 | TAF1L           | chr9:32629451-32635667   | 0 | 0 | 0 | 1 |

|             |                     |                          |   |   |   |   |
|-------------|---------------------|--------------------------|---|---|---|---|
| XLOC_022787 | AQP7                | chr9:33384947-33402517   | 0 | 0 | 0 | 1 |
| XLOC_022790 | SUGT1P1             | chr9:33504534-33511164   | 0 | 0 | 0 | 1 |
| XLOC_022793 | SNORD121A           | chr9:33921690-34048947   | 0 | 0 | 0 | 1 |
| XLOC_022805 | CCL27               | chr9:34652181-34662689   | 0 | 0 | 0 | 1 |
| XLOC_022806 | CCL19               | chr9:34689566-34691274   | 0 | 0 | 0 | 1 |
| XLOC_022807 | CCL21               | chr9:34709001-34710147   | 0 | 0 | 0 | 1 |
| XLOC_022808 | FAM205A             | chr9:34723049-34729535   | 0 | 0 | 0 | 1 |
| XLOC_022809 | FAM205B             | chr9:34830263-34838583   | 0 | 0 | 0 | 1 |
| XLOC_022817 | SIT1                | chr9:35649296-35650947   | 0 | 0 | 0 | 1 |
| XLOC_022826 | FAM221B             | chr9:35817013-35828744   | 0 | 0 | 0 | 1 |
| XLOC_022828 | OR2S2               | chr9:35957104-35958151   | 0 | 0 | 0 | 1 |
| XLOC_022831 | MIR4475             | chr9:36823535-36823596   | 0 | 0 | 0 | 1 |
| XLOC_022832 | PAX5                | chr9:36838530-37034476   | 0 | 0 | 0 | 1 |
| XLOC_022833 | MIR4540             | chr9:36838530-37034476   | 0 | 0 | 0 | 1 |
| XLOC_022834 | MIR4476             | chr9:36838530-37034476   | 0 | 0 | 0 | 1 |
| XLOC_022841 | IGFBPL1             | chr9:38406524-38424444   | 0 | 0 | 0 | 1 |
| XLOC_022844 | CNTNAP3             | chr9:39072763-39288300   | 0 | 0 | 0 | 1 |
| XLOC_022847 | SPATA31A4           | chr9:41321106-41327397   | 0 | 0 | 0 | 1 |
| XLOC_022848 | LOC653501,ZNF658B   | chr9:41588832-41609544   | 0 | 0 | 0 | 1 |
| XLOC_022852 | FAM95B1             | chr9:43027662-43033312   | 0 | 0 | 0 | 1 |
| XLOC_022853 | ANKRD20A2,ANKRD20A3 | chr9:43089971-43133544   | 0 | 0 | 0 | 1 |
| XLOC_022854 | LOC642929           | chr9:43140536-43145484   | 0 | 0 | 0 | 1 |
| XLOC_022855 | SPATA31A6           | chr9:43624501-43630730   | 0 | 0 | 0 | 1 |
| XLOC_022856 | FAM74A2,FAM74A4     | chr9:65487272-65494386   | 0 | 0 | 0 | 1 |
| XLOC_022857 | SPATA31A5           | chr9:65503362-65509610   | 0 | 0 | 0 | 1 |
| XLOC_022858 | LOC286297           | chr9:67017374-67032072   | 0 | 0 | 0 | 1 |
| XLOC_022860 | FAM27B              | chr9:67792928-67794189   | 0 | 0 | 0 | 1 |
| XLOC_022867 | FOXD4L4             | chr9:70426622-70429731   | 0 | 0 | 0 | 1 |
| XLOC_022870 | TMEM252             | chr9:71151497-71155783   | 0 | 0 | 0 | 1 |
| XLOC_022871 | PRKACG              | chr9:71627448-71629039   | 0 | 0 | 0 | 1 |
| XLOC_022872 | BANCR               | chr9:71911596-71921972   | 0 | 0 | 0 | 1 |
| XLOC_022873 | APBA1               | chr9:72042448-72287275   | 0 | 0 | 0 | 1 |
| XLOC_022875 | LOC494558           | chr9:72434320-72435655   | 0 | 0 | 0 | 1 |
| XLOC_022879 | TRPM3               | chr9:73149965-73736514   | 0 | 0 | 0 | 1 |
| XLOC_022880 | MIR204              | chr9:73149965-73736514   | 0 | 0 | 0 | 1 |
| XLOC_022883 | C9orf57             | chr9:74666296-74675521   | 0 | 0 | 0 | 1 |
| XLOC_022890 | MIR548H3            | chr9:78118511-78338744   | 0 | 0 | 0 | 1 |
| XLOC_022893 | VPS13A-AS1          | chr9:79791671-80032399   | 0 | 0 | 0 | 1 |
| XLOC_022894 | GNA14               | chr9:80037994-80263232   | 0 | 0 | 0 | 1 |
| XLOC_022897 | RASEF               | chr9:85594499-85678043   | 0 | 0 | 0 | 1 |
| XLOC_022904 | MIR7-1              | chr9:86582997-86595569   | 0 | 0 | 0 | 1 |
| XLOC_022913 | LOC494127           | chr9:89698800-89700140   | 0 | 0 | 0 | 1 |
| XLOC_022916 | SPATA31C2           | chr9:90744219-90749900   | 0 | 0 | 0 | 1 |
| XLOC_022917 | LOC286238           | chr9:91262093-91267075   | 0 | 0 | 0 | 1 |
| XLOC_022918 | MIR4289             | chr9:91360750-91360820   | 0 | 0 | 0 | 1 |
| XLOC_022921 | LOC286370           | chr9:92782935-92803781   | 0 | 0 | 0 | 1 |
| XLOC_022922 | MIR4290             | chr9:92782935-92803781   | 0 | 0 | 0 | 1 |
| XLOC_022923 | LOC340515           | chr9:93224713-93345028   | 0 | 0 | 0 | 1 |
| XLOC_022924 | DIRAS2              | chr9:93372113-93405108   | 0 | 0 | 0 | 1 |
| XLOC_022925 | LOC100129316        | chr9:93825575-93837414   | 0 | 0 | 0 | 1 |
| XLOC_022928 | MIR3910-2           | chr9:94398532-94398643   | 0 | 0 | 0 | 1 |
| XLOC_022929 | ROR2                | chr9:94484877-94712444   | 0 | 0 | 0 | 1 |
| XLOC_022934 | OGN                 | chr9:95059639-95432547   | 0 | 0 | 0 | 1 |
| XLOC_022935 | OMD                 | chr9:95059639-95432547   | 0 | 0 | 0 | 1 |
| XLOC_022938 | MIR4670             | chr9:95059639-95432547   | 0 | 0 | 0 | 1 |
| XLOC_022945 | BARX1               | chr9:96713908-96717608   | 0 | 0 | 0 | 1 |
| XLOC_022947 | FAM22F              | chr9:97080477-97090926   | 0 | 0 | 0 | 1 |
| XLOC_022949 | FBP1                | chr9:97365420-97402531   | 0 | 0 | 0 | 1 |
| XLOC_022950 | MIR3074             | chr9:97488950-97849500   | 0 | 0 | 0 | 1 |
| XLOC_022954 | LINC00092           | chr9:98782013-98784037   | 0 | 0 | 0 | 1 |
| XLOC_022955 | LOC158434           | chr9:98868942-98878693   | 0 | 0 | 0 | 1 |
| XLOC_022965 | LOC340508           | chr9:99837952-99844227   | 0 | 0 | 0 | 1 |
| XLOC_022966 | LOC286359           | chr9:100153118-100158973 | 0 | 0 | 0 | 1 |
| XLOC_022970 | HEMGN               | chr9:100689072-100707134 | 0 | 0 | 0 | 1 |
| XLOC_022985 | PPP3R2              | chr9:104331633-104500862 | 0 | 0 | 0 | 1 |
| XLOC_022986 | OR13C4              | chr9:107288533-107289490 | 0 | 0 | 0 | 1 |
| XLOC_022987 | OR13C3              | chr9:107298050-107299094 | 0 | 0 | 0 | 1 |
| XLOC_022988 | OR13C5              | chr9:107360737-107361694 | 0 | 0 | 0 | 1 |
| XLOC_022989 | OR13C2              | chr9:107366951-107367908 | 0 | 0 | 0 | 1 |
| XLOC_022990 | OR13C9              | chr9:107379528-107380488 | 0 | 0 | 0 | 1 |
| XLOC_022992 | MIR548Q             | chr9:109625377-109848716 | 0 | 0 | 0 | 1 |
| XLOC_022998 | MIR32               | chr9:111777414-111882228 | 0 | 0 | 0 | 1 |
| XLOC_022999 | FRRS1L              | chr9:111899580-111929577 | 0 | 0 | 0 | 1 |
| XLOC_023004 | TXNDC8              | chr9:113065866-113100128 | 0 | 0 | 0 | 1 |
| XLOC_023005 | SVEP1               | chr9:113127528-113342160 | 0 | 0 | 0 | 1 |
| XLOC_023006 | LPAR1               | chr9:113636053-113800368 | 0 | 0 | 0 | 1 |
| XLOC_023007 | OR2K2               | chr9:114089762-114090713 | 0 | 0 | 0 | 1 |
| XLOC_023010 | LRRRC37A5P          | chr9:114365110-114375833 | 0 | 0 | 0 | 1 |
| XLOC_023026 | AMBP                | chr9:116822407-116840752 | 0 | 0 | 0 | 1 |

|             |                   |                          |   |   |   |   |
|-------------|-------------------|--------------------------|---|---|---|---|
| XLOC_023030 | LOC100505478      | chr9:117428713-117444368 | 0 | 0 | 0 | 1 |
| XLOC_023032 | TNFSF8            | chr9:117655622-117692878 | 0 | 0 | 0 | 1 |
| XLOC_023033 | TNC               | chr9:117781853-117880538 | 0 | 0 | 0 | 1 |
| XLOC_023034 | LINC00474         | chr9:118650543-118687377 | 0 | 0 | 0 | 1 |
| XLOC_023036 | SNORA70C          | chr9:119187503-120177317 | 0 | 0 | 0 | 1 |
| XLOC_023037 | DBC1              | chr9:121928907-122131738 | 0 | 0 | 0 | 1 |
| XLOC_023038 | MIR147A           | chr9:123007256-123007328 | 0 | 0 | 0 | 1 |
| XLOC_023050 | MIR4478           | chr9:124882360-124882448 | 0 | 0 | 0 | 1 |
| XLOC_023052 | LHX6              | chr9:124964855-124991097 | 0 | 0 | 0 | 1 |
| XLOC_023054 | OR1J1             | chr9:125239236-125240208 | 0 | 0 | 0 | 1 |
| XLOC_023055 | OR1N1             | chr9:125288636-125289572 | 0 | 0 | 0 | 1 |
| XLOC_023056 | OR1L8             | chr9:125329826-125330758 | 0 | 0 | 0 | 1 |
| XLOC_023057 | OR1B1             | chr9:125390857-125391818 | 0 | 0 | 0 | 1 |
| XLOC_023060 | SNORD90           | chr9:125611731-125667562 | 0 | 0 | 0 | 1 |
| XLOC_023066 | MIR601            | chr9:126141932-126692417 | 0 | 0 | 0 | 1 |
| XLOC_023077 | ANGPTL2           | chr9:129677052-129985448 | 0 | 0 | 0 | 1 |
| XLOC_023087 | MIR4672           | chr9:130628758-130640022 | 0 | 0 | 0 | 1 |
| XLOC_023097 | MIR199B           | chr9:130928343-131017527 | 0 | 0 | 0 | 1 |
| XLOC_023098 | MIR3154           | chr9:130928343-131017527 | 0 | 0 | 0 | 1 |
| XLOC_023101 | MIR219-2          | chr9:131154896-131154993 | 0 | 0 | 0 | 1 |
| XLOC_023130 | GBGT1             | chr9:136028339-136039307 | 0 | 0 | 0 | 1 |
| XLOC_023131 | OBP2B             | chr9:136080665-136084628 | 0 | 0 | 0 | 1 |
| XLOC_023139 | TMEM8C            | chr9:136379707-136390068 | 0 | 0 | 0 | 1 |
| XLOC_023140 | FAM163B           | chr9:136443536-136445368 | 0 | 0 | 0 | 1 |
| XLOC_023145 | MIR3689A,MIR3689E | chr9:137741020-137742490 | 0 | 0 | 0 | 1 |
| XLOC_023146 | MIR3689C          | chr9:137741020-137742490 | 0 | 0 | 0 | 1 |
| XLOC_023147 | MIR3689D1         | chr9:137741020-137742490 | 0 | 0 | 0 | 1 |
| XLOC_023148 | MIR3689B          | chr9:137741020-137742490 | 0 | 0 | 0 | 1 |
| XLOC_023149 | MIR3689D2         | chr9:137741020-137742490 | 0 | 0 | 0 | 1 |
| XLOC_023150 | MIR3689F          | chr9:137742587-137742653 | 0 | 0 | 0 | 1 |
| XLOC_023151 | FCN1              | chr9:137801430-137809800 | 0 | 0 | 0 | 1 |
| XLOC_023154 | GLT6D1            | chr9:138515501-138531388 | 0 | 0 | 0 | 1 |
| XLOC_023155 | SOHLH1            | chr9:138585254-138591378 | 0 | 0 | 0 | 1 |
| XLOC_023170 | MIR4673           | chr9:139388895-139440238 | 0 | 0 | 0 | 1 |
| XLOC_023171 | MIR4674           | chr9:139440624-139440711 | 0 | 0 | 0 | 1 |
| XLOC_023175 | LCN6              | chr9:139638468-139644363 | 0 | 0 | 0 | 1 |
| XLOC_023176 | LCN8              | chr9:139648839-139652737 | 0 | 0 | 0 | 1 |
| XLOC_023190 | MIR3621           | chr9:140033608-140064497 | 0 | 0 | 0 | 1 |
| XLOC_023233 | LINC00685         | chrX:281384-282054       | 0 | 0 | 0 | 1 |
| XLOC_023234 | SHOX              | chrX:585078-620146       | 0 | 0 | 0 | 1 |
| XLOC_023235 | CSF2RA            | chrX:1387692-1428828     | 0 | 0 | 0 | 1 |
| XLOC_023236 | MIR3690           | chrX:1387692-1428828     | 0 | 0 | 0 | 1 |
| XLOC_023237 | IL3RA             | chrX:1455508-1501582     | 0 | 0 | 0 | 1 |
| XLOC_023238 | ASMTL-AS1         | chrX:1519423-1572655     | 0 | 0 | 0 | 1 |
| XLOC_023239 | AKAP17A,ASMT      | chrX:1710485-1761974     | 0 | 0 | 0 | 1 |
| XLOC_023240 | CD99P1            | chrX:2527305-2575270     | 0 | 0 | 0 | 1 |
| XLOC_023241 | CD99              | chrX:2609227-2659350     | 0 | 0 | 0 | 1 |
| XLOC_023243 | GYG2              | chrX:2746862-2800861     | 0 | 0 | 0 | 1 |
| XLOC_023244 | ARSH              | chrX:2924653-2951426     | 0 | 0 | 0 | 1 |
| XLOC_023245 | ARSF              | chrX:2958274-3030770     | 0 | 0 | 0 | 1 |
| XLOC_023247 | MIR4767           | chrX:6966960-7066231     | 0 | 0 | 0 | 1 |
| XLOC_023249 | VCX               | chrX:7810302-7812184     | 0 | 0 | 0 | 1 |
| XLOC_023250 | MIR651            | chrX:8095005-8095102     | 0 | 0 | 0 | 1 |
| XLOC_023256 | CLCN4             | chrX:10124984-10205699   | 0 | 0 | 0 | 1 |
| XLOC_023258 | AMELX             | chrX:11155662-11683821   | 0 | 0 | 0 | 1 |
| XLOC_023260 | FRMPD4            | chrX:12156584-12742642   | 0 | 0 | 0 | 1 |
| XLOC_023262 | TLR7              | chrX:12885201-12908480   | 0 | 0 | 0 | 1 |
| XLOC_023263 | TLR8              | chrX:12920935-12961419   | 0 | 0 | 0 | 1 |
| XLOC_023265 | LOC100093698      | chrX:13328770-13338518   | 0 | 0 | 0 | 1 |
| XLOC_023266 | LOC100133123      | chrX:13353359-13359944   | 0 | 0 | 0 | 1 |
| XLOC_023267 | EGFL6             | chrX:13587693-13651694   | 0 | 0 | 0 | 1 |
| XLOC_023271 | GLRA2             | chrX:14547419-14749933   | 0 | 0 | 0 | 1 |
| XLOC_023273 | BMX               | chrX:15518899-15574652   | 0 | 0 | 0 | 1 |
| XLOC_023278 | S100G             | chrX:16606121-16731059   | 0 | 0 | 0 | 1 |
| XLOC_023283 | MIR4768           | chrX:17393542-17754113   | 0 | 0 | 0 | 1 |
| XLOC_023289 | CNKSR2            | chrX:21392535-21672813   | 0 | 0 | 0 | 1 |
| XLOC_023294 | ZNF645            | chrX:22277913-23311263   | 0 | 0 | 0 | 1 |
| XLOC_023295 | DDX53             | chrX:22277913-23311263   | 0 | 0 | 0 | 1 |
| XLOC_023302 | SUPT20HL1         | chrX:24380877-24383541   | 0 | 0 | 0 | 1 |
| XLOC_023306 | MAGEB18           | chrX:26156459-26158853   | 0 | 0 | 0 | 1 |
| XLOC_023308 | MAGEB5            | chrX:26234285-26236387   | 0 | 0 | 0 | 1 |
| XLOC_023309 | VENTXP1           | chrX:26576453-26579169   | 0 | 0 | 0 | 1 |
| XLOC_023310 | DCAF8L2           | chrX:27764925-27766938   | 0 | 0 | 0 | 1 |
| XLOC_023311 | MAGEB10           | chrX:27826106-27841131   | 0 | 0 | 0 | 1 |
| XLOC_023312 | IL1RAPL1          | chrX:28605680-29974017   | 0 | 0 | 0 | 1 |
| XLOC_023314 | MAGEB3            | chrX:30248552-30255610   | 0 | 0 | 0 | 1 |
| XLOC_023315 | MAGEB1,MAGEB4     | chrX:30260056-30270155   | 0 | 0 | 0 | 1 |
| XLOC_023317 | FAM47B            | chrX:34960912-34963034   | 0 | 0 | 0 | 1 |
| XLOC_023318 | MAGEB16           | chrX:35816458-35821852   | 0 | 0 | 0 | 1 |

|             |                 |                        |   |   |   |   |
|-------------|-----------------|------------------------|---|---|---|---|
| XLOC_023322 | FAM47C          | chrX:37026431-37029739 | 0 | 0 | 0 | 1 |
| XLOC_023327 | CXorf27         | chrX:37850069-37850570 | 0 | 0 | 0 | 1 |
| XLOC_023328 | SYTL5           | chrX:37865834-37988073 | 0 | 0 | 0 | 1 |
| XLOC_023336 | NYX             | chrX:41306712-41334905 | 0 | 0 | 0 | 1 |
| XLOC_023340 | DUSP21          | chrX:44703248-44704134 | 0 | 0 | 0 | 1 |
| XLOC_023352 | ZNF157          | chrX:47229998-47273098 | 0 | 0 | 0 | 1 |
| XLOC_023353 | SNORA11C        | chrX:47229998-47273098 | 0 | 0 | 0 | 1 |
| XLOC_023356 | MIR4769         | chrX:47420498-47479256 | 0 | 0 | 0 | 1 |
| XLOC_023358 | CXXC1P1         | chrX:47566589-47596027 | 0 | 0 | 0 | 1 |
| XLOC_023360 | SPACA5,SPACA5B  | chrX:47863733-47869128 | 0 | 0 | 0 | 1 |
| XLOC_023361 | SSX6            | chrX:47967366-47980068 | 0 | 0 | 0 | 1 |
| XLOC_023362 | SPACA5,SPACA5B  | chrX:47986602-47991997 | 0 | 0 | 0 | 1 |
| XLOC_023363 | SSX1            | chrX:48114796-48126879 | 0 | 0 | 0 | 1 |
| XLOC_023364 | SSX4B           | chrX:48242956-48252785 | 0 | 0 | 0 | 1 |
| XLOC_023373 | GLOD5           | chrX:48620153-48632064 | 0 | 0 | 0 | 1 |
| XLOC_023374 | GATA1           | chrX:48644981-48652717 | 0 | 0 | 0 | 1 |
| XLOC_023383 | GAGE10          | chrX:49160124-49176311 | 0 | 0 | 0 | 1 |
| XLOC_023384 | GAGE12J         | chrX:49178515-49185866 | 0 | 0 | 0 | 1 |
| XLOC_023386 | GAGE12D         | chrX:49315880-49323262 | 0 | 0 | 0 | 1 |
| XLOC_023387 | GAGE12D,GAGE12F | chrX:49325433-49332821 | 0 | 0 | 0 | 1 |
| XLOC_023388 | GAGE12D,GAGE12F | chrX:49334991-49342370 | 0 | 0 | 0 | 1 |
| XLOC_023389 | GAGE12D         | chrX:49344540-49351917 | 0 | 0 | 0 | 1 |
| XLOC_023390 | GAGE2A          | chrX:49354117-49361430 | 0 | 0 | 0 | 1 |
| XLOC_023391 | GAGE1           | chrX:49363615-49373139 | 0 | 0 | 0 | 1 |
| XLOC_023395 | MIR532          | chrX:49687224-49863892 | 0 | 0 | 0 | 1 |
| XLOC_023396 | MIR188          | chrX:49687224-49863892 | 0 | 0 | 0 | 1 |
| XLOC_023397 | MIR500A         | chrX:49687224-49863892 | 0 | 0 | 0 | 1 |
| XLOC_023398 | MIR362          | chrX:49687224-49863892 | 0 | 0 | 0 | 1 |
| XLOC_023399 | MIR501          | chrX:49687224-49863892 | 0 | 0 | 0 | 1 |
| XLOC_023400 | MIR500B         | chrX:49687224-49863892 | 0 | 0 | 0 | 1 |
| XLOC_023401 | MIR660          | chrX:49687224-49863892 | 0 | 0 | 0 | 1 |
| XLOC_023402 | MIR502          | chrX:49687224-49863892 | 0 | 0 | 0 | 1 |
| XLOC_023404 | BMP15           | chrX:50653734-50659641 | 0 | 0 | 0 | 1 |
| XLOC_023405 | NUDT10          | chrX:51075082-51080377 | 0 | 0 | 0 | 1 |
| XLOC_023406 | CENPVP2         | chrX:51453924-51455226 | 0 | 0 | 0 | 1 |
| XLOC_023410 | MAGED4          | chrX:51927918-51935366 | 0 | 0 | 0 | 1 |
| XLOC_023411 | XAGE2,XAGE2B    | chrX:52112077-52118822 | 0 | 0 | 0 | 1 |
| XLOC_023412 | XAGE1C,XAGE1E   | chrX:52238809-52243953 | 0 | 0 | 0 | 1 |
| XLOC_023413 | XAGE1B,XAGE1C   | chrX:52511760-52516904 | 0 | 0 | 0 | 1 |
| XLOC_023414 | SSX8            | chrX:52651984-52662998 | 0 | 0 | 0 | 1 |
| XLOC_023415 | SSX2,SSX2B      | chrX:52780307-52790617 | 0 | 0 | 0 | 1 |
| XLOC_023416 | XAGE5           | chrX:52841227-52847322 | 0 | 0 | 0 | 1 |
| XLOC_023417 | FAM156A,FAM156B | chrX:52926321-52937585 | 0 | 0 | 0 | 1 |
| XLOC_023418 | GPR173          | chrX:53078505-53109796 | 0 | 0 | 0 | 1 |
| XLOC_023424 | SNORA11         | chrX:54834170-54842445 | 0 | 0 | 0 | 1 |
| XLOC_023428 | PAGE2           | chrX:55115496-55119260 | 0 | 0 | 0 | 1 |
| XLOC_023429 | PAGE5           | chrX:55246790-55250541 | 0 | 0 | 0 | 1 |
| XLOC_023430 | MIR4536-1       | chrX:55477892-55477953 | 0 | 0 | 0 | 1 |
| XLOC_023431 | MAGEH1          | chrX:55478537-55479999 | 0 | 0 | 0 | 1 |
| XLOC_023432 | FOXK2           | chrX:55649832-55652621 | 0 | 0 | 0 | 1 |
| XLOC_023434 | KLF8            | chrX:56258821-56314322 | 0 | 0 | 0 | 1 |
| XLOC_023441 | MIR223          | chrX:65238711-65238821 | 0 | 0 | 0 | 1 |
| XLOC_023443 | AR              | chrX:66763873-66950461 | 0 | 0 | 0 | 1 |
| XLOC_023447 | FAM155B         | chrX:68725077-68752351 | 0 | 0 | 0 | 1 |
| XLOC_023448 | EDA             | chrX:68835910-69259321 | 0 | 0 | 0 | 1 |
| XLOC_023449 | MIR676          | chrX:68835910-69259321 | 0 | 0 | 0 | 1 |
| XLOC_023453 | AWAT1           | chrX:69454504-69460511 | 0 | 0 | 0 | 1 |
| XLOC_023454 | ARR3            | chrX:69488184-69501690 | 0 | 0 | 0 | 1 |
| XLOC_023462 | GJB1            | chrX:70430034-70948962 | 0 | 0 | 0 | 1 |
| XLOC_023468 | FLJ46446        | chrX:70430034-70948962 | 0 | 0 | 0 | 1 |
| XLOC_023469 | CXorf49B        | chrX:70983139-70987051 | 0 | 0 | 0 | 1 |
| XLOC_023470 | NHSL2           | chrX:71130937-71363424 | 0 | 0 | 0 | 1 |
| XLOC_023472 | FLJ44635        | chrX:71364033-71381600 | 0 | 0 | 0 | 1 |
| XLOC_023474 | DMRTC1B         | chrX:72064875-72068636 | 0 | 0 | 0 | 1 |
| XLOC_023475 | LINC00684       | chrX:72158002-72158798 | 0 | 0 | 0 | 1 |
| XLOC_023476 | PABPC1L2B       | chrX:72223351-72225551 | 0 | 0 | 0 | 1 |
| XLOC_023477 | CDX4            | chrX:72667089-72674421 | 0 | 0 | 0 | 1 |
| XLOC_023481 | MIR374C         | chrX:73164158-73513409 | 0 | 0 | 0 | 1 |
| XLOC_023482 | ZCCHC13         | chrX:73524024-73524869 | 0 | 0 | 0 | 1 |
| XLOC_023486 | MAGEE1          | chrX:75648045-75651746 | 0 | 0 | 0 | 1 |
| XLOC_023487 | FGF16           | chrX:76709646-76712013 | 0 | 0 | 0 | 1 |
| XLOC_023491 | LPAR4           | chrX:78003205-78012578 | 0 | 0 | 0 | 1 |
| XLOC_023492 | P2RY10          | chrX:78200828-78217438 | 0 | 0 | 0 | 1 |
| XLOC_023493 | GPR174          | chrX:78426468-78427726 | 0 | 0 | 0 | 1 |
| XLOC_023494 | TBX22           | chrX:79270254-79287268 | 0 | 0 | 0 | 1 |
| XLOC_023495 | FAM46D          | chrX:79591002-79700810 | 0 | 0 | 0 | 1 |
| XLOC_023497 | POU3F4          | chrX:82763268-82764775 | 0 | 0 | 0 | 1 |
| XLOC_023498 | CYLC1           | chrX:83116133-83141708 | 0 | 0 | 0 | 1 |
| XLOC_023499 | UBE2DNL         | chrX:84189156-84189896 | 0 | 0 | 0 | 1 |

|             |                      |                         |   |   |   |   |
|-------------|----------------------|-------------------------|---|---|---|---|
| XLOC_023502 | DACH2                | chrX:85403454-86087605  | 0 | 0 | 0 | 1 |
| XLOC_023503 | KLHL4                | chrX:86772714-86925050  | 0 | 0 | 0 | 1 |
| XLOC_023504 | CPXCR1               | chrX:88002225-88009785  | 0 | 0 | 0 | 1 |
| XLOC_023505 | TGIF2LX              | chrX:89176939-89177882  | 0 | 0 | 0 | 1 |
| XLOC_023506 | PABPC5               | chrX:90689596-90693583  | 0 | 0 | 0 | 1 |
| XLOC_023507 | PCDH11X              | chrX:91034259-91878228  | 0 | 0 | 0 | 1 |
| XLOC_023508 | FAM133A              | chrX:92929011-92967273  | 0 | 0 | 0 | 1 |
| XLOC_023511 | TNMD                 | chrX:99839789-99854882  | 0 | 0 | 0 | 1 |
| XLOC_023523 | NXF2B                | chrX:101502093-10158163 | 0 | 0 | 0 | 1 |
| XLOC_023524 | NXF4                 | chrX:101804892-10182662 | 0 | 0 | 0 | 1 |
| XLOC_023531 | TCEAL7               | chrX:102585113-10258725 | 0 | 0 | 0 | 1 |
| XLOC_023538 | TMEM31               | chrX:102962271-10298355 | 0 | 0 | 0 | 1 |
| XLOC_023539 | PLP1                 | chrX:103031438-10304754 | 0 | 0 | 0 | 1 |
| XLOC_023540 | TMSB15B              | chrX:103139054-10340170 | 0 | 0 | 0 | 1 |
| XLOC_023541 | H2BFXP               | chrX:103139054-10340170 | 0 | 0 | 0 | 1 |
| XLOC_023542 | H2BFM                | chrX:103139054-10340170 | 0 | 0 | 0 | 1 |
| XLOC_023543 | ZCCHC18              | chrX:103139054-10340170 | 0 | 0 | 0 | 1 |
| XLOC_023545 | IL1RAPL2             | chrX:103810995-10501182 | 0 | 0 | 0 | 1 |
| XLOC_023546 | NRK                  | chrX:105066535-10520260 | 0 | 0 | 0 | 1 |
| XLOC_023547 | MUM1L1               | chrX:105412297-10545294 | 0 | 0 | 0 | 1 |
| XLOC_023549 | RNF128               | chrX:105937067-10604024 | 0 | 0 | 0 | 1 |
| XLOC_023552 | PIH1D3               | chrX:106449861-10648747 | 0 | 0 | 0 | 1 |
| XLOC_023557 | COL4A5               | chrX:107683073-10794077 | 0 | 0 | 0 | 1 |
| XLOC_023560 | MIR3978              | chrX:109245862-10942101 | 0 | 0 | 0 | 1 |
| XLOC_023562 | TDGF1P3              | chrX:109763539-10976624 | 0 | 0 | 0 | 1 |
| XLOC_023563 | PAK3                 | chrX:110187512-11046417 | 0 | 0 | 0 | 1 |
| XLOC_023564 | DKFZp686D0853        | chrX:110754889-11076562 | 0 | 0 | 0 | 1 |
| XLOC_023566 | TRPC5OS              | chrX:111017541-11132600 | 0 | 0 | 0 | 1 |
| XLOC_023567 | ZCCHC16              | chrX:111326252-11170047 | 0 | 0 | 0 | 1 |
| XLOC_023568 | HTR2C                | chrX:113818550-11414462 | 0 | 0 | 0 | 1 |
| XLOC_023569 | SNORA35              | chrX:113818550-11414462 | 0 | 0 | 0 | 1 |
| XLOC_023570 | MIR764               | chrX:113818550-11414462 | 0 | 0 | 0 | 1 |
| XLOC_023571 | MIR1912              | chrX:113818550-11414462 | 0 | 0 | 0 | 1 |
| XLOC_023572 | MIR1264              | chrX:113818550-11414462 | 0 | 0 | 0 | 1 |
| XLOC_023573 | MIR1298              | chrX:113818550-11414462 | 0 | 0 | 0 | 1 |
| XLOC_023574 | MIR1911              | chrX:113818550-11414462 | 0 | 0 | 0 | 1 |
| XLOC_023575 | MIR448               | chrX:113818550-11414462 | 0 | 0 | 0 | 1 |
| XLOC_023576 | RBMXL3               | chrX:114345182-11446863 | 0 | 0 | 0 | 1 |
| XLOC_023580 | SLC6A14              | chrX:115567746-11559262 | 0 | 0 | 0 | 1 |
| XLOC_023582 | MIR1277              | chrX:117480035-11758392 | 0 | 0 | 0 | 1 |
| XLOC_023594 | RHOXF2B              | chrX:119292466-11929794 | 0 | 0 | 0 | 1 |
| XLOC_023596 | ATP1B4               | chrX:119495939-11951710 | 0 | 0 | 0 | 1 |
| XLOC_023602 | SH2D1A               | chrX:123480131-12350701 | 0 | 0 | 0 | 1 |
| XLOC_023603 | LOC100129520         | chrX:124453968-12445695 | 0 | 0 | 0 | 1 |
| XLOC_023604 | CXorf64              | chrX:125953746-12595576 | 0 | 0 | 0 | 1 |
| XLOC_023606 | XPNPEP2              | chrX:128872945-12890352 | 0 | 0 | 0 | 1 |
| XLOC_023607 | SASH3                | chrX:128913891-12892917 | 0 | 0 | 0 | 1 |
| XLOC_023614 | ARHGAP36             | chrX:130192215-13022385 | 0 | 0 | 0 | 1 |
| XLOC_023615 | OR13H1               | chrX:130678047-13067897 | 0 | 0 | 0 | 1 |
| XLOC_023617 | HS6ST2-AS1           | chrX:131760037-13209542 | 0 | 0 | 0 | 1 |
| XLOC_023618 | CCDC160              | chrX:133371076-13337980 | 0 | 0 | 0 | 1 |
| XLOC_023623 | SMIM10               | chrX:134124967-13412650 | 0 | 0 | 0 | 1 |
| XLOC_023624 | FAM127A              | chrX:134166332-13416757 | 0 | 0 | 0 | 1 |
| XLOC_023626 | LINC00086            | chrX:134555867-13456022 | 0 | 0 | 0 | 1 |
| XLOC_023628 | CT45A1               | chrX:134847184-13485698 | 0 | 0 | 0 | 1 |
| XLOC_023629 | CT45A2,CT45A3,CT45A4 | chrX:134866213-13489151 | 0 | 0 | 0 | 1 |
| XLOC_023630 | SAGE1                | chrX:134975784-13499522 | 0 | 0 | 0 | 1 |
| XLOC_023633 | GPR112               | chrX:135383121-13549904 | 0 | 0 | 0 | 1 |
| XLOC_023634 | BRS3                 | chrX:135570124-13557459 | 0 | 0 | 0 | 1 |
| XLOC_023636 | VGLL1                | chrX:135614310-13563896 | 0 | 0 | 0 | 1 |
| XLOC_023637 | MIR934               | chrX:135614310-13563896 | 0 | 0 | 0 | 1 |
| XLOC_023638 | LOC100128420         | chrX:135721701-13572458 | 0 | 0 | 0 | 1 |
| XLOC_023640 | ZIC3                 | chrX:136648345-13665425 | 0 | 0 | 0 | 1 |
| XLOC_023641 | FGF13-AS1            | chrX:137713733-13828718 | 0 | 0 | 0 | 1 |
| XLOC_023642 | SRD5A1P1             | chrX:138528977-13853113 | 0 | 0 | 0 | 1 |
| XLOC_023643 | F9                   | chrX:138612894-13864561 | 0 | 0 | 0 | 1 |
| XLOC_023644 | LOC389895            | chrX:139173825-13917507 | 0 | 0 | 0 | 1 |
| XLOC_023645 | RP1-177G6.2          | chrX:139791923-13979699 | 0 | 0 | 0 | 1 |
| XLOC_023646 | SPANXB2              | chrX:140084755-14008587 | 0 | 0 | 0 | 1 |
| XLOC_023647 | SPANXB1              | chrX:140096760-14009787 | 0 | 0 | 0 | 1 |
| XLOC_023648 | SPANXA2-OT1          | chrX:140590842-14073806 | 0 | 0 | 0 | 1 |
| XLOC_023649 | SPANXA2              | chrX:140590842-14073806 | 0 | 0 | 0 | 1 |
| XLOC_023650 | MAGEC3               | chrX:140926101-14098561 | 0 | 0 | 0 | 1 |
| XLOC_023651 | MAGEC1               | chrX:140991641-14099718 | 0 | 0 | 0 | 1 |
| XLOC_023652 | SPANXN4              | chrX:142113703-14212206 | 0 | 0 | 0 | 1 |
| XLOC_023653 | UBE2NL               | chrX:142967172-14296835 | 0 | 0 | 0 | 1 |
| XLOC_023654 | SPANXN1              | chrX:144329106-14433772 | 0 | 0 | 0 | 1 |
| XLOC_023656 | TMEM257              | chrX:144908927-14491137 | 0 | 0 | 0 | 1 |
| XLOC_023657 | CXorf51B             | chrX:145891301-14589192 | 0 | 0 | 0 | 1 |

|             |                |                          |   |   |   |   |
|-------------|----------------|--------------------------|---|---|---|---|
| XLOC_023660 | AFF2           | chrX:147582138-14808219: | 0 | 0 | 0 | 1 |
| XLOC_023662 | MAGEA11        | chrX:148769902-14879892: | 0 | 0 | 0 | 1 |
| XLOC_023663 | HSFX2          | chrX:148855725-14885852: | 0 | 0 | 0 | 1 |
| XLOC_023664 | MAGEA9B        | chrX:148863592-14886939: | 0 | 0 | 0 | 1 |
| XLOC_023665 | MAGEA8         | chrX:149009940-14901460: | 0 | 0 | 0 | 1 |
| XLOC_023667 | MIR2114        | chrX:149396238-14939631: | 0 | 0 | 0 | 1 |
| XLOC_023672 | MIR4330        | chrX:150336693-15033679: | 0 | 0 | 0 | 1 |
| XLOC_023673 | GPR50          | chrX:150345055-15034993: | 0 | 0 | 0 | 1 |
| XLOC_023675 | PASD1          | chrX:150732006-15084521: | 0 | 0 | 0 | 1 |
| XLOC_023676 | PRRG3          | chrX:150863729-15087006: | 0 | 0 | 0 | 1 |
| XLOC_023677 | FATE1          | chrX:150884507-15089166: | 0 | 0 | 0 | 1 |
| XLOC_023678 | CNGA2          | chrX:150903217-15091403: | 0 | 0 | 0 | 1 |
| XLOC_023680 | GABRQ          | chrX:151806636-15182182: | 0 | 0 | 0 | 1 |
| XLOC_023681 | MAGEA6         | chrX:151867244-15187081: | 0 | 0 | 0 | 1 |
| XLOC_023682 | MAGEA2,MAGEA2B | chrX:151883118-15188709: | 0 | 0 | 0 | 1 |
| XLOC_023684 | CSAG2,CSAG3    | chrX:151927733-15192873: | 0 | 0 | 0 | 1 |
| XLOC_023687 | PNMA3          | chrX:152224765-15222882: | 0 | 0 | 0 | 1 |
| XLOC_023688 | PNMA6C,PNMA6D  | chrX:152240726-15224340: | 0 | 0 | 0 | 1 |
| XLOC_023690 | ZFP92          | chrX:152683780-15268708: | 0 | 0 | 0 | 1 |
| XLOC_023691 | BGN            | chrX:152713122-15277500: | 0 | 0 | 0 | 1 |
| XLOC_023701 | MIR3202-1      | chrX:153237990-15324864: | 0 | 0 | 0 | 1 |
| XLOC_023702 | OPN1LW         | chrX:153409724-15342450: | 0 | 0 | 0 | 1 |
| XLOC_023703 | OPN1MW         | chrX:153448084-15346235: | 0 | 0 | 0 | 1 |
| XLOC_023704 | OPN1MW         | chrX:153485202-15352356: | 0 | 0 | 0 | 1 |
| XLOC_023715 | FAM223B        | chrX:153799478-15380018: | 0 | 0 | 0 | 1 |
| XLOC_023716 | CTAG1B         | chrX:153813417-15381507: | 0 | 0 | 0 | 1 |
| XLOC_023719 | SNORA56        | chrX:153991030-15400596: | 0 | 0 | 0 | 1 |
| XLOC_023720 | H2AFB1         | chrX:154064063-15425099: | 0 | 0 | 0 | 1 |
| XLOC_023725 | H2AFB3         | chrX:154610427-15461094: | 0 | 0 | 0 | 1 |
| XLOC_023726 | F8A1           | chrX:154611748-15461345: | 0 | 0 | 0 | 1 |
| XLOC_023727 | MIR1184-3      | chrX:154686574-15468827: | 0 | 0 | 0 | 1 |
| XLOC_023728 | TMLHE-AS1      | chrX:154696200-15484262: | 0 | 0 | 0 | 1 |
| XLOC_023729 | SPRY3          | chrX:154997450-15501211: | 0 | 0 | 0 | 1 |
| XLOC_023730 | VAMP7          | chrX:155110942-15517343: | 0 | 0 | 0 | 1 |
| XLOC_023731 | IL9R           | chrX:155227245-15524048: | 0 | 0 | 0 | 1 |
| XLOC_023732 | GTPBP6         | chrX:221425-230887       | 0 | 0 | 0 | 1 |
| XLOC_023733 | PPP2R3B        | chrX:294667-347690       | 0 | 0 | 0 | 1 |
| XLOC_023734 | CRLF2          | chrX:1314886-1331530     | 0 | 0 | 0 | 1 |
| XLOC_023735 | SLC25A6        | chrX:1505044-1511039     | 0 | 0 | 0 | 1 |
| XLOC_023736 | ASMTL          | chrX:1519423-1572655     | 0 | 0 | 0 | 1 |
| XLOC_023737 | P2RY8          | chrX:1581465-1656037     | 0 | 0 | 0 | 1 |
| XLOC_023738 | DHRX,ZBED1     | chrX:2137554-2419015     | 0 | 0 | 0 | 1 |
| XLOC_023741 | ARSE           | chrX:2852672-2882494     | 0 | 0 | 0 | 1 |
| XLOC_023742 | MXRA5          | chrX:3226608-3264684     | 0 | 0 | 0 | 1 |
| XLOC_023745 | NLGN4X         | chrX:5808082-6146706     | 0 | 0 | 0 | 1 |
| XLOC_023746 | MIR4770        | chrX:6301946-6302004     | 0 | 0 | 0 | 1 |
| XLOC_023747 | VCX3A          | chrX:6451658-6453159     | 0 | 0 | 0 | 1 |
| XLOC_023750 | VCX2           | chrX:8137984-8139308     | 0 | 0 | 0 | 1 |
| XLOC_023751 | KAL1           | chrX:8496914-8700227     | 0 | 0 | 0 | 1 |
| XLOC_023752 | FAM9A          | chrX:8758836-8769424     | 0 | 0 | 0 | 1 |
| XLOC_023753 | FAM9B          | chrX:8993036-9001116     | 0 | 0 | 0 | 1 |
| XLOC_023756 | ARHGAP6        | chrX:11155662-11683821   | 0 | 0 | 0 | 1 |
| XLOC_023757 | TLR8-AS1       | chrX:12920935-12961419   | 0 | 0 | 0 | 1 |
| XLOC_023758 | FAM9C          | chrX:13053735-13062917   | 0 | 0 | 0 | 1 |
| XLOC_023759 | ATXN3L         | chrX:13328770-13338518   | 0 | 0 | 0 | 1 |
| XLOC_023764 | ASB9           | chrX:15262108-15288589   | 0 | 0 | 0 | 1 |
| XLOC_023765 | ASB11          | chrX:15299830-15333746   | 0 | 0 | 0 | 1 |
| XLOC_023774 | RAI2           | chrX:17818168-17879457   | 0 | 0 | 0 | 1 |
| XLOC_023775 | BEND2          | chrX:18181050-18239024   | 0 | 0 | 0 | 1 |
| XLOC_023776 | SCML2          | chrX:18257432-18372844   | 0 | 0 | 0 | 1 |
| XLOC_023783 | LOC729609      | chrX:20004934-20007897   | 0 | 0 | 0 | 1 |
| XLOC_023785 | MIR23C         | chrX:20024830-20135114   | 0 | 0 | 0 | 1 |
| XLOC_023789 | KLHL34         | chrX:21673608-21676448   | 0 | 0 | 0 | 1 |
| XLOC_023790 | SMPX           | chrX:21724089-21776278   | 0 | 0 | 0 | 1 |
| XLOC_023791 | PHEX-AS1       | chrX:22050920-22266478   | 0 | 0 | 0 | 1 |
| XLOC_023792 | LOC100873065   | chrX:22277913-23311263   | 0 | 0 | 0 | 1 |
| XLOC_023797 | SUPT20HL2      | chrX:24328978-24331432   | 0 | 0 | 0 | 1 |
| XLOC_023800 | SMEK3P         | chrX:27478327-27481458   | 0 | 0 | 0 | 1 |
| XLOC_023801 | DCAF8L1        | chrX:27996109-27999566   | 0 | 0 | 0 | 1 |
| XLOC_023802 | NR0B1          | chrX:30322538-30327495   | 0 | 0 | 0 | 1 |
| XLOC_023803 | CXorf21        | chrX:30576940-30596033   | 0 | 0 | 0 | 1 |
| XLOC_023805 | FTHL17         | chrX:31089357-31090170   | 0 | 0 | 0 | 1 |
| XLOC_023806 | DMD            | chrX:31137344-33357726   | 0 | 0 | 0 | 1 |
| XLOC_023807 | FAM47A         | chrX:34147868-34150447   | 0 | 0 | 0 | 1 |
| XLOC_023808 | TMEM47         | chrX:34645180-34675405   | 0 | 0 | 0 | 1 |
| XLOC_023813 | LOC286442      | chrX:39164209-39186616   | 0 | 0 | 0 | 1 |
| XLOC_023817 | LOC100132831   | chrX:40690469-40692449   | 0 | 0 | 0 | 1 |
| XLOC_023819 | PPP1R2P9       | chrX:42636616-42637486   | 0 | 0 | 0 | 1 |
| XLOC_023820 | MAOB           | chrX:43625856-43741721   | 0 | 0 | 0 | 1 |

|             |                |                          |   |   |   |   |
|-------------|----------------|--------------------------|---|---|---|---|
| XLOC_023821 | NDP            | chrX:43808023-43832921   | 0 | 0 | 0 | 1 |
| XLOC_023822 | EFHC2          | chrX:44007127-44202923   | 0 | 0 | 0 | 1 |
| XLOC_023826 | MIR222         | chrX:45606420-45606530   | 0 | 0 | 0 | 1 |
| XLOC_023839 | SSX9           | chrX:48160984-48165614   | 0 | 0 | 0 | 1 |
| XLOC_023840 | SSX3           | chrX:48205862-48216142   | 0 | 0 | 0 | 1 |
| XLOC_023841 | SSX4B          | chrX:48261523-48271355   | 0 | 0 | 0 | 1 |
| XLOC_023856 | CACNA1F        | chrX:49061522-49089833   | 0 | 0 | 0 | 1 |
| XLOC_023858 | PAGE1          | chrX:49452053-49460596   | 0 | 0 | 0 | 1 |
| XLOC_023860 | AKAP4          | chrX:49955410-49965664   | 0 | 0 | 0 | 1 |
| XLOC_023861 | DGKK           | chrX:50111878-50213721   | 0 | 0 | 0 | 1 |
| XLOC_023863 | NUDT11         | chrX:51232862-51239459   | 0 | 0 | 0 | 1 |
| XLOC_023864 | CENPVP2        | chrX:51424145-51425447   | 0 | 0 | 0 | 1 |
| XLOC_023865 | MAGED4,MAGED4B | chrX:51804922-51812368   | 0 | 0 | 0 | 1 |
| XLOC_023866 | SNORA11D       | chrX:51804922-51812368   | 0 | 0 | 0 | 1 |
| XLOC_023867 | SNORA11E       | chrX:51927918-51935366   | 0 | 0 | 0 | 1 |
| XLOC_023868 | XAGE1B,XAGE1D  | chrX:52255219-52260363   | 0 | 0 | 0 | 1 |
| XLOC_023869 | XAGE2,XAGE2B   | chrX:52380351-52387096   | 0 | 0 | 0 | 1 |
| XLOC_023870 | XAGE1C         | chrX:52528159-52533303   | 0 | 0 | 0 | 1 |
| XLOC_023871 | XAGE1A,XAGE1C  | chrX:52541053-52546197   | 0 | 0 | 0 | 1 |
| XLOC_023872 | SSX7           | chrX:52673110-52683950   | 0 | 0 | 0 | 1 |
| XLOC_023873 | SSX2           | chrX:52725945-52736249   | 0 | 0 | 0 | 1 |
| XLOC_023874 | SPANXN5        | chrX:52825185-52826388   | 0 | 0 | 0 | 1 |
| XLOC_023875 | XAGE3          | chrX:52891557-52897119   | 0 | 0 | 0 | 1 |
| XLOC_023882 | MIR98          | chrX:53559056-53713697   | 0 | 0 | 0 | 1 |
| XLOC_023883 | MIRLET7F2      | chrX:53559056-53713697   | 0 | 0 | 0 | 1 |
| XLOC_023890 | ALAS2          | chrX:55035487-55057497   | 0 | 0 | 0 | 1 |
| XLOC_023893 | PAGE3          | chrX:55284848-55291165   | 0 | 0 | 0 | 1 |
| XLOC_023894 | USP51          | chrX:55511048-55515631   | 0 | 0 | 0 | 1 |
| XLOC_023899 | ZXDA           | chrX:57931863-57937067   | 0 | 0 | 0 | 1 |
| XLOC_023903 | MIR1468        | chrX:63005881-63005967   | 0 | 0 | 0 | 1 |
| XLOC_023905 | ASB12          | chrX:63444071-63450511   | 0 | 0 | 0 | 1 |
| XLOC_023906 | MTMR8          | chrX:63487960-63615333   | 0 | 0 | 0 | 1 |
| XLOC_023909 | FRMD8P1        | chrX:64770501-64772301   | 0 | 0 | 0 | 1 |
| XLOC_023910 | VSIG4          | chrX:65241579-65259967   | 0 | 0 | 0 | 1 |
| XLOC_023918 | SLC7A3         | chrX:70145429-70150975   | 0 | 0 | 0 | 1 |
| XLOC_023920 | CXorf65        | chrX:70323738-70326638   | 0 | 0 | 0 | 1 |
| XLOC_023926 | CXorf49B       | chrX:70430034-70948962   | 0 | 0 | 0 | 1 |
| XLOC_023927 | RGAG4          | chrX:71130937-71363424   | 0 | 0 | 0 | 1 |
| XLOC_023933 | LINC00684      | chrX:72001688-72002484   | 0 | 0 | 0 | 1 |
| XLOC_023934 | DMRTC1B        | chrX:72091858-72095622   | 0 | 0 | 0 | 1 |
| XLOC_023936 | PABPC1L2A      | chrX:72297176-72299351   | 0 | 0 | 0 | 1 |
| XLOC_023938 | NAP1L2         | chrX:72432136-72434710   | 0 | 0 | 0 | 1 |
| XLOC_023942 | MIR421         | chrX:73164158-73513409   | 0 | 0 | 0 | 1 |
| XLOC_023943 | MIR374B        | chrX:73164158-73513409   | 0 | 0 | 0 | 1 |
| XLOC_023944 | MIR545         | chrX:73164158-73513409   | 0 | 0 | 0 | 1 |
| XLOC_023945 | MIR374A        | chrX:73164158-73513409   | 0 | 0 | 0 | 1 |
| XLOC_023947 | KIAA2022       | chrX:73952690-74145287   | 0 | 0 | 0 | 1 |
| XLOC_023951 | MAGEE2         | chrX:75002822-75005079   | 0 | 0 | 0 | 1 |
| XLOC_023952 | MIR384         | chrX:76139697-76139785   | 0 | 0 | 0 | 1 |
| XLOC_023957 | CYSLTR1        | chrX:77528129-77583087   | 0 | 0 | 0 | 1 |
| XLOC_023958 | ZCCHC5         | chrX:77911565-77914825   | 0 | 0 | 0 | 1 |
| XLOC_023959 | MIR4328        | chrX:78156690-78156746   | 0 | 0 | 0 | 1 |
| XLOC_023960 | ITM2A          | chrX:78615880-78623049   | 0 | 0 | 0 | 1 |
| XLOC_023963 | RPS6KA6        | chrX:83313353-83442943   | 0 | 0 | 0 | 1 |
| XLOC_023964 | HDX            | chrX:83572881-83757487   | 0 | 0 | 0 | 1 |
| XLOC_023968 | NAP1L3         | chrX:92925924-92928682   | 0 | 0 | 0 | 1 |
| XLOC_023969 | LOC643486      | chrX:95592084-95592901   | 0 | 0 | 0 | 1 |
| XLOC_023970 | LOC442459      | chrX:98716599-99194841   | 0 | 0 | 0 | 1 |
| XLOC_023971 | PCDH19         | chrX:99546641-99665271   | 0 | 0 | 0 | 1 |
| XLOC_023983 | NXF5           | chrX:101087084-101112541 | 0 | 0 | 0 | 1 |
| XLOC_023987 | NXF2           | chrX:101615315-101694921 | 0 | 0 | 0 | 1 |
| XLOC_023988 | TMSB15A        | chrX:101768609-101771691 | 0 | 0 | 0 | 1 |
| XLOC_023989 | BEX1           | chrX:102317580-102319161 | 0 | 0 | 0 | 1 |
| XLOC_023990 | NXF3           | chrX:102330749-102348021 | 0 | 0 | 0 | 1 |
| XLOC_023993 | BEX2           | chrX:102564273-102565971 | 0 | 0 | 0 | 1 |
| XLOC_023996 | GLRA4          | chrX:102962271-102983551 | 0 | 0 | 0 | 1 |
| XLOC_023999 | H2BFWT         | chrX:103139054-103401701 | 0 | 0 | 0 | 1 |
| XLOC_024000 | H2BFXP         | chrX:103139054-103401701 | 0 | 0 | 0 | 1 |
| XLOC_024002 | ESX1           | chrX:103494718-103499591 | 0 | 0 | 0 | 1 |
| XLOC_024003 | TEX13A         | chrX:103810995-105011821 | 0 | 0 | 0 | 1 |
| XLOC_024004 | SERPINA7       | chrX:105277189-105282711 | 0 | 0 | 0 | 1 |
| XLOC_024008 | NUP62CL        | chrX:106366656-106449671 | 0 | 0 | 0 | 1 |
| XLOC_024013 | IRS4           | chrX:107975726-107979601 | 0 | 0 | 0 | 1 |
| XLOC_024014 | GUCY2F         | chrX:108616134-108725281 | 0 | 0 | 0 | 1 |
| XLOC_024018 | SNORD96B       | chrX:109437413-109699561 | 0 | 0 | 0 | 1 |
| XLOC_024021 | DCX            | chrX:110537006-110664831 | 0 | 0 | 0 | 1 |
| XLOC_024022 | RNU6-28        | chrX:110537006-110664831 | 0 | 0 | 0 | 1 |
| XLOC_024023 | TRPC5          | chrX:111017541-111326001 | 0 | 0 | 0 | 1 |
| XLOC_024024 | LHFPL1         | chrX:111873878-111923371 | 0 | 0 | 0 | 1 |

|             |                      |                          |   |   |   |   |
|-------------|----------------------|--------------------------|---|---|---|---|
| XLOC_024026 | MIR4329              | chrX:112018104-11208404: | 0 | 0 | 0 | 1 |
| XLOC_024028 | LRCH2                | chrX:114345182-11446863: | 0 | 0 | 0 | 1 |
| XLOC_024029 | CXorf61              | chrX:115592852-11559419: | 0 | 0 | 0 | 1 |
| XLOC_024030 | KLHL13               | chrX:117031775-11725130: | 0 | 0 | 0 | 1 |
| XLOC_024031 | KIAA1210             | chrX:118212597-11828454: | 0 | 0 | 0 | 1 |
| XLOC_024036 | MIR766               | chrX:118749687-11882733: | 0 | 0 | 0 | 1 |
| XLOC_024038 | SNORA69              | chrX:118920468-11892560: | 0 | 0 | 0 | 1 |
| XLOC_024042 | RHOXF2B              | chrX:119206228-11921170: | 0 | 0 | 0 | 1 |
| XLOC_024043 | RHOXF1               | chrX:119243010-11924984: | 0 | 0 | 0 | 1 |
| XLOC_024049 | CT47B1               | chrX:120006451-12000977: | 0 | 0 | 0 | 1 |
| XLOC_024050 | CT47A1,CT47A4        | chrX:120011344-12006615: | 0 | 0 | 0 | 1 |
| XLOC_024051 | CT47A8               | chrX:120067694-12007101: | 0 | 0 | 0 | 1 |
| XLOC_024052 | CT47A11              | chrX:120072555-12007587: | 0 | 0 | 0 | 1 |
| XLOC_024053 | CT47A5               | chrX:120077415-12008073: | 0 | 0 | 0 | 1 |
| XLOC_024054 | CT47A3               | chrX:120082276-12008559: | 0 | 0 | 0 | 1 |
| XLOC_024055 | CT47A7               | chrX:120087136-12009045: | 0 | 0 | 0 | 1 |
| XLOC_024056 | CT47A1,CT47A2,CT47A6 | chrX:120092019-12010019: | 0 | 0 | 0 | 1 |
| XLOC_024057 | CT47A2               | chrX:120101740-12010505: | 0 | 0 | 0 | 1 |
| XLOC_024058 | CT47A9               | chrX:120106600-12010991: | 0 | 0 | 0 | 1 |
| XLOC_024059 | CT47A8               | chrX:120111460-12011477: | 0 | 0 | 0 | 1 |
| XLOC_024060 | CT47A6               | chrX:120116320-12011963: | 0 | 0 | 0 | 1 |
| XLOC_024062 | TENM1                | chrX:123509755-12409766: | 0 | 0 | 0 | 1 |
| XLOC_024063 | DCAF12L2             | chrX:125297481-12530008: | 0 | 0 | 0 | 1 |
| XLOC_024064 | DCAF12L1             | chrX:125683365-12568684: | 0 | 0 | 0 | 1 |
| XLOC_024065 | ACTRT1               | chrX:127184940-12718638: | 0 | 0 | 0 | 1 |
| XLOC_024072 | GPR119               | chrX:129518318-12951951: | 0 | 0 | 0 | 1 |
| XLOC_024074 | IGSF1                | chrX:130407482-13042340: | 0 | 0 | 0 | 1 |
| XLOC_024076 | FRMD7                | chrX:131211020-13126205: | 0 | 0 | 0 | 1 |
| XLOC_024079 | HS6ST2               | chrX:131760037-13209542: | 0 | 0 | 0 | 1 |
| XLOC_024080 | USP26                | chrX:132159506-13216230: | 0 | 0 | 0 | 1 |
| XLOC_024081 | TFDP3                | chrX:132350696-13235237: | 0 | 0 | 0 | 1 |
| XLOC_024083 | GPC3                 | chrX:132669775-13311967: | 0 | 0 | 0 | 1 |
| XLOC_024084 | MIR363               | chrX:133303407-13330348: | 0 | 0 | 0 | 1 |
| XLOC_024085 | MIR92A2              | chrX:133303567-13330364: | 0 | 0 | 0 | 1 |
| XLOC_024086 | MIR19B2              | chrX:133303700-13330379: | 0 | 0 | 0 | 1 |
| XLOC_024087 | MIR20B               | chrX:133303838-13330390: | 0 | 0 | 0 | 1 |
| XLOC_024088 | MIR18B               | chrX:133304070-13330414: | 0 | 0 | 0 | 1 |
| XLOC_024089 | MIR106A              | chrX:133304227-13330430: | 0 | 0 | 0 | 1 |
| XLOC_024090 | MIR450B              | chrX:133674214-13367429: | 0 | 0 | 0 | 1 |
| XLOC_024091 | MIR450A1             | chrX:133674370-13367446: | 0 | 0 | 0 | 1 |
| XLOC_024092 | MIR450A2             | chrX:133674537-13367463: | 0 | 0 | 0 | 1 |
| XLOC_024093 | MIR542               | chrX:133675370-13367546: | 0 | 0 | 0 | 1 |
| XLOC_024094 | MGC16121,MIR424      | chrX:133677406-13368074: | 0 | 0 | 0 | 1 |
| XLOC_024095 | MIR503               | chrX:133677406-13368074: | 0 | 0 | 0 | 1 |
| XLOC_024099 | FAM127C              | chrX:134154533-13415656: | 0 | 0 | 0 | 1 |
| XLOC_024100 | FAM127B              | chrX:134184962-13418622: | 0 | 0 | 0 | 1 |
| XLOC_024101 | LINC00087            | chrX:134229014-13423273: | 0 | 0 | 0 | 1 |
| XLOC_024102 | LINC00633            | chrX:134252881-13425440: | 0 | 0 | 0 | 1 |
| XLOC_024105 | CT45A4               | chrX:134928696-13493673: | 0 | 0 | 0 | 1 |
| XLOC_024107 | CT45A6               | chrX:134963214-13497124: | 0 | 0 | 0 | 1 |
| XLOC_024112 | SNORD61              | chrX:135951352-13596293: | 0 | 0 | 0 | 1 |
| XLOC_024113 | GPR101               | chrX:136112306-13611383: | 0 | 0 | 0 | 1 |
| XLOC_024114 | LOC158696            | chrX:137696891-13769979: | 0 | 0 | 0 | 1 |
| XLOC_024116 | MIR504               | chrX:137713733-13828718: | 0 | 0 | 0 | 1 |
| XLOC_024119 | MIR505               | chrX:139006306-13900639: | 0 | 0 | 0 | 1 |
| XLOC_024120 | CXorf66              | chrX:139037883-13904767: | 0 | 0 | 0 | 1 |
| XLOC_024121 | SOX3                 | chrX:139585151-13958722: | 0 | 0 | 0 | 1 |
| XLOC_024122 | CDR1                 | chrX:139865424-13986672: | 0 | 0 | 0 | 1 |
| XLOC_024123 | MIR320D2             | chrX:140008336-14000838: | 0 | 0 | 0 | 1 |
| XLOC_024124 | LDLOC1               | chrX:140269930-14027131: | 0 | 0 | 0 | 1 |
| XLOC_024125 | SPANXC               | chrX:140335595-14033664: | 0 | 0 | 0 | 1 |
| XLOC_024126 | SPANXA2              | chrX:140590842-14073806: | 0 | 0 | 0 | 1 |
| XLOC_024127 | SPANXE               | chrX:140785567-14078665: | 0 | 0 | 0 | 1 |
| XLOC_024128 | MAGEC2               | chrX:141290127-14129307: | 0 | 0 | 0 | 1 |
| XLOC_024129 | SPANXN3              | chrX:142596563-14260530: | 0 | 0 | 0 | 1 |
| XLOC_024130 | SLITRK4              | chrX:142710594-14272392: | 0 | 0 | 0 | 1 |
| XLOC_024131 | SPANXN2              | chrX:142795054-14280451: | 0 | 0 | 0 | 1 |
| XLOC_024132 | MIR890               | chrX:145075792-14507586: | 0 | 0 | 0 | 1 |
| XLOC_024133 | MIR888               | chrX:145076301-14507637: | 0 | 0 | 0 | 1 |
| XLOC_024134 | MIR892A              | chrX:145078186-14507826: | 0 | 0 | 0 | 1 |
| XLOC_024135 | MIR892B              | chrX:145078715-14507879: | 0 | 0 | 0 | 1 |
| XLOC_024136 | MIR891B              | chrX:145082570-14508264: | 0 | 0 | 0 | 1 |
| XLOC_024137 | MIR891A              | chrX:145109311-14510939: | 0 | 0 | 0 | 1 |
| XLOC_024138 | CXorf51A             | chrX:145895621-14589624: | 0 | 0 | 0 | 1 |
| XLOC_024139 | MIR506               | chrX:146312237-14631236: | 0 | 0 | 0 | 1 |
| XLOC_024140 | MIR507               | chrX:146312501-14631259: | 0 | 0 | 0 | 1 |
| XLOC_024141 | MIR508               | chrX:146318430-14631854: | 0 | 0 | 0 | 1 |
| XLOC_024142 | MIR514B              | chrX:146331668-14633174: | 0 | 0 | 0 | 1 |
| XLOC_024143 | MIR509-1             | chrX:146340277-14634036: | 0 | 0 | 0 | 1 |



|             |                           |                          |   |   |   |   |
|-------------|---------------------------|--------------------------|---|---|---|---|
| XLOC_024144 | MIR509-3                  | chrX:146341169-14634124  | 0 | 0 | 0 | 1 |
| XLOC_024145 | MIR509-1                  | chrX:146342049-14634214  | 0 | 0 | 0 | 1 |
| XLOC_024146 | MIR510                    | chrX:146353852-146353921 | 0 | 0 | 0 | 1 |
| XLOC_024147 | MIR514A1                  | chrX:146360764-14636086  | 0 | 0 | 0 | 1 |
| XLOC_024148 | MIR514A2                  | chrX:146363460-14636354  | 0 | 0 | 0 | 1 |
| XLOC_024149 | MIR514A3                  | chrX:146366158-14636624  | 0 | 0 | 0 | 1 |
| XLOC_024153 | MAGEA9B                   | chrX:148663308-148669111 | 0 | 0 | 0 | 1 |
| XLOC_024154 | HSFX2                     | chrX:148674171-14867697  | 0 | 0 | 0 | 1 |
| XLOC_024158 | GABRE                     | chrX:151121595-15114315  | 0 | 0 | 0 | 1 |
| XLOC_024159 | MIR452                    | chrX:151121595-15114315  | 0 | 0 | 0 | 1 |
| XLOC_024160 | MAGEA10,MAGEA10-MAGEA10-1 | chrX:151282520-151307051 | 0 | 0 | 0 | 1 |
| XLOC_024161 | GABRA3                    | chrX:151335633-15161983  | 0 | 0 | 0 | 1 |
| XLOC_024162 | MIR105-1                  | chrX:151335633-15161983  | 0 | 0 | 0 | 1 |
| XLOC_024163 | MIR767                    | chrX:151335633-15161983  | 0 | 0 | 0 | 1 |
| XLOC_024164 | MIR105-2                  | chrX:151335633-15161983  | 0 | 0 | 0 | 1 |
| XLOC_024165 | CSAG2,CSAG3               | chrX:151876742-15187774  | 0 | 0 | 0 | 1 |
| XLOC_024167 | MAGEA2,MAGEA2B            | chrX:151918387-15192236  | 0 | 0 | 0 | 1 |
| XLOC_024168 | MAGEA3                    | chrX:151934651-15193824  | 0 | 0 | 0 | 1 |
| XLOC_024170 | PNMA5                     | chrX:152157367-15216267  | 0 | 0 | 0 | 1 |
| XLOC_024171 | PNMA6D                    | chrX:152243995-152246071 | 0 | 0 | 0 | 1 |
| XLOC_024172 | MAGEA1                    | chrX:152481521-152486111 | 0 | 0 | 0 | 1 |
| XLOC_024179 | PDZD4                     | chrX:153067622-15309600  | 0 | 0 | 0 | 1 |
| XLOC_024185 | MIR3202-2                 | chrX:153237990-15324864  | 0 | 0 | 0 | 1 |
| XLOC_024187 | MIR718                    | chrX:153285370-15328544  | 0 | 0 | 0 | 1 |
| XLOC_024189 | TEX28                     | chrX:153485202-15352356  | 0 | 0 | 0 | 1 |
| XLOC_024197 | CTAG1A                    | chrX:153845864-15384752  | 0 | 0 | 0 | 1 |
| XLOC_024199 | CTAG2                     | chrX:153880245-15388185  | 0 | 0 | 0 | 1 |
| XLOC_024201 | MPP1                      | chrX:154006958-15403380  | 0 | 0 | 0 | 1 |
| XLOC_024204 | MIR1184-1                 | chrX:154064063-154250991 | 0 | 0 | 0 | 1 |
| XLOC_024209 | MIR1184-3                 | chrX:154611748-154613451 | 0 | 0 | 0 | 1 |
| XLOC_024211 | H2AFB3                    | chrX:154689079-154689591 | 0 | 0 | 0 | 1 |
| XLOC_024214 | LINC00685                 | chrY:231384-232054       | 0 | 0 | 0 | 1 |
| XLOC_024215 | SHOX                      | chrY:535078-570146       | 0 | 0 | 0 | 1 |
| XLOC_024216 | CSF2RA                    | chrY:1337692-1378828     | 0 | 0 | 0 | 1 |
| XLOC_024217 | MIR3690                   | chrY:1337692-1378828     | 0 | 0 | 0 | 1 |
| XLOC_024218 | IL3RA                     | chrY:1405508-1451582     | 0 | 0 | 0 | 1 |
| XLOC_024219 | ASMTL-AS1                 | chrY:1469423-1522655     | 0 | 0 | 0 | 1 |
| XLOC_024220 | AKAP17A,ASMT              | chrY:1660485-1711974     | 0 | 0 | 0 | 1 |
| XLOC_024221 | CD99P1                    | chrY:2477305-2525270     | 0 | 0 | 0 | 1 |
| XLOC_024222 | CD99                      | chrY:2559227-2609350     | 0 | 0 | 0 | 1 |
| XLOC_024223 | XGPY2                     | chrY:2620336-2643037     | 0 | 0 | 0 | 1 |
| XLOC_024224 | RPS4Y1                    | chrY:2709622-2734997     | 0 | 0 | 0 | 1 |
| XLOC_024225 | ZFY                       | chrY:2803111-2850547     | 0 | 0 | 0 | 1 |
| XLOC_024226 | LINC00278                 | chrY:2871036-2970313     | 0 | 0 | 0 | 1 |
| XLOC_024227 | TGIF2LY                   | chrY:3447125-3448082     | 0 | 0 | 0 | 1 |
| XLOC_024229 | TSPY2                     | chrY:6114263-6117053     | 0 | 0 | 0 | 1 |
| XLOC_024230 | TTTY1B                    | chrY:6258441-6296485     | 0 | 0 | 0 | 1 |
| XLOC_024231 | TTTY21                    | chrY:6311474-6315118     | 0 | 0 | 0 | 1 |
| XLOC_024232 | TTTY7,TTTY7E              | chrY:6317508-6325947     | 0 | 0 | 0 | 1 |
| XLOC_024233 | TBL1Y                     | chrY:6778726-6959724     | 0 | 0 | 0 | 1 |
| XLOC_024234 | PRKY                      | chrY:7142012-7249588     | 0 | 0 | 0 | 1 |
| XLOC_024235 | TTTY12                    | chrY:7672964-7678723     | 0 | 0 | 0 | 1 |
| XLOC_024236 | TTTY19                    | chrY:8572512-8573324     | 0 | 0 | 0 | 1 |
| XLOC_024237 | TSPY3,TSPY4,TSPY8         | chrY:9195451-9368285     | 0 | 0 | 0 | 1 |
| XLOC_024238 | TSPY1                     | chrY:9195451-9368285     | 0 | 0 | 0 | 1 |
| XLOC_024239 | TTTY8B                    | chrY:9528708-9531308     | 0 | 0 | 0 | 1 |
| XLOC_024240 | TTTY2                     | chrY:9573894-9611928     | 0 | 0 | 0 | 1 |
| XLOC_024241 | TTTY22                    | chrY:9638761-9650854     | 0 | 0 | 0 | 1 |
| XLOC_024242 | TTTY23B                   | chrY:9748406-9749571     | 0 | 0 | 0 | 1 |
| XLOC_024243 | TTTY15                    | chrY:14774297-14804153   | 0 | 0 | 0 | 1 |
| XLOC_024244 | USP9Y                     | chrY:14813159-14972768   | 0 | 0 | 0 | 1 |
| XLOC_024245 | DDX3Y                     | chrY:15016018-15032390   | 0 | 0 | 0 | 1 |
| XLOC_024246 | TMSB4Y                    | chrY:15815446-15817902   | 0 | 0 | 0 | 1 |
| XLOC_024247 | VCY                       | chrY:16168097-16168838   | 0 | 0 | 0 | 1 |
| XLOC_024248 | NLGN4Y                    | chrY:16634487-16955848   | 0 | 0 | 0 | 1 |
| XLOC_024249 | FAM41AY1                  | chrY:19612837-19628622   | 0 | 0 | 0 | 1 |
| XLOC_024250 | CDY2A,CDY2B               | chrY:20137666-20139627   | 0 | 0 | 0 | 1 |
| XLOC_024251 | XKRY                      | chrY:20297334-20298915   | 0 | 0 | 0 | 1 |
| XLOC_024252 | FAM224A,FAM224B           | chrY:20488418-20492736   | 0 | 0 | 0 | 1 |
| XLOC_024253 | HSFY1,HSFY2               | chrY:20708556-20752407   | 0 | 0 | 0 | 1 |
| XLOC_024254 | TTTY9A                    | chrY:20891767-20935621   | 0 | 0 | 0 | 1 |
| XLOC_024255 | TXLNG2P                   | chrY:21729243-21769056   | 0 | 0 | 0 | 1 |
| XLOC_024256 | EIF1AY                    | chrY:22737610-22755040   | 0 | 0 | 0 | 1 |
| XLOC_024257 | RPS4Y2                    | chrY:22917953-22942918   | 0 | 0 | 0 | 1 |
| XLOC_024258 | RBM1B                     | chrY:23673223-23687672   | 0 | 0 | 0 | 1 |
| XLOC_024259 | RBM1B                     | chrY:23696764-23711212   | 0 | 0 | 0 | 1 |
| XLOC_024260 | TTTY6,TTTY6E              | chrY:24291111-24292981   | 0 | 0 | 0 | 1 |
| XLOC_024261 | RBM1YF,RBM1YJ             | chrY:24455005-24564028   | 0 | 0 | 0 | 1 |
| XLOC_024262 | PRY2                      | chrY:24636543-24660784   | 0 | 0 | 0 | 1 |

|             |                 |                         |         |         |             |          |
|-------------|-----------------|-------------------------|---------|---------|-------------|----------|
| XLOC_024263 | TTTTY17C        | chrY:24997730-24998862  | 0       | 0       | 0           | 1        |
| XLOC_024264 | TTTTY4          | chrY:25082601-25119431  | 0       | 0       | 0           | 1        |
| XLOC_024265 | BPY2            | chrY:25130409-25151610  | 0       | 0       | 0           | 1        |
| XLOC_024266 | DAZ2,DAZ3,DAZ4  | chrY:25365580-25437503  | 0       | 0       | 0           | 1        |
| XLOC_024267 | TTTTY17C        | chrY:26631478-26632610  | 0       | 0       | 0           | 1        |
| XLOC_024268 | TTTTY4          | chrY:26716348-26753172  | 0       | 0       | 0           | 1        |
| XLOC_024269 | BPY2            | chrY:26764150-26785352  | 0       | 0       | 0           | 1        |
| XLOC_024270 | DAZ2,DAZ3,DAZ4  | chrY:26979966-27053187  | 0       | 0       | 0           | 1        |
| XLOC_024271 | GOLGA2P2Y       | chrY:27601457-27606322  | 0       | 0       | 0           | 1        |
| XLOC_024272 | CSPG4P1Y        | chrY:27629054-27632852  | 0       | 0       | 0           | 1        |
| XLOC_024273 | CDY1            | chrY:27768263-27771048  | 0       | 0       | 0           | 1        |
| XLOC_024274 | TTTTY3          | chrY:27874636-27879535  | 0       | 0       | 0           | 1        |
| XLOC_024275 | SPRY3           | chrY:59100456-59115123  | 0       | 0       | 0           | 1        |
| XLOC_024276 | VAMP7           | chrY:59213948-59276439  | 0       | 0       | 0           | 1        |
| XLOC_024277 | IL9R            | chrY:59330251-59343488  | 0       | 0       | 0           | 1        |
| XLOC_024278 | GTPBP6          | chrY:171425-180887      | 0       | 0       | 0           | 1        |
| XLOC_024279 | PPP2R3B         | chrY:244667-297690      | 0       | 0       | 0           | 1        |
| XLOC_024280 | CRLF2           | chrY:1264886-1281530    | 0       | 0       | 0           | 1        |
| XLOC_024281 | SLC25A6         | chrY:1455044-1461039    | 0       | 0       | 0           | 1        |
| XLOC_024282 | ASMTL           | chrY:1469423-1522655    | 0       | 0       | 0           | 1        |
| XLOC_024283 | P2RY8           | chrY:1531465-1606037    | 0       | 0       | 0           | 1        |
| XLOC_024284 | DHRX,ZBED1      | chrY:2087554-2369015    | 0       | 0       | 0           | 1        |
| XLOC_024285 | SRY             | chrY:2654895-2655792    | 0       | 0       | 0           | 1        |
| XLOC_024286 | TTTTY23B        | chrY:6110486-6111651    | 0       | 0       | 0           | 1        |
| XLOC_024287 | TTTTY2          | chrY:6258441-6296485    | 0       | 0       | 0           | 1        |
| XLOC_024288 | TTTTY8B         | chrY:6339071-6341671    | 0       | 0       | 0           | 1        |
| XLOC_024289 | AMELY           | chrY:6733958-6742068    | 0       | 0       | 0           | 1        |
| XLOC_024290 | TTTTY1E         | chrY:7567397-7569288    | 0       | 0       | 0           | 1        |
| XLOC_024291 | TTTTY1E         | chrY:8551410-8551919    | 0       | 0       | 0           | 1        |
| XLOC_024292 | TTTTY11         | chrY:8651358-8685423    | 0       | 0       | 0           | 1        |
| XLOC_024293 | RBMY1A3P        | chrY:9154669-9160483    | 0       | 0       | 0           | 1        |
| XLOC_024294 | TTTTY20         | chrY:9167488-9172441    | 0       | 0       | 0           | 1        |
| XLOC_024295 | FAM197Y5        | chrY:9187188-9192791    | 0       | 0       | 0           | 1        |
| XLOC_024296 | FAM197Y5        | chrY:9195451-9368285    | 0       | 0       | 0           | 1        |
| XLOC_024297 | FAM197Y2        | chrY:9195451-9368285    | 0       | 0       | 0           | 1        |
| XLOC_024298 | FAM197Y2        | chrY:9195451-9368285    | 0       | 0       | 0           | 1        |
| XLOC_024299 | FAM197Y2        | chrY:9195451-9368285    | 0       | 0       | 0           | 1        |
| XLOC_024300 | RBMY3AP         | chrY:9448329-9452762    | 0       | 0       | 0           | 1        |
| XLOC_024301 | TTTTY7,TTTTY7E  | chrY:9544432-9552871    | 0       | 0       | 0           | 1        |
| XLOC_024302 | TTTTY21         | chrY:9555261-9558905    | 0       | 0       | 0           | 1        |
| XLOC_024303 | TTTTY1B         | chrY:9573894-9611928    | 0       | 0       | 0           | 1        |
| XLOC_024306 | VCY             | chrY:16097651-16098392  | 0       | 0       | 0           | 1        |
| XLOC_024307 | NLGN4Y-AS1      | chrY:16634487-16955848  | 0       | 0       | 0           | 1        |
| XLOC_024308 | FAM224A,FAM224B | chrY:19687040-19691353  | 0       | 0       | 0           | 1        |
| XLOC_024309 | XKRY2           | chrY:19880859-19882440  | 0       | 0       | 0           | 1        |
| XLOC_024310 | CDY2A,CDY2B     | chrY:19990139-19992100  | 0       | 0       | 0           | 1        |
| XLOC_024311 | FAM41AY2        | chrY:20551155-20566932  | 0       | 0       | 0           | 1        |
| XLOC_024312 | TTTTY9B         | chrY:20708556-20752407  | 0       | 0       | 0           | 1        |
| XLOC_024313 | HSFY1,HSFY2     | chrY:20891767-20935621  | 0       | 0       | 0           | 1        |
| XLOC_024314 | NCRNA00185      | chrY:21034386-21040114  | 0       | 0       | 0           | 1        |
| XLOC_024315 | TTTTY14         | chrY:21094584-21239302  | 0       | 0       | 0           | 1        |
| XLOC_024317 | BCORP1          | chrY:21617316-21665039  | 0       | 0       | 0           | 1        |
| XLOC_024318 | KDM5D           | chrY:21867300-21906825  | 0       | 0       | 0           | 1        |
| XLOC_024319 | TTTTY10         | chrY:22627553-22681114  | 0       | 0       | 0           | 1        |
| XLOC_024320 | RBMY2EP         | chrY:23557033-23563448  | 0       | 0       | 0           | 1        |
| XLOC_024321 | TTTTY13         | chrY:23745485-23756552  | 0       | 0       | 0           | 1        |
| XLOC_024322 | RBMY1B          | chrY:24026222-24040673  | 0       | 0       | 0           | 1        |
| XLOC_024323 | RBMY1B          | chrY:24049764-24064214  | 0       | 0       | 0           | 1        |
| XLOC_024324 | PRY             | chrY:24217902-24242154  | 0       | 0       | 0           | 1        |
| XLOC_024325 | RBMY1J          | chrY:24314688-24329089  | 0       | 0       | 0           | 1        |
| XLOC_024326 | TTTTY5          | chrY:24442944-24445023  | 0       | 0       | 0           | 1        |
| XLOC_024327 | TTTTY6,TTTTY6E  | chrY:24585736-24587606  | 0       | 0       | 0           | 1        |
| XLOC_024328 | DAZ1,DAZ4       | chrY:25275501-25345254  | 0       | 0       | 0           | 1        |
| XLOC_024329 | TTTTY3B         | chrY:26082873-26087769  | 0       | 0       | 0           | 1        |
| XLOC_024330 | CDY1            | chrY:26191376-26194161  | 0       | 0       | 0           | 1        |
| XLOC_024331 | CSPG4P1Y        | chrY:26329580-26333378  | 0       | 0       | 0           | 1        |
| XLOC_024332 | GOLGA2P2Y       | chrY:26356113-26360978  | 0       | 0       | 0           | 1        |
| XLOC_024333 | DAZ3,DAZ4       | chrY:26909215-26959639  | 0       | 0       | 0           | 1        |
| XLOC_024334 | BPY2C           | chrY:27177049-27198251  | 0       | 0       | 0           | 1        |
| XLOC_024335 | TTTTY4B         | chrY:27209229-27246039  | 0       | 0       | 0           | 1        |
| XLOC_024336 | TTTTY17B        | chrY:27329789-27330920  | 0       | 0       | 0           | 1        |
| XLOC_021057 | HUS1            | chr7:48002884-48019222  | 5.59004 | 5.5901  | 1.46E-05    | 1        |
| XLOC_016439 | METAP1          | chr4:99916787-99983960  | 30.0958 | 30.0961 | 1.51E-05    | 0.999929 |
| XLOC_008478 | ARHGAP17        | chr16:24930711-25026675 | 10.0953 | 10.0954 | 1.73E-05    | 1        |
| XLOC_010118 | VAPA            | chr18:9913954-9960018   | 15.7913 | 15.7915 | 1.81E-05    | 1        |
| XLOC_002623 | ZDHHC16         | chr10:99205929-99217127 | 26.7389 | 26.7393 | 2.43E-05    | 1        |
| XLOC_004974 | CAND1           | chr12:67663060-67708388 | 15.7665 | 15.767  | 4.27E-05    | 0.999987 |
| XLOC_015664 | FYCO1           | chr3:45959390-46037316  | 2.7764  | 2.77665 | 0.000126963 | 0.999427 |
| XLOC_015688 | SHISA5          | chr3:48509196-48542259  | 99.5559 | 99.5701 | 0.000206563 | 0.999907 |

|             |                       |                          |          |          |             |          |
|-------------|-----------------------|--------------------------|----------|----------|-------------|----------|
| XLOC_000057 | ZBTB48                | chr1:6640062-6649340     | 10.2109  | 10.2126  | 0.000234076 | 0.999427 |
| XLOC_008255 | HSBP1                 | chr16:83841507-83846607  | 57.2146  | 57.225   | 0.00026372  | 0.999929 |
| XLOC_007467 | HERC2                 | chr15:28356182-28567298  | 2.6925   | 2.69304  | 0.000292102 | 0.999591 |
| XLOC_022248 | C8orf82,LRRC24        | chr8:145743348-145754451 | 88.1693  | 88.1944  | 0.000410535 | 0.999567 |
| XLOC_002555 | CCSER2                | chr10:86088409-86278276  | 1.61583  | 1.61633  | 0.000452148 | 0.999427 |
| XLOC_006386 | SLC38A6               | chr14:61447831-61550451  | 4.10062  | 4.10204  | 0.000499849 | 0.999427 |
| XLOC_009297 | SPHK1                 | chr17:74380689-74383941  | 221.854  | 221.937  | 0.000544742 | 0.999427 |
| XLOC_005598 | E2F7                  | chr12:77415025-77459360  | 3.24852  | 3.24977  | 0.000557058 | 0.999427 |
| XLOC_008092 | LONP2                 | chr16:48274602-48420559  | 13.3411  | 13.3462  | 0.000560495 | 0.999427 |
| XLOC_007587 | MYO5A                 | chr15:52599479-52821247  | 2.07481  | 2.07569  | 0.000606845 | 0.999427 |
| XLOC_015721 | IP6K1                 | chr3:49761727-49823973   | 8.75737  | 8.76134  | 0.000653606 | 0.999427 |
| XLOC_020651 | AGFG2                 | chr7:100136833-100165841 | 1.7903   | 1.79113  | 0.000670976 | 0.99926  |
| XLOC_014938 | IL17RC                | chr3:9958757-9975305     | 16.4072  | 16.4151  | 0.00068662  | 0.999427 |
| XLOC_021192 | FAM200A               | chr7:99143922-99149757   | 3.44759  | 3.44927  | 0.000702833 | 0.999427 |
| XLOC_020860 | NOS3                  | chr7:150688143-150721581 | 7.97075  | 7.97494  | 0.000759475 | 0.999427 |
| XLOC_011755 | RTN2                  | chr19:45988545-46000313  | 15.5884  | 15.5967  | 0.00076803  | 0.999427 |
| XLOC_006630 | PPP2R5C               | chr14:102228134-10239431 | 34.9333  | 34.9524  | 0.000791879 | 0.999427 |
| XLOC_011956 | PPP1R12C              | chr19:55602280-55628968  | 19.715   | 19.7261  | 0.000815621 | 0.999427 |
| XLOC_015890 | COX17                 | chr3:119388371-119396241 | 108.607  | 108.669  | 0.000827776 | 0.999427 |
| XLOC_014661 | CECR5                 | chr22:17618409-17646335  | 112.002  | 112.076  | 0.000946506 | 0.999427 |
| XLOC_011513 | MED26                 | chr19:16685717-16739015  | 6.02359  | 6.02776  | 0.000977777 | 0.999427 |
| XLOC_023112 | ASB6                  | chr9:132388434-132404441 | 39.8372  | 39.8653  | 0.00101842  | 0.999427 |
| XLOC_023834 | ELK1                  | chrX:47494918-47510003   | 30.114   | 30.1359  | 0.00104833  | 0.999427 |
| XLOC_005803 | IFT88                 | chr13:21141207-21265576  | 0.835569 | 0.836209 | 0.00110525  | 0.999427 |
| XLOC_002876 | KIF5B                 | chr10:32297937-32345371  | 13.112   | 13.1221  | 0.00111198  | 0.999427 |
| XLOC_001571 | PPAP2B                | chr1:56960418-57045257   | 0.410163 | 0.41048  | 0.00111435  | 0.997323 |
| XLOC_000350 | KIF2C                 | chr1:45205489-45233438   | 32.6219  | 32.6489  | 0.00119456  | 0.999427 |
| XLOC_008321 | WDR24                 | chr16:734701-740400      | 7.16495  | 7.1709   | 0.00119735  | 0.999427 |
| XLOC_014139 | C21orf119             | chr21:33765441-33766266  | 6.76164  | 6.76733  | 0.00121317  | 0.99862  |
| XLOC_011079 | PPP2R1A               | chr19:52693054-52729678  | 199.302  | 199.488  | 0.00134587  | 0.99926  |
| XLOC_021782 | ZNFD23                | chr8:144718182-144735900 | 4.64785  | 4.65222  | 0.00135408  | 0.99926  |
| XLOC_008839 | CNTR0B                | chr17:7835441-7853237    | 13.5207  | 13.5342  | 0.0014436   | 0.999108 |
| XLOC_009218 | TLK2                  | chr17:60556385-60692841  | 4.21954  | 4.22378  | 0.00144834  | 0.99926  |
| XLOC_008647 | NOB1                  | chr16:69775756-69788871  | 127.184  | 127.316  | 0.00149059  | 0.998951 |
| XLOC_017014 | DCTD                  | chr4:183811243-183838631 | 58.1145  | 58.1761  | 0.00152748  | 0.998959 |
| XLOC_018392 | DOPEY1                | chr6:83777384-83906256   | 0.28796  | 0.288278 | 0.00159071  | 1        |
| XLOC_007816 | ITFG3                 | chr16:284800-316119      | 22.4662  | 22.492   | 0.00165897  | 0.999214 |
| XLOC_007286 | ARIH1                 | chr15:72766666-72878896  | 9.03964  | 9.05043  | 0.00172143  | 0.998945 |
| XLOC_015588 | FGD5-AS1              | chr3:14984285-15106816   | 11.0215  | 11.0348  | 0.0017439   | 0.99926  |
| XLOC_001070 | FBX028                | chr1:224301788-224349741 | 6.20678  | 6.21475  | 0.00185151  | 0.998764 |
| XLOC_009854 | COX11                 | chr17:52978051-53046064  | 21.4081  | 21.4356  | 0.00185167  | 0.998951 |
| XLOC_017268 | DCP2                  | chr5:112312406-112824521 | 1.98256  | 1.98515  | 0.00187648  | 0.998945 |
| XLOC_023463 | NONO                  | chrX:70430034-70948962   | 158.98   | 159.19   | 0.00190753  | 0.998975 |
| XLOC_017177 | BDP1                  | chr5:70751441-70863649   | 0.896001 | 0.89722  | 0.00196123  | 0.998644 |
| XLOC_002724 | BAG3                  | chr10:121410881-12143731 | 28.412   | 28.4514  | 0.00200079  | 0.99862  |
| XLOC_000969 | IPO9                  | chr1:201798287-201853421 | 5.32049  | 5.32795  | 0.00202166  | 0.99862  |
| XLOC_014040 | AURKA                 | chr20:54944444-54967351  | 24.5216  | 24.5562  | 0.00203102  | 0.99862  |
| XLOC_009307 | SEC14L1               | chr17:75084724-75213181  | 13.9009  | 13.9205  | 0.00203906  | 0.998831 |
| XLOC_010670 | MYO9B                 | chr19:17186590-17324104  | 12.6745  | 12.6927  | 0.00206939  | 0.99862  |
| XLOC_008767 | EMC6                  | chr17:3539761-3599698    | 148.857  | 149.071  | 0.00207588  | 0.999416 |
| XLOC_004641 | CCDC77                | chr12:389222-551806      | 2.92583  | 2.93021  | 0.00215823  | 0.999427 |
| XLOC_015098 | P4HTM                 | chr3:49027340-49044581   | 15.396   | 15.4194  | 0.00219686  | 0.99862  |
| XLOC_006888 | ENTPD5                | chr14:74433180-74486026  | 0.373034 | 0.373627 | 0.00229126  | 0.997082 |
| XLOC_023020 | CDC26                 | chr9:116029289-116037861 | 61.6742  | 61.7725  | 0.00229737  | 0.998564 |
| XLOC_008060 | RNF40                 | chr16:30759619-30787628  | 16.0611  | 16.0868  | 0.00230633  | 0.998764 |
| XLOC_016688 | DNAAF16               | chr4:17802277-17812381   | 9.32226  | 9.33747  | 0.00235235  | 0.99862  |
| XLOC_007965 | TMC7                  | chr16:1895255-19075262   | 1.08123  | 1.08303  | 0.00240582  | 0.998823 |
| XLOC_023804 | TAB3                  | chrX:30845558-30907511   | 1.90958  | 1.91277  | 0.00241082  | 0.998764 |
| XLOC_001098 | URB2                  | chr1:229761980-229795941 | 2.65118  | 2.65577  | 0.00249459  | 0.99862  |
| XLOC_005208 | ZNFD140               | chr12:133657036-13368421 | 7.14311  | 7.15555  | 0.00250977  | 0.99862  |
| XLOC_018962 | COX7A2                | chr6:75947390-75953644   | 299.608  | 300.131  | 0.00251356  | 0.998564 |
| XLOC_001383 | MAP3K6                | chr1:27681669-27693337   | 2.40931  | 2.41354  | 0.00253055  | 0.999041 |
| XLOC_002319 | PFKP                  | chr10:3109711-3178997    | 84.0537  | 84.2035  | 0.0025675   | 0.998564 |
| XLOC_013153 | FAM168B               | chr2:131805448-131851001 | 10.29    | 10.3095  | 0.00272671  | 0.998558 |
| XLOC_010692 | MAST3                 | chr19:18208602-18262499  | 3.36164  | 3.36811  | 0.00276982  | 0.998564 |
| XLOC_000265 | HPCA                  | chr1:33352097-33366953   | 0.147727 | 0.148014 | 0.00280056  | 1        |
| XLOC_006764 | SNX6                  | chr14:35030617-35099366  | 23.8932  | 23.9402  | 0.00283903  | 0.998526 |
| XLOC_021030 | MRPS24,URGCP,URGCP-IV | chr7:43906156-43965996   | 302.096  | 302.705  | 0.00290308  | 0.998526 |
| XLOC_000334 | CDC20                 | chr1:43824625-43828873   | 133.594  | 133.867  | 0.00294567  | 0.998526 |
| XLOC_001768 | POLR3C                | chr1:145592604-145610881 | 15.4144  | 15.446   | 0.00295131  | 0.998526 |
| XLOC_010163 | DSG2                  | chr18:29078026-29136874  | 10.5163  | 10.5378  | 0.00295233  | 0.998526 |
| XLOC_017865 | ARAP3                 | chr5:141032967-141061800 | 6.47237  | 6.48578  | 0.00298545  | 0.998526 |
| XLOC_013115 | RPL23AP7              | chr2:114368815-114384711 | 8.96658  | 8.98525  | 0.00299988  | 0.998839 |
| XLOC_018996 | LYRM2                 | chr6:90142896-90348474   | 3.97137  | 3.97968  | 0.00301753  | 0.998564 |
| XLOC_007675 | ADPGK                 | chr15:73043707-73090540  | 19.1509  | 19.1913  | 0.00304069  | 0.998514 |
| XLOC_018526 | HECA                  | chr6:139456248-139501941 | 4.5662   | 4.57613  | 0.00313617  | 0.998526 |
| XLOC_017296 | PRRC1                 | chr5:126853308-126890781 | 6.9573   | 6.97269  | 0.00318758  | 0.998526 |
| XLOC_022602 | PPP2R4                | chr9:131873227-131911221 | 167.957  | 168.33   | 0.00319475  | 0.998514 |
| XLOC_017160 | PIK3R1                | chr5:67511583-67597649   | 0.99024  | 0.992462 | 0.00323296  | 0.998558 |

|             |                       |                          |           |           |            |          |
|-------------|-----------------------|--------------------------|-----------|-----------|------------|----------|
| XLOC_001861 | GATAD2B               | chr1:153777202-15389545  | 5.76596   | 5.77903   | 0.0032662  | 0.998526 |
| XLOC_000361 | TOE1                  | chr1:45794913-45956840   | 10.6856   | 10.7101   | 0.00330252 | 0.998564 |
| XLOC_015467 | LOC100505687          | chr3:183165395-183173800 | 3.90311   | 3.91217   | 0.00334422 | 0.998564 |
| XLOC_015657 | ZDHHC3                | chr3:44956752-45017674   | 2.99704   | 3.00406   | 0.00337442 | 0.998526 |
| XLOC_022065 | SNX16                 | chr8:82711817-82754521   | 2.89637   | 2.90319   | 0.00339642 | 0.998526 |
| XLOC_011499 | AKAP8                 | chr19:15464331-15490612  | 10.88     | 10.9061   | 0.00345468 | 0.998514 |
| XLOC_000291 | CDC48                 | chr1:38158072-38175391   | 33.498    | 33.5806   | 0.00355061 | 0.998514 |
| XLOC_005978 | BIVM,BIVM-ERCC5,ERCC5 | chr13:103436630-10352838 | 16.4781   | 16.519    | 0.00357971 | 0.998441 |
| XLOC_022242 | SLC39A4               | chr8:145637797-145642273 | 40.532    | 40.6331   | 0.00359297 | 0.998514 |
| XLOC_015715 | RHOA                  | chr3:49396578-49449526   | 269.243   | 269.927   | 0.0036588  | 0.998152 |
| XLOC_008104 | FTO                   | chr16:53737874-54148379  | 1.74026   | 1.7447    | 0.00367347 | 0.998514 |
| XLOC_012129 | BIRC6                 | chr2:32582095-32843965   | 1.88985   | 1.89482   | 0.00378738 | 0.998514 |
| XLOC_016031 | CCNL1                 | chr3:156865585-156878482 | 22.3514   | 22.4106   | 0.0038145  | 0.997535 |
| XLOC_013713 | RNF114                | chr20:48552913-48570422  | 32.5386   | 32.6279   | 0.00395353 | 0.997892 |
| XLOC_018457 | NT5DC1                | chr6:116421998-116566853 | 9.42904   | 9.45551   | 0.00404366 | 0.997892 |
| XLOC_002846 | DNAJC1                | chr10:22045476-22292650  | 7.7929    | 7.81479   | 0.00404706 | 0.99835  |
| XLOC_009666 | MIEN1                 | chr17:37885408-37886788  | 103.753   | 104.051   | 0.00413252 | 0.997532 |
| XLOC_000405 | LRRC42                | chr1:54411998-54433841   | 28.3691   | 28.4506   | 0.00414006 | 0.997535 |
| XLOC_007858 | NUBP2                 | chr16:1832932-1839192    | 98.2177   | 98.5005   | 0.00414712 | 0.997532 |
| XLOC_020923 | CYTH3                 | chr7:6201411-6312242     | 4.54463   | 4.55783   | 0.0041843  | 0.997892 |
| XLOC_007139 | LOC100131089          | chr15:40331511-40359710  | 3.23259   | 3.24198   | 0.00418528 | 0.99862  |
| XLOC_024186 | IRAK1                 | chrX:153275956-153285343 | 141.146   | 141.558   | 0.00420828 | 0.997342 |
| XLOC_017493 | MSX2                  | chr5:174151574-174157902 | 2.21091   | 2.21739   | 0.00422109 | 0.99862  |
| XLOC_012045 | GRHL1                 | chr2:10091791-10142412   | 1.0109    | 1.0139    | 0.00427269 | 0.99862  |
| XLOC_001767 | NUDT17                | chr1:145575987-145589433 | 1.59791   | 1.60265   | 0.00427546 | 0.998668 |
| XLOC_000857 | POU2F1                | chr1:167190065-167396582 | 0.868613  | 0.871216  | 0.00431658 | 0.998227 |
| XLOC_001268 | MTHFR                 | chr1:11845786-11907840   | 0.940575  | 0.943394  | 0.00431699 | 0.99862  |
| XLOC_011063 | SIGLEC9               | chr19:51628136-51639520  | 0.0644356 | 0.0646287 | 0.00431761 | 1        |
| XLOC_014861 | TCF20                 | chr22:42556018-42611445  | 4.44859   | 4.46204   | 0.00435561 | 0.997535 |
| XLOC_014857 | NAGA                  | chr22:42454337-42466846  | 12.3961   | 12.4338   | 0.00437691 | 0.997532 |
| XLOC_013766 | MRGBP                 | chr20:61427804-61431945  | 40.0059   | 40.1274   | 0.00437762 | 0.997535 |
| XLOC_006645 | APOPT1                | chr14:104029298-10405723 | 24.821    | 24.8974   | 0.00443348 | 0.99761  |
| XLOC_016585 | NEIL3                 | chr4:178230990-178284092 | 1.64591   | 1.65108   | 0.00451661 | 0.99862  |
| XLOC_022920 | SEMA4D                | chr9:91975705-92094611   | 7.94229   | 7.96724   | 0.0045242  | 0.997342 |
| XLOC_003990 | RHOG                  | chr11:3848207-3862213    | 62.2744   | 62.4717   | 0.0045639  | 0.997535 |
| XLOC_012829 | HADHA                 | chr2:26413503-26467594   | 94.465    | 94.7684   | 0.00462611 | 0.99714  |
| XLOC_007011 | CYFIP1                | chr15:22892683-23003603  | 43.0282   | 43.1669   | 0.00464412 | 0.99714  |
| XLOC_023341 | KDM6A                 | chrX:44732422-44971845   | 2.30612   | 2.31359   | 0.00466403 | 0.997892 |
| XLOC_022235 | BOP1                  | chr8:145486055-145515120 | 70.0093   | 70.2377   | 0.00469858 | 0.997342 |
| XLOC_004673 | TAPBP1                | chr12:6561176-6579843    | 1.78216   | 1.78804   | 0.00475488 | 0.998668 |
| XLOC_013467 | THAP4                 | chr2:242523819-242576723 | 87.1288   | 87.4186   | 0.00479068 | 0.997916 |
| XLOC_016842 | PPM1K                 | chr4:89178760-89205983   | 2.3772    | 2.38524   | 0.00487143 | 0.997532 |
| XLOC_003348 | NUCB2                 | chr11:17298285-17353070  | 11.6398   | 11.6794   | 0.00489455 | 0.997309 |
| XLOC_009091 | NBR1                  | chr17:41322497-41363707  | 21.4779   | 21.551    | 0.00490291 | 0.997323 |
| XLOC_009405 | P2RX5,TAX1BP3         | chr17:3539761-3599698    | 95.0563   | 95.3809   | 0.00491842 | 0.998342 |
| XLOC_003300 | TIMM10B               | chr11:6495912-6505911    | 8.84955   | 8.88013   | 0.00497695 | 0.998514 |
| XLOC_021791 | CYC1                  | chr8:145149959-145152428 | 226.727   | 227.518   | 0.00502105 | 0.997342 |
| XLOC_016638 | ZFYVE28               | chr4:2271323-2420370     | 5.00559   | 5.0231    | 0.00503608 | 0.998152 |
| XLOC_003879 | C11orf63              | chr11:122753472-12283043 | 0.538841  | 0.540747  | 0.00509393 | 0.998564 |
| XLOC_006883 | NUMB                  | chr14:73741917-73925286  | 10.7583   | 10.7973   | 0.00521286 | 0.99714  |
| XLOC_008364 | ABC3L                 | chr16:2325878-2390747    | 12.5964   | 12.6422   | 0.00523583 | 0.99714  |
| XLOC_014571 | SMCR7L                | chr22:39898283-39914137  | 9.84512   | 9.88112   | 0.00526528 | 0.99714  |
| XLOC_009424 | CAMTA2                | chr17:4871286-4890960    | 18.8819   | 18.9513   | 0.00529019 | 0.99714  |
| XLOC_008308 | AFG3L1P               | chr16:90036182-90067195  | 4.51132   | 4.52802   | 0.00533236 | 0.998342 |
| XLOC_007015 | GOLGA8S               | chr15:23599894-23613471  | 0.35151   | 0.352813  | 0.00533832 | 0.998514 |
| XLOC_012015 | MZF1                  | chr19:59070552-59086164  | 12.0569   | 12.1018   | 0.00536016 | 0.997342 |
| XLOC_004687 | DSTNP2                | chr12:6993845-6994950    | 3.44476   | 3.45771   | 0.00541059 | 0.99862  |
| XLOC_021264 | THAP5                 | chr7:108202670-108210167 | 5.41932   | 5.43994   | 0.00547978 | 0.99714  |
| XLOC_019068 | HDCC2                 | chr6:125596495-125623282 | 38.613    | 38.7618   | 0.00554681 | 0.99714  |
| XLOC_018252 | ANKS1A                | chr6:34857037-35059190   | 4.14187   | 4.15834   | 0.00572664 | 0.99714  |
| XLOC_015510 | FLJ42393              | chr3:187868993-188608460 | 0.0581703 | 0.0584037 | 0.00577696 | 1        |
| XLOC_023143 | BRD3                  | chr9:136890560-136933143 | 7.78531   | 7.81665   | 0.00579726 | 0.99714  |
| XLOC_012845 | FTTHP3                | chr2:27604065-27632550   | 0.21943   | 0.22032   | 0.00583989 | 1        |
| XLOC_008333 | UNKL                  | chr16:1401899-1464705    | 4.14326   | 4.16012   | 0.00585857 | 0.998564 |
| XLOC_010287 | PPP4R1                | chr18:9546788-9614605    | 9.09747   | 9.13512   | 0.00595852 | 0.997082 |
| XLOC_020442 | SEPT7                 | chr7:35840595-35946715   | 19.3969   | 19.4772   | 0.00596327 | 0.997082 |
| XLOC_010959 | CALM3                 | chr19:47104511-47114039  | 82.1509   | 82.4942   | 0.00601561 | 0.99714  |
| XLOC_001213 | TMEM52                | chr1:1849028-1850740     | 41.7588   | 41.9333   | 0.00601849 | 0.99714  |
| XLOC_009641 | SYNRG                 | chr17:35874899-35969486  | 3.06879   | 3.08168   | 0.00604694 | 0.99714  |
| XLOC_014785 | C22orf28              | chr22:32783561-32808274  | 50.9672   | 51.1829   | 0.00609038 | 0.997082 |
| XLOC_004525 | FDXACB1               | chr11:111744779-11175473 | 1.59829   | 1.60511   | 0.00613815 | 0.998526 |
| XLOC_008270 | COX4I1                | chr16:85833172-85840607  | 486.094   | 488.176   | 0.00616365 | 0.99714  |
| XLOC_001069 | CAPN2                 | chr1:223889294-223963720 | 146.353   | 146.98    | 0.00616925 | 0.997082 |
| XLOC_018603 | C6orf120              | chr6:170102256-170124106 | 6.57773   | 6.60607   | 0.00620291 | 0.998433 |
| XLOC_009070 | NAGLU                 | chr17:40687950-40696466  | 19.6424   | 19.7287   | 0.0063288  | 0.99714  |
| XLOC_003813 | SIK2                  | chr11:111473169-11163716 | 1.78461   | 1.79262   | 0.00645949 | 0.998514 |
| XLOC_008687 | KARS                  | chr16:75661621-75681585  | 76.9744   | 77.3206   | 0.00647375 | 0.997082 |
| XLOC_011286 | FAM108A1              | chr19:1876974-1885518    | 105.853   | 106.337   | 0.00658248 | 0.997036 |
| XLOC_000821 | UFC1                  | chr1:161123533-161128648 | 97.1014   | 97.5471   | 0.00660717 | 0.997082 |

|              |                |                          |           |           |            |          |
|--------------|----------------|--------------------------|-----------|-----------|------------|----------|
| XLOC_010110  | RAB12          | chr18:8609442-8639380    | 12.412    | 12.469    | 0.00661595 | 0.997082 |
| XLOC_020922  | EIF2AK1        | chr7:6048881-6098860     | 29.7792   | 29.918    | 0.00670598 | 0.997082 |
| XLOC_006135  | INTS6          | chr13:51915167-52027275  | 1.87437   | 1.88317   | 0.00676185 | 0.997342 |
| XLOC_010217  | MALT1          | chr18:56338617-56417370  | 4.88168   | 4.90472   | 0.00679108 | 0.997082 |
| XLOC_015585  | CHCHD4         | chr3:14153576-14166371   | 16.5545   | 16.6331   | 0.00683517 | 0.997036 |
| XLOC_017486  | SNORA74B       | chr5:172410762-172461900 | 1.93888   | 1.94814   | 0.00686922 | 0.993379 |
| XLOC_012579  | SGOL2          | chr2:201390864-201448818 | 2.25697   | 2.26775   | 0.00687209 | 0.99714  |
| XLOC_003447  | PTPRJ          | chr11:48002109-48192394  | 3.92653   | 3.94529   | 0.00687574 | 0.99714  |
| XLOC_015325  | COPG1          | chr3:128968452-128996618 | 38.788    | 38.9733   | 0.00687783 | 0.997036 |
| XLOC_004273  | NXF1           | chr11:62559597-62572964  | 25.9776   | 26.1021   | 0.00689288 | 0.997036 |
| XLOC_008529  | BCL7C          | chr16:30899115-30905399  | 107.197   | 107.711   | 0.00689708 | 0.997036 |
| XLOC_009848  | ANKRD40        | chr17:48770550-48785270  | 10.0713   | 10.1196   | 0.00690573 | 0.997036 |
| XLOC_014569  | TAB1           | chr22:39795758-39833133  | 13.0637   | 13.1264   | 0.00690733 | 0.997082 |
| XLOC_009574  | SGK494         | chr17:26926150-26972177  | 0.598505  | 0.601386  | 0.00692691 | 0.89239  |
| XLOC_000179  | LYPLA2         | chr1:24117645-24122029   | 97.1366   | 97.6099   | 0.00701325 | 0.997036 |
| XLOC_018416  | MANEA          | chr6:96025372-96057328   | 1.37715   | 1.38393   | 0.00709174 | 0.99714  |
| XLOC_015947  | TMCC1          | chr3:129366634-129612418 | 1.00158   | 1.00663   | 0.00725568 | 0.99714  |
| XLOC_001683  | SLC25A24       | chr1:108677343-108742980 | 4.7289    | 4.75281   | 0.00727475 | 0.997082 |
| XLOC_015841  | DCBLD2         | chr3:98514813-98620533   | 2.96662   | 2.98171   | 0.00731554 | 0.997036 |
| XLOC_009903  | SMARCD2        | chr17:61909440-61920351  | 42.7876   | 43.0052   | 0.00731824 | 0.997036 |
| XLOC_004889  | HNRNPA1        | chr12:54674487-54679030  | 754.618   | 758.456   | 0.00731903 | 0.997036 |
| XLOC_009379  | PRPF8          | chr17:1553922-1588176    | 38.2654   | 38.4601   | 0.00732    | 0.997036 |
| XLOC_013656  | FAM83D         | chr20:37554954-37581703  | 16.7754   | 16.8609   | 0.00733764 | 0.997036 |
| XLOC_017997  | MGAT4B         | chr5:179224597-179285840 | 103.667   | 104.197   | 0.00735552 | 0.998514 |
| XLOC_006801  | L2HGDH         | chr14:50709151-50778947  | 3.00665   | 3.02219   | 0.00743651 | 0.997036 |
| XLOC_000406  | TCEANC2        | chr1:54519273-54565416   | 0.907522  | 0.912222  | 0.00745265 | 0.99714  |
| XLOC_015412  | GMPS           | chr3:155588324-155655520 | 44.685    | 44.9187   | 0.00752529 | 0.997036 |
| XLOC_018137  | ZSCAN12P1      | chr6:28058584-28063493   | 0.775197  | 0.779271  | 0.00756149 | 0.99714  |
| XLOC_014798  | EIF3D          | chr22:36906896-36925277  | 209.328   | 210.437   | 0.00762516 | 0.997036 |
| XLOC_006943  | MOAP1          | chr14:93648540-93651249  | 17.1444   | 17.2355   | 0.00764378 | 0.997036 |
| XLOC_002993  | MRPS16         | chr10:75007124-75118617  | 36.61     | 36.8051   | 0.00766544 | 0.997036 |
| XLOC_007406  | FURIN          | chr15:91411884-91426687  | 21.891    | 22.0081   | 0.00769351 | 0.997036 |
| XLOC_005893  | CDADC1         | chr13:49822046-49867622  | 2.13111   | 2.14253   | 0.00771025 | 0.99714  |
| XLOC_0021333 | MTPN           | chr7:135611502-135662200 | 32.9957   | 33.1741   | 0.00777974 | 0.997036 |
| XLOC_005651  | ARL1           | chr12:101786902-10180157 | 14.6122   | 14.6912   | 0.0077807  | 0.997036 |
| XLOC_013167  | LCT            | chr2:136545414-136594750 | 0.0214019 | 0.0215177 | 0.00778437 | 1        |
| XLOC_018751  | CCHCR1         | chr6:31110215-31126015   | 9.39115   | 9.44219   | 0.00782006 | 0.997036 |
| XLOC_020340  | ELFN1          | chr7:1748797-1787590     | 1.86798   | 1.87818   | 0.00785925 | 0.997082 |
| XLOC_018530  | VTA1           | chr6:142468409-142542085 | 7.10178   | 7.14123   | 0.00799184 | 0.997036 |
| XLOC_024068  | ZDHHC9         | chrX:128937263-128977911 | 14.4401   | 14.5204   | 0.00799905 | 0.997036 |
| XLOC_006382  | PCNXL4         | chr14:60558628-60601532  | 11.2265   | 11.2893   | 0.00804877 | 0.997036 |
| XLOC_023016  | ZNF883         | chr9:115759399-115774472 | 7.5123    | 7.55434   | 0.00805062 | 0.997036 |
| XLOC_003739  | TMEM126B       | chr11:85339616-85347583  | 38.8126   | 39.0306   | 0.00808026 | 0.997036 |
| XLOC_020943  | ANKMY2         | chr7:16639400-16685442   | 6.3113    | 6.34681   | 0.00809318 | 0.997036 |
| XLOC_003503  | CNTF,ZFP91     | chr11:58346586-58393205  | 6.67657   | 6.71416   | 0.0080988  | 0.997036 |
| XLOC_002119  | ADIPOR1        | chr1:202909959-202927700 | 51.5695   | 51.8618   | 0.00815272 | 0.997036 |
| XLOC_018580  | WTAP           | chr6:160148029-160177352 | 36.2615   | 36.4673   | 0.00816663 | 0.997036 |
| XLOC_003124  | SH3PXD2A       | chr10:105353783-10561518 | 1.20777   | 1.21463   | 0.0081759  | 0.997036 |
| XLOC_006449  | YLPMP1         | chr14:75230068-75304013  | 2.87138   | 2.88774   | 0.0082005  | 0.997036 |
| XLOC_0021532 | FZD3           | chr8:28351721-28431785   | 1.35363   | 1.36137   | 0.00822785 | 0.997036 |
| XLOC_017532  | SQSTM1         | chr5:179224597-179285840 | 211.958   | 213.17    | 0.0082286  | 0.997036 |
| XLOC_018240  | B3GALT4        | chr6:33244916-33246602   | 0.25657   | 0.258045  | 0.00827051 | 1        |
| XLOC_005661  | NT5DC3         | chr12:104166080-10423497 | 2.50372   | 2.51815   | 0.00829028 | 0.997036 |
| XLOC_015621  | OSBPL10        | chr3:31702316-32033228   | 8.09062   | 8.13747   | 0.00833011 | 0.997036 |
| XLOC_022895  | GNAQ           | chr9:80335190-80646219   | 0.884472  | 0.889601  | 0.00834267 | 0.998514 |
| XLOC_005624  | BTG1,LOC256021 | chr12:92378751-92539673  | 16.3267   | 16.4215   | 0.00835553 | 0.997036 |
| XLOC_021799  | HSF1           | chr8:145515269-145550567 | 132.726   | 133.498   | 0.0083648  | 0.997036 |
| XLOC_015360  | CLDN18         | chr3:137717657-137752490 | 0.0400641 | 0.0402983 | 0.00841122 | 1        |
| XLOC_002016  | KIFAP3         | chr1:169890469-170043878 | 1.81809   | 1.82879   | 0.00845864 | 0.997082 |
| XLOC_008596  | CSNK2A2        | chr16:58191811-58231782  | 47.3672   | 47.6462   | 0.00847191 | 0.997036 |
| XLOC_018895  | NFKBIE         | chr6:44225902-44233525   | 12.3469   | 12.4208   | 0.00861137 | 0.997036 |
| XLOC_010594  | LPPR2          | chr19:11466061-11476374  | 17.7044   | 17.8107   | 0.00863385 | 0.997036 |
| XLOC_004695  | EMG1           | chr12:7079943-7085165    | 34.622    | 34.8312   | 0.00869293 | 0.997036 |
| XLOC_017672  | SMIM15         | chr5:60453535-60458302   | 13.9745   | 14.0597   | 0.00877351 | 0.997036 |
| XLOC_003010  | COMTD1         | chr10:76993728-76995770  | 49.7346   | 50.0381   | 0.00877584 | 0.997036 |
| XLOC_010206  | C18orf54       | chr18:51885170-51908404  | 1.23141   | 1.23893   | 0.00877868 | 0.997036 |
| XLOC_017440  | MRPL22         | chr5:154320632-154348970 | 13.124    | 13.2043   | 0.0088044  | 0.997036 |
| XLOC_013854  | TMX4           | chr20:7961715-8000393    | 6.63674   | 6.67758   | 0.00885115 | 0.997036 |
| XLOC_006345  | ARF6           | chr14:50359735-50363772  | 19.4668   | 19.589    | 0.0090241  | 0.997036 |
| XLOC_019022  | BEND3          | chr6:107386384-107435638 | 1.25792   | 1.26583   | 0.00903522 | 0.997036 |
| XLOC_020368  | C1GALT1        | chr7:7222245-7288280     | 3.87224   | 3.89673   | 0.00909556 | 0.997036 |
| XLOC_008095  | CNEP1R1        | chr16:50059188-50070999  | 5.66155   | 5.69741   | 0.00910838 | 0.997036 |
| XLOC_018749  | CDSN           | chr6:31082607-31107869   | 0.101717  | 0.102362  | 0.00911231 | 1        |
| XLOC_020898  | MICALL2        | chr7:1473994-1499109     | 2.16096   | 2.17467   | 0.00912452 | 0.99714  |
| XLOC_016461  | OSTC           | chr4:109571740-109588978 | 75.752    | 76.2337   | 0.00914494 | 0.997036 |
| XLOC_001815  | RFX5           | chr1:151313115-151319768 | 14.3233   | 14.4147   | 0.00917543 | 0.997036 |
| XLOC_012849  | SUPT7L         | chr2:27848505-27917847   | 9.78222   | 9.84475   | 0.0091927  | 0.99714  |
| XLOC_012235  | ZNF638         | chr2:71558884-71662191   | 4.74413   | 4.77453   | 0.00921637 | 0.997036 |
| XLOC_016673  | RAB28          | chr4:13369346-13485989   | 9.95559   | 10.0196   | 0.00924988 | 0.997036 |

|             |              |                          |           |           |            |          |
|-------------|--------------|--------------------------|-----------|-----------|------------|----------|
| XLOC_012365 | CCDC138      | chr2:109403218-109492847 | 0.889918  | 0.895666  | 0.00928933 | 0.997342 |
| XLOC_001302 | NBPF1        | chr1:16890411-16939982   | 0.987937  | 0.994334  | 0.00931157 | 0.99714  |
| XLOC_016961 | PET112       | chr4:152591808-152682171 | 13.9141   | 14.0045   | 0.00934726 | 0.997036 |
| XLOC_023554 | MID2         | chrX:107069083-10717486  | 1.24363   | 1.25172   | 0.0093547  | 0.997036 |
| XLOC_002383 | KIAA1217     | chr10:23983674-24836772  | 2.2757    | 2.29061   | 0.00942379 | 0.997036 |
| XLOC_000432 | DLEU2L       | chr1:63989012-64038364   | 0.199718  | 0.201029  | 0.009439   | 1        |
| XLOC_000164 | CDC42        | chr1:22379119-22419436   | 79.9509   | 80.477    | 0.00946215 | 0.997036 |
| XLOC_018409 | PM20D2       | chr6:89855768-89875288   | 9.55446   | 9.61742   | 0.00947525 | 0.997036 |
| XLOC_015314 | PODXL2       | chr3:127348001-127391653 | 50.3858   | 50.7179   | 0.00947994 | 0.997036 |
| XLOC_006754 | STRN3        | chr14:31363004-31565656  | 4.69572   | 4.72669   | 0.00948448 | 0.997036 |
| XLOC_018606 | FAM120B      | chr6:170615843-170714237 | 3.16325   | 3.18412   | 0.00948644 | 0.997036 |
| XLOC_010910 | ZNF155       | chr19:44488321-44502477  | 1.41919   | 1.42863   | 0.00956456 | 0.997036 |
| XLOC_011350 | MLLT1        | chr19:6210391-6279959    | 27.6062   | 27.7901   | 0.00957971 | 0.997036 |
| XLOC_014085 | ZBTB46       | chr20:62371210-62436856  | 1.85042   | 1.86281   | 0.00962816 | 0.998564 |
| XLOC_006068 | STAR13       | chr13:33677271-34250932  | 1.34619   | 1.3553    | 0.00973064 | 0.997036 |
| XLOC_002500 | H2AFY2       | chr10:71812356-71892690  | 17.4727   | 17.5916   | 0.0097785  | 0.997342 |
| XLOC_011251 | ZNF446       | chr19:58987794-58992597  | 6.75767   | 6.80368   | 0.00979084 | 0.997036 |
| XLOC_022565 | ZBTB43       | chr9:129567284-129600487 | 3.884     | 3.91051   | 0.00981345 | 0.997036 |
| XLOC_017271 | AP3S1        | chr5:115177618-115249778 | 48.3445   | 48.6754   | 0.0098405  | 0.997036 |
| XLOC_014878 | KIAA1644     | chr22:44639556-44708731  | 0.0323034 | 0.0325246 | 0.00984664 | 1        |
| XLOC_022839 | SLOC25A51    | chr9:37877571-37904350   | 3.0626    | 3.08363   | 0.00987144 | 0.997082 |
| XLOC_021304 | PRRT4        | chr7:127990378-128001733 | 11.1637   | 11.2406   | 0.00989637 | 0.997036 |
| XLOC_002985 | ASCC1        | chr10:73855789-73995618  | 8.04204   | 8.09744   | 0.00990394 | 0.997535 |
| XLOC_001957 | PEX19        | chr1:160246598-16025494  | 15.1656   | 15.2703   | 0.00992584 | 0.996453 |
| XLOC_013683 | DBNDD2.SYS1  | chr20:43990576-44039250  | 214.243   | 215.727   | 0.00995682 | 0.997036 |
| XLOC_017205 | PDEBB        | chr5:76506705-76724080   | 0.213343  | 0.214822  | 0.00996456 | 1        |
| XLOC_004859 | KRT7         | chr12:52626953-52642709  | 3.0647    | 3.08597   | 0.00997835 | 0.997036 |
| XLOC_019152 | TRF1M        | chr6:155411422-155635617 | 6.31845   | 6.36326   | 0.0101948  | 0.997036 |
| XLOC_014996 | STT3B        | chr3:31574490-31677556   | 8.28429   | 8.34309   | 0.0102038  | 0.996811 |
| XLOC_010879 | CCDC97       | chr19:41816093-41830788  | 16.8867   | 17.0075   | 0.0102797  | 0.99682  |
| XLOC_010301 | ROCK1        | chr18:18529702-18691812  | 2.82059   | 2.84083   | 0.010317   | 0.997036 |
| XLOC_001485 | LOC100130557 | chr1:41154751-41237275   | 0.550249  | 0.554209  | 0.0103447  | 0.99862  |
| XLOC_014903 | MAPK12       | chr22:50691330-50700089  | 58.3512   | 58.7727   | 0.0103832  | 0.996453 |
| XLOC_013265 | CERKL        | chr2:182321618-182521834 | 0.0259342 | 0.0261223 | 0.0104269  | 1        |
| XLOC_012401 | INSIG2       | chr2:118846049-118867597 | 13.9234   | 14.0245   | 0.0104378  | 0.997036 |
| XLOC_020653 | PCOLCE       | chr7:100183955-100205798 | 16.3564   | 16.4757   | 0.010481   | 0.997036 |
| XLOC_018433 | SOBP         | chr6:107811316-107982513 | 0.532636  | 0.536528  | 0.0105041  | 0.997036 |
| XLOC_021964 | FGFR1        | chr8:38268655-38326352   | 22.067    | 22.2289   | 0.0105479  | 0.996453 |
| XLOC_014443 | PP1L2        | chr22:22020272-22090071  | 8.49035   | 8.55302   | 0.0106109  | 0.997036 |
| XLOC_001603 | ANKRD13C     | chr1:70724684-70820417   | 1.83076   | 1.84429   | 0.0106226  | 0.997036 |
| XLOC_022347 | CLTA         | chr9:36190852-36212059   | 270.426   | 272.425   | 0.0106238  | 0.996453 |
| XLOC_015019 | MYD88        | chr3:38179968-38184512   | 13.6222   | 13.7229   | 0.0106276  | 0.996453 |
| XLOC_015141 | SMIM4        | chr3:52570620-52574586   | 71.7046   | 72.2363   | 0.0106565  | 0.997036 |
| XLOC_012215 | PNO1         | chr2:68385004-68403094   | 12.9828   | 13.0794   | 0.0106944  | 0.996453 |
| XLOC_015561 | TAD3         | chr3:9821653-9878040     | 65.2559   | 65.7442   | 0.0107557  | 0.997036 |
| XLOC_022623 | POMT1        | chr9:134378288-134406662 | 23.089    | 23.2629   | 0.0108242  | 0.99714  |
| XLOC_008929 | PYY2         | chr17:26553588-26555085  | 1.04975   | 1.05774   | 0.0109393  | 0.997036 |
| XLOC_020591 | ADAM2        | chr7:87563565-87832204   | 0.479543  | 0.483199  | 0.0109565  | 0.997036 |
| XLOC_000595 | CTTNBP2NL    | chr1:112938799-113003786 | 4.52107   | 4.55563   | 0.010985   | 0.996453 |
| XLOC_020337 | MAFK         | chr7:1570367-1596066     | 8.51598   | 8.58153   | 0.0110621  | 0.997036 |
| XLOC_018485 | NCOA7        | chr6:126102306-126253178 | 3.66083   | 3.68917   | 0.0111228  | 0.996631 |
| XLOC_008783 | RNF167       | chr17:4843629-4848517    | 55.4163   | 55.8492   | 0.0112252  | 0.996453 |
| XLOC_000240 | PTPRU        | chr1:29563027-29653325   | 12.6091   | 12.7077   | 0.0112324  | 0.996079 |
| XLOC_000094 | VPS13D       | chr1:12290112-12572098   | 0.818132  | 0.824528  | 0.0112355  | 0.996453 |
| XLOC_011808 | LMTK3        | chr19:48988527-49016446  | 0.64125   | 0.646264  | 0.0112355  | 0.997535 |
| XLOC_000690 | PIP5K1A      | chr1:151171020-151222007 | 25.9907   | 26.1942   | 0.0112537  | 0.996079 |
| XLOC_004933 | HSD17B6      | chr12:57157107-57181574  | 0.528887  | 0.53305   | 0.0113113  | 0.997082 |
| XLOC_013835 | C20orf27     | chr20:3734145-3749035    | 125.664   | 126.654   | 0.0113304  | 0.996079 |
| XLOC_011413 | S1PR2        | chr19:10332108-10341948  | 5.61491   | 5.65935   | 0.0113745  | 0.997036 |
| XLOC_023380 | PLP2         | chrX:49028183-49031468   | 460.175   | 463.823   | 0.011392   | 0.996453 |
| XLOC_004309 | EHD1         | chr11:64620207-64646191  | 25.7912   | 25.9968   | 0.0114571  | 0.996173 |
| XLOC_001902 | UBQLN4       | chr1:156005091-156023518 | 27.4598   | 27.6793   | 0.0114877  | 0.996079 |
| XLOC_009739 | KAT2A        | chr17:40265128-40273382  | 36.4934   | 36.7857   | 0.011513   | 0.996242 |
| XLOC_006380 | JKAMP        | chr14:59951160-60043549  | 15.0823   | 15.2041   | 0.0115986  | 0.99634  |
| XLOC_016715 | PDS5A        | chr4:39824482-39979576   | 7.5193    | 7.58001   | 0.0116009  | 0.996079 |
| XLOC_013295 | SF3B1        | chr2:198256697-198299771 | 32.6904   | 32.955    | 0.0116288  | 0.995957 |
| XLOC_018889 | YIPF3        | chr6:43479564-43484728   | 74.7397   | 75.3449   | 0.0116351  | 0.995957 |
| XLOC_006488 | CALM1        | chr14:90863326-90874619  | 39.7367   | 40.0584   | 0.011636   | 0.995957 |
| XLOC_021234 | POLR2J       | chr7:102105389-102119387 | 116.584   | 117.528   | 0.0116377  | 0.997036 |
| XLOC_003893 | SPA1T        | chr11:124492741-12456468 | 5.85855   | 5.90635   | 0.0117218  | 0.997892 |
| XLOC_002956 | RTKN2        | chr10:63952952-64028466  | 0.208852  | 0.210561  | 0.0117562  | 1        |
| XLOC_005440 | BCDIN3D      | chr12:50222325-50236912  | 2.24409   | 2.2625    | 0.0117839  | 0.997036 |
| XLOC_012682 | MFF          | chr2:228192227-228222545 | 28.0726   | 28.3032   | 0.011805   | 0.995957 |
| XLOC_010718 | ZNF101       | chr19:19779662-19791138  | 2.66797   | 2.69012   | 0.0119304  | 0.997036 |
| XLOC_006495 | GOLGA5       | chr14:93260649-93306304  | 7.45567   | 7.51765   | 0.0119439  | 0.996087 |
| XLOC_014989 | OXSM         | chr3:25831562-25836025   | 17.6611   | 17.8114   | 0.0122331  | 0.996453 |
| XLOC_014955 | CAND2        | chr3:12838170-12876313   | 0.092149  | 0.0929408 | 0.012343   | 1        |
| XLOC_012121 | CLIP4        | chr2:29338307-29406679   | 0.0173449 | 0.0174942 | 0.012361   | 1        |
| XLOC_001424 | BSDC1        | chr1:32830704-32860062   | 18.7727   | 18.9343   | 0.0123618  | 0.995957 |

|              |          |                          |          |          |           |          |
|--------------|----------|--------------------------|----------|----------|-----------|----------|
| XLOC_021298  | ZNF800   | chr7:127010353-127032761 | 2.99252  | 3.01857  | 0.0125056 | 0.99634  |
| XLOC_014664  | ATP6V1E1 | chr22:18074902-18111588  | 51.7327  | 52.184   | 0.01253   | 0.995957 |
| XLOC_022615  | ABL1     | chr9:133589267-133763061 | 34.5966  | 34.8997  | 0.012585  | 0.995957 |
| XLOC_017999  | C5orf45  | chr5:179224597-179285841 | 50.1485  | 50.5899  | 0.012644  | 0.998564 |
| XLOC_009576  | SDF2     | chr17:26975373-26989207  | 20.8369  | 21.0203  | 0.0126444 | 0.996014 |
| XLOC_009749  | PLEKHH3  | chr17:40819931-40829048  | 12.9768  | 13.0916  | 0.0127022 | 0.996165 |
| XLOC_013269  | NCKAP1   | chr2:183789604-183903221 | 24.5709  | 24.7883  | 0.0127071 | 0.995302 |
| XLOC_006379  | DAAM1    | chr14:59655380-59838123  | 0.533381 | 0.538101 | 0.0127108 | 0.997036 |
| XLOC_013790  | DNAJC5   | chr20:62526454-62567384  | 13.3307  | 13.4489  | 0.0127373 | 0.995957 |
| XLOC_023013  | SUSD1    | chr9:114758831-115112541 | 5.4007   | 5.44866  | 0.0127535 | 0.99714  |
| XLOC_007163  | MGA      | chr15:41952609-42062141  | 1.10344  | 1.11326  | 0.0127809 | 0.996453 |
| XLOC_002717  | SLC18A2  | chr10:119000583-11903891 | 1.12108  | 1.13106  | 0.0127818 | 0.997036 |
| XLOC_021930  | PBK      | chr8:27667137-27695349   | 27.4669  | 27.7121  | 0.0128212 | 0.995874 |
| XLOC_004344  | MRPL11   | chr11:66202549-66206310  | 40.8836  | 41.2486  | 0.0128224 | 0.995309 |
| XLOC_024069  | ELF4     | chrX:129198894-129244681 | 8.70936  | 8.78727  | 0.0128483 | 0.995528 |
| XLOC_005691  | GLTP     | chr12:110288747-11031821 | 38.0677  | 38.4104  | 0.0129291 | 0.995464 |
| XLOC_023073  | PPP6C    | chr9:127908851-127952211 | 17.8667  | 18.0277  | 0.0129389 | 0.995464 |
| XLOC_007535  | LRRC57   | chr15:42834719-42841002  | 3.97468  | 4.01102  | 0.0131306 | 0.996453 |
| XLOC_005071  | KIAA1033 | chr12:105501491-10556291 | 2.17047  | 2.19035  | 0.0131544 | 0.996014 |
| XLOC_013901  | ABHD12   | chr20:25228705-25371618  | 41.9699  | 42.3584  | 0.0132913 | 0.997036 |
| XLOC_013116  | SLC35F5  | chr2:114471932-114514401 | 4.05205  | 4.08992  | 0.0134198 | 0.996014 |
| XLOC_004643  | WNK1     | chr12:862088-1020618     | 3.42229  | 3.45438  | 0.0134635 | 0.995528 |
| XLOC_022942  | NINJ1    | chr9:95883770-95896570   | 64.9128  | 65.5215  | 0.0134643 | 0.995302 |
| XLOC_016937  | SETD7    | chr4:140427191-140477571 | 6.60143  | 6.66335  | 0.0134695 | 0.994978 |
| XLOC_002240  | FAM89A   | chr1:231154703-231175991 | 24.9163  | 25.1513  | 0.0135447 | 0.995528 |
| XLOC_023121  | UCK1     | chr9:134378288-134406661 | 43.9887  | 44.4047  | 0.0135787 | 0.997036 |
| XLOC_008186  | EDC4     | chr16:67906925-67918417  | 15.6231  | 15.7716  | 0.0136558 | 0.995302 |
| XLOC_023132  | ABO      | chr9:136130562-136150631 | 0.160467 | 0.161997 | 0.0136909 | 1        |
| XLOC_017083  | FAM105B  | chr5:14664782-14699842   | 2.27509  | 2.2968   | 0.0136986 | 0.995957 |
| XLOC_021221  | EPHB4    | chr7:100400186-100425141 | 34.6816  | 35.0128  | 0.0137137 | 0.994978 |
| XLOC_016711  | RFC1     | chr4:39289068-39368001   | 8.2919   | 8.37171  | 0.0138211 | 0.995302 |
| XLOC_021590  | MRPL15   | chr8:55047780-55061074   | 58.9767  | 59.5455  | 0.0138471 | 0.994615 |
| XLOC_000645  | RNF115   | chr1:145611035-145688771 | 7.16772  | 7.237    | 0.0138775 | 0.996079 |
| XLOC_016851  | TSPAN5   | chr4:99391517-99579812   | 3.64104  | 3.67628  | 0.0138931 | 0.996079 |
| XLOC_014159  | CBR1     | chr21:37441939-37498938  | 48.1137  | 48.5798  | 0.0139075 | 0.994615 |
| XLOC_006327  | PAX9     | chr14:37126772-37147011  | 1.69166  | 1.70822  | 0.0140574 | 0.997036 |
| XLOC_001598  | WLS      | chr1:68167148-68698284   | 38.3228  | 38.6989  | 0.0140874 | 0.997036 |
| XLOC_011487  | NDUFB7   | chr19:14676889-14682889  | 259.064  | 261.608  | 0.0140989 | 0.994728 |
| XLOC_0021522 | PPP2R2A  | chr8:26149006-26230195   | 18.2358  | 18.4157  | 0.0141573 | 0.994615 |
| XLOC_023160  | LHX3     | chr9:139088095-139096951 | 0.396242 | 0.400158 | 0.0141893 | 0.996631 |
| XLOC_018744  | MDC1     | chr6:30667583-30685458   | 4.6699   | 4.71606  | 0.014191  | 0.995302 |
| XLOC_023767  | FIGF_PIR | chrX:15363712-15511711   | 0.750027 | 0.757448 | 0.0142054 | 0.997036 |
| XLOC_005795  | CHFR     | chr12:133416937-13346421 | 0.304329 | 0.30735  | 0.0142466 | 1        |
| XLOC_006737  | TGM1     | chr14:24718319-24732416  | 0.315401 | 0.318545 | 0.0143091 | 1        |
| XLOC_008481  | NSMCE1   | chr16:27236314-27301789  | 74.6526  | 75.3979  | 0.0143301 | 0.994615 |
| XLOC_016927  | MFSD8    | chr4:128838959-128952451 | 1.16505  | 1.17674  | 0.0144122 | 0.996631 |
| XLOC_006744  | SDR39U1  | chr14:24899140-24912007  | 52.7764  | 53.3144  | 0.01463   | 0.997036 |
| XLOC_006787  | MIS18BP1 | chr14:45672392-45722605  | 2.63722  | 2.66424  | 0.0147068 | 0.995528 |
| XLOC_014924  | EDEM1    | chr3:5229358-5261650     | 10.3015  | 10.4071  | 0.0147073 | 0.994615 |
| XLOC_006193  | DOCK9    | chr13:99445740-99738660  | 0.984973 | 0.995075 | 0.014721  | 0.99634  |
| XLOC_013127  | TFCP2L1  | chr2:121974163-122042771 | 0.988152 | 0.998293 | 0.0147306 | 0.995957 |
| XLOC_001762  | PFN1P2   | chr1:144610814-144612721 | 0.383567 | 0.387509 | 0.0147515 | 0.997036 |
| XLOC_011670  | FBL      | chr19:40325092-40337054  | 547.28   | 552.908  | 0.0147604 | 0.994615 |
| XLOC_002629  | PI4K2A   | chr10:99400442-99436187  | 15.0591  | 15.2142  | 0.0147819 | 0.994615 |
| XLOC_018116  | HMGNA4   | chr6:26538571-26547164   | 49.0136  | 49.5195  | 0.0148146 | 0.994615 |
| XLOC_023709  | TAZ      | chrX:153626570-153650061 | 20.5154  | 20.7275  | 0.0148391 | 0.998526 |
| XLOC_009013  | DUSP14   | chr17:35849950-35873588  | 35.4509  | 35.8199  | 0.0149395 | 0.994615 |
| XLOC_018032  | PRPF4B   | chr6:4021568-4065217     | 2.82849  | 2.85794  | 0.0149405 | 0.994615 |
| XLOC_011014  | PPFIA3   | chr19:49622662-49654280  | 4.48329  | 4.53005  | 0.0149683 | 0.995957 |
| XLOC_012115  | PPP1CB   | chr2:28974613-29025806   | 19.5062  | 19.7099  | 0.0149835 | 0.994615 |
| XLOC_002865  | WAC-AS1  | chr10:28808845-28821283  | 15.8371  | 16.0036  | 0.0150841 | 0.994615 |
| XLOC_000751  | EFNA4    | chr1:155006281-155042021 | 31.5282  | 31.8604  | 0.0151202 | 0.997342 |
| XLOC_002150  | SLC41A1  | chr1:205758220-205782161 | 12.1854  | 12.3139  | 0.0151315 | 0.994615 |
| XLOC_006397  | ZBTB1    | chr14:64971291-65000408  | 3.93073  | 3.97256  | 0.0152723 | 0.994711 |
| XLOC_009526  | PLD6     | chr17:17104308-17109646  | 13.6607  | 13.8062  | 0.0152928 | 0.994978 |
| XLOC_002708  | TRUB1    | chr10:116697951-11673741 | 4.0365   | 4.07954  | 0.0153008 | 0.995481 |
| XLOC_002099  | KIF14    | chr1:200520624-200589861 | 1.22407  | 1.23714  | 0.0153234 | 0.995957 |
| XLOC_002515  | FAM149B1 | chr10:74927876-75001939  | 1.45497  | 1.47056  | 0.0153814 | 0.996156 |
| XLOC_001873  | UBE2Q1   | chr1:154521050-154531121 | 21.0256  | 21.2523  | 0.0154716 | 0.994615 |
| XLOC_017670  | ELOVL7   | chr5:60047615-60140101   | 3.83928  | 3.88085  | 0.0155363 | 0.995221 |
| XLOC_008639  | SLC7A6OS | chr16:68298418-68344868  | 11.1606  | 11.2816  | 0.0155598 | 0.997036 |
| XLOC_016094  | TMEM41A  | chr3:185207388-185216841 | 8.94667  | 9.04368  | 0.0155599 | 0.994527 |
| XLOC_006435  | ACOT2    | chr14:74034323-74042362  | 8.8393   | 8.93536  | 0.0155936 | 0.995528 |
| XLOC_021383  | PDIA4    | chr7:148700153-148725781 | 73.4617  | 74.264   | 0.0156713 | 0.994615 |
| XLOC_007926  | UBN1     | chr16:4897911-4932363    | 5.16964  | 5.22628  | 0.0157219 | 0.994615 |
| XLOC_020693  | BCAP29   | chr7:107220421-107263761 | 9.08662  | 9.18639  | 0.0157542 | 0.99451  |
| XLOC_005887  | MED4-AS1 | chr13:48649863-48669277  | 3.61487  | 3.65481  | 0.01585   | 0.99862  |
| XLOC_015124  | RBM15B   | chr3:51428698-51534018   | 12.3751  | 12.512   | 0.0158651 | 0.994978 |
| XLOC_014467  | ADORA2A  | chr22:24823529-24890783  | 1.54993  | 1.56712  | 0.0159097 | 0.997036 |

|             |                      |                          |          |          |           |          |
|-------------|----------------------|--------------------------|----------|----------|-----------|----------|
| XLOC_008135 | NLRC5                | chr16:57050985-57117436  | 1.00837  | 1.01957  | 0.0159225 | 0.996284 |
| XLOC_021953 | RNF122               | chr8:33405272-33424643   | 3.68779  | 3.72872  | 0.0159244 | 0.996079 |
| XLOC_017767 | EPB41L4A             | chr5:111498314-111755010 | 0.946129 | 0.956657 | 0.0159651 | 0.99634  |
| XLOC_022086 | TMEM55A              | chr8:92006501-92053203   | 8.51594  | 8.61081  | 0.0159829 | 0.994615 |
| XLOC_022507 | HSDL2                | chr9:115142188-115234688 | 15.7426  | 15.9181  | 0.015996  | 0.99451  |
| XLOC_013291 | GTF3C3               | chr2:197627755-197664492 | 10.9962  | 11.1191  | 0.0160352 | 0.994615 |
| XLOC_000504 | EPHX4                | chr1:92495532-92529093   | 5.04587  | 5.10234  | 0.0160552 | 0.995957 |
| XLOC_006783 | FBXO33               | chr14:39865576-39901704  | 2.59963  | 2.62878  | 0.016091  | 0.995302 |
| XLOC_006886 | ELMSAN1              | chr14:74181824-74253896  | 3.11517  | 3.1503   | 0.0161824 | 0.994615 |
| XLOC_009330 | RPTOR                | chr17:78518624-78940173  | 5.73782  | 5.8026   | 0.0161951 | 0.994615 |
| XLOC_000112 | PRDM2                | chr1:14026734-14151574   | 2.23924  | 2.26455  | 0.0162209 | 0.995957 |
| XLOC_023172 | AGPAT2               | chr9:139567594-139581917 | 288.501  | 291.764  | 0.0162234 | 0.993358 |
| XLOC_005128 | SUDS3                | chr12:118814357-11885584 | 6.48365  | 6.55698  | 0.0162245 | 0.994615 |
| XLOC_009111 | CCDC103              | chr17:42977079-42981047  | 1.35566  | 1.371    | 0.0162319 | 0.997036 |
| XLOC_018804 | HLA-DMA              | chr6:32916390-32920899   | 0.357169 | 0.361225 | 0.0162391 | 0.995957 |
| XLOC_003414 | ALKBH3               | chr11:43902356-43942494  | 19.6735  | 19.8969  | 0.0162923 | 0.994615 |
| XLOC_023823 | FUNDC1               | chrX:44382884-44402221   | 12.4288  | 12.5705  | 0.0163472 | 0.995221 |
| XLOC_012565 | GLS                  | chr2:191745546-191830270 | 9.4048   | 9.512    | 0.0163508 | 0.994553 |
| XLOC_020660 | TRIP6                | chr7:100464949-100471078 | 281.028  | 284.24   | 0.0163958 | 0.99451  |
| XLOC_016731 | CORIN                | chr4:47596017-47840059   | 0.154602 | 0.156379 | 0.0164939 | 1        |
| XLOC_017367 | PCDHA1,PCDHA10,PCDHA | chr5:140165875-140391925 | 0.163135 | 0.165014 | 0.0165244 | 1        |
| XLOC_008973 | SUZ12                | chr17:30264043-30328057  | 9.49089  | 9.60024  | 0.0165277 | 0.994393 |
| XLOC_020650 | NYAP1                | chr7:100081549-100092424 | 1.87303  | 1.89461  | 0.0165299 | 0.99634  |
| XLOC_020575 | LOC100132832         | chr7:76668796-76682355   | 0.752585 | 0.761289 | 0.0165901 | 0.996453 |
| XLOC_015104 | TCTA                 | chr3:49449638-49453909   | 8.83257  | 8.93477  | 0.016596  | 0.994615 |
| XLOC_011470 | STX10                | chr19:13254871-13261188  | 93.3545  | 94.4431  | 0.0167258 | 0.99351  |
| XLOC_021815 | ERIC1H               | chr8:614199-681226       | 9.41785  | 9.5279   | 0.0167607 | 0.994615 |
| XLOC_013849 | GPCPD1               | chr20:5525079-5591672    | 2.76709  | 2.79943  | 0.0167633 | 0.994615 |
| XLOC_004621 | ETS1                 | chr11:128328655-12845744 | 25.6847  | 25.9851  | 0.0167775 | 0.99351  |
| XLOC_009569 | SLC46A1              | chr17:26698986-26733230  | 5.69769  | 5.76454  | 0.0168266 | 0.994615 |
| XLOC_017251 | PPIP5K2              | chr5:102455957-102539224 | 2.36586  | 2.39396  | 0.0170351 | 0.994615 |
| XLOC_016327 | KIAA1211             | chr4:57036360-57196890   | 2.6341   | 2.66566  | 0.0171811 | 0.994615 |
| XLOC_020716 | ING3                 | chr7:120590816-120615717 | 7.97869  | 8.07436  | 0.0171963 | 0.994615 |
| XLOC_023407 | GSPT2                | chrX:51486480-51489326   | 4.36611  | 4.41847  | 0.0171985 | 0.994615 |
| XLOC_007642 | DENND4A              | chr15:65952956-66084631  | 1.10496  | 1.11823  | 0.0172191 | 0.994615 |
| XLOC_000532 | HIAT1                | chr1:100503788-100548925 | 12.6453  | 12.7972  | 0.0172295 | 0.99351  |
| XLOC_014401 | TUBA8                | chr22:118593452-18614498 | 5.78163  | 5.85114  | 0.0172411 | 0.994615 |
| XLOC_020862 | ASIC3                | chr7:150745378-150749843 | 1.60856  | 1.6279   | 0.017245  | 0.997036 |
| XLOC_009066 | NKIRAS2              | chr17:40118758-40190044  | 13.9713  | 14.1393  | 0.0172528 | 0.997082 |
| XLOC_021282 | AASS                 | chr7:121713597-121784344 | 5.62368  | 5.69188  | 0.0173915 | 0.99351  |
| XLOC_015318 | EEFSEC               | chr3:127872312-128127488 | 15.0522  | 15.2355  | 0.0174688 | 0.99451  |
| XLOC_012248 | TET3                 | chr2:74273449-74335302   | 1.08168  | 1.09491  | 0.0175367 | 0.994711 |
| XLOC_021407 | RHEB                 | chr7:151163097-151217010 | 84.4203  | 85.455   | 0.0175748 | 0.99351  |
| XLOC_006632 | WDR20                | chr14:102606188-10269007 | 8.43141  | 8.53495  | 0.0176079 | 0.994615 |
| XLOC_005171 | DDX55                | chr12:124086671-12410548 | 9.75263  | 9.87299  | 0.0176952 | 0.99351  |
| XLOC_012102 | SNX17                | chr2:27593362-27603611   | 45.413   | 45.974   | 0.0177117 | 0.994101 |
| XLOC_001790 | HIST2H2BC            | chr1:149821758-149822340 | 7.55907  | 7.65246  | 0.0177156 | 0.996014 |
| XLOC_017612 | NADKD1               | chr5:36192693-36242258   | 3.28443  | 3.32503  | 0.0177249 | 0.994615 |
| XLOC_001360 | IFNLR1               | chr1:24480646-24513765   | 1.58941  | 1.60907  | 0.0177362 | 0.995048 |
| XLOC_007592 | RSL24D1              | chr15:55473511-55489231  | 131.944  | 133.576  | 0.0177388 | 0.99351  |
| XLOC_010442 | CNN2                 | chr19:1026297-1039064    | 129.543  | 131.149  | 0.0177685 | 0.99351  |
| XLOC_011517 | NR2F6                | chr19:17342693-17356151  | 109.774  | 111.135  | 0.0177762 | 0.99351  |
| XLOC_022590 | GLE1                 | chr9:131266970-131304580 | 32.7868  | 33.1933  | 0.0177784 | 0.99351  |
| XLOC_010063 | RAB40B               | chr17:80614942-80656598  | 11.3357  | 11.4764  | 0.0177982 | 0.99451  |
| XLOC_014017 | STAU1                | chr20:47729875-47804904  | 30.9214  | 31.3075  | 0.0179001 | 0.99351  |
| XLOC_013949 | SCAND1               | chr20:34541538-34543281  | 165.739  | 167.809  | 0.0179057 | 0.99351  |
| XLOC_016091 | MAGEF1               | chr3:184428154-184429836 | 32.7745  | 33.1847  | 0.0179434 | 0.99358  |
| XLOC_021596 | CHCHD7               | chr8:57124314-57131176   | 21.4393  | 21.7081  | 0.0179715 | 0.99351  |
| XLOC_021680 | NDUFAF6              | chr8:96037213-96070944   | 9.3479   | 9.46508  | 0.0179725 | 0.994615 |
| XLOC_004642 | B4GALNT3             | chr12:569542-671058      | 2.08849  | 2.11468  | 0.017975  | 0.995302 |
| XLOC_001911 | MEF2D                | chr1:156433512-156470634 | 10.0646  | 10.1909  | 0.0179931 | 0.99351  |
| XLOC_011420 | KEAP1                | chr19:10596795-10614054  | 38.8291  | 39.3165  | 0.0179968 | 0.99351  |
| XLOC_019145 | RMND1                | chr6:151725896-151773316 | 28.5822  | 28.941   | 0.0179977 | 0.99351  |
| XLOC_002659 | PPRC1                | chr10:103892786-10391005 | 11.3955  | 11.539   | 0.0180485 | 0.99351  |
| XLOC_010578 | ATG4D                | chr19:10654646-10676702  | 19.7159  | 19.9645  | 0.0180768 | 0.997036 |
| XLOC_010172 | ZNF397               | chr18:32820993-32870196  | 1.62416  | 1.64466  | 0.018096  | 0.997036 |
| XLOC_021041 | DDX56                | chr7:44605015-44614137   | 36.7578  | 37.2221  | 0.01811   | 0.99351  |
| XLOC_008108 | LPCAT2               | chr16:55542912-55620582  | 2.02246  | 2.04803  | 0.0181272 | 0.994615 |
| XLOC_024194 | SLC10A3              | chrX:153715649-153719007 | 29.8048  | 30.1835  | 0.0182146 | 0.99351  |
| XLOC_020878 | INSIG1               | chr7:155089485-155101944 | 14.1966  | 14.3772  | 0.0182301 | 0.99351  |
| XLOC_003927 | VPS26B               | chr11:134094560-13411768 | 16.2797  | 16.4874  | 0.0182861 | 0.99351  |
| XLOC_010790 | TMEM147              | chr19:36024313-36038429  | 201.48   | 204.051  | 0.0182921 | 0.99351  |
| XLOC_023842 | SLC38A5              | chrX:48316926-48328644   | 178.525  | 180.812  | 0.0183627 | 0.99351  |
| XLOC_012448 | RAB3GAP1             | chr2:135809834-135928275 | 8.7083   | 8.82049  | 0.0184667 | 0.99351  |
| XLOC_000491 | SH3GLB1              | chr1:87170252-87213867   | 9.00737  | 9.12349  | 0.0184802 | 0.993379 |
| XLOC_008426 | RSL1D1               | chr16:11928054-11945442  | 66.362   | 67.2191  | 0.0185134 | 0.99351  |
| XLOC_005386 | YAF2                 | chr12:42550906-42632154  | 2.58602  | 2.61945  | 0.0185341 | 0.994615 |
| XLOC_023620 | HPRT1                | chrX:133594174-133634691 | 72.1085  | 73.0434  | 0.0185847 | 0.993379 |
| XLOC_008036 | MAZ                  | chr16:29817416-29822504  | 128.574  | 130.242  | 0.0185909 | 0.99351  |



|             |          |                          |          |          |           |          |
|-------------|----------|--------------------------|----------|----------|-----------|----------|
| XLOC_009492 | STX8     | chr17:9153787-9479275    | 46.6097  | 47.2145  | 0.0185977 | 0.99351  |
| XLOC_010293 | PTPN2    | chr18:12785476-12884334  | 19.223   | 19.4724  | 0.0185989 | 0.99351  |
| XLOC_011090 | ZNF137P  | chr19:53099936-53103405  | 0.333459 | 0.337787 | 0.0186056 | 1        |
| XLOC_020362 | RAC1     | chr7:6414125-6443598     | 105.605  | 106.978  | 0.0186407 | 0.99351  |
| XLOC_015978 | COPB2    | chr3:139076432-139108527 | 21.7536  | 22.037   | 0.0186728 | 0.99351  |
| XLOC_012958 | AAK1     | chr2:69685126-69870977   | 0.943441 | 0.955734 | 0.0186778 | 0.99351  |
| XLOC_004651 | FKBP4    | chr12:2904107-2914587    | 68.0816  | 68.9722  | 0.0187495 | 0.99351  |
| XLOC_005082 | FICD     | chr12:108909050-10891338 | 0.666419 | 0.675149 | 0.0187772 | 0.997036 |
| XLOC_011730 | CADM4    | chr19:44126521-44143991  | 13.6573  | 13.8364  | 0.0187947 | 0.99351  |
| XLOC_011348 | RANBP3   | chr19:5914192-5978320    | 23.8991  | 24.2127  | 0.0188107 | 0.99351  |
| XLOC_008269 | GSE1     | chr16:85645028-85709812  | 5.50568  | 5.57797  | 0.0188193 | 0.99351  |
| XLOC_006338 | PRPF39   | chr14:45553301-45603732  | 6.20447  | 6.28613  | 0.0188617 | 0.997036 |
| XLOC_010223 | CDH20    | chr18:59157774-59222365  | 0.169822 | 0.172062 | 0.0189043 | 1        |
| XLOC_023609 | BCORL1   | chrX:129139163-129192051 | 2.65545  | 2.6905   | 0.0189195 | 0.99351  |
| XLOC_008890 | GID4     | chr17:17942610-17971718  | 3.64035  | 3.68847  | 0.0189435 | 0.99451  |
| XLOC_013230 | SLC25A12 | chr2:172639914-172750816 | 3.83101  | 3.88191  | 0.0190427 | 0.99351  |
| XLOC_000459 | TYW3     | chr1:75171171-75232360   | 9.48926  | 9.61566  | 0.0190897 | 0.995302 |
| XLOC_018549 | GINM1    | chr6:149887527-149912067 | 14.8246  | 15.0223  | 0.0191111 | 0.994384 |
| XLOC_015156 | APPL1    | chr3:57261764-57326710   | 3.71881  | 3.76863  | 0.0191996 | 0.99351  |
| XLOC_000446 | MIER1    | chr1:67390577-67454302   | 6.25541  | 6.33932  | 0.0192227 | 0.99351  |
| XLOC_021255 | NAMPT    | chr7:105888731-105925638 | 20.2897  | 20.562   | 0.019233  | 0.993379 |
| XLOC_008315 | AXIN1    | chr16:337439-402676      | 29.7052  | 30.1046  | 0.0192686 | 0.993379 |
| XLOC_009421 | SLC25A11 | chr17:4840425-4843462    | 71.0266  | 71.9857  | 0.0193505 | 0.993379 |
| XLOC_003862 | ABCG4    | chr11:119019749-11903337 | 1.42713  | 1.44645  | 0.0193993 | 0.995528 |
| XLOC_013727 | CSTF1    | chr20:54967426-54979582  | 13.1637  | 13.3425  | 0.0194595 | 0.99351  |
| XLOC_012978 | PRADC1   | chr2:73455133-73460356   | 16.3846  | 16.6075  | 0.0194945 | 0.99351  |
| XLOC_022429 | GADD45G  | chr9:92219926-92221469   | 2.12023  | 2.14921  | 0.0195866 | 0.99714  |
| XLOC_000199 | ZNF593   | chr1:26496387-26497364   | 144.246  | 146.221  | 0.019621  | 0.993379 |
| XLOC_009676 | SMARCE1  | chr17:38783975-38804103  | 35.1741  | 35.6577  | 0.0197011 | 0.993379 |
| XLOC_005518 | SMARCC2  | chr12:56555635-56583351  | 15.3432  | 15.5545  | 0.019739  | 0.993379 |
| XLOC_013628 | ROMO1    | chr20:34256609-34288902  | 446.26   | 452.408  | 0.0197414 | 0.99351  |
| XLOC_005444 | CERS5    | chr12:50523580-50561097  | 28.5389  | 28.933   | 0.0197846 | 0.99316  |
| XLOC_021601 | UBXN2B   | chr8:59323822-59364060   | 6.61089  | 6.70218  | 0.0197859 | 0.993379 |
| XLOC_002577 | STAMBPL1 | chr10:90639943-90683259  | 3.73829  | 3.79001  | 0.0198206 | 0.994519 |
| XLOC_000249 | TMEM39B  | chr1:32538502-32568467   | 17.3034  | 17.5429  | 0.0198315 | 0.99351  |
| XLOC_016303 | NIPAL1   | chr4:48018790-48039080   | 0.145068 | 0.147079 | 0.0198655 | 1        |
| XLOC_000454 | HHLA3    | chr1:70820492-70833705   | 32.6864  | 33.1398  | 0.0198749 | 0.99351  |
| XLOC_003911 | DCPS     | chr11:126173646-12622548 | 32.9644  | 33.4218  | 0.0198824 | 0.993379 |
| XLOC_005297 | CSDA     | chr12:10851675-10875953  | 136.84   | 138.743  | 0.0199239 | 0.993379 |
| XLOC_017124 | PARP8    | chr5:49961732-50142356   | 2.31392  | 2.34611  | 0.0199347 | 0.99351  |
| XLOC_008361 | PGP      | chr16:2261602-2264822    | 10.8062  | 10.9567  | 0.0199623 | 0.99351  |
| XLOC_015431 | PPM1L    | chr3:160473995-160788817 | 0.309389 | 0.313701 | 0.0199644 | 1        |
| XLOC_016463 | CCDC109B | chr4:110481354-110608872 | 35.1822  | 35.6732  | 0.0199977 | 0.993379 |
| XLOC_021679 | INTS8    | chr8:95835517-95907482   | 14.0411  | 14.2372  | 0.0200095 | 0.99351  |
| XLOC_014632 | TBC1D22A | chr22:47158517-47571342  | 13.6545  | 13.8452  | 0.0200129 | 0.993379 |
| XLOC_011553 | LPAR2    | chr19:19734465-19739039  | 16.9287  | 17.1652  | 0.0200202 | 0.99351  |
| XLOC_021398 | FASTK    | chr7:150773707-15077797  | 47.7311  | 48.4004  | 0.0200899 | 0.99351  |
| XLOC_018294 | BYSL     | chr6:41888964-41900784   | 37.1967  | 37.7198  | 0.0201489 | 0.99316  |
| XLOC_001886 | GBAP1    | chr1:155178489-155197327 | 0.946119 | 0.959438 | 0.0201681 | 0.998526 |
| XLOC_015772 | SELK     | chr3:53919225-53925989   | 60.094   | 60.9404  | 0.0201786 | 0.993379 |
| XLOC_012557 | WDR75    | chr2:190306158-190340264 | 9.21027  | 9.34026  | 0.0202196 | 0.993379 |
| XLOC_010828 | SIPA1L3  | chr19:38397867-38699008  | 2.79339  | 2.83293  | 0.0202745 | 0.99351  |
| XLOC_013591 | TM9SF4   | chr20:30697308-30755061  | 15.509   | 15.7288  | 0.0203075 | 0.993379 |
| XLOC_017530 | MAML1    | chr5:179159850-179204287 | 5.84631  | 5.92924  | 0.0203214 | 0.99351  |
| XLOC_008534 | VKORC1   | chr16:31102174-31106276  | 367.213  | 372.423  | 0.0203219 | 0.99316  |
| XLOC_008325 | RPUSD1   | chr16:834973-838383      | 77.4796  | 78.5807  | 0.02036   | 0.992939 |
| XLOC_014621 | ATXN10   | chr22:46067677-46241187  | 20.9621  | 21.26    | 0.0203616 | 0.993108 |
| XLOC_007872 | TRAF7    | chr16:2205798-2246465    | 31.385   | 31.8341  | 0.0204984 | 0.99351  |
| XLOC_000133 | MST1P2   | chr1:16972068-16976915   | 0.723375 | 0.733737 | 0.0205204 | 0.99634  |
| XLOC_015026 | WDR48    | chr3:39093506-39137881   | 5.53883  | 5.61825  | 0.0205389 | 0.993379 |
| XLOC_016725 | GNPDA2   | chr4:44703811-44728651   | 4.08254  | 4.14112  | 0.0205527 | 0.99351  |
| XLOC_001652 | GLMN     | chr1:92711954-92853732   | 4.87812  | 4.94824  | 0.0205904 | 0.995957 |
| XLOC_012924 | FANCL    | chr2:58273776-58468515   | 8.07126  | 8.18731  | 0.0205952 | 0.99451  |
| XLOC_001460 | C1orf109 | chr1:38147241-38156192   | 6.64649  | 6.74208  | 0.0206001 | 0.99351  |
| XLOC_009883 | RNFT1    | chr17:58029722-58042117  | 7.48689  | 7.59458  | 0.0206019 | 0.99351  |
| XLOC_005117 | C12orf52 | chr12:113623554-11363017 | 23.0314  | 23.3631  | 0.0206249 | 0.993379 |
| XLOC_009900 | STRADA   | chr17:61780191-61819330  | 12.812   | 12.9969  | 0.0206627 | 0.99351  |
| XLOC_012553 | GULP1    | chr2:189156395-189460657 | 2.46325  | 2.49887  | 0.0207111 | 0.99451  |
| XLOC_005138 | GATC     | chr12:120884240-12090757 | 8.2513   | 8.3709   | 0.0207605 | 0.997036 |
| XLOC_000972 | RNPEP    | chr1:201951765-201975277 | 34.2616  | 34.7606  | 0.0208614 | 0.993108 |
| XLOC_003575 | C11orf84 | chr11:63580922-63595190  | 45.6573  | 46.3235  | 0.0208979 | 0.992797 |
| XLOC_009585 | DHR13    | chr17:27224798-27230089  | 35.4018  | 35.9196  | 0.0209489 | 0.993108 |
| XLOC_013139 | AMMECR1L | chr2:128619206-128643514 | 6.33143  | 6.42459  | 0.0210739 | 0.993379 |
| XLOC_015753 | TWF2     | chr3:52262625-52273183   | 109.785  | 111.401  | 0.0210746 | 0.992797 |
| XLOC_007835 | STUB1    | chr16:7301114-734439     | 56.7677  | 57.6038  | 0.0210952 | 0.994978 |
| XLOC_005063 | HSP90B1  | chr12:104324111-10434170 | 100.545  | 102.032  | 0.0211785 | 0.99316  |
| XLOC_018063 | JARID2   | chr6:15246205-15522273   | 2.12313  | 2.15455  | 0.021192  | 0.99351  |
| XLOC_001874 | ADAR     | chr1:154554533-154600457 | 20.9031  | 21.2124  | 0.0211942 | 0.993348 |
| XLOC_021011 | HERPUD2  | chr7:35672269-35734772   | 6.43021  | 6.5254   | 0.0212003 | 0.99351  |

|             |              |                          |           |           |           |          |
|-------------|--------------|--------------------------|-----------|-----------|-----------|----------|
| XLOC_017772 | PGGT1B       | chr5:114546526-114598566 | 4.278     | 4.3414    | 0.0212242 | 0.99351  |
| XLOC_012366 | SH3RF3       | chr2:109743783-110262207 | 0.898844  | 0.912177  | 0.0212427 | 0.995528 |
| XLOC_014848 | TOB2         | chr22:41829491-41843027  | 15.5618   | 15.7929   | 0.0212672 | 0.992797 |
| XLOC_017518 | LOC728554    | chr5:177302261-177311268 | 27.3636   | 27.7702   | 0.0212837 | 0.992797 |
| XLOC_013623 | PROC         | chr20:33759773-33765165  | 168.468   | 170.974   | 0.0213074 | 0.992939 |
| XLOC_017350 | UBE2D2       | chr5:138940750-139008018 | 35.0307   | 35.5528   | 0.0213454 | 0.992797 |
| XLOC_021006 | RP9          | chr7:33134409-33149002   | 13.8424   | 14.0488   | 0.0213522 | 0.99351  |
| XLOC_011785 | STRN4        | chr19:47222767-47261832  | 47.2223   | 47.927    | 0.0213709 | 0.992797 |
| XLOC_001010 | MAPKAPK2     | chr1:206858364-206907630 | 33.6472   | 34.1508   | 0.0214323 | 0.991938 |
| XLOC_020875 | LOC100132707 | chr7:154720226-154794687 | 0.861591  | 0.87451   | 0.0214715 | 0.998342 |
| XLOC_015972 | PIK3CB       | chr3:138371539-138478207 | 2.75822   | 2.79965   | 0.0215102 | 0.99351  |
| XLOC_012616 | CCNYL1       | chr2:208576263-208620896 | 2.75808   | 2.79965   | 0.0215812 | 0.994615 |
| XLOC_020361 | USP42        | chr7:6144549-6201195     | 2.49717   | 2.53485   | 0.0216056 | 0.99351  |
| XLOC_014869 | ARFGAP3      | chr22:43192531-43253408  | 7.22424   | 7.33327   | 0.0216112 | 0.993285 |
| XLOC_017162 | CCNB1        | chr5:68462836-68474070   | 52.1907   | 52.9792   | 0.0216341 | 0.992797 |
| XLOC_004131 | PAX6         | chr11:31806339-31908587  | 0.0942772 | 0.0957016 | 0.0216342 | 1        |
| XLOC_015697 | IP6K2        | chr3:48725435-48754711   | 58.5482   | 59.4336   | 0.0216528 | 0.993379 |
| XLOC_009346 | MAPK-AS1     | chr17:79885704-79888629  | 6.68274   | 6.78397   | 0.02169   | 0.99351  |
| XLOC_009649 | C17orf96     | chr17:36827958-36831187  | 24.3332   | 24.702    | 0.0217013 | 0.992797 |
| XLOC_021229 | FIS1         | chr7:100882892-100888377 | 187.038   | 189.88    | 0.021762  | 0.991938 |
| XLOC_017835 | BRD8         | chr5:137475458-137514358 | 11.8723   | 12.053    | 0.0217919 | 0.992651 |
| XLOC_022996 | CTNNA1       | chr9:111704850-111775764 | 31.1756   | 31.6515   | 0.0218558 | 0.992797 |
| XLOC_021623 | CSP1         | chr8:67976602-68108849   | 2.06282   | 2.09437   | 0.0218959 | 0.993379 |
| XLOC_001513 | MUTYH        | chr1:45794913-45956840   | 11.0076   | 11.176    | 0.0219121 | 0.996079 |
| XLOC_010587 | CARM1        | chr19:10982252-11039357  | 47.5421   | 48.2724   | 0.0219933 | 0.993379 |
| XLOC_008662 | PHLPP2       | chr16:71678851-71748704  | 1.41455   | 1.43631   | 0.0220271 | 0.993379 |
| XLOC_022148 | EXT1         | chr8:118811601-119124058 | 13.4951   | 13.7028   | 0.0220367 | 0.992797 |
| XLOC_022124 | ZNF706       | chr8:102209265-102218297 | 39.1418   | 39.7455   | 0.0220827 | 0.992651 |
| XLOC_011285 | KLF16        | chr19:1852397-1863564    | 50.811    | 51.5949   | 0.0220878 | 0.992797 |
| XLOC_008656 | VAC14        | chr16:70721341-70835061  | 28.06     | 28.4947   | 0.0221789 | 0.991767 |
| XLOC_023516 | CENPI        | chrX:100354797-100417971 | 0.569943  | 0.578788  | 0.0222173 | 0.996079 |
| XLOC_016515 | ZNF330       | chr4:142142048-142155850 | 27.5439   | 27.9727   | 0.0222867 | 0.991767 |
| XLOC_018295 | TAF8         | chr6:42018250-42048644   | 4.72948   | 4.8032    | 0.0223124 | 0.993379 |
| XLOC_000605 | HIPK1        | chr1:114471995-114520497 | 2.41583   | 2.45349   | 0.0223191 | 0.99316  |
| XLOC_001258 | LZIC         | chr1:9989775-10002826    | 10.1794   | 10.3383   | 0.0223449 | 0.993379 |
| XLOC_023300 | EIF2S3       | chrX:24073064-24096927   | 91.8006   | 93.234    | 0.0223522 | 0.991956 |
| XLOC_005373 | FAM60A       | chr12:31433519-31479159  | 29.7069   | 30.1766   | 0.0226298 | 0.991767 |
| XLOC_006482 | TTC8         | chr14:89290977-89344335  | 5.49271   | 5.57973   | 0.0226776 | 0.993379 |
| XLOC_004524 | ALG9         | chr11:111652918-11174230 | 3.82127   | 3.88202   | 0.022757  | 0.992797 |
| XLOC_008234 | GABARAPL2    | chr16:75600248-75611779  | 102.899   | 104.536   | 0.022767  | 0.991767 |
| XLOC_001430 | RNF19B       | chr1:33402049-33430286   | 10.8921   | 11.0657   | 0.0228082 | 0.992797 |
| XLOC_012989 | C2orf81      | chr2:74641302-74644844   | 3.85438   | 3.91587   | 0.0228341 | 0.994507 |
| XLOC_010548 | SNAPC2       | chr19:7985193-7988136    | 58.5211   | 59.4595   | 0.0229502 | 0.992191 |
| XLOC_020772 | C7orf73      | chr7:135347220-135361160 | 13.0542   | 13.2635   | 0.0229526 | 0.992797 |
| XLOC_023144 | RNU6ATAC     | chr9:137029561-137029688 | 36.9341   | 37.5275   | 0.0229967 | 0.994615 |
| XLOC_022314 | CHMP5        | chr9:33264876-33282067   | 33.4931   | 34.0319   | 0.023025  | 0.991767 |
| XLOC_015186 | GXYLT2       | chr3:72937384-73024522   | 0.667192  | 0.67796   | 0.0230998 | 0.997036 |
| XLOC_002544 | LINC00857    | chr10:81967465-81979413  | 0.962806  | 0.97835   | 0.0231055 | 0.994978 |
| XLOC_001064 | MIA3         | chr1:222791443-222841357 | 4.15157   | 4.21882   | 0.0231818 | 0.992272 |
| XLOC_023946 | RLIM         | chrX:73802810-73834461   | 4.24563   | 4.31447   | 0.0232048 | 0.992073 |
| XLOC_008099 | NKD1         | chr16:50582240-50674771  | 1.11404   | 1.13211   | 0.0232128 | 0.993379 |
| XLOC_008422 | LITAF        | chr16:11641577-11681322  | 28.5343   | 28.9974   | 0.0232263 | 0.991767 |
| XLOC_021468 | NEIL2        | chr8:11627171-11644854   | 22.4702   | 22.8353   | 0.0232545 | 0.991767 |
| XLOC_011708 | LIPE         | chr19:42901299-43156507  | 3.47815   | 3.53474   | 0.0232848 | 0.99351  |
| XLOC_005103 | SH2B3        | chr12:111843751-11188947 | 11.5952   | 11.784    | 0.0233025 | 0.991767 |
| XLOC_017665 | MIER3        | chr5:56205086-56247954   | 1.74757   | 1.77617   | 0.023421  | 0.99351  |
| XLOC_006987 | PPP1R13B     | chr14:104200087-10431397 | 2.47646   | 2.51709   | 0.0234804 | 0.99351  |
| XLOC_011509 | EPS15L1      | chr19:16466054-16582823  | 12.956    | 13.1695   | 0.0235723 | 0.991767 |
| XLOC_022259 | KANK1        | chr9:470293-746106       | 2.14107   | 2.17637   | 0.0235935 | 0.992797 |
| XLOC_015647 | SEC22C       | chr3:42589458-42690233   | 7.67671   | 7.80343   | 0.0236213 | 0.99634  |
| XLOC_015598 | DPH3         | chr3:16298567-16306496   | 3.291     | 3.34536   | 0.0236355 | 0.993379 |
| XLOC_023403 | CCNB3        | chrX:50027539-50094911   | 0.461866  | 0.46952   | 0.0237124 | 0.997036 |
| XLOC_006373 | ACTR10       | chr14:58666832-58702353  | 13.3318   | 13.5533   | 0.0237719 | 0.991767 |
| XLOC_008819 | CHRN1        | chr17:7348405-7360932    | 36.7824   | 37.3941   | 0.0237945 | 0.991767 |
| XLOC_004920 | ERBB3        | chr12:56473808-56497291  | 4.97301   | 5.05585   | 0.0238348 | 0.995302 |
| XLOC_018517 | PEX7         | chr6:137143701-137235077 | 8.14904   | 8.28523   | 0.0239118 | 0.992939 |
| XLOC_008416 | DEXI         | chr16:11022747-11036257  | 29.8072   | 30.3064   | 0.0239622 | 0.991767 |
| XLOC_009296 | UBALD2       | chr17:74261285-74267379  | 95.3353   | 96.9328   | 0.0239739 | 0.991767 |
| XLOC_004392 | CLPB         | chr11:72003469-72145724  | 6.26503   | 6.37004   | 0.0239811 | 0.993108 |
| XLOC_005325 | SSG1         | chr12:13236470-13256630  | 0.0387521 | 0.0394024 | 0.0240084 | 1        |
| XLOC_005400 | SLC38A2      | chr12:46751970-46766645  | 37.0998   | 37.7232   | 0.0240415 | 0.991767 |
| XLOC_006985 | BAG5         | chr14:104022880-10402918 | 5.5923    | 5.68628   | 0.0240427 | 0.991767 |
| XLOC_016631 | FAM53A       | chr4:1641607-1685988     | 3.04725   | 3.09846   | 0.0240454 | 0.99351  |
| XLOC_022959 | CDC14B       | chr9:99262394-99382112   | 4.23752   | 4.30875   | 0.0240487 | 0.992797 |
| XLOC_021042 | TMED4        | chr7:44618761-44621827   | 38.5583   | 39.2081   | 0.0241076 | 0.992362 |
| XLOC_001414 | PEF1         | chr1:32095462-32110838   | 35.599    | 36.2001   | 0.0241535 | 0.991767 |
| XLOC_009667 | IKZF3        | chr17:37913967-38020441  | 0.0172917 | 0.0175838 | 0.0241671 | 1        |
| XLOC_021573 | VDAC3        | chr8:42249278-42263455   | 106.488   | 108.287   | 0.0241728 | 0.991767 |
| XLOC_001693 | SORT1        | chr1:109852187-109940566 | 5.67211   | 5.76803   | 0.0241926 | 0.991767 |

|             |                           |                          |          |          |           |          |
|-------------|---------------------------|--------------------------|----------|----------|-----------|----------|
| XLOC_005750 | ANAPC5                    | chr12:121746047-12179201 | 45.8322  | 46.6074  | 0.0241995 | 0.991767 |
| XLOC_023426 | APEX2                     | chrX:55026755-55034306   | 22.0546  | 22.4282  | 0.0242341 | 0.991767 |
| XLOC_013219 | STK39                     | chr2:168810529-169104101 | 9.23581  | 9.3927   | 0.0243004 | 0.991767 |
| XLOC_000068 | SPSB1                     | chr1:9352940-9429590     | 15.3779  | 15.6393  | 0.0243236 | 0.991767 |
| XLOC_010968 | C5AR1                     | chr19:47813103-47825327  | 0.306065 | 0.311274 | 0.0243463 | 1        |
| XLOC_003395 | CAPRIN1                   | chr11:34073229-34124157  | 35.5736  | 36.1796  | 0.0243705 | 0.991767 |
| XLOC_009140 | SP2                       | chr17:45973515-46006323  | 4.26543  | 4.33815  | 0.0243865 | 0.993379 |
| XLOC_013908 | MIR663A                   | chr20:26167654-26189669  | 871.489  | 886.349  | 0.0243935 | 0.99634  |
| XLOC_020511 | ZNF138                    | chr7:64254765-64314178   | 2.8154   | 2.86349  | 0.0244347 | 0.993379 |
| XLOC_022046 | UBE2W                     | chr8:74692331-74791145   | 4.61795  | 4.69707  | 0.0245082 | 0.992797 |
| XLOC_021023 | MPLKIP                    | chr7:40172341-40174251   | 25.4013  | 25.8372  | 0.0245477 | 0.992797 |
| XLOC_013729 | RTFDC1                    | chr20:55043646-55101208  | 48.2564  | 49.0846  | 0.0245511 | 0.991767 |
| XLOC_013182 | ARL5A                     | chr2:152657479-152685001 | 11.0311  | 11.2204  | 0.0245529 | 0.991767 |
| XLOC_007161 | ITPKA                     | chr15:41786055-41795757  | 33.8864  | 34.4692  | 0.0245989 | 0.991767 |
| XLOC_012522 | SCRN3                     | chr2:175260456-175294301 | 1.75453  | 1.78473  | 0.0246201 | 0.99351  |
| XLOC_021161 | SAMD9                     | chr7:92728825-92747336   | 0.188056 | 0.191296 | 0.024641  | 1        |
| XLOC_017788 | FLJ33630                  | chr5:127357243-127418761 | 0.920052 | 0.93592  | 0.0246688 | 0.99451  |
| XLOC_017011 | AGA                       | chr4:178351928-178363657 | 2.25649  | 2.29542  | 0.0246784 | 0.99351  |
| XLOC_000192 | LDLRAP1                   | chr1:25870075-25895377   | 9.51471  | 9.67898  | 0.0246946 | 0.991767 |
| XLOC_016752 | PPAT                      | chr4:57259528-57301802   | 7.30012  | 7.42632  | 0.0247283 | 0.991767 |
| XLOC_016737 | OCIAD2                    | chr4:48887404-48908815   | 273.145  | 277.869  | 0.0247366 | 0.990994 |
| XLOC_016423 | PKD2                      | chr4:88928798-88998931   | 1.63593  | 1.66427  | 0.0247815 | 0.993379 |
| XLOC_008214 | SF3B3                     | chr16:70557690-70611571  | 23.1059  | 23.5068  | 0.0248165 | 0.990994 |
| XLOC_018534 | PHACTR2                   | chr6:143929316-144152322 | 1.756    | 1.78651  | 0.0248527 | 0.991767 |
| XLOC_018861 | OARD1                     | chr6:41034530-41040188   | 12.1018  | 12.3123  | 0.0248884 | 0.992642 |
| XLOC_017155 | TRAPPC13                  | chr5:64920557-65017941   | 5.54637  | 5.64304  | 0.0249287 | 0.99351  |
| XLOC_014615 | ARHGAP8,PRR5,PRR5-AR1     | chr22:45064426-45258664  | 29.8697  | 30.3911  | 0.024965  | 0.991767 |
| XLOC_016577 | GALNT7                    | chr4:174089903-174245111 | 3.78141  | 3.84745  | 0.0249784 | 0.991767 |
| XLOC_009743 | GHDC                      | chr17:40341104-40346550  | 15.8382  | 16.115   | 0.0249926 | 0.991767 |
| XLOC_003666 | NDUFV1                    | chr11:67374322-67380012  | 168.733  | 171.682  | 0.0249982 | 0.990994 |
| XLOC_001104 | GNPAT                     | chr1:231359508-231413711 | 17.3801  | 17.6839  | 0.0249993 | 0.991767 |
| XLOC_006945 | BTBD7                     | chr14:93703895-93799385  | 2.86582  | 2.91591  | 0.0250003 | 0.993379 |
| XLOC_009745 | STAT3                     | chr17:40465342-40540513  | 8.77062  | 8.92398  | 0.0250079 | 0.991767 |
| XLOC_022796 | KIAA1161                  | chr9:34368906-34376894   | 1.25262  | 1.27453  | 0.0250202 | 0.994498 |
| XLOC_010753 | NUDT19                    | chr19:33182866-33204702  | 15.6969  | 15.9721  | 0.0250708 | 0.991767 |
| XLOC_021789 | EXOSC4                    | chr8:145133521-145135557 | 112.018  | 113.986  | 0.0251274 | 0.991767 |
| XLOC_020973 | SKAP2                     | chr7:26706687-26904341   | 4.13882  | 4.21196  | 0.0252717 | 0.991767 |
| XLOC_010127 | SLMO1                     | chr18:12407894-12432236  | 7.37712  | 7.5075   | 0.0252762 | 0.993379 |
| XLOC_012380 | POLR1B                    | chr2:113299491-113334727 | 8.12047  | 8.26411  | 0.0252959 | 0.991767 |
| XLOC_011782 | DACT3                     | chr19:47150868-47220384  | 2.14796  | 2.18609  | 0.0253861 | 0.997036 |
| XLOC_012962 | C2orf42                   | chr2:70377016-70418151   | 2.33827  | 2.37988  | 0.025448  | 0.99351  |
| XLOC_011814 | MAMSTR                    | chr19:49216254-49222976  | 1.03999  | 1.05852  | 0.0254787 | 0.995957 |
| XLOC_007709 | TSPAN3                    | chr15:77336359-77363570  | 44.4778  | 45.2711  | 0.0255044 | 0.990857 |
| XLOC_012500 | PPIG                      | chr2:170440849-170494254 | 7.47915  | 7.61309  | 0.0256078 | 0.991767 |
| XLOC_023535 | TCEAL3                    | chrX:102862833-102864851 | 15.789   | 16.0719  | 0.0256262 | 0.991767 |
| XLOC_002748 | FAM175B                   | chr10:126490353-12652521 | 4.7961   | 4.88222  | 0.0256761 | 0.991767 |
| XLOC_014858 | NDUFA6                    | chr22:42481529-42486888  | 64.1623  | 65.3157  | 0.0257062 | 0.990857 |
| XLOC_003902 | CHEK1                     | chr11:125495030-12555071 | 11.6914  | 11.9019  | 0.0257379 | 0.991767 |
| XLOC_012094 | KHK                       | chr2:27309610-27341995   | 7.59423  | 7.73094  | 0.0257402 | 0.995221 |
| XLOC_017300 | ISOC1                     | chr5:128430441-128449711 | 8.01793  | 8.16252  | 0.0257848 | 0.991938 |
| XLOC_003156 | FAM204A                   | chr10:120068571-12010181 | 11.2207  | 11.4234  | 0.0258288 | 0.990994 |
| XLOC_014704 | PPM1F                     | chr22:22273791-22307250  | 11.8491  | 12.0641  | 0.0259326 | 0.990857 |
| XLOC_013360 | TMBIM1                    | chr2:219135114-219211511 | 67.922   | 69.1596  | 0.0260501 | 0.991767 |
| XLOC_010896 | TMEM145                   | chr19:42817476-42829214  | 27.5503  | 28.0526  | 0.0260685 | 0.990857 |
| XLOC_011353 | GTF2F1                    | chr19:6379579-6393291    | 55.3994  | 56.4104  | 0.0260893 | 0.990857 |
| XLOC_017714 | MTX3                      | chr5:79272538-79287088   | 1.53115  | 1.55909  | 0.0260899 | 0.991767 |
| XLOC_007943 | SNX29                     | chr16:12070601-12668146  | 0.466525 | 0.475045 | 0.0261096 | 0.99351  |
| XLOC_010423 | CDC34                     | chr19:531732-542087      | 124.999  | 127.288  | 0.0261822 | 0.990857 |
| XLOC_008958 | CPD                       | chr17:28705941-28796675  | 4.02935  | 4.10315  | 0.0261823 | 0.990795 |
| XLOC_022129 | AZIN1                     | chr8:103838535-103876397 | 28.2676  | 28.786   | 0.0262185 | 0.990857 |
| XLOC_011334 | TICAM1                    | chr19:4815935-4831754    | 15.9656  | 16.2591  | 0.0262859 | 0.991459 |
| XLOC_020782 | C7orf55,C7orf55-LUC7L2,LL | chr7:139025104-139112277 | 44.6215  | 45.4426  | 0.026304  | 0.992109 |
| XLOC_001876 | PMVK                      | chr1:154897207-154909484 | 26.2947  | 26.7794  | 0.0263479 | 0.991459 |
| XLOC_018568 | ARID1B                    | chr6:157099063-157531917 | 2.9451   | 2.99939  | 0.0263527 | 0.991569 |
| XLOC_002173 | LPGAT1                    | chr1:211916798-212004114 | 4.96537  | 5.05711  | 0.0264115 | 0.990857 |
| XLOC_002843 | C10orf114                 | chr10:21783420-21786213  | 8.48617  | 8.64315  | 0.0264433 | 0.992939 |
| XLOC_006276 | MRPL52                    | chr14:23299091-23304246  | 69.2429  | 70.5249  | 0.026466  | 0.990857 |
| XLOC_016480 | SNORA24                   | chr4:119199916-119200971 | 18.8059  | 19.1541  | 0.026466  | 0.993721 |
| XLOC_015652 | GTDC2                     | chr3:43120720-43147575   | 9.25272  | 9.4242   | 0.0264926 | 0.991767 |
| XLOC_004246 | VWCE                      | chr11:61025757-61062788  | 0.469703 | 0.478408 | 0.0264948 | 0.994615 |
| XLOC_022226 | SCRIB                     | chr8:144873089-144897541 | 34.9695  | 35.6179  | 0.0265036 | 0.990857 |
| XLOC_009417 | PELP1                     | chr17:4574678-4607632    | 19.1598  | 19.5158  | 0.0265652 | 0.990857 |
| XLOC_015096 | ATRIP,TREX1               | chr3:48488113-48509044   | 5.50456  | 5.6071   | 0.0266284 | 0.992182 |
| XLOC_002637 | CUTC                      | chr10:101419262-10151581 | 16.2796  | 16.583   | 0.0266355 | 0.996453 |
| XLOC_020934 | NDUFA4                    | chr7:10971579-10979813   | 71.3946  | 72.7278  | 0.0266925 | 0.990857 |
| XLOC_008750 | WDR81                     | chr17:1619816-1641893    | 12.82    | 13.0595  | 0.0267034 | 0.991767 |
| XLOC_018572 | SYNJ2                     | chr6:158402887-158520207 | 1.08446  | 1.10477  | 0.0267788 | 0.992841 |
| XLOC_001446 | TRAPPC3                   | chr1:36602169-36621654   | 63.8239  | 65.0202  | 0.02679   | 0.990857 |
| XLOC_010165 | RNF125                    | chr18:29598444-29653154  | 2.08128  | 2.12049  | 0.0269291 | 0.991767 |

|             |              |                           |           |           |           |          |
|-------------|--------------|---------------------------|-----------|-----------|-----------|----------|
| XLOC_014148 | IFNGR2       | chr21:34775201-34852316   | 40.5266   | 41.2906   | 0.0269443 | 0.991767 |
| XLOC_021107 | DNAJC30      | chr7:73095247-73097781    | 10.7169   | 10.9189   | 0.0269493 | 0.991305 |
| XLOC_007247 | SNX1         | chr15:64388082-64436433   | 5.84524   | 5.9559    | 0.0270579 | 0.990857 |
| XLOC_007715 | TBC1D2B      | chr15:78287326-78369994   | 3.3591    | 3.42271   | 0.0270639 | 0.991569 |
| XLOC_007564 | FBN1         | chr15:48700502-48937985   | 0.0157211 | 0.0160193 | 0.0271047 | 1        |
| XLOC_004844 | ATF1         | chr12:51157788-51214943   | 6.7766    | 6.90519   | 0.0271191 | 0.991459 |
| XLOC_017848 | DNAJC18      | chr5:138745891-138775214  | 2.04376   | 2.08269   | 0.0272243 | 0.991767 |
| XLOC_009891 | APPBP2       | chr17:58520519-58603580   | 3.04888   | 3.10712   | 0.0272972 | 0.991214 |
| XLOC_008167 | CBFB         | chr16:67063049-67134958   | 17.1104   | 17.4377   | 0.0273287 | 0.990857 |
| XLOC_002501 | EIF4EBP2     | chr10:72163860-72188374   | 4.65526   | 4.74433   | 0.0273425 | 0.990857 |
| XLOC_004735 | CREBL2       | chr12:12764830-12798041   | 5.58443   | 5.69143   | 0.0273799 | 0.991459 |
| XLOC_014898 | ALG12        | chr22:50296853-50312106   | 6.85135   | 6.98295   | 0.0274485 | 0.991767 |
| XLOC_012013 | CHMP2A       | chr19:59062932-59066486   | 108.565   | 110.652   | 0.0274609 | 0.990324 |
| XLOC_021003 | KBTBD2       | chr7:32907777-32931468    | 8.17371   | 8.33078   | 0.027461  | 0.990857 |
| XLOC_009217 | METTL2A      | chr17:60501245-60527454   | 10.0636   | 10.2574   | 0.027522  | 0.990857 |
| XLOC_015676 | SETD2        | chr3:47057897-47205467    | 2.65789   | 2.70919   | 0.0275774 | 0.990857 |
| XLOC_006303 | LTB4R,LTB4R2 | chr14:24774392-24787242   | 3.87732   | 3.95218   | 0.0275884 | 0.993713 |
| XLOC_017950 | STK10        | chr5:171469073-171615346  | 6.85208   | 6.98444   | 0.0276018 | 0.990857 |
| XLOC_001117 | GGPS1        | chr1:235491752-235507844  | 8.63622   | 8.80345   | 0.0276683 | 0.990857 |
| XLOC_004646 | WNT5B        | chr12:1726221-1756378     | 0.0545045 | 0.05556   | 0.0276718 | 1        |
| XLOC_004783 | PPFIBP1      | chr12:27677044-27848497   | 3.57488   | 3.64416   | 0.0276904 | 0.990857 |
| XLOC_013957 | MROH8        | chr20:35729628-35870025   | 0.0940152 | 0.0958436 | 0.0277878 | 1        |
| XLOC_021342 | ZC3HAV1      | chr7:138728265-138794465  | 5.74529   | 5.85712   | 0.0278125 | 0.991767 |
| XLOC_015559 | LHFPL4       | chr3:9540044-9595486      | 0.947064  | 0.965526  | 0.0278532 | 0.99351  |
| XLOC_011360 | TNFSF14      | chr19:6663147-6670599     | 0.0406613 | 0.0414541 | 0.0278566 | 1        |
| XLOC_000502 | CDC7         | chr1:91966403-91991321    | 2.38075   | 2.42741   | 0.028001  | 0.991857 |
| XLOC_012110 | MRPL33       | chr2:27994583-28002608    | 131.945   | 134.531   | 0.028004  | 0.990324 |
| XLOC_015656 | KIAA1143     | chr3:44790235-44803173    | 8.1791    | 8.33944   | 0.0280072 | 0.990324 |
| XLOC_011663 | PAF1         | chr19:39876269-39881835   | 16.758    | 17.0873   | 0.0280696 | 0.990324 |
| XLOC_012573 | MARS2        | chr2:198570027-198573114  | 7.5639    | 7.71278   | 0.0281211 | 0.990857 |
| XLOC_023122 | RAPGEF1      | chr9:134452156-134612925  | 18.1721   | 18.5307   | 0.0281897 | 0.989344 |
| XLOC_012586 | CASP10       | chr22:202047620-202094125 | 0.95513   | 0.974018  | 0.0282514 | 0.992939 |
| XLOC_014488 | HSCB         | chr22:29138042-29153496   | 20.8393   | 21.2517   | 0.0282709 | 0.990857 |
| XLOC_014553 | MICALL1      | chr22:38302154-38338465   | 21.6205   | 22.0486   | 0.0282846 | 0.990018 |
| XLOC_018277 | FTSJD2       | chr6:37400906-37449284    | 9.93945   | 10.1366   | 0.0283315 | 0.990324 |
| XLOC_008704 | ZDHHC7       | chr16:85008066-85045141   | 12.166    | 12.4086   | 0.0284875 | 0.990795 |
| XLOC_007433 | ASB7         | chr15:101142754-101191910 | 2.39783   | 2.44569   | 0.0285095 | 0.992939 |
| XLOC_014920 | SETMAR       | chr3:4344987-4358949      | 5.61957   | 5.73204   | 0.0285887 | 0.992797 |
| XLOC_000311 | ZNF684       | chr1:40997232-41013841    | 0.99639   | 1.01635   | 0.0286199 | 0.99351  |
| XLOC_004249 | CPSF7        | chr11:61170119-61197464   | 16.0435   | 16.3651   | 0.0286352 | 0.989748 |
| XLOC_005728 | WSB2         | chr12:118470491-11849895  | 19.3177   | 19.7057   | 0.0286887 | 0.98972  |
| XLOC_007527 | EHD4         | chr15:42191638-42264755   | 15.5707   | 15.8839   | 0.0287317 | 0.989719 |
| XLOC_014637 | ZBED4        | chr22:50247496-50283726   | 3.94581   | 4.02522   | 0.0287486 | 0.990857 |
| XLOC_015041 | CTNNB1       | chr3:41240941-41281939    | 54.2834   | 55.3806   | 0.0288687 | 0.989719 |
| XLOC_001106 | DISC1,TSNAX  | chr1:231664398-232177015  | 9.69468   | 9.89082   | 0.0288971 | 0.990315 |
| XLOC_008115 | OGFOD1       | chr16:56485423-56511407   | 13.2481   | 13.5163   | 0.0289106 | 0.989869 |
| XLOC_023157 | UBAC1        | chr9:138824814-138853226  | 40.0879   | 40.9003   | 0.0289453 | 0.989365 |
| XLOC_022004 | IMPAD1       | chr8:57870487-57906430    | 10.621    | 10.8364   | 0.028976  | 0.98972  |
| XLOC_004527 | PIH1D2       | chr11:111895537-11194485  | 1.17211   | 1.19593   | 0.0290278 | 0.997036 |
| XLOC_023853 | GPKOW        | chrX:48969021-48980079    | 9.80276   | 10.002    | 0.0290323 | 0.990324 |
| XLOC_019159 | EZR          | chr6:159186772-159240456  | 70.4576   | 71.8915   | 0.0290647 | 0.989365 |
| XLOC_007133 | SPRED1       | chr15:38545051-38649450   | 3.30779   | 3.37537   | 0.0291782 | 0.990315 |
| XLOC_021854 | MFHAS1       | chr8:8641998-8751131      | 1.61219   | 1.64514   | 0.0291846 | 0.992797 |
| XLOC_003824 | TTC12        | chr11:113185250-11323711  | 5.47756   | 5.58957   | 0.0292036 | 0.991569 |
| XLOC_004740 | RPL13AP20    | chr12:13028410-13029070   | 2.34731   | 2.39533   | 0.0292172 | 0.994615 |
| XLOC_011607 | U2AF1L4      | chr19:36233427-36236336   | 3.02299   | 3.08484   | 0.0292182 | 0.994615 |
| XLOC_009537 | TOP3A        | chr17:18177234-18218321   | 4.03432   | 4.11692   | 0.0292378 | 0.990857 |
| XLOC_007291 | NEO1         | chr15:73344824-73597547   | 6.47672   | 6.60937   | 0.0292498 | 0.989748 |
| XLOC_006162 | MYCBP2       | chr13:77618791-77901177   | 1.4385    | 1.46799   | 0.0292741 | 0.990324 |
| XLOC_011280 | MBD3         | chr19:1576677-1592652     | 64.0601   | 65.375    | 0.0293116 | 0.989268 |
| XLOC_015679 | ELP6         | chr3:47537129-47555199    | 26.2501   | 26.7907   | 0.0294106 | 0.990324 |
| XLOC_004743 | LOC100506314 | chr12:13127798-13153243   | 0.630069  | 0.643071  | 0.0294683 | 0.932231 |
| XLOC_010850 | PLEKHG2      | chr19:39903749-39919055   | 6.25197   | 6.38121   | 0.0295206 | 0.989365 |
| XLOC_008466 | RRN3P1       | chr16:21807950-21830495   | 5.17054   | 5.27746   | 0.0295274 | 0.991767 |
| XLOC_011183 | BRSK1        | chr19:55795533-55823903   | 9.4919    | 9.68844   | 0.0295678 | 0.990857 |
| XLOC_022973 | TBC1D2       | chr9:100961279-101018003  | 10.5068   | 10.7248   | 0.029623  | 0.990857 |
| XLOC_018881 | MEA1         | chr6:42952236-42981618    | 140.586   | 143.51    | 0.0296963 | 0.991767 |
| XLOC_001733 | SIKE1        | chr1:115312104-115323308  | 4.22097   | 4.30885   | 0.0297281 | 0.98972  |
| XLOC_009200 | SMG8         | chr17:57287370-57292611   | 6.05277   | 6.17902   | 0.0297817 | 0.990324 |
| XLOC_001949 | CCDC19       | chr1:159842153-159869906  | 0.164223  | 0.167649  | 0.0297884 | 1        |
| XLOC_007138 | EIF2AK4      | chr15:40226346-40327797   | 7.98173   | 8.14857   | 0.029845  | 0.98923  |
| XLOC_007756 | NMB          | chr15:85198359-85201802   | 33.7264   | 34.4333   | 0.029924  | 0.990324 |
| XLOC_009790 | ARHGAP27     | chr17:43471267-43503012   | 6.69239   | 6.8328    | 0.0299535 | 0.990857 |
| XLOC_006885 | PNMA1        | chr14:74178485-74181128   | 22.5895   | 23.0639   | 0.0299829 | 0.989365 |
| XLOC_021618 | RRS1         | chr8:67341262-67342968    | 37.7022   | 38.4941   | 0.02999   | 0.989344 |
| XLOC_017809 | VDAC1        | chr5:133307565-133340824  | 143.62    | 146.64    | 0.0300257 | 0.988657 |
| XLOC_008555 | VPS35        | chr16:46693588-46723144   | 14.9415   | 15.2561   | 0.0300602 | 0.98922  |
| XLOC_008179 | CTCF         | chr16:67596309-67673088   | 11.4379   | 11.679    | 0.0301008 | 0.989365 |
| XLOC_014387 | MCM3AP       | chr21:47649157-47705236   | 8.15162   | 8.32352   | 0.0301076 | 0.988657 |

|             |              |                          |           |          |           |          |
|-------------|--------------|--------------------------|-----------|----------|-----------|----------|
| XLOC_017425 | NDST1        | chr5:149887673-14993777: | 4.3456    | 4.43734  | 0.0301383 | 0.989869 |
| XLOC_022605 | NTMT1        | chr9:132388434-13240444: | 141.683   | 144.677  | 0.0301674 | 0.993379 |
| XLOC_014784 | RFP13S       | chr22:32750871-32767063  | 1.89413   | 1.93419  | 0.0301945 | 0.99351  |
| XLOC_009373 | MYO1C        | chr17:1367479-1396001    | 46.5818   | 47.567   | 0.0301953 | 0.989268 |
| XLOC_001635 | ODF2L        | chr1:86812506-86862025   | 2.88769   | 2.94878  | 0.0302028 | 0.990857 |
| XLOC_012263 | MRP119       | chr2:75873908-75889334   | 7.44625   | 7.60385  | 0.0302156 | 0.989268 |
| XLOC_017805 | ZCCHC10      | chr5:132332677-13236224: | 4.16565   | 4.25402  | 0.030284  | 0.991767 |
| XLOC_007259 | DIS3L        | chr15:66585632-66626236  | 3.49236   | 3.56677  | 0.030416  | 0.990857 |
| XLOC_015523 | HES1         | chr3:193853930-19385640: | 21.7874   | 22.252   | 0.0304391 | 0.990857 |
| XLOC_010265 | THOC1        | chr18:214519-268059      | 8.16864   | 8.34284  | 0.0304419 | 0.990324 |
| XLOC_011655 | SARS2        | chr19:39405903-39423659  | 15.8857   | 16.2246  | 0.0304588 | 0.994711 |
| XLOC_012709 | EIF4E2       | chr2:233415356-23343392: | 40.8437   | 41.7155  | 0.0304679 | 0.989344 |
| XLOC_023062 | ZBTB26       | chr9:125680377-12569377: | 0.903673  | 0.922971 | 0.0304843 | 0.99351  |
| XLOC_014018 | ZNFX1        | chr20:47862438-47905795  | 2.11322   | 2.15837  | 0.0304959 | 0.997082 |
| XLOC_005133 | PRKAB1       | chr12:120105760-1201194: | 10.1672   | 10.3846  | 0.0305281 | 0.990315 |
| XLOC_014565 | APOBEC3F     | chr22:39436672-39451975  | 3.23076   | 3.3      | 0.030593  | 0.994615 |
| XLOC_010919 | ZNF227       | chr19:44716690-44741421  | 3.53774   | 3.61397  | 0.0307552 | 0.990857 |
| XLOC_016391 | SEPT11       | chr4:77870894-77959768   | 14.3018   | 14.6101  | 0.0307661 | 0.988533 |
| XLOC_011587 | RHPN2        | chr19:33469497-33555824  | 4.33447   | 4.42799  | 0.0307983 | 0.990324 |
| XLOC_008320 | JMJDB8       | chr16:7301114-734439     | 52.2643   | 53.3951  | 0.0308816 | 0.991767 |
| XLOC_016179 | RNF4         | chr4:2470794-2517586     | 17.7561   | 18.1424  | 0.031047  | 0.988714 |
| XLOC_008931 | TMEM97       | chr17:26646120-26662515  | 25.9938   | 26.5599  | 0.0310812 | 0.991459 |
| XLOC_008464 | SLC7A5P2     | chr16:21529229-21531765  | 0.475598  | 0.485986 | 0.0311697 | 0.994615 |
| XLOC_003346 | C11orf58     | chr11:16760147-16779901  | 25.5234   | 26.082   | 0.0312334 | 0.988154 |
| XLOC_013556 | PLK1S1       | chr20:21106623-21227258  | 5.59377   | 5.71656  | 0.0313275 | 0.990857 |
| XLOC_003393 | HIPK3        | chr11:33279167-33375939  | 0.397965  | 0.406718 | 0.0313891 | 0.99351  |
| XLOC_022732 | PSIP1        | chr9:15464064-15511003   | 28.3919   | 29.0176  | 0.0314479 | 0.989365 |
| XLOC_000531 | SLC35A3      | chr1:100435344-10049253: | 2.44354   | 2.49744  | 0.0314773 | 0.98972  |
| XLOC_013903 | NANP         | chr20:25593572-25604648  | 2.56431   | 2.62089  | 0.0314869 | 0.990857 |
| XLOC_017206 | SCAMP1       | chr5:77656338-77776562   | 6.16242   | 6.29866  | 0.0315494 | 0.988166 |
| XLOC_009016 | SOC57        | chr17:36508006-36561846  | 2.08456   | 2.13067  | 0.0315645 | 0.990574 |
| XLOC_005794 | GOLGA3       | chr12:133345494-1334054: | 5.43956   | 5.55993  | 0.0315745 | 0.988166 |
| XLOC_006429 | DCAF4        | chr14:73393039-73426357  | 9.22491   | 9.42921  | 0.0316016 | 0.989748 |
| XLOC_006733 | TM9SF1       | chr14:24658352-24664882  | 19.0836   | 19.5078  | 0.0317121 | 0.989108 |
| XLOC_001235 | CHD5         | chr1:6161846-6240194     | 0.0424387 | 0.043382 | 0.0317188 | 1        |
| XLOC_004513 | NPAT         | chr11:108028118-1080933: | 1.35648   | 1.38666  | 0.031754  | 0.990939 |
| XLOC_010727 | ZNF738       | chr19:21541734-21571384  | 0.669799  | 0.684708 | 0.0317594 | 0.990857 |
| XLOC_008864 | COX10        | chr17:13932608-14111996  | 7.81507   | 7.98914  | 0.0317806 | 0.990857 |
| XLOC_004474 | MRE11A       | chr11:94150468-94227040  | 1.78175   | 1.82145  | 0.031795  | 0.990324 |
| XLOC_015560 | CAMK1        | chr3:9791627-9811668     | 32.5372   | 33.2623  | 0.0317988 | 0.990857 |
| XLOC_008359 | CASKIN1      | chr16:2205798-2246465    | 12.1404   | 12.4111  | 0.0318128 | 0.99351  |
| XLOC_007963 | PKD1P1       | chr16:16411465-16444465  | 16.6703   | 17.0434  | 0.03193   | 0.988166 |
| XLOC_015906 | HSPBAP1      | chr3:122458843-12251266: | 5.97329   | 6.10705  | 0.0319505 | 0.990371 |
| XLOC_006708 | RBM23        | chr14:23369853-23388396  | 25.6475   | 26.2223  | 0.031977  | 0.987693 |
| XLOC_011922 | ZNF320       | chr19:53379424-53394599  | 2.17635   | 2.22516  | 0.0319997 | 0.989365 |
| XLOC_018840 | STK38        | chr6:36461668-36515247   | 5.44149   | 5.56366  | 0.0320331 | 0.989514 |
| XLOC_010838 | ACTN4        | chr19:39138266-39235114  | 50.3031   | 51.4335  | 0.0320583 | 0.989268 |
| XLOC_018930 | ICK          | chr6:52866097-52926600   | 2.036     | 2.08181  | 0.0320976 | 0.990324 |
| XLOC_023706 | EMD          | chrX:153607596-15360988: | 129.548   | 132.463  | 0.0321021 | 0.987693 |
| XLOC_000370 | UQCRH        | chr1:46769379-46782447   | 897.511   | 917.717  | 0.0321207 | 0.987858 |
| XLOC_004152 | TP53I1       | chr11:44785975-44972857  | 14.0969   | 14.4143  | 0.0321269 | 0.988154 |
| XLOC_007324 | HMG20A       | chr15:77713242-77777945  | 6.9061    | 7.06186  | 0.0321759 | 0.988533 |
| XLOC_001856 | S100A2       | chr1:153533584-15353830: | 566.178   | 578.95   | 0.0321852 | 0.987858 |
| XLOC_008913 | ALDH3A2      | chr17:19552063-19580908  | 8.22966   | 8.41547  | 0.0322112 | 0.988154 |
| XLOC_000945 | TROVE2       | chr1:192981495-19306090: | 5.66743   | 5.79562  | 0.0322697 | 0.995302 |
| XLOC_003867 | LOC100499227 | chr11:119252487-1193699: | 1.18637   | 1.21321  | 0.0322739 | 0.994615 |
| XLOC_003323 | IPO7         | chr11:9406168-9469674    | 11.2237   | 11.4784  | 0.0323693 | 0.987693 |
| XLOC_018396 | CYB5R4       | chr6:84569369-84670146   | 3.8617    | 3.94938  | 0.0323888 | 0.990857 |
| XLOC_012479 | PKP4         | chr2:159313475-15953794: | 8.27602   | 8.46406  | 0.0324127 | 0.988085 |
| XLOC_008623 | TPPP3        | chr16:67423711-67427421  | 0.23039   | 0.235642 | 0.032519  | 1        |
| XLOC_005149 | ORAI1        | chr12:122064454-1220799: | 35.8402   | 36.6575  | 0.0325274 | 0.988742 |
| XLOC_022296 | FOCAD        | chr9:20658308-20995954   | 2.06223   | 2.10929  | 0.0325482 | 0.98972  |
| XLOC_015142 | GNL3         | chr3:52719935-52742197   | 63.2435   | 64.6865  | 0.0325485 | 0.991938 |
| XLOC_005757 | DIABLO       | chr12:122692208-1227120: | 42.5524   | 43.5282  | 0.0327119 | 0.988154 |
| XLOC_022288 | CCDC171      | chr9:15553096-15971897   | 0.459417  | 0.469958 | 0.0327304 | 0.993285 |
| XLOC_017290 | CSNK1G3      | chr5:122847792-12295273: | 6.10211   | 6.24214  | 0.0327311 | 0.988657 |
| XLOC_009300 | SNHG16       | chr17:74553845-74561430  | 127.085   | 130.004  | 0.0327701 | 0.988657 |
| XLOC_023349 | UBA1         | chrX:47050198-47074527   | 95.5091   | 97.7133  | 0.0329174 | 0.987858 |
| XLOC_005828 | GTF3A        | chr13:27998680-28024739  | 110.578   | 113.131  | 0.0329359 | 0.989365 |
| XLOC_001432 | TRIM62       | chr1:33611002-33647671   | 3.08869   | 3.16003  | 0.0329451 | 0.990857 |
| XLOC_009439 | MED31        | chr17:6481644-6554954    | 7.62317   | 7.79943  | 0.0329763 | 0.995957 |
| XLOC_006366 | KTN1         | chr14:56046924-56151302  | 13.3101   | 13.6197  | 0.0331753 | 0.987858 |
| XLOC_021534 | HMBOX1       | chr8:28747910-28910242   | 0.851481  | 0.871304 | 0.0332016 | 0.992797 |
| XLOC_019009 | USP45        | chr6:99880183-99963252   | 1.10521   | 1.13094  | 0.0332064 | 0.990857 |
| XLOC_002785 | LARP4B       | chr10:852853-977645      | 8.60681   | 8.80739  | 0.0332354 | 0.987693 |
| XLOC_011355 | SLC25A41     | chr19:6426047-6433790    | 1.29842   | 1.32885  | 0.033415  | 0.99351  |
| XLOC_009841 | PPP1R9B      | chr17:48211100-48227877  | 17.1517   | 17.5541  | 0.0334554 | 0.987858 |
| XLOC_023670 | MTMR1        | chrX:149861868-14993357: | 3.5114    | 3.59399  | 0.0335429 | 0.989748 |
| XLOC_022441 | WNK2         | chr9:95947211-96108696   | 6.14916   | 6.29394  | 0.0335744 | 0.989201 |

|              |              |                          |          |           |           |          |
|--------------|--------------|--------------------------|----------|-----------|-----------|----------|
| XLOC_012519  | CDCA7        | chr2:174219560-174233711 | 19.327   | 19.7833   | 0.0336679 | 0.987693 |
| XLOC_006191  | STK24        | chr13:99102454-99229396  | 34.4229  | 35.2364   | 0.0337012 | 0.987693 |
| XLOC_023473  | PIN4         | chrX:71401525-71483814   | 11.7328  | 12.0105   | 0.0337509 | 0.991767 |
| XLOC_013011  | TGOLN2       | chr2:85545140-85555419   | 14.5999  | 14.9458   | 0.0337816 | 0.987423 |
| XLOC_000281  | AGO1         | chr1:36348809-36389899   | 3.25469  | 3.33207   | 0.0339001 | 0.988533 |
| XLOC_013948  | RBM39        | chr20:34291530-34330258  | 44.2419  | 45.2938   | 0.0339011 | 0.987627 |
| XLOC_011292  | PLEKHJ1      | chr19:2233154-2236328    | 109.484  | 112.091   | 0.0339504 | 0.987334 |
| XLOC_007345  | FAM108C1     | chr15:80987651-81047962  | 9.11516  | 9.33227   | 0.0339609 | 0.988571 |
| XLOC_013487  | STK35        | chr20:2082527-2129198    | 6.90187  | 7.06657   | 0.0340219 | 0.987693 |
| XLOC_008369  | SRRM2-AS1    | chr16:2787076-2821413    | 0.288661 | 0.295571  | 0.0341294 | 1        |
| XLOC_005796  | ZNF605       | chr12:133498018-13353285 | 1.46553  | 1.50063   | 0.034152  | 0.990315 |
| XLOC_006451  | EIF2B2       | chr14:75469611-75476294  | 18.9608  | 19.4158   | 0.0342137 | 0.987693 |
| XLOC_021527  | SCARA3       | chr8:27491576-27534286   | 12.2931  | 12.589    | 0.0343128 | 0.987693 |
| XLOC_011807  | KDELR1       | chr19:48885826-48894810  | 288.134  | 295.07    | 0.0343167 | 0.987693 |
| XLOC_023721  | F8A1         | chrX:154064063-154250991 | 7.1721   | 7.34522   | 0.0344098 | 0.99351  |
| XLOC_020766  | BPGM         | chr7:134331530-134364567 | 4.48346  | 4.59172   | 0.0344211 | 0.990857 |
| XLOC_013939  | TRPC4AP      | chr20:33543703-33680618  | 38.9175  | 39.8598   | 0.0345146 | 0.987334 |
| XLOC_012111  | BRE          | chr2:28004265-28561767   | 33.3394  | 34.1501   | 0.0346641 | 0.987693 |
| XLOC_014776  | PATZ1        | chr22:31721789-31742249  | 19.5692  | 20.0464   | 0.0347573 | 0.987693 |
| XLOC_008713  | MTFSD        | chr16:86563781-86588841  | 5.24343  | 5.37146   | 0.0348019 | 0.988714 |
| XLOC_018189  | MICA         | chr6:31367560-31383090   | 29.0108  | 29.7207   | 0.0348771 | 0.987053 |
| XLOC_010531  | ARHGEF18     | chr19:7459998-7537371    | 9.27642  | 9.50368   | 0.0349189 | 0.987627 |
| XLOC_000928  | SMG7         | chr1:183441505-183523321 | 8.67873  | 8.89171   | 0.0349764 | 0.987627 |
| XLOC_020597  | GTPBP10      | chr7:89975978-90020769   | 3.63489  | 3.72421   | 0.0350221 | 0.987693 |
| XLOC_004294  | ATL3         | chr11:63396436-63439083  | 10.6982  | 10.9626   | 0.0352232 | 0.987693 |
| XLOC_016051  | MECOM        | chr3:168801286-169381561 | 2.0605   | 2.11145   | 0.0352379 | 0.989365 |
| XLOC_016743  | LNX1         | chr4:54326436-54457753   | 0.086826 | 0.0889732 | 0.0352435 | 1        |
| XLOC_008494  | RABEP2       | chr16:28889808-28936532  | 22.0793  | 22.6255   | 0.0352556 | 0.988571 |
| XLOC_006408  | MPP5         | chr14:67708011-67802778  | 3.95489  | 4.05287   | 0.0353067 | 0.987693 |
| XLOC_023074  | HSPA5        | chr9:127997126-128003661 | 255.578  | 261.913   | 0.0353203 | 0.987693 |
| XLOC_011467  | GADD45GIP1   | chr19:13064969-13068068  | 226.224  | 231.835   | 0.0353437 | 0.987423 |
| XLOC_023584  | IL13RA1      | chrX:117861558-117928491 | 7.44833  | 7.63309   | 0.0353516 | 0.987423 |
| XLOC_014146  | IL10RB       | chr21:34638664-34669539  | 21.4795  | 22.0126   | 0.0353721 | 0.987235 |
| XLOC_016827  | HPSE         | chr4:84213613-84256306   | 2.57436  | 2.6383    | 0.0353959 | 0.988714 |
| XLOC_010684  | FCHO1        | chr19:17858526-17899377  | 7.88663  | 8.08256   | 0.0354031 | 0.987693 |
| XLOC_016523  | SMAD1        | chr4:146402950-146480321 | 3.62109  | 3.71106   | 0.0354086 | 0.989365 |
| XLOC_011362  | GPR108       | chr19:6729924-6737633    | 39.7386  | 40.7286   | 0.0355013 | 0.986822 |
| XLOC_005350  | C2CD5        | chr12:22601517-22697452  | 4.04869  | 4.14987   | 0.0356112 | 0.987693 |
| XLOC_009314  | SYNGR2       | chr17:76164670-76169009  | 104.289  | 106.896   | 0.0356151 | 0.986822 |
| XLOC_000514  | DR1          | chr1:93811477-93828148   | 16.6359  | 17.0517   | 0.0356151 | 0.986822 |
| XLOC_017375  | PCDHB7       | chr5:140552242-140555957 | 0.625255 | 0.640884  | 0.0356183 | 0.993379 |
| XLOC_023203  | ZMYND19      | chr9:140476530-140484937 | 83.205   | 85.2857   | 0.0356345 | 0.986822 |
| XLOC_002224  | C1orf35      | chr1:228288427-228291027 | 32.047   | 32.8492   | 0.035666  | 0.987693 |
| XLOC_012353  | NCK2         | chr2:106361519-106510731 | 18.3204  | 18.7799   | 0.0357396 | 0.987858 |
| XLOC_022018  | PDE7A        | chr8:66626568-66753969   | 1.86474  | 1.91152   | 0.0357449 | 0.987858 |
| XLOC_011698  | RABAC1       | chr19:42460832-42463528  | 140.057  | 143.587   | 0.0359083 | 0.986822 |
| XLOC_016174  | WHSC1        | chr4:1873122-1983934     | 12.8163  | 13.1394   | 0.0359207 | 0.987334 |
| XLOC_015576  | TAMM41       | chr3:11831918-11888352   | 7.14656  | 7.32682   | 0.0359372 | 0.989365 |
| XLOC_002749  | ZRANB1       | chr10:126630691-12667601 | 4.18182  | 4.28739   | 0.0359684 | 0.987627 |
| XLOC_017737  | LYSMD3       | chr5:89811444-89825401   | 2.19964  | 2.25518   | 0.0359721 | 0.989922 |
| XLOC_008773  | ARRB2        | chr17:4613788-4624795    | 96.3581  | 98.7918   | 0.0359851 | 0.986822 |
| XLOC_012204  | MDH1         | chr2:63348534-63834330   | 97.6353  | 100.104   | 0.0360213 | 0.987423 |
| XLOC_004839  | SMARCD1      | chr12:50478982-50494494  | 22.9589  | 23.5398   | 0.0360506 | 0.986822 |
| XLOC_010094  | NDC80        | chr18:2571509-2616634    | 11.1002  | 11.3813   | 0.0360831 | 0.987693 |
| XLOC_008178  | FAM65A       | chr16:67562716-67580691  | 19.8633  | 20.3664   | 0.0360905 | 0.986725 |
| XLOC_006125  | KPNA3        | chr13:50273442-50367057  | 6.95627  | 7.13281   | 0.0361556 | 0.986822 |
| XLOC_015757  | BAP1         | chr3:52435024-52444009   | 24.0283  | 24.6381   | 0.0361587 | 0.986822 |
| XLOC_021787  | GRINA        | chr8:145064225-145067583 | 345.483  | 354.255   | 0.0361725 | 0.986822 |
| XLOC_002279  | ADSS         | chr1:244571793-244615431 | 10.1494  | 10.4073   | 0.0361903 | 0.986822 |
| XLOC_005011  | METTL25      | chr12:82746082-82873016  | 0.584565 | 0.599427  | 0.0362204 | 0.997036 |
| XLOC_024016  | ACSL4        | chrX:108884563-10897662  | 9.47146  | 9.71255   | 0.0362632 | 0.986822 |
| XLOC_014221  | COL18A1      | chr21:46825096-46933634  | 2.84127  | 2.91368   | 0.0363075 | 0.989344 |
| XLOC_010989  | LOC100505812 | chr19:48711342-48761450  | 1.69985  | 1.74336   | 0.0364621 | 0.994615 |
| XLOC_020830  | ARHGEF5      | chr7:144052488-144077721 | 3.92805  | 4.02864   | 0.0364805 | 0.987693 |
| XLOC_015583  | NUP210       | chr3:13357736-13461809   | 15.4316  | 15.8274   | 0.0365388 | 0.986822 |
| XLOC_009976  | WBP2         | chr17:73841779-73851501  | 137.876  | 141.416   | 0.0365786 | 0.986822 |
| XLOC_012317  | CNNM3        | chr2:97481990-97501121   | 7.56779  | 7.76266   | 0.0366781 | 0.987423 |
| XLOC_018547  | TAB2         | chr6:149639435-149732747 | 8.66944  | 8.89276   | 0.0366924 | 0.98655  |
| XLOC_020546  | LIMK1        | chr7:73498106-73536855   | 20.8759  | 21.414    | 0.036715  | 0.986822 |
| XLOC_002973  | PPA1         | chr10:71962585-71993190  | 183.775  | 188.514   | 0.0367281 | 0.986725 |
| XLOC_001121  | LGALS8       | chr1:236681513-236767847 | 7.42027  | 7.61194   | 0.0367939 | 0.991767 |
| XLOC_013039  | MRPS5        | chr2:95752951-95787754   | 38.4656  | 39.4594   | 0.0368022 | 0.986822 |
| XLOC_000499  | LRRC8C       | chr1:90098643-90185094   | 4.1123   | 4.21878   | 0.0368791 | 0.986822 |
| XLOC_000085  | FBXO6        | chr1:11724149-11734409   | 16.9426  | 17.3815   | 0.0369015 | 0.987693 |
| XLOC_020420  | DPY19L2P3    | chr7:29685537-29727859   | 0.229452 | 0.2354    | 0.0369216 | 1        |
| XLOC_015364  | FAIM         | chr3:138327541-138352211 | 6.4963   | 6.66497   | 0.0369796 | 0.989869 |
| XLOC_0011972 | ISOC2        | chr19:55964345-55973049  | 84.949   | 87.1551   | 0.0369886 | 0.986822 |
| XLOC_002330  | FBXO18       | chr10:5903688-5979558    | 20.2719  | 20.7987   | 0.0370159 | 0.987693 |
| XLOC_023828  | SLC9A7       | chrX:46458685-46618607   | 4.77878  | 4.90327   | 0.0371005 | 0.986822 |

|             |                |                          |           |           |           |          |
|-------------|----------------|--------------------------|-----------|-----------|-----------|----------|
| XLOC_016682 | PROM1          | chr4:15969848-16085623   | 0.0162834 | 0.0167076 | 0.0371059 | 1        |
| XLOC_009348 | LRRCC45        | chr17:79981279-79989027  | 9.81219   | 10.068    | 0.0371257 | 0.988657 |
| XLOC_010176 | C18orf21       | chr18:33552587-33559250  | 19.9783   | 20.4995   | 0.0371611 | 0.987693 |
| XLOC_023685 | NSDHL          | chrX:151999510-15203790  | 23.8287   | 24.451    | 0.0371947 | 0.986822 |
| XLOC_010222 | PMAIP1         | chr18:57567191-57571538  | 11.8554   | 12.1654   | 0.0372332 | 0.987858 |
| XLOC_008396 | NMRAL1         | chr16:4511694-4560348    | 38.3442   | 39.3492   | 0.0373258 | 0.991767 |
| XLOC_012503 | UBR3           | chr2:170684017-17094063  | 1.76551   | 1.81187   | 0.0373966 | 0.987693 |
| XLOC_012224 | GMCL1          | chr2:70056817-70106727   | 1.67885   | 1.72297   | 0.037422  | 0.990857 |
| XLOC_018351 | TMEM14A        | chr6:52535883-52551385   | 24.0536   | 24.6864   | 0.0374618 | 0.987627 |
| XLOC_023261 | PRPS2          | chrX:12809473-12842346   | 27.7698   | 28.5009   | 0.037495  | 0.986822 |
| XLOC_011268 | MED16          | chr19:867961-893218      | 28.872    | 29.6322   | 0.0374973 | 0.986822 |
| XLOC_018038 | RREB1          | chr6:7107829-7252213     | 2.79322   | 2.86683   | 0.0375296 | 0.987423 |
| XLOC_004447 | ME3            | chr11:86152149-86383678  | 9.18063   | 9.42292   | 0.037581  | 0.987693 |
| XLOC_022147 | RAD21          | chr8:117858172-117889107 | 59.1308   | 60.6938   | 0.03764   | 0.98655  |
| XLOC_006356 | GPR137C        | chr14:53019865-53104431  | 0.10081   | 0.103476  | 0.0376603 | 1        |
| XLOC_006214 | EFNB2          | chr13:107142078-1071873  | 1.21142   | 1.24356   | 0.0377756 | 0.990315 |
| XLOC_017510 | NSD1           | chr5:176560079-17672721  | 2.00415   | 2.05741   | 0.0378371 | 0.986822 |
| XLOC_014618 | FAM118A        | chr22:45705080-45737836  | 5.48238   | 5.62833   | 0.037905  | 0.987627 |
| XLOC_005356 | KRAS           | chr12:25358179-25403854  | 4.69783   | 4.82294   | 0.0379184 | 0.986822 |
| XLOC_016338 | LOC550112      | chr4:68566995-6858222    | 6.3814    | 6.5514    | 0.037929  | 0.987858 |
| XLOC_004359 | CDK2AP2        | chr11:67273960-67276199  | 51.1843   | 52.5489   | 0.0379588 | 0.986822 |
| XLOC_012558 | ASNSD1         | chr2:190526124-190535557 | 16.5024   | 16.9432   | 0.0380342 | 0.985762 |
| XLOC_000906 | TOR3A          | chr1:179051111-17906512  | 18.7324   | 19.2331   | 0.0380545 | 0.986822 |
| XLOC_021043 | H2AFV          | chr7:44866487-44887725   | 42.444    | 43.5795   | 0.0380875 | 0.987693 |
| XLOC_015478 | VWA5B2         | chr3:183948316-183967313 | 3.14787   | 3.2321    | 0.0380996 | 0.996079 |
| XLOC_009259 | C17orf80       | chr17:71228775-71258019  | 2.87261   | 2.94969   | 0.0381986 | 0.987693 |
| XLOC_013610 | ZNF341         | chr20:32319807-32380075  | 1.7147    | 1.76079   | 0.0382701 | 0.990857 |
| XLOC_016170 | UVSSA          | chr4:1341103-1381837     | 1.02511   | 1.0527    | 0.0383039 | 0.991351 |
| XLOC_017810 | SKP1           | chr5:133492081-13351272  | 107.887   | 110.791   | 0.0383289 | 0.985782 |
| XLOC_014014 | ZMYND8         | chr20:45838380-45985474  | 2.1101    | 2.16697   | 0.0383642 | 0.988571 |
| XLOC_014684 | TRMT2A         | chr22:20067754-20104818  | 15.7082   | 16.133    | 0.0384954 | 0.990324 |
| XLOC_010634 | IL27RA         | chr19:14142551-14163717  | 9.04917   | 9.29389   | 0.0384971 | 0.987432 |
| XLOC_011088 | ZNF808         | chr19:53030908-53059303  | 0.454941  | 0.467252  | 0.0385195 | 0.992651 |
| XLOC_007772 | KIF7           | chr15:90118817-90198682  | 7.97967   | 8.19583   | 0.038561  | 0.991351 |
| XLOC_004367 | UNC93B1        | chr11:67758574-67771593  | 34.1263   | 35.0559   | 0.0387707 | 0.986589 |
| XLOC_009357 | FN3KRP         | chr17:80674581-80685893  | 14.8743   | 15.2795   | 0.0387814 | 0.986822 |
| XLOC_002933 | PARG           | chr10:51026324-51371331  | 3.80452   | 3.90821   | 0.0387928 | 0.988142 |
| XLOC_013964 | LOC388796      | chr20:37049238-37064018  | 123.803   | 127.179   | 0.038813  | 0.984917 |
| XLOC_014999 | GPDI1          | chr3:32148002-32210207   | 2.95311   | 3.03364   | 0.0388138 | 0.987693 |
| XLOC_015966 | STAG1          | chr3:136055998-13647124  | 3.41405   | 3.50739   | 0.0389135 | 0.986822 |
| XLOC_022321 | UBAP1          | chr9:34179002-34329198   | 20.3565   | 20.9142   | 0.0389899 | 0.986353 |
| XLOC_017438 | LARP1          | chr5:154092461-15419716  | 23.8738   | 24.5282   | 0.0390099 | 0.985921 |
| XLOC_004020 | TRIM5          | chr11:5684424-5706339    | 2.30486   | 2.36811   | 0.0390537 | 0.988571 |
| XLOC_015146 | SPCS1          | chr3:52719935-52742197   | 161.025   | 165.447   | 0.0390812 | 0.991767 |
| XLOC_016156 | IQQC           | chr3:197615945-19768688  | 10.2703   | 10.5525   | 0.0391009 | 0.998526 |
| XLOC_012807 | LAPTM4A        | chr2:20232410-20251789   | 92.3749   | 94.9169   | 0.0391642 | 0.984917 |
| XLOC_009819 | HOXB6          | chr17:46667822-46683774  | 5.75896   | 5.91757   | 0.0391962 | 0.991767 |
| XLOC_002149 | RAB7L1         | chr1:205737113-20574461  | 8.35924   | 8.58975   | 0.0392437 | 0.986822 |
| XLOC_001457 | SNIP1          | chr1:38000049-38019945   | 3.95132   | 4.06051   | 0.0393257 | 0.986822 |
| XLOC_002725 | INPP5F         | chr10:121485558-1215886  | 4.95143   | 5.08832   | 0.0393444 | 0.991767 |
| XLOC_005407 | HDAC7          | chr12:48166966-48213763  | 17.4536   | 17.9362   | 0.0393511 | 0.988154 |
| XLOC_003091 | CHUK           | chr10:101948123-1019893  | 3.08731   | 3.1727    | 0.0393586 | 0.987693 |
| XLOC_009972 | ASB16-AS1      | chr17:42248073-42264085  | 5.13058   | 5.27268   | 0.0394162 | 0.990795 |
| XLOC_004644 | ERC1           | chr12:1100403-1605099    | 2.38339   | 2.4495    | 0.0394745 | 0.986822 |
| XLOC_020905 | SNX8           | chr7:2291404-2354099     | 15.7286   | 16.165    | 0.039487  | 0.984917 |
| XLOC_022868 | CBWD3,CBWD5    | chr9:70431999-70490177   | 1.72537   | 1.77326   | 0.0395032 | 0.990967 |
| XLOC_002189 | BPNT1          | chr1:220046618-22032138  | 8.89809   | 9.14528   | 0.0395318 | 0.996453 |
| XLOC_009566 | POLDIP2        | chr17:26662547-26684603  | 55.3219   | 56.8617   | 0.039605  | 0.987334 |
| XLOC_003088 | DNMBP          | chr10:101635333-10176967 | 1.65838   | 1.70465   | 0.0397013 | 0.987627 |
| XLOC_015136 | GLYCTK         | chr3:52321835-52329272   | 8.6814    | 8.92367   | 0.0397086 | 0.988165 |
| XLOC_018013 | TRIM7          | chr5:180620923-180632177 | 13.2704   | 13.6409   | 0.0397236 | 0.989729 |
| XLOC_016201 | MAN2B2         | chr4:6576901-6624188     | 10.6141   | 10.9106   | 0.0397417 | 0.986353 |
| XLOC_023436 | LOC550643      | chrX:56755717-56844004   | 87.4644   | 89.9104   | 0.0397919 | 0.984917 |
| XLOC_012992 | CCDC142,MRPL53 | chr2:74699084-74721691   | 100.177   | 102.981   | 0.0398309 | 0.989719 |
| XLOC_007276 | KIF23          | chr15:69706626-69740764  | 10.6281   | 10.9261   | 0.0398942 | 0.984917 |
| XLOC_000156 | PINK1          | chr1:20959947-20978004   | 19.2711   | 19.8117   | 0.039919  | 0.985802 |
| XLOC_015961 | RYK            | chr3:133875977-13396958  | 17.7272   | 18.2246   | 0.0399192 | 0.984692 |
| XLOC_020978 | HOXA5          | chr7:27179982-27196296   | 8.89982   | 9.14957   | 0.0399291 | 0.99316  |
| XLOC_002648 | C10orf2        | chr10:102747292-1027541  | 19.9935   | 20.5555   | 0.0399933 | 0.986725 |
| XLOC_012283 | PTCD3          | chr2:86333304-86369280   | 10.1542   | 10.4397   | 0.0400018 | 0.984917 |
| XLOC_009280 | MRPS7          | chr17:73232693-73267311  | 41.02     | 42.1735   | 0.0400083 | 0.990324 |
| XLOC_016713 | UGDH           | chr4:39500374-39529218   | 6.61595   | 6.80209   | 0.0400299 | 0.986822 |
| XLOC_012643 | CTDSP1         | chr2:219263060-21927066  | 46.9652   | 48.287    | 0.0400419 | 0.984917 |
| XLOC_020331 | SUN1           | chr7:855193-914557       | 16.4249   | 16.8873   | 0.0400596 | 0.984917 |
| XLOC_012650 | TTL4           | chr2:219575567-21962013  | 6.31849   | 6.49665   | 0.0401158 | 0.985921 |
| XLOC_000346 | DMAP1          | chr1:44679124-44686351   | 16.3678   | 16.8309   | 0.0402478 | 0.986822 |
| XLOC_000248 | KHDRBS1        | chr1:32479294-32526460   | 86.409    | 88.8536   | 0.0402495 | 0.983952 |
| XLOC_007936 | ATFF1P2        | chr16:10479911-10577495  | 1.49699   | 1.53934   | 0.0402928 | 0.989514 |
| XLOC_014421 | ZNF74          | chr22:20748404-20762753  | 7.67926   | 7.89751   | 0.0404312 | 0.986559 |

|              |           |                          |           |          |           |          |
|--------------|-----------|--------------------------|-----------|----------|-----------|----------|
| XLOC_019163  | SOD2      | chr6:160100148-160114353 | 31.8984   | 32.8076  | 0.0405452 | 0.985921 |
| XLOC_011765  | DMWD      | chr19:46286263-46296060  | 10.2216   | 10.5131  | 0.0405614 | 0.986529 |
| XLOC_006922  | SEL1L     | chr14:81937890-82000205  | 4.24081   | 4.36177  | 0.0405757 | 0.984917 |
| XLOC_016486  | LOC645513 | chr4:120375937-120549981 | 2.15597   | 2.21748  | 0.0405821 | 0.994615 |
| XLOC_014523  | FBXO7     | chr22:32870706-32894818  | 69.3225   | 71.3007  | 0.0405935 | 0.983594 |
| XLOC_010143  | MIB1      | chr18:19321544-19450912  | 1.92244   | 1.97741  | 0.0406713 | 0.986529 |
| XLOC_014008  | ELMO2     | chr20:44994689-45035271  | 4.51109   | 4.6401   | 0.04068   | 0.986822 |
| XLOC_018514  | MYB       | chr6:135502452-135540311 | 1.17044   | 1.20396  | 0.0407383 | 0.990324 |
| XLOC_017399  | RBM27     | chr5:145583162-145668784 | 2.79176   | 2.87173  | 0.0407467 | 0.986353 |
| XLOC_005565  | GNS       | chr12:65107221-65153226  | 9.52984   | 9.80353  | 0.0408489 | 0.984917 |
| XLOC_012576  | C2orf69   | chr2:200775978-200792996 | 4.10771   | 4.22568  | 0.0408513 | 0.986822 |
| XLOC_013431  | MSL3P1    | chr2:234774089-234777051 | 4.85061   | 4.98998  | 0.0408682 | 0.987693 |
| XLOC_018313  | ABCC10    | chr6:43395291-43423786   | 1.92433   | 1.97962  | 0.0408705 | 0.988165 |
| XLOC_023169  | NOTCH1    | chr9:139388895-139440231 | 7.01532   | 7.21708  | 0.0409049 | 0.98439  |
| XLOC_015149  | PRKCD     | chr3:53195222-53226733   | 14.0197   | 14.4234  | 0.0409595 | 0.984917 |
| XLOC_011851  | VRK3      | chr19:50479723-50528805  | 11.7517   | 12.0903  | 0.0409781 | 0.985921 |
| XLOC_015043  | VIPR1     | chr3:42530790-42579065   | 0.791147  | 0.813973 | 0.0410346 | 0.992109 |
| XLOC_017709  | AP3B1     | chr5:77298149-77590579   | 5.67107   | 5.83512  | 0.041141  | 0.984917 |
| XLOC_018256  | PPARD     | chr6:35310334-35395968   | 10.9173   | 11.2338  | 0.0412228 | 0.985154 |
| XLOC_011407  | FBXL12    | chr19:9920942-9929731    | 12.8522   | 13.2251  | 0.0412675 | 0.986822 |
| XLOC_004412  | ARRB1     | chr11:74971165-75062875  | 4.68772   | 4.82404  | 0.0413572 | 0.984479 |
| XLOC_000236  | GMEB1     | chr1:28995239-29042115   | 1.6958    | 1.74513  | 0.0413681 | 0.989268 |
| XLOC_002525  | KAT6B     | chr10:76586170-76792380  | 1.13011   | 1.16304  | 0.0414334 | 0.987693 |
| XLOC_001416  | BAI2      | chr1:32192717-32229648   | 2.98068   | 3.06754  | 0.0414382 | 0.987627 |
| XLOC_018571  | SNX9      | chr6:158244293-158366101 | 11.8627   | 12.2085  | 0.0414596 | 0.984692 |
| XLOC_005139  | DYNLL1    | chr12:120907659-12093621 | 298.254   | 306.957  | 0.0414932 | 0.984318 |
| XLOC_014005  | NCOA5     | chr20:44689625-44718580  | 10.1069   | 10.4018  | 0.0414939 | 0.985325 |
| XLOC_017214  | ZFYVE16   | chr5:79703837-79775498   | 1.34943   | 1.38895  | 0.0416443 | 0.987334 |
| XLOC_006863  | PIGH      | chr14:68000007-68067017  | 16.0333   | 16.503   | 0.041653  | 0.987693 |
| XLOC_017659  | PPAP2A    | chr5:54603575-54830873   | 10.1921   | 10.4911  | 0.041712  | 0.99351  |
| XLOC_009319  | C1QTNF1   | chr17:77015290-77045870  | 10.8456   | 11.1643  | 0.0417767 | 0.985921 |
| XLOC_005391  | TWF1      | chr12:44187525-44200178  | 27.4243   | 28.2315  | 0.0418535 | 0.983286 |
| XLOC_022926  | AUH       | chr9:93976096-94124206   | 7.62347   | 7.84884  | 0.0420309 | 0.986822 |
| XLOC_018773  | LSM2      | chr6:31765168-31774761   | 111.517   | 114.823  | 0.0421516 | 0.983594 |
| XLOC_009967  | MIF4GD    | chr17:73232693-73267311  | 26.0587   | 26.8317  | 0.0421758 | 0.993379 |
| XLOC_009565  | IFT20     | chr17:26646120-26662515  | 27.3409   | 28.1526  | 0.0422044 | 0.993441 |
| XLOC_009340  | HGS       | chr17:79650961-79669151  | 84.4649   | 86.9723  | 0.0422053 | 0.98297  |
| XLOC_018738  | HCG18     | chr6:30201815-30314635   | 1.37218   | 1.41296  | 0.0422449 | 0.993907 |
| XLOC_006813  | GNPNAT1   | chr14:53241910-53258386  | 20.077    | 20.6745  | 0.0423089 | 0.98297  |
| XLOC_003785  | KIAA1377  | chr11:101761404-10187171 | 0.0774586 | 0.079765 | 0.042329  | 1        |
| XLOC_005331  | WBP11     | chr12:14939411-14956401  | 26.6381   | 27.4318  | 0.0423585 | 0.984033 |
| XLOC_022618  | NUP214    | chr9:134000980-134109091 | 7.82558   | 8.05895  | 0.0423947 | 0.98468  |
| XLOC_007114  | ARHGAP11B | chr15:30918878-30931013  | 0.899454  | 0.926282 | 0.042402  | 0.99351  |
| XLOC_008813  | TNK1      | chr17:7284292-7307450    | 10.1952   | 10.4993  | 0.0424072 | 0.994615 |
| XLOC_018171  | PRR3      | chr6:30509154-30532473   | 5.29808   | 5.45616  | 0.0424159 | 0.994615 |
| XLOC_006094  | MTRF1     | chr13:41790515-41837713  | 2.59271   | 2.67012  | 0.0424423 | 0.987693 |
| XLOC_022612  | FUBP3     | chr9:133454959-133513731 | 19.9889   | 20.587   | 0.042538  | 0.98298  |
| XLOC_016705  | RELL1     | chr4:37455551-37687999   | 6.30013   | 6.48868  | 0.0425436 | 0.984917 |
| XLOC_021252  | EFCAB10   | chr7:105172531-105221971 | 0.662681  | 0.682531 | 0.0425805 | 0.952371 |
| XLOC_003340  | ARNTL     | chr11:13299324-13408812  | 4.30542   | 4.43449  | 0.0426135 | 0.986822 |
| XLOC_000852  | UCK2      | chr1:165796731-165880851 | 22.9638   | 23.6528  | 0.0426532 | 0.986822 |
| XLOC_003029  | GLUD1     | chr10:88809958-88854776  | 38.8673   | 40.0338  | 0.042662  | 0.9839   |
| XLOC_021230  | RABL5     | chr7:100956647-100965091 | 7.60427   | 7.83256  | 0.0426744 | 0.985982 |
| XLOC_009604  | COPRS     | chr17:30178883-30186326  | 115.142   | 118.601  | 0.0427122 | 0.982703 |
| XLOC_007322  | RCN2      | chr15:77223961-77242601  | 25.2686   | 26.0287  | 0.0427592 | 0.982256 |
| XLOC_023000  | EPB41L4B  | chr9:111934253-112083021 | 4.81571   | 4.96063  | 0.0427752 | 0.985283 |
| XLOC_008589  | CIAPIN1   | chr16:57462086-57495187  | 24.3818   | 25.1156  | 0.0427816 | 0.988657 |
| XLOC_002242  | C1orf131  | chr1:231359508-231413711 | 5.50888   | 5.67485  | 0.0428229 | 0.994553 |
| XLOC_001883  | KRTCAP2   | chr1:155141883-155145801 | 355.492   | 366.211  | 0.0428582 | 0.982123 |
| XLOC_023444  | YIPF6     | chrX:67718623-67757127   | 4.73516   | 4.8781   | 0.0429063 | 0.983952 |
| XLOC_009648  | SRCIN1    | chr17:36686258-36762183  | 0.483435  | 0.498039 | 0.0429383 | 0.990857 |
| XLOC_010742  | POP4      | chr19:30097169-30108162  | 13.4683   | 13.8757  | 0.0429839 | 0.984917 |
| XLOC_021141  | PCLO      | chr7:82383320-82792197   | 0.0171406 | 0.01766  | 0.0430656 | 1        |
| XLOC_012410  | RALB      | chr2:121010413-121052281 | 19.4617   | 20.0524  | 0.0431328 | 0.982703 |
| XLOC_012279  | USP39     | chr2:85829964-85876407   | 32.0744   | 33.0485  | 0.0431609 | 0.986353 |
| XLOC_011281  | UQCR11    | chr19:1597153-1605483    | 80.9718   | 83.4316  | 0.0431752 | 0.982782 |
| XLOC_001061  | MARC2     | chr1:220921675-220957591 | 4.89196   | 5.0406   | 0.0431831 | 0.987627 |
| XLOC_021967  | TM2D2     | chr8:38846326-38854041   | 8.62451   | 8.88691  | 0.0432391 | 0.98468  |
| XLOC_012442  | C2orf27A  | chr2:132480063-132524971 | 0.495019  | 0.510106 | 0.0433158 | 0.994615 |
| XLOC_007409  | UNC45A    | chr15:91473409-91497323  | 33.6322   | 34.6573  | 0.0433159 | 0.984917 |
| XLOC_001577  | MYSM1     | chr1:59120410-59165747   | 1.38842   | 1.43077  | 0.0433507 | 0.986529 |
| XLOC_001753  | NOTCH2    | chr1:120454175-120612311 | 4.43405   | 4.56934  | 0.0433619 | 0.982629 |
| XLOC_017469  | SPDL1     | chr5:169010637-169031781 | 3.27113   | 3.37109  | 0.0434258 | 0.986822 |
| XLOC_014873  | TTL12     | chr22:43562627-43583137  | 54.3226   | 55.9827  | 0.0434268 | 0.982043 |
| XLOC_018664  | GPLD1     | chr6:24426061-24489850   | 0.332326  | 0.34249  | 0.0434616 | 1        |
| XLOC_017004  | FBXO8     | chr4:175157809-175254531 | 3.9242    | 4.0444   | 0.0435255 | 0.990857 |
| XLOC_006315  | NUBPL     | chr14:32030590-32330429  | 1.50638   | 1.55255  | 0.043551  | 0.987693 |
| XLOC_0011579 | UQCRCF51  | chr19:29698166-29704136  | 126.252   | 130.125  | 0.0435948 | 0.982349 |
| XLOC_022306  | IFT74     | chr9:26903367-27062931   | 2.75838   | 2.84314  | 0.0436647 | 0.994615 |



|             |           |                           |          |           |           |          |
|-------------|-----------|---------------------------|----------|-----------|-----------|----------|
| XLOC_016434 | SMARCAD1  | chr4:95128758-95212443    | 2.24761  | 2.31668   | 0.0436652 | 0.986822 |
| XLOC_002203 | TP53BP2   | chr1:223967594-224033674  | 11.2057  | 11.5504   | 0.0437113 | 0.982412 |
| XLOC_011347 | NDUFA11   | chr19:5891286-5904024     | 471.286  | 485.792   | 0.0437331 | 0.981606 |
| XLOC_006274 | ABHD4     | chr14:23067146-23081265   | 8.27484  | 8.52979   | 0.0437797 | 0.984917 |
| XLOC_013106 | ZC3H8     | chr2:112973438-113012664  | 9.72108  | 10.0206   | 0.0437868 | 0.984782 |
| XLOC_000826 | TOMM40L   | chr1:161195832-161208000  | 8.93237  | 9.20775   | 0.0438052 | 0.985094 |
| XLOC_010334 | RPRD1A    | chr18:33569791-33647373   | 9.81874  | 10.1218   | 0.0438623 | 0.981485 |
| XLOC_008428 | CPPED1    | chr16:12753655-12897744   | 1.27489  | 1.31428   | 0.0438949 | 0.986822 |
| XLOC_004326 | MAP3K11   | chr11:65365225-65381720   | 19.5105  | 20.114    | 0.0439488 | 0.982599 |
| XLOC_016770 | YTHDC1    | chr4:69176104-69215824    | 5.30277  | 5.4669    | 0.0439753 | 0.982792 |
| XLOC_010713 | MAU2      | chr19:19431629-19469563   | 6.91546  | 7.12967   | 0.0440109 | 0.98469  |
| XLOC_009315 | AFMID     | chr17:76183397-76203782   | 18.6058  | 19.1822   | 0.044019  | 0.986353 |
| XLOC_023008 | KIAA0368  | chr9:114122972-114247025  | 18.0943  | 18.6551   | 0.0440332 | 0.982803 |
| XLOC_020695 | CBLL1     | chr7:107384278-107402083  | 6.01003  | 6.19639   | 0.0440577 | 0.983594 |
| XLOC_001198 | CPSP3L    | chr1:1243993-1260067      | 76.9329  | 79.3223   | 0.0441242 | 0.984917 |
| XLOC_014320 | HLCS      | chr21:38123188-38362545   | 2.77897  | 2.86538   | 0.0441715 | 0.984967 |
| XLOC_009956 | NAT9      | chr17:72766685-72772470   | 27.0244  | 27.8648   | 0.0441846 | 0.981044 |
| XLOC_021572 | POLB      | chr8:42195972-42229331    | 23.4617  | 24.1923   | 0.0442463 | 0.983952 |
| XLOC_008309 | GAS8      | chr16:90089007-90114191   | 4.45829  | 4.59745   | 0.0443434 | 0.986822 |
| XLOC_006467 | GSTZ1     | chr14:77787229-77797940   | 24.5084  | 25.2736   | 0.044354  | 0.98387  |
| XLOC_021462 | MTMR9     | chr8:11141999-11185654    | 1.30848  | 1.34938   | 0.0444029 | 0.986822 |
| XLOC_003592 | PRDX5     | chr11:64085559-64089295   | 378.205  | 390.033   | 0.0444283 | 0.982336 |
| XLOC_021609 | YTHDF3    | chr8:64081120-64125346    | 7.67243  | 7.91259   | 0.0444668 | 0.982113 |
| XLOC_015159 | FLNB      | chr3:57994126-58157982    | 9.51707  | 9.81502   | 0.0444735 | 0.980556 |
| XLOC_003636 | SFB2      | chr11:65819815-65836382   | 85.052   | 87.7153   | 0.0444844 | 0.981753 |
| XLOC_010618 | CALR      | chr19:13049413-13055304   | 501.473  | 517.179   | 0.0444929 | 0.982698 |
| XLOC_008307 | DEF8      | chr16:90015138-90034468   | 43.7409  | 45.1127   | 0.0445504 | 0.988165 |
| XLOC_011578 | LINC00662 | chr19:28281400-28284848   | 0.763285 | 0.787239  | 0.0445807 | 0.991767 |
| XLOC_022978 | ERP44     | chr9:102741462-102861330  | 16.993   | 17.527    | 0.0446315 | 0.980559 |
| XLOC_005512 | CD63      | chr12:56119226-56123457   | 615.954  | 635.351   | 0.0447311 | 0.981753 |
| XLOC_009386 | SMG6      | chr17:1963132-2207069     | 11.8019  | 12.1739   | 0.0447637 | 0.982937 |
| XLOC_012585 | CFLAR     | chr2:201980876-202037411  | 3.59925  | 3.71269   | 0.0447687 | 0.993379 |
| XLOC_014184 | MX1       | chr21:42792519-42831141   | 7.61675  | 7.85685   | 0.0447757 | 0.98468  |
| XLOC_002595 | KIF11     | chr10:94352824-94415152   | 8.64999  | 8.92288   | 0.0448101 | 0.980556 |
| XLOC_015357 | NCK1      | chr3:136581049-136667968  | 6.52083  | 6.72661   | 0.0448238 | 0.985921 |
| XLOC_005422 | DDX23     | chr12:49223538-49245957   | 21.3805  | 22.0553   | 0.044831  | 0.981044 |
| XLOC_010200 | ME2       | chr18:48405431-48476162   | 14.1832  | 14.6313   | 0.0448664 | 0.98066  |
| XLOC_023724 | VBP1      | chrX:154444700-154468091  | 28.3235  | 29.2182   | 0.044867  | 0.981044 |
| XLOC_014506 | SLC35E4   | chr22:31031792-31043862   | 10.8403  | 11.1829   | 0.0448834 | 0.984917 |
| XLOC_016099 | DGKG      | chr3:185864989-186080023  | 2.17995  | 2.24884   | 0.0448869 | 0.985325 |
| XLOC_010773 | GRAMD1A   | chr19:35491245-35517373   | 74.7995  | 77.1666   | 0.0449469 | 0.981044 |
| XLOC_014510 | TUG1      | chr22:31365633-31375380   | 8.04104  | 8.29556   | 0.0449568 | 0.981044 |
| XLOC_022783 | APTX      | chr9:32972603-33001639    | 17.298   | 17.846    | 0.0449937 | 0.982599 |
| XLOC_001852 | S100A6    | chr1:153507075-153508717  | 2261.55  | 2333.21   | 0.0449991 | 0.982156 |
| XLOC_018934 | GCLC      | chr6:53362139-53409927    | 6.31544  | 6.51584   | 0.045068  | 0.982703 |
| XLOC_001087 | ARF1      | chr1:228270360-228286913  | 293.74   | 303.089   | 0.0451982 | 0.981044 |
| XLOC_017055 | EXOC3     | chr5:443333-467409        | 12.2982  | 12.69     | 0.0452442 | 0.982596 |
| XLOC_006513 | GLRX5     | chr14:96001322-96011055   | 49.436   | 51.0116   | 0.0452635 | 0.981044 |
| XLOC_024044 | NKAPP1    | chrX:119370308-119379123  | 0.454751 | 0.469269  | 0.0453382 | 0.991767 |
| XLOC_021771 | THEM6     | chr8:143808620-143818350  | 82.0251  | 84.6445   | 0.0453503 | 0.980559 |
| XLOC_002668 | SUFU      | chr10:104263718-104393217 | 4.16494  | 4.29796   | 0.0453583 | 0.985921 |
| XLOC_018139 | ZKSCAN8   | chr6:28109715-28125236    | 0.251871 | 0.259925  | 0.0454103 | 1        |
| XLOC_023153 | C9orf116  | chr9:138387025-138391763  | 20.4106  | 21.0634   | 0.0454242 | 0.986822 |
| XLOC_006215 | ARGLU1    | chr13:107195661-107220517 | 36.6133  | 37.7867   | 0.0455098 | 0.980556 |
| XLOC_014811 | CARD10    | chr22:37886399-37915210   | 7.92321  | 8.17716   | 0.0455152 | 0.98468  |
| XLOC_008263 | KLHL36    | chr16:84682130-84695916   | 11.4012  | 11.7667   | 0.0455214 | 0.985921 |
| XLOC_023082 | PTRH1     | chr9:130469270-130477936  | 68.8169  | 71.0244   | 0.0455535 | 0.982599 |
| XLOC_021603 | RAB2A     | chr8:61429468-61536203    | 25.7961  | 26.6238   | 0.045562  | 0.981044 |
| XLOC_013312 | TMEM237   | chr2:202484906-202508253  | 3.63768  | 3.7544    | 0.0455632 | 0.982497 |
| XLOC_015811 | UBA3      | chr3:69103880-69129524    | 14.4586  | 14.9226   | 0.0455739 | 0.981044 |
| XLOC_009670 | MED24     | chr17:38175349-38210889   | 21.9029  | 22.6061   | 0.0455901 | 0.981753 |
| XLOC_017182 | PTCD2     | chr5:71616199-71655180    | 2.35809  | 2.43383   | 0.0456124 | 0.987693 |
| XLOC_016265 | ANAPC4    | chr4:25378847-25420120    | 5.76242  | 5.94759   | 0.0456298 | 0.984917 |
| XLOC_016406 | ENOPH1    | chr4:83351725-83382244    | 18.8404  | 19.4475   | 0.0457571 | 0.980556 |
| XLOC_010450 | C19orf24  | chr19:1275519-1279243     | 118.304  | 122.121   | 0.0458094 | 0.980317 |
| XLOC_018168 | HLA-L     | chr6:30201815-30314635    | 0.015831 | 0.0163424 | 0.0458641 | 1        |
| XLOC_021386 | ZNF777    | chr7:149128453-149158053  | 15.2795  | 15.7732   | 0.045871  | 0.981843 |
| XLOC_021427 | FBXO25    | chr8:356807-419875        | 16.1514  | 16.6738   | 0.0459209 | 0.980556 |
| XLOC_016632 | SLBP      | chr4:1694526-1714030      | 47.4786  | 49.018    | 0.0460343 | 0.979875 |
| XLOC_016191 | ADRA2C    | chr4:3768295-3770253      | 16.3658  | 16.8972   | 0.0461046 | 0.984917 |
| XLOC_023009 | PTGR1     | chr9:114287446-114362133  | 74.5161  | 76.941    | 0.0462015 | 0.980704 |
| XLOC_006520 | GSKIP     | chr14:96829788-96853627   | 5.09484  | 5.26159   | 0.0464643 | 0.984917 |
| XLOC_014715 | GUSBP11   | chr22:23980674-24059610   | 3.90174  | 4.02947   | 0.0464706 | 0.985921 |
| XLOC_021678 | DPY19L4   | chr8:95732102-95806076    | 4.24145  | 4.38038   | 0.0465    | 0.980973 |
| XLOC_002546 | FAM213A   | chr10:82167584-82192753   | 17.5102  | 18.0845   | 0.0465648 | 0.981044 |
| XLOC_006525 | CCNK      | chr14:99947738-100070723  | 18.4828  | 19.0893   | 0.0465815 | 0.989748 |
| XLOC_013891 | CS3       | chr20:23614293-23618574   | 234.091  | 241.777   | 0.0466078 | 0.979733 |
| XLOC_014778 | PISD      | chr22:31892124-32026810   | 21.9577  | 22.6795   | 0.0466608 | 0.985921 |
| XLOC_013779 | ARFGAP1   | chr20:61904164-61921142   | 29.4734  | 30.4429   | 0.0466937 | 0.979701 |

|             |                      |                          |          |          |           |          |
|-------------|----------------------|--------------------------|----------|----------|-----------|----------|
| XLOC_017355 | CYSTM1               | chr5:139554652-139623374 | 85.017   | 87.8158  | 0.0467286 | 0.979733 |
| XLOC_012501 | KLHL23,PHOSPHO2,PHOS | chr2:170550963-170608396 | 6.73817  | 6.96035  | 0.0468037 | 0.986822 |
| XLOC_007706 | ETFA                 | chr15:76508628-76603810  | 101.842  | 105.205  | 0.0468696 | 0.979701 |
| XLOC_015448 | ECT2                 | chr3:172468474-172539264 | 9.87544  | 10.2017  | 0.0468938 | 0.979875 |
| XLOC_010123 | IMPA2                | chr18:11981426-12030885  | 29.218   | 30.1838  | 0.0469156 | 0.982349 |
| XLOC_015432 | NMD3                 | chr3:160939098-160969798 | 11.7295  | 12.1178  | 0.0469865 | 0.980177 |
| XLOC_000383 | CMPK1                | chr1:47799468-47844511   | 27.5593  | 28.4717  | 0.0469921 | 0.979733 |
| XLOC_011705 | ERF                  | chr19:42751716-42759309  | 25.7245  | 26.5779  | 0.0470864 | 0.98038  |
| XLOC_001105 | SPR1N                | chr1:231473681-231490768 | 1.71069  | 1.7675   | 0.0471346 | 0.987411 |
| XLOC_005687 | KCTD10               | chr12:109886459-10991518 | 10.7694  | 11.1271  | 0.0471362 | 0.979917 |
| XLOC_011339 | SAFB2                | chr19:5587009-5622938    | 12.4288  | 12.8416  | 0.0471393 | 0.981044 |
| XLOC_011414 | ZGLP1                | chr19:10415478-10420233  | 1.78821  | 1.84763  | 0.0471575 | 0.990324 |
| XLOC_023274 | CA5BP1               | chrX:15693038-15721474   | 11.7074  | 12.0964  | 0.0471631 | 0.986822 |
| XLOC_001393 | DNAJC8               | chr1:28526789-28559542   | 82.0815  | 84.8097  | 0.0471728 | 0.979701 |
| XLOC_001419 | PTPA4A2              | chr1:32372021-32403988   | 44.4723  | 45.9515  | 0.0472046 | 0.980556 |
| XLOC_001264 | EXOSC10              | chr1:11126675-11159938   | 22.1293  | 22.8656  | 0.047222  | 0.979944 |
| XLOC_010693 | PIK3R2               | chr19:18263987-18281343  | 27.6927  | 28.6184  | 0.047437  | 0.979733 |
| XLOC_001748 | ZNF697               | chr1:120161999-120190390 | 1.75871  | 1.8175   | 0.047438  | 0.986822 |
| XLOC_003050 | FGFBP3               | chr10:93666344-93669258  | 1.95782  | 2.0233   | 0.0474654 | 0.987693 |
| XLOC_008485 | XPO6                 | chr16:28109297-28223239  | 32.0837  | 33.1573  | 0.0474886 | 0.979701 |
| XLOC_017106 | SKP2                 | chr5:36152144-36184142   | 8.59934  | 8.88731  | 0.0475213 | 0.988019 |
| XLOC_015352 | CEP63                | chr3:134196545-134293858 | 1.7983   | 1.85852  | 0.0475261 | 0.995528 |
| XLOC_017813 | CDKN2AIPNL           | chr5:133737755-133747598 | 30.9771  | 32.0155  | 0.0475675 | 0.979944 |
| XLOC_000365 | TMEM69               | chr1:46153846-46216485   | 39.5565  | 40.8828  | 0.0475762 | 0.980556 |
| XLOC_012816 | SFB314               | chr2:24290453-24299314   | 250.302  | 258.713  | 0.0476826 | 0.979733 |
| XLOC_007260 | MAP2K1               | chr15:66679210-66790146  | 45.2756  | 46.7979  | 0.0477101 | 0.979814 |
| XLOC_008043 | INO80E               | chr16:30007530-30022401  | 66.1214  | 68.3516  | 0.0478569 | 0.984917 |
| XLOC_022979 | TEX10                | chr9:103064356-103115258 | 34.1583  | 35.3106  | 0.0478654 | 0.979701 |
| XLOC_010115 | RALBP1               | chr18:9475529-9538106    | 15.8036  | 16.3375  | 0.0479347 | 0.979701 |
| XLOC_003408 | C11orf74             | chr11:36613492-36680817  | 10.0512  | 10.3911  | 0.0479848 | 0.985921 |
| XLOC_003219 | IFITM2               | chr11:308106-309410      | 556.492  | 575.34   | 0.0480544 | 0.979906 |
| XLOC_008726 | APRT                 | chr16:88875876-88878342  | 229.045  | 236.805  | 0.0480648 | 0.979701 |
| XLOC_002730 | WDR11                | chr10:122216465-12280688 | 3.86554  | 3.9966   | 0.0481033 | 0.981044 |
| XLOC_021860 | PINX1                | chr8:10622883-10697299   | 12.8286  | 13.2637  | 0.0481172 | 0.98439  |
| XLOC_004061 | TMEM9B               | chr11:8968839-8985989    | 16.4579  | 17.0169  | 0.0481898 | 0.980903 |
| XLOC_008928 | NLK                  | chr17:26369687-26523404  | 2.60916  | 2.69799  | 0.0483002 | 0.984772 |
| XLOC_002858 | YME1L1               | chr10:27399039-27443349  | 25.6933  | 26.5682  | 0.0483114 | 0.979701 |
| XLOC_002375 | MLLT10               | chr10:21823100-22032559  | 8.74573  | 9.04373  | 0.0483391 | 0.988571 |
| XLOC_021313 | ZC3HC1               | chr7:129658125-129691233 | 19.0332  | 19.6818  | 0.0483465 | 0.979733 |
| XLOC_001542 | TTC39A               | chr1:51752929-51810785   | 4.65809  | 4.81695  | 0.0483817 | 0.984917 |
| XLOC_010120 | NAPG                 | chr18:10525872-10552766  | 4.33749  | 4.48553  | 0.0484162 | 0.981044 |
| XLOC_015751 | POCIA                | chr3:52109248-52188706   | 17.2447  | 17.8335  | 0.0484318 | 0.980556 |
| XLOC_018814 | CUTA                 | chr6:33384318-33386065   | 315.119  | 325.879  | 0.0484423 | 0.979701 |
| XLOC_006637 | TRAF3                | chr14:103243815-10337783 | 3.78349  | 3.91292  | 0.0485271 | 0.980556 |
| XLOC_006832 | C14orf37             | chr14:58470807-58618847  | 1.21535  | 1.25693  | 0.0485297 | 0.987693 |
| XLOC_018801 | PSMB8                | chr6:32808493-32821748   | 59.313   | 61.3436  | 0.0485644 | 0.990315 |
| XLOC_002791 | PITRM1               | chr10:3177918-3215033    | 22.8237  | 23.6056  | 0.0485922 | 0.979733 |
| XLOC_011806 | TMEM143              | chr19:48835615-48867186  | 2.78959  | 2.88519  | 0.0486135 | 0.987693 |
| XLOC_021762 | CHRAC1               | chr8:141521396-141527258 | 30.8146  | 31.8713  | 0.0486422 | 0.979733 |
| XLOC_002521 | ZSWIM8               | chr10:75545381-75561556  | 4.80375  | 4.96851  | 0.0486522 | 0.982907 |
| XLOC_017656 | MCIN                 | chr5:54515424-54523143   | 1.6351   | 1.6912   | 0.0486734 | 0.989365 |
| XLOC_010611 | WDR83                | chr19:12777617-12792701  | 14.2518  | 14.7409  | 0.0486793 | 0.995957 |
| XLOC_022830 | RNF38                | chr9:36336398-36401195   | 3.08953  | 3.19567  | 0.0487312 | 0.981753 |
| XLOC_016919 | CCNA2                | chr4:122722471-122745088 | 19.2237  | 19.8841  | 0.0487338 | 0.985921 |
| XLOC_021595 | LYN                  | chr8:56792385-56925006   | 10.698   | 11.0657  | 0.0487537 | 0.979701 |
| XLOC_008483 | GTF3C1               | chr16:27471933-27561251  | 6.60647  | 6.83407  | 0.048865  | 0.979733 |
| XLOC_015873 | C3orf17              | chr3:112721291-112738558 | 9.25339  | 9.57239  | 0.0488979 | 0.979701 |
| XLOC_008598 | CNOT1                | chr16:58549382-58663790  | 15.8745  | 16.4218  | 0.0489045 | 0.980108 |
| XLOC_018604 | C6orf70              | chr6:170151720-170181617 | 7.37988  | 7.63438  | 0.0489137 | 0.982156 |
| XLOC_015282 | NDUFB4               | chr3:120315127-120321258 | 269.96   | 279.27   | 0.0489152 | 0.979701 |
| XLOC_012543 | SSFA2                | chr2:182756471-182795464 | 6.32418  | 6.54289  | 0.0490501 | 0.979701 |
| XLOC_017966 | GPRIN1               | chr5:176022802-176037137 | 5.74856  | 5.94737  | 0.0490505 | 0.981044 |
| XLOC_012938 | WDPCP                | chr2:63348534-63834330   | 0.446401 | 0.461844 | 0.0490628 | 0.991767 |
| XLOC_008995 | AP2B1                | chr17:33914281-34053436  | 44.8028  | 46.353   | 0.0490743 | 0.979701 |
| XLOC_013062 | MGAT4A               | chr2:99235568-99347589   | 1.06735  | 1.10433  | 0.0491413 | 0.987693 |
| XLOC_003264 | PGAP2                | chr11:3696239-3847601    | 20.4924  | 21.2033  | 0.0492007 | 0.990749 |
| XLOC_016148 | NCBP2                | chr3:196662272-196669464 | 30.3362  | 31.3887  | 0.0492055 | 0.979701 |
| XLOC_020454 | LINC00265            | chr7:39773166-39834222   | 3.49127  | 3.61249  | 0.0492434 | 0.98439  |
| XLOC_020426 | DKFZP58611420        | chr7:30409665-30412410   | 1.04561  | 1.08196  | 0.049299  | 0.988019 |
| XLOC_002975 | LRRC20               | chr10:72058728-72142382  | 6.5275   | 6.75445  | 0.0493081 | 0.981884 |
| XLOC_008202 | NIP7                 | chr16:69362523-69377013  | 21.024   | 21.7559  | 0.0493728 | 0.984917 |
| XLOC_020527 | AUTS2                | chr7:69063904-70257885   | 1.55756  | 1.6118   | 0.0493835 | 0.985921 |
| XLOC_021026 | C7orf25              | chr7:42948871-42951689   | 5.31777  | 5.50354  | 0.0495388 | 0.98468  |
| XLOC_014779 | PRR14L               | chr22:32077333-32146120  | 1.58093  | 1.63617  | 0.0495548 | 0.981044 |
| XLOC_002619 | C10orf12             | chr10:98741040-98745585  | 0.622229 | 0.643994 | 0.0496026 | 0.988166 |
| XLOC_005597 | CSRP2                | chr12:77252495-77272799  | 38.5616  | 39.9117  | 0.0496463 | 0.979875 |
| XLOC_020613 | PPP1R9A              | chr7:94536948-94925727   | 1.39178  | 1.44053  | 0.0496657 | 0.982033 |
| XLOC_022440 | C9orf89              | chr9:95858449-95875565   | 64.8792  | 67.1518  | 0.0496702 | 0.979845 |
| XLOC_003384 | RCN1                 | chr11:32112476-32127272  | 54.4665  | 56.3757  | 0.0497049 | 0.979701 |

|              |              |                          |          |          |           |          |
|--------------|--------------|--------------------------|----------|----------|-----------|----------|
| XLOC_022560  | RABEPK       | chr9:127962820-127996438 | 41.5749  | 43.0326  | 0.0497184 | 0.979701 |
| XLOC_011469  | TRMT1        | chr19:13215713-13227563  | 50.5731  | 52.3467  | 0.0497285 | 0.979701 |
| XLOC_010793  | ETV2         | chr19:36132646-36135773  | 0.530378 | 0.548979 | 0.0497307 | 0.994615 |
| XLOC_018165  | PPP1R11      | chr6:30034931-30043628   | 44.778   | 46.3491  | 0.0497508 | 0.979701 |
| XLOC_011847  | PNKP         | chr19:50364459-50370822  | 35.5347  | 36.7818  | 0.0497654 | 0.979701 |
| XLOC_009005  | GGNBP2       | chr17:34900736-34946276  | 13.0523  | 13.5104  | 0.0497705 | 0.979701 |
| XLOC_014852  | DES1         | chr22:41994031-42017061  | 18.8298  | 19.4911  | 0.0497954 | 0.979701 |
| XLOC_005694  | ANAPC7       | chr12:110810704-11084153 | 12.6005  | 13.0433  | 0.0498334 | 0.979701 |
| XLOC_022899  | UBQLN1       | chr9:86274877-86323168   | 33.2419  | 34.411   | 0.0498643 | 0.979701 |
| XLOC_010596  | PRKCSH       | chr19:11546268-11561782  | 232.717  | 240.906  | 0.049894  | 0.979701 |
| XLOC_009332  | BAIAP2       | chr17:79008946-79156964  | 15.4774  | 16.0225  | 0.0499327 | 0.979733 |
| XLOC_021426  | ZNF596       | chr8:158344-197339       | 0.496463 | 0.51397  | 0.0499967 | 0.9953   |
| XLOC_021541  | WRN          | chr8:30853320-31031277   | 1.68362  | 1.74301  | 0.0500179 | 0.982497 |
| XLOC_004272  | TMEM223      | chr11:62554873-62559486  | 16.3216  | 16.8978  | 0.050056  | 0.993379 |
| XLOC_017730  | CENH         | chr5:86690078-86708850   | 26.9699  | 27.9227  | 0.0500908 | 0.979701 |
| XLOC_017229  | RASA1        | chr5:86564069-86687743   | 3.01832  | 3.12506  | 0.0501382 | 0.982703 |
| XLOC_022670  | RABL6        | chr9:139690789-139735638 | 128.959  | 133.522  | 0.0501665 | 0.979701 |
| XLOC_014871  | TTL1         | chr22:43435522-43485434  | 2.7697   | 2.86772  | 0.0501747 | 0.987693 |
| XLOC_003388  | QSER1        | chr11:32914791-33001814  | 2.63525  | 2.72852  | 0.0501761 | 0.979733 |
| XLOC_001322  | CAPZB        | chr1:19665266-19812066   | 95.0539  | 98.4229  | 0.0502485 | 0.979701 |
| XLOC_006040  | MTMR6        | chr13:25820340-25861704  | 3.49337  | 3.61746  | 0.0503587 | 0.979701 |
| XLOC_017721  | LOC100131067 | chr5:80256507-81047072   | 1.28395  | 1.32959  | 0.0503952 | 0.996079 |
| XLOC_003118  | NT5C2        | chr10:104847773-10495308 | 7.12269  | 7.37619  | 0.0504523 | 0.979701 |
| XLOC_007165  | MAPKBP1      | chr15:42066631-42120053  | 2.57012  | 2.66174  | 0.0505309 | 0.981044 |
| XLOC_010851  | SUPT5H       | chr19:39936185-39967308  | 32.5192  | 33.681   | 0.0506429 | 0.979701 |
| XLOC_012906  | FBXO11       | chr2:48010220-48132932   | 9.02157  | 9.34399  | 0.0506604 | 0.986822 |
| XLOC_010061  | C17orf62     | chr17:80347085-80408707  | 37.4147  | 38.7528  | 0.0506921 | 0.985164 |
| XLOC_002511  | MCU          | chr10:74451888-74647452  | 6.71178  | 6.95771  | 0.0507557 | 0.981044 |
| XLOC_006224  | LINC00346    | chr13:111516333-11152268 | 1.62617  | 1.68448  | 0.0508231 | 0.982379 |
| XLOC_001143  | CNST         | chr1:246729638-246831884 | 3.23697  | 3.35308  | 0.0508409 | 0.985283 |
| XLOC_014961  | TMEM43       | chr3:14166439-14185180   | 16.9212  | 17.5284  | 0.0508644 | 0.979316 |
| XLOC_018445  | AMD1         | chr6:111195986-111216913 | 20.2628  | 20.9906  | 0.0509123 | 0.979701 |
| XLOC_021818  | LOC100287015 | chr8:6261076-6264069     | 1.92499  | 1.99414  | 0.0509186 | 0.987693 |
| XLOC_008423  | TXNDC11      | chr16:11762288-11836648  | 8.25276  | 8.54972  | 0.0510008 | 0.987627 |
| XLOC_017978  | PDLIM7       | chr5:176910394-176924602 | 84.7048  | 87.7546  | 0.0510303 | 0.979701 |
| XLOC_022185  | LRRC6        | chr8:133584200-133687863 | 0.986502 | 1.02208  | 0.0511108 | 0.988581 |
| XLOC_016509  | CCRNL4       | chr4:139936942-139967098 | 10.532   | 10.9119  | 0.0511317 | 0.979875 |
| XLOC_006089  | MRPS31       | chr13:41303431-41345347  | 9.45376  | 9.79575  | 0.0512671 | 0.982497 |
| XLOC_009367  | GLOD4        | chr17:662548-695741      | 32.5641  | 33.744   | 0.0513488 | 0.984947 |
| XLOC_000239  | EPB41        | chr1:29213602-29450421   | 4.01871  | 4.16441  | 0.0513827 | 0.984917 |
| XLOC_014457  | SMARCB1      | chr22:24129149-24181199  | 87.2845  | 90.4525  | 0.0514344 | 0.979701 |
| XLOC_005498  | CBX5         | chr12:54624730-54673915  | 4.00508  | 4.15045  | 0.0514364 | 0.980556 |
| XLOC_015732  | HYAL2        | chr3:50355220-50360281   | 18.831   | 19.5155  | 0.0515137 | 0.979701 |
| XLOC_013504  | ITPA         | chr20:3189513-3204516    | 75.3263  | 78.0659  | 0.0515391 | 0.979701 |
| XLOC_010128  | PSMG2        | chr18:12658737-12725739  | 74.8022  | 77.5237  | 0.0515583 | 0.979701 |
| XLOC_010035  | C17orf70     | chr17:79506910-79519429  | 14.7057  | 15.2411  | 0.0515883 | 0.979701 |
| XLOC_002836  | TRDMT1       | chr10:17184981-17244070  | 0.511918 | 0.53057  | 0.0516284 | 0.986822 |
| XLOC_012984  | DUSP11       | chr2:73989324-74007284   | 17.5528  | 18.1926  | 0.0516564 | 0.979701 |
| XLOC_016304  | SLAIN2       | chr4:48343612-48428215   | 3.38958  | 3.51315  | 0.0516568 | 0.979875 |
| XLOC_0022107 | MTERFD1      | chr8:97251644-97273796   | 32.3098  | 33.4892  | 0.0517236 | 0.979701 |
| XLOC_021224  | VGFB         | chr7:100805789-100808853 | 26.9154  | 27.8986  | 0.0517656 | 0.979701 |
| XLOC_016309  | DCUN1D4      | chr4:52709275-52783003   | 5.46637  | 5.66608  | 0.0517677 | 0.979701 |
| XLOC_023133  | SURF6        | chr9:136197551-136203047 | 58.8217  | 60.972   | 0.0517979 | 0.978981 |
| XLOC_018695  | HIST1H2BK    | chr6:27106071-27114637   | 59.9496  | 62.1422  | 0.0518226 | 0.979638 |
| XLOC_018846  | CCDC167      | chr6:37450696-37467700   | 26.0797  | 27.0346  | 0.0518841 | 0.981197 |
| XLOC_014149  | SON          | chr21:34915349-34949812  | 12.3508  | 12.8032  | 0.0519081 | 0.978981 |
| XLOC_000392  | BTF3L4       | chr1:52521856-52556388   | 14.0403  | 14.5549  | 0.0519308 | 0.979701 |
| XLOC_003604  | MRPL49       | chr11:64888098-64902003  | 32.8444  | 34.0492  | 0.0519706 | 0.995302 |
| XLOC_011542  | COPE         | chr19:19010322-19030199  | 265.098  | 274.825  | 0.0519895 | 0.978703 |
| XLOC_010189  | HAUS1        | chr18:43684297-43708299  | 36.8044  | 38.1566  | 0.0520528 | 0.979046 |
| XLOC_001807  | CERS2        | chr1:150937648-150947478 | 78.8242  | 81.7205  | 0.0520599 | 0.978638 |
| XLOC_020567  | MDH2         | chr7:75677392-75695930   | 335.294  | 347.635  | 0.0521446 | 0.978945 |
| XLOC_002219  | CDC42BPA     | chr1:227177565-227505828 | 2.26239  | 2.34569  | 0.0521621 | 0.979701 |
| XLOC_006460  | GPAT2        | chr14:76618258-76669134  | 1.21307  | 1.25774  | 0.0521746 | 0.987693 |
| XLOC_007971  | CCP110       | chr16:19535178-19564728  | 1.84435  | 1.91233  | 0.0522186 | 0.980559 |
| XLOC_023168  | SEC16A       | chr9:139334547-139380518 | 15.6337  | 16.2103  | 0.052254  | 0.978703 |
| XLOC_006815  | DDHD1        | chr14:53503457-53620046  | 1.33872  | 1.38811  | 0.0522743 | 0.979733 |
| XLOC_015931  | MGLL         | chr3:127407904-127542093 | 25.9137  | 26.8706  | 0.0523148 | 0.979638 |
| XLOC_010615  | RNASEH2A     | chr19:12917427-12924462  | 63.2206  | 65.557   | 0.0523533 | 0.978992 |
| XLOC_011040  | MED25        | chr19:50321535-50340237  | 20.2188  | 20.9677  | 0.0524715 | 0.979701 |
| XLOC_013723  | PFND4        | chr20:52824501-52836492  | 27.7853  | 28.8155  | 0.052521  | 0.979649 |
| XLOC_019030  | PPL16        | chr6:109711417-109765122 | 0.23092  | 0.239486 | 0.0525444 | 1        |
| XLOC_005882  | COG3         | chr13:46039029-46110833  | 2.60637  | 2.70322  | 0.0526405 | 0.979944 |
| XLOC_014163  | CHAF1B       | chr21:37757688-37789125  | 9.34996  | 9.69758  | 0.0526649 | 0.979701 |
| XLOC_016554  | TMEM144      | chr4:159131400-159176438 | 6.05691  | 6.28226  | 0.0527025 | 0.979701 |
| XLOC_022586  | URM1         | chr9:131133597-131154298 | 75.677   | 78.5004  | 0.0528437 | 0.978555 |
| XLOC_013392  | SERPINE2     | chr2:224839764-224904036 | 1.17785  | 1.22181  | 0.0528644 | 0.987693 |
| XLOC_002242  | FAM120A      | chr9:96208781-96328397   | 37.0036  | 38.3851  | 0.0528792 | 0.980098 |
| XLOC_011159  | CNOT3        | chr19:54641435-54663446  | 16.8961  | 17.5273  | 0.0529086 | 0.979875 |

|             |              |                          |           |           |           |          |
|-------------|--------------|--------------------------|-----------|-----------|-----------|----------|
| XLOC_013512 | SMOX         | chr20:4129425-4168394    | 20.1077   | 20.859    | 0.0529217 | 0.979701 |
| XLOC_018366 | PTP4A1       | chr6:64281919-64293489   | 14.3332   | 14.8689   | 0.0529343 | 0.978703 |
| XLOC_017668 | PDE4D        | chr5:58264865-59843484   | 2.15005   | 2.2305    | 0.0529943 | 0.979701 |
| XLOC_015893 | LRRC58       | chr3:120043575-120068184 | 3.68257   | 3.82042   | 0.0530196 | 0.979701 |
| XLOC_013132 | ERCC3        | chr2:128014865-128051752 | 22.2736   | 23.1082   | 0.0530699 | 0.978196 |
| XLOC_006158 | TBC1D4       | chr13:75858808-76056250  | 5.04804   | 5.23745   | 0.0531409 | 0.979701 |
| XLOC_008338 | IFT140       | chr16:1543351-1662109    | 4.55144   | 4.72245   | 0.0532122 | 0.990555 |
| XLOC_005600 | PPP1R12A     | chr12:80167342-80329235  | 4.27368   | 4.43435   | 0.0532459 | 0.979701 |
| XLOC_013141 | HS6ST1       | chr2:129023053-129076172 | 11.6955   | 12.1353   | 0.0532566 | 0.979484 |
| XLOC_014642 | TRABD        | chr22:50624359-50638027  | 51.4184   | 53.3554   | 0.0533486 | 0.978196 |
| XLOC_014586 | ZC3H7B       | chr22:41697506-41756151  | 9.68786   | 10.0529   | 0.0533607 | 0.978188 |
| XLOC_022120 | ANKRD46      | chr8:101521979-101572014 | 3.3403    | 3.46638   | 0.0534512 | 0.982412 |
| XLOC_009344 | ANAPC11      | chr17:79849598-79858363  | 126.269   | 131.037   | 0.053471  | 0.978555 |
| XLOC_005049 | ACTR6        | chr12:100593864-10061820 | 9.98963   | 10.3669   | 0.0534813 | 0.979701 |
| XLOC_008427 | GSPT1        | chr16:11961984-12010519  | 20.3356   | 21.1038   | 0.0534964 | 0.979215 |
| XLOC_015328 | IFT122       | chr3:129149786-129239192 | 2.76623   | 2.87078   | 0.0535187 | 0.990018 |
| XLOC_003740 | TMEM126A     | chr11:85358962-85367597  | 30.6636   | 31.8227   | 0.0535292 | 0.979701 |
| XLOC_006695 | LINC00641    | chr14:21668237-21675059  | 0.75972   | 0.78844   | 0.0535332 | 0.98972  |
| XLOC_008354 | NTHL1        | chr16:2089815-2097867    | 36.5535   | 37.9362   | 0.0535636 | 0.979701 |
| XLOC_004685 | TP1          | chr12:6976583-6982521    | 1159.39   | 1203.27   | 0.0535966 | 0.979701 |
| XLOC_016059 | RPL22L1      | chr3:170582664-170588045 | 306.689   | 318.306   | 0.0536379 | 0.978703 |
| XLOC_018237 | RING1        | chr6:33176285-33180499   | 41.2026   | 42.7636   | 0.0536454 | 0.978188 |
| XLOC_021493 | XPO7         | chr8:21777179-21864096   | 15.0395   | 15.6097   | 0.053684  | 0.977885 |
| XLOC_020369 | MIOS         | chr7:7606615-7647110     | 6.43748   | 6.68169   | 0.0537182 | 0.978981 |
| XLOC_019074 | ARHGAP18     | chr6:129898239-130031370 | 1.32513   | 1.37541   | 0.0537282 | 0.985154 |
| XLOC_008746 | TIMM22       | chr17:900356-905390      | 24.2077   | 25.1266   | 0.0537442 | 0.979701 |
| XLOC_003176 | OAT          | chr10:126085871-12610754 | 48.778    | 50.6299   | 0.0537589 | 0.977332 |
| XLOC_017001 | HMG2         | chr4:174252526-174255592 | 200.496   | 208.108   | 0.0537594 | 0.978703 |
| XLOC_003208 | ECHS1        | chr10:135175986-13518690 | 147.982   | 153.602   | 0.0537719 | 0.978196 |
| XLOC_021911 | TNFRSF10D    | chr8:22993100-23021543   | 34.2186   | 35.5185   | 0.0537885 | 0.979484 |
| XLOC_018322 | TMEM63B      | chr6:44095375-44123256   | 9.18197   | 9.53084   | 0.0537999 | 0.979701 |
| XLOC_021521 | CDCA2        | chr8:25316512-25365425   | 1.98996   | 2.06559   | 0.0538179 | 0.983673 |
| XLOC_012227 | PCBP1        | chr2:70314584-70316334   | 190.88    | 198.149   | 0.0539196 | 0.978725 |
| XLOC_018590 | MAP3K4       | chr6:161412821-161538417 | 2.24914   | 2.33481   | 0.0539295 | 0.979701 |
| XLOC_008981 | TMEM98       | chr17:31254927-31268667  | 47.4749   | 49.285    | 0.0539819 | 0.977332 |
| XLOC_004247 | DDB1         | chr11:61066918-61136975  | 64.3763   | 66.8357   | 0.0540894 | 0.979733 |
| XLOC_008504 | DOC2A        | chr16:30007530-30022401  | 14.0442   | 14.5815   | 0.0541666 | 0.989365 |
| XLOC_021419 | PTPRN2       | chr7:157331749-158380482 | 2.40399   | 2.49599   | 0.0541798 | 0.98297  |
| XLOC_013344 | EKF2F2       | chr2:213864410-214016333 | 0.0236071 | 0.0245111 | 0.054216  | 1        |
| XLOC_015480 | ECE2         | chr3:183967444-184010815 | 42.1644   | 43.7812   | 0.0542832 | 0.986822 |
| XLOC_023931 | HDAC8        | chrX:71549365-71792953   | 10.0913   | 10.4786   | 0.0543268 | 0.979733 |
| XLOC_002840 | NSUN6        | chr10:18834263-18940550  | 3.78691   | 3.93243   | 0.0544006 | 0.981044 |
| XLOC_011737 | ZNF45        | chr19:44416775-44439411  | 1.85573   | 1.92716   | 0.0544895 | 0.982907 |
| XLOC_021205 | TAF6         | chr7:99690403-99723128   | 43.8608   | 45.5492   | 0.0544937 | 0.993108 |
| XLOC_006430 | RBM25        | chr14:73525220-73588076  | 11.246    | 11.679    | 0.0545123 | 0.976756 |
| XLOC_007462 | UBE3A        | chr15:25582395-25684175  | 8.734     | 9.07058   | 0.0545533 | 0.977652 |
| XLOC_012783 | YWHAQ        | chr2:9724105-9771106     | 146.645   | 152.297   | 0.0545573 | 0.977995 |
| XLOC_001331 | MUL1         | chr1:20825940-20834674   | 18.9195   | 19.6497   | 0.0546326 | 0.978196 |
| XLOC_011328 | PLIN4        | chr19:4472254-4517716    | 0.204266  | 0.212152  | 0.0546447 | 1        |
| XLOC_016730 | COMMD8       | chr4:47452810-47465676   | 10.3209   | 10.7194   | 0.0546586 | 0.979701 |
| XLOC_004779 | MED21        | chr12:27175454-27183606  | 5.43705   | 5.64724   | 0.0547212 | 0.979701 |
| XLOC_022693 | NELFB        | chr9:140149758-140168000 | 105.441   | 109.521   | 0.0547699 | 0.977332 |
| XLOC_000075 | KIF1B        | chr1:10270763-10441661   | 3.56475   | 3.70273   | 0.0547906 | 0.978931 |
| XLOC_021029 | COA1         | chr7:43670750-43769140   | 48.2622   | 50.1319   | 0.0548361 | 0.97854  |
| XLOC_000621 | WDR3         | chr1:118472371-118727848 | 12.1602   | 12.632    | 0.0549119 | 0.977177 |
| XLOC_008201 | VPS4A        | chr16:69345286-69358946  | 57.4354   | 59.6671   | 0.054995  | 0.977358 |
| XLOC_017171 | SMN2         | chr5:69345349-69373422   | 2.20754   | 2.29339   | 0.0550414 | 0.986569 |
| XLOC_002983 | PSAP         | chr10:73576054-73611082  | 220.906   | 229.503   | 0.0550819 | 0.978413 |
| XLOC_010866 | SHKBP1       | chr19:41082756-41097305  | 82.5989   | 85.8167   | 0.0551354 | 0.977332 |
| XLOC_016797 | G3BP2        | chr4:76567952-76598667   | 14.9987   | 15.5836   | 0.0551999 | 0.977103 |
| XLOC_014943 | VHL          | chr3:10183318-10195354   | 17.6618   | 18.3514   | 0.0552567 | 0.977332 |
| XLOC_009023 | LASP1        | chr17:37026111-37078023  | 61.126    | 63.5135   | 0.0552761 | 0.977358 |
| XLOC_005885 | LRCH1        | chr13:47127295-47327175  | 2.67406   | 2.7786    | 0.055327  | 0.979701 |
| XLOC_004868 | ESPL1        | chr12:53662082-53687427  | 4.94104   | 5.13433   | 0.0553601 | 0.978703 |
| XLOC_014083 | STMN3        | chr20:62271057-62284963  | 17.9404   | 18.6427   | 0.0553986 | 0.978196 |
| XLOC_008093 | LOC100507577 | chr16:48274602-48420559  | 0.413151  | 0.429328  | 0.0554129 | 0.961175 |
| XLOC_002273 | CHML         | chr1:241695433-241803702 | 1.52956   | 1.58946   | 0.0554168 | 0.979701 |
| XLOC_011046 | SIGLEC16     | chr19:50472911-50479076  | 0.309545  | 0.321667  | 0.0554168 | 1        |
| XLOC_022256 | ZNF252P      | chr8:146198974-146231432 | 3.97902   | 4.13487   | 0.0554276 | 0.979316 |
| XLOC_018973 | IBTK         | chr6:82879955-82957448   | 4.50427   | 4.68087   | 0.0554839 | 0.977527 |
| XLOC_013243 | ATP5G3       | chr2:176040985-176046490 | 64.2522   | 66.777    | 0.0556059 | 0.977332 |
| XLOC_009350 | GPS1         | chr17:80009762-80015346  | 78.3877   | 81.4718   | 0.0556749 | 0.976618 |
| XLOC_009963 | NT5C         | chr17:73106081-73127890  | 132.193   | 137.401   | 0.0557458 | 0.979701 |
| XLOC_007181 | HYPK,SERF2   | chr15:44038589-44094769  | 156.764   | 162.947   | 0.0558062 | 0.987693 |
| XLOC_014693 | KLHL22       | chr22:20795805-20850170  | 7.54625   | 7.84437   | 0.0558979 | 0.979701 |
| XLOC_021655 | CA13         | chr8:86157715-86196302   | 4.41541   | 4.59004   | 0.0559585 | 0.979701 |
| XLOC_012939 | VPS54        | chr2:64119666-64246214   | 3.16032   | 3.28551   | 0.056048  | 0.979701 |
| XLOC_008584 | NUDT21       | chr16:56463047-56485261  | 23.8172   | 24.7615   | 0.0560935 | 0.977103 |
| XLOC_023601 | STAG2        | chrX:123094474-123236502 | 8.51735   | 8.85529   | 0.0561353 | 0.977103 |

|              |                         |                          |           |           |           |          |
|--------------|-------------------------|--------------------------|-----------|-----------|-----------|----------|
| XLOC_013664  | IFT52                   | chr20:42219578-42275862  | 11.5344   | 11.9922   | 0.056151  | 0.979484 |
| XLOC_017899  | DCTN4                   | chr5:150088308-150138657 | 12.2256   | 12.7109   | 0.0561571 | 0.976618 |
| XLOC_013294  | ANKRD44                 | chr2:197851385-198175527 | 0.484324  | 0.50356   | 0.056189  | 0.987693 |
| XLOC_001042  | TATDN3                  | chr1:212965169-212990167 | 4.28906   | 4.45959   | 0.0562494 | 0.979701 |
| XLOC_016742  | SCFD2                   | chr4:53739150-54232242   | 0.854006  | 0.88799   | 0.0562971 | 0.987062 |
| XLOC_021520  | DOCK5                   | chr8:25042286-25270619   | 0.61102   | 0.635335  | 0.056299  | 0.984917 |
| XLOC_003920  | APLP2                   | chr11:129939715-13001470 | 80.0788   | 83.2657   | 0.0563018 | 0.977652 |
| XLOC_000147  | C1orf151-NBL1,MINOS1,NB | chr1:19923470-19984949   | 104.888   | 109.064   | 0.0563193 | 0.979316 |
| XLOC_011963  | PPP6R1                  | chr19:55741146-55770038  | 39.8487   | 41.4351   | 0.0563206 | 0.976618 |
| XLOC_011259  | MIER2                   | chr19:305574-344791      | 15.0419   | 15.6413   | 0.0563738 | 0.978196 |
| XLOC_022824  | SPAG8                   | chr9:35792405-35812259   | 0.0467117 | 0.0485743 | 0.0564101 | 1        |
| XLOC_016630  | CTBP1                   | chr4:1205227-1242908     | 41.5926   | 43.2515   | 0.056425  | 0.976149 |
| XLOC_009733  | NT5C3B                  | chr17:39981333-39992523  | 54.9351   | 57.1281   | 0.0564719 | 0.976618 |
| XLOC_016093  | EHHADH                  | chr3:184880688-184971888 | 0.757077  | 0.78732   | 0.0565102 | 0.986353 |
| XLOC_021257  | COG5                    | chr7:106809405-107218961 | 11.9437   | 12.4209   | 0.0565153 | 0.979944 |
| XLOC_001820  | TDRKH                   | chr1:151744040-151763010 | 2.11174   | 2.19615   | 0.0565452 | 0.98468  |
| XLOC_004987  | CNOT2                   | chr12:70638773-70748773  | 17.1764   | 17.8635   | 0.0565907 | 0.976595 |
| XLOC_004854  | ACVR1B                  | chr12:52345450-52390863  | 6.68865   | 6.93556   | 0.0566171 | 0.977626 |
| XLOC_010263  | ADNP2                   | chr18:77866914-77898228  | 10.522    | 10.9432   | 0.0566235 | 0.977103 |
| XLOC_015856  | IFT57                   | chr3:107879658-107941417 | 7.38673   | 7.68272   | 0.0566811 | 0.978196 |
| XLOC_015126  | TEX264                  | chr3:51705221-51738339   | 99.4966   | 103.488   | 0.0567472 | 0.976618 |
| XLOC_024040  | RNF113A                 | chrX:119004494-119010621 | 32.5136   | 33.8194   | 0.0568066 | 0.990324 |
| XLOC_015312  | PLXNA1                  | chr3:126707436-126756231 | 6.65622   | 6.92371   | 0.0568428 | 0.977095 |
| XLOC_002972  | SAR1A                   | chr10:71909960-71930285  | 25.6385   | 26.6689   | 0.056845  | 0.976214 |
| XLOC_019133  | ZC3H12D                 | chr6:149768765-149806148 | 0.0264497 | 0.0275127 | 0.0568457 | 1        |
| XLOC_007607  | MYO1E                   | chr15:59428167-59665071  | 5.82883   | 6.06318   | 0.0568676 | 0.977531 |
| XLOC_020371  | GLCC1                   | chr7:8008373-8128709     | 0.928006  | 0.965338  | 0.0569005 | 0.985921 |
| XLOC_004243  | PRPF19                  | chr11:60658019-60674061  | 81.8005   | 85.0922   | 0.0569174 | 0.976756 |
| XLOC_014140  | EVA1C                   | chr21:33784751-33887697  | 8.89593   | 9.2541    | 0.0569461 | 0.979701 |
| XLOC_018739  | GNL1                    | chr6:30509154-30532473   | 13.4641   | 14.0068   | 0.0570105 | 0.978703 |
| XLOC_0021150 | SLC25A40                | chr7:87463813-87538856   | 2.34949   | 2.44423   | 0.0570335 | 0.991767 |
| XLOC_007764  | DET1                    | chr15:89055713-89089912  | 3.01766   | 3.13944   | 0.0570781 | 0.982907 |
| XLOC_023850  | TFE3                    | chrX:48886241-48900990   | 27.6556   | 28.7734   | 0.0571622 | 0.976209 |
| XLOC_005055  | UTP20                   | chr12:101673904-10178035 | 1.54502   | 1.60769   | 0.0573627 | 0.978981 |
| XLOC_018180  | GTF2H4                  | chr6:30875976-30881880   | 28.4882   | 29.6476   | 0.0575507 | 0.977103 |
| XLOC_007905  | ZNF205                  | chr16:3160460-3170518    | 18.4066   | 19.1566   | 0.0576154 | 0.979316 |
| XLOC_012329  | MRPL30                  | chr2:99797541-99816020   | 16.3236   | 16.9891   | 0.0576475 | 0.976618 |
| XLOC_003396  | NAT10                   | chr11:34127110-34168458  | 28.0424   | 29.1857   | 0.0576486 | 0.976618 |
| XLOC_005842  | B3GALTL                 | chr13:31774111-31906411  | 1.65653   | 1.72412   | 0.057702  | 0.981135 |
| XLOC_007270  | CORO2B                  | chr15:68871307-69020144  | 1.91917   | 1.9975    | 0.0577112 | 0.98391  |
| XLOC_002859  | ACBD5                   | chr10:27484142-27531068  | 6.19745   | 6.45069   | 0.0577795 | 0.977358 |
| XLOC_016294  | LIMCH1                  | chr4:41362803-41702061   | 1.86824   | 1.9446    | 0.0577902 | 0.979701 |
| XLOC_009089  | RND2                    | chr17:41177257-41184058  | 0.457203  | 0.475897  | 0.0578174 | 0.987693 |
| XLOC_016247  | CC2D2A                  | chr4:15471488-15603180   | 3.33769   | 3.47417   | 0.0578195 | 0.985921 |
| XLOC_013130  | BIN1                    | chr2:127805598-127864903 | 32.18     | 33.4982   | 0.0579222 | 0.976756 |
| XLOC_017393  | NDFIP1                  | chr5:141488323-141534008 | 26.5839   | 27.673    | 0.0579263 | 0.976214 |
| XLOC_002523  | VCL                     | chr10:75757871-75879914  | 14.121    | 14.7002   | 0.0579956 | 0.976618 |
| XLOC_003172  | C10orf88                | chr10:124690418-12471397 | 0.970026  | 1.00984   | 0.0580358 | 0.985982 |
| XLOC_010039  | ARL16                   | chr17:79648223-79650954  | 24.0754   | 25.0639   | 0.0580528 | 0.979215 |
| XLOC_007864  | TBL3                    | chr16:2022063-2028751    | 25.379    | 26.4217   | 0.0580863 | 0.976595 |
| XLOC_012723  | SH3BP4                  | chr2:235860627-235964358 | 3.7637    | 3.91835   | 0.0580914 | 0.979701 |
| XLOC_009965  | SUMO2                   | chr17:73163824-73179098  | 308.009   | 320.674   | 0.0581308 | 0.976618 |
| XLOC_016841  | ABCG2                   | chr4:89011415-89152474   | 0.465474  | 0.484639  | 0.0582126 | 0.986822 |
| XLOC_022561  | GAPVD1                  | chr9:128024110-128127290 | 6.23362   | 6.49052   | 0.0582634 | 0.976326 |
| XLOC_021482  | SLC7A2                  | chr8:17354596-17428077   | 2.77458   | 2.88893   | 0.0582646 | 0.978196 |
| XLOC_008399  | ANKS3                   | chr16:4746510-4799397    | 7.12092   | 7.41471   | 0.0583261 | 0.979733 |
| XLOC_004915  | CDK2                    | chr12:56360555-56366568  | 33.6173   | 35.0043   | 0.0583277 | 0.974585 |
| XLOC_010544  | EVI5L                   | chr19:7895160-7929862    | 7.16005   | 7.45568   | 0.0583705 | 0.979291 |
| XLOC_020606  | CCDC132                 | chr7:92861652-92990435   | 2.31772   | 2.41348   | 0.0584089 | 0.978196 |
| XLOC_015734  | RASSF1                  | chr3:50367216-50378367   | 20.2642   | 21.1015   | 0.0584105 | 0.977358 |
| XLOC_014791  | RBFOX2                  | chr22:36134782-36424585  | 16.1713   | 16.841    | 0.0585391 | 0.974169 |
| XLOC_010730  | ZNF429                  | chr19:21688436-21721079  | 0.495189  | 0.515709  | 0.0585804 | 0.987858 |
| XLOC_021723  | MED30                   | chr8:118532964-118552507 | 34.5996   | 36.0358   | 0.0586791 | 0.977332 |
| XLOC_020918  | RNF216                  | chr7:5659671-5821361     | 9.31026   | 9.69707   | 0.0587265 | 0.977103 |
| XLOC_023351  | USP11                   | chrX:47092313-47107727   | 11.5267   | 12.0061   | 0.05879   | 0.976618 |
| XLOC_006156  | KLF12                   | chr13:74260148-74708066  | 0.428961  | 0.44683   | 0.0588801 | 0.982782 |
| XLOC_009285  | LLGL2                   | chr17:73521782-73571290  | 34.8621   | 36.3151   | 0.0589074 | 0.979398 |
| XLOC_012840  | MPV17                   | chr2:27532359-27545969   | 44.1554   | 45.9968   | 0.0589438 | 0.976595 |
| XLOC_021035  | POLD2                   | chr7:44154278-44163169   | 154.131   | 160.561   | 0.0589635 | 0.974585 |
| XLOC_008424  | ZC3H7A                  | chr16:11844441-11891114  | 4.96145   | 5.16869   | 0.0590363 | 0.977332 |
| XLOC_000074  | UBE4B                   | chr1:10093040-10241296   | 5.25611   | 5.47588   | 0.0590941 | 0.977332 |
| XLOC_001625  | SSX2IP                  | chr1:85109389-85156240   | 2.97133   | 3.09577   | 0.0591885 | 0.977103 |
| XLOC_014847  | RANGAP1                 | chr22:41641614-41682216  | 94.985    | 98.9655   | 0.0592265 | 0.976618 |
| XLOC_000650  | CHD11                   | chr1:146714290-146767447 | 29.08     | 30.2991   | 0.0592445 | 0.974044 |
| XLOC_003591  | ESRRA                   | chr11:64073043-64085033  | 54.8984   | 57.2003   | 0.0592573 | 0.989126 |
| XLOC_012455  | SPOPL                   | chr2:139259349-139330808 | 1.52317   | 1.58708   | 0.0592964 | 0.979701 |
| XLOC_003179  | METTL10                 | chr10:126447405-12648043 | 3.15774   | 3.29024   | 0.0593018 | 0.979701 |
| XLOC_004166  | LRP4                    | chr11:46867961-46940173  | 1.40837   | 1.4675    | 0.0593343 | 0.979733 |
| XLOC_011309  | MFSD12                  | chr19:3538262-3557571    | 71.7816   | 74.7964   | 0.0593551 | 0.974249 |

|              |              |                          |            |            |           |          |
|--------------|--------------|--------------------------|------------|------------|-----------|----------|
| XLOC_018354  | LRRC1        | chr6:53659777-53788919   | 3.70196    | 3.85748    | 0.059371  | 0.979484 |
| XLOC_016522  | ABCE1        | chr4:145915726-146050674 | 19.279     | 20.0902    | 0.0594576 | 0.976618 |
| XLOC_022562  | PBX3         | chr9:128509616-128729655 | 18.0467    | 18.8065    | 0.0594954 | 0.976326 |
| XLOC_008826  | CD68         | chr17:7482804-7485429    | 413.625    | 431.075    | 0.0596146 | 0.976618 |
| XLOC_016089  | CLCN2        | chr3:184053716-184079435 | 6.85409    | 7.14347    | 0.0596607 | 0.987334 |
| XLOC_019046  | HDAC2        | chr6:114257319-114292355 | 7.30034    | 7.60864    | 0.0596758 | 0.974044 |
| XLOC_013924  | COMMD7       | chr20:31290492-31331814  | 30.5218    | 31.8121    | 0.0597376 | 0.974392 |
| XLOC_018308  | PTK7         | chr6:43044005-43129458   | 29.6535    | 30.9079    | 0.0597711 | 0.974494 |
| XLOC_001674  | DBT          | chr1:100652477-100715405 | 1.14768    | 1.19626    | 0.0598125 | 0.978555 |
| XLOC_011669  | DYRK1B       | chr19:40315989-40324841  | 1.09587    | 1.14241    | 0.0599998 | 0.987627 |
| XLOC_004870  | C12orf10     | chr12:53693469-53700965  | 41.3601    | 43.1171    | 0.0600211 | 0.976214 |
| XLOC_006485  | TDP1         | chr14:90422245-90511108  | 8.06198    | 8.4045     | 0.0600271 | 0.976618 |
| XLOC_003672  | PPP6R3       | chr11:68228185-68382801  | 11.4291    | 11.9148    | 0.0600358 | 0.974226 |
| XLOC_008846  | RANGRF       | chr17:8191081-8198170    | 67.8291    | 70.7148    | 0.0601066 | 0.977103 |
| XLOC_007160  | RTF1         | chr15:41709301-41775761  | 12.7575    | 13.3007    | 0.0601523 | 0.974142 |
| XLOC_003954  | CHID1        | chr11:867858-915058      | 22.4453    | 23.4014    | 0.0601767 | 0.974044 |
| XLOC_003051  | CPEB3        | chr10:93808396-94050875  | 0.161624   | 0.16851    | 0.0601907 | 1        |
| XLOC_021337  | CREB3L2      | chr7:137559724-137686847 | 4.3062     | 4.48992    | 0.060276  | 0.98241  |
| XLOC_002947  | IPMK         | chr10:59951277-60027694  | 1.80676    | 1.8839     | 0.0603126 | 0.979701 |
| XLOC_002951  | CCDC6        | chr10:61548505-61666414  | 9.90083    | 10.3237    | 0.0603367 | 0.973348 |
| XLOC_005745  | SPPL3        | chr12:121200312-12134215 | 13.7254    | 14.3117    | 0.0603451 | 0.974044 |
| XLOC_010534  | MCOLN1       | chr19:7587495-7598895    | 10.8549    | 11.3186    | 0.0603481 | 0.987803 |
| XLOC_018974  | UBE3D        | chr6:83602185-83775545   | 1.61437    | 1.68334    | 0.060355  | 0.986431 |
| XLOC_022698  | EHMT1        | chr9:140513443-140730574 | 11.3135    | 11.797     | 0.060377  | 0.976595 |
| XLOC_006298  | IRF9         | chr14:24630421-24635774  | 2.48829    | 2.5947     | 0.0604118 | 0.984917 |
| XLOC_014718  | CHCHD10      | chr22:24105207-24110141  | 311.896    | 325.242    | 0.0604489 | 0.974044 |
| XLOC_001543  | EPS15        | chr1:51819934-51984995   | 5.64477    | 5.88634    | 0.060457  | 0.976618 |
| XLOC_0012141 | NDUFAF7      | chr2:37458773-37476303   | 7.39845    | 7.71513    | 0.0604664 | 0.977332 |
| XLOC_001289  | CASP9        | chr1:15818768-15851285   | 4.11684    | 4.29305    | 0.0604672 | 0.980556 |
| XLOC_022977  | LOC441461    | chr9:102648599-102668885 | 2.26636    | 2.36339    | 0.060482  | 0.989748 |
| XLOC_015838  | CLDND1       | chr3:98234316-98241910   | 24.1782    | 25.2135    | 0.060486  | 0.974044 |
| XLOC_013596  | DNMT3B       | chr20:31350190-31397162  | 1.49067    | 1.55451    | 0.0604993 | 0.981197 |
| XLOC_009228  | DDX42        | chr17:61851566-61896677  | 16.6896    | 17.4044    | 0.0605031 | 0.973348 |
| XLOC_006281  | C14orf119    | chr14:23527773-23569665  | 25.0323    | 26.1045    | 0.0605103 | 0.986822 |
| XLOC_011873  | SHANK1       | chr19:51165083-51220195  | 4.60132    | 4.79843    | 0.060515  | 0.979215 |
| XLOC_003859  | HMBS         | chr11:118955586-11896425 | 24.8609    | 25.9269    | 0.0605679 | 0.976214 |
| XLOC_004301  | TRMT112      | chr11:64073043-64085033  | 438.938    | 457.76     | 0.0605726 | 0.979701 |
| XLOC_001982  | OLFML2B      | chr1:161952981-16199364  | 0.560159   | 0.584197   | 0.0606168 | 0.987693 |
| XLOC_005599  | PAWR         | chr12:79985744-80084790  | 16.0281    | 16.717     | 0.0607138 | 0.976618 |
| XLOC_014956  | HDAC11       | chr3:13521714-13547924   | 9.84593    | 10.2693    | 0.0607425 | 0.976618 |
| XLOC_015760  | NT5DC2       | chr3:52529355-52569093   | 97.786     | 101.991    | 0.0607445 | 0.973867 |
| XLOC_016862  | LAMTOR3      | chr4:100799494-100815703 | 5.30768    | 5.53616    | 0.0608047 | 0.976122 |
| XLOC_016635  | NELFA        | chr4:1984440-2010962     | 38.004     | 39.6405    | 0.060826  | 0.974044 |
| XLOC_016200  | WFS1         | chr4:6271576-6304992     | 13.6069    | 14.1932    | 0.0608694 | 0.976122 |
| XLOC_003766  | HEPPL1       | chr11:93754377-93847374  | 0.00755493 | 0.00788055 | 0.0608785 | 1        |
| XLOC_002404  | CCNY         | chr10:35535952-35860847  | 24.946     | 26.0214    | 0.0608908 | 0.972601 |
| XLOC_001119  | GPR137B      | chr1:236305831-236372205 | 10.0158    | 10.4479    | 0.0609336 | 0.977332 |
| XLOC_020866  | NUB1         | chr7:151038846-151075544 | 18.0963    | 18.8778    | 0.0609937 | 0.972989 |
| XLOC_015414  | TIPARP       | chr3:156390959-156424557 | 11.3468    | 11.8372    | 0.0610331 | 0.974169 |
| XLOC_007498  | ATPBD4       | chr15:35663169-36151202  | 3.06374    | 3.19621    | 0.0610689 | 0.979733 |
| XLOC_008491  | SULT1A1      | chr16:28616907-28634907  | 9.04329    | 9.43448    | 0.0610967 | 0.979701 |
| XLOC_000212  | ZDHHC18      | chr1:27153200-27182211   | 29.3663    | 30.6389    | 0.0611999 | 0.97314  |
| XLOC_023357  | LOC100133957 | chrX:47511190-47519776   | 2.51721    | 2.62631    | 0.0612143 | 0.995302 |
| XLOC_004299  | PPP1R14B     | chr11:64011950-64014413  | 435.827    | 454.717    | 0.061215  | 0.973065 |
| XLOC_010568  | C19orf66     | chr19:10196805-10213425  | 8.19583    | 8.55118    | 0.061234  | 0.979701 |
| XLOC_005711  | DDX54        | chr12:113587662-11362325 | 32.215     | 33.6144    | 0.0613453 | 0.972989 |
| XLOC_004475  | CWC15        | chr11:94695786-94706776  | 25.3528    | 26.4542    | 0.0613531 | 0.974044 |
| XLOC_016795  | RCHY1        | chr4:76404246-76439640   | 3.99892    | 4.17272    | 0.0613799 | 0.977103 |
| XLOC_003087  | COX15        | chr10:101419262-10151585 | 8.88746    | 9.27387    | 0.0614018 | 0.979701 |
| XLOC_000534  | RTCA         | chr1:100731713-100758325 | 15.9613    | 16.6554    | 0.0614188 | 0.973723 |
| XLOC_017749  | ERAP1        | chr5:95997740-96149848   | 2.86095    | 2.98538    | 0.0614207 | 0.993108 |
| XLOC_017913  | FLJ38109     | chr5:153570294-153825382 | 0.0359673  | 0.0375319  | 0.0614336 | 1        |
| XLOC_002676  | TAF5         | chr10:105127723-10515627 | 2.92308    | 3.05034    | 0.0614828 | 0.99351  |
| XLOC_000337  | KDM4A        | chr1:44115796-44173012   | 6.719      | 7.01172    | 0.0615229 | 0.97582  |
| XLOC_006505  | IFI27L1      | chr14:94547638-94569060  | 22.6228    | 23.6093    | 0.0615778 | 0.979701 |
| XLOC_011849  | IL4I1,NUP62  | chr19:50392912-50437193  | 24.5414    | 25.6121    | 0.0616124 | 0.987693 |
| XLOC_014777  | EIF4ENIF1    | chr22:31835344-31885874  | 3.93988    | 4.11206    | 0.0617101 | 0.979215 |
| XLOC_017058  | NKD2         | chr5:1009076-1038927     | 13.412     | 13.9983    | 0.0617342 | 0.977332 |
| XLOC_000203  | SH3BGR3      | chr1:26606212-26608013   | 291.885    | 304.673    | 0.061862  | 0.971854 |
| XLOC_005737  | PXN          | chr12:120639093-12070357 | 90.0492    | 93.9959    | 0.0618831 | 0.97314  |
| XLOC_007197  | BLOC1S6      | chr15:45879416-45901909  | 10.52      | 10.9813    | 0.0619109 | 0.972601 |
| XLOC_000735  | CREB3L4      | chr1:153931574-153950457 | 5.75951    | 6.01208    | 0.0619195 | 0.99634  |
| XLOC_014929  | THUMPDP3     | chr3:9404716-9428475     | 11.4037    | 11.9046    | 0.0620251 | 0.972989 |
| XLOC_007481  | WHAMMP1      | chr15:32812048-32825942  | 0.64783    | 0.676312   | 0.0620735 | 0.988154 |
| XLOC_000627  | FAM72B       | chr1:120839004-120855687 | 1.60591    | 1.67652    | 0.0620738 | 0.983952 |
| XLOC_014261  | CCT8         | chr21:30428647-30446010  | 170.163    | 177.648    | 0.0621034 | 0.974044 |
| XLOC_022654  | MRPS2        | chr9:138392476-138396515 | 284.709    | 297.24     | 0.0621426 | 0.974044 |
| XLOC_016804  | NUP54        | chr4:77035816-77069655   | 13.7516    | 14.357     | 0.062148  | 0.974044 |
| XLOC_012421  | SFT2D3       | chr2:128458596-128461407 | 7.3718     | 7.69634    | 0.0621554 | 0.978196 |

|             |              |                          |           |           |           |          |
|-------------|--------------|--------------------------|-----------|-----------|-----------|----------|
| XLOC_002954 | RHOBTB1      | chr10:62629197-62761198  | 0.734651  | 0.766995  | 0.0621579 | 0.982703 |
| XLOC_003116 | ARL3         | chr10:104433483-10447411 | 6.07296   | 6.34041   | 0.062176  | 0.976756 |
| XLOC_015484 | FAM131A      | chr3:184053716-184079431 | 15.6833   | 16.3752   | 0.062285  | 0.979733 |
| XLOC_010673 | BABAM1       | chr19:17378231-17390162  | 51.8799   | 54.1698   | 0.0623139 | 0.971485 |
| XLOC_023816 | MED14        | chrX:40508794-40594804   | 4.62383   | 4.8281    | 0.0623671 | 0.973723 |
| XLOC_002605 | PLCE1        | chr10:95753745-96088148  | 0.0653555 | 0.0682431 | 0.0623745 | 1        |
| XLOC_014687 | RTN4R        | chr22:20228937-20255816  | 17.9354   | 18.728    | 0.0623854 | 0.977332 |
| XLOC_016302 | ATP10D       | chr4:47487409-47595503   | 0.840198  | 0.877327  | 0.0623866 | 0.979875 |
| XLOC_010809 | TBCB         | chr19:36602104-36616849  | 80.7962   | 84.3699   | 0.062422  | 0.979701 |
| XLOC_022498 | RAD23B       | chr9:110045516-110094471 | 50.645    | 52.8852   | 0.0624455 | 0.972989 |
| XLOC_013417 | LINC00471    | chr2:232373136-232379051 | 0.145143  | 0.151566  | 0.0624761 | 1        |
| XLOC_015769 | DCP1A        | chr3:53317444-53381654   | 3.39341   | 3.54366   | 0.0625055 | 0.976618 |
| XLOC_004267 | C11orf48     | chr11:62430288-62441162  | 50.409    | 52.6449   | 0.0626103 | 0.979701 |
| XLOC_006353 | C14orf166    | chr14:52456227-52471420  | 178.758   | 186.691   | 0.0626472 | 0.972397 |
| XLOC_017706 | WDR41        | chr5:76728068-76788332   | 13.0656   | 13.6456   | 0.0626627 | 0.972111 |
| XLOC_004586 | HSPA8        | chr11:122928199-12293291 | 609.914   | 636.998   | 0.0626683 | 0.976214 |
| XLOC_008015 | KIAA0556     | chr16:27561467-27791692  | 1.46492   | 1.53      | 0.0627097 | 0.979701 |
| XLOC_023814 | BCOR         | chrX:39910498-40036582   | 1.7211    | 1.79757   | 0.0627113 | 0.979701 |
| XLOC_023191 | ANAPC2       | chr9:140069235-140084821 | 28.8946   | 30.1792   | 0.0627516 | 0.987423 |
| XLOC_011335 | PLIN3        | chr19:4838345-4867780    | 72.203    | 75.4132   | 0.062758  | 0.970232 |
| XLOC_011498 | BRD4         | chr19:15348300-15391262  | 8.78293   | 9.17349   | 0.062769  | 0.974044 |
| XLOC_022466 | TDRD7        | chr9:100174301-100258401 | 5.52217   | 5.76802   | 0.0628411 | 0.974773 |
| XLOC_002518 | SEC24C       | chr10:75504130-75531933  | 10.8138   | 11.2953   | 0.0628531 | 0.972228 |
| XLOC_003076 | MORN4        | chr10:99374309-99393913  | 4.95584   | 5.17665   | 0.0628912 | 0.979701 |
| XLOC_003308 | ZNF215       | chr11:6947653-6979278    | 1.65564   | 1.72942   | 0.0629065 | 0.979701 |
| XLOC_010146 | CABLES1      | chr18:20714527-20840434  | 1.73646   | 1.81385   | 0.0629076 | 0.979701 |
| XLOC_012403 | STEAP3       | chr2:119981383-120023221 | 15.8376   | 16.5438   | 0.0629395 | 0.972989 |
| XLOC_007997 | UBFD1        | chr16:23568861-23585710  | 7.30966   | 7.63582   | 0.0629778 | 0.973348 |
| XLOC_023810 | DYNLT3       | chrX:37698088-37706889   | 5.24232   | 5.47631   | 0.0629995 | 0.977652 |
| XLOC_003628 | MUS81        | chr11:65627871-65640405  | 28.7346   | 30.02     | 0.0631345 | 0.974044 |
| XLOC_004965 | RASSF3       | chr12:65004292-65091347  | 6.10459   | 6.3777    | 0.0631416 | 0.976618 |
| XLOC_015525 | TMEM44-AS1   | chr3:194304996-194354151 | 1.92903   | 2.01555   | 0.0633001 | 0.994615 |
| XLOC_013408 | SP110        | chr2:231033644-231090441 | 1.59487   | 1.66643   | 0.0633233 | 0.982497 |
| XLOC_002198 | TAF1A        | chr1:222731243-222763271 | 3.18153   | 3.32449   | 0.0634131 | 0.979701 |
| XLOC_009776 | SLC25A39     | chr17:42396992-42402217  | 359.507   | 375.667   | 0.0634345 | 0.97028  |
| XLOC_009341 | MRPL12       | chr17:79670399-79674556  | 145.61    | 152.157   | 0.0634484 | 0.970551 |
| XLOC_013337 | KANSL1L      | chr2:210867351-211036051 | 3.31702   | 3.46623   | 0.0634805 | 0.979733 |
| XLOC_012658 | ZFAND2B      | chr2:220071505-220074371 | 29.3597   | 30.6804   | 0.0634812 | 0.976198 |
| XLOC_014865 | POLDIP3      | chr22:42979726-43010962  | 29.7727   | 31.1128   | 0.0635222 | 0.970346 |
| XLOC_011190 | ZNF524       | chr19:56111729-56114504  | 28.5661   | 29.853    | 0.063574  | 0.976618 |
| XLOC_015631 | LRRFIP2      | chr3:37094116-37217851   | 9.02964   | 9.43693   | 0.0636489 | 0.972176 |
| XLOC_001878 | PYGO2        | chr1:154929501-154934251 | 10.7241   | 11.2084   | 0.0637201 | 0.974169 |
| XLOC_015946 | PLXND1       | chr3:129274055-129325581 | 8.88307   | 9.28493   | 0.0638329 | 0.972989 |
| XLOC_000960 | CAMSAP2      | chr1:200708685-200829831 | 2.35724   | 2.46401   | 0.0639071 | 0.974762 |
| XLOC_013185 | PRPF40A      | chr2:153508106-153573971 | 9.96173   | 10.4132   | 0.0639393 | 0.972111 |
| XLOC_023195 | FAM166A      | chr9:140135710-140142221 | 9.00178   | 9.40994   | 0.0639743 | 0.997036 |
| XLOC_005346 | LDHB         | chr12:21788274-21810789  | 807.837   | 844.482   | 0.0640029 | 0.974044 |
| XLOC_013176 | MMADHC       | chr2:150426146-150444331 | 73.979    | 77.3361   | 0.0640266 | 0.970232 |
| XLOC_021066 | SEC61G       | chr7:54819939-54826939   | 372.044   | 388.966   | 0.0641684 | 0.970195 |
| XLOC_012570 | CCDC150      | chr2:197504355-197597531 | 1.17733   | 1.2309    | 0.0641938 | 0.979733 |
| XLOC_016022 | C3orf33      | chr3:155480400-155524051 | 4.04567   | 4.22979   | 0.064208  | 0.979701 |
| XLOC_010536 | CAMSAP3      | chr19:7660787-7683196    | 13.0071   | 13.5991   | 0.0642102 | 0.974044 |
| XLOC_002934 | AGAP8        | chr10:51026324-51371331  | 0.84655   | 0.885093  | 0.0642337 | 0.99351  |
| XLOC_010755 | C19orf40     | chr19:33463147-33467960  | 2.37594   | 2.48418   | 0.0642724 | 0.984917 |
| XLOC_000676 | RPRD2        | chr1:150336989-150449041 | 3.11532   | 3.25732   | 0.0643058 | 0.974044 |
| XLOC_015786 | ARF4         | chr3:57557089-57583215   | 69.8655   | 73.0502   | 0.0643069 | 0.969963 |
| XLOC_002986 | DNAJB12      | chr10:74092587-74114907  | 16.3698   | 17.1163   | 0.0643307 | 0.972228 |
| XLOC_011550 | SUGP1        | chr19:19387321-19431321  | 15.5023   | 16.2099   | 0.0643914 | 0.974044 |
| XLOC_003506 | FAM111A      | chr11:58910317-58922511  | 4.70932   | 4.925     | 0.0646065 | 0.976002 |
| XLOC_011462 | RTBDN        | chr19:12936290-12946242  | 0.450386  | 0.471039  | 0.0646845 | 0.991767 |
| XLOC_013129 | MKI67IP      | chr2:122407229-122494501 | 47.8223   | 50.0153   | 0.0646873 | 0.970232 |
| XLOC_005162 | HIP1R        | chr12:123320038-12334751 | 13.9689   | 14.6097   | 0.0647036 | 0.972111 |
| XLOC_007978 | LYRM1        | chr16:20869395-20936328  | 11.8154   | 12.358    | 0.0647734 | 0.979701 |
| XLOC_008493 | LOC100289092 | chr16:28889808-28936532  | 7.16661   | 7.49598   | 0.0648265 | 0.995957 |
| XLOC_022431 | SYK          | chr9:93564011-93660842   | 8.77833   | 9.18203   | 0.0648669 | 0.971485 |
| XLOC_015100 | NDUFAF3      | chr3:49044636-49060926   | 67.467    | 70.5715   | 0.0649021 | 0.989365 |
| XLOC_011691 | EXOSC5       | chr19:41892275-41903256  | 137.67    | 144.009   | 0.0649384 | 0.969963 |
| XLOC_008650 | EXOSC6       | chr16:70284133-70285833  | 27.8998   | 29.1849   | 0.0649694 | 0.974044 |
| XLOC_022082 | NBN          | chr8:90945563-90996899   | 9.58959   | 10.0314   | 0.0649767 | 0.970232 |
| XLOC_013046 | STARD7       | chr2:96850602-96908362   | 37.0352   | 38.7425   | 0.0650214 | 0.970195 |
| XLOC_015465 | ATP11B       | chr3:182511290-182639421 | 3.63953   | 3.80733   | 0.0650251 | 0.972111 |
| XLOC_008959 | GOSR1        | chr17:28804425-28853832  | 5.32798   | 5.57364   | 0.0650315 | 0.972176 |
| XLOC_004033 | HPX          | chr11:6452267-6462254    | 0.225778  | 0.2362    | 0.0651027 | 1        |
| XLOC_022666 | FAM69B       | chr9:139607023-139622631 | 3.07224   | 3.21407   | 0.0651107 | 0.995874 |
| XLOC_011895 | CLNDN2       | chr19:51870351-51872257  | 0.314166  | 0.328677  | 0.0651428 | 1        |
| XLOC_017559 | LOC728613    | chr5:1597671-1634120     | 0.657298  | 0.687683  | 0.0651954 | 0.986822 |
| XLOC_021813 | RPL23AP53    | chr8:158344-197339       | 1.63956   | 1.71541   | 0.0652471 | 0.979484 |
| XLOC_015653 | SNRK-AS1     | chr3:43328003-43393454   | 0.283042  | 0.296137  | 0.0652489 | 1        |
| XLOC_000347 | RNF220       | chr1:44870959-45117396   | 40.9174   | 42.8107   | 0.0652582 | 0.970195 |

|             |                 |                          |           |           |           |          |
|-------------|-----------------|--------------------------|-----------|-----------|-----------|----------|
| XLOC_018380 | MTO1            | chr6:74171453-74211179   | 5.81343   | 6.08263   | 0.0653054 | 0.974044 |
| XLOC_018717 | TRIM27          | chr6:28870778-28891768   | 33.3763   | 34.9233   | 0.0653676 | 0.970053 |
| XLOC_008235 | TERF2IP         | chr16:75681634-75691341  | 24.0598   | 25.1752   | 0.0653803 | 0.970195 |
| XLOC_003165 | MCMBP           | chr10:121588915-12163314 | 15.4965   | 16.2153   | 0.0654148 | 0.96887  |
| XLOC_008047 | CORO1A          | chr16:30194730-30200575  | 18.1163   | 18.9577   | 0.0654937 | 0.972613 |
| XLOC_000508 | RPAP2           | chr1:92711954-92853732   | 4.31994   | 4.52067   | 0.0655247 | 0.979733 |
| XLOC_017939 | NUDCD2          | chr5:162880585-162887143 | 41.902    | 43.85     | 0.0655564 | 0.972228 |
| XLOC_018297 | UBR2            | chr6:42531759-42661243   | 2.66319   | 2.78706   | 0.0655857 | 0.972989 |
| XLOC_001500 | ELOVL1          | chr1:43829067-43833745   | 91.543    | 95.8059   | 0.0656645 | 0.970195 |
| XLOC_000009 | ISG15           | chr1:948846-949919       | 102.431   | 107.207   | 0.0657434 | 0.972775 |
| XLOC_005766 | ABCY9           | chr12:123405497-12345103 | 4.18844   | 4.38403   | 0.0658439 | 0.978703 |
| XLOC_021862 | XKR6            | chr8:10753656-11058875   | 0.149334  | 0.15632   | 0.0659509 | 1        |
| XLOC_009595 | SLC6A4          | chr17:28521336-28562986  | 0.0494035 | 0.051715  | 0.0659696 | 1        |
| XLOC_004405 | PGM2L1          | chr11:74041360-74109502  | 0.431969  | 0.452194  | 0.0660166 | 0.979733 |
| XLOC_016462 | SEC24B          | chr4:110351118-110461613 | 5.76573   | 6.0357    | 0.066017  | 0.972601 |
| XLOC_010870 | EGLN2,MIA,RAB4B | chr19:41281081-41314346  | 50.9905   | 53.3782   | 0.0660197 | 0.970195 |
| XLOC_010285 | LAMA1           | chr18:6941742-7117813    | 7.77244   | 8.13641   | 0.0660241 | 0.968918 |
| XLOC_001996 | ILDR2           | chr1:166882440-166944567 | 0.64567   | 0.675926  | 0.0660691 | 0.979701 |
| XLOC_002520 | CHCHD1          | chr10:75541807-75543406  | 73.077    | 76.5018   | 0.0660762 | 0.969514 |
| XLOC_012811 | C2orf43         | chr2:20884817-21022827   | 3.1679    | 3.31651   | 0.0661377 | 0.977103 |
| XLOC_009876 | TEX14           | chr17:56634037-56769416  | 0.0298887 | 0.031291  | 0.0661444 | 1        |
| XLOC_008081 | ZNF720          | chr16:31724549-31772886  | 1.9256    | 2.01595   | 0.0661493 | 0.979701 |
| XLOC_000772 | SLC25A44        | chr1:156163729-156182587 | 6.26069   | 6.55448   | 0.0661608 | 0.974044 |
| XLOC_016624 | GAK             | chr4:843064-926174       | 19.3999   | 20.3109   | 0.0662073 | 0.967799 |
| XLOC_021920 | KCTD9           | chr8:25285363-25315984   | 6.1659    | 6.45586   | 0.0662994 | 0.972176 |
| XLOC_011511 | CHERP           | chr19:16607204-16653263  | 19.3993   | 20.3124   | 0.0663548 | 0.972601 |
| XLOC_014803 | TST             | chr22:37406899-37425863  | 83.1105   | 87.025    | 0.0663994 | 0.968822 |
| XLOC_002241 | RMI1            | chr9:86595636-86618987   | 1.89981   | 1.98932   | 0.0664189 | 0.978196 |
| XLOC_015372 | ACPL2           | chr3:140950681-141013488 | 3.69243   | 3.86676   | 0.0665549 | 0.977103 |
| XLOC_013146 | CCDC74B         | chr2:130887195-130902707 | 1.32478   | 1.38733   | 0.0665613 | 0.987693 |
| XLOC_023980 | GLA             | chrX:100645877-100669121 | 20.4231   | 21.3875   | 0.0665648 | 0.976618 |
| XLOC_015089 | DHX30           | chr3:47844398-47891686   | 32.7101   | 34.2559   | 0.0666156 | 0.97028  |
| XLOC_018582 | MRPL18          | chr6:160211491-160219467 | 72.352    | 75.7717   | 0.0666249 | 0.968205 |
| XLOC_010098 | MYL12B          | chr18:3262110-3278282    | 613.159   | 642.142   | 0.0666316 | 0.970232 |
| XLOC_016457 | CYP2U1          | chr4:108852716-108874613 | 1.8598    | 1.94777   | 0.0666752 | 0.977332 |
| XLOC_012306 | FAHD2A          | chr2:96068447-96078879   | 24.2039   | 25.3489   | 0.0666867 | 0.970195 |
| XLOC_022467 | TMOD1           | chr9:100263461-100436023 | 0.989896  | 1.03674   | 0.0666998 | 0.99634  |
| XLOC_013759 | OSBPL2          | chr20:60813579-60871269  | 8.66995   | 9.08033   | 0.0667203 | 0.970346 |
| XLOC_007384 | MRPS11          | chr15:89010683-89021861  | 23.7987   | 24.9254   | 0.0667375 | 0.97028  |
| XLOC_022933 | NOL8            | chr9:95059639-95432547   | 6.19722   | 6.49064   | 0.0667407 | 0.979944 |
| XLOC_005483 | SPRYD3          | chr12:53436972-53473204  | 24.9805   | 26.1646   | 0.0668137 | 0.969075 |
| XLOC_022330 | UNC13B          | chr9:35161988-35405332   | 1.36116   | 1.42572   | 0.0668498 | 0.977991 |
| XLOC_006027 | ZDHHC20         | chr13:21872263-22033508  | 4.27492   | 4.47775   | 0.0668777 | 0.972601 |
| XLOC_013394 | CUL3            | chr2:225334866-225450114 | 5.82779   | 6.10431   | 0.0668798 | 0.970195 |
| XLOC_018411 | CASP8AP2        | chr6:90539618-90584155   | 0.45322   | 0.474754  | 0.0669701 | 0.979733 |
| XLOC_012583 | NIF3L1          | chr2:201754049-201768657 | 19.2409   | 20.1552   | 0.0669793 | 0.970232 |
| XLOC_002895 | ZNF32           | chr10:44124264-44170147  | 24.5027   | 25.6691   | 0.067087  | 0.974169 |
| XLOC_014198 | PDXK            | chr21:45138977-45182188  | 17.6281   | 18.4676   | 0.0671197 | 0.967901 |
| XLOC_012582 | BZW1            | chr2:201676268-201688567 | 66.7023   | 69.8795   | 0.0671345 | 0.967901 |
| XLOC_008113 | GNAO1           | chr16:56225250-56391356  | 0.0152823 | 0.0160105 | 0.0671548 | 1        |
| XLOC_023714 | IKBKX           | chrX:153759605-153793267 | 12.5038   | 13.1003   | 0.0672346 | 0.986832 |
| XLOC_001407 | PUM1            | chr1:31404352-31538564   | 7.9911    | 8.37245   | 0.0672555 | 0.969963 |
| XLOC_001344 | LUZP1           | chr1:23410515-23495351   | 3.49358   | 3.66037   | 0.0672842 | 0.970053 |
| XLOC_004308 | CDC42BPG        | chr11:64591661-64612041  | 0.0977964 | 0.102466  | 0.067291  | 1        |
| XLOC_008040 | ASPHD1          | chr16:29912146-29917377  | 35.0868   | 36.7629   | 0.067324  | 0.969963 |
| XLOC_000385 | FOXO2           | chr1:47901688-47906363   | 1.74907   | 1.83264   | 0.0673421 | 0.980533 |
| XLOC_021272 | LOC401397       | chr7:112756772-112758663 | 72.9138   | 76.3997   | 0.0673751 | 0.967901 |
| XLOC_013060 | TMEM131         | chr2:98372800-98612354   | 4.69417   | 4.9186    | 0.0673782 | 0.970142 |
| XLOC_016215 | TRMT44          | chr4:8442531-8478282     | 4.32328   | 4.52999   | 0.0673815 | 0.976756 |
| XLOC_022785 | B4GALT1         | chr9:33110638-33167356   | 9.36739   | 9.81562   | 0.0674313 | 0.969963 |
| XLOC_018083 | ALDH5A1         | chr6:24495196-24537435   | 3.98585   | 4.17662   | 0.0674481 | 0.970881 |
| XLOC_003158 | CACUL1          | chr10:120440493-12051473 | 7.225     | 7.57091   | 0.0674689 | 0.967901 |
| XLOC_003073 | RRP12           | chr10:99116457-99161127  | 12.4905   | 13.0886   | 0.0674808 | 0.966946 |
| XLOC_010313 | KCTD1           | chr18:24034873-24237365  | 2.96379   | 3.10572   | 0.0674845 | 0.979701 |
| XLOC_009030 | STARD3          | chr17:37793332-37820454  | 29.3626   | 30.7703   | 0.0675606 | 0.967901 |
| XLOC_012321 | LOC728537       | chr2:98286205-98319529   | 0.965767  | 1.01209   | 0.0675857 | 0.986822 |
| XLOC_002979 | PCBD1           | chr10:72643266-72648541  | 200.722   | 210.364   | 0.0676877 | 0.967901 |
| XLOC_009860 | COIL            | chr17:55015560-55038411  | 5.24660   | 5.49821   | 0.0677286 | 0.972989 |
| XLOC_024195 | FAM3A           | chrX:153733326-153744561 | 15.5064   | 16.2519   | 0.0677438 | 0.970195 |
| XLOC_006462 | VASH1           | chr14:77282324-77249363  | 2.2167    | 2.3233    | 0.0677662 | 0.976595 |
| XLOC_020681 | ARMC10          | chr7:102715327-102789567 | 35.9811   | 37.7122   | 0.0677913 | 0.972228 |
| XLOC_000233 | TRNAU1AP        | chr1:28879528-28908366   | 13.5686   | 14.2218   | 0.0678243 | 0.978279 |
| XLOC_021571 | IKBKX           | chr8:42128819-42190171   | 12.3196   | 12.9127   | 0.0678246 | 0.966946 |
| XLOC_024184 | HCFC1           | chrX:153213007-153236811 | 9.36238   | 9.81327   | 0.0678596 | 0.966045 |
| XLOC_008185 | NUTF2           | chr16:67862059-67905219  | 259.22    | 271.708   | 0.0678811 | 0.976214 |
| XLOC_023125 | TTF1            | chr9:135250936-135282238 | 8.78814   | 9.21168   | 0.0679072 | 0.973348 |
| XLOC_010295 | FAM210A         | chr18:13663345-13726591  | 7.12131   | 7.46497   | 0.0679937 | 0.969241 |
| XLOC_003863 | NLRX1           | chr11:119039439-11905472 | 7.33641   | 7.69065   | 0.0680313 | 0.974044 |
| XLOC_001583 | TM2D1           | chr1:62146718-62191095   | 25.6285   | 26.8662   | 0.0680418 | 0.970195 |



|             |                               |                          |           |           |           |          |
|-------------|-------------------------------|--------------------------|-----------|-----------|-----------|----------|
| XLOC_009080 | CNTD1                         | chr17:40950853-40976310  | 0.185847  | 0.19483   | 0.0681027 | 1        |
| XLOC_003682 | CTTN                          | chr11:70244611-70282690  | 67.4644   | 70.7266   | 0.0681263 | 0.967901 |
| XLOC_014426 | SNAP29                        | chr22:2123291-21245501   | 6.61505   | 6.93497   | 0.0681361 | 0.968906 |
| XLOC_001906 | C1orf85                       | chr1:156262477-156265480 | 32.3775   | 33.9444   | 0.0681805 | 0.970195 |
| XLOC_002882 | CUL2                          | chr10:35297478-35379570  | 8.18901   | 8.58545   | 0.0682049 | 0.967799 |
| XLOC_006640 | TNFAlP2                       | chr14:103592663-10360371 | 7.11907   | 7.46375   | 0.0682124 | 0.972228 |
| XLOC_021000 | LSM5                          | chr7:32524944-32534870   | 20.411    | 21.3993   | 0.0682159 | 0.966946 |
| XLOC_003566 | POLR2G                        | chr11:62529010-62534187  | 118.845   | 124.606   | 0.0682828 | 0.967901 |
| XLOC_001048 | SMYD2                         | chr1:214454564-214510477 | 18.4356   | 19.33     | 0.0683519 | 0.968882 |
| XLOC_010599 | ZNF833P                       | chr19:11784812-11797384  | 0.586432  | 0.61489   | 0.0683651 | 0.986822 |
| XLOC_009078 | VPS25                         | chr17:40925453-40931617  | 77.9155   | 81.6975   | 0.0683814 | 0.966946 |
| XLOC_011547 | NR2C2AP                       | chr19:19256375-19314238  | 44.7932   | 46.968    | 0.068397  | 0.980663 |
| XLOC_018305 | KLHDC3                        | chr6:42981840-42989036   | 47.3522   | 49.6554   | 0.0685209 | 0.966946 |
| XLOC_005997 | MCF2L                         | chr13:113623534-11375401 | 1.79548   | 1.88282   | 0.068525  | 0.977332 |
| XLOC_014842 | SLC25A17                      | chr22:41165638-41215392  | 12.1855   | 12.7785   | 0.0685551 | 0.970053 |
| XLOC_002600 | CEP55                         | chr10:95256368-95288849  | 13.492    | 14.1489   | 0.0685838 | 0.969963 |
| XLOC_008754 | DPH1,OVCA2                    | chr17:1933430-1946725    | 110.863   | 116.265   | 0.0686396 | 0.970195 |
| XLOC_004780 | STK38L                        | chr12:27397077-27478890  | 2.94474   | 3.0883    | 0.0686715 | 0.97067  |
| XLOC_012599 | CYP20A1                       | chr2:204103163-204170561 | 1.3658    | 1.43239   | 0.0686815 | 0.973585 |
| XLOC_016386 | USO1                          | chr4:76649828-76735366   | 9.13489   | 9.58078   | 0.0687556 | 0.967901 |
| XLOC_009669 | ORMDL3                        | chr17:38077295-38083884  | 16.9578   | 17.7856   | 0.0687613 | 0.969075 |
| XLOC_017165 | CDK7                          | chr5:68530621-68573257   | 36.3034   | 38.0757   | 0.0687674 | 0.966946 |
| XLOC_005424 | FKBP11                        | chr12:49315741-49319330  | 150.766   | 158.151   | 0.0689918 | 0.967289 |
| XLOC_001114 | COA6                          | chr1:234509213-234519791 | 70.362    | 73.8132   | 0.0690839 | 0.969963 |
| XLOC_012080 | RAB10                         | chr2:26256728-26360323   | 25.9732   | 27.2475   | 0.069098  | 0.966946 |
| XLOC_007662 | TLE3                          | chr15:70340542-70390256  | 8.23908   | 8.64429   | 0.069264  | 0.966946 |
| XLOC_014330 | HMGN1                         | chr21:40714240-40721047  | 204.37    | 214.424   | 0.0692853 | 0.966946 |
| XLOC_013065 | MIFD1                         | chr2:99785725-99797492   | 18.718    | 19.639    | 0.0692963 | 0.972076 |
| XLOC_013806 | SRXN1                         | chr20:627267-634014      | 38.7203   | 40.6258   | 0.069305  | 0.966946 |
| XLOC_002838 | PTPLA                         | chr10:17631957-17659373  | 4.56645   | 4.79117   | 0.0693073 | 0.979701 |
| XLOC_012753 | FARP2                         | chr2:242295663-242448981 | 0.580617  | 0.609239  | 0.0694213 | 0.870747 |
| XLOC_005895 | PHF11                         | chr13:50069800-50103117  | 8.73203   | 9.1631    | 0.069518  | 0.973723 |
| XLOC_013983 | TOMM34                        | chr20:43570770-43589114  | 81.4459   | 85.4693   | 0.0695638 | 0.966946 |
| XLOC_018681 | HIST1H2BC                     | chr6:26123694-26124132   | 2.02244   | 2.12241   | 0.0696056 | 0.990857 |
| XLOC_003391 | LINC00294                     | chr11:33097695-33101000  | 3.0372    | 3.18736   | 0.0696204 | 0.976618 |
| XLOC_010112 | NDUFV2                        | chr18:9102627-9134343    | 155.903   | 163.618   | 0.0696846 | 0.966566 |
| XLOC_016435 | PDLIM5                        | chr4:95373007-95589378   | 2.92346   | 3.06826   | 0.0697467 | 0.979701 |
| XLOC_010464 | DOT1L                         | chr19:2164147-2232577    | 7.36286   | 7.72758   | 0.0697502 | 0.968205 |
| XLOC_004102 | TSG101                        | chr11:18501857-18548503  | 33.5287   | 35.1902   | 0.0697782 | 0.966946 |
| XLOC_021397 | CDK5                          | chr7:150750898-150755051 | 36.6025   | 38.4166   | 0.0697887 | 0.967901 |
| XLOC_013263 | CWC22                         | chr2:180809603-180871780 | 3.84783   | 4.03856   | 0.0697954 | 0.972601 |
| XLOC_012545 | DNAJC10                       | chr2:183580767-183644750 | 6.26469   | 6.57542   | 0.0698405 | 0.966946 |
| XLOC_001290 | AGMAT                         | chr1:15853351-15911605   | 6.95116   | 7.29601   | 0.0698541 | 0.979291 |
| XLOC_013544 | POLR3F                        | chr20:18448032-18465286  | 4.31841   | 4.53277   | 0.0698917 | 0.976149 |
| XLOC_010624 | CCDC130                       | chr19:13858752-13874106  | 19.8787   | 20.8656   | 0.0699024 | 0.972111 |
| XLOC_007654 | AAGAB                         | chr15:67493012-67819641  | 12.7391   | 13.372    | 0.0699511 | 0.974705 |
| XLOC_018764 | LY6G5C                        | chr6:31644460-31648150   | 2.36501   | 2.4826    | 0.0700038 | 0.986529 |
| XLOC_003778 | CEP57                         | chr11:95523624-95565857  | 9.7489    | 10.2336   | 0.070008  | 0.966946 |
| XLOC_009972 | GALK1                         | chr17:73754017-73761280  | 48.8224   | 51.2505   | 0.0700223 | 0.967282 |
| XLOC_014545 | PDXP                          | chr22:38054736-38062939  | 50.8621   | 53.3926   | 0.0700487 | 0.966372 |
| XLOC_015733 | TUSC2                         | chr3:50362340-50365668   | 19.0016   | 19.9475   | 0.0700853 | 0.968521 |
| XLOC_020926 | KDEL2                         | chr7:6500711-6523849     | 56.3705   | 59.1781   | 0.0701218 | 0.965498 |
| XLOC_017768 | REEP5                         | chr5:112196884-112258031 | 26.3154   | 27.6277   | 0.0702051 | 0.972304 |
| XLOC_015712 | C3orf62                       | chr3:49306029-49314508   | 2.51099   | 2.63625   | 0.070231  | 0.976595 |
| XLOC_020752 | KLHDC10                       | chr7:129710348-129775560 | 3.52885   | 3.70501   | 0.0702804 | 0.970195 |
| XLOC_011416 | RAVER1                        | chr19:10426888-10444314  | 31.6515   | 33.2316   | 0.0702817 | 0.966946 |
| XLOC_024190 | FLNA                          | chrX:153576899-153603001 | 76.1253   | 79.9285   | 0.0703337 | 0.966946 |
| XLOC_002062 | GLUL                          | chr1:182350838-182361341 | 22.4491   | 23.5708   | 0.0703432 | 0.965685 |
| XLOC_015988 | LOC100289361                  | chr3:142719686-142720301 | 6.31662   | 6.63233   | 0.0703639 | 0.984481 |
| XLOC_011098 | ZNF765                        | chr19:53898396-53915262  | 1.0147    | 1.06542   | 0.0703682 | 0.979046 |
| XLOC_001825 | THEM4                         | chr1:151843342-151882361 | 3.14473   | 3.30205   | 0.070425  | 0.972111 |
| XLOC_009270 | SLC9A3R1                      | chr17:72744750-72765499  | 50.6049   | 53.1365   | 0.0704253 | 0.965148 |
| XLOC_015737 | TMEM115                       | chr3:50392179-50396939   | 38.0531   | 39.9595   | 0.070523  | 0.96513  |
| XLOC_023674 | VMA21                         | chrX:150565656-150577831 | 10.1749   | 10.685    | 0.0705702 | 0.966946 |
| XLOC_005886 | NUDT15                        | chr13:48611702-48621282  | 10.3599   | 10.8794   | 0.0705978 | 0.969963 |
| XLOC_006701 | RAB2B                         | chr14:21927178-21945132  | 3.61739   | 3.79889   | 0.0706296 | 0.975414 |
| XLOC_018655 | NUP153                        | chr6:17615268-17706818   | 6.0771    | 6.38203   | 0.0706342 | 0.966946 |
| XLOC_022896 | TLE1                          | chr9:84198597-84303596   | 6.75772   | 7.09683   | 0.0706387 | 0.97067  |
| XLOC_013736 | RBM38                         | chr20:55904830-55998278  | 35.9047   | 37.7073   | 0.0706689 | 0.979701 |
| XLOC_013635 | C20orf24,TGIF2,TGIF2-C20orf24 | chr20:35201875-35274619  | 89.7355   | 94.2425   | 0.0706987 | 0.97028  |
| XLOC_011236 | ZNF587B                       | chr19:58341661-58357606  | 2.40029   | 2.52116   | 0.070877  | 0.976133 |
| XLOC_013740 | RAB22A                        | chr20:56884770-56942563  | 3.73647   | 3.92475   | 0.0709222 | 0.966946 |
| XLOC_011297 | LSM7                          | chr19:2321519-2328614    | 247.909   | 260.407   | 0.0709564 | 0.966442 |
| XLOC_004528 | TIMM8B                        | chr11:111944967-11195751 | 47.3241   | 49.7109   | 0.0709895 | 0.979701 |
| XLOC_008520 | ZNF747                        | chr16:30542778-30546194  | 5.97708   | 6.27918   | 0.0711358 | 0.977332 |
| XLOC_001533 | STIL                          | chr1:47715810-47779819   | 3.70623   | 3.89361   | 0.0711557 | 0.967901 |
| XLOC_012580 | AOX1                          | chr2:201450730-201536217 | 0.0808024 | 0.0848918 | 0.0712268 | 1        |
| XLOC_021549 | PROSC                         | chr8:37620100-37637286   | 30.3594   | 31.8964   | 0.0712498 | 0.965735 |
| XLOC_011192 | ZNF580                        | chr19:56152391-56154836  | 89.2051   | 93.7237   | 0.0712877 | 0.966946 |

|             |                       |                          |           |           |           |          |
|-------------|-----------------------|--------------------------|-----------|-----------|-----------|----------|
| XLOC_007688 | CYP1A1                | chr15:75011882-75017877  | 0.31663   | 0.33267   | 0.0712946 | 1        |
| XLOC_010564 | UBL5                  | chr19:9938555-9940797    | 529.839   | 556.682   | 0.0713018 | 0.965607 |
| XLOC_015236 | LOC152225             | chr3:101659702-101716770 | 7.07327   | 7.43204   | 0.0713817 | 0.972176 |
| XLOC_023995 | MORF4L2               | chrX:102930425-10294748  | 66.7607   | 70.1482   | 0.0714063 | 0.966946 |
| XLOC_023846 | PIM2                  | chrX:48770458-48776413   | 19.0406   | 20.0069   | 0.0714175 | 0.966946 |
| XLOC_008395 | CORO7_CORO7-PAM16,PA  | chr16:4390251-4466962    | 150.466   | 158.105   | 0.0714443 | 0.978196 |
| XLOC_003175 | CHST15                | chr10:125767181-12585312 | 8.72364   | 9.16734   | 0.0715725 | 0.967901 |
| XLOC_000399 | SCP2                  | chr1:53392900-53517289   | 31.1694   | 32.7548   | 0.0715778 | 0.965573 |
| XLOC_007848 | UBE2I                 | chr16:1359153-1377019    | 81.2376   | 85.3703   | 0.0715875 | 0.966409 |
| XLOC_008556 | MYLK3                 | chr16:46736193-46782221  | 0.0172844 | 0.0181643 | 0.0716405 | 1        |
| XLOC_017190 | ARHGEF28              | chr5:72921982-73237818   | 10.7828   | 11.332    | 0.0716644 | 0.966946 |
| XLOC_011380 | ELAVL1                | chr19:8023456-8070529    | 17.8952   | 18.8067   | 0.0716732 | 0.964792 |
| XLOC_016873 | SLC9B2                | chr4:103946651-103998170 | 7.03334   | 7.39177   | 0.0717099 | 0.969752 |
| XLOC_001505 | ER13                  | chr1:44686741-44820939   | 53.6283   | 56.3634   | 0.0717655 | 0.965328 |
| XLOC_001045 | RPS6KC1               | chr1:213224587-213446800 | 1.17383   | 1.23371   | 0.0717858 | 0.977332 |
| XLOC_008947 | ERAL1                 | chr17:27182042-27188072  | 48.8135   | 51.3074   | 0.0718892 | 0.96513  |
| XLOC_006223 | CARS2                 | chr13:111293756-11135884 | 51.3394   | 53.9684   | 0.0720483 | 0.965148 |
| XLOC_003409 | API5                  | chr11:43333504-43366080  | 24.4884   | 25.7426   | 0.0720568 | 0.963669 |
| XLOC_012711 | GIGYF2                | chr2:233562014-233725280 | 5.6394    | 5.92825   | 0.072064  | 0.965698 |
| XLOC_005520 | ANKRD52               | chr12:56623819-56652143  | 5.17722   | 5.44251   | 0.0720947 | 0.965148 |
| XLOC_010678 | MVB12A                | chr19:17530911-17536140  | 61.5059   | 64.6577   | 0.0720988 | 0.966566 |
| XLOC_012802 | NT5C1B,NT5C1B-RDH14,R | chr2:18735988-18770846   | 10.5922   | 11.1353   | 0.0721343 | 0.97028  |
| XLOC_000426 | USP1                  | chr1:62901974-62917475   | 11.5551   | 12.1478   | 0.0721614 | 0.965607 |
| XLOC_006738 | RABGGTA               | chr14:24734743-24740833  | 14.9019   | 15.6663   | 0.0721665 | 0.969272 |
| XLOC_014701 | YDJC                  | chr22:21982377-21984340  | 113.4     | 119.219   | 0.0721928 | 0.965328 |
| XLOC_016868 | PPP3CA                | chr4:101944586-102268620 | 2.25657   | 2.37239   | 0.0722077 | 0.974044 |
| XLOC_004942 | GLI1                  | chr12:57853917-57873633  | 0.289372  | 0.304226  | 0.0722202 | 1        |
| XLOC_005491 | ATF7                  | chr12:53901639-54020199  | 3.18328   | 3.34676   | 0.0722504 | 0.987334 |
| XLOC_008067 | STX4                  | chr16:31044415-31051488  | 48.5473   | 51.0409   | 0.0722618 | 0.966215 |
| XLOC_002043 | MRPS14                | chr1:174982093-17499259  | 10.6065   | 11.1514   | 0.0722773 | 0.966946 |
| XLOC_004873 | PRR13                 | chr12:53835432-53840427  | 89.7635   | 94.3758   | 0.0722871 | 0.96513  |
| XLOC_009407 | C17orf85              | chr17:3710044-3749545    | 2.6262    | 2.76118   | 0.0723075 | 0.970195 |
| XLOC_008054 | PRR14                 | chr16:30662240-30667734  | 29.7981   | 31.3302   | 0.0723333 | 0.965573 |
| XLOC_013188 | NR4A2                 | chr2:157180943-157189287 | 0.357714  | 0.376122  | 0.0723952 | 0.986745 |
| XLOC_015427 | SMC4                  | chr3:160117429-16015274  | 6.65737   | 7.00013   | 0.0724303 | 0.966946 |
| XLOC_004543 | ZNF259                | chr11:116649275-11665847 | 37.004    | 38.9114   | 0.0725105 | 0.965606 |
| XLOC_012724 | AGAP1                 | chr2:236402732-237040444 | 3.01207   | 3.16741   | 0.0725505 | 0.967901 |
| XLOC_003234 | PNPLA2                | chr11:818900-825571      | 68.5625   | 72.0986   | 0.0725525 | 0.965515 |
| XLOC_006740 | CIDEB                 | chr14:24774392-24787242  | 1.5499    | 1.62986   | 0.0725726 | 0.990857 |
| XLOC_003032 | ATAD1                 | chr10:89512874-89577917  | 10.4752   | 11.0158   | 0.0725968 | 0.965607 |
| XLOC_014518 | YWHAH                 | chr22:32329506-32353590  | 60.454    | 63.5845   | 0.0728377 | 0.963669 |
| XLOC_006044 | USP12                 | chr13:27640286-27746033  | 6.27261   | 6.59752   | 0.072859  | 0.966946 |
| XLOC_019065 | SERINC1               | chr6:122764492-122792952 | 17.9386   | 18.8681   | 0.0728842 | 0.962439 |
| XLOC_014889 | CDPF1                 | chr22:46639909-46646193  | 5.14042   | 5.40688   | 0.0729093 | 0.977707 |
| XLOC_012254 | TTC31                 | chr2:74699084-74721691   | 5.71348   | 6.00973   | 0.07293   | 0.984917 |
| XLOC_008567 | BRD7                  | chr16:50352928-50402845  | 26.0052   | 27.3541   | 0.0729574 | 0.963669 |
| XLOC_008347 | MSRB1                 | chr16:1988233-1993294    | 25.5596   | 26.8873   | 0.0730565 | 0.967624 |
| XLOC_022045 | STAU2                 | chr8:74332308-74659943   | 7.06196   | 7.42883   | 0.0730678 | 0.968205 |
| XLOC_022903 | HNRNPK                | chr9:86582997-86595569   | 187.822   | 197.587   | 0.07312   | 0.965598 |
| XLOC_023192 | TPRN                  | chr9:140086068-14009516  | 48.5643   | 51.0911   | 0.0731759 | 0.963669 |
| XLOC_010677 | GTPBP3                | chr19:17445790-17453540  | 19.2176   | 20.2175   | 0.073179  | 0.966521 |
| XLOC_016872 | SLC9B1                | chr4:103790134-10394089  | 0.196054  | 0.206256  | 0.0731834 | 1        |
| XLOC_022141 | SYBU                  | chr8:110586404-110704020 | 6.89643   | 7.25565   | 0.073255  | 0.969716 |
| XLOC_016683 | TAPT1                 | chr4:16162127-16228161   | 2.19252   | 2.30675   | 0.0732693 | 0.974044 |
| XLOC_005911 | HNRNPA1L2             | chr13:53191604-53217919  | 8.40276   | 8.8406    | 0.0732807 | 0.967901 |
| XLOC_005514 | DNAJC14               | chr12:56211805-56236767  | 10.1898   | 10.7211   | 0.0733241 | 0.979701 |
| XLOC_013877 | CRNKL1                | chr20:20015011-20341346  | 5.0197    | 5.28145   | 0.0733336 | 0.966946 |
| XLOC_012944 | RAB1A                 | chr2:65283494-65357435   | 42.0117   | 44.2031   | 0.0733559 | 0.965735 |
| XLOC_013306 | ORC2                  | chr2:201774893-20182842  | 3.24355   | 3.41284   | 0.0733971 | 0.973348 |
| XLOC_012566 | MYO1B                 | chr2:192110106-19229011  | 9.88449   | 10.4005   | 0.0734201 | 0.963266 |
| XLOC_010666 | TMEM38A               | chr19:16771937-16799816  | 1.85577   | 1.95271   | 0.0734576 | 0.982703 |
| XLOC_013694 | CTSA                  | chr20:44517110-44541003  | 56.9658   | 59.9414   | 0.0734583 | 0.968205 |
| XLOC_008742 | C17orf97              | chr17:260117-264457      | 6.24046   | 6.56651   | 0.073474  | 0.977512 |
| XLOC_015654 | ANO10                 | chr3:43407817-43663560   | 7.90989   | 8.32321   | 0.0734822 | 0.969073 |
| XLOC_010422 | TPGS1                 | chr19:507496-519654      | 16.8432   | 17.7237   | 0.0735091 | 0.979701 |
| XLOC_000037 | FAM213B               | chr1:2517898-2564481     | 20.5394   | 21.6132   | 0.0735167 | 0.969963 |
| XLOC_014400 | PEX26                 | chr22:18560685-18573797  | 7.47821   | 7.86937   | 0.0735549 | 0.966946 |
| XLOC_021976 | PLAT                  | chr8:42032235-42065194   | 1.04517   | 1.09987   | 0.0735921 | 0.980177 |
| XLOC_008587 | FAM192A               | chr16:57186377-57219976  | 16.6333   | 17.5039   | 0.0736043 | 0.962618 |
| XLOC_022513 | PRPF4                 | chr9:116037913-11605518  | 16.4715   | 17.3338   | 0.0736172 | 0.965353 |
| XLOC_004550 | BACE1                 | chr11:117103403-1171869  | 2.8014    | 2.94807   | 0.0736222 | 0.978188 |
| XLOC_008474 | EARS2                 | chr16:23533333-23568696  | 9.82089   | 10.3353   | 0.0736614 | 0.963669 |
| XLOC_005889 | RB1                   | chr13:48877882-49056026  | 5.36      | 5.64106   | 0.0737319 | 0.966045 |
| XLOC_000748 | ZBTB7B                | chr1:154975105-15499100  | 10.468    | 11.017    | 0.0737444 | 0.966946 |
| XLOC_009969 | GRB2                  | chr17:73314156-73401790  | 39.5423   | 41.6186   | 0.0738322 | 0.962439 |
| XLOC_011928 | ZNF665                | chr19:53666551-53696619  | 0.0171964 | 0.0180996 | 0.0738484 | 1        |
| XLOC_014121 | USP16                 | chr21:30396937-30426807  | 5.68022   | 5.97866   | 0.0738755 | 0.966946 |
| XLOC_023422 | GNL3L                 | chrX:54556643-54593720   | 3.31335   | 3.48755   | 0.0739198 | 0.965148 |
| XLOC_009889 | USP32                 | chr17:58254690-58469586  | 3.71256   | 3.90777   | 0.0739315 | 0.965328 |

|             |                           |                          |           |           |           |          |
|-------------|---------------------------|--------------------------|-----------|-----------|-----------|----------|
| XLOC_022691 | TUBB4B                    | chr9:140135710-140142221 | 824.182   | 867.527   | 0.0739463 | 0.965227 |
| XLOC_021127 | YWHAG                     | chr7:75956107-75988342   | 37.0259   | 38.9751   | 0.0740169 | 0.963266 |
| XLOC_016519 | SMARCA5                   | chr4:144434615-144478641 | 8.91869   | 9.38899   | 0.0741383 | 0.96296  |
| XLOC_022282 | KDM4C                     | chr9:6720862-7175648     | 2.93975   | 3.09484   | 0.0741716 | 0.972432 |
| XLOC_010663 | AP1M1                     | chr19:16308664-16346156  | 18.1353   | 19.0924   | 0.0741958 | 0.96619  |
| XLOC_010541 | TRAPPC5                   | chr19:7745706-7747748    | 200.078   | 210.64    | 0.0742172 | 0.963209 |
| XLOC_014736 | TFIP11                    | chr22:26879849-26908437  | 12.3112   | 12.9618   | 0.0742984 | 0.974392 |
| XLOC_020950 | TWISTNB                   | chr7:19735084-19748660   | 4.93284   | 5.19358   | 0.0743102 | 0.966946 |
| XLOC_003435 | ATG13                     | chr11:46638825-46697568  | 11.8955   | 12.5244   | 0.0743233 | 0.962439 |
| XLOC_003742 | EED                       | chr11:85955805-85989785  | 12.5288   | 13.1912   | 0.0743294 | 0.965252 |
| XLOC_008851 | WDR16                     | chr17:9479943-9546776    | 0.0644013 | 0.0678078 | 0.074363  | 1        |
| XLOC_001746 | WARS2                     | chr1:119573838-119683291 | 5.32129   | 5.60312   | 0.0744555 | 0.967901 |
| XLOC_012819 | ITSN2                     | chr2:24425734-24583397   | 1.26827   | 1.33552   | 0.0745413 | 0.974585 |
| XLOC_014978 | RAB5A                     | chr3:19988571-20053765   | 13.7767   | 14.5073   | 0.0745485 | 0.96275  |
| XLOC_003956 | TOLLIP                    | chr11:1295597-1330892    | 22.2681   | 23.4498   | 0.0745979 | 0.961551 |
| XLOC_011317 | DAPK3                     | chr19:3958451-3969826    | 138.416   | 145.767   | 0.0746459 | 0.961224 |
| XLOC_007777 | AP3S2,C15orf38,C15orf38-A | chr15:90373830-90456222  | 13.086    | 13.782    | 0.074767  | 0.971854 |
| XLOC_020886 | DNAJB6                    | chr7:157129709-157210131 | 71.3687   | 75.165    | 0.0747698 | 0.962439 |
| XLOC_022021 | MYBL1                     | chr8:67474409-67525480   | 1.04329   | 1.09885   | 0.0748547 | 0.977332 |
| XLOC_024078 | MRNL3                     | chrX:131503342-131623991 | 0.269373  | 0.283725  | 0.0748921 | 1        |
| XLOC_002851 | ARHGAP21                  | chr10:24872537-25012597  | 4.79335   | 5.04888   | 0.0749286 | 0.962439 |
| XLOC_003568 | TMEM179B                  | chr11:62554873-62559486  | 59.4974   | 62.6705   | 0.0749597 | 0.966946 |
| XLOC_014218 | FAM207A                   | chr21:46359954-46396888  | 84.0592   | 88.5439   | 0.0749866 | 0.96513  |
| XLOC_022589 | ODF2                      | chr9:131217433-131263571 | 19.7974   | 20.8538   | 0.0750004 | 0.964339 |
| XLOC_003495 | CLP1                      | chr11:57425215-57429337  | 11.1846   | 11.782    | 0.0750773 | 0.966946 |
| XLOC_017336 | SMAD5                     | chr5:135465202-135518421 | 3.51305   | 3.70106   | 0.0752156 | 0.965573 |
| XLOC_004138 | LMO2                      | chr11:33880122-33913836  | 2.54731   | 2.68373   | 0.0752644 | 0.979701 |
| XLOC_005741 | SRSF9                     | chr12:120884240-12090751 | 299.607   | 315.653   | 0.0752679 | 0.966946 |
| XLOC_011459 | C19orf43                  | chr19:12841453-12845529  | 280.657   | 295.69    | 0.0752773 | 0.961224 |
| XLOC_006312 | SCFD1                     | chr14:31091459-31205033  | 7.64475   | 8.05486   | 0.0753898 | 0.966946 |
| XLOC_020726 | ARF5                      | chr7:127228405-127231751 | 306.776   | 323.237   | 0.0754081 | 0.962439 |
| XLOC_023458 | DLG3                      | chrX:69664704-69725339   | 7.17987   | 7.56541   | 0.0754593 | 0.962247 |
| XLOC_003617 | SCYL1                     | chr11:65292547-65325699  | 46.1677   | 48.6491   | 0.0755289 | 0.965573 |
| XLOC_001058 | IARS2                     | chr1:220046618-220321381 | 27.0602   | 28.5146   | 0.0755306 | 0.985921 |
| XLOC_004015 | OR51B5                    | chr11:5362112-5526882    | 0.520273  | 0.548253  | 0.0755725 | 0.990315 |
| XLOC_006323 | PSMA6                     | chr14:35761573-35786682  | 145.926   | 153.787   | 0.0756988 | 0.961224 |
| XLOC_011049 | MYH14                     | chr19:50706884-50813801  | 5.09838   | 5.37316   | 0.0757301 | 0.965515 |
| XLOC_008142 | COQ9                      | chr16:57462086-57495187  | 30.4543   | 32.0958   | 0.0757382 | 0.979701 |
| XLOC_007552 | MFAP1                     | chr15:44096732-44116951  | 16.1832   | 17.0556   | 0.0757451 | 0.96252  |
| XLOC_012154 | EML4                      | chr2:42396489-42559688   | 4.74665   | 5.00255   | 0.0757548 | 0.962247 |
| XLOC_012481 | TANC1                     | chr2:159825145-160089171 | 1.79975   | 1.89701   | 0.075932  | 0.966946 |
| XLOC_014499 | UQCRL10                   | chr22:30163357-30166402  | 89.4386   | 94.2724   | 0.0759378 | 0.960403 |
| XLOC_001323 | TMCO4                     | chr1:20008705-20126410   | 5.10512   | 5.38111   | 0.0759593 | 0.970195 |
| XLOC_008249 | CMIP                      | chr16:81478774-81745367  | 8.48124   | 8.9401    | 0.0760157 | 0.965148 |
| XLOC_007120 | ARHGAP11A                 | chr15:32907690-32931868  | 5.75736   | 6.06892   | 0.0760326 | 0.962215 |
| XLOC_004627 | NFRKB                     | chr11:129733669-12976541 | 5.60434   | 5.90764   | 0.0760386 | 0.963209 |
| XLOC_014059 | TAF4                      | chr20:60549853-60640866  | 4.35948   | 4.59556   | 0.0760837 | 0.969963 |
| XLOC_007497 | ZNF770                    | chr15:35270541-35280497  | 7.32582   | 7.72287   | 0.0761467 | 0.960711 |
| XLOC_014581 | XPNPEP3                   | chr22:41253084-41328823  | 4.24708   | 4.47739   | 0.0761851 | 0.978703 |
| XLOC_004370 | C11orf24                  | chr11:68028802-68039469  | 20.9554   | 22.0922   | 0.0762121 | 0.963748 |
| XLOC_009141 | PNPO                      | chr17:46018888-46026674  | 12.5906   | 13.2739   | 0.0762486 | 0.962247 |
| XLOC_006899 | ACYP1                     | chr14:75519927-75530736  | 14.0524   | 14.8162   | 0.0763522 | 0.974044 |
| XLOC_002995 | IKBKAP                    | chr9:111629799-111696601 | 4.74542   | 5.00336   | 0.0763625 | 0.962439 |
| XLOC_005497 | SMUG1                     | chr12:54574141-54582778  | 33.7072   | 35.5398   | 0.0763754 | 0.974044 |
| XLOC_017529 | CANX                      | chr5:179125929-179158631 | 83.2035   | 87.7307   | 0.0764375 | 0.96128  |
| XLOC_005023 | NUDT4                     | chr12:93771700-93797024  | 15.6185   | 16.4683   | 0.0764382 | 0.960763 |
| XLOC_009414 | MYBBP1A                   | chr17:4402128-4458681    | 25.4578   | 26.8433   | 0.0764532 | 0.96103  |
| XLOC_011422 | KRI1                      | chr19:10654646-10676702  | 20.1106   | 21.2052   | 0.076458  | 0.968521 |
| XLOC_013612 | RALY                      | chr20:32581457-32670991  | 46.2691   | 48.7885   | 0.0764893 | 0.96128  |
| XLOC_002466 | UBE2D1                    | chr10:60094738-60130513  | 10.0081   | 10.5531   | 0.0764939 | 0.962247 |
| XLOC_023484 | UPRT                      | chrX:74493893-74524732   | 5.89592   | 6.17866   | 0.0765129 | 0.96926  |
| XLOC_013336 | IDH1                      | chr2:209100952-209119801 | 13.2812   | 14.005    | 0.0765554 | 0.961224 |
| XLOC_006331 | GEMIN2                    | chr14:39583487-39606177  | 8.78894   | 9.26814   | 0.07659   | 0.969963 |
| XLOC_012131 | TTC27                     | chr2:32853086-33046118   | 7.51269   | 7.92293   | 0.076704  | 0.965515 |
| XLOC_004121 | CCDC34                    | chr11:27360060-27384795  | 8.3741    | 8.8315    | 0.0767233 | 0.970195 |
| XLOC_003789 | BIRC2                     | chr11:102217912-10224941 | 13.5861   | 14.3284   | 0.0767408 | 0.963457 |
| XLOC_002111 | WBSCR27                   | chr7:73248920-73256855   | 12.1546   | 12.8186   | 0.0767465 | 0.976595 |
| XLOC_021411 | PAXIP1                    | chr7:154720226-154794681 | 5.73101   | 6.0442    | 0.0767622 | 0.966946 |
| XLOC_009438 | KIAA0753                  | chr17:6481644-6554954    | 1.81801   | 1.91738   | 0.0767697 | 0.991767 |
| XLOC_016269 | TBC1D19                   | chr4:26585545-26756918   | 1.76981   | 1.8666    | 0.0768137 | 0.978551 |
| XLOC_003399 | PDHX                      | chr11:34903842-35017675  | 9.67594   | 10.2052   | 0.0768308 | 0.977332 |
| XLOC_022224 | FAM83H                    | chr8:144806102-144815914 | 31.7778   | 33.5177   | 0.0769049 | 0.959465 |
| XLOC_004656 | TEAD4                     | chr12:3068477-3149842    | 44.3273   | 46.7544   | 0.0769068 | 0.959465 |
| XLOC_021417 | LMBR1                     | chr7:156473569-156685901 | 8.19457   | 8.64327   | 0.0769095 | 0.961224 |
| XLOC_003645 | BBS1                      | chr11:66278118-66301084  | 3.13239   | 3.304     | 0.0769475 | 0.972601 |
| XLOC_012781 | ITGB1BP1                  | chr2:9545814-9563643     | 28.5978   | 30.1647   | 0.0769584 | 0.959465 |
| XLOC_000822 | USP21                     | chr1:161129253-161135511 | 14.9177   | 15.7351   | 0.0769659 | 0.965148 |
| XLOC_023558 | NXT2                      | chrX:108779009-108787921 | 1.92498   | 2.03048   | 0.0769743 | 0.976618 |
| XLOC_019134 | PPIL4                     | chr6:149825630-149867231 | 7.37123   | 7.77536   | 0.077003  | 0.965148 |

|             |               |                          |           |           |           |          |
|-------------|---------------|--------------------------|-----------|-----------|-----------|----------|
| XLOC_004623 | KCNJ1         | chr11:128707908-12873724 | 0.0278677 | 0.0293983 | 0.0771376 | 1        |
| XLOC_001374 | UBXN11        | chr1:26608772-26647014   | 11.1013   | 11.7114   | 0.0771875 | 0.972989 |
| XLOC_012240 | SMYD5         | chr2:73441365-73454355   | 21.7491   | 22.9446   | 0.077197  | 0.959465 |
| XLOC_022788 | AQP3          | chr9:33441151-33447631   | 0.124215  | 0.131045  | 0.0772259 | 1        |
| XLOC_012482 | MARCH7        | chr2:160569009-160625084 | 12.6827   | 13.3802   | 0.0772327 | 0.959465 |
| XLOC_010810 | CAPNS1        | chr19:36630917-36641255  | 262.185   | 276.637   | 0.0774119 | 0.959465 |
| XLOC_015948 | FAM86HP       | chr3:129800673-129830274 | 1.01226   | 1.06818   | 0.07757   | 0.982492 |
| XLOC_014543 | GGA1          | chr22:38004480-38029571  | 29.058    | 30.666    | 0.0777049 | 0.959465 |
| XLOC_003149 | HSPA12A       | chr10:118430702-11850208 | 1.51113   | 1.59479   | 0.077741  | 0.972374 |
| XLOC_019116 | CITED2        | chr6:139693391-139695787 | 6.86243   | 7.24239   | 0.0777476 | 0.970195 |
| XLOC_007411 | LOC100507118  | chr15:91509267-91537881  | 6.05952   | 6.39504   | 0.0777483 | 0.989598 |
| XLOC_012117 | WDR43         | chr2:29117532-29171080   | 20.6373   | 21.7802   | 0.077765  | 0.958814 |
| XLOC_000691 | PSMD4         | chr1:151227196-151239954 | 161.062   | 169.989   | 0.077825  | 0.960883 |
| XLOC_012539 | PLEKHA3       | chr2:179059207-179672150 | 5.97573   | 6.30742   | 0.0779347 | 0.984917 |
| XLOC_008398 | UBALD1        | chr16:4658883-4664927    | 45.1236   | 47.6311   | 0.0780211 | 0.961432 |
| XLOC_008557 | C16orf87      | chr16:46835958-46865074  | 2.75849   | 2.91179   | 0.0780267 | 0.977332 |
| XLOC_006849 | WDR89         | chr14:64063756-64108641  | 2.96578   | 3.13062   | 0.0780369 | 0.970195 |
| XLOC_014021 | B4GALT5       | chr20:48249482-48330421  | 10.1388   | 10.7027   | 0.0780978 | 0.958719 |
| XLOC_017548 | ZDHHHC11      | chr5:795719-851101       | 3.25953   | 3.44098   | 0.0781551 | 0.973792 |
| XLOC_020590 | DBF4          | chr7:87463813-87538856   | 6.23037   | 6.54842   | 0.078164  | 0.967901 |
| XLOC_000957 | NEK7          | chr1:198126107-198291548 | 2.82865   | 2.98627   | 0.0782309 | 0.968055 |
| XLOC_018264 | MAPK13        | chr6:36098260-36112301   | 13.4407   | 14.1898   | 0.078247  | 0.959709 |
| XLOC_008343 | HAGH          | chr16:1859103-1877195    | 38.3514   | 40.4901   | 0.0782896 | 0.961224 |
| XLOC_009377 | SCARF1        | chr17:1537151-1549041    | 0.563119  | 0.594549  | 0.0783566 | 0.984917 |
| XLOC_006665 | MTA1          | chr14:105886185-10593708 | 42.272    | 44.6357   | 0.078495  | 0.958902 |
| XLOC_008526 | C16orf93      | chr16:30759619-30787628  | 2.50834   | 2.64863   | 0.0785145 | 0.99634  |
| XLOC_006521 | AK7           | chr14:96858447-96955764  | 0.123008  | 0.129888  | 0.078526  | 1        |
| XLOC_010760 | CEBPG         | chr19:33864574-33873592  | 21.2478   | 22.4368   | 0.0785528 | 0.963451 |
| XLOC_005645 | IKBIP         | chr12:99007181-99038829  | 12.6185   | 13.3255   | 0.078641  | 0.97135  |
| XLOC_024108 | MMGT1         | chrX:135044230-135056134 | 6.88165   | 7.26746   | 0.0786977 | 0.964792 |
| XLOC_023071 | GOLGA1        | chr9:127640572-127703388 | 5.04462   | 5.32754   | 0.0787249 | 0.962935 |
| XLOC_021494 | NPM2          | chr8:21882353-21894408   | 20.278    | 21.4154   | 0.0787301 | 0.966946 |
| XLOC_005242 | NOP2          | chr12:6666035-6677498    | 29.5367   | 31.1934   | 0.0787316 | 0.959465 |
| XLOC_001495 | LEPRE1        | chr1:43212005-43232755   | 17.2123   | 18.1786   | 0.0787988 | 0.959465 |
| XLOC_022391 | C9orf85       | chr9:74526422-74588371   | 7.95199   | 8.39857   | 0.0788278 | 0.969075 |
| XLOC_007917 | GLIS2         | chr16:4382224-4389598    | 12.0849   | 12.7644   | 0.0789246 | 0.962618 |
| XLOC_012991 | MOGS          | chr2:74688183-74692537   | 44.9611   | 47.4898   | 0.07894   | 0.959465 |
| XLOC_004840 | GPD1          | chr12:50497601-50505103  | 0.110085  | 0.116276  | 0.0789418 | 1        |
| XLOC_010368 | MBD1          | chr18:47793251-47808144  | 14.1888   | 14.9869   | 0.0789466 | 0.961224 |
| XLOC_015627 | CLASP2        | chr3:33537738-33759705   | 2.19819   | 2.32192   | 0.0790001 | 0.965735 |
| XLOC_009243 | NOL11         | chr17:65714060-65740266  | 16.8224   | 17.7705   | 0.0791036 | 0.95884  |
| XLOC_022804 | SIGMAR1       | chr9:34634718-34637768   | 144.717   | 152.876   | 0.0791316 | 0.958814 |
| XLOC_018257 | FANCE         | chr6:35420137-35434881   | 13.954    | 14.741    | 0.0791584 | 0.961319 |
| XLOC_006200 | GGACT         | chr13:100741268-10124104 | 1.42382   | 1.50416   | 0.0791824 | 0.987627 |
| XLOC_001208 | CDK11A,CDK11B | chr1:1571099-1655791     | 15.0477   | 15.897    | 0.0792105 | 0.977332 |
| XLOC_001435 | SMIM12        | chr1:35315962-35325417   | 5.59988   | 5.91605   | 0.0792379 | 0.959457 |
| XLOC_016889 | CASP6         | chr4:110609784-110624628 | 12.212    | 12.9014   | 0.0792381 | 0.965573 |
| XLOC_008340 | MRPS34        | chr16:1821895-1823140    | 175.351   | 185.253   | 0.0792456 | 0.957891 |
| XLOC_017760 | EFNA5         | chr5:106712589-107006594 | 1.1106    | 1.17333   | 0.079274  | 0.976214 |
| XLOC_005669 | NUAK1         | chr12:106457124-10653387 | 1.16117   | 1.22676   | 0.0792746 | 0.974044 |
| XLOC_000752 | EFNA3         | chr1:155051347-155060014 | 33.9432   | 35.8609   | 0.0792885 | 0.962922 |
| XLOC_001433 | PHC2          | chr1:33789223-33841194   | 128.305   | 135.56    | 0.0793469 | 0.959465 |
| XLOC_020619 | LMTK2         | chr7:97736196-97838944   | 3.70843   | 3.91813   | 0.0793568 | 0.961224 |
| XLOC_006756 | HECTD1        | chr14:31569323-31676689  | 3.25466   | 3.43871   | 0.0793589 | 0.959465 |
| XLOC_017517 | B4GALT7       | chr5:177027118-177037344 | 32.4461   | 34.281    | 0.0793605 | 0.959465 |
| XLOC_008168 | C16orf70      | chr16:67143914-67184902  | 5.15451   | 5.44605   | 0.0793743 | 0.977332 |
| XLOC_011969 | TMEM238       | chr19:55890611-55895627  | 21.8835   | 23.1225   | 0.0794557 | 0.979701 |
| XLOC_001633 | ZNHIT6        | chr1:86115105-86174116   | 5.09497   | 5.38351   | 0.079472  | 0.959683 |
| XLOC_015348 | CDV3          | chr3:133292433-133309118 | 35.8009   | 37.8284   | 0.0794745 | 0.958814 |
| XLOC_013873 | RBBP9         | chr20:18467187-18477887  | 2.82156   | 2.98137   | 0.0794821 | 0.969296 |
| XLOC_016072 | KCNMB3        | chr3:178957536-178984838 | 0.648632  | 0.685422  | 0.0795914 | 0.986822 |
| XLOC_018830 | TEAD3         | chr6:35441373-35464861   | 11.465    | 12.1156   | 0.0796233 | 0.96128  |
| XLOC_008630 | RANBP10       | chr16:67757004-67840555  | 5.09901   | 5.38846   | 0.0796548 | 0.963457 |
| XLOC_010054 | DUS1L         | chr17:80015747-80023697  | 58.377    | 61.6911   | 0.0796632 | 0.958902 |
| XLOC_023186 | SAPCD2        | chr9:139956578-139965028 | 52.7707   | 55.767    | 0.0796736 | 0.956807 |
| XLOC_018468 | NUS1          | chr6:117996616-118031884 | 11.0611   | 11.6892   | 0.0796753 | 0.958902 |
| XLOC_015461 | TTC14         | chr3:180319917-180328918 | 1.47048   | 1.55399   | 0.0796921 | 0.977103 |
| XLOC_023335 | DDX3X         | chrX:41192650-41209524   | 28.579    | 30.2025   | 0.0797081 | 0.959465 |
| XLOC_000891 | DARS2         | chr1:173793796-173827688 | 6.11968   | 6.46856   | 0.0799881 | 0.963669 |
| XLOC_012862 | NLRC4         | chr2:32449517-32490812   | 0.14264   | 0.150773  | 0.0800032 | 1        |
| XLOC_005269 | FAM86FP       | chr12:8383644-8395542    | 1.60148   | 1.69282   | 0.0800287 | 0.979701 |
| XLOC_005106 | MAPKAPK5      | chr12:112277572-11233122 | 11.0266   | 11.6563   | 0.0801128 | 0.974249 |
| XLOC_020734 | METTL2B       | chr7:128116782-128142978 | 6.12179   | 6.47141   | 0.0801249 | 0.966946 |
| XLOC_007140 | BUB1B,PAK6    | chr15:40453209-40569688  | 17.4232   | 18.4192   | 0.0802037 | 0.959024 |
| XLOC_018036 | FARS2         | chr6:5261583-5771816     | 8.05489   | 8.51547   | 0.0802217 | 0.966946 |
| XLOC_005542 | NDUFA4L2      | chr12:57623355-57634475  | 1.69245   | 1.78928   | 0.0802627 | 0.997036 |
| XLOC_002400 | MAP3K8        | chr10:30722949-30750762  | 1.03167   | 1.0907    | 0.0802696 | 0.979701 |
| XLOC_013720 | BCAS4         | chr20:49411466-49493714  | 25.6542   | 27.1226   | 0.080303  | 0.96128  |
| XLOC_018302 | CNPY3         | chr6:42896859-42907008   | 55.9467   | 59.1512   | 0.0803536 | 0.956807 |

|             |                        |                          |           |           |           |          |
|-------------|------------------------|--------------------------|-----------|-----------|-----------|----------|
| XLOC_002564 | FAM22A                 | chr10:88985204-88994733  | 0.753943  | 0.797214  | 0.080512  | 0.980095 |
| XLOC_006933 | CCDC88C                | chr14:91737666-91884188  | 3.36826   | 3.56158   | 0.0805145 | 0.963457 |
| XLOC_014954 | MKNR2                  | chr3:12598512-12705700   | 10.0812   | 10.6599   | 0.0805269 | 0.982599 |
| XLOC_004841 | COX14                  | chr12:50505763-50514240  | 60.0708   | 63.5196   | 0.0805365 | 0.961224 |
| XLOC_005176 | FAM101A,ZNF664,ZNF664- | chr12:124457761-12480057 | 17.8972   | 18.9248   | 0.0805416 | 0.956807 |
| XLOC_016844 | NAP1L5                 | chr4:89513573-89629693   | 1.14137   | 1.2069    | 0.0805471 | 0.991459 |
| XLOC_007873 | MLST8                  | chr16:2255177-2261069    | 74.7355   | 79.0269   | 0.0805493 | 0.958201 |
| XLOC_001770 | GPR89A                 | chr1:145764594-145827103 | 4.55277   | 4.81435   | 0.0805949 | 0.970195 |
| XLOC_007999 | PLK1                   | chr16:23690200-23724821  | 64.1035   | 67.7871   | 0.0806079 | 0.958814 |
| XLOC_022471 | NANS                   | chr9:100818958-100881488 | 122.502   | 129.543   | 0.0806237 | 0.968205 |
| XLOC_014013 | SLC13A3,TP53RK         | chr20:45186461-45318276  | 6.22268   | 6.58033   | 0.080624  | 0.961224 |
| XLOC_003594 | RPS6KA4                | chr11:64126624-64139687  | 38.2596   | 40.4603   | 0.0806836 | 0.956373 |
| XLOC_015997 | CP                     | chr3:148847370-148939833 | 1.53345   | 1.62169   | 0.0807183 | 0.979733 |
| XLOC_017600 | ZFR                    | chr5:32354455-32444844   | 6.94709   | 7.34685   | 0.0807184 | 0.958201 |
| XLOC_011242 | ZNF544                 | chr19:58740069-58775008  | 4.4404    | 4.69604   | 0.0807542 | 0.964431 |
| XLOC_006735 | MDP1,NEDD8,NEDD8-MDP   | chr14:24683142-24701576  | 285.686   | 302.138   | 0.0807735 | 0.957925 |
| XLOC_006641 | EIF5                   | chr14:103800338-10381136 | 22.6373   | 23.9412   | 0.0807924 | 0.958814 |
| XLOC_012191 | VRK2                   | chr2:58273776-58468515   | 2.3601    | 2.49607   | 0.0808124 | 0.987693 |
| XLOC_016994 | CBR4                   | chr4:169908741-169931468 | 4.6338    | 4.9008    | 0.0808209 | 0.963669 |
| XLOC_008070 | KAT8                   | chr16:31128984-31142714  | 21.618    | 22.8643   | 0.0808636 | 0.959465 |
| XLOC_011071 | ZNF175                 | chr19:52074530-52092991  | 1.48734   | 1.57309   | 0.0808661 | 0.973348 |
| XLOC_006926 | EML5                   | chr14:89081173-89259096  | 0.198817  | 0.210282  | 0.0808842 | 1        |
| XLOC_006940 | NDUFB1                 | chr14:92582467-92588153  | 173.664   | 183.679   | 0.0808932 | 0.958201 |
| XLOC_008699 | HSDL1                  | chr16:84155743-84178800  | 5.94644   | 6.28941   | 0.0808988 | 0.960403 |
| XLOC_014054 | ATP5E,SLMO2            | chr20:57603732-57617901  | 698.178   | 738.451   | 0.0809066 | 0.972228 |
| XLOC_006631 | DYNC1H1                | chr14:102430864-10251713 | 19.9299   | 21.08     | 0.0809446 | 0.958814 |
| XLOC_017743 | MCTP1                  | chr5:94042288-94620279   | 4.53338   | 4.79504   | 0.0809564 | 0.963669 |
| XLOC_015930 | TPRA1                  | chr3:127291906-127309602 | 47.9991   | 50.7715   | 0.0810113 | 0.957507 |
| XLOC_017782 | PPIC                   | chr5:122359077-122372428 | 13.1025   | 13.8596   | 0.0810461 | 0.966442 |
| XLOC_020906 | BRAT1                  | chr7:2577443-2595392     | 20.9754   | 22.1876   | 0.0810605 | 0.959465 |
| XLOC_000500 | LRRRC8D                | chr1:90286572-90401989   | 5.95584   | 6.3001    | 0.0810699 | 0.963219 |
| XLOC_004746 | EMP1                   | chr12:13349601-13369708  | 41.5849   | 43.9892   | 0.0810874 | 0.957343 |
| XLOC_015391 | HPS3                   | chr3:148847370-148939833 | 2.79706   | 2.95898   | 0.0811884 | 0.976214 |
| XLOC_020524 | TMEM248                | chr7:66386202-66423538   | 17.049    | 18.0362   | 0.0812028 | 0.956807 |
| XLOC_021490 | ATP6V1B2               | chr8:20054703-20079207   | 31.9122   | 33.7611   | 0.0812519 | 0.958201 |
| XLOC_003445 | NDUFS3                 | chr11:47586981-47606115  | 99.1538   | 104.899   | 0.0812603 | 0.976198 |
| XLOC_016917 | ANXA5                  | chr4:122589151-122618147 | 257.737   | 272.683   | 0.0813232 | 0.957343 |
| XLOC_003671 | LRP5                   | chr11:68080107-68216743  | 11.981    | 12.6758   | 0.0813353 | 0.959465 |
| XLOC_012700 | PTMA                   | chr2:232573234-232578257 | 1140.24   | 1206.42   | 0.0814035 | 0.961224 |
| XLOC_016639 | TNIP2                  | chr4:2743386-2758103     | 48.2945   | 51.1005   | 0.0814775 | 0.956657 |
| XLOC_016559 | RAPGEF2                | chr4:160188997-160281307 | 1.59007   | 1.68248   | 0.0814942 | 0.966946 |
| XLOC_015945 | MBD4                   | chr3:129149786-129239197 | 8.05181   | 8.51977   | 0.081501  | 0.976595 |
| XLOC_020907 | GNA12                  | chr7:2767740-2883959     | 7.29243   | 7.71637   | 0.0815243 | 0.96128  |
| XLOC_008152 | CCDC113                | chr16:58283839-58328951  | 1.16199   | 1.22961   | 0.0815978 | 0.974392 |
| XLOC_009074 | TUBG1                  | chr17:40731525-40767256  | 42.5708   | 45.0495   | 0.081649  | 0.974585 |
| XLOC_021481 | VPS37A                 | chr8:17104400-17271040   | 3.23308   | 3.4214    | 0.0816757 | 0.970195 |
| XLOC_005864 | SLC25A15               | chr13:41363546-41495910  | 4.82295   | 5.10403   | 0.0817213 | 0.969075 |
| XLOC_021223 | ACHE                   | chr7:100487614-100493547 | 4.8115    | 5.09208   | 0.0817684 | 0.972601 |
| XLOC_023532 | WBP5                   | chrX:102611379-102613397 | 45.7298   | 48.3968   | 0.0817771 | 0.958459 |
| XLOC_018020 | IRF4                   | chr6:391738-411443       | 0.0625675 | 0.0662182 | 0.081815  | 1        |
| XLOC_007757 | SEC11A                 | chr15:85212767-85259691  | 163.063   | 172.578   | 0.0818162 | 0.957925 |
| XLOC_011290 | MOB3A                  | chr19:2071034-2096269    | 9.67955   | 10.2445   | 0.081836  | 0.961224 |
| XLOC_012155 | MTA3                   | chr2:42795670-42936353   | 11.5449   | 12.2188   | 0.081844  | 0.961224 |
| XLOC_000222 | STX12                  | chr1:28099693-28150963   | 10.0534   | 10.6403   | 0.0818542 | 0.958201 |
| XLOC_009083 | AOC3                   | chr17:41003200-41010140  | 0.837324  | 0.886221  | 0.0818804 | 0.979484 |
| XLOC_006036 | PARP4                  | chr13:24995068-25086948  | 13.8532   | 14.6627   | 0.0819353 | 0.955406 |
| XLOC_002726 | SEC23IP                | chr10:121652084-12170417 | 2.93587   | 3.10748   | 0.0819601 | 0.96115  |
| XLOC_017812 | CDKL3                  | chr5:133634114-133702768 | 0.669744  | 0.708913  | 0.0819986 | 0.981575 |
| XLOC_001616 | USP33                  | chr1:78161673-78225564   | 6.19583   | 6.55841   | 0.08205   | 0.959293 |
| XLOC_014150 | ITSN1                  | chr21:35014783-35261609  | 1.51178   | 1.60034   | 0.082126  | 0.969241 |
| XLOC_018336 | CD2AP                  | chr6:47445524-47594996   | 5.49719   | 5.81924   | 0.0821362 | 0.958814 |
| XLOC_002239 | TTC13                  | chr1:231041986-231114618 | 1.38621   | 1.46744   | 0.0821535 | 0.976595 |
| XLOC_023710 | ATP6AP1                | chrX:153656977-153664867 | 66.436    | 70.3331   | 0.0822388 | 0.956657 |
| XLOC_003380 | ARL14EP                | chr11:30344648-30359165  | 5.52006   | 5.84397   | 0.0822662 | 0.966946 |
| XLOC_003723 | UVRAG                  | chr11:75526211-75855282  | 1.54167   | 1.63222   | 0.082336  | 0.969877 |
| XLOC_010565 | PIN1                   | chr19:9945882-9960365    | 89.5959   | 94.8606   | 0.0823758 | 0.954768 |
| XLOC_020414 | TAX1BP1                | chr7:27778991-27869386   | 13.0974   | 13.8671   | 0.0823868 | 0.955758 |
| XLOC_007904 | IL32                   | chr16:3115312-3119668    | 370.739   | 392.553   | 0.0824836 | 0.958814 |
| XLOC_015338 | NEK11                  | chr3:130745693-131100318 | 0.500316  | 0.529758  | 0.0824943 | 0.98985  |
| XLOC_000293 | C1orf122               | chr1:38268613-38275126   | 66.094    | 69.9856   | 0.0825382 | 0.977852 |
| XLOC_008858 | MAP2K4                 | chr17:11924134-12047051  | 5.75844   | 6.09786   | 0.0826253 | 0.959465 |
| XLOC_007795 | ADAMTS17               | chr15:100511642-10088218 | 0.0687634 | 0.0728166 | 0.0826262 | 1        |
| XLOC_021281 | FAM3C                  | chr7:120988904-121036422 | 20.5133   | 21.7225   | 0.0826349 | 0.95534  |
| XLOC_010937 | GEMIN7                 | chr19:45582517-45594782  | 25.0501   | 26.5277   | 0.0826795 | 0.959465 |
| XLOC_009826 | HOXB13                 | chr17:46802126-46806111  | 1.76649   | 1.87069   | 0.0826895 | 0.976618 |
| XLOC_001377 | GPN2                   | chr1:27205872-27216869   | 25.4475   | 26.9502   | 0.0827757 | 0.959735 |
| XLOC_006793 | RPL36AL                | chr14:50085406-50087349  | 572.151   | 605.939   | 0.0827771 | 0.957206 |
| XLOC_018040 | DSP                    | chr6:7541869-7586946     | 2.3356    | 2.47355   | 0.0827858 | 0.96128  |
| XLOC_015230 | TRMT10C                | chr3:101280679-101285290 | 24.5449   | 25.9954   | 0.0828341 | 0.956382 |

|             |           |                           |           |           |           |          |
|-------------|-----------|---------------------------|-----------|-----------|-----------|----------|
| XLOC_012972 | MCEE      | chr2:71336805-71357394    | 4.12723   | 4.37135   | 0.0829037 | 0.977332 |
| XLOC_011439 | ELOF1     | chr19:11663857-11670051   | 102.655   | 108.733   | 0.0829753 | 0.956373 |
| XLOC_023270 | OFD1      | chrX:13752831-13787480    | 5.14855   | 5.45348   | 0.0830129 | 0.960071 |
| XLOC_018779 | NELFE     | chr6:31919863-31937532    | 75.3081   | 79.7713   | 0.0830649 | 0.965148 |
| XLOC_009990 | RHBDF2    | chr17:74466974-74497509   | 5.26695   | 5.57912   | 0.0830714 | 0.966946 |
| XLOC_008720 | CYBA      | chr16:88709696-88717492   | 365.773   | 3871.464  | 0.0831126 | 0.955709 |
| XLOC_001480 | TRIT1     | chr1:40306705-40349177    | 14.5199   | 15.3815   | 0.0831716 | 0.959293 |
| XLOC_019025 | SEC63     | chr6:108188959-108279482  | 5.18721   | 5.49505   | 0.0831735 | 0.956373 |
| XLOC_016996 | NEK1      | chr4:170314420-170533778  | 1.04866   | 1.11093   | 0.0832272 | 0.969526 |
| XLOC_004492 | MMP1      | chr11:102654406-10271434  | 0.188975  | 0.200197  | 0.0832286 | 1        |
| XLOC_020849 | REPIN1    | chr7:150065878-150071133  | 102.586   | 108.681   | 0.0832672 | 0.956373 |
| XLOC_007472 | NDNL2     | chr15:29412454-29862927   | 17.2914   | 18.3188   | 0.083275  | 0.958814 |
| XLOC_014741 | PITPNB    | chr22:28247656-28315255   | 18.0844   | 19.1595   | 0.0833161 | 0.956657 |
| XLOC_014682 | TXNRD2    | chr22:19863039-20004309   | 22.6995   | 24.0497   | 0.0833546 | 0.985283 |
| XLOC_008285 | SNAI3-AS1 | chr16:88729780-88753594   | 1.17022   | 1.23984   | 0.0833764 | 0.991314 |
| XLOC_004162 | ARHGAP1   | chr11:46698624-46722215   | 18.8412   | 19.9635   | 0.0834691 | 0.955075 |
| XLOC_013173 | GTDC1     | chr2:144703580-145090083  | 1.21687   | 1.28936   | 0.0834893 | 0.977039 |
| XLOC_014371 | UBE2G2    | chr21:46188494-46221751   | 19.8288   | 21.0104   | 0.0835104 | 0.95534  |
| XLOC_007220 | MAPK6     | chr15:52311410-52358462   | 7.3496    | 7.78809   | 0.0836043 | 0.957925 |
| XLOC_008403 | GLYR1     | chr16:4853203-4897303     | 11.521    | 12.2085   | 0.0836146 | 0.95534  |
| XLOC_009432 | DHX33     | chr17:5344231-5372380     | 8.83648   | 9.36404   | 0.0836605 | 0.956807 |
| XLOC_019126 | SF3B5     | chr6:144416017-144416754  | 284.839   | 301.847   | 0.0836718 | 0.956033 |
| XLOC_005948 | NDFIP2    | chr13:80051498-80130212   | 6.65678   | 7.05449   | 0.0837187 | 0.955758 |
| XLOC_014321 | PIGP      | chr21:38437663-38445458   | 30.3829   | 32.1986   | 0.0837378 | 0.959465 |
| XLOC_018535 | LTV1      | chr6:144164507-144184943  | 14.2668   | 15.1198   | 0.0837724 | 0.957152 |
| XLOC_015344 | UBA5      | chr3:132276981-132593050  | 10.1404   | 10.7466   | 0.0837785 | 0.974044 |
| XLOC_005695 | ARPC3     | chr12:110872705-110888151 | 284.661   | 301.684   | 0.0837941 | 0.956807 |
| XLOC_007693 | COX5A     | chr15:75212616-75230495   | 332.311   | 352.204   | 0.0838758 | 0.95534  |
| XLOC_002502 | PALD1     | chr10:72238563-72328206   | 9.43224   | 9.99733   | 0.0839422 | 0.957925 |
| XLOC_005592 | KRR1      | chr12:75874512-75905418   | 16.9732   | 17.9901   | 0.0839478 | 0.976618 |
| XLOC_012226 | MXD1      | chr2:70142172-70170076    | 6.43018   | 6.81571   | 0.084005  | 0.958201 |
| XLOC_004167 | ARFGAP2   | chr11:46958250-47198676   | 25.7538   | 27.2986   | 0.0840444 | 0.966946 |
| XLOC_016871 | UBE2D3    | chr4:103717132-103790033  | 114.492   | 121.362   | 0.0840708 | 0.956373 |
| XLOC_016824 | LIN54     | chr4:83845755-83934040    | 1.96685   | 2.08493   | 0.0841145 | 0.965735 |
| XLOC_003226 | PHRF1     | chr11:576482-612222       | 8.84766   | 9.37951   | 0.0842174 | 0.958814 |
| XLOC_011271 | POLR2E    | chr19:1065921-1095391     | 80.852    | 85.715    | 0.0842647 | 0.966946 |
| XLOC_022396 | OSTF1     | chr9:77703397-77762114    | 16.8206   | 17.8325   | 0.0842792 | 0.959465 |
| XLOC_022891 | RFK       | chr9:79000432-79009444    | 10.3368   | 10.9588   | 0.0842965 | 0.957343 |
| XLOC_016761 | UBA6      | chr4:68481478-68566889    | 6.4508    | 6.8392    | 0.0843488 | 0.95534  |
| XLOC_020865 | CHPF2     | chr7:150929584-150935905  | 36.0863   | 38.2596   | 0.0843703 | 0.978196 |
| XLOC_023578 | PLS3      | chrX:114795176-114885171  | 11.5128   | 12.2069   | 0.0844628 | 0.954657 |
| XLOC_020961 | IGF2BP3   | chr7:23349827-23509995    | 5.34869   | 5.67156   | 0.0845601 | 0.959465 |
| XLOC_000250 | KPNA6     | chr1:32573643-32642168    | 8.16992   | 8.66326   | 0.0845894 | 0.954768 |
| XLOC_003576 | MARK2     | chr11:63606399-63678492   | 10.9061   | 11.565    | 0.0846206 | 0.957206 |
| XLOC_014033 | ZFP64     | chr20:50700549-50808524   | 6.02657   | 6.39078   | 0.0846545 | 0.963669 |
| XLOC_021122 | HIP1      | chr7:75162618-75368283    | 3.9503    | 4.1893    | 0.0847481 | 0.956807 |
| XLOC_020623 | TRRAP     | chr7:98476112-98610866    | 5.41954   | 5.74769   | 0.0848118 | 0.954768 |
| XLOC_002681 | SFR1      | chr10:105881815-10588614  | 4.68523   | 4.96896   | 0.084825  | 0.970346 |
| XLOC_017808 | C5orf15   | chr5:133291197-133304406  | 11.1892   | 11.8669   | 0.0848349 | 0.956807 |
| XLOC_012077 | CENPO     | chr2:25013135-25142055    | 3.77773   | 4.00666   | 0.0848828 | 0.987693 |
| XLOC_015839 | CPOX      | chr3:98298289-98312455    | 10.5661   | 11.2069   | 0.0849425 | 0.957782 |
| XLOC_004343 | SLC29A2   | chr11:66129991-66139291   | 13.5896   | 14.4147   | 0.0850366 | 0.958201 |
| XLOC_002216 | LIN9      | chr1:226418849-226497445  | 1.62444   | 1.72314   | 0.0850929 | 0.972176 |
| XLOC_004245 | VPS37C    | chr11:60897727-60928916   | 13.3921   | 14.2069   | 0.0852074 | 0.956807 |
| XLOC_000882 | METT13    | chr1:171750760-171766856  | 11.8745   | 12.597    | 0.0852118 | 0.95534  |
| XLOC_010271 | METT14    | chr18:2537523-2571489     | 1.77916   | 1.88751   | 0.0852851 | 0.968521 |
| XLOC_010781 | USF2      | chr19:35759895-35770718   | 93.6297   | 99.3323   | 0.0852981 | 0.954188 |
| XLOC_011201 | ZNF444    | chr19:56652534-56672262   | 22.9109   | 24.3068   | 0.085329  | 0.959722 |
| XLOC_014299 | SYNJ1     | chr21:34001068-34100351   | 0.66645   | 0.707065  | 0.0853476 | 0.972111 |
| XLOC_009913 | TEX2      | chr17:62224794-62340653   | 2.05649   | 2.18182   | 0.0853481 | 0.965607 |
| XLOC_020671 | SH2B2     | chr7:101928404-101962178  | 15.5385   | 16.4862   | 0.0854127 | 0.965607 |
| XLOC_012337 | MAP4K4    | chr2:102314164-102511152  | 7.06949   | 7.50088   | 0.085454  | 0.954768 |
| XLOC_004982 | YEATS4    | chr12:69753531-69784576   | 25.1195   | 26.6525   | 0.0854617 | 0.956657 |
| XLOC_012352 | C2orf49   | chr2:105954012-105961984  | 8.59203   | 9.11648   | 0.0854786 | 0.967901 |
| XLOC_003386 | EIF3M     | chr11:32605312-32816187   | 123.67    | 131.219   | 0.0854834 | 0.957152 |
| XLOC_012472 | ARL6IP6   | chr2:153574406-153617767  | 5.21345   | 5.53178   | 0.0855061 | 0.964792 |
| XLOC_022203 | ARC       | chr8:143692404-143695833  | 4.96268   | 5.26573   | 0.0855137 | 0.970195 |
| XLOC_011289 | MKNK2     | chr19:2037469-2051243     | 50.6142   | 53.7053   | 0.0855201 | 0.96103  |
| XLOC_016962 | FBXW7     | chr4:153242409-153456393  | 2.93745   | 3.11704   | 0.0856098 | 0.965148 |
| XLOC_006901 | TMED10    | chr14:75598170-75643349   | 26.0249   | 27.6163   | 0.0856298 | 0.954559 |
| XLOC_018448 | SLC16A10  | chr6:111408780-111544606  | 1.36041   | 1.44363   | 0.0856529 | 0.976617 |
| XLOC_011632 | LOC284412 | chr19:37756840-37759912   | 0.370433  | 0.393093  | 0.0856589 | 0.985283 |
| XLOC_014594 | SREBF2    | chr22:42229105-42302375   | 30.8819   | 32.7714   | 0.0856789 | 0.954677 |
| XLOC_011370 | PEX11G    | chr19:7541755-7553924     | 2.87609   | 3.05219   | 0.0857386 | 0.979875 |
| XLOC_011241 | ZNF274    | chr19:58694395-58724927   | 0.0707917 | 0.0751275 | 0.0857615 | 1        |
| XLOC_017694 | FOXD1     | chr5:72742084-72744352    | 93.1782   | 98.895    | 0.0859053 | 0.954559 |
| XLOC_011614 | ALKBH6    | chr19:36500021-36505141   | 18.2788   | 19.4008   | 0.085942  | 0.966946 |
| XLOC_004390 | ANAPC15   | chr11:71709957-71823822   | 22.4965   | 23.8774   | 0.085946  | 0.991767 |
| XLOC_020353 | WIPI2     | chr7:5229834-5273486      | 26.8812   | 28.5336   | 0.0860627 | 0.954559 |

|             |                      |                          |           |           |           |          |
|-------------|----------------------|--------------------------|-----------|-----------|-----------|----------|
| XLOC_018997 | MDN1                 | chr6:90353230-90529442   | 0.695979  | 0.738793  | 0.086127  | 0.96128  |
| XLOC_001006 | SRGAP2,SRGAP2C,SRGAP | chr1:206516199-20663778: | 4.78588   | 5.08031   | 0.0861322 | 0.964792 |
| XLOC_003007 | AP3M1                | chr10:75880014-75910826  | 6.48334   | 6.88226   | 0.0861453 | 0.954768 |
| XLOC_012560 | PMS1                 | chr2:190634992-19074235: | 3.55114   | 3.76972   | 0.0861752 | 0.985921 |
| XLOC_015724 | TRAIIP               | chr3:49866027-49893992   | 6.58785   | 6.99379   | 0.0862686 | 0.961224 |
| XLOC_023259 | MSL3                 | chrX:11776277-11793872   | 13.9366   | 14.7955   | 0.0862798 | 0.955406 |
| XLOC_002184 | GPATCH2              | chr1:217603833-21780440: | 0.855797  | 0.908554  | 0.086304  | 0.979452 |
| XLOC_007916 | DNASE1               | chr16:3702939-3767598    | 0.568621  | 0.603685  | 0.0863277 | 0.996631 |
| XLOC_000746 | FLAD1                | chr1:154955769-15496558: | 30.2282   | 32.0922   | 0.0863303 | 0.95467  |
| XLOC_010803 | APLP1                | chr19:36359400-36370699  | 15.3775   | 16.3264   | 0.0863857 | 0.956807 |
| XLOC_005074 | POLR3B               | chr12:106751435-1072830: | 0.975113  | 1.03529   | 0.0863912 | 0.984917 |
| XLOC_010805 | LRFN3                | chr19:36428021-36436097  | 11.5107   | 12.2223   | 0.086542  | 0.962247 |
| XLOC_022269 | CDC37L1              | chr9:4679565-4706594     | 6.47069   | 6.87076   | 0.0865499 | 0.964222 |
| XLOC_007599 | RFX7                 | chr15:56382730-56535483  | 1.83546   | 1.94905   | 0.0866347 | 0.962228 |
| XLOC_002338 | ATP5C1               | chr10:7830092-7849762    | 216.806   | 230.235   | 0.0867016 | 0.953837 |
| XLOC_021792 | MAF1                 | chr8:145159304-14516251: | 206.165   | 218.937   | 0.0867176 | 0.954559 |
| XLOC_009364 | FAM101B              | chr17:289770-295731      | 0.137764  | 0.146299  | 0.0867273 | 1        |
| XLOC_012648 | BCS1L                | chr2:219524378-21952816: | 24.7689   | 26.3038   | 0.0867442 | 0.95534  |
| XLOC_012234 | MPHOSPH10            | chr2:71357443-71377232   | 8.54826   | 9.07803   | 0.0867481 | 0.956382 |
| XLOC_004255 | FADS3                | chr11:61640997-61659006  | 63.849    | 67.8069   | 0.0867679 | 0.954188 |
| XLOC_013469 | PDCD1                | chr2:242792032-24280105: | 0.11246   | 0.119431  | 0.0867734 | 1        |
| XLOC_014297 | TCP10L               | chr21:33947150-33957845  | 0.779162  | 0.827467  | 0.0867799 | 0.979701 |
| XLOC_021215 | SAP25                | chr7:100169852-10017127: | 1.32868   | 1.41106   | 0.086792  | 0.987627 |
| XLOC_011981 | ZNF787               | chr19:56598731-56632649  | 73.483    | 78.0407   | 0.0868172 | 0.954559 |
| XLOC_022216 | MAFA                 | chr8:144510229-14451260: | 5.31841   | 5.64837   | 0.0868395 | 0.973348 |
| XLOC_022976 | ALG2                 | chr9:101978706-10198424: | 16.31     | 17.3233   | 0.0869596 | 0.954559 |
| XLOC_016300 | GUF1                 | chr4:44680432-44702697   | 7.845     | 8.33242   | 0.0869626 | 0.954768 |
| XLOC_000277 | ZMYM4                | chr1:35734567-35887545   | 3.36965   | 3.57911   | 0.0870042 | 0.956373 |
| XLOC_017217 | RASGRF2              | chr5:80256507-81047072   | 0.0682779 | 0.0725234 | 0.0870269 | 1        |
| XLOC_013794 | PRPF6                | chr20:62612430-62664453  | 30.8503   | 32.7686   | 0.0870271 | 0.951888 |
| XLOC_007342 | ZFAND6               | chr15:80351909-80430735  | 25.8503   | 27.4585   | 0.0870704 | 0.95534  |
| XLOC_021467 | GATA4                | chr8:11561716-11617509   | 7.22123   | 7.67067   | 0.0871082 | 0.961432 |
| XLOC_023012 | PTBP3                | chr9:114758831-11511254: | 9.16259   | 9.73362   | 0.0872215 | 0.970195 |
| XLOC_013508 | AP5S1                | chr20:3801170-3805954    | 5.9325    | 6.30233   | 0.0872443 | 0.967289 |
| XLOC_009547 | B9D1                 | chr17:19240866-19290532  | 28.0614   | 29.8127   | 0.0873399 | 0.978196 |
| XLOC_015855 | CD47                 | chr3:107761940-10780993: | 7.22588   | 7.67689   | 0.0873498 | 0.952905 |
| XLOC_005806 | MRP63                | chr13:21727733-21753220  | 28.3889   | 30.1617   | 0.0873907 | 0.970869 |
| XLOC_004389 | LAMTOR1              | chr11:71709957-71823822  | 98.694    | 104.862   | 0.0874624 | 0.977424 |
| XLOC_013114 | DDX11L2              | chr2:114341229-11436129: | 0.458836  | 0.487575  | 0.0874755 | 0.995874 |
| XLOC_010290 | AFG3L2               | chr18:12328942-12377275  | 33.9243   | 36.0455   | 0.0874979 | 0.950929 |
| XLOC_013940 | EDEM2                | chr20:33703159-33735161  | 10.6432   | 11.3093   | 0.0875803 | 0.958853 |
| XLOC_001336 | EIF4G3               | chr1:21132784-21503381   | 3.20278   | 3.4033    | 0.0876113 | 0.95534  |
| XLOC_009560 | C17orf51             | chr17:21431570-21454941  | 3.27336   | 3.47833   | 0.0876223 | 0.95534  |
| XLOC_015845 | TOMM70A              | chr3:100082302-10017517: | 18.1724   | 19.3104   | 0.0876298 | 0.952905 |
| XLOC_014308 | CRYZL1               | chr21:34961647-35014160  | 4.95768   | 5.26827   | 0.0876645 | 0.965607 |
| XLOC_001972 | DEDD                 | chr1:161070345-16110247: | 20.1543   | 21.4179   | 0.0877308 | 0.987627 |
| XLOC_005760 | ZCCHC8               | chr12:122956145-1229855: | 4.77245   | 5.0719    | 0.0877965 | 0.959465 |
| XLOC_015678 | SCAP                 | chr3:47455183-47517445   | 26.5926   | 28.2613   | 0.0878034 | 0.952371 |
| XLOC_006116 | SUCLA2               | chr13:48516790-48575462  | 6.98645   | 7.4249    | 0.0878121 | 0.958201 |
| XLOC_001764 | PDE4DIP              | chr1:144851423-14507618: | 0.539632  | 0.573498  | 0.0878146 | 0.977017 |
| XLOC_022607 | TOR1B                | chr9:132565431-13257356: | 18.753    | 19.9308   | 0.0878736 | 0.952469 |
| XLOC_003183 | FLJ37035             | chr10:127371811-1274080: | 0.101372  | 0.107745  | 0.0879638 | 1        |
| XLOC_014607 | TSPO                 | chr22:43547519-43559248  | 389.754   | 414.293   | 0.0880909 | 0.952469 |
| XLOC_014694 | PI4KA                | chr22:21061978-21213100  | 13.3853   | 14.2288   | 0.0881584 | 0.95534  |
| XLOC_000181 | PNRC2                | chr1:24286300-24289949   | 38.0665   | 40.4652   | 0.0881586 | 0.950929 |
| XLOC_020594 | STEAP1               | chr7:89783688-89794141   | 9.77869   | 10.3951   | 0.0881847 | 0.960071 |
| XLOC_020679 | FAM185A              | chr7:102389398-10244967: | 1.86287   | 1.98031   | 0.0881996 | 0.972601 |
| XLOC_008575 | AKTIP                | chr16:53468350-53537170  | 6.66895   | 7.08944   | 0.0882123 | 0.977103 |
| XLOC_016641 | NOP14                | chr4:2937277-2965118     | 22.9926   | 24.4427   | 0.0882286 | 0.956618 |
| XLOC_015362 | MRAS                 | chr3:138066489-13812437: | 1.4272    | 1.51728   | 0.0882974 | 0.970346 |
| XLOC_012287 | RMND5A               | chr2:86730552-87005164   | 4.28691   | 4.55753   | 0.0883148 | 0.979733 |
| XLOC_006154 | MZT1                 | chr13:73282494-73301938  | 15.2705   | 16.2345   | 0.0883156 | 0.952371 |
| XLOC_008651 | AARS                 | chr16:70286296-70323412  | 40.8651   | 43.4449   | 0.0883169 | 0.959465 |
| XLOC_012690 | CAB39                | chr2:231577556-23168579: | 8.84702   | 9.40553   | 0.0883171 | 0.955406 |
| XLOC_006046 | LNK2                 | chr13:28120049-28194720  | 1.42211   | 1.51192   | 0.0883433 | 0.966946 |
| XLOC_023342 | KRBOX4               | chrX:46306623-46334074   | 3.85415   | 4.09769   | 0.0883979 | 0.963266 |
| XLOC_001992 | TMCO1                | chr1:165693527-16573815: | 13.211    | 14.046    | 0.0884195 | 0.952711 |
| XLOC_007167 | GANC                 | chr15:42566365-42645864  | 0.500996  | 0.53267   | 0.0884419 | 0.978196 |
| XLOC_014931 | MTMR14               | chr3:9691116-9744078     | 22.2637   | 23.6714   | 0.0884532 | 0.952371 |
| XLOC_013557 | XRN2                 | chr20:21283941-21370463  | 20.9101   | 22.2329   | 0.0884966 | 0.950929 |
| XLOC_015326 | C3orf37              | chr3:128997683-12902413: | 37.4219   | 39.7899   | 0.0885211 | 0.952905 |
| XLOC_018120 | HIST1H4I             | chr6:27106071-27114637   | 1.06205   | 1.12935   | 0.0886404 | 0.992797 |
| XLOC_015847 | IMP2                 | chr3:100941389-10103941: | 0.0209515 | 0.0222804 | 0.088722  | 1        |
| XLOC_005789 | DDX51                | chr12:132621139-1326288: | 8.52576   | 9.06739   | 0.0888593 | 0.954315 |
| XLOC_007251 | PLEKHO2              | chr15:65134081-65160201  | 4.90349   | 5.21533   | 0.0889521 | 0.959465 |
| XLOC_001654 | EV15                 | chr1:92974252-93257961   | 1.54961   | 1.64825   | 0.0890356 | 0.959214 |
| XLOC_013501 | MRPS26               | chr20:3026674-3028896    | 136.287   | 144.966   | 0.0890666 | 0.951344 |
| XLOC_001178 | WASH7P               | chr1:11873-29370         | 9.99541   | 10.6319   | 0.0890667 | 0.96087  |
| XLOC_007988 | EEF2K                | chr16:22217591-22300066  | 4.93356   | 5.24778   | 0.0890771 | 0.954559 |

|             |                       |                          |          |          |           |          |
|-------------|-----------------------|--------------------------|----------|----------|-----------|----------|
| XLOC_010497 | SHD                   | chr19:4278597-4290720    | 0.443521 | 0.471778 | 0.0891057 | 0.986822 |
| XLOC_001901 | SSR2                  | chr1:155978838-155990758 | 327.983  | 348.881  | 0.089114  | 0.950972 |
| XLOC_005633 | NR2C1                 | chr12:95414004-95467404  | 5.03013  | 5.35065  | 0.0891178 | 0.960403 |
| XLOC_015939 | ISY1,ISY1-RAB43,RAB43 | chr3:128806411-128880078 | 20.5761  | 21.8884  | 0.0891944 | 0.951902 |
| XLOC_002498 | C21orf35              | chr10:71390002-71393355  | 24.7771  | 26.3588  | 0.0892819 | 0.957925 |
| XLOC_001194 | SDFA                  | chr1:1152287-1167447     | 87.5641  | 93.1542  | 0.0892824 | 0.950929 |
| XLOC_014923 | ARLBB                 | chr3:5163929-5222601     | 20.993   | 22.3333  | 0.0892922 | 0.950929 |
| XLOC_022063 | SLC10A5               | chr8:82605890-82607207   | 1.16501  | 1.23941  | 0.0893147 | 0.979701 |
| XLOC_007609 | GTF2A2                | chr15:59930260-59949737  | 27.2623  | 29.0035  | 0.0893221 | 0.950929 |
| XLOC_015940 | CNBP                  | chr3:128886657-128902818 | 118.996  | 126.598  | 0.0893319 | 0.954559 |
| XLOC_009156 | KAT7                  | chr17:47865980-47906458  | 9.02562  | 9.60248  | 0.0893817 | 0.953964 |
| XLOC_012688 | SP140L                | chr2:231191893-231268448 | 3.89537  | 4.14435  | 0.089385  | 0.96103  |
| XLOC_001065 | BROX                  | chr1:222885905-222906106 | 1.03439  | 1.10064  | 0.0895578 | 0.979701 |
| XLOC_008143 | POLR2C                | chr16:57496550-57520385  | 49.5448  | 52.7188  | 0.0895864 | 0.958814 |
| XLOC_005395 | PLEKHA8P1             | chr12:45566816-45834187  | 2.06902  | 2.20167  | 0.0896465 | 0.992353 |
| XLOC_012996 | AUP1                  | chr2:74753774-74784678   | 179.134  | 190.619  | 0.0896528 | 0.962247 |
| XLOC_008469 | RNR3P3                | chr16:22430866-22503541  | 0.947016 | 1.00775  | 0.0896772 | 0.979701 |
| XLOC_002682 | GSTO1                 | chr10:106013951-10602728 | 557.415  | 593.2    | 0.0897648 | 0.952371 |
| XLOC_003574 | RTN3                  | chr11:63448921-63527363  | 53.8647  | 57.3234  | 0.0897844 | 0.950929 |
| XLOC_006805 | NIN                   | chr14:51186480-51297839  | 3.33387  | 3.54799  | 0.0898056 | 0.955758 |
| XLOC_016884 | LEF1                  | chr4:108968700-109097588 | 7.00684  | 7.45744  | 0.0899153 | 0.956382 |
| XLOC_021068 | VOPP1                 | chr7:55538305-55640200   | 24.5832  | 26.1642  | 0.0899192 | 0.950929 |
| XLOC_014872 | MCAT                  | chr22:43528211-43539403  | 17.606   | 18.7383  | 0.0899267 | 0.954559 |
| XLOC_005425 | ARF3                  | chr12:49329991-49351252  | 44.6492  | 47.5227  | 0.0899846 | 0.950929 |
| XLOC_002320 | PITRM1-AS1            | chr10:3179918-3215033    | 0.393673 | 0.419029 | 0.0900543 | 0.99451  |
| XLOC_020812 | ZYX                   | chr7:143078359-143220548 | 350.82   | 373.417  | 0.0900544 | 0.950929 |
| XLOC_021305 | IMPDH1                | chr7:128032330-128050036 | 99.7505  | 106.18   | 0.0901168 | 0.950929 |
| XLOC_012875 | ATL2                  | chr2:38522028-38604432   | 11.1625  | 11.8826  | 0.090184  | 0.952905 |
| XLOC_016181 | SH3BP2                | chr4:2794749-2842823     | 6.68557  | 7.11709  | 0.0902376 | 0.952469 |
| XLOC_017149 | IPO11,LRRC70          | chr5:61708572-61924416   | 8.44089  | 8.98577  | 0.0902477 | 0.956382 |
| XLOC_006903 | GTFB3                 | chr14:76424441-76448092  | 1.73109  | 1.84303  | 0.0903943 | 0.970053 |
| XLOC_009274 | CDR2L                 | chr17:72983726-73001892  | 16.1953  | 17.2438  | 0.0905045 | 0.952344 |
| XLOC_023973 | SYTL4                 | chrX:99929488-99987135   | 0.855558 | 0.910968 | 0.0905346 | 0.972989 |
| XLOC_014243 | C21orf91              | chr21:19149720-19191703  | 1.27178  | 1.35418  | 0.0905687 | 0.966946 |
| XLOC_004401 | UCP2                  | chr11:73685715-73693889  | 58.3119  | 62.0905  | 0.0905815 | 0.950929 |
| XLOC_022952 | PTCH1                 | chr9:98205263-98279247   | 1.64655  | 1.75329  | 0.0906185 | 0.96128  |
| XLOC_014755 | ZMAT5                 | chr22:30116343-30162969  | 33.3598  | 35.5234  | 0.0906579 | 0.956765 |
| XLOC_020750 | SMKR1                 | chr7:129142319-129152778 | 5.66746  | 6.03536  | 0.0907358 | 0.971854 |
| XLOC_013569 | ENTPD6                | chr20:25176338-25207360  | 35.7782  | 38.1012  | 0.0907551 | 0.950929 |
| XLOC_000567 | GNAI3                 | chr1:110091185-110138454 | 15.0534  | 16.031   | 0.0907738 | 0.950684 |
| XLOC_004806 | PPHLN1                | chr12:42719946-42842422  | 19.9755  | 21.2733  | 0.0908084 | 0.957782 |
| XLOC_005521 | CS                    | chr12:56665482-56694175  | 65.2041  | 69.4429  | 0.0908657 | 0.950929 |
| XLOC_016732 | NFXL1                 | chr4:47849257-47916633   | 3.42265  | 3.6452   | 0.0908826 | 0.958902 |
| XLOC_006168 | RBM26                 | chr13:79894099-79979923  | 6.21409  | 6.61839  | 0.0909369 | 0.953101 |
| XLOC_002471 | CDK1                  | chr10:62538088-62554610  | 39.6989  | 42.2824  | 0.0909581 | 0.948179 |
| XLOC_021755 | EFR3A                 | chr8:132916355-133025888 | 4.83631  | 5.15127  | 0.0910221 | 0.954677 |
| XLOC_001888 | FAM189B               | chr1:155216995-155225274 | 56.4951  | 60.1776  | 0.0911023 | 0.950016 |
| XLOC_017898 | RBM22                 | chr5:150070351-150080668 | 21.4939  | 22.8951  | 0.0911102 | 0.948719 |
| XLOC_001918 | HDBG                  | chr1:156711898-156722248 | 171.226  | 182.39   | 0.0911223 | 0.950929 |
| XLOC_012934 | CCT4                  | chr2:62095261-62115806   | 100.904  | 107.486  | 0.0911591 | 0.950929 |
| XLOC_008046 | PPP4C                 | chr16:30087383-30096695  | 150.212  | 160.011  | 0.0911697 | 0.950929 |
| XLOC_017357 | ANKHD1,ANKHD1-EIF4EBF | chr5:139781398-139929168 | 30.9224  | 32.9412  | 0.091242  | 0.979701 |
| XLOC_001734 | LYPD5                 | chr19:44300078-44324808  | 0.426594 | 0.45446  | 0.0912873 | 0.980556 |
| XLOC_002401 | ZEB1                  | chr10:31608100-31818742  | 2.90115  | 3.09072  | 0.0913198 | 0.955683 |
| XLOC_001973 | B4GALT3               | chr1:161141099-161147758 | 33.2596  | 35.4345  | 0.0913841 | 0.950684 |
| XLOC_007854 | HN1L                  | chr16:1728277-1752073    | 20.2096  | 21.5316  | 0.0914084 | 0.948088 |
| XLOC_021556 | TACC1                 | chr8:38585703-38710546   | 3.13098  | 3.3358   | 0.0914213 | 0.954768 |
| XLOC_003058 | NOC3L                 | chr10:96092988-96122683  | 7.77674  | 8.28555  | 0.0914326 | 0.953384 |
| XLOC_012702 | DIS3L2                | chr2:232826292-233208678 | 4.2141   | 4.49004  | 0.0915042 | 0.959465 |
| XLOC_016568 | MSMO1                 | chr4:166248817-166264314 | 21.1153  | 22.4983  | 0.0915261 | 0.95035  |
| XLOC_023533 | NGFRAP1               | chrX:102631267-102633007 | 94.9417  | 101.165  | 0.091601  | 0.950699 |
| XLOC_009392 | METTL16               | chr17:2319347-2415200    | 4.33067  | 4.61495  | 0.0917239 | 0.954441 |
| XLOC_011514 | SMIM7                 | chr19:16756958-16770968  | 28.587   | 30.4643  | 0.0917596 | 0.950929 |
| XLOC_009557 | USP22                 | chr17:20902905-20946352  | 36.1009  | 38.4723  | 0.0917844 | 0.949303 |
| XLOC_004884 | HOXC4,HOXC5,HOXC6     | chr12:54410641-54449814  | 11.1519  | 11.8852  | 0.0918872 | 0.963457 |
| XLOC_007212 | USP8                  | chr15:50716578-50838902  | 4.46486  | 4.75859  | 0.0919184 | 0.952358 |
| XLOC_006385 | MNAT1                 | chr14:61201458-61435398  | 21.8146  | 23.25    | 0.0919369 | 0.950929 |
| XLOC_009740 | RAB5C                 | chr17:40276993-40307062  | 77.5005  | 82.6031  | 0.0919886 | 0.947247 |
| XLOC_021938 | KIF13B                | chr8:28924794-29120610   | 1.61791  | 1.72448  | 0.0920372 | 0.958814 |
| XLOC_007906 | ZNF213                | chr16:3185056-3192805    | 8.71862  | 9.29331  | 0.0920923 | 0.958568 |
| XLOC_000860 | DCAF6                 | chr1:167885912-168045088 | 5.23765  | 5.58332  | 0.092202  | 0.979701 |
| XLOC_004980 | CPSF6                 | chr12:69633316-69668138  | 9.20997  | 9.81837  | 0.0922878 | 0.950684 |
| XLOC_000217 | TMEM222               | chr1:27648635-27662891   | 36.3527  | 38.7547  | 0.0923109 | 0.950929 |
| XLOC_007895 | FLYWCH1               | chr16:2961979-3001209    | 15.9319  | 16.9853  | 0.0923653 | 0.947966 |
| XLOC_000285 | MAP7D1                | chr1:36621802-36646441   | 39.0282  | 41.6088  | 0.0923728 | 0.947008 |
| XLOC_019123 | FUCA2                 | chr6:143815948-143833020 | 45.7307  | 48.7552  | 0.092391  | 0.950929 |
| XLOC_020563 | RHBDD2                | chr7:75508316-75518244   | 44.3177  | 47.2508  | 0.0924576 | 0.949303 |
| XLOC_023534 | TCEAL4                | chrX:102840418-102842651 | 48.085   | 51.2677  | 0.0924632 | 0.947001 |
| XLOC_015622 | CMTM6                 | chr3:32522803-32544403   | 13.4736  | 14.3656  | 0.0924781 | 0.948354 |



|             |                       |                          |           |           |           |          |
|-------------|-----------------------|--------------------------|-----------|-----------|-----------|----------|
| XLOC_008658 | FTSJD1                | chr16:71316202-71323509  | 4.89524   | 5.21952   | 0.0925388 | 0.954315 |
| XLOC_000768 | LAMTOR2               | chr1:156024516-156028301 | 90.6629   | 96.6729   | 0.0925991 | 0.950929 |
| XLOC_017054 | AHRR,PDCD6            | chr5:271735-438405       | 83.0874   | 88.5985   | 0.092653  | 0.950684 |
| XLOC_008119 | MT1L                  | chr16:56651372-56652730  | 1237.34   | 1319.43   | 0.0926703 | 0.950929 |
| XLOC_010703 | C19orf60              | chr19:18699494-18703147  | 57.4591   | 61.2716   | 0.0926823 | 0.95534  |
| XLOC_008121 | MT1M                  | chr16:56666533-56667898  | 212.694   | 226.827   | 0.0928128 | 0.950929 |
| XLOC_000242 | ZCCHC17               | chr1:31769841-31837780   | 14.1478   | 15.0881   | 0.0928331 | 0.952371 |
| XLOC_009147 | CALCOCO2              | chr17:46908349-46942607  | 12.6961   | 13.5402   | 0.0928554 | 0.951874 |
| XLOC_016960 | SH3D19                | chr4:152041432-152149181 | 3.27574   | 3.49354   | 0.0928675 | 0.955406 |
| XLOC_002312 | ZMYND11               | chr10:180404-300577      | 5.59092   | 5.96294   | 0.0929373 | 0.951888 |
| XLOC_003136 | BBIP1                 | chr10:112631552-11267911 | 9.14255   | 9.75124   | 0.0929889 | 0.980533 |
| XLOC_016740 | USP46                 | chr4:53457126-53525502   | 1.2018    | 1.28183   | 0.093004  | 0.957925 |
| XLOC_017436 | GALNT10               | chr5:153570294-153825381 | 2.02838   | 2.16345   | 0.0930089 | 0.959465 |
| XLOC_020708 | MET                   | chr7:116312458-116438441 | 8.29234   | 8.84458   | 0.0930139 | 0.947247 |
| XLOC_005170 | TMED2                 | chr12:124069075-12408261 | 80.3417   | 85.6926   | 0.0930216 | 0.948088 |
| XLOC_001726 | AP4B1                 | chr1:114356432-114447741 | 6.37574   | 6.80042   | 0.0930299 | 0.95534  |
| XLOC_001309 | SDHB                  | chr1:17345224-17380665   | 119.273   | 127.221   | 0.093068  | 0.947008 |
| XLOC_006490 | C14orf159             | chr14:91580356-91691703  | 6.92802   | 7.38984   | 0.0930988 | 0.956807 |
| XLOC_000760 | RUSC1                 | chr1:155278538-155300901 | 24.4648   | 26.0962   | 0.0931286 | 0.979733 |
| XLOC_008063 | FBXL19                | chr16:30930639-30960104  | 10.3586   | 11.0508   | 0.0933163 | 0.954559 |
| XLOC_008956 | NSRP1                 | chr17:28443824-28513493  | 7.42319   | 7.91937   | 0.0933472 | 0.952739 |
| XLOC_005778 | UBC                   | chr12:125396191-12539951 | 536.147   | 571.984   | 0.0933472 | 0.953101 |
| XLOC_004540 | CADM1                 | chr11:115044344-11537521 | 6.1159    | 6.52483   | 0.0933766 | 0.950929 |
| XLOC_000598 | MOV10                 | chr1:113217047-113243361 | 31.9362   | 34.0717   | 0.0933832 | 0.948088 |
| XLOC_008251 | PLCG2                 | chr16:81812898-81991899  | 2.6319    | 2.8079    | 0.0933843 | 0.960763 |
| XLOC_005675 | PRDM4                 | chr12:108126642-10815491 | 10.2489   | 10.9343   | 0.0933924 | 0.945946 |
| XLOC_001461 | EPHA10                | chr1:38181645-38230824   | 0.729084  | 0.777846  | 0.0933997 | 0.976214 |
| XLOC_017465 | WWC1                  | chr5:167719064-167899301 | 6.99964   | 7.4678    | 0.0934015 | 0.947008 |
| XLOC_017675 | SREK1IP1              | chr5:63986134-64064496   | 3.42999   | 3.65973   | 0.0935294 | 0.950929 |
| XLOC_006999 | BRF1                  | chr14:105675622-10586441 | 15.3465   | 16.3746   | 0.0935511 | 0.984917 |
| XLOC_004341 | BRMS1                 | chr11:66104803-66112582  | 48.3145   | 51.5528   | 0.0935956 | 0.948179 |
| XLOC_015300 | MYLK-AS1              | chr3:123304402-123603141 | 0.155292  | 0.165702  | 0.0936063 | 1        |
| XLOC_015035 | EIF1B                 | chr3:39851302-40353915   | 61.9985   | 66.1594   | 0.0937121 | 0.948179 |
| XLOC_016896 | C4orf12               | chr4:113460488-113578741 | 0.588744  | 0.628268  | 0.093738  | 0.987334 |
| XLOC_012310 | CIAO1                 | chr2:96931883-96939900   | 20.1231   | 21.4743   | 0.0937582 | 0.945691 |
| XLOC_001865 | JTB                   | chr1:153931574-153950451 | 152.536   | 162.782   | 0.0937902 | 0.976618 |
| XLOC_004636 | NCAPD3                | chr11:134022336-13409441 | 5.05251   | 5.39193   | 0.0938009 | 0.950929 |
| XLOC_006531 | YY1                   | chr14:100705101-10074481 | 16.4354   | 17.5409   | 0.0939161 | 0.950929 |
| XLOC_012451 | UBXN4                 | chr2:136499188-136542631 | 15.3817   | 16.4173   | 0.0940019 | 0.945946 |
| XLOC_014155 | SMIM11                | chr21:35747748-35761452  | 17.3701   | 18.5405   | 0.0940778 | 0.957152 |
| XLOC_023282 | NHS                   | chrX:17393542-17754113   | 0.0207761 | 0.0221769 | 0.0941316 | 1        |
| XLOC_015197 | CHMP2B                | chr3:87276412-87304698   | 16.8132   | 17.947    | 0.0941512 | 0.945946 |
| XLOC_016363 | UTP3                  | chr4:71554195-71556268   | 22.1785   | 23.6743   | 0.0941585 | 0.947247 |
| XLOC_001595 | SERBP1                | chr1:67873492-67896123   | 39.0708   | 41.7105   | 0.0943215 | 0.947247 |
| XLOC_016620 | ATPS1                 | chr4:666224-668127       | 738.232   | 788.146   | 0.0943878 | 0.944601 |
| XLOC_024111 | RBM5                  | chrX:135951352-135962931 | 135.055   | 144.195   | 0.0944726 | 0.949303 |
| XLOC_007363 | FAM103A1              | chr15:83654954-83680393  | 18.2494   | 19.487    | 0.0946638 | 0.959465 |
| XLOC_010017 | EIF4A3                | chr17:78109012-78120982  | 74.3834   | 79.4319   | 0.0947384 | 0.946257 |
| XLOC_023064 | STRBP                 | chr9:125883907-126030851 | 9.09406   | 9.71133   | 0.0947442 | 0.942519 |
| XLOC_001511 | HECTD3                | chr1:45468219-45477027   | 10.1204   | 10.8077   | 0.0948058 | 0.950929 |
| XLOC_017183 | TNPO1                 | chr5:72112417-72210215   | 9.4838    | 10.1281   | 0.0948234 | 0.943067 |
| XLOC_009877 | TRIM37                | chr17:56833229-57184266  | 4.24456   | 4.5334    | 0.0949775 | 0.953101 |
| XLOC_006848 | PPP2R5E               | chr14:63841354-64010079  | 3.97671   | 4.24753   | 0.0950507 | 0.955799 |
| XLOC_023365 | FTSJ1                 | chrX:48334548-48344752   | 29.9808   | 32.0233   | 0.0950831 | 0.943036 |
| XLOC_007886 | PDPK1                 | chr16:2587964-2653191    | 2.601     | 2.77821   | 0.0950922 | 0.95534  |
| XLOC_010157 | TAF4B                 | chr18:23806408-23971650  | 1.72547   | 1.84304   | 0.0950966 | 0.960165 |
| XLOC_004275 | WDR74                 | chr11:62600382-62607628  | 61.4578   | 65.6569   | 0.095351  | 0.945783 |
| XLOC_012676 | MRPL44                | chr2:224822120-224832431 | 26.5825   | 28.3995   | 0.0953899 | 0.948088 |
| XLOC_020444 | ANLN                  | chr7:36363758-36493400   | 9.54837   | 10.2016   | 0.0954629 | 0.946765 |
| XLOC_003180 | CTBP2                 | chr10:126676417-12684961 | 14.0859   | 15.0496   | 0.0954686 | 0.945247 |
| XLOC_011245 | A1BG-AS1              | chr19:58858171-58874214  | 0.190586  | 0.203637  | 0.0955519 | 1        |
| XLOC_020655 | GNB2                  | chr7:100271362-100276791 | 453.051   | 484.085   | 0.0955874 | 0.944538 |
| XLOC_014116 | GABPA                 | chr21:27096790-27144771  | 2.72645   | 2.91326   | 0.0956098 | 0.987244 |
| XLOC_017677 | CENPK                 | chr5:64813592-64858995   | 2.69563   | 2.88045   | 0.0956703 | 0.966946 |
| XLOC_013475 | ZCCHC3                | chr20:278203-280963      | 14.4007   | 15.3883   | 0.0956886 | 0.950684 |
| XLOC_004753 | DERA                  | chr12:16064185-16190315  | 15.838    | 16.9243   | 0.0957049 | 0.950929 |
| XLOC_007725 | MTHFS,ST20,ST20-MTHFS | chr15:80135888-80217196  | 16.6363   | 17.7774   | 0.0957139 | 0.977103 |
| XLOC_001819 | MRPL9                 | chr1:151732122-151743801 | 65.7322   | 70.2411   | 0.0957156 | 0.944601 |
| XLOC_009372 | CRK                   | chr17:1324646-1359561    | 7.83813   | 8.37582   | 0.0957209 | 0.950929 |
| XLOC_000072 | NMNAT1                | chr1:10003485-10045556   | 2.11332   | 2.25831   | 0.0957362 | 0.959465 |
| XLOC_005697 | VPS29                 | chr12:110929329-11093991 | 49.8603   | 53.2843   | 0.0958189 | 0.942878 |
| XLOC_005792 | POLE                  | chr12:133200347-13326391 | 6.19771   | 6.62353   | 0.0958657 | 0.944314 |
| XLOC_009899 | LIMD2                 | chr17:61699800-61777519  | 8.10479   | 8.66286   | 0.0960687 | 0.966946 |
| XLOC_010917 | ZNF234                | chr19:44645709-44664462  | 0.942814  | 1.00791   | 0.0963213 | 0.966946 |
| XLOC_014252 | ATP5J                 | chr21:27096790-27144771  | 164.443   | 175.808   | 0.0964067 | 0.954162 |
| XLOC_000298 | MACF1                 | chr1:39547088-39952810   | 4.22525   | 4.51733   | 0.0964319 | 0.943606 |
| XLOC_011274 | CIRBP-AS1             | chr19:1267469-1274809    | 1.10699   | 1.18358   | 0.096511  | 0.99351  |
| XLOC_002265 | HEATR1                | chr1:236681513-236767841 | 5.56962   | 5.95522   | 0.0965753 | 0.967901 |
| XLOC_017811 | PPP2CA                | chr5:133532147-133561951 | 47.498    | 50.7902   | 0.0966826 | 0.941621 |

|             |               |                           |          |          |           |          |
|-------------|---------------|---------------------------|----------|----------|-----------|----------|
| XLOC_013767 | OGFR          | chr20:61436176-61445352   | 36.2584  | 38.7744  | 0.09679   | 0.942472 |
| XLOC_017415 | GRPEL2        | chr5:148724976-148734146  | 9.6868   | 10.3591  | 0.0968118 | 0.950929 |
| XLOC_003074 | EXOSC1        | chr10:99195665-99205768   | 26.418   | 28.2525  | 0.0968554 | 0.950684 |
| XLOC_001687 | CLCC1         | chr1:109419602-109506111  | 5.79526  | 6.1978   | 0.0968839 | 0.952905 |
| XLOC_021228 | CLDN15        | chr7:100875372-100882101  | 11.2013  | 11.9794  | 0.0968998 | 0.959465 |
| XLOC_003982 | OSBPL5        | chr11:3108345-3186582     | 4.72853  | 5.05752  | 0.0970385 | 0.956807 |
| XLOC_004861 | KRT18         | chr12:53290970-53346685   | 227.142  | 242.954  | 0.0970865 | 0.950929 |
| XLOC_006713 | PSMB5         | chr14:23495059-23504429   | 235.401  | 251.791  | 0.0971031 | 0.942519 |
| XLOC_020864 | AGAP3         | chr7:150783825-150841523  | 39.3907  | 42.1355  | 0.0971809 | 0.948176 |
| XLOC_015983 | GK5           | chr3:141876368-141944445  | 0.632291 | 0.676353 | 0.0971882 | 0.961224 |
| XLOC_004534 | TMPRSS5       | chr11:113558267-11357706  | 0.386255 | 0.413172 | 0.0971886 | 0.984772 |
| XLOC_004718 | LOC374443     | chr12:9769879-9811010     | 1.18503  | 1.26764  | 0.0972249 | 0.974044 |
| XLOC_014703 | MAPK1         | chr22:22113946-22221970   | 10.0239  | 10.7228  | 0.0972326 | 0.961432 |
| XLOC_007397 | ZNF710        | chr15:90544751-90625432   | 7.10366  | 7.59957  | 0.0973565 | 0.950929 |
| XLOC_000278 | NCDN          | chr1:36023392-36032380    | 10.149   | 10.8579  | 0.0974047 | 0.950929 |
| XLOC_002009 | SLC19A2       | chr1:169433148-169455208  | 8.23879  | 8.81425  | 0.0974066 | 0.947008 |
| XLOC_013479 | RBCK1         | chr20:388708-411610       | 37.5185  | 40.1398  | 0.097434  | 0.946765 |
| XLOC_024034 | NKRF          | chrX:118722299-11873984   | 4.62455  | 4.94771  | 0.0974486 | 0.950684 |
| XLOC_011482 | LPHN1         | chr19:14247963-14316997   | 11.8211  | 12.6492  | 0.0976804 | 0.942472 |
| XLOC_011221 | ZNF547        | chr19:57874878-57890925   | 10.2837  | 11.0042  | 0.0976845 | 0.965573 |
| XLOC_010036 | NPLOC4        | chr17:79523912-79604138   | 20.1345  | 21.5452  | 0.0976958 | 0.942472 |
| XLOC_012578 | SPATS2L       | chr2:201170603-201346988  | 8.27636  | 8.85697  | 0.0978164 | 0.945946 |
| XLOC_003965 | CTSD          | chr11:1490684-1785501     | 167.916  | 179.719  | 0.0980036 | 0.951788 |
| XLOC_013224 | FASKTD1       | chr2:170386262-170430424  | 9.09637  | 9.736    | 0.098038  | 0.945946 |
| XLOC_001592 | WDR78         | chr1:67278571-67390570    | 0.118134 | 0.126447 | 0.098112  | 1        |
| XLOC_008524 | ZNF689        | chr16:30613878-30622096   | 3.90265  | 4.17738  | 0.0981453 | 0.95752  |
| XLOC_006918 | CEP128        | chr14:80962820-81405884   | 0.384661 | 0.41174  | 0.0981457 | 0.976077 |
| XLOC_020434 | AVL9          | chr7:32535175-32758780    | 4.13229  | 4.42329  | 0.0981793 | 0.960071 |
| XLOC_014483 | SRRD          | chr22:26879849-26908437   | 16.1246  | 17.2609  | 0.0982504 | 0.973723 |
| XLOC_009182 | PCTP          | chr17:53828339-53854748   | 9.10934  | 9.75138  | 0.0982604 | 0.952725 |
| XLOC_006147 | DIAPH3        | chr13:60239720-60738119   | 5.50515  | 5.89317  | 0.0982621 | 0.948088 |
| XLOC_021399 | TMUB1         | chr7:150778171-150780620  | 153.266  | 164.085  | 0.0984037 | 0.942472 |
| XLOC_003561 | METTL12       | chr11:62430288-62441162   | 5.39083  | 5.77139  | 0.0984118 | 0.991767 |
| XLOC_018736 | TRIM26        | chr6:30152231-30181271    | 15.7333  | 16.844   | 0.0984169 | 0.942827 |
| XLOC_002832 | FAM188A       | chr10:15820174-15902519   | 10.9904  | 11.7684  | 0.0986649 | 0.946257 |
| XLOC_015612 | TOP2B         | chr3:25469753-25705863    | 13.4594  | 14.4121  | 0.0986664 | 0.938194 |
| XLOC_001814 | PI4KB         | chr1:151254790-151300191  | 19.7734  | 21.1733  | 0.0986862 | 0.960591 |
| XLOC_004177 | MTCH2         | chr11:47638857-47664206   | 39.9877  | 42.8189  | 0.0986905 | 0.938843 |
| XLOC_014452 | BCR           | chr22:23522551-23660224   | 9.08161  | 9.72487  | 0.0987321 | 0.944601 |
| XLOC_002692 | PDCD4         | chr10:112631552-11267912  | 15.3102  | 16.3948  | 0.0987481 | 0.954677 |
| XLOC_015381 | U2SURP        | chr3:142720371-142779567  | 8.00313  | 8.57046  | 0.09881   | 0.940075 |
| XLOC_014748 | RHBD3         | chr22:29655843-29663914   | 19.875   | 21.2849  | 0.0988722 | 0.950929 |
| XLOC_021937 | INTS9         | chr8:28625174-28747698    | 11.1137  | 11.9021  | 0.0988771 | 0.945798 |
| XLOC_021507 | KIAA1967      | chr8:22462144-22526661    | 37.0334  | 39.6609  | 0.09889   | 0.951888 |
| XLOC_005338 | EPS8          | chr12:15773074-15942510   | 2.42712  | 2.59942  | 0.0989459 | 0.955709 |
| XLOC_018741 | DHX16         | chr6:30614815-30640830    | 17.1455  | 18.3636  | 0.0990181 | 0.958814 |
| XLOC_012330 | EIF5B         | chr2:99953833-100016728   | 13.6923  | 14.6651  | 0.0990209 | 0.940338 |
| XLOC_001230 | LRRC47        | chr1:3696783-3713068      | 30.2783  | 32.4304  | 0.0990631 | 0.936493 |
| XLOC_022881 | TMEM2         | chr9:74298281-74383800    | 0.552867 | 0.592195 | 0.0991417 | 0.967901 |
| XLOC_010676 | DDA1          | chr19:17420336-17445638   | 11.1139  | 11.9046  | 0.0991551 | 0.950929 |
| XLOC_012030 | LOC100506054  | chr2:3605975-3609340      | 5.72462  | 6.1321   | 0.0992012 | 0.965607 |
| XLOC_012164 | PRKCE         | chr2:45879042-46415129    | 1.23238  | 1.32017  | 0.099274  | 0.961224 |
| XLOC_001546 | KTI12,TXNDC12 | chr1:52485803-52521843    | 61.4234  | 65.8071  | 0.099455  | 0.948088 |
| XLOC_002218 | ITPKB         | chr1:226819390-226926878  | 1.96826  | 2.10876  | 0.0994716 | 0.955799 |
| XLOC_017786 | MARCKB        | chr5:126203405-126366440  | 0.371763 | 0.398309 | 0.099506  | 0.978188 |
| XLOC_006450 | DLST          | chr14:75348593-75370450   | 44.2561  | 47.4163  | 0.0995079 | 0.938194 |
| XLOC_003980 | SNORA54       | chr11:2965659-3013607     | 17.7276  | 18.994   | 0.0995434 | 0.990857 |
| XLOC_023671 | HMGB3         | chrX:150151762-150159241  | 12.1564  | 13.0248  | 0.099553  | 0.935939 |
| XLOC_015593 | METTL6        | chr3:15451376-15469042    | 4.61744  | 4.94736  | 0.0995645 | 0.95534  |
| XLOC_013388 | FARSB         | chr2:223436161-223520827  | 25.6364  | 27.4689  | 0.0996055 | 0.93616  |
| XLOC_013857 | MKKS          | chr20:10385427-10414887   | 13.5156  | 14.4817  | 0.0996097 | 0.948514 |
| XLOC_012587 | CASP8         | chr2:202098165-202152434  | 5.44322  | 5.83239  | 0.0996257 | 0.951659 |
| XLOC_004174 | CELF1         | chr11:47487488-47574792   | 18.8361  | 20.183   | 0.0996375 | 0.942747 |
| XLOC_009861 | MRPS23        | chr17:55916296-55927433   | 35.3889  | 37.9208  | 0.0996911 | 0.939647 |
| XLOC_005696 | GPN3          | chr12:110890290-110928181 | 21.9306  | 23.4997  | 0.099695  | 0.966045 |
| XLOC_008939 | SUPT6H        | chr17:26989301-27029249   | 15.4629  | 16.5698  | 0.0997518 | 0.937765 |
| XLOC_016959 | LRBA          | chr4:151185810-151936645  | 4.0726   | 4.36417  | 0.0997571 | 0.939091 |
| XLOC_013530 | BTBD3         | chr20:11871476-11907243   | 2.20335  | 2.36111  | 0.0997697 | 0.955758 |
| XLOC_012470 | RIF1          | chr2:152266396-152333860  | 1.81154  | 1.94126  | 0.0997737 | 0.94657  |
| XLOC_007524 | RPAP1         | chr15:41809374-41836464   | 7.67833  | 8.22855  | 0.0998448 | 0.948179 |
| XLOC_009179 | TOM1L1        | chr17:52978051-53046064   | 7.06174  | 7.56803  | 0.0998956 | 0.979701 |
| XLOC_005689 | FAM222A-AS1   | chr12:110152186-110211125 | 3.24273  | 3.47525  | 0.0999084 | 0.979701 |
| XLOC_022202 | TSNARE1       | chr8:143293440-143484543  | 5.19419  | 5.56676  | 0.0999409 | 0.963669 |
| XLOC_008476 | PALB2         | chr16:23614482-23652678   | 3.04595  | 3.26446  | 0.0999497 | 0.950929 |
| XLOC_022426 | CKS2          | chr9:91926112-91931618    | 446.343  | 478.367  | 0.0999653 | 0.937813 |
| XLOC_000589 | ATP5F1        | chr1:111982511-112004525  | 82.7442  | 88.6811  | 0.0999694 | 0.952216 |
| XLOC_013486 | SIRPA         | chr20:1874812-1920540     | 4.60753  | 4.93818  | 0.0999858 | 0.950929 |
| XLOC_008827 | MPDU1         | chr17:7486964-7493488     | 55.3028  | 59.2733  | 0.10003   | 0.942207 |
| XLOC_002249 | PCNXL2        | chr1:233119881-233431455  | 1.13264  | 1.21398  | 0.10006   | 0.959465 |

|             |                |                          |           |           |          |          |
|-------------|----------------|--------------------------|-----------|-----------|----------|----------|
| XLOC_018890 | XPO5           | chr6:43490067-43543812   | 17.3861   | 18.6354   | 0.100112 | 0.936493 |
| XLOC_015533 | FBXO45         | chr3:196295724-196315930 | 3.66827   | 3.93196   | 0.10015  | 0.945946 |
| XLOC_023887 | FGD1           | chrX:54471886-54522599   | 10.6185   | 11.3819   | 0.100156 | 0.947247 |
| XLOC_002547 | TSPAN14        | chr10:82214037-82282391  | 4.82178   | 5.16851   | 0.100182 | 0.947716 |
| XLOC_005985 | ABHD13         | chr13:108870762-10888660 | 1.76882   | 1.89606   | 0.100218 | 0.954559 |
| XLOC_015540 | DLG1-AS1       | chr3:196769430-197030627 | 0.158453  | 0.169853  | 0.100232 | 1        |
| XLOC_016989 | TMEM192        | chr4:165997229-166034024 | 3.09691   | 3.31979   | 0.100262 | 0.950929 |
| XLOC_015441 | SEC62          | chr3:169684579-169716167 | 8.62215   | 9.24274   | 0.100272 | 0.936621 |
| XLOC_008991 | FNDC8          | chr17:33448630-33457751  | 1.18169   | 1.26675   | 0.100281 | 0.97749  |
| XLOC_020519 | ASL            | chr7:65540775-65558329   | 38.4154   | 41.1808   | 0.100288 | 0.943036 |
| XLOC_002924 | ARHGAP22       | chr10:49654067-49864310  | 32.1704   | 34.4871   | 0.100322 | 0.942519 |
| XLOC_021664 | RIPK2          | chr8:90769974-90803292   | 38.7138   | 41.5028   | 0.100358 | 0.940338 |
| XLOC_008137 | RSPRY1         | chr16:57220240-57272947  | 2.22469   | 2.38496   | 0.100362 | 0.96571  |
| XLOC_007453 | NIPA1          | chr15:23043278-23086843  | 5.20775   | 5.583     | 0.100382 | 0.942472 |
| XLOC_002345 | SEC61A2        | chr10:12171639-12292589  | 7.64569   | 8.1967    | 0.100398 | 0.991767 |
| XLOC_010056 | CCDC57         | chr17:80059345-80170689  | 3.91678   | 4.19926   | 0.100467 | 0.956807 |
| XLOC_016782 | GRSF1          | chr4:71681498-71705627   | 23.1213   | 24.7894   | 0.100504 | 0.938194 |
| XLOC_003419 | EXT2           | chr11:44117098-44266980  | 21.5025   | 23.0539   | 0.100507 | 0.936139 |
| XLOC_000869 | C1orf112       | chr1:169764549-169863100 | 3.05723   | 3.27789   | 0.10054  | 0.960403 |
| XLOC_010619 | RAD23A         | chr19:13056627-13064457  | 127.874   | 137.104   | 0.100545 | 0.937399 |
| XLOC_020666 | AP1S1          | chr7:100797685-100804557 | 162.576   | 174.33    | 0.100706 | 0.939056 |
| XLOC_016813 | ANTXR2         | chr4:80822770-80994477   | 10.5434   | 11.3057   | 0.100712 | 0.937235 |
| XLOC_006942 | ITPK1          | chr14:93403258-93582263  | 31.767    | 34.0643   | 0.100732 | 0.937399 |
| XLOC_023847 | OTUD5          | chrX:48779302-48815648   | 22.7187   | 24.3627   | 0.100796 | 0.938194 |
| XLOC_020626 | ARPC1A         | chr7:98923495-98963885   | 122.765   | 131.65    | 0.100807 | 0.936288 |
| XLOC_022668 | TMEM141        | chr9:139685776-139687768 | 152.167   | 163.186   | 0.100859 | 0.936621 |
| XLOC_005700 | PPP1CC         | chr12:111157612-11118078 | 96.7227   | 103.73    | 0.100904 | 0.942519 |
| XLOC_023344 | CTCF7          | chrX:46433191-46457838   | 1.2305    | 1.3197    | 0.100964 | 0.978981 |
| XLOC_006442 | COQ6           | chr14:74399694-74429813  | 17.7231   | 19.0086   | 0.101016 | 0.948088 |
| XLOC_004306 | MAP4K2         | chr11:64556608-64570713  | 16.2511   | 17.4302   | 0.101047 | 0.942472 |
| XLOC_013444 | HDAC4          | chr2:239969863-240322643 | 0.463207  | 0.496824  | 0.101079 | 0.971133 |
| XLOC_012247 | DGUOK          | chr2:74153952-74186088   | 56.5549   | 60.6607   | 0.101111 | 0.939091 |
| XLOC_017854 | SRA1           | chr5:139929651-139937678 | 31.3045   | 33.5782   | 0.101158 | 0.942967 |
| XLOC_023115 | C9orf78        | chr9:132589563-132597572 | 61.2292   | 65.6772   | 0.101171 | 0.936621 |
| XLOC_005151 | SETD1B         | chr12:122242637-12227056 | 2.4182    | 2.5939    | 0.10119  | 0.952469 |
| XLOC_014451 | RAB36          | chr22:23487512-23506531  | 2.64132   | 2.83336   | 0.101254 | 0.957925 |
| XLOC_015993 | PLSCR1         | chr3:146232966-146262628 | 5.81455   | 6.23749   | 0.101297 | 0.950929 |
| XLOC_003621 | PCNXL3         | chr11:65383782-65404910  | 7.41364   | 7.95298   | 0.101314 | 0.942624 |
| XLOC_017725 | TMEM167A       | chr5:82348664-82373272   | 7.64968   | 8.20625   | 0.101323 | 0.935939 |
| XLOC_006123 | RC3TB1         | chr13:50106081-50159719  | 4.46724   | 4.79238   | 0.101359 | 0.945946 |
| XLOC_018242 | KIFC1          | chr6:33359312-33377699   | 33.8529   | 36.317    | 0.101365 | 0.937399 |
| XLOC_012029 | TRAPPC12       | chr2:3383445-3483342     | 17.2014   | 18.4543   | 0.10143  | 0.943036 |
| XLOC_012547 | NUP35          | chr2:183989082-184026408 | 6.56397   | 7.04209   | 0.101436 | 0.954559 |
| XLOC_015361 | ARMC8          | chr3:137906114-138048728 | 3.4921    | 3.74648   | 0.101438 | 0.951888 |
| XLOC_010346 | ATP5A1         | chr18:43664109-43684199  | 268.773   | 288.36    | 0.101484 | 0.936621 |
| XLOC_008033 | QPRT           | chr16:29690440-29709314  | 0.086155  | 0.0924348 | 0.101502 | 1        |
| XLOC_002524 | ADK            | chr10:75910942-76469061  | 16.8719   | 18.1021   | 0.101529 | 0.940338 |
| XLOC_022315 | NFX1           | chr9:33290417-33371155   | 6.48286   | 6.95558   | 0.101542 | 0.942747 |
| XLOC_020443 | EEPD1          | chr7:36192835-36341152   | 1.65474   | 1.77544   | 0.101576 | 0.961026 |
| XLOC_010707 | UPF1           | chr19:18942743-18979039  | 20.5443   | 22.0434   | 0.101607 | 0.936493 |
| XLOC_020629 | CPSF4          | chr7:99006600-99063824   | 64.7523   | 69.4799   | 0.101665 | 0.984053 |
| XLOC_001596 | GNGL2          | chr1:68167148-68698284   | 20.9284   | 22.4575   | 0.101739 | 0.976337 |
| XLOC_010683 | MAP1S          | chr19:17830302-17845324  | 21.5975   | 23.1757   | 0.101748 | 0.941329 |
| XLOC_011841 | NOSIP          | chr19:50058724-50083829  | 73.3512   | 78.7172   | 0.101859 | 0.935939 |
| XLOC_016914 | NDNF           | chr4:121956781-121993673 | 0.0271668 | 0.0291553 | 0.101914 | 1        |
| XLOC_001653 | GF1I           | chr1:92940317-92952433   | 1.61523   | 1.73349   | 0.101941 | 0.970195 |
| XLOC_002672 | AS3MT,C10orf32 | chr10:104613966-10466168 | 4.73531   | 5.08242   | 0.102057 | 0.95534  |
| XLOC_000564 | ATXN7L2        | chr1:110026560-110035420 | 8.15715   | 8.75511   | 0.102061 | 0.952905 |
| XLOC_013009 | SUCLG1         | chr2:84650646-84686586   | 48.4096   | 51.9601   | 0.10211  | 0.934345 |
| XLOC_008500 | CDIPT          | chr16:29869677-29874578  | 53.8384   | 57.7908   | 0.102204 | 0.938194 |
| XLOC_014540 | KCTD17         | chr22:37447778-37459430  | 22.222    | 23.8536   | 0.102223 | 0.945783 |
| XLOC_007194 | SPATA5L1       | chr15:45694518-45713616  | 9.99292   | 10.7269   | 0.102248 | 0.949303 |
| XLOC_016049 | PDCD10         | chr3:167401694-167452657 | 32.0808   | 34.439    | 0.102332 | 0.935939 |
| XLOC_021732 | ZHX2           | chr8:123793900-123986758 | 2.14338   | 2.30098   | 0.102358 | 0.956807 |
| XLOC_020469 | YKT6           | chr7:44240577-44253893   | 32.8007   | 35.2126   | 0.102367 | 0.933258 |
| XLOC_003415 | SEC14L1P1      | chr11:43902356-43942494  | 0.311682  | 0.334603  | 0.102376 | 1        |
| XLOC_009971 | RECQL5         | chr17:73584138-73663269  | 6.18633   | 6.64144   | 0.102412 | 0.952469 |
| XLOC_021961 | LSM1           | chr8:38020838-38070819   | 36.8872   | 39.6012   | 0.102425 | 0.955709 |
| XLOC_006749 | STXBP6         | chr14:25281305-25519095  | 0.506562  | 0.543884  | 0.102561 | 0.979701 |
| XLOC_004890 | COPZ1          | chr12:54718873-54745635  | 93.6917   | 100.595   | 0.102568 | 0.939371 |
| XLOC_015299 | SEC22A         | chr3:122920773-122992982 | 4.37402   | 4.69652   | 0.102634 | 0.949812 |
| XLOC_006820 | GCH1           | chr14:55308723-55369542  | 6.30764   | 6.77275   | 0.102643 | 0.954677 |
| XLOC_004426 | INTS4          | chr11:77589765-77705717  | 7.15564   | 7.68343   | 0.10267  | 0.942519 |
| XLOC_013581 | PSIMCT-1       | chr20:30102240-30161066  | 1.09775   | 1.17876   | 0.102712 | 0.996014 |
| XLOC_011269 | R3HDM4         | chr19:896502-913225      | 81.9838   | 88.0366   | 0.102765 | 0.931473 |
| XLOC_004682 | LEPREL2        | chr12:6937571-6949018    | 22.628    | 24.2994   | 0.102807 | 0.937255 |
| XLOC_000258 | HDAC1          | chr1:32757707-32799224   | 65.998    | 70.8745   | 0.102844 | 0.936584 |
| XLOC_018975 | PGM3           | chr6:83777384-83906256   | 4.8022    | 5.15717   | 0.102884 | 0.953837 |
| XLOC_008904 | PRPSAP2        | chr17:18759611-18834599  | 20.1806   | 21.6728   | 0.102914 | 0.937363 |

|             |                          |                          |           |           |          |          |
|-------------|--------------------------|--------------------------|-----------|-----------|----------|----------|
| XLOC_001766 | GNRHR2                   | chr1:145507556-145516071 | 4.80961   | 5.16528   | 0.102924 | 0.981044 |
| XLOC_002347 | CAMK1D                   | chr10:12391582-12871733  | 3.69128   | 3.96425   | 0.102926 | 0.962439 |
| XLOC_008312 | NPRL3                    | chr16:127017-188697      | 41.1854   | 44.2324   | 0.102972 | 0.974044 |
| XLOC_021487 | SH2D4A                   | chr8:19171080-19253729   | 3.41988   | 3.67316   | 0.103075 | 0.952919 |
| XLOC_017306 | CDC42SE2                 | chr5:130599701-130730382 | 5.95161   | 6.39245   | 0.103089 | 0.945946 |
| XLOC_009009 | AATF                     | chr17:35306174-35414171  | 47.1474   | 50.6397   | 0.103093 | 0.936316 |
| XLOC_023264 | TMSB4X                   | chrX:12993225-12995346   | 337.836   | 362.864   | 0.103103 | 0.940075 |
| XLOC_017887 | SH3TC2                   | chr5:148361712-148442731 | 0.0797499 | 0.0856599 | 0.103137 | 1        |
| XLOC_010210 | WDR7                     | chr18:54318615-54697036  | 0.607505  | 0.652544  | 0.103178 | 0.963266 |
| XLOC_007986 | C16orf52                 | chr16:22019455-22095972  | 1.08103   | 1.1612    | 0.10321  | 0.962439 |
| XLOC_012629 | ATIC                     | chr2:216176678-216214496 | 62.8244   | 67.4838   | 0.103215 | 0.936252 |
| XLOC_008317 | TMEM8A                   | chr16:420775-431950      | 33.047    | 35.498    | 0.103219 | 0.934181 |
| XLOC_006960 | CLMN                     | chr14:95648275-95786245  | 1.28009   | 1.37504   | 0.103222 | 0.947247 |
| XLOC_005932 | PIBF1                    | chr13:73302041-73590591  | 1.49775   | 1.60884   | 0.103224 | 0.990324 |
| XLOC_001739 | CD58                     | chr1:117057155-117111371 | 7.72618   | 8.30005   | 0.103366 | 0.956382 |
| XLOC_001196 | UBE2J2                   | chr1:1189291-1209234     | 31.2905   | 33.6155   | 0.103405 | 0.937403 |
| XLOC_015923 | SLC41A3                  | chr3:125725199-125820391 | 18.9469   | 20.355    | 0.103421 | 0.942519 |
| XLOC_009575 | KIAA0100                 | chr17:26926150-269972177 | 14.998    | 16.1128   | 0.103439 | 0.936637 |
| XLOC_015044 | SS18L2                   | chr3:42589458-42690233   | 19.5432   | 20.9968   | 0.103502 | 0.973562 |
| XLOC_023781 | SH3KBP1                  | chrX:19552082-19905744   | 5.55549   | 5.96893   | 0.103557 | 0.942878 |
| XLOC_003363 | NAV2                     | chr11:19372270-20143147  | 5.29382   | 5.68831   | 0.10369  | 0.945946 |
| XLOC_004074 | EIF4G2                   | chr11:10818592-10830582  | 99.6687   | 107.105   | 0.103815 | 0.935939 |
| XLOC_021115 | WBSCR16                  | chr7:74456282-74489699   | 33.1484   | 35.6219   | 0.103824 | 0.935939 |
| XLOC_010589 | SMARCA4                  | chr19:11071597-11172958  | 32.2952   | 34.7067   | 0.103895 | 0.933417 |
| XLOC_017167 | MARVELD2                 | chr5:68710938-68737890   | 0.461356  | 0.49588   | 0.104111 | 0.978703 |
| XLOC_021158 | PEX1                     | chr7:92116336-92157845   | 4.17183   | 4.48412   | 0.104142 | 0.944284 |
| XLOC_023086 | AKP1                     | chr9:130628758-130640022 | 52.3783   | 56.3008   | 0.104186 | 0.933625 |
| XLOC_010006 | USP36                    | chr17:76792964-76836969  | 8.29515   | 8.91676   | 0.104251 | 0.933936 |
| XLOC_017735 | CETN3                    | chr5:89689528-89705603   | 19.3771   | 20.8292   | 0.104254 | 0.942519 |
| XLOC_013548 | DTD1                     | chr20:18568555-18744560  | 59.7267   | 64.2076   | 0.104368 | 0.931471 |
| XLOC_001072 | CNIH4                    | chr1:224544594-224563695 | 136.603   | 146.853   | 0.10438  | 0.932468 |
| XLOC_011627 | ZNF850                   | chr19:37234379-37263716  | 1.49986   | 1.6125    | 0.104474 | 0.949929 |
| XLOC_008455 | THUMPDP1                 | chr16:20744988-20753199  | 3.98458   | 4.28404   | 0.104547 | 0.942827 |
| XLOC_000687 | MLLT11                   | chr1:151032150-151040973 | 0.566727  | 0.609328  | 0.104566 | 0.977332 |
| XLOC_007989 | POLR3E                   | chr16:22308695-22346424  | 9.21534   | 9.90878   | 0.104669 | 0.939662 |
| XLOC_004781 | ARNTL2                   | chr12:27485786-27578746  | 3.11488   | 3.34939   | 0.104722 | 0.938194 |
| XLOC_000744 | CKS1B                    | chr1:154947117-154951725 | 175.121   | 188.308   | 0.104741 | 0.933952 |
| XLOC_001074 | DNAH14                   | chr1:225117355-225586996 | 5.08454   | 5.46764   | 0.1048   | 0.964871 |
| XLOC_015123 | MANF                     | chr3:51422691-51426828   | 90.4543   | 97.2744   | 0.104871 | 0.931471 |
| XLOC_016449 | CISD2                    | chr4:103790134-103940896 | 6.82553   | 7.34043   | 0.104923 | 0.932202 |
| XLOC_015228 | TFG                      | chr3:100428133-100467811 | 57.3943   | 61.7253   | 0.104953 | 0.933811 |
| XLOC_021218 | TFR2                     | chr7:100218038-100239173 | 17.0547   | 18.3421   | 0.104989 | 0.937542 |
| XLOC_017488 | BNIP1                    | chr5:172571444-172591390 | 15.1079   | 16.2486   | 0.105013 | 0.946765 |
| XLOC_020661 | SRRT                     | chr7:100472700-100486288 | 42.3748   | 45.5751   | 0.10504  | 0.931471 |
| XLOC_014412 | COMT                     | chr22:19863039-20004309  | 45.2813   | 48.7018   | 0.105059 | 0.96103  |
| XLOC_005626 | EEA1                     | chr12:93166284-93323107  | 0.94535   | 1.01681   | 0.105131 | 0.95534  |
| XLOC_022696 | MRPL41                   | chr9:140446308-140447007 | 550.263   | 591.866   | 0.105148 | 0.931506 |
| XLOC_016161 | PIGG                     | chr4:419223-533320       | 5.6134    | 6.03784   | 0.105156 | 0.965148 |
| XLOC_014024 | TMEM189, TMEM189-UBE2A   | chr20:48697660-48770335  | 78.5765   | 84.5185   | 0.105169 | 0.933023 |
| XLOC_013585 | TPX2                     | chr20:30326903-30389603  | 29.4817   | 31.7114   | 0.105179 | 0.933023 |
| XLOC_007533 | TMEM87A                  | chr15:42502725-42565755  | 10.3267   | 11.1086   | 0.105288 | 0.934181 |
| XLOC_017136 | SKIVL2                   | chr5:54603575-54830873   | 11.5538   | 12.4286   | 0.1053   | 0.942827 |
| XLOC_012827 | ASXL2                    | chr2:25962252-26101312   | 0.482144  | 0.518651  | 0.1053   | 0.965573 |
| XLOC_011962 | TMEM86B                  | chr19:55738001-55740632  | 2.03934   | 2.19376   | 0.105308 | 0.974044 |
| XLOC_004976 | RAP1B                    | chr12:69004618-69054385  | 76.7554   | 82.5739   | 0.105417 | 0.931471 |
| XLOC_003805 | FDX1                     | chr11:110300660-11033560 | 7.62312   | 8.20137   | 0.105483 | 0.940338 |
| XLOC_016636 | HAUS3, POLN              | chr4:2073644-2243860     | 1.83745   | 1.97685   | 0.105498 | 0.950929 |
| XLOC_014647 | NCAPH2                   | chr22:50946644-50968514  | 21.3385   | 22.9576   | 0.105514 | 0.967901 |
| XLOC_006459 | IFT43                    | chr14:76452095-76550416  | 30.0505   | 32.3307   | 0.105517 | 0.945783 |
| XLOC_009640 | ACACA                    | chr17:35441926-35766902  | 4.01232   | 4.3168    | 0.105528 | 0.933023 |
| XLOC_016289 | N4BP2                    | chr4:40044536-40159872   | 0.335774  | 0.361264  | 0.105565 | 0.96513  |
| XLOC_005758 | VPS33A                   | chr12:122716093-12275106 | 7.43888   | 8.00368   | 0.105578 | 0.942519 |
| XLOC_013517 | CDS2                     | chr20:5107406-5178533    | 4.89712   | 5.26897   | 0.105585 | 0.931471 |
| XLOC_010393 | KDSR                     | chr18:60994970-61034506  | 20.6826   | 22.2532   | 0.105596 | 0.931471 |
| XLOC_009515 | CDRT4, TVP23C, TVP23C-Cl | chr17:15339331-15466945  | 8.37169   | 9.00781   | 0.105658 | 0.950929 |
| XLOC_010750 | DPY19L3                  | chr19:32896654-32976799  | 2.07529   | 2.233     | 0.10567  | 0.947008 |
| XLOC_009090 | NBR2                     | chr17:41277599-41297125  | 1.83282   | 1.97211   | 0.105675 | 0.975511 |
| XLOC_012638 | ARPC2                    | chr2:219081873-219119071 | 203.195   | 218.64    | 0.105693 | 0.931355 |
| XLOC_020937 | ETV1                     | chr7:13930855-14031050   | 0.631255  | 0.679238  | 0.105695 | 0.960698 |
| XLOC_010553 | RAB11B                   | chr19:8439259-8469317    | 91.9266   | 98.9149   | 0.105706 | 0.930066 |
| XLOC_010912 | ZNF222                   | chr19:44529493-44537262  | 3.22643   | 3.47189   | 0.105782 | 0.959465 |
| XLOC_009529 | RASD1                    | chr17:17397752-17399709  | 0.20238   | 0.217783  | 0.105824 | 1        |
| XLOC_003215 | RIC8A                    | chr11:208529-236362      | 64.6593   | 69.5807   | 0.105831 | 0.947247 |
| XLOC_021947 | GSR                      | chr8:30535579-30585486   | 21.9264   | 23.5955   | 0.105848 | 0.934345 |
| XLOC_010659 | TPM4                     | chr19:16178316-16213813  | 240.572   | 258.909   | 0.105976 | 0.935917 |
| XLOC_022784 | SMU1                     | chr9:33041849-33076714   | 9.57848   | 10.3089   | 0.106019 | 0.930066 |
| XLOC_003406 | PRR5L                    | chr11:36317724-36486754  | 1.30829   | 1.40809   | 0.106056 | 0.96128  |
| XLOC_024182 | NAA10                    | chrX:153195279-153200607 | 133.325   | 143.497   | 0.106073 | 0.930488 |
| XLOC_008473 | GGA2                     | chr16:23474862-23521815  | 9.26627   | 9.9733    | 0.106082 | 0.932468 |

|             |              |                          |           |           |          |          |
|-------------|--------------|--------------------------|-----------|-----------|----------|----------|
| XLOC_006278 | LRP10        | chr14:23340959-23347291  | 41.16     | 44.3027   | 0.106152 | 0.931471 |
| XLOC_011158 | PRPF31       | chr19:54610319-54635150  | 45.7575   | 49.2512   | 0.106152 | 0.935836 |
| XLOC_001593 | SLC35D1      | chr1:67465014-67520080   | 1.1094    | 1.19416   | 0.106213 | 0.955758 |
| XLOC_002778 | MTG1         | chr10:135207620-13523811 | 27.6198   | 29.7301   | 0.106221 | 0.943861 |
| XLOC_001786 | HIST2H2BF    | chr1:149754244-149783921 | 1.28967   | 1.38824   | 0.106259 | 0.987693 |
| XLOC_006916 | SNW1         | chr14:78183943-78236085  | 32.0484   | 34.4999   | 0.106339 | 0.927627 |
| XLOC_005448 | SLC11A2      | chr12:51373565-51422058  | 7.07028   | 7.61125   | 0.106366 | 0.944284 |
| XLOC_007126 | EMC4         | chr15:34517244-34630265  | 92.0616   | 99.1127   | 0.106471 | 0.935836 |
| XLOC_012128 | YIPF4        | chr2:32502957-32531658   | 16.0616   | 17.2934   | 0.106605 | 0.935939 |
| XLOC_006498 | TMEM251      | chr14:93651295-93653431  | 25.0533   | 26.9748   | 0.106614 | 0.940999 |
| XLOC_001924 | ETV3         | chr1:157094458-157108383 | 0.494265  | 0.532188  | 0.106652 | 0.979701 |
| XLOC_012200 | B3GNT2       | chr2:62423261-62451866   | 4.13831   | 4.45588   | 0.106672 | 0.949812 |
| XLOC_015789 | PDHB         | chr3:58413356-58419579   | 29.0094   | 31.2418   | 0.106696 | 0.932231 |
| XLOC_010695 | MPV17L2      | chr19:18304039-18307550  | 14.4284   | 15.5388   | 0.106965 | 0.947247 |
| XLOC_009271 | TMEM104      | chr17:72772621-72835922  | 1.97782   | 2.1301    | 0.107014 | 0.959465 |
| XLOC_021395 | KCNH2        | chr7:150642043-150675402 | 20.02     | 21.5616   | 0.107021 | 0.934345 |
| XLOC_018812 | TAPBP_ZBTB22 | chr6:33267471-33285719   | 32.7324   | 35.2535   | 0.107048 | 0.932901 |
| XLOC_000422 | NFIA         | chr1:61542945-61928460   | 1.03987   | 1.11999   | 0.107086 | 0.952469 |
| XLOC_007598 | NEDD4        | chr15:56119121-56285835  | 1.8304    | 1.97154   | 0.107162 | 0.946765 |
| XLOC_010147 | RIOK3        | chr18:21032786-21063099  | 10.0589   | 10.8349   | 0.107215 | 0.930488 |
| XLOC_005957 | GPR180       | chr13:95254103-95286899  | 1.67685   | 1.80639   | 0.107349 | 0.943036 |
| XLOC_008653 | ST3GAL2      | chr16:70413337-70472991  | 3.62997   | 3.91046   | 0.10738  | 0.950929 |
| XLOC_009810 | CBX1         | chr17:46147413-46178883  | 52.9815   | 57.0761   | 0.107399 | 0.930066 |
| XLOC_019157 | DYNLT1       | chr6:159057506-159065804 | 83.9635   | 90.4538   | 0.107419 | 0.930488 |
| XLOC_009748 | FAM134C      | chr17:40731525-40767256  | 17.159    | 18.4854   | 0.107421 | 0.959465 |
| XLOC_001481 | MYCL1        | chr1:40361095-40367687   | 3.47492   | 3.74354   | 0.107422 | 0.955709 |
| XLOC_023986 | BEX5         | chrX:101408678-101410981 | 14.4637   | 15.5819   | 0.10743  | 0.950929 |
| XLOC_009983 | SRP68        | chr17:74034855-74068607  | 40.745    | 43.9009   | 0.107628 | 0.932468 |
| XLOC_000344 | CCDC24       | chr1:44457279-44497164   | 7.20836   | 7.76718   | 0.107721 | 0.988154 |
| XLOC_020901 | PSMG3        | chr7:1606969-1609668     | 60.7516   | 65.4625   | 0.107747 | 0.932202 |
| XLOC_013179 | NMI          | chr2:152126981-152146431 | 9.21134   | 9.92573   | 0.107761 | 0.946765 |
| XLOC_011795 | KPTN         | chr19:47978399-47987521  | 3.93451   | 4.23975   | 0.107798 | 0.961224 |
| XLOC_017360 | IK           | chr5:140027383-140042061 | 19.5661   | 21.0851   | 0.107862 | 0.929536 |
| XLOC_008205 | WVWP2        | chr16:69796186-69975644  | 11.1132   | 11.9761   | 0.107884 | 0.935296 |
| XLOC_023976 | TRMT2B       | chrX:100264333-100307101 | 2.80504   | 3.02288   | 0.107904 | 0.953384 |
| XLOC_021290 | NDUFA5       | chr7:123181082-123197951 | 32.3272   | 34.8389   | 0.107953 | 0.930066 |
| XLOC_011270 | TMEM259      | chr19:1000436-1021141    | 73.5737   | 79.2904   | 0.107956 | 0.929635 |
| XLOC_006979 | MOK          | chr14:102690833-10277151 | 6.87577   | 7.41011   | 0.107973 | 0.958814 |
| XLOC_017949 | FBXW11       | chr5:171288555-171433871 | 7.94253   | 8.55978   | 0.107975 | 0.931471 |
| XLOC_012533 | MTX2         | chr2:177134122-177202751 | 35.8937   | 38.6844   | 0.108019 | 0.931473 |
| XLOC_001017 | CD55         | chr1:207494816-207534311 | 18.1988   | 19.6139   | 0.108033 | 0.931471 |
| XLOC_009796 | KANSL1       | chr17:44107281-44302740  | 6.16287   | 6.64213   | 0.108043 | 0.931471 |
| XLOC_021873 | FAM86B1      | chr8:12039612-12051624   | 3.57636   | 3.85449   | 0.108048 | 0.958201 |
| XLOC_009279 | NUP85        | chr17:73201596-73231854  | 24.3705   | 26.2658   | 0.10805  | 0.930157 |
| XLOC_010452 | MUM1         | chr19:1354975-1378430    | 8.52952   | 9.19306   | 0.10808  | 0.935939 |
| XLOC_008787 | USP6         | chr17:5031686-5078324    | 0.18207   | 0.196237  | 0.108103 | 1        |
| XLOC_017588 | MYO10        | chr5:16662015-16936385   | 6.29812   | 6.78874   | 0.108222 | 0.92969  |
| XLOC_009028 | CDK12        | chr17:37617738-37690800  | 4.45368   | 4.80063   | 0.108226 | 0.931473 |
| XLOC_002109 | CSRP1        | chr1:201452657-201476381 | 102.965   | 110.988   | 0.108254 | 0.931471 |
| XLOC_018770 | CLIC1        | chr6:31698357-31704341   | 580.75    | 626.01    | 0.108267 | 0.934426 |
| XLOC_004999 | GLIPR1       | chr12:75874512-75905418  | 14.1821   | 15.2884   | 0.108368 | 0.965515 |
| XLOC_010847 | SAMD4B       | chr19:39833107-39875537  | 10.2998   | 11.1034   | 0.108392 | 0.932231 |
| XLOC_012103 | NRBP1        | chr2:27651472-27665124   | 54.5718   | 58.8301   | 0.108397 | 0.929635 |
| XLOC_022493 | FSD1L        | chr9:108210314-108311381 | 0.982735  | 1.05944   | 0.108431 | 0.981753 |
| XLOC_002825 | DCLRE1C      | chr10:14948870-14996094  | 2.89996   | 3.12642   | 0.108481 | 0.947008 |
| XLOC_011047 | ZNF473       | chr19:50529211-50552031  | 3.00829   | 3.24328   | 0.10851  | 0.945946 |
| XLOC_000693 | PSMB4        | chr1:151372040-151374411 | 504.46    | 543.884   | 0.108559 | 0.928653 |
| XLOC_021232 | SPDYE6       | chr7:101986191-101996881 | 0.314684  | 0.339278  | 0.108566 | 1        |
| XLOC_010715 | NDUFA13      | chr19:19627018-19639013  | 580.695   | 626.098   | 0.108607 | 0.929635 |
| XLOC_012569 | SLC39A10     | chr2:196521531-196602421 | 3.7586    | 4.05274   | 0.108702 | 0.937187 |
| XLOC_002871 | MTPAP        | chr10:30598729-30638267  | 7.62942   | 8.22661   | 0.108724 | 0.926258 |
| XLOC_003094 | BLOC1S2      | chr10:102033034-10204644 | 16.0241   | 17.2787   | 0.108748 | 0.930066 |
| XLOC_011970 | UBE2S        | chr19:55912649-55919325  | 545.379   | 588.081   | 0.108756 | 0.931471 |
| XLOC_010934 | CLPTM1       | chr19:45457841-45496604  | 43.9633   | 47.4112   | 0.108929 | 0.927627 |
| XLOC_018891 | GTPBP2       | chr6:43543877-43596936   | 37.2877   | 40.2129   | 0.108961 | 0.954677 |
| XLOC_012207 | AFTPH        | chr2:64751438-64820138   | 6.0445    | 6.51966   | 0.109174 | 0.931471 |
| XLOC_006267 | RNASE7       | chr14:21510384-21512392  | 0.0698069 | 0.0752951 | 0.109186 | 1        |
| XLOC_004737 | APOLD1       | chr12:12878850-12944399  | 0.233893  | 0.252303  | 0.109306 | 1        |
| XLOC_001332 | DDOST        | chr1:20978259-20988037   | 185.875   | 200.513   | 0.109368 | 0.928755 |
| XLOC_009614 | RAD51D,RFFL  | chr17:33336130-33448541  | 12.9037   | 13.92     | 0.109372 | 0.942519 |
| XLOC_010355 | IER3IP1      | chr18:44681389-44702745  | 41.6708   | 44.9539   | 0.109409 | 0.925771 |
| XLOC_013953 | DSN1         | chr20:35380193-35402230  | 9.31093   | 10.0445   | 0.109409 | 0.942269 |
| XLOC_007519 | INO80        | chr15:41271078-41408340  | 2.86744   | 3.09345   | 0.109452 | 0.942238 |
| XLOC_002786 | IDI2         | chr10:1064846-1095061    | 7.91007   | 8.53389   | 0.109513 | 0.982267 |
| XLOC_016475 | UGT8         | chr4:115519610-115598202 | 3.11048   | 3.35589   | 0.109556 | 0.950929 |
| XLOC_008537 | PYCARD       | chr16:31212806-31214097  | 0.297495  | 0.320967  | 0.10956  | 1        |
| XLOC_015970 | NME9         | chr3:137906114-138048721 | 0.118904  | 0.128289  | 0.109593 | 1        |
| XLOC_006464 | KIAA1737     | chr14:77564577-77583630  | 2.90754   | 3.13721   | 0.109682 | 0.945946 |
| XLOC_005990 | ING1         | chr13:111364969-11137342 | 6.42402   | 6.93189   | 0.109774 | 0.946274 |

|             |                      |                          |          |          |          |          |
|-------------|----------------------|--------------------------|----------|----------|----------|----------|
| XLOC_014756 | ASCC2                | chr22:30184596-30234293  | 20.4841  | 22.1043  | 0.109827 | 0.92969  |
| XLOC_000090 | MFN2                 | chr1:12040237-12073572   | 9.77996  | 10.5536  | 0.109836 | 0.928909 |
| XLOC_023284 | SCML1                | chrX:17755591-17773105   | 3.18557  | 3.43761  | 0.109853 | 0.950929 |
| XLOC_006227 | MCF2L-AS1            | chr13:113621797-11362295 | 0.952035 | 1.02741  | 0.109921 | 0.979701 |
| XLOC_021946 | GTF2E2               | chr8:30436030-30515738   | 22.5781  | 24.3657  | 0.109927 | 0.92969  |
| XLOC_007347 | MESDC1               | chr15:81293294-81296345  | 17.0949  | 18.4488  | 0.109959 | 0.938194 |
| XLOC_013868 | RRBP1                | chr20:17594322-17662928  | 16.5721  | 17.8858  | 0.110051 | 0.92844  |
| XLOC_017900 | ZNF300               | chr5:150273953-15028454  | 5.9336   | 6.40396  | 0.110056 | 0.937399 |
| XLOC_008393 | LOC100507501         | chr16:4295825-4303790    | 2.27814  | 2.45874  | 0.110061 | 0.963536 |
| XLOC_001544 | NRD1                 | chr1:52082545-52344609   | 21.2603  | 22.9458  | 0.110072 | 0.95467  |
| XLOC_023279 | SYAP1                | chrX:16737706-16780807   | 22.7868  | 24.5956  | 0.1102   | 0.923433 |
| XLOC_000684 | PRUNE                | chr1:150980972-15100818  | 5.07774  | 5.4808   | 0.1102   | 0.943036 |
| XLOC_023616 | MST4                 | chrX:131157244-13120997  | 10.8327  | 11.6928  | 0.110232 | 0.92969  |
| XLOC_011216 | AURKC                | chr19:57742376-57746916  | 0.727068 | 0.7848   | 0.110234 | 0.979701 |
| XLOC_021552 | ASH2L                | chr8:37963010-37997598   | 8.94422  | 9.65454  | 0.110253 | 0.935836 |
| XLOC_007183 | CASC4                | chr15:44580908-44707959  | 8.09086  | 8.73373  | 0.110305 | 0.930777 |
| XLOC_004909 | METTL7B              | chr12:56075329-56106089  | 2.03665  | 2.19848  | 0.11031  | 0.982937 |
| XLOC_010046 | SIRT7                | chr17:79869814-79876058  | 20.8908  | 22.5526  | 0.110425 | 0.933417 |
| XLOC_012257 | HTRA2                | chr2:74753774-74784678   | 18.2732  | 19.7273  | 0.110463 | 0.985982 |
| XLOC_021168 | BET1                 | chr7:93620999-93633690   | 9.61933  | 10.3849  | 0.110476 | 0.930157 |
| XLOC_005038 | ELK3                 | chr12:96588206-96661606  | 8.67526  | 9.36594  | 0.110516 | 0.945082 |
| XLOC_006289 | DHRS4L2              | chr14:24439082-24475617  | 11.703   | 12.6347  | 0.11052  | 0.945946 |
| XLOC_019114 | REPS1                | chr6:139225619-13930939  | 15.442   | 16.6721  | 0.110576 | 0.928018 |
| XLOC_019203 | DLL1                 | chr6:170591293-17059969  | 6.34794  | 6.85396  | 0.110648 | 0.946257 |
| XLOC_000237 | YTHDF2               | chr1:29063132-29096287   | 30.8874  | 33.3552  | 0.110891 | 0.922006 |
| XLOC_020904 | FTSJ3                | chr7:2273925-2281833     | 17.9764  | 19.4126  | 0.110892 | 0.931473 |
| XLOC_022414 | NAA35                | chr9:88556056-88637217   | 8.78423  | 9.48611  | 0.110901 | 0.934345 |
| XLOC_003011 | ZNF503               | chr10:77157602-77168740  | 8.24328  | 8.90196  | 0.110906 | 0.950929 |
| XLOC_004515 | KDEL2C               | chr11:108342832-1083691  | 3.78962  | 4.09247  | 0.110917 | 0.935939 |
| XLOC_001955 | IGSF8                | chr1:160061128-16006861  | 17.7115  | 19.127   | 0.110931 | 0.935062 |
| XLOC_023280 | TXLNG                | chrX:16804554-16862642   | 12.1183  | 13.0873  | 0.110974 | 0.928909 |
| XLOC_021012 | KIAA0895             | chr7:36363758-36493400   | 0.453256 | 0.489501 | 0.110987 | 0.993379 |
| XLOC_024096 | PLAC1                | chrX:133699872-13379251  | 0.229511 | 0.247866 | 0.110996 | 1        |
| XLOC_001953 | PIGM                 | chr1:159997461-16000178  | 2.36623  | 2.55547  | 0.110999 | 0.948689 |
| XLOC_017773 | CCDC112              | chr5:114602884-11463245  | 1.99556  | 2.15532  | 0.111105 | 0.956373 |
| XLOC_017135 | GPX8                 | chr5:54408798-54469005   | 14.5186  | 15.6809  | 0.11111  | 0.926813 |
| XLOC_013741 | VAPB                 | chr20:56964174-57026156  | 6.43082  | 6.94575  | 0.111126 | 0.922006 |
| XLOC_002991 | ECD                  | chr10:74894281-74927853  | 10.9201  | 11.7952  | 0.111217 | 0.931471 |
| XLOC_012895 | PREPL                | chr2:44502596-44589001   | 4.18283  | 4.51807  | 0.111226 | 0.932231 |
| XLOC_021696 | SPAG1                | chr8:101170262-10125413  | 3.57967  | 3.86672  | 0.111286 | 0.938305 |
| XLOC_021963 | WHSC1L1              | chr8:38132560-38239790   | 5.35951  | 5.7895   | 0.111336 | 0.93351  |
| XLOC_022731 | TTC39B               | chr9:15170841-15307358   | 0.434828 | 0.469718 | 0.111335 | 0.970558 |
| XLOC_016398 | BMP2K                | chr4:79697531-79833341   | 2.17567  | 2.35031  | 0.111397 | 0.956033 |
| XLOC_006646 | KLC1                 | chr14:104095524-1041818  | 17.4007  | 18.7975  | 0.111398 | 0.950929 |
| XLOC_006643 | MARK3                | chr14:103851700-1039701  | 20.3447  | 21.9785  | 0.111444 | 0.928902 |
| XLOC_012038 | RNF144A              | chr2:7052406-7184309     | 2.02032  | 2.18257  | 0.111444 | 0.945946 |
| XLOC_000617 | TTF2                 | chr1:117602948-11764549  | 4.34591  | 4.69496  | 0.111454 | 0.932468 |
| XLOC_015765 | MUSTN1,TMEM110,TMEM1 | chr3:52867130-52931597   | 5.18484  | 5.60137  | 0.111481 | 0.966946 |
| XLOC_013684 | PIGT                 | chr20:44044706-44054885  | 64.7494  | 69.9584  | 0.11163  | 0.92969  |
| XLOC_020771 | NUP205               | chr7:135242661-13533349  | 16.433   | 17.7552  | 0.111649 | 0.922579 |
| XLOC_004610 | TMEM218              | chr11:124964265-1249816  | 2.45801  | 2.65578  | 0.111649 | 0.948088 |
| XLOC_005363 | TM7SF3               | chr12:27124505-27167339  | 9.8953   | 10.6924  | 0.111769 | 0.926446 |
| XLOC_014753 | THOC5                | chr22:29904155-29949736  | 24.9289  | 26.9378  | 0.11181  | 0.925094 |
| XLOC_005774 | EIF2B1               | chr12:124105569-1241471  | 12.8467  | 13.8823  | 0.111852 | 0.967901 |
| XLOC_023161 | QSOX2                | chr9:139098181-13913768  | 19.951   | 21.5596  | 0.111872 | 0.92385  |
| XLOC_004234 | OSBP                 | chr11:59341870-59383617  | 15.3128  | 16.5475  | 0.111875 | 0.923433 |
| XLOC_000936 | C1orf27              | chr1:185703682-18644665  | 3.12847  | 3.38095  | 0.111972 | 0.979733 |
| XLOC_008350 | SNORA10              | chr16:2012061-2014827    | 44.1503  | 47.7145  | 0.112004 | 0.995528 |
| XLOC_022930 | SPTLC1               | chr9:94793426-94877690   | 25.5635  | 27.6291  | 0.112105 | 0.942519 |
| XLOC_012381 | CHCHD5               | chr2:113342035-11334661  | 35.5281  | 38.3995  | 0.112126 | 0.944284 |
| XLOC_012195 | PEX13                | chr2:61167547-61279125   | 3.6655   | 3.9618   | 0.112144 | 0.938444 |
| XLOC_003138 | GPAM                 | chr10:113909621-1139435  | 1.31144  | 1.41759  | 0.112289 | 0.947008 |
| XLOC_010492 | PIAS4                | chr19:4007748-4038067    | 9.99612  | 10.8054  | 0.112313 | 0.946393 |
| XLOC_008211 | DDX19B               | chr16:70323669-70380650  | 12.3275  | 13.3263  | 0.112398 | 0.933023 |
| XLOC_004122 | LGR4                 | chr11:27387507-27494334  | 1.15092  | 1.24428  | 0.112525 | 0.953101 |
| XLOC_021643 | HNF4G                | chr8:76452202-76479061   | 0.405241 | 0.438156 | 0.112667 | 0.970195 |
| XLOC_003900 | EI24                 | chr11:125439297-1254545  | 47.0611  | 50.8845  | 0.11269  | 0.922247 |
| XLOC_015822 | FAM86DP              | chr3:75470702-75484266   | 4.62137  | 4.99682  | 0.11269  | 0.948529 |
| XLOC_012285 | MRPL35               | chr2:86426555-86440477   | 9.49562  | 10.2671  | 0.112695 | 0.943545 |
| XLOC_013593 | KIF3B                | chr20:30865453-30922811  | 2.7643   | 2.98894  | 0.112722 | 0.938194 |
| XLOC_003856 | CCDC84               | chr11:118868851-1188890  | 14.0152  | 15.1544  | 0.112739 | 0.99351  |
| XLOC_014794 | APOL2                | chr22:36622254-36636000  | 4.21607  | 4.5589   | 0.112785 | 0.945946 |
| XLOC_014202 | PWP2                 | chr21:45527207-45551063  | 20.7446  | 22.4324  | 0.112851 | 0.926258 |
| XLOC_016517 | USP38                | chr4:144106069-14414314  | 2.82935  | 3.05961  | 0.112878 | 0.937757 |
| XLOC_017140 | SETD9                | chr5:56205086-56247954   | 2.79228  | 3.01957  | 0.1129   | 0.979701 |
| XLOC_015158 | SLMAP                | chr3:57743173-57914894   | 4.41077  | 4.76997  | 0.112949 | 0.933023 |
| XLOC_006534 | WDR25                | chr14:100842754-1009966  | 4.1411   | 4.47839  | 0.112966 | 0.95534  |
| XLOC_003939 | RNH1                 | chr11:494511-507283      | 102.045  | 110.359  | 0.113003 | 0.925191 |
| XLOC_012109 | SLC4A1AP             | chr2:27848505-27917847   | 7.43827  | 8.04436  | 0.113011 | 0.979701 |

|              |              |                          |           |          |          |          |
|--------------|--------------|--------------------------|-----------|----------|----------|----------|
| XLOC_020355  | FSCN1        | chr7:5632435-5646287     | 156.963   | 169.755  | 0.113029 | 0.923433 |
| XLOC_002235  | TAF5L        | chr1:229728865-229761794 | 6.53759   | 7.07048  | 0.11305  | 0.93549  |
| XLOC_008227  | DHX38        | chr16:72118755-72146811  | 12.7226   | 13.7602  | 0.113103 | 0.950929 |
| XLOC_007699  | SNUPN        | chr15:75890423-75918719  | 18.0149   | 19.486   | 0.113248 | 0.930872 |
| XLOC_011311  | CACTIN       | chr19:3607244-3626813    | 12.8234   | 13.8711  | 0.113299 | 0.932468 |
| XLOC_005739  | MSI1         | chr12:120779132-12080698 | 17.4453   | 18.8707  | 0.113312 | 0.926446 |
| XLOC_006419  | KIAA0247     | chr14:70078309-70181861  | 1.50531   | 1.62832  | 0.113322 | 0.952216 |
| XLOC_000221  | FAM76A       | chr1:28052489-28089423   | 1.25511   | 1.35767  | 0.113322 | 0.959465 |
| XLOC_020617  | ACN9         | chr7:96745904-96811075   | 11.5955   | 12.543   | 0.113324 | 0.931471 |
| XLOC_000886  | SUCO         | chr1:172502259-172580973 | 2.96581   | 3.20836  | 0.113406 | 0.933023 |
| XLOC_012945  | SPRED2       | chr2:65537984-65659656   | 8.86963   | 9.59541  | 0.113471 | 0.924106 |
| XLOC_020571  | DTX2         | chr7:76090971-76135312   | 11.2036   | 12.1205  | 0.11348  | 0.942284 |
| XLOC_007600  | MNS1         | chr15:56657643-56757335  | 0.502842  | 0.543998 | 0.113496 | 0.979701 |
| XLOC_009558  | TMEM11       | chr17:21101262-21117908  | 24.5457   | 26.5549  | 0.113511 | 0.933132 |
| XLOC_015258  | SLC35A5      | chr3:112280856-112303284 | 3.19716   | 3.459    | 0.113563 | 0.944284 |
| XLOC_024033  | CXorf56      | chrX:118672111-11869939  | 9.77839   | 10.5794  | 0.113589 | 0.930922 |
| XLOC_016500  | HSPA4L       | chr4:128703452-128754524 | 2.82645   | 3.058    | 0.113596 | 0.944284 |
| XLOC_012379  | TTL          | chr2:113239742-113290222 | 9.85692   | 10.6645  | 0.113613 | 0.922383 |
| XLOC_006845  | HIF1A-AS2    | chr14:62162118-62215807  | 9.44157   | 10.2152  | 0.113626 | 0.947008 |
| XLOC_020531  | SBDSP1       | chr7:72299951-72307978   | 15.9806   | 17.291   | 0.113703 | 0.92969  |
| XLOC_018923  | TRAM2        | chr6:52362199-52441862   | 2.68064   | 2.90049  | 0.113718 | 0.935312 |
| XLOC_006219  | IRS2         | chr13:110406183-11043897 | 3.69198   | 3.99488  | 0.113759 | 0.938811 |
| XLOC_016992  | DDX60        | chr4:169137441-169239958 | 0.2263    | 0.244872 | 0.11379  | 1        |
| XLOC_010148  | C1orf8       | chr18:21083433-21166581  | 9.65      | 10.442   | 0.113791 | 0.976214 |
| XLOC_017115  | C5orf51      | chr5:41904469-41921738   | 4.50958   | 4.87975  | 0.113814 | 0.931733 |
| XLOC_022579  | LOC389791    | chr9:130890807-130892913 | 0.342285  | 0.370399 | 0.11388  | 0.979944 |
| XLOC_007621  | DAPK2        | chr15:64199234-64338521  | 0.856856  | 0.927259 | 0.113919 | 0.967901 |
| XLOC_006368  | PELI2        | chr14:56585092-56768031  | 0.601358  | 0.650769 | 0.113921 | 0.96128  |
| XLOC_013861  | TASP1        | chr20:13370035-13619583  | 2.91464   | 3.15441  | 0.114054 | 0.952905 |
| XLOC_022169  | KIAA0196     | chr8:126036502-126104067 | 11.9039   | 12.8836  | 0.114108 | 0.922881 |
| XLOC_019023  | PDS52        | chr6:107473760-107780778 | 2.37652   | 2.57213  | 0.114111 | 0.950929 |
| XLOC_002258  | B3GALNT2     | chr1:235530727-235667787 | 6.3418    | 6.86398  | 0.114153 | 0.942472 |
| XLOC_008698  | MBTPS1       | chr16:84087368-84150517  | 14.4478   | 15.6375  | 0.114167 | 0.919147 |
| XLOC_005050  | SCYL2        | chr12:100661548-10073397 | 4.97809   | 5.38805  | 0.11417  | 0.930066 |
| XLOC_011321  | ZBTB7A       | chr19:4045215-4066816    | 8.25135   | 8.93212  | 0.114372 | 0.930481 |
| XLOC_002654  | BTRC         | chr10:103113789-10331707 | 2.74492   | 2.97147  | 0.114414 | 0.934181 |
| XLOC_021160  | CDK6         | chr7:92234234-92465941   | 2.34934   | 2.54349  | 0.11455  | 0.926225 |
| XLOC_001887  | GBA          | chr1:155204238-155214653 | 15.8055   | 17.1126  | 0.11463  | 0.923575 |
| XLOC_0201913 | LOXL2        | chr8:231544409-23261722  | 0.43451   | 0.470469 | 0.114711 | 0.971854 |
| XLOC_014147  | IFNAR1       | chr21:34697213-34732128  | 5.48971   | 5.94404  | 0.114715 | 0.926233 |
| XLOC_018034  | CDYL         | chr6:4706392-4955778     | 7.22802   | 7.8263   | 0.114728 | 0.929478 |
| XLOC_014866  | CYBSR3       | chr22:43013845-43045405  | 54.2857   | 58.7801  | 0.114755 | 0.918571 |
| XLOC_010631  | CC2D1A       | chr19:14016955-14041693  | 19.3294   | 20.9298  | 0.114763 | 0.923433 |
| XLOC_006481  | ZC3H14       | chr14:89029252-89079853  | 8.5403    | 9.24748  | 0.114773 | 0.926233 |
| XLOC_015623  | DYNCL1L1     | chr3:32567462-32612366   | 17.3754   | 18.8145  | 0.114801 | 0.918898 |
| XLOC_011641  | DPF1         | chr19:38701648-38720317  | 2.78189   | 3.01238  | 0.114841 | 0.959465 |
| XLOC_001660  | GCLM         | chr1:94352589-94375012   | 2.48202   | 2.68768  | 0.114851 | 0.950408 |
| XLOC_002056  | TOR1AIP2     | chr1:179809101-179846947 | 15.982    | 17.3066  | 0.114872 | 0.919186 |
| XLOC_016333  | POLR2B       | chr4:57845108-58071465   | 22.5435   | 24.4119  | 0.114876 | 0.920963 |
| XLOC_006969  | SETD3        | chr14:99864082-99947226  | 10.232    | 11.0802  | 0.114891 | 0.930414 |
| XLOC_023126  | DDX31        | chr9:135469675-135565470 | 14.7114   | 15.9311  | 0.11492  | 0.953101 |
| XLOC_0011291 | AP3D1        | chr19:2100986-2151556    | 14.1584   | 15.3336  | 0.115034 | 0.919505 |
| XLOC_000757  | MTX1         | chr1:155178489-155197321 | 46.722    | 50.6005  | 0.115049 | 0.920028 |
| XLOC_016863  | DNAJB14      | chr4:100820709-100867878 | 1.29282   | 1.40016  | 0.115075 | 0.955758 |
| XLOC_012434  | PLEKHB2      | chr2:131862419-131907421 | 34.1892   | 37.0282  | 0.115085 | 0.922006 |
| XLOC_013138  | POLR2D       | chr2:128603839-128615721 | 11.6681   | 12.6371  | 0.115091 | 0.926899 |
| XLOC_015120  | MAPKAPK3     | chr3:50649292-50686728   | 63.9804   | 69.2944  | 0.11511  | 0.919029 |
| XLOC_010214  | LOC100505549 | chr18:55297533-55470327  | 0.943942  | 1.02235  | 0.115125 | 0.970558 |
| XLOC_000836  | DUSP12       | chr1:161719580-161726952 | 22.8176   | 24.7134  | 0.115145 | 0.931466 |
| XLOC_022352  | POLR1E       | chr9:37485944-37503693   | 34.256    | 37.1025  | 0.115161 | 0.921879 |
| XLOC_018835  | SRPK1        | chr6:35800810-35888957   | 24.0537   | 26.0534  | 0.115211 | 0.919721 |
| XLOC_022152  | TAF2         | chr8:120743013-120845074 | 5.16216   | 5.59176  | 0.115327 | 0.924847 |
| XLOC_000888  | PRDX6        | chr1:173446485-173457946 | 273.941   | 296.756  | 0.115415 | 0.92313  |
| XLOC_015699  | SLC25A20     | chr3:48894355-48936426   | 3.4302    | 3.7159   | 0.115417 | 0.954768 |
| XLOC_001265  | MTOR         | chr1:11166587-11322608   | 2.67238   | 2.89496  | 0.115421 | 0.930066 |
| XLOC_012172  | TTC7A        | chr2:47129008-47303275   | 3.03494   | 3.28773  | 0.115423 | 0.987693 |
| XLOC_018935  | KLHL31       | chr6:53512698-53530506   | 0.0287501 | 0.031146 | 0.115479 | 1        |
| XLOC_006914  | SPTLC2       | chr14:77972339-78083110  | 6.50238   | 7.04431  | 0.115489 | 0.919911 |
| XLOC_014307  | DONSON       | chr21:34949858-34961014  | 11.3454   | 12.2913  | 0.115534 | 0.926446 |
| XLOC_022144  | TRP1         | chr8:116420723-116681221 | 0.486306  | 0.526852 | 0.115534 | 0.954677 |
| XLOC_018883  | MRPL2        | chr6:43021766-43027242   | 42.9966   | 46.5829  | 0.115576 | 0.923894 |
| XLOC_005320  | LOH12CR2     | chr12:12508341-12510001  | 0.363012  | 0.393304 | 0.115629 | 0.979701 |
| XLOC_012198  | AHS2         | chr2:61404554-61697849   | 4.30627   | 4.66593  | 0.115728 | 0.976618 |
| XLOC_020600  | FZD1         | chr7:90893782-90898132   | 1.80948   | 1.96066  | 0.115761 | 0.95534  |
| XLOC_007635  | CLPX         | chr15:65442783-65477563  | 10.3533   | 11.2183  | 0.115764 | 0.92385  |
| XLOC_014975  | PLCL2        | chr3:16926451-17132098   | 1.26476   | 1.37044  | 0.115773 | 0.978981 |
| XLOC_018897  | AARS2        | chr6:44266462-44281063   | 6.19941   | 6.7178   | 0.115857 | 0.927456 |
| XLOC_004931  | SPRYD4       | chr12:56862300-56882181  | 8.44945   | 9.15614  | 0.115882 | 0.967102 |
| XLOC_002007  | NME7         | chr1:169075946-169337181 | 8.17628   | 8.86025  | 0.115902 | 0.969639 |

|             |              |                          |           |           |          |          |
|-------------|--------------|--------------------------|-----------|-----------|----------|----------|
| XLOC_001917 | MRPL24       | chr1:156707093-156710923 | 99.247    | 107.549   | 0.115904 | 0.920199 |
| XLOC_005136 | SIRT4        | chr12:120740123-12075104 | 1.69767   | 1.83968   | 0.115905 | 0.969963 |
| XLOC_013164 | LOC100129961 | chr2:135596185-135676171 | 0.217303  | 0.235484  | 0.115921 | 1        |
| XLOC_005822 | CDK8         | chr13:26828755-26978569  | 3.41166   | 3.69731   | 0.115999 | 0.950929 |
| XLOC_003230 | TALDO1       | chr11:747431-765024      | 140.387   | 152.143   | 0.116016 | 0.915091 |
| XLOC_014584 | EP300        | chr22:41488613-41576081  | 1.3245    | 1.43546   | 0.116065 | 0.942519 |
| XLOC_012876 | HNRPLL       | chr2:38790327-38830178   | 7.49539   | 8.12411   | 0.116206 | 0.927013 |
| XLOC_019147 | FBXO5        | chr6:153291657-15330474  | 8.38817   | 9.09196   | 0.116235 | 0.931822 |
| XLOC_010928 | PVRL2        | chr19:45349392-45392485  | 47.9184   | 51.9393   | 0.116248 | 0.922247 |
| XLOC_010756 | GPATCH1      | chr19:33571785-33621318  | 1.85976   | 2.01587   | 0.116288 | 0.952905 |
| XLOC_009105 | GRN          | chr17:42422490-42430470  | 154.24    | 167.198   | 0.116381 | 0.920028 |
| XLOC_000998 | TMCC2        | chr1:205197037-20524247  | 1.60169   | 1.73631   | 0.116424 | 0.958432 |
| XLOC_019019 | ATG5         | chr6:106632351-10677369  | 8.19635   | 8.88528   | 0.116436 | 0.928902 |
| XLOC_002491 | KIAA1279     | chr10:70748476-70776739  | 6.17761   | 6.69705   | 0.116476 | 0.934394 |
| XLOC_007959 | ABCC1        | chr16:16043433-16236930  | 10.4096   | 11.285    | 0.116486 | 0.918079 |
| XLOC_018174 | MRPS18B      | chr6:30585485-30594174   | 77.8817   | 84.4339   | 0.116539 | 0.917453 |
| XLOC_006796 | NEMF         | chr14:50250531-50319539  | 3.11782   | 3.38039   | 0.11665  | 0.935062 |
| XLOC_013897 | APMAP        | chr20:24943579-24973425  | 51.3942   | 55.723    | 0.116666 | 0.917325 |
| XLOC_022592 | SET          | chr9:131445933-13145867  | 291.742   | 316.316   | 0.11667  | 0.927627 |
| XLOC_000190 | TMEM50A      | chr1:25664788-25747363   | 33.5697   | 36.4008   | 0.116807 | 0.919029 |
| XLOC_006860 | ATP6V1D      | chr14:67804580-67826720  | 27.0599   | 29.3424   | 0.116828 | 0.919541 |
| XLOC_016000 | WVTR1        | chr3:149235021-14942106  | 2.10578   | 2.28347   | 0.116871 | 0.942472 |
| XLOC_003540 | DAK          | chr11:61066918-61136975  | 7.99151   | 8.66615   | 0.116923 | 0.98922  |
| XLOC_015490 | MAP3K13      | chr3:185000728-18520688  | 9.8668    | 10.7001   | 0.116964 | 0.935062 |
| XLOC_009336 | BAHCC1       | chr17:79373539-79433358  | 1.10515   | 1.19857   | 0.117074 | 0.950929 |
| XLOC_008324 | NARFL        | chr16:779768-790997      | 13.0429   | 14.1459   | 0.117119 | 0.932136 |
| XLOC_007134 | FAM98B       | chr15:38746327-38777063  | 4.51847   | 4.90071   | 0.117157 | 0.948088 |
| XLOC_018439 | CEP57L1      | chr6:109416355-10948511  | 1.60178   | 1.73733   | 0.117195 | 0.954677 |
| XLOC_005779 | DHX37        | chr12:125431369-1254736  | 12.3989   | 13.4482   | 0.117203 | 0.922006 |
| XLOC_008686 | ADAT1        | chr16:75632246-75657221  | 0.777926  | 0.843843  | 0.117341 | 0.963209 |
| XLOC_018349 | EFHC1        | chr6:52284993-52360583   | 1.09656   | 1.18949   | 0.117357 | 0.950929 |
| XLOC_001062 | MARC1        | chr1:220960038-22098774  | 9.36598   | 10.1603   | 0.11744  | 0.930269 |
| XLOC_012276 | VAMP8        | chr2:85804613-85809156   | 1.05393   | 1.14332   | 0.117446 | 0.979701 |
| XLOC_013642 | CTNBL1       | chr20:36322433-36500520  | 25.1142   | 27.2444   | 0.117453 | 0.919186 |
| XLOC_018438 | ARMC2        | chr6:109169618-10929535  | 0.0755824 | 0.0819941 | 0.117469 | 1        |
| XLOC_022476 | NR4A3        | chr9:102584136-10262917  | 0.271772  | 0.294827  | 0.117473 | 1        |
| XLOC_015920 | OSBPL1       | chr3:125247701-12531438  | 1.3831    | 1.50045   | 0.117483 | 0.948179 |
| XLOC_008717 | KLHDC4       | chr16:87741417-87799598  | 17.2817   | 18.7483   | 0.117512 | 0.926899 |
| XLOC_016852 | EIF4E        | chr4:99799606-99851786   | 16.6376   | 18.0497   | 0.117529 | 0.918042 |
| XLOC_010779 | FXYD5        | chr19:35645624-35660788  | 450.567   | 488.808   | 0.117529 | 0.918619 |
| XLOC_023348 | RBM10        | chrX:47004616-47046214   | 34.7      | 37.6456   | 0.117543 | 0.920028 |
| XLOC_021155 | CYP51A1      | chr7:91741462-91764059   | 29.586    | 32.0979   | 0.117563 | 0.913628 |
| XLOC_015095 | TMA7         | chr3:48481685-48485537   | 468.915   | 508.767   | 0.117677 | 0.918342 |
| XLOC_017245 | ERAP2        | chr5:96211643-96255406   | 3.54183   | 3.84284   | 0.117678 | 0.926446 |
| XLOC_001371 | PAFAH2       | chr1:26286257-26324648   | 2.90345   | 3.15023   | 0.117689 | 0.939261 |
| XLOC_020979 | HOXA6        | chr7:27179982-27196296   | 0.235403  | 0.255414  | 0.117708 | 1        |
| XLOC_002104 | TMEM9        | chr1:201103899-20112363  | 71.5281   | 77.6091   | 0.117714 | 0.917379 |
| XLOC_014984 | UBE2E1       | chr3:23847383-23933131   | 49.9807   | 54.2301   | 0.117723 | 0.918993 |
| XLOC_023053 | RBM18        | chr9:125001833-12508574  | 7.31085   | 7.9325    | 0.117737 | 0.974585 |
| XLOC_001718 | RHOC         | chr1:113243748-11325002  | 281.442   | 305.385   | 0.117794 | 0.919029 |
| XLOC_010632 | DCAF15       | chr19:14041999-14072256  | 27.6556   | 30.0102   | 0.117884 | 0.919186 |
| XLOC_014201 | TRAPPC10     | chr21:45432205-45526432  | 2.67668   | 2.90462   | 0.117901 | 0.931471 |
| XLOC_003192 | MK167        | chr10:129894924-1299244  | 9.75496   | 10.5857   | 0.117904 | 0.914275 |
| XLOC_005318 | LRP6         | chr12:12268960-12419811  | 1.12456   | 1.22035   | 0.117932 | 0.934181 |
| XLOC_001463 | MTF1         | chr1:38275238-38325292   | 1.1077    | 1.20209   | 0.117977 | 0.944314 |
| XLOC_016800 | SDAD1        | chr4:76871067-76912113   | 9.39485   | 10.1959   | 0.118051 | 0.922257 |
| XLOC_004729 | LOC100129361 | chr12:10984447-11328619  | 4.78132   | 5.18932   | 0.118135 | 0.92969  |
| XLOC_009777 | FAM171A2     | chr17:42431100-42441235  | 7.79737   | 8.46309   | 0.118197 | 0.948836 |
| XLOC_014578 | ADSL         | chr22:40742503-40762575  | 62.6895   | 68.0419   | 0.118199 | 0.918342 |
| XLOC_006732 | IPO4         | chr14:24641233-24658124  | 32.0812   | 34.8217   | 0.118257 | 0.917325 |
| XLOC_010841 | MRPS12       | chr19:39405903-39423659  | 117.288   | 127.309   | 0.118282 | 0.935939 |
| XLOC_017031 | LRP2BP       | chr4:186131283-18630015  | 0.318953  | 0.346207  | 0.118291 | 1        |
| XLOC_006155 | DIS3         | chr13:73302041-73590591  | 6.17865   | 6.70678   | 0.118327 | 0.939025 |
| XLOC_008641 | CHTF8        | chr16:69139466-69166493  | 34.2956   | 37.2329   | 0.118553 | 0.920505 |
| XLOC_012404 | DBI          | chr2:120124503-12013012  | 190.81    | 207.154   | 0.118564 | 0.916932 |
| XLOC_018162 | HCG9         | chr6:29942891-29946177   | 0.166432  | 0.1807    | 0.118659 | 1        |
| XLOC_004264 | B3GAT3       | chr11:62382767-62389647  | 37.3614   | 40.5647   | 0.118674 | 0.920028 |
| XLOC_011378 | CTXN1        | chr19:7989380-7991051    | 28.1681   | 30.5852   | 0.118771 | 0.935939 |
| XLOC_020404 | CBX3         | chr7:26240830-26253227   | 72.029    | 78.2168   | 0.118901 | 0.918898 |
| XLOC_019034 | WASF1        | chr6:110421021-11050120  | 3.10297   | 3.36961   | 0.118933 | 0.945946 |
| XLOC_012033 | ALLC         | chr2:3705785-3750260     | 0.188547  | 0.204767  | 0.11906  | 1        |
| XLOC_015264 | ATP6V1A      | chr3:113465865-11353090  | 6.3544    | 6.90142   | 0.119138 | 0.920766 |
| XLOC_011157 | NDUFA3       | chr19:54606159-54610281  | 195.054   | 211.845   | 0.11914  | 0.921432 |
| XLOC_002394 | RAB18        | chr10:27793102-27831166  | 9.8307    | 10.6777   | 0.119236 | 0.915394 |
| XLOC_021927 | CLU          | chr8:27454433-27472328   | 38.3682   | 41.6748   | 0.119265 | 0.917325 |
| XLOC_015110 | RBM6         | chr3:49977476-50114685   | 13.1828   | 14.3196   | 0.119337 | 0.918471 |
| XLOC_013406 | TRIP12       | chr2:230631929-23078665  | 8.85051   | 9.6142    | 0.119406 | 0.913628 |
| XLOC_006363 | MAPK11P1L    | chr14:55518361-55536912  | 10.4392   | 11.34     | 0.119413 | 0.914686 |
| XLOC_008394 | TFAP4        | chr16:4307186-4323001    | 13.9629   | 15.1682   | 0.11945  | 0.92969  |



|             |          |                          |            |            |          |          |
|-------------|----------|--------------------------|------------|------------|----------|----------|
| XLOC_000172 | KDM1A    | chr1:23345940-23410184   | 51.5945    | 56.0495    | 0.119483 | 0.916838 |
| XLOC_000367 | TSPAN1   | chr1:46640748-46651634   | 0.234715   | 0.254986   | 0.119509 | 1        |
| XLOC_017507 | UNC5A    | chr5:176237559-176326333 | 1.38775    | 1.50762    | 0.119523 | 0.959465 |
| XLOC_017683 | TAF9     | chr5:68647552-68710630   | 96.9392    | 105.313    | 0.119534 | 0.931471 |
| XLOC_013135 | IWS1     | chr2:128238382-128284087 | 11.351     | 12.3321    | 0.11961  | 0.919029 |
| XLOC_000255 | EIF3I    | chr1:32687970-32697205   | 232.306    | 252.394    | 0.119651 | 0.914427 |
| XLOC_014295 | URB1     | chr21:33664123-33765312  | 3.96357    | 4.30635    | 0.119665 | 0.917379 |
| XLOC_020925 | DAGLB    | chr7:6448746-6487643     | 19.0688    | 20.7187    | 0.119719 | 0.917325 |
| XLOC_023142 | VAV2     | chr9:136627015-136857444 | 15.5455    | 16.8907    | 0.119733 | 0.913628 |
| XLOC_011704 | GSK3A    | chr19:42734337-42746736  | 44.5228    | 48.3773    | 0.119784 | 0.917208 |
| XLOC_017039 | FAT1     | chr4:187508936-187644987 | 1.21724    | 1.32268    | 0.119847 | 0.928909 |
| XLOC_003588 | GPR137   | chr11:64037299-64056972  | 14.1087    | 15.3309    | 0.119853 | 0.976618 |
| XLOC_004675 | SCARNA10 | chr12:6603297-6641132    | 1.55741    | 1.69236    | 0.119889 | 0.995309 |
| XLOC_008643 | TMED6    | chr16:69377148-69385712  | 0.84266    | 0.915698   | 0.11992  | 0.978188 |
| XLOC_015200 | C3orf38  | chr3:88101099-88207115   | 4.0546     | 4.40603    | 0.11992  | 0.979701 |
| XLOC_015952 | MRPL3    | chr3:131181044-131221860 | 51.2549    | 55.6978    | 0.119931 | 0.913628 |
| XLOC_002820 | SEPHS1   | chr10:13359437-13390298  | 21.046     | 22.8709    | 0.119969 | 0.916337 |
| XLOC_008558 | DNAJA2   | chr16:46989273-47007625  | 24.4737    | 26.596     | 0.119977 | 0.913628 |
| XLOC_007623 | PPIB     | chr15:64443915-64455354  | 694.694    | 754.982    | 0.120064 | 0.916838 |
| XLOC_006897 | PGF      | chr14:75408532-75422467  | 17.5395    | 19.0623    | 0.120111 | 0.929635 |
| XLOC_020656 | POP7     | chr7:100303675-100305123 | 131.653    | 143.098    | 0.120266 | 0.915576 |
| XLOC_012619 | PIKFYVE  | chr2:209130990-209223471 | 1.58765    | 1.72567    | 0.120267 | 0.929495 |
| XLOC_013019 | ST3GAL5  | chr2:86066270-86116157   | 1.88168    | 2.04531    | 0.120295 | 0.954188 |
| XLOC_010829 | SPINT2   | chr19:38755097-38783254  | 2.23834    | 2.43314    | 0.120393 | 0.960403 |
| XLOC_022535 | MRRF     | chr9:125001833-125085742 | 42.2321    | 45.9084    | 0.120416 | 0.93149  |
| XLOC_023788 | RPS6KA3  | chrX:20168028-20284750   | 3.37325    | 3.6674     | 0.120617 | 0.922006 |
| XLOC_021537 | DCTN6    | chr8:29920257-30108213   | 16.5285    | 17.9702    | 0.12065  | 0.982586 |
| XLOC_008560 | ITFG1    | chr16:47189297-47495015  | 10.4395    | 11.3505    | 0.120705 | 0.922881 |
| XLOC_013147 | SMPD4    | chr2:130908964-130948300 | 20.198     | 21.9612    | 0.120745 | 0.967901 |
| XLOC_012835 | PREB     | chr2:27346656-27357542   | 44.0181    | 47.8608    | 0.120747 | 0.912767 |
| XLOC_014853 | NHP2L1   | chr22:42069936-42084913  | 142.389    | 154.824    | 0.120794 | 0.913628 |
| XLOC_008830 | WRAP53   | chr17:7571719-7606820    | 20.1742    | 21.9379    | 0.120918 | 0.969627 |
| XLOC_005487 | AAAS     | chr12:53701239-53715412  | 24.3958    | 26.531     | 0.121044 | 0.919029 |
| XLOC_003092 | CWF19L1  | chr10:101992054-10202743 | 55.2278    | 11.6871    | 0.12112  | 0.917639 |
| XLOC_010834 | SPRED3   | chr19:38880839-38890523  | 1.67749    | 1.8244     | 0.121125 | 0.945946 |
| XLOC_018402 | C6orf163 | chr6:88054570-88075181   | 0.161168   | 0.175285   | 0.12114  | 1        |
| XLOC_012640 | PNKD     | chr2:219135114-219211511 | 55.2278    | 60.0658    | 0.121149 | 0.980559 |
| XLOC_015118 | CYB561D2 | chr3:50384918-50391496   | 35.4796    | 38.5886    | 0.121186 | 0.950929 |
| XLOC_004978 | SLC35E3  | chr12:69139935-69159853  | 5.65644    | 6.15227    | 0.121226 | 0.930066 |
| XLOC_021325 | CHCHD3   | chr7:132469622-132766821 | 74.9517    | 81.524     | 0.121264 | 0.913019 |
| XLOC_018762 | C6orf47  | chr6:31626074-31628549   | 10.1351    | 11.0238    | 0.121264 | 0.920028 |
| XLOC_012701 | COP5TB   | chr2:232651161-232673434 | 20.1941    | 21.9657    | 0.121317 | 0.918116 |
| XLOC_021090 | SBDS     | chr7:66452689-66460588   | 48.9961    | 53.295     | 0.121335 | 0.91236  |
| XLOC_014311 | RCAN1    | chr21:35888783-35987382  | 10.5067    | 11.429     | 0.121389 | 0.92385  |
| XLOC_005227 | FOXM1    | chr12:2945981-2998691    | 24.7105    | 26.8798    | 0.121402 | 0.929635 |
| XLOC_011869 | JOSD2    | chr19:51009253-51014612  | 50.3467    | 54.7697    | 0.121481 | 0.922006 |
| XLOC_011763 | SIX5     | chr19:46268042-46272497  | 12.5575    | 13.6607    | 0.121485 | 0.922881 |
| XLOC_010431 | PTBP1    | chr19:797391-812327      | 143.431    | 156.033    | 0.121496 | 0.913628 |
| XLOC_017878 | LARS     | chr5:145492588-145562294 | 27.3586    | 29.7632    | 0.121533 | 0.912776 |
| XLOC_004137 | FBXO3    | chr11:33762489-33796071  | 6.5401     | 7.11496    | 0.121542 | 0.93038  |
| XLOC_004946 | PIP4K2C  | chr12:57984941-57997211  | 10.4216    | 11.3377    | 0.12155  | 0.918983 |
| XLOC_021794 | FAM203A  | chr8:145192671-145195620 | 2.16642    | 2.35689    | 0.121572 | 0.961    |
| XLOC_022290 | SH3GL2   | chr9:17578952-17797122   | 0.0495431  | 0.0538992  | 0.121577 | 1        |
| XLOC_021187 | SMURF1   | chr7:98625057-98741743   | 6.37375    | 6.93461    | 0.121672 | 0.919384 |
| XLOC_010042 | P4HB     | chr17:79801033-79818544  | 409.218    | 445.261    | 0.121783 | 0.919285 |
| XLOC_018876 | TRERF1   | chr6:42192668-42419783   | 2.64176    | 2.87447    | 0.121793 | 0.929369 |
| XLOC_000451 | LRRC7    | chr1:70225857-70589171   | 0.00713742 | 0.00776617 | 0.1218   | 1        |
| XLOC_008807 | ELP5     | chr17:7155371-7166512    | 49.0244    | 53.3435    | 0.12181  | 0.915091 |
| XLOC_017731 | TMEM161B | chr5:87491022-87564665   | 4.44914    | 4.84127    | 0.121859 | 0.930939 |
| XLOC_012965 | FAM136A  | chr2:70523107-70529220   | 34.3386    | 37.3656    | 0.12188  | 0.911837 |
| XLOC_010364 | ACAA2    | chr18:47309873-47340251  | 34.955     | 38.0399    | 0.122018 | 0.912689 |
| XLOC_012769 | TSSC1    | chr2:3192740-3381653     | 14.5123    | 15.7933    | 0.122036 | 0.923433 |
| XLOC_018761 | BAG6     | chr6:31606804-31625987   | 64.0876    | 69.745     | 0.122044 | 0.916838 |
| XLOC_013021 | POLR1A   | chr2:86253450-86333278   | 4.60183    | 5.00832    | 0.12212  | 0.918898 |
| XLOC_001237 | ICMT     | chr1:6266188-6296044     | 11.278     | 12.2744    | 0.122134 | 0.919029 |
| XLOC_022478 | INVS     | chr9:102861501-103063421 | 4.47414    | 4.86955    | 0.122177 | 0.926423 |
| XLOC_003850 | ARCN1    | chr11:118443101-11847374 | 25.8491    | 28.1343    | 0.122219 | 0.908749 |
| XLOC_014007 | SLC35C2  | chr20:44978176-44993064  | 29.9045    | 32.5498    | 0.122284 | 0.913628 |
| XLOC_020631 | ZKSCAN5  | chr7:99102272-99131445   | 4.4093     | 4.79943    | 0.122314 | 0.919739 |
| XLOC_017708 | TBCA     | chr5:76986994-77072185   | 288.756    | 314.306    | 0.122319 | 0.913628 |
| XLOC_008790 | RPAIN    | chr17:5289345-5342471    | 40.7852    | 44.3954    | 0.122365 | 0.982629 |
| XLOC_006869 | DCAF5    | chr14:69517636-69619914  | 4.80004    | 5.2251     | 0.122414 | 0.917325 |
| XLOC_010145 | RBBP8    | chr18:20513294-20606449  | 4.98147    | 5.42263    | 0.122421 | 0.92969  |
| XLOC_010134 | RNMT     | chr18:13726703-13764554  | 8.51215    | 9.26606    | 0.122431 | 0.912327 |
| XLOC_006028 | EFHA1    | chr13:22066827-22178355  | 12.1773    | 13.2559    | 0.122432 | 0.917159 |
| XLOC_005618 | ATP2B1   | chr12:89981825-90049844  | 1.2736     | 1.3864     | 0.122432 | 0.932468 |
| XLOC_023954 | MAGT1    | chrX:77081861-77151065   | 10.1406    | 11.0388    | 0.122434 | 0.912689 |
| XLOC_018454 | MARCKS   | chr6:114178526-114184652 | 11.6437    | 12.6757    | 0.122524 | 0.912689 |
| XLOC_005079 | PWP1     | chr12:108079589-10810621 | 30.145     | 32.818     | 0.12257  | 0.912696 |

|             |               |                           |         |         |          |          |
|-------------|---------------|---------------------------|---------|---------|----------|----------|
| XLOC_013611 | CHMP4B        | chr20:32399109-32442173   | 64.8078 | 70.5552 | 0.122586 | 0.908273 |
| XLOC_015303 | UMPS          | chr3:124449212-124468115  | 4.94908 | 5.38802 | 0.122594 | 0.913825 |
| XLOC_005502 | ITGA5         | chr12:54789044-54813050   | 24.1061 | 26.2455 | 0.122669 | 0.909016 |
| XLOC_015321 | RAB7A         | chr3:128444978-128533641  | 97.5395 | 106.197 | 0.122684 | 0.914313 |
| XLOC_008759 | RAP1GAP2      | chr17:2699731-2941035     | 5.99356 | 6.52605 | 0.122797 | 0.917379 |
| XLOC_001451 | MRPS15        | chr1:36921361-36930040    | 118.754 | 129.318 | 0.122943 | 0.909016 |
| XLOC_010559 | ZNF317        | chr19:9251055-9274091     | 9.98862 | 10.8772 | 0.122953 | 0.913628 |
| XLOC_003146 | ABLIM1        | chr10:116190868-11644441  | 9.35102 | 10.1831 | 0.122974 | 0.910156 |
| XLOC_003822 | PTS           | chr11:112097087-11210465  | 14.1921 | 15.4553 | 0.123009 | 0.930727 |
| XLOC_018482 | TPD52L1       | chr6:125474878-125584644  | 24.2843 | 26.4457 | 0.123013 | 0.917208 |
| XLOC_012212 | ACTR2         | chr2:65454828-65498390    | 34.757  | 37.8507 | 0.123015 | 0.909179 |
| XLOC_005793 | ANKLE2        | chr12:133302253-13333845  | 13.8971 | 15.1342 | 0.123035 | 0.912767 |
| XLOC_023099 | GOLGA2        | chr9:131018107-131038265  | 21.8982 | 23.8478 | 0.123043 | 0.909768 |
| XLOC_001243 | NOL9          | chr1:6581406-6614658      | 5.94893 | 6.4786  | 0.123054 | 0.912696 |
| XLOC_019151 | CNKSR3        | chr6:154726432-154831755  | 1.69298 | 1.84379 | 0.123111 | 0.950929 |
| XLOC_015941 | H1FX          | chr3:129033613-129043412  | 257.929 | 280.908 | 0.123123 | 0.90907  |
| XLOC_013678 | STK4          | chr20:43595119-43708593   | 6.43125 | 7.00439 | 0.123161 | 0.91236  |
| XLOC_003649 | C11orf80,RCE1 | chr11:66512206-66614003   | 25.8188 | 28.1203 | 0.123191 | 0.931471 |
| XLOC_006762 | SPTSSA        | chr14:34902143-34931468   | 11.3282 | 12.3385 | 0.12324  | 0.915488 |
| XLOC_013540 | MGME1         | chr20:17949761-17971762   | 10.7358 | 11.6933 | 0.123251 | 0.919186 |
| XLOC_001095 | RNF187        | chr1:228675067-228683885  | 58.5331 | 63.7539 | 0.123263 | 0.912308 |
| XLOC_000737 | UBAP2L        | chr1:154179182-154243325  | 22.0442 | 24.0108 | 0.123285 | 0.973792 |
| XLOC_002486 | CCAR1         | chr10:70480970-70551309   | 6.12215 | 6.6685  | 0.123324 | 0.916838 |
| XLOC_013250 | NFE2L2        | chr2:178095030-178129855  | 12.2068 | 13.2964 | 0.123354 | 0.918983 |
| XLOC_018314 | TJAP1         | chr6:43445260-43474294    | 16.7596 | 18.2557 | 0.123358 | 0.916894 |
| XLOC_001056 | LYPLAL1       | chr1:219347191-219386207  | 11.1255 | 12.1187 | 0.123369 | 0.92385  |
| XLOC_009808 | COPZ2         | chr17:46103532-46115152   | 6.25261 | 6.81089 | 0.123384 | 0.950929 |
| XLOC_000297 | NDUFS5        | chr1:39491966-39500308    | 378.104 | 409.689 | 0.123397 | 0.911656 |
| XLOC_012147 | MORN2         | chr2:39103102-39109850    | 8.08553 | 8.80797 | 0.123468 | 0.946765 |
| XLOC_022563 | MVB12B        | chr9:129089122-129269320  | 6.44169 | 7.0173  | 0.123477 | 0.919029 |
| XLOC_009108 | DBF4B         | chr17:42785975-42829636   | 6.32517 | 6.89112 | 0.123635 | 0.926225 |
| XLOC_003109 | C10orf76      | chr10:103605355-10381595  | 4.05921 | 4.42244 | 0.123643 | 0.925516 |
| XLOC_001401 | SRSF4         | chr1:29474249-29508637    | 43.0687 | 46.9226 | 0.123645 | 0.909016 |
| XLOC_000079 | TARDBP        | chr1:110726781-11085549   | 15.7981 | 17.2138 | 0.123807 | 0.909164 |
| XLOC_015235 | NFKBIZ,NXPE3  | chr3:101498028-101579865  | 14.8149 | 16.1427 | 0.123837 | 0.916838 |
| XLOC_002022 | CEP85         | chr1:26560692-26605299    | 5.41993 | 5.90579 | 0.123856 | 0.922312 |
| XLOC_014559 | CBY1          | chr22:39052657-39069855   | 28.6759 | 31.2477 | 0.123908 | 0.915432 |
| XLOC_010378 | TXNL1         | chr18:54270052-54305920   | 75.3021 | 82.0572 | 0.123939 | 0.909016 |
| XLOC_003802 | DDX10         | chr11:108535815-108811164 | 8.74362 | 9.52808 | 0.123955 | 0.918379 |
| XLOC_005532 | PTGES3        | chr12:57057124-57082078   | 173.414 | 188.974 | 0.123964 | 0.913628 |
| XLOC_010478 | GNA15         | chr19:3136190-3163766     | 7.87592 | 8.58259 | 0.123966 | 0.933543 |
| XLOC_012635 | IGFBP2        | chr2:217498126-217529155  | 40.8985 | 44.5701 | 0.12403  | 0.918898 |
| XLOC_022887 | C9orf40       | chr9:77561498-77567802    | 11.6567 | 12.7046 | 0.124188 | 0.919029 |
| XLOC_016869 | SLC39A8       | chr4:103172197-103266655  | 12.1286 | 13.219  | 0.124204 | 0.914275 |
| XLOC_018784 | ATF6B         | chr6:32083044-32096017    | 41.9085 | 45.677  | 0.124222 | 0.907657 |
| XLOC_006166 | RNF219        | chr13:78628989-79233314   | 3.36216 | 3.66454 | 0.124241 | 0.929369 |
| XLOC_018968 | HMGN3         | chr6:79910961-79946517    | 26.1466 | 28.4981 | 0.124245 | 0.926423 |
| XLOC_011454 | WDR83OS       | chr19:12777617-12792701   | 193.762 | 211.189 | 0.124245 | 0.942519 |
| XLOC_010372 | MBD2          | chr18:51677970-51751158   | 11.1291 | 12.1306 | 0.124311 | 0.905695 |
| XLOC_017926 | CLINT1        | chr5:157212750-157286183  | 7.90582 | 8.61773 | 0.124393 | 0.913628 |
| XLOC_004867 | MFS5          | chr12:53645369-53648190   | 23.6707 | 25.8023 | 0.124398 | 0.917325 |
| XLOC_014572 | ATF4          | chr22:39916568-39918691   | 473.951 | 516.638 | 0.124415 | 0.917325 |
| XLOC_010612 | ASNA1         | chr19:12848305-12859137   | 87.8562 | 95.7699 | 0.124427 | 0.909489 |
| XLOC_011762 | FBXO46        | chr19:46213886-46234151   | 13.6374 | 14.8659 | 0.124439 | 0.921047 |
| XLOC_014675 | CLTCL1        | chr22:19166986-19279239   | 1.37456 | 1.4984  | 0.124451 | 0.943036 |
| XLOC_024006 | MORC4         | chrX:106183963-10624347   | 7.30612 | 7.96494 | 0.124558 | 0.913628 |
| XLOC_021454 | ER11          | chr8:8860313-8890849      | 6.1353  | 6.68862 | 0.124574 | 0.916438 |
| XLOC_019205 | PDCD2         | chr6:170884659-170893780  | 35.7447 | 38.9688 | 0.124588 | 0.928086 |
| XLOC_002589 | PCGF5         | chr10:92922768-93044088   | 11.7654 | 12.8274 | 0.124674 | 0.963457 |
| XLOC_017053 | SDHA          | chr5:218355-256814        | 56.2118 | 61.2861 | 0.124686 | 0.908114 |
| XLOC_023590 | UBE2A         | chrX:118708498-118718375  | 27.636  | 30.1315 | 0.124723 | 0.912153 |
| XLOC_001370 | STMN1         | chr1:26210676-26233368    | 189.434 | 206.554 | 0.124821 | 0.90907  |
| XLOC_011756 | OPA3          | chr19:46031024-46088122   | 3.19569 | 3.48458 | 0.124858 | 0.95835  |
| XLOC_011461 | PRDX2         | chr19:12907633-12912694   | 563.096 | 614.004 | 0.124868 | 0.909694 |
| XLOC_004657 | TSPAN9        | chr12:3186520-3395730     | 2.49895 | 2.72499 | 0.124927 | 0.938194 |
| XLOC_023480 | JPX           | chrX:73164158-73513409    | 3.50879 | 3.82642 | 0.125021 | 0.953115 |
| XLOC_012225 | SNRNP27       | chr2:70121074-70132368    | 19.5912 | 21.3648 | 0.125024 | 0.917363 |
| XLOC_023844 | TIMM17B       | chrX:48750729-48760422    | 112.712 | 122.921 | 0.125087 | 0.950929 |
| XLOC_022768 | CAAP1         | chr9:26840682-26892826    | 3.98523 | 4.34632 | 0.125134 | 0.931471 |
| XLOC_014616 | NUP50         | chr22:45559725-45583890   | 10.4877 | 11.4382 | 0.125153 | 0.908586 |
| XLOC_015522 | OPA1          | chr3:193310932-193415600  | 8.27813 | 9.02835 | 0.125158 | 0.909016 |
| XLOC_018202 | CSNK2B        | chr6:31629005-31637843    | 237.314 | 258.821 | 0.12516  | 0.926423 |
| XLOC_010689 | CCDC124       | chr19:18043823-18054794   | 229.155 | 249.926 | 0.125177 | 0.906816 |
| XLOC_000178 | PITHD1        | chr1:24104875-24114722    | 32.0338 | 34.9376 | 0.125186 | 0.909435 |
| XLOC_020686 | RINT1         | chr7:105172531-105221975  | 9.04534 | 9.86555 | 0.125224 | 0.913628 |
| XLOC_001077 | H3F3A         | chr1:226250407-226259705  | 399.905 | 436.183 | 0.125273 | 0.908586 |
| XLOC_002834 | RSU1          | chr10:16632616-16859453   | 10.2181 | 11.1454 | 0.125327 | 0.909179 |
| XLOC_015182 | ARL6IP5       | chr3:69134089-69155239    | 14.9953 | 16.3566 | 0.125361 | 0.913628 |
| XLOC_021943 | TMEM66        | chr8:29920257-30108213    | 53.5362 | 58.3977 | 0.125396 | 0.934737 |

|             |                         |                          |           |           |          |          |
|-------------|-------------------------|--------------------------|-----------|-----------|----------|----------|
| XLOC_011198 | NLRP4                   | chr19:56296762-56393220  | 0.0402486 | 0.0439046 | 0.125432 | 1        |
| XLOC_002314 | GTPBP4                  | chr10:1034348-1063708    | 43.6035   | 47.5652   | 0.125461 | 0.909016 |
| XLOC_005370 | IPO8                    | chr12:30781914-30848929  | 7.40666   | 8.07966   | 0.125472 | 0.906892 |
| XLOC_004400 | COA4                    | chr11:73583712-73638781  | 101.189   | 110.394   | 0.125608 | 0.928354 |
| XLOC_014343 | ZBTB21                  | chr21:43406939-43430496  | 2.32064   | 2.53178   | 0.125631 | 0.923433 |
| XLOC_014466 | SPECC1L                 | chr22:24666789-24813708  | 6.44505   | 7.03149   | 0.125638 | 0.918718 |
| XLOC_011983 | ZSCAN5A                 | chr19:56732678-56739659  | 0.586777  | 0.640196  | 0.125702 | 0.972374 |
| XLOC_011667 | EID2                    | chr19:40029446-40030838  | 26.1416   | 28.522    | 0.12573  | 0.918416 |
| XLOC_003265 | STIM1                   | chr11:3876932-4114440    | 9.52699   | 10.3947   | 0.125751 | 0.913628 |
| XLOC_013226 | METTL5                  | chr2:170655321-170681353 | 62.3755   | 68.0608   | 0.125843 | 0.961224 |
| XLOC_006896 | RPS6KL1                 | chr14:75370656-75389145  | 1.24951   | 1.36346   | 0.125903 | 0.948068 |
| XLOC_007958 | NDE1                    | chr16:15737123-15950887  | 5.43981   | 5.93589   | 0.125908 | 0.931471 |
| XLOC_021695 | POLR2K                  | chr8:101162838-101166230 | 56.0357   | 61.1459   | 0.125909 | 0.907929 |
| XLOC_017432 | SLC36A1                 | chr5:150827162-150871940 | 1.12513   | 1.22779   | 0.12597  | 0.947008 |
| XLOC_017220 | ZCCHC9                  | chr5:80256507-81047072   | 18.9992   | 20.7329   | 0.125981 | 0.938194 |
| XLOC_004961 | TMEM5                   | chr12:64173636-64202887  | 9.9082    | 10.813    | 0.126071 | 0.926995 |
| XLOC_020547 | EIF4H                   | chr7:73588705-73611429   | 185.079   | 201.982   | 0.126088 | 0.908531 |
| XLOC_010010 | CANT1                   | chr17:76987797-77005899  | 22.9947   | 25.0951   | 0.1261   | 0.903682 |
| XLOC_007593 | RAB27A                  | chr15:55495163-55582013  | 2.08748   | 2.27818   | 0.126115 | 0.936288 |
| XLOC_021859 | SOX7                    | chr8:10581277-10588022   | 0.0936881 | 0.102255  | 0.126228 | 1        |
| XLOC_008256 | MLYCD                   | chr16:83932729-83949787  | 7.41483   | 8.09342   | 0.126335 | 0.931473 |
| XLOC_010465 | SF3A2                   | chr19:2236815-2248678    | 105.68    | 115.353   | 0.126354 | 0.906464 |
| XLOC_021308 | TNPO3                   | chr7:128594233-128695227 | 16.2409   | 17.7275   | 0.126364 | 0.908114 |
| XLOC_021906 | BIN3                    | chr8:22462144-22526661   | 16.0782   | 17.5503   | 0.126393 | 0.978269 |
| XLOC_018893 | MRPL14                  | chr6:44081372-44095191   | 121.11    | 132.201   | 0.126412 | 0.907165 |
| XLOC_008978 | ZNF207                  | chr17:30677127-30697468  | 47.7209   | 52.092    | 0.126439 | 0.908789 |
| XLOC_018666 | TDP2                    | chr6:24650204-24667115   | 14.2688   | 15.5759   | 0.126448 | 0.912696 |
| XLOC_005116 | CCDC42B                 | chr12:113587662-11362321 | 0.182898  | 0.199654  | 0.126463 | 1        |
| XLOC_015259 | GTPBP8                  | chr3:112709799-112720227 | 8.23841   | 8.99327   | 0.126481 | 0.931255 |
| XLOC_004930 | IL23A                   | chr12:56732662-56734194  | 0.807386  | 0.881376  | 0.126499 | 0.976629 |
| XLOC_009865 | MKS1                    | chr17:56282796-56296966  | 9.52541   | 10.399    | 0.126593 | 0.918619 |
| XLOC_021773 | LY6E                    | chr8:144099901-144103827 | 445.133   | 486.022   | 0.126787 | 0.909164 |
| XLOC_014604 | SERHL2                  | chr22:42949924-42978017  | 0.0714373 | 0.0780001 | 0.126798 | 1        |
| XLOC_018325 | HSP90AB1                | chr6:44213902-44221625   | 770.389   | 841.205   | 0.12687  | 0.922257 |
| XLOC_013024 | REEP1                   | chr2:86441119-86565206   | 0.804715  | 0.878701  | 0.126894 | 0.954559 |
| XLOC_016255 | NCAPG                   | chr4:17812435-18023483   | 5.3388    | 5.82971   | 0.126906 | 0.938194 |
| XLOC_007407 | FES                     | chr15:91427664-91439006  | 0.405762  | 0.44308   | 0.126933 | 0.974044 |
| XLOC_018810 | WDR46                   | chr6:33246879-33257304   | 37.2616   | 40.6889   | 0.126942 | 0.902585 |
| XLOC_020883 | NOM1                    | chr7:156742416-156765871 | 6.92227   | 7.55952   | 0.12705  | 0.909592 |
| XLOC_019018 | PREP                    | chr6:105725441-105850995 | 14.1275   | 15.4283   | 0.127068 | 0.909435 |
| XLOC_000843 | UAP1                    | chr1:162531295-162569633 | 193.578   | 211.406   | 0.127105 | 0.913628 |
| XLOC_022113 | STK3                    | chr8:99466858-99954799   | 5.57869   | 6.09253   | 0.127115 | 0.92313  |
| XLOC_016978 | C4orf46                 | chr4:159587830-159593201 | 4.58407   | 5.00643   | 0.127154 | 0.922312 |
| XLOC_007955 | PDXDC1                  | chr16:15068832-15131552  | 10.5263   | 11.4968   | 0.127238 | 0.906464 |
| XLOC_016085 | PARL                    | chr3:183547172-183602693 | 48.0058   | 52.4343   | 0.127302 | 0.901132 |
| XLOC_008664 | AP1G1                   | chr16:71762904-71842976  | 5.58429   | 6.09963   | 0.127348 | 0.907688 |
| XLOC_019138 | LRP11                   | chr6:150139893-150244214 | 5.55739   | 6.07045   | 0.127397 | 0.920505 |
| XLOC_021739 | RNF139                  | chr8:125487007-125551325 | 17.4913   | 19.1064   | 0.127418 | 0.953469 |
| XLOC_002176 | BATF3                   | chr1:212859758-212873327 | 25.085    | 27.4025   | 0.127483 | 0.924847 |
| XLOC_011789 | TMEM160                 | chr19:47549166-47551882  | 64.0129   | 69.9293   | 0.127535 | 0.929536 |
| XLOC_020346 | TTYH3                   | chr7:2671602-2704436     | 21.0964   | 23.0463   | 0.12754  | 0.907689 |
| XLOC_003236 | CD151                   | chr11:832951-838835      | 360.545   | 393.875   | 0.127555 | 0.907688 |
| XLOC_016366 | DKK                     | chr4:71859264-71896629   | 5.33572   | 5.82904   | 0.127576 | 0.924847 |
| XLOC_010308 | NPC1                    | chr18:21083433-21166581  | 10.5398   | 11.5144   | 0.127588 | 0.931471 |
| XLOC_022975 | ANKS6                   | chr9:101494290-101558794 | 8.96091   | 9.78958   | 0.127602 | 0.908114 |
| XLOC_000971 | TIMM17A                 | chr1:201924618-201939785 | 36.7365   | 40.1399   | 0.127821 | 0.904448 |
| XLOC_013553 | NAA20                   | chr20:19997933-20014273  | 83.092    | 90.7963   | 0.127923 | 0.905942 |
| XLOC_017289 | PRDM6                   | chr5:122424840-122523745 | 0.0698164 | 0.076292  | 0.127965 | 1        |
| XLOC_009512 | PMP22                   | chr17:15133095-15168644  | 28.581    | 31.2322   | 0.12798  | 0.908288 |
| XLOC_005858 | UFM1                    | chr13:38923941-38937143  | 14.4285   | 15.7675   | 0.128036 | 0.907688 |
| XLOC_006763 | EAPP                    | chr14:34985134-35008943  | 22.8747   | 24.9978   | 0.12805  | 0.906895 |
| XLOC_023039 | CDK5RAP2                | chr9:123151146-123342448 | 4.54978   | 4.9721    | 0.128058 | 0.909435 |
| XLOC_007515 | RMDN3                   | chr15:41028085-41047458  | 15.0492   | 16.4462   | 0.128068 | 0.913628 |
| XLOC_018365 | PRIM2                   | chr6:57182421-57513376   | 8.73624   | 9.54789   | 0.12817  | 0.913628 |
| XLOC_007340 | KIAA1024                | chr15:79724857-79764642  | 0.176562  | 0.192967  | 0.128181 | 1        |
| XLOC_010447 | ATP5D                   | chr19:1241748-1244824    | 365.637   | 399.613   | 0.128191 | 0.905695 |
| XLOC_021340 | KIAA1549                | chr7:138516126-138666060 | 1.26808   | 1.38598   | 0.128259 | 0.923433 |
| XLOC_022217 | ZC3H3                   | chr8:144519824-144623620 | 17.6958   | 19.3412   | 0.128265 | 0.907657 |
| XLOC_000462 | RABGGTB                 | chr1:76251878-76260775   | 54.25     | 59.2946   | 0.128276 | 0.902703 |
| XLOC_023001 | PTPN3                   | chr9:112137973-112260593 | 5.78908   | 6.32748   | 0.128298 | 0.908114 |
| XLOC_011941 | MBOAT7                  | chr19:54677105-54693733  | 94.9769   | 103.811   | 0.128315 | 0.907651 |
| XLOC_022132 | SLC25A32                | chr8:104410865-104455680 | 16.6778   | 18.2294   | 0.128341 | 0.966946 |
| XLOC_012363 | LIMS1                   | chr2:109150810-109303702 | 2.93372   | 3.20678   | 0.128396 | 0.926225 |
| XLOC_017843 | SIL1                    | chr5:138282409-138534065 | 39.3084   | 42.9673   | 0.128403 | 0.907435 |
| XLOC_009470 | TRAPPC1                 | chr17:7833662-7835317    | 144.344   | 157.784   | 0.128433 | 0.902309 |
| XLOC_011617 | POLR2I                  | chr19:36602104-36616849  | 88.3373   | 96.5631   | 0.12845  | 0.958814 |
| XLOC_021190 | ATP5J2,ATP5J2-PTCD1,PTI | chr7:99006600-99063824   | 722.26    | 789.519   | 0.128456 | 0.953738 |
| XLOC_011424 | AP1M2                   | chr19:10683346-10697991  | 3.34047   | 3.65168   | 0.128512 | 0.950929 |
| XLOC_002893 | HNRNPF                  | chr10:43881064-43904696  | 106.49    | 116.412   | 0.128518 | 0.905658 |

|             |           |                          |            |            |          |          |
|-------------|-----------|--------------------------|------------|------------|----------|----------|
| XLOC_007349 | IL16      | chr15:81489218-81616524  | 0.027004   | 0.0295203  | 0.128532 | 1        |
| XLOC_003027 | WAPAL     | chr10:88195012-88281541  | 5.2009     | 5.68564    | 0.12856  | 0.908114 |
| XLOC_018946 | LMBRD1    | chr6:70385640-70507049   | 8.8598     | 9.68673    | 0.128736 | 0.913628 |
| XLOC_018873 | C6orf132  | chr6:42068856-421110715  | 3.6853     | 4.02939    | 0.128779 | 0.918898 |
| XLOC_008447 | C16orf88  | chr16:19717673-19868859  | 5.89644    | 6.44748    | 0.128891 | 0.945946 |
| XLOC_019062 | MAN1A1    | chr6:119498365-119670937 | 1.11193    | 1.21586    | 0.128911 | 0.944329 |
| XLOC_016450 | TET2      | chr4:106067031-106200960 | 0.583902   | 0.638484   | 0.128924 | 0.945946 |
| XLOC_018025 | WRNIP1    | chr6:2765665-2785979     | 33.9804    | 37.1571    | 0.128934 | 0.904734 |
| XLOC_003433 | MDK       | chr11:46402333-46405387  | 615.23     | 672.793    | 0.129036 | 0.904223 |
| XLOC_006807 | TRIM9     | chr14:51441980-51562422  | 0.00351405 | 0.00384287 | 0.129049 | 1        |
| XLOC_013570 | PYGB      | chr20:25228705-25371618  | 19.2945    | 21.1003    | 0.129075 | 0.953384 |
| XLOC_017972 | MXD3      | chr5:176730762-176739292 | 32.1327    | 35.1409    | 0.129109 | 0.965735 |
| XLOC_014918 | TRNT1     | chr3:3168599-3190706     | 7.02241    | 7.68032    | 0.129201 | 0.917861 |
| XLOC_023290 | MBTPS2    | chrX:21857655-21903541   | 2.31327    | 2.53007    | 0.129246 | 0.931471 |
| XLOC_006818 | CNIH      | chr14:54893646-54908148  | 61.9513    | 67.7595    | 0.129289 | 0.901793 |
| XLOC_004938 | NXP4      | chr12:57610577-57620232  | 31.3446    | 34.2872    | 0.129455 | 0.913628 |
| XLOC_023075 | MAPKAP1   | chr9:128199672-128469513 | 65.9443    | 72.1376    | 0.129503 | 0.917325 |
| XLOC_004684 | USP5      | chr12:6961284-6975795    | 29.9381    | 32.7503    | 0.129523 | 0.903682 |
| XLOC_005420 | ADCY6     | chr12:49159974-49182820  | 6.42292    | 7.02628    | 0.129531 | 0.913236 |
| XLOC_023658 | FMR1      | chrX:146990948-147032647 | 5.18493    | 5.67214    | 0.129569 | 0.913236 |
| XLOC_018875 | MRPS10    | chr6:42174538-42185633   | 18.4585    | 20.1931    | 0.129577 | 0.906464 |
| XLOC_013279 | ORMDL1    | chr2:190634992-190742355 | 21.796     | 23.8474    | 0.12977  | 0.921254 |
| XLOC_012493 | CERS6     | chr2:169312758-169642935 | 3.15001    | 3.44652    | 0.129788 | 0.946765 |
| XLOC_018447 | RPF2      | chr6:111303290-111346794 | 50.4195    | 55.1675    | 0.129838 | 0.902703 |
| XLOC_008564 | N4BP1     | chr16:48572636-48644120  | 2.95562    | 3.23397    | 0.129847 | 0.918342 |
| XLOC_015570 | SEC13     | chr3:10342614-10362858   | 72.988     | 79.863     | 0.129869 | 0.898567 |
| XLOC_022728 | ZDHHC21   | chr9:14611068-14693480   | 0.852199   | 0.932472   | 0.12987  | 0.930633 |
| XLOC_002225 | MRPL55    | chr1:228294379-228297013 | 64.3769    | 70.447     | 0.129996 | 0.917325 |
| XLOC_011188 | NAT14     | chr19:55996556-55998935  | 1.97659    | 2.16301    | 0.130031 | 0.966946 |
| XLOC_018987 | RARS2     | chr6:88224095-88299735   | 15.781     | 17.2703    | 0.130104 | 0.907657 |
| XLOC_010766 | PDCD2L    | chr19:34895302-34917072  | 25.8521    | 28.2932    | 0.130172 | 0.914199 |
| XLOC_021948 | PPP2CB    | chr8:30643125-30670352   | 39.3424    | 43.0585    | 0.130212 | 0.902188 |
| XLOC_007950 | BFAR      | chr16:14726667-14763093  | 19.9541    | 21.8396    | 0.130264 | 0.902703 |
| XLOC_007998 | DCTN5     | chr16:23652686-23685068  | 6.22761    | 6.81618    | 0.130286 | 0.902703 |
| XLOC_005730 | TAOK3     | chr12:118587605-11881071 | 1.20263    | 1.3163     | 0.130292 | 0.945783 |
| XLOC_011326 | SH3GL1    | chr19:4360363-4400565    | 67.9648    | 74.3947    | 0.130412 | 0.900578 |
| XLOC_017697 | GFM2      | chr5:73980968-74072737   | 10.8915    | 11.9221    | 0.13044  | 0.986353 |
| XLOC_015805 | LRIG1     | chr3:66119284-66550845   | 2.62729    | 2.87597    | 0.130475 | 0.977332 |
| XLOC_015087 | KLHL18    | chr3:47205859-47388306   | 4.39503    | 4.81105    | 0.130479 | 0.927082 |
| XLOC_008502 | KCTD13    | chr16:29917656-29937545  | 9.62485    | 10.5366    | 0.130575 | 0.930066 |
| XLOC_021951 | FUT10     | chr8:33228343-33330664   | 2.85451    | 3.12493    | 0.130584 | 0.926258 |
| XLOC_017778 | SEMA6A    | chr5:115779250-115910557 | 0.0498506  | 0.0545735  | 0.130587 | 1        |
| XLOC_015474 | EIF2B5    | chr3:183852809-183863095 | 21.3144    | 23.3348    | 0.130657 | 0.898524 |
| XLOC_017376 | PCDHB8    | chr5:140557370-140560087 | 1.41247    | 1.54641    | 0.130701 | 0.955758 |
| XLOC_017479 | NPM1      | chr5:170814707-170837888 | 1377.59    | 1508.23    | 0.130711 | 0.919029 |
| XLOC_016288 | UBE2K     | chr4:39699663-39784410   | 13.9141    | 15.2353    | 0.13087  | 0.898626 |
| XLOC_004647 | ADIPOR2   | chr12:1800246-1897845    | 10.6875    | 11.7024    | 0.13088  | 0.902703 |
| XLOC_004562 | INT4      | chr11:118401802-11843675 | 7.22162    | 7.90752    | 0.130902 | 0.925094 |
| XLOC_020668 | ZNHIT1    | chr7:100849257-100867477 | 154.054    | 168.692    | 0.130957 | 0.942519 |
| XLOC_019106 | IFNGR1    | chr6:137518620-137540567 | 7.51631    | 8.23188    | 0.131198 | 0.916105 |
| XLOC_003443 | SLC39A13  | chr11:47430045-47438051  | 31.8701    | 34.9052    | 0.13124  | 0.902188 |
| XLOC_008514 | CD2BP2    | chr16:30362086-30366682  | 33.12      | 36.2743    | 0.131245 | 0.897501 |
| XLOC_014936 | JAGN1     | chr3:9932270-9936031     | 28.1793    | 30.8632    | 0.131256 | 0.904448 |
| XLOC_018076 | CDKAL1    | chr6:20534687-21232634   | 2.74948    | 3.01139    | 0.131272 | 0.929478 |
| XLOC_001636 | SEP15     | chr1:87328127-87380107   | 53.3945    | 58.4809    | 0.131273 | 0.898291 |
| XLOC_010815 | ZNF382    | chr19:37096206-37119499  | 0.0708893  | 0.0776437  | 0.1313   | 1        |
| XLOC_012966 | TGFA      | chr2:70674411-70781147   | 2.21788    | 2.42922    | 0.131313 | 0.927569 |
| XLOC_012464 | EPC2      | chr2:149402559-149545136 | 2.5582     | 2.80207    | 0.131361 | 0.92377  |
| XLOC_005274 | M6PR      | chr12:9067315-9102357    | 70.947     | 77.7105    | 0.131368 | 0.913236 |
| XLOC_009119 | CRHR1-IT1 | chr17:43697709-43913194  | 3.93253    | 4.3075     | 0.131395 | 0.979316 |
| XLOC_018802 | TAP1      | chr6:32808493-32821748   | 24.5741    | 26.9184    | 0.131455 | 0.962558 |
| XLOC_021049 | TBRG4     | chr7:45139698-45151346   | 72.656     | 79.5884    | 0.131476 | 0.901326 |
| XLOC_014438 | UBE2L3    | chr22:21899957-21978323  | 44.0734    | 48.2789    | 0.131486 | 0.895883 |
| XLOC_009289 | SAP30BP   | chr17:73663398-73704139  | 24.6057    | 26.9537    | 0.131492 | 0.897933 |
| XLOC_014676 | HIRA      | chr22:19318223-19419219  | 6.62854    | 7.26121    | 0.131519 | 0.912776 |
| XLOC_007687 | EDC3      | chr15:74922898-74988386  | 9.80006    | 10.7357    | 0.131547 | 0.904096 |
| XLOC_018557 | MTHFD1L   | chr6:151186814-151423023 | 31.288     | 34.2751    | 0.13155  | 0.937255 |
| XLOC_021062 | GRB10     | chr7:50657759-50861159   | 7.75239    | 8.49271    | 0.131584 | 0.908308 |
| XLOC_022010 | ASPH      | chr8:62200524-62627199   | 46.2224    | 50.6367    | 0.131591 | 0.907688 |
| XLOC_012736 | TRAF3IP1  | chr2:239229184-239309547 | 1.7513     | 1.91864    | 0.131655 | 0.938657 |
| XLOC_018867 | TFEB      | chr6:41651715-41703997   | 1.99472    | 2.18543    | 0.131735 | 0.954559 |
| XLOC_013758 | GTPBP5    | chr20:60758080-60777810  | 5.73523    | 6.2837     | 0.131763 | 0.926423 |
| XLOC_000881 | PRRC2C    | chr1:171454665-171562650 | 4.45799    | 4.88439    | 0.131786 | 0.900578 |
| XLOC_016169 | MAEA      | chr4:1283671-1333925     | 22.7488    | 24.9271    | 0.131924 | 0.905942 |
| XLOC_021719 | UTP23     | chr8:117778741-117786927 | 7.46278    | 8.17756    | 0.131957 | 0.90869  |
| XLOC_020892 | PRKAR1B   | chr7:588833-826116       | 18.7658    | 20.5643    | 0.132038 | 0.953483 |
| XLOC_010574 | ICAM1     | chr19:10381516-10397291  | 29.9468    | 32.819     | 0.132129 | 0.903682 |
| XLOC_023556 | ATG4A     | chrX:107334898-107397907 | 2.13828    | 2.34348    | 0.132204 | 0.943082 |
| XLOC_020991 | SCRN1     | chr7:29959718-30029905   | 0.0329099  | 0.0360682  | 0.132205 | 1        |

|             |            |                          |           |           |          |          |
|-------------|------------|--------------------------|-----------|-----------|----------|----------|
| XLOC_002563 | FAM35A     | chr10:88854952-88951222  | 4.31528   | 4.72965   | 0.132281 | 0.916337 |
| XLOC_004458 | CHORDC1    | chr11:89933596-89956532  | 9.15018   | 10.0289   | 0.132287 | 0.904734 |
| XLOC_008768 | GSG2       | chr17:3617918-3704537    | 3.47071   | 3.8041    | 0.132325 | 0.96115  |
| XLOC_016912 | MAD2L1     | chr4:120980578-12098801  | 49.1535   | 53.8751   | 0.132326 | 0.900463 |
| XLOC_017153 | CWC2       | chr5:64064754-64314590   | 9.00555   | 9.87079   | 0.132352 | 0.909164 |
| XLOC_002354 | HSPA14     | chr10:14880260-14913740  | 16.0526   | 17.5951   | 0.132367 | 0.906606 |
| XLOC_018075 | E2F3       | chr6:20402136-20493945   | 3.98034   | 4.36288   | 0.132389 | 0.913984 |
| XLOC_018267 | KCTD20     | chr6:36358328-36458315   | 5.5101    | 6.0398    | 0.132422 | 0.903682 |
| XLOC_012726 | COPS8      | chr2:237994083-23800748  | 30.3058   | 33.2238   | 0.132623 | 0.893882 |
| XLOC_018743 | NRM        | chr6:30655823-30659197   | 27.2336   | 29.8568   | 0.132671 | 0.912696 |
| XLOC_003164 | TIAL1      | chr10:121332977-12135654 | 16.4462   | 18.0306   | 0.132688 | 0.897976 |
| XLOC_017109 | WDR70      | chr5:37379411-37752774   | 8.58412   | 9.41151   | 0.132754 | 0.912689 |
| XLOC_009363 | RPH3AL     | chr17:62179-202633       | 2.86102   | 3.13694   | 0.132829 | 0.945946 |
| XLOC_011796 | NAPA       | chr19:47987538-48018515  | 45.5363   | 49.929    | 0.132859 | 0.895818 |
| XLOC_007170 | HAUS2      | chr15:42841010-42862190  | 9.44793   | 10.3594   | 0.132872 | 0.900578 |
| XLOC_017604 | RAD1       | chr5:34905365-34915780   | 4.76806   | 5.22812   | 0.13289  | 0.90486  |
| XLOC_017221 | ATG10      | chr5:81267843-81551216   | 1.49799   | 1.64265   | 0.133002 | 0.946257 |
| XLOC_015287 | EAF2       | chr3:121554033-12160537  | 2.35503   | 2.56076   | 0.133131 | 0.955952 |
| XLOC_003767 | PANX1      | chr11:93862093-93915137  | 3.0228    | 3.31503   | 0.133135 | 0.930066 |
| XLOC_009060 | EIF1       | chr17:39845126-39847898  | 773.286   | 848.061   | 0.133165 | 0.913628 |
| XLOC_023019 | FKBP15     | chr9:115927799-11598364  | 24.8017   | 27.2012   | 0.133231 | 0.895217 |
| XLOC_017095 | SUB1       | chr5:32585604-32604185   | 26.8352   | 29.4331   | 0.13331  | 0.894494 |
| XLOC_001798 | ANP32E     | chr1:150190716-15020850  | 15.7098   | 17.2319   | 0.133415 | 0.899649 |
| XLOC_000766 | SYT11      | chr1:155829259-15585499  | 0.0121323 | 0.0133079 | 0.133428 | 1        |
| XLOC_016144 | RNF168     | chr3:196195656-19623063  | 5.2917    | 5.80459   | 0.133463 | 0.905942 |
| XLOC_012752 | SEPT2      | chr2:242166681-24229344  | 42.2115   | 46.3048   | 0.133524 | 0.949303 |
| XLOC_018293 | TOMM6      | chr6:41755180-41757634   | 134.329   | 147.356   | 0.133533 | 0.894057 |
| XLOC_001425 | ZBTB8OS    | chr1:33087306-33116185   | 15.059    | 16.5201   | 0.133596 | 0.92313  |
| XLOC_018364 | BAG2       | chr6:57037103-57050012   | 20.6615   | 22.6666   | 0.133621 | 0.900748 |
| XLOC_018981 | SYNCRIP    | chr6:86317501-86353043   | 13.1502   | 14.4276   | 0.133745 | 0.918898 |
| XLOC_000394 | PRPF38A    | chr1:52870218-52883992   | 13.656    | 14.9829   | 0.133776 | 0.898291 |
| XLOC_015054 | ABHD5      | chr3:43732374-43764217   | 2.58886   | 2.84042   | 0.133788 | 0.918342 |
| XLOC_017973 | LMAN2      | chr5:176758562-17677888  | 115.555   | 126.802   | 0.134002 | 0.895717 |
| XLOC_013051 | LMAN2L     | chr2:97371666-97405813   | 6.96895   | 7.64747   | 0.134041 | 0.919541 |
| XLOC_014003 | PLTP       | chr20:44517110-44541003  | 9.03192   | 9.91162   | 0.134088 | 0.98241  |
| XLOC_001232 | C1orf174   | chr1:3805696-3816857     | 14.6694   | 16.0986   | 0.134129 | 0.908288 |
| XLOC_002494 | SUPV3L1    | chr10:70939992-70968849  | 19.8787   | 21.8171   | 0.134239 | 0.896051 |
| XLOC_023332 | ATP6AP2    | chrX:40440215-40465888   | 33.3659   | 36.6223   | 0.134351 | 0.895499 |
| XLOC_016501 | PLK4       | chr4:128802015-12882037  | 4.71635   | 5.17671   | 0.134365 | 0.905695 |
| XLOC_015565 | EMC3       | chr3:10006635-10028522   | 29.8247   | 32.7366   | 0.134394 | 0.905695 |
| XLOC_002961 | DNAJC12    | chr10:69556426-69597937  | 30.2049   | 33.1541   | 0.134404 | 0.909694 |
| XLOC_005656 | PMCH       | chr12:102513955-1025916  | 1.09067   | 1.19719   | 0.134439 | 0.988571 |
| XLOC_016656 | MRFAP1L1   | chr4:6709428-6711606     | 34.4942   | 37.8658   | 0.13454  | 0.89272  |
| XLOC_015763 | NEK4       | chr3:52744795-52804965   | 3.11139   | 3.41595   | 0.134728 | 0.921047 |
| XLOC_022789 | NOL6       | chr9:33461350-33473941   | 9.11105   | 10.003    | 0.134741 | 0.895818 |
| XLOC_007860 | NDUFB10    | chr16:2009516-2011976    | 115.042   | 126.307   | 0.134774 | 0.891486 |
| XLOC_022865 | CBWD6      | chr9:69204537-69262593   | 3.31266   | 3.63724   | 0.134854 | 0.932231 |
| XLOC_007734 | EFTUD1     | chr15:82422560-82555104  | 14.6412   | 16.0758   | 0.134855 | 0.890355 |
| XLOC_007180 | PDIA3      | chr15:44038589-44094769  | 115.512   | 126.831   | 0.134871 | 0.948704 |
| XLOC_012894 | LRPPRC     | chr2:44113362-44223144   | 27.7697   | 30.4916   | 0.134902 | 0.895818 |
| XLOC_001958 | COPA       | chr1:160258376-16032874  | 19.9589   | 21.9153   | 0.134907 | 0.931471 |
| XLOC_014745 | XBP1       | chr22:29190547-29196560  | 69.4773   | 76.2889   | 0.134933 | 0.906895 |
| XLOC_012518 | ZAK        | chr2:173940564-17414676  | 5.32542   | 5.84786   | 0.135015 | 0.911245 |
| XLOC_021715 | ENY2       | chr8:110346551-11035818  | 36.6914   | 40.2919   | 0.135046 | 0.893663 |
| XLOC_005753 | RHOF       | chr12:122150657-1222315  | 106.14    | 116.564   | 0.135153 | 0.912308 |
| XLOC_001298 | RSG1       | chr1:16558181-16563659   | 1.57041   | 1.72481   | 0.135302 | 0.961724 |
| XLOC_017082 | FAM105A    | chr5:14581890-14616287   | 0.824352  | 0.905413  | 0.135315 | 0.932231 |
| XLOC_023346 | PHF16      | chrX:46771735-46920641   | 2.32015   | 2.54832   | 0.135328 | 0.918619 |
| XLOC_009607 | C17orf75   | chr17:30655459-30669228  | 2.07373   | 2.27767   | 0.13533  | 0.925867 |
| XLOC_002493 | VPS26A     | chr10:70883907-70932616  | 22.2984   | 24.4915   | 0.135346 | 0.893663 |
| XLOC_017935 | SLU7       | chr5:159828647-15984616  | 8.98265   | 9.86621   | 0.135355 | 0.898291 |
| XLOC_009262 | TTYH2      | chr17:72209695-72258157  | 8.69852   | 9.55417   | 0.135361 | 0.907688 |
| XLOC_010792 | RBM42      | chr19:36119979-36128587  | 64.4378   | 70.7789   | 0.135412 | 0.894319 |
| XLOC_001482 | PPT1       | chr1:40538381-40563142   | 44.9177   | 49.3397   | 0.135466 | 0.886662 |
| XLOC_005653 | GNPTAB     | chr12:102139274-1022246  | 2.50011   | 2.74626   | 0.135478 | 0.913628 |
| XLOC_009453 | DVL2       | chr17:7128660-7137863    | 31.2042   | 34.2766   | 0.13548  | 0.890666 |
| XLOC_010745 | URI1       | chr19:30414550-30507519  | 11.7251   | 12.8797   | 0.135498 | 0.897241 |
| XLOC_012025 | ACP1       | chr2:264868-278282       | 58.5613   | 64.3313   | 0.135573 | 0.887902 |
| XLOC_000251 | TXLNA      | chr1:32645344-32663886   | 21.4552   | 23.57     | 0.135623 | 0.891905 |
| XLOC_012824 | DNMT3A     | chr2:25455829-25565459   | 1.35036   | 1.48346   | 0.135626 | 0.958902 |
| XLOC_018102 | HIST1H4E   | chr6:26204872-26205249   | 5.16729   | 5.67664   | 0.135629 | 0.9727   |
| XLOC_006978 | HSP90AA1   | chr14:102547074-1026060  | 291.575   | 320.383   | 0.135931 | 0.909694 |
| XLOC_016836 | KLHL8      | chr4:88082213-88141674   | 1.28617   | 1.41328   | 0.135968 | 0.931471 |
| XLOC_010425 | BSG        | chr19:571276-583493      | 637.395   | 700.44    | 0.136073 | 0.90233  |
| XLOC_023343 | ZNF674-AS1 | chrX:46404924-46407910   | 1.93084   | 2.1219    | 0.136133 | 0.948088 |
| XLOC_004159 | AMBRA1     | chr11:46417961-46615619  | 5.34486   | 5.8738    | 0.136142 | 0.909016 |
| XLOC_002995 | ANXA7      | chr10:75135188-75173841  | 25.6985   | 28.2419   | 0.136153 | 0.894057 |
| XLOC_009225 | TACO1      | chr17:61678230-61685725  | 16.9339   | 18.6099   | 0.136162 | 0.907657 |
| XLOC_007841 | CHTF18     | chr16:838621-850733      | 14.9241   | 16.4013   | 0.136166 | 0.903682 |

|             |              |                          |           |           |          |          |
|-------------|--------------|--------------------------|-----------|-----------|----------|----------|
| XLOC_004797 | BICD1        | chr12:32260184-32531141  | 0.332839  | 0.365805  | 0.13625  | 0.965573 |
| XLOC_022964 | CTSL2        | chr9:99791958-99801925   | 2.38576   | 2.62212   | 0.136284 | 0.917453 |
| XLOC_018595 | FGFR10P      | chr6:167412815-167454066 | 6.6152    | 7.27068   | 0.136304 | 0.917379 |
| XLOC_011555 | ATP13A1      | chr19:19756009-19774503  | 21.6049   | 23.7467   | 0.136367 | 0.888528 |
| XLOC_003505 | FAM111B      | chr11:58874657-58894888  | 1.34919   | 1.48299   | 0.136421 | 0.937403 |
| XLOC_000340 | IPO13        | chr1:44412477-44433694   | 5.75035   | 6.32084   | 0.136467 | 0.908114 |
| XLOC_005743 | COQ5         | chr12:120941081-12096696 | 15.4566   | 16.9908   | 0.136526 | 0.903932 |
| XLOC_022645 | WDR5         | chr9:137001209-137025094 | 41.3446   | 45.4493   | 0.136558 | 0.889242 |
| XLOC_020914 | TNRC18       | chr7:5346422-5463177     | 6.89105   | 7.57535   | 0.136589 | 0.893663 |
| XLOC_022997 | TMEM245      | chr9:111777414-111882225 | 5.92806   | 6.51676   | 0.136596 | 0.889644 |
| XLOC_023818 | CASK         | chrX:41374188-41782287   | 1.45544   | 1.59999   | 0.136613 | 0.917208 |
| XLOC_001622 | GNG5         | chr1:84944919-84972262   | 285.688   | 314.068   | 0.136641 | 0.918342 |
| XLOC_020472 | PPIA         | chr7:44836240-44842716   | 621.868   | 683.67    | 0.136691 | 0.909056 |
| XLOC_010863 | MAP3K10      | chr19:40697650-40721482  | 9.6026    | 10.557    | 0.136699 | 0.912776 |
| XLOC_016663 | ABLIM2       | chr4:7967036-8160559     | 0.414437  | 0.455633  | 0.136719 | 0.967901 |
| XLOC_002587 | RPP30        | chr10:92631708-92668312  | 6.58883   | 7.24393   | 0.13675  | 0.921164 |
| XLOC_007549 | ELL3         | chr15:44038589-44094769  | 1.56948   | 1.72557   | 0.136788 | 0.994798 |
| XLOC_016038 | KPNA4        | chr3:160212782-160283376 | 8.32846   | 9.15677   | 0.136789 | 0.898626 |
| XLOC_014849 | PHF5A        | chr22:41855720-41864708  | 65.2252   | 71.7152   | 0.136849 | 0.894319 |
| XLOC_016928 | PGRMC2       | chr4:129190391-129209984 | 18.2277   | 20.0418   | 0.136878 | 0.889643 |
| XLOC_018441 | SMPD2        | chr6:109711417-109765122 | 9.68867   | 10.6531   | 0.136898 | 0.924203 |
| XLOC_023928 | ERCC6L       | chrX:71401525-71483814   | 1.77749   | 1.95446   | 0.136925 | 0.960071 |
| XLOC_017508 | ZNF346       | chr5:176449696-176493745 | 3.14832   | 3.46218   | 0.137098 | 0.925191 |
| XLOC_005655 | NUP37        | chr12:102467972-10251236 | 31.4811   | 34.6244   | 0.137304 | 0.894299 |
| XLOC_021880 | LONRF1       | chr8:12579405-12612992   | 3.58106   | 3.93865   | 0.137313 | 0.918342 |
| XLOC_000759 | FDPS         | chr1:155278538-155300905 | 67.2378   | 73.9577   | 0.137428 | 0.92844  |
| XLOC_004104 | SPTY2D1      | chr11:18621350-18656020  | 2.8837    | 3.17192   | 0.137434 | 0.908114 |
| XLOC_004332 | FIBP         | chr11:65647283-65656010  | 96.5839   | 106.239   | 0.137461 | 0.888528 |
| XLOC_020569 | HSPB1        | chr7:75931874-75933614   | 864.308   | 950.727   | 0.137486 | 0.894057 |
| XLOC_009464 | FXR2         | chr17:7494547-7536700    | 41.1448   | 45.261    | 0.137556 | 0.94735  |
| XLOC_017329 | TXNDC15      | chr5:134209459-134237322 | 7.77707   | 8.55513   | 0.137564 | 0.902188 |
| XLOC_008614 | FAM96B       | chr16:66965957-66968326  | 171.216   | 188.346   | 0.137565 | 0.886391 |
| XLOC_023589 | SLC25A5      | chrX:118599995-118605351 | 480.629   | 528.722   | 0.137586 | 0.898291 |
| XLOC_007305 | CSK          | chr15:75074424-75095539  | 68.6329   | 75.5009   | 0.137593 | 0.88893  |
| XLOC_000576 | STRIP1       | chr1:110574198-110597262 | 6.90432   | 7.59522   | 0.137593 | 0.907874 |
| XLOC_018458 | DSE          | chr6:116601282-116759442 | 2.91361   | 3.20543   | 0.137713 | 0.913628 |
| XLOC_003106 | NPM3         | chr10:103541081-10354317 | 162.249   | 178.502   | 0.137773 | 0.886887 |
| XLOC_004536 | USP28        | chr11:113668596-11374621 | 4.82902   | 5.31289   | 0.137769 | 0.903932 |
| XLOC_012971 | TEX261       | chr2:71213067-71222001   | 28.1258   | 30.9446   | 0.137795 | 0.887925 |
| XLOC_003216 | PSMD13       | chr11:236807-252984      | 114.292   | 125.754   | 0.137881 | 0.889644 |
| XLOC_017168 | OCLN         | chr5:68788118-68853931   | 5.16275   | 5.6806    | 0.137903 | 0.896464 |
| XLOC_007851 | TELO2        | chr16:1543351-1662109    | 26.8446   | 29.5373   | 0.137904 | 0.918972 |
| XLOC_007283 | SENPB        | chr15:72118360-72433311  | 1.11933   | 1.23162   | 0.13793  | 0.971625 |
| XLOC_009943 | SLC39A11     | chr17:70642084-71088853  | 4.89839   | 5.39001   | 0.137982 | 0.917325 |
| XLOC_019029 | CD164        | chr6:109687716-109703762 | 40.8271   | 44.9258   | 0.138018 | 0.89239  |
| XLOC_011382 | CD320        | chr19:8367010-8373240    | 271.542   | 298.819   | 0.138093 | 0.896051 |
| XLOC_022035 | NCOA2        | chr8:71024266-71316020   | 0.28625   | 0.315005  | 0.138097 | 1        |
| XLOC_013220 | CERS6-AS1    | chr2:169312758-169642935 | 5.95053   | 6.54841   | 0.138127 | 0.950929 |
| XLOC_013123 | C2orf76      | chr2:120060019-120124258 | 1.29197   | 1.42188   | 0.138232 | 0.965735 |
| XLOC_012346 | SLC9A2       | chr2:103236165-103327805 | 0.152623  | 0.167977  | 0.138295 | 1        |
| XLOC_019077 | EPB41L2      | chr6:131160487-131384462 | 14.0029   | 15.4122   | 0.138344 | 0.888528 |
| XLOC_009042 | THRA         | chr17:38218445-38256978  | 9.09141   | 10.0068   | 0.138408 | 0.95534  |
| XLOC_022523 | C9orf91      | chr9:117373705-117408702 | 8.82079   | 9.70971   | 0.13852  | 0.900578 |
| XLOC_005034 | METAP2       | chr12:95867821-95909613  | 25.3189   | 27.8707   | 0.138537 | 0.885624 |
| XLOC_023851 | PRAF2        | chrX:48928817-48931662   | 2.62726   | 2.89229   | 0.138652 | 0.955758 |
| XLOC_020836 | CUL1         | chr7:148395932-148498202 | 21.2426   | 23.3869   | 0.138741 | 0.885254 |
| XLOC_017893 | PDGFRB       | chr5:149493401-149535422 | 0.0168542 | 0.0185557 | 0.138759 | 1        |
| XLOC_005043 | TMPO         | chr12:98906750-98944157  | 26.1204   | 28.7577   | 0.13877  | 0.891486 |
| XLOC_003543 | SDHAF2       | chr11:61197596-61214239  | 31.9366   | 35.1615   | 0.138786 | 0.896032 |
| XLOC_004144 | COMMD9       | chr11:36293841-36310999  | 6.27006   | 6.90403   | 0.138959 | 0.90608  |
| XLOC_007883 | TBC1D24      | chr16:2525146-2555734    | 3.05155   | 3.36016   | 0.138991 | 0.912308 |
| XLOC_001525 | MKNK1        | chr1:47004367-47069966   | 8.08528   | 8.90315   | 0.139019 | 0.905886 |
| XLOC_016719 | APBB2        | chr4:40812043-41216635   | 0.989511  | 1.0897    | 0.139139 | 0.930066 |
| XLOC_005801 | MPHOSPH8     | chr13:20207787-20247599  | 9.21129   | 10.1441   | 0.139168 | 0.892192 |
| XLOC_003710 | PPME1        | chr11:73882107-73965748  | 41.382    | 45.5729   | 0.139171 | 0.882523 |
| XLOC_019199 | PHF10        | chr6:170102256-170124106 | 19.936    | 21.9553   | 0.13919  | 0.938286 |
| XLOC_012241 | CCT7         | chr2:73461363-73480150   | 316.864   | 348.967   | 0.139226 | 0.895818 |
| XLOC_021249 | LOC100216545 | chr7:104650988-104654588 | 1.89241   | 2.08415   | 0.139233 | 0.938194 |
| XLOC_002208 | LBR          | chr1:225589203-225616557 | 10.7592   | 11.8498   | 0.139287 | 0.886684 |
| XLOC_012527 | HOXD9        | chr2:176987412-176989645 | 9.7946    | 10.7875   | 0.139307 | 0.920432 |
| XLOC_020787 | ADCK2        | chr7:140372952-140394908 | 44.4658   | 48.9742   | 0.139327 | 0.887791 |
| XLOC_011843 | IRF3         | chr19:50162825-50177173  | 61.6115   | 67.8634   | 0.139434 | 0.92969  |
| XLOC_012233 | NAGK         | chr2:71295407-71305998   | 13.5633   | 14.9398   | 0.139452 | 0.907688 |
| XLOC_018638 | SLC35B3      | chr6:8413300-8435794     | 7.13519   | 7.85933   | 0.139456 | 0.911915 |
| XLOC_011590 | PEPD         | chr19:33877854-34012799  | 39.6326   | 43.657    | 0.139528 | 0.887791 |
| XLOC_009052 | KRTAP4-9     | chr17:39261640-39262740  | 0.810712  | 0.893052  | 0.139554 | 0.976756 |
| XLOC_000667 | HIST2H2AC    | chr1:149858524-149858961 | 4.47409   | 4.9286    | 0.139585 | 0.974044 |
| XLOC_005328 | PLBD1        | chr12:14656596-14720791  | 16.0577   | 17.6894   | 0.139621 | 0.892962 |
| XLOC_006902 | C14orf1      | chr14:76117232-76127538  | 33.6641   | 37.0857   | 0.139654 | 0.890666 |

|             |           |                          |           |          |          |          |
|-------------|-----------|--------------------------|-----------|----------|----------|----------|
| XLOC_001905 | SMG5      | chr1:156219014-156252620 | 17.5861   | 19.3746  | 0.139729 | 0.884666 |
| XLOC_007502 | MEIS2     | chr15:37183221-37393500  | 2.46056   | 2.71092  | 0.139795 | 0.930616 |
| XLOC_020520 | CRCP      | chr7:65579804-65619553   | 11.4975   | 12.6673  | 0.139798 | 0.896051 |
| XLOC_001857 | S100A16   | chr1:153579366-153585514 | 794.819   | 875.704  | 0.139817 | 0.895499 |
| XLOC_012350 | MRPS9     | chr2:105654482-105716418 | 31.4975   | 34.706   | 0.139946 | 0.888975 |
| XLOC_017348 | SNORA74A  | chr5:138609440-138667366 | 0.965185  | 1.06359  | 0.140062 | 0.987693 |
| XLOC_007937 | NUBP1     | chr16:10837697-10912621  | 15.9158   | 17.5408  | 0.140256 | 0.907689 |
| XLOC_000518 | ABCD3     | chr1:94883932-94984219   | 9.28623   | 10.2347  | 0.140304 | 0.912776 |
| XLOC_014197 | RRP1B     | chr21:45079431-45115960  | 14.2228   | 15.6768  | 0.140422 | 0.881073 |
| XLOC_011008 | RUVBL2    | chr19:49497155-49519182  | 215.865   | 237.956  | 0.140561 | 0.885618 |
| XLOC_010744 | CCNE1     | chr19:30302900-30315215  | 13.0815   | 14.4206  | 0.140598 | 0.904264 |
| XLOC_000116 | EFHD2     | chr1:15736390-15756839   | 49.8779   | 54.9838  | 0.140606 | 0.881988 |
| XLOC_013703 | NCOA3     | chr20:46130600-46285621  | 1.14326   | 1.26033  | 0.140648 | 0.918898 |
| XLOC_012770 | AD1       | chr2:3501689-3523350     | 21.6882   | 23.9093  | 0.140667 | 0.890466 |
| XLOC_014491 | KREMEN1   | chr22:29469065-29564321  | 2.63576   | 2.90573  | 0.140681 | 0.909435 |
| XLOC_006734 | CHMP4A    | chr14:24678786-24683036  | 34.6584   | 38.2084  | 0.140686 | 0.886481 |
| XLOC_000780 | BCAN      | chr1:156611739-156629324 | 3.10418   | 3.42239  | 0.140794 | 0.927627 |
| XLOC_009188 | AKAP1     | chr17:55162552-55198710  | 12.2026   | 13.4544  | 0.140899 | 0.885624 |
| XLOC_018039 | RIOK1     | chr6:7390061-7418270     | 12.2208   | 13.4758  | 0.141038 | 0.898751 |
| XLOC_000731 | SNAPIN    | chr1:153631129-153643504 | 36.8368   | 40.6201  | 0.141044 | 0.983393 |
| XLOC_009782 | EFTUD2    | chr17:42923720-42976993  | 34.4084   | 37.9428  | 0.141065 | 0.88211  |
| XLOC_000612 | ATP1A1    | chr1:116915794-116961244 | 77.8208   | 85.8151  | 0.141075 | 0.886459 |
| XLOC_008621 | FHOD1     | chr16:67263291-67281425  | 8.98803   | 9.9136   | 0.141404 | 0.900578 |
| XLOC_019006 | FAXC      | chr6:99720792-99797531   | 0.500068  | 0.551636 | 0.141591 | 0.931473 |
| XLOC_005534 | PRIM1     | chr12:57125363-57146146  | 13.1702   | 14.5289  | 0.141641 | 0.899478 |
| XLOC_022084 | TMEM64    | chr8:91634222-91658133   | 6.29345   | 6.94293  | 0.141695 | 0.893315 |
| XLOC_003148 | C10orf82  | chr10:118423206-11842948 | 0.0977653 | 0.107858 | 0.141744 | 1        |
| XLOC_001431 | AK2       | chr1:33473540-33502512   | 69.9371   | 77.1654  | 0.141895 | 0.890622 |
| XLOC_017679 | SGTB      | chr5:64920557-65017941   | 2.38211   | 2.62839  | 0.141942 | 0.948088 |
| XLOC_000763 | MSTO1     | chr1:155579960-155584758 | 7.82423   | 8.63375  | 0.142038 | 0.907689 |
| XLOC_016202 | MRFAP1    | chr4:6641817-6644470     | 136.967   | 151.143  | 0.142087 | 0.883279 |
| XLOC_004066 | TMEM41B   | chr11:9302200-9336315    | 24.7802   | 27.345   | 0.142092 | 0.90731  |
| XLOC_010552 | ANGPTL4   | chr19:8429010-8439257    | 94.6801   | 104.486  | 0.142179 | 0.88621  |
| XLOC_002073 | GLT2SD2   | chr1:183904965-184006886 | 0.518134  | 0.571804 | 0.142196 | 0.952371 |
| XLOC_022993 | KLF4      | chr9:110247132-110252047 | 5.84655   | 6.45231  | 0.14223  | 0.917379 |
| XLOC_000303 | CAP1      | chr1:40506254-40538321   | 75.1066   | 82.8888  | 0.142236 | 0.882845 |
| XLOC_002139 | RBBP5     | chr1:205055269-205091150 | 3.13335   | 3.45809  | 0.142269 | 0.910376 |
| XLOC_003062 | ALDH18A1  | chr10:97365685-97416567  | 41.2362   | 45.5104  | 0.142285 | 0.877554 |
| XLOC_001267 | MAD2L2    | chr1:11734536-11751678   | 128.909   | 142.275  | 0.142332 | 0.876336 |
| XLOC_006441 | ZNF410    | chr14:74353317-74398991  | 17.3155   | 19.1112  | 0.142356 | 0.882592 |
| XLOC_014053 | CTSZ      | chr20:57570241-57582309  | 84.0632   | 92.7826  | 0.142379 | 0.881688 |
| XLOC_015766 | SFMBT1    | chr3:52937582-53080089   | 2.46648   | 2.72242  | 0.142436 | 0.915557 |
| XLOC_003633 | SART1     | chr11:65729159-65747607  | 25.0711   | 27.6735  | 0.142478 | 0.877493 |
| XLOC_017103 | DNAJC21   | chr5:34929697-34959069   | 3.19171   | 3.52302  | 0.142484 | 0.891397 |
| XLOC_000140 | ARHGEF10L | chr1:17866329-18024370   | 5.20724   | 5.74807  | 0.14256  | 0.910156 |
| XLOC_004637 | THYN1     | chr11:134118172-13412328 | 56.7398   | 62.6352  | 0.142613 | 0.882404 |
| XLOC_006963 | SNHG10    | chr14:9599248-96001209   | 5.47888   | 6.04891  | 0.142795 | 0.938194 |
| XLOC_007920 | HMOX2     | chr16:4511694-4560348    | 33.2862   | 36.7511  | 0.142861 | 0.934345 |
| XLOC_005265 | SLC2A3    | chr12:8071823-8088892    | 13.9721   | 15.427   | 0.142903 | 0.890622 |
| XLOC_002731 | TACC2     | chr10:123748688-12401408 | 7.78563   | 8.59632  | 0.142904 | 0.895818 |
| XLOC_012750 | PPP1R7    | chr2:242089901-242122438 | 57.8418   | 63.8647  | 0.142908 | 0.875892 |
| XLOC_016810 | PAQR3     | chr4:79839093-79860582   | 4.50373   | 4.97272  | 0.142915 | 0.902309 |
| XLOC_017682 | CCDC125   | chr5:68576518-68616410   | 1.80038   | 1.988    | 0.143015 | 0.924009 |
| XLOC_005436 | MCRS1     | chr12:49952085-49961911  | 31.8225   | 35.139   | 0.143023 | 0.882107 |
| XLOC_000782 | PRCC      | chr1:156737273-156770608 | 22.8756   | 25.2597  | 0.143028 | 0.885624 |
| XLOC_014769 | PES1      | chr22:30972611-31003000  | 78.3601   | 86.5291  | 0.143066 | 0.877363 |
| XLOC_009478 | AURKB     | chr17:8108048-8113944    | 93.1057   | 102.812  | 0.143074 | 0.877493 |
| XLOC_014515 | DRG1      | chr22:31795538-31830172  | 56.9906   | 62.9323  | 0.143076 | 0.87753  |
| XLOC_000063 | PARK7     | chr1:8021713-8045342     | 311.214   | 343.686  | 0.143182 | 0.875679 |
| XLOC_015406 | MBNL1     | chr3:151980404-152183568 | 6.20704   | 6.85481  | 0.143212 | 0.886459 |
| XLOC_018660 | MBOAT1    | chr6:20099915-20212695   | 1.42923   | 1.57843  | 0.14326  | 0.931355 |
| XLOC_022036 | TRAM1     | chr8:71485452-71520694   | 42.2089   | 46.6185  | 0.143355 | 0.87753  |
| XLOC_006187 | UGGT2     | chr13:96453835-96705736  | 2.14684   | 2.3713   | 0.143466 | 0.908432 |
| XLOC_018990 | RNGTT     | chr6:89319988-89673348   | 2.90028   | 3.2037   | 0.143547 | 0.906892 |
| XLOC_000824 | NDUFS2    | chr1:161169104-161184184 | 53.7847   | 59.4185  | 0.143714 | 0.876899 |
| XLOC_018651 | RANBP9    | chr6:13621729-13711796   | 10.5124   | 11.6135  | 0.143715 | 0.878923 |
| XLOC_002693 | SHOC2     | chr10:112679300-11277342 | 4.60054   | 5.08271  | 0.143793 | 0.898751 |
| XLOC_013438 | ILKAP     | chr2:239079042-239112324 | 31.8772   | 35.2189  | 0.143825 | 0.885254 |
| XLOC_018958 | MB21D1    | chr6:74134855-74162043   | 4.01591   | 4.43698  | 0.143854 | 0.931733 |
| XLOC_006406 | GPHN      | chr14:66974124-67648525  | 5.38996   | 5.95529  | 0.143896 | 0.893663 |
| XLOC_006656 | SIVA1     | chr14:105219469-10522598 | 151.389   | 167.274  | 0.143951 | 0.875485 |
| XLOC_003093 | SNORA12   | chr10:101992054-10202743 | 39.2407   | 43.3581  | 0.143953 | 0.879701 |
| XLOC_021994 | LYPLA1    | chr8:54958937-55014577   | 33.9957   | 37.5635  | 0.143979 | 0.877387 |
| XLOC_000315 | KCNQ4     | chr1:41249683-41306124   | 5.22499   | 5.77344  | 0.144001 | 0.908288 |
| XLOC_015134 | ALAS1     | chr3:5223098-52248343    | 28.7785   | 31.7992  | 0.144003 | 0.877493 |
| XLOC_002810 | SFTA1P    | chr10:10826401-10836877  | 392.868   | 434.114  | 0.144028 | 0.881688 |
| XLOC_010525 | TRIP10    | chr19:6739706-6751529    | 40.355    | 44.6003  | 0.144308 | 0.872554 |
| XLOC_004842 | LARP4     | chr12:50794591-50873788  | 2.7391    | 3.02726  | 0.14431  | 0.908709 |
| XLOC_021530 | ELP3      | chr8:27950583-28048669   | 10.2956   | 11.3791  | 0.144359 | 0.880508 |

|             |            |                          |          |          |          |          |
|-------------|------------|--------------------------|----------|----------|----------|----------|
| XLOC_001206 | SSU2       | chr1:1477052-1510262     | 144.082  | 159.245  | 0.144362 | 0.877459 |
| XLOC_008353 | ZNF598     | chr16:2047652-2059822    | 40.7181  | 45.0034  | 0.144366 | 0.877263 |
| XLOC_001355 | FUCA1      | chr1:24171571-24194859   | 7.53123  | 8.32416  | 0.144419 | 0.907651 |
| XLOC_013535 | SNRPB2     | chr20:16710608-16722417  | 41.5786  | 45.9576  | 0.144462 | 0.874106 |
| XLOC_010380 | FECH       | chr18:55212072-55253969  | 1.97463  | 2.18271  | 0.144544 | 0.906892 |
| XLOC_008836 | CYB5D1     | chr17:7760002-7765600    | 4.64607  | 5.13577  | 0.144569 | 0.950929 |
| XLOC_006431 | PSEN1      | chr14:73603142-73690399  | 6.52955  | 7.2179   | 0.144595 | 0.876899 |
| XLOC_002417 | CSGALNACT2 | chr10:43633892-43680754  | 4.24322  | 4.69056  | 0.144603 | 0.898193 |
| XLOC_002135 | PPP1R15B   | chr1:204372491-204380944 | 8.56983  | 9.4738   | 0.144676 | 0.879514 |
| XLOC_011299 | LMNB2      | chr19:2428162-2456966    | 42.6603  | 47.1608  | 0.144694 | 0.871957 |
| XLOC_016647 | TMEM128    | chr4:4237268-4249934     | 12.8097  | 14.1615  | 0.144746 | 0.893751 |
| XLOC_011924 | ZNF702P    | chr19:53471503-53496784  | 1.51335  | 1.67311  | 0.144793 | 0.93105  |
| XLOC_008212 | DDX19A     | chr16:70380823-70407281  | 11.4332  | 12.6403  | 0.1448   | 0.885624 |
| XLOC_017495 | SFXN1      | chr5:174905513-17495562  | 13.0029  | 14.3759  | 0.14481  | 0.884256 |
| XLOC_012985 | BOLA3      | chr2:74362527-74375039   | 79.9656  | 88.4144  | 0.144902 | 0.890689 |
| XLOC_010622 | NACC1      | chr19:13229101-13251961  | 31.3152  | 34.6252  | 0.144959 | 0.874082 |
| XLOC_005777 | SCARB1     | chr12:125262173-1253485  | 56.925   | 62.9458  | 0.145049 | 0.873862 |
| XLOC_009893 | BRIP1      | chr17:59756546-59940920  | 1.66549  | 1.84183  | 0.145192 | 0.905658 |
| XLOC_002967 | SLC25A16   | chr10:70242089-70287280  | 2.52855  | 2.79633  | 0.145225 | 0.931355 |
| XLOC_009328 | ENDOV      | chr17:78234659-78411884  | 8.7604   | 9.68827  | 0.145243 | 0.972584 |
| XLOC_004542 | BUD13      | chr11:116618885-1166437  | 12.7877  | 14.1422  | 0.145248 | 0.893751 |
| XLOC_013533 | NDUFAF5    | chr20:13765671-13799067  | 5.54916  | 6.13709  | 0.145285 | 0.909435 |
| XLOC_010878 | HNRNPUL1   | chr19:41768390-41813811  | 58.8736  | 65.1117  | 0.145297 | 0.873414 |
| XLOC_003389 | DEPDC7     | chr11:33037409-33055128  | 1.53403  | 1.69665  | 0.145357 | 0.950929 |
| XLOC_009371 | YWHAE      | chr17:1247833-1303556    | 341.417  | 377.612  | 0.145368 | 0.880115 |
| XLOC_002465 | CISD1      | chr10:60028861-60049019  | 11.5979  | 12.8278  | 0.145408 | 0.887208 |
| XLOC_021184 | TECPR1     | chr7:97844754-97881563   | 4.58977  | 5.07673  | 0.145477 | 0.895717 |
| XLOC_012217 | APLF       | chr2:68694690-68807294   | 0.295149 | 0.326464 | 0.145481 | 1        |
| XLOC_008199 | CIRH1A     | chr16:69166498-69202937  | 34.5639  | 38.2325  | 0.145534 | 0.877493 |
| XLOC_013022 | IMMT       | chr2:86371054-86422893   | 38.8349  | 42.9569  | 0.145537 | 0.874709 |
| XLOC_001656 | TMED5      | chr1:93615298-93646246   | 6.99061  | 7.73302  | 0.145613 | 0.875558 |
| XLOC_020778 | TRIM24     | chr7:138145078-13827033  | 3.94071  | 4.35922  | 0.145613 | 0.902188 |
| XLOC_006138 | ATP7B      | chr13:52506805-52585630  | 1.10551  | 1.22296  | 0.145675 | 0.930616 |
| XLOC_009404 | SHPK,TRPV1 | chr17:3468739-3539616    | 4.82638  | 5.33953  | 0.145773 | 0.913825 |
| XLOC_010581 | ILF3       | chr19:10764936-10803095  | 60.1195  | 66.5116  | 0.145775 | 0.877497 |
| XLOC_009447 | SLC16A11   | chr17:6944948-6947242    | 0.252409 | 0.279271 | 0.145901 | 1        |
| XLOC_000296 | AKR1N1     | chr1:39456915-39471737   | 18.298   | 20.2458  | 0.145936 | 0.871523 |
| XLOC_004799 | DNM1L      | chr12:32832136-32898584  | 10.6531  | 11.7873  | 0.145957 | 0.877493 |
| XLOC_021604 | CHD7       | chr8:61591323-61780586   | 1.67684  | 1.85544  | 0.146013 | 0.893663 |
| XLOC_020870 | GALNT11    | chr7:151722777-15181942  | 12.6215  | 13.9668  | 0.146122 | 0.879021 |
| XLOC_012301 | TEKT4      | chr2:95534429-95613087   | 0.561292 | 0.621123 | 0.146127 | 0.977103 |
| XLOC_012933 | FAM161A    | chr2:62051982-62081278   | 0.99499  | 1.10108  | 0.146166 | 0.937399 |
| XLOC_014941 | FANCD2     | chr3:10068112-10149915   | 2.51364  | 2.78183  | 0.146256 | 0.905983 |
| XLOC_006941 | LGMN       | chr14:93170151-93215047  | 28.9924  | 32.0861  | 0.146271 | 0.875988 |
| XLOC_010833 | PSMD8      | chr19:38865189-38874464  | 290.01   | 320.962  | 0.146301 | 0.876927 |
| XLOC_005529 | ATP5B      | chr12:57031958-57039852  | 451.134  | 499.315  | 0.146394 | 0.881849 |
| XLOC_004882 | HOXC9      | chr12:54393876-54397120  | 1.10776  | 1.22607  | 0.146398 | 0.962215 |
| XLOC_018652 | CCDC90A    | chr6:13786780-13814792   | 5.09589  | 5.64016  | 0.146401 | 0.883756 |
| XLOC_017648 | MOCS2      | chr5:52393894-52405598   | 16.7828  | 18.5755  | 0.146419 | 0.887208 |
| XLOC_004349 | SPTBN2     | chr11:66452719-66488870  | 12.146   | 13.4437  | 0.146444 | 0.872117 |
| XLOC_005925 | TDRD3      | chr13:60970590-61148013  | 4.32053  | 4.78264  | 0.146598 | 0.904734 |
| XLOC_001223 | MMEL1      | chr1:2517898-2564481     | 2.91524  | 3.22731  | 0.146717 | 0.977841 |
| XLOC_000591 | RAP1A      | chr1:112162404-11225610  | 19.8946  | 22.025   | 0.146771 | 0.877459 |
| XLOC_002399 | PTCHD3P1   | chr10:29698500-29711299  | 5.50412  | 6.09396  | 0.146868 | 0.910156 |
| XLOC_022140 | NUDCD1     | chr8:110253147-11034635  | 20.1128  | 22.2688  | 0.146905 | 0.865198 |
| XLOC_015398 | SELT       | chr3:150321065-15034823  | 23.1102  | 25.5887  | 0.14698  | 0.868024 |
| XLOC_000145 | MRT04      | chr1:19578074-19586622   | 44.8787  | 49.6922  | 0.146989 | 0.874491 |
| XLOC_018576 | TMEM181    | chr6:158957467-159056467 | 4.2581   | 4.71499  | 0.147045 | 0.889643 |
| XLOC_018401 | SMIM8      | chr6:87992696-88052043   | 1.92736  | 2.13419  | 0.147067 | 0.931816 |
| XLOC_002604 | SLC35G1    | chr10:95653729-95662491  | 2.10562  | 2.3318   | 0.147199 | 0.92969  |
| XLOC_001317 | EMC1       | chr1:19542157-19578053   | 5.29428  | 5.86354  | 0.147337 | 0.876899 |
| XLOC_005769 | MPHOSPH9   | chr12:123640945-12370644 | 1.43181  | 1.58581  | 0.147376 | 0.925683 |
| XLOC_007977 | LOC81691   | chr16:20775311-20860990  | 5.82187  | 6.44809  | 0.147388 | 0.937542 |
| XLOC_011383 | NDUFA7     | chr19:8376183-8386280    | 155.905  | 172.676  | 0.147408 | 0.877363 |
| XLOC_010001 | TK1        | chr17:76170159-76183285  | 119.989  | 132.906  | 0.147506 | 0.873788 |
| XLOC_008933 | TMEM199    | chr17:26684686-26689089  | 7.91151  | 8.76346  | 0.147548 | 0.909694 |
| XLOC_003161 | SFXN4      | chr10:120900424-1209252  | 45.7238  | 50.648   | 0.147556 | 0.872554 |
| XLOC_020396 | MALSU1     | chr7:23338939-23349180   | 59.9831  | 66.444   | 0.147584 | 0.877764 |
| XLOC_015675 | CCDC12     | chr3:46963230-47051194   | 37.2687  | 41.2835  | 0.1476   | 0.934628 |
| XLOC_007329 | DNAJA4     | chr15:78556486-78574538  | 5.64836  | 6.25693  | 0.147622 | 0.89937  |
| XLOC_023369 | RBM3       | chrX:48432740-48439553   | 64.4716  | 71.4255  | 0.147776 | 0.877764 |
| XLOC_021544 | MAK16      | chr8:33342684-33370703   | 8.05767  | 8.92684  | 0.147787 | 0.913628 |
| XLOC_008498 | SLC7A5P1   | chr16:29624423-29625038  | 0.526757 | 0.583611 | 0.14787  | 0.990213 |
| XLOC_012662 | DNAJB2     | chr2:220144039-220151622 | 35.2694  | 39.0768  | 0.147893 | 0.877493 |
| XLOC_012983 | TPRKB      | chr2:73956956-73964517   | 47.525   | 52.6556  | 0.147901 | 0.880162 |
| XLOC_000228 | ATPIF1     | chr1:28562601-28564616   | 269.529  | 298.629  | 0.147917 | 0.879301 |
| XLOC_006988 | C1orf2     | chr14:104378624-1043879  | 356.941  | 395.483  | 0.147932 | 0.868469 |
| XLOC_009639 | MYO19      | chr17:34842472-348491305 | 13.3422  | 14.7829  | 0.147933 | 0.950929 |
| XLOC_000845 | HSD17B7    | chr1:162760495-16278260  | 7.54969  | 8.36497  | 0.147942 | 0.913019 |



|             |                        |                          |           |           |          |          |
|-------------|------------------------|--------------------------|-----------|-----------|----------|----------|
| XLOC_021651 | CHMP4C                 | chr8:82644687-82671748   | 48.2358   | 53.4455   | 0.147963 | 0.87753  |
| XLOC_003620 | EHPB1L1                | chr11:65343508-65360116  | 9.07359   | 10.0541   | 0.148038 | 0.877497 |
| XLOC_011818 | BCAT2                  | chr19:49298318-49314320  | 89.1502   | 98.7872   | 0.148087 | 0.876899 |
| XLOC_023587 | PGRMC1                 | chrX:118370210-118378421 | 93.3643   | 103.46    | 0.148134 | 0.869885 |
| XLOC_003705 | RELT                   | chr11:73087404-73108519  | 11.3397   | 12.5661   | 0.148146 | 0.885254 |
| XLOC_001369 | PAQR7                  | chr1:26187974-26197744   | 17.4732   | 19.3637   | 0.148212 | 0.875776 |
| XLOC_022859 | AQP7P1                 | chr9:67270214-67289492   | 0.0200888 | 0.0222624 | 0.14822  | 1        |
| XLOC_003726 | ACER3                  | chr11:76571916-76734850  | 1.1846    | 1.31282   | 0.148262 | 0.928138 |
| XLOC_003531 | CCDC86                 | chr11:60609428-60623444  | 42.2514   | 46.8282   | 0.148379 | 0.875964 |
| XLOC_019042 | FYN                    | chr6:111981534-112194651 | 7.0261    | 7.78737   | 0.148411 | 0.887208 |
| XLOC_005090 | MVK                    | chr12:110011499-11003507 | 13.9546   | 15.4681   | 0.148554 | 0.895818 |
| XLOC_003410 | TTC17                  | chr11:43380434-43516483  | 8.17847   | 9.06567   | 0.148582 | 0.870709 |
| XLOC_000915 | XPR1                   | chr1:180601145-180859411 | 1.94087   | 2.15146   | 0.148616 | 0.892038 |
| XLOC_010092 | TYMS                   | chr18:596997-712662      | 21.3758   | 23.697    | 0.148723 | 0.966946 |
| XLOC_010764 | KIAA0355               | chr19:34745455-34846471  | 1.17607   | 1.30384   | 0.148794 | 0.920028 |
| XLOC_004617 | SRPR                   | chr11:126081618-12613887 | 19.9058   | 22.0685   | 0.148795 | 0.89967  |
| XLOC_002359 | PTER                   | chr10:16478941-16564004  | 4.9832    | 5.52468   | 0.148818 | 0.89937  |
| XLOC_013359 | AAMP                   | chr2:219128851-219134891 | 125.536   | 139.178   | 0.148837 | 0.874082 |
| XLOC_008429 | PARN                   | chr16:14529556-14724128  | 9.7872    | 10.851    | 0.148861 | 0.878642 |
| XLOC_001201 | AURKAIP1               | chr1:1309109-1310818     | 232.865   | 258.178   | 0.148868 | 0.865173 |
| XLOC_017392 | RNF14                  | chr5:141346401-141369851 | 4.78452   | 5.30484   | 0.148932 | 0.883938 |
| XLOC_021912 | TNFRSF10A              | chr8:23048969-23082680   | 5.77196   | 6.40037   | 0.149093 | 0.912776 |
| XLOC_004134 | CSTF3                  | chr11:33106129-33183037  | 15.9578   | 17.6952   | 0.149099 | 0.949739 |
| XLOC_011312 | PIP5K1C                | chr19:3630178-3700477    | 8.08534   | 8.96582   | 0.149127 | 0.887208 |
| XLOC_012445 | MGAT5                  | chr2:135011829-135212192 | 3.79233   | 4.20555   | 0.149209 | 0.874082 |
| XLOC_023773 | RBBP7                  | chrX:16862774-16888534   | 42.922    | 47.6002   | 0.149251 | 0.867317 |
| XLOC_002689 | DUSP5                  | chr10:112257624-11227131 | 101.248   | 112.289   | 0.149324 | 0.883754 |
| XLOC_003957 | MOB2                   | chr11:1490684-1785501    | 25.2981   | 28.0579   | 0.149378 | 0.981586 |
| XLOC_004432 | NARS2                  | chr11:78147006-78285909  | 6.61212   | 7.33388   | 0.149465 | 0.898397 |
| XLOC_014813 | ANKRD54                | chr22:38226861-38240378  | 13.5      | 14.9747   | 0.149566 | 0.892016 |
| XLOC_015083 | PTH1R                  | chr3:46919235-46945289   | 6.03874   | 6.69897   | 0.149691 | 0.917325 |
| XLOC_022267 | SLC1A1                 | chr9:4490426-4587469     | 1.88489   | 2.09104   | 0.14974  | 0.919939 |
| XLOC_002199 | AIDA                   | chr1:222841354-222885864 | 21.4976   | 23.8491   | 0.149762 | 0.868024 |
| XLOC_004305 | SF1                    | chr11:64532075-64546316  | 78.21     | 86.7655   | 0.149768 | 0.871957 |
| XLOC_020885 | UBE3C                  | chr7:156931654-157062061 | 17.3376   | 19.2344   | 0.149784 | 0.863993 |
| XLOC_015949 | PIK3R4                 | chr3:130397777-130465691 | 2.53045   | 2.80742   | 0.149852 | 0.898626 |
| XLOC_005807 | MIPEPP3                | chr13:21872263-22033508  | 0.514691  | 0.57104   | 0.149884 | 0.994615 |
| XLOC_001889 | SCAMP3                 | chr1:155225769-155232171 | 51.1734   | 56.7765   | 0.1499   | 0.869458 |
| XLOC_012577 | C2orf47                | chr2:200793633-200828847 | 17.2849   | 19.1777   | 0.149917 | 0.916969 |
| XLOC_018828 | TAF11                  | chr6:34845554-34855848   | 16.0821   | 17.8443   | 0.150004 | 0.884233 |
| XLOC_009205 | CLTC                   | chr17:57697049-57774317  | 22.3479   | 24.7972   | 0.150033 | 0.868519 |
| XLOC_002699 | TCF7L2                 | chr10:114710008-11492747 | 3.75989   | 4.17198   | 0.150045 | 0.904096 |
| XLOC_012014 | UBE2M                  | chr19:59067078-59070343  | 130.938   | 145.296   | 0.150107 | 0.865882 |
| XLOC_010521 | CLPP                   | chr19:6361462-6368915    | 188.666   | 209.368   | 0.150207 | 0.867266 |
| XLOC_001758 | FAM72D                 | chr1:143896451-143913143 | 1.26924   | 1.40865   | 0.150347 | 0.945067 |
| XLOC_016388 | FAM47E,FAM47E-STBD1,S' | chr4:77135192-77232283   | 9.24694   | 10.2628   | 0.150377 | 0.882983 |
| XLOC_004631 | SNX9                   | chr11:130745765-13078631 | 1.9467    | 2.16057   | 0.150388 | 0.90612  |
| XLOC_018765 | ABHD16A                | chr6:31654725-31671137   | 26.2131   | 29.0959   | 0.150529 | 0.875369 |
| XLOC_021853 | SGK223                 | chr8:8175257-8239257     | 2.36856   | 2.62922   | 0.150624 | 0.918898 |
| XLOC_014788 | LARGE                  | chr22:33669061-34316416  | 3.7013    | 4.10869   | 0.150647 | 0.901132 |
| XLOC_003069 | TM9SF3                 | chr10:98277866-98346809  | 24.183    | 26.8451   | 0.150668 | 0.868757 |
| XLOC_008370 | TCEB2                  | chr16:2821414-2827297    | 485.415   | 538.857   | 0.150685 | 0.885624 |
| XLOC_007506 | SRP14                  | chr15:40327890-40331389  | 215.343   | 239.064   | 0.15076  | 0.869168 |
| XLOC_021063 | COBL                   | chr7:51083908-51384515   | 3.44774   | 3.82787   | 0.150891 | 0.890466 |
| XLOC_016514 | ELMOD2                 | chr4:141445311-141474924 | 2.79453   | 3.1027    | 0.150922 | 0.89261  |
| XLOC_006184 | ABCC4                  | chr13:95672082-95953687  | 3.41501   | 3.79163   | 0.150932 | 0.880645 |
| XLOC_006865 | RDH11                  | chr14:68143518-68162510  | 18.946    | 21.0368   | 0.151022 | 0.869078 |
| XLOC_004798 | FGD4                   | chr12:32655040-32798984  | 0.0844394 | 0.0937605 | 0.151064 | 1        |
| XLOC_003693 | RNF121                 | chr11:71639767-71708643  | 9.70061   | 10.7716   | 0.15109  | 0.886368 |
| XLOC_005248 | ZNF384                 | chr12:6775642-6798738    | 15.3319   | 17.0248   | 0.151104 | 0.87432  |
| XLOC_021402 | ABCF2                  | chr7:150904922-150924317 | 45.4244   | 50.4403   | 0.15111  | 0.868833 |
| XLOC_017292 | PHAX                   | chr5:125936606-125962944 | 5.94656   | 6.60345   | 0.151165 | 0.87867  |
| XLOC_011485 | GIPC1                  | chr19:14588570-14606961  | 132.196   | 146.812   | 0.151296 | 0.8725   |
| XLOC_021227 | PLOD3                  | chr7:100849257-100867477 | 46.3501   | 51.4751   | 0.151303 | 0.942878 |
| XLOC_021669 | OTUD6B                 | chr8:92082423-92099323   | 3.89372   | 4.32451   | 0.151389 | 0.898291 |
| XLOC_014082 | GMEB2                  | chr20:62218954-62258381  | 6.54014   | 7.26393   | 0.151429 | 0.886142 |
| XLOC_016903 | ARSJ                   | chr4:114821439-114900871 | 2.03242   | 2.2574    | 0.151466 | 0.909489 |
| XLOC_010453 | NDUFS7                 | chr19:1383882-1395588    | 159.273   | 176.907   | 0.151484 | 0.869168 |
| XLOC_014670 | PRODH                  | chr22:18900286-18924066  | 1.06018   | 1.17764   | 0.151588 | 0.956373 |
| XLOC_006201 | TMT4C                  | chr13:101256089-10132711 | 3.84972   | 4.27649   | 0.151675 | 0.902309 |
| XLOC_015482 | EIF4G1                 | chr3:184032282-184053148 | 36.637    | 40.699    | 0.151694 | 0.865626 |
| XLOC_008745 | RNMTL1                 | chr17:662548-695741      | 26.1926   | 29.0977   | 0.151745 | 0.939292 |
| XLOC_001991 | ALDH9A1                | chr1:165631448-165667901 | 32.6344   | 36.2551   | 0.151792 | 0.865626 |
| XLOC_017982 | LOC202181              | chr5:177045500-177099271 | 0.615473  | 0.683818  | 0.151917 | 0.950929 |
| XLOC_007668 | MYO9A                  | chr15:72118360-72433311  | 0.209762  | 0.233066  | 0.151987 | 1        |
| XLOC_013305 | PPIL3                  | chr2:201735678-201753841 | 13.7699   | 15.3      | 0.152019 | 0.885624 |
| XLOC_005379 | PKP2                   | chr12:32943679-33049780  | 3.19296   | 3.5478    | 0.15203  | 0.896073 |
| XLOC_023083 | TOR2A                  | chr9:130478357-130497621 | 42.9093   | 47.6829   | 0.152179 | 0.874631 |
| XLOC_023051 | NDUFA8                 | chr9:124906337-124922091 | 146.182   | 162.445   | 0.152185 | 0.858127 |

|             |                    |                          |            |           |          |          |
|-------------|--------------------|--------------------------|------------|-----------|----------|----------|
| XLOC_020342 | EIF3B              | chr7:2394473-2420377     | 72.7211    | 80.8129   | 0.152212 | 0.863571 |
| XLOC_004307 | MEN1               | chr11:64570985-64578766  | 32.7131    | 36.3545   | 0.152266 | 0.865806 |
| XLOC_020933 | ICA1               | chr7:8152814-8302242     | 3.17399    | 3.52759   | 0.152387 | 0.917553 |
| XLOC_017123 | MRPS30             | chr5:44809026-44815618   | 39.3655    | 43.7549   | 0.152512 | 0.860257 |
| XLOC_010791 | HAUS5              | chr19:36103645-36116251  | 5.99709    | 6.66592   | 0.152539 | 0.882845 |
| XLOC_023717 | DKC1               | chrX:153991030-15400596  | 38.9828    | 43.333    | 0.152627 | 0.869283 |
| XLOC_003014 | POLR3A             | chr10:79734906-79789298  | 4.81907    | 5.35775   | 0.152872 | 0.869283 |
| XLOC_022037 | LACTB2             | chr8:71520811-71581447   | 16.0935    | 17.893    | 0.152917 | 0.872961 |
| XLOC_004262 | MTA2               | chr11:62360674-62369312  | 36.1531    | 40.1982   | 0.153011 | 0.857414 |
| XLOC_020615 | DYNC111            | chr7:95401817-95727736   | 0.13235    | 0.147161  | 0.153036 | 1        |
| XLOC_016077 | DNAJC19            | chr3:180701497-180707562 | 13.0347    | 14.4937   | 0.153073 | 0.881618 |
| XLOC_014727 | ADORA2A-AS1        | chr22:24823529-24890783  | 0.062942   | 0.0699885 | 0.153095 | 1        |
| XLOC_011276 | C19orf25           | chr19:1450147-1479228    | 33.7993    | 37.5834   | 0.153101 | 0.876899 |
| XLOC_011685 | ADCK4              | chr19:41197433-41222790  | 20.0168    | 22.2584   | 0.153138 | 0.869458 |
| XLOC_023488 | COX7B              | chrX:77154960-77160881   | 320.489    | 356.383   | 0.153157 | 0.856223 |
| XLOC_017640 | C5orf28            | chr5:43444353-43483992   | 2.91431    | 3.24097   | 0.153275 | 0.910156 |
| XLOC_003728 | CAPN5              | chr11:76777991-76837198  | 5.64479    | 6.2777    | 0.153314 | 0.883985 |
| XLOC_024109 | MAP7D3             | chrX:135295378-13533864  | 4.75791    | 5.29147   | 0.153339 | 0.874417 |
| XLOC_004373 | MRPL21             | chr11:68658745-68671303  | 98.8661    | 109.953   | 0.153342 | 0.863016 |
| XLOC_021379 | TPK1               | chr7:144149033-144533144 | 0.571277   | 0.635377  | 0.153424 | 0.95534  |
| XLOC_004153 | SYT13              | chr11:45261852-45307884  | 0.00985601 | 0.0109622 | 0.153455 | 1        |
| XLOC_017657 | CCNO               | chr5:54526980-54529508   | 16.9079    | 18.8061   | 0.153501 | 0.912696 |
| XLOC_010471 | THOP1              | chr19:2785505-2813599    | 64.8513    | 72.135    | 0.153565 | 0.854415 |
| XLOC_017154 | PPWD1              | chr5:64859062-64883376   | 8.80268    | 9.79252   | 0.153738 | 0.879301 |
| XLOC_001109 | KIAA1804           | chr1:233463513-23352089  | 2.61933    | 2.91389   | 0.153749 | 0.892742 |
| XLOC_013316 | ICA1L              | chr2:203637872-20373637  | 0.408181   | 0.454139  | 0.153926 | 0.938123 |
| XLOC_017421 | HMGXB3             | chr5:149372685-14943270  | 15.25      | 16.9674   | 0.153953 | 0.863016 |
| XLOC_008672 | CLEC18B            | chr16:74442528-74455368  | 0.136717   | 0.15213   | 0.154112 | 1        |
| XLOC_008013 | IL4R               | chr16:27325229-27376099  | 7.04127    | 7.83536   | 0.154166 | 0.876899 |
| XLOC_022736 | HAUS6              | chr9:19053134-19102940   | 4.66671    | 5.19305   | 0.154178 | 0.865541 |
| XLOC_009596 | BLMH               | chr17:28575212-28619184  | 14.7685    | 16.435    | 0.154225 | 0.865856 |
| XLOC_007606 | SLTM               | chr15:59171243-59225852  | 7.0967     | 7.89752   | 0.154252 | 0.869193 |
| XLOC_012804 | TTC32              | chr2:20096513-20101744   | 2.98816    | 3.32546   | 0.154297 | 0.949812 |
| XLOC_013035 | E1F2AK3            | chr2:88856258-88927094   | 1.92504    | 2.14241   | 0.154347 | 0.906895 |
| XLOC_010994 | GRWD1              | chr19:48949029-48957164  | 32.6599    | 36.3495   | 0.154412 | 0.85843  |
| XLOC_002101 | KIF21B             | chr1:200938513-20099282  | 0.0920007  | 0.102398  | 0.154472 | 1        |
| XLOC_017358 | SLC35A4            | chr5:139944419-13994868  | 25.8847    | 28.8113   | 0.154534 | 0.859569 |
| XLOC_021594 | TGS1               | chr8:56651319-56738005   | 7.58499    | 8.44277   | 0.15457  | 0.935939 |
| XLOC_001967 | TSTD1              | chr1:161007421-16100877  | 91.2677    | 101.595   | 0.154655 | 0.871759 |
| XLOC_010798 | PSENIEN            | chr19:36236493-36237903  | 82.67      | 92.0341   | 0.154804 | 0.86583  |
| XLOC_005490 | NPFF               | chr12:53900473-53901422  | 1.6799     | 1.8702    | 0.154819 | 0.969963 |
| XLOC_023848 | KCND1              | chrX:48818638-48828251   | 0.380512   | 0.423628  | 0.154857 | 0.956807 |
| XLOC_008676 | FA2H               | chr16:74746855-74808729  | 2.69079    | 2.99579   | 0.154903 | 0.929478 |
| XLOC_006953 | SERPINA1           | chr14:94843083-94857029  | 0.0849203  | 0.0945485 | 0.154946 | 1        |
| XLOC_011534 | LSM4               | chr19:18417039-18434001  | 147.176    | 163.868   | 0.154997 | 0.852163 |
| XLOC_012686 | FBXO36             | chr2:230787206-23087782  | 0.569242   | 0.633838  | 0.155072 | 0.952905 |
| XLOC_007362 | WHAMM              | chr15:83477972-83503613  | 4.99966    | 5.56714   | 0.155106 | 0.880739 |
| XLOC_005167 | SETD8              | chr12:123868703-1238939  | 18.733     | 20.8597   | 0.15514  | 0.861084 |
| XLOC_004939 | SHMT2              | chr12:57623355-57634475  | 262.219    | 292.013   | 0.155264 | 0.877263 |
| XLOC_001311 | RCC2               | chr1:17733250-17766250   | 23.0478    | 25.6668   | 0.155276 | 0.856463 |
| XLOC_001413 | FABP3              | chr1:31838099-31845923   | 0.0609498  | 0.0678758 | 0.155276 | 1        |
| XLOC_009915 | POLG2              | chr17:62473901-62493184  | 5.06725    | 5.64311   | 0.15529  | 0.912689 |
| XLOC_008191 | PLA2G15            | chr16:68279246-68294961  | 11.1509    | 12.4191   | 0.155396 | 0.874709 |
| XLOC_017909 | ATOX1              | chr5:151122382-15113821  | 110.84     | 123.447   | 0.15541  | 0.864476 |
| XLOC_023021 | RNF183             | chr9:116059372-11606132  | 0.0606363  | 0.0675335 | 0.155421 | 1        |
| XLOC_023467 | ACRC               | chrX:70430034-70948962   | 0.200514   | 0.223329  | 0.155466 | 1        |
| XLOC_016701 | SEL1L3             | chr4:25749048-25864610   | 9.9531     | 11.0858   | 0.155501 | 0.859262 |
| XLOC_007328 | IDH3A              | chr15:78441718-78462884  | 14.0876    | 15.691    | 0.155516 | 0.860963 |
| XLOC_012415 | TSN                | chr2:122513120-12252542  | 20.0656    | 22.3497   | 0.155535 | 0.8552   |
| XLOC_016448 | NFKB1              | chr4:103422485-10353845  | 7.00997    | 7.80853   | 0.155643 | 0.872117 |
| XLOC_012860 | MEMO1              | chr2:32092893-32235698   | 25.5508    | 28.466    | 0.155875 | 0.858966 |
| XLOC_013812 | FKBP1A,SDCBP2      | chr20:1290554-1373816    | 126.01     | 140.391   | 0.155917 | 0.859648 |
| XLOC_006894 | KIAA0317           | chr14:75127954-75179807  | 4.94773    | 5.51272   | 0.155996 | 0.872117 |
| XLOC_007914 | NAA60              | chr16:3493667-3536963    | 21.4182    | 23.8663   | 0.156139 | 0.861111 |
| XLOC_001614 | PIGK               | chr1:77554666-77685132   | 3.21473    | 3.58236   | 0.156214 | 0.880481 |
| XLOC_003612 | FRMD8              | chr11:65154040-65180995  | 10.8677    | 12.1109   | 0.156265 | 0.871957 |
| XLOC_005046 | APAF1              | chr12:99039077-10037843  | 1.42585    | 1.58903   | 0.156323 | 0.939371 |
| XLOC_008629 | GFOD2              | chr16:67708435-67753273  | 14.9086    | 16.6157   | 0.1564   | 0.908586 |
| XLOC_017874 | YIPF5              | chr5:143537722-14355027  | 6.8781     | 7.66601   | 0.156466 | 0.873144 |
| XLOC_004156 | PEX16              | chr11:45931219-45939674  | 24.2608    | 27.042    | 0.156579 | 0.872554 |
| XLOC_015082 | TMIE               | chr3:46742822-46752413   | 0.280026   | 0.312133  | 0.156601 | 1        |
| XLOC_015293 | DTX3L              | chr3:122246759-12229404  | 1.66792    | 1.85925   | 0.156669 | 0.927422 |
| XLOC_005560 | PPM1H              | chr12:63037762-63328665  | 1.42755    | 1.59136   | 0.156723 | 0.907794 |
| XLOC_010700 | SSBP4              | chr19:18530145-18549111  | 62.2626    | 69.4117   | 0.156813 | 0.873715 |
| XLOC_006686 | TMEM55B            | chr14:20926011-20929637  | 28.6733    | 31.9669   | 0.156871 | 0.855981 |
| XLOC_014489 | CCDC117            | chr22:29168661-29185283  | 4.24098    | 4.72842   | 0.156962 | 0.879021 |
| XLOC_022614 | EXOSC2             | chr9:133569157-13358045  | 30.368     | 33.8592   | 0.156996 | 0.858563 |
| XLOC_020989 | LOC646762,ZNRFP2P2 | chr7:29685537-29727859   | 1.99905    | 2.22895   | 0.15705  | 0.909164 |
| XLOC_019120 | HIVEP2             | chr6:143072603-14326633  | 2.01173    | 2.2431    | 0.157054 | 0.874155 |

|             |              |                          |           |           |          |          |
|-------------|--------------|--------------------------|-----------|-----------|----------|----------|
| XLOC_012789 | PDIA6        | chr2:10861774-10952960   | 137.943   | 153.813   | 0.157105 | 0.860257 |
| XLOC_010249 | ZNF407       | chr18:72342918-72777628  | 0.736345  | 0.821061  | 0.157108 | 0.917379 |
| XLOC_015589 | MRPS25       | chr3:14984285-15106816   | 11.6801   | 13.0249   | 0.157218 | 0.923894 |
| XLOC_017814 | SAR1B        | chr5:133936838-13396853  | 3.14011   | 3.50178   | 0.157272 | 0.870173 |
| XLOC_003371 | GAS2         | chr11:22688159-22834547  | 0.0605706 | 0.0675516 | 0.157371 | 1        |
| XLOC_006644 | TRMT61A      | chr14:103995508-1040034  | 13.8468   | 15.4432   | 0.157422 | 0.865541 |
| XLOC_002970 | AIFM2        | chr10:71812356-71892690  | 20.6629   | 23.0453   | 0.157426 | 0.903682 |
| XLOC_015681 | SMARCC1      | chr3:47627377-47823405   | 18.0538   | 20.1364   | 0.157502 | 0.851389 |
| XLOC_021488 | INTS10       | chr8:19674917-19709586   | 24.0522   | 26.8268   | 0.157503 | 0.852163 |
| XLOC_017466 | RARS         | chr5:167913462-16794630  | 32.8986   | 36.6961   | 0.157601 | 0.850947 |
| XLOC_001968 | USF1         | chr1:161009040-16101576  | 20.7936   | 23.195    | 0.157675 | 0.858913 |
| XLOC_015626 | UBP1         | chr3:33429828-33481897   | 15.6633   | 17.4738   | 0.157806 | 0.851541 |
| XLOC_017917 | GEMIN5       | chr5:154266975-15431777  | 5.10306   | 5.69305   | 0.15784  | 0.868833 |
| XLOC_012160 | PPM1B        | chr2:44395999-44461742   | 8.38814   | 9.35823   | 0.157883 | 0.906895 |
| XLOC_024011 | PSMD10       | chrX:107327434-10733487  | 27.6954   | 30.8992   | 0.157921 | 0.850768 |
| XLOC_001426 | SYNC         | chr1:33116748-33168361   | 26.9087   | 30.0229   | 0.157988 | 0.912308 |
| XLOC_017671 | ERCC8        | chr5:60169658-6024905    | 3.26206   | 3.63963   | 0.158007 | 0.906464 |
| XLOC_022794 | DCAF12       | chr9:34086380-34126771   | 9.63792   | 10.7535   | 0.158008 | 0.857265 |
| XLOC_005110 | PTPN11       | chr12:112856535-1129477  | 9.7286    | 10.8548   | 0.158027 | 0.849892 |
| XLOC_005240 | MRPL51       | chr12:6601315-6602471    | 208.377   | 232.51    | 0.158099 | 0.847596 |
| XLOC_009284 | TSEN54       | chr17:73512608-73520820  | 30.7125   | 34.2714   | 0.158181 | 0.8561   |
| XLOC_011584 | ANKRD27      | chr19:33087906-33166102  | 6.63458   | 7.40374   | 0.158247 | 0.868469 |
| XLOC_007336 | MORF4L1      | chr15:79165122-79190081  | 72.4857   | 80.8904   | 0.158272 | 0.851569 |
| XLOC_005036 | SNRPF        | chr12:96252708-96260238  | 136.264   | 152.074   | 0.158369 | 0.850878 |
| XLOC_000286 | THRAP3       | chr1:36690016-36770957   | 24.4654   | 27.3057   | 0.158461 | 0.845125 |
| XLOC_022600 | FAM73B       | chr9:131799252-13183435  | 18.3568   | 20.488    | 0.158469 | 0.851892 |
| XLOC_009114 | HEXIM1       | chr17:43224683-43229468  | 13.1592   | 14.6875   | 0.158513 | 0.855981 |
| XLOC_018621 | TUBB2A       | chr6:3153901-3157783     | 12.7293   | 14.2081   | 0.15856  | 0.889644 |
| XLOC_021803 | PPP1R16A     | chr8:145722108-14572750  | 34.7028   | 38.7352   | 0.158595 | 0.855674 |
| XLOC_017330 | PCBD2        | chr5:134240809-13429833  | 2.78426   | 3.10817   | 0.158774 | 0.917687 |
| XLOC_001313 | ALDH4A1      | chr1:19197923-19229293   | 14.0697   | 15.7071   | 0.158816 | 0.863467 |
| XLOC_016983 | NAF1         | chr4:164047859-16408807  | 8.20563   | 9.16056   | 0.158822 | 0.880115 |
| XLOC_002352 | PRPF18       | chr10:13628938-13672868  | 10.0719   | 11.2442   | 0.158832 | 0.87753  |
| XLOC_017343 | KDM3B        | chr5:137688284-13777271  | 7.23342   | 8.07549   | 0.158872 | 0.851868 |
| XLOC_017500 | SIMC1        | chr5:175665369-17577299  | 9.12402   | 10.1869   | 0.158975 | 0.882523 |
| XLOC_023592 | NDUFA1       | chrX:119004494-11901062  | 275.295   | 307.368   | 0.15899  | 0.891486 |
| XLOC_012729 | LRRFIP1      | chr2:238536223-23869029  | 10.5962   | 11.831    | 0.159023 | 0.865626 |
| XLOC_017662 | SLC38A9      | chr5:54921672-55008163   | 4.22876   | 4.72158   | 0.159035 | 0.895818 |
| XLOC_018082 | MRS2         | chr6:24403152-24425816   | 7.68755   | 8.5836    | 0.159059 | 0.859648 |
| XLOC_009520 | CENPV        | chr17:16245847-16256812  | 62.1256   | 69.3673   | 0.159067 | 0.847835 |
| XLOC_010780 | LSR          | chr19:35739558-35758867  | 51.6089   | 57.6272   | 0.159133 | 0.850128 |
| XLOC_005152 | PSMD9        | chr12:122326636-12235577 | 31.8539   | 35.5756   | 0.159415 | 0.8501   |
| XLOC_013468 | DTYMK        | chr2:242615156-24262638  | 72.8822   | 81.3997   | 0.159456 | 0.854482 |
| XLOC_022445 | PTPDC1       | chr9:96793075-96872138   | 1.78105   | 1.98931   | 0.159542 | 0.906892 |
| XLOC_008433 | RRN3         | chr16:15153878-15188158  | 13.0652   | 14.5942   | 0.159661 | 0.851868 |
| XLOC_014440 | SDF2L1       | chr22:21996541-21998588  | 81.8562   | 91.4439   | 0.159794 | 0.866932 |
| XLOC_020578 | RSBN1L       | chr7:77313167-77409120   | 2.55135   | 2.85021   | 0.15981  | 0.929155 |
| XLOC_012184 | SPTBN1       | chr2:54683453-54898583   | 8.92892   | 9.97492   | 0.159819 | 0.845755 |
| XLOC_014372 | SUMO3        | chr21:46225531-46238044  | 31.8495   | 35.5843   | 0.159969 | 0.8501   |
| XLOC_024118 | ATP11C       | chrX:138808504-13891444  | 1.78642   | 1.99592   | 0.159981 | 0.884394 |
| XLOC_010462 | CSNK1G2      | chr19:1941160-1981336    | 35.1788   | 39.3043   | 0.159983 | 0.851637 |
| XLOC_007745 | LOC283693    | chr15:83394649-83408532  | 0.043029  | 0.0480763 | 0.160017 | 1        |
| XLOC_010401 | TMX3         | chr18:66340924-66382353  | 4.62725   | 5.17008   | 0.160033 | 0.858563 |
| XLOC_006458 | TLLL5        | chr14:76127550-76421425  | 2.43936   | 2.72557   | 0.160056 | 0.887209 |
| XLOC_016667 | SLC2A9       | chr4:9827847-10041872    | 0.0452372 | 0.0505482 | 0.160149 | 1        |
| XLOC_010047 | MFG          | chr17:79876144-79885587  | 9.34181   | 10.439    | 0.16021  | 0.851868 |
| XLOC_005879 | KIAA1704     | chr13:45563686-45602404  | 2.50084   | 2.79469   | 0.160273 | 0.928069 |
| XLOC_003497 | CTNND1, TMX2 | chr11:57479994-57586652  | 60.7883   | 67.934    | 0.160341 | 0.950929 |
| XLOC_012508 | GORASP2      | chr2:171784947-17182364  | 33.3565   | 37.2781   | 0.160359 | 0.846243 |
| XLOC_006404 | FUT8         | chr14:65877309-66210839  | 2.18256   | 2.43919   | 0.160382 | 0.898291 |
| XLOC_014493 | EWSR1        | chr22:29663997-29696515  | 101.988   | 113.983   | 0.160418 | 0.854482 |
| XLOC_007624 | CSNK1G1      | chr15:64457715-64648442  | 1.88324   | 2.1048    | 0.160464 | 0.874155 |
| XLOC_021569 | AGPAT6       | chr8:41435706-41482520   | 15.3676   | 17.1762   | 0.160526 | 0.846441 |
| XLOC_021027 | PSMA2        | chr7:42956461-42971805   | 93.321    | 104.308   | 0.160576 | 0.848508 |
| XLOC_013128 | CLASP1       | chr2:122095351-12240705  | 3.00421   | 3.35794   | 0.160588 | 0.868469 |
| XLOC_018659 | DEK          | chr6:18224399-18264799   | 43.8706   | 49.0369   | 0.160614 | 0.845971 |
| XLOC_021547 | ZNF703       | chr8:37553300-37556396   | 5.39106   | 6.0261    | 0.160655 | 0.93165  |
| XLOC_006095 | VWA8         | chr13:42140960-42535221  | 1.8561    | 2.07477   | 0.160673 | 0.928653 |
| XLOC_021993 | TCEA1        | chr8:54879115-54935008   | 48.5831   | 54.3071   | 0.160687 | 0.856008 |
| XLOC_000043 | TP73         | chr1:3569128-3663937     | 3.80344   | 4.25189   | 0.160799 | 0.882107 |
| XLOC_003090 | ERLIN1       | chr10:101909846-1019458  | 16.4676   | 18.4093   | 0.160803 | 0.8501   |
| XLOC_022227 | PUF60        | chr8:144898513-14491155  | 210.961   | 235.842   | 0.160845 | 0.847187 |
| XLOC_009166 | RSAD1        | chr17:48556189-48563336  | 28.9903   | 32.4114   | 0.160932 | 0.845726 |
| XLOC_004654 | RHNO1        | chr12:2945981-2998691    | 7.8344    | 8.75893   | 0.160933 | 0.977332 |
| XLOC_005820 | NUPL1        | chr13:25875665-25916561  | 10.7409   | 12.0091   | 0.16101  | 0.845974 |
| XLOC_013048 | SNRNP200     | chr2:96940073-96971307   | 26.0674   | 29.147    | 0.161101 | 0.845726 |
| XLOC_004338 | YIF1A        | chr11:66052050-66056638  | 72.8336   | 81.4458   | 0.161237 | 0.845974 |
| XLOC_013830 | SLC4A11      | chr20:3208062-3219887    | 10.7987   | 12.0757   | 0.161242 | 0.869885 |
| XLOC_012667 | TMEM198      | chr2:220408744-22041531  | 2.56045   | 2.86323   | 0.161247 | 0.935062 |

|             |                        |                         |           |           |          |          |
|-------------|------------------------|-------------------------|-----------|-----------|----------|----------|
| XLOC_022166 | TMEM65                 | chr8:125323158-12538494 | 4.88204   | 5.45943   | 0.161266 | 0.86815  |
| XLOC_011341 | LONP1                  | chr19:5691844-5720463   | 98.7987   | 110.494   | 0.16141  | 0.851868 |
| XLOC_009973 | H3F3B                  | chr17:73772514-73775860 | 188.763   | 211.117   | 0.16147  | 0.854482 |
| XLOC_021109 | ABHD11                 | chr7:73150424-73153190  | 17.8905   | 20.0097   | 0.161501 | 0.880739 |
| XLOC_016074 | MRPL47                 | chr3:179306254-17932243 | 35.7      | 39.931    | 0.161587 | 0.844123 |
| XLOC_014194 | PKNOX1                 | chr21:44394642-44453688 | 2.04075   | 2.28275   | 0.161678 | 0.893663 |
| XLOC_012596 | FAM117B                | chr2:203499900-20363448 | 1.34403   | 1.50355   | 0.161802 | 0.906464 |
| XLOC_012932 | XPO1                   | chr2:61705068-61765418  | 26.1633   | 29.2689   | 0.161827 | 0.848382 |
| XLOC_004857 | C12orf44               | chr12:52463757-52471279 | 66.741    | 74.6758   | 0.162068 | 0.845268 |
| XLOC_022244 | TONSL                  | chr8:145654162-14566981 | 25.1397   | 28.1288   | 0.162077 | 0.846271 |
| XLOC_020769 | TMEM140                | chr7:134832765-13485557 | 0.506859  | 0.567126  | 0.162084 | 0.991767 |
| XLOC_003674 | IGHMBP2                | chr11:68671318-68708069 | 6.06381   | 6.78482   | 0.162086 | 0.877459 |
| XLOC_012400 | DDX18                  | chr2:118572254-11858995 | 14.3165   | 16.0198   | 0.162173 | 0.845726 |
| XLOC_001638 | GTF2B                  | chr1:89318320-89357301  | 16.5486   | 18.5177   | 0.162199 | 0.861232 |
| XLOC_002287 | ZNF669                 | chr1:247263263-24726767 | 1.93464   | 2.16486   | 0.162213 | 0.92969  |
| XLOC_009964 | HN1                    | chr17:73131343-73150775 | 129.652   | 145.085   | 0.162256 | 0.84584  |
| XLOC_004618 | FLJ39051               | chr11:126173646-1262254 | 1.86671   | 2.11139   | 0.162324 | 0.991767 |
| XLOC_006522 | PAPOLA                 | chr14:96968712-97033453 | 24.0425   | 26.9058   | 0.16233  | 0.842695 |
| XLOC_018988 | AKIRIN2                | chr6:88384577-88411985  | 17.8929   | 20.0243   | 0.162365 | 0.863873 |
| XLOC_022609 | GPR107                 | chr9:132815984-13290244 | 15.1692   | 16.977    | 0.162436 | 0.842158 |
| XLOC_022552 | LOC100129034           | chr9:127115743-12717775 | 17.4224   | 19.4996   | 0.162506 | 0.95395  |
| XLOC_008803 | C17orf49,RNASEK        | chr17:6915735-6922973   | 398.763   | 446.309   | 0.162512 | 0.859892 |
| XLOC_015650 | HIGD1A                 | chr3:42824399-42846027  | 14.7591   | 16.5194   | 0.162551 | 0.845971 |
| XLOC_015799 | THOC7                  | chr3:63805040-63849597  | 35.6116   | 39.8613   | 0.162642 | 0.84841  |
| XLOC_013632 | AAR2                   | chr20:34824338-34844863 | 17.4605   | 19.5461   | 0.16279  | 0.845125 |
| XLOC_006652 | KIF26A                 | chr14:104605059-1046472 | 2.69615   | 3.01836   | 0.162867 | 0.89761  |
| XLOC_012535 | AGPS                   | chr2:178257470-17840856 | 3.50161   | 3.92018   | 0.162901 | 0.850795 |
| XLOC_004213 | SLC43A1                | chr11:57252003-57283192 | 25.8066   | 28.8935   | 0.163001 | 0.84775  |
| XLOC_001694 | PSMA5                  | chr1:109941652-10996910 | 28.7733   | 32.215    | 0.163002 | 0.848508 |
| XLOC_018278 | ZFAND3                 | chr6:37787306-38122399  | 20.4638   | 22.9133   | 0.163112 | 0.848915 |
| XLOC_009342 | SLC25A10               | chr17:79679265-79688046 | 71.5368   | 80.1005   | 0.163126 | 0.839607 |
| XLOC_010245 | TIMM21                 | chr18:71815745-71826204 | 15.0488   | 16.8517   | 0.163244 | 0.8586   |
| XLOC_020900 | TMEM184A               | chr7:1570367-1596066    | 4.29416   | 4.80872   | 0.163277 | 0.920694 |
| XLOC_005706 | TMEM116                | chr12:112369086-1124510 | 4.38174   | 4.90699   | 0.163333 | 0.907929 |
| XLOC_013989 | MATN4                  | chr20:43922086-43946464 | 0.0537452 | 0.0601891 | 0.163366 | 1        |
| XLOC_016936 | NDUFC1                 | chr4:140211070-14031193 | 191.399   | 214.36    | 0.163455 | 0.906892 |
| XLOC_012071 | UBXN2A                 | chr2:24163375-24223693  | 4.66612   | 5.22598   | 0.163477 | 0.894976 |
| XLOC_013979 | SERINC3                | chr20:43124863-43150726 | 17.4304   | 19.5236   | 0.163608 | 0.846426 |
| XLOC_010166 | RNF138                 | chr18:29671817-29711524 | 7.4774    | 8.37596   | 0.163718 | 0.855212 |
| XLOC_001900 | ARHGFE2                | chr1:155916629-15594833 | 47.535    | 53.2475   | 0.163723 | 0.890644 |
| XLOC_014678 | UFD1L                  | chr22:19437463-19466738 | 27.6745   | 31.0023   | 0.163817 | 0.846441 |
| XLOC_001034 | LINC00467              | chr1:211556096-21160587 | 7.68701   | 8.61145   | 0.163833 | 0.915999 |
| XLOC_009578 | NARR,RAB34             | chr17:27041298-27045286 | 0.0814666 | 0.0912712 | 0.163951 | 1        |
| XLOC_001346 | HNRNPR                 | chr1:23636275-23670853  | 45.7328   | 51.2435   | 0.164142 | 0.851389 |
| XLOC_006037 | CENPJ                  | chr13:25456411-25497027 | 1.20272   | 1.3478    | 0.164312 | 0.902309 |
| XLOC_020894 | COX19                  | chr7:1004485-1015235    | 4.08127   | 4.57361   | 0.164315 | 0.869671 |
| XLOC_013786 | LIME1                  | chr20:62367977-62370460 | 6.86003   | 7.68772   | 0.164341 | 0.924336 |
| XLOC_014950 | ATG7                   | chr3:11314009-11762220  | 4.73619   | 5.30767   | 0.16435  | 0.934459 |
| XLOC_005083 | INSC                   | chr12:108956293-1089631 | 53.8875   | 60.3937   | 0.164449 | 0.844167 |
| XLOC_022483 | RNF20                  | chr9:104296132-10432562 | 6.00773   | 6.73317   | 0.164466 | 0.851892 |
| XLOC_016502 | C4orf29                | chr4:128838959-12895245 | 0.692119  | 0.775729  | 0.164534 | 0.976214 |
| XLOC_014242 | BTG3                   | chr21:18965967-18985268 | 25.3155   | 28.3748   | 0.164589 | 0.845726 |
| XLOC_011651 | HNRNPL                 | chr19:39327027-39342979 | 179.662   | 201.391   | 0.16471  | 0.845125 |
| XLOC_012571 | COQ10B                 | chr2:198318230-19833985 | 17.795    | 19.9475   | 0.16474  | 0.849026 |
| XLOC_011778 | PPP5D1                 | chr19:46984044-47104457 | 0.147473  | 0.165324  | 0.164841 | 1        |
| XLOC_012780 | MBOAT2                 | chr2:8996700-9143876    | 4.68652   | 5.25413   | 0.164935 | 0.869283 |
| XLOC_005805 | SAP18                  | chr13:21714652-21723224 | 40.9254   | 45.8827   | 0.164953 | 0.834859 |
| XLOC_020481 | UPP1                   | chr7:48128354-48148330  | 533.306   | 597.907   | 0.164958 | 0.847835 |
| XLOC_014582 | RBX1                   | chr22:41347350-41369019 | 67.0653   | 75.1904   | 0.164982 | 0.83481  |
| XLOC_000077 | APITD1,APITD1-CORT,COF | chr1:10490158-10512060  | 9.8674    | 11.0632   | 0.165029 | 0.893663 |
| XLOC_008903 | TVP23B                 | chr17:18684581-18710026 | 7.45652   | 8.36024   | 0.165041 | 0.876899 |
| XLOC_008674 | RFWD3                  | chr16:74655296-74700779 | 7.81332   | 8.76042   | 0.165065 | 0.842475 |
| XLOC_020744 | TPI1P2                 | chr7:128695276-12869729 | 0.166657  | 0.186862  | 0.165096 | 1        |
| XLOC_006448 | FCF1                   | chr14:75179849-75203390 | 10.3957   | 11.6567   | 0.165176 | 0.856667 |
| XLOC_001908 | CCT3                   | chr1:156278751-15631678 | 294.423   | 330.145   | 0.165209 | 0.849166 |
| XLOC_002801 | ANKRD16                | chr10:5903688-5979558   | 11.58     | 12.9851   | 0.165225 | 0.970195 |
| XLOC_009510 | COX10-AS1              | chr17:13932608-14111996 | 1.03494   | 1.16052   | 0.165236 | 0.980533 |
| XLOC_009201 | GDPD1                  | chr17:57297827-57353330 | 2.96753   | 3.3278    | 0.165303 | 0.913628 |
| XLOC_010639 | TECR                   | chr19:14640354-14676792 | 116.145   | 130.255   | 0.16541  | 0.838906 |
| XLOC_011033 | SCAF1                  | chr19:50145381-50161906 | 15.9219   | 17.8576   | 0.165526 | 0.849892 |
| XLOC_008310 | POLR3K                 | chr16:96978-103632      | 32.9455   | 36.9516   | 0.165554 | 0.85843  |
| XLOC_000259 | TSSK3                  | chr1:32827861-32829924  | 1.11247   | 1.24775   | 0.165563 | 0.955406 |
| XLOC_006850 | SGPP1                  | chr14:64150934-64194756 | 5.08051   | 5.69901   | 0.165738 | 0.868469 |
| XLOC_006334 | CTAGE5                 | chr14:39734475-39820397 | 4.88751   | 5.48259   | 0.165758 | 0.869746 |
| XLOC_007310 | PPCDC                  | chr15:75315926-75343067 | 5.82898   | 6.53907   | 0.165842 | 0.868729 |
| XLOC_022710 | KIAA0020               | chr9:2804154-2844130    | 13.6292   | 15.2904   | 0.165925 | 0.845608 |
| XLOC_021151 | SRI                    | chr7:87834431-87856308  | 68.2651   | 76.5871   | 0.165953 | 0.871194 |
| XLOC_012467 | LYPD6                  | chr2:150186498-15033065 | 0.889358  | 0.997784  | 0.165964 | 0.918342 |
| XLOC_007172 | TMEM62                 | chr15:43425721-43477341 | 8.51469   | 9.55312   | 0.166018 | 0.85843  |

|             |                         |                          |           |            |          |          |
|-------------|-------------------------|--------------------------|-----------|------------|----------|----------|
| XLOC_000993 | SNRPE                   | chr1:203830739-203840281 | 61.7237   | 69.2514    | 0.166019 | 0.832722 |
| XLOC_006209 | TEX30                   | chr13:103418462-10342614 | 0.19372   | 0.217357   | 0.166088 | 1        |
| XLOC_008602 | GOT2                    | chr16:58741034-58768246  | 79.3838   | 89.0735    | 0.166152 | 0.835721 |
| XLOC_017102 | BRIX1                   | chr5:34915819-34925787   | 31.8596   | 35.7503    | 0.166229 | 0.845125 |
| XLOC_008073 | ITGAM                   | chr16:31271287-31344213  | 0.0159537 | 0.0179023  | 0.16625  | 1        |
| XLOC_015566 | LOC401052               | chr3:10048101-10052779   | 1.60157   | 1.7972     | 0.166263 | 0.936729 |
| XLOC_008411 | USP7                    | chr16:8985950-9057341    | 15.5578   | 17.4586    | 0.166294 | 0.83481  |
| XLOC_006433 | C14orf169               | chr14:73945188-74025651  | 11.7844   | 13.2242    | 0.166297 | 0.877493 |
| XLOC_001860 | ILF2                    | chr1:153631129-153643504 | 135.296   | 151.827    | 0.166306 | 0.849166 |
| XLOC_023138 | SLC2A6                  | chr9:136336215-136344274 | 17.5619   | 19.709     | 0.166403 | 0.850947 |
| XLOC_019053 | ZUFSP                   | chr6:116956780-116989973 | 5.299     | 5.94684    | 0.166404 | 0.874082 |
| XLOC_004661 | RAD51AP1                | chr12:4647949-4669213    | 5.12219   | 5.74854    | 0.166436 | 0.874417 |
| XLOC_003868 | OAF                     | chr11:120081746-12010065 | 47.431    | 53.2331    | 0.166495 | 0.832266 |
| XLOC_008550 | UBE2MP1                 | chr16:34403801-34404762  | 3.14324   | 3.52784    | 0.166531 | 0.941348 |
| XLOC_015963 | ANAPC13                 | chr3:134196545-134293855 | 30.9761   | 34.7665    | 0.166544 | 0.86583  |
| XLOC_015157 | PDE12                   | chr3:57541980-57547768   | 8.43425   | 9.46638    | 0.166553 | 0.844829 |
| XLOC_004500 | CASP4                   | chr11:104813593-10483933 | 126.282   | 141.737    | 0.166565 | 0.844123 |
| XLOC_010482 | NFIC                    | chr19:3359560-3469215    | 8.75941   | 9.83194    | 0.166642 | 0.841208 |
| XLOC_006423 | TTC9                    | chr14:71108503-71142077  | 0.618466  | 0.694222   | 0.166704 | 0.927627 |
| XLOC_012631 | XRCC5                   | chr2:216974019-217071011 | 73.9211   | 82.9785    | 0.166751 | 0.839867 |
| XLOC_004921 | PA2G4                   | chr12:56498102-56507694  | 114.602   | 128.646    | 0.16677  | 0.840255 |
| XLOC_003496 | ZDHHC5                  | chr11:57435473-57468659  | 17.6055   | 19.764     | 0.166853 | 0.830321 |
| XLOC_020917 | ACTB                    | chr7:5566778-5570232     | 1885.56   | 2116.8     | 0.166892 | 0.869408 |
| XLOC_023852 | WDR45                   | chrX:48932091-48958059   | 36.3961   | 40.8598    | 0.1669   | 0.841842 |
| XLOC_014517 | DEPDC5                  | chr22:32149936-32303020  | 1.35973   | 1.52661    | 0.167014 | 0.903682 |
| XLOC_003086 | SLC25A28                | chr10:101370274-10138022 | 17.9417   | 20.1452    | 0.167119 | 0.860562 |
| XLOC_005966 | UBAC2                   | chr13:99848627-100058554 | 19.7792   | 22.2084    | 0.167124 | 0.843155 |
| XLOC_002815 | UPF2                    | chr10:11962020-12085169  | 4.75913   | 5.34386    | 0.167186 | 0.845969 |
| XLOC_020627 | ARPC1B                  | chr7:98972297-99006305   | 146.684   | 164.719    | 0.167298 | 0.938396 |
| XLOC_000309 | ZFP69                   | chr1:40943301-40962015   | 1.68413   | 1.89129    | 0.167366 | 0.91945  |
| XLOC_001892 | RUSC1-AS1               | chr1:155278538-155300905 | 10.4219   | 11.7044    | 0.167432 | 0.98468  |
| XLOC_017323 | UBE2B                   | chr5:133706869-133727795 | 20.8174   | 23.3806    | 0.167521 | 0.838994 |
| XLOC_008171 | E2F4                    | chr16:67226067-67232821  | 51.4043   | 57.7339    | 0.167529 | 0.830384 |
| XLOC_009761 | ETV4                    | chr17:41605210-41623800  | 66.3658   | 74.5395    | 0.167567 | 0.832581 |
| XLOC_018694 | HIST1H2BJ               | chr6:27100094-27100575   | 2.28095   | 2.56191    | 0.167581 | 0.966946 |
| XLOC_015423 | IQCJ,IQCJ-SCHIP1,SCHIP1 | chr3:158787040-159615155 | 6.68008   | 7.50302    | 0.167606 | 0.885828 |
| XLOC_012538 | DFNB59                  | chr2:179059207-179672151 | 0.631231  | 0.709025   | 0.167669 | 0.99351  |
| XLOC_011839 | PIH1D1                  | chr19:49949549-49955115  | 93.0133   | 104.484    | 0.167779 | 0.833863 |
| XLOC_010852 | TIMM50                  | chr19:39971051-39981528  | 50.9587   | 57.247     | 0.16787  | 0.832174 |
| XLOC_003341 | FAR1                    | chr11:13690205-13753893  | 6.16609   | 6.92715    | 0.167906 | 0.838416 |
| XLOC_004058 | ST5                     | chr11:8714898-8932498    | 1.48655   | 1.6701     | 0.167968 | 0.923433 |
| XLOC_018559 | C6orf211                | chr6:151773421-151791233 | 4.80854   | 5.40264    | 0.168065 | 0.872554 |
| XLOC_000232 | RCC1                    | chr1:28832454-28865708   | 105.703   | 118.777    | 0.168235 | 0.836072 |
| XLOC_020986 | JAZF1                   | chr7:27870192-28280996   | 2.09909   | 2.35875    | 0.168259 | 0.903682 |
| XLOC_008823 | EIF4A1,SENP3            | chr17:7465308-7482324    | 802.614   | 901.912    | 0.168282 | 0.856449 |
| XLOC_006290 | DHRS4L1                 | chr14:24505709-24520580  | 0.17349   | 0.194958   | 0.16831  | 1        |
| XLOC_010630 | NANOS3                  | chr19:13988062-13991571  | 2.6727    | 3.00372    | 0.168451 | 0.952469 |
| XLOC_017836 | CDC23                   | chr5:137514416-137549032 | 7.50178   | 8.43155    | 0.168566 | 0.913628 |
| XLOC_018679 | HIST1H1C                | chr6:26055967-26056699   | 119.266   | 134.051    | 0.168596 | 0.836132 |
| XLOC_009459 | GPS2                    | chr17:7215977-7218658    | 38.1999   | 42.9372    | 0.168659 | 0.835511 |
| XLOC_001353 | GALE                    | chr1:24122088-24127294   | 83.9088   | 94.3153    | 0.168671 | 0.832722 |
| XLOC_015858 | KIAA1524                | chr3:108268717-108413693 | 2.00217   | 2.25049    | 0.168673 | 0.923433 |
| XLOC_012647 | PLCD4                   | chr2:219472487-219501905 | 0.364118  | 0.409278   | 0.168675 | 0.954768 |
| XLOC_014591 | C22orf46                | chr22:42086546-42094140  | 1.44751   | 1.62709    | 0.168722 | 0.88444  |
| XLOC_022902 | C9orf64                 | chr9:86553226-86571663   | 9.03831   | 10.1597    | 0.168727 | 0.862722 |
| XLOC_007473 | TJP1                    | chr15:2992356-30114706   | 4.9289    | 5.54103    | 0.168886 | 0.830662 |
| XLOC_010903 | ZNF575                  | chr19:44037339-44040284  | 0.841028  | 0.945478   | 0.16889  | 0.965515 |
| XLOC_008578 | CRNDE                   | chr16:54952776-54963101  | 19.4225   | 21.8347    | 0.168895 | 0.881073 |
| XLOC_008283 | ZC3H18                  | chr16:88636788-88698372  | 8.23441   | 9.25713    | 0.168899 | 0.852163 |
| XLOC_011332 | C19orf10                | chr19:4657556-4670415    | 146.208   | 164.375    | 0.168965 | 0.830184 |
| XLOC_022096 | FSBP,RAD54B             | chr8:95384187-95487343   | 4.02915   | 4.52989    | 0.169002 | 0.873144 |
| XLOC_004635 | IGSF9B                  | chr11:133785184-13382688 | 0.127452  | 0.143297   | 0.169052 | 1        |
| XLOC_021670 | LRRC69                  | chr8:92114846-92231464   | 0.136493  | 0.153466   | 0.169095 | 1        |
| XLOC_023114 | TOR1A                   | chr9:132575220-132586444 | 37.5043   | 42.1682    | 0.169098 | 0.827026 |
| XLOC_022221 | PYCR1                   | chr8:144686082-144691784 | 20.7813   | 23.3663    | 0.169142 | 0.845125 |
| XLOC_010247 | CNDP2                   | chr18:72163499-72190689  | 15.3168   | 17.223     | 0.169218 | 0.828589 |
| XLOC_017148 | KIF2A                   | chr5:61601988-61683011   | 4.99314   | 5.61465    | 0.169248 | 0.851389 |
| XLOC_021627 | LOC286190               | chr8:71520811-71581447   | 0.0083452 | 0.00938519 | 0.169438 | 1        |
| XLOC_009176 | UTP18                   | chr17:49337896-49375292  | 36.2966   | 40.8213    | 0.169488 | 0.833863 |
| XLOC_020683 | PSMC2                   | chr7:102987970-103086624 | 31.2768   | 35.1757    | 0.169489 | 0.828583 |
| XLOC_023089 | ST6GALNAC4              | chr9:130670164-130679304 | 202.888   | 228.185    | 0.169521 | 0.832265 |
| XLOC_016146 | WDR53                   | chr3:196281058-196295413 | 2.58077   | 2.90259    | 0.169537 | 0.918953 |
| XLOC_003940 | HRAS                    | chr11:532241-535550      | 43.1075   | 48.483     | 0.169539 | 0.845726 |
| XLOC_017087 | GUSBP1                  | chr5:21459588-21589481   | 2.57637   | 2.89771    | 0.16957  | 0.930066 |
| XLOC_012126 | SPAST                   | chr2:32286679-32382706   | 1.86888   | 2.10212    | 0.169674 | 0.877497 |
| XLOC_012732 | SCLY,UBE2F              | chr2:238875586-239008054 | 29.293    | 32.9493    | 0.169694 | 0.83505  |
| XLOC_021632 | TERF1                   | chr8:73921096-73959987   | 12.291    | 13.8252    | 0.169702 | 0.833592 |
| XLOC_010617 | GCDH                    | chr19:13001973-13030086  | 27.6323   | 31.0825    | 0.169745 | 0.835119 |
| XLOC_002504 | SGPL1                   | chr10:72575703-72640932  | 7.19282   | 8.09106    | 0.169771 | 0.833863 |

|              |          |                          |           |           |          |          |
|--------------|----------|--------------------------|-----------|-----------|----------|----------|
| XLOC_004086  | PSMA1    | chr11:14526421-14665180  | 134.408   | 151.215   | 0.169991 | 0.830321 |
| XLOC_012997  | LOXL3    | chr2:74753774-74784678   | 5.55112   | 6.24546   | 0.170029 | 0.986822 |
| XLOC_014514  | LIMK2    | chr22:31608249-31676066  | 9.2805    | 10.4415   | 0.170052 | 0.851815 |
| XLOC_004535  | ZW10     | chr11:113603904-11364448 | 4.39807   | 4.94858   | 0.170145 | 0.865806 |
| XLOC_010890  | ARHGEF1  | chr19:42387266-42411604  | 40.9982   | 46.1309   | 0.170175 | 0.830246 |
| XLOC_008388  | SLX4     | chr16:3631183-3661585    | 1.37871   | 1.55133   | 0.170192 | 0.897782 |
| XLOC_015800  | PSMD6    | chr3:63989697-64009686   | 79.0438   | 88.943    | 0.17023  | 0.828583 |
| XLOC_008740  | PRDM7    | chr16:90122973-90142338  | 0.0138158 | 0.0155468 | 0.170294 | 1        |
| XLOC_006715  | ACIN1    | chr14:23527773-23569665  | 57.4835   | 64.6889   | 0.170369 | 0.912776 |
| XLOC_005362  | ASUN     | chr12:27058111-27091254  | 7.69452   | 8.65931   | 0.17042  | 0.8501   |
| XLOC_017555  | CLPTM1L  | chr5:1317999-1345002     | 46.2119   | 52.0069   | 0.17044  | 0.830384 |
| XLOC_000553  | PRPF38B  | chr1:109234931-10924442  | 9.93069   | 11.1768   | 0.17054  | 0.929657 |
| XLOC_014479  | ADRBK2   | chr22:25960860-26125258  | 0.437356  | 0.492235  | 0.17054  | 0.913628 |
| XLOC_008024  | NFATC2IP | chr16:28962317-28977767  | 8.91364   | 10.0322   | 0.170549 | 0.837706 |
| XLOC_006004  | TFDP1    | chr13:114239002-11429578 | 22.0601   | 24.8296   | 0.170627 | 0.828589 |
| XLOC_013075  | RNF149   | chr2:101892062-101925178 | 14.8856   | 16.7546   | 0.170637 | 0.832174 |
| XLOC_012245  | STAMBP   | chr2:74056042-74094295   | 5.5955    | 6.29824   | 0.170682 | 0.833863 |
| XLOC_008363  | RNPS1    | chr16:2303099-2318413    | 132.573   | 149.224   | 0.170688 | 0.829377 |
| XLOC_004669  | CD9      | chr12:6309481-6347437    | 261.9     | 294.795   | 0.170697 | 0.833147 |
| XLOC_014757  | LIF      | chr22:30636435-30642840  | 17.677    | 19.8982   | 0.17076  | 0.835941 |
| XLOC_015606  | SGOL1    | chr3:20202084-20227919   | 2.94422   | 3.31423   | 0.170788 | 0.901347 |
| XLOC_003426  | SLC35C1  | chr11:45825622-45834567  | 10.0672   | 11.3329   | 0.170855 | 0.85192  |
| XLOC_017940  | PANK3    | chr5:167982627-168006614 | 2.76151   | 3.10888   | 0.170937 | 0.880833 |
| XLOC_021101  | NSUN5    | chr7:72716513-72722864   | 28.7562   | 32.3741   | 0.170967 | 0.832611 |
| XLOC_021703  | ATP6V1C1 | chr8:104033247-104085288 | 14.866    | 16.7389   | 0.171188 | 0.822774 |
| XLOC_003256  | TSSC4    | chr11:2423522-2425106    | 40.2725   | 45.3469   | 0.17121  | 0.837836 |
| XLOC_016697  | DHX15    | chr4:24529087-24586184   | 33.4199   | 37.6323   | 0.171267 | 0.825098 |
| XLOC_005070  | C12orf45 | chr12:105380097-10538858 | 48.537    | 54.6573   | 0.171329 | 0.845974 |
| XLOC_020810  | CASP2    | chr7:142985307-143004788 | 12.0725   | 13.5949   | 0.171333 | 0.83059  |
| XLOC_013717  | PTPN1    | chr20:49126890-49201086  | 19.2632   | 21.6933   | 0.171399 | 0.827857 |
| XLOC_004785  | MRPS35   | chr12:27863705-27909237  | 35.4212   | 39.8926   | 0.171508 | 0.830184 |
| XLOC_022599  | NUP188   | chr9:131707808-131769378 | 30.0342   | 33.8262   | 0.171536 | 0.849166 |
| XLOC_000369  | RAD54L   | chr1:46713366-46769038   | 9.14615   | 10.3013   | 0.171596 | 0.955089 |
| XLOC_008852  | USP43    | chr17:9548853-9633003    | 1.23578   | 1.39188   | 0.171607 | 0.918898 |
| XLOC_014585  | L3MBTL2  | chr22:41601312-41636935  | 9.76785   | 11.0018   | 0.171629 | 0.83956  |
| XLOC_003001  | AGAP5    | chr10:75434032-75457554  | 0.670423  | 0.755137  | 0.171666 | 0.944284 |
| XLOC_012181  | ERLEC1   | chr2:53897116-54087170   | 11.7604   | 13.2466   | 0.171685 | 0.876899 |
| XLOC_000069  | SLC25A33 | chr1:9599527-9642831     | 21.6461   | 24.3832   | 0.171784 | 0.845125 |
| XLOC_021508  | RHOBTB2  | chr8:22844929-22941132   | 3.86672   | 4.35611   | 0.171932 | 0.978981 |
| XLOC_004174  | HAUS7    | chrX:152713122-15277500  | 19.5749   | 22.0553   | 0.172116 | 0.85843  |
| XLOC_008055  | FBRS     | chr16:30675777-30682131  | 22.3253   | 25.1556   | 0.172196 | 0.830816 |
| XLOC_005073  | ATXN2    | chr12:111890017-11203748 | 5.49613   | 6.19305   | 0.172234 | 0.850933 |
| XLOC_021172  | PON2     | chr7:95034173-95064384   | 33.6584   | 37.9268   | 0.17225  | 0.826204 |
| XLOC_003356  | GTF2H1   | chr11:18343815-18388590  | 9.67536   | 10.9023   | 0.17225  | 0.833086 |
| XLOC_012680  | RHBDD1   | chr2:227700670-22786392  | 2.90299   | 3.27118   | 0.172273 | 0.867828 |
| XLOC_004577  | PVRL1    | chr11:119508807-11959943 | 9.24035   | 10.4133   | 0.172401 | 0.926225 |
| XLOC_018333  | TDRD6    | chr6:46655611-46703430   | 0.027337  | 0.0308089 | 0.172493 | 1        |
| XLOC_013689  | DNTTIP1  | chr20:44420575-44440066  | 77.8589   | 87.7575   | 0.17266  | 0.823379 |
| XLOC_001382  | SLC9A1   | chr1:27425299-27481621   | 8.7526    | 9.86562   | 0.172698 | 0.846228 |
| XLOC_012844  | PPM1G    | chr2:27604065-27632550   | 111.008   | 125.132   | 0.172777 | 0.827004 |
| XLOC_000678  | ECM1     | chr1:150480486-150486268 | 1.37801   | 1.55338   | 0.172819 | 0.931471 |
| XLOC_015958  | RAB6B    | chr3:133543079-133614691 | 0.50977   | 0.574652  | 0.172842 | 0.930157 |
| XLOC_016526  | LSM6     | chr4:147096834-147111213 | 24.746    | 27.8981   | 0.17297  | 0.848298 |
| XLOC_016316  | FIP1L1   | chr4:54243819-54326103   | 8.3978    | 9.46821   | 0.173081 | 0.849194 |
| XLOC_017511  | PRELID1  | chr5:176730762-176739292 | 173.949   | 196.122   | 0.173083 | 0.881965 |
| XLOC_003737  | PCF11    | chr11:82868136-82896835  | 2.98272   | 3.36291   | 0.173084 | 0.854683 |
| XLOC_005427  | DDN      | chr12:49388932-49393088  | 4.85573   | 5.47538   | 0.173271 | 0.871982 |
| XLOC_014542  | CDC42EP1 | chr22:37956470-37965410  | 115.573   | 130.326   | 0.17333  | 0.828858 |
| XLOC_011466  | FARSA    | chr19:13033283-13044558  | 87.6235   | 98.816    | 0.173428 | 0.820463 |
| XLOC_005865  | WBP4     | chr13:41635696-41658139  | 4.23946   | 4.781     | 0.173432 | 0.872604 |
| XLOC_016417  | NUDT9    | chr4:88343727-88380606   | 7.23806   | 8.16287   | 0.173474 | 0.840803 |
| XLOC_006226  | TUBGCP3  | chr13:113139327-11324248 | 3.53066   | 3.98182   | 0.173489 | 0.86543  |
| XLOC_013706  | CSE1L    | chr20:47662782-47713497  | 43.8992   | 49.5092   | 0.173501 | 0.822187 |
| XLOC_002940  | BICD2    | chr9:95473644-95527083   | 10.6856   | 12.0515   | 0.173539 | 0.828589 |
| XLOC_000120  | DNAJC16  | chr1:15853351-15911605   | 2.08198   | 2.34833   | 0.173677 | 0.925191 |
| XLOC_000231  | PHACTR4  | chr1:28696092-28826881   | 4.0613    | 4.58155   | 0.173892 | 0.842753 |
| XLOC_020980  | HOXA7    | chr7:27179982-27196296   | 12.3787   | 14.3706   | 0.173908 | 0.907689 |
| XLOC_017912  | FAM114A2 | chr5:153371268-153418497 | 3.50266   | 3.95145   | 0.17393  | 0.868469 |
| XLOC_018871  | MED20    | chr6:41873091-41888877   | 3.74393   | 4.22376   | 0.173975 | 0.878528 |
| XLOC_017013  | MGC45800 | chr4:183060158-183065668 | 0.744425  | 0.839854  | 0.174013 | 0.926258 |
| XLOC_022838  | EXOSC3   | chr9:37779710-37785089   | 17.1821   | 19.3854   | 0.174062 | 0.828889 |
| XLOC_000798  | IFI16    | chr1:158979681-159024948 | 34.4972   | 38.9212   | 0.174078 | 0.823658 |
| XLOC_003936  | IFITM3   | chr11:319672-320914      | 325.589   | 367.375   | 0.174203 | 0.823458 |
| XLOC_000494  | LMO4     | chr1:87794150-87814607   | 4.60796   | 5.19952   | 0.174249 | 0.856449 |
| XLOC_008407  | FAM86A   | chr16:5121809-5147789    | 10.1591   | 11.4641   | 0.174353 | 0.912696 |
| XLOC_015023  | XYLB     | chr3:38388250-38456467   | 1.59099   | 1.79546   | 0.174427 | 0.90314  |
| XLOC_021533  | EXTL3    | chr8:28558989-28611207   | 14.3538   | 16.1986   | 0.174431 | 0.85377  |
| XLOC_0007814 | HBA1     | chr16:226678-227520      | 0.268409  | 0.302906  | 0.174433 | 1        |
| XLOC_015761  | PBRM1    | chr3:52579367-52719866   | 1.764     | 1.99073   | 0.17445  | 0.853262 |

|             |           |                          |           |           |          |          |
|-------------|-----------|--------------------------|-----------|-----------|----------|----------|
| XLOC_008311 | RHBDF1    | chr16:108057-122629      | 18.6318   | 21.0271   | 0.174479 | 0.83464  |
| XLOC_014394 | IL17RA    | chr22:17565848-17596584  | 3.46559   | 3.91152   | 0.174628 | 0.841712 |
| XLOC_023695 | ABCD1     | chrX:152990322-153010211 | 10.5701   | 11.9309   | 0.174718 | 0.845125 |
| XLOC_013430 | HJURP     | chr2:234745485-23476321  | 15.3976   | 17.38     | 0.174721 | 0.827718 |
| XLOC_008946 | TRAF4     | chr17:27071022-27077976  | 20.5854   | 23.2384   | 0.174885 | 0.827004 |
| XLOC_022584 | COQ4      | chr9:131084790-13109635  | 73.4131   | 82.8777   | 0.174947 | 0.820185 |
| XLOC_008035 | KIF22     | chr16:29802033-29816706  | 58.0984   | 65.5915   | 0.175011 | 0.813924 |
| XLOC_021983 | PRKDC     | chr8:48685668-48872743   | 10.397    | 11.7394   | 0.175188 | 0.82129  |
| XLOC_001180 | LOC729737 | chr1:134772-140566       | 0.209874  | 0.236983  | 0.175257 | 1        |
| XLOC_004139 | ABTB2     | chr11:34172533-34379555  | 2.0132    | 2.27326   | 0.175274 | 0.896032 |
| XLOC_018444 | CDC40     | chr6:110501623-11055342  | 4.22689   | 4.77301   | 0.175303 | 0.845125 |
| XLOC_023611 | SLC25A14  | chrX:129474046-12950733  | 5.52631   | 6.24053   | 0.175353 | 0.885828 |
| XLOC_010711 | RFXANK    | chr19:19256375-19314238  | 38.0465   | 42.9638   | 0.175359 | 0.930066 |
| XLOC_023908 | LAS1L     | chrX:64732461-64754686   | 24.4737   | 27.6391   | 0.175482 | 0.821849 |
| XLOC_000206 | DHDDS     | chr1:26758772-26797795   | 6.54259   | 7.38891   | 0.175499 | 0.844285 |
| XLOC_005367 | ERGIC2    | chr12:29493578-29534143  | 15.6868   | 17.7167   | 0.17556  | 0.830101 |
| XLOC_013592 | POFUT1    | chr20:30795695-30826467  | 6.76883   | 7.64483   | 0.175579 | 0.823931 |
| XLOC_021614 | MTFR1     | chr8:66556887-66622798   | 14.2384   | 16.0815   | 0.175613 | 0.825249 |
| XLOC_017433 | G3BP1     | chr5:151151475-15118491  | 33.6447   | 38.0016   | 0.175684 | 0.823458 |
| XLOC_023631 | SLC9A6    | chrX:135067582-13512942  | 2.09252   | 2.36355   | 0.175712 | 0.876899 |
| XLOC_020394 | NUPL2     | chr7:23221445-23240630   | 10.0774   | 11.3834   | 0.175808 | 0.853057 |
| XLOC_014737 | TPST2     | chr22:26921713-26986089  | 15.2778   | 17.2585   | 0.17587  | 0.845726 |
| XLOC_015969 | DBR1      | chr3:137879829-13789379  | 5.15674   | 5.82538   | 0.175892 | 0.863259 |
| XLOC_003162 | PRDX3     | chr10:120927214-1209383  | 86.6113   | 97.8418   | 0.175895 | 0.816305 |
| XLOC_023619 | PHF6      | chrX:133507341-13356282  | 3.87107   | 4.3732    | 0.175957 | 0.837677 |
| XLOC_007158 | OIP5-AS1  | chr15:41576200-41591795  | 8.94074   | 10.1014   | 0.176088 | 0.850795 |
| XLOC_005250 | MLF2      | chr12:6857157-6862636    | 192.467   | 217.458   | 0.176126 | 0.823658 |
| XLOC_002949 | SLC16A9   | chr10:61410521-61469649  | 2.99043   | 3.37908   | 0.176277 | 0.869168 |
| XLOC_007203 | DUT       | chr15:48623620-48635570  | 42.666    | 48.2159   | 0.176421 | 0.815945 |
| XLOC_021330 | CNOT4     | chr7:135046546-13519487  | 4.06909   | 4.59844   | 0.176437 | 0.872117 |
| XLOC_018176 | C6orf136  | chr6:30614815-30640830   | 25.1597   | 28.4335   | 0.176476 | 0.943067 |
| XLOC_002414 | BMS1      | chr10:43277953-43330385  | 8.22232   | 9.29268   | 0.176549 | 0.819681 |
| XLOC_024048 | C1GALT1C1 | chrX:119759528-11976400  | 8.14458   | 9.20505   | 0.176585 | 0.848999 |
| XLOC_001387 | PRAM1     | chr19:8554939-8567538    | 0.176885  | 0.199923  | 0.176663 | 1        |
| XLOC_013803 | TBC1D20   | chr20:416123-443187      | 10.6851   | 12.0788   | 0.17688  | 0.819258 |
| XLOC_001672 | SASS6     | chr1:100549101-10059851  | 1.47536   | 1.66819   | 0.177216 | 0.887208 |
| XLOC_014469 | SNRPD3    | chr22:24951617-24968509  | 39.7585   | 44.9584   | 0.177328 | 0.820463 |
| XLOC_007169 | SNAP23    | chr15:42787503-42825259  | 21.9798   | 24.8557   | 0.1774   | 0.822751 |
| XLOC_014974 | OXNAD1    | chr3:16306666-16347594   | 1.76768   | 1.99907   | 0.177473 | 0.889644 |
| XLOC_018772 | VARS      | chr6:31745296-31763712   | 54.8458   | 62.027    | 0.177515 | 0.816112 |
| XLOC_003320 | AKIP1     | chr11:8932700-8954553    | 21.708    | 24.5517   | 0.177597 | 0.845125 |
| XLOC_018306 | RRP36     | chr6:42989384-42997337   | 27.4636   | 31.0622   | 0.17764  | 0.82944  |
| XLOC_000609 | VANGL1    | chr1:116184573-11624084  | 1.63312   | 1.84713   | 0.177654 | 0.852163 |
| XLOC_009466 | TP53      | chr17:7571719-7606820    | 27.0795   | 30.6282   | 0.177658 | 0.871957 |
| XLOC_002029 | CENPL     | chr1:173768687-17379377  | 3.95935   | 4.47822   | 0.177663 | 0.879021 |
| XLOC_022939 | IPPK      | chr9:95059639-95432547   | 6.5939    | 7.45815   | 0.177685 | 0.923228 |
| XLOC_009968 | SLC25A19  | chr17:73267379-73285530  | 24.298    | 27.4835   | 0.177727 | 0.832662 |
| XLOC_011874 | C19orf48  | chr19:51300960-51307974  | 326.43    | 369.246   | 0.177808 | 0.823379 |
| XLOC_018317 | MAD2L1BP  | chr6:43597278-43608688   | 36.854    | 41.6882   | 0.177815 | 0.821056 |
| XLOC_008133 | HERPUD1   | chr16:56965747-56977793  | 56.9385   | 64.4075   | 0.177824 | 0.820014 |
| XLOC_022675 | TRAF2     | chr9:139780964-13982106  | 36.1758   | 40.9233   | 0.177899 | 0.814433 |
| XLOC_016584 | SPCS3     | chr4:177241089-17725339  | 15.8203   | 17.8977   | 0.177998 | 0.810878 |
| XLOC_020598 | CLDN12    | chr7:90032647-90045268   | 12.6891   | 14.3554   | 0.177998 | 0.819644 |
| XLOC_011298 | TIMM13    | chr19:2389783-2427875    | 81.4858   | 92.1886   | 0.17804  | 0.806424 |
| XLOC_017145 | NDUFAF2   | chr5:60240955-60448864   | 93.4755   | 105.754   | 0.178048 | 0.819579 |
| XLOC_013675 | KCNK15    | chr20:43374487-43438979  | 0.0860407 | 0.0973432 | 0.178062 | 1        |
| XLOC_002745 | BUB3      | chr10:124913759-1249248  | 106.366   | 120.339   | 0.178073 | 0.844714 |
| XLOC_014863 | RRP7A     | chr22:42896584-42915829  | 24.4195   | 27.6278   | 0.178088 | 0.808353 |
| XLOC_000771 | SEMA4A    | chr1:156119734-15614754  | 0.025978  | 0.0293915 | 0.178107 | 1        |
| XLOC_021555 | LETM2     | chr8:38243958-38266062   | 3.5657    | 4.03423   | 0.178108 | 0.890622 |
| XLOC_013078 | MFSFD9    | chr2:103333665-10335333  | 1.70735   | 1.93171   | 0.178115 | 0.908114 |
| XLOC_007755 | WDR73     | chr15:85186011-85197521  | 9.40118   | 10.6372   | 0.178199 | 0.847891 |
| XLOC_003668 | NDUFS8    | chr11:67798083-67804114  | 181.999   | 205.927   | 0.178203 | 0.811724 |
| XLOC_005190 | RAN       | chr12:131356616-1313608  | 365.597   | 413.701   | 0.178337 | 0.825625 |
| XLOC_007910 | ZNF263    | chr16:3333486-3341459    | 11.6439   | 13.1762   | 0.178363 | 0.819612 |
| XLOC_015619 | AZI2      | chr3:28363843-28390618   | 15.3937   | 17.4214   | 0.178525 | 0.881851 |
| XLOC_023913 | PJA1      | chrX:68380580-68385365   | 7.63392   | 8.63979   | 0.178572 | 0.858966 |
| XLOC_021326 | SLC35B4   | chr7:133974089-13400182  | 3.1793    | 3.59829   | 0.178603 | 0.841354 |
| XLOC_010923 | CEACAM19  | chr19:45174723-45187627  | 11.3967   | 12.9006   | 0.178819 | 0.835119 |
| XLOC_017889 | CSNK1A1   | chr5:148875456-14893111  | 30.148    | 34.127    | 0.178854 | 0.808776 |
| XLOC_021469 | FDFT1     | chr8:11660189-11696818   | 58.8333   | 66.5987   | 0.17886  | 0.819513 |
| XLOC_014227 | PCNT      | chr21:47744035-47865682  | 2.10449   | 2.38229   | 0.178876 | 0.8433   |
| XLOC_017964 | CLTB      | chr5:175819455-17584357  | 122.431   | 138.604   | 0.179003 | 0.809695 |
| XLOC_018109 | BTN2A2    | chr6:26383323-26395100   | 3.16314   | 3.581     | 0.179004 | 0.870466 |
| XLOC_022247 | RECQL4    | chr8:145736666-14574321  | 29.2619   | 33.1279   | 0.179026 | 0.811724 |
| XLOC_009004 | PIGW      | chr17:34891402-34895150  | 4.57808   | 5.18337   | 0.179148 | 0.868277 |
| XLOC_005899 | DLU1      | chr13:50556687-50699677  | 6.98657   | 7.91154   | 0.179373 | 0.965607 |
| XLOC_009374 | INPP5K    | chr17:1397870-1420182    | 13.9558   | 15.804    | 0.179429 | 0.824676 |
| XLOC_013745 | NELFCD    | chr20:57556262-57570188  | 37.624    | 42.6085   | 0.179489 | 0.808353 |

|             |                         |                          |           |           |          |          |
|-------------|-------------------------|--------------------------|-----------|-----------|----------|----------|
| XLOC_006968 | BCL11B                  | chr14:99635624-99737822  | 0.148638  | 0.168333  | 0.179517 | 1        |
| XLOC_017450 | UBLCP1                  | chr5:158690088-158713048 | 8.62827   | 9.77198   | 0.179579 | 0.831644 |
| XLOC_013321 | NDUFS1                  | chr2:206987802-207024243 | 10.3712   | 11.7461   | 0.179596 | 0.820804 |
| XLOC_022175 | FAM49B                  | chr8:130851838-131028889 | 21.873    | 24.7727   | 0.179599 | 0.810365 |
| XLOC_005959 | DNAJC3                  | chr13:96329392-96447243  | 6.63425   | 7.5143    | 0.179705 | 0.821056 |
| XLOC_012255 | LBX2-AS1                | chr2:74724643-74734821   | 7.88077   | 8.92639   | 0.179741 | 0.945946 |
| XLOC_012044 | TAF1B                   | chr2:9983570-10074545    | 3.55536   | 4.0271    | 0.179747 | 0.872961 |
| XLOC_005433 | TUBA1B                  | chr12:49521566-49525304  | 710.282   | 804.533   | 0.17976  | 0.830817 |
| XLOC_020929 | CCZ1B                   | chr7:6838565-6865926     | 6.50408   | 7.36714   | 0.179761 | 0.860963 |
| XLOC_007594 | CCPG1,DYX1C1            | chr15:55611132-55800432  | 3.17127   | 3.59229   | 0.179841 | 0.915595 |
| XLOC_006321 | FAM177A1                | chr14:35514112-35552589  | 4.42612   | 5.0138    | 0.179861 | 0.848564 |
| XLOC_004992 | RAB21                   | chr12:72148657-72181150  | 12.3018   | 13.9354   | 0.179887 | 0.828589 |
| XLOC_003332 | CTR9                    | chr11:10772810-10801290  | 8.40228   | 9.51842   | 0.179941 | 0.819455 |
| XLOC_009538 | SHMT1                   | chr17:18218593-18266856  | 17.2444   | 19.5358   | 0.179996 | 0.874855 |
| XLOC_016079 | DCUN1D1                 | chr3:182660558-182698326 | 3.4564    | 3.91605   | 0.180131 | 0.857478 |
| XLOC_009855 | MMD                     | chr17:53469973-53499341  | 2.58684   | 2.93094   | 0.180173 | 0.882845 |
| XLOC_008766 | CTNS                    | chr17:3539761-3599698    | 4.63002   | 5.2461    | 0.180228 | 0.978714 |
| XLOC_000358 | UROD                    | chr1:45477804-45481341   | 135.33    | 153.339   | 0.180238 | 0.812413 |
| XLOC_007933 | PMM2                    | chr16:8891669-8943194    | 19.8813   | 22.5269   | 0.180241 | 0.825249 |
| XLOC_007331 | IREB1                   | chr15:78730517-78793798  | 3.72199   | 4.21757   | 0.180336 | 0.826204 |
| XLOC_017761 | FBXL17                  | chr5:107194733-107717795 | 1.0844    | 1.22888   | 0.180444 | 0.897241 |
| XLOC_003675 | TPCN2                   | chr11:68816349-68858072  | 2.96302   | 3.35787   | 0.180479 | 0.86157  |
| XLOC_001655 | FAM69A                  | chr1:93297593-93427079   | 2.50533   | 2.83921   | 0.18049  | 0.984917 |
| XLOC_017231 | POLR3G                  | chr5:89770680-89810369   | 3.67107   | 4.1604    | 0.180521 | 0.8501   |
| XLOC_023028 | AKNA                    | chr9:117096432-117156685 | 3.67518   | 4.16511   | 0.180539 | 0.869104 |
| XLOC_009735 | ACL1                    | chr17:40023178-40075272  | 32.6338   | 36.9856   | 0.180596 | 0.805942 |
| XLOC_005734 | GCN1L1                  | chr12:120565013-12063251 | 13.8515   | 15.6994   | 0.180669 | 0.803555 |
| XLOC_018636 | BLOC1S5,EEF1E1,TXNDC5   | chr6:7727010-8102828     | 117.395   | 133.057   | 0.180673 | 0.848017 |
| XLOC_009486 | MYH10                   | chr17:8377522-8534079    | 0.085356  | 0.0967439 | 0.180677 | 1        |
| XLOC_015160 | ABHD6                   | chr3:58223258-58280461   | 5.61265   | 6.36172   | 0.180734 | 0.856449 |
| XLOC_002202 | CAPN8                   | chr1:223714971-223853436 | 0.0284962 | 0.032302  | 0.180853 | 1        |
| XLOC_020473 | CCM2                    | chr7:45039344-45116069   | 20.2948   | 23.0053   | 0.18086  | 0.835119 |
| XLOC_010335 | SLC39A6                 | chr18:33688493-33709357  | 19.5699   | 22.1842   | 0.180901 | 0.806389 |
| XLOC_010268 | ENOSF1                  | chr18:596997-712662      | 14.8638   | 16.8498   | 0.180935 | 0.853758 |
| XLOC_005672 | LOC100505978            | chr12:106751435-10728305 | 0.0846959 | 0.0960196 | 0.181037 | 1        |
| XLOC_018062 | CD83                    | chr6:14117486-14137148   | 4.35313   | 4.93556   | 0.181161 | 0.868277 |
| XLOC_015729 | IFRD2                   | chr3:50316517-50330026   | 80.8933   | 91.718    | 0.181184 | 0.797744 |
| XLOC_005039 | NEDD1                   | chr12:97301000-97347469  | 3.8162    | 4.32695   | 0.181213 | 0.843587 |
| XLOC_005681 | CORO1C                  | chr12:109038884-10912532 | 91.9276   | 104.232   | 0.181234 | 0.816178 |
| XLOC_023551 | CLDN2                   | chrX:106143292-10617409  | 0.0398918 | 0.0452329 | 0.18128  | 1        |
| XLOC_011265 | RNF126                  | chr19:647525-663233      | 74.9109   | 84.9448   | 0.181349 | 0.813342 |
| XLOC_009186 | SCPEP1                  | chr17:55055467-55084129  | 10.7239   | 12.1605   | 0.181367 | 0.832286 |
| XLOC_024196 | G6PD                    | chrX:153759605-15379326  | 22.7941   | 25.8501   | 0.181509 | 0.872056 |
| XLOC_017189 | UTP15                   | chr5:72861597-72877794   | 3.55749   | 4.03445   | 0.18151  | 0.852163 |
| XLOC_005296 | STYK1                   | chr12:10771537-10826891  | 0.175929  | 0.199518  | 0.181529 | 1        |
| XLOC_004427 | KCTD14,NDUFC2,NDUFC2    | chr11:77726760-77850699  | 21.4397   | 24.3149   | 0.181559 | 0.907929 |
| XLOC_006910 | TMED8                   | chr14:77808113-77843396  | 0.222846  | 0.252734  | 0.18157  | 1        |
| XLOC_023158 | NACC2                   | chr9:138898382-138987131 | 7.47441   | 8.4772    | 0.181627 | 0.8171   |
| XLOC_018181 | VARS2                   | chr6:30881981-30894235   | 15.7669   | 17.8823   | 0.181628 | 0.813139 |
| XLOC_006075 | ALG5                    | chr13:37523907-37573504  | 32.0145   | 36.3118   | 0.181713 | 0.814226 |
| XLOC_008642 | COG8,PDF                | chr16:69362523-69377013  | 28.653    | 32.4991   | 0.181714 | 0.948179 |
| XLOC_003951 | SLC25A22                | chr11:790474-798269      | 19.9445   | 22.6235   | 0.181831 | 0.821848 |
| XLOC_000227 | XKR8                    | chr1:28286503-28294604   | 11.3412   | 12.8655   | 0.181941 | 0.851127 |
| XLOC_022475 | SEC61B                  | chr9:101984569-101992901 | 229.254   | 260.078   | 0.181997 | 0.80896  |
| XLOC_006729 | NRL                     | chr14:24549315-24553832  | 0.474483  | 0.538376  | 0.182258 | 0.959465 |
| XLOC_000458 | FPGT,FPGT-TNNI3K,TNNI3  | chr1:74663895-75010116   | 1.34082   | 1.52137   | 0.182261 | 0.877669 |
| XLOC_012312 | NCAPH                   | chr2:97001483-97041274   | 4.88584   | 5.54443   | 0.182435 | 0.824676 |
| XLOC_010467 | OAZ1                    | chr19:2269519-2273487    | 876.525   | 994.723   | 0.1825   | 0.817332 |
| XLOC_005482 | LOC283335               | chr12:53436972-53473204  | 0.337478  | 0.382991  | 0.182517 | 0.907689 |
| XLOC_009605 | UTP6                    | chr17:30190189-30228729  | 18.5128   | 21.0108   | 0.182604 | 0.813004 |
| XLOC_021189 | PDAP1                   | chr7:98972297-99006305   | 95.2287   | 108.084   | 0.182678 | 0.876899 |
| XLOC_015680 | CSPG5                   | chr3:47603727-47621730   | 1.29687   | 1.47204   | 0.182792 | 0.931161 |
| XLOC_013246 | HOXD-AS2                | chr2:176999568-177001826 | 7.53019   | 8.54788   | 0.182882 | 0.93549  |
| XLOC_008203 | CYB5B                   | chr16:69458497-69500167  | 12.7307   | 14.4529   | 0.183044 | 0.805942 |
| XLOC_020360 | ANKRD61                 | chr7:6048881-6098860     | 0.123606  | 0.14033   | 0.183075 | 1        |
| XLOC_000907 | SOAT1                   | chr1:179262848-179327814 | 3.33732   | 3.78902   | 0.183136 | 0.830384 |
| XLOC_005160 | DENR                    | chr12:123237370-12325595 | 20.3468   | 23.1012   | 0.183171 | 0.799255 |
| XLOC_005445 | LIMA1                   | chr12:50569562-50677353  | 4.113     | 4.6699    | 0.183201 | 0.844685 |
| XLOC_013369 | IHH                     | chr2:219919141-219925236 | 0.0654358 | 0.0742996 | 0.183274 | 1        |
| XLOC_012135 | LTBP1                   | chr2:33172368-33624575   | 1.48681   | 1.68839   | 0.183427 | 0.877493 |
| XLOC_002204 | NVL                     | chr1:224415035-224517891 | 5.94328   | 6.74911   | 0.183439 | 0.840026 |
| XLOC_022160 | C8orf76,ZHX1,ZHX1-C8ORF | chr8:124232195-124287781 | 33.4606   | 37.9996   | 0.18352  | 0.829085 |
| XLOC_004209 | SSRP1                   | chr11:57093458-57103351  | 100.3     | 113.909   | 0.183561 | 0.806888 |
| XLOC_023003 | TXN                     | chr9:113006091-113018926 | 772.521   | 877.341   | 0.183562 | 0.806008 |
| XLOC_015070 | LIMD1                   | chr3:45636322-45730374   | 4.41497   | 5.01414   | 0.1836   | 0.865379 |
| XLOC_023812 | RPGR                    | chrX:38128422-38186788   | 1.19856   | 1.3613    | 0.183675 | 0.90314  |
| XLOC_012550 | ZC3H15                  | chr2:187350884-187374081 | 28.657    | 32.5487   | 0.183711 | 0.807024 |
| XLOC_013440 | HES6                    | chr2:239146907-239148681 | 142.788   | 162.2     | 0.183893 | 0.80341  |
| XLOC_011611 | NFKBID                  | chr19:36379142-36391552  | 2.1429    | 2.43456   | 0.184092 | 0.920298 |



|             |                      |                          |          |           |          |          |
|-------------|----------------------|--------------------------|----------|-----------|----------|----------|
| XLOC_007934 | C16orf72             | chr16:9185536-9213555    | 7.36966  | 8.37284   | 0.184118 | 0.819877 |
| XLOC_007222 | PIGB                 | chr15:55611132-55800432  | 2.82982  | 3.21515   | 0.184177 | 0.958814 |
| XLOC_008173 | TMEM208              | chr16:67261015-67263182  | 77.7171  | 88.3032   | 0.184234 | 0.80896  |
| XLOC_015877 | NAA50                | chr3:113435306-113465120 | 16.8965  | 19.1982   | 0.184246 | 0.804229 |
| XLOC_009112 | NMT1                 | chr17:43138679-43186382  | 20.0708  | 22.806    | 0.184316 | 0.799544 |
| XLOC_017025 | ACSL1                | chr4:185676748-185747215 | 7.66441  | 8.71017   | 0.184527 | 0.806888 |
| XLOC_007940 | RM12                 | chr16:11439310-11445617  | 6.60433  | 7.50587   | 0.184606 | 0.877493 |
| XLOC_017320 | HSPA4                | chr5:132387661-132440705 | 39.7428  | 45.1746   | 0.184821 | 0.797456 |
| XLOC_006377 | KIAA0586             | chr14:58862643-59015549  | 0.517038 | 0.587705  | 0.184821 | 0.979944 |
| XLOC_022781 | NDUFB6               | chr9:32553523-32573182   | 58.6858  | 66.7095   | 0.184881 | 0.804053 |
| XLOC_018683 | HIST1H2AD,HIST1H3D   | chr6:26197011-26199521   | 2.89963  | 3.29616   | 0.184917 | 0.946765 |
| XLOC_018192 | MICB                 | chr6:31465854-31478901   | 7.77187  | 8.83475   | 0.184927 | 0.832722 |
| XLOC_001792 | HIST2H2BE            | chr1:149856009-149858232 | 5.7521   | 6.53876   | 0.184928 | 0.86601  |
| XLOC_008230 | PSMD7                | chr16:74330672-74340186  | 46.1708  | 52.4853   | 0.184934 | 0.800703 |
| XLOC_008753 | RPA1                 | chr17:1733272-1802848    | 13.6541  | 15.523    | 0.185081 | 0.799255 |
| XLOC_017751 | RIOK2                | chr5:96496570-96519005   | 6.38607  | 7.26021   | 0.185083 | 0.831889 |
| XLOC_009222 | ACE                  | chr17:61554421-61575741  | 3.86978  | 4.3995    | 0.185087 | 0.864019 |
| XLOC_011546 | MEF2B,MEF2BNB,MEF2BN | chr19:19256375-19314238  | 13.5009  | 15.3509   | 0.185261 | 0.974044 |
| XLOC_009653 | CWCV25               | chr17:36956686-36981603  | 6.38355  | 7.25834   | 0.18528  | 0.826656 |
| XLOC_023743 | PRKX                 | chrX:3522383-3631675     | 5.71189  | 6.49471   | 0.185296 | 0.80896  |
| XLOC_003817 | DLAT                 | chr11:111895537-11194485 | 4.44662  | 5.05604   | 0.185297 | 0.833197 |
| XLOC_003336 | MICALCL              | chr11:12308446-12380691  | 0.297089 | 0.337826  | 0.185386 | 1        |
| XLOC_019004 | MMS22L               | chr6:97372495-97862283   | 1.2169   | 1.38385   | 0.18548  | 0.851815 |
| XLOC_015296 | DIRC2                | chr3:122513900-12259998  | 10.1969  | 11.5959   | 0.185487 | 0.811389 |
| XLOC_018815 | BAK1                 | chr6:33540322-33548070   | 47.3743  | 53.8742   | 0.185489 | 0.797015 |
| XLOC_017533 | CNOT6                | chr5:179921416-18000535  | 4.83437  | 5.49767   | 0.185494 | 0.811724 |
| XLOC_023025 | POLE3                | chr9:116169517-11619187  | 40.902   | 46.5162   | 0.185562 | 0.793038 |
| XLOC_000861 | TIPRL                | chr1:168148170-16817135  | 9.7713   | 11.1126   | 0.185573 | 0.813924 |
| XLOC_018241 | PFDN6                | chr6:33257373-33258711   | 96.7168  | 109.994   | 0.185591 | 0.799255 |
| XLOC_011379 | TIMM44               | chr19:7991602-8008708    | 27.6752  | 31.4749   | 0.185607 | 0.802508 |
| XLOC_009473 | HES7                 | chr17:8023907-8027410    | 11.7716  | 13.3879   | 0.185619 | 0.854644 |
| XLOC_013330 | PLEKHM3              | chr2:208686011-20889028  | 0.32778  | 0.372797  | 0.185664 | 0.912308 |
| XLOC_019197 | THBS2                | chr6:169615874-16965413  | 0.337889 | 0.384307  | 0.185711 | 0.932638 |
| XLOC_014490 | ZNRF3                | chr22:29279754-29453476  | 1.4595   | 1.66005   | 0.185753 | 0.872554 |
| XLOC_003133 | LOC100505933         | chr10:111705316-1118953  | 0.041587 | 0.0473023 | 0.185778 | 1        |
| XLOC_023608 | UTP14A               | chrX:129040096-12906373  | 9.87137  | 11.2281   | 0.185797 | 0.817735 |
| XLOC_021500 | POLR3D               | chr8:22102618-22108680   | 24.4263  | 27.7836   | 0.185801 | 0.812655 |
| XLOC_017638 | HMGCS1               | chr5:43287571-43313614   | 2.71268  | 3.08563   | 0.185846 | 0.828589 |
| XLOC_017267 | SRP19                | chr5:112196884-11225803  | 18.8179  | 21.407    | 0.185981 | 0.950684 |
| XLOC_017678 | TRIM23               | chr5:64885506-64920187   | 1.54797  | 1.76099   | 0.186009 | 0.926899 |
| XLOC_013177 | RND3                 | chr2:151324706-15134420  | 5.83504  | 6.63858   | 0.186131 | 0.833197 |
| XLOC_022969 | C9orf156             | chr9:100666771-10068485  | 5.71524  | 6.50279   | 0.186245 | 0.868469 |
| XLOC_018732 | ZNRD1-AS1            | chr6:29968787-30028961   | 0.517408 | 0.588754  | 0.186363 | 0.976618 |
| XLOC_003673 | GAL                  | chr11:68451982-68458643  | 134.982  | 153.596   | 0.186379 | 0.803764 |
| XLOC_003875 | SC5DL                | chr11:121163387-1211841  | 2.5169   | 2.86404   | 0.186405 | 0.826204 |
| XLOC_009351 | SLC16A3              | chr17:80186281-80197375  | 204.981  | 233.256   | 0.186421 | 0.80896  |
| XLOC_010028 | SLC38A10             | chr17:79218798-79269096  | 22.5369  | 25.6456   | 0.186423 | 0.802508 |
| XLOC_008815 | SPEM1                | chr17:7323678-7324951    | 0.566359 | 0.6445    | 0.186464 | 0.966946 |
| XLOC_019161 | RSPH3                | chr6:159398265-15942119  | 1.72731  | 1.96586   | 0.186632 | 0.913628 |
| XLOC_017100 | RAI14                | chr5:34656432-34832717   | 5.3421   | 6.07988   | 0.186633 | 0.806888 |
| XLOC_000498 | LRRC8B               | chr1:89990396-90063420   | 1.44262  | 1.64187   | 0.186652 | 0.844167 |
| XLOC_005605 | CCDC59               | chr12:82746082-82873016  | 18.8631  | 21.4706   | 0.1868   | 0.811195 |
| XLOC_006340 | FANCM                | chr14:45605135-45670093  | 0.437445 | 0.49792   | 0.186811 | 0.907657 |
| XLOC_000207 | HMGN2                | chr1:26798901-26803133   | 197.665  | 225.003   | 0.186886 | 0.806389 |
| XLOC_003132 | XPNP1                | chr10:111624523-1116833  | 30.2158  | 34.3977   | 0.187011 | 0.796838 |
| XLOC_007224 | TEX9                 | chr15:56657643-56757335  | 0.425974 | 0.484933  | 0.187022 | 0.976595 |
| XLOC_017955 | NKX2-5               | chr5:172659106-17266231  | 27.2037  | 30.9702   | 0.187076 | 0.830384 |
| XLOC_000820 | NIT1                 | chr1:161070345-16110247  | 30.5566  | 34.7873   | 0.187077 | 0.966946 |
| XLOC_020675 | LRWD1                | chr7:102105389-10211938  | 29.4016  | 33.474    | 0.187144 | 0.935279 |
| XLOC_017673 | DIMT1                | chr5:61684350-61699728   | 26.8265  | 30.5422   | 0.187145 | 0.80323  |
| XLOC_013194 | WDSUB1               | chr2:160092303-16014323  | 5.74406  | 6.53988   | 0.187192 | 0.849711 |
| XLOC_010183 | PIK3C3               | chr18:39535198-39661446  | 7.73793  | 8.81018   | 0.187223 | 0.810912 |
| XLOC_014136 | SOD1                 | chr21:33031934-33041243  | 332.827  | 378.97    | 0.187312 | 0.79799  |
| XLOC_006328 | LOC100129794         | chr14:37147125-37642998  | 1.14788  | 1.30711   | 0.187405 | 0.966946 |
| XLOC_008682 | TMEM170A             | chr16:75480922-75498584  | 5.0849   | 5.7905    | 0.187466 | 0.895818 |
| XLOC_020738 | CALU                 | chr7:128379345-12841584  | 28.2799  | 32.2054   | 0.187522 | 0.795292 |
| XLOC_010709 | ARMC6                | chr19:19144386-19168987  | 21.4179  | 24.3915   | 0.18756  | 0.804881 |
| XLOC_004699 | PEX5                 | chr12:7341758-7371169    | 30.4516  | 34.6801   | 0.187586 | 0.795219 |
| XLOC_005516 | WIBG                 | chr12:56295196-56321697  | 16.4223  | 18.7028   | 0.187604 | 0.837677 |
| XLOC_015596 | HACL1                | chr3:15602239-15643130   | 11.7483  | 13.38     | 0.187626 | 0.815945 |
| XLOC_008789 | RABEP1               | chr17:5185557-5289132    | 7.49274  | 8.53358   | 0.187658 | 0.801067 |
| XLOC_010259 | CTDP1                | chr18:77439800-77514510  | 11.2779  | 12.8448   | 0.187684 | 0.823458 |
| XLOC_000292 | MANEAL               | chr1:38259773-38267278   | 10.7838  | 12.2832   | 0.187819 | 0.817762 |
| XLOC_022157 | DERL1                | chr8:124025403-12405466  | 30.1517  | 34.3445   | 0.187836 | 0.788214 |
| XLOC_023793 | ACOT9                | chrX:23721776-23761407   | 23.9455  | 27.2765   | 0.187902 | 0.797849 |
| XLOC_005450 | TFCP2                | chr12:51487538-51566926  | 2.66804  | 3.03943   | 0.18802  | 0.850906 |
| XLOC_018658 | TPMT                 | chr6:18128544-18155374   | 4.30093  | 4.89973   | 0.188054 | 0.831797 |
| XLOC_002449 | MAMPK8               | chr10:49609686-49643183  | 7.51345  | 8.55985   | 0.188111 | 0.851362 |
| XLOC_008876 | UBB                  | chr17:16284366-16286054  | 1035.83  | 1180.1    | 0.188118 | 0.819258 |

|             |              |                         |           |           |          |          |
|-------------|--------------|-------------------------|-----------|-----------|----------|----------|
| XLOC_007562 | SLC30A4      | chr15:45774679-45848928 | 0.112607  | 0.128292  | 0.188128 | 1        |
| XLOC_000597 | CAPZA1       | chr1:113162074-11321424 | 72.1928   | 82.2543   | 0.188236 | 0.799327 |
| XLOC_008796 | C17orf100    | chr17:6555058-6556617   | 0.515092  | 0.586886  | 0.188249 | 0.955709 |
| XLOC_017557 | LPCAT1       | chr5:1461541-1524076    | 26.2899   | 29.956    | 0.188335 | 0.793371 |
| XLOC_023137 | REXO4        | chr9:136243283-13632450 | 67.528    | 76.9559   | 0.188548 | 0.80896  |
| XLOC_015421 | GFM1         | chr3:158362316-15841036 | 7.32152   | 8.34394   | 0.188585 | 0.850795 |
| XLOC_009508 | ELAC2        | chr17:12692828-12921381 | 27.3058   | 31.1217   | 0.188714 | 0.812587 |
| XLOC_012375 | MERTK        | chr2:112656190-11278694 | 0.886341  | 1.01033   | 0.188886 | 0.910396 |
| XLOC_018449 | KIAA1919     | chr6:111580481-11159026 | 0.547652  | 0.624264  | 0.188896 | 0.923433 |
| XLOC_013699 | SLC2A10      | chr20:45338278-45364985 | 2.30332   | 2.62587   | 0.18908  | 0.857467 |
| XLOC_022116 | COX6C        | chr8:100890222-10090624 | 359.856   | 410.256   | 0.189103 | 0.793371 |
| XLOC_019002 | NDUFAF4      | chr6:97337186-97345767  | 9.67983   | 11.0356   | 0.189105 | 0.807444 |
| XLOC_013516 | PCNA-AS1     | chr20:5095598-5107268   | 51.1921   | 58.3663   | 0.189216 | 0.980098 |
| XLOC_021733 | WDR67        | chr8:124084919-12416439 | 2.25588   | 2.57211   | 0.18926  | 0.865404 |
| XLOC_019102 | MAP3K5       | chr6:136878186-13711365 | 0.631899  | 0.720511  | 0.189326 | 0.906935 |
| XLOC_021430 | CLN8         | chr8:1711869-1734736    | 2.17065   | 2.47506   | 0.189337 | 0.842475 |
| XLOC_004333 | FOSL1        | chr11:65659691-65667997 | 327.072   | 372.945   | 0.189351 | 0.805637 |
| XLOC_012956 | GFPT1        | chr2:69546900-69614386  | 6.34032   | 7.23029   | 0.189498 | 0.797958 |
| XLOC_015278 | ADPRH        | chr3:119298522-11930879 | 0.810004  | 0.923735  | 0.189549 | 0.914484 |
| XLOC_012821 | ADCY3        | chr2:25013135-25142055  | 16.4783   | 18.7938   | 0.189692 | 0.853289 |
| XLOC_018533 | PEX3         | chr6:143771917-14381175 | 7.38267   | 8.42028   | 0.189726 | 0.812215 |
| XLOC_008238 | MON1B,SYCE1L | chr16:77224835-77246976 | 9.52411   | 10.863    | 0.189768 | 0.814226 |
| XLOC_004398 | FAM168A      | chr11:73117027-73309228 | 1.46842   | 1.67489   | 0.189797 | 0.924468 |
| XLOC_007859 | FAHD1        | chr16:1877224-1922179   | 14.255    | 16.261    | 0.189945 | 0.819258 |
| XLOC_003979 | NAP1L4       | chr11:2965659-3013607   | 45.6875   | 52.1196   | 0.190028 | 0.781725 |
| XLOC_004705 | NECAP1       | chr12:8234806-8250373   | 7.96604   | 9.0886    | 0.190196 | 0.814226 |
| XLOC_007485 | EMC7         | chr15:34376223-34394053 | 87.521    | 99.8571   | 0.190236 | 0.783224 |
| XLOC_001555 | LRP8         | chr1:53692563-53793821  | 2.45642   | 2.80286   | 0.190343 | 0.942519 |
| XLOC_013192 | ACVR1        | chr2:158592957-15873237 | 4.59076   | 5.23833   | 0.190372 | 0.83095  |
| XLOC_008264 | USP10        | chr16:84733554-84813527 | 25.3017   | 28.8713   | 0.1904   | 0.794333 |
| XLOC_005178 | BRI3BP       | chr12:125478193-1255103 | 13.5397   | 15.4513   | 0.190532 | 0.85843  |
| XLOC_006317 | AKAP6        | chr14:32798478-33302268 | 0.012461  | 0.0142207 | 0.190579 | 1        |
| XLOC_000669 | VPS45        | chr1:150039341-15011750 | 5.5851    | 6.37395   | 0.190604 | 0.829181 |
| XLOC_015419 | RSRC1        | chr3:157827840-15826262 | 3.65379   | 4.17018   | 0.190715 | 0.868469 |
| XLOC_013510 | PANK2        | chr20:3869485-3904502   | 13.7557   | 15.7002   | 0.190749 | 0.806459 |
| XLOC_002098 | ZNF281       | chr1:200375419-20037916 | 1.88492   | 2.15138   | 0.190765 | 0.873144 |
| XLOC_020383 | HDAC9        | chr7:18126571-19036992  | 5.44407   | 6.21425   | 0.190895 | 0.815133 |
| XLOC_015936 | RPN1         | chr3:128338812-12836971 | 82.863    | 94.5862   | 0.190901 | 0.796874 |
| XLOC_013804 | CSNK2A1      | chr20:463337-524482     | 36.9254   | 42.1499   | 0.190915 | 0.784181 |
| XLOC_014199 | RRP1         | chr21:45209417-45223983 | 47.7749   | 54.5351   | 0.190931 | 0.790283 |
| XLOC_020451 | YAE1D1       | chr7:39606002-39612480  | 11.0401   | 12.6033   | 0.191051 | 0.846681 |
| XLOC_013921 | PLAGL2       | chr20:30780306-30795546 | 4.6494    | 5.30797   | 0.191115 | 0.811598 |
| XLOC_009816 | HOXB4        | chr17:46652868-46655743 | 5.83713   | 6.66426   | 0.191184 | 0.868757 |
| XLOC_016282 | KLHL5        | chr4:39046450-39127853  | 1.343     | 1.53338   | 0.191258 | 0.844123 |
| XLOC_018103 | HIST1H2AE    | chr6:26217147-26217711  | 11.7833   | 13.4538   | 0.19128  | 0.913628 |
| XLOC_017254 | FER          | chr5:108083522-10852337 | 0.946366  | 1.08057   | 0.191321 | 0.907657 |
| XLOC_005902 | RNASEH2B     | chr13:51456514-51544596 | 19.8516   | 22.6669   | 0.191333 | 0.805637 |
| XLOC_018066 | GMPR         | chr6:16238810-16295780  | 15.5085   | 17.7082   | 0.191358 | 0.815706 |
| XLOC_003735 | C11orf82     | chr11:82612736-82645699 | 2.03731   | 2.32628   | 0.191359 | 0.857131 |
| XLOC_014153 | LINC00310    | chr21:35552977-35562220 | 0.135171  | 0.15435   | 0.191421 | 1        |
| XLOC_013463 | PASK         | chr2:242045513-24208939 | 1.91264   | 2.18418   | 0.191527 | 0.870747 |
| XLOC_017023 | CASP3        | chr4:185548849-18557062 | 5.80489   | 6.62919   | 0.191563 | 0.829181 |
| XLOC_008693 | GCSH         | chr16:81115551-81129980 | 11.8829   | 13.5708   | 0.191622 | 0.814226 |
| XLOC_009278 | ARMC7        | chr17:73106081-73127890 | 8.13982   | 9.29612   | 0.191633 | 0.962922 |
| XLOC_020713 | NAA38        | chr7:117824085-11784409 | 4.04455   | 4.6196    | 0.191788 | 0.78806  |
| XLOC_003441 | NR1H3        | chr11:47260852-47290584 | 3.39568   | 3.87847   | 0.191788 | 0.966946 |
| XLOC_010512 | SAFB         | chr19:5623045-5668489   | 35.6155   | 40.6798   | 0.191807 | 0.788211 |
| XLOC_013068 | TXNDC9       | chr2:99935486-99952860  | 3.81923   | 4.36237   | 0.191828 | 0.872554 |
| XLOC_014590 | XRCC6        | chr22:42017294-42060052 | 196.422   | 224.359   | 0.191849 | 0.79485  |
| XLOC_006395 | MTHFD1       | chr14:64854758-64926725 | 30.7167   | 35.0868   | 0.191905 | 0.781066 |
| XLOC_020459 | HECW1        | chr7:43152197-43602938  | 0.0414764 | 0.0473773 | 0.191905 | 1        |
| XLOC_001228 | WRAP73       | chr1:3547330-3566671    | 24.8032   | 28.336    | 0.192109 | 0.806843 |
| XLOC_021622 | MCMDC2       | chr8:67782983-67837777  | 0.175127  | 0.200075  | 0.192134 | 1        |
| XLOC_018894 | SLC35B2      | chr6:44221837-44225283  | 42.06     | 48.0526   | 0.192167 | 0.771183 |
| XLOC_001365 | C1orf63      | chr1:25568739-25573985  | 11.6764   | 13.3402   | 0.192175 | 0.844458 |
| XLOC_001040 | ATF3         | chr1:212738675-21279411 | 18.1332   | 20.7177   | 0.192236 | 0.811389 |
| XLOC_000639 | L1X1L        | chr1:145477084-14549909 | 7.93241   | 9.06356   | 0.192319 | 0.860562 |
| XLOC_017616 | NUP155       | chr5:37291940-37371197  | 5.41954   | 6.19299   | 0.192467 | 0.798172 |
| XLOC_001454 | LOC728431    | chr1:37920479-37940044  | 0.686103  | 0.784025  | 0.192474 | 0.954559 |
| XLOC_021348 | SLC37A3      | chr7:140033551-14009831 | 9.7777    | 11.1732   | 0.192475 | 0.797744 |
| XLOC_020861 | ABCB8        | chr7:150725509-15074486 | 4.79392   | 5.47821   | 0.192499 | 0.827184 |
| XLOC_002900 | C10orf25     | chr10:45493145-45500777 | 0.39274   | 0.44885   | 0.192657 | 0.983049 |
| XLOC_003646 | ACTN3        | chr11:66313865-66330799 | 0.0297562 | 0.0340101 | 0.192774 | 1        |
| XLOC_018853 | CKNK5        | chr6:39156746-39197251  | 4.4725    | 5.11197   | 0.1928   | 0.833197 |
| XLOC_000323 | YBX1         | chr1:43148065-43168020  | 621.327   | 710.184   | 0.192842 | 0.806008 |
| XLOC_008517 | DCTPP1       | chr16:30435018-30441373 | 97.858    | 111.857   | 0.192893 | 0.786806 |
| XLOC_012828 | KIF3C        | chr2:26149454-26205443  | 2.58719   | 2.95737   | 0.192929 | 0.845125 |
| XLOC_005096 | ATP2A2       | chr12:110719031-1107888 | 14.2192   | 16.2544   | 0.192995 | 0.778665 |
| XLOC_008732 | CHMP1A       | chr16:89710838-89736866 | 46.6366   | 53.3204   | 0.193224 | 0.801862 |

|             |                        |                          |           |           |          |           |
|-------------|------------------------|--------------------------|-----------|-----------|----------|-----------|
| XLOC_000322 | PPIH                   | chr1:43124047-43142429   | 82.9601   | 94.8516   | 0.193253 | 0.781336  |
| XLOC_006065 | MINOS1P1               | chr13:33006929-33112936  | 0.0176318 | 0.0201596 | 0.193282 | 1         |
| XLOC_016955 | SLC10A7                | chr4:147175136-14744312: | 0.564443  | 0.645372  | 0.193303 | 0.914351  |
| XLOC_017566 | MED10                  | chr5:6372038-6378639     | 45.7042   | 52.2582   | 0.193331 | 0.783033  |
| XLOC_021092 | PMS2P4                 | chr7:66741117-66767429   | 1.36939   | 1.56588   | 0.193448 | 0.952216  |
| XLOC_018172 | ABCF1                  | chr6:30539169-30559309   | 14.0126   | 16.0235   | 0.193465 | 0.786271  |
| XLOC_000449 | GADD45A                | chr1:68150859-68154021   | 130.745   | 149.511   | 0.193496 | 0.790881  |
| XLOC_018049 | PAK1IP1                | chr6:10695187-10709970   | 14.2371   | 16.2814   | 0.193575 | 0.806993  |
| XLOC_005199 | EP400NL                | chr12:132568827-1326108: | 0.291055  | 0.332849  | 0.193577 | 1         |
| XLOC_023102 | WDR34                  | chr9:131314836-13141912: | 137.915   | 157.74    | 0.193773 | 0.919413  |
| XLOC_005196 | PUS1                   | chr12:132413744-1324284: | 34.8141   | 39.8239   | 0.19396  | 0.794296  |
| XLOC_005399 | SLC38A1                | chr12:46576840-46663208  | 29.1177   | 33.3094   | 0.194036 | 0.79185   |
| XLOC_012091 | TMEM214                | chr2:27255773-27264565   | 27.969    | 32.0004   | 0.194261 | 0.774943  |
| XLOC_020410 | HOXA-AS4               | chr7:27202056-27219880   | 0.759811  | 0.869346  | 0.19429  | 0.97314   |
| XLOC_020649 | MEPCE                  | chr7:99998494-100031749  | 53.6959   | 61.4421   | 0.194415 | 0.790283  |
| XLOC_001795 | SF3B4                  | chr1:149895208-14990014: | 60.3509   | 69.0583   | 0.194438 | 0.771666  |
| XLOC_004986 | RAB3IP                 | chr12:70132630-70216984  | 3.20022   | 3.66226   | 0.194562 | 0.785439  |
| XLOC_021254 | SYPL1                  | chr7:105730813-10575309: | 44.605    | 51.0459   | 0.19459  | 0.767826  |
| XLOC_020332 | GET4                   | chr7:916190-936071       | 42.3425   | 48.4575   | 0.194614 | 0.780349  |
| XLOC_005378 | YARS2                  | chr12:32899477-32908887  | 31.46     | 36.0052   | 0.194686 | 0.778996  |
| XLOC_019091 | SLC18B1                | chr6:133090506-13311974: | 9.05924   | 10.3688   | 0.194787 | 0.806888  |
| XLOC_013839 | RNF24                  | chr20:3912068-3996216    | 2.97225   | 3.40197   | 0.194815 | 0.857104  |
| XLOC_004547 | SIK3                   | chr11:116714117-1169689: | 2.83853   | 3.24894   | 0.194827 | 0.819681  |
| XLOC_005812 | C1QTNF9B-AS1           | chr13:24304327-24471125  | 0.25891   | 0.296356  | 0.19488  | 1         |
| XLOC_013823 | IDH3B                  | chr20:2639040-2644865    | 45.014    | 51.5244   | 0.194884 | 0.786044  |
| XLOC_009902 | FTS3J                  | chr17:61896792-61909387  | 14.757    | 16.8934   | 0.195057 | 0.936321  |
| XLOC_017952 | SH3PXD2B               | chr5:171760502-17188152: | 3.48067   | 3.98462   | 0.195079 | 0.807124  |
| XLOC_009229 | PSMCS                  | chr17:61896792-61909387  | 85.3514   | 97.7098   | 0.195088 | 0.852072  |
| XLOC_005390 | PUS7L                  | chr12:44122409-44152620  | 1.90675   | 2.18288   | 0.195115 | 0.865814  |
| XLOC_000113 | KAZN                   | chr1:14925212-15478960   | 5.35145   | 6.1269    | 0.195226 | 0.831797  |
| XLOC_016591 | CDKN2AIP               | chr4:184365788-18436904: | 5.31247   | 6.08241   | 0.19526  | 0.834145  |
| XLOC_014839 | RPS19BP1               | chr22:39925097-39928860  | 127.618   | 146.127   | 0.195384 | 0.776703  |
| XLOC_013705 | ARFGEF2                | chr20:47538274-47653230  | 1.56033   | 1.78666   | 0.195408 | 0.823658  |
| XLOC_015067 | EXOSC7                 | chr3:45017740-45054158   | 64.7136   | 74.1007   | 0.195418 | 0.7741    |
| XLOC_015458 | ACTL6A                 | chr3:179280707-17930619: | 27.5237   | 31.5187   | 0.195534 | 0.786575  |
| XLOC_009275 | ICT1                   | chr17:73008779-73017356  | 44.7945   | 51.2999   | 0.195633 | 0.793371  |
| XLOC_018091 | TRIM38                 | chr6:25962916-25987557   | 1.94475   | 2.22721   | 0.195651 | 0.833863  |
| XLOC_000924 | NPL                    | chr1:182758583-18279951: | 0.850106  | 0.973581  | 0.195659 | 0.921047  |
| XLOC_005936 | UCHL3                  | chr13:76123615-76180156  | 44.8703   | 51.392    | 0.195783 | 0.78079   |
| XLOC_000674 | MRPS21                 | chr1:150266268-15028081: | 346.562   | 396.945   | 0.195824 | 0.781057  |
| XLOC_011522 | BST2                   | chr19:17513754-17516384  | 395.163   | 452.634   | 0.195896 | 0.78806   |
| XLOC_002769 | INPP5A                 | chr10:134351352-1345969: | 6.26817   | 7.1802    | 0.19598  | 0.823658  |
| XLOC_014511 | SMTN                   | chr22:31477281-31500610  | 81.2963   | 93.1312   | 0.196075 | 0.775259  |
| XLOC_002536 | PPIF                   | chr10:81107219-81115089  | 57.5944   | 65.9844   | 0.196195 | 0.778305  |
| XLOC_002263 | EROL1B                 | chr1:236378421-23644533: | 1.44608   | 1.65675   | 0.196213 | 0.849948  |
| XLOC_011333 | DPP9                   | chr19:4675243-4723855    | 15.4989   | 17.7578   | 0.196282 | 0.782765  |
| XLOC_022047 | TCEB1                  | chr8:74857372-74884522   | 59.1813   | 67.8095   | 0.196346 | 0.787528  |
| XLOC_020932 | RPA3                   | chr7:7676574-7918851     | 17.4849   | 20.0386   | 0.19667  | 0.832742  |
| XLOC_022134 | LRP12                  | chr8:105501458-10560125: | 3.18963   | 3.65553   | 0.196693 | 0.81526   |
| XLOC_007405 | BLM                    | chr15:91260578-91358686  | 2.28335   | 2.61688   | 0.196696 | 0.840803  |
| XLOC_021084 | ERV3-1,ZNF117          | chr7:64434829-64467124   | 0.745245  | 0.854153  | 0.19678  | 0.913628  |
| XLOC_000034 | RER1                   | chr1:2323213-2344010     | 35.445    | 40.6258   | 0.196815 | 0.820633  |
| XLOC_002212 | PYCR2                  | chr1:226107576-22611204: | 60.8536   | 69.751    | 0.196872 | 0.774943  |
| XLOC_017193 | HMGCR                  | chr5:74632992-74657926   | 5.02904   | 5.76464   | 0.196948 | 0.79544   |
| XLOC_017283 | SRFBP1                 | chr5:121297655-12136429: | 18.3961   | 21.0871   | 0.196963 | 0.778996  |
| XLOC_009571 | PIGS                   | chr17:26880405-26898887  | 18.6883   | 21.4251   | 0.197163 | 0.1977374 |
| XLOC_016574 | CLCN3                  | chr4:170541671-17064433: | 6.30127   | 7.22442   | 0.19724  | 0.783608  |
| XLOC_006016 | PSPC1                  | chr13:20248891-20357159  | 18.614    | 21.344    | 0.197439 | 0.797744  |
| XLOC_015687 | CCDC51                 | chr3:48473579-48481529   | 15.7232   | 18.0299   | 0.197498 | 0.808353  |
| XLOC_008303 | SPIRE2                 | chr16:89894906-89937727  | 8.59532   | 9.85635   | 0.197503 | 0.811423  |
| XLOC_007653 | LCTL                   | chr15:66797430-66857835  | 0.458386  | 0.52564   | 0.197512 | 0.985921  |
| XLOC_000026 | ATAD3A                 | chr1:1447522-1470067     | 49.2847   | 56.5203   | 0.19763  | 0.778344  |
| XLOC_017866 | PCDH1                  | chr5:141232672-14125794: | 4.97269   | 5.70326   | 0.197761 | 0.81665   |
| XLOC_017390 | RELL2                  | chr5:141016516-14103098: | 6.6641    | 7.64325   | 0.197777 | 0.959465  |
| XLOC_015377 | ATP1B3                 | chr3:141595469-14164538: | 86.0518   | 98.6959   | 0.197785 | 0.766627  |
| XLOC_009901 | CCDC47                 | chr17:61822609-61851088  | 19.8336   | 22.7491   | 0.197863 | 0.766445  |
| XLOC_010198 | SKA1                   | chr18:47901391-47920538: | 9.04346   | 10.3751   | 0.198175 | 0.806008  |
| XLOC_020665 | SERPINE1               | chr7:100770369-10078254: | 380.788   | 436.869   | 0.198211 | 0.799188  |
| XLOC_005137 | COX6A1                 | chr12:120875892-1208785: | 649.128   | 744.843   | 0.198434 | 0.777215  |
| XLOC_006111 | LCP1                   | chr13:46700057-46756459  | 84.4904   | 96.9519   | 0.198483 | 0.775729  |
| XLOC_009130 | GOSR2                  | chr17:45000485-45018733  | 6.4358    | 7.38519   | 0.198516 | 0.837677  |
| XLOC_016693 | GPR125                 | chr4:22388996-22517677   | 4.81096   | 5.52079   | 0.19855  | 0.800271  |
| XLOC_001366 | RHCE                   | chr1:25664788-25747363   | 0.267408  | 0.306865  | 0.198562 | 1         |
| XLOC_014476 | CRYBB2                 | chr22:25615611-25627836  | 7.04757   | 8.08782   | 0.198625 | 0.890355  |
| XLOC_002660 | NOLC1                  | chr10:103911932-1039236: | 23.0105   | 26.4071   | 0.198634 | 0.767868  |
| XLOC_000536 | CDC14A                 | chr1:100818022-10098583: | 0.910593  | 1.04502   | 0.19865  | 0.885624  |
| XLOC_001075 | SRP9                   | chr1:225965514-22597816: | 118.138   | 135.59    | 0.198782 | 0.768425  |
| XLOC_004353 | PPP1CA                 | chr11:67159422-67169376  | 203.044   | 233.04    | 0.198786 | 0.780656  |
| XLOC_006282 | BCL2L2,BCL2L2-PABPN1,P | chr14:23775970-23795394  | 112.852   | 129.527   | 0.198825 | 0.790956  |

|              |                   |                          |           |           |          |          |
|--------------|-------------------|--------------------------|-----------|-----------|----------|----------|
| XLOC_021422  | NCAPG2            | chr7:158424002-158497520 | 9.96461   | 11.4376   | 0.198901 | 0.771346 |
| XLOC_016557  | FNIP2             | chr4:159690181-159956333 | 0.326056  | 0.374261  | 0.198924 | 0.920064 |
| XLOC_000973  | ELF3              | chr1:201979689-201986315 | 0.0570453 | 0.0654798 | 0.198941 | 1        |
| XLOC_003237  | TSPAN4            | chr11:842823-867116      | 49.8047   | 57.1692   | 0.198955 | 0.774949 |
| XLOC_011034  | BCL2L12           | chr19:50162825-50177173  | 40.0733   | 45.9991   | 0.198964 | 0.914503 |
| XLOC_000146  | PQLC2             | chr1:19638739-19655794   | 26.7286   | 30.6834   | 0.199071 | 0.791478 |
| XLOC_003634  | BANF1             | chr11:65764015-65771617  | 248.333   | 285.077   | 0.199074 | 0.80121  |
| XLOC_015957  | TOPBP1            | chr3:133319448-133380737 | 6.43996   | 7.39383   | 0.199271 | 0.776743 |
| XLOC_017349  | PAIP2             | chr5:138677518-138719035 | 45.8652   | 52.6629   | 0.199389 | 0.762454 |
| XLOC_001110  | KCNK1             | chr1:233749749-233808255 | 13.8799   | 15.9373   | 0.199411 | 0.786957 |
| XLOC_018519  | TNFAIP3           | chr6:138144806-138204457 | 0.692454  | 0.795178  | 0.199558 | 0.908114 |
| XLOC_012782  | ADAM17            | chr2:9629410-9695917     | 3.18934   | 3.66293   | 0.199741 | 0.827718 |
| XLOC_018612  | GMDS              | chr6:1624034-2245868     | 19.9155   | 22.8747   | 0.199861 | 0.794777 |
| XLOC_010394  | VPS4B             | chr18:61056424-61089752  | 5.712     | 6.5618    | 0.200095 | 0.801827 |
| XLOC_010861  | PSMC4             | chr19:40476911-40487671  | 45.2991   | 52.0391   | 0.200114 | 0.756026 |
| XLOC_002221  | JMJD4             | chr1:227916239-227968937 | 16.583    | 19.0517   | 0.200219 | 0.918342 |
| XLOC_008475  | NDUFAB1           | chr16:23592334-23607639  | 165.317   | 189.931   | 0.200233 | 0.755939 |
| XLOC_011943  | LILRA6            | chr19:54740468-54746724  | 0.0379278 | 0.0435769 | 0.200309 | 1        |
| XLOC_023136  | SURF4             | chr9:136228339-136242970 | 161.538   | 185.599   | 0.200322 | 0.772073 |
| XLOC_008795  | TXNDC17           | chr17:6481644-6554954    | 32.0121   | 36.7804   | 0.200322 | 0.816305 |
| XLOC_003694  | IL18BB            | chr11:71709957-71823822  | 1.17874   | 1.35433   | 0.200342 | 0.984917 |
| XLOC_010964  | SAE1              | chr19:47634079-47713893  | 65.1252   | 74.8352   | 0.200502 | 0.772137 |
| XLOC_010922  | PVR               | chr19:45147097-45169428  | 16.1135   | 18.5183   | 0.200684 | 0.772137 |
| XLOC_022707  | CBWD1             | chr9:121037-179075       | 9.14672   | 10.5125   | 0.20078  | 0.807058 |
| XLOC_018464  | KPNA5             | chr6:117002366-117063030 | 0.643463  | 0.739585  | 0.200858 | 0.919892 |
| XLOC_009039  | PSMD3             | chr17:38137020-38154213  | 84.4168   | 97.0293   | 0.200889 | 0.762454 |
| XLOC_005880  | GTF2F2            | chr13:45694630-45858239  | 23.0082   | 26.4472   | 0.200963 | 0.776981 |
| XLOC_008020  | ATXN2L            | chr16:28834368-28848558  | 48.1863   | 55.3885   | 0.200965 | 0.757982 |
| XLOC_002903  | MARCH8            | chr10:45952816-46090354  | 0.735721  | 0.845714  | 0.201012 | 0.926225 |
| XLOC_016165  | TMEM175           | chr4:926261-952443       | 7.11588   | 8.18008   | 0.201073 | 0.858563 |
| XLOC_023330  | TSPAN7            | chrX:38420730-38548172   | 0.679889  | 0.781583  | 0.2011   | 0.933023 |
| XLOC_002484  | HNRNPH3           | chr10:70042416-70102953  | 36.2905   | 41.7205   | 0.201164 | 0.765568 |
| XLOC_020788  | NDUFB2            | chr7:140395135-140406444 | 363.68    | 418.124   | 0.201258 | 0.766627 |
| XLOC_006822  | WDHD1             | chr14:55405655-55493819  | 2.41333   | 2.77473   | 0.201325 | 0.809136 |
| XLOC_002331  | RBM17             | chr10:6130948-6159422    | 34.2871   | 39.4227   | 0.201361 | 0.767585 |
| XLOC_012918  | SMEK2             | chr2:55775513-55844796   | 6.61514   | 7.60706   | 0.201567 | 0.773641 |
| XLOC_004516  | EXPH5             | chr11:108376157-10846437 | 0.254578  | 0.292752  | 0.201567 | 1        |
| XLOC_015151  | IL17RB            | chr3:53880576-53899827   | 3.00743   | 3.45891   | 0.201784 | 0.863051 |
| XLOC_018397  | MRAP2             | chr6:84743419-84800605   | 1.26795   | 1.4583    | 0.201784 | 0.90316  |
| XLOC_018756  | ATP6V1G2,DDX39B   | chr6:31496738-31514625   | 145.798   | 167.687   | 0.201796 | 0.764707 |
| XLOC_000859  | MPZL1             | chr1:167691186-167761155 | 14.4333   | 16.6011   | 0.20188  | 0.753531 |
| XLOC_010258  | NFATC1            | chr18:77155771-77289323  | 3.10521   | 3.57162   | 0.201891 | 0.865541 |
| XLOC_012755  | ATG4B             | chr2:242577026-242613277 | 23.9466   | 27.5455   | 0.201994 | 0.75896  |
| XLOC_023345  | RP2               | chrX:46696346-46741791   | 1.17119   | 1.34722   | 0.202009 | 0.874082 |
| XLOC_017288  | SNX24             | chr5:122181159-122344907 | 11.2987   | 12.997    | 0.202026 | 0.799188 |
| XLOC_000482  | RPF1              | chr1:84944919-84972262   | 19.856    | 22.8406   | 0.202028 | 0.935939 |
| XLOC_001263  | SRM               | chr1:11114648-11120091   | 163.028   | 187.556   | 0.202199 | 0.75896  |
| XLOC_002531  | DLGS-AS1          | chr10:79686569-79689583  | 0.804281  | 0.925339  | 0.202282 | 0.914199 |
| XLOC_018493  | L3MBTL3           | chr6:130339727-130462594 | 1.0901    | 1.25418   | 0.202287 | 0.869771 |
| XLOC_000341  | DPH2              | chr1:44435652-44439043   | 20.7484   | 23.8723   | 0.202339 | 0.773127 |
| XLOC_007394  | TICRR             | chr15:90118817-90198682  | 3.49327   | 4.01936   | 0.202389 | 0.877191 |
| XLOC_015378  | PLS1              | chr3:142315228-142432505 | 3.27042   | 3.76296   | 0.202392 | 0.807864 |
| XLOC_0021633 | RDH10             | chr8:74206836-74237520   | 4.16934   | 4.79743   | 0.202441 | 0.81082  |
| XLOC_016820  | SCD5              | chr4:83550689-83720010   | 13.962    | 16.0655   | 0.202456 | 0.771544 |
| XLOC_015367  | MRPS22            | chr3:139062860-139075887 | 42.2064   | 48.565    | 0.202457 | 0.762225 |
| XLOC_016601  | TLR3              | chr4:186990308-187006257 | 0.198973  | 0.228955  | 0.20249  | 1        |
| XLOC_022500  | FAM206A           | chr9:111696672-111703237 | 18.003    | 20.716    | 0.202514 | 0.767103 |
| XLOC_010637  | CD97              | chr19:14491955-14519537  | 24.8243   | 28.5659   | 0.202542 | 0.762454 |
| XLOC_012808  | SDC1              | chr2:20400557-20425194   | 24.3044   | 27.97     | 0.202663 | 0.761735 |
| XLOC_013317  | WDR12             | chr2:203745322-203776945 | 14.1994   | 16.3412   | 0.202681 | 0.766011 |
| XLOC_000662  | FAM91A2,LINC00623 | chr1:149576261-149672737 | 4.58046   | 5.27202   | 0.202863 | 0.896032 |
| XLOC_012199  | COMMD1            | chr2:62132802-62363205   | 24.2829   | 27.9512   | 0.202973 | 0.819258 |
| XLOC_022028  | COP5              | chr8:67955314-67974562   | 60.4214   | 69.5492   | 0.202975 | 0.751328 |
| XLOC_013546  | SEC23B            | chr20:18488187-18542059  | 10.8806   | 12.5245   | 0.203    | 0.77234  |
| XLOC_001864  | SLC39A1           | chr1:153931574-153950457 | 114.621   | 131.952   | 0.203142 | 0.88922  |
| XLOC_016511  | RAB33B            | chr4:140374960-140397065 | 1.3735    | 1.58158   | 0.203508 | 0.867513 |
| XLOC_008097  | PAPD5             | chr16:50186828-50269219  | 1.3874    | 1.5976    | 0.203523 | 0.814226 |
| XLOC_018300  | RPL7L1            | chr6:42847670-42854731   | 15.3983   | 17.7316   | 0.203549 | 0.80323  |
| XLOC_012584  | NDUFB3            | chr2:201936461-201950477 | 61.4098   | 70.7177   | 0.203601 | 0.760508 |
| XLOC_014667  | MICAL3            | chr22:18270415-18507325  | 3.66948   | 4.22579   | 0.203647 | 0.782228 |
| XLOC_011323  | SIRT6             | chr19:4174105-4182596    | 27.156    | 31.2747   | 0.203726 | 0.786575 |
| XLOC_023100  | TRUB2             | chr9:131071395-131084697 | 66.47     | 76.5554   | 0.203802 | 0.757896 |
| XLOC_014856  | CENPM             | chr22:42334740-42343148  | 34.0008   | 39.1663   | 0.204043 | 0.79485  |
| XLOC_022951  | FANCC             | chr9:97861335-98079991   | 3.28446   | 3.78344   | 0.204043 | 0.823658 |
| XLOC_005761  | RSRC2             | chr12:122989189-12301155 | 20.8679   | 24.039    | 0.204093 | 0.761735 |
| XLOC_002113  | PTPN7             | chr1:202116140-202130711 | 25.3297   | 29.1805   | 0.204173 | 0.75208  |
| XLOC_005408  | VDR               | chr12:48235319-48298814  | 1.35623   | 1.56249   | 0.204242 | 0.863259 |
| XLOC_000041  | ARHGEP16          | chr1:3371146-3397677     | 12.3755   | 14.2578   | 0.204265 | 0.789117 |
| XLOC_017453  | TTC1              | chr5:159436179-159492550 | 40.8509   | 47.0645   | 0.204271 | 0.758036 |

|              |           |                          |           |           |          |          |
|--------------|-----------|--------------------------|-----------|-----------|----------|----------|
| XLOC_017435  | MFAP3     | chr5:153418518-153437014 | 2.75572   | 3.17502   | 0.204338 | 0.806843 |
| XLOC_001350  | E2F2      | chr1:23832919-23857712   | 2.56341   | 2.95361   | 0.204416 | 0.827026 |
| XLOC_020494  | MRPS17    | chr7:56019610-56023033   | 62.9105   | 72.4879   | 0.20444  | 0.774623 |
| XLOC_017161  | SLC30A5   | chr5:68389775-68426899   | 5.37005   | 6.18836   | 0.204621 | 0.813829 |
| XLOC_017977  | DBN1      | chr5:176883613-176900694 | 99.7958   | 115.008   | 0.204682 | 0.753148 |
| XLOC_023355  | TIMP1     | chrX:47420498-47479256   | 522.462   | 602.173   | 0.204852 | 0.793408 |
| XLOC_016541  | MND1      | chr4:154265800-154336241 | 33.5083   | 38.6231   | 0.204947 | 0.780271 |
| XLOC_016603  | CYP4V2    | chr4:187112673-187134617 | 0.938588  | 1.08192   | 0.205024 | 0.877159 |
| XLOC_001659  | DNTTIP2   | chr1:94335013-94344762   | 16.8326   | 19.4051   | 0.205174 | 0.755527 |
| XLOC_021855  | PPP1R3B   | chr8:8993763-9009152     | 15.8194   | 18.2382   | 0.20527  | 0.760508 |
| XLOC_009103  | TMUB2     | chr17:42264353-42269099  | 10.9578   | 12.6339   | 0.205346 | 0.799255 |
| XLOC_011404  | ZNF562    | chr19:9759337-9785776    | 3.19029   | 3.6787    | 0.205507 | 0.774623 |
| XLOC_017985  | NHP2      | chr5:177576464-177580961 | 227.631   | 262.519   | 0.205722 | 0.749883 |
| XLOC_000307  | SMAP2     | chr1:40839377-40888998   | 14.6594   | 16.9068   | 0.205785 | 0.771117 |
| XLOC_0011457 | TNPO2     | chr19:12810007-12834810  | 12.7475   | 14.7025   | 0.205845 | 0.760829 |
| XLOC_002490  | DDX21     | chr10:70715878-70744825  | 24.2734   | 27.9966   | 0.205877 | 0.758132 |
| XLOC_022567  | RALGPS1   | chr9:129677052-129985444 | 0.875739  | 1.01022   | 0.206101 | 0.917325 |
| XLOC_020902  | MAD1L1    | chr7:1855427-2272583     | 8.67177   | 10.0043   | 0.206218 | 0.792555 |
| XLOC_005410  | SENP1     | chr12:48436680-48540187  | 3.10947   | 3.58742   | 0.206278 | 0.972601 |
| XLOC_002071  | ARPC5     | chr1:183595327-183605076 | 29.0386   | 33.5025   | 0.2063   | 0.749335 |
| XLOC_009051  | KRTAP4-7  | chr17:39240458-39241396  | 0.266367  | 0.307347  | 0.206453 | 1        |
| XLOC_022825  | HINT2     | chr9:35812956-35815042   | 17.3553   | 20.0262   | 0.206508 | 0.851868 |
| XLOC_016253  | LAP3      | chr4:17578926-17609590   | 24.046    | 27.7473   | 0.206548 | 0.750689 |
| XLOC_016786  | ANKRD17   | chr4:73940501-74124502   | 5.29837   | 6.11423   | 0.206622 | 0.747687 |
| XLOC_001540  | DMRTA2    | chr1:50883222-50889119   | 6.39792   | 7.38309   | 0.206623 | 0.838876 |
| XLOC_012532  | HOXD1     | chr2:177037923-177055631 | 0.127917  | 0.147627  | 0.206743 | 1        |
| XLOC_001099  | GALNT1    | chr1:230202955-230417871 | 8.86276   | 10.229    | 0.206837 | 0.764908 |
| XLOC_008675  | MLKL2     | chr16:74705752-74734789  | 6.68268   | 7.71289   | 0.206844 | 0.815706 |
| XLOC_013637  | RPN2      | chr20:35729628-35870025  | 84.0589   | 97.0207   | 0.206892 | 0.747687 |
| XLOC_003582  | FERMT3    | chr11:63974151-63993726  | 0.37763   | 0.435868  | 0.206917 | 0.985921 |
| XLOC_018060  | NOL7      | chr6:13615558-13621127   | 109.065   | 125.886   | 0.20693  | 0.749584 |
| XLOC_011210  | ZNF71     | chr19:57106663-57135544  | 3.88814   | 4.488     | 0.206993 | 0.837208 |
| XLOC_013961  | TTI1      | chr20:36611422-36661833  | 5.27735   | 6.09197   | 0.207097 | 0.781066 |
| XLOC_017516  | TMED9     | chr5:177019212-177023095 | 180.032   | 207.827   | 0.207129 | 0.754753 |
| XLOC_009979  | MRPL38    | chr17:73894723-73901181  | 94.41     | 108.994   | 0.207234 | 0.746953 |
| XLOC_002797  | TUBAL3    | chr10:5435060-5446793    | 0.915661  | 1.0572    | 0.207361 | 0.923894 |
| XLOC_018056  | HIVEP1    | chr6:12012723-12165232   | 0.209205  | 0.241549  | 0.207398 | 1        |
| XLOC_023091  | DPM2      | chr9:130697373-130700763 | 140.672   | 162.428   | 0.207468 | 0.749584 |
| XLOC_015202  | ARL13B    | chr3:93698982-93774522   | 0.701101  | 0.80955   | 0.207498 | 0.897007 |
| XLOC_013956  | RBL1      | chr20:35626177-35724410  | 0.587017  | 0.677843  | 0.207549 | 0.894299 |
| XLOC_008554  | SHCBP1    | chr16:46614467-46655311  | 5.3586    | 6.18792   | 0.2076   | 0.778392 |
| XLOC_012202  | EHBP1     | chr2:62909985-63275656   | 2.17008   | 2.50593   | 0.207601 | 0.81082  |
| XLOC_008391  | ADCY9     | chr16:4012649-4166186    | 1.34551   | 1.55392   | 0.207758 | 0.845974 |
| XLOC_001080  | PSEN2     | chr1:227058272-227083804 | 5.81212   | 6.71277   | 0.207844 | 0.827184 |
| XLOC_009530  | PEMT      | chr17:17408876-17495017  | 65.3231   | 75.4535   | 0.207995 | 0.759977 |
| XLOC_007604  | ADAM10    | chr15:58888509-59042177  | 2.43542   | 2.81312   | 0.208002 | 0.817735 |
| XLOC_013346  | BARD1     | chr2:215593274-215674421 | 0.220377  | 0.254565  | 0.208059 | 1        |
| XLOC_018251  | UHRF1BP1  | chr6:34759793-34845291   | 3.20153   | 3.6983    | 0.208101 | 0.774943 |
| XLOC_006829  | EXOC5     | chr14:57669193-57756797  | 3.15429   | 3.64374   | 0.208105 | 0.829181 |
| XLOC_003845  | UBE4A     | chr11:118230295-11828953 | 5.86816   | 6.77876   | 0.208113 | 0.952216 |
| XLOC_019135  | KATNA1    | chr6:149916010-149969941 | 11.4963   | 13.2803   | 0.208115 | 0.77414  |
| XLOC_004480  | CCDC82    | chr11:96085928-96123083  | 1.94164   | 2.24315   | 0.208251 | 0.845974 |
| XLOC_006054  | SLC7A1    | chr13:30083550-30169825  | 16.492    | 19.0542   | 0.20834  | 0.76182  |
| XLOC_004082  | BTBD10    | chr11:13409555-13484838  | 9.72918   | 11.2407   | 0.208345 | 0.771183 |
| XLOC_010129  | SEH1L     | chr18:12947982-12987536  | 21.04     | 24.3129   | 0.208588 | 0.772924 |
| XLOC_012397  | ACTR3     | chr2:114647536-114716161 | 39.4542   | 45.5932   | 0.208638 | 0.738943 |
| XLOC_000677  | TARS2     | chr1:150459839-150480081 | 25.6499   | 29.641    | 0.208643 | 0.754842 |
| XLOC_015457  | MFN1      | chr3:179065479-179111001 | 5.76401   | 6.66108   | 0.208681 | 0.778996 |
| XLOC_000633  | SEC22B    | chr1:145096406-145116997 | 11.887    | 13.7375   | 0.208726 | 0.782917 |
| XLOC_002966  | DNA2      | chr10:70173820-70231730  | 1.03844   | 1.20018   | 0.208825 | 0.86815  |
| XLOC_004403  | C2CD3     | chr11:73745479-73882064  | 0.264777  | 0.306037  | 0.20893  | 1        |
| XLOC_001711  | WDR77     | chr1:111982511-112004521 | 14.651    | 16.9351   | 0.209015 | 0.954559 |
| XLOC_023786  | EIF1AX    | chrX:20142635-20159966   | 28.3394   | 32.7617   | 0.209202 | 0.737375 |
| XLOC_001729  | BCAS2     | chr1:115110180-115124261 | 22.8796   | 26.4501   | 0.20921  | 0.760508 |
| XLOC_004130  | IMMP1L    | chr11:31391376-31531169  | 4.55172   | 5.26228   | 0.209277 | 0.948088 |
| XLOC_008503  | HIRIP3    | chr16:30003641-30007417  | 9.60991   | 11.1102   | 0.209288 | 0.807864 |
| XLOC_008835  | TMEM88    | chr17:7758383-7759417    | 1.23504   | 1.42787   | 0.209301 | 0.957925 |
| XLOC_009634  | CCL3L1    | chr17:3452267-34524156   | 0.267415  | 0.309185  | 0.20939  | 1        |
| XLOC_015727  | MON1A     | chr3:49946301-49967445   | 10.2927   | 11.9026   | 0.209654 | 0.819083 |
| XLOC_007573  | GABPB1    | chr15:50569388-50650503  | 7.1519    | 8.27061   | 0.209667 | 0.859289 |
| XLOC_005834  | POMP      | chr13:29233140-29253093  | 83.2483   | 96.2815   | 0.209839 | 0.742065 |
| XLOC_001868  | TPM3      | chr1:154127779-154164601 | 67.1267   | 77.6458   | 0.21002  | 0.736403 |
| XLOC_012852  | TRMT61B   | chr2:29033699-29093175   | 8.38743   | 9.70197   | 0.210049 | 0.790283 |
| XLOC_021073  | CHCHD2    | chr7:56169265-56174187   | 748.882   | 866.269   | 0.210078 | 0.755364 |
| XLOC_000184  | NIPAL3    | chr1:24742244-24799473   | 5.90944   | 6.83596   | 0.210122 | 0.752508 |
| XLOC_021509  | LOC286059 | chr8:22844929-22941132   | 0.0467631 | 0.0540994 | 0.210241 | 1        |
| XLOC_016098  | ETV5      | chr3:185764105-185826901 | 12.5685   | 14.5412   | 0.210336 | 0.762454 |
| XLOC_006506  | IFI27     | chr14:94577078-94583033  | 40.1004   | 46.395    | 0.210354 | 0.794886 |
| XLOC_016995  | SH3RF1    | chr4:170015406-170192241 | 1.81829   | 2.10374   | 0.210374 | 0.820463 |

|             |               |                          |            |           |          |          |
|-------------|---------------|--------------------------|------------|-----------|----------|----------|
| XLOC_023323 | PRRG1         | chrX:37208527-37316548   | 1.99367    | 2.30678   | 0.210453 | 0.879994 |
| XLOC_016595 | CCDC111       | chr4:185570766-18565528  | 2.25769    | 2.61251   | 0.210587 | 0.961237 |
| XLOC_008628 | ENKD1         | chr16:67696849-67700628  | 1.91297    | 2.21389   | 0.210768 | 0.917363 |
| XLOC_017563 | IRX2          | chr5:2746278-2751769     | 7.44411    | 8.61514   | 0.210774 | 0.827919 |
| XLOC_018799 | HLA-DOB       | chr6:32780539-32784825   | 0.0737252  | 0.0853289 | 0.210876 | 1        |
| XLOC_010269 | YES1          | chr18:721591-812327      | 8.90727    | 10.3104   | 0.211038 | 0.738229 |
| XLOC_015342 | DNAJC13       | chr3:132136552-13225787  | 2.35363    | 2.72442   | 0.211061 | 0.774191 |
| XLOC_021790 | GPAA1         | chr8:145137523-14514111  | 127.687    | 147.804   | 0.211078 | 0.739331 |
| XLOC_005486 | RARG          | chr12:53604349-53626040  | 8.93044    | 10.3377   | 0.211105 | 0.792482 |
| XLOC_022597 | LRRC8A        | chr9:131644390-131680317 | 12.9922    | 15.0402   | 0.211179 | 0.746773 |
| XLOC_002526 | SAMD8         | chr10:76871392-76941881  | 3.32721    | 3.85174   | 0.211199 | 0.761735 |
| XLOC_021858 | RP1L1         | chr8:10463859-10512617   | 0.00979754 | 0.0113422 | 0.211209 | 1        |
| XLOC_021214 | TSC22D4       | chr7:100064141-10007690  | 44.3844    | 51.3824   | 0.211222 | 0.738462 |
| XLOC_005568 | LLPH          | chr12:66516848-66524533  | 52.1083    | 60.3259   | 0.211264 | 0.732063 |
| XLOC_012502 | SSB           | chr2:170655321-17068135  | 44.2729    | 51.2552   | 0.211273 | 0.829179 |
| XLOC_002058 | ACBD6         | chr1:180257351-18047202  | 28.0094    | 32.4283   | 0.211346 | 0.746863 |
| XLOC_008611 | NAE1          | chr16:66836780-66864879  | 39.681     | 45.9461   | 0.211493 | 0.738368 |
| XLOC_009528 | COP3          | chr17:17149937-17184617  | 39.5047    | 45.7471   | 0.211656 | 0.728698 |
| XLOC_022706 | FOXO4         | chr9:116230-118417       | 1.04654    | 1.212     | 0.211762 | 0.929478 |
| XLOC_005455 | GALNT6        | chr12:51745832-51909547  | 13.9502    | 16.1563   | 0.211807 | 0.777255 |
| XLOC_011261 | C2CD4C        | chr19:405442-409170      | 9.75192    | 11.2941   | 0.211812 | 0.80323  |
| XLOC_020364 | C7orf26       | chr7:6629914-6648355     | 19.7819    | 22.9114   | 0.211885 | 0.771029 |
| XLOC_018608 | TBP           | chr6:170863420-17088195  | 9.19375    | 10.6485   | 0.211918 | 0.785396 |
| XLOC_011845 | FUZ           | chr19:50270179-50316567  | 2.41548    | 2.7977    | 0.211929 | 0.986822 |
| XLOC_004825 | TUBA1C        | chr12:49658864-49667113  | 460.284    | 533.124   | 0.211948 | 0.754654 |
| XLOC_007622 | FAM96A        | chr15:64364760-64386207  | 50.7522    | 58.7886   | 0.212065 | 0.736467 |
| XLOC_002878 | ITGB1         | chr10:33189245-33247293  | 301.669    | 349.451   | 0.212126 | 0.778305 |
| XLOC_002339 | TFP3          | chr10:7860466-8057016    | 2.45772    | 2.84706   | 0.212157 | 0.830321 |
| XLOC_015069 | LARS2         | chr3:45430074-45590328   | 5.08383    | 5.88956   | 0.212245 | 0.774709 |
| XLOC_023748 | HDHD1         | chrX:6966960-7066231     | 12.0319    | 13.9404   | 0.212399 | 0.76443  |
| XLOC_021910 | TNFRSF10B     | chr8:22844929-22941132   | 36.4969    | 42.2882   | 0.212482 | 0.760508 |
| XLOC_012902 | MCFD2         | chr2:47129008-47303275   | 22.0084    | 25.501    | 0.212498 | 0.773635 |
| XLOC_003877 | UBASH3B       | chr11:122526397-1226851  | 1.6842     | 1.95155   | 0.212561 | 0.806888 |
| XLOC_001801 | ENSA          | chr1:150594598-15060209  | 138.181    | 160.124   | 0.212627 | 0.75896  |
| XLOC_018653 | DTNBP1        | chr6:15523031-15663289   | 22.3423    | 25.8903   | 0.212639 | 0.760508 |
| XLOC_015745 | RRP9          | chr3:51967441-51975957   | 68.6707    | 79.5772   | 0.21266  | 0.732989 |
| XLOC_017839 | ETF1          | chr5:137841781-13787898  | 29.4476    | 34.1252   | 0.212687 | 0.739919 |
| XLOC_015878 | KIAA1407      | chr3:113682983-11377546  | 0.209338   | 0.242601  | 0.21275  | 1        |
| XLOC_012168 | CRIP1         | chr2:46844324-46852881   | 7.16184    | 8.30042   | 0.212854 | 0.797088 |
| XLOC_006372 | NAA30         | chr14:57857270-57879466  | 3.38864    | 3.92745   | 0.212887 | 0.790283 |
| XLOC_013827 | FASTKD5,UBOX5 | chr20:3087556-3140556    | 10.6662    | 12.3623   | 0.212896 | 0.754842 |
| XLOC_010369 | CXXC1         | chr18:47808712-47814692  | 21.927     | 25.4153   | 0.212989 | 0.740319 |
| XLOC_008708 | C16orf74      | chr16:85741123-85784689  | 49.7175    | 57.6399   | 0.213313 | 0.762614 |
| XLOC_001717 | ST7L          | chr1:113066140-11316204  | 3.21674    | 3.72957   | 0.213407 | 0.835119 |
| XLOC_003019 | TMEM254-AS1   | chr10:81805988-81852307  | 0.0256828  | 0.0297786 | 0.213474 | 1        |
| XLOC_005765 | VPS37B        | chr12:123349874-1233807  | 42.8119    | 49.6416   | 0.213536 | 0.728767 |
| XLOC_009502 | SCO1          | chr17:10583648-10600885  | 16.9255    | 19.628    | 0.213716 | 0.75896  |
| XLOC_018432 | C6orf203      | chr6:107349406-10737254  | 13.3223    | 15.4495   | 0.213718 | 0.796177 |
| XLOC_005996 | ATP11A        | chr13:113344642-1135414  | 1.97969    | 2.29587   | 0.213768 | 0.780271 |
| XLOC_014831 | CXB6          | chr22:39260247-39268258  | 5.56318    | 6.45212   | 0.213864 | 0.818284 |
| XLOC_016539 | FHDC1         | chr4:153864134-15390084  | 0.343601   | 0.398532  | 0.213964 | 0.906895 |
| XLOC_018628 | RPP40         | chr6:4995279-5004271     | 9.38087    | 10.8815   | 0.214085 | 0.815706 |
| XLOC_011732 | SMG9          | chr19:44235300-44259142  | 33.8027    | 39.2107   | 0.214105 | 0.728031 |
| XLOC_009894 | INTS2         | chr17:59942727-60005377  | 1.55599    | 1.80493   | 0.214112 | 0.811724 |
| XLOC_023049 | TTL11         | chr9:124584203-12485588  | 2.14703    | 2.49055   | 0.21412  | 0.899051 |
| XLOC_001418 | SPOCD1        | chr1:32256024-32281580   | 12.9458    | 15.0179   | 0.214196 | 0.74078  |
| XLOC_013597 | MAPRE1        | chr20:31407698-31438211  | 24.5485    | 28.4786   | 0.214244 | 0.726592 |
| XLOC_022239 | FBXL6         | chr8:145579087-14558218  | 51.6963    | 59.9788   | 0.214392 | 0.735667 |
| XLOC_022837 | TOMM5         | chr9:37588411-37592636   | 101.248    | 117.473   | 0.214441 | 0.735885 |
| XLOC_004606 | ESAM          | chr11:124623018-1246322  | 9.88746    | 11.4725   | 0.214513 | 0.783569 |
| XLOC_023830 | NDUFB1        | chrX:47001614-47004609   | 129.028    | 149.725   | 0.214634 | 0.730513 |
| XLOC_008508 | GDPD3         | chr16:30116130-30124878  | 1.65471    | 1.92018   | 0.21466  | 0.919413 |
| XLOC_007231 | FAM63B        | chr15:59063392-59149734  | 0.423508   | 0.491483  | 0.214754 | 0.900578 |
| XLOC_005385 | GXYLT1        | chr12:42475647-42538673  | 1.40982    | 1.63611   | 0.214764 | 0.794777 |
| XLOC_007903 | MMP25         | chr16:3096681-3110724    | 2.7032     | 3.1372    | 0.214808 | 0.855026 |
| XLOC_018634 | SSR1          | chr6:7281287-7313541     | 9.23801    | 10.7212   | 0.214817 | 0.73891  |
| XLOC_006140 | NEK3          | chr13:52706778-52733996  | 8.03303    | 9.32284   | 0.214824 | 0.769558 |
| XLOC_009012 | TADA2A        | chr17:35766976-35837226  | 3.53684    | 4.10482   | 0.214857 | 0.85843  |
| XLOC_002569 | PAPSS2        | chr10:89419475-89507462  | 0.143355   | 0.166387  | 0.214946 | 1        |
| XLOC_012422 | UGGT1         | chr2:128848753-12895324  | 3.60618    | 4.18594   | 0.215082 | 0.738943 |
| XLOC_020448 | STARD3NL      | chr7:38217807-38270272   | 11.2613    | 13.0717   | 0.215082 | 0.774949 |
| XLOC_021548 | ERLIN2        | chr8:37594096-37615319   | 4.20133    | 4.87705   | 0.215162 | 0.76422  |
| XLOC_015032 | SNORA62       | chr3:39448203-39454032   | 5.9025     | 6.85255   | 0.215315 | 0.991767 |
| XLOC_001141 | EFCAB2        | chr1:245133170-24528853  | 1.72585    | 2.00371   | 0.215373 | 0.903682 |
| XLOC_006909 | POMT2         | chr14:77741298-77787225  | 2.8302     | 3.28605   | 0.215452 | 0.797849 |
| XLOC_016130 | LSG1          | chr3:194361516-19439320  | 6.997      | 8.12442   | 0.215529 | 0.742477 |
| XLOC_018222 | EGLFL8,PPT2   | chr6:32120578-32145888   | 36.9954    | 42.9572   | 0.215555 | 0.887208 |
| XLOC_007691 | SCAMP2        | chr15:75137196-75165670  | 38.1675    | 44.325    | 0.215778 | 0.741805 |
| XLOC_009781 | GJC1          | chr17:42875815-42908179  | 7.96612    | 9.25165   | 0.215833 | 0.740319 |

|             |           |                          |           |           |          |          |
|-------------|-----------|--------------------------|-----------|-----------|----------|----------|
| XLOC_003134 | SMNDC1    | chr10:112052797-11206470 | 44.9223   | 52.172    | 0.215845 | 0.718824 |
| XLOC_016817 | HNRPD1    | chr4:83343716-83351378   | 43.4742   | 50.4928   | 0.215919 | 0.729625 |
| XLOC_010496 | CCDC94    | chr19:4247110-4269085    | 19.5343   | 22.6886   | 0.215958 | 0.774623 |
| XLOC_007828 | PIGQ      | chr16:619967-634136      | 33.4217   | 38.8215   | 0.21607  | 0.721145 |
| XLOC_015203 | NSUN3     | chr3:93776765-93845630   | 1.32548   | 1.53973   | 0.216156 | 0.945946 |
| XLOC_006487 | PSMC1     | chr14:90722893-90738966  | 76.8957   | 89.3249   | 0.216159 | 0.726892 |
| XLOC_016567 | KLHL2     | chr4:166128769-166244308 | 2.46639   | 2.86518   | 0.216228 | 0.819455 |
| XLOC_018774 | HSPA1L    | chr6:31777395-31782835   | 0.13522   | 0.157105  | 0.216423 | 1        |
| XLOC_020790 | AGK       | chr7:141251077-141354208 | 10.4173   | 12.104    | 0.216507 | 0.746516 |
| XLOC_022274 | CD274     | chr9:5450502-5470567     | 1.02209   | 1.18759   | 0.21651  | 0.865806 |
| XLOC_023849 | GRIPAP1   | chrX:48830133-48858675   | 10.7848   | 12.5314   | 0.216548 | 0.746092 |
| XLOC_017586 | ZNF622    | chr5:16451627-16465894   | 30.5154   | 35.4615   | 0.216719 | 0.733705 |
| XLOC_017610 | LMBRD2    | chr5:36103413-36152015   | 0.309539  | 0.359742  | 0.216843 | 0.923433 |
| XLOC_017279 | HSD17B4   | chr5:118788137-118878030 | 11.1196   | 12.9238   | 0.216922 | 0.731968 |
| XLOC_018650 | GFOD1     | chr6:13363586-13487869   | 1.24069   | 1.44201   | 0.21694  | 0.894976 |
| XLOC_002813 | USP6NL    | chr10:11502508-11653679  | 2.98105   | 3.46492   | 0.217003 | 0.790283 |
| XLOC_013937 | GSS       | chr20:33516235-33543601  | 62.1508   | 72.2418   | 0.217062 | 0.721145 |
| XLOC_010043 | ARHGDI1A  | chr17:79825596-79829282  | 260.766   | 303.115   | 0.217106 | 0.728698 |
| XLOC_001412 | SNRNP40   | chr1:31732414-31769644   | 36.3164   | 42.2155   | 0.21715  | 0.729713 |
| XLOC_004768 | PYROXD1   | chr12:21590537-21654603  | 2.66585   | 3.09976   | 0.217559 | 0.926446 |
| XLOC_005678 | SART3     | chr12:108915990-10895510 | 11.1082   | 12.9166   | 0.217601 | 0.721145 |
| XLOC_005640 | CDK17     | chr12:96672038-96794366  | 10.3257   | 12.0073   | 0.217672 | 0.734493 |
| XLOC_022263 | SMARCA2   | chr9:2015341-2193623     | 4.57807   | 5.32387   | 0.217734 | 0.740319 |
| XLOC_021745 | TRIB1     | chr8:126442562-126450644 | 18.3798   | 21.3742   | 0.217744 | 0.721145 |
| XLOC_006857 | MAX       | chr14:65381078-65569413  | 35.3336   | 41.0909   | 0.217778 | 0.917325 |
| XLOC_005553 | AVIL      | chr12:58176527-58209852  | 0.239392  | 0.278439  | 0.217988 | 1        |
| XLOC_022332 | RUSC2     | chr9:35490006-35563896   | 9.3977    | 10.9319   | 0.218168 | 0.735443 |
| XLOC_015097 | ARIH2     | chr3:48955220-49022971   | 16.8507   | 19.6024   | 0.218216 | 0.717812 |
| XLOC_000470 | FAM73A    | chr1:78245308-78345225   | 1.01304   | 1.17857   | 0.218336 | 0.825249 |
| XLOC_014991 | CMC1      | chr3:28283123-28361263   | 42.7218   | 49.7029   | 0.218355 | 0.759668 |
| XLOC_010418 | TXNL4A    | chr18:77732866-77748532  | 71.2739   | 82.924    | 0.218416 | 0.714136 |
| XLOC_009148 | ATP5G1    | chr17:46970147-46973232  | 167.377   | 194.736   | 0.218417 | 0.724523 |
| XLOC_007575 | USP50     | chr15:50716578-50838902  | 0.828073  | 0.963543  | 0.218592 | 0.987627 |
| XLOC_001458 | GNL2      | chr1:3802519-38061586    | 28.2021   | 32.8173   | 0.218655 | 0.714136 |
| XLOC_000638 | ANKRD34A  | chr1:145470507-145475647 | 1.83364   | 2.13384   | 0.218744 | 0.863467 |
| XLOC_011354 | KHSRP     | chr19:6413118-6424822    | 58.3312   | 67.8828   | 0.21878  | 0.716391 |
| XLOC_012347 | TMEM182   | chr2:103378489-103434138 | 0.635133  | 0.739198  | 0.218901 | 0.892588 |
| XLOC_009834 | SPOP      | chr17:47676245-47755525  | 12.1504   | 14.1413   | 0.218909 | 0.730493 |
| XLOC_010354 | HDHD2     | chr18:44633780-44676871  | 3.83849   | 4.46748   | 0.21892  | 0.816822 |
| XLOC_022631 | CEL       | chr9:135937364-135947250 | 0.817806  | 0.951856  | 0.218985 | 0.918898 |
| XLOC_019100 | BCLAF1    | chr6:136578000-136610988 | 9.04101   | 10.5232   | 0.219012 | 0.725528 |
| XLOC_007647 | SNAPC5    | chr15:66679210-66790146  | 7.85429   | 9.14309   | 0.219201 | 0.979733 |
| XLOC_022578 | SLC25A25  | chr9:130830478-130871537 | 15.6895   | 18.2646   | 0.219246 | 0.716391 |
| XLOC_000543 | ACTG1P4   | chr1:104068577-104122148 | 0.0522166 | 0.0607881 | 0.21928  | 1        |
| XLOC_013375 | ATG9A     | chr2:220084101-220094367 | 25.1703   | 29.3022   | 0.219286 | 0.717812 |
| XLOC_021005 | NT5C3     | chr7:33053724-33102409   | 14.8525   | 17.2912   | 0.219334 | 0.73642  |
| XLOC_013361 | USP37     | chr2:219314973-219433084 | 1.18753   | 1.38255   | 0.219377 | 0.792482 |
| XLOC_011545 | TMEM161A  | chr19:19230424-19249310  | 48.9431   | 56.9841   | 0.219453 | 0.723605 |
| XLOC_017000 | AADAT     | chr4:170981372-171011372 | 5.80209   | 6.75548   | 0.219486 | 0.776787 |
| XLOC_011955 | RDH13     | chr19:55555691-55580914  | 8.46562   | 9.8571    | 0.219547 | 0.805637 |
| XLOC_020380 | BZW2      | chr7:16685758-16746148   | 78.0462   | 90.8761   | 0.219573 | 0.716012 |
| XLOC_001632 | DDAH1     | chr1:85784167-86044046   | 18.791    | 21.8806   | 0.219609 | 0.71659  |
| XLOC_004754 | MGST1     | chr12:16500075-16530123  | 137.601   | 160.243   | 0.219763 | 0.721117 |
| XLOC_003909 | FOXRED1   | chr11:126138934-12614802 | 24.8669   | 28.9619   | 0.219932 | 0.735667 |
| XLOC_023367 | EBP       | chrX:48380163-48387104   | 70.5832   | 82.2125   | 0.220034 | 0.719177 |
| XLOC_006126 | SPRYD7    | chr13:50486841-50510625  | 5.58702   | 6.50785   | 0.220103 | 0.751467 |
| XLOC_022900 | GKAP1     | chr9:86354335-86432752   | 2.50867   | 2.92224   | 0.220153 | 0.8586   |
| XLOC_018892 | MRPS18A   | chr6:43638933-43655549   | 64.9484   | 75.6569   | 0.220177 | 0.718396 |
| XLOC_009107 | C17orf104 | chr17:42733761-42753165  | 0.0798814 | 0.0930521 | 0.220179 | 1        |
| XLOC_017454 | FABP6     | chr5:159614373-159665728 | 12.1077   | 14.1042   | 0.220205 | 0.844212 |
| XLOC_008150 | USB1      | chr16:58035276-58055527  | 28.775    | 33.5201   | 0.220209 | 0.721145 |
| XLOC_004425 | RSF1      | chr11:77377273-77531880  | 2.08287   | 2.42647   | 0.220282 | 0.786806 |
| XLOC_022218 | MROH6     | chr8:144648362-144654928 | 4.18362   | 4.8739    | 0.220325 | 0.830816 |
| XLOC_022338 | RGP1      | chr9:35749276-35754274   | 1.45192   | 1.69149   | 0.220338 | 0.926423 |
| XLOC_002823 | FAM107B   | chr10:14560558-14816896  | 7.59534   | 8.84887   | 0.220378 | 0.751467 |
| XLOC_016328 | PAICS     | chr4:57301914-57327534   | 93.1464   | 108.536   | 0.220606 | 0.720701 |
| XLOC_002550 | GHITM     | chr10:85899184-85913311  | 80.4466   | 93.7395   | 0.220627 | 0.731519 |
| XLOC_018819 | LEM2      | chr6:33738989-33756906   | 28.0886   | 32.731    | 0.220671 | 0.721195 |
| XLOC_012665 | GMPPA     | chr2:220363586-220371718 | 29.2956   | 34.1378   | 0.220683 | 0.716439 |
| XLOC_007919 | DNAJA3    | chr16:4475805-4506775    | 35.2242   | 41.0463   | 0.220685 | 0.71532  |
| XLOC_010945 | VASP      | chr19:46010687-46030240  | 59.7038   | 69.5725   | 0.220695 | 0.714085 |
| XLOC_002808 | KIN       | chr10:7792924-7829990    | 1.78301   | 2.07787   | 0.220787 | 0.802407 |
| XLOC_006264 | METTL17   | chr14:21457964-21465194  | 38.3184   | 44.6628   | 0.221038 | 0.716063 |
| XLOC_008601 | SLC38A7   | chr16:58700297-58718674  | 2.07261   | 2.41589   | 0.221106 | 0.854683 |
| XLOC_001043 | FLVCR1    | chr1:213031596-213072708 | 2.80512   | 3.2701    | 0.221271 | 0.764908 |
| XLOC_016609 | FRG1      | chr4:190861973-190884358 | 30.6771   | 35.7643   | 0.221358 | 0.724424 |
| XLOC_002633 | R3HCC1L   | chr10:99894380-100004654 | 6.5259    | 7.60823   | 0.221384 | 0.801827 |
| XLOC_016561 | TMA16     | chr4:164415672-164441697 | 10.6177   | 12.3795   | 0.221482 | 0.752993 |
| XLOC_023780 | MAP3K15   | chrX:19362010-19533379   | 0.69206   | 0.806913  | 0.221516 | 0.987693 |

|             |                      |                         |           |           |          |          |
|-------------|----------------------|-------------------------|-----------|-----------|----------|----------|
| XLOC_002849 | PIP4K2A              | chr10:22823765-23003503 | 7.291     | 8.50131   | 0.221567 | 0.736907 |
| XLOC_022803 | ARID3C               | chr9:34621454-34628011  | 0.17646   | 0.20576   | 0.221627 | 1        |
| XLOC_004451 | CTSC                 | chr11:88026759-88070941 | 45.4824   | 53.0413   | 0.221807 | 0.772137 |
| XLOC_014238 | HSPA13               | chr21:15743436-15755509 | 6.88489   | 8.0294    | 0.221858 | 0.736907 |
| XLOC_020742 | LOC100130705         | chr7:128506463-12851210 | 0.940742  | 1.09714   | 0.221873 | 0.89933  |
| XLOC_018418 | UFL1                 | chr6:96969701-97003151  | 3.92919   | 4.58243   | 0.221882 | 0.750955 |
| XLOC_003335 | MICAL2               | chr11:12132137-12285331 | 4.09293   | 4.77343   | 0.221894 | 0.786958 |
| XLOC_008710 | EMC8                 | chr16:85812230-85833148 | 27.8391   | 32.4678   | 0.221897 | 0.724741 |
| XLOC_002677 | PDCD11               | chr10:105156411-1052060 | 9.47097   | 11.0469   | 0.222054 | 0.71659  |
| XLOC_015162 | PXK                  | chr3:58318616-58410878  | 1.87895   | 2.19172   | 0.222134 | 0.865379 |
| XLOC_021584 | MGM4                 | chr8:48872762-48890719  | 37.8769   | 44.1831   | 0.222178 | 0.716012 |
| XLOC_002737 | DMBT1                | chr10:124320180-1244032 | 0.044279  | 0.0516524 | 0.222211 | 1        |
| XLOC_024071 | ZNF280C              | chrX:129336672-12940292 | 1.60495   | 1.8723    | 0.222282 | 0.814366 |
| XLOC_002763 | PPP2R2D              | chr10:133747959-1337700 | 12.6802   | 14.7928   | 0.222313 | 0.761947 |
| XLOC_003581 | STIP1                | chr11:63953586-63972020 | 134.137   | 156.491   | 0.222376 | 0.720523 |
| XLOC_003097 | NDUFB8               | chr10:102283496-1022896 | 246.904   | 288.071   | 0.222473 | 0.713567 |
| XLOC_020403 | NFE2L3               | chr7:26191846-26226756  | 3.31636   | 3.86941   | 0.222514 | 0.784978 |
| XLOC_010660 | RAB8A                | chr19:16222489-16244445 | 27.6731   | 32.294    | 0.222781 | 0.713826 |
| XLOC_020564 | POR                  | chr7:75544419-75623992  | 42.4869   | 49.5834   | 0.222839 | 0.804374 |
| XLOC_002281 | HNRNP1               | chr1:245013601-24502782 | 42.9629   | 50.1405   | 0.222884 | 0.717812 |
| XLOC_001757 | PPIAL4G              | chr1:143767143-14376788 | 0.0528713 | 0.0617088 | 0.22299  | 1        |
| XLOC_004110 | E2F8                 | chr11:19245609-19263202 | 1.22973   | 1.43532   | 0.223031 | 0.846101 |
| XLOC_020637 | ZKSCAN1              | chr7:99613218-99635403  | 1.88925   | 2.20528   | 0.223153 | 0.789079 |
| XLOC_021800 | SLC52A2              | chr8:145582216-14558494 | 110.044   | 128.461   | 0.22324  | 0.716012 |
| XLOC_002143 | LEMD1                | chr1:205342379-20539121 | 0.0628797 | 0.0734059 | 0.223302 | 1        |
| XLOC_008979 | PSMD11               | chr17:30771480-30810337 | 25.4413   | 29.7005   | 0.223317 | 0.701805 |
| XLOC_005713 | SLC24A6              | chr12:113736570-1137729 | 10.8809   | 12.7033   | 0.223397 | 0.7424   |
| XLOC_020470 | OGDH                 | chr7:44646120-44748669  | 6.79571   | 7.93414   | 0.22345  | 0.73595  |
| XLOC_016888 | SEC24B-AS1           | chr4:110351118-11046161 | 0.450475  | 0.526014  | 0.223656 | 0.979701 |
| XLOC_007884 | ATP6V0C              | chr16:2563726-2570224   | 250.91    | 292.998   | 0.223721 | 0.697381 |
| XLOC_015659 | TMEM158              | chr3:45265955-45267814  | 28.6361   | 33.4412   | 0.22379  | 0.762454 |
| XLOC_005254 | SCARNA12             | chr12:7074514-7079916   | 9.58212   | 11.1904   | 0.223839 | 0.990857 |
| XLOC_015549 | SUMF1                | chr3:4402828-4508966    | 8.18565   | 9.56074   | 0.224025 | 0.756805 |
| XLOC_018121 | HIST1H2AH            | chr6:27114860-27115341  | 1.48476   | 1.73423   | 0.224067 | 0.959465 |
| XLOC_002597 | EXOC6                | chr10:94594469-94819251 | 2.93462   | 3.42799   | 0.224191 | 0.77409  |
| XLOC_021708 | DCAF13               | chr8:104410865-10445568 | 45.8121   | 53.525    | 0.224486 | 0.791404 |
| XLOC_014850 | POLR3H               | chr22:41865128-41940479 | 20.2243   | 23.6299   | 0.224526 | 0.844167 |
| XLOC_001527 | ATPAF1               | chr1:47100710-47134099  | 23.8651   | 27.8844   | 0.224555 | 0.719967 |
| XLOC_003644 | PPP3                 | chr11:66247483-66277130 | 15.6335   | 18.2674   | 0.224629 | 0.721117 |
| XLOC_012536 | RBM45                | chr2:178977181-17899438 | 4.81362   | 5.62493   | 0.224716 | 0.806888 |
| XLOC_000867 | ATP1B1               | chr1:169075946-16933718 | 8.41281   | 9.83136   | 0.224804 | 0.865379 |
| XLOC_015916 | SLC12A8              | chr3:124801479-12493160 | 4.24177   | 4.95704   | 0.224815 | 0.774943 |
| XLOC_005457 | KRT80                | chr12:52562779-52585784 | 0.953607  | 1.11447   | 0.224888 | 0.877493 |
| XLOC_007503 | RASGRP1              | chr15:38780301-38857007 | 0.612273  | 0.715601  | 0.224979 | 0.871957 |
| XLOC_009780 | CCDC43               | chr17:42754804-42767165 | 7.55859   | 8.83473   | 0.22507  | 0.753148 |
| XLOC_021635 | TMEM70               | chr8:74888376-74895018  | 28.8781   | 33.7542   | 0.225092 | 0.703191 |
| XLOC_001007 | IKBKE                | chr1:206643585-20667022 | 2.52657   | 2.95323   | 0.225111 | 0.829595 |
| XLOC_004826 | PRPH                 | chr12:49688908-49692481 | 0.0852089 | 0.0996058 | 0.225225 | 1        |
| XLOC_008954 | ANKRD13B             | chr17:27920526-27948441 | 8.66823   | 10.1345   | 0.225467 | 0.754929 |
| XLOC_009916 | DDX5                 | chr17:62494373-62502484 | 66.5277   | 77.7819   | 0.225479 | 0.707294 |
| XLOC_018009 | MGAT1                | chr5:180217540-18023713 | 31.4358   | 36.755    | 0.225532 | 0.707294 |
| XLOC_000310 | EXO5                 | chr1:40974432-40982214  | 3.82758   | 4.4755    | 0.225618 | 0.799762 |
| XLOC_010440 | WDR18                | chr19:984327-994569     | 75.9297   | 88.7904   | 0.22574  | 0.701805 |
| XLOC_014060 | PSMA7                | chr20:60711782-60718514 | 274.491   | 320.989   | 0.225764 | 0.708451 |
| XLOC_013789 | TPD52L2              | chr20:62496580-62522898 | 91.7246   | 107.264   | 0.225782 | 0.703191 |
| XLOC_007249 | TRIP4                | chr15:64680002-64747502 | 5.41942   | 6.33808   | 0.225909 | 0.782383 |
| XLOC_003578 | COX8A                | chr11:63742078-63744015 | 929.712   | 1087.33   | 0.22594  | 0.712918 |
| XLOC_004321 | SYVN1                | chr11:64888098-64902003 | 16.4995   | 19.2969   | 0.225942 | 0.985921 |
| XLOC_009756 | AARSD1,PTGES3L,PTGES | chr17:41102542-41132545 | 30.1003   | 35.204    | 0.22596  | 0.726641 |
| XLOC_015481 | PSMD2                | chr3:184017021-18402684 | 290.404   | 339.676   | 0.226097 | 0.726571 |
| XLOC_018231 | BRD2                 | chr6:32936436-32949282  | 34.6812   | 40.5688   | 0.22622  | 0.701804 |
| XLOC_017503 | FAF2                 | chr5:175875355-17593707 | 10.4599   | 12.2381   | 0.226514 | 0.700253 |
| XLOC_001641 | GBP1                 | chr1:89517986-89531043  | 0.0360524 | 0.0421822 | 0.226539 | 1        |
| XLOC_017163 | CENPH                | chr5:68485374-68506184  | 23.6535   | 27.6755   | 0.226553 | 0.716439 |
| XLOC_021259 | SLC26A3              | chr7:107405911-10744367 | 0.0118119 | 0.0138214 | 0.226658 | 1        |
| XLOC_000461 | ACADM                | chr1:76190042-76229355  | 9.71858   | 11.3721   | 0.226677 | 0.716391 |
| XLOC_015298 | PDI45                | chr3:122785855-12288095 | 7.75619   | 9.07607   | 0.226719 | 0.78031  |
| XLOC_016167 | FGFR1L               | chr4:1005609-1020686    | 12.7837   | 14.9616   | 0.226955 | 0.719177 |
| XLOC_007487 | SLC12A6              | chr15:34517244-34630265 | 1.07741   | 1.26102   | 0.227015 | 0.965148 |
| XLOC_001071 | DEGS1                | chr1:224370909-22438114 | 23.5068   | 27.5142   | 0.227098 | 0.699227 |
| XLOC_019070 | ECHDC1               | chr6:127609856-12766475 | 19.1538   | 22.4191   | 0.227098 | 0.718041 |
| XLOC_023014 | INIP                 | chr9:115448790-11548038 | 5.41915   | 6.3432    | 0.227145 | 0.802978 |
| XLOC_003901 | STT3A                | chr11:125462738-1254912 | 36.6187   | 42.8682   | 0.227326 | 0.703484 |
| XLOC_003381 | DNAJC24              | chr11:31391376-31531169 | 2.85461   | 3.34189   | 0.22737  | 0.823458 |
| XLOC_017596 | DROSHA               | chr5:31400601-31532282  | 3.6429    | 4.26477   | 0.227384 | 0.730282 |
| XLOC_020359 | AIMP2                | chr7:6048881-6098860    | 11.2075   | 13.1214   | 0.227452 | 0.976214 |
| XLOC_000896 | CACYBP               | chr1:174968570-17498116 | 44.3642   | 51.9436   | 0.227549 | 0.700037 |
| XLOC_021182 | MGC72080             | chr7:97595907-97601638  | 13.6683   | 16.0034   | 0.227552 | 0.830321 |
| XLOC_003115 | ACTR1A               | chr10:104238985-1042625 | 32.2827   | 37.7987   | 0.227577 | 0.701805 |



|             |              |                         |           |           |          |          |
|-------------|--------------|-------------------------|-----------|-----------|----------|----------|
| XLOC_019148 | MTRF1L       | chr6:153308399-15332392 | 7.49      | 8.77016   | 0.227638 | 0.714136 |
| XLOC_018543 | STXBP5       | chr6:147162524-14771161 | 0.499561  | 0.585067  | 0.22794  | 0.833863 |
| XLOC_009246 | KPNA2        | chr17:66031847-66042970 | 85.1737   | 99.7536   | 0.227961 | 0.707322 |
| XLOC_009747 | PSMC3IP      | chr17:40719077-40729849 | 21.4533   | 25.1258   | 0.227969 | 0.897223 |
| XLOC_012332 | PDCL3        | chr2:101179417-10119320 | 16.4971   | 19.3222   | 0.228042 | 0.747664 |
| XLOC_021280 | TSPAN12      | chr7:120427373-12049817 | 1.35606   | 1.58837   | 0.228129 | 0.852163 |
| XLOC_006668 | C14orf80     | chr14:105956191-1059655 | 16.3358   | 19.137    | 0.228326 | 0.778996 |
| XLOC_008518 | SEPHS2       | chr16:30454951-30457224 | 52.5503   | 61.5633   | 0.22837  | 0.7131   |
| XLOC_016259 | PACRGL       | chr4:20702035-20729980  | 2.48188   | 2.90789   | 0.228539 | 0.842287 |
| XLOC_022354 | TRMT10B      | chr9:37753801-37778969  | 2.67881   | 3.13874   | 0.228592 | 0.822695 |
| XLOC_010725 | ZNF714       | chr19:21264952-21307883 | 0.484377  | 0.567578  | 0.22869  | 0.831858 |
| XLOC_010392 | BCL2         | chr18:60790578-60986613 | 1.9316    | 2.26344   | 0.228718 | 0.954441 |
| XLOC_011051 | POLD1        | chr19:50887579-50921275 | 29.2015   | 34.2182   | 0.22872  | 0.688626 |
| XLOC_014962 | LSM3         | chr3:14220227-14239869  | 104.454   | 122.402   | 0.228752 | 0.693648 |
| XLOC_015000 | CMTM8        | chr3:32280170-32411813  | 14.9474   | 17.5175   | 0.228903 | 0.788214 |
| XLOC_019007 | COQ3         | chr6:99817347-99842082  | 10.7543   | 12.6037   | 0.228938 | 0.754197 |
| XLOC_006819 | GMFB         | chr14:54941208-54955744 | 6.69017   | 7.84139   | 0.229066 | 0.714805 |
| XLOC_020274 | EDEM3        | chr1:184659624-18472404 | 0.807271  | 0.946234  | 0.229145 | 0.821719 |
| XLOC_012990 | RTKN         | chr2:74652987-74669060  | 19.0754   | 22.3596   | 0.229185 | 0.71532  |
| XLOC_015919 | SNX4         | chr3:125165487-12523905 | 4.8021    | 5.62963   | 0.229374 | 0.766612 |
| XLOC_022638 | SURF2        | chr9:136223420-13622804 | 71.2028   | 83.4814   | 0.229522 | 0.703835 |
| XLOC_008998 | TAF15        | chr17:34136458-34174246 | 64.6113   | 75.7552   | 0.229558 | 0.699281 |
| XLOC_015869 | ATG3         | chr3:112251358-11228048 | 31.8731   | 37.3737   | 0.229682 | 0.700253 |
| XLOC_005969 | TM9SF2       | chr13:100153627-1002163 | 14.924    | 17.5022   | 0.229901 | 0.701805 |
| XLOC_003765 | MED17        | chr11:93517404-93546496 | 8.29852   | 9.73228   | 0.229924 | 0.723055 |
| XLOC_021279 | CTTNBP2      | chr7:117350705-11751356 | 0.605642  | 0.710285  | 0.229933 | 0.855173 |
| XLOC_013580 | HM13         | chr20:30102240-30161066 | 118.182   | 138.621   | 0.230128 | 0.687011 |
| XLOC_008039 | LOC440356    | chr16:29875503-29879374 | 0.213942  | 0.250958  | 0.230226 | 1        |
| XLOC_018843 | PPIL1        | chr6:36822605-36842800  | 22.4425   | 26.3285   | 0.230388 | 0.701805 |
| XLOC_003930 | GLB1L2       | chr11:134201767-1342462 | 15.6282   | 18.335    | 0.230452 | 0.700392 |
| XLOC_011303 | SGTA         | chr19:2754711-2783354   | 69.3076   | 81.3184   | 0.230567 | 0.68423  |
| XLOC_001337 | ECE1         | chr1:21543739-21672034  | 13.646    | 16.0117   | 0.23065  | 0.691895 |
| XLOC_016186 | MSANTD1      | chr4:3250766-3258342    | 0.134233  | 0.157517  | 0.23077  | 1        |
| XLOC_000619 | MAN1A2       | chr1:117910084-11806832 | 0.798235  | 0.9367    | 0.230773 | 0.83481  |
| XLOC_015071 | SACM1L       | chr3:45730753-45786900  | 4.81482   | 5.6508    | 0.230972 | 0.73891  |
| XLOC_001501 | MED8         | chr1:43849578-43855483  | 20.038    | 23.5177   | 0.231005 | 0.71532  |
| XLOC_001640 | GBP3         | chr1:89472359-89488549  | 1.65714   | 1.94498   | 0.231055 | 0.822993 |
| XLOC_004214 | TIMM10       | chr11:57295935-57298232 | 57.8661   | 67.9197   | 0.23111  | 0.710231 |
| XLOC_013735 | RAE1         | chr20:55904830-55998278 | 27.7783   | 32.6078   | 0.23126  | 0.852163 |
| XLOC_003857 | TRAPPC4      | chr11:118889240-1188943 | 50.4731   | 59.2522   | 0.231354 | 0.678263 |
| XLOC_022048 | JPH1         | chr8:75146938-75233562  | 2.78903   | 3.27417   | 0.231369 | 0.78079  |
| XLOC_012175 | MSH2         | chr2:47630205-47710367  | 7.33199   | 8.60929   | 0.23169  | 0.711067 |
| XLOC_007239 | TLN2         | chr15:62939509-63136829 | 1.02357   | 1.20196   | 0.231778 | 0.772137 |
| XLOC_010814 | LOC728752    | chr19:36980528-36981942 | 1.17892   | 1.38438   | 0.231779 | 0.915375 |
| XLOC_000078 | PEX14        | chr1:10535002-10690815  | 22.2855   | 26.17     | 0.231806 | 0.721145 |
| XLOC_020523 | RABGEF1      | chr7:66205642-66309813  | 4.40826   | 5.1767    | 0.231823 | 0.852163 |
| XLOC_005382 | KIF21A       | chr12:39687029-39837192 | 0.760671  | 0.893296  | 0.231866 | 0.820283 |
| XLOC_016469 | C4orf32      | chr4:113066552-11311023 | 4.20511   | 4.93836   | 0.231887 | 0.778388 |
| XLOC_014531 | MCM5         | chr22:35796115-35820495 | 36.6235   | 43.0135   | 0.232019 | 0.682259 |
| XLOC_011754 | ERCC1        | chr19:45882891-45927177 | 217.571   | 255.551   | 0.232121 | 0.744243 |
| XLOC_009136 | KPNB1        | chr17:45727203-45761004 | 36.7454   | 43.1601   | 0.232137 | 0.702128 |
| XLOC_000741 | IL6R         | chr1:154377668-15444192 | 1.98695   | 2.33396   | 0.23223  | 0.791441 |
| XLOC_022056 | ZNF704       | chr8:81540685-81787016  | 0.284331  | 0.334013  | 0.232335 | 1        |
| XLOC_002607 | HELLS        | chr10:96305573-96361856 | 3.67694   | 4.31947   | 0.232347 | 0.755027 |
| XLOC_004663 | NDUF9        | chr12:4758263-4796720   | 52.7952   | 62.0209   | 0.232349 | 0.688363 |
| XLOC_007213 | AP4E1        | chr15:51200868-51298097 | 1.23265   | 1.44826   | 0.232561 | 0.781531 |
| XLOC_004745 | KIAA1467     | chr12:13197314-13236383 | 1.65192   | 1.94104   | 0.232682 | 0.797744 |
| XLOC_018813 | DAXX         | chr6:33286334-33290793  | 32.209    | 37.8462   | 0.232687 | 0.693849 |
| XLOC_023553 | PRPS1        | chrX:106871653-10689425 | 24.286    | 28.5374   | 0.232729 | 0.684119 |
| XLOC_022128 | KLF10        | chr8:103661004-10366798 | 11.532    | 13.551    | 0.232754 | 0.700075 |
| XLOC_004928 | SLC39A5      | chr12:56623819-56652143 | 0.0384944 | 0.0452385 | 0.232904 | 1        |
| XLOC_006679 | TTC5         | chr14:20757300-20774153 | 9.10424   | 10.6994   | 0.232923 | 0.746078 |
| XLOC_004653 | LOC100507424 | chr12:2945981-2998691   | 0.609263  | 0.716015  | 0.232926 | 0.991866 |
| XLOC_003413 | HSD17B12     | chr11:43702142-43878169 | 27.1792   | 31.9438   | 0.233032 | 0.686761 |
| XLOC_002393 | MASTL        | chr10:27443752-27475848 | 5.97358   | 7.02122   | 0.233126 | 0.72508  |
| XLOC_008627 | ACD          | chr16:67679029-67694718 | 39.539    | 46.4769   | 0.233238 | 0.690838 |
| XLOC_014292 | SCAF4        | chr21:33043312-33104431 | 8.64927   | 10.1674   | 0.233303 | 0.707294 |
| XLOC_017862 | DIAPH1       | chr5:140894587-14099862 | 11.2616   | 13.2392   | 0.233402 | 0.688314 |
| XLOC_014554 | POLR2F       | chr22:38339056-38365319 | 33.4036   | 39.2703   | 0.233439 | 0.714678 |
| XLOC_000911 | TOR1AIP1     | chr1:179851176-17988921 | 14.3265   | 16.8471   | 0.233819 | 0.679982 |
| XLOC_016556 | ETFDH        | chr4:159593276-15962984 | 3.02605   | 3.5585    | 0.233834 | 0.80121  |
| XLOC_004383 | DHCR7        | chr11:71145456-71159477 | 38.6681   | 45.474    | 0.233897 | 0.682587 |
| XLOC_014750 | AP1B1        | chr22:29723668-29784572 | 23.439    | 27.5678   | 0.234071 | 0.686761 |
| XLOC_007302 | ARID3B       | chr15:74833547-74890472 | 3.66567   | 4.31232   | 0.234387 | 0.764271 |
| XLOC_010993 | GRIN2D       | chr19:48898131-48948188 | 19.3024   | 22.7084   | 0.234447 | 0.691625 |
| XLOC_012487 | GCA          | chr2:163200582-16321914 | 2.51677   | 2.96112   | 0.23457  | 0.781917 |
| XLOC_009833 | PHB          | chr17:47481419-47492242 | 159.754   | 187.968   | 0.234632 | 0.692443 |
| XLOC_005525 | TIMELESS     | chr12:56810156-56843200 | 6.31674   | 7.43261   | 0.234688 | 0.705787 |
| XLOC_006702 | METTL3       | chr14:21945334-21979457 | 12.0327   | 14.1584   | 0.2347   | 0.907651 |

|             |              |                          |            |            |          |          |
|-------------|--------------|--------------------------|------------|------------|----------|----------|
| XLOC_022111 | HRSP12       | chr8:99114566-99129418   | 46.0404    | 54.1751    | 0.234732 | 0.690479 |
| XLOC_003431 | DGKZ         | chr11:46354454-46402104  | 24.2663    | 28.5556    | 0.23482  | 0.695206 |
| XLOC_020863 | SLC4A2       | chr7:150755298-150773614 | 62.7675    | 73.8677    | 0.234927 | 0.685271 |
| XLOC_015962 | AMOTL2       | chr3:134074189-134093404 | 19.7141    | 23.2014    | 0.234986 | 0.686668 |
| XLOC_006497 | ITPK1-AS1    | chr14:93403258-93582263  | 0.0138511  | 0.0163013  | 0.234988 | 1        |
| XLOC_017294 | LMNB1        | chr5:126112314-126172712 | 10.5595    | 12.4291    | 0.235168 | 0.704102 |
| XLOC_022312 | DNAJA1       | chr9:33025208-33039062   | 82.9909    | 97.6915    | 0.23528  | 0.683558 |
| XLOC_007929 | ALG1         | chr16:5121809-5147789    | 4.97162    | 5.85237    | 0.235304 | 0.855239 |
| XLOC_007900 | TNFRSF12A    | chr16:3070312-3072383    | 537.092    | 632.263    | 0.235355 | 0.689384 |
| XLOC_018872 | CCND3        | chr6:41902670-42016610   | 30.7228    | 36.1674    | 0.235381 | 0.691659 |
| XLOC_008224 | DHODH        | chr16:72042642-72059316  | 6.54302    | 7.70284    | 0.235434 | 0.747241 |
| XLOC_010059 | SECTM1       | chr17:80278899-80291921  | 6.2185     | 7.32098    | 0.235469 | 0.793038 |
| XLOC_020644 | STAG3        | chr7:99775537-99869855   | 0.184026   | 0.216677   | 0.235637 | 1        |
| XLOC_004955 | TSFM         | chr12:58176527-58209852  | 23.1925    | 27.3116    | 0.235859 | 0.686273 |
| XLOC_009393 | CLUH         | chr17:2592679-2614927    | 29.9841    | 35.31      | 0.235878 | 0.680021 |
| XLOC_005064 | TDG          | chr12:104359592-10438264 | 3.75481    | 4.4222     | 0.236022 | 0.748391 |
| XLOC_016510 | NAA15        | chr4:140211070-140311933 | 7.05821    | 8.31377    | 0.2362   | 0.879325 |
| XLOC_015001 | CMTM7        | chr3:32433162-32496333   | 77.4328    | 91.2091    | 0.236234 | 0.674625 |
| XLOC_023058 | PDCL         | chr9:125580375-125590933 | 4.17962    | 4.92371    | 0.236373 | 0.749035 |
| XLOC_009128 | NSF          | chr17:44668034-44834828  | 5.7151     | 6.73274    | 0.236415 | 0.701805 |
| XLOC_020789 | TMEM178B     | chr7:140774031-141180173 | 0.00308154 | 0.00363061 | 0.236561 | 1        |
| XLOC_012964 | SNRPG        | chr2:70508505-70520869   | 259.087    | 305.273    | 0.236667 | 0.672991 |
| XLOC_010819 | ZNF568       | chr19:37407230-37488834  | 0.0619916  | 0.0730487  | 0.236786 | 1        |
| XLOC_011182 | EPS8L1       | chr19:55587220-55599291  | 7.99824    | 9.42507    | 0.236822 | 0.787566 |
| XLOC_005205 | PGAM5        | chr12:133287392-13329932 | 41.0035    | 48.3262    | 0.237059 | 0.690127 |
| XLOC_006523 | VRK1         | chr14:97263683-97347951  | 12.0637    | 14.2206    | 0.237308 | 0.707294 |
| XLOC_017382 | PCDHB13      | chr5:140593508-140596992 | 1.8614     | 2.19447    | 0.237485 | 0.817266 |
| XLOC_000170 | EPHB2        | chr1:23037330-23241823   | 7.86631    | 9.27417    | 0.237531 | 0.690838 |
| XLOC_016488 | EXOSC9       | chr4:122722471-122745083 | 17.4306    | 20.5505    | 0.237551 | 0.879833 |
| XLOC_008076 | ARMC5        | chr16:31470316-31478488  | 6.55933    | 7.73419    | 0.237701 | 0.763851 |
| XLOC_009911 | ICAM2        | chr17:62075710-62097994  | 8.11661    | 9.57064    | 0.237738 | 0.803587 |
| XLOC_009859 | TRIM25       | chr17:54965269-54991409  | 18.8514    | 22.2345    | 0.238128 | 0.71619  |
| XLOC_010714 | GATAD2A      | chr19:19496641-19619741  | 16.5545    | 19.5257    | 0.238156 | 0.674744 |
| XLOC_008405 | NAGPA        | chr16:50748444-5092972   | 8.50256    | 10.0295    | 0.238279 | 0.764271 |
| XLOC_012079 | EFR3B        | chr2:25264972-25382004   | 0.164047   | 0.193518   | 0.23836  | 1        |
| XLOC_020356 | ZNF815P      | chr7:5862790-5894066     | 0.639858   | 0.75483    | 0.2384   | 0.890666 |
| XLOC_017057 | TRIP13       | chr5:892968-918164       | 7.67265    | 9.05146    | 0.238425 | 0.721145 |
| XLOC_010175 | GALNT1       | chr18:33234532-33291798  | 4.769      | 5.6261     | 0.238448 | 0.714805 |
| XLOC_016276 | PGM2         | chr4:37828281-37864559   | 7.67945    | 9.06002    | 0.238512 | 0.698227 |
| XLOC_016285 | LIAS         | chr4:39460664-39479271   | 7.64651    | 9.02153    | 0.23857  | 0.729713 |
| XLOC_020525 | TYW1         | chr7:66461791-66704507   | 3.85547    | 4.54926    | 0.238725 | 0.74078  |
| XLOC_018715 | SCAND3       | chr6:28539406-28555112   | 0.471906   | 0.556879   | 0.238864 | 0.858992 |
| XLOC_010227 | PHLPP1       | chr18:60382671-60647676  | 2.79702    | 3.30076    | 0.238906 | 0.747687 |
| XLOC_015999 | TM4SF1       | chr3:149086804-149095563 | 57.8781    | 68.3046    | 0.238965 | 0.674163 |
| XLOC_005218 | FBXL14       | chr12:1675158-1703331    | 1.84518    | 2.17771    | 0.239049 | 0.86583  |
| XLOC_000893 | ZBTB37       | chr1:173837492-173855774 | 0.177005   | 0.208907   | 0.239073 | 1        |
| XLOC_010439 | ARID3A       | chr19:926036-972803      | 4.99637    | 5.89737    | 0.239191 | 0.774943 |
| XLOC_015808 | EOGT         | chr3:69024367-69062774   | 4.16494    | 4.9165     | 0.239334 | 0.719177 |
| XLOC_007939 | CLEC16A      | chr16:11038344-11276046  | 2.31334    | 2.73083    | 0.239359 | 0.742477 |
| XLOC_000925 | DHX9         | chr1:182808438-182857111 | 27.5626    | 32.539     | 0.239458 | 0.671358 |
| XLOC_005241 | IFFO1        | chr12:6648693-6665249    | 0.0656591  | 0.0775197  | 0.239567 | 1        |
| XLOC_018550 | PCMT1        | chr6:150070830-150132557 | 54.5464    | 64.4018    | 0.239615 | 0.698227 |
| XLOC_006697 | SUPT16H      | chr14:21819630-21852425  | 25.3317    | 29.9096    | 0.239664 | 0.668949 |
| XLOC_008189 | DUS2L        | chr16:68055176-68113226  | 10.752     | 12.6954    | 0.239698 | 0.877493 |
| XLOC_012919 | PNPT1        | chr2:55861197-55921045   | 7.86615    | 9.28868    | 0.239816 | 0.673883 |
| XLOC_014797 | FOXRED2      | chr22:36883232-36903148  | 9.44859    | 11.1579    | 0.239892 | 0.671358 |
| XLOC_013943 | UQCC         | chr20:33890368-33999945  | 17.8994    | 21.1401    | 0.24007  | 0.674962 |
| XLOC_022812 | PIGO         | chr9:35088684-35096598   | 9.97642    | 11.783     | 0.240109 | 0.710074 |
| XLOC_003567 | TAF6L        | chr11:62538774-62554813  | 10.6841    | 12.6193    | 0.240161 | 0.755114 |
| XLOC_007885 | AMDHD2       | chr16:2570362-2581409    | 21.8511    | 25.81      | 0.240225 | 0.798391 |
| XLOC_022462 | LOC100132781 | chr9:99631181-99634510   | 0.0192961  | 0.0227973  | 0.240554 | 1        |
| XLOC_000312 | NFYC         | chr1:41154751-41237275   | 16.7586    | 19.8001    | 0.240603 | 0.709525 |
| XLOC_021736 | FAM91A1      | chr8:124780881-124827693 | 9.89499    | 11.6908    | 0.240605 | 0.671254 |
| XLOC_007333 | PSMA4        | chr15:78832746-78841563  | 99.254     | 117.269    | 0.240622 | 0.667999 |
| XLOC_011583 | LOC400684    | chr19:32880955-32896445  | 1.43079    | 1.69054    | 0.240672 | 0.929536 |
| XLOC_022011 | GGH          | chr8:63927638-63951610   | 47.5657    | 56.2054    | 0.240787 | 0.664149 |
| XLOC_010590 | LDLR         | chr19:11200037-11244505  | 14.0264    | 16.5764    | 0.24099  | 0.686575 |
| XLOC_001051 | KCTD3        | chr1:215740734-215795145 | 4.54073    | 5.36659    | 0.241081 | 0.713826 |
| XLOC_018523 | CCDC28A      | chr6:139046347-139114456 | 17.6906    | 20.909     | 0.241147 | 0.695505 |
| XLOC_009586 | PHF12        | chr17:27232270-27278508  | 3.86446    | 4.5677     | 0.241202 | 0.731614 |
| XLOC_001378 | GPATCH3      | chr1:27216978-27226962   | 8.19564    | 9.68711    | 0.24121  | 0.736532 |
| XLOC_021962 | PPAPDC1B     | chr8:38120649-38126738   | 32.488     | 38.4006    | 0.241222 | 0.788591 |
| XLOC_010454 | DAZAP1       | chr19:1407583-1435682    | 100.616    | 118.935    | 0.241314 | 0.658298 |
| XLOC_011012 | SNRNP70      | chr19:49588464-49611870  | 118.921    | 140.609    | 0.24169  | 0.673824 |
| XLOC_000616 | CD101        | chr1:117544371-117579173 | 0.396166   | 0.46842    | 0.241695 | 0.902188 |
| XLOC_003832 | REXO2        | chr11:114310107-11432100 | 77.8045    | 91.9963    | 0.241722 | 0.653383 |
| XLOC_003143 | DCLRE1A      | chr10:115594482-11561411 | 2.55239    | 3.01823    | 0.241853 | 0.736954 |
| XLOC_011056 | C19orf81     | chr19:51152701-51162567  | 1.44889    | 1.71349    | 0.241988 | 0.942878 |
| XLOC_017463 | MAT2B        | chr5:162930069-162946355 | 19.3524    | 22.8889    | 0.242136 | 0.669766 |

|             |                |                          |           |           |          |          |
|-------------|----------------|--------------------------|-----------|-----------|----------|----------|
| XLOC_005430 | RHEBL1         | chr12:49458467-49463775  | 10.5916   | 12.5277   | 0.242197 | 0.760508 |
| XLOC_005108 | ERP29          | chr12:112451151-11246102 | 102.062   | 120.724   | 0.24227  | 0.661892 |
| XLOC_023095 | PTGES2         | chr9:130882971-13089074  | 158.42    | 187.397   | 0.242344 | 0.671358 |
| XLOC_003724 | C11orf30       | chr11:76156068-76262589  | 0.705633  | 0.834705  | 0.242348 | 0.829181 |
| XLOC_004927 | NABP2          | chr12:56618124-56623638  | 51.9736   | 61.4849   | 0.242455 | 0.663064 |
| XLOC_016102 | TBCCD1         | chr3:186263855-186288332 | 1.62206   | 1.91902   | 0.242542 | 0.828589 |
| XLOC_006411 | ARG2           | chr14:68086578-68141602  | 21.2601   | 25.1574   | 0.242833 | 0.86815  |
| XLOC_018731 | HCG4B          | chr6:29892368-29893428   | 0.151746  | 0.179569  | 0.242888 | 1        |
| XLOC_000649 | PDIA3P         | chr1:146649429-146651528 | 1.30886   | 1.54889   | 0.242925 | 0.854683 |
| XLOC_000918 | IER5           | chr1:181057637-181059978 | 23.8611   | 28.2438   | 0.243274 | 0.700075 |
| XLOC_003168 | ATE1           | chr10:123502624-12368754 | 1.21791   | 1.44186   | 0.243521 | 0.855212 |
| XLOC_012296 | RPIA           | chr2:88991175-89050452   | 17.8698   | 21.159    | 0.243743 | 0.674625 |
| XLOC_014502 | CCDC157        | chr22:30727976-30773894  | 0.478502  | 0.566576  | 0.243744 | 0.990857 |
| XLOC_011643 | YIF1B          | chr19:38794199-38806606  | 22.1411   | 26.2171   | 0.243778 | 0.877493 |
| XLOC_001124 | RYR2           | chr1:237205701-237997288 | 0.175058  | 0.207295  | 0.243858 | 1        |
| XLOC_006310 | C14orf23       | chr14:29241909-29264000  | 0.0135439 | 0.0160391 | 0.243952 | 1        |
| XLOC_005733 | RAB35          | chr12:120532898-12055464 | 20.8793   | 24.7322   | 0.244314 | 0.655033 |
| XLOC_001740 | IGSF3          | chr1:117117030-117210314 | 1.55312   | 1.83987   | 0.244435 | 0.754842 |
| XLOC_005628 | UBE2N          | chr12:93802087-93836026  | 36.5281   | 43.273    | 0.24446  | 0.645744 |
| XLOC_019184 | MPC1           | chr6:166778407-166796507 | 18.7448   | 22.206    | 0.24446  | 0.728767 |
| XLOC_008818 | FGF11          | chr17:7342688-7348251    | 1.58912   | 1.88277   | 0.244634 | 0.844123 |
| XLOC_013933 | PIGU           | chr20:33148345-33265089  | 17.5316   | 20.7715   | 0.244643 | 0.68944  |
| XLOC_004172 | PSMC3          | chr11:47440319-47448024  | 74.283    | 88.0206   | 0.244809 | 0.655465 |
| XLOC_014639 | PIM3           | chr22:50354142-50357720  | 43.9886   | 52.1248   | 0.244841 | 0.666794 |
| XLOC_018675 | HIST1H4B       | chr6:26027123-26027480   | 0.982197  | 1.16388   | 0.244853 | 0.968294 |
| XLOC_018525 | ABRACL         | chr6:139349818-139364438 | 92.5612   | 109.688   | 0.24493  | 0.652832 |
| XLOC_022451 | HIATL1         | chr9:97136832-97223202   | 17.6322   | 20.8947   | 0.24493  | 0.653383 |
| XLOC_018546 | UST            | chr6:149068270-149398128 | 2.58252   | 3.06059   | 0.245031 | 0.738927 |
| XLOC_021174 | SLC25A13       | chr7:95749531-95951459   | 5.30911   | 6.29291   | 0.245258 | 0.714805 |
| XLOC_003895 | ROBO3          | chr11:124735304-12475137 | 2.93589   | 3.47995   | 0.245267 | 0.763859 |
| XLOC_007301 | LOC440288      | chr15:74753605-74773633  | 2.4644    | 2.92132   | 0.245384 | 0.857925 |
| XLOC_009732 | LEPREL4        | chr17:39958204-39968451  | 21.3703   | 25.3347   | 0.245507 | 0.666069 |
| XLOC_005059 | DRAM1          | chr12:102271104-10231748 | 6.33407   | 7.50941   | 0.245566 | 0.715655 |
| XLOC_005150 | TMEM120B       | chr12:122150657-12223155 | 6.14757   | 7.28847   | 0.2456   | 0.942519 |
| XLOC_015232 | LOC100009676   | chr3:101368282-101398057 | 2.14196   | 2.53969   | 0.24572  | 0.918898 |
| XLOC_002787 | ID1            | chr10:1064846-1095061    | 17.5016   | 20.7516   | 0.245738 | 0.740994 |
| XLOC_016307 | OClAD1         | chr4:48833059-48863834   | 38.695    | 45.8849   | 0.245873 | 0.65516  |
| XLOC_010391 | PIGN           | chr18:59711457-59854289  | 3.04031   | 3.60529   | 0.245895 | 0.714805 |
| XLOC_002114 | UBE2T          | chr1:202300784-202311094 | 46.0069   | 54.5569   | 0.245909 | 0.653768 |
| XLOC_022971 | TRIM14         | chr9:100818958-100881488 | 10.9982   | 13.0421   | 0.245913 | 0.908129 |
| XLOC_003713 | SPCS2          | chr11:74660291-74690076  | 27.5192   | 32.6339   | 0.24593  | 0.653433 |
| XLOC_012136 | RASGRP3        | chr2:33661415-33789798   | 0.0478908 | 0.0568001 | 0.246143 | 1        |
| XLOC_008048 | SLX1B, SULT1A4 | chr16:30204255-30218248  | 0.564584  | 0.669698  | 0.246323 | 0.950929 |
| XLOC_013931 | EIF2S2         | chr20:32676114-32700085  | 85.5053   | 101.428   | 0.246365 | 0.691366 |
| XLOC_004830 | LOC100335030   | chr12:49760687-49921207  | 0.273288  | 0.324237  | 0.246625 | 1        |
| XLOC_009305 | MFSD11         | chr17:74730196-74775336  | 3.48109   | 4.13033   | 0.246717 | 0.975734 |
| XLOC_016118 | MB21D2         | chr3:192514604-192635958 | 1.69612   | 2.01253   | 0.246771 | 0.800595 |
| XLOC_015455 | PIK3CA         | chr3:178866310-178952497 | 1.09833   | 1.30322   | 0.246774 | 0.813829 |
| XLOC_023526 | GPRASP1        | chrX:101854095-101972667 | 0.0664497 | 0.0788478 | 0.246809 | 1        |
| XLOC_010930 | APOE           | chr19:45409038-45412650  | 0.747212  | 0.886652  | 0.24685  | 0.952905 |
| XLOC_002522 | PLAU           | chr10:75669726-75682535  | 30.9989   | 36.7845   | 0.246879 | 0.651582 |
| XLOC_003403 | TRIM44         | chr11:35684352-35830930  | 4.8709    | 5.78044   | 0.246991 | 0.691625 |
| XLOC_007581 | LYSMD2         | chr15:52015260-52043650  | 9.53491   | 11.3162   | 0.2471   | 0.748288 |
| XLOC_008242 | WWOX           | chr16:78133326-79246564  | 5.7054    | 6.77174   | 0.247199 | 0.87226  |
| XLOC_016970 | PLRG1          | chr4:155456148-155471588 | 12.0549   | 14.3139   | 0.2478   | 0.673111 |
| XLOC_006076 | SUPT20H        | chr13:37574677-37633850  | 10.1036   | 11.9972   | 0.247828 | 0.895499 |
| XLOC_010662 | FAM32A         | chr19:16296234-16302857  | 43.6167   | 51.7933   | 0.247883 | 0.641563 |
| XLOC_007801 | VIMP           | chr15:101811213-10181778 | 41.7966   | 49.6383   | 0.248069 | 0.648141 |
| XLOC_020579 | PHTF2          | chr7:77428108-77586821   | 2.64147   | 3.13722   | 0.24815  | 0.747687 |
| XLOC_005912 | SUGT1          | chr13:53226830-53262433  | 27.4233   | 32.5708   | 0.248177 | 0.648914 |
| XLOC_010665 | C19orf44       | chr19:16607204-16653263  | 1.7148    | 2.03669   | 0.248187 | 0.965607 |
| XLOC_012975 | EXOC6B         | chr2:72406443-73053177   | 0.345419  | 0.41031   | 0.248367 | 0.909016 |
| XLOC_006469 | AHSA1          | chr14:77924372-77935815  | 144.947   | 172.196   | 0.248528 | 0.652768 |
| XLOC_008777 | GLTPD2         | chr17:4692253-4693884    | 0.197964  | 0.23519   | 0.248586 | 1        |
| XLOC_013125 | TMEM185B       | chr2:120975046-120980984 | 11.2681   | 13.3874   | 0.248623 | 0.638092 |
| XLOC_017859 | HARS           | chr5:140053489-140078898 | 39.2562   | 46.6396   | 0.248636 | 0.722382 |
| XLOC_008289 | ACSF3          | chr16:89160216-89222171  | 4.74346   | 5.63563   | 0.248637 | 0.735667 |
| XLOC_014875 | EFCAB6         | chr22:43912133-44208217  | 0.0193505 | 0.0229909 | 0.248693 | 1        |
| XLOC_016473 | ANK2           | chr4:113739238-114304898 | 0.360133  | 0.427895  | 0.248729 | 0.839213 |
| XLOC_012083 | EPT1           | chr2:26531040-26618759   | 3.22486   | 3.83183   | 0.248797 | 0.664149 |
| XLOC_012731 | RAMP1          | chr2:238768186-238820755 | 44.464    | 52.84     | 0.248995 | 0.698688 |
| XLOC_002568 | MINPP1         | chr10:89264222-89313218  | 6.77198   | 8.04793   | 0.249041 | 0.716391 |
| XLOC_006270 | TMEM253        | chr14:21558204-21572863  | 0.292682  | 0.347845  | 0.249115 | 0.989719 |
| XLOC_006780 | SEC23A         | chr14:39501122-39572437  | 3.77165   | 4.48272   | 0.249179 | 0.714627 |
| XLOC_021687 | MTDH           | chr8:98656406-98742488   | 27.0686   | 32.1734   | 0.249251 | 0.654629 |
| XLOC_017332 | CATSPER3       | chr5:134303595-134347397 | 0.587585  | 0.698418  | 0.249293 | 0.920541 |
| XLOC_015002 | CNOT10         | chr3:32726636-32815367   | 12.5422   | 14.9092   | 0.249403 | 0.657573 |
| XLOC_004570 | H2AFX          | chr11:118964584-11896617 | 199.87    | 237.593   | 0.249434 | 0.653311 |
| XLOC_021178 | SHFM1          | chr7:96318078-96339203   | 410.558   | 488.094   | 0.249573 | 0.649163 |

|             |          |                          |            |           |          |          |
|-------------|----------|--------------------------|------------|-----------|----------|----------|
| XLOC_022763 | CDKN2A   | chr9:21967137-21994490   | 1.89344    | 2.25108   | 0.249603 | 0.904734 |
| XLOC_022664 | EGFL7    | chr9:139553307-139567130 | 190.427    | 226.399   | 0.249629 | 0.642142 |
| XLOC_011989 | DUXA     | chr19:57663093-57678856  | 0.00914935 | 0.0108777 | 0.249633 | 1        |
| XLOC_004512 | SLC35F2  | chr11:107661716-10772991 | 21.2279    | 25.2388   | 0.249683 | 0.641563 |
| XLOC_016634 | LETM1    | chr4:1813205-1857974     | 14.7667    | 17.5578   | 0.249767 | 0.6442   |
| XLOC_008731 | ANKRD11  | chr16:89334028-89556969  | 12.7678    | 15.1815   | 0.249806 | 0.807124 |
| XLOC_015494 | DNAJB11  | chr3:186288466-186303581 | 24.2263    | 28.8122   | 0.250107 | 0.655465 |
| XLOC_014716 | ZNF70    | chr22:24083771-24093279  | 0.575979   | 0.68504   | 0.250172 | 0.869696 |
| XLOC_009422 | PFN1     | chr17:4848944-4852381    | 1278.66    | 1520.85   | 0.250252 | 0.680196 |
| XLOC_005294 | KLRAP1   | chr12:10741076-10752434  | 0.174409   | 0.207447  | 0.250266 | 1        |
| XLOC_004612 | ACRV1    | chr11:125495030-12555071 | 0.109359   | 0.130078  | 0.250303 | 1        |
| XLOC_015394 | RNF13    | chr3:149530474-149679921 | 5.8048     | 6.90458   | 0.250308 | 0.700083 |
| XLOC_006444 | LIN52    | chr14:74551655-74667117  | 0.99177    | 1.17967   | 0.25031  | 0.879301 |
| XLOC_000025 | ATAD3B   | chr1:1407163-1431582     | 35.8506    | 42.6434   | 0.250323 | 0.637163 |
| XLOC_021436 | AGPAT5   | chr8:6565877-6619021     | 8.97942    | 10.6823   | 0.250531 | 0.633817 |
| XLOC_000220 | GPR3     | chr1:27719147-27722317   | 6.14944    | 7.31619   | 0.250639 | 0.74078  |
| XLOC_010524 | TNFSF9   | chr19:6531009-6535939    | 19.6031    | 23.3227   | 0.250655 | 0.701805 |
| XLOC_019204 | PSMB1    | chr6:170844203-170862417 | 221.125    | 263.099   | 0.250744 | 0.648378 |
| XLOC_012056 | LPIN1    | chr2:11817704-11967533   | 7.66278    | 9.11747   | 0.250765 | 0.641988 |
| XLOC_003120 | USMG5    | chr10:105127273-10515627 | 354.546    | 421.856   | 0.250778 | 0.68423  |
| XLOC_018113 | BTN2A1   | chr6:26458152-26482737   | 5.24508    | 6.24103   | 0.250819 | 0.716012 |
| XLOC_007153 | SPINT1   | chr15:41136245-41149853  | 51.8465    | 61.6965   | 0.250941 | 0.638092 |
| XLOC_003255 | CD81     | chr11:2398546-2418649    | 324.255    | 385.877   | 0.25101  | 0.646994 |
| XLOC_001361 | STPG1    | chr1:24645811-24741587   | 5.04056    | 5.99875   | 0.251079 | 0.728225 |
| XLOC_004372 | CPT1A    | chr11:68522087-68609399  | 8.67303    | 10.3234   | 0.251306 | 0.649163 |
| XLOC_007896 | KREMENT2 | chr16:3014216-3018384    | 18.9164    | 22.5171   | 0.251381 | 0.717812 |
| XLOC_004077 | GALNT18  | chr11:11292420-11643561  | 32.9263    | 39.194    | 0.251393 | 0.632357 |
| XLOC_010751 | PDCD5    | chr19:33072093-33078358  | 168.709    | 200.834   | 0.251469 | 0.631604 |
| XLOC_013376 | GLBL1L   | chr2:220101502-220110131 | 0.572651   | 0.68173   | 0.251545 | 0.893663 |
| XLOC_018340 | CENPQ    | chr6:49431095-49460820   | 5.36856    | 6.39142   | 0.2516   | 0.739609 |
| XLOC_005632 | NDUFA12  | chr12:95365103-95397489  | 98.9571    | 117.821   | 0.251717 | 0.645533 |
| XLOC_011035 | PRMT1    | chr19:50180408-50191707  | 279.961    | 333.361   | 0.25186  | 0.648914 |
| XLOC_018406 | ORC3     | chr6:88299784-88377172   | 8.55815    | 10.1913   | 0.251966 | 0.676634 |
| XLOC_000580 | RBM15    | chr1:110881944-110889303 | 4.6837     | 5.57749   | 0.251969 | 0.717991 |
| XLOC_000913 | QSOX1    | chr1:180123967-180169851 | 50.6796    | 60.3524   | 0.252008 | 0.669766 |
| XLOC_023962 | HMGN5    | chrX:80369199-80554046   | 2.37876    | 2.83298   | 0.252112 | 0.948806 |
| XLOC_022099 | CCNE2    | chr8:9583517-95907482    | 3.31515    | 3.94848   | 0.252222 | 0.954559 |
| XLOC_023288 | PDHA1    | chrX:19362010-19533379   | 28.4095    | 33.838    | 0.252273 | 0.63475  |
| XLOC_023040 | MEGF9    | chr9:123363195-123476761 | 1.12683    | 1.34226   | 0.252387 | 0.761735 |
| XLOC_006320 | SRP54    | chr14:35452103-35498773  | 9.35635    | 11.1455   | 0.252438 | 0.671418 |
| XLOC_003626 | OVOL1    | chr11:65554504-65564690  | 0.0226069  | 0.0269313 | 0.252518 | 1        |
| XLOC_010381 | NARS     | chr18:55267893-55289177  | 39.6276    | 47.2087   | 0.252544 | 0.663296 |
| XLOC_007582 | LEO1     | chr15:52230221-52263958  | 7.07014    | 8.42366   | 0.25271  | 0.67573  |
| XLOC_023298 | SAT1     | chrX:23801274-23804327   | 103.824    | 123.71    | 0.252821 | 0.6442   |
| XLOC_006002 | LAMP1    | chr13:113951468-11397774 | 67.7282    | 80.7017   | 0.252842 | 0.642142 |
| XLOC_008791 | MIS12    | chr17:5389693-5394130    | 9.737      | 11.6053   | 0.253238 | 0.671358 |
| XLOC_019043 | TUBE1    | chr6:112391859-112423991 | 7.45113    | 8.88099   | 0.25326  | 0.872554 |
| XLOC_006928 | EFCAB11  | chr14:90263468-90421089  | 10.5032    | 12.5189   | 0.253284 | 0.782186 |
| XLOC_009926 | CEP112   | chr17:63631657-64188212  | 1.43766    | 1.71361   | 0.253314 | 0.873144 |
| XLOC_018291 | MDF1     | chr6:41606194-41621982   | 28.3305    | 33.7695   | 0.253362 | 0.672097 |
| XLOC_003159 | EIF3A    | chr10:120794540-12084031 | 24.8364    | 29.6052   | 0.253399 | 0.637163 |
| XLOC_002805 | PRKCC    | chr10:6469104-6622254    | 1.36303    | 1.62483   | 0.253466 | 0.808353 |
| XLOC_013280 | MTSN     | chr2:190920425-190927451 | 0.0100558  | 0.0119901 | 0.25381  | 1        |
| XLOC_002559 | BMPR1A   | chr10:88516395-88684945  | 2.83507    | 3.38057   | 0.25388  | 0.73007  |
| XLOC_013658 | TOP1     | chr20:39657461-39753126  | 18.7666    | 22.3818   | 0.254158 | 0.624818 |
| XLOC_014892 | CELSR1   | chr22:46756730-46933067  | 0.049414   | 0.0589364 | 0.25424  | 1        |
| XLOC_012901 | PIGF     | chr2:46769866-46844251   | 20.1489    | 24.0332   | 0.25433  | 0.917325 |
| XLOC_011979 | NLRP11   | chr19:56296762-56393220  | 0.304573   | 0.363308  | 0.254407 | 0.897825 |
| XLOC_016311 | DANCR    | chr4:53578620-53580305   | 101.176    | 120.69    | 0.254441 | 0.638092 |
| XLOC_007293 | CD276    | chr15:73976621-74006859  | 24.9279    | 29.7371   | 0.254503 | 0.631534 |
| XLOC_014298 | C21orf59 | chr21:33973983-33984918  | 36.0569    | 43.0251   | 0.254903 | 0.632634 |
| XLOC_001102 | ARV1     | chr1:231114822-231136471 | 6.65095    | 7.93759   | 0.255141 | 0.741805 |
| XLOC_015804 | MAGI1    | chr3:65339905-66024509   | 0.782676   | 0.934209  | 0.255331 | 0.800631 |
| XLOC_007431 | HSP90B2P | chr15:99791651-99926498  | 0.0304936  | 0.0363999 | 0.255429 | 1        |
| XLOC_013296 | HSPD1    | chr2:198351307-198418421 | 386.86     | 461.827   | 0.255541 | 0.734475 |
| XLOC_009081 | PSME3    | chr17:40985158-40995777  | 30.9879    | 36.995    | 0.255627 | 0.635935 |
| XLOC_008487 | CLN3     | chr16:28488599-28503623  | 25.7581    | 30.7518   | 0.255644 | 0.650075 |
| XLOC_016131 | XXYL1T   | chr3:194789012-194991891 | 2.86191    | 3.41687   | 0.255698 | 0.790283 |
| XLOC_007809 | SNRNP25  | chr16:103828-107669      | 27.7355    | 33.1156   | 0.255779 | 0.653383 |
| XLOC_010089 | USP14    | chr18:158482-213739      | 10.934     | 13.0562   | 0.255919 | 0.636639 |
| XLOC_020424 | ZNRF2    | chr7:30323922-30407308   | 1.23202    | 1.47129   | 0.256055 | 0.830321 |
| XLOC_021245 | ORC5     | chr7:103766787-103848491 | 18.7804    | 22.429    | 0.256141 | 0.624874 |
| XLOC_020374 | PHF14    | chr7:11013498-11209250   | 3.64357    | 4.35159   | 0.256191 | 0.723055 |
| XLOC_021071 | PSPH     | chr7:56078743-56119268   | 14.7364    | 17.6017   | 0.256333 | 0.703835 |
| XLOC_011848 | AKT1S1   | chr19:50372296-50380644  | 48.5148    | 57.951    | 0.256408 | 0.632011 |
| XLOC_019183 | SFT2D1   | chr6:166733516-166755991 | 103.826    | 124.024   | 0.256442 | 0.632842 |
| XLOC_004964 | TBK1     | chr12:64845839-64895899  | 6.30948    | 7.53698   | 0.256466 | 0.661955 |
| XLOC_009599 | TEFM     | chr17:29226000-29233286  | 8.14446    | 9.7295    | 0.256547 | 0.72467  |
| XLOC_008891 | DRG2     | chr17:17991180-18011299  | 24.6557    | 29.4564   | 0.256661 | 0.638917 |

|              |                     |                          |           |           |          |          |
|--------------|---------------------|--------------------------|-----------|-----------|----------|----------|
| XLOC_006255  | PNP                 | chr14:20937537-20946165  | 67.9927   | 81.232    | 0.256668 | 0.620408 |
| XLOC_004402  | UCP3                | chr11:73711325-73720282  | 0.158078  | 0.188881  | 0.256884 | 1        |
| XLOC_014743  | TTC28               | chr22:28315363-29075853  | 0.413567  | 0.494169  | 0.256909 | 0.924371 |
| XLOC_016686  | QDPR                | chr4:17488015-17513857   | 32.5609   | 38.9075   | 0.256981 | 0.625369 |
| XLOC_004969  | LEMD3               | chr12:65563350-65642141  | 3.25735   | 3.89246   | 0.257188 | 0.682297 |
| XLOC_002269  | PLAA                | chr9:26903367-27062931   | 7.61026   | 9.09538   | 0.257195 | 0.691625 |
| XLOC_008595  | C16orf80            | chr16:58147496-58163296  | 38.6979   | 46.2499   | 0.257331 | 0.638545 |
| XLOC_009143  | NFE2L1              | chr17:46125685-46138907  | 22.9432   | 27.4232   | 0.257396 | 0.633749 |
| XLOC_015317  | SEC61A1             | chr3:127771211-127790521 | 82.0195   | 98.0395   | 0.257467 | 0.634201 |
| XLOC_004569  | HYOU1               | chr11:118914895-11892792 | 22.0954   | 26.4124   | 0.257504 | 0.620054 |
| XLOC_008438  | ABCC6               | chr16:16243421-16317328  | 1.02018   | 1.21953   | 0.257634 | 0.935939 |
| XLOC_004496  | DCUN1D5             | chr11:102921412-10296294 | 4.22243   | 5.04799   | 0.257659 | 0.624393 |
| XLOC_008919  | MAP2K3              | chr17:21187967-21218551  | 50.2636   | 60.092    | 0.257758 | 0.624281 |
| XLOC_0022907 | GOLM1               | chr9:88641057-88715116   | 47.8035   | 57.1544   | 0.258044 | 0.613617 |
| XLOC_007800  | CHSY1               | chr15:101715927-10179212 | 3.42725   | 4.09769   | 0.258082 | 0.70071  |
| XLOC_020696  | DLD                 | chr7:107531585-107561643 | 24.0118   | 28.7111   | 0.258182 | 0.619291 |
| XLOC_004828  | DNAJC22             | chr12:49741040-49745685  | 4.36451   | 5.21895   | 0.258183 | 0.777608 |
| XLOC_001558  | TMEM48              | chr1:54231133-54304225   | 6.38208   | 7.63187   | 0.258411 | 0.638092 |
| XLOC_000316  | CTPS1               | chr1:41445006-41478235   | 19.1718   | 22.9267   | 0.258561 | 0.617065 |
| XLOC_023179  | EDF1                | chr9:139756570-139760738 | 827.952   | 990.137   | 0.259045 | 0.647116 |
| XLOC_022980  | BAAT                | chr9:104122698-104147287 | 0.111286  | 0.133095  | 0.259054 | 1        |
| XLOC_000929  | RGL1                | chr1:183605207-183897666 | 0.30376   | 0.363288  | 0.259424 | 0.869885 |
| XLOC_013571  | GINS1               | chr20:25388322-25429191  | 7.5048    | 8.97694   | 0.259456 | 0.654231 |
| XLOC_022085  | LOC100127983        | chr8:91803920-91997485   | 0.128702  | 0.153964  | 0.259534 | 1        |
| XLOC_006082  | PROSER1             | chr13:39584001-39612213  | 6.0542    | 7.24305   | 0.259573 | 0.651582 |
| XLOC_011678  | C19orf47            | chr19:40826966-40884390  | 8.59134   | 10.279    | 0.259717 | 0.938194 |
| XLOC_024098  | MOSPDI              | chrX:134021661-134049292 | 3.18085   | 3.80577   | 0.259755 | 0.750092 |
| XLOC_008316  | MRPL28              | chr16:417383-420569      | 110.689   | 132.45    | 0.259821 | 0.612792 |
| XLOC_003702  | P2RY2               | chr11:72929343-72947395  | 0.588754  | 0.704554  | 0.260157 | 0.895195 |
| XLOC_014638  | CRELD2              | chr22:50312282-50321186  | 12.0296   | 14.3957   | 0.260273 | 0.728031 |
| XLOC_017711  | ARSB                | chr5:78073036-78282357   | 0.68039   | 0.814427  | 0.260363 | 0.889711 |
| XLOC_014092  | RGS19               | chr20:62704534-62711324  | 22.4732   | 26.9011   | 0.260498 | 0.666069 |
| XLOC_015277  | TIMMDC1             | chr3:119217367-119243121 | 32.1949   | 38.5398   | 0.260501 | 0.619231 |
| XLOC_020466  | DBNL                | chr7:44084238-44101315   | 37.639    | 45.0573   | 0.260569 | 0.619291 |
| XLOC_013518  | LOC643406           | chr20:5451841-5457780    | 0.105294  | 0.126051  | 0.260652 | 1        |
| XLOC_000817  | SLAMF7              | chr1:160709076-160724607 | 0.197843  | 0.236867  | 0.260718 | 1        |
| XLOC_001187  | NOC2L               | chr1:861120-894679       | 68.0973   | 81.5313   | 0.261047 | 0.619291 |
| XLOC_017715  | SERINC5             | chr5:79407049-79551898   | 1.56395   | 1.87248   | 0.261115 | 0.730493 |
| XLOC_012974  | CYP26B1             | chr2:72356366-72374963   | 1.0152    | 1.21553   | 0.261354 | 0.824588 |
| XLOC_019137  | NUP43               | chr6:150045456-150067688 | 9.40903   | 11.2683   | 0.261358 | 0.633936 |
| XLOC_000738  | HAX1                | chr1:154245038-154248351 | 68.9835   | 82.6219   | 0.261387 | 0.638558 |
| XLOC_017249  | FAM174A             | chr5:99871123-99922440   | 7.15268   | 8.56734   | 0.261408 | 0.749584 |
| XLOC_011264  | POLRMT              | chr19:617222-633568      | 37.344    | 44.7341   | 0.261462 | 0.606887 |
| XLOC_017178  | MCCC2               | chr5:70883114-70954530   | 20.287    | 24.3017   | 0.261462 | 0.608559 |
| XLOC_007452  | NIP2A               | chr15:23004683-23034427  | 18.6837   | 22.3822   | 0.261513 | 0.634201 |
| XLOC_004218  | BTBD18              | chr11:57479994-57586652  | 0.0142598 | 0.0170836 | 0.261513 | 1        |
| XLOC_007391  | FANCI               | chr15:89787193-89878026  | 6.6712    | 7.99259   | 0.261643 | 0.850379 |
| XLOC_003676  | MYEOV               | chr11:69061621-69064754  | 7.51819   | 9.00942   | 0.261695 | 0.716012 |
| XLOC_006357  | PSMC6               | chr14:53173895-53194716  | 28.0751   | 33.6453   | 0.261946 | 0.611988 |
| XLOC_001631  | BCL10               | chr1:85731459-85743771   | 27.6078   | 33.0908   | 0.262128 | 0.628409 |
| XLOC_007390  | ABHD2               | chr15:89631380-89745591  | 2.55759   | 3.06554   | 0.262246 | 0.653383 |
| XLOC_004985  | CCT2                | chr12:69979207-69995357  | 171.196   | 205.201   | 0.26227  | 0.626978 |
| XLOC_000121  | DDI2_RSC1A1         | chr1:15943952-15988217   | 2.13132   | 2.5547    | 0.262469 | 0.796325 |
| XLOC_000193  | MAN1C1              | chr1:25943958-26111258   | 0.102193  | 0.122499  | 0.262545 | 1        |
| XLOC_004977  | NUP107              | chr12:69080730-69136473  | 14.1104   | 16.9146   | 0.262608 | 0.617065 |
| XLOC_004856  | NR4A1               | chr12:52416615-52453291  | 12.6233   | 15.1333   | 0.262633 | 0.668888 |
| XLOC_006731  | PSME2               | chr14:24612573-24615855  | 99.784    | 119.63    | 0.262633 | 0.606953 |
| XLOC_019113  | LOC100507462        | chr6:139046347-139114451 | 0.0988234 | 0.118479  | 0.262851 | 1        |
| XLOC_016295  | TMEM33              | chr4:41937136-41962824   | 7.56285   | 9.06848   | 0.262904 | 0.618093 |
| XLOC_002939  | SGMS1               | chr10:52065344-52383737  | 2.47719   | 2.97039   | 0.262999 | 0.723204 |
| XLOC_004833  | TMBIM6              | chr12:50135292-50158717  | 269.339   | 323.004   | 0.263003 | 0.640343 |
| XLOC_005105  | ALDH2               | chr12:112204690-11224778 | 58.3852   | 70.024    | 0.263151 | 0.606431 |
| XLOC_015183  | MITF                | chr3:69788585-70017488   | 0.459008  | 0.550517  | 0.263229 | 0.839607 |
| XLOC_011501  | WIZ                 | chr19:15532317-15560762  | 15.5689   | 18.6754   | 0.263299 | 0.619111 |
| XLOC_010537  | PET100              | chr19:7694670-7698634    | 154.383   | 185.196   | 0.263303 | 0.633749 |
| XLOC_014342  | C2CD2               | chr21:43305218-43373999  | 21.8911   | 26.2615   | 0.263332 | 0.622998 |
| XLOC_011433  | TMEM205             | chr19:11453451-11456981  | 97.2561   | 116.675   | 0.263366 | 0.624874 |
| XLOC_003047  | NUDT9P1             | chr10:92911760-92912837  | 0.257893  | 0.309433  | 0.26352  | 1        |
| XLOC_012326  | UNC50               | chr2:99225041-99234977   | 25.8842   | 31.0582   | 0.263632 | 0.651749 |
| XLOC_006409  | EIF2S1              | chr14:67827033-67853233  | 18.3454   | 22.0138   | 0.263728 | 0.61078  |
| XLOC_018071  | KDM1B               | chr6:18155618-18224084   | 1.66004   | 1.99215   | 0.263728 | 0.750689 |
| XLOC_016158  | ZNF595,ZNF718       | chr4:53226-156490        | 0.44548   | 0.534608  | 0.263894 | 0.876927 |
| XLOC_002759  | PTPRE               | chr10:129705324-12988411 | 0.868212  | 1.04194   | 0.263952 | 0.786958 |
| XLOC_017817  | H2AFY               | chr5:134670070-134735571 | 67.7561   | 81.3222   | 0.263994 | 0.604298 |
| XLOC_005977  | TPP2                | chr13:103249285-10333151 | 8.22334   | 9.86984   | 0.264299 | 0.612792 |
| XLOC_003266  | RRM1                | chr11:4115923-4160106    | 26.9785   | 32.3832   | 0.264336 | 0.601838 |
| XLOC_013382  | CHPF                | chr2:220403668-220408487 | 49.0948   | 58.939    | 0.264525 | 0.605597 |
| XLOC_006025  | LATS2               | chr13:21547175-21635722  | 3.8526    | 4.62535   | 0.263728 | 0.666069 |
| XLOC_001759  | LINC00623,LOC728875 | chr1:144300511-144341751 | 0.899926  | 1.08055   | 0.263894 | 0.900119 |

|             |                        |                           |           |          |          |          |
|-------------|------------------------|---------------------------|-----------|----------|----------|----------|
| XLOC_002175 | TMEM206                | chr1:212537815-212588261  | 10.1956   | 12.2422  | 0.263925 | 0.671358 |
| XLOC_007255 | PTPLAD1                | chr15:65822826-65870693   | 29.0911   | 34.9309  | 0.263927 | 0.605597 |
| XLOC_017257 | SLC25A46               | chr5:110074753-110098484  | 5.5196    | 6.62778  | 0.263964 | 0.679982 |
| XLOC_017331 | MIR4461                | chr5:134240809-134298336  | 3043.01   | 3654     | 0.263976 | 0.98972  |
| XLOC_011258 | PPAP2C                 | chr19:281043-291435       | 79.2278   | 95.1425  | 0.264083 | 0.605597 |
| XLOC_018618 | SERPINB9               | chr6:2887499-2903546      | 11.3829   | 13.6702  | 0.264174 | 0.617065 |
| XLOC_014306 | GART                   | chr21:34876237-34915198   | 28.8019   | 34.5964  | 0.264456 | 0.638545 |
| XLOC_008492 | TUFM                   | chr16:28853731-28857729   | 301.068   | 361.663  | 0.26456  | 0.614283 |
| XLOC_019155 | TMEM242                | chr6:157710053-157745253  | 3.39902   | 4.08405  | 0.264878 | 0.65681  |
| XLOC_016662 | AFAP1                  | chr4:7755816-7941653      | 1.01997   | 1.22558  | 0.264937 | 0.754842 |
| XLOC_018763 | GPANK1                 | chr6:31629005-31637843    | 17.3545   | 20.8549  | 0.265073 | 0.931471 |
| XLOC_010869 | SNRPA                  | chr19:41256758-41271297   | 124.669   | 149.815  | 0.265078 | 0.615994 |
| XLOC_021713 | EMC2                   | chr8:109455852-109499136  | 30.2234   | 36.3205  | 0.26512  | 0.608559 |
| XLOC_009339 | CCDC137                | chr17:79633760-79640936   | 24.8959   | 29.9188  | 0.265148 | 0.619732 |
| XLOC_018086 | LRRRC16A               | chr6:25279655-25620758    | 1.59213   | 1.91359  | 0.265325 | 0.727212 |
| XLOC_014606 | BIK                    | chr22:43506753-43525718   | 4.66592   | 5.60805  | 0.265338 | 0.830184 |
| XLOC_000188 | CLIC4                  | chr1:25071759-25170815    | 21.5357   | 25.8845  | 0.265361 | 0.624818 |
| XLOC_005141 | CABP1                  | chr12:121078421-12110512  | 1.18391   | 1.423    | 0.265375 | 0.895818 |
| XLOC_014935 | ARPC4,ARPC4-TTLL3,TTLL | chr3:9821653-9878040      | 115.883   | 139.291  | 0.265431 | 0.780773 |
| XLOC_014251 | MRPL39                 | chr21:26957967-26979801   | 44.6596   | 53.6832  | 0.265498 | 0.589808 |
| XLOC_000374 | DMBX1                  | chr1:46972667-46979886    | 1.58056   | 1.90003  | 0.265582 | 0.824707 |
| XLOC_002164 | PLXNA2                 | chr1:208195587-208417665  | 0.414104  | 0.497808 | 0.265596 | 0.806843 |
| XLOC_002025 | TNFSF4                 | chr1:173152869-173176477  | 0.0391561 | 0.047077 | 0.265785 | 1        |
| XLOC_016323 | TMEM165                | chr4:56262079-56292342    | 43.3329   | 52.0996  | 0.265809 | 0.584416 |
| XLOC_015819 | SHQ1                   | chr3:72798427-72897598    | 4.11722   | 4.95043  | 0.265885 | 0.690127 |
| XLOC_020341 | NUDT1                  | chr7:2281856-2290780      | 50.2698   | 60.4458  | 0.265952 | 0.650075 |
| XLOC_007131 | C15orf41               | chr15:36871811-37110707   | 1.97463   | 2.37471  | 0.266173 | 0.778471 |
| XLOC_010573 | MRPL4                  | chr19:10362639-10370736   | 146.594   | 176.336  | 0.266501 | 0.61004  |
| XLOC_023635 | HTATSF1                | chrX:135579237-135594503  | 6.56063   | 7.89233  | 0.266617 | 0.657112 |
| XLOC_003648 | RBM14,RBM14-RBM4,RBM   | chr11:66384052-66445275   | 90.6313   | 109.04   | 0.266773 | 0.73891  |
| XLOC_002697 | VTI1A                  | chr10:114206755-11457851  | 3.96017   | 4.76466  | 0.266809 | 0.664776 |
| XLOC_001976 | NR1I3                  | chr1:161195832-161208000  | 1.51135   | 1.81838  | 0.266815 | 0.967367 |
| XLOC_006986 | XRCC3                  | chr14:104095524-10418182  | 11.6718   | 14.0445  | 0.266974 | 0.863259 |
| XLOC_010409 | CYB5A                  | chr18:71920526-71959251   | 10.966    | 13.1958  | 0.267039 | 0.739919 |
| XLOC_012515 | ITGA6                  | chr2:173292313-173371181  | 2.20687   | 2.65603  | 0.267269 | 0.674625 |
| XLOC_005172 | GTF2H3                 | chr12:124105569-124147151 | 7.48325   | 9.00687  | 0.267362 | 0.806843 |
| XLOC_011253 | LOC100131691           | chr19:59070552-59086164   | 0.276419  | 0.332715 | 0.267431 | 1        |
| XLOC_003638 | KLC2                   | chr11:66024764-66035332   | 31.0779   | 37.4075  | 0.267437 | 0.596377 |
| XLOC_017490 | CPEB4                  | chr5:173315330-173387313  | 0.531662  | 0.63999  | 0.267538 | 0.787642 |
| XLOC_016411 | CDS1                   | chr4:85504056-85572493    | 1.84137   | 2.21697  | 0.267812 | 0.728892 |
| XLOC_006371 | AP5M1                  | chr14:57669193-57756797   | 4.2127    | 5.07205  | 0.267822 | 0.905536 |
| XLOC_018488 | CENPW                  | chr6:126661252-126669750  | 65.9118   | 79.3763  | 0.268172 | 0.637163 |
| XLOC_013413 | NCL                    | chr2:232319458-232329205  | 236.314   | 284.593  | 0.268193 | 0.621004 |
| XLOC_015932 | RUVBL1                 | chr3:127799799-127842677  | 41.8507   | 50.401   | 0.268199 | 0.590604 |
| XLOC_005078 | BTBD11                 | chr12:107712196-10805347  | 0.349664  | 0.421113 | 0.268238 | 0.875655 |
| XLOC_020358 | CCZ1                   | chr7:5938340-5965603      | 9.098     | 10.9574  | 0.268283 | 0.662533 |
| XLOC_012914 | RTN4                   | chr2:55199326-55277734    | 145.337   | 175.075  | 0.268573 | 0.596611 |
| XLOC_009932 | WIPI1                  | chr17:66417421-66453653   | 9.20446   | 11.088   | 0.268589 | 0.671358 |
| XLOC_004169 | ACP2                   | chr11:47260852-47290584   | 8.69086   | 10.4713  | 0.268875 | 0.728912 |
| XLOC_009102 | ASB16                  | chr17:42248073-42264085   | 0.171055  | 0.2062   | 0.269583 | 1        |
| XLOC_022417 | DAPK1                  | chr9:90112755-90323549    | 2.4932    | 3.00547  | 0.269592 | 0.682297 |
| XLOC_002147 | SLC45A3                | chr1:205626980-205649630  | 5.9872    | 7.21776  | 0.269671 | 0.678263 |
| XLOC_009100 | G6PC3                  | chr17:42148097-42153712   | 61.953    | 74.6936  | 0.26981  | 0.585469 |
| XLOC_005522 | CNPY2,PAN2             | chr12:56704212-56727837   | 97.9434   | 118.095  | 0.269923 | 0.662533 |
| XLOC_017963 | NOP16                  | chr5:175810939-175815763  | 88.504    | 106.716  | 0.269963 | 0.579831 |
| XLOC_001644 | GBP4                   | chr1:89646830-89664633    | 0.0068673 | 0.008281 | 0.270062 | 1        |
| XLOC_017542 | CCDC127                | chr5:204874-218297        | 11.8242   | 14.2601  | 0.270242 | 0.679123 |
| XLOC_021690 | C8orf47                | chr8:99076749-99105838    | 6.70429   | 8.0855   | 0.270252 | 0.819513 |
| XLOC_008026 | SPNS1                  | chr16:28986095-28995869   | 28.1652   | 33.9693  | 0.27032  | 0.612662 |
| XLOC_022497 | ZNF462                 | chr9:109625377-109848716  | 0.932934  | 1.12523  | 0.270372 | 0.728225 |
| XLOC_009257 | SSTR2                  | chr17:71161159-71168062   | 0.0152142 | 0.018352 | 0.27052  | 1        |
| XLOC_008148 | KATNB1                 | chr16:57769659-57791162   | 34.5785   | 41.7108  | 0.270546 | 0.589726 |
| XLOC_017419 | PPARGC1B               | chr5:149109814-149234585  | 0.427954  | 0.516262 | 0.270645 | 0.788214 |
| XLOC_012926 | BCL11A                 | chr2:60678301-60780633    | 0.756925  | 0.913232 | 0.270832 | 0.872554 |
| XLOC_007973 | IQCK                   | chr16:19717673-19868859   | 2.2682    | 2.73659  | 0.270835 | 0.896464 |
| XLOC_001225 | FLJ42875               | chr1:2976180-2984289      | 5.31349   | 6.41105  | 0.270899 | 0.879809 |
| XLOC_013929 | E2F1                   | chr20:32263291-32274210   | 17.1943   | 20.7475  | 0.271008 | 0.612736 |
| XLOC_023067 | PSMB7                  | chr9:127115743-127177753  | 247.644   | 298.823  | 0.271022 | 0.707157 |
| XLOC_011419 | CDC37                  | chr19:10501808-10514271   | 236.325   | 285.173  | 0.271065 | 0.72467  |
| XLOC_007522 | NDUFAF1                | chr15:41679546-41694658   | 12.8515   | 15.5085  | 0.271127 | 0.651323 |
| XLOC_005001 | NAV3                   | chr12:78225068-78606790   | 5.19939   | 6.27666  | 0.271655 | 0.598176 |
| XLOC_014547 | NAV12                  | chr22:38082343-38089485   | 6.41512   | 7.74512  | 0.271811 | 0.668862 |
| XLOC_006893 | LTBP2                  | chr14:74964885-75079034   | 0.58105   | 0.701536 | 0.271856 | 0.797849 |
| XLOC_006427 | SIPA1L1                | chr14:71996041-72206120   | 4.93486   | 5.95836  | 0.271907 | 0.617065 |
| XLOC_009898 | CYB5E1                 | chr17:61509664-61523722   | 12.5766   | 15.1871  | 0.272105 | 0.609543 |
| XLOC_012863 | FAM98A                 | chr2:33808728-33824362    | 10.154    | 12.2623  | 0.27218  | 0.605227 |
| XLOC_003720 | SERPINH1               | chr11:75273100-75283849   | 108.355   | 130.86   | 0.27226  | 0.595039 |
| XLOC_015887 | TMEM39A                | chr3:119147806-119182525  | 4.21863   | 5.09509  | 0.272332 | 0.629966 |
| XLOC_007718 | WDR61                  | chr15:78575577-78591940   | 22.5304   | 27.2114  | 0.27234  | 0.617065 |

|             |            |                         |            |            |          |          |
|-------------|------------|-------------------------|------------|------------|----------|----------|
| XLOC_005375 | AMN1       | chr12:31824070-31882108 | 1.01608    | 1.22738    | 0.272569 | 0.839401 |
| XLOC_008089 | GPT2       | chr16:46918307-46965201 | 22.0529    | 26.64      | 0.272625 | 0.610406 |
| XLOC_003055 | FRA10AC1   | chr10:95427639-95462329 | 5.22085    | 6.30733    | 0.272746 | 0.634201 |
| XLOC_011803 | LIG1       | chr19:48618702-48673560 | 18.3875    | 22.2145    | 0.272772 | 0.598567 |
| XLOC_014708 | PRAME      | chr22:22890122-22901696 | 14.4152    | 17.4185    | 0.273034 | 0.617065 |
| XLOC_013168 | MCM6       | chr2:136597195-13663404 | 16.2994    | 19.6971    | 0.273163 | 0.582306 |
| XLOC_014352 | U2AF1      | chr21:44513065-44527688 | 183.674    | 221.965    | 0.273186 | 0.586293 |
| XLOC_010048 | PYCR1      | chr17:79890266-79894968 | 196.045    | 236.935    | 0.273311 | 0.602989 |
| XLOC_004180 | NUP160     | chr11:47799669-47870057 | 5.72511    | 6.91978    | 0.273422 | 0.594487 |
| XLOC_012047 | RRM2       | chr2:10262694-10271546  | 42.4241    | 51.2778    | 0.27345  | 0.572217 |
| XLOC_006454 | LOC731223  | chr14:75761106-75763111 | 0.395552   | 0.478109   | 0.273474 | 0.97314  |
| XLOC_002483 | MYPN       | chr10:69865873-69971773 | 0.00642714 | 0.00776858 | 0.273475 | 1        |
| XLOC_009172 | LUC7L3     | chr17:48796925-48830072 | 18.1312    | 21.9157    | 0.273495 | 0.652768 |
| XLOC_002154 | MRPL13     | chr8:121408082-12153587 | 99.1907    | 119.91     | 0.273681 | 0.603292 |
| XLOC_007119 | CHRNA7     | chr15:32322685-32462384 | 1.41083    | 1.70555    | 0.273694 | 0.787871 |
| XLOC_016270 | STIM2      | chr4:26862312-27027003  | 0.966586   | 1.16855    | 0.273753 | 0.761735 |
| XLOC_005200 | NOCL4      | chr12:132628992-1326369 | 30.0209    | 36.2949    | 0.2738   | 0.611466 |
| XLOC_014402 | USP18      | chr22:18632757-18660162 | 3.55144    | 4.29415    | 0.273969 | 0.742706 |
| XLOC_010015 | CBX4       | chr17:77806954-77813213 | 23.9608    | 28.9724    | 0.274007 | 0.600828 |
| XLOC_006685 | OSGEP      | chr14:20915206-20923267 | 27.0027    | 32.6589    | 0.274377 | 0.589808 |
| XLOC_021191 | ZNF394     | chr7:99090853-99097877  | 13.4026    | 16.2106    | 0.274426 | 0.609543 |
| XLOC_020895 | C7orf50    | chr7:1036622-1177893    | 90.2128    | 109.116    | 0.274462 | 0.628269 |
| XLOC_022262 | DMRT2      | chr9:1050345-1057554    | 2.35373    | 2.84701    | 0.274499 | 0.784181 |
| XLOC_021502 | SLC39A14   | chr8:22224761-22291640  | 23.2667    | 28.1441    | 0.274567 | 0.585654 |
| XLOC_001448 | STK4       | chr1:36805224-36851485  | 13.9355    | 16.8591    | 0.27476  | 0.619995 |
| XLOC_012376 | TMEM87B    | chr2:112812799-11287689 | 2.96652    | 3.5889     | 0.274767 | 0.645335 |
| XLOC_013020 | LOC90784   | chr2:86247338-86250991  | 2.99374    | 3.62226    | 0.27494  | 0.691659 |
| XLOC_012674 | ACSL3      | chr2:223725731-22380811 | 10.8214    | 13.0939    | 0.275003 | 0.585481 |
| XLOC_015313 | MCM2       | chr3:127317199-12734127 | 34.4463    | 41.6888    | 0.275312 | 0.57212  |
| XLOC_002210 | TMEM63A    | chr1:225997796-22607042 | 5.13922    | 6.22029    | 0.275434 | 0.832722 |
| XLOC_012621 | MAP2       | chr2:210288770-21059883 | 0.0832844  | 0.10081    | 0.27552  | 1        |
| XLOC_023459 | FOXO4      | chrX:70315998-70323384  | 1.44173    | 1.74519    | 0.275581 | 0.786804 |
| XLOC_011767 | SYMPK      | chr19:46318699-46366548 | 17.0401    | 20.6281    | 0.275682 | 0.568534 |
| XLOC_001357 | SRSF10     | chr1:24292936-24306953  | 24.2272    | 29.3311    | 0.275805 | 0.597239 |
| XLOC_021112 | RFC2       | chr7:73645831-73668738  | 32.8331    | 39.7511    | 0.275847 | 0.574819 |
| XLOC_006285 | NGDN       | chr14:23938897-23947402 | 20.9992    | 25.424     | 0.275859 | 0.61592  |
| XLOC_015413 | KCNAB1     | chr3:155838336-15625692 | 1.10337    | 1.336      | 0.275999 | 0.760508 |
| XLOC_011045 | ATF5       | chr19:50392912-50437193 | 34.8857    | 42.2427    | 0.276067 | 0.912696 |
| XLOC_005406 | RAPGEF3    | chr12:48128452-48152889 | 0.479926   | 0.581178   | 0.276168 | 0.827857 |
| XLOC_022054 | MRPS28     | chr8:80831094-80942506  | 40.3973    | 48.9215    | 0.276209 | 0.611729 |
| XLOC_003404 | LDLRAD3    | chr11:35965611-36252841 | 2.55876    | 3.09873    | 0.276232 | 0.727358 |
| XLOC_002497 | TSPAN15    | chr10:71211225-71267423 | 7.2026     | 8.7236     | 0.276407 | 0.701167 |
| XLOC_020780 | TTC26      | chr7:138818489-13887455 | 1.84463    | 2.23435    | 0.27653  | 0.780149 |
| XLOC_010768 | WTIP       | chr19:34972879-34992085 | 1.4131     | 1.71168    | 0.27655  | 0.867513 |
| XLOC_008336 | CLCN7      | chr16:1494933-1525085   | 38.6474    | 46.814     | 0.276568 | 0.553778 |
| XLOC_017312 | C5orf56    | chr5:131746464-13181173 | 0.623821   | 0.755734   | 0.276745 | 0.947848 |
| XLOC_015221 | CMSS1      | chr3:99273152-99897476  | 33.8416    | 40.9996    | 0.276814 | 0.670347 |
| XLOC_006253 | PARP2      | chr14:20811772-20826063 | 12.7369    | 15.4321    | 0.276918 | 0.608261 |
| XLOC_021585 | UBE2V2     | chr8:48920994-48974454  | 20.5389    | 24.8856    | 0.276952 | 0.584739 |
| XLOC_012786 | ODC1       | chr2:10580507-10588453  | 176.919    | 214.384    | 0.277114 | 0.568527 |
| XLOC_002335 | PRKCCQ-AS1 | chr10:6622386-6627323   | 2.62386    | 3.17963    | 0.277169 | 0.736579 |
| XLOC_016097 | TRA2B      | chr3:185632357-18565592 | 26.353     | 31.9366    | 0.277244 | 0.5661   |
| XLOC_009162 | TMEM92     | chr17:48348766-48358846 | 0.110104   | 0.133453   | 0.277468 | 1        |
| XLOC_021536 | LEPROTL1   | chr8:29920257-30108213  | 9.72424    | 11.7867    | 0.277506 | 0.924847 |
| XLOC_021684 | PTDSS1     | chr8:97274166-97346774  | 91.5317    | 110.95     | 0.27756  | 0.57472  |
| XLOC_003782 | ARHGAP42   | chr11:100558406-1008616 | 0.283025   | 0.343085   | 0.277636 | 1        |
| XLOC_008625 | ATP6V0D1   | chr16:67471916-67515089 | 59.2767    | 71.8568    | 0.277658 | 0.563967 |
| XLOC_018684 | HIST1H2BG  | chr6:26216427-26216872  | 2.82396    | 3.42341    | 0.277715 | 0.917687 |
| XLOC_018649 | TBC1D7     | chr6:13305183-13328787  | 5.6792     | 6.88507    | 0.277784 | 0.765576 |
| XLOC_007226 | LOC283663  | chr15:57592562-57599967 | 0.164212   | 0.19908    | 0.277792 | 1        |
| XLOC_007538 | UBR1       | chr15:43235097-43398286 | 1.25182    | 1.51775    | 0.277905 | 0.66921  |
| XLOC_019026 | OSTM1      | chr6:108362612-10839594 | 2.86643    | 3.4756     | 0.278005 | 0.656493 |
| XLOC_005973 | PCCA       | chr13:100741268-1012410 | 1.20418    | 1.46044    | 0.278356 | 0.90909  |
| XLOC_006854 | SPTB       | chr14:65213000-65289866 | 0.632081   | 0.766653   | 0.278466 | 0.787909 |
| XLOC_009996 | SRSF2      | chr17:74730196-74775336 | 82.6085    | 100.207    | 0.278621 | 0.621063 |
| XLOC_022470 | ANP32B     | chr9:100745488-10077822 | 183.287    | 222.362    | 0.278808 | 0.573076 |
| XLOC_006295 | FITM1      | chr14:24600674-24602058 | 1.02958    | 1.24908    | 0.278808 | 0.921047 |
| XLOC_015852 | CBLB       | chr3:105377108-10558788 | 0.509064   | 0.617631   | 0.278897 | 0.830384 |
| XLOC_012646 | RQCD1      | chr2:219433302-21946115 | 17.1051    | 20.7532    | 0.278908 | 0.580748 |
| XLOC_020962 | TRA2A      | chr7:23544400-23571656  | 30.3176    | 36.7863    | 0.279012 | 0.561689 |
| XLOC_008489 | NUPR1      | chr16:28548661-28550495 | 1.89269    | 2.29669    | 0.279122 | 0.898626 |
| XLOC_022630 | GTF3C5     | chr9:135906061-13593389 | 93.2009    | 113.096    | 0.279137 | 0.558681 |
| XLOC_006483 | FOXN3-AS1  | chr14:89622515-90085494 | 1.74432    | 2.11668    | 0.279144 | 0.977272 |
| XLOC_015554 | SSUH2      | chr3:8661085-8693764    | 0.101754   | 0.12348    | 0.279195 | 1        |
| XLOC_002284 | TFB2M      | chr1:246703862-24672956 | 14.5544    | 17.6624    | 0.279218 | 0.601762 |
| XLOC_009642 | DDX52      | chr17:35972362-36003493 | 4.39475    | 5.3336     | 0.279328 | 0.630542 |
| XLOC_005243 | CHD4       | chr12:6679247-6716551   | 15.9462    | 19.3544    | 0.279447 | 0.550919 |
| XLOC_023123 | MED27      | chr9:134735496-13495527 | 50.0614    | 60.7639    | 0.279515 | 0.561603 |
| XLOC_005813 | SPATA13    | chr13:24734860-24881212 | 1.4567     | 1.76854    | 0.279853 | 0.689101 |

|             |                   |                           |            |            |          |          |
|-------------|-------------------|---------------------------|------------|------------|----------|----------|
| XLOC_017474 | LOC257358         | chr5:169758434-169762104  | 0.022853   | 0.0277452  | 0.279858 | 1        |
| XLOC_009835 | SLC35B1           | chr17:47778689-47785282   | 44.9269    | 54.549     | 0.279973 | 0.559828 |
| XLOC_020345 | IQCE              | chr7:2598631-2654368      | 0.888529   | 1.07891    | 0.280081 | 0.757993 |
| XLOC_008696 | MPHOSPH6          | chr16:82181766-82203829   | 19.4239    | 23.5911    | 0.280415 | 0.61004  |
| XLOC_001510 | EIF2B3            | chr1:45316193-45452394    | 6.23044    | 7.56742    | 0.280466 | 0.653104 |
| XLOC_017342 | FAM53C            | chr5:137673223-137685411  | 15.623     | 18.9761    | 0.280505 | 0.558681 |
| XLOC_020994 | GGCT              | chr7:30536236-30544457    | 30.7161    | 37.3097    | 0.280555 | 0.609835 |
| XLOC_007399 | GDPGP1            | chr15:90777486-90785312   | 0.680313   | 0.826369   | 0.280588 | 0.910175 |
| XLOC_008691 | CMC2              | chr16:81009698-81066709   | 49.7404    | 60.4195    | 0.280596 | 0.832286 |
| XLOC_018250 | SNRPC             | chr6:34724870-34741634    | 110.819    | 134.628    | 0.280764 | 0.561012 |
| XLOC_010580 | SLC44A2           | chr19:10713120-10755235   | 18.0782    | 21.9637    | 0.280875 | 0.56432  |
| XLOC_002754 | BCCIP             | chr10:127512103-12756988  | 51.0519    | 62.0269    | 0.280929 | 0.725703 |
| XLOC_002329 | FAM208B           | chr10:5726800-5805703     | 2.42001    | 2.94036    | 0.280981 | 0.619231 |
| XLOC_005941 | CLN5              | chr13:77566058-77576652   | 5.40509    | 6.56736    | 0.280994 | 0.627251 |
| XLOC_007729 | MESDC2            | chr15:81268094-81282205   | 7.71631    | 9.37589    | 0.281045 | 0.578521 |
| XLOC_004523 | PPP2R1B           | chr11:111473169-111637116 | 6.19287    | 7.52551    | 0.281181 | 0.759668 |
| XLOC_012817 | TP53I3            | chr2:24300302-24308085    | 13.5065    | 16.4154    | 0.281399 | 0.649424 |
| XLOC_007763 | MRPL46            | chr15:89002708-89010633   | 23.3121    | 28.3356    | 0.281539 | 0.618827 |
| XLOC_018789 | AGER              | chr6:32148744-32152099    | 1.5965     | 1.94118    | 0.282021 | 0.821687 |
| XLOC_001827 | S100A11           | chr1:152004981-152009517  | 778.563    | 946.663    | 0.282037 | 0.561264 |
| XLOC_001617 | FUBP1             | chr1:78413590-78444777    | 18.5358    | 22.5385    | 0.282083 | 0.569697 |
| XLOC_005319 | MANSC1            | chr12:12482217-12503169   | 3.76513    | 4.57883    | 0.282282 | 0.700075 |
| XLOC_017842 | LRRTM2            | chr5:138089106-138270723  | 0.00687102 | 0.0083568  | 0.282427 | 1        |
| XLOC_004345 | ZDHHC24           | chr11:66306734-66313671   | 32.6604    | 39.7248    | 0.2825   | 0.617065 |
| XLOC_019140 | RAET1G            | chr6:150139893-150244214  | 0.509634   | 0.619933   | 0.282651 | 0.986822 |
| XLOC_005404 | RPAP3             | chr12:48055714-48099844   | 4.48501    | 5.45584    | 0.282689 | 0.617038 |
| XLOC_004769 | GOLT1B            | chr12:21654698-21671337   | 8.71038    | 10.5966    | 0.282801 | 0.579009 |
| XLOC_013315 | SUMO1             | chr2:203070902-203103322  | 63.1306    | 76.8031    | 0.282824 | 0.553008 |
| XLOC_013643 | VSTM2L            | chr20:36531498-36573747   | 0.0476211  | 0.0579356  | 0.282849 | 1        |
| XLOC_006499 | UBR7              | chr14:93669236-93695561   | 9.08002    | 11.0472    | 0.282918 | 0.648914 |
| XLOC_008130 | NUP93             | chr16:56764016-56878861   | 19.9199    | 24.2396    | 0.283154 | 0.543368 |
| XLOC_013085 | UXS1              | chr2:106709758-106810795  | 9.16152    | 11.1482    | 0.283157 | 0.611988 |
| XLOC_002248 | SIPA1L2           | chr1:232533711-232651243  | 0.32712    | 0.398099   | 0.283306 | 0.833863 |
| XLOC_013411 | LOC348761         | chr2:231849082-231860747  | 0.0153761  | 0.0187129  | 0.283339 | 1        |
| XLOC_015422 | MFS1              | chr3:158519714-158547508  | 12.052     | 14.669     | 0.283496 | 0.582142 |
| XLOC_018531 | GPR126            | chr6:142623055-142767403  | 2.723      | 3.31508    | 0.283848 | 0.598722 |
| XLOC_020422 | PLEKHA8           | chr7:30067976-30157961    | 2.13481    | 2.59917    | 0.283943 | 0.776787 |
| XLOC_004098 | SAAL1             | chr11:18101889-18127638   | 19.3759    | 23.5928    | 0.284083 | 0.570526 |
| XLOC_002581 | IFIT3             | chr10:91087601-91100725   | 0.298757   | 0.363822   | 0.28426  | 0.889644 |
| XLOC_012949 | C1D               | chr2:68269331-68290159    | 19.3307    | 23.5409    | 0.284275 | 0.596925 |
| XLOC_020930 | LOC100131257      | chr7:7115400-7136417      | 0.00429145 | 0.00522649 | 0.284378 | 1        |
| XLOC_006766 | BAZ1A             | chr14:35221936-35344853   | 3.89385    | 4.74231    | 0.284393 | 0.585388 |
| XLOC_000983 | ADORA1            | chr1:203096835-203136533  | 2.24018    | 2.72923    | 0.284875 | 0.771346 |
| XLOC_012315 | CNNM4             | chr2:97426638-97477628    | 3.27206    | 3.98638    | 0.28488  | 0.647615 |
| XLOC_004963 | XPOT              | chr12:64798152-64842463   | 16.3597    | 19.9313    | 0.284893 | 0.582397 |
| XLOC_007610 | BNIP2             | chr15:59955061-59981642   | 11.0777    | 13.4965    | 0.284924 | 0.563736 |
| XLOC_021336 | DGKI              | chr7:137074384-137531605  | 1.71509    | 2.0897     | 0.285012 | 0.69673  |
| XLOC_013707 | DDX27             | chr20:47835831-47860614   | 11.4261    | 13.9239    | 0.285232 | 0.582397 |
| XLOC_003153 | PDZD8             | chr10:119042605-11913493  | 1.6994     | 2.07093    | 0.285248 | 0.723055 |
| XLOC_003738 | ANKRD42           | chr11:82905290-82960013   | 0.310263   | 0.378122   | 0.28536  | 0.885255 |
| XLOC_021104 | BCL7B             | chr7:72950682-72972065    | 42.4468    | 51.7323    | 0.28541  | 0.536951 |
| XLOC_009431 | C1QBP             | chr17:5289345-5342471     | 301.139    | 367.029    | 0.285462 | 0.697843 |
| XLOC_003324 | SNORA23           | chr11:9406168-9469674     | 5.682      | 6.9254     | 0.2855   | 0.989719 |
| XLOC_013320 | GCSP3             | chr2:206980296-206981296  | 1.99071    | 2.42661    | 0.285566 | 0.835721 |
| XLOC_006786 | FKBP3             | chr14:45553301-45603732   | 33.7399    | 41.1291    | 0.285703 | 0.650127 |
| XLOC_006059 | HMG1B             | chr13:31032878-31040081   | 74.8894    | 91.2909    | 0.28571  | 0.556835 |
| XLOC_010065 | B3GNTL1           | chr17:80901666-81009686   | 4.82851    | 5.88645    | 0.28582  | 0.771945 |
| XLOC_000615 | PTGFRN            | chr1:117452688-117532973  | 7.76519    | 9.46698    | 0.285883 | 0.558681 |
| XLOC_020400 | STK31             | chr7:23749785-23872130    | 0.0435962  | 0.0531545  | 0.285989 | 1        |
| XLOC_016067 | NCEH1             | chr3:172348434-172429008  | 1.88009    | 2.29235    | 0.286029 | 0.701005 |
| XLOC_004277 | SNORD22           | chr11:62619459-62623360   | 38.4394    | 46.8685    | 0.286036 | 0.990857 |
| XLOC_006332 | PNN               | chr14:39644386-39652422   | 15.504     | 18.9043    | 0.286072 | 0.551816 |
| XLOC_009144 | SNX11             | chr17:46184919-46200105   | 8.69233    | 10.5992    | 0.286141 | 0.613093 |
| XLOC_003618 | SSSCA1            | chr11:65337942-65339239   | 65.9056    | 80.3667    | 0.286197 | 0.609543 |
| XLOC_004792 | DDX11             | chr12:31173696-31257725   | 11.5945    | 14.1399    | 0.286328 | 0.585481 |
| XLOC_022397 | PCSK5             | chr9:78505559-78977255    | 1.62237    | 1.97857    | 0.286356 | 0.7578   |
| XLOC_021410 | XRCC2             | chr7:152343586-152373253  | 0.915333   | 1.11637    | 0.286448 | 0.798355 |
| XLOC_008375 | CLDN6             | chr16:3064712-3068188     | 0.123063   | 0.150096   | 0.286492 | 1        |
| XLOC_016142 | TCTEX1D2, TM4SF19 | chr3:196018089-196065297  | 77.2277    | 94.1989    | 0.286593 | 0.543276 |
| XLOC_007142 | DISP2             | chr15:40650433-40663256   | 0.704297   | 0.85915    | 0.286725 | 0.829181 |
| XLOC_013926 | CDK5RAP1          | chr20:31946644-31989337   | 16.2469    | 19.8192    | 0.286736 | 0.563967 |
| XLOC_013514 | PRNP              | chr20:4666796-4682234     | 28.6397    | 34.9375    | 0.286764 | 0.568626 |
| XLOC_017641 | C5orf34           | chr5:43486802-43515273    | 2.32219    | 2.83297    | 0.286831 | 0.723754 |
| XLOC_018054 | SMIM13            | chr6:11094265-11138969    | 2.64458    | 3.2263     | 0.286842 | 0.642142 |
| XLOC_001231 | CEP104            | chr1:3728644-3773797      | 2.98975    | 3.6483     | 0.287199 | 0.610855 |
| XLOC_023559 | TMEM164           | chrX:109245862-109421011  | 2.1356     | 2.60649    | 0.287468 | 0.672535 |
| XLOC_000294 | UTP11L            | chr1:38478383-38490497    | 19.1563    | 23.3817    | 0.287562 | 0.549958 |
| XLOC_018788 | AGPAT1            | chr6:32120578-32145888    | 34.0146    | 41.5174    | 0.287563 | 0.757054 |
| XLOC_022662 | PMPCA             | chr9:139305115-139318213  | 114.194    | 139.386    | 0.287607 | 0.540351 |



|             |              |                          |            |           |          |          |
|-------------|--------------|--------------------------|------------|-----------|----------|----------|
| XLOC_004790 | LOC100287314 | chr12:30948614-30955645  | 4.92429    | 6.01113   | 0.287719 | 0.701805 |
| XLOC_013955 | SAMHD1       | chr20:35504569-35580246  | 1.01632    | 1.24076   | 0.287866 | 0.787681 |
| XLOC_014630 | TRMU         | chr22:46731297-46753237  | 18.1405    | 22.1478   | 0.28795  | 0.574731 |
| XLOC_020697 | DNAJB9       | chr7:108210188-108215294 | 10.0069    | 12.2176   | 0.287975 | 0.572896 |
| XLOC_010682 | GLT25D1      | chr19:17666510-17693965  | 52.9723    | 64.6817   | 0.28812  | 0.544363 |
| XLOC_007488 | NOP10        | chr15:34633916-34635362  | 467.999    | 571.457   | 0.288139 | 0.553477 |
| XLOC_018581 | ACAT2        | chr6:160181290-160210735 | 12.5554    | 15.332    | 0.288236 | 0.960403 |
| XLOC_001244 | KLHL21       | chr1:6650783-6662929     | 33.3365    | 40.7119   | 0.288347 | 0.540382 |
| XLOC_010307 | TMEM241      | chr18:20875978-21017925  | 2.72859    | 3.3323    | 0.288361 | 0.701005 |
| XLOC_015905 | PARP9        | chr3:122246759-122294045 | 1.63609    | 1.99824   | 0.28848  | 0.867317 |
| XLOC_010461 | ADAT3,SCAMP4 | chr19:1905370-1926012    | 36.2982    | 44.3421   | 0.288778 | 0.640881 |
| XLOC_000909 | TDRD5        | chr1:179560747-179660407 | 0.349747   | 0.427275  | 0.288853 | 0.860615 |
| XLOC_013356 | TNS1         | chr2:218664511-218808796 | 0.127501   | 0.155766  | 0.288866 | 1        |
| XLOC_020710 | ST7          | chr7:116592500-116870075 | 9.62426    | 11.758    | 0.288891 | 0.701805 |
| XLOC_017061 | NDUFS6       | chr5:1801495-1816167     | 127.833    | 156.202   | 0.289149 | 0.545981 |
| XLOC_013829 | DDRGK1       | chr20:3171011-3185295    | 87.3981    | 106.794   | 0.289157 | 0.532105 |
| XLOC_008078 | SLCSA2       | chr16:31494438-31519706  | 0.176168   | 0.21529   | 0.289329 | 1        |
| XLOC_008197 | TANGO6       | chr16:68877508-69119085  | 2.50396    | 3.06009   | 0.289362 | 0.633749 |
| XLOC_004217 | MED19        | chr11:57471186-57479673  | 5.61742    | 6.86513   | 0.28938  | 0.695538 |
| XLOC_007633 | UBAP1L       | chr15:65385341-65398697  | 1.01931    | 1.24575   | 0.289421 | 0.907689 |
| XLOC_021263 | GNPLA8       | chr7:108110865-108168605 | 1.82256    | 2.22794   | 0.289747 | 0.664776 |
| XLOC_018446 | GTF3C6       | chr6:111279762-111289097 | 52.1581    | 63.763    | 0.289828 | 0.525846 |
| XLOC_016213 | SH3TC1       | chr4:8201059-8242830     | 3.74913    | 4.58338   | 0.289857 | 0.672097 |
| XLOC_001442 | PSMB2        | chr1:36065142-36107445   | 30.829     | 37.6953   | 0.290094 | 0.531362 |
| XLOC_021743 | SQLE         | chr8:126010719-126034525 | 17.1701    | 20.9953   | 0.290169 | 0.550662 |
| XLOC_013850 | TRMT6        | chr20:5918485-5931173    | 9.50061    | 11.6181   | 0.290278 | 0.582309 |
| XLOC_002165 | LAMB3        | chr1:209788217-209825825 | 64.4344    | 78.8019   | 0.290398 | 0.535638 |
| XLOC_016464 | GAR1         | chr4:110736665-110745895 | 4.33693    | 53.0416   | 0.290451 | 0.553667 |
| XLOC_015535 | PIGX         | chr3:196439244-196462875 | 4.07554    | 4.98461   | 0.290489 | 0.636219 |
| XLOC_020646 | SPDYE3       | chr7:99905324-99965454   | 0.31052    | 0.379783  | 0.29049  | 0.976618 |
| XLOC_005759 | CLIP1        | chr12:122755980-12290717 | 4.48366    | 5.48403   | 0.290559 | 0.553879 |
| XLOC_018027 | NQO2         | chr6:3000066-3019994     | 91.3799    | 111.804   | 0.29102  | 0.524574 |
| XLOC_012899 | SRBD1        | chr2:45615818-45838433   | 1.13363    | 1.38712   | 0.291134 | 0.749749 |
| XLOC_008425 | BCAR4        | chr16:11913691-11922689  | 0.216528   | 0.264988  | 0.291377 | 1        |
| XLOC_006349 | TMX1         | chr14:51706885-51724372  | 17.7383    | 21.7095   | 0.291459 | 0.521303 |
| XLOC_019165 | TCP1         | chr6:160181290-160210735 | 86.2481    | 105.568   | 0.291606 | 0.578028 |
| XLOC_000837 | ATF6         | chr1:161736033-161933865 | 7.32192    | 8.96309   | 0.291774 | 0.528511 |
| XLOC_009845 | LRRC59       | chr17:48450580-48474914  | 42.0863    | 51.5208   | 0.291806 | 0.540505 |
| XLOC_018463 | RSPH4A       | chr6:116937641-116954148 | 0.144444   | 0.176857  | 0.292073 | 1        |
| XLOC_015617 | SLC4A7       | chr3:27414211-27525911   | 1.36969    | 1.67729   | 0.292274 | 0.651194 |
| XLOC_019146 | SYNE1        | chr6:152442818-152958534 | 0.0109657  | 0.0134302 | 0.292486 | 1        |
| XLOC_002355 | SUV39H2      | chr10:14920781-14946304  | 5.0525     | 6.18834   | 0.292554 | 0.619231 |
| XLOC_016659 | GRPEL1       | chr4:7061779-7069800     | 60.5567    | 74.1808   | 0.292757 | 0.519452 |
| XLOC_017840 | HSPA9        | chr5:137890570-137911318 | 157.098    | 192.492   | 0.293131 | 0.553756 |
| XLOC_017833 | FAM13B       | chr5:137225124-137368802 | 2.15977    | 2.64696   | 0.293459 | 0.633936 |
| XLOC_011054 | EMC10        | chr19:50970044-50986608  | 35.0925    | 43.0101   | 0.293512 | 0.540505 |
| XLOC_020399 | FAM221A      | chr7:23719748-23742269   | 5.21751    | 6.39502   | 0.293589 | 0.699086 |
| XLOC_005439 | NCKAP5L      | chr12:50184928-50222208  | 6.0951     | 7.47203   | 0.293851 | 0.580998 |
| XLOC_017567 | NSUN2        | chr5:6599351-6633473     | 22.9866    | 28.1807   | 0.293911 | 0.524107 |
| XLOC_016264 | ZCCHC4       | chr4:25314395-25372005   | 2.14076    | 2.62453   | 0.293939 | 0.708293 |
| XLOC_001269 | NPPA         | chr1:11845786-11907840   | 0.172779   | 0.211831  | 0.293984 | 1        |
| XLOC_000455 | CTH          | chr1:70876900-70905534   | 13.8105    | 16.9351   | 0.294258 | 0.665644 |
| XLOC_012484 | PSMD14       | chr2:162164785-162268228 | 74.7972    | 91.7211   | 0.294271 | 0.518637 |
| XLOC_011908 | ZNF577       | chr19:52359055-52391229  | 0.328856   | 0.40333   | 0.294503 | 0.939182 |
| XLOC_012528 | HOXD8        | chr2:176994421-176997425 | 2.61619    | 3.20953   | 0.294899 | 0.752661 |
| XLOC_013491 | NOP56        | chr20:2633177-2639039    | 75.3806    | 92.4893   | 0.295093 | 0.510728 |
| XLOC_005113 | OAS3         | chr12:113376248-11341105 | 1.84894    | 2.26881   | 0.29524  | 0.633936 |
| XLOC_003711 | POLD3        | chr11:74303574-74354105  | 1.87422    | 2.29988   | 0.295272 | 0.667693 |
| XLOC_012060 | DDX1         | chr2:15731744-15771235   | 27.7304    | 34.0295   | 0.295316 | 0.509102 |
| XLOC_009736 | DNAJC7       | chr17:40118758-40190044  | 31.9263    | 39.1833   | 0.29549  | 0.830321 |
| XLOC_002408 | ZNF37A       | chr10:38383263-38412278  | 1.82344    | 2.23803   | 0.295566 | 0.602523 |
| XLOC_023885 | FAM120C      | chrX:54094756-54209714   | 2.67192    | 3.28003   | 0.295831 | 0.869283 |
| XLOC_009387 | TSR1         | chr17:2207247-2240678    | 20.0242    | 24.5824   | 0.295877 | 0.527529 |
| XLOC_013848 | LINC00654    | chr20:5479217-5485242    | 0.0130126  | 0.0159749 | 0.295894 | 1        |
| XLOC_003169 | NSMCE4A      | chr10:123716602-12373474 | 18.384     | 22.5757   | 0.296324 | 0.566357 |
| XLOC_015767 | RFT1         | chr3:53122500-53164470   | 8.11113    | 9.96065   | 0.296336 | 0.521183 |
| XLOC_022559 | ARP5L        | chr9:127631483-127639695 | 99.2668    | 121.903   | 0.29635  | 0.516001 |
| XLOC_017024 | MLF1IP       | chr4:185570766-185655285 | 9.58826    | 11.7748   | 0.296368 | 0.605975 |
| XLOC_005437 | FAM186B      | chr12:49976657-49999433  | 0.0946169  | 0.116209  | 0.296549 | 1        |
| XLOC_001465 | SF3A3        | chr1:38422651-38455761   | 32.5158    | 39.9389   | 0.296655 | 0.518295 |
| XLOC_010171 | MAPRE2       | chr18:32556891-32723432  | 2.9004     | 3.56262   | 0.296685 | 0.623126 |
| XLOC_022052 | IL7          | chr8:79645006-79717758   | 0.728238   | 0.894522  | 0.296706 | 0.827888 |
| XLOC_007980 | ANKS4B       | chr16:21245015-21263750  | 0.0113868  | 0.0139873 | 0.296762 | 1        |
| XLOC_012591 | NOP58        | chr2:203130514-203168384 | 38.0706    | 46.7663   | 0.296794 | 0.502529 |
| XLOC_017522 | HNRNPAB      | chr5:177631507-177659805 | 133.464    | 163.963   | 0.296919 | 0.553778 |
| XLOC_006286 | THTPA        | chr14:23980968-24048009  | 9.39727    | 11.5462   | 0.2971   | 0.907969 |
| XLOC_017746 | GLRX         | chr5:95149552-95158577   | 498.595    | 612.645   | 0.297184 | 0.5322   |
| XLOC_010225 | TNFRSF11A    | chr18:59992519-60054943  | 0.866975   | 1.06533   | 0.297238 | 0.766657 |
| XLOC_010836 | RYR1         | chr19:38924339-39078204  | 0.00442491 | 0.0054373 | 0.297243 | 1        |

|             |              |                          |            |            |          |          |
|-------------|--------------|--------------------------|------------|------------|----------|----------|
| XLOC_022981 | MRPL50       | chr9:104152248-104160911 | 40.7783    | 50.1189    | 0.297552 | 0.524713 |
| XLOC_006210 | KDEL1        | chr13:103436630-10352831 | 4.2336     | 5.20347    | 0.297589 | 0.941619 |
| XLOC_023779 | GPR64        | chrX:19007424-19140755   | 0.00660508 | 0.00811864 | 0.297662 | 1        |
| XLOC_016907 | SEC24D       | chr4:119643977-119757321 | 3.39367    | 4.17177    | 0.297811 | 0.610481 |
| XLOC_011898 | LOC147646    | chr19:51891542-51893828  | 0.050172   | 0.0616784  | 0.297883 | 1        |
| XLOC_011463 | DNASE2       | chr19:12986024-12992335  | 40.7848    | 50.1439    | 0.298042 | 0.507287 |
| XLOC_002174 | INTS7        | chr1:212113740-212278181 | 3.3232     | 4.0861     | 0.29815  | 0.85843  |
| XLOC_020330 | HEATR2       | chr7:588833-826116       | 17.5743    | 21.6092    | 0.298174 | 0.71659  |
| XLOC_021268 | DOCK4        | chr7:111366163-111846461 | 0.40137    | 0.49352    | 0.298176 | 0.762454 |
| XLOC_001512 | ZSWIM5       | chr1:45482075-45672250   | 0.161833   | 0.198988   | 0.298178 | 1        |
| XLOC_008778 | PSMB6        | chr17:4699438-4701798    | 234.01     | 287.74     | 0.298194 | 0.500068 |
| XLOC_021740 | NDUFB9       | chr8:125551342-125562221 | 590.071    | 725.557    | 0.298199 | 0.519551 |
| XLOC_017539 | TRIM41       | chr5:180650262-180662801 | 10.2177    | 12.5648    | 0.298319 | 0.553031 |
| XLOC_020915 | FBXL18       | chr7:5515427-5553399     | 1.43072    | 1.75938    | 0.298319 | 0.666069 |
| XLOC_010958 | PPPS5        | chr19:46850250-46894232  | 29.6497    | 36.4611    | 0.29834  | 0.51857  |
| XLOC_001602 | LRRC40       | chr1:70610484-70671361   | 3.41723    | 4.20239    | 0.298386 | 0.628471 |
| XLOC_016021 | PLCH1        | chr3:155197670-155421991 | 0.366094   | 0.45036    | 0.298866 | 0.788059 |
| XLOC_001515 | CCDC163P     | chr1:45959597-45965751   | 1.07543    | 1.32325    | 0.298876 | 0.827718 |
| XLOC_000191 | TMEM57       | chr1:25757387-25826698   | 5.02273    | 6.18163    | 0.299516 | 0.565086 |
| XLOC_016453 | GSTCD        | chr4:106629940-106768881 | 1.63053    | 2.00689    | 0.299625 | 0.686575 |
| XLOC_009828 | SNF8         | chr17:47007458-47022154  | 79.6022    | 97.9872    | 0.299786 | 0.507825 |
| XLOC_000342 | ATP6V0B      | chr1:44440601-44443972   | 177.888    | 218.983    | 0.299851 | 0.507234 |
| XLOC_008129 | MT1X         | chr16:56716381-56718108  | 1608.93    | 1980.76    | 0.299954 | 0.557891 |
| XLOC_004747 | ATF7IP       | chr12:14518610-14651697  | 1.9144     | 2.35689    | 0.299994 | 0.644013 |
| XLOC_011790 | ZC3H4        | chr19:47567446-47617009  | 5.55689    | 6.84187    | 0.300111 | 0.548279 |
| XLOC_015683 | CDC25A       | chr3:48198667-48229801   | 6.40344    | 7.88459    | 0.300187 | 0.5661   |
| XLOC_005545 | ARHGAP9      | chr12:57853917-57873633  | 0.077444   | 0.0953621  | 0.300262 | 1        |
| XLOC_008770 | SPNS3        | chr17:4337218-4391499    | 0.314227   | 0.386951   | 0.300342 | 0.933023 |
| XLOC_002217 | PARP1        | chr1:226548391-226595801 | 25.0251    | 30.822     | 0.300586 | 0.504447 |
| XLOC_001587 | ITGB3BP      | chr1:63906440-63988944   | 15.4991    | 19.0912    | 0.300722 | 0.598176 |
| XLOC_012950 | WDR92        | chr2:68357280-68384692   | 2.32069    | 2.85876    | 0.300833 | 0.713671 |
| XLOC_007179 | CKMT1A       | chr15:43985083-43991420  | 0.0822673  | 0.101372   | 0.301271 | 1        |
| XLOC_001420 | TMEM234      | chr1:32681797-32687926   | 4.96311    | 6.11583    | 0.301305 | 0.739919 |
| XLOC_016054 | LRRC34       | chr3:169511215-169530574 | 1.24765    | 1.53744    | 0.301317 | 0.778996 |
| XLOC_016709 | TLR6         | chr4:38825328-38858438   | 0.645587   | 0.795549   | 0.301341 | 0.726892 |
| XLOC_020628 | BUD31        | chr7:99006600-99063824   | 63.6438    | 78.4349    | 0.301477 | 0.926225 |
| XLOC_006374 | PSMA3        | chr14:58711522-58764855  | 73.1543    | 90.1585    | 0.301521 | 0.642142 |
| XLOC_008301 | LOC100128881 | chr16:89773540-89883065  | 17.9293    | 22.1005    | 0.301761 | 0.880276 |
| XLOC_014593 | CCDC134      | chr22:42196677-42222303  | 4.31617    | 5.32104    | 0.301956 | 0.737375 |
| XLOC_009864 | SRSF1        | chr17:56078279-56084707  | 19.2327    | 23.7125    | 0.302084 | 0.511185 |
| XLOC_004759 | PLEKHA5      | chr12:19282625-19529333  | 1.64303    | 2.02584    | 0.302168 | 0.67787  |
| XLOC_022373 | KGFLP1       | chr9:46687556-46746820   | 0.139718   | 0.172278   | 0.302225 | 1        |
| XLOC_010325 | GAREM        | chr18:29843483-30050447  | 0.345369   | 0.425905   | 0.302394 | 0.784181 |
| XLOC_005452 | SMAGP        | chr12:51632507-51664202  | 151.366    | 186.691    | 0.302615 | 0.721048 |
| XLOC_012070 | LHLH29       | chr2:23608297-23931483   | 2.95871    | 3.64968    | 0.302801 | 0.63573  |
| XLOC_001054 | RRP15        | chr1:218458628-218511321 | 0.937034   | 1.15593    | 0.302883 | 0.63573  |
| XLOC_004386 | LOC100133315 | chr11:71576554-71639493  | 0.372519   | 0.459543   | 0.302887 | 0.917639 |
| XLOC_009109 | ADAM11       | chr17:42836567-42859214  | 2.68132    | 3.30772    | 0.302897 | 0.661548 |
| XLOC_018129 | HIST1H3H     | chr6:27777841-27778314   | 2.12222    | 2.61827    | 0.303041 | 0.925534 |
| XLOC_004238 | MRPL16       | chr11:59573607-59578345  | 63.6559    | 78.5405    | 0.303142 | 0.503721 |
| XLOC_022815 | FAM166B      | chr9:35490006-35563896   | 0.693744   | 0.855969   | 0.303156 | 0.991767 |
| XLOC_023880 | HSD17B10     | chrX:53458205-53461323   | 107.542    | 132.691    | 0.30317  | 0.481126 |
| XLOC_009987 | QRICH2       | chr17:74270129-74303761  | 1.05322    | 1.29956    | 0.303208 | 0.714085 |
| XLOC_020496 | CCT6A        | chr7:56119377-56131682   | 80.2203    | 98.9863    | 0.303261 | 0.508719 |
| XLOC_011644 | GGN          | chr19:38874991-38878668  | 0.807031   | 0.995887   | 0.303357 | 0.902309 |
| XLOC_018922 | MCM3         | chr6:52128811-52149679   | 28.6022    | 35.2974    | 0.303437 | 0.478792 |
| XLOC_011619 | ZNF565       | chr19:36673186-36729675  | 0.609124   | 0.751757   | 0.303531 | 0.985587 |
| XLOC_013483 | RAD21L1      | chr20:1206763-1235145    | 0.0152839  | 0.0188655  | 0.303744 | 1        |
| XLOC_013820 | SNRPB        | chr20:2442280-2451499    | 449.891    | 555.39     | 0.303925 | 0.524009 |
| XLOC_012042 | CPSF3        | chr2:9563665-9613239     | 20.355     | 25.1293    | 0.303988 | 0.504654 |
| XLOC_021902 | REEP4        | chr8:21995532-21999448   | 51.3799    | 63.4335    | 0.30404  | 0.508132 |
| XLOC_017224 | XRCC4        | chr5:82373316-82649579   | 5.81789    | 7.18362    | 0.304217 | 0.618966 |
| XLOC_004752 | STRAP        | chr12:16035287-16056410  | 76.1917    | 94.0934    | 0.30446  | 0.508132 |
| XLOC_016652 | CRMP1        | chr4:5822490-5894785     | 2.33336    | 2.88261    | 0.304966 | 0.698688 |
| XLOC_020641 | CNPY4        | chr7:99690403-99723128   | 1.71583    | 2.11977    | 0.305004 | 0.990814 |
| XLOC_008597 | PRSS54       | chr16:58283839-58328951  | 0.476438   | 0.588612   | 0.305028 | 0.961551 |
| XLOC_003070 | PIK3AP1      | chr10:98353068-98480279  | 1.80776    | 2.23348    | 0.305091 | 0.648194 |
| XLOC_023845 | SLC35A2      | chrX:48760458-48769235   | 15.6197    | 19.3001    | 0.305246 | 0.567852 |
| XLOC_017098 | TARS         | chr5:33440801-33468196   | 49.3164    | 60.9448    | 0.305437 | 0.544179 |
| XLOC_001239 | ACOT7        | chr1:6324331-6453826     | 98.683     | 121.956    | 0.305486 | 0.480501 |
| XLOC_001390 | RPA2         | chr1:28218048-28241236   | 26.8477    | 33.1806    | 0.305544 | 0.504861 |
| XLOC_000642 | ITGA10       | chr1:145524989-145543861 | 0.130889   | 0.16177    | 0.305601 | 1        |
| XLOC_013534 | MACROD2      | chr20:13976145-16033841  | 0.00647933 | 0.00800947 | 0.305862 | 1        |
| XLOC_003586 | FKBP2        | chr11:64008412-64011607  | 83.8371    | 103.649    | 0.306045 | 0.506591 |
| XLOC_018324 | SLC29A1      | chr6:44187241-44201888   | 80.9921    | 100.139    | 0.306145 | 0.477677 |
| XLOC_023581 | WDR44        | chrX:117480035-117583921 | 1.15096    | 1.42326    | 0.306354 | 0.693849 |
| XLOC_002271 | FH           | chr1:241660856-241683081 | 47.6736    | 58.9522    | 0.306357 | 0.490428 |
| XLOC_000480 | SAMD13       | chr1:84764048-84816481   | 0.131681   | 0.162855   | 0.306534 | 1        |
| XLOC_022512 | SLC31A1      | chr9:115983807-116026771 | 14.6662    | 18.1404    | 0.30671  | 0.498057 |

|             |                      |                          |            |           |          |          |
|-------------|----------------------|--------------------------|------------|-----------|----------|----------|
| XLOC_024177 | BCAP31               | chrX:152965946-15299020  | 224.067    | 277.145   | 0.306712 | 0.50004  |
| XLOC_007182 | WDR76                | chr15:44119111-44160617  | 5.96182    | 7.37636   | 0.307155 | 0.527104 |
| XLOC_010332 | INO80C               | chr18:33048290-33077955  | 11.548     | 14.2894   | 0.307301 | 0.648914 |
| XLOC_015542 | LRC3H3               | chr3:197518144-197598456 | 1.38387    | 1.71241   | 0.307315 | 0.776353 |
| XLOC_001913 | GPATCH4              | chr1:156564099-156571275 | 19.8693    | 24.5865   | 0.307324 | 0.473746 |
| XLOC_014562 | APOBEC3A,APOBEC3A_B, | chr22:39353526-39388784  | 16.3672    | 20.2537   | 0.307379 | 0.550445 |
| XLOC_021201 | MCM7                 | chr7:99690403-99723128   | 113.285    | 140.252   | 0.308065 | 0.648914 |
| XLOC_012779 | KIDINS220            | chr2:8868986-8977755     | 2.19018    | 2.71176   | 0.308181 | 0.553466 |
| XLOC_005232 | C12orf4              | chr12:4596900-4647637    | 1.56845    | 1.94206   | 0.30825  | 0.661548 |
| XLOC_012242 | ALMS1                | chr2:73612885-73837046   | 0.551991   | 0.683507  | 0.308312 | 0.634201 |
| XLOC_002998 | USP54                | chr10:75257295-75335433  | 0.94376    | 1.16866   | 0.30836  | 0.685156 |
| XLOC_016409 | MRPS18C              | chr4:84377117-84406290   | 17.9173    | 22.1875   | 0.308395 | 0.708398 |
| XLOC_007521 | OIP5                 | chr15:41601465-41624819  | 10.0383    | 12.4315   | 0.308487 | 0.628541 |
| XLOC_005904 | SERPINE3             | chr13:51915167-52027275  | 0.0390408  | 0.04835   | 0.308532 | 1        |
| XLOC_022780 | TOPORS               | chr9:32540541-32553015   | 2.46071    | 3.04762   | 0.308606 | 0.65754  |
| XLOC_013661 | SRSF6                | chr20:42086503-42092244  | 26.3874    | 32.6812   | 0.308612 | 0.466015 |
| XLOC_005161 | CCDC62               | chr12:123259055-12331192 | 0.103973   | 0.128773  | 0.308623 | 1        |
| XLOC_002274 | MAP1LC3C             | chr1:242158791-242162385 | 0.849995   | 1.05307   | 0.309008 | 0.881073 |
| XLOC_005344 | RECQL                | chr12:21590537-21654603  | 4.82217    | 5.97469   | 0.30918  | 0.723011 |
| XLOC_014940 | PRRT3-AS1            | chr3:9987225-9996471     | 4.78479    | 5.92854   | 0.309223 | 0.890355 |
| XLOC_003541 | TMEM138              | chr11:61066918-61136975  | 16.0168    | 19.8469   | 0.309321 | 0.961737 |
| XLOC_014382 | SLC19A1              | chr21:46934628-46962385  | 20.413     | 25.295    | 0.309368 | 0.532349 |
| XLOC_004039 | DCHS1                | chr11:6642557-6677074    | 0.0284824  | 0.0353019 | 0.309678 | 1        |
| XLOC_009433 | DERL2                | chr17:5377612-5389494    | 28.8901    | 35.813    | 0.309907 | 0.531076 |
| XLOC_005674 | CRY1                 | chr12:107385142-10748763 | 8.96533    | 11.116    | 0.310213 | 0.52114  |
| XLOC_020792 | SSBP1                | chr7:141438120-141450288 | 247.336    | 306.691   | 0.31031  | 0.499152 |
| XLOC_017129 | FST                  | chr5:52776263-52782304   | 0.0232043  | 0.0287728 | 0.310316 | 1        |
| XLOC_002802 | IL15RA               | chr10:5994333-6020150    | 13.2125    | 16.3875   | 0.310691 | 0.588606 |
| XLOC_023485 | PBDC1                | chrX:75392770-75398033   | 19.8435    | 24.6147   | 0.310857 | 0.5153   |
| XLOC_015125 | RAD54L2              | chr3:51575595-51697612   | 0.244905   | 0.303839  | 0.311087 | 1        |
| XLOC_015192 | LOC401074            | chr3:75721431-75728454   | 0.103108   | 0.127925  | 0.311151 | 1        |
| XLOC_015108 | RNF123               | chr3:49726949-49761384   | 8.26657    | 10.2572   | 0.311279 | 0.625    |
| XLOC_005233 | AKAP3                | chr12:4724675-4754343    | 0.198224   | 0.246031  | 0.311711 | 1        |
| XLOC_004113 | LOC100126784         | chr11:19372270-20143147  | 2.77578    | 3.44574   | 0.311922 | 0.929478 |
| XLOC_012877 | SRSF7                | chr2:38970740-38978636   | 44.6727    | 55.4651   | 0.312189 | 0.474913 |
| XLOC_000092 | TNFRSF8              | chr1:12123433-12204264   | 0.275611   | 0.342353  | 0.312855 | 1        |
| XLOC_018309 | SRF                  | chr6:43138919-43149244   | 24.4183    | 30.3366   | 0.313093 | 0.466015 |
| XLOC_003140 | ZDHHC6               | chr10:114190057-11420667 | 14.9001    | 18.5137   | 0.313267 | 0.504108 |
| XLOC_023723 | BRCC3                | chrX:154299694-15435134  | 2.91741    | 3.62494   | 0.313272 | 0.583291 |
| XLOC_012073 | FKBP1B               | chr2:24272583-24286550   | 0.0469436  | 0.0583306 | 0.313325 | 1        |
| XLOC_006855 | GPX2                 | chr14:65381078-65569413  | 0.0373361  | 0.0463969 | 0.313457 | 1        |
| XLOC_018269 | CDKN1A               | chr6:36644236-36655116   | 73.9632    | 91.914    | 0.313478 | 0.473105 |
| XLOC_011788 | AP2S1                | chr19:47341422-47354203  | 184.953    | 229.903   | 0.313869 | 0.46038  |
| XLOC_017994 | HNRNP1H              | chr5:179041178-179050722 | 65.5607    | 81.5067   | 0.314086 | 0.474913 |
| XLOC_005124 | RNF172               | chr12:117176095-11729143 | 1.96399    | 2.44236   | 0.314491 | 0.695737 |
| XLOC_008845 | PFAS                 | chr17:8152595-8173809    | 8.3164     | 10.3424   | 0.314536 | 0.48277  |
| XLOC_016825 | PLAC8                | chr4:84011210-84035911   | 0.0699541  | 0.0870013 | 0.314627 | 1        |
| XLOC_007657 | CLN6                 | chr15:68499329-68522080  | 47.9453    | 59.6444   | 0.314997 | 0.464668 |
| XLOC_006109 | ZC3H13               | chr13:46536313-46626894  | 0.854963   | 1.06358   | 0.315    | 0.653383 |
| XLOC_005856 | EXOSC8               | chr13:37574677-37633850  | 33.5213    | 41.7034   | 0.315089 | 0.727901 |
| XLOC_018473 | ASF1A                | chr6:119134611-119256327 | 4.86511    | 6.05363   | 0.315328 | 0.639984 |
| XLOC_000561 | SARS                 | chr1:109756514-109780804 | 160.123    | 199.25    | 0.315395 | 0.519452 |
| XLOC_016470 | APIAR                | chr4:113152894-113191217 | 6.57306    | 8.17925   | 0.315403 | 0.537496 |
| XLOC_001743 | GDAP2                | chr1:118406106-118472302 | 1.10816    | 1.37896   | 0.315408 | 0.754886 |
| XLOC_016198 | EVC                  | chr4:5712923-5816031     | 5.54266    | 6.89717   | 0.315425 | 0.512422 |
| XLOC_016456 | SGMS2                | chr4:108745720-108836204 | 2.63745    | 3.28217   | 0.315506 | 0.528607 |
| XLOC_020920 | RSPH10B              | chr7:5965776-6010314     | 0.0140114  | 0.0174376 | 0.315606 | 1        |
| XLOC_023338 | GPR82                | chrX:41374188-41782287   | 0.00884392 | 0.011009  | 0.315925 | 1        |
| XLOC_021242 | DNAJC2               | chr7:102937872-102985320 | 21.6039    | 26.8929   | 0.315929 | 0.827507 |
| XLOC_023372 | SUV39H1              | chrX:48555130-48567406   | 9.44636    | 11.7593   | 0.315972 | 0.5209   |
| XLOC_012393 | FOXO4L1              | chr2:114256660-114258727 | 0.54131    | 0.673861  | 0.315995 | 0.896528 |
| XLOC_006432 | PAPLN                | chr14:73704204-73741347  | 0.120166   | 0.149603  | 0.316112 | 1        |
| XLOC_002467 | TFAM                 | chr10:60144902-60158990  | 6.08996    | 7.5824    | 0.316221 | 0.482416 |
| XLOC_021103 | BAZ1B                | chr7:72854727-72936615   | 8.4495     | 10.5209   | 0.316321 | 0.466558 |
| XLOC_021253 | ATXN7L1              | chr7:105245220-105517037 | 1.03219    | 1.28545   | 0.316563 | 0.835702 |
| XLOC_012391 | LOC654433            | chr2:113973573-114036496 | 2.32827    | 2.89981   | 0.3167   | 0.910298 |
| XLOC_002936 | TIMM23               | chr10:51592080-51623386  | 105.832    | 131.82    | 0.316791 | 0.462131 |
| XLOC_021978 | SLC20A2              | chr8:42273979-42408140   | 5.42368    | 6.75653   | 0.317011 | 0.8433   |
| XLOC_016756 | IGFBP7               | chr4:57845108-58071465   | 0.046045   | 0.0573667 | 0.31717  | 1        |
| XLOC_008714 | C16orf95             | chr16:87336403-87351026  | 3.12377    | 3.8919    | 0.317189 | 0.79799  |
| XLOC_023930 | CITED1               | chrX:71521487-71527037   | 10.5276    | 13.1181   | 0.317386 | 0.664397 |
| XLOC_009101 | C17orf53             | chr17:42219273-42239844  | 4.47199    | 5.57304   | 0.317548 | 0.609835 |
| XLOC_012986 | MOB1A                | chr2:74383210-74405995   | 20.2787    | 25.2726   | 0.317605 | 0.499123 |
| XLOC_020381 | TFAM                 | chr7:16793350-16824161   | 5.37935    | 6.70489   | 0.317783 | 0.602446 |
| XLOC_017298 | SLC12A2              | chr5:127419482-127525380 | 1.52466    | 1.90047   | 0.317865 | 0.57289  |
| XLOC_012695 | PSMD1                | chr2:231921577-232037540 | 19.6111    | 24.4503   | 0.318181 | 0.439482 |
| XLOC_000213 | SFN                  | chr1:27189632-27190947   | 66.744     | 83.2218   | 0.318324 | 0.457353 |
| XLOC_023763 | FANCB                | chrX:14861528-14891184   | 0.368195   | 0.459161  | 0.318528 | 0.823379 |
| XLOC_008945 | NEK8                 | chr17:27055831-27069784  | 0.752387   | 0.938292  | 0.318563 | 0.807024 |

|             |              |                          |           |           |          |          |
|-------------|--------------|--------------------------|-----------|-----------|----------|----------|
| XLOC_015275 | ARHGAP31     | chr3:119013219-11913832  | 1.23715   | 1.54289   | 0.318615 | 0.616288 |
| XLOC_001970 | PVRL4        | chr1:161040780-16105938  | 0.0751876 | 0.0937939 | 0.318999 | 1        |
| XLOC_006709 | PMRT5        | chr14:23389732-23398661  | 59.8822   | 74.7101   | 0.319175 | 0.461117 |
| XLOC_022295 | ACER2        | chr9:19408924-19452500   | 0.0893001 | 0.111418  | 0.319252 | 1        |
| XLOC_010456 | APC2         | chr19:1450147-1479228    | 0.688427  | 0.858951  | 0.319273 | 0.965607 |
| XLOC_017719 | DHFR         | chr5:79922044-80172634   | 12.84     | 16.0254   | 0.319713 | 0.754842 |
| XLOC_008277 | MAP1LC3B     | chr16:87425800-87438380  | 69.8223   | 87.1489   | 0.319794 | 0.498433 |
| XLOC_011964 | HSPBP1       | chr19:55773590-55791751  | 38.1191   | 47.579    | 0.319812 | 0.462301 |
| XLOC_022156 | HAS2         | chr8:122625270-12265756  | 0.467341  | 0.583341  | 0.319864 | 0.817735 |
| XLOC_011195 | U2AF2        | chr19:56165415-56186082  | 58.9519   | 73.5932   | 0.320035 | 0.450904 |
| XLOC_023018 | FAM225B      | chr9:115867002-115873957 | 0.421922  | 0.526772  | 0.320204 | 0.783798 |
| XLOC_006042 | RNF6         | chr13:26786904-26796508  | 10.7885   | 13.4707   | 0.320329 | 0.477155 |
| XLOC_000862 | SFT2D2       | chr1:168195254-16821208  | 3.33898   | 4.16938   | 0.320425 | 0.768707 |
| XLOC_023253 | SHROOM2      | chrX:9754495-9917481     | 0.520764  | 0.650387  | 0.320669 | 0.749883 |
| XLOC_007889 | KCTD5        | chr16:2732494-2759031    | 26.3381   | 32.899    | 0.320893 | 0.46196  |
| XLOC_003362 | ZDHHC13      | chr11:19138691-19197967  | 6.95629   | 8.68946   | 0.320948 | 0.52066  |
| XLOC_012180 | CHAC2        | chr2:53897116-54087170   | 4.07643   | 5.09233   | 0.321021 | 0.935939 |
| XLOC_016194 | LOC100507266 | chr4:4543857-4712664     | 0.176318  | 0.220304  | 0.321313 | 1        |
| XLOC_015179 | KBTBD8       | chr3:67048726-67061632   | 0.91947   | 1.14898   | 0.321479 | 0.672217 |
| XLOC_009929 | PSMD12       | chr17:65336618-65362721  | 29.9181   | 37.3879   | 0.32155  | 0.442936 |
| XLOC_000539 | SLC30A7      | chr1:101361631-10144731  | 2.09322   | 2.61589   | 0.321578 | 0.532105 |
| XLOC_008305 | MC1R         | chr16:89984286-89987385  | 2.26559   | 2.83131   | 0.321584 | 0.697216 |
| XLOC_023922 | BCYRN1       | chrX:70430034-7048962    | 27.8779   | 34.8466   | 0.321895 | 0.986822 |
| XLOC_015350 | SRPRB        | chr3:133502876-13354033  | 22.3922   | 27.9927   | 0.32205  | 0.443332 |
| XLOC_015206 | ARL6         | chr3:97483594-97517373   | 1.09448   | 1.36867   | 0.322527 | 0.81082  |
| XLOC_016143 | UBXN7        | chr3:196080368-19615934  | 1.67226   | 2.09143   | 0.322688 | 0.613617 |
| XLOC_022300 | MTAP         | chr9:21802634-21865969   | 28.5332   | 35.6917   | 0.322943 | 0.454512 |
| XLOC_001554 | MAGOH        | chr1:53692563-53793821   | 63.4543   | 79.3762   | 0.32299  | 0.626609 |
| XLOC_002816 | NUDT5        | chr10:12171639-12292589  | 97.2899   | 121.729   | 0.323313 | 0.79799  |
| XLOC_021477 | C8orf48      | chr8:13424351-13425797   | 2.25781   | 2.8254    | 0.32353  | 0.721071 |
| XLOC_002762 | GLRX3        | chr10:131934638-1319786  | 105.158   | 131.629   | 0.323916 | 0.462417 |
| XLOC_010840 | NFKB1B       | chr19:39369194-39399534  | 23.1473   | 28.9745   | 0.323944 | 0.877493 |
| XLOC_009021 | PSMB3        | chr17:36909001-36920478  | 291.768   | 365.254   | 0.324079 | 0.450569 |
| XLOC_000125 | FBLIM1       | chr1:16085254-16113084   | 0.355287  | 0.444777  | 0.324097 | 0.888528 |
| XLOC_003119 | PCGF6        | chr10:105062552-1051108  | 8.51007   | 10.658    | 0.324691 | 0.520758 |
| XLOC_008850 | NTN1         | chr17:8924858-9147317    | 2.78758   | 3.49121   | 0.324713 | 0.59346  |
| XLOC_007566 | SHC4         | chr15:49115933-49255641  | 0.0201247 | 0.0252068 | 0.324843 | 1        |
| XLOC_023421 | TSR2         | chrX:54466852-54471731   | 25.9606   | 32.5219   | 0.325085 | 0.461971 |
| XLOC_001805 | CTSX         | chr1:150768683-150780917 | 1.10323   | 1.38232   | 0.325353 | 0.777454 |
| XLOC_002992 | DNAJC9       | chr10:75002581-75007025  | 38.7382   | 48.5395   | 0.325401 | 0.462088 |
| XLOC_005634 | FGD6         | chr12:95470524-95611240  | 0.0930438 | 0.11663   | 0.325954 | 1        |
| XLOC_013221 | SPC25        | chr2:169727400-16974694  | 14.1745   | 17.7699   | 0.32613  | 0.493884 |
| XLOC_017988 | COL23A1      | chr5:177664616-17801755  | 0.0243105 | 0.0304792 | 0.326242 | 1        |
| XLOC_003551 | FADS2        | chr11:61595712-61634825  | 7.59301   | 9.52153   | 0.326521 | 0.513534 |
| XLOC_013919 | PDRG1        | chr20:30532757-30539883  | 27.9399   | 35.0402   | 0.326682 | 0.458152 |
| XLOC_021657 | CA2          | chr8:86376130-86393721   | 7.47019   | 9.36999   | 0.326902 | 0.549171 |
| XLOC_013676 | YWHA8        | chr20:43514343-43537161  | 48.6387   | 61.0192   | 0.327161 | 0.416982 |
| XLOC_003533 | TMEM109      | chr11:60681370-60690915  | 29.1725   | 36.6      | 0.327238 | 0.443332 |
| XLOC_014327 | PSMG1        | chr21:40547371-40555440  | 66.4309   | 83.3668   | 0.327619 | 0.441724 |
| XLOC_010999 | SPHK2        | chr19:49118583-49133663  | 8.80938   | 11.057    | 0.327851 | 0.897332 |
| XLOC_008105 | IRX5         | chr16:54965110-54968395  | 0.45029   | 0.565425  | 0.328481 | 0.882012 |
| XLOC_000640 | RBM8A        | chr1:145507556-14551607  | 22.4007   | 28.1316   | 0.328649 | 0.5152   |
| XLOC_002864 | MPP7         | chr10:28339922-28571067  | 0.176513  | 0.221694  | 0.328795 | 1        |
| XLOC_009734 | KLHL11       | chr17:40009798-40021629  | 0.360073  | 0.45232   | 0.329055 | 0.855712 |
| XLOC_009072 | COASY        | chr17:40714091-40718299  | 46.5626   | 58.4919   | 0.329067 | 0.431019 |
| XLOC_022712 | GLIS3        | chr9:3824127-4300035     | 0.0959096 | 0.120483  | 0.329081 | 1        |
| XLOC_001478 | BMP8B        | chr1:40204516-40254533   | 0.827183  | 1.03931   | 0.329345 | 0.977103 |
| XLOC_003321 | TMEM9B-AS1   | chr11:8986221-8997830    | 0.308074  | 0.387124  | 0.329521 | 0.928653 |
| XLOC_008692 | C16orf46     | chr16:81087101-81110872  | 0.308382  | 0.387523  | 0.329562 | 0.88211  |
| XLOC_009878 | SKA2         | chr17:57187307-57232800  | 16.5116   | 20.7499   | 0.329622 | 0.436134 |
| XLOC_005540 | TMEM194A     | chr12:57449425-57472574  | 6.21914   | 7.81882   | 0.330235 | 0.450737 |
| XLOC_017637 | LOC100132356 | chr5:43065288-43067073   | 0.160434  | 0.201707  | 0.330279 | 1        |
| XLOC_008207 | CLEC18A      | chr16:69984607-69998250  | 0.20938   | 0.263279  | 0.330471 | 1        |
| XLOC_006944 | C14orf142    | chr14:93669236-93695561  | 5.15092   | 6.47773   | 0.330659 | 0.929536 |
| XLOC_010708 | DDX49        | chr19:19030483-19039442  | 33.0473   | 41.5801   | 0.331361 | 0.431637 |
| XLOC_014522 | LOC339666    | chr22:32772650-32780329  | 0.171374  | 0.215687  | 0.33179  | 1        |
| XLOC_016032 | VEPH1        | chr3:156977531-15722141  | 1.17645   | 1.48071   | 0.33185  | 0.870747 |
| XLOC_000688 | GABPB2       | chr1:151043079-15109100  | 0.958615  | 1.20658   | 0.331899 | 0.772924 |
| XLOC_014557 | MAFF         | chr22:38597938-38612517  | 39.5121   | 49.7431   | 0.3322   | 0.413605 |
| XLOC_010141 | SNRPD1       | chr18:19192259-19210208  | 65.8365   | 82.8934   | 0.332369 | 0.426605 |
| XLOC_002085 | GLRX2        | chr1:193065594-19307524  | 17.8656   | 22.4949   | 0.332414 | 0.553043 |
| XLOC_003608 | POLA2        | chr11:65029431-65065088  | 9.06629   | 11.4157   | 0.332441 | 0.473746 |
| XLOC_016816 | HNRNPD       | chr4:83274466-83295149   | 119.7     | 150.727   | 0.332514 | 0.433739 |
| XLOC_004322 | SLC25A45     | chr11:65142662-65150142  | 1.31038   | 1.65035   | 0.332777 | 0.773127 |
| XLOC_011152 | MYADM        | chr19:54369610-54379689  | 42.5      | 53.5292   | 0.332864 | 0.411459 |
| XLOC_022468 | NCBP1        | chr9:100263461-10043602  | 10.8921   | 13.7193   | 0.332921 | 0.549068 |
| XLOC_001191 | C1orf159     | chr1:1017197-1051736     | 13.8304   | 17.4225   | 0.33311  | 0.53058  |
| XLOC_011786 | SLC1A5       | chr19:47278139-47291842  | 213.381   | 268.815   | 0.333181 | 0.483752 |
| XLOC_006376 | TOMM20L      | chr14:58862643-59015549  | 1.05963   | 1.33501   | 0.333302 | 0.986822 |

|             |              |                          |            |            |          |          |
|-------------|--------------|--------------------------|------------|------------|----------|----------|
| XLOC_006500 | UNC79        | chr14:93799564-94173689  | 0.00386366 | 0.00486843 | 0.333487 | 1        |
| XLOC_018512 | TBPL1        | chr6:134273307-134308638 | 8.11874    | 10.2319    | 0.333749 | 0.559828 |
| XLOC_006470 | SLIRP        | chr14:78174413-78183941  | 282.833    | 356.462    | 0.333799 | 0.424017 |
| XLOC_005266 | C3AR1        | chr12:8210918-8218955    | 0.151121   | 0.190462   | 0.333802 | 1        |
| XLOC_001569 | DMCR24       | chr1:55315299-55352921   | 42.9168    | 54.0913    | 0.333854 | 0.424147 |
| XLOC_004771 | CHAS         | chr12:22199109-22218606  | 15.8167    | 19.9377    | 0.334053 | 0.454392 |
| XLOC_020632 | ZNF655       | chr7:99156044-99174076   | 17.3446    | 21.8656    | 0.334178 | 0.748691 |
| XLOC_014762 | KIAA1656     | chr22:30727976-30773894  | 0.520442   | 0.656104   | 0.334186 | 0.979701 |
| XLOC_017771 | TRIM36       | chr5:114460458-114516243 | 1.97558    | 2.49122    | 0.33458  | 0.556185 |
| XLOC_016864 | H2AFZ        | chr4:100869243-100871512 | 457.045    | 576.389    | 0.334707 | 0.44093  |
| XLOC_005145 | HNF1A        | chr12:121416548-12144037 | 0.485542   | 0.612462   | 0.335024 | 0.830321 |
| XLOC_014027 | DPM1         | chr20:49551404-49575060  | 37.3432    | 47.1053    | 0.335043 | 0.409587 |
| XLOC_001516 | PRDX1        | chr1:45965855-45988562   | 458.108    | 577.996    | 0.335371 | 0.435611 |
| XLOC_011516 | HAUS8        | chr19:17160570-17186343  | 10.1517    | 12.8095    | 0.335501 | 0.527259 |
| XLOC_010929 | TOMM40       | chr19:45394476-45406946  | 104.781    | 132.216    | 0.335517 | 0.409587 |
| XLOC_013419 | PDE6D        | chr2:232597146-232645974 | 9.26571    | 11.6918    | 0.335522 | 0.56719  |
| XLOC_013968 | SNORA71D     | chr20:37049238-37064018  | 3.82465    | 4.82725    | 0.335872 | 0.981884 |
| XLOC_000302 | MFSD2A       | chr1:40420783-40435628   | 10.2985    | 12.9996    | 0.336038 | 0.509535 |
| XLOC_011156 | CACNG6       | chr19:54495541-54515920  | 0.0359333  | 0.0453618  | 0.336154 | 1        |
| XLOC_020573 | LOC100133091 | chr7:76178657-76257299   | 3.48755    | 4.40316    | 0.336326 | 0.842158 |
| XLOC_016026 | SSR3         | chr3:156257928-156272973 | 217.043    | 274.091    | 0.336673 | 0.471178 |
| XLOC_011412 | DNMT1        | chr19:10244021-10305755  | 17.3011    | 21.8505    | 0.336802 | 0.39392  |
| XLOC_009197 | RADS1C       | chr17:56769962-56811692  | 21.438     | 27.0766    | 0.336879 | 0.57061  |
| XLOC_016141 | PCYT1A       | chr3:195965252-196014584 | 6.61778    | 8.35955    | 0.337077 | 0.565929 |
| XLOC_003860 | C2CD2L       | chr11:118978092-11898782 | 6.50282    | 8.21674    | 0.337501 | 0.511917 |
| XLOC_012788 | NOLW         | chr2:10710891-10830113   | 6.02017    | 7.607      | 0.337523 | 0.470491 |
| XLOC_012367 | SOWAHC       | chr2:110371910-110376564 | 6.7351     | 8.51281    | 0.337937 | 0.462131 |
| XLOC_016147 | CEP19        | chr3:196433147-196439123 | 0.380944   | 0.48153    | 0.338047 | 0.844829 |
| XLOC_022168 | MTSS1        | chr8:125563027-125740730 | 1.89229    | 2.3921     | 0.338146 | 0.563736 |
| XLOC_008646 | NQO1         | chr16:69743303-69760533  | 19.3256    | 24.4356    | 0.338467 | 0.417856 |
| XLOC_022510 | FAM225A      | chr9:115875175-115882126 | 0.724371   | 0.91595    | 0.338539 | 0.682587 |
| XLOC_001245 | DNAJC11      | chr1:6684924-6761966     | 17.1081    | 21.6344    | 0.338647 | 0.573076 |
| XLOC_007970 | TMC5         | chr16:19422056-19510434  | 1.42925    | 1.80739    | 0.338649 | 0.637163 |
| XLOC_023134 | MED22        | chr9:136207754-136214972 | 40.9984    | 51.8608    | 0.339077 | 0.562177 |
| XLOC_004011 | HBG2         | chr11:5274420-5276011    | 0.69079    | 0.873829   | 0.339104 | 0.910156 |
| XLOC_018093 | HIST1H4A     | chr6:26021906-26022278   | 0.468252   | 0.592598   | 0.339769 | 0.96275  |
| XLOC_006862 | TMEM229B     | chr14:67936982-67982021  | 0.290994   | 0.368306   | 0.339915 | 0.831797 |
| XLOC_022418 | CTSL1        | chr9:90340973-90346384   | 107.328    | 135.861    | 0.340114 | 0.411923 |
| XLOC_013390 | AP1S3        | chr2:224620046-224702318 | 0.00811824 | 0.0102777  | 0.340286 | 1        |
| XLOC_020652 | FBXO24       | chr7:100183955-100205798 | 0.286843   | 0.363149   | 0.340298 | 0.982154 |
| XLOC_007185 | EIF3J        | chr15:44829265-44955876  | 13.8637    | 17.552     | 0.340318 | 0.622934 |
| XLOC_019092 | SLC2A12      | chr6:134308718-134373788 | 0.59216    | 0.750005   | 0.340914 | 0.679514 |
| XLOC_011769 | MYPOP        | chr19:46393280-46405862  | 11.0124    | 13.949     | 0.341026 | 0.554478 |
| XLOC_021434 | MYOM2        | chr8:1993157-2093380     | 0.0313773  | 0.0397497  | 0.341222 | 1        |
| XLOC_005616 | DUSP6        | chr12:89741836-89746296  | 17.5005    | 22.1706    | 0.341254 | 0.469503 |
| XLOC_007659 | ANP32A       | chr15:69070874-69113261  | 48.1221    | 60.9663    | 0.341314 | 0.393354 |
| XLOC_006032 | MIFEP        | chr13:24304327-24471125  | 10.1655    | 12.8801    | 0.341469 | 0.464668 |
| XLOC_015164 | PTPRG        | chr3:61547242-62304622   | 1.2631     | 1.60061    | 0.341651 | 0.57271  |
| XLOC_018187 | TCF19        | chr6:31126302-31131992   | 8.5535     | 10.8416    | 0.341987 | 0.425716 |
| XLOC_014949 | HRH1         | chr3:11178778-11304939   | 1.91665    | 2.42939    | 0.342039 | 0.574061 |
| XLOC_017933 | C1QTNF2      | chr5:159774774-159797648 | 1.17044    | 1.48361    | 0.342065 | 0.730089 |
| XLOC_023879 | SMC1A        | chrX:53401069-53449618   | 4.63066    | 5.86975    | 0.342083 | 0.397773 |
| XLOC_001800 | MCL1         | chr1:150547026-150552214 | 69.3547    | 87.9283    | 0.342334 | 0.409267 |
| XLOC_012869 | EIF2AK2      | chr2:37332283-37384190   | 2.44147    | 3.09592    | 0.34262  | 0.52724  |
| XLOC_021893 | PSD3         | chr8:18384812-18871196   | 0.00536734 | 0.00680664 | 0.342736 | 1        |
| XLOC_002703 | NHLRC2       | chr10:115614390-11567228 | 1.03538    | 1.31304    | 0.342745 | 0.574061 |
| XLOC_000492 | HS2ST1       | chr1:87380334-87575681   | 3.45228    | 4.38011    | 0.34342  | 0.511816 |
| XLOC_013715 | CEBPB        | chr20:48807119-48809227  | 88.0288    | 111.694    | 0.343499 | 0.474047 |
| XLOC_004784 | REP15        | chr12:27849427-27850566  | 0.740801   | 0.940054   | 0.343657 | 0.832995 |
| XLOC_011976 | FIZ1         | chr19:56102736-56110893  | 6.02356    | 7.64414    | 0.343737 | 0.569286 |
| XLOC_006299 | REC8         | chr14:24641233-24658124  | 0.62049    | 0.787775   | 0.344376 | 0.979701 |
| XLOC_022773 | MOB3B        | chr9:27325206-27529850   | 0.550264   | 0.698682   | 0.344512 | 0.686575 |
| XLOC_018941 | RAB23        | chr6:57053581-57087078   | 1.72375    | 2.18902    | 0.344735 | 0.616214 |
| XLOC_013765 | NTSR1        | chr20:61340188-61394123  | 7.60205    | 9.65686    | 0.345166 | 0.474386 |
| XLOC_002403 | CREM         | chr10:35415768-35501886  | 18.5803    | 23.606     | 0.345382 | 0.491042 |
| XLOC_015698 | PRKAR2A      | chr3:48788092-48885270   | 0.91495    | 1.16245    | 0.345408 | 0.744061 |
| XLOC_021707 | CTHRC1       | chr8:104383742-104395233 | 0.0300616  | 0.0381976  | 0.345563 | 1        |
| XLOC_006033 | C1QTNF9B     | chr13:24304327-24471125  | 0.360309   | 0.457875   | 0.345719 | 0.969075 |
| XLOC_001560 | HSPB11       | chr1:54387233-54411288   | 36.4538    | 46.3268    | 0.345778 | 0.462958 |
| XLOC_000183 | GRHL3        | chr1:24645811-24741587   | 0.00958561 | 0.0121823  | 0.345884 | 1        |
| XLOC_013845 | PCNA         | chr20:5095598-5107268    | 83.1105    | 105.643    | 0.346101 | 0.419411 |
| XLOC_001203 | MRPL20       | chr1:1334909-1342693     | 137.358    | 174.62     | 0.34628  | 0.448417 |
| XLOC_016330 | ARL9         | chr4:57371374-57390058   | 0.234669   | 0.298402   | 0.346629 | 1        |
| XLOC_009942 | LINC00511    | chr17:70594179-70636611  | 0.0353451  | 0.0449689  | 0.347417 | 1        |
| XLOC_011243 | ZNF8         | chr19:58790317-58807254  | 2.05594    | 2.61581    | 0.347455 | 0.663562 |
| XLOC_018832 | FKBP5        | chr6:35541361-35704724   | 6.1014     | 7.76314    | 0.3475   | 0.418251 |
| XLOC_016997 | C4orf27      | chr4:170650618-170679093 | 14.9066    | 18.9673    | 0.347563 | 0.445736 |
| XLOC_011020 | ALDH16A1     | chr19:49956472-49974305  | 9.99798    | 12.722     | 0.347611 | 0.454301 |
| XLOC_024073 | ENOX2        | chrX:129757356-130037201 | 1.17699    | 1.49772    | 0.347663 | 0.614509 |

|              |              |                          |            |            |          |          |
|--------------|--------------|--------------------------|------------|------------|----------|----------|
| XLOC_002371  | ARL5B        | chr10:18948312-18966940  | 2.33327    | 2.96978    | 0.348003 | 0.551547 |
| XLOC_006879  | MED6         | chr14:71050956-71067384  | 16.085     | 20.4771    | 0.348293 | 0.442493 |
| XLOC_018111  | BTN2A3P      | chr6:26421618-26430816   | 0.237813   | 0.302777   | 0.348426 | 1        |
| XLOC_019020  | RTN4IP1      | chr6:107018902-10707737  | 2.98455    | 3.80086    | 0.348809 | 0.564578 |
| XLOC_020458  | MRPL32       | chr7:42971938-42977453   | 58.7682    | 74.8543    | 0.349049 | 0.387393 |
| XLOC_009881  | PTRH2        | chr17:57774666-57784856  | 44.2306    | 56.3385    | 0.349077 | 0.396027 |
| XLOC_000087  | AGTRAP       | chr1:11796141-11810828   | 70.3714    | 89.665     | 0.349557 | 0.401371 |
| XLOC_013760  | ADRM1        | chr20:60878026-60883918  | 137.399    | 175.128    | 0.350034 | 0.373076 |
| XLOC_004101  | HPS5         | chr11:18300216-18343721  | 1.50268    | 1.91544    | 0.350137 | 0.559722 |
| XLOC_010480  | NCLN         | chr19:3185874-3209573    | 47.178     | 60.1418    | 0.350254 | 0.37527  |
| XLOC_005267  | POU5F1P3     | chr12:8276227-8291203    | 0.0424654  | 0.0541347  | 0.350265 | 1        |
| XLOC_001025  | G0S2         | chr1:209848669-20984973  | 209.468    | 267.035    | 0.350302 | 0.404397 |
| XLOC_022197  | AGO2         | chr8:141541263-14164564  | 17.3011    | 22.0582    | 0.35045  | 0.383974 |
| XLOC_000431  | EFCAB7       | chr1:63989012-64038364   | 0.723096   | 0.92193    | 0.35047  | 0.756805 |
| XLOC_001818  | CELF3        | chr1:151672533-151689290 | 0.0162452  | 0.0207137  | 0.350565 | 1        |
| XLOC_015301  | KALRN        | chr3:123813557-12444003  | 0.0233013  | 0.0297129  | 0.350679 | 1        |
| XLOC_008259  | DNAAF1       | chr16:84178864-84220676  | 0.0197319  | 0.0251622  | 0.350731 | 1        |
| XLOC_017175  | SMN2         | chr5:70220767-70248842   | 3.78893    | 4.83196    | 0.350818 | 0.593539 |
| XLOC_006052  | SLC46A3      | chr13:29274217-29293150  | 2.9357     | 3.74438    | 0.351022 | 0.556835 |
| XLOC_016023  | SLC33A1      | chr3:155544300-15557224  | 4.06581    | 5.18772    | 0.351557 | 0.50726  |
| XLOC_007314  | COMMD4       | chr15:75628373-75632614  | 127.617    | 162.844    | 0.351674 | 0.37652  |
| XLOC_000436  | CACHD1       | chr1:64936475-65158741   | 1.13389    | 1.44698    | 0.351768 | 0.5777   |
| XLOC_014350  | WDR4         | chr21:44263189-44299699  | 7.14603    | 9.11984    | 0.351867 | 0.583855 |
| XLOC_001804  | CTSS         | chr1:150702671-15073843  | 0.024893   | 0.0317753  | 0.352161 | 1        |
| XLOC_009758  | BRC4A1       | chr17:41196311-41277500  | 3.59132    | 4.5847     | 0.352313 | 0.457353 |
| XLOC_017852  | PFDF1        | chr5:139624634-13968268  | 73.4808    | 93.8272    | 0.352638 | 0.370751 |
| XLOC_014822  | LOC400927    | chr22:38740669-38794931  | 0.996599   | 1.27268    | 0.352789 | 0.919921 |
| XLOC_022687  | NDOR1        | chr9:140100118-14011381  | 11.5269    | 14.7243    | 0.353202 | 0.401233 |
| XLOC_015658  | CDCP1        | chr3:45123768-45187914   | 24.2328    | 30.9646    | 0.353659 | 0.358376 |
| XLOC_022452  | C9orf3       | chr9:97488950-97849500   | 2.02789    | 2.59249    | 0.354363 | 0.595747 |
| XLOC_024039  | UPF3B        | chrX:118967988-11898699  | 4.56247    | 5.83396    | 0.354661 | 0.491932 |
| XLOC_006093  | KBTD7        | chr13:41765710-41768702  | 0.199266   | 0.254821   | 0.354789 | 1        |
| XLOC_010167  | MEP1B        | chr18:29769986-29800366  | 0.0118941  | 0.0152122  | 0.354974 | 1        |
| XLOC_009980  | FBF1         | chr17:73906617-73937119  | 1.13957    | 1.458      | 0.355508 | 0.682587 |
| XLOC_017076  | CCT5         | chr5:10250281-10266501   | 72.6199    | 92.922     | 0.355656 | 0.370382 |
| XLOC_005120  | SDSL         | chr12:113860215-1138760  | 27.7481    | 35.515     | 0.356038 | 0.395886 |
| XLOC_014782  | RFPL2        | chr22:32586421-32600718  | 0.214391   | 0.274437   | 0.356232 | 1        |
| XLOC_018099  | HIST1H2BD    | chr6:26158348-26171576   | 14.9187    | 19.1012    | 0.35654  | 0.67323  |
| XLOC_004141  | APIP         | chr11:34903842-35017675  | 13.3917    | 17.1485    | 0.356751 | 0.713826 |
| XLOC_002392  | PDSS1        | chr10:26986594-27150016  | 5.92344    | 7.58613    | 0.356928 | 0.904096 |
| XLOC_021551  | EIF4EBP1     | chr8:37888019-37917883   | 303.679    | 388.95     | 0.357039 | 0.367367 |
| XLOC_003137  | RPL13AP6     | chr10:112679300-1127734  | 0.327393   | 0.419357   | 0.357154 | 0.987627 |
| XLOC_018585  | IGF2R        | chr6:160390130-16052755  | 4.96418    | 6.35991    | 0.357451 | 0.372206 |
| XLOC_022931  | IARS         | chr9:94972489-95056038   | 64.883     | 83.1277    | 0.357489 | 0.390876 |
| XLOC_021793  | KIAA1875     | chr8:145162628-14517321  | 0.0985432  | 0.126281   | 0.357807 | 1        |
| XLOC_004478  | MTMR2        | chr11:95566043-95657371  | 5.85124    | 7.49868    | 0.357894 | 0.386151 |
| XLOC_003548  | DAGLA        | chr11:61447904-61514474  | 1.15466    | 1.47982    | 0.357955 | 0.638092 |
| XLOC_014888  | C22orf26     | chr22:46446338-46454402  | 0.224112   | 0.28725    | 0.358086 | 1        |
| XLOC_011731  | PLAUR        | chr19:44150246-44174498  | 101.831    | 130.519    | 0.358087 | 0.348575 |
| XLOC_009069  | ATP6V0A1     | chr17:40610861-40674597  | 10.1903    | 13.0624    | 0.358229 | 0.368292 |
| XLOC_004571  | DPAGT1       | chr11:118967212-1189727  | 22.3305    | 28.6248    | 0.35825  | 0.371978 |
| XLOC_007156  | CHAC1        | chr15:41245635-41248717  | 35.4125    | 45.4066    | 0.358642 | 0.540243 |
| XLOC_005716  | RBM19        | chr12:114254542-1144041  | 12.0293    | 15.427     | 0.358896 | 0.363804 |
| XLOC_021774  | C8orf31      | chr8:144120678-14413572  | 0.942789   | 1.20913    | 0.358958 | 0.781336 |
| XLOC_003190  | FAM196A      | chr10:128594022-1292507  | 0.00757493 | 0.00971596 | 0.359124 | 1        |
| XLOC_018095  | HFE          | chr6:26087508-26095469   | 1.1248     | 1.44279    | 0.359189 | 0.760508 |
| XLOC_016649  | STX18        | chr4:4387982-4543775     | 13.9329    | 17.8735    | 0.359327 | 0.383463 |
| XLOC_017689  | GTF2H2       | chr5:70330950-70363497   | 0.754448   | 0.967945   | 0.359505 | 0.746863 |
| XLOC_018234  | SLC39A7      | chr6:33168602-33172214   | 44.6792    | 57.3285    | 0.35965  | 0.355297 |
| XLOC_002188  | EPRS         | chr1:220046618-22032138  | 23.0056    | 29.522     | 0.359807 | 0.721117 |
| XLOC_022189  | ST3GAL1      | chr8:134467090-13458418  | 5.4511     | 6.99642    | 0.36007  | 0.348762 |
| XLOC_004549  | PCSK7        | chr11:117075787-1171028  | 7.88171    | 10.12      | 0.36063  | 0.409587 |
| XLOC_009472  | ALOXE3       | chr17:7999217-8022234    | 4.79798    | 6.16125    | 0.360796 | 0.488518 |
| XLOC_005646  | ANKS1B       | chr12:99039077-10037843  | 2.85717    | 3.66945    | 0.360975 | 0.759668 |
| XLOC_018085  | GMNN         | chr6:24775158-24786325   | 20.9006    | 26.8446    | 0.361089 | 0.401647 |
| XLOC_002945  | ZWINT        | chr10:58117198-58121034  | 29.4408    | 37.8272    | 0.361606 | 0.356014 |
| XLOC_008120  | MT1E         | chr16:56659584-56661024  | 1544.25    | 1984.15    | 0.361612 | 0.36192  |
| XLOC_001132  | EXO1         | chr1:242011492-24205324  | 5.34422    | 6.86744    | 0.361791 | 0.410986 |
| XLOC_018435  | LACE1        | chr6:108616097-10884425  | 0.937194   | 1.20503    | 0.362644 | 0.714805 |
| XLOC_012961  | LOC100133985 | chr2:70351167-70352448   | 1.93192    | 2.48453    | 0.362937 | 0.867828 |
| XLOC_005134  | CCDC64       | chr12:120427647-1205322  | 1.16732    | 1.50124    | 0.362951 | 0.71659  |
| XLOC_015229  | FAM172BP     | chr3:101237710-10124273  | 0.310256   | 0.399048   | 0.363103 | 0.832174 |
| XLOC_009430  | NUP88        | chr17:5289345-5342471    | 23.1128    | 29.7338    | 0.363408 | 0.904096 |
| XLOC_016034  | LXN          | chr3:158362316-15841036  | 8.45438    | 10.8764    | 0.363434 | 0.9799   |
| XLOC_004877  | HOXC13       | chr12:54329111-54340328  | 0.303501   | 0.390458   | 0.363466 | 0.886459 |
| XLOC_002639  | DNMBP-AS1    | chr10:101635333-1017696  | 0.0114649  | 0.0147502  | 0.363517 | 1        |
| XLOC_012124  | LCLAT1       | chr2:30670122-30867091   | 2.95929    | 3.80844    | 0.363947 | 0.440324 |
| XLOC_0017484 | RPL26L1      | chr5:172386438-17239677  | 70.2026    | 90.3547    | 0.364075 | 0.346277 |
| XLOC_014137  | HUNK         | chr21:33245627-33376377  | 0.397194   | 0.511304   | 0.364338 | 0.702098 |

|             |                      |                          |            |            |          |          |
|-------------|----------------------|--------------------------|------------|------------|----------|----------|
| XLOC_003569 | SLC3A2               | chr11:62623483-62656355  | 201.087    | 258.868    | 0.364393 | 0.387314 |
| XLOC_020406 | LOC441204            | chr7:26443107-26535986   | 0.0607775  | 0.0782459  | 0.364479 | 1        |
| XLOC_000308 | ZFP69B               | chr1:40916336-40929390   | 1.13977    | 1.46766    | 0.364768 | 0.708345 |
| XLOC_008221 | MARVELD3             | chr16:71660055-71675868  | 1.27326    | 1.63968    | 0.36489  | 0.705946 |
| XLOC_013941 | EIF6                 | chr20:33866708-33872619  | 240.4      | 309.601    | 0.364974 | 0.34675  |
| XLOC_005724 | TESC                 | chr12:117476727-11753725 | 44.8017    | 57.6999    | 0.365017 | 0.37535  |
| XLOC_012837 | SLC5A6               | chr2:27422454-27440046   | 17.3098    | 22.2965    | 0.365227 | 0.735667 |
| XLOC_013866 | KIF16B               | chr20:16252748-16554079  | 1.26009    | 1.62354    | 0.365617 | 0.547384 |
| XLOC_018096 | HIST1H4C             | chr6:26104175-26104565   | 1.15419    | 1.48723    | 0.365748 | 0.929635 |
| XLOC_020966 | CYCS                 | chr7:25158269-25164980   | 21.1796    | 27.2936    | 0.365888 | 0.346589 |
| XLOC_020521 | TPST1                | chr7:65670258-65825438   | 2.46992    | 3.18312    | 0.36598  | 0.602446 |
| XLOC_006870 | ERH                  | chr14:69846839-69865021  | 220.152    | 283.73     | 0.36602  | 0.356572 |
| XLOC_007350 | FAM154B              | chr15:82555151-82577267  | 0.0350946  | 0.045235   | 0.36619  | 1        |
| XLOC_015644 | ULK4                 | chr3:41288089-42003660   | 0.314673   | 0.405602   | 0.36621  | 0.754984 |
| XLOC_001858 | S100A14              | chr1:153586731-153588808 | 0.263225   | 0.33931    | 0.366304 | 1        |
| XLOC_009079 | WNK4                 | chr17:40932648-40949084  | 1.04944    | 1.35284    | 0.366371 | 0.664776 |
| XLOC_023164 | CARD9                | chr9:139258407-139268133 | 1.25223    | 1.61425    | 0.366371 | 0.764136 |
| XLOC_000364 | NASP                 | chr1:46049659-46084578   | 43.7633    | 56.4318    | 0.366788 | 0.348909 |
| XLOC_003932 | LOC100133161         | chr11:126986-131920      | 0.126936   | 0.163705   | 0.366997 | 1        |
| XLOC_021650 | FABP5                | chr8:82192717-82197012   | 210.955    | 272.105    | 0.367226 | 0.34477  |
| XLOC_008098 | ADCY7                | chr16:50321822-50352043  | 5.54397    | 7.15387    | 0.367802 | 0.374906 |
| XLOC_018733 | RNF39                | chr6:30034931-30043628   | 0.0673926  | 0.0869703  | 0.367932 | 1        |
| XLOC_000289 | ZC3H12A              | chr1:37940118-37949978   | 3.52538    | 4.54988    | 0.368047 | 0.559537 |
| XLOC_019099 | MTRFR2               | chr6:136552167-136571445 | 10.4413    | 13.4814    | 0.368667 | 0.413338 |
| XLOC_014375 | C21orf67             | chr21:46353198-46359828  | 1.4685     | 1.8961     | 0.368689 | 0.79799  |
| XLOC_002473 | ARID5B               | chr10:63661012-63856707  | 0.189065   | 0.244139   | 0.368817 | 1        |
| XLOC_024025 | AMOT                 | chrX:112018104-11208404  | 0.22107    | 0.285535   | 0.369165 | 1        |
| XLOC_009157 | FLJ45513             | chr17:47915670-47926199  | 0.0504763  | 0.0652037  | 0.369347 | 1        |
| XLOC_005906 | WDFY2                | chr13:52158483-52336171  | 3.32078    | 4.29015    | 0.369505 | 0.46354  |
| XLOC_014509 | MORC2-AS1            | chr22:31318294-31364187  | 0.788021   | 1.01809    | 0.369551 | 0.930066 |
| XLOC_001470 | GJA9_MYCBP           | chr1:39328161-39347298   | 8.14344    | 10.5246    | 0.370054 | 0.381083 |
| XLOC_006023 | N6AMT2               | chr13:21303072-21348057  | 7.37979    | 9.53769    | 0.37006  | 0.562445 |
| XLOC_001676 | EXTL2                | chr1:101337927-101360735 | 5.22506    | 6.75334    | 0.370153 | 0.393497 |
| XLOC_002356 | MEIG1                | chr10:15001437-15014850  | 0.161313   | 0.208498   | 0.370165 | 1        |
| XLOC_012687 | SP140                | chr2:231090444-231177930 | 0.117849   | 0.152342   | 0.370383 | 1        |
| XLOC_001296 | EPHA2                | chr1:16450831-16482582   | 70.564     | 91.2262    | 0.370515 | 0.337663 |
| XLOC_001498 | EBNA1BP2             | chr1:43629844-43720029   | 74.0954    | 95.8079    | 0.370776 | 0.315903 |
| XLOC_009919 | SMURF2               | chr17:62540734-62658386  | 67.5262    | 87.3171    | 0.370817 | 0.362161 |
| XLOC_016745 | CHIC2                | chr4:54875957-54930815   | 16.6237    | 21.4958    | 0.370819 | 0.443848 |
| XLOC_021872 | FAM90A2P             | chr8:12030962-12034776   | 0.0574573  | 0.0743014  | 0.3709   | 1        |
| XLOC_003804 | ZC3H12C              | chr11:109964086-11004255 | 0.72034    | 0.931777   | 0.371306 | 0.525646 |
| XLOC_014804 | TMPRSS6              | chr22:37461478-37499693  | 0.0386101  | 0.0499574  | 0.371721 | 1        |
| XLOC_013521 | MCM8                 | chr20:5931297-5975831    | 1.9722     | 2.55184    | 0.371734 | 0.507287 |
| XLOC_012534 | HNRNPA3              | chr2:178077421-17808868  | 40.1003    | 51.8879    | 0.371786 | 0.327288 |
| XLOC_017424 | TCOF1                | chr5:149737201-14977987  | 24.8601    | 32.1702    | 0.371893 | 0.310429 |
| XLOC_010698 | GDF15                | chr19:18496967-18499986  | 151.6      | 196.187    | 0.371961 | 0.436887 |
| XLOC_002346 | CDC123               | chr10:12171639-12292589  | 119.177    | 154.264    | 0.3723   | 0.561012 |
| XLOC_014141 | PAXBP1-AS1           | chr21:34100424-34144169  | 0.0738379  | 0.0956116  | 0.372824 | 1        |
| XLOC_009731 | JUP                  | chr17:39910858-39942964  | 0.0206921  | 0.0268097  | 0.373674 | 1        |
| XLOC_008918 | DHRS7B               | chr17:21030240-21095285  | 10.6755    | 13.8328    | 0.37379  | 0.400128 |
| XLOC_016110 | LPP-AS2              | chr3:187868993-188608460 | 0.327609   | 0.42464    | 0.374264 | 0.977332 |
| XLOC_016648 | LYAR                 | chr4:4269428-4291896     | 23.0687    | 29.9082    | 0.374605 | 0.341634 |
| XLOC_014191 | SLC37A1              | chr21:43919741-44001550  | 6.23764    | 8.08772    | 0.374734 | 0.429337 |
| XLOC_012632 | PKI55                | chr2:217081611-217084915 | 1.30267    | 1.68916    | 0.374837 | 0.573076 |
| XLOC_013436 | COL6A3               | chr2:238232654-23832285  | 0.00401604 | 0.00520804 | 0.374969 | 1        |
| XLOC_002739 | LOC399815            | chr10:124591670-12465825 | 0.333127   | 0.432017   | 0.375015 | 0.947936 |
| XLOC_022774 | C9orf72              | chr9:27546542-27573864   | 3.36579    | 4.36607    | 0.375392 | 0.475849 |
| XLOC_011662 | GMFG                 | chr19:39818998-39826726  | 0.28602    | 0.371239   | 0.376234 | 0.938566 |
| XLOC_002084 | UCHL5                | chr1:192981495-193060900 | 9.63388    | 12.5121    | 0.377132 | 0.625    |
| XLOC_000646 | PDZK1                | chr1:145727665-145764200 | 0.0712527  | 0.0925474  | 0.377249 | 1        |
| XLOC_015454 | KCNMB2               | chr3:178254223-178562217 | 0.0108932  | 0.0141492  | 0.377282 | 1        |
| XLOC_023833 | CFP                  | chrX:47483611-47489704   | 0.215635   | 0.280096   | 0.377326 | 1        |
| XLOC_000306 | ZMPSTE24             | chr1:40723721-40759856   | 8.18757    | 10.6363    | 0.377492 | 0.348762 |
| XLOC_001769 | CD160                | chr1:145695797-145715565 | 0.150385   | 0.1954     | 0.377772 | 1        |
| XLOC_001487 | SLFN1                | chr1:41480261-41707815   | 0.156485   | 0.203339   | 0.377864 | 1        |
| XLOC_008781 | C17orf107            | chr17:4736634-4806369    | 0.126338   | 0.164172   | 0.377918 | 1        |
| XLOC_015902 | CCDC58               | chr3:122078435-122102074 | 38.9202    | 50.5872    | 0.378252 | 0.342445 |
| XLOC_013712 | SLC9A8               | chr20:48429249-48508779  | 2.94612    | 3.83062    | 0.378762 | 0.404194 |
| XLOC_022348 | MELK                 | chr9:36572858-36677680   | 10.222     | 13.297     | 0.379425 | 0.373076 |
| XLOC_004766 | SLCO1B1              | chr12:21284127-21392730  | 0.0448254  | 0.0583381  | 0.380124 | 1        |
| XLOC_014296 | SNORA80              | chr21:33664123-33765312  | 12.2882    | 15.9977    | 0.38059  | 0.986822 |
| XLOC_005850 | RFC3                 | chr13:34392205-34540695  | 5.95417    | 7.75499    | 0.381226 | 0.41086  |
| XLOC_018268 | SRSF3                | chr6:36562089-36572244   | 67.6065    | 88.0611    | 0.381344 | 0.298162 |
| XLOC_008668 | TXNL4B               | chr16:72118755-72146811  | 5.81631    | 7.57722    | 0.381564 | 0.868024 |
| XLOC_013714 | SNAI1                | chr20:48599512-48605420  | 8.4952     | 11.0722    | 0.382228 | 0.48288  |
| XLOC_012572 | HSPE1_HSPE1-MOB4_MOB | chr2:198351307-19841842  | 334.107    | 435.497    | 0.382351 | 0.886662 |
| XLOC_006726 | ZFH2                 | chr14:23980968-24048009  | 0.154945   | 0.201983   | 0.382483 | 1        |
| XLOC_018641 | C6orf52              | chr6:10671650-10695030   | 2.34835    | 3.0617     | 0.382681 | 0.793112 |
| XLOC_021960 | STAR                 | chr8:38000217-38008600   | 0.0787142  | 0.102664   | 0.383232 | 1        |

|             |                |                          |            |            |          |          |
|-------------|----------------|--------------------------|------------|------------|----------|----------|
| XLOC_006038 | TPTE2P1        | chr13:25502892-25542607  | 0.0108917  | 0.0142097  | 0.383653 | 1        |
| XLOC_014220 | LOC642852      | chr21:46707966-46717269  | 0.733018   | 0.956575   | 0.38403  | 0.590286 |
| XLOC_008028 | RRN3P2         | chr16:29086162-29128038  | 0.0551797  | 0.0720251  | 0.384361 | 1        |
| XLOC_008652 | LOC100506803   | chr16:70323669-70380650  | 0.282652   | 0.369006   | 0.38462  | 0.965148 |
| XLOC_002779 | LOC619207      | chr10:135267431-13528198 | 0.102262   | 0.133508   | 0.384644 | 1        |
| XLOC_016103 | RFC4           | chr3:186501360-18652448  | 27.6632    | 36.1159    | 0.384666 | 0.943876 |
| XLOC_022178 | LOC100507117   | chr8:131064350-131455906 | 0.0151239  | 0.0197453  | 0.384676 | 1        |
| XLOC_022199 | SLC45A4        | chr8:142220869-14223867  | 4.56011    | 5.95365    | 0.384706 | 0.461971 |
| XLOC_009995 | JMJ06          | chr17:74708913-74722881  | 22.692     | 29.6291    | 0.38483  | 0.349757 |
| XLOC_007677 | NPTN           | chr15:73735498-73925753  | 19.4924    | 25.4518    | 0.384856 | 0.304248 |
| XLOC_000675 | PRPF3          | chr1:150293927-15032570  | 9.09597    | 11.8771    | 0.384887 | 0.337233 |
| XLOC_005119 | PLBD2          | chr12:113796370-1138274  | 8.13592    | 10.6262    | 0.385249 | 0.391018 |
| XLOC_004354 | PTPRCAP        | chr11:67202980-67205153  | 1.53299    | 2.00228    | 0.385294 | 0.831797 |
| XLOC_003981 | CARS           | chr11:3022151-3078681    | 27.0022    | 35.277     | 0.38565  | 0.3855   |
| XLOC_016493 | SPATA5         | chr4:123844224-12424060  | 0.647913   | 0.846558   | 0.38581  | 0.53058  |
| XLOC_001440 | SFPQ           | chr1:35649200-35658743   | 57.137     | 74.6618    | 0.385945 | 0.32849  |
| XLOC_005388 | PRICKLE1       | chr12:42852139-42983572  | 0.00745858 | 0.00974718 | 0.386085 | 1        |
| XLOC_005954 | MIR17,MIR18A,M | chr13:92000073-92006829  | 4.45444    | 5.82248    | 0.386382 | 0.696468 |
| XLOC_021008 | DPY19L1        | chr7:34968492-35077653   | 2.85383    | 3.73194    | 0.387027 | 0.396936 |
| XLOC_000428 | ATG4C          | chr1:63249776-63330941   | 2.09184    | 2.73663    | 0.387629 | 0.49774  |
| XLOC_023371 | WAS            | chrX:48542185-48549817   | 0.186938   | 0.24474    | 0.388688 | 1        |
| XLOC_021095 | TYW1B          | chr7:72023728-72298813   | 0.849794   | 1.11301    | 0.389279 | 0.638499 |
| XLOC_005295 | MAGOHB         | chr12:10756363-10766208  | 3.23178    | 4.23439    | 0.389827 | 0.420042 |
| XLOC_018481 | RNF217         | chr6:125304513-12540466  | 0.450467   | 0.590353   | 0.390155 | 0.782186 |
| XLOC_003687 | KRTAP5-8       | chr11:71249070-71250253  | 0.0872611  | 0.114366   | 0.390248 | 1        |
| XLOC_014573 | CACNA1I        | chr22:39966757-40085740  | 0.00480618 | 0.00630179 | 0.39087  | 1        |
| XLOC_019036 | DDO            | chr6:110713382-11073675  | 0.0198974  | 0.0260942  | 0.39115  | 1        |
| XLOC_014648 | KLHDC7B        | chr22:50986461-50989452  | 0.0911297  | 0.119535   | 0.391441 | 1        |
| XLOC_007957 | C16orf45       | chr16:15528324-15682116  | 0.0770849  | 0.101157   | 0.392069 | 1        |
| XLOC_011302 | SLC39A3        | chr19:2732522-2740074    | 26.1938    | 34.3803    | 0.392353 | 0.468891 |
| XLOC_013299 | SATB2          | chr2:200134222-20033748  | 1.1925     | 1.5654     | 0.392538 | 0.508234 |
| XLOC_001914 | NES            | chr1:156638555-15664718  | 6.43488    | 8.45029    | 0.393087 | 0.297369 |
| XLOC_008118 | MT2A           | chr16:56642477-56643409  | 6880.75    | 9042.26    | 0.394118 | 0.334518 |
| XLOC_021992 | ATP6V1H        | chr8:54628102-54755871   | 31.7211    | 41.7024    | 0.394686 | 0.269877 |
| XLOC_020664 | TRIM56         | chr7:100728785-10073388  | 1.39485    | 1.83422    | 0.395055 | 0.621939 |
| XLOC_016699 | LG12           | chr4:25000470-25032414   | 0.159535   | 0.209794   | 0.395098 | 1        |
| XLOC_015233 | PDCL3P4        | chr3:101431277-10143226  | 0.119202   | 0.156773   | 0.395269 | 1        |
| XLOC_017327 | DDX46          | chr5:134094460-13416681  | 4.66269    | 6.13452    | 0.395788 | 0.286697 |
| XLOC_023510 | RPA4           | chrX:95939661-96855597   | 0.252073   | 0.331671   | 0.395991 | 1        |
| XLOC_016542 | KIAA0922       | chr4:154387497-15455786  | 2.31724    | 3.04965    | 0.39624  | 0.3855   |
| XLOC_017258 | TSLP           | chr5:110405777-11041372  | 3.25258    | 4.28121    | 0.396433 | 0.535638 |
| XLOC_011483 | DDX39A         | chr19:14519609-14530195  | 62.8589    | 82.7713    | 0.397013 | 0.264053 |
| XLOC_004461 | C11orf75       | chr11:93211638-93276546  | 13.3939    | 17.6477    | 0.3979   | 0.413    |
| XLOC_012483 | TANK           | chr2:161993465-16209268  | 6.18135    | 8.14538    | 0.39806  | 0.586532 |
| XLOC_003085 | GOT1           | chr10:101156626-1011905  | 32.2285    | 42.4848    | 0.398608 | 0.390235 |
| XLOC_009345 | NPB            | chr17:79860071-79869340  | 0.792556   | 1.04484    | 0.398703 | 0.985921 |
| XLOC_016933 | SLC7A11        | chr4:138948576-13916350  | 1.72171    | 2.26995    | 0.398817 | 0.489264 |
| XLOC_008144 | GPR114         | chr16:57576600-57611100  | 1.96984    | 2.59823    | 0.399449 | 0.498028 |
| XLOC_010842 | PAPL           | chr19:39574944-39602128  | 12.4831    | 16.4684    | 0.399725 | 0.322165 |
| XLOC_022161 | ATAD2          | chr8:124332090-12440870  | 10.5458    | 13.9131    | 0.399769 | 0.271828 |
| XLOC_007261 | ZWILCH         | chr15:66797430-66857835  | 4.11428    | 5.42852    | 0.399919 | 0.369585 |
| XLOC_006341 | LRR1           | chr14:50065414-50081390  | 15.0631    | 19.8758    | 0.399994 | 0.406712 |
| XLOC_011402 | ZNF121         | chr19:9676291-9695209    | 1.12652    | 1.4867     | 0.400245 | 0.641563 |
| XLOC_003033 | KLLN           | chr10:89618917-89623194  | 0.127954   | 0.1689     | 0.400543 | 1        |
| XLOC_004429 | ALG8           | chr11:77726760-77850699  | 22.0397    | 29.0937    | 0.400603 | 0.682065 |
| XLOC_007223 | FLJ27352       | chr15:55611132-55800432  | 0.977255   | 1.29037    | 0.400975 | 0.984917 |
| XLOC_001477 | HPCAL4         | chr1:40144644-40157089   | 1.01351    | 1.33831    | 0.401042 | 0.553043 |
| XLOC_021568 | GINS4          | chr8:41386724-41402565   | 4.77315    | 6.30422    | 0.401376 | 0.340882 |
| XLOC_004317 | CDC45          | chr11:64844926-64851615  | 33.9893    | 44.8949    | 0.40147  | 0.258126 |
| XLOC_005357 | IFLTD1         | chr12:25629015-25801496  | 0.0116289  | 0.0153612  | 0.401577 | 1        |
| XLOC_000501 | ZNF326         | chr1:90460677-90494094   | 4.61219    | 6.0932     | 0.401749 | 0.339309 |
| XLOC_019201 | LINC00242      | chr6:170188885-17020296  | 0.338054   | 0.446615   | 0.401777 | 0.83637  |
| XLOC_012530 | HOXD4          | chr2:177016112-17701794  | 1.00381    | 1.32727    | 0.402982 | 0.80323  |
| XLOC_022585 | SLC27A4        | chr9:131102838-13112374  | 45.3735    | 59.9969    | 0.403037 | 0.255272 |
| XLOC_023708 | SNORA70        | chrX:153626570-15365006  | 58.2864    | 77.0767    | 0.403135 | 0.979733 |
| XLOC_004680 | CD4            | chr12:6898637-6929976    | 0.0324362  | 0.0429067  | 0.403597 | 1        |
| XLOC_004510 | ALKBH8         | chr11:107373452-10743644 | 0.836886   | 1.10712    | 0.403703 | 0.541307 |
| XLOC_010252 | FLJ44313       | chr18:74207476-74210045  | 0.408083   | 0.539981   | 0.404047 | 0.79263  |
| XLOC_005123 | MAP1LC3B2      | chr12:116997185-1170144  | 3.56529    | 4.71827    | 0.404237 | 0.63426  |
| XLOC_024070 | AIFM1          | chrX:129263337-12929986  | 31.6146    | 41.862     | 0.405052 | 0.290517 |
| XLOC_022033 | SLCO5A1        | chr8:70584567-70747299   | 1.92473    | 2.54885    | 0.40519  | 0.506721 |
| XLOC_010008 | LOC100653515   | chr17:76849058-76921472  | 0.0180819  | 0.0239464  | 0.405266 | 1        |
| XLOC_022394 | ANXA1          | chr9:75766780-75785307   | 222.933    | 295.464    | 0.406373 | 0.285663 |
| XLOC_000927 | LAMC2          | chr1:183155173-18321426  | 0.109609   | 0.145309   | 0.406758 | 1        |
| XLOC_004788 | FAR2           | chr12:29301935-29488549  | 2.73491    | 3.62752    | 0.407493 | 0.386513 |
| XLOC_002357 | OLAH           | chr10:15085894-15115851  | 0.0366663  | 0.0486382  | 0.407635 | 1        |
| XLOC_001035 | DTL            | chr1:212113740-21227818  | 6.30317    | 8.3613     | 0.407648 | 0.477937 |
| XLOC_002852 | PRTFDC1        | chr10:25137553-25241533  | 4.75155    | 6.30322    | 0.40769  | 0.393779 |
| XLOC_014416 | RANBP1         | chr22:20105023-20114704  | 146.324    | 194.117    | 0.407759 | 0.252815 |



|             |                  |                          |            |            |          |          |
|-------------|------------------|--------------------------|------------|------------|----------|----------|
| XLOC_015434 | SERPINI1         | chr3:167453431-167543351 | 0.315611   | 0.418732   | 0.407877 | 0.806183 |
| XLOC_014998 | ZNF860           | chr3:31702316-32033228   | 0.0488872  | 0.0649159  | 0.409115 | 1        |
| XLOC_005066 | TXNRD1           | chr12:104609556-10474401 | 23.4609    | 31.1564    | 0.409269 | 0.252815 |
| XLOC_012087 | SLC35F6          | chr2:26987141-27004099   | 16.8371    | 22.3606    | 0.40932  | 0.263759 |
| XLOC_006142 | THSD1            | chr13:52951302-52980629  | 0.851953   | 1.13149    | 0.409379 | 0.61666  |
| XLOC_020540 | WBSCR22          | chr7:73097897-73112551   | 101.112    | 134.384    | 0.410407 | 0.242372 |
| XLOC_015556 | RAD18            | chr3:8918879-9005159     | 3.17674    | 4.22339    | 0.410853 | 0.292729 |
| XLOC_017916 | C5orf4           | chr5:154198051-154230213 | 0.0114169  | 0.0151784  | 0.410855 | 1        |
| XLOC_021058 | SUN3             | chr7:48026745-48068716   | 22.5234    | 29.9444    | 0.410859 | 0.293795 |
| XLOC_011519 | ABHD8            | chr19:17402939-17414282  | 8.43124    | 11.2101    | 0.410983 | 0.443332 |
| XLOC_016086 | ABCC5            | chr3:183637723-183735721 | 4.83137    | 6.42402    | 0.411044 | 0.52724  |
| XLOC_000214 | NUDC             | chr1:27248212-27273362   | 381.248    | 507.022    | 0.411319 | 0.280816 |
| XLOC_006422 | ADAM21           | chr14:70918873-70926622  | 0.0368877  | 0.0490864  | 0.412185 | 1        |
| XLOC_001462 | YRDC             | chr1:38268613-38275126   | 26.4061    | 35.1405    | 0.412261 | 0.471747 |
| XLOC_016623 | CPDX1            | chr4:778744-819945       | 5.00262    | 6.65785    | 0.412373 | 0.528992 |
| XLOC_000626 | PHGDH            | chr1:120254418-120286848 | 116.064    | 154.509    | 0.412777 | 0.297247 |
| XLOC_001504 | SLC6A9           | chr1:44457279-44497164   | 3.71576    | 4.9476     | 0.41307  | 0.923433 |
| XLOC_010970 | DHX34            | chr19:47852537-47885961  | 9.89105    | 13.1704    | 0.413105 | 0.281159 |
| XLOC_010178 | MOCOS            | chr18:33767479-33848685  | 13.7244    | 18.2761    | 0.413218 | 0.287787 |
| XLOC_002636 | ENTPD7           | chr10:101419262-10151585 | 2.49618    | 3.3249     | 0.41359  | 0.838366 |
| XLOC_013867 | BFSF1            | chr20:17474549-17539605  | 0.230584   | 0.307191   | 0.413843 | 1        |
| XLOC_013552 | RIN2             | chr20:19867164-19983103  | 0.0411444  | 0.0548173  | 0.413936 | 1        |
| XLOC_012771 | RNASEH1          | chr2:3592690-3605940     | 8.90871    | 11.874     | 0.414517 | 0.343319 |
| XLOC_020736 | FAM71F2          | chr7:128312345-128323375 | 0.0475198  | 0.0633574  | 0.414984 | 1        |
| XLOC_004837 | AQP6             | chr12:50366619-50370922  | 0.0153413  | 0.0204569  | 0.415168 | 1        |
| XLOC_000430 | ALG6             | chr1:63833260-63904233   | 2.35735    | 3.1435     | 0.415206 | 0.39951  |
| XLOC_023794 | APOO             | chrX:23851464-23926057   | 11.9063    | 15.8908    | 0.416472 | 0.344159 |
| XLOC_016410 | AGPAT9           | chr4:84457066-84527027   | 5.5555     | 7.4161     | 0.416742 | 0.327838 |
| XLOC_011308 | DOHH             | chr19:3490818-3500938    | 17.1889    | 22.9463    | 0.416784 | 0.327838 |
| XLOC_022898 | FRMD3            | chr9:85857904-86153348   | 0.0165569  | 0.0221038  | 0.416863 | 1        |
| XLOC_004998 | GLIPR1L2         | chr12:75784849-75826177  | 0.0796889  | 0.106405   | 0.41711  | 1        |
| XLOC_017127 | ITGA2            | chr5:52285155-52390609   | 0.956335   | 1.27715    | 0.417335 | 0.387097 |
| XLOC_016394 | MRPL1            | chr4:78783804-78873944   | 8.37187    | 11.1805    | 0.417368 | 0.360219 |
| XLOC_018553 | ULBP1            | chr6:150285142-150294848 | 1.15721    | 1.54588    | 0.417769 | 0.542153 |
| XLOC_017633 | OXCT1            | chr5:41730166-41870791   | 18.2862    | 24.4332    | 0.418085 | 0.229068 |
| XLOC_009269 | RAB37            | chr17:72667255-72743474  | 0.0886912  | 0.118545   | 0.418568 | 1        |
| XLOC_012475 | GPD2             | chr2:157291964-157442915 | 3.69827    | 4.94363    | 0.418721 | 0.255557 |
| XLOC_017553 | TERT             | chr5:1253286-1295162     | 0.8401     | 1.12391    | 0.419898 | 0.655465 |
| XLOC_000440 | DNAJC6           | chr1:65730376-65881552   | 1.51221    | 2.02344    | 0.420156 | 0.371978 |
| XLOC_011351 | ACER1            | chr19:6306509-6333640    | 0.37333    | 0.499557   | 0.4202   | 0.877287 |
| XLOC_011003 | PPP1R15A         | chr19:49375648-49379319  | 185.718    | 248.519    | 0.420244 | 0.267079 |
| XLOC_009298 | AANAT            | chr17:74449432-74466199  | 0.130844   | 0.175104   | 0.420367 | 1        |
| XLOC_010508 | UHRF1            | chr19:4909509-4962165    | 17.4981    | 23.4321    | 0.421287 | 0.230268 |
| XLOC_010131 | LDLRAD4          | chr18:13218728-13652753  | 0.0554943  | 0.0743143  | 0.421301 | 1        |
| XLOC_020992 | FKBP14           | chr7:30050198-30066417   | 2.16126    | 2.89441    | 0.421396 | 0.333419 |
| XLOC_000229 | SESN2            | chr1:28585962-28609002   | 56.3042    | 75.4562    | 0.422398 | 0.365183 |
| XLOC_002477 | NRBF2            | chr10:64893006-64914786  | 5.97161    | 8.00305    | 0.42243  | 0.34147  |
| XLOC_007735 | GOLGA6L10        | chr15:82633122-82641706  | 0.0583822  | 0.0782574  | 0.422698 | 1        |
| XLOC_020552 | GTF2I            | chr7:74072029-74175022   | 0.802094   | 1.07519    | 0.422752 | 0.534096 |
| XLOC_015677 | KIF9             | chr3:47205859-47388306   | 0.860847   | 1.154      | 0.422809 | 0.912696 |
| XLOC_004330 | CFL1             | chr11:65622284-65625804  | 697.377    | 934.875    | 0.422836 | 0.25986  |
| XLOC_013350 | MREG             | chr2:216807313-216878346 | 4.8847     | 6.54934    | 0.423081 | 0.302567 |
| XLOC_010241 | CCDC102B         | chr18:66382490-66722426  | 0.0401907  | 0.0538941  | 0.423265 | 1        |
| XLOC_002315 | ID12-AS1         | chr10:1064846-1095061    | 1.38502    | 1.85777    | 0.423666 | 0.984917 |
| XLOC_009884 | TBC1D3P1-DHX40P1 | chr17:58053384-58096336  | 0.0232541  | 0.0311964  | 0.423896 | 1        |
| XLOC_012512 | HAT1             | chr2:172778934-172848601 | 23.204     | 31.1309    | 0.423972 | 0.214768 |
| XLOC_019111 | NHSL1            | chr6:138743180-138893668 | 0.757827   | 1.0169     | 0.424232 | 0.486707 |
| XLOC_013965 | SNORA71B         | chr20:37049238-37064018  | 3.93336    | 5.27986    | 0.424736 | 0.979638 |
| XLOC_008809 | EIF5A            | chr17:7210317-7215782    | 829.856    | 1114.26    | 0.425152 | 0.272235 |
| XLOC_016284 | KLB              | chr4:39408472-39453153   | 0.0406845  | 0.0546345  | 0.425333 | 1        |
| XLOC_004865 | SOAT2            | chr12:53497273-53518323  | 0.141246   | 0.189916   | 0.427155 | 1        |
| XLOC_017119 | LOC153684        | chr5:43042235-43045370   | 0.150495   | 0.202387   | 0.427401 | 1        |
| XLOC_013652 | ARHGAP40         | chr20:37230576-37279295  | 1.37111    | 1.84395    | 0.427453 | 0.551176 |
| XLOC_021720 | RAD21-AS1        | chr8:117858172-117889107 | 0.0658572  | 0.0885723  | 0.427514 | 1        |
| XLOC_017096 | NPR3             | chr5:32710742-32791830   | 0.00670686 | 0.00902376 | 0.428091 | 1        |
| XLOC_010500 | CHAF1A           | chr19:4402659-4443394    | 12.5388    | 16.8747    | 0.428462 | 0.224751 |
| XLOC_009362 | DOC2B            | chr17:6010131420         | 0.854483   | 1.1502     | 0.428766 | 0.815979 |
| XLOC_017197 | IQAP2            | chr5:75699148-76003957   | 0.00718825 | 0.00967685 | 0.428896 | 1        |
| XLOC_016087 | ALG3             | chr3:183948316-183967313 | 61.2365    | 82.4445    | 0.429032 | 0.26832  |
| XLOC_012605 | NRP2             | chr2:206547223-206662851 | 0.728786   | 0.981531   | 0.429539 | 0.495922 |
| XLOC_012799 | FAM49A           | chr2:16730729-16847134   | 0.0242983  | 0.0327264  | 0.429597 | 1        |
| XLOC_023304 | POLA1            | chrX:24712063-25015102   | 2.075      | 2.79487    | 0.429666 | 0.295409 |
| XLOC_012250 | MTHFD2           | chr2:74425689-74442424   | 75.5686    | 101.789    | 0.429729 | 0.290328 |
| XLOC_005947 | RBM26-AS1        | chr13:79980443-79998468  | 0.174132   | 0.234562   | 0.429786 | 1        |
| XLOC_008782 | GP1BA            | chr17:4835591-4838325    | 0.120039   | 0.161706   | 0.429862 | 1        |
| XLOC_022795 | KIF24            | chr9:34179002-34329198   | 0.620114   | 0.835444   | 0.43001  | 0.923451 |
| XLOC_015524 | FLJ34208         | chr3:194207868-194209274 | 0.0568407  | 0.0765826  | 0.430091 | 1        |
| XLOC_013086 | RGPD3            | chr2:107021135-107084801 | 0.0333259  | 0.0449098  | 0.43039  | 1        |
| XLOC_013347 | ABCA12           | chr2:215796265-216003151 | 0.00325081 | 0.00438125 | 0.430545 | 1        |

|             |            |                           |            |            |          |          |
|-------------|------------|---------------------------|------------|------------|----------|----------|
| XLOC_015639 | CSRNP1     | chr3:39183341-39195102    | 7.48829    | 10.1008    | 0.431766 | 0.285331 |
| XLOC_007802 | SNRPA1     | chr15:101821714-10183544  | 46.8859    | 63.2576    | 0.432084 | 0.208452 |
| XLOC_000114 | TMEM51     | chr1:15479027-15546974    | 4.86795    | 6.57089    | 0.432776 | 0.400128 |
| XLOC_003343 | PDE3B      | chr11:14665268-14893604   | 0.863921   | 1.16628    | 0.432945 | 0.451219 |
| XLOC_008413 | EMP2       | chr16:10622278-10674539   | 3.38501    | 4.57016    | 0.433086 | 0.275061 |
| XLOC_004514 | C11orf65   | chr11:108253726-10833825  | 0.349796   | 0.47234    | 0.433315 | 0.830569 |
| XLOC_023382 | PPP1R3F    | chrX:49126305-49144555    | 0.757416   | 1.02281    | 0.433338 | 0.650466 |
| XLOC_018072 | RNF144B    | chr6:18387580-18469105    | 0.224394   | 0.303025   | 0.433401 | 1        |
| XLOC_011342 | PRR22      | chr19:5782970-5784776     | 9.40807    | 12.7085    | 0.433821 | 0.425659 |
| XLOC_008153 | GIN53      | chr16:58426297-58440048   | 5.65225    | 7.63953    | 0.434658 | 0.311781 |
| XLOC_014475 | CRYBB3     | chr22:25595816-25603326   | 0.251663   | 0.340472   | 0.436039 | 1        |
| XLOC_020572 | UPK3B      | chr7:76139744-76157199    | 1.17084    | 1.58439    | 0.436389 | 0.711277 |
| XLOC_007881 | C16orf59   | chr16:2510114-2514964     | 9.01931    | 12.2072    | 0.436647 | 0.366269 |
| XLOC_003978 | PHLDA2     | chr11:2949502-2950650     | 100.933    | 136.679    | 0.437396 | 0.216565 |
| XLOC_004776 | RASSF8     | chr12:26107587-26232825   | 0.115756   | 0.156757   | 0.437445 | 1        |
| XLOC_021377 | CTAGE4     | chr7:143955788-143983096  | 0.0852809  | 0.115498   | 0.437579 | 1        |
| XLOC_004075 | SNORD97    | chr11:10818592-10830582   | 5.8278     | 7.8939     | 0.437787 | 0.979701 |
| XLOC_003816 | DIXDC1     | chr11:111797867-11189330  | 0.75916    | 1.02882    | 0.438582 | 0.489015 |
| XLOC_011436 | CCDC151    | chr19:11531271-11545980   | 0.489758   | 0.663777   | 0.438663 | 0.767909 |
| XLOC_012162 | CAMKMT     | chr2:44589042-44999731    | 2.63873    | 3.57653    | 0.438716 | 0.487792 |
| XLOC_020605 | MGC16142   | chr7:92167788-92169079    | 0.859984   | 1.1657     | 0.438816 | 0.689384 |
| XLOC_001634 | COL24A1    | chr1:86194915-86621211    | 0.00380908 | 0.00516324 | 0.438835 | 1        |
| XLOC_001008 | RASSF5     | chr1:206680878-206762616  | 0.49506    | 0.671182   | 0.439099 | 0.651901 |
| XLOC_020971 | HNRNPA2B1  | chr7:26229555-26240413    | 140.14     | 190.028    | 0.439341 | 0.220188 |
| XLOC_021060 | FIGLN1     | chr7:50511831-50518088    | 2.66586    | 3.61598    | 0.439784 | 0.307454 |
| XLOC_013665 | MYBL2      | chr20:42295708-42345122   | 17.7643    | 24.0965    | 0.439841 | 0.194686 |
| XLOC_009213 | TBX2       | chr17:59477256-59486827   | 0.080809   | 0.109634   | 0.440102 | 1        |
| XLOC_022984 | GRIN3A     | chr9:104331633-10450086   | 0.04063    | 0.0551477  | 0.440756 | 1        |
| XLOC_016958 | NR3C2      | chr4:148999914-14936367   | 0.206878   | 0.280821   | 0.440874 | 1        |
| XLOC_010664 | KLF2       | chr19:16435650-16438339   | 37.2541    | 50.5771    | 0.441085 | 0.279241 |
| XLOC_015384 | C3orf58    | chr3:143690639-143711210  | 2.43651    | 3.30832    | 0.441279 | 0.338322 |
| XLOC_021935 | FBXO16     | chr8:28285925-28347835    | 0.738312   | 1.00263    | 0.441486 | 0.716391 |
| XLOC_020518 | VKORC1L1   | chr7:65338256-65419800    | 7.97222    | 10.8311    | 0.442131 | 0.377178 |
| XLOC_015526 | FAM43A     | chr3:1944406621-194409766 | 3.09644    | 4.20822    | 0.4426   | 0.458034 |
| XLOC_022912 | LOC440173  | chr9:89623365-89657041    | 0.0247981  | 0.033729   | 0.443763 | 1        |
| XLOC_023787 | SCARNA9L   | chrX:20142635-20159966    | 0.962384   | 1.30919    | 0.443986 | 0.980663 |
| XLOC_023291 | YY2        | chrX:21857655-21903541    | 0.497556   | 0.677327   | 0.444994 | 0.912776 |
| XLOC_005838 | ALOX5AP    | chr13:31287614-31338565   | 0.0435773  | 0.0593399  | 0.445425 | 1        |
| XLOC_009183 | ANKFN1     | chr17:54230835-54560007   | 0.0677962  | 0.092342   | 0.445782 | 1        |
| XLOC_018688 | HIST1H3G   | chr6:26271145-26271612    | 1.29987    | 1.77061    | 0.445882 | 0.881618 |
| XLOC_012672 | SGPP2      | chr2:223289321-223423617  | 0.703262   | 0.958203   | 0.446268 | 0.773969 |
| XLOC_005093 | TCHP       | chr12:110338078-11035558  | 3.87141    | 5.27487    | 0.446276 | 0.298465 |
| XLOC_012269 | DNAH6      | chr2:84743578-85046713    | 0.0176574  | 0.0240621  | 0.446493 | 1        |
| XLOC_008258 | NECAB2     | chr16:84002236-84036379   | 0.109365   | 0.149068   | 0.446813 | 1        |
| XLOC_013407 | SLC16A14   | chr2:230899689-230933715  | 2.3427     | 3.19334    | 0.446896 | 0.296942 |
| XLOC_013282 | TMEM194B   | chr2:191371618-191399468  | 9.27774    | 12.6512    | 0.447434 | 0.205713 |
| XLOC_008017 | APOBR      | chr16:28505969-28510291   | 0.0302171  | 0.0412117  | 0.447692 | 1        |
| XLOC_003199 | BNIP3      | chr10:133781203-1337954   | 0.033455   | 0.0456379  | 0.44801  | 1        |
| XLOC_008718 | SLC7A5     | chr16:87863628-87903100   | 86.7115    | 118.305    | 0.448212 | 0.273055 |
| XLOC_007413 | SLCO3A1    | chr15:92396937-92715665   | 1.97591    | 2.69589    | 0.448241 | 0.497634 |
| XLOC_024103 | CXorf48    | chrX:134290460-13430575   | 0.00995028 | 0.0135767  | 0.448325 | 1        |
| XLOC_021303 | RBM28      | chr7:127950435-12798396   | 17.6453    | 24.0855    | 0.448879 | 0.187039 |
| XLOC_002670 | SFXN2      | chr10:104474297-1044989   | 5.74399    | 7.84367    | 0.449477 | 0.275259 |
| XLOC_016385 | C4orf26    | chr4:76481257-76491103    | 0.0256163  | 0.0349812  | 0.449517 | 1        |
| XLOC_007742 | CEPB1      | chr15:83211950-83378635   | 0.0111201  | 0.0151883  | 0.449789 | 1        |
| XLOC_016588 | TENM3      | chr4:183245136-18372417   | 0.192485   | 0.262913   | 0.449842 | 1        |
| XLOC_011720 | PSG5       | chr19:43671894-43690688   | 0.0187496  | 0.02562    | 0.450415 | 1        |
| XLOC_004080 | DKK3       | chr11:11984542-12030917   | 0.158811   | 0.217043   | 0.450665 | 1        |
| XLOC_017020 | ENPP6      | chr4:185009858-18513911   | 0.0317919  | 0.0434604  | 0.451044 | 1        |
| XLOC_003894 | NRGN       | chr11:124609828-12461710  | 16.8732    | 23.0693    | 0.451241 | 0.326015 |
| XLOC_007195 | C15orf48   | chr15:45722726-45725647   | 0.0996097  | 0.136199   | 0.451356 | 1        |
| XLOC_021314 | TMEM209    | chr7:129804554-129845338  | 5.68077    | 7.77051    | 0.451924 | 0.22859  |
| XLOC_018896 | TCTE1      | chr6:44247896-44265458    | 0.0825505  | 0.112922   | 0.451973 | 1        |
| XLOC_020427 | GARS       | chr7:30634180-30673648    | 70.4381    | 96.4142    | 0.452891 | 0.274884 |
| XLOC_010264 | PARD6G-AS1 | chr18:77905806-78005397   | 0.463737   | 0.634909   | 0.453245 | 0.976595 |
| XLOC_002792 | KLF6       | chr10:3818187-3827473     | 8.81476    | 12.0694    | 0.453355 | 0.190553 |
| XLOC_020953 | MACC1      | chr7:20174278-20257013    | 0.00712935 | 0.00976192 | 0.453394 | 1        |
| XLOC_007666 | THAP10     | chr15:71173680-71184772   | 0.873999   | 1.19756    | 0.454394 | 0.669766 |
| XLOC_012210 | SLC1A4     | chr2:65215578-65251000    | 8.36723    | 11.4692    | 0.454942 | 0.254449 |
| XLOC_007388 | INS20      | chr15:89182038-89198879   | 40.219     | 55.1337    | 0.455057 | 0.212535 |
| XLOC_011085 | ZNF528     | chr19:52901120-52921657   | 0.0176209  | 0.0241731  | 0.456119 | 1        |
| XLOC_001671 | FRRS1      | chr1:100111430-100231345  | 0.436263   | 0.598787   | 0.456846 | 0.663653 |
| XLOC_015255 | C3orf52    | chr3:111805181-11183707   | 6.30651    | 8.65896    | 0.457351 | 0.266383 |
| XLOC_001427 | YARS       | chr1:33240839-33324480    | 59.1017    | 81.1672    | 0.457696 | 0.255272 |
| XLOC_017467 | FBLL1      | chr5:167956581-167957635  | 0.245758   | 0.337532   | 0.457789 | 1        |
| XLOC_008707 | GIN52      | chr16:85711279-85722588   | 24.786     | 34.0508    | 0.458166 | 0.19909  |
| XLOC_004850 | SLC4A8     | chr12:51745832-51909547   | 0.881839   | 1.21207    | 0.458889 | 0.823299 |
| XLOC_013478 | TRIB3      | chr20:361307-378203       | 120.613    | 165.921    | 0.460111 | 0.343415 |
| XLOC_011942 | LILRB3     | chr19:54720146-54726959   | 0.025214   | 0.0346934  | 0.460438 | 1        |

|             |              |                          |            |            |          |          |
|-------------|--------------|--------------------------|------------|------------|----------|----------|
| XLOC_007377 | ALPK3        | chr15:85359910-85416713  | 0.0305658  | 0.0420663  | 0.460747 | 1        |
| XLOC_010519 | LOC100128568 | chr19:5978413-6110664    | 0.0657328  | 0.0905159  | 0.461557 | 1        |
| XLOC_008374 | PKMYT1       | chr16:3019341-3030540    | 55.1527    | 75.9628    | 0.461862 | 0.395326 |
| XLOC_008756 | SRR          | chr17:2207247-2240678    | 0.698818   | 0.962686   | 0.462149 | 0.979875 |
| XLOC_005819 | PABPC3       | chr13:25670275-25672704  | 0.0263085  | 0.0362448  | 0.462245 | 1        |
| XLOC_010904 | PINLYP       | chr19:44080951-44086256  | 0.782885   | 1.07863    | 0.462332 | 0.855293 |
| XLOC_005832 | ATP5EP2      | chr13:28519342-28519710  | 0.896653   | 1.23589    | 0.462929 | 0.895883 |
| XLOC_013768 | COL9A3       | chr20:61448413-61493115  | 12.5749    | 17.3354    | 0.463179 | 0.452355 |
| XLOC_022601 | DOLPP1       | chr9:131843382-131852717 | 18.356     | 25.3087    | 0.463383 | 0.170977 |
| XLOC_008278 | JPH3         | chr16:87635440-87731761  | 0.0412545  | 0.0568913  | 0.463654 | 1        |
| XLOC_021529 | ESCO2        | chr8:27632057-27662424   | 2.54412    | 3.50846    | 0.463668 | 0.269734 |
| XLOC_021724 | SAMD12-AS1   | chr8:119201694-119738300 | 0.0854461  | 0.117935   | 0.464901 | 1        |
| XLOC_021819 | ANGPT2       | chr8:6264112-6501140     | 0.0130681  | 0.018047   | 0.465706 | 1        |
| XLOC_005184 | LINC00507    | chr12:128399954-12843600 | 0.0395602  | 0.0547008  | 0.46751  | 1        |
| XLOC_018552 | ULBP2        | chr6:150263135-150270368 | 12.597     | 17.423     | 0.46792  | 0.227422 |
| XLOC_007149 | RAD51        | chr15:40987326-41024356  | 7.27854    | 10.0681    | 0.468078 | 0.21543  |
| XLOC_021540 | UBXN8        | chr8:30601689-30624520   | 5.70633    | 7.8949     | 0.468357 | 0.293966 |
| XLOC_014294 | MIS18A       | chr21:33640529-33651376  | 15.1802    | 21.0102    | 0.468898 | 0.208276 |
| XLOC_004242 | PTGDR2       | chr11:60609428-60623444  | 0.979505   | 1.35721    | 0.470519 | 0.952905 |
| XLOC_009047 | CDC6         | chr17:38444145-38459413  | 8.48175    | 11.754     | 0.470714 | 0.186139 |
| XLOC_016081 | LAMP3        | chr3:182840002-182880667 | 0.822466   | 1.14178    | 0.47326  | 0.491932 |
| XLOC_001971 | PFDN2        | chr1:161070345-161102478 | 241.882    | 335.795    | 0.473279 | 0.361679 |
| XLOC_021056 | PKD1L1       | chr7:47814249-47988071   | 0.103273   | 0.143432   | 0.473904 | 1        |
| XLOC_008071 | FUS          | chr16:31191430-31206192  | 44.2095    | 61.4199    | 0.474348 | 0.174152 |
| XLOC_002447 | ZNF488       | chr10:48355088-48373866  | 0.270644   | 0.376479   | 0.476172 | 0.69598  |
| XLOC_021734 | FAM83A       | chr8:124194751-124222318 | 0.029377   | 0.0408666  | 0.476232 | 1        |
| XLOC_007209 | SLC27A2      | chr15:50474392-50528589  | 12.7049    | 17.6766    | 0.476461 | 0.148987 |
| XLOC_014409 | CDC45        | chr22:19467413-19508135  | 16.32      | 22.7127    | 0.476859 | 0.180085 |
| XLOC_001444 | CLSPN        | chr1:36197712-36235551   | 0.915654   | 1.27434    | 0.476879 | 0.277931 |
| XLOC_002171 | SLC30A1      | chr1:211748380-211752095 | 3.63379    | 5.05827    | 0.47717  | 0.327733 |
| XLOC_006768 | NFKBIA       | chr14:35870715-35873960  | 32.7675    | 45.6416    | 0.478083 | 0.184331 |
| XLOC_009768 | PYY          | chr17:42030106-42081837  | 0.0987789  | 0.137626   | 0.478483 | 1        |
| XLOC_017236 | ANKRD32      | chr5:93954390-94031573   | 0.76034    | 1.05942    | 0.478555 | 0.441752 |
| XLOC_010694 | IFI30        | chr19:18284578-18288927  | 48.8661    | 68.1645    | 0.480185 | 0.141455 |
| XLOC_006026 | SKA3         | chr13:21727733-21753220  | 10.6186    | 14.8135    | 0.480325 | 0.609479 |
| XLOC_007369 | LOC100505679 | chr15:84841241-84850985  | 0.322493   | 0.449933   | 0.480441 | 0.933023 |
| XLOC_011638 | ZNF573       | chr19:38229202-38270230  | 0.135199   | 0.188635   | 0.480511 | 1        |
| XLOC_007334 | CHRNA5       | chr15:78857861-78913637  | 1.72993    | 2.41371    | 0.480539 | 0.29743  |
| XLOC_010220 | SEC11C       | chr18:56807124-56826063  | 28.9155    | 40.3466    | 0.480603 | 0.173569 |
| XLOC_016979 | PPID         | chr4:159630278-159644552 | 22.9714    | 32.0628    | 0.481064 | 0.135065 |
| XLOC_005582 | BEST3        | chr12:70047388-70093196  | 0.293868   | 0.41037    | 0.481758 | 0.664149 |
| XLOC_021382 | EZH2         | chr7:148504463-148581447 | 18.2152    | 25.442     | 0.482073 | 0.158976 |
| XLOC_023513 | CSTF2        | chrX:100075347-100095927 | 8.3224     | 11.6269    | 0.48239  | 0.19909  |
| XLOC_024017 | AMMECR1      | chrX:109437413-109699567 | 1.25447    | 1.75266    | 0.482471 | 0.307167 |
| XLOC_014592 | MEI1         | chr22:42095517-42195459  | 0.0152495  | 0.0213133  | 0.482998 | 1        |
| XLOC_013324 | MDH1B        | chr2:207602488-207630050 | 0.170713   | 0.238719   | 0.483735 | 1        |
| XLOC_017246 | LNPEP        | chr5:96271345-96365115   | 0.624385   | 0.873357   | 0.484135 | 0.452642 |
| XLOC_005870 | DGKH         | chr13:42614171-42803891  | 0.247783   | 0.346621   | 0.48428  | 1        |
| XLOC_004892 | NCKAP1L      | chr12:54891494-54936899  | 0.0369877  | 0.0517606  | 0.484809 | 1        |
| XLOC_005666 | SLC41A2      | chr12:105197274-10532247 | 0.601847   | 0.842353   | 0.485029 | 0.486422 |
| XLOC_010235 | HMSD         | chr18:61616587-61627645  | 5.18568    | 7.25841    | 0.485121 | 0.46195  |
| XLOC_017587 | FAM134B      | chr5:16473146-16617167   | 0.49315    | 0.690269   | 0.485131 | 0.549946 |
| XLOC_008183 | TSNAXIP1     | chr16:67841009-67861971  | 0.0370167  | 0.0518341  | 0.485725 | 1        |
| XLOC_014891 | CN5H6.4      | chr22:46691039-46692557  | 0.11581    | 0.16226    | 0.486548 | 1        |
| XLOC_023967 | CHM          | chrX:85116184-85302566   | 1.58951    | 2.22712    | 0.486596 | 0.303771 |
| XLOC_000024 | ATAD3C       | chr1:1385068-1405538     | 0.135825   | 0.19041    | 0.487364 | 1        |
| XLOC_009799 | WNT3         | chr17:44841686-44896082  | 1.21241    | 1.70023    | 0.487851 | 0.658266 |
| XLOC_022135 | ABRA         | chr8:107771710-107782477 | 0.0160997  | 0.0225798  | 0.488004 | 1        |
| XLOC_000914 | LHX4         | chr1:180199432-180244188 | 0.674104   | 0.945711   | 0.488428 | 0.862523 |
| XLOC_024228 | PCDH11Y      | chrY:4868266-5610264     | 0.0281637  | 0.0395146  | 0.488548 | 1        |
| XLOC_007625 | KIAA0101     | chr15:64657210-64673702  | 24.2337    | 34.0302    | 0.489802 | 0.146724 |
| XLOC_013412 | HTR2B        | chr2:231921577-232037540 | 0.0289761  | 0.0406982  | 0.490102 | 1        |
| XLOC_001490 | HIVEP3       | chr1:41972035-42501596   | 0.225197   | 0.31636    | 0.49038  | 1        |
| XLOC_011389 | MYO1F        | chr19:8585673-8642331    | 0.0640216  | 0.0899418  | 0.490433 | 1        |
| XLOC_018005 | GFPT2        | chr5:179727699-179780315 | 18.3754    | 25.8173    | 0.490562 | 0.170977 |
| XLOC_009391 | LOC284009    | chr17:2310274-2318730    | 0.0829895  | 0.116681   | 0.491565 | 1        |
| XLOC_008727 | GALNS        | chr16:88880141-88923374  | 8.93646    | 12.5651    | 0.491653 | 0.200886 |
| XLOC_001103 | TRIM67       | chr1:231298673-231357314 | 0.0043063  | 0.00606384 | 0.493783 | 1        |
| XLOC_012696 | ARMC9        | chr2:232063293-232238600 | 2.28877    | 3.22353    | 0.49407  | 0.355611 |
| XLOC_004665 | KCNA6        | chr12:4918341-4960278    | 0.00638737 | 0.00899642 | 0.494129 | 1        |
| XLOC_006235 | LINC00565    | chr13:114629486-11463190 | 0.483289   | 0.680858   | 0.494468 | 0.654038 |
| XLOC_009146 | HOXB-AS5     | chr17:46800541-46802119  | 1.45294    | 2.04748    | 0.494868 | 0.775769 |
| XLOC_005270 | LOC389634    | chr12:8509559-8543348    | 0.99787    | 1.40765    | 0.496365 | 0.845125 |
| XLOC_018262 | LHFLP5       | chr6:35773070-35791852   | 0.047859   | 0.0675193  | 0.496509 | 1        |
| XLOC_018558 | AKAP12       | chr6:151561133-151679694 | 1.58608    | 2.23805    | 0.496779 | 0.206979 |
| XLOC_015909 | PTPLB        | chr3:123213362-123303924 | 0.485602   | 0.685851   | 0.49812  | 0.756513 |
| XLOC_015599 | RFTN1        | chr3:16357351-16555222   | 0.0112952  | 0.0159568  | 0.498462 | 1        |
| XLOC_010470 | GADD45B      | chr19:2476122-2478257    | 60.4105    | 85.3584    | 0.498735 | 0.122708 |
| XLOC_007645 | TIPIN        | chr15:66629007-66649054  | 5.786      | 8.17739    | 0.499073 | 0.269592 |

|             |              |                         |            |            |          |           |
|-------------|--------------|-------------------------|------------|------------|----------|-----------|
| XLOC_002715 | ENO4         | chr10:118609022-1186421 | 0.122191   | 0.172715   | 0.499256 | 1         |
| XLOC_007235 | FAM81A       | chr15:59730371-59815751 | 0.68582    | 0.969415   | 0.499285 | 0.439482  |
| XLOC_002159 | C1orf116     | chr1:207191865-20720610 | 0.00566515 | 0.00801107 | 0.499881 | 1         |
| XLOC_009337 | FSCN2        | chr17:79495416-79504156 | 0.100988   | 0.142858   | 0.500401 | 1         |
| XLOC_015898 | HCLS1        | chr3:121350245-12137979 | 0.941231   | 1.33194    | 0.500906 | 0.525846  |
| XLOC_001689 | TAF13        | chr1:109606997-10961862 | 9.01936    | 12.7647    | 0.501057 | 0.342771  |
| XLOC_001142 | KIF26B       | chr1:245318286-24586642 | 0.202783   | 0.287519   | 0.503722 | 1         |
| XLOC_002310 | SH3BP5L      | chr1:249104650-24912015 | 67.7757    | 96.1048    | 0.503841 | 0.141232  |
| XLOC_018776 | SLC44A4      | chr6:31830969-31846823  | 0.0430355  | 0.0610765  | 0.505089 | 1         |
| XLOC_010044 | ALYREF       | chr17:79845710-79849462 | 110.03     | 156.205    | 0.505536 | 0.108045  |
| XLOC_000898 | PAPPA2       | chr1:176432306-17681197 | 0.00685618 | 0.00973644 | 0.505989 | 1         |
| XLOC_008266 | KIAA0513     | chr16:85061409-85127828 | 0.621937   | 0.883354   | 0.506223 | 0.37762   |
| XLOC_013702 | LOC100131496 | chr20:45838380-45985474 | 0.015518   | 0.0220414  | 0.506273 | 1         |
| XLOC_024027 | IL13RA2      | chrX:114238537-11425220 | 111.821    | 158.833    | 0.506327 | 0.151982  |
| XLOC_015077 | CCR12        | chr3:46448720-46451014  | 1.87136    | 2.65829    | 0.506412 | 0.415394  |
| XLOC_016064 | PLD1         | chr3:171318194-17152828 | 0.171526   | 0.243844   | 0.507532 | 1         |
| XLOC_016050 | GOLIM4       | chr3:167727653-16781341 | 0.62795    | 0.892971   | 0.507965 | 0.490029  |
| XLOC_010731 | LOC641367    | chr19:21906842-21950430 | 0.0450924  | 0.0641312  | 0.50814  | 1         |
| XLOC_001052 | SPATA17      | chr1:217804694-21804048 | 0.181867   | 0.25868    | 0.508286 | 1         |
| XLOC_012342 | IL18R1       | chr2:102979096-10301521 | 0.132361   | 0.18837    | 0.509096 | 1         |
| XLOC_000930 | TSEN15       | chr1:184020810-18404334 | 12.0987    | 17.2275    | 0.509861 | 0.161438  |
| XLOC_017371 | PCDHB4       | chr5:140501580-14050520 | 0.0363943  | 0.051832   | 0.51013  | 1         |
| XLOC_002667 | TMEM180      | chr10:104221169-1042368 | 5.4138     | 7.71604    | 0.511217 | 0.208364  |
| XLOC_006817 | BMP4         | chr14:54416454-54423554 | 0.594267   | 0.847014   | 0.511274 | 0.63524   |
| XLOC_009931 | SLC16A6      | chr17:66255322-66417000 | 0.382647   | 0.545651   | 0.511965 | 0.674625  |
| XLOC_013982 | RIMS4        | chr20:43374487-43438979 | 0.00729915 | 0.0104113  | 0.512351 | 1         |
| XLOC_011636 | ZNF781       | chr19:38158649-38183216 | 0.0615317  | 0.0877842  | 0.512631 | 1         |
| XLOC_009501 | MYH3         | chr17:10531842-10560626 | 0.154941   | 0.221235   | 0.513857 | 1         |
| XLOC_023379 | MAGIX        | chrX:49019180-49023836  | 0.678202   | 0.96851    | 0.514052 | 0.671133  |
| XLOC_014183 | MX2          | chr21:42733949-42780869 | 0.0371685  | 0.0531157  | 0.515058 | 1         |
| XLOC_004945 | KIF5A        | chr12:57943846-57978554 | 0.00827168 | 0.0118258  | 0.51569  | 1         |
| XLOC_023316 | GK           | chrX:30671475-30749577  | 0.890729   | 1.27412    | 0.51644  | 0.334215  |
| XLOC_021391 | ACTR3C       | chr7:149944300-15003524 | 0.578065   | 0.826916   | 0.516508 | 0.983286  |
| XLOC_010303 | ABHD3        | chr18:19230857-19284766 | 3.68961    | 5.27915    | 0.516839 | 0.225852  |
| XLOC_002537 | EIF5AL1      | chr10:81272356-81276192 | 2.97534    | 4.25899    | 0.517458 | 0.169417  |
| XLOC_016892 | ELOVL6       | chr4:110970228-11111982 | 6.44908    | 9.23309    | 0.517722 | 0.112094  |
| XLOC_006293 | PKC2         | chr14:24563482-24573339 | 59.0792    | 84.6047    | 0.518088 | 0.117139  |
| XLOC_012987 | SLC4A5       | chr2:74443368-74570534  | 4.23097    | 6.06016    | 0.518368 | 0.128214  |
| XLOC_012068 | RHOB         | chr2:20646834-20649201  | 33.401     | 47.8566    | 0.518828 | 0.102638  |
| XLOC_017796 | LOC553103    | chr5:131630144-13173130 | 0.196154   | 0.281103   | 0.519115 | 1         |
| XLOC_008373 | PRSS22       | chr16:2902727-2908171   | 8.4605     | 12.1385    | 0.52078  | 0.269188  |
| XLOC_014407 | TSSK2        | chr22:19117791-19132190 | 0.646176   | 0.927263   | 0.52105  | 0.959465  |
| XLOC_021240 | RPL19P12     | chr7:102715327-10278956 | 0.0652103  | 0.093593   | 0.5213   | 1         |
| XLOC_003329 | ADM          | chr11:10326641-10328923 | 61.1377    | 87.8328    | 0.522697 | 0.124319  |
| XLOC_021730 | MTBP         | chr8:121408082-12153587 | 2.27443    | 3.26786    | 0.522844 | 0.869408  |
| XLOC_003550 | FEN1         | chr11:61560108-61564714 | 19.5864    | 28.1695    | 0.524282 | 0.0865352 |
| XLOC_002134 | LINC00628    | chr1:204337557-20433884 | 0.0908469  | 0.130663   | 0.524342 | 1         |
| XLOC_011000 | SEC1P        | chr19:49141271-49185502 | 0.0269777  | 0.0388097  | 0.524653 | 1         |
| XLOC_010661 | HSH2D        | chr19:16244837-16269377 | 0.334518   | 0.481263   | 0.524741 | 0.659194  |
| XLOC_007798 | PRKXP1       | chr15:101087956-1010994 | 0.122759   | 0.176612   | 0.524757 | 1         |
| XLOC_010757 | WDR88        | chr19:33622997-33666703 | 0.0340111  | 0.0489333  | 0.524812 | 1         |
| XLOC_012683 | LOC100616530 | chr8:96257140-96822371  | 0.173316   | 0.249577   | 0.526075 | 1         |
| XLOC_023464 | ITGB1BP2     | chrX:70430034-70948962  | 0.378712   | 0.545571   | 0.526667 | 0.970346  |
| XLOC_013275 | COL5A2       | chr2:189896640-19004460 | 0.0293148  | 0.0422494  | 0.527302 | 1         |
| XLOC_007680 | STOML1       | chr15:74275558-74286963 | 4.22229    | 6.08575    | 0.527407 | 0.285653  |
| XLOC_014810 | FMFN         | chr22:37865100-37882478 | 0.119401   | 0.172156   | 0.5279   | 1         |
| XLOC_000962 | C1orf106     | chr1:200860626-20088486 | 0.255264   | 0.36825    | 0.528695 | 0.61004   |
| XLOC_015719 | AMIGO3       | chr3:49726949-49761384  | 2.7699     | 3.99698    | 0.52908  | 0.830101  |
| XLOC_022380 | CBWD3        | chr9:70856838-70914932  | 0.319796   | 0.462076   | 0.530976 | 0.670632  |
| XLOC_012830 | GPR113       | chr2:26531040-26618759  | 0.0145186  | 0.0209888  | 0.531721 | 1         |
| XLOC_018569 | ZDHHC14      | chr6:157802556-15809497 | 1.28178    | 1.85358    | 0.532171 | 0.468467  |
| XLOC_007248 | SNX22        | chr15:64443915-64455354 | 0.464336   | 0.671623   | 0.532481 | 0.977103  |
| XLOC_001715 | KCND3        | chr1:112318453-11253177 | 0.0169791  | 0.024592   | 0.534428 | 1         |
| XLOC_018044 | LOC100506207 | chr6:8435855-8785678    | 0.124897   | 0.180948   | 0.534839 | 1         |
| XLOC_022946 | MIRLET7DHG   | chr9:96938851-96966848  | 0.516588   | 0.74879    | 0.535546 | 0.631872  |
| XLOC_007246 | FBXL22       | chr15:63796709-63894620 | 0.140962   | 0.204407   | 0.536134 | 1         |
| XLOC_005748 | OASL         | chr12:121458094-1214770 | 0.0106334  | 0.0154237  | 0.536545 | 1         |
| XLOC_002179 | FLVCR1-AS1   | chr1:213029945-21303148 | 2.08183    | 3.02189    | 0.537598 | 0.501373  |
| XLOC_023319 | CXorf22      | chrX:35937850-36008269  | 0.0156439  | 0.0227316  | 0.539097 | 1         |
| XLOC_004347 | CCDC87       | chr11:66357639-66360554 | 0.0208787  | 0.0303449  | 0.53942  | 1         |
| XLOC_001176 | ZNF672       | chr1:249132529-24914371 | 104.796    | 152.354    | 0.539841 | 0.102638  |
| XLOC_004645 | LOC100292680 | chr12:1609656-1613590   | 0.0177882  | 0.0258732  | 0.54054  | 1         |
| XLOC_020402 | MPP6         | chr7:24613084-24727498  | 3.004      | 4.37621    | 0.542794 | 0.200542  |
| XLOC_013193 | CCDC148      | chr2:159023161-15931326 | 0.055347   | 0.0806727  | 0.543576 | 1         |
| XLOC_000485 | LOC646626    | chr1:85731459-85743771  | 2.66515    | 3.88532    | 0.543815 | 0.978981  |
| XLOC_021691 | POP1         | chr8:99129520-99172069  | 4.63159    | 6.75262    | 0.54394  | 0.107103  |
| XLOC_009376 | SLC43A2      | chr17:1477695-1532130   | 3.66       | 5.33696    | 0.544175 | 0.236698  |
| XLOC_008088 | ORC6         | chr16:46723557-46732306 | 13.4231    | 19.5752    | 0.54431  | 0.104594  |
| XLOC_015521 | MGC2889      | chr3:192958916-19298864 | 0.0399486  | 0.0583338  | 0.546188 | 1         |

|             |                |                         |            |            |          |           |
|-------------|----------------|-------------------------|------------|------------|----------|-----------|
| XLOC_023586 | LONRF3         | chrX:118108712-11815194 | 2.05946    | 3.00849    | 0.546774 | 0.293045  |
| XLOC_012277 | VAMP5          | chr2:85811530-85820511  | 0.0716485  | 0.104683   | 0.547015 | 1         |
| XLOC_009697 | KRTAP2-2       | chr17:39210750-39211463 | 0.106534   | 0.15567    | 0.54718  | 1         |
| XLOC_018130 | HIST1H2BM      | chr6:27782821-27783267  | 0.139761   | 0.204237   | 0.547282 | 1         |
| XLOC_013199 | RBMS1          | chr2:161128661-16135031 | 0.120499   | 0.17612    | 0.547542 | 1         |
| XLOC_001217 | LOC100129534   | chr1:2252695-2322993    | 0.46533    | 0.68053    | 0.548405 | 0.726592  |
| XLOC_009214 | C17orf82       | chr17:59489111-59490641 | 0.368965   | 0.539638   | 0.54851  | 0.844123  |
| XLOC_007726 | BCL2A1         | chr15:80253231-80263643 | 31.1607    | 45.5799    | 0.548671 | 0.0857334 |
| XLOC_000300 | BMP8A          | chr1:39957317-40025370  | 0.18542    | 0.271406   | 0.549656 | 1         |
| XLOC_018284 | APOBEC2        | chr6:41020939-41032630  | 0.0300953  | 0.0440747  | 0.550413 | 1         |
| XLOC_011681 | SERTAD1        | chr19:40928408-40931932 | 76.0812    | 111.434    | 0.550573 | 0.0730091 |
| XLOC_005459 | KRT81          | chr12:52679696-52685299 | 0.534086   | 0.782327   | 0.5507   | 0.655097  |
| XLOC_009381 | MIR22,MIR22HG  | chr17:1614797-1619566   | 4.19588    | 6.15447    | 0.552659 | 0.271991  |
| XLOC_007514 | LOC100505648   | chr15:40985952-40987303 | 0.294739   | 0.432376   | 0.552846 | 0.786996  |
| XLOC_018699 | HIST1H2BL      | chr6:27775256-27775709  | 1.32864    | 1.95006    | 0.553573 | 0.786614  |
| XLOC_005867 | OR7E37P        | chr13:42016699-42017902 | 0.164229   | 0.241202   | 0.554535 | 1         |
| XLOC_014122 | C21orf7        | chr21:30452872-30548202 | 0.13277    | 0.195006   | 0.554588 | 1         |
| XLOC_018737 | HCG17          | chr6:30201815-30314635  | 0.40362    | 0.592927   | 0.554856 | 0.979701  |
| XLOC_000317 | SLFN1-AS1      | chr1:41480261-41707815  | 0.133035   | 0.19548    | 0.555213 | 1         |
| XLOC_010961 | FKRP           | chr19:47222767-47261832 | 2.45897    | 3.61551    | 0.556145 | 0.907874  |
| XLOC_005045 | SNORA53        | chr12:98987402-98995778 | 1.5846     | 2.32998    | 0.556199 | 0.972601  |
| XLOC_001713 | LOC100129269   | chr1:112141628-11215094 | 0.031256   | 0.0459602  | 0.556252 | 1         |
| XLOC_010236 | SERPINB8       | chr18:61637262-61656608 | 5.68937    | 8.37117    | 0.557161 | 0.098844  |
| XLOC_003349 | NCR3LG1        | chr11:17373308-17398868 | 0.222271   | 0.327378   | 0.55864  | 1         |
| XLOC_021315 | CEP41          | chr7:130033611-13008105 | 1.08187    | 1.5945     | 0.559567 | 0.229241  |
| XLOC_010370 | MRO            | chr18:48321489-48351754 | 0.00335603 | 0.00494956 | 0.560542 | 1         |
| XLOC_018532 | AIG1           | chr6:143382022-14366144 | 28.7964    | 42.4729    | 0.560653 | 0.0671701 |
| XLOC_017699 | GCNT4          | chr5:74323288-74326724  | 0.0292791  | 0.0431992  | 0.561133 | 1         |
| XLOC_017204 | ZBED3-AS1      | chr5:76372531-76444176  | 0.164317   | 0.242453   | 0.561221 | 1         |
| XLOC_022153 | DSCC1          | chr8:120846180-12086817 | 5.51115    | 8.13215    | 0.561284 | 0.109667  |
| XLOC_005699 | HVCN1          | chr12:111051831-1111276 | 0.0487227  | 0.0719129  | 0.561657 | 1         |
| XLOC_004800 | ALG10          | chr12:34175215-34181236 | 1.1978     | 1.7696     | 0.563033 | 0.286255  |
| XLOC_018217 | C4A,C4B        | chr6:31949833-31970458  | 0.0160591  | 0.023765   | 0.56545  | 1         |
| XLOC_019071 | KIAA0408,SOGA3 | chr6:127759550-12784050 | 0.00538885 | 0.00797552 | 0.565602 | 1         |
| XLOC_005249 | PIANP          | chr12:6802956-6810009   | 0.0765457  | 0.113297   | 0.565717 | 1         |
| XLOC_007192 | SLC28A2        | chr15:45544427-45568132 | 0.0280872  | 0.0415889  | 0.566284 | 1         |
| XLOC_006795 | POLE2          | chr14:50110269-50155098 | 4.44614    | 6.60154    | 0.57025  | 0.165549  |
| XLOC_006507 | PPP4R4         | chr14:94640648-94746072 | 0.389033   | 0.577946   | 0.571043 | 0.762783  |
| XLOC_007396 | MESP2          | chr15:90319588-90321982 | 0.0653991  | 0.0973148  | 0.573389 | 1         |
| XLOC_018800 | TAP2           | chr6:32789609-32806547  | 17.7607    | 26.4301    | 0.573488 | 0.0929396 |
| XLOC_000123 | SLC25A34       | chr1:16062808-16067884  | 0.150782   | 0.224466   | 0.574032 | 1         |
| XLOC_017853 | HBEGF          | chr5:139712427-13972618 | 19.0572    | 28.4037    | 0.57574  | 0.0640789 |
| XLOC_005423 | RND1           | chr12:49250915-49259653 | 1.65788    | 2.47332    | 0.577104 | 0.373993  |
| XLOC_007577 | SPPL2A         | chr15:50999736-51057910 | 3.2596     | 4.86353    | 0.577312 | 0.173569  |
| XLOC_023320 | CHDC2          | chrX:36065052-36163187  | 0.00806628 | 0.0120356  | 0.577339 | 1         |
| XLOC_002351 | MCM10          | chr10:13203553-13253104 | 3.6819     | 5.49524    | 0.577731 | 0.0806848 |
| XLOC_008157 | LOC100505865   | chr16:66442426-66444803 | 0.176242   | 0.26319    | 0.578547 | 1         |
| XLOC_024015 | KCNE1L         | chrX:108866928-10886839 | 0.593085   | 0.885939   | 0.578968 | 0.667938  |
| XLOC_010687 | SNORA68        | chr19:17970686-17974133 | 8.49728    | 12.7117    | 0.581088 | 0.977527  |
| XLOC_014770 | DUSP18         | chr22:31058038-31063872 | 0.276935   | 0.414375   | 0.581388 | 0.632357  |
| XLOC_014461 | GSTT2          | chr22:24322313-24326106 | 0.790048   | 1.18405    | 0.583723 | 0.62349   |
| XLOC_008049 | MYLPF          | chr16:30386122-30389310 | 0.143584   | 0.215274   | 0.584281 | 1         |
| XLOC_000141 | ACTL8          | chr1:18081807-18153558  | 1.63461    | 2.45162    | 0.584793 | 0.378002  |
| XLOC_009722 | KRT15          | chr17:39669996-39675270 | 0.079772   | 0.119669   | 0.585093 | 1         |
| XLOC_010321 | LOC100652770   | chr18:29078026-29136874 | 0.114008   | 0.171039   | 0.585184 | 1         |
| XLOC_022404 | PSAT1          | chr9:80912058-80945009  | 64.5769    | 96.9428    | 0.586115 | 0.108219  |
| XLOC_015022 | SLC22A14       | chr3:38347444-38359859  | 0.029985   | 0.0450207  | 0.58635  | 1         |
| XLOC_011815 | RASIP1         | chr19:49223841-49243970 | 0.211815   | 0.318093   | 0.586642 | 1         |
| XLOC_018605 | LINC00574      | chr6:170188885-17020296 | 0.0980439  | 0.147373   | 0.58797  | 1         |
| XLOC_002061 | ZNF648         | chr1:182023704-18203084 | 0.0282106  | 0.0424166  | 0.588391 | 1         |
| XLOC_011978 | NLRP9          | chr19:56219797-56249768 | 0.0641524  | 0.0965923  | 0.590404 | 1         |
| XLOC_014988 | RARB           | chr3:25469753-25705863  | 0.0645135  | 0.097151   | 0.590627 | 1         |
| XLOC_000992 | ZBED6          | chr1:203764750-20382325 | 0.0881425  | 0.132933   | 0.592786 | 1         |
| XLOC_005336 | ARHGDB1        | chr12:15094949-15114562 | 0.0393506  | 0.0593659  | 0.59325  | 1         |
| XLOC_015006 | FBXL2          | chr3:33318933-33428757  | 0.0292427  | 0.044123   | 0.593457 | 1         |
| XLOC_016451 | ARHGEF38       | chr4:106473776-10660207 | 0.00256282 | 0.00386727 | 0.593581 | 1         |
| XLOC_023857 | FOXP3          | chrX:49091926-49121288  | 0.173982   | 0.262841   | 0.59525  | 1         |
| XLOC_007512 | MRPL42P5       | chr15:40824082-40824749 | 0.328282   | 0.496558   | 0.597024 | 0.805942  |
| XLOC_015790 | ACOX2          | chr3:58490862-58522929  | 0.731087   | 1.10995    | 0.602376 | 0.404397  |
| XLOC_009602 | EVI2B          | chr17:29421944-29704695 | 0.0149689  | 0.0227385  | 0.603169 | 1         |
| XLOC_018746 | IER3           | chr6:30710975-30712327  | 43.383     | 65.9582    | 0.604423 | 0.0645318 |
| XLOC_021747 | POU5F1B        | chr8:128427856-12842944 | 0.401743   | 0.612146   | 0.607603 | 0.642142  |
| XLOC_006314 | AP4S1          | chr14:31363004-31565656 | 0.417572   | 0.636708   | 0.608607 | 0.855674  |
| XLOC_018106 | HIST1H2BH      | chr6:26251878-26252303  | 12.7973    | 19.5149    | 0.608729 | 0.300944  |
| XLOC_007796 | FLJ42289       | chr15:100884661-1008909 | 0.0332807  | 0.0507725  | 0.609362 | 1         |
| XLOC_008460 | CRYM           | chr16:21269838-21329912 | 0.629782   | 0.96154    | 0.610494 | 0.670347  |
| XLOC_006830 | C14orf105      | chr14:57936594-57960576 | 0.0156329  | 0.0238807  | 0.611263 | 1         |
| XLOC_022112 | NIPAL2         | chr8:99204386-99306621  | 0.185058   | 0.282965   | 0.612647 | 1         |
| XLOC_007121 | SCG5           | chr15:32933869-32989298 | 0.217258   | 0.332211   | 0.612694 | 1         |

|             |                 |                          |            |            |          |          |
|-------------|-----------------|--------------------------|------------|------------|----------|----------|
| XLOC_008586 | MT1G            | chr16:56700652-56701977  | 0.407913   | 0.624097   | 0.613508 | 0.909694 |
| XLOC_011214 | USP29           | chr19:57631508-57643293  | 0.00396914 | 0.00608596 | 0.616666 | 1        |
| XLOC_008145 | GPR56           | chr16:57653909-57698944  | 0.0176093  | 0.0270858  | 0.621199 | 1        |
| XLOC_010575 | ICAM4           | chr19:10397642-10399260  | 0.16672    | 0.256445   | 0.621219 | 1        |
| XLOC_003211 | SYCE1           | chr10:135367403-13538344 | 0.0361764  | 0.0556586  | 0.621558 | 1        |
| XLOC_007992 | LOC653786       | chr16:22557018-22588186  | 0.0174748  | 0.0268965  | 0.622144 | 1        |
| XLOC_017215 | FAM151B         | chr5:79783799-79838382   | 0.130176   | 0.200416   | 0.622532 | 1        |
| XLOC_004632 | OPCML           | chr11:132284874-13340240 | 0.00248974 | 0.00383318 | 0.622542 | 1        |
| XLOC_017979 | DOK3            | chr5:176928905-176937427 | 3.18944    | 4.91643    | 0.624309 | 0.211458 |
| XLOC_014001 | SPATA25         | chr20:44515129-44516238  | 0.109627   | 0.169204   | 0.626158 | 1        |
| XLOC_004089 | SOX6            | chr11:15987994-16497935  | 0.00185474 | 0.00286569 | 0.627667 | 1        |
| XLOC_001067 | DISP1           | chr1:222988430-223179337 | 0.168276   | 0.260217   | 0.628882 | 1        |
| XLOC_011523 | TMEM221         | chr19:17546317-17559376  | 0.107746   | 0.166723   | 0.629822 | 1        |
| XLOC_008805 | SLC16A13        | chr17:6939393-6943440    | 9.95129    | 15.4096    | 0.630877 | 0.104845 |
| XLOC_022457 | LOC100507346    | chr9:98205263-98279247   | 0.0332096  | 0.0514595  | 0.631839 | 1        |
| XLOC_014044 | MTRNR2L3        | chr20:55904830-55998278  | 0.123866   | 0.192039   | 0.632616 | 1        |
| XLOC_005835 | MTUS2           | chr13:29598747-30080084  | 0.0717452  | 0.111254   | 0.632904 | 1        |
| XLOC_022573 | C9orf117        | chr9:130469270-130477936 | 0.317003   | 0.49164    | 0.633106 | 0.890466 |
| XLOC_021286 | RNF148          | chr7:121958477-122526813 | 0.200278   | 0.310871   | 0.634312 | 1        |
| XLOC_004558 | MPZL3           | chr11:118100335-11812307 | 0.145619   | 0.22618    | 0.63527  | 1        |
| XLOC_013240 | CHN1            | chr2:175664041-175870107 | 0.0379674  | 0.059119   | 0.638862 | 1        |
| XLOC_021746 | PCAT1           | chr8:128025398-128033255 | 0.0311482  | 0.0485025  | 0.638907 | 1        |
| XLOC_000685 | BNIP1           | chr1:151009028-151020076 | 0.154587   | 0.240889   | 0.639947 | 1        |
| XLOC_016413 | ARHGAP24        | chr4:86396283-86923823   | 0.100977   | 0.157437   | 0.640737 | 1        |
| XLOC_016706 | FLJ13197        | chr4:38614321-38703129   | 0.00837904 | 0.0130653  | 0.64088  | 1        |
| XLOC_014707 | ZNF280A         | chr22:22868060-22874613  | 0.00770582 | 0.0120231  | 0.64179  | 1        |
| XLOC_009338 | TSPAN10         | chr17:79609348-79615779  | 0.920378   | 1.43619    | 0.641952 | 0.553879 |
| XLOC_000200 | CNKSR1          | chr1:26503980-26516375   | 0.363095   | 0.566707   | 0.642256 | 0.525846 |
| XLOC_019080 | CTAGE9          | chr6:131958441-132068550 | 0.0548533  | 0.0857     | 0.643716 | 1        |
| XLOC_012456 | YY1P2           | chr2:139654893-139656744 | 0.0550704  | 0.0860698  | 0.64423  | 1        |
| XLOC_018707 | HIST1H2AM       | chr6:27860476-27860963   | 3.71162    | 5.80997    | 0.644703 | 0.530867 |
| XLOC_012733 | ESPNL           | chr2:239008950-239041928 | 0.0640271  | 0.100183   | 0.645885 | 1        |
| XLOC_014357 | LOC284837       | chr21:45225638-45232448  | 0.0324038  | 0.0507209  | 0.646416 | 1        |
| XLOC_021637 | GDAP1           | chr8:75262617-75279335   | 1.45369    | 2.27604    | 0.646804 | 0.108045 |
| XLOC_018048 | GCNT2           | chr6:10521567-10629601   | 0.00350438 | 0.00548865 | 0.647294 | 1        |
| XLOC_016840 | SPARCL1         | chr4:88394487-88450655   | 0.00456941 | 0.00716128 | 0.64821  | 1        |
| XLOC_015171 | PSMD6-AS2       | chr3:63989697-64009686   | 0.15768    | 0.247198   | 0.648672 | 1        |
| XLOC_010400 | DSEL            | chr18:65173818-65566856  | 0.00164524 | 0.00258176 | 0.650054 | 1        |
| XLOC_003552 | BEST1           | chr11:61717355-61735132  | 0.144022   | 0.226143   | 0.650953 | 1        |
| XLOC_009503 | TMEM220         | chr17:10616638-10718481  | 0.0601974  | 0.0945447  | 0.651295 | 1        |
| XLOC_017169 | GTF2H2C,GTF2H2D | chr5:68856050-68888729   | 1.05358    | 1.65587    | 0.652293 | 0.252465 |
| XLOC_003310 | RBMXL2          | chr11:7110164-7112379    | 0.0458349  | 0.0721     | 0.653551 | 1        |
| XLOC_003558 | ASRGL1          | chr11:62104773-62160887  | 1.00437    | 1.58088    | 0.654443 | 0.276401 |
| XLOC_017578 | FAM173B         | chr5:10225619-10250021   | 1.28565    | 2.02411    | 0.654792 | 0.158777 |
| XLOC_006782 | LOC100288846    | chr14:39734475-39820397  | 0.341392   | 0.537599   | 0.655102 | 0.959465 |
| XLOC_003986 | OR7E12P         | chr11:3402190-3430378    | 0.0178679  | 0.0281913  | 0.657876 | 1        |
| XLOC_015049 | CCBP2           | chr3:42850963-42908775   | 0.0154015  | 0.0243007  | 0.657929 | 1        |
| XLOC_009145 | HOXB-AS3        | chr17:46667822-46683774  | 0.842318   | 1.3291     | 0.658012 | 0.922006 |
| XLOC_013978 | FITM2           | chr20:42935196-42939889  | 0.998064   | 1.57551    | 0.658614 | 0.521281 |
| XLOC_017871 | FGF1            | chr5:141971742-142077638 | 0.0238703  | 0.0376972  | 0.659239 | 1        |
| XLOC_013999 | TNNC2           | chr20:44451854-44455953  | 0.191725   | 0.302963   | 0.660097 | 1        |
| XLOC_014464 | SUSD2           | chr22:24577443-24585074  | 0.10863    | 0.17166    | 0.660124 | 1        |
| XLOC_011850 | SIGLEC11        | chr19:50452249-50464429  | 0.0196379  | 0.0310933  | 0.662963 | 1        |
| XLOC_020549 | LAT2            | chr7:73624086-73644164   | 0.587651   | 0.931182   | 0.664104 | 0.377924 |
| XLOC_022368 | AQP7P3          | chr9:42844369-42893137   | 0.344973   | 0.546649   | 0.664131 | 0.800125 |
| XLOC_009910 | SCN4A           | chr17:62015913-62050278  | 0.00985328 | 0.0156167  | 0.664414 | 1        |
| XLOC_011037 | ADM5            | chr19:50191941-50194247  | 2.83016    | 4.4876     | 0.665059 | 0.187299 |
| XLOC_003121 | CALHM2          | chr10:105206542-10521216 | 0.280707   | 0.445915   | 0.6677   | 0.579583 |
| XLOC_006139 | NEK5            | chr13:52638899-52703214  | 0.158524   | 0.251903   | 0.668173 | 1        |
| XLOC_006378 | DACT1           | chr14:59100785-59115038  | 0.00612568 | 0.00973761 | 0.668697 | 1        |
| XLOC_005999 | F10             | chr13:113777112-11380384 | 0.19382    | 0.308574   | 0.670897 | 1        |
| XLOC_012935 | TMEM17          | chr2:62727355-62733604   | 0.493896   | 0.786761   | 0.671718 | 0.430049 |
| XLOC_006667 | CRIP1           | chr14:105953256-10595512 | 0.192407   | 0.306556   | 0.671989 | 1        |
| XLOC_004124 | BDNF            | chr11:27528398-27743605  | 0.0354935  | 0.0565565  | 0.672137 | 1        |
| XLOC_002558 | LDB3            | chr10:88428205-88495824  | 0.0195366  | 0.0311353  | 0.672374 | 1        |
| XLOC_014453 | FBXW4P1         | chr22:23522551-23660224  | 0.265335   | 0.423701   | 0.675229 | 0.952905 |
| XLOC_012243 | ALMS1P          | chr2:73872045-73912694   | 0.0101391  | 0.0161918  | 0.675338 | 1        |
| XLOC_005322 | GPR19           | chr12:12813994-12849121  | 0.301768   | 0.482382   | 0.676734 | 0.549262 |
| XLOC_015889 | POPDC2          | chr3:119360907-119379404 | 0.182292   | 0.291438   | 0.67694  | 1        |
| XLOC_008392 | SRL             | chr16:4239374-4292081    | 0.00454968 | 0.00727419 | 0.677023 | 1        |
| XLOC_008690 | CDYL2           | chr16:80637675-80838175  | 0.133384   | 0.213369   | 0.677761 | 1        |
| XLOC_003988 | CHRNA10         | chr11:3686816-3692614    | 1.0046     | 1.61088    | 0.681234 | 0.372752 |
| XLOC_018836 | SLC26A8         | chr6:35911290-35992413   | 0.00543061 | 0.00870889 | 0.681375 | 1        |
| XLOC_017890 | PDE6A           | chr5:149237518-149324356 | 0.0103673  | 0.0166352  | 0.682195 | 1        |
| XLOC_021558 | HTRA4           | chr8:38831667-38846181   | 0.0181112  | 0.0291224  | 0.685249 | 1        |
| XLOC_002200 | TLR5            | chr1:223282747-223316624 | 0.0151715  | 0.0243997  | 0.685498 | 1        |
| XLOC_001517 | CCDC17          | chr1:46085715-46089731   | 0.225926   | 0.363449   | 0.6859   | 0.622505 |
| XLOC_014926 | LMCD1           | chr3:8543510-8609806     | 0.0710841  | 0.114664   | 0.689814 | 1        |
| XLOC_005485 | ITGB7           | chr12:53585106-53601000  | 0.0312285  | 0.0503778  | 0.689925 | 1        |

|             |                 |                         |            |            |          |          |
|-------------|-----------------|-------------------------|------------|------------|----------|----------|
| XLOC_005680 | SELPLG          | chr12:109015679-1090276 | 0.0982191  | 0.158479   | 0.690219 | 1        |
| XLOC_008908 | EPN2-IT1        | chr17:19140689-19240028 | 0.0243435  | 0.0393221  | 0.691805 | 1        |
| XLOC_004855 | GRASP           | chr12:52400728-52409673 | 0.375106   | 0.605935   | 0.691865 | 0.593301 |
| XLOC_000785 | LRRC71          | chr1:156890423-15690288 | 0.370205   | 0.598052   | 0.691948 | 0.526447 |
| XLOC_005488 | SP7             | chr12:53720359-53730004 | 0.00704421 | 0.0113815  | 0.692184 | 1        |
| XLOC_020483 | CDC14C          | chr7:48964156-48967049  | 0.00537949 | 0.0087053  | 0.694425 | 1        |
| XLOC_011401 | ZNF426          | chr19:9638680-9649303   | 0.0185707  | 0.0300649  | 0.695054 | 1        |
| XLOC_000880 | TOP1P1          | chr1:171283485-17131122 | 0.066858   | 0.108264   | 0.695379 | 1        |
| XLOC_003907 | DDX25           | chr11:125774260-1257930 | 0.00932071 | 0.0150959  | 0.695645 | 1        |
| XLOC_015395 | LOC646903       | chr3:149689065-14969102 | 0.0857908  | 0.138985   | 0.696033 | 1        |
| XLOC_003763 | SCARNA9         | chr11:93394815-93463522 | 4.28225    | 6.94133    | 0.696843 | 0.774943 |
| XLOC_016988 | TRIM61          | chr4:165875597-16589881 | 0.0113185  | 0.0183646  | 0.698238 | 1        |
| XLOC_006468 | SAMD15          | chr14:77843761-77857587 | 0.0391353  | 0.0635582  | 0.699607 | 1        |
| XLOC_018578 | C6orf99         | chr6:159309618-15933138 | 0.294159   | 0.478055   | 0.700581 | 0.790283 |
| XLOC_021316 | MESTIT1         | chr7:130126015-13037140 | 0.00469522 | 0.00763557 | 0.701543 | 1        |
| XLOC_009064 | TTC25           | chr17:40086887-40117668 | 0.0437768  | 0.0712457  | 0.702636 | 1        |
| XLOC_005787 | RIMBP2          | chr12:130880680-1310024 | 0.00303436 | 0.00494378 | 0.704224 | 1        |
| XLOC_005067 | EID3            | chr12:104609556-1047440 | 0.16708    | 0.272295   | 0.704631 | 1        |
| XLOC_016039 | SCARNA7         | chr3:160212782-16028337 | 13.8747    | 22.6122    | 0.704645 | 0.916838 |
| XLOC_002194 | AURKAPS1        | chr1:220321609-22044584 | 0.551692   | 0.899525   | 0.7053   | 0.891994 |
| XLOC_018768 | LY6G6C          | chr6:31686424-31689511  | 0.0313311  | 0.0511132  | 0.706101 | 1        |
| XLOC_000224 | SCARNA1         | chr1:28157251-28178183  | 0.84808    | 1.38475    | 0.707349 | 0.965148 |
| XLOC_018057 | EDN1            | chr6:12290528-12297427  | 0.0180775  | 0.0295219  | 0.707591 | 1        |
| XLOC_021301 | LRRC4           | chr7:127292201-12773265 | 0.0046673  | 0.00763807 | 0.71062  | 1        |
| XLOC_024166 | MAGEA12         | chrX:151895977-15190318 | 0.0115031  | 0.0188461  | 0.712242 | 1        |
| XLOC_001381 | FAM46B          | chr1:27331510-27339333  | 0.776784   | 1.27296    | 0.712599 | 0.305621 |
| XLOC_022699 | FLJ40292        | chr9:140513443-14073057 | 0.0144484  | 0.0236942  | 0.713629 | 1        |
| XLOC_022020 | LOC100505676    | chr8:67331821-67341212  | 0.0130573  | 0.0214189  | 0.714027 | 1        |
| XLOC_000330 | WDR65           | chr1:43629844-43720029  | 0.0109841  | 0.0180503  | 0.716603 | 1        |
| XLOC_018700 | HIST1H2AJ       | chr6:27782079-27782518  | 1.16306    | 1.91165    | 0.716889 | 0.716391 |
| XLOC_012171 | LOC100134259    | chr2:47055002-47086145  | 0.0159572  | 0.0262399  | 0.717553 | 1        |
| XLOC_001686 | AKNAD1          | chr1:109358519-10940114 | 0.0145428  | 0.0239153  | 0.717626 | 1        |
| XLOC_022302 | CDKN2B-AS1      | chr9:21994789-22121093  | 0.15175    | 0.249773   | 0.718925 | 1        |
| XLOC_010345 | PSTPIP2         | chr18:43563501-43652250 | 0.0150661  | 0.0248141  | 0.719861 | 1        |
| XLOC_007674 | HIGD2B          | chr15:72968122-72978490 | 0.0217827  | 0.0359344  | 0.72218  | 1        |
| XLOC_011398 | ZNF699          | chr19:9405985-9415795   | 0.0345617  | 0.0570255  | 0.722432 | 1        |
| XLOC_011833 | HRC             | chr19:49654455-49658681 | 0.0294299  | 0.0486355  | 0.724729 | 1        |
| XLOC_015803 | ADAMTS9         | chr3:64501330-64997143  | 0.120561   | 0.19941    | 0.725975 | 1        |
| XLOC_004013 | OR51B4          | chr11:5322243-5323176   | 0.0415439  | 0.06874    | 0.726513 | 1        |
| XLOC_010185 | SETBP1          | chr18:42260137-42648475 | 0.00169839 | 0.00281353 | 0.728216 | 1        |
| XLOC_004292 | HRASLS2         | chr11:63014620-63330855 | 0.031324   | 0.0519169  | 0.728936 | 1        |
| XLOC_001975 | APOA2           | chr1:161192082-16119341 | 0.656876   | 1.09002    | 0.730664 | 0.714291 |
| XLOC_018587 | SLC22A1         | chr6:160542862-16057975 | 0.0505578  | 0.0840148  | 0.732711 | 1        |
| XLOC_012637 | CXCR2           | chr2:218990012-21900197 | 0.00665105 | 0.0110596  | 0.733643 | 1        |
| XLOC_008684 | CHST5           | chr16:75562427-75569068 | 0.308912   | 0.51378    | 0.733954 | 0.431637 |
| XLOC_008738 | C16orf3         | chr16:90089007-90114191 | 0.0243433  | 0.0405079  | 0.734679 | 1        |
| XLOC_003987 | ART5            | chr11:3659735-3663546   | 0.545083   | 0.907217   | 0.734971 | 0.474762 |
| XLOC_005401 | SLC38A4         | chr12:47158543-47219780 | 0.0532418  | 0.088633   | 0.735285 | 1        |
| XLOC_022722 | GLDC            | chr9:6532463-6645692    | 0.0177854  | 0.0296569  | 0.737675 | 1        |
| XLOC_020431 | ADCYAP1R1       | chr7:31092075-31151093  | 0.0176507  | 0.0294376  | 0.73793  | 1        |
| XLOC_005526 | MIP             | chr12:56843285-56848435 | 0.0297587  | 0.0496457  | 0.73836  | 1        |
| XLOC_013909 | MLLT10P1        | chr20:29637583-29638138 | 0.0794352  | 0.132874   | 0.742207 | 1        |
| XLOC_017272 | AQPEP           | chr5:115298150-11536329 | 0.0124574  | 0.0208546  | 0.743362 | 1        |
| XLOC_005500 | GPR84           | chr12:54756228-54758270 | 0.0145348  | 0.0243532  | 0.744599 | 1        |
| XLOC_000218 | LOC644961       | chr1:27648635-27662891  | 0.108965   | 0.182614   | 0.744935 | 1        |
| XLOC_017335 | TGFB1           | chr5:135364583-13539950 | 0.00686912 | 0.0115327  | 0.747536 | 1        |
| XLOC_005259 | CD163L1         | chr12:7507556-7596749   | 0.157908   | 0.265237   | 0.748201 | 1        |
| XLOC_008816 | C1orf74         | chr17:7328934-7330886   | 0.54022    | 0.907713   | 0.748689 | 0.471178 |
| XLOC_013292 | C2orf66         | chr2:197669138-19767500 | 0.1223     | 0.20551    | 0.748779 | 1        |
| XLOC_003061 | SORBS1          | chr10:97071529-97321171 | 0.148529   | 0.249617   | 0.748972 | 1        |
| XLOC_001696 | GNAT2           | chr1:110145888-11015570 | 0.060506   | 0.101772   | 0.750195 | 1        |
| XLOC_010969 | C5AR2           | chr19:47835403-47845272 | 0.0234968  | 0.0395677  | 0.751859 | 1        |
| XLOC_011995 | ZNF671          | chr19:58231118-58238995 | 0.00667214 | 0.011255   | 0.754347 | 1        |
| XLOC_022982 | ALDOB           | chr9:104182841-10419806 | 0.0465127  | 0.0786431  | 0.757696 | 1        |
| XLOC_007602 | LOC145783       | chr15:57178367-57210697 | 0.160637   | 0.271946   | 0.759518 | 1        |
| XLOC_013851 | LRRN4           | chr20:6021191-6034726   | 1.40659    | 2.385      | 0.761786 | 0.142951 |
| XLOC_004315 | BATF2           | chr11:64755416-64764517 | 0.212003   | 0.359694   | 0.762683 | 0.532218 |
| XLOC_007646 | SCARNA14        | chr15:66629007-66649054 | 23.387     | 39.7266    | 0.764398 | 0.964222 |
| XLOC_015253 | TAGLN3          | chr3:111717585-11173273 | 0.0201157  | 0.0341923  | 0.765348 | 1        |
| XLOC_007827 | NHLRC4          | chr16:617031-619495     | 0.0124731  | 0.0212024  | 0.765409 | 1        |
| XLOC_000434 | ROR1            | chr1:64239689-64647179  | 0.0433892  | 0.0738059  | 0.7664   | 1        |
| XLOC_005216 | NINJ2           | chr12:673461-772755     | 0.765963   | 1.30297    | 0.766458 | 0.428181 |
| XLOC_012995 | DXQ1            | chr2:74745257-74753408  | 0.038453   | 0.0654287  | 0.766827 | 1        |
| XLOC_012139 | GPATCH11        | chr2:37311593-37323738  | 0.761198   | 1.29544    | 0.7671   | 0.258786 |
| XLOC_015752 | TLR9            | chr3:52255095-52260179  | 0.00685714 | 0.0116719  | 0.767365 | 1        |
| XLOC_010197 | SCARNA17        | chr18:47340392-47340813 | 4.93016    | 8.39468    | 0.76784  | 0.299436 |
| XLOC_015349 | TF              | chr3:133464976-13349785 | 0.00633379 | 0.0107906  | 0.768637 | 1        |
| XLOC_022932 | MIR3651,SNORA84 | chr9:94972489-95056038  | 22.3561    | 38.0936    | 0.768882 | 0.959465 |
| XLOC_022864 | FOXDL46         | chr9:69199479-69202204  | 0.0446621  | 0.0761311  | 0.769433 | 1        |

|             |              |                         |            |            |          |           |
|-------------|--------------|-------------------------|------------|------------|----------|-----------|
| XLOC_018303 | GNMT         | chr6:42928499-42946981  | 0.242408   | 0.41335    | 0.769926 | 0.929478  |
| XLOC_004943 | MARS         | chr12:57881735-57914300 | 30.1545    | 51.5511    | 0.773632 | 0.241341  |
| XLOC_009677 | KRT222       | chr17:38811871-38821416 | 0.0631512  | 0.108084   | 0.775271 | 1         |
| XLOC_009752 | RAMP2-AS1    | chr17:40905946-40915060 | 0.024379   | 0.0417602  | 0.776491 | 1         |
| XLOC_001078 | MIXL1        | chr1:226411382-22641351 | 0.065455   | 0.112166   | 0.777061 | 1         |
| XLOC_004470 | SNORA40      | chr11:93468275-93468402 | 17.2487    | 29.5723    | 0.777756 | 0.776433  |
| XLOC_001138 | C1orf101     | chr1:244624672-24480366 | 0.00441471 | 0.00756959 | 0.777896 | 1         |
| XLOC_014535 | APOL1        | chr22:36649116-36663577 | 0.0357003  | 0.0612186  | 0.778033 | 1         |
| XLOC_012052 | C2orf50      | chr2:11273178-11286916  | 0.0463243  | 0.0794549  | 0.778366 | 1         |
| XLOC_018685 | HIST1H1D     | chr6:26234439-26235216  | 1.19203    | 2.04507    | 0.77873  | 0.400128  |
| XLOC_012299 | GGT8P        | chr2:91963367-91970153  | 0.00796105 | 0.0136598  | 0.778909 | 1         |
| XLOC_009656 | SNORA21      | chr17:37006320-37010053 | 22.8556    | 39.2712    | 0.780928 | 0.950929  |
| XLOC_015113 | GNAT1        | chr3:50229042-50235129  | 0.00533107 | 0.00916046 | 0.780994 | 1         |
| XLOC_016425 | HERC5        | chr4:89378267-89427319  | 0.0416723  | 0.071666   | 0.782199 | 1         |
| XLOC_020367 | RSPH10B2     | chr7:6793739-6838396    | 0.0152594  | 0.0262513  | 0.782689 | 1         |
| XLOC_023118 | QRFP         | chr9:133768814-13376922 | 1.15641    | 1.99101    | 0.783845 | 0.671358  |
| XLOC_017896 | CD74         | chr5:149781199-14979249 | 0.0280733  | 0.048528   | 0.789617 | 1         |
| XLOC_003935 | IFITM5       | chr11:298200-299526     | 0.0440015  | 0.0760884  | 0.790125 | 1         |
| XLOC_001396 | SNORA61      | chr1:28879528-28908366  | 32.2225    | 55.7567    | 0.791077 | 0.974044  |
| XLOC_018689 | HIST1H4H     | chr6:26285353-26285727  | 3.05803    | 5.30857    | 0.795721 | 0.390876  |
| XLOC_017112 | PTGER4       | chr5:40680031-40693837  | 0.168749   | 0.292994   | 0.795989 | 1         |
| XLOC_015503 | SNORA4       | chr3:186501360-18652448 | 4.29064    | 7.45104    | 0.796249 | 0.960403  |
| XLOC_006810 | NID2         | chr14:52471519-52535946 | 0.0538626  | 0.0936894  | 0.798602 | 1         |
| XLOC_020357 | OCM          | chr7:5920428-5925994    | 0.0539052  | 0.0938077  | 0.799282 | 1         |
| XLOC_010681 | FAM129C      | chr19:17634109-17664648 | 0.0959388  | 0.167001   | 0.79967  | 1         |
| XLOC_004463 | SNORA32      | chr11:93464144-93464265 | 8.50852    | 14.8159    | 0.800169 | 0.886662  |
| XLOC_006452 | ZC2HC1C      | chr14:75536298-75544799 | 0.13697    | 0.238723   | 0.801478 | 1         |
| XLOC_016378 | EPGN         | chr4:75174186-75182520  | 0.0112397  | 0.01959    | 0.801507 | 1         |
| XLOC_016744 | RPL21P44     | chr4:54851665-54853449  | 0.0319271  | 0.0556753  | 0.802257 | 1         |
| XLOC_014768 | GAL3ST1      | chr22:30950623-30960876 | 0.0216341  | 0.0377557  | 0.803388 | 1         |
| XLOC_024117 | MCF2         | chrX:138663929-13879038 | 0.0035226  | 0.0061481  | 0.803497 | 1         |
| XLOC_018119 | HIST1H2AG    | chr6:27100816-27101314  | 1.32265    | 2.31666    | 0.80862  | 0.559916  |
| XLOC_011263 | ODF3L2       | chr19:463345-474983     | 0.481789   | 0.843926   | 0.808714 | 0.446323  |
| XLOC_005851 | NBEA         | chr13:35516423-36705514 | 0.00118027 | 0.00207432 | 0.81352  | 1         |
| XLOC_018562 | MYCT1        | chr6:153019029-15304571 | 0.0192643  | 0.0338577  | 0.813552 | 1         |
| XLOC_021486 | NAT2         | chr8:18248754-18258723  | 0.0111798  | 0.0196492  | 0.813573 | 1         |
| XLOC_006194 | UBAC2-AS1    | chr13:99848627-10005855 | 0.250834   | 0.441153   | 0.814546 | 0.958814  |
| XLOC_015605 | PP2D1        | chr3:19988571-20053765  | 0.0278965  | 0.0490825  | 0.815124 | 1         |
| XLOC_001398 | SNORA16A     | chr1:28879528-28908366  | 4.79013    | 8.43867    | 0.816951 | 0.966946  |
| XLOC_017712 | DMGDH        | chr5:78293428-78365449  | 0.00425342 | 0.00749899 | 0.818075 | 1         |
| XLOC_001700 | LOC440600    | chr1:110828998-11088179 | 0.0885778  | 0.15621    | 0.818466 | 1         |
| XLOC_007123 | RYR3         | chr15:33603176-34158303 | 0.00293891 | 0.00518349 | 0.818642 | 1         |
| XLOC_010002 | LOC100996291 | chr17:76257429-76274573 | 0.0073679  | 0.012997   | 0.818858 | 1         |
| XLOC_020941 | ISPD         | chr7:16127151-16460947  | 0.0576538  | 0.101736   | 0.819337 | 1         |
| XLOC_016507 | SLC7A11-AS1  | chr4:138948576-13916350 | 0.00910967 | 0.0160888  | 0.820585 | 1         |
| XLOC_013586 | MYLK2        | chr20:30407177-30422500 | 0.268573   | 0.474543   | 0.821224 | 0.349916  |
| XLOC_009223 | KCNH6        | chr17:61600694-61626338 | 0.0558776  | 0.0988114  | 0.822408 | 1         |
| XLOC_013322 | GPR1         | chr2:207040041-20708277 | 0.00724639 | 0.012819   | 0.822945 | 1         |
| XLOC_008404 | PPL          | chr16:4932507-4987136   | 0.00341138 | 0.00603731 | 0.823551 | 1         |
| XLOC_008415 | TVP23A       | chr16:10837697-10912621 | 0.0912178  | 0.161538   | 0.824485 | 1         |
| XLOC_009124 | KANSL1-AS1   | chr17:44107281-44302740 | 0.462206   | 0.819718   | 0.826592 | 0.970195  |
| XLOC_022737 | SCARNA8      | chr9:19053134-19102940  | 3.89277    | 6.90437    | 0.826713 | 0.961306  |
| XLOC_008897 | C17orf50     | chr17:34087915-34092098 | 0.0442256  | 0.0785492  | 0.828713 | 1         |
| XLOC_005355 | CASC1        | chr12:25205180-25348094 | 0.00504131 | 0.00895633 | 0.82911  | 1         |
| XLOC_011518 | USHBP1       | chr19:17360848-17375544 | 0.156519   | 0.278077   | 0.829147 | 1         |
| XLOC_013400 | TM4SF20      | chr2:22822873-22824402  | 0.00604504 | 0.010744   | 0.829705 | 1         |
| XLOC_021355 | FLJ40852     | chr7:141404137-14143803 | 0.0318556  | 0.0566953  | 0.831681 | 1         |
| XLOC_002626 | HOGA1        | chr10:99344101-99372555 | 0.0259986  | 0.0462731  | 0.831741 | 1         |
| XLOC_014927 | LINC00312    | chr3:8613467-8616354    | 0.00942612 | 0.0168134  | 0.83488  | 1         |
| XLOC_023085 | ENG          | chr9:130577290-13061704 | 1.57694    | 2.81281    | 0.834886 | 0.0755921 |
| XLOC_009738 | DHX58        | chr17:40253421-40264751 | 0.0249138  | 0.0444509  | 0.835264 | 1         |
| XLOC_004566 | RPL23AP64    | chr11:118868851-1188890 | 0.200185   | 0.357509   | 0.836649 | 0.947008  |
| XLOC_003663 | CABP4        | chr11:67222817-67229245 | 0.00800527 | 0.0143033  | 0.837322 | 1         |
| XLOC_000559 | SCARNA2      | chr1:109642814-10964323 | 2.65608    | 4.75027    | 0.83871  | 0.407645  |
| XLOC_003635 | CST6         | chr11:65779461-65780976 | 0.0583898  | 0.104436   | 0.838836 | 1         |
| XLOC_002089 | F13B         | chr1:197008320-19703639 | 0.00523301 | 0.00937517 | 0.841205 | 1         |
| XLOC_016483 | SYNPO2       | chr4:119809995-11998240 | 0.00329479 | 0.00590295 | 0.841248 | 1         |
| XLOC_024173 | TREX2        | chrX:152710177-15271194 | 0.312472   | 0.55987    | 0.841365 | 0.651901  |
| XLOC_005496 | LOC100240735 | chr12:54452037-54516018 | 0.0216757  | 0.0388845  | 0.843116 | 1         |
| XLOC_018491 | C6orf58      | chr6:127898318-12791296 | 0.0429595  | 0.0770946  | 0.843653 | 1         |
| XLOC_004302 | NRXN2        | chr11:64373645-64490660 | 0.0272571  | 0.0489192  | 0.843766 | 1         |
| XLOC_006287 | DHRS2        | chr14:24105572-24114848 | 0.101981   | 0.183292   | 0.845841 | 1         |
| XLOC_004097 | TPH1         | chr11:18042083-18062335 | 0.00762424 | 0.0137348  | 0.849172 | 1         |
| XLOC_011324 | TMIGD2       | chr19:4292224-4302428   | 0.0195122  | 0.0351606  | 0.849584 | 1         |
| XLOC_020964 | DFNA5        | chr7:24737973-24797639  | 0.00726231 | 0.0130963  | 0.850664 | 1         |
| XLOC_012630 | TMEM169      | chr2:216946588-21696750 | 0.00846518 | 0.0152665  | 0.850755 | 1         |
| XLOC_001872 | SHE          | chr1:154451953-15447452 | 0.00243627 | 0.00439503 | 0.851201 | 1         |
| XLOC_010992 | SYNGR4       | chr19:48867650-48879634 | 0.117075   | 0.211261   | 0.851599 | 1         |
| XLOC_017430 | GPX3         | chr5:150399998-15040855 | 0.0302164  | 0.0546053  | 0.853711 | 1         |



|              |               |                          |            |            |          |          |
|--------------|---------------|--------------------------|------------|------------|----------|----------|
| XLOC_001853  | S100A5        | chr1:153509622-15351424  | 0.0247855  | 0.0448174  | 0.854562 | 1        |
| XLOC_012157  | PLEKHH2       | chr2:43864438-43995126   | 0.00183901 | 0.00332603 | 0.854874 | 1        |
| XLOC_003344  | CALCB         | chr11:15095145-15100177  | 0.0550715  | 0.0996312  | 0.855292 | 1        |
| XLOC_015127  | GRM2          | chr3:51741080-51752625   | 0.0414542  | 0.075045   | 0.856238 | 1        |
| XLOC_021170  | PON1          | chr7:94927668-94953884   | 0.015398   | 0.0278956  | 0.857289 | 1        |
| XLOC_003012  | KCNMA1        | chr10:78629358-79397577  | 0.00258402 | 0.00468175 | 0.857434 | 1        |
| XLOC_011352  | PSPN          | chr19:6375304-6375860    | 0.334713   | 0.606991   | 0.858751 | 0.825249 |
| XLOC_008125  | MT1B          | chr16:56685810-56687116  | 0.193152   | 0.35056    | 0.859925 | 0.873144 |
| XLOC_016710  | TMEM156       | chr4:38968440-39034041   | 0.0145212  | 0.0263846  | 0.861542 | 1        |
| XLOC_006700  | SNORD8        | chr14:21853352-21905457  | 8.96835    | 16.2993    | 0.861891 | 0.963669 |
| XLOC_023002  | C9orf152      | chr9:112961845-11297041  | 0.0130212  | 0.0236951  | 0.863728 | 1        |
| XLOC_021731  | HAS2-AS1      | chr8:122625270-12265756  | 0.023984   | 0.0436717  | 0.864626 | 1        |
| XLOC_000028  | MMP23B        | chr1:1567559-1570030     | 0.0357559  | 0.0651424  | 0.865416 | 1        |
| XLOC_014108  | CXADR         | chr21:18885223-18965897  | 0.0194721  | 0.0355346  | 0.867872 | 1        |
| XLOC_005068  | CHST11        | chr12:104850691-1051557  | 0.00536065 | 0.00978691 | 0.868446 | 1        |
| XLOC_013555  | INSM1         | chr20:20348764-20351592  | 0.173833   | 0.317397   | 0.868586 | 1        |
| XLOC_009632  | CCL3          | chr17:34415602-34417506  | 0.0310916  | 0.0567757  | 0.868748 | 1        |
| XLOC_018842  | CPNE5         | chr6:36708554-36807220   | 0.0646883  | 0.118359   | 0.871597 | 1        |
| XLOC_005376  | H3F3C         | chr12:31944118-31945175  | 0.0177689  | 0.0325572  | 0.873362 | 1        |
| XLOC_002984  | SPOCK2        | chr10:73818791-73848790  | 0.0228097  | 0.0418238  | 0.874678 | 1        |
| XLOC_009847  | CACNA1G-AS1   | chr17:48633567-48704832  | 0.0133582  | 0.0245062  | 0.875422 | 1        |
| XLOC_015316  | KBTBD12       | chr3:127641901-12770651  | 0.00559385 | 0.0102753  | 0.877269 | 1        |
| XLOC_021890  | MTUS1         | chr8:17501302-17658426   | 0.211733   | 0.389205   | 0.87828  | 0.194377 |
| XLOC_014029  | NFATC2        | chr20:50003493-50179370  | 0.0024238  | 0.0044602  | 0.87984  | 1        |
| XLOC_004805  | PDZRN4        | chr12:41582249-41968392  | 0.00431002 | 0.00793204 | 0.879999 | 1        |
| XLOC_010274  | LOC727896     | chr18:2916991-3011945    | 0.00873178 | 0.0160991  | 0.882632 | 1        |
| XLOC_011330  | LRG1          | chr19:4537226-4540036    | 0.0404567  | 0.0746771  | 0.884287 | 1        |
| XLOC_004823  | CCDC65        | chr12:49297892-49315359  | 0.0079014  | 0.0145917  | 0.884965 | 1        |
| XLOC_018567  | CLDN20        | chr6:155411422-155635617 | 0.0126254  | 0.0233248  | 0.885542 | 1        |
| XLOC_005246  | ACRBP         | chr12:6747241-6756580    | 0.180243   | 0.333035   | 0.885728 | 1        |
| XLOC_007479  | OTUD7A        | chr15:31775328-31947542  | 0.0717407  | 0.132559   | 0.885766 | 1        |
| XLOC_013287  | DNAH7         | chr2:196602426-19693353  | 0.00101063 | 0.00186996 | 0.887757 | 1        |
| XLOC_000056  | TAS1R1        | chr1:6615337-6639817     | 0.0104022  | 0.0192512  | 0.888052 | 1        |
| XLOC_016017  | ARHGEF26-AS1  | chr3:153742189-15397561  | 0.0165736  | 0.0307298  | 0.890749 | 1        |
| XLOC_022685  | GRIN1         | chr9:140033608-14006449  | 0.0510599  | 0.0947797  | 0.892388 | 1        |
| XLOC_022383  | PIP5K1B       | chr9:71320615-71624091   | 0.0801324  | 0.148872   | 0.893614 | 1        |
| XLOC_013456  | PP14571       | chr2:241375114-24140749  | 0.0290482  | 0.0540357  | 0.895462 | 1        |
| XLOC_015728  | LUST          | chr3:50126340-50156397   | 0.10858    | 0.202137   | 0.896576 | 1        |
| XLOC_013368  | CCDC108       | chr2:219866936-21990624  | 0.00309898 | 0.00576944 | 0.896639 | 1        |
| XLOC_015217  | OR5K2         | chr3:98216524-98217475   | 0.0175114  | 0.0326659  | 0.89949  | 1        |
| XLOC_020871  | FABP5P3       | chr7:152133979-15214010  | 0.0200962  | 0.037511   | 0.900392 | 1        |
| XLOC_002005  | LIN28A        | chr1:26737268-26756219   | 0.00380853 | 0.00712862 | 0.904387 | 1        |
| XLOC_009308  | SCARNA16      | chr17:75084724-75213181  | 8.77689    | 16.4784    | 0.908795 | 0.942519 |
| XLOC_016159  | ZNF876P       | chr4:206388-249773       | 0.0717731  | 0.135401   | 0.915726 | 1        |
| XLOC_016791  | CXCL3         | chr4:74902311-74904490   | 0.351146   | 0.662447   | 0.915733 | 0.40651  |
| XLOC_003746  | LOC100506368  | chr11:86666662-86711989  | 0.12827    | 0.242359   | 0.917965 | 1        |
| XLOC_003376  | BDNF-AS       | chr11:27528398-27743605  | 0.0997262  | 0.188449   | 0.918132 | 1        |
| XLOC_015662  | SLC6A20       | chr3:45796940-45838035   | 0.00610697 | 0.0115428  | 0.918468 | 1        |
| XLOC_020677  | SPDYE2L       | chr7:102178365-10221306  | 0.017835   | 0.0337731  | 0.921161 | 1        |
| XLOC_005114  | OAS2          | chr12:113416273-1134495  | 0.0174319  | 0.0330279  | 0.921952 | 1        |
| XLOC_019166  | SNORA20       | chr6:160181290-16021073  | 2.53509    | 4.80368    | 0.922101 | 0.954657 |
| XLOC_013730  | FAM209A       | chr20:55043646-55101208  | 0.202134   | 0.383396   | 0.923524 | 0.961224 |
| XLOC_001775  | FMO5          | chr1:146655883-14669723  | 0.0893562  | 0.169627   | 0.924727 | 1        |
| XLOC_021923  | ADRA1A        | chr8:26605666-26722922   | 0.011289   | 0.0214541  | 0.926335 | 1        |
| XLOC_001392  | PTAFR         | chr1:28473676-28520447   | 0.034965   | 0.0665059  | 0.92757  | 1        |
| XLOC_014167  | DSCR9         | chr21:38580803-38594037  | 0.042213   | 0.0803567  | 0.928729 | 1        |
| XLOC_016533  | MAB21L2       | chr4:151185810-15193664  | 0.0144768  | 0.0275911  | 0.930453 | 1        |
| XLOC_018456  | TPI1P3        | chr6:116262692-11638192  | 0.0285558  | 0.0544713  | 0.931712 | 1        |
| XLOC_020553  | NCF1          | chr7:74188308-74203659   | 0.0201289  | 0.0383998  | 0.931827 | 1        |
| XLOC_009674  | TNS4          | chr17:38632079-38657854  | 0.00441018 | 0.00843327 | 0.935253 | 1        |
| XLOC_004520  | POU2AF1       | chr11:111222980-1112501  | 0.00654702 | 0.0125283  | 0.936279 | 1        |
| XLOC_014068  | LINC00659     | chr20:61405472-61408208  | 0.499183   | 0.959641   | 0.942928 | 0.535638 |
| XLOC_018404  | C6orf165      | chr6:88117689-88174191   | 0.0195492  | 0.0376043  | 0.943786 | 1        |
| XLOC_017385  | PCDHB19P      | chr5:140619688-14062431  | 0.00784868 | 0.0151019  | 0.944205 | 1        |
| XLOC_003651  | C11orf86      | chr11:66742753-66744479  | 0.0201184  | 0.0387676  | 0.946339 | 1        |
| XLOC_021677  | ESRP1         | chr8:95653363-95719694   | 0.016085   | 0.0310813  | 0.950333 | 1        |
| XLOC_007857  | EME2          | chr16:1823228-1826239    | 0.251614   | 0.48626    | 0.950519 | 0.66311  |
| XLOC_003117  | CYP17A1       | chr10:104590287-1045972  | 0.0181446  | 0.035107   | 0.952219 | 1        |
| XLOC_003249  | LSP1          | chr11:1874199-1913493    | 0.014381   | 0.0278366  | 0.952818 | 1        |
| XLOC_014349  | RSPH1         | chr21:43892596-43916401  | 0.247486   | 0.479528   | 0.954267 | 0.365811 |
| XLOC_001214  | KIAA1751      | chr1:1884751-1935276     | 0.00417718 | 0.008094   | 0.954323 | 1        |
| XLOC_018706  | HIST1H3J      | chr6:27858092-27858570   | 0.0813568  | 0.157685   | 0.954712 | 1        |
| XLOC_023799  | ARX           | chrX:25021812-25034065   | 0.0119929  | 0.0232875  | 0.957377 | 1        |
| XLOC_014397  | SLC25A18      | chr22:18043182-18073647  | 0.0670409  | 0.130398   | 0.959807 | 1        |
| XLOC_014932  | CPNE9         | chr3:9745509-9771592     | 0.0496601  | 0.0967728  | 0.962516 | 1        |
| XLOC_005499  | NFE2          | chr12:54685890-54694821  | 0.0241382  | 0.0470505  | 0.962894 | 1        |
| XLOC_016189  | DOK7          | chr4:3465032-3496209     | 0.0258744  | 0.0506037  | 0.967718 | 1        |
| XLOC_0012746 | GPR35         | chr2:241544824-24157067  | 0.384518   | 0.753187   | 0.969959 | 0.277658 |
| XLOC_000653  | GPR89B,GPR89C | chr1:147400505-14746575  | 0.0573441  | 0.112408   | 0.971029 | 1        |

|             |                       |                          |            |            |          |          |
|-------------|-----------------------|--------------------------|------------|------------|----------|----------|
| XLOC_016037 | TRIM59                | chr3:160153290-160167624 | 0.07715    | 0.151356   | 0.972206 | 1        |
| XLOC_011266 | PRSS57                | chr19:685545-695461      | 0.0306136  | 0.0601059  | 0.973334 | 1        |
| XLOC_015773 | ESRG                  | chr3:54156692-55108584   | 0.0468349  | 0.0919617  | 0.973451 | 1        |
| XLOC_014048 | PPP4R1L               | chr20:56807832-56884495  | 0.0933782  | 0.18382    | 0.977139 | 1        |
| XLOC_001483 | COL9A2                | chr1:40766162-40782939   | 0.00802693 | 0.0158594  | 0.982417 | 1        |
| XLOC_010479 | S1PR4                 | chr19:3178735-3180330    | 0.0229469  | 0.0454249  | 0.985187 | 1        |
| XLOC_022558 | WDR38                 | chr9:127615695-127624240 | 0.0181292  | 0.0358991  | 0.985637 | 1        |
| XLOC_006638 | AMN                   | chr14:103388992-10339717 | 0.0637437  | 0.126451   | 0.988219 | 1        |
| XLOC_011679 | HIPK4                 | chr19:40885177-40896094  | 0.0955889  | 0.189651   | 0.98843  | 1        |
| XLOC_010950 | LOC388553             | chr19:46242887-46262748  | 0.0159718  | 0.0317355  | 0.990567 | 1        |
| XLOC_011059 | ACPT                  | chr19:51293671-51298481  | 0.0230141  | 0.0457578  | 0.991503 | 1        |
| XLOC_013284 | STAT4                 | chr2:191894301-192016322 | 0.0154045  | 0.0306798  | 0.993943 | 1        |
| XLOC_008005 | SLC5A11               | chr16:24857183-24922949  | 0.0170276  | 0.0339348  | 0.994893 | 1        |
| XLOC_016296 | DCAF4L1               | chr4:41983712-41988484   | 0.07738    | 0.154963   | 1.00189  | 1        |
| XLOC_018866 | TREM1                 | chr6:41242998-41254457   | 0.0185416  | 0.037316   | 1.00902  | 1        |
| XLOC_013070 | AFF3                  | chr2:100163715-100759037 | 0.00440625 | 0.00891242 | 1.01627  | 1        |
| XLOC_009698 | KRTAP2-3              | chr17:39215492-39216344  | 1.32206    | 2.67789    | 1.01831  | 0.186614 |
| XLOC_012179 | GTF2A1L,STON1,STON1-G | chr2:48757063-49003656   | 0.0052151  | 0.0105737  | 1.01971  | 1        |
| XLOC_006105 | SNORA31               | chr13:45911303-45915297  | 5.00625    | 10.153     | 1.0201   | 0.931471 |
| XLOC_010196 | LIPG                  | chr18:47088426-47119278  | 0.0577186  | 0.117249   | 1.02247  | 1        |
| XLOC_004325 | KCNK7                 | chr11:65360325-65363467  | 0.360874   | 0.733235   | 1.02278  | 0.241608 |
| XLOC_011949 | LAIR1                 | chr19:54865234-54876721  | 0.0315854  | 0.0641959  | 1.02322  | 1        |
| XLOC_010717 | CILP2                 | chr19:19649073-19657468  | 0.0600828  | 0.122137   | 1.02348  | 1        |
| XLOC_002599 | CYP26A1               | chr10:94833231-94837641  | 0.0395372  | 0.0804688  | 1.02522  | 1        |
| XLOC_009703 | KRTAP4-6              | chr17:39295684-39296739  | 0.113006   | 0.229998   | 1.02522  | 1        |
| XLOC_021142 | SEMA3E                | chr7:82993221-83278479   | 0.00462754 | 0.00944023 | 1.02858  | 1        |
| XLOC_004611 | FEZ1                  | chr11:125315640-12536620 | 0.0301276  | 0.0615695  | 1.03113  | 1        |
| XLOC_003688 | KRTAP5-9              | chr11:71259465-71260653  | 0.07972    | 0.16427    | 1.04305  | 1        |
| XLOC_007776 | ANPEP                 | chr15:90328125-90358072  | 0.0170838  | 0.035314   | 1.04761  | 1        |
| XLOC_008786 | ZFP3                  | chr17:4981753-4999669    | 0.01197    | 0.0248548  | 1.0541   | 1        |
| XLOC_014498 | CABP7                 | chr22:30116343-30162969  | 0.0289705  | 0.0601932  | 1.05501  | 1        |
| XLOC_018469 | SLC35F1               | chr6:118228688-118638830 | 0.00668799 | 0.0139235  | 1.05788  | 1        |
| XLOC_015976 | PRR23C                | chr3:138760943-138763734 | 0.0159005  | 0.0331381  | 1.05942  | 1        |
| XLOC_000811 | CASQ1                 | chr1:160160284-160171670 | 0.0173717  | 0.0362245  | 1.06203  | 1        |
| XLOC_017356 | SLC4A9                | chr5:139739786-139754722 | 0.0448415  | 0.0935373  | 1.06071  | 1        |
| XLOC_018318 | RSPH9                 | chr6:43612766-43638748   | 0.0772689  | 0.161854   | 1.06673  | 1        |
| XLOC_000715 | LCE1B                 | chr1:152784446-152785580 | 0.0507144  | 0.106776   | 1.07413  | 1        |
| XLOC_008486 | EIF3C,EIF3CL          | chr16:28390899-28437775  | 0.0226034  | 0.0477448  | 1.07881  | 1        |
| XLOC_013201 | AHCTF1P1              | chr2:162355577-162364413 | 0.00301628 | 0.00637566 | 1.0798   | 1        |
| XLOC_012806 | MATN3                 | chr2:20191812-20212455   | 0.0120366  | 0.0254803  | 1.08195  | 1        |
| XLOC_000020 | TAS1R3                | chr1:1266725-1269844     | 0.113943   | 0.242384   | 1.08898  | 1        |
| XLOC_004989 | LGR5                  | chr12:71833812-71978621  | 0.0169278  | 0.0360615  | 1.09106  | 1        |
| XLOC_011094 | VN1R2                 | chr19:53761544-53762855  | 0.0358176  | 0.076442   | 1.0937   | 1        |
| XLOC_010466 | AMH                   | chr19:2249112-2252072    | 0.247095   | 0.527444   | 1.09395  | 0.715731 |
| XLOC_002232 | ACTA1                 | chr1:229566992-229569840 | 0.554826   | 1.18462    | 1.09432  | 0.180428 |
| XLOC_021636 | LY96                  | chr8:74903563-74941307   | 0.914852   | 1.97237    | 1.10832  | 0.195403 |
| XLOC_011053 | MYBPC2                | chr19:50936159-50969583  | 0.0112113  | 0.0242559  | 1.11339  | 1        |
| XLOC_010109 | PTPRM                 | chr18:7567313-8406859    | 0.0114095  | 0.0246873  | 1.11353  | 1        |
| XLOC_022331 | ATP8B5P               | chr9:35406751-35483026   | 0.0194005  | 0.0420766  | 1.11692  | 1        |
| XLOC_013271 | CALCRL                | chr2:188206689-188313027 | 0.00420008 | 0.00911547 | 1.1179   | 1        |
| XLOC_018610 | HUS1B                 | chr6:485137-693141       | 0.470352   | 1.02415    | 1.12261  | 0.904448 |
| XLOC_011197 | RFPL4A                | chr19:56270506-56274541  | 0.142272   | 0.311316   | 1.12973  | 1        |
| XLOC_002126 | LOC730227             | chr1:203267885-203274453 | 0.0070653  | 0.0155569  | 1.13873  | 1        |
| XLOC_003122 | CALHM1                | chr10:105213143-10521864 | 0.0179111  | 0.0394881  | 1.14057  | 1        |
| XLOC_013621 | MYH7B                 | chr20:33543703-33680618  | 0.0358183  | 0.0790011  | 1.14118  | 1        |
| XLOC_011295 | C19orf35              | chr19:2274630-2282181    | 0.0408829  | 0.0904157  | 1.14508  | 1        |
| XLOC_010037 | PDE6G                 | chr17:79617488-79623607  | 0.0301716  | 0.0667577  | 1.14574  | 1        |
| XLOC_021339 | ATP6V0A4              | chr7:138391038-138490760 | 0.0109892  | 0.0243579  | 1.14831  | 1        |
| XLOC_005468 | KRT5                  | chr12:52908358-52914243  | 0.0975058  | 0.217182   | 1.15535  | 1        |
| XLOC_013159 | ANKRD30BL             | chr2:132905163-133015542 | 0.0419829  | 0.0939355  | 1.16187  | 1        |
| XLOC_013313 | MPP4                  | chr2:202509596-202563417 | 0.0111873  | 0.0253084  | 1.17776  | 1        |
| XLOC_009840 | SAMD14                | chr17:48172100-48207246  | 0.0166718  | 0.0379278  | 1.18585  | 1        |
| XLOC_014746 | ZNRF3-AS1             | chr22:29279754-29453476  | 0.0279514  | 0.0636813  | 1.18795  | 1        |
| XLOC_013589 | CCM2L                 | chr20:30598244-30619984  | 0.0237136  | 0.0540431  | 1.1884   | 1        |
| XLOC_018104 | HIST1H3E              | chr6:26225382-26225844   | 0.197366   | 0.44991    | 1.18876  | 0.742477 |
| XLOC_014717 | VPREB3                | chr22:24094929-24096630  | 0.316361   | 0.721583   | 1.18959  | 0.562358 |
| XLOC_011602 | SBSN                  | chr19:36014268-36019253  | 0.0327331  | 0.07508    | 1.19768  | 1        |
| XLOC_022580 | LCN2                  | chr9:130911731-130915734 | 0.0752298  | 0.17267    | 1.19865  | 1        |
| XLOC_001146 | VN1R5                 | chr1:247419373-247420447 | 0.0196967  | 0.0452095  | 1.19868  | 1        |
| XLOC_019016 | BVES                  | chr6:105544698-105585040 | 0.00289057 | 0.00664647 | 1.20123  | 1        |
| XLOC_018195 | LTA                   | chr6:31539875-31542100   | 0.0825291  | 0.189791   | 1.20143  | 1        |
| XLOC_023974 | NOX1                  | chrX:100098312-100129333 | 0.0297257  | 0.0684175  | 1.20266  | 1        |
| XLOC_011052 | SPIB                  | chr19:50922194-50934309  | 0.0789885  | 0.181914   | 1.20354  | 1        |
| XLOC_016240 | DEFB131               | chr4:9446259-9452240     | 0.594534   | 1.37073    | 1.20511  | 0.82774  |
| XLOC_015534 | LRRC33                | chr3:196366655-196388874 | 0.116019   | 0.267707   | 1.20629  | 1        |
| XLOC_019048 | FRK                   | chr6:116262692-116381927 | 0.0149648  | 0.0345758  | 1.20819  | 1        |
| XLOC_018589 | PLG                   | chr6:161123224-161175080 | 0.00790827 | 0.0182989  | 1.21032  | 1        |
| XLOC_016747 | SRD5A3-AS1            | chr4:56212387-56251747   | 0.0335905  | 0.0779716  | 1.2149   | 1        |
| XLOC_015795 | PTPRG-AS1             | chr3:61547242-62304622   | 0.00664228 | 0.0155038  | 1.22287  | 1        |

|              |              |                         |            |            |         |          |
|--------------|--------------|-------------------------|------------|------------|---------|----------|
| XLOC_015174  | PRICKLE2-AS3 | chr3:64053639-64211131  | 0.00561842 | 0.0131577  | 1.22767 | 1        |
| XLOC_013951  | SLA2         | chr20:35201875-35274619 | 0.0224156  | 0.0525027  | 1.22789 | 1        |
| XLOC_007312  | GOLGA6C      | chr15:75550898-75565796 | 0.00285942 | 0.00669765 | 1.22793 | 1        |
| XLOC_003217  | NLRP6        | chr11:278569-285388     | 0.0284153  | 0.0666743  | 1.23046 | 1        |
| XLOC_014780  | C22orf24     | chr22:32329506-32353590 | 0.0300807  | 0.0707369  | 1.23363 | 1        |
| XLOC_016058  | SLC7A14      | chr3:170177341-17030386 | 0.00151259 | 0.00359222 | 1.24786 | 1        |
| XLOC_011373  | FCER2        | chr19:7753642-7767032   | 0.0713661  | 0.170173   | 1.2537  | 1        |
| XLOC_001093  | HIST3H2BB    | chr1:228645807-22864625 | 0.149367   | 0.356327   | 1.25434 | 0.809759 |
| XLOC_019182  | PRR18        | chr6:166719167-16672187 | 0.0121128  | 0.0289372  | 1.25639 | 1        |
| XLOC_001751  | NBPF7        | chr1:120377387-12038777 | 0.0387665  | 0.0929472  | 1.2616  | 1        |
| XLOC_009909  | CD79B        | chr17:62006097-62009704 | 0.0217716  | 0.0522591  | 1.26324 | 1        |
| XLOC_021944  | MBOAT4       | chr8:29920257-30108213  | 0.012907   | 0.0311656  | 1.2718  | 1        |
| XLOC_010957  | HIF3A        | chr19:46720994-46846690 | 0.00408234 | 0.00991567 | 1.28031 | 1        |
| XLOC_008290  | LINC00304    | chr16:89225627-89230083 | 0.0539393  | 0.131077   | 1.28101 | 1        |
| XLOC_023832  | SYN1         | chrX:47420498-47479256  | 0.0147247  | 0.0358552  | 1.28395 | 1        |
| XLOC_023529  | RAB40AL      | chrX:102192199-10219322 | 0.0412918  | 0.101399   | 1.29611 | 1        |
| XLOC_018196  | TNF          | chr6:31543343-31546112  | 0.0127904  | 0.0317338  | 1.31096 | 1        |
| XLOC_020593  | DPY19L2P4    | chr7:89748713-89754914  | 0.0237279  | 0.0589405  | 1.31268 | 1        |
| XLOC_002814  | PROSER2-AS1  | chr10:11865396-11936709 | 0.00574892 | 0.014295   | 1.31415 | 1        |
| XLOC_022529  | LOC100288842 | chr9:123555774-12356100 | 0.275571   | 0.685809   | 1.31539 | 0.467892 |
| XLOC_001579  | HSD52        | chr1:59597607-59612479  | 0.0506135  | 0.126426   | 1.3207  | 1        |
| XLOC_005679  | TMEM119      | chr12:108983621-1089918 | 0.00792693 | 0.0198345  | 1.32318 | 1        |
| XLOC_002938  | ASAH2        | chr10:51946999-52008370 | 0.0257358  | 0.0644066  | 1.32343 | 1        |
| XLOC_010326  | KLHL14       | chr18:30252633-30352974 | 0.0152696  | 0.0383695  | 1.3293  | 1        |
| XLOC_021038  | CAMK2B       | chr7:44256748-44365230  | 0.0179235  | 0.0450775  | 1.33056 | 1        |
| XLOC_010058  | CD7          | chr17:80272745-80275480 | 0.0691133  | 0.174007   | 1.33211 | 1        |
| XLOC_012639  | GPBAR1       | chr2:219125737-21912858 | 0.211338   | 0.532541   | 1.33334 | 0.265949 |
| XLOC_013618  | MAP1LC3A     | chr20:33134687-33148149 | 0.113559   | 0.28637    | 1.33444 | 1        |
| XLOC_001576  | TACSTD2      | chr1:59041094-59043166  | 0.0151391  | 0.0382635  | 1.33769 | 1        |
| XLOC_003564  | GNG3         | chr11:62457733-62494857 | 0.0682841  | 0.173299   | 1.34364 | 1        |
| XLOC_003068  | TLL2         | chr10:98124362-98273683 | 0.0149315  | 0.0380366  | 1.34903 | 1        |
| XLOC_001090  | GJC2         | chr1:228337414-22834752 | 0.0580776  | 0.148166   | 1.35117 | 1        |
| XLOC_004893  | PDE1B        | chr12:54943176-54973023 | 0.00630292 | 0.0161103  | 1.35389 | 1        |
| XLOC_005826  | SNORA27      | chr13:27825691-27830702 | 20.7079    | 53.0312    | 1.35666 | 0.871957 |
| XLOC_014749  | RASL10A      | chr22:29708921-29711745 | 0.17486    | 0.449691   | 1.36274 | 0.505328 |
| XLOC_018682  | HIST1H4D     | chr6:26188937-26189304  | 0.426804   | 1.10105    | 1.36723 | 0.556835 |
| XLOC_022212  | LOC100133669 | chr8:144063447-14409980 | 0.0397088  | 0.102654   | 1.37026 | 1        |
| XLOC_023530  | BEX4         | chrX:102470019-10247212 | 0.0878316  | 0.227127   | 1.37069 | 1        |
| XLOC_012274  | SH2D6        | chr2:85661917-85664152  | 0.0318971  | 0.0826655  | 1.37386 | 1        |
| XLOC_005635  | USP44        | chr12:95910887-95945263 | 0.00390405 | 0.0101745  | 1.38191 | 1        |
| XLOC_022655  | LCN1         | chr9:138413283-13841838 | 0.0319053  | 0.0836056  | 1.3898  | 1        |
| XLOC_007525  | SPTBN5       | chr15:42120282-42186275 | 0.00994869 | 0.0261562  | 1.39458 | 1        |
| XLOC_023440  | MSN          | chrX:64887510-64961793  | 0.00844586 | 0.022209   | 1.39483 | 1        |
| XLOC_016175  | SCARNA22     | chr4:1873122-1983934    | 30.1716    | 79.476     | 1.39733 | 0.926446 |
| XLOC_006119  | LPAR6        | chr13:48877882-49056026 | 0.00551468 | 0.0145296  | 1.39764 | 1        |
| XLOC_001621  | UOX          | chr1:84830640-84863576  | 0.00864215 | 0.0227734  | 1.39789 | 1        |
| XLOC_018249  | PACSIN1      | chr6:34433837-34503000  | 0.015773   | 0.0415916  | 1.39884 | 1        |
| XLOC_004860  | KRT86        | chr12:52695648-52702947 | 0.0278307  | 0.0734947  | 1.40096 | 1        |
| XLOC_003571  | SLC22A9      | chr11:63014620-63330855 | 0.0143385  | 0.0379497  | 1.4042  | 1        |
| XLOC_008326  | GNG13        | chr16:838621-850733     | 0.0283982  | 0.0753011  | 1.40687 | 1        |
| XLOC_007474  | CHRFAM7A     | chr15:30653442-30685864 | 0.0297549  | 0.0790994  | 1.41054 | 1        |
| XLOC_016212  | AFAP1-AS1    | chr4:7755816-7941653    | 0.00500223 | 0.0133039  | 1.41121 | 1        |
| XLOC_021476  | KIAA1456     | chr8:12803182-12887284  | 0.00460049 | 0.0122459  | 1.41244 | 1        |
| XLOC_007563  | MYEF2        | chr15:48413168-48470558 | 0.00246819 | 0.00657897 | 1.41441 | 1        |
| XLOC_023859  | LOC158572    | chrX:49641326-49643959  | 0.0235469  | 0.0628513  | 1.41641 | 1        |
| XLOC_005884  | CPB2-AS1     | chr13:46626982-46679211 | 0.00369132 | 0.00988008 | 1.42039 | 1        |
| XLOC_001147  | NLRP3        | chr1:247579457-24761240 | 0.0773691  | 0.207113   | 1.42059 | 1        |
| XLOC_018379  | DDX43        | chr6:74104284-74127289  | 0.00500155 | 0.013397   | 1.42147 | 1        |
| XLOC_023079  | SNORA65      | chr9:130209552-13021371 | 5.91003    | 15.874     | 1.42542 | 0.87867  |
| XLOC_003823  | NCAM1        | chr11:112831968-1131491 | 0.00250994 | 0.00674437 | 1.42603 | 1        |
| XLOC_006798  | C14orf183    | chr14:50550368-50559361 | 0.0373203  | 0.100295   | 1.42621 | 1        |
| XLOC_014016  | PREX1        | chr20:47240792-47444420 | 0.0123032  | 0.0331107  | 1.42826 | 1        |
| XLOC_018007  | FLT4         | chr5:180028505-18007662 | 0.00511449 | 0.0137674  | 1.4286  | 1        |
| XLOC_000672  | C1orf54      | chr1:150245182-15025333 | 0.190079   | 0.511888   | 1.42923 | 0.450904 |
| XLOC_007282  | NR2E3        | chr15:72102893-72110597 | 0.0316954  | 0.0855961  | 1.43327 | 1        |
| XLOC_010311  | ZNF521       | chr18:22641887-22932214 | 0.0335046  | 0.0907392  | 1.43737 | 1        |
| XLOC_004491  | MMP10        | chr11:102641232-1026513 | 0.00792144 | 0.0215405  | 1.44322 | 1        |
| XLOC_014911  | SYCE3        | chr22:50989540-51001328 | 0.123305   | 0.3354     | 1.44365 | 1        |
| XLOC_005938  | C13orf45     | chr13:76445173-76457948 | 0.0140757  | 0.0383549  | 1.44621 | 1        |
| XLOC_015031  | SNORA6       | chr3:39448203-39454032  | 2.05745    | 5.61503    | 1.44844 | 0.897782 |
| XLOC_016749  | PDCL2        | chr4:56422691-56458379  | 0.017262   | 0.0472323  | 1.45217 | 1        |
| XLOC_016193  | NSG1         | chr4:4387982-4543775    | 0.00706255 | 0.0193378  | 1.45316 | 1        |
| XLOC_011024  | SNORD33      | chr19:49990810-49995564 | 57.5391    | 158.495    | 1.46182 | 0.912776 |
| XLOC_0011899 | SIGLEC10     | chr19:51913274-51921057 | 0.00645926 | 0.0178159  | 1.46373 | 1        |
| XLOC_023577  | LUZP4        | chrX:114524291-11454212 | 0.00775489 | 0.021394   | 1.46403 | 1        |
| XLOC_013268  | FRZB         | chr2:183698004-18373149 | 0.00596528 | 0.0164604  | 1.46433 | 1        |
| XLOC_014917  | CNTN4        | chr3:2140549-3099645    | 0.00258298 | 0.00713186 | 1.46524 | 1        |
| XLOC_022525  | PAPPA        | chr9:118916070-11916460 | 0.00131632 | 0.00363782 | 1.46656 | 1        |
| XLOC_002178  | C1orf227     | chr1:213003484-21302099 | 0.0425325  | 0.117599   | 1.46724 | 1        |

|              |              |                         |            |            |         |           |
|--------------|--------------|-------------------------|------------|------------|---------|-----------|
| XLOC_018583  | PNLDC1       | chr6:160221300-16024173 | 0.0261825  | 0.0726018  | 1.4714  | 1         |
| XLOC_009110  | HIGD1B       | chr17:42923720-42976993 | 0.0956958  | 0.265567   | 1.47255 | 1         |
| XLOC_005454  | CELA1        | chr12:51722226-51740463 | 0.0219032  | 0.0609036  | 1.47539 | 1         |
| XLOC_018101  | HIST1H2BF    | chr6:26199786-26200216  | 0.353862   | 0.986284   | 1.47882 | 0.539391  |
| XLOC_004253  | FADS1        | chr11:61567096-61584529 | 0.00343222 | 0.00957256 | 1.47976 | 1         |
| XLOC_001997  | GPA33        | chr1:167022081-16705986 | 0.00623322 | 0.0174981  | 1.48915 | 1         |
| XLOC_014025  | FAM65C       | chr20:49202646-49253426 | 0.00471378 | 0.0132465  | 1.49065 | 1         |
| XLOC_003166  | WDR11-AS1    | chr10:122216465-1228068 | 0.0192233  | 0.0540911  | 1.49253 | 1         |
| XLOC_022381  | FOXDL3       | chr9:70917782-70920000  | 0.0118552  | 0.0334676  | 1.49725 | 1         |
| XLOC_009299  | PRCD         | chr17:74523429-74541458 | 0.102689   | 0.290365   | 1.49958 | 1         |
| XLOC_002627  | C10orf62     | chr10:99344101-99372555 | 0.0144577  | 0.0408912  | 1.49996 | 1         |
| XLOC_003596  | LOC100996455 | chr11:64216528-64219128 | 0.0138178  | 0.0392215  | 1.50512 | 1         |
| XLOC_000578  | SLC6A17      | chr1:110693131-11074482 | 0.00291695 | 0.00834337 | 1.51617 | 1         |
| XLOC_007982  | SNX29P1      | chr16:21360683-21397254 | 0.0206678  | 0.0591668  | 1.51741 | 1         |
| XLOC_002131  | KISS1        | chr1:204159468-20416561 | 0.0447222  | 0.128093   | 1.51812 | 1         |
| XLOC_003590  | TEX40        | chr11:64067862-64072239 | 0.0349299  | 0.100276   | 1.52144 | 1         |
| XLOC_003607  | SLC22A20     | chr11:64981310-65010228 | 0.0659632  | 0.189836   | 1.52502 | 1         |
| XLOC_013998  | WFDC3        | chr20:44402846-44420547 | 0.0407052  | 0.117419   | 1.52838 | 1         |
| XLOC_012608  | SNORA41      | chr2:207024317-20702765 | 2.43136    | 7.02834    | 1.53142 | 0.918342  |
| XLOC_017308  | CSF2         | chr5:131409484-13141186 | 0.0274096  | 0.0792525  | 1.53178 | 1         |
| XLOC_009689  | KRTAP3-3     | chr17:39149681-39150385 | 0.0285966  | 0.0827036  | 1.5321  | 1         |
| XLOC_008029  | SNX29P2      | chr16:29313607-29376380 | 0.0135964  | 0.0393918  | 1.53467 | 1         |
| XLOC_012651  | CYP27A1      | chr2:219646471-21968001 | 0.0208466  | 0.0604038  | 1.53483 | 1         |
| XLOC_022237  | SCRT1        | chr8:145554453-14555994 | 0.0102294  | 0.0298322  | 1.54416 | 1         |
| XLOC_024180  | L1CAM        | chrX:153126970-15314139 | 0.00396933 | 0.0115817  | 1.54489 | 1         |
| XLOC_008689  | MAF          | chr16:79627744-79634622 | 0.00537191 | 0.0157629  | 1.55303 | 1         |
| XLOC_020691  | GPR22        | chr7:106809405-10721896 | 0.00493158 | 0.0144767  | 1.55361 | 1         |
| XLOC_023181  | CLIC3        | chr9:139889059-13989102 | 0.0578166  | 0.170063   | 1.55652 | 1         |
| XLOC_011613  | SYNE4        | chr19:36494001-36499672 | 0.104189   | 0.308088   | 1.56414 | 1         |
| XLOC_007504  | FSIP1        | chr15:39892231-40075039 | 0.0096603  | 0.0288338  | 1.57762 | 1         |
| XLOC_011497  | EPHX3        | chr19:15337729-15343858 | 0.0516694  | 0.154595   | 1.58111 | 1         |
| XLOC_008352  | NOXO1        | chr16:2028917-2031550   | 0.229513   | 0.688664   | 1.58522 | 0.0944715 |
| XLOC_021564  | IDO1         | chr8:39771327-39786309  | 0.0334221  | 0.101252   | 1.59908 | 1         |
| XLOC_011541  | CERS1        | chr19:18979360-19006953 | 0.073719   | 0.223566   | 1.60059 | 1         |
| XLOC_006403  | LOC100506321 | chr14:65381078-65569413 | 0.0420436  | 0.127546   | 1.60106 | 1         |
| XLOC_020614  | ASB4         | chr7:95115212-95169543  | 0.00337028 | 0.0102324  | 1.6022  | 1         |
| XLOC_004269  | LRRN4CL      | chr11:62453873-62457371 | 0.0533133  | 0.16249    | 1.60778 | 1         |
| XLOC_016818  | TMEM150C     | chr4:83405603-83483126  | 0.0245877  | 0.0766688  | 1.6407  | 1         |
| XLOC_008109  | CAPNS2       | chr16:55542912-55620582 | 0.0188456  | 0.0590493  | 1.64769 | 1         |
| XLOC_004442  | DLG2         | chr11:83166055-85338314 | 0.00541101 | 0.0170615  | 1.65677 | 1         |
| XLOC_021163  | HEPACAM2     | chr7:92817898-92855782  | 0.00749651 | 0.0237064  | 1.66098 | 1         |
| XLOC_013402  | SLC19A3      | chr2:228549925-22858274 | 0.0044364  | 0.0140995  | 1.66819 | 1         |
| XLOC_018043  | PIP5K1P1     | chr6:7727010-8102828    | 0.0043061  | 0.0137023  | 1.66996 | 1         |
| XLOC_017314  | IL13         | chr5:131993864-13199680 | 0.0599118  | 0.192436   | 1.68346 | 1         |
| XLOC_010424  | GZMM         | chr19:544033-549920     | 0.207024   | 0.670645   | 1.69575 | 0.267772  |
| XLOC_002613  | C10orf131    | chr10:97471535-97849992 | 0.0393306  | 0.127439   | 1.69609 | 1         |
| XLOC_000729  | S100A1       | chr1:153591275-15361878 | 0.152003   | 0.493157   | 1.69795 | 0.845125  |
| XLOC_015555  | OXTR         | chr3:8792094-8811300    | 0.0600357  | 0.197146   | 1.71537 | 1         |
| XLOC_022495  | TAL2         | chr9:108424737-10842538 | 0.137108   | 0.452944   | 1.72401 | 0.395325  |
| XLOC_002888  | SEPT7L       | chr10:38671997-38691780 | 0.0446912  | 0.148043   | 1.72795 | 1         |
| XLOC_020718  | WNT16        | chr7:120965420-12098115 | 0.0106916  | 0.0359607  | 1.74995 | 1         |
| XLOC_000505  | BTBD8        | chr1:92545861-92613401  | 0.0228142  | 0.0770358  | 1.7556  | 1         |
| XLOC_009098  | FAM215A      | chr17:41994575-41995355 | 0.0423194  | 0.142969   | 1.75631 | 1         |
| XLOC_013018  | SFTPB        | chr2:85884439-85895864  | 0.0148657  | 0.0504752  | 1.76359 | 1         |
| XLOC_000254  | DCDC2B       | chr1:32674694-32681797  | 0.0151238  | 0.0514127  | 1.76531 | 1         |
| XLOC_016443  | MTTP         | chr4:100485239-10054515 | 0.00714356 | 0.0242997  | 1.76622 | 1         |
| XLOC_014825  | DMC1         | chr22:38914953-38966189 | 0.0173604  | 0.0591572  | 1.76875 | 1         |
| XLOC_002557  | OPN4         | chr10:88414313-88426216 | 0.01099    | 0.0374522  | 1.76886 | 1         |
| XLOC_018214  | CFB          | chr6:31913720-31919861  | 0.00645251 | 0.021994   | 1.76918 | 1         |
| XLOC_000600  | AKR7A2P1     | chr1:113454469-11349897 | 0.0321978  | 0.110399   | 1.77769 | 1         |
| XLOC_020467  | AEBP1        | chr7:44143959-44154159  | 0.0055487  | 0.0193593  | 1.80281 | 1         |
| XLOC_004782  | C12orf70     | chr12:27619742-27655118 | 0.0462235  | 0.161345   | 1.80345 | 1         |
| XLOC_014157  | LOC100506385 | chr21:36118121-36157168 | 0.0124298  | 0.0434023  | 1.80397 | 1         |
| XLOC_013225  | CCDC173      | chr2:170501934-17055093 | 0.00549232 | 0.0194352  | 1.82319 | 1         |
| XLOC_020625  | MYH16        | chr7:98870923-98895594  | 0.00778253 | 0.0275687  | 1.82472 | 1         |
| XLOC_022994  | ACTL7B       | chr9:111616868-11161827 | 0.0238634  | 0.0849332  | 1.83153 | 1         |
| XLOC_009139  | LRRc46       | chr17:45908992-45918699 | 0.15175    | 0.541013   | 1.83397 | 0.845125  |
| XLOC_006881  | DPF3         | chr14:73136659-73360809 | 0.0600104  | 0.214415   | 1.83712 | 1         |
| XLOC_015884  | LSAMP        | chr3:115521209-11616438 | 0.00135501 | 0.00484483 | 1.83814 | 1         |
| XLOC_018692  | GUSBP2       | chr6:26839265-26924333  | 0.0439121  | 0.157299   | 1.84082 | 1         |
| XLOC_011661  | LRFN1        | chr19:39797456-39805976 | 0.0142732  | 0.0512097  | 1.84311 | 1         |
| XLOC_023621  | LINC00629    | chrX:133684053-13369442 | 0.0115527  | 0.0418502  | 1.857   | 1         |
| XLOC_008553  | ANKRD26P1    | chr16:46503248-46603009 | 0.00212841 | 0.00782671 | 1.87863 | 1         |
| XLOC_018591  | PACRG        | chr6:161768589-16374550 | 0.0116091  | 0.0429001  | 1.88573 | 1         |
| XLOC_000368  | LURAP1       | chr1:46654352-46686928  | 0.00998523 | 0.0369216  | 1.8866  | 1         |
| XLOC_006835  | GPR135       | chr14:59930239-59932059 | 0.106398   | 0.393751   | 1.88781 | 0.351316  |
| XLOC_0007124 | CHRM5        | chr15:34158427-34357287 | 0.00489018 | 0.0181187  | 1.88952 | 1         |
| XLOC_020717  | CPED1        | chr7:120628750-12093749 | 0.00235065 | 0.00883267 | 1.90979 | 1         |
| XLOC_001909  | C10orf61     | chr1:156374054-15639918 | 0.0226728  | 0.0852366  | 1.91051 | 1         |

|             |              |                          |            |                |          |           |
|-------------|--------------|--------------------------|------------|----------------|----------|-----------|
| XLOC_000563 | SYPL2        | chr1:110009099-110024764 | 0.0051797  | 0.0195466      | 1.91598  | 1         |
| XLOC_016376 | CXCL1        | chr4:74735108-74737019   | 0.113888   | 0.431821       | 1.92282  | 0.127726  |
| XLOC_000357 | BTBD19       | chr1:45274153-45279801   | 0.0206259  | 0.0795017      | 1.94653  | 1         |
| XLOC_011608 | HSPB6        | chr19:36245466-36247930  | 0.0182573  | 0.0707317      | 1.95388  | 1         |
| XLOC_016188 | HGFAC        | chr4:3443725-3451213     | 0.0153412  | 0.0598103      | 1.96299  | 1         |
| XLOC_005539 | MYO1A        | chr12:57422300-57444549  | 0.0133395  | 0.0521882      | 1.96802  | 1         |
| XLOC_006399 | PPP1R36      | chr14:65016619-65056096  | 0.0124339  | 0.0493011      | 1.98734  | 1         |
| XLOC_005686 | FOXN4        | chr12:109715782-10974702 | 0.0127028  | 0.0510597      | 2.00704  | 1         |
| XLOC_004502 | CASP1        | chr11:104896236-10490588 | 0.0513331  | 0.208035       | 2.01886  | 1         |
| XLOC_015604 | EFHB         | chr3:19920965-19975706   | 0.0087768  | 0.0355714      | 2.01895  | 1         |
| XLOC_007789 | LOC91948     | chr15:98285845-98417659  | 0.0175424  | 0.0719403      | 2.03595  | 1         |
| XLOC_018524 | ECT2L        | chr6:139117247-139225207 | 0.023526   | 0.0973009      | 2.0482   | 1         |
| XLOC_015758 | SEMA3G       | chr3:52467267-52479043   | 0.00441619 | 0.0185245      | 2.06856  | 1         |
| XLOC_011794 | SLC8A2       | chr19:47931278-47975307  | 0.00591899 | 0.0248325      | 2.06881  | 1         |
| XLOC_005235 | VWF          | chr12:6058039-6233836    | 0.00231052 | 0.0097387      | 2.07551  | 1         |
| XLOC_022557 | OLFML2A      | chr9:127539436-127577155 | 0.00324866 | 0.0137025      | 2.07652  | 1         |
| XLOC_018596 | CCR6         | chr6:167525294-167552625 | 0.0192566  | 0.0815592      | 2.08249  | 1         |
| XLOC_017094 | PDZD2        | chr5:31799030-32111038   | 0.0014917  | 0.00635177     | 2.0902   | 1         |
| XLOC_002157 | PIGR         | chr1:207101866-207119817 | 0.00453826 | 0.0194861      | 2.10223  | 1         |
| XLOC_008546 | SLC6A10P     | chr16:32888796-32896463  | 0.01591    | 0.0686056      | 2.1084   | 1         |
| XLOC_010041 | PPP1R27      | chr17:79791367-79792926  | 0.0424051  | 0.183288       | 2.1118   | 1         |
| XLOC_009458 | YBX2         | chr17:7191570-7197876    | 0.016756   | 0.0724492      | 2.11229  | 1         |
| XLOC_023299 | CXorf58      | chrX:23926122-23957624   | 0.0101392  | 0.0451519      | 2.15484  | 1         |
| XLOC_006355 | PTGER2       | chr14:52781015-52795322  | 0.0148942  | 0.0672184      | 2.17411  | 1         |
| XLOC_020480 | C7orf57      | chr7:48075107-48100894   | 0.00815174 | 0.0368847      | 2.17784  | 1         |
| XLOC_009541 | CCDC144B     | chr17:18441114-18528930  | 0.00136367 | 0.0061784      | 2.17974  | 1         |
| XLOC_002634 | CNNM1        | chr10:101088855-10115408 | 0.0030356  | 0.0137801      | 2.18253  | 1         |
| XLOC_002570 | CFL1P1       | chr10:89578069-89605369  | 0.0071926  | 0.0328756      | 2.19243  | 1         |
| XLOC_013668 | GDAP1L1      | chr20:42875738-42909557  | 0.00697596 | 0.0320776      | 2.2011   | 1         |
| XLOC_004625 | TP53AIP1     | chr11:128804626-12881325 | 0.0174065  | 0.0839609      | 2.27009  | 1         |
| XLOC_022549 | CRB2         | chr9:126118447-126141032 | 0.014309   | 0.0693268      | 2.27649  | 1         |
| XLOC_004546 | APOA1        | chr11:116706468-11670832 | 0.0329174  | 0.16116        | 2.29157  | 1         |
| XLOC_000815 | NHLH1        | chr1:160336860-160342638 | 0.028746   | 0.14438        | 2.32844  | 1         |
| XLOC_020913 | ZNF890P      | chr7:5160940-5184177     | 0.0126826  | 0.0639808      | 2.33479  | 1         |
| XLOC_008180 | RLTPR        | chr16:67679029-67694718  | 0.00629514 | 0.0335161      | 2.41254  | 1         |
| XLOC_004063 | SCUBE2       | chr11:9041046-9113150    | 0.00418487 | 0.0225713      | 2.43124  | 1         |
| XLOC_016373 | IL8          | chr4:74606222-74609433   | 0.0667311  | 0.373558       | 2.4849   | 0.0596414 |
| XLOC_009647 | GPR179       | chr17:36481492-36499693  | 0.00198948 | 0.0114817      | 2.52888  | 1         |
| XLOC_009690 | KRTAP3-2     | chr17:39155444-39156138  | 0.0336398  | 0.195305       | 2.53749  | 1         |
| XLOC_000290 | DNALI1       | chr1:38022519-38061586   | 0.00573879 | 0.037266       | 2.69904  | 1         |
| XLOC_023015 | SLC46A2      | chr9:115641199-115653192 | 0.00922528 | 0.0621934      | 2.7531   | 1         |
| XLOC_014652 | ACR          | chr22:51176651-51183277  | 0.0174961  | 0.120647       | 2.78569  | 1         |
| XLOC_016056 | LOC100128164 | chr3:169661771-169684522 | 0.00257833 | 0.018857       | 2.87059  | 1         |
| XLOC_000448 | IL12RB2      | chr1:67773046-67862583   | 0.00395107 | 0.0302251      | 2.93543  | 1         |
| XLOC_018270 | RAB44        | chr6:36665627-36700960   | 0.00496526 | 0.0432354      | 3.12227  | 1         |
| XLOC_004608 | ROBO4        | chr11:124754113-12476783 | 0.016841   | 0.154435       | 3.19695  | 1         |
| XLOC_010998 | SPACA4       | chr19:49103856-49116694  | 0.0289543  | 0.283133       | 3.28963  | 1         |
| XLOC_021028 | LOC100506895 | chr7:43152197-43602938   | 0.00506134 | 0.0513273      | 3.34214  | 1         |
| XLOC_008187 | NRN1L        | chr16:67918780-67920271  | 0.0637512  | 0.660143       | 3.37225  | 0.680313  |
| XLOC_011189 | SSC5D        | chr19:55999869-56030466  | 0.00447449 | 0.0476913      | 3.41393  | 1         |
| XLOC_011301 | DIRAS1       | chr19:2714564-2721390    | 0.00638402 | 0.0846426      | 3.72885  | 1         |
| XLOC_014605 | RNU12        | chr22:43011250-43011399  | 0          | 1.83511 inf    | 0.346561 | 1         |
| XLOC_002032 | SNORD47      | chr1:173832385-173837125 | 0          | 433.509 inf    | 0.384848 | 1         |
| XLOC_000352 | SNORD55      | chr1:45241245-45244412   | 0          | 340.835 inf    | 0.409587 | 1         |
| XLOC_022636 | SNORD36A     | chr9:136215068-136218280 | 0          | 201.26 inf     | 0.464311 | 1         |
| XLOC_015613 | MIR4442      | chr3:25706363-25706430   | 0          | 579.061 inf    | 0.482596 | 1         |
| XLOC_008358 | SNORD60      | chr16:2205023-2205106    | 0          | 74.0416 inf    | 0.482596 | 1         |
| XLOC_009232 | SNORD104     | chr17:62223437-62223517  | 0          | 89.7563 inf    | 0.482596 | 1         |
| XLOC_006920 | SNORA79      | chr14:81641795-81687575  | 0          | 37.3936 inf    | 0.509535 | 1         |
| XLOC_008838 | SCARNA21     | chr17:7788122-7816075    | 0          | 3.21514 inf    | 0.648194 | 1         |
| XLOC_023305 | SCARNA23     | chrX:24712063-25015102   | 0          | 4.85069 inf    | 0.657414 | 1         |
| XLOC_005244 | SCARNA11     | chr12:6679247-6716551    | 0          | 3.83053 inf    | 0.663499 | 1         |
| XLOC_000464 | SNORD45A     | chr1:76251878-76260775   | 0          | 69.7027 inf    | 0.67045  | 1         |
| XLOC_022454 | MIR23B       | chr9:97488950-97849500   | 0          | 44.6711 inf    | 0.672415 | 1         |
| XLOC_004465 | SNORA1       | chr11:93465169-93465299  | 0          | 2.02204 inf    | 1        | 1         |
| XLOC_013967 | SNORA71C     | chr20:37049238-37064018  | 0          | 1.6281 inf     | 1        | 1         |
| XLOC_015943 | SNORA7B      | chr3:129101676-129118228 | 0          | 1.50144 inf    | 1        | 1         |
| XLOC_017364 | VTRNA1-1     | chr5:140090860-140090958 | 0          | 21.7197 inf    | 1        | 1         |
| XLOC_000353 | SNORD46      | chr1:45241245-45244412   | 0          | 12.1732 inf    | 1        | 1         |
| XLOC_023081 | MIR3911      | chr9:130374485-130454995 | 0          | 6.03159 inf    | 1        | 1         |
| XLOC_000055 | ESPN         | chr1:6484847-6521004     | 0          | 0.0383756 inf  | 1        | 1         |
| XLOC_000138 | PADI4        | chr1:17634689-17690495   | 0          | 0.0225138 inf  | 1        | 1         |
| XLOC_000143 | KLHDC7A      | chr1:18807423-18812480   | 0          | 0.00694766 inf | 1        | 1         |
| XLOC_000155 | CDA          | chr1:20915443-20945400   | 0          | 0.0209364 inf  | 1        | 1         |
| XLOC_000159 | ALPL         | chr1:21835857-21904905   | 0          | 0.00895567 inf | 1        | 1         |
| XLOC_000160 | LDLRAD2      | chr1:22138757-22263750   | 0          | 0.0162109 inf  | 1        | 1         |
| XLOC_000166 | EPHA8        | chr1:22890003-22930087   | 0          | 0.0294368 inf  | 1        | 1         |
| XLOC_000201 | CATSPER4     | chr1:26517118-26529033   | 0          | 0.0133201 inf  | 1        | 1         |
| XLOC_000260 | ZBTB8B       | chr1:32930657-32953459   | 0          | 0.00337844 inf | 1        | 1         |

|             |            |                           |   |            |     |   |
|-------------|------------|---------------------------|---|------------|-----|---|
| XLOC_000283 | TEKT2      | chr1:36549675-36553876    | 0 | 0.0117916  | inf | 1 |
| XLOC_000305 | TMCO2      | chr1:40713572-40717365    | 0 | 0.0226433  | inf | 1 |
| XLOC_000384 | FOXE3      | chr1:47881743-47883724    | 0 | 0.0443389  | inf | 1 |
| XLOC_000411 | C1orf177   | chr1:55271735-55307937    | 0 | 0.00960438 | inf | 1 |
| XLOC_000469 | AK5        | chr1:77747661-78025654    | 0 | 0.0080412  | inf | 1 |
| XLOC_000473 | GIPC2      | chr1:78511588-78603112    | 0 | 0.0128826  | inf | 1 |
| XLOC_000479 | PRKACB     | chr1:84543744-84704181    | 0 | 0.00725705 | inf | 1 |
| XLOC_000490 | CLCA3P     | chr1:87099958-87121059    | 0 | 0.00323969 | inf | 1 |
| XLOC_000503 | BRDT       | chr1:92414927-92479985    | 0 | 0.00346142 | inf | 1 |
| XLOC_000594 | LOC643355  | chr1:112533189-112541463  | 0 | 0.0130805  | inf | 1 |
| XLOC_000665 | HIST2H2AA3 | chr1:149822627-149823167  | 0 | 0.070308   | inf | 1 |
| XLOC_000701 | LCE5A      | chr1:152483319-152484653  | 0 | 0.0260864  | inf | 1 |
| XLOC_000761 | POU5F1P4   | chr1:155305051-155533733  | 0 | 0.0180131  | inf | 1 |
| XLOC_000767 | RXFP4      | chr1:155911479-155912623  | 0 | 0.0675683  | inf | 1 |
| XLOC_000769 | RAB25      | chr1:156030965-156040293  | 0 | 0.093195   | inf | 1 |
| XLOC_000788 | CD1D       | chr1:158149736-158156216  | 0 | 0.0112967  | inf | 1 |
| XLOC_000808 | KCNJ9      | chr1:160051359-160059212  | 0 | 0.0114145  | inf | 1 |
| XLOC_000809 | ATP1A2     | chr1:160085519-160113374  | 0 | 0.00279099 | inf | 1 |
| XLOC_000851 | LOC440700  | chr1:165667986-165679193  | 0 | 0.0134545  | inf | 1 |
| XLOC_000858 | RCS1       | chr1:167599473-167675486  | 0 | 0.0144741  | inf | 1 |
| XLOC_000865 | XCL1       | chr1:168545710-168551313  | 0 | 0.0098268  | inf | 1 |
| XLOC_000885 | C1orf105   | chr1:172389827-172437963  | 0 | 0.014688   | inf | 1 |
| XLOC_000990 | LAX1       | chr1:203734283-203745483  | 0 | 0.00409282 | inf | 1 |
| XLOC_000997 | CNTN2      | chr1:205012339-205047177  | 0 | 0.00220054 | inf | 1 |
| XLOC_001046 | LINC00538  | chr1:214098091-214099996  | 0 | 0.00719316 | inf | 1 |
| XLOC_001055 | TGFB2      | chr1:218517537-218617967  | 0 | 0.00223515 | inf | 1 |
| XLOC_001135 | LOC339529  | chr1:244080703-244210613  | 0 | 0.00751671 | inf | 1 |
| XLOC_001224 | TTC34      | chr1:2572806-2706230      | 0 | 0.0165221  | inf | 1 |
| XLOC_001261 | C1orf127   | chr1:11006529-11042094    | 0 | 0.006753   | inf | 1 |
| XLOC_001345 | HTR1D      | chr1:23518387-23521222    | 0 | 0.00579526 | inf | 1 |
| XLOC_001404 | LAPTM5     | chr1:31205314-31230683    | 0 | 0.0211747  | inf | 1 |
| XLOC_001415 | COL16A1    | chr1:32117847-32169768    | 0 | 0.0134229  | inf | 1 |
| XLOC_001491 | GUCA2A     | chr1:42628361-42630395    | 0 | 0.08321    | inf | 1 |
| XLOC_001561 | LDLRAD1    | chr1:54472970-54483859    | 0 | 0.00663332 | inf | 1 |
| XLOC_001586 | LINC00466  | chr1:63624753-63782901    | 0 | 0.00803568 | inf | 1 |
| XLOC_001594 | C1orf141   | chr1:67557858-67600654    | 0 | 0.00540094 | inf | 1 |
| XLOC_001724 | PTPN22     | chr1:114356432-114447774  | 0 | 0.00991466 | inf | 1 |
| XLOC_001727 | SYT6       | chr1:114631913-114696472  | 0 | 0.00318629 | inf | 1 |
| XLOC_001742 | VTCN1      | chr1:117686208-117753558  | 0 | 0.00549264 | inf | 1 |
| XLOC_001821 | LINGO4     | chr1:151772764-151777882  | 0 | 0.00817835 | inf | 1 |
| XLOC_001867 | NUP210L    | chr1:153965167-154127592  | 0 | 0.0139763  | inf | 1 |
| XLOC_001875 | KCNN3      | chr1:154669941-154842754  | 0 | 0.00206077 | inf | 1 |
| XLOC_001907 | VHLL       | chr1:156268414-156269428  | 0 | 0.0963413  | inf | 1 |
| XLOC_001920 | INSRR      | chr1:156776034-156851642  | 0 | 0.0052433  | inf | 1 |
| XLOC_001938 | SPTA1      | chr1:158580495-158656506  | 0 | 0.00159044 | inf | 1 |
| XLOC_001951 | IGSF9      | chr1:159896828-159915386  | 0 | 0.0110537  | inf | 1 |
| XLOC_001960 | CD84       | chr1:160510883-160549306  | 0 | 0.00157531 | inf | 1 |
| XLOC_001974 | ADAMTS4    | chr1:161159537-161168843  | 0 | 0.0135077  | inf | 1 |
| XLOC_001977 | MPZ        | chr1:161274524-161279762  | 0 | 0.0186702  | inf | 1 |
| XLOC_001983 | C1orf111   | chr1:162343514-162346644  | 0 | 0.0181258  | inf | 1 |
| XLOC_001989 | RXRG       | chr1:165370158-165414592  | 0 | 0.00962588 | inf | 1 |
| XLOC_002000 | ADCY10     | chr1:167778624-167883452  | 0 | 0.00700015 | inf | 1 |
| XLOC_002010 | F5         | chr1:169481191-169555763  | 0 | 0.00121189 | inf | 1 |
| XLOC_002050 | SEC16B     | chr1:177898241-177939050  | 0 | 0.0036348  | inf | 1 |
| XLOC_002055 | NPHS2      | chr1:179334854-179545084  | 0 | 0.00915459 | inf | 1 |
| XLOC_002072 | APOBEC4    | chr1:183605207-183897666  | 0 | 0.00480352 | inf | 1 |
| XLOC_002075 | FAM129A    | chr1:184760165-184943682  | 0 | 0.00384592 | inf | 1 |
| XLOC_002121 | LOC401980  | chr1:202955579-202976392  | 0 | 0.0154882  | inf | 1 |
| XLOC_002122 | MYOG       | chr1:203052256-203055166  | 0 | 0.0141391  | inf | 1 |
| XLOC_002155 | IL10       | chr1:206940947-206945833  | 0 | 0.00895066 | inf | 1 |
| XLOC_002237 | AGT        | chr1:230838271-230850336  | 0 | 0.00683252 | inf | 1 |
| XLOC_002324 | AKR1C3     | chr10:5090957-5149878     | 0 | 0.0119711  | inf | 1 |
| XLOC_002341 | CELF2      | chr10:11047258-11378672   | 0 | 0.00169879 | inf | 1 |
| XLOC_002363 | TMEM236    | chr10:17794259-17842866   | 0 | 0.00460894 | inf | 1 |
| XLOC_002440 | ANXA8L2    | chr10:47746919-47763040   | 0 | 0.00769919 | inf | 1 |
| XLOC_002452 | C10orf71   | chr10:50507186-50535537   | 0 | 0.00511029 | inf | 1 |
| XLOC_002492 | SRGN       | chr10:70847827-70864567   | 0 | 0.0123841  | inf | 1 |
| XLOC_002533 | LINC00856  | chr10:80008381-80012402   | 0 | 0.00589751 | inf | 1 |
| XLOC_002534 | LINC00595  | chr10:80027084-80039970   | 0 | 0.0225978  | inf | 1 |
| XLOC_002543 | PLAC9      | chr10:81892257-81904784   | 0 | 0.323361   | inf | 1 |
| XLOC_002548 | SH2D4B     | chr10:82297657-82406316   | 0 | 0.0203096  | inf | 1 |
| XLOC_002601 | FFAR4      | chr10:95326421-95349829   | 0 | 0.00402187 | inf | 1 |
| XLOC_002610 | CYP2C9     | chr10:96698414-96749148   | 0 | 0.00754715 | inf | 1 |
| XLOC_002702 | PLEKHS1    | chr10:115511212-11554213  | 0 | 0.0071878  | inf | 1 |
| XLOC_002744 | HMX2       | chr10:124907637-124910118 | 0 | 0.0187333  | inf | 1 |
| XLOC_002782 | TUBB8      | chr10:92827-95178         | 0 | 0.0240276  | inf | 1 |
| XLOC_002806 | SFMBT2     | chr10:7200585-7453448     | 0 | 0.00178765 | inf | 1 |
| XLOC_002807 | ITH5       | chr10:7601231-7708961     | 0 | 0.00868765 | inf | 1 |
| XLOC_002847 | EBLN1      | chr10:22497742-22498912   | 0 | 0.0108112  | inf | 1 |

|             |                         |                          |   |            |     |   |
|-------------|-------------------------|--------------------------|---|------------|-----|---|
| XLOC_002886 | ZNF33BP1                | chr10:38065453-38147012  | 0 | 0.00868937 | inf | 1 |
| XLOC_002892 | RASGEF1A                | chr10:43689983-43762367  | 0 | 0.00982508 | inf | 1 |
| XLOC_002898 | TMEM72-AS1              | chr10:45306471-45455137  | 0 | 0.00836542 | inf | 1 |
| XLOC_002901 | RSU1P2                  | chr10:45594923-45650044  | 0 | 0.00751921 | inf | 1 |
| XLOC_002950 | M1                      | chr10:61496747-61513203  | 0 | 0.046042   | inf | 1 |
| XLOC_002953 | ANK3                    | chr10:61786055-62493284  | 0 | 0.00135644 | inf | 1 |
| XLOC_002976 | NODAL                   | chr10:72191691-72201465  | 0 | 0.0156178  | inf | 1 |
| XLOC_003021 | MAT1A                   | chr10:82031575-82049434  | 0 | 0.00462852 | inf | 1 |
| XLOC_003084 | HPSE2                   | chr10:100216833-10099563 | 0 | 0.00364075 | inf | 1 |
| XLOC_003184 | MMP21                   | chr10:127455026-12746433 | 0 | 0.00941064 | inf | 1 |
| XLOC_003261 | LOC650368               | chr11:3402190-3430378    | 0 | 0.0261255  | inf | 1 |
| XLOC_003296 | C11orf42                | chr11:6226797-6232365    | 0 | 0.0382116  | inf | 1 |
| XLOC_003322 | KRT8P41                 | chr11:9115909-9117737    | 0 | 0.00902292 | inf | 1 |
| XLOC_003359 | LDHAL6A                 | chr11:18477373-18501147  | 0 | 0.0207345  | inf | 1 |
| XLOC_003437 | F2                      | chr11:46740742-46761056  | 0 | 0.0186194  | inf | 1 |
| XLOC_003446 | FAM180B                 | chr11:47608229-47610746  | 0 | 0.0132857  | inf | 1 |
| XLOC_003490 | P2RX3                   | chr11:57105840-57137549  | 0 | 0.0242415  | inf | 1 |
| XLOC_003530 | MS4A10                  | chr11:60552820-60568778  | 0 | 0.00758644 | inf | 1 |
| XLOC_003660 | TBC1D10C                | chr11:67171383-67177561  | 0 | 0.0333157  | inf | 1 |
| XLOC_003683 | SHANK2-AS1              | chr11:70313960-70935808  | 0 | 0.00611555 | inf | 1 |
| XLOC_003684 | SHANK2-AS3              | chr11:70313960-70935808  | 0 | 0.0165355  | inf | 1 |
| XLOC_003697 | FOLR1                   | chr11:71900601-71907367  | 0 | 0.0201971  | inf | 1 |
| XLOC_003706 | PLEKHB1                 | chr11:73357222-73373864  | 0 | 0.0181203  | inf | 1 |
| XLOC_003729 | OMP                     | chr11:76777991-76837198  | 0 | 0.18147    | inf | 1 |
| XLOC_003848 | TTC36                   | chr11:118398209-11840174 | 0 | 0.0530909  | inf | 1 |
| XLOC_003852 | CXCR5                   | chr11:118754474-11878161 | 0 | 0.00674256 | inf | 1 |
| XLOC_003916 | KCNJ5                   | chr11:128761312-12878795 | 0 | 0.00557763 | inf | 1 |
| XLOC_004016 | OR51I1                  | chr11:5362112-5526882    | 0 | 0.0177625  | inf | 1 |
| XLOC_004018 | UBQLNL                  | chr11:5535622-5537956    | 0 | 0.00602508 | inf | 1 |
| XLOC_004046 | CYB5R2                  | chr11:7686325-7694821    | 0 | 0.0112411  | inf | 1 |
| XLOC_004073 | MRV1                    | chr11:10562782-10715535  | 0 | 0.002398   | inf | 1 |
| XLOC_004090 | PLEKHA7                 | chr11:16809206-17035963  | 0 | 0.0034973  | inf | 1 |
| XLOC_004127 | MPPED2                  | chr11:30406039-30607930  | 0 | 0.00244299 | inf | 1 |
| XLOC_004129 | DCDC1                   | chr11:31284170-31391357  | 0 | 0.00782286 | inf | 1 |
| XLOC_004140 | ELF5                    | chr11:34500341-34535347  | 0 | 0.0186919  | inf | 1 |
| XLOC_004143 | PAMR1                   | chr11:35453375-35547176  | 0 | 0.017313   | inf | 1 |
| XLOC_004155 | C11orf94                | chr11:45928085-45928833  | 0 | 0.102886   | inf | 1 |
| XLOC_004313 | GPHA2                   | chr11:64692142-64703360  | 0 | 0.0289292  | inf | 1 |
| XLOC_004382 | FLJ42102                | chr11:71116791-71134400  | 0 | 0.00771291 | inf | 1 |
| XLOC_004406 | KCNE3                   | chr11:74165885-74178600  | 0 | 0.00420069 | inf | 1 |
| XLOC_004420 | LRRC32                  | chr11:76368567-76381791  | 0 | 0.00425557 | inf | 1 |
| XLOC_004444 | CCDC89                  | chr11:85394892-85397320  | 0 | 0.00564367 | inf | 1 |
| XLOC_004483 | TRPC6                   | chr11:101322294-10145465 | 0 | 0.00272091 | inf | 1 |
| XLOC_004493 | MMP3                    | chr11:102654406-10271434 | 0 | 0.00708895 | inf | 1 |
| XLOC_004499 | LOC643733               | chr11:104772275-10478891 | 0 | 0.0293169  | inf | 1 |
| XLOC_004505 | CARD18                  | chr11:105008447-10501046 | 0 | 0.0240608  | inf | 1 |
| XLOC_004529 | IL18                    | chr11:112013973-11203484 | 0 | 0.0131575  | inf | 1 |
| XLOC_004561 | LOC100131626            | chr11:118230295-11828953 | 0 | 0.0316224  | inf | 1 |
| XLOC_004573 | MCAM                    | chr11:119179233-11918784 | 0 | 0.0103733  | inf | 1 |
| XLOC_004578 | TRIM29                  | chr11:119981993-12000888 | 0 | 0.0202897  | inf | 1 |
| XLOC_004580 | MIR100HG                | chr11:121959810-12207371 | 0 | 0.00374808 | inf | 1 |
| XLOC_004609 | HEPACAM                 | chr11:124789145-12480631 | 0 | 0.0102579  | inf | 1 |
| XLOC_004727 | KLRD1                   | chr12:10457049-10469850  | 0 | 0.0127366  | inf | 1 |
| XLOC_004748 | H2AFJ                   | chr12:14927269-14930936  | 0 | 0.00789186 | inf | 1 |
| XLOC_004751 | PTPRO                   | chr12:15475190-15751265  | 0 | 0.00307804 | inf | 1 |
| XLOC_004767 | IAPP                    | chr12:21417533-21548371  | 0 | 0.00643476 | inf | 1 |
| XLOC_004817 | H1FNT                   | chr12:48722762-48724062  | 0 | 0.0195562  | inf | 1 |
| XLOC_004858 | LINC00592               | chr12:52604713-52617597  | 0 | 0.0174847  | inf | 1 |
| XLOC_004872 | AMHR2                   | chr12:53817638-53825318  | 0 | 0.012566   | inf | 1 |
| XLOC_004887 | LOC100240734            | chr12:54452037-54516018  | 0 | 0.0477698  | inf | 1 |
| XLOC_004947 | DTX3                    | chr12:57998603-58003583  | 0 | 0.0311636  | inf | 1 |
| XLOC_004988 | KCNMB4                  | chr12:70760061-70828072  | 0 | 0.00592593 | inf | 1 |
| XLOC_005002 | SYT1                    | chr12:79257772-79845788  | 0 | 0.00245989 | inf | 1 |
| XLOC_005015 | NTS                     | chr12:86268072-86276770  | 0 | 0.0204219  | inf | 1 |
| XLOC_005022 | PLEKHG7                 | chr12:93130264-93165868  | 0 | 0.00679864 | inf | 1 |
| XLOC_005051 | SLC17A8                 | chr12:100750856-10081583 | 0 | 0.00311784 | inf | 1 |
| XLOC_005062 | STAB2                   | chr12:103981068-10416003 | 0 | 0.00468841 | inf | 1 |
| XLOC_005115 | DTX1                    | chr12:113495661-11353583 | 0 | 0.0076292  | inf | 1 |
| XLOC_005177 | MIR5188                 | chr12:125400092-12540009 | 0 | 4.06858    | inf | 1 |
| XLOC_005203 | P2RX2                   | chr12:133195402-13319891 | 0 | 0.0410657  | inf | 1 |
| XLOC_005220 | CACNA2D4                | chr12:1901122-2027870    | 0 | 0.00303805 | inf | 1 |
| XLOC_005230 | FGF23                   | chr12:4477392-4488894    | 0 | 0.00516292 | inf | 1 |
| XLOC_005234 | ANO2                    | chr12:5671816-6055398    | 0 | 0.00399648 | inf | 1 |
| XLOC_005260 | CD163                   | chr12:7623411-7656414    | 0 | 0.00297733 | inf | 1 |
| XLOC_005290 | KLRC4,KLRC4-KLRK1,KLRK1 | chr12:10524951-10562745  | 0 | 0.00838894 | inf | 1 |
| XLOC_005300 | TAS2R9                  | chr12:10961692-10962767  | 0 | 0.0132626  | inf | 1 |
| XLOC_005326 | C12orf36                | chr12:13523604-13529679  | 0 | 0.00398284 | inf | 1 |
| XLOC_005340 | LMO3                    | chr12:16701305-16761148  | 0 | 0.00354771 | inf | 1 |
| XLOC_005353 | BCAT1                   | chr12:24962957-25102393  | 0 | 0.00116761 | inf | 1 |

|             |              |                          |   |            |     |   |
|-------------|--------------|--------------------------|---|------------|-----|---|
| XLOC_005369 | TMTC1        | chr12:29653745-29937692  | 0 | 0.00273611 | inf | 1 |
| XLOC_005383 | ABCD2        | chr12:39945021-40013843  | 0 | 0.00219284 | inf | 1 |
| XLOC_005447 | FAM186A      | chr12:50721094-50790405  | 0 | 0.00179818 | inf | 1 |
| XLOC_005456 | FIGNL2       | chr12:52221675-52225701  | 0 | 0.00553778 | inf | 1 |
| XLOC_005478 | KRT4         | chr12:53200326-53207900  | 0 | 0.00738139 | inf | 1 |
| XLOC_005494 | HOXC-AS5     | chr12:54329111-54340328  | 0 | 0.0141454  | inf | 1 |
| XLOC_005508 | TESPA1       | chr12:55342086-55378530  | 0 | 0.00346685 | inf | 1 |
| XLOC_005524 | APOF         | chr12:56754354-56756583  | 0 | 0.00809904 | inf | 1 |
| XLOC_005538 | TAC3         | chr12:57403780-57410344  | 0 | 0.0291619  | inf | 1 |
| XLOC_005622 | LUM          | chr12:91497231-91505542  | 0 | 0.00600691 | inf | 1 |
| XLOC_005690 | TRPV4        | chr12:110220891-11027124 | 0 | 0.00783408 | inf | 1 |
| XLOC_005701 | MYL2         | chr12:111348623-11135840 | 0 | 0.0692254  | inf | 1 |
| XLOC_005714 | SDS          | chr12:113830250-11384168 | 0 | 0.0129994  | inf | 1 |
| XLOC_005726 | NOS1         | chr12:117645946-11779960 | 0 | 0.00274003 | inf | 1 |
| XLOC_005755 | HPD          | chr12:122277432-12232657 | 0 | 0.0217964  | inf | 1 |
| XLOC_005956 | GPC6         | chr13:93879077-95060273  | 0 | 0.00352001 | inf | 1 |
| XLOC_006034 | ANKRD20A19P  | chr13:24481422-24523454  | 0 | 0.00666741 | inf | 1 |
| XLOC_006041 | SHISA2       | chr13:26618734-26625198  | 0 | 0.0111324  | inf | 1 |
| XLOC_006080 | LINC00571    | chr13:38624953-38717369  | 0 | 0.0751173  | inf | 1 |
| XLOC_006086 | LINC00598    | chr13:40921270-41055143  | 0 | 0.00800791 | inf | 1 |
| XLOC_006101 | LINC00330    | chr13:45373639-45383766  | 0 | 0.013131   | inf | 1 |
| XLOC_006103 | KCTD4        | chr13:45694630-45858239  | 0 | 0.00604178 | inf | 1 |
| XLOC_006112 | LINC00563    | chr13:46870579-46871979  | 0 | 0.0194366  | inf | 1 |
| XLOC_006132 | RNASEH2B-AS1 | chr13:51456514-51544596  | 0 | 0.0542035  | inf | 1 |
| XLOC_006144 | LECT1        | chr13:53277399-53313947  | 0 | 0.0103024  | inf | 1 |
| XLOC_006305 | NYNRIN       | chr14:24867991-24888494  | 0 | 0.00220427 | inf | 1 |
| XLOC_006352 | GN2          | chr14:52327021-52436518  | 0 | 0.00316988 | inf | 1 |
| XLOC_006398 | HSPA2        | chr14:65007185-65009954  | 0 | 0.0231731  | inf | 1 |
| XLOC_006445 | VSX2         | chr14:74706174-74729441  | 0 | 0.013718   | inf | 1 |
| XLOC_006493 | SLC24A4      | chr14:92788924-92967825  | 0 | 0.00307556 | inf | 1 |
| XLOC_006503 | LINC00521    | chr14:94463615-94478041  | 0 | 0.00903555 | inf | 1 |
| XLOC_006642 | SNORA28      | chr14:103800338-10381136 | 0 | 2.23269    | inf | 1 |
| XLOC_006649 | TDRD9        | chr14:104394816-10451900 | 0 | 0.00266132 | inf | 1 |
| XLOC_006717 | SLC7A8       | chr14:23594503-23652869  | 0 | 0.00776404 | inf | 1 |
| XLOC_006720 | SLC22A17     | chr14:23815526-23822080  | 0 | 0.0139171  | inf | 1 |
| XLOC_006741 | ADCY4        | chr14:24787554-24804277  | 0 | 0.00595327 | inf | 1 |
| XLOC_006742 | RIPK3        | chr14:24805226-24809242  | 0 | 0.00924164 | inf | 1 |
| XLOC_006750 | NOVA1        | chr14:26915088-27066960  | 0 | 0.0143923  | inf | 1 |
| XLOC_006789 | MDGA2        | chr14:47308827-48144157  | 0 | 0.00209848 | inf | 1 |
| XLOC_006808 | FRMD6-AS2    | chr14:51921229-52197444  | 0 | 0.0289968  | inf | 1 |
| XLOC_006831 | SLC35F4      | chr14:58030639-58332592  | 0 | 0.00836123 | inf | 1 |
| XLOC_006895 | PROX2        | chr14:75319735-75330537  | 0 | 0.0249137  | inf | 1 |
| XLOC_006908 | NGB          | chr14:77731833-77737655  | 0 | 0.0129625  | inf | 1 |
| XLOC_006921 | STON2        | chr14:81726993-81893748  | 0 | 0.0119869  | inf | 1 |
| XLOC_006961 | LINC00341    | chr14:95873603-95876427  | 0 | 0.00505206 | inf | 1 |
| XLOC_006962 | SYNE3        | chr14:95883830-95942173  | 0 | 0.00621649 | inf | 1 |
| XLOC_007018 | NPAP1        | chr15:24920540-24928593  | 0 | 0.00174777 | inf | 1 |
| XLOC_007019 | SNRPN,SNURF  | chr15:25068793-25223729  | 0 | 0.0399061  | inf | 1 |
| XLOC_007052 | IPW          | chr15:25361691-25367623  | 0 | 0.00273621 | inf | 1 |
| XLOC_007116 | HERC2P10     | chr15:31110238-31119986  | 0 | 0.115171   | inf | 1 |
| XLOC_007196 | HMGNP2P46    | chr15:45774679-45848928  | 0 | 0.0348424  | inf | 1 |
| XLOC_007207 | FGF7         | chr15:49447975-49913118  | 0 | 0.00577155 | inf | 1 |
| XLOC_007214 | DCAF13P3     | chr15:51200868-51298097  | 0 | 0.00413776 | inf | 1 |
| XLOC_007234 | LDHAL6B      | chr15:59428167-59665071  | 0 | 0.0150315  | inf | 1 |
| XLOC_007236 | GCNT3        | chr15:59903981-59912210  | 0 | 0.00572381 | inf | 1 |
| XLOC_007254 | KBTBD13      | chr15:65369153-65372276  | 0 | 0.026398   | inf | 1 |
| XLOC_007297 | ISLR2        | chr15:74421714-74429143  | 0 | 0.00792309 | inf | 1 |
| XLOC_007317 | ODF3L1       | chr15:76016318-76032418  | 0 | 0.0187162  | inf | 1 |
| XLOC_007353 | GOLGA6L9     | chr15:82722184-82731586  | 0 | 0.00279476 | inf | 1 |
| XLOC_007368 | EFTUD1P1     | chr15:84748938-84795353  | 0 | 0.0262692  | inf | 1 |
| XLOC_007443 | NBEAP1       | chr15:20874796-20961480  | 0 | 0.0444834  | inf | 1 |
| XLOC_007470 | GOLGA6L7P    | chr15:29034979-29101720  | 0 | 0.013521   | inf | 1 |
| XLOC_007505 | GPR176       | chr15:40091222-40213093  | 0 | 0.00397307 | inf | 1 |
| XLOC_007517 | PPP1R14D     | chr15:41107642-41120907  | 0 | 0.0286826  | inf | 1 |
| XLOC_007558 | DUOX2        | chr15:45384851-45406359  | 0 | 0.00831873 | inf | 1 |
| XLOC_007583 | BCL2L10      | chr15:52401821-52404972  | 0 | 0.185191   | inf | 1 |
| XLOC_007636 | CILP         | chr15:65488336-65503840  | 0 | 0.0133628  | inf | 1 |
| XLOC_007651 | SNORD16      | chr15:66791652-66797193  | 0 | 15.2684    | inf | 1 |
| XLOC_007665 | LARP6        | chr15:71123888-71146498  | 0 | 0.00814046 | inf | 1 |
| XLOC_007667 | CT62         | chr15:71402582-71407839  | 0 | 0.00836342 | inf | 1 |
| XLOC_007669 | GRAMD2       | chr15:72452146-72490136  | 0 | 0.00446182 | inf | 1 |
| XLOC_007676 | HCN4         | chr15:73612199-73661605  | 0 | 0.00306582 | inf | 1 |
| XLOC_007682 | LOC283731    | chr15:74418713-74421619  | 0 | 0.00791372 | inf | 1 |
| XLOC_007683 | STRA6        | chr15:74471807-74502046  | 0 | 0.0161074  | inf | 1 |
| XLOC_007712 | LINGO1       | chr15:77905368-77924709  | 0 | 0.00866714 | inf | 1 |
| XLOC_007727 | LOC283688    | chr15:80555409-80634147  | 0 | 0.00450866 | inf | 1 |
| XLOC_007750 | HDGFRP3      | chr15:83806803-83876770  | 0 | 0.00600469 | inf | 1 |
| XLOC_007762 | NTRK3        | chr15:88419987-88814297  | 0 | 0.00750041 | inf | 1 |
| XLOC_007781 | GABARAPL3    | chr15:90889762-90892679  | 0 | 0.00735136 | inf | 1 |



|             |              |                          |   |            |     |   |
|-------------|--------------|--------------------------|---|------------|-----|---|
| XLOC_007797 | CERS3        | chr15:100940599-10108492 | 0 | 0.0426661  | inf | 1 |
| XLOC_007863 | RNF151       | chr16:2016874-2018976    | 0 | 0.0391945  | inf | 1 |
| XLOC_007892 | PRSS21       | chr16:2867163-2871723    | 0 | 0.0192708  | inf | 1 |
| XLOC_007908 | OR1F2P       | chr16:3265561-3266546    | 0 | 0.0196659  | inf | 1 |
| XLOC_007956 | MPV17L       | chr16:15489610-15503543  | 0 | 0.00779468 | inf | 1 |
| XLOC_007968 | SYT17        | chr16:19179637-19278554  | 0 | 0.0214814  | inf | 1 |
| XLOC_007987 | VWA3A        | chr16:22103862-22168287  | 0 | 0.00335411 | inf | 1 |
| XLOC_008014 | IL21R        | chr16:27413482-27464714  | 0 | 0.00354183 | inf | 1 |
| XLOC_008052 | ITGAL        | chr16:30483982-30534506  | 0 | 0.0033383  | inf | 1 |
| XLOC_008079 | AHSP         | chr16:31539202-31540124  | 0 | 0.0384998  | inf | 1 |
| XLOC_008106 | IRX6         | chr16:55358470-55364672  | 0 | 0.0311133  | inf | 1 |
| XLOC_008127 | MT1H         | chr16:56703725-56705041  | 0 | 0.183615   | inf | 1 |
| XLOC_008134 | CETP         | chr16:56995834-57017756  | 0 | 0.0210295  | inf | 1 |
| XLOC_008284 | IL17C        | chr16:88705000-88706882  | 0 | 0.025865   | inf | 1 |
| XLOC_008291 | LOC400558    | chr16:89232790-89235555  | 0 | 0.0187436  | inf | 1 |
| XLOC_008328 | SSTR5-AS1    | chr16:1114081-1131454    | 0 | 0.00796032 | inf | 1 |
| XLOC_008337 | PTX4         | chr16:1535939-1538468    | 0 | 0.0413242  | inf | 1 |
| XLOC_008344 | MEIOB        | chr16:1877224-1922179    | 0 | 0.0071322  | inf | 1 |
| XLOC_008401 | SEPT12       | chr16:4827614-4846492    | 0 | 0.0269143  | inf | 1 |
| XLOC_008477 | ERN2         | chr16:23690200-23724821  | 0 | 0.0110955  | inf | 1 |
| XLOC_008490 | SULT1A2      | chr16:28603263-28608391  | 0 | 0.0670992  | inf | 1 |
| XLOC_008542 | CSDAP1       | chr16:31579087-31580845  | 0 | 0.020526   | inf | 1 |
| XLOC_008566 | ZNF423       | chr16:49524514-49891830  | 0 | 0.00420647 | inf | 1 |
| XLOC_008636 | DPEP2        | chr16:68021292-68033421  | 0 | 0.0109142  | inf | 1 |
| XLOC_008728 | PABPN1L      | chr16:88929747-88933068  | 0 | 0.0887293  | inf | 1 |
| XLOC_008741 | LOC100506388 | chr17:62179-202633       | 0 | 0.0198382  | inf | 1 |
| XLOC_008772 | SMTNL2       | chr17:4487275-4511614    | 0 | 0.0114323  | inf | 1 |
| XLOC_008841 | ALOX15B      | chr17:7942357-7952451    | 0 | 0.007452   | inf | 1 |
| XLOC_008871 | MEIS3P1      | chr17:15690163-15693019  | 0 | 0.00962548 | inf | 1 |
| XLOC_009029 | PPP1R1B      | chr17:37783176-37792878  | 0 | 0.0122619  | inf | 1 |
| XLOC_009097 | CD300LG      | chr17:41924515-41940997  | 0 | 0.00693752 | inf | 1 |
| XLOC_009152 | ABI3         | chr17:47283595-47300587  | 0 | 0.0193269  | inf | 1 |
| XLOC_009167 | MYCBPAP      | chr17:48585744-48608862  | 0 | 0.00953614 | inf | 1 |
| XLOC_009192 | MSX2P1       | chr17:56234319-56236480  | 0 | 0.0148734  | inf | 1 |
| XLOC_009194 | EPX          | chr17:56270088-56282535  | 0 | 0.00746696 | inf | 1 |
| XLOC_009196 | BZRAP1-AS1   | chr17:56378587-56494931  | 0 | 0.0388312  | inf | 1 |
| XLOC_009210 | C17orf64     | chr17:58499864-58508787  | 0 | 0.0205776  | inf | 1 |
| XLOC_009215 | TBX4         | chr17:59533806-59561664  | 0 | 0.00660668 | inf | 1 |
| XLOC_009234 | MILR1        | chr17:62461568-62464760  | 0 | 0.0591841  | inf | 1 |
| XLOC_009253 | MAP2K6       | chr17:67410837-67538470  | 0 | 0.00733008 | inf | 1 |
| XLOC_009263 | DNAI2        | chr17:72270385-72311023  | 0 | 0.00797417 | inf | 1 |
| XLOC_009272 | OTOP2        | chr17:72920369-72930006  | 0 | 0.0105066  | inf | 1 |
| XLOC_009273 | OTOP3        | chr17:72931896-72946087  | 0 | 0.00940891 | inf | 1 |
| XLOC_009334 | AATK-AS1     | chr17:79008946-79156964  | 0 | 0.0278323  | inf | 1 |
| XLOC_009403 | TRPV3        | chr17:3413795-3461289    | 0 | 0.00245595 | inf | 1 |
| XLOC_009426 | SLC52A1      | chr17:4935896-4938727    | 0 | 0.00897596 | inf | 1 |
| XLOC_009491 | PIK3R5       | chr17:8782232-8869029    | 0 | 0.0205751  | inf | 1 |
| XLOC_009494 | RCVRN        | chr17:9801026-9808684    | 0 | 0.0172827  | inf | 1 |
| XLOC_009504 | MAGOH2       | chr17:10616638-10718481  | 0 | 0.0242549  | inf | 1 |
| XLOC_009505 | LINC00675    | chr17:10616638-10718481  | 0 | 0.0109772  | inf | 1 |
| XLOC_009524 | KRT16P2      | chr17:16733796-16736147  | 0 | 0.0115185  | inf | 1 |
| XLOC_009531 | SMCR5        | chr17:17584786-17740325  | 0 | 0.0057392  | inf | 1 |
| XLOC_009562 | NOS2         | chr17:26083791-26127555  | 0 | 0.00389783 | inf | 1 |
| XLOC_009601 | OMG          | chr17:29421944-29704695  | 0 | 0.0126308  | inf | 1 |
| XLOC_009635 | TBC1D3C      | chr17:34581084-34592032  | 0 | 0.0356114  | inf | 1 |
| XLOC_009638 | TBC1D3G      | chr17:34797174-34808103  | 0 | 0.00880751 | inf | 1 |
| XLOC_009661 | STAC2        | chr17:37366788-37382040  | 0 | 0.00571981 | inf | 1 |
| XLOC_009664 | NEUROD2      | chr17:37760020-37764175  | 0 | 0.00994793 | inf | 1 |
| XLOC_009701 | KRTAP4-11    | chr17:39273433-39274606  | 0 | 0.0189686  | inf | 1 |
| XLOC_009742 | HCRT         | chr17:40336077-40337470  | 0 | 0.101454   | inf | 1 |
| XLOC_009763 | SOST         | chr17:41831098-41836156  | 0 | 0.00849081 | inf | 1 |
| XLOC_009897 | MARCH10      | chr17:60778674-61505067  | 0 | 0.00449487 | inf | 1 |
| XLOC_009914 | PECAM1       | chr17:62396776-62407083  | 0 | 0.00337281 | inf | 1 |
| XLOC_009937 | ABCA6        | chr17:67074846-67138015  | 0 | 0.0022234  | inf | 1 |
| XLOC_009947 | SDK2         | chr17:71330522-71640227  | 0 | 0.00169954 | inf | 1 |
| XLOC_010011 | LOC100507410 | chr17:77015290-77045870  | 0 | 0.0186322  | inf | 1 |
| XLOC_010140 | GREB1L       | chr18:18822202-19102791  | 0 | 0.0064879  | inf | 1 |
| XLOC_010158 | AQP4-AS1     | chr18:24432007-24765302  | 0 | 0.00572014 | inf | 1 |
| XLOC_010212 | ST8SIA3      | chr18:55019720-55036161  | 0 | 0.0011423  | inf | 1 |
| XLOC_010218 | ZNF532       | chr18:56530060-56653709  | 0 | 0.00203098 | inf | 1 |
| XLOC_010242 | DOK6         | chr18:67068283-67516322  | 0 | 0.00130352 | inf | 1 |
| XLOC_010277 | C18orf42     | chr18:5143671-5197255    | 0 | 0.00540394 | inf | 1 |
| XLOC_010296 | MC2R         | chr18:13882042-13915535  | 0 | 0.00966173 | inf | 1 |
| XLOC_010315 | AQP4         | chr18:24432007-24765302  | 0 | 0.00214468 | inf | 1 |
| XLOC_010331 | ZNF396       | chr18:32946660-32957301  | 0 | 0.00430899 | inf | 1 |
| XLOC_010376 | TCF4         | chr18:52889561-53303188  | 0 | 0.00338742 | inf | 1 |
| XLOC_010388 | CCBE1        | chr18:57098170-57364644  | 0 | 0.00646288 | inf | 1 |
| XLOC_010493 | CREB3L3      | chr19:4153597-4173051    | 0 | 0.013054   | inf | 1 |
| XLOC_010498 | FSD1         | chr19:4304590-4323843    | 0 | 0.023274   | inf | 1 |

|             |              |                          |   |             |     |   |
|-------------|--------------|--------------------------|---|-------------|-----|---|
| XLOC_010527 | EMR1         | chr19:6887559-6940464    | 0 | 0.0114631   | inf | 1 |
| XLOC_010543 | CLEC4GP1     | chr19:7852369-7855898    | 0 | 0.0109051   | inf | 1 |
| XLOC_010550 | CERS4        | chr19:8274216-8327304    | 0 | 0.0117792   | inf | 1 |
| XLOC_010754 | TDRD12       | chr19:33210678-33281714  | 0 | 0.0154176   | inf | 1 |
| XLOC_010784 | CD22         | chr19:35820071-35838264  | 0 | 0.0120203   | inf | 1 |
| XLOC_010844 | NCCRP1       | chr19:39687603-39692522  | 0 | 0.0109815   | inf | 1 |
| XLOC_010892 | LOC100505622 | chr19:42636780-42641251  | 0 | 0.0325279   | inf | 1 |
| XLOC_010907 | IRGC         | chr19:44220213-44224169  | 0 | 0.0198263   | inf | 1 |
| XLOC_010951 | FOXA3        | chr19:46367517-46377055  | 0 | 0.00999393  | inf | 1 |
| XLOC_010975 | SNORD23      | chr19:48248792-48260323  | 0 | 6.24622     | inf | 1 |
| XLOC_011092 | ERVV-2       | chr19:53547990-53554380  | 0 | 0.00581559  | inf | 1 |
| XLOC_011179 | FCAR         | chr19:55385548-55401839  | 0 | 0.0322264   | inf | 1 |
| XLOC_011185 | TMEM190      | chr19:55888203-55889612  | 0 | 0.151419    | inf | 1 |
| XLOC_011203 | ZNF542       | chr19:56879467-56891196  | 0 | 0.00354676  | inf | 1 |
| XLOC_011220 | ZNF304       | chr19:57862644-57871265  | 0 | 0.00555101  | inf | 1 |
| XLOC_011238 | LOC100128398 | chr19:58488440-58518574  | 0 | 0.00736207  | inf | 1 |
| XLOC_011267 | LPPR3        | chr19:812487-821952      | 0 | 0.0196561   | inf | 1 |
| XLOC_011314 | RAX2         | chr19:3769088-3772219    | 0 | 0.0255747   | inf | 1 |
| XLOC_011344 | FUT6         | chr19:5830636-5839742    | 0 | 0.0135287   | inf | 1 |
| XLOC_011381 | FBN3         | chr19:8130286-8212385    | 0 | 0.00228436  | inf | 1 |
| XLOC_011393 | MUC16        | chr19:8959519-9092018    | 0 | 0.000296411 | inf | 1 |
| XLOC_011484 | PTGER1       | chr19:14583277-14586174  | 0 | 0.0423285   | inf | 1 |
| XLOC_011489 | EMR2         | chr19:14843508-14889353  | 0 | 0.0073656   | inf | 1 |
| XLOC_011508 | CIB3         | chr19:16272178-16284286  | 0 | 0.029469    | inf | 1 |
| XLOC_011528 | IL12RB1      | chr19:18170370-18197697  | 0 | 0.00984471  | inf | 1 |
| XLOC_011548 | HAPLN4       | chr19:19366451-19373596  | 0 | 0.00677775  | inf | 1 |
| XLOC_011549 | TM6SF2       | chr19:19375173-19384074  | 0 | 0.014751    | inf | 1 |
| XLOC_011564 | ZNF626       | chr19:20802744-20844402  | 0 | 0.00186896  | inf | 1 |
| XLOC_011592 | SCGB2B2      | chr19:35084345-35085490  | 0 | 0.0593846   | inf | 1 |
| XLOC_011599 | FAM187B      | chr19:35715703-35719628  | 0 | 0.0365709   | inf | 1 |
| XLOC_011645 | RASGRP4      | chr19:38893774-38916945  | 0 | 0.0152733   | inf | 1 |
| XLOC_011710 | CEACAM1      | chr19:42901299-43156507  | 0 | 0.0164289   | inf | 1 |
| XLOC_011711 | CEACAM8      | chr19:42901299-43156507  | 0 | 0.0178914   | inf | 1 |
| XLOC_011712 | PSG3         | chr19:43225793-43244668  | 0 | 0.00711283  | inf | 1 |
| XLOC_011715 | PSG1         | chr19:43370612-43383871  | 0 | 0.00577078  | inf | 1 |
| XLOC_011719 | PSG2         | chr19:43568361-43586893  | 0 | 0.00856193  | inf | 1 |
| XLOC_011721 | PSG4         | chr19:43696853-43709926  | 0 | 0.00672918  | inf | 1 |
| XLOC_011744 | CEACAM20     | chr19:45010210-45033548  | 0 | 0.0112929   | inf | 1 |
| XLOC_011780 | PTGIR        | chr19:47123724-47128354  | 0 | 0.0126401   | inf | 1 |
| XLOC_011831 | KCNA7        | chr19:49570674-49576198  | 0 | 0.00399132  | inf | 1 |
| XLOC_011837 | PTH2         | chr19:49925670-49926698  | 0 | 0.215637    | inf | 1 |
| XLOC_011865 | KCNC3        | chr19:50818764-50832634  | 0 | 0.0108884   | inf | 1 |
| XLOC_011881 | KLK4         | chr19:51409607-51413994  | 0 | 0.0162701   | inf | 1 |
| XLOC_011885 | KLK8         | chr19:51499263-51504958  | 0 | 0.0174345   | inf | 1 |
| XLOC_011905 | SIGLEC14     | chr19:52145805-52150132  | 0 | 0.025649    | inf | 1 |
| XLOC_011906 | HAS1         | chr19:52216364-52227221  | 0 | 0.0318053   | inf | 1 |
| XLOC_011929 | ZNF677       | chr19:53738637-53758111  | 0 | 0.00299206  | inf | 1 |
| XLOC_011935 | VSTM1        | chr19:54544079-54567207  | 0 | 0.017768    | inf | 1 |
| XLOC_011947 | LILRA5       | chr19:54818352-54824409  | 0 | 0.0141457   | inf | 1 |
| XLOC_011960 | SYT5         | chr19:55684468-55691720  | 0 | 0.0137847   | inf | 1 |
| XLOC_011965 | TMEM150B     | chr19:55824226-55836708  | 0 | 0.0600036   | inf | 1 |
| XLOC_011973 | SBK2         | chr19:56041099-56048435  | 0 | 0.0405134   | inf | 1 |
| XLOC_011982 | ZSCAN5B      | chr19:56701057-56704421  | 0 | 0.0196145   | inf | 1 |
| XLOC_011985 | ZNF667       | chr19:56950692-56988770  | 0 | 0.0125816   | inf | 1 |
| XLOC_012002 | C1orf18      | chr19:58469804-58485902  | 0 | 0.0168862   | inf | 1 |
| XLOC_012026 | SNTG2        | chr2:946553-1371384      | 0 | 0.0290831   | inf | 1 |
| XLOC_012037 | RSAD2        | chr2:7017795-7038363     | 0 | 0.0103922   | inf | 1 |
| XLOC_012039 | LOC100506274 | chr2:7561391-7590381     | 0 | 0.0298338   | inf | 1 |
| XLOC_012072 | MFSDB2B      | chr2:24232952-24247145   | 0 | 0.0154459   | inf | 1 |
| XLOC_012095 | ABHD1        | chr2:27346656-27357542   | 0 | 0.0541429   | inf | 1 |
| XLOC_012100 | TRIM54       | chr2:27505296-27531130   | 0 | 0.0113148   | inf | 1 |
| XLOC_012120 | FAM179A      | chr2:29204163-29275096   | 0 | 0.00611036  | inf | 1 |
| XLOC_012142 | QPCT         | chr2:37571752-37600465   | 0 | 0.0085025   | inf | 1 |
| XLOC_012161 | SLC3A1       | chr2:44502596-44589001   | 0 | 0.00577858  | inf | 1 |
| XLOC_012173 | EPCAM        | chr2:47596286-47614167   | 0 | 0.0079234   | inf | 1 |
| XLOC_012216 | PLEK         | chr2:68592321-68624585   | 0 | 0.00897691  | inf | 1 |
| XLOC_012244 | C2orf78      | chr2:74011315-74044274   | 0 | 0.00898769  | inf | 1 |
| XLOC_012288 | ANAPC1P1     | chr2:87042459-87122165   | 0 | 0.0147225   | inf | 1 |
| XLOC_012292 | PLGLB2       | chr2:88047605-88285309   | 0 | 0.00833652  | inf | 1 |
| XLOC_012341 | IL1RL1       | chr2:102927961-102968497 | 0 | 0.0050236   | inf | 1 |
| XLOC_012343 | IL18RAP      | chr2:103035253-103069027 | 0 | 0.00473082  | inf | 1 |
| XLOC_012359 | SULT1C2      | chr2:108905094-108926377 | 0 | 0.00422663  | inf | 1 |
| XLOC_012361 | SULT1C4      | chr2:108994420-109004271 | 0 | 0.00739795  | inf | 1 |
| XLOC_012369 | LIMS3L       | chr2:110656008-110726145 | 0 | 0.0243257   | inf | 1 |
| XLOC_012377 | FBLN7        | chr2:112895961-112945797 | 0 | 0.0107088   | inf | 1 |
| XLOC_012443 | GPR39        | chr2:133174146-133429071 | 0 | 0.00681199  | inf | 1 |
| XLOC_012452 | LOC100507600 | chr2:136545414-136594751 | 0 | 0.00635541  | inf | 1 |
| XLOC_012485 | TBR1         | chr2:162272619-162281577 | 0 | 0.0076897   | inf | 1 |
| XLOC_012490 | LOC100506134 | chr2:166729871-166810348 | 0 | 0.0456506   | inf | 1 |

|             |              |                         |   |             |     |   |
|-------------|--------------|-------------------------|---|-------------|-----|---|
| XLOC_012575 | SATB2-AS1    | chr2:200134222-20033748 | 0 | 0.00539458  | inf | 1 |
| XLOC_012614 | CPO          | chr2:207804277-20783419 | 0 | 0.0431527   | inf | 1 |
| XLOC_012622 | UNC80        | chr2:210636716-21086402 | 0 | 0.000942125 | inf | 1 |
| XLOC_012661 | TUBA4B       | chr2:220110191-22013691 | 0 | 0.0126797   | inf | 1 |
| XLOC_012764 | FAM150B      | chr2:279560-288308      | 0 | 0.0152403   | inf | 1 |
| XLOC_012767 | PXDN         | chr2:1635658-1748291    | 0 | 0.00259413  | inf | 1 |
| XLOC_012803 | OSR1         | chr2:19551245-19558372  | 0 | 0.0144321   | inf | 1 |
| XLOC_012831 | OTOF         | chr2:26680070-26781566  | 0 | 0.00430015  | inf | 1 |
| XLOC_012864 | MYADML       | chr2:33951127-33953284  | 0 | 0.0109676   | inf | 1 |
| XLOC_012879 | LOC375196    | chr2:39146503-39202590  | 0 | 0.0322597   | inf | 1 |
| XLOC_012903 | C2orf61      | chr2:47314129-47382517  | 0 | 0.0190967   | inf | 1 |
| XLOC_012927 | FLJ16341     | chr2:61074894-61108449  | 0 | 0.00942917  | inf | 1 |
| XLOC_012929 | LOC339803    | chr2:61368726-61372110  | 0 | 0.0111154   | inf | 1 |
| XLOC_012959 | SNORA36C     | chr2:69685126-69870977  | 0 | 2.05969     | inf | 1 |
| XLOC_013038 | LOC442028    | chr2:95534429-95613087  | 0 | 0.00478856  | inf | 1 |
| XLOC_013043 | ADRA2B       | chr2:96778622-96781888  | 0 | 0.00643747  | inf | 1 |
| XLOC_013118 | LOC100499194 | chr2:114735245-11476488 | 0 | 0.035997    | inf | 1 |
| XLOC_013121 | EN1          | chr2:119599746-11960575 | 0 | 0.0108844   | inf | 1 |
| XLOC_013124 | SCTR         | chr2:120197418-1202820  | 0 | 0.0112695   | inf | 1 |
| XLOC_013144 | LOC440905    | chr2:130783571-13080870 | 0 | 0.00257058  | inf | 1 |
| XLOC_013161 | LYPD1        | chr2:133174146-13342907 | 0 | 0.0769708   | inf | 1 |
| XLOC_013187 | LOC100144595 | chr2:154728425-15531395 | 0 | 0.00561205  | inf | 1 |
| XLOC_013207 | FIGN         | chr2:164464117-16459251 | 0 | 0.00281178  | inf | 1 |
| XLOC_013223 | LRP2         | chr2:169983618-17021912 | 0 | 0.000796498 | inf | 1 |
| XLOC_013349 | LINC00607    | chr2:216476285-21670825 | 0 | 0.00368004  | inf | 1 |
| XLOC_013386 | EPHA4        | chr2:222282746-22243701 | 0 | 0.00204176  | inf | 1 |
| XLOC_013459 | KIF1A        | chr2:241653180-24175972 | 0 | 0.00477494  | inf | 1 |
| XLOC_013460 | C2orf54      | chr2:241825464-24183557 | 0 | 0.00952431  | inf | 1 |
| XLOC_013488 | TGM3         | chr20:2276612-2321725   | 0 | 0.00603334  | inf | 1 |
| XLOC_013503 | UBOX5-AS1    | chr20:3087556-3140556   | 0 | 0.0184853   | inf | 1 |
| XLOC_013531 | SPTLC3       | chr20:12989626-13147411 | 0 | 0.00329588  | inf | 1 |
| XLOC_013539 | BANF2        | chr20:17674319-17716517 | 0 | 0.0668634   | inf | 1 |
| XLOC_013558 | PAX1         | chr20:21686296-21699124 | 0 | 0.00646863  | inf | 1 |
| XLOC_013640 | NNAT         | chr20:36145818-36156333 | 0 | 0.0379721   | inf | 1 |
| XLOC_013697 | SLC12A5      | chr20:44650328-44688789 | 0 | 0.00316077  | inf | 1 |
| XLOC_013722 | TSHZ2        | chr20:51588945-52111869 | 0 | 0.00111207  | inf | 1 |
| XLOC_013783 | C20orf195    | chr20:62184372-62188035 | 0 | 0.0510469   | inf | 1 |
| XLOC_013824 | CPXM1        | chr20:2774714-2781292   | 0 | 0.00953919  | inf | 1 |
| XLOC_013834 | SIGLEC1      | chr20:3667616-3687775   | 0 | 0.00877202  | inf | 1 |
| XLOC_013864 | FLRT3        | chr20:13976145-16033841 | 0 | 0.00292293  | inf | 1 |
| XLOC_013882 | LINC00261    | chr20:22541191-22559280 | 0 | 0.00249488  | inf | 1 |
| XLOC_013936 | GGT7         | chr20:33432522-33460661 | 0 | 0.0080827   | inf | 1 |
| XLOC_013942 | FAM83C       | chr20:33873533-33880225 | 0 | 0.00538001  | inf | 1 |
| XLOC_013944 | GDF5         | chr20:34021148-34026027 | 0 | 0.0169006   | inf | 1 |
| XLOC_013970 | MAFB         | chr20:39314516-39317876 | 0 | 0.00674491  | inf | 1 |
| XLOC_014045 | CTCFL        | chr20:56071020-56100708 | 0 | 0.00869566  | inf | 1 |
| XLOC_014052 | GNAS-AS1     | chr20:57393972-57486250 | 0 | 0.0190052   | inf | 1 |
| XLOC_014061 | HRH3         | chr20:60790016-60795323 | 0 | 0.0110234   | inf | 1 |
| XLOC_014075 | NKAIN4       | chr20:61872135-61892967 | 0 | 0.015985    | inf | 1 |
| XLOC_014100 | ABCC13       | chr21:15646119-15673692 | 0 | 0.00436305  | inf | 1 |
| XLOC_014109 | CHODL        | chr21:19289656-19639687 | 0 | 0.00569133  | inf | 1 |
| XLOC_014165 | DSCR6        | chr21:38378862-38391958 | 0 | 0.0161714   | inf | 1 |
| XLOC_014187 | ZNF295-AS1   | chr21:43442112-43445060 | 0 | 0.0422672   | inf | 1 |
| XLOC_014188 | UMODL1       | chr21:43483067-43563105 | 0 | 0.00361213  | inf | 1 |
| XLOC_014249 | LINC00158    | chr21:26758132-26804013 | 0 | 0.00830282  | inf | 1 |
| XLOC_014254 | CYYR1        | chr21:27838527-27945581 | 0 | 0.00431276  | inf | 1 |
| XLOC_014291 | TIAM1        | chr21:32490735-32931290 | 0 | 0.00889789  | inf | 1 |
| XLOC_014351 | CBS          | chr21:44473300-44496472 | 0 | 0.00922308  | inf | 1 |
| XLOC_014384 | FTCD         | chr21:47556175-47575481 | 0 | 0.0147073   | inf | 1 |
| XLOC_014385 | SPATC1L      | chr21:47581061-47604373 | 0 | 0.0594632   | inf | 1 |
| XLOC_014406 | DGCR10       | chr22:19010136-19011063 | 0 | 0.0179176   | inf | 1 |
| XLOC_014501 | HORMAD2      | chr22:30476452-30573062 | 0 | 0.0064838   | inf | 1 |
| XLOC_014519 | SLC5A1       | chr22:32439018-32509011 | 0 | 0.00267296  | inf | 1 |
| XLOC_014541 | CYTH4        | chr22:37678494-37711389 | 0 | 0.0115189   | inf | 1 |
| XLOC_014567 | APOBEC3H     | chr22:39493228-39500072 | 0 | 0.0349889   | inf | 1 |
| XLOC_014580 | MCHR1        | chr22:41075181-41078818 | 0 | 0.00820751  | inf | 1 |
| XLOC_014598 | WBP2NL       | chr22:42394728-42424477 | 0 | 0.0109649   | inf | 1 |
| XLOC_014620 | FBLN1        | chr22:45898718-45997014 | 0 | 0.0101987   | inf | 1 |
| XLOC_014634 | FAM19A5      | chr22:48885287-49147744 | 0 | 0.0180373   | inf | 1 |
| XLOC_014656 | CCT8L2       | chr22:17071647-17073700 | 0 | 0.00863862  | inf | 1 |
| XLOC_014696 | TUBA3FP      | chr22:21354060-21368576 | 0 | 0.00928849  | inf | 1 |
| XLOC_014731 | PIWIL3       | chr22:25115000-25170687 | 0 | 0.00338636  | inf | 1 |
| XLOC_014833 | PDGFB        | chr22:39619684-39640957 | 0 | 0.00779687  | inf | 1 |
| XLOC_014836 | SNORD83A     | chr22:39708886-39715670 | 0 | 26.0083     | inf | 1 |
| XLOC_014900 | MLC1         | chr22:50497819-50524358 | 0 | 0.00565608  | inf | 1 |
| XLOC_014957 | FBLN2        | chr3:13590624-13679922  | 0 | 0.0051719   | inf | 1 |
| XLOC_015052 | FAM198A      | chr3:43020758-43099207  | 0 | 0.00507798  | inf | 1 |
| XLOC_015080 | TDGF1        | chr3:46616044-46623952  | 0 | 0.00839084  | inf | 1 |
| XLOC_015085 | NRADDP       | chr3:47053031-47054957  | 0 | 0.112123    | inf | 1 |

|             |                        |                          |   |             |     |   |
|-------------|------------------------|--------------------------|---|-------------|-----|---|
| XLOC_015102 | CCDC36                 | chr3:49235860-49295537   | 0 | 0.00962374  | inf | 1 |
| XLOC_015132 | GPR62                  | chr3:51989329-52001482   | 0 | 0.0372207   | inf | 1 |
| XLOC_015181 | FAM19A1                | chr3:68040733-68594771   | 0 | 0.00798193  | inf | 1 |
| XLOC_015222 | TMEM30C                | chr3:99904667-99913030   | 0 | 0.124495    | inf | 1 |
| XLOC_015240 | CCDC54                 | chr3:107096187-10709748  | 0 | 0.00946501  | inf | 1 |
| XLOC_015257 | CD200                  | chr3:112051915-112081658 | 0 | 0.00630211  | inf | 1 |
| XLOC_015260 | BOC                    | chr3:112931374-11316036  | 0 | 0.00442814  | inf | 1 |
| XLOC_015274 | UPK1B                  | chr3:118892424-11892400  | 0 | 0.00685304  | inf | 1 |
| XLOC_015285 | ARGFX                  | chr3:121286777-121309468 | 0 | 0.00479774  | inf | 1 |
| XLOC_015308 | CCDC37                 | chr3:126113781-126155398 | 0 | 0.0173131   | inf | 1 |
| XLOC_015333 | ALG1L2                 | chr3:129800673-129830278 | 0 | 0.0212331   | inf | 1 |
| XLOC_015353 | EPHB1                  | chr3:134514098-134979307 | 0 | 0.00653489  | inf | 1 |
| XLOC_015403 | LOC201651              | chr3:151347319-151546278 | 0 | 0.00951955  | inf | 1 |
| XLOC_015418 | C3orf55                | chr3:157261132-15731902  | 0 | 0.017833    | inf | 1 |
| XLOC_015420 | MLF1                   | chr3:158288952-158324248 | 0 | 0.0111392   | inf | 1 |
| XLOC_015496 | FETUB                  | chr3:186358148-186370797 | 0 | 0.00972959  | inf | 1 |
| XLOC_015551 | BHLHE40-AS1            | chr3:4939913-4948186     | 0 | 0.0636293   | inf | 1 |
| XLOC_015563 | CIDEC                  | chr3:9908393-9921938     | 0 | 0.0169337   | inf | 1 |
| XLOC_015630 | EPM2AIP1               | chr3:37027356-37034795   | 0 | 0.00326988  | inf | 1 |
| XLOC_015640 | XIRP1                  | chr3:39224705-39234085   | 0 | 0.00272732  | inf | 1 |
| XLOC_015665 | XCR1                   | chr3:46062290-46068979   | 0 | 0.0182247   | inf | 1 |
| XLOC_015743 | IQCF5                  | chr3:51907736-51909600   | 0 | 0.158712    | inf | 1 |
| XLOC_015744 | IQCF1                  | chr3:51928891-51937386   | 0 | 0.0576314   | inf | 1 |
| XLOC_015820 | PDZRN3                 | chr3:73431651-73674072   | 0 | 0.00454522  | inf | 1 |
| XLOC_015826 | LOC440970              | chr3:84687555-84918726   | 0 | 0.0014644   | inf | 1 |
| XLOC_015872 | CD200R1                | chr3:112641531-112693937 | 0 | 0.00507197  | inf | 1 |
| XLOC_015880 | ZNF80                  | chr3:113953479-113956428 | 0 | 0.00456014  | inf | 1 |
| XLOC_015885 | IGSF11                 | chr3:118619478-118864898 | 0 | 0.012016    | inf | 1 |
| XLOC_015888 | CD80                   | chr3:119243139-11927848  | 0 | 0.0043923   | inf | 1 |
| XLOC_015924 | ALDH1L1                | chr3:125822403-12592901  | 0 | 0.00674133  | inf | 1 |
| XLOC_015934 | GATA2                  | chr3:128198264-12821203  | 0 | 0.0132024   | inf | 1 |
| XLOC_016005 | FAM194A                | chr3:150377674-15042174  | 0 | 0.00636942  | inf | 1 |
| XLOC_016010 | GPR87                  | chr3:150804675-151176497 | 0 | 0.0353768   | inf | 1 |
| XLOC_016117 | FGF12                  | chr3:191857181-192445388 | 0 | 0.00208334  | inf | 1 |
| XLOC_016136 | MUC4                   | chr3:195473637-19553884  | 0 | 0.00528056  | inf | 1 |
| XLOC_016197 | C4orf6                 | chr4:5526882-5529527     | 0 | 0.0354236   | inf | 1 |
| XLOC_016204 | S100P                  | chr4:6695565-6698897     | 0 | 0.0808772   | inf | 1 |
| XLOC_016241 | DRD5                   | chr4:9783257-9785633     | 0 | 0.0101679   | inf | 1 |
| XLOC_016262 | LOC285540              | chr4:25162293-25200127   | 0 | 0.0128861   | inf | 1 |
| XLOC_016275 | C4orf19                | chr4:37455551-37687999   | 0 | 0.00335747  | inf | 1 |
| XLOC_016292 | NSUN7                  | chr4:40751913-40812002   | 0 | 0.00721128  | inf | 1 |
| XLOC_016299 | GRXCR1                 | chr4:42895282-43032675   | 0 | 0.0155957   | inf | 1 |
| XLOC_016320 | PDGFRA                 | chr4:55095263-55164412   | 0 | 0.00382646  | inf | 1 |
| XLOC_016337 | STAP1                  | chr4:68424445-68472616   | 0 | 0.0221885   | inf | 1 |
| XLOC_016367 | SLC4A4                 | chr4:72053002-72437804   | 0 | 0.00150679  | inf | 1 |
| XLOC_016415 | PTPN13                 | chr4:87515467-87736328   | 0 | 0.00565918  | inf | 1 |
| XLOC_016419 | DMP1                   | chr4:88571453-88585512   | 0 | 0.00432636  | inf | 1 |
| XLOC_016454 | NPNT                   | chr4:106816596-10689282  | 0 | 0.00284386  | inf | 1 |
| XLOC_016520 | GUSBP5                 | chr4:144480624-14448261  | 0 | 0.0128813   | inf | 1 |
| XLOC_016544 | FGB                    | chr4:155484131-15549391  | 0 | 0.00336686  | inf | 1 |
| XLOC_016545 | LRAT                   | chr4:155665162-15567427  | 0 | 0.00250412  | inf | 1 |
| XLOC_016550 | TDO2                   | chr4:156824844-156841558 | 0 | 0.00706608  | inf | 1 |
| XLOC_016716 | LOC344967              | chr4:40044536-40159872   | 0 | 0.0141293   | inf | 1 |
| XLOC_016771 | UGT2B17                | chr4:69402902-69434245   | 0 | 0.00578023  | inf | 1 |
| XLOC_016781 | IGJ                    | chr4:71521257-71532348   | 0 | 0.00893954  | inf | 1 |
| XLOC_016833 | SLC10A6                | chr4:87744620-87770416   | 0 | 0.0200073   | inf | 1 |
| XLOC_016865 | DDIT4L                 | chr4:101107026-101111658 | 0 | 0.00457046  | inf | 1 |
| XLOC_016956 | TTC29                  | chr4:147628178-14786703  | 0 | 0.00747422  | inf | 1 |
| XLOC_016966 | ANXA2P1                | chr4:154074269-15426047  | 0 | 0.0201487   | inf | 1 |
| XLOC_017017 | CLDN24                 | chr4:184242916-18424357  | 0 | 0.0259988   | inf | 1 |
| XLOC_017027 | LOC731424              | chr4:185764449-18576820  | 0 | 0.0040594   | inf | 1 |
| XLOC_017035 | SORBS2                 | chr4:186506597-18687787  | 0 | 0.00317025  | inf | 1 |
| XLOC_017092 | CDH6                   | chr5:31193761-31329253   | 0 | 0.00133043  | inf | 1 |
| XLOC_017111 | OSMR                   | chr5:38845959-38935743   | 0 | 0.00218104  | inf | 1 |
| XLOC_017114 | C7                     | chr5:40909598-40983042   | 0 | 0.0100139   | inf | 1 |
| XLOC_017117 | GHR                    | chr5:42423876-42721980   | 0 | 0.00268154  | inf | 1 |
| XLOC_017225 | VCAN                   | chr5:82767492-82878122   | 0 | 0.00116465  | inf | 1 |
| XLOC_017232 | GPR98                  | chr5:89854616-90460033   | 0 | 0.000600662 | inf | 1 |
| XLOC_017242 | C5orf27                | chr5:95187935-95195836   | 0 | 0.00793687  | inf | 1 |
| XLOC_017270 | KCNN2                  | chr5:113698015-113832197 | 0 | 0.00930008  | inf | 1 |
| XLOC_017293 | C5orf48                | chr5:125967413-12597197  | 0 | 0.0450199   | inf | 1 |
| XLOC_017374 | PCDHB17                | chr5:140535579-14053799  | 0 | 0.0178512   | inf | 1 |
| XLOC_017389 | LOC100505658           | chr5:140894587-140998622 | 0 | 0.014205    | inf | 1 |
| XLOC_017417 | MIR143,MIR143HG,MIR145 | chr5:148786439-148812398 | 0 | 0.00318171  | inf | 1 |
| XLOC_017489 | LOC285593              | chr5:173006645-173012078 | 0 | 0.0082673   | inf | 1 |
| XLOC_017499 | LOC100507387           | chr5:175546551-175552168 | 0 | 0.0361621   | inf | 1 |
| XLOC_017501 | ARL10                  | chr5:175792501-17580050  | 0 | 0.00705667  | inf | 1 |
| XLOC_017573 | LOC729506              | chr5:8333595-8457677     | 0 | 0.00831312  | inf | 1 |
| XLOC_017574 | SEMA5A                 | chr5:9035137-9546233     | 0 | 0.00112733  | inf | 1 |

|             |                |                          |   |            |     |   |
|-------------|----------------|--------------------------|---|------------|-----|---|
| XLOC_017589 | LOC285696      | chr5:17130136-17276954   | 0 | 0.00506332 | inf | 1 |
| XLOC_017602 | SLC45A2        | chr5:33944720-33984780   | 0 | 0.0100487  | inf | 1 |
| XLOC_017652 | CDC20B         | chr5:54408798-54469005   | 0 | 0.015377   | inf | 1 |
| XLOC_017667 | PLK2           | chr5:57749809-57755966   | 0 | 0.0143035  | inf | 1 |
| XLOC_017755 | ST8SIA4        | chr5:100142638-100238987 | 0 | 0.00182495 | inf | 1 |
| XLOC_017820 | NEUROG1        | chr5:134869971-134871638 | 0 | 0.0184996  | inf | 1 |
| XLOC_017821 | CXCL14         | chr5:134906370-134914968 | 0 | 0.0100329  | inf | 1 |
| XLOC_017827 | LOC389332      | chr5:135527155-135528857 | 0 | 0.0457799  | inf | 1 |
| XLOC_017829 | SPOCK1         | chr5:136310986-136835018 | 0 | 0.00265919 | inf | 1 |
| XLOC_017849 | ECSCR          | chr5:138784244-138842320 | 0 | 0.0237978  | inf | 1 |
| XLOC_017879 | GPR151         | chr5:145894416-145895678 | 0 | 0.0128671  | inf | 1 |
| XLOC_017882 | DPYSL3         | chr5:146770370-146889618 | 0 | 0.00562135 | inf | 1 |
| XLOC_017883 | JAKMIP2        | chr5:146939556-147162417 | 0 | 0.00127383 | inf | 1 |
| XLOC_017901 | ZNF300P1       | chr5:150309997-150326148 | 0 | 0.00473096 | inf | 1 |
| XLOC_017918 | TIMD4          | chr5:156346292-156390268 | 0 | 0.0103313  | inf | 1 |
| XLOC_017919 | HAVCR1         | chr5:156456530-156485970 | 0 | 0.00930055 | inf | 1 |
| XLOC_017924 | ADAM19         | chr5:156904311-157002783 | 0 | 0.0025229  | inf | 1 |
| XLOC_017947 | KCNMB1         | chr5:169780880-170163638 | 0 | 0.0242355  | inf | 1 |
| XLOC_017986 | GMCL1P1        | chr5:177611510-177614433 | 0 | 0.00436323 | inf | 1 |
| XLOC_017995 | C5orf60        | chr5:179068557-179072047 | 0 | 0.0160126  | inf | 1 |
| XLOC_018003 | RASGEF1C       | chr5:179527794-179636130 | 0 | 0.0100821  | inf | 1 |
| XLOC_018023 | FOXC1          | chr6:1610680-1614129     | 0 | 0.00580494 | inf | 1 |
| XLOC_018042 | BMP6           | chr6:7727010-8102828     | 0 | 0.00508287 | inf | 1 |
| XLOC_018166 | TRIM40         | chr6:30104509-30116512   | 0 | 0.0155126  | inf | 1 |
| XLOC_018182 | DPCR1          | chr6:30908776-30921998   | 0 | 0.00230805 | inf | 1 |
| XLOC_018190 | HCP5           | chr6:31430956-31433586   | 0 | 0.0475967  | inf | 1 |
| XLOC_018197 | LST1           | chr6:31553955-31560762   | 0 | 0.0382188  | inf | 1 |
| XLOC_018205 | LY6G6D         | chr6:31683132-31685581   | 0 | 0.0687874  | inf | 1 |
| XLOC_018206 | C6orf25        | chr6:31691120-31694485   | 0 | 0.0169273  | inf | 1 |
| XLOC_018266 | PNPLA1         | chr6:36210944-36276372   | 0 | 0.0122327  | inf | 1 |
| XLOC_018296 | GUCA1A         | chr6:42123143-42147794   | 0 | 0.0100042  | inf | 1 |
| XLOC_018323 | CAPN11         | chr6:44126547-44152139   | 0 | 0.00601276 | inf | 1 |
| XLOC_018337 | GPR111         | chr6:47624325-47665533   | 0 | 0.00247874 | inf | 1 |
| XLOC_018358 | FAM83B         | chr6:54711568-54809897   | 0 | 0.00358506 | inf | 1 |
| XLOC_018371 | COL19A1        | chr6:70576447-70922157   | 0 | 0.00136267 | inf | 1 |
| XLOC_018415 | TSG1           | chr6:94416800-94486199   | 0 | 0.00223125 | inf | 1 |
| XLOC_018424 | PRDM13         | chr6:100054649-100063454 | 0 | 0.00847128 | inf | 1 |
| XLOC_018484 | HEY2           | chr6:126070731-126082418 | 0 | 0.00573573 | inf | 1 |
| XLOC_018592 | QKI            | chr6:163835674-163999628 | 0 | 0.00126485 | inf | 1 |
| XLOC_018614 | MYLK4          | chr6:2663862-2751154     | 0 | 0.0047084  | inf | 1 |
| XLOC_018640 | LINC00518      | chr6:10428017-10435055   | 0 | 0.00395985 | inf | 1 |
| XLOC_018674 | HIST1H1A       | chr6:26017259-26018040   | 0 | 0.0300641  | inf | 1 |
| XLOC_018680 | HIST1H1T       | chr6:26107639-26108364   | 0 | 0.0278054  | inf | 1 |
| XLOC_018704 | HIST1H3I       | chr6:27839622-27840099   | 0 | 0.0908536  | inf | 1 |
| XLOC_018720 | OR2B3          | chr6:29053984-29055090   | 0 | 0.0134762  | inf | 1 |
| XLOC_018759 | LTB            | chr6:31548335-31550202   | 0 | 0.0772017  | inf | 1 |
| XLOC_018806 | HLA-DPA1       | chr6:33032345-33057473   | 0 | 0.00820441 | inf | 1 |
| XLOC_018931 | GCM1           | chr6:52991759-53013624   | 0 | 0.00539371 | inf | 1 |
| XLOC_018944 | LGSN           | chr6:63985855-64029882   | 0 | 0.00211615 | inf | 1 |
| XLOC_018965 | IMPG1          | chr6:76631061-76782335   | 0 | 0.0039097  | inf | 1 |
| XLOC_018991 | SRSF12         | chr6:89805677-89827800   | 0 | 0.0171133  | inf | 1 |
| XLOC_018995 | RRAGD          | chr6:90074334-90121995   | 0 | 0.0024814  | inf | 1 |
| XLOC_019139 | RAET1E         | chr6:150139893-150244214 | 0 | 0.00649676 | inf | 1 |
| XLOC_019150 | IPCEF1         | chr6:154331630-154677900 | 0 | 0.00182313 | inf | 1 |
| XLOC_020333 | CYP2W1         | chr7:1022834-1029276     | 0 | 0.0137863  | inf | 1 |
| XLOC_020348 | SDK1           | chr7:3341079-4308631     | 0 | 0.00187215 | inf | 1 |
| XLOC_020387 | RPL23P8        | chr7:20866916-20867439   | 0 | 0.0674306  | inf | 1 |
| XLOC_020397 | RPS2P32        | chr7:23530006-23531031   | 0 | 0.0255034  | inf | 1 |
| XLOC_020439 | BMPER          | chr7:33944522-34195484   | 0 | 0.00541181 | inf | 1 |
| XLOC_020482 | ABCA13         | chr7:48211056-48687091   | 0 | 0.00141816 | inf | 1 |
| XLOC_020536 | NCF1B          | chr7:72634673-72649979   | 0 | 0.0165247  | inf | 1 |
| XLOC_020589 | RUNDC3B        | chr7:87133178-87461613   | 0 | 0.00311242 | inf | 1 |
| XLOC_020719 | PTPRZ1         | chr7:121513158-121702090 | 0 | 0.00213173 | inf | 1 |
| XLOC_020722 | LMOD2          | chr7:123295860-123304147 | 0 | 0.01246    | inf | 1 |
| XLOC_020727 | FSCN3          | chr7:127233688-127241857 | 0 | 0.0372019  | inf | 1 |
| XLOC_020745 | LOC407835      | chr7:128766324-128768050 | 0 | 0.0154919  | inf | 1 |
| XLOC_020786 | RAB19          | chr7:140103842-140126050 | 0 | 0.0183563  | inf | 1 |
| XLOC_020811 | CLCN1          | chr7:143013218-143049097 | 0 | 0.00581415 | inf | 1 |
| XLOC_020827 | OR2A20P,OR2A9P | chr7:143996465-143997598 | 0 | 0.0217904  | inf | 1 |
| XLOC_020831 | CNTNAP2        | chr7:145813452-148118088 | 0 | 0.00127457 | inf | 1 |
| XLOC_020874 | DPP6           | chr7:153584418-154685998 | 0 | 0.00374624 | inf | 1 |
| XLOC_020940 | MEOX2          | chr7:15650836-15726308   | 0 | 0.00631869 | inf | 1 |
| XLOC_020996 | CRHR2          | chr7:30691558-30739719   | 0 | 0.0134863  | inf | 1 |
| XLOC_020999 | LOC100130673   | chr7:32496509-32498106   | 0 | 0.00899267 | inf | 1 |
| XLOC_021009 | DPY19L2P1      | chr7:35120898-35225774   | 0 | 0.00448855 | inf | 1 |
| XLOC_021015 | ELMO1          | chr7:36892510-37488895   | 0 | 0.004096   | inf | 1 |
| XLOC_021067 | EGFR-AS1       | chr7:55086724-55275031   | 0 | 0.00559851 | inf | 1 |
| XLOC_021102 | TRIM50         | chr7:72726534-72742085   | 0 | 0.0125963  | inf | 1 |
| XLOC_021116 | NCF1C          | chr7:74572383-74587816   | 0 | 0.0557057  | inf | 1 |

|             |                      |                          |   |            |     |   |
|-------------|----------------------|--------------------------|---|------------|-----|---|
| XLOC_021276 | ST7-AS2              | chr7:116592500-116870075 | 0 | 0.0321443  | inf | 1 |
| XLOC_021332 | FAM180A              | chr7:135414345-135433594 | 0 | 0.0093188  | inf | 1 |
| XLOC_021374 | OR2A1                | chr7:143929003-143929936 | 0 | 0.0250621  | inf | 1 |
| XLOC_021394 | TMEM176B             | chr7:150488375-150502208 | 0 | 0.016716   | inf | 1 |
| XLOC_021404 | WDR86                | chr7:151078206-151110132 | 0 | 0.0199923  | inf | 1 |
| XLOC_021405 | CRYGN                | chr7:151127055-151137095 | 0 | 0.0339209  | inf | 1 |
| XLOC_021428 | ERICH1-AS1           | chr8:687586-1087777      | 0 | 0.0305459  | inf | 1 |
| XLOC_021444 | FAM90A10P            | chr8:7627105-7628835     | 0 | 0.043295   | inf | 1 |
| XLOC_021472 | FAM66D               | chr8:11973290-12008698   | 0 | 0.0194551  | inf | 1 |
| XLOC_021501 | PIWIL2               | chr8:22132809-22213584   | 0 | 0.00774507 | inf | 1 |
| XLOC_021516 | ADAM28               | chr8:24151579-24212726   | 0 | 0.00326256 | inf | 1 |
| XLOC_021545 | UNC5D                | chr8:35092974-35652181   | 0 | 0.00174551 | inf | 1 |
| XLOC_021616 | TRIM55               | chr8:67039277-67087718   | 0 | 0.0148152  | inf | 1 |
| XLOC_021667 | LINC00534            | chr8:91233715-91400187   | 0 | 0.02177    | inf | 1 |
| XLOC_021699 | NACAP1               | chr8:102381120-102381823 | 0 | 0.0662752  | inf | 1 |
| XLOC_021700 | GRHL2                | chr8:102504667-102681952 | 0 | 0.00278665 | inf | 1 |
| XLOC_021711 | ZFPM2                | chr8:106331146-106816763 | 0 | 0.00867674 | inf | 1 |
| XLOC_021729 | COL14A1              | chr8:121137346-121384273 | 0 | 0.00184171 | inf | 1 |
| XLOC_021767 | LINC00051            | chr8:143279716-143290364 | 0 | 0.0142842  | inf | 1 |
| XLOC_021797 | FAM203A              | chr8:145437879-145440828 | 0 | 0.0113174  | inf | 1 |
| XLOC_021884 | SGCZ                 | chr8:13947372-15095792   | 0 | 0.00639423 | inf | 1 |
| XLOC_021886 | MSR1                 | chr8:15965386-16050300   | 0 | 0.00762811 | inf | 1 |
| XLOC_021897 | LZTS1                | chr8:20103675-20112803   | 0 | 0.00787989 | inf | 1 |
| XLOC_021903 | LGI3                 | chr8:22004342-22014344   | 0 | 0.00741831 | inf | 1 |
| XLOC_021924 | STMN4                | chr8:27093813-27115903   | 0 | 0.0126192  | inf | 1 |
| XLOC_021926 | CHRNA2               | chr8:27317277-27336813   | 0 | 0.00449459 | inf | 1 |
| XLOC_021965 | C8orf86              | chr8:38368351-38386180   | 0 | 0.0127167  | inf | 1 |
| XLOC_021966 | RNF5P1               | chr8:38457692-38458775   | 0 | 0.0183403  | inf | 1 |
| XLOC_021971 | SFRP1                | chr8:41119475-41166990   | 0 | 0.00359462 | inf | 1 |
| XLOC_021985 | SNAI2                | chr8:49830238-49833999   | 0 | 0.00686929 | inf | 1 |
| XLOC_022264 | VLDLR                | chr9:2535654-2654485     | 0 | 0.00385114 | inf | 1 |
| XLOC_022307 | TEK                  | chr9:27109146-27230172   | 0 | 0.00263391 | inf | 1 |
| XLOC_022316 | ANKRD18B             | chr9:33524410-33573001   | 0 | 0.0030239  | inf | 1 |
| XLOC_022344 | RECK                 | chr9:36036909-36124452   | 0 | 0.00875124 | inf | 1 |
| XLOC_022372 | FAM27A               | chr9:45727028-45728283   | 0 | 0.0332326  | inf | 1 |
| XLOC_022379 | LOC100133920         | chr9:69651360-69664949   | 0 | 0.0146676  | inf | 1 |
| XLOC_022387 | FAM189A2             | chr9:71939487-72007370   | 0 | 0.00853312 | inf | 1 |
| XLOC_022389 | MAMDC2               | chr9:72658496-72873790   | 0 | 0.00387338 | inf | 1 |
| XLOC_022514 | BSPRY                | chr9:116111811-116133513 | 0 | 0.00771471 | inf | 1 |
| XLOC_022564 | LMX1B                | chr9:129376721-129463311 | 0 | 0.00342945 | inf | 1 |
| XLOC_022574 | TTC16                | chr9:130478357-130497628 | 0 | 0.0203249  | inf | 1 |
| XLOC_022598 | PHYHD1               | chr9:131683173-131704326 | 0 | 0.130134   | inf | 1 |
| XLOC_022667 | LOC100128593         | chr9:139638468-139644363 | 0 | 0.0090668  | inf | 1 |
| XLOC_022689 | RNF224               | chr9:140122017-140124096 | 0 | 0.0160931  | inf | 1 |
| XLOC_022709 | FLJ35024             | chr9:2535654-2654485     | 0 | 0.0218052  | inf | 1 |
| XLOC_022733 | C9orf92              | chr9:16203932-16276311   | 0 | 0.0589912  | inf | 1 |
| XLOC_022744 | PTPLAD2              | chr9:21006364-21031635   | 0 | 0.00893342 | inf | 1 |
| XLOC_022845 | LOC653501_ZNF658B    | chr9:39443813-39464526   | 0 | 0.00260164 | inf | 1 |
| XLOC_022876 | LOC100507244         | chr9:72658496-72873790   | 0 | 0.00816117 | inf | 1 |
| XLOC_022914 | LOC392364            | chr9:90472957-90473971   | 0 | 0.0190008  | inf | 1 |
| XLOC_022936 | ASP1                 | chr9:95059639-95432547   | 0 | 0.00485708 | inf | 1 |
| XLOC_023232 | PLCXD1               | chrX:192990-220022       | 0 | 0.0108151  | inf | 1 |
| XLOC_023254 | LOC100288814         | chrX:9935397-9936042     | 0 | 0.0625937  | inf | 1 |
| XLOC_023277 | GRPR                 | chrX:16141423-16171641   | 0 | 0.0210332  | inf | 1 |
| XLOC_023296 | PTCHD1               | chrX:23352984-23414918   | 0 | 0.00244327 | inf | 1 |
| XLOC_023333 | MPC1L                | chrX:40482817-40483388   | 0 | 0.144887   | inf | 1 |
| XLOC_023347 | RGN                  | chrX:46937774-46952712   | 0 | 0.00952976 | inf | 1 |
| XLOC_023385 | GAGE12D,GAGE12F,GAGE | chrX:49188093-49313710   | 0 | 0.0381156  | inf | 1 |
| XLOC_023425 | TRO                  | chrX:54946995-54957866   | 0 | 0.0174083  | inf | 1 |
| XLOC_023450 | OTUD6A               | chrX:69282340-69284029   | 0 | 0.0421655  | inf | 1 |
| XLOC_023515 | TMEM35               | chrX:100333835-100351351 | 0 | 0.0142116  | inf | 1 |
| XLOC_023522 | TCEAL2               | chrX:101380659-101382688 | 0 | 0.0112878  | inf | 1 |
| XLOC_023591 | SOWAHD               | chrX:118892575-118894161 | 0 | 0.1029     | inf | 1 |
| XLOC_023593 | AKAP14               | chrX:119029935-119054671 | 0 | 0.0817343  | inf | 1 |
| XLOC_023659 | FMR1NB               | chrX:147062848-147108181 | 0 | 0.0350116  | inf | 1 |
| XLOC_023679 | MAGEA4               | chrX:151081360-151093643 | 0 | 0.00947064 | inf | 1 |
| XLOC_023693 | DUSP9                | chrX:152907896-152916781 | 0 | 0.0126009  | inf | 1 |
| XLOC_023699 | AVPR2                | chrX:153167984-153172621 | 0 | 0.0283831  | inf | 1 |
| XLOC_023768 | ACE2                 | chrX:15579155-15620192   | 0 | 0.00309275 | inf | 1 |
| XLOC_023798 | PCYT1B               | chrX:24576203-24690979   | 0 | 0.0026506  | inf | 1 |
| XLOC_023838 | SSX5                 | chrX:48045655-48056199   | 0 | 0.0112365  | inf | 1 |
| XLOC_023862 | SHROOM4              | chrX:50334642-50557044   | 0 | 0.0025742  | inf | 1 |
| XLOC_023886 | WNK3                 | chrX:54219255-54384438   | 0 | 0.00196467 | inf | 1 |
| XLOC_023888 | ITIH6                | chrX:54775331-54824673   | 0 | 0.00575239 | inf | 1 |
| XLOC_023895 | UQCRBP1              | chrX:56755717-56844004   | 0 | 0.031518   | inf | 1 |
| XLOC_023917 | TEX11                | chrX:69748789-70128567   | 0 | 0.00378203 | inf | 1 |
| XLOC_023924 | INGX                 | chrX:70430034-70948962   | 0 | 0.0738012  | inf | 1 |
| XLOC_023925 | CXCR3                | chrX:70430034-70948962   | 0 | 0.036606   | inf | 1 |
| XLOC_023966 | POF1B                | chrX:84532394-84634748   | 0 | 0.00262688 | inf | 1 |

|             |                        |                          |            |            |        |          |
|-------------|------------------------|--------------------------|------------|------------|--------|----------|
| XLOC_023992 | TCEAL5                 | chrX:102528617-10253179  | 0          | 0.0114823  | inf    | 1        |
| XLOC_024012 | COL4A6                 | chrX:107398836-10768270  | 0          | 0.00217867 | inf    | 1        |
| XLOC_024019 | CHRD1                  | chrX:109917083-110039281 | 0          | 0.00331594 | inf    | 1        |
| XLOC_024066 | SMARCA1                | chrX:128580477-128657461 | 0          | 0.00296569 | inf    | 1        |
| XLOC_024115 | FGF13                  | chrX:137713733-138287181 | 0          | 0.0248987  | inf    | 1        |
| XLOC_024198 | FAM223B                | chrX:153860738-153861441 | 0          | 0.108164   | inf    | 1        |
| XLOC_024206 | RAB39B                 | chrX:154487525-154493851 | 0          | 0.00359079 | inf    | 1        |
| XLOC_024210 | F8A1                   | chrX:154686574-154688271 | 0          | 0.0207657  | inf    | 1        |
| XLOC_024213 | PLCXD1                 | chrY:142990-170022       | 0          | 0.0108151  | inf    | 1        |
| XLOC_024305 | UTY                    | chrY:15360258-15592550   | 0          | 0.0019891  | inf    | 1        |
| XLOC_010629 | MIR181D                | chr19:13985688-13985825  | 3.70119    | 0          | #NAME? | 0.284036 |
| XLOC_000510 | SNORD21                | chr1:93297593-93427079   | 45.1893    | 0          | #NAME? | 0.378228 |
| XLOC_010362 | SNORD58C               | chr18:47007547-47018935  | 88.0913    | 0          | #NAME? | 0.385425 |
| XLOC_003718 | SNORD15A               | chr11:75110534-75133345  | 2.8545     | 0          | #NAME? | 0.454989 |
| XLOC_002161 | MIR29C                 | chr1:207975196-207975284 | 52.938     | 0          | #NAME? | 0.462141 |
| XLOC_021905 | MIR320A                | chr8:22102474-22102556   | 126.511    | 0          | #NAME? | 0.470983 |
| XLOC_018017 | SNORD95                | chr5:180663927-180670901 | 728.195    | 0          | #NAME? | 0.479014 |
| XLOC_011026 | SNORD35A               | chr19:49990810-49995564  | 63.0998    | 0          | #NAME? | 0.489264 |
| XLOC_018983 | SNORD50A               | chr6:86386724-86388451   | 174.033    | 0          | #NAME? | 0.540783 |
| XLOC_008600 | SNORA50                | chr16:58549382-58663790  | 3.57422    | 0          | #NAME? | 0.55302  |
| XLOC_020548 | MIR590                 | chr7:73588705-73611429   | 21.6684    | 0          | #NAME? | 0.580082 |
| XLOC_009918 | MIR5047                | chr17:62494373-62502484  | 18.4336    | 0          | #NAME? | 0.580412 |
| XLOC_021051 | SNORA5C                | chr7:45139698-45151346   | 2.87594    | 0          | #NAME? | 0.610107 |
| XLOC_002047 | SCARNA3                | chr1:175913966-176176371 | 4.47687    | 0          | #NAME? | 0.610406 |
| XLOC_008599 | SNORA46                | chr16:58549382-58663790  | 3.53153    | 0          | #NAME? | 0.631812 |
| XLOC_004280 | SNORD29                | chr11:62619459-62623360  | 634.992    | 0          | #NAME? | 0.637148 |
| XLOC_021052 | SNORA5B                | chr7:45139698-45151346   | 5.14075    | 0          | #NAME? | 0.651901 |
| XLOC_013492 | SNORD110               | chr20:2633177-2639039    | 207.275    | 0          | #NAME? | 0.652768 |
| XLOC_020517 | SNORA22                | chr7:65111923-65235797   | 3.62949    | 0          | #NAME? | 0.663172 |
| XLOC_011318 | MIR637                 | chr19:3958451-3969826    | 19.7707    | 0          | #NAME? | 0.664776 |
| XLOC_008061 | MIR762                 | chr16:30899115-30905399  | 110.276    | 0          | #NAME? | 0.66806  |
| XLOC_023718 | SNORA36A               | chrX:153991030-15400596  | 1.95901    | 0          | #NAME? | 1        |
| XLOC_001397 | SNORA44                | chr1:28879528-28908366   | 2.38539    | 0          | #NAME? | 1        |
| XLOC_021050 | SNORA5A                | chr7:45139698-45151346   | 1.90964    | 0          | #NAME? | 1        |
| XLOC_000003 | LOC100132062,LOC100133 | chr1:323891-328581       | 0.00643206 | 0          | #NAME? | 1        |
| XLOC_000073 | RBP7                   | chr1:10057254-10076078   | 0.0300777  | 0          | #NAME? | 1        |
| XLOC_000175 | MDS2                   | chr1:23953823-23967056   | 0.0421645  | 0          | #NAME? | 1        |
| XLOC_000204 | CD52                   | chr1:26608772-26647014   | 0.0543287  | 0          | #NAME? | 1        |
| XLOC_000272 | GJB5                   | chr1:35220647-35224113   | 0.0153529  | 0          | #NAME? | 1        |
| XLOC_000274 | GJB3                   | chr1:35246789-35251967   | 0.0383258  | 0          | #NAME? | 1        |
| XLOC_000395 | GPX7                   | chr1:53068042-53074723   | 0.0292892  | 0          | #NAME? | 1        |
| XLOC_000412 | TMEM61                 | chr1:55446464-55457966   | 0.0303075  | 0          | #NAME? | 1        |
| XLOC_000414 | PCSK9                  | chr1:55505148-55530526   | 0.00717147 | 0          | #NAME? | 1        |
| XLOC_000429 | FOXD3                  | chr1:63788729-63790797   | 0.0223839  | 0          | #NAME? | 1        |
| XLOC_000487 | CLCA2                  | chr1:86889768-86922240   | 0.0130524  | 0          | #NAME? | 1        |
| XLOC_000556 | SRG7                   | chr1:109358519-109401144 | 0.0452541  | 0          | #NAME? | 1        |
| XLOC_000566 | GPR61                  | chr1:110082493-110088451 | 0.00653144 | 0          | #NAME? | 1        |
| XLOC_000623 | HSD3B2                 | chr1:119957553-119965662 | 0.0105452  | 0          | #NAME? | 1        |
| XLOC_000636 | HFE2                   | chr1:145413190-145417541 | 0.0122158  | 0          | #NAME? | 1        |
| XLOC_000725 | PRR9                   | chr1:153190059-153191793 | 0.0146783  | 0          | #NAME? | 1        |
| XLOC_000732 | NPR1                   | chr1:153651163-153666461 | 0.00503561 | 0          | #NAME? | 1        |
| XLOC_000747 | LENEP                  | chr1:154966061-154966791 | 0.0377855  | 0          | #NAME? | 1        |
| XLOC_000749 | DCST1                  | chr1:155006281-155042021 | 0.0109658  | 0          | #NAME? | 1        |
| XLOC_000779 | HAPLN2                 | chr1:156589085-156595517 | 0.0396118  | 0          | #NAME? | 1        |
| XLOC_000813 | SUMO1P3                | chr1:160258376-160328742 | 0.0267475  | 0          | #NAME? | 1        |
| XLOC_000831 | FCGR2C                 | chr1:161551128-161571011 | 0.00601694 | 0          | #NAME? | 1        |
| XLOC_000832 | HSPA7                  | chr1:161575848-161578341 | 0.00955967 | 0          | #NAME? | 1        |
| XLOC_000833 | FCGR2B                 | chr1:161632904-161648444 | 0.0164493  | 0          | #NAME? | 1        |
| XLOC_000834 | FCRLA                  | chr1:161676761-161684142 | 0.00896785 | 0          | #NAME? | 1        |
| XLOC_000855 | MAEL                   | chr1:166958518-166991447 | 0.0194957  | 0          | #NAME? | 1        |
| XLOC_000910 | FAM163A                | chr1:179712297-179785333 | 0.00711042 | 0          | #NAME? | 1        |
| XLOC_000958 | PTPRC                  | chr1:198608097-198726601 | 0.0124854  | 0          | #NAME? | 1        |
| XLOC_000964 | PKP1                   | chr1:201252579-201302121 | 0.00326643 | 0          | #NAME? | 1        |
| XLOC_001011 | IL19                   | chr1:206972214-207016321 | 0.0153888  | 0          | #NAME? | 1        |
| XLOC_001022 | LOC148696              | chr1:207991723-207995941 | 0.016073   | 0          | #NAME? | 1        |
| XLOC_001041 | FAM71A                 | chr1:212797788-212800121 | 0.0235984  | 0          | #NAME? | 1        |
| XLOC_001066 | FAM177B                | chr1:222910557-222924001 | 0.00997163 | 0          | #NAME? | 1        |
| XLOC_001079 | C1orf95                | chr1:226736500-226796911 | 0.00228293 | 0          | #NAME? | 1        |
| XLOC_001112 | SLC35F3                | chr1:234040678-234460262 | 0.0119358  | 0          | #NAME? | 1        |
| XLOC_001116 | LOC100506810           | chr1:234859788-234867391 | 0.00891979 | 0          | #NAME? | 1        |
| XLOC_001130 | KMO                    | chr1:241695433-241803701 | 0.00290461 | 0          | #NAME? | 1        |
| XLOC_001133 | SDCCAG8                | chr1:243419306-244006881 | 0.00562815 | 0          | #NAME? | 1        |
| XLOC_001204 | ANKRD65                | chr1:1353799-1356824     | 0.0128318  | 0          | #NAME? | 1        |
| XLOC_001205 | TMEM240                | chr1:1470157-1475740     | 0.0875225  | 0          | #NAME? | 1        |
| XLOC_001358 | MYOM3                  | chr1:24382530-24438665   | 0.00332771 | 0          | #NAME? | 1        |
| XLOC_001384 | FCN3                   | chr1:27695600-27701315   | 0.0463096  | 0          | #NAME? | 1        |
| XLOC_001445 | COL8A2                 | chr1:36560843-36565850   | 0.0148974  | 0          | #NAME? | 1        |
| XLOC_001475 | HEYL                   | chr1:40089102-40105348   | 0.00500632 | 0          | #NAME? | 1        |
| XLOC_001519 | RPS15AP10              | chr1:46092975-46152302   | 0.0333083  | 0          | #NAME? | 1        |

|             |              |                          |            |   |        |   |
|-------------|--------------|--------------------------|------------|---|--------|---|
| XLOC_001604 | PTGER3       | chr1:71318035-71546972   | 0.0164348  | 0 | #NAME? | 1 |
| XLOC_001624 | C1orf180     | chr1:85093912-85100703   | 0.00510927 | 0 | #NAME? | 1 |
| XLOC_001626 | LPAR3        | chr1:85279085-85358896   | 0.0262654  | 0 | #NAME? | 1 |
| XLOC_001666 | DPYD         | chr1:97543299-98386615   | 0.00353497 | 0 | #NAME? | 1 |
| XLOC_001690 | C1orf194     | chr1:109648572-109656475 | 0.0232462  | 0 | #NAME? | 1 |
| XLOC_001706 | LRIF1        | chr1:111489811-111506566 | 0.00770227 | 0 | #NAME? | 1 |
| XLOC_001712 | ADORA3       | chr1:112025969-112106597 | 0.00737141 | 0 | #NAME? | 1 |
| XLOC_001778 | GJA5         | chr1:147228331-147245484 | 0.00497612 | 0 | #NAME? | 1 |
| XLOC_001822 | RORC         | chr1:151778546-151804348 | 0.00608486 | 0 | #NAME? | 1 |
| XLOC_001954 | KCNJ10       | chr1:160007256-160040057 | 0.00577778 | 0 | #NAME? | 1 |
| XLOC_001981 | RPL31P11     | chr1:161653494-161655047 | 0.0171482  | 0 | #NAME? | 1 |
| XLOC_002008 | C1orf114     | chr1:169337193-169396670 | 0.0366077  | 0 | #NAME? | 1 |
| XLOC_002063 | TEDDM1       | chr1:182367251-182369757 | 0.0134706  | 0 | #NAME? | 1 |
| XLOC_002081 | PDC          | chr1:185703682-186446657 | 0.0129229  | 0 | #NAME? | 1 |
| XLOC_002086 | B3GALT2      | chr1:193091087-193223947 | 0.01117644 | 0 | #NAME? | 1 |
| XLOC_002132 | GOLT1A       | chr1:204167287-204183220 | 0.0303099  | 0 | #NAME? | 1 |
| XLOC_002137 | LRRN2        | chr1:204586302-204654597 | 0.0150976  | 0 | #NAME? | 1 |
| XLOC_002145 | LOC284578    | chr1:205523400-205525767 | 0.0072483  | 0 | #NAME? | 1 |
| XLOC_002169 | KCNH1        | chr1:210851656-211307457 | 0.00406439 | 0 | #NAME? | 1 |
| XLOC_002170 | RD3          | chr1:211649863-211666255 | 0.00390912 | 0 | #NAME? | 1 |
| XLOC_002364 | MRC1         | chr10:17851361-17953178  | 0.00253305 | 0 | #NAME? | 1 |
| XLOC_002405 | GJD4         | chr10:35894337-35897863  | 0.0194181  | 0 | #NAME? | 1 |
| XLOC_002416 | RET          | chr10:43572516-43625797  | 0.00372656 | 0 | #NAME? | 1 |
| XLOC_002418 | FXFD4        | chr10:43867091-43871783  | 0.0445862  | 0 | #NAME? | 1 |
| XLOC_002442 | CTSL1P2      | chr10:48155942-48158691  | 0.0150507  | 0 | #NAME? | 1 |
| XLOC_002450 | WDFY4        | chr10:49893517-50191001  | 0.00172152 | 0 | #NAME? | 1 |
| XLOC_002469 | FAM133CP     | chr10:60272903-60588845  | 0.00609289 | 0 | #NAME? | 1 |
| XLOC_002475 | ZNF365       | chr10:64133915-64431771  | 0.00356726 | 0 | #NAME? | 1 |
| XLOC_002545 | DYDC2        | chr10:82095860-82127829  | 0.0263521  | 0 | #NAME? | 1 |
| XLOC_002560 | SNCG         | chr10:88718287-88723017  | 0.0280551  | 0 | #NAME? | 1 |
| XLOC_002642 | WNT8B        | chr10:102222811-10224338 | 0.0126464  | 0 | #NAME? | 1 |
| XLOC_002694 | ADRA2A       | chr10:112836789-11284066 | 0.0159479  | 0 | #NAME? | 1 |
| XLOC_002714 | PNLIPRP2     | chr10:118380464-11840468 | 0.0109047  | 0 | #NAME? | 1 |
| XLOC_002768 | C10orf91     | chr10:134258713-13426182 | 0.0429488  | 0 | #NAME? | 1 |
| XLOC_003000 | SYNP02L      | chr10:75404643-75415832  | 0.00462628 | 0 | #NAME? | 1 |
| XLOC_003009 | DUSP13       | chr10:76854189-76868970  | 0.029834   | 0 | #NAME? | 1 |
| XLOC_003025 | GRID1        | chr10:87337487-88126250  | 0.00326708 | 0 | #NAME? | 1 |
| XLOC_003066 | BLNK         | chr10:97951454-98031333  | 0.0127729  | 0 | #NAME? | 1 |
| XLOC_003089 | CPN1         | chr10:101802064-10184116 | 0.0125968  | 0 | #NAME? | 1 |
| XLOC_003141 | NRAP         | chr10:115310589-11542382 | 0.00269969 | 0 | #NAME? | 1 |
| XLOC_003145 | AFAP1L2      | chr10:116054582-11616457 | 0.00416631 | 0 | #NAME? | 1 |
| XLOC_003147 | GFRA1        | chr10:117816441-11803312 | 0.00164537 | 0 | #NAME? | 1 |
| XLOC_003174 | CPXM2        | chr10:125505151-12565150 | 0.0275486  | 0 | #NAME? | 1 |
| XLOC_003197 | TCERG1L      | chr10:132890654-13310998 | 0.01893    | 0 | #NAME? | 1 |
| XLOC_003258 | KCNQ1DN      | chr11:2891262-2893336    | 0.02438    | 0 | #NAME? | 1 |
| XLOC_003262 | TRPC2        | chr11:3647689-3658789    | 0.0197604  | 0 | #NAME? | 1 |
| XLOC_003272 | OR52I1       | chr11:4615268-4616243    | 0.0190148  | 0 | #NAME? | 1 |
| XLOC_003294 | OR56B4       | chr11:6129008-6129968    | 0.0193039  | 0 | #NAME? | 1 |
| XLOC_003312 | OLFML1       | chr11:7506599-7532606    | 0.00575986 | 0 | #NAME? | 1 |
| XLOC_003416 | C11orf96     | chr11:43964105-43965433  | 0.0458976  | 0 | #NAME? | 1 |
| XLOC_003430 | CREB3L1      | chr11:46299227-46342972  | 0.0088795  | 0 | #NAME? | 1 |
| XLOC_003492 | SMTNL1       | chr11:57310113-57317747  | 0.041896   | 0 | #NAME? | 1 |
| XLOC_003597 | SLC22A11     | chr11:64323097-64338999  | 0.00976408 | 0 | #NAME? | 1 |
| XLOC_003614 | MIR612       | chr11:65211928-65212028  | 18.5829    | 0 | #NAME? | 1 |
| XLOC_003627 | SNX32        | chr11:65601409-65621172  | 0.0128506  | 0 | #NAME? | 1 |
| XLOC_003692 | LOC100129216 | chr11:71576554-71639493  | 0.286065   | 0 | #NAME? | 1 |
| XLOC_003696 | FOLR3        | chr11:71846770-71850934  | 0.0602141  | 0 | #NAME? | 1 |
| XLOC_003703 | P2RY6        | chr11:72975569-73009664  | 0.020232   | 0 | #NAME? | 1 |
| XLOC_003786 | C11orf70     | chr11:101918168-10195528 | 0.00729899 | 0 | #NAME? | 1 |
| XLOC_003794 | GRIA4        | chr11:105480799-10585287 | 0.00481172 | 0 | #NAME? | 1 |
| XLOC_003869 | POU2F3       | chr11:120107348-12019068 | 0.0128906  | 0 | #NAME? | 1 |
| XLOC_003917 | BARX2        | chr11:129245880-12932217 | 0.0124464  | 0 | #NAME? | 1 |
| XLOC_003924 | NTM          | chr11:131240370-13220677 | 0.00582563 | 0 | #NAME? | 1 |
| XLOC_003947 | SCT          | chr11:626312-627173      | 0.0855239  | 0 | #NAME? | 1 |
| XLOC_003974 | TRPM5        | chr11:2425745-2444275    | 0.0211938  | 0 | #NAME? | 1 |
| XLOC_004042 | OR2AG2       | chr11:6789237-6790188    | 0.0222222  | 0 | #NAME? | 1 |
| XLOC_004043 | OR6A2        | chr11:6815755-6817139    | 0.0127795  | 0 | #NAME? | 1 |
| XLOC_004044 | OR2D2        | chr11:6912804-6913731    | 0.0206868  | 0 | #NAME? | 1 |
| XLOC_004056 | STK33        | chr11:8413417-8615503    | 0.0157757  | 0 | #NAME? | 1 |
| XLOC_004151 | ALX4         | chr11:44282277-44331716  | 0.0041493  | 0 | #NAME? | 1 |
| XLOC_004318 | LOC100130348 | chr11:64851693-64856542  | 0.0713353  | 0 | #NAME? | 1 |
| XLOC_004416 | MAP6         | chr11:75297962-75379479  | 0.0134226  | 0 | #NAME? | 1 |
| XLOC_004453 | NOX4         | chr11:89057521-89322779  | 0.00376838 | 0 | #NAME? | 1 |
| XLOC_004472 | VSTM5        | chr11:93553734-93583668  | 0.0420874  | 0 | #NAME? | 1 |
| XLOC_004485 | ANGPTL5      | chr11:101761404-10187178 | 0.0178704  | 0 | #NAME? | 1 |
| XLOC_004503 | CARD16       | chr11:104912052-10491608 | 0.0263304  | 0 | #NAME? | 1 |
| XLOC_004530 | C11orf34     | chr11:112118875-11213158 | 0.0234112  | 0 | #NAME? | 1 |
| XLOC_004557 | AMICA1       | chr11:118064441-11809580 | 0.00728665 | 0 | #NAME? | 1 |
| XLOC_004576 | THY1         | chr11:119252487-11936994 | 0.00827144 | 0 | #NAME? | 1 |



|             |                 |                          |             |   |        |   |
|-------------|-----------------|--------------------------|-------------|---|--------|---|
| XLOC_004587 | CLMP            | chr11:122943032-1230660  | 0.00671937  | 0 | #NAME? | 1 |
| XLOC_004649 | CACNA1C         | chr12:2162415-2807115    | 0.00125933  | 0 | #NAME? | 1 |
| XLOC_004710 | CLEC4D          | chr12:8666135-8674960    | 0.0229131   | 0 | #NAME? | 1 |
| XLOC_004712 | A2ML1           | chr12:8975149-9029381    | 0.00441486  | 0 | #NAME? | 1 |
| XLOC_004732 | BCL2L14         | chr12:12223877-12252627  | 0.0256954   | 0 | #NAME? | 1 |
| XLOC_004763 | SLCO1C1         | chr12:20848288-20906320  | 0.0100058   | 0 | #NAME? | 1 |
| XLOC_004791 | TSPAN11         | chr12:31079837-31149537  | 0.00714975  | 0 | #NAME? | 1 |
| XLOC_004794 | DENND5B-AS1     | chr12:31535156-31768285  | 0.102853    | 0 | #NAME? | 1 |
| XLOC_004820 | OR8S1           | chr12:48919414-48921886  | 0.0211656   | 0 | #NAME? | 1 |
| XLOC_004821 | LOC255411       | chr12:49121217-49159569  | 0.0352835   | 0 | #NAME? | 1 |
| XLOC_004851 | SCN8A           | chr12:51985019-52206648  | 0.0097345   | 0 | #NAME? | 1 |
| XLOC_004853 | ACVRL1          | chr12:52301201-52317145  | 0.0137346   | 0 | #NAME? | 1 |
| XLOC_004972 | IRAK3           | chr12:66582977-66648394  | 0.00526659  | 0 | #NAME? | 1 |
| XLOC_005102 | CUX2            | chr12:111471827-11178831 | 0.00281693  | 0 | #NAME? | 1 |
| XLOC_005129 | SRRM4           | chr12:119419299-11960081 | 0.00622772  | 0 | #NAME? | 1 |
| XLOC_005156 | LRRC43          | chr12:122652265-12268801 | 0.0322991   | 0 | #NAME? | 1 |
| XLOC_005165 | LOC100507091    | chr12:123468026-12359497 | 0.00764878  | 0 | #NAME? | 1 |
| XLOC_005182 | LOC100507206    | chr12:127215246-12725680 | 0.00710091  | 0 | #NAME? | 1 |
| XLOC_005187 | GLT1D1          | chr12:129338080-12946950 | 0.00739912  | 0 | #NAME? | 1 |
| XLOC_005201 | LOC100130238    | chr12:132680916-13290590 | 0.00553027  | 0 | #NAME? | 1 |
| XLOC_005245 | LPAR5           | chr12:6728000-6745297    | 0.00924005  | 0 | #NAME? | 1 |
| XLOC_005276 | A2M             | chr12:9217772-9268558    | 0.00931859  | 0 | #NAME? | 1 |
| XLOC_005292 | KLRC2           | chr12:10583205-10588592  | 0.012854    | 0 | #NAME? | 1 |
| XLOC_005301 | TAS2R10         | chr12:10977944-10978868  | 0.0185906   | 0 | #NAME? | 1 |
| XLOC_005308 | TAS2R31         | chr12:10998447-11328619  | 0.0163717   | 0 | #NAME? | 1 |
| XLOC_005309 | TAS2R46         | chr12:10998447-11328619  | 0.0384269   | 0 | #NAME? | 1 |
| XLOC_005310 | TAS2R43         | chr12:10998447-11328619  | 0.0177958   | 0 | #NAME? | 1 |
| XLOC_005345 | GYS2            | chr12:21689122-21757781  | 0.013106    | 0 | #NAME? | 1 |
| XLOC_005364 | C12orf71        | chr12:27233989-27235455  | 0.0216791   | 0 | #NAME? | 1 |
| XLOC_005366 | PTHLH           | chr12:28111016-28124916  | 0.017317    | 0 | #NAME? | 1 |
| XLOC_005414 | LALBA           | chr12:48961466-48963829  | 0.0527614   | 0 | #NAME? | 1 |
| XLOC_005417 | SNORA2A         | chr12:49046994-49076035  | 1.88946     | 0 | #NAME? | 1 |
| XLOC_005426 | WNT10B          | chr12:49359122-49365641  | 0.00960213  | 0 | #NAME? | 1 |
| XLOC_005441 | FAIM2           | chr12:50260678-50297760  | 0.00424677  | 0 | #NAME? | 1 |
| XLOC_005507 | DCD             | chr12:55038374-55042149  | 0.0418673   | 0 | #NAME? | 1 |
| XLOC_005577 | LOC100130075    | chr12:69198216-69199274  | 0.0213418   | 0 | #NAME? | 1 |
| XLOC_005581 | LRRC10          | chr12:70002344-70004942  | 0.0139247   | 0 | #NAME? | 1 |
| XLOC_005612 | C12orf50        | chr12:88373815-88423176  | 0.00771358  | 0 | #NAME? | 1 |
| XLOC_005683 | SVOP            | chr12:109304657-10945884 | 0.00531853  | 0 | #NAME? | 1 |
| XLOC_005790 | GALNT9          | chr12:132680916-13290590 | 0.0291484   | 0 | #NAME? | 1 |
| XLOC_005823 | WASF3           | chr13:27131839-27263082  | 0.00339397  | 0 | #NAME? | 1 |
| XLOC_005860 | FREM2           | chr13:39261172-39461267  | 0.000971052 | 0 | #NAME? | 1 |
| XLOC_005910 | TPTE2P3         | chr13:53063127-53161225  | 0.00552268  | 0 | #NAME? | 1 |
| XLOC_005955 | GPC5            | chr13:92050934-93519487  | 0.0118395   | 0 | #NAME? | 1 |
| XLOC_005987 | MYO16           | chr13:109248499-10986031 | 0.00238412  | 0 | #NAME? | 1 |
| XLOC_006015 | TPTE2           | chr13:19997018-20135714  | 0.00843069  | 0 | #NAME? | 1 |
| XLOC_006051 | FLT1            | chr13:28874482-29069265  | 0.00216493  | 0 | #NAME? | 1 |
| XLOC_006058 | LINC00426       | chr13:30914406-30948036  | 0.0109464   | 0 | #NAME? | 1 |
| XLOC_006062 | ZAR1L           | chr13:32877907-32886091  | 0.0862799   | 0 | #NAME? | 1 |
| XLOC_006097 | ENOX1           | chr13:43787665-44361116  | 0.0194616   | 0 | #NAME? | 1 |
| XLOC_006108 | SIAH3           | chr13:46354415-46425846  | 0.0048771   | 0 | #NAME? | 1 |
| XLOC_006131 | DLEU7           | chr13:51286758-51424041  | 0.0231007   | 0 | #NAME? | 1 |
| XLOC_006220 | COL4A1          | chr13:110801309-11095941 | 0.00253406  | 0 | #NAME? | 1 |
| XLOC_006261 | RNASE3          | chr14:21359561-21360507  | 0.0254641   | 0 | #NAME? | 1 |
| XLOC_006262 | ECRP            | chr14:21387499-21388335  | 0.0350136   | 0 | #NAME? | 1 |
| XLOC_006313 | COCH            | chr14:31343740-31359822  | 0.00532375  | 0 | #NAME? | 1 |
| XLOC_006318 | NPAS3           | chr14:33408458-34273382  | 0.00298288  | 0 | #NAME? | 1 |
| XLOC_006367 | RPL13AP3        | chr14:56232962-56234435  | 0.0123937   | 0 | #NAME? | 1 |
| XLOC_006387 | PRKCH           | chr14:61788514-62017698  | 0.00503736  | 0 | #NAME? | 1 |
| XLOC_006405 | LINC00238       | chr14:66953108-66965271  | 0.0128147   | 0 | #NAME? | 1 |
| XLOC_006414 | ACTN1-AS1       | chr14:69446398-69454180  | 0.0609118   | 0 | #NAME? | 1 |
| XLOC_006416 | GALNT16         | chr14:69726680-69821190  | 0.0207605   | 0 | #NAME? | 1 |
| XLOC_006421 | SMOC1           | chr14:70346113-70499083  | 0.00522004  | 0 | #NAME? | 1 |
| XLOC_006471 | C14orf178       | chr14:78183943-78236085  | 0.0409645   | 0 | #NAME? | 1 |
| XLOC_006479 | LOC283587       | chr14:88490893-88553688  | 0.0228376   | 0 | #NAME? | 1 |
| XLOC_006491 | SNORA11B        | chr14:91580356-91691703  | 2.65744     | 0 | #NAME? | 1 |
| XLOC_006648 | LINC00637       | chr14:104314057-10432431 | 0.0200313   | 0 | #NAME? | 1 |
| XLOC_006676 | OR11H2          | chr14:20181062-20182491  | 0.0188419   | 0 | #NAME? | 1 |
| XLOC_006688 | RNASE11,RNASE12 | chr14:21051051-21058982  | 0.00866284  | 0 | #NAME? | 1 |
| XLOC_006691 | NDRG2           | chr14:21484921-21493935  | 0.0165439   | 0 | #NAME? | 1 |
| XLOC_006753 | LOC100506071    | chr14:31343740-31359822  | 0.00680508  | 0 | #NAME? | 1 |
| XLOC_006770 | PTSC3           | chr14:36539632-36645857  | 0.0279297   | 0 | #NAME? | 1 |
| XLOC_006873 | SLC10A1         | chr14:70242551-70264006  | 0.0216736   | 0 | #NAME? | 1 |
| XLOC_006875 | ADAM21P1        | chr14:70712469-70714518  | 0.00742411  | 0 | #NAME? | 1 |
| XLOC_006917 | DIO2            | chr14:80663867-80921810  | 0.0021592   | 0 | #NAME? | 1 |
| XLOC_006951 | SERPINA10       | chr14:94749649-94759608  | 0.00776202  | 0 | #NAME? | 1 |
| XLOC_006996 | GPR132          | chr14:105515736-10553171 | 0.00673831  | 0 | #NAME? | 1 |
| XLOC_007021 | PAR5            | chr15:25230006-25233379  | 0.00374863  | 0 | #NAME? | 1 |
| XLOC_007112 | DKFZP434L187    | chr15:30488238-30506743  | 0.00320894  | 0 | #NAME? | 1 |

|             |                     |                         |            |   |        |   |
|-------------|---------------------|-------------------------|------------|---|--------|---|
| XLOC_007238 | C2CD4A              | chr15:62359175-62363116 | 0.00680852 | 0 | #NAME? | 1 |
| XLOC_007300 | LOC729739           | chr15:74630102-74660081 | 0.0912997  | 0 | #NAME? | 1 |
| XLOC_007321 | ISL2                | chr15:76629146-76634816 | 0.0206824  | 0 | #NAME? | 1 |
| XLOC_007348 | C15orf26            | chr15:81426643-81441516 | 0.00937644 | 0 | #NAME? | 1 |
| XLOC_007373 | LOC100506874        | chr15:85070426-85123412 | 0.0192711  | 0 | #NAME? | 1 |
| XLOC_007378 | SLC28A1             | chr15:85427912-85489027 | 0.0146527  | 0 | #NAME? | 1 |
| XLOC_007416 | ASB9P1              | chr15:93338713-93340338 | 0.0108678  | 0 | #NAME? | 1 |
| XLOC_007466 | OCA2                | chr15:28000022-28344458 | 0.00578773 | 0 | #NAME? | 1 |
| XLOC_007500 | CSNK1A1P1           | chr15:36871811-37110707 | 0.00896501 | 0 | #NAME? | 1 |
| XLOC_007509 | ANKRD63             | chr15:40573644-40574787 | 0.109473   | 0 | #NAME? | 1 |
| XLOC_007529 | PLA2G4D             | chr15:42359880-42386752 | 0.0055326  | 0 | #NAME? | 1 |
| XLOC_007572 | HDC                 | chr15:50534145-50558162 | 0.0198066  | 0 | #NAME? | 1 |
| XLOC_007578 | TNFAIP8L3           | chr15:51348798-51397473 | 0.00792779 | 0 | #NAME? | 1 |
| XLOC_007590 | ONECUT1             | chr15:53049159-53082209 | 0.0117034  | 0 | #NAME? | 1 |
| XLOC_007638 | IGDCC3              | chr15:65619464-65670378 | 0.00450854 | 0 | #NAME? | 1 |
| XLOC_007744 | LOC338963           | chr15:83379222-83382745 | 0.0319108  | 0 | #NAME? | 1 |
| XLOC_007791 | PGPEP1L             | chr15:99511458-99551024 | 0.0231739  | 0 | #NAME? | 1 |
| XLOC_007826 | C16orf11            | chr16:610421-615529     | 0.0156017  | 0 | #NAME? | 1 |
| XLOC_007844 | SSTR5               | chr16:1114081-1131454   | 0.013411   | 0 | #NAME? | 1 |
| XLOC_007925 | LOC440335           | chr16:4827614-4846492   | 0.124546   | 0 | #NAME? | 1 |
| XLOC_008075 | ITGAD               | chr16:31404632-31437826 | 0.00495489 | 0 | #NAME? | 1 |
| XLOC_008087 | FLJ26245, RNA5SP411 | chr16:34980893-34990995 | 0.0347387  | 0 | #NAME? | 1 |
| XLOC_008156 | CDH5                | chr16:66400524-66438689 | 0.00467065 | 0 | #NAME? | 1 |
| XLOC_008225 | HP                  | chr16:72088507-72094955 | 0.0264547  | 0 | #NAME? | 1 |
| XLOC_008329 | C1QTNF8             | chr16:1138225-1146244   | 0.00886315 | 0 | #NAME? | 1 |
| XLOC_008371 | PRSS33              | chr16:2833953-2836708   | 0.0173854  | 0 | #NAME? | 1 |
| XLOC_008372 | PRSS30P             | chr16:2889573-2892752   | 0.0146689  | 0 | #NAME? | 1 |
| XLOC_008381 | MEFV                | chr16:3292027-3306627   | 0.00578967 | 0 | #NAME? | 1 |
| XLOC_008406 | C16orf89            | chr16:5094122-5116146   | 0.0132528  | 0 | #NAME? | 1 |
| XLOC_008430 | PLA2G10             | chr16:14766404-14788526 | 0.0314219  | 0 | #NAME? | 1 |
| XLOC_008458 | DNAH3               | chr16:20944475-21191937 | 0.0013259  | 0 | #NAME? | 1 |
| XLOC_008467 | PDZD9               | chr16:21995185-22012431 | 0.0154868  | 0 | #NAME? | 1 |
| XLOC_008606 | LOC283867           | chr16:65318401-65610203 | 0.00821691 | 0 | #NAME? | 1 |
| XLOC_008622 | KCTD19              | chr16:67311412-67360661 | 0.00559447 | 0 | #NAME? | 1 |
| XLOC_008712 | FENDRR              | chr16:86508130-86542466 | 0.0164657  | 0 | #NAME? | 1 |
| XLOC_008792 | LOC339166           | chr17:5675553-5834016   | 0.0111716  | 0 | #NAME? | 1 |
| XLOC_008799 | XAF1                | chr17:6659155-6678964   | 0.00794885 | 0 | #NAME? | 1 |
| XLOC_008831 | EFNB3               | chr17:7608519-7614693   | 0.0272973  | 0 | #NAME? | 1 |
| XLOC_008857 | DNAH9               | chr17:11501747-11873065 | 0.00501793 | 0 | #NAME? | 1 |
| XLOC_008883 | FAM106CP            | chr17:16690205-16707819 | 0.00883677 | 0 | #NAME? | 1 |
| XLOC_008917 | LOC100287072        | chr17:20615758-20641178 | 0.00621264 | 0 | #NAME? | 1 |
| XLOC_008920 | KCNJ12, KCNJ18      | chr17:21279698-21323179 | 0.00437025 | 0 | #NAME? | 1 |
| XLOC_008967 | DPRXP4              | chr17:29297955-29326929 | 0.0252038  | 0 | #NAME? | 1 |
| XLOC_008982 | SPACA3              | chr17:31318881-31324892 | 0.0605882  | 0 | #NAME? | 1 |
| XLOC_008992 | UNC45B              | chr17:33474835-33516364 | 0.00294622 | 0 | #NAME? | 1 |
| XLOC_009011 | C17orf78            | chr17:35441926-35766902 | 0.00833022 | 0 | #NAME? | 1 |
| XLOC_009084 | AOC4                | chr17:41019161-41021234 | 0.0311048  | 0 | #NAME? | 1 |
| XLOC_009085 | G6PC                | chr17:41052813-41066450 | 0.00392514 | 0 | #NAME? | 1 |
| XLOC_009132 | MYL4                | chr17:45286427-45301045 | 0.0512448  | 0 | #NAME? | 1 |
| XLOC_009155 | NXPH3               | chr17:47653297-47661171 | 0.00337564 | 0 | #NAME? | 1 |
| XLOC_009288 | SMIM6               | chr17:73584138-73663269 | 0.0867395  | 0 | #NAME? | 1 |
| XLOC_009294 | ZACN                | chr17:74075262-74099868 | 0.0175592  | 0 | #NAME? | 1 |
| XLOC_009410 | ATP2A3              | chr17:3827162-3867758   | 0.00664186 | 0 | #NAME? | 1 |
| XLOC_009436 | AIP1L1              | chr17:6327058-6338519   | 0.00656371 | 0 | #NAME? | 1 |
| XLOC_009441 | SLC13A5             | chr17:6588038-6616740   | 0.00582963 | 0 | #NAME? | 1 |
| XLOC_009442 | TEKT1               | chr17:6703299-6735060   | 0.0119329  | 0 | #NAME? | 1 |
| XLOC_009483 | KRBA2               | chr17:8271972-8274858   | 0.0228176  | 0 | #NAME? | 1 |
| XLOC_009487 | CCDC42              | chr17:8633245-8648154   | 0.0156028  | 0 | #NAME? | 1 |
| XLOC_009495 | GAS7                | chr17:9813925-10101868  | 0.00237277 | 0 | #NAME? | 1 |
| XLOC_009499 | MYH1                | chr17:10395626-10421859 | 0.00218288 | 0 | #NAME? | 1 |
| XLOC_009603 | EVI2A               | chr17:29421944-29704695 | 0.014671   | 0 | #NAME? | 1 |
| XLOC_009606 | ARGFXP2             | chr17:30469472-30552746 | 0.0128331  | 0 | #NAME? | 1 |
| XLOC_009619 | SLFN13              | chr17:33762114-33775856 | 0.00180856 | 0 | #NAME? | 1 |
| XLOC_009696 | KRTAP2-1            | chr17:39202795-39203568 | 0.0537734  | 0 | #NAME? | 1 |
| XLOC_009699 | KRTAP2-4            | chr17:39221367-39222131 | 0.120519   | 0 | #NAME? | 1 |
| XLOC_009755 | LINC00671           | chr17:41026690-41050751 | 0.0100432  | 0 | #NAME? | 1 |
| XLOC_009762 | MEOX1               | chr17:41717757-41739262 | 0.00874733 | 0 | #NAME? | 1 |
| XLOC_009767 | PPY                 | chr17:42018171-42019833 | 0.0599409  | 0 | #NAME? | 1 |
| XLOC_009778 | ITGA2B              | chr17:42449549-42466873 | 0.00731465 | 0 | #NAME? | 1 |
| XLOC_009783 | GFAP                | chr17:42982993-42992920 | 0.00613211 | 0 | #NAME? | 1 |
| XLOC_009788 | SPATA32             | chr17:43325302-43394414 | 0.0485024  | 0 | #NAME? | 1 |
| XLOC_009800 | RPRML               | chr17:45055521-45056614 | 0.0917877  | 0 | #NAME? | 1 |
| XLOC_009807 | PRR15L              | chr17:46029333-46035243 | 0.0126505  | 0 | #NAME? | 1 |
| XLOC_009872 | HSF5                | chr17:56497528-56565759 | 0.00369001 | 0 | #NAME? | 1 |
| XLOC_009890 | SCARNA20            | chr17:58254690-58469586 | 2.92864    | 0 | #NAME? | 1 |
| XLOC_009892 | NACA2               | chr17:59667793-59668563 | 0.0225794  | 0 | #NAME? | 1 |
| XLOC_009954 | CD300E              | chr17:72606021-72619897 | 0.00400859 | 0 | #NAME? | 1 |
| XLOC_009998 | FLJ45079            | chr17:75875082-75880169 | 0.00363295 | 0 | #NAME? | 1 |
| XLOC_010064 | ZNF750              | chr17:80709939-80901062 | 0.0199059  | 0 | #NAME? | 1 |

|             |              |                          |            |   |        |   |
|-------------|--------------|--------------------------|------------|---|--------|---|
| XLOC_010096 | EMILIN2      | chr18:2847027-2914090    | 0.00476349 | 0 | #NAME? | 1 |
| XLOC_010186 | SLC14A2      | chr18:42792946-43263060  | 0.0142955  | 0 | #NAME? | 1 |
| XLOC_010208 | RAB27B       | chr18:52495707-52562747  | 0.00209294 | 0 | #NAME? | 1 |
| XLOC_010270 | LINC00470    | chr18:1268311-1359630    | 0.00766175 | 0 | #NAME? | 1 |
| XLOC_010379 | LINC-ROR     | chr18:54721803-54739350  | 0.00581398 | 0 | #NAME? | 1 |
| XLOC_010384 | ALPK2        | chr18:56148481-56296189  | 0.00182028 | 0 | #NAME? | 1 |
| XLOC_010402 | CD226        | chr18:67530192-67624232  | 0.0153419  | 0 | #NAME? | 1 |
| XLOC_010421 | MADCAM1      | chr19:496489-505343      | 0.0633984  | 0 | #NAME? | 1 |
| XLOC_010434 | AZU1         | chr19:827830-832017      | 0.0371212  | 0 | #NAME? | 1 |
| XLOC_010435 | PRTN3        | chr19:840984-848175      | 0.101843   | 0 | #NAME? | 1 |
| XLOC_010436 | ELANE        | chr19:852290-856246      | 0.0873722  | 0 | #NAME? | 1 |
| XLOC_010505 | MIR7-3HG     | chr19:4769116-4772568    | 0.0334376  | 0 | #NAME? | 1 |
| XLOC_010542 | CLEC4M       | chr19:7828034-7834491    | 0.0133322  | 0 | #NAME? | 1 |
| XLOC_010591 | C19orf80     | chr19:11309968-11373168  | 0.0557994  | 0 | #NAME? | 1 |
| XLOC_010633 | RLN3         | chr19:14139016-14141783  | 0.0685469  | 0 | #NAME? | 1 |
| XLOC_010640 | CLEC17A      | chr19:14693895-14721956  | 0.0086045  | 0 | #NAME? | 1 |
| XLOC_010646 | SYDE1        | chr19:15218213-15236577  | 0.0180866  | 0 | #NAME? | 1 |
| XLOC_010650 | CYP4F3       | chr19:15751706-15771570  | 0.00617035 | 0 | #NAME? | 1 |
| XLOC_010735 | ZNF492       | chr19:22817125-22850472  | 0.00643987 | 0 | #NAME? | 1 |
| XLOC_010776 | FXSD3        | chr19:35606731-35615228  | 0.0138169  | 0 | #NAME? | 1 |
| XLOC_010782 | HAMP         | chr19:35773409-35776045  | 0.0673057  | 0 | #NAME? | 1 |
| XLOC_010808 | OVOL3        | chr19:36602104-36616849  | 0.104647   | 0 | #NAME? | 1 |
| XLOC_010856 | LOC100129935 | chr19:40129324-40133041  | 0.0100427  | 0 | #NAME? | 1 |
| XLOC_010875 | CYP2F1       | chr19:41620352-41634281  | 0.0159687  | 0 | #NAME? | 1 |
| XLOC_010960 | DACT3-AS1    | chr19:47150868-47220384  | 0.0480136  | 0 | #NAME? | 1 |
| XLOC_011169 | LILRB1       | chr19:55128628-55149004  | 0.0130017  | 0 | #NAME? | 1 |
| XLOC_011228 | ZIK1         | chr19:58095627-58103758  | 0.0116526  | 0 | #NAME? | 1 |
| XLOC_011287 | CSNK1G2-AS1  | chr19:1941160-1981336    | 0.0421246  | 0 | #NAME? | 1 |
| XLOC_011296 | LINGO3       | chr19:2289773-2308156    | 0.0259342  | 0 | #NAME? | 1 |
| XLOC_011337 | PTPRS        | chr19:5205518-5340814    | 0.00341201 | 0 | #NAME? | 1 |
| XLOC_011468 | LYL1         | chr19:13209841-13213974  | 0.0210953  | 0 | #NAME? | 1 |
| XLOC_011506 | CYP4F2       | chr19:15988833-16008884  | 0.0159523  | 0 | #NAME? | 1 |
| XLOC_011510 | CALR3        | chr19:16589867-16607003  | 0.0141377  | 0 | #NAME? | 1 |
| XLOC_011535 | LRRC25       | chr19:18501953-18508415  | 0.0516744  | 0 | #NAME? | 1 |
| XLOC_011559 | ZNF682       | chr19:20115226-20150277  | 0.00780998 | 0 | #NAME? | 1 |
| XLOC_011568 | ZNF208       | chr19:22148896-22193745  | 0.00251471 | 0 | #NAME? | 1 |
| XLOC_011571 | ZNF99        | chr19:22934984-22966973  | 0.00309253 | 0 | #NAME? | 1 |
| XLOC_011577 | HAVCR1P1     | chr19:24344994-24346249  | 0.0521264  | 0 | #NAME? | 1 |
| XLOC_011605 | UPK1A-AS1    | chr19:36157714-36169367  | 0.0532014  | 0 | #NAME? | 1 |
| XLOC_011618 | COX7A1       | chr19:36641823-36643771  | 0.0440316  | 0 | #NAME? | 1 |
| XLOC_011622 | ZFP82        | chr19:36882860-36909550  | 0.00525242 | 0 | #NAME? | 1 |
| XLOC_011640 | WDR87        | chr19:38375471-38397317  | 0.00135205 | 0 | #NAME? | 1 |
| XLOC_011723 | PSG9         | chr19:43757434-43773682  | 0.0183089  | 0 | #NAME? | 1 |
| XLOC_011750 | EXOC3L2      | chr19:45715878-45737469  | 0.0329693  | 0 | #NAME? | 1 |
| XLOC_011751 | CKM          | chr19:45809670-45826235  | 0.0499831  | 0 | #NAME? | 1 |
| XLOC_011777 | PNMAL1       | chr19:46969747-46974820  | 0.00506209 | 0 | #NAME? | 1 |
| XLOC_011825 | CGB          | chr19:49526125-49527632  | 0.0373575  | 0 | #NAME? | 1 |
| XLOC_011870 | ASPDH        | chr19:51014856-51017947  | 0.0368797  | 0 | #NAME? | 1 |
| XLOC_011904 | SIGLEC5      | chr19:52114755-52133727  | 0.00712693 | 0 | #NAME? | 1 |
| XLOC_011932 | LOC284379    | chr19:54102884-54106751  | 0.0144853  | 0 | #NAME? | 1 |
| XLOC_011971 | SHISA7       | chr19:55940104-55954230  | 0.0143795  | 0 | #NAME? | 1 |
| XLOC_011991 | ZNF772       | chr19:57980953-57988938  | 0.00940938 | 0 | #NAME? | 1 |
| XLOC_012084 | CCDC164      | chr2:26624783-26679579   | 0.00580779 | 0 | #NAME? | 1 |
| XLOC_012086 | KCNK3        | chr2:26915580-26954066   | 0.012511   | 0 | #NAME? | 1 |
| XLOC_012213 | MEIS1        | chr2:66662531-66799891   | 0.0161452  | 0 | #NAME? | 1 |
| XLOC_012229 | VAX2         | chr2:71127719-71160575   | 0.0593167  | 0 | #NAME? | 1 |
| XLOC_012311 | ITPRIPL1     | chr2:96991061-96994091   | 0.0104101  | 0 | #NAME? | 1 |
| XLOC_012351 | GPR45        | chr2:105858199-10585992  | 0.0164184  | 0 | #NAME? | 1 |
| XLOC_012356 | RGPD4        | chr2:108443387-108509000 | 0.00205861 | 0 | #NAME? | 1 |
| XLOC_012383 | IL37         | chr2:113670547-113676458 | 0.115802   | 0 | #NAME? | 1 |
| XLOC_012411 | INHBB        | chr2:121103718-121109388 | 0.00779903 | 0 | #NAME? | 1 |
| XLOC_012419 | MYO7B        | chr2:128293377-128395303 | 0.00650136 | 0 | #NAME? | 1 |
| XLOC_012423 | RAB6C        | chr2:130724164-130740311 | 0.0051658  | 0 | #NAME? | 1 |
| XLOC_012439 | TUBA3D       | chr2:132202795-132360468 | 0.0803837  | 0 | #NAME? | 1 |
| XLOC_012454 | HNMT         | chr2:138721807-138773934 | 0.0511421  | 0 | #NAME? | 1 |
| XLOC_012461 | PABPC1P2     | chr2:147344624-147348558 | 0.00376871 | 0 | #NAME? | 1 |
| XLOC_012474 | KCNJ3        | chr2:155555092-155714864 | 0.00348191 | 0 | #NAME? | 1 |
| XLOC_012497 | DHR9         | chr2:169921298-169952677 | 0.0117166  | 0 | #NAME? | 1 |
| XLOC_012499 | KLHL41       | chr2:170366211-170382777 | 0.0111115  | 0 | #NAME? | 1 |
| XLOC_012523 | HOXD13       | chr2:176957531-176960668 | 0.00866063 | 0 | #NAME? | 1 |
| XLOC_012581 | AOX2P        | chr2:201560445-201658941 | 0.00839177 | 0 | #NAME? | 1 |
| XLOC_012663 | DES          | chr2:220283098-220291461 | 0.0102765  | 0 | #NAME? | 1 |
| XLOC_012664 | SPEG         | chr2:220299699-220358354 | 0.0267911  | 0 | #NAME? | 1 |
| XLOC_012666 | ASIC4        | chr2:220378891-220403494 | 0.0271073  | 0 | #NAME? | 1 |
| XLOC_012681 | COL4A3       | chr2:228029280-228179508 | 0.00196656 | 0 | #NAME? | 1 |
| XLOC_012735 | LOC643387    | chr2:239140326-239142988 | 0.00578258 | 0 | #NAME? | 1 |
| XLOC_012759 | NEU4         | chr2:242750159-242758738 | 0.0331416  | 0 | #NAME? | 1 |
| XLOC_012813 | LOC645949    | chr2:21910305-21933524   | 0.0197964  | 0 | #NAME? | 1 |
| XLOC_012937 | DBIL5P2      | chr2:63344985-63346677   | 0.00911091 | 0 | #NAME? | 1 |

|             |              |                          |            |   |        |   |
|-------------|--------------|--------------------------|------------|---|--------|---|
| XLOC_012967 | ADD2         | chr2:70889215-70995375   | 0.00486034 | 0 | #NAME? | 1 |
| XLOC_012999 | TACR1        | chr2:75273589-75426645   | 0.00965731 | 0 | #NAME? | 1 |
| XLOC_013066 | LYG2         | chr2:99858710-99871570   | 0.0242222  | 0 | #NAME? | 1 |
| XLOC_013089 | EDAR         | chr2:109510926-109605828 | 0.00360726 | 0 | #NAME? | 1 |
| XLOC_013122 | C1QL2        | chr2:119913818-11991647  | 0.021032   | 0 | #NAME? | 1 |
| XLOC_013150 | LOC100216479 | chr2:131174325-131186118 | 0.0105868  | 0 | #NAME? | 1 |
| XLOC_013154 | WTH3DI       | chr2:132118064-13212173  | 0.00414557 | 0 | #NAME? | 1 |
| XLOC_013212 | SCN3A        | chr2:165944029-166060577 | 0.00166303 | 0 | #NAME? | 1 |
| XLOC_013266 | NEUROD1      | chr2:182540832-182545392 | 0.00671543 | 0 | #NAME? | 1 |
| XLOC_013290 | LOC100130452 | chr2:197504355-197597530 | 0.048417   | 0 | #NAME? | 1 |
| XLOC_013309 | ALS2CR12     | chr2:202153146-20222210  | 0.051028   | 0 | #NAME? | 1 |
| XLOC_013365 | FEV          | chr2:219845808-219850378 | 0.0260467  | 0 | #NAME? | 1 |
| XLOC_013414 | SNORA75      | chr2:232319458-232329208 | 2.40392    | 0 | #NAME? | 1 |
| XLOC_013447 | MGC16025     | chr2:239969863-240322642 | 0.0096768  | 0 | #NAME? | 1 |
| XLOC_013455 | OTOS         | chr2:241078445-241080072 | 0.100948   | 0 | #NAME? | 1 |
| XLOC_013490 | TMC2         | chr20:2517252-2622430    | 0.00522271 | 0 | #NAME? | 1 |
| XLOC_013532 | ISM1         | chr20:13202417-13281297  | 0.00710798 | 0 | #NAME? | 1 |
| XLOC_013554 | C20orf26     | chr20:20015011-20341346  | 0.00909449 | 0 | #NAME? | 1 |
| XLOC_013614 | ASIP         | chr20:32848170-32857148  | 0.0755982  | 0 | #NAME? | 1 |
| XLOC_013648 | SNORA39      | chr20:37075296-37079564  | 1.9337     | 0 | #NAME? | 1 |
| XLOC_013674 | WISP2        | chr20:43343884-43356452  | 0.0189876  | 0 | #NAME? | 1 |
| XLOC_013686 | WFDC10A      | chr20:44236577-44259907  | 0.0495439  | 0 | #NAME? | 1 |
| XLOC_013687 | WFDC13       | chr20:44313289-44337456  | 0.0363643  | 0 | #NAME? | 1 |
| XLOC_013742 | APCDD1L-AS1  | chr20:57090434-57194948  | 0.0102657  | 0 | #NAME? | 1 |
| XLOC_013773 | LOC100144597 | chr20:61640734-61716423  | 0.0194096  | 0 | #NAME? | 1 |
| XLOC_013798 | MYT1         | chr20:62795826-62873606  | 0.00353674 | 0 | #NAME? | 1 |
| XLOC_013809 | ANGPT4       | chr20:853296-896960      | 0.0214586  | 0 | #NAME? | 1 |
| XLOC_013976 | JPH2         | chr20:42740336-42816218  | 0.0135535  | 0 | #NAME? | 1 |
| XLOC_013986 | WFDC5        | chr20:43738092-43743813  | 0.0259794  | 0 | #NAME? | 1 |
| XLOC_014015 | SULF2        | chr20:46286149-46415360  | 0.00452987 | 0 | #NAME? | 1 |
| XLOC_014041 | GCNT7        | chr20:55043646-55101208  | 0.00751434 | 0 | #NAME? | 1 |
| XLOC_014072 | LINC00029    | chr20:61640734-61716423  | 0.0123187  | 0 | #NAME? | 1 |
| XLOC_014080 | SRMS         | chr20:62172162-62178857  | 0.0398536  | 0 | #NAME? | 1 |
| XLOC_014120 | LINC00161    | chr21:29911639-29912677  | 0.0311185  | 0 | #NAME? | 1 |
| XLOC_014123 | LINC00189    | chr21:30565814-30660526  | 0.0236022  | 0 | #NAME? | 1 |
| XLOC_014138 | MRAP         | chr21:33664123-33765312  | 0.0399794  | 0 | #NAME? | 1 |
| XLOC_014151 | LINC00649    | chr21:35303515-35343487  | 0.0387731  | 0 | #NAME? | 1 |
| XLOC_014171 | KCNJ15       | chr21:39601836-39673746  | 0.005918   | 0 | #NAME? | 1 |
| XLOC_014196 | LINC00319    | chr21:44869903-44873771  | 0.0268326  | 0 | #NAME? | 1 |
| XLOC_014217 | ITGB2-AS1    | chr21:46305867-46349595  | 0.00936788 | 0 | #NAME? | 1 |
| XLOC_014310 | KCNE1        | chr21:35818985-35884573  | 0.00487946 | 0 | #NAME? | 1 |
| XLOC_014314 | RUNX1-IT1    | chr21:36160097-36421595  | 0.0115213  | 0 | #NAME? | 1 |
| XLOC_014317 | LOC100133286 | chr21:37441939-37498938  | 0.105544   | 0 | #NAME? | 1 |
| XLOC_014374 | ITGB2        | chr21:46305867-46349595  | 0.00833124 | 0 | #NAME? | 1 |
| XLOC_014377 | LINC00162    | chr21:46419126-46424642  | 0.0405298  | 0 | #NAME? | 1 |
| XLOC_014380 | COL18A1-AS2  | chr21:46825096-46933634  | 0.050396   | 0 | #NAME? | 1 |
| XLOC_014381 | COL18A1-AS1  | chr21:46825096-46933634  | 0.00661492 | 0 | #NAME? | 1 |
| XLOC_014480 | MYO18B       | chr22:26138119-26427007  | 0.00229841 | 0 | #NAME? | 1 |
| XLOC_014521 | RFPL3        | chr22:32750871-32767063  | 0.0167532  | 0 | #NAME? | 1 |
| XLOC_014574 | GRAP2        | chr22:40297085-40367384  | 0.0237509  | 0 | #NAME? | 1 |
| XLOC_014619 | RIBC2        | chr22:45809571-45828302  | 0.0157074  | 0 | #NAME? | 1 |
| XLOC_014640 | MOV10L1      | chr22:50528434-50600116  | 0.0190587  | 0 | #NAME? | 1 |
| XLOC_014658 | XKR3         | chr22:17264305-17302584  | 0.00867404 | 0 | #NAME? | 1 |
| XLOC_014709 | POM121L1P    | chr22:22974027-22987012  | 0.00956503 | 0 | #NAME? | 1 |
| XLOC_014710 | RTDR1        | chr22:23401592-23484241  | 0.0871289  | 0 | #NAME? | 1 |
| XLOC_014732 | TMEM211      | chr22:25331207-25335314  | 0.104565   | 0 | #NAME? | 1 |
| XLOC_014764 | SEC14L3      | chr22:30855215-30868034  | 0.00841435 | 0 | #NAME? | 1 |
| XLOC_014773 | PLA2G3       | chr22:31530792-31536469  | 0.0218382  | 0 | #NAME? | 1 |
| XLOC_014854 | SHISA8       | chr22:42305557-42310671  | 0.0469947  | 0 | #NAME? | 1 |
| XLOC_014896 | C22orf34     | chr22:50013289-50051190  | 0.00804335 | 0 | #NAME? | 1 |
| XLOC_014899 | IL17REL      | chr22:50432941-50451055  | 0.00710597 | 0 | #NAME? | 1 |
| XLOC_014966 | FGD5         | chr3:14860468-14976072   | 0.00649409 | 0 | #NAME? | 1 |
| XLOC_014973 | GALNT15      | chr3:16216183-16271253   | 0.00368725 | 0 | #NAME? | 1 |
| XLOC_015014 | ITGA9        | chr3:37493812-37861281   | 0.00409736 | 0 | #NAME? | 1 |
| XLOC_015018 | DLEC1        | chr3:38080695-38178733   | 0.0272532  | 0 | #NAME? | 1 |
| XLOC_015066 | TGM4         | chr3:44916097-44956088   | 0.0104859  | 0 | #NAME? | 1 |
| XLOC_015169 | C3orf49      | chr3:63805040-63849597   | 0.0123014  | 0 | #NAME? | 1 |
| XLOC_015191 | FRG2C        | chr3:75713480-75716368   | 0.0085058  | 0 | #NAME? | 1 |
| XLOC_015201 | EPHA3        | chr3:89156673-89531284   | 0.00577238 | 0 | #NAME? | 1 |
| XLOC_015242 | LINC00636    | chr3:107602051-107647752 | 0.0183746  | 0 | #NAME? | 1 |
| XLOC_015356 | SLC35G2      | chr3:136537860-136574732 | 0.00905495 | 0 | #NAME? | 1 |
| XLOC_015363 | ESYT3        | chr3:138153414-138197256 | 0.00353074 | 0 | #NAME? | 1 |
| XLOC_015376 | GRK7         | chr3:141497042-141535892 | 0.0119809  | 0 | #NAME? | 1 |
| XLOC_015436 | EGFEM1P      | chr3:167967309-168548372 | 0.00441412 | 0 | #NAME? | 1 |
| XLOC_015445 | CLDN11       | chr3:170136652-170152478 | 0.0213169  | 0 | #NAME? | 1 |
| XLOC_015452 | LINC00578    | chr3:177159708-177470492 | 0.0114601  | 0 | #NAME? | 1 |
| XLOC_015453 | KCNMB2-IT1   | chr3:178136988-178175092 | 0.131184   | 0 | #NAME? | 1 |
| XLOC_015495 | AHS3         | chr3:186330849-186339107 | 0.0258903  | 0 | #NAME? | 1 |
| XLOC_015511 | TPRG1        | chr3:188889762-189041272 | 0.00455738 | 0 | #NAME? | 1 |

|             |              |                          |            |   |        |   |
|-------------|--------------|--------------------------|------------|---|--------|---|
| XLOC_015514 | CLDN16       | chr3:190105660-190129932 | 0.00468526 | 0 | #NAME? | 1 |
| XLOC_015553 | LMCD1-AS1    | chr3:8262833-8543344     | 0.00722485 | 0 | #NAME? | 1 |
| XLOC_015571 | ATP2B2       | chr3:10365706-10547268   | 0.00228232 | 0 | #NAME? | 1 |
| XLOC_015637 | SCN11A       | chr3:38887259-38992052   | 0.00466604 | 0 | #NAME? | 1 |
| XLOC_015641 | CX3CR1       | chr3:39304984-39323226   | 0.00556872 | 0 | #NAME? | 1 |
| XLOC_015660 | LARS2-AS1    | chr3:45430074-45590328   | 0.00778451 | 0 | #NAME? | 1 |
| XLOC_015668 | LRRC2        | chr3:46556877-46608040   | 0.00263669 | 0 | #NAME? | 1 |
| XLOC_015788 | DNASE1L3     | chr3:58178352-58196730   | 0.018608   | 0 | #NAME? | 1 |
| XLOC_015791 | FAM107A      | chr3:58549844-58563491   | 0.00577541 | 0 | #NAME? | 1 |
| XLOC_015813 | FRMD4B       | chr3:69219145-69435430   | 0.00268009 | 0 | #NAME? | 1 |
| XLOC_015834 | STX19        | chr3:93698982-93774522   | 0.0226562  | 0 | #NAME? | 1 |
| XLOC_015864 | PVRL3-AS1    | chr3:110764162-110788800 | 0.0598311  | 0 | #NAME? | 1 |
| XLOC_015867 | SLC9C1       | chr3:111859751-112013074 | 0.00297911 | 0 | #NAME? | 1 |
| XLOC_015895 | HGD          | chr3:120347014-120401411 | 0.0162551  | 0 | #NAME? | 1 |
| XLOC_015914 | MUC13        | chr3:124624288-124653590 | 0.00578238 | 0 | #NAME? | 1 |
| XLOC_015964 | KY           | chr3:134318764-134369864 | 0.00296207 | 0 | #NAME? | 1 |
| XLOC_015974 | PRR23A       | chr3:138722803-138725110 | 0.00975911 | 0 | #NAME? | 1 |
| XLOC_016007 | CLRN1        | chr3:150643949-150797617 | 0.0135309  | 0 | #NAME? | 1 |
| XLOC_016111 | TPRG1-AS2    | chr3:188889762-189041271 | 0.0434792  | 0 | #NAME? | 1 |
| XLOC_016120 | ATP13A4      | chr3:193119865-193272690 | 0.00363221 | 0 | #NAME? | 1 |
| XLOC_016121 | OPA1-AS1     | chr3:193310932-193415600 | 0.0418948  | 0 | #NAME? | 1 |
| XLOC_016126 | LRRC15       | chr3:194075975-194090472 | 0.00327635 | 0 | #NAME? | 1 |
| XLOC_016127 | GP5          | chr3:194115549-194119990 | 0.023009   | 0 | #NAME? | 1 |
| XLOC_016379 | EREG         | chr4:75230859-75254477   | 0.00330737 | 0 | #NAME? | 1 |
| XLOC_016422 | SPP1         | chr4:88896801-88904563   | 0.00870096 | 0 | #NAME? | 1 |
| XLOC_016492 | FGF2         | chr4:123747862-123844150 | 0.00680956 | 0 | #NAME? | 1 |
| XLOC_016499 | SLC25A31     | chr4:128651554-128695447 | 0.0106151  | 0 | #NAME? | 1 |
| XLOC_016516 | IL15         | chr4:142557748-142655140 | 0.00811581 | 0 | #NAME? | 1 |
| XLOC_016606 | ZFP42        | chr4:188916924-188926190 | 0.00683705 | 0 | #NAME? | 1 |
| XLOC_016721 | BEND4        | chr4:42112869-42154895   | 0.00198254 | 0 | #NAME? | 1 |
| XLOC_016728 | COX7B2       | chr4:46736846-46911252   | 0.0947644  | 0 | #NAME? | 1 |
| XLOC_016763 | TMPRSS11D    | chr4:68686593-68749716   | 0.00460055 | 0 | #NAME? | 1 |
| XLOC_016806 | CCDC158      | chr4:77234191-77328458   | 0.00347741 | 0 | #NAME? | 1 |
| XLOC_016807 | SOWAHB       | chr4:77816081-77819002   | 0.0071343  | 0 | #NAME? | 1 |
| XLOC_016856 | ADH6         | chr4:100010007-100222510 | 0.0111853  | 0 | #NAME? | 1 |
| XLOC_016895 | NEUROG2      | chr4:113434671-113437320 | 0.0122316  | 0 | #NAME? | 1 |
| XLOC_016977 | FAM198B      | chr4:159045731-159094200 | 0.00319292 | 0 | #NAME? | 1 |
| XLOC_016982 | FSTL5        | chr4:162305043-163085180 | 0.00257381 | 0 | #NAME? | 1 |
| XLOC_017005 | HPGD         | chr4:175411327-175444040 | 0.00517066 | 0 | #NAME? | 1 |
| XLOC_017026 | SLSD1        | chr4:185676748-185747210 | 0.0613797  | 0 | #NAME? | 1 |
| XLOC_017052 | LRRC14B      | chr5:191625-195468       | 0.0234425  | 0 | #NAME? | 1 |
| XLOC_017078 | ROPN1L       | chr5:10441973-10465138   | 0.0549589  | 0 | #NAME? | 1 |
| XLOC_017121 | NIM1         | chr5:43192169-43280952   | 0.0115836  | 0 | #NAME? | 1 |
| XLOC_017138 | IL31RA       | chr5:55147206-55218682   | 0.0115966  | 0 | #NAME? | 1 |
| XLOC_017176 | PMCHL2       | chr5:70671611-70681820   | 0.00767784 | 0 | #NAME? | 1 |
| XLOC_017264 | SNORA13      | chr5:111496222-111498190 | 2.21816    | 0 | #NAME? | 1 |
| XLOC_017373 | PCDHB6       | chr5:140529838-140532860 | 0.00730611 | 0 | #NAME? | 1 |
| XLOC_017414 | AFAP1L1      | chr5:148651400-148721367 | 0.00386469 | 0 | #NAME? | 1 |
| XLOC_017443 | PPP1R2P3     | chr5:156277548-156279530 | 0.00802725 | 0 | #NAME? | 1 |
| XLOC_017481 | EFCAB9       | chr5:171621175-171630450 | 0.0540596  | 0 | #NAME? | 1 |
| XLOC_017492 | HMP19        | chr5:173472606-173536180 | 0.0156719  | 0 | #NAME? | 1 |
| XLOC_017504 | CDHR2        | chr5:175969511-176022760 | 0.0146894  | 0 | #NAME? | 1 |
| XLOC_017605 | AGXT2        | chr5:34998205-35048240   | 0.00728646 | 0 | #NAME? | 1 |
| XLOC_017613 | RANBP3L      | chr5:36249103-36302011   | 0.0147718  | 0 | #NAME? | 1 |
| XLOC_017680 | LOC100303749 | chr5:65222381-65376851   | 0.0194653  | 0 | #NAME? | 1 |
| XLOC_017690 | LOC647859    | chr5:70370029-70388897   | 0.0266935  | 0 | #NAME? | 1 |
| XLOC_017722 | ACOT12       | chr5:80256507-81047072   | 0.00858128 | 0 | #NAME? | 1 |
| XLOC_017754 | LOC100133050 | chr5:99715208-99723958   | 0.0342834  | 0 | #NAME? | 1 |
| XLOC_017787 | C5orf63      | chr5:126378249-126409180 | 0.0024072  | 0 | #NAME? | 1 |
| XLOC_017794 | ACSL6        | chr5:131285666-131347761 | 0.0066439  | 0 | #NAME? | 1 |
| XLOC_017830 | KLHL3        | chr5:136953188-137071770 | 0.00439032 | 0 | #NAME? | 1 |
| XLOC_017844 | SLC23A1      | chr5:138677518-138719030 | 0.0344385  | 0 | #NAME? | 1 |
| XLOC_017851 | NRG2         | chr5:139226363-139422880 | 0.00748532 | 0 | #NAME? | 1 |
| XLOC_017860 | SLC25A2      | chr5:140682195-140683610 | 0.0414427  | 0 | #NAME? | 1 |
| XLOC_017884 | SPINK1       | chr5:147204142-147211260 | 0.106565   | 0 | #NAME? | 1 |
| XLOC_017906 | SLC36A2      | chr5:150694538-150727151 | 0.00497364 | 0 | #NAME? | 1 |
| XLOC_017923 | FND9         | chr5:156693090-156822600 | 0.0298124  | 0 | #NAME? | 1 |
| XLOC_017974 | PFN3         | chr5:176827107-176827630 | 0.216893   | 0 | #NAME? | 1 |
| XLOC_017992 | GRM6         | chr5:178405329-178422120 | 0.00320938 | 0 | #NAME? | 1 |
| XLOC_017996 | CBY3         | chr5:179105558-179107970 | 0.0475317  | 0 | #NAME? | 1 |
| XLOC_018053 | ELOVL2-AS1   | chr6:10980992-11079377   | 0.0105882  | 0 | #NAME? | 1 |
| XLOC_018058 | PHACTR1      | chr6:12717036-13295818   | 0.00633119 | 0 | #NAME? | 1 |
| XLOC_018080 | NRSN1        | chr6:24126413-24147757   | 0.00623427 | 0 | #NAME? | 1 |
| XLOC_018100 | HIST1H2BE    | chr6:26184023-26184458   | 0.0927424  | 0 | #NAME? | 1 |
| XLOC_018141 | NKAPL        | chr6:28227074-28228736   | 0.0202922  | 0 | #NAME? | 1 |
| XLOC_018158 | LOC554223    | chr6:29758807-29765584   | 0.0556833  | 0 | #NAME? | 1 |
| XLOC_018193 | MCCD1        | chr6:31496738-31514625   | 0.0347122  | 0 | #NAME? | 1 |
| XLOC_018246 | GGNBP1       | chr6:33551475-33561115   | 0.0208792  | 0 | #NAME? | 1 |
| XLOC_018283 | TSPO2        | chr6:41010236-41012076   | 0.0260755  | 0 | #NAME? | 1 |

|             |                       |                          |            |   |        |   |
|-------------|-----------------------|--------------------------|------------|---|--------|---|
| XLOC_018459 | FAM26F                | chr6:116782532-116784934 | 0.134498   | 0 | #NAME? | 1 |
| XLOC_018460 | FAM26E                | chr6:116817650-116880031 | 0.00929043 | 0 | #NAME? | 1 |
| XLOC_018470 | BRD7P3                | chr6:118781934-119031238 | 0.0285178  | 0 | #NAME? | 1 |
| XLOC_018471 | PLN                   | chr6:118781934-119031238 | 0.00824026 | 0 | #NAME? | 1 |
| XLOC_018477 | FABP7                 | chr6:123100645-123105211 | 0.0156612  | 0 | #NAME? | 1 |
| XLOC_018492 | LAMA2                 | chr6:129204285-129837710 | 0.00571281 | 0 | #NAME? | 1 |
| XLOC_018495 | SMLR1                 | chr6:131148544-131158276 | 0.0117153  | 0 | #NAME? | 1 |
| XLOC_018498 | ENPP3                 | chr6:131958441-132068550 | 0.00409582 | 0 | #NAME? | 1 |
| XLOC_018548 | SUMO4                 | chr6:149639435-149732747 | 0.0263012  | 0 | #NAME? | 1 |
| XLOC_018556 | PLEKHG1               | chr6:150920998-151164795 | 0.0066759  | 0 | #NAME? | 1 |
| XLOC_018563 | VIP                   | chr6:153071931-153080902 | 0.00855829 | 0 | #NAME? | 1 |
| XLOC_018622 | LOC100507194          | chr6:3183051-3196001     | 0.0124069  | 0 | #NAME? | 1 |
| XLOC_018753 | PSORS1C3              | chr6:31141511-31145676   | 0.0443515  | 0 | #NAME? | 1 |
| XLOC_018760 | NCR3                  | chr6:31553955-31560762   | 0.0503033  | 0 | #NAME? | 1 |
| XLOC_018795 | HLA-DRB6              | chr6:32520489-32527779   | 0.0779028  | 0 | #NAME? | 1 |
| XLOC_018834 | CLPS                  | chr6:35762758-35765121   | 0.0646414  | 0 | #NAME? | 1 |
| XLOC_018839 | PXT1                  | chr6:36358328-36458315   | 0.0313468  | 0 | #NAME? | 1 |
| XLOC_018863 | TREM2                 | chr6:41126243-41130924   | 0.0385355  | 0 | #NAME? | 1 |
| XLOC_018906 | GPR110                | chr6:46967812-47010082   | 0.0108941  | 0 | #NAME? | 1 |
| XLOC_018957 | OOEP                  | chr6:74078279-74079515   | 0.0669335  | 0 | #NAME? | 1 |
| XLOC_018964 | FILIP1                | chr6:76017799-76203496   | 0.00606159 | 0 | #NAME? | 1 |
| XLOC_018993 | GABRR2                | chr6:89966839-90025018   | 0.0177045  | 0 | #NAME? | 1 |
| XLOC_019049 | COL10A1               | chr6:116421998-116566853 | 0.0196966  | 0 | #NAME? | 1 |
| XLOC_019103 | NHEG1                 | chr6:137303295-137314361 | 0.0176065  | 0 | #NAME? | 1 |
| XLOC_019118 | NMBR                  | chr6:142396744-142409936 | 0.0180303  | 0 | #NAME? | 1 |
| XLOC_019124 | LOC285740             | chr6:143875466-143890471 | 0.0348514  | 0 | #NAME? | 1 |
| XLOC_019174 | PARK2                 | chr6:161768589-163745501 | 0.013477   | 0 | #NAME? | 1 |
| XLOC_019200 | TCTE3                 | chr6:170140214-170151638 | 0.0228854  | 0 | #NAME? | 1 |
| XLOC_020347 | AMZ1                  | chr7:2719162-2755069     | 0.00517109 | 0 | #NAME? | 1 |
| XLOC_020376 | SCIN                  | chr7:12610202-12693228   | 0.006007   | 0 | #NAME? | 1 |
| XLOC_020386 | ABC85                 | chr7:20655244-20796637   | 0.00363499 | 0 | #NAME? | 1 |
| XLOC_020390 | LOC100506178          | chr7:22602955-22613617   | 0.00571133 | 0 | #NAME? | 1 |
| XLOC_020537 | FKBP6                 | chr7:72742154-72772641   | 0.0255147  | 0 | #NAME? | 1 |
| XLOC_020585 | CD36                  | chr7:80231503-80308593   | 0.00823761 | 0 | #NAME? | 1 |
| XLOC_020636 | AZGP1P1               | chr7:99578384-99581860   | 0.0136503  | 0 | #NAME? | 1 |
| XLOC_020669 | COL26A1               | chr7:101006121-101202304 | 0.00851912 | 0 | #NAME? | 1 |
| XLOC_020712 | CFLTR                 | chr7:117120016-117308711 | 0.00244621 | 0 | #NAME? | 1 |
| XLOC_020721 | ASB15                 | chr7:123249111-123277932 | 0.00535455 | 0 | #NAME? | 1 |
| XLOC_020737 | FAM71F1               | chr7:128355442-128371797 | 0.0271583  | 0 | #NAME? | 1 |
| XLOC_020779 | TMEM213               | chr7:138391038-138490761 | 0.00524629 | 0 | #NAME? | 1 |
| XLOC_020791 | WEE2                  | chr7:141404137-141438030 | 0.00527929 | 0 | #NAME? | 1 |
| XLOC_020813 | EPHA1-AS1             | chr7:143078359-143220541 | 0.00512024 | 0 | #NAME? | 1 |
| XLOC_020859 | ABP1                  | chr7:150549564-150558371 | 0.00886542 | 0 | #NAME? | 1 |
| XLOC_020881 | LINC00244             | chr7:156333184-156333791 | 0.0413569  | 0 | #NAME? | 1 |
| XLOC_020912 | MMD2                  | chr7:4931875-4998844     | 0.0384964  | 0 | #NAME? | 1 |
| XLOC_020919 | RNF216-IT1            | chr7:5659671-5821361     | 0.103147   | 0 | #NAME? | 1 |
| XLOC_020942 | SOSTDC1               | chr7:16501105-16505474   | 0.0102062  | 0 | #NAME? | 1 |
| XLOC_021048 | NACAD                 | chr7:45120035-45128493   | 0.00974079 | 0 | #NAME? | 1 |
| XLOC_021117 | LOC100093631          | chr7:74601103-74653459   | 0.00944811 | 0 | #NAME? | 1 |
| XLOC_021169 | SGCE                  | chr7:94214535-94285521   | 0.00865182 | 0 | #NAME? | 1 |
| XLOC_021194 | CYP3A7,CYP3A7-CYP3AP1 | chr7:99282301-99332819   | 0.0295487  | 0 | #NAME? | 1 |
| XLOC_021196 | OR2AE1                | chr7:99473684-99474656   | 0.020499   | 0 | #NAME? | 1 |
| XLOC_021219 | ACTL6B                | chr7:100240725-100254008 | 0.0133589  | 0 | #NAME? | 1 |
| XLOC_021226 | MOGAT3                | chr7:100839012-100844302 | 0.0214589  | 0 | #NAME? | 1 |
| XLOC_021258 | SLC26A4-AS1           | chr7:107296960-107358252 | 0.00422686 | 0 | #NAME? | 1 |
| XLOC_021271 | GPR85                 | chr7:112720467-112727832 | 0.0062094  | 0 | #NAME? | 1 |
| XLOC_021278 | ASZ1                  | chr7:117003275-117067571 | 0.0082622  | 0 | #NAME? | 1 |
| XLOC_021296 | GRM8                  | chr7:126078651-126892421 | 0.00847586 | 0 | #NAME? | 1 |
| XLOC_021331 | SLC13A4               | chr7:135365986-135412932 | 0.00699828 | 0 | #NAME? | 1 |
| XLOC_021356 | PRSS37                | chr7:141536077-141541221 | 0.0302323  | 0 | #NAME? | 1 |
| XLOC_021364 | KEL                   | chr7:142638200-142659502 | 0.0164875  | 0 | #NAME? | 1 |
| XLOC_021375 | OR2A20P,OR2A9P        | chr7:143947563-143948691 | 0.0270449  | 0 | #NAME? | 1 |
| XLOC_021390 | ATP6V0E2-AS1          | chr7:149564782-149577781 | 0.0129989  | 0 | #NAME? | 1 |
| XLOC_021424 | VIPR2                 | chr7:158820865-158937641 | 0.00531193 | 0 | #NAME? | 1 |
| XLOC_021464 | C8orf12,TDH           | chr8:11197145-11324276   | 0.0551203  | 0 | #NAME? | 1 |
| XLOC_021470 | DEFB135               | chr8:11839829-11842099   | 0.261123   | 0 | #NAME? | 1 |
| XLOC_021514 | LOC100507156          | chr8:23154409-23261722   | 0.0073647  | 0 | #NAME? | 1 |
| XLOC_021539 | SMIM18                | chr8:30436030-30515738   | 0.0203609  | 0 | #NAME? | 1 |
| XLOC_021582 | LOC100287846          | chr8:48100929-48104439   | 0.0104548  | 0 | #NAME? | 1 |
| XLOC_021600 | FAM110B               | chr8:58907112-59062277   | 0.00461813 | 0 | #NAME? | 1 |
| XLOC_021615 | DNAJC5B               | chr8:66933790-67012755   | 0.0356675  | 0 | #NAME? | 1 |
| XLOC_021704 | BAALC                 | chr8:104145190-104242532 | 0.0061584  | 0 | #NAME? | 1 |
| XLOC_021709 | RIMS2                 | chr8:104512975-105266651 | 0.00403959 | 0 | #NAME? | 1 |
| XLOC_021867 | DEFB134               | chr8:11851488-11853760   | 0.434834   | 0 | #NAME? | 1 |
| XLOC_021899 | DOK2                  | chr8:21766383-21771205   | 0.0161235  | 0 | #NAME? | 1 |
| XLOC_021931 | SCARA5                | chr8:27727398-27850369   | 0.00491029 | 0 | #NAME? | 1 |
| XLOC_021950 | PURG                  | chr8:30853320-31031277   | 0.00866616 | 0 | #NAME? | 1 |
| XLOC_021955 | LOC728024             | chr8:37594096-37615319   | 0.0202667  | 0 | #NAME? | 1 |
| XLOC_021973 | ANK1                  | chr8:41510743-41754280   | 0.00277727 | 0 | #NAME? | 1 |

|             |                     |                          |            |   |        |   |
|-------------|---------------------|--------------------------|------------|---|--------|---|
| XLOC_021977 | DKK4                | chr8:42231585-42234674   | 0.0247179  | 0 | #NAME? | 1 |
| XLOC_021986 | PXDNL               | chr8:52232136-52722005   | 0.00335783 | 0 | #NAME? | 1 |
| XLOC_021988 | ST18                | chr8:53023391-53322439   | 0.00231873 | 0 | #NAME? | 1 |
| XLOC_021991 | OPRK1               | chr8:54138275-54164194   | 0.00711739 | 0 | #NAME? | 1 |
| XLOC_022043 | LOC100130301        | chr8:74153658-74171737   | 0.0660487  | 0 | #NAME? | 1 |
| XLOC_022080 | DCAF4L2             | chr8:88882970-88886296   | 0.00487454 | 0 | #NAME? | 1 |
| XLOC_022105 | GDF6                | chr8:97154557-97173020   | 0.00523122 | 0 | #NAME? | 1 |
| XLOC_022151 | ENPP2               | chr8:120569316-120651106 | 0.00683952 | 0 | #NAME? | 1 |
| XLOC_022163 | KLHL38              | chr8:124657914-124665190 | 0.0216014  | 0 | #NAME? | 1 |
| XLOC_022170 | LOC100130231        | chr8:126934766-126963447 | 0.00297938 | 0 | #NAME? | 1 |
| XLOC_022179 | ASAP1-IT1           | chr8:131064350-131455906 | 0.0313474  | 0 | #NAME? | 1 |
| XLOC_022184 | HPYR1               | chr8:133572744-133573726 | 0.0329231  | 0 | #NAME? | 1 |
| XLOC_022195 | KCNK9               | chr8:140624803-140715295 | 0.0244683  | 0 | #NAME? | 1 |
| XLOC_022208 | LYNX1               | chr8:143845755-143859640 | 0.0528866  | 0 | #NAME? | 1 |
| XLOC_022277 | MLANA               | chr9:5890908-5909822     | 0.0207507  | 0 | #NAME? | 1 |
| XLOC_022298 | IFNA8               | chr9:21409145-21410184   | 0.0175644  | 0 | #NAME? | 1 |
| XLOC_022305 | LOC100506422        | chr9:26066672-26118406   | 0.0171219  | 0 | #NAME? | 1 |
| XLOC_022342 | HRIT2               | chr9:35906188-35907138   | 0.0535883  | 0 | #NAME? | 1 |
| XLOC_022343 | LOC158376           | chr9:35909479-35911617   | 0.028681   | 0 | #NAME? | 1 |
| XLOC_022371 | FAM27C              | chr9:44990235-44991492   | 0.0333125  | 0 | #NAME? | 1 |
| XLOC_022376 | ANKRD20A1,ANKRD20A3 | chr9:67926760-67970293   | 0.00399087 | 0 | #NAME? | 1 |
| XLOC_022392 | GDA                 | chr9:74729510-74867140   | 0.0083248  | 0 | #NAME? | 1 |
| XLOC_022415 | LOC100506834        | chr9:89563612-89616948   | 0.00384976 | 0 | #NAME? | 1 |
| XLOC_022424 | NXNL2               | chr9:91150015-91190704   | 0.0886032  | 0 | #NAME? | 1 |
| XLOC_022425 | C9orf47,S1PR3       | chr9:91605777-91620069   | 0.00449393 | 0 | #NAME? | 1 |
| XLOC_022499 | ACTL7A              | chr9:111624602-111626036 | 0.013836   | 0 | #NAME? | 1 |
| XLOC_022521 | ORM2                | chr9:117092068-117095536 | 0.0232933  | 0 | #NAME? | 1 |
| XLOC_022534 | MORN5               | chr9:124922189-124962367 | 0.074674   | 0 | #NAME? | 1 |
| XLOC_022544 | OR1L6               | chr9:125512126-125513067 | 0.0253018  | 0 | #NAME? | 1 |
| XLOC_022625 | C9orf171            | chr9:135285610-135448675 | 0.0746296  | 0 | #NAME? | 1 |
| XLOC_022629 | GF11B               | chr9:135854097-135867084 | 0.0131459  | 0 | #NAME? | 1 |
| XLOC_022657 | PAEP                | chr9:138453603-138458627 | 0.0492128  | 0 | #NAME? | 1 |
| XLOC_022702 | TUBBP5              | chr9:141044564-141071887 | 0.0425276  | 0 | #NAME? | 1 |
| XLOC_022726 | FLJ41200            | chr9:13406378-13431328   | 0.0069112  | 0 | #NAME? | 1 |
| XLOC_022735 | FAM154A             | chr9:18927890-19033256   | 0.0103858  | 0 | #NAME? | 1 |
| XLOC_022752 | IFNA17              | chr9:21227241-21228221   | 0.0164227  | 0 | #NAME? | 1 |
| XLOC_022771 | LINC00032           | chr9:27245681-27282791   | 0.00496743 | 0 | #NAME? | 1 |
| XLOC_022800 | CNTFR               | chr9:34551429-34590138   | 0.026488   | 0 | #NAME? | 1 |
| XLOC_022866 | FOXO4L5             | chr9:70175706-70178815   | 0.0159167  | 0 | #NAME? | 1 |
| XLOC_022877 | LOC100507299        | chr9:72658496-72873790   | 0.0216737  | 0 | #NAME? | 1 |
| XLOC_022885 | ALDH1A1             | chr9:75515577-75568233   | 0.00704941 | 0 | #NAME? | 1 |
| XLOC_022905 | SLC28A3             | chr9:86890764-86983413   | 0.00298567 | 0 | #NAME? | 1 |
| XLOC_023047 | STOM                | chr9:124101265-124132587 | 0.00683907 | 0 | #NAME? | 1 |
| XLOC_023068 | NR5A1               | chr9:127243514-127269695 | 0.00766747 | 0 | #NAME? | 1 |
| XLOC_023111 | C9orf50             | chr9:132374503-132383057 | 0.0199852  | 0 | #NAME? | 1 |
| XLOC_023183 | FUT7                | chr9:139901685-139931234 | 0.0233837  | 0 | #NAME? | 1 |
| XLOC_023242 | XG                  | chrX:2670092-2734541     | 0.00948243 | 0 | #NAME? | 1 |
| XLOC_023246 | CXorf28             | chrX:3189860-3202694     | 0.0296681  | 0 | #NAME? | 1 |
| XLOC_023307 | MAGEB6              | chrX:26210556-26213763   | 0.00935304 | 0 | #NAME? | 1 |
| XLOC_023324 | LANCL3              | chrX:37430821-37536750   | 0.0104351  | 0 | #NAME? | 1 |
| XLOC_023329 | OTC                 | chrX:38211735-38280703   | 0.00924673 | 0 | #NAME? | 1 |
| XLOC_023376 | ERAS                | chrX:48684922-48688279   | 0.0300675  | 0 | #NAME? | 1 |
| XLOC_023392 | PAGE4               | chrX:49593905-49598570   | 0.0404265  | 0 | #NAME? | 1 |
| XLOC_023442 | HEPH                | chrX:65382432-65487230   | 0.00335641 | 0 | #NAME? | 1 |
| XLOC_023452 | DGAT2L6             | chrX:69397335-69425553   | 0.0204082  | 0 | #NAME? | 1 |
| XLOC_023457 | GDPD2               | chrX:69642880-69653241   | 0.0282221  | 0 | #NAME? | 1 |
| XLOC_023579 | AGTR2               | chrX:115301957-115306227 | 0.00484718 | 0 | #NAME? | 1 |
| XLOC_023585 | ZCCHC12             | chrX:117957786-117960937 | 0.00880905 | 0 | #NAME? | 1 |
| XLOC_023598 | GLUD2               | chrX:120181461-120183791 | 0.0298227  | 0 | #NAME? | 1 |
| XLOC_023599 | GRIA3               | chrX:122318095-122624761 | 0.0216514  | 0 | #NAME? | 1 |
| XLOC_023639 | CD40LG              | chrX:135730335-135742547 | 0.00958126 | 0 | #NAME? | 1 |
| XLOC_023655 | SLITRK2             | chrX:144899346-144907361 | 0.00453242 | 0 | #NAME? | 1 |
| XLOC_023668 | MAMLD1              | chrX:149531550-149682441 | 0.00462846 | 0 | #NAME? | 1 |
| XLOC_023705 | TKTL1               | chrX:153524026-153558717 | 0.00644598 | 0 | #NAME? | 1 |
| XLOC_023796 | ZFX-AS1             | chrX:24164341-24234372   | 0.0629026  | 0 | #NAME? | 1 |
| XLOC_023809 | FTH1P18             | chrX:37060954-37061867   | 0.0635256  | 0 | #NAME? | 1 |
| XLOC_023824 | CXorf36             | chrX:45007617-45060146   | 0.00359234 | 0 | #NAME? | 1 |
| XLOC_023843 | PCK1N               | chrX:48689503-48694036   | 0.124055   | 0 | #NAME? | 1 |
| XLOC_023898 | SPIN2A              | chrX:57162082-57164058   | 0.0295026  | 0 | #NAME? | 1 |
| XLOC_023914 | AWAT2               | chrX:69260391-69269788   | 0.00934017 | 0 | #NAME? | 1 |
| XLOC_023915 | P2RY4               | chrX:69478015-69479654   | 0.0407682  | 0 | #NAME? | 1 |
| XLOC_023921 | IL2RG               | chrX:70327253-70331481   | 0.0208834  | 0 | #NAME? | 1 |
| XLOC_023949 | ZDHHC15             | chrX:74588261-74743337   | 0.00225701 | 0 | #NAME? | 1 |
| XLOC_024010 | TEX13B              | chrX:107224093-107225601 | 0.0169914  | 0 | #NAME? | 1 |
| XLOC_024020 | CAPN6               | chrX:110488326-110513777 | 0.00406787 | 0 | #NAME? | 1 |
| XLOC_024106 | CT45A5              | chrX:134945650-134953997 | 0.0112177  | 0 | #NAME? | 1 |
| XLOC_024202 | SMIM9               | chrX:154051622-154062937 | 0.0207791  | 0 | #NAME? | 1 |
| XLOC_024208 | TMLHE-AS1           | chrX:154576449-154603827 | 0.00922886 | 0 | #NAME? | 1 |
| XLOC_024304 | GYG2P1              | chrY:14517914-14533389   | 0.028421   | 0 | #NAME? | 1 |





## 7hrs vs 1/2hr

| gene              | c5       | c7        | log2(fold_change) | q_value    |
|-------------------|----------|-----------|-------------------|------------|
| LDHD              | 1.16223  | 1.49846   | 0.366581          | 0.736044   |
| CYP4F35P          | 0.103307 | 0.155204  | 0.587225          | 1          |
| NEAT1             | 22.5857  | 43.0927   | 0.932034          | 0.00134142 |
| ANKRD20A12P       | 0.228543 | 0.401545  | 0.813098          | 0.3126     |
| NRG4              | 0.18288  | 0.813411  | 2.15309           | 0.00134142 |
| SYNPO             | 0.185765 | 0.183592  | -0.0169775        | 1          |
| ATP8A1            | 0.14823  | 0.0872658 | -0.764346         | 1          |
| CENPE             | 0.193499 | 0.650095  | 1.74833           | 0.00134142 |
| MTRNR2L1          | 0.398709 | 0.381748  | -0.0627138        | 0.989598   |
| CA9               | 104.024  | 126.833   | 0.286021          | 0.488301   |
| KIF17             | 0.332878 | 0.173866  | -0.937014         | 1          |
| AKAP9             | 0.343759 | 0.5542    | 0.689007          | 0.0587985  |
| HR                | 0.470458 | 0.195337  | -1.2681           | 0.0270114  |
| PLXNB3            | 0.411198 | 0.309198  | -0.411301         | 0.717812   |
| LOC100190986      | 0.431032 | 0.883418  | 1.0353            | 0.0439989  |
| MEGF6             | 0.43824  | 0.304891  | -0.523429         | 0.474875   |
| ID1               | 21.6917  | 56.8906   | 1.39104           | 0.00134142 |
| LOC143666         | 0.698321 | 1.66428   | 1.25293           | 0.0167292  |
| LOC284454,MIR24-2 | 5.14236  | 12.1948   | 1.24576           | 0.00134142 |
| MGAT5B            | 1.54524  | 1.04068   | -0.570298         | 0.271605   |
| SMAD7             | 1.57974  | 0.88948   | -0.828653         | 0.077181   |
| ANKRD12           | 0.307884 | 0.390231  | 0.341943          | 0.620054   |
| NAT16             | 1.13805  | 0.978725  | -0.217595         | 0.89952    |
| ZNF627            | 1.70313  | 1.8776    | 0.1407            | 0.922881   |
| ID3               | 141.728  | 379.655   | 1.42157           | 0.00134142 |
| SOX2-OT           | 0.768464 | 0.416535  | -0.883538         | 0.0764532  |
| AMT,NICN1         | 0.898547 | 0.981573  | 0.127501          | 0.946765   |
| EPS8L2            | 0.949089 | 0.633637  | -0.582886         | 0.458463   |
| MIR155,MIR155HG   | 2.23158  | 4.87889   | 1.12849           | 0.0120701  |
| CKB               | 3.79851  | 4.04772   | 0.0916777         | 0.9727     |
| AHNAK2            | 0.650152 | 0.242966  | -1.42002          | 0.00134142 |
| DHDH              | 3.37443  | 2.99373   | -0.172701         | 0.931471   |
| DDIT4             | 81.5535  | 70.596    | -0.20816          | 0.700075   |
| ZNF792            | 0.638663 | 1.00918   | 0.660057          | 0.163218   |
| PPP1R3E           | 0.863976 | 1.16078   | 0.426034          | 0.486205   |
| SH3D21            | 3.2233   | 1.22642   | -1.39408          | 0.00134142 |
| FAM212A           | 5.14508  | 8.03672   | 0.643414          | 0.145048   |
| ZNF484            | 0.5465   | 0.576534  | 0.0771855         | 0.978196   |
| ARHGAP33          | 1.61558  | 1.05423   | -0.615861         | 0.229047   |
| XIST              | 3.15718  | 4.57715   | 0.535815          | 0.0515434  |
| CLK1              | 14.1494  | 23.5925   | 0.737588          | 0.00425224 |
| GOLGA4            | 1.435    | 3.2104    | 1.1617            | 0.00134142 |
| OBSCN             | 0.525173 | 0.415985  | -0.33626          | 0.595983   |
| PIK3IP1           | 2.066    | 0.769317  | -1.42519          | 0.00134142 |
| GABBR1            | 2.43942  | 2.65534   | 0.122356          | 0.931733   |
| PIM1              | 10.9827  | 15.3201   | 0.480189          | 0.124933   |
| BRWD3             | 0.354879 | 0.344101  | -0.0444933        | 0.986822   |
| CAV1              | 7.78267  | 4.81998   | -0.691239         | 0.0189207  |
| NRBP2             | 7.27828  | 8.58287   | 0.237863          | 0.686445   |
| MYLIP             | 3.2491   | 3.03836   | -0.0967449        | 0.954907   |
| LOC646329         | 11.7513  | 12.3693   | 0.0739402         | 0.961224   |
| ATHL1             | 17.3742  | 19.7867   | 0.18759           | 0.766627   |
| ITGA3             | 23.1558  | 33.9924   | 0.55384           | 0.042771   |
| TGIF1             | 26.3485  | 44.9298   | 0.769952          | 0.00134142 |
| BHLHE40           | 20.3029  | 37.4212   | 0.882171          | 0.00134142 |
| CRIP2             | 20.5764  | 20.4084   | -0.0118274        | 0.996453   |
| ZMAT3             | 2.02147  | 3.20136   | 0.663276          | 0.0132924  |
| PROSAP1P1         | 3.23607  | 3.86332   | 0.255601          | 0.678791   |
| ITPR1             | 1.63853  | 0.534421  | -1.61635          | 0.00134142 |
| TMEM74B           | 10.2759  | 10.2107   | -0.00918882       | 0.997036   |
| MAN2C1            | 8.37533  | 9.12589   | 0.123819          | 0.917861   |
| HSD17B14          | 18.3986  | 16.5704   | -0.150984         | 0.879021   |
| NDRG1             | 284.632  | 83.2733   | -1.77317          | 0.00134142 |
| S100A10           | 140.721  | 217.953   | 0.631179          | 0.0183825  |
| LAMB2             | 9.74895  | 8.13896   | -0.260401         | 0.579174   |
| GOLGA8A           | 11.0735  | 10.9644   | -0.0142815        | 0.994615   |
| LRP1              | 4.81887  | 3.0107    | -0.678598         | 0.00882987 |
| COMMD6            | 49.7952  | 54.2861   | 0.124575          | 0.887701   |
| HNRNPM            | 106.918  | 131.887   | 0.302808          | 0.441999   |
| WARS              | 72.4734  | 41.0239   | -0.820986         | 0.00134142 |
| CYR61             | 317.53   | 67.3873   | -2.23634          | 0.00134142 |
| ZFP36             | 22.0116  | 20.0872   | -0.131984         | 0.896032   |
| ASNS              | 210.558  | 64.4503   | -1.70796          | 0.00134142 |
| DUSP2             | 42.0587  | 34.0944   | -0.302869         | 0.446835   |
| ITPRIP            | 10.2418  | 4.89048   | -1.06642          | 0.00134142 |
| FOSB              | 6.44844  | 4.2168    | -0.612801         | 0.0481547  |

|                 |            |            |            |            |
|-----------------|------------|------------|------------|------------|
| IER2            | 226.127    | 169.849    | -0.412884  | 0.180085   |
| ARRDC4          | 2.49025    | 3.68708    | 0.566189   | 0.0938606  |
| TXNIP           | 65.595     | 55.323     | -0.245706  | 0.619929   |
| JUNB            | 64.8805    | 55.9924    | -0.212554  | 0.698743   |
| TFRC            | 21.9745    | 15.9999    | -0.457763  | 0.181833   |
| CLDN23          | 1.53162    | 1.07058    | -0.516659  | 0.499391   |
| EGR3            | 3.48212    | 2.73378    | -0.349069  | 0.468622   |
| CTGF            | 47.5376    | 4.85971    | -3.29013   | 0.00134142 |
| CXCL2           | 1.62607    | 0.473017   | -1.78142   | 0.00743393 |
| EGR2            | 0.557903   | 0.0653942  | -3.09278   | 0.00134142 |
| TERC            | 8.22856    | 1.79572    | -2.19607   | 0.0162707  |
| FOS             | 15.9207    | 5.32672    | -1.57959   | 0.00134142 |
| EGR1            | 73.8399    | 15.4166    | -2.25992   | 0.00134142 |
| GHRL            | 0.408319   | 0.14579    | -1.48581   | 0.276007   |
| C9orf24         | 0.393535   | 0.377197   | -0.0611725 | 0.99351    |
| RPS17           | 0          | 0          | 0          | 1          |
| RPS17L          | 0.045967   | 2.18731    | 5.57242    | 0.664752   |
| NBPF11_NBPF24   | 0.00445045 | 0.00793118 | 0.833585   | 1          |
| LOC643401       | 0.014851   | 0.04425    | 1.57512    | 1          |
| PNCK            | 0.0155999  | 0.00967254 | -0.689567  | 1          |
| RCAN2           | 0.00386438 | 0.013208   | 1.77311    | 1          |
| PTTG2           | 0.0327484  | 0.296049   | 3.17634    | 1          |
| SULF1           | 0.0021933  | 0.00310509 | 0.501534   | 1          |
| EDA2R           | 0.00384456 | 0.0120605  | 1.64939    | 1          |
| ZAP70           | 0.0112282  | 0.126674   | 3.49593    | 1          |
| LOC100129924    | 0.0186049  | 0.0380286  | 1.0314     | 1          |
| RCAN3AS         | 0.0669748  | 0.0983964  | 0.554987   | 1          |
| FMR1-AS1        | 0.00535986 | 0.00564273 | 0.0741964  | 1          |
| CCDC135         | 0.00585838 | 0.00854646 | 0.544825   | 1          |
| ABLIM3          | 0.00360233 | 0.0075162  | 1.06107    | 1          |
| CYP46A1         | 0.0111082  | 0.049902   | 2.16747    | 1          |
| SCARNA18        | 1.57326    | 1.20856    | -0.380464  | 1          |
| PAGE2B          | 0.0347045  | 0.023704   | -0.549989  | 1          |
| OR7D2           | 0.0135913  | 0.00672873 | -1.01427   | 1          |
| RIMBP3C         | 0.00407098 | 0.0301019  | 2.8864     | 1          |
| LOC100652739    | 0.0408278  | 0.0265122  | -0.622892  | 1          |
| HRH4            | 0.00389628 | 0.00653488 | 0.746064   | 1          |
| OR2B6           | 0.0339073  | 0.123789   | 1.86822    | 1          |
| KCNJ13          | 0.00378509 | 0.0175419  | 2.2124     | 1          |
| PBOV1           | 0.00495075 | 0.0223915  | 2.17723    | 1          |
| KLK15           | 0.01774    | 0.0422542  | 1.25209    | 1          |
| LOC100499183    | 0.0132385  | 0.00833896 | -0.666802  | 1          |
| CPNE4           | 0.00544441 | 0.0220012  | 2.01473    | 1          |
| CDKL5           | 0.00377583 | 0.0109827  | 1.54036    | 1          |
| FER1L5          | 0.00481983 | 0.0169079  | 1.81064    | 1          |
| LINC00173       | 0.108158   | 0          | #NAME?     | 1          |
| SLC2A14         | 0.00774462 | 0          | #NAME?     | 1          |
| NFAM1           | 0.00307833 | 0.0103338  | 1.74715    | 1          |
| ZSCAN18         | 0.0118553  | 0.0516377  | 2.12289    | 1          |
| LOC100128076    | 0.0293421  | 0.0408097  | 0.475939   | 1          |
| DPY19L2P2       | 0.0033241  | 0.0216495  | 2.7033     | 1          |
| WFDC10B         | 0.0310676  | 0          | #NAME?     | 1          |
| SNORA37         | 2.65905    | 12.8056    | 2.26779    | 0.790844   |
| ZNF549          | 0.0059614  | 0.0186141  | 1.64267    | 1          |
| MIR1248,SNORA81 | 3.60881    | 5.42869    | 0.589081   | 0.959465   |
| LOC728228       | 0.0341372  | 0.297115   | 3.1216     | 1          |
| LOC101059948    | 0.0465342  | 0.02884    | -0.690217  | 1          |
| CEND1           | 0.0305306  | 0.169409   | 2.47218    | 1          |
| PRRT2           | 0.0180387  | 0.0747317  | 2.05063    | 1          |
| ZNF843          | 0.0149764  | 0.00970171 | -0.626384  | 1          |
| SLC2A1-AS1      | 0.0308337  | 0          | #NAME?     | 1          |
| FAM35BP         | 0.00333269 | 0.00508589 | 0.609814   | 1          |
| MUC5B           | 0.0085577  | 0.0182165  | 1.08995    | 1          |
| ANO9            | 0.0232266  | 0.0745233  | 1.68192    | 1          |
| LOC100272228    | 0.0241908  | 0.0527016  | 1.12339    | 1          |
| CCRL1           | 0.00506426 | 0.0327569  | 2.69338    | 1          |
| RUNX1T1         | 0.00177314 | 0.00510745 | 1.5263     | 1          |
| SSPN            | 0.00284986 | 0          | #NAME?     | 1          |
| PDIA2           | 0.0279541  | 0.0482616  | 0.787817   | 1          |
| FAS-AS1         | 0.00838623 | 0.0600874  | 2.84097    | 1          |
| CCDC79          | 0.00451649 | 0          | #NAME?     | 1          |
| CNGA1           | 0.0119006  | 0.0172284  | 0.533757   | 1          |
| C3orf14         | 0.0191168  | 0.0266102  | 0.477134   | 1          |
| DCDC5           | 0.00241508 | 0          | #NAME?     | 1          |
| ZNF660          | 0.0102717  | 0.0118106  | 0.201401   | 1          |
| RLN1            | 0.0163171  | 0.0114823  | -0.506974  | 1          |
| LOC100507557    | 0.00316045 | 0.00413647 | 0.388269   | 1          |
| ALS2CR11        | 0.0018962  | 0          | #NAME?     | 1          |
| HHLA2           | 0.0047758  | 0.0189391  | 1.98755    | 1          |

|              |            |             |             |          |
|--------------|------------|-------------|-------------|----------|
| GJC3         | 0.015859   | 0.0258649   | 0.705692    | 1        |
| SPDYE8P      | 0.00489646 | 0.00413491  | -0.243882   | 1        |
| HEIH         | 0.0138895  | 0.0119718   | -0.214357   | 1        |
| ZNF569       | 0.00554479 | 0.0129086   | 1.21913     | 1        |
| PRR26        | 0.0190744  | 0.0660104   | 1.79106     | 1        |
| TIAM2        | 0.00758565 | 0.00647234  | -0.228985   | 1        |
| FNDC5        | 0.0149656  | 0.0669497   | 2.16143     | 1        |
| LOC151475    | 0.00547539 | 0.0112025   | 1.03279     | 1        |
| LINC00266-1  | 0.0256109  | 0.0434683   | 0.763206    | 1        |
| HES2         | 0.00409994 | 0.00591507  | 0.528792    | 1        |
| CECR5-AS1    | 0.0593429  | 0.261856    | 2.14163     | 1        |
| LOC100506655 | 0.00556515 | 0.00441013  | -0.335599   | 1        |
| LINC00441    | 0.0290998  | 0.0339144   | 0.220889    | 1        |
| EPO          | 0.0491043  | 0.274304    | 2.48185     | 1        |
| ABCA4        | 0.00212363 | 0.0106492   | 2.32614     | 1        |
| SULT2B1      | 0.0421174  | 0.0179166   | -1.23312    | 1        |
| TCF7L1       | 0.0238464  | 0.118704    | 2.31552     | 1        |
| HIST1H2BI    | 0.0727927  | 0.365653    | 2.32861     | 0.70534  |
| BTBD16       | 0.00856478 | 0.0061365   | -0.481001   | 1        |
| GAS6-AS1     | 0.0276366  | 0           | #NAME?      | 1        |
| CNGA4        | 0.0098859  | 0           | #NAME?      | 1        |
| CGB8         | 0.161862   | 0.394756    | 1.2862      | 0.530543 |
| PSTPIP1      | 0.0123665  | 0.0269458   | 1.12362     | 1        |
| CDO1         | 0.0163503  | 0           | #NAME?      | 1        |
| IRF7         | 0.014825   | 0.00959474  | -0.627716   | 1        |
| SH3RF3-AS1   | 0.0130701  | 0.0375875   | 1.52399     | 1        |
| C3orf43      | 0.0353505  | 0.0825744   | 1.22396     | 1        |
| ENTPD8       | 0.0562013  | 0.0455614   | -0.302792   | 1        |
| ZNF454       | 0.0120101  | 0.00491499  | -1.28899    | 1        |
| C20orf144    | 0.075069   | 0.0943911   | 0.330434    | 1        |
| LOC400043    | 0.0314779  | 0.0610049   | 0.954589    | 1        |
| GPR65        | 0.00267862 | 0.00539231  | 1.00941     | 1        |
| PCDHB12      | 0.0270102  | 0.0336659   | 0.317783    | 1        |
| TMEM212      | 0.0360727  | 0.0887252   | 1.29844     | 1        |
| MUC20        | 0.0196831  | 0.0248531   | 0.336473    | 1        |
| ARHGDI3      | 0.138291   | 0.132463    | -0.062119   | 1        |
| SMC1B        | 0.00503317 | 0.0155439   | 1.62681     | 1        |
| DAND5        | 0.0418705  | 0.0538524   | 0.363078    | 1        |
| WHAMMP2      | 0.0120326  | 0.00994749  | -0.274538   | 1        |
| FAM45B       | 0.0106284  | 0.0162903   | 0.616092    | 1        |
| C1orf228     | 0.0534838  | 0.0707119   | 0.402852    | 1        |
| FAT2         | 0.00471267 | 0.0236861   | 2.32943     | 1        |
| GRAP         | 0.0189538  | 0.0199041   | 0.0705762   | 1        |
| A1CF         | 0.00386109 | 0.00232225  | -0.733482   | 1        |
| HSP90AB4P    | 0.00910232 | 0.0714039   | 2.9717      | 1        |
| LOC100129722 | 0.153152   | 0.106183    | -0.528416   | 1        |
| CGB7         | 0.34743    | 0.345849    | -0.00657946 | 0.997082 |
| GJA1         | 0.00388759 | 0.00322089  | -0.271418   | 1        |
| SCN2A        | 0.00137552 | 0.000913723 | -0.590144   | 1        |
| ZNF705A      | 0.00332755 | 0.00739227  | 1.15156     | 1        |
| C10orf10     | 0.0338074  | 0.0399209   | 0.239807    | 1        |
| NAP1L6       | 0.00703691 | 0.00505921  | -0.47603    | 1        |
| ABCA1        | 0.0120667  | 0.0119517   | -0.0138124  | 1        |
| MFAP5        | 0.00462773 | 0.01261     | 1.4462      | 1        |
| GLIPR1L1     | 0.0159136  | 0           | #NAME?      | 1        |
| PA2G4P4      | 0.00441673 | 0.00589228  | 0.415848    | 1        |
| CCDC3        | 0.00660019 | 0.00421541  | -0.646835   | 1        |
| HIST2H3D     | 0.197359   | 0.541892    | 1.45718     | 1        |
| C8orf42      | 0.0163294  | 0.020835    | 0.351542    | 1        |
| DHRS3        | 0.129189   | 0.0569271   | -1.1823     | 1        |
| NTRK2        | 0.00310578 | 0           | #NAME?      | 1        |
| FLJ13224     | 0.0650764  | 0.246875    | 1.92358     | 1        |
| PSORS1C2     | 0.0381553  | 0.0120704   | -1.66042    | 1        |
| SLN          | 0.0217509  | 0.0721059   | 1.72904     | 1        |
| LOC100129480 | 0.0139824  | 0.230416    | 4.04256     | 1        |
| CA14         | 0.00829281 | 0.0129451   | 0.642471    | 1        |
| WISP3        | 0.0105497  | 0.0299431   | 1.50502     | 1        |
| LOC643770    | 0.0643648  | 0.0827629   | 0.362711    | 1        |
| FLJ44511     | 0.0344646  | 0.0528987   | 0.618118    | 1        |
| GNN          | 0.0140293  | 0.0138152   | -0.0221868  | 1        |
| FLJ37201     | 0.0176852  | 0.0399152   | 1.17439     | 1        |
| SLC25A53     | 0.00482768 | 0.0358731   | 2.8935      | 1        |
| COL6A6       | 0.00138855 | 0.0106086   | 2.93359     | 1        |
| C3orf20      | 0.00534957 | 0.00681983  | 0.350312    | 1        |
| APOC1P1      | 0.0308823  | 0.0366011   | 0.245108    | 1        |
| LINC00535    | 0.0158801  | 0.0779412   | 2.29516     | 1        |
| DCT          | 0.00599334 | 0.00929463  | 0.633037    | 1        |
| INPP5D       | 0.0952766  | 0.124617    | 0.387304    | 1        |
| FBP2         | 0.0135638  | 0.0403837   | 1.57402     | 1        |

|                        |            |            |           |           |
|------------------------|------------|------------|-----------|-----------|
| LOC338817              | 0.0040417  | 0.00910269 | 1.17133   | 1         |
| FAM20A                 | 0.00345011 | 0.0184371  | 2.4179    | 1         |
| PXMP4                  | 0.00255985 | 0.00362984 | 0.503845  | 1         |
| ERVV-1                 | 0.00563646 | 0.0168329  | 1.57842   | 1         |
| GSTM5                  | 0.0539452  | 0.077723   | 0.526848  | 1         |
| DZIP1                  | 0.00352059 | 0.00254964 | -0.46552  | 1         |
| ZNF252P-AS1            | 0.0386588  | 0.188635   | 2.28673   | 1         |
| PGM5P2                 | 0.0409984  | 0.0959163  | 1.22621   | 1         |
| LOC284080              | 0.0460773  | 0.0410966  | -0.165037 | 1         |
| CRYBA1                 | 0.0198896  | 0.0525283  | 1.40108   | 1         |
| PRH2                   | 0.00382163 | 0.0093945  | 1.29763   | 1         |
| KLHDC9                 | 0.123899   | 0.0130522  | -3.2468   | 1         |
| PPP2R2C                | 0.00370926 | 0.0055069  | 0.570108  | 1         |
| FLRT1                  | 0.0271387  | 0.200217   | 2.88314   | 1         |
| SH2D7                  | 0.00928148 | 0          | #NAME?    | 1         |
| RPL34-AS1              | 0.00316335 | 0.00460892 | 0.542975  | 1         |
| KLKB1                  | 0.0159598  | 0.0231822  | 0.538569  | 1         |
| HBBP1                  | 0.0507055  | 0.187459   | 1.88636   | 1         |
| KIAA1984               | 0.0528811  | 0.179306   | 1.7616    | 1         |
| C9orf173               | 0.0501053  | 0          | #NAME?    | 1         |
| KCNV2                  | 0.0226571  | 0.0376069  | 0.731036  | 1         |
| KLK1                   | 0.0443108  | 0.0138701  | -1.67568  | 1         |
| CACNA1G                | 0.00296406 | 0.0018211  | -0.702766 | 1         |
| TEX21P                 | 0.0242606  | 0.0458007  | 0.916756  | 1         |
| ABCC11                 | 0.0103288  | 0.0127011  | 0.298279  | 1         |
| FKBP1AP1               | 0.00999963 | 0.0296153  | 1.56639   | 1         |
| LINC00264              | 0.0167028  | 0.0747094  | 2.1612    | 1         |
| SNORA47                | 1.41399    | 0          | #NAME?    | 1         |
| PRG2                   | 0.0222941  | 0.0386237  | 0.792826  | 1         |
| TSSK4                  | 0.0263721  | 0.0535422  | 1.02166   | 1         |
| SLC35G6                | 0.0198852  | 0.0123397  | -0.688388 | 1         |
| SGK2                   | 0.103491   | 0.127737   | 0.303669  | 1         |
| LINC00035              | 0.175794   | 0.30552    | 0.797382  | 1         |
| C4A,C4B_2              | 0.0033523  | 0.00458154 | 0.45068   | 1         |
| LCN12                  | 0.0785388  | 0          | #NAME?    | 1         |
| AIM1                   | 0.00179332 | 0.00347118 | 0.952796  | 1         |
| ANP32A-IT1             | 0.00414076 | 0.0306808  | 2.88937   | 1         |
| PKD1L3                 | 0.00250138 | 0.00744149 | 1.57287   | 1         |
| TSPEAR                 | 0.00537832 | 0.0226067  | 2.07152   | 1         |
| LG14                   | 0.00826873 | 0.0473872  | 2.51876   | 1         |
| DNAI1                  | 0.0115645  | 0.00465187 | -1.31382  | 1         |
| TIE1                   | 0.0214681  | 0.0445499  | 1.05323   | 1         |
| C11orf16               | 0.00876017 | 0.0427069  | 2.28544   | 1         |
| CLUHP3                 | 0.126687   | 0.428567   | 1.75825   | 0.0637115 |
| SMO                    | 0.0237534  | 0.0761621  | 1.68094   | 1         |
| RBPMS2                 | 0.0114737  | 0.00932436 | -0.29925  | 1         |
| IL34                   | 0.0128006  | 0          | #NAME?    | 1         |
| EXOC3L1                | 0.00929447 | 0.0199809  | 1.10418   | 1         |
| NWD1                   | 0.00209022 | 0.00169137 | -0.305457 | 1         |
| C17orf47               | 0.00684039 | 0.0045904  | -0.575457 | 1         |
| SCUBE3                 | 0.00311352 | 0.0223725  | 2.84511   | 1         |
| SLC10A4                | 0.0090593  | 0.00733569 | -0.304466 | 1         |
| SMAD5-AS1              | 0.0315275  | 0.110753   | 1.81266   | 1         |
| HOXA-AS3               | 0.0175848  | 0.0180446  | 0.0372383 | 1         |
| LOC100129046           | 0.0109796  | 0.0360561  | 1.71542   | 1         |
| CNTD2                  | 0.0164414  | 0.130841   | 2.99241   | 1         |
| VSIG1                  | 0.00432731 | 0.0167278  | 1.95071   | 1         |
| FAM151A                | 0.0946897  | 0.11241    | 0.247486  | 1         |
| FAM228A                | 0.0526944  | 0.0573568  | 0.122313  | 1         |
| LINC00239              | 0.0682361  | 0.0716168  | 0.0697636 | 1         |
| ECM2                   | 0.00837471 | 0.0302318  | 1.85196   | 1         |
| TAS2R14                | 0.0624537  | 0.0988574  | 0.662561  | 1         |
| RASSF2                 | 0.00256997 | 0.00636161 | 1.30764   | 1         |
| CA7                    | 0.0137462  | 0.018066   | 0.394241  | 1         |
| RTN1                   | 0.00985853 | 0.00824998 | -0.256983 | 1         |
| CSAG1                  | 0.027027   | 0.0612728  | 1.18085   | 1         |
| MYOZ3                  | 0.00881171 | 0.0207845  | 1.23802   | 1         |
| ST14                   | 0.00740992 | 0.00988986 | 0.416493  | 1         |
| ZMIZ1-AS1              | 0.0210977  | 0          | #NAME?    | 1         |
| FLNC                   | 0.0222135  | 0.0382589  | 0.784359  | 1         |
| GIMAP1,GIMAP1-GIMAP5,C | 0.00338365 | 0          | #NAME?    | 1         |
| SNORA8                 | 11.031     | 22.2198    | 1.01028   | 0.532841  |
| GVINP1                 | 0.00391185 | 0.00708654 | 0.857229  | 1         |
| VWA8-AS1               | 0.0116094  | 0.0251195  | 1.11351   | 1         |
| CES4A                  | 0.00855152 | 0          | #NAME?    | 1         |
| PTGS1                  | 0.00576689 | 0.0138289  | 1.26182   | 1         |
| LOC643201              | 0.0123077  | 0.0225654  | 0.874556  | 1         |
| GALNT3                 | 0.00718912 | 0.00771135 | 0.101169  | 1         |
| ABHD12B                | 0.0183897  | 0.0187633  | 0.0290094 | 1         |

|                |            |            |             |          |
|----------------|------------|------------|-------------|----------|
| SNORA52        | 8.36614    | 18.2498    | 1.12524     | 0.917379 |
| LOC643669      | 0.137596   | 0.223435   | 0.699413    | 1        |
| C1orf204,VSIG8 | 0.0439069  | 0.0460424  | 0.0685159   | 1        |
| LOC100287036   | 0.0436435  | 0.0120109  | -1.86142    | 1        |
| NRIP2          | 0.0580183  | 0.0845015  | 0.542469    | 1        |
| KRTAP5-10      | 0.0475412  | 0.107757   | 1.18053     | 1        |
| TMEM191C       | 0.220229   | 0.375134   | 0.768402    | 0.76964  |
| FAM182B        | 0.031522   | 0.126018   | 1.99921     | 1        |
| AATK           | 0.201108   | 0.427351   | 1.08745     | 0.889019 |
| GOLGA8I        | 0.0152085  | 0.0376468  | 1.30765     | 1        |
| TEX29          | 0.246355   | 0.274514   | 0.156141    | 1        |
| AIRN           | 0.0115205  | 0.0280741  | 1.28504     | 1        |
| RAB33A         | 0.0538197  | 0.0918487  | 0.771125    | 1        |
| B3GNT7         | 0.0534618  | 0.0635178  | 0.248654    | 1        |
| LOC100505716   | 0.0244425  | 0.011687   | -1.06448    | 1        |
| ACY3           | 0.0379777  | 0.0542367  | 0.514116    | 1        |
| TET1           | 0.00380669 | 0.0010273  | -1.88968    | 1        |
| TEX19          | 0.161084   | 0.128522   | -0.325788   | 1        |
| PRSS56         | 0.105055   | 0.0392432  | -1.42064    | 1        |
| PTPRVP         | 0.00940848 | 0.00703677 | -0.419049   | 1        |
| CCDC64B        | 0.0912299  | 0.179667   | 0.977745    | 1        |
| LINC00640      | 0.0474941  | 0.0299123  | -0.667011   | 1        |
| CRX            | 0.0142802  | 0.051759   | 1.85779     | 1        |
| SPATA9         | 0.0212149  | 0.0359681  | 0.76164     | 1        |
| CDH23          | 0.0129698  | 0.0142872  | 0.139573    | 1        |
| EFCAB5         | 0.0125551  | 0.012444   | -0.0128191  | 1        |
| SUSD5          | 0.0107525  | 0.0234424  | 1.12445     | 1        |
| NBPF11,NBPF24  | 0.00511451 | 0.0149488  | 1.54736     | 1        |
| FUT3           | 0.0211944  | 0.027258   | 0.362998    | 1        |
| HIST1H2BO      | 0.598288   | 1.33374    | 1.15656     | 0.437764 |
| DEGS2          | 0.0435869  | 0.0193417  | -1.17218    | 1        |
| C6orf195       | 0.0493979  | 0.133164   | 1.43069     | 1        |
| LOC728558      | 0.00984755 | 0.00885776 | -0.152823   | 1        |
| CLDN7          | 0.0588431  | 0.101667   | 0.788904    | 1        |
| EBF3           | 0.0198245  | 0.0612474  | 1.62736     | 1        |
| ZNF790-AS1     | 0.0264864  | 0.0346222  | 0.386443    | 1        |
| ASCL5          | 0.193182   | 0.274139   | 0.504951    | 1        |
| GATM-AS1       | 0.0325061  | 0.0882371  | 1.44067     | 1        |
| ANKRD1         | 0.146577   | 0.0318982  | -2.20012    | 1        |
| FUT8-AS1       | 0.0573339  | 0.0677782  | 0.241432    | 1        |
| DENND2D        | 0.0129656  | 0.00618237 | -1.06846    | 1        |
| GLIS1          | 0.0193293  | 0          | #NAME?      | 1        |
| LOC440461      | 0.0400023  | 0.0466809  | 0.222749    | 1        |
| FOXI3          | 0.0554201  | 0.210888   | 1.928       | 1        |
| COLEC10        | 0.0226577  | 0.0114199  | -0.988452   | 1        |
| TMEM132B       | 0.00325322 | 0          | #NAME?      | 1        |
| MRPL23-AS1     | 0.0236114  | 0.0102125  | -1.20914    | 1        |
| TRPV6          | 0.0126312  | 0.00861947 | -0.55132    | 1        |
| KCNJ4          | 0.0287952  | 0.0723613  | 1.32939     | 1        |
| NREP           | 0.0289268  | 0.0137049  | -1.07772    | 1        |
| SPON2          | 0.192145   | 0.40661    | 1.08145     | 0.288993 |
| BARHL1         | 0.0412045  | 0.0678077  | 0.718647    | 1        |
| LOC100129617   | 0.0241627  | 0.0969287  | 2.00414     | 1        |
| LINC00222      | 0.0238994  | 0.0112812  | -1.08305    | 1        |
| TAF7L          | 0.0372189  | 0.0823176  | 1.14517     | 1        |
| ALDH3B1        | 0.0245368  | 0.0703794  | 1.5202      | 1        |
| RBM44          | 0.0453212  | 0.0536826  | 0.244269    | 1        |
| RBFOX3         | 0.0188811  | 0.0997359  | 2.40117     | 1        |
| PRSS8          | 0.147947   | 0.096543   | -0.615835   | 1        |
| FRMD6-AS1      | 0.14232    | 0.272434   | 0.936766    | 1        |
| CASS4          | 0.0112504  | 0.0235766  | 1.06738     | 1        |
| PROZ           | 0.093787   | 0.172069   | 0.875524    | 1        |
| TNFSF15        | 0.00184852 | 0.00423882 | 1.1973      | 1        |
| CDH3           | 0.0698489  | 0.0222423  | -1.65093    | 1        |
| SLC22A31       | 0.0297783  | 0.0669172  | 1.16811     | 1        |
| GPR18          | 0.0103196  | 0.0275245  | 1.41533     | 1        |
| GIMAP2         | 0.0245409  | 0.0055336  | -2.1489     | 1        |
| TMEM59L        | 0.0480968  | 0.0590821  | 0.29678     | 1        |
| C21orf62       | 0.00316367 | 0.0240933  | 2.92896     | 1        |
| FDPSSL2A       | 0.0137793  | 0.0136997  | -0.00836204 | 1        |
| LOC100507489   | 0.0404032  | 0.00354906 | -3.50896    | 1        |
| CYBRD1         | 0.00596573 | 0.0116969  | 0.971356    | 1        |
| NLRP14         | 0.00297963 | 0.0169494  | 2.50803     | 1        |
| LOC100506195   | 0.0130857  | 0.0347947  | 1.41087     | 1        |
| PPEF2          | 0.0264472  | 0.037672   | 0.51038     | 1        |
| MARCH1         | 0.0915409  | 0.118569   | 0.373234    | 1        |
| LGALS4         | 0.0831797  | 0.0708525  | -0.231412   | 1        |
| FP588          | 0.0767351  | 0.0388564  | -0.981736   | 1        |
| JAKMIP3        | 0.0661349  | 0.0346272  | -0.933505   | 1        |

|                 |             |             |           |            |
|-----------------|-------------|-------------|-----------|------------|
| CCDC81          | 0.0267808   | 0.0867375   | 1.69546   | 1          |
| LOC100128770    | 0.0362667   | 0.070114    | 0.951056  | 1          |
| LOC285626       | 0.00907916  | 0           | #NAME?    | 1          |
| TAT             | 0.00535364  | 0           | #NAME?    | 1          |
| LOC100129138    | 0.0673839   | 0.214494    | 1.67046   | 1          |
| LOC100505839    | 0.00699732  | 0.00586798  | -0.253939 | 1          |
| SYNDIG1L        | 0.0348986   | 0.0360165   | 0.045487  | 1          |
| LOC100505841    | 0.27149     | 0.218272    | -0.314767 | 1          |
| AGSK1.LOC727849 | 0.0229269   | 0.00766534  | -1.58062  | 1          |
| ATOH8           | 0.0153861   | 0.00760088  | -1.01739  | 1          |
| LOC401242       | 0.00538508  | 0           | #NAME?    | 1          |
| TMEM178A        | 0.0868955   | 0.0279257   | -1.63769  | 1          |
| HNRNPA3P1       | 0.00347432  | 0.00485158  | 0.481723  | 1          |
| LOC440311       | 0.100819    | 0.0790457   | -0.351009 | 1          |
| C1orf220        | 0.0426512   | 0.0723682   | 0.76277   | 1          |
| ST8SIA1         | 0.00114403  | 0.00266744  | 1.22133   | 1          |
| CXXC4           | 0.00233238  | 0.0014541   | -0.681672 | 1          |
| EBLN2           | 0.0298733   | 0.0494304   | 0.72654   | 1          |
| DNAJB13         | 0.0397497   | 0.00972134  | -2.03172  | 1          |
| ARTN            | 0.128429    | 0.0889694   | -0.529589 | 1          |
| APOBEC3G        | 0.00828239  | 0           | #NAME?    | 1          |
| PTENP1          | 0.00306072  | 0.00213607  | -0.518913 | 1          |
| SERPINC1        | 0.0190913   | 0.0481991   | 1.33609   | 1          |
| HSPA6           | 0.288992    | 1.03828     | 1.84509   | 0.00743393 |
| GABBR2          | 0.00566994  | 0.00203337  | -1.47946  | 1          |
| C1orf210        | 0.0136139   | 0           | #NAME?    | 1          |
| STL             | 0.0174658   | 0.0228278   | 0.386265  | 1          |
| C22orf43        | 0.0629554   | 0.211817    | 1.75042   | 1          |
| TULP1           | 0.042855    | 0.131581    | 1.61842   | 1          |
| LOC100652772    | 0.00375529  | 0           | #NAME?    | 1          |
| C12orf69        | 0.0171049   | 0.0355554   | 1.05566   | 1          |
| RNF165          | 0.103135    | 0.216142    | 1.06745   | 1          |
| GJB7            | 0.00591259  | 0.00349876  | -0.756946 | 1          |
| PADI3           | 0.00492749  | 0.00628604  | 0.351299  | 1          |
| JAZF1-AS1       | 0.0255576   | 0.0365695   | 0.516889  | 1          |
| LOC728392       | 0.301741    | 0.123268    | -1.29151  | 1          |
| GPR157          | 0.163008    | 0.0740984   | -1.13743  | 1          |
| TUBB1           | 0.0571543   | 0.194499    | 1.76683   | 1          |
| C6orf123        | 0.0106189   | 0.0303531   | 1.51521   | 1          |
| EFHD1           | 0.0648084   | 0.118903    | 0.875528  | 1          |
| PRUNE2          | 0.000910397 | 0.000576684 | -0.658713 | 1          |
| RS1             | 0.00502521  | 0.0290384   | 2.53071   | 1          |
| MYO15B          | 0.234397    | 0.0755715   | -1.63304  | 1          |
| BCRP3           | 0.131232    | 0.398446    | 1.60227   | 0.305208   |
| TIPARP-AS1      | 0.166514    | 0.130008    | -0.357042 | 1          |
| BEAN1           | 0.112006    | 0.111075    | -0.012039 | 1          |
| PMFBP1          | 0.0454248   | 0.0301576   | -0.590956 | 1          |
| BTK             | 0.00518844  | 0.00348487  | -0.574196 | 1          |
| GPM6B           | 0.00444568  | 0.0373146   | 3.06926   | 1          |
| NRON            | 0.00521368  | 0.0145901   | 1.48461   | 1          |
| LOC648691       | 0.00432838  | 0           | #NAME?    | 1          |
| SLC9A9          | 0.00745925  | 0.00249252  | -1.58143  | 1          |
| RNF144A-AS1     | 0.00576441  | 0.00365     | -0.659278 | 1          |
| KCNH8           | 0.0230344   | 0.0066903   | -1.78365  | 1          |
| TP73-AS1        | 0.00576124  | 0           | #NAME?    | 1          |
| PCDHGB8P        | 0.00756031  | 0           | #NAME?    | 1          |
| LOC653653       | 0.025867    | 0.0412895   | 0.674664  | 1          |
| DNAH2           | 0.00221085  | 0.00141642  | -0.642356 | 1          |
| FBXO17          | 0.0168964   | 0.0133409   | -0.340854 | 1          |
| EMX2OS          | 0.00182953  | 0           | #NAME?    | 1          |
| RHD             | 0.0497336   | 0.0706874   | 0.507233  | 1          |
| XKRX            | 0.0153236   | 0.0106579   | -0.523827 | 1          |
| POM121L9P       | 0.00644922  | 0.0370556   | 2.5225    | 1          |
| TAS2R5          | 0.141194    | 0.202235    | 0.518348  | 1          |
| GGTLC2          | 0.0291379   | 0.0255286   | -0.19078  | 1          |
| MIR1291,SNORA34 | 1.33455     | 2.99979     | 1.1685    | 0.923433   |
| LOC284276       | 0.0074885   | 0.0226925   | 1.59947   | 1          |
| KRTDAP          | 0.355046    | 1.37463     | 1.95296   | 0.137269   |
| CC2D2B          | 0.00691582  | 0.00891166  | 0.365794  | 1          |
| CD33            | 0.0436719   | 0.0466224   | 0.0943158 | 1          |
| ACSM3           | 0.157683    | 0.0849664   | -0.892067 | 1          |
| NOMO3           | 0.0104418   | 0.0191617   | 0.875848  | 1          |
| TRIM31          | 0.0147503   | 0.01635     | 0.148554  | 1          |
| VTN             | 0.023808    | 0.00752477  | -1.66173  | 1          |
| CYP3A43         | 0.00625138  | 0           | #NAME?    | 1          |
| LAIR2           | 0.641706    | 0.778796    | 0.279334  | 0.937187   |
| GUSBP9          | 0.033327    | 0.0574785   | 0.78633   | 1          |
| GIMAP6          | 0.00811008  | 0.00250417  | -1.69538  | 1          |
| ITGB4           | 0.00379488  | 0.00667053  | 0.813746  | 1          |

|              |             |            |            |           |
|--------------|-------------|------------|------------|-----------|
| KPNA7        | 0.0104562   | 0          | #NAME?     | 1         |
| TLX2         | 0.016225    | 0          | #NAME?     | 1         |
| LOC100506343 | 0.0153537   | 0.0100207  | -0.615612  | 1         |
| SNORA45      | 1.69475     | 3.41436    | 1.01054    | 0.931471  |
| ABCA9        | 0.00370236  | 0.00390355 | 0.076345   | 1         |
| CHRN2        | 0.00606562  | 0.0131912  | 1.12085    | 1         |
| EIF1B-AS1    | 0.0410148   | 0.0205736  | -0.995352  | 1         |
| MPZL2        | 0.00449176  | 0.0158643  | 1.82043    | 1         |
| LOC145837    | 0.0311942   | 0.00471752 | -2.72518   | 1         |
| SOX2         | 0.0321518   | 0.0323457  | 0.00867445 | 1         |
| MEGF11       | 0.00980153  | 0.0370081  | 1.91676    | 1         |
| SNORA49      | 1.88351     | 0          | #NAME?     | 1         |
| FUT5         | 0.0349607   | 0.00850757 | -2.03892   | 1         |
| CSTF3-AS1    | 0.00826819  | 0          | #NAME?     | 1         |
| P2RX6        | 0.00679576  | 0.0111811  | 0.718358   | 1         |
| HP07349      | 2.00929     | 3.89317    | 0.954258   | 0.33045   |
| GLUD1P3      | 0.156192    | 0.398226   | 1.35027    | 0.0685498 |
| SNORA2B      | 1.60684     | 0          | #NAME?     | 1         |
| RIPK4        | 0.016127    | 0.0238021  | 0.561617   | 1         |
| NEXN         | 0.00683669  | 0.0192241  | 1.49154    | 1         |
| LOC728175    | 0.00734673  | 0          | #NAME?     | 1         |
| ADPGK-AS1    | 0.0282206   | 0.0964428  | 1.77293    | 1         |
| LINC00854    | 0.0150201   | 0.0602378  | 2.00377    | 1         |
| SLC9A3       | 0.190559    | 0.165249   | -0.205598  | 1         |
| C16orf71     | 0.0473961   | 0.108885   | 1.19996    | 1         |
| CHST6        | 0.0135948   | 0.0349199  | 1.36099    | 1         |
| RFPL1-AS1    | 0.00265981  | 0.00212644 | -0.322886  | 1         |
| SLC4A1       | 0.0101075   | 0.00514147 | -0.975169  | 1         |
| LOC100128288 | 0.0177146   | 0.0291456  | 0.718342   | 1         |
| LOC643723    | 0.00779347  | 0.00546431 | -0.512225  | 1         |
| PRPH2        | 0.010225    | 0.00781994 | -0.386872  | 1         |
| M1AP         | 0.0118299   | 0.0182529  | 0.625681   | 1         |
| TMEM89       | 0.0627225   | 0.0848027  | 0.435127   | 1         |
| ACSL5        | 0.0117457   | 0.0398787  | 1.76349    | 1         |
| MLLT4-AS1    | 0.0886946   | 0.0564206  | -0.652624  | 1         |
| GPR52        | 0.00958806  | 0.00670703 | -0.515564  | 1         |
| SERPINB7     | 0.0394093   | 0.0414037  | 0.0712221  | 1         |
| ZNF154       | 0.0266737   | 0.0355217  | 0.413285   | 1         |
| TRIM15       | 0.00971687  | 0          | #NAME?     | 1         |
| SERPING1     | 0.0274435   | 0.0201461  | -0.445967  | 1         |
| PPM1E        | 0.0074234   | 0.0180397  | 1.28102    | 1         |
| CACNA1B      | 0.00378957  | 0.00540371 | 0.511914   | 1         |
| TNFRSF1B     | 0.00504819  | 0.0183235  | 1.85986    | 1         |
| CMYA5        | 0.000884597 | 0.0094495  | 3.41715    | 1         |
| RIPPLY1      | 0.0306416   | 0.0829478  | 1.43671    | 1         |
| CHRNA        | 0.00918391  | 0.0363669  | 1.98545    | 1         |
| SLC35G5      | 0.0375608   | 0.251786   | 2.7449     | 1         |
| ARL4C        | 0.0992058   | 0.0703632  | -0.495604  | 1         |
| LOC399753    | 0.06331     | 0.199896   | 1.65875    | 1         |
| OR10V2P      | 0.0280129   | 0          | #NAME?     | 1         |
| GRIK1        | 0.00478165  | 0.0128756  | 1.42906    | 1         |
| DIP2A-IT1    | 0.044616    | 0.194324   | 2.12283    | 1         |
| CCDC13       | 0.00586873  | 0.0123166  | 1.06948    | 1         |
| PHEX         | 0.00453239  | 0.0169613  | 1.9039     | 1         |
| BOK-AS1      | 0.0310609   | 0          | #NAME?     | 1         |
| SLC22A3      | 0.00451228  | 0.00380695 | -0.245223  | 1         |
| INSL3        | 0.0346993   | 0.0741211  | 1.09498    | 1         |
| MAOA         | 0.00513229  | 0.00576639 | 0.168066   | 1         |
| TNFRSF10C    | 0.706373    | 0.503936   | -0.487191  | 0.765317  |
| SPATA4       | 0.0115304   | 0          | #NAME?     | 1         |
| GBP2         | 0.00459995  | 0.00681209 | 0.56648    | 1         |
| TMC8         | 0.0903203   | 0.0593394  | -0.60606   | 1         |
| COL6A4P1     | 0.0378605   | 0.0142629  | -1.40843   | 1         |
| HIST1H3A     | 0.232596    | 0.266264   | 0.195031   | 1         |
| LOC100288123 | 0.111083    | 0.093508   | -0.248477  | 1         |
| HLA-DRB5     | 0.0317052   | 0.013125   | -1.2724    | 1         |
| SNX31        | 0.0113843   | 0.0072354  | -0.653898  | 1         |
| CHRND        | 0.0129127   | 0          | #NAME?     | 1         |
| TRIM17       | 0.021772    | 0.0186107  | -0.226344  | 1         |
| DGCR9        | 0.0210017   | 0.0276941  | 0.399072   | 1         |
| AZGP1        | 0.0360652   | 0.0558341  | 0.63054    | 1         |
| C9orf139     | 0.00576912  | 0.00352697 | -0.709921  | 1         |
| GGTLC1       | 0.0222096   | 0          | #NAME?     | 1         |
| GPR156       | 0.00327983  | 0.0146918  | 2.16332    | 1         |
| CETN4P       | 0.19666     | 0.172196   | -0.191649  | 1         |
| TSC22D1-AS1  | 0.0746033   | 0.131637   | 0.819252   | 1         |
| RRAD         | 0.339696    | 0.436213   | 0.36079    | 0.913628  |
| LINC00311    | 0.0294395   | 0.396587   | 3.75181    | 0.245718  |
| C1orf145     | 0.321888    | 0.316804   | -0.0229693 | 1         |

|                |            |            |            |          |
|----------------|------------|------------|------------|----------|
| LINC00520      | 0.0730364  | 0.0762664  | 0.062432   | 1        |
| LOC100506804   | 0.105444   | 0.132332   | 0.327673   | 1        |
| CACNA1D        | 0.00567968 | 0.0158605  | 1.48156    | 1        |
| TEKT5          | 0.0241762  | 0.0309073  | 0.354358   | 1        |
| COLEC11        | 0.304922   | 0.598946   | 0.973986   | 0.14869  |
| ZBTB32         | 0.0552415  | 0.0863573  | 0.644565   | 1        |
| DSC3           | 0.00171    | 0.00804735 | 2.23452    | 1        |
| SDCBP2-AS1     | 0.123341   | 0.124186   | 0.00985449 | 1        |
| CYP3A5         | 0.0440616  | 0.0959979  | 1.12348    | 1        |
| C9orf84        | 0.00239778 | 0.00157915 | -0.602554  | 1        |
| DUOXA1         | 0.0137137  | 0          | #NAME?     | 1        |
| LOC100507564   | 0.104009   | 0.0996685  | -0.0614998 | 1        |
| C15orf55       | 0.00418786 | 0.0103983  | 1.31206    | 1        |
| SAG            | 0.0092867  | 0.0138725  | 0.578995   | 1        |
| C1orf229       | 0.219687   | 0.390315   | 0.829192   | 0.550662 |
| PLGLB2         | 0.00416614 | 0.00276933 | -0.589172  | 1        |
| LOC151171      | 0.00759629 | 0.00653894 | -0.216238  | 1        |
| CPM            | 0.00957292 | 0.0161381  | 0.753438   | 1        |
| ADAM32         | 0.0046115  | 0.0194864  | 2.07916    | 1        |
| HLTF           | 0.0369927  | 0.0603843  | 0.706933   | 1        |
| HIST1H2AK      | 0.157292   | 0.384706   | 1.29031    | 1        |
| ANKRD45        | 0.00515065 | 0          | #NAME?     | 1        |
| LCN10          | 0.00876043 | 0.00763557 | -0.198265  | 1        |
| PTPRN          | 0.0625939  | 0.0171483  | -1.86795   | 1        |
| GNRHR          | 0.002026   | 0.00668531 | 1.72236    | 1        |
| ST6GALNAC2     | 0.0781825  | 0.170218   | 1.12246    | 1        |
| LINC00665      | 0.0523802  | 0.0593576  | 0.180413   | 1        |
| DLEU7-AS1      | 0.00756419 | 0          | #NAME?     | 1        |
| RASA4CP        | 0.0978093  | 0.0137446  | -2.8311    | 1        |
| LOC100270804   | 0.223677   | 0.211967   | -0.0775783 | 1        |
| ZNF287         | 0.00265247 | 0.00156666 | -0.759645  | 1        |
| PLA2G1B        | 0.0402022  | 0.0861867  | 1.10019    | 1        |
| ERN1           | 0.0892715  | 0.202764   | 1.18353    | 1        |
| LOC100129055   | 0.0568065  | 0.0279062  | -1.02547   | 1        |
| PCBP3          | 0.00982057 | 0.0133867  | 0.446926   | 1        |
| A1BG           | 0.20201    | 0.144604   | -0.482316  | 1        |
| CEP290         | 0.278037   | 0.453536   | 0.705939   | 0.612206 |
| PSCA           | 0.367071   | 0.155382   | -1.24024   | 0.75767  |
| TRIM46         | 0.0470488  | 0.0145662  | -1.69154   | 1        |
| CSF1R          | 0.00452215 | 0.00272916 | -0.728555  | 1        |
| CDRT15P1       | 0.17208    | 0.511707   | 1.57224    | 0.216539 |
| LOC150197      | 0.0989825  | 0.284267   | 1.522      | 1        |
| MF12-AS1       | 1.4256     | 2.75007    | 0.947902   | 0.950929 |
| SNORD89        | 4.09483    | 12.7454    | 1.6381     | 0.804197 |
| HOMER2         | 0.112304   | 0.0979808  | -0.19684   | 1        |
| SLC34A3        | 0.0142545  | 0.0101219  | -0.493941  | 1        |
| SLC9A4         | 0.0354395  | 0.0710377  | 1.00323    | 1        |
| CBR3-AS1       | 0.49843    | 0.37028    | -0.428775  | 0.952216 |
| KCP            | 0.0109798  | 0.00807098 | -0.444041  | 1        |
| LCE1F          | 0.0880229  | 0.132279   | 0.587632   | 1        |
| C11orf52,HSPB2 | 0.027219   | 0.023513   | -0.211153  | 1        |
| CPAMD8         | 0.00349569 | 0          | #NAME?     | 1        |
| HIST1H3F       | 1.15247    | 1.66194    | 0.528139   | 0.817504 |
| L1TD1          | 0.012912   | 0.0162262  | 0.32961    | 1        |
| DOC2GP         | 0.0615813  | 0.0972273  | 0.658869   | 1        |
| IGFL4          | 0.0376384  | 0.0318945  | -0.238897  | 1        |
| HOXA2          | 0.128577   | 0.240477   | 0.903265   | 1        |
| UBE2Q2P1       | 0.0973606  | 0.0799573  | -0.284107  | 1        |
| PRMT8          | 0.497154   | 0.852841   | 0.778584   | 0.217352 |
| PRF1           | 0.0422916  | 0.0217949  | -0.956382  | 1        |
| CD27           | 0.138861   | 0.12293    | -0.175802  | 1        |
| BMP2           | 0.0148144  | 0.0104901  | -0.497962  | 1        |
| SEMA3B         | 0.373667   | 0.174345   | -1.09981   | 0.259261 |
| SCNN1A         | 0.490085   | 0.183649   | -1.41608   | 0.868024 |
| LINC00273      | 0.0320417  | 0.0769822  | 1.26457    | 1        |
| CD8A           | 0.0290332  | 0.0195552  | -0.570152  | 1        |
| CSMD2          | 0.010292   | 0.0153548  | 0.577167   | 1        |
| GNG4           | 0.0182458  | 0.0116289  | -0.649844  | 1        |
| UNC5B-AS1      | 1.07068    | 0.445264   | -1.26579   | 0.937187 |
| ST7-OT4        | 0.0795363  | 0.0441688  | -0.848586  | 1        |
| C4orf22        | 1.14721    | 0.731217   | -0.649762  | 0.445443 |
| ZNF483         | 0.125635   | 0.177683   | 0.50007    | 1        |
| CLDN9          | 0.136527   | 0.182017   | 0.414888   | 1        |
| DEFB136        | 0.20058    | 0          | #NAME?     | 1        |
| LOC100506394   | 0.155338   | 0.118442   | -0.39122   | 1        |
| TNFRSF9        | 0.00676616 | 0.058955   | 3.1232     | 1        |
| LRRC19         | 0.00941607 | 0.0131985  | 0.487183   | 1        |
| KATNAL2        | 0.067716   | 0.13048    | 0.946258   | 1        |
| SYT12          | 0.0113971  | 0.00813252 | -0.486891  | 1        |



|              |            |            |             |            |
|--------------|------------|------------|-------------|------------|
| PCDHB15      | 0.0595994  | 0.0505702  | -0.23701    | 1          |
| C1QTNF6      | 0.496991   | 0.182939   | -1.44186    | 0.126367   |
| RHOU         | 0.160943   | 0.306276   | 0.928284    | 1          |
| GUSBP3       | 0.0544279  | 0.0447012  | -0.284031   | 1          |
| LOC101101776 | 0.0645569  | 0.110749   | 0.778646    | 1          |
| NAALADL1     | 0.0447108  | 0.0154443  | -1.53355    | 1          |
| FUT2         | 0.108964   | 0.302794   | 1.47449     | 1          |
| NEDD9        | 0.0142362  | 0          | #NAME?      | 1          |
| CTSO         | 0.124989   | 0.155101   | 0.311408    | 1          |
| OR13J1       | 0.0257622  | 0          | #NAME?      | 1          |
| TTC9B        | 0.854899   | 0.543428   | -0.653665   | 0.764271   |
| PI3          | 0.0409865  | 0.213966   | 2.38416     | 1          |
| RGAG1        | 0.00255572 | 0          | #NAME?      | 1          |
| C16orf86     | 0.251884   | 0.200382   | -0.330002   | 1          |
| ANKRD20A5P   | 0.0429288  | 0.0371939  | -0.206879   | 1          |
| SARDH        | 0.229569   | 0.130029   | -0.820095   | 1          |
| GSG1L        | 0.0133316  | 0.00745591 | -0.838398   | 1          |
| TRIML2       | 0.239013   | 0.43121    | 0.851305    | 0.453868   |
| SLC11A1      | 0.113566   | 0.2089     | 0.879285    | 1          |
| CD96         | 0.0109332  | 0.0151446  | 0.470087    | 1          |
| PATL2        | 0.107335   | 0.0367579  | -1.54599    | 1          |
| RNF43        | 0.0240165  | 0.00696263 | -1.78632    | 1          |
| PDE2A        | 0.0458276  | 0.0384458  | -0.253392   | 1          |
| ARHGAP4      | 0.131412   | 0.327088   | 1.31558     | 1          |
| TBC1D26      | 0.0855275  | 0.0613321  | -0.479746   | 1          |
| DSG3         | 0.00660684 | 0.0267785  | 2.01905     | 1          |
| TMEM255A     | 0.0213966  | 0.00894748 | -1.25783    | 1          |
| DRP2         | 0.0161228  | 0.0226698  | 0.491673    | 1          |
| ABCA17P      | 0.0815883  | 0.110695   | 0.440152    | 1          |
| UNC13A       | 0.0078059  | 0.0153928  | 0.97962     | 1          |
| EBF4         | 0.435437   | 0.457567   | 0.0715187   | 0.987693   |
| PIN4P1       | 0.0167817  | 0.0334024  | 0.993062    | 1          |
| BSN          | 0.0220381  | 0.0209965  | -0.0698505  | 1          |
| LEP          | 0.0113246  | 0.0098773  | -0.19727    | 1          |
| ZSCAN10      | 0.0152485  | 0          | #NAME?      | 1          |
| CCDC154      | 0.175068   | 0.236899   | 0.436353    | 1          |
| CARD14       | 0.0699968  | 0.0894592  | 0.353941    | 1          |
| ZMAT1        | 0.0528962  | 0.0164611  | -1.6841     | 1          |
| LRRD1        | 0.0207428  | 0.0465737  | 1.16691     | 1          |
| TNXB         | 0.0198139  | 0.00123536 | -4.00351    | 1          |
| AGBL2        | 0.0200457  | 0.0050785  | -1.98082    | 1          |
| COX6B2       | 0.309696   | 0.286761   | -0.111005   | 1          |
| MATN1        | 0.0419432  | 0.0945576  | 1.17275     | 1          |
| DPYSL4       | 0.0341412  | 0.0337457  | -0.0168091  | 1          |
| SSPO         | 0.0111153  | 0.00845537 | -0.394603   | 1          |
| RIMBP3       | 0.0352301  | 0.0378145  | 0.10213     | 1          |
| TC2N         | 0.00907286 | 0.00139527 | -2.70102    | 1          |
| SMIM1        | 3.65409    | 3.11562    | -0.229996   | 0.920028   |
| JAM2         | 0.0323218  | 0.0462778  | 0.517813    | 1          |
| TMEM217      | 0.10134    | 0.212094   | 1.0655      | 1          |
| OAS1         | 0.00998344 | 0          | #NAME?      | 1          |
| WNT4         | 0.198381   | 0.136179   | -0.542764   | 1          |
| GRAMD1B      | 0.0250522  | 0.00880627 | -1.50834    | 1          |
| MAP1A        | 0.052182   | 0.0359527  | -0.537454   | 1          |
| FLJ35390     | 0.452543   | 0.478852   | 0.0815237   | 0.990857   |
| OVGP1        | 0.561487   | 1.30412    | 1.21575     | 0.00818401 |
| ACVR1C       | 0.0069959  | 0.00260866 | -1.4232     | 1          |
| RASAL2-AS1   | 0.0562611  | 0.04549    | -0.306588   | 1          |
| LOC286467    | 0.498413   | 0.603142   | 0.275156    | 0.841266   |
| STRC         | 0.062224   | 0.0618805  | -0.00798672 | 1          |
| TIGD1        | 1.11951    | 1.95745    | 0.806114    | 0.129875   |
| CBX3P2       | 0.263097   | 0.0637813  | -2.04439    | 1          |
| SH3GL1P2     | 0.0587949  | 0.0736001  | 0.324015    | 1          |
| VN1R1        | 0.179644   | 0.537312   | 1.58062     | 0.049309   |
| DNM1P41      | 0.170927   | 0.212018   | 0.3108      | 1          |
| ZNF233       | 0.229075   | 0.226202   | -0.0182111  | 1          |
| DPY19L2      | 0.00580129 | 0.00201623 | -1.52472    | 1          |
| PROM2        | 0.13386    | 0.256183   | 0.936451    | 1          |
| DNM3         | 0.0109511  | 0.00610457 | -0.843113   | 1          |
| C1orf74      | 0.943508   | 1.49663    | 0.665611    | 0.272575   |
| MGC45922     | 0.131173   | 0.0576345  | -1.18646    | 1          |
| MT1DP        | 3.02305    | 3.03096    | 0.00376807  | 0.998951   |
| NAPA-AS1     | 1.92719    | 1.91138    | -0.0118805  | 0.985921   |
| TMEM191A     | 0.505414   | 0.725407   | 0.521326    | 0.642142   |
| TMEM27       | 0.181977   | 0.0901918  | -1.01269    | 1          |
| FMO4         | 0.26282    | 0.104598   | -1.32922    | 1          |
| APOL4        | 0.012294   | 0.0272939  | 1.15062     | 1          |
| ZNF614       | 0.0959466  | 0.104276   | 0.120104    | 1          |
| LOC100289230 | 0.251747   | 0.485362   | 0.947084    | 0.245718   |

|              |           |            |            |           |
|--------------|-----------|------------|------------|-----------|
| SAMD11       | 0.935982  | 0.22266    | -2.07164   | 0.806888  |
| AQP8         | 0.0685906 | 0.134695   | 0.973609   | 1         |
| LOC100130093 | 0.389574  | 0.792666   | 1.02481    | 0.940075  |
| ADAMTS2      | 0.0556526 | 0.0549063  | -0.0194758 | 1         |
| MFSD7        | 0.160717  | 0.24306    | 0.596794   | 1         |
| CCDC114      | 0.0694246 | 0.0172657  | -2.00754   | 1         |
| EFEMP2       | 1.28222   | 0.353492   | -1.8589    | 0.763069  |
| LAMB2P1      | 0.496183  | 0.248076   | -1.00009   | 0.233215  |
| TRPC1        | 0.0790313 | 0.0363572  | -1.12018   | 1         |
| CACNA2D2     | 0.0972846 | 0.157018   | 0.690646   | 1         |
| RINL         | 0.590715  | 0.23417    | -1.3349    | 0.0240561 |
| LIPT2        | 1.30105   | 1.11743    | -0.219496  | 0.940893  |
| BAI1         | 0.320439  | 0.0876673  | -1.86994   | 1         |
| IGIP         | 0.54732   | 0.533605   | -0.0366125 | 0.992768  |
| HS3ST3B1     | 0.196453  | 0.188429   | -0.0601669 | 1         |
| PYGM         | 0.0462964 | 0.0907971  | 0.971744   | 1         |
| ZNF880       | 0.0150828 | 0.0193441  | 0.358992   | 1         |
| ATP8B4       | 0.0167274 | 0.00895402 | -0.901608  | 1         |
| MT1JP        | 0.950594  | 2.22437    | 1.2265     | 0.2895    |
| SMIM5        | 0.0319041 | 0.0138129  | -1.20772   | 1         |
| MTRNR2L10    | 0.898685  | 1.06601    | 0.246327   | 0.890533  |
| TAS2R20      | 0.166388  | 0.293414   | 0.818383   | 1         |
| LOC391322    | 1.31715   | 1.56112    | 0.245162   | 0.944284  |
| LOC339874    | 0.113341  | 0.040398   | -1.48832   | 1         |
| ENDOU        | 0.0179856 | 0.00855962 | -1.07122   | 1         |
| LOC100271836 | 0.0390433 | 0.0562104  | 0.525762   | 1         |
| NPHS1        | 0.0400641 | 0.0167201  | -1.26072   | 1         |
| RASGEF1B     | 0.0424545 | 0.0110213  | -1.94562   | 1         |
| CARNS1       | 0.0366165 | 0.177803   | 2.27972    | 1         |
| A2M-AS1      | 0.0891037 | 0.0651794  | -0.45107   | 1         |
| GPR124       | 0.0491202 | 0.065073   | 0.405741   | 1         |
| PAN3-AS1     | 0.433109  | 1.08531    | 1.3253     | 0.652768  |
| ADCY5        | 0.0135294 | 0.0283642  | 1.06797    | 1         |
| ALG1L9P      | 0.09781   | 0.180418   | 0.883289   | 1         |
| ZNF487P      | 0.228389  | 0.240156   | 0.0724752  | 1         |
| CYP2C18      | 0.010731  | 0.0344249  | 1.68167    | 1         |
| HAPLN3       | 0.47046   | 0.450033   | -0.064044  | 0.991678  |
| LOC441242    | 0.0378494 | 0.0782294  | 1.04744    | 1         |
| L3MBTL1      | 0.128389  | 0.270268   | 1.07387    | 1         |
| LOC100288432 | 0.623362  | 0.570778   | -0.12714   | 0.985921  |
| LOC100507547 | 1.53402   | 1.0369     | -0.56504   | 0.940075  |
| CSDC2        | 0.035865  | 0.0114097  | -1.65231   | 1         |
| PHKA2-AS1    | 0.0454708 | 0.127284   | 1.48504    | 1         |
| ZNF649       | 0.0837907 | 0.215144   | 1.36044    | 1         |
| ADTRP        | 0.183707  | 0.212306   | 0.208739   | 1         |
| TCEA2        | 0.0488092 | 0.0117495  | -2.05455   | 1         |
| TYRP1        | 0.0127121 | 0.00291295 | -2.12564   | 1         |
| WDR63        | 0.0328002 | 0.0324107  | -0.0172348 | 1         |
| AGAP7        | 0.220151  | 0.23355    | 0.085233   | 1         |
| RAET1L       | 0.0390775 | 0          | #NAME?     | 1         |
| LOC100294362 | 0.0490749 | 0.213464   | 2.12094    | 1         |
| LOC653712    | 0.0949639 | 0.0682571  | -0.476401  | 1         |
| LOC100506136 | 0.0404869 | 0.0800662  | 0.983737   | 1         |
| MYO1H        | 0.0061811 | 0.00448341 | -0.463269  | 1         |
| REN          | 0.0362533 | 0.0200138  | -0.857118  | 1         |
| LINC00202-1  | 0.0723219 | 0.138768   | 0.940173   | 1         |
| MAPK15       | 2.09494   | 2.84163    | 0.43981    | 0.521303  |
| ALOX12       | 0.0226666 | 0.0329324  | 0.538943   | 1         |
| INTS4L2      | 0.0348828 | 0.0307385  | -0.182468  | 1         |
| CTAGE7P      | 0.0311039 | 0.0689904  | 1.1493     | 1         |
| GPFR         | 0.0895243 | 0.0644567  | -0.47395   | 1         |
| LINC00515    | 0.0903064 | 0.244355   | 1.43608    | 1         |
| DUSP15       | 0.165654  | 0          | #NAME?     | 1         |
| MST1         | 1.12451   | 0.513067   | -1.13207   | 0.066512  |
| CNIH2        | 0.315083  | 0.406959   | 0.369153   | 0.893315  |
| ARSI         | 0.028748  | 0.0671088  | 1.22304    | 1         |
| NEURL1B      | 0.20651   | 0.145185   | -0.508315  | 1         |
| MFSD4        | 0.0419356 | 0.0374574  | -0.162926  | 1         |
| RNF138P1     | 0.0201113 | 0.0146605  | -0.456072  | 1         |
| LOC100302640 | 0.094545  | 0.052974   | -0.835716  | 1         |
| PRORS1P      | 0.383895  | 0.264291   | -0.538584  | 0.608559  |
| DKFZP434A062 | 0.0116678 | 0.0205906  | 0.819453   | 1         |
| FBXL13       | 0.0614724 | 0.0572792  | -0.101926  | 1         |
| RIMS1        | 0.0732512 | 0.0267821  | -1.45158   | 1         |
| C1R          | 0.378264  | 0.220206   | -0.780536  | 0.397773  |
| ZNF572       | 0.793241  | 0.960994   | 0.276768   | 0.763641  |
| SNAI3        | 1.5711    | 1.72824    | 0.137524   | 0.973348  |
| STAG3L3      | 0.185531  | 0.552884   | 1.57532    | 0.0539552 |
| C8G          | 0.164843  | 0.618335   | 1.9073     | 0.288546  |

|              |            |            |            |            |
|--------------|------------|------------|------------|------------|
| ACOT4        | 0.0399975  | 0.0473526  | 0.243532   | 1          |
| MAP7D2       | 0.0245469  | 0.0289064  | 0.235848   | 1          |
| FEZF1        | 0.169497   | 0.0871948  | -0.958943  | 1          |
| SNORA71A     | 4.52398    | 14.2124    | 1.65149    | 0.843126   |
| FAM226A      | 0.34638    | 0.444659   | 0.360342   | 0.82129    |
| MTRNR2L6     | 0.524368   | 0.439106   | -0.256013  | 0.903723   |
| SLX4IP       | 0.172498   | 0.207722   | 0.268075   | 1          |
| CNBD2        | 0.0684331  | 0.0468899  | -0.545416  | 1          |
| DNAJC9-AS1   | 0.0186272  | 0.0196725  | 0.0787677  | 1          |
| ST7-AS1      | 3.14568    | 1.49728    | -1.07103   | 0.535022   |
| CAPS         | 1.27914    | 0.851062   | -0.587835  | 0.967445   |
| GRIN2C       | 0.118313   | 0.169749   | 0.520798   | 1          |
| SYCP2        | 0.0257549  | 0.00886586 | -1.53852   | 1          |
| HEATR4       | 0.0202887  | 0.0140548  | -0.529615  | 1          |
| GAS1         | 0.419281   | 0.73098    | 0.801913   | 0.253547   |
| S100A4       | 0.49517    | 1.00008    | 1.01411    | 0.397773   |
| LOC286367    | 0.346731   | 0.456186   | 0.395805   | 0.671358   |
| DAW1         | 0.0414386  | 0.015601   | -1.40934   | 1          |
| LOC100134368 | 0.191168   | 0.148979   | -0.35973   | 1          |
| ATP2C2       | 0.0266713  | 0.0368458  | 0.466215   | 1          |
| TMEM91       | 3.91462    | 3.8807     | -0.0125564 | 0.997342   |
| NELL2        | 0.0076488  | 0          | #NAME?     | 1          |
| FBXO43       | 0.0733479  | 0.035806   | -1.03455   | 1          |
| LINC00282    | 0.0169673  | 0.00925673 | -0.874186  | 1          |
| TYRO3P       | 0.0428828  | 0.0133145  | -1.6874    | 1          |
| GPR162       | 3.11796    | 2.26028    | -0.4641    | 0.454825   |
| NTN5         | 0.371227   | 0.621128   | 0.742588   | 0.909016   |
| LOC254128    | 0.953458   | 1.25388    | 0.395161   | 0.972421   |
| LOC646471    | 0.172045   | 0.11748    | -0.550374  | 1          |
| SPRY1        | 1.23384    | 3.23294    | 1.38969    | 0.00134142 |
| LOC400752    | 0.493641   | 0.414264   | -0.252913  | 0.926446   |
| ZNF554       | 0.771616   | 0.740567   | -0.0592522 | 0.984917   |
| ATOH7        | 0.120701   | 0.128334   | 0.0884683  | 1          |
| MARK2P9      | 0.0321015  | 0.0644346  | 1.00519    | 1          |
| LINC00102    | 0.0196906  | 0          | #NAME?     | 1          |
| PCDHB18      | 0.0219031  | 0.00680828 | -1.68577   | 1          |
| KRTAP4-8     | 0.243388   | 0.306876   | 0.334398   | 1          |
| PDE4B        | 0.711055   | 0.409651   | -0.795568  | 0.0920155  |
| KRT79        | 0.2104     | 0.541034   | 1.36259    | 0.070203   |
| DENND6B      | 1.75887    | 1.59127    | -0.144464  | 0.950929   |
| TTN-AS1      | 0.116386   | 0.095209   | -0.289748  | 1          |
| HOTAIR       | 0.326212   | 0.412261   | 0.337749   | 0.949812   |
| BMP3         | 0.0391276  | 0.0212032  | -0.883904  | 1          |
| LINC00514    | 0.172419   | 0.242681   | 0.493145   | 1          |
| MAP2K4P1     | 0.00977856 | 0.00409805 | -1.25469   | 1          |
| CLEC4A       | 0.369734   | 0.889041   | 1.26576    | 0.0704662  |
| COL1A1       | 0.0617957  | 0.0272884  | -1.17922   | 1          |
| USH2A        | 0.00122056 | 0.00493054 | 2.0142     | 1          |
| LOC100288911 | 6.2711     | 5.22844    | -0.262339  | 0.821849   |
| GPR143       | 0.0235584  | 0.0160447  | -0.554141  | 1          |
| VSTM4        | 0.00422192 | 0.00661688 | 0.648252   | 1          |
| MID1         | 0.0299871  | 0.0062113  | -2.27137   | 1          |
| LOC728323    | 0.170137   | 0.188893   | 0.150873   | 1          |
| LOC284260    | 0.0430742  | 0.00625961 | -2.78268   | 1          |
| TBX15        | 0.00797725 | 0.00573772 | -0.475415  | 1          |
| ANKRD26      | 0.143506   | 0.213655   | 0.574167   | 1          |
| C3           | 0.012988   | 0.0264648  | 1.02689    | 1          |
| LINC00663    | 0.998954   | 0.78184    | -0.353545  | 0.717812   |
| XYLT1        | 0.00339239 | 0.00481686 | 0.505788   | 1          |
| COL17A1      | 0.00569539 | 0.0118808  | 1.06077    | 1          |
| ARHGAP30     | 0.0309856  | 0.0165827  | -0.901922  | 1          |
| LRRN3        | 0.0065244  | 0.00221983 | -1.5554    | 1          |
| C6orf164     | 0.0758063  | 0.0614039  | -0.303989  | 1          |
| ZNF774       | 0.292271   | 0.315661   | 0.111071   | 1          |
| ZNF555       | 0.288538   | 0.347373   | 0.267727   | 1          |
| UBA7         | 0.121594   | 0.20484    | 0.752424   | 1          |
| ARMC12       | 0.204276   | 0.18096    | -0.174842  | 1          |
| TAS2R4       | 0.038222   | 0.096037   | 1.32919    | 1          |
| CDH4         | 0.0284734  | 0.0411583  | 0.531567   | 1          |
| DNAJB7       | 0.137464   | 0.140442   | 0.0309216  | 1          |
| SKIDA1       | 0.112414   | 0.151672   | 0.432131   | 1          |
| C1orf192     | 0.0459215  | 0.0704036  | 0.61648    | 1          |
| HCG27        | 0.227148   | 0.156064   | -0.541497  | 1          |
| ZPLD1        | 0.00998687 | 0.00201579 | -2.30868   | 1          |
| SMPD3        | 0.231349   | 0.264765   | 0.194639   | 1          |
| RNF222       | 0.0121662  | 0.0200072  | 0.717637   | 1          |
| CYP2E1       | 1.21464    | 1.8407     | 0.599726   | 0.294485   |
| ZNF461       | 0.284196   | 0.396145   | 0.479142   | 0.604298   |
| LOC440354    | 0.191474   | 0.23413    | 0.290161   | 1          |

|              |            |            |            |            |
|--------------|------------|------------|------------|------------|
| HSF2BP       | 0.712318   | 0.648317   | -0.135822  | 0.96115    |
| LPAL2        | 0.165136   | 0.167668   | 0.0219514  | 1          |
| LOC100289137 | 1.66356    | 2.80009    | 0.7512     | 0.0504457  |
| TMCC3        | 0.00438915 | 0.00539208 | 0.296898   | 1          |
| HLF          | 0.0385384  | 0.0623883  | 0.694979   | 1          |
| C2orf82      | 3.31845    | 3.22741    | -0.0401301 | 0.99351    |
| SERPINF2     | 0.0929807  | 0.156711   | 0.753106   | 1          |
| ZNF582       | 0.0198461  | 0.00710934 | -1.48107   | 1          |
| LOC100630918 | 1.22473    | 2.02904    | 0.728327   | 0.239863   |
| GPRC5D       | 0.307326   | 0.225086   | -0.449295  | 1          |
| MORF4L2-AS1  | 0.0904227  | 0.0475951  | -0.925872  | 1          |
| TRIM58       | 0.0178842  | 0.0161119  | -0.150559  | 1          |
| DPEP1        | 0.24632    | 0.243603   | -0.0160028 | 1          |
| STARD9       | 0.263523   | 0.479336   | 0.863112   | 0.0172978  |
| AGPHD1       | 2.02259    | 1.60684    | -0.331978  | 0.784181   |
| MYLK         | 0.0101799  | 0.011143   | 0.130413   | 1          |
| ZNF546       | 0.17879    | 0.239969   | 0.424582   | 1          |
| GPT          | 0.211832   | 0.69478    | 1.71364    | 0.0761023  |
| SPATA12      | 0.0578653  | 0.0120006  | -2.26959   | 1          |
| SEPT14       | 0.00635243 | 0          | #NAME?     | 1          |
| ANXA9        | 0.274716   | 0.174495   | -0.654752  | 1          |
| TBC1D3       | 0.145121   | 0.145698   | 0.00572458 | 1          |
| SYCP2L       | 0.0874615  | 0.0254573  | -1.78057   | 1          |
| MRGPRX3      | 0.0946339  | 0.145507   | 0.620663   | 1          |
| C3orf35      | 0.151049   | 0.20339    | 0.429233   | 1          |
| CCDC155      | 0.0155989  | 0.0364915  | 1.22611    | 1          |
| ZNF467       | 0.943046   | 0.587673   | -0.682314  | 0.553031   |
| PGBD4        | 0.344745   | 0.328029   | -0.0717066 | 1          |
| TMEM173      | 0.0351317  | 0.0944404  | 1.42663    | 1          |
| SNORA3       | 4.36506    | 2.89868    | -0.590608  | 0.961224   |
| HBA2         | 0.408287   | 0.503686   | 0.302942   | 0.961551   |
| PFKFB1       | 0.0846872  | 0.0899291  | 0.0866437  | 1          |
| RAET1K       | 1.25237    | 2.60279    | 1.0554     | 0.00818401 |
| RGPD8        | 0.0422346  | 0.029743   | -0.505875  | 1          |
| TMPRSS13     | 0.00523706 | 0.00871838 | 0.735302   | 1          |
| IDUA         | 2.39189    | 2.76846    | 0.210934   | 0.922312   |
| NGG12-AS1    | 0.0366611  | 0.00870297 | -2.07467   | 1          |
| IL1R1        | 0.00742    | 0.00965522 | 0.37989    | 1          |
| LOC100132354 | 0.0142835  | 0          | #NAME?     | 1          |
| HCG25        | 0.192332   | 0.0524846  | -1.87363   | 1          |
| TAPT1-AS1    | 0.173146   | 0.0441285  | -1.97221   | 1          |
| ARMCX1       | 0.0507743  | 0.0519608  | 0.033326   | 1          |
| LOC144486    | 0.110064   | 0.121184   | 0.138863   | 1          |
| SLC43A3      | 0.133418   | 0.215433   | 0.691287   | 1          |
| PBX1         | 0.166639   | 0.0361909  | -2.20303   | 1          |
| ZNF701       | 0.0995512  | 0.1069     | 0.102753   | 1          |
| NOS1AP       | 0.19556    | 0.21242    | 0.119314   | 1          |
| RPPH1        | 28.7177    | 51.5808    | 0.844897   | 0.021138   |
| MSLN         | 0.026205   | 0.0207461  | -0.337003  | 1          |
| SYTL2        | 0.489942   | 0.202626   | -1.27379   | 0.0167292  |
| USH1C        | 0.0543742  | 0.0415787  | -0.387078  | 1          |
| C14orf182    | 0.0264539  | 0.0273854  | 0.0499237  | 1          |
| PARVG        | 0.0822783  | 0.0845624  | 0.0395045  | 1          |
| BHLHB9       | 0.109972   | 0.223989   | 1.02629    | 1          |
| CD79A        | 0.623725   | 0.78492    | 0.331636   | 0.852548   |
| UNC5CL       | 0.395989   | 0.224211   | -0.820601  | 0.302567   |
| SEPT4        | 0.280694   | 0.138475   | -1.01937   | 1          |
| C17orf98     | 0.161703   | 0.515029   | 1.67131    | 0.407592   |
| IL1A         | 0.0208412  | 0.0169867  | -0.295033  | 1          |
| ADAMTS13     | 2.3682     | 1.53994    | -0.620915  | 0.936256   |
| HSD17B13     | 0.057775   | 0.0357274  | -0.693416  | 1          |
| CSAD         | 1.33855    | 1.8397     | 0.458801   | 0.931471   |
| LINC00313    | 0.0810374  | 0          | #NAME?     | 1          |
| PPFIA4       | 0.063336   | 0.099819   | 0.656287   | 1          |
| DDIT3        | 72.3132    | 20.386     | -1.82668   | 0.00593755 |
| FLJ36777     | 0.0119736  | 0.0325671  | 1.44356    | 1          |
| LHB          | 0.982796   | 1.28376    | 0.385416   | 0.898711   |
| C14orf28     | 0.870371   | 0.519644   | -0.744108  | 0.130554   |
| PCDH12       | 0.0121173  | 0.0436772  | 1.84982    | 1          |
| PLVAP        | 0.0172956  | 0.0107745  | -0.68279   | 1          |
| PTCH2        | 0.185576   | 0.437619   | 1.23767    | 0.0710419  |
| ANKRD18DP    | 0.072204   | 0.0948875  | 0.39414    | 1          |
| STX11        | 0.160645   | 0.226629   | 0.496457   | 1          |
| CATSPERG     | 0.114192   | 0.113007   | -0.0150474 | 1          |
| STARD13-AS   | 0.0491681  | 0.0194958  | -1.33456   | 1          |
| SMAD6        | 0.643606   | 0.253633   | -1.34344   | 0.16034    |
| C9orf96      | 0.0876293  | 0.163956   | 0.903825   | 1          |
| LRIT3        | 0.0613131  | 0.142737   | 1.21909    | 1          |
| GDF9         | 0.069955   | 0.0293803  | -1.25158   | 1          |

|                      |            |            |             |            |
|----------------------|------------|------------|-------------|------------|
| EQTN                 | 0.0369261  | 0.0493885  | 0.419534    | 1          |
| DRD4                 | 1.27186    | 2.19333    | 0.786175    | 0.390589   |
| GSDMB                | 1.24115    | 1.86926    | 0.590785    | 0.293986   |
| CRYAB                | 0.142418   | 0.175882   | 0.304483    | 1          |
| SDR9C7               | 0.0179748  | 0.0074913  | -1.26269    | 1          |
| DICER1-AS1           | 2.02996    | 1.02182    | -0.990307   | 0.130354   |
| ZKSCAN4              | 1.08613    | 1.92335    | 0.824428    | 0.0504457  |
| TRIM52               | 1.1683     | 1.39395    | 0.25477     | 0.812079   |
| FAM41C               | 0.326635   | 0.546984   | 0.743819    | 0.37244    |
| ZNF540               | 0.123021   | 0.319572   | 1.37724     | 1          |
| COL20A1              | 0.0115038  | 0.010087   | -0.189618   | 1          |
| FONG                 | 0.793049   | 0.862427   | 0.120993    | 0.979701   |
| STARD4-AS1           | 0.00898332 | 0.0128315  | 0.514365    | 1          |
| NAPSA                | 0.0582092  | 0          | #NAME?      | 1          |
| GPIHBP1              | 0.0520612  | 0.0353803  | -0.557264   | 1          |
| LOC100129726         | 0.022737   | 0.0566874  | 1.31799     | 1          |
| FAM46C               | 0.213354   | 0.0898588  | -1.24752    | 1          |
| ANKRD36B             | 0.236432   | 0.204413   | -0.209938   | 1          |
| KIAA1683             | 0.0206417  | 0.0425664  | 1.04415     | 1          |
| SEMA7A               | 0.185469   | 0.263485   | 0.50654     | 1          |
| BAIAP3               | 1.23949    | 1.23573    | -0.00437943 | 0.999427   |
| ALDH8A1              | 0.0823627  | 0.232497   | 1.49715     | 1          |
| CASB                 | 0.546563   | 0.379363   | -0.526808   | 0.536951   |
| LOC554206            | 0.539118   | 0.538191   | -0.00248217 | 0.998227   |
| ZC3H6                | 0.0960739  | 0.0159509  | -2.59051    | 1          |
| CLIP3                | 0.221762   | 0.110723   | -1.00205    | 1          |
| ZNF552               | 1.07108    | 1.65622    | 0.628832    | 0.159615   |
| KCNE2                | 0.178441   | 0.200217   | 0.166119    | 1          |
| FAM46A               | 0.339226   | 0.640887   | 0.917821    | 0.0318033  |
| ZNF786               | 1.98434    | 3.38427    | 0.770185    | 0.030165   |
| PLCB2                | 0.138552   | 0.276044   | 0.994465    | 1          |
| KLF11                | 1.35006    | 1.36202    | 0.0127283   | 0.996453   |
| CA3                  | 0.397358   | 0.294577   | -0.431792   | 0.7741     |
| PTCHD4               | 0.0845818  | 0.0793869  | -0.091446   | 1          |
| C19orf59             | 0.0219192  | 0.0311101  | 0.50519     | 1          |
| TMC4                 | 0.348636   | 0.488667   | 0.487132    | 0.737265   |
| LOC441081            | 0.141265   | 0.215818   | 0.61141     | 1          |
| ARL17A,ARL17B        | 0.161772   | 0.348499   | 1.10719     | 0.669766   |
| EFCAB12              | 0.0657302  | 0.0927869  | 0.497366    | 1          |
| CSTA                 | 0.356104   | 0.281068   | -0.341381   | 0.918342   |
| MATN1-AS1            | 0.81014    | 0.552061   | -0.553342   | 0.620126   |
| SPDEF                | 0.0271156  | 0.0716239  | 1.40132     | 1          |
| IRS1                 | 0.386923   | 0.568775   | 0.555812    | 0.251616   |
| ZNF425               | 0.369016   | 0.339205   | -0.121526   | 0.970346   |
| FBXW12               | 0.0466021  | 0.0779051  | 0.741322    | 1          |
| ABCC2                | 0.0922019  | 0.125105   | 0.440268    | 1          |
| PLAC4                | 0.0529286  | 0.141827   | 1.42201     | 1          |
| NT5E                 | 0.652612   | 0.595295   | -0.132621   | 0.950929   |
| C12orf39             | 0.0726438  | 0          | #NAME?      | 1          |
| WDR27                | 0.907026   | 0.82252    | -0.141094   | 0.950408   |
| LRRC17               | 0.040627   | 0.0452406  | 0.155179    | 1          |
| ZNF763               | 0.479695   | 0.379071   | -0.33965    | 0.762909   |
| RHBDL1               | 1.39992    | 2.90135    | 1.05137     | 0.0601893  |
| NTRK1                | 0.0374628  | 0.0527026  | 0.492415    | 1          |
| MSTO2P               | 0.177651   | 0.366094   | 1.04317     | 0.88211    |
| TAS2R19              | 0.0511841  | 0.0482033  | -0.0865634  | 1          |
| ZNF610               | 0.0251972  | 0.0123926  | -1.02379    | 1          |
| FBXL8,HSF4           | 6.73287    | 7.68693    | 0.191187    | 0.898291   |
| NIPSNAP3B            | 0.318646   | 0.358197   | 0.168798    | 0.961432   |
| BMF                  | 0.274139   | 0.280425   | 0.0327042   | 1          |
| C3orf72              | 0.0078304  | 0.0242391  | 1.63018     | 1          |
| CABYR                | 0.419334   | 0.748579   | 0.836052    | 0.241341   |
| SEC31B               | 0.35096    | 0.425873   | 0.279118    | 0.830817   |
| LOC100506801         | 0.0569263  | 0.0357115  | -0.672706   | 1          |
| AP4B1-AS1            | 0.0161307  | 0.0701282  | 2.12018     | 1          |
| ACAP1                | 0.44971    | 0.437664   | -0.0391711  | 0.993379   |
| VMAC                 | 0.764314   | 0.566649   | -0.431711   | 0.751467   |
| PCDHGA1,PCDHGA10,PCD | 4.66157    | 3.21793    | -0.534684   | 0.193192   |
| PXN-AS1              | 1.79018    | 1.95099    | 0.124097    | 0.994978   |
| PNMA2                | 0.0087145  | 0.00407733 | -1.09579    | 1          |
| KLF9                 | 1.06476    | 0.489371   | -1.12153    | 0.00425224 |
| IL21R-AS1            | 0.0424865  | 0.0666174  | 0.648894    | 1          |
| CTF1                 | 0.336213   | 0.212737   | -0.660304   | 1          |
| PPAPDC3              | 0.209962   | 0.125382   | -0.743801   | 1          |
| HIST1H4J             | 0.707267   | 2.51646    | 1.83107     | 0.211048   |
| C21orf90             | 0.666754   | 0.619738   | -0.105498   | 0.981753   |
| BACE1-AS             | 0.545354   | 0.583289   | 0.0970155   | 0.991767   |
| PLCH2                | 0.0443705  | 0.0288424  | -0.621411   | 1          |
| IFNE                 | 0.0501076  | 0.0846913  | 0.757186    | 1          |

|                         |            |            |            |            |
|-------------------------|------------|------------|------------|------------|
| ACTA2                   | 1.91007    | 2.55681    | 0.42072    | 0.825067   |
| GSTM2                   | 0.104142   | 0.0334476  | -1.63857   | 1          |
| LINC00460               | 0.456726   | 0.329229   | -0.472237  | 0.821039   |
| MIR4763,MIRLET7A3,MIRLI | 0.521611   | 1.26835    | 1.2819     | 0.266383   |
| OR2H2                   | 0.146169   | 0.307609   | 1.07347    | 1          |
| LOC283038               | 0.0367679  | 0.0179526  | -1.03426   | 1          |
| KGFLP2                  | 0.10305    | 0.0975672  | -0.0788767 | 1          |
| SHROOM3                 | 0.00938127 | 0.015525   | 0.726741   | 1          |
| SLC16A8                 | 0.0447568  | 0          | #NAME?     | 1          |
| ZNF737                  | 0.463886   | 0.357917   | -0.374142  | 0.545862   |
| DNAH5                   | 0.0139939  | 0.0120956  | -0.210321  | 1          |
| SPTBN4                  | 0.107508   | 0.0590483  | -0.86448   | 1          |
| GK3P                    | 0.0305213  | 0.0116967  | -1.38372   | 1          |
| SPNS2                   | 0.766897   | 0.411719   | -0.897371  | 0.911553   |
| ZNF708                  | 0.726903   | 0.800673   | 0.139451   | 0.933625   |
| NEK10                   | 0.0136744  | 0.01975    | 0.530373   | 1          |
| LOC148709               | 0.205614   | 0.201298   | -0.0306096 | 1          |
| AGPAT4-IT1              | 0.019529   | 0.00683232 | -1.51517   | 1          |
| KIF20B                  | 0.693759   | 1.08884    | 0.650279   | 0.0715857  |
| AKR7L                   | 1.24194    | 2.24718    | 0.855517   | 0.0292254  |
| APLN                    | 2.80378    | 2.66879    | -0.0711871 | 0.976198   |
| EXD3                    | 1.47942    | 1.54331    | 0.0609898  | 0.985921   |
| C1QTNF4                 | 0.426633   | 0.395515   | -0.109266  | 0.989344   |
| LOC100131726            | 0.0719995  | 0.117195   | 0.702854   | 1          |
| TRIM45                  | 0.295406   | 0.377075   | 0.352151   | 0.772137   |
| HYAL1                   | 0.0333031  | 0.0830768  | 1.31879    | 1          |
| LOC100130275            | 1.58706    | 1.66534    | 0.0694595  | 0.99351    |
| FMN1                    | 0.0489298  | 0.0601606  | 0.298105   | 1          |
| KCNIP4                  | 0.159362   | 0.272717   | 0.775099   | 1          |
| PDZD7                   | 1.5427     | 1.00463    | -0.618797  | 0.948923   |
| FOSL2                   | 3.77347    | 2.72392    | -0.470204  | 0.27405    |
| ZNF582-AS1              | 0.0244975  | 0.0474063  | 0.952441   | 1          |
| ADAMTS6                 | 0.031377   | 0.00558405 | -2.49032   | 1          |
| SLC25A5-AS1             | 0.277173   | 0.235649   | -0.234148  | 1          |
| C7orf10                 | 0.289318   | 0.27488    | -0.0738529 | 1          |
| CLCF1                   | 3.79952    | 6.84078    | 0.848346   | 0.304428   |
| MYO7A                   | 0.115565   | 0.114284   | -0.0160783 | 1          |
| LINC00115               | 1.22224    | 3.09051    | 1.33832    | 0.00743393 |
| TMEM163                 | 0.0185243  | 0.141776   | 2.93613    | 1          |
| SPDYE1                  | 0.0855892  | 0.110406   | 0.367315   | 1          |
| RGS17                   | 0.0356956  | 0.00720527 | -2.30862   | 1          |
| LOC100506123            | 0.467915   | 0.7464     | 0.673701   | 0.222647   |
| KLHL30                  | 0.0257257  | 0.032842   | 0.352328   | 1          |
| FAM110D                 | 0.428221   | 0.923745   | 1.10914    | 0.241608   |
| MYO1G                   | 0.0129434  | 0.0322368  | 1.3165     | 1          |
| FAAH2                   | 0.642093   | 0.327524   | -0.971179  | 0.112939   |
| LOC100505738,MIR4458    | 2.13451    | 2.8997     | 0.441999   | 0.447444   |
| CCDC96                  | 0.419446   | 0.820331   | 0.967721   | 0.967534   |
| CNFN                    | 3.40527    | 4.08976    | 0.264248   | 0.906464   |
| LRRRC3-AS1              | 0.0512105  | 0.0486276  | -0.0746627 | 1          |
| ZNF788                  | 0.0469485  | 0.0403868  | -0.217194  | 1          |
| CCR9                    | 0.012311   | 0.00500444 | -1.29866   | 1          |
| HCN2                    | 0.0429704  | 0.0519444  | 0.273624   | 1          |
| WBSCR28                 | 0.0490816  | 0.016916   | -1.5368    | 1          |
| ZNF586                  | 0.345957   | 0.292228   | -0.243499  | 1          |
| MLK7-AS1                | 0.0310405  | 0.0397763  | 0.357759   | 1          |
| PROCA1                  | 0.603684   | 0.289328   | -1.06109   | 0.255652   |
| GALR3                   | 0.900715   | 0.711415   | -0.34038   | 0.922006   |
| SLC6A16                 | 0.172022   | 0.170641   | -0.011622  | 1          |
| LOC100652999            | 0.0930794  | 0.105597   | 0.182033   | 1          |
| C18orf56                | 5.43062    | 3.37151    | -0.687725  | 0.954559   |
| TCEANC                  | 0.20132    | 0.0855849  | -1.23406   | 1          |
| SHBG                    | 0.459106   | 0.589555   | 0.3608     | 0.966946   |
| BREA2                   | 0.38843    | 0.48681    | 0.325705   | 0.918116   |
| DCST2                   | 0.0839926  | 0.0722464  | -0.217336  | 1          |
| KLHDC1                  | 0.0450262  | 0.0248148  | -0.859562  | 1          |
| TCTEX1D4                | 0.0450197  | 0.047233   | 0.0692375  | 1          |
| N4BP2L2-IT2             | 0.196098   | 0.317094   | 0.69334    | 1          |
| FLJ43663                | 3.34994    | 2.9975     | -0.160378  | 0.897241   |
| SP5                     | 0.690684   | 0.679727   | -0.0230704 | 0.996453   |
| EFCAB13                 | 0.0249543  | 0.0327056  | 0.390248   | 1          |
| TSPY26P                 | 0.0445573  | 0          | #NAME?     | 1          |
| LOC338799               | 1.865      | 1.45545    | -0.357715  | 0.728031   |
| C1S                     | 0.251116   | 0.326574   | 0.379056   | 1          |
| CCDC30                  | 0.0291325  | 0.0152409  | -0.934683  | 1          |
| TMEM139                 | 0.0577239  | 0.0217243  | -1.40986   | 1          |
| COL5A1                  | 0.00978645 | 0.00883143 | -0.148138  | 1          |
| PITPNM3                 | 0.130459   | 0.194065   | 0.572935   | 1          |
| THAP8                   | 2.62636    | 1.2242     | -1.10122   | 0.0172978  |

|              |            |            |            |            |
|--------------|------------|------------|------------|------------|
| HK3          | 0.0142601  | 0.0536698  | 1.91213    | 1          |
| C17orf67     | 1.07616    | 1.93898    | 0.849404   | 0.0539552  |
| CLK4         | 2.94994    | 4.13207    | 0.486181   | 0.206979   |
| DLGAP1-AS1   | 1.55949    | 0.91388    | -0.771002  | 0.265804   |
| RDH16        | 0.16736    | 0.172251   | 0.0415593  | 1          |
| GIPR         | 0.390104   | 0.188152   | -1.05196   | 0.34222    |
| POU5F2       | 0.0313531  | 0.0308353  | -0.0240255 | 1          |
| TNFRSF13C    | 0.981352   | 0.610751   | -0.684187  | 0.620631   |
| CTAGE6P      | 0.0404703  | 0.0362677  | -0.158179  | 1          |
| CRYM-AS1     | 0.130845   | 0.231946   | 0.825933   | 1          |
| LOC400680    | 0.363397   | 0.478153   | 0.395923   | 0.646918   |
| C5           | 0.239798   | 0.134212   | -0.837306  | 1          |
| ATP6V0E2     | 0.0200135  | 0.0287415  | 0.522162   | 1          |
| CNDP1        | 0.0477049  | 0.0522528  | 0.131371   | 1          |
| GOLGA7B      | 0.126952   | 0.0984777  | -0.366419  | 1          |
| RAB3A        | 1.48528    | 2.43303    | 0.712019   | 0.19894    |
| ESR2         | 0.0425948  | 0.0641759  | 0.591355   | 1          |
| GAPDHS       | 0.157358   | 0.266611   | 0.760684   | 1          |
| LPXN         | 0.920309   | 0.591827   | -0.636943  | 0.348416   |
| ZNF599       | 0.205134   | 0.338817   | 0.723939   | 1          |
| FAM66C       | 0.0257652  | 0.016942   | -0.60482   | 1          |
| DOCK3        | 0.0259495  | 0.037687   | 0.538363   | 1          |
| LOC100129518 | 0.176171   | 0.188677   | 0.0989482  | 1          |
| F3           | 2.05114    | 1.98703    | -0.0458134 | 0.986822   |
| LAG3         | 0.0744012  | 0.0660669  | -0.171398  | 1          |
| ZNF785       | 0.77902    | 1.78956    | 1.19987    | 0.0101293  |
| ZNF10        | 1.5464     | 2.10055    | 0.441849   | 0.277658   |
| FIBCD1       | 3.71227    | 4.61693    | 0.31463    | 0.629687   |
| TBXAS1       | 0.170709   | 0.180823   | 0.0830369  | 1          |
| ADIRF_AGAP11 | 34.8988    | 46.2207    | 0.405363   | 0.325375   |
| NTF4         | 0.954064   | 0.460495   | -1.0509    | 0.29804    |
| TFAP2C       | 0.306958   | 0.374577   | 0.287218   | 0.872961   |
| DERL3        | 1.13079    | 0.936938   | -0.271312  | 0.984481   |
| ZNF284       | 0.497216   | 0.801822   | 0.68941    | 0.241177   |
| ZNF773       | 0.728298   | 0.52002    | -0.485962  | 0.540336   |
| TEC          | 0.681817   | 0.580866   | -0.231179  | 0.852548   |
| GOLGA6L9     | 0.12559    | 0.149244   | 0.248955   | 1          |
| LOC100130691 | 0.0762348  | 0.0254657  | -1.58189   | 1          |
| PBX4         | 0.984568   | 0.887147   | -0.150318  | 0.959465   |
| FAM8A1       | 0.904797   | 1.44377    | 0.674178   | 0.0715857  |
| LOC202781    | 5.62151    | 5.57002    | -0.0132755 | 0.996014   |
| PRELP        | 0.0060138  | 0.00384588 | -0.644382  | 1          |
| LOC730668    | 0.0384196  | 0.0277382  | -0.469971  | 1          |
| TBC1D30      | 0.0586843  | 0.0283277  | -1.05076   | 1          |
| FGF8         | 0.75716    | 1.4419     | 0.929299   | 0.295409   |
| LOC100133445 | 1.07703    | 0.718384   | -0.584233  | 0.931471   |
| BCCL2L11     | 1.67305    | 2.68683    | 0.683424   | 0.0511722  |
| WDR93        | 0.0299633  | 0.0260875  | -0.19984   | 1          |
| TMEM151B     | 0.0424514  | 0.0279729  | -0.601782  | 1          |
| LOC654433    | 2.52494    | 3.35775    | 0.411248   | 0.805942   |
| TTC21A       | 0.1754     | 0.0743231  | -1.23877   | 1          |
| ZNF700       | 2.56949    | 3.15456    | 0.295959   | 0.595511   |
| CELLF5       | 0.25939    | 0.329501   | 0.345161   | 1          |
| WDR66        | 0.0951193  | 0.182893   | 0.94319    | 1          |
| HSD17B7P2    | 0.552399   | 0.617959   | 0.1618     | 0.958814   |
| DNAH1        | 0.115125   | 0.173595   | 0.592523   | 1          |
| ACSF2        | 4.58437    | 4.11545    | -0.155673  | 0.893663   |
| SBSPPON      | 0.204885   | 0.517332   | 1.33628    | 0.0150729  |
| TNNC1        | 0.380788   | 0.2084     | -0.869634  | 0.663064   |
| CCDC80       | 1.07598    | 0.598613   | -0.845949  | 0.0370005  |
| ACTL10       | 1.76584    | 3.03184    | 0.779844   | 0.859569   |
| RAD9B        | 0.31849    | 0.1867     | -0.770523  | 1          |
| TRAPPC6A     | 22.6526    | 21.7103    | -0.0612933 | 0.979484   |
| GAMT         | 0.171537   | 0.0221204  | -2.95507   | 1          |
| FCRLB        | 0.261542   | 0.447973   | 0.776371   | 0.557674   |
| LOC646214    | 0.150994   | 0.184546   | 0.289485   | 1          |
| C16orf62     | 0.0239527  | 0.0680121  | 1.5056     | 1          |
| POU2F2       | 0.0658127  | 0.17018    | 1.37063    | 1          |
| LOC100505695 | 2.55578    | 0.896954   | -1.51066   | 0.00509212 |
| TCEA3        | 0.0281027  | 0.0207929  | -0.434619  | 1          |
| BMS1P5       | 0.146011   | 0.146519   | 0.00501281 | 1          |
| PCDHB11      | 0.197255   | 0.0588906  | -1.74395   | 1          |
| SLC26A7      | 0.00643737 | 0.0028374  | -1.1819    | 1          |
| FLJ12825     | 0.104546   | 0.0905974  | -0.206589  | 1          |
| SMIM14       | 1.26215    | 0.364918   | -1.79023   | 0.196063   |
| TRIM74       | 0.414218   | 0.496952   | 0.262715   | 0.931822   |
| LOC100128750 | 0.450974   | 0.310078   | -0.540412  | 0.984772   |
| CDRT1        | 0.0478526  | 0.0114882  | -2.05844   | 1          |
| ANKK1        | 0.134134   | 0.084094   | -0.673603  | 1          |

|                 |            |            |            |            |
|-----------------|------------|------------|------------|------------|
| CDH15           | 0.467508   | 0.557792   | 0.254736   | 0.913628   |
| LOC645638       | 0.10064    | 0.127854   | 0.3453     | 1          |
| ZNF440          | 1.74843    | 2.23342    | 0.353195   | 0.463889   |
| DKFZP434I0714   | 0.630151   | 0.725876   | 0.204026   | 0.894319   |
| PLCD1           | 2.84739    | 1.78003    | -0.677735  | 0.101849   |
| LOC100216546    | 0.110722   | 0.151037   | 0.447964   | 1          |
| REPS2           | 0.329367   | 0.12677    | -1.37748   | 1          |
| PKD1L2          | 0.0646434  | 0          | #NAME?     | 1          |
| CELSR3          | 0.751927   | 0.918274   | 0.288333   | 0.893315   |
| FHIT            | 10.1045    | 9.49234    | -0.0901644 | 0.961224   |
| KCNQ1OT1        | 0.046904   | 0.0658982  | 0.490528   | 1          |
| KRT17           | 0.26471    | 0.399942   | 0.59538    | 0.711382   |
| MTMR9LP         | 2.02891    | 1.13556    | -0.837302  | 0.103533   |
| LINC00852       | 0.645834   | 1.43536    | -1.15218   | 0.871957   |
| C21orf15        | 0.256554   | 0.22237    | -0.206302  | 1          |
| ZNF460          | 0.287752   | 0.288298   | 0.00273541 | 1          |
| NOXA1           | 5.55177    | 2.13117    | -1.3813    | 0.00134142 |
| MAPRE3          | 0.850906   | 0.823589   | -0.0470767 | 0.990857   |
| C19orf45        | 0.570572   | 0.23197    | -1.29847   | 0.194841   |
| GARNL3          | 1.01903    | 1.28029    | 0.329275   | 0.654693   |
| LOC283174       | 0.644939   | 1.91927    | 1.57332    | 0.00134142 |
| STXBP5L         | 0.00728487 | 0.0134571  | 0.885396   | 1          |
| C7orf29         | 11.4061    | 18.742     | 0.716472   | 0.147239   |
| EDARADD         | 0.58256    | 0.779221   | 0.419627   | 0.602221   |
| MSS51           | 0.458038   | 0.444619   | -0.0428974 | 0.991767   |
| SNORA18         | 33.4979    | 42.6772    | 0.349395   | 0.919029   |
| DNAH11          | 0.00424999 | 0.00521097 | 0.294091   | 1          |
| LOC729683       | 0.551987   | 0.748766   | 0.439881   | 0.717587   |
| GPR4            | 0.0195116  | 0.00951028 | -1.03677   | 1          |
| RGS11           | 8.00031    | 6.72244    | -0.251071  | 0.703191   |
| HOXA3           | 0.407841   | 0.394641   | -0.0474663 | 0.991767   |
| KLF7            | 0.0115747  | 0.00548564 | -1.07725   | 1          |
| SNORA9          | 8.05271    | 5.97011    | -0.431716  | 0.979733   |
| SLC6A12         | 0.0889262  | 0.0408108  | -1.12366   | 1          |
| LOC440900       | 0.10856    | 0.14257    | 0.393172   | 1          |
| BEST4           | 0.0906866  | 0.0433564  | -1.06465   | 1          |
| PTN             | 0.159546   | 0.0461147  | -1.79068   | 1          |
| DNM1P35         | 0.170553   | 0.0598708  | -1.5103    | 1          |
| NUDT14          | 27.8139    | 33.5468    | 0.27037    | 0.638558   |
| LDHC            | 0.0636157  | 0.0826182  | 0.377075   | 1          |
| MAGI2           | 0.271434   | 0.145421   | -0.900368  | 1          |
| FLJ42351        | 0.653742   | 0.293412   | -1.15579   | 0.493716   |
| CCT6P3          | 2.26557    | 3.28662    | 0.53673    | 0.18287    |
| CYP4F11         | 0.0789231  | 0.046006   | -0.778624  | 1          |
| CPQ             | 6.05454    | 5.43485    | -0.155779  | 0.87816    |
| SCGB1B2P        | 0.409908   | 0.48498    | 0.242626   | 0.967901   |
| PRSS27          | 1.06439    | 0.330158   | -1.6888    | 0.0601893  |
| RBM43           | 0.947788   | 0.434256   | -1.12602   | 0.0139368  |
| DMRT1           | 0.0319056  | 0.00655193 | -2.28382   | 1          |
| OCLM            | 0.0782289  | 0.100938   | 0.367702   | 1          |
| IGFALS          | 0.12966    | 0.120941   | -0.100432  | 1          |
| IGSF22          | 0.0317769  | 0.00953929 | -1.73602   | 1          |
| TFAP2A          | 2.60042    | 3.8184     | 0.554223   | 0.157488   |
| ZNF2            | 0.941939   | 1.41368    | 0.585747   | 0.186826   |
| PRSS36          | 0.254844   | 0.242946   | -0.0689817 | 1          |
| ANXA2R          | 2.58997    | 2.23131    | -0.215041  | 0.895818   |
| ZNF79           | 2.91268    | 4.63583    | 0.670482   | 0.0757506  |
| PDXDC2P         | 1.93404    | 2.54257    | 0.39467    | 0.389311   |
| ZNF250          | 1.08131    | 1.38243    | 0.354432   | 0.462141   |
| ZNF619          | 0.426974   | 0.353714   | -0.271563  | 0.830384   |
| INTU            | 0.515643   | 0.194497   | -1.40663   | 0.00743393 |
| SUGT1P3,TPTE2P5 | 0.229041   | 0.218534   | -0.0677477 | 1          |
| LYPD3           | 0.647098   | 0.416569   | -0.635428  | 0.554478   |
| MURC            | 0.143529   | 0.205874   | 0.520418   | 1          |
| REM2            | 0.209555   | 0.3089     | 0.559815   | 1          |
| HRK             | 1.53248    | 1.10762    | -0.468407  | 0.597004   |
| CMPK2           | 0.294577   | 0.34119    | 0.211929   | 1          |
| NPIPL3          | 2.53992    | 3.65641    | 0.525645   | 0.208938   |
| GTF2IRD2B       | 0.0500363  | 0.0398096  | -0.32986   | 1          |
| FLJ45340        | 3.10784    | 2.55364    | -0.28336   | 0.548694   |
| IFIT2           | 0.0862643  | 0.0693667  | -0.314521  | 1          |
| WDR52           | 0.17114    | 0.157343   | -0.121263  | 1          |
| KDM5B-AS1       | 17.93      | 9.97809    | -0.845544  | 0.0377654  |
| ATRX            | 1.00843    | 1.48767    | 0.560936   | 0.0882057  |
| SYNM            | 0.00672861 | 0.00822866 | 0.290349   | 1          |
| SNORA80B        | 5.1738     | 7.49526    | 0.534755   | 0.980177   |
| PLXNB1          | 3.55952    | 4.85109    | 0.446628   | 0.182485   |
| ZNRF2P1         | 0.475267   | 0.634459   | 0.416786   | 0.778996   |
| DBP             | 11.8756    | 9.86214    | -0.268034  | 0.695206   |



|              |           |            |            |            |
|--------------|-----------|------------|------------|------------|
| CDC42EP5     | 14.4175   | 14.2188    | -0.0200255 | 0.995302   |
| LOC91450     | 0.0689773 | 0.612647   | 3.15086    | 0.294917   |
| CCDC170      | 0.0187392 | 0.00316683 | -2.56495   | 1          |
| AKD1         | 0.426314  | 0.380395   | -0.164418  | 0.948088   |
| FRMPD1       | 0.0121876 | 0.00412295 | -1.56366   | 1          |
| FAM229A      | 2.31325   | 2.672      | 0.208      | 0.952896   |
| ZNF543       | 0.396358  | 0.402185   | 0.0210532  | 0.995709   |
| AK8          | 0.547797  | 0.407535   | -0.426717  | 0.756805   |
| MALL         | 0.0182026 | 0.0264427  | 0.538729   | 1          |
| TMEM191B     | 1.3377    | 1.71205    | 0.355969   | 0.835119   |
| ZMYND12      | 0.151893  | 0.0780074  | -0.961372  | 1          |
| NAALAD2      | 0.0638505 | 0.40254    | 2.65636    | 0.00337323 |
| HY1          | 16.9104   | 19.9264    | 0.236774   | 0.828589   |
| GSTT2        | 0.799352  | 2.03222    | 1.34615    | 0.0240561  |
| SRPX2        | 0.0397659 | 0          | #NAME?     | 1          |
| SPATC1       | 0.0738667 | 0.225054   | 1.60728    | 1          |
| CCT6P1       | 2.34862   | 2.87909    | 0.293799   | 0.690479   |
| TP53TG5      | 0.399889  | 0.319322   | -0.324587  | 0.986822   |
| STARD5       | 1.23966   | 1.11989    | -0.146583  | 0.957891   |
| BRCA2        | 0.106811  | 0.108706   | 0.0253703  | 1          |
| ZNF493       | 0.763465  | 1.04102    | 0.447363   | 0.633749   |
| TIGD3        | 1.98913   | 2.04181    | 0.0377136  | 0.990994   |
| VAMP1        | 2.80932   | 4.69728    | 0.741604   | 0.208452   |
| ZNF823       | 1.21716   | 1.92186    | 0.658991   | 0.123328   |
| SNED1        | 0.323792  | 0.301237   | -0.104169  | 1          |
| ZNF566       | 1.16984   | 1.51996    | 0.377724   | 0.428495   |
| CYGB         | 0.149913  | 0.150812   | 0.00862951 | 1          |
| BCAM         | 24.4821   | 30.3608    | 0.310481   | 0.468622   |
| KLHL28       | 0.495638  | 0.427001   | -0.215048  | 0.854644   |
| PAD1I        | 0.0125641 | 0.0118441  | -0.0851388 | 1          |
| NEURL3       | 0.0418011 | 0          | #NAME?     | 1          |
| MCM3AP-AS1   | 0.0900488 | 0.116991   | 0.37762    | 1          |
| PKLR         | 0.37031   | 0.918068   | 1.30987    | 0.128787   |
| CACNB3       | 16.1049   | 13.2772    | -0.278556  | 0.549068   |
| DKKL1        | 0.583815  | 0.365907   | -0.674034  | 0.621874   |
| CRYL1        | 17.6116   | 9.30716    | -0.920111  | 0.00134142 |
| ACCS         | 1.15652   | 0.571699   | -1.01646   | 0.0688198  |
| DEPDC4       | 0.196299  | 0.160006   | -0.294927  | 1          |
| PLXNA3       | 4.36357   | 5.19991    | 0.252979   | 0.653433   |
| ALG1L        | 0.293881  | 0.124844   | -1.23511   | 1          |
| CCDC116      | 0.0494878 | 0.0774751  | 0.64666    | 1          |
| EID2B        | 1.68912   | 2.58604    | 0.614467   | 0.216407   |
| C1orf189     | 0.079929  | 0.122858   | 0.6202     | 1          |
| AACSP1       | 0.516169  | 0.485084   | -0.0896081 | 0.979701   |
| C10orf11     | 9.98355   | 10.0961    | 0.0161682  | 0.995214   |
| LENG8        | 6.98466   | 12.3353    | 0.820525   | 0.0183825  |
| ZNF30        | 0.552608  | 0.832544   | 0.59127    | 0.310783   |
| CCDC88A      | 0.815756  | 1.06281    | 0.381677   | 0.394201   |
| CNN1         | 0.104706  | 0.0418926  | -1.32157   | 1          |
| SLC7A9       | 0.10848   | 0.120415   | 0.150591   | 1          |
| LRRRC39      | 0.352799  | 0.464368   | 0.39642    | 0.950684   |
| COL7A1       | 0.456432  | 0.624104   | 0.451386   | 0.876923   |
| LOC100129083 | 0.117168  | 0          | #NAME?     | 1          |
| UGDH-AS1     | 1.72378   | 1.99857    | 0.213395   | 0.85074    |
| ZNF404       | 1.56033   | 1.66476    | 0.0934689  | 0.967901   |
| BEND3P3      | 0.0127325 | 0.0211836  | 0.73444    | 1          |
| LCA5L        | 0.154284  | 0.139726   | -0.142983  | 1          |
| LOC100287042 | 0.180178  | 0.411562   | 1.19168    | 0.959465   |
| PLAG1        | 0.822741  | 0.315495   | -1.38282   | 0.00134142 |
| CPNE7        | 29.8654   | 51.0947    | 0.774697   | 0.00134142 |
| ANKAR        | 0.16345   | 0.1072     | -0.608536  | 1          |
| DPY19L1P1    | 0.450434  | 0.306533   | -0.555271  | 0.896032   |
| FNDC4        | 9.61429   | 9.78638    | 0.0255951  | 0.991767   |
| ZNF93        | 0.0319418 | 0.0572258  | 0.841219   | 1          |
| TMEM249      | 0.887416  | 2.44889    | 1.46444    | 0.0357572  |
| USP30-AS1    | 0.0757524 | 0.116118   | 0.616228   | 1          |
| ACSBG1       | 0.0943498 | 0.273402   | 1.53493    | 1          |
| DUSP10       | 0.73768   | 0.41331    | -0.835771  | 0.178496   |
| ZNF416       | 2.76119   | 3.12178    | 0.177081   | 0.863259   |
| ARRDC3       | 3.26958   | 4.90384    | 0.584804   | 0.0584113  |
| CLEC2D       | 0.401464  | 0.350471   | -0.195976  | 0.89195    |
| ZNF805       | 0.856004  | 0.776527   | -0.140581  | 0.908288   |
| SOCS1        | 2.40094   | 4.65841    | 0.956239   | 0.0904428  |
| DNAJC28      | 0.218305  | 0.198961   | -0.133857  | 1          |
| SCN4B        | 0.0436451 | 0.0126218  | -1.7899    | 1          |
| SLC2A11      | 1.84444   | 2.36018    | 0.355713   | 0.618305   |
| OPRL1        | 1.41251   | 0.761649   | -0.891065  | 0.0551188  |
| DUOX1        | 0.0326035 | 0.019285   | -0.757549  | 1          |
| RNF157       | 0.457663  | 0.417374   | -0.132947  | 0.954768   |

|              |           |            |            |            |
|--------------|-----------|------------|------------|------------|
| LOC286437    | 0.150791  | 0.267366   | 0.826269   | 1          |
| HOXA11-AS    | 1.97172   | 1.74325    | -0.177675  | 0.931471   |
| PRPF40B      | 0.651289  | 0.480446   | -0.438924  | 0.965573   |
| ENDOD1       | 0.354974  | 0.690277   | 0.959463   | 0.0322484  |
| KCNN4        | 6.30286   | 6.55413    | 0.0563983  | 0.979701   |
| PCDHB10      | 0.223761  | 0.14596    | -0.61639   | 1          |
| C12orf76     | 1.12917   | 1.24427    | 0.140036   | 0.947008   |
| LURAP1L      | 3.32016   | 0.593151   | -2.48478   | 0.00134142 |
| AHR          | 0.2369    | 0.240542   | 0.0220097  | 1          |
| RPLP0P2      | 0.685943  | 1.18423    | 0.787782   | 0.101591   |
| BCL3         | 6.81126   | 6.44617    | -0.079481  | 0.972111   |
| KIAA1958     | 0.581089  | 0.378595   | -0.618102  | 0.398469   |
| ZNF436       | 1.19467   | 1.44452    | 0.27398    | 0.725178   |
| LOC100507373 | 0.33995   | 0.408636   | 0.265496   | 0.976618   |
| TNFRSF14     | 14.2846   | 10.0815    | -0.502754  | 0.169924   |
| NRN1         | 26.0727   | 8.43638    | -1.62785   | 0.00134142 |
| LOC100272216 | 0.0347508 | 0.0698373  | 1.00695    | 1          |
| C12orf60     | 1.1596    | 0.990712   | -0.227091  | 0.901579   |
| ZNF732       | 0.0145675 | 0.0102019  | -0.51391   | 1          |
| NS3BP        | 1.78998   | 4.00719    | 1.16265    | 0.0114515  |
| XKR9         | 0.0864282 | 0.125758   | 0.541081   | 1          |
| C8orf58      | 25.1328   | 18.0973    | -0.473802  | 0.128873   |
| ZNF564       | 1.34213   | 1.49626    | 0.156841   | 0.909164   |
| TMOD4        | 0.104807  | 0.107446   | 0.0358839  | 1          |
| VSIG2        | 0.0503788 | 0.110859   | 1.13784    | 1          |
| TPT1-AS1     | 4.54052   | 3.0001     | -0.597846  | 0.218449   |
| RPL32P3      | 1.56418   | 2.30512    | 0.559436   | 0.271991   |
| ZNF624       | 0.243974  | 0.187327   | -0.381163  | 1          |
| CCDC61       | 6.15058   | 6.99663    | 0.185938   | 0.872554   |
| ZNF607       | 1.08732   | 1.78733    | 0.71703    | 0.0373672  |
| CYP2D7P1     | 0.658462  | 0.800244   | 0.281339   | 0.908114   |
| ARL15        | 0.97545   | 0.91984    | -0.0846858 | 0.976214   |
| IL11         | 6.8405    | 14.0025    | 1.03351    | 0.00134142 |
| PHF1         | 24.122    | 17.9697    | -0.424784  | 0.207891   |
| HIATL2       | 0.995286  | 1.38675    | 0.478529   | 0.759003   |
| RORA         | 1.05425   | 0.33314    | -1.66202   | 0.00134142 |
| KIF9-AS1     | 0.18284   | 0.161003   | -0.183498  | 1          |
| NKPD1        | 0.0149573 | 0.00750509 | -0.994905  | 1          |
| WWTR1-AS1    | 0.0821905 | 0.101724   | 0.307614   | 1          |
| SNORD94      | 4.88583   | 4.32662    | -0.175361  | 0.991767   |
| NAPB         | 1.23006   | 2.07231    | 0.752511   | 0.030994   |
| JRKL         | 1.17506   | 1.288      | 0.132394   | 0.934181   |
| SYNE2        | 2.07382   | 1.82995    | -0.180486  | 0.912776   |
| GAS5         | 1060.2    | 1034.66    | -0.0351834 | 0.986822   |
| RG52         | 4.26732   | 4.29411    | 0.00902962 | 0.997036   |
| MAN2B1       | 20.6809   | 22.6273    | 0.129767   | 0.890666   |
| EMID1        | 6.81948   | 7.18421    | 0.0751661  | 0.971373   |
| CCDC106      | 0.53205   | 0.688429   | 0.371746   | 0.845974   |
| ZNF474       | 5.02853   | 2.49321    | -1.01213   | 0.00243047 |
| SNORA72      | 17.2837   | 20.5307    | 0.248368   | 0.988166   |
| ENO2         | 167.666   | 59.4362    | -1.49617   | 0.00134142 |
| RIBC1        | 0.393774  | 0.284786   | -0.467489  | 0.830321   |
| ZNF276       | 3.92996   | 5.29465    | 0.430022   | 0.781066   |
| JAK3         | 0.966521  | 0.622521   | -0.634679  | 0.21617    |
| PTPRB        | 0.0102568 | 0.00287127 | -1.83682   | 1          |
| DUSP23       | 19.1265   | 26.5398    | 0.472583   | 0.307454   |
| FAM160A1     | 1.20387   | 0.425006   | -1.50213   | 0.00134142 |
| LOC100506599 | 0.479932  | 0.546226   | 0.186668   | 0.926258   |
| ZBTB3        | 0.885525  | 0.926211   | 0.0648082  | 0.984917   |
| TMEM86A      | 0.872622  | 0.464043   | -0.911098  | 0.0634431  |
| LRRC48       | 0.162676  | 0.146884   | -0.147326  | 1          |
| DFNB31       | 10.8946   | 11.3525    | 0.059391   | 0.975842   |
| SPAG4        | 19.1208   | 8.61324    | -1.15051   | 0.00134142 |
| RAG1         | 0.0545397 | 0.00783933 | -2.7985    | 1          |
| C1orf213     | 0.846739  | 0.833047   | -0.0235203 | 0.99714    |
| AXDND1       | 0.528216  | 0.432299   | -0.289096  | 0.788214   |
| PTP4A3       | 9.50038   | 4.4966     | -1.07915   | 0.00509212 |
| LINC00853    | 1.32216   | 0.759255   | -0.800243  | 0.441752   |
| ZFP112       | 0.546658  | 0.654889   | 0.260613   | 0.803764   |
| LINC00240    | 0.544144  | 0.886007   | 0.70333    | 0.697216   |
| POM121L10P   | 0.0259424 | 0.0464446  | 0.840201   | 1          |
| OTUD1        | 2.87459   | 1.63638    | -0.812846  | 0.0288382  |
| LOC100506123 | 1.14922   | 1.43089    | 0.316263   | 0.675612   |
| LOC100131289 | 0.966761  | 0.819668   | -0.23812   | 0.93549    |
| ZNF133       | 4.11905   | 4.54531    | 0.142067   | 0.909179   |
| DCXR         | 155.619   | 224.938    | 0.531502   | 0.0463932  |
| ALDOC        | 137.797   | 101.452    | -0.441741  | 0.146724   |
| LOC284581    | 0.0213798 | 0.0247268  | 0.209824   | 1          |
| ZNF57        | 2.31327   | 3.57375    | 0.627505   | 0.0848024  |

|                |            |            |            |            |
|----------------|------------|------------|------------|------------|
| PLLP           | 0.971091   | 0.160479   | -2.59722   | 0.0235476  |
| FGF17          | 2.55492    | 3.90515    | 0.612101   | 0.339703   |
| SMAD9          | 2.62267    | 1.06014    | -1.30678   | 0.00134142 |
| ABCA2          | 16.6483    | 18.4173    | 0.145683   | 0.849892   |
| KLK14          | 0.129598   | 0.206977   | 0.675429   | 1          |
| FAM13A-AS1     | 0.132926   | 0.163419   | 0.297956   | 1          |
| SLC22A4        | 0.311437   | 0.673911   | 1.11362    | 0.693258   |
| FGF9           | 0.228887   | 0.321602   | 0.490639   | 1          |
| ROCK1P1        | 0.319586   | 0.123342   | -1.37354   | 1          |
| YPEL4          | 0.27368    | 0.031712   | -3.10939   | 1          |
| TRABD2B        | 0.0392721  | 0.020242   | -0.956155  | 1          |
| FHL1           | 0.0892823  | 0.216744   | 1.27954    | 1          |
| VMO1           | 0.718143   | 0.967885   | 0.430565   | 0.828589   |
| KLHL7-AS1      | 0.0496352  | 0.0230096  | -1.10913   | 1          |
| FAM228B        | 0.753493   | 0.254853   | -1.56393   | 0.0245451  |
| SHC2           | 12.2724    | 9.94252    | -0.303737  | 0.559547   |
| PRKCG          | 2.82004    | 2.16741    | -0.379739  | 0.534473   |
| BTBD2          | 51.2877    | 35.0774    | -0.548073  | 0.0455504  |
| PPEF1          | 0.163709   | 0.0225882  | -2.85749   | 1          |
| LOC100130417   | 0.283716   | 0.0331365  | -3.09795   | 1          |
| LRP5L          | 4.65924    | 5.78841    | 0.313074   | 0.624281   |
| YPEL3          | 17.3915    | 6.07591    | -1.51721   | 0.00134142 |
| C10orf118      | 0.210868   | 0.22326    | 0.0823862  | 1          |
| DLG4           | 14.3523    | 7.97047    | -0.84855   | 0.582479   |
| PLA2G4C        | 0.0714143  | 0.0731189  | 0.0340324  | 1          |
| PVT1           | 24.7866    | 30.8611    | 0.31623    | 0.397636   |
| LINC00638      | 0.212466   | 0.18722    | -0.182495  | 1          |
| ESRRB          | 0.148306   | 0.115816   | -0.356735  | 1          |
| NPC1L1         | 0.0124789  | 0.0127242  | 0.0280911  | 1          |
| DNM1           | 7.57318    | 6.90684    | -0.132874  | 0.986822   |
| LOC389247      | 0.155984   | 0.340874   | 1.12784    | 1          |
| FLJ39639       | 0.136041   | 0.181632   | 0.41698    | 1          |
| DKFZP686115217 | 0.721601   | 0.377168   | -0.935996  | 0.153604   |
| ID2            | 2.39374    | 1.52124    | -0.654019  | 0.216565   |
| LOC100130000   | 0.060647   | 0.081904   | 0.433497   | 1          |
| ENPP5          | 0.255103   | 0.131797   | -0.952762  | 1          |
| LOC100272217   | 0.529315   | 0.786313   | 0.570978   | 0.441206   |
| CCT6B          | 0.957231   | 0.669835   | -0.515063  | 0.474838   |
| ZBTB20         | 0.0530894  | 0.0122713  | -2.11314   | 1          |
| ACVR2B-AS1     | 0.391658   | 0.271953   | -0.526238  | 0.938139   |
| KLRG1          | 0.108806   | 0.0909843  | -0.258074  | 1          |
| PARP6          | 5.25324    | 5.47813    | 0.0604762  | 0.976618   |
| STK4-AS1       | 0.0389484  | 0.0338264  | -0.203415  | 1          |
| MSMP           | 1.79922    | 1.98697    | 0.143202   | 0.978981   |
| HLX            | 0.26821    | 0.433212   | 0.691711   | 0.636639   |
| LOC494141      | 0.00665918 | 0.0283327  | 2.08905    | 1          |
| CAPN3          | 1.79299    | 1.4977     | -0.259618  | 0.845783   |
| LOC100506548   | 18.1463    | 18.0798    | -0.0052944 | 0.99714    |
| AQP1           | 0.115579   | 0.148751   | 0.364022   | 1          |
| PLXDC1         | 0.0765318  | 0.0115886  | -2.72335   | 1          |
| LINC00167      | 0.0467985  | 0.0362045  | -0.37029   | 1          |
| OTX1           | 1.42235    | 1.82282    | 0.357894   | 0.654905   |
| DNAJB5         | 2.81025    | 2.39425    | -0.231121  | 0.791404   |
| GP6            | 0.0749707  | 0.169844   | 1.17981    | 1          |
| STAG3L2        | 1.11712    | 1.78453    | 0.67575    | 0.219827   |
| KDM4D          | 0.280071   | 0.250561   | -0.160632  | 1          |
| ZNF814         | 0.889994   | 1.61187    | 0.85687    | 0.00743393 |
| CROT           | 0.565786   | 0.580626   | 0.0373522  | 0.993379   |
| ADAP2          | 0.0337398  | 0.00754658 | -2.16056   | 1          |
| HIST1H2AB      | 0.258402   | 0.98902    | 1.93638    | 0.406031   |
| LRRC37A11P     | 0.0154982  | 0.00726064 | -1.09394   | 1          |
| RGS14          | 4.26377    | 5.91372    | 0.471936   | 0.270279   |
| CDKN1B         | 7.28785    | 6.06712    | -0.26448   | 0.649424   |
| LOC440925      | 0.154772   | 0.0190614  | -3.02142   | 1          |
| CLYBL          | 0.339653   | 0.368571   | 0.117878   | 0.964792   |
| HAVCR2         | 0.0227407  | 0.0146599  | -0.633401  | 1          |
| C20orf196      | 1.56949    | 2.68395    | 0.774065   | 0.125546   |
| NTNG2          | 1.43802    | 0.778873   | -0.884619  | 0.102329   |
| ITGA7          | 2.6936     | 2.23209    | -0.271138  | 0.774191   |
| DHRS12         | 1.706      | 1.57644    | -0.113949  | 0.969776   |
| RBKS           | 2.02607    | 1.21049    | -0.74309   | 0.926446   |
| TINCR          | 0.171683   | 0.206968   | 0.26966    | 1          |
| C1RL-AS1       | 0.219604   | 0.135796   | -0.693465  | 1          |
| MGAM           | 0.0218083  | 0.00481581 | -2.17903   | 1          |
| HAS3           | 1.10255    | 2.35506    | 1.09493    | 0.548577   |
| ZNF846         | 0.227097   | 0.0791308  | -1.521     | 1          |
| MAB21L3        | 0.0816628  | 0.0638232  | -0.355597  | 1          |
| KIRREL         | 0.71847    | 0.656282   | -0.130612  | 0.956807   |
| HOMEZ          | 1.56154    | 1.44164    | -0.115266  | 0.948068   |

|                       |            |            |            |            |
|-----------------------|------------|------------|------------|------------|
| ZKSCAN7               | 0.482178   | 0.548737   | 0.186548   | 0.927627   |
| ZNF518A               | 0.881729   | 0.830085   | -0.0870765 | 0.959465   |
| PSORS1C1              | 0.593274   | 0.37568    | -0.659195  | 0.737639   |
| ZC3H12B               | 0.187318   | 0.225271   | 0.266177   | 1          |
| ZDHHC8P1              | 0.72563    | 0.578525   | -0.326853  | 0.826236   |
| ATP6V1C2              | 0.267376   | 0.289461   | 0.1145     | 1          |
| FAM167B               | 0.678857   | 0.541353   | -0.326537  | 0.912689   |
| TP53TG1               | 5.29486    | 4.65954    | -0.184407  | 0.912418   |
| AASDH                 | 1.64316    | 1.01376    | -0.696761  | 0.0648441  |
| RPL13                 | 743.802    | 886.502    | 0.253205   | 0.674264   |
| TBX6                  | 0.772588   | 0.243263   | -1.66718   | 0.0504457  |
| CRYGS                 | 1.53317    | 2.5056     | 0.708635   | 0.253393   |
| HESX1                 | 0.346701   | 0.170836   | -1.02108   | 1          |
| CPA4                  | 0.0270166  | 0.0109334  | -1.3051    | 1          |
| MIR31HG               | 0.216393   | 0.212782   | -0.0242813 | 1          |
| SCD                   | 80.0755    | 105.432    | 0.396876   | 0.227784   |
| CLEC2B                | 0.205911   | 0.0519376  | -1.98717   | 1          |
| LOC388692             | 0.285967   | 0.355948   | 0.315818   | 0.680021   |
| ADSSL1                | 1.6017     | 1.19753    | -0.419535  | 0.634201   |
| FANCF                 | 2.99761    | 4.36304    | 0.541525   | 0.115486   |
| FAM83G                | 6.51419    | 4.88944    | -0.413916  | 0.349665   |
| DNAH17                | 0.151334   | 0.254993   | 0.752719   | 1          |
| AMER1                 | 0.416651   | 1.01993    | 1.29156    | 0.00134142 |
| LOC100188947          | 0.132246   | 0.136796   | 0.0488064  | 1          |
| LYRM9                 | 2.13689    | 0.756606   | -1.4979    | 0.00425224 |
| ENTPD3-AS1            | 0.112052   | 0.0611594  | -0.873517  | 1          |
| LOC399715             | 0.216246   | 0.0934552  | -1.21033   | 1          |
| FAM149A               | 0.931308   | 0.782467   | -0.251228  | 0.847596   |
| SPN                   | 0.00918497 | 0.00479499 | -0.937747  | 1          |
| CA12                  | 6.29558    | 4.75036    | -0.406302  | 0.258786   |
| ZFP1                  | 1.67355    | 2.29296    | 0.4543     | 0.281427   |
| POM121L8P             | 0.263608   | 0.436685   | 0.7282     | 0.165739   |
| SPDYE5                | 0.15117    | 0.123196   | -0.295213  | 1          |
| ZNF816,ZNF816-ZNF321P | 2.45448    | 3.15631    | 0.362822   | 0.491149   |
| LYG1                  | 1.87909    | 4.0209     | 1.09748    | 0.0150729  |
| GOLGA6L4              | 0.102098   | 0.0775813  | -0.396169  | 1          |
| LOC100271722          | 1.81422    | 0.974559   | -0.89653   | 0.0743087  |
| ASS1                  | 87.6254    | 88.4457    | 0.0134416  | 0.994615   |
| DPYSL2                | 6.39611    | 5.73116    | -0.158368  | 0.844458   |
| SMG1P1                | 0.0344142  | 0.015031   | -1.19506   | 1          |
| FOXA1                 | 1.08674    | 1.39017    | 0.355255   | 0.629687   |
| KDM3A                 | 14.192     | 7.42863    | -0.933908  | 0.00134142 |
| KIFC2                 | 11.6991    | 15.8352    | 0.436737   | 0.364877   |
| LCE1E                 | 0.140495   | 0.0143638  | -3.29001   | 1          |
| NLRP1                 | 0.258132   | 0.0743767  | -1.79519   | 1          |
| TJP3                  | 0.461222   | 0.106313   | -2.11714   | 0.699609   |
| TLR1                  | 0.0386486  | 0.021913   | -0.818628  | 1          |
| UCN                   | 2.78082    | 4.82112    | 0.793861   | 0.345568   |
| SLCO1B7               | 0.185118   | 0.0851833  | -1.1198    | 1          |
| PP7080                | 10.213     | 14.6449    | 0.519991   | 0.114315   |
| CRIPAK                | 0.871248   | 0.810525   | -0.104227  | 0.961224   |
| ERVFRD-1              | 0.0223401  | 0.0150029  | -0.57439   | 1          |
| INPP5J                | 2.39732    | 1.60954    | -0.574777  | 0.270481   |
| SND1-IT1              | 0.0392437  | 0.0402699  | 0.0372408  | 1          |
| MROH1                 | 16.5911    | 16.0896    | -0.0442756 | 0.981197   |
| LEAP2                 | 0.360455   | 1.03965    | 1.5282     | 0.0909525  |
| MIR210HG              | 10.4018    | 6.32028    | -0.718769  | 0.0205623  |
| C2                    | 0.130995   | 0.110837   | -0.241074  | 1          |
| NECAB1                | 0.0309216  | 0.0381266  | 0.302187   | 1          |
| CYP2D6                | 1.22186    | 1.46444    | 0.261273   | 0.876452   |
| LOC283683             | 0.052864   | 0.0193756  | -1.44805   | 1          |
| CUL7                  | 4.79147    | 4.23138    | -0.17934   | 0.813924   |
| C1orf110              | 0.223103   | 0.278395   | 0.31942    | 1          |
| PRSS23                | 2.74983    | 4.20511    | 0.612801   | 0.0576801  |
| PLIN1                 | 0.0958918  | 0.0886428  | -0.113404  | 1          |
| PALM3                 | 10.2751    | 11.9109    | 0.213131   | 0.73399    |
| WASH5P                | 2.00231    | 2.16492    | 0.112653   | 0.966946   |
| C6orf170              | 0.205761   | 0.145074   | -0.504183  | 1          |
| GPRC5C                | 0.338758   | 0.316257   | -0.0991587 | 1          |
| ACAP3                 | 4.74122    | 6.73207    | 0.505792   | 0.165314   |
| PMS2CL                | 1.95118    | 1.62707    | -0.262071  | 0.801355   |
| RRAS                  | 29.9242    | 19.3002    | -0.632696  | 0.0470437  |
| GOLGA8B               | 3.51609    | 3.37543    | -0.0589032 | 0.977095   |
| ZNF442                | 0.29759    | 0.405986   | 0.448106   | 0.638499   |
| CHRM3                 | 0.0610064  | 0.087647   | 0.522744   | 1          |
| MTL5                  | 1.4326     | 0.525756   | -1.44617   | 0.00243047 |
| ZNF709                | 0.654176   | 0.774684   | 0.243929   | 0.803764   |
| EYS                   | 0.00722077 | 0.0134981  | 0.902529   | 1          |
| LOC100132247          | 1.62181    | 1.97239    | 0.282338   | 0.728225   |

|            |            |            |             |            |
|------------|------------|------------|-------------|------------|
| LINC00263  | 10.981     | 5.39703    | -1.02477    | 0.00134142 |
| NBPF14     | 2.17469    | 2.5916     | 0.253035    | 0.698337   |
| ZNF767     | 1.84238    | 3.25697    | 0.821962    | 0.0235476  |
| C9orf172   | 0.462969   | 1.03794    | 1.16474     | 0.189199   |
| IL11RA     | 0.780951   | 1.26074    | 0.690967    | 0.279887   |
| NF1        | 0.767518   | 0.675211   | -0.184862   | 0.88673    |
| STAG3L1    | 0.0677402  | 0.100058   | 0.562755    | 1          |
| COL13A1    | 2.12293    | 0.79505    | -1.41694    | 0.00134142 |
| PTPN6      | 0.0255783  | 0.0384747  | 0.588988    | 1          |
| LOX        | 0.811457   | 0.914192   | 0.171983    | 0.897739   |
| DAB2       | 0.033611   | 0.016625   | -1.01558    | 1          |
| DCUN1D2    | 3.06012    | 5.34935    | 0.805774    | 0.009453   |
| TRIM66     | 0.351817   | 0.265257   | -0.407437   | 0.555919   |
| RENBP      | 0.185431   | 0.0683946  | -1.43893    | 1          |
| ZNF611     | 0.356021   | 0.288627   | -0.302755   | 0.781492   |
| CLIC2      | 0.151567   | 0.0497398  | -1.60748    | 1          |
| FLJ45445   | 0.037109   | 0.012235   | -1.60075    | 1          |
| TMEM37     | 0.120201   | 0          | #NAME?      | 1          |
| SEMA6C     | 1.9704     | 1.36075    | -0.534081   | 0.29367    |
| ST6GALNAC6 | 82.1854    | 130.187    | 0.663633    | 0.010797   |
| TP53INP1   | 1.54855    | 0.895024   | -0.790918   | 0.0189207  |
| RASA4      | 3.591      | 2.34955    | -0.612001   | 0.0605453  |
| TMEM71     | 0.515583   | 0.0852656  | -2.59617    | 0.0145499  |
| ZNF585A    | 0.710859   | 0.56177    | -0.339582   | 0.674163   |
| B9D2       | 5.18844    | 7.87188    | 0.601408    | 0.373993   |
| PNPLA7     | 1.38864    | 1.1606     | -0.258803   | 0.787261   |
| G2E3       | 0.791259   | 0.935349   | 0.241355    | 0.767144   |
| ZNF571     | 0.620249   | 0.505776   | -0.29435    | 0.872117   |
| SYTL1      | 10.8404    | 6.57494    | -0.721368   | 0.0467709  |
| GCC2       | 0.529118   | 0.551208   | 0.0590084   | 0.979944   |
| CROCCP3    | 0.234504   | 0.370736   | 0.660782    | 0.300705   |
| THAP7-AS1  | 2.32011    | 2.4663     | 0.0881537   | 0.993379   |
| APOBEC3D   | 0.0899953  | 0.113474   | 0.334443    | 1          |
| ZNF17      | 0.876589   | 1.24864    | 0.510384    | 0.337563   |
| CMBL       | 8.64149    | 5.68447    | -0.604256   | 0.0278845  |
| LOC113230  | 3.71654    | 5.38932    | 0.536141    | 0.426017   |
| C9orf131   | 0.0140082  | 0.0317648  | 1.18116     | 1          |
| CCNG1      | 45.0128    | 37.8203    | -0.251172   | 0.58206    |
| NAIP       | 0.428123   | 0.46349    | 0.114512    | 0.958814   |
| OTOA       | 0.0487053  | 0.0274026  | -0.829765   | 1          |
| PNPLA4     | 6.82911    | 5.18303    | -0.397902   | 0.27405    |
| ENO1-AS1   | 0.330621   | 0.371652   | 0.168774    | 0.99351    |
| AIFM3      | 0.503709   | 0.199653   | -1.3351     | 0.0436049  |
| CTRL       | 0.985991   | 3.52111    | 1.83638     | 0.278323   |
| GOLGB1     | 1.93868    | 2.23213    | 0.203348    | 0.758132   |
| ZNF182     | 0.9057     | 1.05672    | 0.222487    | 0.825249   |
| CD72       | 0.495853   | 0.20244    | -1.29242    | 0.913628   |
| C4orf40    | 0.00246939 | 0.00152734 | -0.693136   | 1          |
| ALDH6A1    | 2.05251    | 1.3135     | -0.643979   | 0.205713   |
| ZNF724P    | 0.187866   | 0.19084    | 0.0226597   | 1          |
| FAM201A    | 2.99543    | 1.90827    | -0.650499   | 0.219954   |
| FEM1B      | 1.29292    | 0.891163   | -0.536867   | 0.37012    |
| TTC30B     | 0.10787    | 0.116409   | 0.109912    | 1          |
| SLC5A4     | 0.0404704  | 0.0346706  | -0.223151   | 1          |
| SRD5A1     | 2.27246    | 2.021      | -0.169186   | 0.907689   |
| TMEM120A   | 28.5833    | 33.5308    | 0.230317    | 0.917308   |
| PIGZ       | 0.62103    | 0.318476   | -0.963475   | 0.15219    |
| IL10RA     | 0.0707431  | 0.092869   | 0.392609    | 1          |
| LRIG2      | 1.58107    | 1.07835    | -0.552069   | 0.199241   |
| CCDC153    | 0.192114   | 0.191125   | -0.00744633 | 1          |
| FBXO15     | 0.357334   | 0.0807508  | -2.14572    | 0.0382315  |
| RRM2B      | 7.2887     | 8.21172    | 0.172023    | 0.812113   |
| TCTN1      | 4.54518    | 4.14807    | -0.131896   | 0.927627   |
| LINC00174  | 0.707957   | 0.352596   | -1.00565    | 0.0630479  |
| ATXN1      | 0.289019   | 0.0667887  | -2.11349    | 1          |
| ZNF581     | 110.057    | 80.4494    | -0.452101   | 0.123542   |
| BCO2       | 0.0475151  | 0.0694614  | 0.547826    | 1          |
| L3HYPDH    | 2.04118    | 2.18859    | 0.100599    | 0.970195   |
| SCYL3      | 0.628091   | 0.564014   | -0.155243   | 0.979291   |
| GFRA3      | 0.0735944  | 0.0227429  | -1.69418    | 1          |
| NUAK2      | 0.185261   | 0.251996   | 0.443841    | 1          |
| ZNF248     | 1.25513    | 2.45257    | 0.966453    | 0.00134142 |
| ZNF764     | 2.70227    | 4.35756    | 0.689347    | 0.0645318  |
| PPM1M      | 6.9091     | 4.19704    | -0.719126   | 0.0245451  |
| PPP1R12B   | 0.40583    | 0.462283   | 0.187898    | 0.933242   |
| ZNF391     | 0.454594   | 0.340083   | -0.418691   | 0.762454   |
| SGIP1      | 0.394509   | 0.256918   | -0.618754   | 0.316648   |
| STAT2      | 4.07925    | 3.48459    | -0.227315   | 0.714805   |
| MMP19      | 1.58218    | 0.736396   | -1.10336    | 0.617509   |

|                     |            |            |            |            |
|---------------------|------------|------------|------------|------------|
| SLC23A3             | 0.511309   | 0.693646   | 0.440005   | 0.67097    |
| SLC17A7             | 0.267396   | 0.111813   | -1.25789   | 1          |
| UQCRHL              | 1.84579    | 2.31604    | 0.327427   | 0.839607   |
| UFSP1               | 2.65532    | 7.63906    | 1.52451    | 0.00243047 |
| C22orf32            | 21.3792    | 23.2602    | 0.121656   | 0.904734   |
| GALR2               | 0.263593   | 0.78586    | 1.57596    | 0.280427   |
| PLK3                | 10.9261    | 15.4631    | 0.501051   | 0.128584   |
| MTM1                | 0.563132   | 0.469275   | -0.263039  | 0.830662   |
| FAM212B             | 0.857338   | 1.06424    | 0.311886   | 0.895717   |
| FAM222A             | 0.835821   | 3.27213    | 1.96896    | 0.00134142 |
| LOC613037           | 3.33396    | 5.30254    | 0.669446   | 0.0470437  |
| ZNF398              | 2.05953    | 3.42699    | 0.734632   | 0.0126858  |
| ROM1                | 1.24612    | 1.62613    | 0.383999   | 0.950929   |
| ZNF563              | 0.706198   | 0.733158   | 0.0540521  | 0.986919   |
| ZNF469              | 0.00581882 | 0.00160787 | -1.85557   | 1          |
| PLEKHF1             | 5.24235    | 5.5794     | 0.0898941  | 0.966946   |
| WDR96               | 0.0378601  | 0.0166171  | -1.18801   | 1          |
| WDR5B               | 0.759149   | 1.03157    | 0.442393   | 0.416586   |
| TRIOBP              | 8.68697    | 8.92769    | 0.0394329  | 0.987858   |
| GPR146              | 4.10236    | 1.36276    | -1.58992   | 0.819258   |
| SWSAP1              | 2.20503    | 3.73548    | 0.760494   | 0.0736473  |
| ZNF681              | 0.311954   | 0.243527   | -0.357249  | 1          |
| FXVD1               | 1.18408    | 0.968454   | -0.290017  | 0.925972   |
| RPS18               | 10930.9    | 12382.4    | 0.179877   | 0.852163   |
| ZNF292              | 1.29739    | 0.986472   | -0.395262  | 0.330501   |
| ZNF114              | 2.95512    | 3.11619    | 0.0765695  | 0.970195   |
| LOC388152,LOC642423 | 11.4076    | 10.2128    | -0.159617  | 0.845726   |
| RASD2               | 0.833926   | 0.552457   | -0.594057  | 0.381597   |
| LOC100506190        | 8.89002    | 3.54367    | -1.32694   | 0.00134142 |
| PITPNA-AS1          | 11.9924    | 6.71062    | -0.837606  | 0.806389   |
| TCTN2               | 1.54526    | 1.30476    | -0.244064  | 0.812937   |
| DDX11-AS1           | 0.72923    | 0.556656   | -0.389589  | 0.970232   |
| LRRC56              | 1.63164    | 1.81322    | 0.152237   | 0.942878   |
| IL20RA              | 0.573599   | 0.314141   | -0.868632  | 0.105593   |
| ITPRIPL2            | 2.99984    | 5.65079    | 0.913565   | 0.00134142 |
| SNORA57             | 17.151     | 29.2987    | 0.772546   | 0.954768   |
| TRIM22              | 0.0988526  | 0.104535   | 0.080635   | 1          |
| MTMR3               | 3.43171    | 2.48886    | -0.46344   | 0.141091   |
| BAIAP2L2            | 0.100483   | 0.0299287  | -1.74735   | 1          |
| KIAA0825            | 0.0189074  | 0.0173137  | -0.127036  | 1          |
| PANK1               | 0.204726   | 0.335584   | 0.71298    | 1          |
| PRDM11              | 0.191073   | 0.19807    | 0.0518853  | 1          |
| TPPP                | 1.12358    | 0.86366    | -0.379574  | 0.532349   |
| KIAA1109            | 0.706002   | 0.582928   | -0.276356  | 0.615468   |
| OPN1SW              | 0.189514   | 0.34259    | 0.854177   | 1          |
| PTGER4P2-CDK2AP2P2  | 0.0415965  | 0.0627171  | 0.592396   | 1          |
| ZNF254              | 0.687085   | 0.566603   | -0.278151  | 0.771183   |
| ATP2A1              | 0.913313   | 0.820393   | -0.154794  | 0.986822   |
| SIDT2               | 2.94096    | 2.12221    | -0.47072   | 0.850947   |
| CNPY1               | 0.00540852 | 0.0033679  | -0.683384  | 1          |
| HSD17B3             | 0.200068   | 0.0909244  | -1.13775   | 1          |
| HHIP-AS1            | 0.0770677  | 0.0534179  | -0.528804  | 1          |
| CAMK2D              | 3.31727    | 1.46718    | -1.17696   | 0.00134142 |
| LOC440300           | 0.126638   | 0.119229   | -0.0869725 | 1          |
| EEF1G               | 3357.71    | 3776.21    | 0.169461   | 0.856886   |
| SLC7A7              | 0.145892   | 0.157254   | 0.108203   | 1          |
| C10orf111           | 0.123311   | 0.133321   | 0.112599   | 1          |
| ZNRF1               | 11.1072    | 7.85079    | -0.50059   | 0.0935542  |
| EPPK1               | 0.00944655 | 0.0100367  | 0.0874187  | 1          |
| TSC22D2             | 6.82466    | 5.53095    | -0.30323   | 0.518593   |
| IL1RAP              | 2.35022    | 0.768337   | -1.61299   | 0.00134142 |
| SLC37A2             | 0.215409   | 0.158171   | -0.445598  | 1          |
| KCNN1               | 0.175359   | 0.0918134  | -0.933533  | 1          |
| LRRC37A3            | 0.028631   | 0.0314699  | 0.136391   | 1          |
| RPLP1               | 8738.64    | 11178.6    | 0.355261   | 0.398538   |
| C9orf153            | 0.0436918  | 0.0480053  | 0.13583    | 1          |
| TIGD7               | 0.0974383  | 0.128589   | 0.400202   | 1          |
| ZNF75A              | 1.02965    | 1.49022    | 0.533368   | 0.377178   |
| HERC2P7             | 2.56068    | 3.98671    | 0.638671   | 0.11025    |
| RAB30               | 0.265526   | 0.167007   | -0.668944  | 1          |
| HNRNPU-AS1          | 4.62206    | 6.05948    | 0.39066    | 0.36322    |
| PPP1R32             | 0.492057   | 0.520502   | 0.0810804  | 0.986353   |
| TLL7                | 0.12686    | 0.0831966  | -0.608646  | 1          |
| MYH11               | 0.0649822  | 0.0525704  | -0.305795  | 1          |
| HIST4H4             | 0.555293   | 0.511387   | -0.118832  | 0.989869   |
| TEF                 | 2.035      | 4.00115    | 0.975388   | 0.00134142 |
| LMAN1               | 1.73374    | 1.57791    | -0.135876  | 0.913628   |
| TMEM40              | 0.087345   | 0.0697767  | -0.32398   | 1          |
| LOC100506730        | 1.4363     | 1.55553    | 0.115051   | 0.954768   |

|                       |           |            |            |            |
|-----------------------|-----------|------------|------------|------------|
| DTX4                  | 1.04254   | 1.67537    | 0.684374   | 0.0596414  |
| BCL2L15               | 0.0460379 | 0.0776667  | 0.754474   | 1          |
| ZNF230                | 0.580617  | 0.681458   | 0.231038   | 0.841354   |
| LOC100508120          | 0.476091  | 0.28651    | -0.732653  | 0.453509   |
| CRY2                  | 3.62256   | 4.50992    | 0.316093   | 0.5221     |
| TPT1                  | 3575.13   | 3926.87    | 0.135381   | 0.901579   |
| HNRNPH2,RPL36A,RPL36A | 1430.69   | 1624.35    | 0.183153   | 0.806888   |
| DDR2                  | 0.0834373 | 0.0511509  | -0.705932  | 1          |
| MSANTD3,MSANTD3-TMEF  | 61.8171   | 47.9369    | -0.36687   | 0.270279   |
| RPSAP58               | 38.9712   | 42.8565    | 0.137104   | 0.869078   |
| PLEKHG4               | 3.23906   | 2.35167    | -0.461892  | 0.269188   |
| GEM                   | 1.3409    | 0.522293   | -1.36027   | 0.00672555 |
| TUBB3                 | 51.5374   | 81.8749    | 0.667801   | 0.00743393 |
| ENPEP                 | 0.0308867 | 0.00988236 | -1.64406   | 1          |
| PDE7B                 | 0.107974  | 0.195259   | 0.854702   | 1          |
| TGFBR3L               | 0.360073  | 0.216987   | -0.730684  | 1          |
| DDDB2                 | 20.8666   | 11.4039    | -0.871664  | 0.00337323 |
| ZNF821                | 4.34891   | 2.9834     | -0.5437    | 0.216565   |
| ZNF319                | 2.59776   | 2.79461    | 0.105383   | 0.950929   |
| GREB1                 | 0.0537747 | 0.0325166  | -0.725749  | 1          |
| HCST                  | 1.55593   | 1.28628    | -0.274569  | 0.933625   |
| LOC100128822          | 6.80555   | 5.16209    | -0.398756  | 0.509102   |
| ACADVL                | 100.903   | 125.353    | 0.31302    | 0.535638   |
| C4orf47               | 1.02129   | 0.381689   | -1.41992   | 0.0718958  |
| CUX1                  | 20.5573   | 20.7553    | 0.013831   | 0.995515   |
| SMAP1                 | 2.9252    | 1.93425    | -0.596766  | 0.11492    |
| HCN3                  | 0.631592  | 1.0521     | 0.736212   | 0.265454   |
| ZNF185                | 0.12411   | 0.0980778  | -0.339615  | 1          |
| TTC18                 | 0.34602   | 0.15515    | -1.1572    | 1          |
| CSPG4                 | 0.0130992 | 0.0343123  | 1.38925    | 1          |
| CCDC120               | 0.267402  | 0.187302   | -0.513646  | 1          |
| LENG9                 | 11.9226   | 10.6773    | -0.159156  | 0.952905   |
| PPP1R21               | 2.81593   | 3.00049    | 0.0915887  | 0.95534    |
| RIMKLA                | 2.1769    | 0.905845   | -1.26494   | 0.00134142 |
| MTMR11                | 2.18783   | 0.887038   | -1.30243   | 0.00134142 |
| KCNQ3                 | 0.0065682 | 0.00687874 | 0.0666462  | 1          |
| ZNF783                | 1.53068   | 1.83651    | 0.262791   | 0.742873   |
| PHYHIP                | 0.129904  | 0.0411186  | -1.65958   | 1          |
| FXYD7                 | 0.226964  | 0.038787   | -2.54882   | 1          |
| KIAA1614              | 0.0214446 | 0.0538604  | 1.32861    | 1          |
| BBS12                 | 0.547979  | 0.850193   | 0.633671   | 0.225675   |
| EPOR                  | 4.72939   | 4.08154    | -0.212542  | 0.807656   |
| LOC100505718          | 3.04896   | 1.49982    | -1.02353   | 0.00134142 |
| OCEL1                 | 18.872    | 14.3389    | -0.396312  | 0.34771    |
| LOC284023             | 3.96155   | 5.3301     | 0.428099   | 0.288804   |
| CREB5                 | 2.46931   | 0.813571   | -1.60177   | 0.00134142 |
| LRR1Q4                | 0.0333043 | 0          | #NAME?     | 1          |
| LOC155060             | 2.81804   | 2.43661    | -0.209818  | 0.835941   |
| GOLGA6L5              | 0.176038  | 0.201414   | 0.19428    | 1          |
| FSTL1                 | 0.0277212 | 0.0122397  | -1.17942   | 1          |
| GABPB1-AS1            | 1.09047   | 1.13985    | 0.0638874  | 0.991767   |
| TMEM198B              | 1.68824   | 0.642091   | -1.39467   | 0.738927   |
| PDX1                  | 1.84494   | 2.29651    | 0.31587    | 0.718723   |
| ZNF500                | 3.09453   | 4.31954    | 0.481158   | 0.2331     |
| ZNF19                 | 0.606603  | 0.330649   | -0.875451  | 0.106054   |
| ZNF658                | 0.166946  | 0.1467     | -0.186511  | 1          |
| RPL39                 | 7121.28   | 8327.11    | 0.22568    | 0.71112    |
| NAP1L1                | 124.006   | 123.058    | -0.0110797 | 0.995957   |
| TBX1                  | 1.56798   | 1.40634    | -0.156958  | 0.956296   |
| ACOT11                | 0.182768  | 0.108196   | -0.75637   | 1          |
| GBE1                  | 23.1746   | 14.1529    | -0.711451  | 0.00243047 |
| ZNF862                | 0.995078  | 0.520761   | -0.934188  | 0.0189207  |
| UTRN                  | 0.892696  | 0.471566   | -0.92071   | 0.00243047 |
| SMARCD3               | 45.5953   | 60.4588    | 0.407068   | 0.187511   |
| RPL9                  | 3980.98   | 4186.09    | 0.0724813  | 0.966409   |
| NUDT3,RPS10,RPS10-NUD | 4835.64   | 5749.34    | 0.249688   | 0.672097   |
| FAM22G                | 0.0790912 | 0.240973   | 1.60728    | 1          |
| CACNG8                | 0.118727  | 0.117644   | -0.0132237 | 1          |
| HMHA1                 | 19.124    | 17.5827    | -0.121224  | 0.979046   |
| RUFY2                 | 1.38948   | 1.36375    | -0.0269651 | 0.992173   |
| IDH2                  | 44.446    | 37.6924    | -0.237782  | 0.619732   |
| ZNF324B               | 1.75074   | 2.82789    | 0.69176    | 0.0970854  |
| C9orf163              | 0.37467   | 0.918802   | 1.29414    | 0.927099   |
| ZNF34                 | 1.32519   | 1.24258    | -0.0928685 | 0.972989   |
| ELAC1                 | 1.72128   | 1.23098    | -0.483682  | 0.359221   |
| ZNF527                | 0.770397  | 0.67927    | -0.181615  | 0.890888   |
| ASH1L-AS1             | 2.09929   | 2.70366    | 0.365012   | 0.921047   |
| HSD3B7                | 19.9251   | 23.9694    | 0.266608   | 0.553778   |
| NR1D2                 | 2.73986   | 1.65155    | -0.730286  | 0.0126858  |

|                       |            |            |             |            |
|-----------------------|------------|------------|-------------|------------|
| RAPSN                 | 0.11303    | 0.127908   | 0.178402    | 1          |
| PDIK1L                | 1.61762    | 1.65643    | 0.0342047   | 0.989365   |
| AGBL5                 | 10.762     | 9.1972     | -0.226679   | 0.956373   |
| LOC653160             | 0.694336   | 0.742277   | 0.0963225   | 0.979733   |
| SCNN1D                | 1.11819    | 0.594857   | -0.910549   | 0.120396   |
| NPAS2                 | 6.68911    | 6.37691    | -0.0689581  | 0.966946   |
| MYOF                  | 10.8372    | 7.72613    | -0.488182   | 0.0652056  |
| SNORD17               | 1.81851    | 2.23416    | 0.296976    | 0.988166   |
| DYSF                  | 0.103883   | 0.0637579  | -0.704289   | 1          |
| KDELR3                | 11.8387    | 6.33306    | -0.90254    | 0.735667   |
| SYNGAP1               | 2.76639    | 2.25428    | -0.295338   | 0.651698   |
| HILPDA                | 22.804     | 29.8806    | 0.389925    | 0.255519   |
| SLC2A5                | 0.0457652  | 0.0220686  | -1.05226    | 1          |
| ZNF675                | 1.54517    | 1.31595    | -0.231656   | 0.819681   |
| METTL21B              | 2.51368    | 3.00098    | 0.255629    | 0.737796   |
| RGS4                  | 12.6564    | 22.4861    | 0.829165    | 0.00134142 |
| ENGASE                | 3.61769    | 6.77629    | 0.905426    | 0.00134142 |
| NRXN3                 | 0.00149933 | 0.00219437 | 0.549489    | 1          |
| RNF112                | 0.266023   | 0.220368   | -0.27164    | 1          |
| LCA5                  | 0.228692   | 0.127833   | -0.839151   | 1          |
| TCP11L2               | 0.448665   | 0.10247    | -2.13044    | 0.0200038  |
| GEMIN8P4              | 0.989663   | 0.813919   | -0.282051   | 0.857265   |
| RPS3A                 | 3036.89    | 3260.73    | 0.102603    | 0.941621   |
| ALDH1A3               | 0.0255766  | 0.022748   | -0.169085   | 1          |
| HYDIN2                | 0.00303688 | 0.00502693 | 0.72709     | 1          |
| CDKL2                 | 0.151789   | 0.0285745  | -2.40927    | 1          |
| SNHG6                 | 849.572    | 949.723    | 0.16077     | 0.828427   |
| APOC1                 | 8.54866    | 10.8592    | 0.345145    | 0.693704   |
| C7orf63               | 0.468957   | 0.831168   | 0.825683    | 0.0611798  |
| FAM175A               | 4.40195    | 2.50748    | -0.811905   | 0.248226   |
| PFKFB4                | 43.8803    | 15.421     | -1.50868    | 0.00134142 |
| NHLH2                 | 0.441996   | 0.512737   | 0.214184    | 0.918342   |
| LOC728875             | 0.120852   | 0.176839   | 0.549192    | 1          |
| IGDCC4                | 0.0990013  | 0.0925796  | -0.0967545  | 1          |
| DPCD                  | 54.4661    | 54.4973    | 0.000827039 | 0.999427   |
| CD302,LY75,LY75-CD302 | 0.32514    | 0.487163   | 0.583342    | 0.316696   |
| F8                    | 2.4043     | 1.33962    | -0.843796   | 0.102585   |
| SLC27A1               | 4.6558     | 2.85304    | -0.706531   | 0.0407579  |
| LRR1Q3                | 0.144823   | 0.0839955  | -0.785906   | 1          |
| RPS19                 | 4907.84    | 6265.09    | 0.352247    | 0.404331   |
| DNHD1                 | 0.476997   | 0.786633   | 0.721712    | 0.227784   |
| LOC401127             | 0.0594385  | 0.127764   | 1.10401     | 1          |
| LTBP4                 | 10.4469    | 6.90055    | -0.598298   | 0.0444101  |
| CDHR5                 | 0.0137686  | 0.0259616  | 0.914998    | 1          |
| LIN7B                 | 2.24339    | 3.30989    | 0.561104    | 0.664776   |
| PCDHB14               | 2.35263    | 1.84873    | -0.347737   | 0.583373   |
| HSPH1                 | 3.50481    | 8.43394    | 1.26687     | 0.00134142 |
| PDLIM2                | 118.228    | 80.7179    | -0.55061    | 0.0336095  |
| B3GNT4                | 1.76927    | 0.609294   | -1.53794    | 0.0114515  |
| SRGAP1                | 0.402968   | 0.512552   | 0.347034    | 0.621063   |
| GPR158                | 0.126031   | 0.149566   | 0.247006    | 1          |
| GRAMD1C               | 0.579689   | 0.173913   | -1.73692    | 0.00134142 |
| NOXRED1               | 0.145115   | 0.0849196  | -0.773023   | 1          |
| HSD11B1L              | 0.84407    | 0.912936   | 0.113152    | 0.993379   |
| C17orf76-AS1,SNORD49B | 1029.78    | 1073.92    | 0.0605554   | 0.973348   |
| CLOCK                 | 0.604708   | 0.817163   | 0.434385    | 0.292729   |
| FRS3                  | 3.34695    | 3.49711    | 0.0633172   | 0.979701   |
| RPS3                  | 2443.88    | 2659.25    | 0.121848    | 0.929536   |
| ANKRD50               | 0.869403   | 0.777992   | -0.160269   | 0.885624   |
| HCFC2                 | 0.552601   | 0.648106   | 0.229991    | 0.816855   |
| IFIT1                 | 0.123611   | 0.122952   | -0.00770939 | 1          |
| FAM13C                | 0.00397755 | 0          | #NAME?      | 1          |
| HOXB5                 | 1.88973    | 2.72278    | 0.526906    | 0.69673    |
| SLC15A3               | 2.03212    | 2.89663    | 0.511388    | 0.958201   |
| ZNF529                | 1.21873    | 1.34125    | 0.138197    | 0.924371   |
| LOC644656             | 1.53939    | 1.92922    | 0.325658    | 0.77851    |
| HDAC10                | 10.1403    | 10.4746    | 0.0467811   | 0.982156   |
| LOC100268168          | 2.60832    | 1.2672     | -1.04147    | 0.036526   |
| CDK18                 | 6.63909    | 3.28283    | -1.01604    | 0.00134142 |
| EPHX2                 | 3.92073    | 2.57185    | -0.608318   | 0.123604   |
| CALML6                | 0.108474   | 0.0827385  | -0.390715   | 1          |
| INE2                  | 1.84568    | 1.42254    | -0.375683   | 0.736532   |
| FAM229B               | 2.07309    | 1.47056    | -0.495421   | 0.734132   |
| DDX17                 | 49.981     | 65.4678    | 0.389407    | 0.26155    |
| ANKRD20A9P            | 0.0660108  | 0.0743845  | 0.172299    | 1          |
| HTR7P1                | 0.71652    | 0.908741   | 0.342861    | 0.674962   |
| FOXH1                 | 8.67974    | 11.5599    | 0.413405    | 0.642688   |
| CCDC144A              | 0.00170419 | 0          | #NAME?      | 1          |
| CCDC39                | 0.00521558 | 0.0350674  | 2.74923     | 1          |



|                     |            |            |             |            |
|---------------------|------------|------------|-------------|------------|
| ANKDD1A             | 0.930926   | 0.752245   | -0.307465   | 0.750689   |
| ANKRD18A            | 0.34636    | 0.369517   | 0.0933708   | 0.976618   |
| DUSP28              | 2.23978    | 2.75718    | 0.299838    | 0.806389   |
| ZNF613              | 1.32912    | 1.55998    | 0.231059    | 0.828589   |
| LOC100505912        | 0.137263   | 0.127011   | -0.111993   | 1          |
| LOC150381           | 3.46844    | 4.77607    | 0.461537    | 0.319563   |
| SCAPER              | 1.73083    | 0.887091   | -0.96431    | 0.00337323 |
| RPS8                | 4782.34    | 5512.74    | 0.205055    | 0.771183   |
| DEPTOR              | 0.68983    | 0.347442   | -0.98947    | 0.0691409  |
| KNDC1               | 0.854388   | 0.472756   | -0.853797   | 0.0615558  |
| LCN15               | 0.301881   | 0.278403   | -0.116803   | 1          |
| THAP9-AS1           | 10.7455    | 9.16536    | -0.229464   | 0.715731   |
| KRT34               | 0.0641518  | 0.0180898  | -1.82631    | 1          |
| TAGLN2              | 75.3559    | 112.556    | 0.578853    | 0.0270114  |
| C2orf62             | 0.0953474  | 0.0215224  | -2.14736    | 1          |
| DMXL2               | 1.58075    | 1.32105    | -0.258927   | 0.642142   |
| SNN                 | 6.31046    | 7.95461    | 0.334046    | 0.663996   |
| FAM184B             | 0.143978   | 0.448576   | 1.6395      | 0.0150729  |
| SETD4               | 6.60311    | 9.58145    | 0.537099    | 0.19894    |
| CCBL1               | 9.04423    | 7.50928    | -0.268324   | 0.660278   |
| ILF3-AS1            | 5.66113    | 6.91522    | 0.288685    | 0.633749   |
| FAM227A             | 0.0955662  | 0.190063   | 0.991909    | 1          |
| GLTSCR2             | 618.378    | 609.78     | -0.0202002  | 0.991767   |
| OSTCP1              | 0.0953408  | 0.0870191  | -0.131761   | 1          |
| SP8                 | 0.264619   | 0.302291   | 0.192018    | 1          |
| FAM90A25P           | 0.621006   | 0.395293   | -0.651683   | 0.512119   |
| UBL4B               | 0.0728507  | 0.053408   | -0.447887   | 1          |
| TSSK6               | 1.46713    | 0.866619   | -0.75953    | 0.408933   |
| ZBTB34              | 2.06678    | 1.96547    | -0.072511   | 0.966946   |
| SRD5A3              | 3.69629    | 1.96623    | -0.910647   | 0.00425224 |
| HSD17B8             | 6.17588    | 4.13817    | -0.577651   | 0.229068   |
| KIAA1324L           | 0.255694   | 0.174492   | -0.551254   | 1          |
| UACA                | 0.779994   | 0.27614    | -1.49806    | 0.00134142 |
| THBS3               | 1.4514     | 0.845093   | -0.780259   | 0.0870955  |
| RPS27               | 9402.34    | 10453.3    | 0.152868    | 0.865541   |
| MST1L               | 0.217364   | 0.108153   | -1.00704    | 1          |
| DHRS1               | 1.50368    | 2.4226     | 0.688059    | 0.209943   |
| RASA2               | 0.489973   | 0.443354   | -0.144243   | 0.954188   |
| ZNF83               | 2.17916    | 1.67968    | -0.375587   | 0.463847   |
| BTN3A3              | 0.819708   | 0.817345   | -0.00416538 | 0.998564   |
| C10orf55            | 0.202036   | 0.280721   | 0.474521    | 1          |
| BBS9                | 0.904052   | 0.421408   | -1.10119    | 0.009453   |
| LGALS3              | 42.8463    | 46.6464    | 0.122595    | 0.900727   |
| FLJ27354            | 0.799568   | 0.395721   | -1.01474    | 0.346561   |
| ZNF223              | 0.880925   | 0.667295   | -0.400694   | 0.619291   |
| TCAP                | 0.186512   | 0.526918   | 1.49831     | 0.255272   |
| EXOC3L4             | 0.0521225  | 0.019165   | -1.44344    | 1          |
| RPL36               | 4760.67    | 5760.68    | 0.275073    | 0.558681   |
| ETNK2               | 1.21916    | 0.652698   | -0.901395   | 0.0967199  |
| SEMA3C              | 0.28482    | 0.314207   | 0.141665    | 1          |
| BTG2                | 8.93206    | 9.7096     | 0.120419    | 0.912153   |
| LOC493754           | 3.76655    | 3.90408    | 0.0517421   | 0.979701   |
| SENP7               | 0.93691    | 0.491414   | -0.930971   | 0.0167292  |
| ZNF567              | 2.08742    | 2.28579    | 0.130971    | 0.926225   |
| ZNF778              | 0.277632   | 0.530885   | 0.935225    | 0.0753213  |
| BIRC3               | 0.613361   | 1.45999    | 1.25114     | 0.00134142 |
| ZNF12               | 3.39068    | 3.91223    | 0.206417    | 0.739394   |
| PAX2                | 1.38724    | 1.54433    | 0.154756    | 0.929478   |
| LOC100507140        | 0.00729038 | 0.00459065 | -0.667294   | 1          |
| HCFC1R1             | 306.196    | 281.885    | -0.119351   | 0.950929   |
| RAB13               | 73.3614    | 82.6198    | 0.171466    | 0.789193   |
| ANKRD20A2,ANKRD20A3 | 0.00305844 | 0          | #NAME?      | 1          |
| ZNF419              | 2.15751    | 2.20755    | 0.0330814   | 0.990857   |
| GATSL3              | 3.02444    | 3.66127    | 0.275677    | 0.783646   |
| IDS                 | 9.72749    | 10.6056    | 0.124687    | 0.943861   |
| HHAT                | 0.440618   | 0.227755   | -0.952044   | 0.0736473  |
| KIAA0319            | 0.0555279  | 0.0266918  | -1.05682    | 1          |
| ZNF16               | 9.10747    | 5.50415    | -0.726531   | 0.00882987 |
| C1orf162            | 0.412272   | 0.427591   | 0.0526359   | 0.99316    |
| ZNF81               | 0.114791   | 0.119062   | 0.0527088   | 1          |
| PARS2               | 4.03875    | 5.73971    | 0.507069    | 0.173163   |
| CDNF                | 1.10796    | 0.393745   | -1.49258    | 0.0200038  |
| ARHGEF6             | 0.302344   | 0.141434   | -1.09606    | 1          |
| GPSM2               | 1.33417    | 0.875892   | -0.607114   | 0.819681   |
| LRRC29              | 0.785545   | 0.335968   | -1.22537    | 0.147583   |
| ARSG                | 0.575308   | 0.49595    | -0.214139   | 0.94904    |
| CLIP2               | 14.1977    | 9.12843    | -0.637215   | 0.0126858  |
| SLC26A4             | 0.0560625  | 0.051714   | -0.116481   | 1          |
| EEF1A1              | 5035.02    | 4797.67    | -0.0696639  | 0.979484   |

|               |            |            |             |            |
|---------------|------------|------------|-------------|------------|
| NSUN5P2       | 5.09378    | 8.64998    | 0.76396     | 0.679573   |
| GCKR          | 0.118312   | 0.0497375  | -1.25019    | 1          |
| SERPINB2      | 0.00669328 | 0.00421831 | -0.66605    | 1          |
| HPDL          | 9.39556    | 29.6093    | 1.656       | 0.00134142 |
| ACTR1B        | 65.303     | 49.3194    | -0.404995   | 0.192672   |
| PCED1A        | 12.4387    | 14.0571    | 0.176461    | 0.966946   |
| NFAT5         | 2.32835    | 2.51984    | 0.114022    | 0.913628   |
| CENPF         | 3.73199    | 4.72984    | 0.341846    | 0.33875    |
| ATAT1         | 1.28723    | 1.47982    | 0.201156    | 0.916105   |
| SOGA1         | 0.398412   | 0.651255   | 0.708962    | 0.261904   |
| OPLAH         | 28.0935    | 43.9066    | 0.644204    | 0.0145499  |
| RARRES1       | 1.09905    | 0.695656   | -0.659815   | 0.420042   |
| TRIQQ         | 1.86938    | 0.589202   | -1.66572    | 0.00134142 |
| KCTD11        | 11.5163    | 12.2228    | 0.0858968   | 0.950929   |
| IQUB          | 0.010824   | 0.0076417  | -0.502264   | 1          |
| CCDC122       | 0.903647   | 0.267459   | -1.75644    | 0.156099   |
| IL17D         | 2.14718    | 3.31258    | 0.62551     | 0.212023   |
| LOC146880     | 8.54937    | 9.26133    | 0.115402    | 0.933023   |
| PHLDA3        | 85.2039    | 83.6543    | -0.0264794  | 0.990324   |
| TIGD5         | 21.37      | 46.1262    | 1.11        | 0.00134142 |
| ZNF431        | 1.63924    | 0.941032   | -0.800711   | 0.0270114  |
| ZBTB24        | 3.00743    | 3.14238    | 0.0633258   | 0.979701   |
| IFIT5         | 2.28434    | 5.19555    | 1.1855      | 0.00134142 |
| RHBDL2        | 0.0757328  | 0.020381   | -1.89369    | 1          |
| FBXO38        | 4.79737    | 4.52243    | -0.085144   | 0.954677   |
| RPL35         | 8047.42    | 10262.5    | 0.350788    | 0.385575   |
| C11orf92      | 0.0869952  | 0.076814   | -0.179567   | 1          |
| MPL           | 0.0323313  | 0.0294602  | -0.134163   | 1          |
| FGGY          | 6.50629    | 4.28885    | -0.601246   | 0.0929396  |
| NSUN5P1       | 6.4493     | 12.5524    | 0.960754    | 0.396027   |
| PARVA         | 3.26006    | 4.54462    | 0.479262    | 0.0997646  |
| FAM178A       | 2.96314    | 3.33333    | 0.169838    | 0.963669   |
| FLJ37453      | 2.15904    | 1.68707    | -0.355869   | 0.955406   |
| HEXDC         | 2.23593    | 2.22537    | -0.00682709 | 0.999214   |
| KCNIP3        | 2.0422     | 2.06149    | 0.013564    | 0.996453   |
| PHLDB2,PLCXD2 | 0.444225   | 0.378345   | -0.231588   | 0.868277   |
| FAM35DP       | 0.161305   | 0.145283   | -0.150924   | 1          |
| CDH2          | 0.00295678 | 0          | #NAME?      | 1          |
| POLR2J3       | 2.36115    | 3.03564    | 0.362511    | 0.648141   |
| LOC100505989  | 0.00401615 | 0.00862091 | 1.10203     | 1          |
| TUBGCP5       | 3.88334    | 2.85134    | -0.44566    | 0.206979   |
| AGRN          | 10.6866    | 15.9745    | 0.579975    | 0.0292254  |
| CRISPLD2      | 0.030928   | 0.0505554  | 0.708952    | 1          |
| CYBB          | 0.0412569  | 0.0435768  | 0.0789271   | 1          |
| NAB1          | 3.60071    | 3.8989     | 0.114786    | 0.921182   |
| C11orf45      | 0.101245   | 0.0233034  | -2.11924    | 1          |
| RPL15         | 938.706    | 1076.65    | 0.197807    | 0.786082   |
| FAM102B       | 1.57628    | 1.33298    | -0.241864   | 0.72508    |
| HHIPL2        | 0.13716    | 0.133709   | -0.0367617  | 1          |
| COMMMD10      | 5.44763    | 7.64456    | 0.488804    | 0.208084   |
| LOC389765     | 0.398985   | 0.51119    | 0.357524    | 0.808776   |
| RPL26         | 4976.29    | 5663.8     | 0.186701    | 0.814226   |
| CCDC71L       | 2.39578    | 1.97418    | -0.279239   | 0.638558   |
| TGM2          | 94.4489    | 101.464    | 0.103365    | 0.926446   |
| ANKRD36       | 0.250458   | 0.266689   | 0.0905894   | 1          |
| ASB13         | 10.9592    | 6.57556    | -0.736959   | 0.009453   |
| RERE          | 3.18804    | 3.84737    | 0.271205    | 0.606359   |
| LOC100506990  | 3.37892    | 2.66296    | -0.343531   | 0.664776   |
| ZNF514        | 0.955119   | 0.961447   | 0.009526    | 0.997036   |
| MYH15         | 0.103757   | 0.0870691  | -0.252972   | 1          |
| RPL37         | 849.909    | 936.211    | 0.139525    | 0.884394   |
| SLC25A27      | 0.979311   | 0.658761   | -0.572013   | 0.319171   |
| TMEM53        | 1.93195    | 1.85423    | -0.0592328  | 0.985982   |
| RNF213        | 1.02078    | 0.724539   | -0.494543   | 0.383539   |
| PFKL          | 48.2622    | 44.0126    | -0.132979   | 0.875534   |
| LOC100289341  | 1.34252    | 1.95928    | 0.545381    | 0.412057   |
| BLOC1S3       | 9.65859    | 12.0471    | 0.318807    | 0.475025   |
| TLE6          | 5.40468    | 1.46996    | -1.87844    | 0.00134142 |
| ZCWPW2        | 0.108632   | 0.0265596  | -2.03215    | 1          |
| ENO3          | 3.11603    | 1.94303    | -0.681402   | 0.172302   |
| PLSCR4        | 0.00440177 | 0          | #NAME?      | 1          |
| ZNF717        | 0.135459   | 0.102177   | -0.406782   | 1          |
| LINC00476     | 3.35527    | 2.97562    | -0.173241   | 0.95598    |
| VAMP4         | 2.10711    | 1.80492    | -0.223327   | 0.795219   |
| TPM2          | 75.8789    | 94.88      | 0.322406    | 0.371679   |
| PJA2          | 2.97383    | 1.28782    | -1.20739    | 0.00134142 |
| EEF1B2        | 1842.12    | 2166.86    | 0.234238    | 0.681812   |
| PARP10        | 4.20173    | 3.72003    | -0.175666   | 0.869898   |
| GPI           | 262.661    | 253.979    | -0.0484915  | 0.979701   |

|              |            |            |             |            |
|--------------|------------|------------|-------------|------------|
| LEF1-AS1     | 0.273571   | 0.21595    | -0.341214   | 1          |
| TFPI         | 12.8568    | 6.51316    | -0.981107   | 0.00134142 |
| MACROD1      | 73.9338    | 70.4158    | -0.0703338  | 0.96103    |
| RPS21        | 6140.95    | 7323.66    | 0.254103    | 0.624818   |
| CXorf23      | 0.408178   | 0.427511   | 0.0667642   | 0.979701   |
| RPL37A       | 8978.48    | 10929.8    | 0.283719    | 0.566186   |
| GUCY2C       | 0.00303391 | 0          | #NAME?      | 1          |
| ZNF20,ZNF625 | 1.4386     | 1.80328    | 0.325956    | 0.602221   |
| KBTBD3       | 0.579268   | 0.393575   | -0.557592   | 0.902703   |
| KIAA1984-AS1 | 0.58584    | 0.594309   | 0.0207055   | 0.99862    |
| TMEM42       | 10.39      | 5.90349    | -0.815556   | 0.036526   |
| CCDC15       | 0.0551074  | 0.0513696  | -0.101333   | 1          |
| COLQ         | 0.467039   | 0.672785   | 0.526603    | 0.486565   |
| CBX2         | 6.09144    | 11.0595    | 0.860425    | 0.00134142 |
| MAMDC4       | 2.02198    | 1.65516    | -0.288797   | 0.739331   |
| KLHL32       | 0.0241687  | 0.011733   | -1.04257    | 1          |
| LOC100144603 | 1.73641    | 2.17839    | 0.327153    | 0.900769   |
| HSD11B2      | 7.20056    | 12.1201    | 0.751218    | 0.0183825  |
| PARD3B       | 0.294044   | 0.116096   | -1.34071    | 1          |
| CASQ2        | 0.00450329 | 0          | #NAME?      | 1          |
| PCSK2        | 0.00299044 | 0          | #NAME?      | 1          |
| TRAF1        | 0.811478   | 0.771701   | -0.0725097  | 0.979701   |
| SPEF1        | 0.107291   | 0.193216   | 0.848691    | 1          |
| C6orf223     | 0.107386   | 0.0276534  | -1.95728    | 1          |
| GAS2L3       | 0.261605   | 0.146199   | -0.839454   | 1          |
| GNAZ         | 3.50904    | 4.27064    | 0.283375    | 0.638558   |
| NUDT6        | 4.16906    | 3.15053    | -0.40413    | 0.513433   |
| RPL13A       | 8275.72    | 9491.97    | 0.197824    | 0.845125   |
| IRF2BPL      | 7.39478    | 11.9404    | 0.691272    | 0.0156972  |
| MXI1         | 8.89791    | 7.3632     | -0.273134   | 0.563967   |
| GOLGA6L10    | 0.0460387  | 0.0378135  | -0.283946   | 1          |
| LRRRC28      | 3.25058    | 2.45061    | -0.407555   | 0.548694   |
| EHD2         | 6.42158    | 5.16581    | -0.313934   | 0.545771   |
| CAPS2        | 0.0462591  | 0.0173043  | -1.41861    | 1          |
| ZNF479       | 0.00530714 | 0          | #NAME?      | 1          |
| HSPG2        | 1.19278    | 1.42237    | 0.253967    | 0.684082   |
| MGC21881     | 1.08615    | 1.06292    | -0.031183   | 0.992797   |
| JAG1         | 1.26219    | 1.53583    | 0.283086    | 0.65899    |
| KRT8         | 17.4242    | 13.5599    | -0.361744   | 0.947716   |
| ZNF337       | 3.21249    | 2.64419    | -0.280864   | 0.627251   |
| FAM81B       | 0.00794544 | 0          | #NAME?      | 1          |
| FAM182A      | 0.0196223  | 0.0348592  | 0.829046    | 1          |
| CCDC147      | 0.293767   | 0.158627   | -0.889033   | 1          |
| CCDC102A     | 4.59249    | 4.37404    | -0.0703106  | 0.977332   |
| RHPN1-AS1    | 2.24939    | 2.8466     | 0.339706    | 0.651901   |
| LOC100506023 | 0.0365003  | 0.02799    | -0.382998   | 1          |
| GPX4         | 334.056    | 341.754    | 0.0328712   | 0.986822   |
| GSTT1        | 44.2267    | 38.8707    | -0.186233   | 0.774949   |
| FAM86B3P     | 1.73958    | 0.791339   | -1.13638    | 0.0447795  |
| S100A3       | 3.20746    | 5.19427    | 0.695489    | 0.216749   |
| NPEPL1,STX16 | 27.5702    | 25.8439    | -0.0932838  | 0.955758   |
| CCDC71       | 12.4944    | 14.4602    | 0.210808    | 0.754654   |
| CDH24        | 9.09027    | 12.5614    | 0.4666      | 0.147024   |
| ZBTB42       | 3.83516    | 5.71878    | 0.576423    | 0.0857334  |
| GLTPD1       | 18.5641    | 30.1561    | 0.699934    | 0.00743393 |
| SMPDL3B      | 1.60787    | 0.779709   | -1.04414    | 0.0451064  |
| DTTL         | 1.79554    | 3.52976    | 0.975147    | 0.781066   |
| HIST1H2AI    | 0.813487   | 0.940451   | 0.209233    | 0.974044   |
| BCL6         | 2.65155    | 3.64469    | 0.458958    | 0.273055   |
| CRABP2       | 140.438    | 130.107    | -0.110241   | 0.913628   |
| LAPTM4B      | 1.1044     | 0.486921   | -1.1815     | 0.0261279  |
| NEURL2       | 1.63039    | 1.06526    | -0.614009   | 0.96974    |
| JMJD1C-AS1   | 0.743036   | 0.448186   | -0.729335   | 0.976618   |
| ZC3H10       | 2.60908    | 3.34424    | 0.358136    | 0.549043   |
| LOC729603    | 0.220567   | 0.250135   | 0.181489    | 1          |
| FGFR4        | 9.08994    | 10.6731    | 0.23163     | 0.714136   |
| PEX5L        | 0.00804887 | 0.00593303 | -0.440017   | 1          |
| METAP1D      | 0.804531   | 0.713599   | -0.173034   | 0.949025   |
| C15orf56     | 1.34681    | 1.04143    | -0.370983   | 0.956382   |
| FAM227B      | 0.449907   | 0.235148   | -0.936056   | 0.851892   |
| RCCD1        | 8.12993    | 9.03825    | 0.152801    | 0.862523   |
| PER3         | 0.197501   | 0.22842    | 0.209827    | 1          |
| SLC25A26     | 16.6314    | 16.6074    | -0.00208619 | 0.998668   |
| ZNF491       | 0.238466   | 0.137966   | -0.789469   | 1          |
| CCDC38       | 0.00629867 | 0.017177   | 1.44736     | 1          |
| TSIX         | 0.00688283 | 0.00808827 | 0.23283     | 1          |
| LINC00652    | 0.00951756 | 0.0211185  | 1.14984     | 1          |
| PRSS53       | 3.51106    | 3.77488    | 0.104525    | 0.979701   |
| SOX15        | 0.393916   | 0.940054   | 1.25486     | 0.920945   |

|              |            |            |            |            |
|--------------|------------|------------|------------|------------|
| C1QTNF9      | 0.0141146  | 0          | #NAME?     | 1          |
| IMPDH2       | 236.755    | 202.365    | -0.226438  | 0.650075   |
| BTD          | 1.1796     | 1.35146    | 0.196216   | 0.898524   |
| TRAF6        | 1.53815    | 1.41918    | -0.116133  | 0.924371   |
| GRIP2        | 0.0569881  | 0.158492   | 1.47567    | 1          |
| C7orf45      | 0.0116439  | 0          | #NAME?     | 1          |
| C2orf88      | 0.85504    | 1.62472    | 0.926129   | 0.00743393 |
| FAM200B      | 3.0198     | 2.92243    | -0.0472828 | 0.98015    |
| DNAJB4       | 2.9251     | 3.17282    | 0.117283   | 0.934181   |
| ZNF32-AS2    | 0.352524   | 0.371037   | 0.0738396  | 0.993108   |
| INADL        | 1.48694    | 0.774161   | -0.941643  | 0.00134142 |
| FRMD5        | 1.9388     | 0.746356   | -1.37722   | 0.00243047 |
| ATP8B1       | 0.0087736  | 0.00647562 | -0.438149  | 1          |
| METTL21EP    | 0.0056527  | 0          | #NAME?     | 1          |
| DPP7         | 274.174    | 356.141    | 0.377358   | 0.26122    |
| TUBG2        | 11.6477    | 14.7061    | 0.336365   | 0.456016   |
| ZFAS1        | 571.093    | 604.268    | 0.0814609  | 0.956657   |
| FUT11        | 3.04334    | 2.54166    | -0.259886  | 0.787528   |
| FRYL         | 0.991293   | 0.928069   | -0.0950791 | 0.950684   |
| RPS6         | 4069.24    | 4391.95    | 0.110101   | 0.931471   |
| IQCD         | 0.169906   | 0.0385558  | -2.13971   | 1          |
| LOC100505761 | 7.99733    | 9.34774    | 0.225099   | 0.770824   |
| ZBTB4        | 6.38414    | 4.76054    | -0.423365  | 0.191486   |
| AGO4         | 1.60112    | 0.807918   | -0.986804  | 0.00134142 |
| RAC2         | 6.25596    | 3.41304    | -0.874173  | 0.0314167  |
| PTOV1        | 52.5328    | 70.2984    | 0.420273   | 0.187625   |
| OSR2         | 7.88598    | 8.83049    | 0.163203   | 0.875727   |
| C5orf42      | 0.137944   | 0.184599   | 0.420307   | 1          |
| CNTLN        | 0.767087   | 1.04604    | 0.447474   | 0.360219   |
| FAM72A       | 1.16471    | 0.637113   | -0.870356  | 0.0924793  |
| NLRC3        | 0.126772   | 0.144229   | 0.186125   | 1          |
| ZNF510       | 1.3056     | 1.54876    | 0.246403   | 0.711487   |
| VILL         | 0.183758   | 0.203994   | 0.150719   | 1          |
| CRTAM        | 0.00509639 | 0          | #NAME?     | 1          |
| SLC2A4       | 0.602642   | 1.14392    | 0.924609   | 0.0749663  |
| LRRC37A      | 0.0230753  | 0.0328122  | 0.507884   | 1          |
| TLE2         | 26.9046    | 23.4192    | -0.200156  | 0.749584   |
| SPIN4        | 1.29869    | 1.22332    | -0.0862551 | 0.966946   |
| PYDC1        | 0.392084   | 0.559602   | 0.51324    | 0.979733   |
| KDM8         | 0.477146   | 0.826485   | 0.792557   | 0.201085   |
| LOC100507053 | 0.0216548  | 0.0133262  | -0.700424  | 1          |
| RPL32        | 1188.84    | 1316.53    | 0.147187   | 0.871051   |
| C1orf53      | 1.4921     | 3.46714    | 1.2164     | 0.061906   |
| LOC100129550 | 0.86246    | 0.596371   | -0.532247  | 0.246685   |
| SOX8         | 14.1767    | 33.3232    | 1.233      | 0.00134142 |
| RPS11        | 5080.97    | 5977.34    | 0.2344     | 0.699422   |
| FAM76B       | 1.55256    | 1.09414    | -0.504847  | 0.242534   |
| AQP11        | 0.864816   | 0.807019   | -0.0997911 | 0.974044   |
| ZNF646       | 1.93212    | 2.04903    | 0.0847582  | 0.974044   |
| SLC15A1      | 0.00446426 | 0.00317564 | -0.491372  | 1          |
| RGMB         | 7.18615    | 7.62206    | 0.0849613  | 0.952469   |
| C22orf39     | 10.7771    | 10.5493    | -0.0308144 | 0.989344   |
| LOC645212    | 3.74446    | 2.99857    | -0.320486  | 0.62566    |
| C1orf50      | 9.46962    | 7.85613    | -0.269488  | 0.699313   |
| RAPGEF5      | 0.70892    | 0.726883   | 0.0360996  | 0.989869   |
| INHBE        | 0.518195   | 0.237272   | -1.12695   | 0.113441   |
| PTPRH        | 0.701985   | 0.152485   | -2.20277   | 0.00134142 |
| H6PD         | 2.73547    | 1.6409     | -0.737301  | 0.010797   |
| OR13A1       | 0.00760954 | 0          | #NAME?     | 1          |
| SGSM2        | 8.04613    | 8.88092    | 0.142415   | 0.870747   |
| HLA-G        | 0.0832705  | 0.0393287  | -1.08222   | 1          |
| ASIC1        | 5.90528    | 6.42715    | 0.122174   | 0.918342   |
| ZNF793       | 0.00457617 | 0.0110882  | 1.27682    | 1          |
| STARD8       | 0.0187624  | 0.0196154  | 0.0641404  | 1          |
| PRH1,PRR4    | 1.7917     | 1.8043     | 0.010112   | 0.998905   |
| ZEB1-AS1     | 2.65735    | 1.66676    | -0.672945  | 0.103533   |
| TRANK1       | 0.0307055  | 0.0119844  | -1.35734   | 1          |
| CLK3         | 15.7764    | 19.164     | 0.280631   | 0.539266   |
| SHANK3       | 4.99469    | 8.15322    | 0.706975   | 0.00818401 |
| ITGAX        | 0.70308    | 0.342611   | -1.03712   | 0.030165   |
| BLCAP        | 32.6885    | 38.9525    | 0.252929   | 0.576888   |
| LRRC23       | 5.4651     | 3.59864    | -0.602797  | 0.128341   |
| FAM57B       | 0.149504   | 0.0899868  | -0.732395  | 1          |
| ALDOA        | 3838.87    | 3809.68    | -0.0110116 | 0.996453   |
| NRTN         | 7.43875    | 9.26943    | 0.31742    | 0.728766   |
| RPS5         | 4241.66    | 5205.56    | 0.295424   | 0.536372   |
| REV3L        | 0.437293   | 0.535482   | 0.292239   | 0.665706   |
| MSH5,SAPCD1  | 7.01947    | 4.65648    | -0.592122  | 0.222289   |
| METTL7A      | 0.00907535 | 0.0124452  | 0.455566   | 1          |

|              |            |            |            |            |
|--------------|------------|------------|------------|------------|
| LFNG         | 2.07892    | 6.23862    | 1.5854     | 0.00134142 |
| NKTR         | 1.21494    | 1.76341    | 0.537479   | 0.570441   |
| COBL1        | 0.0838813  | 0.0676387  | -0.310502  | 1          |
| CCDC121      | 0.19881    | 0.071361   | -1.47819   | 1          |
| USP4         | 2.86209    | 3.06438    | 0.0985243  | 0.949827   |
| RPL18A       | 4823.28    | 5945.12    | 0.301692   | 0.492222   |
| ADAMTSL1     | 0.641325   | 0.665571   | 0.0535362  | 0.991459   |
| PTBP2        | 2.8023     | 2.53662    | -0.143702  | 0.898751   |
| C19orf33     | 222.234    | 244.031    | 0.134984   | 0.936488   |
| ALX3         | 1.22739    | 1.74459    | 0.507297   | 0.550253   |
| DDX26B       | 0.915044   | 0.700701   | -0.385043  | 0.563967   |
| D2HGDH       | 7.49354    | 5.15674    | -0.539188  | 0.173163   |
| LOC100130357 | 0.13734    | 0.142671   | 0.0549413  | 1          |
| SLC29A4      | 12.1154    | 12.1286    | 0.00156939 | 0.998921   |
| SNTB1        | 0.00277911 | 0          | #NAME?     | 1          |
| GATM         | 0.189811   | 0.143796   | -0.400539  | 1          |
| SLC5A12      | 0.00361824 | 0          | #NAME?     | 1          |
| FUNDC2       | 18.7043    | 21.143     | 0.176808   | 0.778996   |
| MYC          | 206.111    | 245.719    | 0.253589   | 0.580744   |
| LINC00482    | 0.0592817  | 0.00526439 | -3.49325   | 1          |
| DNAJC27      | 0.579075   | 0.510614   | -0.181518  | 0.907415   |
| CPEB2        | 0.190614   | 0.146206   | -0.382651  | 1          |
| RPS25        | 4025.53    | 4347.24    | 0.110921   | 0.926258   |
| ZP3          | 10.0029    | 7.92716    | -0.335535  | 0.550253   |
| GLT8D2       | 0.0828438  | 0.131922   | 0.67122    | 1          |
| CRTC1        | 3.12839    | 2.5049     | -0.32067   | 0.501695   |
| KCTD16       | 0.00231584 | 0          | #NAME?     | 1          |
| ADAM20       | 0.0121857  | 0.0114883  | -0.0850331 | 1          |
| EIF3L        | 233.123    | 242.323    | 0.0558427  | 0.974044   |
| CHKB,CPT1B   | 14.3455    | 14.0576    | -0.0292417 | 0.990315   |
| MBLAC2       | 1.15296    | 1.3892     | 0.268918   | 0.716391   |
| SLC35E2      | 2.8372     | 1.98794    | -0.513193  | 0.44093    |
| ZNF584       | 4.79285    | 9.12552    | 0.929023   | 0.00134142 |
| C20orf202    | 0.00879441 | 0.00743984 | -0.241314  | 1          |
| ODF3B        | 8.48303    | 3.53171    | -1.26421   | 0.0132924  |
| RBM12B-AS1   | 0.763212   | 1.37753    | 0.851925   | 0.952216   |
| SEPT7P2      | 1.4483     | 1.69191    | 0.224289   | 0.844123   |
| TMPO-AS1     | 1.24168    | 0.917132   | -0.437096  | 0.958104   |
| FZD5         | 2.21637    | 2.87486    | 0.375292   | 0.365268   |
| LPP          | 1.6356     | 1.14397    | -0.515777  | 0.0851035  |
| TEKT4P2      | 7.48345    | 9.24752    | 0.305363   | 0.721145   |
| MMP24        | 3.84153    | 4.54965    | 0.244075   | 0.698798   |
| FAM211B      | 7.43774    | 6.21273    | -0.259637  | 0.89239    |
| LOC100130581 | 0.528605   | 0.130245   | -2.02097   | 0.0101293  |
| CECR6        | 0.430869   | 0.591549   | 0.457249   | 0.571112   |
| TGFBR1       | 5.37959    | 5.51797    | 0.0366407  | 0.984917   |
| ZBTB25       | 2.40132    | 1.41407    | -0.763974  | 0.0914856  |
| MAPK8IP1     | 0.848648   | 0.622654   | -0.446737  | 0.63573    |
| HSPA1B       | 44.6988    | 278.99     | 2.6419     | 0.00134142 |
| RPL18        | 3033.73    | 3630.44    | 0.259053   | 0.616434   |
| PHPT1        | 110.033    | 159.783    | 0.538183   | 0.0470437  |
| WSB1         | 33.4809    | 16.7455    | -0.999564  | 0.00134142 |
| KIAA1841     | 0.292928   | 0.354462   | 0.275083   | 0.825249   |
| MAPK8IP2     | 0.841312   | 0.643156   | -0.387473  | 0.746092   |
| RNASL        | 0.428619   | 0.242863   | -0.819556  | 0.135648   |
| FLJ30679     | 0.101104   | 0.0908411  | -0.154421  | 1          |
| STS          | 0.159573   | 0.479549   | 1.58746    | 0.00134142 |
| CRTP         | 30.4617    | 26.2314    | -0.215699  | 0.681092   |
| DGCR8        | 5.00933    | 16.5989    | 1.7284     | 0.00134142 |
| RCBTB2       | 0.249967   | 0.482347   | 0.948332   | 0.10104    |
| AXIN2        | 0.658612   | 0.703343   | 0.0947983  | 0.972409   |
| ZYG11B       | 1.42725    | 1.25837    | -0.181685  | 0.830817   |
| RABL2A       | 1.10194    | 1.2715     | 0.206486   | 0.897202   |
| DBIL5P       | 0.248521   | 0.337792   | 0.44277    | 1          |
| C19orf71     | 0.269391   | 0.660561   | 1.29399    | 0.88962    |
| SLC22A18     | 11.2078    | 6.02998    | -0.894272  | 0.0200038  |
| POLH         | 1.64781    | 1.89095    | 0.198561   | 0.95534    |
| NEB          | 0.00539131 | 0.00657557 | 0.286479   | 1          |
| CCDC23       | 10.8119    | 9.31867    | -0.214424  | 0.877187   |
| RAC3         | 168.515    | 259.495    | 0.622832   | 0.0150729  |
| C5orf54      | 1.11467    | 0.882266   | -0.337331  | 0.679982   |
| PFN4         | 0.234106   | 0.159313   | -0.5553    | 1          |
| ZNF43        | 0.00220199 | 0          | #NAME?     | 1          |
| RPL10        | 1561.98    | 1666.63    | 0.0935611  | 0.952469   |
| ZNF84        | 3.13339    | 3.08769    | -0.0211991 | 0.991767   |
| ZBTB9        | 5.63467    | 9.03499    | 0.681191   | 0.0167292  |
| ZMYM1        | 1.48152    | 1.52591    | 0.0425965  | 0.986822   |
| PAQR6        | 2.70291    | 1.43848    | -0.909964  | 0.790805   |
| SNX33        | 21.5296    | 14.7677    | -0.543875  | 0.0584113  |

|                    |            |            |             |            |
|--------------------|------------|------------|-------------|------------|
| SYCP3              | 0.116638   | 0.155124   | 0.411378    | 1          |
| FAM104B            | 5.88708    | 8.1877     | 0.475906    | 0.247003   |
| TMEM134            | 22.2507    | 22.6556    | 0.0260174   | 0.991767   |
| ZDHHC1             | 2.90493    | 1.52627    | -0.928493   | 0.0580464  |
| LOC100134868       | 0.488981   | 0.421328   | -0.214834   | 0.938305   |
| LINC00630          | 0.204234   | 0.271012   | 0.408132    | 1          |
| ZNF526             | 2.87606    | 4.50128    | 0.646241    | 0.0394523  |
| NME3               | 61.0633    | 65.67      | 0.104928    | 0.931916   |
| SAT2               | 105.01     | 99.0506    | -0.0842859  | 0.979046   |
| ZNF691             | 6.13368    | 8.35487    | 0.445864    | 0.271991   |
| RPL30              | 5910.17    | 6397.85    | 0.114388    | 0.924847   |
| LRRRC73            | 1.85938    | 1.3613     | -0.44983    | 0.622297   |
| KIAA0087           | 0.00284599 | 0.0036123  | 0.343985    | 1          |
| DDHD2              | 2.73123    | 2.56342    | -0.0914834  | 0.950929   |
| OSCAR              | 2.03427    | 1.07759    | -0.916698   | 0.0888791  |
| KLHL10             | 0.0723691  | 0.0367842  | -0.976286   | 1          |
| PDK1               | 17.72      | 9.01199    | -0.975457   | 0.00134142 |
| LRRRC3             | 1.42557    | 2.37031    | 0.733537    | 0.108427   |
| ABCA10,ABCA5       | 0.354972   | 0.3722     | 0.0683722   | 0.979701   |
| KIF13A             | 1.1172     | 0.906201   | -0.30198    | 0.707294   |
| ARL13A             | 0.0125403  | 0.00577041 | -1.11982    | 1          |
| TTC3P1             | 0.0992383  | 0.105208   | 0.0842691   | 1          |
| CGNL1              | 0.0224862  | 0.0290936  | 0.371665    | 1          |
| BCDIN3D-AS1        | 0.110134   | 0.0846385  | -0.379878   | 1          |
| CAMKK1             | 4.37957    | 4.14675    | -0.0788052  | 0.965573   |
| HAL                | 0.086985   | 0.199231   | 1.1956      | 1          |
| TBX19              | 0.496433   | 0.351715   | -0.497191   | 0.589726   |
| MIR4315-1,PLEKHM1P | 1.44105    | 1.28467    | -0.16572    | 0.954677   |
| SSR4P1             | 0.420187   | 0.300669   | -0.482853   | 0.724424   |
| UNQ6975            | 0.0131058  | 0          | #NAME?      | 1          |
| LOC338758          | 0.0371264  | 0.102927   | 1.4711      | 1          |
| LOC100131564       | 0.221598   | 0.113092   | -0.970446   | 1          |
| ZNF502             | 1.2849     | 1.1581     | -0.149895   | 0.920101   |
| RFPL1              | 0.0104461  | 0.00892811 | -0.226535   | 1          |
| ZNF251             | 5.27612    | 6.8854     | 0.384063    | 0.305504   |
| IRGM               | 0.0093568  | 0.0059441  | -0.654383   | 1          |
| LOC100130015       | 2.83394    | 3.0866     | 0.123208    | 0.979701   |
| LOC649395          | 0.0146395  | 0.0148018  | 0.0159098   | 1          |
| LY6G5B             | 2.56185    | 4.94723    | 0.949433    | 0.0477866  |
| XRN1               | 1.16386    | 0.791097   | -0.556993   | 0.0908564  |
| SUZ12P1            | 3.54551    | 5.49029    | 0.63089     | 0.222109   |
| C1QL3              | 0.302612   | 0.225467   | -0.424558   | 1          |
| RPL31              | 4051.28    | 4658.65    | 0.201535    | 0.766011   |
| FOX2-AS1           | 2.86207    | 5.60935    | 0.970775    | 0.00425224 |
| TRIP11             | 0.759896   | 0.760191   | 0.000559203 | 0.999493   |
| RRAGB              | 2.85247    | 2.77964    | -0.0373167  | 0.988657   |
| RBM47              | 0.0238037  | 0.00922082 | -1.36822    | 1          |
| LMNA               | 71.3283    | 92.5274    | 0.375406    | 0.290201   |
| SMA4               | 0.405833   | 0.348388   | -0.220192   | 0.922247   |
| PPM1N              | 3.70575    | 3.11519    | -0.250444   | 0.813038   |
| PLEKHO1            | 20.2915    | 26.4192    | 0.38071     | 0.291851   |
| FASN               | 28.119     | 59.1198    | 1.0721      | 0.00134142 |
| LOC145820          | 0.00553036 | 0.00330688 | -0.741901   | 1          |
| MGC12916           | 2.59902    | 5.46264    | 1.07163     | 0.00134142 |
| CHRD               | 1.95876    | 1.98375    | 0.0182871   | 0.995352   |
| ZNF432             | 1.01574    | 0.780315   | -0.380408   | 0.605975   |
| PLEKHG5,TNFRSF25   | 12.7731    | 13.2688    | 0.0549281   | 0.984917   |
| SEPP1              | 0.00603283 | 0.00808959 | 0.423232    | 1          |
| LIN37              | 7.90122    | 9.00729    | 0.189018    | 0.851815   |
| RPS10P7            | 1.40956    | 0.910368   | -0.630728   | 0.532313   |
| CPT1C              | 4.06173    | 3.21587    | -0.336886   | 0.578521   |
| P4HA1              | 26.144     | 11.6209    | -1.16976    | 0.00134142 |
| SYT3               | 0.068899   | 0.0502989  | -0.453956   | 1          |
| CRELD1             | 10.2301    | 5.79729    | -0.819377   | 0.00243047 |
| HABP4              | 13.0411    | 16.6566    | 0.353032    | 0.314596   |
| IGFLR1             | 3.11889    | 2.63061    | -0.245636   | 0.862843   |
| BNIP3L             | 39.2928    | 17.1296    | -1.19778    | 0.00134142 |
| KANSL2             | 9.44544    | 10.3003    | 0.124999    | 0.902309   |
| DIRAS3             | 0.166308   | 0.22088    | 0.4094      | 1          |
| PIGV               | 4.38494    | 2.26939    | -0.950254   | 0.00337323 |
| C4orf3             | 80.1522    | 64.5029    | -0.313378   | 0.406031   |
| PTPRF              | 20.1841    | 20.2637    | 0.00567661  | 0.997082   |
| LSM11              | 1.70416    | 1.26122    | -0.434243   | 0.474273   |
| KIF12              | 1.02535    | 0.456391   | -1.16777    | 0.0611798  |
| NOV                | 2.97557    | 1.92544    | -0.627977   | 0.107348   |
| KLF5               | 1.64738    | 1.35546    | -0.281396   | 0.726892   |
| PIPOX              | 0.0571758  | 0.0462599  | -0.305643   | 1          |
| SIRT2              | 33.5544    | 32.8693    | -0.0297606  | 0.991767   |
| MAPK3              | 63.6394    | 52.7031    | -0.272032   | 0.505095   |

|                     |            |             |             |            |
|---------------------|------------|-------------|-------------|------------|
| NEU3                | 0.501965   | 0.475514    | -0.0780988  | 0.980247   |
| LOC648987           | 1.22277    | 1.42305     | 0.218828    | 0.875369   |
| CCDC141             | 0.00134078 | 0.000795804 | -0.752589   | 1          |
| ZRANB3              | 0.474317   | 0.197786    | -1.26191    | 0.0183825  |
| PHF13               | 4.92122    | 6.19923     | 0.333075    | 0.445908   |
| C15orf39            | 6.21078    | 10.4695     | 0.753348    | 0.00743393 |
| CASP5               | 0.0182666  | 0.0524333   | 1.52128     | 1          |
| MOCS3               | 4.11713    | 4.84166     | 0.233862    | 0.724424   |
| LRRC14              | 8.45523    | 14.8269     | 0.810303    | 0.0995023  |
| RPL27               | 4443.11    | 4921.89     | 0.147642    | 0.870516   |
| CBR3                | 15.2704    | 12.8246     | -0.251814   | 0.69673    |
| FAHD2CP             | 4.72632    | 2.63595     | -0.842394   | 0.0917667  |
| LOC100270746        | 2.85951    | 2.31315     | -0.305912   | 0.845424   |
| LOC100506963        | 2.48353    | 2.65594     | 0.0968311   | 0.986822   |
| GLUD1P7             | 0.028928   | 0.0182495   | -0.664612   | 1          |
| RPS2                | 10153.1    | 11428.6     | 0.170728    | 0.865541   |
| DNAJC4              | 17.561     | 14.0985     | -0.316842   | 0.532711   |
| PPP1R35             | 64.4657    | 74.6502     | 0.211616    | 0.743209   |
| NOL3                | 16.6601    | 17.1103     | 0.0384676   | 0.990315   |
| LOC151009,LOC440894 | 3.55325    | 4.3104      | 0.278682    | 0.648732   |
| VPS9D1              | 2.11635    | 1.74548     | -0.277959   | 0.978703   |
| HRNR                | 0.00342718 | 0.0014784   | -1.21299    | 1          |
| LOC253039           | 1.94675    | 1.11515     | -0.803838   | 0.0288382  |
| TMEM74              | 0.00716956 | 0           | #NAME?      | 1          |
| BOD1L1              | 0.592431   | 0.918891    | 0.633247    | 0.0580464  |
| FAM161B             | 0.328628   | 0.200963    | -0.709528   | 1          |
| FOXN3               | 2.8384     | 0.905418    | -1.64842    | 0.00134142 |
| LEKR1               | 0.0880078  | 0.0540158   | -0.70425    | 1          |
| LOC154761           | 1.53575    | 0.385684    | -1.99345    | 0.00134142 |
| ACBD4               | 8.34525    | 5.1391      | -0.699439   | 0.0447795  |
| ZMYM3               | 5.90151    | 4.24691     | -0.474671   | 0.936616   |
| CRB3                | 1.71604    | 0.457497    | -1.90725    | 0.200886   |
| ZNF512B             | 0.0275215  | 0.0542078   | 0.977942    | 1          |
| SIAE                | 5.85455    | 4.9436      | -0.243997   | 0.892588   |
| HNRNPA1P33          | 0.0311407  | 0.0254815   | -0.289351   | 1          |
| RASGRF1             | 0.00305624 | 0.00259323  | -0.237007   | 1          |
| LANCL2              | 2.19379    | 3.88678     | 0.825151    | 0.00337323 |
| ZNF878              | 0.319812   | 0.580252    | 0.859453    | 0.224751   |
| HDAC6               | 1.86574    | 1.21716     | -0.616232   | 0.135336   |
| TTN                 | 0.0138981  | 0.0122129   | -0.186483   | 1          |
| LONRF2              | 0.00100109 | 0.00353659  | 1.82079     | 1          |
| MIB2                | 8.37875    | 9.61438     | 0.198459    | 0.812413   |
| CACNB2              | 0.0852165  | 0.0912985   | 0.0994587   | 1          |
| IZUMO4              | 0.116153   | 0.349773    | 1.59039     | 0.229068   |
| REEP2               | 37.7715    | 30.0197     | -0.331389   | 0.371679   |
| AP3M2               | 4.03571    | 6.00779     | 0.574012    | 0.0539552  |
| MORC2               | 3.39376    | 4.94458     | 0.542963    | 0.109667   |
| FAM131B             | 4.49618    | 2.81494     | -0.675595   | 0.0283563  |
| ASB14               | 0.19812    | 0.246972    | 0.317976    | 1          |
| PCIF1               | 10.4381    | 9.05437     | -0.205172   | 0.763481   |
| DLEU2               | 0.176946   | 0.227207    | 0.360695    | 1          |
| RPL13P5             | 0.95842    | 0.59275     | -0.693236   | 0.622998   |
| OR2A7               | 0.608515   | 0.536468    | -0.181801   | 0.950929   |
| LINC00672           | 0.123081   | 0.0559313   | -1.13788    | 1          |
| SEZ6L2              | 22.7031    | 17.1175     | -0.407417   | 0.214291   |
| MIAT                | 0.0335486  | 0.0374947   | 0.160433    | 1          |
| HSPA1A              | 2.56087    | 14.5281     | 2.50413     | 0.00134142 |
| CHST13              | 0.291828   | 0.173344    | -0.751485   | 1          |
| LOC100505875        | 0.226685   | 0.133764    | -0.760996   | 1          |
| KCTD21              | 0.880987   | 1.0725      | 0.283787    | 0.772137   |
| OSGEPL1             | 1.69655    | 0.959317    | -0.822521   | 0.064193   |
| GIGYF1              | 17.13      | 20.1616     | 0.235086    | 0.633551   |
| ZNF302              | 3.34713    | 3.33876     | -0.00361338 | 0.998508   |
| ATRAID              | 92.0844    | 80.6976     | -0.190432   | 0.89272    |
| MATN2               | 0.00968537 | 0.00534164  | -0.858523   | 1          |
| SLCO1B3             | 6.61267    | 3.95336     | -0.742152   | 0.00882987 |
| SAMD9L              | 0.0609025  | 0.0314279   | -0.954455   | 1          |
| NOP14-AS1           | 2.44589    | 1.97163     | -0.310968   | 0.948179   |
| ZNF91               | 0.661936   | 0.943537    | 0.511389    | 0.238089   |
| RPLP0               | 5992.53    | 6253.17     | 0.061422    | 0.977332   |
| VPS37D              | 17.5003    | 11.1086     | -0.655706   | 0.0515434  |
| KIAA1211L           | 0.187474   | 0.206344    | 0.138357    | 1          |
| C15orf62            | 0.293145   | 0.358424    | 0.290051    | 0.946274   |
| BCRP2               | 2.64683    | 3.50864     | 0.406649    | 0.44306    |
| SLC25A35            | 1.4768     | 1.61464     | 0.128741    | 0.990857   |
| PAQR8               | 1.46083    | 0.884499    | -0.723857   | 0.0573356  |
| STAU2-AS1           | 0.0240747  | 0.0115022   | -1.06561    | 1          |
| SNORD10             | 10.8866    | 7.1978      | -0.596931   | 0.961224   |
| DALRD3              | 31.5079    | 27.0366     | -0.2208     | 0.931949   |

|                 |            |             |            |            |
|-----------------|------------|-------------|------------|------------|
| TIGD6           | 0.858246   | 0.541276    | -0.665028  | 0.905536   |
| NR5A2           | 0.02227    | 0.0293149   | 0.396534   | 1          |
| FAM160B1        | 1.76728    | 1.6585      | -0.0916558 | 0.954677   |
| LOC100132273    | 1.0034     | 0.811223    | -0.306724  | 0.837677   |
| SLC24A2         | 0.00114331 | 0.000675128 | -0.759988  | 1          |
| HEXIM2          | 4.74941    | 3.25037     | -0.547145  | 0.289628   |
| RPS12           | 7560.98    | 8224.99     | 0.121441   | 0.920028   |
| THAP3           | 20.8528    | 23.4276     | 0.167967   | 0.955709   |
| HOXA13          | 0.605717   | 0.614557    | 0.0209012  | 0.996079   |
| CELF6           | 0.531183   | 0.424404    | -0.323771  | 0.808495   |
| TMEM8B          | 4.16289    | 2.09606     | -0.989909  | 0.0150729  |
| CCNI            | 47.8478    | 29.0668     | -0.71908   | 0.00337323 |
| WNT11           | 6.7085     | 7.54562     | 0.16965    | 0.877521   |
| SPEF2           | 0.398532   | 0.166354    | -1.26044   | 0.0326415  |
| LOC344595       | 0.62937    | 1.04386     | 0.729955   | 0.098844   |
| LOC100499405    | 0.00605542 | 0.00486115  | -0.316931  | 1          |
| CCNB1IP1        | 135.762    | 105.168     | -0.368393  | 0.280157   |
| ZNF226          | 3.96052    | 3.11111     | -0.34826   | 0.66589    |
| ALPK1           | 1.34033    | 0.395803    | -1.75973   | 0.00134142 |
| LOC731275       | 0.323238   | 0.233245    | -0.47075   | 1          |
| NPC2            | 234.918    | 228.8       | -0.0380729 | 0.984501   |
| LOC100129917    | 0.251      | 0.272112    | 0.116512   | 1          |
| FAM162A         | 280.527    | 231.39      | -0.277812  | 0.502813   |
| RPS29           | 8954.83    | 9618.94     | 0.103213   | 0.931471   |
| PDE4A           | 1.01032    | 0.665403    | -0.602508  | 0.239642   |
| ZIC5            | 1.2619     | 1.54554     | 0.292509   | 0.69598    |
| CDK9            | 40.496     | 67.761      | 0.742678   | 0.00337323 |
| REEP6           | 16.4373    | 12.7241     | -0.36941   | 0.441876   |
| NLGN2           | 19.1463    | 17.6358     | -0.118559  | 0.902703   |
| FRY             | 0.00254911 | 0.00104771  | -1.28276   | 1          |
| FAM115C         | 1.43098    | 0.618133    | -1.21101   | 0.00134142 |
| PCP2            | 0.712533   | 0.198351    | -1.84491   | 0.747687   |
| OGT             | 12.5711    | 11.901      | -0.0790355 | 0.990324   |
| FBXW8           | 1.31994    | 0.898277    | -0.555238  | 0.211321   |
| ACOT6           | 0.0162166  | 0           | #NAME?     | 1          |
| TCAIM           | 5.52363    | 2.82995     | -0.964841  | 0.00134142 |
| FBXW10          | 0.0527254  | 0.032388    | -0.703041  | 1          |
| CEBPA-AS1       | 2.39492    | 4.00477     | 0.741741   | 0.0710419  |
| ACTR8           | 2.88507    | 3.13848     | 0.121461   | 0.922006   |
| C11orf68        | 50.9901    | 78.6094     | 0.624484   | 0.0172978  |
| DST             | 0.985613   | 0.636287    | -0.631344  | 0.0370005  |
| SPSB2           | 8.24328    | 11.2567     | 0.44949    | 0.965148   |
| DGCR5           | 0.0924375  | 0.19085     | 1.04589    | 1          |
| DRAM2           | 18.6841    | 11.635      | -0.683339  | 0.0860016  |
| LRP4-AS1        | 0.280016   | 0.165628    | -0.757565  | 1          |
| PGK1            | 664.39     | 613.568     | -0.114807  | 0.921486   |
| SELM            | 327.538    | 473.395     | 0.531383   | 0.0501327  |
| C5orf30         | 3.89909    | 5.08924     | 0.384312   | 0.326632   |
| LOC730091       | 0.00414226 | 0           | #NAME?     | 1          |
| SPATA7          | 3.15293    | 1.60999     | -0.969638  | 0.00882987 |
| LOC100287177    | 19.1136    | 12.4504     | -0.618407  | 0.505561   |
| EML6            | 0.417514   | 0.315375    | -0.404753  | 0.545981   |
| PROK1           | 0.0129713  | 0           | #NAME?     | 1          |
| RNF207          | 1.48054    | 2.45829     | 0.731528   | 0.797744   |
| PGM5-AS1        | 0.21995    | 0.0465878   | -2.23915   | 1          |
| SYT15           | 0.824891   | 1.01345     | 0.296996   | 0.849725   |
| C6orf57         | 11.9852    | 5.22399     | -1.19803   | 0.00509212 |
| ZNF136          | 0.846838   | 0.675578    | -0.325963  | 0.707375   |
| LOC100506100    | 5.9055     | 7.36003     | 0.317652   | 0.968521   |
| ABCA7           | 1.91434    | 1.58483     | -0.272522  | 0.714446   |
| MUC12           | 0.231828   | 0.427845    | 0.884035   | 0.0227017  |
| TGFB111         | 47.0345    | 29.0917     | -0.693109  | 0.0114515  |
| AGSK1,LOC727849 | 0.22624    | 0.210712    | -0.102587  | 1          |
| ZNF77           | 2.06104    | 2.6399      | 0.357111   | 0.566357   |
| LPIN3           | 3.01091    | 2.22771     | -0.434638  | 0.498433   |
| SACS            | 0.634533   | 1.26459     | 0.994901   | 0.00134142 |
| RPL29           | 4592.88    | 5169.67     | 0.170672   | 0.835511   |
| SIK1            | 9.99743    | 9.36639     | -0.0940637 | 0.942519   |
| CAV2            | 2.59739    | 1.93103     | -0.427696  | 0.330501   |
| TOMM7           | 296.065    | 312.413     | 0.0775372  | 0.954677   |
| SERTAD2         | 4.95947    | 3.88854     | -0.350958  | 0.34147    |
| FRG2            | 0.00686218 | 0           | #NAME?     | 1          |
| PUSL1           | 34.9759    | 63.0078     | 0.849171   | 0.275061   |
| SLC9A5          | 4.02939    | 5.14051     | 0.351351   | 0.448101   |
| EML3            | 13.7309    | 13.4758     | -0.0270532 | 0.990324   |
| HLA-B           | 367.701    | 459.59      | 0.321814   | 0.397705   |
| MBIP            | 4.61824    | 3.61213     | -0.354491  | 0.480572   |
| CXXC5           | 3.53514    | 5.30359     | 0.5852     | 0.255176   |
| LOC284889       | 1.63794    | 2.93679     | 0.842352   | 0.942842   |



|                |            |            |            |            |
|----------------|------------|------------|------------|------------|
| NMNAT3         | 2.26467    | 1.10729    | -1.03227   | 0.0194494  |
| PLD2           | 9.05861    | 7.68493    | -0.237258  | 0.671133   |
| IGBP1          | 57.9543    | 40.2772    | -0.524953  | 0.0573357  |
| PRPSAP1        | 21.3241    | 23.8273    | 0.160131   | 0.829471   |
| PHF3           | 4.50063    | 3.47387    | -0.373583  | 0.275042   |
| C11orf35       | 1.8312     | 0.791083   | -1.21089   | 0.336176   |
| LOC729013      | 5.52341    | 3.27459    | -0.754244  | 0.0655915  |
| LINC00085      | 0.36746    | 0.80424    | 1.13004    | 0.0710419  |
| CACTIN-AS1     | 0.148222   | 0.0612372  | -1.27528   | 1          |
| STX1B          | 0.438781   | 0.21284    | -1.04373   | 0.061906   |
| DPH3P1         | 0.814945   | 0.704647   | -0.209803  | 0.989365   |
| C1orf170       | 0.803778   | 0.795795   | -0.0144003 | 0.997036   |
| HERC3          | 2.29325    | 1.13228    | -1.01817   | 0.009453   |
| CIB2           | 18.4045    | 18.7713    | 0.0284746  | 0.990315   |
| DAZAP2         | 28.1127    | 20.1105    | -0.48327   | 0.727456   |
| CDKN2C         | 12.5526    | 4.61413    | -1.44385   | 0.00134142 |
| KLHL7          | 9.8506     | 8.59101    | -0.197385  | 0.869885   |
| GAD1           | 8.42618    | 6.07195    | -0.472718  | 0.432272   |
| CSRN2P2        | 4.76653    | 6.12477    | 0.361717   | 0.33121    |
| GALT           | 11.1418    | 10.3209    | -0.11041   | 0.937403   |
| GPR34          | 0.00724914 | 0.0182422  | 1.33139    | 1          |
| LOC100131094   | 0.222573   | 0.362911   | 0.705339   | 0.977626   |
| HMMR           | 1.36061    | 1.13376    | -0.263143  | 0.757054   |
| TEX22          | 0.230781   | 0.185157   | -0.317777  | 1          |
| EIF4A2         | 128.501    | 104.071    | -0.304212  | 0.537931   |
| GNPMB          | 0.157324   | 0.11633    | -0.435521  | 1          |
| LTBP3          | 6.94238    | 10.4664    | 0.592261   | 0.662877   |
| DUSP19         | 0.384222   | 0.226856   | -0.760159  | 0.164652   |
| SLC25A42       | 3.30433    | 2.40849    | -0.456233  | 0.344865   |
| NRDE2          | 1.62014    | 1.99173    | 0.297899   | 0.638499   |
| GP1BB,SEPT5    | 7.68288    | 10.0805    | 0.391846   | 0.752981   |
| N4BP2L1        | 0.518162   | 0.140106   | -1.88688   | 0.00509212 |
| GOLGA8EP       | 0.00238269 | 0.00345933 | 0.537902   | 1          |
| ZNF18          | 1.5838     | 1.04714    | -0.596938  | 0.212535   |
| RPS15A         | 3998.79    | 4300.46    | 0.104926   | 0.92969    |
| CTAGE10P       | 0.00441639 | 0.014822   | 1.7468     | 1          |
| ZMYM2          | 1.6585     | 1.12559    | -0.559197  | 0.0704662  |
| SMCR7          | 18.3314    | 8.66725    | -1.08067   | 0.00134142 |
| CPZ            | 21.6553    | 18.7331    | -0.209129  | 0.737375   |
| MED12          | 2.74627    | 1.95255    | -0.492116  | 0.166955   |
| BRPF1          | 5.29092    | 7.56889    | 0.516563   | 0.0865352  |
| NLGN3          | 0.695351   | 0.557552   | -0.318633  | 0.75494    |
| TAGLN          | 50.0938    | 138.664    | 1.46889    | 0.00134142 |
| CREBZF         | 4.77463    | 6.89113    | 0.529352   | 0.0688198  |
| STOX1          | 2.06945    | 1.81532    | -0.189027  | 0.953738   |
| NDUFB2-AS1     | 1.21551    | 1.49744    | 0.300939   | 0.983594   |
| SH3BGR         | 2.34646    | 1.26059    | -0.896394  | 0.0757506  |
| SS18L1         | 2.28278    | 3.2392     | 0.504848   | 0.156997   |
| STAT5A         | 7.02028    | 5.1191     | -0.455639  | 0.165314   |
| NBPF16         | 4.49213    | 5.75919    | 0.358466   | 0.343157   |
| PLSCR3,TMEM256 | 232.692    | 226.908    | -0.0363138 | 0.989268   |
| FGD3           | 3.45457    | 2.00573    | -0.784376  | 0.0261279  |
| CAB39L         | 2.70188    | 2.12176    | -0.348702  | 0.474499   |
| EPB41L4A-AS1   | 65.9554    | 51.4377    | -0.358663  | 0.300705   |
| HSPA12B        | 0.149766   | 0.468198   | 1.6444     | 0.0523239  |
| C9orf41        | 0.760533   | 1.13235    | 0.57424    | 0.328112   |
| ZNF322         | 2.90295    | 3.34239    | 0.203359   | 0.767061   |
| MYO15A         | 0.0162274  | 0.0132113  | -0.296657  | 1          |
| HGSNAT         | 4.82391    | 4.76781    | -0.0168774 | 0.99351    |
| PON3           | 0.797895   | 0.628145   | -0.345101  | 0.799188   |
| PRSS16         | 2.38328    | 1.31269    | -0.860421  | 0.0314167  |
| RPL21          | 3378.87    | 3597.94    | 0.0906315  | 0.947008   |
| LINC00094      | 2.0574     | 2.44538    | 0.249235   | 0.906464   |
| ITPR3          | 34.4291    | 24.0456    | -0.517859  | 0.0592084  |
| ASPM           | 1.56484    | 2.02866    | 0.37452    | 0.386944   |
| STPG2          | 0.0153427  | 0          | #NAME?     | 1          |
| ZNF347         | 0.0103652  | 0.0161828  | 0.642719   | 1          |
| KIAA1009       | 0.252465   | 0.361318   | 0.517186   | 0.44093    |
| YBEY           | 17.6446    | 12.4979    | -0.497548  | 0.183686   |
| TTC3           | 2.22988    | 2.75027    | 0.302612   | 0.505225   |
| ZFX            | 1.77725    | 2.08612    | 0.231174   | 0.70303    |
| BLOC1S4        | 20.4759    | 29.6449    | 0.533857   | 0.061906   |
| PRMT6          | 5.75371    | 12.782     | 1.15155    | 0.00134142 |
| TRPV2          | 0.358106   | 0.121488   | -1.55957   | 0.0792619  |
| TMED10P1       | 0.132212   | 0.148026   | 0.162992   | 1          |
| PTGR2          | 2.00898    | 1.08276    | -0.891753  | 0.0167292  |
| NTN4           | 0.408293   | 0.183659   | -1.15257   | 0.042771   |
| FLJ30403       | 0.672454   | 0.661487   | -0.0237224 | 0.995957   |
| CCDC110        | 0.0781374  | 0.0419182  | -0.898435  | 1          |

|                         |            |            |              |            |
|-------------------------|------------|------------|--------------|------------|
| C20orf112               | 1.18904    | 1.34751    | 0.180496     | 0.863259   |
| MEX3B                   | 1.06823    | 0.799906   | -0.417321    | 0.597789   |
| PTPRR                   | 0.296931   | 0.0377251  | -2.97653     | 1          |
| CUZD1,FAM24B            | 7.86168    | 7.86594    | 0.000781681  | 0.999427   |
| USH1G                   | 0.438855   | 0.39313    | -0.158739    | 0.956807   |
| ZNF841                  | 1.64753    | 1.02971    | -0.678067    | 0.0710419  |
| TRIM34,TRIM6,TRIM6-TRIM | 0.35619    | 0.112903   | -1.65757     | 0.0270114  |
| RPS14                   | 3893.13    | 4409.17    | 0.179574     | 0.812413   |
| NR2F1                   | 3.19126    | 6.34101    | 0.990587     | 0.10104    |
| EGOT                    | 0.0099511  | 0          | #NAME?       | 1          |
| C9orf37                 | 5.0621     | 6.73425    | 0.41178      | 0.928018   |
| HERC2P3                 | 0.514605   | 0.670229   | 0.38119      | 0.633275   |
| ZNF229                  | 0.00260225 | 0          | #NAME?       | 1          |
| ASB8                    | 4.96096    | 4.44344    | -0.158942    | 0.869885   |
| RPS28                   | 6034.64    | 7365.5     | 0.287516     | 0.515724   |
| ARNT                    | 4.57094    | 2.46002    | -0.893824    | 0.00134142 |
| OTUB2                   | 0.96597    | 0.615822   | -0.649465    | 0.180428   |
| NOSTRIN                 | 0.0254291  | 0.0289266  | 0.185912     | 1          |
| RPL28                   | 1707.89    | 2001.8     | 0.229084     | 0.837208   |
| LMOD3                   | 0.00300198 | 0.0118601  | 1.98213      | 1          |
| FEM1C                   | 2.60826    | 2.05761    | -0.342115    | 0.418623   |
| SESN3                   | 0.107955   | 0.0264915  | -2.02683     | 1          |
| ALDH1L2                 | 0.00306341 | 0.00702043 | 1.19642      | 1          |
| HAUS4                   | 35.4199    | 23.5922    | -0.58625     | 0.0274653  |
| SNORA15                 | 1.86916    | 0          | #NAME?       | 1          |
| NFASC                   | 0.00153234 | 0          | #NAME?       | 1          |
| LETMD1                  | 36.171     | 18.4061    | -0.974651    | 0.00134142 |
| DKFZp779M0652           | 0.973528   | 0.925617   | -0.0728073   | 0.990857   |
| RBPJ                    | 6.92418    | 4.6021     | -0.58935     | 0.0270114  |
| RAB11FIP5               | 18.5166    | 17.0017    | -0.123137    | 0.894255   |
| ZNF277                  | 9.67375    | 4.48621    | -1.10858     | 0.00134142 |
| SYTL3                   | 0.41753    | 0.15448    | -1.43446     | 0.036221   |
| ATAD5                   | 0.513189   | 0.447021   | -0.199148    | 0.875369   |
| SDC3                    | 2.85022    | 3.07472    | 0.109385     | 0.936047   |
| EXTL1                   | 0.0431671  | 0.0431477  | -0.000648425 | 1          |
| PRICKLE4                | 1.72676    | 1.5954     | -0.114153    | 0.966566   |
| NUDT16P1                | 2.58276    | 2.99672    | 0.214469     | 0.851624   |
| RPS16                   | 4806.17    | 5489.77    | 0.191858     | 0.787871   |
| INO80B,WBP1             | 61.8878    | 58.4673    | -0.0820266   | 0.954677   |
| RPL38                   | 3971.81    | 4633.76    | 0.222385     | 0.690726   |
| LOC256880               | 0.0828294  | 0.0894733  | 0.111314     | 1          |
| DUSP8                   | 4.71085    | 4.17512    | -0.17417     | 0.984917   |
| RALGDS                  | 41.185     | 41.2309    | 0.00160383   | 0.998764   |
| AMPD3                   | 2.79542    | 1.59378    | -0.810613    | 0.0145499  |
| WEE1                    | 23.0372    | 12.1285    | -0.925566    | 0.00134142 |
| GOLGA8T                 | 0.134794   | 0.0798623  | -0.75517     | 1          |
| ZADH2                   | 4.69223    | 4.13368    | -0.182848    | 0.790241   |
| LYST                    | 0.217522   | 0.130228   | -0.740116    | 1          |
| MLH3                    | 0.996599   | 1.43757    | 0.528549     | 0.137579   |
| ZNF33A                  | 2.21722    | 1.82398    | -0.281658    | 0.563967   |
| STARD10                 | 25.6044    | 26.6244    | 0.0563603    | 0.974044   |
| BTN3A1                  | 1.12861    | 0.780134   | -0.53275     | 0.315951   |
| ANAPC16                 | 19.9782    | 14.7426    | -0.438437    | 0.241608   |
| TMEM130                 | 0.00647437 | 0          | #NAME?       | 1          |
| CD109                   | 0.999255   | 0.623267   | -0.681002    | 0.0436049  |
| TOB1-AS1                | 0.732947   | 0.480036   | -0.610565    | 0.948179   |
| RPL27A                  | 357.56     | 395.303    | 0.144774     | 0.872554   |
| PRDM5                   | 1.14249    | 0.512043   | -1.15784     | 0.00818401 |
| AP1G2,JPH4              | 12.6586    | 13.2747    | 0.0685546    | 0.974494   |
| ZSCAN9                  | 5.37181    | 5.897      | 0.134573     | 0.913628   |
| EMR4P                   | 0.00522305 | 0          | #NAME?       | 1          |
| KLHDC2                  | 17.0701    | 9.94103    | -0.780006    | 0.00337323 |
| OXA1L                   | 144.658    | 131.785    | -0.134456    | 0.873414   |
| PTPN4                   | 0.490886   | 0.512936   | 0.0633902    | 0.978196   |
| ALS2CL                  | 5.42424    | 3.375      | -0.684535    | 0.0274653  |
| ZNF331                  | 0.358715   | 0.186475   | -0.943853    | 0.066512   |
| SPATA20                 | 27.9702    | 26.7625    | -0.0636794   | 0.966946   |
| CATSPER1                | 1.40641    | 0.383462   | -1.87486     | 0.00134142 |
| ACP5                    | 0.159019   | 0.12021    | -0.403646    | 1          |
| SUV420H2                | 7.11045    | 6.38173    | -0.155992    | 0.898291   |
| TNNT1                   | 134.489    | 124.589    | -0.110309    | 0.913749   |
| PFDN5                   | 422.021    | 495.737    | 0.232261     | 0.639984   |
| LTA4H                   | 80.5024    | 68.1064    | -0.241243    | 0.612137   |
| ZNF329                  | 2.62686    | 2.78517    | 0.084424     | 0.96103    |
| DCLRE1B                 | 2.52645    | 3.07167    | 0.281908     | 0.620271   |
| CLUL1                   | 0.0241835  | 0.013108   | -0.883576    | 1          |
| ACSBG2                  | 0.0227398  | 0.0102415  | -1.15078     | 1          |
| MTFR1L                  | 20.3087    | 21.7976    | 0.10207      | 0.92969    |
| LOC283070               | 7.03692    | 6.13321    | -0.198303    | 0.791291   |

|               |            |            |             |            |
|---------------|------------|------------|-------------|------------|
| PPP1R13L      | 2.92388    | 1.33184    | -1.13446    | 0.959293   |
| KLF15         | 4.19321    | 2.63295    | -0.671375   | 0.077181   |
| EVA1B         | 23.0459    | 32.0243    | 0.474659    | 0.214768   |
| CASC5         | 0.348284   | 0.528805   | 0.602473    | 0.162979   |
| DENND5B       | 0.484048   | 0.37204    | -0.379693   | 0.524672   |
| ZNF790        | 0.411347   | 0.545916   | 0.408323    | 0.742706   |
| GAPDH         | 6982.13    | 6692.2     | -0.0611877  | 0.979701   |
| METTL18       | 4.05896    | 3.8854     | -0.0630455  | 0.97749    |
| FOXF1         | 1.91769    | 1.66192    | -0.206518   | 0.887208   |
| ZNF362        | 2.0177     | 1.39013    | -0.537494   | 0.298465   |
| CBX8          | 12.2937    | 12.2673    | -0.00310912 | 0.998526   |
| OR2H1         | 0.00458901 | 0.0230203  | 2.32665     | 1          |
| RNF185        | 17.7304    | 11.8736    | -0.578468   | 0.0345327  |
| PHF7          | 1.3832     | 0.653811   | -1.08107    | 0.0217078  |
| OXLD1         | 40.1008    | 35.3109    | -0.18352    | 0.844123   |
| ZNF283        | 1.6658     | 1.79042    | 0.104088    | 0.956807   |
| NIPSNAP3A     | 4.99019    | 5.19883    | 0.0590925   | 0.979701   |
| RAB26         | 8.70821    | 5.15187    | -0.757281   | 0.0373672  |
| ACTG2         | 0.0736547  | 0.0442161  | -0.736207   | 1          |
| ZNF268        | 1.43871    | 1.86712    | 0.376039    | 0.388315   |
| LOC286297     | 0.00603532 | 0          | #NAME?      | 1          |
| RPS9          | 3673.64    | 4280.65    | 0.22062     | 0.719177   |
| C17orf59      | 12.0681    | 12.9502    | 0.101782    | 0.945946   |
| BAZ2B         | 0.754255   | 0.315633   | -1.2568     | 0.00134142 |
| ZNF733P       | 0.0127492  | 0          | #NAME?      | 1          |
| LOC148413     | 8.3059     | 11.2811    | 0.441703    | 0.865567   |
| MON2          | 0.978897   | 1.10184    | 0.170685    | 0.845969   |
| TSPAN18       | 0.00397116 | 0.0115548  | 1.54086     | 1          |
| PGAP1         | 0.738525   | 0.742153   | 0.00706986  | 0.997036   |
| LOC339524     | 0.0179284  | 0.00955346 | -0.908154   | 1          |
| ZFHX4         | 0.00583937 | 0.00123303 | -2.2436     | 1          |
| GPRC5A        | 9.0965     | 3.34178    | -1.44469    | 0.00134142 |
| GNB4          | 0.0487477  | 0.137393   | 1.4949      | 1          |
| ALOX12B       | 2.33485    | 0.69849    | -1.74102    | 0.00134142 |
| RAB41         | 0.0155796  | 0.0220784  | 0.50298     | 1          |
| RFX3          | 0.411602   | 0.0875798  | -2.23258    | 0.00593755 |
| PGBD2         | 1.39498    | 1.91269    | 0.455359    | 0.41033    |
| SERINC4       | 1.17741    | 1.42341    | 0.273735    | 0.986822   |
| PCMTD1        | 2.34789    | 0.992455   | -1.24229    | 0.00134142 |
| RPL34         | 915.939    | 974.217    | 0.0889923   | 0.945602   |
| ZBTB49        | 1.43424    | 1.96734    | 0.45596     | 0.373076   |
| MYL9          | 70.6271    | 122.482    | 0.794272    | 0.00134142 |
| LOC100130987  | 0.721138   | 0.455719   | -0.662129   | 0.977358   |
| CCDC149       | 1.06979    | 0.510181   | -1.06824    | 0.00743393 |
| WDR6          | 23.7681    | 34.0251    | 0.517571    | 0.255557   |
| KIAA1755      | 1.31577    | 0.699549   | -0.91141    | 0.0189207  |
| RPL4          | 2969.88    | 3040.07    | 0.0337012   | 0.988657   |
| POLI          | 2.11798    | 1.26531    | -0.743192   | 0.0167292  |
| TEX38         | 0.0423331  | 0.0135249  | -1.64617    | 1          |
| TMOD2         | 0.631227   | 0.721842   | 0.193523    | 0.844212   |
| KCTD7         | 1.14444    | 1.13746    | -0.00882967 | 0.997082   |
| CD24          | 4.21051    | 3.45373    | -0.28584    | 0.642966   |
| ADAMTSL4      | 2.69058    | 1.51616    | -0.827499   | 0.0217078  |
| NPRL2         | 15.2002    | 20.7471    | 0.448823    | 0.499152   |
| LOC645166     | 4.12362    | 8.12379    | 0.978243    | 0.0318033  |
| EEF2          | 2005.39    | 1657.77    | -0.274636   | 0.622505   |
| RPL23A        | 2199.22    | 2418.02    | 0.136837    | 0.896399   |
| EIF4B         | 137.263    | 117.25     | -0.22735    | 0.668888   |
| CCDC92        | 2.2689     | 2.60976    | 0.201924    | 0.888997   |
| SLC13A1       | 0.0284901  | 0.0482282  | 0.759416    | 1          |
| C8orf56       | 0.0482355  | 0          | #NAME?      | 1          |
| MTRNR2L2      | 43.5063    | 40.7938    | -0.092874   | 0.977896   |
| GAS6          | 21.5621    | 25.2471    | 0.227622    | 0.684267   |
| ERGIC1        | 59.3242    | 62.741     | 0.0807899   | 0.953243   |
| ATL1          | 0.622142   | 0.401473   | -0.631943   | 0.294609   |
| FLG           | 0.00100716 | 0.00160589 | 0.673076    | 1          |
| PLEKHA1       | 3.36417    | 3.56936    | 0.085412    | 0.956807   |
| CLVS1         | 0.0201857  | 0.0257468  | 0.351057    | 1          |
| FAM210B       | 18.2911    | 15.5315    | -0.235944   | 0.622934   |
| NOD1          | 1.46743    | 1.40273    | -0.0650543  | 0.979291   |
| TREH          | 0.0092907  | 0.0067522  | -0.460431   | 1          |
| RDM1          | 1.52036    | 0.808375   | -0.911319   | 0.112939   |
| TMEM177       | 30.5453    | 49.1524    | 0.686309    | 0.00743393 |
| VPS8          | 3.08357    | 2.58942    | -0.251969   | 0.650037   |
| BTBD6         | 41.0014    | 50.4536    | 0.299281    | 0.73595    |
| AMACR.C1QTNF3 | 1.8777     | 1.20094    | -0.644798   | 0.0909525  |
| CAMK2N1       | 19.2325    | 14.7603    | -0.38182    | 0.275061   |
| RUNX1         | 7.13349    | 4.8417     | -0.559096   | 0.0935542  |
| WDR54         | 82.7226    | 54.16      | -0.611053   | 0.0200038  |

|                |            |            |             |            |
|----------------|------------|------------|-------------|------------|
| C14orf93       | 5.2731     | 2.89027    | -0.867446   | 0.0101293  |
| GAB2           | 2.31618    | 1.13078    | -1.03443    | 0.00134142 |
| MRPS31P5       | 1.78308    | 1.38876    | -0.360573   | 0.602148   |
| IDNK           | 2.42553    | 1.81827    | -0.41573    | 0.631872   |
| NAPRT1         | 41.322     | 39.5649    | -0.0626876  | 0.96926    |
| PROS1          | 10.1949    | 6.72332    | -0.600606   | 0.0283563  |
| HYDIN          | 0.0694604  | 0.0438393  | -0.663965   | 1          |
| LOC285033      | 1.33613    | 1.35363    | 0.0187652   | 0.995515   |
| PIAS3          | 5.98257    | 7.24587    | 0.276393    | 0.605151   |
| ADRB1          | 0.303947   | 0.388372   | 0.353619    | 0.844285   |
| AGXT2L2        | 8.24544    | 5.23509    | -0.655382   | 0.940075   |
| LOC100652768   | 1.50234    | 1.53983    | 0.0355578   | 0.99351    |
| ST6GAL1        | 2.94247    | 4.02022    | 0.450249    | 0.21543    |
| ANKRD36BP1     | 0.0693758  | 0.0770859  | 0.152033    | 1          |
| LINC00339      | 9.68226    | 5.6557     | -0.775639   | 0.030994   |
| ATCAY          | 0.00331973 | 0.00241163 | -0.461055   | 1          |
| ZNF214         | 0.237537   | 0.181929   | -0.38478    | 1          |
| ZFP37          | 1.86742    | 1.5832     | -0.238202   | 0.776787   |
| ARHGAP19,SLIT1 | 1.95934    | 1.98626    | 0.0196895   | 0.99351    |
| CCS            | 30.4969    | 33.108     | 0.118516    | 0.917453   |
| EBI3           | 0.386149   | 0.392138   | 0.0222011   | 0.99714    |
| RPSA           | 3504.95    | 3820.24    | 0.124266    | 0.917379   |
| FTL            | 7782.42    | 8371.06    | 0.10519     | 0.943695   |
| LYSMD4         | 2.54866    | 2.56996    | 0.0120069   | 0.997036   |
| RPL35A         | 3570.14    | 3966.48    | 0.15188     | 0.865806   |
| USP25          | 3.39914    | 2.69029    | -0.337407   | 0.407592   |
| ABHD15         | 5.01995    | 7.10014    | 0.500175    | 0.124933   |
| C3orf65        | 0.027899   | 0.0221452  | -0.333216   | 1          |
| ELF2           | 3.11907    | 2.34815    | -0.409589   | 0.340391   |
| CIC            | 8.60221    | 11.4893    | 0.41751     | 0.196063   |
| HAGHL          | 75.1347    | 72.397     | -0.0535489  | 0.976214   |
| DDAH2          | 39.7795    | 27.2552    | -0.545492   | 0.0608269  |
| LINC00324      | 0.790226   | 0.350901   | -1.1712     | 0.0713011  |
| ZBTB5          | 2.24967    | 1.9146     | -0.23267    | 0.736044   |
| ZSWIM3         | 1.04938    | 1.04657    | -0.00387246 | 0.998564   |
| HOXC11         | 4.97526    | 7.02551    | 0.497833    | 0.288546   |
| TPT2P6         | 0.00963041 | 0          | #NAME?      | 1          |
| PCDH8          | 0.00794063 | 0.0115606  | 0.541896    | 1          |
| DENND2A        | 0.0047713  | 0.0164503  | 1.78566     | 1          |
| C7orf61        | 0.250686   | 0.536689   | 1.0982      | 0.366894   |
| NUDT13         | 0.784211   | 0.643568   | -0.285149   | 0.827278   |
| SOX4           | 7.13867    | 7.76051    | 0.120497    | 0.909768   |
| LOC440028      | 1.57679    | 0.282002   | -2.48322    | 0.10214    |
| RBM41          | 0.82742    | 1.12834    | 0.447504    | 0.485249   |
| CXorf30        | 0.0273733  | 0.00992467 | -1.46368    | 1          |
| RMRP           | 98.2719    | 129.847    | 0.401965    | 0.349665   |
| OBFC1          | 1.92495    | 1.2837     | -0.584515   | 0.0868006  |
| GCAT           | 98.5783    | 76.3086    | -0.369424   | 0.261904   |
| ZFP36L1        | 97.1243    | 80.4732    | -0.271325   | 0.539964   |
| ACADS          | 45.1232    | 35.9685    | -0.327135   | 0.37244    |
| FCGRT          | 34.5515    | 30.8464    | -0.163643   | 0.830384   |
| HIST3H2A       | 33.5099    | 20.014     | -0.74358    | 0.0879449  |
| PHF20L1        | 2.84059    | 3.17769    | 0.161789    | 0.862445   |
| POGZ           | 4.25868    | 3.2844     | -0.374775   | 0.297125   |
| RHPN1          | 20.4305    | 18.3966    | -0.151286   | 0.847835   |
| PRDM1          | 0.161191   | 0.11341    | -0.507229   | 1          |
| ZNF200         | 2.96321    | 3.66897    | 0.308211    | 0.555498   |
| LOC100131434   | 0.052071   | 0.0435356  | -0.258282   | 1          |
| FAM86JP        | 0.895252   | 0.376566   | -1.24939    | 0.0501327  |
| LOC100862671   | 3.93957    | 5.37826    | 0.449099    | 0.288804   |
| NAIF1          | 3.29627    | 2.40955    | -0.452075   | 0.307051   |
| RPS27A         | 1716.84    | 1935.61    | 0.173034    | 0.817127   |
| SHISA9         | 0.824494   | 0.989806   | 0.263636    | 0.74078    |
| OPTN           | 25.3751    | 12.1072    | -1.06754    | 0.00134142 |
| RAD52          | 2.66044    | 1.54155    | -0.787284   | 0.0288382  |
| NUDT16         | 5.37544    | 7.87723    | 0.551307    | 0.641988   |
| MTRNR2L4       | 0.174825   | 0.129865   | -0.428902   | 1          |
| DEAF1          | 32.4902    | 37.2547    | 0.197417    | 0.790283   |
| MN1            | 0.00994126 | 0.0130958  | 0.397607    | 1          |
| KIAA1191       | 30.7618    | 36.1536    | 0.232998    | 0.633344   |
| PLIN5          | 1.30709    | 0.504261   | -1.37412    | 0.0114515  |
| LOC100130954   | 0.00709877 | 0.0121228  | 0.772076    | 1          |
| UBE2O          | 8.25521    | 9.12035    | 0.143786    | 0.860257   |
| RPS13          | 3179.48    | 3671.82    | 0.207705    | 0.73549    |
| ZBTB18         | 1.73351    | 2.03671    | 0.232546    | 0.773635   |
| DLL4           | 0.986273   | 1.19948    | 0.282354    | 0.797744   |
| ZNF69          | 2.11147    | 1.90075    | -0.151675   | 0.927661   |
| IFFO2          | 7.34611    | 8.06253    | 0.134252    | 0.879947   |
| MANBA          | 9.45555    | 3.99933    | -1.2414     | 0.00134142 |

|                         |            |            |            |            |
|-------------------------|------------|------------|------------|------------|
| PLEKHA4                 | 6.89597    | 3.48493    | -0.984623  | 0.00134142 |
| ZNF784                  | 8.20185    | 6.20573    | -0.402347  | 0.389384   |
| ZNF550                  | 0.366489   | 0.295338   | -0.311401  | 0.91236    |
| C18orf32,RPL17,RPL17-C1 | 3489.81    | 3833.49    | 0.135509   | 0.900578   |
| PGAM4                   | 0.149222   | 0.101954   | -0.549539  | 1          |
| HOXA4                   | 4.66542    | 3.82661    | -0.28594   | 0.71619    |
| C12orf65                | 8.77075    | 10.7877    | 0.298611   | 0.529644   |
| C7orf31                 | 1.29267    | 0.853657   | -0.598629  | 0.173163   |
| PBLD                    | 0.345003   | 0.220297   | -0.647163  | 1          |
| PI4K2B                  | 2.63787    | 3.12333    | 0.243709   | 0.705893   |
| SESN1                   | 2.92949    | 2.76402    | -0.0838823 | 0.965735   |
| ZNF33B                  | 2.10752    | 1.80168    | -0.226209  | 0.716439   |
| PARM1                   | 1.21698    | 1.17171    | -0.0546825 | 0.980556   |
| RPL12                   | 8183.19    | 7900.14    | -0.0507846 | 0.979701   |
| PITPNC1                 | 5.60734    | 4.44751    | -0.33432   | 0.357955   |
| DGCR6                   | 20.916     | 18.1358    | -0.205768  | 0.78079    |
| RPL7A                   | 9687.81    | 10508.1    | 0.117265   | 0.938412   |
| ZNF160                  | 3.89752    | 2.38506    | -0.708528  | 0.0172978  |
| PHF15                   | 3.25107    | 5.33473    | 0.714499   | 0.00672555 |
| CREBRF                  | 1.70035    | 0.413995   | -2.03814   | 0.00134142 |
| ZDHHC17                 | 2.20442    | 1.9158     | -0.202452  | 0.787869   |
| PIK3R3                  | 0.956375   | 1.39856    | 0.548293   | 0.177737   |
| DCAF10                  | 2.26917    | 0.941655   | -1.26889   | 0.00134142 |
| EGLN1                   | 15.6189    | 10.9237    | -0.515831  | 0.0678232  |
| RPL24                   | 3877.02    | 4277.75    | 0.141903   | 0.880139   |
| CLK2                    | 13.8331    | 14.3062    | 0.0485115  | 0.979701   |
| PDDC1                   | 13.3494    | 19.3362    | 0.534526   | 0.0554961  |
| LOC100506713            | 1.19217    | 1.23747    | 0.0538018  | 0.991767   |
| TM7SF2,VPS51            | 51.5261    | 44.7412    | -0.203701  | 0.786271   |
| SLC45A1                 | 3.15943    | 1.14483    | -1.46453   | 0.00243047 |
| C9orf123                | 24.4515    | 23.9808    | -0.0280416 | 0.988657   |
| ARHGAP23                | 2.08982    | 0.812429   | -1.36307   | 0.00134142 |
| RAP2B                   | 4.75828    | 5.29388    | 0.153884   | 0.844123   |
| DCLK2                   | 0.540683   | 0.677822   | 0.326125   | 0.750422   |
| PRR15                   | 2.35034    | 2.3628     | 0.00763163 | 0.99714    |
| ZNHIT2                  | 18.9372    | 35.1365    | 0.89175    | 0.00509212 |
| ARHGEF4                 | 0.00490801 | 0.00480992 | -0.0291266 | 1          |
| CHRM4                   | 0.195132   | 0.187899   | -0.0544932 | 1          |
| FAM78B                  | 2.92982    | 6.28507    | 1.10112    | 0.00337323 |
| ZFAND1                  | 39.3178    | 25.9384    | -0.600092  | 0.0278845  |
| OST4                    | 470.66     | 624.942    | 0.409038   | 0.235468   |
| PHLDA1                  | 52.9073    | 45.3092    | -0.22366   | 0.67045    |
| POLM                    | 5.08724    | 5.01729    | -0.0199733 | 0.99351    |
| ARHGAP12                | 4.68058    | 3.58891    | -0.383141  | 0.293861   |
| ZCCHC24                 | 1.33174    | 1.17717    | -0.17799   | 0.877493   |
| FCER1G                  | 0.521593   | 0.806024   | 0.6279     | 0.714729   |
| MPI                     | 44.2135    | 20.5004    | -1.10883   | 0.00134142 |
| CD5                     | 0.00595189 | 0          | #NAME?     | 1          |
| TRIM4                   | 7.71473    | 6.1694     | -0.322486  | 0.431328   |
| TBCK                    | 1.29106    | 0.60841    | -1.08544   | 0.664149   |
| ANKRD9                  | 14.591     | 11.6258    | -0.327748  | 0.625      |
| MGC39372                | 1.87009    | 0.452997   | -2.04554   | 0.00337323 |
| NIPBL                   | 1.35644    | 1.24347    | -0.125457  | 0.912776   |
| ZNF680                  | 1.29749    | 1.15504    | -0.167771  | 0.900578   |
| ZNF813                  | 0.0108931  | 0.00865879 | -0.331176  | 1          |
| IFI35                   | 5.38937    | 3.2447     | -0.73203   | 0.0732879  |
| KIAA1244                | 2.53548    | 1.44748    | -0.808713  | 0.00134142 |
| MIR1282                 | 18.8606    | 79.5021    | 2.07562    | 0.845125   |
| DCBLD1                  | 0.511491   | 0.524677   | 0.0367204  | 0.997036   |
| MBLAC1                  | 3.16334    | 4.16169    | 0.39572    | 0.614657   |
| RBL2                    | 3.15333    | 1.98847    | -0.665221  | 0.157488   |
| NBEAL2                  | 4.2422     | 4.02359    | -0.0763299 | 0.979452   |
| SEMA3A                  | 1.47456    | 0.467215   | -1.65813   | 0.00134142 |
| SZT2                    | 1.22004    | 1.19449    | -0.0305421 | 0.992651   |
| PTK6                    | 3.48522    | 1.98574    | -0.811575  | 0.0467709  |
| MAST4                   | 0.587967   | 0.208274   | -1.49725   | 0.0340561  |
| PHC3                    | 1.32906    | 1.11923    | -0.247907  | 0.649124   |
| IRF2BP2                 | 19.0716    | 10.4487    | -0.868106  | 0.00134142 |
| BAD                     | 69.8072    | 76.9726    | 0.14097    | 0.908114   |
| PMS2P3                  | 0.85146    | 1.02462    | 0.267082   | 0.871957   |
| RUFY1                   | 9.18874    | 12.2879    | 0.419297   | 0.19909    |
| C11orf71                | 5.77769    | 3.5876     | -0.687474  | 0.322381   |
| ZNF35                   | 1.98001    | 3.60751    | 0.865492   | 0.0101293  |
| GPR160                  | 15.9595    | 10.3531    | -0.624347  | 0.0227017  |
| CLDN3                   | 2.01124    | 0.701675   | -1.51921   | 0.0467709  |
| CROCCP2                 | 17.4145    | 25.0407    | 0.523989   | 0.0924793  |
| PHYH                    | 30.1887    | 23.329     | -0.371884  | 0.266528   |
| TK2                     | 3.93358    | 2.30292    | -0.772378  | 0.00882987 |
| ZFAT                    | 1.32347    | 1.89707    | 0.519445   | 0.207647   |

|              |            |            |            |            |
|--------------|------------|------------|------------|------------|
| POU6F1       | 1.61653    | 1.25167    | -0.369045  | 0.504108   |
| LLGL1        | 15.1382    | 15.3099    | 0.0162699  | 0.997036   |
| HOTTIP       | 0.0614615  | 0.0903102  | 0.555207   | 1          |
| PAM          | 10.0766    | 7.17455    | -0.490048  | 0.0873591  |
| CEP192       | 0.779541   | 0.67277    | -0.212511  | 0.814226   |
| DNAJC27-AS1  | 0.0123461  | 0.00509632 | -1.27652   | 1          |
| GNPTG        | 18.2133    | 27.5749    | 0.598363   | 0.150173   |
| FAM193B      | 8.45177    | 8.73744    | 0.0479565  | 0.98015    |
| C17orf58     | 15.5353    | 10.3946    | -0.579713  | 0.0715857  |
| SKOR1        | 0.526898   | 0.598868   | 0.184714   | 0.949972   |
| CLDN22       | 1.43997    | 1.92252    | 0.416958   | 0.701167   |
| IRF1         | 3.16616    | 5.85651    | 0.887309   | 0.00134142 |
| CUL9         | 1.77612    | 1.22543    | -0.535444  | 0.155066   |
| HK2          | 34.2       | 23.9333    | -0.514977  | 0.0688198  |
| FAM86B2      | 0.870575   | 0.767679   | -0.181465  | 0.952905   |
| DNAH10       | 0.0738776  | 0.109576   | 0.568726   | 1          |
| ELMO3        | 1.73826    | 3.46557    | 0.995445   | 0.00672555 |
| CIRBP        | 94.9248    | 54.113     | -0.810809  | 0.00243047 |
| SLC16A5      | 5.15111    | 2.52891    | -1.02637   | 0.0114515  |
| C12orf23     | 9.60662    | 8.48527    | -0.179067  | 0.7854     |
| STC1         | 0.031052   | 0.0178497  | -0.798784  | 1          |
| C2orf74      | 0.0702268  | 0.0449165  | -0.644779  | 1          |
| PILRB        | 39.0687    | 45.987     | 0.235212   | 0.754797   |
| DMXL1        | 0.732148   | 0.387228   | -0.91895   | 0.00243047 |
| LOC284751    | 0.271867   | 0.0500117  | -2.44256   | 1          |
| LOC100499489 | 2.42264    | 2.22533    | -0.122559  | 0.952905   |
| TMEM45B      | 0.0616523  | 0.0894523  | 0.536964   | 1          |
| LOC100506082 | 0.151448   | 0.205605   | 0.441049   | 1          |
| BRWD1-IT2    | 0.47795    | 0.385745   | -0.309213  | 0.92856    |
| C19orf26     | 2.61619    | 2.57165    | -0.0247725 | 0.99451    |
| LAMA5        | 2.69321    | 3.99156    | 0.567624   | 0.148987   |
| TLCD2        | 1.15686    | 0.907944   | -0.349537  | 0.543459   |
| CD27-AS1     | 3.21366    | 1.54174    | -1.05966   | 0.00243047 |
| PAX8         | 1.05036    | 0.59185    | -0.827583  | 0.506591   |
| ZNF597       | 0.890809   | 0.903204   | 0.0199349  | 0.995957   |
| INHA         | 0.427122   | 0.178397   | -1.25956   | 0.272094   |
| KBTBD6       | 1.10091    | 1.79105    | 0.702105   | 0.0410573  |
| PACS1        | 16.929     | 15.5863    | -0.119211  | 0.907145   |
| RDX          | 0.00941152 | 0          | #NAME?     | 1          |
| TRIM16L      | 4.55505    | 3.97052    | -0.198138  | 0.837208   |
| ERCC6,PGBD3  | 1.35629    | 1.01676    | -0.415688  | 0.546592   |
| DHPS         | 41.9062    | 32.3005    | -0.375609  | 0.819877   |
| MPG          | 160.924    | 134.128    | -0.262768  | 0.771117   |
| ARHGAP32     | 1.50218    | 0.799503   | -0.909878  | 0.00134142 |
| NHEJ1        | 7.1061     | 9.10933    | 0.358286   | 0.373156   |
| LOC100379224 | 1.85557    | 1.96921    | 0.085748   | 0.964247   |
| PCSK6        | 4.86983    | 5.28887    | 0.119089   | 0.942827   |
| MTRNR2L8     | 32.787     | 30.4526    | -0.106558  | 0.922401   |
| PNPLA3       | 0.668764   | 0.41467    | -0.689533  | 0.27191    |
| ADHFE1       | 0.244425   | 0.369685   | 0.596905   | 0.610107   |
| PMS2         | 1.0686     | 0.649112   | -0.719186  | 0.149876   |
| EPAS1        | 2.08256    | 1.00124    | -1.05657   | 0.00134142 |
| ZRANB2-AS1   | 0.0257919  | 0.0189892  | -0.441733  | 1          |
| PAOX         | 5.6089     | 3.92695    | -0.514308  | 0.280157   |
| FAM45A       | 6.33615    | 4.98997    | -0.344576  | 0.430764   |
| ZFP14        | 0.229886   | 0.242754   | 0.0785779  | 1          |
| EPHA1        | 0.0109177  | 0.0297719  | 1.44728    | 1          |
| METTL21D     | 3.74554    | 4.83678    | 0.368874   | 0.486707   |
| FAM109B      | 2.73795    | 4.39518    | 0.682826   | 0.0698587  |
| LINC00634    | 0.298292   | 0.203209   | -0.553759  | 1          |
| DIAPH2       | 4.16492    | 2.25981    | -0.882088  | 0.00243047 |
| FAM134A      | 25.6756    | 24.2861    | -0.0802701 | 0.952905   |
| MATK         | 1.10956    | 0.449424   | -1.30384   | 0.0459324  |
| MAPKAPK5-AS1 | 8.64466    | 8.76106    | 0.0192959  | 0.996079   |
| TRAPPC8      | 1.697      | 1.52222    | -0.156809  | 0.876899   |
| IVNS1ABP     | 14.4232    | 19.4923    | 0.434506   | 0.133194   |
| TMEM159      | 43.4914    | 29.776     | -0.54658   | 0.0410573  |
| ARHGEF17     | 2.85618    | 1.7243     | -0.728074  | 0.0227017  |
| DDX41        | 39.2416    | 54.791     | 0.481557   | 0.0736473  |
| OSM          | 0.0114471  | 0.0199386  | 0.800583   | 1          |
| KDM4A-AS1    | 0.440816   | 0.870333   | 0.981391   | 0.891353   |
| HACE1        | 0.794528   | 0.650696   | -0.288113  | 0.736907   |
| RPL5         | 2043.33    | 2204.76    | 0.109697   | 0.929478   |
| KDM6B        | 4.96852    | 8.5275     | 0.779306   | 0.00243047 |
| FAM84A       | 0.0046264  | 0          | #NAME?     | 1          |
| BRSK2        | 9.28893    | 14.314     | 0.623848   | 0.0231741  |
| ZBTB41       | 0.373134   | 0.2894     | -0.366632  | 0.585568   |
| PCYOX1       | 5.69616    | 5.88561    | 0.0472043  | 0.979701   |
| TRPT1        | 58.5077    | 26.093     | -1.16496   | 0.00134142 |

|                          |            |            |              |            |
|--------------------------|------------|------------|--------------|------------|
| PI4KAP1                  | 10.9902    | 12.0708    | 0.135312     | 0.898291   |
| UBE2R2                   | 13.3109    | 12.7444    | -0.0627419   | 0.966946   |
| C8orf44,C8orf44-SGK3,SGK | 1.90936    | 2.06171    | 0.110748     | 0.952905   |
| ZNF696                   | 5.42298    | 9.50046    | 0.808912     | 0.00134142 |
| EPB41L5                  | 1.51099    | 1.36711    | -0.144363    | 0.90608    |
| ZMYND10                  | 0.559535   | 1.60692    | 1.522        | 0.00425224 |
| NROB2                    | 0.0342661  | 0.0232023  | -0.562517    | 1          |
| BPTF                     | 1.28003    | 1.2799     | -0.000150261 | 0.999929   |
| OR6W1P                   | 0.0119326  | 0.00801372 | -0.574359    | 1          |
| AZI1                     | 8.45248    | 7.69179    | -0.136055    | 0.900578   |
| ULK2                     | 1.44471    | 0.892486   | -0.694876    | 0.0983149  |
| TES                      | 0.0147992  | 0.00693705 | -1.09312     | 1          |
| UEVLD                    | 0.872403   | 0.896809   | 0.0398056    | 0.990857   |
| KIF15                    | 2.17194    | 1.63388    | -0.410677    | 0.314484   |
| ALKBH7                   | 64.8538    | 61.4468    | -0.0778527   | 0.956657   |
| PGM5                     | 0.00877751 | 0.00557951 | -0.653672    | 1          |
| YPEL1                    | 2.80591    | 2.27487    | -0.302685    | 0.832803   |
| IDH1-AS1                 | 1.15936    | 0.568669   | -1.02767     | 0.46195    |
| ZFP30                    | 0.975979   | 1.00729    | 0.0455616    | 0.986822   |
| BAMBI                    | 5.01694    | 5.95118    | 0.246368     | 0.739919   |
| FGF18                    | 0.32188    | 0.469206   | 0.543697     | 0.695538   |
| AVP11                    | 15.7693    | 21.2974    | 0.43356      | 0.234793   |
| VSIG10L                  | 0.948532   | 1.03938    | 0.131951     | 0.950929   |
| OR7E156P                 | 0.00779031 | 0.00532654 | -0.548482    | 1          |
| UPK2                     | 0.0503686  | 0          | #NAME?       | 1          |
| ZCCHC2                   | 1.25918    | 1.91877    | 0.607702     | 0.0757506  |
| SCARNA6                  | 0.159776   | 0.30393    | 0.927687     | 1          |
| PGM1                     | 39.0142    | 25.0854    | -0.63715     | 0.0120701  |
| PCDHB5                   | 0.0131998  | 0.0132254  | 0.00279582   | 1          |
| OSBPL7                   | 2.62847    | 2.61678    | -0.00642915  | 0.99714    |
| ECH1                     | 113.892    | 102.376    | -0.153784    | 0.830476   |
| NKAIN1                   | 1.64775    | 2.24837    | 0.448384     | 0.43457    |
| ALKBH5                   | 47.0536    | 59.0537    | 0.327725     | 0.355184   |
| PILRA                    | 0.482245   | 0.151235   | -1.67298     | 0.0976197  |
| FAM131C                  | 21.927     | 15.8483    | -0.468377    | 0.161633   |
| APOL                     | 2.02838    | 1.76415    | -0.201354    | 0.790283   |
| SDHAP1                   | 0.872371   | 1.32388    | 0.601761     | 0.290201   |
| FLJ10038                 | 0.76205    | 0.813586   | 0.0944098    | 0.987858   |
| ZNF395                   | 12.108     | 6.22285    | -0.960318    | 0.00134142 |
| MIR600HG                 | 0.808092   | 1.35763    | 0.748502     | 0.0377654  |
| CCDC85B                  | 248.033    | 243.637    | -0.0257965   | 0.989365   |
| MGEA5                    | 18.1593    | 9.677      | -0.908076    | 0.00134142 |
| ARSA                     | 7.21004    | 6.53175    | -0.142538    | 0.884463   |
| CISH                     | 1.93142    | 4.18242    | 1.11468      | 0.00337323 |
| SEPT3                    | 7.74871    | 5.75623    | -0.428831    | 0.255652   |
| FRG1B                    | 6.99759    | 3.33765    | -1.06802     | 0.00243047 |
| ZNF501                   | 0.571481   | 0.458101   | -0.319039    | 0.765318   |
| ZNF845                   | 1.08712    | 0.924806   | -0.233284    | 0.797744   |
| MAP4K1                   | 0.101944   | 0.100332   | -0.022992    | 1          |
| IZUMO1                   | 0.0114941  | 0.036504   | 1.66716      | 1          |
| CPSF1                    | 26.4407    | 33.8754    | 0.357478     | 0.363804   |
| RNF31                    | 8.68767    | 11.3956    | 0.391433     | 0.274547   |
| RRP8                     | 11.3739    | 16.4103    | 0.528876     | 0.0778493  |
| SCAI                     | 0.94256    | 0.766997   | -0.297364    | 0.563967   |
| ZNF100                   | 1.33247    | 1.23033    | -0.115062    | 0.942519   |
| SAMD1                    | 43.9642    | 52.9518    | 0.268351     | 0.585735   |
| ABCC9                    | 0.405122   | 0.484027   | 0.256731     | 0.773167   |
| NUDT18                   | 10.2634    | 4.83998    | -1.08444     | 0.00134142 |
| TBC1D12                  | 1.39815    | 1.04037    | -0.426417    | 0.34496    |
| LACTB                    | 5.90207    | 4.85755    | -0.280991    | 0.619363   |
| KIAA2018                 | 0.494901   | 0.449869   | -0.137636    | 0.919921   |
| COL2A1                   | 0.00733466 | 0.011263   | 0.618795     | 1          |
| DHRS4-AS1                | 1.97487    | 1.26824    | -0.638932    | 0.508949   |
| ANKRD37                  | 8.69574    | 9.22145    | 0.0846857    | 0.989344   |
| LRRC66                   | 0.0565306  | 0.0390344  | -0.534285    | 1          |
| ZNF131                   | 2.93662    | 2.82714    | -0.0548153   | 0.979701   |
| MORN1                    | 0.719408   | 0.424727   | -0.760274    | 0.592747   |
| SPIN3                    | 1.60518    | 2.00813    | 0.32312      | 0.728031   |
| LOC100130899             | 4.92495    | 6.10641    | 0.310215     | 0.481679   |
| ZNF85                    | 1.11218    | 0.46109    | -1.27028     | 0.00743393 |
| VPS11                    | 10.6635    | 7.76655    | -0.457331    | 0.147583   |
| CYP2R1                   | 9.57148    | 9.61937    | 0.00720049   | 0.997036   |
| VAT1                     | 157.972    | 131.349    | -0.266266    | 0.530352   |
| CXorf40A                 | 6.42094    | 8.66065    | 0.43169      | 0.281011   |
| CCDC136                  | 5.14086    | 5.70768    | 0.150896     | 0.919892   |
| ZFP2                     | 0.275313   | 0.288902   | 0.0695086    | 1          |
| MARK4                    | 10.4035    | 7.50034    | -0.472034    | 0.111788   |
| RPS26                    | 1920.19    | 2131.43    | 0.150575     | 0.854644   |
| FNIP1                    | 4.93074    | 2.43306    | -1.01903     | 0.00134142 |

|                |            |             |             |            |
|----------------|------------|-------------|-------------|------------|
| CALD1          | 23.7432    | 29.3486     | 0.305775    | 0.468467   |
| S100A13        | 405.679    | 566.29      | 0.481202    | 0.274686   |
| HLA-F          | 60.3193    | 55.1432     | -0.129437   | 0.88826    |
| ZFC3H1         | 1.35751    | 2.92944     | 1.10966     | 0.00134142 |
| EXOC4          | 15.1479    | 9.20005     | -0.719403   | 0.00243047 |
| ZNF503-AS2     | 1.78005    | 2.80984     | 0.658567    | 0.773127   |
| DIDO1          | 5.52949    | 5.92095     | 0.0986841   | 0.945006   |
| LOXL1          | 4.93238    | 5.18295     | 0.0714896   | 0.979701   |
| PRDM8          | 19.7109    | 40.4597     | 1.03749     | 0.00134142 |
| ZNF181         | 1.66694    | 1.32278     | -0.333629   | 0.597945   |
| NUMBL          | 9.68315    | 14.3222     | 0.564709    | 0.0531423  |
| IAH1           | 34.8815    | 28.4399     | -0.294545   | 0.510094   |
| PCDHB16        | 0.94891    | 0.763849    | -0.312984   | 0.693737   |
| CCDC9          | 6.54567    | 7.75338     | 0.244284    | 0.730089   |
| PLEKHG4B       | 0.00431686 | 0.000904879 | -2.25419    | 1          |
| ATM            | 1.21816    | 0.862027    | -0.498903   | 0.128341   |
| BHMT2          | 0.00586254 | 0.00348639  | -0.749792   | 1          |
| SH3GL1P1       | 0.322783   | 0.506771    | 0.650768    | 0.848508   |
| DCDC2          | 0.49523    | 0.215294    | -1.20179    | 0.0145499  |
| HLA-A          | 1043.56    | 1136.65     | 0.12328     | 0.908114   |
| ZNF711         | 0.94846    | 0.653388    | -0.537648   | 0.241608   |
| HECTD2         | 0.713096   | 0.626317    | -0.187205   | 0.913628   |
| SUCLG2         | 21.7176    | 16.4885     | -0.397401   | 0.196619   |
| CARHSP1        | 25.2722    | 17.999      | -0.489636   | 0.0844105  |
| ZNF766         | 3.75465    | 1.97881     | -0.924045   | 0.00134142 |
| ISL1           | 0.168749   | 0.1962      | 0.217446    | 1          |
| BLVRB          | 159.445    | 135.536     | -0.23438    | 0.619929   |
| ZNF865         | 7.07642    | 8.33056     | 0.235395    | 0.691839   |
| TIMP2          | 7.33736    | 5.25732     | -0.480934   | 0.131385   |
| WNT7B          | 0.0059413  | 0.0208556   | 1.81158     | 1          |
| ZNF44          | 1.69934    | 1.52764     | -0.153676   | 0.916838   |
| CCDC78         | 3.4956     | 1.92972     | -0.857151   | 0.640746   |
| SNX30          | 2.48052    | 2.01428     | -0.300379   | 0.504757   |
| SLC27A3        | 6.03093    | 5.55055     | -0.11975    | 0.935917   |
| LSS            | 14.0337    | 23.8697     | 0.76628     | 0.00243047 |
| MXRA7          | 44.6536    | 50.552      | 0.178993    | 0.778305   |
| ZNF350         | 2.13146    | 2.11687     | -0.00991212 | 0.997036   |
| PMEP1          | 0.758291   | 0.605008    | -0.325797   | 0.717152   |
| LOC729444      | 0.0131788  | 0.0126507   | -0.0590027  | 1          |
| IQCH           | 0.729104   | 0.404198    | -0.851062   | 0.92969    |
| ASTE1          | 1.77323    | 2.03758     | 0.200473    | 0.979484   |
| MLXIPL         | 5.2594     | 2.25517     | -1.22166    | 0.00134142 |
| KLHL15         | 1.35516    | 1.17322     | -0.207992   | 0.798573   |
| TMEM219        | 96.0513    | 82.1743     | -0.225118   | 0.649163   |
| OXCT2          | 1.5727     | 2.66972     | 0.763449    | 0.942519   |
| RGS9           | 0.0850098  | 0.0158773   | -2.42066    | 1          |
| KIAA1551       | 0.674703   | 0.750249    | 0.153118    | 0.909016   |
| EEF1D          | 1144.31    | 1376.94     | 0.266989    | 0.581978   |
| FAM102A        | 10.5993    | 13.8986     | 0.390971    | 0.258126   |
| C5orf38        | 5.8787     | 4.0525      | -0.536686   | 0.448465   |
| TSC22D1        | 13.85      | 11.2706     | -0.297322   | 0.471178   |
| MAP1B          | 0.007187   | 0.0155939   | 1.11752     | 1          |
| TFPT           | 9.70161    | 13.4986     | 0.476513    | 0.855134   |
| MPND           | 20.2813    | 23.8252     | 0.232341    | 0.700037   |
| FAM110A        | 9.0959     | 8.44367     | -0.107346   | 0.950929   |
| C11orf83       | 15.3817    | 20.291      | 0.399622    | 0.753148   |
| ZNF266         | 8.2769     | 7.74279     | -0.0962379  | 0.935939   |
| GPR182         | 0.0272669  | 0.0294426   | 0.110754    | 1          |
| HPS6           | 16.2687    | 28.3382     | 0.800651    | 0.00134142 |
| STAP2          | 16.0403    | 12.5375     | -0.355455   | 0.41212    |
| KCNJ14         | 0.636335   | 1.11052     | 0.803381    | 0.10214    |
| RPGRIP1        | 0.00622069 | 0.0157988   | 1.34467     | 1          |
| ENDOG          | 31.0467    | 50.5406     | 0.703003    | 0.648914   |
| THEMIS2        | 0.0203004  | 0.0262322   | 0.369834    | 1          |
| ZNF829         | 0.00657725 | 0.0141094   | 1.1011      | 1          |
| C10orf68,CCDC7 | 0.531633   | 0.227309    | -1.22578    | 0.0373672  |
| KIAA0907       | 6.83866    | 10.655      | 0.639751    | 0.0250278  |
| LOC100506844   | 13.8007    | 7.98569     | -0.789256   | 0.0336095  |
| BRPF3          | 3.75224    | 3.59558     | -0.0615253  | 0.974044   |
| EGFR           | 1.10769    | 0.424382    | -1.38412    | 0.00134142 |
| ACTR3B         | 9.75961    | 14.5698     | 0.578085    | 0.0451064  |
| TSACC          | 0.483469   | 0.509422    | 0.0754381   | 0.997036   |
| ADAMTS14       | 0.00365079 | 0.00267456  | -0.448909   | 1          |
| ZNF827         | 0.212336   | 0.123528    | -0.78151    | 1          |
| ATG16L1        | 4.71907    | 7.96895     | 0.755888    | 0.00672555 |
| ABHD14B        | 36.0836    | 24.2066     | -0.575943   | 0.0451064  |
| TCEB3          | 1.57349    | 2.51381     | 0.675908    | 0.0547855  |
| LINC00622      | 0.153706   | 0.0511517   | -1.58732    | 1          |
| CYP21A2        | 0.112795   | 0.0334414   | -1.754      | 1          |



|                        |            |            |             |            |
|------------------------|------------|------------|-------------|------------|
| ADM2                   | 0.00481824 | 0.00309467 | -0.63872    | 1          |
| CCNT2                  | 2.42926    | 2.11618    | -0.199055   | 0.771183   |
| MESP1                  | 32.6762    | 44.2022    | 0.435879    | 0.25986    |
| ANKRD31                | 0.0343652  | 0.0182331  | -0.91439    | 1          |
| LSMD1                  | 47.9535    | 71.0873    | 0.567957    | 0.262818   |
| PITPNM1                | 12.4985    | 20.1203    | 0.6869      | 0.009453   |
| JMJD7,JMJD7-PLA2G4B,PL | 17.0655    | 14.7091    | -0.21437    | 0.778146   |
| LOC100130744           | 0.52381    | 0.512669   | -0.0310139  | 0.997323   |
| AN06                   | 9.89476    | 6.94122    | -0.511475   | 0.074638   |
| ANKRD23                | 1.46858    | 2.12441    | 0.532635    | 0.327288   |
| C9orf129               | 1.86887    | 2.93636    | 0.651863    | 0.845125   |
| NBPF10                 | 0.181414   | 0.166312   | -0.1254     | 1          |
| HMG20B                 | 96.5042    | 93.5507    | -0.0448433  | 0.979701   |
| SH3YL1                 | 5.97563    | 4.12715    | -0.533945   | 0.152605   |
| LOC152217              | 23.4173    | 32.2532    | 0.461866    | 0.131622   |
| IGFBP6                 | 172.712    | 201.854    | 0.224943    | 0.674625   |
| USP27X                 | 1.10792    | 1.202      | 0.117577    | 0.954559   |
| SHC1                   | 139.127    | 149.485    | 0.103594    | 0.924336   |
| MNF1                   | 30.6745    | 37.0736    | 0.273353    | 0.52114    |
| CD82                   | 2.40794    | 2.28744    | -0.0740645  | 0.979701   |
| C21orf58               | 1.55933    | 1.67482    | 0.10308     | 0.965607   |
| HIC2                   | 1.3904     | 1.66084    | 0.256411    | 0.726892   |
| GJD3                   | 2.86689    | 3.40189    | 0.246849    | 0.738678   |
| SGOL1-AS1              | 1.1285     | 1.05725    | -0.094091   | 0.99351    |
| FAHD2B                 | 15.7642    | 10.9517    | -0.525498   | 0.115606   |
| PDE4C                  | 0.0942841  | 0.0626841  | -0.588916   | 1          |
| TOM1                   | 15.545     | 10.8295    | -0.521478   | 0.092295   |
| RPS23                  | 410.228    | 421.711    | 0.039827    | 0.984917   |
| SNCAIP                 | 0.213853   | 0.0439534  | -2.28257    | 1          |
| CTRC                   | 0.0235421  | 0.0408347  | 0.794555    | 1          |
| BRI3                   | 284.507    | 164.913    | -0.786761   | 0.0167292  |
| ASAH2B                 | 0.107823   | 0.0187056  | -2.52712    | 1          |
| CCNG2                  | 6.07159    | 1.63334    | -1.89425    | 0.00134142 |
| TRAF3IP2-AS1           | 3.25036    | 3.10052    | -0.0680904  | 0.993379   |
| ZNF211                 | 1.24093    | 1.20504    | -0.0423411  | 0.989343   |
| KTN1-AS1               | 1.43132    | 0.722293   | -0.98669    | 0.0637115  |
| RPS15                  | 4341.63    | 5309.23    | 0.290266    | 0.511387   |
| ZNF354B                | 1.36206    | 1.2845     | -0.0845875  | 0.972989   |
| TBC1D8B                | 0.497814   | 0.224986   | -1.14577    | 0.030994   |
| MAP6D1                 | 6.91022    | 14.2439    | 1.04354     | 0.00134142 |
| PEAR1                  | 1.29795    | 0.734465   | -0.821468   | 0.0459324  |
| SNTA1                  | 14.4745    | 11.8514    | -0.288452   | 0.553489   |
| FLJ46361               | 0.00369262 | 0.00296401 | -0.317096   | 1          |
| TMEM132A               | 28.9986    | 45.9437    | 0.663883    | 0.0101293  |
| ZSCAN16                | 4.68238    | 3.77841    | -0.309462   | 0.638558   |
| PAN3                   | 3.33685    | 3.51098    | 0.0733858   | 0.965252   |
| C1orf56                | 3.54132    | 2.58882    | -0.451994   | 0.947247   |
| SNORA25                | 2.0921     | 4.55099    | 1.12123     | 0.907651   |
| HMGCL                  | 32.8781    | 13.2707    | -1.30888    | 0.00134142 |
| FEZ2                   | 104.967    | 83.5738    | -0.328811   | 0.344417   |
| LOC284801              | 0.0362412  | 0.0552467  | 0.608256    | 1          |
| KIF20A                 | 6.20544    | 7.29577    | 0.233526    | 0.872117   |
| MSANTD2                | 1.5052     | 2.75375    | 0.871444    | 0.0250278  |
| ZKSCAN2                | 1.11597    | 0.945731   | -0.238801   | 0.74929    |
| CCDC144C               | 0.00483507 | 0.00729946 | 0.594252    | 1          |
| SIRT3                  | 10.4596    | 6.13471    | -0.769762   | 0.624393   |
| LOC100144604           | 0.0304237  | 0.0163348  | -0.897248   | 1          |
| NBPF3                  | 4.8803     | 5.14633    | 0.0765748   | 0.961224   |
| CPLX3                  | 0.0687126  | 0.118365   | 0.784594    | 1          |
| FAM220A                | 6.06839    | 3.87132    | -0.648489   | 0.0474163  |
| AMZ2P1                 | 1.66426    | 0.88041    | -0.918631   | 0.0139368  |
| RGS9BP                 | 0.1748     | 0.157387   | -0.15139    | 1          |
| GPR83                  | 0.156215   | 0.163602   | 0.0666598   | 1          |
| LOC100289187           | 1.48705    | 1.47962    | -0.00722199 | 0.997342   |
| TNFAIP8                | 2.65947    | 1.93497    | -0.458826   | 0.344255   |
| NAB2                   | 33.1528    | 36.3907    | 0.134439    | 0.962922   |
| METTL23                | 20.6806    | 12.503     | -0.725998   | 0.0250278  |
| ZNF417                 | 0.306047   | 0.333555   | 0.124169    | 1          |
| UROS                   | 20.3533    | 27.6318    | 0.441064    | 0.170566   |
| ZNF630                 | 0.474129   | 0.229583   | -1.04627    | 0.0694871  |
| ZNF318                 | 2.05327    | 1.84935    | -0.150906   | 0.871957   |
| BBC3                   | 48.2229    | 16.519     | -1.54559    | 0.00134142 |
| RPS20                  | 3375.87    | 3580.64    | 0.0849565   | 0.95542    |
| ALOX5                  | 0.029653   | 0.0164615  | -0.84908    | 1          |
| UNK                    | 7.78443    | 6.11867    | -0.347373   | 0.465288   |
| TRMT5                  | 3.88876    | 4.61275    | 0.246315    | 0.623055   |
| RNF208                 | 47.291     | 49.0864    | 0.0537574   | 0.977332   |
| LINC00667              | 2.9106     | 3.15719    | 0.117324    | 0.925955   |
| SH3BP5-AS1             | 0.686034   | 0.564639   | -0.280951   | 0.928474   |

|              |            |            |            |            |
|--------------|------------|------------|------------|------------|
| HEBP1        | 59.8508    | 45.3692    | -0.399657  | 0.19894    |
| C15orf61     | 11.0859    | 10.4687    | -0.0826446 | 0.986822   |
| GUCD1        | 20.1039    | 26.0125    | 0.37173    | 0.254928   |
| ULBP3        | 2.31179    | 3.46704    | 0.584695   | 0.380775   |
| C16orf91     | 26.0279    | 54.2478    | 1.05951    | 0.00134142 |
| RPL8         | 10478.7    | 11971.4    | 0.192132   | 0.830817   |
| KLHL24       | 2.20269    | 0.641955   | -1.77872   | 0.00134142 |
| ASAP3        | 4.31586    | 4.33346    | 0.00587048 | 0.99714    |
| RPL22        | 306.838    | 316.299    | 0.0438117  | 0.98038    |
| ACOT1        | 2.70204    | 1.86079    | -0.538131  | 0.851762   |
| NOP9         | 1.98687    | 4.48448    | 1.17444    | 0.00243047 |
| EXD1         | 0.0132185  | 0.00907055 | -0.543299  | 1          |
| HLA-J        | 1.52511    | 0.945057   | -0.690441  | 0.573076   |
| KCNH3        | 0.60432    | 0.363917   | -0.731702  | 0.329464   |
| TPP1         | 33.5304    | 26.8572    | -0.32016   | 0.374678   |
| WWC3         | 0.0135808  | 0          | #NAME?     | 1          |
| RACGAP1P     | 0.00873045 | 0.00299457 | -1.54371   | 1          |
| TBC1D28      | 0.0331648  | 0.0338549  | 0.0297113  | 1          |
| SP6          | 2.27026    | 2.37527    | 0.0652291  | 0.977413   |
| ANKRD35      | 0.00522571 | 0.00448611 | -0.220161  | 1          |
| FLJ33360     | 0.0908706  | 0.0774949  | -0.229713  | 1          |
| HELZ2        | 2.56536    | 2.47607    | -0.0511085 | 0.979875   |
| EFNA2        | 3.97683    | 4.08757    | 0.039626   | 0.989089   |
| FLJ20021     | 2.99362    | 2.46828    | -0.278387  | 0.867828   |
| SLC16A4      | 0.109639   | 0.0864564  | -0.342711  | 1          |
| FBXW5        | 128.833    | 163.793    | 0.34637    | 0.315059   |
| ZNF236       | 0.637522   | 0.618871   | -0.0428363 | 0.987627   |
| ZNF224       | 0.0383631  | 0.0412644  | 0.105179   | 1          |
| SPG11        | 3.10523    | 1.6368     | -0.92382   | 0.241177   |
| ARID4B       | 1.13636    | 1.35301    | 0.251754   | 0.702182   |
| HEXA-AS1     | 0.0651346  | 0.0205285  | -1.66579   | 1          |
| CGRRF1       | 6.50039    | 4.87191    | -0.416039  | 0.358044   |
| RNF34        | 8.03374    | 11.401     | 0.505017   | 0.15127    |
| SDC4         | 52.0563    | 44.1792    | -0.236707  | 0.618232   |
| JDP2         | 6.64989    | 2.31971    | -1.51939   | 0.00134142 |
| JRK          | 6.73806    | 13.7746    | 1.0316     | 0.00134142 |
| LOC400027    | 5.49784    | 4.86411    | -0.17669   | 0.848508   |
| ALCAM        | 5.79201    | 6.70564    | 0.211309   | 0.71167    |
| SPG7         | 18.0447    | 24.0359    | 0.413619   | 0.193192   |
| ANXA6        | 44.5422    | 35.5724    | -0.324413  | 0.348909   |
| BAIAP2-AS1   | 2.53205    | 2.81456    | 0.152603   | 0.893663   |
| RAPGEFL1     | 2.36848    | 2.65944    | 0.167164   | 0.880739   |
| PRCP         | 33.7085    | 25.476     | -0.403974  | 0.192879   |
| KCTD12       | 1.45302    | 2.09764    | 0.529714   | 0.127726   |
| RGL2         | 22.4253    | 15.659     | -0.518133  | 0.0655915  |
| LOC100288637 | 0.954915   | 0.996292   | 0.0611961  | 0.979701   |
| RSBN1L-AS1   | 4.3069     | 6.538      | 0.602198   | 0.498268   |
| RNF166       | 14.5735    | 11.9086    | -0.291342  | 0.589722   |
| ZNF836       | 1.48231    | 0.474413   | -1.64364   | 0.00134142 |
| SUV420H1     | 4.81142    | 3.69867    | -0.379454  | 0.362623   |
| ADAM20P1     | 0.060927   | 0.057628   | -0.080311  | 1          |
| LGALS1       | 1947.57    | 2098.45    | 0.107651   | 0.920028   |
| BHLHA15      | 1.96413    | 3.15716    | 0.684737   | 0.476073   |
| BCKDHB       | 7.34253    | 6.08524    | -0.270962  | 0.678791   |
| ADC          | 3.15642    | 2.36133    | -0.418689  | 0.474762   |
| ABHD10       | 11.6144    | 8.13752    | -0.513256  | 0.0838642  |
| ZNF749       | 0.618907   | 0.858239   | 0.471656   | 0.465784   |
| ZNF197       | 2.51326    | 1.93247    | -0.379119  | 0.425127   |
| ZSCAN25      | 2.81081    | 3.13684    | 0.158326   | 0.875606   |
| BHLHE41      | 2.5195     | 2.31528    | -0.121949  | 0.932231   |
| LINC00612    | 0.022579   | 0.00922888 | -1.29076   | 1          |
| MGARP        | 0.243622   | 0.303988   | 0.319367   | 1          |
| ZNF275       | 2.7946     | 2.94162    | 0.0739734  | 0.965515   |
| DYNC2H1      | 0.792714   | 0.414375   | -0.935863  | 0.00243047 |
| DZIP1L       | 1.777      | 2.33389    | 0.393293   | 0.447323   |
| FAM19A2      | 0.00722209 | 0.00240816 | -1.58448   | 1          |
| TACR2        | 0.0142761  | 0.0212803  | 0.575924   | 1          |
| TUBB6        | 4.65802    | 3.41579    | -0.447499  | 0.387388   |
| BOLA3-AS1    | 3.65084    | 3.83071    | 0.0693811  | 0.990324   |
| PRRC2B       | 17.6349    | 18.0197    | 0.0311395  | 0.987627   |
| DLX4         | 0.688568   | 0.142282   | -2.27484   | 0.0126858  |
| OPN3         | 0.14039    | 0.13834    | -0.0212267 | 1          |
| EXOC8        | 1.94648    | 2.17803    | 0.162157   | 0.871926   |
| LAT          | 1.05877    | 1.87592    | 0.82521    | 0.144603   |
| TMCO6        | 8.06025    | 8.76904    | 0.121594   | 0.979701   |
| RPS27L       | 68.7002    | 96.7319    | 0.493677   | 0.0790043  |
| TPR          | 4.01217    | 4.49446    | 0.163764   | 0.907651   |
| RPL11        | 3907.13    | 4272.38    | 0.128934   | 0.902188   |
| LNP1         | 1.50429    | 1.30185    | -0.208514  | 0.990315   |

|                      |            |           |             |            |
|----------------------|------------|-----------|-------------|------------|
| ZNF438               | 1.10556    | 0.399419  | -1.4688     | 0.00134142 |
| TMEM50B              | 7.34662    | 9.67952   | 0.397855    | 0.756556   |
| BTNL9                | 2.51289    | 2.35752   | -0.0920781  | 0.959465   |
| PPAPDC2              | 3.94681    | 4.15747   | 0.0750181   | 0.967901   |
| ADAMTS16             | 0.00333514 | 0         | #NAME?      | 1          |
| CRIM1                | 8.3445     | 7.3504    | -0.183002   | 0.7741     |
| MBD6                 | 11.4167    | 8.93986   | -0.352822   | 0.845726   |
| UAP1L1               | 34.3416    | 27.5776   | -0.316462   | 0.388744   |
| WFIKKN1              | 0.179104   | 0.182716  | 0.0288007   | 1          |
| TBX3                 | 1.60076    | 2.546     | 0.669476    | 0.0592084  |
| C6orf226             | 10.8287    | 12.2369   | 0.176376    | 0.920028   |
| FBXO42               | 7.07021    | 6.34316   | -0.156549   | 0.857478   |
| FBXW4                | 18.3577    | 12.6444   | -0.537892   | 0.0671701  |
| POU5F1               | 0.0986768  | 0.0726979 | -0.440796   | 1          |
| RAB11FIP4            | 3.68533    | 2.51064   | -0.553738   | 0.117699   |
| ATP5S                | 4.86398    | 4.58093   | -0.0864978  | 0.966946   |
| TECTA                | 0.063453   | 0.0435763 | -0.542146   | 1          |
| GM2A                 | 10.6616    | 6.99029   | -0.609002   | 0.030994   |
| AHCYL2               | 2.11304    | 1.97681   | -0.0961521  | 0.952202   |
| HBE1                 | 134.755    | 174.591   | 0.373639    | 0.26122    |
| TARBP1               | 3.8139     | 3.0534    | -0.320851   | 0.474273   |
| PLD3                 | 45.616     | 33.0901   | -0.463137   | 0.220496   |
| PEX2                 | 7.30583    | 4.79825   | -0.606539   | 0.0227017  |
| AMY2B,RNPC3          | 2.81219    | 1.73896   | -0.693469   | 0.0780546  |
| LAGE3                | 16.8464    | 21.5959   | 0.358319    | 0.328659   |
| ZMYND15              | 1.42711    | 1.2997    | -0.13492    | 0.950929   |
| FGFR1OP2             | 6.72444    | 6.64779   | -0.0165395  | 0.996014   |
| SCN2B                | 0.00622466 | 0.0064324 | 0.0473605   | 1          |
| MED13                | 2.36637    | 2.06568   | -0.196062   | 0.762454   |
| COA3                 | 50.5254    | 80.9302   | 0.679669    | 0.00425224 |
| AGAP6                | 3.51698    | 5.14492   | 0.548809    | 0.119625   |
| GUSBP9,SMA5          | 0.587794   | 0.574952  | -0.0318692  | 0.995302   |
| LOC642236            | 0.229535   | 0.0638684 | -1.84554    | 1          |
| RHOV                 | 5.26568    | 9.43496   | 0.841396    | 0.0139368  |
| TAF1D                | 30.4062    | 21.3255   | -0.511785   | 0.0678232  |
| PDE5A                | 0.361613   | 0.21141   | -0.774405   | 0.273394   |
| GIT2                 | 6.32368    | 5.17362   | -0.289589   | 0.573731   |
| CADPS2               | 0.775579   | 0.78156   | 0.0110844   | 0.997036   |
| SLCO4A1              | 26.5536    | 40.5937   | 0.612347    | 0.0240561  |
| SPICE1               | 0.982792   | 0.652685  | -0.5905     | 0.159417   |
| SNHG7,SNORA17,SNORA4 | 386.828    | 358.912   | -0.108061   | 0.927627   |
| PLAC8L1              | 2.36937    | 4.09379   | 0.788932    | 0.123542   |
| FLJ22184             | 11.5863    | 5.67738   | -1.02913    | 0.00134142 |
| CLHC1                | 0.245181   | 0.193421  | -0.342103   | 1          |
| RASSF4               | 3.67027    | 2.25653   | -0.70178    | 0.0587985  |
| RBM5                 | 21.2106    | 16.8125   | -0.335252   | 0.342445   |
| CDK10                | 32.4017    | 38.3697   | 0.243897    | 0.754842   |
| MFSD3                | 45.1008    | 46.8869   | 0.0560297   | 0.976326   |
| MIF                  | 3298.36    | 4080.21   | 0.306896    | 0.436762   |
| FAM63A               | 5.03486    | 1.83023   | -1.45992    | 0.00134142 |
| ZDBF2                | 0.451543   | 0.383194  | -0.236789   | 0.792482   |
| SEPT1                | 0.911584   | 0.564639  | -0.691046   | 0.956382   |
| TP53INP2             | 6.36212    | 4.90865   | -0.374182   | 0.326591   |
| VPS39                | 7.40003    | 5.33801   | -0.471228   | 0.111587   |
| RPL41                | 12104.9    | 12960     | 0.0984672   | 0.950423   |
| ZNF169               | 0.640074   | 0.66978   | 0.0654467   | 0.982497   |
| GRTP1                | 9.93209    | 6.29865   | -0.657054   | 0.0645318  |
| C19orf55             | 1.27368    | 1.08383   | -0.232862   | 0.88211    |
| AMDHD1               | 0.343016   | 0.0999446 | -1.77908    | 1          |
| ST3GAL3              | 2.90953    | 1.54021   | -0.917659   | 0.0178668  |
| FZD8                 | 1.9753     | 2.38789   | 0.273664    | 0.771183   |
| TNRC6A               | 1.24179    | 1.49025   | 0.263132    | 0.650127   |
| FAM122A              | 2.64641    | 2.63726   | -0.00499719 | 0.997535   |
| TSGA10               | 0.096082   | 0.0807667 | -0.250505   | 1          |
| ANKRD33B             | 1.18268    | 1.23496   | 0.062406    | 0.977358   |
| DIO1                 | 0.0160708  | 0.0159832 | -0.00788422 | 1          |
| GPM6A                | 0.00465691 | 0.011372  | 1.28804     | 1          |
| ATP6V0A2             | 0.877108   | 1.31392   | 0.583049    | 0.118183   |
| AMPD2                | 32.0961    | 41.2478   | 0.36192     | 0.27885    |
| RBM12B               | 2.40149    | 3.36492   | 0.486642    | 0.136959   |
| OTUD3                | 1.5032     | 1.32749   | -0.179337   | 0.847596   |
| NRSN2                | 0.292006   | 0.0622206 | -2.23054    | 1          |
| TMEM14E              | 0.0352027  | 0.0175507 | -1.00416    | 1          |
| LOC100128338         | 8.94583    | 7.65949   | -0.223967   | 0.716614   |
| CDC42EP2             | 18.5197    | 43.7469   | 1.24012     | 0.00134142 |
| LOC541471            | 347.716    | 350.117   | 0.00993055  | 0.996079   |
| FLJ38576             | 0.0638113  | 0.104794  | 0.715668    | 1          |
| SCARNA5              | 0.994107   | 1.19824   | 0.269447    | 0.990857   |
| R3HCC1               | 43.7796    | 37.4086   | -0.226891   | 0.656747   |

|              |            |            |            |            |
|--------------|------------|------------|------------|------------|
| ANKRD10      | 8.84635    | 11.1376    | 0.332291   | 0.422156   |
| FBXL4        | 3.06157    | 1.78823    | -0.775739  | 0.0183825  |
| FBNP4        | 7.7415     | 9.55215    | 0.303213   | 0.44093    |
| INO80D       | 0.488519   | 0.441089   | -0.147346  | 0.907949   |
| ACAD11,NPHP3 | 7.31088    | 4.36155    | -0.745205  | 0.211699   |
| AKR7A2       | 33.8969    | 28.6478    | -0.242728  | 0.606735   |
| FLJ25758     | 0.0565664  | 0.00817286 | -2.79103   | 1          |
| ERVK13-1     | 0.807534   | 1.46208    | 0.856426   | 0.00882987 |
| MDM2         | 11.6119    | 11.8727    | 0.0320454  | 0.986822   |
| TJP2         | 3.75293    | 2.0506     | -0.871972  | 0.00243047 |
| LOC115110    | 1.05479    | 0.266714   | -1.98359   | 0.00672555 |
| LOC100507250 | 0.241066   | 0.0537445  | -2.16524   | 1          |
| ENC1         | 11.0749    | 12.2791    | 0.148902   | 0.850795   |
| STK16        | 10.1591    | 7.95585    | -0.352687  | 0.903126   |
| ZNF354A      | 5.44689    | 4.61277    | -0.239799  | 0.689101   |
| LOC284385    | 1.95654    | 1.21865    | -0.683018  | 0.150383   |
| ZNF776       | 1.22101    | 0.888435   | -0.458741  | 0.293045   |
| MT1F         | 81.8874    | 66.5739    | -0.298686  | 0.559634   |
| SNORA33      | 7.86571    | 9.23438    | 0.231438   | 0.991767   |
| HLA-DMB      | 0.011401   | 0.00766793 | -0.572254  | 1          |
| PHLDB3       | 8.80063    | 8.26291    | -0.0909568 | 0.956807   |
| LGALS9       | 0.156037   | 0.204176   | 0.387928   | 1          |
| MTERFD3      | 3.41562    | 4.30132    | 0.332631   | 0.542506   |
| RAB20        | 21.3708    | 18.2166    | -0.230384  | 0.714085   |
| KCTD2        | 6.69158    | 10.6338    | 0.668242   | 0.0120701  |
| TBL1XR1      | 14.4589    | 12.4562    | -0.215085  | 0.676575   |
| KCNC4        | 3.3103     | 5.32919    | 0.686955   | 0.0414844  |
| RNF223       | 0.266511   | 0.139553   | -0.933379  | 1          |
| HOXB2        | 19.2654    | 29.9341    | 0.635779   | 0.0314167  |
| GMPR2        | 34.3075    | 29.5412    | -0.215793  | 0.681208   |
| THBS4        | 0.21883    | 0.0677307  | -1.69193   | 1          |
| CACNB4       | 0.451086   | 0.306617   | -0.556964  | 0.256338   |
| UTS2D        | 0.0228808  | 0.0038145  | -2.58457   | 1          |
| FGFR2        | 0.72589    | 0.652807   | -0.153094  | 0.931161   |
| TTPAL        | 3.22984    | 4.13064    | 0.354905   | 0.342317   |
| SYNGR3       | 8.00237    | 4.56576    | -0.809572  | 0.021138   |
| C16orf54     | 0.00715589 | 0          | #NAME?     | 1          |
| BBS5         | 0.557816   | 0.923097   | 0.726693   | 0.199892   |
| MAGEB2       | 0.0466709  | 0.0424389  | -0.137136  | 1          |
| RNASET2      | 50.6062    | 39.4675    | -0.35865   | 0.29889    |
| RAP1GAP      | 3.43753    | 2.99537    | -0.19864   | 0.831185   |
| ZNF37BP      | 1.52889    | 2.76857    | 0.856657   | 0.00134142 |
| ASAP2        | 2.72054    | 1.50163    | -0.857369  | 0.00425224 |
| HS1BP3       | 18.5274    | 8.27482    | -1.16286   | 0.00134142 |
| ZIC2         | 4.91294    | 5.53375    | 0.17167    | 0.869885   |
| NXN          | 9.00974    | 4.11402    | -1.13094   | 0.00134142 |
| LZTS2        | 48.8824    | 51.376     | 0.0717791  | 0.959465   |
| TBCEL        | 1.27944    | 0.9393     | -0.44585   | 0.360993   |
| COX8C        | 0.1016     | 0.0678833  | -0.581766  | 1          |
| ETAA1        | 2.32986    | 2.22089    | -0.0691085 | 0.972989   |
| CEP95        | 6.09827    | 4.69973    | -0.375823  | 0.32997    |
| NT5M         | 7.82266    | 6.09307    | -0.360489  | 0.534568   |
| PMS2P5       | 2.63362    | 1.9947     | -0.400875  | 0.624818   |
| CCNJ         | 3.13579    | 5.2948     | 0.755748   | 0.0803445  |
| ZNF180       | 2.16313    | 2.33729    | 0.111715   | 0.938811   |
| C6orf48      | 289.517    | 225.608    | -0.359826  | 0.289756   |
| NEK2         | 9.48079    | 6.67109    | -0.507084  | 0.115606   |
| PRKCDBP      | 20.7125    | 12.3882    | -0.741531  | 0.0419471  |
| PDP1         | 5.52695    | 2.70875    | -1.02885   | 0.00134142 |
| STAM2        | 1.58299    | 1.12687    | -0.490337  | 0.193761   |
| LOC100294145 | 2.22058    | 2.289      | 0.0437858  | 0.984917   |
| ORAI3        | 14.4744    | 4.45251    | -1.70081   | 0.00134142 |
| PDK3         | 5.52473    | 3.19559    | -0.789822  | 0.13237    |
| FAM129B      | 93.6866    | 149.133    | 0.670684   | 0.00882987 |
| PHKG2        | 7.21077    | 10.7288    | 0.573257   | 0.666069   |
| UHMK1        | 8.90017    | 8.05448    | -0.144041  | 0.851389   |
| SNORA78      | 3.66668    | 2.53023    | -0.535205  | 1          |
| NAAA         | 8.81112    | 8.68528    | -0.0207526 | 0.993379   |
| SLC24A1      | 0.93656    | 0.449653   | -1.05856   | 0.0183825  |
| CCNL2        | 25.5169    | 35.6997    | 0.484459   | 0.100126   |
| ZSCAN31      | 0.978389   | 0.490324   | -0.996673  | 0.0288382  |
| LOC100132352 | 4.61456    | 3.78338    | -0.28652   | 0.709367   |
| ARSD         | 4.08758    | 2.00559    | -1.02722   | 0.00134142 |
| SKIL         | 0.996183   | 0.605439   | -0.718431  | 0.0467709  |
| FAM172A      | 1.94007    | 1.05154    | -0.8836    | 0.192415   |
| CACNG7       | 0.613324   | 0.14943    | -2.03718   | 0.0394523  |
| ZNF761       | 2.57052    | 3.9738     | 0.628457   | 0.0467709  |
| MSL2         | 4.19103    | 3.82919    | -0.130267  | 0.902188   |
| REST         | 3.36689    | 3.26624    | -0.0437844 | 0.979875   |

|                         |            |            |            |            |
|-------------------------|------------|------------|------------|------------|
| PNRC1                   | 25.107     | 16.3791    | -0.616234  | 0.0235476  |
| N4BP2L2                 | 12.3503    | 12.4703    | 0.0139451  | 0.995528   |
| RILP                    | 18.681     | 14.9136    | -0.324943  | 0.48841    |
| UCA1                    | 6.49974    | 4.44943    | -0.546761  | 0.119771   |
| IQSEC1                  | 5.50692    | 8.13283    | 0.562511   | 0.0489893  |
| MSL1                    | 5.75595    | 8.08243    | 0.489734   | 0.109152   |
| FKTN                    | 3.32729    | 4.08047    | 0.294389   | 0.653974   |
| PODXL                   | 19.8466    | 16.4748    | -0.268625  | 0.536951   |
| PYGL                    | 40.3928    | 32.1437    | -0.329563  | 0.346372   |
| LOC100131096            | 0.891265   | 0.791822   | -0.170679  | 0.969963   |
| SNX21                   | 9.15886    | 7.96583    | -0.201344  | 0.833863   |
| HOXB9                   | 20.7023    | 17.061     | -0.279091  | 0.507105   |
| RAPGEF6                 | 0.954807   | 1.05106    | 0.138567   | 0.911779   |
| LOC158435               | 0.00621425 | 0.00985783 | 0.665689   | 1          |
| MASP2                   | 0.195942   | 0.129826   | -0.593855  | 1          |
| SLC5A10                 | 0.498936   | 0.381645   | -0.386623  | 0.957206   |
| PLIN2                   | 34.8175    | 21.122     | -0.721068  | 0.00134142 |
| MKLN1                   | 4.68002    | 3.60773    | -0.375424  | 0.245934   |
| PCYT2                   | 12.1177    | 12.0012    | -0.0139365 | 0.994615   |
| MAPT                    | 0.00937651 | 0.0191717  | 1.03185    | 1          |
| DNAL1                   | 0.483301   | 0.735133   | 0.605085   | 0.123604   |
| PARD6B                  | 1.76672    | 1.34415    | -0.394376  | 0.408463   |
| ZNF678                  | 0.41375    | 0.369527   | -0.163082  | 0.909179   |
| FKBP10                  | 108.535    | 96.8863    | -0.163793  | 0.81342    |
| BCL7A                   | 7.24532    | 7.21616    | -0.005819  | 0.99714    |
| ATP2B3                  | 0.00282173 | 0          | #NAME?     | 1          |
| TSPAN31                 | 6.61154    | 3.83577    | -0.78547   | 0.8586     |
| EIF3E                   | 637.002    | 591.92     | -0.105894  | 0.927627   |
| ZFAT-AS1                | 0.0932804  | 0.0305668  | -1.60961   | 1          |
| SPATA24                 | 1.6266     | 1.21029    | -0.426512  | 0.724424   |
| SMAD3                   | 4.33704    | 5.0805     | 0.22826    | 0.674625   |
| TMEM230                 | 54.8275    | 50.3437    | -0.123088  | 0.887208   |
| LOC100289495            | 0.225496   | 0.0784061  | -1.52406   | 1          |
| MYOZ1                   | 0.0107557  | 0.00728499 | -0.562096  | 1          |
| NKAP                    | 16.0841    | 11.3975    | -0.496925  | 0.123604   |
| NEIL1                   | 8.12418    | 7.30234    | -0.153864  | 0.903682   |
| LHPP                    | 9.54249    | 8.46696    | -0.172522  | 0.864691   |
| LINC00163               | 0.0108263  | 0.0649348  | 2.58445    | 1          |
| STX2                    | 3.68754    | 5.1648     | 0.486053   | 0.154481   |
| ACOX3                   | 4.60513    | 4.90836    | 0.0919981  | 0.956807   |
| PHF23                   | 15.4014    | 40.721     | 1.40271    | 0.00134142 |
| C11orf1                 | 17.0671    | 12.186     | -0.485986  | 0.277325   |
| GRIP1                   | 0.303415   | 0.382626   | 0.334643   | 0.72731    |
| RALGAPA2                | 1.06208    | 0.900016   | -0.238876  | 0.737796   |
| FAM219B                 | 7.89341    | 9.25273    | 0.22923    | 0.684576   |
| LGALS1                  | 5.23489    | 5.8065     | 0.14951    | 0.862445   |
| NGLY1                   | 15.7108    | 11.1612    | -0.493263  | 0.0909525  |
| RPL14                   | 2751.16    | 2986.97    | 0.118643   | 0.918153   |
| ANKRD49                 | 5.04752    | 4.17081    | -0.275247  | 0.645533   |
| TCIRG1                  | 33.8867    | 29.0513    | -0.222116  | 0.689101   |
| OSBPL8                  | 3.13265    | 3.4799     | 0.151662   | 0.852163   |
| CEP89                   | 2.08282    | 1.91415    | -0.121835  | 0.938194   |
| SNHG5                   | 1157.08    | 1183.41    | 0.0324556  | 0.986822   |
| LOC100133331            | 0.658678   | 0.583918   | -0.173807  | 0.934181   |
| FZD4                    | 0.751366   | 1.14192    | 0.603871   | 0.10637    |
| TNFAIP8L1               | 5.72291    | 5.58605    | -0.0349186 | 0.987627   |
| MSH4                    | 0.493963   | 0.278102   | -0.828791  | 0.128584   |
| HEATR6                  | 3.00081    | 2.75786    | -0.121802  | 0.926446   |
| RARRES3                 | 0.0479795  | 0          | #NAME?     | 1          |
| CNTNAP1                 | 6.55652    | 4.66468    | -0.491153  | 0.112365   |
| PKIG                    | 22.9198    | 15.6601    | -0.549498  | 0.0924793  |
| RCOR2                   | 11.9265    | 7.6785     | -0.635271  | 0.0394523  |
| ABHD16B                 | 10.9225    | 35.2848    | 1.69174    | 0.00134142 |
| ZMYM6NB                 | 31.1049    | 17.2573    | -0.849934  | 0.00243047 |
| ABCB6                   | 9.50441    | 11.8712    | 0.320799   | 0.457989   |
| SH3BGRL                 | 16.0638    | 13.6732    | -0.232459  | 0.724741   |
| CMC4,MTCP1              | 12.7552    | 10.4183    | -0.291964  | 0.666392   |
| TANC2                   | 1.56863    | 1.01907    | -0.622248  | 0.0470437  |
| CTAGE15P                | 0.14932    | 0.106766   | -0.483956  | 1          |
| BCL2L13                 | 4.41487    | 2.70033    | -0.709236  | 0.009453   |
| LINC00336               | 0.0154073  | 0.00552037 | -1.48078   | 1          |
| ONECUT2                 | 0.319633   | 0.358219   | 0.164426   | 0.893663   |
| FGFR3                   | 4.05061    | 6.53115    | 0.689198   | 0.0222212  |
| ZNF177,ZNF559,ZNF559-Z1 | 2.44158    | 2.12198    | -0.202403  | 0.830321   |
| RFTN2                   | 0.0283279  | 0.0468847  | 0.726893   | 1          |
| GDI1                    | 44.4713    | 49.2188    | 0.146337   | 0.84262    |
| FBXO27                  | 0.094874   | 0.0321444  | -1.56145   | 1          |
| RPS7                    | 3952.03    | 4324.87    | 0.130061   | 0.904734   |
| ATG16L2                 | 16.0385    | 12.4117    | -0.369836  | 0.330372   |

|              |           |           |            |            |
|--------------|-----------|-----------|------------|------------|
| GBAS         | 22.8302   | 18.4339   | -0.308584  | 0.41836    |
| NDRG3        | 5.57029   | 5.33969   | -0.0609949 | 0.9755     |
| ZDHH8        | 9.76165   | 16.1252   | 0.724122   | 0.00337323 |
| TMEM151A     | 0.0251843 | 0         | #NAME?     | 1          |
| STK17A       | 5.55135   | 9.42884   | 0.764242   | 0.00134142 |
| MEIS3        | 58.0366   | 44.6616   | -0.377929  | 0.240573   |
| PLXNB2       | 21.181    | 20.4424   | -0.0512031 | 0.977103   |
| SOCS5        | 1.41466   | 1.54394   | 0.126159   | 0.931471   |
| H1FX-AS1     | 0.475999  | 0.412002  | -0.208307  | 0.992797   |
| SAMD4A       | 2.59399   | 2.36742   | -0.131855  | 0.907689   |
| CLCN6        | 2.37704   | 2.43475   | 0.0346079  | 0.992797   |
| NARF         | 74.4959   | 55.4493   | -0.425993  | 0.156839   |
| RNF146       | 5.93152   | 3.54613   | -0.742158  | 0.0156972  |
| ZFP62        | 2.00285   | 1.70043   | -0.236159  | 0.731049   |
| DOCK6        | 10.3885   | 7.59927   | -0.451059  | 0.128873   |
| FEZF1-AS1    | 2.37052   | 1.189     | -0.995458  | 0.0227017  |
| MARCH2       | 12.6516   | 11.9314   | -0.0845515 | 0.960314   |
| SAYSD1       | 3.78048   | 5.17404   | 0.452723   | 0.289756   |
| PPIAP30      | 0.0883245 | 0.0416542 | -1.08435   | 1          |
| CUBN         | 0.446689  | 0.273762  | -0.706347  | 0.0792619  |
| TESK2        | 2.17227   | 1.08703   | -0.99881   | 0.488269   |
| TRNP1        | 13.0443   | 15.7025   | 0.267579   | 0.605597   |
| ERC2         | 22.3124   | 19.2187   | -0.215335  | 0.833863   |
| FAN1         | 2.93807   | 4.06595   | 0.468726   | 0.302091   |
| RPL7         | 6137.91   | 6437.94   | 0.068851   | 0.973735   |
| NR1H2        | 33.6034   | 38.7153   | 0.204295   | 0.725129   |
| HOXA11       | 5.15751   | 10.4976   | 1.02531    | 0.00134142 |
| CCDC175      | 0.362296  | 0.502239  | 0.471203   | 0.945052   |
| PELL1        | 1.65004   | 1.20467   | -0.453858  | 0.341373   |
| STX1A        | 16.5999   | 18.4993   | 0.156297   | 0.852163   |
| FAM217B      | 1.80387   | 1.91743   | 0.0880734  | 0.967901   |
| C20orf118    | 0.0318592 | 0.0537831 | 0.755444   | 1          |
| ZKSCAN3      | 0.748916  | 1.01569   | 0.439579   | 0.430709   |
| LRR8E        | 13.857    | 15.5715   | 0.168302   | 0.809695   |
| NUCB1        | 97.0018   | 86.764    | -0.160914  | 0.821557   |
| IRAK2        | 1.04725   | 1.13831   | 0.12028    | 0.95467    |
| CD247        | 0.0107578 | 0         | #NAME?     | 1          |
| CDKN1C       | 11.0233   | 4.48881   | -1.29616   | 0.00134142 |
| DICER1       | 1.50003   | 1.99865   | 0.414039   | 0.2318     |
| APOM         | 3.12529   | 2.44223   | -0.355793  | 0.984967   |
| SCAND2P      | 2.19491   | 3.00407   | 0.452759   | 0.255176   |
| SEMA3F       | 4.77865   | 5.48547   | 0.199013   | 0.806993   |
| VPS36        | 3.74166   | 3.92795   | 0.0700966  | 0.966946   |
| PACS2        | 8.95392   | 9.00822   | 0.00872372 | 0.997342   |
| MYL5         | 5.62499   | 7.43787   | 0.403038   | 0.563459   |
| RPL23        | 4155.96   | 4796.12   | 0.206687   | 0.738368   |
| TSPYL2       | 11.6978   | 10.2116   | -0.196021  | 0.752981   |
| DNAJB1       | 71.3101   | 172.497   | 1.27439    | 0.00134142 |
| GDPD5        | 7.70044   | 8.92571   | 0.213026   | 0.739919   |
| ZNF517       | 5.74117   | 3.88119   | -0.564847  | 0.1718     |
| ZNF3         | 16.3067   | 17.4024   | 0.0938262  | 0.950929   |
| PNISR        | 5.68361   | 5.5918    | -0.0234961 | 0.991767   |
| POLL         | 20.324    | 11.142    | -0.867179  | 0.00134142 |
| LOC283177    | 0.0205289 | 0.0104986 | -0.967452  | 1          |
| KLHL9        | 6.3332    | 7.33746   | 0.212347   | 0.700075   |
| ACTRT3       | 1.18696   | 1.39282   | 0.230738   | 0.85843    |
| LOC728743    | 0.829242  | 0.521457  | -0.669246  | 0.296574   |
| LOC100507634 | 0.552854  | 0.60767   | 0.136391   | 0.965735   |
| CAPRIN2      | 18.0381   | 20.3455   | 0.173662   | 0.799908   |
| SAMD10       | 3.25497   | 4.84604   | 0.574163   | 0.181132   |
| HES4         | 72.5911   | 190.9     | 1.39495    | 0.00134142 |
| KLHL35       | 12.3379   | 9.92072   | -0.314576  | 0.587886   |
| ARHGEF33     | 0.0194364 | 0.020854  | 0.101564   | 1          |
| FRAT1        | 3.6364    | 2.16089   | -0.750886  | 0.0755921  |
| LOC254100    | 0.682614  | 0.674121  | -0.0180627 | 0.997036   |
| CRYBG3       | 0.255179  | 0.233002  | -0.131165  | 1          |
| MAPK8IP3     | 8.0629    | 9.72579   | 0.270517   | 0.572896   |
| SLC25A21     | 0.831942  | 0.99229   | 0.254279   | 0.833863   |
| FLJ14186     | 1.67821   | 1.11713   | -0.587131  | 0.20932    |
| CXorf31      | 0.121148  | 0.020864  | -2.53768   | 1          |
| C5orf24      | 4.55579   | 5.04376   | 0.1468     | 0.860362   |
| CTIF         | 9.62586   | 6.84928   | -0.490963  | 0.0972878  |
| ZNF578       | 1.36327   | 1.82575   | 0.421417   | 0.284421   |
| CEP350       | 1.08106   | 0.819707  | -0.399271  | 0.286255   |
| ATP2B4       | 1.59445   | 1.50866   | -0.0797915 | 0.961      |
| BCKDHA       | 97.0877   | 69.5817   | -0.480581  | 0.0780546  |
| CDKN2B       | 2.69432   | 6.8959    | 1.35582    | 0.00134142 |
| PKM          | 1202.82   | 1301.5    | 0.11375    | 0.926423   |
| ZNF189       | 4.86365   | 4.91898   | 0.0163217  | 0.993916   |

|               |            |            |            |            |
|---------------|------------|------------|------------|------------|
| DOM3Z         | 9.65863    | 11.5901    | 0.263001   | 0.7433     |
| ALKBH4        | 10.7776    | 17.9123    | 0.732909   | 0.16323    |
| CDCA3         | 25.2965    | 36.5896    | 0.532497   | 0.0743087  |
| LRRRC37A6P    | 0.00405593 | 0          | #NAME?     | 1          |
| PPARA         | 0.998911   | 0.952891   | -0.0680452 | 0.974631   |
| BEGAIN        | 3.32281    | 5.62086    | 0.758387   | 0.0485415  |
| FAU           | 1857.55    | 2388.71    | 0.362829   | 0.373076   |
| ZNF48         | 10.3285    | 14.0478    | 0.443715   | 0.162786   |
| C4orf52       | 28.4811    | 16.3743    | -0.798577  | 0.00243047 |
| SIRT5         | 3.94367    | 2.20865    | -0.836373  | 0.0101293  |
| ZNF449        | 0.53731    | 0.294576   | -0.867115  | 0.0732879  |
| RP9P          | 8.06702    | 12.4549    | 0.626604   | 0.0507992  |
| SNORA26       | 17.164     | 12.6265    | -0.442924  | 0.98468    |
| GAB3          | 0.00823231 | 0.0017043  | -2.27212   | 1          |
| CHD2          | 5.90957    | 3.87562    | -0.608627  | 0.0447795  |
| CASD1         | 3.38239    | 4.03534    | 0.254648   | 0.650401   |
| COX7A2L       | 103.188    | 83.1942    | -0.310719  | 0.406031   |
| PLEKHH1       | 1.78284    | 0.935671   | -0.930105  | 0.20203    |
| C2orf73       | 0.0058918  | 0          | #NAME?     | 1          |
| KLK6          | 0.0126391  | 0.00861736 | -0.552577  | 1          |
| SLC52A3       | 0.00796187 | 0.00652719 | -0.286646  | 1          |
| IL22RA1       | 0.61537    | 0.239258   | -1.36288   | 0.0349222  |
| LINC00485     | 0.00340401 | 0.00281661 | -0.273278  | 1          |
| USPL1         | 2.76132    | 3.76647    | 0.447855   | 0.195657   |
| LOC100506710  | 6.13772    | 6.83436    | 0.155105   | 0.844123   |
| RPLP2         | 6453.41    | 7489.19    | 0.214747   | 0.728031   |
| DSTYK         | 1.60676    | 1.73097    | 0.107422   | 0.934345   |
| RHOD          | 64.1659    | 67.923     | 0.0820924  | 0.953738   |
| RAD9A         | 5.45577    | 8.16044    | 0.580865   | 0.926258   |
| PQLC3         | 7.55011    | 4.95379    | -0.607965  | 0.0755921  |
| SIX4          | 1.69237    | 2.46696    | 0.543691   | 0.0925999  |
| GEMIN8        | 6.37159    | 3.53848    | -0.848526  | 0.00134142 |
| UBE3B         | 5.9976     | 5.41027    | -0.148683  | 0.913628   |
| SERTAD4-AS1   | 4.19932    | 1.79919    | -1.22281   | 0.0403066  |
| CCN12         | 0.0158123  | 0.00649676 | -1.28326   | 1          |
| RUNX2         | 1.54868    | 1.30692    | -0.244867  | 0.887112   |
| LOC645249     | 13.5422    | 15.2624    | 0.172515   | 0.876892   |
| UBA2          | 20.3541    | 16.1837    | -0.330777  | 0.340063   |
| NRP1          | 1.07725    | 0.927071   | -0.216598  | 0.898772   |
| ABTB1         | 16.3144    | 5.54371    | -1.55722   | 0.00134142 |
| SVIP          | 6.59306    | 7.1705     | 0.121125   | 0.926007   |
| RBBP6         | 7.00547    | 6.1271     | -0.193278  | 0.90907    |
| IQSEC2        | 7.22819    | 5.40534    | -0.419248  | 0.5154     |
| LANCL1        | 4.31144    | 3.38057    | -0.350901  | 0.394061   |
| SERTAD3       | 14.9604    | 27.4177    | 0.873955   | 0.00134142 |
| FAM90A1       | 0.492703   | 0.428689   | -0.200786  | 0.935187   |
| RRNAD1        | 12.3513    | 5.65735    | -1.12646   | 0.00134142 |
| FRS2          | 1.80761    | 1.72689    | -0.0659059 | 0.972111   |
| MIPOL1        | 0.270334   | 0.185939   | -0.539916  | 1          |
| FJX1          | 26.0813    | 46.3873    | 0.830714   | 0.00134142 |
| METTL20       | 0.300017   | 0.15969    | -0.909771  | 1          |
| HKR1          | 6.33105    | 7.54531    | 0.253136   | 0.629966   |
| REL           | 0.134479   | 0.136854   | 0.025249   | 1          |
| C16orf13      | 150.273    | 164.135    | 0.127296   | 0.895818   |
| NBPF15,NBPF16 | 5.57294    | 6.91089    | 0.310434   | 0.44885    |
| TRIM68        | 0.94454    | 0.739019   | -0.354     | 0.664058   |
| MCM9          | 0.797355   | 1.02559    | 0.363164   | 0.855981   |
| POLD4         | 23.5926    | 13.8295    | -0.770583  | 0.0162707  |
| GRIK1-AS2     | 0.105518   | 0.0874475  | -0.270993  | 1          |
| MFSD6         | 1.67526    | 1.82749    | 0.125481   | 0.925955   |
| LOC149134     | 1.17577    | 1.28779    | 0.131298   | 0.966946   |
| ZNF92         | 1.61552    | 1.42157    | -0.184514  | 0.868469   |
| MEST          | 12.0157    | 13.0182    | 0.115607   | 0.943861   |
| CASZ1         | 1.81851    | 2.68001    | 0.559483   | 0.175815   |
| HMOX1         | 45.9458    | 50.516     | 0.136808   | 0.869898   |
| PEX6          | 6.34454    | 5.04292    | -0.331255  | 0.48332    |
| INCA1         | 0.559023   | 0.501184   | -0.157567  | 0.962439   |
| GNA11         | 7.46565    | 10.0728    | 0.432133   | 0.344674   |
| RBMS2         | 7.01012    | 4.13341    | -0.762106  | 0.129356   |
| CEP72         | 6.33113    | 4.99784    | -0.341157  | 0.493853   |
| NPAS1         | 1.88294    | 0.632102   | -1.57475   | 0.010797   |
| ZNF445        | 1.02464    | 1.11532    | 0.122345   | 0.923433   |
| PTRHD1        | 47.1409    | 64.9228    | 0.461746   | 0.778897   |
| GTF2IRD2      | 0.0885818  | 0.0460981  | -0.942303  | 1          |
| SPTY2D1-AS1   | 0.0378864  | 0.0889623  | 1.23151    | 1          |
| ZFFM1         | 2.1497     | 1.72035    | -0.321431  | 0.759915   |
| ZNF746        | 10.8895    | 14.0029    | 0.362784   | 0.298586   |
| MAGI3         | 0.405696   | 0.419702   | 0.0489634  | 0.986822   |
| C12orf75      | 23.4253    | 32.6194    | 0.477664   | 0.0941664  |

|              |            |           |            |            |
|--------------|------------|-----------|------------|------------|
| PDCD6IP      | 14.5584    | 12.4376   | -0.227136  | 0.637514   |
| COQ10A       | 11.8425    | 10.1555   | -0.22171   | 0.739919   |
| ATF2         | 3.99989    | 3.9344    | -0.0238156 | 0.991459   |
| XRRA1        | 9.01196    | 5.9817    | -0.591285  | 0.0451064  |
| CINP         | 23.8518    | 28.2196   | 0.242595   | 0.654699   |
| KLHL17       | 13.9956    | 23.7848   | 0.765072   | 0.00509212 |
| VWA5A        | 3.19098    | 1.96991   | -0.695872  | 0.049309   |
| AHDC1        | 1.35552    | 2.26931   | 0.743402   | 0.0419471  |
| QARS         | 84.828     | 79.6531   | -0.0908093 | 0.938194   |
| ACOT8        | 16.6278    | 14.8108   | -0.166946  | 0.935723   |
| LOC100289511 | 0.0574599  | 0.0832111 | 0.534221   | 1          |
| RGS5         | 0.36888    | 0.256334  | -0.525123  | 0.675553   |
| TCP11        | 0.0348476  | 0.0180145 | -0.951903  | 1          |
| TRIM32       | 7.25681    | 8.17809   | 0.172428   | 0.823379   |
| RASAL2       | 0.728345   | 0.757093  | 0.0558482  | 0.979701   |
| JAK2         | 0.328976   | 0.273665  | -0.265571  | 1          |
| RAD50        | 2.56709    | 1.64877   | -0.638742  | 0.0306129  |
| RUNC1        | 4.712      | 6.95106   | 0.560892   | 0.0710419  |
| STAT5B       | 7.12095    | 4.50706   | -0.659884  | 0.0172978  |
| ZSWIM8-AS1   | 2.78068    | 2.26556   | -0.29557   | 0.944538   |
| CDT1         | 67.7525    | 34.0149   | -0.994105  | 0.00134142 |
| SNORD15B     | 15.7264    | 17.5363   | 0.157155   | 0.992939   |
| ERMPI        | 4.10875    | 2.34925   | -0.806499  | 0.00509212 |
| RPP14        | 5.40774    | 6.94493   | 0.360934   | 0.356572   |
| ZXDB         | 3.74702    | 2.78073   | -0.43028   | 0.226083   |
| SDCCAG3      | 98.1803    | 86.7755   | -0.178146  | 0.778996   |
| ANG,RNASE4   | 22.6399    | 7.07998   | -1.67705   | 0.00134142 |
| LATS1        | 1.9898     | 1.48803   | -0.419217  | 0.393354   |
| TLCD1        | 11.807     | 13.4317   | 0.186007   | 0.988714   |
| IL6ST        | 2.3049     | 2.875     | 0.318859   | 0.40651    |
| CEBPD        | 28.7856    | 40.0663   | 0.477039   | 0.190811   |
| MCC          | 0.0288242  | 0.0258716 | -0.155914  | 1          |
| MVP,PAGR1    | 23.4084    | 33.4562   | 0.515251   | 0.0562227  |
| SYT2         | 0.0124148  | 0.0205423 | 0.726533   | 1          |
| KRTAP5-6     | 0.0521664  | 0         | #NAME?     | 1          |
| ANXA4        | 17.5144    | 11.819    | -0.567443  | 0.0459324  |
| BBS10        | 2.01951    | 1.64134   | -0.29913   | 0.623055   |
| IMMP2L       | 11.2022    | 5.5994    | -1.00044   | 0.00243047 |
| KLF3         | 2.79026    | 2.0318    | -0.457642  | 0.184926   |
| LOC100505624 | 0.0591404  | 0.0124051 | -2.25321   | 1          |
| TAOK1        | 3.13657    | 2.71068   | -0.210531  | 0.700253   |
| CCNJL        | 6.05691    | 6.37943   | 0.074844   | 0.963799   |
| TCFL5        | 6.31778    | 4.93002   | -0.357825  | 0.719483   |
| KIAA1147     | 3.3095     | 2.86488   | -0.208136  | 0.730089   |
| AJUBA        | 11.4316    | 8.57998   | -0.413978  | 0.192415   |
| KRTAP5-7     | 0.026021   | 0.0564151 | 1.1164     | 1          |
| TOX2         | 10.4725    | 3.78667   | -1.4676    | 0.00134142 |
| LYSMD1       | 1.78963    | 1.86305   | 0.0579999  | 0.991767   |
| LOC285074    | 11.3893    | 11.0185   | -0.0477465 | 0.979701   |
| ZNF324       | 4.26326    | 5.97138   | 0.486109   | 0.205335   |
| DGAT1        | 28.7681    | 49.0362   | 0.769377   | 0.195403   |
| EPB49        | 18.0878    | 13.6017   | -0.41123   | 0.238699   |
| TEP1         | 0.976522   | 0.72302   | -0.433617  | 0.315759   |
| ACAD10       | 1.9739     | 1.3444    | -0.554083  | 0.184926   |
| NOMO2        | 0.76626    | 0.713509  | -0.102902  | 0.965607   |
| POGK         | 12.2428    | 16.1436   | 0.399037   | 0.190295   |
| FMNL1        | 0.0117259  | 0.0176087 | 0.586592   | 1          |
| ITFG2        | 3.38511    | 3.48564   | 0.0422232  | 0.987334   |
| HPS4         | 5.73519    | 3.19277   | -0.845034  | 0.00243047 |
| LRRC37B      | 1.73237    | 1.02405   | -0.758455  | 0.0983149  |
| BRK1         | 78.1981    | 80.129    | 0.0351918  | 0.985325   |
| SLC25A36     | 13.0088    | 8.67329   | -0.58484   | 0.021138   |
| SH3BP5       | 5.96889    | 6.5033    | 0.123711   | 0.918983   |
| CEBPA        | 21.602     | 30.9533   | 0.518929   | 0.0749662  |
| FAAH         | 8.22413    | 8.14381   | -0.0141593 | 0.995709   |
| TUBGCP6      | 5.27729    | 5.40713   | 0.0350658  | 0.987334   |
| TTLL6        | 0.0327419  | 0.007969  | -2.03867   | 1          |
| SIN3B        | 7.68963    | 10.1309   | 0.397775   | 0.24535    |
| RHOQ         | 13.8949    | 10.4219   | -0.414939  | 0.285855   |
| FAM86C2P     | 0.889872   | 0.8072    | -0.140671  | 0.958201   |
| PTAR1        | 1.36986    | 1.18404   | -0.210308  | 0.765268   |
| ZNF791       | 1.05341    | 0.946934  | -0.153733  | 0.92969    |
| KCNIP2       | 0.135523   | 0.289718  | 1.09611    | 1          |
| CD37         | 0.0669297  | 0.070365  | 0.0722125  | 1          |
| GORAB        | 1.7546     | 1.39779   | -0.327994  | 0.62349    |
| RNF133       | 0.00883081 | 0.0485603 | 2.45916    | 1          |
| CHRNE        | 3.58428    | 4.13239   | 0.205294   | 0.969061   |
| LOC388948    | 0.0155293  | 0         | #NAME?     | 1          |
| PRDM12       | 1.48464    | 1.58192   | 0.0915677  | 0.976618   |



|                   |            |            |             |            |
|-------------------|------------|------------|-------------|------------|
| CCNDBP1           | 10.0374    | 7.06966    | -0.505669   | 0.0694871  |
| NADSYN1           | 28.9993    | 29.3867    | 0.0191469   | 0.992797   |
| CLEC3B            | 1.33584    | 1.68501    | 0.335008    | 0.851868   |
| GUSBP4            | 0.416144   | 0.195546   | -1.08957    | 0.519925   |
| MUC1              | 3.27017    | 2.19073    | -0.577951   | 0.272974   |
| KCNQ5             | 0.00204646 | 0          | #NAME?      | 1          |
| CGN               | 1.76056    | 1.74499    | -0.012812   | 0.996079   |
| CCDC14            | 4.1896     | 3.76653    | -0.153576   | 0.863873   |
| ZMIZ1             | 1.61562    | 0.952776   | -0.761875   | 0.0231741  |
| SOCS6             | 2.15264    | 1.99455    | -0.110047   | 0.932264   |
| RAB3B             | 2.74576    | 2.44415    | -0.167872   | 0.815773   |
| ZNF688            | 5.34732    | 5.09695    | -0.0691822  | 0.979733   |
| NPR2              | 1.80893    | 3.12536    | 0.788884    | 0.0235476  |
| MAST1             | 4.36516    | 2.24156    | -0.961533   | 0.00337323 |
| BMS1P6            | 0.00255541 | 0          | #NAME?      | 1          |
| CUEDC2            | 76.2171    | 72.1755    | -0.0786065  | 0.954049   |
| ZSCAN21           | 1.42527    | 1.26143    | -0.176173   | 0.984917   |
| DTD2              | 3.95181    | 4.85263    | 0.296251    | 0.567105   |
| MLL               | 0.90149    | 0.824284   | -0.12917    | 0.90704    |
| SP100             | 14.3647    | 12.6986    | -0.177858   | 0.823658   |
| FDXR              | 39.1894    | 39.0547    | -0.00496795 | 0.99714    |
| IGF2,INS,INS-IGF2 | 0.00704653 | 0.00223647 | -1.65569    | 1          |
| KANK2             | 2.03506    | 2.45456    | 0.270392    | 0.685214   |
| TYSND1            | 14.0344    | 9.10426    | -0.624354   | 0.0240561  |
| SNX27             | 3.095      | 3.99654    | 0.368811    | 0.322165   |
| PC                | 1.52509    | 1.50137    | -0.0226178  | 0.99714    |
| FERMT2            | 0.0249954  | 0.00683711 | -1.8702     | 1          |
| PPM1A             | 3.63881    | 3.77272    | 0.0521381   | 0.979701   |
| SLC51B            | 0.018859   | 0          | #NAME?      | 1          |
| ENKUR             | 0.0946924  | 0.181667   | 0.939976    | 1          |
| FUT4              | 3.0242     | 6.64194    | 1.13505     | 0.00134142 |
| IER5L             | 25.1899    | 62.5991    | 1.31329     | 0.00134142 |
| UGCG              | 6.37167    | 3.48711    | -0.869639   | 0.00818401 |
| LRTOMT            | 1.16625    | 0.651597   | -0.839821   | 0.851624   |
| HPS1              | 30.2032    | 28.4872    | -0.0843845  | 0.957507   |
| C15orf27          | 0.0165907  | 0.0237805  | 0.51941     | 1          |
| ZNF184            | 1.75236    | 1.51322    | -0.211676   | 0.828589   |
| MYO1D             | 3.26429    | 2.9887     | -0.127248   | 0.916475   |
| FHOD3             | 0.0461199  | 0.079181   | 0.779766    | 1          |
| GPR68             | 0.250425   | 0.197012   | -0.346091   | 1          |
| PTGES             | 0.0934217  | 0.0628384  | -0.57211    | 1          |
| MR1               | 0.970207   | 0.379085   | -1.35577    | 0.00134142 |
| PPCS              | 35.843     | 26.5717    | -0.4318     | 0.166396   |
| CCDC107           | 13.6113    | 10.6324    | -0.356331   | 0.760508   |
| PLCG1             | 12.5529    | 12.7246    | 0.0195973   | 0.992797   |
| STK36             | 2.64864    | 2.47812    | -0.0960087  | 0.979733   |
| MAST2             | 17.967     | 21.0946    | 0.231526    | 0.620054   |
| ACYP2             | 2.68215    | 3.47994    | 0.375674    | 0.603757   |
| EIF3F             | 382.179    | 387.543    | 0.0201088   | 0.992797   |
| FOXO3             | 4.93618    | 2.51212    | -0.97449    | 0.00134142 |
| TRPM6             | 0.0470672  | 0.0221241  | -1.0891     | 1          |
| C4orf33           | 5.13161    | 1.79577    | -1.51481    | 0.00134142 |
| ABCB7             | 13.6133    | 7.77113    | -0.808819   | 0.00134142 |
| LIPT1             | 7.3633     | 3.88795    | -0.921341   | 0.00243047 |
| ATN1              | 36.2538    | 33.0113    | -0.13517    | 0.868277   |
| SUMF2             | 58.7864    | 39.5985    | -0.570036   | 0.0799746  |
| TXNRD3,TXNRD3NB   | 2.99781    | 3.01599    | 0.008724    | 0.997036   |
| BAX               | 174.064    | 228.72     | 0.393966    | 0.219645   |
| THPO              | 0.213039   | 0.0734669  | -1.53595    | 1          |
| AMIGO1            | 2.3127     | 2.11171    | -0.131162   | 0.935939   |
| MPP2              | 4.93924    | 2.53349    | -0.963165   | 0.00134142 |
| IRAK1BP1          | 1.50536    | 0.829929   | -0.85905    | 0.199241   |
| UBA52             | 355.445    | 402.06     | 0.177782    | 0.799255   |
| SMAD4             | 3.86658    | 3.15934    | -0.291432   | 0.4748     |
| PIDD              | 12.7053    | 11.9353    | -0.0901929  | 0.952469   |
| ZNF253            | 1.36432    | 1.06728    | -0.354246   | 0.629687   |
| TNFRSF1A          | 27.7839    | 44.0596    | 0.665206    | 0.00593755 |
| FBXL19-AS1        | 0.272942   | 0.469225   | 0.781685    | 0.878389   |
| ZFYVE20           | 3.47302    | 3.57496    | 0.0417378   | 0.981044   |
| CDK5RAP3          | 27.9777    | 25.6079    | -0.127684   | 0.889644   |
| AKR7A3            | 9.95524    | 9.64649    | -0.0454515  | 0.985982   |
| GNB5              | 7.74721    | 6.13928    | -0.335609   | 0.429337   |
| AK3               | 6.87943    | 6.0331     | -0.189391   | 0.78079    |
| FNBP1             | 0.00863874 | 0.00745255 | -0.213086   | 1          |
| PSD4              | 1.58787    | 1.64963    | 0.0550479   | 0.981044   |
| SPON1             | 0.0269518  | 0.0349043  | 0.373021    | 1          |
| TMSB10            | 5403.15    | 6424.73    | 0.249835    | 0.650855   |
| LOC730101         | 1.34944    | 2.02782    | 0.587563    | 0.124106   |
| ACBD7             | 1.92211    | 2.87812    | 0.582434    | 0.0932788  |

|              |            |             |             |            |
|--------------|------------|-------------|-------------|------------|
| SLC23A2      | 0.867783   | 0.910005    | 0.0685412   | 0.977103   |
| SLC25A38     | 44.2885    | 54.6873     | 0.304273    | 0.413471   |
| FAM126B      | 0.968481   | 0.922276    | -0.0705242  | 0.969963   |
| TNFRSF21     | 2.96138    | 6.74396     | 1.18732     | 0.00134142 |
| RPL3         | 3642.79    | 3660.71     | 0.00708196  | 0.997082   |
| COL4A3BP     | 4.22096    | 3.15435     | -0.42023    | 0.292417   |
| MLL5         | 4.67558    | 3.56921     | -0.38954    | 0.243408   |
| SLC25A29     | 40.5638    | 39.6729     | -0.03204    | 0.987627   |
| GLS2         | 10.7348    | 7.26704     | -0.562857   | 0.226665   |
| CASP7        | 4.13218    | 5.7424      | 0.474749    | 0.189667   |
| TBCD         | 11.768     | 12.773      | 0.118232    | 0.90608    |
| C9orf174     | 0.413194   | 0.348405    | -0.246053   | 0.85843    |
| CORO6        | 0.0189372  | 0.0628134   | 1.72985     | 1          |
| HIST1H2BN    | 1.55572    | 2.02624     | 0.381225    | 0.875703   |
| PDGFA        | 5.24081    | 6.08717     | 0.215984    | 0.788214   |
| RNPEPL1      | 43.8897    | 41.207      | -0.0909916  | 0.937765   |
| WDR90        | 5.27796    | 5.86793     | 0.152871    | 0.870173   |
| TMEM106A     | 0.54543    | 0.545725    | 0.000780838 | 0.998951   |
| NMU          | 17.9305    | 26.9051     | 0.585463    | 0.0678232  |
| TUBD1        | 1.58328    | 2.39941     | 0.599765    | 0.184116   |
| GLCE         | 1.10732    | 1.14853     | 0.0527145   | 0.981044   |
| MECP2        | 25.6359    | 22.3878     | -0.195458   | 0.815612   |
| ZNF205-AS1   | 0.286569   | 0.255931    | -0.163125   | 1          |
| SHARPIN      | 81.9025    | 72.5961     | -0.174015   | 0.787528   |
| BTLA         | 0.00337409 | 0           | #NAME?      | 1          |
| KRTCAP3      | 0.673397   | 0.846154    | 0.329465    | 0.977332   |
| GABARAP      | 335.299    | 251.939     | -0.412373   | 0.179474   |
| NUDT12       | 2.46625    | 1.30997     | -0.912789   | 0.00672555 |
| PRKAG1       | 38.8581    | 26.2998     | -0.563163   | 0.0390303  |
| PLAGL1       | 9.01036    | 5.22674     | -0.785675   | 0.00243047 |
| ENTPD2       | 117.507    | 95.1606     | -0.304311   | 0.415527   |
| RPS4X        | 3015       | 3258.65     | 0.112115    | 0.92969    |
| PSRC1        | 27.5061    | 40.9383     | 0.573699    | 0.0331269  |
| AAMDC        | 24.0972    | 19.6288     | -0.295889   | 0.638558   |
| RAB17        | 0.0489429  | 0.0250278   | -0.967567   | 1          |
| LTK          | 37.7768    | 31.2418     | -0.274023   | 0.519111   |
| MLL4         | 5.94851    | 7.31274     | 0.297884    | 0.462725   |
| C9orf43      | 0.32909    | 0.467062    | 0.505129    | 0.981044   |
| DDC          | 0.027754   | 0.011614    | -1.25683    | 1          |
| ZNRD1        | 82.571     | 107.344     | 0.37854     | 0.245718   |
| NTAN1        | 22.7191    | 21.677      | -0.067743   | 0.967901   |
| CPNE1,RBM12  | 80.4938    | 75.4225     | -0.0938837  | 0.956807   |
| ANKIB1       | 2.48022    | 2.03972     | -0.282092   | 0.580748   |
| GAA          | 51.015     | 41.939      | -0.28263    | 0.482085   |
| FCGBP        | 0.0296788  | 0.016688    | -0.83062    | 1          |
| ASXL1        | 10.8985    | 11.2637     | 0.047543    | 0.987858   |
| TIMM9        | 41.85      | 28.8834     | -0.534988   | 0.0634431  |
| RGS12        | 2.16496    | 2.22507     | 0.0395068   | 0.988142   |
| GALK2        | 8.53696    | 4.42467     | -0.948151   | 0.00134142 |
| ZMYM5        | 4.29238    | 3.1175      | -0.461388   | 0.366894   |
| LOC100129250 | 14.8119    | 13.6823     | -0.114441   | 0.980663   |
| CTSW         | 0.0145888  | 0.0292539   | 1.00376     | 1          |
| SNAPC3       | 2.53807    | 2.06319     | -0.298856   | 0.636639   |
| LOC401321    | 2.23896    | 2.66807     | 0.252968    | 0.702044   |
| C19orf38     | 0.169784   | 0.124602    | -0.446377   | 1          |
| PHKA2        | 3.72274    | 2.84216     | -0.389376   | 0.312486   |
| RAB3D        | 11.837     | 9.86759     | -0.262538   | 0.563736   |
| CARD6        | 0.906251   | 0.699097    | -0.374417   | 0.570193   |
| MFAP3L       | 0.226614   | 0.488804    | 1.10902     | 0.0126858  |
| GCSAM        | 0.194884   | 0.355285    | 0.866359    | 0.176896   |
| DYRK1A       | 4.67016    | 3.61716     | -0.368613   | 0.303951   |
| CDR2         | 7.85685    | 12.7042     | 0.693279    | 0.00743393 |
| SPATA6L      | 0.483355   | 0.245803    | -0.975583   | 0.539266   |
| HSD3BP4      | 0.00142298 | 0.000998362 | -0.511285   | 1          |
| HOOK1        | 0.00378083 | 0           | #NAME?      | 1          |
| C4orf36      | 0.306357   | 0.240142    | -0.351323   | 1          |
| CAMK2G       | 5.48745    | 5.71724     | 0.0591835   | 0.974631   |
| ZBTB2        | 5.01295    | 6.93981     | 0.469234    | 0.1419     |
| GDF2         | 0.00921583 | 0           | #NAME?      | 1          |
| THNSL1       | 8.61859    | 8.01774     | -0.104257   | 0.923575   |
| OSCP1        | 1.47088    | 1.01425     | -0.536257   | 0.609543   |
| MLL3         | 1.28174    | 1.05092     | -0.286457   | 0.536091   |
| NUDT16L1     | 27.7423    | 33.9629     | 0.291873    | 0.524713   |
| TMEM63C      | 1.42035    | 1.32911     | -0.0957901  | 0.961224   |
| VMP1         | 58.6809    | 63.6304     | 0.116826    | 0.905597   |
| DHRS11       | 11.9696    | 7.65283     | -0.645314   | 0.0580464  |
| MYO6         | 1.60597    | 1.12915     | -0.508212   | 0.126783   |
| CEP152       | 1.06133    | 0.867368    | -0.291156   | 0.657573   |
| AP5Z1        | 9.6976     | 11.5822     | 0.256203    | 0.585388   |

|              |            |            |             |            |
|--------------|------------|------------|-------------|------------|
| SPATA6       | 0.50418    | 0.191673   | -1.39529    | 0.00243047 |
| RIMBP3C      | 0.0125912  | 0.0148096  | 0.234121    | 1          |
| TMLHE        | 6.41968    | 3.569      | -0.84698    | 0.0240561  |
| CFL2         | 12.8189    | 9.51454    | -0.430061   | 0.164179   |
| RPL10A       | 2862.95    | 2925.97    | 0.0314131   | 0.987858   |
| HBG1         | 0.268354   | 0.297841   | 0.150407    | 1          |
| ATG9B        | 1.06366    | 0.860415   | -0.305939   | 0.930066   |
| DENND1C      | 0.196219   | 0.0727437  | -1.43157    | 1          |
| HOXB3        | 2.94356    | 3.87153    | 0.395339    | 0.368883   |
| PRDM15       | 0.662317   | 1.61375    | 1.28482     | 0.00134142 |
| LTN1         | 1.09575    | 0.856276   | -0.355765   | 0.456061   |
| ZBTB6        | 2.59813    | 2.69594    | 0.0533145   | 0.979701   |
| B2M          | 724.691    | 720.083    | -0.00920183 | 0.997036   |
| ZER1         | 30.7466    | 18.3511    | -0.744558   | 0.00134142 |
| C14orf101    | 3.33803    | 2.23651    | -0.577746   | 0.0838642  |
| FBXL5        | 7.06479    | 6.19445    | -0.189671   | 0.782383   |
| B4GALNT4     | 12.352     | 14.8552    | 0.266215    | 0.599424   |
| LOXL1-AS1    | 1.13427    | 1.14821    | 0.0176225   | 0.997036   |
| KIAA0430     | 1.86167    | 0.752849   | -1.30617    | 0.00134142 |
| UBL3         | 4.00892    | 3.01825    | -0.409502   | 0.268118   |
| FLII         | 61.2691    | 56.2389    | -0.12359    | 0.913628   |
| HKDC1        | 1.28451    | 0.184728   | -2.79775    | 0.00134142 |
| COP2         | 14.6949    | 14.877     | 0.017765    | 0.99316    |
| NECAP2       | 22.334     | 25.7829    | 0.20717     | 0.706761   |
| RPL19        | 5314.36    | 5741.76    | 0.111596    | 0.928653   |
| OPHN1        | 1.70567    | 1.60975    | -0.0834973  | 0.959227   |
| KLHL42       | 2.93077    | 3.35357    | 0.19442     | 0.771544   |
| VASN         | 1.66667    | 2.39019    | 0.520157    | 0.961432   |
| CHMP7        | 17.0227    | 22.0018    | 0.370159    | 0.271746   |
| TBC1D8       | 1.93872    | 2.34195    | 0.272607    | 0.989365   |
| PORCN        | 14.314     | 12.9981    | -0.139126   | 0.891331   |
| TGFBR2       | 0.897226   | 0.859187   | -0.0624999  | 0.979733   |
| IRAK4        | 3.28777    | 2.20046    | -0.579302   | 0.0780546  |
| RNF19A       | 6.30984    | 4.601      | -0.455654   | 0.145992   |
| C19orf57     | 0.6322     | 0.837292   | 0.405351    | 0.688363   |
| ISM2         | 0.00748178 | 0.00455171 | -0.716975   | 1          |
| PLXNC1       | 0.570938   | 0.353911   | -0.68995    | 0.210185   |
| SSH3         | 17.9213    | 17.6125    | -0.0250755  | 0.990857   |
| LOC100288069 | 0.763526   | 0.517757   | -0.560403   | 0.589726   |
| LYRM7        | 1.2475     | 1.43264    | 0.199637    | 0.809416   |
| ZNF14        | 1.73466    | 1.60575    | -0.1114     | 0.950929   |
| ZSWIM7       | 7.72611    | 7.08071    | -0.125848   | 0.978703   |
| SCARB2       | 20.7468    | 13.3102    | -0.640353   | 0.0120701  |
| GNA13        | 5.55022    | 4.45933    | -0.315718   | 0.407055   |
| PAPOLG       | 1.49657    | 1.28379    | -0.221245   | 0.745122   |
| YY1AP1       | 19.3891    | 18.1943    | -0.0917616  | 0.940338   |
| DGKA         | 9.30642    | 6.38778    | -0.54291    | 0.0715857  |
| PER1         | 4.96114    | 7.58196    | 0.611899    | 0.0423316  |
| MAP2K2       | 142.265    | 144.772    | 0.0252078   | 0.989748   |
| TNFRSF4      | 0.0251852  | 0.0187532  | -0.425444   | 1          |
| DYRK2        | 3.16379    | 4.3786     | 0.468817    | 0.144914   |
| ZXDC         | 4.73093    | 4.04839    | -0.224776   | 0.840803   |
| HOXC8        | 1.94678    | 4.01352    | 1.04378     | 0.00425224 |
| CALB2        | 13.5273    | 11.9986    | -0.173002   | 0.84262    |
| PIK3CD       | 2.42877    | 1.02131    | -1.2498     | 0.448101   |
| NAT8L        | 0.0150552  | 0.0111172  | -0.437468   | 1          |
| ING4         | 6.03164    | 4.24736    | -0.505986   | 0.269734   |
| KRT83        | 0.0340886  | 0.0230625  | -0.563743   | 1          |
| ZNF219       | 16.7375    | 15.7118    | -0.091233   | 0.952905   |
| HIST1H2AC    | 5.62676    | 6.93473    | 0.301535    | 0.832286   |
| TMEM121      | 1.22686    | 1.48298    | 0.273536    | 0.913628   |
| CCDC101      | 11.2597    | 12.1286    | 0.107244    | 0.949812   |
| C8orf40      | 44.0749    | 22.5649    | -0.965877   | 0.0704662  |
| LRRRC49      | 1.27237    | 0.819826   | -0.634131   | 0.168861   |
| FAM122B      | 5.73871    | 8.02254    | 0.483333    | 0.14958    |
| CUL4B        | 6.63875    | 3.23143    | -1.03874    | 0.00134142 |
| EFNA1        | 17.0074    | 22.9038    | 0.429427    | 0.203359   |
| EIF4E3       | 2.93853    | 1.84329    | -0.672807   | 0.021138   |
| SNORA76      | 8.93001    | 26.9653    | 1.59437     | 0.511286   |
| KIAA1432     | 1.39299    | 1.27279    | -0.130196   | 0.919186   |
| CKAP2L       | 2.40612    | 1.49419    | -0.687343   | 0.0544049  |
| PRKRA        | 18.6805    | 21.0437    | 0.171856    | 0.880508   |
| MMP11        | 6.94485    | 4.81995    | -0.526927   | 0.166117   |
| DLGAP4       | 22.0259    | 19.1797    | -0.199623   | 0.733942   |
| ZNF616       | 1.04734    | 0.879477   | -0.252015   | 0.800125   |
| FANK1        | 0.647998   | 0.22636    | -1.51737    | 0.0447795  |
| RCOR3        | 3.38517    | 2.686      | -0.333767   | 0.563736   |
| UGT3A1       | 0.00494097 | 0          | #NAME?      | 1          |
| MAP3K14      | 2.85895    | 3.16015    | 0.144504    | 0.907651   |

|              |            |           |             |            |
|--------------|------------|-----------|-------------|------------|
| GSTM1        | 32.7566    | 30.7997   | -0.0888683  | 0.947008   |
| ZC3H11A      | 14.7249    | 15.1876   | 0.0446348   | 0.979701   |
| KCNRG.TRIM13 | 3.63649    | 2.83468   | -0.359359   | 0.482631   |
| CDC25C       | 5.28232    | 2.84705   | -0.891702   | 0.0101293  |
| GPSM3,NOTCH4 | 0.150527   | 0.190528  | 0.339976    | 1          |
| PPM1J        | 20.4787    | 21.0571   | 0.0401828   | 0.984917   |
| TCEAL1       | 10.3634    | 8.96627   | -0.208925   | 0.797088   |
| ZNF195       | 5.50094    | 4.96641   | -0.147474   | 0.874082   |
| PVRL3        | 1.36028    | 1.22391   | -0.152408   | 0.897241   |
| PVRIG        | 0.04449    | 0.0813343 | 0.87038     | 1          |
| PAIP2B       | 2.03107    | 0.822232  | -1.30462    | 0.00134142 |
| DGCR6L       | 71.5903    | 85.6687   | 0.259005    | 0.554656   |
| DLGAP5       | 6.77849    | 6.89165   | 0.0238853   | 0.991459   |
| SURF1        | 38.9838    | 33.2581   | -0.229167   | 0.673626   |
| PSTK         | 2.53072    | 2.13836   | -0.243043   | 0.830384   |
| CHD8         | 3.22297    | 4.23109   | 0.39264     | 0.240188   |
| SPSB3        | 40.5588    | 29.2267   | -0.472731   | 0.133194   |
| CACFD1       | 5.61355    | 3.48772   | -0.686629   | 0.0414844  |
| CD3G         | 0.0104853  | 0         | #NAME?      | 1          |
| RNF25        | 24.8476    | 41.1607   | 0.72816     | 0.010797   |
| GON4L        | 1.86423    | 2.01201   | 0.110058    | 0.932468   |
| TPGS2        | 34.93      | 27.9565   | -0.321285   | 0.576801   |
| MAGED2       | 36.0043    | 32.4206   | -0.151256   | 0.833258   |
| EPC1         | 4.76884    | 3.02094   | -0.65864    | 0.030165   |
| LRRC26       | 5.91433    | 8.82136   | 0.576785    | 0.437712   |
| TAS2R3       | 0.0133431  | 0.0525374 | 1.97725     | 1          |
| ZNF780B      | 0.585295   | 0.759718  | 0.3763      | 0.454347   |
| GUCA1B       | 1.03595    | 1.7249    | 0.735556    | 0.113441   |
| FLJ14107     | 0.0280554  | 0.0520999 | 0.893001    | 1          |
| RAB11B-AS1   | 3.45313    | 2.14789   | -0.684985   | 0.974848   |
| LOC100288778 | 12.0235    | 9.55788   | -0.33109    | 0.537496   |
| KLC3         | 31.8652    | 22.8801   | -0.477893   | 0.432599   |
| ZNF430       | 1.09124    | 0.993429  | -0.135484   | 0.929635   |
| SGSH         | 14.412     | 11.5349   | -0.321263   | 0.445908   |
| C2orf16      | 0.0807741  | 0.0778496 | -0.0532031  | 1          |
| LOC92249     | 4.47901    | 2.8182    | -0.668409   | 0.049309   |
| SLC26A1      | 0.563108   | 0.621561  | 0.142483    | 0.986579   |
| FTX          | 0.491308   | 0.518774  | 0.0784783   | 0.990857   |
| MED15        | 20.1024    | 12.7494   | -0.65694    | 0.0120701  |
| C12orf61     | 0.375375   | 0.314834  | -0.253742   | 0.940338   |
| EPHX1        | 16.2679    | 14.7173   | -0.144516   | 0.930066   |
| MAN2A2       | 7.28757    | 7.85887   | 0.108885    | 0.919029   |
| UBE2H        | 10.4882    | 8.66193   | -0.276006   | 0.504136   |
| LOC100132077 | 0.173358   | 0.191596  | 0.144314    | 1          |
| BMPR2        | 0.657516   | 0.513092  | -0.35781    | 0.477937   |
| PAK4         | 32.571     | 32.6411   | 0.00310149  | 0.998417   |
| RGL3         | 10.8204    | 5.84236   | -0.889138   | 0.00134142 |
| SIGIRR       | 40.6535    | 50.7877   | 0.321099    | 0.379976   |
| ZFAND2A      | 17.5228    | 22.7878   | 0.379033    | 0.344255   |
| ADPRHL1      | 3.39165    | 2.20705   | -0.619868   | 0.18476    |
| VTRNA1-3     | 117.489    | 35.4415   | -1.72901    | 0.828589   |
| RETSAT       | 15.5816    | 11.8787   | -0.391464   | 0.234793   |
| SLC44A1      | 10.0772    | 7.15369   | -0.49433    | 0.0786602  |
| C19orf70     | 96.7489    | 126.435   | 0.386074    | 0.240737   |
| MSRB3        | 0.388561   | 0.299454  | -0.375804   | 0.70303    |
| MXD4         | 23.937     | 23.7825   | -0.00934353 | 0.99647    |
| PARP16       | 8.3396     | 4.67106   | -0.836228   | 0.00337323 |
| ZNF799       | 1.63526    | 1.77286   | 0.116558    | 0.949156   |
| TYK2         | 16.6397    | 17.4679   | 0.0700846   | 0.961026   |
| LOC387895    | 0.121873   | 0.216088  | 0.826241    | 1          |
| LBX2         | 5.89251    | 3.37758   | -0.802892   | 0.651901   |
| MAPK14       | 8.70894    | 9.0923    | 0.0621481   | 0.967901   |
| VEGFB        | 70.705     | 58.7233   | -0.267878   | 0.516847   |
| ZNF41        | 0.231131   | 0.226368  | -0.0300425  | 1          |
| ARL17A       | 0.184308   | 0.274532  | 0.574856    | 1          |
| DOCK11       | 0.706002   | 0.406364  | -0.796899   | 0.036221   |
| ZYG11A       | 0.00329581 | 0         | #NAME?      | 1          |
| HINFP        | 10.0896    | 10.041    | -0.00696604 | 0.997036   |
| CDC25B       | 19.4746    | 20.2005   | 0.0527988   | 0.976214   |
| TRIM47       | 14.3086    | 28.045    | 0.970858    | 0.00134142 |
| TMEM246      | 24.6177    | 28.6195   | 0.2173      | 0.687488   |
| PION         | 0.805074   | 0.549749  | -0.550349   | 0.348669   |
| ST13         | 84.2657    | 88.7942   | 0.0755191   | 0.956657   |
| GATS         | 1.65152    | 2.55335   | 0.628596    | 0.133781   |
| LOC100288198 | 0.460468   | 0.371702  | -0.308952   | 0.978981   |
| VPS41        | 2.74428    | 1.7204    | -0.673677   | 0.0270114  |
| RIMS3        | 0.767545   | 0.768209  | 0.00124611  | 0.999427   |
| ZBTB14       | 1.48557    | 1.39998   | -0.0856142  | 0.967702   |
| CMTM3        | 56.8819    | 65.6123   | 0.205997    | 0.689901   |

|              |            |            |            |            |
|--------------|------------|------------|------------|------------|
| CRADD        | 8.459      | 7.38368    | -0.196147  | 0.834115   |
| ATP5L        | 136.227    | 155.728    | 0.193015   | 0.791105   |
| LINC00669    | 0.553549   | 0.0671466  | -3.04333   | 0.00509212 |
| LOC100506305 | 0.0200108  | 0          | #NAME?     | 1          |
| HLA-DRB1     | 0.0311106  | 0.0889493  | 1.51558    | 1          |
| THAP2        | 0.458032   | 0.320798   | -0.513783  | 0.845969   |
| FBXL3        | 5.22936    | 4.00443    | -0.385039  | 0.294176   |
| RPSAP9       | 8.05397    | 8.70585    | 0.112285   | 0.931471   |
| TBCC         | 18.1674    | 21.3051    | 0.229849   | 0.693169   |
| LRTM2        | 0.022427   | 0.030946   | 0.464517   | 1          |
| LRRC37BP1    | 4.08784    | 3.70426    | -0.142154  | 0.876568   |
| ZNF490       | 1.50345    | 1.02733    | -0.549378  | 0.154233   |
| PAG1         | 0.0707193  | 0.0413203  | -0.775253  | 1          |
| KIAA0391     | 13.6018    | 13.9705    | 0.0385817  | 0.985921   |
| ZNF615       | 0.579764   | 0.565783   | -0.0352156 | 0.990994   |
| NUDT2        | 47.1099    | 32.834     | -0.520841  | 0.0713011  |
| CERCAM       | 66.8531    | 65.5035    | -0.0294219 | 0.987858   |
| STK25        | 73.3289    | 95.2107    | 0.376742   | 0.252718   |
| RNF26        | 22.9262    | 25.8601    | 0.173734   | 0.797849   |
| SUPT3H       | 3.72068    | 1.34059    | -1.4727    | 0.00134142 |
| HOXB7        | 19.987     | 21.1093    | 0.0788167  | 0.959465   |
| CCDC104      | 46.7324    | 36.0666    | -0.373762  | 0.253393   |
| PLEKHA6      | 1.35868    | 1.32062    | -0.0409965 | 0.987334   |
| GTF2H2B      | 1.87686    | 3.61247    | 0.944662   | 0.00134142 |
| TMPRSS7      | 0.00528183 | 0          | #NAME?     | 1          |
| MYL6B        | 104.248    | 97.9334    | -0.090146  | 0.942519   |
| NDST2        | 5.80081    | 6.02124    | 0.0538077  | 0.978196   |
| CEACAM22P    | 0.00974447 | 0.00620751 | -0.650569  | 1          |
| GPN1         | 26.475     | 31.8799    | 0.268017   | 0.799255   |
| TOM1L2       | 3.62565    | 2.32376    | -0.641777  | 0.036526   |
| PPP1R3D      | 1.6539     | 1.80742    | 0.12806    | 0.967901   |
| CAPN7        | 3.06937    | 2.49021    | -0.301675  | 0.534473   |
| CCDC146      | 0.370987   | 0.376876   | 0.0227189  | 0.995874   |
| CRTC2        | 17.0251    | 19.0553    | 0.162531   | 0.821056   |
| TMEM51-AS1   | 0.0976684  | 0.0816298  | -0.258796  | 1          |
| TRIO         | 2.21808    | 1.79094    | -0.308594  | 0.501903   |
| TRAPPC9      | 8.04724    | 5.61973    | -0.517992  | 0.0897447  |
| LOC729970    | 1.88849    | 0.959566   | -0.976781  | 0.0786602  |
| IL17B        | 0.0674856  | 0          | #NAME?     | 1          |
| KIAA1328     | 0.349712   | 0.213587   | -0.711344  | 0.945602   |
| MMAA         | 0.426699   | 0.431485   | 0.0160928  | 0.996079   |
| LAMC3        | 0.112971   | 0.0516534  | -1.12901   | 1          |
| ARL4A        | 3.01856    | 3.81506    | 0.337844   | 0.464005   |
| RAPH1        | 0.772824   | 0.545253   | -0.503213  | 0.212722   |
| LOC282997    | 1.86935    | 1.05189    | -0.829561  | 0.0813633  |
| C1orf115     | 3.0398     | 2.0337     | -0.579871  | 0.144603   |
| SERPINB6     | 92.4619    | 76.9033    | -0.265813  | 0.52724    |
| SH2D3A       | 7.00686    | 5.72525    | -0.291428  | 0.629626   |
| ELK4         | 3.85443    | 3.71161    | -0.0544717 | 0.982359   |
| TTC33        | 1.42025    | 1.24717    | -0.187488  | 0.831858   |
| CTNNA2       | 0.00361141 | 0          | #NAME?     | 1          |
| ASGR1        | 12.8388    | 7.42715    | -0.78963   | 0.0162707  |
| AMOTL1       | 0.0364285  | 0.0198206  | -0.878067  | 1          |
| USP47        | 5.29868    | 4.84439    | -0.129318  | 0.88709    |
| FAM3B        | 0.202037   | 0.154455   | -0.387431  | 1          |
| SLC22A15     | 1.00503    | 0.516171   | -0.961321  | 0.0114515  |
| GOPC         | 4.41464    | 4.83379    | 0.130859   | 0.893249   |
| FRAS1        | 0.960829   | 0.494413   | -0.958563  | 0.00134142 |
| ASPRV1       | 0.708834   | 0.35652    | -0.991465  | 0.272575   |
| ACVR2A       | 0.677995   | 0.668436   | -0.0204845 | 0.997036   |
| PCDH18       | 0.0611411  | 0.030664   | -0.995598  | 1          |
| TMTC2        | 0.178018   | 0.209425   | 0.234407   | 1          |
| FLT3LG       | 7.63964    | 5.62157    | -0.44253   | 0.458034   |
| GNB2L1       | 2943.35    | 2879.45    | -0.0316683 | 0.988533   |
| LOC646719    | 1.98006    | 1.92749    | -0.0388194 | 0.98741    |
| HEBP2        | 48.4905    | 51.6546    | 0.0911942  | 0.937813   |
| KIAA1598     | 3.21159    | 2.48777    | -0.368436  | 0.346533   |
| RB1CC1       | 5.48245    | 2.73541    | -1.00306   | 0.00134142 |
| MBTD1        | 2.26495    | 1.29093    | -0.81107   | 0.0114515  |
| DUSP1        | 48.4498    | 28.6886    | -0.756013  | 0.00337323 |
| CHAD         | 0.0138316  | 0.0112965  | -0.292089  | 1          |
| WASH2P       | 8.86074    | 6.22316    | -0.50978   | 0.175545   |
| MDM4         | 3.59506    | 3.4402     | -0.0635268 | 0.96926    |
| BRD9         | 10.8429    | 17.585     | 0.697588   | 0.009453   |
| MGMT         | 64.6299    | 58.7861    | -0.136727  | 0.869898   |
| ATP1A1OS     | 3.01125    | 2.99756    | -0.0065756 | 0.99926    |
| WWC2         | 0.824599   | 0.880257   | 0.0942333  | 0.966946   |
| RNF169       | 1.00174    | 0.643921   | -0.637547  | 0.565921   |
| MTCH1        | 27.4404    | 30.4069    | 0.1481     | 0.851892   |

|                     |            |            |             |            |
|---------------------|------------|------------|-------------|------------|
| HNF1A-AS1           | 0.00597625 | 0.0125202  | 1.06695     | 1          |
| PLA2G12A            | 4.03837    | 4.79406    | 0.247474    | 0.624281   |
| METTL9              | 19.7677    | 19.6382    | -0.00948808 | 0.996453   |
| C8orf46             | 0.0229866  | 0.040627   | 0.821644    | 1          |
| TRPM4               | 7.47175    | 4.96881    | -0.588546   | 0.0658487  |
| CABLES2             | 1.77901    | 3.18897    | 0.842019    | 0.0132924  |
| ZSWIM1              | 4.24557    | 3.92423    | -0.113548   | 0.934459   |
| TAF12               | 29.7909    | 27.3478    | -0.12345    | 0.904202   |
| DOK4                | 12.656     | 12.1415    | -0.0598737  | 0.989344   |
| BPHL                | 16.1769    | 12.6156    | -0.358727   | 0.367974   |
| BOD1                | 34.5378    | 29.1645    | -0.243962   | 0.606431   |
| HIF1A               | 1.8696     | 1.65315    | -0.177504   | 0.957507   |
| MEX3A               | 4.00284    | 5.60116    | 0.484703    | 0.109906   |
| ATP13A3             | 7.31358    | 7.41911    | 0.0206679   | 0.991767   |
| UBXN6               | 132.254    | 108.917    | -0.280073   | 0.490719   |
| HLA-F-AS1           | 1.70586    | 2.552      | 0.581131    | 0.933023   |
| MID1IP1             | 25.4917    | 27.2171    | 0.0944848   | 0.942878   |
| LOC440434           | 8.51368    | 7.33887    | -0.214224   | 0.760508   |
| RBAK,RBAK-LOC389458 | 34.6992    | 31.1826    | -0.154161   | 0.961224   |
| UNC119              | 71.54      | 59.9075    | -0.256013   | 0.556835   |
| MAML2               | 0.0286919  | 0.00521868 | -2.45889    | 1          |
| LINC00526           | 1.54652    | 1.32217    | -0.226119   | 0.895818   |
| HRASLS              | 0.210933   | 0.17326    | -0.283846   | 1          |
| KIAA1430            | 7.52633    | 6.33525    | -0.248544   | 0.581978   |
| TMEM107             | 8.62605    | 4.20768    | -1.03567    | 0.00134142 |
| DNASE1L1            | 14.1197    | 9.12514    | -0.629792   | 0.911895   |
| LOC100507032        | 1.41564    | 1.05141    | -0.429133   | 0.39951    |
| DGKQ                | 5.39578    | 6.75042    | 0.323148    | 0.474762   |
| MYO5C               | 0.571753   | 0.334977   | -0.771328   | 0.077181   |
| GSTM3               | 15.261     | 17.1567    | 0.168923    | 0.806389   |
| PPIEL               | 0.0773838  | 0.185729   | 1.2631      | 1          |
| AMZ2                | 43.4202    | 31.405     | -0.467376   | 0.110937   |
| EMP3                | 138.614    | 161.535    | 0.220777    | 0.679982   |
| SMIM16              | 0.0195093  | 0          | #NAME?      | 1          |
| XRCC6BP1            | 5.46138    | 5.43855    | -0.00604342 | 0.99714    |
| AHCY                | 173.719    | 182.49     | 0.0710555   | 0.959465   |
| LOC340074           | 0.00690879 | 0          | #NAME?      | 1          |
| ITGAE               | 3.06052    | 5.56393    | 0.862326    | 0.036526   |
| HARB1               | 1.35594    | 1.56445    | 0.206367    | 0.897241   |
| C19orf54            | 7.83947    | 3.45713    | -1.18118    | 0.0790043  |
| LOXL4               | 0.00935587 | 0.00391301 | -1.25759    | 1          |
| CEP70               | 2.76273    | 1.89044    | -0.547374   | 0.1419     |
| TNRC6B              | 1.15507    | 0.610726   | -0.919384   | 0.00337323 |
| CDCA7L              | 30.9171    | 19.9064    | -0.63517    | 0.0126858  |
| ERCC4               | 0.572414   | 0.607996   | 0.0870017   | 0.967901   |
| CISD3               | 14.0307    | 18.8058    | 0.422585    | 0.632357   |
| AKAP5               | 0.0901239  | 0.137448   | 0.608906    | 1          |
| UBN2                | 1.05139    | 0.800069   | -0.394095   | 0.300944   |
| GTF2H5              | 3.38793    | 3.46102    | 0.030791    | 0.987858   |
| PLEKHF2             | 5.98054    | 4.09128    | -0.547724   | 0.0813633  |
| ATP5SL              | 26.6663    | 29.8534    | 0.162879    | 0.826959   |
| C21orf49            | 0.0122195  | 0          | #NAME?      | 1          |
| NGEF                | 12.1492    | 4.61556    | -1.39628    | 0.00134142 |
| TOB2P1              | 0.740282   | 0.701511   | -0.0776098  | 0.979701   |
| AHNAK               | 12.7042    | 11.9074    | -0.0934444  | 0.974494   |
| CEP164              | 1.98516    | 2.10963    | 0.0877402   | 0.959465   |
| INSC                | 0.00551003 | 0          | #NAME?      | 1          |
| TARSL2              | 2.52159    | 3.18815    | 0.33839     | 0.488907   |
| ING2                | 9.20304    | 9.39271    | 0.029432    | 0.990857   |
| ST8SIA5             | 0.0654869  | 0.0164984  | -1.98888    | 1          |
| HOXD-AS1            | 2.11206    | 1.30794    | -0.691348   | 0.064193   |
| PAFAH1B3            | 96.7178    | 119.921    | 0.31023     | 0.46196    |
| BACE2               | 16.7409    | 16.9104    | 0.0145348   | 0.994615   |
| ITPKC               | 5.27151    | 10.9854    | 1.0593      | 0.00243047 |
| RTN4RL2             | 23.9454    | 17.6773    | -0.437857   | 0.328217   |
| BTBD9               | 1.33584    | 1.59196    | 0.253056    | 0.698141   |
| RPS6KB1             | 2.77801    | 5.33503    | 0.941444    | 0.00134142 |
| SMYD3               | 21.4381    | 11.8935    | -0.85       | 0.00134142 |
| ARHGEF10            | 5.84572    | 6.04158    | 0.0475452   | 0.979701   |
| SNORD83B            | 26.8804    | 37.7859    | 0.491296    | 0.968205   |
| SERPINF1            | 0.227029   | 0.373536   | 0.718369    | 0.585481   |
| DENND6A             | 3.12596    | 2.32362    | -0.427925   | 0.250936   |
| RTEL1,TNFRSF6B      | 6.26052    | 8.91699    | 0.510274    | 0.669758   |
| CTBS                | 3.15784    | 1.40254    | -1.17089    | 0.00134142 |
| KLHL25              | 3.37343    | 5.78797    | 0.778843    | 0.0114515  |
| WDR60               | 1.80969    | 1.51016    | -0.261048   | 0.732349   |
| ADARB1              | 3.13508    | 5.17447    | 0.722906    | 0.0189207  |
| SNX25               | 4.71685    | 3.86988    | -0.285532   | 0.59496    |
| CDON                | 0.253448   | 0.304565   | 0.26506     | 1          |

|                        |           |            |             |            |
|------------------------|-----------|------------|-------------|------------|
| CCDC41                 | 1.4562    | 2.38098    | 0.709347    | 0.0431891  |
| LOC387723              | 0.840515  | 0.738338   | -0.186992   | 0.925586   |
| SLC26A6                | 8.37791   | 9.26863    | 0.145766    | 0.881851   |
| HERC2P9                | 3.00917   | 4.53964    | 0.593213    | 0.0757506  |
| ULK1                   | 6.36862   | 3.01046    | -1.081      | 0.00134142 |
| ALG13                  | 3.89466   | 4.17792    | 0.101286    | 0.946274   |
| TTG37                  | 1.35195   | 1.01919    | -0.407617   | 0.363804   |
| FZD7                   | 3.67052   | 3.06591    | -0.259668   | 0.693225   |
| LOC100506469           | 5.75069   | 5.52938    | -0.0566176  | 0.996453   |
| CNIH3                  | 0.0158073 | 0.0208138  | 0.39695     | 1          |
| SELRC1                 | 4.40525   | 7.21462    | 0.7117      | 0.0217078  |
| CCDC176                | 0.34178   | 0.192613   | -0.827361   | 1          |
| RANBP17                | 0.364075  | 0.292359   | -0.316494   | 0.783837   |
| KIAA2026               | 0.580639  | 0.558928   | -0.0549781  | 0.98297    |
| UPK1A                  | 0.0539676 | 0.124939   | 1.21106     | 1          |
| MRI1                   | 10.9668   | 12.9505    | 0.239863    | 0.639928   |
| C15orf40               | 13.2386   | 13.2234    | -0.00166026 | 0.999427   |
| STRADB                 | 17.0902   | 14.4461    | -0.242482   | 0.618032   |
| OGFOD3                 | 5.28953   | 7.34402    | 0.473432    | 0.619039   |
| MTMR4                  | 6.94234   | 5.00838    | -0.47108    | 0.106054   |
| HTT                    | 4.21195   | 3.96006    | -0.0889658  | 0.942878   |
| SCUBE1                 | 0.0112264 | 0          | #NAME?      | 1          |
| RWDD2A                 | 3.46956   | 3.03963    | -0.190857   | 0.967901   |
| ATP5G2                 | 737.793   | 669.351    | -0.140453   | 0.855981   |
| SCNM1,TNFAIP8L2,TNFAIP | 10.448    | 10.6956    | 0.033784    | 0.988657   |
| POM121C                | 10.2609   | 10.294     | 0.00465706  | 0.997535   |
| DNASE1L2               | 1.88069   | 3.47902    | 0.887417    | 0.10214    |
| MRC2                   | 0.0120568 | 0.00903057 | -0.416955   | 1          |
| DDX60L                 | 0.280552  | 0.26434    | -0.0858734  | 1          |
| FAM156A,FAM156B        | 0.454153  | 0.539424   | 0.248242    | 0.887209   |
| TNK2                   | 7.99992   | 8.33304    | 0.0588583   | 0.9755     |
| SF11                   | 6.32471   | 3.82241    | -0.726519   | 0.540366   |
| C5orf22                | 2.96807   | 3.23346    | 0.12355     | 0.920505   |
| SBF2                   | 2.00651   | 0.914812   | -1.13314    | 0.00134142 |
| AP4M1                  | 23.444    | 22.1943    | -0.0790336  | 0.993379   |
| APOL6                  | 0.146529  | 0.0586153  | -1.32184    | 1          |
| ARHGAP44               | 2.83907   | 2.49599    | -0.185805   | 0.978942   |
| MRM1                   | 7.42948   | 8.3433     | 0.167356    | 0.871902   |
| INPP1                  | 10.0847   | 11.5094    | 0.19065     | 0.793371   |
| ARID5A                 | 9.81246   | 8.90431    | -0.140111   | 0.899115   |
| TRADD                  | 9.60313   | 13.1044    | 0.448474    | 0.315903   |
| ZSWIM6                 | 1.96117   | 1.06654    | -0.878775   | 0.00672555 |
| PARP3                  | 11.1436   | 6.9754     | -0.675865   | 0.0194494  |
| ADNP                   | 9.6309    | 8.11045    | -0.247887   | 0.585481   |
| USP13                  | 1.491     | 1.66141    | 0.156129    | 0.869885   |
| MRPL45                 | 46.9322   | 37.398     | -0.327616   | 0.342801   |
| ATPAF2                 | 9.43089   | 10.8941    | 0.208079    | 0.778305   |
| KRCC1                  | 2.38773   | 1.06576    | -1.16376    | 0.00337323 |
| RGS16                  | 4.57529   | 7.91141    | 0.79007     | 0.00882987 |
| NTPCR                  | 36.5213   | 29.9567    | -0.285858   | 0.53058    |
| TTC39C                 | 22.2768   | 17.7217    | -0.330029   | 0.726892   |
| LOC100506746           | 0.548746  | 0.188799   | -1.53929    | 0.0235476  |
| SMC2                   | 4.32626   | 3.86049    | -0.164337   | 0.826299   |
| LOC285819              | 0.354956  | 0.304314   | -0.222083   | 0.980177   |
| TIA1                   | 6.34332   | 5.86745    | -0.112504   | 0.916105   |
| AKAP7                  | 0.83545   | 0.548654   | -0.606657   | 0.301426   |
| TMEM99                 | 9.0198    | 7.65654    | -0.236402   | 0.872985   |
| RNF2                   | 8.31041   | 7.49368    | -0.149244   | 0.853758   |
| CPNE3                  | 19.73     | 20.0903    | 0.0261089   | 0.989869   |
| OAZ2                   | 34.7976   | 37.6547    | 0.11384     | 0.912767   |
| ZNF107                 | 0.660673  | 0.743931   | 0.171234    | 0.900463   |
| DECR2                  | 17.4427   | 16.9512    | -0.0412417  | 0.984947   |
| VEZF1                  | 6.65431   | 5.62237    | -0.243112   | 0.613617   |
| DVL3                   | 15.7171   | 17.4331    | 0.149499    | 0.845125   |
| SECISBP2L              | 1.84143   | 1.44205    | -0.352699   | 0.416586   |
| SFXN5                  | 0.716451  | 1.83829    | 1.35942     | 0.00134142 |
| PLEKHN1                | 1.66947   | 1.14297    | -0.5466     | 0.416586   |
| KCTD6                  | 5.50023   | 6.43323    | 0.226053    | 0.768425   |
| ACVR2B                 | 1.18999   | 0.968646   | -0.296913   | 0.574307   |
| CDK5R1                 | 2.2867    | 3.55912    | 0.638252    | 0.0626518  |
| METTL1                 | 7.37516   | 18.7278    | 1.34444     | 0.00134142 |
| SGK1                   | 2.43729   | 3.35312    | 0.460226    | 0.300944   |
| MED23                  | 1.68024   | 1.32081    | -0.34725    | 0.50623    |
| CXCR6                  | 0.0226603 | 0.00964828 | -1.23182    | 1          |
| TMEM136                | 3.92111   | 2.87849    | -0.445952   | 0.212023   |
| FLJ31813               | 0.37555   | 0.283658   | -0.40485    | 0.788441   |
| UQCRB                  | 51.1188   | 53.1325    | 0.0557414   | 0.974631   |
| MZT2B                  | 370.623   | 453.578    | 0.291399    | 0.66589    |
| ADCK1                  | 3.29677   | 3.76332    | 0.190955    | 0.863051   |

|              |           |            |             |            |
|--------------|-----------|------------|-------------|------------|
| DIP2C        | 2.14443   | 1.50977    | -0.506265   | 0.1365     |
| LMOD1        | 0.137545  | 0.0549966  | -1.32249    | 1          |
| ZBTB47       | 1.53994   | 1.47579    | -0.0613873  | 0.979701   |
| TM2D3        | 17.8266   | 18.936     | 0.087101    | 0.950929   |
| LOC100127888 | 1.02003   | 1.47771    | 0.534757    | 0.958902   |
| HDAC5        | 15.5357   | 6.96491    | -1.15741    | 0.00134142 |
| FN1          | 0.0209695 | 0.0419005  | 0.998675    | 1          |
| YOD1         | 1.75031   | 1.24635    | -0.489901   | 0.180428   |
| FRMD6        | 15.7901   | 17.239     | 0.126659    | 0.890088   |
| H1F0         | 201.652   | 67.0878    | -1.58775    | 0.00134142 |
| CRKL         | 12.0803   | 13.0805    | 0.114755    | 0.907657   |
| SEMA4G       | 4.00734   | 3.14468    | -0.349732   | 0.887701   |
| ATXN7        | 1.51059   | 1.33024    | -0.183423   | 0.839401   |
| WASH3P       | 12.2091   | 10.6157    | -0.201752   | 0.771117   |
| THG1L        | 20.01     | 14.7791    | -0.43716    | 0.19586    |
| VIM          | 6.77548   | 3.53914    | -0.936922   | 0.00509212 |
| C14orf79     | 5.1172    | 6.64195    | 0.376252    | 0.425888   |
| LOC729059    | 0.0419338 | 0.0266422  | -0.6544     | 1          |
| ZSCAN30      | 1.1957    | 0.755432   | -0.662479   | 0.286255   |
| MAPK9        | 9.82284   | 15.1278    | 0.622988    | 0.0178668  |
| PUS10        | 0.355217  | 0.145554   | -1.28715    | 0.595511   |
| TMF1         | 2.75863   | 2.70267    | -0.029565   | 0.988533   |
| TBC1D17      | 10.8262   | 7.84697    | -0.464313   | 0.21617    |
| UNC119B      | 9.72941   | 10.188     | 0.0664512   | 0.965735   |
| CMTM4        | 11.0111   | 11.4487    | 0.0562298   | 0.974044   |
| STXBP1       | 15.3601   | 13.2347    | -0.214862   | 0.678263   |
| BCAR3        | 5.87349   | 3.67833    | -0.675169   | 0.0270114  |
| GCF2         | 10.9172   | 10.1987    | -0.0982123  | 0.959465   |
| SEC31A       | 5.90654   | 6.29852    | 0.0927001   | 0.943606   |
| DBNDD1       | 39.1179   | 40.1306    | 0.0368714   | 0.984917   |
| FARP1        | 12.9041   | 10.4729    | -0.301165   | 0.438087   |
| LOC255512    | 2.71795   | 2.45436    | -0.147169   | 0.959465   |
| ESD          | 53.5958   | 41.9143    | -0.354678   | 0.291528   |
| DNAAF2       | 6.31407   | 9.15297    | 0.53567     | 0.0914856  |
| MRPS6,SLC5A3 | 56.9481   | 93.8239    | 0.720307    | 0.010797   |
| GSDMD        | 43.9265   | 40.3872    | -0.121194   | 0.901132   |
| ZNF652       | 0.799825  | 0.856007   | 0.0979387   | 0.950929   |
| CACNB1       | 4.27833   | 5.79827    | 0.438575    | 0.252465   |
| TMEM18       | 15.7347   | 17.5178    | 0.154868    | 0.831777   |
| NNMT         | 0.0105935 | 0.00671613 | -0.657481   | 1          |
| KIF18A       | 1.38267   | 1.32362    | -0.0629644  | 0.979701   |
| SMAD2        | 5.18968   | 3.97756    | -0.383761   | 0.230041   |
| LOC401320    | 0.53711   | 0.277556   | -0.952438   | 0.0599768  |
| DIP2A        | 3.70492   | 3.27669    | -0.177203   | 0.859569   |
| BRMS1L       | 2.07919   | 3.83671    | 0.883846    | 0.00509212 |
| GMIP         | 14.6372   | 11.8942    | -0.299389   | 0.473708   |
| SAP30L       | 2.77886   | 3.52754    | 0.34417     | 0.386954   |
| FGF5         | 0.531049  | 0.690027   | 0.377809    | 0.557793   |
| LARP1B       | 4.82666   | 6.23305    | 0.368914    | 0.341046   |
| MAP3K14-AS1  | 0.771331  | 0.244193   | -1.65933    | 0.80896    |
| ADAT2        | 1.97814   | 2.75867    | 0.479823    | 0.14313    |
| FCHSD2       | 3.78069   | 3.37701    | -0.162904   | 0.851637   |
| VAMP3        | 21.5303   | 23.5844    | 0.131464    | 0.878089   |
| COG7         | 5.50753   | 5.02741    | -0.13159    | 0.91236    |
| ALDH1B1      | 19.2954   | 36.2862    | 0.911165    | 0.00134142 |
| OSBP2        | 4.65137   | 3.0623     | -0.60304    | 0.0601893  |
| IQCC         | 1.51253   | 1.95499    | 0.370194    | 0.593697   |
| FAM214A      | 1.26054   | 0.537852   | -1.22877    | 0.00134142 |
| LOC79015     | 0.0232097 | 0.00734695 | -1.65951    | 1          |
| MICAL1       | 15.1066   | 12.5223    | -0.270672   | 0.553489   |
| SSBP3        | 12.514    | 9.51753    | -0.394881   | 0.287787   |
| CNTRL        | 1.72412   | 0.893725   | -0.947956   | 0.00134142 |
| ARMCX2       | 0.135553  | 0.100629   | -0.429806   | 1          |
| CA11         | 10.8619   | 7.64455    | -0.50678    | 0.177737   |
| FAM13A       | 1.30541   | 1.32426    | 0.0206899   | 0.99351    |
| DYRK3        | 9.57584   | 5.84818    | -0.711411   | 0.0132924  |
| PLOD1        | 114.421   | 79.5064    | -0.525205   | 0.0615558  |
| TRAF3IP2     | 3.88015   | 2.92142    | -0.409444   | 0.311781   |
| TMEM101      | 36.5174   | 23.5398    | -0.633482   | 0.0167292  |
| HDAC3        | 65.3393   | 64.9744    | -0.00807924 | 0.997036   |
| FAM160A2     | 8.84706   | 8.2972     | -0.0925736  | 0.947247   |
| TBC1D5       | 3.53642   | 1.38434    | -1.35309    | 0.00134142 |
| LOC100507066 | 0.0170862 | 0.012124   | -0.494966   | 1          |
| PCID2        | 26.0064   | 24.2372    | -0.101641   | 0.929478   |
| NMT2         | 3.41659   | 3.18877    | -0.0995581  | 0.940106   |
| PRR24        | 22.0798   | 21.4309    | -0.04304    | 0.987423   |
| ETV6         | 1.92493   | 1.68498    | -0.192069   | 0.81342    |
| THAP9        | 0.922941  | 0.294399   | -1.64846    | 0.2815     |
| CRAT         | 74.8085   | 58.0193    | -0.36667    | 0.243246   |



|                      |            |            |            |            |
|----------------------|------------|------------|------------|------------|
| SOS1                 | 1.7713     | 2.04507    | 0.207342   | 0.753148   |
| HIBADH               | 12.2639    | 7.68047    | -0.675154  | 0.0194494  |
| PIAS2                | 9.46967    | 6.07125    | -0.641319  | 0.0150729  |
| EXOC1                | 5.62446    | 2.96359    | -0.924367  | 0.00134142 |
| CLSTN3               | 8.52018    | 5.2878     | -0.688216  | 0.0150729  |
| BMI1,COMMD3,COMMD3-B | 72.2636    | 53.2646    | -0.440091  | 0.292226   |
| FKBP9L               | 0.518688   | 0.278225   | -0.898613  | 0.167979   |
| ERO1L                | 34.7649    | 18.5397    | -0.907011  | 0.00134142 |
| BCAS1                | 0.00757995 | 0.00594053 | -0.351598  | 1          |
| VPS72                | 38.6182    | 39.3901    | 0.0285532  | 0.989268   |
| GCNT1                | 0.933642   | 1.11866    | 0.260831   | 0.723055   |
| NIPSNAP1             | 70.0198    | 47.8443    | -0.549415  | 0.0283563  |
| COL6A1               | 19.888     | 23.5183    | 0.241889   | 0.608789   |
| IL12A                | 1.41429    | 1.71805    | 0.280695   | 0.805672   |
| METTL14              | 3.02109    | 2.10021    | -0.524538  | 0.206941   |
| DZANK1               | 0.224179   | 0.269108   | 0.263532   | 1          |
| DDX50                | 25.7009    | 15.5706    | -0.722992  | 0.00337323 |
| MLLT6                | 15.9818    | 16.5359    | 0.0491733  | 0.977652   |
| BIN2                 | 0.00590738 | 0.0125704  | 1.08944    | 1          |
| PBX2                 | 26.7931    | 19.6665    | -0.446124  | 0.117923   |
| RGS3                 | 9.23248    | 8.63801    | -0.0960194 | 0.95534    |
| SPRY4                | 40.7059    | 51.278     | 0.333101   | 0.344865   |
| PRKCZ                | 17.0607    | 14.3932    | -0.245294  | 0.885414   |
| CCR10                | 22.5584    | 13.8086    | -0.708096  | 0.0576801  |
| C9orf66              | 0.326592   | 0.185821   | -0.813574  | 1          |
| FBXO9                | 5.61416    | 7.05716    | 0.330017   | 0.3703     |
| SLC44A3              | 0.843843   | 0.391558   | -1.10775   | 0.0297125  |
| THAP11               | 24.4928    | 45.8885    | 0.905775   | 0.371297   |
| PPP1R2               | 9.50316    | 8.21403    | -0.210317  | 0.703567   |
| MTF2                 | 5.54095    | 5.87497    | 0.0844461  | 0.952371   |
| C12orf66             | 0.93475    | 0.740359   | -0.336356  | 0.723154   |
| RAB4A,SPHAR          | 8.78267    | 11.3318    | 0.367641   | 0.290771   |
| ANKZF1               | 38.5366    | 23.7174    | -0.700285  | 0.00509212 |
| POLR2J2,UPK3BL       | 44.84      | 36.9597    | -0.278835  | 0.518637   |
| PAQR4                | 24.0376    | 29.0307    | 0.272285   | 0.848143   |
| SIPA1                | 13.0592    | 11.9714    | -0.125472  | 0.909694   |
| PFKFB3               | 19.0271    | 22.1006    | 0.216033   | 0.684119   |
| CEP97                | 0.44393    | 0.418408   | -0.0854223 | 0.977332   |
| LGR6                 | 0.0318865  | 0          | #NAME?     | 1          |
| RFIG                 | 62.0174    | 62.3519    | 0.0077587  | 0.997036   |
| LPCAT3               | 11.047     | 20.8261    | 0.914736   | 0.00134142 |
| RACGAP1              | 14.2334    | 12.6691    | -0.16797   | 0.802943   |
| KRT10                | 16.7361    | 21.85      | 0.384667   | 0.390876   |
| HGF                  | 3.05079    | 5.405      | 0.825115   | 0.0373672  |
| SLC25A30             | 0.448857   | 0.778944   | 0.795265   | 0.0908564  |
| MXRA8                | 0.437091   | 0.215411   | -1.02084   | 0.370833   |
| REV1                 | 2.48386    | 2.82336    | 0.184827   | 0.816012   |
| ZNF235               | 0.270117   | 0.271181   | 0.0056733  | 1          |
| HP1BP3               | 24.5387    | 21.8047    | -0.170419  | 0.794222   |
| PQLC1                | 37.3699    | 51.8767    | 0.473209   | 0.098844   |
| MOB3C                | 4.98378    | 5.63439    | 0.17702    | 0.830101   |
| FAM19A3              | 0.98454    | 0.461994   | -1.09158   | 0.102329   |
| TBCE                 | 4.66346    | 3.76799    | -0.307606  | 0.881073   |
| ARFIP2               | 9.15869    | 17.81      | 0.95947    | 0.00134142 |
| AKT3                 | 1.52252    | 0.939763   | -0.696094  | 0.0274653  |
| RNU11                | 29.2332    | 18.2337    | -0.681002  | 0.748064   |
| ZNF585B              | 0.830059   | 0.933738   | 0.169804   | 0.882497   |
| PTMS                 | 199.134    | 318.179    | 0.6761     | 0.00743393 |
| DHX32                | 12.3967    | 10.6706    | -0.216316  | 0.924371   |
| JHDM1D               | 1.73534    | 0.557585   | -1.63795   | 0.00134142 |
| SH2D5                | 0.392374   | 0.377702   | -0.0549826 | 0.989365   |
| SLC25A23             | 32.066     | 30.3221    | -0.0806746 | 0.951559   |
| NPTXR                | 0.227387   | 0.299738   | 0.398554   | 1          |
| PARVB                | 33.7901    | 31.9672    | -0.0800094 | 0.954559   |
| HMX3                 | 0.636869   | 0.328221   | -0.956328  | 0.633936   |
| APBB3                | 6.67952    | 3.25726    | -1.03609   | 0.00134142 |
| SNORA64              | 7.99057    | 5.97037    | -0.420478  | 0.980556   |
| RCAN3                | 3.01636    | 1.28599    | -1.22993   | 0.00134142 |
| PLGRKT               | 11.6666    | 7.85175    | -0.571292  | 0.126498   |
| CGB5                 | 0.17109    | 0.155634   | -0.136603  | 1          |
| MTR                  | 1.5827     | 1.13112    | -0.484634  | 0.148987   |
| ANXA11               | 63.6135    | 51.8149    | -0.295966  | 0.437712   |
| GPC2                 | 1.60339    | 2.3444     | 0.548095   | 0.315584   |
| ZNF548               | 1.45049    | 0.862834   | -0.749385  | 0.0357572  |
| ZSWIM4               | 5.58148    | 2.60689    | -1.09832   | 0.00134142 |
| UBL7                 | 48.5972    | 42.1813    | -0.204272  | 0.716391   |
| CDK14                | 0.0121789  | 0.00195272 | -2.64082   | 1          |
| ZNF654               | 1.53511    | 0.993423   | -0.627863  | 0.678263   |
| DOLK                 | 17.2089    | 22.8749    | 0.410606   | 0.876927   |

|              |            |            |            |            |
|--------------|------------|------------|------------|------------|
| NETO2        | 10.8834    | 21.9668    | 1.01319    | 0.00134142 |
| ARL2BP       | 32.0845    | 41.9033    | 0.385186   | 0.229414   |
| SHF          | 4.70265    | 2.24636    | -1.06589   | 0.00134142 |
| ATP12A       | 0.0126004  | 0.00259185 | -2.28142   | 1          |
| PRRG2        | 0.716429   | 0.833818   | 0.218908   | 0.938194   |
| NOTCH2NL     | 5.67158    | 4.61788    | -0.29652   | 0.477566   |
| NCOR1        | 1.45714    | 1.32858    | -0.133262  | 0.913628   |
| ZDHHC2       | 5.89682    | 4.31845    | -0.449423  | 0.168166   |
| FOXJ2        | 2.34461    | 1.8497     | -0.342054  | 0.465173   |
| SP1          | 7.28016    | 5.10479    | -0.512119  | 0.0648441  |
| VCCIP1       | 2.27979    | 2.14445    | -0.088291  | 0.950929   |
| BNC2         | 0.757866   | 0.323901   | -1.22639   | 0.00134142 |
| FAM188B,INMT | 0.702007   | 0.568939   | -0.303212  | 0.805942   |
| MMACHC       | 2.43434    | 3.26033    | 0.421489   | 0.986822   |
| TBC1D9B      | 27.1101    | 26.4433    | -0.0359297 | 0.984917   |
| IFI6         | 3.96967    | 4.02205    | 0.0189093  | 0.996014   |
| KIAA0895L    | 5.1033     | 3.94299    | -0.372142  | 0.675356   |
| CYTH2        | 17.1928    | 10.4701    | -0.715532  | 0.00593755 |
| SRCRB4D      | 0.529463   | 1.02404    | 0.951672   | 0.589726   |
| LTC4S        | 1.22902    | 0.979498   | -0.3274    | 0.941621   |
| CHD9         | 1.658      | 1.3991     | -0.244948  | 0.649685   |
| EMILIN3      | 3.33889    | 2.6609     | -0.327452  | 0.7578     |
| SLC1A6       | 0.00575317 | 0.00491065 | -0.228442  | 1          |
| TMEM135      | 2.22767    | 1.31112    | -0.76474   | 0.00743393 |
| TAF7         | 30.6229    | 37.9616    | 0.309928   | 0.401785   |
| TWSG1        | 7.9188     | 7.10101    | -0.157256  | 0.834095   |
| XPC          | 10.2878    | 7.74615    | -0.409382  | 0.210375   |
| DHX57        | 2.78872    | 4.24075    | 0.604717   | 0.042771   |
| LOC439994    | 2.93196    | 3.43201    | 0.227186   | 0.965148   |
| LOC100133612 | 0.0636644  | 0.0939054  | 0.560723   | 1          |
| ADA          | 20.2759    | 14.5487    | -0.478871  | 0.138798   |
| PAXBP1       | 9.44861    | 10.7787    | 0.190012   | 0.765576   |
| BST1         | 0.37455    | 0.483858   | 0.369424   | 0.849725   |
| SLC35D3      | 0.0239548  | 0.031008   | 0.372328   | 1          |
| ZBTB33       | 3.47311    | 4.43874    | 0.353921   | 0.339736   |
| JAM3         | 0.684379   | 1.61545    | 1.23907    | 0.00134142 |
| RAB11FIP3    | 14.4007    | 18.9031    | 0.392482   | 0.227772   |
| PDPR         | 1.70197    | 1.65949    | -0.0364692 | 0.987693   |
| FZR1         | 23.3457    | 21.4155    | -0.124499  | 0.898626   |
| HCAR2        | 0.00810234 | 0.0192042  | 1.24501    | 1          |
| CBX7         | 9.914      | 6.19908    | -0.677413  | 0.0156972  |
| SRRM3        | 11.0279    | 11.5762    | 0.0700036  | 0.966946   |
| MOSPD2       | 0.785432   | 0.382592   | -1.03768   | 0.0189207  |
| DARS         | 55.1717    | 34.3154    | -0.685073  | 0.00425224 |
| N4BP3        | 4.45442    | 4.8149     | 0.112266   | 0.924371   |
| COPG2,TSGA13 | 12.5687    | 8.13459    | -0.627689  | 0.237422   |
| ZNF26        | 4.07556    | 4.19804    | 0.0427165  | 0.9839     |
| PRR7-AS1     | 0.613356   | 0.781493   | 0.349509   | 0.986353   |
| GAB1         | 0.261088   | 0.218574   | -0.256418  | 1          |
| SIAH1        | 9.76667    | 7.25925    | -0.428045  | 0.730561   |
| FAM22D       | 0.108377   | 0.130584   | 0.268921   | 1          |
| GLI4         | 28.4787    | 14.6483    | -0.959144  | 0.00243047 |
| SRPX         | 12.2047    | 9.61494    | -0.344092  | 0.419017   |
| LCOR         | 1.23533    | 0.678836   | -0.863757  | 0.00672555 |
| PROX1        | 0.0391797  | 0.0273984  | -0.516013  | 1          |
| GPAT2        | 0.0761752  | 0.0521282  | -0.547259  | 1          |
| UNC13D       | 0.598345   | 0.254154   | -1.23527   | 0.0314167  |
| IL20RB       | 0.18039    | 0.189927   | 0.0743276  | 1          |
| NDRG4        | 4.29787    | 2.4377     | -0.818102  | 0.0114515  |
| CYP39A1      | 0.408417   | 0.18686    | -1.12808   | 0.0906031  |
| ESCO1        | 1.88948    | 1.8514     | -0.029377  | 0.990324   |
| CEP78        | 4.03069    | 5.82529    | 0.531303   | 0.10531    |
| TBC1D1       | 15.4084    | 12.0713    | -0.352139  | 0.342123   |
| EFCAB14      | 5.86303    | 7.33856    | 0.32385    | 0.37206    |
| KLF13        | 6.07214    | 6.19839    | 0.0296874  | 0.988019   |
| TBRG1        | 4.3416     | 5.63189    | 0.375394   | 0.540382   |
| SLC25A37     | 19.8337    | 24.4433    | 0.301483   | 0.483718   |
| RICTOR       | 1.44203    | 0.958138   | -0.589799  | 0.0599768  |
| SLC15A2      | 0.0199082  | 0.0112353  | -0.825316  | 1          |
| IDH3G        | 61.5856    | 63.7156    | 0.0490534  | 0.991767   |
| HID1         | 17.6909    | 10.2468    | -0.787832  | 0.00134142 |
| MST1R        | 4.75195    | 2.84759    | -0.738775  | 0.0132924  |
| GCC1         | 6.58854    | 6.70288    | 0.0248232  | 0.990958   |
| PTPN23       | 6.65888    | 6.92694    | 0.0569368  | 0.976756   |
| RILPL2       | 28.3461    | 31.2535    | 0.140863   | 0.868469   |
| KRTAP5-1     | 0.188906   | 0.158142   | -0.25645   | 1          |
| MAP3K2       | 1.39701    | 1.02249    | -0.450256  | 0.193036   |
| LY6K         | 0.155076   | 0.145688   | -0.0900926 | 1          |
| CBLN3        | 0.158476   | 0.151656   | -0.0634618 | 1          |

|              |           |            |            |            |
|--------------|-----------|------------|------------|------------|
| SPRN         | 2.47417   | 3.55463    | 0.522758   | 0.754197   |
| TMEM25       | 0.0524027 | 0.0526643  | 0.00718504 | 1          |
| PPFIA1       | 5.49961   | 5.42881    | -0.0186918 | 0.99351    |
| RAB15        | 11.1887   | 12.4497    | 0.154067   | 0.963669   |
| SAV1         | 13.3342   | 7.91283    | -0.752862  | 0.00134142 |
| VWA7         | 0.085934  | 0.057059   | -0.590773  | 1          |
| DLC1         | 19.1873   | 25.0673    | 0.385656   | 0.218449   |
| CALML4       | 1.98958   | 3.61925    | 0.863226   | 0.00425224 |
| GDF11        | 4.21825   | 5.73896    | 0.444143   | 0.619995   |
| SGK196       | 0.396614  | 0.589229   | 0.571092   | 0.575728   |
| LOC100134229 | 4.4071    | 2.41415    | -0.868313  | 0.0132924  |
| DNPH1        | 165.022   | 159.106    | -0.0526709 | 0.977039   |
| ZBTB44       | 2.66008   | 2.01285    | -0.402233  | 0.237255   |
| GAREML       | 7.00129   | 8.87426    | 0.342007   | 0.393638   |
| FAM117A      | 10.7685   | 8.08591    | -0.413329  | 0.269877   |
| BTC          | 0.0240521 | 0.00738473 | -1.70355   | 1          |
| LOC100505666 | 0.999492  | 0.785201   | -0.348133  | 0.981044   |
| PAR6A        | 15.9093   | 13.2244    | -0.266664  | 0.694828   |
| TMEM44       | 14.025    | 7.984      | -0.812812  | 0.00743393 |
| FOXP1        | 3.15829   | 2.45671    | -0.362418  | 0.657112   |
| LOC100527964 | 1.26873   | 1.59693    | 0.331915   | 0.726571   |
| PAK1         | 19.1457   | 12.8505    | -0.575198  | 0.0235476  |
| LRRK1        | 1.25513   | 1.42554    | 0.183667   | 0.854482   |
| VAMP2        | 28.3747   | 15.7723    | -0.847208  | 0.00134142 |
| MDM1         | 2.13594   | 2.30191    | 0.107958   | 0.950929   |
| COG6         | 2.63933   | 1.55931    | -0.759262  | 0.0194494  |
| PDP2         | 1.97373   | 3.74458    | 0.923879   | 0.00134142 |
| LINC00620    | 0.0312557 | 0          | #NAME?     | 1          |
| LOC283922    | 0.493604  | 0.540649   | 0.131337   | 0.963209   |
| KAAG1        | 0.550155  | 0.289476   | -0.926395  | 0.710885   |
| OVOL2        | 3.42008   | 4.96189    | 0.536858   | 0.266528   |
| GNRH1        | 0.632246  | 0.92364    | 0.546846   | 0.502917   |
| LOC283403    | 0.0119863 | 0          | #NAME?     | 1          |
| HELB         | 0.315956  | 0.275734   | -0.196447  | 1          |
| XAB2         | 29.6668   | 26.092     | -0.185244  | 0.77409    |
| HERC2P4      | 0.995329  | 1.2749     | 0.357138   | 0.775809   |
| OLFML3       | 0.018141  | 0.0116254  | -0.641973  | 1          |
| NPHP4        | 2.11133   | 2.02862    | -0.0576514 | 0.99351    |
| PHC1         | 3.83157   | 2.98125    | -0.362018  | 0.928354   |
| PSD          | 0.884656  | 0.375947   | -1.23459   | 0.780271   |
| NUDCD3       | 11.8684   | 13.1861    | 0.151885   | 0.83719    |
| TRMT10A      | 0.574572  | 0.774804   | 0.431342   | 0.498268   |
| RAB11FIP2    | 1.32737   | 1.38882    | 0.0652899  | 0.976326   |
| DPH5         | 17.1051   | 15.8846    | -0.106801  | 0.923433   |
| DCAF8        | 12.9329   | 12.2819    | -0.0745104 | 0.959465   |
| GALNT12      | 7.36333   | 4.72509    | -0.640018  | 0.0370005  |
| AKR1A1       | 122.16    | 108.603    | -0.169714  | 0.804229   |
| PRELID2      | 6.52523   | 2.5957     | -1.3299    | 0.00134142 |
| INPPL1       | 16.0264   | 14.0632    | -0.188525  | 0.751417   |
| FLCN         | 15.8938   | 8.02161    | -0.986497  | 0.00134142 |
| PLA2G4A      | 1.43073   | 0.736902   | -0.957204  | 0.0194494  |
| KCNJ11       | 5.67905   | 4.33429    | -0.389855  | 0.37983    |
| SKI          | 7.90061   | 10.4983    | 0.410118   | 0.220496   |
| GP5M1        | 45.324    | 55.2485    | 0.285661   | 0.518295   |
| IQCH-AS1     | 3.09873   | 4.53203    | 0.548483   | 0.954907   |
| TMEM167B     | 7.76287   | 6.41634    | -0.27484   | 0.55302    |
| MBNL1-AS1    | 0.114821  | 0.124703   | 0.119111   | 1          |
| NDUFA2       | 113.384   | 145.062    | 0.355447   | 0.392645   |
| TIMM8A       | 9.05752   | 18.4064    | 1.02302    | 0.00243047 |
| ZNF174       | 3.67363   | 5.71378    | 0.637237   | 0.0868006  |
| RAB1F        | 3.04159   | 4.94295    | 0.700545   | 0.0235476  |
| TEAD1        | 4.03027   | 3.17213    | -0.345428  | 0.320834   |
| CD3EAP       | 1.91831   | 5.016      | 1.3867     | 0.747687   |
| TNFAIP1      | 11.5824   | 11.5286    | -0.0067249 | 0.998514   |
| CHD1         | 2.68569   | 4.13095    | 0.621179   | 0.0235476  |
| AKR1B1       | 0.0107316 | 0.00920335 | -0.221638  | 1          |
| TMEM14C      | 151.419   | 117.99     | -0.359888  | 0.280157   |
| FKBP9        | 9.31085   | 5.43046    | -0.777839  | 0.00593755 |
| HOXB8        | 3.14732   | 5.65217    | 0.844679   | 0.0497748  |
| ARVCF        | 13.9341   | 8.84785    | -0.655218  | 0.496877   |
| FUT1         | 3.14407   | 4.80453    | 0.611763   | 0.0626518  |
| C10orf95     | 1.26465   | 1.5982     | 0.337701   | 0.967901   |
| ZNF25        | 1.46791   | 0.65319    | -1.16819   | 0.00134142 |
| UNC5B        | 1.69786   | 1.93119    | 0.185768   | 0.845125   |
| ZNF556       | 1.1246    | 1.98641    | 0.820755   | 0.0891066  |
| CORO2A       | 5.63471   | 3.92181    | -0.52282   | 0.0637115  |
| SNHG12       | 26.4885   | 52.7023    | 0.992501   | 0.0390303  |
| RC3H1        | 1.27292   | 1.3271     | 0.060138   | 0.976618   |
| CCDC159      | 2.87039   | 2.08952    | -0.458079  | 0.559828   |

|              |            |            |            |            |
|--------------|------------|------------|------------|------------|
| RSBN1        | 1.9752     | 1.86638    | -0.081757  | 0.958814   |
| GLTSCR1L     | 0.581779   | 0.396038   | -0.554831  | 0.289884   |
| LDHA         | 940.22     | 884.905    | -0.0874748 | 0.954768   |
| WDR62        | 6.54336    | 8.02288    | 0.294089   | 0.500126   |
| TOP3B        | 7.40505    | 8.00952    | 0.113208   | 0.926446   |
| SEC14L2      | 7.55855    | 6.183      | -0.289803  | 0.54641    |
| C12orf49     | 6.16565    | 7.84725    | 0.347934   | 0.391936   |
| SDCBP        | 71.5103    | 62.9208    | -0.184614  | 0.762867   |
| GLTSCR1      | 2.38005    | 2.98317    | 0.325857   | 0.600983   |
| ZNF557       | 1.80451    | 1.7072     | -0.0799816 | 0.963669   |
| UQCRC2       | 86.4006    | 69.0667    | -0.32305   | 0.360044   |
| COX7C        | 1154.72    | 1218.36    | 0.0773971  | 0.95534    |
| FAM153C      | 0.0139685  | 0.0221978  | 0.668241   | 1          |
| TSTD3        | 0.804997   | 0.56619    | -0.507697  | 0.50623    |
| USP19        | 8.55645    | 9.02131    | 0.0763249  | 0.958814   |
| TMOD3        | 3.89829    | 3.35845    | -0.215046  | 0.729849   |
| CDC42EP3     | 1.96856    | 2.19702    | 0.158412   | 0.873144   |
| WDR55        | 15.7643    | 24.0004    | 0.606395   | 0.0447795  |
| GAS2L1       | 15.5735    | 18.9093    | 0.280002   | 0.572126   |
| EEF1A2       | 0.0308097  | 0          | #NAME?     | 1          |
| OAZ3         | 3.17187    | 3.56812    | 0.16983    | 0.986822   |
| SEC14L5      | 0.00255399 | 0.0038124  | 0.577946   | 1          |
| FRAT2        | 13.8098    | 18.7111    | 0.438205   | 0.202966   |
| LOC100506668 | 3.78283    | 5.88768    | 0.638232   | 0.925516   |
| UTS2         | 4.98327    | 3.41732    | -0.544227  | 0.375498   |
| CARKD        | 21.5372    | 26.5756    | 0.303266   | 0.445688   |
| SETD6        | 4.06058    | 6.16028    | 0.601311   | 0.807024   |
| GRIK5        | 0.316684   | 0.243484   | -0.379216  | 1          |
| PABPC1L      | 5.46263    | 4.03197    | -0.43811   | 0.360993   |
| ANAPC10      | 6.09971    | 6.16317    | 0.0149324  | 0.997532   |
| TMPRSS9      | 0.0323947  | 0.0468703  | 0.532918   | 1          |
| FAM179B      | 0.6307     | 0.663749   | 0.0736824  | 0.976756   |
| DZIP3        | 0.958388   | 0.327433   | -1.54941   | 0.117699   |
| C1orf226     | 1.57809    | 1.54468    | -0.0308729 | 0.991305   |
| ANGPTL6      | 3.3727     | 4.99212    | 0.565747   | 0.653383   |
| TG           | 0.00184332 | 0.00315979 | 0.777517   | 1          |
| INHBC        | 0.0169452  | 0.0319725  | 0.915957   | 1          |
| AES          | 188.055    | 197.353    | 0.0696202  | 0.961224   |
| CCDC50       | 7.56209    | 3.66177    | -1.04624   | 0.00134142 |
| CEP170       | 0.00162856 | 0          | #NAME?     | 1          |
| GIT1         | 38.9105    | 37.3804    | -0.0578769 | 0.970729   |
| GGA3         | 10.9897    | 11.0516    | 0.00809821 | 0.997535   |
| PMS2P1       | 10.6856    | 8.12179    | -0.395798  | 0.890666   |
| ANKLE1       | 0.415074   | 0.741909   | 0.837874   | 0.166117   |
| SLC30A9      | 13.4547    | 9.5092     | -0.500717  | 0.0844105  |
| TBC1D22B     | 3.76379    | 2.92029    | -0.366073  | 0.425716   |
| KCNC1        | 0.00637256 | 0.00458971 | -0.473469  | 1          |
| RAVER2       | 4.63829    | 5.02511    | 0.115562   | 0.973723   |
| SBF1         | 8.73127    | 12.8792    | 0.560777   | 0.183567   |
| ARRDC2       | 15.1622    | 19.9951    | 0.399166   | 0.236474   |
| BTN3A2       | 6.56966    | 5.22837    | -0.329458  | 0.448465   |
| HSPB9        | 0.0943469  | 0.440398   | 2.22276    | 0.430215   |
| SCRN2        | 42.8388    | 31.5676    | -0.440476  | 0.148094   |
| TMEM133      | 0.582569   | 0.531706   | -0.131801  | 0.960763   |
| NDUFB5       | 62.0515    | 43.5994    | -0.509156  | 0.064193   |
| USP40        | 2.9744     | 2.46022    | -0.273812  | 0.615468   |
| KIF3A        | 1.53871    | 2.07233    | 0.429528   | 0.241449   |
| DEDD2        | 36.6329    | 66.1041    | 0.851598   | 0.00243047 |
| DENND1A      | 12.5177    | 8.5274     | -0.553792  | 0.0662578  |
| TULP4        | 1.3647     | 1.9449     | 0.511113   | 0.128873   |
| ZNF837       | 1.97776    | 0.814842   | -1.27928   | 0.0451064  |
| ZNF271       | 3.22232    | 4.84456    | 0.588266   | 0.0394523  |
| MMP14        | 13.465     | 11.3217    | -0.250124  | 0.611988   |
| DUSP4        | 0.515144   | 0.507455   | -0.0216948 | 0.994615   |
| TMEM200B     | 6.23584    | 7.17863    | 0.203125   | 0.921047   |
| CDK3,TEN1    | 36.8273    | 48.9847    | 0.411555   | 0.532823   |
| MIDN         | 13.3554    | 16.3437    | 0.291305   | 0.509535   |
| CES3         | 5.50164    | 3.72774    | -0.561558  | 0.102638   |
| FAM89B       | 32.8708    | 73.866     | 1.16811    | 0.00134142 |
| RUFY3        | 1.59255    | 2.36925    | 0.573089   | 0.0995023  |
| SREBF1       | 22.238     | 29.6858    | 0.416745   | 0.25146    |
| MYADML2      | 0.0819708  | 0.0630405  | -0.378832  | 1          |
| IQGAP3       | 8.73568    | 4.41625    | -0.984098  | 0.00134142 |
| RLF          | 3.67304    | 2.89815    | -0.341843  | 0.396027   |
| RASSF7       | 35.5575    | 51.3927    | 0.531409   | 0.064193   |
| LDB1         | 17.6221    | 18.1943    | 0.0461006  | 0.979875   |
| RNF214       | 3.07308    | 1.52184    | -1.01387   | 0.108219   |
| C9orf114     | 31.3817    | 51.5191    | 0.715182   | 0.00425224 |
| MINK1        | 17.6365    | 16.8505    | -0.0657728 | 0.967901   |

|              |            |            |             |            |
|--------------|------------|------------|-------------|------------|
| RNF44        | 9.00513    | 6.40383    | -0.491812   | 0.117401   |
| RAB9A        | 7.44882    | 7.54586    | 0.0186734   | 0.99451    |
| DUS4L        | 4.89101    | 1.97702    | -1.3068     | 0.293988   |
| QPCTL        | 16.8064    | 13.3646    | -0.330594   | 0.411727   |
| ZBTB11       | 1.68947    | 2.92317    | 0.790964    | 0.0183825  |
| TRAPPC2      | 10.421     | 10.2899    | -0.0182634  | 0.99351    |
| BIRC5        | 40.2348    | 64.5709    | 0.682442    | 0.00337323 |
| DGKB         | 0.00173032 | 0.00102526 | -0.755048   | 1          |
| RNASEH2C     | 21.0217    | 30.9373    | 0.557466    | 0.092295   |
| TOP2A        | 10.0189    | 8.9822     | -0.157584   | 0.825896   |
| ZNF587       | 1.2395     | 1.38009    | 0.15501     | 0.88576    |
| SUOX         | 5.35848    | 5.98829    | 0.160318    | 0.874344   |
| ARHGEF9      | 1.93656    | 1.31944    | -0.55357    | 0.142344   |
| NLRP12       | 0.00597506 | 0.00731021 | 0.290959    | 1          |
| ST6GAL2      | 0.00199927 | 0.0183564  | 3.19874     | 1          |
| ZNF512       | 4.04835    | 6.71276    | 0.729572    | 0.009453   |
| SLFN5        | 1.01212    | 0.273053   | -1.89012    | 0.00134142 |
| CSF1         | 2.9005     | 4.72745    | 0.704762    | 0.030994   |
| ZBTB40       | 2.20008    | 2.96813    | 0.431996    | 0.189199   |
| VEGFA        | 22.7009    | 14.3513    | -0.661576   | 0.009453   |
| ABI3BP       | 0.0240819  | 0.0456447  | 0.922498    | 1          |
| NFATC3       | 3.8439     | 6.13882    | 0.675389    | 0.169417   |
| LOC441454    | 0.255147   | 0.365159   | 0.517196    | 0.73058    |
| FHL3         | 33.9603    | 33.7943    | -0.00707032 | 0.997036   |
| LOC642361    | 1.9489     | 2.45307    | 0.331928    | 0.767826   |
| PIP4K2B      | 6.96026    | 10.0827    | 0.53467     | 0.0551188  |
| SNHG11       | 12.9519    | 9.96075    | -0.378841   | 0.421895   |
| C12orf5      | 2.431      | 4.1837     | 0.783231    | 0.00425224 |
| TMBIM4       | 28.5669    | 19.7441    | -0.53292    | 0.0554961  |
| SLC27A5      | 18.325     | 21.4812    | 0.229259    | 0.679631   |
| SERPINB1     | 53.7914    | 28.7348    | -0.904577   | 0.00134142 |
| NKX3-1       | 3.1964     | 5.4589     | 0.772162    | 0.010797   |
| ARL8A        | 24.3942    | 26.1162    | 0.098404    | 0.935187   |
| HDLBP        | 27.8855    | 27.3652    | -0.027175   | 0.99351    |
| GSTK1        | 124.886    | 113.979    | -0.13184    | 0.877493   |
| ZNF443       | 1.38356    | 1.97794    | 0.515612    | 0.255138   |
| AEBP2        | 1.63615    | 1.74142    | 0.0899582   | 0.958814   |
| RABGAP1      | 4.00606    | 3.73504    | -0.101058   | 0.93616    |
| PIK3C2B      | 1.43277    | 0.898998   | -0.672421   | 0.0634431  |
| ZBED5        | 9.37521    | 8.50903    | -0.139856   | 0.876899   |
| MTHFD2L      | 0.783434   | 0.637641   | -0.297067   | 0.781956   |
| LOC100506714 | 1.35904    | 1.39832    | 0.0411046   | 0.991459   |
| MTERFD2      | 8.36542    | 9.99269    | 0.256434    | 0.721145   |
| SRSF11       | 29.3466    | 32.7213    | 0.157037    | 0.820633   |
| ARHGEF39     | 6.53598    | 6.40334    | -0.0295773  | 0.991305   |
| LOC541473    | 0.556877   | 0.892813   | 0.681001    | 0.568186   |
| ZNF124       | 1.95929    | 2.18019    | 0.15412     | 0.922247   |
| LOC730183    | 2.36897    | 3.61106    | 0.60816     | 0.579257   |
| PLCD3        | 17.5898    | 19.6037    | 0.156388    | 0.836262   |
| C16orf58     | 40.5499    | 25.6437    | -0.661095   | 0.00818401 |
| LRRRC61      | 41.8526    | 77.2373    | 0.88398     | 0.00425224 |
| NUDT8        | 41.768     | 45.3103    | 0.117441    | 0.923867   |
| RBFA         | 5.06183    | 6.34655    | 0.326311    | 0.397842   |
| CBFA2T3      | 1.80779    | 2.40377    | 0.41107     | 0.471178   |
| KCNQ1        | 10.5677    | 5.12565    | -1.04385    | 0.030165   |
| ZFYVE1       | 6.92651    | 4.82669    | -0.521095   | 0.14176    |
| CHN2         | 0.500921   | 0.140116   | -1.83796    | 0.00134142 |
| LIG4         | 0.869042   | 1.58989    | 0.871429    | 0.010797   |
| TMEM67       | 1.23982    | 0.730781   | -0.762622   | 0.036221   |
| SSH1         | 5.55709    | 5.74297    | 0.0474688   | 0.979701   |
| COA5         | 9.17939    | 7.768      | -0.240856   | 0.680566   |
| TAF9B        | 8.2684     | 5.40241    | -0.614005   | 0.0297125  |
| NCKIPSD      | 22.0275    | 14.477     | -0.605547   | 0.0278845  |
| LOC100130776 | 69.2791    | 66.9157    | -0.0500767  | 0.978196   |
| FAM86EP      | 0.660189   | 0.667513   | 0.0159167   | 0.996453   |
| TMEM129      | 23.5668    | 21.5121    | -0.131606   | 0.885624   |
| CUL5         | 1.97528    | 2.19808    | 0.154182    | 0.870466   |
| FBXO48       | 0.143858   | 0.119298   | -0.270067   | 1          |
| TPCN1        | 5.06311    | 7.17159    | 0.50227     | 0.0941664  |
| MLLT3        | 3.58968    | 1.25104    | -1.52072    | 0.00134142 |
| CAMLG        | 49.5728    | 25.2514    | -0.973184   | 0.00134142 |
| BAG4         | 3.72917    | 4.56481    | 0.2917      | 0.817471   |
| RBP5         | 0.181402   | 0.175116   | -0.0508789  | 1          |
| EIF2D        | 27.078     | 19.8426    | -0.448518   | 0.123328   |
| GSDMA        | 0.00766592 | 0          | #NAME?      | 1          |
| LOC389641    | 4.67783    | 2.67886    | -0.804219   | 0.0292254  |
| CHAMP1       | 4.63673    | 4.09115    | -0.1806     | 0.817127   |
| ZNF468       | 2.21147    | 1.98469    | -0.156092   | 0.883938   |
| RGS10        | 142.617    | 118.722    | -0.264567   | 0.539577   |

|                |            |           |             |            |
|----------------|------------|-----------|-------------|------------|
| ZSCAN2         | 6.19444    | 4.43822   | -0.480994   | 0.486422   |
| HEATR5B        | 1.77664    | 1.33398   | -0.413409   | 0.320489   |
| PTPRK          | 1.37282    | 0.899459  | -0.610018   | 0.0972878  |
| NPIP           | 45.7899    | 50.7687   | 0.148911    | 0.850392   |
| LOC100505715   | 0.16032    | 0.228943  | 0.51403     | 1          |
| SRPK3          | 0.0246931  | 0.0106996 | -1.20654    | 1          |
| UHRF2          | 5.57131    | 5.49409   | -0.020135   | 0.992797   |
| ATAD2B         | 0.339385   | 0.297292  | -0.191044   | 1          |
| ZNF212         | 8.4545     | 6.53363   | -0.371835   | 0.345217   |
| ZNF853         | 0.0717795  | 0.155969  | 1.11961     | 1          |
| FOXJ3          | 8.10814    | 7.59985   | -0.0934013  | 0.937845   |
| ARHGEF11       | 2.64625    | 2.68861   | 0.0229097   | 0.992797   |
| SQRDL          | 10.489     | 6.52901   | -0.683943   | 0.0235476  |
| STARD4         | 1.65944    | 1.22017   | -0.443619   | 0.466443   |
| DYNC112        | 12.0695    | 10.9829   | -0.136104   | 0.870747   |
| ZNF639         | 9.11728    | 9.74098   | 0.0954628   | 0.93549    |
| ARHGEF26       | 0.146845   | 0.119536  | -0.296846   | 1          |
| MYO18A,TIAF1   | 9.51652    | 8.96785   | -0.0856728  | 0.962618   |
| LOC728989      | 0.0166098  | 0.0141519 | -0.231044   | 1          |
| ZNF480         | 1.36616    | 1.48577   | 0.121078    | 0.928172   |
| TMEM231        | 9.96677    | 5.7347    | -0.797407   | 0.00743393 |
| JUND           | 127.576    | 106.072   | -0.266317   | 0.525686   |
| TPRG1L         | 16.2833    | 26.1919   | 0.685726    | 0.00337323 |
| FAM209B        | 0.805434   | 1.07469   | 0.416077    | 0.815099   |
| FAM122C        | 0.437286   | 0.205956  | -1.08624    | 0.784181   |
| ZNF7           | 15.4848    | 12.7204   | -0.283713   | 0.518637   |
| OLA1           | 43.6275    | 32.7501   | -0.413737   | 0.165928   |
| MKL1           | 4.42786    | 5.77056   | 0.382102    | 0.678791   |
| ZNF561         | 4.248      | 4.80093   | 0.176529    | 0.81082    |
| KIAA1522       | 12.6386    | 9.14308   | -0.467079   | 0.152899   |
| ZBTB8A         | 1.58354    | 1.26764   | -0.321004   | 0.509535   |
| EXD2           | 4.2917     | 3.69268   | -0.216882   | 0.725752   |
| PRKACA         | 18.3485    | 20.6686   | 0.171777    | 0.808994   |
| MPPE1          | 8.51158    | 6.18632   | -0.460344   | 0.722205   |
| ZNF204P        | 1.67128    | 0.996281  | -0.746328   | 0.061906   |
| SPAG7          | 36.1481    | 39.4995   | 0.127913    | 0.893663   |
| LGALS3BP       | 38.3434    | 32.3875   | -0.243542   | 0.602148   |
| TOMM20         | 57.011     | 54.9812   | -0.0523019  | 0.976618   |
| CDC42EP4       | 8.49081    | 8.12243   | -0.0639913  | 0.972176   |
| P2RX4          | 12.3778    | 6.34637   | -0.96375    | 0.00243047 |
| TUBA4A         | 82.2926    | 180.899   | 1.13635     | 0.00134142 |
| C7orf60        | 3.29903    | 2.71787   | -0.279569   | 0.603292   |
| ZSCAN32        | 4.11747    | 6.38636   | 0.633237    | 0.0373672  |
| C22orf29,GNB1L | 13.3437    | 24.0866   | 0.852074    | 0.064193   |
| LOC728730      | 0.405618   | 0.110502  | -1.87605    | 0.0126858  |
| QTRT1          | 48.1104    | 59.367    | 0.303313    | 0.448101   |
| ZNF232         | 9.30667    | 18.1036   | 0.959936    | 0.00134142 |
| MT1IP          | 0.00986366 | 0.0239054 | 1.27714     | 1          |
| ITCH           | 3.9909     | 3.25066   | -0.29598    | 0.483389   |
| PIF1           | 5.82218    | 8.83084   | 0.600991    | 0.0637115  |
| AP2A2          | 11.664     | 13.6276   | 0.224466    | 0.656082   |
| NAA16          | 2.48644    | 4.11573   | 0.727065    | 0.0120701  |
| CMTM2          | 0.136987   | 0.445532  | 1.70149     | 0.227772   |
| PRSS12         | 1.55409    | 0.893806  | -0.798034   | 0.0283563  |
| SH3GLB2        | 131.46     | 108.365   | -0.278722   | 0.506512   |
| RAB8B          | 4.82093    | 3.53405   | -0.447986   | 0.168676   |
| INTS1          | 17.0052    | 20.7258   | 0.285451    | 0.481015   |
| LIMS2          | 0.0274531  | 0.011412  | -1.26643    | 1          |
| HM13-AS1       | 0.326622   | 0.133714  | -1.28847    | 1          |
| UNG            | 27.8575    | 42.4026   | 0.60609     | 0.0172978  |
| SNHG8          | 314.375    | 291.46    | -0.10919    | 0.932468   |
| ZNHIT3         | 74.7113    | 71.6305   | -0.0607534  | 0.979701   |
| RPP38          | 25.4946    | 33.879    | 0.4102      | 0.217352   |
| RBM48          | 6.61913    | 6.08695   | -0.120922   | 0.923433   |
| MZT2A          | 338.137    | 378.573   | 0.162964    | 0.860953   |
| FBXO34         | 4.38135    | 3.72175   | -0.235396   | 0.698337   |
| SCO2,TYMP      | 64.8275    | 118.16    | 0.866067    | 0.0314167  |
| MCOLN2         | 5.43974    | 7.26586   | 0.417595    | 0.241449   |
| FOXO1          | 1.07644    | 1.33542   | 0.311026    | 0.621429   |
| ISCA2          | 30.0535    | 24.3462   | -0.303835   | 0.461203   |
| ZNF280D        | 2.99679    | 2.06264   | -0.538928   | 0.211048   |
| MCCC1          | 13.6633    | 8.29609   | -0.719799   | 0.00593755 |
| PARD6G         | 2.48381    | 2.46923   | -0.00849379 | 0.997036   |
| INTS5          | 11.7302    | 15.6481   | 0.415761    | 0.209943   |
| TNKS1BP1       | 10.1928    | 10.1131   | -0.0113192  | 0.995709   |
| VIPAS39        | 4.60081    | 2.81387   | -0.709332   | 0.0340561  |
| PTPN18         | 14.4343    | 11.0347   | -0.38745    | 0.24199    |
| ARHGAP27       | 3.39954    | 3.08217   | -0.141392   | 0.964222   |
| NPDC1          | 236.264    | 268.669   | 0.185428    | 0.764178   |

|             |            |            |            |            |
|-------------|------------|------------|------------|------------|
| LOC257396   | 1.1313     | 0.945478   | -0.258861  | 0.828054   |
| VPS28       | 292        | 280.441    | -0.0582701 | 0.972228   |
| PIIP5K1     | 4.07871    | 3.26663    | -0.32031   | 0.810878   |
| CYP21A2     | 0.033995   | 0.0314531  | -0.112117  | 1          |
| TNRC6C      | 0.464436   | 0.488613   | 0.0732146  | 0.98038    |
| CAPG        | 126.952    | 111.093    | -0.192513  | 0.739871   |
| PUM2        | 11.2576    | 11.1433    | -0.0147265 | 0.994269   |
| SOGA2       | 3.33027    | 4.38784    | 0.397873   | 0.282566   |
| WDR85       | 32.748     | 54.9248    | 0.746048   | 0.00337323 |
| PCGF1       | 17.1906    | 16.1236    | -0.0924504 | 0.974478   |
| ZNF358      | 51.3063    | 31.4558    | -0.705812  | 0.00882987 |
| KIAA1468    | 1.95612    | 1.87011    | -0.0648672 | 0.973723   |
| DHTKD1      | 3.3199     | 1.67177    | -0.989762  | 0.00134142 |
| DHX29       | 3.0307     | 4.39283    | 0.5355     | 0.0694871  |
| ULK3        | 22.8854    | 27.0455    | 0.24096    | 0.621063   |
| SLC25A4     | 15.329     | 18.1139    | 0.240833   | 0.602446   |
| CTSB        | 48.0239    | 44.3892    | -0.113542  | 0.907929   |
| VPS33B      | 7.41313    | 5.53904    | -0.420446  | 0.262818   |
| TRIB2       | 1.00465    | 0.942746   | -0.0917527 | 0.972601   |
| TROAP       | 43.4982    | 65.0789    | 0.581234   | 0.129875   |
| UBE2D4      | 3.2817     | 4.48952    | 0.452118   | 0.284624   |
| ZNF75D      | 1.22205    | 1.54065    | 0.334234   | 0.622998   |
| ELL2        | 3.868      | 2.42834    | -0.67162   | 0.0162707  |
| ZNF132      | 0.176871   | 0.403372   | 1.18942    | 0.0601893  |
| UXT         | 124.63     | 139.011    | 0.15755    | 0.829023   |
| MED18       | 11.2889    | 12.3092    | 0.124837   | 0.908586   |
| SEMA4B      | 14.2345    | 15.9054    | 0.160125   | 0.832742   |
| GORASP1     | 6.75473    | 8.30552    | 0.298174   | 0.506591   |
| MMS19       | 22.2107    | 16.9236    | -0.39222   | 0.217848   |
| BTAF1       | 3.10969    | 2.62662    | -0.243564  | 0.638558   |
| PGPEP1      | 6.83605    | 3.95932    | -0.787912  | 0.00134142 |
| OTUD7B      | 2.25328    | 2.43033    | 0.109123   | 0.931471   |
| FAM193A     | 3.83842    | 3.43854    | -0.158718  | 0.86601    |
| XPA         | 7.75851    | 10.2251    | 0.398265   | 0.301125   |
| FAM57A      | 25.6336    | 26.9333    | 0.0713543  | 0.961224   |
| ZNF285      | 0.0128605  | 0.0270286  | 1.07154    | 1          |
| USE1        | 36.013     | 31.0406    | -0.214363  | 0.739331   |
| ALS2CR8     | 0.100409   | 0.0520197  | -0.948762  | 1          |
| ATG2B       | 1.03833    | 0.900281   | -0.205821  | 0.787261   |
| USP48       | 7.56254    | 7.23876    | -0.0631283 | 0.969987   |
| C3orf45     | 0.0123846  | 0.0637526  | 2.36394    | 1          |
| TSPYL4      | 2.69774    | 4.07168    | 0.593872   | 0.0668932  |
| PKP3        | 41.5838    | 32.0792    | -0.374385  | 0.258219   |
| ELAVL3      | 0.00417313 | 0.00962697 | 1.20595    | 1          |
| ORM1        | 0.021449   | 0          | #NAME?     | 1          |
| ETFB        | 87.2026    | 81.9266    | -0.0900397 | 0.944538   |
| ZNF506      | 2.03519    | 1.528      | -0.413517  | 0.374906   |
| CATSPER2    | 0.596025   | 0.292132   | -1.02875   | 0.135065   |
| C2orf68     | 3.85532    | 2.54712    | -0.597985  | 0.684119   |
| TSC2        | 9.45704    | 9.8303     | 0.0558471  | 0.982412   |
| AP1S2       | 13.199     | 13.408     | 0.0226709  | 0.991614   |
| LCORL       | 2.97589    | 2.61854    | -0.184557  | 0.933023   |
| MTUS2-AS1   | 0.0435715  | 0.0766064  | 0.814079   | 1          |
| MRPL17      | 45.2991    | 45.3602    | 0.00194496 | 0.99862    |
| BBS4        | 5.30906    | 3.05082    | -0.799258  | 0.0101293  |
| LEPR.LEPROT | 7.60042    | 7.04896    | -0.108668  | 0.979701   |
| PHF2        | 4.37787    | 4.01908    | -0.123366  | 0.91236    |
| CSTB        | 248.895    | 302.002    | 0.279023   | 0.480572   |
| CD46        | 8.12394    | 7.50198    | -0.114909  | 0.913236   |
| MFAP4       | 0.0415933  | 0.167659   | 2.01111    | 1          |
| ZNF385C     | 0.00699004 | 0.0189241  | 1.43685    | 1          |
| HOOK3       | 0.98069    | 1.13029    | 0.204827   | 0.761904   |
| NPEPPS      | 14.3945    | 15.2959    | 0.0876264  | 0.944828   |
| GSTM4       | 14.926     | 10.0643    | -0.56858   | 0.0715857  |
| TUBA1A      | 40.5251    | 52.1183    | 0.362973   | 0.275042   |
| CLDN4       | 0.183929   | 0.244794   | 0.412418   | 1          |
| RILPL1      | 9.16494    | 10.3663    | 0.177698   | 0.814573   |
| TRIM3       | 3.66368    | 6.3051     | 0.783226   | 0.0162707  |
| PLEKHA2     | 10.1501    | 5.04513    | -1.00853   | 0.00134142 |
| STX5        | 29.0856    | 20.9415    | -0.473937  | 0.111788   |
| CDH12       | 0.0403488  | 0.0398737  | -0.0170896 | 1          |
| PDK2        | 18.0963    | 14.3663    | -0.333004  | 0.520342   |
| SLC22A18AS  | 0.387771   | 0.226253   | -0.777267  | 0.900727   |
| MPST        | 148.181    | 148.789    | 0.00590283 | 0.997532   |
| CWF19L2     | 1.56067    | 1.57217    | 0.0105977  | 0.997036   |
| LRRCC1      | 1.63698    | 1.34417    | -0.284324  | 0.666069   |
| SEPT9       | 39.1509    | 42.9822    | 0.134692   | 0.872604   |
| PCNP        | 40.6439    | 36.405     | -0.158903  | 0.820463   |
| SKIV2L      | 7.28448    | 6.86683    | -0.0851821 | 0.984917   |

|              |            |           |            |            |
|--------------|------------|-----------|------------|------------|
| LRRC37A2     | 0.199357   | 0.136131  | -0.550361  | 1          |
| DDR1         | 9.52181    | 12.02     | 0.336132   | 0.389881   |
| MFAP2        | 0.379672   | 0.0940234 | -2.01366   | 1          |
| KIF1C        | 19.4808    | 31.6456   | 0.699955   | 0.00425224 |
| CCND2        | 20.6431    | 26.4685   | 0.358612   | 0.26939    |
| PSKH1        | 6.68181    | 7.4588    | 0.158705   | 0.86827    |
| TSPAN6       | 16.4023    | 14.6843   | -0.159619  | 0.832265   |
| NFYA         | 3.577      | 4.78525   | 0.419844   | 0.215563   |
| EPB41L1      | 4.73322    | 3.49588   | -0.437166  | 0.194581   |
| C17orf103    | 4.12253    | 2.74856   | -0.584854  | 0.0749663  |
| TRAK1        | 3.78351    | 3.37766   | -0.1637    | 0.851815   |
| FAM214B      | 3.86945    | 2.60987   | -0.568154  | 0.143392   |
| PARP11       | 1.0625     | 0.469219  | -1.17912   | 0.00243047 |
| VPS13C       | 0.946196   | 0.605369  | -0.644324  | 0.0403066  |
| TIGD4        | 0.142006   | 0.0779856 | -0.864668  | 1          |
| SMC5         | 2.96704    | 3.41204   | 0.201613   | 0.74929    |
| SELO         | 22.8062    | 33.779    | 0.566698   | 0.0559179  |
| FAM108B1     | 4.08745    | 5.35089   | 0.388578   | 0.313957   |
| RAB31L1      | 5.77073    | 6.80857   | 0.238598   | 0.748391   |
| TTC9C        | 21.7058    | 18.825    | -0.205435  | 0.769228   |
| SBF2-AS1     | 2.21633    | 0.844687  | -1.39169   | 0.0414844  |
| HERC4        | 5.35753    | 4.58751   | -0.223855  | 0.686818   |
| PEX11B       | 11.4815    | 11.7543   | 0.033882   | 0.987858   |
| TGFBR3       | 0.363595   | 0.397218  | 0.1276     | 0.953215   |
| OSBPL9       | 14.5043    | 10.5248   | -0.462684  | 0.528722   |
| ZFYVE19      | 21.4266    | 16.82     | -0.349223  | 0.563967   |
| PSMB10       | 46.1576    | 70.5886   | 0.612867   | 0.0250278  |
| SLC22A23     | 1.58398    | 1.91054   | 0.270426   | 0.690184   |
| C3orf70      | 0.00237247 | 0         | #NAME?     | 1          |
| PAPD4        | 5.41556    | 4.095     | -0.403246  | 0.261549   |
| ATP13A2      | 19.0255    | 29.4006   | 0.627909   | 0.0172978  |
| ELMOD1       | 0.00489492 | 0         | #NAME?     | 1          |
| C2orf48      | 1.92048    | 0.975062  | -0.977899  | 0.160099   |
| ABAT         | 1.42604    | 1.26708   | -0.170502  | 0.885093   |
| NAV1         | 1.28503    | 1.36021   | 0.0820241  | 0.958568   |
| RAP2C        | 5.85293    | 6.54366   | 0.160938   | 0.838386   |
| RPS6KA1      | 21.4152    | 31.2738   | 0.546316   | 0.0377654  |
| KLHDC8B      | 8.27076    | 8.56645   | 0.0506771  | 0.979701   |
| RMDN2        | 0.259483   | 0.499006  | 0.943418   | 0.170338   |
| DYM          | 8.89324    | 4.92821   | -0.851646  | 0.00134142 |
| ILVBL        | 37.9093    | 35.9437   | -0.0768134 | 0.95534    |
| PCM1         | 4.76114    | 3.17469   | -0.584692  | 0.0227017  |
| LOC389906    | 19.3986    | 22.5298   | 0.215879   | 0.715731   |
| CIT          | 3.93312    | 1.98632   | -0.985578  | 0.00243047 |
| TBC1D13      | 19.2433    | 23.8966   | 0.312444   | 0.389384   |
| ZNF345       | 0.523783   | 0.372948  | -0.489994  | 0.899094   |
| FBXL15       | 11.3201    | 14.9595   | 0.402181   | 0.315903   |
| B3GNT9       | 7.24718    | 10.7297   | 0.566115   | 0.285855   |
| UBTF         | 16.7718    | 25.4427   | 0.601214   | 0.0178668  |
| ZNF90        | 0.00300747 | 0         | #NAME?     | 1          |
| KIAA1731     | 0.722173   | 0.661271  | -0.127102  | 0.938843   |
| TENC1        | 0.705727   | 0.33281   | -1.08441   | 0.921843   |
| FLJ42709     | 0.4912     | 0.169686  | -1.53344   | 0.133781   |
| LOC100505876 | 10.03      | 7.9393    | -0.337241  | 0.671358   |
| MRS2P2       | 0.00959948 | 0.0298116 | 1.63484    | 1          |
| N6AMT1       | 2.77979    | 3.45855   | 0.315188   | 0.714446   |
| TRIM2        | 1.88954    | 1.4746    | -0.357703  | 0.407592   |
| UCKL1        | 29.5282    | 33.4003   | 0.177769   | 0.79103    |
| ZNF583       | 0.841763   | 0.963957  | 0.195555   | 0.893663   |
| TNIP1        | 65.7546    | 44.2752   | -0.570593  | 0.0306129  |
| CXorf40B     | 14.7979    | 19.6139   | 0.406489   | 0.262729   |
| EGF          | 0.00238061 | 0         | #NAME?     | 1          |
| NENF         | 135.78     | 145.748   | 0.102208   | 0.923575   |
| CAMKK2       | 9.2628     | 13.6182   | 0.55601    | 0.0444101  |
| FLJ42627     | 1.99868    | 1.57692   | -0.341943  | 0.465173   |
| SMG7-AS1     | 0.0422839  | 0.0908632 | 1.10359    | 1          |
| FAM173A      | 70.3685    | 144.61    | 1.03916    | 0.00134142 |
| FAM109A      | 7.74681    | 12.5299   | 0.693696   | 0.0150729  |
| PEAK1        | 1.15745    | 0.932618  | -0.311587  | 0.510424   |
| MF12         | 33.4475    | 35.2039   | 0.0738371  | 0.958814   |
| NRARP        | 40.7404    | 68.4423   | 0.748427   | 0.00425224 |
| CHP1         | 41.8765    | 37.7405   | -0.150029  | 0.833863   |
| PTEN         | 7.8521     | 4.37703   | -0.843127  | 0.00134142 |
| PKN1         | 104.084    | 74.0598   | -0.490986  | 0.0645318  |
| USP32P1      | 0.165324   | 0.188429  | 0.188727   | 1          |
| RNF111       | 2.16152    | 2.03081   | -0.0899936 | 0.954559   |
| PIP5KL1      | 13.7974    | 20.1595   | 0.547056   | 0.160581   |
| HERC1        | 0.612994   | 0.540512  | -0.181548  | 0.844123   |
| RHOBTB3      | 6.32666    | 3.59389   | -0.815898  | 0.00134142 |



|                       |           |           |            |            |
|-----------------------|-----------|-----------|------------|------------|
| POT1                  | 3.13531   | 1.46745   | -1.0953    | 0.00134142 |
| GSN                   | 30.4162   | 23.2256   | -0.389125  | 0.229923   |
| TMEM201               | 8.74607   | 18.1819   | 1.0558     | 0.00134142 |
| NPHP1                 | 1.003     | 0.642514  | -0.642519  | 0.234962   |
| HEY1                  | 2.55661   | 2.05485   | -0.3152    | 0.677027   |
| SLC17A9               | 20.2478   | 34.1126   | 0.752539   | 0.00509212 |
| IL17RD                | 1.15408   | 0.858461  | -0.426914  | 0.298586   |
| NSA2                  | 147.526   | 149.058   | 0.0149029  | 0.995965   |
| GID8                  | 14.5005   | 12.4412   | -0.220984  | 0.661219   |
| HOXA10,HOXA9          | 27.0727   | 40.5687   | 0.583526   | 0.030994   |
| ANKRD6                | 0.0421956 | 0.0375786 | -0.16718   | 1          |
| MNT                   | 5.57329   | 4.32871   | -0.364591  | 0.3703     |
| MTMR10                | 2.00423   | 1.86215   | -0.106083  | 0.967901   |
| RAB5B                 | 10.1255   | 11.3332   | 0.162559   | 0.826634   |
| RPS6KA2               | 0.299186  | 0.18108   | -0.724418  | 1          |
| ZCCHC7                | 8.80397   | 5.63858   | -0.642823  | 0.0217078  |
| CDC16                 | 24.976    | 23.655    | -0.0783965 | 0.953243   |
| ZFYVE21               | 25.5988   | 29.595    | 0.209277   | 0.713204   |
| QTRTD1                | 5.27668   | 7.21498   | 0.451367   | 0.141232   |
| TMEM203               | 62.4949   | 100.188   | 0.680901   | 0.00743393 |
| LOC100996307          | 0.215519  | 0.133227  | -0.693927  | 1          |
| GNAI2                 | 59.7692   | 58.1652   | -0.0392454 | 0.981044   |
| SPAG5-AS1             | 0.462628  | 0.164307  | -1.49346   | 0.869898   |
| MAP4K3                | 2.76886   | 2.31681   | -0.257155  | 0.650075   |
| NCAPD2                | 30.5659   | 18.4573   | -0.727733  | 0.00134142 |
| PAAF1                 | 13.917    | 6.77737   | -1.03805   | 0.452642   |
| GPR155                | 0.290778  | 0.28734   | -0.0171557 | 1          |
| TMEM161B-AS1          | 1.77332   | 1.61243   | -0.137212  | 0.965328   |
| ASTL                  | 0.0372461 | 0.0114775 | -1.69828   | 1          |
| ZNF143                | 4.12119   | 3.75123   | -0.135697  | 0.905695   |
| DLG5                  | 4.48736   | 5.79531   | 0.369021   | 0.293234   |
| CTAGE4                | 0.263564  | 0.207122  | -0.347673  | 1          |
| F12                   | 31.7928   | 34.9605   | 0.137026   | 0.877493   |
| FAM86C1               | 2.71123   | 2.74242   | 0.0165003  | 0.995957   |
| HSBP1L1               | 76.6145   | 60.5494   | -0.339505  | 0.353362   |
| CD59                  | 15.8422   | 18.8273   | 0.249054   | 0.59771    |
| SOCS4                 | 2.31461   | 3.12336   | 0.432331   | 0.209562   |
| FAM71E1               | 4.15517   | 3.05702   | -0.442782  | 0.967901   |
| CHRNA3                | 0.164907  | 0.388699  | 1.237      | 0.906895   |
| CDKN3                 | 36.8957   | 30.8489   | -0.258231  | 0.613686   |
| SHISA4                | 10.7941   | 9.70333   | -0.153698  | 0.889711   |
| SSH2                  | 0.796054  | 0.870358  | 0.128742   | 0.922312   |
| ZNF260                | 2.11308   | 2.26141   | 0.0978721  | 0.945946   |
| CASC3                 | 24.0819   | 18.1013   | -0.411855  | 0.164179   |
| ZNF771                | 11.7649   | 8.7122    | -0.433383  | 0.464784   |
| PHF8                  | 7.00438   | 8.08402   | 0.206816   | 0.71659    |
| SPG21                 | 75.1953   | 67.7685   | -0.150027  | 0.845125   |
| PITX1                 | 29.6446   | 49.4952   | 0.739519   | 0.00337323 |
| GTF3C4                | 5.52067   | 6.92833   | 0.327664   | 0.773681   |
| E2F5                  | 8.01414   | 6.8446    | -0.227583  | 0.965607   |
| CEP120                | 3.05865   | 1.93349   | -0.661689  | 0.0231741  |
| C20orf111             | 26.6742   | 13.6948   | -0.961818  | 0.00134142 |
| RNF135                | 6.57212   | 4.77671   | -0.460341  | 0.272094   |
| CEP85L                | 0.459974  | 0.426672  | -0.108422  | 0.969987   |
| PAK2                  | 10.6338   | 11.49     | 0.111715   | 0.912153   |
| CYHR1                 | 65.5639   | 62.982    | -0.0579608 | 0.974044   |
| LOC100507003          | 0.0109985 | 0.0281041 | 1.35347    | 1          |
| ORC4                  | 4.35915   | 4.19933   | -0.0538895 | 0.977358   |
| IFT172                | 1.81501   | 0.836705  | -1.11719   | 0.00134142 |
| MAP2K5                | 11.8056   | 4.41099   | -1.4203    | 0.00134142 |
| C8orf37               | 0.612138  | 0.438722  | -0.48055   | 0.499286   |
| FN3K                  | 33.0172   | 22.0474   | -0.582608  | 0.0559179  |
| FAM219A               | 9.4767    | 8.2632    | -0.197684  | 0.760181   |
| PEX11A                | 2.71705   | 2.40986   | -0.173088  | 0.870466   |
| ZSCAN29               | 3.12926   | 3.77764   | 0.271663   | 0.580834   |
| ZSCAN20               | 0.356621  | 0.247755  | -0.525475  | 0.498374   |
| SLC25A3               | 431.452   | 472.613   | 0.131458   | 0.888528   |
| NOA1                  | 37.0737   | 19.7352   | -0.909623  | 0.00134142 |
| POGLUT1               | 2.98173   | 3.82223   | 0.358264   | 0.397842   |
| ELP4                  | 9.69227   | 5.92308   | -0.710487  | 0.0217078  |
| BGLAP,PMF1,PMF1-BGLAF | 45.3157   | 49.7534   | 0.134784   | 0.887208   |
| SERGEF                | 19.6549   | 18.4953   | -0.0877341 | 0.950929   |
| UBTD1                 | 33.3697   | 45.1729   | 0.436918   | 0.169417   |
| FBXO41                | 5.79125   | 5.71502   | -0.0191159 | 0.993379   |
| ZNF441                | 0.415009  | 0.306721  | -0.436217  | 0.540243   |
| C4orf48               | 53.4646   | 77.2674   | 0.531277   | 0.203854   |
| RPS24                 | 3353.09   | 3508.49   | 0.065359   | 0.96955    |
| FCHSD1                | 11.2691   | 8.78498   | -0.359254  | 0.40453    |
| SGSM1                 | 0.763873  | 0.28004   | -1.4477    | 0.00134142 |

|                      |           |            |            |            |
|----------------------|-----------|------------|------------|------------|
| ZNF551               | 0.758952  | 0.65748    | -0.207063  | 0.87816    |
| C1orf51              | 0.66553   | 0.790714   | 0.248653   | 0.894626   |
| HARS2                | 9.13619   | 8.94791    | -0.030043  | 0.995302   |
| STEAP1B              | 0.0111888 | 0.0143001  | 0.353971   | 1          |
| KCNT1                | 0.0148405 | 0.0078783  | -0.913587  | 1          |
| ZNF286B              | 2.44794   | 3.01925    | 0.302622   | 0.521183   |
| MTMR7                | 0.895956  | 1.03649    | 0.210212   | 0.931471   |
| RAB11FIP1            | 4.15627   | 3.95605    | -0.0712289 | 0.962215   |
| ZSCAN22              | 1.13326   | 1.78621    | 0.656424   | 0.0860016  |
| NISCH                | 15.8683   | 16.4608    | 0.0528857  | 0.977103   |
| ARHGAP5              | 2.32992   | 1.93778    | -0.265879  | 0.572114   |
| BLVRA                | 43.3424   | 56.3658    | 0.379039   | 0.24791    |
| RWDD2B               | 8.22055   | 6.48909    | -0.341218  | 0.457989   |
| FLOT1                | 102.546   | 76.2757    | -0.426973  | 0.147583   |
| CC2D1B               | 4.48415   | 5.75171    | 0.359155   | 0.315903   |
| TSEN34               | 53.8195   | 61.9496    | 0.202966   | 0.709838   |
| SYP                  | 0.287469  | 0.383128   | 0.414419   | 0.781725   |
| ZNF629               | 5.98881   | 8.23183    | 0.458943   | 0.124933   |
| NSL1                 | 0.863614  | 0.957175   | 0.148396   | 0.876899   |
| GNG7                 | 1.34642   | 0.97958    | -0.458894  | 0.44885    |
| PKN2                 | 3.77616   | 3.19325    | -0.241897  | 0.648914   |
| APPL2                | 4.04654   | 3.30596    | -0.291622  | 0.585481   |
| NFIB                 | 2.64453   | 2.53807    | -0.0592787 | 0.972228   |
| H19,MIR675           | 1.85395   | 1.41377    | -0.391048  | 0.748378   |
| PDE11A               | 0.0793699 | 0.0403166  | -0.977218  | 1          |
| SLC22A5              | 2.75746   | 4.46422    | 0.695065   | 0.0410573  |
| PEX10                | 19.595    | 25.6108    | 0.386268   | 0.792073   |
| ENHO                 | 16.029    | 15.0987    | -0.0862668 | 0.961224   |
| SREK1                | 3.47569   | 3.93646    | 0.1796     | 0.795772   |
| HOTAIRM1             | 14.9234   | 16.7438    | 0.166059   | 0.86583    |
| TMEM236              | 0.0427695 | 0.0171121  | -1.32156   | 1          |
| EFCAB4B              | 1.2248    | 1.96467    | 0.681748   | 0.12699    |
| DNM2                 | 39.1507   | 42.1918    | 0.107923   | 0.917325   |
| RPS26P11             | 1.21597   | 1.61345    | 0.408042   | 0.81526    |
| TLE4                 | 0.551798  | 0.369129   | -0.580015  | 0.325034   |
| UCN2                 | 0.0754992 | 0.182629   | 1.27438    | 1          |
| TIGD2                | 3.01806   | 2.61942    | -0.204375  | 0.823379   |
| PRKD3                | 2.21833   | 2.05827    | -0.108042  | 0.935062   |
| KPNA1                | 5.39702   | 8.33982    | 0.627853   | 0.0114515  |
| FAM98C               | 45.4569   | 29.2473    | -0.636194  | 0.0235476  |
| OTUD4                | 3.62946   | 4.72398    | 0.380247   | 0.27191    |
| RPUSD2               | 16.2911   | 26.818     | 0.719116   | 0.00672555 |
| NR6A1                | 0.758585  | 0.96286    | 0.344015   | 0.761862   |
| METRNL               | 55.6978   | 63.7225    | 0.194183   | 0.754666   |
| KIAA0226             | 3.1269    | 4.17813    | 0.418124   | 0.640881   |
| ARAF                 | 20.9265   | 22.6888    | 0.116646   | 0.986812   |
| SPI1                 | 0.0427315 | 0.142453   | 1.73712    | 1          |
| AKAP11               | 1.7299    | 1.52722    | -0.179776  | 0.807864   |
| IFITM1               | 1.12937   | 1.48655    | 0.396454   | 0.791887   |
| SPC24                | 9.09108   | 5.7099     | -0.670984  | 0.178496   |
| SIAH2                | 15.7267   | 20.3318    | 0.370521   | 0.2815     |
| VCX3B                | 0.0142097 | 0.00920997 | -0.625605  | 1          |
| CACNA2D1             | 0.1927    | 0.0458352  | -2.07183   | 1          |
| YPEL2                | 1.21666   | 0.587505   | -1.05026   | 0.00818401 |
| HLA-E                | 139.573   | 115.241    | -0.276363  | 0.507723   |
| NACA                 | 1100.83   | 1176.21    | 0.0955496  | 0.938123   |
| AIP                  | 60.4328   | 57.0568    | -0.0829343 | 0.948179   |
| CCDC69               | 3.96139   | 4.08677    | 0.0449573  | 0.983952   |
| IRF5                 | 23.3586   | 17.4797    | -0.418276  | 0.183686   |
| TMEM150A             | 10.2156   | 20.6137    | 1.01282    | 0.00134142 |
| AIF1L                | 40.5246   | 54.2212    | 0.420059   | 0.165549   |
| PTTG1                | 193.478   | 216.615    | 0.162962   | 0.816305   |
| SNX14                | 10.5929   | 9.068      | -0.22424   | 0.657414   |
| TCF3                 | 28.5214   | 35.1381    | 0.300994   | 0.430326   |
| TMC6                 | 26.2088   | 19.992     | -0.390628  | 0.24631    |
| MAP3K1               | 0.797137  | 0.467123   | -0.771024  | 0.0501327  |
| LOC642366            | 0.0268419 | 0.0481281  | 0.842392   | 1          |
| NR2F2                | 2.84113   | 4.27132    | 0.588217   | 0.0626518  |
| CDK19                | 1.62403   | 0.728346   | -1.15688   | 0.00134142 |
| UHRF1BP1L            | 1.37518   | 1.00402    | -0.453833  | 0.414341   |
| RALGAPB              | 3.25211   | 3.31523    | 0.0277301  | 0.989344   |
| FBXL20               | 2.29195   | 1.0312     | -1.15225   | 0.00134142 |
| GALNT4,POC1B,POC1B-G | 5.20133   | 3.20699    | -0.69766   | 0.0114515  |
| BTF3                 | 815.842   | 860.569    | 0.0770019  | 0.956373   |
| GYG1                 | 31.0277   | 27.5301    | -0.172548  | 0.799255   |
| DNAH12               | 0.010301  | 0.00150816 | -2.77192   | 1          |
| C1orf123             | 26.1833   | 19.6514    | -0.414015  | 0.431201   |
| RDH12                | 0.0297501 | 0.00804909 | -1.88599   | 1          |
| ESYT2                | 7.60403   | 6.2741     | -0.277355  | 0.514922   |

|            |            |            |             |            |
|------------|------------|------------|-------------|------------|
| SYDE2      | 1.38339    | 0.621377   | -1.15467    | 0.00134142 |
| NAGS       | 5.62945    | 5.47678    | -0.039664   | 0.988667   |
| SNHG1      | 156.825    | 158.287    | 0.0133856   | 0.994615   |
| SHPRH      | 0.618057   | 0.857631   | 0.472617    | 0.757853   |
| LAMTOR4    | 297.414    | 348.905    | 0.230359    | 0.623055   |
| ELL        | 11.1738    | 10.8326    | -0.0447325  | 0.980556   |
| TMEM59     | 70.6861    | 49.622     | -0.510447   | 0.0608269  |
| LDOC1L     | 5.96348    | 6.64607    | 0.156347    | 0.845726   |
| TLN1       | 15.8392    | 14.5215    | -0.125304   | 0.944843   |
| ZNF628     | 4.70904    | 4.7219     | 0.00393491  | 0.998514   |
| C1orf198   | 8.03009    | 13.6964    | 0.770312    | 0.00243047 |
| TTLL13     | 0.161969   | 0.0471159  | -1.78143    | 1          |
| PYROXD2    | 0.0475442  | 0.0391294  | -0.281016   | 1          |
| RPP25L     | 72.663     | 49.0369    | -0.567354   | 0.0419471  |
| UBE2L6     | 26.6318    | 22.2058    | -0.262211   | 0.581651   |
| STXBP2     | 59.2106    | 42.2866    | -0.485658   | 0.0875912  |
| TBXA2R     | 3.15979    | 2.78004    | -0.184723   | 0.897371   |
| CECR2      | 0.0384177  | 0.0296142  | -0.375484   | 1          |
| PRRT3      | 1.21554    | 0.901462   | -0.431259   | 0.719177   |
| SDHAP3     | 3.65834    | 3.52189    | -0.054837   | 0.985921   |
| CHKA       | 23.1558    | 24.6499    | 0.0902072   | 0.945602   |
| ATP1A3     | 8.70374    | 8.89722    | 0.0317193   | 0.988154   |
| CFD        | 22.2324    | 15.8119    | -0.491655   | 0.229068   |
| P2RY1      | 0.100895   | 0.141134   | 0.484209    | 1          |
| EMILIN1    | 0.196522   | 0.290744   | 0.565055    | 1          |
| TRMT11     | 6.75489    | 8.09687    | 0.261431    | 0.63426    |
| IGF2BP2    | 27.7559    | 19.5204    | -0.507815   | 0.062329   |
| PABPC4     | 103.792    | 106.319    | 0.0346992   | 0.986822   |
| TMEM80     | 11.5003    | 14.1714    | 0.301313    | 0.899051   |
| USP34      | 2.72994    | 2.76143    | 0.0165457   | 0.994615   |
| SIN3A      | 4.56375    | 5.86837    | 0.36274     | 0.288804   |
| SETD5-AS1  | 3.98227    | 3.78587    | -0.0729669  | 0.974044   |
| CKMT1B     | 12.0113    | 11.7957    | -0.0261343  | 0.995309   |
| PDCD7      | 14.6627    | 16.4198    | 0.163285    | 0.827857   |
| ZNF202     | 3.438      | 4.39092    | 0.352957    | 0.386656   |
| VPRBP      | 2.37885    | 3.15211    | 0.406053    | 0.80896    |
| LOC93622   | 19.548     | 34.1534    | 0.805011    | 0.00134142 |
| CEMP1      | 9.66934    | 13.9534    | 0.529126    | 0.498433   |
| ALG10B     | 0.4854     | 0.318785   | -0.606591   | 0.158178   |
| FAM195A    | 104.148    | 150.772    | 0.533733    | 0.0523239  |
| ZNF264     | 1.09877    | 0.871321   | -0.33461    | 0.471406   |
| FAM174B    | 7.91806    | 10.1169    | 0.35355     | 0.357799   |
| CENPBD1    | 1.57451    | 1.50405    | -0.0660441  | 0.990857   |
| C1orf86    | 136.27     | 151.317    | 0.15111     | 0.90907    |
| SATB1      | 3.23717    | 2.68705    | -0.268707   | 0.646166   |
| FOPNL      | 12.6692    | 11.7978    | -0.102808   | 0.927627   |
| ARRDC3-AS1 | 0.0830592  | 0.100719   | 0.278118    | 1          |
| FBXO31     | 13.0957    | 15.9564    | 0.285041    | 0.506721   |
| C7orf41    | 2.85195    | 2.39496    | -0.251947   | 0.664397   |
| TMEM187    | 6.37226    | 1.51182    | -2.07552    | 0.00134142 |
| CCDC126    | 1.1501     | 0.892008   | -0.366625   | 0.619231   |
| CAD        | 11.3213    | 14.1474    | 0.321503    | 0.368292   |
| MZB1       | 0.047439   | 0          | #NAME?      | 1          |
| SRRM1      | 17.297     | 23.5745    | 0.446703    | 0.13237    |
| VAV1       | 0.194902   | 0.088529   | -1.13853    | 1          |
| CETN2      | 25.2673    | 26.9736    | 0.0942787   | 0.944284   |
| APBA2      | 0.00519499 | 0          | #NAME?      | 1          |
| CENPA      | 20.3381    | 18.4808    | -0.13816    | 0.879159   |
| PPP2R3A    | 1.05943    | 0.975645   | -0.118866   | 0.946274   |
| KSR1       | 0.152156   | 0.164741   | 0.11465     | 1          |
| RPRD1B     | 5.76935    | 6.39457    | 0.148438    | 0.869283   |
| EZH1       | 3.95062    | 2.50594    | -0.656731   | 0.0270114  |
| KNSTRN     | 20.1379    | 30.6641    | 0.606636    | 0.0222212  |
| NUFIP1     | 2.37884    | 3.46082    | 0.540859    | 0.102329   |
| TTK        | 5.21214    | 3.73146    | -0.482135   | 0.146724   |
| CEP135     | 1.46596    | 1.02923    | -0.51027    | 0.184498   |
| UBE2Z      | 42.1187    | 48.0646    | 0.190515    | 0.735667   |
| LOC401010  | 0.00695386 | 0.00446936 | -0.637745   | 1          |
| ATP8B3     | 0.432844   | 0.177626   | -1.28501    | 0.0162707  |
| CCDC74A    | 9.7863     | 7.46966    | -0.389722   | 0.950929   |
| POLR2A     | 10.4313    | 14.8462    | 0.509177    | 0.0587985  |
| SWAP70     | 5.82243    | 4.2119     | -0.46715    | 0.12699    |
| ADCK5      | 17.8691    | 20.4733    | 0.196272    | 0.954559   |
| FLJ26850   | 1.47421    | 1.33832    | -0.139516   | 0.955406   |
| AGO3       | 1.21701    | 1.20967    | -0.00872218 | 0.997082   |
| DGKD       | 4.04396    | 4.18819    | 0.0505592   | 0.979701   |
| ZNF420     | 0.852429   | 1.17322    | 0.460817    | 0.401028   |
| NRF1       | 3.53329    | 3.54233    | 0.00368479  | 0.998764   |
| VDAC2      | 171.962    | 155.518    | -0.145005   | 0.851868   |

|                    |            |           |            |            |
|--------------------|------------|-----------|------------|------------|
| NCOA4              | 50.6214    | 36.5989   | -0.467947  | 0.0963541  |
| TADA2B             | 5.25982    | 5.94379   | 0.176369   | 0.940056   |
| ZNF414             | 12.9649    | 7.44131   | -0.800981  | 0.0386414  |
| SEMA3D             | 4.2028     | 3.42736   | -0.294255  | 0.482666   |
| CFDP1              | 25.9545    | 24.4294   | -0.0873634 | 0.947008   |
| POLR1C             | 51.4604    | 70.5009   | 0.454178   | 0.109667   |
| ADAM15             | 94.1187    | 115.031   | 0.289472   | 0.542245   |
| DOK1               | 21.1966    | 31.1724   | 0.556437   | 0.769235   |
| SETD1A             | 7.32573    | 11.2232   | 0.615439   | 0.0156972  |
| ASH1L              | 0.978455   | 1.05948   | 0.114784   | 0.972601   |
| PUS3               | 8.89949    | 11.0254   | 0.309042   | 0.651901   |
| MAP3K9             | 0.496079   | 0.582101  | 0.230699   | 0.856449   |
| MXN1               | 19.4162    | 26.6886   | 0.458962   | 0.192415   |
| DPM3               | 129.148    | 137.43    | 0.0896669  | 0.949783   |
| NUSAP1             | 34.8393    | 32.809    | -0.0866246 | 0.945946   |
| PTOV1-AS1          | 2.31806    | 2.49191   | 0.104335   | 0.990814   |
| SLC38A8            | 0.0189032  | 0.182739  | 3.27308    | 1          |
| PHKG1              | 22.9886    | 17.6946   | -0.377612  | 0.74104    |
| ZNF670,ZNF695      | 4.68784    | 3.91904   | -0.258422  | 0.855674   |
| C6orf89            | 5.10597    | 5.0006    | -0.030083  | 0.988154   |
| TIFA               | 7.11105    | 6.22023   | -0.193093  | 0.771985   |
| HIST2H2AB          | 0.258865   | 0         | #NAME?     | 1          |
| SMIM17             | 0.137493   | 0.136217  | -0.0134584 | 1          |
| MAN2A1             | 0.562331   | 0.623114  | 0.148077   | 0.935506   |
| ARMC4              | 0.00345794 | 0         | #NAME?     | 1          |
| DMPK               | 12.3207    | 11.4443   | -0.106457  | 0.935939   |
| MLEC               | 22.6648    | 34.705    | 0.614691   | 0.0145499  |
| GCOM1,MYZAP,POLR2M | 9.63017    | 6.85313   | -0.490798  | 0.0935542  |
| GNAL               | 3.10897    | 3.01458   | -0.044479  | 0.991857   |
| WNT10A             | 1.04498    | 1.22075   | 0.224299   | 0.90314    |
| ANKH               | 4.04822    | 3.37387   | -0.262884  | 0.575816   |
| ORC1               | 3.83546    | 4.10469   | 0.0978744  | 0.950929   |
| ENO1               | 2293.69    | 2469.42   | 0.106501   | 0.939418   |
| ETHE1              | 119.721    | 110.811   | -0.111582  | 0.909768   |
| CIR1               | 11.481     | 7.80533   | -0.556713  | 0.0626518  |
| BAIAP2L1           | 24.8781    | 14.2867   | -0.800203  | 0.0601893  |
| C1orf43            | 135.626    | 94.6505   | -0.518955  | 0.205713   |
| DSTN               | 63.5742    | 73.8029   | 0.215236   | 0.669697   |
| UGP2               | 14.0852    | 10.8845   | -0.371897  | 0.280083   |
| MYL6               | 848.415    | 1017.07   | 0.261575   | 0.558681   |
| CLDN14             | 0.115359   | 0         | #NAME?     | 1          |
| GEN1               | 1.53634    | 1.74324   | 0.182273   | 0.823491   |
| RPL23AP82          | 5.06075    | 5.69997   | 0.171603   | 0.93549    |
| CHCHD6             | 68.3405    | 85.2426   | 0.318834   | 0.380852   |
| CSGALNACT1         | 0.0910037  | 0.248455  | 1.44899    | 1          |
| UBE2E3             | 45.6756    | 49.2858   | 0.109748   | 0.91238    |
| THAP7              | 29.4906    | 38.3324   | 0.378308   | 0.355274   |
| HIST1H3B           | 1.16521    | 1.36547   | 0.228806   | 0.963451   |
| SF3A1              | 20.2929    | 18.0256   | -0.170928  | 0.805942   |
| HYAL3,NAT6         | 25.0356    | 19.7897   | -0.339233  | 0.429593   |
| TTC21B             | 1.63756    | 1.0947    | -0.581009  | 0.104845   |
| PRR7               | 38.8475    | 58.5248   | 0.591224   | 0.487618   |
| NDUFA10            | 17.9252    | 17.9569   | 0.00254943 | 0.998526   |
| PNPLA6             | 28.9166    | 34.3659   | 0.249083   | 0.581565   |
| TEAD2              | 9.21265    | 9.72077   | 0.0774555  | 0.96103    |
| PRKAB2             | 3.14852    | 1.58639   | -0.988926  | 0.00134142 |
| AXL                | 211.707    | 145.294   | -0.543091  | 0.0527559  |
| GBA2               | 9.65567    | 16.3897   | 0.763344   | 0.414474   |
| OLFM2              | 0.025484   | 0         | #NAME?     | 1          |
| POLR1D             | 238.196    | 177.266   | -0.426234  | 0.189409   |
| OGG1               | 14.4618    | 13.388    | -0.111305  | 0.971854   |
| ANO8               | 2.07114    | 1.69643   | -0.28792   | 0.961293   |
| PHKA1              | 5.52923    | 5.09946   | -0.116732  | 0.912776   |
| GPR63              | 0.860599   | 1.61988   | 0.912475   | 0.00425224 |
| ZMIZ2              | 12.1639    | 13.5595   | 0.156707   | 0.823658   |
| ARHGAP26           | 0.410185   | 0.782629  | 0.932055   | 0.00818401 |
| COQ2               | 16.8309    | 14.0863   | -0.256813  | 0.612588   |
| MAP3K12            | 6.78252    | 5.91223   | -0.198119  | 0.988657   |
| AK4                | 15.6145    | 14.7231   | -0.0848093 | 0.948088   |
| UFSP2              | 9.77151    | 6.97185   | -0.48704   | 0.240188   |
| ENTHD2             | 13.4087    | 14.7874   | 0.141195   | 0.891331   |
| FLJ43681           | 0.688731   | 0.76136   | 0.144638   | 0.950943   |
| GRB7               | 0.0688784  | 0.0554209 | -0.313621  | 1          |
| ITIH4              | 0.255899   | 0.207889  | -0.299762  | 1          |
| SOCS2-AS1          | 0.556743   | 0.268279  | -1.05328   | 0.96128    |
| SYT7               | 2.49277    | 2.42767   | -0.0381822 | 0.986822   |
| EP400              | 2.63818    | 2.51342   | -0.0698887 | 0.965148   |
| ARHGEF40           | 2.47673    | 3.34502   | 0.43358    | 0.271828   |
| C7orf43            | 9.57013    | 20.1284   | 1.07262    | 0.00134142 |

|                      |            |            |             |            |
|----------------------|------------|------------|-------------|------------|
| KIAA2013             | 56.5548    | 66.9715    | 0.243898    | 0.598176   |
| IMPACT               | 3.79094    | 2.21214    | -0.777112   | 0.009453   |
| HTRA1                | 0.441605   | 0.795417   | 0.848954    | 0.237032   |
| BCAS3                | 2.52069    | 1.0487     | -1.26521    | 0.00134142 |
| MMP15                | 6.70489    | 9.1071     | 0.441777    | 0.230041   |
| ZDHHC23              | 3.35857    | 4.59709    | 0.452873    | 0.19325    |
| FAM120AOS            | 17.4555    | 14.6994    | -0.247922   | 0.922312   |
| NFKBIL1              | 37.937     | 14.2823    | -1.40938    | 0.00134142 |
| MORC3                | 3.11559    | 2.32963    | -0.4194     | 0.265309   |
| SH2D2A               | 3.28913    | 1.28444    | -1.35657    | 0.00818401 |
| PGS1                 | 10.3231    | 14.0043    | 0.439997    | 0.23451    |
| CTDSP2               | 23.4921    | 14.6665    | -0.679654   | 0.00672555 |
| FAM83E               | 0.456721   | 0.544647   | 0.254006    | 0.937936   |
| MEX3C                | 7.00051    | 4.94448    | -0.501643   | 0.102585   |
| CABIN1               | 8.34274    | 7.98498    | -0.0632333  | 0.967289   |
| TNFSF13B             | 0.0323949  | 0.0463222  | 0.515937    | 1          |
| ST13P4               | 0.0955889  | 0.101136   | 0.0813853   | 1          |
| NRIP3                | 0.00737837 | 0.00245053 | -1.59021    | 1          |
| STXBP3               | 6.01843    | 5.11728    | -0.234011   | 0.685308   |
| SEPT8                | 9.82462    | 10.6352    | 0.114368    | 0.91236    |
| ABCG5                | 0.00610425 | 0.00826169 | 0.436623    | 1          |
| B3GNT5               | 2.42122    | 2.9161     | 0.268308    | 0.642621   |
| PODNL1               | 0.124195   | 0.0911143  | -0.44686    | 1          |
| MRPL34               | 79.768     | 130.519    | 0.710376    | 0.00743393 |
| LINC00568            | 0.196931   | 0.158668   | -0.31168    | 1          |
| SMCR8                | 2.13503    | 2.28745    | 0.0994838   | 0.976326   |
| EPN3                 | 0.016796   | 0.0108241  | -0.633878   | 1          |
| ZNF507               | 1.34366    | 1.27267    | -0.0783099  | 0.965148   |
| B3GAT2               | 1.98221    | 1.48268    | -0.418901   | 0.881073   |
| TOP1MT               | 106.626    | 135.4      | 0.34467     | 0.303349   |
| PEL13                | 11.1202    | 9.60014    | -0.212058   | 0.744061   |
| ZRANB2-AS2           | 0.258679   | 0.0752789  | -1.78084    | 1          |
| SAP30                | 39.6342    | 32.5295    | -0.284997   | 0.520857   |
| COQ7                 | 3.7526     | 2.88924    | -0.3772     | 0.406031   |
| NADK                 | 39.7497    | 60.5437    | 0.607033    | 0.0167292  |
| NCOR2                | 9.47297    | 6.80587    | -0.477037   | 0.101849   |
| ARHGAP29             | 32.3664    | 34.7619    | 0.10301     | 0.927627   |
| ZNF451               | 3.71134    | 2.99345    | -0.310132   | 0.485223   |
| TYRO3                | 16.0231    | 14.5253    | -0.141589   | 0.864906   |
| LMF1                 | 23.4026    | 22.3713    | -0.065019   | 0.970195   |
| PCDHB3               | 0.166209   | 0.114197   | -0.541468   | 1          |
| PLA2G16              | 65.0157    | 55.9272    | -0.217238   | 0.68423    |
| GPBP1L1              | 10.5062    | 9.04438    | -0.21615    | 0.693459   |
| SORBS3               | 109.153    | 94.5591    | -0.207058   | 0.700037   |
| MTRNR2L5             | 0.00725439 | 0.00547198 | -0.406792   | 1          |
| LOC100289561,PRKRIP1 | 28.7029    | 27.3989    | -0.0670775  | 0.970195   |
| USP53                | 1.02259    | 0.682186   | -0.583988   | 0.118443   |
| GJA3                 | 0.660402   | 0.71886    | 0.122366    | 0.952371   |
| IFT27                | 11.152     | 8.70991    | -0.356567   | 0.51222    |
| RC3H2                | 2.78173    | 2.84595    | 0.0329273   | 0.98907    |
| FBXO21               | 4.01973    | 3.71774    | -0.112673   | 0.926423   |
| KIAA0232             | 1.67913    | 1.72973    | 0.0428348   | 0.982907   |
| PAPD7                | 10.0225    | 13.7913    | 0.460514    | 0.124106   |
| ARPP19               | 13.4639    | 16.3136    | 0.276973    | 0.491932   |
| NANOG                | 0.00767014 | 0.0108676  | 0.502713    | 1          |
| DMKN                 | 79.1228    | 96.5404    | 0.287041    | 0.563967   |
| BRD1                 | 5.42146    | 5.73936    | 0.0822071   | 0.95534    |
| ASAP1                | 12.1069    | 10.2015    | -0.247043   | 0.593697   |
| PFKFB2               | 1.43963    | 0.851031   | -0.758417   | 0.0349222  |
| TMEM216              | 29.7166    | 34.3391    | 0.208582    | 0.716614   |
| FAM199X              | 2.90617    | 3.59822    | 0.308167    | 0.441032   |
| KAT2B                | 1.45091    | 0.953494   | -0.605664   | 0.117139   |
| PMEL                 | 0.824407   | 0.534231   | -0.625893   | 0.383539   |
| CGGBP1               | 8.20602    | 6.88587    | -0.253043   | 0.720017   |
| FAM195B              | 62.6954    | 74.7104    | 0.25295     | 0.588366   |
| TAF1C                | 13.7503    | 21.5341    | 0.647156    | 0.0132924  |
| COX20                | 4.68218    | 4.25232    | -0.138932   | 0.966566   |
| MRPL36               | 102.588    | 197.576    | 0.945543    | 0.00134142 |
| NECAB3               | 30.7483    | 28.0244    | -0.133824   | 0.898626   |
| RPP25                | 59.0589    | 109.545    | 0.891297    | 0.00134142 |
| C21orf2              | 4.64291    | 6.38075    | 0.458698    | 0.313781   |
| RNF152               | 0.843256   | 1.39236    | 0.723485    | 0.205335   |
| IRF2                 | 4.69452    | 5.4953     | 0.22722     | 0.748991   |
| SNORA48              | 23.4997    | 23.3904    | -0.00672691 | 0.998564   |
| PIK3C2A              | 2.48915    | 2.62205    | 0.0750451   | 0.959024   |
| MEX3D                | 25.8738    | 26.4056    | 0.029352    | 0.989268   |
| TMEM45A              | 14.0662    | 4.86441    | -1.5319     | 0.00134142 |
| ZCCHC11              | 1.862      | 1.47959    | -0.331653   | 0.486456   |
| TBL1X                | 4.98086    | 3.5272     | -0.49787    | 0.108704   |

|                       |           |           |             |            |
|-----------------------|-----------|-----------|-------------|------------|
| SPIRE1                | 5.0569    | 5.02805   | -0.00825301 | 0.997036   |
| RIC8B                 | 1.54376   | 2.31257   | 0.583052    | 0.226489   |
| NANOS1                | 2.44679   | 4.18876   | 0.775632    | 0.00743393 |
| IMPA1                 | 8.81539   | 7.93834   | -0.151187   | 0.849851   |
| RALGPS2               | 2.36359   | 1.26844   | -0.897919   | 0.00134142 |
| WHAMMP3               | 0.168247  | 0.126483  | -0.411645   | 1          |
| SEPT6                 | 7.18071   | 5.84452   | -0.297042   | 0.518593   |
| SCLT1                 | 1.78687   | 1.60304   | -0.156625   | 0.903932   |
| GTPBP1                | 13.0286   | 11.8182   | -0.140673   | 0.864932   |
| MRPL45P2              | 2.40779   | 1.90047   | -0.341357   | 0.666069   |
| LRSAM1                | 15.4769   | 10.2225   | -0.598367   | 0.0306129  |
| WDR35                 | 1.63557   | 1.82529   | 0.158334    | 0.86601    |
| SPIN1                 | 8.42787   | 8.47334   | 0.00776295  | 0.997036   |
| ALG11,UTP14C          | 1.79701   | 2.07102   | 0.204744    | 0.787681   |
| CREB1                 | 1.91546   | 1.55737   | -0.298575   | 0.515624   |
| ZNF775                | 8.89722   | 5.77173   | -0.624351   | 0.107348   |
| HOXD3                 | 0.750477  | 0.937782  | 0.321446    | 0.81342    |
| MAVS                  | 3.51955   | 3.3685    | -0.0632837  | 0.966946   |
| ARMCX5,ARMCX5-GPRAS1  | 2.95915   | 1.81241   | -0.707275   | 0.0407579  |
| DENND5A               | 8.6584    | 5.82697   | -0.571355   | 0.0261279  |
| NUFIP2                | 4.24345   | 5.01713   | 0.241624    | 0.599424   |
| ZNF782                | 0.697983  | 0.594766  | -0.230868   | 0.849166   |
| TMEM243               | 14.8507   | 21.9929   | 0.566504    | 0.197175   |
| CENPP                 | 1.72016   | 2.08718   | 0.27901     | 0.958814   |
| MRPL54                | 70.8048   | 92.3414   | 0.383131    | 0.255652   |
| ATXN1L                | 2.06093   | 2.24914   | 0.126076    | 0.908729   |
| NIT2                  | 61.6148   | 48.3847   | -0.348726   | 0.298345   |
| FAM114A1              | 4.64357   | 2.77908   | -0.740626   | 0.010797   |
| RABL3                 | 3.8666    | 5.39495   | 0.480542    | 0.147583   |
| ADD1                  | 20.0373   | 20.49     | 0.0322357   | 0.986822   |
| NCF4                  | 0.0143743 | 0         | #NAME?      | 1          |
| ZDHC4                 | 41.1277   | 29.4358   | -0.482537   | 0.0891066  |
| RBBP4                 | 7.56687   | 7.56683   | -7.62E-06   | 1          |
| HIST1H1B              | 0.0373138 | 0         | #NAME?      | 1          |
| CPNE2                 | 27.9938   | 26.9552   | -0.0545435  | 0.97582    |
| RANBP6                | 4.69212   | 5.74927   | 0.293141    | 0.501931   |
| SRRM2                 | 37.6238   | 46.5963   | 0.30857     | 0.407645   |
| GSTA4                 | 11.081    | 7.12937   | -0.636238   | 0.0477866  |
| SHB                   | 10.1405   | 10.6832   | 0.0752241   | 0.956382   |
| RNF141                | 3.20695   | 2.58701   | -0.309917   | 0.518913   |
| TMEM79                | 3.64809   | 3.54038   | -0.0432383  | 0.987235   |
| RNF32                 | 1.52379   | 0.950983  | -0.680172   | 0.188259   |
| ROGDI                 | 8.95242   | 9.76709   | 0.12565     | 0.927439   |
| STX7                  | 4.74083   | 4.4724    | -0.0840895  | 0.955656   |
| FBXO22                | 6.72039   | 8.06107   | 0.262426    | 0.730493   |
| LOC440894             | 1.62315   | 3.13631   | 0.950273    | 0.0150729  |
| TXK                   | 0.0628272 | 0.0260235 | -1.27157    | 1          |
| RGL4                  | 0.609899  | 0.519898  | -0.230341   | 0.966946   |
| CNN3                  | 69.4655   | 75.0271   | 0.111115    | 0.914142   |
| SNX3                  | 130.408   | 149.253   | 0.194724    | 0.739656   |
| ZNF839                | 4.56077   | 3.79068   | -0.266822   | 0.647681   |
| FEM1A                 | 17.128    | 23.3948   | 0.449835    | 0.127726   |
| CYP27B1               | 1.71847   | 2.86692   | 0.738381    | 0.0908564  |
| FAM211A               | 2.71195   | 1.86201   | -0.542474   | 0.965515   |
| DMTF1                 | 3.2549    | 2.10011   | -0.632152   | 0.291851   |
| C11orf95              | 4.66963   | 6.27613   | 0.426567    | 0.218684   |
| RNF130                | 49.2631   | 42.2263   | -0.222366   | 0.653383   |
| ATP6V1E2              | 2.334     | 1.56179   | -0.579605   | 0.217535   |
| LIMD1-AS1             | 5.2012    | 6.56407   | 0.335747    | 0.820283   |
| MYRF                  | 3.87281   | 3.22357   | -0.264719   | 0.629966   |
| CDK13                 | 1.66966   | 1.88946   | 0.178417    | 0.835941   |
| C10orf137             | 1.79053   | 3.39524   | 0.923125    | 0.00134142 |
| GOLGA2P5              | 1.37315   | 1.02112   | -0.427343   | 0.530962   |
| ZNF644                | 6.20412   | 5.94657   | -0.0611689  | 0.976326   |
| ASTN2                 | 3.09428   | 0.872855  | -1.82579    | 0.148987   |
| AKAP13                | 1.52722   | 1.52876   | 0.00145328  | 0.999108   |
| ACTG1                 | 3207.03   | 3221.72   | 0.00659337  | 0.99714    |
| MTSS1L                | 14.1208   | 17.6402   | 0.321045    | 0.384848   |
| HELQ                  | 2.02945   | 1.64709   | -0.301166   | 0.612792   |
| TMED1                 | 32.0495   | 47.7889   | 0.576374    | 0.0398899  |
| PATL1                 | 13.761    | 12.0089   | -0.19649    | 0.729713   |
| ZNF433                | 1.41219   | 0.902628  | -0.645732   | 0.194841   |
| MSH3                  | 0.388163  | 0.331996  | -0.225497   | 0.966946   |
| CRLF1                 | 0.906577  | 1.03755   | 0.194679    | 0.939418   |
| GPC4                  | 6.24453   | 4.59502   | -0.442521   | 0.180428   |
| SMIM3                 | 8.73056   | 8.36221   | -0.062191   | 0.973723   |
| C17orf89              | 78.8824   | 150.303   | 0.930096    | 0.00134142 |
| HECTD4                | 0.732199  | 0.727925  | -0.0084452  | 0.997036   |
| TNFSF12,TNFSF12-TNFSF | 16.2321   | 9.64646   | -0.750777   | 0.0231741  |

|              |            |            |            |            |
|--------------|------------|------------|------------|------------|
| TSKU         | 15.3182    | 19.5165    | 0.349444   | 0.331712   |
| SETD5        | 6.8845     | 6.76365    | -0.0255495 | 0.990324   |
| MED1         | 4.74049    | 5.25954    | 0.1499     | 0.845726   |
| BET1L        | 20.7475    | 21.5183    | 0.0526234  | 0.977103   |
| YPEL5        | 16.3314    | 7.82709    | -1.0611    | 0.00134142 |
| CXorf38      | 2.11923    | 1.98029    | -0.0978258 | 0.951888   |
| PTDSS2       | 44.8361    | 56.4786    | 0.333042   | 0.345539   |
| PRMT2        | 18.809     | 22.3354    | 0.247906   | 0.613686   |
| FAM132A      | 1.63452    | 1.7539     | 0.101695   | 0.979701   |
| AFF4         | 3.19884    | 2.24502    | -0.510816  | 0.0784289  |
| ADD3         | 3.14348    | 1.16767    | -1.42873   | 0.00134142 |
| MARCH9       | 15.0034    | 17.1753    | 0.195044   | 0.750701   |
| FAS          | 3.91179    | 4.10231    | 0.068607   | 0.974585   |
| BORA         | 4.15955    | 3.57872    | -0.216982  | 0.954677   |
| MRPL48       | 23.3628    | 27.359     | 0.227802   | 0.684177   |
| LOC441155    | 0.0914415  | 0.0898657  | -0.0250785 | 1          |
| ZNF385A      | 14.9795    | 10.9999    | -0.445497  | 0.213335   |
| PHKB         | 3.90956    | 2.47137    | -0.661697  | 0.0189207  |
| PRKRIR       | 11.0633    | 15.321     | 0.469731   | 0.10328    |
| ABCF3        | 20.4879    | 30.0131    | 0.550821   | 0.036526   |
| CD44         | 74.1422    | 59.4538    | -0.318525  | 0.374085   |
| CAST         | 30.9077    | 18.9126    | -0.708619  | 0.010797   |
| APBA3        | 10.9232    | 11.5398    | 0.0792227  | 0.964792   |
| FYTTD1       | 7.72833    | 11.6789    | 0.595673   | 0.0865352  |
| FILIP1L      | 2.61268    | 0.79804    | -1.711     | 0.170566   |
| CAT          | 7.25791    | 4.71991    | -0.620795  | 0.0470437  |
| WDTC1        | 1.30197    | 0.976868   | -0.414459  | 0.501458   |
| MFSD10       | 161.943    | 167.868    | 0.0518428  | 0.976618   |
| ATP9A        | 2.83121    | 2.22502    | -0.347603  | 0.392999   |
| CHGA         | 0.0107071  | 0.0173702  | 0.698039   | 1          |
| TACC3        | 37.5383    | 53.4716    | 0.510408   | 0.064193   |
| FSTL3        | 34.4454    | 35.0552    | 0.0253186  | 0.990018   |
| MANBAL       | 55.6983    | 71.1018    | 0.352253   | 0.289182   |
| ARMCX6       | 31.3756    | 27.0481    | -0.214114  | 0.771346   |
| KDM5C        | 20.199     | 14.5597    | -0.472304  | 0.0909525  |
| ZNF165       | 9.19762    | 4.69428    | -0.970357  | 0.00134142 |
| HIC1         | 5.44431    | 11.1839    | 1.03861    | 0.00134142 |
| DTNB         | 12.2848    | 6.27003    | -0.970335  | 0.00134142 |
| RARA         | 9.05839    | 10.8231    | 0.256787   | 0.621063   |
| MTFP1        | 144.293    | 123.438    | -0.225217  | 0.648914   |
| C22orf23     | 3.66055    | 4.08356    | 0.157766   | 0.983286   |
| CHRM1        | 0.00775764 | 0.00563584 | -0.460988  | 1          |
| GIN1         | 0.843258   | 0.819045   | -0.0420324 | 0.988154   |
| KCNAB2       | 35.9958    | 30.1353    | -0.256372  | 0.602298   |
| FADD         | 29.8638    | 42.2737    | 0.501361   | 0.0710419  |
| RPUSD3       | 60.6302    | 28.5067    | -1.08873   | 0.00134142 |
| ITIH2        | 0.00814874 | 0.0295739  | 1.85968    | 1          |
| GOLPH3       | 16.9041    | 16.181     | -0.0630721 | 0.966946   |
| SEC14L4      | 1.48287    | 1.08379    | -0.452305  | 0.501458   |
| ZBTB39       | 1.54353    | 1.48978    | -0.0511313 | 0.979875   |
| CEP44        | 1.82027    | 1.02636    | -0.826612  | 0.0658487  |
| SLC39A9      | 14.3718    | 14.0877    | -0.0288053 | 0.990324   |
| PANK4        | 10.5403    | 13.4122    | 0.347623   | 0.395326   |
| LACC1        | 0.969062   | 0.602488   | -0.685656  | 0.170566   |
| ZNF579       | 31.6881    | 28.1329    | -0.17168   | 0.821056   |
| TMEM254      | 1.81912    | 1.1874     | -0.61543   | 0.205713   |
| LINC00152    | 456.958    | 369.344    | -0.307097  | 0.406031   |
| PRSS3        | 51.3509    | 46.2676    | -0.150388  | 0.853758   |
| CRHR1        | 8.62766    | 7.22951    | -0.255072  | 0.734493   |
| LOC440896    | 0.104879   | 0.147069   | 0.48777    | 1          |
| WDR91        | 2.46489    | 2.10039    | -0.230867  | 0.753695   |
| ZNF221       | 0.0608509  | 0.108318   | 0.831918   | 1          |
| CHADL        | 0.0291201  | 0.18643    | 2.67854    | 1          |
| C11orf54     | 4.16298    | 2.18749    | -0.928343  | 0.00425224 |
| ATP8B2       | 0.835951   | 0.436884   | -0.936167  | 0.0227017  |
| GYS1         | 49.0268    | 29.6818    | -0.723992  | 0.00243047 |
| NFIX         | 6.80141    | 9.20431    | 0.436477   | 0.170566   |
| KAT5         | 11.3751    | 8.73987    | -0.380189  | 0.807024   |
| IFITM10      | 0.682923   | 0.563503   | -0.277299  | 0.990994   |
| TCF7         | 5.8901     | 6.15751    | 0.0640545  | 0.974044   |
| SCAF11       | 3.63666    | 4.00607    | 0.139574   | 0.870709   |
| FRMD4A       | 11.2488    | 7.77238    | -0.533341  | 0.0547855  |
| MRPL42       | 12.6562    | 12.9786    | 0.0362888  | 0.985982   |
| SFXN3        | 34.6369    | 17.1888    | -1.01084   | 0.00134142 |
| LOC100507463 | 1.06668    | 0.99015    | -0.107407  | 0.99351    |
| ZNF217       | 1.73569    | 1.70511    | -0.0256449 | 0.991767   |
| BDH1         | 21.3005    | 21.4423    | 0.00957272 | 0.996631   |
| CROCC        | 5.33796    | 3.67341    | -0.539168  | 0.103533   |
| ARHGEF37     | 0.366412   | 0.134164   | -1.44947   | 0.0126858  |

|                |            |            |            |            |
|----------------|------------|------------|------------|------------|
| SLC6A1         | 0.00390138 | 0.00237206 | -0.717845  | 1          |
| CALM2          | 254.316    | 302.834    | 0.251903   | 0.592668   |
| MEAF6          | 10.6415    | 11.1747    | 0.0705255  | 0.961224   |
| LPCAT4         | 29.0907    | 25.9365    | -0.165576  | 0.816305   |
| IFRD1          | 16.9729    | 10.4436    | -0.700614  | 0.00509212 |
| TCN2           | 0.0566741  | 0.0494171  | -0.197678  | 1          |
| BDH2           | 5.89765    | 2.76024    | -1.09535   | 0.00134142 |
| ZNF558         | 4.58116    | 3.00166    | -0.609952  | 0.0554961  |
| TCAM1P         | 0.00446615 | 0.00268368 | -0.734822  | 1          |
| BID            | 29.3283    | 40.0085    | 0.448015   | 0.124319   |
| PABPC1         | 818.662    | 665.815    | -0.298148  | 0.518637   |
| C6orf1         | 40.5621    | 16.393     | -1.30705   | 0.00134142 |
| AKT2           | 15.8361    | 21.8337    | 0.463338   | 0.106054   |
| NXT1           | 35.3057    | 60.3973    | 0.774585   | 0.00134142 |
| KIAA0930       | 11.1962    | 17.621     | 0.654288   | 0.0120701  |
| LOC729852      | 2.65846    | 1.90587    | -0.480141  | 0.717812   |
| ARIH2OS        | 1.39948    | 0.740044   | -0.919206  | 0.965148   |
| PURB           | 3.77685    | 5.00991    | 0.4076     | 0.188729   |
| ZNF600         | 4.52926    | 4.3714     | -0.0511821 | 0.979701   |
| ZNF24          | 5.25492    | 5.42535    | 0.046047   | 0.979701   |
| ZNF511         | 32.8648    | 39.8008    | 0.276252   | 0.845296   |
| RIN3           | 10.4137    | 13.7991    | 0.406102   | 0.231628   |
| FOX1           | 0.0662644  | 0.0125728  | -2.39792   | 1          |
| GUK1           | 258.198    | 326.962    | 0.340644   | 0.342995   |
| ACACB          | 0.425544   | 0.264259   | -0.687355  | 0.169417   |
| AGAP2          | 0.424771   | 0.314883   | -0.431868  | 0.974044   |
| PIGC           | 11.6576    | 9.86032    | -0.24156   | 0.682065   |
| MPP3           | 5.0533     | 6.30013    | 0.318153   | 0.499123   |
| MOB1B          | 1.45041    | 1.37066    | -0.0815902 | 0.962247   |
| AKT1           | 64.2929    | 80.6181    | 0.326445   | 0.355857   |
| USP49          | 0.152905   | 0.173657   | 0.183605   | 1          |
| POFUT2         | 8.79296    | 8.24402    | -0.0930014 | 0.950929   |
| FCHO2          | 1.75751    | 1.16197    | -0.596962  | 0.092295   |
| ARID2          | 1.70716    | 1.75008    | 0.0358229  | 0.987235   |
| SH2D3C         | 0.267949   | 0.198302   | -0.434262  | 1          |
| TINF2          | 15.7717    | 15.9581    | 0.0169513  | 0.99351    |
| ZNF32-AS1      | 18.0752    | 16.8837    | -0.0983875 | 0.985283   |
| SPPL2B         | 5.66784    | 4.40835    | -0.36256   | 0.468312   |
| NCOA1          | 1.81305    | 1.93918    | 0.097035   | 0.947008   |
| BSC12,HNRNPUL2 | 26.8062    | 25.7829    | -0.0561535 | 0.979701   |
| ZGPAT          | 14.0877    | 27.652     | 0.972947   | 0.0841079  |
| DUSP22         | 11.5704    | 10.0525    | -0.202894  | 0.798828   |
| SLC26A11       | 7.46637    | 6.72652    | -0.150547  | 0.888862   |
| ARL4D          | 0.0120801  | 0.00739339 | -0.708321  | 1          |
| ATR            | 0.861265   | 1.10299    | 0.356894   | 0.445956   |
| TMEM54         | 133.563    | 126.645    | -0.0767283 | 0.95534    |
| ZSCAN12        | 0.523034   | 0.354969   | -0.559214  | 0.330501   |
| SRGAP2D        | 0.306476   | 0.236328   | -0.374981  | 1          |
| CCDC53         | 19.8724    | 11.0853    | -0.84212   | 0.00337323 |
| FAM83F         | 28.5242    | 33.5122    | 0.2325     | 0.64705    |
| CCDC40         | 0.311344   | 0.323208   | 0.0539498  | 1          |
| TBC1D23        | 8.92312    | 5.78183    | -0.626021  | 0.0167292  |
| NFIL3          | 27.2635    | 15.6818    | -0.797877  | 0.00134142 |
| RRAGA          | 62.9169    | 66.5047    | 0.0800086  | 0.952905   |
| AGL            | 1.77095    | 1.66465    | -0.0893082 | 0.950929   |
| PIWIL4         | 0.36185    | 0.357274   | -0.0183628 | 0.996453   |
| DENND4C        | 2.43645    | 1.83602    | -0.4082    | 0.247003   |
| ABHD14A,ACY1   | 84.3877    | 64.7833    | -0.381411  | 0.281587   |
| SERINC2        | 30.2071    | 20.16      | -0.583397  | 0.0410573  |
| CALCOCO1       | 8.21615    | 3.71898    | -1.14356   | 0.00134142 |
| LOC100288181   | 0.319637   | 0.155761   | -1.0371    | 1          |
| CERK           | 11.1424    | 13.8484    | 0.313659   | 0.399996   |
| TOB1           | 10.9045    | 8.99558    | -0.277638  | 0.575065   |
| SLC48A1        | 9.41352    | 7.83347    | -0.265084  | 0.888907   |
| KDM5A          | 2.18228    | 1.73544    | -0.330531  | 0.499286   |
| RIT1           | 5.61857    | 3.32782    | -0.755626  | 0.00672555 |
| SND1           | 86.8643    | 68.9193    | -0.333855  | 0.346372   |
| NPW            | 0.344779   | 0.130906   | -1.39715   | 1          |
| PPP1R18        | 52.4945    | 52.7286    | 0.00641947 | 0.997036   |
| NAA25          | 4.26303    | 5.96682    | 0.485082   | 0.102959   |
| PRSS48         | 0.0288698  | 0.0116062  | -1.31466   | 1          |
| MBP            | 3.37384    | 3.62514    | 0.103642   | 0.942763   |
| SDHAP2         | 0.984282   | 1.52501    | 0.631677   | 0.248869   |
| E4F1           | 16.915     | 27.3234    | 0.691834   | 0.0101293  |
| METRN          | 132.531    | 176.456    | 0.412981   | 0.184926   |
| SEPSECS        | 0.988992   | 0.483526   | -1.03237   | 0.00243047 |
| LOC402160      | 0.0111599  | 0.00723513 | -0.625232  | 1          |
| ZNF780A        | 1.54919    | 1.41053    | -0.135279  | 0.931471   |
| FHL2           | 359.572    | 202.638    | -0.827374  | 0.00134142 |



|                       |            |           |             |            |
|-----------------------|------------|-----------|-------------|------------|
| NEK9                  | 5.49959    | 4.55839   | -0.270801   | 0.540057   |
| SLC37A4               | 23.32      | 18.8619   | -0.306091   | 0.44532    |
| EXOC7                 | 27.7896    | 40.2877   | 0.535795    | 0.0485415  |
| AH11                  | 1.4726     | 1.5238    | 0.0493108   | 0.981044   |
| CEP68                 | 2.5131     | 2.46946   | -0.0252708  | 0.997036   |
| PPOX                  | 14.489     | 9.18321   | -0.657889   | 0.0390303  |
| DOCK7                 | 3.02276    | 1.95623   | -0.627792   | 0.0357572  |
| PFKM                  | 47.1248    | 33.7191   | -0.482921   | 0.123328   |
| SRPK2                 | 8.66963    | 7.76929   | -0.158187   | 0.830816   |
| CUEDC1                | 5.46368    | 6.15462   | 0.171795    | 0.855712   |
| DENND3                | 1.03646    | 0.619453  | -0.7426     | 0.0891066  |
| SUN2                  | 19.0107    | 14.3518   | -0.405572   | 0.193036   |
| SNTB2                 | 1.37002    | 1.31353   | -0.0607539  | 0.976618   |
| KIFC3                 | 42.0268    | 34.9548   | -0.265818   | 0.539391   |
| ZNF768                | 47.828     | 46.2912   | -0.0471189  | 0.978196   |
| GPR161                | 2.44656    | 2.91801   | 0.254229    | 0.628199   |
| ERBB2IP               | 5.69687    | 3.23153   | -0.817952   | 0.00134142 |
| TUBGCP4               | 7.11685    | 5.43741   | -0.38832    | 0.742614   |
| STK11                 | 20.5066    | 24.9954   | 0.285577    | 0.487792   |
| IQGAP1                | 9.01183    | 6.68441   | -0.43102    | 0.146551   |
| BCAR1                 | 23.7846    | 35.593    | 0.581567    | 0.0326415  |
| APBB1                 | 15.2482    | 11.075    | -0.461338   | 0.164416   |
| UPF3A                 | 14.0729    | 14.3168   | 0.0247933   | 0.990857   |
| IDE                   | 3.21745    | 3.22871   | 0.00503814  | 0.997532   |
| TMEM68                | 8.47678    | 6.27349   | -0.43425    | 0.699313   |
| SMC6                  | 1.50309    | 1.60293   | 0.0927749   | 0.954768   |
| ACSS2                 | 6.09577    | 4.23904   | -0.524069   | 0.10531    |
| WDR47                 | 1.56866    | 1.72528   | 0.137295    | 0.917325   |
| FBXL16                | 25.5417    | 26.2921   | 0.0417753   | 0.98066    |
| LINC00116             | 13.4964    | 16.6303   | 0.301233    | 0.478644   |
| DHX8                  | 6.42814    | 6.61332   | 0.0409747   | 0.982599   |
| CGREF1                | 20.2962    | 17.8074   | -0.188734   | 0.876899   |
| EDN2                  | 0.0189177  | 0.0162732 | -0.217241   | 1          |
| NOTCH3                | 0.164331   | 0.102766  | -0.677234   | 1          |
| PFN2                  | 45.6782    | 42.2056   | -0.114073   | 0.90608    |
| SMS                   | 176.9      | 136.514   | -0.373885   | 0.286046   |
| ZNF574                | 10.284     | 13.4257   | 0.384594    | 0.281145   |
| MRPL43                | 86.2925    | 92.3717   | 0.0982159   | 0.950929   |
| LOC100507217          | 35.7166    | 29.5981   | -0.271086   | 0.525803   |
| DTX2P1-UPK3BP1-PMS2P1 | 0.394469   | 0.510125  | 0.37094     | 0.845608   |
| DIP2B                 | 3.05134    | 2.72929   | -0.160916   | 0.835119   |
| EFCAB3                | 0.39588    | 0.223449  | -0.825116   | 0.345729   |
| RGN3                  | 3.21529    | 3.76459   | 0.227545    | 0.847624   |
| USP3                  | 8.85854    | 8.34792   | -0.0856527  | 0.950929   |
| DEPDC1                | 5.16318    | 5.48782   | 0.0879729   | 0.948088   |
| IFNAR2                | 7.84287    | 6.46956   | -0.277714   | 0.663653   |
| IKZF5                 | 3.36894    | 2.94034   | -0.196313   | 0.778996   |
| TMEM102               | 24.4436    | 28.4087   | 0.216877    | 0.717812   |
| PRKAR1A               | 20.0673    | 18.2152   | -0.1397     | 0.882035   |
| XK                    | 0.390851   | 0.397432  | 0.0240883   | 0.994615   |
| IFIH1                 | 0.561264   | 0.277936  | -1.01393    | 0.0410573  |
| SLC31A2               | 7.95562    | 13.0579   | 0.714878    | 0.0145499  |
| LOC100129931          | 9.43977    | 16.8095   | 0.832454    | 0.00425224 |
| AP5B1                 | 7.08106    | 9.57751   | 0.435685    | 0.152605   |
| WWC2-AS2              | 0.842833   | 0.612566  | -0.460383   | 0.726571   |
| SLC30A6               | 3.53471    | 3.37182   | -0.0680658  | 0.966946   |
| ALAD                  | 7.52113    | 5.15819   | -0.544084   | 0.0824049  |
| POM121                | 11.1825    | 14.0087   | 0.32508     | 0.530981   |
| CCDC174               | 4.75199    | 2.73281   | -0.798147   | 0.00882987 |
| SPATA2                | 4.78383    | 8.19607   | 0.776765    | 0.00425224 |
| ZNF28                 | 1.33062    | 1.25883   | -0.0800185  | 0.967901   |
| USP2                  | 0.546365   | 0.709727  | 0.377399    | 0.708923   |
| ENTPD1                | 1.04927    | 2.01294   | 0.939922    | 0.00818401 |
| KDM4B                 | 11.6001    | 5.07658   | -1.19221    | 0.00134142 |
| TBC1D15               | 5.51799    | 3.24584   | -0.765554   | 0.00337323 |
| TSHZ1                 | 1.59445    | 2.15205   | 0.432651    | 0.33121    |
| MYRIP                 | 0.00285389 | 0         | #NAME?      | 1          |
| SLC39A2               | 0.0123231  | 0.0684733 | 2.47418     | 1          |
| NFS1                  | 10.333     | 11.6546   | 0.173638    | 0.950929   |
| FGF21                 | 0.0271333  | 0         | #NAME?      | 1          |
| LMF2                  | 52.3978    | 55.7758   | 0.0901312   | 0.93846    |
| AKAP2,PALM2,PALM2-AKA | 5.4731     | 5.91988   | 0.113209    | 0.909694   |
| ARFRP1                | 14.0617    | 25.2926   | 0.846942    | 0.0671701  |
| BEND7                 | 7.24567    | 6.09435   | -0.249647   | 0.673051   |
| DIEXF                 | 3.70266    | 3.7425    | 0.0154431   | 0.994562   |
| ZNF408                | 10.5786    | 11.1533   | 0.076323    | 0.962558   |
| TOMM22                | 83.0426    | 121.881   | 0.55355     | 0.0354094  |
| ARID4A                | 0.624073   | 0.429372  | -0.539486   | 0.24615    |
| BCL9                  | 1.76575    | 1.75738   | -0.00685247 | 0.99714    |

|              |           |           |             |            |
|--------------|-----------|-----------|-------------|------------|
| EPN2         | 7.76581   | 7.77907   | 0.00246215  | 0.998564   |
| PLCB3        | 21.3095   | 17.746    | -0.264001   | 0.532349   |
| WDR36        | 6.34081   | 8.35102   | 0.397286    | 0.199241   |
| IGF1R        | 2.22896   | 1.83305   | -0.282126   | 0.548564   |
| FBXW9        | 8.10967   | 10.3938   | 0.358002    | 0.48277    |
| BUB1         | 14.3214   | 16.0371   | 0.163241    | 0.816079   |
| ICOSLG       | 2.62324   | 6.59104   | 1.32916     | 0.00134142 |
| KIAA0754     | 0.243573  | 0.371781  | 0.610101    | 0.954907   |
| SRCAP        | 5.01924   | 8.26082   | 0.718815    | 0.00134142 |
| CSNK1D       | 38.06     | 44.0486   | 0.210821    | 0.690535   |
| SRSF8        | 6.53737   | 8.47377   | 0.374294    | 0.277248   |
| PIAS1        | 4.28616   | 3.87304   | -0.146221   | 0.898291   |
| APH1B        | 3.8521    | 2.24859   | -0.776623   | 0.00743393 |
| RASL10B      | 10.3887   | 9.13688   | -0.185242   | 0.791404   |
| BTBD1        | 21.7232   | 22.6682   | 0.0614355   | 0.969963   |
| TTC30A       | 0.0915637 | 0.068562  | -0.417367   | 1          |
| EAF1         | 5.41856   | 4.97455   | -0.123343   | 0.905536   |
| GGCX         | 5.91486   | 15.0059   | 1.34311     | 0.00134142 |
| RHOT1        | 5.25754   | 4.39767   | -0.257649   | 0.63524    |
| CLNS1A       | 96.4711   | 90.0884   | -0.0987553  | 0.928138   |
| TSGA10IP     | 0.282725  | 0.0501078 | -2.49629    | 1          |
| TTC38        | 15.8562   | 24.0436   | 0.600602    | 0.0274653  |
| KHNYN        | 12.6134   | 7.66584   | -0.718437   | 0.0354094  |
| PKD4         | 0.215571  | 0.048521  | -2.15148    | 1          |
| ECSIT,ZNF653 | 43.2206   | 46.9464   | 0.119295    | 0.913628   |
| PXMP2        | 13.8942   | 18.027    | 0.375675    | 0.417521   |
| FBLN5        | 3.04773   | 1.48157   | -1.04061    | 0.00337323 |
| IQCB1        | 13.4455   | 10.3996   | -0.370584   | 0.292352   |
| GNB1         | 94.4677   | 94.2364   | -0.00353698 | 0.998342   |
| SMCHD1       | 2.98336   | 2.88355   | -0.0490931  | 0.979452   |
| MYO5B        | 0.860805  | 0.308321  | -1.48125    | 0.00134142 |
| CHST14       | 22.424    | 25.9748   | 0.21207     | 0.71078    |
| INCENP       | 7.65182   | 8.65369   | 0.177512    | 0.805942   |
| FASTKD3      | 8.98184   | 14.3259   | 0.673541    | 0.0678232  |
| PTPRA,VPS16  | 29.5354   | 24.1397   | -0.291041   | 0.609404   |
| HDHD3        | 30.37     | 32.9685   | 0.118442    | 0.907688   |
| PRX          | 1.46696   | 1.06      | -0.46877    | 0.37983    |
| FKBPL        | 5.72793   | 10.1072   | 0.819296    | 0.0150729  |
| FAM21C       | 5.94009   | 4.85488   | -0.291048   | 0.500907   |
| PSME1        | 166.279   | 189.417   | 0.187959    | 0.779575   |
| EFCAB4A      | 6.24399   | 5.51707   | -0.178566   | 0.88245    |
| NUDT22       | 59.3956   | 43.9806   | -0.433489   | 0.185354   |
| TRAFD1       | 10.3933   | 9.76729   | -0.0896286  | 0.947008   |
| BAZ2A        | 9.87087   | 9.19208   | -0.102786   | 0.950929   |
| ZNF692       | 20.0591   | 25.4211   | 0.34177     | 0.38116    |
| KIAA0141     | 11.8472   | 9.46499   | -0.323877   | 0.386954   |
| TBC1D25      | 5.54566   | 6.24981   | 0.172453    | 0.830662   |
| ETNK1        | 4.95026   | 5.38529   | 0.121522    | 0.947262   |
| SLC20A1      | 8.93695   | 12.9038   | 0.529936    | 0.064193   |
| WBP1L        | 6.02708   | 5.58153   | -0.110798   | 0.925041   |
| JAK1         | 14.5199   | 12.763    | -0.18606    | 0.80896    |
| ZNF267       | 2.24431   | 1.85161   | -0.277489   | 0.648246   |
| NUCKS1       | 17.0933   | 11.9054   | -0.521816   | 0.0527559  |
| SPAG5        | 17.7111   | 15.9081   | -0.154887   | 0.83481    |
| NEURL        | 6.42527   | 3.65261   | -0.814829   | 0.00672555 |
| ASCC3        | 3.34967   | 4.47311   | 0.41726     | 0.220369   |
| HEATR3       | 1.77079   | 3.3004    | 0.898245    | 0.00818401 |
| ZNF674       | 0.556345  | 0.241162  | -1.20598    | 0.00672555 |
| NBPF9        | 0.849776  | 1.00565   | 0.242978    | 0.830321   |
| ITGB5        | 25.3405   | 18.2768   | -0.471431   | 0.105875   |
| PECR         | 2.8699    | 1.43404   | -1.00092    | 0.00672555 |
| EML2         | 14.3799   | 7.58538   | -0.92276    | 0.00672555 |
| KBTBD11      | 3.18213   | 3.53021   | 0.149763    | 0.875964   |
| CAPN1        | 86.5876   | 78.9148   | -0.133864   | 0.872494   |
| LINC00673    | 0.362472  | 0.479599  | 0.403959    | 0.757993   |
| OSGIN2       | 8.88018   | 6.61711   | -0.424388   | 0.165169   |
| COX18        | 4.04138   | 2.91696   | -0.470384   | 0.167189   |
| NFYB         | 5.12258   | 3.428     | -0.579506   | 0.0444101  |
| EID1         | 26.5034   | 30.8143   | 0.217421    | 0.671358   |
| TUSC1        | 10.1823   | 13.0625   | 0.359367    | 0.348669   |
| FAM50A       | 84.077    | 75.4438   | -0.156309   | 0.829595   |
| NAA40        | 4.64171   | 7.25485   | 0.644288    | 0.0306129  |
| CCDC11       | 1.17042   | 1.09678   | -0.0937561  | 0.972989   |
| NKIRAS1      | 3.9336    | 6.19575   | 0.655429    | 0.965607   |
| IMP3         | 124.933   | 198.624   | 0.66888     | 0.009453   |
| ZNF282       | 23.857    | 24.938    | 0.063929    | 0.966946   |
| CNOT11       | 22.2746   | 20.8199   | -0.0974377  | 0.931471   |
| ZNF439       | 1.30073   | 0.903883  | -0.525117   | 0.312776   |
| RIPK1        | 5.31322   | 6.58662   | 0.309952    | 0.454989   |

|                |            |           |            |            |
|----------------|------------|-----------|------------|------------|
| WDR26          | 7.29094    | 6.91214   | -0.0769723 | 0.956711   |
| APC            | 0.900758   | 1.00144   | 0.152869   | 0.874071   |
| POLR2J4        | 0.77875    | 0.81074   | 0.0580791  | 0.990857   |
| NME4           | 75.264     | 76.8969   | 0.0309652  | 0.987693   |
| TAF1           | 1.95668    | 1.51653   | -0.367633  | 0.986725   |
| DYRK4          | 11.646     | 9.30593   | -0.323612  | 0.457353   |
| SLC25A43       | 7.24011    | 7.71043   | 0.0908008  | 0.950684   |
| WDR33          | 11.2811    | 10.0846   | -0.161748  | 0.830817   |
| BMS1P4         | 0.280168   | 0.358792  | 0.356857   | 0.830101   |
| MAT2A          | 27.6693    | 73.5104   | 1.40966    | 0.00134142 |
| C16orf55       | 7.71124    | 15.0298   | 0.96279    | 0.610107   |
| ASB1           | 29.1952    | 21.7171   | -0.4269    | 0.162023   |
| ERBB2          | 16.9423    | 18.092    | 0.0947284  | 0.934998   |
| C1orf21        | 2.47757    | 1.13363   | -1.12797   | 0.00134142 |
| ZHX3           | 1.95264    | 1.52154   | -0.359897  | 0.369215   |
| ERGIC3         | 141.672    | 152.053   | 0.102016   | 0.926717   |
| FAH            | 28.0536    | 25.1508   | -0.157581  | 0.830321   |
| IBA57          | 1.492      | 1.23736   | -0.269985  | 0.665039   |
| DNAAF3         | 26.3611    | 33.6212   | 0.350963   | 0.334951   |
| ZNF713         | 0.151209   | 0.0953476 | -0.66528   | 1          |
| CAP2           | 3.93725    | 3.98541   | 0.0175399  | 0.99451    |
| TRAK2          | 1.20299    | 2.02468   | 0.751077   | 0.0167292  |
| ZNF687         | 7.63969    | 5.23799   | -0.544501  | 0.477937   |
| PCYOX1L        | 4.30646    | 3.36936   | -0.354026  | 0.487792   |
| MYOM1          | 0.122966   | 0.0282155 | -2.1237    | 1          |
| KANK3          | 3.13547    | 2.71112   | -0.209791  | 0.879021   |
| ATXN7L3B       | 15.1463    | 18.7567   | 0.308443   | 0.410986   |
| EMB            | 1.9617     | 2.22981   | 0.184823   | 0.830662   |
| GNPDA1         | 97.1526    | 62.8634   | -0.628031  | 0.0194494  |
| JSRP1          | 39.5193    | 24.355    | -0.698336  | 0.0167292  |
| HIF1AN         | 5.66248    | 5.32404   | -0.0889124 | 0.944724   |
| TESK1          | 23.9437    | 36.434    | 0.60564    | 0.0189207  |
| TCEAL6         | 0.00970451 | 0.0334666 | 1.786      | 1          |
| CENPC1         | 1.93212    | 1.44313   | -0.420983  | 0.373076   |
| NBAS           | 6.90065    | 2.95605   | -1.22306   | 0.00134142 |
| PPP6R2         | 12.6603    | 13.536    | 0.0964902  | 0.971338   |
| LSM14A         | 25.2867    | 23.585    | -0.10051   | 0.926121   |
| ARHGAP10       | 4.46583    | 5.07849   | 0.18547    | 0.809759   |
| CLCN5          | 0.679065   | 0.59766   | -0.184226  | 0.876592   |
| CSRP2BP,PET117 | 17.615     | 21.771    | 0.305601   | 0.553477   |
| EIF5A2         | 1.28174    | 2.16703   | 0.757614   | 0.00743393 |
| HIST1H1E       | 2.90244    | 2.11856   | -0.454177  | 0.686273   |
| MSH6           | 6.54033    | 10.4718   | 0.679076   | 0.113745   |
| ROCK2          | 1.0529     | 1.0264    | -0.0367822 | 0.987693   |
| SNAPC4         | 12.1013    | 24.0627   | 0.991639   | 0.00134142 |
| FKBP8          | 268.838    | 246.294   | -0.126359  | 0.89153    |
| P4HA2          | 31.9723    | 18.8943   | -0.758871  | 0.00134142 |
| PBXIP1         | 8.24607    | 2.77432   | -1.57157   | 0.00134142 |
| CHMP1B         | 16.9007    | 12.4671   | -0.43896   | 0.410196   |
| RCOR1          | 4.88652    | 5.98283   | 0.292021   | 0.491932   |
| IRGQ           | 2.17521    | 4.47871   | 1.04193    | 0.00134142 |
| ERMAP          | 1.9166     | 1.36221   | -0.492602  | 0.50623    |
| IGFL2          | 0.0354263  | 0         | #NAME?     | 1          |
| BCKDK          | 119.997    | 107.65    | -0.156649  | 0.827184   |
| FUK            | 4.3341     | 3.83303   | -0.177246  | 0.851892   |
| HIGD2A         | 249.298    | 265.543   | 0.0910752  | 0.939292   |
| NMRK1          | 8.12234    | 3.26787   | -1.31355   | 0.00134142 |
| PPP2R5D        | 21.0396    | 21.4147   | 0.0254903  | 0.994615   |
| ATG14          | 2.87118    | 2.03575   | -0.496088  | 0.156302   |
| PHF21A         | 3.19571    | 1.34213   | -1.25161   | 0.00134142 |
| FTH1           | 572.058    | 561.117   | -0.0278606 | 0.989411   |
| CAPN12         | 14.4457    | 19.046    | 0.398852   | 0.831277   |
| PROB1          | 0.48951    | 0.75469   | 0.624545   | 0.508949   |
| TMEM30A        | 12.4485    | 14.2866   | 0.198694   | 0.720774   |
| RAP1GDS1       | 9.92631    | 7.99042   | -0.312986  | 0.430215   |
| HOMER3         | 81.171     | 60.2733   | -0.429445  | 0.162023   |
| KIAA0195       | 10.9642    | 7.73065   | -0.50414   | 0.18135    |
| EYA3           | 4.1309     | 7.01471   | 0.763929   | 0.00134142 |
| HOXC10         | 7.97386    | 5.99193   | -0.412256  | 0.343577   |
| TCF12          | 7.60881    | 5.47879   | -0.473813  | 0.121426   |
| AVEN           | 5.76579    | 10.4835   | 0.862536   | 0.00425224 |
| EIF2B4         | 29.3421    | 42.9347   | 0.549173   | 0.0447795  |
| LGALS8-AS1     | 0.423158   | 0.350122  | -0.273339  | 0.98922    |
| UBQLN2         | 9.89669    | 10.852    | 0.132937   | 0.885624   |
| MED9           | 8.92381    | 11.4458   | 0.359088   | 0.373169   |
| KIAA0319L      | 7.7519     | 4.50999   | -0.781426  | 0.00134142 |
| C2orf15        | 1.62016    | 0.79121   | -1.034     | 0.0605453  |
| STK19          | 5.25013    | 4.42292   | -0.247352  | 0.911348   |
| PDZD11         | 19.8455    | 20.4018   | 0.0398826  | 0.984772   |

|              |            |           |             |            |
|--------------|------------|-----------|-------------|------------|
| TFAP2E       | 3.31783    | 6.71344   | 1.01681     | 0.00134142 |
| LOC100130855 | 0.388344   | 0.40071   | 0.045221    | 0.979701   |
| COG2         | 6.29833    | 7.2437    | 0.201757    | 0.758079   |
| PRMT10       | 2.15259    | 1.76117   | -0.289543   | 0.658298   |
| RNF7         | 52.8799    | 50.3053   | -0.0720081  | 0.959465   |
| EPM2A        | 0.359992   | 0.381973  | 0.0855048   | 0.99351    |
| MIR497HG     | 1.27757    | 1.16095   | -0.138097   | 0.994615   |
| CTDSPL       | 6.71565    | 6.0717    | -0.145426   | 0.859019   |
| MSANTD4      | 3.49598    | 4.03665   | 0.207463    | 0.744819   |
| PLEK2        | 42.9315    | 41.7731   | -0.039462   | 0.980569   |
| ZNF333       | 0.870512   | 0.358978  | -1.27797    | 0.00243047 |
| VSIG10       | 3.91109    | 2.77334   | -0.495944   | 0.123604   |
| C7orf13      | 1.05349    | 1.00161   | -0.0728619  | 0.980704   |
| ADAMTSL5     | 4.54698    | 4.21802   | -0.108343   | 0.950929   |
| LOC729041    | 1.8841     | 1.14144   | -0.723024   | 0.212263   |
| ALKBH2       | 32.0457    | 44.6848   | 0.479655    | 0.123542   |
| FNDC7        | 0.00448943 | 0         | #NAME?      | 1          |
| CPT2         | 9.10774    | 5.91042   | -0.623832   | 0.194686   |
| ZNF620       | 0.691418   | 0.554445  | -0.318514   | 0.771991   |
| CBFA2T2      | 2.16759    | 1.73172   | -0.323887   | 0.494995   |
| SDHAF1       | 32.8407    | 46.9718   | 0.51631     | 0.0906031  |
| C20orf96     | 8.06921    | 5.95773   | -0.437666   | 0.271828   |
| C11orf93     | 0.899988   | 0.294773  | -1.6103     | 0.219411   |
| PRG4         | 0.0445446  | 0.0683192 | 0.617041    | 1          |
| AFF1         | 2.01808    | 2.30726   | 0.193198    | 0.776393   |
| HYLS1        | 3.81149    | 4.90155   | 0.362885    | 0.789003   |
| AQR          | 3.94573    | 4.1781    | 0.0825537   | 0.95534    |
| RRH          | 0.104466   | 0.1419    | 0.441844    | 1          |
| STRA13       | 82.0072    | 145.444   | 0.826639    | 0.00134142 |
| MGC16275     | 2.293      | 2.01198   | -0.188621   | 0.878089   |
| ZC2HC1A      | 1.65516    | 0.751661  | -1.13882    | 0.00134142 |
| STXBP4       | 0.244789   | 0.339483  | 0.471798    | 1          |
| CCDC18       | 0.350916   | 0.440759  | 0.328863    | 0.720797   |
| RNF10        | 29.2047    | 22.5435   | -0.373488   | 0.237422   |
| DNAJC17      | 15.3793    | 21.7795   | 0.501976    | 0.542153   |
| ZZEF1        | 1.82557    | 1.93791   | 0.0861583   | 0.952905   |
| SGCB         | 3.53977    | 3.46254   | -0.0318251  | 0.988742   |
| GTF3C2       | 12.0664    | 16.2049   | 0.425433    | 0.156997   |
| TTC28-AS1    | 13.48      | 11.3306   | -0.250597   | 0.774943   |
| LOC652276    | 2.95227    | 3.12776   | 0.0833054   | 0.965148   |
| MLXIP        | 5.17171    | 6.11468   | 0.241636    | 0.657079   |
| DACH1        | 0.282935   | 0.0584971 | -2.27404    | 1          |
| TBKBP1       | 6.0197     | 6.44581   | 0.0986712   | 0.945946   |
| TRIM65       | 14.6023    | 15.6306   | 0.0981748   | 0.931471   |
| CES2         | 8.06727    | 9.85516   | 0.2888      | 0.497347   |
| GPBP1        | 13.296     | 13.2432   | -0.00574502 | 0.997082   |
| ZCCHC6       | 2.66391    | 2.33607   | -0.189465   | 0.79799    |
| HHIPL1       | 0.00815909 | 0         | #NAME?      | 1          |
| WRB          | 16.2243    | 15.5547   | -0.0608041  | 0.973792   |
| CENPT        | 17.014     | 23.8044   | 0.484509    | 0.820463   |
| DFFB         | 3.8084     | 8.2603    | 1.11701     | 0.00134142 |
| AGPAT4       | 0.487834   | 0.133569  | -1.86881    | 0.00134142 |
| TCF25        | 87.0051    | 81.6727   | -0.0912454  | 0.939525   |
| MAP2K7       | 21.1884    | 22.3254   | 0.0754124   | 0.956807   |
| MPC2         | 15.4625    | 14.6189   | -0.080933   | 0.965148   |
| MAGED1       | 21.208     | 18.3101   | -0.21197    | 0.694639   |
| BMP1         | 7.82245    | 7.71968   | -0.0190791  | 0.99351    |
| SNAP47       | 18.1959    | 20.4778   | 0.170449    | 0.927627   |
| CRLS1        | 16.3806    | 19.7039   | 0.266496    | 0.516969   |
| LOC100128573 | 0.0456299  | 0         | #NAME?      | 1          |
| SLC15A4      | 9.12862    | 10.7386   | 0.234341    | 0.671358   |
| ZNF239       | 2.12655    | 2.74742   | 0.369561    | 0.531743   |
| ARHGEF19     | 8.57951    | 6.29603   | -0.446452   | 0.222468   |
| S100PBP      | 3.46088    | 3.23496   | -0.0973891  | 0.990857   |
| STYXL1       | 15.3211    | 8.41438   | -0.864591   | 0.00509212 |
| COG1         | 7.63058    | 6.05812   | -0.332923   | 0.790844   |
| ZBTB12       | 4.86642    | 3.70461   | -0.393538   | 0.526544   |
| EMC9         | 37.9474    | 37.9591   | 0.000448331 | 0.999929   |
| ZFAND5       | 12.7828    | 12.6268   | -0.0177214  | 0.993379   |
| RAI1         | 4.10848    | 4.84055   | 0.236567    | 0.916337   |
| LOC646999    | 0.0476509  | 0.0535008 | 0.167057    | 1          |
| ACSS1        | 1.13299    | 1.07156   | -0.080424   | 0.979701   |
| COX5B        | 482.58     | 495.092   | 0.0369286   | 0.984917   |
| GCHFR        | 74.4647    | 66.3549   | -0.166353   | 0.829377   |
| KLHL26       | 5.44389    | 5.392     | -0.0138166  | 0.995957   |
| POLR3GL      | 24.6447    | 12.3258   | -0.999591   | 0.00134142 |
| LPIN2        | 4.05079    | 2.13876   | -0.921428   | 0.00243047 |
| DHRS4        | 14.6327    | 14.2532   | -0.0379102  | 0.988104   |
| ZCRB1        | 21.6551    | 15.4857   | -0.483767   | 0.0947123  |

|              |            |            |             |            |
|--------------|------------|------------|-------------|------------|
| SDHC         | 35.354     | 31.8825    | -0.149108   | 0.844458   |
| MCOLN3       | 4.66143    | 3.5889     | -0.377234   | 0.363804   |
| PIGL         | 5.28848    | 5.34377    | 0.0150051   | 0.995957   |
| VPS13A       | 1.21758    | 1.24725    | 0.0347329   | 0.987627   |
| KIAA1107     | 0.261081   | 0.0725411  | -1.84763    | 1          |
| GTF2E1       | 3.96843    | 6.15629    | 0.633492    | 0.0331269  |
| SETDB1       | 4.14179    | 3.28534    | -0.33421    | 0.582309   |
| C7orf49      | 22.6375    | 27.0975    | 0.259446    | 0.617065   |
| DLG1         | 3.24524    | 3.40169    | 0.0679253   | 0.970142   |
| PARP12       | 6.76563    | 9.87946    | 0.546208    | 0.0671701  |
| PRKAA1       | 4.78976    | 4.78604    | -0.00112131 | 0.999427   |
| PIPSL        | 0.00394985 | 0.00818323 | 1.05087     | 1          |
| SECISBP2     | 7.53507    | 7.09763    | -0.0862829  | 0.950929   |
| LCAT_SLC12A4 | 23.7315    | 18.8501    | -0.332229   | 0.534473   |
| TARBP2       | 23.2904    | 40.8839    | 0.811798    | 0.00134142 |
| B3GNT8       | 0.0155604  | 0.0429085  | 1.46338     | 1          |
| MVD          | 32.7623    | 45.7602    | 0.482056    | 0.0947123  |
| DTWD2        | 0.426489   | 0.340946   | -0.322963   | 0.747331   |
| IFT81        | 0.939334   | 0.96246    | 0.0350883   | 0.99093    |
| SNX10        | 9.82727    | 5.09876    | -0.946645   | 0.00134142 |
| TUFT1        | 15.1615    | 5.23086    | -1.5353     | 0.00134142 |
| STEAP2       | 2.46597    | 2.38333    | -0.0491776  | 0.986822   |
| FDX1L        | 29.5375    | 54.1082    | 0.8733      | 0.00134142 |
| ZNF740       | 6.58505    | 7.50766    | 0.189169    | 0.78806    |
| ZNF589       | 4.42969    | 6.02166    | 0.442956    | 0.202623   |
| NARG2        | 2.10737    | 1.78934    | -0.236016   | 0.701805   |
| POLG         | 14.6635    | 22.7206    | 0.631768    | 0.123893   |
| HADH         | 41.0691    | 33.4271    | -0.297036   | 0.431964   |
| CLASRP       | 18.1278    | 19.0264    | 0.0698042   | 0.965814   |
| NFKB2        | 37.8387    | 33.9572    | -0.156149   | 0.83062    |
| MOSPD3       | 48.8554    | 44.4011    | -0.137924   | 0.881073   |
| RBM4B        | 9.30408    | 9.34597    | 0.00648057  | 0.998764   |
| PPP3CB       | 8.11672    | 6.03882    | -0.426631   | 0.18514    |
| CYB5R1       | 27.1493    | 19.7373    | -0.45999    | 0.122378   |
| TRIM69       | 0.136156   | 0.105691   | -0.365412   | 1          |
| LINC00839    | 0.00686042 | 0.00413837 | -0.729234   | 1          |
| KBTD4        | 7.37696    | 8.75945    | 0.247813    | 0.953101   |
| R3HDM2       | 7.30327    | 2.61565    | -1.48137    | 0.00134142 |
| VGLL4        | 9.49582    | 10.6274    | 0.162428    | 0.909016   |
| BRWD1        | 1.28356    | 1.16271    | -0.142654   | 0.958201   |
| ABL2         | 16.2459    | 7.26825    | -1.16039    | 0.00134142 |
| HSD17B11     | 33.9752    | 15.1075    | -1.16922    | 0.00134142 |
| PKDREJ       | 0.0127397  | 0.00112634 | -3.49961    | 1          |
| ENAH         | 3.53348    | 3.3764     | -0.0656033  | 0.965735   |
| RALGAPA1     | 1.13062    | 0.823065   | -0.458037   | 0.252815   |
| ABT1         | 22.8618    | 34.4392    | 0.59111     | 0.0288382  |
| THOC2        | 3.24558    | 3.45337    | 0.0895286   | 0.94901    |
| CDK16        | 45.3164    | 52.4584    | 0.211139    | 0.690353   |
| SIRT1        | 3.97256    | 3.13109    | -0.343405   | 0.416718   |
| DCAF11       | 16.9858    | 12.7885    | -0.409483   | 0.193036   |
| ABCB10       | 2.821      | 4.08628    | 0.53458     | 0.107348   |
| DAP          | 34.8126    | 39.0028    | 0.163965    | 0.807479   |
| UBL4A        | 23.9863    | 39.8342    | 0.731793    | 0.00243047 |
| CDX2         | 12.1768    | 17.5988    | 0.531349    | 0.0870955  |
| MKL2         | 0.912829   | 0.938475   | 0.0399732   | 0.987334   |
| UIMC1        | 10.8767    | 10.2301    | -0.0884206  | 0.945783   |
| PTPN12       | 8.19849    | 6.33449    | -0.37213    | 0.288417   |
| DCTN1        | 30.0223    | 31.4882    | 0.0687777   | 0.96103    |
| ZNF576       | 5.68714    | 10.6606    | 0.906512    | 0.00134142 |
| NEK6         | 29.0843    | 18.5917    | -0.645583   | 0.010797   |
| MCF2L2       | 0.126866   | 0.0624547  | -1.02243    | 1          |
| PKN3         | 78.8061    | 70.9994    | -0.150501   | 0.874831   |
| GDE1         | 23.5563    | 23.4906    | -0.00403247 | 0.997532   |
| BCL2L1       | 112.037    | 117.383    | 0.0672502   | 0.96513    |
| MLX          | 27.0947    | 24.8033    | -0.127476   | 0.931471   |
| IFI27L2      | 199.241    | 201.051    | 0.0130453   | 0.995302   |
| LOC100131347 | 0.0640131  | 0.0266555  | -1.26394    | 1          |
| TRIM16       | 3.76206    | 4.54167    | 0.2717      | 0.657112   |
| LCE1C        | 0.126304   | 0.120141   | -0.0721701  | 1          |
| PEBP1        | 170.725    | 208.743    | 0.290053    | 0.46116    |
| PPP2R3C      | 17.7218    | 14.691     | -0.27059    | 0.550662   |
| KAZALD1      | 3.35739    | 2.52237    | -0.412558   | 0.481422   |
| PGAM2        | 1.10298    | 0.463724   | -1.25006    | 0.172302   |
| ADO          | 7.10087    | 10.0856    | 0.506231    | 0.0824049  |
| SSNA1        | 192.492    | 298.544    | 0.633141    | 0.0511722  |
| FLJ46906     | 5.0112     | 2.32965    | -1.10504    | 0.00882987 |
| SARM1        | 0.618543   | 0.937536   | 0.600002    | 0.778471   |
| C2orf72      | 6.19237    | 4.23688    | -0.547492   | 0.0947123  |
| ZNF485       | 2.89721    | 3.26907    | 0.174214    | 0.872838   |

|              |            |            |            |            |
|--------------|------------|------------|------------|------------|
| GRHPR        | 110.978    | 96.4156    | -0.20294   | 0.707559   |
| COMMD2       | 3.81765    | 3.57716    | -0.0938698 | 0.950929   |
| FBRSL1       | 18.2148    | 32.661     | 0.842461   | 0.00134142 |
| CPVL         | 13.0376    | 9.56048    | -0.44752   | 0.179474   |
| LOC100132215 | 0.118489   | 0.157156   | 0.407441   | 1          |
| MED29        | 9.19038    | 8.68663    | -0.0813266 | 0.955406   |
| TSC22D3      | 12.3345    | 4.51091    | -1.45121   | 0.00134142 |
| TEX12        | 0.0699466  | 0.103328   | 0.562905   | 1          |
| ZNF496       | 6.98503    | 4.88914    | -0.514686  | 0.191743   |
| ZFP106       | 3.45567    | 3.48081    | 0.0104578  | 0.996079   |
| SETX         | 4.08159    | 5.51513    | 0.434263   | 0.146251   |
| DNAL4        | 9.22947    | 3.80249    | -1.2793    | 0.00134142 |
| HLA-H        | 13.1455    | 20.1659    | 0.617353   | 0.0377654  |
| ZFP36L2      | 7.15272    | 10.6016    | 0.567718   | 0.0576801  |
| PAFAH1B1     | 13.1418    | 11.7388    | -0.162875  | 0.811389   |
| WDYHV1       | 11.6147    | 8.60865    | -0.432099  | 0.246685   |
| ZNF335       | 5.99207    | 6.83716    | 0.190343   | 0.786804   |
| ZFPL1        | 40.4548    | 23.9207    | -0.75805   | 0.00134142 |
| CKAP2        | 13.7506    | 12.191     | -0.173677  | 0.78079    |
| ZFP90        | 2.74203    | 1.73466    | -0.660587  | 0.0336095  |
| BRICD5       | 4.25093    | 5.55138    | 0.385065   | 0.967901   |
| TSTD2        | 4.91115    | 4.39629    | -0.159774  | 0.965917   |
| LOC116437    | 0.00632358 | 0.00423852 | -0.577182  | 1          |
| ZNF519       | 0.38358    | 0.378745   | -0.0182999 | 0.996409   |
| GNAI1        | 3.66381    | 3.01075    | -0.283222  | 0.598332   |
| PARD3        | 18.5988    | 11.9451    | -0.638793  | 0.0150729  |
| MBD5         | 0.178709   | 0.0299459  | -2.57718   | 1          |
| ZNF273       | 1.0019     | 0.768913   | -0.381846  | 0.511715   |
| ARL6IP4      | 196.617    | 232.87     | 0.24413    | 0.607335   |
| ASPSCR1      | 21.9421    | 15.5767    | -0.494309  | 0.142081   |
| FLJ46300     | 0.00526025 | 0.0118374  | 1.17015    | 1          |
| BECN1        | 19.5416    | 18.0396    | -0.11538   | 0.91254    |
| FLJ31306     | 11.1882    | 8.13033    | -0.460588  | 0.701805   |
| USP20        | 12.3364    | 10.9538    | -0.171489  | 0.80896    |
| ATP7A        | 0.495383   | 0.272585   | -0.861836  | 0.0318033  |
| F11R         | 5.55965    | 4.13711    | -0.426371  | 0.199641   |
| LYRM5        | 6.92771    | 5.17246    | -0.421529  | 0.347164   |
| SNORA14B     | 2.18411    | 1.39854    | -0.64313   | 1          |
| LOC220729    | 1.32065    | 2.28533    | 0.791156   | 0.0906031  |
| AKAP8L       | 27.4429    | 20.8188    | -0.398546  | 0.227784   |
| TAOK2        | 10.6907    | 16.9103    | 0.661548   | 0.00337323 |
| PRICKLE3     | 14.2981    | 15.3634    | 0.103668   | 0.93616    |
| CIDECP       | 5.02249    | 5.23967    | 0.0610729  | 0.983594   |
| SPATS2       | 9.14872    | 7.90875    | -0.21012   | 0.716391   |
| FLVCR2       | 1.03455    | 0.813682   | -0.34646   | 0.672217   |
| C6orf106     | 16.0039    | 17.9843    | 0.168316   | 0.803764   |
| SNHG9        | 56.0683    | 133.83     | 1.25514    | 0.00134142 |
| LOC643837    | 2.14511    | 3.49166    | 0.702861   | 0.021138   |
| PDS5B        | 1.95333    | 2.05695    | 0.0745695  | 0.963266   |
| SLC2A8       | 27.6155    | 34.2574    | 0.310938   | 0.437764   |
| PACSIN2      | 15.669     | 19.7304    | 0.332511   | 0.349479   |
| SHOX2        | 0.136361   | 0.122482   | -0.154864  | 1          |
| KCNK4        | 0.0190417  | 0.0804189  | 2.07837    | 1          |
| CLUAP1       | 2.90481    | 2.56444    | -0.179801  | 0.847596   |
| ATP5O        | 320.787    | 318.387    | -0.0108344 | 0.996079   |
| C8orf33      | 34.5969    | 58.5057    | 0.757936   | 0.00134142 |
| ILK          | 74.4449    | 69.2278    | -0.104822  | 0.950045   |
| CDC73        | 4.8236     | 4.99216    | 0.0495523  | 0.978196   |
| C9orf169     | 2.81154    | 2.75714    | -0.028188  | 0.994615   |
| AKAP10       | 3.80511    | 2.58992    | -0.555028  | 0.0806848  |
| NAGPA-AS1    | 0.014405   | 0.0380851  | 1.40265    | 1          |
| RAD17        | 7.53943    | 6.31096    | -0.256597  | 0.93549    |
| COL11A2      | 0.214889   | 0.207021   | -0.0538153 | 1          |
| TMEM14B      | 83.5806    | 74.4751    | -0.16641   | 0.806888   |
| INPP4A       | 2.22995    | 2.11988    | -0.0730267 | 0.966946   |
| ZNF592       | 3.20093    | 2.65883    | -0.267701  | 0.580074   |
| ABR          | 18.6514    | 25.8786    | 0.47248    | 0.0912351  |
| TBL2         | 18.4226    | 21.6539    | 0.23315    | 0.624337   |
| PPTC7        | 1.13183    | 1.14804    | 0.0205189  | 0.99451    |
| LOC150776    | 8.69609    | 9.41124    | 0.114018   | 0.979701   |
| ITGA1,PELO   | 15.7999    | 20.3525    | 0.365284   | 0.279887   |
| CREB3        | 30.8039    | 42.6501    | 0.469436   | 0.63475    |
| CTSH         | 19.6327    | 17.9696    | -0.127694  | 0.901579   |
| PITPNM2      | 2.62896    | 2.71313    | 0.0454618  | 0.982907   |
| ANKRD53      | 0.0354648  | 0.00749109 | -2.24314   | 1          |
| TRIAP1       | 21.8164    | 32.6233    | 0.580489   | 0.0357572  |
| CDK4         | 202.147    | 181.267    | -0.157287  | 0.835541   |
| RCL1         | 11.3906    | 15.3606    | 0.431388   | 0.190295   |
| RIN1         | 48.8542    | 35.3897    | -0.465154  | 0.108219   |

|           |           |            |             |            |
|-----------|-----------|------------|-------------|------------|
| ACO2      | 22.553    | 17.8536    | -0.337101   | 0.790844   |
| ERCC6L2   | 0.372539  | 0.419484   | 0.171222    | 0.961224   |
| CITED4    | 99.1908   | 102.07     | 0.0412807   | 0.984074   |
| LINS      | 1.79387   | 1.90508    | 0.0867755   | 0.966946   |
| BRAP      | 4.9419    | 4.90374    | -0.0111853  | 0.996079   |
| KIF27     | 0.300127  | 0.293124   | -0.0340633  | 1          |
| LAMB1     | 14.9786   | 9.16148    | -0.709246   | 0.00509212 |
| TBC1D10A  | 13.6393   | 13.1899    | -0.0483292  | 0.979866   |
| ARAP1     | 13.8474   | 11.4146    | -0.27874    | 0.510627   |
| CYLD      | 1.86193   | 1.15884    | -0.684115   | 0.0178668  |
| DYNLL2    | 22.2453   | 30.6384    | 0.461839    | 0.134793   |
| LMBR1L    | 12.0267   | 7.24264    | -0.731657   | 0.0126858  |
| TMEM183A  | 34.9719   | 38.8027    | 0.149959    | 0.842      |
| PRRG4     | 2.38071   | 3.57087    | 0.584881    | 0.0501327  |
| LSM14B    | 21.5266   | 15.3484    | -0.488031   | 0.0991734  |
| CNOT6L    | 2.50991   | 2.51414    | 0.00242635  | 0.998564   |
| DCP1B     | 8.99672   | 4.71024    | -0.933598   | 0.00134142 |
| PICALM    | 22.8108   | 19.5186    | -0.224868   | 0.664149   |
| SLC12A7   | 12.4539   | 13.918     | 0.160357    | 0.824676   |
| TMEM123   | 42.5575   | 31.2686    | -0.444702   | 0.12522    |
| C19orf12  | 4.69094   | 4.7091     | 0.00557308  | 0.99714    |
| CCNB2     | 45.0543   | 35.2793    | -0.352844   | 0.307051   |
| ARFGEF1   | 3.83172   | 3.50703    | -0.127743   | 0.887701   |
| PSMD5     | 17.4491   | 22.3243    | 0.355459    | 0.289311   |
| C12orf73  | 3.15521   | 3.66503    | 0.216087    | 0.829181   |
| USP30     | 2.46679   | 1.46991    | -0.746906   | 0.0292254  |
| TATDN2    | 7.95      | 13.4625    | 0.759916    | 0.00134142 |
| THSD4     | 0.115231  | 0.0918466  | -0.32723    | 1          |
| CAMSAP1   | 7.76708   | 7.4781     | -0.0547009  | 0.973348   |
| CHIC1     | 1.00212   | 0.775726   | -0.36944    | 0.453868   |
| CRSP8P    | 0.0128192 | 0.0358923  | 1.48537     | 1          |
| ICAM3     | 9.04391   | 12.3477    | 0.449227    | 0.224272   |
| PERP      | 30.8986   | 21.2938    | -0.537109   | 0.0481547  |
| MCTP2     | 0.707609  | 0.45313    | -0.643029   | 0.224751   |
| HUWE1     | 6.91181   | 6.0093     | -0.201866   | 0.705025   |
| SRRM5     | 0.534961  | 0.759639   | 0.505879    | 0.877493   |
| PIEZO1    | 17.8046   | 30.8961    | 0.795177    | 0.00425224 |
| PPIE      | 42.4156   | 30.7928    | -0.462004   | 0.263143   |
| SEMA4C    | 12.5209   | 14.0441    | 0.165617    | 0.827004   |
| RANBP2    | 3.76975   | 4.74583    | 0.332192    | 0.343415   |
| CYBASC3   | 8.3973    | 12.2991    | 0.55055     | 0.905052   |
| CNP       | 19.904    | 25.1214    | 0.335861    | 0.65203    |
| HOOK2     | 9.24713   | 8.0745     | -0.195632   | 0.797015   |
| PLCB4     | 0.590418  | 0.462276   | -0.352982   | 0.624393   |
| LOC654342 | 11.9393   | 16.0799    | 0.429538    | 0.367602   |
| HOXA1     | 1.689     | 1.50354    | -0.167805   | 0.913628   |
| SRGAP3    | 0.0186136 | 0.00115255 | -4.01346    | 1          |
| MRPS36    | 20.0995   | 20.1697    | 0.00503171  | 0.99714    |
| MAP4      | 20.261    | 20.7685    | 0.0356888   | 0.984917   |
| GOLPH3L   | 6.08917   | 3.22384    | -0.917465   | 0.00134142 |
| LINC00657 | 24.7941   | 24.6124    | -0.0106133  | 0.995957   |
| QRSL1     | 4.58269   | 3.80136    | -0.26968    | 0.585481   |
| DTWD1     | 7.68392   | 6.35674    | -0.273555   | 0.563736   |
| SLC35E1   | 14.6547   | 15.1698    | 0.0498403   | 0.977103   |
| CCNT1     | 3.70496   | 4.11893    | 0.152812    | 0.847061   |
| MFG8      | 15.3024   | 15.1968    | -0.00999381 | 0.996453   |
| MED13L    | 1.65449   | 1.01223    | -0.708853   | 0.0205623  |
| ARHGAP35  | 4.03336   | 4.09977    | 0.0235611   | 0.991223   |
| SHC3      | 0.0354433 | 0.0145791  | -1.28161    | 1          |
| TBC1D16   | 4.18948   | 4.60233    | 0.135593    | 0.893751   |
| SNRNP35   | 11.5876   | 15.6573    | 0.434252    | 0.273394   |
| PCNX      | 2.64784   | 2.1704     | -0.286855   | 0.472765   |
| KDM2A     | 11.3087   | 12.2419    | 0.114395    | 0.909768   |
| SZRD1     | 42.6811   | 61.2887    | 0.522024    | 0.0539552  |
| USP9X     | 5.91798   | 4.08879    | -0.53343    | 0.0390303  |
| FHAD1     | 1.76213   | 0.937015   | -0.911179   | 0.00337323 |
| INPP5B    | 4.90984   | 3.92176    | -0.324174   | 0.460219   |
| DEF6      | 18.4075   | 13.5325    | -0.44387    | 0.158666   |
| NSMAF     | 16.8206   | 20.246     | 0.267414    | 0.525867   |
| ANXA2     | 578.356   | 636.79     | 0.13886     | 0.877191   |
| HK1       | 71.4987   | 45.1094    | -0.66449    | 0.00425224 |
| CCDC25    | 10.8105   | 9.11837    | -0.245591   | 0.617582   |
| SLC16A2   | 4.76835   | 4.57479    | -0.0597867  | 0.97418    |
| GPC1      | 34.1004   | 56.0103    | 0.715904    | 0.00509212 |
| BRF2      | 10.2386   | 10.5246    | 0.0397461   | 0.985094   |
| MARCKSL1  | 243.811   | 356.424    | 0.547832    | 0.0390303  |
| PYURF     | 62.1473   | 91.3039    | 0.554985    | 0.0345327  |
| GABRB3    | 0.640637  | 0.359793   | -0.832338   | 0.0527559  |
| OXR1      | 9.1868    | 4.77343    | -0.944536   | 0.00134142 |

|                       |            |            |            |            |
|-----------------------|------------|------------|------------|------------|
| POP5                  | 30.7904    | 48.6529    | 0.660048   | 0.0178668  |
| MALAT1                | 52.4608    | 50.9203    | -0.043001  | 0.981044   |
| C12orf57              | 320.047    | 366.593    | 0.195895   | 0.724812   |
| ZNF721                | 3.37618    | 3.53764    | 0.0673966  | 0.986822   |
| MAML3                 | 0.723488   | 0.363671   | -0.992335  | 0.551636   |
| TRAF5                 | 4.00326    | 3.7252     | -0.103858  | 0.934181   |
| CREBBP                | 3.25855    | 2.85009    | -0.193224  | 0.765317   |
| TMEM127               | 9.73381    | 12.404     | 0.349724   | 0.293861   |
| APH1A                 | 106.323    | 105.44     | -0.0120296 | 0.995957   |
| NUDT7                 | 4.08509    | 1.29837    | -1.65367   | 0.00134142 |
| LRIG3                 | 0.893868   | 1.02279    | 0.194381   | 0.875534   |
| ACSM1                 | 0.00695966 | 0.00473908 | -0.55441   | 1          |
| TRAPPC6B              | 4.2757     | 3.93983    | -0.11803   | 0.922312   |
| MEF2A                 | 3.75889    | 2.68311    | -0.486403  | 0.128787   |
| EBPL                  | 126.65     | 115.101    | -0.13794   | 0.865379   |
| FAM171A1              | 15.3049    | 18.0998    | 0.241979   | 0.609019   |
| PAFAH1B2              | 19.108     | 24.2278    | 0.342488   | 0.315059   |
| CIB1                  | 186.136    | 210.455    | 0.177159   | 0.777021   |
| HTATSF1P2             | 1.79682    | 1.39293    | -0.367323  | 0.470491   |
| OCRL                  | 7.89229    | 4.93822    | -0.676452  | 0.00818401 |
| RASGRP2               | 0.643072   | 0.329786   | -0.963451  | 0.142081   |
| MGC2752               | 11.0124    | 11.914     | 0.113527   | 0.918818   |
| COX16,SYNJ2BP,SYNJ2BP | 34.1934    | 44.8649    | 0.39187    | 0.243837   |
| NBEAL1                | 0.0410146  | 0.0290525  | -0.497475  | 1          |
| IPO5                  | 27.7238    | 24.6039    | -0.172242  | 0.793038   |
| WDR82                 | 15.3262    | 22.5071    | 0.554378   | 0.030994   |
| COL27A1               | 4.27711    | 4.59455    | 0.103289   | 0.937765   |
| KIAA1045              | 0.00279034 | 0.00223191 | -0.322166  | 1          |
| CDK2AP1               | 48.3947    | 95.148     | 0.975324   | 0.00134142 |
| FOXP4                 | 10.2058    | 12.2065    | 0.258257   | 0.581815   |
| LRGUK                 | 0.115565   | 0.0857839  | -0.42993   | 1          |
| SNX7                  | 11.2136    | 9.39364    | -0.255491  | 0.62798    |
| ZNF516                | 2.43964    | 1.53219    | -0.671074  | 0.030165   |
| MSRA                  | 9.16348    | 16.631     | 0.859903   | 0.00337323 |
| AGAP4                 | 1.03959    | 1.05203    | 0.0171555  | 0.996079   |
| FOXN2                 | 2.94745    | 2.53845    | -0.21552   | 0.730454   |
| PROSER2               | 3.6829     | 3.71138    | 0.0111124  | 0.997036   |
| ZNF609                | 3.48478    | 3.24601    | -0.102401  | 0.930066   |
| INTS12                | 14.0891    | 12.6064    | -0.160421  | 0.844458   |
| TXNDC16               | 0.578611   | 0.270565   | -1.09662   | 0.0132924  |
| RBPM5                 | 29.2988    | 20.9699    | -0.482523  | 0.208452   |
| MGST3                 | 79.3225    | 70.8766    | -0.162422  | 0.817735   |
| EIF3G                 | 299.289    | 311.85     | 0.0593143  | 0.977332   |
| TNIK                  | 6.39805    | 6.48424    | 0.0193055  | 0.996453   |
| TTI2                  | 5.93259    | 8.36438    | 0.495596   | 0.58083    |
| TMEM185A              | 6.09743    | 6.73139    | 0.142703   | 0.89239    |
| SOLH                  | 27.9011    | 54.5277    | 0.966669   | 0.00134142 |
| POLQ                  | 0.568466   | 0.71777    | 0.336448   | 0.556835   |
| NSUN4                 | 6.62979    | 5.81749    | -0.188568  | 0.781722   |
| FBXO2                 | 1.95106    | 1.31048    | -0.574157  | 0.965515   |
| GLO1                  | 100.008    | 91.1918    | -0.133135  | 0.877187   |
| RAB38                 | 22.6543    | 18.5573    | -0.287797  | 0.510297   |
| PRR11                 | 5.80378    | 4.39116    | -0.40239   | 0.228416   |
| ZNF486                | 1.46567    | 1.03286    | -0.504923  | 0.257766   |
| YIPF1                 | 11.5632    | 11.8745    | 0.0383259  | 0.985921   |
| KATNBL1               | 6.70706    | 5.34901    | -0.326407  | 0.430215   |
| CHEK2                 | 12.6501    | 8.18742    | -0.62767   | 0.030994   |
| EIF3H                 | 564.053    | 478.746    | -0.236571  | 0.646497   |
| WDR45B                | 46.3985    | 45.1021    | -0.0408832 | 0.98066    |
| FAM78A                | 3.51251    | 5.14045    | 0.549394   | 0.106054   |
| ANKRD24               | 0.135249   | 0.0380922  | -1.82805   | 1          |
| TMEM81                | 3.17366    | 4.84832    | 0.611339   | 0.141232   |
| ZNF343                | 2.74465    | 3.6985     | 0.430322   | 0.264345   |
| SPTAN1                | 30.0833    | 21.7532    | -0.467731  | 0.335283   |
| TTC23                 | 2.9168     | 2.16526    | -0.429844  | 0.312486   |
| SLC36A4               | 3.58372    | 3.51687    | -0.0271643 | 0.991767   |
| CCDC91                | 4.40457    | 4.13579    | -0.0908406 | 0.954677   |
| HERC2P2               | 1.7205     | 2.48183    | 0.528572   | 0.13619    |
| ACAP2                 | 3.4126     | 2.83681    | -0.266598  | 0.57439    |
| RFX1                  | 3.06158    | 2.77186    | -0.143424  | 0.921047   |
| PGBD1                 | 1.96914    | 2.82534    | 0.520855   | 0.16323    |
| EIF3K                 | 296.395    | 321.163    | 0.115787   | 0.909435   |
| XRCC1                 | 16.8978    | 10.2937    | -0.715079  | 0.0114515  |
| GMPPB                 | 7.10633    | 11.4068    | 0.682722   | 0.460498   |
| TRIM33                | 2.79971    | 2.62994    | -0.0902481 | 0.947008   |
| PCBP2                 | 182.907    | 140.57     | -0.379815  | 0.277735   |
| THOC6                 | 141.39     | 145.667    | 0.0429935  | 0.987858   |
| MTFMT                 | 9.71032    | 12.0727    | 0.314161   | 0.418623   |
| CTBP1-AS1             | 3.68807    | 3.90508    | 0.082486   | 0.963346   |



|              |            |            |              |            |
|--------------|------------|------------|--------------|------------|
| PTPN9        | 6.07757    | 5.19419    | -0.226596    | 0.705893   |
| NSMF         | 96.1127    | 121.719    | 0.340754     | 0.337762   |
| TMTC3        | 1.01364    | 1.10794    | 0.128337     | 0.921047   |
| FIG4         | 4.47093    | 2.48991    | -0.84448     | 0.00425224 |
| SOCS2        | 7.78975    | 7.97951    | 0.0347226    | 0.986822   |
| LOC388906    | 0.225568   | 0.219617   | -0.0385758   | 1          |
| C21orf33     | 68.2276    | 43.9903    | -0.633169    | 0.0132924  |
| USP35        | 2.44156    | 3.4694     | 0.50688      | 0.214052   |
| KLHL20       | 1.77712    | 1.78772    | 0.00857712   | 0.997036   |
| SLC17A5      | 9.1126     | 5.78563    | -0.65539     | 0.0183825  |
| TRAPP11      | 5.46339    | 3.24369    | -0.752157    | 0.00509212 |
| SOX12        | 19.204     | 19.8538    | 0.0480068    | 0.978981   |
| SCCPDH       | 27.0116    | 19.9971    | -0.433791    | 0.14478    |
| SH3BP1       | 22.5404    | 23.9024    | 0.0846398    | 0.950263   |
| LRRC41       | 30.74      | 40.9019    | 0.412052     | 0.2823     |
| AHCTF1       | 2.06465    | 3.10399    | 0.588227     | 0.0357572  |
| ZNF146       | 14.9004    | 16.445     | 0.142293     | 0.857872   |
| DESI2        | 16.1228    | 15.9302    | -0.0173325   | 0.99351    |
| LOC100286793 | 0.883277   | 0.581294   | -0.603598    | 0.525803   |
| LRRC4B       | 0.829993   | 0.229019   | -1.85763     | 0.0162707  |
| SMPD1        | 6.74162    | 4.48806    | -0.587003    | 0.0873591  |
| SYCE2        | 0.78655    | 0.85657    | 0.123033     | 0.95534    |
| DLL3         | 0.020559   | 0.0451298  | 1.13431      | 1          |
| C20orf203    | 0.00349339 | 0.00748196 | 1.09879      | 1          |
| CIZ1         | 111.887    | 99.5694    | -0.168266    | 0.817299   |
| NAT1         | 1.94323    | 1.73112    | -0.166747    | 0.909768   |
| CELSR2       | 2.36223    | 2.51013    | 0.0876126    | 0.951888   |
| FXR1         | 6.14674    | 5.1896     | -0.244199    | 0.609835   |
| EFNB1        | 8.54047    | 11.2603    | 0.398852     | 0.267569   |
| ZCWPW1       | 1.09601    | 0.427665   | -1.3577      | 0.729625   |
| SLC4A3       | 3.8037     | 3.50432    | -0.118267    | 0.932468   |
| C11orf57     | 9.14997    | 8.59789    | -0.0897842   | 0.972989   |
| KIAA1609     | 5.21771    | 3.05492    | -0.772281    | 0.00509212 |
| PRR12        | 4.47167    | 5.66613    | 0.341552     | 0.403783   |
| C15orf52     | 0.0280049  | 0.0542779  | 0.954685     | 1          |
| SLC9A3R2     | 38.102     | 48.7383    | 0.35519      | 0.294113   |
| FBXW2        | 8.00101    | 12.4319    | 0.635789     | 0.0132924  |
| PRR19        | 7.30908    | 10.5072    | 0.523612     | 0.78475    |
| NUP133       | 7.40047    | 6.28648    | -0.235364    | 0.653433   |
| WDR37        | 5.53067    | 4.89408    | -0.176417    | 0.806993   |
| RGS20        | 0.078173   | 0.019258   | -2.02121     | 1          |
| FNBP1L       | 4.87382    | 2.79363    | -0.802913    | 0.00509212 |
| PLEKHG3      | 10.8066    | 12.2633    | 0.182429     | 0.781066   |
| ANKRD30BP2   | 0.0248582  | 0.0115043  | -1.11155     | 1          |
| AUNIP        | 5.86777    | 7.44291    | 0.343055     | 0.450737   |
| DNPEP        | 45.2167    | 42.1243    | -0.102205    | 0.926446   |
| TEKT3        | 0.138852   | 0.096001   | -0.532426    | 1          |
| CACNA1A      | 0.00246885 | 0.00152208 | -0.697791    | 1          |
| COMMD5       | 62.6545    | 112.02     | 0.838271     | 0.00134142 |
| OMA1         | 5.55239    | 2.82702    | -0.973829    | 0.00425224 |
| IPP          | 1.05718    | 0.742147   | -0.51045     | 0.918619   |
| MGRN1        | 17.2945    | 21.6137    | 0.321638     | 0.390876   |
| TMEM19       | 2.68076    | 2.74926    | 0.0364026    | 0.986831   |
| MCTS1        | 2.80534    | 2.52607    | -0.151282    | 0.846498   |
| DHFR1L1      | 0.789339   | 0.430267   | -0.875412    | 0.09508    |
| FMNL2        | 7.12207    | 7.09105    | -0.00629729  | 0.997082   |
| PRKCA        | 0.876316   | 1.02565    | 0.227015     | 0.765568   |
| MLLT4        | 4.82894    | 4.13868    | -0.222536    | 0.671358   |
| CCDC66       | 1.35755    | 1.94837    | 0.521261     | 0.81526    |
| SRP72        | 20.0348    | 15.889     | -0.334478    | 0.327394   |
| MED11        | 22.8622    | 24.3509    | 0.0910116    | 0.984772   |
| RYBP         | 6.57603    | 4.72083    | -0.478178    | 0.113745   |
| TRMT13       | 2.39093    | 2.92409    | 0.290421     | 0.637571   |
| PLEKHM1      | 10.1373    | 6.23119    | -0.702096    | 0.0156972  |
| PDE8A        | 5.11344    | 5.11766    | 0.0011898    | 0.999416   |
| CEP76        | 1.59876    | 1.43365    | -0.157253    | 0.979701   |
| ZNF148       | 1.81911    | 1.59917    | -0.185909    | 0.795735   |
| PCGF2        | 42.0875    | 39.3566    | -0.0967876   | 0.953061   |
| CPSF4L       | 0.0306017  | 0.0887215  | 1.53567      | 1          |
| GRK5         | 5.31493    | 5.89005    | 0.148229     | 0.891839   |
| WWP1         | 6.54118    | 7.67712    | 0.231016     | 0.653104   |
| ACOX1        | 3.94501    | 4.13771    | 0.0688052    | 0.977332   |
| JMJD1C       | 4.56407    | 2.1417     | -1.09156     | 0.00134142 |
| TMED3        | 94.6226    | 120.247    | 0.34574      | 0.301426   |
| CKAP4        | 20.648     | 21.8617    | 0.0823998    | 0.950929   |
| CCDC22       | 17.6364    | 15.5876    | -0.178162    | 0.80896    |
| SCARF2       | 1.57788    | 1.30113    | -0.278227    | 0.847891   |
| CNOT7        | 26.587     | 26.5785    | -0.000461763 | 0.999427   |
| INPP5E       | 21.8828    | 18.7526    | -0.222704    | 0.678458   |

|                       |            |            |             |            |
|-----------------------|------------|------------|-------------|------------|
| LTBR                  | 38.5797    | 79.5354    | 1.04376     | 0.00134142 |
| DHX35                 | 3.53568    | 3.97383    | 0.168542    | 0.85977    |
| METTL8                | 2.20597    | 2.67586    | 0.278589    | 0.669472   |
| UBE2J1                | 10.183     | 11.1649    | 0.132809    | 0.873286   |
| ZRANB2                | 12.0818    | 15.8767    | 0.394072    | 0.220496   |
| ALS2                  | 3.59237    | 3.38576    | -0.0854561  | 0.959465   |
| NUF2                  | 11.6237    | 8.77345    | -0.405853   | 0.264637   |
| KCNAB3                | 0.566634   | 0.523207   | -0.115035   | 0.971854   |
| NABP1                 | 17.9566    | 22.9783    | 0.355757    | 0.293795   |
| SNORA63               | 58.2908    | 50.6897    | -0.201575   | 0.990857   |
| DFFA                  | 15.539     | 18.1851    | 0.226863    | 0.700253   |
| GPX1                  | 709.888    | 933.209    | 0.394609    | 0.200793   |
| MARCH6                | 9.48408    | 7.23117    | -0.391278   | 0.20932    |
| TCEAL8                | 43.3997    | 31.0759    | -0.48189    | 0.0906031  |
| C11orf31              | 157.769    | 160.604    | 0.0256901   | 0.99351    |
| FAM171B               | 0.213783   | 0.123401   | -0.792795   | 1          |
| ZC4H2                 | 4.72098    | 3.00811    | -0.650229   | 0.0390303  |
| ENPP4                 | 1.60266    | 1.17735    | -0.44493    | 0.281427   |
| TRPM7                 | 2.43751    | 2.21732    | -0.136595   | 0.884417   |
| DDX58                 | 0.484979   | 0.416574   | -0.219349   | 0.865814   |
| LYZ                   | 0.0547163  | 0.0192482  | -1.50725    | 1          |
| PCGF3                 | 4.97295    | 4.34272    | -0.195503   | 0.762454   |
| LRRRC37A4P            | 0.945569   | 0.804328   | -0.233399   | 0.777374   |
| ADH5                  | 45.9194    | 31.9483    | -0.523365   | 0.0507992  |
| PARPBP                | 1.57802    | 1.63355    | 0.0498902   | 0.985921   |
| ADPRHL2               | 35.6811    | 43.2157    | 0.276395    | 0.501931   |
| C2orf44               | 2.967      | 5.55123    | 0.903802    | 0.00134142 |
| ZRSR2                 | 6.39771    | 5.94178    | -0.106659   | 0.944813   |
| SLC6A6                | 3.58341    | 6.51985    | 0.863505    | 0.0250278  |
| PQBP1                 | 78.2673    | 94.7061    | 0.275047    | 0.791404   |
| NUMA1                 | 18.7529    | 12.6771    | -0.564886   | 0.276401   |
| KIF4A                 | 5.89365    | 7.32724    | 0.314108    | 0.435611   |
| LIG3                  | 5.31077    | 5.89007    | 0.149365    | 0.865541   |
| TP53BP1               | 2.75476    | 2.43913    | -0.175561   | 0.952469   |
| RAP2A                 | 3.1474     | 3.29167    | 0.064657    | 0.972111   |
| PKIB                  | 0.0472565  | 0.0127341  | -1.89181    | 1          |
| DOPEY2                | 1.53762    | 0.969538   | -0.665334   | 0.0507992  |
| NEDD4L                | 8.29597    | 4.66255    | -0.83129    | 0.00134142 |
| FPR3                  | 0.0370528  | 0.0244171  | -0.601689   | 1          |
| KCTD18                | 2.22227    | 1.36326    | -0.704973   | 0.0828001  |
| ZNF513                | 9.24204    | 12.6948    | 0.457957    | 0.845726   |
| SSR4                  | 429.822    | 501.607    | 0.22282     | 0.751467   |
| VPS13B                | 1.55516    | 1.14117    | -0.446547   | 0.219954   |
| SNORA38               | 2.06058    | 5.44677    | 1.40235     | 0.920028   |
| POLE4                 | 87.3043    | 132.958    | 0.606843    | 0.0178668  |
| SEC24A                | 1.89911    | 2.03588    | 0.100332    | 0.942472   |
| TNS3                  | 0.00224366 | 0          | #NAME?      | 1          |
| MAPK11                | 14.8624    | 14.2595    | -0.0597446  | 0.974494   |
| ST3GAL4               | 18.8       | 24.9671    | 0.409293    | 0.204101   |
| PLA2G6                | 2.21961    | 0.863948   | -1.36129    | 0.00243047 |
| KIAA1715              | 4.1099     | 1.83014    | -1.16715    | 0.00134142 |
| SIM2                  | 3.29995    | 2.76278    | -0.256325   | 0.689101   |
| JUN                   | 133.59     | 146.78     | 0.135842    | 0.869898   |
| RPL6                  | 2650.68    | 2943.25    | 0.151045    | 0.871957   |
| C18orf25              | 1.97183    | 1.57967    | -0.319912   | 0.540505   |
| TCP11L1               | 3.37226    | 2.05935    | -0.711525   | 0.0451064  |
| LUC7L                 | 23.4177    | 49.4695    | 1.07894     | 0.00134142 |
| FAM183B               | 0.443331   | 0.228672   | -0.955105   | 0.346561   |
| CDIP1                 | 0.00732219 | 0.04106    | 2.48738     | 1          |
| CRTC3                 | 6.69008    | 5.6354     | -0.247507   | 0.619231   |
| SPECC1                | 6.47652    | 4.28339    | -0.596468   | 0.0373672  |
| THADA                 | 1.70481    | 2.54605    | 0.57865     | 0.0730091  |
| NSFL1C                | 20.7703    | 27.0034    | 0.378617    | 0.232252   |
| FMNL3                 | 3.42724    | 3.41172    | -0.00654864 | 0.997036   |
| PARP14                | 2.70674    | 2.27073    | -0.2534     | 0.620198   |
| SNRK                  | 0.522489   | 0.577084   | 0.14338     | 0.943036   |
| FAM104A               | 13.6935    | 12.6634    | -0.112829   | 0.938305   |
| OSBPL1A               | 3.71444    | 2.22896    | -0.73677    | 0.0178668  |
| MSRB2                 | 8.82468    | 6.24422    | -0.499023   | 0.153149   |
| SWT1                  | 0.818064   | 0.4301     | -0.92754    | 0.507313   |
| KDM5B                 | 6.30495    | 5.82792    | -0.113506   | 0.912521   |
| GALM                  | 4.43736    | 2.80522    | -0.661587   | 0.0576801  |
| PDE6B                 | 0.00613396 | 0.00884954 | 0.528784    | 1          |
| CTNNA1                | 53.0582    | 48.0437    | -0.143228   | 0.852163   |
| PIGA                  | 2.79862    | 2.22021    | -0.334015   | 0.527104   |
| CRBN                  | 6.29589    | 3.56282    | -0.82139    | 0.00134142 |
| OTUB1                 | 63.0851    | 91.014     | 0.528788    | 0.0431891  |
| CHURC1,CHURC1-FNTB,F1 | 23.9977    | 16.3859    | -0.550439   | 0.399996   |
| B4GALT6               | 3.63593    | 2.01278    | -0.853131   | 0.00243047 |

|                       |            |            |            |            |
|-----------------------|------------|------------|------------|------------|
| FANCG                 | 17.4631    | 13.6537    | -0.355011  | 0.315903   |
| PRRT1                 | 1.89377    | 0.860488   | -1.13803   | 0.0511722  |
| SOS2                  | 1.47016    | 0.939006   | -0.646772  | 0.0739785  |
| CASC2                 | 0.188536   | 0.115126   | -0.711631  | 1          |
| ERRF1                 | 50.7289    | 21.9438    | -1.20899   | 0.00134142 |
| PRRC2A                | 32.4202    | 36.26      | 0.161487   | 0.81665    |
| SLC7A10               | 0.179187   | 0.337106   | 0.911734   | 1          |
| GLG1                  | 17.1745    | 12.8014    | -0.423969  | 0.159812   |
| SLC35E2B              | 5.93079    | 3.16308    | -0.906893  | 0.0862993  |
| LOC100289019          | 1.60164    | 2.12878    | 0.410475   | 0.444143   |
| LINC00493             | 129.07     | 120.28     | -0.101766  | 0.928018   |
| MRPL27                | 77.6487    | 122.931    | 0.662819   | 0.00818401 |
| SLK                   | 3.69893    | 2.95696    | -0.322994  | 0.426476   |
| ANP32AP1              | 0.0220508  | 0.0132311  | -0.736891  | 1          |
| TKT                   | 293.709    | 256.542    | -0.19519   | 0.744243   |
| EVPL                  | 4.67404    | 5.45813    | 0.223736   | 0.713826   |
| RASL11A               | 2.96924    | 7.70481    | 1.37567    | 0.00134142 |
| MED4                  | 15.9297    | 16.6009    | 0.0595369  | 0.972088   |
| ZFYVE27               | 14.5428    | 22.7717    | 0.646935   | 0.010797   |
| ERI2                  | 3.39559    | 3.09206    | -0.135095  | 0.937187   |
| MRPS27                | 38.0773    | 36.6647    | -0.0545399 | 0.974044   |
| ACTN1                 | 69.3169    | 73.2906    | 0.0804203  | 0.952469   |
| RAB14                 | 21.5979    | 23.7041    | 0.134244   | 0.874807   |
| RNF170                | 5.2957     | 3.08688    | -0.778671  | 0.0189207  |
| CLSTN1                | 27.9317    | 28.5596    | 0.0320723  | 0.987423   |
| RAB40A                | 0.557673   | 0.539852   | -0.0468546 | 0.993379   |
| ASAH1                 | 25.4545    | 14.7827    | -0.784018  | 0.00337323 |
| ASB3,GPR75,GPR75-ASB3 | 3.24687    | 2.3104     | -0.490906  | 0.823658   |
| SRC                   | 18.1689    | 19.1898    | 0.0788675  | 0.954559   |
| RFWD2                 | 9.00927    | 9.50729    | 0.0776249  | 0.95835    |
| PHLDB1                | 2.97893    | 3.34978    | 0.169272   | 0.85508    |
| DPY30                 | 56.9271    | 53.4845    | -0.0899942 | 0.943861   |
| AASDHPTT              | 9.5679     | 12.3       | 0.36238    | 0.303349   |
| ARHGEF12              | 5.01797    | 4.35367    | -0.204874  | 0.707322   |
| ADAM1A                | 0.437664   | 0.827558   | 0.919037   | 0.0678232  |
| VPS52                 | 8.68818    | 5.99092    | -0.536275  | 0.0882057  |
| PURA                  | 3.80696    | 6.9447     | 0.867271   | 0.00134142 |
| RAB24                 | 27.4393    | 33.2469    | 0.276977   | 0.531475   |
| LAMC1                 | 10.0213    | 7.57452    | -0.403848  | 0.191486   |
| SERHL                 | 0.0143485  | 0.0401798  | 1.48557    | 1          |
| TERF2                 | 10.4917    | 9.86539    | -0.0888012 | 0.945946   |
| BAG1                  | 16.4874    | 26.1567    | 0.665819   | 0.00818401 |
| ZNF707                | 9.62275    | 14.41      | 0.582554   | 0.0685498  |
| PHF20                 | 2.66403    | 2.12032    | -0.32933   | 0.454347   |
| NDUFV3                | 28.3987    | 27.055     | -0.0699255 | 0.967901   |
| GD12                  | 154.117    | 137.38     | -0.165846  | 0.81342    |
| ORAI2                 | 3.15852    | 5.70684    | 0.853445   | 0.0101293  |
| LOC729732             | 1.45041    | 0.966566   | -0.585525  | 0.464668   |
| CCSAP                 | 1.74467    | 1.89809    | 0.12159    | 0.925191   |
| TSR3                  | 100.025    | 178.849    | 0.838383   | 0.00134142 |
| MGST2                 | 69.9483    | 51.1655    | -0.451117  | 0.164179   |
| WIPF2                 | 4.43894    | 3.25265    | -0.448602  | 0.176896   |
| INTS3                 | 8.3127     | 6.85983    | -0.277145  | 0.533392   |
| TP53I13               | 57.4173    | 43.5339    | -0.399346  | 0.218942   |
| CDCA4                 | 32.7871    | 32.1903    | -0.0265013 | 0.989514   |
| CBWD2                 | 1.73264    | 2.89052    | 0.738356   | 0.0523239  |
| CSNK1E                | 66.0784    | 57.9049    | -0.190493  | 0.739331   |
| LINC00696             | 0.00546038 | 0.00445194 | -0.294565  | 1          |
| FAM160B2              | 17.6011    | 17.2002    | -0.0332385 | 0.986822   |
| TLK1                  | 6.49789    | 5.62007    | -0.209382  | 0.703995   |
| ZNF497                | 1.63138    | 1.38453    | -0.236697  | 0.855712   |
| CDHR3                 | 0.0516631  | 0.0610737  | 0.241419   | 1          |
| RHOT2                 | 39.9307    | 64.0787    | 0.682347   | 0.00509212 |
| ESYT1                 | 41.2716    | 33.2688    | -0.31098   | 0.392645   |
| IRF2BP1               | 21.0884    | 30.5673    | 0.535539   | 0.0691409  |
| DDX20                 | 6.47067    | 6.30229    | -0.0380384 | 0.986928   |
| UCKL1-AS1             | 0.160463   | 0.18793    | 0.227957   | 1          |
| SOX13                 | 4.22995    | 4.53798    | 0.10141    | 0.944284   |
| FXN                   | 9.50597    | 12.2027    | 0.360296   | 0.72508    |
| CTC1                  | 2.69725    | 2.19292    | -0.298636  | 0.556835   |
| PUS7                  | 7.48519    | 11.51      | 0.620782   | 0.0167292  |
| CYB5D2                | 14.7633    | 8.97801    | -0.717548  | 0.0235476  |
| ANKMY1                | 1.46105    | 0.972962   | -0.586551  | 0.319563   |
| TUT1                  | 10.0738    | 8.71144    | -0.209618  | 0.749584   |
| LOC646278             | 0.387024   | 0.218115   | -0.827336  | 0.282228   |
| RPS6KB2               | 50.5812    | 69.7151    | 0.462872   | 0.105875   |
| TSPYL1                | 20.1768    | 23.1204    | 0.196465   | 0.732349   |
| PCBP4                 | 42.6587    | 53.5513    | 0.328082   | 0.364877   |
| ZBTB45                | 10.8261    | 15.4188    | 0.510167   | 0.147583   |

|                      |            |           |            |            |
|----------------------|------------|-----------|------------|------------|
| TUBB                 | 458.777    | 601.782   | 0.391446   | 0.275337   |
| AAED1                | 28.8757    | 26.8847   | -0.103071  | 0.927422   |
| SLC6A8               | 62.883     | 63.6963   | 0.0185386  | 0.993379   |
| CENPN                | 19.1504    | 22.8348   | 0.253862   | 0.857291   |
| RBMX2                | 19.1127    | 16.803    | -0.185812  | 0.7854     |
| FBXO10               | 2.53476    | 2.89524   | 0.191832   | 0.816305   |
| CCDC85C              | 17.4269    | 29.1209   | 0.740741   | 0.0270114  |
| DLX1                 | 4.75605    | 8.45755   | 0.830478   | 0.00425224 |
| C17orf72             | 0.0797368  | 0.114334  | 0.519935   | 1          |
| CTU1                 | 12.5858    | 13.5163   | 0.10291    | 0.945946   |
| FLJ35946             | 0.393565   | 0.261607  | -0.589201  | 0.976756   |
| ALDH7A1              | 14.8759    | 11.6669   | -0.35056   | 0.290899   |
| MGC27345             | 1.93436    | 3.73769   | 0.950289   | 0.00134142 |
| CKLF,CKLF-CMTM1,CMTM | 58.9544    | 49.2109   | -0.260619  | 0.588846   |
| TRABD2A              | 17.6472    | 20.3478   | 0.205434   | 0.747687   |
| PRC1                 | 18.2624    | 19.362    | 0.0843545  | 0.954559   |
| STXBP5-AS1           | 0.0281074  | 0.0106195 | -1.40423   | 1          |
| TTC19                | 21.4289    | 19.2997   | -0.150979  | 0.866155   |
| PGD                  | 111.219    | 117.943   | 0.0846893  | 0.947008   |
| WDR19                | 2.42225    | 1.18397   | -1.03272   | 0.00134142 |
| GNB3                 | 1.96136    | 3.52914   | 0.847463   | 0.0370005  |
| KIAA1429             | 5.88636    | 4.98683   | -0.239253  | 0.632634   |
| ZNF225               | 0.579065   | 0.562677  | -0.0414181 | 0.990857   |
| SSBP2                | 2.10789    | 1.11139   | -0.923438  | 0.251616   |
| NEU1                 | 79.2366    | 54.2053   | -0.547733  | 0.042771   |
| CCDC73               | 3.73059    | 3.84762   | 0.0445631  | 0.994615   |
| METTL21A             | 8.34472    | 10.5507   | 0.338401   | 0.337034   |
| MMRN2                | 0.206746   | 0.394362  | 0.931663   | 0.157488   |
| LMO7                 | 2.68606    | 1.37551   | -0.96552   | 0.00134142 |
| CEP170B              | 11.421     | 18.1139   | 0.665402   | 0.00509212 |
| TMEM106B             | 3.45443    | 2.13254   | -0.695873  | 0.0120701  |
| ZNF286A              | 2.15971    | 2.89282   | 0.421637   | 0.240188   |
| DAD1                 | 224.139    | 252.523   | 0.172022   | 0.790283   |
| CD40                 | 17.4755    | 12.9489   | -0.432501  | 0.205713   |
| PRKAG2               | 17.0999    | 15.8744   | -0.107281  | 0.933526   |
| ITIH3                | 0.00516734 | 0         | #NAME?     | 1          |
| DEFA5                | 0.0596997  | 0         | #NAME?     | 1          |
| AGFG1                | 4.17563    | 4.64961   | 0.155116   | 0.877879   |
| NCS1                 | 49.4772    | 64.6398   | 0.38566    | 0.216749   |
| LSM10                | 61.9359    | 108.333   | 0.806622   | 0.00134142 |
| PLEC                 | 14.0252    | 27.3946   | 0.965866   | 0.00134142 |
| HTATIP2              | 36.7851    | 31.2006   | -0.237547  | 0.643946   |
| STX17                | 2.91549    | 2.25513   | -0.370528  | 0.311781   |
| SPAG16               | 7.47736    | 5.27053   | -0.504581  | 0.191486   |
| ANKRD19P             | 0.79157    | 0.74967   | -0.0784621 | 0.979875   |
| RAB11A               | 21.2985    | 18.9628   | -0.167574  | 0.801139   |
| STX3                 | 13.2341    | 8.44351   | -0.648351  | 0.010797   |
| WDFY3                | 1.04137    | 0.736518  | -0.499689  | 0.136959   |
| COPS7A               | 50.1281    | 46.8236   | -0.0983846 | 0.92969    |
| RFESD                | 1.53113    | 0.908784  | -0.752587  | 0.115606   |
| NFATC4               | 0.435518   | 0.0771224 | -2.49751   | 0.00243047 |
| RXR8                 | 22.6202    | 13.2475   | -0.771896  | 0.00337323 |
| LOC100289509         | 0.327626   | 0.248794  | -0.397101  | 1          |
| ARHGEF7              | 8.55467    | 9.11013   | 0.09076    | 0.941621   |
| APEX1                | 190.484    | 193.66    | 0.0238564  | 0.990857   |
| ADCK3                | 22.3793    | 15.9007   | -0.493076  | 0.0914856  |
| ISCA1                | 25.5555    | 29.1611   | 0.190413   | 0.746304   |
| ATG2A                | 10.6184    | 7.59747   | -0.48297   | 0.104594   |
| TMEM184C             | 4.32124    | 3.99136   | -0.114565  | 0.929635   |
| COG4                 | 10.5167    | 6.39273   | -0.718174  | 0.0126858  |
| CYB561D1             | 3.82574    | 3.31068   | -0.208613  | 0.763683   |
| UQCRC1               | 224.549    | 221.291   | -0.0210885 | 0.991767   |
| MAP4K5               | 8.39216    | 6.62023   | -0.34216   | 0.327394   |
| ROBO1                | 1.04452    | 0.667376  | -0.646264  | 0.0820682  |
| ECHDC2               | 9.74471    | 7.78518   | -0.323889  | 0.539391   |
| ZNF830               | 10.8749    | 13.7969   | 0.343349   | 0.400613   |
| FNDC3A               | 4.97868    | 3.35475   | -0.569557  | 0.0394523  |
| ZNF367               | 3.7136     | 3.29994   | -0.170378  | 0.845974   |
| PKD1                 | 4.51621    | 5.38586   | 0.254066   | 0.7854     |
| LINC00176            | 0.379896   | 0.342519  | -0.149419  | 0.955517   |
| ZNF618               | 2.11273    | 1.9685    | -0.102007  | 0.940338   |
| RRAS2                | 19.0269    | 17.1604   | -0.148956  | 0.844123   |
| SOCS3                | 17.3095    | 27.4423   | 0.66484    | 0.0101293  |
| HINT1                | 722.691    | 832.633   | 0.204302   | 0.718396   |
| TMEM60               | 26.3428    | 18.2409   | -0.530234  | 0.0957181  |
| MRPL10               | 80.4458    | 55.0061   | -0.548427  | 0.0340561  |
| NSMCE2               | 23.704     | 12.8374   | -0.884777  | 0.00134142 |
| CDC27                | 6.82772    | 7.63891   | 0.161962   | 0.81526    |
| EHMT2                | 20.1893    | 20.389    | 0.0142028  | 0.994615   |

|          |           |           |            |            |
|----------|-----------|-----------|------------|------------|
| MTMR12   | 3.7735    | 4.19449   | 0.152589   | 0.85744    |
| SAC3D1   | 44.509    | 69.6161   | 0.645324   | 0.0183825  |
| DUSP16   | 2.68297   | 1.6222    | -0.725879  | 0.0156972  |
| ITPR2    | 0.381291  | 0.290683  | -0.391449  | 0.490826   |
| SLC2A1   | 97.0803   | 72.0847   | -0.429485  | 0.176673   |
| STAM     | 6.47745   | 5.64801   | -0.197683  | 0.752661   |
| SHANK2   | 0.559155  | 0.315175  | -0.827097  | 0.0515434  |
| C11orf91 | 1.86754   | 2.01954   | 0.112891   | 0.976214   |
| OSGIN1   | 17.084    | 12.4313   | -0.458664  | 0.205713   |
| ARFIP1   | 5.90564   | 5.43555   | -0.119668  | 0.914427   |
| MAP7     | 5.63702   | 3.18632   | -0.823041  | 0.00337323 |
| HEG1     | 1.7973    | 2.59774   | 0.531424   | 0.0932788  |
| ARRDC1   | 90.9568   | 85.8494   | -0.083373  | 0.950074   |
| NFU1     | 35.8314   | 27.3424   | -0.390087  | 0.240188   |
| USP32P2  | 0.0719049 | 0.0804963 | 0.162834   | 1          |
| TADA1    | 7.34785   | 6.44637   | -0.188834  | 0.806888   |
| RAB40C   | 15.7734   | 16.9938   | 0.107516   | 0.930066   |
| THUMPD2  | 8.71591   | 11.1757   | 0.358643   | 0.330501   |
| TXN2     | 101.163   | 102.84    | 0.0237176  | 0.990857   |
| KIAA1586 | 2.78813   | 2.75391   | -0.0178169 | 0.99451    |
| RPUSD4   | 22.2324   | 23.1327   | 0.057271   | 0.972111   |
| TRIM21   | 6.53418   | 6.08496   | -0.10276   | 0.946274   |
| C19orf52 | 17.3987   | 16.7891   | -0.0514557 | 0.979944   |
| ANKRD13A | 27.1206   | 19.5407   | -0.472912  | 0.0953833  |
| NME6     | 12.9707   | 11.2981   | -0.199171  | 0.807124   |
| ARNT2    | 1.79326   | 1.58857   | -0.174863  | 0.852163   |
| DEPDC1B  | 7.21718   | 7.76895   | 0.106285   | 0.931733   |
| AGPAT3   | 7.85752   | 11.3845   | 0.534922   | 0.0436049  |
| ESF1     | 2.29307   | 3.55187   | 0.631297   | 0.0447795  |
| YIPF2    | 31.777    | 31.8552   | 0.00354169 | 0.99862    |
| EPHB6    | 0.132714  | 0.0807791 | -0.716269  | 1          |
| ADPRM    | 6.12053   | 3.03998   | -1.0096    | 0.00134142 |
| MAP3K3   | 4.82531   | 5.50275   | 0.189532   | 0.889598   |
| MMAB     | 6.20188   | 5.48085   | -0.178307  | 0.80896    |
| SUSD4    | 0.247991  | 0.225761  | -0.135491  | 1          |
| TRIM72   | 4.38172   | 3.38233   | -0.373479  | 0.600205   |
| TPD52    | 32.1816   | 23.7603   | -0.437683  | 0.130354   |
| IGLON5   | 0.0062201 | 0.0375591 | 2.59415    | 1          |
| KCTD15   | 10.8324   | 13.8909   | 0.358792   | 0.30664    |
| ATP9B    | 2.02206   | 1.5337    | -0.398809  | 0.433179   |
| C9orf9   | 7.58876   | 3.37818   | -1.16762   | 0.00593755 |
| DDX59    | 4.85069   | 2.31939   | -1.06444   | 0.00134142 |
| SPATA2L  | 15.4659   | 13.9468   | -0.149162  | 0.957112   |
| MICU1    | 30.9492   | 19.527    | -0.66443   | 0.0120701  |
| SENP5    | 3.72455   | 5.70245   | 0.614516   | 0.0235476  |
| GSTO2    | 37.8177   | 21.3872   | -0.822311  | 0.00134142 |
| CCDC115  | 16.1764   | 18.2989   | 0.177862   | 0.808353   |
| PAQR5    | 2.92207   | 2.74028   | -0.0926677 | 0.950929   |
| ABCD4    | 14.2995   | 11.003    | -0.378068  | 0.264491   |
| SASH1    | 1.1499    | 0.607534  | -0.920469  | 0.00509212 |
| ISG20L2  | 12.9709   | 25.3473   | 0.966546   | 0.00134142 |
| SNX13    | 2.59524   | 1.87264   | -0.470788  | 0.145692   |
| NLN      | 3.19794   | 3.66522   | 0.196756   | 0.73595    |
| DDX47    | 31.7458   | 40.1175   | 0.337663   | 0.317218   |
| THAP6    | 1.59619   | 1.1048    | -0.530853  | 0.211132   |
| POLR2L   | 172.779   | 336.653   | 0.962329   | 0.00134142 |
| NOMO1    | 14.0365   | 17.8526   | 0.346955   | 0.315903   |
| TATDN1   | 55.4024   | 37.5996   | -0.55923   | 0.265454   |
| ANO7     | 2.54349   | 2.52154   | -0.012504  | 0.997036   |
| FAM21B   | 1.01711   | 0.901654  | -0.173829  | 0.898626   |
| DND1     | 8.95194   | 13.3687   | 0.578584   | 0.619291   |
| SLC35D2  | 25.6825   | 19.1639   | -0.422393  | 0.177959   |
| CDC42BPB | 9.4348    | 10.245    | 0.118857   | 0.901579   |
| HPCAL1   | 44.9874   | 76.277    | 0.761728   | 0.00593755 |
| HEXB     | 68.6442   | 48.6251   | -0.497439  | 0.549043   |
| PWWP2A   | 5.34236   | 3.6638    | -0.544137  | 0.0860016  |
| LAMTOR5  | 139.289   | 145.837   | 0.066267   | 0.963669   |
| MED28    | 35.0439   | 32.9965   | -0.0868501 | 0.948088   |
| PTK2B    | 0.542     | 0.117983  | -2.19971   | 0.00134142 |
| SV2A     | 0.0337097 | 0.0751075 | 1.15579    | 1          |
| SMEK1    | 11.9904   | 13.0791   | 0.125383   | 0.893663   |
| SH2B1    | 14.3935   | 21.601    | 0.585683   | 0.0357572  |
| TRIM35   | 5.50606   | 6.81828   | 0.308386   | 0.482596   |
| MARCH5   | 10.1945   | 8.93112   | -0.190878  | 0.756513   |
| RNF181   | 175.748   | 122.648   | -0.51898   | 0.0531423  |
| SPIN2B   | 2.05386   | 3.40748   | 0.730369   | 0.117923   |
| KIAA1324 | 0.152605  | 0.123967  | -0.299848  | 1          |
| FBXO44   | 21.5885   | 22.6359   | 0.0683528  | 0.964792   |
| DCAKD    | 15.367    | 13.5986   | -0.176385  | 0.819877   |

|                          |            |           |            |            |
|--------------------------|------------|-----------|------------|------------|
| ING5                     | 3.16252    | 4.86791   | 0.622225   | 0.0436049  |
| GGT1                     | 5.25969    | 3.0097    | -0.80536   | 0.14478    |
| UBE2G1                   | 11.1933    | 15.9431   | 0.510297   | 0.062329   |
| DUSP3                    | 21.4277    | 17.509    | -0.291379  | 0.461203   |
| ANXA2P2                  | 3.94129    | 3.82482   | -0.043278  | 0.987693   |
| CD3D                     | 0.0261125  | 0.0184884 | -0.498119  | 1          |
| NF2                      | 8.52891    | 12.6423   | 0.567821   | 0.0386414  |
| PAC SIN3                 | 41.6174    | 40.3168   | -0.0458072 | 0.979701   |
| TFDP2                    | 3.07662    | 1.63271   | -0.914075  | 0.00134142 |
| AEN                      | 28.9229    | 37.4753   | 0.373729   | 0.248384   |
| OSBPL3                   | 1.51343    | 2.63773   | 0.801475   | 0.00425224 |
| SCN1B                    | 4.57127    | 3.69486   | -0.307076  | 0.722658   |
| LMLN                     | 0.407682   | 0.350074  | -0.219781  | 0.865379   |
| TTBK2                    | 0.359371   | 0.150451  | -1.25618   | 0.0167292  |
| MYL12A                   | 363.065    | 262.876   | -0.465848  | 0.108219   |
| TBC1D14                  | 0.770374   | 1.11763   | 0.536815   | 0.926293   |
| GRK6                     | 28.4735    | 31.0468   | 0.124825   | 0.919413   |
| SMPDL3A                  | 1.48411    | 0.990433  | -0.583466  | 0.276855   |
| AGTPBP1                  | 4.88998    | 2.96579   | -0.721413  | 0.00743393 |
| ATP6V1G1                 | 101.109    | 103.463   | 0.0332061  | 0.986822   |
| WASH1                    | 5.92708    | 4.04585   | -0.55088   | 0.177118   |
| RELA                     | 59.932     | 58.3751   | -0.0379722 | 0.98439    |
| LOC100506060             | 1.10832    | 1.52541   | 0.460812   | 0.527104   |
| PHF19                    | 89.7218    | 149.907   | 0.740542   | 0.0227017  |
| COPS4                    | 24.5229    | 23.088    | -0.0869916 | 0.94971    |
| MADD                     | 6.39692    | 5.68789   | -0.169483  | 0.812413   |
| MAPK7                    | 9.10401    | 10.8388   | 0.251634   | 0.853057   |
| MTRR                     | 4.67393    | 7.6224    | 0.705609   | 0.0126858  |
| MAP3K7                   | 5.37445    | 5.88587   | 0.131138   | 0.887208   |
| LCMT1                    | 38.971     | 30.3973   | -0.358458  | 0.304248   |
| PER2                     | 2.1398     | 3.3982    | 0.667298   | 0.0240561  |
| CTDNEP1                  | 114.71     | 113.671   | -0.0131294 | 0.994615   |
| ARHGEF3                  | 1.32006    | 1.3314    | 0.0123398  | 0.996639   |
| SUGP2                    | 7.62757    | 9.38602   | 0.299291   | 0.466056   |
| UBE2C                    | 297.369    | 332.92    | 0.162923   | 0.819681   |
| KDM2B                    | 8.96675    | 11.9702   | 0.416787   | 0.179474   |
| RLN2                     | 0.0610481  | 0.0124715 | -2.29131   | 1          |
| PRMT3                    | 4.31124    | 5.12983   | 0.250806   | 0.671358   |
| LOC100128361             | 0.565834   | 0.858877  | 0.602072   | 0.966946   |
| CUL4A                    | 16.7688    | 21.1373   | 0.334012   | 0.317218   |
| ZNF621                   | 2.42011    | 2.18618   | -0.146661  | 0.871957   |
| SYF2                     | 36.1711    | 22.5764   | -0.680022  | 0.00743393 |
| TMEM186                  | 12.7241    | 17.7192   | 0.477751   | 0.130554   |
| ANKRD13D                 | 17.3366    | 25.7712   | 0.571935   | 0.0444101  |
| VEZT                     | 6.20529    | 4.47769   | -0.470745  | 0.123604   |
| IST1                     | 24.2095    | 23.4748   | -0.0444593 | 0.979701   |
| POLR2H                   | 228.415    | 275.413   | 0.269941   | 0.5209     |
| CCNC                     | 24.0741    | 25.5403   | 0.0852963  | 0.945946   |
| CRAMP1L                  | 2.13874    | 2.275     | 0.089107   | 0.954768   |
| SENP2                    | 6.8862     | 6.0606    | -0.184249  | 0.799188   |
| DGAT2                    | 6.42715    | 7.32791   | 0.189221   | 0.812215   |
| TICAM2, TMED7, TMED7-TIC | 12.8557    | 13.3432   | 0.0536951  | 0.976122   |
| COTL1                    | 244.793    | 281.732   | 0.202764   | 0.721145   |
| GGTA1P                   | 0.196851   | 0.0970207 | -1.02074   | 1          |
| ATP6V1F                  | 593.257    | 595.336   | 0.0050466  | 0.99714    |
| WDR1                     | 132.806    | 140.297   | 0.0791693  | 0.954907   |
| LRRC16B                  | 0.374717   | 0.212494  | -0.818378  | 0.261459   |
| MECR                     | 14.6008    | 14.6992   | 0.00968732 | 0.996453   |
| RAB9B                    | 0.112902   | 0.0959392 | -0.234875  | 1          |
| VWA9                     | 28.4691    | 35.2806   | 0.309476   | 0.415016   |
| KRIT1                    | 4.29186    | 4.094     | -0.0680905 | 0.966946   |
| CCDC90B                  | 19.452     | 12.7709   | -0.607066  | 0.030994   |
| C15orf37                 | 2.17089    | 2.44836   | 0.173528   | 0.984501   |
| SNX5                     | 42.0692    | 33.513    | -0.328046  | 0.348909   |
| GSK3B                    | 5.31389    | 4.43105   | -0.262119  | 0.556835   |
| RNF8                     | 6.33642    | 8.76455   | 0.468011   | 0.105875   |
| PTPN14                   | 1.52479    | 1.39841   | -0.12482   | 0.909164   |
| ITM2C                    | 105.604    | 99.7962   | -0.0816063 | 0.950972   |
| CAPN10                   | 11.4346    | 22.4567   | 0.973746   | 0.00134142 |
| TRIM28                   | 180.93     | 315.2     | 0.800836   | 0.00134142 |
| GRK4                     | 0.411491   | 0.349288  | -0.236443  | 0.917325   |
| AIMP1                    | 19.3852    | 14.5235   | -0.416562  | 0.19586    |
| ITGA11                   | 0.00341852 | 0.0023615 | -0.533669  | 1          |
| RHBDL3                   | 0.987202   | 1.60781   | 0.703678   | 0.068174   |
| GEMIN4                   | 19.2622    | 29.8322   | 0.6311     | 0.0132924  |
| SDE2                     | 3.92684    | 4.19985   | 0.0969684  | 0.947247   |
| PSMG4                    | 29.0429    | 28.5625   | -0.0240646 | 0.991767   |
| RPSAP52                  | 2.63148    | 0.477063  | -2.46362   | 0.680566   |
| EIF2A                    | 19.1705    | 15.4655   | -0.30983   | 0.403849   |

|                        |            |            |            |            |
|------------------------|------------|------------|------------|------------|
| MAN1B1                 | 42.5052    | 31.6307    | -0.426314  | 0.148987   |
| MRPS33                 | 29.2288    | 25.8033    | -0.179835  | 0.819397   |
| PLEKHM2                | 32.502     | 29.5752    | -0.136139  | 0.870198   |
| EIF1AD                 | 10.9069    | 19.9264    | 0.869439   | 0.485249   |
| ADRBK1                 | 35.914     | 41.0927    | 0.194335   | 0.736403   |
| ORAOV1                 | 5.87071    | 8.08417    | 0.461564   | 0.207172   |
| PPP3R1                 | 12.2331    | 13.464     | 0.138316   | 0.870734   |
| ZBTB38                 | 1.6553     | 0.973119   | -0.766408  | 0.0120701  |
| SLC25A1                | 161.337    | 169.383    | 0.0702109  | 0.961224   |
| PGAP3                  | 1.74815    | 1.42012    | -0.299821  | 0.743924   |
| GTF2IRD1               | 21.31      | 9.16881    | -1.21672   | 0.00134142 |
| SAMD12                 | 1.80261    | 1.0368     | -0.797955  | 0.0150729  |
| WDFY3-AS2              | 0.180114   | 0.0610736  | -1.56029   | 1          |
| C7orf53                | 0.509757   | 1.04061    | 1.02955    | 0.0601893  |
| FASTKD2                | 5.03065    | 6.38888    | 0.344818   | 0.325034   |
| RAPGEF4                | 0.0631673  | 0.0128814  | -2.29389   | 1          |
| ATP2C1                 | 14.9391    | 13.8308    | -0.111209  | 0.91945    |
| PPFIBP2                | 1.8225     | 1.63059    | -0.160518  | 0.902851   |
| DHX36                  | 5.75685    | 5.82993    | 0.018199   | 0.99351    |
| BAHD1                  | 10.8817    | 12.0279    | 0.144482   | 0.856449   |
| GABARAPL1              | 8.14673    | 3.3227     | -1.29387   | 0.00134142 |
| ICAM5                  | 1.87079    | 1.09175    | -0.77701   | 0.173436   |
| FANCA                  | 7.00647    | 10.7639    | 0.619437   | 0.396936   |
| TPBG                   | 11.9923    | 12.1548    | 0.0194208  | 0.993108   |
| RWDD3, TMEM56, TMEM56- | 10.9217    | 8.88319    | -0.298044  | 0.692141   |
| ENPP1                  | 0.944083   | 0.684322   | -0.464239  | 0.277658   |
| DDT                    | 291.471    | 310.95     | 0.0933308  | 0.940009   |
| RALA                   | 13.0597    | 14.9192    | 0.192052   | 0.744106   |
| BMS1P1                 | 0.0987416  | 0.0640495  | -0.624472  | 1          |
| B3GAT1                 | 7.85877    | 7.32656    | -0.101167  | 0.935955   |
| POMZP3                 | 8.28977    | 12.698     | 0.615197   | 0.341797   |
| FBXO4                  | 6.22582    | 3.52083    | -0.822349  | 0.0200038  |
| DLX2                   | 2.09383    | 2.79631    | 0.41738    | 0.563967   |
| STAT1                  | 5.49335    | 9.08363    | 0.725584   | 0.00337323 |
| LIPA                   | 12.7035    | 11.4906    | -0.144768  | 0.855026   |
| XIAP                   | 2.14703    | 1.64806    | -0.381573  | 0.330501   |
| MUC6                   | 0.0408775  | 0.0941009  | 1.2029     | 1          |
| UBIAD1                 | 10.1024    | 14.69      | 0.540142   | 0.0474163  |
| PPP2R5A                | 11.292     | 10.3055    | -0.131876  | 0.885254   |
| SBN01                  | 3.19157    | 4.15453    | 0.380418   | 0.245718   |
| MSI2                   | 5.80371    | 3.13901    | -0.886663  | 0.0145499  |
| AHCYL1                 | 22.7615    | 18.9251    | -0.26629   | 0.527972   |
| GAS5-AS1               | 0.684044   | 0.405971   | -0.752711  | 0.946731   |
| COL4A2                 | 0.00304699 | 0.00189681 | -0.683809  | 1          |
| SLC2A13                | 0.462597   | 0.37265    | -0.311936  | 0.707294   |
| NXNL1                  | 0.0351344  | 0          | #NAME?     | 1          |
| APOA1BP                | 145.94     | 148.307    | 0.0232118  | 0.990857   |
| UBAP2                  | 5.89606    | 8.24448    | 0.483678   | 0.105593   |
| C19orf53               | 148.146    | 195.181    | 0.397787   | 0.194377   |
| RABGAP1L               | 1.86314    | 1.46366    | -0.348156  | 0.821525   |
| UBR5                   | 5.96151    | 4.85681    | -0.295667  | 0.446078   |
| CPS1                   | 0.464361   | 0.232144   | -1.00023   | 0.0373672  |
| TMEM258                | 516.974    | 491.847    | -0.0718825 | 0.958814   |
| TSTA3                  | 176.143    | 236.622    | 0.425839   | 0.156997   |
| PRMT7                  | 11.4559    | 13.4174    | 0.228021   | 0.700075   |
| CD14                   | 0.0949973  | 0.235386   | 1.30907    | 1          |
| FBXO32                 | 1.6391     | 0.530891   | -1.62642   | 0.00134142 |
| KANSL3                 | 7.83155    | 8.55376    | 0.127261   | 0.887208   |
| DENND4B                | 10.6305    | 9.47096    | -0.166624  | 0.808353   |
| BBS2                   | 12.0873    | 6.59662    | -0.873696  | 0.00134142 |
| ARMCX4                 | 0.258848   | 0.329255   | 0.347102   | 1          |
| FLYWCH2                | 40.1477    | 42.1195    | 0.0691707  | 0.966946   |
| ZNF844                 | 1.05083    | 0.588716   | -0.835888  | 0.0605453  |
| PGLS                   | 130.124    | 114.885    | -0.179693  | 0.780271   |
| CAPZA2                 | 44.8263    | 47.7917    | 0.0924148  | 0.938123   |
| KCNK6                  | 10.959     | 16.9864    | 0.632258   | 0.0227017  |
| ORMDL2                 | 24.1851    | 26.3686    | 0.1247     | 0.954691   |
| DGCR2                  | 17.8824    | 21.2166    | 0.246648   | 0.596611   |
| LRRC27                 | 2.96354    | 1.9559     | -0.59949   | 0.298465   |
| GAN                    | 0.231282   | 0.235481   | 0.0259539  | 1          |
| ADAP1                  | 19.0864    | 24.1428    | 0.339047   | 0.379029   |
| YTHDC2                 | 2.04272    | 1.60909    | -0.344247  | 0.432272   |
| EPG5                   | 1.40175    | 0.693539   | -1.01518   | 0.00134142 |
| RRAGC                  | 13.0866    | 7.95024    | -0.719025  | 0.00425224 |
| SP4                    | 0.598832   | 0.316868   | -0.918266  | 0.0345327  |
| C19orf21               | 0.357073   | 0.158163   | -1.17481   | 0.161828   |
| PWWP2B                 | 21.8659    | 22.4004    | 0.0348449  | 0.987334   |
| NINL                   | 1.89952    | 1.69404    | -0.16517   | 0.889644   |
| WDFY1                  | 4.32811    | 3.09687    | -0.482925  | 0.13292    |

|                     |            |            |             |            |
|---------------------|------------|------------|-------------|------------|
| KIAA0947            | 2.74246    | 3.94851    | 0.525839    | 0.0601893  |
| FAM118B             | 6.02998    | 10.5286    | 0.804088    | 0.292352   |
| ZNF428              | 11.83      | 13.4436    | 0.184471    | 0.845971   |
| ZMYM6               | 1.73061    | 1.46147    | -0.243862   | 0.711382   |
| TMEM106C            | 109.981    | 97.961     | -0.166976   | 0.808953   |
| DVL1                | 67.4216    | 75.2529    | 0.158536    | 0.821622   |
| RNF11               | 16.7368    | 13.5551    | -0.304184   | 0.418191   |
| SPEN                | 3.30901    | 4.44145    | 0.424633    | 0.184498   |
| CHD3                | 12.6791    | 13.0633    | 0.0430627   | 0.979733   |
| TULP3               | 9.05555    | 6.22828    | -0.539969   | 0.0704662  |
| BRAF                | 2.01576    | 0.854474   | -1.23821    | 0.00134142 |
| LOC440354,LOC595101 | 1.93602    | 2.18526    | 0.174711    | 0.854482   |
| RELB                | 14.0169    | 21.8376    | 0.639648    | 0.0231741  |
| FAM92A1             | 32.2118    | 32.1691    | -0.00191371 | 0.99862    |
| PSME4               | 9.25205    | 9.7572     | 0.0766945   | 0.954677   |
| ANAPC1              | 6.4633     | 6.43836    | -0.0055776  | 0.997082   |
| RAB6A               | 20.546     | 18.5151    | -0.150157   | 0.848382   |
| SRSF5               | 71.5459    | 66.903     | -0.0967974  | 0.932313   |
| ZNF668              | 8.69074    | 16.6073    | 0.934266    | 0.00134142 |
| KIAA1671            | 1.90655    | 1.99048    | 0.0621573   | 0.972989   |
| KLC4                | 5.338      | 3.09879    | -0.784593   | 0.0200038  |
| RPE                 | 6.07936    | 6.36667    | 0.066621    | 0.982412   |
| ADAMTS8             | 0.0062236  | 0          | #NAME?      | 1          |
| LENG1               | 13.274     | 11.0594    | -0.263329   | 0.926899   |
| RAF1                | 20.1867    | 25.3475    | 0.328438    | 0.501959   |
| RNF41               | 10.5774    | 7.26359    | -0.542233   | 0.0481547  |
| METTL15             | 2.93159    | 1.86031    | -0.656143   | 0.0326415  |
| HMG2                | 20.3973    | 17.5367    | -0.218002   | 0.82146    |
| APEH                | 97.7475    | 91.9531    | -0.088162   | 0.946765   |
| PPP2R5B             | 17.4518    | 12.5012    | -0.481315   | 0.120065   |
| PPP3CC              | 0.0612182  | 0.0962228  | 0.652418    | 1          |
| SWI5                | 38.392     | 27.8894    | -0.461089   | 0.141091   |
| ARID1A              | 4.79138    | 3.95073    | -0.27832    | 0.530219   |
| RABL2B              | 5.63438    | 6.73926    | 0.258334    | 0.768707   |
| ZNF383              | 2.04039    | 1.2649     | -0.689818   | 0.140867   |
| PRDM16              | 1.44183    | 1.25899    | -0.195627   | 0.830321   |
| ZSCAN26             | 5.50952    | 3.36131    | -0.712901   | 0.0222212  |
| LOC100093631        | 0.378684   | 0.27862    | -0.442698   | 0.640679   |
| TMEM38B             | 11.4001    | 10.2788    | -0.149384   | 0.845974   |
| ZNF296              | 22.1514    | 54.1072    | 1.28842     | 0.00134142 |
| ZNF525              | 1.03208    | 1.23628    | 0.260451    | 0.700253   |
| USP24               | 3.20264    | 3.61864    | 0.176183    | 0.793038   |
| GZF1                | 2.42896    | 2.51588    | 0.0507226   | 0.979701   |
| SH3BGRL2            | 1.66181    | 1.71213    | 0.0430441   | 0.985782   |
| GTSE1               | 10.2317    | 12.8162    | 0.324916    | 0.409587   |
| DYNC2LI1            | 10.4357    | 4.83658    | -1.10946    | 0.00134142 |
| GFER                | 28.9064    | 25.1704    | -0.199662   | 0.728031   |
| TRMT1L              | 3.28832    | 2.52697    | -0.379942   | 0.445859   |
| ARL6IP1             | 66.7867    | 62.3936    | -0.0981622  | 0.930269   |
| CSDE1,NRAS          | 35.254     | 29.4667    | -0.2587     | 0.606735   |
| RBM34               | 22.3593    | 20.1524    | -0.149924   | 0.844458   |
| PRKD2               | 17.4239    | 22.3674    | 0.36033     | 0.329867   |
| DYNC1LI2            | 7.95211    | 11.375     | 0.516454    | 0.064193   |
| ELMOD3              | 4.08144    | 5.07663    | 0.314794    | 0.585649   |
| CCND1               | 25.8854    | 35.1404    | 0.440995    | 0.134015   |
| KATNAL1             | 0.343794   | 0.28872    | -0.251872   | 1          |
| SBK1                | 4.22448    | 5.67719    | 0.426404    | 0.240028   |
| JAG2                | 16.743     | 26.0418    | 0.637274    | 0.010797   |
| SFSWAP              | 8.92933    | 11.377     | 0.349498    | 0.354622   |
| CYTH1               | 4.65551    | 5.5174     | 0.245049    | 0.700392   |
| CCBL2,RBML1         | 15.2758    | 13.1869    | -0.212144   | 0.748391   |
| ACO1                | 14.7632    | 12.1387    | -0.28239    | 0.481015   |
| CTPS2               | 3.89054    | 2.15822    | -0.850128   | 0.00425224 |
| ALG14               | 6.47827    | 9.67181    | 0.578178    | 0.134521   |
| SNRNP48             | 4.00487    | 4.67019    | 0.221726    | 0.70303    |
| RAD51B              | 5.50228    | 1.73527    | -1.66487    | 0.00134142 |
| CORO1B              | 122.346    | 99.3391    | -0.300535   | 0.430215   |
| RXRA                | 15.5162    | 15.8627    | 0.0318647   | 0.987693   |
| TPRXL               | 0.00886913 | 0.00536278 | -0.725812   | 1          |
| ECI1                | 148.717    | 132.818    | -0.163124   | 0.81342    |
| VASH2               | 0.477328   | 0.42644    | -0.162639   | 0.934394   |
| C9orf69             | 42.3785    | 71.1205    | 0.746933    | 0.00134142 |
| ASPHD2              | 3.81415    | 7.52519    | 0.980366    | 0.00134142 |
| MBNL2               | 3.18535    | 1.54253    | -1.04615    | 0.00134142 |
| HMG1                | 1117.31    | 1045.86    | -0.0953386  | 0.939525   |
| CYB5RL              | 0.500419   | 0.390148   | -0.359116   | 0.739919   |
| FAM167A             | 0.981067   | 0.442684   | -1.14807    | 0.0101293  |
| DPP8                | 0.889615   | 0.762004   | -0.223383   | 0.832662   |
| DCAF17              | 1.70888    | 1.56816    | -0.123982   | 0.965148   |



|              |           |          |             |            |
|--------------|-----------|----------|-------------|------------|
| LRFN4        | 41.6529   | 73.1674  | 0.812783    | 0.00134142 |
| ZFYVE9       | 2.74556   | 2.53854  | -0.113105   | 0.928902   |
| ARL2.SNX15   | 163.265   | 147.215  | -0.149293   | 0.849892   |
| PPP1R8       | 20.2563   | 24.006   | 0.245024    | 0.599972   |
| C1orf52      | 15.2327   | 12.0057  | -0.343455   | 0.321414   |
| CAMK2N2      | 61.3099   | 57.2127  | -0.0997833  | 0.964523   |
| ATXN7L3      | 16.56     | 23.0762  | 0.478701    | 0.0796329  |
| B3GALT6      | 14.074    | 28.3161  | 1.00859     | 0.00134142 |
| ATXN3        | 1.73356   | 0.837896 | -1.0489     | 0.00134142 |
| EIF3C,EIF3CL | 1.19747   | 1.05989  | -0.176074   | 0.912153   |
| C5orf55      | 3.09581   | 2.619    | -0.241301   | 0.826331   |
| R3HDM1       | 4.18049   | 3.63355  | -0.202294   | 0.753148   |
| COPB1        | 20.8257   | 15.2797  | -0.446749   | 0.125756   |
| ACAT1        | 49.2823   | 41.5258  | -0.247064   | 0.585061   |
| FAM53B       | 6.43095   | 8.91291  | 0.470864    | 0.124106   |
| LIN7C        | 5.75786   | 6.91319  | 0.263819    | 0.558934   |
| STOML2       | 296.027   | 335.584  | 0.180948    | 0.775689   |
| DAG1         | 11.2324   | 15.3645  | 0.451944    | 0.114012   |
| ANKRD28      | 3.94589   | 3.1746   | -0.313774   | 0.431455   |
| DECR1        | 115.947   | 89.2706  | -0.377214   | 0.235468   |
| STAT6        | 32.3862   | 35.2123  | 0.120702    | 0.942472   |
| MPRIP        | 7.80952   | 8.94703  | 0.196175    | 0.721145   |
| ZCCHC14      | 2.59469   | 2.57287  | -0.0121846  | 0.995974   |
| STK32C       | 9.2067    | 6.04979  | -0.6058     | 0.0897447  |
| CENPB        | 41.0288   | 74.2218  | 0.855206    | 0.00134142 |
| DCAF7        | 28.5565   | 20.237   | -0.496823   | 0.283711   |
| AGGF1        | 4.09993   | 3.9679   | -0.0472243  | 0.979701   |
| C6orf141     | 1.51635   | 1.18285  | -0.358343   | 0.74078    |
| SNAPC1       | 5.7002    | 5.30863  | -0.102673   | 0.937765   |
| ASF1B        | 35.733    | 38.9002  | 0.122521    | 0.896032   |
| MYH9         | 62.0736   | 61.4711  | -0.0140717  | 0.994615   |
| YWHAZ        | 244.61    | 282.365  | 0.207077    | 0.742569   |
| PPP1R26      | 16.6158   | 21.4391  | 0.367691    | 0.264199   |
| OGFRL1       | 14.0804   | 11.2491  | -0.323879   | 0.431146   |
| SLC7A6       | 4.90514   | 8.90591  | 0.860469    | 0.00337323 |
| EXOG         | 3.54704   | 4.64706  | 0.389701    | 0.341373   |
| GPR25        | 0.0481576 | 0        | #NAME?      | 1          |
| WDR31        | 0.342767  | 0.05981  | -2.51877    | 1          |
| NDEL1        | 5.1012    | 7.00073  | 0.456669    | 0.217352   |
| CCL5         | 1.33591   | 1.75424  | 0.393023    | 0.688221   |
| SPRY2        | 6.64356   | 6.53497  | -0.0237771  | 0.991884   |
| GPR153       | 5.73785   | 6.90365  | 0.26685     | 0.638558   |
| PMM1         | 59.9609   | 33.434   | -0.842707   | 0.00134142 |
| POLK         | 1.3112    | 0.992693 | -0.401473   | 0.782305   |
| LOC399744    | 2.01813   | 1.02375  | -0.979153   | 0.00509212 |
| LRPAP1       | 16.0883   | 20.5555  | 0.353511    | 0.287977   |
| DUS3L        | 41.0483   | 55.2509  | 0.428675    | 0.17761    |
| VWA1         | 4.56037   | 4.27679  | -0.0926223  | 0.955327   |
| CCDC28B      | 9.38822   | 7.31707  | -0.359585   | 0.557773   |
| RBM7         | 11.1104   | 9.23704  | -0.266404   | 0.598176   |
| COPS6        | 160.896   | 188.183  | 0.226011    | 0.648914   |
| KCMF1        | 10.1831   | 7.8982   | -0.366583   | 0.262111   |
| CNNM2        | 3.32022   | 1.02348  | -1.6978     | 0.00134142 |
| FKBP7        | 1.43445   | 1.00337  | -0.515642   | 0.898711   |
| TGDS         | 5.49456   | 5.4742   | -0.00535478 | 0.99714    |
| GGT3P        | 0.164587  | 0.177087 | 0.105602    | 1          |
| TMEM168      | 4.01482   | 4.66388  | 0.216194    | 0.730282   |
| FPGS         | 126.092   | 139.293  | 0.143645    | 0.855766   |
| FNDC3B       | 1.96468   | 2.00304  | 0.0278935   | 0.990324   |
| CPSF2        | 6.38209   | 5.99779  | -0.0895982  | 0.944284   |
| GATA6        | 2.93668   | 2.68231  | -0.130707   | 0.926446   |
| RUNDC3A      | 0.978893  | 0.50851  | -0.944876   | 0.183686   |
| GRAMD4       | 8.92029   | 8.72405  | -0.0320922  | 0.987693   |
| NEURL4       | 3.3964    | 5.78935  | 0.769392    | 0.00743393 |
| RNF145       | 28.0301   | 31.7018  | 0.177587    | 0.785016   |
| GAL3ST4      | 0.28386   | 0.243958 | -0.218547   | 1          |
| GLB1.TMPPE   | 32.578    | 24.5399  | -0.408771   | 0.187625   |
| SEPW1        | 193.7     | 305.566  | 0.657662    | 0.00818401 |
| RAB1B        | 161.94    | 190.97   | 0.237887    | 0.617065   |
| E2F6         | 7.76995   | 10.7146  | 0.463598    | 0.109152   |
| HINT3        | 6.06264   | 3.46191  | -0.808381   | 0.00134142 |
| RNF5         | 69.6966   | 47.7284  | -0.54624    | 0.0423316  |
| SMG1         | 2.33128   | 2.72501  | 0.225139    | 0.655366   |
| ARMC1        | 10.9466   | 10.5693  | -0.0505984  | 0.977501   |
| SPAG9        | 3.59239   | 3.19737  | -0.168058   | 0.811724   |
| ZNF789       | 3.51236   | 3.72072  | 0.0831401   | 0.978196   |
| HBS1L        | 4.81376   | 5.09165  | 0.080969    | 0.959465   |
| CECR7        | 1.1042    | 1.17032  | 0.0838951   | 0.977332   |
| PCDHB9       | 0.382773  | 0.153441 | -1.31881    | 0.036526   |

|                        |            |            |            |            |
|------------------------|------------|------------|------------|------------|
| RWDD1                  | 38.4727    | 50.5266    | 0.39321    | 0.213575   |
| ACADSB                 | 2.21024    | 1.95167    | -0.179495  | 0.826046   |
| RNF215                 | 17.8786    | 8.52073    | -1.06919   | 0.00134142 |
| HEMK1                  | 4.76499    | 2.77118    | -0.781974  | 0.0270114  |
| KRT19                  | 0.0185368  | 0          | #NAME?     | 1          |
| PRDM10                 | 1.16246    | 1.4084     | 0.276876   | 0.691366   |
| TYW5                   | 1.72218    | 1.76714    | 0.0371857  | 0.992797   |
| TPM1                   | 50.0183    | 60.8652    | 0.283163   | 0.488301   |
| ACBD3                  | 7.77064    | 8.11363    | 0.062314   | 0.970195   |
| CBL                    | 3.18747    | 2.80711    | -0.183324  | 0.776313   |
| PCCB                   | 73.87      | 56.8083    | -0.378888  | 0.219827   |
| NUP98                  | 7.58344    | 9.36154    | 0.303894   | 0.579666   |
| MKRN1                  | 45.0111    | 31.2637    | -0.52579   | 0.0652056  |
| FAM133B                | 13.0683    | 15.7972    | 0.273596   | 0.512119   |
| BLZF1                  | 1.0937     | 0.906951   | -0.270118  | 0.80896    |
| BACH1                  | 2.59344    | 1.47315    | -0.815962  | 0.00337323 |
| ACTR5                  | 5.0776     | 8.20698    | 0.692704   | 0.0194494  |
| PEA15                  | 101.19     | 107.817    | 0.0915135  | 0.938194   |
| PHF17                  | 7.21074    | 7.80354    | 0.113981   | 0.916337   |
| CARD8                  | 2.69916    | 1.81272    | -0.574351  | 0.676575   |
| TMCO3                  | 9.42252    | 5.72729    | -0.718261  | 0.00818401 |
| FAM21A,FAM21B          | 1.80535    | 1.41286    | -0.353665  | 0.487792   |
| NET1                   | 7.62309    | 10.1015    | 0.406121   | 0.202966   |
| LINC00674              | 2.52445    | 2.17052    | -0.217924  | 0.699367   |
| SORD                   | 40.2371    | 29.8201    | -0.432241  | 0.144603   |
| DDX6                   | 12.0535    | 12.9485    | 0.103329   | 0.923469   |
| C9orf16                | 365.151    | 409.151    | 0.164141   | 0.815706   |
| LOC100505783           | 1.22625    | 0.345381   | -1.82799   | 0.00509212 |
| CTU2                   | 17.1613    | 47.6013    | 1.47184    | 0.0150729  |
| AGBL3                  | 0.0809968  | 0.0849318  | 0.0684398  | 1          |
| NRIP1                  | 0.502494   | 0.445693   | -0.173058  | 0.895479   |
| TGFBRAP1               | 1.39272    | 1.94289    | 0.480298   | 0.347324   |
| RRP7B                  | 4.75884    | 8.66657    | 0.86485    | 0.00593755 |
| TAF10                  | 135.213    | 159.859    | 0.241569   | 0.885828   |
| PITPNA                 | 16.2149    | 23.3799    | 0.527948   | 0.0569429  |
| PSMB9                  | 14.1915    | 11.5921    | -0.291887  | 0.612792   |
| LOC96610               | 2.58523    | 3.46734    | 0.423538   | 0.385863   |
| ACAD9                  | 12.1663    | 13.5238    | 0.152614   | 0.845969   |
| DOCK8                  | 0.415903   | 0.426438   | 0.0360889  | 0.991767   |
| SLC6A13                | 0.655344   | 0.20043    | -1.70915   | 0.025628   |
| MINA                   | 7.80024    | 8.97518    | 0.202421   | 0.739205   |
| LMAN1L                 | 0.0135363  | 0.0306828  | 1.1806     | 1          |
| OGFOD2                 | 8.82331    | 8.46176    | -0.0603617 | 0.977626   |
| YEATS2                 | 11.9455    | 7.50835    | -0.669895  | 0.009453   |
| GBF1                   | 6.22511    | 5.88831    | -0.0802454 | 0.95534    |
| OXER1                  | 0.0150404  | 0.0104069  | -0.531311  | 1          |
| PAPSS1                 | 15.0728    | 11.3658    | -0.407249  | 0.194581   |
| SLC12A9                | 25.1807    | 36.0865    | 0.519142   | 0.0599768  |
| LAMP2                  | 12.8277    | 9.78655    | -0.390391  | 0.228416   |
| C1orf216               | 8.10107    | 17.4866    | 1.11007    | 0.00134142 |
| PTK2                   | 26.0269    | 23.4503    | -0.150397  | 0.836371   |
| NOTUM                  | 4.18436    | 1.60238    | -1.38479   | 0.00134142 |
| CHMP3,RNF103,RNF103-C1 | 22.7969    | 20.178     | -0.176053  | 0.862445   |
| HIPK2                  | 1.66714    | 1.96267    | 0.235439   | 0.66067    |
| DUSP7                  | 25.8881    | 54.1806    | 1.06549    | 0.00134142 |
| FAM84B                 | 6.42703    | 4.06755    | -0.659993  | 0.0162707  |
| LARP7                  | 8.15568    | 8.92209    | 0.129576   | 0.909164   |
| PPP4R2                 | 3.83046    | 4.0919     | 0.0952519  | 0.958104   |
| ATP6AP1L               | 1.00721    | 0.579177   | -0.798294  | 0.463889   |
| ADAM9                  | 10.4754    | 5.60193    | -0.903006  | 0.00134142 |
| RMND5B                 | 19.502     | 17.193     | -0.181802  | 0.797603   |
| KITLG                  | 0.149201   | 0.271465   | 0.863512   | 1          |
| LOC100506233           | 4.37139    | 4.19854    | -0.0582043 | 0.985283   |
| ARAP2                  | 0.593115   | 0.810337   | 0.450211   | 0.33045    |
| ABI2                   | 8.20677    | 6.12797    | -0.421404  | 0.159174   |
| SMYD4                  | 2.04299    | 1.84955    | -0.143509  | 0.909016   |
| RWDD4                  | 9.11631    | 11.735     | 0.364292   | 0.293861   |
| MAK                    | 0.0724725  | 0.0554406  | -0.386491  | 1          |
| NME1,NME1-NME2,NME2    | 1776.35    | 2196.31    | 0.306163   | 0.474273   |
| XYLT2                  | 16.4106    | 19.273     | 0.231951   | 0.648914   |
| STAB1                  | 0.00286491 | 0.00378544 | 0.401971   | 1          |
| ANGEL1                 | 6.63786    | 4.68732    | -0.501954  | 0.112094   |
| ATG12                  | 9.9054     | 7.19437    | -0.461348  | 0.118443   |
| CHD6                   | 1.17331    | 0.694499   | -0.756537  | 0.0183825  |
| IFT80                  | 2.06271    | 1.07431    | -0.941137  | 0.00134142 |
| PEX12                  | 1.31108    | 0.900814   | -0.541457  | 0.3163     |
| CYFIP2                 | 9.74957    | 6.80212    | -0.519354  | 0.0504457  |
| ATRN                   | 3.53702    | 3.09577    | -0.192237  | 0.805942   |
| ECI2                   | 33.5519    | 26.7959    | -0.324382  | 0.380929   |

|                       |           |           |            |            |
|-----------------------|-----------|-----------|------------|------------|
| CNPPD1                | 45.7069   | 27.6562   | -0.724808  | 0.00134142 |
| RPS6KA5               | 0.328663  | 0.239554  | -0.456259  | 1          |
| SNRPD2                | 607.991   | 739.671   | 0.282833   | 0.474762   |
| CNOT8                 | 27.3047   | 19.561    | -0.481173  | 0.0891066  |
| ARMCX3                | 8.33363   | 6.68092   | -0.318898  | 0.425127   |
| HELZ                  | 1.87908   | 1.19889   | -0.648324  | 0.0172978  |
| LRCH4                 | 11.9104   | 15.1605   | 0.348102   | 0.359221   |
| STRN                  | 1.00617   | 0.754399  | -0.415472  | 0.259411   |
| BSND                  | 0.0147237 | 0         | #NAME?     | 1          |
| FLOT2                 | 36.4288   | 28.9995   | -0.329054  | 0.345568   |
| EXOC2                 | 4.12509   | 3.34206   | -0.303685  | 0.514922   |
| PTTG1IP               | 84.185    | 82.335    | -0.0320579 | 0.987334   |
| TRIM11                | 20.5191   | 26.9804   | 0.394944   | 0.215245   |
| DOCK1                 | 5.52381   | 4.05539   | -0.445821  | 0.138263   |
| FAM110C               | 1.31386   | 0.989737  | -0.40869   | 0.476521   |
| VCP                   | 56.9188   | 93.3533   | 0.713796   | 0.00425224 |
| AGAP9                 | 0.122387  | 0.05231   | -1.22629   | 1          |
| GUSB                  | 27.5951   | 24.397    | -0.177709  | 0.786575   |
| RASA3                 | 13.2489   | 11.207    | -0.241476  | 0.618093   |
| HEATR5A               | 0.717518  | 1.04161   | 0.537725   | 0.173569   |
| MEGF8                 | 1.3834    | 1.79947   | 0.379351   | 0.38116    |
| NAPEPLD               | 2.1926    | 2.66447   | 0.281208   | 0.922006   |
| GNE                   | 2.16845   | 2.05654   | -0.0764434 | 0.967901   |
| PGAM1                 | 490.422   | 515.451   | 0.0718105  | 0.961551   |
| CD300C                | 0.0127255 | 0.035352  | 1.47406    | 1          |
| PMPCB                 | 27.1417   | 19.3833   | -0.485696  | 0.327733   |
| CHMP6                 | 14.8315   | 26.3777   | 0.830654   | 0.00593755 |
| SLC2A4RG              | 57.2329   | 42.5943   | -0.426184  | 0.179301   |
| FAM208A               | 4.67373   | 4.5476    | -0.039471  | 0.985921   |
| SETDB2                | 1.07282   | 0.514472  | -1.06025   | 0.00134142 |
| SP3                   | 5.66444   | 4.44078   | -0.351121  | 0.301426   |
| P2RY11,PPAN,PPAN-P2RY | 43.6995   | 81.1047   | 0.892169   | 0.246526   |
| CDKL1                 | 0.917048  | 1.37938   | 0.588947   | 0.392999   |
| ATP6V0E1              | 213.362   | 269.808   | 0.338628   | 0.317107   |
| MRPL23                | 111.7     | 123.175   | 0.141076   | 0.862869   |
| ARHGAP39              | 5.34696   | 9.66512   | 0.854071   | 0.00337323 |
| BANP                  | 6.07157   | 6.60154   | 0.120731   | 0.933417   |
| PRKAG2-AS1            | 18.5161   | 13.1311   | -0.495791  | 0.701167   |
| B4GALT4               | 5.41141   | 4.9099    | -0.140312  | 0.898626   |
| PKDCC                 | 7.14397   | 9.67992   | 0.438269   | 0.25971    |
| MYNN                  | 2.31161   | 2.23987   | -0.0454847 | 0.981044   |
| NR1D1                 | 8.00804   | 12.4038   | 0.631257   | 0.175144   |
| NGRN                  | 62.0386   | 81.7814   | 0.398606   | 0.19325    |
| SEPT10                | 14.9593   | 10.2277   | -0.54856   | 0.0436049  |
| STAC3                 | 0.684519  | 0.33722   | -1.0214    | 0.16323    |
| TANGO2                | 11.1167   | 10.7915   | -0.0428292 | 0.981753   |
| C11orf73              | 28.8919   | 29.1573   | 0.0131907  | 0.995221   |
| GATAD1                | 13.4671   | 8.66176   | -0.636712  | 0.010797   |
| FAM216A               | 30.8364   | 20.8472   | -0.564781  | 0.247003   |
| ZNF76                 | 9.42548   | 7.27987   | -0.372653  | 0.350008   |
| ANGEL2                | 5.13482   | 5.54402   | 0.110619   | 0.920028   |
| ZZZ3                  | 3.04669   | 2.11252   | -0.528276  | 0.100814   |
| HDDC3                 | 18.6574   | 12.6708   | -0.558234  | 0.782228   |
| LZTR1                 | 11.8932   | 15.6402   | 0.395127   | 0.21876    |
| SEPN1                 | 72.9312   | 59.7862   | -0.286724  | 0.469309   |
| SNX12                 | 17.9888   | 18.7414   | 0.0591263  | 0.972386   |
| SNX2                  | 26.6623   | 16.7908   | -0.667134  | 0.00593755 |
| ELP2                  | 26.6078   | 14.1829   | -0.907697  | 0.00134142 |
| GNRH2                 | 0.075757  | 0.266109  | 1.81257    | 1          |
| CEPT1                 | 11.6701   | 11.1853   | -0.0612112 | 0.980177   |
| WDR13                 | 32.7989   | 30.3868   | -0.110201  | 0.919029   |
| ETS2                  | 6.70643   | 7.77605   | 0.213493   | 0.716439   |
| NCSTN                 | 23.4038   | 14.6804   | -0.672851  | 0.205713   |
| LOC100129148          | 1.83673   | 2.44767   | 0.41427    | 0.985921   |
| PPM1D                 | 2.14768   | 1.91036   | -0.168936  | 0.867513   |
| TMEM117               | 0.919325  | 0.894469  | -0.0395436 | 0.98972    |
| CTNNBIP1              | 8.23425   | 7.32884   | -0.168054  | 0.83461    |
| C8orf59               | 148.457   | 142.88    | -0.0552373 | 0.974169   |
| FAM169A               | 2.22029   | 2.56805   | 0.209925   | 0.753312   |
| BOK                   | 57.693    | 71.5679   | 0.310915   | 0.394904   |
| PML                   | 13.2837   | 11.8744   | -0.161795  | 0.860832   |
| UBE2Q2                | 11.5657   | 10.3965   | -0.153759  | 0.837677   |
| SEMA4F                | 4.21765   | 3.14294   | -0.424326  | 0.229068   |
| WAC                   | 23.6933   | 18.8735   | -0.328121  | 0.358376   |
| SMC3                  | 9.52553   | 11.6236   | 0.287182   | 0.468312   |
| PRDX4                 | 221.628   | 288.958   | 0.382723   | 0.237032   |
| VPS18                 | 14.0935   | 21.9748   | 0.640823   | 0.0145499  |
| PPP1R37               | 10.7435   | 11.2266   | 0.063446   | 0.972989   |
| NDUFAF4P1             | 0.0291731 | 0.0340519 | 0.223096   | 1          |

|                         |           |            |            |            |
|-------------------------|-----------|------------|------------|------------|
| TRAPPC2L                | 79.3591   | 104.996    | 0.403863   | 0.211458   |
| KXD1                    | 142.928   | 123.996    | -0.204994  | 0.711487   |
| SERAC1                  | 3.20488   | 3.6163     | 0.174244   | 0.836371   |
| MRPL37                  | 184.928   | 173.568    | -0.0914635 | 0.942534   |
| TCERG1                  | 10.3473   | 10.8445    | 0.0677102  | 0.963219   |
| YTHDF1                  | 17.7739   | 22.4539    | 0.337208   | 0.325034   |
| ACAD8                   | 13.8118   | 18.2782    | 0.404221   | 0.215748   |
| CKAP5                   | 13.9757   | 12.7903    | -0.127873  | 0.88826    |
| USP15                   | 3.51653   | 3.77294    | 0.101538   | 0.959465   |
| THOC3                   | 17.5547   | 15.2502    | -0.20303   | 0.747687   |
| RNF216P1                | 11.8122   | 15.6909    | 0.409657   | 0.227422   |
| PICK1                   | 17.0931   | 15.7946    | -0.113983  | 0.922365   |
| SBNO2                   | 13.563    | 19.362     | 0.513557   | 0.066512   |
| CEBPZ                   | 8.10898   | 11.0385    | 0.444946   | 0.342317   |
| GLT8D1                  | 15.7507   | 14.4718    | -0.122162  | 0.987235   |
| CAMTA1                  | 62.9127   | 60.3452    | -0.0601112 | 0.972601   |
| ATMIN                   | 3.89126   | 4.38809    | 0.173357   | 0.822284   |
| MSX1                    | 21.5045   | 40.9477    | 0.929143   | 0.00134142 |
| TIRAP                   | 1.97059   | 1.98005    | 0.00691305 | 0.997535   |
| ZNF641                  | 2.33637   | 1.66708    | -0.486944  | 0.208695   |
| IKZF4                   | 1.15198   | 1.03591    | -0.15322   | 0.912767   |
| CDKN2D                  | 10.5639   | 8.4294     | -0.325648  | 0.582397   |
| DHRS7                   | 55.3868   | 38.9569    | -0.507664  | 0.064193   |
| DNLZ                    | 89.8225   | 198.85     | 1.14653    | 0.00134142 |
| MGAT2                   | 16.1573   | 21.0478    | 0.381486   | 0.244216   |
| C6orf62                 | 28.6527   | 21.7824    | -0.395511  | 0.371065   |
| IL17RE                  | 0.619757  | 0.768486   | 0.310316   | 0.824676   |
| DHX40                   | 6.18486   | 3.60595    | -0.778361  | 0.00425224 |
| TSPAN17                 | 26.5914   | 34.6218    | 0.380721   | 0.238089   |
| F2R                     | 0.905288  | 0.27181    | -1.73578   | 0.00134142 |
| SGSM3                   | 16.4368   | 13.9527    | -0.23638   | 0.759977   |
| FZD2                    | 5.77964   | 3.65386    | -0.661559  | 0.0523239  |
| FAM222B                 | 5.10682   | 4.81741    | -0.0841689 | 0.956033   |
| TNNI3                   | 8.78613   | 6.14069    | -0.516827  | 0.337663   |
| LRP3                    | 36.5727   | 47.033     | 0.362904   | 0.257615   |
| ATP5H                   | 294.531   | 301.724    | 0.0348105  | 0.984917   |
| LOC642846               | 3.49065   | 4.43336    | 0.344904   | 0.472765   |
| RFC5                    | 14.2694   | 15.0773    | 0.0794543  | 0.95534    |
| RPP21,TRIM39,TRIM39-RP1 | 166.136   | 176.464    | 0.0870109  | 0.961224   |
| PITX2                   | 8.48255   | 13.6346    | 0.684708   | 0.0183825  |
| WDR59                   | 11.721    | 9.85113    | -0.250729  | 0.612792   |
| UBTD2                   | 6.67244   | 6.89634    | 0.0476177  | 0.979701   |
| HLA-C                   | 671.363   | 751.111    | 0.161934   | 0.828583   |
| SUPT4H1                 | 37.549    | 41.0322    | 0.127983   | 0.887701   |
| DAP3                    | 81.7873   | 70.7437    | -0.209275  | 0.700075   |
| BBS7                    | 2.71468   | 2.47912    | -0.130958  | 0.916838   |
| DRAP1                   | 526.56    | 735.614    | 0.482351   | 0.0920155  |
| GPATCH8                 | 4.87406   | 4.30591    | -0.178806  | 0.787871   |
| UBXN1                   | 148.258   | 112.049    | -0.403981  | 0.183567   |
| DAB2IP                  | 6.39914   | 8.48915    | 0.407742   | 0.217848   |
| C12orf29                | 4.39878   | 5.62883    | 0.355732   | 0.461971   |
| PCDHB2                  | 2.60997   | 1.93484    | -0.431818  | 0.448586   |
| SHROOM1                 | 8.72174   | 8.8769     | 0.025441   | 0.991614   |
| FAM58A                  | 38.4752   | 61.4491    | 0.675462   | 0.0120701  |
| JMY                     | 1.56727   | 0.974276   | -0.68585   | 0.0314167  |
| CREG1                   | 39.1932   | 29.0801    | -0.430569  | 0.144914   |
| HBP1                    | 5.28271   | 2.33597    | -1.17726   | 0.112365   |
| LOC375295               | 22.1683   | 21.0441    | -0.0750789 | 0.962215   |
| CRLF3                   | 5.74496   | 6.19384    | 0.108538   | 0.930464   |
| ITM2B                   | 51.6139   | 38.1783    | -0.435009  | 0.127236   |
| OS9                     | 64.434    | 60.4633    | -0.0917623 | 0.93954    |
| ABI1                    | 16.0041   | 11.5543    | -0.470016  | 0.182316   |
| POC5                    | 3.82559   | 3.30647    | -0.210391  | 0.807267   |
| YAP1                    | 10.2299   | 9.01751    | -0.181988  | 0.770865   |
| NDUFS4                  | 73.1409   | 74.5866    | 0.0282381  | 0.988154   |
| HOMER1                  | 0.882113  | 1.23783    | 0.488777   | 0.293988   |
| RFXPAP                  | 2.55841   | 2.12241    | -0.269543  | 0.710284   |
| DGKE                    | 1.96215   | 3.06839    | 0.645047   | 0.0167292  |
| QRICH1                  | 18.4823   | 20.6251    | 0.158256   | 0.826046   |
| DCUN1D3                 | 2.06336   | 2.90744    | 0.494755   | 0.622225   |
| B3GALNT1                | 6.15479   | 8.91316    | 0.534229   | 0.0605453  |
| GEMIN6                  | 31.814    | 46.0934    | 0.5349     | 0.0648441  |
| PSMG3-AS1               | 0.310532  | 0.245827   | -0.337099  | 1          |
| CACNA1H                 | 0.0036101 | 0.00309318 | -0.222948  | 1          |
| HEXA                    | 52.0712   | 38.3448    | -0.441453  | 0.128341   |
| DDX24                   | 36.2938   | 46.8667    | 0.36884    | 0.26155    |
| AMFR                    | 31.5723   | 26.9563    | -0.228035  | 0.643892   |
| AP2A1                   | 26.8871   | 20.8275    | -0.368422  | 0.282494   |
| ARHGEF35                | 1.8142    | 1.37575    | -0.399119  | 0.509077   |

|              |           |           |            |            |
|--------------|-----------|-----------|------------|------------|
| METTL22      | 7.02441   | 5.82189   | -0.270889  | 0.69673    |
| ESRP2        | 11.0754   | 21.9258   | 0.985268   | 0.00134142 |
| ZNF22        | 9.93134   | 9.83496   | -0.0140698 | 0.994859   |
| ALKBH1       | 4.42198   | 4.74985   | 0.103188   | 0.943861   |
| KIF18B       | 10.4499   | 13.2602   | 0.343617   | 0.342995   |
| STX6         | 6.14384   | 7.92055   | 0.366461   | 0.287787   |
| SPDYA        | 0.0992747 | 0.211348  | 1.09012    | 1          |
| ZBED3        | 0.871444  | 0.888682  | 0.0282599  | 0.996631   |
| PTRF         | 61.6011   | 101.156   | 0.715558   | 0.00337323 |
| CHTOP        | 56.08     | 62.1932   | 0.14927    | 0.948194   |
| LOC728190    | 19.88     | 21.8798   | 0.138277   | 0.91759    |
| SESTD1       | 0.430223  | 0.408719  | -0.0739777 | 0.974169   |
| ACPF6        | 16.1802   | 10.0342   | -0.689307  | 0.0156972  |
| DGCR14       | 4.56144   | 5.46433   | 0.260554   | 0.624281   |
| LOC100130894 | 0.0782598 | 0.142102  | 0.860583   | 1          |
| OBSL1        | 12.9686   | 11.5685   | -0.164828  | 0.834801   |
| TRAP1        | 168.786   | 146.362   | -0.205657  | 0.716439   |
| ZFP41        | 4.70827   | 4.12398   | -0.191157  | 0.841061   |
| TRIM8        | 35.2221   | 26.6787   | -0.400792  | 0.202476   |
| PCMTD2       | 5.05701   | 3.00766   | -0.749643  | 0.00672555 |
| NHLRC3       | 2.80371   | 1.75358   | -0.677036  | 0.0439989  |
| KNTC1        | 1.85774   | 0.907228  | -1.03401   | 0.00134142 |
| CRYZ         | 16.4672   | 18.5114   | 0.168826   | 0.918898   |
| TBC1D10B     | 24.6533   | 29.332    | 0.250697   | 0.585471   |
| SLC35A1      | 6.63462   | 5.51578   | -0.266449  | 0.648194   |
| WNT2B        | 0.890444  | 0.533466  | -0.739129  | 0.24199    |
| CCDC93       | 4.41786   | 3.72656   | -0.245502  | 0.612792   |
| SATL1        | 0.402354  | 0.37258   | -0.110915  | 0.991767   |
| ZMAT2        | 33.0567   | 43.4191   | 0.393386   | 0.213335   |
| ACAA1        | 38.0335   | 37.9006   | -0.0050498 | 0.99714    |
| VTI1B        | 70.8512   | 73.7991   | 0.0588105  | 0.979733   |
| STYX         | 3.1041    | 3.03207   | -0.0338708 | 0.987693   |
| BLOC1S1,RDH5 | 115.131   | 117.693   | 0.0317512  | 0.987693   |
| CSTF2T       | 4.81228   | 5.79897   | 0.269075   | 0.557793   |
| HNRNPA0      | 50.1034   | 71.1486   | 0.505927   | 0.0671701  |
| FBXO30       | 4.11647   | 4.4127    | 0.100252   | 0.951702   |
| PRKCI        | 7.54765   | 6.40076   | -0.237783  | 0.635182   |
| MTIF3        | 31.9202   | 19.3268   | -0.723867  | 0.536731   |
| SPDYE7P      | 1.16904   | 1.12061   | -0.0610378 | 0.979701   |
| KAT6A        | 3.41771   | 3.56409   | 0.0605071  | 0.970558   |
| MARVELD1     | 14.9103   | 19.6264   | 0.396481   | 0.229241   |
| ZNF142       | 2.94383   | 4.49907   | 0.611934   | 0.0407579  |
| PI4KAP2      | 12.9784   | 13.0681   | 0.00992805 | 0.996631   |
| PPP1R10      | 12.1266   | 9.84474   | -0.300745  | 0.453509   |
| CSNK2A3      | 0.204299  | 0.144553  | -0.499084  | 1          |
| RBM33        | 3.99395   | 2.56739   | -0.637513  | 0.0205623  |
| ZNF23        | 7.56084   | 4.41148   | -0.777284  | 0.00243047 |
| C12orf43     | 6.02205   | 11.5054   | 0.933991   | 0.00134142 |
| NR2C2        | 1.37159   | 1.27068   | -0.110249  | 0.986822   |
| MTIF2        | 14.7329   | 11.9753   | -0.298978  | 0.458817   |
| HMGXB4       | 4.66915   | 3.05134   | -0.613715  | 0.0386414  |
| GTF2IRD1P1   | 8.74816   | 8.93049   | 0.0297584  | 0.991767   |
| CDAN1        | 5.08772   | 5.52129   | 0.117986   | 0.918153   |
| PDGFRL       | 5.29583   | 3.77245   | -0.489355  | 0.249512   |
| COL4A4       | 0.0132875 | 0.0241252 | 0.860468   | 1          |
| CXCL16       | 44.5439   | 51.6798   | 0.214373   | 0.753148   |
| SERP1        | 44.9165   | 46.169    | 0.0396784  | 0.982497   |
| LHFPL2       | 2.51084   | 3.37605   | 0.427171   | 0.237644   |
| CEP250       | 9.52771   | 7.7924    | -0.290062  | 0.460263   |
| SCMH1        | 13.3319   | 11.6512   | -0.194411  | 0.766627   |
| ANKFY1       | 3.8486    | 5.31219   | 0.464974   | 0.10637    |
| CLEC11A      | 225.261   | 234.799   | 0.0598314  | 0.970195   |
| APOBEC3C     | 15.1681   | 7.03288   | -1.10886   | 0.00134142 |
| TSPAN33      | 28.8444   | 23.917    | -0.27026   | 0.519452   |
| SAP130       | 6.88523   | 6.57354   | -0.0668339 | 0.966946   |
| NLE1         | 32.2188   | 38.4301   | 0.254334   | 0.5728     |
| PRAP1        | 0.0318145 | 0.0525751 | 0.724693   | 1          |
| TCTN3        | 22.3978   | 19.3009   | -0.214683  | 0.680196   |
| RMDN1        | 8.80859   | 5.54834   | -0.666854  | 0.0150729  |
| ACOT13       | 7.27122   | 4.7725    | -0.60745   | 0.43694    |
| BOLA1        | 0.257822  | 0.161627  | -0.67371   | 1          |
| PTPMT1       | 17.8322   | 20.8098   | 0.222776   | 0.891839   |
| B3GNT1       | 12.2453   | 17.4393   | 0.510113   | 0.112939   |
| MATR3        | 39.48     | 36.9622   | -0.0950712 | 0.937255   |
| C15orf57     | 20.1067   | 19.0539   | -0.0775881 | 0.95534    |
| FAF1         | 28.0756   | 17.8316   | -0.654878  | 0.0126858  |
| REXO1        | 16.6837   | 18.2997   | 0.133383   | 0.879021   |
| STRIP2       | 3.29152   | 4.20089   | 0.351941   | 0.415077   |
| KIAA0040     | 2.00578   | 1.44673   | -0.471369  | 0.244643   |

|                       |           |            |            |            |
|-----------------------|-----------|------------|------------|------------|
| SH3RF2                | 0.549917  | 0.0622669  | -3.14268   | 0.0120701  |
| SS18                  | 13.9227   | 14.962     | 0.103862   | 0.921047   |
| ARHGAP5-AS1           | 2.14885   | 2.27398    | 0.0816596  | 0.979316   |
| UBR4                  | 5.76937   | 3.92311    | -0.556416  | 0.0318033  |
| ZDHHC12               | 78.6873   | 71.4206    | -0.139791  | 0.966203   |
| DCTN2                 | 62.0752   | 47.1985    | -0.395276  | 0.310137   |
| HSF2                  | 6.06613   | 5.09742    | -0.251009  | 0.649163   |
| INSR                  | 2.97487   | 2.3626     | -0.332452  | 0.40453    |
| EBAG9                 | 17.1923   | 16.3214    | -0.0749914 | 0.961      |
| SARNP                 | 43.4843   | 54.8667    | 0.335436   | 0.482666   |
| CDK20                 | 7.9124    | 8.36903    | 0.0809451  | 0.96103    |
| ZC3HAV1L              | 1.83235   | 1.22438    | -0.581636  | 0.326673   |
| FAM126A               | 0.0188381 | 0.00471747 | -1.99757   | 1          |
| TGFB1                 | 99.5092   | 128.936    | 0.373754   | 0.255519   |
| TUBB2B                | 0.864624  | 2.07511    | 1.26304    | 0.00672555 |
| C19orf73              | 2.75443   | 2.8732     | 0.060902   | 0.992797   |
| OXSRI                 | 8.43655   | 9.93454    | 0.2358     | 0.630611   |
| ADAM8                 | 0.779226  | 0.822333   | 0.0776816  | 0.979701   |
| SERF1A                | 0.108799  | 0.162973   | 0.582963   | 1          |
| DCTN3                 | 98.6453   | 97.9548    | -0.0101344 | 0.996453   |
| LOH12CR1              | 4.381     | 3.90026    | -0.167691  | 0.881073   |
| LSM12                 | 61.0559   | 66.0591    | 0.113627   | 0.909768   |
| VPS53                 | 2.66603   | 3.84537    | 0.52843    | 0.0481547  |
| TUBGCP2               | 22.2195   | 19.4239    | -0.193993  | 0.80896    |
| MRPL40                | 77.5895   | 71.3582    | -0.120782  | 0.900578   |
| KLHL12                | 9.92496   | 5.14536    | -0.947788  | 0.00134142 |
| IMP4                  | 133.946   | 184.562    | 0.462457   | 0.101333   |
| AACS                  | 9.09897   | 10.9284    | 0.264302   | 0.582968   |
| CATSPER2P1            | 0.391496  | 0.15524    | -1.33449   | 0.140867   |
| FZD6                  | 8.67378   | 5.05369    | -0.779323  | 0.00425224 |
| TSC1                  | 4.21568   | 3.38336    | -0.317309  | 0.429593   |
| EPN1                  | 98.566    | 96.2242    | -0.03469   | 0.986107   |
| C1RL                  | 3.96051   | 1.40217    | -1.49802   | 0.00134142 |
| SLC16A7               | 0.185346  | 0.12918    | -0.520847  | 1          |
| HADHB                 | 64.8084   | 55.5637    | -0.222039  | 0.665381   |
| GTF2A1                | 3.26844   | 2.64326    | -0.306286  | 0.485249   |
| ANKRA2                | 2.70798   | 1.07156    | -1.3375    | 0.00134142 |
| PCSK4                 | 1.00184   | 0.356722   | -1.48978   | 0.030994   |
| USP31                 | 1.64501   | 2.38633    | 0.536703   | 0.070203   |
| STK17B                | 2.66078   | 1.876      | -0.504192  | 0.138076   |
| C3orf18               | 6.45684   | 4.04791    | -0.67365   | 0.3074     |
| SNPH                  | 1.40751   | 1.57936    | 0.166196   | 0.898291   |
| PPA2                  | 39.5751   | 30.1753    | -0.391224  | 0.217848   |
| ADORA2B               | 30.704    | 25.705     | -0.256375  | 0.563967   |
| PSMF1                 | 34.4871   | 29.9225    | -0.204825  | 0.703377   |
| DNAJC25,DNAJC25-GNG1C | 104.457   | 113.692    | 0.122234   | 0.907651   |
| SMARCAL1              | 7.13222   | 4.79766    | -0.572018  | 0.0652056  |
| EME1                  | 2.30539   | 1.38259    | -0.737635  | 0.938194   |
| LOC100506124          | 0.343854  | 0.297535   | -0.208739  | 1          |
| MUT                   | 5.92808   | 3.75558    | -0.65853   | 0.0172978  |
| CD99L2                | 6.59639   | 4.55675    | -0.533672  | 0.0997646  |
| CCDC88B               | 5.17128   | 2.68456    | -0.945836  | 0.00337323 |
| FNTA                  | 55.0667   | 29.2928    | -0.910633  | 0.00134142 |
| WASF2                 | 18.2628   | 9.56925    | -0.93243   | 0.00134142 |
| HIBCH                 | 2.55109   | 3.17712    | 0.316609   | 0.630681   |
| TNKS2                 | 3.21596   | 2.48641    | -0.371188  | 0.310315   |
| INF2                  | 40.4219   | 47.7332    | 0.239856   | 0.729849   |
| PHB2                  | 465.475   | 455.548    | -0.0311023 | 0.987693   |
| CHPT1                 | 14.7277   | 16.263     | 0.143061   | 0.876899   |
| CRYBB2P1              | 21.7768   | 23.5333    | 0.111913   | 0.919029   |
| MLL2                  | 2.00695   | 3.08508    | 0.6203     | 0.0194494  |
| SENP6                 | 4.62294   | 5.1051     | 0.143129   | 0.854644   |
| YJEFN3                | 3.67083   | 3.50003    | -0.0687397 | 0.986353   |
| REEP3                 | 3.89516   | 3.3729     | -0.207696  | 0.737796   |
| MED7                  | 7.88493   | 7.78391    | -0.018602  | 0.994615   |
| SLC50A1               | 40.7756   | 25.0036    | -0.705571  | 0.00743393 |
| TNKS                  | 3.50324   | 1.3462     | -1.3798    | 0.00134142 |
| ZBTB17                | 12.18     | 11.8817    | -0.0357697 | 0.987693   |
| RTTN                  | 0.837484  | 0.554569   | -0.594694  | 0.145048   |
| SLC29A3               | 7.28561   | 5.87159    | -0.311297  | 0.560168   |
| HERC6                 | 3.09315   | 2.02324    | -0.612409  | 0.0640789  |
| DDX28                 | 15.8862   | 17.8129    | 0.165143   | 0.909016   |
| SAMM50                | 22.505    | 25.8492    | 0.199874   | 0.726892   |
| THAP1                 | 6.31955   | 6.32948    | 0.00226391 | 0.998644   |
| CHDH                  | 4.47167   | 5.06204    | 0.178907   | 0.833086   |
| STK11IP               | 2.41526   | 2.80528    | 0.215969   | 0.81342    |
| RPGRIP1L              | 0.272786  | 0.30098    | 0.1419     | 1          |
| LZTFL1                | 2.74959   | 1.8307     | -0.586821  | 0.0857334  |
| DDX12P                | 3.15652   | 3.96289    | 0.328216   | 0.519111   |

|             |           |           |            |            |
|-------------|-----------|-----------|------------|------------|
| MROH7, TTC4 | 13.9737   | 17.9788   | 0.363585   | 0.281574   |
| APP         | 78.8447   | 63.4164   | -0.314157  | 0.407645   |
| CHST12      | 10.0135   | 18.2905   | 0.869141   | 0.00243047 |
| CDC42SE1    | 32.4622   | 43.1631   | 0.411036   | 0.187625   |
| PHTF1       | 1.67657   | 2.20426   | 0.394778   | 0.408804   |
| KIAA1199    | 0.0950015 | 0.0568441 | -0.74094   | 1          |
| SCAMP5      | 22.6287   | 24.8711   | 0.136316   | 0.863458   |
| DPF2        | 27.5584   | 21.6234   | -0.349903  | 0.299618   |
| FOXK2       | 18.0275   | 22.8142   | 0.339731   | 0.325034   |
| KIAA1549L   | 1.26146   | 0.809407  | -0.640162  | 0.0410573  |
| MIIP        | 35.6313   | 36.8789   | 0.0496519  | 0.978196   |
| TOR4A       | 54.6421   | 74.3408   | 0.444142   | 0.12699    |
| TMEM184B    | 19.6696   | 27.8563   | 0.502035   | 0.0691409  |
| STAG3L4     | 6.72352   | 4.76238   | -0.497534  | 0.156549   |
| SLC51A      | 0.117301  | 0.182182  | 0.635167   | 1          |
| ZFYVE26     | 1.63788   | 1.84606   | 0.172617   | 0.837238   |
| LYRM4       | 21.6913   | 31.0981   | 0.519708   | 0.0637115  |
| TTPA        | 0.310394  | 0.373281  | 0.266162   | 0.886887   |
| HSD17B1     | 26.8106   | 29.6766   | 0.146522   | 0.855981   |
| HCCS        | 11.5093   | 15.4639   | 0.426099   | 0.175545   |
| SDHD        | 54.5602   | 46.94     | -0.217033  | 0.67146    |
| FOXK1       | 7.71229   | 7.13236   | -0.112779  | 0.909016   |
| C9orf142    | 151.561   | 227.318   | 0.584813   | 0.025628   |
| CASKIN2     | 4.769     | 6.38085   | 0.420063   | 0.670511   |
| DYNLRB1     | 178.456   | 187.651   | 0.0724775  | 0.958104   |
| FERMT1      | 4.88903   | 7.27012   | 0.572432   | 0.0489893  |
| SNHG15      | 148.768   | 199.329   | 0.422091   | 0.151522   |
| MCPH1       | 3.23385   | 3.15812   | -0.0341886 | 0.987868   |
| GNAS        | 461.718   | 434.039   | -0.0891867 | 0.947247   |
| BCL9L       | 5.28547   | 5.53989   | 0.0678248  | 0.966946   |
| FAM20B      | 7.65782   | 8.29097   | 0.114608   | 0.908432   |
| TRMT12      | 4.94813   | 8.24361   | 0.736393   | 0.00882987 |
| TOX4        | 10.5775   | 10.0211   | -0.0779578 | 0.971853   |
| GSTP1       | 985.72    | 1251.02   | 0.34386    | 0.34496    |
| SPR         | 75.8744   | 115.797   | 0.609909   | 0.0172978  |
| XPO4        | 2.3613    | 3.08394   | 0.385195   | 0.247378   |
| MYEOV2      | 232.117   | 379.782   | 0.71032    | 0.00337323 |
| WASL        | 9.47347   | 7.92096   | -0.258218  | 0.568186   |
| CCNF        | 9.59458   | 15.2729   | 0.670684   | 0.010797   |
| KIAA0146    | 8.61469   | 6.68086   | -0.366764  | 0.307051   |
| IVD         | 15.9014   | 18.0068   | 0.179391   | 0.773928   |
| SAMD5       | 0.59918   | 0.88672   | 0.565489   | 0.173927   |
| C11orf49    | 17.7934   | 10.4692   | -0.765193  | 0.325034   |
| TSEN2       | 5.30562   | 6.64934   | 0.325692   | 0.509306   |
| JOSD1       | 21.5632   | 17.3765   | -0.311438  | 0.403093   |
| FBXO22-AS1  | 43.5036   | 53.5961   | 0.300994   | 0.812317   |
| PTPN21      | 1.43743   | 1.08158   | -0.410355  | 0.373076   |
| UQCRCQ      | 110.247   | 136.947   | 0.312877   | 0.405147   |
| AP2M1       | 207.193   | 201.934   | -0.0370873 | 0.984692   |
| ELF1        | 6.88014   | 4.32055   | -0.671223  | 0.0132924  |
| COX6B1      | 355.54    | 410.445   | 0.207175   | 0.70199    |
| ANKRD39     | 20.8827   | 36.5886   | 0.809084   | 0.00672555 |
| FAM64A      | 17.8459   | 23.6208   | 0.404465   | 0.264053   |
| PAIP1       | 33.5753   | 29.4653   | -0.188382  | 0.746908   |
| SVIL        | 1.74495   | 1.8895    | 0.114815   | 0.931471   |
| TECPR2      | 0.694088  | 0.878574  | 0.340046   | 0.595117   |
| B4GALT2     | 43.3077   | 55.8903   | 0.367973   | 0.263143   |
| CDC5L       | 5.42328   | 4.8257    | -0.168426  | 0.806781   |
| ISYNA1      | 4.93011   | 5.97827   | 0.278109   | 0.954559   |
| RFX2        | 3.05939   | 2.23286   | -0.45435   | 0.30413    |
| SEMA6B      | 16.8561   | 12.9321   | -0.382314  | 0.286255   |
| SLC26A2     | 1.22225   | 1.38162   | 0.176822   | 0.843587   |
| POMGNT1     | 30.278    | 31.4984   | 0.0570109  | 0.97314    |
| AOC2        | 2.15363   | 4.27616   | 0.989544   | 0.00243047 |
| RAB3GAP2    | 3.02431   | 1.869     | -0.694342  | 0.0167292  |
| HDGFRP2     | 37.712    | 36.6128   | -0.0426757 | 0.980704   |
| CTDSPL2     | 2.61825   | 1.70942   | -0.615092  | 0.0551188  |
| BBX         | 2.32269   | 1.54807   | -0.585326  | 0.0569429  |
| GANAB       | 91.0409   | 77.6781   | -0.229008  | 0.642966   |
| PPDPF       | 575.338   | 505.076   | -0.187911  | 0.758132   |
| NCOA6       | 3.75315   | 4.34398   | 0.210915   | 0.759487   |
| ARSK        | 1.01553   | 0.83036   | -0.290418  | 0.742569   |
| GOLGA7      | 31.5109   | 29.8705   | -0.0771324 | 0.954188   |
| PHIP        | 2.19484   | 1.73765   | -0.336978  | 0.374085   |
| SLC16A1     | 33.8929   | 49.7861   | 0.554761   | 0.0278845  |
| LOC400657   | 2.62219   | 1.94416   | -0.431624  | 0.330501   |
| DSCR3       | 15.2249   | 9.95068   | -0.613568  | 0.0227017  |
| ENTPD4      | 3.84063   | 3.76545   | -0.0285205 | 0.989365   |
| PALLD       | 4.81775   | 2.96172   | -0.701921  | 0.0120701  |

|                   |         |                |           |            |
|-------------------|---------|----------------|-----------|------------|
| ITGAV             | 2.50178 | 2.26082        | -0.146112 | 0.873862   |
| SCAF8             | 6.68343 | 5.39488        | -0.308998 | 0.432218   |
| ZFHx3             | 1.05776 | 1.09199        | 0.0459383 | 0.982907   |
| FAM115A           | 8.54423 | 3.32821        | -1.36021  | 0.00134142 |
| CXorf57           | 1.67852 | 0.753173       | -1.15614  | 0.00134142 |
| LINC00235         | 0       | 0.521858 inf   |           | 0.00509212 |
| SNAR-F            | 0       | 20.4955 inf    |           | 0.0139368  |
| MIR221            | 0       | 15.3414 inf    |           | 0.130354   |
| SNORD99           | 0       | 106.764 inf    |           | 0.482631   |
| RNU4ATAC          | 0       | 11.5605 inf    |           | 0.510424   |
| SNORD57           | 0       | 397.359 inf    |           | 0.530543   |
| DDX11L1           | 0       | 0              | 0         | 1          |
| OR4F5             | 0       | 0              | 0         | 1          |
| OR4F3             | 0       | 0              | 0         | 1          |
| LOC254099         | 0       | 0              | 0         | 1          |
| MIR200B           | 0       | 0              | 0         | 1          |
| MIR200A           | 0       | 0              | 0         | 1          |
| MIR429            | 0       | 0              | 0         | 1          |
| TTL10             | 0       | 0              | 0         | 1          |
| TMEM88B           | 0       | 0              | 0         | 1          |
| MMP23A            | 0       | 0              | 0         | 1          |
| GABRD             | 0       | 0              | 0         | 1          |
| ACTRT2            | 0       | 0              | 0         | 1          |
| MIR4251           | 0       | 0              | 0         | 1          |
| CCDC27            | 0       | 0              | 0         | 1          |
| LOC728716         | 0       | 0              | 0         | 1          |
| LOC284661         | 0       | 0              | 0         | 1          |
| AJAP1             | 0       | 0.00454787 inf |           | 1          |
| MIR4417           | 0       | 0              | 0         | 1          |
| HES3              | 0       | 0              | 0         | 1          |
| CA6               | 0       | 0              | 0         | 1          |
| MTOR-AS1          | 0       | 0              | 0         | 1          |
| ANGPTL7           | 0       | 0.00531477 inf |           | 1          |
| PTCHD2            | 0       | 0              | 0         | 1          |
| DRAXIN            | 0       | 0              | 0         | 1          |
| SNORA59A          | 0       | 0              | 0         | 1          |
| AADAACL4          | 0       | 0              | 0         | 1          |
| AADAACL3          | 0       | 0              | 0         | 1          |
| C1orf158          | 0       | 0              | 0         | 1          |
| PRAMEF12          | 0       | 0              | 0         | 1          |
| PRAMEF1           | 0       | 0              | 0         | 1          |
| PRAMEF2           | 0       | 0              | 0         | 1          |
| PRAMEF7,PRAMEF8   | 0       | 0              | 0         | 1          |
| PRAMEF22          | 0       | 0              | 0         | 1          |
| PRAMEF5           | 0       | 0              | 0         | 1          |
| PRAMEF9           | 0       | 0              | 0         | 1          |
| PRAMEF16          | 0       | 0              | 0         | 1          |
| PRAMEF20,PRAMEF21 | 0       | 0              | 0         | 1          |
| PRAMEF9           | 0       | 0              | 0         | 1          |
| PRAMEF17          | 0       | 0              | 0         | 1          |
| PRAMEF20,PRAMEF21 | 0       | 0              | 0         | 1          |
| PDPN              | 0       | 0.00444217 inf |           | 1          |
| CELA2A            | 0       | 0              | 0         | 1          |
| CELA2B            | 0       | 0              | 0         | 1          |
| TMEM82            | 0       | 0              | 0         | 1          |
| C1orf64           | 0       | 0              | 0         | 1          |
| CLCNKA            | 0       | 0              | 0         | 1          |
| CLCNKB            | 0       | 0              | 0         | 1          |
| MIR3675           | 0       | 0              | 0         | 1          |
| MIR3675           | 0       | 0              | 0         | 1          |
| PADI6             | 0       | 0              | 0         | 1          |
| IGSF21            | 0       | 0              | 0         | 1          |
| PAX7              | 0       | 0              | 0         | 1          |
| HTR6              | 0       | 0              | 0         | 1          |
| PLA2G5            | 0       | 0              | 0         | 1          |
| PLA2G2F           | 0       | 0              | 0         | 1          |
| UBXN10            | 0       | 0              | 0         | 1          |
| VWA5B1            | 0       | 0              | 0         | 1          |
| FAM43B            | 0       | 0              | 0         | 1          |
| CELA3B            | 0       | 0              | 0         | 1          |
| CELA3A            | 0       | 0              | 0         | 1          |
| C1QA              | 0       | 0              | 0         | 1          |
| C1QC              | 0       | 0              | 0         | 1          |
| C1QB              | 0       | 0              | 0         | 1          |
| MIR4684           | 0       | 0              | 0         | 1          |
| MIR3115           | 0       | 0              | 0         | 1          |
| MIR378F           | 0       | 0              | 0         | 1          |
| LOC284632         | 0       | 0              | 0         | 1          |
| NCMAP             | 0       | 0              | 0         | 1          |



|              |   |            |     |   |
|--------------|---|------------|-----|---|
| MIR1976      | 0 | 0          | 0   | 1 |
| RAB42        | 0 | 0          | 0   | 1 |
| OPRD1        | 0 | 0          | 0   | 1 |
| LOC149086    | 0 | 0          | 0   | 1 |
| LOC284551    | 0 | 0          | 0   | 1 |
| TINAGL1      | 0 | 0          | 0   | 1 |
| HCRTR1       | 0 | 0          | 0   | 1 |
| LCK          | 0 | 0.0060241  | inf | 1 |
| HMGB4        | 0 | 0          | 0   | 1 |
| LOC402779    | 0 | 0          | 0   | 1 |
| C1orf94      | 0 | 0          | 0   | 1 |
| GJB4         | 0 | 0          | 0   | 1 |
| GJA4         | 0 | 0          | 0   | 1 |
| MIR4255      | 0 | 0          | 0   | 1 |
| MIR3659      | 0 | 0          | 0   | 1 |
| MIR30E       | 0 | 0          | 0   | 1 |
| MIR30C1      | 0 | 0          | 0   | 1 |
| GUCA2B       | 0 | 0          | 0   | 1 |
| FAM183A      | 0 | 0.0217859  | inf | 1 |
| TMEM125      | 0 | 0          | 0   | 1 |
| KLF17        | 0 | 0          | 0   | 1 |
| MIR5584      | 0 | 0          | 0   | 1 |
| SNORD38A     | 0 | 0          | 0   | 1 |
| SNORD38B     | 0 | 0          | 0   | 1 |
| MKMK1-AS1    | 0 | 0.00540487 | inf | 1 |
| EFCAB14-AS1  | 0 | 0          | 0   | 1 |
| CYP4B1       | 0 | 0          | 0   | 1 |
| CYP4X1       | 0 | 0          | 0   | 1 |
| CYP4Z1       | 0 | 0          | 0   | 1 |
| CYP4A22      | 0 | 0          | 0   | 1 |
| SLC5A9       | 0 | 0          | 0   | 1 |
| ELAVL4       | 0 | 0          | 0   | 1 |
| C1orf185     | 0 | 0          | 0   | 1 |
| FAM159A      | 0 | 0          | 0   | 1 |
| PODN         | 0 | 0          | 0   | 1 |
| DMRTB1       | 0 | 0          | 0   | 1 |
| MIR4781      | 0 | 0          | 0   | 1 |
| MIR4422      | 0 | 0          | 0   | 1 |
| PRKAA2       | 0 | 0          | 0   | 1 |
| C8A          | 0 | 0          | 0   | 1 |
| LOC100131060 | 0 | 0.0115422  | inf | 1 |
| MGC34796     | 0 | 0          | 0   | 1 |
| ANGPTL3      | 0 | 0.0117305  | inf | 1 |
| UBE2U        | 0 | 0          | 0   | 1 |
| MIR4794      | 0 | 0          | 0   | 1 |
| MIR3117      | 0 | 0          | 0   | 1 |
| TCTEX1D1     | 0 | 0          | 0   | 1 |
| IL23R        | 0 | 0          | 0   | 1 |
| PIN1P1       | 0 | 0          | 0   | 1 |
| LHX8         | 0 | 0          | 0   | 1 |
| SNORD45C     | 0 | 0          | 0   | 1 |
| SNORD45B     | 0 | 0          | 0   | 1 |
| ST6GALNAC3   | 0 | 0          | 0   | 1 |
| ST6GALNAC5   | 0 | 0          | 0   | 1 |
| MGC27382     | 0 | 0          | 0   | 1 |
| PTGFR        | 0 | 0          | 0   | 1 |
| IFI44L       | 0 | 0          | 0   | 1 |
| IFI44        | 0 | 0.00973748 | inf | 1 |
| LPHN2        | 0 | 0          | 0   | 1 |
| DNASE2B      | 0 | 0          | 0   | 1 |
| MIR4423      | 0 | 0          | 0   | 1 |
| CLCA1        | 0 | 0          | 0   | 1 |
| CLCA4        | 0 | 0          | 0   | 1 |
| GBP6         | 0 | 0          | 0   | 1 |
| GBP1P1       | 0 | 0          | 0   | 1 |
| C1orf146     | 0 | 0          | 0   | 1 |
| SNORA66      | 0 | 3.41086    | inf | 1 |
| MIR760       | 0 | 0          | 0   | 1 |
| FLJ31662     | 0 | 0          | 0   | 1 |
| DPYD-AS1     | 0 | 0          | 0   | 1 |
| LOC729987    | 0 | 0          | 0   | 1 |
| LOC100129620 | 0 | 0          | 0   | 1 |
| LPPR4        | 0 | 0          | 0   | 1 |
| PALMD        | 0 | 0          | 0   | 1 |
| MIR553       | 0 | 0          | 0   | 1 |
| GPR88        | 0 | 0          | 0   | 1 |
| VCAM1        | 0 | 0          | 0   | 1 |
| S1PR1        | 0 | 0          | 0   | 1 |
| DNAJA1P5     | 0 | 0          | 0   | 1 |

|              |   |            |     |   |
|--------------|---|------------|-----|---|
| AMY2A        | 0 | 0          | 0   | 1 |
| AMY1A        | 0 | 0          | 0   | 1 |
| AMY1A        | 0 | 0          | 0   | 1 |
| NTNG1        | 0 | 0          | 0   | 1 |
| VAV3-AS1     | 0 | 0          | 0   | 1 |
| NBPF6        | 0 | 0          | 0   | 1 |
| MIR197       | 0 | 0          | 0   | 1 |
| CYMP         | 0 | 0          | 0   | 1 |
| CD53         | 0 | 0          | 0   | 1 |
| CHI3L2       | 0 | 0          | 0   | 1 |
| CHIAP2       | 0 | 0          | 0   | 1 |
| CHIA         | 0 | 0          | 0   | 1 |
| PIFO         | 0 | 0          | 0   | 1 |
| SYCP1        | 0 | 0          | 0   | 1 |
| TSHB         | 0 | 0          | 0   | 1 |
| MIR320B1     | 0 | 0          | 0   | 1 |
| CD2          | 0 | 0          | 0   | 1 |
| MIR942       | 0 | 0          | 0   | 1 |
| HAO2         | 0 | 0          | 0   | 1 |
| HSD3B1       | 0 | 0          | 0   | 1 |
| HIST2H2BA    | 0 | 0          | 0   | 1 |
| EMBP1        | 0 | 0          | 0   | 1 |
| GPR89C       | 0 | 0          | 0   | 1 |
| GJA8         | 0 | 0          | 0   | 1 |
| PPIAL4E      | 0 | 0          | 0   | 1 |
| PPIAL4D      | 0 | 0          | 0   | 1 |
| FCGR1C       | 0 | 0          | 0   | 1 |
| PPIAL4B      | 0 | 0          | 0   | 1 |
| FCGR1A       | 0 | 0          | 0   | 1 |
| HIST2H4B     | 0 | 0          | 0   | 1 |
| HIST2H3C     | 0 | 0          | 0   | 1 |
| MIR4257      | 0 | 0          | 0   | 1 |
| MIR554       | 0 | 0          | 0   | 1 |
| RIAD1        | 0 | 0          | 0   | 1 |
| LOC100132111 | 0 | 0          | 0   | 1 |
| CRCT1        | 0 | 0          | 0   | 1 |
| LCE3C        | 0 | 0          | 0   | 1 |
| LCE3B        | 0 | 0          | 0   | 1 |
| LCE2D        | 0 | 0          | 0   | 1 |
| LCE2C        | 0 | 0          | 0   | 1 |
| LCE2B        | 0 | 0          | 0   | 1 |
| LCE2A        | 0 | 0          | 0   | 1 |
| LCE4A        | 0 | 0          | 0   | 1 |
| C1orf68      | 0 | 0          | 0   | 1 |
| KPRP         | 0 | 0          | 0   | 1 |
| LCE1D        | 0 | 0          | 0   | 1 |
| LCE1A        | 0 | 0          | 0   | 1 |
| LCE6A        | 0 | 0          | 0   | 1 |
| SMCP         | 0 | 0          | 0   | 1 |
| IVL          | 0 | 0          | 0   | 1 |
| SPRR4        | 0 | 0          | 0   | 1 |
| SPRR1A       | 0 | 0          | 0   | 1 |
| SPRR3        | 0 | 0          | 0   | 1 |
| SPRR1B       | 0 | 0.0311998  | inf | 1 |
| LELP1        | 0 | 0          | 0   | 1 |
| LOR          | 0 | 0          | 0   | 1 |
| S100A9       | 0 | 0          | 0   | 1 |
| S100A7A      | 0 | 0          | 0   | 1 |
| AQP10        | 0 | 0          | 0   | 1 |
| TDRD10       | 0 | 0          | 0   | 1 |
| MIR4258      | 0 | 0          | 0   | 1 |
| MIR92B       | 0 | 0          | 0   | 1 |
| RHBG         | 0 | 0.0257381  | inf | 1 |
| TTC24        | 0 | 0          | 0   | 1 |
| CYCSP52      | 0 | 0          | 0   | 1 |
| CD1A         | 0 | 0          | 0   | 1 |
| CD1C         | 0 | 0          | 0   | 1 |
| CD1E         | 0 | 0          | 0   | 1 |
| OR10K1       | 0 | 0          | 0   | 1 |
| OR10R2       | 0 | 0          | 0   | 1 |
| OR10Z1       | 0 | 0          | 0   | 1 |
| OR6K6        | 0 | 0          | 0   | 1 |
| MNDA         | 0 | 0          | 0   | 1 |
| PYHIN1       | 0 | 0.00396189 | inf | 1 |
| CADM3        | 0 | 0          | 0   | 1 |
| DARC         | 0 | 0          | 0   | 1 |
| FCER1A       | 0 | 0          | 0   | 1 |
| OR10J1       | 0 | 0          | 0   | 1 |
| APCS         | 0 | 0          | 0   | 1 |

|              |   |             |     |   |
|--------------|---|-------------|-----|---|
| FCRL6        | 0 | 0           | 0   | 1 |
| SLAMF8       | 0 | 0           | 0   | 1 |
| LOC100505633 | 0 | 0           | 0   | 1 |
| ATP1A4       | 0 | 0           | 0   | 1 |
| VANGL2       | 0 | 0           | 0   | 1 |
| LY9          | 0 | 0           | 0   | 1 |
| PCP4L1       | 0 | 0           | 0   | 1 |
| FCGR2A       | 0 | 0.00349531  | inf | 1 |
| MIR4654      | 0 | 0           | 0   | 1 |
| MIR556       | 0 | 0           | 0   | 1 |
| LRRCS2       | 0 | 0           | 0   | 1 |
| FMO9P        | 0 | 0           | 0   | 1 |
| DUSP27       | 0 | 0           | 0   | 1 |
| MIR557       | 0 | 0           | 0   | 1 |
| LINC00626    | 0 | 0           | 0   | 1 |
| METTTL11B    | 0 | 0           | 0   | 1 |
| PRRX1        | 0 | 0           | 0   | 1 |
| MROH9        | 0 | 0           | 0   | 1 |
| FMO3         | 0 | 0           | 0   | 1 |
| MIR1295B     | 0 | 0           | 0   | 1 |
| FMO6P        | 0 | 0           | 0   | 1 |
| FMO2         | 0 | 0           | 0   | 1 |
| FMO1         | 0 | 0           | 0   | 1 |
| MIR3120      | 0 | 0           | 0   | 1 |
| FASLG        | 0 | 0           | 0   | 1 |
| LOC730159    | 0 | 0           | 0   | 1 |
| TNN          | 0 | 0           | 0   | 1 |
| FAM5B        | 0 | 0           | 0   | 1 |
| TEX35        | 0 | 0           | 0   | 1 |
| MIR4424      | 0 | 0           | 0   | 1 |
| GM140        | 0 | 0           | 0   | 1 |
| CACNA1E      | 0 | 0           | 0   | 1 |
| LINC00272    | 0 | 0           | 0   | 1 |
| RGSL1        | 0 | 0           | 0   | 1 |
| LOC284648    | 0 | 0           | 0   | 1 |
| HMCN1        | 0 | 0           | 0   | 1 |
| LOC440704    | 0 | 0           | 0   | 1 |
| RGS18        | 0 | 0           | 0   | 1 |
| RGS21        | 0 | 0           | 0   | 1 |
| RGS1         | 0 | 0           | 0   | 1 |
| RGS13        | 0 | 0           | 0   | 1 |
| MIR1278      | 0 | 0           | 0   | 1 |
| CFH          | 0 | 0.00200944  | inf | 1 |
| CFHR3        | 0 | 0           | 0   | 1 |
| CFHR1        | 0 | 0           | 0   | 1 |
| CFHR4        | 0 | 0           | 0   | 1 |
| CFHR2        | 0 | 0           | 0   | 1 |
| CFHR5        | 0 | 0           | 0   | 1 |
| CRB1         | 0 | 0           | 0   | 1 |
| LHX9         | 0 | 0           | 0   | 1 |
| IGFN1        | 0 | 0.000937478 | inf | 1 |
| MIR5191      | 0 | 0           | 0   | 1 |
| MIR1231      | 0 | 0           | 0   | 1 |
| GPR37L1      | 0 | 0.0304825   | inf | 1 |
| LOC641515    | 0 | 0.0205167   | inf | 1 |
| OPTC         | 0 | 0           | 0   | 1 |
| SNORA77      | 0 | 0           | 0   | 1 |
| LINC00260    | 0 | 0           | 0   | 1 |
| LEMD1-AS1    | 0 | 0           | 0   | 1 |
| AVPR1B       | 0 | 0           | 0   | 1 |
| CTSE         | 0 | 0           | 0   | 1 |
| IL20         | 0 | 0           | 0   | 1 |
| IL24         | 0 | 0           | 0   | 1 |
| C4BPB        | 0 | 0           | 0   | 1 |
| C4BPA        | 0 | 0           | 0   | 1 |
| CR2          | 0 | 0           | 0   | 1 |
| CR1          | 0 | 0.000953222 | inf | 1 |
| CR1L         | 0 | 0           | 0   | 1 |
| MIR205HG     | 0 | 0           | 0   | 1 |
| CAMK1G       | 0 | 0           | 0   | 1 |
| HSD11B1      | 0 | 0.0068547   | inf | 1 |
| TRAF3IP3     | 0 | 0.0189391   | inf | 1 |
| SYT14        | 0 | 0           | 0   | 1 |
| SERTAD4      | 0 | 0           | 0   | 1 |
| MIR3122      | 0 | 0           | 0   | 1 |
| SNORA16B     | 0 | 1.32291     | inf | 1 |
| KCNK2        | 0 | 0           | 0   | 1 |
| LINC00210    | 0 | 0           | 0   | 1 |
| RNU5F-1      | 0 | 0           | 0   | 1 |

|                    |   |               |   |   |
|--------------------|---|---------------|---|---|
| MARK1              | 0 | 0             | 0 | 1 |
| C1orf65            | 0 | 0             | 0 | 1 |
| PRSS38             | 0 | 0             | 0 | 1 |
| WNT3A              | 0 | 0             | 0 | 1 |
| MIR3620            | 0 | 0             | 0 | 1 |
| MIR4666A           | 0 | 0             | 0 | 1 |
| CAPN9              | 0 | 0             | 0 | 1 |
| MAP10              | 0 | 0             | 0 | 1 |
| MIR4427            | 0 | 0             | 0 | 1 |
| MIR4671            | 0 | 0             | 0 | 1 |
| LINC00184          | 0 | 0             | 0 | 1 |
| ACTN2              | 0 | 0             | 0 | 1 |
| LOC100130331       | 0 | 0             | 0 | 1 |
| RPS7P5             | 0 | 0             | 0 | 1 |
| FMN2               | 0 | 0             | 0 | 1 |
| MIR3123            | 0 | 0             | 0 | 1 |
| WDR64              | 0 | 0             | 0 | 1 |
| MIR4677            | 0 | 0             | 0 | 1 |
| C1orf100           | 0 | 0             | 0 | 1 |
| OR2W5              | 0 | 0             | 0 | 1 |
| GCSAML             | 0 | 0             | 0 | 1 |
| OR2G2              | 0 | 0             | 0 | 1 |
| OR2G3              | 0 | 0             | 0 | 1 |
| OR2W3              | 0 | 0             | 0 | 1 |
| OR2T8              | 0 | 0             | 0 | 1 |
| OR2L13             | 0 | 0             | 0 | 1 |
| OR2L8              | 0 | 0             | 0 | 1 |
| OR2AK2             | 0 | 0             | 0 | 1 |
| OR2L1P             | 0 | 0             | 0 | 1 |
| OR2L5              | 0 | 0             | 0 | 1 |
| OR2L2              | 0 | 0             | 0 | 1 |
| OR2L3              | 0 | 0             | 0 | 1 |
| OR2M1P             | 0 | 0             | 0 | 1 |
| OR2M5              | 0 | 0             | 0 | 1 |
| OR2M2              | 0 | 0             | 0 | 1 |
| OR2M3              | 0 | 0             | 0 | 1 |
| OR2M4              | 0 | 0             | 0 | 1 |
| OR14C36            | 0 | 0             | 0 | 1 |
| OR2T4              | 0 | 0             | 0 | 1 |
| OR2T6              | 0 | 0             | 0 | 1 |
| OR2T1              | 0 | 0             | 0 | 1 |
| OR2T2              | 0 | 0             | 0 | 1 |
| OR2T3              | 0 | 0             | 0 | 1 |
| OR2T5              | 0 | 0             | 0 | 1 |
| OR2G6              | 0 | 0             | 0 | 1 |
| MIR3124            | 0 | 0             | 0 | 1 |
| FAM138F            | 0 | 0             | 0 | 1 |
| OR4F3              | 0 | 0             | 0 | 1 |
| TNFRSF18           | 0 | 0             | 0 | 1 |
| C1orf233           | 0 | 0             | 0 | 1 |
| HES5               | 0 | 0             | 0 | 1 |
| MIR551A            | 0 | 0             | 0 | 1 |
| MIR4689            | 0 | 0             | 0 | 1 |
| MIR4252            | 0 | 0             | 0 | 1 |
| SLC2A7             | 0 | 0             | 0 | 1 |
| MIR34A             | 0 | 0             | 0 | 1 |
| C1orf200           | 0 | 0             | 0 | 1 |
| NPPB               | 0 | 0.0248391 inf | 0 | 1 |
| PRAMEF11           | 0 | 0             | 0 | 1 |
| HNRNPCL1,LOC649330 | 0 | 0.021455 inf  | 0 | 1 |
| PRAMEF4            | 0 | 0             | 0 | 1 |
| PRAMEF10           | 0 | 0             | 0 | 1 |
| PRAMEF6            | 0 | 0             | 0 | 1 |
| PRAMEF5            | 0 | 0             | 0 | 1 |
| LOC440563          | 0 | 0             | 0 | 1 |
| PRAMEF3            | 0 | 0             | 0 | 1 |
| PRAMEF8            | 0 | 0             | 0 | 1 |
| PRAMEF13,PRAMEF14  | 0 | 0             | 0 | 1 |
| PRAMEF18           | 0 | 0             | 0 | 1 |
| PRAMEF7,PRAMEF8    | 0 | 0             | 0 | 1 |
| PRAMEF14           | 0 | 0             | 0 | 1 |
| PRAMEF18           | 0 | 0             | 0 | 1 |
| LRRC38             | 0 | 0             | 0 | 1 |
| HSPB7              | 0 | 0             | 0 | 1 |
| SPATA21            | 0 | 0             | 0 | 1 |
| ESPNP              | 0 | 0             | 0 | 1 |
| MIR3675            | 0 | 0             | 0 | 1 |
| PADI2              | 0 | 0             | 0 | 1 |
| TAS1R2             | 0 | 0             | 0 | 1 |

|                 |   |            |     |   |
|-----------------|---|------------|-----|---|
| MIR4695         | 0 | 0          | 0   | 1 |
| RNF186          | 0 | 0          | 0   | 1 |
| PLA2G2E         | 0 | 0          | 0   | 1 |
| PLA2G2A         | 0 | 0          | 0   | 1 |
| PLA2G2D         | 0 | 0          | 0   | 1 |
| PLA2G2C         | 0 | 0          | 0   | 1 |
| LOC339505       | 0 | 0.0026033  | inf | 1 |
| MIR4253         | 0 | 0          | 0   | 1 |
| CNR2            | 0 | 0          | 0   | 1 |
| RUNX3           | 0 | 0.00366507 | inf | 1 |
| SLC30A2         | 0 | 0          | 0   | 1 |
| TRIM63          | 0 | 0.0141526  | inf | 1 |
| AIM1L           | 0 | 0          | 0   | 1 |
| ZNF683          | 0 | 0          | 0   | 1 |
| C1orf172        | 0 | 0          | 0   | 1 |
| CD164L2         | 0 | 0          | 0   | 1 |
| FGR             | 0 | 0.00675446 | inf | 1 |
| MIR4420         | 0 | 0          | 0   | 1 |
| SNORD103A       | 0 | 0          | 0   | 1 |
| SNORD103A       | 0 | 0          | 0   | 1 |
| SNORD85         | 0 | 0          | 0   | 1 |
| MIR4254         | 0 | 0          | 0   | 1 |
| DLGAP3          | 0 | 0          | 0   | 1 |
| CSF3R           | 0 | 0          | 0   | 1 |
| GRIK3           | 0 | 0.00100635 | inf | 1 |
| MIR5581         | 0 | 0          | 0   | 1 |
| RSP01           | 0 | 0          | 0   | 1 |
| POU3F1          | 0 | 0.0101445  | inf | 1 |
| LOC339442       | 0 | 0          | 0   | 1 |
| SNORA55         | 0 | 0          | 0   | 1 |
| NT5C1A          | 0 | 0          | 0   | 1 |
| CLDN19          | 0 | 0          | 0   | 1 |
| KNCN            | 0 | 0          | 0   | 1 |
| CYP4Z2P         | 0 | 0          | 0   | 1 |
| CYP4A11         | 0 | 0.00465758 | inf | 1 |
| PDZK1IP1        | 0 | 0          | 0   | 1 |
| TAL1            | 0 | 0.00916624 | inf | 1 |
| SKINTL          | 0 | 0          | 0   | 1 |
| AGBL4           | 0 | 0          | 0   | 1 |
| BEND5           | 0 | 0          | 0   | 1 |
| SLC1A7          | 0 | 0          | 0   | 1 |
| SLC25A3P1       | 0 | 0          | 0   | 1 |
| CDCP2           | 0 | 0.00794428 | inf | 1 |
| TTC22           | 0 | 0          | 0   | 1 |
| C1orf168        | 0 | 0          | 0   | 1 |
| C8B             | 0 | 0          | 0   | 1 |
| DAB1            | 0 | 0          | 0   | 1 |
| MIR4711         | 0 | 0          | 0   | 1 |
| CYP2J2          | 0 | 0          | 0   | 1 |
| C1orf87         | 0 | 0          | 0   | 1 |
| KANK4           | 0 | 0          | 0   | 1 |
| MIR3671         | 0 | 0          | 0   | 1 |
| MIR101-1        | 0 | 0          | 0   | 1 |
| INSL5           | 0 | 0          | 0   | 1 |
| MIR1262         | 0 | 0          | 0   | 1 |
| RPE65           | 0 | 0          | 0   | 1 |
| MIR186          | 0 | 0          | 0   | 1 |
| NEGR1           | 0 | 0          | 0   | 1 |
| NEGR1-IT1       | 0 | 0          | 0   | 1 |
| C1orf173        | 0 | 0          | 0   | 1 |
| SLC44A5         | 0 | 0          | 0   | 1 |
| ASB17           | 0 | 0.00692291 | inf | 1 |
| ELTD1           | 0 | 0          | 0   | 1 |
| MIR548AP        | 0 | 0          | 0   | 1 |
| LOC100505768    | 0 | 0.0229847  | inf | 1 |
| GBP7            | 0 | 0          | 0   | 1 |
| GBP5            | 0 | 0.00215417 | inf | 1 |
| BARHL2          | 0 | 0          | 0   | 1 |
| HFM1            | 0 | 0          | 0   | 1 |
| MIR137,MIR137HG | 0 | 0          | 0   | 1 |
| MIR2682         | 0 | 0          | 0   | 1 |
| LPPR5           | 0 | 0          | 0   | 1 |
| LOC100128787    | 0 | 0          | 0   | 1 |
| RNU6-6          | 0 | 0          | 0   | 1 |
| OLFM3           | 0 | 0          | 0   | 1 |
| COL11A1         | 0 | 0          | 0   | 1 |
| AMY1A           | 0 | 0          | 0   | 1 |
| VAV3            | 0 | 0          | 0   | 1 |
| NBPF4           | 0 | 0          | 0   | 1 |

|            |   |             |     |   |
|------------|---|-------------|-----|---|
| HENMT1     | 0 | 0           | 0   | 1 |
| MYBPHL     | 0 | 0           | 0   | 1 |
| EPS8L3     | 0 | 0           | 0   | 1 |
| KCNA10     | 0 | 0           | 0   | 1 |
| KCNA2      | 0 | 0           | 0   | 1 |
| KCNA3      | 0 | 0           | 0   | 1 |
| PGCP1      | 0 | 0           | 0   | 1 |
| MIR4256    | 0 | 0           | 0   | 1 |
| LOC643441  | 0 | 0           | 0   | 1 |
| DENND2C    | 0 | 0.00239309  | inf | 1 |
| AMPD1      | 0 | 0.00391874  | inf | 1 |
| TSPAN2     | 0 | 0           | 0   | 1 |
| NGF        | 0 | 0           | 0   | 1 |
| SPAG17     | 0 | 0.000946588 | inf | 1 |
| HMGCS2     | 0 | 0           | 0   | 1 |
| REG4       | 0 | 0.00751981  | inf | 1 |
| ADAM30     | 0 | 0           | 0   | 1 |
| FCGR1B     | 0 | 0.0063487   | inf | 1 |
| PPIAL4B    | 0 | 0           | 0   | 1 |
| LOC653513  | 0 | 0.0134319   | inf | 1 |
| PDZK1P1    | 0 | 0           | 0   | 1 |
| LINC00624  | 0 | 0           | 0   | 1 |
| PDZK1P1    | 0 | 0           | 0   | 1 |
| MIR5087    | 0 | 0           | 0   | 1 |
| FLJ39739   | 0 | 0           | 0   | 1 |
| PPIAL4B    | 0 | 0           | 0   | 1 |
| PPIAL4D    | 0 | 0           | 0   | 1 |
| HIST2H3A   | 0 | 0           | 0   | 1 |
| HIST2H2AA3 | 0 | 0.0519648   | inf | 1 |
| HIST2H4A   | 0 | 0           | 0   | 1 |
| HORMAD1    | 0 | 0           | 0   | 1 |
| SELENBP1   | 0 | 0           | 0   | 1 |
| C2CD4D     | 0 | 0           | 0   | 1 |
| THEM5      | 0 | 0           | 0   | 1 |
| TCHHL1     | 0 | 0           | 0   | 1 |
| TCHH       | 0 | 0           | 0   | 1 |
| RPTN       | 0 | 0           | 0   | 1 |
| FLG2       | 0 | 0           | 0   | 1 |
| CRNN       | 0 | 0           | 0   | 1 |
| LCE3E      | 0 | 0           | 0   | 1 |
| LCE3D      | 0 | 0           | 0   | 1 |
| LCE3A      | 0 | 0           | 0   | 1 |
| SPRR2D     | 0 | 0.0369223   | inf | 1 |
| SPRR2A     | 0 | 0           | 0   | 1 |
| SPRR2B     | 0 | 0           | 0   | 1 |
| SPRR2E     | 0 | 0           | 0   | 1 |
| SPRR2F     | 0 | 0           | 0   | 1 |
| SPRR2C     | 0 | 0           | 0   | 1 |
| SPRR2G     | 0 | 0           | 0   | 1 |
| PGLYRP3    | 0 | 0           | 0   | 1 |
| PGLYRP4    | 0 | 0           | 0   | 1 |
| S100A12    | 0 | 0           | 0   | 1 |
| S100A8     | 0 | 0           | 0   | 1 |
| S100A7L2   | 0 | 0           | 0   | 1 |
| S100A7     | 0 | 0           | 0   | 1 |
| MIR190B    | 0 | 0           | 0   | 1 |
| SNORA42    | 0 | 0           | 0   | 1 |
| SCARNA4    | 0 | 0           | 0   | 1 |
| MIR9-1     | 0 | 0           | 0   | 1 |
| MIR765     | 0 | 0           | 0   | 1 |
| ETV3L      | 0 | 0.00647708  | inf | 1 |
| FCRL5      | 0 | 0           | 0   | 1 |
| FCRL4      | 0 | 0           | 0   | 1 |
| FCRL3      | 0 | 0           | 0   | 1 |
| FCRL2      | 0 | 0           | 0   | 1 |
| FCRL1      | 0 | 0           | 0   | 1 |
| CD5L       | 0 | 0           | 0   | 1 |
| LOC646268  | 0 | 0           | 0   | 1 |
| CD1B       | 0 | 0           | 0   | 1 |
| OR10T2     | 0 | 0           | 0   | 1 |
| OR10K2     | 0 | 0           | 0   | 1 |
| OR6Y1      | 0 | 0           | 0   | 1 |
| OR6P1      | 0 | 0           | 0   | 1 |
| OR10X1     | 0 | 0           | 0   | 1 |
| OR6K2      | 0 | 0           | 0   | 1 |
| OR6K3      | 0 | 0           | 0   | 1 |
| OR6N1      | 0 | 0           | 0   | 1 |
| OR6N2      | 0 | 0           | 0   | 1 |
| AIM2       | 0 | 0.00502997  | inf | 1 |

|              |   |            |     |   |
|--------------|---|------------|-----|---|
| LOC100131825 | 0 | 0          | 0   | 1 |
| OR10J3       | 0 | 0          | 0   | 1 |
| OR10J5       | 0 | 0          | 0   | 1 |
| CRP          | 0 | 0          | 0   | 1 |
| SLAMF9       | 0 | 0.0155469  | inf | 1 |
| SLAMF6       | 0 | 0          | 0   | 1 |
| SLAMF1       | 0 | 0          | 0   | 1 |
| CD48         | 0 | 0          | 0   | 1 |
| CD244        | 0 | 0          | 0   | 1 |
| ITLN1        | 0 | 0          | 0   | 1 |
| ITLN2        | 0 | 0          | 0   | 1 |
| FCGR3A       | 0 | 0          | 0   | 1 |
| FCGR3B       | 0 | 0          | 0   | 1 |
| SH2D1B       | 0 | 0.00746797 | inf | 1 |
| LOC100505795 | 0 | 0          | 0   | 1 |
| LMX1A        | 0 | 0          | 0   | 1 |
| LOC400794    | 0 | 0          | 0   | 1 |
| MIR921       | 0 | 0          | 0   | 1 |
| LOC100505918 | 0 | 0.00314297 | inf | 1 |
| XCL2         | 0 | 0          | 0   | 1 |
| DPT          | 0 | 0          | 0   | 1 |
| SELP         | 0 | 0          | 0   | 1 |
| SELL         | 0 | 0          | 0   | 1 |
| SELE         | 0 | 0          | 0   | 1 |
| MIR3119-1    | 0 | 0          | 0   | 1 |
| LOC284688    | 0 | 0          | 0   | 1 |
| MIR1295A     | 0 | 0          | 0   | 1 |
| MYOC         | 0 | 0          | 0   | 1 |
| DNM3OS       | 0 | 0          | 0   | 1 |
| TNFSF18      | 0 | 0          | 0   | 1 |
| SLC9C2       | 0 | 0          | 0   | 1 |
| SNORD81      | 0 | 0          | 0   | 1 |
| SNORD80      | 0 | 0          | 0   | 1 |
| SNORD79      | 0 | 0          | 0   | 1 |
| SNORD78      | 0 | 0          | 0   | 1 |
| SNORD44      | 0 | 440.519    | inf | 1 |
| SNORD77      | 0 | 0          | 0   | 1 |
| SNORD76      | 0 | 52.7029    | inf | 1 |
| SNORD75      | 0 | 0          | 0   | 1 |
| SNORD74      | 0 | 0          | 0   | 1 |
| TNR          | 0 | 0          | 0   | 1 |
| ASTN1        | 0 | 0          | 0   | 1 |
| MIR488       | 0 | 0          | 0   | 1 |
| LOC730102    | 0 | 0          | 0   | 1 |
| ANGPTL1      | 0 | 0          | 0   | 1 |
| MIR3121      | 0 | 0          | 0   | 1 |
| RGS8         | 0 | 0          | 0   | 1 |
| SHCBP1L      | 0 | 0          | 0   | 1 |
| NMNAT2       | 0 | 0          | 0   | 1 |
| NCF2         | 0 | 0.00423208 | inf | 1 |
| LOC100288079 | 0 | 0          | 0   | 1 |
| MIR548F1     | 0 | 0          | 0   | 1 |
| PTGS2        | 0 | 0          | 0   | 1 |
| FAM5C        | 0 | 0          | 0   | 1 |
| KCNT2        | 0 | 0          | 0   | 1 |
| MIR4735      | 0 | 0          | 0   | 1 |
| DENND1B      | 0 | 0.00443955 | inf | 1 |
| ATP6V1G3     | 0 | 0          | 0   | 1 |
| LOC100131234 | 0 | 0          | 0   | 1 |
| MIR181B1     | 0 | 0          | 0   | 1 |
| MIR181A1     | 0 | 0          | 0   | 1 |
| CACNA1S      | 0 | 0          | 0   | 1 |
| TNNT2        | 0 | 0          | 0   | 1 |
| LAD1         | 0 | 0.00923517 | inf | 1 |
| TNNI1        | 0 | 0          | 0   | 1 |
| RNU6-79      | 0 | 0          | 0   | 1 |
| MYBPH        | 0 | 0          | 0   | 1 |
| CHI3L1       | 0 | 0          | 0   | 1 |
| CHIT1        | 0 | 0          | 0   | 1 |
| FMOD         | 0 | 0          | 0   | 1 |
| LINC00303    | 0 | 0          | 0   | 1 |
| KLHDC8A      | 0 | 0          | 0   | 1 |
| MIR135B      | 0 | 0          | 0   | 1 |
| PM20D1       | 0 | 0          | 0   | 1 |
| SLC26A9      | 0 | 0          | 0   | 1 |
| C1orf186     | 0 | 0          | 0   | 1 |
| FAIM3        | 0 | 0          | 0   | 1 |
| FCAMR        | 0 | 0          | 0   | 1 |
| MIR29B2      | 0 | 0          | 0   | 1 |

|                 |   |            |     |   |
|-----------------|---|------------|-----|---|
| CD34            | 0 | 0          | 0   | 1 |
| IRF6            | 0 | 0          | 0   | 1 |
| ESRRG           | 0 | 0          | 0   | 1 |
| LOC728463       | 0 | 0          | 0   | 1 |
| SLC30A10        | 0 | 0          | 0   | 1 |
| MIR215          | 0 | 0          | 0   | 1 |
| MIR194-1        | 0 | 0          | 0   | 1 |
| MIR664.SNORA36B | 0 | 0          | 0   | 1 |
| C1orf140        | 0 | 0          | 0   | 1 |
| MIR320B2        | 0 | 0          | 0   | 1 |
| MIR4742         | 0 | 0          | 0   | 1 |
| LEFTY1          | 0 | 0.013861   | inf | 1 |
| LEFTY2          | 0 | 0          | 0   | 1 |
| ZNF847P         | 0 | 0          | 0   | 1 |
| WNT9A           | 0 | 0          | 0   | 1 |
| MIR5008         | 0 | 0          | 0   | 1 |
| HIST3H3         | 0 | 0          | 0   | 1 |
| PGBD5           | 0 | 0          | 0   | 1 |
| LOC149373       | 0 | 0          | 0   | 1 |
| SNRPD2P2        | 0 | 0.0170047  | inf | 1 |
| LINC00582       | 0 | 0          | 0   | 1 |
| DISC2           | 0 | 0.00419192 | inf | 1 |
| LOC100506795    | 0 | 0          | 0   | 1 |
| MIR4753         | 0 | 0          | 0   | 1 |
| MIR1537         | 0 | 0          | 0   | 1 |
| NID1            | 0 | 0          | 0   | 1 |
| MT1P2           | 0 | 0          | 0   | 1 |
| ZP4             | 0 | 0          | 0   | 1 |
| LOC339535       | 0 | 0          | 0   | 1 |
| GREM2           | 0 | 0          | 0   | 1 |
| RGS7            | 0 | 0          | 0   | 1 |
| PLD5            | 0 | 0          | 0   | 1 |
| LOC255654       | 0 | 0.0118305  | inf | 1 |
| MIR3916         | 0 | 0          | 0   | 1 |
| OR2B11          | 0 | 0          | 0   | 1 |
| OR2C3           | 0 | 0          | 0   | 1 |
| OR13G1          | 0 | 0          | 0   | 1 |
| OR6F1           | 0 | 0          | 0   | 1 |
| OR1C1           | 0 | 0          | 0   | 1 |
| OR14A16         | 0 | 0          | 0   | 1 |
| OR11L1          | 0 | 0          | 0   | 1 |
| OR2T33          | 0 | 0          | 0   | 1 |
| OR2T12          | 0 | 0          | 0   | 1 |
| OR2M7           | 0 | 0          | 0   | 1 |
| OR2T29          | 0 | 0          | 0   | 1 |
| OR2T34          | 0 | 0          | 0   | 1 |
| OR2T10          | 0 | 0          | 0   | 1 |
| OR2T11          | 0 | 0          | 0   | 1 |
| OR2T35          | 0 | 0          | 0   | 1 |
| OR2T27          | 0 | 0          | 0   | 1 |
| OR14I1          | 0 | 0          | 0   | 1 |
| LYPD8           | 0 | 0          | 0   | 1 |
| LINC00200       | 0 | 0          | 0   | 1 |
| ADARB2-AS1      | 0 | 0          | 0   | 1 |
| LINC00705       | 0 | 0          | 0   | 1 |
| AKR1E2          | 0 | 0          | 0   | 1 |
| AKR1C1          | 0 | 0.00752894 | inf | 1 |
| AKR1C4          | 0 | 0          | 0   | 1 |
| UCN3            | 0 | 0          | 0   | 1 |
| CALML3          | 0 | 0.0153789  | inf | 1 |
| MIR3155A        | 0 | 0          | 0   | 1 |
| LINC00707       | 0 | 0.00318588 | inf | 1 |
| GATA3           | 0 | 0          | 0   | 1 |
| ECHDC3          | 0 | 0          | 0   | 1 |
| MIR4480         | 0 | 0          | 0   | 1 |
| MIR1265         | 0 | 0          | 0   | 1 |
| ST8SIA6-AS1     | 0 | 0          | 0   | 1 |
| MIR511-1        | 0 | 0          | 0   | 1 |
| MRC1            | 0 | 0          | 0   | 1 |
| MIR511-2        | 0 | 0          | 0   | 1 |
| SLC39A12        | 0 | 0          | 0   | 1 |
| PLXDC2          | 0 | 0          | 0   | 1 |
| MIR4675         | 0 | 0          | 0   | 1 |
| NEBL-AS1        | 0 | 0          | 0   | 1 |
| LOC100130992    | 0 | 0          | 0   | 1 |
| SPAG6           | 0 | 0.00432151 | inf | 1 |
| ARMC3           | 0 | 0          | 0   | 1 |
| PTF1A           | 0 | 0          | 0   | 1 |
| MIR603          | 0 | 0          | 0   | 1 |



|                    |   |            |     |   |
|--------------------|---|------------|-----|---|
| MYO3A              | 0 | 0          | 0   | 1 |
| GAD2               | 0 | 0          | 0   | 1 |
| APBB1IP            | 0 | 0          | 0   | 1 |
| LINC00202-2        | 0 | 0          | 0   | 1 |
| MIR5586            | 0 | 0          | 0   | 1 |
| LYZL1              | 0 | 0          | 0   | 1 |
| ANKRD30A           | 0 | 0          | 0   | 1 |
| ACTR3BP5           | 0 | 0          | 0   | 1 |
| MIR5100            | 0 | 0          | 0   | 1 |
| ZNF32-AS3          | 0 | 0          | 0   | 1 |
| LINC00619          | 0 | 0          | 0   | 1 |
| LINC00840          | 0 | 0          | 0   | 1 |
| LINC00841          | 0 | 0          | 0   | 1 |
| LOC100130539       | 0 | 0          | 0   | 1 |
| TMEM72             | 0 | 0          | 0   | 1 |
| ANKRD30BP3         | 0 | 0          | 0   | 1 |
| MIR3156-1          | 0 | 0          | 0   | 1 |
| GLUD1P7            | 0 | 0.00616426 | inf | 1 |
| GPRIN2             | 0 | 0          | 0   | 1 |
| PPYR1              | 0 | 0          | 0   | 1 |
| BMS1P2             | 0 | 0          | 0   | 1 |
| FAM25C             | 0 | 0          | 0   | 1 |
| ANXA8              | 0 | 0          | 0   | 1 |
| FAM170B-AS1        | 0 | 0          | 0   | 1 |
| CHAT               | 0 | 0          | 0   | 1 |
| SLC18A3            | 0 | 0          | 0   | 1 |
| C10orf53           | 0 | 0          | 0   | 1 |
| MSMB               | 0 | 0.0223481  | inf | 1 |
| PRKG1              | 0 | 0          | 0   | 1 |
| MIR605             | 0 | 0          | 0   | 1 |
| DKK1               | 0 | 0          | 0   | 1 |
| BICC1              | 0 | 0          | 0   | 1 |
| PHYHIPL            | 0 | 0          | 0   | 1 |
| C10orf107          | 0 | 0          | 0   | 1 |
| MIR548AV           | 0 | 0          | 0   | 1 |
| ANXA2P3            | 0 | 0.00601094 | inf | 1 |
| LRRTM3             | 0 | 0          | 0   | 1 |
| SNORD98            | 0 | 0          | 0   | 1 |
| CHST3              | 0 | 0          | 0   | 1 |
| MIR4676            | 0 | 0          | 0   | 1 |
| OIT3               | 0 | 0.00501784 | inf | 1 |
| ZNF503-AS1         | 0 | 0          | 0   | 1 |
| SFTP A1            | 0 | 0          | 0   | 1 |
| LOC100288974,MBL1P | 0 | 0          | 0   | 1 |
| NRG3               | 0 | 0          | 0   | 1 |
| C10orf99           | 0 | 0          | 0   | 1 |
| CDHR1              | 0 | 0          | 0   | 1 |
| RGR                | 0 | 0          | 0   | 1 |
| LINC00858          | 0 | 0          | 0   | 1 |
| GRID1-AS1          | 0 | 0          | 0   | 1 |
| FAM25A             | 0 | 0          | 0   | 1 |
| MIR4678            | 0 | 0          | 0   | 1 |
| LIPJ               | 0 | 0          | 0   | 1 |
| LIPF               | 0 | 0          | 0   | 1 |
| LIPK               | 0 | 0          | 0   | 1 |
| LIPN               | 0 | 0          | 0   | 1 |
| LIPM               | 0 | 0          | 0   | 1 |
| MIR4679-1          | 0 | 0          | 0   | 1 |
| IFIT1B             | 0 | 0.00959234 | inf | 1 |
| LOC643529          | 0 | 0.00241264 | inf | 1 |
| LINC00502          | 0 | 0          | 0   | 1 |
| HHEX               | 0 | 0          | 0   | 1 |
| CYP26C1            | 0 | 0          | 0   | 1 |
| PDE6C              | 0 | 0.00242716 | inf | 1 |
| LG1                | 0 | 0          | 0   | 1 |
| CYP2C19            | 0 | 0          | 0   | 1 |
| C10orf129          | 0 | 0          | 0   | 1 |
| DNTT               | 0 | 0          | 0   | 1 |
| LOC100505540       | 0 | 0          | 0   | 1 |
| ANKRD2             | 0 | 0.0135494  | inf | 1 |
| MIR5692C2          | 0 | 0          | 0   | 1 |
| NKX2-3             | 0 | 0          | 0   | 1 |
| MIR608             | 0 | 0          | 0   | 1 |
| TLX1               | 0 | 0          | 0   | 1 |
| FLJ41350           | 0 | 0          | 0   | 1 |
| ELOVL3             | 0 | 0.00986231 | inf | 1 |
| MIR146B            | 0 | 0          | 0   | 1 |
| LOC729020          | 0 | 0          | 0   | 1 |
| INA                | 0 | 0          | 0   | 1 |

|                  |   |            |     |   |
|------------------|---|------------|-----|---|
| SORCS3           | 0 | 0          | 0   | 1 |
| RNU6-53          | 0 | 0          | 0   | 1 |
| RBM20            | 0 | 0          | 0   | 1 |
| TECTB            | 0 | 0          | 0   | 1 |
| MIR4295          | 0 | 0          | 0   | 1 |
| HABP2            | 0 | 0          | 0   | 1 |
| TDRD1            | 0 | 0          | 0   | 1 |
| VWA2             | 0 | 0          | 0   | 1 |
| ATRNL1           | 0 | 0          | 0   | 1 |
| CCDC172          | 0 | 0          | 0   | 1 |
| PNLIPRP3         | 0 | 0          | 0   | 1 |
| PNLIP            | 0 | 0          | 0   | 1 |
| PNLIPRP1         | 0 | 0          | 0   | 1 |
| KCNK18           | 0 | 0          | 0   | 1 |
| EMX2             | 0 | 0.00455198 | inf | 1 |
| MIR4681          | 0 | 0          | 0   | 1 |
| MIR4682          | 0 | 0          | 0   | 1 |
| PPAPDC1A         | 0 | 0          | 0   | 1 |
| MIR5694          | 0 | 0          | 0   | 1 |
| MIR3941          | 0 | 0          | 0   | 1 |
| ARMS2            | 0 | 0          | 0   | 1 |
| FAM24A           | 0 | 0          | 0   | 1 |
| GPR26            | 0 | 0          | 0   | 1 |
| LOC100169752     | 0 | 0          | 0   | 1 |
| MIR4484          | 0 | 56.9497    | inf | 1 |
| NPS              | 0 | 0          | 0   | 1 |
| FOXI2            | 0 | 0          | 0   | 1 |
| LOC399829        | 0 | 0          | 0   | 1 |
| GPR123           | 0 | 0          | 0   | 1 |
| UTF1             | 0 | 0          | 0   | 1 |
| VENTX            | 0 | 0.0140646  | inf | 1 |
| DUX2,DUX4,DUX4L2 | 0 | 0          | 0   | 1 |
| MIR5699          | 0 | 0          | 0   | 1 |
| ADARB2           | 0 | 0          | 0   | 1 |
| LINC00700        | 0 | 0          | 0   | 1 |
| LINC00701        | 0 | 0          | 0   | 1 |
| LINC00704        | 0 | 0.00597978 | inf | 1 |
| AKR1C6P          | 0 | 0          | 0   | 1 |
| AKR1C2           | 0 | 0          | 0   | 1 |
| AKR1CL1          | 0 | 0          | 0   | 1 |
| CALML5           | 0 | 0          | 0   | 1 |
| IL2RA            | 0 | 0          | 0   | 1 |
| MIR3155B         | 0 | 0          | 0   | 1 |
| GATA3-AS1        | 0 | 0          | 0   | 1 |
| LINC00710        | 0 | 0          | 0   | 1 |
| CELF2-AS2        | 0 | 0          | 0   | 1 |
| UCMA             | 0 | 0          | 0   | 1 |
| ITGA8            | 0 | 0          | 0   | 1 |
| ST8SIA6          | 0 | 0          | 0   | 1 |
| LOC100129213     | 0 | 0          | 0   | 1 |
| NEBL             | 0 | 0.00416223 | inf | 1 |
| C10orf113        | 0 | 0          | 0   | 1 |
| MIR1915          | 0 | 0          | 0   | 1 |
| C10orf67         | 0 | 0          | 0   | 1 |
| GPR158-AS1       | 0 | 0          | 0   | 1 |
| PTCHD3           | 0 | 0          | 0   | 1 |
| MKX              | 0 | 0          | 0   | 1 |
| LINC00837        | 0 | 0          | 0   | 1 |
| MIR604           | 0 | 0          | 0   | 1 |
| MIR938           | 0 | 0          | 0   | 1 |
| KIAA1462         | 0 | 0          | 0   | 1 |
| LYZL2            | 0 | 0          | 0   | 1 |
| LINC00838        | 0 | 0          | 0   | 1 |
| MTRNR2L7         | 0 | 0          | 0   | 1 |
| LOC441666        | 0 | 0          | 0   | 1 |
| CXCL12           | 0 | 0          | 0   | 1 |
| ZFAND4           | 0 | 0          | 0   | 1 |
| PTPN20A,PTPN20B  | 0 | 0          | 0   | 1 |
| LINC00842        | 0 | 0          | 0   | 1 |
| ANXA8            | 0 | 0.00528372 | inf | 1 |
| FAM25C           | 0 | 0          | 0   | 1 |
| AGAP9            | 0 | 0          | 0   | 1 |
| RBP3             | 0 | 0.00341111 | inf | 1 |
| GDF10            | 0 | 0          | 0   | 1 |
| PTPN20A,PTPN20B  | 0 | 0          | 0   | 1 |
| FRMPD2P1         | 0 | 0          | 0   | 1 |
| FAM25C           | 0 | 0          | 0   | 1 |
| FRMPD2           | 0 | 0          | 0   | 1 |
| LRRC18           | 0 | 0          | 0   | 1 |

|              |   |                 |   |   |
|--------------|---|-----------------|---|---|
| MIR4294      | 0 | 0               | 0 | 1 |
| FAM170B      | 0 | 0               | 0 | 1 |
| C10orf128    | 0 | 0               | 0 | 1 |
| DRGX         | 0 | 0               | 0 | 1 |
| OGDHL        | 0 | 0               | 0 | 1 |
| PRKG1-AS1    | 0 | 0.00333916 inf  |   | 1 |
| MBL2         | 0 | 0               | 0 | 1 |
| PCDH15       | 0 | 0.000963153 inf |   | 1 |
| MIR3924      | 0 | 0               | 0 | 1 |
| C10orf40     | 0 | 0               | 0 | 1 |
| TMEM26       | 0 | 0               | 0 | 1 |
| MIR1296      | 0 | 0               | 0 | 1 |
| CTNNA3       | 0 | 0               | 0 | 1 |
| NEUROG3      | 0 | 0               | 0 | 1 |
| NPFFR1       | 0 | 0               | 0 | 1 |
| TBATA        | 0 | 0               | 0 | 1 |
| C10orf105    | 0 | 0               | 0 | 1 |
| C10orf54     | 0 | 0               | 0 | 1 |
| MIR1256      | 0 | 0               | 0 | 1 |
| PLA2G12B     | 0 | 0               | 0 | 1 |
| DUPD1        | 0 | 0               | 0 | 1 |
| SFTP2A2      | 0 | 0               | 0 | 1 |
| SFTPD        | 0 | 0               | 0 | 1 |
| DYDC1        | 0 | 0               | 0 | 1 |
| LRIT2        | 0 | 0               | 0 | 1 |
| LRIT1        | 0 | 0               | 0 | 1 |
| MIR346       | 0 | 0               | 0 | 1 |
| LOC728218    | 0 | 0               | 0 | 1 |
| RNLS         | 0 | 0               | 0 | 1 |
| ANKRD22      | 0 | 0               | 0 | 1 |
| MIR4679-2    | 0 | 0               | 0 | 1 |
| CH25H        | 0 | 0               | 0 | 1 |
| SLC16A12     | 0 | 0               | 0 | 1 |
| MIR107       | 0 | 0               | 0 | 1 |
| HTR7         | 0 | 0               | 0 | 1 |
| PPP1R3C      | 0 | 0               | 0 | 1 |
| RBP4         | 0 | 0               | 0 | 1 |
| LOC100128054 | 0 | 0               | 0 | 1 |
| CYP2C8       | 0 | 0               | 0 | 1 |
| PDLIM1       | 0 | 0               | 0 | 1 |
| MIR3157      | 0 | 0               | 0 | 1 |
| OPALIN       | 0 | 0               | 0 | 1 |
| SFRP5        | 0 | 0.0470867 inf   |   | 1 |
| CRTAC1       | 0 | 0               | 0 | 1 |
| MIR4685      | 0 | 0               | 0 | 1 |
| PKD2L1       | 0 | 0               | 0 | 1 |
| TLX1NB       | 0 | 0               | 0 | 1 |
| LBX1         | 0 | 0               | 0 | 1 |
| MIR3158-2    | 0 | 0               | 0 | 1 |
| PITX3        | 0 | 0               | 0 | 1 |
| CALHM3       | 0 | 0               | 0 | 1 |
| MIR609       | 0 | 0               | 0 | 1 |
| MIR4482-1    | 0 | 0               | 0 | 1 |
| SORCS1       | 0 | 0               | 0 | 1 |
| GUCY2GP      | 0 | 0               | 0 | 1 |
| MIR4483      | 0 | 0               | 0 | 1 |
| VAX1         | 0 | 0               | 0 | 1 |
| MIR3663      | 0 | 0               | 0 | 1 |
| PRLHR        | 0 | 0               | 0 | 1 |
| SNORA19      | 0 | 0               | 0 | 1 |
| C10orf120    | 0 | 0               | 0 | 1 |
| NKX1-2       | 0 | 0               | 0 | 1 |
| MIR4296      | 0 | 0               | 0 | 1 |
| TEX36        | 0 | 0               | 0 | 1 |
| ADAM12       | 0 | 0               | 0 | 1 |
| LINC00601    | 0 | 0               | 0 | 1 |
| C10orf90     | 0 | 0               | 0 | 1 |
| CLRN3        | 0 | 0               | 0 | 1 |
| MIR4297      | 0 | 0               | 0 | 1 |
| MIR378C      | 0 | 0               | 0 | 1 |
| NKX6-2       | 0 | 0               | 0 | 1 |
| TTC40        | 0 | 0               | 0 | 1 |
| MIR202       | 0 | 0               | 0 | 1 |
| CALY         | 0 | 0.0261038 inf   |   | 1 |
| FUOM         | 0 | 0               | 0 | 1 |
| MIR3944      | 0 | 0               | 0 | 1 |
| FRG2B        | 0 | 0               | 0 | 1 |
| SCGB1C1      | 0 | 0               | 0 | 1 |
| ODF3         | 0 | 0               | 0 | 1 |

|               |   |               |   |   |
|---------------|---|---------------|---|---|
| MUC2          | 0 | 0             | 0 | 1 |
| LOC338651     | 0 | 0.0117373 inf |   | 1 |
| KRTAP5-5      | 0 | 0             | 0 | 1 |
| FAM99A        | 0 | 0             | 0 | 1 |
| SYT8          | 0 | 0.0284912 inf |   | 1 |
| TNNI2         | 0 | 0             | 0 | 1 |
| TNNT3         | 0 | 0             | 0 | 1 |
| IGF2-AS       | 0 | 0             | 0 | 1 |
| MIR4686       | 0 | 0             | 0 | 1 |
| TSPAN32       | 0 | 0.0110119 inf |   | 1 |
| MRGPRG-AS1    | 0 | 0             | 0 | 1 |
| ART1          | 0 | 0             | 0 | 1 |
| OR52K2        | 0 | 0             | 0 | 1 |
| OR52K1        | 0 | 0             | 0 | 1 |
| OR52M1        | 0 | 0             | 0 | 1 |
| OR52I2        | 0 | 0             | 0 | 1 |
| OR51D1        | 0 | 0             | 0 | 1 |
| OR51E1        | 0 | 0             | 0 | 1 |
| OR51F2        | 0 | 0             | 0 | 1 |
| OR51T1        | 0 | 0             | 0 | 1 |
| OR51A7        | 0 | 0             | 0 | 1 |
| MMP26         | 0 | 0             | 0 | 1 |
| OR51L1        | 0 | 0             | 0 | 1 |
| OR52J3        | 0 | 0             | 0 | 1 |
| OR51B6        | 0 | 0             | 0 | 1 |
| OR51M1        | 0 | 0.0150734 inf |   | 1 |
| OR51Q1        | 0 | 0             | 0 | 1 |
| OR51I2        | 0 | 0             | 0 | 1 |
| OR52D1        | 0 | 0             | 0 | 1 |
| OR52B6        | 0 | 0             | 0 | 1 |
| OR56B1        | 0 | 0             | 0 | 1 |
| OR52N4        | 0 | 0             | 0 | 1 |
| OR52N2        | 0 | 0             | 0 | 1 |
| OR52E4        | 0 | 0             | 0 | 1 |
| OR56A3        | 0 | 0             | 0 | 1 |
| OR52W1        | 0 | 0.0125848 inf |   | 1 |
| CCKBR         | 0 | 0             | 0 | 1 |
| OR2AG1        | 0 | 0             | 0 | 1 |
| OR10A5        | 0 | 0             | 0 | 1 |
| OR10A2        | 0 | 0.0167755 inf |   | 1 |
| OR10A4        | 0 | 0             | 0 | 1 |
| OR2D3         | 0 | 0.0396355 inf |   | 1 |
| SYT9          | 0 | 0             | 0 | 1 |
| OR5E1P        | 0 | 0             | 0 | 1 |
| TUB           | 0 | 0             | 0 | 1 |
| MRV11-AS1     | 0 | 0             | 0 | 1 |
| RASSF10       | 0 | 0             | 0 | 1 |
| OR7E14P       | 0 | 0             | 0 | 1 |
| MYOD1         | 0 | 0             | 0 | 1 |
| MRGPRX4       | 0 | 0             | 0 | 1 |
| SAA1          | 0 | 0             | 0 | 1 |
| MIR4486       | 0 | 0             | 0 | 1 |
| SLC6A5        | 0 | 0             | 0 | 1 |
| NELL1         | 0 | 0             | 0 | 1 |
| ANO5          | 0 | 0             | 0 | 1 |
| SLC17A6       | 0 | 0             | 0 | 1 |
| LUZP2         | 0 | 0             | 0 | 1 |
| ANO3          | 0 | 0             | 0 | 1 |
| FIBIN         | 0 | 0             | 0 | 1 |
| BBOX1         | 0 | 0             | 0 | 1 |
| MIR610        | 0 | 0             | 0 | 1 |
| FSHB          | 0 | 0             | 0 | 1 |
| DKFZp686K1684 | 0 | 0             | 0 | 1 |
| WT1-AS        | 0 | 0             | 0 | 1 |
| EHF           | 0 | 0             | 0 | 1 |
| MIR1343       | 0 | 0             | 0 | 1 |
| MIR3973       | 0 | 0             | 0 | 1 |
| MIR670        | 0 | 0             | 0 | 1 |
| MIR129-2      | 0 | 0             | 0 | 1 |
| ACCSL         | 0 | 0             | 0 | 1 |
| LOC221122     | 0 | 0             | 0 | 1 |
| LOC100507384  | 0 | 0             | 0 | 1 |
| GYLTL1B       | 0 | 0             | 0 | 1 |
| MIR4688       | 0 | 0             | 0 | 1 |
| MIR3160-2     | 0 | 0             | 0 | 1 |
| OR4B1         | 0 | 0             | 0 | 1 |
| OR4X2         | 0 | 0             | 0 | 1 |
| OR4X1         | 0 | 0             | 0 | 1 |
| OR4S1         | 0 | 0             | 0 | 1 |

|             |   |            |     |   |
|-------------|---|------------|-----|---|
| OR4C3       | 0 | 0          | 0   | 1 |
| OR4A47      | 0 | 0          | 0   | 1 |
| TRIM49B     | 0 | 0          | 0   | 1 |
| LOC440040   | 0 | 0          | 0   | 1 |
| OR4C13      | 0 | 0          | 0   | 1 |
| LOC646813   | 0 | 0          | 0   | 1 |
| OR4C46      | 0 | 0          | 0   | 1 |
| TRIM48      | 0 | 0          | 0   | 1 |
| OR4A16      | 0 | 0          | 0   | 1 |
| OR4A15      | 0 | 0          | 0   | 1 |
| OR4C15      | 0 | 0          | 0   | 1 |
| OR4C16      | 0 | 0          | 0   | 1 |
| OR4P4       | 0 | 0          | 0   | 1 |
| OR4S2       | 0 | 0          | 0   | 1 |
| OR4C6       | 0 | 0          | 0   | 1 |
| OR5D13      | 0 | 0          | 0   | 1 |
| OR5D14      | 0 | 0          | 0   | 1 |
| OR5L1       | 0 | 0          | 0   | 1 |
| OR5D18      | 0 | 0          | 0   | 1 |
| OR5L2       | 0 | 0          | 0   | 1 |
| OR5D16      | 0 | 0          | 0   | 1 |
| TRIM51      | 0 | 0          | 0   | 1 |
| OR5AS1      | 0 | 0          | 0   | 1 |
| OR8I2       | 0 | 0          | 0   | 1 |
| OR8H2       | 0 | 0          | 0   | 1 |
| OR8H3       | 0 | 0          | 0   | 1 |
| OR5J2       | 0 | 0          | 0   | 1 |
| OR5T3       | 0 | 0          | 0   | 1 |
| OR5T1       | 0 | 0          | 0   | 1 |
| OR8K3       | 0 | 0          | 0   | 1 |
| OR8K1       | 0 | 0          | 0   | 1 |
| OR8J1       | 0 | 0          | 0   | 1 |
| OR8U1,OR8U8 | 0 | 0          | 0   | 1 |
| OR5AR1      | 0 | 0          | 0   | 1 |
| OR9G9       | 0 | 0          | 0   | 1 |
| OR5AK2      | 0 | 0          | 0   | 1 |
| OR5AK4P     | 0 | 0          | 0   | 1 |
| LRRC55      | 0 | 0          | 0   | 1 |
| MIR130A     | 0 | 0          | 0   | 1 |
| OR9Q1       | 0 | 0          | 0   | 1 |
| OR6Q1       | 0 | 0          | 0   | 1 |
| OR9Q2       | 0 | 0          | 0   | 1 |
| OR1S1       | 0 | 0          | 0   | 1 |
| GLYATL1     | 0 | 0          | 0   | 1 |
| OR5AN1      | 0 | 0          | 0   | 1 |
| OR5A1       | 0 | 0          | 0   | 1 |
| OR4D6       | 0 | 0          | 0   | 1 |
| OR4D10      | 0 | 0          | 0   | 1 |
| OR4D11      | 0 | 0          | 0   | 1 |
| OR4D9       | 0 | 0          | 0   | 1 |
| PLAC1L      | 0 | 0          | 0   | 1 |
| MS4A3       | 0 | 0          | 0   | 1 |
| MS4A2       | 0 | 0          | 0   | 1 |
| MS4A4A      | 0 | 0          | 0   | 1 |
| MS4A6E      | 0 | 0          | 0   | 1 |
| MS4A7       | 0 | 0          | 0   | 1 |
| MS4A14      | 0 | 0          | 0   | 1 |
| MS4A5       | 0 | 0          | 0   | 1 |
| MS4A1       | 0 | 0          | 0   | 1 |
| MS4A12      | 0 | 0          | 0   | 1 |
| MS4A13      | 0 | 0          | 0   | 1 |
| LINC00301   | 0 | 0          | 0   | 1 |
| MS4A8B      | 0 | 0          | 0   | 1 |
| MS4A15      | 0 | 0          | 0   | 1 |
| ZP1         | 0 | 0.00699207 | inf | 1 |
| CD6         | 0 | 0          | 0   | 1 |
| PGA3        | 0 | 0          | 0   | 1 |
| PGA4        | 0 | 0          | 0   | 1 |
| PGA5        | 0 | 0          | 0   | 1 |
| MIR4488     | 0 | 0          | 0   | 1 |
| LRRC10B     | 0 | 0          | 0   | 1 |
| SCGB1D1     | 0 | 0          | 0   | 1 |
| SCGB2A1     | 0 | 0.0472996  | inf | 1 |
| SCGB1D2     | 0 | 0          | 0   | 1 |
| SCGB2A2     | 0 | 0          | 0   | 1 |
| SCGB1A1     | 0 | 0          | 0   | 1 |
| SLC22A10    | 0 | 0          | 0   | 1 |
| LGALS12     | 0 | 0          | 0   | 1 |
| MIR1237     | 0 | 0          | 0   | 1 |

|                     |   |                 |   |   |
|---------------------|---|-----------------|---|---|
| SLC22A12            | 0 | 0               | 0 | 1 |
| SPDYC               | 0 | 0               | 0 | 1 |
| MIR548AR            | 0 | 0               | 0 | 1 |
| MIR4690             | 0 | 0               | 0 | 1 |
| MIR4489             | 0 | 0               | 0 | 1 |
| NPAS4               | 0 | 0               | 0 | 1 |
| MIR4691             | 0 | 0               | 0 | 1 |
| ANO1                | 0 | 0               | 0 | 1 |
| MIR548K             | 0 | 0               | 0 | 1 |
| DEFB108B            | 0 | 0               | 0 | 1 |
| FOLR2               | 0 | 0               | 0 | 1 |
| MIR4692             | 0 | 0               | 0 | 1 |
| SLCO2B1             | 0 | 0               | 0 | 1 |
| TPBGL               | 0 | 0               | 0 | 1 |
| MOGAT2              | 0 | 0               | 0 | 1 |
| B3GNT6              | 0 | 0               | 0 | 1 |
| THRSP               | 0 | 0.00875787 inf  |   | 1 |
| CCDC83              | 0 | 0.00414954 inf  |   | 1 |
| GRM5-AS1            | 0 | 0               | 0 | 1 |
| TYR                 | 0 | 0               | 0 | 1 |
| FOLH1B              | 0 | 0               | 0 | 1 |
| TRIM77              | 0 | 0               | 0 | 1 |
| MIR5692A1           | 0 | 0               | 0 | 1 |
| TRIM53AP            | 0 | 0               | 0 | 1 |
| TRIM49D1P,TRIM49D2P | 0 | 0               | 0 | 1 |
| TRIM64              | 0 | 0               | 0 | 1 |
| TRIM49C             | 0 | 0               | 0 | 1 |
| UBTFL1              | 0 | 0               | 0 | 1 |
| FAT3                | 0 | 0.000389193 inf |   | 1 |
| MTNR1B              | 0 | 0               | 0 | 1 |
| CCDC67              | 0 | 0               | 0 | 1 |
| FOLR4               | 0 | 0               | 0 | 1 |
| LOC643037           | 0 | 0               | 0 | 1 |
| KDM4E               | 0 | 0               | 0 | 1 |
| MIR1260B            | 0 | 0               | 0 | 1 |
| CNTN5               | 0 | 0               | 0 | 1 |
| LOC101054525        | 0 | 0               | 0 | 1 |
| WTAPP1              | 0 | 0               | 0 | 1 |
| MIR4693             | 0 | 0               | 0 | 1 |
| DDI1                | 0 | 0               | 0 | 1 |
| LOC643923           | 0 | 0               | 0 | 1 |
| RAB39A              | 0 | 0               | 0 | 1 |
| C11orf87            | 0 | 0               | 0 | 1 |
| C11orf53            | 0 | 0               | 0 | 1 |
| MIR4491             | 0 | 0               | 0 | 1 |
| MIR34B              | 0 | 0               | 0 | 1 |
| MIR34C              | 0 | 0               | 0 | 1 |
| C11orf88            | 0 | 0               | 0 | 1 |
| LAYN                | 0 | 0               | 0 | 1 |
| CLDN25              | 0 | 0               | 0 | 1 |
| HTR3B               | 0 | 0               | 0 | 1 |
| HTR3A               | 0 | 0               | 0 | 1 |
| ZBTB16              | 0 | 0               | 0 | 1 |
| NXPE2               | 0 | 0               | 0 | 1 |
| APOC3               | 0 | 0               | 0 | 1 |
| TMPRSS4             | 0 | 0               | 0 | 1 |
| CD3E                | 0 | 0               | 0 | 1 |
| MIR4492             | 0 | 0               | 0 | 1 |
| FOXR1               | 0 | 0               | 0 | 1 |
| PDZD3               | 0 | 0               | 0 | 1 |
| GRIK4               | 0 | 0               | 0 | 1 |
| SORL1               | 0 | 0               | 0 | 1 |
| LOC341056           | 0 | 0               | 0 | 1 |
| OR8D4               | 0 | 0               | 0 | 1 |
| OR4D5               | 0 | 0               | 0 | 1 |
| OR10G4              | 0 | 0               | 0 | 1 |
| OR10G9              | 0 | 0               | 0 | 1 |
| OR10G8              | 0 | 0               | 0 | 1 |
| OR8G2               | 0 | 0               | 0 | 1 |
| OR8G1,OR8G5         | 0 | 0               | 0 | 1 |
| OR8A1               | 0 | 0               | 0 | 1 |
| PANX3               | 0 | 0               | 0 | 1 |
| HEPN1               | 0 | 0               | 0 | 1 |
| PKNOX2              | 0 | 0               | 0 | 1 |
| PATE1               | 0 | 0               | 0 | 1 |
| PATE3               | 0 | 0               | 0 | 1 |
| PATE4               | 0 | 0.00409001 inf  |   | 1 |
| KIRREL3-AS2         | 0 | 0               | 0 | 1 |
| KIRREL3-AS3         | 0 | 0               | 0 | 1 |

|                     |   |                |   |   |
|---------------------|---|----------------|---|---|
| FLI1                | 0 | 0              | 0 | 1 |
| ADAMTS15            | 0 | 0              | 0 | 1 |
| C11orf44            | 0 | 0              | 0 | 1 |
| LOC100128239        | 0 | 0              | 0 | 1 |
| GLB1L3              | 0 | 0.00746255 inf |   | 1 |
| MIR210              | 0 | 7.23137 inf    |   | 1 |
| KRTAP5-2            | 0 | 0              | 0 | 1 |
| KRTAP5-3            | 0 | 0              | 0 | 1 |
| KRTAP5-4            | 0 | 0.0116474 inf  |   | 1 |
| FAM99B              | 0 | 0              | 0 | 1 |
| MIR4298             | 0 | 0              | 0 | 1 |
| MIR483              | 0 | 0              | 0 | 1 |
| TH                  | 0 | 0              | 0 | 1 |
| ASCL2               | 0 | 0              | 0 | 1 |
| C11orf21            | 0 | 0              | 0 | 1 |
| MRGPRG              | 0 | 0              | 0 | 1 |
| MRGPRE              | 0 | 0              | 0 | 1 |
| OR52B4              | 0 | 0              | 0 | 1 |
| C11orf40            | 0 | 0              | 0 | 1 |
| OR51E2              | 0 | 0              | 0 | 1 |
| OR51F1              | 0 | 0              | 0 | 1 |
| OR52R1              | 0 | 0              | 0 | 1 |
| OR51S1              | 0 | 0              | 0 | 1 |
| OR51G2              | 0 | 0              | 0 | 1 |
| OR51G1              | 0 | 0              | 0 | 1 |
| OR51A4              | 0 | 0              | 0 | 1 |
| OR51A2              | 0 | 0              | 0 | 1 |
| OR52E2              | 0 | 0              | 0 | 1 |
| OR52A5              | 0 | 0              | 0 | 1 |
| OR52A1              | 0 | 0              | 0 | 1 |
| OR51V1              | 0 | 0              | 0 | 1 |
| HBB                 | 0 | 0              | 0 | 1 |
| HBD                 | 0 | 0.033962 inf   |   | 1 |
| OR51B2              | 0 | 0              | 0 | 1 |
| UBQLN3              | 0 | 0              | 0 | 1 |
| OR52H1              | 0 | 0              | 0 | 1 |
| OR52N5              | 0 | 0              | 0 | 1 |
| OR52N1              | 0 | 0              | 0 | 1 |
| OR52E6              | 0 | 0              | 0 | 1 |
| OR52E8              | 0 | 0              | 0 | 1 |
| OR56A5              | 0 | 0              | 0 | 1 |
| OR52L1              | 0 | 0              | 0 | 1 |
| OR56A4              | 0 | 0              | 0 | 1 |
| OR56A1              | 0 | 0              | 0 | 1 |
| OR52B2              | 0 | 0              | 0 | 1 |
| OVCH2               | 0 | 0              | 0 | 1 |
| OR5P2               | 0 | 0              | 0 | 1 |
| OR5P3               | 0 | 0              | 0 | 1 |
| LOC283299           | 0 | 0              | 0 | 1 |
| OR10A6              | 0 | 0              | 0 | 1 |
| OR10A3              | 0 | 0              | 0 | 1 |
| NLRP10              | 0 | 0              | 0 | 1 |
| RIC3                | 0 | 0.00154295 inf |   | 1 |
| LMO1                | 0 | 0              | 0 | 1 |
| ASCL3               | 0 | 0              | 0 | 1 |
| MIR5691             | 0 | 0              | 0 | 1 |
| LYVE1               | 0 | 0              | 0 | 1 |
| MIR4299             | 0 | 0              | 0 | 1 |
| PTH                 | 0 | 0              | 0 | 1 |
| CALCA               | 0 | 0              | 0 | 1 |
| ABCC8               | 0 | 0              | 0 | 1 |
| SAA3P               | 0 | 0              | 0 | 1 |
| SAA2,SAA2-SAA4,SAA4 | 0 | 0.00310405 inf |   | 1 |
| PTPN5               | 0 | 0.00413403 inf |   | 1 |
| MRGPRX1             | 0 | 0              | 0 | 1 |
| MRGPRX2             | 0 | 0              | 0 | 1 |
| CSRP3               | 0 | 0              | 0 | 1 |
| NAV2-AS5            | 0 | 0              | 0 | 1 |
| NAV2-AS4            | 0 | 0              | 0 | 1 |
| MIR4694             | 0 | 0              | 0 | 1 |
| DBX1                | 0 | 0              | 0 | 1 |
| CCDC179             | 0 | 0              | 0 | 1 |
| MUC15               | 0 | 0              | 0 | 1 |
| KCNA4               | 0 | 0              | 0 | 1 |
| WT1                 | 0 | 0              | 0 | 1 |
| SLC1A2              | 0 | 0              | 0 | 1 |
| RAG2                | 0 | 0.00255613 inf |   | 1 |
| LRRC4C              | 0 | 0.00248289 inf |   | 1 |
| LOC100507205        | 0 | 0              | 0 | 1 |

|              |   |            |     |   |
|--------------|---|------------|-----|---|
| HNRNPKP3     | 0 | 0          | 0   | 1 |
| LOC100507300 | 0 | 0          | 0   | 1 |
| CHST1        | 0 | 0.00921027 | inf | 1 |
| MIR3160-1    | 0 | 0          | 0   | 1 |
| MIR5582      | 0 | 0          | 0   | 1 |
| SNORD67      | 0 | 0          | 0   | 1 |
| MYBPC3       | 0 | 0          | 0   | 1 |
| OR4C45       | 0 | 0          | 0   | 1 |
| TRIM64C      | 0 | 0          | 0   | 1 |
| FOLH1        | 0 | 0          | 0   | 1 |
| OR4C12       | 0 | 0          | 0   | 1 |
| LOC441601    | 0 | 0          | 0   | 1 |
| OR4A5        | 0 | 0          | 0   | 1 |
| TRIM51HP     | 0 | 0          | 0   | 1 |
| OR4C11       | 0 | 0          | 0   | 1 |
| OR5W2        | 0 | 0          | 0   | 1 |
| OR5I1        | 0 | 0          | 0   | 1 |
| OR10AG1      | 0 | 0          | 0   | 1 |
| OR7E5P       | 0 | 0          | 0   | 1 |
| OR5F1        | 0 | 0          | 0   | 1 |
| OR8J3        | 0 | 0          | 0   | 1 |
| OR8K5        | 0 | 0          | 0   | 1 |
| OR5T2        | 0 | 0          | 0   | 1 |
| OR8H1        | 0 | 0          | 0   | 1 |
| OR5R1        | 0 | 0          | 0   | 1 |
| OR5M9        | 0 | 0          | 0   | 1 |
| OR5M3        | 0 | 0          | 0   | 1 |
| OR5M8        | 0 | 0          | 0   | 1 |
| OR5M11       | 0 | 0          | 0   | 1 |
| OR5M10       | 0 | 0          | 0   | 1 |
| OR5M1        | 0 | 0          | 0   | 1 |
| OR5AP2       | 0 | 0          | 0   | 1 |
| OR9G4        | 0 | 0          | 0   | 1 |
| APLNR        | 0 | 0          | 0   | 1 |
| PRG3         | 0 | 0          | 0   | 1 |
| OR9I1        | 0 | 0          | 0   | 1 |
| OR1S2        | 0 | 0          | 0   | 1 |
| OR10Q1       | 0 | 0          | 0   | 1 |
| OR10W1       | 0 | 0          | 0   | 1 |
| OR5B17       | 0 | 0          | 0   | 1 |
| OR5B3        | 0 | 0          | 0   | 1 |
| OR5B2        | 0 | 0          | 0   | 1 |
| OR5B12       | 0 | 0          | 0   | 1 |
| OR5B21       | 0 | 0          | 0   | 1 |
| GLYAT        | 0 | 0.00471553 | inf | 1 |
| GLYATL2      | 0 | 0          | 0   | 1 |
| LOC283194    | 0 | 0          | 0   | 1 |
| MPEG1        | 0 | 0.00173259 | inf | 1 |
| OR5A2        | 0 | 0          | 0   | 1 |
| MIR3162      | 0 | 0          | 0   | 1 |
| OR10V1       | 0 | 0          | 0   | 1 |
| GIF          | 0 | 0          | 0   | 1 |
| TCN1         | 0 | 0.00700731 | inf | 1 |
| MS4A6A       | 0 | 0          | 0   | 1 |
| DKFZP434K028 | 0 | 0          | 0   | 1 |
| MIR1908      | 0 | 0          | 0   | 1 |
| SCGB1D4      | 0 | 0          | 0   | 1 |
| SNORD31      | 0 | 0          | 0   | 1 |
| SNORD30      | 0 | 127.583    | inf | 1 |
| SNORD28      | 0 | 0          | 0   | 1 |
| SNORD27      | 0 | 169.905    | inf | 1 |
| SNORD26      | 0 | 0          | 0   | 1 |
| SNORD25      | 0 | 0          | 0   | 1 |
| SLC22A6      | 0 | 0          | 0   | 1 |
| SLC22A8      | 0 | 0          | 0   | 1 |
| SLC22A24     | 0 | 0          | 0   | 1 |
| SLC22A25     | 0 | 0          | 0   | 1 |
| MIR3680-2    | 0 | 0          | 0   | 1 |
| HRASLS5      | 0 | 0          | 0   | 1 |
| MIR192       | 0 | 0          | 0   | 1 |
| MIR194-2     | 0 | 0          | 0   | 1 |
| C11orf85     | 0 | 0          | 0   | 1 |
| GAL3ST3      | 0 | 0.00401455 | inf | 1 |
| CD248        | 0 | 0          | 0   | 1 |
| CTSF         | 0 | 0          | 0   | 1 |
| GPR152       | 0 | 0          | 0   | 1 |
| CABP2        | 0 | 0          | 0   | 1 |
| TBX10        | 0 | 0.0105218  | inf | 1 |
| ALDH3B2      | 0 | 0          | 0   | 1 |



|                        |   |                |   |   |
|------------------------|---|----------------|---|---|
| MRGPRD                 | 0 | 0              | 0 | 1 |
| MRGPRF                 | 0 | 0.00829479 inf |   | 1 |
| FGF19                  | 0 | 0              | 0 | 1 |
| FGF4                   | 0 | 0              | 0 | 1 |
| FGF3                   | 0 | 0              | 0 | 1 |
| MIR3664                | 0 | 0              | 0 | 1 |
| KRTAP5-11              | 0 | 0              | 0 | 1 |
| MIR3165                | 0 | 0              | 0 | 1 |
| PHOX2A                 | 0 | 0              | 0 | 1 |
| MIR139                 | 0 | 0              | 0 | 1 |
| P4HA3                  | 0 | 0              | 0 | 1 |
| CHRD2                  | 0 | 0              | 0 | 1 |
| MIR4696                | 0 | 0              | 0 | 1 |
| OR2AT4                 | 0 | 0              | 0 | 1 |
| MIR326                 | 0 | 0              | 0 | 1 |
| LOC283214              | 0 | 0              | 0 | 1 |
| GUCY2EP                | 0 | 0              | 0 | 1 |
| GDPD4                  | 0 | 0              | 0 | 1 |
| RNU6-83                | 0 | 0              | 0 | 1 |
| TENM4                  | 0 | 0              | 0 | 1 |
| MIR708                 | 0 | 0              | 0 | 1 |
| MIR5579                | 0 | 0              | 0 | 1 |
| MIR4300                | 0 | 0              | 0 | 1 |
| FAM181B                | 0 | 0              | 0 | 1 |
| SNORA70E               | 0 | 0              | 0 | 1 |
| OR7E2P                 | 0 | 0              | 0 | 1 |
| GRM5                   | 0 | 0              | 0 | 1 |
| TRIM49                 | 0 | 0              | 0 | 1 |
| TRIM64B                | 0 | 0              | 0 | 1 |
| TRIM49D1P,TRIM49D2P    | 0 | 0              | 0 | 1 |
| TRIM53AP               | 0 | 0              | 0 | 1 |
| MIR4490                | 0 | 0              | 0 | 1 |
| SNORD6                 | 0 | 0              | 0 | 1 |
| SNORD5                 | 0 | 0              | 0 | 1 |
| MIR1304                | 0 | 0              | 0 | 1 |
| JRKL-AS1               | 0 | 0              | 0 | 1 |
| PGR                    | 0 | 0              | 0 | 1 |
| MIR3920                | 0 | 0              | 0 | 1 |
| MMP7                   | 0 | 0              | 0 | 1 |
| MMP20                  | 0 | 0              | 0 | 1 |
| MMP27                  | 0 | 0              | 0 | 1 |
| MMP8                   | 0 | 0              | 0 | 1 |
| MMP12                  | 0 | 0              | 0 | 1 |
| MMP13                  | 0 | 0              | 0 | 1 |
| PDGFD                  | 0 | 0              | 0 | 1 |
| CASP12                 | 0 | 0              | 0 | 1 |
| CARD17                 | 0 | 0              | 0 | 1 |
| GUCY1A2                | 0 | 0              | 0 | 1 |
| ARHGAP20               | 0 | 0              | 0 | 1 |
| LOC100132078           | 0 | 0              | 0 | 1 |
| BTG4                   | 0 | 0              | 0 | 1 |
| LOC100288346           | 0 | 0              | 0 | 1 |
| DRD2                   | 0 | 0              | 0 | 1 |
| MIR4301                | 0 | 0              | 0 | 1 |
| NXPE1                  | 0 | 0              | 0 | 1 |
| NXPE4                  | 0 | 0              | 0 | 1 |
| LOC283143              | 0 | 0              | 0 | 1 |
| APOA5                  | 0 | 0              | 0 | 1 |
| APOA4                  | 0 | 0              | 0 | 1 |
| DSCAML1                | 0 | 0.0025094 inf  |   | 1 |
| FXYD2,FXYD6,FXYD6-FXYI | 0 | 0              | 0 | 1 |
| TMPRSS4-AS1            | 0 | 0              | 0 | 1 |
| MFRP                   | 0 | 0.00470944 inf |   | 1 |
| LOC649133              | 0 | 0              | 0 | 1 |
| MIR125B1               | 0 | 0              | 0 | 1 |
| BLID                   | 0 | 0              | 0 | 1 |
| MIRLET7A2              | 0 | 0              | 0 | 1 |
| MIR100                 | 0 | 0              | 0 | 1 |
| BSX                    | 0 | 0              | 0 | 1 |
| MIR4493                | 0 | 0              | 0 | 1 |
| SCN3B                  | 0 | 0.0015693 inf  |   | 1 |
| OR6X1                  | 0 | 0              | 0 | 1 |
| OR6M1                  | 0 | 0              | 0 | 1 |
| TMEM225                | 0 | 0              | 0 | 1 |
| OR6T1                  | 0 | 0              | 0 | 1 |
| OR10S1                 | 0 | 0              | 0 | 1 |
| OR10G7                 | 0 | 0              | 0 | 1 |
| OR8D1                  | 0 | 0              | 0 | 1 |
| OR8D2                  | 0 | 0              | 0 | 1 |

|              |   |               |   |   |
|--------------|---|---------------|---|---|
| OR8B2        | 0 | 0             | 0 | 1 |
| OR8B3        | 0 | 0             | 0 | 1 |
| OR8B4        | 0 | 0             | 0 | 1 |
| OR8B8        | 0 | 0             | 0 | 1 |
| OR8B12       | 0 | 0             | 0 | 1 |
| PATE2        | 0 | 0             | 0 | 1 |
| KIRREL3      | 0 | 0.0226888 inf |   | 1 |
| MIR3167      | 0 | 0             | 0 | 1 |
| FLI1-AS1     | 0 | 0             | 0 | 1 |
| SPATA19      | 0 | 0             | 0 | 1 |
| IQSEC3       | 0 | 0             | 0 | 1 |
| CACNA1C-IT3  | 0 | 0             | 0 | 1 |
| GALNT8       | 0 | 0             | 0 | 1 |
| KCNA1        | 0 | 0             | 0 | 1 |
| KCNA5        | 0 | 0             | 0 | 1 |
| NTF3         | 0 | 0             | 0 | 1 |
| PLEKHG6      | 0 | 0.0142403 inf |   | 1 |
| MIR200C      | 0 | 0             | 0 | 1 |
| MIR141       | 0 | 0             | 0 | 1 |
| ACSM4        | 0 | 0             | 0 | 1 |
| DPPA3        | 0 | 0             | 0 | 1 |
| NANOGNB      | 0 | 0             | 0 | 1 |
| CLEC6A       | 0 | 0             | 0 | 1 |
| RIMKLB       | 0 | 0             | 0 | 1 |
| KLRF1        | 0 | 0             | 0 | 1 |
| KLRF2        | 0 | 0             | 0 | 1 |
| CLEC12A      | 0 | 0             | 0 | 1 |
| CLEC12B      | 0 | 0             | 0 | 1 |
| CLEC9A       | 0 | 0             | 0 | 1 |
| TMEM52B      | 0 | 0             | 0 | 1 |
| MIR1244-2    | 0 | 0             | 0 | 1 |
| MIR613       | 0 | 0             | 0 | 1 |
| MIR614       | 0 | 0             | 0 | 1 |
| PDE6H        | 0 | 0             | 0 | 1 |
| SKP1P2       | 0 | 0             | 0 | 1 |
| MIR3974      | 0 | 0             | 0 | 1 |
| PIK3C2G      | 0 | 0             | 0 | 1 |
| CAPZA3       | 0 | 0             | 0 | 1 |
| LOC100506393 | 0 | 0             | 0 | 1 |
| PDE3A        | 0 | 0             | 0 | 1 |
| MIR920       | 0 | 0             | 0 | 1 |
| LRMP         | 0 | 0             | 0 | 1 |
| LOC101055625 | 0 | 0             | 0 | 1 |
| C12orf40     | 0 | 0             | 0 | 1 |
| LRRK2        | 0 | 0             | 0 | 1 |
| CNTN1        | 0 | 0             | 0 | 1 |
| MIR4698      | 0 | 0             | 0 | 1 |
| PCED1B       | 0 | 0             | 0 | 1 |
| C12orf68     | 0 | 0             | 0 | 1 |
| ANP32D       | 0 | 0             | 0 | 1 |
| C12orf54     | 0 | 0             | 0 | 1 |
| WNT1         | 0 | 0             | 0 | 1 |
| AQP2         | 0 | 0             | 0 | 1 |
| AQP5         | 0 | 0             | 0 | 1 |
| TMPRSS12     | 0 | 0             | 0 | 1 |
| HIGD1C       | 0 | 0             | 0 | 1 |
| ANKRD33      | 0 | 0             | 0 | 1 |
| HOXC12       | 0 | 0             | 0 | 1 |
| MIR196A2     | 0 | 0             | 0 | 1 |
| MIR615       | 0 | 0             | 0 | 1 |
| MIR148B      | 0 | 0             | 0 | 1 |
| MUCL1        | 0 | 0             | 0 | 1 |
| NEUROD4      | 0 | 0             | 0 | 1 |
| OR9K2        | 0 | 0             | 0 | 1 |
| OR10A7       | 0 | 0             | 0 | 1 |
| OR6C74       | 0 | 0             | 0 | 1 |
| OR6C1        | 0 | 0             | 0 | 1 |
| OR6C3        | 0 | 0             | 0 | 1 |
| OR6C75       | 0 | 0             | 0 | 1 |
| OR6C65       | 0 | 0             | 0 | 1 |
| OR6C76       | 0 | 0             | 0 | 1 |
| OR6C2        | 0 | 0             | 0 | 1 |
| OR6C68       | 0 | 0             | 0 | 1 |
| OR6C4        | 0 | 0             | 0 | 1 |
| OR2AP1       | 0 | 0             | 0 | 1 |
| OR10P1       | 0 | 0             | 0 | 1 |
| MIR1228      | 0 | 0             | 0 | 1 |
| ARHGEF25     | 0 | 0             | 0 | 1 |
| SLC26A10     | 0 | 0             | 0 | 1 |

|                |   |            |     |   |
|----------------|---|------------|-----|---|
| MIRLET71       | 0 | 0          | 0   | 1 |
| MIR548C        | 0 | 0          | 0   | 1 |
| FLJ41278       | 0 | 0          | 0   | 1 |
| MIR3913-2      | 0 | 0          | 0   | 1 |
| TPH2           | 0 | 0          | 0   | 1 |
| TRHDE          | 0 | 0          | 0   | 1 |
| MIR1252        | 0 | 0          | 0   | 1 |
| MIR5692B       | 0 | 0          | 0   | 1 |
| OTOGL          | 0 | 0          | 0   | 1 |
| PTPRQ          | 0 | 0          | 0   | 1 |
| MYF6           | 0 | 0.0104066  | inf | 1 |
| MYF5           | 0 | 0          | 0   | 1 |
| ACSS3          | 0 | 0          | 0   | 1 |
| MIR4699        | 0 | 0          | 0   | 1 |
| LRR1Q1         | 0 | 0          | 0   | 1 |
| ALX1           | 0 | 0          | 0   | 1 |
| LINC00615      | 0 | 0          | 0   | 1 |
| CLLU1          | 0 | 0          | 0   | 1 |
| C12orf74       | 0 | 0          | 0   | 1 |
| MIR5700        | 0 | 0          | 0   | 1 |
| KRT19P2,MIR492 | 0 | 0          | 0   | 1 |
| MIR331         | 0 | 0          | 0   | 1 |
| MIR3685        | 0 | 0          | 0   | 1 |
| PGAM1P5        | 0 | 0          | 0   | 1 |
| RMST           | 0 | 0          | 0   | 1 |
| MIR1251        | 0 | 0          | 0   | 1 |
| MIR135A2       | 0 | 0          | 0   | 1 |
| FAM71C         | 0 | 0          | 0   | 1 |
| MIR1827        | 0 | 0          | 0   | 1 |
| NR1H4          | 0 | 0          | 0   | 1 |
| ANO4           | 0 | 0          | 0   | 1 |
| SPIC           | 0 | 0          | 0   | 1 |
| MYBPC1         | 0 | 0          | 0   | 1 |
| ASCL1          | 0 | 0          | 0   | 1 |
| MIR3922        | 0 | 0          | 0   | 1 |
| RFX4           | 0 | 0          | 0   | 1 |
| ASCL4          | 0 | 0          | 0   | 1 |
| WSCD2          | 0 | 0          | 0   | 1 |
| DAO            | 0 | 0          | 0   | 1 |
| MIR4497        | 0 | 0          | 0   | 1 |
| CCDC63         | 0 | 0          | 0   | 1 |
| LOC100131138   | 0 | 0.0758594  | inf | 1 |
| RPH3A          | 0 | 0          | 0   | 1 |
| TBX5-AS1       | 0 | 0          | 0   | 1 |
| HSPB8          | 0 | 0.00504149 | inf | 1 |
| CCDC60         | 0 | 0          | 0   | 1 |
| TMEM233        | 0 | 0          | 0   | 1 |
| P2RX7          | 0 | 0.00277866 | inf | 1 |
| MIR3908        | 0 | 0          | 0   | 1 |
| LOC100128554   | 0 | 0          | 0   | 1 |
| FLJ37505       | 0 | 0          | 0   | 1 |
| TMEM132C       | 0 | 0          | 0   | 1 |
| MIR3612        | 0 | 0          | 0   | 1 |
| FZD10          | 0 | 0          | 0   | 1 |
| PIWIL1         | 0 | 0          | 0   | 1 |
| GPR133         | 0 | 0          | 0   | 1 |
| MMP17          | 0 | 0          | 0   | 1 |
| FAM138D        | 0 | 0          | 0   | 1 |
| LOC574538      | 0 | 0          | 0   | 1 |
| MIR3649        | 0 | 0          | 0   | 1 |
| LOC100271702   | 0 | 0          | 0   | 1 |
| CACNA1C-AS4    | 0 | 0          | 0   | 1 |
| CACNA1C-AS1    | 0 | 0          | 0   | 1 |
| LOC283440      | 0 | 0          | 0   | 1 |
| FGF6           | 0 | 0          | 0   | 1 |
| APOBEC1        | 0 | 0          | 0   | 1 |
| GDF3           | 0 | 0          | 0   | 1 |
| CLEC4C         | 0 | 0          | 0   | 1 |
| CLEC4E         | 0 | 0          | 0   | 1 |
| AICDA          | 0 | 0          | 0   | 1 |
| PZP            | 0 | 0          | 0   | 1 |
| A2MP1          | 0 | 0          | 0   | 1 |
| MIR1244-1      | 0 | 0          | 0   | 1 |
| KLRB1          | 0 | 0          | 0   | 1 |
| CLECL1         | 0 | 0          | 0   | 1 |
| CD69           | 0 | 0          | 0   | 1 |
| CLEC2A         | 0 | 0          | 0   | 1 |
| CLEC1B         | 0 | 0          | 0   | 1 |
| CLEC1A         | 0 | 0          | 0   | 1 |

|              |   |            |     |   |
|--------------|---|------------|-----|---|
| CLEC7A       | 0 | 0.00936349 | inf | 1 |
| OLR1         | 0 | 0.00688827 | inf | 1 |
| KLRC3        | 0 | 0          | 0   | 1 |
| KLRC1        | 0 | 0          | 0   | 1 |
| TAS2R7       | 0 | 0          | 0   | 1 |
| TAS2R8       | 0 | 0          | 0   | 1 |
| TAS2R13      | 0 | 0          | 0   | 1 |
| TAS2R50      | 0 | 0.0121311  | inf | 1 |
| TAS2R30      | 0 | 0.03694    | inf | 1 |
| TAS2R42      | 0 | 0          | 0   | 1 |
| PRB3         | 0 | 0          | 0   | 1 |
| PRB4         | 0 | 0          | 0   | 1 |
| PRB1         | 0 | 0          | 0   | 1 |
| PRB2         | 0 | 0          | 0   | 1 |
| RNU6-19      | 0 | 0          | 0   | 1 |
| GRIN2B       | 0 | 0          | 0   | 1 |
| ART4         | 0 | 0          | 0   | 1 |
| MGP          | 0 | 0          | 0   | 1 |
| ERP27        | 0 | 0          | 0   | 1 |
| REERG        | 0 | 0          | 0   | 1 |
| SLC15A5      | 0 | 0          | 0   | 1 |
| RERGL        | 0 | 0          | 0   | 1 |
| PLCZ1        | 0 | 0          | 0   | 1 |
| SLCO1A2      | 0 | 0.00102227 | inf | 1 |
| KCNJ8        | 0 | 0          | 0   | 1 |
| SOX5         | 0 | 0          | 0   | 1 |
| LINC00477    | 0 | 0          | 0   | 1 |
| C12orf77     | 0 | 0          | 0   | 1 |
| MIR4302      | 0 | 0          | 0   | 1 |
| LOC100506451 | 0 | 0          | 0   | 1 |
| MANSC4       | 0 | 0.00755231 | inf | 1 |
| OVCH1        | 0 | 0          | 0   | 1 |
| RNU6-78      | 0 | 0          | 0   | 1 |
| SYT10        | 0 | 0          | 0   | 1 |
| CPNE8        | 0 | 0          | 0   | 1 |
| ADAMTS20     | 0 | 0.0015791  | inf | 1 |
| DBX2         | 0 | 0          | 0   | 1 |
| RNY5         | 0 | 0          | 0   | 1 |
| AMIGO2       | 0 | 0          | 0   | 1 |
| PCED1B-AS1   | 0 | 0.00742998 | inf | 1 |
| OR10AD1      | 0 | 0          | 0   | 1 |
| MIR4701      | 0 | 0          | 0   | 1 |
| DHH          | 0 | 0.0575319  | inf | 1 |
| C1QL4        | 0 | 0          | 0   | 1 |
| LOC283332    | 0 | 0          | 0   | 1 |
| MIR1293      | 0 | 0          | 0   | 1 |
| KRT85        | 0 | 0          | 0   | 1 |
| KRT84        | 0 | 0          | 0   | 1 |
| KRT82        | 0 | 0          | 0   | 1 |
| KRT75        | 0 | 0          | 0   | 1 |
| KRT6B        | 0 | 0          | 0   | 1 |
| KRT6C        | 0 | 0          | 0   | 1 |
| KRT6A        | 0 | 0          | 0   | 1 |
| KRT71        | 0 | 0          | 0   | 1 |
| KRT74        | 0 | 0          | 0   | 1 |
| KRT72        | 0 | 0          | 0   | 1 |
| KRT73        | 0 | 0          | 0   | 1 |
| KRT2         | 0 | 0          | 0   | 1 |
| KRT1         | 0 | 0          | 0   | 1 |
| KRT77        | 0 | 0          | 0   | 1 |
| KRT76        | 0 | 0          | 0   | 1 |
| KRT3         | 0 | 0          | 0   | 1 |
| KRT78        | 0 | 0          | 0   | 1 |
| GTSF1        | 0 | 0          | 0   | 1 |
| PPP1R1A      | 0 | 0          | 0   | 1 |
| GLYCAM1      | 0 | 0          | 0   | 1 |
| LACRT        | 0 | 0          | 0   | 1 |
| OR6C6        | 0 | 0          | 0   | 1 |
| OR6C70       | 0 | 0          | 0   | 1 |
| SNORD59B     | 0 | 0          | 0   | 1 |
| SNORD59A     | 0 | 0          | 0   | 1 |
| B4GALNT1     | 0 | 0          | 0   | 1 |
| MIR26A2      | 0 | 0          | 0   | 1 |
| AVPR1A       | 0 | 0          | 0   | 1 |
| C12orf56     | 0 | 0          | 0   | 1 |
| WIF1         | 0 | 0          | 0   | 1 |
| IFNG         | 0 | 0          | 0   | 1 |
| IL26         | 0 | 0          | 0   | 1 |
| IL22         | 0 | 0          | 0   | 1 |

|              |   |            |     |   |
|--------------|---|------------|-----|---|
| SNORA70G     | 0 | 0          | 0   | 1 |
| MIR1279      | 0 | 0          | 0   | 1 |
| MIR3913-1    | 0 | 0          | 0   | 1 |
| TSPAN8       | 0 | 0          | 0   | 1 |
| TRHDE-AS1    | 0 | 0          | 0   | 1 |
| LOC100507377 | 0 | 0          | 0   | 1 |
| KCNC2        | 0 | 0          | 0   | 1 |
| LIN7A        | 0 | 0          | 0   | 1 |
| MIR617       | 0 | 0          | 0   | 1 |
| MIR618       | 0 | 0          | 0   | 1 |
| PPFIA2       | 0 | 0          | 0   | 1 |
| SLC6A15      | 0 | 0          | 0   | 1 |
| TSPAN19      | 0 | 0          | 0   | 1 |
| RASSF9       | 0 | 0          | 0   | 1 |
| MGAT4C       | 0 | 0          | 0   | 1 |
| MIR548AL     | 0 | 0          | 0   | 1 |
| MKRN9P       | 0 | 0          | 0   | 1 |
| LOC728084    | 0 | 0          | 0   | 1 |
| CCER1        | 0 | 0          | 0   | 1 |
| EPYC         | 0 | 0          | 0   | 1 |
| KERA         | 0 | 0          | 0   | 1 |
| DCN          | 0 | 0          | 0   | 1 |
| CLLU1OS      | 0 | 0          | 0   | 1 |
| LOC643339    | 0 | 0          | 0   | 1 |
| MIR4303      | 0 | 0          | 0   | 1 |
| SLC9A7P1     | 0 | 0          | 0   | 1 |
| SLC5A8       | 0 | 0          | 0   | 1 |
| IGF1         | 0 | 0.00483491 | inf | 1 |
| PAH          | 0 | 0          | 0   | 1 |
| C12orf42     | 0 | 0          | 0   | 1 |
| LOC100287944 | 0 | 0          | 0   | 1 |
| LOC728739    | 0 | 0          | 0   | 1 |
| CMKLR1       | 0 | 0.00162579 | inf | 1 |
| RASAL1       | 0 | 0          | 0   | 1 |
| LHX5         | 0 | 0          | 0   | 1 |
| TBX5         | 0 | 0          | 0   | 1 |
| MIR620       | 0 | 0          | 0   | 1 |
| MIR4472-2    | 0 | 0          | 0   | 1 |
| KSR2         | 0 | 0          | 0   | 1 |
| LOC144742    | 0 | 0          | 0   | 1 |
| MIR4498      | 0 | 0          | 0   | 1 |
| MORN3        | 0 | 0          | 0   | 1 |
| IL31         | 0 | 0          | 0   | 1 |
| HCAR3        | 0 | 0          | 0   | 1 |
| HCAR1        | 0 | 0          | 0   | 1 |
| MIR4304      | 0 | 0          | 0   | 1 |
| LOC400084    | 0 | 0          | 0   | 1 |
| LOC440117    | 0 | 0          | 0   | 1 |
| TMEM132D     | 0 | 0          | 0   | 1 |
| LOC100190940 | 0 | 0          | 0   | 1 |
| FLJ31485     | 0 | 0          | 0   | 1 |
| LRCOL1       | 0 | 0          | 0   | 1 |
| ANHX         | 0 | 0          | 0   | 1 |
| LINC00442    | 0 | 0          | 0   | 1 |
| RNU6-52      | 0 | 0          | 0   | 1 |
| LINC00421    | 0 | 0          | 0   | 1 |
| SGCG         | 0 | 0          | 0   | 1 |
| LINC00327    | 0 | 0          | 0   | 1 |
| TNFRSF19     | 0 | 0          | 0   | 1 |
| MIR2276      | 0 | 0          | 0   | 1 |
| RNF17        | 0 | 0          | 0   | 1 |
| ATP8A2       | 0 | 0          | 0   | 1 |
| SNORD102     | 0 | 0          | 0   | 1 |
| GSX1         | 0 | 0          | 0   | 1 |
| LINC00544    | 0 | 0          | 0   | 1 |
| LINC00398    | 0 | 0          | 0   | 1 |
| MEDAG        | 0 | 0          | 0   | 1 |
| TEX26        | 0 | 0          | 0   | 1 |
| RXFP2        | 0 | 0          | 0   | 1 |
| EEF1DP3      | 0 | 0          | 0   | 1 |
| KL           | 0 | 0          | 0   | 1 |
| SPG20OS      | 0 | 0          | 0   | 1 |
| CCNA1        | 0 | 0          | 0   | 1 |
| SERTM1       | 0 | 0          | 0   | 1 |
| LINC00547    | 0 | 0.00210777 | inf | 1 |
| LINC00366    | 0 | 0          | 0   | 1 |
| LINC00332    | 0 | 0          | 0   | 1 |
| RGCC         | 0 | 0          | 0   | 1 |
| TNFSF11      | 0 | 0          | 0   | 1 |

|                       |   |                |   |   |
|-----------------------|---|----------------|---|---|
| FAM216B               | 0 | 0              | 0 | 1 |
| DNAJC15               | 0 | 0              | 0 | 1 |
| LINC00284             | 0 | 0              | 0 | 1 |
| SERP2                 | 0 | 0              | 0 | 1 |
| SPERT                 | 0 | 0              | 0 | 1 |
| CYSLTR2               | 0 | 0              | 0 | 1 |
| MLNR                  | 0 | 0.0240852 inf  |   | 1 |
| ARL11                 | 0 | 0.00247986 inf |   | 1 |
| FAM124A               | 0 | 0.0026969 inf  |   | 1 |
| MIR4703               | 0 | 0              | 0 | 1 |
| CCDC70                | 0 | 0              | 0 | 1 |
| MIR759                | 0 | 0              | 0 | 1 |
| OLFM4                 | 0 | 0              | 0 | 1 |
| LINC00558             | 0 | 0              | 0 | 1 |
| MIR5007               | 0 | 0              | 0 | 1 |
| PRR20B                | 0 | 0              | 0 | 1 |
| PRR20D                | 0 | 0              | 0 | 1 |
| PRR20E                | 0 | 0              | 0 | 1 |
| PRR20A                | 0 | 0              | 0 | 1 |
| PRR20A                | 0 | 0              | 0 | 1 |
| PCDH17                | 0 | 0              | 0 | 1 |
| DIAPH3-AS1            | 0 | 0              | 0 | 1 |
| DIAPH3-AS2            | 0 | 0              | 0 | 1 |
| PCDH9-AS2             | 0 | 0              | 0 | 1 |
| PCDH9-AS3             | 0 | 0              | 0 | 1 |
| ATXN8OS               | 0 | 0              | 0 | 1 |
| LINC00348             | 0 | 0              | 0 | 1 |
| LINC00381             | 0 | 0              | 0 | 1 |
| LINC00347             | 0 | 0              | 0 | 1 |
| BTF3P11               | 0 | 0              | 0 | 1 |
| IRG1                  | 0 | 0              | 0 | 1 |
| MYCBP2-AS1            | 0 | 0              | 0 | 1 |
| SECL                  | 0 | 0.00283037 inf |   | 1 |
| SLAIN1                | 0 | 0              | 0 | 1 |
| LINC00446             | 0 | 0              | 0 | 1 |
| POU4F1-AS1            | 0 | 0.0037211 inf  |   | 1 |
| LINC00333             | 0 | 0              | 0 | 1 |
| LINC00351             | 0 | 0              | 0 | 1 |
| SLITRK5               | 0 | 0              | 0 | 1 |
| LINC00433             | 0 | 0              | 0 | 1 |
| MIR622                | 0 | 0              | 0 | 1 |
| CLDN10                | 0 | 0              | 0 | 1 |
| HS6ST3                | 0 | 0              | 0 | 1 |
| MIR3170               | 0 | 0              | 0 | 1 |
| FKSG29                | 0 | 0.0239506 inf  |   | 1 |
| MIR623                | 0 | 0              | 0 | 1 |
| MIR4306               | 0 | 0              | 0 | 1 |
| NALCN-AS1             | 0 | 0              | 0 | 1 |
| ITGBL1                | 0 | 0              | 0 | 1 |
| FGF14-AS2             | 0 | 0              | 0 | 1 |
| DAOA                  | 0 | 0              | 0 | 1 |
| LINC00343             | 0 | 0              | 0 | 1 |
| LINC00551             | 0 | 0              | 0 | 1 |
| LINC00443             | 0 | 0              | 0 | 1 |
| SOX1                  | 0 | 0              | 0 | 1 |
| SPACA7                | 0 | 0              | 0 | 1 |
| C13orf35              | 0 | 0              | 0 | 1 |
| F7                    | 0 | 0              | 0 | 1 |
| GRK1                  | 0 | 0              | 0 | 1 |
| TMEM255B              | 0 | 0              | 0 | 1 |
| TUBA3C                | 0 | 0              | 0 | 1 |
| ANKRD26P3             | 0 | 0              | 0 | 1 |
| GJB2                  | 0 | 0              | 0 | 1 |
| GJB6                  | 0 | 0              | 0 | 1 |
| MIR4499               | 0 | 0              | 0 | 1 |
| LINC00424             | 0 | 0              | 0 | 1 |
| BASP1P1               | 0 | 0              | 0 | 1 |
| SPATA13-AS1           | 0 | 0              | 0 | 1 |
| AMER2                 | 0 | 0              | 0 | 1 |
| GPR12                 | 0 | 0              | 0 | 1 |
| PRHOXNB               | 0 | 0              | 0 | 1 |
| FLT3                  | 0 | 0              | 0 | 1 |
| LINC00297             | 0 | 0              | 0 | 1 |
| TEX26-AS1             | 0 | 0              | 0 | 1 |
| LINC00423             | 0 | 0              | 0 | 1 |
| LINC00457             | 0 | 0              | 0 | 1 |
| MAB21L1               | 0 | 0              | 0 | 1 |
| DCLK1                 | 0 | 0.00170522 inf |   | 1 |
| CCDC169,CCDC169-SOHLI | 0 | 0              | 0 | 1 |

|              |   |             |     |   |
|--------------|---|-------------|-----|---|
| SPG20        | 0 | 0           | 0   | 1 |
| CSNK1A1L     | 0 | 0           | 0   | 1 |
| POSTN        | 0 | 0           | 0   | 1 |
| TRPC4        | 0 | 0           | 0   | 1 |
| STOML3       | 0 | 0           | 0   | 1 |
| LHFP         | 0 | 0           | 0   | 1 |
| MIR4305      | 0 | 0           | 0   | 1 |
| LINC00548    | 0 | 0           | 0   | 1 |
| MIR320D1     | 0 | 0           | 0   | 1 |
| EPST11       | 0 | 0           | 0   | 1 |
| SMIM2-IT1    | 0 | 0           | 0   | 1 |
| FAM194B      | 0 | 0           | 0   | 1 |
| CPB2         | 0 | 0           | 0   | 1 |
| KIAA0226L    | 0 | 0           | 0   | 1 |
| HTR2A        | 0 | 0           | 0   | 1 |
| LINC00462    | 0 | 0           | 0   | 1 |
| MIR3613      | 0 | 0           | 0   | 1 |
| MIR16-1      | 0 | 0           | 0   | 1 |
| MIR15A       | 0 | 0           | 0   | 1 |
| GUCY1B2      | 0 | 0           | 0   | 1 |
| MIR5693      | 0 | 0           | 0   | 1 |
| MIR1297      | 0 | 0           | 0   | 1 |
| MIR3169      | 0 | 0           | 0   | 1 |
| PCDH20       | 0 | 0           | 0   | 1 |
| PCDH9        | 0 | 0           | 0   | 1 |
| LINC00550    | 0 | 0           | 0   | 1 |
| KLHL1        | 0 | 0           | 0   | 1 |
| CTAGE11P     | 0 | 0.00275215  | inf | 1 |
| MIR3665      | 0 | 0           | 0   | 1 |
| EDNRB        | 0 | 0.0132786   | inf | 1 |
| POU4F1       | 0 | 0           | 0   | 1 |
| LINC00331    | 0 | 0           | 0   | 1 |
| NDFIP2-AS1   | 0 | 0           | 0   | 1 |
| SLITRK1      | 0 | 0           | 0   | 1 |
| SLITRK6      | 0 | 0           | 0   | 1 |
| MIR4500HG    | 0 | 0           | 0   | 1 |
| MIR4500      | 0 | 0           | 0   | 1 |
| LINC00353    | 0 | 0           | 0   | 1 |
| LINC00559    | 0 | 0           | 0   | 1 |
| LINC00410    | 0 | 0           | 0   | 1 |
| LINC00379    | 0 | 0           | 0   | 1 |
| GPC5-AS1     | 0 | 0           | 0   | 1 |
| GPC6-AS2     | 0 | 0           | 0   | 1 |
| SOX21        | 0 | 0           | 0   | 1 |
| CLDN10-AS1   | 0 | 0           | 0   | 1 |
| LINC00359    | 0 | 0           | 0   | 1 |
| OXGR1        | 0 | 0           | 0   | 1 |
| RNF113B      | 0 | 0.00952686  | inf | 1 |
| MIR548AN     | 0 | 0           | 0   | 1 |
| GPR183       | 0 | 0           | 0   | 1 |
| PCCA-AS1     | 0 | 0           | 0   | 1 |
| NALCN        | 0 | 0           | 0   | 1 |
| FGF14        | 0 | 0           | 0   | 1 |
| MIR2681      | 0 | 0           | 0   | 1 |
| MIR4705      | 0 | 0           | 0   | 1 |
| FGF14-IT1    | 0 | 0           | 0   | 1 |
| METTL21C     | 0 | 0.0089142   | inf | 1 |
| CCDC168      | 0 | 0.000723498 | inf | 1 |
| SLC10A2      | 0 | 0.00221633  | inf | 1 |
| MIR548AS     | 0 | 0           | 0   | 1 |
| DAOA-AS1     | 0 | 0           | 0   | 1 |
| FAM155A      | 0 | 0           | 0   | 1 |
| MYO16-AS1    | 0 | 0           | 0   | 1 |
| COL4A2-AS1   | 0 | 0           | 0   | 1 |
| ATP4B        | 0 | 0           | 0   | 1 |
| LINC00552    | 0 | 0           | 0   | 1 |
| OR11H12      | 0 | 0           | 0   | 1 |
| POTEG        | 0 | 0           | 0   | 1 |
| LOC101101776 | 0 | 0           | 0   | 1 |
| OR4Q3        | 0 | 0           | 0   | 1 |
| OR4M1        | 0 | 0           | 0   | 1 |
| OR4N2        | 0 | 0           | 0   | 1 |
| OR4K2        | 0 | 0           | 0   | 1 |
| OR4K5        | 0 | 0           | 0   | 1 |
| OR4K1        | 0 | 0           | 0   | 1 |
| OR4K15       | 0 | 0           | 0   | 1 |
| OR4L1        | 0 | 0           | 0   | 1 |
| OR4K17       | 0 | 0           | 0   | 1 |
| OR4N5        | 0 | 0           | 0   | 1 |

|             |   |            |     |   |
|-------------|---|------------|-----|---|
| OR11G2      | 0 | 0          | 0   | 1 |
| OR11H6      | 0 | 0          | 0   | 1 |
| OR11H4      | 0 | 0          | 0   | 1 |
| RNASE10     | 0 | 0          | 0   | 1 |
| EDDM3A      | 0 | 0          | 0   | 1 |
| EDDM3B      | 0 | 0          | 0   | 1 |
| RNASE6      | 0 | 0          | 0   | 1 |
| RNASE2      | 0 | 0          | 0   | 1 |
| TPPP2       | 0 | 0          | 0   | 1 |
| RNASE8      | 0 | 0          | 0   | 1 |
| OR4E2       | 0 | 0          | 0   | 1 |
| PSMB11      | 0 | 0          | 0   | 1 |
| IL25        | 0 | 0          | 0   | 1 |
| CMTM5       | 0 | 0          | 0   | 1 |
| CPNE6       | 0 | 0          | 0   | 1 |
| MIR4307     | 0 | 0          | 0   | 1 |
| LINC00645   | 0 | 0          | 0   | 1 |
| FOXG1       | 0 | 0          | 0   | 1 |
| IGBP1P1     | 0 | 0          | 0   | 1 |
| INSM2       | 0 | 0          | 0   | 1 |
| LINC00609   | 0 | 0          | 0   | 1 |
| SSTR1       | 0 | 0          | 0   | 1 |
| MIA2        | 0 | 0          | 0   | 1 |
| LRFN5       | 0 | 0          | 0   | 1 |
| SNORD127    | 0 | 0          | 0   | 1 |
| PTGDR       | 0 | 0          | 0   | 1 |
| OTX2-AS1    | 0 | 0          | 0   | 1 |
| LRRC9       | 0 | 0.00133549 | inf | 1 |
| SIX6        | 0 | 0          | 0   | 1 |
| FLJ22447    | 0 | 0          | 0   | 1 |
| SYT16       | 0 | 0          | 0   | 1 |
| LINC00643   | 0 | 0          | 0   | 1 |
| RHOJ        | 0 | 0.00293302 | inf | 1 |
| MIR4706     | 0 | 0          | 0   | 1 |
| FAM71D      | 0 | 0          | 0   | 1 |
| PLEKHD1     | 0 | 0          | 0   | 1 |
| SNORD56B    | 0 | 0          | 0   | 1 |
| LOC145474   | 0 | 0.0146962  | inf | 1 |
| RGS6        | 0 | 0          | 0   | 1 |
| MIR4505     | 0 | 0          | 0   | 1 |
| VRTN        | 0 | 0          | 0   | 1 |
| BATF        | 0 | 0          | 0   | 1 |
| C14orf166B  | 0 | 0          | 0   | 1 |
| MIR1260A    | 0 | 0          | 0   | 1 |
| DIO2-AS1    | 0 | 0          | 0   | 1 |
| TSHR        | 0 | 0.00232545 | inf | 1 |
| FLRT2       | 0 | 0          | 0   | 1 |
| LOC283585   | 0 | 0          | 0   | 1 |
| FOXN3-AS2   | 0 | 0          | 0   | 1 |
| KCNK13      | 0 | 0          | 0   | 1 |
| LINC00642   | 0 | 0          | 0   | 1 |
| FAM181A     | 0 | 0          | 0   | 1 |
| SERPINA4    | 0 | 0          | 0   | 1 |
| SERPINA5    | 0 | 0          | 0   | 1 |
| SERPINA3    | 0 | 0          | 0   | 1 |
| SERPINA13P  | 0 | 0          | 0   | 1 |
| TCL6        | 0 | 0          | 0   | 1 |
| TCL1B       | 0 | 0          | 0   | 1 |
| LINC00617   | 0 | 0          | 0   | 1 |
| C14orf132   | 0 | 0.00165297 | inf | 1 |
| BDKRB2      | 0 | 0          | 0   | 1 |
| BDKRB1      | 0 | 0          | 0   | 1 |
| C14orf177   | 0 | 0          | 0   | 1 |
| MIR5698     | 0 | 0          | 0   | 1 |
| EML1        | 0 | 0          | 0   | 1 |
| EVL         | 0 | 0          | 0   | 1 |
| MIR345      | 0 | 0          | 0   | 1 |
| SLC25A47    | 0 | 0.0124688  | inf | 1 |
| LINC00523   | 0 | 0          | 0   | 1 |
| DLK1        | 0 | 0          | 0   | 1 |
| MIR2392     | 0 | 0          | 0   | 1 |
| MEG3,MIR770 | 0 | 0          | 0   | 1 |
| MIR493      | 0 | 0          | 0   | 1 |
| MIR337      | 0 | 0          | 0   | 1 |
| MIR665      | 0 | 0          | 0   | 1 |
| MIR431      | 0 | 0          | 0   | 1 |
| MIR433      | 0 | 0          | 0   | 1 |
| MIR127      | 0 | 0          | 0   | 1 |
| MIR432      | 0 | 0          | 0   | 1 |



|             |   |   |   |   |
|-------------|---|---|---|---|
| MIR136      | 0 | 0 | 0 | 1 |
| MEG8        | 0 | 0 | 0 | 1 |
| SNORD113-1  | 0 | 0 | 0 | 1 |
| SNORD113-2  | 0 | 0 | 0 | 1 |
| SNORD113-4  | 0 | 0 | 0 | 1 |
| SNORD113-5  | 0 | 0 | 0 | 1 |
| SNORD113-6  | 0 | 0 | 0 | 1 |
| SNORD113-7  | 0 | 0 | 0 | 1 |
| SNORD113-9  | 0 | 0 | 0 | 1 |
| SNORD114-1  | 0 | 0 | 0 | 1 |
| SNORD114-2  | 0 | 0 | 0 | 1 |
| SNORD114-3  | 0 | 0 | 0 | 1 |
| SNORD114-4  | 0 | 0 | 0 | 1 |
| SNORD114-5  | 0 | 0 | 0 | 1 |
| SNORD114-6  | 0 | 0 | 0 | 1 |
| SNORD114-7  | 0 | 0 | 0 | 1 |
| SNORD114-8  | 0 | 0 | 0 | 1 |
| SNORD114-9  | 0 | 0 | 0 | 1 |
| SNORD114-10 | 0 | 0 | 0 | 1 |
| SNORD114-11 | 0 | 0 | 0 | 1 |
| SNORD114-12 | 0 | 0 | 0 | 1 |
| SNORD114-13 | 0 | 0 | 0 | 1 |
| SNORD114-14 | 0 | 0 | 0 | 1 |
| SNORD114-15 | 0 | 0 | 0 | 1 |
| SNORD114-16 | 0 | 0 | 0 | 1 |
| SNORD114-17 | 0 | 0 | 0 | 1 |
| SNORD114-18 | 0 | 0 | 0 | 1 |
| SNORD114-19 | 0 | 0 | 0 | 1 |
| SNORD114-20 | 0 | 0 | 0 | 1 |
| SNORD114-21 | 0 | 0 | 0 | 1 |
| SNORD114-22 | 0 | 0 | 0 | 1 |
| SNORD114-23 | 0 | 0 | 0 | 1 |
| SNORD114-24 | 0 | 0 | 0 | 1 |
| SNORD114-25 | 0 | 0 | 0 | 1 |
| SNORD114-26 | 0 | 0 | 0 | 1 |
| SNORD114-27 | 0 | 0 | 0 | 1 |
| SNORD114-28 | 0 | 0 | 0 | 1 |
| SNORD114-29 | 0 | 0 | 0 | 1 |
| SNORD114-30 | 0 | 0 | 0 | 1 |
| SNORD114-31 | 0 | 0 | 0 | 1 |
| MIR379      | 0 | 0 | 0 | 1 |
| MIR411      | 0 | 0 | 0 | 1 |
| MIR299      | 0 | 0 | 0 | 1 |
| MIR380      | 0 | 0 | 0 | 1 |
| MIR1197     | 0 | 0 | 0 | 1 |
| MIR323A     | 0 | 0 | 0 | 1 |
| MIR758      | 0 | 0 | 0 | 1 |
| MIR329-1    | 0 | 0 | 0 | 1 |
| MIR329-2    | 0 | 0 | 0 | 1 |
| MIR494      | 0 | 0 | 0 | 1 |
| MIR1193     | 0 | 0 | 0 | 1 |
| MIR543      | 0 | 0 | 0 | 1 |
| MIR495      | 0 | 0 | 0 | 1 |
| MIR376C     | 0 | 0 | 0 | 1 |
| MIR376A2    | 0 | 0 | 0 | 1 |
| MIR654      | 0 | 0 | 0 | 1 |
| MIR376B     | 0 | 0 | 0 | 1 |
| MIR376A1    | 0 | 0 | 0 | 1 |
| MIR300      | 0 | 0 | 0 | 1 |
| MIR1185-1   | 0 | 0 | 0 | 1 |
| MIR1185-2   | 0 | 0 | 0 | 1 |
| MIR381      | 0 | 0 | 0 | 1 |
| MIR487B     | 0 | 0 | 0 | 1 |
| MIR539      | 0 | 0 | 0 | 1 |
| MIR889      | 0 | 0 | 0 | 1 |
| MIR655      | 0 | 0 | 0 | 1 |
| MIR487A     | 0 | 0 | 0 | 1 |
| MIR382      | 0 | 0 | 0 | 1 |
| MIR134      | 0 | 0 | 0 | 1 |
| MIR668      | 0 | 0 | 0 | 1 |
| MIR485      | 0 | 0 | 0 | 1 |
| MIR323B     | 0 | 0 | 0 | 1 |
| MIR154      | 0 | 0 | 0 | 1 |
| MIR496      | 0 | 0 | 0 | 1 |
| MIR377      | 0 | 0 | 0 | 1 |
| MIR541      | 0 | 0 | 0 | 1 |
| MIR409      | 0 | 0 | 0 | 1 |
| MIR412      | 0 | 0 | 0 | 1 |
| MIR369      | 0 | 0 | 0 | 1 |

|              |         |            |     |   |
|--------------|---------|------------|-----|---|
| MIR410       | 0       | 0          | 0   | 1 |
| MIR656       | 0       | 0          | 0   | 1 |
| MEG9         | 0       | 0          | 0   | 1 |
| DIO3         | 0       | 0          | 0   | 1 |
| MIR4309      | 0       | 0          | 0   | 1 |
| ASPG         | 0       | 0.00878172 | inf | 1 |
| MIR203       | 0       | 0          | 0   | 1 |
| C14orf180    | 0       | 0.00889905 | inf | 1 |
| PLD4         | 0       | 0          | 0   | 1 |
| KIAA0125     | 0       | 0          | 0   | 1 |
| LINC00226    | 0       | 0          | 0   | 1 |
| LINC00221    | 0       | 0          | 0   | 1 |
| LOC642426    | 0       | 0          | 0   | 1 |
| LOC101101776 | 0       | 0          | 0   | 1 |
| POTEM        | 0       | 0          | 0   | 1 |
| OR4K14       | 0       | 0          | 0   | 1 |
| OR4K13       | 0       | 0          | 0   | 1 |
| SNORD126     | 0       | 0          | 0   | 1 |
| KLHL33       | 0       | 0          | 0   | 1 |
| RNASE9       | 0       | 0          | 0   | 1 |
| OR6S1        | 0       | 0          | 0   | 1 |
| RNASE1       | 0       | 0          | 0   | 1 |
| RNASE13      | 0       | 0          | 0   | 1 |
| OR5AU1       | 0       | 0          | 0   | 1 |
| HNRNPC       | 152.264 | 151.648    | 0   | 1 |
| SNORD9       | 0       | 7.83765    | inf | 1 |
| SALL2        | 0       | 0          | 0   | 1 |
| OR10G3       | 0       | 0          | 0   | 1 |
| OR10G2       | 0       | 0          | 0   | 1 |
| CEBPE        | 0       | 0          | 0   | 1 |
| EFS          | 0       | 0          | 0   | 1 |
| MYH6         | 0       | 0          | 0   | 1 |
| MIR208A      | 0       | 0          | 0   | 1 |
| MYH7         | 0       | 0          | 0   | 1 |
| MIR208B      | 0       | 0          | 0   | 1 |
| CMA1         | 0       | 0          | 0   | 1 |
| CTSG         | 0       | 0          | 0   | 1 |
| GZMH         | 0       | 0          | 0   | 1 |
| GZMB         | 0       | 0          | 0   | 1 |
| MIR548AI     | 0       | 0          | 0   | 1 |
| PRKD1        | 0       | 0          | 0   | 1 |
| MIR624       | 0       | 0          | 0   | 1 |
| GPR33        | 0       | 0          | 0   | 1 |
| EGLN3        | 0       | 0          | 0   | 1 |
| SFTA3        | 0       | 0          | 0   | 1 |
| NKX2-1       | 0       | 0          | 0   | 1 |
| NKX2-8       | 0       | 0          | 0   | 1 |
| MIR4503      | 0       | 0          | 0   | 1 |
| CLEC14A      | 0       | 0          | 0   | 1 |
| LINC00639    | 0       | 0          | 0   | 1 |
| FSCB         | 0       | 0          | 0   | 1 |
| RPL10L       | 0       | 0          | 0   | 1 |
| MIR548Y      | 0       | 0          | 0   | 1 |
| LINC00648    | 0       | 0          | 0   | 1 |
| MIR5580      | 0       | 0          | 0   | 1 |
| MIR4308      | 0       | 0          | 0   | 1 |
| TBPL2        | 0       | 0          | 0   | 1 |
| OTX2         | 0       | 0          | 0   | 1 |
| C14orf39     | 0       | 0          | 0   | 1 |
| SIX1         | 0       | 0.00478999 | inf | 1 |
| TMEM30B      | 0       | 0          | 0   | 1 |
| KCNH5        | 0       | 0          | 0   | 1 |
| GPHB5        | 0       | 0          | 0   | 1 |
| MIR4708      | 0       | 0          | 0   | 1 |
| CCDC177      | 0       | 0          | 0   | 1 |
| SLC8A3       | 0       | 0          | 0   | 1 |
| RNU6-6       | 0       | 0          | 0   | 1 |
| ZDHHC22      | 0       | 0          | 0   | 1 |
| GALC         | 0       | 0          | 0   | 1 |
| KCNK10       | 0       | 0          | 0   | 1 |
| TTC7B        | 0       | 0          | 0   | 1 |
| CATSPERB     | 0       | 0          | 0   | 1 |
| PRIMA1       | 0       | 0          | 0   | 1 |
| FAM181A-AS1  | 0       | 0          | 0   | 1 |
| ASB2         | 0       | 0          | 0   | 1 |
| SERPINA6     | 0       | 0          | 0   | 1 |
| SERPINA11    | 0       | 0          | 0   | 1 |
| SERPINA9     | 0       | 0          | 0   | 1 |
| SERPINA12    | 0       | 0          | 0   | 1 |

|                       |   |   |   |   |
|-----------------------|---|---|---|---|
| GSC                   | 0 | 0 | 0 | 1 |
| MIR3173               | 0 | 0 | 0 | 1 |
| TCL1A                 | 0 | 0 | 0 | 1 |
| LOC100129345          | 0 | 0 | 0 | 1 |
| C14orf64              | 0 | 0 | 0 | 1 |
| RTL1                  | 0 | 0 | 0 | 1 |
| DIO3OS                | 0 | 0 | 0 | 1 |
| MIR1247               | 0 | 0 | 0 | 1 |
| LINC00605             | 0 | 0 | 0 | 1 |
| RD3L                  | 0 | 0 | 0 | 1 |
| MIR3545               | 0 | 0 | 0 | 1 |
| TMEM179               | 0 | 0 | 0 | 1 |
| MIR4710               | 0 | 0 | 0 | 1 |
| ELK2AP                | 0 | 0 | 0 | 1 |
| ADAM6                 | 0 | 0 | 0 | 1 |
| CHEK2P2               | 0 | 0 | 0 | 1 |
| GOLGA8CP              | 0 | 0 | 0 | 1 |
| CT60                  | 0 | 0 | 0 | 1 |
| OR4M2                 | 0 | 0 | 0 | 1 |
| OR4N4                 | 0 | 0 | 0 | 1 |
| OR4N3P                | 0 | 0 | 0 | 1 |
| REREP3                | 0 | 0 | 0 | 1 |
| GOLGA6L1              | 0 | 0 | 0 | 1 |
| MKRN3                 | 0 | 0 | 0 | 1 |
| PWRN1                 | 0 | 0 | 0 | 1 |
| PAR-SN                | 0 | 0 | 0 | 1 |
| SNORD109A             | 0 | 0 | 0 | 1 |
| SNORD116-1            | 0 | 0 | 0 | 1 |
| SNORD116-2            | 0 | 0 | 0 | 1 |
| SNORD116-9            | 0 | 0 | 0 | 1 |
| SNORD116-4            | 0 | 0 | 0 | 1 |
| SNORD116-5            | 0 | 0 | 0 | 1 |
| SNORD116-6            | 0 | 0 | 0 | 1 |
| SNORD116-7            | 0 | 0 | 0 | 1 |
| SNORD116-8            | 0 | 0 | 0 | 1 |
| SNORD116-9            | 0 | 0 | 0 | 1 |
| SNORD116-10           | 0 | 0 | 0 | 1 |
| SNORD116-11           | 0 | 0 | 0 | 1 |
| SNORD116-12           | 0 | 0 | 0 | 1 |
| SNORD116-13           | 0 | 0 | 0 | 1 |
| SNORD116-14           | 0 | 0 | 0 | 1 |
| SNORD116-15           | 0 | 0 | 0 | 1 |
| SNORD116-16           | 0 | 0 | 0 | 1 |
| SNORD116-17           | 0 | 0 | 0 | 1 |
| SNORD116-18           | 0 | 0 | 0 | 1 |
| SNORD116-19           | 0 | 0 | 0 | 1 |
| SNORD116-20           | 0 | 0 | 0 | 1 |
| SNORD116-21           | 0 | 0 | 0 | 1 |
| SNORD116-22           | 0 | 0 | 0 | 1 |
| SNORD116-23           | 0 | 0 | 0 | 1 |
| SNORD116-24           | 0 | 0 | 0 | 1 |
| SNORD116-25           | 0 | 0 | 0 | 1 |
| SNORD116-26           | 0 | 0 | 0 | 1 |
| SNORD116-27           | 0 | 0 | 0 | 1 |
| SNORD116-28           | 0 | 0 | 0 | 1 |
| SNORD116-29           | 0 | 0 | 0 | 1 |
| PAR1                  | 0 | 0 | 0 | 1 |
| SNORD115-1            | 0 | 0 | 0 | 1 |
| SNORD115-2            | 0 | 0 | 0 | 1 |
| SNORD115-3            | 0 | 0 | 0 | 1 |
| SNORD115-4            | 0 | 0 | 0 | 1 |
| SNORD115-5            | 0 | 0 | 0 | 1 |
| SNORD115-6            | 0 | 0 | 0 | 1 |
| SNORD115-7            | 0 | 0 | 0 | 1 |
| SNORD115-8            | 0 | 0 | 0 | 1 |
| SNORD115-9            | 0 | 0 | 0 | 1 |
| SNORD115-10           | 0 | 0 | 0 | 1 |
| SNORD115-43           | 0 | 0 | 0 | 1 |
| SNORD115-10           | 0 | 0 | 0 | 1 |
| SNORD115-13           | 0 | 0 | 0 | 1 |
| SNORD115-14           | 0 | 0 | 0 | 1 |
| SNORD115-16           | 0 | 0 | 0 | 1 |
| SNORD115-18           | 0 | 0 | 0 | 1 |
| SNORD115-18           | 0 | 0 | 0 | 1 |
| SNORD115-17           | 0 | 0 | 0 | 1 |
| SNORD115-15,SNORD115- | 0 | 0 | 0 | 1 |
| SNORD115-22           | 0 | 0 | 0 | 1 |
| PAR4                  | 0 | 0 | 0 | 1 |
| SNORD115-24           | 0 | 0 | 0 | 1 |

|                 |   |            |     |   |
|-----------------|---|------------|-----|---|
| SNORD115-25     | 0 | 0          | 0   | 1 |
| SNORD115-26     | 0 | 0          | 0   | 1 |
| SNORD115-27     | 0 | 0          | 0   | 1 |
| SNORD115-28     | 0 | 0          | 0   | 1 |
| SNORD115-11     | 0 | 0          | 0   | 1 |
| SNORD115-30     | 0 | 0          | 0   | 1 |
| SNORD115-31     | 0 | 0          | 0   | 1 |
| SNORD115-32     | 0 | 0          | 0   | 1 |
| SNORD115-33     | 0 | 0          | 0   | 1 |
| SNORD115-35     | 0 | 0          | 0   | 1 |
| SNORD115-11     | 0 | 0          | 0   | 1 |
| SNORD115-37     | 0 | 0          | 0   | 1 |
| SNORD115-38     | 0 | 0          | 0   | 1 |
| SNORD115-39     | 0 | 0          | 0   | 1 |
| SNORD115-40     | 0 | 0          | 0   | 1 |
| SNORD115-41     | 0 | 0          | 0   | 1 |
| SNORD115-10     | 0 | 0          | 0   | 1 |
| SNORD115-11     | 0 | 0          | 0   | 1 |
| SNORD115-44     | 0 | 0          | 0   | 1 |
| SNORD115-45     | 0 | 0          | 0   | 1 |
| SNORD115-47     | 0 | 0          | 0   | 1 |
| SNORD115-48     | 0 | 0          | 0   | 1 |
| SNORD109B       | 0 | 0          | 0   | 1 |
| LOC100128714    | 0 | 0          | 0   | 1 |
| LOC503519       | 0 | 0          | 0   | 1 |
| GABRA5          | 0 | 0          | 0   | 1 |
| GABRG3          | 0 | 0          | 0   | 1 |
| GOLGA8F,GOLGA8G | 0 | 0          | 0   | 1 |
| MIR4509-1       | 0 | 0          | 0   | 1 |
| LOC100289656    | 0 | 0          | 0   | 1 |
| ULK4P3          | 0 | 0          | 0   | 1 |
| ULK4P2          | 0 | 0          | 0   | 1 |
| GREM1           | 0 | 0          | 0   | 1 |
| ATPBD4-AS1      | 0 | 0.00596685 | inf | 1 |
| MIR4510         | 0 | 0          | 0   | 1 |
| TMCO5A          | 0 | 0          | 0   | 1 |
| C15orf53        | 0 | 0          | 0   | 1 |
| C15orf54        | 0 | 0          | 0   | 1 |
| THBS1           | 0 | 0          | 0   | 1 |
| PHGR1           | 0 | 0          | 0   | 1 |
| MIR626          | 0 | 0          | 0   | 1 |
| ADAL            | 0 | 0.00528328 | inf | 1 |
| RNU6-28         | 0 | 0          | 0   | 1 |
| C15orf43        | 0 | 0          | 0   | 1 |
| DUOXA2          | 0 | 0          | 0   | 1 |
| SEMA6D          | 0 | 0          | 0   | 1 |
| SLC24A5         | 0 | 0          | 0   | 1 |
| CTXN2           | 0 | 0          | 0   | 1 |
| SLC12A1         | 0 | 0          | 0   | 1 |
| MIR4712         | 0 | 0          | 0   | 1 |
| MIR4713         | 0 | 0          | 0   | 1 |
| GLDN            | 0 | 0.00219632 | inf | 1 |
| SCG3            | 0 | 0.00589205 | inf | 1 |
| UNC13C          | 0 | 0          | 0   | 1 |
| AQP9            | 0 | 0          | 0   | 1 |
| LIPC            | 0 | 0          | 0   | 1 |
| FOXB1           | 0 | 0          | 0   | 1 |
| MIR190A         | 0 | 0          | 0   | 1 |
| MIR4311         | 0 | 0          | 0   | 1 |
| MIR548H4        | 0 | 0          | 0   | 1 |
| NOX5,SPESP1     | 0 | 0          | 0   | 1 |
| LINC00277       | 0 | 0          | 0   | 1 |
| LINC00593       | 0 | 0          | 0   | 1 |
| TMEM202         | 0 | 0          | 0   | 1 |
| MIR630          | 0 | 0          | 0   | 1 |
| GOLGA6B         | 0 | 0          | 0   | 1 |
| C15orf60        | 0 | 0          | 0   | 1 |
| TBC1D21         | 0 | 0          | 0   | 1 |
| ISLR            | 0 | 0          | 0   | 1 |
| CCDC33          | 0 | 0          | 0   | 1 |
| CYP1A2          | 0 | 0.00469737 | inf | 1 |
| GOLGA6D         | 0 | 0          | 0   | 1 |
| LOC253044       | 0 | 0          | 0   | 1 |
| MIR5003         | 0 | 0          | 0   | 1 |
| CRABP1          | 0 | 0          | 0   | 1 |
| LOC646938       | 0 | 0          | 0   | 1 |
| MIR184          | 0 | 0          | 0   | 1 |
| ANKRD34C        | 0 | 0          | 0   | 1 |
| LOC390660       | 0 | 0          | 0   | 1 |

|                   |   |             |     |   |
|-------------------|---|-------------|-----|---|
| UBE2Q2P2,UBE2Q2P3 | 0 | 0           | 0   | 1 |
| LOC440297         | 0 | 0           | 0   | 1 |
| LOC390660         | 0 | 0           | 0   | 1 |
| UBE2Q2P2,UBE2Q2P3 | 0 | 0           | 0   | 1 |
| LOC440297         | 0 | 0           | 0   | 1 |
| LOC283692         | 0 | 0           | 0   | 1 |
| SCARNA15          | 0 | 0           | 0   | 1 |
| MIR4515           | 0 | 0           | 0   | 1 |
| TM6SF1            | 0 | 0           | 0   | 1 |
| SH3GL3            | 0 | 0           | 0   | 1 |
| ADAMTSL3          | 0 | 0           | 0   | 1 |
| AGBL1             | 0 | 0           | 0   | 1 |
| LINC00052         | 0 | 0.00636342  | inf | 1 |
| NTRK3-AS1         | 0 | 0           | 0   | 1 |
| MIR1179           | 0 | 0           | 0   | 1 |
| MIR7-2            | 0 | 0           | 0   | 1 |
| ACAN              | 0 | 0           | 0   | 1 |
| MIR9-3            | 0 | 0           | 0   | 1 |
| LOC254559         | 0 | 0           | 0   | 1 |
| SV2B              | 0 | 0.000827173 | inf | 1 |
| ST8SIA2           | 0 | 0           | 0   | 1 |
| C15orf32          | 0 | 0           | 0   | 1 |
| MIR3175           | 0 | 0           | 0   | 1 |
| MIR1469           | 0 | 0           | 0   | 1 |
| SPATA8            | 0 | 0           | 0   | 1 |
| MIR4714           | 0 | 0           | 0   | 1 |
| OR4F6             | 0 | 0           | 0   | 1 |
| OR4F15            | 0 | 0           | 0   | 1 |
| OR4F13P           | 0 | 0           | 0   | 1 |
| FAM138E           | 0 | 0           | 0   | 1 |
| GOLGA6L6          | 0 | 0           | 0   | 1 |
| POTEB             | 0 | 0           | 0   | 1 |
| NF1P2             | 0 | 0           | 0   | 1 |
| CXADRP2           | 0 | 0           | 0   | 1 |
| POTEB             | 0 | 0           | 0   | 1 |
| NF1P2             | 0 | 0           | 0   | 1 |
| MIR4509-3         | 0 | 0           | 0   | 1 |
| GOLGA8DP          | 0 | 0           | 0   | 1 |
| LOC440243         | 0 | 0           | 0   | 1 |
| MIR4508           | 0 | 0           | 0   | 1 |
| MAGEL2            | 0 | 0           | 0   | 1 |
| NDN               | 0 | 0           | 0   | 1 |
| PWRN2             | 0 | 0           | 0   | 1 |
| ATP10A            | 0 | 0           | 0   | 1 |
| MIR4715           | 0 | 0           | 0   | 1 |
| MIR4509-1         | 0 | 0           | 0   | 1 |
| GOLGA8F,GOLGA8G   | 0 | 0           | 0   | 1 |
| FAM189A1          | 0 | 0           | 0   | 1 |
| TRPM1             | 0 | 0           | 0   | 1 |
| MIR211            | 0 | 0           | 0   | 1 |
| LOC283710         | 0 | 0           | 0   | 1 |
| ULK4P1,ULK4P3     | 0 | 0.010349    | inf | 1 |
| TMCO5B            | 0 | 0           | 0   | 1 |
| MIR1233-2         | 0 | 0           | 0   | 1 |
| MIR1233-1         | 0 | 0           | 0   | 1 |
| GJD2              | 0 | 0           | 0   | 1 |
| ACTC1             | 0 | 0.00515904  | inf | 1 |
| MIR3942           | 0 | 0           | 0   | 1 |
| LOC145845         | 0 | 0           | 0   | 1 |
| MIR4310           | 0 | 0           | 0   | 1 |
| PLA2G4E           | 0 | 0.0068772   | inf | 1 |
| PLA2G4F           | 0 | 0           | 0   | 1 |
| MIR627            | 0 | 0           | 0   | 1 |
| EPB42             | 0 | 0           | 0   | 1 |
| TGM5              | 0 | 0           | 0   | 1 |
| TGM7              | 0 | 0           | 0   | 1 |
| LCMT2             | 0 | 0           | 0   | 1 |
| MIR4716           | 0 | 0           | 0   | 1 |
| CYP19A1           | 0 | 0           | 0   | 1 |
| MIR1266           | 0 | 0           | 0   | 1 |
| WDR72             | 0 | 0           | 0   | 1 |
| MIR628            | 0 | 0           | 0   | 1 |
| PYGO1             | 0 | 0           | 0   | 1 |
| PRTG              | 0 | 0           | 0   | 1 |
| ALDH1A2           | 0 | 0           | 0   | 1 |
| MIR2116           | 0 | 0           | 0   | 1 |
| C2CD4B            | 0 | 0           | 0   | 1 |
| MGC15885          | 0 | 0           | 0   | 1 |
| MIR1272           | 0 | 0           | 0   | 1 |

|                 |   |            |     |   |
|-----------------|---|------------|-----|---|
| RASL12          | 0 | 0.021264   | inf | 1 |
| MIR4511         | 0 | 0          | 0   | 1 |
| SNORD18C        | 0 | 316.135    | inf | 1 |
| SNORD18B        | 0 | 0          | 0   | 1 |
| SNORD18A        | 0 | 0          | 0   | 1 |
| MIR4312         | 0 | 0          | 0   | 1 |
| MIR629          | 0 | 0          | 0   | 1 |
| C15orf59        | 0 | 0          | 0   | 1 |
| GOLGA6A         | 0 | 0          | 0   | 1 |
| CYP11A1         | 0 | 0          | 0   | 1 |
| MIR4513         | 0 | 0          | 0   | 1 |
| MIR631          | 0 | 0          | 0   | 1 |
| MIR4313         | 0 | 0          | 0   | 1 |
| LINC00597       | 0 | 0.0050766  | inf | 1 |
| LOC645752       | 0 | 0          | 0   | 1 |
| CHRNA4          | 0 | 0          | 0   | 1 |
| ADAMTS7         | 0 | 0          | 0   | 1 |
| LOC729911       | 0 | 0          | 0   | 1 |
| MIR549          | 0 | 0          | 0   | 1 |
| MIR4514         | 0 | 0          | 0   | 1 |
| TMC3            | 0 | 0.0070064  | inf | 1 |
| LOC440297       | 0 | 0          | 0   | 1 |
| AGSK1.LOC727849 | 0 | 0          | 0   | 1 |
| AP3B2           | 0 | 0.00291468 | inf | 1 |
| FSD2            | 0 | 0.00681103 | inf | 1 |
| BNC1            | 0 | 0          | 0   | 1 |
| LOC642423       | 0 | 0          | 0   | 1 |
| MIR1276         | 0 | 0          | 0   | 1 |
| LOC727915       | 0 | 0          | 0   | 1 |
| MIR3529         | 0 | 0          | 0   | 1 |
| RLBP1           | 0 | 0          | 0   | 1 |
| RHCG            | 0 | 0          | 0   | 1 |
| LOC283761       | 0 | 0          | 0   | 1 |
| MIR5094         | 0 | 0          | 0   | 1 |
| RGMA            | 0 | 0          | 0   | 1 |
| LOC400456       | 0 | 0          | 0   | 1 |
| FAM169B         | 0 | 0          | 0   | 1 |
| DNM1P46         | 0 | 0          | 0   | 1 |
| OR4F4           | 0 | 0          | 0   | 1 |
| DDX11L9         | 0 | 0          | 0   | 1 |
| DDX11L10        | 0 | 0          | 0   | 1 |
| HBZ             | 0 | 0          | 0   | 1 |
| HBM             | 0 | 0          | 0   | 1 |
| HBQ1            | 0 | 0.282148   | inf | 1 |
| MIR5587         | 0 | 0          | 0   | 1 |
| MIR3176         | 0 | 0          | 0   | 1 |
| MIR662          | 0 | 0          | 0   | 1 |
| PRR25           | 0 | 0          | 0   | 1 |
| TPSAB1          | 0 | 0.0176425  | inf | 1 |
| TPSD1           | 0 | 0          | 0   | 1 |
| TMEM204         | 0 | 0.0110664  | inf | 1 |
| MIR3177         | 0 | 0          | 0   | 1 |
| MIR4516         | 0 | 0          | 0   | 1 |
| MIR3677         | 0 | 0          | 0   | 1 |
| MIR940          | 0 | 0          | 0   | 1 |
| MIR4717         | 0 | 0          | 0   | 1 |
| NTN3            | 0 | 0.0184616  | inf | 1 |
| PRSS41          | 0 | 0          | 0   | 1 |
| ZG16B           | 0 | 0          | 0   | 1 |
| OR1F1           | 0 | 0          | 0   | 1 |
| OR2C1           | 0 | 0.0142967  | inf | 1 |
| C16orf96        | 0 | 0.00690895 | inf | 1 |
| RBFOX1          | 0 | 0          | 0   | 1 |
| MIR548X         | 0 | 0          | 0   | 1 |
| CIITA           | 0 | 0.00322909 | inf | 1 |
| TNFRSF17        | 0 | 0          | 0   | 1 |
| MIR4718         | 0 | 0          | 0   | 1 |
| MIR193B         | 0 | 0          | 0   | 1 |
| MIR365A         | 0 | 0          | 0   | 1 |
| MIR3179-3       | 0 | 0          | 0   | 1 |
| MIR3180-3       | 0 | 0          | 0   | 1 |
| MIR3179-1       | 0 | 0          | 0   | 1 |
| MIR3180-1       | 0 | 0          | 0   | 1 |
| ABCC6P1         | 0 | 0.00299323 | inf | 1 |
| CLEC19A         | 0 | 0          | 0   | 1 |
| ACSM5           | 0 | 0          | 0   | 1 |
| ACSM2A          | 0 | 0          | 0   | 1 |
| MIR548D2        | 0 | 0          | 0   | 1 |
| HS3ST2          | 0 | 0          | 0   | 1 |

|                     |   |             |     |   |
|---------------------|---|-------------|-----|---|
| SCNN1G              | 0 | 0           | 0   | 1 |
| SCNN1B              | 0 | 0           | 0   | 1 |
| CHP2                | 0 | 0           | 0   | 1 |
| PRKCB               | 0 | 0           | 0   | 1 |
| CACNG3              | 0 | 0           | 0   | 1 |
| HS3ST4              | 0 | 0           | 0   | 1 |
| C16orf82            | 0 | 0           | 0   | 1 |
| FLJ21408            | 0 | 0           | 0   | 1 |
| CD19                | 0 | 0           | 0   | 1 |
| MIR4517             | 0 | 0           | 0   | 1 |
| LOC606724           | 0 | 0           | 0   | 1 |
| SLX1A,SLX1B,SULT1A3 | 0 | 0           | 0   | 1 |
| ZG16                | 0 | 0           | 0   | 1 |
| C16orf92            | 0 | 0           | 0   | 1 |
| MIR4518             | 0 | 0           | 0   | 1 |
| SNORA30             | 0 | 0           | 0   | 1 |
| TP53TG3D            | 0 | 0           | 0   | 1 |
| TP53TG3,TP53TG3B    | 0 | 0           | 0   | 1 |
| TP53TG3,TP53TG3B    | 0 | 0           | 0   | 1 |
| LOC283914           | 0 | 0           | 0   | 1 |
| MIR548AE2           | 0 | 0           | 0   | 1 |
| C16orf78            | 0 | 0           | 0   | 1 |
| NOD2                | 0 | 0.00276967  | inf | 1 |
| MMP2                | 0 | 0           | 0   | 1 |
| SLC6A2              | 0 | 0           | 0   | 1 |
| CES1P2              | 0 | 0           | 0   | 1 |
| CES1P1              | 0 | 0           | 0   | 1 |
| MIR3935             | 0 | 0           | 0   | 1 |
| MT4                 | 0 | 0           | 0   | 1 |
| MT3                 | 0 | 0           | 0   | 1 |
| MT1A                | 0 | 0.132304    | inf | 1 |
| MIR138-2            | 0 | 0           | 0   | 1 |
| SLC12A3             | 0 | 0           | 0   | 1 |
| CCL22               | 0 | 0.00467217  | inf | 1 |
| CX3CL1              | 0 | 0           | 0   | 1 |
| CCL17               | 0 | 0.0671672   | inf | 1 |
| GPR97               | 0 | 0           | 0   | 1 |
| TEPP                | 0 | 0           | 0   | 1 |
| LRRC36              | 0 | 0           | 0   | 1 |
| CDH1                | 0 | 0           | 0   | 1 |
| MIR140              | 0 | 0           | 0   | 1 |
| MIR1972-2           | 0 | 0           | 0   | 1 |
| CLEC18C             | 0 | 0.00914761  | inf | 1 |
| SNORD111B           | 0 | 0           | 0   | 1 |
| SNORD111            | 0 | 0           | 0   | 1 |
| CHST4               | 0 | 0.00497551  | inf | 1 |
| HPR                 | 0 | 0           | 0   | 1 |
| HTA                 | 0 | 0           | 0   | 1 |
| LOC100506172        | 0 | 0           | 0   | 1 |
| CTRB1               | 0 | 0           | 0   | 1 |
| CNTNAP4             | 0 | 0           | 0   | 1 |
| MIR4719             | 0 | 0           | 0   | 1 |
| VAT1L               | 0 | 0           | 0   | 1 |
| CLEC3A              | 0 | 0           | 0   | 1 |
| DYNLRB2             | 0 | 0           | 0   | 1 |
| BCMO1               | 0 | 0           | 0   | 1 |
| MIR4720             | 0 | 0           | 0   | 1 |
| HSD17B2             | 0 | 0.00761698  | inf | 1 |
| CDH13               | 0 | 0           | 0   | 1 |
| MIR3182             | 0 | 0           | 0   | 1 |
| ADAD2               | 0 | 0.0202924   | inf | 1 |
| WFDC1               | 0 | 0           | 0   | 1 |
| LOC400548           | 0 | 0.0061721   | inf | 1 |
| IRF8                | 0 | 0           | 0   | 1 |
| LOC146513           | 0 | 0           | 0   | 1 |
| FOXC2               | 0 | 0           | 0   | 1 |
| MIR5189             | 0 | 0           | 0   | 1 |
| TPSG1               | 0 | 0           | 0   | 1 |
| TPSB2               | 0 | 0           | 0   | 1 |
| LINC00254           | 0 | 0           | 0   | 1 |
| HS3ST6              | 0 | 0           | 0   | 1 |
| RPL3L               | 0 | 0           | 0   | 1 |
| MIR1225             | 0 | 0           | 0   | 1 |
| MIR3180-5           | 0 | 0           | 0   | 1 |
| MIR3178             | 0 | 0           | 0   | 1 |
| C16orf90            | 0 | 0           | 0   | 1 |
| TMEM114             | 0 | 0           | 0   | 1 |
| GRIN2A              | 0 | 0.000542191 | inf | 1 |
| TNP2                | 0 | 0           | 0   | 1 |

|              |   |            |     |   |
|--------------|---|------------|-----|---|
| PRM3         | 0 | 0          | 0   | 1 |
| PRM2         | 0 | 0          | 0   | 1 |
| PRM1         | 0 | 0          | 0   | 1 |
| ABCC6P2      | 0 | 0          | 0   | 1 |
| MIR3180-4    | 0 | 0          | 0   | 1 |
| MIR3180-1    | 0 | 0          | 0   | 1 |
| MIR3179-1    | 0 | 0          | 0   | 1 |
| GPRC5B       | 0 | 0          | 0   | 1 |
| GPR139       | 0 | 0          | 0   | 1 |
| GP2          | 0 | 0          | 0   | 1 |
| UMOD         | 0 | 0          | 0   | 1 |
| PDILT        | 0 | 0          | 0   | 1 |
| ACSM2B       | 0 | 0          | 0   | 1 |
| ZP2          | 0 | 0.00371645 | inf | 1 |
| IGSF6        | 0 | 0          | 0   | 1 |
| MIR548AA2    | 0 | 0          | 0   | 1 |
| IL27         | 0 | 0          | 0   | 1 |
| BOLA2B       | 0 | 0          | 0   | 1 |
| LOC388242    | 0 | 0          | 0   | 1 |
| BOLA2B       | 0 | 0          | 0   | 1 |
| LOC388242    | 0 | 0          | 0   | 1 |
| MIR4519      | 0 | 0          | 0   | 1 |
| COX6A2       | 0 | 0          | 0   | 1 |
| LOC390705    | 0 | 0          | 0   | 1 |
| TP53TG3      | 0 | 0          | 0   | 1 |
| LOC390705    | 0 | 0          | 0   | 1 |
| RNU6-76      | 0 | 0          | 0   | 1 |
| LOC146481    | 0 | 0          | 0   | 1 |
| LOC100130700 | 0 | 0          | 0   | 1 |
| ABCC12       | 0 | 0          | 0   | 1 |
| CBLN1        | 0 | 0          | 0   | 1 |
| SNX20        | 0 | 0.0185621  | inf | 1 |
| SALL1        | 0 | 0          | 0   | 1 |
| C16orf97     | 0 | 0          | 0   | 1 |
| LOC100505619 | 0 | 0          | 0   | 1 |
| TOX3         | 0 | 0          | 0   | 1 |
| LOC643714    | 0 | 0          | 0   | 1 |
| LOC643802    | 0 | 0          | 0   | 1 |
| IRX3         | 0 | 0          | 0   | 1 |
| CES1         | 0 | 0          | 0   | 1 |
| CES5A        | 0 | 0          | 0   | 1 |
| LOC283856    | 0 | 0          | 0   | 1 |
| DKFZP434H168 | 0 | 0          | 0   | 1 |
| CNGB1        | 0 | 0          | 0   | 1 |
| LOC644649    | 0 | 0          | 0   | 1 |
| CDH8         | 0 | 0          | 0   | 1 |
| CDH11        | 0 | 0          | 0   | 1 |
| CDH16        | 0 | 0          | 0   | 1 |
| MIR328       | 0 | 0          | 0   | 1 |
| AGRP         | 0 | 0          | 0   | 1 |
| DPEP3        | 0 | 0.00985272 | inf | 1 |
| MIR1538      | 0 | 0          | 0   | 1 |
| SNORA70D     | 0 | 0          | 0   | 1 |
| SNORD71      | 0 | 0          | 0   | 1 |
| CTRB2        | 0 | 0          | 0   | 1 |
| ADAMTS18     | 0 | 0          | 0   | 1 |
| SDR42E1      | 0 | 0          | 0   | 1 |
| KCNG4        | 0 | 0          | 0   | 1 |
| FAM92B       | 0 | 0          | 0   | 1 |
| MIR5093      | 0 | 0          | 0   | 1 |
| MIR1910      | 0 | 0          | 0   | 1 |
| LOC732275    | 0 | 0          | 0   | 1 |
| CA5A         | 0 | 0          | 0   | 1 |
| MIR4722      | 0 | 0          | 0   | 1 |
| BHLHA9       | 0 | 0          | 0   | 1 |
| TUSC5        | 0 | 0          | 0   | 1 |
| OR1A2        | 0 | 0          | 0   | 1 |
| OR1A1        | 0 | 0          | 0   | 1 |
| OR1D4        | 0 | 0          | 0   | 1 |
| OR3A4P       | 0 | 0          | 0   | 1 |
| OR3A3        | 0 | 0          | 0   | 1 |
| ASPA         | 0 | 0          | 0   | 1 |
| TM4SF5       | 0 | 0          | 0   | 1 |
| LOC100130950 | 0 | 0          | 0   | 1 |
| WSCD1        | 0 | 0          | 0   | 1 |
| MIR4520B     | 0 | 0          | 0   | 1 |
| ALOX15P1     | 0 | 0          | 0   | 1 |
| FBXO39       | 0 | 0          | 0   | 1 |
| ALOX12P2     | 0 | 0.0144451  | inf | 1 |



|              |   |                |   |   |
|--------------|---|----------------|---|---|
| BCL6B        | 0 | 0              | 0 | 1 |
| TMEM95       | 0 | 0.0199978 inf  |   | 1 |
| ATP1B2       | 0 | 0.0078187 inf  |   | 1 |
| RPL29P2      | 0 | 0              | 0 | 1 |
| GUCY2D       | 0 | 0.00473249 inf |   | 1 |
| MIR4314      | 0 | 0              | 0 | 1 |
| MIR4521      | 0 | 0              | 0 | 1 |
| MIR3676      | 0 | 0              | 0 | 1 |
| ARHGEF15     | 0 | 0              | 0 | 1 |
| ODF4         | 0 | 0              | 0 | 1 |
| GLP2R        | 0 | 0              | 0 | 1 |
| TMEM220-AS1  | 0 | 0              | 0 | 1 |
| SHISA6       | 0 | 0              | 0 | 1 |
| MIR744       | 0 | 0              | 0 | 1 |
| LINC00670    | 0 | 0              | 0 | 1 |
| MYOCD        | 0 | 0              | 0 | 1 |
| CDRT7        | 0 | 0              | 0 | 1 |
| CDRT15P2     | 0 | 0              | 0 | 1 |
| MIR1288      | 0 | 0              | 0 | 1 |
| SNORD49A     | 0 | 0              | 0 | 1 |
| SNORD65      | 0 | 0              | 0 | 1 |
| SMCR9        | 0 | 0              | 0 | 1 |
| EVPLL        | 0 | 0.00823808 inf |   | 1 |
| LOC339240    | 0 | 0              | 0 | 1 |
| KRT16P1      | 0 | 0              | 0 | 1 |
| LGALS9C      | 0 | 0              | 0 | 1 |
| GRAPL        | 0 | 0              | 0 | 1 |
| SLC47A1      | 0 | 0              | 0 | 1 |
| SNORA59B     | 0 | 0              | 0 | 1 |
| CDRT15L2     | 0 | 0              | 0 | 1 |
| FAM27L       | 0 | 0              | 0 | 1 |
| FLJ36000     | 0 | 0              | 0 | 1 |
| TBC1D3P5     | 0 | 0              | 0 | 1 |
| PPY2         | 0 | 0              | 0 | 1 |
| MIR4723      | 0 | 0              | 0 | 1 |
| SLC13A2      | 0 | 0              | 0 | 1 |
| FOXN1        | 0 | 0              | 0 | 1 |
| SNORD42B     | 0 | 0              | 0 | 1 |
| SNORD4A      | 0 | 108.296 inf    |   | 1 |
| SNORD42A     | 0 | 0              | 0 | 1 |
| SNORD4B      | 0 | 121.809 inf    |   | 1 |
| MIR451B      | 0 | 0              | 0 | 1 |
| MIR4523      | 0 | 0              | 0 | 1 |
| MIR423       | 0 | 0              | 0 | 1 |
| TBC1D29      | 0 | 0              | 0 | 1 |
| MIR193A      | 0 | 0              | 0 | 1 |
| MIR4725      | 0 | 0              | 0 | 1 |
| MIR365B      | 0 | 0              | 0 | 1 |
| CCL2         | 0 | 0.0533244 inf  |   | 1 |
| CCL7         | 0 | 0              | 0 | 1 |
| CCL11        | 0 | 0.0116112 inf  |   | 1 |
| CCL8         | 0 | 0              | 0 | 1 |
| CCL13        | 0 | 0              | 0 | 1 |
| TMEM132E     | 0 | 0              | 0 | 1 |
| SNORD7       | 0 | 0              | 0 | 1 |
| CCL18        | 0 | 0              | 0 | 1 |
| CCL4         | 0 | 0              | 0 | 1 |
| CCL4L1       | 0 | 0              | 0 | 1 |
| CCL4L2       | 0 | 0              | 0 | 1 |
| LHX1         | 0 | 0              | 0 | 1 |
| MIR2909      | 0 | 0              | 0 | 1 |
| MIR4726      | 0 | 0              | 0 | 1 |
| MIR4727      | 0 | 0              | 0 | 1 |
| PNMT         | 0 | 0              | 0 | 1 |
| MIR4728      | 0 | 0              | 0 | 1 |
| ZPBP2        | 0 | 0              | 0 | 1 |
| LRRC3C       | 0 | 0              | 0 | 1 |
| CSF3         | 0 | 0.0773726 inf  |   | 1 |
| SNORD124     | 0 | 0              | 0 | 1 |
| IGFBP4       | 0 | 0.00630614 inf |   | 1 |
| KRTAP9-1     | 0 | 0              | 0 | 1 |
| KRTAP9-2     | 0 | 0              | 0 | 1 |
| KRTAP9-3     | 0 | 0              | 0 | 1 |
| KRTAP9-8     | 0 | 0              | 0 | 1 |
| KRTAP9-4     | 0 | 0              | 0 | 1 |
| KRTAP9-9     | 0 | 0              | 0 | 1 |
| LOC100505782 | 0 | 0              | 0 | 1 |
| GAST         | 0 | 0              | 0 | 1 |
| RAMP2        | 0 | 0              | 0 | 1 |

|              |   |            |     |   |
|--------------|---|------------|-----|---|
| MIR2117      | 0 | 0          | 0   | 1 |
| C17orf105    | 0 | 0          | 0   | 1 |
| SPPL2C       | 0 | 0          | 0   | 1 |
| MAPT-IT1     | 0 | 0          | 0   | 1 |
| STH          | 0 | 0          | 0   | 1 |
| NSFP1        | 0 | 0          | 0   | 1 |
| WNT9B        | 0 | 0          | 0   | 1 |
| MIR5089      | 0 | 0          | 0   | 1 |
| ITGB3        | 0 | 0          | 0   | 1 |
| TBX21        | 0 | 0          | 0   | 1 |
| IGF2BP1      | 0 | 0          | 0   | 1 |
| B4GALNT2     | 0 | 0          | 0   | 1 |
| FLJ40194     | 0 | 0          | 0   | 1 |
| NGFR         | 0 | 0          | 0   | 1 |
| SGCA         | 0 | 0          | 0   | 1 |
| ABCC3        | 0 | 0          | 0   | 1 |
| WFIKKN2      | 0 | 0          | 0   | 1 |
| C17orf112    | 0 | 0          | 0   | 1 |
| KIF2B        | 0 | 0          | 0   | 1 |
| NOG          | 0 | 0          | 0   | 1 |
| RNF126P1     | 0 | 0          | 0   | 1 |
| OR4D1        | 0 | 0          | 0   | 1 |
| OR4D2        | 0 | 0          | 0   | 1 |
| LPO          | 0 | 0          | 0   | 1 |
| MIR4729      | 0 | 0          | 0   | 1 |
| MIR21        | 0 | 0          | 0   | 1 |
| CA4          | 0 | 0          | 0   | 1 |
| MIR548W      | 0 | 0          | 0   | 1 |
| MIR634       | 0 | 0          | 0   | 1 |
| CACNG5       | 0 | 0          | 0   | 1 |
| CACNG4       | 0 | 0.00495086 | inf | 1 |
| CACNG1       | 0 | 0          | 0   | 1 |
| SNORA38B     | 0 | 1.23543    | inf | 1 |
| MIR4524B     | 0 | 0          | 0   | 1 |
| KCNJ16       | 0 | 0          | 0   | 1 |
| KCNJ2        | 0 | 0          | 0   | 1 |
| SOX9         | 0 | 0          | 0   | 1 |
| LOC400620    | 0 | 0          | 0   | 1 |
| KIF19        | 0 | 0          | 0   | 1 |
| GPR142       | 0 | 0          | 0   | 1 |
| CD300A       | 0 | 0          | 0   | 1 |
| C17orf77     | 0 | 0          | 0   | 1 |
| MIR3678      | 0 | 0          | 0   | 1 |
| RNF157-AS1   | 0 | 0          | 0   | 1 |
| SNORD1C      | 0 | 0          | 0   | 1 |
| SNORD1B      | 0 | 0          | 0   | 1 |
| SNORD1A      | 0 | 0          | 0   | 1 |
| LOC100507351 | 0 | 0          | 0   | 1 |
| C17orf99     | 0 | 0.0152447  | inf | 1 |
| TMEM235      | 0 | 0          | 0   | 1 |
| ENPP7        | 0 | 0          | 0   | 1 |
| MIR4730      | 0 | 0          | 0   | 1 |
| MIR3065      | 0 | 0          | 0   | 1 |
| GCGR         | 0 | 0          | 0   | 1 |
| UTS2R        | 0 | 0          | 0   | 1 |
| MIR3183      | 0 | 0          | 0   | 1 |
| RTN4RL1      | 0 | 0.00469377 | inf | 1 |
| MIR132       | 0 | 0          | 0   | 1 |
| MIR212       | 0 | 0          | 0   | 1 |
| SNORD91B     | 0 | 0          | 0   | 1 |
| SNORD91A     | 0 | 0          | 0   | 1 |
| MIR1253      | 0 | 0          | 0   | 1 |
| OR1D5        | 0 | 0          | 0   | 1 |
| OR1D2        | 0 | 0          | 0   | 1 |
| OR1G1        | 0 | 0          | 0   | 1 |
| OR3A2        | 0 | 0          | 0   | 1 |
| OR3A1        | 0 | 0          | 0   | 1 |
| OR1E1        | 0 | 0          | 0   | 1 |
| OR1E2        | 0 | 0          | 0   | 1 |
| SPATA22      | 0 | 0          | 0   | 1 |
| P2RX1        | 0 | 0          | 0   | 1 |
| GGT6         | 0 | 0.00609804 | inf | 1 |
| ALOX15       | 0 | 0.00573656 | inf | 1 |
| ZNF594       | 0 | 0          | 0   | 1 |
| SCIMP        | 0 | 0          | 0   | 1 |
| MIR4520A     | 0 | 0          | 0   | 1 |
| MIR195       | 0 | 0          | 0   | 1 |
| MIR497       | 0 | 0          | 0   | 1 |
| CLEC10A      | 0 | 0          | 0   | 1 |

|             |   |            |     |   |
|-------------|---|------------|-----|---|
| ASGR2       | 0 | 0          | 0   | 1 |
| MIR324      | 0 | 0          | 0   | 1 |
| SPDYE4      | 0 | 0          | 0   | 1 |
| MFSD6L      | 0 | 0          | 0   | 1 |
| PIK3R6      | 0 | 0          | 0   | 1 |
| DHRS7C      | 0 | 0          | 0   | 1 |
| MYH13       | 0 | 0          | 0   | 1 |
| MYH8        | 0 | 0          | 0   | 1 |
| MYH4        | 0 | 0          | 0   | 1 |
| MYH2        | 0 | 0          | 0   | 1 |
| PIRT        | 0 | 0          | 0   | 1 |
| HS3ST3A1    | 0 | 0          | 0   | 1 |
| CDRT15      | 0 | 0.0602495  | inf | 1 |
| MIR4731     | 0 | 0          | 0   | 1 |
| TNFRSF13B   | 0 | 0          | 0   | 1 |
| MIR33B      | 0 | 0          | 0   | 1 |
| FAM106A     | 0 | 0          | 0   | 1 |
| EPN2-AS1    | 0 | 0.0194593  | inf | 1 |
| MIR1180     | 0 | 0          | 0   | 1 |
| SLC47A2     | 0 | 0          | 0   | 1 |
| ALDH3A1     | 0 | 0          | 0   | 1 |
| LGALS9B     | 0 | 0          | 0   | 1 |
| KRT16P3     | 0 | 0.00675159 | inf | 1 |
| CCDC144NL   | 0 | 0          | 0   | 1 |
| MIR4522     | 0 | 0          | 0   | 1 |
| KRT18P55    | 0 | 0.00546009 | inf | 1 |
| SEBOX       | 0 | 0.0250833  | inf | 1 |
| MIR451A     | 0 | 0          | 0   | 1 |
| MIR144      | 0 | 0          | 0   | 1 |
| MIR4732     | 0 | 0          | 0   | 1 |
| SEZ6        | 0 | 0          | 0   | 1 |
| MIR3184     | 0 | 0          | 0   | 1 |
| TMIGD1      | 0 | 0          | 0   | 1 |
| MIR4733     | 0 | 0          | 0   | 1 |
| ASIC2       | 0 | 0          | 0   | 1 |
| AAO6        | 0 | 0          | 0   | 1 |
| CCL1        | 0 | 0          | 0   | 1 |
| C17orf102   | 0 | 0          | 0   | 1 |
| SLC35G3     | 0 | 0.0152944  | inf | 1 |
| SLFN11      | 0 | 0          | 0   | 1 |
| SLFN12      | 0 | 0          | 0   | 1 |
| SLFN12L     | 0 | 0          | 0   | 1 |
| SLFN14      | 0 | 0          | 0   | 1 |
| GAS2L2      | 0 | 0          | 0   | 1 |
| MMP28       | 0 | 0          | 0   | 1 |
| C17orf66    | 0 | 0          | 0   | 1 |
| LYZL6       | 0 | 0          | 0   | 1 |
| CCL16       | 0 | 0          | 0   | 1 |
| CCL14,CCL15 | 0 | 0          | 0   | 1 |
| CCL23       | 0 | 0          | 0   | 1 |
| TBC1D3B     | 0 | 0.00769849 | inf | 1 |
| CCL3L1      | 0 | 0          | 0   | 1 |
| TBC1D3H     | 0 | 0          | 0   | 1 |
| HNF1B       | 0 | 0          | 0   | 1 |
| LOC284100   | 0 | 0          | 0   | 1 |
| TBC1D3      | 0 | 0          | 0   | 1 |
| MIR4734     | 0 | 0          | 0   | 1 |
| FBXO47      | 0 | 0          | 0   | 1 |
| ARL5C       | 0 | 0          | 0   | 1 |
| CCR7        | 0 | 0          | 0   | 1 |
| KRT24       | 0 | 0          | 0   | 1 |
| KRT25       | 0 | 0          | 0   | 1 |
| KRT26       | 0 | 0          | 0   | 1 |
| KRT27       | 0 | 0          | 0   | 1 |
| KRT28       | 0 | 0          | 0   | 1 |
| KRT12       | 0 | 0.0117531  | inf | 1 |
| KRT20       | 0 | 0          | 0   | 1 |
| KRT23       | 0 | 0          | 0   | 1 |
| KRT39       | 0 | 0          | 0   | 1 |
| KRT40       | 0 | 0          | 0   | 1 |
| KRTAP3-1    | 0 | 0          | 0   | 1 |
| KRTAP1-5    | 0 | 0          | 0   | 1 |
| KRTAP1-4    | 0 | 0          | 0   | 1 |
| KRTAP1-3    | 0 | 0          | 0   | 1 |
| KRTAP1-1    | 0 | 0          | 0   | 1 |
| KRTAP4-12   | 0 | 0          | 0   | 1 |
| KRTAP4-5    | 0 | 0          | 0   | 1 |
| KRTAP4-4    | 0 | 0          | 0   | 1 |
| KRTAP4-3    | 0 | 0          | 0   | 1 |

|              |   |            |     |   |
|--------------|---|------------|-----|---|
| KRTAP4-2     | 0 | 0          | 0   | 1 |
| KRTAP4-1     | 0 | 0          | 0   | 1 |
| KRTAP29-1    | 0 | 0          | 0   | 1 |
| KRTAP16-1    | 0 | 0          | 0   | 1 |
| KRTAP17-1    | 0 | 0          | 0   | 1 |
| KRT33A       | 0 | 0          | 0   | 1 |
| KRT33B       | 0 | 0          | 0   | 1 |
| KRT31        | 0 | 0          | 0   | 1 |
| KRT37        | 0 | 0          | 0   | 1 |
| KRT38        | 0 | 0          | 0   | 1 |
| KRT32        | 0 | 0.00793146 | inf | 1 |
| KRT35        | 0 | 0          | 0   | 1 |
| KRT36        | 0 | 0          | 0   | 1 |
| KRT13        | 0 | 0          | 0   | 1 |
| LOC147093    | 0 | 0          | 0   | 1 |
| KRT9         | 0 | 0          | 0   | 1 |
| KRT14        | 0 | 0          | 0   | 1 |
| KRT16        | 0 | 0.0192009  | inf | 1 |
| KRT42P       | 0 | 0.00376808 | inf | 1 |
| HAP1         | 0 | 0          | 0   | 1 |
| KCNH4        | 0 | 0          | 0   | 1 |
| C1QL1        | 0 | 0          | 0   | 1 |
| LOC644172    | 0 | 0          | 0   | 1 |
| MAPT-AS1     | 0 | 0          | 0   | 1 |
| MIR152       | 0 | 0          | 0   | 1 |
| SKAP1        | 0 | 0.00753308 | inf | 1 |
| MIR1203      | 0 | 0          | 0   | 1 |
| HOXB1        | 0 | 0          | 0   | 1 |
| MIR10A       | 0 | 0          | 0   | 1 |
| MIR196A1     | 0 | 0          | 0   | 1 |
| PRAC         | 0 | 0          | 0   | 1 |
| MIR3185      | 0 | 0          | 0   | 1 |
| GIP          | 0 | 0          | 0   | 1 |
| GNGT2        | 0 | 0          | 0   | 1 |
| PHOSPHO1     | 0 | 0.0107431  | inf | 1 |
| TAC4         | 0 | 0          | 0   | 1 |
| DLX3         | 0 | 0          | 0   | 1 |
| HILS1        | 0 | 0          | 0   | 1 |
| LINC00483    | 0 | 0.0104558  | inf | 1 |
| CA10         | 0 | 0          | 0   | 1 |
| TMEM100      | 0 | 0          | 0   | 1 |
| MTVR2        | 0 | 0          | 0   | 1 |
| MPO          | 0 | 0          | 0   | 1 |
| BZRAP1       | 0 | 0          | 0   | 1 |
| MIR142       | 0 | 0          | 0   | 1 |
| MIR4736      | 0 | 0          | 0   | 1 |
| MIR454       | 0 | 0          | 0   | 1 |
| MIR301A      | 0 | 0          | 0   | 1 |
| MIR4737      | 0 | 0          | 0   | 1 |
| TBC1D3P2     | 0 | 0          | 0   | 1 |
| CSH2         | 0 | 0          | 0   | 1 |
| GH2          | 0 | 0          | 0   | 1 |
| CSH1         | 0 | 0          | 0   | 1 |
| CSHL1        | 0 | 0          | 0   | 1 |
| GH1          | 0 | 0          | 0   | 1 |
| MIR3064      | 0 | 0          | 0   | 1 |
| APOH         | 0 | 0          | 0   | 1 |
| MIR635       | 0 | 0          | 0   | 1 |
| ABCA8        | 0 | 0          | 0   | 1 |
| MIR4524A     | 0 | 0          | 0   | 1 |
| KCNJ2-AS1    | 0 | 0          | 0   | 1 |
| LINC00469    | 0 | 0          | 0   | 1 |
| BTBD17       | 0 | 0          | 0   | 1 |
| CD300LB      | 0 | 0          | 0   | 1 |
| CD300LD      | 0 | 0          | 0   | 1 |
| CD300LF      | 0 | 0          | 0   | 1 |
| FADS6        | 0 | 0          | 0   | 1 |
| MIR4738      | 0 | 0          | 0   | 1 |
| FOXJ1        | 0 | 0          | 0   | 1 |
| ST6GALNAC1   | 0 | 0          | 0   | 1 |
| MIR4316      | 0 | 0          | 0   | 1 |
| MIR4739      | 0 | 0          | 0   | 1 |
| NPTX1        | 0 | 0          | 0   | 1 |
| MIR657       | 0 | 0          | 0   | 1 |
| MIR338       | 0 | 0          | 0   | 1 |
| MIR1250      | 0 | 0          | 0   | 1 |
| TMEM105      | 0 | 0.00860606 | inf | 1 |
| LOC100130370 | 0 | 0          | 0   | 1 |
| MIR4740      | 0 | 0          | 0   | 1 |

|              |   |                |   |   |
|--------------|---|----------------|---|---|
| MIR3186      | 0 | 0              | 0 | 1 |
| CETN1        | 0 | 0              | 0 | 1 |
| ADCYAP1      | 0 | 0              | 0 | 1 |
| DLGAP1-AS3   | 0 | 0              | 0 | 1 |
| DLGAP1-AS5   | 0 | 0              | 0 | 1 |
| LOC645355    | 0 | 0              | 0 | 1 |
| MIR3976      | 0 | 0              | 0 | 1 |
| LOC100130480 | 0 | 0              | 0 | 1 |
| ARHGAP28     | 0 | 0              | 0 | 1 |
| LRR30        | 0 | 0              | 0 | 1 |
| RAB31        | 0 | 0              | 0 | 1 |
| TXNDC2       | 0 | 0              | 0 | 1 |
| APCDD1       | 0 | 0              | 0 | 1 |
| C18orf61     | 0 | 0              | 0 | 1 |
| CIDEA        | 0 | 0.0126932 inf  | 0 | 1 |
| MIR5190      | 0 | 0              | 0 | 1 |
| MIR4526      | 0 | 0              | 0 | 1 |
| MC5R         | 0 | 0              | 0 | 1 |
| ANKRD30B     | 0 | 0              | 0 | 1 |
| MIR3156-2    | 0 | 0              | 0 | 1 |
| MIR320C1     | 0 | 0              | 0 | 1 |
| LAMA3        | 0 | 0              | 0 | 1 |
| MIR320C2     | 0 | 0              | 0 | 1 |
| LOC729950    | 0 | 0              | 0 | 1 |
| PSMA8        | 0 | 0              | 0 | 1 |
| MIR302F      | 0 | 0              | 0 | 1 |
| DSG1         | 0 | 0              | 0 | 1 |
| DSG4         | 0 | 0              | 0 | 1 |
| TTR          | 0 | 0              | 0 | 1 |
| WBP11P1      | 0 | 0              | 0 | 1 |
| ASXL3        | 0 | 0              | 0 | 1 |
| DTNA         | 0 | 0              | 0 | 1 |
| MIR3975      | 0 | 0              | 0 | 1 |
| MIR4318      | 0 | 0              | 0 | 1 |
| MIR5583-1    | 0 | 0              | 0 | 1 |
| SLC14A1      | 0 | 0              | 0 | 1 |
| SIGLEC15     | 0 | 0              | 0 | 1 |
| MIR4743      | 0 | 0              | 0 | 1 |
| MIR1539      | 0 | 0              | 0 | 1 |
| MAPK4        | 0 | 0              | 0 | 1 |
| LOC100287225 | 0 | 0              | 0 | 1 |
| DCC          | 0 | 0              | 0 | 1 |
| DYNAP        | 0 | 0              | 0 | 1 |
| MIR4529      | 0 | 0              | 0 | 1 |
| BOD1L2       | 0 | 0              | 0 | 1 |
| MIR122       | 0 | 0              | 0 | 1 |
| OACYLP       | 0 | 0              | 0 | 1 |
| GRP          | 0 | 0              | 0 | 1 |
| SERPINB5     | 0 | 0              | 0 | 1 |
| SERPINB12    | 0 | 0              | 0 | 1 |
| SERPINB13    | 0 | 0              | 0 | 1 |
| SERPINB11    | 0 | 0              | 0 | 1 |
| SERPINB10    | 0 | 0              | 0 | 1 |
| LOC284294    | 0 | 0              | 0 | 1 |
| CDH7         | 0 | 0              | 0 | 1 |
| MIR5011      | 0 | 0              | 0 | 1 |
| LOC643542    | 0 | 0              | 0 | 1 |
| LOC100505817 | 0 | 0.00724989 inf | 0 | 1 |
| C18orf63     | 0 | 0              | 0 | 1 |
| LOC339298    | 0 | 0              | 0 | 1 |
| GALLR1       | 0 | 0              | 0 | 1 |
| SALL3        | 0 | 0              | 0 | 1 |
| KCNG2        | 0 | 0.0722724 inf  | 0 | 1 |
| COLEC12      | 0 | 0              | 0 | 1 |
| DLGAP1       | 0 | 0.00221097 inf | 0 | 1 |
| EPB41L3      | 0 | 0              | 0 | 1 |
| TMEM200C     | 0 | 0              | 0 | 1 |
| L3MBTL4      | 0 | 0              | 0 | 1 |
| MIR4317      | 0 | 0              | 0 | 1 |
| LINC00668    | 0 | 0              | 0 | 1 |
| LOC100192426 | 0 | 0              | 0 | 1 |
| PIEZO2       | 0 | 0              | 0 | 1 |
| LOC100288122 | 0 | 0              | 0 | 1 |
| CXADRP3      | 0 | 0              | 0 | 1 |
| POTEC        | 0 | 0              | 0 | 1 |
| LOC644669    | 0 | 0              | 0 | 1 |
| MIR133A1     | 0 | 0              | 0 | 1 |
| MIR1-2       | 0 | 0              | 0 | 1 |
| CTAGE1       | 0 | 0              | 0 | 1 |

|              |   |            |     |   |
|--------------|---|------------|-----|---|
| ANKRD29      | 0 | 0          | 0   | 1 |
| LOC728606    | 0 | 0          | 0   | 1 |
| CHST9        | 0 | 0          | 0   | 1 |
| DSC2         | 0 | 0          | 0   | 1 |
| DSC1         | 0 | 0.00179597 | inf | 1 |
| SLC25A52     | 0 | 0          | 0   | 1 |
| CCDC178      | 0 | 0          | 0   | 1 |
| NOL4         | 0 | 0          | 0   | 1 |
| MIR187       | 0 | 0          | 0   | 1 |
| CELF4        | 0 | 0.00368089 | inf | 1 |
| MIR5583-2    | 0 | 0          | 0   | 1 |
| KC6          | 0 | 0          | 0   | 1 |
| RIT2         | 0 | 0          | 0   | 1 |
| SYT4         | 0 | 0          | 0   | 1 |
| MIR4319      | 0 | 0          | 0   | 1 |
| LOXHD1       | 0 | 0          | 0   | 1 |
| TCEB3CL2     | 0 | 0          | 0   | 1 |
| TCEB3CL2     | 0 | 0          | 0   | 1 |
| TCEB3C       | 0 | 0          | 0   | 1 |
| TCEB3B       | 0 | 0          | 0   | 1 |
| ZBTB7C       | 0 | 0.00679025 | inf | 1 |
| MIR4744      | 0 | 0          | 0   | 1 |
| SNORD58A     | 0 | 0          | 0   | 1 |
| MIR4320      | 0 | 0          | 0   | 1 |
| STARD6       | 0 | 0          | 0   | 1 |
| CCDC68       | 0 | 0          | 0   | 1 |
| LOC100505474 | 0 | 0          | 0   | 1 |
| MIR3591      | 0 | 0          | 0   | 1 |
| RAX          | 0 | 0          | 0   | 1 |
| CPLX4        | 0 | 0          | 0   | 1 |
| MC4R         | 0 | 0          | 0   | 1 |
| SERPINB4     | 0 | 0          | 0   | 1 |
| SERPINB3     | 0 | 0          | 0   | 1 |
| LINC00305    | 0 | 0          | 0   | 1 |
| LOC400654    | 0 | 0          | 0   | 1 |
| CDH19        | 0 | 0          | 0   | 1 |
| LOC100505776 | 0 | 0          | 0   | 1 |
| CBLN2        | 0 | 0          | 0   | 1 |
| NETO1        | 0 | 0          | 0   | 1 |
| LOC400655    | 0 | 0          | 0   | 1 |
| FAM69C       | 0 | 0          | 0   | 1 |
| C18orf62     | 0 | 0          | 0   | 1 |
| LOC100131655 | 0 | 0.0439348  | inf | 1 |
| OR4F17       | 0 | 0          | 0   | 1 |
| FGF22        | 0 | 0.058675   | inf | 1 |
| PALM         | 0 | 0          | 0   | 1 |
| MIR4745      | 0 | 0          | 0   | 1 |
| MIR3187      | 0 | 0          | 0   | 1 |
| KISS1R       | 0 | 0          | 0   | 1 |
| GRIN3B       | 0 | 0.0230415  | inf | 1 |
| PLK5         | 0 | 0          | 0   | 1 |
| ONECUT3      | 0 | 0          | 0   | 1 |
| GIPC3        | 0 | 0          | 0   | 1 |
| NMRK2        | 0 | 0          | 0   | 1 |
| MIR4746      | 0 | 0          | 0   | 1 |
| MIR7-3       | 0 | 0          | 0   | 1 |
| MIR4747      | 0 | 0          | 0   | 1 |
| ZNRF4        | 0 | 0          | 0   | 1 |
| CATSPERD     | 0 | 0.00820959 | inf | 1 |
| MBD3L5       | 0 | 0          | 0   | 1 |
| MBD3L2       | 0 | 0          | 0   | 1 |
| RETN         | 0 | 0          | 0   | 1 |
| CCL25        | 0 | 0.0182045  | inf | 1 |
| OR2Z1        | 0 | 0          | 0   | 1 |
| MBD3L1       | 0 | 0          | 0   | 1 |
| OR1M1        | 0 | 0          | 0   | 1 |
| OR7E24       | 0 | 0          | 0   | 1 |
| RDH8         | 0 | 0.00757169 | inf | 1 |
| C3P1         | 0 | 0          | 0   | 1 |
| SNORD105     | 0 | 0          | 0   | 1 |
| SNORD105B    | 0 | 0          | 0   | 1 |
| MIR4322      | 0 | 0          | 0   | 1 |
| MIR1238      | 0 | 58.8567    | inf | 1 |
| MIR638       | 0 | 0          | 0   | 1 |
| MIR4748      | 0 | 0          | 0   | 1 |
| TSPAN16      | 0 | 0          | 0   | 1 |
| BEST2        | 0 | 0.0682914  | inf | 1 |
| MIR181C      | 0 | 0          | 0   | 1 |
| OR7C2        | 0 | 0          | 0   | 1 |

|               |   |            |     |   |
|---------------|---|------------|-----|---|
| CCDC105       | 0 | 0          | 0   | 1 |
| CASP14        | 0 | 0          | 0   | 1 |
| OR111         | 0 | 0          | 0   | 1 |
| MIR1470       | 0 | 0          | 0   | 1 |
| CYP4F22       | 0 | 0          | 0   | 1 |
| CYP4F8        | 0 | 0          | 0   | 1 |
| CYP4F12       | 0 | 0          | 0   | 1 |
| OR10H2        | 0 | 0          | 0   | 1 |
| OR10H3        | 0 | 0          | 0   | 1 |
| OR10H5        | 0 | 0          | 0   | 1 |
| OR10H4        | 0 | 0          | 0   | 1 |
| LINC00661     | 0 | 0          | 0   | 1 |
| FLJ25328      | 0 | 0          | 0   | 1 |
| F2RL3         | 0 | 0.00551809 | inf | 1 |
| B3GNT3        | 0 | 0.00883986 | inf | 1 |
| SLC5A5        | 0 | 0.00925923 | inf | 1 |
| MIR3188       | 0 | 0          | 0   | 1 |
| MIR3189       | 0 | 0          | 0   | 1 |
| NCAN          | 0 | 0          | 0   | 1 |
| ZNF257        | 0 | 0          | 0   | 1 |
| ZNF729        | 0 | 0          | 0   | 1 |
| LOC440518     | 0 | 0          | 0   | 1 |
| ZNF726        | 0 | 0          | 0   | 1 |
| LOC148145     | 0 | 0          | 0   | 1 |
| LOC100505835  | 0 | 0          | 0   | 1 |
| VSTM2B        | 0 | 0.0153987  | inf | 1 |
| ZNF536        | 0 | 0          | 0   | 1 |
| DKFZp566F0947 | 0 | 0          | 0   | 1 |
| THEG5         | 0 | 0          | 0   | 1 |
| CHST8         | 0 | 0          | 0   | 1 |
| SCGB2B3P      | 0 | 0          | 0   | 1 |
| HPN           | 0 | 0          | 0   | 1 |
| MAG           | 0 | 0          | 0   | 1 |
| FFAR1         | 0 | 0          | 0   | 1 |
| FFAR3         | 0 | 0          | 0   | 1 |
| LOC100128682  | 0 | 0          | 0   | 1 |
| FFAR2         | 0 | 0          | 0   | 1 |
| KIRREL2       | 0 | 0          | 0   | 1 |
| LOC100134317  | 0 | 0.0565316  | inf | 1 |
| LOC644189     | 0 | 0.010315   | inf | 1 |
| ZNF570        | 0 | 0          | 0   | 1 |
| LOC644554     | 0 | 0.00913332 | inf | 1 |
| LGALS7B       | 0 | 0          | 0   | 1 |
| IFNL2         | 0 | 0          | 0   | 1 |
| IFNL1         | 0 | 0          | 0   | 1 |
| SELV          | 0 | 0          | 0   | 1 |
| LGALS13       | 0 | 0          | 0   | 1 |
| LGALS16       | 0 | 0          | 0   | 1 |
| LGALS17A      | 0 | 0          | 0   | 1 |
| LGALS14       | 0 | 0          | 0   | 1 |
| LEUTX         | 0 | 0          | 0   | 1 |
| CYP2G1P       | 0 | 0          | 0   | 1 |
| CYP2B7P1      | 0 | 0.0133307  | inf | 1 |
| CYP2B6        | 0 | 0.00320657 | inf | 1 |
| CYP2A13       | 0 | 0          | 0   | 1 |
| CYP2S1        | 0 | 0          | 0   | 1 |
| C19orf69      | 0 | 0          | 0   | 1 |
| CEACAM21      | 0 | 0.00749128 | inf | 1 |
| CEACAM5       | 0 | 0.00261617 | inf | 1 |
| CEACAM6       | 0 | 0          | 0   | 1 |
| CEACAM3       | 0 | 0          | 0   | 1 |
| DMRTC2        | 0 | 0          | 0   | 1 |
| LOC100289650  | 0 | 0          | 0   | 1 |
| PRG1          | 0 | 0          | 0   | 1 |
| CD177         | 0 | 0          | 0   | 1 |
| TEX101        | 0 | 0.0196742  | inf | 1 |
| IGSF23        | 0 | 0.0109261  | inf | 1 |
| CEACAM16      | 0 | 0          | 0   | 1 |
| CBLC          | 0 | 0          | 0   | 1 |
| APOC2,APOC4   | 0 | 0.0275597  | inf | 1 |
| MIR642A       | 0 | 0          | 0   | 1 |
| MIR769        | 0 | 0          | 0   | 1 |
| DKFZp434J0226 | 0 | 0.00690084 | inf | 1 |
| IGFL1         | 0 | 0          | 0   | 1 |
| MIR3190       | 0 | 0          | 0   | 1 |
| SNAR-A13      | 0 | 0          | 0   | 1 |
| SNAR-C2       | 0 | 0          | 0   | 1 |
| SNAR-A2       | 0 | 0          | 0   | 1 |
| SNAR-A8       | 0 | 0          | 0   | 1 |

|           |   |               |   |   |
|-----------|---|---------------|---|---|
| SNAR-C5   | 0 | 0             | 0 | 1 |
| SNAR-A2   | 0 | 0             | 0 | 1 |
| SNAR-C4   | 0 | 0             | 0 | 1 |
| SNAR-A13  | 0 | 0             | 0 | 1 |
| SNAR-C3   | 0 | 0             | 0 | 1 |
| SNAR-C5   | 0 | 0             | 0 | 1 |
| ELSPBP1   | 0 | 0             | 0 | 1 |
| CGB2      | 0 | 0.0270406 inf | 0 | 1 |
| SNAR-G1   | 0 | 0             | 0 | 1 |
| SNORD32A  | 0 | 38.6928 inf   | 0 | 1 |
| SNORD34   | 0 | 0             | 0 | 1 |
| SNORD35B  | 0 | 23.2404 inf   | 0 | 1 |
| MIR5088   | 0 | 0             | 0 | 1 |
| MIR4749   | 0 | 0             | 0 | 1 |
| MIR4750   | 0 | 0             | 0 | 1 |
| GPR32     | 0 | 0             | 0 | 1 |
| KLK3      | 0 | 0             | 0 | 1 |
| KLK2      | 0 | 0             | 0 | 1 |
| SIGLEC7   | 0 | 0             | 0 | 1 |
| SIGLEC17P | 0 | 0             | 0 | 1 |
| SIGLECL1  | 0 | 0             | 0 | 1 |
| CEACAM18  | 0 | 0             | 0 | 1 |
| MIR99B    | 0 | 0             | 0 | 1 |
| MIRLET7E  | 0 | 0             | 0 | 1 |
| MIR125A   | 0 | 0             | 0 | 1 |
| FPR2      | 0 | 0             | 0 | 1 |
| MIR643    | 0 | 0             | 0 | 1 |
| ZNF534    | 0 | 0             | 0 | 1 |
| ZNF818P   | 0 | 0             | 0 | 1 |
| FAM90A27P | 0 | 0             | 0 | 1 |
| DPRX      | 0 | 0             | 0 | 1 |
| MIR512-2  | 0 | 0             | 0 | 1 |
| MIR512-2  | 0 | 0             | 0 | 1 |
| MIR1323   | 0 | 0             | 0 | 1 |
| MIR498    | 0 | 0             | 0 | 1 |
| MIR520E   | 0 | 0             | 0 | 1 |
| MIR515-2  | 0 | 0             | 0 | 1 |
| MIR519E   | 0 | 0             | 0 | 1 |
| MIR520F   | 0 | 0             | 0 | 1 |
| MIR515-1  | 0 | 0             | 0 | 1 |
| MIR519C   | 0 | 0             | 0 | 1 |
| MIR1283-1 | 0 | 0             | 0 | 1 |
| MIR520A   | 0 | 0             | 0 | 1 |
| MIR526B   | 0 | 0             | 0 | 1 |
| MIR519B   | 0 | 0             | 0 | 1 |
| MIR525    | 0 | 0             | 0 | 1 |
| MIR523    | 0 | 0             | 0 | 1 |
| MIR518F   | 0 | 0             | 0 | 1 |
| MIR520B   | 0 | 0             | 0 | 1 |
| MIR518B   | 0 | 0             | 0 | 1 |
| MIR526A1  | 0 | 0             | 0 | 1 |
| MIR520C   | 0 | 0             | 0 | 1 |
| MIR518C   | 0 | 0             | 0 | 1 |
| MIR524    | 0 | 0             | 0 | 1 |
| MIR517A   | 0 | 0             | 0 | 1 |
| MIR519D   | 0 | 0             | 0 | 1 |
| MIR521-2  | 0 | 0             | 0 | 1 |
| MIR520D   | 0 | 0             | 0 | 1 |
| MIR517B   | 0 | 0             | 0 | 1 |
| MIR520G   | 0 | 0             | 0 | 1 |
| MIR516B2  | 0 | 0             | 0 | 1 |
| MIR526A2  | 0 | 0             | 0 | 1 |
| MIR518E   | 0 | 0             | 0 | 1 |
| MIR518A1  | 0 | 0             | 0 | 1 |
| MIR518D   | 0 | 0             | 0 | 1 |
| MIR516B1  | 0 | 0             | 0 | 1 |
| MIR518A2  | 0 | 0             | 0 | 1 |
| MIR517C   | 0 | 0             | 0 | 1 |
| MIR520H   | 0 | 0             | 0 | 1 |
| MIR521-1  | 0 | 0             | 0 | 1 |
| MIR522    | 0 | 0             | 0 | 1 |
| MIR519A1  | 0 | 0             | 0 | 1 |
| MIR527    | 0 | 0             | 0 | 1 |
| MIR516A1  | 0 | 0             | 0 | 1 |
| MIR1283-2 | 0 | 0             | 0 | 1 |
| MIR516A2  | 0 | 0             | 0 | 1 |
| MIR519A2  | 0 | 0             | 0 | 1 |
| MIR371A   | 0 | 0             | 0 | 1 |
| MIR372    | 0 | 0             | 0 | 1 |



|                      |   |             |     |   |
|----------------------|---|-------------|-----|---|
| MIR373               | 0 | 0           | 0   | 1 |
| MIR4752              | 0 | 0           | 0   | 1 |
| TTYH1                | 0 | 0.0247862   | inf | 1 |
| KIR3DX1              | 0 | 0           | 0   | 1 |
| LILRA2               | 0 | 0           | 0   | 1 |
| LILRA1               | 0 | 0           | 0   | 1 |
| LILRB4               | 0 | 0           | 0   | 1 |
| LILRP2               | 0 | 0           | 0   | 1 |
| KIR3DL3              | 0 | 0           | 0   | 1 |
| KIR2DL3              | 0 | 0           | 0   | 1 |
| KIR2DL1              | 0 | 0           | 0   | 1 |
| KIR2DL4,LOC100287534 | 0 | 0           | 0   | 1 |
| KIR3DL1              | 0 | 0           | 0   | 1 |
| KIR2DS4              | 0 | 0           | 0   | 1 |
| KIR3DL2              | 0 | 0           | 0   | 1 |
| NCR1                 | 0 | 0           | 0   | 1 |
| NLRP2                | 0 | 0           | 0   | 1 |
| NLRP8                | 0 | 0.00462713  | inf | 1 |
| NLRP5                | 0 | 0           | 0   | 1 |
| GALP                 | 0 | 0           | 0   | 1 |
| LOC100128252         | 0 | 0           | 0   | 1 |
| ZNF471               | 0 | 0.00196385  | inf | 1 |
| ZFP28                | 0 | 0           | 0   | 1 |
| ZNF470               | 0 | 0.000951756 | inf | 1 |
| PEG3-AS1             | 0 | 0           | 0   | 1 |
| MIMT1                | 0 | 0           | 0   | 1 |
| ZNF530               | 0 | 0           | 0   | 1 |
| ZNF134               | 0 | 0.00426493  | inf | 1 |
| ZSCAN4               | 0 | 0           | 0   | 1 |
| ZSCAN1               | 0 | 0           | 0   | 1 |
| ZNF135               | 0 | 0           | 0   | 1 |
| LOC646862            | 0 | 0           | 0   | 1 |
| FAM138A              | 0 | 0           | 0   | 1 |
| THEG                 | 0 | 0           | 0   | 1 |
| MIR1227              | 0 | 0           | 0   | 1 |
| C19orf77             | 0 | 0.0284237   | inf | 1 |
| ZFR2                 | 0 | 0           | 0   | 1 |
| SNORD37              | 0 | 0           | 0   | 1 |
| ARRDC5               | 0 | 0           | 0   | 1 |
| TUBB4A               | 0 | 0.00655547  | inf | 1 |
| CD70                 | 0 | 0           | 0   | 1 |
| MBD3L4               | 0 | 0           | 0   | 1 |
| MBD3L3               | 0 | 0           | 0   | 1 |
| CLEC4G               | 0 | 0           | 0   | 1 |
| CD209                | 0 | 0.0056776   | inf | 1 |
| LOC388499            | 0 | 0.0109464   | inf | 1 |
| MIR4999              | 0 | 0           | 0   | 1 |
| ADAMTS10             | 0 | 0           | 0   | 1 |
| ACTL9                | 0 | 0           | 0   | 1 |
| OR7G2                | 0 | 0           | 0   | 1 |
| OR7G1                | 0 | 0           | 0   | 1 |
| OR7G3                | 0 | 0           | 0   | 1 |
| OR7D4                | 0 | 0           | 0   | 1 |
| ZNF560               | 0 | 0           | 0   | 1 |
| ZNF812               | 0 | 0           | 0   | 1 |
| COL5A3               | 0 | 0.00979266  | inf | 1 |
| S1PR5                | 0 | 0           | 0   | 1 |
| MIR199A1             | 0 | 0           | 0   | 1 |
| SNORD41              | 0 | 0           | 0   | 1 |
| KLF1                 | 0 | 0.0247347   | inf | 1 |
| MIR27A               | 0 | 0           | 0   | 1 |
| MIR23A               | 0 | 0           | 0   | 1 |
| EMR3                 | 0 | 0           | 0   | 1 |
| OR7C1                | 0 | 0           | 0   | 1 |
| OR7A5                | 0 | 0           | 0   | 1 |
| OR7A10               | 0 | 0           | 0   | 1 |
| OR7A17               | 0 | 0           | 0   | 1 |
| RASAL3               | 0 | 0           | 0   | 1 |
| PGLYRP2              | 0 | 0.0285242   | inf | 1 |
| CYP4F24P             | 0 | 0           | 0   | 1 |
| OR10H1               | 0 | 0           | 0   | 1 |
| LOC729966            | 0 | 0           | 0   | 1 |
| COMP                 | 0 | 0           | 0   | 1 |
| MIR1270-2            | 0 | 0           | 0   | 1 |
| ZNF826P              | 0 | 0           | 0   | 1 |
| MIR1270-2            | 0 | 0           | 0   | 1 |
| ZNF676               | 0 | 0           | 0   | 1 |
| ZNF98                | 0 | 0           | 0   | 1 |
| ZNF728               | 0 | 0           | 0   | 1 |

|              |   |            |     |   |
|--------------|---|------------|-----|---|
| LOC284395    | 0 | 0          | 0   | 1 |
| TSHZ3        | 0 | 0          | 0   | 1 |
| LOC400685    | 0 | 0          | 0   | 1 |
| LOC100652909 | 0 | 0          | 0   | 1 |
| LOC100128675 | 0 | 0.00369474 | inf | 1 |
| ATP4A        | 0 | 0          | 0   | 1 |
| PRODH2       | 0 | 0          | 0   | 1 |
| TYROBP       | 0 | 0          | 0   | 1 |
| LOC100631378 | 0 | 0          | 0   | 1 |
| PPP1R14A     | 0 | 0          | 0   | 1 |
| LGALS7       | 0 | 0          | 0   | 1 |
| SYCN         | 0 | 0          | 0   | 1 |
| IFNL3        | 0 | 0          | 0   | 1 |
| IFNL4        | 0 | 0          | 0   | 1 |
| MIR4530      | 0 | 0          | 0   | 1 |
| CLC          | 0 | 0          | 0   | 1 |
| MIR641       | 0 | 0          | 0   | 1 |
| CYP2A6       | 0 | 0          | 0   | 1 |
| CYP2A7       | 0 | 0          | 0   | 1 |
| LOC100505495 | 0 | 0          | 0   | 1 |
| CEACAM4      | 0 | 0          | 0   | 1 |
| CEACAM7      | 0 | 0          | 0   | 1 |
| LYPD4        | 0 | 0          | 0   | 1 |
| MIR4323      | 0 | 0          | 0   | 1 |
| CXCL17       | 0 | 0          | 0   | 1 |
| PSG8         | 0 | 0          | 0   | 1 |
| PSG10P       | 0 | 0          | 0   | 1 |
| PSG6         | 0 | 0          | 0   | 1 |
| PSG7         | 0 | 0          | 0   | 1 |
| PSG11        | 0 | 0          | 0   | 1 |
| LOC284344    | 0 | 0          | 0   | 1 |
| MIR4531      | 0 | 0          | 0   | 1 |
| MIR330       | 0 | 0          | 0   | 1 |
| MIR642B      | 0 | 0          | 0   | 1 |
| RSPH6A       | 0 | 0          | 0   | 1 |
| NANOS2       | 0 | 0          | 0   | 1 |
| NOVA2        | 0 | 0          | 0   | 1 |
| PGLYRP1      | 0 | 0          | 0   | 1 |
| IGFL3        | 0 | 0.0256121  | inf | 1 |
| RNU6-66      | 0 | 0          | 0   | 1 |
| CCDC8        | 0 | 0          | 0   | 1 |
| PNMAL2       | 0 | 0          | 0   | 1 |
| GNG8         | 0 | 0          | 0   | 1 |
| MIR320E      | 0 | 0          | 0   | 1 |
| SNAR-E       | 0 | 0          | 0   | 1 |
| MIR3191      | 0 | 0          | 0   | 1 |
| ZNF541       | 0 | 0          | 0   | 1 |
| TPRX1        | 0 | 0          | 0   | 1 |
| SULT2A1      | 0 | 0          | 0   | 1 |
| BSPH1        | 0 | 0          | 0   | 1 |
| CABP5        | 0 | 0          | 0   | 1 |
| TULP2        | 0 | 0          | 0   | 1 |
| SNAR-G2      | 0 | 0          | 0   | 1 |
| CGB1         | 0 | 0          | 0   | 1 |
| MIR4324      | 0 | 0          | 0   | 1 |
| MIR150       | 0 | 0          | 0   | 1 |
| TSKS         | 0 | 0          | 0   | 1 |
| SNAR-A8      | 0 | 0          | 0   | 1 |
| SNAR-A4      | 0 | 0          | 0   | 1 |
| SNAR-A10     | 0 | 0          | 0   | 1 |
| SNAR-A7      | 0 | 0          | 0   | 1 |
| SNAR-A14     | 0 | 0          | 0   | 1 |
| SNAR-A3      | 0 | 0          | 0   | 1 |
| SNAR-A6      | 0 | 0          | 0   | 1 |
| SNAR-A10     | 0 | 0          | 0   | 1 |
| SNAR-A8      | 0 | 0          | 0   | 1 |
| SNAR-B1      | 0 | 0          | 0   | 1 |
| SNAR-B2      | 0 | 0          | 0   | 1 |
| SNAR-D       | 0 | 0          | 0   | 1 |
| IZUMO2       | 0 | 0          | 0   | 1 |
| NAPSB        | 0 | 0          | 0   | 1 |
| SNORD88B     | 0 | 0          | 0   | 1 |
| SNORD88A     | 0 | 0          | 0   | 1 |
| SNORD88C     | 0 | 0          | 0   | 1 |
| KLKP1        | 0 | 0          | 0   | 1 |
| KLK5         | 0 | 0          | 0   | 1 |
| KLK7         | 0 | 0          | 0   | 1 |
| KLK9         | 0 | 0          | 0   | 1 |
| KLK10        | 0 | 0          | 0   | 1 |

|              |   |            |     |   |
|--------------|---|------------|-----|---|
| KLK11        | 0 | 0          | 0   | 1 |
| KLK12        | 0 | 0          | 0   | 1 |
| KLK13        | 0 | 0          | 0   | 1 |
| NKG7         | 0 | 0          | 0   | 1 |
| LIM2         | 0 | 0          | 0   | 1 |
| SIGLEC8      | 0 | 0          | 0   | 1 |
| SIGLEC12     | 0 | 0          | 0   | 1 |
| SIGLEC6      | 0 | 0          | 0   | 1 |
| FPR1         | 0 | 0          | 0   | 1 |
| ZNF415       | 0 | 0          | 0   | 1 |
| VN1R4        | 0 | 0.0154398  | inf | 1 |
| BIRC8        | 0 | 0          | 0   | 1 |
| MIR371B      | 0 | 0          | 0   | 1 |
| TARM1        | 0 | 0          | 0   | 1 |
| LILRB5       | 0 | 0.00596935 | inf | 1 |
| LILRB2       | 0 | 0          | 0   | 1 |
| LILRA3       | 0 | 0          | 0   | 1 |
| LILRA4       | 0 | 0          | 0   | 1 |
| NLRP7        | 0 | 0          | 0   | 1 |
| RNU6-64      | 0 | 0          | 0   | 1 |
| FAM71E2      | 0 | 0          | 0   | 1 |
| SGK110       | 0 | 0          | 0   | 1 |
| NLRP13       | 0 | 0          | 0   | 1 |
| ZNF835       | 0 | 0.0159843  | inf | 1 |
| PEG3,ZIM2    | 0 | 0          | 0   | 1 |
| ZIM3         | 0 | 0          | 0   | 1 |
| ZNF418       | 0 | 0.00215084 | inf | 1 |
| ZNF256       | 0 | 0          | 0   | 1 |
| ZNF606       | 0 | 0          | 0   | 1 |
| MIR4754      | 0 | 0          | 0   | 1 |
| TPO          | 0 | 0          | 0   | 1 |
| LOC730811    | 0 | 0          | 0   | 1 |
| SOX11        | 0 | 0          | 0   | 1 |
| LOC150622    | 0 | 0          | 0   | 1 |
| LOC400940    | 0 | 0          | 0   | 1 |
| KCNF1        | 0 | 0          | 0   | 1 |
| LINC00570    | 0 | 0          | 0   | 1 |
| MIR3125      | 0 | 0          | 0   | 1 |
| MYCN         | 0 | 0          | 0   | 1 |
| VSNL1        | 0 | 0          | 0   | 1 |
| MSGN1        | 0 | 0          | 0   | 1 |
| KCNS3        | 0 | 0          | 0   | 1 |
| MIR4757      | 0 | 0          | 0   | 1 |
| FLJ12334     | 0 | 0          | 0   | 1 |
| GDF7         | 0 | 0          | 0   | 1 |
| C2orf70      | 0 | 0          | 0   | 1 |
| DPYSL5       | 0 | 0          | 0   | 1 |
| TCF23        | 0 | 0          | 0   | 1 |
| DNAJC5G      | 0 | 0          | 0   | 1 |
| MIR4263      | 0 | 0          | 0   | 1 |
| PLB1         | 0 | 0          | 0   | 1 |
| SNORD92      | 0 | 0          | 0   | 1 |
| SNORD53      | 0 | 0          | 0   | 1 |
| LBH          | 0 | 0          | 0   | 1 |
| EHD3         | 0 | 0          | 0   | 1 |
| MIR558       | 0 | 0          | 0   | 1 |
| MIR4765      | 0 | 0          | 0   | 1 |
| LINC00486    | 0 | 0          | 0   | 1 |
| LOC100271832 | 0 | 0          | 0   | 1 |
| VIT          | 0 | 0          | 0   | 1 |
| CYP1B1-AS1   | 0 | 0.00637941 | inf | 1 |
| SLC8A1-AS1   | 0 | 0          | 0   | 1 |
| LOC388942    | 0 | 0          | 0   | 1 |
| ABCG8        | 0 | 0          | 0   | 1 |
| SIX3         | 0 | 0          | 0   | 1 |
| TMEM247      | 0 | 0          | 0   | 1 |
| MIR559       | 0 | 0          | 0   | 1 |
| RPL23AP32    | 0 | 0.039572   | inf | 1 |
| CCDC85A      | 0 | 0          | 0   | 1 |
| FLJ30838     | 0 | 0          | 0   | 1 |
| MIR5192      | 0 | 0          | 0   | 1 |
| MIR4434      | 0 | 0          | 0   | 1 |
| LOC339807    | 0 | 0          | 0   | 1 |
| PROKR1       | 0 | 0          | 0   | 1 |
| ARHGAP25     | 0 | 0          | 0   | 1 |
| GKN1         | 0 | 0          | 0   | 1 |
| ANTXR1       | 0 | 0          | 0   | 1 |
| MIR3126      | 0 | 0          | 0   | 1 |
| ATP6V1B1     | 0 | 0.0148379  | inf | 1 |

|                  |   |            |     |   |
|------------------|---|------------|-----|---|
| OR7E91P          | 0 | 0          | 0   | 1 |
| EMX1             | 0 | 0          | 0   | 1 |
| NOTO             | 0 | 0          | 0   | 1 |
| DCTN1-AS1        | 0 | 0          | 0   | 1 |
| MIR5000          | 0 | 0          | 0   | 1 |
| REG3G            | 0 | 0          | 0   | 1 |
| REG1A            | 0 | 0          | 0   | 1 |
| LOC1720          | 0 | 0          | 0   | 1 |
| FUNDC2P2         | 0 | 0          | 0   | 1 |
| GNLY             | 0 | 0          | 0   | 1 |
| LOC284950        | 0 | 0          | 0   | 1 |
| RGPD1,RGPD2      | 0 | 0          | 0   | 1 |
| MIR4435-1        | 0 | 0          | 0   | 1 |
| SMYD1            | 0 | 0          | 0   | 1 |
| THNSL2           | 0 | 0          | 0   | 1 |
| TEX37            | 0 | 0          | 0   | 1 |
| ANKRD36BP2       | 0 | 0.00425344 | inf | 1 |
| MIR4436A         | 0 | 0          | 0   | 1 |
| ACTR3BP2         | 0 | 0          | 0   | 1 |
| MAL              | 0 | 0          | 0   | 1 |
| TRIM43           | 0 | 0          | 0   | 1 |
| MIR3127          | 0 | 0          | 0   | 1 |
| VWA3B            | 0 | 0          | 0   | 1 |
| CNGA3            | 0 | 0          | 0   | 1 |
| NMS              | 0 | 0          | 0   | 1 |
| MIR5696          | 0 | 0          | 0   | 1 |
| IL1R2            | 0 | 0          | 0   | 1 |
| IL1RL2           | 0 | 0          | 0   | 1 |
| MIR4772          | 0 | 0          | 0   | 1 |
| LOC150568        | 0 | 0          | 0   | 1 |
| POU3F3           | 0 | 0          | 0   | 1 |
| C2orf40          | 0 | 0.0194615  | inf | 1 |
| PLGLA            | 0 | 0          | 0   | 1 |
| SLC5A7           | 0 | 0          | 0   | 1 |
| SULT1C3          | 0 | 0          | 0   | 1 |
| SULT1C2P1        | 0 | 0          | 0   | 1 |
| RGPD5,RGPD6      | 0 | 0          | 0   | 1 |
| LOC100507334     | 0 | 0          | 0   | 1 |
| MIR4436B2        | 0 | 0          | 0   | 1 |
| ACOXL            | 0 | 0          | 0   | 1 |
| IL36G            | 0 | 0          | 0   | 1 |
| IL36A            | 0 | 0          | 0   | 1 |
| IL36RN           | 0 | 0          | 0   | 1 |
| IL1F10           | 0 | 0          | 0   | 1 |
| IL1RN            | 0 | 0          | 0   | 1 |
| FAM138B          | 0 | 0.0116224  | inf | 1 |
| DPP10            | 0 | 0          | 0   | 1 |
| MARCO            | 0 | 0          | 0   | 1 |
| PCDP1            | 0 | 0          | 0   | 1 |
| GLI2             | 0 | 0          | 0   | 1 |
| CNTNAP5          | 0 | 0          | 0   | 1 |
| GYPC             | 0 | 0          | 0   | 1 |
| PROC             | 0 | 0.0110521  | inf | 1 |
| GPR17            | 0 | 0          | 0   | 1 |
| CCDC74B-AS1      | 0 | 0.00706828 | inf | 1 |
| CFC1B            | 0 | 0          | 0   | 1 |
| LOC646743,TISP43 | 0 | 0          | 0   | 1 |
| CYP4F30P         | 0 | 0          | 0   | 1 |
| GPR148           | 0 | 0          | 0   | 1 |
| AMER3            | 0 | 0.00172227 | inf | 1 |
| POTEE            | 0 | 0.00964232 | inf | 1 |
| LOC440910        | 0 | 0          | 0   | 1 |
| LOC389043        | 0 | 0          | 0   | 1 |
| RNU6-81          | 0 | 0          | 0   | 1 |
| MIR3679          | 0 | 0          | 0   | 1 |
| ACMSD            | 0 | 0          | 0   | 1 |
| MIR128-1         | 0 | 0          | 0   | 1 |
| THSD7B           | 0 | 0          | 0   | 1 |
| KYNU             | 0 | 0          | 0   | 1 |
| ARHGAP15         | 0 | 0.00587604 | inf | 1 |
| ZEB2-AS1         | 0 | 0          | 0   | 1 |
| DKFZp686O1327    | 0 | 0          | 0   | 1 |
| KIF5C            | 0 | 0          | 0   | 1 |
| LYPD6B           | 0 | 0          | 0   | 1 |
| TNFAIP6          | 0 | 0          | 0   | 1 |
| MIR4773-1        | 0 | 0          | 0   | 1 |
| GALNT13          | 0 | 0          | 0   | 1 |
| GALNT5           | 0 | 0          | 0   | 1 |
| UPP2             | 0 | 0          | 0   | 1 |

|                       |   |            |     |   |
|-----------------------|---|------------|-----|---|
| CCDC148-AS1           | 0 | 0          | 0   | 1 |
| DAPL1                 | 0 | 0          | 0   | 1 |
| SLC4A10               | 0 | 0          | 0   | 1 |
| CSRNP3                | 0 | 0          | 0   | 1 |
| XIRP2                 | 0 | 0          | 0   | 1 |
| B3GALT1               | 0 | 0          | 0   | 1 |
| MIR4774               | 0 | 0          | 0   | 1 |
| G6PC2                 | 0 | 0          | 0   | 1 |
| MYO3B                 | 0 | 0          | 0   | 1 |
| LOC285084             | 0 | 0.00351222 | inf | 1 |
| SP9                   | 0 | 0          | 0   | 1 |
| HOXD12                | 0 | 0          | 0   | 1 |
| HOXD11                | 0 | 0          | 0   | 1 |
| HOXD10                | 0 | 0          | 0   | 1 |
| MIR10B                | 0 | 0          | 0   | 1 |
| OSBPPL6               | 0 | 0          | 0   | 1 |
| ITGA4                 | 0 | 0.00123526 | inf | 1 |
| PPP1R1C               | 0 | 0          | 0   | 1 |
| ZNF804A               | 0 | 0          | 0   | 1 |
| FSIP2                 | 0 | 0          | 0   | 1 |
| MIR561                | 0 | 0          | 0   | 1 |
| COL3A1                | 0 | 0          | 0   | 1 |
| MIR1245A              | 0 | 0          | 0   | 1 |
| PCGEM1                | 0 | 0          | 0   | 1 |
| PLCL1                 | 0 | 0          | 0   | 1 |
| CDK15                 | 0 | 0          | 0   | 1 |
| SNORD70               | 0 | 0          | 0   | 1 |
| SNORD11B              | 0 | 0          | 0   | 1 |
| SNORD11               | 0 | 0          | 0   | 1 |
| CD28                  | 0 | 0          | 0   | 1 |
| CTLA4                 | 0 | 0          | 0   | 1 |
| ICOS                  | 0 | 0          | 0   | 1 |
| SNORD51               | 0 | 0          | 0   | 1 |
| ADAM23                | 0 | 0          | 0   | 1 |
| LOC200726             | 0 | 0          | 0   | 1 |
| MIR3130-2             | 0 | 0          | 0   | 1 |
| LOC100507443          | 0 | 0          | 0   | 1 |
| PTH2R                 | 0 | 0          | 0   | 1 |
| CPS1-IT1              | 0 | 0          | 0   | 1 |
| VWC2L                 | 0 | 0          | 0   | 1 |
| VWC2L-IT1             | 0 | 0          | 0   | 1 |
| RUFY4                 | 0 | 0          | 0   | 1 |
| MIR26B                | 0 | 0          | 0   | 1 |
| VIL1                  | 0 | 0.00487159 | inf | 1 |
| WNT6                  | 0 | 0          | 0   | 1 |
| CDK5R2                | 0 | 0          | 0   | 1 |
| LINC00608             | 0 | 0          | 0   | 1 |
| LOC100129175          | 0 | 0          | 0   | 1 |
| CCDC140               | 0 | 0          | 0   | 1 |
| MOGAT1                | 0 | 0          | 0   | 1 |
| KCNE4                 | 0 | 0          | 0   | 1 |
| NYAP2                 | 0 | 0          | 0   | 1 |
| MIR548AR              | 0 | 0          | 0   | 1 |
| LOC646736             | 0 | 0          | 0   | 1 |
| CCL20                 | 0 | 0          | 0   | 1 |
| LOC151484             | 0 | 0          | 0   | 1 |
| SPATA3                | 0 | 0          | 0   | 1 |
| MIR4777               | 0 | 0          | 0   | 1 |
| C2orf57               | 0 | 0          | 0   | 1 |
| ALPP                  | 0 | 0          | 0   | 1 |
| ALPPL2                | 0 | 0.0059646  | inf | 1 |
| ALPI                  | 0 | 0          | 0   | 1 |
| NEU2                  | 0 | 0          | 0   | 1 |
| UGT1A1,UGT1A10,UGT1A3 | 0 | 0          | 0   | 1 |
| TRPM8                 | 0 | 0          | 0   | 1 |
| SPP2                  | 0 | 0          | 0   | 1 |
| CXCR7                 | 0 | 0          | 0   | 1 |
| MLPH                  | 0 | 0          | 0   | 1 |
| PRLH                  | 0 | 0          | 0   | 1 |
| TWIST2                | 0 | 0          | 0   | 1 |
| MIR4269               | 0 | 0          | 0   | 1 |
| LOC150935             | 0 | 0          | 0   | 1 |
| MIR149                | 0 | 0          | 0   | 1 |
| AQP12A                | 0 | 0          | 0   | 1 |
| AGXT                  | 0 | 0          | 0   | 1 |
| GAL3ST2               | 0 | 0.0230255  | inf | 1 |
| CXXC11                | 0 | 0          | 0   | 1 |
| LOC339822             | 0 | 0          | 0   | 1 |
| MYT1L                 | 0 | 0          | 0   | 1 |

|                     |   |            |     |   |
|---------------------|---|------------|-----|---|
| LOC100505964        | 0 | 0          | 0   | 1 |
| LOC727982           | 0 | 0          | 0   | 1 |
| LINC00487           | 0 | 0          | 0   | 1 |
| LOC339788           | 0 | 0          | 0   | 1 |
| LINC00299           | 0 | 0          | 0   | 1 |
| CYS1                | 0 | 0          | 0   | 1 |
| MIR4261             | 0 | 0          | 0   | 1 |
| FLJ33534            | 0 | 0          | 0   | 1 |
| MIR4429             | 0 | 0          | 0   | 1 |
| NTSR2               | 0 | 0          | 0   | 1 |
| MIR4262             | 0 | 0          | 0   | 1 |
| LOC100506474        | 0 | 0          | 0   | 1 |
| MYCNOS              | 0 | 0          | 0   | 1 |
| RAD51AP2            | 0 | 0          | 0   | 1 |
| APOB                | 0 | 0          | 0   | 1 |
| POMC                | 0 | 0          | 0   | 1 |
| MIR1301             | 0 | 0          | 0   | 1 |
| CIB4                | 0 | 0.0159928  | inf | 1 |
| C2orf53             | 0 | 0          | 0   | 1 |
| SLC30A3             | 0 | 0          | 0   | 1 |
| C2orf71             | 0 | 0          | 0   | 1 |
| ALK                 | 0 | 0          | 0   | 1 |
| CAPN13              | 0 | 0          | 0   | 1 |
| GALNT14             | 0 | 0          | 0   | 1 |
| CAPN14              | 0 | 0          | 0   | 1 |
| XDH                 | 0 | 0.00193389 | inf | 1 |
| SRD5A2              | 0 | 0          | 0   | 1 |
| SULT6B1             | 0 | 0          | 0   | 1 |
| CYP1B1              | 0 | 0          | 0   | 1 |
| CDKL4               | 0 | 0.0122232  | inf | 1 |
| SLC8A1              | 0 | 0          | 0   | 1 |
| C2orf91             | 0 | 0          | 0   | 1 |
| KCNG3               | 0 | 0          | 0   | 1 |
| HAAO                | 0 | 0          | 0   | 1 |
| LOC728819           | 0 | 0          | 0   | 1 |
| MIR548AD            | 0 | 0          | 0   | 1 |
| SIX2                | 0 | 0          | 0   | 1 |
| KCNK12              | 0 | 0.0377826  | inf | 1 |
| LHCGR               | 0 | 0          | 0   | 1 |
| FSHR                | 0 | 0          | 0   | 1 |
| NRXN1               | 0 | 0          | 0   | 1 |
| MIR3682             | 0 | 0          | 0   | 1 |
| TSPYL6              | 0 | 0          | 0   | 1 |
| EFEMP1              | 0 | 0          | 0   | 1 |
| MIR217              | 0 | 0          | 0   | 1 |
| MIR216A             | 0 | 0          | 0   | 1 |
| MIR216B             | 0 | 0          | 0   | 1 |
| MIR4432             | 0 | 0          | 0   | 1 |
| SNORA70B            | 0 | 0          | 0   | 1 |
| LINC00309           | 0 | 0          | 0   | 1 |
| LOC400958           | 0 | 0          | 0   | 1 |
| MIR4778             | 0 | 0          | 0   | 1 |
| MEIS1-AS3           | 0 | 0          | 0   | 1 |
| LOC644838           | 0 | 0          | 0   | 1 |
| CNRIP1              | 0 | 0          | 0   | 1 |
| BMP10               | 0 | 0          | 0   | 1 |
| GKN2                | 0 | 0          | 0   | 1 |
| FIGLA               | 0 | 0          | 0   | 1 |
| CLEC4F              | 0 | 0          | 0   | 1 |
| CD207               | 0 | 0.00478663 | inf | 1 |
| EGR4                | 0 | 0          | 0   | 1 |
| NAT8                | 0 | 0          | 0   | 1 |
| NAT8B               | 0 | 0.0174635  | inf | 1 |
| EVA1A               | 0 | 0          | 0   | 1 |
| LRRTM4              | 0 | 0          | 0   | 1 |
| SNAR-H              | 0 | 0          | 0   | 1 |
| REG1B               | 0 | 0          | 0   | 1 |
| REG1P               | 0 | 0          | 0   | 1 |
| REG3A               | 0 | 0          | 0   | 1 |
| MIR4264             | 0 | 0          | 0   | 1 |
| LRRTM1              | 0 | 0          | 0   | 1 |
| MIR4779             | 0 | 0          | 0   | 1 |
| CD8B                | 0 | 0          | 0   | 1 |
| RGPD1,RGPD2         | 0 | 0.00360785 | inf | 1 |
| MIR4780             | 0 | 0          | 0   | 1 |
| FABP1               | 0 | 0          | 0   | 1 |
| ANKRD20A8P,LOC90499 | 0 | 0.00621461 | inf | 1 |
| TRIM43B             | 0 | 0          | 0   | 1 |
| FAM178B             | 0 | 0.0175268  | inf | 1 |

|                  |   |            |     |   |
|------------------|---|------------|-----|---|
| CHST10           | 0 | 0          | 0   | 1 |
| CREG2            | 0 | 0          | 0   | 1 |
| RFX8             | 0 | 0.00641003 | inf | 1 |
| LOC100287010     | 0 | 0          | 0   | 1 |
| LOC284998        | 0 | 0          | 0   | 1 |
| LOC100506421     | 0 | 0          | 0   | 1 |
| LOC285000        | 0 | 0          | 0   | 1 |
| LOC729121        | 0 | 0.0193182  | inf | 1 |
| MIR4265          | 0 | 0          | 0   | 1 |
| MIR4266          | 0 | 0          | 0   | 1 |
| MIR4267          | 0 | 0          | 0   | 1 |
| MIR4436B1        | 0 | 0          | 0   | 1 |
| LIMS3            | 0 | 0          | 0   | 1 |
| RGPD5,RGPD6      | 0 | 0          | 0   | 1 |
| MIR4435-1        | 0 | 0          | 0   | 1 |
| IL1B             | 0 | 0          | 0   | 1 |
| IL36B            | 0 | 0          | 0   | 1 |
| MIR4782          | 0 | 0          | 0   | 1 |
| LOC389023        | 0 | 0          | 0   | 1 |
| LOC84931         | 0 | 0          | 0   | 1 |
| CYP27C1          | 0 | 0          | 0   | 1 |
| MIR4783          | 0 | 0          | 0   | 1 |
| LOC389033        | 0 | 0          | 0   | 1 |
| LOC100131320     | 0 | 0          | 0   | 1 |
| POTEF            | 0 | 0          | 0   | 1 |
| TUBA3E           | 0 | 0.0161669  | inf | 1 |
| LOC646743,TISP43 | 0 | 0          | 0   | 1 |
| CFC1,CFC1B       | 0 | 0          | 0   | 1 |
| MIR4784          | 0 | 0          | 0   | 1 |
| C2orf27B         | 0 | 0          | 0   | 1 |
| MIR663B          | 0 | 0          | 0   | 1 |
| NCKAP5           | 0 | 0          | 0   | 1 |
| MAP3K19          | 0 | 0          | 0   | 1 |
| CXCR4            | 0 | 0          | 0   | 1 |
| NXP2             | 0 | 0          | 0   | 1 |
| LRP1B            | 0 | 0          | 0   | 1 |
| ZEB2             | 0 | 0          | 0   | 1 |
| RPRM             | 0 | 0          | 0   | 1 |
| ERMN             | 0 | 0          | 0   | 1 |
| CYTIP            | 0 | 0          | 0   | 1 |
| PLA2R1           | 0 | 0          | 0   | 1 |
| ITGB6            | 0 | 0          | 0   | 1 |
| MIR4785          | 0 | 0          | 0   | 1 |
| DPP4             | 0 | 0          | 0   | 1 |
| GCG              | 0 | 0          | 0   | 1 |
| FAP              | 0 | 0.00533525 | inf | 1 |
| KCNH7            | 0 | 0          | 0   | 1 |
| GRB14            | 0 | 0          | 0   | 1 |
| SNORA70F         | 0 | 0          | 0   | 1 |
| SLC38A11         | 0 | 0          | 0   | 1 |
| SCN1A            | 0 | 0          | 0   | 1 |
| SCN9A            | 0 | 0          | 0   | 1 |
| SCN7A            | 0 | 0.00105363 | inf | 1 |
| ABCB11           | 0 | 0          | 0   | 1 |
| RAPGEF4-AS1      | 0 | 0.00182173 | inf | 1 |
| WIPF1            | 0 | 0          | 0   | 1 |
| CHRNA1           | 0 | 0.00488336 | inf | 1 |
| MIR933           | 0 | 0          | 0   | 1 |
| EVX2             | 0 | 0          | 0   | 1 |
| MIR1246          | 0 | 0          | 0   | 1 |
| MIR3128          | 0 | 0          | 0   | 1 |
| ZNF385B          | 0 | 0          | 0   | 1 |
| MIR1258          | 0 | 0          | 0   | 1 |
| MIR4437          | 0 | 0          | 0   | 1 |
| PDE1A            | 0 | 0.0161913  | inf | 1 |
| ZSWIM2           | 0 | 0          | 0   | 1 |
| DIRC1            | 0 | 0          | 0   | 1 |
| MIR1245B         | 0 | 0          | 0   | 1 |
| MIR3129          | 0 | 0          | 0   | 1 |
| SLC40A1          | 0 | 0          | 0   | 1 |
| SDPR             | 0 | 0          | 0   | 1 |
| TMEFF2           | 0 | 0          | 0   | 1 |
| HECW2            | 0 | 0          | 0   | 1 |
| BOLL             | 0 | 0          | 0   | 1 |
| CFLAR-AS1        | 0 | 0          | 0   | 1 |
| DYTN             | 0 | 0          | 0   | 1 |
| MIR2355          | 0 | 0          | 0   | 1 |
| CRYGD            | 0 | 0          | 0   | 1 |
| CRYGC            | 0 | 0          | 0   | 1 |

|              |   |            |     |   |
|--------------|---|------------|-----|---|
| CRYGB        | 0 | 0          | 0   | 1 |
| CRYGA        | 0 | 0          | 0   | 1 |
| C2orf80      | 0 | 0          | 0   | 1 |
| ACADL        | 0 | 0          | 0   | 1 |
| MYL1         | 0 | 0          | 0   | 1 |
| ERBB4        | 0 | 0          | 0   | 1 |
| MIR548F2     | 0 | 0          | 0   | 1 |
| MIR4776-2    | 0 | 0          | 0   | 1 |
| LOC100130451 | 0 | 0.0166683  | inf | 1 |
| MARCH4       | 0 | 0          | 0   | 1 |
| IGFBP5       | 0 | 0          | 0   | 1 |
| TNP1         | 0 | 0          | 0   | 1 |
| DIRC3        | 0 | 0          | 0   | 1 |
| CXCR2P1      | 0 | 0          | 0   | 1 |
| CXCR1        | 0 | 0          | 0   | 1 |
| PRKAG3       | 0 | 0          | 0   | 1 |
| CRYBA2       | 0 | 0          | 0   | 1 |
| MIR375       | 0 | 0          | 0   | 1 |
| MIR3131      | 0 | 0          | 0   | 1 |
| MIR153-1     | 0 | 0          | 0   | 1 |
| RESP18       | 0 | 0          | 0   | 1 |
| MIR3132      | 0 | 0          | 0   | 1 |
| MIR4268      | 0 | 0          | 0   | 1 |
| PAX3         | 0 | 0          | 0   | 1 |
| SCG2         | 0 | 0          | 0   | 1 |
| FAM124B      | 0 | 0          | 0   | 1 |
| DOCK10       | 0 | 0          | 0   | 1 |
| MIR4439      | 0 | 0          | 0   | 1 |
| MIR5702      | 0 | 0          | 0   | 1 |
| C2orf83      | 0 | 0          | 0   | 1 |
| SPHKAP       | 0 | 0          | 0   | 1 |
| PID1         | 0 | 0          | 0   | 1 |
| DNER         | 0 | 0          | 0   | 1 |
| GPR55        | 0 | 0          | 0   | 1 |
| SNORD20      | 0 | 0          | 0   | 1 |
| SNORD82      | 0 | 145.661    | inf | 1 |
| NMUR1        | 0 | 0          | 0   | 1 |
| MIR1471      | 0 | 0          | 0   | 1 |
| NPPC         | 0 | 0          | 0   | 1 |
| ECEL1P2      | 0 | 0          | 0   | 1 |
| ECEL1        | 0 | 0          | 0   | 1 |
| DNAJB3       | 0 | 0          | 0   | 1 |
| LOC100286922 | 0 | 0          | 0   | 1 |
| GBX2         | 0 | 0          | 0   | 1 |
| ASB18        | 0 | 0          | 0   | 1 |
| IQCA1        | 0 | 0          | 0   | 1 |
| LOC151174    | 0 | 0          | 0   | 1 |
| FLJ43879     | 0 | 0          | 0   | 1 |
| MIR4440      | 0 | 0          | 0   | 1 |
| MIR4441      | 0 | 0          | 0   | 1 |
| MIR2467      | 0 | 0          | 0   | 1 |
| MIR4786      | 0 | 0          | 0   | 1 |
| OR6B2        | 0 | 0          | 0   | 1 |
| PRR21        | 0 | 0          | 0   | 1 |
| OR6B3        | 0 | 0          | 0   | 1 |
| AQP12B       | 0 | 0          | 0   | 1 |
| LOC200772    | 0 | 0.007811   | inf | 1 |
| DEFB125      | 0 | 0          | 0   | 1 |
| DEFB126      | 0 | 0          | 0   | 1 |
| DEFB127      | 0 | 0          | 0   | 1 |
| DEFB129      | 0 | 0          | 0   | 1 |
| DEFB132      | 0 | 0          | 0   | 1 |
| TGM6         | 0 | 0          | 0   | 1 |
| SNORA51      | 0 | 1.68625    | inf | 1 |
| SNORD56      | 0 | 0          | 0   | 1 |
| C2orf141     | 0 | 0          | 0   | 1 |
| TMEM239      | 0 | 0          | 0   | 1 |
| OXT          | 0 | 0.0907824  | inf | 1 |
| MIR103A2     | 0 | 0          | 0   | 1 |
| PRND         | 0 | 0          | 0   | 1 |
| CHGB         | 0 | 0.00314729 | inf | 1 |
| PLCB1        | 0 | 0          | 0   | 1 |
| LAMP5        | 0 | 0.00558474 | inf | 1 |
| ANKEF1       | 0 | 0          | 0   | 1 |
| SNAP25       | 0 | 0          | 0   | 1 |
| OTOR         | 0 | 0          | 0   | 1 |
| LINC00851    | 0 | 0          | 0   | 1 |
| MIR3192      | 0 | 0          | 0   | 1 |
| SCP2D1       | 0 | 0          | 0   | 1 |



|                          |   |            |     |   |   |
|--------------------------|---|------------|-----|---|---|
| SLC24A3                  | 0 | 0.00644319 | inf | 0 | 1 |
| LOC100270679             | 0 | 0          |     | 0 | 1 |
| SSTR4                    | 0 | 0          |     | 0 | 1 |
| CSTL1                    | 0 | 0          |     | 0 | 1 |
| CST8                     | 0 | 0          |     | 0 | 1 |
| CST13P                   | 0 | 0          |     | 0 | 1 |
| FLJ33581                 | 0 | 0          |     | 0 | 1 |
| SYNDIG1                  | 0 | 0          |     | 0 | 1 |
| CST7                     | 0 | 0          |     | 0 | 1 |
| DEFB115                  | 0 | 0          |     | 0 | 1 |
| DEFB118                  | 0 | 0          |     | 0 | 1 |
| DEFB123                  | 0 | 0          |     | 0 | 1 |
| REM1                     | 0 | 0          |     | 0 | 1 |
| LINC00028                | 0 | 0          |     | 0 | 1 |
| MIR3193                  | 0 | 0          |     | 0 | 1 |
| COX4I2                   | 0 | 0          |     | 0 | 1 |
| TTLL9                    | 0 | 0          |     | 0 | 1 |
| XKR7                     | 0 | 0          |     | 0 | 1 |
| HCK                      | 0 | 0          |     | 0 | 1 |
| LOC149950                | 0 | 0          |     | 0 | 1 |
| BPIFB2                   | 0 | 0          |     | 0 | 1 |
| BPIFB6                   | 0 | 0          |     | 0 | 1 |
| BPIFB3                   | 0 | 0          |     | 0 | 1 |
| BPIFB4                   | 0 | 0          |     | 0 | 1 |
| BPIFA2                   | 0 | 0          |     | 0 | 1 |
| BPIFA4P                  | 0 | 0          |     | 0 | 1 |
| BPIFA3                   | 0 | 0          |     | 0 | 1 |
| BPIFA1                   | 0 | 0          |     | 0 | 1 |
| BPIFB1                   | 0 | 0          |     | 0 | 1 |
| MIR4755                  | 0 | 0          |     | 0 | 1 |
| MIR644A                  | 0 | 0          |     | 0 | 1 |
| MIR499A                  | 0 | 0          |     | 0 | 1 |
| LOC100287792             | 0 | 0.010299   | inf | 0 | 1 |
| BPI                      | 0 | 0          |     | 0 | 1 |
| LBP                      | 0 | 0          |     | 0 | 1 |
| SNORA60                  | 0 | 0          |     | 0 | 1 |
| ADIG                     | 0 | 0.0185311  | inf | 0 | 1 |
| SLC32A1                  | 0 | 0          |     | 0 | 1 |
| PPP1R16B                 | 0 | 0.00417533 | inf | 0 | 1 |
| R3HDML                   | 0 | 0          |     | 0 | 1 |
| HNF4A                    | 0 | 0          |     | 0 | 1 |
| MIR3646                  | 0 | 0          |     | 0 | 1 |
| SEMG1                    | 0 | 0          |     | 0 | 1 |
| SEMG2                    | 0 | 0          |     | 0 | 1 |
| RBPJL                    | 0 | 0          |     | 0 | 1 |
| WFDC2                    | 0 | 0.0668124  | inf | 0 | 1 |
| SPINT4                   | 0 | 0          |     | 0 | 1 |
| MMP9                     | 0 | 0          |     | 0 | 1 |
| EYA2                     | 0 | 0          |     | 0 | 1 |
| MIR3616                  | 0 | 0          |     | 0 | 1 |
| LINC00494                | 0 | 0          |     | 0 | 1 |
| SNORD12C                 | 0 | 0          |     | 0 | 1 |
| SNORD12B                 | 0 | 0          |     | 0 | 1 |
| SNORD12                  | 0 | 0          |     | 0 | 1 |
| MIR645                   | 0 | 0          |     | 0 | 1 |
| DOK5                     | 0 | 0          |     | 0 | 1 |
| MC3R                     | 0 | 0          |     | 0 | 1 |
| SPO11                    | 0 | 0          |     | 0 | 1 |
| MIR5095                  | 0 | 0          |     | 0 | 1 |
| PCK1                     | 0 | 0          |     | 0 | 1 |
| MIR4532                  | 0 | 0          |     | 0 | 1 |
| C20orf85                 | 0 | 0          |     | 0 | 1 |
| ZNF831                   | 0 | 0          |     | 0 | 1 |
| EDN3                     | 0 | 0          |     | 0 | 1 |
| PHACTR3                  | 0 | 0          |     | 0 | 1 |
| CDH26                    | 0 | 0          |     | 0 | 1 |
| C20orf197                | 0 | 0          |     | 0 | 1 |
| LOC284757                | 0 | 0          |     | 0 | 1 |
| MIR4533                  | 0 | 0          |     | 0 | 1 |
| C20orf166                | 0 | 0          |     | 0 | 1 |
| MIR1-1                   | 0 | 0          |     | 0 | 1 |
| LOC63930                 | 0 | 0          |     | 0 | 1 |
| HAR1A                    | 0 | 0          |     | 0 | 1 |
| MIR124-3                 | 0 | 0          |     | 0 | 1 |
| BIRC7                    | 0 | 0          |     | 0 | 1 |
| MIR3196                  | 0 | 0          |     | 0 | 1 |
| FLJ16779                 | 0 | 0          |     | 0 | 1 |
| MIR4326                  | 0 | 0          |     | 0 | 1 |
| MIR941-1,MIR941-3,MIR941 | 0 | 0          |     | 0 | 1 |

|                          |   |            |     |   |
|--------------------------|---|------------|-----|---|
| MIR941-2,MIR941-3,MIR941 | 0 | 0          | 0   | 1 |
| DEFB128                  | 0 | 0          | 0   | 1 |
| TCF15                    | 0 | 0.0130412  | inf | 1 |
| SCRT2                    | 0 | 0          | 0   | 1 |
| RSPO4                    | 0 | 0.0117729  | inf | 1 |
| SIRPB2                   | 0 | 0          | 0   | 1 |
| SIRPD                    | 0 | 0          | 0   | 1 |
| SIRPB1                   | 0 | 0          | 0   | 1 |
| SIRPG                    | 0 | 0          | 0   | 1 |
| LOC100289473             | 0 | 0          | 0   | 1 |
| PDYN                     | 0 | 0          | 0   | 1 |
| SNORD119                 | 0 | 0          | 0   | 1 |
| AVP                      | 0 | 0          | 0   | 1 |
| C20orf194                | 0 | 0          | 0   | 1 |
| GFRA4                    | 0 | 0.0317476  | inf | 1 |
| ADAM33                   | 0 | 0          | 0   | 1 |
| MIR103B2                 | 0 | 0          | 0   | 1 |
| ADRA1D                   | 0 | 0.0104483  | inf | 1 |
| PRNT                     | 0 | 0          | 0   | 1 |
| PROKR2                   | 0 | 0          | 0   | 1 |
| LINC00658                | 0 | 0.0173732  | inf | 1 |
| HAO1                     | 0 | 0          | 0   | 1 |
| PAK7                     | 0 | 0          | 0   | 1 |
| SNAP25-AS1               | 0 | 0          | 0   | 1 |
| LOC339593                | 0 | 0          | 0   | 1 |
| ISM1-AS1                 | 0 | 0          | 0   | 1 |
| SEL1L2                   | 0 | 0          | 0   | 1 |
| MACROD2-AS1              | 0 | 0          | 0   | 1 |
| C20orf78                 | 0 | 0          | 0   | 1 |
| LOC100130264             | 0 | 0          | 0   | 1 |
| NKX2-4                   | 0 | 0          | 0   | 1 |
| NKX2-2                   | 0 | 0          | 0   | 1 |
| LOC284788                | 0 | 0          | 0   | 1 |
| FOXA2                    | 0 | 0          | 0   | 1 |
| THBD                     | 0 | 0          | 0   | 1 |
| CD93                     | 0 | 0          | 0   | 1 |
| LINC00656                | 0 | 0          | 0   | 1 |
| CST11                    | 0 | 0          | 0   | 1 |
| CST9L                    | 0 | 0          | 0   | 1 |
| CST9                     | 0 | 0          | 0   | 1 |
| CST4                     | 0 | 0          | 0   | 1 |
| CST1                     | 0 | 0          | 0   | 1 |
| CST2                     | 0 | 0          | 0   | 1 |
| CST5                     | 0 | 0          | 0   | 1 |
| VSX1                     | 0 | 0          | 0   | 1 |
| LOC284798                | 0 | 0          | 0   | 1 |
| NCOR1P1                  | 0 | 0          | 0   | 1 |
| DEFB116                  | 0 | 0          | 0   | 1 |
| DEFB119                  | 0 | 0          | 0   | 1 |
| DEFB121                  | 0 | 0          | 0   | 1 |
| DEFB122                  | 0 | 0          | 0   | 1 |
| DEFB124                  | 0 | 0          | 0   | 1 |
| FOXS1                    | 0 | 0          | 0   | 1 |
| SUN5                     | 0 | 0          | 0   | 1 |
| HMGB3P1                  | 0 | 0.0103955  | inf | 1 |
| MIR499B                  | 0 | 0          | 0   | 1 |
| C20orf173                | 0 | 0          | 0   | 1 |
| GHRH                     | 0 | 0          | 0   | 1 |
| LINC00489                | 0 | 0          | 0   | 1 |
| LOC339568                | 0 | 0          | 0   | 1 |
| PTPRT                    | 0 | 0          | 0   | 1 |
| GTSF1L                   | 0 | 0          | 0   | 1 |
| KCNS1                    | 0 | 0          | 0   | 1 |
| WFDC12                   | 0 | 0          | 0   | 1 |
| SLPI                     | 0 | 0          | 0   | 1 |
| SPINT3                   | 0 | 0          | 0   | 1 |
| EPPIN,EPPIN-WFDC6,WFD    | 0 | 0          | 0   | 1 |
| WFDC8                    | 0 | 0.00733828 | inf | 1 |
| WFDC9                    | 0 | 0          | 0   | 1 |
| WFDC11                   | 0 | 0          | 0   | 1 |
| CDH22                    | 0 | 0          | 0   | 1 |
| ZNF663                   | 0 | 0          | 0   | 1 |
| MKRN7P                   | 0 | 0          | 0   | 1 |
| ZNF334                   | 0 | 0          | 0   | 1 |
| OCSTAMP                  | 0 | 0          | 0   | 1 |
| KCNB1                    | 0 | 0.00352401 | inf | 1 |
| PTGIS                    | 0 | 0          | 0   | 1 |
| LINC00651                | 0 | 0.0327507  | inf | 1 |
| KCNG1                    | 0 | 0          | 0   | 1 |

|               |   |                |   |   |
|---------------|---|----------------|---|---|
| MIR3194       | 0 | 0              | 0 | 1 |
| SALL4         | 0 | 0.00812911 inf |   | 1 |
| SUMO1P1       | 0 | 0              | 0 | 1 |
| MIR4756       | 0 | 0              | 0 | 1 |
| CYP24A1       | 0 | 0              | 0 | 1 |
| CBLN4         | 0 | 0              | 0 | 1 |
| BMP7          | 0 | 0.0033662 inf  |   | 1 |
| MIR4325       | 0 | 0              | 0 | 1 |
| ZBP1          | 0 | 0.00577804 inf |   | 1 |
| APCDD1L       | 0 | 0.00565251 inf |   | 1 |
| MIR296        | 0 | 0              | 0 | 1 |
| MIR298        | 0 | 0              | 0 | 1 |
| LOC100506384  | 0 | 0              | 0 | 1 |
| MIR1257       | 0 | 0              | 0 | 1 |
| RBBP8NL       | 0 | 0              | 0 | 1 |
| GATA5         | 0 | 0              | 0 | 1 |
| C20orf166-AS1 | 0 | 0              | 0 | 1 |
| BHLHE23       | 0 | 0              | 0 | 1 |
| HAR1B         | 0 | 0              | 0 | 1 |
| CHRNA4        | 0 | 0              | 0 | 1 |
| KCNQ2         | 0 | 0              | 0 | 1 |
| MIR1914       | 0 | 0              | 0 | 1 |
| MIR647        | 0 | 0              | 0 | 1 |
| SOX18         | 0 | 0              | 0 | 1 |
| C20orf201     | 0 | 0              | 0 | 1 |
| NPBWR2        | 0 | 0              | 0 | 1 |
| MIR3648       | 0 | 0              | 0 | 1 |
| MIR3687       | 0 | 0              | 0 | 1 |
| POTED         | 0 | 0              | 0 | 1 |
| RBM11         | 0 | 0              | 0 | 1 |
| SAMSN1-AS1    | 0 | 0              | 0 | 1 |
| LINC00478     | 0 | 0.00278513 inf |   | 1 |
| MIR99A        | 0 | 0              | 0 | 1 |
| MIRLET7C      | 0 | 0              | 0 | 1 |
| MIR125B2      | 0 | 0              | 0 | 1 |
| C21orf37      | 0 | 0              | 0 | 1 |
| NCAM2         | 0 | 0              | 0 | 1 |
| RNU6-67       | 0 | 0              | 0 | 1 |
| LINC00308     | 0 | 0              | 0 | 1 |
| LOC339622     | 0 | 0              | 0 | 1 |
| MIR4759       | 0 | 0              | 0 | 1 |
| LINC00113     | 0 | 0              | 0 | 1 |
| LINC00314     | 0 | 0              | 0 | 1 |
| GRIK1-AS1     | 0 | 0              | 0 | 1 |
| KRTAP13-1     | 0 | 0              | 0 | 1 |
| KRTAP13-4     | 0 | 0              | 0 | 1 |
| KRTAP15-1     | 0 | 0              | 0 | 1 |
| KRTAP6-3      | 0 | 0              | 0 | 1 |
| KRTAP22-1     | 0 | 0              | 0 | 1 |
| KRTAP20-1     | 0 | 0              | 0 | 1 |
| KRTAP20-4     | 0 | 0              | 0 | 1 |
| KRTAP20-2     | 0 | 0              | 0 | 1 |
| KRTAP20-3     | 0 | 0              | 0 | 1 |
| OLIG2         | 0 | 0              | 0 | 1 |
| OLIG1         | 0 | 0              | 0 | 1 |
| CLIC6         | 0 | 0              | 0 | 1 |
| MIR802        | 0 | 0              | 0 | 1 |
| DSCR8         | 0 | 0              | 0 | 1 |
| DSCR10        | 0 | 0              | 0 | 1 |
| BRWD1-AS1     | 0 | 0              | 0 | 1 |
| B3GALT5       | 0 | 0              | 0 | 1 |
| IGSF5         | 0 | 0              | 0 | 1 |
| PCP4          | 0 | 0.0177152 inf  |   | 1 |
| DSCAM-AS1     | 0 | 0              | 0 | 1 |
| MIR3197       | 0 | 0              | 0 | 1 |
| LINC00111     | 0 | 0              | 0 | 1 |
| LINC00112     | 0 | 0              | 0 | 1 |
| ABCG1         | 0 | 0              | 0 | 1 |
| UBASH3A       | 0 | 0              | 0 | 1 |
| PDE9A         | 0 | 0              | 0 | 1 |
| CRYAA         | 0 | 0              | 0 | 1 |
| AIRE          | 0 | 0              | 0 | 1 |
| TRPM2         | 0 | 0.00225467 inf |   | 1 |
| KRTAP10-4     | 0 | 0              | 0 | 1 |
| KRTAP10-7     | 0 | 0              | 0 | 1 |
| KRTAP10-8     | 0 | 0              | 0 | 1 |
| KRTAP10-9     | 0 | 0              | 0 | 1 |
| KRTAP10-10    | 0 | 0              | 0 | 1 |
| KRTAP10-11    | 0 | 0              | 0 | 1 |

|                       |   |            |     |   |
|-----------------------|---|------------|-----|---|
| KRTAP12-3             | 0 | 0          | 0   | 1 |
| KRTAP10-12            | 0 | 0          | 0   | 1 |
| COL6A2                | 0 | 0.00514393 | inf | 1 |
| TPTE                  | 0 | 0.00951587 | inf | 1 |
| BAGE,BAGE3,BAGE4,BAGE | 0 | 0          | 0   | 1 |
| MIR3156-3             | 0 | 0          | 0   | 1 |
| ANKRD20A11P           | 0 | 0.0134847  | inf | 1 |
| LIP1                  | 0 | 0          | 0   | 1 |
| SAMSN1                | 0 | 0          | 0   | 1 |
| LOC388813             | 0 | 0          | 0   | 1 |
| CHODL-AS1             | 0 | 0          | 0   | 1 |
| TMPRSS15              | 0 | 0          | 0   | 1 |
| LINC00320             | 0 | 0          | 0   | 1 |
| LINC00317             | 0 | 0          | 0   | 1 |
| D21S2088E             | 0 | 0          | 0   | 1 |
| ADAMTS1               | 0 | 0          | 0   | 1 |
| ADAMTS5               | 0 | 0          | 0   | 1 |
| MIR5009               | 0 | 0          | 0   | 1 |
| CLDN17                | 0 | 0          | 0   | 1 |
| LINC00307             | 0 | 0          | 0   | 1 |
| CLDN8                 | 0 | 0          | 0   | 1 |
| KRTAP24-1             | 0 | 0          | 0   | 1 |
| KRTAP25-1             | 0 | 0          | 0   | 1 |
| KRTAP26-1             | 0 | 0          | 0   | 1 |
| KRTAP27-1             | 0 | 0          | 0   | 1 |
| KRTAP23-1             | 0 | 0          | 0   | 1 |
| KRTAP13-2             | 0 | 0          | 0   | 1 |
| MIR4327               | 0 | 0          | 0   | 1 |
| KRTAP13-3             | 0 | 0          | 0   | 1 |
| KRTAP19-1             | 0 | 0          | 0   | 1 |
| KRTAP19-2             | 0 | 0          | 0   | 1 |
| KRTAP19-3             | 0 | 0          | 0   | 1 |
| KRTAP19-4             | 0 | 0          | 0   | 1 |
| KRTAP19-5             | 0 | 0          | 0   | 1 |
| KRTAP19-6             | 0 | 0          | 0   | 1 |
| KRTAP19-7             | 0 | 0          | 0   | 1 |
| KRTAP22-2             | 0 | 0          | 0   | 1 |
| KRTAP6-2              | 0 | 0          | 0   | 1 |
| KRTAP6-1              | 0 | 0          | 0   | 1 |
| KRTAP21-3             | 0 | 0          | 0   | 1 |
| KRTAP21-2             | 0 | 0          | 0   | 1 |
| KRTAP21-1             | 0 | 0          | 0   | 1 |
| KRTAP8-1              | 0 | 0          | 0   | 1 |
| KRTAP7-1              | 0 | 0          | 0   | 1 |
| KRTAP11-1             | 0 | 0          | 0   | 1 |
| KRTAP19-8             | 0 | 0          | 0   | 1 |
| LINC00159             | 0 | 0          | 0   | 1 |
| C21orf54              | 0 | 0          | 0   | 1 |
| LINC00160             | 0 | 0          | 0   | 1 |
| LOC100506403          | 0 | 0          | 0   | 1 |
| KCNJ6                 | 0 | 0          | 0   | 1 |
| DSCR4                 | 0 | 0          | 0   | 1 |
| ERG                   | 0 | 0          | 0   | 1 |
| LINC00114             | 0 | 0          | 0   | 1 |
| C21orf88              | 0 | 0          | 0   | 1 |
| DSCAM                 | 0 | 0          | 0   | 1 |
| MIR4760               | 0 | 0          | 0   | 1 |
| DSCAM-IT1             | 0 | 0          | 0   | 1 |
| LINC00323             | 0 | 0.00632746 | inf | 1 |
| TMPRSS2               | 0 | 0.0035485  | inf | 1 |
| LINC00479             | 0 | 0          | 0   | 1 |
| C21orf128             | 0 | 0          | 0   | 1 |
| TFF3                  | 0 | 0          | 0   | 1 |
| TFF2                  | 0 | 0          | 0   | 1 |
| TFF1                  | 0 | 0.0733442  | inf | 1 |
| TMPRSS3               | 0 | 0          | 0   | 1 |
| DNMT3L                | 0 | 0          | 0   | 1 |
| KRTAP10-1             | 0 | 0          | 0   | 1 |
| KRTAP10-2             | 0 | 0          | 0   | 1 |
| KRTAP10-3             | 0 | 0          | 0   | 1 |
| KRTAP10-5             | 0 | 0          | 0   | 1 |
| KRTAP10-6             | 0 | 0          | 0   | 1 |
| KRTAP12-4             | 0 | 0          | 0   | 1 |
| KRTAP12-2             | 0 | 0          | 0   | 1 |
| KRTAP12-1             | 0 | 0          | 0   | 1 |
| LOC100129027          | 0 | 0          | 0   | 1 |
| S100B                 | 0 | 0          | 0   | 1 |
| TPTEP1                | 0 | 0          | 0   | 1 |
| HSFY1P1               | 0 | 0          | 0   | 1 |

|                   |   |            |     |   |
|-------------------|---|------------|-----|---|
| FLJ41941          | 0 | 0          | 0   | 1 |
| MIR185            | 0 | 0          | 0   | 1 |
| POM121L4P         | 0 | 0          | 0   | 1 |
| SERPIND1          | 0 | 0.00458669 | inf | 1 |
| LOC400891         | 0 | 0          | 0   | 1 |
| MIR301B           | 0 | 116.753    | inf | 1 |
| MIR130B           | 0 | 0          | 0   | 1 |
| VPREB1            | 0 | 0          | 0   | 1 |
| MIR650            | 0 | 0          | 0   | 1 |
| IGLL5             | 0 | 0.0189661  | inf | 1 |
| C22orf15          | 0 | 0          | 0   | 1 |
| UPB1              | 0 | 0.0111745  | inf | 1 |
| TOP1P2            | 0 | 0          | 0   | 1 |
| IGLL3P            | 0 | 0          | 0   | 1 |
| SEZ6L             | 0 | 0          | 0   | 1 |
| CRYBA4            | 0 | 0          | 0   | 1 |
| MIR3199-2         | 0 | 0          | 0   | 1 |
| NEFH              | 0 | 0.0159822  | inf | 1 |
| MIR3200           | 0 | 0          | 0   | 1 |
| AP1B1P1           | 0 | 0          | 0   | 1 |
| TIMP3             | 0 | 0.0018976  | inf | 1 |
| ISX               | 0 | 0          | 0   | 1 |
| MIR3909           | 0 | 0          | 0   | 1 |
| APOL5             | 0 | 0          | 0   | 1 |
| CSF2RB            | 0 | 0          | 0   | 1 |
| LOC100506241      | 0 | 0          | 0   | 1 |
| MIR4534           | 0 | 0          | 0   | 1 |
| SYNGR1            | 0 | 0          | 0   | 1 |
| MGAT3             | 0 | 0          | 0   | 1 |
| MIR1281           | 0 | 0          | 0   | 1 |
| MIR33A            | 0 | 0          | 0   | 1 |
| MPPED1            | 0 | 0          | 0   | 1 |
| EFCAB6-AS1        | 0 | 0          | 0   | 1 |
| LINC00207         | 0 | 0          | 0   | 1 |
| UPK3A             | 0 | 0          | 0   | 1 |
| MIR4762           | 0 | 0          | 0   | 1 |
| MIR3619           | 0 | 0          | 0   | 1 |
| MIR3201           | 0 | 0          | 0   | 1 |
| MIR4535           | 0 | 0          | 0   | 1 |
| LOC100128946      | 0 | 0          | 0   | 1 |
| PANX2             | 0 | 0          | 0   | 1 |
| MIOX              | 0 | 0          | 0   | 1 |
| POTEH             | 0 | 0          | 0   | 1 |
| OR11H1            | 0 | 0          | 0   | 1 |
| ANKRD62P1-PARP4P3 | 0 | 0          | 0   | 1 |
| GAB4              | 0 | 0          | 0   | 1 |
| CECR1             | 0 | 0          | 0   | 1 |
| CECR3             | 0 | 0          | 0   | 1 |
| MIR3198-1         | 0 | 0          | 0   | 1 |
| MIR648            | 0 | 0          | 0   | 1 |
| GSC2              | 0 | 0          | 0   | 1 |
| CLDN5             | 0 | 0.0460753  | inf | 1 |
| LOC150185         | 0 | 0          | 0   | 1 |
| LOC388849         | 0 | 0.0235956  | inf | 1 |
| LOC284865         | 0 | 0          | 0   | 1 |
| MIR1286           | 0 | 0          | 0   | 1 |
| SLC7A4            | 0 | 0          | 0   | 1 |
| P2RX6P            | 0 | 0          | 0   | 1 |
| ZNF280B           | 0 | 0          | 0   | 1 |
| CES5AP1           | 0 | 0          | 0   | 1 |
| IGLL1             | 0 | 0          | 0   | 1 |
| GSTTP1            | 0 | 0          | 0   | 1 |
| GSTTP2            | 0 | 0          | 0   | 1 |
| GGT5              | 0 | 0          | 0   | 1 |
| LOC100128531      | 0 | 0.013037   | inf | 1 |
| MIR548J           | 0 | 0          | 0   | 1 |
| CRYBB1            | 0 | 0          | 0   | 1 |
| MIR3199-1         | 0 | 0          | 0   | 1 |
| C22orf31          | 0 | 0.0090647  | inf | 1 |
| MIR3653           | 0 | 0          | 0   | 1 |
| SDC4P             | 0 | 0.0282076  | inf | 1 |
| SEC14L6           | 0 | 0          | 0   | 1 |
| MIR3928           | 0 | 0          | 0   | 1 |
| C22orf42          | 0 | 0          | 0   | 1 |
| BPIFC             | 0 | 0          | 0   | 1 |
| SYN3              | 0 | 0.00508373 | inf | 1 |
| MIR4764           | 0 | 0          | 0   | 1 |
| MB                | 0 | 0          | 0   | 1 |
| APOL3             | 0 | 0          | 0   | 1 |

|              |   |            |     |   |
|--------------|---|------------|-----|---|
| CACNG2       | 0 | 0          | 0   | 1 |
| PVALB        | 0 | 0          | 0   | 1 |
| TEX33        | 0 | 0          | 0   | 1 |
| IL2RB        | 0 | 0          | 0   | 1 |
| SSTR3        | 0 | 0          | 0   | 1 |
| ELFN2        | 0 | 0          | 0   | 1 |
| LGALS2       | 0 | 0          | 0   | 1 |
| MIR659       | 0 | 0          | 0   | 1 |
| SOX10        | 0 | 0.0200414  | inf | 1 |
| RNU86        | 0 | 0          | 0   | 1 |
| SNORD43      | 0 | 0          | 0   | 1 |
| ENTHD1       | 0 | 0          | 0   | 1 |
| MIR4766      | 0 | 0          | 0   | 1 |
| ATP5L2       | 0 | 0          | 0   | 1 |
| A4GALT       | 0 | 0          | 0   | 1 |
| SULT4A1      | 0 | 0          | 0   | 1 |
| PNPLA5       | 0 | 0          | 0   | 1 |
| LINC00229    | 0 | 0          | 0   | 1 |
| PHF21B       | 0 | 0          | 0   | 1 |
| MIR1249      | 0 | 0          | 0   | 1 |
| FLJ46257     | 0 | 0          | 0   | 1 |
| LOC284933    | 0 | 0          | 0   | 1 |
| CHL1         | 0 | 0          | 0   | 1 |
| CNTN6        | 0 | 0          | 0   | 1 |
| LRRN1        | 0 | 0          | 0   | 1 |
| GRM7         | 0 | 0          | 0   | 1 |
| CAV3         | 0 | 0.00896216 | inf | 1 |
| SLC6A11      | 0 | 0          | 0   | 1 |
| SYN2         | 0 | 0.00315288 | inf | 1 |
| PPARG        | 0 | 0          | 0   | 1 |
| FGD5P1       | 0 | 0          | 0   | 1 |
| MIR563       | 0 | 0          | 0   | 1 |
| LOC339862    | 0 | 0          | 0   | 1 |
| VENTXP7      | 0 | 0          | 0   | 1 |
| UBE2E2       | 0 | 0.00567005 | inf | 1 |
| MIR548AC     | 0 | 0          | 0   | 1 |
| THR-B-AS1    | 0 | 0          | 0   | 1 |
| LRRC3B       | 0 | 0          | 0   | 1 |
| LINC00693    | 0 | 0          | 0   | 1 |
| RBMS3        | 0 | 0          | 0   | 1 |
| OSBPL10-AS1  | 0 | 0          | 0   | 1 |
| TRIM71       | 0 | 0          | 0   | 1 |
| CCR4         | 0 | 0          | 0   | 1 |
| ARPP21       | 0 | 0          | 0   | 1 |
| MIR128-2     | 0 | 0          | 0   | 1 |
| STAC         | 0 | 0          | 0   | 1 |
| MLH1         | 0 | 0.00820677 | inf | 1 |
| MIR26A1      | 0 | 0          | 0   | 1 |
| SLC22A13     | 0 | 0.0187203  | inf | 1 |
| CCR8         | 0 | 0          | 0   | 1 |
| MOBP         | 0 | 0          | 0   | 1 |
| ENTPD3       | 0 | 0.00341859 | inf | 1 |
| KLHL40       | 0 | 0          | 0   | 1 |
| CCDC13-AS1   | 0 | 0          | 0   | 1 |
| ZNF662       | 0 | 0          | 0   | 1 |
| KRBOX1       | 0 | 0          | 0   | 1 |
| MIR138-1     | 0 | 0          | 0   | 1 |
| TOPAZ1       | 0 | 0          | 0   | 1 |
| CCR3         | 0 | 0          | 0   | 1 |
| CCR2         | 0 | 0          | 0   | 1 |
| CCR5         | 0 | 0          | 0   | 1 |
| RTP3         | 0 | 0          | 0   | 1 |
| LRRC2-AS1    | 0 | 0          | 0   | 1 |
| LOC100132146 | 0 | 0          | 0   | 1 |
| MIR1226      | 0 | 0          | 0   | 1 |
| MIR4443      | 0 | 0          | 0   | 1 |
| CAMP         | 0 | 0          | 0   | 1 |
| MIR4271      | 0 | 0          | 0   | 1 |
| SLC38A3      | 0 | 0          | 0   | 1 |
| MIR4787      | 0 | 0          | 0   | 1 |
| IQCF4        | 0 | 0          | 0   | 1 |
| IQCF3        | 0 | 0          | 0   | 1 |
| IQCF2        | 0 | 0          | 0   | 1 |
| SNORD19      | 0 | 0          | 0   | 1 |
| SNORD19B     | 0 | 0          | 0   | 1 |
| SNORD69      | 0 | 0          | 0   | 1 |
| ITIH1        | 0 | 0          | 0   | 1 |
| CACNA2D3     | 0 | 0          | 0   | 1 |
| ARHGEF3-AS1  | 0 | 0          | 0   | 1 |

|              |   |            |     |   |
|--------------|---|------------|-----|---|
| LINC00698    | 0 | 0          | 0   | 1 |
| SYNPR        | 0 | 0          | 0   | 1 |
| SNTN         | 0 | 0          | 0   | 1 |
| PRICKLE2-AS1 | 0 | 0          | 0   | 1 |
| PRICKLE2-AS2 | 0 | 0          | 0   | 1 |
| ADAMTS9-AS2  | 0 | 0          | 0   | 1 |
| MIR548A2     | 0 | 0          | 0   | 1 |
| MAGI1-AS1    | 0 | 0.020411   | inf | 1 |
| MIR4272      | 0 | 0          | 0   | 1 |
| GPR27        | 0 | 0          | 0   | 1 |
| LOC201617    | 0 | 0          | 0   | 1 |
| MIR4444-1    | 0 | 0          | 0   | 1 |
| MIR1324      | 0 | 0          | 0   | 1 |
| MIR4273      | 0 | 0          | 0   | 1 |
| ROBO2        | 0 | 0          | 0   | 1 |
| CADM2        | 0 | 0          | 0   | 1 |
| MIR5688      | 0 | 0          | 0   | 1 |
| HTR1F        | 0 | 0          | 0   | 1 |
| LOC255025    | 0 | 0          | 0   | 1 |
| EPHA6        | 0 | 0          | 0   | 1 |
| OR5AC2       | 0 | 0          | 0   | 1 |
| OR5H1        | 0 | 0          | 0   | 1 |
| OR5H14       | 0 | 0          | 0   | 1 |
| OR5H15       | 0 | 0          | 0   | 1 |
| OR5H6        | 0 | 0          | 0   | 1 |
| OR5H2        | 0 | 0          | 0   | 1 |
| OR5K4        | 0 | 0          | 0   | 1 |
| OR5K3        | 0 | 0          | 0   | 1 |
| OR5K1        | 0 | 0          | 0   | 1 |
| GPR15        | 0 | 0          | 0   | 1 |
| ST3GAL6      | 0 | 0.00231535 | inf | 1 |
| COL8A1       | 0 | 0          | 0   | 1 |
| GPR128       | 0 | 0          | 0   | 1 |
| TRAT1        | 0 | 0          | 0   | 1 |
| FLJ22763     | 0 | 0          | 0   | 1 |
| LINC00488    | 0 | 0          | 0   | 1 |
| FLJ25363     | 0 | 0.00843235 | inf | 1 |
| MIR567       | 0 | 0          | 0   | 1 |
| WDR52-AS1    | 0 | 0          | 0   | 1 |
| SIDT1        | 0 | 0          | 0   | 1 |
| MIR4446      | 0 | 0          | 0   | 1 |
| TIGIT        | 0 | 0          | 0   | 1 |
| ZBTB20-AS1   | 0 | 0          | 0   | 1 |
| GAP43        | 0 | 0          | 0   | 1 |
| LSAMP-AS3    | 0 | 0          | 0   | 1 |
| IGSF11-AS1   | 0 | 0          | 0   | 1 |
| C3orf30      | 0 | 0          | 0   | 1 |
| PLA1A        | 0 | 0          | 0   | 1 |
| MAATS1       | 0 | 0          | 0   | 1 |
| NR1I2        | 0 | 0          | 0   | 1 |
| FBXO40       | 0 | 0          | 0   | 1 |
| CD86         | 0 | 0          | 0   | 1 |
| CASR         | 0 | 0          | 0   | 1 |
| PARP15       | 0 | 0.00379941 | inf | 1 |
| MIR5002      | 0 | 0          | 0   | 1 |
| ROPN1B       | 0 | 0.0273701  | inf | 1 |
| ALDH1L1-AS1  | 0 | 0          | 0   | 1 |
| ALDH1L1-AS2  | 0 | 0          | 0   | 1 |
| NUP210P1     | 0 | 0          | 0   | 1 |
| DNAJB8-AS1   | 0 | 0          | 0   | 1 |
| LOC90246     | 0 | 0          | 0   | 1 |
| EFCC1        | 0 | 0          | 0   | 1 |
| GP9          | 0 | 0          | 0   | 1 |
| RHO          | 0 | 0          | 0   | 1 |
| H1FOO        | 0 | 0          | 0   | 1 |
| TRH          | 0 | 0          | 0   | 1 |
| COL6A4P2     | 0 | 0.0028994  | inf | 1 |
| COL6A5       | 0 | 0          | 0   | 1 |
| ACPP         | 0 | 0          | 0   | 1 |
| NPHP3-AS1    | 0 | 0          | 0   | 1 |
| TMEM108      | 0 | 0          | 0   | 1 |
| BFSP2        | 0 | 0          | 0   | 1 |
| MIR4788      | 0 | 0          | 0   | 1 |
| SOX14        | 0 | 0          | 0   | 1 |
| BPESC1       | 0 | 0          | 0   | 1 |
| CLSTN2       | 0 | 0          | 0   | 1 |
| TRIM42       | 0 | 0.00551187 | inf | 1 |
| SPSB4        | 0 | 0          | 0   | 1 |
| LOC100507389 | 0 | 0          | 0   | 1 |

|              |   |                |   |   |
|--------------|---|----------------|---|---|
| CHST2        | 0 | 0              | 0 | 1 |
| SLC9A9-AS1   | 0 | 0              | 0 | 1 |
| ZIC1         | 0 | 0              | 0 | 1 |
| AGTR1        | 0 | 0              | 0 | 1 |
| CPB1         | 0 | 0              | 0 | 1 |
| CPA3         | 0 | 0              | 0 | 1 |
| HLTF-AS1     | 0 | 0              | 0 | 1 |
| TM4SF4       | 0 | 0              | 0 | 1 |
| CLRN1-AS1    | 0 | 0              | 0 | 1 |
| MED12L       | 0 | 0              | 0 | 1 |
| MIR548H2     | 0 | 0              | 0 | 1 |
| AADAACL2     | 0 | 0              | 0 | 1 |
| AADAC        | 0 | 0              | 0 | 1 |
| SUCNR1       | 0 | 0              | 0 | 1 |
| C3orf79      | 0 | 0              | 0 | 1 |
| MME          | 0 | 0              | 0 | 1 |
| LOC100498859 | 0 | 0              | 0 | 1 |
| PTX3         | 0 | 0.00631701 inf | 0 | 1 |
| MIR3919      | 0 | 0              | 0 | 1 |
| C3orf80      | 0 | 0              | 0 | 1 |
| MIR15B       | 0 | 0              | 0 | 1 |
| MIR16-2      | 0 | 0              | 0 | 1 |
| ARL14        | 0 | 0              | 0 | 1 |
| OTOL1        | 0 | 0              | 0 | 1 |
| LOC646168    | 0 | 0              | 0 | 1 |
| MIR551B      | 0 | 0              | 0 | 1 |
| SAMD7        | 0 | 0              | 0 | 1 |
| NLGN1        | 0 | 0              | 0 | 1 |
| NAALADL2     | 0 | 0              | 0 | 1 |
| MIR4789      | 0 | 0              | 0 | 1 |
| ABCC5-AS1    | 0 | 0              | 0 | 1 |
| HTR3D        | 0 | 0              | 0 | 1 |
| HTR3C        | 0 | 0              | 0 | 1 |
| HTR3E        | 0 | 0              | 0 | 1 |
| MIR1224      | 0 | 0              | 0 | 1 |
| SNORD66      | 0 | 0              | 0 | 1 |
| EPHB3        | 0 | 0              | 0 | 1 |
| EHHADH-AS1   | 0 | 0              | 0 | 1 |
| LOC344887    | 0 | 0              | 0 | 1 |
| HRG          | 0 | 0              | 0 | 1 |
| KNG1         | 0 | 0              | 0 | 1 |
| SNORD2       | 0 | 0              | 0 | 1 |
| ADIPOQ       | 0 | 0              | 0 | 1 |
| RTP1         | 0 | 0              | 0 | 1 |
| RTP4         | 0 | 0              | 0 | 1 |
| LOC100131635 | 0 | 0              | 0 | 1 |
| TP63         | 0 | 0              | 0 | 1 |
| MIR944       | 0 | 0              | 0 | 1 |
| SNAR-I       | 0 | 0              | 0 | 1 |
| OSTN         | 0 | 0              | 0 | 1 |
| PYDC2        | 0 | 0              | 0 | 1 |
| LOC100507391 | 0 | 0.00234907 inf | 0 | 1 |
| MIR570       | 0 | 0              | 0 | 1 |
| LOC401109    | 0 | 0              | 0 | 1 |
| FAM157A      | 0 | 0              | 0 | 1 |
| CNTN4-AS2    | 0 | 0              | 0 | 1 |
| IL5RA        | 0 | 0.00150816 inf | 0 | 1 |
| MIR4790      | 0 | 0              | 0 | 1 |
| FANCD2OS     | 0 | 0.0457218 inf  | 0 | 1 |
| MIR885       | 0 | 0              | 0 | 1 |
| LINC00606    | 0 | 0              | 0 | 1 |
| SLC6A1-AS1   | 0 | 0              | 0 | 1 |
| TIMP4        | 0 | 0              | 0 | 1 |
| WNT7A        | 0 | 0.0109476 inf  | 0 | 1 |
| MIR4270      | 0 | 0              | 0 | 1 |
| DAZL         | 0 | 0              | 0 | 1 |
| MIR4791      | 0 | 0              | 0 | 1 |
| ZNF385D      | 0 | 0              | 0 | 1 |
| LINC00691    | 0 | 0              | 0 | 1 |
| THRB         | 0 | 0              | 0 | 1 |
| MIR4792      | 0 | 0              | 0 | 1 |
| LINC00692    | 0 | 0              | 0 | 1 |
| EOMES        | 0 | 0              | 0 | 1 |
| GADL1        | 0 | 0              | 0 | 1 |
| DCLK3        | 0 | 0              | 0 | 1 |
| SCN5A        | 0 | 0.0126997 inf  | 0 | 1 |
| SCN10A       | 0 | 0              | 0 | 1 |
| CCK          | 0 | 0              | 0 | 1 |
| LYZL4        | 0 | 0              | 0 | 1 |



|              |   |             |     |   |
|--------------|---|-------------|-----|---|
| HHATL        | 0 | 0           | 0   | 1 |
| CYP8B1       | 0 | 0           | 0   | 1 |
| CCR1         | 0 | 0           | 0   | 1 |
| LTF          | 0 | 0           | 0   | 1 |
| PRSS50       | 0 | 0           | 0   | 1 |
| PRSS46       | 0 | 0           | 0   | 1 |
| PRSS45       | 0 | 0           | 0   | 1 |
| PRSS42       | 0 | 0           | 0   | 1 |
| MYL3         | 0 | 0           | 0   | 1 |
| SPINK8       | 0 | 0           | 0   | 1 |
| MIR425       | 0 | 0           | 0   | 1 |
| MIR191       | 0 | 0           | 0   | 1 |
| LOC646498    | 0 | 0           | 0   | 1 |
| BSN-AS2      | 0 | 0.00440486  | inf | 1 |
| CDHR4        | 0 | 0           | 0   | 1 |
| CAMKV        | 0 | 0           | 0   | 1 |
| IQCF6        | 0 | 0           | 0   | 1 |
| MIRLET7G     | 0 | 0           | 0   | 1 |
| MIR135A1     | 0 | 0           | 0   | 1 |
| CACNA2D3-AS1 | 0 | 0           | 0   | 1 |
| LRTM1        | 0 | 0           | 0   | 1 |
| WNT5A        | 0 | 0.00187198  | inf | 1 |
| ERC2         | 0 | 0           | 0   | 1 |
| ERC2-IT1     | 0 | 0           | 0   | 1 |
| MIR3938      | 0 | 0           | 0   | 1 |
| FAM3D        | 0 | 0.0118745   | inf | 1 |
| C3orf67      | 0 | 0           | 0   | 1 |
| FEZF2        | 0 | 0           | 0   | 1 |
| CADPS        | 0 | 0           | 0   | 1 |
| SYNPR-AS1    | 0 | 0           | 0   | 1 |
| LOC100287879 | 0 | 0           | 0   | 1 |
| PRICKLE2     | 0 | 0           | 0   | 1 |
| FAM19A4      | 0 | 0           | 0   | 1 |
| MIR3136      | 0 | 0           | 0   | 1 |
| MIR1284      | 0 | 0           | 0   | 1 |
| PROK2        | 0 | 0           | 0   | 1 |
| CNTN3        | 0 | 0           | 0   | 1 |
| CADM2-AS2    | 0 | 0           | 0   | 1 |
| RNU6-69      | 0 | 0           | 0   | 1 |
| VGLL3        | 0 | 0.000777701 | inf | 1 |
| MIR4795      | 0 | 0           | 0   | 1 |
| POU1F1       | 0 | 0           | 0   | 1 |
| GABRR3       | 0 | 0           | 0   | 1 |
| ST3GAL6-AS1  | 0 | 0           | 0   | 1 |
| MIR548G      | 0 | 0           | 0   | 1 |
| MIR3921      | 0 | 0           | 0   | 1 |
| MIR548A3     | 0 | 0           | 0   | 1 |
| LINC00635    | 0 | 0           | 0   | 1 |
| RETNLB       | 0 | 0           | 0   | 1 |
| GUCA1C       | 0 | 0           | 0   | 1 |
| MORC1        | 0 | 0           | 0   | 1 |
| DPPA2        | 0 | 0           | 0   | 1 |
| DPPA4        | 0 | 0.00319983  | inf | 1 |
| ZBED2        | 0 | 0           | 0   | 1 |
| CD200R1L     | 0 | 0           | 0   | 1 |
| DRD3         | 0 | 0           | 0   | 1 |
| MIR568       | 0 | 0           | 0   | 1 |
| MIR4796      | 0 | 0           | 0   | 1 |
| ILDR1        | 0 | 0           | 0   | 1 |
| SEMA5B       | 0 | 0           | 0   | 1 |
| ROPN1        | 0 | 0           | 0   | 1 |
| MIR5092      | 0 | 0           | 0   | 1 |
| MIR5481      | 0 | 0.903204    | inf | 1 |
| UROC1        | 0 | 0           | 0   | 1 |
| C3orf22      | 0 | 0.016794    | inf | 1 |
| DNAJB8       | 0 | 0           | 0   | 1 |
| C3orf27      | 0 | 0           | 0   | 1 |
| KIAA1257     | 0 | 0           | 0   | 1 |
| SNORA58      | 0 | 0           | 0   | 1 |
| MIR5704      | 0 | 0           | 0   | 1 |
| C3orf36      | 0 | 0           | 0   | 1 |
| SLCO2A1      | 0 | 0           | 0   | 1 |
| A4GNT        | 0 | 0           | 0   | 1 |
| FOXL2        | 0 | 0           | 0   | 1 |
| PRR23B       | 0 | 0           | 0   | 1 |
| PISRT1       | 0 | 0           | 0   | 1 |
| RBP2         | 0 | 0           | 0   | 1 |
| RBP1         | 0 | 0           | 0   | 1 |
| PCOLCE2      | 0 | 0           | 0   | 1 |

|              |   |            |     |   |
|--------------|---|------------|-----|---|
| PAQR9        | 0 | 0          | 0   | 1 |
| PLOD2        | 0 | 0          | 0   | 1 |
| PLSCR2       | 0 | 0          | 0   | 1 |
| PLSCR5       | 0 | 0          | 0   | 1 |
| ZIC4         | 0 | 0          | 0   | 1 |
| TM4SF18      | 0 | 0          | 0   | 1 |
| ANKUB1       | 0 | 0          | 0   | 1 |
| GPR171       | 0 | 0          | 0   | 1 |
| P2RY14       | 0 | 0          | 0   | 1 |
| P2RY13       | 0 | 0          | 0   | 1 |
| P2RY12       | 0 | 0          | 0   | 1 |
| IGSF10       | 0 | 0          | 0   | 1 |
| MIR5186      | 0 | 0          | 0   | 1 |
| GPR149       | 0 | 0          | 0   | 1 |
| LOC100507537 | 0 | 0          | 0   | 1 |
| KCNAB1-AS2   | 0 | 0          | 0   | 1 |
| KCNAB1-AS1   | 0 | 0          | 0   | 1 |
| LOC339894    | 0 | 0.0102155  | inf | 1 |
| SPTSSB       | 0 | 0          | 0   | 1 |
| CT64         | 0 | 0          | 0   | 1 |
| SI           | 0 | 0.00140636 | inf | 1 |
| SLITRK3      | 0 | 0          | 0   | 1 |
| BCHE         | 0 | 0          | 0   | 1 |
| ZBBX         | 0 | 0          | 0   | 1 |
| SERPINI2     | 0 | 0          | 0   | 1 |
| WDR49        | 0 | 0          | 0   | 1 |
| LRRC31       | 0 | 0          | 0   | 1 |
| SLC2A2       | 0 | 0          | 0   | 1 |
| MIR569       | 0 | 0          | 0   | 1 |
| GHSR         | 0 | 0          | 0   | 1 |
| TNFSF10      | 0 | 0          | 0   | 1 |
| SPATA16      | 0 | 0          | 0   | 1 |
| NAALADL2-AS3 | 0 | 0          | 0   | 1 |
| FLJ46066     | 0 | 0          | 0   | 1 |
| KLHL6        | 0 | 0.00132679 | inf | 1 |
| LIPH         | 0 | 0.00359051 | inf | 1 |
| LOC253573    | 0 | 0          | 0   | 1 |
| ADIPOQ-AS1   | 0 | 0.00267763 | inf | 1 |
| RPL39L       | 0 | 0.0190579  | inf | 1 |
| MASP1        | 0 | 0          | 0   | 1 |
| SST          | 0 | 0          | 0   | 1 |
| RTP2         | 0 | 0          | 0   | 1 |
| LEPREL1      | 0 | 0          | 0   | 1 |
| CLDN1        | 0 | 0          | 0   | 1 |
| TMEM207      | 0 | 0          | 0   | 1 |
| GMNC         | 0 | 0          | 0   | 1 |
| ATP13A5      | 0 | 0.00240655 | inf | 1 |
| LOC647323    | 0 | 0          | 0   | 1 |
| DPPA2P3      | 0 | 0          | 0   | 1 |
| LOC100131551 | 0 | 0          | 0   | 1 |
| CPN2         | 0 | 0          | 0   | 1 |
| MIR5692C1    | 0 | 0          | 0   | 1 |
| APOD         | 0 | 0          | 0   | 1 |
| ZDHHC19      | 0 | 0          | 0   | 1 |
| MIR4797      | 0 | 0          | 0   | 1 |
| ZNF141       | 0 | 0          | 0   | 1 |
| FLJ35424     | 0 | 0          | 0   | 1 |
| STK32B       | 0 | 0          | 0   | 1 |
| LOC285484    | 0 | 0          | 0   | 1 |
| SORCS2       | 0 | 0.00241215 | inf | 1 |
| MIR4798      | 0 | 0          | 0   | 1 |
| MIR4274      | 0 | 0          | 0   | 1 |
| HTRA3        | 0 | 0          | 0   | 1 |
| GPR78        | 0 | 0          | 0   | 1 |
| LOC650293    | 0 | 0.0502716  | inf | 1 |
| USP17L10     | 0 | 0          | 0   | 1 |
| USP17L18     | 0 | 0          | 0   | 1 |
| USP17L21     | 0 | 0          | 0   | 1 |
| USP17L13     | 0 | 0          | 0   | 1 |
| USP17L15     | 0 | 0          | 0   | 1 |
| USP17L17     | 0 | 0          | 0   | 1 |
| USP17L18     | 0 | 0          | 0   | 1 |
| USP17L19     | 0 | 0          | 0   | 1 |
| USP17L22     | 0 | 0          | 0   | 1 |
| USP17L12     | 0 | 0          | 0   | 1 |
| USP17L22     | 0 | 0          | 0   | 1 |
| USP17L28     | 0 | 0          | 0   | 1 |
| USP17L26     | 0 | 0          | 0   | 1 |
| USP17L24     | 0 | 0          | 0   | 1 |

|              |   |            |     |   |
|--------------|---|------------|-----|---|
| USP17L28     | 0 | 0          | 0   | 1 |
| USP17L25     | 0 | 0          | 0   | 1 |
| USP17L30     | 0 | 0          | 0   | 1 |
| USP17L27     | 0 | 0          | 0   | 1 |
| USP17L9P     | 0 | 0          | 0   | 1 |
| USP17L27     | 0 | 0          | 0   | 1 |
| USP17L6P     | 0 | 0          | 0   | 1 |
| MIR572       | 0 | 0          | 0   | 1 |
| MIR5091      | 0 | 0          | 0   | 1 |
| LOC152742    | 0 | 0          | 0   | 1 |
| C1QTNF7      | 0 | 0          | 0   | 1 |
| CD38         | 0 | 0          | 0   | 1 |
| CLRN2        | 0 | 0          | 0   | 1 |
| SLIT2        | 0 | 0          | 0   | 1 |
| SLIT2-IT1    | 0 | 0          | 0   | 1 |
| MIR218-1     | 0 | 0          | 0   | 1 |
| GBA3         | 0 | 0          | 0   | 1 |
| SOD3         | 0 | 0          | 0   | 1 |
| SLC34A2      | 0 | 0          | 0   | 1 |
| MIR4275      | 0 | 0          | 0   | 1 |
| PCDH7        | 0 | 0          | 0   | 1 |
| DTHD1        | 0 | 0          | 0   | 1 |
| KIAA1239     | 0 | 0.00104597 | inf | 1 |
| MIR574       | 0 | 0          | 0   | 1 |
| RHOH         | 0 | 0          | 0   | 1 |
| CHRNA9       | 0 | 0          | 0   | 1 |
| UCHL1        | 0 | 0          | 0   | 1 |
| SHISA3       | 0 | 0.00701844 | inf | 1 |
| GABRB1       | 0 | 0          | 0   | 1 |
| ZAR1         | 0 | 0          | 0   | 1 |
| CWH43        | 0 | 0          | 0   | 1 |
| SPATA18      | 0 | 0          | 0   | 1 |
| MIR4449      | 0 | 0          | 0   | 1 |
| LOC152578    | 0 | 0          | 0   | 1 |
| RASL11B      | 0 | 0.00684881 | inf | 1 |
| LNK1-AS1     | 0 | 0          | 0   | 1 |
| LNK1-AS2     | 0 | 0          | 0   | 1 |
| GSX2         | 0 | 0          | 0   | 1 |
| KIT          | 0 | 0          | 0   | 1 |
| LOC644145    | 0 | 0          | 0   | 1 |
| THEGL        | 0 | 0          | 0   | 1 |
| LOC255130    | 0 | 0          | 0   | 1 |
| LPHN3        | 0 | 0          | 0   | 1 |
| LOC100144602 | 0 | 0          | 0   | 1 |
| LOC550113    | 0 | 0          | 0   | 1 |
| FTLP10       | 0 | 0          | 0   | 1 |
| TMPRSS11E    | 0 | 0          | 0   | 1 |
| UGT2B10      | 0 | 0          | 0   | 1 |
| UGT2B7       | 0 | 0          | 0   | 1 |
| UGT2B28      | 0 | 0          | 0   | 1 |
| CSN1S1       | 0 | 0          | 0   | 1 |
| STATH        | 0 | 0          | 0   | 1 |
| HTN3         | 0 | 0          | 0   | 1 |
| HTN1         | 0 | 0          | 0   | 1 |
| CSN1S2AP     | 0 | 0          | 0   | 1 |
| CSN1S2BP     | 0 | 0          | 0   | 1 |
| ODAM         | 0 | 0          | 0   | 1 |
| FDCSP        | 0 | 0          | 0   | 1 |
| CSN3         | 0 | 0          | 0   | 1 |
| CABS1        | 0 | 0          | 0   | 1 |
| SMR3A        | 0 | 0          | 0   | 1 |
| SMR3B        | 0 | 0          | 0   | 1 |
| PROL1        | 0 | 0          | 0   | 1 |
| MUC7         | 0 | 0          | 0   | 1 |
| AMTN         | 0 | 0          | 0   | 1 |
| AMBN         | 0 | 0          | 0   | 1 |
| ENAM         | 0 | 0          | 0   | 1 |
| NPFFR2       | 0 | 0          | 0   | 1 |
| ALB          | 0 | 0.00377092 | inf | 1 |
| AFP          | 0 | 0          | 0   | 1 |
| AFM          | 0 | 0          | 0   | 1 |
| LOC728040    | 0 | 0          | 0   | 1 |
| CXCL6        | 0 | 0          | 0   | 1 |
| PF4V1        | 0 | 0          | 0   | 1 |
| AREG         | 0 | 0          | 0   | 1 |
| AREG         | 0 | 0          | 0   | 1 |
| LOC441025    | 0 | 0          | 0   | 1 |
| ART3         | 0 | 0          | 0   | 1 |
| MIR4450      | 0 | 0          | 0   | 1 |

|              |   |            |     |   |
|--------------|---|------------|-----|---|
| CXCL13       | 0 | 0          | 0   | 1 |
| ANXA3        | 0 | 0          | 0   | 1 |
| LOC100505702 | 0 | 0          | 0   | 1 |
| LOC100506035 | 0 | 0.00428256 | inf | 1 |
| GDEP         | 0 | 0          | 0   | 1 |
| MIR4451      | 0 | 0          | 0   | 1 |
| DSPP         | 0 | 0          | 0   | 1 |
| IBSP         | 0 | 0          | 0   | 1 |
| MEPE         | 0 | 0.00383334 | inf | 1 |
| LOC644248    | 0 | 0          | 0   | 1 |
| MMRN1        | 0 | 0          | 0   | 1 |
| CCSER1       | 0 | 0          | 0   | 1 |
| GRID2        | 0 | 0          | 0   | 1 |
| ATOH1        | 0 | 0          | 0   | 1 |
| BMPR1B       | 0 | 0          | 0   | 1 |
| PDHA2        | 0 | 0          | 0   | 1 |
| MIR3684      | 0 | 0          | 0   | 1 |
| C4orf17      | 0 | 0          | 0   | 1 |
| DAPP1        | 0 | 0          | 0   | 1 |
| BANK1        | 0 | 0          | 0   | 1 |
| ARHGEF38-IT1 | 0 | 0          | 0   | 1 |
| MIR1243      | 0 | 0          | 0   | 1 |
| MIR577       | 0 | 0          | 0   | 1 |
| MIR1973      | 0 | 0          | 0   | 1 |
| NDST3        | 0 | 0          | 0   | 1 |
| CEP170P1     | 0 | 0          | 0   | 1 |
| MYOZ2        | 0 | 0          | 0   | 1 |
| PP12613      | 0 | 0          | 0   | 1 |
| ADAD1        | 0 | 0          | 0   | 1 |
| LOC285419    | 0 | 0          | 0   | 1 |
| FAT4         | 0 | 0          | 0   | 1 |
| MIR2054      | 0 | 0          | 0   | 1 |
| PCDH10       | 0 | 0          | 0   | 1 |
| LINC00499    | 0 | 0          | 0   | 1 |
| SCOC         | 0 | 0          | 0   | 1 |
| HHIP         | 0 | 0          | 0   | 1 |
| C4orf51      | 0 | 0          | 0   | 1 |
| POU4F2       | 0 | 0          | 0   | 1 |
| EDNRA        | 0 | 0          | 0   | 1 |
| MIR4799      | 0 | 0          | 0   | 1 |
| TLR2         | 0 | 0          | 0   | 1 |
| RBM46        | 0 | 0          | 0   | 1 |
| NPY2R        | 0 | 0          | 0   | 1 |
| GUCY1A3      | 0 | 0          | 0   | 1 |
| GUCY1B3      | 0 | 0          | 0   | 1 |
| GLRB         | 0 | 0          | 0   | 1 |
| GRIA2        | 0 | 0          | 0   | 1 |
| LOC340017    | 0 | 0          | 0   | 1 |
| RXFP1        | 0 | 0          | 0   | 1 |
| MIR3688-2    | 0 | 0          | 0   | 1 |
| NPY5R        | 0 | 0          | 0   | 1 |
| MIR5684      | 0 | 0          | 0   | 1 |
| LOC100506013 | 0 | 0          | 0   | 1 |
| FAM218A      | 0 | 0          | 0   | 1 |
| TRIM60       | 0 | 0          | 0   | 1 |
| CPE          | 0 | 0          | 0   | 1 |
| MIR578       | 0 | 0          | 0   | 1 |
| TLL1         | 0 | 0          | 0   | 1 |
| ANXA10       | 0 | 0.00578938 | inf | 1 |
| LOC100506122 | 0 | 0.00428511 | inf | 1 |
| GALNTL6      | 0 | 0          | 0   | 1 |
| NBLA00301    | 0 | 0          | 0   | 1 |
| MIR4276      | 0 | 0          | 0   | 1 |
| ADAM29       | 0 | 0          | 0   | 1 |
| WDR17        | 0 | 0          | 0   | 1 |
| LOC285501    | 0 | 0          | 0   | 1 |
| MIR1305      | 0 | 0          | 0   | 1 |
| FAM92A1P2    | 0 | 0          | 0   | 1 |
| STOX2        | 0 | 0          | 0   | 1 |
| HELT         | 0 | 0          | 0   | 1 |
| F11          | 0 | 0          | 0   | 1 |
| TRIML1       | 0 | 0          | 0   | 1 |
| LOC401164    | 0 | 0          | 0   | 1 |
| DUX2         | 0 | 0          | 0   | 1 |
| DUX4L4       | 0 | 0          | 0   | 1 |
| DUX4L5       | 0 | 0          | 0   | 1 |
| DUX4L6       | 0 | 0          | 0   | 1 |
| DUX4L4       | 0 | 0          | 0   | 1 |
| DUX4         | 0 | 0          | 0   | 1 |

|               |   |            |     |   |
|---------------|---|------------|-----|---|
| DUX4L3        | 0 | 0          | 0   | 1 |
| DUX4          | 0 | 0          | 0   | 1 |
| RNF212        | 0 | 0          | 0   | 1 |
| TMED11P       | 0 | 0          | 0   | 1 |
| HTT-AS1       | 0 | 0          | 0   | 1 |
| LOC100133461  | 0 | 0          | 0   | 1 |
| OTOP1         | 0 | 0          | 0   | 1 |
| CYTL1         | 0 | 0          | 0   | 1 |
| EVC2          | 0 | 0          | 0   | 1 |
| MIR378D1      | 0 | 0          | 0   | 1 |
| JAKMIP1       | 0 | 0          | 0   | 1 |
| PSAPL1        | 0 | 0          | 0   | 1 |
| HMX1          | 0 | 0          | 0   | 1 |
| MIR548I2      | 0 | 0          | 0   | 1 |
| MIR3138       | 0 | 0          | 0   | 1 |
| ZNF518B       | 0 | 0          | 0   | 1 |
| CLNK          | 0 | 0          | 0   | 1 |
| HS3ST1        | 0 | 0          | 0   | 1 |
| LOC285547     | 0 | 0          | 0   | 1 |
| NKX3-2        | 0 | 0          | 0   | 1 |
| LOC285548     | 0 | 0          | 0   | 1 |
| LOC441009     | 0 | 0          | 0   | 1 |
| FGFBP1        | 0 | 0          | 0   | 1 |
| FGFBP2        | 0 | 0          | 0   | 1 |
| LDB2          | 0 | 0          | 0   | 1 |
| MIR548AX      | 0 | 0          | 0   | 1 |
| KCNIP4-IT1    | 0 | 0          | 0   | 1 |
| MIR548AJ2     | 0 | 0          | 0   | 1 |
| PPARGC1A      | 0 | 0          | 0   | 1 |
| MIR573        | 0 | 0          | 0   | 1 |
| CCKAR         | 0 | 0          | 0   | 1 |
| MIR4801       | 0 | 0          | 0   | 1 |
| TLR10         | 0 | 0.00197888 | inf | 1 |
| MIR4802       | 0 | 0          | 0   | 1 |
| PHOX2B        | 0 | 0          | 0   | 1 |
| KCTD8         | 0 | 0          | 0   | 1 |
| YIPF7         | 0 | 0.0253975  | inf | 1 |
| GABRG1        | 0 | 0          | 0   | 1 |
| GABRA2        | 0 | 0.00831074 | inf | 1 |
| GABRA4        | 0 | 0          | 0   | 1 |
| ERVMER34-1    | 0 | 0.00332348 | inf | 1 |
| KDR           | 0 | 0          | 0   | 1 |
| HOPX          | 0 | 0          | 0   | 1 |
| SPINK2        | 0 | 0          | 0   | 1 |
| TECRL         | 0 | 0          | 0   | 1 |
| LOC401134     | 0 | 0          | 0   | 1 |
| EPHA5         | 0 | 0          | 0   | 1 |
| TMPRSS11A     | 0 | 0          | 0   | 1 |
| TMPRSS11GP    | 0 | 0          | 0   | 1 |
| TMPRSS11F     | 0 | 0          | 0   | 1 |
| SYT14L        | 0 | 0          | 0   | 1 |
| TMPRSS11BNL   | 0 | 0          | 0   | 1 |
| TMPRSS11B     | 0 | 0.00593008 | inf | 1 |
| UGT2B15       | 0 | 0.00359859 | inf | 1 |
| UGT2A3        | 0 | 0          | 0   | 1 |
| UGT2B10       | 0 | 0          | 0   | 1 |
| UGT2B11       | 0 | 0          | 0   | 1 |
| UGT2B4        | 0 | 0          | 0   | 1 |
| UGT2A1,UGT2A2 | 0 | 0          | 0   | 1 |
| SULT1B1       | 0 | 0          | 0   | 1 |
| SULT1E1       | 0 | 0          | 0   | 1 |
| CSN2          | 0 | 0          | 0   | 1 |
| GC            | 0 | 0          | 0   | 1 |
| ADAMTS3       | 0 | 0          | 0   | 1 |
| RASSF6        | 0 | 0          | 0   | 1 |
| PF4           | 0 | 0          | 0   | 1 |
| PPBP          | 0 | 0          | 0   | 1 |
| CXCL5         | 0 | 0          | 0   | 1 |
| PPBPP2        | 0 | 0          | 0   | 1 |
| CXCL9         | 0 | 0          | 0   | 1 |
| CXCL10        | 0 | 0          | 0   | 1 |
| CXCL11        | 0 | 0          | 0   | 1 |
| NAA11         | 0 | 0          | 0   | 1 |
| GK2           | 0 | 0          | 0   | 1 |
| PRKG2         | 0 | 0          | 0   | 1 |
| LINC00575     | 0 | 0          | 0   | 1 |
| MIR575        | 0 | 0          | 0   | 1 |
| NKX6-1        | 0 | 0          | 0   | 1 |
| MAPK10        | 0 | 0          | 0   | 1 |

|              |   |            |     |   |
|--------------|---|------------|-----|---|
| MIR5705      | 0 | 0          | 0   | 1 |
| GPRIN3       | 0 | 0          | 0   | 1 |
| SNCA         | 0 | 0          | 0   | 1 |
| HPGDS        | 0 | 0          | 0   | 1 |
| UNC5C        | 0 | 0          | 0   | 1 |
| ADH4         | 0 | 0          | 0   | 1 |
| PCNAP1       | 0 | 0          | 0   | 1 |
| ADH1A        | 0 | 0          | 0   | 1 |
| ADH1B        | 0 | 0          | 0   | 1 |
| ADH1C        | 0 | 0          | 0   | 1 |
| ADH7         | 0 | 0          | 0   | 1 |
| EMCN         | 0 | 0          | 0   | 1 |
| EMCN-IT3     | 0 | 0          | 0   | 1 |
| TACR3        | 0 | 0          | 0   | 1 |
| GIMD1        | 0 | 0          | 0   | 1 |
| DKK2         | 0 | 0          | 0   | 1 |
| AGXT2L1      | 0 | 0          | 0   | 1 |
| COL25A1      | 0 | 0          | 0   | 1 |
| CFI          | 0 | 0          | 0   | 1 |
| MIR367       | 0 | 0          | 0   | 1 |
| MIR302D      | 0 | 0          | 0   | 1 |
| MIR302A      | 0 | 0          | 0   | 1 |
| MIR302C      | 0 | 0          | 0   | 1 |
| MIR302B      | 0 | 0          | 0   | 1 |
| NDST4        | 0 | 0          | 0   | 1 |
| TRAM1L1      | 0 | 0          | 0   | 1 |
| FABP2        | 0 | 0          | 0   | 1 |
| TNIP3        | 0 | 0          | 0   | 1 |
| QRFPR        | 0 | 0          | 0   | 1 |
| TMEM155      | 0 | 0          | 0   | 1 |
| TRPC3        | 0 | 0          | 0   | 1 |
| IL2          | 0 | 0          | 0   | 1 |
| IL21         | 0 | 0          | 0   | 1 |
| PABPC4L      | 0 | 0          | 0   | 1 |
| LINC00616    | 0 | 0          | 0   | 1 |
| LOC100129858 | 0 | 0          | 0   | 1 |
| CLGN         | 0 | 0          | 0   | 1 |
| UCP1         | 0 | 0          | 0   | 1 |
| TBC1D9       | 0 | 0          | 0   | 1 |
| TNRC18P1     | 0 | 0.00596352 | inf | 1 |
| RNF150       | 0 | 0          | 0   | 1 |
| INPP4B       | 0 | 0          | 0   | 1 |
| FREM3        | 0 | 0          | 0   | 1 |
| GYPE         | 0 | 0          | 0   | 1 |
| GYPB         | 0 | 0          | 0   | 1 |
| GYPA         | 0 | 0          | 0   | 1 |
| LOC100505545 | 0 | 0          | 0   | 1 |
| MIR3140      | 0 | 0          | 0   | 1 |
| TMEM154      | 0 | 0          | 0   | 1 |
| RNF175       | 0 | 0          | 0   | 1 |
| SFRP2        | 0 | 0          | 0   | 1 |
| DCHS2        | 0 | 0          | 0   | 1 |
| FGA          | 0 | 0          | 0   | 1 |
| FGG          | 0 | 0          | 0   | 1 |
| MAP9         | 0 | 0          | 0   | 1 |
| ASIC5        | 0 | 0          | 0   | 1 |
| PDGFC        | 0 | 0          | 0   | 1 |
| C4orf45      | 0 | 0          | 0   | 1 |
| MIR3688-1    | 0 | 0          | 0   | 1 |
| NPY1R        | 0 | 0          | 0   | 1 |
| TKTL2        | 0 | 0          | 0   | 1 |
| ANP32C       | 0 | 0          | 0   | 1 |
| SPOCK3       | 0 | 0          | 0   | 1 |
| LOC100506085 | 0 | 0.00166387 | inf | 1 |
| SCRG1        | 0 | 0.0155107  | inf | 1 |
| HAND2        | 0 | 0          | 0   | 1 |
| GLRA3        | 0 | 0          | 0   | 1 |
| ASB5         | 0 | 0          | 0   | 1 |
| VEGFC        | 0 | 0.0046566  | inf | 1 |
| LINC00290    | 0 | 0          | 0   | 1 |
| MIR3945      | 0 | 0          | 0   | 1 |
| LOC100506229 | 0 | 0          | 0   | 1 |
| PDLIM3       | 0 | 0          | 0   | 1 |
| LOC285441    | 0 | 0          | 0   | 1 |
| MTNR1A       | 0 | 0          | 0   | 1 |
| LOC339975    | 0 | 0          | 0   | 1 |
| SLC6A19      | 0 | 0          | 0   | 1 |
| SLC6A18      | 0 | 0          | 0   | 1 |
| IRX1         | 0 | 0          | 0   | 1 |

|              |   |            |     |   |
|--------------|---|------------|-----|---|
| LOC340094    | 0 | 0          | 0   | 1 |
| UBE2QL1      | 0 | 0          | 0   | 1 |
| LOC255167    | 0 | 0          | 0   | 1 |
| ADCY2        | 0 | 0          | 0   | 1 |
| LOC100505806 | 0 | 0          | 0   | 1 |
| SNORD123     | 0 | 0          | 0   | 1 |
| CT49         | 0 | 0          | 0   | 1 |
| FBXL7        | 0 | 0          | 0   | 1 |
| BASP1        | 0 | 0          | 0   | 1 |
| PMCHL1       | 0 | 0          | 0   | 1 |
| PRDM9        | 0 | 0          | 0   | 1 |
| LSP1P3       | 0 | 0          | 0   | 1 |
| LOC340113    | 0 | 0          | 0   | 1 |
| RXFP3        | 0 | 0          | 0   | 1 |
| TTC23L       | 0 | 0.00686432 | inf | 1 |
| IL7R         | 0 | 0.00202749 | inf | 1 |
| SLC1A3       | 0 | 0          | 0   | 1 |
| EGFLAM       | 0 | 0          | 0   | 1 |
| CCDC152      | 0 | 0          | 0   | 1 |
| NNT          | 0 | 0          | 0   | 1 |
| HSPB3        | 0 | 0          | 0   | 1 |
| SNX18        | 0 | 0          | 0   | 1 |
| GZMK         | 0 | 0          | 0   | 1 |
| GZMA         | 0 | 0          | 0   | 1 |
| DDX4         | 0 | 0.00656093 | inf | 1 |
| GAPT         | 0 | 0          | 0   | 1 |
| RAB3C        | 0 | 0          | 0   | 1 |
| PART1        | 0 | 0.00301206 | inf | 1 |
| C5orf64      | 0 | 0.00332881 | inf | 1 |
| RNF180       | 0 | 0          | 0   | 1 |
| RGS7BP       | 0 | 0          | 0   | 1 |
| FAM159B      | 0 | 0.0185602  | inf | 1 |
| SERF1A       | 0 | 0          | 0   | 1 |
| CARTPT       | 0 | 0          | 0   | 1 |
| MIR4803      | 0 | 0          | 0   | 1 |
| MIR4804      | 0 | 0          | 0   | 1 |
| TMEM171      | 0 | 0.0100518  | inf | 1 |
| TMEM174      | 0 | 0          | 0   | 1 |
| ANKDD1B      | 0 | 0          | 0   | 1 |
| SV2C         | 0 | 0          | 0   | 1 |
| NCRUPAR      | 0 | 0          | 0   | 1 |
| F2RL1        | 0 | 0          | 0   | 1 |
| S100Z        | 0 | 0.0110851  | inf | 1 |
| CRHBP        | 0 | 0          | 0   | 1 |
| BHMT         | 0 | 0          | 0   | 1 |
| SPZ1         | 0 | 0          | 0   | 1 |
| RNU5E-1      | 0 | 0          | 0   | 1 |
| CKMT2        | 0 | 0          | 0   | 1 |
| MIR3977      | 0 | 0          | 0   | 1 |
| NBPF22P      | 0 | 0.00641909 | inf | 1 |
| MIR3607      | 0 | 0          | 0   | 1 |
| MIR548AO     | 0 | 0          | 0   | 1 |
| GPR150       | 0 | 0          | 0   | 1 |
| MIR583       | 0 | 0          | 0   | 1 |
| RAB9BP1      | 0 | 0          | 0   | 1 |
| LOC100289673 | 0 | 0.0122442  | inf | 1 |
| CAMK4        | 0 | 0          | 0   | 1 |
| NREP-AS1     | 0 | 0          | 0   | 1 |
| FLJ11235     | 0 | 0          | 0   | 1 |
| ARL14EPL     | 0 | 0          | 0   | 1 |
| LOC728342    | 0 | 0          | 0   | 1 |
| MIR1244-2    | 0 | 0          | 0   | 1 |
| FAM170A      | 0 | 0          | 0   | 1 |
| PRR16        | 0 | 0          | 0   | 1 |
| FTMT         | 0 | 0          | 0   | 1 |
| GRAMD3       | 0 | 0          | 0   | 1 |
| MEGF10       | 0 | 0          | 0   | 1 |
| CTXN3        | 0 | 0          | 0   | 1 |
| SLC27A6      | 0 | 0          | 0   | 1 |
| MIR4633      | 0 | 0          | 0   | 1 |
| ADAMTS19     | 0 | 0          | 0   | 1 |
| KIAA1024L    | 0 | 0          | 0   | 1 |
| CHSY3        | 0 | 0          | 0   | 1 |
| IL3          | 0 | 0          | 0   | 1 |
| PDLIM4       | 0 | 0          | 0   | 1 |
| IL4          | 0 | 0          | 0   | 1 |
| SOWAHA       | 0 | 0.0107978  | inf | 1 |
| MIR3661      | 0 | 0          | 0   | 1 |
| SLC25A48     | 0 | 0          | 0   | 1 |

|                        |   |            |     |   |
|------------------------|---|------------|-----|---|
| FBXL21                 | 0 | 0          | 0   | 1 |
| NPY6R                  | 0 | 0          | 0   | 1 |
| MYOT                   | 0 | 0          | 0   | 1 |
| PKD2L2                 | 0 | 0.00314066 | inf | 1 |
| WNT8A                  | 0 | 0          | 0   | 1 |
| PSD2                   | 0 | 0.00265991 | inf | 1 |
| VTRNA1-2               | 0 | 0          | 0   | 1 |
| PCDHB1                 | 0 | 0          | 0   | 1 |
| MIR5197                | 0 | 0          | 0   | 1 |
| HMBB1                  | 0 | 0          | 0   | 1 |
| POU4F3                 | 0 | 0          | 0   | 1 |
| STK32A                 | 0 | 0          | 0   | 1 |
| JAKMIP2-AS1            | 0 | 0          | 0   | 1 |
| SCGB3A2                | 0 | 0          | 0   | 1 |
| SPINK5                 | 0 | 0          | 0   | 1 |
| SPINK14                | 0 | 0          | 0   | 1 |
| SPINK6                 | 0 | 0          | 0   | 1 |
| SPINK13                | 0 | 0          | 0   | 1 |
| SPINK7                 | 0 | 0          | 0   | 1 |
| SPINK9                 | 0 | 0          | 0   | 1 |
| ADRB2                  | 0 | 0          | 0   | 1 |
| CDX1                   | 0 | 0          | 0   | 1 |
| SLC6A7                 | 0 | 0          | 0   | 1 |
| GRIA1                  | 0 | 0          | 0   | 1 |
| KIF4B                  | 0 | 0.00373644 | inf | 1 |
| SGCD                   | 0 | 0          | 0   | 1 |
| ITK                    | 0 | 0          | 0   | 1 |
| NIPAL4                 | 0 | 0          | 0   | 1 |
| C5orf52                | 0 | 0          | 0   | 1 |
| ADRA1B                 | 0 | 0          | 0   | 1 |
| MIR3142                | 0 | 0          | 0   | 1 |
| MIR146A                | 0 | 0          | 0   | 1 |
| GABRA6                 | 0 | 0          | 0   | 1 |
| GABRA1                 | 0 | 0          | 0   | 1 |
| GABRG2                 | 0 | 0          | 0   | 1 |
| TENM2                  | 0 | 0.00317531 | inf | 1 |
| MIR103B1               | 0 | 0          | 0   | 1 |
| DOCK2                  | 0 | 0          | 0   | 1 |
| MIR378E                | 0 | 0          | 0   | 1 |
| FOX11                  | 0 | 0          | 0   | 1 |
| C5orf58                | 0 | 0          | 0   | 1 |
| KCNIP1                 | 0 | 0          | 0   | 1 |
| GABRP                  | 0 | 0          | 0   | 1 |
| TLX3                   | 0 | 0          | 0   | 1 |
| C5orf47                | 0 | 0          | 0   | 1 |
| MIR4634                | 0 | 0          | 0   | 1 |
| HRH2                   | 0 | 0.00696216 | inf | 1 |
| CPLX2                  | 0 | 0.00491057 | inf | 1 |
| FAM153B                | 0 | 0          | 0   | 1 |
| EIF4E1B                | 0 | 0          | 0   | 1 |
| SLC34A1                | 0 | 0.00886135 | inf | 1 |
| ZNF879                 | 0 | 0          | 0   | 1 |
| ZNF354C                | 0 | 0          | 0   | 1 |
| LINC00847              | 0 | 0          | 0   | 1 |
| BTNL8                  | 0 | 0          | 0   | 1 |
| BTNL3                  | 0 | 0          | 0   | 1 |
| OR2V2                  | 0 | 0          | 0   | 1 |
| LOC100132062,LOC100133 | 0 | 0          | 0   | 1 |
| OR4F3                  | 0 | 0          | 0   | 1 |
| MIR4456                | 0 | 0          | 0   | 1 |
| LOC100506688           | 0 | 0.00418438 | inf | 1 |
| MIR4635                | 0 | 0          | 0   | 1 |
| MIR4457                | 0 | 0          | 0   | 1 |
| SLC6A3                 | 0 | 0.00324718 | inf | 1 |
| MIR4277                | 0 | 0          | 0   | 1 |
| IRX4                   | 0 | 0          | 0   | 1 |
| LOC285577              | 0 | 0          | 0   | 1 |
| MIR4278                | 0 | 0          | 0   | 1 |
| MIR4454                | 0 | 0          | 0   | 1 |
| LOC442132              | 0 | 0          | 0   | 1 |
| C5orf49                | 0 | 0          | 0   | 1 |
| MIR4636                | 0 | 0          | 0   | 1 |
| TAS2R1                 | 0 | 0          | 0   | 1 |
| LOC285692              | 0 | 0          | 0   | 1 |
| CTNND2                 | 0 | 0          | 0   | 1 |
| MIR4637                | 0 | 0          | 0   | 1 |
| MARCH11                | 0 | 0          | 0   | 1 |
| LOC401177              | 0 | 0          | 0   | 1 |
| CDH18                  | 0 | 0          | 0   | 1 |



|                  |   |            |     |   |
|------------------|---|------------|-----|---|
| CDH10            | 0 | 0          | 0   | 1 |
| LOC340107        | 0 | 0          | 0   | 1 |
| CDH9             | 0 | 0          | 0   | 1 |
| MIR4279          | 0 | 0          | 0   | 1 |
| ADAMTS12         | 0 | 0          | 0   | 1 |
| PRLR             | 0 | 0          | 0   | 1 |
| CAPSL            | 0 | 0          | 0   | 1 |
| UGT3A2           | 0 | 0          | 0   | 1 |
| MIR580           | 0 | 0          | 0   | 1 |
| GDNF             | 0 | 0          | 0   | 1 |
| EGFLAM-AS4       | 0 | 0          | 0   | 1 |
| LIFR             | 0 | 0          | 0   | 1 |
| MIR3650          | 0 | 0          | 0   | 1 |
| FYB              | 0 | 0          | 0   | 1 |
| C9               | 0 | 0          | 0   | 1 |
| SNORD72          | 0 | 0          | 0   | 1 |
| MROH2B           | 0 | 0          | 0   | 1 |
| C6               | 0 | 0          | 0   | 1 |
| PLCXD3           | 0 | 0          | 0   | 1 |
| CCL28            | 0 | 0          | 0   | 1 |
| FGF10            | 0 | 0          | 0   | 1 |
| HCN1             | 0 | 0          | 0   | 1 |
| MIR581           | 0 | 0          | 0   | 1 |
| ESM1             | 0 | 0          | 0   | 1 |
| MIR449A          | 0 | 0          | 0   | 1 |
| MIR449B          | 0 | 0          | 0   | 1 |
| MIR449C          | 0 | 0          | 0   | 1 |
| MIR5687          | 0 | 0          | 0   | 1 |
| ANKRD55          | 0 | 0          | 0   | 1 |
| ACTBL2           | 0 | 0          | 0   | 1 |
| HTR1A            | 0 | 0          | 0   | 1 |
| CD180            | 0 | 0          | 0   | 1 |
| ZNF366           | 0 | 0          | 0   | 1 |
| F2RL2            | 0 | 0          | 0   | 1 |
| OTP              | 0 | 0          | 0   | 1 |
| LOC644936        | 0 | 0          | 0   | 1 |
| ANKRD34B         | 0 | 0.00268197 | inf | 1 |
| HAPLN1           | 0 | 0          | 0   | 1 |
| EDIL3            | 0 | 0          | 0   | 1 |
| MIR4280          | 0 | 0          | 0   | 1 |
| LINC00461_MIR9-2 | 0 | 0          | 0   | 1 |
| MEF2C            | 0 | 0.00306562 | inf | 1 |
| MIR3660          | 0 | 0          | 0   | 1 |
| PCSK1            | 0 | 0.00152873 | inf | 1 |
| LIX1             | 0 | 0          | 0   | 1 |
| SLCO4C1          | 0 | 0          | 0   | 1 |
| SLCO6A1          | 0 | 0          | 0   | 1 |
| TMEM232          | 0 | 0.00231763 | inf | 1 |
| TSSK1B           | 0 | 0          | 0   | 1 |
| MGC32805         | 0 | 0          | 0   | 1 |
| ZNF608           | 0 | 0          | 0   | 1 |
| FBN2             | 0 | 0          | 0   | 1 |
| MIR4460          | 0 | 0          | 0   | 1 |
| MIR3936          | 0 | 0          | 0   | 1 |
| IL5              | 0 | 0          | 0   | 1 |
| FSTL4            | 0 | 0          | 0   | 1 |
| MIR1289-2        | 0 | 0          | 0   | 1 |
| LOC340073        | 0 | 0          | 0   | 1 |
| C5orf20          | 0 | 0          | 0   | 1 |
| TIFAB            | 0 | 0          | 0   | 1 |
| IL9              | 0 | 0          | 0   | 1 |
| LECT2            | 0 | 0          | 0   | 1 |
| VTRNA2-1         | 0 | 8.55584    | inf | 1 |
| TRPC7            | 0 | 0          | 0   | 1 |
| MIR874           | 0 | 0          | 0   | 1 |
| NME5             | 0 | 0          | 0   | 1 |
| SNORD63          | 0 | 0          | 0   | 1 |
| LOC729080        | 0 | 0          | 0   | 1 |
| ARHGAP26-AS1     | 0 | 0          | 0   | 1 |
| NR3C1            | 0 | 0.00362267 | inf | 1 |
| GRXCR2           | 0 | 0          | 0   | 1 |
| PPP2R2B          | 0 | 0          | 0   | 1 |
| PPP2R2B-IT1      | 0 | 0          | 0   | 1 |
| C5orf46          | 0 | 0          | 0   | 1 |
| HTR4             | 0 | 0          | 0   | 1 |
| CAMK2A           | 0 | 0          | 0   | 1 |
| SLC36A3          | 0 | 0.00300443 | inf | 1 |
| SPARC            | 0 | 0          | 0   | 1 |
| GLRA1            | 0 | 0          | 0   | 1 |

|              |   |            |     |   |
|--------------|---|------------|-----|---|
| NMUR2        | 0 | 0          | 0   | 1 |
| HAND1        | 0 | 0          | 0   | 1 |
| MIR3141      | 0 | 0          | 0   | 1 |
| FAM71B       | 0 | 0          | 0   | 1 |
| SOX30        | 0 | 0          | 0   | 1 |
| EBF1         | 0 | 0.00186742 | inf | 1 |
| IL12B        | 0 | 0          | 0   | 1 |
| LOC285627    | 0 | 0          | 0   | 1 |
| ATP10B       | 0 | 0          | 0   | 1 |
| LOC285629    | 0 | 0          | 0   | 1 |
| GABRB2       | 0 | 0          | 0   | 1 |
| MIR103A1     | 0 | 0          | 0   | 1 |
| SLIT3        | 0 | 0          | 0   | 1 |
| MIR218-2     | 0 | 0          | 0   | 1 |
| MIR585       | 0 | 0          | 0   | 1 |
| FAM196B      | 0 | 0          | 0   | 1 |
| LCP2         | 0 | 0          | 0   | 1 |
| MIR3912      | 0 | 0          | 0   | 1 |
| STC2         | 0 | 0.00449192 | inf | 1 |
| FLJ16171     | 0 | 0          | 0   | 1 |
| DRD1         | 0 | 0          | 0   | 1 |
| SNCB         | 0 | 0          | 0   | 1 |
| MIR4281      | 0 | 0          | 0   | 1 |
| FAM153A      | 0 | 0          | 0   | 1 |
| PROP1        | 0 | 0          | 0   | 1 |
| MIR1229      | 0 | 0          | 0   | 1 |
| MIR340       | 0 | 0          | 0   | 1 |
| SCGB3A1      | 0 | 0          | 0   | 1 |
| OR2Y1        | 0 | 0          | 0   | 1 |
| OR2V1        | 0 | 0          | 0   | 1 |
| MIR4638      | 0 | 0          | 0   | 1 |
| SNORD96A     | 0 | 0          | 0   | 1 |
| FOXQ1        | 0 | 0          | 0   | 1 |
| FOXF2        | 0 | 0          | 0   | 1 |
| FAM50B       | 0 | 0          | 0   | 1 |
| C6orf201     | 0 | 0          | 0   | 1 |
| PPP1R3G      | 0 | 0          | 0   | 1 |
| LY86         | 0 | 0          | 0   | 1 |
| HULC         | 0 | 0          | 0   | 1 |
| MIR5689      | 0 | 0          | 0   | 1 |
| TMEM170B     | 0 | 0          | 0   | 1 |
| RNF182       | 0 | 0          | 0   | 1 |
| MIR4639      | 0 | 0          | 0   | 1 |
| STMND1       | 0 | 0          | 0   | 1 |
| RBM24        | 0 | 0          | 0   | 1 |
| MIR548A1     | 0 | 0          | 0   | 1 |
| ID4          | 0 | 0          | 0   | 1 |
| LINC00340    | 0 | 0          | 0   | 1 |
| HDGFL1       | 0 | 0          | 0   | 1 |
| SCGN         | 0 | 0          | 0   | 1 |
| HIST1H2BA    | 0 | 0          | 0   | 1 |
| HIST1H2APS1  | 0 | 0          | 0   | 1 |
| SLC17A4      | 0 | 0          | 0   | 1 |
| HIST1H3C     | 0 | 0.0653818  | inf | 1 |
| HIST1H4F     | 0 | 0          | 0   | 1 |
| BTN1A1       | 0 | 0          | 0   | 1 |
| HCG11        | 0 | 0.00287515 | inf | 1 |
| MIR3143      | 0 | 0          | 0   | 1 |
| VN1R10P      | 0 | 0          | 0   | 1 |
| LOC100507173 | 0 | 0.00483464 | inf | 1 |
| HIST1H2AL    | 0 | 0          | 0   | 1 |
| GPX5         | 0 | 0          | 0   | 1 |
| LOC100129636 | 0 | 0          | 0   | 1 |
| OR2J3        | 0 | 0          | 0   | 1 |
| OR2J2        | 0 | 0          | 0   | 1 |
| OR14J1       | 0 | 0          | 0   | 1 |
| OR12D2       | 0 | 0          | 0   | 1 |
| OR10C1       | 0 | 0          | 0   | 1 |
| LOC100507362 | 0 | 0          | 0   | 1 |
| SNORD32B     | 0 | 0          | 0   | 1 |
| MOG          | 0 | 0.00554779 | inf | 1 |
| MIR877       | 0 | 0          | 0   | 1 |
| MIR4640      | 0 | 0          | 0   | 1 |
| MUC21        | 0 | 0          | 0   | 1 |
| MUC22        | 0 | 0          | 0   | 1 |
| HCG22        | 0 | 0          | 0   | 1 |
| HCG26        | 0 | 0.0163395  | inf | 1 |
| AIF1         | 0 | 0.0269571  | inf | 1 |
| LY6G6F       | 0 | 0          | 0   | 1 |

|              |   |            |     |   |
|--------------|---|------------|-----|---|
| SNORD48      | 0 | 0          | 0   | 1 |
| SNORD52      | 0 | 0          | 0   | 1 |
| STK19        | 0 | 0          | 0   | 1 |
| HCG23        | 0 | 0          | 0   | 1 |
| HLA-DRA      | 0 | 0          | 0   | 1 |
| HLA-DQA1     | 0 | 0          | 0   | 1 |
| HLA-DQA2     | 0 | 0          | 0   | 1 |
| HLA-DPB1     | 0 | 0          | 0   | 1 |
| HLA-DPB2     | 0 | 0          | 0   | 1 |
| MIR219-1     | 0 | 5.49296    | inf | 1 |
| CLPSL2       | 0 | 0          | 0   | 1 |
| CLPSL1       | 0 | 0          | 0   | 1 |
| PI16         | 0 | 0          | 0   | 1 |
| FGD2         | 0 | 0.00404436 | inf | 1 |
| DNAH8        | 0 | 0          | 0   | 1 |
| GLP1R        | 0 | 0          | 0   | 1 |
| DAAM2        | 0 | 0          | 0   | 1 |
| TDRG1        | 0 | 0          | 0   | 1 |
| TREML4       | 0 | 0          | 0   | 1 |
| TREML5P      | 0 | 0          | 0   | 1 |
| NCR2         | 0 | 0          | 0   | 1 |
| MIR4641      | 0 | 0          | 0   | 1 |
| ATP6V0CP3    | 0 | 0          | 0   | 1 |
| PTCRA        | 0 | 0          | 0   | 1 |
| TTBK1        | 0 | 0.00219808 | inf | 1 |
| SLC22A7      | 0 | 0          | 0   | 1 |
| SPATS1       | 0 | 0          | 0   | 1 |
| MIR4642      | 0 | 0          | 0   | 1 |
| ANKRD66      | 0 | 0          | 0   | 1 |
| MEP1A        | 0 | 0.0102041  | inf | 1 |
| GPR115       | 0 | 0          | 0   | 1 |
| OPN5         | 0 | 0          | 0   | 1 |
| GLYATL3      | 0 | 0          | 0   | 1 |
| TFAP2D       | 0 | 0          | 0   | 1 |
| TFAP2B       | 0 | 0          | 0   | 1 |
| MIR206       | 0 | 0          | 0   | 1 |
| MIR133B      | 0 | 0          | 0   | 1 |
| IL17A        | 0 | 0          | 0   | 1 |
| MIR5685      | 0 | 0          | 0   | 1 |
| MLIP-IT1     | 0 | 0          | 0   | 1 |
| MLIP         | 0 | 0          | 0   | 1 |
| TINAG        | 0 | 0          | 0   | 1 |
| HCRTR2       | 0 | 0          | 0   | 1 |
| GFRAL        | 0 | 0          | 0   | 1 |
| BEND6        | 0 | 0          | 0   | 1 |
| SLC25A51P1   | 0 | 0          | 0   | 1 |
| BAI3         | 0 | 0          | 0   | 1 |
| FAM135A      | 0 | 0          | 0   | 1 |
| KHDC3L       | 0 | 0          | 0   | 1 |
| RNY4         | 0 | 0          | 0   | 1 |
| PRSS35       | 0 | 0          | 0   | 1 |
| RIPPLY2      | 0 | 0          | 0   | 1 |
| HTR1E        | 0 | 0          | 0   | 1 |
| SPACA1       | 0 | 0          | 0   | 1 |
| GJA10        | 0 | 0          | 0   | 1 |
| MIR4464      | 0 | 0          | 0   | 1 |
| MIR4643      | 0 | 0          | 0   | 1 |
| FUT9         | 0 | 0          | 0   | 1 |
| FHL5         | 0 | 0          | 0   | 1 |
| MIR2113      | 0 | 0          | 0   | 1 |
| POU3F2       | 0 | 0          | 0   | 1 |
| LOC728012    | 0 | 0          | 0   | 1 |
| GRIK2        | 0 | 0          | 0   | 1 |
| LIN28B       | 0 | 0          | 0   | 1 |
| BVES-AS1     | 0 | 0          | 0   | 1 |
| NR2E1        | 0 | 0.00418696 | inf | 1 |
| CCDC162P     | 0 | 0          | 0   | 1 |
| GPR6         | 0 | 0          | 0   | 1 |
| RFPL4B       | 0 | 0          | 0   | 1 |
| FLJ34503     | 0 | 0          | 0   | 1 |
| FAM26D       | 0 | 0          | 0   | 1 |
| RFX6         | 0 | 0          | 0   | 1 |
| VGLL2        | 0 | 0          | 0   | 1 |
| LOC100287632 | 0 | 0          | 0   | 1 |
| CLVS2        | 0 | 0          | 0   | 1 |
| NKAIN2       | 0 | 0          | 0   | 1 |
| LOC643623    | 0 | 0          | 0   | 1 |
| RSPO3        | 0 | 0          | 0   | 1 |
| TMEM200A     | 0 | 0          | 0   | 1 |

|              |   |                |   |   |
|--------------|---|----------------|---|---|
| ARG1         | 0 | 0              | 0 | 1 |
| LOC100507254 | 0 | 0              | 0 | 1 |
| TAAR9        | 0 | 0              | 0 | 1 |
| TAAR8        | 0 | 0              | 0 | 1 |
| TAAR6        | 0 | 0              | 0 | 1 |
| SNORD101     | 0 | 0              | 0 | 1 |
| SNORD100     | 0 | 0              | 0 | 1 |
| LINC00326    | 0 | 0              | 0 | 1 |
| EYA4         | 0 | 0              | 0 | 1 |
| MGC34034     | 0 | 0              | 0 | 1 |
| TCF21        | 0 | 0              | 0 | 1 |
| LOC154092    | 0 | 0              | 0 | 1 |
| LINC00271    | 0 | 0              | 0 | 1 |
| LOC100132735 | 0 | 0              | 0 | 1 |
| MIR3668      | 0 | 0              | 0 | 1 |
| MIR4465      | 0 | 0              | 0 | 1 |
| ZC2HC1B      | 0 | 0              | 0 | 1 |
| GRM1         | 0 | 0              | 0 | 1 |
| RAB32        | 0 | 0              | 0 | 1 |
| ADGB         | 0 | 0              | 0 | 1 |
| PPP1R14C     | 0 | 0              | 0 | 1 |
| IYD          | 0 | 0              | 0 | 1 |
| ESR1         | 0 | 0              | 0 | 1 |
| OPRM1        | 0 | 0              | 0 | 1 |
| MIR3692      | 0 | 0              | 0 | 1 |
| SYNJ2-IT1    | 0 | 0              | 0 | 1 |
| FNDC1        | 0 | 0              | 0 | 1 |
| MAS1         | 0 | 0              | 0 | 1 |
| LINC00602    | 0 | 0              | 0 | 1 |
| TCP10L2      | 0 | 0              | 0 | 1 |
| UNC93A       | 0 | 0              | 0 | 1 |
| TLL2         | 0 | 0              | 0 | 1 |
| KIF25        | 0 | 0              | 0 | 1 |
| SMOC2        | 0 | 0              | 0 | 1 |
| MIR4644      | 0 | 0              | 0 | 1 |
| LOC285768    | 0 | 0              | 0 | 1 |
| MIR4645      | 0 | 0              | 0 | 1 |
| PXDC1        | 0 | 0              | 0 | 1 |
| FAM217A      | 0 | 0              | 0 | 1 |
| MIR3691      | 0 | 0              | 0 | 1 |
| F13A1        | 0 | 0              | 0 | 1 |
| LY86-AS1     | 0 | 0              | 0 | 1 |
| CAGE1        | 0 | 0.0125926 inf  | 0 | 1 |
| SCARNA27     | 0 | 0              | 0 | 1 |
| GCM2         | 0 | 0              | 0 | 1 |
| ELOVL2       | 0 | 0              | 0 | 1 |
| NHLRC1       | 0 | 0              | 0 | 1 |
| LOC729177    | 0 | 0.00403517 inf | 0 | 1 |
| PRL          | 0 | 0              | 0 | 1 |
| FAM65B       | 0 | 0              | 0 | 1 |
| CMAHP        | 0 | 0              | 0 | 1 |
| HIST1H2AA    | 0 | 0              | 0 | 1 |
| SLC17A1      | 0 | 0              | 0 | 1 |
| SLC17A3      | 0 | 0              | 0 | 1 |
| SLC17A2      | 0 | 0              | 0 | 1 |
| HIST1H2BB    | 0 | 0              | 0 | 1 |
| HIST1H4G     | 0 | 0              | 0 | 1 |
| POM121L2     | 0 | 0              | 0 | 1 |
| HIST1H4K     | 0 | 0.382585 inf   | 0 | 1 |
| HIST1H4L     | 0 | 0              | 0 | 1 |
| OR2B2        | 0 | 0              | 0 | 1 |
| ZSCAN23      | 0 | 0              | 0 | 1 |
| GPX6         | 0 | 0              | 0 | 1 |
| ZNF311       | 0 | 0              | 0 | 1 |
| OR2W1        | 0 | 0              | 0 | 1 |
| OR5V1        | 0 | 0              | 0 | 1 |
| OR12D3       | 0 | 0              | 0 | 1 |
| OR11A1       | 0 | 0              | 0 | 1 |
| MAS1L        | 0 | 0              | 0 | 1 |
| UBD          | 0 | 0              | 0 | 1 |
| ZFP57        | 0 | 0              | 0 | 1 |
| IFITM4P      | 0 | 0.219601 inf   | 0 | 1 |
| HCG4         | 0 | 0.00642414 inf | 0 | 1 |
| TRIM10       | 0 | 0              | 0 | 1 |
| SFTA2        | 0 | 0              | 0 | 1 |
| C6orf15      | 0 | 0              | 0 | 1 |
| SNORD117     | 0 | 0              | 0 | 1 |
| SNORD84      | 0 | 0              | 0 | 1 |
| MIR4646      | 0 | 0              | 0 | 1 |

|              |   |            |     |   |
|--------------|---|------------|-----|---|
| LY6G6E       | 0 | 0          | 0   | 1 |
| MIR1236      | 0 | 0          | 0   | 1 |
| TNXB         | 0 | 0          | 0   | 1 |
| C6orf10      | 0 | 0          | 0   | 1 |
| BTNL2        | 0 | 0          | 0   | 1 |
| HLA-DQB1     | 0 | 0          | 0   | 1 |
| HLA-DQB2     | 0 | 0          | 0   | 1 |
| HLA-DOA      | 0 | 0          | 0   | 1 |
| IP6K3        | 0 | 0.00523423 | inf | 1 |
| MLN          | 0 | 0          | 0   | 1 |
| LOC100507584 | 0 | 0          | 0   | 1 |
| MIR1275      | 0 | 0          | 0   | 1 |
| GRM4         | 0 | 0          | 0   | 1 |
| MIR5690      | 0 | 0          | 0   | 1 |
| C6orf222     | 0 | 0          | 0   | 1 |
| ETV7         | 0 | 0          | 0   | 1 |
| MIR3925      | 0 | 0          | 0   | 1 |
| MIR4462      | 0 | 0          | 0   | 1 |
| MDGA1        | 0 | 0.00178548 | inf | 1 |
| LOC100131047 | 0 | 0          | 0   | 1 |
| KCNK17       | 0 | 0          | 0   | 1 |
| KCNK16       | 0 | 0          | 0   | 1 |
| KIF6         | 0 | 0          | 0   | 1 |
| MOC51        | 0 | 0          | 0   | 1 |
| FLJ41649     | 0 | 0          | 0   | 1 |
| LRFN2        | 0 | 0          | 0   | 1 |
| TREML1       | 0 | 0          | 0   | 1 |
| TREML2       | 0 | 0          | 0   | 1 |
| TREML3P      | 0 | 0          | 0   | 1 |
| PGC          | 0 | 0          | 0   | 1 |
| CRIP3        | 0 | 0          | 0   | 1 |
| DLK2         | 0 | 0.0251713  | inf | 1 |
| MIR586       | 0 | 0          | 0   | 1 |
| CLIC5        | 0 | 0          | 0   | 1 |
| PLA2G7       | 0 | 0          | 0   | 1 |
| GPR116       | 0 | 0          | 0   | 1 |
| RHAG         | 0 | 0          | 0   | 1 |
| CRISP2       | 0 | 0          | 0   | 1 |
| CRISP3       | 0 | 0          | 0   | 1 |
| PGK2         | 0 | 0          | 0   | 1 |
| CRISP1       | 0 | 0          | 0   | 1 |
| DEFB133      | 0 | 0          | 0   | 1 |
| DEFB114      | 0 | 0          | 0   | 1 |
| DEFB113      | 0 | 0          | 0   | 1 |
| DEFB110      | 0 | 0          | 0   | 1 |
| DEFB112      | 0 | 0          | 0   | 1 |
| PKHD1        | 0 | 0          | 0   | 1 |
| IL17F        | 0 | 0.016419   | inf | 1 |
| GSTA7P       | 0 | 0          | 0   | 1 |
| GSTA2        | 0 | 0          | 0   | 1 |
| GSTA1        | 0 | 0          | 0   | 1 |
| GSTA5        | 0 | 0          | 0   | 1 |
| GSTA3        | 0 | 0          | 0   | 1 |
| ELOVL5       | 0 | 0          | 0   | 1 |
| RPS16P5      | 0 | 0          | 0   | 1 |
| HMGCLL1      | 0 | 0          | 0   | 1 |
| BMP5         | 0 | 0          | 0   | 1 |
| COL21A1      | 0 | 0          | 0   | 1 |
| RNU6-71      | 0 | 0          | 0   | 1 |
| KHDRBS2      | 0 | 0          | 0   | 1 |
| COL9A1       | 0 | 0          | 0   | 1 |
| MIR30C2      | 0 | 0          | 0   | 1 |
| MIR30A       | 0 | 0          | 0   | 1 |
| LINC00472    | 0 | 0          | 0   | 1 |
| MIR4282      | 0 | 0          | 0   | 1 |
| KCNQ5-AS1    | 0 | 0          | 0   | 1 |
| KHDC1L       | 0 | 0          | 0   | 1 |
| KHDC1        | 0 | 0          | 0   | 1 |
| DPPA5        | 0 | 0.0315364  | inf | 1 |
| COL12A1      | 0 | 0          | 0   | 1 |
| HTR1B        | 0 | 0          | 0   | 1 |
| C6orf7       | 0 | 0          | 0   | 1 |
| ELOVL4       | 0 | 0          | 0   | 1 |
| ME1          | 0 | 0          | 0   | 1 |
| SNAP91       | 0 | 0          | 0   | 1 |
| TBX18        | 0 | 0          | 0   | 1 |
| SNORD50B     | 0 | 0          | 0   | 1 |
| CGA          | 0 | 0          | 0   | 1 |
| CNR1         | 0 | 0          | 0   | 1 |

|              |   |                |   |   |
|--------------|---|----------------|---|---|
| GABRR1       | 0 | 0              | 0 | 1 |
| BACH2        | 0 | 0              | 0 | 1 |
| EPHA7        | 0 | 0              | 0 | 1 |
| MIR548H3     | 0 | 0              | 0 | 1 |
| MCHR2        | 0 | 0              | 0 | 1 |
| SIM1         | 0 | 0              | 0 | 1 |
| LINC00577    | 0 | 0              | 0 | 1 |
| POPDC3       | 0 | 0              | 0 | 1 |
| LOC100422737 | 0 | 0              | 0 | 1 |
| SCML4        | 0 | 0              | 0 | 1 |
| METTL24      | 0 | 0              | 0 | 1 |
| SLC22A16     | 0 | 0              | 0 | 1 |
| GSTM2P1      | 0 | 0              | 0 | 1 |
| LAMA4        | 0 | 0              | 0 | 1 |
| LOC285758    | 0 | 0              | 0 | 1 |
| HS3ST5       | 0 | 0              | 0 | 1 |
| BET3L        | 0 | 0              | 0 | 1 |
| FAM162B      | 0 | 0              | 0 | 1 |
| GPRC6A       | 0 | 0              | 0 | 1 |
| ROS1         | 0 | 0              | 0 | 1 |
| FAM184A      | 0 | 0              | 0 | 1 |
| MIR548B      | 0 | 0              | 0 | 1 |
| LOC285762    | 0 | 0              | 0 | 1 |
| TRDN         | 0 | 0              | 0 | 1 |
| MIR5695      | 0 | 0              | 0 | 1 |
| THEMIS       | 0 | 0              | 0 | 1 |
| TMEM244      | 0 | 0              | 0 | 1 |
| SAMD3        | 0 | 0              | 0 | 1 |
| OR2A4        | 0 | 0              | 0 | 1 |
| MOXD1        | 0 | 0              | 0 | 1 |
| TAAR5        | 0 | 0              | 0 | 1 |
| TAAR3        | 0 | 0              | 0 | 1 |
| TAAR2        | 0 | 0              | 0 | 1 |
| TAAR1        | 0 | 0              | 0 | 1 |
| VNN1         | 0 | 0              | 0 | 1 |
| VNN3         | 0 | 0              | 0 | 1 |
| VNN2         | 0 | 0              | 0 | 1 |
| HMGA1P7      | 0 | 0              | 0 | 1 |
| MIR3662      | 0 | 0              | 0 | 1 |
| IL22RA2      | 0 | 0              | 0 | 1 |
| OLIG3        | 0 | 0              | 0 | 1 |
| LOC100130476 | 0 | 0              | 0 | 1 |
| MIR3145      | 0 | 0              | 0 | 1 |
| TXLNB        | 0 | 0              | 0 | 1 |
| LOC645434    | 0 | 0              | 0 | 1 |
| LOC153910    | 0 | 0              | 0 | 1 |
| LOC729176    | 0 | 0              | 0 | 1 |
| LOC100128176 | 0 | 0              | 0 | 1 |
| NOX3         | 0 | 0              | 0 | 1 |
| MIR4466      | 0 | 0              | 0 | 1 |
| MIR3918      | 0 | 0              | 0 | 1 |
| TAGAP        | 0 | 0              | 0 | 1 |
| SNORA29      | 0 | 0.953165 inf   | 0 | 1 |
| SLC22A2      | 0 | 0              | 0 | 1 |
| LPA          | 0 | 0              | 0 | 1 |
| PACRG-AS1    | 0 | 0              | 0 | 1 |
| DKFZp451B082 | 0 | 0              | 0 | 1 |
| CAHM         | 0 | 0              | 0 | 1 |
| C6orf118     | 0 | 0              | 0 | 1 |
| PDE10A       | 0 | 0              | 0 | 1 |
| LINC00473    | 0 | 0              | 0 | 1 |
| T            | 0 | 0              | 0 | 1 |
| RPS6KA2-IT1  | 0 | 0.0271007 inf  | 0 | 1 |
| MIR1913      | 0 | 0              | 0 | 1 |
| MIR3939      | 0 | 0              | 0 | 1 |
| GPR31        | 0 | 0              | 0 | 1 |
| TCP10        | 0 | 0              | 0 | 1 |
| HGC6.3       | 0 | 0.0146934 inf  | 0 | 1 |
| FRMD1        | 0 | 0              | 0 | 1 |
| DACT2        | 0 | 0.00562183 inf | 0 | 1 |
| LOC154449    | 0 | 0              | 0 | 1 |
| FAM20C       | 0 | 0              | 0 | 1 |
| LOC100288524 | 0 | 0              | 0 | 1 |
| LOC442497    | 0 | 0              | 0 | 1 |
| UNCX         | 0 | 0              | 0 | 1 |
| TFAMP1       | 0 | 0.00479286 inf | 0 | 1 |
| NXPH1        | 0 | 0              | 0 | 1 |
| PER4         | 0 | 0              | 0 | 1 |
| LOC100506025 | 0 | 0.00446015 inf | 0 | 1 |

|              |   |            |     |   |
|--------------|---|------------|-----|---|
| LRRC72       | 0 | 0          | 0   | 1 |
| MACC1-AS1    | 0 | 0          | 0   | 1 |
| ITGB8        | 0 | 0          | 0   | 1 |
| IL6          | 0 | 0          | 0   | 1 |
| SNORD93      | 0 | 0          | 0   | 1 |
| NPY          | 0 | 0          | 0   | 1 |
| C7orf71      | 0 | 0          | 0   | 1 |
| EVX1         | 0 | 0          | 0   | 1 |
| LOC100506497 | 0 | 0          | 0   | 1 |
| WIPF3        | 0 | 0          | 0   | 1 |
| MIR550A1     | 0 | 0          | 0   | 1 |
| GHRHR        | 0 | 0          | 0   | 1 |
| CCDC129      | 0 | 0          | 0   | 1 |
| PPP1R17      | 0 | 0          | 0   | 1 |
| NPSR1        | 0 | 0          | 0   | 1 |
| LOC401324    | 0 | 0          | 0   | 1 |
| GPR141       | 0 | 0          | 0   | 1 |
| NME8         | 0 | 0          | 0   | 1 |
| EPDR1        | 0 | 0          | 0   | 1 |
| LOC100506776 | 0 | 0          | 0   | 1 |
| POU6F2       | 0 | 0          | 0   | 1 |
| INHBA-AS1    | 0 | 0          | 0   | 1 |
| MIR3943      | 0 | 0          | 0   | 1 |
| MIR4649      | 0 | 0          | 0   | 1 |
| RAMP3        | 0 | 0          | 0   | 1 |
| ADCY1        | 0 | 0.00569769 | inf | 1 |
| IGFBP1       | 0 | 0          | 0   | 1 |
| C7orf65      | 0 | 0          | 0   | 1 |
| LINC00525    | 0 | 0          | 0   | 1 |
| C7orf69      | 0 | 0          | 0   | 1 |
| VWC2         | 0 | 0          | 0   | 1 |
| C7orf72      | 0 | 0          | 0   | 1 |
| IKZF1        | 0 | 0          | 0   | 1 |
| LOC100129427 | 0 | 0          | 0   | 1 |
| POM121L12    | 0 | 0          | 0   | 1 |
| VSTM2A       | 0 | 0          | 0   | 1 |
| LOC285878    | 0 | 0          | 0   | 1 |
| DKFZp434L192 | 0 | 0          | 0   | 1 |
| MIR3147      | 0 | 0          | 0   | 1 |
| ZNF716       | 0 | 0.00139904 | inf | 1 |
| LOC100287704 | 0 | 0          | 0   | 1 |
| MIR4283-2    | 0 | 0          | 0   | 1 |
| ZNF727       | 0 | 0          | 0   | 1 |
| ZNF735       | 0 | 0          | 0   | 1 |
| ZNF679       | 0 | 0          | 0   | 1 |
| ZNF736       | 0 | 0          | 0   | 1 |
| LOC641746    | 0 | 0          | 0   | 1 |
| WBSCR17      | 0 | 0.00433158 | inf | 1 |
| MIR3914-2    | 0 | 0          | 0   | 1 |
| MIR4650-1    | 0 | 0          | 0   | 1 |
| PMS2L2       | 0 | 0          | 0   | 1 |
| FZD9         | 0 | 0          | 0   | 1 |
| MIR4284      | 0 | 0          | 0   | 1 |
| ELN          | 0 | 0          | 0   | 1 |
| GATSL1       | 0 | 0          | 0   | 1 |
| SPDYE8P      | 0 | 0          | 0   | 1 |
| SPDYE8P      | 0 | 0          | 0   | 1 |
| MIR4651      | 0 | 0          | 0   | 1 |
| SNORA14A     | 0 | 1.40986    | inf | 1 |
| RPL13AP17    | 0 | 0          | 0   | 1 |
| MAGI2-AS2    | 0 | 0          | 0   | 1 |
| MAGI2-AS3    | 0 | 0          | 0   | 1 |
| MIR548M      | 0 | 0          | 0   | 1 |
| GRM3         | 0 | 0.00301908 | inf | 1 |
| ZNF804B      | 0 | 0          | 0   | 1 |
| MIR4652      | 0 | 0          | 0   | 1 |
| GNGT1        | 0 | 0          | 0   | 1 |
| GNG11        | 0 | 0          | 0   | 1 |
| COL1A2       | 0 | 0          | 0   | 1 |
| PEG10        | 0 | 0          | 0   | 1 |
| DLX6         | 0 | 0          | 0   | 1 |
| TAC1         | 0 | 0          | 0   | 1 |
| NPTX2        | 0 | 0          | 0   | 1 |
| MIR3609      | 0 | 0          | 0   | 1 |
| ZAN          | 0 | 0          | 0   | 1 |
| MUC17        | 0 | 0.00125601 | inf | 1 |
| MIR4653      | 0 | 0          | 0   | 1 |
| MIR4285      | 0 | 0          | 0   | 1 |
| MIR4467      | 0 | 0          | 0   | 1 |

|              |   |             |     |   |
|--------------|---|-------------|-----|---|
| SPDYE2L      | 0 | 0           | 0   | 1 |
| LHFPL3       | 0 | 0           | 0   | 1 |
| PIK3CG       | 0 | 0           | 0   | 1 |
| PRKAR2B      | 0 | 0           | 0   | 1 |
| FOXP2        | 0 | 0           | 0   | 1 |
| MIR3666      | 0 | 0           | 0   | 1 |
| MDFIC        | 0 | 0           | 0   | 1 |
| ANKRD7       | 0 | 0           | 0   | 1 |
| KCND2        | 0 | 0           | 0   | 1 |
| HYALP1       | 0 | 0           | 0   | 1 |
| HYAL4        | 0 | 0           | 0   | 1 |
| SPAM1        | 0 | 0           | 0   | 1 |
| MIR593       | 0 | 0           | 0   | 1 |
| MIR129-1     | 0 | 0           | 0   | 1 |
| CPA2         | 0 | 0           | 0   | 1 |
| CPA5         | 0 | 0           | 0   | 1 |
| CPA1         | 0 | 0           | 0   | 1 |
| MIR335       | 0 | 0           | 0   | 1 |
| FLJ40288     | 0 | 0           | 0   | 1 |
| AKR1B10      | 0 | 0.00519347  | inf | 1 |
| AKR1B15      | 0 | 0           | 0   | 1 |
| STRA8        | 0 | 0           | 0   | 1 |
| CHRM2        | 0 | 0           | 0   | 1 |
| MIR490       | 0 | 0           | 0   | 1 |
| LOC100130880 | 0 | 0           | 0   | 1 |
| AKR1D1       | 0 | 0.00286678  | inf | 1 |
| MIR4468      | 0 | 0           | 0   | 1 |
| CLEC2L       | 0 | 0           | 0   | 1 |
| OR9A4        | 0 | 0           | 0   | 1 |
| LOC93432     | 0 | 0           | 0   | 1 |
| PRSS1        | 0 | 0           | 0   | 1 |
| PRSS2        | 0 | 0           | 0   | 1 |
| C7orf34      | 0 | 0           | 0   | 1 |
| OR6V1        | 0 | 0           | 0   | 1 |
| PIP          | 0 | 0           | 0   | 1 |
| TAS2R39      | 0 | 0           | 0   | 1 |
| TAS2R40      | 0 | 0           | 0   | 1 |
| TAS2R60      | 0 | 0           | 0   | 1 |
| TAS2R41      | 0 | 0           | 0   | 1 |
| OR2F2        | 0 | 0           | 0   | 1 |
| OR2F1        | 0 | 0           | 0   | 1 |
| OR6B1        | 0 | 0           | 0   | 1 |
| OR2A5        | 0 | 0           | 0   | 1 |
| OR2A25       | 0 | 0           | 0   | 1 |
| OR2A12       | 0 | 0           | 0   | 1 |
| OR2A2        | 0 | 0           | 0   | 1 |
| OR2A14       | 0 | 0           | 0   | 1 |
| OR2A1        | 0 | 0.0328361   | inf | 1 |
| RNU6-57      | 0 | 0           | 0   | 1 |
| MIR548AQ     | 0 | 0           | 0   | 1 |
| MIR548F3     | 0 | 0           | 0   | 1 |
| MIR548T      | 0 | 0           | 0   | 1 |
| C7orf33      | 0 | 0           | 0   | 1 |
| KRBA1        | 0 | 0           | 0   | 1 |
| RNU6-33      | 0 | 0           | 0   | 1 |
| LOC285972    | 0 | 0           | 0   | 1 |
| GIMAP8       | 0 | 0           | 0   | 1 |
| GIMAP7       | 0 | 0           | 0   | 1 |
| GIMAP4       | 0 | 0           | 0   | 1 |
| TMEM176A     | 0 | 0           | 0   | 1 |
| WDR86-AS1    | 0 | 0           | 0   | 1 |
| GALNTL5      | 0 | 0           | 0   | 1 |
| HTR5A        | 0 | 0           | 0   | 1 |
| EN2          | 0 | 0           | 0   | 1 |
| LOC100506585 | 0 | 0           | 0   | 1 |
| MIR5707      | 0 | 0           | 0   | 1 |
| LINC00689    | 0 | 0           | 0   | 1 |
| MIR339       | 0 | 0           | 0   | 1 |
| MIR4655      | 0 | 0           | 0   | 1 |
| CARD11       | 0 | 0           | 0   | 1 |
| MIR4656      | 0 | 0           | 0   | 1 |
| RADIL        | 0 | 0           | 0   | 1 |
| PAPOLB       | 0 | 0           | 0   | 1 |
| MIR589       | 0 | 0           | 0   | 1 |
| GRID2IP      | 0 | 0           | 0   | 1 |
| COL28A1      | 0 | 0           | 0   | 1 |
| THSD7A       | 0 | 0.000768451 | inf | 1 |
| VWDE         | 0 | 0           | 0   | 1 |
| AGMO         | 0 | 0           | 0   | 1 |



|              |   |            |     |   |
|--------------|---|------------|-----|---|
| AGR2         | 0 | 0          | 0   | 1 |
| AGR3         | 0 | 0          | 0   | 1 |
| PRPS1L1      | 0 | 0          | 0   | 1 |
| TWIST1       | 0 | 0          | 0   | 1 |
| FERD3L       | 0 | 0          | 0   | 1 |
| MIR3146      | 0 | 0          | 0   | 1 |
| TMEM196      | 0 | 0          | 0   | 1 |
| CLK2P        | 0 | 0          | 0   | 1 |
| NPVF         | 0 | 0          | 0   | 1 |
| RNU6-16      | 0 | 0          | 0   | 1 |
| MIR148A      | 0 | 0          | 0   | 1 |
| MIR196B      | 0 | 0          | 0   | 1 |
| TRIL         | 0 | 0          | 0   | 1 |
| MIR550A3     | 0 | 0          | 0   | 1 |
| NEUROD6      | 0 | 0          | 0   | 1 |
| PDE1C        | 0 | 0          | 0   | 1 |
| MIR550B2     | 0 | 0          | 0   | 1 |
| NPSR1-AS1    | 0 | 0          | 0   | 1 |
| TBX20        | 0 | 0          | 0   | 1 |
| AOAH         | 0 | 0          | 0   | 1 |
| AOAH-IT1     | 0 | 0          | 0   | 1 |
| MIR1200      | 0 | 0          | 0   | 1 |
| SFRP4        | 0 | 0          | 0   | 1 |
| TARP         | 0 | 0          | 0   | 1 |
| AMPH         | 0 | 0.00314809 | inf | 1 |
| POU6F2-AS1   | 0 | 0          | 0   | 1 |
| INHBA        | 0 | 0          | 0   | 1 |
| GLI3         | 0 | 0          | 0   | 1 |
| MYL7         | 0 | 0          | 0   | 1 |
| GCK          | 0 | 0          | 0   | 1 |
| IGFBP3       | 0 | 0          | 0   | 1 |
| ZPBP         | 0 | 0          | 0   | 1 |
| FLJ45974     | 0 | 0          | 0   | 1 |
| HPVC1        | 0 | 0          | 0   | 1 |
| NUPR1L       | 0 | 0          | 0   | 1 |
| LOC650226    | 0 | 0          | 0   | 1 |
| LOC100130849 | 0 | 0          | 0   | 1 |
| MIR4283-2    | 0 | 0          | 0   | 1 |
| GUSBP10      | 0 | 0          | 0   | 1 |
| LOC100287834 | 0 | 0          | 0   | 1 |
| LOC100506050 | 0 | 0          | 0   | 1 |
| MIR4650-1    | 0 | 0          | 0   | 1 |
| MIR3914-1    | 0 | 0          | 0   | 1 |
| CALN1        | 0 | 0          | 0   | 1 |
| GTF2IRD2P1   | 0 | 0          | 0   | 1 |
| GATSL2       | 0 | 0.0163693  | inf | 1 |
| PMS2L2       | 0 | 0          | 0   | 1 |
| CCL26        | 0 | 0          | 0   | 1 |
| CCL24        | 0 | 0          | 0   | 1 |
| FGL2         | 0 | 0.0163131  | inf | 1 |
| MIR548AU     | 0 | 0          | 0   | 1 |
| GNAT3        | 0 | 0          | 0   | 1 |
| ABCB4        | 0 | 0.00439507 | inf | 1 |
| ABCB1        | 0 | 0          | 0   | 1 |
| STEAP4       | 0 | 0          | 0   | 1 |
| C7orf62      | 0 | 0          | 0   | 1 |
| MTERF        | 0 | 0          | 0   | 1 |
| CALCR        | 0 | 0          | 0   | 1 |
| MIR653       | 0 | 0          | 0   | 1 |
| MIR489       | 0 | 0          | 0   | 1 |
| TFPI2        | 0 | 0          | 0   | 1 |
| MIR591       | 0 | 0          | 0   | 1 |
| C7orf76      | 0 | 0          | 0   | 1 |
| DLX6-AS1     | 0 | 0          | 0   | 1 |
| DLX5         | 0 | 0          | 0   | 1 |
| OCM2         | 0 | 0          | 0   | 1 |
| CYP3A4       | 0 | 0.00291289 | inf | 1 |
| MIR25        | 0 | 0          | 0   | 1 |
| MIR93        | 0 | 0          | 0   | 1 |
| MIR106B      | 0 | 0          | 0   | 1 |
| PCOLCE-AS1   | 0 | 0.0201811  | inf | 1 |
| MYL10        | 0 | 0.0243861  | inf | 1 |
| SLC26A5      | 0 | 0          | 0   | 1 |
| RELN         | 0 | 0          | 0   | 1 |
| LHFPL3-AS1   | 0 | 0          | 0   | 1 |
| LHFPL3-AS2   | 0 | 0.00455812 | inf | 1 |
| LAMB4        | 0 | 0          | 0   | 1 |
| NRCAM        | 0 | 0          | 0   | 1 |
| C7orf66      | 0 | 0          | 0   | 1 |

|                   |   |            |     |   |
|-------------------|---|------------|-----|---|
| EIF3IP1           | 0 | 0          | 0   | 1 |
| PPP1R3A           | 0 | 0          | 0   | 1 |
| TFEC              | 0 | 0          | 0   | 1 |
| WNT2              | 0 | 0          | 0   | 1 |
| TAS2R16           | 0 | 0          | 0   | 1 |
| TMEM229A          | 0 | 0          | 0   | 1 |
| GPR37             | 0 | 0          | 0   | 1 |
| LOC154872         | 0 | 0          | 0   | 1 |
| MIR592            | 0 | 0          | 0   | 1 |
| PAX4              | 0 | 0          | 0   | 1 |
| MIR182            | 0 | 0          | 0   | 1 |
| MIR96             | 0 | 0          | 0   | 1 |
| MIR183            | 0 | 0          | 0   | 1 |
| KLF14             | 0 | 0          | 0   | 1 |
| MIR29A            | 0 | 0          | 0   | 1 |
| MIR29B1           | 0 | 0          | 0   | 1 |
| PLXNA4            | 0 | 0          | 0   | 1 |
| LOC349160         | 0 | 0          | 0   | 1 |
| SVOPL             | 0 | 0          | 0   | 1 |
| KLRG2             | 0 | 0          | 0   | 1 |
| CLEC5A            | 0 | 0          | 0   | 1 |
| TAS2R38           | 0 | 0          | 0   | 1 |
| MOXD2P            | 0 | 0          | 0   | 1 |
| PRSS58            | 0 | 0          | 0   | 1 |
| LOC730441         | 0 | 0          | 0   | 1 |
| TRPV5             | 0 | 0          | 0   | 1 |
| OR9A2             | 0 | 0          | 0   | 1 |
| RNU6-57           | 0 | 0          | 0   | 1 |
| NOBOX             | 0 | 0          | 0   | 1 |
| MIR548I4          | 0 | 0          | 0   | 1 |
| MIR548F4          | 0 | 0          | 0   | 1 |
| RARRES2           | 0 | 0          | 0   | 1 |
| GBX1              | 0 | 0.0172455  | inf | 1 |
| ASB10             | 0 | 0          | 0   | 1 |
| MIR3907           | 0 | 0          | 0   | 1 |
| LOC100128264      | 0 | 0          | 0   | 1 |
| SHH               | 0 | 0          | 0   | 1 |
| LOC285889         | 0 | 0          | 0   | 1 |
| MIR153-2          | 0 | 0          | 0   | 1 |
| MIR595            | 0 | 0          | 0   | 1 |
| DLGAP2            | 0 | 0          | 0   | 1 |
| MIR596            | 0 | 0          | 0   | 1 |
| MIR4659A          | 0 | 0          | 0   | 1 |
| LOC100652791      | 0 | 0          | 0   | 1 |
| DEFB109P1B        | 0 | 0          | 0   | 1 |
| USP17L1P          | 0 | 0          | 0   | 1 |
| USP17L4           | 0 | 0          | 0   | 1 |
| DEFB105B          | 0 | 0          | 0   | 1 |
| DEFB107A          | 0 | 0          | 0   | 1 |
| DEFB106B          | 0 | 0          | 0   | 1 |
| DEFB104B          | 0 | 0          | 0   | 1 |
| SPAG11A,SPAG11B   | 0 | 0          | 0   | 1 |
| DEFB103A,DEFB103B | 0 | 0          | 0   | 1 |
| DEFB4A            | 0 | 0          | 0   | 1 |
| ZNF705B           | 0 | 0          | 0   | 1 |
| FAM66E            | 0 | 0          | 0   | 1 |
| MIR4660           | 0 | 0          | 0   | 1 |
| LOC157273         | 0 | 0.00477464 | inf | 1 |
| MIR597            | 0 | 0          | 0   | 1 |
| PRSS55            | 0 | 0          | 0   | 1 |
| C8orf74           | 0 | 0          | 0   | 1 |
| BLK               | 0 | 0          | 0   | 1 |
| LINC00208         | 0 | 0          | 0   | 1 |
| ZNF705D           | 0 | 0.00196433 | inf | 1 |
| FAM66A            | 0 | 0          | 0   | 1 |
| MIR3926-2         | 0 | 0          | 0   | 1 |
| TUSC3             | 0 | 0          | 0   | 1 |
| EFHA2             | 0 | 0          | 0   | 1 |
| LPL               | 0 | 0          | 0   | 1 |
| LZTS1-AS1         | 0 | 0          | 0   | 1 |
| LOC286114         | 0 | 0          | 0   | 1 |
| SFTPC             | 0 | 0          | 0   | 1 |
| ADAMDEC1          | 0 | 0.00337052 | inf | 1 |
| ADAM7             | 0 | 0          | 0   | 1 |
| NEFM              | 0 | 0          | 0   | 1 |
| MIR3622A          | 0 | 0          | 0   | 1 |
| PNOC              | 0 | 0          | 0   | 1 |
| LOC286135         | 0 | 0          | 0   | 1 |
| NRG1              | 0 | 0          | 0   | 1 |

|              |   |            |     |   |
|--------------|---|------------|-----|---|
| NRG1-IT3     | 0 | 0          | 0   | 1 |
| KCNU1        | 0 | 0          | 0   | 1 |
| ADAM5        | 0 | 0          | 0   | 1 |
| LOC100130964 | 0 | 0          | 0   | 1 |
| ADAM18       | 0 | 0          | 0   | 1 |
| IDO2         | 0 | 0          | 0   | 1 |
| C8orf4       | 0 | 0          | 0   | 1 |
| CHRN3        | 0 | 0          | 0   | 1 |
| POTEA        | 0 | 0          | 0   | 1 |
| LINC00293    | 0 | 0          | 0   | 1 |
| C8orf22      | 0 | 0          | 0   | 1 |
| SNTG1        | 0 | 0          | 0   | 1 |
| NPBWR1       | 0 | 0          | 0   | 1 |
| SOX17        | 0 | 0          | 0   | 1 |
| RP1          | 0 | 0          | 0   | 1 |
| XKR4         | 0 | 0          | 0   | 1 |
| LOC100507651 | 0 | 0.00393032 | inf | 1 |
| LOC286177    | 0 | 0          | 0   | 1 |
| LINC00588    | 0 | 0          | 0   | 1 |
| MIR4470      | 0 | 0          | 0   | 1 |
| NKAIN3       | 0 | 0          | 0   | 1 |
| UG0898H09    | 0 | 0          | 0   | 1 |
| LOC286184    | 0 | 0          | 0   | 1 |
| LOC100130155 | 0 | 0          | 0   | 1 |
| MIR124-2     | 0 | 0          | 0   | 1 |
| BHLHE22      | 0 | 0          | 0   | 1 |
| LOC100505659 | 0 | 0          | 0   | 1 |
| PREX2        | 0 | 0          | 0   | 1 |
| C8orf34      | 0 | 0          | 0   | 1 |
| LOC100132891 | 0 | 0          | 0   | 1 |
| RNU6-83      | 0 | 0          | 0   | 1 |
| KCNB2        | 0 | 0          | 0   | 1 |
| MIR5681A     | 0 | 0          | 0   | 1 |
| FLJ39080     | 0 | 0          | 0   | 1 |
| MIR2052      | 0 | 0          | 0   | 1 |
| PI15         | 0 | 0          | 0   | 1 |
| CRISPLD1     | 0 | 0          | 0   | 1 |
| PKIA         | 0 | 0          | 0   | 1 |
| STMN2        | 0 | 0          | 0   | 1 |
| MIR5708      | 0 | 0          | 0   | 1 |
| ZBTB10       | 0 | 0          | 0   | 1 |
| RALYL        | 0 | 0          | 0   | 1 |
| REXO1L2P     | 0 | 0          | 0   | 1 |
| REXO1L2P     | 0 | 0          | 0   | 1 |
| ATP6V0D2     | 0 | 0.00845684 | inf | 1 |
| CNBD1        | 0 | 0          | 0   | 1 |
| MIR4661      | 0 | 0          | 0   | 1 |
| MIR3150A     | 0 | 0          | 0   | 1 |
| SDC2         | 0 | 0          | 0   | 1 |
| KCNS2        | 0 | 0          | 0   | 1 |
| MIR4471      | 0 | 0          | 0   | 1 |
| FLJ42969     | 0 | 0.0052228  | inf | 1 |
| MIR5680      | 0 | 0          | 0   | 1 |
| ODF1         | 0 | 0          | 0   | 1 |
| MIR3151      | 0 | 0          | 0   | 1 |
| DCSTAMP      | 0 | 0          | 0   | 1 |
| TRHR         | 0 | 0.0131965  | inf | 1 |
| PKHD1L1      | 0 | 0          | 0   | 1 |
| MIR2053      | 0 | 0          | 0   | 1 |
| AARD         | 0 | 0.00644382 | inf | 1 |
| SLC30A8      | 0 | 0          | 0   | 1 |
| MAL2         | 0 | 0          | 0   | 1 |
| FER1L6       | 0 | 0.00174456 | inf | 1 |
| LOC157381    | 0 | 0          | 0   | 1 |
| MIR1204      | 0 | 0          | 0   | 1 |
| MIR1205      | 0 | 0          | 0   | 1 |
| MIR1206      | 0 | 0          | 0   | 1 |
| MIR1207      | 0 | 0          | 0   | 1 |
| MIR1208      | 0 | 0          | 0   | 1 |
| WISP1        | 0 | 0          | 0   | 1 |
| LOC286094    | 0 | 0          | 0   | 1 |
| KHDRBS3      | 0 | 0          | 0   | 1 |
| LOC731779    | 0 | 0          | 0   | 1 |
| MIR4472-1    | 0 | 0          | 0   | 1 |
| GML          | 0 | 0          | 0   | 1 |
| SCXB         | 0 | 0          | 0   | 1 |
| SCXA         | 0 | 0          | 0   | 1 |
| OR4F21       | 0 | 0          | 0   | 1 |
| LOC286083    | 0 | 0          | 0   | 1 |

|                   |   |                |   |   |
|-------------------|---|----------------|---|---|
| CSMD1             | 0 | 0              | 0 | 1 |
| MIR4659B          | 0 | 0              | 0 | 1 |
| XKR5              | 0 | 0              | 0 | 1 |
| DEFB1             | 0 | 0              | 0 | 1 |
| DEFA6             | 0 | 0              | 0 | 1 |
| DEFA4             | 0 | 0              | 0 | 1 |
| DEFA8P            | 0 | 0              | 0 | 1 |
| DEFA9P            | 0 | 0              | 0 | 1 |
| DEFA10P           | 0 | 0              | 0 | 1 |
| DEFA1B            | 0 | 0              | 0 | 1 |
| DEFT1P2           | 0 | 0              | 0 | 1 |
| DEFA1             | 0 | 0              | 0 | 1 |
| DEFT1P2           | 0 | 0              | 0 | 1 |
| DEFA1             | 0 | 0              | 0 | 1 |
| DEFA11P           | 0 | 0              | 0 | 1 |
| LOC349196         | 0 | 0              | 0 | 1 |
| LOC349196         | 0 | 0              | 0 | 1 |
| LOC349196         | 0 | 0              | 0 | 1 |
| FAM66B            | 0 | 0              | 0 | 1 |
| ZNF705G           | 0 | 0              | 0 | 1 |
| DEFB4B            | 0 | 0              | 0 | 1 |
| DEFB103A,DEFB103B | 0 | 0              | 0 | 1 |
| SPAG11B           | 0 | 0              | 0 | 1 |
| DEFB104A          | 0 | 0              | 0 | 1 |
| DEFB106B          | 0 | 0              | 0 | 1 |
| FAM90A7P          | 0 | 0              | 0 | 1 |
| FAM90A7P          | 0 | 0              | 0 | 1 |
| DEFB107B          | 0 | 0              | 0 | 1 |
| DEFB105A          | 0 | 0              | 0 | 1 |
| USP17L8           | 0 | 0              | 0 | 1 |
| USP17L3           | 0 | 0              | 0 | 1 |
| DEFB109P1B        | 0 | 0              | 0 | 1 |
| MIR548I3          | 0 | 0              | 0 | 1 |
| LINC00599         | 0 | 0              | 0 | 1 |
| MIR124-1          | 0 | 0              | 0 | 1 |
| MIR1322           | 0 | 0              | 0 | 1 |
| MIR598            | 0 | 0              | 0 | 1 |
| LOC100133267      | 0 | 0              | 0 | 1 |
| LOC392196         | 0 | 0              | 0 | 1 |
| USP17L7           | 0 | 0              | 0 | 1 |
| USP17L2           | 0 | 0              | 0 | 1 |
| DEFB130           | 0 | 0              | 0 | 1 |
| LOC649352         | 0 | 0              | 0 | 1 |
| DEFB109P1         | 0 | 0              | 0 | 1 |
| MIR3926-1         | 0 | 0              | 0 | 1 |
| LOC340357         | 0 | 0              | 0 | 1 |
| MIR383            | 0 | 0              | 0 | 1 |
| FGF20             | 0 | 0              | 0 | 1 |
| FGL1              | 0 | 0              | 0 | 1 |
| LOC100128993      | 0 | 0              | 0 | 1 |
| SLC18A1           | 0 | 0              | 0 | 1 |
| GFRA2             | 0 | 0              | 0 | 1 |
| PEBP4             | 0 | 0              | 0 | 1 |
| NKX2-6            | 0 | 0              | 0 | 1 |
| NEFL              | 0 | 0              | 0 | 1 |
| EBF2              | 0 | 0              | 0 | 1 |
| MIR3622B          | 0 | 0              | 0 | 1 |
| MIR4287           | 0 | 0              | 0 | 1 |
| NUGGC             | 0 | 0.00582081 inf | 0 | 1 |
| MIR4288           | 0 | 0              | 0 | 1 |
| LINC00589         | 0 | 0              | 0 | 1 |
| MIR3148           | 0 | 0              | 0 | 1 |
| MIR548O2          | 0 | 0              | 0 | 1 |
| TEX15             | 0 | 0              | 0 | 1 |
| DUSP26            | 0 | 0              | 0 | 1 |
| GOT1L1            | 0 | 0              | 0 | 1 |
| ADRB3             | 0 | 0              | 0 | 1 |
| ADAM3A            | 0 | 0              | 0 | 1 |
| ADAM2             | 0 | 0              | 0 | 1 |
| ZMAT4             | 0 | 0              | 0 | 1 |
| NKX6-3            | 0 | 0              | 0 | 1 |
| MIR486            | 0 | 0              | 0 | 1 |
| CHRNA6            | 0 | 0              | 0 | 1 |
| EFCAB1            | 0 | 0              | 0 | 1 |
| FAM150A           | 0 | 0              | 0 | 1 |
| SBF1P1            | 0 | 0              | 0 | 1 |
| SNORD54           | 0 | 0              | 0 | 1 |
| MOS               | 0 | 0              | 0 | 1 |
| SDR16C5           | 0 | 0              | 0 | 1 |

|              |   |            |     |   |
|--------------|---|------------|-----|---|
| PENK         | 0 | 0          | 0   | 1 |
| LOC100507632 | 0 | 0          | 0   | 1 |
| CYP7A1       | 0 | 0          | 0   | 1 |
| TOX          | 0 | 0          | 0   | 1 |
| CA8          | 0 | 0          | 0   | 1 |
| LOC100130298 | 0 | 0          | 0   | 1 |
| LOC401463    | 0 | 0          | 0   | 1 |
| CYP7B1       | 0 | 0          | 0   | 1 |
| LINC00251    | 0 | 0          | 0   | 1 |
| LOC286186    | 0 | 0.00428847 | inf | 1 |
| CRH          | 0 | 0          | 0   | 1 |
| PTTG3P       | 0 | 0          | 0   | 1 |
| SNORD87      | 0 | 0          | 0   | 1 |
| TCF24        | 0 | 0          | 0   | 1 |
| PPP1R42      | 0 | 0          | 0   | 1 |
| CPA6         | 0 | 0          | 0   | 1 |
| LOC286189    | 0 | 0          | 0   | 1 |
| PRDM14       | 0 | 0          | 0   | 1 |
| EYA1         | 0 | 0.00463079 | inf | 1 |
| MSC          | 0 | 0          | 0   | 1 |
| TRPA1        | 0 | 0          | 0   | 1 |
| LOC392232    | 0 | 0          | 0   | 1 |
| MIR5681B     | 0 | 0          | 0   | 1 |
| ZFHX4-AS1    | 0 | 0          | 0   | 1 |
| PMP2         | 0 | 0          | 0   | 1 |
| FABP9        | 0 | 0          | 0   | 1 |
| FABP4        | 0 | 0          | 0   | 1 |
| FABP12       | 0 | 0          | 0   | 1 |
| CA1          | 0 | 0          | 0   | 1 |
| REXO1L2P     | 0 | 0          | 0   | 1 |
| REXO1L1      | 0 | 0          | 0   | 1 |
| REXO1L2P     | 0 | 0          | 0   | 1 |
| REXO1L1      | 0 | 0.00318086 | inf | 1 |
| REXO1L2P     | 0 | 0          | 0   | 1 |
| REXO1L2P     | 0 | 0          | 0   | 1 |
| REXO1L2P     | 0 | 0          | 0   | 1 |
| REXO1L2P     | 0 | 0          | 0   | 1 |
| PSKH2        | 0 | 0          | 0   | 1 |
| SLC7A13      | 0 | 0          | 0   | 1 |
| CNGB3        | 0 | 0          | 0   | 1 |
| MMP16        | 0 | 0          | 0   | 1 |
| CALB1        | 0 | 0.00365368 | inf | 1 |
| FLJ46284     | 0 | 0          | 0   | 1 |
| C8orf87      | 0 | 0          | 0   | 1 |
| MIR378D2     | 0 | 0          | 0   | 1 |
| CDH17        | 0 | 0.00269832 | inf | 1 |
| LOC100288748 | 0 | 0.00605537 | inf | 1 |
| MIR3150B     | 0 | 0          | 0   | 1 |
| C8orf69      | 0 | 0          | 0   | 1 |
| LOC100500773 | 0 | 0          | 0   | 1 |
| TSPYL5       | 0 | 0          | 0   | 1 |
| MIR599       | 0 | 0          | 0   | 1 |
| MIR875       | 0 | 0          | 0   | 1 |
| RGS22        | 0 | 0          | 0   | 1 |
| NCALD        | 0 | 0          | 0   | 1 |
| DPYS         | 0 | 0.00503925 | inf | 1 |
| ANGPT1       | 0 | 0          | 0   | 1 |
| RSPO2        | 0 | 0          | 0   | 1 |
| KCNV1        | 0 | 0          | 0   | 1 |
| CSMD3        | 0 | 0          | 0   | 1 |
| LINC00536    | 0 | 0          | 0   | 1 |
| TNFRSF11B    | 0 | 0          | 0   | 1 |
| MIR4663      | 0 | 0          | 0   | 1 |
| ANXA13       | 0 | 0          | 0   | 1 |
| FER1L6-AS1   | 0 | 0          | 0   | 1 |
| LOC727677    | 0 | 0          | 0   | 1 |
| LOC728724    | 0 | 0          | 0   | 1 |
| GSDMC        | 0 | 0          | 0   | 1 |
| MIR5194      | 0 | 0          | 0   | 1 |
| ADCY8        | 0 | 0          | 0   | 1 |
| OC90         | 0 | 0          | 0   | 1 |
| HHLA1        | 0 | 0          | 0   | 1 |
| SLA          | 0 | 0          | 0   | 1 |
| MIR30B       | 0 | 0          | 0   | 1 |
| MIR30D       | 0 | 0          | 0   | 1 |
| FAM135B      | 0 | 0          | 0   | 1 |
| COL22A1      | 0 | 0          | 0   | 1 |
| GPR20        | 0 | 0          | 0   | 1 |
| MROH5        | 0 | 0          | 0   | 1 |

|            |   |                |   |   |
|------------|---|----------------|---|---|
| SLURP1     | 0 | 0              | 0 | 1 |
| LYPD2      | 0 | 0              | 0 | 1 |
| LY6D       | 0 | 0              | 0 | 1 |
| CYP11B1    | 0 | 0              | 0 | 1 |
| CYP11B2    | 0 | 0              | 0 | 1 |
| LY6H       | 0 | 0              | 0 | 1 |
| CCDC166    | 0 | 0              | 0 | 1 |
| MIR4664    | 0 | 0              | 0 | 1 |
| MIR661     | 0 | 0              | 0 | 1 |
| MIR1234    | 0 | 0              | 0 | 1 |
| DDX11L5    | 0 | 0.0072231 inf  | 0 | 1 |
| DMRT3      | 0 | 0              | 0 | 1 |
| GLIS3-AS1  | 0 | 0              | 0 | 1 |
| MIR101-2   | 0 | 0              | 0 | 1 |
| INSL4      | 0 | 0              | 0 | 1 |
| PDCCD1LG2  | 0 | 0              | 0 | 1 |
| MIR4665    | 0 | 0              | 0 | 1 |
| IL33       | 0 | 0              | 0 | 1 |
| TPD52L3    | 0 | 0              | 0 | 1 |
| LINC00583  | 0 | 0              | 0 | 1 |
| LOC389705  | 0 | 0              | 0 | 1 |
| MIR3152    | 0 | 0              | 0 | 1 |
| MIR491     | 0 | 0              | 0 | 1 |
| IFNA1      | 0 | 0              | 0 | 1 |
| C9orf53    | 0 | 0              | 0 | 1 |
| DMRTA1     | 0 | 0              | 0 | 1 |
| FLJ35282   | 0 | 0              | 0 | 1 |
| IFNK       | 0 | 0              | 0 | 1 |
| TMEM215    | 0 | 0              | 0 | 1 |
| SPINK4     | 0 | 0.0476181 inf  | 0 | 1 |
| SNORD121B  | 0 | 0              | 0 | 1 |
| LOC415056  | 0 | 0              | 0 | 1 |
| MIR4667    | 0 | 0              | 0 | 1 |
| GLIPR2     | 0 | 0.00510955 inf | 0 | 1 |
| CCIN       | 0 | 0.0055233 inf  | 0 | 1 |
| SPATA31A2  | 0 | 0              | 0 | 1 |
| SPATA31A2  | 0 | 0              | 0 | 1 |
| FAM74A1    | 0 | 0              | 0 | 1 |
| SPATA31A3  | 0 | 0              | 0 | 1 |
| FAM74A3    | 0 | 0              | 0 | 1 |
| SPATA31A5  | 0 | 0              | 0 | 1 |
| LOC643648  | 0 | 0              | 0 | 1 |
| FAM95B1    | 0 | 0              | 0 | 1 |
| FOXD4L4    | 0 | 0              | 0 | 1 |
| CNTNAP3B   | 0 | 0              | 0 | 1 |
| LOC643648  | 0 | 0              | 0 | 1 |
| LOC643648  | 0 | 0              | 0 | 1 |
| ANKRD20A4  | 0 | 0              | 0 | 1 |
| C9orf135   | 0 | 0              | 0 | 1 |
| TMC1       | 0 | 0              | 0 | 1 |
| RORB       | 0 | 0              | 0 | 1 |
| PCA3       | 0 | 0              | 0 | 1 |
| FOXB2      | 0 | 0              | 0 | 1 |
| SPATA31D5P | 0 | 0              | 0 | 1 |
| SPATA31D4  | 0 | 0              | 0 | 1 |
| SPATA31D3  | 0 | 0              | 0 | 1 |
| SPATA31D1  | 0 | 0              | 0 | 1 |
| C9orf170   | 0 | 0              | 0 | 1 |
| CTSL3P     | 0 | 0              | 0 | 1 |
| CTSL1P8    | 0 | 0              | 0 | 1 |
| SPATA31E1  | 0 | 0              | 0 | 1 |
| SPATA31C1  | 0 | 0              | 0 | 1 |
| MIR3153    | 0 | 0              | 0 | 1 |
| UNQ6494    | 0 | 0              | 0 | 1 |
| MIR3910-1  | 0 | 0              | 0 | 1 |
| LINC00475  | 0 | 0              | 0 | 1 |
| SUSD3      | 0 | 0              | 0 | 1 |
| MIR4291    | 0 | 0              | 0 | 1 |
| MIRLET7A1  | 0 | 0              | 0 | 1 |
| MIRLET7F1  | 0 | 0              | 0 | 1 |
| MIRLET7D   | 0 | 0              | 0 | 1 |
| MIR2278    | 0 | 0              | 0 | 1 |
| MIR27B     | 0 | 0              | 0 | 1 |
| MIR24-1    | 0 | 0              | 0 | 1 |
| LOC441455  | 0 | 0              | 0 | 1 |
| FOXE1      | 0 | 0              | 0 | 1 |
| COL15A1    | 0 | 0.00185987 inf | 0 | 1 |
| LPPR1      | 0 | 0              | 0 | 1 |
| CYLC2      | 0 | 0              | 0 | 1 |

|                 |   |            |     |   |
|-----------------|---|------------|-----|---|
| OR13F1          | 0 | 0          | 0   | 1 |
| OR13C8          | 0 | 0          | 0   | 1 |
| OR13D1          | 0 | 0          | 0   | 1 |
| MUSK            | 0 | 0          | 0   | 1 |
| MIR4668         | 0 | 0          | 0   | 1 |
| MIR455          | 0 | 0          | 0   | 1 |
| DEC1            | 0 | 0          | 0   | 1 |
| LOC100128505    | 0 | 0          | 0   | 1 |
| TLR4            | 0 | 0          | 0   | 1 |
| OR1J2           | 0 | 0          | 0   | 1 |
| OR1J4           | 0 | 0          | 0   | 1 |
| OR1N2           | 0 | 0          | 0   | 1 |
| OR1Q1           | 0 | 0          | 0   | 1 |
| OR1L1           | 0 | 0          | 0   | 1 |
| OR1L3           | 0 | 0          | 0   | 1 |
| OR1L4           | 0 | 0          | 0   | 1 |
| OR5C1           | 0 | 0          | 0   | 1 |
| OR1K1           | 0 | 0          | 0   | 1 |
| GPR21           | 0 | 0.0162361  | inf | 1 |
| LHX2            | 0 | 0          | 0   | 1 |
| GPR144          | 0 | 0          | 0   | 1 |
| MIR181A2HG      | 0 | 0          | 0   | 1 |
| MIR181A2        | 0 | 0          | 0   | 1 |
| MIR181B2        | 0 | 0          | 0   | 1 |
| MIR2861_MIR3960 | 0 | 0          | 0   | 1 |
| MIR2964A        | 0 | 0          | 0   | 1 |
| C9orf106        | 0 | 0          | 0   | 1 |
| PRRX2           | 0 | 0          | 0   | 1 |
| SNORD62A        | 0 | 0          | 0   | 1 |
| SNORD62B        | 0 | 0          | 0   | 1 |
| CELP            | 0 | 0.0167191  | inf | 1 |
| SNORD24         | 0 | 0          | 0   | 1 |
| SNORD36B        | 0 | 0          | 0   | 1 |
| SNORD36C        | 0 | 0          | 0   | 1 |
| ADAMTSL2        | 0 | 0          | 0   | 1 |
| DBH             | 0 | 0          | 0   | 1 |
| MIR4669         | 0 | 0          | 0   | 1 |
| FCN2            | 0 | 0          | 0   | 1 |
| OLFM1           | 0 | 0          | 0   | 1 |
| LOC401557       | 0 | 0          | 0   | 1 |
| C9orf62         | 0 | 0          | 0   | 1 |
| OBP2A           | 0 | 0          | 0   | 1 |
| LCN9            | 0 | 0          | 0   | 1 |
| MIR126          | 0 | 0          | 0   | 1 |
| MIR4292         | 0 | 0          | 0   | 1 |
| MIR4479         | 0 | 0          | 0   | 1 |
| PTGDS           | 0 | 0.0206763  | inf | 1 |
| LCNL1           | 0 | 0          | 0   | 1 |
| MIR602          | 0 | 0          | 0   | 1 |
| FAM157B         | 0 | 0          | 0   | 1 |
| FAM138C         | 0 | 0          | 0   | 1 |
| INSL6           | 0 | 0          | 0   | 1 |
| PTPRD           | 0 | 0          | 0   | 1 |
| MPDZ            | 0 | 0          | 0   | 1 |
| CER1            | 0 | 0          | 0   | 1 |
| FREM1           | 0 | 0          | 0   | 1 |
| MIR4473         | 0 | 0          | 0   | 1 |
| MIR4474         | 0 | 0          | 0   | 1 |
| IFNB1           | 0 | 0          | 0   | 1 |
| IFNW1           | 0 | 0.00693479 | inf | 1 |
| IFNA21          | 0 | 0          | 0   | 1 |
| IFNA4           | 0 | 0          | 0   | 1 |
| IFNA7           | 0 | 0          | 0   | 1 |
| IFNA10          | 0 | 0          | 0   | 1 |
| IFNA16          | 0 | 0          | 0   | 1 |
| IFNA14          | 0 | 0          | 0   | 1 |
| IFNA22P         | 0 | 0          | 0   | 1 |
| IFNA5           | 0 | 0.0147095  | inf | 1 |
| IFNA6           | 0 | 0          | 0   | 1 |
| IFNA13          | 0 | 0          | 0   | 1 |
| IFNA2           | 0 | 0          | 0   | 1 |
| MIR31           | 0 | 0          | 0   | 1 |
| ELAVL2          | 0 | 0          | 0   | 1 |
| IZUMO3          | 0 | 0          | 0   | 1 |
| LINGO2          | 0 | 0          | 0   | 1 |
| MIR876          | 0 | 0          | 0   | 1 |
| MIR873          | 0 | 0          | 0   | 1 |
| LOC401497       | 0 | 0          | 0   | 1 |
| TAF1L           | 0 | 0          | 0   | 1 |

|                     |   |            |     |   |
|---------------------|---|------------|-----|---|
| AQP7                | 0 | 0          | 0   | 1 |
| SUGT1P1             | 0 | 0          | 0   | 1 |
| SNORD121A           | 0 | 0          | 0   | 1 |
| CCL27               | 0 | 0          | 0   | 1 |
| CCL19               | 0 | 0          | 0   | 1 |
| CCL21               | 0 | 0          | 0   | 1 |
| FAM205A             | 0 | 0          | 0   | 1 |
| FAM205B             | 0 | 0          | 0   | 1 |
| SIT1                | 0 | 0          | 0   | 1 |
| FAM221B             | 0 | 0          | 0   | 1 |
| OR2S2               | 0 | 0          | 0   | 1 |
| MIR4475             | 0 | 0          | 0   | 1 |
| PAX5                | 0 | 0          | 0   | 1 |
| MIR4540             | 0 | 0          | 0   | 1 |
| MIR4476             | 0 | 0          | 0   | 1 |
| IGFBPL1             | 0 | 0.00307444 | inf | 1 |
| CNTNAP3             | 0 | 0          | 0   | 1 |
| SPATA31A4           | 0 | 0          | 0   | 1 |
| LOC653501,ZNF658B   | 0 | 0          | 0   | 1 |
| FAM95B1             | 0 | 0          | 0   | 1 |
| ANKRD20A2,ANKRD20A3 | 0 | 0          | 0   | 1 |
| LOC642929           | 0 | 0          | 0   | 1 |
| SPATA31A6           | 0 | 0          | 0   | 1 |
| FAM74A2,FAM74A4     | 0 | 0          | 0   | 1 |
| SPATA31A5           | 0 | 0          | 0   | 1 |
| LOC286297           | 0 | 0          | 0   | 1 |
| FAM27B              | 0 | 0          | 0   | 1 |
| FOXDL4              | 0 | 0.00543419 | inf | 1 |
| TMEM252             | 0 | 0          | 0   | 1 |
| PRKACG              | 0 | 0          | 0   | 1 |
| BANCR               | 0 | 0          | 0   | 1 |
| APBA1               | 0 | 0          | 0   | 1 |
| LOC494558           | 0 | 0          | 0   | 1 |
| TRPM3               | 0 | 0          | 0   | 1 |
| MIR204              | 0 | 0          | 0   | 1 |
| C9orf57             | 0 | 0          | 0   | 1 |
| MIR548H3            | 0 | 0          | 0   | 1 |
| VPS13A-AS1          | 0 | 0          | 0   | 1 |
| GNA14               | 0 | 0          | 0   | 1 |
| RASEF               | 0 | 0          | 0   | 1 |
| MIR7-1              | 0 | 4.76396    | inf | 1 |
| LOC494127           | 0 | 0          | 0   | 1 |
| SPATA31C2           | 0 | 0          | 0   | 1 |
| LOC286238           | 0 | 0          | 0   | 1 |
| MIR4289             | 0 | 0          | 0   | 1 |
| LOC286370           | 0 | 0          | 0   | 1 |
| MIR4290             | 0 | 0          | 0   | 1 |
| LOC340515           | 0 | 0          | 0   | 1 |
| DIRAS2              | 0 | 0          | 0   | 1 |
| LOC100129316        | 0 | 0          | 0   | 1 |
| MIR3910-2           | 0 | 0          | 0   | 1 |
| ROR2                | 0 | 0          | 0   | 1 |
| OGN                 | 0 | 0.00247254 | inf | 1 |
| OMD                 | 0 | 0          | 0   | 1 |
| MIR4670             | 0 | 0          | 0   | 1 |
| BARX1               | 0 | 0          | 0   | 1 |
| FAM22F              | 0 | 0          | 0   | 1 |
| FBP1                | 0 | 0          | 0   | 1 |
| MIR3074             | 0 | 0          | 0   | 1 |
| LINC00092           | 0 | 0.0229663  | inf | 1 |
| LOC158434           | 0 | 0          | 0   | 1 |
| LOC340508           | 0 | 0.0169352  | inf | 1 |
| LOC286359           | 0 | 0          | 0   | 1 |
| HEMGN               | 0 | 0          | 0   | 1 |
| PPP3R2              | 0 | 0          | 0   | 1 |
| OR13C4              | 0 | 0          | 0   | 1 |
| OR13C3              | 0 | 0          | 0   | 1 |
| OR13C5              | 0 | 0          | 0   | 1 |
| OR13C2              | 0 | 0          | 0   | 1 |
| OR13C9              | 0 | 0          | 0   | 1 |
| MIR548Q             | 0 | 0          | 0   | 1 |
| MIR32               | 0 | 0          | 0   | 1 |
| FRRS1L              | 0 | 0          | 0   | 1 |
| TXNDC8              | 0 | 0          | 0   | 1 |
| SVEP1               | 0 | 0          | 0   | 1 |
| LPAR1               | 0 | 0          | 0   | 1 |
| OR2K2               | 0 | 0          | 0   | 1 |
| LRRC37A5P           | 0 | 0          | 0   | 1 |
| AMBIP               | 0 | 0.00899592 | inf | 1 |



|                   |   |            |     |   |
|-------------------|---|------------|-----|---|
| LOC100505478      | 0 | 0          | 0   | 1 |
| TNFSF8            | 0 | 0          | 0   | 1 |
| TNC               | 0 | 0          | 0   | 1 |
| LINC00474         | 0 | 0          | 0   | 1 |
| SNORA70C          | 0 | 0          | 0   | 1 |
| DBC1              | 0 | 0          | 0   | 1 |
| MIR147A           | 0 | 0          | 0   | 1 |
| MIR4478           | 0 | 0          | 0   | 1 |
| LHX6              | 0 | 0          | 0   | 1 |
| OR1J1             | 0 | 0          | 0   | 1 |
| OR1N1             | 0 | 0          | 0   | 1 |
| OR1L8             | 0 | 0          | 0   | 1 |
| OR1B1             | 0 | 0          | 0   | 1 |
| SNORD90           | 0 | 0          | 0   | 1 |
| MIR601            | 0 | 0          | 0   | 1 |
| ANGPTL2           | 0 | 0.00297672 | inf | 1 |
| MIR4672           | 0 | 0          | 0   | 1 |
| MIR199B           | 0 | 0          | 0   | 1 |
| MIR3154           | 0 | 0          | 0   | 1 |
| MIR219-2          | 0 | 0          | 0   | 1 |
| GBGT1             | 0 | 0          | 0   | 1 |
| OBP2B             | 0 | 0          | 0   | 1 |
| TMEM8C            | 0 | 0          | 0   | 1 |
| FAM163B           | 0 | 0          | 0   | 1 |
| MIR3689A,MIR3689E | 0 | 0          | 0   | 1 |
| MIR3689C          | 0 | 0          | 0   | 1 |
| MIR3689D1         | 0 | 0          | 0   | 1 |
| MIR3689B          | 0 | 0          | 0   | 1 |
| MIR3689D2         | 0 | 0          | 0   | 1 |
| MIR3689F          | 0 | 0          | 0   | 1 |
| FCN1              | 0 | 0          | 0   | 1 |
| GLT6D1            | 0 | 0          | 0   | 1 |
| SOHLH1            | 0 | 0.0119742  | inf | 1 |
| MIR4673           | 0 | 0          | 0   | 1 |
| MIR4674           | 0 | 0          | 0   | 1 |
| LCN6              | 0 | 0          | 0   | 1 |
| LCN8              | 0 | 0          | 0   | 1 |
| MIR3621           | 0 | 0          | 0   | 1 |
| LINC00685         | 0 | 0          | 0   | 1 |
| SHOX              | 0 | 0          | 0   | 1 |
| CSF2RA            | 0 | 0          | 0   | 1 |
| MIR3690           | 0 | 0          | 0   | 1 |
| IL3RA             | 0 | 0          | 0   | 1 |
| ASMTL-AS1         | 0 | 0          | 0   | 1 |
| AKAP17A,ASMT      | 0 | 0          | 0   | 1 |
| CD99P1            | 0 | 0          | 0   | 1 |
| CD99              | 0 | 0          | 0   | 1 |
| GYG2              | 0 | 0          | 0   | 1 |
| ARSH              | 0 | 0          | 0   | 1 |
| ARSF              | 0 | 0          | 0   | 1 |
| MIR4767           | 0 | 0          | 0   | 1 |
| VCX               | 0 | 0          | 0   | 1 |
| MIR651            | 0 | 0          | 0   | 1 |
| CLCN4             | 0 | 0          | 0   | 1 |
| AMELX             | 0 | 0          | 0   | 1 |
| FRMPD4            | 0 | 0          | 0   | 1 |
| TLR7              | 0 | 0          | 0   | 1 |
| TLR8              | 0 | 0          | 0   | 1 |
| LOC100093698      | 0 | 0          | 0   | 1 |
| LOC100133123      | 0 | 0          | 0   | 1 |
| EGFL6             | 0 | 0          | 0   | 1 |
| GLRA2             | 0 | 0.0120848  | inf | 1 |
| BMX               | 0 | 0          | 0   | 1 |
| S100G             | 0 | 0          | 0   | 1 |
| MIR4768           | 0 | 0          | 0   | 1 |
| CNKSR2            | 0 | 0          | 0   | 1 |
| ZNF645            | 0 | 0          | 0   | 1 |
| DDX53             | 0 | 0          | 0   | 1 |
| SUPT20HL1         | 0 | 0          | 0   | 1 |
| MAGEB18           | 0 | 0          | 0   | 1 |
| MAGEB5            | 0 | 0          | 0   | 1 |
| VENTXP1           | 0 | 0          | 0   | 1 |
| DCAF8L2           | 0 | 0          | 0   | 1 |
| MAGEB10           | 0 | 0          | 0   | 1 |
| IL1RAPL1          | 0 | 0          | 0   | 1 |
| MAGEB3            | 0 | 0          | 0   | 1 |
| MAGEB1,MAGEB4     | 0 | 0          | 0   | 1 |
| FAM47B            | 0 | 0          | 0   | 1 |
| MAGEB16           | 0 | 0          | 0   | 1 |

|                 |   |            |     |   |
|-----------------|---|------------|-----|---|
| FAM47C          | 0 | 0          | 0   | 1 |
| CXorf27         | 0 | 0          | 0   | 1 |
| SYTL5           | 0 | 0          | 0   | 1 |
| NYX             | 0 | 0          | 0   | 1 |
| DUSP21          | 0 | 0          | 0   | 1 |
| ZNF157          | 0 | 0          | 0   | 1 |
| SNORA11C        | 0 | 0          | 0   | 1 |
| MIR4769         | 0 | 0          | 0   | 1 |
| CXXC1P1         | 0 | 0          | 0   | 1 |
| SPACA5,SPACA5B  | 0 | 0          | 0   | 1 |
| SSX6            | 0 | 0          | 0   | 1 |
| SPACA5,SPACA5B  | 0 | 0          | 0   | 1 |
| SSX1            | 0 | 0          | 0   | 1 |
| SSX4B           | 0 | 0          | 0   | 1 |
| GLOD5           | 0 | 0          | 0   | 1 |
| GATA1           | 0 | 0          | 0   | 1 |
| GAGE10          | 0 | 0          | 0   | 1 |
| GAGE12J         | 0 | 0          | 0   | 1 |
| GAGE12D         | 0 | 0          | 0   | 1 |
| GAGE12D,GAGE12F | 0 | 0          | 0   | 1 |
| GAGE12D,GAGE12F | 0 | 0          | 0   | 1 |
| GAGE12D         | 0 | 0          | 0   | 1 |
| GAGE2A          | 0 | 0          | 0   | 1 |
| GAGE1           | 0 | 0          | 0   | 1 |
| MIR532          | 0 | 0          | 0   | 1 |
| MIR188          | 0 | 0          | 0   | 1 |
| MIR500A         | 0 | 0          | 0   | 1 |
| MIR362          | 0 | 0          | 0   | 1 |
| MIR501          | 0 | 0          | 0   | 1 |
| MIR500B         | 0 | 0          | 0   | 1 |
| MIR660          | 0 | 0          | 0   | 1 |
| MIR502          | 0 | 0          | 0   | 1 |
| BMP15           | 0 | 0          | 0   | 1 |
| NUDT10          | 0 | 0          | 0   | 1 |
| CENPVP2         | 0 | 0          | 0   | 1 |
| MAGED4          | 0 | 0          | 0   | 1 |
| XAGE2,XAGE2B    | 0 | 0          | 0   | 1 |
| XAGE1C,XAGE1E   | 0 | 0          | 0   | 1 |
| XAGE1B,XAGE1C   | 0 | 0          | 0   | 1 |
| SSX8            | 0 | 0          | 0   | 1 |
| SSX2,SSX2B      | 0 | 0          | 0   | 1 |
| XAGE5           | 0 | 0          | 0   | 1 |
| FAM156A,FAM156B | 0 | 0          | 0   | 1 |
| GPR173          | 0 | 0.00229762 | inf | 1 |
| SNORA11         | 0 | 0          | 0   | 1 |
| PAGE2           | 0 | 0          | 0   | 1 |
| PAGE5           | 0 | 0          | 0   | 1 |
| MIR4536-1       | 0 | 0          | 0   | 1 |
| MAGEH1          | 0 | 0          | 0   | 1 |
| FOXR2           | 0 | 0          | 0   | 1 |
| KLF8            | 0 | 0.00216719 | inf | 1 |
| MIR223          | 0 | 0          | 0   | 1 |
| AR              | 0 | 0          | 0   | 1 |
| FAM155B         | 0 | 0          | 0   | 1 |
| EDA             | 0 | 0          | 0   | 1 |
| MIR676          | 0 | 0          | 0   | 1 |
| AWAT1           | 0 | 0          | 0   | 1 |
| ARR3            | 0 | 0.00826174 | inf | 1 |
| GJB1            | 0 | 0          | 0   | 1 |
| FLJ46446        | 0 | 0          | 0   | 1 |
| CXorf49B        | 0 | 0          | 0   | 1 |
| NHSL2           | 0 | 0.00306829 | inf | 1 |
| FLJ44635        | 0 | 0          | 0   | 1 |
| DMRTC1B         | 0 | 0          | 0   | 1 |
| LINC00684       | 0 | 0          | 0   | 1 |
| PABPC1L2B       | 0 | 0          | 0   | 1 |
| CDX4            | 0 | 0          | 0   | 1 |
| MIR374C         | 0 | 0          | 0   | 1 |
| ZCCHC13         | 0 | 0          | 0   | 1 |
| MAGEE1          | 0 | 0          | 0   | 1 |
| FGF16           | 0 | 0          | 0   | 1 |
| LPAR4           | 0 | 0          | 0   | 1 |
| P2RY10          | 0 | 0          | 0   | 1 |
| GPR174          | 0 | 0          | 0   | 1 |
| TBX22           | 0 | 0          | 0   | 1 |
| FAM46D          | 0 | 0          | 0   | 1 |
| POU3F4          | 0 | 0          | 0   | 1 |
| CYLC1           | 0 | 0          | 0   | 1 |
| UBE2DNL         | 0 | 0          | 0   | 1 |

|                      |   |            |     |   |
|----------------------|---|------------|-----|---|
| DACH2                | 0 | 0          | 0   | 1 |
| KLHL4                | 0 | 0          | 0   | 1 |
| CPXCR1               | 0 | 0.00454763 | inf | 1 |
| TGIF2LX              | 0 | 0          | 0   | 1 |
| PABPC5               | 0 | 0          | 0   | 1 |
| PCDH11X              | 0 | 0.00394324 | inf | 1 |
| FAM133A              | 0 | 0          | 0   | 1 |
| TNMD                 | 0 | 0          | 0   | 1 |
| NXF2B                | 0 | 0          | 0   | 1 |
| NXF4                 | 0 | 0          | 0   | 1 |
| TCEAL7               | 0 | 0          | 0   | 1 |
| TMEM31               | 0 | 0.0265157  | inf | 1 |
| PLP1                 | 0 | 0          | 0   | 1 |
| TMSB15B              | 0 | 0          | 0   | 1 |
| H2BFXP               | 0 | 0          | 0   | 1 |
| H2BFM                | 0 | 0          | 0   | 1 |
| ZCCHC18              | 0 | 0          | 0   | 1 |
| IL1RAPL2             | 0 | 0          | 0   | 1 |
| NRK                  | 0 | 0          | 0   | 1 |
| MUM1L1               | 0 | 0          | 0   | 1 |
| RNF128               | 0 | 0          | 0   | 1 |
| PIH1D3               | 0 | 0          | 0   | 1 |
| COL4A5               | 0 | 0          | 0   | 1 |
| MIR3978              | 0 | 0          | 0   | 1 |
| TDGF1P3              | 0 | 0          | 0   | 1 |
| PAK3                 | 0 | 0          | 0   | 1 |
| DKFZp686D0853        | 0 | 0          | 0   | 1 |
| TRPC5OS              | 0 | 0          | 0   | 1 |
| ZCCHC16              | 0 | 0.00279421 | inf | 1 |
| HTR2C                | 0 | 0          | 0   | 1 |
| SNORA35              | 0 | 0          | 0   | 1 |
| MIR764               | 0 | 0          | 0   | 1 |
| MIR1912              | 0 | 0          | 0   | 1 |
| MIR1264              | 0 | 0          | 0   | 1 |
| MIR1298              | 0 | 0          | 0   | 1 |
| MIR1911              | 0 | 0          | 0   | 1 |
| MIR448               | 0 | 0          | 0   | 1 |
| RBMXL3               | 0 | 0          | 0   | 1 |
| SLC6A14              | 0 | 0          | 0   | 1 |
| MIR1277              | 0 | 0          | 0   | 1 |
| RHOXF2B              | 0 | 0          | 0   | 1 |
| ATP1B4               | 0 | 0          | 0   | 1 |
| SH2D1A               | 0 | 0          | 0   | 1 |
| LOC100129520         | 0 | 0          | 0   | 1 |
| CXorf64              | 0 | 0          | 0   | 1 |
| XPNPEP2              | 0 | 0.0034196  | inf | 1 |
| SASH3                | 0 | 0.00916581 | inf | 1 |
| ARHGAP36             | 0 | 0          | 0   | 1 |
| OR13H1               | 0 | 0          | 0   | 1 |
| HS6ST2-AS1           | 0 | 0          | 0   | 1 |
| CCDC160              | 0 | 0.00695172 | inf | 1 |
| SMIM10               | 0 | 0          | 0   | 1 |
| FAM127A              | 0 | 0          | 0   | 1 |
| LINC00086            | 0 | 0          | 0   | 1 |
| CT45A1               | 0 | 0          | 0   | 1 |
| CT45A2,CT45A3,CT45A4 | 0 | 0          | 0   | 1 |
| SAGE1                | 0 | 0          | 0   | 1 |
| GPR112               | 0 | 0          | 0   | 1 |
| BRS3                 | 0 | 0          | 0   | 1 |
| VGLL1                | 0 | 0          | 0   | 1 |
| MIR934               | 0 | 0          | 0   | 1 |
| LOC100128420         | 0 | 0          | 0   | 1 |
| ZIC3                 | 0 | 0          | 0   | 1 |
| FGF13-AS1            | 0 | 0          | 0   | 1 |
| SRD5A1P1             | 0 | 0          | 0   | 1 |
| F9                   | 0 | 0          | 0   | 1 |
| LOC389895            | 0 | 0          | 0   | 1 |
| RP1-177G6.2          | 0 | 0          | 0   | 1 |
| SPANXB2              | 0 | 0          | 0   | 1 |
| SPANXB1              | 0 | 0          | 0   | 1 |
| SPANXA2-OT1          | 0 | 0          | 0   | 1 |
| SPANXA2              | 0 | 0          | 0   | 1 |
| MAGEC3               | 0 | 0          | 0   | 1 |
| MAGEC1               | 0 | 0          | 0   | 1 |
| SPANXN4              | 0 | 0          | 0   | 1 |
| UBE2NL               | 0 | 0.00758394 | inf | 1 |
| SPANXN1              | 0 | 0          | 0   | 1 |
| TMEM257              | 0 | 0          | 0   | 1 |
| CXorf51B             | 0 | 0          | 0   | 1 |

|                |   |            |     |   |
|----------------|---|------------|-----|---|
| AFF2           | 0 | 0          | 0   | 1 |
| MAGEA11        | 0 | 0          | 0   | 1 |
| HSFX2          | 0 | 0          | 0   | 1 |
| MAGEA9B        | 0 | 0          | 0   | 1 |
| MAGEA8         | 0 | 0          | 0   | 1 |
| MIR2114        | 0 | 0          | 0   | 1 |
| MIR4330        | 0 | 0          | 0   | 1 |
| GPR50          | 0 | 0.00783738 | inf | 1 |
| PASD1          | 0 | 0          | 0   | 1 |
| PRRG3          | 0 | 0          | 0   | 1 |
| FATE1          | 0 | 0          | 0   | 1 |
| CNGA2          | 0 | 0          | 0   | 1 |
| GABRQ          | 0 | 0          | 0   | 1 |
| MAGEA6         | 0 | 0          | 0   | 1 |
| MAGEA2,MAGEA2B | 0 | 0          | 0   | 1 |
| CSAG2,CSAG3    | 0 | 0          | 0   | 1 |
| PNMA3          | 0 | 0          | 0   | 1 |
| PNMA6C,PNMA6D  | 0 | 0          | 0   | 1 |
| ZFP92          | 0 | 0          | 0   | 1 |
| BGN            | 0 | 0          | 0   | 1 |
| MIR3202-1      | 0 | 0          | 0   | 1 |
| OPN1LW         | 0 | 0          | 0   | 1 |
| OPN1MW         | 0 | 0          | 0   | 1 |
| OPN1MW         | 0 | 0          | 0   | 1 |
| FAM223B        | 0 | 0          | 0   | 1 |
| CTAG1B         | 0 | 0          | 0   | 1 |
| SNORA56        | 0 | 0          | 0   | 1 |
| H2AFB1         | 0 | 0          | 0   | 1 |
| H2AFB3         | 0 | 0          | 0   | 1 |
| F8A1           | 0 | 0          | 0   | 1 |
| MIR1184-3      | 0 | 0          | 0   | 1 |
| TMLHE-AS1      | 0 | 0.00498618 | inf | 1 |
| SPRY3          | 0 | 0          | 0   | 1 |
| VAMP7          | 0 | 0          | 0   | 1 |
| IL9R           | 0 | 0          | 0   | 1 |
| GTBPB6         | 0 | 0          | 0   | 1 |
| PPP2R3B        | 0 | 0          | 0   | 1 |
| CRLF2          | 0 | 0          | 0   | 1 |
| SLC25A6        | 0 | 0          | 0   | 1 |
| ASMTL          | 0 | 0          | 0   | 1 |
| P2RY8          | 0 | 0          | 0   | 1 |
| DHRX,ZBED1     | 0 | 0          | 0   | 1 |
| ARSE           | 0 | 0          | 0   | 1 |
| MXRA5          | 0 | 0          | 0   | 1 |
| NLGN4X         | 0 | 0          | 0   | 1 |
| MIR4770        | 0 | 0          | 0   | 1 |
| VCX3A          | 0 | 0          | 0   | 1 |
| VCX2           | 0 | 0          | 0   | 1 |
| KAL1           | 0 | 0          | 0   | 1 |
| FAM9A          | 0 | 0          | 0   | 1 |
| FAM9B          | 0 | 0          | 0   | 1 |
| ARHGAP6        | 0 | 0          | 0   | 1 |
| TLR8-AS1       | 0 | 0          | 0   | 1 |
| FAM9C          | 0 | 0          | 0   | 1 |
| ATXN3L         | 0 | 0          | 0   | 1 |
| ASB9           | 0 | 0          | 0   | 1 |
| ASB11          | 0 | 0          | 0   | 1 |
| RAI2           | 0 | 0          | 0   | 1 |
| BEND2          | 0 | 0          | 0   | 1 |
| SCML2          | 0 | 0          | 0   | 1 |
| LOC729609      | 0 | 0          | 0   | 1 |
| MIR23C         | 0 | 0          | 0   | 1 |
| KLHL34         | 0 | 0          | 0   | 1 |
| SMPX           | 0 | 0          | 0   | 1 |
| PHEX-AS1       | 0 | 0          | 0   | 1 |
| LOC100873065   | 0 | 0          | 0   | 1 |
| SUPT20HL2      | 0 | 0          | 0   | 1 |
| SMEK3P         | 0 | 0          | 0   | 1 |
| DCAF8L1        | 0 | 0          | 0   | 1 |
| NR0B1          | 0 | 0          | 0   | 1 |
| CXorf21        | 0 | 0          | 0   | 1 |
| FTHL17         | 0 | 0          | 0   | 1 |
| DMD            | 0 | 0          | 0   | 1 |
| FAM47A         | 0 | 0          | 0   | 1 |
| TMEM47         | 0 | 0          | 0   | 1 |
| LOC286442      | 0 | 0          | 0   | 1 |
| LOC100132831   | 0 | 0          | 0   | 1 |
| PPP1R2P9       | 0 | 0          | 0   | 1 |
| MAOB           | 0 | 0          | 0   | 1 |

|                |   |                |   |   |
|----------------|---|----------------|---|---|
| NDP            | 0 | 0              | 0 | 1 |
| EFHC2          | 0 | 0              | 0 | 1 |
| MIR222         | 0 | 0              | 0 | 1 |
| SSX9           | 0 | 0              | 0 | 1 |
| SSX3           | 0 | 0              | 0 | 1 |
| SSX4B          | 0 | 0              | 0 | 1 |
| CACNA1F        | 0 | 0              | 0 | 1 |
| PAGE1          | 0 | 0              | 0 | 1 |
| AKAP4          | 0 | 0              | 0 | 1 |
| DGKK           | 0 | 0              | 0 | 1 |
| NUDT11         | 0 | 0              | 0 | 1 |
| CENPVP2        | 0 | 0              | 0 | 1 |
| MAGED4,MAGED4B | 0 | 0              | 0 | 1 |
| SNORA11D       | 0 | 0              | 0 | 1 |
| SNORA11E       | 0 | 0              | 0 | 1 |
| XAGE1B,XAGE1D  | 0 | 0              | 0 | 1 |
| XAGE2,XAGE2B   | 0 | 0              | 0 | 1 |
| XAGE1C         | 0 | 0              | 0 | 1 |
| XAGE1A,XAGE1C  | 0 | 0              | 0 | 1 |
| SSX7           | 0 | 0              | 0 | 1 |
| SSX2           | 0 | 0              | 0 | 1 |
| SPANXN5        | 0 | 0              | 0 | 1 |
| XAGE3          | 0 | 0              | 0 | 1 |
| MIR98          | 0 | 0              | 0 | 1 |
| MIRLET7F2      | 0 | 0              | 0 | 1 |
| ALAS2          | 0 | 0              | 0 | 1 |
| PAGE3          | 0 | 0              | 0 | 1 |
| USP51          | 0 | 0              | 0 | 1 |
| ZXDA           | 0 | 0              | 0 | 1 |
| MIR1468        | 0 | 0              | 0 | 1 |
| ASB12          | 0 | 0              | 0 | 1 |
| MTMR8          | 0 | 0              | 0 | 1 |
| FRMD8P1        | 0 | 0              | 0 | 1 |
| VSIG4          | 0 | 0              | 0 | 1 |
| SLC7A3         | 0 | 0              | 0 | 1 |
| CXorf65        | 0 | 0              | 0 | 1 |
| CXorf49B       | 0 | 0              | 0 | 1 |
| RGAG4          | 0 | 0              | 0 | 1 |
| LINC00684      | 0 | 0              | 0 | 1 |
| DMRTC1B        | 0 | 0              | 0 | 1 |
| PABPC1L2A      | 0 | 0              | 0 | 1 |
| NAP1L2         | 0 | 0              | 0 | 1 |
| MIR421         | 0 | 0              | 0 | 1 |
| MIR374B        | 0 | 0              | 0 | 1 |
| MIR545         | 0 | 0              | 0 | 1 |
| MIR374A        | 0 | 0              | 0 | 1 |
| KIAA2022       | 0 | 0              | 0 | 1 |
| MAGEE2         | 0 | 0              | 0 | 1 |
| MIR384         | 0 | 0              | 0 | 1 |
| CYSLTR1        | 0 | 0              | 0 | 1 |
| ZCCHC5         | 0 | 0              | 0 | 1 |
| MIR4328        | 0 | 0              | 0 | 1 |
| ITM2A          | 0 | 0              | 0 | 1 |
| RPS6KA6        | 0 | 0              | 0 | 1 |
| HDX            | 0 | 0              | 0 | 1 |
| NAP1L3         | 0 | 0              | 0 | 1 |
| LOC643486      | 0 | 0              | 0 | 1 |
| LOC442459      | 0 | 0              | 0 | 1 |
| PCDH19         | 0 | 0.00789194 inf | 0 | 1 |
| NXF5           | 0 | 0              | 0 | 1 |
| NXF2           | 0 | 0              | 0 | 1 |
| TMSB15A        | 0 | 0              | 0 | 1 |
| BEX1           | 0 | 0              | 0 | 1 |
| NXF3           | 0 | 0.00450277 inf | 0 | 1 |
| BEX2           | 0 | 0              | 0 | 1 |
| GLRA4          | 0 | 0              | 0 | 1 |
| H2BFWT         | 0 | 0              | 0 | 1 |
| H2BFXP         | 0 | 0              | 0 | 1 |
| ESX1           | 0 | 0              | 0 | 1 |
| TEX13A         | 0 | 0              | 0 | 1 |
| SERPINA7       | 0 | 0              | 0 | 1 |
| NUP62CL        | 0 | 0              | 0 | 1 |
| IRS4           | 0 | 0              | 0 | 1 |
| GUCY2F         | 0 | 0.00568354 inf | 0 | 1 |
| SNORD96B       | 0 | 0              | 0 | 1 |
| DCX            | 0 | 0              | 0 | 1 |
| RNU6-28        | 0 | 0              | 0 | 1 |
| TRPC5          | 0 | 0.00161987 inf | 0 | 1 |
| LHFPL1         | 0 | 0              | 0 | 1 |

|                      |   |            |     |   |
|----------------------|---|------------|-----|---|
| MIR4329              | 0 | 0          | 0   | 1 |
| LRCH2                | 0 | 0          | 0   | 1 |
| CXorf61              | 0 | 0          | 0   | 1 |
| KLHL13               | 0 | 0          | 0   | 1 |
| KIAA1210             | 0 | 0.00115644 | inf | 1 |
| MIR766               | 0 | 0          | 0   | 1 |
| SNORA69              | 0 | 0          | 0   | 1 |
| RHOXF2B              | 0 | 0          | 0   | 1 |
| RHOXF1               | 0 | 0          | 0   | 1 |
| CT47B1               | 0 | 0          | 0   | 1 |
| CT47A1,CT47A4        | 0 | 0          | 0   | 1 |
| CT47A8               | 0 | 0          | 0   | 1 |
| CT47A11              | 0 | 0          | 0   | 1 |
| CT47A5               | 0 | 0          | 0   | 1 |
| CT47A3               | 0 | 0          | 0   | 1 |
| CT47A7               | 0 | 0          | 0   | 1 |
| CT47A1,CT47A2,CT47A6 | 0 | 0          | 0   | 1 |
| CT47A2               | 0 | 0          | 0   | 1 |
| CT47A9               | 0 | 0          | 0   | 1 |
| CT47A8               | 0 | 0          | 0   | 1 |
| CT47A6               | 0 | 0          | 0   | 1 |
| TENM1                | 0 | 0          | 0   | 1 |
| DCAF12L2             | 0 | 0          | 0   | 1 |
| DCAF12L1             | 0 | 0          | 0   | 1 |
| ACTRT1               | 0 | 0          | 0   | 1 |
| GPR119               | 0 | 0          | 0   | 1 |
| IGSF1                | 0 | 0          | 0   | 1 |
| FRMD7                | 0 | 0          | 0   | 1 |
| HS6ST2               | 0 | 0          | 0   | 1 |
| USP26                | 0 | 0          | 0   | 1 |
| TFDP3                | 0 | 0          | 0   | 1 |
| GPC3                 | 0 | 0          | 0   | 1 |
| MIR363               | 0 | 0          | 0   | 1 |
| MIR92A2              | 0 | 0          | 0   | 1 |
| MIR19B2              | 0 | 0          | 0   | 1 |
| MIR20B               | 0 | 0          | 0   | 1 |
| MIR18B               | 0 | 0          | 0   | 1 |
| MIR106A              | 0 | 0          | 0   | 1 |
| MIR450B              | 0 | 0          | 0   | 1 |
| MIR450A1             | 0 | 0          | 0   | 1 |
| MIR450A2             | 0 | 0          | 0   | 1 |
| MIR542               | 0 | 0          | 0   | 1 |
| MGC16121,MIR424      | 0 | 0          | 0   | 1 |
| MIR503               | 0 | 0          | 0   | 1 |
| FAM127C              | 0 | 0          | 0   | 1 |
| FAM127B              | 0 | 0          | 0   | 1 |
| LINC00087            | 0 | 0          | 0   | 1 |
| LINC00633            | 0 | 0          | 0   | 1 |
| CT45A4               | 0 | 0          | 0   | 1 |
| CT45A6               | 0 | 0          | 0   | 1 |
| SNORD61              | 0 | 0          | 0   | 1 |
| GPR101               | 0 | 0          | 0   | 1 |
| LOC158696            | 0 | 0          | 0   | 1 |
| MIR504               | 0 | 0          | 0   | 1 |
| MIR505               | 0 | 0          | 0   | 1 |
| CXorf66              | 0 | 0          | 0   | 1 |
| SOX3                 | 0 | 0          | 0   | 1 |
| CDR1                 | 0 | 0          | 0   | 1 |
| MIR320D2             | 0 | 0          | 0   | 1 |
| LDOC1                | 0 | 0          | 0   | 1 |
| SPANXC               | 0 | 0          | 0   | 1 |
| SPANXA2              | 0 | 0          | 0   | 1 |
| SPANXE               | 0 | 0          | 0   | 1 |
| MAGEC2               | 0 | 0          | 0   | 1 |
| SPANXN3              | 0 | 0          | 0   | 1 |
| SLITRK4              | 0 | 0          | 0   | 1 |
| SPANXN2              | 0 | 0          | 0   | 1 |
| MIR890               | 0 | 0          | 0   | 1 |
| MIR888               | 0 | 0          | 0   | 1 |
| MIR892A              | 0 | 0          | 0   | 1 |
| MIR892B              | 0 | 0          | 0   | 1 |
| MIR891B              | 0 | 0          | 0   | 1 |
| MIR891A              | 0 | 0          | 0   | 1 |
| CXorf51A             | 0 | 0          | 0   | 1 |
| MIR506               | 0 | 0          | 0   | 1 |
| MIR507               | 0 | 0          | 0   | 1 |
| MIR508               | 0 | 0          | 0   | 1 |
| MIR514B              | 0 | 0          | 0   | 1 |
| MIR509-1             | 0 | 0          | 0   | 1 |

|                      |   |            |     |   |
|----------------------|---|------------|-----|---|
| MIR509-3             | 0 | 0          | 0   | 1 |
| MIR509-1             | 0 | 0          | 0   | 1 |
| MIR510               | 0 | 0          | 0   | 1 |
| MIR514A1             | 0 | 0          | 0   | 1 |
| MIR514A2             | 0 | 0          | 0   | 1 |
| MIR514A3             | 0 | 0          | 0   | 1 |
| MAGEA9B              | 0 | 0          | 0   | 1 |
| HSFX2                | 0 | 0          | 0   | 1 |
| GABRE                | 0 | 0          | 0   | 1 |
| MIR452               | 0 | 0          | 0   | 1 |
| MAGEA10,MAGEA10-MAGE | 0 | 0          | 0   | 1 |
| GABRA3               | 0 | 0          | 0   | 1 |
| MIR105-1             | 0 | 0          | 0   | 1 |
| MIR767               | 0 | 0          | 0   | 1 |
| MIR105-2             | 0 | 0          | 0   | 1 |
| CSAG2,CSAG3          | 0 | 0          | 0   | 1 |
| MAGEA2,MAGEA2B       | 0 | 0          | 0   | 1 |
| MAGEA3               | 0 | 0          | 0   | 1 |
| PNMA5                | 0 | 0          | 0   | 1 |
| PNMA6D               | 0 | 0          | 0   | 1 |
| MAGEA1               | 0 | 0          | 0   | 1 |
| PDZD4                | 0 | 0.00424168 | inf | 1 |
| MIR3202-2            | 0 | 0          | 0   | 1 |
| MIR718               | 0 | 0          | 0   | 1 |
| TEX28                | 0 | 0          | 0   | 1 |
| CTAG1A               | 0 | 0          | 0   | 1 |
| CTAG2                | 0 | 0          | 0   | 1 |
| MPP1                 | 0 | 0.00547886 | inf | 1 |
| MIR1184-1            | 0 | 0          | 0   | 1 |
| MIR1184-3            | 0 | 0          | 0   | 1 |
| H2AFB3               | 0 | 0          | 0   | 1 |
| LINC00685            | 0 | 0          | 0   | 1 |
| SHOX                 | 0 | 0          | 0   | 1 |
| CSF2RA               | 0 | 0          | 0   | 1 |
| MIR3690              | 0 | 0          | 0   | 1 |
| IL3RA                | 0 | 0          | 0   | 1 |
| ASMTL-AS1            | 0 | 0          | 0   | 1 |
| AKAP17A,ASMT         | 0 | 0          | 0   | 1 |
| CD99P1               | 0 | 0          | 0   | 1 |
| CD99                 | 0 | 0          | 0   | 1 |
| XGPY2                | 0 | 0          | 0   | 1 |
| RPS4Y1               | 0 | 0          | 0   | 1 |
| ZFY                  | 0 | 0          | 0   | 1 |
| LINC00278            | 0 | 0          | 0   | 1 |
| TGIF2LY              | 0 | 0          | 0   | 1 |
| TSPY2                | 0 | 0          | 0   | 1 |
| TTY1B                | 0 | 0          | 0   | 1 |
| TTY21                | 0 | 0          | 0   | 1 |
| TTY7,TTY7E           | 0 | 0          | 0   | 1 |
| TBL1Y                | 0 | 0          | 0   | 1 |
| PRKY                 | 0 | 0.00112506 | inf | 1 |
| TTY12                | 0 | 0          | 0   | 1 |
| TTY19                | 0 | 0          | 0   | 1 |
| TSPY3,TSPY4,TSPY8    | 0 | 0          | 0   | 1 |
| TSPY1                | 0 | 0          | 0   | 1 |
| TTY8B                | 0 | 0          | 0   | 1 |
| TTY2                 | 0 | 0          | 0   | 1 |
| TTY22                | 0 | 0          | 0   | 1 |
| TTY23B               | 0 | 0          | 0   | 1 |
| TTY15                | 0 | 0          | 0   | 1 |
| USP9Y                | 0 | 0          | 0   | 1 |
| DDX3Y                | 0 | 0          | 0   | 1 |
| TMSB4Y               | 0 | 0          | 0   | 1 |
| VCY                  | 0 | 0          | 0   | 1 |
| NLGN4Y               | 0 | 0          | 0   | 1 |
| FAM41AY1             | 0 | 0          | 0   | 1 |
| CDY2A,CDY2B          | 0 | 0          | 0   | 1 |
| XKRY                 | 0 | 0          | 0   | 1 |
| FAM224A,FAM224B      | 0 | 0          | 0   | 1 |
| HSFY1,HSFY2          | 0 | 0          | 0   | 1 |
| TTY9A                | 0 | 0          | 0   | 1 |
| TXLNG2P              | 0 | 0          | 0   | 1 |
| EIF1AY               | 0 | 0          | 0   | 1 |
| RPS4Y2               | 0 | 0          | 0   | 1 |
| RBM1B                | 0 | 0          | 0   | 1 |
| RBM1B                | 0 | 0          | 0   | 1 |
| TTY6,TTY6E           | 0 | 0          | 0   | 1 |
| RBM1F,RBM1J          | 0 | 0          | 0   | 1 |
| PRY2                 | 0 | 0          | 0   | 1 |

|                 |         |         |            |          |
|-----------------|---------|---------|------------|----------|
| TTY17C          | 0       | 0       | 0          | 1        |
| TTY4            | 0       | 0       | 0          | 1        |
| BPY2            | 0       | 0       | 0          | 1        |
| DAZ2,DAZ3,DAZ4  | 0       | 0       | 0          | 1        |
| TTY17C          | 0       | 0       | 0          | 1        |
| TTY4            | 0       | 0       | 0          | 1        |
| BPY2            | 0       | 0       | 0          | 1        |
| DAZ2,DAZ3,DAZ4  | 0       | 0       | 0          | 1        |
| GOLGA2P2Y       | 0       | 0       | 0          | 1        |
| CSPG4P1Y        | 0       | 0       | 0          | 1        |
| CDY1            | 0       | 0       | 0          | 1        |
| TTY3            | 0       | 0       | 0          | 1        |
| SPRY3           | 0       | 0       | 0          | 1        |
| VAMP7           | 0       | 0       | 0          | 1        |
| IL9R            | 0       | 0       | 0          | 1        |
| GTPBP6          | 0       | 0       | 0          | 1        |
| PPP2R3B         | 0       | 0       | 0          | 1        |
| CRLF2           | 0       | 0       | 0          | 1        |
| SLC25A6         | 0       | 0       | 0          | 1        |
| ASMTL           | 0       | 0       | 0          | 1        |
| P2RY8           | 0       | 0       | 0          | 1        |
| DHRX,ZBED1      | 0       | 0       | 0          | 1        |
| SRY             | 0       | 0       | 0          | 1        |
| TTY23B          | 0       | 0       | 0          | 1        |
| TTY2            | 0       | 0       | 0          | 1        |
| TTY8B           | 0       | 0       | 0          | 1        |
| AMELY           | 0       | 0       | 0          | 1        |
| TTY16           | 0       | 0       | 0          | 1        |
| TTY18           | 0       | 0       | 0          | 1        |
| TTY11           | 0       | 0       | 0          | 1        |
| RBM1A3P         | 0       | 0       | 0          | 1        |
| TTY20           | 0       | 0       | 0          | 1        |
| FAM197Y5        | 0       | 0       | 0          | 1        |
| FAM197Y5        | 0       | 0       | 0          | 1        |
| FAM197Y2        | 0       | 0       | 0          | 1        |
| FAM197Y2        | 0       | 0       | 0          | 1        |
| FAM197Y2        | 0       | 0       | 0          | 1        |
| RBM1A3P         | 0       | 0       | 0          | 1        |
| TTY7,TTY7E      | 0       | 0       | 0          | 1        |
| TTY21           | 0       | 0       | 0          | 1        |
| TTY1B           | 0       | 0       | 0          | 1        |
| VCY             | 0       | 0       | 0          | 1        |
| NLGN4Y-AS1      | 0       | 0       | 0          | 1        |
| FAM224A,FAM224B | 0       | 0       | 0          | 1        |
| XKRY2           | 0       | 0       | 0          | 1        |
| CDY2A,CDY2B     | 0       | 0       | 0          | 1        |
| FAM41AY2        | 0       | 0       | 0          | 1        |
| TTY9B           | 0       | 0       | 0          | 1        |
| HSFY1,HSFY2     | 0       | 0       | 0          | 1        |
| NCRNA00185      | 0       | 0       | 0          | 1        |
| TTY14           | 0       | 0       | 0          | 1        |
| BCORP1          | 0       | 0       | 0          | 1        |
| KDM5D           | 0       | 0       | 0          | 1        |
| TTY10           | 0       | 0       | 0          | 1        |
| RBM1A2EP        | 0       | 0       | 0          | 1        |
| TTY13           | 0       | 0       | 0          | 1        |
| RBM1A           | 0       | 0       | 0          | 1        |
| RBM1A           | 0       | 0       | 0          | 1        |
| PRY             | 0       | 0       | 0          | 1        |
| RBM1A           | 0       | 0       | 0          | 1        |
| TTY5            | 0       | 0       | 0          | 1        |
| TTY6,TTY6E      | 0       | 0       | 0          | 1        |
| DAZ1,DAZ4       | 0       | 0       | 0          | 1        |
| TTY3B           | 0       | 0       | 0          | 1        |
| CDY1            | 0       | 0       | 0          | 1        |
| CSPG4P1Y        | 0       | 0       | 0          | 1        |
| GOLGA2P2Y       | 0       | 0       | 0          | 1        |
| DAZ3,DAZ4       | 0       | 0       | 0          | 1        |
| BPY2C           | 0       | 0       | 0          | 1        |
| TTY4B           | 0       | 0       | 0          | 1        |
| TTY17B          | 0       | 0       | 0          | 1        |
| HUS1            | 5.5901  | 4.56258 | -0.293024  | 0.593222 |
| METAP1          | 30.0961 | 27.7554 | -0.116809  | 0.904448 |
| ARHGAP17        | 10.0954 | 12.0635 | 0.256948   | 0.58321  |
| VAPA            | 15.7915 | 15.5715 | -0.0202459 | 0.991767 |
| ZDHHC16         | 26.7393 | 29.1066 | 0.122382   | 0.899883 |
| CAND1           | 15.767  | 19.9775 | 0.34147    | 0.326632 |
| FYCO1           | 2.77665 | 2.63054 | -0.0779855 | 0.959465 |
| SHISA5          | 99.5701 | 86.7656 | -0.198591  | 0.725353 |



|                      |          |          |             |            |
|----------------------|----------|----------|-------------|------------|
| ZBTB48               | 10.2126  | 13.3176  | 0.382986    | 0.319517   |
| HSBP1                | 57.225   | 78.4789  | 0.455659    | 0.116542   |
| HERC2                | 2.69304  | 3.23664  | 0.26526     | 0.551266   |
| C8orf82.LRRC24       | 88.1944  | 87.9741  | -0.0036084  | 0.998564   |
| CCSER2               | 1.61633  | 0.936653 | -0.787138   | 0.00509212 |
| SLC38A6              | 4.10204  | 2.78225  | -0.560093   | 0.186614   |
| SPHK1                | 221.937  | 336.073  | 0.59862     | 0.0167292  |
| E2F7                 | 3.24977  | 3.44464  | 0.0840135   | 0.954768   |
| LONP2                | 13.3462  | 9.34934  | -0.513497   | 0.12522    |
| MYO5A                | 2.07569  | 2.2577   | 0.121261    | 0.904574   |
| IP6K1                | 8.76134  | 12.6948  | 0.535014    | 0.0566185  |
| AGFG2                | 1.79113  | 3.08636  | 0.785033    | 0.021138   |
| IL17RC               | 16.4151  | 9.07238  | -0.855467   | 0.00134142 |
| FAM200A              | 3.44927  | 3.88231  | 0.170624    | 0.851892   |
| NOS3                 | 7.97494  | 6.0285   | -0.403676   | 0.306818   |
| RTN2                 | 15.5967  | 15.5273  | -0.00643911 | 0.997082   |
| PPP2R5C              | 34.9524  | 25.2003  | -0.471952   | 0.156302   |
| PPP1R12C             | 19.7261  | 24.2991  | 0.300793    | 0.47235    |
| COX17                | 108.669  | 140.222  | 0.367765    | 0.299254   |
| CECR5                | 112.076  | 108.831  | -0.0423885  | 0.979875   |
| MED26                | 6.02776  | 6.25292  | 0.0529098   | 0.979701   |
| ASB6                 | 39.8653  | 73.4345  | 0.881323    | 0.009453   |
| ELK1                 | 30.1359  | 30.5589  | 0.0201073   | 0.992797   |
| IFT88                | 0.836209 | 0.52953  | -0.659151   | 0.211887   |
| KIF5B                | 13.1221  | 18.6425  | 0.506601    | 0.0658487  |
| PPAP2B               | 0.41048  | 0.559268 | 0.446228    | 0.609835   |
| KIF2C                | 32.6489  | 27.1025  | -0.268612   | 0.540505   |
| WDR24                | 7.1709   | 7.37045  | 0.0396      | 0.986363   |
| C21orf119            | 6.76733  | 8.41357  | 0.314131    | 0.688434   |
| PPP2R1A              | 199.488  | 197.067  | -0.0176156  | 0.993379   |
| ZNF623               | 4.65222  | 3.138    | -0.568072   | 0.0710419  |
| CNTROB               | 13.5342  | 12.7288  | -0.088517   | 0.944418   |
| TLK2                 | 4.22378  | 4.7629   | 0.173308    | 0.810615   |
| NOB1                 | 127.316  | 95.5201  | -0.414536   | 0.171252   |
| DCTD                 | 58.1761  | 58.8087  | 0.0156028   | 0.99351    |
| DOPEY1               | 0.288278 | 0.177878 | -0.696572   | 1          |
| ITFG3                | 22.492   | 14.5472  | -0.628667   | 0.0150729  |
| ARIH1                | 9.05043  | 8.72555  | -0.0527409  | 0.975414   |
| FGD5-AS1             | 11.0348  | 12.847   | 0.21937     | 0.898588   |
| FBXO28               | 6.21475  | 5.96905  | -0.058195   | 0.972989   |
| COX11                | 21.4356  | 16.4048  | -0.385893   | 0.340227   |
| DCP2                 | 1.98515  | 1.59652  | -0.314316   | 0.46196    |
| NONO                 | 159.19   | 140.817  | -0.176932   | 0.845726   |
| BDP1                 | 0.89722  | 1.34058  | 0.579323    | 0.0601893  |
| BAG3                 | 28.4514  | 66.1489  | 1.21722     | 0.00134142 |
| IPO9                 | 5.32795  | 5.31278  | -0.00411365 | 0.997535   |
| AURKA                | 24.5562  | 33.5027  | 0.448194    | 0.151774   |
| SEC14L1              | 13.9205  | 13.7682  | -0.0158695  | 0.994615   |
| MYO9B                | 12.6927  | 16.6814  | 0.394246    | 0.197882   |
| EMC6                 | 149.071  | 189.196  | 0.343878    | 0.796141   |
| CCDC77               | 2.93021  | 3.51602  | 0.262939    | 0.902188   |
| P4HTM                | 15.4194  | 8.54604  | -0.851421   | 0.00509212 |
| ENTPD5               | 0.373627 | 0.255852 | -0.54629    | 0.617807   |
| CDC26                | 61.7725  | 87.7287  | 0.506083    | 0.0569429  |
| RNF40                | 16.0868  | 21.9537  | 0.448588    | 0.293861   |
| DCAF16               | 9.33747  | 9.03663  | -0.0472473  | 0.979484   |
| TMC7                 | 1.08303  | 0.730429 | -0.56826    | 0.227772   |
| TAB3                 | 1.91277  | 1.38184  | -0.469074   | 0.200542   |
| URB2                 | 2.65577  | 5.29307  | 0.994977    | 0.00134142 |
| ZNF140               | 7.15555  | 6.99429  | -0.0328849  | 0.987693   |
| COX7A2               | 300.131  | 330.349  | 0.138401    | 0.862445   |
| MAP3K6               | 2.41354  | 2.75554  | 0.191187    | 0.856035   |
| PFKP                 | 84.2035  | 69.8655  | -0.269298   | 0.519826   |
| FAM168B              | 10.3095  | 10.6417  | 0.0457607   | 0.979701   |
| MAST3                | 3.36811  | 5.21958  | 0.631996    | 0.0394523  |
| HPCA                 | 0.148014 | 0.210723 | 0.509608    | 1          |
| SNX6                 | 23.9402  | 20.6614  | -0.212501   | 0.68317    |
| MRPS24,URGCP,URGCP-W | 302.705  | 347.013  | 0.197079    | 0.778996   |
| CDC20                | 133.867  | 183.769  | 0.457085    | 0.128873   |
| POLR3C               | 15.446   | 9.06957  | -0.768123   | 0.00134142 |
| DSG2                 | 10.5378  | 6.07762  | -0.793995   | 0.00134142 |
| ARAP3                | 6.48578  | 6.12071  | -0.0835817  | 0.950929   |
| RPL23AP7             | 8.98525  | 9.09372  | 0.0173124   | 0.996079   |
| LYRM2                | 3.97968  | 4.43053  | 0.154826    | 0.847596   |
| ADPGK                | 19.1913  | 26.6257  | 0.472367    | 0.102638   |
| HECA                 | 4.57613  | 2.47549  | -0.886414   | 0.00134142 |
| PRRC1                | 6.97269  | 6.373    | -0.129743   | 0.88709    |
| PPP2R4               | 168.33   | 187.614  | 0.156482    | 0.830321   |
| PIK3R1               | 0.992462 | 1.07708  | 0.118042    | 0.938194   |

|                       |           |           |             |            |
|-----------------------|-----------|-----------|-------------|------------|
| GATAD2B               | 5.77903   | 4.06789   | -0.506547   | 0.0786602  |
| TOE1                  | 10.7101   | 20.1821   | 0.914101    | 0.0183825  |
| LOC100505687          | 3.91217   | 3.21807   | -0.281773   | 0.715244   |
| ZDHHC3                | 3.00406   | 4.47647   | 0.57545     | 0.0274653  |
| SNX16                 | 2.90319   | 1.79901   | -0.690435   | 0.0459324  |
| AKAP8                 | 10.9061   | 15.0041   | 0.460221    | 0.116242   |
| CDCA8                 | 33.5806   | 37.9236   | 0.175468    | 0.778901   |
| BIVM,BIVM-ERCC5,ERCC5 | 16.519    | 13.6224   | -0.278152   | 0.56414    |
| SLC39A4               | 40.6331   | 44.7373   | 0.138825    | 0.869333   |
| RHOA                  | 269.927   | 272.369   | 0.0129959   | 0.995302   |
| FTO                   | 1.7447    | 1.5679    | -0.154138   | 0.895818   |
| BIRC6                 | 1.89482   | 2.03764   | 0.104835    | 0.922006   |
| CCNL1                 | 22.4106   | 18.7509   | -0.257217   | 0.563034   |
| RNF114                | 32.6279   | 22.7841   | -0.518083   | 0.0562227  |
| NT5DC1                | 9.45551   | 4.6283    | -1.03067    | 0.00134142 |
| DNAJC1                | 7.81479   | 6.16478   | -0.342157   | 0.448078   |
| MIEN1                 | 104.051   | 128.364   | 0.302954    | 0.418251   |
| LRRC42                | 28.4506   | 32.6835   | 0.200106    | 0.723506   |
| NUBP2                 | 98.5005   | 127.757   | 0.375201    | 0.240188   |
| CYTH3                 | 4.55783   | 4.8214    | 0.0811035   | 0.956711   |
| LOC100131089          | 3.24198   | 1.8168    | -0.835477   | 0.305979   |
| IRAK1                 | 141.558   | 163.748   | 0.210083    | 0.703025   |
| MSX2                  | 2.21739   | 2.18932   | -0.018381   | 0.995302   |
| GRHL1                 | 1.0139    | 1.09487   | 0.110845    | 0.956373   |
| NUDT17                | 1.60265   | 1.22146   | -0.391854   | 0.954677   |
| POU2F1                | 0.871216  | 0.612799  | -0.507615   | 0.153355   |
| MTHFR                 | 0.943394  | 0.518747  | -0.862829   | 0.491256   |
| SIGLEC9               | 0.0646287 | 0         | #NAME?      | 1          |
| TCF20                 | 4.46204   | 5.35057   | 0.261989    | 0.563967   |
| NAGA                  | 12.4338   | 8.75191   | -0.506596   | 0.0778493  |
| MRGBP                 | 40.1274   | 43.2754   | 0.108958    | 0.915507   |
| APOPT1                | 24.8974   | 24.1461   | -0.0442088  | 0.98039    |
| NEIL3                 | 1.65108   | 1.40014   | -0.237831   | 0.81526    |
| SEMA4D                | 7.96724   | 7.92373   | -0.00790014 | 0.997036   |
| RHOG                  | 62.4717   | 81.2175   | 0.378587    | 0.226489   |
| HADHA                 | 94.7684   | 82.7919   | -0.194916   | 0.737796   |
| CYFIP1                | 43.1669   | 38.7283   | -0.156536   | 0.823658   |
| KDM6A                 | 2.31359   | 1.42304   | -0.701155   | 0.0235476  |
| BOP1                  | 70.2377   | 146.672   | 1.06228     | 0.00134142 |
| TAPBPL                | 1.78804   | 1.71294   | -0.0619011  | 0.991614   |
| THAP4                 | 87.4186   | 117.04    | 0.420985    | 0.251149   |
| PPM1K                 | 2.38524   | 2.65657   | 0.155425    | 0.859648   |
| NUCB2                 | 11.6794   | 8.40887   | -0.473979   | 0.137767   |
| NBR1                  | 21.551    | 5.91032   | -1.86645    | 0.00134142 |
| P2RX5,TAX1BP3         | 95.3809   | 165.272   | 0.793068    | 0.0189207  |
| TIMM10B               | 8.88013   | 14.0195   | 0.658786    | 0.174555   |
| CYC1                  | 227.518   | 286.628   | 0.3332      | 0.355857   |
| ZFYVE28               | 5.0231    | 4.14412   | -0.277511   | 0.693347   |
| C11orf63              | 0.540747  | 0.371723  | -0.540726   | 0.581651   |
| NUMB                  | 10.7973   | 8.21048   | -0.395129   | 0.227422   |
| ABCA3                 | 12.6422   | 14.0733   | 0.154712    | 0.830662   |
| SMCR7L                | 9.88112   | 14.0466   | 0.507474    | 0.0710419  |
| CAMTA2                | 18.9513   | 12.7818   | -0.568202   | 0.0292254  |
| AFG3L1P               | 4.52802   | 9.24702   | 1.03011     | 0.00134142 |
| GOLGA8S               | 0.352813  | 0.278651  | -0.340444   | 0.721048   |
| MZF1                  | 12.1018   | 9.8333    | -0.299476   | 0.557803   |
| DSTNP2                | 3.45771   | 2.65684   | -0.380103   | 0.588926   |
| THAP5                 | 5.43994   | 5.3592    | -0.0215736  | 0.991767   |
| HDDC2                 | 38.7618   | 40.5665   | 0.0656531   | 0.965515   |
| ANKS1A                | 4.15834   | 5.0388    | 0.277071    | 0.558232   |
| FLJ42393              | 0.0584037 | 0.0511278 | -0.191952   | 1          |
| BRD3                  | 7.81665   | 7.24998   | -0.108574   | 0.937765   |
| FTH1P3                | 0.22032   | 0.271833  | 0.30312     | 1          |
| UNKL                  | 4.16012   | 5.74661   | 0.466086    | 0.739348   |
| PPP4R1                | 9.13512   | 11.7693   | 0.365528    | 0.288804   |
| SEPT7                 | 19.4772   | 18.3916   | -0.0827419  | 0.948821   |
| CALM3                 | 82.4942   | 109.207   | 0.404705    | 0.179646   |
| TMEM52                | 41.9333   | 56.8229   | 0.438375    | 0.180428   |
| SYNRG                 | 3.08168   | 2.1985    | -0.487196   | 0.129875   |
| C22orf28              | 51.1829   | 48.8036   | -0.0686716  | 0.96128    |
| FDXACB1               | 1.60511   | 2.41184   | 0.587462    | 0.486456   |
| COX4I1                | 488.176   | 490.974   | 0.00824605  | 0.997036   |
| CAPN2                 | 146.98    | 141.203   | -0.0578524  | 0.972601   |
| C6orf120              | 6.60607   | 5.99451   | -0.14015    | 0.945946   |
| NAGLU                 | 19.7287   | 12.7959   | -0.624617   | 0.0270114  |
| SIK2                  | 1.79262   | 1.20692   | -0.570735   | 0.614283   |
| KARS                  | 77.3206   | 68.1775   | -0.181557   | 0.769235   |
| FAM108A1              | 106.337   | 114.815   | 0.11067     | 0.916337   |
| UFC1                  | 97.5471   | 121.782   | 0.320131    | 0.379322   |

|                |           |           |             |            |
|----------------|-----------|-----------|-------------|------------|
| RAB12          | 12.469    | 15.1322   | 0.279275    | 0.534096   |
| EIF2AK1        | 29.918    | 24.9663   | -0.261029   | 0.588607   |
| INTS6          | 1.88317   | 1.96501   | 0.0613673   | 0.979701   |
| MALT1          | 4.90472   | 3.35974   | -0.54582    | 0.0685498  |
| CHCHD4         | 16.6331   | 25.0947   | 0.593327    | 0.0297125  |
| SNORA74B       | 1.94814   | 1.22787   | -0.665933   | 0.967901   |
| SGOL2          | 2.26775   | 3.26165   | 0.524343    | 0.102638   |
| PTPRJ          | 3.94529   | 3.09899   | -0.348335   | 0.465131   |
| COPG1          | 38.9733   | 35.5344   | -0.133269   | 0.872056   |
| NXF1           | 26.1021   | 52.7412   | 1.01477     | 0.00134142 |
| BCL7C          | 107.711   | 137.493   | 0.352199    | 0.291851   |
| ANKRD40        | 10.1196   | 12.3616   | 0.288702    | 0.481533   |
| TAB1           | 13.1264   | 12.2157   | -0.103735   | 0.93038    |
| SGK494         | 0.601386  | 0.63683   | 0.0826179   | 0.995528   |
| LYPLA2         | 97.6099   | 135.167   | 0.469639    | 0.0983149  |
| MANEA          | 1.38393   | 1.32001   | -0.0682276  | 0.974762   |
| TMCC1          | 1.00663   | 1.14829   | 0.189956    | 0.848565   |
| SLC25A24       | 4.75281   | 2.97865   | -0.674122   | 0.0231741  |
| DCBLD2         | 2.98171   | 3.77465   | 0.340206    | 0.391936   |
| SMARCD2        | 43.0052   | 48.0223   | 0.159193    | 0.826046   |
| HNRNPA1        | 758.456   | 654.897   | -0.211798   | 0.72301    |
| PRPF8          | 38.4601   | 37.164    | -0.0494573  | 0.977885   |
| FAM83D         | 16.8609   | 24.1321   | 0.517272    | 0.068174   |
| MGAT4B         | 104.197   | 104.049   | -0.00205557 | 0.999416   |
| L2HGDH         | 3.02219   | 2.72304   | -0.150374   | 0.863873   |
| TCEANC2        | 0.912222  | 0.958872  | 0.0719534   | 0.978196   |
| GMPS           | 44.9187   | 34.9817   | -0.360714   | 0.280427   |
| ZSCAN12P1      | 0.779271  | 0.647723  | -0.266747   | 0.796801   |
| EIF3D          | 210.437   | 131.953   | -0.673368   | 0.00818401 |
| MOAP1          | 17.2355   | 15.8639   | -0.119635   | 0.90314    |
| MRPS16         | 36.8051   | 31.849    | -0.208655   | 0.696169   |
| FURIN          | 22.0081   | 26.4799   | 0.266864    | 0.517521   |
| CDADC1         | 2.14253   | 1.58186   | -0.43769    | 0.382171   |
| MTPN           | 33.1741   | 37.813    | 0.188827    | 0.752957   |
| ARL1           | 14.6912   | 16.5949   | 0.175786    | 0.782994   |
| LCT            | 0.0215177 | 0.0194671 | -0.144488   | 1          |
| CCHCR1         | 9.44219   | 5.71159   | -0.72523    | 0.0126858  |
| ELFN1          | 1.87818   | 0.998651  | -0.911286   | 0.0523239  |
| VTA1           | 7.14123   | 7.1705    | 0.00590166  | 0.99714    |
| ZDHHC9         | 14.5204   | 10.3704   | -0.485606   | 0.0865352  |
| PCNXL4         | 11.2893   | 4.84402   | -1.22068    | 0.00134142 |
| ZNF883         | 7.55434   | 6.40992   | -0.236998   | 0.671358   |
| TMEM126B       | 39.0306   | 45.876    | 0.233131    | 0.645533   |
| ANKMY2         | 6.34681   | 5.55984   | -0.190988   | 0.790283   |
| CNTF_ZFP91     | 6.71416   | 7.75783   | 0.208446    | 0.706998   |
| ADIPOR1        | 51.8618   | 48.6457   | -0.0923594  | 0.935062   |
| WTAP           | 36.4673   | 44.7228   | 0.294407    | 0.43457    |
| SH3PXD2A       | 1.21463   | 1.67162   | 0.460724    | 0.183901   |
| YLPM1          | 2.88774   | 3.15088   | 0.125813    | 0.900599   |
| FZD3           | 1.36137   | 1.16776   | -0.221312   | 0.71659    |
| SQSTM1         | 213.17    | 108.196   | -0.97836    | 0.00337323 |
| B3GALT4        | 0.258045  | 0.250615  | -0.0421467  | 1          |
| NTSDC3         | 2.51815   | 3.38075   | 0.424981    | 0.208452   |
| OSBPL10        | 8.13747   | 4.19308   | -0.956571   | 0.00134142 |
| GNAQ           | 0.889601  | 0.786279  | -0.178119   | 0.923433   |
| BTG1.LOC256021 | 16.4215   | 7.02189   | -1.22565    | 0.00134142 |
| HSF1           | 133.498   | 143.52    | 0.104439    | 0.950929   |
| CLDN18         | 0.0402983 | 0.0513859 | 0.350652    | 1          |
| KIFAP3         | 1.82879   | 1.41815   | -0.366878   | 0.528722   |
| CSNK2A2        | 47.6462   | 22.6206   | -1.07472    | 0.00134142 |
| NFKBIE         | 12.4208   | 23.4103   | 0.914383    | 0.00134142 |
| LPPR2          | 17.8107   | 25.5177   | 0.518758    | 0.0757506  |
| EMG1           | 34.8312   | 50.7431   | 0.542831    | 0.0477866  |
| SMIM15         | 14.0597   | 15.2858   | 0.120629    | 0.89937    |
| COMTD1         | 50.0381   | 42.7886   | -0.2258     | 0.740134   |
| C18orf54       | 1.23893   | 1.02822   | -0.268938   | 0.688363   |
| MRPL22         | 13.2043   | 13.0263   | -0.0195784  | 0.992797   |
| TMX4           | 6.67758   | 5.83577   | -0.194404   | 0.793075   |
| ARF6           | 19.589    | 21.1969   | 0.113815    | 0.908114   |
| BEND3          | 1.26583   | 2.73357   | 1.11071     | 0.00134142 |
| C1GALT1        | 3.89673   | 2.71459   | -0.52153    | 0.0792619  |
| CNEP1R1        | 5.69741   | 4.98851   | -0.191696   | 0.81342    |
| CDSN           | 0.102362  | 0.0848642 | -0.270448   | 1          |
| MICALL2        | 2.17467   | 2.59602   | 0.255504    | 0.798828   |
| OSTC           | 76.2337   | 78.455    | 0.041437    | 0.980556   |
| RFX5           | 14.4147   | 13.6472   | -0.078937   | 0.953215   |
| SUPT7L         | 9.84475   | 9.32826   | -0.0777472  | 0.979701   |
| ZNF638         | 4.77453   | 5.41998   | 0.182927    | 0.773641   |
| RAB28          | 10.0196   | 9.84294   | -0.0256673  | 0.990857   |

|              |           |           |            |            |
|--------------|-----------|-----------|------------|------------|
| CCDC138      | 0.895666  | 0.909591  | 0.0222575  | 0.994615   |
| NBPF1        | 0.994334  | 1.00149   | 0.0103485  | 0.997036   |
| PET112       | 14.0045   | 11.9515   | -0.228706  | 0.671358   |
| MID2         | 1.25172   | 1.08853   | -0.201534  | 0.809382   |
| KIAA1217     | 2.29061   | 0.894907  | -1.35592   | 0.00134142 |
| DLEU2L       | 0.201029  | 0.38468   | 0.936255   | 0.747687   |
| CDC42        | 80.477    | 89.6732   | 0.1561     | 0.830662   |
| PM20D2       | 9.61742   | 10.1857   | 0.0828246  | 0.948088   |
| PODXL2       | 50.7179   | 52.3176   | 0.0447997  | 0.979701   |
| STRN3        | 4.72669   | 4.50958   | -0.0678393 | 0.97067    |
| FAM120B      | 3.18412   | 2.5249    | -0.334667  | 0.516224   |
| ZNF155       | 1.42863   | 1.30849   | -0.126727  | 0.942519   |
| MLLT1        | 27.7901   | 37.7369   | 0.441408   | 0.126498   |
| ZBTB46       | 1.86281   | 2.19517   | 0.236852   | 0.958201   |
| STARD13      | 1.3553    | 1.20861   | -0.16526   | 0.877363   |
| H2AFY2       | 17.5916   | 9.04493   | -0.959704  | 0.109152   |
| ZNF446       | 6.80368   | 2.72484   | -1.32014   | 0.00134142 |
| ZBTB43       | 3.91051   | 2.7963    | -0.483838  | 0.126498   |
| AP3S1        | 48.6754   | 42.8782   | -0.182947  | 0.76531    |
| KIAA1644     | 0.0325246 | 0.0184764 | -0.815848  | 1          |
| SLC25A51     | 3.08363   | 3.49475   | 0.180559   | 0.900484   |
| PRRT4        | 11.2406   | 8.27656   | -0.441614  | 0.247003   |
| ASCC1        | 8.09744   | 5.02323   | -0.68885   | 0.369215   |
| PEX19        | 15.2703   | 11.812    | -0.37047   | 0.266297   |
| DBNDD2,SYS1  | 215.727   | 163.254   | -0.402091  | 0.247219   |
| PDE8B        | 0.214822  | 0.177267  | -0.277213  | 1          |
| KRT7         | 3.08597   | 3.11903   | 0.0153771  | 0.99634    |
| TFB1M        | 6.36326   | 4.23628   | -0.58697   | 0.0551188  |
| STT3B        | 8.34309   | 6.55009   | -0.349067  | 0.378002   |
| CCDC97       | 17.0075   | 14.5282   | -0.227314  | 0.657112   |
| ROCK1        | 2.84083   | 3.00888   | 0.0829111  | 0.952905   |
| LOC100130557 | 0.554209  | 0.603083  | 0.121927   | 0.990857   |
| MAPK12       | 58.7727   | 76.4486   | 0.379343   | 0.232929   |
| CERKL        | 0.0261223 | 0.0248164 | -0.0739911 | 1          |
| INSIG2       | 14.0245   | 4.20856   | -1.73655   | 0.00134142 |
| PCOLCE       | 16.4757   | 9.10251   | -0.856001  | 0.00509212 |
| SOBP         | 0.536528  | 1.11911   | 1.06063    | 0.00882987 |
| FGFR1        | 22.2289   | 17.5392   | -0.341851  | 0.315903   |
| PPIL2        | 8.55302   | 9.55318   | 0.159546   | 0.886752   |
| ANKRD13C     | 1.84429   | 1.39672   | -0.401021  | 0.340882   |
| CLTA         | 272.425   | 261.744   | -0.0577009 | 0.973348   |
| MYD88        | 13.7229   | 22.9898   | 0.744407   | 0.00243047 |
| SMIM4        | 72.2363   | 107.86    | 0.578366   | 0.0562227  |
| PNO1         | 13.0794   | 30.1753   | 1.20607    | 0.00134142 |
| TADA3        | 65.7442   | 42.8635   | -0.617114  | 0.342801   |
| POMT1        | 23.2629   | 20.8333   | -0.159141  | 0.950929   |
| PYY2         | 1.05774   | 1.05014   | -0.0104028 | 0.998514   |
| ADAM22       | 0.483199  | 0.410856  | -0.233983  | 0.811724   |
| CTTNBP2NL    | 4.55563   | 3.95061   | -0.205575  | 0.742065   |
| MAFK         | 8.58153   | 11.015    | 0.360158   | 0.637163   |
| NCOA7        | 3.68917   | 2.17729   | -0.760761  | 0.0120701  |
| RNF167       | 55.8492   | 45.4501   | -0.297252  | 0.444143   |
| PTPRU        | 12.7077   | 9.03579   | -0.491978  | 0.0891066  |
| VPS13D       | 0.824528  | 0.800646  | -0.0424052 | 0.984003   |
| LMTK3        | 0.646264  | 0.47099   | -0.456426  | 0.632357   |
| PIP5K1A      | 26.1942   | 23.7971   | -0.138463  | 0.863467   |
| HSD17B6      | 0.53305   | 0.208083  | -1.35711   | 0.0786602  |
| C20orf27     | 126.654   | 186.281   | 0.556582   | 0.0373672  |
| S1PR2        | 5.65935   | 6.33253   | 0.162147   | 0.853057   |
| PLP2         | 463.823   | 446.211   | -0.0558483 | 0.974044   |
| EHD1         | 25.9968   | 48.1634   | 0.889603   | 0.00134142 |
| UBQLN4       | 27.6793   | 33.9008   | 0.292512   | 0.442319   |
| KAT2A        | 36.7857   | 47.1033   | 0.35668    | 0.281587   |
| JKAMP        | 15.2041   | 14.4794   | -0.0704565 | 0.96103    |
| PDS5A        | 7.58001   | 7.23809   | -0.0665903 | 0.967457   |
| SF3B1        | 32.955    | 29.743    | -0.147947  | 0.845125   |
| YIPF3        | 75.3449   | 63.3695   | -0.249721  | 0.574725   |
| CALM1        | 40.0584   | 68.6725   | 0.777625   | 0.00243047 |
| POLR2J       | 117.528   | 126       | 0.100412   | 0.955354   |
| SPA17        | 5.90635   | 4.97144   | -0.248603  | 0.960084   |
| RTKN2        | 0.210561  | 0.100907  | -1.06121   | 1          |
| BCDIN3D      | 2.2625    | 1.9178    | -0.23846   | 0.78079    |
| MFF          | 28.3032   | 19.5267   | -0.535522  | 0.049309   |
| ZNF101       | 2.69012   | 3.23607   | 0.266571   | 0.749348   |
| GOLGA5       | 7.51765   | 6.14178   | -0.291624  | 0.525374   |
| OXSM         | 17.8114   | 13.4623   | -0.403881  | 0.293988   |
| CAND2        | 0.0929408 | 0.154421  | 0.732482   | 1          |
| CLIP4        | 0.0174942 | 0         | #NAME?     | 1          |
| BSDC1        | 18.9343   | 15.6899   | -0.271159  | 0.532218   |

|          |          |           |             |            |
|----------|----------|-----------|-------------|------------|
| ZNF800   | 3.01857  | 3.11563   | 0.0456582   | 0.980556   |
| ATP6V1E1 | 52.184   | 54.732    | 0.0687768   | 0.963219   |
| ABL1     | 34.8997  | 34.6975   | -0.00838372 | 0.997036   |
| C5orf45  | 50.5899  | 29.3726   | -0.784377   | 0.845974   |
| SDF2     | 21.0203  | 19.1409   | -0.135127   | 0.882058   |
| PLEKHH3  | 13.0916  | 11.8383   | -0.145172   | 0.891905   |
| NCKAP1   | 24.7883  | 19.1372   | -0.373281   | 0.244643   |
| DAAM1    | 0.538101 | 0.558576  | 0.0538754   | 0.98468    |
| DNAJC5   | 13.4489  | 17.047    | 0.342036    | 0.305387   |
| SUSD1    | 5.44866  | 5.32034   | -0.0343827  | 0.99351    |
| MGA      | 1.11326  | 1.59628   | 0.519925    | 0.0963541  |
| SLC18A2  | 1.13106  | 1.35225   | 0.257689    | 0.757843   |
| PBK      | 27.7121  | 25.3167   | -0.130428   | 0.882845   |
| MRPL11   | 41.2486  | 48.368    | 0.229708    | 0.631326   |
| ELF4     | 8.78727  | 7.16571   | -0.294305   | 0.48321    |
| GLTP     | 38.4104  | 39.7712   | 0.050226    | 0.977332   |
| PPP6C    | 18.0277  | 17.5902   | -0.035447   | 0.985921   |
| LRRRC57  | 4.01102  | 3.40524   | -0.236216   | 0.754447   |
| KIAA1033 | 2.19035  | 1.58027   | -0.470995   | 0.18514    |
| ABHD12   | 42.3584  | 43.8411   | 0.0496364   | 0.987627   |
| SLC35F5  | 4.08992  | 2.67376   | -0.613206   | 0.064193   |
| WNK1     | 3.45438  | 4.02704   | 0.221295    | 0.67329    |
| NINJ1    | 65.5215  | 59.131    | -0.148054   | 0.845125   |
| SETD7    | 6.66335  | 7.72046   | 0.212439    | 0.691839   |
| FAM89A   | 25.1513  | 32.8892   | 0.386977    | 0.244595   |
| UCK1     | 44.4047  | 57.0646   | 0.361884    | 0.508822   |
| EDC4     | 15.7716  | 18.898    | 0.260899    | 0.539871   |
| ABO      | 0.161997 | 0.0891576 | -0.861542   | 1          |
| FAM105B  | 2.2968   | 3.16146   | 0.460969    | 0.145048   |
| EPHB4    | 35.0128  | 46.3143   | 0.403575    | 0.197427   |
| RFC1     | 8.37171  | 5.61025   | -0.577458   | 0.0326415  |
| MRPL15   | 59.5455  | 68.5637   | 0.203453    | 0.711487   |
| RNF115   | 7.237    | 5.3367    | -0.439444   | 0.278399   |
| TSPAN5   | 3.67628  | 2.04642   | -0.84514    | 0.00882987 |
| CBR1     | 48.5798  | 100.304   | 1.04596     | 0.00134142 |
| PAX9     | 1.70822  | 2.25465   | 0.400411    | 0.485249   |
| WLS      | 38.6989  | 23.0808   | -0.745596   | 0.188729   |
| NDUFB7   | 261.608  | 376.146   | 0.523883    | 0.0501327  |
| PPP2R2A  | 18.4157  | 20.3161   | 0.141688    | 0.8561     |
| LHX3     | 0.400158 | 0.349709  | -0.194414   | 0.956807   |
| MDC1     | 4.71606  | 4.10573   | -0.199942   | 0.739331   |
| FIGF,PIR | 0.757448 | 0.39719   | -0.931317   | 0.153355   |
| CHFR     | 0.30735  | 0.0876616 | -1.80986    | 1          |
| TGM1     | 0.318545 | 0.358985  | 0.172428    | 0.955406   |
| NSMCE1   | 75.3979  | 52.9513   | -0.509857   | 0.0599768  |
| MFSDB    | 1.17674  | 1.48748   | 0.338075    | 0.579748   |
| SDR39U1  | 53.3144  | 47.5726   | -0.164394   | 0.926258   |
| MIS18BP1 | 2.66424  | 2.68353   | 0.0104081   | 0.996284   |
| EDEM1    | 10.4071  | 6.8027    | -0.613383   | 0.0150729  |
| DOCK9    | 0.995075 | 1.03332   | 0.0544139   | 0.979824   |
| TFCP2L1  | 0.998293 | 0.872306  | -0.194628   | 0.830445   |
| PFN1P2   | 0.387509 | 0.773162  | 0.99654     | 0.109497   |
| FBL      | 552.908  | 650.496   | 0.234501    | 0.625      |
| PI4K2A   | 15.2142  | 14.0685   | -0.112946   | 0.909489   |
| HMGNA4   | 49.5195  | 47.8563   | -0.0492877  | 0.97798    |
| TAZ      | 20.7275  | 11.5891   | -0.838783   | 0.827718   |
| DUSP14   | 35.8199  | 48.1352   | 0.426332    | 0.155605   |
| PRPF4B   | 2.85794  | 4.92394   | 0.78484     | 0.00134142 |
| PPFIA3   | 4.53005  | 6.64975   | 0.553774    | 0.0909525  |
| PPP1CB   | 19.7099  | 14.1869   | -0.474357   | 0.0875912  |
| WAC-AS1  | 16.0036  | 20.6631   | 0.368664    | 0.253393   |
| EFNA4    | 31.8604  | 31.0625   | -0.0365888  | 0.996079   |
| SLC41A1  | 12.3139  | 16.923    | 0.4587      | 0.115606   |
| ZBTB1    | 3.97256  | 3.06304   | -0.375105   | 0.331982   |
| PLD6     | 13.8062  | 17.9515   | 0.378781    | 0.281781   |
| TRUB1    | 4.07954  | 4.66531   | 0.193568    | 0.79263    |
| KIF14    | 1.23714  | 1.34883   | 0.124698    | 0.919186   |
| FAM149B1 | 1.47056  | 0.795433  | -0.886557   | 0.0274653  |
| UBE2Q1   | 21.2523  | 28.3681   | 0.416651    | 0.159812   |
| ELOVL7   | 3.88085  | 3.25552   | -0.253483   | 0.655465   |
| SLC7A6OS | 11.2816  | 18.3397   | 0.700996    | 0.236139   |
| TMEM41A  | 9.04368  | 10.6697   | 0.238531    | 0.654969   |
| ACOT2    | 8.93536  | 5.43795   | -0.716461   | 0.0349222  |
| PDIA4    | 74.264   | 85.2989   | 0.199863    | 0.730753   |
| UBN1     | 5.22628  | 6.24969   | 0.258       | 0.575728   |
| BCAP29   | 9.18639  | 9.56811   | 0.0587364   | 0.970195   |
| MED4-AS1 | 3.65481  | 3.85361   | 0.0764171   | 0.995464   |
| RBM15B   | 12.512   | 13.8579   | 0.1474      | 0.874417   |
| ADORA2A  | 1.56712  | 1.73494   | 0.146775    | 0.942472   |

|                      |          |           |             |            |
|----------------------|----------|-----------|-------------|------------|
| NLRC5                | 1.01957  | 1.39013   | 0.44727     | 0.330411   |
| RNF122               | 3.72872  | 2.71421   | -0.458151   | 0.387171   |
| EPB41L4A             | 0.956657 | 1.26563   | 0.403777    | 0.443971   |
| TMEM55A              | 8.61081  | 4.50758   | -0.933794   | 0.00134142 |
| HSDL2                | 15.9181  | 7.95607   | -1.00054    | 0.00134142 |
| GTF3C3               | 11.1191  | 6.9231    | -0.683551   | 0.00593755 |
| EPHX4                | 5.10234  | 4.04478   | -0.335097   | 0.580737   |
| FBXO33               | 2.62878  | 2.53299   | -0.0535563  | 0.979701   |
| ELMSAN1              | 3.1503   | 2.80697   | -0.166476   | 0.847244   |
| RPTOR                | 5.8026   | 7.05539   | 0.282026    | 0.525374   |
| PRDM2                | 2.26455  | 2.25251   | -0.00769088 | 0.99714    |
| AGPAT2               | 291.764  | 348.837   | 0.257751    | 0.565672   |
| SUDS3                | 6.55698  | 6.57707   | 0.00441256  | 0.997527   |
| CCDC103              | 1.371    | 1.90725   | 0.476261    | 0.439804   |
| HLA-DMA              | 0.361225 | 0.206496  | -0.806784   | 0.603292   |
| ALKBH3               | 19.8969  | 15.1257   | -0.395547   | 0.268523   |
| FUNDC1               | 12.5705  | 11.756    | -0.0966364  | 0.948179   |
| GLS                  | 9.512    | 11.5579   | 0.281063    | 0.482736   |
| TRIP6                | 284.24   | 246.577   | -0.205069   | 0.714136   |
| CORIN                | 0.156379 | 0.0944362 | -0.727639   | 1          |
| PCDHA1,PCDHA10,PCDHA | 0.165014 | 0.0689903 | -1.25813    | 1          |
| SUZ12                | 9.60024  | 10.2418   | 0.0933224   | 0.935939   |
| NYAP1                | 1.89461  | 0.822582  | -1.20367    | 0.00593755 |
| LOC100132832         | 0.761289 | 0.602119  | -0.338396   | 0.761735   |
| TCTA                 | 8.93477  | 8.33294   | -0.100604   | 0.942519   |
| STX10                | 94.4431  | 103.54    | 0.132669    | 0.87753    |
| ERICH1               | 9.5279   | 12.1774   | 0.353977    | 0.384992   |
| GPCPD1               | 2.79943  | 1.66857   | -0.74652    | 0.009453   |
| ETS1                 | 25.9851  | 17.0714   | -0.606105   | 0.0139368  |
| SLC46A1              | 5.76454  | 8.56637   | 0.571479    | 0.0410573  |
| PPIP5K2              | 2.39396  | 1.60988   | -0.572446   | 0.0648441  |
| KIAA1211             | 2.66566  | 1.05658   | -1.33509    | 0.00134142 |
| ING3                 | 8.07436  | 4.72604   | -0.772715   | 0.0114515  |
| GSPT2                | 4.41847  | 4.6223    | 0.065066    | 0.974044   |
| DENND4A              | 1.11823  | 0.881855  | -0.342603   | 0.498778   |
| HIAT1                | 12.7972  | 14.3243   | 0.162636    | 0.821056   |
| TUBA8                | 5.85114  | 6.40539   | 0.130568    | 0.915538   |
| ASIC3                | 1.6279   | 1.44368   | -0.173259   | 0.931471   |
| NKIRAS2              | 14.1393  | 13.6956   | -0.0459995  | 0.99351    |
| AASS                 | 5.69188  | 5.3427    | -0.0913349  | 0.942827   |
| EEFSEC               | 15.2355  | 9.68222   | -0.654032   | 0.0240561  |
| TET3                 | 1.09491  | 1.1699    | 0.0955756   | 0.950929   |
| RHEB                 | 85.455   | 79.6576   | -0.101352   | 0.926258   |
| WDR20                | 8.53495  | 10.7398   | 0.331511    | 0.409132   |
| DDX55                | 9.87299  | 11.1194   | 0.171516    | 0.810878   |
| SNX17                | 45.974   | 49.0951   | 0.0947598   | 0.943351   |
| HIST2H2BC            | 7.65246  | 8.80471   | 0.202351    | 0.909694   |
| NADKD1               | 3.32503  | 3.06621   | -0.11691    | 0.928069   |
| IFNLR1               | 1.60907  | 1.64235   | 0.0295399   | 0.991094   |
| RSL24D1              | 133.576  | 89.8742   | -0.571681   | 0.0322484  |
| CNN2                 | 131.149  | 126.462   | -0.0524957  | 0.976618   |
| NR2F6                | 111.135  | 183.538   | 0.723765    | 0.00509212 |
| GLE1                 | 33.1933  | 23.868    | -0.475816   | 0.0860016  |
| RAB40B               | 11.4764  | 16.2088   | 0.498107    | 0.131385   |
| STAU1                | 31.3075  | 33.6466   | 0.103956    | 0.923433   |
| SCAND1               | 167.809  | 179.757   | 0.0992261   | 0.930956   |
| MAGEF1               | 33.1847  | 46.7528   | 0.494535    | 0.0786602  |
| CHCHD7               | 21.7081  | 28.1832   | 0.376603    | 0.277735   |
| NDUFAF6              | 9.46508  | 19.455    | 1.03946     | 0.00134142 |
| B4GALNT3             | 2.11468  | 4.04691   | 0.936383    | 0.00337323 |
| MEF2D                | 10.1909  | 6.43047   | -0.664284   | 0.0139368  |
| KEAP1                | 39.3165  | 58.311    | 0.568635    | 0.0231741  |
| RMND1                | 28.941   | 17.2038   | -0.750391   | 0.00134142 |
| PPRC1                | 11.539   | 17.1309   | 0.570079    | 0.0318033  |
| ATG4D                | 19.9645  | 24.8733   | 0.317156    | 0.819455   |
| ZNF397               | 1.64466  | 1.05738   | -0.637296   | 0.482196   |
| DDX56                | 37.2221  | 70.3544   | 0.91848     | 0.00134142 |
| LPCAT2               | 2.04803  | 1.68478   | -0.281672   | 0.613093   |
| SLC10A3              | 30.1835  | 40.8846   | 0.437799    | 0.156302   |
| INSIG1               | 14.3772  | 18.1686   | 0.337667    | 0.369215   |
| VPS26B               | 16.4874  | 17.6885   | 0.101455    | 0.926446   |
| TMEM147              | 204.051  | 289.69    | 0.50558     | 0.0715857  |
| SLC38A5              | 180.812  | 193.004   | 0.0941362   | 0.938194   |
| RAB3GAP1             | 8.82049  | 6.66692   | -0.403837   | 0.180085   |
| SH3GLB1              | 9.12349  | 7.7138    | -0.242143   | 0.602446   |
| RSL1D1               | 67.2191  | 72.2564   | 0.104254    | 0.928268   |
| YAF2                 | 2.61945  | 2.72049   | 0.0545987   | 0.979701   |
| HPRT1                | 73.0434  | 67.1925   | -0.120453   | 0.899883   |
| MAZ                  | 130.242  | 184.085   | 0.499175    | 0.0909525  |

|          |          |          |             |            |
|----------|----------|----------|-------------|------------|
| STX8     | 47.2145  | 37.7765  | -0.321742   | 0.412458   |
| PTPN2    | 19.4724  | 20.3026  | 0.0602308   | 0.970195   |
| ZNF137P  | 0.337787 | 0.252164 | -0.421749   | 1          |
| RAC1     | 106.978  | 114.145  | 0.0935549   | 0.934345   |
| COPB2    | 22.037   | 21.6404  | -0.0262006  | 0.98972    |
| AAK1     | 0.955734 | 0.889    | -0.104427   | 0.92969    |
| FKBP4    | 68.9722  | 117.332  | 0.766512    | 0.00134142 |
| FICD     | 0.675149 | 0.508849 | -0.407969   | 0.795219   |
| CADM4    | 13.8364  | 13.7149  | -0.0127164  | 0.99584    |
| RANBP3   | 24.2127  | 36.5323  | 0.593409    | 0.0227017  |
| GSE1     | 5.57797  | 3.56346  | -0.64646    | 0.0200038  |
| PRPF39   | 6.28613  | 7.52739  | 0.259978    | 0.882523   |
| CDH20    | 0.172062 | 0.181401 | 0.0762585   | 1          |
| BCORL1   | 2.6905   | 3.38198  | 0.329995    | 0.450569   |
| GID4     | 3.68847  | 2.96239  | -0.316258   | 0.520122   |
| SLC25A12 | 3.88191  | 4.1767   | 0.105596    | 0.932231   |
| TYW3     | 9.61566  | 13.5225  | 0.491909    | 0.266383   |
| GINM1    | 15.0223  | 10.3529  | -0.53707    | 0.0924793  |
| APPL1    | 3.76863  | 3.28613  | -0.197651   | 0.755277   |
| MIER1    | 6.33932  | 5.15614  | -0.298036   | 0.505095   |
| NAMPT    | 20.562   | 20.4375  | -0.00876654 | 0.997036   |
| AXIN1    | 30.1046  | 32.335   | 0.103115    | 0.919921   |
| SLC25A11 | 71.9857  | 73.4254  | 0.0285706   | 0.987896   |
| ABCG4    | 1.44645  | 2.68296  | 0.891307    | 0.0217078  |
| CSTF1    | 13.3425  | 13.1788  | -0.0178063  | 0.99351    |
| PRADC1   | 16.6075  | 25.5192  | 0.61975     | 0.0357572  |
| GADD45G  | 2.14921  | 1.30142  | -0.723721   | 0.407592   |
| ZNF593   | 146.221  | 304.71   | 1.05929     | 0.00134142 |
| SMARCE1  | 35.6577  | 32.6036  | -0.129181   | 0.882845   |
| SMARCC2  | 15.5545  | 10.5222  | -0.563893   | 0.0283563  |
| ROMO1    | 452.408  | 570.103  | 0.333596    | 0.456016   |
| CERS5    | 28.933   | 25.9602  | -0.156413   | 0.831797   |
| UBXN2B   | 6.70218  | 5.76436  | -0.217471   | 0.691625   |
| STAMBPL1 | 3.79001  | 4.82074  | 0.347054    | 0.495862   |
| TMEM39B  | 17.5429  | 16.7272  | -0.068694   | 0.967901   |
| NIPAL1   | 0.147079 | 0.276718 | 0.911824    | 1          |
| HHLA3    | 33.1398  | 26.7872  | -0.307018   | 0.515524   |
| DCPS     | 33.4218  | 28.9751  | -0.205975   | 0.732235   |
| CSDA     | 138.743  | 168.362  | 0.279156    | 0.503513   |
| PARP8    | 2.34611  | 1.76021  | -0.414524   | 0.234962   |
| PGP      | 10.9567  | 27.0778  | 1.30529     | 0.00134142 |
| PPM1L    | 0.313701 | 0.286162 | -0.132558   | 1          |
| CCDC109B | 35.6732  | 24.5955  | -0.536449   | 0.0551188  |
| INTS8    | 14.2372  | 10.009   | -0.508365   | 0.180085   |
| TBC1D22A | 13.8452  | 8.48285  | -0.706768   | 0.009453   |
| LPAR2    | 17.1652  | 12.4868  | -0.459082   | 0.181616   |
| FASTK    | 48.4004  | 49.7885  | 0.0407912   | 0.982703   |
| BYSL     | 37.7198  | 66.2304  | 0.812173    | 0.00134142 |
| GBAP1    | 0.959438 | 0.665226 | -0.528345   | 0.948088   |
| SELK     | 60.9404  | 62.8598  | 0.0447375   | 0.979733   |
| WDR75    | 9.34026  | 11.0869  | 0.247315    | 0.610107   |
| SIPA1L3  | 2.83293  | 4.18727  | 0.563716    | 0.0718958  |
| TM9SF4   | 15.7288  | 14.2304  | -0.144431   | 0.850795   |
| MAML1    | 5.92924  | 6.23506  | 0.072555    | 0.961224   |
| VKORC1   | 372.423  | 293.408  | -0.344034   | 0.317328   |
| RPUSD1   | 78.5807  | 165.858  | 1.0777      | 0.00134142 |
| ATXN10   | 21.26    | 19.699   | -0.110024   | 0.913628   |
| TRAF7    | 31.8341  | 27.3608  | -0.218464   | 0.768947   |
| MST1P2   | 0.733737 | 0.281644 | -1.38139    | 0.0531423  |
| WDR48    | 5.61825  | 4.62426  | -0.280899   | 0.541215   |
| GNPDA2   | 4.14112  | 3.26341  | -0.34364    | 0.516801   |
| GLMN     | 4.94824  | 7.06245  | 0.513254    | 0.367602   |
| FANCL    | 8.18731  | 8.74287  | 0.0947166   | 0.959465   |
| C1orf109 | 6.74208  | 10.7459  | 0.672519    | 0.0145499  |
| RNFT1    | 7.59458  | 5.92703  | -0.35766    | 0.386369   |
| C12orf52 | 23.3631  | 34.1816  | 0.548992    | 0.0414844  |
| STRADA   | 12.9969  | 9.65624  | -0.42863    | 0.223398   |
| GULP1    | 2.49887  | 1.35913  | -0.878593   | 0.00882987 |
| GATC     | 8.3709   | 12.0011  | 0.519709    | 0.737796   |
| RNPEP    | 34.7606  | 31.4912  | -0.142502   | 0.855793   |
| C11orf84 | 46.3235  | 83.7826  | 0.854906    | 0.00134142 |
| DHRS13   | 35.9196  | 19.0261  | -0.91679    | 0.00134142 |
| AMMECR1L | 6.42459  | 5.99022  | -0.100996   | 0.930066   |
| TWF2     | 111.401  | 96.139   | -0.212567   | 0.678263   |
| STUB1    | 57.6038  | 83.6378  | 0.53799     | 0.320834   |
| HSP90B1  | 102.032  | 116.401  | 0.190088    | 0.760181   |
| JARID2   | 2.15455  | 1.6127   | -0.417907   | 0.338717   |
| ADAR     | 21.2124  | 25.3468  | 0.25689     | 0.576306   |
| HERPUD2  | 6.5254   | 4.14223  | -0.655658   | 0.0283563  |

|              |           |           |            |            |
|--------------|-----------|-----------|------------|------------|
| PGGT1B       | 4.3414    | 3.35153   | -0.37334   | 0.371379   |
| SH3RF3       | 0.912177  | 1.41129   | 0.629628   | 0.14313    |
| TOB2         | 15.7929   | 16.8144   | 0.0904187  | 0.940338   |
| LOC728554    | 27.7702   | 26.3419   | -0.0761796 | 0.95534    |
| PROCR        | 170.974   | 180.127   | 0.0752316  | 0.957925   |
| UBE2D2       | 35.5528   | 35.9413   | 0.0156783  | 0.99351    |
| RP9          | 14.0488   | 15.525    | 0.144147   | 0.87753    |
| STRN4        | 47.927    | 46.0918   | -0.0563289 | 0.974169   |
| MAPKAPK2     | 34.1508   | 41.9148   | 0.295544   | 0.425069   |
| LOC100132707 | 0.87451   | 0.879489  | 0.00819089 | 0.999124   |
| PIK3CB       | 2.79965   | 3.41172   | 0.285253   | 0.557793   |
| CCNYL1       | 2.79965   | 4.01612   | 0.520555   | 0.207647   |
| USP42        | 2.53485   | 3.0853    | 0.28351    | 0.602221   |
| ARFGAP3      | 7.33327   | 8.15452   | 0.153143   | 0.860963   |
| CCNB1        | 52.9792   | 87.6966   | 0.727095   | 0.00425224 |
| PAX6         | 0.0957016 | 0.08683   | -0.140349  | 1          |
| IP6K2        | 59.4336   | 38.9762   | -0.608684  | 0.0235476  |
| MAFG-AS1     | 6.78397   | 7.78335   | 0.198262   | 0.830662   |
| C17orf96     | 24.702    | 44.3072   | 0.84291    | 0.00134142 |
| FIS1         | 189.88    | 242.552   | 0.353206   | 0.286255   |
| BRD8         | 12.053    | 10.3766   | -0.216059  | 0.693347   |
| CTNNA1       | 31.6515   | 28.9366   | -0.129378  | 0.877363   |
| CSPP1        | 2.09437   | 2.99122   | 0.51422    | 0.116242   |
| MUTYH        | 11.176    | 8.18674   | -0.44905   | 0.721775   |
| CARM1        | 48.2724   | 48.9319   | 0.0195751  | 0.993379   |
| PHLPP2       | 1.43631   | 2.23405   | 0.637292   | 0.0200038  |
| EXT1         | 13.7028   | 8.05733   | -0.766096  | 0.00337323 |
| ZNF706       | 39.7455   | 44.9683   | 0.178118   | 0.773127   |
| KLF16        | 51.5949   | 87.0249   | 0.7542     | 0.00134142 |
| VAC14        | 28.4947   | 25.5365   | -0.158133  | 0.82313    |
| CENPI        | 0.578788  | 0.526006  | -0.137956  | 0.95534    |
| ZNF330       | 27.9727   | 24.6045   | -0.185099  | 0.75896    |
| TAF8         | 4.8032    | 5.11479   | 0.0906789  | 0.947511   |
| HIPK1        | 2.45349   | 2.75584   | 0.167655   | 0.832021   |
| LZIC         | 10.3383   | 7.12298   | -0.537448  | 0.108427   |
| EIF2S3       | 93.234    | 92.193    | -0.0161996 | 0.99351    |
| FAM60A       | 30.1766   | 31.2421   | 0.0500627  | 0.977332   |
| TTC8         | 5.57973   | 4.66303   | -0.258928  | 0.664752   |
| ALG9         | 3.88202   | 3.04643   | -0.34969   | 0.374906   |
| GABARAPL2    | 104.536   | 85.9943   | -0.281682  | 0.475849   |
| RNF19B       | 11.0657   | 7.64835   | -0.532875  | 0.0860016  |
| C2orf81      | 3.91587   | 1.56061   | -1.32722   | 0.00134142 |
| SNAPC2       | 59.4595   | 58.3725   | -0.0266195 | 0.989748   |
| C7orf73      | 13.2635   | 12.4463   | -0.09175   | 0.946257   |
| RNU6ATAC     | 37.5275   | 36.6168   | -0.0354459 | 0.995709   |
| CHMP5        | 34.0319   | 21.9957   | -0.629665  | 0.010797   |
| GXYLT2       | 0.67796   | 0.231897  | -1.54772   | 0.0504457  |
| LINC00857    | 0.97835   | 0.607117  | -0.688376  | 0.217848   |
| MIA3         | 4.21882   | 3.05607   | -0.465164  | 0.109152   |
| RLIM         | 4.31447   | 3.51094   | -0.297325  | 0.432653   |
| NKD1         | 1.13211   | 0.790834  | -0.51757   | 0.188097   |
| LITAF        | 28.9974   | 31.8378   | 0.134815   | 0.869078   |
| NEIL2        | 22.8353   | 21.9936   | -0.0541852 | 0.976214   |
| LIPE         | 3.53474   | 3.17341   | -0.15557   | 0.897072   |
| SH2B3        | 11.784    | 16.1685   | 0.456352   | 0.116841   |
| MIER3        | 1.77617   | 1.8724    | 0.076123   | 0.972374   |
| PPP1R13B     | 2.51709   | 2.93549   | 0.221842   | 0.752528   |
| EPS15L1      | 13.1695   | 12.6284   | -0.0605257 | 0.970346   |
| KANK1        | 2.17637   | 3.08745   | 0.504492   | 0.126367   |
| SEC22C       | 7.80343   | 7.14291   | -0.127598  | 0.974044   |
| DPH3         | 3.34536   | 6.37715   | 0.930752   | 0.00134142 |
| CCNB3        | 0.46952   | 0.148847  | -1.65735   | 0.119072   |
| ACTR10       | 13.5533   | 10.6389   | -0.349298  | 0.343608   |
| CHRN1        | 37.3941   | 17.2625   | -1.11517   | 0.00134142 |
| ERBB3        | 5.05585   | 4.36243   | -0.212823  | 0.912767   |
| PEX7         | 8.28523   | 5.00656   | -0.726722  | 0.0306129  |
| DEXI         | 30.3064   | 46.7986   | 0.62684    | 0.0178668  |
| UBALD2       | 96.9328   | 40.7368   | -1.25065   | 0.00134142 |
| CLPB         | 6.37004   | 7.04841   | 0.145997   | 0.882107   |
| GSG1         | 0.0394024 | 0.0825388 | 1.06679    | 1          |
| SLC38A2      | 37.7232   | 36.8703   | -0.032994  | 0.986832   |
| BAG5         | 5.68628   | 7.76389   | 0.449294   | 0.137767   |
| FAM53A       | 3.09846   | 2.21701   | -0.482938  | 0.364638   |
| CDC14B       | 4.30875   | 2.8524    | -0.595094  | 0.0474163  |
| TMED4        | 39.2081   | 34.7331   | -0.174839  | 0.812317   |
| PEF1         | 36.2001   | 43.2562   | 0.256914   | 0.58482    |
| IKZF3        | 0.0175838 | 0.0250045 | 0.507945   | 1          |
| VDAC3        | 108.287   | 126.474   | 0.223982   | 0.657176   |
| SORT1        | 5.76803   | 5.72092   | -0.0118324 | 0.995302   |



|                           |          |          |            |            |
|---------------------------|----------|----------|------------|------------|
| ANAPC5                    | 46.6074  | 44.2467  | -0.0749917 | 0.956807   |
| APEX2                     | 22.4282  | 28.3187  | 0.336438   | 0.352755   |
| STK39                     | 9.3927   | 6.77973  | -0.470311  | 0.126498   |
| SPSB1                     | 15.6393  | 10.4038  | -0.588067  | 0.0331269  |
| C5AR1                     | 0.311274 | 0.36559  | 0.232039   | 0.926423   |
| CAPRN1                    | 36.1796  | 31.7035  | -0.190532  | 0.747331   |
| SP2                       | 4.33815  | 3.75814  | -0.20706   | 0.806389   |
| MIR663A                   | 886.349  | 651.911  | -0.4432    | 0.866035   |
| ZNF138                    | 2.86349  | 1.84193  | -0.636552  | 0.0749663  |
| UBE2W                     | 4.69707  | 4.18372  | -0.166974  | 0.836371   |
| MPLKIP                    | 25.8372  | 19.9357  | -0.374096  | 0.358532   |
| RTFDC1                    | 49.0846  | 49.6339  | 0.0160552  | 0.99351    |
| ARL5A                     | 11.2204  | 12.7413  | 0.183389   | 0.772177   |
| ITPKA                     | 34.4692  | 45.682   | 0.406319   | 0.234115   |
| SCRN3                     | 1.78473  | 1.06292  | -0.747666  | 0.0407579  |
| SAMD9                     | 0.191296 | 0.170945 | -0.162268  | 1          |
| FLJ33630                  | 0.93592  | 0.421376 | -1.15128   | 0.009453   |
| AGA                       | 2.29542  | 1.34502  | -0.771135  | 0.0592084  |
| LDLRAP1                   | 9.67898  | 11.0637  | 0.192911   | 0.773687   |
| PPAT                      | 7.42632  | 11.3917  | 0.61726    | 0.0178668  |
| OCIAD2                    | 277.869  | 205.852  | -0.432797  | 0.148094   |
| PKD2                      | 1.66427  | 1.45264  | -0.196214  | 0.827718   |
| SF3B3                     | 23.5068  | 21.2929  | -0.142708  | 0.851892   |
| PHACTR2                   | 1.78651  | 1.79129  | 0.00385575 | 0.997736   |
| OARD1                     | 12.3123  | 6.40127  | -0.943677  | 0.00337323 |
| TRAPPC13                  | 5.64304  | 4.88817  | -0.207179  | 0.881073   |
| ARHGAP8,PRR5,PRR5-AR1     | 30.3911  | 58.4223  | 0.942871   | 0.00134142 |
| GALNT7                    | 3.84745  | 3.72017  | -0.0485345 | 0.979701   |
| GHDC                      | 16.115   | 11.3986  | -0.49954   | 0.0997646  |
| NDUFV1                    | 171.682  | 162.795  | -0.0766807 | 0.956807   |
| GNPAT                     | 17.6839  | 15.3744  | -0.201911  | 0.771183   |
| BTBD7                     | 2.91591  | 3.24747  | 0.155369   | 0.893663   |
| STAT3                     | 8.92398  | 9.92982  | 0.154079   | 0.8433     |
| KIAA1161                  | 1.27453  | 1.88671  | 0.565906   | 0.227652   |
| NUDT19                    | 15.9721  | 21.9919  | 0.461424   | 0.113441   |
| EXOSC4                    | 113.986  | 239.466  | 1.07096    | 0.00134142 |
| SKAP2                     | 4.21196  | 1.86243  | -1.1773    | 0.00134142 |
| SLMO1                     | 7.5075   | 4.2464   | -0.822094  | 0.021138   |
| POLR1B                    | 8.26411  | 12.7667  | 0.627453   | 0.0126858  |
| DACT3                     | 2.18609  | 2.04695  | -0.0948809 | 0.990857   |
| C2orf42                   | 2.37988  | 2.53063  | 0.0886083  | 0.962439   |
| MAMSTR                    | 1.05852  | 1.81307  | 0.776391   | 0.202476   |
| TSPAN3                    | 45.2711  | 36.2543  | -0.320439  | 0.372209   |
| PPIG                      | 7.61309  | 9.0428   | 0.248287   | 0.624011   |
| TCEAL3                    | 16.0719  | 10.9592  | -0.552406  | 0.0924793  |
| FAM175B                   | 4.88222  | 4.60344  | -0.0848228 | 0.955758   |
| NDUFA6                    | 65.3157  | 64.0982  | -0.0271467 | 0.989268   |
| CHEK1                     | 11.9019  | 8.52244  | -0.481851  | 0.109906   |
| KHK                       | 7.73094  | 14.4902  | 0.906358   | 0.0485415  |
| ISOC1                     | 8.16252  | 13.0413  | 0.676002   | 0.0139368  |
| FAM204A                   | 11.4234  | 11.2989  | -0.0158103 | 0.99351    |
| PPM1F                     | 12.0641  | 19.0267  | 0.657313   | 0.00882987 |
| TMBIM1                    | 69.1596  | 61.1263  | -0.178138  | 0.818667   |
| TMEM145                   | 28.0526  | 25.6088  | -0.131493  | 0.890355   |
| GTF2F1                    | 56.4104  | 57.0867  | 0.0171948  | 0.99351    |
| MTX3                      | 1.55909  | 1.17632  | -0.406426  | 0.292855   |
| SNX29                     | 0.475045 | 0.389858 | -0.285117  | 0.761735   |
| CDC34                     | 127.288  | 170.572  | 0.422282   | 0.163378   |
| CPD                       | 4.10315  | 3.47222  | -0.240872  | 0.617065   |
| AZIN1                     | 28.786   | 29.2933  | 0.0252016  | 0.990324   |
| TICAM1                    | 16.2591  | 20.4067  | 0.327796   | 0.387536   |
| C7orf55,C7orf55-LUC7L2,LL | 45.4426  | 43.7505  | -0.0547439 | 0.979701   |
| PMVK                      | 26.7794  | 30.2807  | 0.177275   | 0.80896    |
| ARID1B                    | 2.99939  | 2.32892  | -0.365009  | 0.326714   |
| LPGAT1                    | 5.05711  | 4.78434  | -0.0799928 | 0.954677   |
| C10orf114                 | 8.64315  | 7.70493  | -0.165776  | 0.88709    |
| MRPL52                    | 70.5249  | 104.454  | 0.566665   | 0.0357572  |
| SNORA24                   | 19.1541  | 28.726   | 0.584706   | 0.982143   |
| GTDC2                     | 9.4242   | 13.6919  | 0.538879   | 0.0868006  |
| VWCE                      | 0.478408 | 0.750246 | 0.649121   | 0.317439   |
| SCRIB                     | 35.6179  | 60.682   | 0.768665   | 0.00134142 |
| PELP1                     | 19.5158  | 24.4572  | 0.325613   | 0.360219   |
| ATRIP,TREX1               | 5.6071   | 7.05411  | 0.331209   | 0.489231   |
| CUTC                      | 16.583   | 15.2654  | -0.11944   | 0.978188   |
| NDUFA4                    | 72.7278  | 80.4128  | 0.144918   | 0.852163   |
| WDR81                     | 13.0595  | 18.2158  | 0.480088   | 0.108981   |
| SYNJ2                     | 1.10477  | 1.58695  | 0.522503   | 0.162218   |
| TRAPPC3                   | 65.0202  | 80.164   | 0.302067   | 0.453509   |
| RNF125                    | 2.12049  | 1.05329  | -1.0095    | 0.00134142 |

|              |           |            |            |            |
|--------------|-----------|------------|------------|------------|
| IFNGR2       | 41.2906   | 49.4395    | 0.259854   | 0.66915    |
| DNAJC30      | 10.9189   | 12.0169    | 0.138239   | 0.885255   |
| SNX1         | 5.9559    | 6.35669    | 0.0939557  | 0.932468   |
| TBC1D2B      | 3.42271   | 4.59108    | 0.423696   | 0.213201   |
| FBN1         | 0.0160193 | 0.00625407 | -1.35694   | 1          |
| ATF1         | 6.90519   | 6.21749    | -0.151347  | 0.862445   |
| DNAJC18      | 2.08269   | 1.50073    | -0.472781  | 0.213335   |
| APPBP2       | 3.10712   | 2.31249    | -0.42613   | 0.208364   |
| CBFB         | 17.4377   | 25.0696    | 0.523735   | 0.0569429  |
| EIF4EBP2     | 4.74433   | 4.9961     | 0.0745977  | 0.958814   |
| CREBL2       | 5.69143   | 3.72819    | -0.610315  | 0.0382315  |
| ALG12        | 6.98295   | 7.80595    | 0.160739   | 0.871312   |
| CHMP2A       | 110.652   | 94.8995    | -0.221552  | 0.660278   |
| KBTD2        | 8.33078   | 7.18065    | -0.214338  | 0.691951   |
| METTL2A      | 10.2574   | 11.2876    | 0.138079   | 0.876899   |
| SETD2        | 2.70919   | 2.8553     | 0.0757796  | 0.958814   |
| LTB4R,LTB4R2 | 3.95218   | 5.69768    | 0.527723   | 0.462301   |
| STK10        | 6.98444   | 8.38217    | 0.26318    | 0.563967   |
| GGPS1        | 8.80345   | 5.19124    | -0.76199   | 0.00337323 |
| WNT5B        | 0.05556   | 0          | #NAME?     | 1          |
| PPFIBP1      | 3.64416   | 2.62658    | -0.472399  | 0.1419     |
| MROH8        | 0.0958436 | 0.023441   | -2.03165   | 1          |
| ZC3HAV1      | 5.85712   | 10.2639    | 0.809313   | 0.00425224 |
| LHFPL4       | 0.965526  | 0.724988   | -0.413358  | 0.541876   |
| TNFSF14      | 0.0414541 | 0.0169799  | -1.28769   | 1          |
| CDC7         | 2.42741   | 3.20604    | 0.401379   | 0.330501   |
| MRPL33       | 134.531   | 160.32     | 0.253017   | 0.600828   |
| KIAA1143     | 8.33944   | 7.0569     | -0.240916  | 0.617065   |
| PAF1         | 17.0873   | 22.3253    | 0.385759   | 0.229047   |
| MARS2        | 7.71278   | 10.6195    | 0.4614     | 0.148987   |
| RAPGEF1      | 18.5307   | 19.5189    | 0.0749602  | 0.956296   |
| CASP10       | 0.974018  | 0.580971   | -0.745483  | 0.0485415  |
| HSCB         | 21.2517   | 18.0557    | -0.235124  | 0.685616   |
| MICALL1      | 22.0486   | 29.1633    | 0.403471   | 0.193966   |
| FTSJD2       | 10.1366   | 9.3953     | -0.109559  | 0.918361   |
| ZDHHC7       | 12.4086   | 15.352     | 0.307088   | 0.436187   |
| ASB7         | 2.44569   | 2.15547    | -0.182238  | 0.871759   |
| SETMAR       | 5.73204   | 6.39838    | 0.158657   | 0.896116   |
| ZNF684       | 1.01635   | 1.23428    | 0.28027    | 0.78079    |
| CPSF7        | 16.3651   | 18.4504    | 0.173024   | 0.801139   |
| WSB2         | 19.7057   | 21.6841    | 0.138026   | 0.866805   |
| EHD4         | 15.8839   | 19.7761    | 0.31619    | 0.402402   |
| ZBED4        | 4.02522   | 3.80547    | -0.0809945 | 0.956373   |
| CTNNB1       | 55.3806   | 53.7729    | -0.042501  | 0.979733   |
| DISC1,TSNAX  | 9.89082   | 8.4458     | -0.227856  | 0.663653   |
| OGFOD1       | 13.5163   | 20.5078    | 0.601474   | 0.0240561  |
| UBAC1        | 40.9003   | 48.2804    | 0.239326   | 0.614283   |
| IMPAD1       | 10.8364   | 15.433     | 0.510125   | 0.066512   |
| PIH1D2       | 1.19593   | 1.39289    | 0.219949   | 0.97725    |
| GPKOW        | 10.002    | 8.52714    | -0.230158  | 0.673171   |
| EZR          | 71.8915   | 75.6361    | 0.0732539  | 0.958201   |
| SPRED1       | 3.37537   | 2.5729     | -0.391649  | 0.255557   |
| MFHAS1       | 1.64514   | 1.46506    | -0.167242  | 0.896464   |
| TTC12        | 5.58957   | 2.95144    | -0.921318  | 0.00134142 |
| RPL13AP20    | 2.39533   | 2.2874     | -0.0665187 | 0.987693   |
| U2AF1L4      | 3.08484   | 2.88983    | -0.0942101 | 0.977531   |
| TOP3A        | 4.11692   | 4.93174    | 0.260532   | 0.62201    |
| NEO1         | 6.60937   | 3.89321    | -0.763554  | 0.00134142 |
| MYCBP2       | 1.46799   | 1.82027    | 0.310316   | 0.41953    |
| MBD3         | 65.375    | 131.68     | 1.01022    | 0.00134142 |
| ELP6         | 26.7907   | 31.596     | 0.238008   | 0.646443   |
| LOC100506314 | 0.643071  | 0.713499   | 0.149934   | 0.990857   |
| PLEKHG2      | 6.38121   | 5.7504     | -0.15017   | 0.848943   |
| RRN3P1       | 5.27746   | 4.30522    | -0.293757  | 0.62883    |
| BRSK1        | 9.68844   | 8.3756     | -0.210071  | 0.760508   |
| TBC1D2       | 10.7248   | 12.5546    | 0.227266   | 0.716439   |
| MEA1         | 143.51    | 157.256    | 0.131971   | 0.919029   |
| SIKE1        | 4.30885   | 3.56709    | -0.272555  | 0.556185   |
| SMG8         | 6.17902   | 7.89321    | 0.353235   | 0.342898   |
| CCDC19       | 0.167649  | 0.199947   | 0.254174   | 1          |
| EIF2AK4      | 8.14857   | 6.80403    | -0.260158  | 0.556835   |
| NMB          | 34.4333   | 48.2057    | 0.485399   | 0.131385   |
| ARHGAP27     | 6.8328    | 6.34079    | -0.107814  | 0.937542   |
| PNMA1        | 23.0639   | 26.0748    | 0.177021   | 0.784978   |
| RRS1         | 38.4941   | 101.41     | 1.39749    | 0.00134142 |
| VDAC1        | 146.64    | 171.332    | 0.224512   | 0.655528   |
| VPS35        | 15.2561   | 12.1354    | -0.330164  | 0.354308   |
| CTCF         | 11.679    | 15.0574    | 0.366557   | 0.274963   |
| MCM3AP       | 8.32352   | 9.3261     | 0.164079   | 0.812317   |

|              |          |           |            |            |
|--------------|----------|-----------|------------|------------|
| NDST1        | 4.43734  | 7.26502   | 0.711272   | 0.00509212 |
| NTMT1        | 144.677  | 159.46    | 0.140357   | 0.952905   |
| RFPL3S       | 1.93419  | 2.0048    | 0.0517288  | 0.987693   |
| MYO1C        | 47.567   | 46.7195   | -0.0259383 | 0.98972    |
| ODF2L        | 2.94878  | 1.9938    | -0.564599  | 0.0813633  |
| MRPL19       | 7.60385  | 8.29893   | 0.126196   | 0.883961   |
| ZCCHC10      | 4.25402  | 5.41309   | 0.347626   | 0.42745    |
| DIS3L        | 3.56677  | 3.27038   | -0.125161  | 0.920694   |
| HES1         | 22.252   | 16.157    | -0.461779  | 0.182485   |
| THOC1        | 8.34284  | 10.5254   | 0.335268   | 0.397773   |
| SARS2        | 16.2246  | 16.7184   | 0.0432563  | 0.993379   |
| EIF4E2       | 41.7155  | 47.7962   | 0.196313   | 0.740319   |
| ZBTB26       | 0.922971 | 0.474994  | -0.958376  | 0.0648441  |
| ZNFX1        | 2.15837  | 3.81489   | 0.8217     | 0.714085   |
| PRKAB1       | 10.3846  | 10.0495   | -0.0473217 | 0.979701   |
| APOBEC3F     | 3.3      | 1.58448   | -1.05845   | 0.169924   |
| ZNF227       | 3.61397  | 3.07208   | -0.234369  | 0.723055   |
| SEPT11       | 14.6101  | 18.6954   | 0.355722   | 0.281159   |
| RHPN2        | 4.42799  | 4.88253   | 0.140975   | 0.891331   |
| JMJ8         | 53.3951  | 77.8023   | 0.543106   | 0.169001   |
| RNF4         | 18.1424  | 26.2679   | 0.533937   | 0.0507992  |
| TMEM97       | 26.5599  | 47.3175   | 0.833124   | 0.00134142 |
| SLC7A5P2     | 0.485986 | 0.495187  | 0.0270606  | 0.994978   |
| C11orf58     | 26.082   | 26.3317   | 0.0137478  | 0.994615   |
| PLK1S1       | 5.71656  | 1.97477   | -1.53347   | 0.00134142 |
| HIPK3        | 0.406718 | 0.389608  | -0.062006  | 0.985921   |
| PSIP1        | 29.0176  | 21.8459   | -0.409566  | 0.245718   |
| SLC35A3      | 2.49744  | 1.73481   | -0.525673  | 0.114654   |
| NANP         | 2.62089  | 2.58065   | -0.0223238 | 0.993108   |
| SCAMP1       | 6.29866  | 4.51905   | -0.479026  | 0.0944715  |
| SOC57        | 2.13067  | 2.35549   | 0.144718   | 0.881073   |
| GOLGA3       | 5.55993  | 8.72631   | 0.650307   | 0.00882987 |
| DCAF4        | 9.42921  | 13.3319   | 0.499678   | 0.118183   |
| TM9SF1       | 19.5078  | 20.3002   | 0.0574483  | 0.973683   |
| CHD5         | 0.043382 | 0.0364499 | -0.251182  | 1          |
| NPAT         | 1.38666  | 1.22645   | -0.177131  | 0.845969   |
| ZNF738       | 0.684708 | 0.825376  | 0.269563   | 0.649163   |
| COX10        | 7.98914  | 7.83946   | -0.0272856 | 0.990857   |
| MRE11A       | 1.82145  | 0.953417  | -0.933911  | 0.00425224 |
| CAMK1        | 33.2623  | 28.5121   | -0.222312  | 0.776787   |
| CASKIN1      | 12.4111  | 13.7288   | 0.145573   | 0.95534    |
| PKD1P1       | 17.0434  | 18.8768   | 0.147401   | 0.849892   |
| HSPBAP1      | 6.10705  | 3.0274    | -1.0124    | 0.00243047 |
| RBM23        | 26.2223  | 37.3996   | 0.512232   | 0.0554961  |
| ZNF320       | 2.22516  | 2.14495   | -0.0529636 | 0.979701   |
| STK38        | 5.56366  | 7.55635   | 0.441654   | 0.165169   |
| ACTN4        | 51.4335  | 61.9178   | 0.267647   | 0.604298   |
| ICK          | 2.08181  | 1.14987   | -0.856364  | 0.00593755 |
| EMD          | 132.463  | 113.745   | -0.219781  | 0.664504   |
| UQCRH        | 917.717  | 975.79    | 0.0885205  | 0.945946   |
| TP53111      | 14.4143  | 9.64797   | -0.579206  | 0.036526   |
| HMG20A       | 7.06186  | 5.13179   | -0.460585  | 0.144914   |
| S100A2       | 578.95   | 750.337   | 0.374098   | 0.258219   |
| ALDH3A2      | 8.41547  | 7.93032   | -0.0856658 | 0.949303   |
| TROVE2       | 5.79562  | 4.56277   | -0.345055  | 0.89239    |
| LOC100499227 | 1.21321  | 1.25062   | 0.0438119  | 0.991459   |
| IPO7         | 11.4784  | 14.1489   | 0.301774   | 0.415129   |
| CYB5R4       | 3.94938  | 3.46887   | -0.187161  | 0.833863   |
| PKP4         | 8.46406  | 7.15611   | -0.242173  | 0.622154   |
| TPPP3        | 0.235642 | 0.0567652 | -2.05352   | 1          |
| ORAI1        | 36.6575  | 45.9876   | 0.327137   | 0.405491   |
| FOCAD        | 2.10929  | 1.29144   | -0.707773  | 0.0283563  |
| GNL3         | 64.6865  | 90.0803   | 0.477747   | 0.302567   |
| DIABLO       | 43.5282  | 45.2566   | 0.0561782  | 0.972601   |
| CCDC171      | 0.469958 | 0.258476  | -0.862501  | 0.0806848  |
| CSNK1G3      | 6.24214  | 5.67956   | -0.136261  | 0.885616   |
| SNHG16       | 130.004  | 136.405   | 0.0693391  | 0.961224   |
| UBA1         | 97.7133  | 113.37    | 0.214412   | 0.686761   |
| GTF3A        | 113.131  | 133.324   | 0.236946   | 0.674163   |
| TRIM62       | 3.16003  | 3.60862   | 0.191508   | 0.832722   |
| MED31        | 7.79943  | 11.6367   | 0.577247   | 0.674803   |
| KTN1         | 13.6197  | 16.3168   | 0.260657   | 0.581562   |
| HMBOX1       | 0.871304 | 0.43605   | -0.998684  | 0.0278845  |
| USP45        | 1.13094  | 1.18394   | 0.0660781  | 0.976214   |
| LARP4B       | 8.80739  | 11.4254   | 0.375463   | 0.234115   |
| SLC25A41     | 1.32885  | 1.42847   | 0.104291   | 0.97355    |
| PPP1R9B      | 17.5541  | 29.4816   | 0.748006   | 0.00243047 |
| MTMR1        | 3.59399  | 4.65965   | 0.374634   | 0.401852   |
| WNK2         | 6.29394  | 7.55329   | 0.263142   | 0.600983   |

|              |           |          |            |            |
|--------------|-----------|----------|------------|------------|
| CDCA7        | 19.7833   | 24.3273  | 0.298296   | 0.44532    |
| STK24        | 35.2364   | 29.2513  | -0.268568  | 0.507003   |
| PIN4         | 12.0105   | 10.2672  | -0.226254  | 0.851892   |
| TGOLN2       | 14.9458   | 13.7993  | -0.115148  | 0.909016   |
| AGO1         | 3.33207   | 3.90763  | 0.229875   | 0.674625   |
| RBM39        | 45.2938   | 50.4074  | 0.154322   | 0.834115   |
| PLEKHJ1      | 112.091   | 111.27   | -0.0106006 | 0.996079   |
| FAM108C1     | 9.33227   | 14.4408  | 0.629847   | 0.0227017  |
| STK35        | 7.06657   | 9.09097  | 0.363425   | 0.285653   |
| SRRM2-AS1    | 0.295571  | 0.143122 | -1.04626   | 1          |
| ZNF605       | 1.50063   | 1.65365  | 0.140078   | 0.900578   |
| EIF2B2       | 19.4158   | 27.236   | 0.488286   | 0.0870955  |
| SCARA3       | 12.589    | 11.0849  | -0.183567  | 0.78079    |
| KDEL1        | 295.07    | 243.53   | -0.276959  | 0.507441   |
| FBA1         | 7.34522   | 8.49438  | 0.209704   | 0.900578   |
| BPGM         | 4.59172   | 6.0241   | 0.391711   | 0.37535    |
| TRPC4AP      | 39.8598   | 41.2972  | 0.0511081  | 0.978196   |
| BRE          | 34.1501   | 17.8217  | -0.938255  | 0.00134142 |
| PATZ1        | 20.0464   | 22.6835  | 0.178299   | 0.793038   |
| MTHFSD       | 5.37146   | 4.07456  | -0.398668  | 0.348322   |
| MICA         | 29.7207   | 40.8993  | 0.460607   | 0.102959   |
| ARHGEF18     | 9.50368   | 11.0793  | 0.221302   | 0.671719   |
| SMG7         | 8.89171   | 10.094   | 0.182964   | 0.771863   |
| GTPBP10      | 3.72421   | 3.186    | -0.22519   | 0.666593   |
| ATL3         | 10.9626   | 10.7964  | -0.0220297 | 0.991767   |
| MECOM        | 2.11445   | 1.36636  | -0.627896  | 0.0658487  |
| LNX1         | 0.0889732 | 0.117289 | 0.398627   | 1          |
| RABEP2       | 22.6255   | 37.4766  | 0.728042   | 0.00593755 |
| MPP5         | 4.05287   | 3.94868  | -0.0375716 | 0.985921   |
| HSPA5        | 261.913   | 256.011  | -0.0328774 | 0.987858   |
| GADD45GIP1   | 231.835   | 309.537  | 0.417018   | 0.162218   |
| IL13RA1      | 7.63309   | 7.07554  | -0.109428  | 0.919029   |
| IL10RB       | 22.0126   | 10.7921  | -1.02835   | 0.00134142 |
| HPSE         | 2.6383    | 2.11867  | -0.316449  | 0.5155     |
| FCHO1        | 8.08256   | 9.10695  | 0.172156   | 0.843815   |
| SMAD1        | 3.71106   | 3.04705  | -0.284421  | 0.63573    |
| GPR108       | 40.7286   | 35.4355  | -0.200849  | 0.722558   |
| C2CD5        | 4.14987   | 3.07724  | -0.431428  | 0.212961   |
| SYNR2        | 106.896   | 172.874  | 0.693514   | 0.00425224 |
| DR1          | 17.0517   | 18.1812  | 0.0925286  | 0.936621   |
| PCDHB7       | 0.640884  | 0.325204 | -0.978717  | 0.0718958  |
| ZMYND19      | 85.2857   | 163.734  | 0.940977   | 0.00134142 |
| C1orf35      | 32.8492   | 51.092   | 0.63724    | 0.0231741  |
| NCK2         | 18.7799   | 20.3345  | 0.114741   | 0.918471   |
| PDE7A        | 1.91152   | 1.89648  | -0.0114018 | 0.996284   |
| RABAC1       | 143.587   | 146.693  | 0.0308742  | 0.987627   |
| WHSC1        | 13.1394   | 10.9346  | -0.264995  | 0.537947   |
| TAMM41       | 7.32682   | 9.35771  | 0.352969   | 0.477566   |
| ZRANB1       | 4.28739   | 3.5817   | -0.259455  | 0.615468   |
| LYSMD3       | 2.25518   | 1.6273   | -0.470759  | 0.208276   |
| ARRB2        | 98.7918   | 83.5469  | -0.241805  | 0.605975   |
| MDH1         | 100.104   | 95.6767  | -0.0652562 | 0.966946   |
| SMARCD1      | 23.5398   | 29.6834  | 0.334552   | 0.326421   |
| NDC80        | 11.3813   | 7.34966  | -0.630915  | 0.0245451  |
| FAM65A       | 20.3664   | 24.0391  | 0.23919    | 0.608559   |
| KPNA3        | 7.13281   | 10.5382  | 0.563081   | 0.0354094  |
| BAP1         | 24.6381   | 31.6544  | 0.361516   | 0.274527   |
| GRINA        | 354.255   | 360.867  | 0.0266813  | 0.98972    |
| ADSS         | 10.4073   | 11.1437  | 0.0986331  | 0.92969    |
| METTTL25     | 0.599427  | 0.678904 | 0.179624   | 0.986822   |
| ACSL4        | 9.71255   | 7.6377   | -0.346713  | 0.311376   |
| COL18A1      | 2.91368   | 6.18781  | 1.08659    | 0.00134142 |
| LOC100505812 | 1.74336   | 1.61362  | -0.111571  | 0.97814    |
| ARHGEF5      | 4.02864   | 4.32137  | 0.101196   | 0.937403   |
| NUP210       | 15.8274   | 13.2266  | -0.258982  | 0.556835   |
| WBP2         | 141.416   | 74.1952  | -0.930551  | 0.00134142 |
| CNNM3        | 7.76266   | 11.0777  | 0.513041   | 0.0792619  |
| TAB2         | 8.89276   | 6.75962  | -0.39569   | 0.207506   |
| LIMK1        | 21.414    | 16.7917  | -0.350803  | 0.308645   |
| PPA1         | 188.514   | 208.217  | 0.143419   | 0.8561     |
| LGALS8       | 7.61194   | 4.16248  | -0.870823  | 0.0784289  |
| MRPS5        | 39.4594   | 50.1941  | 0.347147   | 0.29367    |
| LRRC8C       | 4.21878   | 3.93347  | -0.101022  | 0.930066   |
| FBXO6        | 17.3815   | 13.1782  | -0.399405  | 0.2998     |
| DPY19L2P3    | 0.2354    | 0.137884 | -0.771661  | 1          |
| FAIM         | 6.66497   | 10.0388  | 0.590912   | 0.0925999  |
| ISOC2        | 87.1551   | 134.198  | 0.622705   | 0.0217078  |
| FBXO18       | 20.7987   | 19.4426  | -0.0972715 | 0.946274   |
| SLC9A7       | 4.90327   | 3.29189  | -0.574826  | 0.0306129  |

|                |           |            |             |            |
|----------------|-----------|------------|-------------|------------|
| PROM1          | 0.0167076 | 0.00406147 | -2.04043    | 1          |
| LRRC45         | 10.068    | 10.0111    | -0.0081708  | 0.997036   |
| C18orf21       | 20.4995   | 17.3652    | -0.239393   | 0.68423    |
| NSDHL          | 24.451    | 35.9993    | 0.558075    | 0.036221   |
| PMAIP1         | 12.1654   | 7.67291    | -0.664936   | 0.0250278  |
| NMRAL1         | 39.3492   | 29.9239    | -0.395039   | 0.748333   |
| UBR3           | 1.81187   | 2.43742    | 0.427872    | 0.218942   |
| GMCL1          | 1.72297   | 1.5763     | -0.12835    | 0.942519   |
| TMEM14A        | 24.6864   | 20.5558    | -0.264167   | 0.598254   |
| PRPS2          | 28.5009   | 25.5873    | -0.155582   | 0.827857   |
| MED16          | 29.6322   | 27.4333    | -0.111239   | 0.91437    |
| RREB1          | 2.86683   | 2.64919    | -0.113907   | 0.925147   |
| ME3            | 9.42292   | 8.9523     | -0.0739158  | 0.965929   |
| RAD21          | 60.6938   | 46.9096    | -0.371667   | 0.249612   |
| GPR137C        | 0.103476  | 0.0902508  | -0.197287   | 1          |
| EFNB2          | 1.24356   | 1.45558    | 0.227121    | 0.802689   |
| NSD1           | 2.05741   | 2.35729    | 0.196302    | 0.750701   |
| FAM118A        | 5.62833   | 5.52112    | -0.0277465  | 0.990857   |
| KRAS           | 4.82294   | 4.52065    | -0.093382   | 0.943036   |
| LOC550112      | 6.5514    | 3.16201    | -1.05096    | 0.00134142 |
| CDK2AP2        | 52.5489   | 61.8507    | 0.23513     | 0.658298   |
| ASNSD1         | 16.9432   | 21.1569    | 0.320423    | 0.377326   |
| TOR3A          | 19.2331   | 41.9891    | 1.12642     | 0.00134142 |
| H2AFV          | 43.5795   | 41.294     | -0.0777173  | 0.961563   |
| VWA5B2         | 3.2321    | 1.25852    | -1.36075    | 0.471406   |
| C17orf80       | 2.94969   | 3.76786    | 0.353185    | 0.407645   |
| ZNF341         | 1.76079   | 2.47561    | 0.491561    | 0.312197   |
| UVSSA          | 1.0527    | 0.480853   | -1.13042    | 0.00882987 |
| SKP1           | 110.791   | 135.439    | 0.289802    | 0.462141   |
| ZMYND8         | 2.16697   | 1.321      | -0.714046   | 0.0470437  |
| TRMT2A         | 16.133    | 23.133     | 0.519938    | 0.274249   |
| IL27RA         | 9.29389   | 21.2726    | 1.19464     | 0.00134142 |
| ZNF808         | 0.467252  | 0.317143   | -0.559068   | 0.393354   |
| KIF7           | 8.19583   | 15.672     | 0.935224    | 0.0132924  |
| UNC93B1        | 35.0559   | 27.4028    | -0.35533    | 0.300705   |
| FN3KRP         | 15.2795   | 12.7636    | -0.25956    | 0.617065   |
| PARG           | 3.90821   | 4.28456    | 0.132641    | 0.909694   |
| LOC388796      | 127.179   | 162.684    | 0.355216    | 0.298162   |
| GPD1L          | 3.03364   | 5.80302    | 0.935754    | 0.00134142 |
| STAG1          | 3.50739   | 3.68796    | 0.0724252   | 0.963549   |
| UBAP1          | 20.9142   | 16.929     | -0.304987   | 0.462141   |
| LARP1          | 24.5282   | 34.3757    | 0.486951    | 0.0906031  |
| TRIM5          | 2.36811   | 1.28353    | -0.883624   | 0.010797   |
| SPCS1          | 165.447   | 166.681    | 0.0107256   | 0.997036   |
| IQCG           | 10.5525   | 17.6751    | 0.744135    | 0.934181   |
| LAPTM4A        | 94.9169   | 74.0204    | -0.358742   | 0.285784   |
| HOXB6          | 5.91757   | 7.91286    | 0.419195    | 0.549068   |
| RAB7L1         | 8.58975   | 8.92162    | 0.0546904   | 0.975734   |
| SNIP1          | 4.06051   | 3.82621    | -0.0857429  | 0.954559   |
| INPP5F         | 5.08832   | 5.00345    | -0.0242662  | 0.99451    |
| HDAC7          | 17.9362   | 24.347     | 0.440869    | 0.261459   |
| CHUK           | 3.1727    | 6.59255    | 1.05513     | 0.00134142 |
| ASB16-AS1      | 5.27268   | 4.42611    | -0.252499   | 0.811389   |
| ERC1           | 2.4495    | 2.33555    | -0.0687265  | 0.966946   |
| SNX8           | 16.165    | 13.3803    | -0.272769   | 0.516969   |
| CBWD3,CBWD5    | 1.77326   | 2.4257     | 0.451997    | 0.395255   |
| BPNT1          | 9.14528   | 7.25205    | -0.334639   | 0.931816   |
| POLDIP2        | 56.8617   | 60.0039    | 0.0775997   | 0.959465   |
| DNMBP          | 1.70465   | 1.39827    | -0.285825   | 0.622505   |
| GLYCTK         | 8.92367   | 6.96783    | -0.356928   | 0.494676   |
| TRIM7          | 13.6409   | 23.447     | 0.781467    | 0.0222212  |
| MAN2B2         | 10.9106   | 8.7092     | -0.325118   | 0.386953   |
| LOC550643      | 89.9104   | 93.3644    | 0.0543845   | 0.976214   |
| CCDC142,MRPL53 | 102.981   | 122.495    | 0.250344    | 0.7578     |
| KIF23          | 10.9261   | 11.0621    | 0.0178501   | 0.99351    |
| PINK1          | 19.8117   | 20.2445    | 0.0311742   | 0.987627   |
| RYK            | 18.2246   | 18.1328    | -0.00727841 | 0.997036   |
| HOXA5          | 9.14957   | 10.491     | 0.197375    | 0.932297   |
| C10orf2        | 20.5555   | 35.1653    | 0.774624    | 0.00509212 |
| PTCD3          | 10.4397   | 9.8146     | -0.0890759  | 0.942472   |
| MRPS7          | 42.1735   | 56.4502    | 0.420641    | 0.446323   |
| UGDH           | 6.80209   | 10.9737    | 0.690006    | 0.0126858  |
| CTDSP1         | 48.287    | 41.4659    | -0.219707   | 0.668862   |
| SUN1           | 16.8873   | 14.4112    | -0.22875    | 0.647944   |
| TLL4           | 6.49665   | 7.6587     | 0.237402    | 0.637231   |
| DMAP1          | 16.8309   | 21.4714    | 0.351303    | 0.377473   |
| KHDRBS1        | 88.8536   | 76.6665    | -0.212834   | 0.693258   |
| ATF7IP2        | 1.53934   | 1.56935    | 0.0278494   | 0.991767   |
| ZNF74          | 7.89751   | 8.34897    | 0.0802      | 0.957925   |

|           |          |            |            |            |
|-----------|----------|------------|------------|------------|
| SOD2      | 32.8076  | 53.3745    | 0.702119   | 0.010797   |
| DMWD      | 10.5131  | 10.7532    | 0.0325883  | 0.988019   |
| SEL1L     | 4.36177  | 3.47131    | -0.329435  | 0.363804   |
| LOC645513 | 2.21748  | 2.02839    | -0.128583  | 0.979484   |
| FBXO7     | 71.3007  | 63.24      | -0.17308   | 0.790283   |
| MIB1      | 1.97741  | 1.14511    | -0.788124  | 0.00134142 |
| ELMO2     | 4.6401   | 5.33198    | 0.200516   | 0.769235   |
| MYB       | 1.20396  | 1.79245    | 0.574147   | 0.174284   |
| RBM27     | 2.87173  | 2.97961    | 0.053202   | 0.977696   |
| GNS       | 9.80353  | 6.84548    | -0.518149  | 0.0576801  |
| C2orf69   | 4.22568  | 4.98817    | 0.239327   | 0.666069   |
| MSL3P1    | 4.98998  | 4.83851    | -0.0444712 | 0.984917   |
| ABCC10    | 1.97962  | 4.29224    | 1.11651    | 0.00134142 |
| NOTCH1    | 7.21708  | 12.6655    | 0.811421   | 0.00134142 |
| PRKCD     | 14.4234  | 17.703     | 0.295579   | 0.463191   |
| VRK3      | 12.0903  | 8.67236    | -0.479352  | 0.154481   |
| VIPR1     | 0.813973 | 0.414998   | -0.971877  | 0.0810244  |
| AP3B1     | 5.83512  | 3.58672    | -0.702097  | 0.0120701  |
| PPARD     | 11.2338  | 12.9715    | 0.207502   | 0.726892   |
| FBXL12    | 13.2251  | 12.1454    | -0.122872  | 0.916838   |
| ARRB1     | 4.82404  | 6.59757    | 0.451692   | 0.128873   |
| GMEB1     | 1.74513  | 1.15699    | -0.592951  | 0.194841   |
| KAT6B     | 1.16304  | 1.04649    | -0.152343  | 0.890666   |
| BAI2      | 3.06754  | 3.32342    | 0.115585   | 0.935939   |
| SNX9      | 12.2085  | 9.01303    | -0.437803  | 0.139454   |
| DYNLL1    | 306.957  | 583.177    | 0.925899   | 0.00134142 |
| NCOA5     | 10.4018  | 14.6895    | 0.497947   | 0.0799746  |
| ZFYVE16   | 1.38895  | 1.35856    | -0.0319218 | 0.989365   |
| PIGH      | 16.503   | 18.8975    | 0.195467   | 0.820869   |
| PPAP2A    | 10.4911  | 8.54925    | -0.295294  | 0.90486    |
| C1QTNF1   | 11.1643  | 12.0003    | 0.104185   | 0.931822   |
| TWF1      | 28.2315  | 27.2557    | -0.0507477 | 0.977103   |
| AUH       | 7.84884  | 6.82634    | -0.201367  | 0.791404   |
| LSM2      | 114.823  | 135.194    | 0.235619   | 0.621802   |
| MIF4GD    | 26.8317  | 16.6849    | -0.685394  | 0.547916   |
| IFT20     | 28.1526  | 27.6842    | -0.0242041 | 0.996079   |
| HGS       | 86.9723  | 59.9808    | -0.536057  | 0.0515434  |
| HCG18     | 1.41296  | 1.95518    | 0.468585   | 0.691659   |
| GNPNAT1   | 20.6745  | 27.645     | 0.419166   | 0.170566   |
| KIAA1377  | 0.079765 | 0.0388756  | -1.03689   | 1          |
| WBP11     | 27.4318  | 27.85      | 0.0218281  | 0.991767   |
| NUP214    | 8.05895  | 7.26798    | -0.149037  | 0.845726   |
| ARHGAP11B | 0.926282 | 1.01086    | 0.126064   | 0.969075   |
| TNK1      | 10.4993  | 10.1793    | -0.0446639 | 0.99351    |
| PRR3      | 5.45616  | 9.26273    | 0.763552   | 0.514922   |
| MTRF1     | 2.67012  | 2.84535    | 0.0917011  | 0.958814   |
| FUBP3     | 20.587   | 25.6954    | 0.319773   | 0.3703     |
| RELL1     | 6.48868  | 5.90045    | -0.1371    | 0.881688   |
| EFCAB10   | 0.682531 | 0.664244   | -0.0391821 | 0.980556   |
| ARNTL     | 4.43449  | 2.79492    | -0.665958  | 0.0439989  |
| UCK2      | 23.6528  | 34.7437    | 0.55474    | 0.78908    |
| GLUD1     | 40.0338  | 34.971     | -0.195063  | 0.737545   |
| RABL5     | 7.83256  | 7.16287    | -0.128946  | 0.90731    |
| COPRS     | 118.601  | 163.822    | 0.466007   | 0.0976197  |
| RCN2      | 26.0287  | 24.4761    | -0.0887285 | 0.942269   |
| EPB41L4B  | 4.96063  | 5.84011    | 0.235471   | 0.674163   |
| CIAPIN1   | 25.1156  | 39.8281    | 0.665204   | 0.0562227  |
| C1orf131  | 5.67485  | 5.70577    | 0.00783917 | 0.998526   |
| KRTCAP2   | 366.211  | 355.87     | -0.0413267 | 0.979944   |
| YIPF6     | 4.8781   | 4.09452    | -0.252624  | 0.589726   |
| SRGIN1    | 0.498039 | 0.292837   | -0.76616   | 0.161153   |
| POP4      | 13.8757  | 20.2249    | 0.543574   | 0.0439989  |
| PCLO      | 0.01766  | 0.00962525 | -0.875586  | 1          |
| RALB      | 20.0524  | 18.8686    | -0.087787  | 0.947008   |
| USP39     | 33.0485  | 35.9703    | 0.122224   | 0.915538   |
| UQCR11    | 83.4316  | 111.842    | 0.422793   | 0.158976   |
| MARC2     | 5.0406   | 3.91218    | -0.365624  | 0.507441   |
| TM2D2     | 8.88691  | 9.51338    | 0.0982767  | 0.933023   |
| C2orf27A  | 0.510106 | 0.344228   | -0.567432  | 0.685308   |
| UNC45A    | 34.6573  | 35.7959    | 0.046634   | 0.979733   |
| MYSM1     | 1.43077  | 1.24719    | -0.198114  | 0.795698   |
| NOTCH2    | 4.56934  | 4.81519    | 0.0756048  | 0.95534    |
| SPDL1     | 3.37109  | 4.31425    | 0.355895   | 0.430177   |
| TTL12     | 55.9827  | 66.2824    | 0.243645   | 0.591478   |
| GPLD1     | 0.34249  | 0.426921   | 0.317907   | 0.731968   |
| FBXO8     | 4.0444   | 1.67119    | -1.27505   | 0.009453   |
| NUBPL     | 1.55255  | 1.11852    | -0.473054  | 0.333252   |
| UQCRRFS1  | 130.125  | 186.629    | 0.520276   | 0.049309   |
| IFT74     | 2.84314  | 1.78429    | -0.672137  | 0.691839   |

|           |           |           |            |            |
|-----------|-----------|-----------|------------|------------|
| SMARCAD1  | 2.31668   | 2.59133   | 0.161638   | 0.866932   |
| TP53BP2   | 11.5504   | 8.74937   | -0.400694  | 0.200542   |
| NDUFA11   | 485.792   | 597.292   | 0.298099   | 0.440427   |
| ABHD4     | 8.52979   | 5.12759   | -0.734229  | 0.0145499  |
| ZC3H8     | 10.0206   | 9.00352   | -0.154415  | 0.858101   |
| TOMM40L   | 9.20775   | 16.4311   | 0.835507   | 0.00243047 |
| RPRD1A    | 10.1218   | 11.2396   | 0.151124   | 0.837677   |
| CPPED1    | 1.31428   | 1.64876   | 0.327113   | 0.509535   |
| MAP3K11   | 20.114    | 27.5769   | 0.455257   | 0.129076   |
| YTHDC1    | 5.4669    | 4.83381   | -0.177562  | 0.788441   |
| MAU2      | 7.12967   | 4.68324   | -0.60633   | 0.0336095  |
| AFMID     | 19.1822   | 17.1751   | -0.159453  | 0.873414   |
| KIAA0368  | 18.6551   | 18.0906   | -0.044326  | 0.979701   |
| CBLL1     | 6.19639   | 5.56822   | -0.154214  | 0.845125   |
| CPSF3L    | 79.3223   | 71.6959   | -0.145836  | 0.885301   |
| HLCS      | 2.86538   | 2.55047   | -0.167958  | 0.835721   |
| NAT9      | 27.8648   | 38.377    | 0.461795   | 0.113208   |
| POLB      | 24.1923   | 18.4604   | -0.390116  | 0.242534   |
| GAS8      | 4.59745   | 3.56012   | -0.36891   | 0.490137   |
| GSTZ1     | 25.2736   | 18.0412   | -0.486338  | 0.118183   |
| MTMR9     | 1.34938   | 1.37174   | 0.0237071  | 0.991938   |
| PRDX5     | 390.033   | 373.03    | -0.064306  | 0.968067   |
| YTHDF3    | 7.91259   | 6.50204   | -0.283257  | 0.488907   |
| FLNB      | 9.81502   | 6.7947    | -0.530581  | 0.0451064  |
| SF3B2     | 87.7153   | 93.6289   | 0.0941253  | 0.935062   |
| CALR      | 517.179   | 766.327   | 0.567295   | 0.0547855  |
| DEF8      | 45.1127   | 88.7141   | 0.975629   | 0.00337323 |
| LINC00662 | 0.787239  | 0.550095  | -0.517122  | 0.557685   |
| ERP44     | 17.527    | 14.9478   | -0.229646  | 0.638092   |
| CD63      | 635.351   | 662.025   | 0.0593321  | 0.971854   |
| SMG6      | 12.1739   | 12.8742   | 0.0806917  | 0.954677   |
| CFLAR     | 3.71269   | 3.01932   | -0.298244  | 0.851127   |
| MX1       | 7.85685   | 8.20872   | 0.0632064  | 0.971854   |
| KIF11     | 8.92288   | 7.78809   | -0.19624   | 0.734977   |
| NCK1      | 6.72661   | 5.62531   | -0.257947  | 0.666392   |
| DDX23     | 22.0553   | 40.4606   | 0.87539    | 0.00134142 |
| ME2       | 14.6313   | 14.0858   | -0.0548078 | 0.974044   |
| VBP1      | 29.2182   | 33.1919   | 0.183964   | 0.757982   |
| SLC35E4   | 11.1829   | 20.4505   | 0.870849   | 0.00134142 |
| DGKG      | 2.24884   | 2.32547   | 0.0483406  | 0.980177   |
| GRAMD1A   | 77.1666   | 48.6095   | -0.666739  | 0.00882987 |
| TUG1      | 8.29556   | 8.51983   | 0.0384854  | 0.982349   |
| APTX      | 17.846    | 20.6137   | 0.208005   | 0.721025   |
| S100A6    | 2333.21   | 3063.05   | 0.392655   | 0.264199   |
| GCLC      | 6.51584   | 6.5489    | 0.0073026  | 0.997036   |
| ARF1      | 303.089   | 357.619   | 0.238685   | 0.619231   |
| EXOC3     | 12.69     | 11.6548   | -0.122767  | 0.906892   |
| GLRX5     | 51.0116   | 94.4651   | 0.888956   | 0.00134142 |
| NKAPP1    | 0.469269  | 0.282365  | -0.732857  | 0.291851   |
| THEM6     | 84.6445   | 109.072   | 0.365797   | 0.263965   |
| SUFU      | 4.29796   | 4.64366   | 0.111609   | 0.933242   |
| ZKSCAN8   | 0.259925  | 0.239363  | -0.118895  | 1          |
| C9orf116  | 21.0634   | 21.5167   | 0.0307192  | 0.990857   |
| ARGLU1    | 37.7867   | 54.0669   | 0.516866   | 0.0481547  |
| CARD10    | 8.17716   | 7.97683   | -0.0357849 | 0.986822   |
| KLHL36    | 11.7667   | 6.14384   | -0.937494  | 0.00243047 |
| PTRH1     | 71.0244   | 84.3716   | 0.248442   | 0.646166   |
| RAB2A     | 26.6238   | 24.7259   | -0.106694  | 0.919029   |
| TMEM237   | 3.7544    | 4.07709   | 0.118957   | 0.912689   |
| UBA3      | 14.9226   | 13.9086   | -0.101518  | 0.92969    |
| MED24     | 22.6061   | 27.7601   | 0.296305   | 0.441032   |
| PTCD2     | 2.43383   | 1.84032   | -0.403273  | 0.480572   |
| ANAPC4    | 5.94759   | 6.78742   | 0.190559   | 0.789041   |
| ENOPH1    | 19.4475   | 23.8881   | 0.29671    | 0.445736   |
| C19orf24  | 122.121   | 179.71    | 0.557365   | 0.0331269  |
| HLA-L     | 0.0163424 | 0.0174964 | 0.0984422  | 1          |
| ZNF777    | 15.7732   | 16.6501   | 0.0780562  | 0.956657   |
| FBXO25    | 16.6738   | 9.957     | -0.743796  | 0.00509212 |
| SLBP      | 49.018    | 62.1003   | 0.341287   | 0.315059   |
| ADRA2C    | 16.8972   | 13.1411   | -0.362699  | 0.448101   |
| PTGR1     | 76.941    | 61.1496   | -0.331411  | 0.337762   |
| GSKIP     | 5.26159   | 5.48656   | 0.0604016  | 0.976618   |
| GUSBP11   | 4.02947   | 4.23412   | 0.0714751  | 0.972572   |
| DPY19L4   | 4.38038   | 2.79871   | -0.646293  | 0.0167292  |
| FAM213A   | 18.0845   | 14.4859   | -0.320107  | 0.415129   |
| CCNK      | 19.0893   | 14.6415   | -0.382698  | 0.697381   |
| CST3      | 241.777   | 287.798   | 0.251379   | 0.568874   |
| PISD      | 22.6795   | 36.3037   | 0.678727   | 0.0270114  |
| ARFGAP1   | 30.4429   | 41.811    | 0.457777   | 0.112939   |

|                       |          |          |            |            |
|-----------------------|----------|----------|------------|------------|
| CYSTM1                | 87.8158  | 73.9483  | -0.247963  | 0.585481   |
| KLHL23,PHOSPHO2,PHOSI | 6.96035  | 9.0581   | 0.380048   | 0.431019   |
| ETFA                  | 105.205  | 101.336  | -0.0540647 | 0.976214   |
| ECT2                  | 10.2017  | 11.1121  | 0.123316   | 0.898084   |
| IMPA2                 | 30.1838  | 21.0214  | -0.521918  | 0.0817307  |
| NMD3                  | 12.1178  | 10.9292  | -0.14894   | 0.845971   |
| CMPK1                 | 28.4717  | 31.3836  | 0.140481   | 0.857872   |
| ERF                   | 26.5779  | 39.8928  | 0.585899   | 0.0235476  |
| SPRTN                 | 1.7675   | 2.90296  | 0.715808   | 0.0318033  |
| KCTD10                | 11.1271  | 12.0807  | 0.118625   | 0.902703   |
| SAFB2                 | 12.8416  | 19.5793  | 0.608504   | 0.0227017  |
| ZGLP1                 | 1.84763  | 2.60686  | 0.496637   | 0.37859    |
| CA5BP1                | 12.0964  | 17.5392  | 0.536005   | 0.148987   |
| DNAJC8                | 84.8097  | 100.421  | 0.243757   | 0.605597   |
| PTP4A2                | 45.9515  | 47.2695  | 0.0407992  | 0.981753   |
| EXOSC10               | 22.8656  | 22.2274  | -0.0408388 | 0.979814   |
| PIK3R2                | 28.6184  | 37.3154  | 0.382828   | 0.231628   |
| ZNF697                | 1.8175   | 1.81954  | 0.00161573 | 0.999214   |
| FGFBP3                | 2.0233   | 2.03453  | 0.00798339 | 0.99714    |
| XP06                  | 33.1573  | 42.9703  | 0.374014   | 0.253296   |
| SKP2                  | 8.88731  | 12.371   | 0.477142   | 0.221303   |
| CEP63                 | 1.85852  | 1.29749  | -0.518432  | 0.83481    |
| CDKN2AIPNL            | 32.0155  | 29.3866  | -0.123613  | 0.902188   |
| TMEM69                | 40.8828  | 28.4517  | -0.522979  | 0.0608269  |
| SF3B14                | 258.713  | 319.705  | 0.305386   | 0.409068   |
| MAP2K1                | 46.7979  | 40.5264  | -0.207581  | 0.713308   |
| INO80E                | 68.3516  | 83.2843  | 0.285069   | 0.606953   |
| TEX10                 | 35.3106  | 37.616   | 0.0912475  | 0.939091   |
| RALBP1                | 16.3375  | 12.295   | -0.410113  | 0.182099   |
| C11orf74              | 10.3911  | 4.613    | -1.17158   | 0.00134142 |
| IFITM2                | 575.34   | 638.321  | 0.149867   | 0.845726   |
| APRT                  | 236.805  | 290.826  | 0.296458   | 0.45016    |
| WDR11                 | 3.9966   | 3.00979  | -0.409107  | 0.244055   |
| PINX1                 | 13.2637  | 22.276   | 0.748006   | 0.00509212 |
| TMEM9B                | 17.0169  | 21.8158  | 0.358402   | 0.302329   |
| NLK                   | 2.69799  | 3.73604  | 0.469629   | 0.188259   |
| YME1L1                | 26.5682  | 23.0293  | -0.206235  | 0.716439   |
| MLLT10                | 9.04373  | 8.66393  | -0.0618953 | 0.984033   |
| ZC3HC1                | 19.6818  | 19.4997  | -0.0134108 | 0.994615   |
| TTC39A                | 4.81695  | 2.24625  | -1.1006    | 0.00134142 |
| NAPG                  | 4.48553  | 4.85392  | 0.113874   | 0.920766   |
| POC1A                 | 17.8335  | 15.431   | -0.208754  | 0.724812   |
| CUTA                  | 325.879  | 279.101  | -0.22355   | 0.676575   |
| TRAF3                 | 3.91292  | 5.99226  | 0.614855   | 0.0194494  |
| C14orf37              | 1.25693  | 0.524537 | -1.26078   | 0.00134142 |
| PSMB8                 | 61.3436  | 55.992   | -0.131693  | 0.954063   |
| PITRM1                | 23.6056  | 20.6726  | -0.191407  | 0.753148   |
| TMEM143               | 2.88519  | 1.50921  | -0.934877  | 0.0292254  |
| CHRAC1                | 31.8713  | 34.7843  | 0.126181   | 0.884187   |
| ZSWIM8                | 4.96851  | 6.43876  | 0.373969   | 0.346589   |
| MCIN                  | 1.6912   | 2.71687  | 0.683897   | 0.155313   |
| WDR83                 | 14.7409  | 19.7313  | 0.420659   | 0.926446   |
| RNF38                 | 3.19567  | 2.46652  | -0.373643  | 0.344579   |
| CCNA2                 | 19.8841  | 22.2602  | 0.162845   | 0.887209   |
| LYN                   | 11.0657  | 13.2766  | 0.262786   | 0.537309   |
| GTF3C1                | 6.83407  | 8.33796  | 0.28695    | 0.469503   |
| C3orf17               | 9.57239  | 9.23884  | -0.0511674 | 0.977332   |
| CNOT1                 | 16.4218  | 14.0999  | -0.21993   | 0.698524   |
| C6orf70               | 7.63438  | 4.0973   | -0.897836  | 0.00134142 |
| NDUFB4                | 279.27   | 300.436  | 0.105396   | 0.919029   |
| SSFA2                 | 6.54289  | 5.61213  | -0.221379  | 0.678791   |
| GPRIN1                | 5.94737  | 9.14222  | 0.620292   | 0.0292254  |
| WDPCP                 | 0.461844 | 0.30325  | -0.606898  | 0.979701   |
| AP2B1                 | 46.353   | 36.6805  | -0.337651  | 0.322381   |
| MGAT4A                | 1.10433  | 0.999672 | -0.143643  | 0.928371   |
| PGAP2                 | 21.2033  | 13.6933  | -0.630815  | 0.400064   |
| NCBP2                 | 31.3887  | 37.8825  | 0.271286   | 0.501959   |
| LINC00265             | 3.61249  | 2.34068  | -0.626067  | 0.0875912  |
| DKFZP5861420          | 1.08196  | 1.17977  | 0.124856   | 0.948179   |
| LRRRC20               | 6.75445  | 3.92254  | -0.784049  | 0.00672555 |
| NIP7                  | 21.7559  | 34.0228  | 0.645095   | 0.0474163  |
| AUTS2                 | 1.6118   | 1.64152  | 0.0263631  | 0.991767   |
| C7orf25               | 5.50354  | 4.5927   | -0.261018  | 0.686761   |
| PRR14L                | 1.63617  | 1.73118  | 0.0814257  | 0.955758   |
| C10orf12              | 0.643994 | 0.580019 | -0.150948  | 0.930066   |
| CSRFP2                | 39.9117  | 27.334   | -0.546116  | 0.0551188  |
| PPP1R9A               | 1.44053  | 0.922319 | -0.64326   | 0.0357572  |
| C9orf89               | 67.1518  | 56.0959  | -0.25953   | 0.593697   |
| RCN1                  | 56.3757  | 55.0999  | -0.033025  | 0.986832   |



|              |          |          |            |            |
|--------------|----------|----------|------------|------------|
| RABEPK       | 43.0326  | 49.7314  | 0.208728   | 0.701805   |
| TRMT1        | 52.3467  | 73.7407  | 0.494361   | 0.0713011  |
| ETV2         | 0.548979 | 0.411143 | -0.417112  | 0.844285   |
| PPP1R11      | 46.3491  | 40.8585  | -0.181903  | 0.766627   |
| PNKP         | 36.7818  | 31.9776  | -0.201932  | 0.725998   |
| GGNBP2       | 13.5104  | 10.0552  | -0.426135  | 0.170566   |
| DESI1        | 19.4911  | 26.643   | 0.450943   | 0.12797    |
| ANAPC7       | 13.0433  | 13.7799  | 0.0792539  | 0.954907   |
| UBQLN1       | 34.411   | 38.1467  | 0.148691   | 0.842695   |
| PRKCSH       | 240.906  | 199.484  | -0.272195  | 0.532953   |
| BAIAP2       | 16.0225  | 14.7068  | -0.123609  | 0.904243   |
| ZNF596       | 0.51397  | 0.202568 | -1.34328   | 0.5414     |
| WRN          | 1.74301  | 1.54924  | -0.17002   | 0.856062   |
| TMEM223      | 16.8978  | 13.7753  | -0.29475   | 0.906141   |
| CCNH         | 27.9227  | 26.1697  | -0.093544  | 0.938194   |
| RASA1        | 3.12506  | 2.10825  | -0.567836  | 0.0865352  |
| RABL6        | 133.522  | 152.374  | 0.190541   | 0.75896    |
| TLL1         | 2.86772  | 0.999118 | -1.52118   | 0.00134142 |
| QSER1        | 2.72852  | 3.28108  | 0.266055   | 0.564914   |
| CAPZB        | 98.4229  | 112.975  | 0.198934   | 0.726173   |
| MTMR6        | 3.61746  | 3.30778  | -0.129114  | 0.894976   |
| LOC100131067 | 1.32959  | 0.672057 | -0.984324  | 0.716439   |
| NT5C2        | 7.37619  | 6.13016  | -0.26695   | 0.565586   |
| MAPKBP1      | 2.66174  | 3.10534  | 0.22238    | 0.727115   |
| SUPT5H       | 33.681   | 31.0584  | -0.116954  | 0.907651   |
| FBXO11       | 9.34399  | 6.56326  | -0.509625  | 0.316696   |
| C17orf62     | 38.7528  | 32.6936  | -0.245291  | 0.734977   |
| MCU          | 6.95771  | 5.43477  | -0.356393  | 0.373615   |
| LINC00346    | 1.68448  | 1.06874  | -0.656393  | 0.0451064  |
| CNST         | 3.35308  | 2.2828   | -0.554682  | 0.132134   |
| TMEM43       | 17.5284  | 24.1261  | 0.4609     | 0.102329   |
| AMD1         | 20.9906  | 37.2282  | 0.826651   | 0.00134142 |
| LOC100287015 | 1.99414  | 1.71745  | -0.2155    | 0.851868   |
| TXNDC11      | 8.54972  | 10.3333  | 0.273349   | 0.728031   |
| PDLIM7       | 87.7546  | 83.8534  | -0.0656054 | 0.965735   |
| LRRC6        | 1.02208  | 0.465407 | -1.13494   | 0.0292254  |
| CCRN4L       | 10.9119  | 12.0441  | 0.142423   | 0.884233   |
| MRPS31       | 9.79575  | 6.92069  | -0.50124   | 0.16366    |
| GLOD4        | 33.744   | 30.9627  | -0.124098  | 0.947096   |
| EPB41        | 4.16441  | 3.41303  | -0.287061  | 0.677929   |
| SMARCB1      | 90.4525  | 86.0077  | -0.0726939 | 0.958201   |
| CBX5         | 4.15045  | 3.63356  | -0.191885  | 0.797958   |
| HYAL2        | 19.5155  | 44.5319  | 1.19022    | 0.00134142 |
| ITPA         | 78.0659  | 94.3272  | 0.272981   | 0.522297   |
| PSMG2        | 77.5237  | 58.1585  | -0.414647  | 0.200143   |
| C17orf70     | 15.2411  | 25.477   | 0.741228   | 0.00243047 |
| TRDMT1       | 0.53057  | 0.309817 | -0.776125  | 0.0698587  |
| DUSP11       | 18.1926  | 16.5072  | -0.140255  | 0.869885   |
| SLAIN2       | 3.51315  | 3.31531  | -0.0836211 | 0.954866   |
| MTERFD1      | 33.4892  | 37.5842  | 0.166433   | 0.808353   |
| VGf          | 27.8986  | 32.1569  | 0.204935   | 0.74078    |
| DCUN1D4      | 5.66608  | 7.13912  | 0.333395   | 0.365964   |
| SURF6        | 60.972   | 114.651  | 0.911025   | 0.00134142 |
| HIST1H2BK    | 62.1422  | 198.685  | 1.67684    | 0.00134142 |
| CCDC167      | 27.0346  | 25.2976  | -0.09581   | 0.952905   |
| SON          | 12.8032  | 17.3123  | 0.435291   | 0.132134   |
| BTF3L4       | 14.5549  | 8.40766  | -0.79173   | 0.00134142 |
| MRPL49       | 34.0492  | 45.909   | 0.431157   | 0.909016   |
| COPE         | 274.825  | 285.493  | 0.054939   | 0.974226   |
| HAUS1        | 38.1566  | 30.9769  | -0.300738  | 0.44532    |
| CERS2        | 81.7205  | 99.4235  | 0.282889   | 0.475774   |
| MDH2         | 347.635  | 355.621  | 0.0327678  | 0.986822   |
| CDC42BPA     | 2.34569  | 1.83289  | -0.35589   | 0.348909   |
| GPATCH2L     | 1.25774  | 1.17732  | -0.0953338 | 0.967901   |
| CCP110       | 1.91233  | 2.08128  | 0.122142   | 0.919892   |
| SEC16A       | 16.2103  | 19.2729  | 0.249661   | 0.593697   |
| DDHD1        | 1.38811  | 1.78279  | 0.361016   | 0.33202    |
| MGLL         | 26.8706  | 21.7792  | -0.303078  | 0.421895   |
| RNASEH2A     | 65.557   | 53.7808  | -0.285659  | 0.491654   |
| MED25        | 20.9677  | 17.7567  | -0.239804  | 0.662533   |
| PFDN4        | 28.8155  | 21.8629  | -0.398358  | 0.212023   |
| PPIL6        | 0.239486 | 0.136476 | -0.811292  | 1          |
| COG3         | 2.70322  | 2.40742  | -0.167189  | 0.8501     |
| CHAF1B       | 9.69758  | 6.34853  | -0.611201  | 0.0373672  |
| TMEM144      | 6.28226  | 1.22899  | -2.35381   | 0.00134142 |
| URM1         | 78.5004  | 79.5344  | 0.0188797  | 0.992797   |
| SERPINE2     | 1.22181  | 1.62541  | 0.411779   | 0.524713   |
| FAM120A      | 38.3851  | 39.8948  | 0.0556549  | 0.977369   |
| CNOT3        | 17.5273  | 14.9027  | -0.234028  | 0.707157   |

|              |           |            |             |            |
|--------------|-----------|------------|-------------|------------|
| SMOX         | 20.859    | 17.4425    | -0.258068   | 0.606507   |
| PTP4A1       | 14.8689   | 14.834     | -0.00338294 | 0.997892   |
| PDE4D        | 2.2305    | 1.21109    | -0.881063   | 0.00134142 |
| LRRC58       | 3.82042   | 3.93864    | 0.0439648   | 0.979875   |
| ERCC3        | 23.1082   | 32.287     | 0.482549    | 0.0757506  |
| TBC1D4       | 5.23745   | 6.11102    | 0.222549    | 0.674081   |
| IFT140       | 4.72245   | 2.03634    | -1.21356    | 0.230495   |
| PPP1R12A     | 4.43435   | 4.15047    | -0.0954492  | 0.938123   |
| HS6ST1       | 12.1353   | 20.8133    | 0.7783      | 0.00134142 |
| TRABD        | 53.3554   | 80.4202    | 0.591923    | 0.0231741  |
| ZC3H7B       | 10.0529   | 12.202     | 0.279505    | 0.510297   |
| ANKRD46      | 3.46638   | 2.73349    | -0.342686   | 0.495922   |
| ANAPC11      | 131.037   | 130.086    | -0.0105012  | 0.99625    |
| ACTR6        | 10.3669   | 7.61375    | -0.445305   | 0.180647   |
| GSPT1        | 21.1038   | 29.111     | 0.464065    | 0.106054   |
| IFT122       | 2.87078   | 1.74578    | -0.717568   | 0.438806   |
| TMEM126A     | 31.8227   | 22.3467    | -0.509996   | 0.102585   |
| LINC00641    | 0.78844   | 0.799429   | 0.0199705   | 0.995957   |
| NTHL1        | 37.9362   | 52.5692    | 0.470644    | 0.119771   |
| TPI1         | 1203.27   | 1312.78    | 0.12566     | 0.90608    |
| RPL22L1      | 318.306   | 334.605    | 0.072047    | 0.960591   |
| RING1        | 42.7636   | 33.5814    | -0.348719   | 0.294732   |
| XPO7         | 15.6097   | 10.8522    | -0.52445    | 0.0615558  |
| MIOS         | 6.68169   | 6.5745     | -0.0233319  | 0.991767   |
| ARHGAP18     | 1.37541   | 0.450013   | -1.61182    | 0.00134142 |
| TIMM22       | 25.1266   | 46.3074    | 0.882031    | 0.00134142 |
| OAT          | 50.6299   | 54.6028    | 0.108985    | 0.912689   |
| HMGB2        | 208.108   | 109.306    | -0.928956   | 0.00134142 |
| ECHS1        | 153.602   | 178.772    | 0.218925    | 0.66627    |
| TNFRSF10D    | 35.5185   | 38.303     | 0.108886    | 0.922257   |
| TMEM63B      | 9.53084   | 8.07398    | -0.239323   | 0.664776   |
| CDC42        | 2.06559   | 1.6002     | -0.368305   | 0.494782   |
| PCBP1        | 198.149   | 260.15     | 0.392758    | 0.224751   |
| MAP3K4       | 2.33481   | 2.68813    | 0.203298    | 0.781336   |
| TMEM98       | 49.285    | 40.2902    | -0.29072    | 0.473105   |
| DBB1         | 66.8357   | 66.5603    | -0.00595828 | 0.99714    |
| DOC2A        | 14.5815   | 17.0997    | 0.229828    | 0.890666   |
| PTPRN2       | 2.49599   | 2.96497    | 0.248407    | 0.720797   |
| IKZF2        | 0.0245111 | 0.00857503 | -1.51522    | 1          |
| ECE2         | 43.7812   | 69.5757    | 0.668273    | 0.0912351  |
| HDAC8        | 10.4786   | 8.97048    | -0.224185   | 0.75208    |
| NSUN6        | 3.93243   | 3.089      | -0.348283   | 0.469995   |
| ZNF45        | 1.92716   | 1.99878    | 0.0526491   | 0.979733   |
| TAF6         | 45.5492   | 40.5778    | -0.166736   | 0.966946   |
| RBM25        | 11.679    | 16.8739    | 0.530869    | 0.0489893  |
| UBE3A        | 9.07058   | 9.6009     | 0.0819741   | 0.950929   |
| YWHAQ        | 152.297   | 167.654    | 0.138593    | 0.870466   |
| MUL1         | 19.6497   | 16.9545    | -0.212833   | 0.708293   |
| PLIN4        | 0.212152  | 0.0849279  | -1.32078    | 1          |
| COMMD8       | 10.7194   | 9.03586    | -0.246495   | 0.680254   |
| MED21        | 5.64724   | 5.16304    | -0.129326   | 0.906895   |
| NELFB        | 109.521   | 123.86     | 0.177497    | 0.775104   |
| KIF1B        | 3.70273   | 2.68401    | -0.464201   | 0.126367   |
| COA1         | 50.1319   | 52.4007    | 0.0638562   | 0.969241   |
| WDR3         | 12.632    | 18.5139    | 0.551531    | 0.0261279  |
| VPS4A        | 59.6671   | 62.7165    | 0.0719097   | 0.958827   |
| SMN2         | 2.29339   | 2.8789     | 0.32804     | 0.642487   |
| PSAP         | 229.503   | 174.347    | -0.396556   | 0.224751   |
| SHKBP1       | 85.8167   | 74.2763    | -0.208357   | 0.688434   |
| G3BP2        | 15.5836   | 18.6009    | 0.255339    | 0.554911   |
| VHL          | 18.3514   | 18.1601    | -0.0151198  | 0.99351    |
| LASP1        | 63.5135   | 49.7405    | -0.352642   | 0.287528   |
| LRCH1        | 2.7786    | 2.95755    | 0.0900443   | 0.953061   |
| ESPL1        | 5.13433   | 5.11146    | -0.00643867 | 0.997036   |
| STMN3        | 18.6427   | 28.2472    | 0.599494    | 0.0283563  |
| LOC100507577 | 0.429328  | 0.455843   | 0.0864547   | 0.985607   |
| CHML         | 1.58946   | 1.8387     | 0.210149    | 0.758132   |
| SIGLEC16     | 0.321667  | 0.288354   | -0.157728   | 1          |
| ZNF252P      | 4.13487   | 3.67671    | -0.169428   | 0.819258   |
| IBTK         | 4.68087   | 3.28061    | -0.512813   | 0.074638   |
| ATP5G3       | 66.777    | 90.7707    | 0.442875    | 0.142081   |
| GPS1         | 81.4718   | 89.3429    | 0.133051    | 0.873414   |
| NT5C         | 137.401   | 119.228    | -0.204671   | 0.785358   |
| HYPK,SERF2   | 162.947   | 209.876    | 0.365134    | 0.688314   |
| KLHL22       | 7.84437   | 5.88218    | -0.415307   | 0.300468   |
| CA13         | 4.59004   | 5.26555    | 0.198077    | 0.771117   |
| VPS54        | 3.28551   | 2.9505     | -0.155157   | 0.865626   |
| NUDT21       | 24.7615   | 19.5834    | -0.338469   | 0.334951   |
| STAG2        | 8.85529   | 5.10801    | -0.793779   | 0.00134142 |

|                         |           |           |            |            |
|-------------------------|-----------|-----------|------------|------------|
| IFT52                   | 11.9922   | 8.70412   | -0.462321  | 0.168861   |
| DCTN4                   | 12.7109   | 7.51102   | -0.758987  | 0.00337323 |
| ANKRD44                 | 0.50356   | 0.392608  | -0.359073  | 0.714085   |
| TATDN3                  | 4.45959   | 2.11017   | -1.07955   | 0.00134142 |
| SCFD2                   | 0.88799   | 2.01393   | 1.1814     | 0.00134142 |
| DOCK5                   | 0.635335  | 0.58426   | -0.120909  | 0.945783   |
| APLP2                   | 83.2657   | 84.3631   | 0.0188906  | 0.993379   |
| C1orf151-NBL1,MINOS1,NB | 109.064   | 131.416   | 0.268968   | 0.592826   |
| PPP6R1                  | 41.4351   | 57.1047   | 0.462757   | 0.0960847  |
| MIER2                   | 15.6413   | 19.7818   | 0.338816   | 0.372752   |
| SPAG8                   | 0.0485743 | 0.0575049 | 0.243491   | 1          |
| CTBP1                   | 43.2515   | 51.2959   | 0.246094   | 0.585568   |
| NT5C3B                  | 57.1281   | 64.383    | 0.172479   | 0.797015   |
| EHHADH                  | 0.78732   | 0.36645   | -1.10333   | 0.0126858  |
| COG5                    | 12.4209   | 6.44686   | -0.946103  | 0.00134142 |
| TDRKH                   | 2.19615   | 1.05992   | -1.05102   | 0.00243047 |
| CNOT2                   | 17.8635   | 14.6295   | -0.288137  | 0.465131   |
| ACVR1B                  | 6.93556   | 5.85345   | -0.244725  | 0.635935   |
| ADNP2                   | 10.9432   | 8.28524   | -0.401416  | 0.200886   |
| IFT57                   | 7.68272   | 8.56742   | 0.157243   | 0.837131   |
| TEX264                  | 103.488   | 90.8649   | -0.187671  | 0.754842   |
| RNF113A                 | 33.8194   | 27.8621   | -0.279549  | 0.880508   |
| PLXNA1                  | 6.92371   | 12.9222   | 0.900239   | 0.00134142 |
| SAR1A                   | 26.6689   | 36.9858   | 0.471812   | 0.0820682  |
| ZC3H12D                 | 0.0275127 | 0.022604  | -0.283522  | 1          |
| MYO1E                   | 6.06318   | 4.14001   | -0.550439  | 0.0511722  |
| GLCCI1                  | 0.965338  | 0.726478  | -0.410116  | 0.491762   |
| PRPF19                  | 85.0922   | 111.225   | 0.386386   | 0.235468   |
| EVA1C                   | 9.2541    | 14.4251   | 0.640418   | 0.0354094  |
| GNL1                    | 14.0068   | 16.2935   | 0.218171   | 0.721145   |
| SLC25A40                | 2.44423   | 1.21388   | -1.00975   | 0.29367    |
| DET1                    | 3.13944   | 1.94271   | -0.692436  | 0.0879449  |
| TFE3                    | 28.7734   | 22.5939   | -0.3488    | 0.29743    |
| UTP20                   | 1.60769   | 4.04024   | 1.32945    | 0.00134142 |
| GTF2H4                  | 29.6476   | 33.3238   | 0.168635   | 0.806494   |
| ZNF205                  | 19.1566   | 18.4164   | -0.0568509 | 0.977531   |
| MRPL30                  | 16.9891   | 15.5846   | -0.124488  | 0.894341   |
| NAT10                   | 29.1857   | 35.8733   | 0.297648   | 0.439482   |
| B3GALT1                 | 1.72412   | 1.68758   | -0.0309052 | 0.990948   |
| CORO2B                  | 1.9975    | 2.96317   | 0.568947   | 0.165928   |
| ACBD5                   | 6.45069   | 4.88592   | -0.400823  | 0.239198   |
| LIMCH1                  | 1.9446    | 1.37203   | -0.50316   | 0.173927   |
| RND2                    | 0.475897  | 0.3319    | -0.519903  | 0.462258   |
| CC2D2A                  | 3.47417   | 2.9751    | -0.223729  | 0.845974   |
| BIN1                    | 33.4982   | 24.8846   | -0.428829  | 0.165314   |
| NDFIP1                  | 27.673    | 23.7803   | -0.218711  | 0.666069   |
| VCL                     | 14.7002   | 10.5864   | -0.473625  | 0.108981   |
| C10orf88                | 1.00984   | 1.00265   | -0.0103188 | 0.997036   |
| ARL16                   | 25.0639   | 30.5956   | 0.287716   | 0.525867   |
| TBL3                    | 26.4217   | 34.0218   | 0.364739   | 0.275337   |
| SH3BP4                  | 3.91835   | 3.78749   | -0.0490037 | 0.979701   |
| SUMO2                   | 320.674   | 302.704   | -0.0831969 | 0.950929   |
| ABCG2                   | 0.484639  | 0.343154  | -0.498055  | 0.464668   |
| GAPVD1                  | 6.49052   | 7.27238   | 0.164095   | 0.806888   |
| SLC7A2                  | 2.88893   | 4.4292    | 0.616509   | 0.0245451  |
| ANKS3                   | 7.41471   | 10.197    | 0.459689   | 0.233215   |
| CDK2                    | 35.0043   | 34.7335   | -0.0112054 | 0.995957   |
| EVI5L                   | 7.45568   | 4.78761   | -0.639033  | 0.0398899  |
| CCDC132                 | 2.41348   | 2.17942   | -0.147175  | 0.87563    |
| RASSF1                  | 21.1015   | 32.3969   | 0.618513   | 0.0139368  |
| RBFOX2                  | 16.841    | 9.91513   | -0.764271  | 0.00425224 |
| ZNF429                  | 0.515709  | 0.436747  | -0.239759  | 0.879971   |
| MED30                   | 36.0358   | 21.599    | -0.738469  | 0.00425224 |
| RNF216                  | 9.69707   | 11.0956   | 0.19437    | 0.743163   |
| USP11                   | 12.0061   | 9.07768   | -0.403369  | 0.23942    |
| KLF12                   | 0.44683   | 0.131407  | -1.76569   | 0.00134142 |
| LLGL2                   | 36.3151   | 41.8636   | 0.205128   | 0.770579   |
| MPV17                   | 45.9968   | 36.5535   | -0.331524  | 0.378668   |
| POLD2                   | 160.561   | 154.341   | -0.0569973 | 0.973879   |
| ZC3H7A                  | 5.16869   | 4.18808   | -0.303509  | 0.485249   |
| UBE4B                   | 5.47588   | 4.57188   | -0.260302  | 0.596611   |
| SSX2IP                  | 3.09577   | 3.1721    | 0.0351413  | 0.986822   |
| RANGAP1                 | 98.9655   | 130.444   | 0.398429   | 0.208084   |
| CHD1L                   | 30.2991   | 27.0886   | -0.161591  | 0.8187     |
| ESRRA                   | 57.2003   | 71.1854   | 0.315559   | 0.808776   |
| SPOPL                   | 1.58708   | 1.12254   | -0.499607  | 0.201532   |
| METTL10                 | 3.29024   | 2.67157   | -0.300505  | 0.614283   |
| LRP4                    | 1.4675    | 1.51219   | 0.0432732  | 0.985325   |
| MFSD12                  | 74.7964   | 97.9204   | 0.38864    | 0.224094   |

|              |            |            |              |            |
|--------------|------------|------------|--------------|------------|
| LRRC1        | 3.85748    | 3.70548    | -0.0579991   | 0.977332   |
| ABCE1        | 20.0902    | 23.932     | 0.252451     | 0.615031   |
| PBX3         | 18.8065    | 11.4081    | -0.721171    | 0.00672555 |
| CD68         | 431.075    | 333.152    | -0.371759    | 0.272235   |
| CLCN2        | 7.14347    | 10.6219    | 0.57235      | 0.252041   |
| HDAC2        | 7.60864    | 10.757     | 0.499566     | 0.0580464  |
| COMMMD7      | 31.8121    | 29.2639    | -0.120456    | 0.901132   |
| PTK7         | 30.9079    | 25.0069    | -0.305648    | 0.427064   |
| DBT          | 1.19626    | 1.01161    | -0.241883    | 0.693347   |
| DYRK1B       | 1.14241    | 1.90568    | 0.738231     | 0.147239   |
| C12orf10     | 43.1171    | 43.0982    | -0.000631931 | 0.999427   |
| TDP1         | 8.4045     | 7.71809    | -0.122917    | 0.907689   |
| PPP6R3       | 11.9148    | 12.5483    | 0.0747356    | 0.954559   |
| RANGRF       | 70.7148    | 81.4068    | 0.203137     | 0.751467   |
| RTF1         | 13.3007    | 18.0344    | 0.439253     | 0.13673    |
| CHID1        | 23.4014    | 28.5076    | 0.284756     | 0.476932   |
| CPEB3        | 0.16851    | 0.109022   | -0.628208    | 1          |
| CREB3L2      | 4.48992    | 2.78138    | -0.690891    | 0.117401   |
| IPMK         | 1.8839     | 1.42347    | -0.404309    | 0.328217   |
| CCDC6        | 10.3237    | 8.27517    | -0.319096    | 0.371147   |
| SPPL3        | 14.3117    | 13.6081    | -0.0727292   | 0.957925   |
| MCOLN1       | 11.3186    | 18.8085    | 0.732685     | 0.0156972  |
| UBE3D        | 1.68334    | 2.38292    | 0.501403     | 0.331815   |
| EHMT1        | 11.797     | 13.5598    | 0.20091      | 0.721145   |
| IRF9         | 2.5947     | 4.43437    | 0.773162     | 0.0439989  |
| CHCHD10      | 325.242    | 363.372    | 0.159934     | 0.818634   |
| EPS15        | 5.88634    | 4.08322    | -0.527665    | 0.0608269  |
| RNUFAF7      | 7.71513    | 7.62132    | -0.0176499   | 0.99351    |
| CASP9        | 4.29305    | 3.00105    | -0.516535    | 0.240737   |
| LOC441461    | 2.36339    | 0.465413   | -2.34427     | 0.0156972  |
| CLDND1       | 25.2135    | 16.6901    | -0.595202    | 0.0235476  |
| DNMT3B       | 1.55451    | 1.65628    | 0.0914829    | 0.965042   |
| DDX42        | 17.4044    | 19.8924    | 0.192767     | 0.731968   |
| C14orf119    | 26.1045    | 28.7002    | 0.13676      | 0.954677   |
| SHANK1       | 4.79843    | 4.37541    | -0.133145    | 0.907657   |
| HMBS         | 25.9269    | 26.9846    | 0.0576867    | 0.973348   |
| TRMT112      | 457.76     | 613.164    | 0.421683     | 0.293861   |
| OLFML2B      | 0.584197   | 0.377724   | -0.629122    | 0.397842   |
| PAWR         | 16.717     | 12.2657    | -0.446687    | 0.159174   |
| HDAC11       | 10.2693    | 5.50877    | -0.89854     | 0.00134142 |
| NT5DC2       | 101.991    | 128.573    | 0.334142     | 0.330501   |
| LAMTOR3      | 5.53616    | 4.35651    | -0.345712    | 0.349757   |
| NELFA        | 39.6405    | 33.493     | -0.243116    | 0.611988   |
| WFS1         | 14.1932    | 16.0155    | 0.174269     | 0.79799    |
| HEPH1        | 0.00788055 | 0.00161155 | -2.28984     | 1          |
| CCNY         | 26.0214    | 24.6326    | -0.079134    | 0.952469   |
| GPR137B      | 10.4479    | 6.77573    | -0.624767    | 0.0444101  |
| NUB1         | 18.8778    | 15.3632    | -0.297214    | 0.444143   |
| TIPARP       | 11.8372    | 10.0349    | -0.238292    | 0.631187   |
| ATPBD4       | 3.19621    | 1.99135    | -0.682611    | 0.0854642  |
| SULT1A1      | 9.43448    | 6.9955     | -0.431517    | 0.337927   |
| ZDHHC18      | 30.6389    | 44.4741    | 0.537602     | 0.0444101  |
| LOC100133957 | 2.62631    | 5.76356    | 1.13392      | 0.92844    |
| PPP1R14B     | 454.717    | 640.444    | 0.494101     | 0.0790043  |
| C19orf66     | 8.55118    | 12.2238    | 0.515502     | 0.174152   |
| DDX54        | 33.6144    | 42.7506    | 0.346866     | 0.293045   |
| CWC15        | 26.4542    | 22.3439    | -0.243612    | 0.608559   |
| RCHY1        | 4.17272    | 3.36712    | -0.309474    | 0.476222   |
| COX15        | 9.27387    | 5.50533    | -0.752343    | 0.0266793  |
| RTCA         | 16.6554    | 14.765     | -0.17381     | 0.791404   |
| ERAP1        | 2.98538    | 2.79015    | -0.0975711   | 0.984917   |
| FLJ38109     | 0.0375319  | 0.0587248  | 0.645852     | 1          |
| TAF5         | 3.05034    | 4.25592    | 0.480502     | 0.842695   |
| KDM4A        | 7.01172    | 4.97829    | -0.494117    | 0.112706   |
| IFI27L1      | 23.6093    | 17.9961    | -0.39167     | 0.415394   |
| IL4I1,NUP62  | 25.6121    | 45.178     | 0.818795     | 0.0678232  |
| EIF4ENIF1    | 4.11206    | 5.28734    | 0.36268      | 0.377099   |
| NKD2         | 13.9983    | 12.6774    | -0.142999    | 0.895818   |
| SH3BGR13     | 304.673    | 396.44     | 0.379841     | 0.235692   |
| PXN          | 93.9959    | 85.6085    | -0.134843    | 0.875582   |
| BLOC1S6      | 10.9813    | 8.16196    | -0.428058    | 0.15219    |
| CREB3L4      | 6.01208    | 1.81422    | -1.72852     | 0.483718   |
| THUMPD3      | 11.9046    | 9.02633    | -0.399311    | 0.188259   |
| WHAMMP1      | 0.676312   | 0.627373   | -0.108366    | 0.972989   |
| FAM72B       | 1.67652    | 1.00685    | -0.73562     | 0.0920155  |
| CCT8         | 177.648    | 184.549    | 0.0549829    | 0.974169   |
| MRPS2        | 297.24     | 373.083    | 0.327865     | 0.370382   |
| NUP54        | 14.357     | 14.1241    | -0.0235881   | 0.991767   |
| SFT2D3       | 7.69634    | 6.72369    | -0.194918    | 0.800595   |

|              |           |           |             |            |
|--------------|-----------|-----------|-------------|------------|
| RHOBTB1      | 0.766995  | 0.533648  | -0.523329   | 0.324714   |
| ARL3         | 6.34041   | 6.02259   | -0.0741936  | 0.96103    |
| FAM131A      | 16.3752   | 10.0324   | -0.706837   | 0.0944715  |
| BABAM1       | 54.1698   | 45.2729   | -0.258842   | 0.550662   |
| MED14        | 4.8281    | 3.58306   | -0.430266   | 0.170566   |
| PLCE1        | 0.0682431 | 0.0404814 | -0.753422   | 1          |
| RTN4R        | 18.728    | 20.2981   | 0.11615     | 0.927966   |
| ATP10D       | 0.877327  | 0.77307   | -0.182516   | 0.869168   |
| TBCB         | 84.3699   | 93.3602   | 0.146078    | 0.909489   |
| RAD23B       | 52.8852   | 55.0736   | 0.0584965   | 0.972176   |
| LINC00471    | 0.151566  | 0.123173  | -0.299258   | 1          |
| DCP1A        | 3.54366   | 3.03584   | -0.223145   | 0.704102   |
| C11orf48     | 52.6449   | 101.378   | 0.945373    | 0.00134142 |
| C14orf166    | 186.691   | 177.649   | -0.071626   | 0.958814   |
| WDR41        | 13.6456   | 9.08137   | -0.587448   | 0.0278845  |
| HSPA8        | 636.998   | 1176.29   | 0.884888    | 0.00134142 |
| KIAA0556     | 1.53      | 1.613     | 0.0762178   | 0.967901   |
| BCOR         | 1.79757   | 1.95255   | 0.119315    | 0.931471   |
| ANAPC2       | 30.1792   | 47.3505   | 0.649826    | 0.287718   |
| PLIN3        | 75.4132   | 66.1733   | -0.188568   | 0.745866   |
| BRD4         | 9.17349   | 9.07496   | -0.0155787  | 0.99451    |
| TDRD7        | 5.76802   | 4.5977    | -0.327165   | 0.409587   |
| SEC24C       | 11.2953   | 13.1273   | 0.216848    | 0.675671   |
| MORN4        | 5.17665   | 3.56093   | -0.539766   | 0.141455   |
| ZNF215       | 1.72942   | 2.2243    | 0.363056    | 0.443183   |
| CABLES1      | 1.81385   | 2.24832   | 0.309789    | 0.606735   |
| STEAP3       | 16.5438   | 22.4528   | 0.440602    | 0.130354   |
| UBFD1        | 7.63582   | 11.0353   | 0.531274    | 0.0504457  |
| DYNLT3       | 5.47631   | 4.99783   | -0.131904   | 0.908531   |
| MUS81        | 30.02     | 24.211    | -0.310262   | 0.423354   |
| RASSF3       | 6.3777    | 11.4715   | 0.846949    | 0.00134142 |
| TMEM44-AS1   | 2.01555   | 1.11813   | -0.850082   | 0.741377   |
| SP110        | 1.66643   | 2.22321   | 0.415882    | 0.448101   |
| TAF1A        | 3.32449   | 4.34737   | 0.387011    | 0.41953    |
| SLC25A39     | 375.667   | 443.466   | 0.239368    | 0.619877   |
| MRPL12       | 152.157   | 224.837   | 0.56332     | 0.0274653  |
| KANSL1L      | 3.46623   | 3.54872   | 0.0339285   | 0.990857   |
| ZFAND2B      | 30.6804   | 26.3281   | -0.220714   | 0.718598   |
| POLDIP3      | 31.1128   | 32.3733   | 0.0572928   | 0.970195   |
| ZNF524       | 29.853    | 18.0457   | -0.726223   | 0.0172978  |
| LRRFIP2      | 9.43693   | 7.84248   | -0.267009   | 0.564914   |
| PYGO2        | 11.2084   | 11.5149   | 0.0389207   | 0.984917   |
| PLXND1       | 9.28493   | 8.91697   | -0.0583374  | 0.973723   |
| CAMSAP2      | 2.46401   | 2.38584   | -0.0465076  | 0.979701   |
| PRPF40A      | 10.4132   | 11.0215   | 0.0819168   | 0.950929   |
| FAM166A      | 9.40994   | 23.2203   | 1.30313     | 0.927627   |
| LDHB         | 844.482   | 875.005   | 0.0512231   | 0.978981   |
| MMADHC       | 77.3361   | 55.0048   | -0.491585   | 0.0792619  |
| SEC61G       | 388.966   | 419.821   | 0.110133    | 0.912418   |
| CCDC150      | 1.2309    | 1.43768   | 0.224032    | 0.808918   |
| C3orf33      | 4.22979   | 3.25106   | -0.379673   | 0.429721   |
| CAMSAP3      | 13.5991   | 15.5991   | 0.197953    | 0.752793   |
| AGAP8        | 0.885093  | 0.878809  | -0.0102785  | 0.998526   |
| C19orf40     | 2.48418   | 1.68626   | -0.55894    | 0.367367   |
| RPRD2        | 3.25732   | 2.58601   | -0.332954   | 0.403645   |
| ARF4         | 73.0502   | 98.0932   | 0.425265    | 0.151774   |
| DNAJB12      | 17.1163   | 16.8421   | -0.0232959  | 0.991067   |
| SUGP1        | 16.2099   | 17.0199   | 0.0703487   | 0.964235   |
| FAM111A      | 4.925     | 4.7722    | -0.0454711  | 0.980119   |
| RTBDN        | 0.471039  | 0.534098  | 0.181258    | 0.961      |
| MKI67IP      | 50.0153   | 66.556    | 0.412197    | 0.183567   |
| HIP1R        | 14.6097   | 16.2642   | 0.154772    | 0.831246   |
| LYRM1        | 12.358    | 7.73043   | -0.676823   | 0.0906031  |
| LOC100289092 | 7.49598   | 4.7718    | -0.651584   | 0.939091   |
| SYK          | 9.18203   | 9.30985   | 0.0199453   | 0.992797   |
| NDUFAF3      | 70.5715   | 70.1029   | -0.00961143 | 0.997342   |
| EXOSC5       | 144.009   | 129.332   | -0.155076   | 0.830321   |
| EXOSC6       | 29.1849   | 48.2275   | 0.724633    | 0.00743393 |
| NBN          | 10.0314   | 11.4126   | 0.186106    | 0.757303   |
| STARD7       | 38.7425   | 66.1055   | 0.770853    | 0.00134142 |
| ATP11B       | 3.80733   | 2.416     | -0.656161   | 0.0194494  |
| GOSR1        | 5.57364   | 6.05922   | 0.120511    | 0.906464   |
| HPX          | 0.2362    | 0.304822  | 0.367958    | 1          |
| FAM69B       | 3.21407   | 3.19045   | -0.0106408  | 0.998564   |
| CLDND2       | 0.328677  | 0.243224  | -0.434384   | 1          |
| LOC728613    | 0.687683  | 0.543365  | -0.339822   | 0.763767   |
| RPL23AP53    | 1.71541   | 1.9727    | 0.201618    | 0.808353   |
| SNRK-AS1     | 0.296137  | 0.142908  | -1.05118    | 1          |
| RNF220       | 42.8107   | 47.6648   | 0.154952    | 0.828458   |

|                 |           |            |            |            |
|-----------------|-----------|------------|------------|------------|
| MTO1            | 6.08263   | 5.52676    | -0.138262  | 0.895818   |
| TRIM27          | 34.9233   | 44.6642    | 0.35493    | 0.286255   |
| TERF2IP         | 25.1752   | 18.3617    | -0.455299  | 0.11933    |
| MCMBP           | 16.2153   | 20.6047    | 0.34562    | 0.3126     |
| CORO1A          | 18.9577   | 20.3467    | 0.102009   | 0.933843   |
| RPAP2           | 4.52067   | 3.71073    | -0.284832  | 0.739919   |
| NUDCD2          | 43.85     | 39.1975    | -0.161812  | 0.823658   |
| UBR2            | 2.78706   | 2.67011    | -0.0618472 | 0.970195   |
| ELOVL1          | 95.8059   | 100.938    | 0.0752781  | 0.957925   |
| ISG15           | 107.207   | 152.263    | 0.506176   | 0.070203   |
| ABCB9           | 4.38403   | 4.98591    | 0.185599   | 0.838646   |
| XKR6            | 0.15632   | 0.154335   | -0.0184291 | 1          |
| SLC6A4          | 0.051715  | 0.0792147  | 0.615187   | 1          |
| PGM2L1          | 0.452194  | 0.429468   | -0.074393  | 0.976595   |
| SEC24B          | 6.0357    | 4.58181    | -0.397605  | 0.24748    |
| EGLN2,MIA,RAB4B | 53.3782   | 60.0344    | 0.169541   | 0.804951   |
| LAMA1           | 8.13641   | 5.1326     | -0.664702  | 0.00882987 |
| ILDR2           | 0.675926  | 0.751601   | 0.153102   | 0.907657   |
| CHCHD1          | 76.5018   | 87.0371    | 0.186137   | 0.768707   |
| C2orf43         | 3.31651   | 2.36559    | -0.487462  | 0.202623   |
| TEX14           | 0.031291  | 0.0224633  | -0.478179  | 1          |
| ZNF720          | 2.01595   | 1.58173    | -0.349953  | 0.550253   |
| SLC25A44        | 6.55448   | 10.752     | 0.714048   | 0.00818401 |
| GAK             | 20.3109   | 25.4439    | 0.325068   | 0.358376   |
| KCTD9           | 6.45586   | 6.1878     | -0.0611842 | 0.972176   |
| CHERP           | 20.3124   | 26.6025    | 0.389201   | 0.251362   |
| TST             | 87.025    | 95.4343    | 0.133078   | 0.959465   |
| RM11            | 1.98932   | 1.85577    | -0.100256  | 0.950929   |
| ACPL2           | 3.86676   | 4.27542    | 0.144941   | 0.886345   |
| CCDC74B         | 1.38733   | 1.02051    | -0.443023  | 0.678791   |
| GLA             | 21.3875   | 30.6464    | 0.518953   | 0.942519   |
| DHX30           | 34.2559   | 43.8588    | 0.356517   | 0.291092   |
| MRPL18          | 75.7717   | 119.705    | 0.659757   | 0.0101293  |
| MYL12B          | 642.142   | 625.047    | -0.0389279 | 0.98386    |
| CYP2U1          | 1.94777   | 1.36508    | -0.512837  | 0.185616   |
| FAHD2A          | 25.3489   | 15.1374    | -0.743805  | 0.00593755 |
| TMOD1           | 1.03674   | 0.501689   | -1.04719   | 0.904734   |
| OSBPL2          | 9.08033   | 9.67201    | 0.0910711  | 0.943861   |
| MRPS11          | 24.9254   | 31.206     | 0.324206   | 0.387393   |
| NOL8            | 6.49064   | 7.05626    | 0.120542   | 0.955433   |
| SPRYD3          | 26.1646   | 27.0282    | 0.0468481  | 0.979701   |
| UNC13B          | 1.42572   | 1.52159    | 0.0938893  | 0.95534    |
| ZDHHC20         | 4.47775   | 5.05716    | 0.175553   | 0.805942   |
| CUL3            | 6.10431   | 8.57993    | 0.491136   | 0.0778493  |
| CASP8AP2        | 0.474754  | 0.649768   | 0.452744   | 0.351474   |
| NIF3L1          | 20.1552   | 19.3989    | -0.0551752 | 0.976149   |
| ZNF32           | 25.6691   | 21.6392    | -0.246383  | 0.670347   |
| PDXK            | 18.4676   | 19.9921    | 0.114436   | 0.907929   |
| BZW1            | 69.8795   | 67.4829    | -0.0503486 | 0.977696   |
| GNAO1           | 0.0160105 | 0.00523793 | -1.61195   | 1          |
| IKBK            | 13.1003   | 15.6124    | 0.253088   | 0.879514   |
| PUM1            | 8.37245   | 8.02825    | -0.0605639 | 0.969075   |
| LUZP1           | 3.66037   | 4.66314    | 0.349313   | 0.318433   |
| CDC42BPG        | 0.102466  | 0.0814905  | -0.330441  | 1          |
| ASPHD1          | 36.7629   | 51.3549    | 0.482251   | 0.098844   |
| FOXD2           | 1.83264   | 1.33019    | -0.46229   | 0.439254   |
| LOC401397       | 76.3997   | 68.8127    | -0.150893  | 0.833197   |
| TMEM131         | 4.9186    | 3.86106    | -0.349251  | 0.343998   |
| TRMT44          | 4.52999   | 5.33476    | 0.235918   | 0.720774   |
| B4GALT1         | 9.81562   | 9.34851    | -0.0703422 | 0.961224   |
| ALDH5A1         | 4.17662   | 3.15089    | -0.406576  | 0.262523   |
| CACUL1          | 7.57091   | 7.95753    | 0.0718536  | 0.959465   |
| RRP12           | 13.0886   | 28.2877    | 1.11187    | 0.00134142 |
| KCTD1           | 3.10572   | 2.64696    | -0.230593  | 0.807726   |
| STARD3          | 30.7703   | 27.1041    | -0.183026  | 0.76964    |
| LOC728537       | 1.01209   | 0.29922    | -1.75805   | 0.0101293  |
| PCBD1           | 210.364   | 207.123    | -0.0224029 | 0.991767   |
| COIL            | 5.49821   | 4.70401    | -0.225071  | 0.721048   |
| FAM3A           | 16.2519   | 12.5996    | -0.367234  | 0.292039   |
| VASH1           | 2.3233    | 2.90468    | 0.322202   | 0.507415   |
| ARMC10          | 37.7122   | 36.5187    | -0.0463952 | 0.980098   |
| TRNAU1AP        | 14.2218   | 11.2359    | -0.339983  | 0.671133   |
| IKKB            | 12.9127   | 11.5551    | -0.16026   | 0.827278   |
| HCFC1           | 9.81327   | 15.4694    | 0.656614   | 0.0114515  |
| NUTF2           | 271.708   | 309.273    | 0.186822   | 0.835941   |
| TTF1            | 9.21168   | 10.6574    | 0.210317   | 0.750999   |
| FAM210A         | 7.46497   | 7.01379    | -0.0899429 | 0.944724   |
| NLRX1           | 7.69065   | 4.07435    | -0.916535  | 0.00243047 |
| TM2D1           | 26.8662   | 17.9545    | -0.581445  | 0.0470437  |

|                          |           |          |            |            |
|--------------------------|-----------|----------|------------|------------|
| CNTD1                    | 0.19483   | 0.20392  | 0.0657898  | 1          |
| CTTN                     | 70.7266   | 85.3026  | 0.270337   | 0.525846   |
| SNAP29                   | 6.93497   | 5.80504  | -0.256584  | 0.59496    |
| C1orf85                  | 33.9444   | 22.7579  | -0.576803  | 0.0431891  |
| CUL2                     | 8.58545   | 8.68259  | 0.0162314  | 0.99351    |
| TNFAIP2                  | 7.46375   | 10.0203  | 0.424952   | 0.205908   |
| LSM5                     | 21.3993   | 25.6271  | 0.260106   | 0.550228   |
| POLR2G                   | 124.606   | 107.805  | -0.20895   | 0.69673    |
| SMYD2                    | 19.33     | 21.2645  | 0.137605   | 0.877493   |
| ZNF833P                  | 0.61489   | 0.468358 | -0.392716  | 0.690479   |
| VPS25                    | 81.6975   | 65.921   | -0.309555  | 0.408933   |
| NR2C2AP                  | 46.968    | 64.2034  | 0.450973   | 0.38398    |
| KLHDC3                   | 49.6554   | 37.7522  | -0.39539   | 0.204348   |
| MCF2L                    | 1.88282   | 1.2486   | -0.592581  | 0.111587   |
| SLC25A17                 | 12.7785   | 14.3884  | 0.171186   | 0.806888   |
| CEP55                    | 14.1489   | 13.3822  | -0.0803756 | 0.954677   |
| DPH1_OVCA2               | 116.265   | 121.122  | 0.0590556  | 0.974044   |
| STK38L                   | 3.0883    | 2.65542  | -0.21787   | 0.728031   |
| CYP20A1                  | 1.43239   | 0.981739 | -0.545013  | 0.108981   |
| USO1                     | 9.58078   | 7.28382  | -0.395448  | 0.225852   |
| ORMDL3                   | 17.7856   | 23.1513  | 0.380382   | 0.25146    |
| CDK7                     | 38.0757   | 26.5184  | -0.521879  | 0.0507992  |
| FKBP11                   | 158.151   | 172.217  | 0.122922   | 0.896032   |
| COA6                     | 73.8132   | 78.9339  | 0.0967644  | 0.93549    |
| RAB10                    | 27.2475   | 27.2942  | 0.00247233 | 0.998564   |
| TLE3                     | 8.64429   | 8.3031   | -0.0580972 | 0.974044   |
| HMGN1                    | 214.424   | 241.854  | 0.173666   | 0.790283   |
| MITD1                    | 19.639    | 14.7866  | -0.409434  | 0.277325   |
| SRXN1                    | 40.6258   | 51.6115  | 0.345296   | 0.300705   |
| PTPLA                    | 4.79117   | 4.47292  | -0.0991607 | 0.958814   |
| FARP2                    | 0.609239  | 0.660181 | 0.115853   | 0.904554   |
| PHF11                    | 9.1631    | 4.86597  | -0.913108  | 0.00134142 |
| TOMM34                   | 85.4693   | 97.7229  | 0.193291   | 0.739348   |
| HIST1H2BC                | 2.12241   | 2.23666  | 0.0756378  | 0.988154   |
| LINC00294                | 3.18736   | 3.83783  | 0.267931   | 0.642142   |
| NDUFB2                   | 163.618   | 165.463  | 0.0161745  | 0.99351    |
| PDLIM5                   | 3.06826   | 2.83613  | -0.113497  | 0.950929   |
| DOT1L                    | 7.72758   | 8.75768  | 0.180532   | 0.779264   |
| TSG101                   | 35.1902   | 20.039   | -0.812364  | 0.00134142 |
| CDK5                     | 38.4166   | 37.1786  | -0.0472582 | 0.979701   |
| CWC22                    | 4.03856   | 4.25252  | 0.0744771  | 0.963209   |
| DNAJC10                  | 6.57542   | 6.81115  | 0.0508148  | 0.977332   |
| AGMAT                    | 7.29601   | 7.52889  | 0.0453295  | 0.987627   |
| POLR3F                   | 4.53277   | 6.36766  | 0.490372   | 0.14869    |
| CCDC130                  | 20.8656   | 18.5273  | -0.171468  | 0.827718   |
| AAGAB                    | 13.372    | 17.1679  | 0.360497   | 0.386151   |
| LY6G5C                   | 2.4826    | 1.83815  | -0.433599  | 0.674323   |
| CEP57                    | 10.2336   | 3.94137  | -1.37655   | 0.00134142 |
| GALK1                    | 51.2505   | 39.4901  | -0.376074  | 0.274547   |
| PDXP                     | 53.3926   | 89.7318  | 0.748979   | 0.00337323 |
| TUSC2                    | 19.9475   | 39.3817  | 0.981317   | 0.00134142 |
| KDELR2                   | 59.1781   | 72.0743  | 0.284421   | 0.484525   |
| REEP5                    | 27.6277   | 26.0978  | -0.0821829 | 0.961432   |
| C3orf62                  | 2.63625   | 3.19985  | 0.279516   | 0.622082   |
| KLHDC10                  | 3.70501   | 2.41152  | -0.619537  | 0.0278845  |
| RAVER1                   | 33.2316   | 42.9779  | 0.371038   | 0.248384   |
| FLNA                     | 79.9285   | 71.3687  | -0.163418  | 0.825067   |
| GLUL                     | 23.5708   | 29.1025  | 0.304141   | 0.415129   |
| LOC100289361             | 6.63233   | 4.9608   | -0.418943  | 0.583774   |
| ZNF765                   | 1.06542   | 1.16402  | 0.127706   | 0.931816   |
| THEM4                    | 3.30205   | 4.39964  | 0.414025   | 0.243457   |
| SLC9A3R1                 | 53.1365   | 84.1926  | 0.663991   | 0.668888   |
| TMEM115                  | 39.9595   | 66.8726  | 0.742876   | 0.00425224 |
| VMA21                    | 10.685    | 16.52    | 0.628632   | 0.0132924  |
| NUDT15                   | 10.8794   | 16.9342  | 0.638338   | 0.0150729  |
| RAB2B                    | 3.79889   | 3.08485  | -0.300376  | 0.580744   |
| NUP153                   | 6.38203   | 7.47267  | 0.227607   | 0.651194   |
| TLE1                     | 7.09683   | 5.18317  | -0.453339  | 0.203111   |
| RBM38                    | 37.7073   | 50.3204  | 0.416302   | 0.524985   |
| C20orf24,TGIF2,TGIF2-C20 | 94.2425   | 148.979  | 0.660663   | 0.0172978  |
| ZNF587B                  | 2.52116   | 2.88233  | 0.193146   | 0.820047   |
| RAB22A                   | 3.92475   | 3.58344  | -0.131252  | 0.882983   |
| LSM7                     | 260.407   | 331.484  | 0.348171   | 0.298465   |
| TIMM8B                   | 49.7109   | 84.2557  | 0.761211   | 0.0340561  |
| ZNF747                   | 6.27918   | 9.65419  | 0.62058    | 0.0662578  |
| STIL                     | 3.89361   | 3.51553  | -0.147365  | 0.870466   |
| AOX1                     | 0.0848918 | 0.080151 | -0.0829043 | 1          |
| PROSC                    | 31.8964   | 30.1482  | -0.0813225 | 0.950929   |
| ZNF580                   | 93.7237   | 84.0415  | -0.157311  | 0.835119   |

|                        |           |           |             |            |
|------------------------|-----------|-----------|-------------|------------|
| CYP1A1                 | 0.33267   | 0.226984  | -0.551503   | 1          |
| UBL5                   | 556.682   | 679.352   | 0.287305    | 0.468427   |
| LOC152225              | 7.43204   | 4.17771   | -0.831045   | 0.00337323 |
| MORF4L2                | 70.1482   | 86.9197   | 0.309278    | 0.420042   |
| PIM2                   | 20.0069   | 29.0008   | 0.535595    | 0.0477866  |
| CORO7,CORO7-PAM16,PA   | 158.105   | 163.182   | 0.0456026   | 0.985921   |
| CHST15                 | 9.16734   | 9.6853    | 0.0792942   | 0.955758   |
| SCP2                   | 32.7548   | 27.4551   | -0.254633   | 0.594881   |
| UBE2I                  | 85.3703   | 74.7486   | -0.191687   | 0.752981   |
| MYLK3                  | 0.0181643 | 0.0169602 | -0.0989579  | 1          |
| ARHGEF28               | 11.332    | 4.28468   | -1.40314    | 0.00134142 |
| ELAVL1                 | 18.8067   | 23.4677   | 0.319435    | 0.38253    |
| SLC9B2                 | 7.39177   | 5.7679    | -0.357873   | 0.355857   |
| ER13                   | 56.3634   | 48.5368   | -0.215679   | 0.671358   |
| RPS6KC1                | 1.23371   | 1.42926   | 0.21226     | 0.819258   |
| ERAL1                  | 51.3074   | 53.7403   | 0.0668369   | 0.963457   |
| CARS2                  | 53.9684   | 45.6675   | -0.240946   | 0.605597   |
| API5                   | 25.7426   | 33.7323   | 0.389975    | 0.210564   |
| GIGYF2                 | 5.92825   | 5.83857   | -0.0219906  | 0.991767   |
| ANKRD52                | 5.44251   | 10.7102   | 0.97664     | 0.00134142 |
| MVB12A                 | 64.6577   | 45.0544   | -0.521155   | 0.0630479  |
| NT5C1B,NT5C1B-RDH14,R1 | 11.1353   | 12.6639   | 0.18558     | 0.806183   |
| USP1                   | 12.1478   | 13.6849   | 0.171891    | 0.79799    |
| RABGGTA                | 15.6663   | 13.1317   | -0.254611   | 0.638545   |
| YDJC                   | 119.219   | 162.321   | 0.445236    | 0.134248   |
| PPP3CA                 | 2.37239   | 2.73783   | 0.206692    | 0.786044   |
| GLI1                   | 0.304226  | 0.493394  | 0.697597    | 0.336176   |
| ATF7                   | 3.34676   | 3.90858   | 0.22388     | 0.917325   |
| STX4                   | 51.0409   | 69.3093   | 0.441395    | 0.13237    |
| MRPS14                 | 11.1514   | 10.4153   | -0.0985216  | 0.933023   |
| PRR13                  | 94.3758   | 100.34    | 0.0884126   | 0.942116   |
| C17orf85               | 2.76118   | 2.76544   | 0.00222766  | 0.998564   |
| PRR14                  | 31.3302   | 32.517    | 0.0536409   | 0.976198   |
| NR4A2                  | 0.376122  | 0.494669  | 0.395261    | 0.68423    |
| SMC4                   | 7.00013   | 7.575     | 0.113864    | 0.913628   |
| ZNF259                 | 38.9114   | 43.2311   | 0.151876    | 0.834859   |
| AGAP1                  | 3.16741   | 2.24319   | -0.497749   | 0.102638   |
| PNPLA2                 | 72.0986   | 73.7157   | 0.0320002   | 0.986822   |
| CIDEB                  | 1.62986   | 3.69707   | 1.18163     | 0.0963541  |
| ATAD1                  | 11.0158   | 8.43559   | -0.385011   | 0.243837   |
| YWHAH                  | 63.5845   | 86.547    | 0.444807    | 0.119771   |
| USP12                  | 6.59752   | 6.69509   | 0.0211787   | 0.991767   |
| SERINC1                | 18.8681   | 8.5456    | -1.14269    | 0.00134142 |
| CDPF1                  | 5.40688   | 3.16148   | -0.774197   | 0.0515434  |
| TTC31                  | 6.00973   | 4.41467   | -0.444995   | 0.654565   |
| BRD7                   | 27.3541   | 26.4324   | -0.0494494  | 0.977995   |
| MSRB1                  | 26.8873   | 41.4281   | 0.623686    | 0.0240561  |
| STAU2                  | 7.42883   | 4.68213   | -0.66597    | 0.0194494  |
| HNRNPK                 | 197.587   | 175.266   | -0.172936   | 0.80896    |
| TPRN                   | 51.0911   | 56.8642   | 0.15445     | 0.828589   |
| GTPBP3                 | 20.2175   | 41.004    | 1.02016     | 0.00134142 |
| SLC9B1                 | 0.206256  | 0.117064  | -0.817131   | 1          |
| SYBU                   | 7.25565   | 6.22706   | -0.220553   | 0.732063   |
| TAPT1                  | 2.30675   | 1.96031   | -0.234784   | 0.733942   |
| HNRNPA1L2              | 8.8406    | 8.10526   | -0.125286   | 0.908114   |
| DNAJC14                | 10.7211   | 10.9572   | 0.0314228   | 0.992353   |
| CRNKL1                 | 5.28145   | 4.58163   | -0.205072   | 0.732283   |
| RAB1A                  | 44.2031   | 44.123    | -0.00261586 | 0.998558   |
| ORC2                   | 3.41284   | 3.68493   | 0.110666    | 0.931471   |
| MYO1B                  | 10.4005   | 9.06033   | -0.199023   | 0.720847   |
| TMEM38A                | 1.95271   | 2.92594   | 0.583424    | 0.287139   |
| CTSA                   | 59.9414   | 56.3552   | -0.0890061  | 0.950929   |
| C17orf97               | 6.56651   | 8.21635   | 0.32337     | 0.571197   |
| ANO10                  | 8.32321   | 5.76412   | -0.53004    | 0.101849   |
| TPGS1                  | 17.7237   | 19.5965   | 0.144916    | 0.924371   |
| FAM213B                | 21.6132   | 37.3562   | 0.789437    | 0.00337323 |
| PEX26                  | 7.86937   | 7.29467   | -0.109405   | 0.922006   |
| PLAT                   | 1.09987   | 0.493985  | -1.15479    | 0.0200038  |
| FAM192A                | 17.5039   | 15.3081   | -0.193385   | 0.742477   |
| PRPF4                  | 17.3338   | 31.6636   | 0.869237    | 0.00134142 |
| BACE1                  | 2.94807   | 2.51641   | -0.228408   | 0.79185    |
| EARS2                  | 10.3353   | 12.2451   | 0.244623    | 0.607184   |
| RB1                    | 5.64106   | 3.46353   | -0.703722   | 0.00818401 |
| ZBTB7B                 | 11.017    | 14.5537   | 0.401656    | 0.227355   |
| GRB2                   | 41.6186   | 51.1415   | 0.297267    | 0.431583   |
| ZNF665                 | 0.0180996 | 0.0161571 | -0.163787   | 1          |
| USP16                  | 5.97866   | 6.3407    | 0.0848205   | 0.952371   |
| GNL3L                  | 3.48755   | 5.39386   | 0.629105    | 0.0183825  |
| USP32                  | 3.90777   | 2.46301   | -0.665922   | 0.00882987 |



|                           |           |           |            |            |
|---------------------------|-----------|-----------|------------|------------|
| TUBB4B                    | 867.527   | 1874.55   | 1.11156    | 0.00134142 |
| YWHAG                     | 38.9751   | 55.4501   | 0.508638   | 0.0730091  |
| SMARCA5                   | 9.38899   | 9.87122   | 0.0722589  | 0.958902   |
| KDM4C                     | 3.09484   | 1.93257   | -0.679349  | 0.0370005  |
| AP1M1                     | 19.0924   | 20.495    | 0.102275   | 0.92856    |
| TRAPPC5                   | 210.64    | 235.929   | 0.163572   | 0.812903   |
| TFIP11                    | 12.9618   | 14.7945   | 0.190787   | 0.849027   |
| TWISTNB                   | 5.19358   | 7.02659   | 0.436095   | 0.165739   |
| ATG13                     | 12.5244   | 7.74989   | -0.69249   | 0.00425224 |
| EED                       | 13.1912   | 15.8896   | 0.268514   | 0.559022   |
| WDR16                     | 0.0678078 | 0.0461838 | -0.554065  | 1          |
| WARS2                     | 5.60312   | 4.03892   | -0.472262  | 0.175368   |
| ITSN2                     | 1.33552   | 0.913304  | -0.548232  | 0.157978   |
| RAB5A                     | 14.5073   | 10.1829   | -0.510627  | 0.0708615  |
| TOLLIP                    | 23.4498   | 24.1493   | 0.0424046  | 0.979875   |
| DAPK3                     | 145.767   | 98.8027   | -0.561038  | 0.0266793  |
| AP3S2,C15orf38,C15orf38-A | 13.782    | 10.6281   | -0.374907  | 0.399303   |
| DNAJB6                    | 75.165    | 112.673   | 0.584011   | 0.0250278  |
| MYBL1                     | 1.09885   | 1.37486   | 0.323289   | 0.578516   |
| MBNL3                     | 0.283725  | 0.151292  | -0.907161  | 1          |
| ARHGAP21                  | 5.04888   | 5.44728   | 0.109574   | 0.918416   |
| TMEM179B                  | 62.6705   | 48.2905   | -0.376048  | 0.318543   |
| FAM207A                   | 88.5439   | 84.3945   | -0.0692445 | 0.961224   |
| ODF2                      | 20.8538   | 19.0706   | -0.128961  | 0.896051   |
| CLP1                      | 11.782    | 15.6751   | 0.41189    | 0.222289   |
| SMAD5                     | 3.70106   | 4.16431   | 0.17014    | 0.809901   |
| LMO2                      | 2.68373   | 0.915863  | -1.55103   | 0.00134142 |
| SRSF9                     | 315.653   | 304.176   | -0.0534352 | 0.978196   |
| C19orf43                  | 295.69    | 437.129   | 0.563971   | 0.0322484  |
| SCFD1                     | 8.05486   | 7.33251   | -0.135553  | 0.893663   |
| ARF5                      | 323.237   | 318.84    | -0.0197599 | 0.992797   |
| DLG3                      | 7.56541   | 4.72899   | -0.677887  | 0.0120701  |
| SCYL1                     | 48.6491   | 58.0421   | 0.254687   | 0.623055   |
| IARS2                     | 28.5146   | 21.4877   | -0.408191  | 0.663653   |
| OR51B5                    | 0.548253  | 0.353039  | -0.635014  | 0.749348   |
| PSMA6                     | 153.787   | 160.629   | 0.0628003  | 0.966442   |
| MYH14                     | 5.37316   | 3.76889   | -0.511629  | 0.111788   |
| COQ9                      | 32.0958   | 24.2942   | -0.401774  | 0.615326   |
| MFAP1                     | 17.0556   | 19.5578   | 0.1975     | 0.735667   |
| EML4                      | 5.00255   | 5.98854   | 0.259541   | 0.552496   |
| TANC1                     | 1.89701   | 2.23074   | 0.233794   | 0.694316   |
| UQCRC10                   | 94.2724   | 118.487   | 0.329826   | 0.331712   |
| TMCC04                    | 5.38111   | 4.46043   | -0.270721  | 0.66067    |
| CMIP                      | 8.9401    | 6.34694   | -0.494228  | 0.105061   |
| ARHGAP11A                 | 6.06892   | 9.89077   | 0.704642   | 0.00337323 |
| NFRKB                     | 5.90764   | 6.6675    | 0.174563   | 0.802478   |
| TAF4                      | 4.59556   | 4.75589   | 0.0494746  | 0.979875   |
| ZNF770                    | 7.72287   | 7.84732   | 0.0230631  | 0.990994   |
| XPNPPEP3                  | 4.47739   | 3.33861   | -0.423408  | 0.494676   |
| C11orf24                  | 22.0922   | 34.078    | 0.625306   | 0.0178668  |
| PNPO                      | 13.2739   | 11.8073   | -0.168913  | 0.81297    |
| ACYP1                     | 14.8162   | 13.4909   | -0.135189  | 0.918898   |
| IKBKAP                    | 5.00336   | 5.99379   | 0.260571   | 0.565086   |
| SMUG1                     | 35.5398   | 34.1616   | -0.0570565 | 0.979701   |
| CANX                      | 87.7307   | 81.5035   | -0.106221  | 0.92385    |
| NUDT4                     | 16.4683   | 19.8686   | 0.270794   | 0.524575   |
| MYBBP1A                   | 26.8433   | 55.2608   | 1.0417     | 0.00134142 |
| KRI1                      | 21.2052   | 33.739    | 0.670001   | 0.0278845  |
| RALY                      | 48.7885   | 48.3428   | -0.0132395 | 0.995302   |
| UBE2D1                    | 10.5531   | 8.33956   | -0.33962   | 0.358687   |
| UPRT                      | 6.17866   | 3.37291   | -0.873302  | 0.00134142 |
| IDH1                      | 14.005    | 12.2251   | -0.196091  | 0.74929    |
| GEMIN2                    | 9.26814   | 8.6101    | -0.106249  | 0.936256   |
| TTC27                     | 7.92293   | 9.28184   | 0.228376   | 0.688314   |
| CCDC34                    | 8.8315    | 9.76054   | 0.144303   | 0.882845   |
| BIRC2                     | 14.3284   | 11.9389   | -0.263202  | 0.564234   |
| WBSCR27                   | 12.8186   | 4.85739   | -1.39999   | 0.00134142 |
| PAXIP1                    | 6.0442    | 6.243     | 0.0466879  | 0.979701   |
| KIAA0753                  | 1.91738   | 2.46465   | 0.362247   | 0.920028   |
| TBC1D19                   | 1.8666    | 0.740349  | -1.33413   | 0.00134142 |
| PDHX                      | 10.2052   | 8.40137   | -0.280608  | 0.721548   |
| FAM83H                    | 33.5177   | 53.3515   | 0.670605   | 0.00134142 |
| TEAD4                     | 46.7544   | 42.8091   | -0.127182  | 0.892082   |
| LMBR1                     | 8.64327   | 8.26931   | -0.0638097 | 0.966946   |
| BBS1                      | 3.304     | 2.3165    | -0.512264  | 0.197629   |
| ITGB1BP1                  | 30.1647   | 43.2734   | 0.520617   | 0.0547855  |
| USP21                     | 15.7351   | 12.5871   | -0.322041  | 0.422286   |
| NXT2                      | 2.03048   | 1.92918   | -0.0738327 | 0.976214   |
| PPIL4                     | 7.77536   | 6.7069    | -0.213263  | 0.721117   |

|               |           |           |            |            |
|---------------|-----------|-----------|------------|------------|
| KCNJ1         | 0.0293983 | 0.0030038 | -3.29087   | 1          |
| UBXN11        | 11.7114   | 9.62519   | -0.283033  | 0.654699   |
| SMYD5         | 22.9446   | 31.3296   | 0.449372   | 0.111788   |
| AQP3          | 0.131045  | 0.410534  | 1.64744    | 0.0757506  |
| MARCH7        | 13.3802   | 9.78966   | -0.450765  | 0.130193   |
| CAPNS1        | 276.637   | 282.45    | 0.0300018  | 0.987693   |
| FAM86HP       | 1.06818   | 0.327067  | -1.70749   | 0.00593755 |
| GGA1          | 30.666    | 32.2556   | 0.0729089  | 0.95835    |
| HSPA12A       | 1.59479   | 1.69463   | 0.087601   | 0.959465   |
| CITED2        | 7.24239   | 6.20536   | -0.222951  | 0.772843   |
| LOC100507118  | 6.39504   | 6.99942   | 0.130282   | 0.978196   |
| WDR43         | 21.7802   | 27.8659   | 0.355487   | 0.271404   |
| PSMD4         | 169.989   | 121.157   | -0.488562  | 0.0875912  |
| PLEKHA3       | 6.30742   | 5.22641   | -0.271228  | 0.872554   |
| UBALD1        | 47.6311   | 48.1742   | 0.0163566  | 0.99351    |
| C16orf87      | 2.91179   | 2.30362   | -0.338004  | 0.647944   |
| WDR89         | 3.13062   | 3.93298   | 0.329175   | 0.466097   |
| B4GALT5       | 10.7027   | 18.0401   | 0.753226   | 0.00134142 |
| ZDHHC11       | 3.44098   | 4.05274   | 0.236079   | 0.757993   |
| DBF4          | 6.54842   | 7.86692   | 0.264651   | 0.619995   |
| NEK7          | 2.98627   | 2.37098   | -0.332858  | 0.475849   |
| MAPK13        | 14.1898   | 9.60928   | -0.562349  | 0.0278845  |
| HAGH          | 40.4901   | 31.7438   | -0.351092  | 0.328386   |
| SCARF1        | 0.594549  | 0.424905  | -0.484657  | 0.594881   |
| MTA1          | 44.6357   | 33.2661   | -0.424148  | 0.156997   |
| C16orf93      | 2.64863   | 3.37831   | 0.351054   | 0.979701   |
| AK7           | 0.129888  | 0.0476293 | -1.44735   | 1          |
| CEBPG         | 22.4368   | 11.4744   | -0.96744   | 0.00134142 |
| IKBIP         | 13.3255   | 13.9443   | 0.0654902  | 0.974044   |
| MMGT1         | 7.26746   | 8.29557   | 0.190889   | 0.759967   |
| GOLGA1        | 5.32754   | 3.13711   | -0.764033  | 0.00818401 |
| NPM2          | 21.4154   | 24.5668   | 0.198066   | 0.78079    |
| NOP2          | 31.1934   | 56.5957   | 0.859451   | 0.00134142 |
| LEPRE1        | 18.1786   | 20.9778   | 0.206623   | 0.719967   |
| C9orf85       | 8.39857   | 5.33677   | -0.654176  | 0.0504457  |
| GLIS2         | 12.7644   | 10.3809   | -0.298188  | 0.493853   |
| MOGS          | 47.4898   | 68.0549   | 0.51908    | 0.0439989  |
| GPD1          | 0.116276  | 0.0833941 | -0.479536  | 1          |
| MBD1          | 14.9869   | 14.6544   | -0.0323716 | 0.987693   |
| CLASP2        | 2.32192   | 2.40341   | 0.0497671  | 0.979701   |
| NOL11         | 17.7705   | 27.5536   | 0.632755   | 0.0139368  |
| SIGMAR1       | 152.876   | 140.861   | -0.118089  | 0.903682   |
| FANCE         | 14.741    | 14.297    | -0.0441276 | 0.980533   |
| GGACT         | 1.50416   | 0.930636  | -0.692664  | 0.496089   |
| CDK11A,CDK11B | 15.897    | 20.9345   | 0.397128   | 0.428623   |
| SMIM12        | 5.91605   | 9.64154   | 0.704629   | 0.00743393 |
| CASP6         | 12.9014   | 9.99008   | -0.368965  | 0.366116   |
| MRPS34        | 185.253   | 268.875   | 0.537443   | 0.0451064  |
| EFNA5         | 1.17333   | 1.2003    | 0.0327847  | 0.990324   |
| NUAK1         | 1.22676   | 0.545311  | -1.16971   | 0.00134142 |
| EFNA3         | 35.8609   | 49.246    | 0.457594   | 0.13292    |
| PHC2          | 135.56    | 98.8921   | -0.455     | 0.113208   |
| LMTK2         | 3.91813   | 4.21112   | 0.104038   | 0.926717   |
| HECTD1        | 3.43871   | 4.5386    | 0.400381   | 0.208364   |
| B4GALT7       | 34.281    | 25.6112   | -0.420632  | 0.192415   |
| C16orf70      | 5.44605   | 7.36417   | 0.435312   | 0.407326   |
| TMEM238       | 23.1225   | 28.9369   | 0.323612   | 0.725998   |
| ZNHIT6        | 5.38351   | 6.80975   | 0.339055   | 0.33121    |
| CDV3          | 37.8284   | 50.6147   | 0.420087   | 0.16323    |
| RBBP9         | 2.98137   | 2.10729   | -0.500582  | 0.173163   |
| KCNMB3        | 0.685422  | 0.686075  | 0.00137436 | 0.999427   |
| TEAD3         | 12.1156   | 15.0399   | 0.31193    | 0.440376   |
| RANBP10       | 5.38846   | 3.74672   | -0.524242  | 0.0780546  |
| DUS1L         | 61.6911   | 95.07     | 0.623928   | 0.0162707  |
| SAPCD2        | 55.767    | 109.33    | 0.9712     | 0.00134142 |
| NUS1          | 11.6892   | 18.1951   | 0.638377   | 0.0126858  |
| TTC14         | 1.55399   | 1.64326   | 0.080576   | 0.969963   |
| DDX3X         | 30.2025   | 44.5978   | 0.562307   | 0.0382315  |
| DARS2         | 6.46856   | 5.63622   | -0.198716  | 0.771183   |
| NLRC4         | 0.150773  | 0.195499  | 0.374783   | 1          |
| FAM86FP       | 1.69282   | 0.698958  | -1.27616   | 0.00672555 |
| MAPKAPK5      | 11.6563   | 11.3831   | -0.0342079 | 0.990324   |
| METTL2B       | 6.47141   | 7.43743   | 0.200726   | 0.77038    |
| BUB1B,PAK6    | 18.4192   | 22.7996   | 0.307801   | 0.461438   |
| FARS2         | 8.51547   | 7.21786   | -0.238515  | 0.717812   |
| NDUFA4L2      | 1.78928   | 1.06091   | -0.754073  | 0.947247   |
| MAP3K8        | 1.0907    | 0.890366  | -0.292782  | 0.771183   |
| BCAS4         | 27.1226   | 22.3018   | -0.282336  | 0.556174   |
| CNPY3         | 59.1512   | 57.0993   | -0.0509355 | 0.976618   |

|                        |           |           |             |            |
|------------------------|-----------|-----------|-------------|------------|
| FAM22A                 | 0.797214  | 0.662297  | -0.267488   | 0.844285   |
| CCDC88C                | 3.56158   | 3.6969    | 0.0537973   | 0.977696   |
| MKRN2                  | 10.6599   | 7.69508   | -0.47018    | 0.624281   |
| COX14                  | 63.5196   | 71.7142   | 0.175057    | 0.806043   |
| FAM101A,ZNF664,ZNF664- | 18.9248   | 20.4931   | 0.114858    | 0.906484   |
| NAP1L5                 | 1.2069    | 1.64081   | 0.443096    | 0.819513   |
| MLST8                  | 79.0269   | 67.1067   | -0.235887   | 0.628339   |
| GPR89A                 | 4.81435   | 6.07666   | 0.335938    | 0.485249   |
| PLK1                   | 67.7871   | 93.5918   | 0.465371    | 0.106054   |
| NANS                   | 129.543   | 167.455   | 0.370339    | 0.407986   |
| SLC13A3,TP53RK         | 6.58033   | 10.955    | 0.735352    | 0.00337323 |
| RPS6KA4                | 40.4603   | 69.7297   | 0.785267    | 0.00134142 |
| CP                     | 1.62169   | 0.812551  | -0.996966   | 0.0615558  |
| ZFR                    | 7.34685   | 8.20415   | 0.159227    | 0.825067   |
| ZNF544                 | 4.69604   | 5.66088   | 0.269582    | 0.588607   |
| MDP1,NEDD8,NEDD8-MDP   | 302.138   | 318.731   | 0.077133    | 0.954188   |
| EIF5                   | 23.9412   | 32.6223   | 0.446366    | 0.124319   |
| VRK2                   | 2.49607   | 1.52977   | -0.706341   | 0.671358   |
| CBR4                   | 4.9008    | 3.17416   | -0.626639   | 0.0283563  |
| KAT8                   | 22.8643   | 22.3178   | -0.0348991  | 0.986529   |
| ZNF175                 | 1.57309   | 1.14894   | -0.4533     | 0.33121    |
| EML5                   | 0.210282  | 0.331362  | 0.656082    | 1          |
| NDUFB1                 | 183.679   | 188.371   | 0.0363867   | 0.985283   |
| HSDL1                  | 6.28941   | 5.99739   | -0.0685896  | 0.966227   |
| ATP5E,SLMO2            | 738.451   | 894.47    | 0.276532    | 0.649554   |
| DYNC1H1                | 21.08     | 16.4192   | -0.36049    | 0.278127   |
| MCTP1                  | 4.79504   | 1.03872   | -2.20674    | 0.00134142 |
| TPRA1                  | 50.7715   | 47.7283   | -0.0891742  | 0.946765   |
| PPIC                   | 13.8596   | 14.062    | 0.0209136   | 0.993379   |
| BRAT1                  | 22.1876   | 32.5277   | 0.551912    | 0.0410573  |
| LRRC8D                 | 6.3001    | 6.57559   | 0.0617465   | 0.972787   |
| EMP1                   | 43.9892   | 50.6958   | 0.204717    | 0.720195   |
| HPS3                   | 2.95898   | 1.36202   | -1.11935    | 0.00337323 |
| TMEM248                | 18.0362   | 22.0573   | 0.290361    | 0.455614   |
| ATP6V1B2               | 33.7611   | 23.7851   | -0.505299   | 0.0599768  |
| NDUFS3                 | 104.899   | 117.584   | 0.164694    | 0.903932   |
| ANXA5                  | 272.683   | 280.518   | 0.0408706   | 0.981753   |
| LRP5                   | 12.6758   | 14.6336   | 0.207207    | 0.716166   |
| PTMA                   | 1206.42   | 1541.82   | 0.353893    | 0.343608   |
| TNIP2                  | 51.1005   | 61.9642   | 0.278098    | 0.505225   |
| RAPGEF2                | 1.68248   | 1.16106   | -0.535145   | 0.129674   |
| MBD4                   | 8.51977   | 11.1314   | 0.385743    | 0.50726    |
| GNA12                  | 7.71637   | 11.03     | 0.515433    | 0.0671701  |
| CCDC113                | 1.22961   | 0.5429    | -1.17944    | 0.00337323 |
| TUBG1                  | 45.0495   | 75.978    | 0.754071    | 0.030165   |
| VPS37A                 | 3.4214    | 3.32907   | -0.0394683  | 0.987334   |
| SLC25A15               | 5.10403   | 7.96352   | 0.64177     | 0.0245451  |
| ACHE                   | 5.09208   | 6.2176    | 0.288102    | 0.651966   |
| WBP5                   | 48.3968   | 42.4131   | -0.190399   | 0.751467   |
| IRF4                   | 0.0662182 | 0.0160639 | -2.04341    | 1          |
| SEC11A                 | 172.578   | 162.058   | -0.0907333  | 0.940072   |
| MOB3A                  | 10.2445   | 11.9863   | 0.226534    | 0.686575   |
| MTA3                   | 12.2188   | 7.53388   | -0.697632   | 0.0101293  |
| STX12                  | 10.6403   | 7.71901   | -0.463053   | 0.129076   |
| AOC3                   | 0.886221  | 1.62851   | 0.877817    | 0.0326415  |
| PARP4                  | 14.6627   | 8.74207   | -0.746105   | 0.00243047 |
| SEC23IP                | 3.10748   | 4.3371    | 0.480985    | 0.109667   |
| CDKL3                  | 0.708913  | 0.488923  | -0.536002   | 0.532823   |
| USP33                  | 6.55841   | 4.18365   | -0.648583   | 0.0145499  |
| ITSN1                  | 1.60034   | 1.50251   | -0.0910013  | 0.958915   |
| CD2AP                  | 5.81924   | 5.82273   | 0.000864826 | 0.999427   |
| TTC13                  | 1.46744   | 1.76736   | 0.268295    | 0.729713   |
| ATP6AP1                | 70.3331   | 61.1923   | -0.200854   | 0.721725   |
| ARL14EP                | 5.84397   | 5.72147   | -0.0305631  | 0.989748   |
| UVRAG                  | 1.63222   | 1.4935    | -0.128139   | 0.925701   |
| PIN1                   | 94.8606   | 96.5062   | 0.0248131   | 0.990324   |
| TAX1BP1                | 13.8671   | 10.3195   | -0.426293   | 0.158976   |
| IL32                   | 392.553   | 612.298   | 0.641348    | 0.0145499  |
| NEK11                  | 0.529758  | 0.390761  | -0.439046   | 0.869885   |
| C1orf122               | 69.9856   | 141.42    | 1.01485     | 0.0288382  |
| MAP2K4                 | 6.09786   | 6.81433   | 0.160269    | 0.830321   |
| ADAMTS17               | 0.0728166 | 0.131525  | 0.852997    | 1          |
| FAM3C                  | 21.7225   | 27.6638   | 0.348807    | 0.30221    |
| GEMIN7                 | 26.5277   | 33.3834   | 0.331634    | 0.372359   |
| HOXB13                 | 1.87069   | 1.07984   | -0.792752   | 0.0755921  |
| GNP2                   | 26.9502   | 27.6658   | 0.0378043   | 0.985921   |
| RPL36AL                | 605.939   | 859.942   | 0.505066    | 0.072702   |
| DSP                    | 2.47355   | 2.22163   | -0.154963   | 0.855173   |
| TRMT10C                | 25.9954   | 41.126    | 0.661795    | 0.00743393 |

|           |           |           |             |            |
|-----------|-----------|-----------|-------------|------------|
| MCEE      | 4.37135   | 2.94168   | -0.571439   | 0.281145   |
| ELOF1     | 108.733   | 175.919   | 0.694126    | 0.00593755 |
| OFD1      | 5.45348   | 3.46671   | -0.65361    | 0.0274653  |
| NELFE     | 79.7713   | 79.3039   | -0.00847898 | 0.997036   |
| RHBDF2    | 5.57912   | 6.41037   | 0.200369    | 0.806888   |
| CYBA      | 387.464   | 427.749   | 0.142701    | 0.852163   |
| TRIT1     | 15.3815   | 14.3303   | -0.102131   | 0.930157   |
| SEC63     | 5.49505   | 4.76265   | -0.206366   | 0.716391   |
| NEK1      | 1.11093   | 0.720722  | -0.62426    | 0.100814   |
| MMP1      | 0.200197  | 0.15668   | -0.353601   | 1          |
| REPIN1    | 108.681   | 121.951   | 0.166202    | 0.80896    |
| NDNL2     | 18.3188   | 21.3297   | 0.219537    | 0.700083   |
| PITPNB    | 19.1595   | 30.9548   | 0.692106    | 0.00509212 |
| TXNRD2    | 24.0497   | 20.3442   | -0.241402   | 0.895414   |
| SNAI3-AS1 | 1.23984   | 0.939741  | -0.399822   | 0.898711   |
| ARHGAP1   | 19.9635   | 16.6565   | -0.26128    | 0.563286   |
| GTDC1     | 1.28936   | 1.22942   | -0.0686826  | 0.979701   |
| UBE2G2    | 21.0104   | 36.0077   | 0.777202    | 0.00134142 |
| MAPK6     | 7.78809   | 5.51881   | -0.496912   | 0.0906031  |
| GLYR1     | 12.2085   | 16.8631   | 0.465991    | 0.102638   |
| DHX33     | 9.36404   | 13.7674   | 0.556049    | 0.0345327  |
| SF3B5     | 301.847   | 441.485   | 0.548546    | 0.0336095  |
| NDFIP2    | 7.05449   | 7.38712   | 0.0664704   | 0.963669   |
| PIGP      | 32.1986   | 15.7357   | -1.03296    | 0.00134142 |
| LTV1      | 15.1198   | 24.2538   | 0.681772    | 0.009453   |
| UBA5      | 10.7466   | 9.51797   | -0.17516    | 0.877187   |
| ARPC3     | 301.684   | 295.768   | -0.0285748  | 0.988166   |
| COX5A     | 352.204   | 365.079   | 0.0517953   | 0.976618   |
| PALD1     | 9.99733   | 11.3797   | 0.18685     | 0.771183   |
| KRR1      | 17.9901   | 25.8351   | 0.522129    | 0.277735   |
| MXD1      | 6.81571   | 4.00123   | -0.768421   | 0.00337323 |
| ARFGAP2   | 27.2986   | 21.3348   | -0.355616   | 0.450569   |
| UBE2D3    | 121.362   | 122.037   | 0.00799912  | 0.997036   |
| LIN54     | 2.08493   | 1.26872   | -0.716621   | 0.0178668  |
| PHRF1     | 9.37951   | 14.6676   | 0.645051    | 0.0150729  |
| POLR2E    | 85.715    | 100.35    | 0.227417    | 0.713826   |
| OSTF1     | 17.8325   | 15.4839   | -0.203745   | 0.748077   |
| RFK       | 10.9588   | 17.3046   | 0.65907     | 0.00818401 |
| UBA6      | 6.8392    | 5.15439   | -0.408027   | 0.195403   |
| CHPF2     | 38.2596   | 50.1297   | 0.389846    | 0.582224   |
| PLS3      | 12.2069   | 8.81191   | -0.47017    | 0.109152   |
| IGF2BP3   | 5.67156   | 4.15322   | -0.449515   | 0.162979   |
| KPNA6     | 8.66326   | 11.0829   | 0.355355    | 0.286255   |
| MARK2     | 11.565    | 16.1903   | 0.485366    | 0.0841079  |
| ZFP64     | 6.39078   | 5.08699   | -0.32918    | 0.491932   |
| HIP1      | 4.1893    | 3.57376   | -0.229268   | 0.672055   |
| TRRAP     | 5.74769   | 6.34816   | 0.143356    | 0.851335   |
| SFR1      | 4.96896   | 2.68887   | -0.885946   | 0.0156972  |
| C5orf15   | 11.8669   | 11.1457   | -0.0904557  | 0.945602   |
| CENPO     | 4.00666   | 6.63253   | 0.727158    | 0.441752   |
| CPOX      | 11.2069   | 13.6453   | 0.284018    | 0.503201   |
| SLC29A2   | 14.4147   | 24.8396   | 0.785101    | 0.00243047 |
| LIN9      | 1.72314   | 1.59529   | -0.111216   | 0.949783   |
| VPS37C    | 14.2069   | 9.52737   | -0.576445   | 0.0463932  |
| METTL13   | 12.597    | 25.5044   | 1.01767     | 0.00134142 |
| METTL4    | 1.88751   | 1.90444   | 0.0128809   | 0.996079   |
| USF2      | 99.3323   | 82.5276   | -0.267386   | 0.525846   |
| ZNF444    | 24.3068   | 25.9296   | 0.0932404   | 0.945946   |
| SYNJ1     | 0.707065  | 0.711721  | 0.00946848  | 0.997036   |
| TEX2      | 2.18182   | 3.91272   | 0.842635    | 0.00593755 |
| SH2B2     | 16.4862   | 18.8533   | 0.193559    | 0.81342    |
| MAP4K4    | 7.50088   | 8.21735   | 0.131613    | 0.880508   |
| YEATS4    | 26.6525   | 18.0647   | -0.561099   | 0.0501327  |
| C2orf49   | 9.11648   | 8.21565   | -0.150103   | 0.90314    |
| EIF3M     | 131.219   | 117.31    | -0.161656   | 0.841179   |
| ARL6IP6   | 5.53178   | 2.88248   | -0.940434   | 0.00134142 |
| ARC       | 5.26573   | 7.49726   | 0.50973     | 0.193505   |
| MKNK2     | 53.7053   | 51.9421   | -0.0481585  | 0.979701   |
| FBXW7     | 3.11704   | 2.99913   | -0.0556334  | 0.979701   |
| TMED10    | 27.6163   | 24.1458   | -0.193747   | 0.735396   |
| SLC16A10  | 1.44363   | 1.79422   | 0.31366     | 0.678791   |
| LOC284412 | 0.393093  | 0.318895  | -0.301788   | 0.874203   |
| SREBF2    | 32.7714   | 25.7314   | -0.34891    | 0.293234   |
| PEX11G    | 3.05219   | 0.882619  | -1.78998    | 0.00672555 |
| ZNF274    | 0.0751275 | 0.0291918 | -1.36378    | 1          |
| FOXD1     | 98.895    | 44.3163   | -1.15806    | 0.00134142 |
| ALKBH6    | 19.4008   | 14.6266   | -0.407522   | 0.3703     |
| ANAPC15   | 23.8774   | 28.7358   | 0.267206    | 0.945946   |
| WIPI2     | 28.5336   | 24.7882   | -0.203008   | 0.712918   |

|                      |           |            |            |            |
|----------------------|-----------|------------|------------|------------|
| MDN1                 | 0.738793  | 0.996726   | 0.432026   | 0.233946   |
| SRGAP2,SRGAP2C,SRGAF | 5.08031   | 4.07675    | -0.317497  | 0.529626   |
| AP3M1                | 6.88226   | 7.55418    | 0.134394   | 0.876336   |
| PMS1                 | 3.76972   | 4.50019    | 0.255529   | 0.913628   |
| TRAIP                | 6.99379   | 7.2827     | 0.058398   | 0.977103   |
| MSL3                 | 14.7955   | 11.0449    | -0.421779  | 0.192879   |
| GPATCH2              | 0.908554  | 0.891635   | -0.0271193 | 0.99351    |
| DNASE1               | 0.603685  | 0.699438   | 0.212399   | 0.993379   |
| FLAD1                | 32.0922   | 52.7721    | 0.717551   | 0.00337323 |
| APLP1                | 16.3264   | 14.1574    | -0.205654  | 0.746092   |
| POLR3B               | 1.03529   | 1.54631    | 0.578802   | 0.528068   |
| LRFN3                | 12.2223   | 13.2571    | 0.117254   | 0.92969    |
| CDC37L1              | 6.87076   | 5.77378    | -0.250954  | 0.68423    |
| RFX7                 | 1.94905   | 1.83577    | -0.0863843 | 0.95534    |
| ATP5C1               | 230.235   | 234.624    | 0.0272402  | 0.989365   |
| MAF1                 | 218.937   | 220.704    | 0.011595   | 0.995709   |
| FAM101B              | 0.146299  | 0.103003   | -0.506241  | 1          |
| BCS1L                | 26.3038   | 30.1298    | 0.195915   | 0.753148   |
| MPHOSPH10            | 9.07803   | 12.4663    | 0.457582   | 0.13673    |
| FADS3                | 67.8069   | 73.5497    | 0.117288   | 0.903932   |
| PDCD1                | 0.119431  | 0.117053   | -0.0290136 | 1          |
| TCP10L               | 0.827467  | 1.59624    | 0.947901   | 0.0357572  |
| SAP25                | 1.41106   | 2.21191    | 0.648514   | 0.476222   |
| ZNF787               | 78.0407   | 69.8669    | -0.159618  | 0.827026   |
| MAFA                 | 5.64837   | 5.47976    | -0.0437211 | 0.987693   |
| ALG2                 | 17.3233   | 18.5894    | 0.10176    | 0.922712   |
| GUF1                 | 8.33242   | 7.12023    | -0.226812  | 0.660278   |
| ZMYM4                | 3.57911   | 3.04422    | -0.233528  | 0.66311    |
| RASGRF2              | 0.0725234 | 0.0544053  | -0.4147    | 1          |
| PRPF6                | 32.7686   | 32.499     | -0.0119172 | 0.995326   |
| ZFAND6               | 27.4585   | 21.9265    | -0.324579  | 0.384628   |
| GATA4                | 7.67067   | 11.3178    | 0.561169   | 0.0668932  |
| PTBP3                | 9.73362   | 9.66428    | -0.0103138 | 0.997036   |
| AP5S1                | 6.30233   | 6.91613    | 0.134081   | 0.920064   |
| B9D1                 | 29.8127   | 22.2855    | -0.419821  | 0.633936   |
| CD47                 | 7.67689   | 6.84639    | -0.16518   | 0.813105   |
| MRP63                | 30.1617   | 34.6386    | 0.199659   | 0.851892   |
| LAMTOR1              | 104.862   | 108.269    | 0.0461269  | 0.987693   |
| DDX11L2              | 0.487517  | 0.495896   | 0.0245854  | 0.998342   |
| AFG3L2               | 36.0455   | 39.3851    | 0.127831   | 0.885737   |
| EDEM2                | 11.3093   | 9.59655    | -0.236919  | 0.701805   |
| EIF4G3               | 3.4033    | 3.34929    | -0.0230813 | 0.991767   |
| C17orf51             | 3.47833   | 4.10476    | 0.238903   | 0.652768   |
| TOMM70A              | 19.3104   | 18.9234    | -0.0292054 | 0.987858   |
| CRYZL1               | 5.26827   | 4.06979    | -0.372376  | 0.430764   |
| DEDD                 | 21.4179   | 20.2102    | -0.0837323 | 0.986822   |
| ZCCHC8               | 5.0719    | 3.94559    | -0.362286  | 0.337233   |
| SCAP                 | 28.2613   | 34.7079    | 0.296433   | 0.429337   |
| SUCLA2               | 7.4249    | 8.90517    | 0.262271   | 0.612792   |
| PDE4DIP              | 0.573498  | 0.546421   | -0.0697755 | 0.979701   |
| TOR1B                | 19.9308   | 24.8969    | 0.320965   | 0.373076   |
| FLJ37035             | 0.107745  | 0.0192354  | -2.48579   | 1          |
| TSPO                 | 414.293   | 425.828    | 0.0396163  | 0.984003   |
| PI4KA                | 14.2288   | 13.4996    | -0.0758956 | 0.959465   |
| PNRC2                | 40.4652   | 32.5849    | -0.312478  | 0.386954   |
| STEAP1               | 10.3951   | 12.6365    | 0.281704   | 0.572301   |
| FAM185A              | 1.98031   | 2.36743    | 0.257594   | 0.757584   |
| AKTIP                | 7.08944   | 4.32032    | -0.714534  | 0.128873   |
| NOP14                | 24.4427   | 28.2342    | 0.208042   | 0.734977   |
| MRAS                 | 1.51728   | 1.0463     | -0.536194  | 0.231628   |
| RMND5A               | 4.55753   | 4.3329     | -0.0729207 | 0.984033   |
| MZT1                 | 16.2345   | 13.4763    | -0.268632  | 0.541415   |
| AARS                 | 43.4449   | 16.7578    | -1.37436   | 0.00134142 |
| CAB39                | 9.40553   | 9.89589    | 0.0733213  | 0.959465   |
| LNX2                 | 1.51192   | 1.49337    | -0.0178075 | 0.99451    |
| KRBOX4               | 4.09769   | 2.26945    | -0.852468  | 0.00882987 |
| TMCO1                | 14.046    | 15.9268    | 0.181296   | 0.767185   |
| GANC                 | 0.53267   | 0.525137   | -0.0205491 | 0.994978   |
| MTMR14               | 23.6714   | 22.6481    | -0.0637521 | 0.967811   |
| XRN2                 | 22.2329   | 24.1005    | 0.11637    | 0.906895   |
| C3orf37              | 39.7899   | 42.8334    | 0.106335   | 0.921977   |
| HIST1H4I             | 1.12935   | 1.18892    | 0.0741583  | 0.996631   |
| IMPG2                | 0.0222804 | 0.00756008 | -1.5593    | 1          |
| DDX51                | 9.06739   | 13.5557    | 0.58014    | 0.0274653  |
| PLEKH02              | 5.21533   | 6.15258    | 0.238432   | 0.692443   |
| EVI5                 | 1.64825   | 1.77359    | 0.105731   | 0.935939   |
| MRPS26               | 144.966   | 269.111    | 0.892489   | 0.00134142 |
| WASH7P               | 10.6319   | 6.55361    | -0.698043  | 0.0297125  |
| EEF2K                | 5.24778   | 5.36332    | 0.0314191  | 0.987693   |

|                       |          |          |             |            |
|-----------------------|----------|----------|-------------|------------|
| SHD                   | 0.471778 | 0.20309  | -1.21599    | 0.194171   |
| SSR2                  | 348.881  | 368.075  | 0.0772647   | 0.954559   |
| NR2C1                 | 5.35065  | 3.91612  | -0.450287   | 0.212535   |
| ISY1,ISY1-RAB43,RAB43 | 21.8884  | 25.2711  | 0.207325    | 0.708293   |
| C10orf35              | 26.3588  | 26.9115  | 0.0299348   | 0.988571   |
| SDF4                  | 93.1542  | 119.739  | 0.362203    | 0.267105   |
| ARL8B                 | 22.3333  | 19.497   | -0.195949   | 0.725998   |
| SLC10A5               | 1.23941  | 1.28182  | 0.0485467   | 0.988657   |
| GTF2A2                | 29.0035  | 37.7998  | 0.38215     | 0.231628   |
| CNBP                  | 126.598  | 141.571  | 0.161275    | 0.827507   |
| KAT7                  | 9.60248  | 6.08756  | -0.657542   | 0.0205623  |
| SP140L                | 4.14435  | 4.957    | 0.258319    | 0.660482   |
| BROX                  | 1.10064  | 0.816044 | -0.431623   | 0.629486   |
| POLR2C                | 52.7188  | 63.554   | 0.269664    | 0.61078    |
| PLEKHA8P1             | 2.20167  | 1.80752  | -0.284583   | 0.959465   |
| AUP1                  | 190.619  | 238.964  | 0.326105    | 0.508719   |
| RRN3P3                | 1.00775  | 1.26659  | 0.329817    | 0.739348   |
| GSTO1                 | 593.2    | 459.062  | -0.36983    | 0.281159   |
| RTN3                  | 57.3234  | 50.4124  | -0.185344   | 0.760508   |
| NIN                   | 3.54799  | 3.81478  | 0.104596    | 0.933116   |
| LEF1                  | 7.45744  | 8.33216  | 0.160012    | 0.846441   |
| VOPP1                 | 26.1642  | 26.145   | -0.00105469 | 0.99926    |
| MCAT                  | 18.7383  | 27.6799  | 0.562849    | 0.0414844  |
| ARF3                  | 47.5227  | 52.1594  | 0.134309    | 0.870017   |
| PITRM1-AS1            | 0.419029 | 0.343624 | -0.286221   | 0.977531   |
| ZYX                   | 373.417  | 349.811  | -0.0942124  | 0.938194   |
| IMPDH1                | 106.18   | 190.937  | 0.846582    | 0.00134142 |
| ATL2                  | 11.8826  | 12.5269  | 0.0761788   | 0.9582     |
| SH3BP2                | 7.11709  | 9.40784  | 0.402576    | 0.194995   |
| IPO11,LRRC70          | 8.98577  | 10.3646  | 0.205945    | 0.754842   |
| TGFB3                 | 1.84303  | 1.1959   | -0.623982   | 0.150383   |
| CDR2L                 | 17.2438  | 21.8047  | 0.338561    | 0.349638   |
| SYTL4                 | 0.910968 | 0.731225 | -0.317084   | 0.693347   |
| C21orf91              | 1.35418  | 1.14752  | -0.238899   | 0.767427   |
| UCP2                  | 62.0905  | 49.786   | -0.318633   | 0.395325   |
| PTCH1                 | 1.75329  | 1.48649  | -0.238157   | 0.721145   |
| ZMAT5                 | 35.5234  | 29.2042  | -0.282591   | 0.548694   |
| SMKR1                 | 6.03536  | 5.09404  | -0.244629   | 0.798172   |
| ENTPD6                | 38.1012  | 37.0297  | -0.0411559  | 0.979733   |
| GNAI3                 | 16.031   | 14.2657  | -0.168311   | 0.798319   |
| PPHLN1                | 21.2733  | 20.006   | -0.088608   | 0.952469   |
| CS                    | 69.4429  | 71.9083  | 0.050331    | 0.977531   |
| NFXL1                 | 3.6452   | 3.03187  | -0.265789   | 0.617363   |
| RBM26                 | 6.61839  | 9.0753   | 0.455464    | 0.128214   |
| CDK1                  | 42.2824  | 42.5291  | 0.00839216  | 0.997036   |
| EFR3A                 | 5.15127  | 5.97924  | 0.215035    | 0.703835   |
| FAM189B               | 60.1776  | 50.3544  | -0.257109   | 0.551816   |
| RBM22                 | 22.8951  | 19.6767  | -0.218549   | 0.674163   |
| HDGF                  | 182.39   | 205.845  | 0.174534    | 0.797849   |
| CCT4                  | 107.486  | 112.2    | 0.0619293   | 0.969963   |
| PPP4C                 | 160.011  | 176.245  | 0.13941     | 0.86583    |
| ANKHD1,ANKHD1-EIF4EBF | 32.9412  | 25.7306  | -0.356412   | 0.754185   |
| LYPD5                 | 0.45446  | 0.331616 | -0.45464    | 0.672475   |
| ZEB1                  | 3.09072  | 3.44364  | 0.155993    | 0.845726   |
| B4GALT3               | 35.4345  | 45.2818  | 0.353775    | 0.296942   |
| HN1L                  | 21.5316  | 33.9838  | 0.658395    | 0.00882987 |
| TACC1                 | 3.3358   | 3.75502  | 0.170785    | 0.816338   |
| NOC3L                 | 8.28555  | 8.45813  | 0.0297401   | 0.988154   |
| DIS3L2                | 4.49004  | 4.517    | 0.0086353   | 0.997036   |
| MSMO1                 | 22.4983  | 31.18    | 0.470805    | 0.102329   |
| NGFRAP1               | 101.165  | 71.3139  | -0.504459   | 0.0757506  |
| METTL16               | 4.61495  | 7.6107   | 0.721714    | 0.00425224 |
| SMIM7                 | 30.4643  | 31.8679  | 0.0649842   | 0.966946   |
| USP22                 | 38.4723  | 37.1094  | -0.0520347  | 0.976214   |
| HOXC4,HOXC5,HOXC6     | 11.8852  | 14.9016  | 0.326291    | 0.531475   |
| USP8                  | 4.75859  | 3.55734  | -0.419735   | 0.201532   |
| MNAT1                 | 23.25    | 18.7285  | -0.312001   | 0.420042   |
| RAB5C                 | 82.6031  | 110.854  | 0.424398    | 0.14958    |
| KIF13B                | 1.72448  | 1.10849  | -0.637566   | 0.0455504  |
| ZNF213                | 9.29331  | 7.58576  | -0.292899   | 0.567276   |
| DCAF6                 | 5.58332  | 3.83091  | -0.543435   | 0.428495   |
| CPSF6                 | 9.81837  | 10.7978  | 0.137176    | 0.862644   |
| TMEM222               | 38.7547  | 54.0266  | 0.479298    | 0.0909525  |
| FLYWCH1               | 16.9853  | 15.2971  | -0.151025   | 0.83713    |
| MAP7D1                | 41.6088  | 60.018   | 0.528506    | 0.049309   |
| FUCA2                 | 48.7552  | 43.5616  | -0.162498   | 0.81082    |
| RHBDD2                | 47.2508  | 69.5266  | 0.557225    | 0.0410573  |
| TCEAL4                | 51.2677  | 48.1672  | -0.0899977  | 0.938444   |
| CMTM6                 | 14.3656  | 17.6439  | 0.296555    | 0.435505   |

|                       |           |           |             |            |
|-----------------------|-----------|-----------|-------------|------------|
| FTSJD1                | 5.21952   | 5.20826   | -0.00311681 | 0.998514   |
| LAMTOR2               | 96.6729   | 101.494   | 0.0702153   | 0.961224   |
| AHRR,PDCD6            | 88.5985   | 108.519   | 0.292588    | 0.468622   |
| MT1L                  | 1319.43   | 1395.19   | 0.0805532   | 0.952469   |
| C19orf60              | 61.2716   | 47.8652   | -0.35624    | 0.380054   |
| MT1M                  | 226.827   | 292.081   | 0.364774    | 0.277325   |
| ZCCHC17               | 15.0881   | 19.5887   | 0.376611    | 0.274963   |
| CALCOCO2              | 13.5402   | 6.32652   | -1.09776    | 0.00134142 |
| SH3D19                | 3.49354   | 1.53028   | -1.19089    | 0.00134142 |
| ZMYND11               | 5.96294   | 7.29887   | 0.29165     | 0.489555   |
| BBIP1                 | 9.75124   | 5.39832   | -0.853074   | 0.135336   |
| USP46                 | 1.28183   | 1.63771   | 0.353479    | 0.41685    |
| GALNT10               | 2.16345   | 3.53588   | 0.708734    | 0.0126858  |
| MET                   | 8.84458   | 5.00398   | -0.821716   | 0.00134142 |
| TMED2                 | 85.6926   | 90.4151   | 0.0773923   | 0.954677   |
| AP4B1                 | 6.80042   | 6.52087   | -0.0605598  | 0.974044   |
| SDHB                  | 127.221   | 122.453   | -0.0551106  | 0.974044   |
| C14orf159             | 7.38984   | 5.30171   | -0.479085   | 0.174284   |
| RUSC1                 | 26.0962   | 40.8457   | 0.646348    | 0.389738   |
| FBXL19                | 11.0508   | 18.1694   | 0.717365    | 0.00425224 |
| NSRP1                 | 7.91937   | 6.79955   | -0.219947   | 0.711382   |
| UBC                   | 571.984   | 492.462   | -0.215963   | 0.716391   |
| CADM1                 | 6.52483   | 4.66803   | -0.483127   | 0.108427   |
| MOV10                 | 34.0717   | 28.4242   | -0.261455   | 0.548189   |
| PLCG2                 | 2.8079    | 1.43453   | -0.968909   | 0.00337323 |
| PRDM4                 | 10.9343   | 10.1164   | -0.112159   | 0.912767   |
| EPHA10                | 0.777846  | 0.643046  | -0.274562   | 0.806888   |
| WWC1                  | 7.4678    | 9.29882   | 0.316364    | 0.400613   |
| SREK1IP1              | 3.65973   | 4.63476   | 0.340758    | 0.342898   |
| BRF1                  | 16.3746   | 23.0817   | 0.495288    | 0.638068   |
| BRMS1                 | 51.5528   | 99.4777   | 0.948321    | 0.00134142 |
| MYLK-AS1              | 0.165702  | 0.224581  | 0.438644    | 1          |
| E1F1B                 | 66.1594   | 38.7008   | -0.773582   | 0.00337323 |
| C4orf21               | 0.628268  | 0.427789  | -0.554481   | 0.726592   |
| CIAO1                 | 21.4743   | 22.7533   | 0.0834641   | 0.950929   |
| JTB                   | 162.782   | 194.735   | 0.258571    | 0.822719   |
| NCAPD3                | 5.39193   | 6.35904   | 0.238006    | 0.637163   |
| YY1                   | 17.5409   | 22.0777   | 0.331867    | 0.365811   |
| UBXN4                 | 16.4173   | 11.9755   | -0.455128   | 0.115606   |
| SMIM11                | 18.5405   | 25.8882   | 0.481611    | 0.152398   |
| NHS                   | 0.0221769 | 0.0100702 | -1.13896    | 1          |
| CHMP2B                | 17.947    | 12.2368   | -0.552516   | 0.0386414  |
| UTP3                  | 23.6743   | 37.9846   | 0.682092    | 0.00425224 |
| SERBP1                | 41.7105   | 59.0669   | 0.501938    | 0.0718958  |
| ATP5I                 | 788.146   | 967.796   | 0.296241    | 0.433739   |
| RBMX                  | 144.195   | 84.3146   | -0.774164   | 0.00243047 |
| FAM103A1              | 19.487    | 21.3785   | 0.133644    | 0.912776   |
| E1F4A3                | 79.4319   | 131.239   | 0.724402    | 0.00134142 |
| STRBP                 | 9.71133   | 6.97897   | -0.476655   | 0.0873591  |
| HECTD3                | 10.8077   | 14.8443   | 0.457847    | 0.135879   |
| TNPO1                 | 10.1281   | 10.2532   | 0.0177115   | 0.993379   |
| TRIM37                | 4.5334    | 5.74345   | 0.341325    | 0.37012    |
| PPP2R5E               | 4.24753   | 3.70052   | -0.198898   | 0.796362   |
| FTSJ1                 | 32.0233   | 43.0471   | 0.426792    | 0.148094   |
| PDPK1                 | 2.77821   | 2.56669   | -0.114247   | 0.92644    |
| TAF4B                 | 1.84304   | 1.29066   | -0.513979   | 0.186826   |
| WDR74                 | 65.6569   | 97.723    | 0.573752    | 0.0261279  |
| MRPL44                | 28.3995   | 28.3567   | -0.00217751 | 0.99862    |
| ANLN                  | 10.2016   | 13.3161   | 0.38438     | 0.244216   |
| CTBP2                 | 15.0496   | 17.7508   | 0.238157    | 0.619929   |
| A1BG-AS1              | 0.203637  | 0.179038  | -0.185732   | 1          |
| GNB2                  | 484.085   | 521.511   | 0.107436    | 0.920414   |
| GABPA                 | 2.91326   | 2.44085   | -0.255251   | 0.942878   |
| CENPK                 | 2.88045   | 2.03064   | -0.50436    | 0.291655   |
| ZCCHC3                | 15.3883   | 16.5531   | 0.105273    | 0.926258   |
| DERA                  | 16.9243   | 9.49339   | -0.834098   | 0.00134142 |
| MTHFS,ST20,ST20-MTHFS | 17.7774   | 23.4758   | 0.401126    | 0.590127   |
| MRPL9                 | 70.2411   | 65.6578   | -0.0973501  | 0.931471   |
| CRK                   | 8.37582   | 9.2543    | 0.143894    | 0.870173   |
| NMNAT1                | 2.25831   | 1.70529   | -0.405226   | 0.374382   |
| VPS29                 | 53.2843   | 45.9295   | -0.214287   | 0.684383   |
| POLE                  | 6.62353   | 7.45013   | 0.169664    | 0.806843   |
| LIMD2                 | 8.66286   | 10.3735   | 0.259993    | 0.753531   |
| ZNF234                | 1.00791   | 1.22752   | 0.284377    | 0.697898   |
| ATP5J                 | 175.808   | 211.831   | 0.268918    | 0.599424   |
| MACF1                 | 4.51733   | 3.56512   | -0.341519   | 0.326673   |
| CIRBP-AS1             | 1.18358   | 2.65205   | 1.16395     | 0.88312    |
| HEATR1                | 5.95522   | 7.19147   | 0.272133    | 0.70303    |
| PPP2CA                | 50.7902   | 59.0611   | 0.217658    | 0.671358   |

|               |          |           |             |            |
|---------------|----------|-----------|-------------|------------|
| OGFR          | 38.7744  | 62.056    | 0.678464    | 0.00672555 |
| GRPEL2        | 10.3591  | 6.74459   | -0.619101   | 0.0231741  |
| EXOSC1        | 28.2525  | 21.4995   | -0.394074   | 0.249983   |
| CLCC1         | 6.1978   | 4.85322   | -0.352816   | 0.39222    |
| CLDN15        | 11.9794  | 12.567    | 0.0690792   | 0.975414   |
| OSBPL5        | 5.05752  | 2.99793   | -0.754463   | 0.0194494  |
| KRT18         | 242.954  | 305.271   | 0.32941     | 0.3868     |
| PSMB5         | 251.791  | 342.706   | 0.444749    | 0.138263   |
| AGAP3         | 42.1355  | 61.2157   | 0.538868    | 0.0626518  |
| GK5           | 0.676353 | 0.525903  | -0.36298    | 0.491042   |
| TMPRSS5       | 0.413172 | 0.378685  | -0.125743   | 0.976002   |
| LOC3744443    | 1.26764  | 0.510607  | -1.31186    | 0.00743393 |
| MAPK1         | 10.7228  | 9.37372   | -0.193987   | 0.849027   |
| ZNF710        | 7.59957  | 10.1891   | 0.423032    | 0.190086   |
| NCDN          | 10.8579  | 19.31     | 0.830599    | 0.00134142 |
| SLC19A2       | 8.81425  | 5.82569   | -0.59741    | 0.0306129  |
| RBCK1         | 40.1398  | 28.1965   | -0.50952    | 0.0688198  |
| NKRF          | 4.94771  | 5.13876   | 0.0546569   | 0.977332   |
| LPHN1         | 12.6492  | 15.6734   | 0.309271    | 0.383974   |
| ZNF547        | 11.0042  | 8.66682   | -0.344474   | 0.615031   |
| NPLOC4        | 21.5452  | 33.4331   | 0.633909    | 0.0114515  |
| SPATS2L       | 8.85697  | 7.80859   | -0.18175    | 0.775379   |
| CTSD          | 179.719  | 149.042   | -0.270025   | 0.600828   |
| FASTKD1       | 9.736    | 10.9728   | 0.172534    | 0.800595   |
| WDR78         | 0.126447 | 0.0630746 | -1.0034     | 1          |
| ZNF689        | 4.17738  | 4.64788   | 0.153975    | 0.881849   |
| CEP128        | 0.41174  | 0.363605  | -0.179361   | 0.919468   |
| AVL9          | 4.42329  | 2.05379   | -1.10683    | 0.00243047 |
| SRRD          | 17.2609  | 19.3878   | 0.167641    | 0.930066   |
| PCTP          | 9.75138  | 8.63327   | -0.175699   | 0.82263    |
| DIAPH3        | 5.89317  | 3.51675   | -0.7448     | 0.00743393 |
| TMUB1         | 164.085  | 182.113   | 0.150393    | 0.844123   |
| METTL12       | 5.77139  | 6.0989    | 0.0796304   | 0.99351    |
| TRIM26        | 16.844   | 18.6186   | 0.144509    | 0.849892   |
| FAM188A       | 11.7684  | 10.1828   | -0.208781   | 0.731681   |
| TOP2B         | 14.4121  | 10.7243   | -0.426399   | 0.146251   |
| PI4KB         | 21.1733  | 22.6111   | 0.0947851   | 0.954677   |
| MTCH2         | 42.8189  | 44.866    | 0.0673744   | 0.96128    |
| BCR           | 9.72487  | 12.6277   | 0.376843    | 0.251828   |
| PDCD4         | 16.3948  | 6.19374   | -1.40436    | 0.00134142 |
| U2SURP        | 8.57046  | 8.32713   | -0.0415537  | 0.980556   |
| RHBDD3        | 21.2849  | 22.3516   | 0.0705491   | 0.966442   |
| INTS9         | 11.9021  | 14.1723   | 0.251866    | 0.618966   |
| KIAA1967      | 39.6609  | 49.6417   | 0.323836    | 0.468662   |
| EPS8          | 2.59942  | 1.30298   | -0.996377   | 0.00134142 |
| DHX16         | 18.3636  | 19.7307   | 0.103587    | 0.947247   |
| EIF5B         | 14.6651  | 29.7989   | 1.02288     | 0.00134142 |
| LRRC47        | 32.4304  | 40.6968   | 0.327569    | 0.360906   |
| TMEM2         | 0.592195 | 0.718254  | 0.278421    | 0.729713   |
| DDA1          | 11.9046  | 17.6209   | 0.565769    | 0.0455504  |
| LOC100506054  | 6.1321   | 6.90549   | 0.171362    | 0.895818   |
| PRKCE         | 1.32017  | 0.850829  | -0.63378    | 0.0947123  |
| KTI12,TXNDC12 | 65.8071  | 66.2913   | 0.0105746   | 0.99634    |
| ITPKB         | 2.10876  | 2.87269   | 0.446007    | 0.226665   |
| MARCH3        | 0.398309 | 0.536391  | 0.429397    | 0.616434   |
| DLST          | 47.4163  | 40.9889   | -0.210151   | 0.688434   |
| SNORA54       | 18.994   | 7.68604   | -1.30523    | 0.913628   |
| HMGB3         | 13.0248  | 16.5265   | 0.343512    | 0.318762   |
| METTL6        | 4.94736  | 4.92086   | -0.00774739 | 0.997036   |
| FARSB         | 27.4689  | 26.9756   | -0.0261456  | 0.990324   |
| MKKS          | 14.4817  | 15.4426   | 0.0926844   | 0.947746   |
| CASP8         | 5.83239  | 6.18387   | 0.0844219   | 0.95492    |
| CELF1         | 20.183   | 23.4283   | 0.215116    | 0.713826   |
| MRPS23        | 37.9208  | 48.9944   | 0.369629    | 0.250623   |
| GPN3          | 23.4997  | 20.6234   | -0.188362   | 0.874082   |
| SUPT6H        | 16.5698  | 18.7757   | 0.180311    | 0.771183   |
| LRBA          | 4.36417  | 2.23525   | -0.965267   | 0.00134142 |
| BTBD3         | 2.36111  | 2.0183    | -0.226325   | 0.748691   |
| RIF1          | 1.94126  | 2.40444   | 0.30871     | 0.44885    |
| RPAP1         | 8.22855  | 5.75107   | -0.516809   | 0.0851035  |
| TOM1L1        | 7.56803  | 4.53906   | -0.737524   | 0.2852     |
| FAM222A-AS1   | 3.47525  | 8.17601   | 1.23428     | 0.00337323 |
| TSNARE1       | 5.56676  | 3.06631   | -0.860336   | 0.0318033  |
| PALB2         | 3.26446  | 3.50911   | 0.104263    | 0.938194   |
| CKS2          | 478.367  | 651.157   | 0.444886    | 0.138571   |
| ATP5F1        | 88.6811  | 87.5528   | -0.0184747  | 0.99351    |
| SIRPA         | 4.93818  | 6.90861   | 0.484417    | 0.12797    |
| MPDU1         | 59.2733  | 98.1094   | 0.727008    | 0.00134142 |
| PCNXL2        | 1.21398  | 0.706186  | -0.78163    | 0.0205623  |



|                |           |            |             |            |
|----------------|-----------|------------|-------------|------------|
| XPO5           | 18.6354   | 20.5713    | 0.142594    | 0.856449   |
| FBXO45         | 3.93196   | 4.11732    | 0.0664552   | 0.967799   |
| FGD1           | 11.3819   | 9.83305    | -0.211027   | 0.721117   |
| TSPAN14        | 5.16851   | 5.60318    | 0.116499    | 0.912776   |
| ABHD13         | 1.89606   | 1.93903    | 0.0323304   | 0.988657   |
| DLG1-AS1       | 0.169853  | 0.0595385  | -1.51239    | 1          |
| TMEM192        | 3.31979   | 1.84748    | -0.845531   | 0.00672555 |
| SEC62          | 9.24274   | 9.09617    | -0.0230603  | 0.991351   |
| FNDC8          | 1.26675   | 1.44295    | 0.187891    | 0.926258   |
| ASL            | 41.1808   | 37.9786    | -0.116784   | 0.908114   |
| ARHGAP22       | 34.4871   | 26.3432    | -0.388624   | 0.263143   |
| RIPK2          | 41.5028   | 25.6013    | -0.696988   | 0.00425224 |
| RSPRY1         | 2.38496   | 1.67667    | -0.508369   | 0.297247   |
| NIPA1          | 5.583     | 5.92712    | 0.086289    | 0.948179   |
| SEC61A2        | 8.1967    | 7.14282    | -0.19855    | 0.987858   |
| CCDC57         | 4.19926   | 4.79869    | 0.192506    | 0.823379   |
| GRSF1          | 24.7894   | 24.5728    | -0.012665   | 0.9953     |
| EXT2           | 23.0539   | 22.9614    | -0.00580387 | 0.997082   |
| C1orf112       | 3.27789   | 2.23637    | -0.551609   | 0.150974   |
| RAD23A         | 137.104   | 100.469    | -0.448527   | 0.117401   |
| AP1S1          | 174.33    | 199.068    | 0.191441    | 0.739331   |
| ANTXR2         | 11.3057   | 9.5024     | -0.250686   | 0.574731   |
| ITPK1          | 34.0643   | 37.1359    | 0.124555    | 0.893663   |
| OTUD5          | 24.3627   | 24.1267    | -0.0140423  | 0.994615   |
| ARPC1A         | 131.65    | 132.154    | 0.0055119   | 0.997082   |
| TMEM141        | 163.186   | 130.047    | -0.327489   | 0.354308   |
| PPP1CC         | 103.73    | 95.2814    | -0.122564   | 0.902309   |
| CHST7          | 1.3197    | 1.44539    | 0.131249    | 0.959465   |
| COQ6           | 19.0086   | 14.2607    | -0.414609   | 0.257766   |
| MAP4K2         | 17.4302   | 11.6812    | -0.577404   | 0.0322484  |
| HDAC4          | 0.496824  | 0.603325   | 0.2802      | 0.752993   |
| DGUOK          | 60.6607   | 63.0969    | 0.0568055   | 0.974044   |
| SRA1           | 33.5782   | 47.6884    | 0.506112    | 0.0780546  |
| C9orf78        | 65.6772   | 101.396    | 0.626544    | 0.0126858  |
| SETD1B         | 2.5939    | 4.37023    | 0.752584    | 0.00743393 |
| RAB36          | 2.83336   | 3.81636    | 0.429685    | 0.310606   |
| PLSCR1         | 6.23749   | 4.75977    | -0.390074   | 0.363804   |
| PCNXL3         | 7.95298   | 15.8541    | 0.995287    | 0.00134142 |
| TMEM167A       | 8.20625   | 10.1846    | 0.3116      | 0.397286   |
| RCBTB1         | 4.79238   | 4.66353    | -0.0393214  | 0.984917   |
| KIFC1          | 36.317    | 33.7755    | -0.104665   | 0.921664   |
| TRAPPC12       | 18.4543   | 14.9302    | -0.30572    | 0.478049   |
| NUP35          | 7.04209   | 8.96317    | 0.348005    | 0.42091    |
| ARMC8          | 3.74648   | 4.76723    | 0.347617    | 0.408328   |
| ATP5A1         | 288.36    | 273.615    | -0.075726   | 0.958802   |
| QPRT           | 0.0924348 | 0.00826318 | -3.48367    | 1          |
| ADK            | 18.1021   | 15.4548    | -0.228101   | 0.654501   |
| NFX1           | 6.95558   | 5.28305    | -0.3968     | 0.243837   |
| EEPD1          | 1.77544   | 1.68153    | -0.0784059  | 0.970729   |
| UPF1           | 22.0434   | 37.9669    | 0.784396    | 0.00134142 |
| CPSF4          | 69.4799   | 66.6315    | -0.0603921  | 0.990857   |
| GNG12          | 22.4575   | 12.7634    | -0.815193   | 0.0743087  |
| MAP1S          | 23.1757   | 22.5291    | -0.0408197  | 0.980663   |
| NOSIP          | 78.7172   | 88.438     | 0.167987    | 0.809313   |
| NDNF           | 0.0291553 | 0.00296151 | -3.29936    | 1          |
| GF11           | 1.73349   | 1.72487    | -0.00719572 | 0.99714    |
| AS3MT,C10orf32 | 5.08242   | 6.74521    | 0.408347    | 0.281587   |
| ATXN7L2        | 8.75511   | 9.9661     | 0.186904    | 0.809759   |
| SUCLG1         | 51.9601   | 46.4937    | -0.160368   | 0.817735   |
| CDIPT          | 57.7908   | 70.8915    | 0.294773    | 0.437263   |
| KCTD17         | 23.8536   | 34.2514    | 0.521952    | 0.072702   |
| SPATA5L1       | 10.7269   | 11.4662    | 0.096164    | 0.942472   |
| PDCD10         | 34.439    | 25.3347    | -0.442929   | 0.127236   |
| ZHX2           | 2.30098   | 2.16234    | -0.0896564  | 0.958902   |
| YKT6           | 35.2126   | 65.8685    | 0.903497    | 0.00134142 |
| SEC14L1P1      | 0.334603  | 0.414934   | 0.310431    | 0.98392    |
| RECQL5         | 6.64144   | 4.23922    | -0.647697   | 0.0340561  |
| LSM1           | 39.6012   | 57.9724    | 0.549823    | 0.119072   |
| STXBP6         | 0.543884  | 0.29157    | -0.899458   | 0.25971    |
| COPZ1          | 100.595   | 89.5766    | -0.167368   | 0.81342    |
| SEC22A         | 4.69652   | 3.35088    | -0.487055   | 0.1419     |
| GCH1           | 6.77275   | 12.5132    | 0.885638    | 0.00243047 |
| INTS4          | 7.68343   | 6.84911    | -0.165834   | 0.829181   |
| PSIMCT-1       | 1.17876   | 1.55687    | 0.401384    | 0.987627   |
| R3HDM4         | 88.0366   | 83.7421    | -0.0721511  | 0.958814   |
| LEPREL2        | 24.2994   | 27.8199    | 0.1952      | 0.744819   |
| HDAC1          | 70.8745   | 67.8395    | -0.0631405  | 0.966946   |
| PGM3           | 5.15717   | 4.91395    | -0.0696981  | 0.971854   |
| PRPSAP2        | 21.6728   | 15.6965    | -0.465445   | 0.143392   |

|                          |           |           |             |            |
|--------------------------|-----------|-----------|-------------|------------|
| GNRHR2                   | 5.16528   | 11.0949   | 1.10298     | 0.0810244  |
| CAMK1D                   | 3.96425   | 2.61835   | -0.598387   | 0.156549   |
| NPRL3                    | 44.2324   | 35.1641   | -0.331002   | 0.748064   |
| SH2D4A                   | 3.67316   | 5.8083    | 0.661093    | 0.0314167  |
| CDC42SE2                 | 6.39245   | 6.27386   | -0.0270151  | 0.990213   |
| AATF                     | 50.6397   | 62.0807   | 0.293874    | 0.445565   |
| TMSB4X                   | 362.864   | 380.864   | 0.0698458   | 0.963669   |
| SH3TC2                   | 0.0856599 | 0.042532  | -1.01007    | 1          |
| WDR7                     | 0.652544  | 0.959501  | 0.556209    | 0.165169   |
| C16orf52                 | 1.1612    | 1.10208   | -0.0753869  | 0.973683   |
| ATIC                     | 67.4838   | 66.4817   | -0.0215847  | 0.991767   |
| TMEM8A                   | 35.498    | 47.5392   | 0.421377    | 0.16034    |
| CLMN                     | 1.37504   | 0.43947   | -1.64563    | 0.00134142 |
| PIBF1                    | 1.60884   | 1.47677   | -0.123579   | 0.986822   |
| CD58                     | 8.30005   | 7.01845   | -0.241968   | 0.729713   |
| UBE2J2                   | 33.6155   | 43.1396   | 0.359886    | 0.285784   |
| SLC41A3                  | 20.355    | 13.8467   | -0.555842   | 0.0554961  |
| KIAA0100                 | 16.1128   | 19.4071   | 0.268377    | 0.535638   |
| SS18L2                   | 20.9968   | 32.4685   | 0.628872    | 0.224504   |
| SH3KBP1                  | 5.96893   | 5.08267   | -0.231886   | 0.690388   |
| NAV2                     | 5.68831   | 2.30804   | -1.30133    | 0.00134142 |
| EIF4G2                   | 107.105   | 124.405   | 0.216013    | 0.688363   |
| WBSCR16                  | 35.6219   | 48.736    | 0.452224    | 0.126498   |
| SMARCA4                  | 34.7067   | 38.6136   | 0.153893    | 0.837677   |
| MARVELD2                 | 0.49588   | 0.577812  | 0.220609    | 0.90907    |
| PEX1                     | 4.48412   | 2.32072   | -0.950252   | 0.00134142 |
| AK1                      | 56.3008   | 73.5745   | 0.38605     | 0.227784   |
| USP36                    | 8.91676   | 7.25962   | -0.296625   | 0.460616   |
| CETN3                    | 20.8292   | 13.2454   | -0.653116   | 0.0167292  |
| DTD1                     | 64.2076   | 55.8021   | -0.202425   | 0.713152   |
| CNIH4                    | 146.853   | 121.334   | -0.275392   | 0.507234   |
| ZNF850                   | 1.6125    | 1.72003   | 0.0931351   | 0.951688   |
| THUMPD1                  | 4.28404   | 5.14626   | 0.264551    | 0.571112   |
| MLLT11                   | 0.609328  | 0.423417  | -0.525138   | 0.525666   |
| POLR3E                   | 9.90878   | 12.3051   | 0.312482    | 0.44093    |
| ARNTL2                   | 3.34939   | 3.41046   | 0.0260645   | 0.990324   |
| CKS1B                    | 188.308   | 167.945   | -0.165106   | 0.813924   |
| DNAH14                   | 5.46764   | 4.39163   | -0.316162   | 0.674521   |
| MANF                     | 97.2744   | 165.348   | 0.765378    | 0.00134142 |
| CISD2                    | 7.34043   | 6.50732   | -0.173801   | 0.788441   |
| TFG                      | 61.7253   | 53.2718   | -0.212489   | 0.698985   |
| TFR2                     | 18.3421   | 19.5626   | 0.0929419   | 0.942878   |
| BNIP1                    | 16.2486   | 14.9968   | -0.11566    | 0.926225   |
| SRRT                     | 45.5751   | 73.3036   | 0.685639    | 0.00337323 |
| COMT                     | 48.7018   | 31.6515   | -0.621702   | 0.131622   |
| EEA1                     | 1.01681   | 1.26455   | 0.314575    | 0.546774   |
| MRPL41                   | 591.866   | 770.819   | 0.381121    | 0.242372   |
| PIGG                     | 6.03784   | 6.52201   | 0.111284    | 0.953101   |
| TMEM189, TMEM189-UBE2I   | 84.5185   | 95.1366   | 0.170734    | 0.799544   |
| TPX2                     | 31.7114   | 26.8962   | -0.237597   | 0.62776    |
| TMEM87A                  | 11.1086   | 10.8581   | -0.0329032  | 0.986822   |
| SKIV2L2                  | 12.4286   | 11.0519   | -0.169373   | 0.82774    |
| ASXL2                    | 0.518651  | 0.482224  | -0.105061   | 0.958814   |
| TMEM86B                  | 2.19376   | 3.04181   | 0.471523    | 0.472878   |
| RAP1B                    | 82.5739   | 69.9114   | -0.240157   | 0.621063   |
| FDX1                     | 8.20137   | 9.65513   | 0.235431    | 0.653639   |
| HAUS3, POLN              | 1.97685   | 1.74485   | -0.180099   | 0.826046   |
| NCAPH2                   | 22.9576   | 22.8939   | -0.00400658 | 0.998526   |
| IFT43                    | 32.3307   | 21.916    | -0.56092    | 0.0862993  |
| ACACA                    | 4.3168    | 5.36889   | 0.314662    | 0.408933   |
| N4BP2                    | 0.361264  | 0.233432  | -0.630054   | 0.180647   |
| VPS33A                   | 8.00368   | 8.99293   | 0.168129    | 0.831797   |
| CDS2                     | 5.26897   | 4.5114    | -0.223945   | 0.658298   |
| KDSR                     | 22.2532   | 12.5731   | -0.823667   | 0.00337323 |
| CDRT4, TVP23C, TVP23C-CI | 9.00781   | 5.74496   | -0.648879   | 0.0507992  |
| DPY19L3                  | 2.233     | 2.31243   | 0.05043     | 0.979701   |
| NBR2                     | 1.97211   | 1.26522   | -0.640348   | 0.293861   |
| ARPC2                    | 218.64    | 246.846   | 0.17505     | 0.779342   |
| ETV1                     | 0.679238  | 0.0860968 | -2.97989    | 0.00134142 |
| RAB11B                   | 98.9149   | 78.8643   | -0.326815   | 0.363528   |
| ZNF222                   | 3.47189   | 2.48945   | -0.479894   | 0.294732   |
| RASD1                    | 0.217783  | 0.119084  | -0.870915   | 1          |
| RIC8A                    | 69.5807   | 87.4719   | 0.330131    | 0.41086    |
| GSR                      | 23.5955   | 25.4667   | 0.110097    | 0.914003   |
| TPM4                     | 258.909   | 244.787   | -0.0809157  | 0.956382   |
| SMU1                     | 10.3089   | 10.8747   | 0.0770928   | 0.954188   |
| PRR5L                    | 1.40809   | 1.94831   | 0.468484    | 0.300886   |
| NAA10                    | 143.497   | 190.524   | 0.40895     | 0.18135    |
| GGA2                     | 9.9733    | 9.49344   | -0.0711405  | 0.959885   |

|              |           |           |              |            |
|--------------|-----------|-----------|--------------|------------|
| LRP10        | 44.3027   | 37.0845   | -0.256577    | 0.552239   |
| PRPF31       | 49.2512   | 69.2542   | 0.491742     | 0.0841079  |
| SLC35D1      | 1.19416   | 1.49256   | 0.321793     | 0.545588   |
| MTG1         | 29.7301   | 26.9097   | -0.143799    | 0.882845   |
| HIST2H2BF    | 1.38824   | 0.736869  | -0.91378     | 0.809759   |
| SNW1         | 34.4999   | 30.2214   | -0.191022    | 0.726892   |
| SLC11A2      | 7.61125   | 5.25346   | -0.534864    | 0.0909525  |
| EMC4         | 99.1127   | 98.4613   | -0.00951391  | 0.996631   |
| YIPF4        | 17.2934   | 8.03989   | -1.10498     | 0.00134142 |
| TMEM251      | 26.9748   | 19.8945   | -0.43924     | 0.205713   |
| ETV3         | 0.532188  | 0.320777  | -0.730366    | 0.406576   |
| B3GNT2       | 4.45588   | 4.79733   | 0.10652      | 0.935836   |
| PDHB         | 31.2418   | 27.0744   | -0.20655     | 0.714085   |
| MPV17L2      | 15.5388   | 50.1506   | 1.69039      | 0.00134142 |
| TMEM104      | 2.1301    | 7.62417   | 1.83966      | 0.00134142 |
| KCNH2        | 21.5616   | 20.5682   | -0.0680468   | 0.965735   |
| TAPBP_ZBTB22 | 35.2535   | 33.7807   | -0.0615675   | 0.969963   |
| NFIA         | 1.11999   | 1.19823   | 0.0974095    | 0.951559   |
| NEDD4        | 1.97154   | 1.48558   | -0.408295    | 0.297369   |
| RIOK3        | 10.8349   | 4.55532   | -1.25006     | 0.00134142 |
| GPR180       | 1.80639   | 2.66983   | 0.563641     | 0.0539552  |
| ST3GAL2      | 3.91046   | 7.3786    | 0.916009     | 0.00134142 |
| CBX1         | 57.0761   | 52.7087   | -0.114847    | 0.906606   |
| DYNLT1       | 90.4538   | 84.2122   | -0.103151    | 0.923672   |
| FAM134C      | 18.4854   | 15.4352   | -0.260159    | 0.801827   |
| MYCL1        | 3.74354   | 2.57451   | -0.540105    | 0.189409   |
| BEX5         | 15.5819   | 10.4754   | -0.572861    | 0.0953833  |
| SRP68        | 43.9009   | 48.8191   | 0.153195     | 0.834859   |
| CCDC24       | 7.76718   | 4.85715   | -0.677281    | 0.619231   |
| PSMG3        | 65.4625   | 96.9978   | 0.567283     | 0.0326415  |
| NMI          | 9.92573   | 13.4518   | 0.438553     | 0.211132   |
| KPTN         | 4.23975   | 4.80431   | 0.180349     | 0.882983   |
| IK           | 21.0851   | 18.408    | -0.195885    | 0.744561   |
| WWP2         | 11.9761   | 12.3499   | 0.0443359    | 0.979965   |
| TRMT2B       | 3.02288   | 2.33596   | -0.371906    | 0.468662   |
| NDUFA5       | 34.8389   | 29.1223   | -0.258578    | 0.547489   |
| TMEM259      | 79.2904   | 96.664    | 0.285831     | 0.466674   |
| MOK          | 7.41011   | 15.1403   | 1.03083      | 0.00134142 |
| FBXW11       | 8.55978   | 9.23206   | 0.109079     | 0.916876   |
| MTX2         | 38.6844   | 23.6214   | -0.711653    | 0.00882987 |
| CD55         | 19.6139   | 9.46194   | -1.05167     | 0.00134142 |
| KANSL1       | 6.64213   | 4.18673   | -0.665823    | 0.0194494  |
| FAM86B1      | 3.85449   | 1.5516    | -1.31279     | 0.00134142 |
| NUP85        | 26.2658   | 29.59     | 0.171927     | 0.795255   |
| MUM1         | 9.19306   | 15.7257   | 0.774512     | 0.00425224 |
| USP6         | 0.196237  | 0.166171  | -0.239932    | 1          |
| MYO10        | 6.78874   | 7.73512   | 0.18828      | 0.744986   |
| CDK12        | 4.80063   | 6.8439    | 0.511596     | 0.0523239  |
| CSRP1        | 110.988   | 119.032   | 0.100951     | 0.92969    |
| CLIC1        | 626.01    | 654.982   | 0.0652699    | 0.967714   |
| GLIPR1       | 15.2884   | 16.6417   | 0.122365     | 0.95534    |
| SAMD4B       | 11.1034   | 10.225    | -0.118902    | 0.906464   |
| NRBP1        | 58.8301   | 69.5911   | 0.24235      | 0.606953   |
| FSD1L        | 1.05944   | 0.866025  | -0.290824    | 0.902703   |
| DCLRE1C      | 3.12642   | 2.27984   | -0.455578    | 0.219176   |
| ZNF473       | 3.24328   | 3.72132   | 0.198362     | 0.776309   |
| PSMB4        | 543.884   | 574.145   | 0.0781168    | 0.954188   |
| SPDYE6       | 0.339278  | 0.329425  | -0.0425188   | 1          |
| NDUFA13      | 626.098   | 694.894   | 0.150405     | 0.844001   |
| SLC39A10     | 4.05274   | 4.28894   | 0.0817264    | 0.954677   |
| MTPAP        | 8.22661   | 9.1867    | 0.159249     | 0.826656   |
| BLOC1S2      | 17.2787   | 17.2764   | -0.000192243 | 0.999929   |
| UBE2S        | 588.081   | 928.991   | 0.659651     | 0.009453   |
| CLPTM1       | 47.4112   | 61.2325   | 0.369071     | 0.247378   |
| GTPBP2       | 40.2129   | 14.3018   | -1.49146     | 0.00134142 |
| AFTPH        | 6.51966   | 4.80553   | -0.440102    | 0.153355   |
| RNASE7       | 0.0752951 | 0.0275253 | -1.45179     | 1          |
| APOLD1       | 0.252303  | 0.103654  | -1.28338     | 1          |
| DDOST        | 200.513   | 181.273   | -0.145534    | 0.850392   |
| RAD51D_RFFL  | 13.92     | 10.5488   | -0.400082    | 0.291092   |
| IER3IP1      | 44.9539   | 48.9401   | 0.122571     | 0.896051   |
| DSN1         | 10.0445   | 9.15854   | -0.133218    | 0.898291   |
| INO80        | 3.09345   | 3.50926   | 0.181949     | 0.806888   |
| IDI2         | 8.53389   | 13.589    | 0.671167     | 0.553578   |
| UGT8         | 3.35589   | 2.84401   | -0.238767    | 0.727115   |
| PYCARD       | 0.320967  | 0.469114  | 0.547515     | 0.852548   |
| NME9         | 0.128289  | 0.0823946 | -0.638772    | 1          |
| KIAA1737     | 3.13721   | 5.48043   | 0.804808     | 0.00425224 |
| ING1         | 6.93189   | 7.13621   | 0.0419085    | 0.984917   |

|                      |          |          |              |            |
|----------------------|----------|----------|--------------|------------|
| ASCC2                | 22.1043  | 20.9427  | -0.0778817   | 0.955758   |
| MFN2                 | 10.5536  | 13.8991  | 0.397257     | 0.206979   |
| SCML1                | 3.43761  | 3.48803  | 0.0210105    | 0.99351    |
| MCF2L-AS1            | 1.02741  | 0.662434 | -0.63316     | 0.510627   |
| GTF2E2               | 24.3657  | 26.113   | 0.0999159    | 0.928909   |
| MESDC1               | 18.4488  | 27.2826  | 0.564452     | 0.0459324  |
| RRBP1                | 17.8858  | 21.1643  | 0.242825     | 0.605975   |
| ZNF300               | 6.40396  | 6.49557  | 0.020493     | 0.993108   |
| LOC100507501         | 2.45874  | 0.786391 | -1.6446      | 0.00134142 |
| NRD1                 | 22.9458  | 17.6853  | -0.375678    | 0.435611   |
| SYAP1                | 24.5956  | 24.698   | 0.00599294   | 0.997082   |
| PRUNE                | 5.4808   | 5.19724  | -0.076641    | 0.961224   |
| MST4                 | 11.6928  | 10.6446  | -0.135497    | 0.871957   |
| AURKC                | 0.7848   | 0.483727 | -0.698132    | 0.421445   |
| ASH2L                | 9.65454  | 6.82006  | -0.501424    | 0.100814   |
| CASC4                | 8.73373  | 6.84157  | -0.35227     | 0.315951   |
| METTL7B              | 2.19848  | 1.3788   | -0.673092    | 0.61004    |
| SIRT7                | 22.5526  | 27.1762  | 0.26905      | 0.574736   |
| HTRA2                | 19.7273  | 23.1837  | 0.232913     | 0.952905   |
| BET1                 | 10.3849  | 6.6373   | -0.645816    | 0.0162707  |
| ELK3                 | 9.36594  | 8.2775   | -0.178229    | 0.830321   |
| DHRS4L2              | 12.6347  | 10.6417  | -0.247665    | 0.699313   |
| REPS1                | 16.6721  | 12.2819  | -0.440893    | 0.148094   |
| DLL1                 | 6.85396  | 6.85961  | 0.0011888    | 0.99926    |
| YTHDF2               | 33.3552  | 35.6333  | 0.0953145    | 0.931816   |
| FTSJ2                | 19.4126  | 25.846   | 0.412945     | 0.194995   |
| NAA35                | 9.48611  | 8.6888   | -0.126661    | 0.898291   |
| ZNF503               | 8.90196  | 11.1638  | 0.326631     | 0.519452   |
| KDEL2                | 4.09247  | 2.60675  | -0.650715    | 0.0278845  |
| IGSF8                | 19.127   | 21.9769  | 0.200377     | 0.747687   |
| TXLNG                | 13.0873  | 14.7224  | 0.169846     | 0.794777   |
| KIAA0895             | 0.489501 | 0.801044 | 0.710569     | 0.877493   |
| PLAC1                | 0.247866 | 0.147197 | -0.751815    | 1          |
| PIGM                 | 2.55547  | 2.82274  | 0.143508     | 0.897241   |
| CCDC112              | 2.15532  | 1.68878  | -0.351923    | 0.546956   |
| GPX8                 | 15.6809  | 15.354   | -0.030395    | 0.987896   |
| VAPB                 | 6.94575  | 6.94292  | -0.000587612 | 0.999427   |
| ECD                  | 11.7952  | 9.6975   | -0.282516    | 0.530676   |
| PREPL                | 4.51807  | 3.00756  | -0.587113    | 0.0326415  |
| SPAG1                | 3.86672  | 4.62486  | 0.258298     | 0.628471   |
| WHSC1L1              | 5.7895   | 4.3543   | -0.410997    | 0.240573   |
| TTC39B               | 0.469718 | 0.160084 | -1.55297     | 0.00337323 |
| BMP2K                | 2.35031  | 3.53714  | 0.58973      | 0.105061   |
| KLC1                 | 18.7975  | 18.6825  | -0.00885489  | 0.997036   |
| MARK3                | 21.9785  | 21.9945  | 0.00104564   | 0.999427   |
| RNF144A              | 2.18257  | 1.11815  | -0.964908    | 0.00337323 |
| TTF2                 | 4.69496  | 6.15862  | 0.391495     | 0.243457   |
| MUSTN1,TMEM110,TMEM1 | 5.60137  | 8.886    | 0.665755     | 0.183567   |
| PIGT                 | 69.9584  | 71.5721  | 0.0329008    | 0.986832   |
| NUP205               | 17.7552  | 14.4018  | -0.302       | 0.430271   |
| TMEM218              | 2.65578  | 1.68733  | -0.654395    | 0.0477866  |
| TM7SF3               | 10.6924  | 6.36806  | -0.747658    | 0.00337323 |
| THOC5                | 26.9378  | 19.3298  | -0.4788      | 0.0882057  |
| EIF2B1               | 13.8823  | 22.2394  | 0.679868     | 0.141091   |
| QSOX2                | 21.5596  | 25.8801  | 0.263508     | 0.535228   |
| OSBP                 | 16.5475  | 11.0935  | -0.576901    | 0.0245451  |
| C1orf27              | 3.38095  | 2.86127  | -0.240774    | 0.915538   |
| SNORA10              | 47.7145  | 55.574   | 0.219983     | 0.990324   |
| SPTLC1               | 27.6291  | 25.9981  | -0.0877835   | 0.95534    |
| CHCHD5               | 38.3995  | 30.2205  | -0.345561    | 0.454944   |
| PEX13                | 3.9618   | 3.14282  | -0.334096    | 0.443332   |
| GPAM                 | 1.41759  | 2.02521  | 0.514629     | 0.128341   |
| PIAS4                | 10.8054  | 9.84654  | -0.134064    | 0.913628   |
| DDX19B               | 13.3263  | 8.21031  | -0.698767    | 0.0150729  |
| LGR4                 | 1.24428  | 1.38765  | 0.157327     | 0.89386    |
| HNF4G                | 0.438156 | 0.259073 | -0.758085    | 0.150383   |
| EI24                 | 50.8845  | 69.5527  | 0.450879     | 0.108219   |
| FAM86DP              | 4.99682  | 4.27243  | -0.225956    | 0.759915   |
| MRPL35               | 10.2671  | 12.4373  | 0.276648     | 0.604686   |
| KIF3B                | 2.98894  | 3.39031  | 0.181783     | 0.804229   |
| CCDC84               | 15.1544  | 21.1346  | 0.479875     | 0.984003   |
| APOL2                | 4.5589   | 8.77549  | 0.944794     | 0.00134142 |
| PWP2                 | 22.4324  | 34.6598  | 0.627679     | 0.0162707  |
| USP38                | 3.05961  | 3.0182   | -0.0196599   | 0.99351    |
| SETD9                | 3.01957  | 2.69272  | -0.165278    | 0.961432   |
| SLMAP                | 4.76997  | 4.41344  | -0.112076    | 0.922247   |
| WDR25                | 4.47839  | 3.38046  | -0.405759    | 0.449603   |
| RNH1                 | 110.359  | 112.367  | 0.0260214    | 0.989514   |
| SLC4A1AP             | 8.04436  | 8.16727  | 0.0218753    | 0.996453   |

|              |          |          |            |            |
|--------------|----------|----------|------------|------------|
| FSCN1        | 169.755  | 179.465  | 0.0802456  | 0.953101   |
| TAF5L        | 7.07048  | 9.21358  | 0.381953   | 0.283904   |
| DHX38        | 13.7602  | 18.8704  | 0.455629   | 0.230041   |
| SNUPN        | 19.486   | 17.733   | -0.136004  | 0.879301   |
| CACTIN       | 13.8711  | 21.3711  | 0.623578   | 0.0270114  |
| MS1          | 18.8707  | 28.0411  | 0.571396   | 0.0292254  |
| KIAA0247     | 1.62832  | 2.02347  | 0.313448   | 0.581647   |
| FAM76A       | 1.35767  | 1.43959  | 0.0845281  | 0.970558   |
| ACN9         | 12.543   | 15.5909  | 0.313822   | 0.442493   |
| SUCO         | 3.20836  | 2.00093  | -0.681162  | 0.0167292  |
| SPRED2       | 9.59541  | 8.071    | -0.249597  | 0.61004    |
| DTX2         | 12.1205  | 12.1375  | 0.00202351 | 0.998764   |
| MNS1         | 0.543998 | 0.325248 | -0.742063  | 0.433865   |
| TMEM11       | 26.5549  | 37.8414  | 0.510988   | 0.0885273  |
| SLC35A5      | 3.459    | 2.06957  | -0.741024  | 0.0222212  |
| CXorf56      | 10.5794  | 11.9496  | 0.175703   | 0.803587   |
| HSPA4L       | 3.058    | 4.36595  | 0.513709   | 0.115606   |
| TTL          | 10.6645  | 11.8316  | 0.149822   | 0.8433     |
| HIF1A-AS2    | 10.2152  | 11.529   | 0.174549   | 0.845969   |
| SBDSP1       | 17.291   | 23.6392  | 0.451158   | 0.134248   |
| TRAM2        | 2.90049  | 4.01449  | 0.468922   | 0.1419     |
| IRS2         | 3.99488  | 1.34243  | -1.57331   | 0.00134142 |
| DDX60        | 0.244872 | 0.114625 | -1.09511   | 1          |
| C18orf8      | 10.442   | 13.4246  | 0.362484   | 0.684267   |
| C5orf51      | 4.87975  | 3.58536  | -0.44469   | 0.163218   |
| LOC389791    | 0.370399 | 0.694915 | 0.907757   | 0.19325    |
| DAPK2        | 0.927259 | 0.743915 | -0.317835  | 0.759668   |
| PELI2        | 0.650769 | 0.236327 | -1.46136   | 0.00134142 |
| TASP1        | 3.15441  | 3.21744  | 0.0285447  | 0.991569   |
| KIAA0196     | 12.8836  | 9.15997  | -0.492126  | 0.0755921  |
| PDSS2        | 2.57213  | 1.63862  | -0.650483  | 0.0691409  |
| B3GALNT2     | 6.86398  | 6.68888  | -0.0372807 | 0.986822   |
| MBTPS1       | 15.6375  | 14.09    | -0.15034   | 0.842317   |
| SCYL2        | 5.38805  | 4.21892  | -0.352891  | 0.357643   |
| ZBTB7A       | 8.93212  | 9.71258  | 0.120852   | 0.912776   |
| BTRC         | 2.97147  | 3.34224  | 0.169637   | 0.830384   |
| CDK6         | 2.54349  | 2.46592  | -0.0446827 | 0.979733   |
| GBA          | 17.1126  | 14.9661  | -0.193365  | 0.759573   |
| LOXL2        | 0.470469 | 0.596777 | 0.343094   | 0.754022   |
| IFNAR1       | 5.94404  | 4.98562  | -0.253672  | 0.585561   |
| CDYL         | 7.8263   | 7.05396  | -0.149895  | 0.856449   |
| CYB5R3       | 58.7801  | 66.2939  | 0.173549   | 0.787035   |
| CC2D1A       | 20.9298  | 24.565   | 0.231048   | 0.641563   |
| ZC3H14       | 9.24748  | 9.59632  | 0.0534209  | 0.976756   |
| DYNC1LI1     | 18.8145  | 19.2687  | 0.0344172  | 0.986353   |
| DPF1         | 3.01238  | 2.47465  | -0.283679  | 0.746304   |
| GCML         | 2.68768  | 5.86714  | 1.12629    | 0.00134142 |
| TOR1AIP2     | 17.3066  | 14.8393  | -0.221898  | 0.658266   |
| POLR2B       | 24.4119  | 30.6535  | 0.328465   | 0.348909   |
| SETD3        | 11.0802  | 14.7388  | 0.411636   | 0.225675   |
| DDX31        | 15.9311  | 20.154   | 0.339217   | 0.510094   |
| AP3D1        | 15.3336  | 15.6115  | 0.0259154  | 0.989748   |
| MTX1         | 50.6005  | 50.6575  | 0.00162388 | 0.998764   |
| DNAJB14      | 1.40016  | 0.939515 | -0.575606  | 0.21876    |
| PLEKHB2      | 37.0282  | 36.9039  | -0.0048501 | 0.99714    |
| POLR2D       | 12.6371  | 15.2956  | 0.275453   | 0.529644   |
| MAPKAPK3     | 69.2944  | 63.43    | -0.127573  | 0.888528   |
| LOC100505549 | 1.02235  | 0.664503 | -0.621546  | 0.335117   |
| DUSP12       | 24.7134  | 29.8158  | 0.270783   | 0.552585   |
| POLR1E       | 37.1025  | 37.6079  | 0.0195199  | 0.992797   |
| SRPK1        | 26.0534  | 28.0034  | 0.104131   | 0.924371   |
| TAF2         | 5.59176  | 6.04258  | 0.111863   | 0.917687   |
| PRDX6        | 296.756  | 299.681  | 0.0141483  | 0.994615   |
| SLC25A20     | 3.7159   | 8.71253  | 1.22938    | 0.00134142 |
| MTOR         | 2.89496  | 3.11182  | 0.104213   | 0.930066   |
| TTC7A        | 3.28773  | 3.05484  | -0.105995  | 0.987693   |
| KLHL31       | 0.031146 | 0.029004 | -0.102794  | 1          |
| SPTLC2       | 7.04431  | 6.07632  | -0.213261  | 0.674625   |
| DONSON       | 12.2913  | 11.7828  | -0.0609528 | 0.970053   |
| TRPS1        | 0.526852 | 0.389966 | -0.434051  | 0.380929   |
| MRPL2        | 46.5829  | 38.4853  | -0.27549   | 0.519309   |
| LOH12CR2     | 0.393304 | 0.179578 | -1.13104   | 0.217535   |
| AHSA2        | 4.66593  | 4.6395   | -0.0081953 | 0.997736   |
| FZD1         | 1.96066  | 1.42847  | -0.456863  | 0.39222    |
| CLPX         | 11.2183  | 9.29415  | -0.271459  | 0.550625   |
| PLCL2        | 1.37044  | 1.32533  | -0.0482819 | 0.991767   |
| AARS2        | 6.7178   | 6.61873  | -0.021433  | 0.992797   |
| SPRYD4       | 9.15614  | 13.4207  | 0.551649   | 0.240188   |
| NME7         | 8.86025  | 6.20679  | -0.5135    | 0.431201   |

|              |           |           |             |            |
|--------------|-----------|-----------|-------------|------------|
| MRPL24       | 107.549   | 114.294   | 0.0877512   | 0.944553   |
| SIRT4        | 1.83968   | 2.28616   | 0.31347     | 0.773842   |
| LOC100129961 | 0.235484  | 0.291579  | 0.308258    | 1          |
| CDK8         | 3.69731   | 2.95663   | -0.322524   | 0.609835   |
| TALDO1       | 152.143   | 154.496   | 0.0221411   | 0.990994   |
| EP300        | 1.43546   | 1.02215   | -0.489907   | 0.170977   |
| HNRPLL       | 8.12411   | 6.55638   | -0.30931    | 0.457827   |
| FBXO5        | 9.09196   | 9.12865   | 0.00581027  | 0.99714    |
| PVRL2        | 51.9393   | 45.9273   | -0.177474   | 0.791254   |
| GPATCH1      | 2.01587   | 1.73243   | -0.218607   | 0.819455   |
| GRN          | 167.198   | 149.982   | -0.15677    | 0.830817   |
| TMCC2        | 1.73631   | 1.76824   | 0.0262937   | 0.993379   |
| ATG5         | 8.88528   | 9.66404   | 0.12121     | 0.903682   |
| KIAA1279     | 6.69705   | 6.74065   | 0.00936384  | 0.997036   |
| ABCC1        | 11.285    | 10.6421   | -0.0846226  | 0.948088   |
| MRPS18B      | 84.4339   | 56.7978   | -0.571986   | 0.0250278  |
| NEMF         | 3.38039   | 3.4674    | 0.0366666   | 0.986822   |
| APMAP        | 55.723    | 66.622    | 0.257727    | 0.548007   |
| SET          | 316.316   | 388.734   | 0.297419    | 0.500412   |
| TMEM50A      | 36.4008   | 35.359    | -0.0418921  | 0.979875   |
| ATP6V1D      | 29.3424   | 29.9978   | 0.0318712   | 0.986822   |
| WWTR1        | 2.28347   | 1.77318   | -0.364892   | 0.426146   |
| DAK          | 8.66615   | 6.54763   | -0.404417   | 0.931471   |
| MAP3K13      | 10.7001   | 9.10172   | -0.233407   | 0.707322   |
| BAHCC1       | 1.19857   | 0.997592  | -0.264795   | 0.729809   |
| NARFL        | 14.1459   | 14.8454   | 0.0696342   | 0.966946   |
| FAM98B       | 4.90071   | 7.02555   | 0.51962     | 0.158777   |
| CEP57L1      | 1.73733   | 1.37851   | -0.333767   | 0.602221   |
| DHX37        | 13.4482   | 31.0533   | 1.20734     | 0.00134142 |
| ADAT1        | 0.843843  | 0.687795  | -0.294995   | 0.772137   |
| EFHC1        | 1.18949   | 0.592521  | -1.0054     | 0.00672555 |
| MARC1        | 10.1603   | 9.12296   | -0.155369   | 0.863051   |
| VAMP8        | 1.14332   | 0.464808  | -1.29852    | 0.130554   |
| CTNBNL1      | 27.2444   | 32.7677   | 0.266315    | 0.530219   |
| ARMC2        | 0.0819941 | 0.0635287 | -0.368112   | 1          |
| NR4A3        | 0.294827  | 0.301058  | 0.0301749   | 1          |
| OSBPL11      | 1.50045   | 1.94016   | 0.370782    | 0.441752   |
| KLHDC4       | 18.7483   | 19.8263   | 0.080658    | 0.955102   |
| EIF4E        | 18.0497   | 24.739    | 0.454814    | 0.10531    |
| FXYD5        | 488.808   | 494.213   | 0.0158625   | 0.99351    |
| RBM10        | 37.6456   | 28.8264   | -0.385089   | 0.234679   |
| CYP51A1      | 32.0979   | 32.6793   | 0.0258991   | 0.990324   |
| TMA7         | 508.767   | 621.185   | 0.288018    | 0.471519   |
| ERAP2        | 3.84284   | 3.14398   | -0.289582   | 0.530981   |
| PAFAH2       | 3.15023   | 3.14459   | -0.00258353 | 0.99862    |
| HOXA6        | 0.255414  | 0.298353  | 0.224179    | 1          |
| TMEM9        | 77.6091   | 68.8335   | -0.173115   | 0.78475    |
| UBE2E1       | 54.2301   | 42.3617   | -0.356333   | 0.287459   |
| RBM18        | 7.9325    | 8.11853   | 0.0334429   | 0.99351    |
| RHOC         | 305.385   | 398.816   | 0.385092    | 0.240188   |
| DCAF15       | 30.0102   | 30.6132   | 0.0287018   | 0.988657   |
| TRAPPC10     | 2.90462   | 3.52148   | 0.277834    | 0.564234   |
| MKI67        | 10.5857   | 13.4368   | 0.344077    | 0.318762   |
| LRP6         | 1.22035   | 1.02452   | -0.25234    | 0.664752   |
| MTF1         | 1.20209   | 1.43034   | 0.250819    | 0.683888   |
| SDAD1        | 10.1959   | 12.3892   | 0.281089    | 0.48299    |
| LOC100129361 | 5.18932   | 5.66984   | 0.127764    | 0.900119   |
| FAM171A2     | 8.46309   | 4.27047   | -0.98679    | 0.00593755 |
| ADSL         | 68.0419   | 66.8297   | -0.0259343  | 0.989411   |
| IPO4         | 34.8217   | 57.1235   | 0.7141      | 0.00134142 |
| MRPS12       | 127.309   | 235.741   | 0.888867    | 0.00134142 |
| LRP2BP       | 0.346207  | 0.361007  | 0.0603903   | 0.993379   |
| DIS3         | 6.70678   | 6.40185   | -0.0671304  | 0.97067    |
| CHTF8        | 37.2329   | 31.7772   | -0.228585   | 0.671358   |
| DBI          | 207.154   | 302.525   | 0.546353    | 0.0398899  |
| HCG9         | 0.1807    | 0.0559955 | -1.69021    | 1          |
| B3GAT3       | 40.5647   | 49.6931   | 0.292823    | 0.473708   |
| CTXN1        | 30.5852   | 65.8673   | 1.10673     | 0.00134142 |
| CBX3         | 78.2168   | 95.4716   | 0.287593    | 0.47186    |
| WASF1        | 3.36961   | 3.38348   | 0.00592672  | 0.99714    |
| ALLC         | 0.204767  | 0.370659  | 0.856109    | 0.433631   |
| ATP6V1A      | 6.90142   | 5.68376   | -0.280048   | 0.518295   |
| NDUFA3       | 211.845   | 245       | 0.209768    | 0.718396   |
| RAB18        | 10.6777   | 11.5167   | 0.10912     | 0.918335   |
| CLU          | 41.6748   | 37.2073   | -0.163587   | 0.809759   |
| RBM6         | 14.3196   | 18.6715   | 0.38285     | 0.24791    |
| TRIP12       | 9.6142    | 11.5744   | 0.267698    | 0.521183   |
| MAPK1IP1L    | 11.34     | 10.5591   | -0.102939   | 0.920541   |
| TFAP4        | 15.1682   | 13.7226   | -0.144496   | 0.87753    |

|          |            |            |            |            |
|----------|------------|------------|------------|------------|
| KDM1A    | 56.0495    | 60.5359    | 0.11109    | 0.913628   |
| TSPAN1   | 0.254986   | 0.221883   | -0.20062   | 1          |
| UNC5A    | 1.50762    | 1.44201    | -0.0641924 | 0.979875   |
| TAF9     | 105.313    | 110.302    | 0.0667774  | 0.966946   |
| IWS1     | 12.3321    | 14.4765    | 0.23129    | 0.64801    |
| EIF3I    | 252.394    | 255.017    | 0.014919   | 0.994536   |
| URB1     | 4.30635    | 6.73255    | 0.644687   | 0.009453   |
| DAGLB    | 20.7187    | 15.2152    | -0.445421  | 0.157978   |
| VAV2     | 16.8907    | 21.076     | 0.319367   | 0.373156   |
| GSK3A    | 48.3773    | 78.697     | 0.70198    | 0.00243047 |
| FAT1     | 1.32268    | 1.4634     | 0.145866   | 0.870173   |
| GPR137   | 15.3309    | 14.4211    | -0.0882595 | 0.979701   |
| SCARNA10 | 1.69236    | 1.93105    | 0.190347   | 0.993379   |
| TMED6    | 0.915698   | 1.27411    | 0.476543   | 0.657079   |
| C3orf38  | 4.40603    | 4.03871    | -0.125584  | 0.974478   |
| MRPL3    | 55.6978    | 63.8094    | 0.196149   | 0.730262   |
| SEPHS1   | 22.8709    | 31.3979    | 0.457155   | 0.104845   |
| DNAJA2   | 26.596     | 27.4575    | 0.045993   | 0.979484   |
| PPIB     | 754.982    | 932.547    | 0.304735   | 0.435452   |
| PGF      | 19.0623    | 22.7974    | 0.25815    | 0.629267   |
| POP7     | 143.098    | 300.671    | 1.07118    | 0.00134142 |
| PIKFYVE  | 1.72567    | 1.41584    | -0.285503  | 0.585304   |
| ST3GAL5  | 2.04531    | 0.828581   | -1.3036    | 0.00134142 |
| SPINT2   | 2.43314    | 0.825968   | -1.55866   | 0.00243047 |
| MRRF     | 45.9084    | 43.7309    | -0.0701051 | 0.969963   |
| RPS6KA3  | 3.6674     | 3.58265    | -0.0337288 | 0.986822   |
| DCTN6    | 17.9702    | 13.3234    | -0.431637  | 0.844285   |
| ITFG1    | 11.3505    | 6.46728    | -0.811531  | 0.00243047 |
| SMPD4    | 21.9612    | 28.5742    | 0.379756   | 0.720774   |
| PREB     | 47.8608    | 75.2751    | 0.653331   | 0.00672555 |
| NHP2L1   | 154.824    | 208.165    | 0.427103   | 0.151982   |
| WRAP53   | 21.9379    | 33.7652    | 0.622108   | 0.263759   |
| AAAS     | 26.531     | 20.512     | -0.371207  | 0.29172    |
| CWF19L1  | 12.7106    | 11.3456    | -0.163906  | 0.820901   |
| SPRED3   | 1.8244     | 2.03233    | 0.155709   | 0.894057   |
| C6orf163 | 0.175285   | 0.0929245  | -0.915572  | 1          |
| PNKD     | 60.0658    | 53.6237    | -0.163673  | 0.969776   |
| CYB561D2 | 38.5886    | 57.5338    | 0.576236   | 0.129076   |
| SLC35E3  | 6.15227    | 3.09393    | -0.991679  | 0.00134142 |
| CHCHD3   | 81.524     | 75.7432    | -0.106109  | 0.918061   |
| C6orf47  | 11.0238    | 12.7744    | 0.212631   | 0.716391   |
| COPS7B   | 21.9657    | 35.0861    | 0.675651   | 0.00882987 |
| SBDS     | 53.295     | 66.515     | 0.319679   | 0.374678   |
| RCAN1    | 11.429     | 11.1145    | -0.0402487 | 0.9839     |
| FOXM1    | 26.8798    | 30.5221    | 0.18333    | 0.802544   |
| JOSD2    | 54.7697    | 42.9466    | -0.350835  | 0.380054   |
| SIX5     | 13.6607    | 8.99881    | -0.602223  | 0.0474163  |
| PTBP1    | 156.033    | 169.547    | 0.119829   | 0.902703   |
| LARS     | 29.7632    | 21.1881    | -0.490273  | 0.0882057  |
| FBXO3    | 7.11496    | 3.98183    | -0.837424  | 0.00593755 |
| PIP4K2C  | 11.3377    | 15.4844    | 0.449682   | 0.129875   |
| FAM203A  | 2.35689    | 3.97862    | 0.755384   | 0.0753213  |
| SH3GL2   | 0.0538992  | 0.00797779 | -2.7562    | 1          |
| SMURF1   | 6.93461    | 6.53521    | -0.0855805 | 0.950929   |
| P4HB     | 445.261    | 375.306    | -0.246586  | 0.618093   |
| TRERF1   | 2.87447    | 2.31364    | -0.313129  | 0.477044   |
| LRRC7    | 0.00776617 | 0.00421455 | -0.881826  | 1          |
| ELP5     | 53.3435    | 64.7233    | 0.278973   | 0.517897   |
| TMEM161B | 4.84127    | 3.11381    | -0.636704  | 0.0455504  |
| FAM136A  | 37.3656    | 66.6712    | 0.835354   | 0.00134142 |
| ACAA2    | 38.0399    | 20.8159    | -0.869832  | 0.00134142 |
| TSSC1    | 15.7933    | 11.9528    | -0.401963  | 0.272094   |
| BAG6     | 69.745     | 52.3941    | -0.412684  | 0.200886   |
| POLR1A   | 5.00832    | 8.65106    | 0.78855    | 0.00134142 |
| ICMT     | 12.2744    | 19.289     | 0.65213    | 0.0139368  |
| INVS     | 4.86955    | 3.09312    | -0.654724  | 0.030165   |
| ARCN1    | 28.1343    | 25.1256    | -0.163171  | 0.805942   |
| SLC35C2  | 32.5498    | 17.1873    | -0.921304  | 0.00134142 |
| ZKSCAN5  | 4.79943    | 5.64303    | 0.233609   | 0.666069   |
| TBCA     | 314.306    | 285.007    | -0.141172  | 0.859569   |
| RPAIN    | 44.3954    | 25.9988    | -0.771965  | 0.705025   |
| DCAF5    | 5.2251     | 4.61109    | -0.180351  | 0.790283   |
| RBBP8    | 5.42263    | 6.24263    | 0.203161   | 0.755114   |
| RNMT     | 9.26606    | 5.61286    | -0.723219  | 0.00337323 |
| EFHA1    | 13.2559    | 11.8643    | -0.160007  | 0.828589   |
| ATP2B1   | 1.3864     | 1.99241    | 0.523168   | 0.109906   |
| MAGT1    | 11.0388    | 9.99808    | -0.142858  | 0.855134   |
| MARCKS   | 12.6757    | 5.88392    | -1.10722   | 0.00134142 |
| PWP1     | 32.818     | 33.4536    | 0.027674   | 0.98907    |

|               |         |          |              |            |
|---------------|---------|----------|--------------|------------|
| CHMP4B        | 70.5552 | 74.2454  | 0.0735492    | 0.957507   |
| UMPS          | 5.38802 | 8.57976  | 0.671183     | 0.00743393 |
| ITGA5         | 26.2455 | 23.5902  | -0.15388     | 0.832642   |
| RAB7A         | 106.197 | 105.574  | -0.00849506  | 0.997036   |
| RAP1GAP2      | 6.52605 | 5.97149  | -0.128118    | 0.88826    |
| MRPS15        | 129.318 | 148.453  | 0.19909      | 0.725037   |
| ZNF317        | 10.8772 | 9.36001  | -0.216728    | 0.688434   |
| ABLM1         | 10.1831 | 7.24204  | -0.491703    | 0.0761023  |
| PTS           | 15.4553 | 19.5835  | 0.341541     | 0.425831   |
| TPD52L1       | 26.4457 | 16.9901  | -0.638344    | 0.0205623  |
| ACTR2         | 37.8507 | 32.2309  | -0.231876    | 0.623198   |
| ANKLE2        | 15.1342 | 16.6436  | 0.137156     | 0.865173   |
| GOLGA2        | 23.8478 | 16.3701  | -0.542794    | 0.0431891  |
| NOL9          | 6.4786  | 10.4822  | 0.69418      | 0.00818401 |
| CNKSR3        | 1.84379 | 2.50666  | 0.443089     | 0.337563   |
| H1FX          | 280.908 | 142.943  | -0.974657    | 0.00134142 |
| STK4          | 7.00439 | 8.30142  | 0.245097     | 0.597632   |
| C11orf80,RCE1 | 28.1203 | 40.9009  | 0.54052      | 0.103533   |
| SPTSSA        | 12.3385 | 12.8795  | 0.061919     | 0.967799   |
| MGME1         | 11.6933 | 12.9911  | 0.151841     | 0.845608   |
| RNF187        | 63.7539 | 54.7707  | -0.21911     | 0.680021   |
| UBAP2L        | 24.0108 | 34.4234  | 0.519706     | 0.457516   |
| CCAR1         | 6.6685  | 8.51717  | 0.35301      | 0.319563   |
| NFE2L2        | 13.2964 | 11.5675  | -0.200958    | 0.743254   |
| TJAP1         | 18.2557 | 18.9796  | 0.0560991    | 0.974044   |
| LYPLAL1       | 12.1187 | 5.13637  | -1.23842     | 0.00134142 |
| COPZ2         | 6.81089 | 5.16602  | -0.398789    | 0.505095   |
| NDUFS5        | 409.689 | 491.452  | 0.262523     | 0.550253   |
| MORN2         | 8.80797 | 8.4496   | -0.0599269   | 0.979701   |
| MVB12B        | 7.0173  | 7.87191  | 0.165797     | 0.82369    |
| DBF4B         | 6.89112 | 10.9126  | 0.66318      | 0.0132924  |
| C10orf76      | 4.42244 | 3.68118  | -0.264674    | 0.619929   |
| SRSF4         | 46.9226 | 66.9318  | 0.512407     | 0.064193   |
| TARDBP        | 17.2138 | 37.2292  | 1.11287      | 0.00134142 |
| NFKBIZ,NXPE3  | 16.1427 | 12.1354  | -0.41166     | 0.267105   |
| CEP85         | 5.90579 | 6.75125  | 0.193025     | 0.767826   |
| CBY1          | 31.2477 | 28.9964  | -0.107873    | 0.922881   |
| TXNL1         | 82.0572 | 76.5261  | -0.100677    | 0.926225   |
| DDX10         | 9.52808 | 16.7454  | 0.81351      | 0.00134142 |
| PTGES3        | 188.974 | 275.873  | 0.545816     | 0.0501327  |
| GNA15         | 8.58259 | 9.43822  | 0.137101     | 0.90608    |
| IGFBP2        | 44.5701 | 53.539   | 0.264514     | 0.568527   |
| C9orf40       | 12.7046 | 13.0264  | 0.0360874    | 0.986353   |
| SLC39A8       | 13.219  | 10.2166  | -0.371698    | 0.273055   |
| ATF6B         | 45.677  | 29.1598  | -0.647487    | 0.00672555 |
| RNF219        | 3.66454 | 3.76238  | 0.0380146    | 0.985626   |
| HMGN3         | 28.4981 | 33.5686  | 0.236244     | 0.669697   |
| WDR83OS       | 211.189 | 244.164  | 0.209314     | 0.781066   |
| MBD2          | 12.1306 | 12.8334  | 0.0812581    | 0.950929   |
| CLINT1        | 8.61773 | 11.8482  | 0.459283     | 0.129076   |
| MFSD5         | 25.8023 | 42.1879  | 0.709333     | 0.00743393 |
| ATF4          | 516.638 | 238.147  | -1.1173      | 0.00134142 |
| ASNA1         | 95.7699 | 124.458  | 0.378015     | 0.24551    |
| FBXO46        | 14.8659 | 12.9822  | -0.195473    | 0.771183   |
| CLTCL1        | 1.4984  | 0.989742 | -0.5983      | 0.125756   |
| MORC4         | 7.96494 | 7.6108   | -0.0656151   | 0.966946   |
| ERI1          | 6.68862 | 6.68594  | -0.000578355 | 0.999427   |
| PDCD2         | 38.9688 | 42.4716  | 0.124178     | 0.920028   |
| PCGF5         | 12.8274 | 14.606   | 0.187337     | 0.908471   |
| SDHA          | 61.2861 | 52.1644  | -0.232495    | 0.627198   |
| UBE2A         | 30.1315 | 36.6765  | 0.283584     | 0.478792   |
| STMN1         | 206.554 | 172.568  | -0.259351    | 0.549958   |
| OPA3          | 3.48458 | 5.09258  | 0.54741      | 0.357175   |
| PRDX2         | 614.004 | 734.103  | 0.257734     | 0.563967   |
| TSPAN9        | 2.72499 | 4.24996  | 0.641199     | 0.0477866  |
| JPX           | 3.82642 | 3.2979   | -0.214448    | 0.844001   |
| SNRNP27       | 21.3648 | 21.5793  | 0.0144131    | 0.994615   |
| TIMM17B       | 122.921 | 107.474  | -0.193746    | 0.882546   |
| CAAP1         | 4.34632 | 3.30243  | -0.396268    | 0.330501   |
| NUP50         | 11.4382 | 15.7507  | 0.461559     | 0.10104    |
| OPA1          | 9.02835 | 8.91446  | -0.0183151   | 0.993379   |
| CSNK2B        | 258.821 | 268.622  | 0.0536203    | 0.978446   |
| CCDC124       | 249.926 | 276.027  | 0.143305     | 0.849027   |
| PITHD1        | 34.9376 | 45.9544  | 0.395423     | 0.201085   |
| RINT1         | 9.86555 | 10.5547  | 0.0974162    | 0.935917   |
| H3F3A         | 436.183 | 490.601  | 0.169619     | 0.799156   |
| RSU1          | 11.1454 | 17.4506  | 0.646821     | 0.00593755 |
| ARL6IP5       | 16.3566 | 13.2067  | -0.30861     | 0.430215   |
| TMEM66        | 58.3977 | 40.7579  | -0.518831    | 0.173795   |



|                         |           |           |             |            |
|-------------------------|-----------|-----------|-------------|------------|
| NLRP4                   | 0.0439046 | 0         | #NAME?      | 1          |
| GTPBP4                  | 47.5652   | 67.7645   | 0.510623    | 0.0611798  |
| IPO8                    | 8.07966   | 8.12074   | 0.00731667  | 0.997036   |
| COA4                    | 110.394   | 154.632   | 0.486175    | 0.121756   |
| ZBTB21                  | 2.53178   | 2.3001    | -0.138455   | 0.889643   |
| SPECC1L                 | 7.03149   | 9.34599   | 0.410518    | 0.20932    |
| ZSCAN5A                 | 0.640196  | 0.956144  | 0.578714    | 0.41836    |
| EID2                    | 28.522    | 34.4516   | 0.272495    | 0.556835   |
| STIM1                   | 10.3947   | 7.85001   | -0.405076   | 0.223398   |
| METTL5                  | 68.0608   | 43.3026   | -0.652369   | 0.362537   |
| RPS6KL1                 | 1.36346   | 1.95202   | 0.517701    | 0.194686   |
| NDE1                    | 5.93589   | 6.13489   | 0.0475742   | 0.982256   |
| POLR2K                  | 61.1459   | 78.7074   | 0.364242    | 0.267975   |
| SLC36A1                 | 1.22779   | 1.9593    | 0.674268    | 0.0470437  |
| ZCCHC9                  | 20.7329   | 15.0859   | -0.45872    | 0.259411   |
| TMEM5                   | 10.813    | 15.1505   | 0.4866      | 0.134015   |
| EIF4H                   | 201.982   | 189.274   | -0.0937467  | 0.939261   |
| CANT1                   | 25.0951   | 29.6357   | 0.239932    | 0.614731   |
| RAB27A                  | 2.27818   | 3.01787   | 0.405649    | 0.331712   |
| SOX7                    | 0.102255  | 0.241432  | 1.23945     | 1          |
| MLYCD                   | 8.09342   | 7.59983   | -0.0907824  | 0.956033   |
| SF3A2                   | 115.353   | 77.7654   | -0.568861   | 0.0266793  |
| TNPO3                   | 17.7275   | 19.2743   | 0.120689    | 0.895948   |
| BIN3                    | 17.5503   | 19.5509   | 0.155737    | 0.966946   |
| MRPL14                  | 132.201   | 215.925   | 0.707804    | 0.00337323 |
| ZNF207                  | 52.092    | 84.0409   | 0.690031    | 0.00337323 |
| TDP2                    | 15.5759   | 14.0457   | -0.149184   | 0.852163   |
| CCDC42B                 | 0.199654  | 0.266435  | 0.416282    | 1          |
| GTPBP8                  | 8.99327   | 9.10501   | 0.0178144   | 0.99351    |
| IL23A                   | 0.881376  | 0.392898  | -1.1656     | 0.157978   |
| MKS1                    | 10.399    | 4.58928   | -1.18011    | 0.00134142 |
| LY6E                    | 486.022   | 483.398   | -0.0078112  | 0.997036   |
| SERHL2                  | 0.0780001 | 0.0620586 | -0.329844   | 1          |
| HSP90AB1                | 841.205   | 988.207   | 0.232357    | 0.703942   |
| REEP1                   | 0.878701  | 0.780298  | -0.171346   | 0.910195   |
| NCAPG                   | 5.82971   | 3.66362   | -0.670153   | 0.0566185  |
| FES                     | 0.44308   | 0.568093  | 0.35856     | 0.790844   |
| WDR46                   | 40.6889   | 74.5657   | 0.873878    | 0.00134142 |
| NOM1                    | 7.55952   | 11.1296   | 0.558039    | 0.0357572  |
| PREP                    | 15.4283   | 15.3456   | -0.00775393 | 0.997036   |
| UAP1                    | 211.406   | 223.135   | 0.0778986   | 0.955758   |
| STK3                    | 6.09253   | 4.93337   | -0.304467   | 0.520122   |
| C4orf46                 | 5.00643   | 6.74705   | 0.430474    | 0.200886   |
| PDXDC1                  | 11.4968   | 14.7227   | 0.3568      | 0.284553   |
| PARL                    | 52.4343   | 52.355    | -0.00218401 | 0.998564   |
| AP1G1                   | 6.09963   | 6.05905   | -0.00962898 | 0.996453   |
| LRP11                   | 6.07045   | 3.8368    | -0.6619     | 0.0235476  |
| RNF139                  | 19.1064   | 13.104    | -0.544051   | 0.19325    |
| BATF3                   | 27.4025   | 68.4831   | 1.32144     | 0.00134142 |
| TMEM160                 | 69.9293   | 79.4082   | 0.183391    | 0.819681   |
| TTYH3                   | 23.0463   | 20.6571   | -0.157896   | 0.826656   |
| CD151                   | 393.875   | 435.544   | 0.145082    | 0.856449   |
| DCK                     | 5.82904   | 4.58395   | -0.346667   | 0.435326   |
| NPC1                    | 11.5144   | 4.56955   | -1.33331    | 0.00134142 |
| ANKS6                   | 9.78958   | 10.9743   | 0.164813    | 0.812384   |
| TIMM17A                 | 40.1399   | 69.7946   | 0.79808     | 0.00134142 |
| NAA20                   | 90.7963   | 113.976   | 0.328022    | 0.35617    |
| PRDM6                   | 0.076292  | 0.0700586 | -0.122968   | 1          |
| PMP22                   | 31.2322   | 44.6204   | 0.514669    | 0.0573356  |
| UFM1                    | 15.7675   | 14.2197   | -0.149069   | 0.846243   |
| EAPP                    | 24.9978   | 16.331    | -0.614192   | 0.0266793  |
| CDK5RAP2                | 4.9721    | 3.3621    | -0.564495   | 0.0477866  |
| RMDN3                   | 16.4462   | 19.5405   | 0.248713    | 0.608559   |
| PRIM2                   | 9.54789   | 5.8535    | -0.705882   | 0.0150729  |
| KIAA1024                | 0.192967  | 0.301335  | 0.64301     | 1          |
| ATP5D                   | 399.613   | 454.107   | 0.184431    | 0.762867   |
| KIAA1549                | 1.38598   | 1.70319   | 0.297329    | 0.520342   |
| ZC3H3                   | 19.3412   | 22.8444   | 0.240165    | 0.622505   |
| RABGGTB                 | 59.2946   | 64.4947   | 0.121281    | 0.898291   |
| PTPN3                   | 6.32748   | 5.49918   | -0.202414   | 0.716973   |
| MBOAT7                  | 103.811   | 97.7428   | -0.0869016  | 0.945946   |
| SLC25A32                | 18.2294   | 29.2785   | 0.683574    | 0.284036   |
| LIMS1                   | 3.20678   | 2.59682   | -0.304378   | 0.530257   |
| SIL1                    | 42.9673   | 29.386    | -0.548109   | 0.0436049  |
| TRAPPC1                 | 157.784   | 171.964   | 0.124161    | 0.890511   |
| POLR2I                  | 96.5631   | 101.806   | 0.0762743   | 0.979701   |
| ATP5J2,ATP5J2-PTCD1,PTI | 789.519   | 977.827   | 0.308605    | 0.68633    |
| AP1M2                   | 3.65168   | 3.28654   | -0.15199    | 0.919186   |
| HNRNPF                  | 116.412   | 145.021   | 0.317022    | 0.385863   |

|           |            |           |            |            |
|-----------|------------|-----------|------------|------------|
| IL16      | 0.0295203  | 0.0299328 | 0.0200184  | 1          |
| WAPAL     | 5.68564    | 6.87944   | 0.274969   | 0.505355   |
| LMBRD1    | 9.68673    | 3.89127   | -1.31577   | 0.00134142 |
| C6orf132  | 4.02939    | 4.48695   | 0.155174   | 0.851514   |
| C16orf88  | 6.44748    | 7.65894   | 0.248409   | 0.746773   |
| MAN1A1    | 1.21586    | 0.952742  | -0.351814  | 0.54069    |
| TET2      | 0.638484   | 0.423074  | -0.593738  | 0.128584   |
| WRNIP1    | 37.1571    | 49.0009   | 0.399171   | 0.200886   |
| MDK       | 672.793    | 636.174   | -0.0807406 | 0.952905   |
| TRIM9     | 0.00384287 | 0         | #NAME?     | 1          |
| PYGB      | 21.1003    | 27.3885   | 0.376306   | 0.504136   |
| MXD3      | 35.1409    | 54.9433   | 0.644792   | 0.296942   |
| TRNT1     | 7.68032    | 14.3492   | 0.901732   | 0.00134142 |
| MBTPS2    | 2.53007    | 1.51393   | -0.740884  | 0.0326415  |
| CNIH      | 67.7595    | 59.9331   | -0.177069  | 0.775379   |
| NXPH4     | 34.2872    | 39.3762   | 0.199652   | 0.750701   |
| MAPKAP1   | 72.1376    | 50.811    | -0.505609  | 0.0857334  |
| USP5      | 32.7503    | 38.5932   | 0.236838   | 0.605597   |
| ADCY6     | 7.02628    | 8.44927   | 0.266065   | 0.559828   |
| FMR1      | 5.67214    | 4.98401   | -0.186586  | 0.787261   |
| MRPS10    | 20.1931    | 19.0204   | -0.0863156 | 0.947247   |
| ORMDL1    | 23.8474    | 25.9781   | 0.123465   | 0.913984   |
| CERS6     | 3.44652    | 3.4722    | 0.0107068  | 0.997036   |
| RPF2      | 55.1675    | 55.5601   | 0.0102285  | 0.996079   |
| N4BP1     | 3.23397    | 2.69552   | -0.262746  | 0.61004    |
| SEC13     | 79.863     | 99.6407   | 0.319208   | 0.365268   |
| ZDHHHC21  | 0.932472   | 0.86287   | -0.111916  | 0.932468   |
| MRPL55    | 70.447     | 103.512   | 0.555181   | 0.0531423  |
| NAT14     | 2.16301    | 2.18394   | 0.0138904  | 0.997036   |
| RARS2     | 17.2703    | 14.7106   | -0.231439  | 0.652159   |
| PDCD2L    | 28.2932    | 30.7744   | 0.121278   | 0.906895   |
| PPP2CB    | 43.0585    | 51.5282   | 0.259065   | 0.550662   |
| BFAR      | 21.8396    | 17.4103   | -0.32701   | 0.360906   |
| DCTN5     | 6.81618    | 9.08972   | 0.415272   | 0.167979   |
| TAOK3     | 1.3163     | 1.2705    | -0.0510927 | 0.983483   |
| SH3GL1    | 74.3947    | 86.8861   | 0.223925   | 0.651698   |
| GF2M      | 11.9221    | 9.87071   | -0.272412  | 0.950929   |
| LRIG1     | 2.87597    | 3.44401   | 0.260038   | 0.87867    |
| KLHL18    | 4.81105    | 10.03     | 1.05989    | 0.00134142 |
| KCTD13    | 10.5366    | 7.29449   | -0.530533  | 0.169417   |
| FUT10     | 3.12493    | 2.63972   | -0.24344   | 0.716391   |
| SEMA6A    | 0.0545735  | 0.0376952 | -0.533818  | 1          |
| EIF2B5    | 23.3348    | 25.294    | 0.116311   | 0.905597   |
| PCDHB8    | 1.54641    | 0.806038  | -0.940003  | 0.0398899  |
| NPM1      | 1508.23    | 1474.85   | -0.0322926 | 0.987693   |
| UBE2K     | 15.2353    | 17.8929   | 0.231965   | 0.632842   |
| ADIPOR2   | 11.7024    | 17.4338   | 0.575078   | 0.0292254  |
| IFT46     | 7.90752    | 4.40724   | -0.84335   | 0.0101293  |
| ZNHIT1    | 168.692    | 179.591   | 0.0903269  | 0.965515   |
| IFNGR1    | 8.23188    | 5.50452   | -0.580607  | 0.049309   |
| SLC39A13  | 34.9052    | 48.7006   | 0.480497   | 0.0904428  |
| CD2BP2    | 36.2743    | 44.6287   | 0.299023   | 0.424407   |
| JAGN1     | 30.8632    | 31.3656   | 0.0232948  | 0.991459   |
| CDKAL1    | 3.01139    | 2.39088   | -0.33289   | 0.52114    |
| SEP15     | 58.4809    | 47.9706   | -0.285814  | 0.462958   |
| ZNF382    | 0.0776437  | 0.0458254 | -0.760722  | 1          |
| TGFA      | 2.42922    | 1.89969   | -0.354728  | 0.466097   |
| EPC2      | 2.80207    | 1.84133   | -0.605745  | 0.0739785  |
| M6PR      | 77.7105    | 67.0694   | -0.212455  | 0.724424   |
| CRHR1-IT1 | 4.3075     | 3.39526   | -0.343329  | 0.874904   |
| TAP1      | 26.9184    | 32.5845   | 0.275591   | 0.797015   |
| TBRG4     | 79.5884    | 105.109   | 0.401262   | 0.184331   |
| UBE2L3    | 48.2789    | 71.7713   | 0.572013   | 0.0306129  |
| SAP30BP   | 26.9537    | 34.5399   | 0.357783   | 0.274547   |
| HIRA      | 7.26121    | 11.7225   | 0.690994   | 0.00882987 |
| EDC3      | 10.7357    | 12.9683   | 0.272576   | 0.52724    |
| MTHFD1L   | 34.2751    | 32.6609   | -0.0695982 | 0.97314    |
| GRB10     | 8.49271    | 5.41007   | -0.650578  | 0.0167292  |
| ASPH      | 50.6367    | 37.6148   | -0.428882  | 0.161633   |
| TRAF3IP1  | 1.91864    | 2.80183   | 0.546289   | 0.127726   |
| TFEB      | 2.18543    | 2.82701   | 0.371357   | 0.619587   |
| GTPBP5    | 6.2837     | 7.56688   | 0.268085   | 0.636003   |
| PRRC2C    | 4.88439    | 6.0596    | 0.311046   | 0.395326   |
| MAEA      | 24.9271    | 31.2987   | 0.32839    | 0.371147   |
| UTP23     | 8.17756    | 9.50132   | 0.216458   | 0.692443   |
| PRKAR1B   | 20.5643    | 34.409    | 0.742643   | 0.0569429  |
| ICAM1     | 32.819     | 35.338    | 0.106691   | 0.920082   |
| ATG4A     | 2.34348    | 3.5992    | 0.619021   | 0.0820682  |
| SCRN1     | 0.0360682  | 0.0589733 | 0.709337   | 1          |

|            |           |           |            |            |
|------------|-----------|-----------|------------|------------|
| FAM35A     | 4.72965   | 5.71937   | 0.274124   | 0.575816   |
| CHORDC1    | 10.0289   | 32.2285   | 1.68418    | 0.00134142 |
| GSG2       | 3.8041    | 3.35559   | -0.180988  | 0.942857   |
| MAD2L1     | 53.8751   | 57.9423   | 0.104998   | 0.921236   |
| CWC27      | 9.87079   | 7.45682   | -0.404606  | 0.244643   |
| HSPA14     | 17.5951   | 25.2239   | 0.519617   | 0.0601893  |
| E2F3       | 4.36288   | 5.59304   | 0.35835    | 0.333252   |
| KCTD20     | 6.0398    | 5.21439   | -0.212001  | 0.700253   |
| COPS8      | 33.2238   | 35.6031   | 0.0997857  | 0.926225   |
| NRM        | 29.8568   | 20.9339   | -0.512215  | 0.098844   |
| TIAL1      | 18.0306   | 20.7585   | 0.203258   | 0.706945   |
| WDR70      | 9.41151   | 5.82698   | -0.691676  | 0.0139368  |
| RPH3AL     | 3.13694   | 1.93904   | -0.694017  | 0.0891066  |
| NAPA       | 49.929    | 66.1795   | 0.406507   | 0.193192   |
| HAUS2      | 10.3594   | 11.222    | 0.115391   | 0.909435   |
| RAD1       | 5.22812   | 5.59793   | 0.0986026  | 0.935939   |
| ATG10      | 1.64265   | 0.954944  | -0.78254   | 0.0704662  |
| EAF2       | 2.56076   | 1.24713   | -1.03796   | 0.0261279  |
| PANX1      | 3.31503   | 3.58968   | 0.114834   | 0.937399   |
| EIF1       | 848.061   | 418.529   | -1.01884   | 0.00134142 |
| FKBP15     | 27.2012   | 14.8677   | -0.871492  | 0.00134142 |
| SUB1       | 29.4331   | 39.1067   | 0.409977   | 0.170566   |
| ANP32E     | 17.2319   | 20.1804   | 0.227878   | 0.642142   |
| SYT11      | 0.0133079 | 0.0223439 | 0.747599   | 1          |
| RNF168     | 5.80459   | 4.85708   | -0.257104  | 0.594881   |
| SEPT2      | 46.3048   | 45.2005   | -0.0348222 | 0.990324   |
| TOMM6      | 147.356   | 204.416   | 0.4722     | 0.0991734  |
| ZBTB8OS    | 16.5201   | 17.6076   | 0.0919713  | 0.954455   |
| BAG2       | 22.6666   | 40.215    | 0.827165   | 0.00134142 |
| SYNCRIP    | 14.4276   | 24.9822   | 0.792074   | 0.00425224 |
| PRPF38A    | 14.9829   | 15.5025   | 0.0491895  | 0.978703   |
| ABHD5      | 2.84042   | 2.7998    | -0.0207844 | 0.992939   |
| LMAN2      | 126.802   | 122.995   | -0.0439732 | 0.979701   |
| LMAN2L     | 7.64747   | 10.7181   | 0.486988   | 0.131622   |
| PLTP       | 9.91162   | 9.14272   | -0.116497  | 0.984479   |
| C1orf174   | 16.0986   | 20.9989   | 0.383375   | 0.278399   |
| SUPV3L1    | 21.8171   | 21.1024   | -0.0480535 | 0.978196   |
| ATP6AP2    | 36.6223   | 29.3609   | -0.318828  | 0.369215   |
| PLK4       | 5.17671   | 4.25085   | -0.284286  | 0.531344   |
| EMC3       | 32.7366   | 32.0959   | -0.0285134 | 0.989486   |
| DNAJC12    | 33.1541   | 19.3431   | -0.777367  | 0.00337323 |
| PMCH       | 1.19719   | 1.24688   | 0.0586624  | 0.994571   |
| MRFAP1L1   | 37.8658   | 47.8365   | 0.337218   | 0.334518   |
| NEK4       | 3.41595   | 3.25321   | -0.0704203 | 0.96926    |
| NOL6       | 10.003    | 33.625    | 1.7491     | 0.00134142 |
| NDUFB10    | 126.307   | 154.397   | 0.289716   | 0.456061   |
| CBWD6      | 3.63724   | 4.03773   | 0.1507     | 0.901496   |
| EFTUD1     | 16.0758   | 8.84233   | -0.862393  | 0.00134142 |
| PDIA3      | 126.831   | 141.249   | 0.155329   | 0.924865   |
| LRPPRC     | 30.4916   | 23.4363   | -0.379669  | 0.243457   |
| COPA       | 21.9153   | 10.7796   | -1.02364   | 0.00134142 |
| XBP1       | 76.2889   | 34.5102   | -1.14445   | 0.00134142 |
| ZAK        | 5.84786   | 5.0287    | -0.217722  | 0.720295   |
| ENY2       | 40.2919   | 52.1943   | 0.373403   | 0.238477   |
| RHOF       | 116.564   | 79.8188   | -0.546324  | 0.104845   |
| RSG1       | 1.72481   | 1.40664   | -0.294186  | 0.826204   |
| FAM105A    | 0.905413  | 0.867488  | -0.0617326 | 0.978188   |
| PHF16      | 2.54832   | 2.56378   | 0.00873114 | 0.997036   |
| C17orf75   | 2.27767   | 1.32603   | -0.780446  | 0.0205623  |
| VPS26A     | 24.4915   | 19.9147   | -0.298454  | 0.44532    |
| SLU7       | 9.86621   | 7.05139   | -0.484588  | 0.0920155  |
| TTYH2      | 9.55417   | 14.0528   | 0.55665    | 0.0497748  |
| RBM42      | 70.7789   | 83.1242   | 0.231949   | 0.638      |
| PPT1       | 49.3397   | 54.363    | 0.139876   | 0.859569   |
| GNPTAB     | 2.74626   | 2.85462   | 0.0558261  | 0.977103   |
| DVL2       | 34.2766   | 23.7212   | -0.531047  | 0.0523239  |
| URI1       | 12.8797   | 14.5847   | 0.179355   | 0.777061   |
| ACP1       | 64.3313   | 63.012    | -0.0298934 | 0.987693   |
| TXLNA      | 23.57     | 28.1389   | 0.255618   | 0.568356   |
| DNMT3A     | 1.48346   | 1.46247   | -0.0205578 | 0.995302   |
| HIST1H4E   | 5.67664   | 3.34938   | -0.761141  | 0.357264   |
| HSP90AA1   | 320.383   | 629.389   | 0.974158   | 0.00134142 |
| KLHL8      | 1.41328   | 1.28672   | -0.135355  | 0.919029   |
| BSG        | 700.44    | 758.474   | 0.114839   | 0.913628   |
| ZNF674-AS1 | 2.1219    | 2.7972    | 0.398627   | 0.474273   |
| AMBRA1     | 5.8738    | 5.66378   | -0.052529  | 0.978196   |
| ANXA7      | 28.2419   | 23.1295   | -0.288106  | 0.479015   |
| TACO1      | 18.6099   | 19.5986   | 0.0746795  | 0.96103    |
| CHTF18     | 16.4013   | 18.6016   | 0.181615   | 0.789942   |

|              |           |          |            |            |
|--------------|-----------|----------|------------|------------|
| BICD1        | 0.365805  | 0.233302 | -0.648875  | 0.342414   |
| CTSL2        | 2.62212   | 1.70123  | -0.624159  | 0.0551188  |
| FGFR10P      | 7.27068   | 5.83677  | -0.31692   | 0.520144   |
| ATP13A1      | 23.7467   | 27.9411  | 0.23466    | 0.626609   |
| FAM111B      | 1.48299   | 2.8705   | 0.952795   | 0.00134142 |
| IPO13        | 6.32084   | 8.63903  | 0.450752   | 0.170566   |
| COQ5         | 16.9908   | 8.22697  | -1.04632   | 0.00134142 |
| WDR5         | 45.4493   | 63.647   | 0.485834   | 0.0768595  |
| TNRC18       | 7.57535   | 6.72288  | -0.172234  | 0.805942   |
| TMEM245      | 6.51676   | 4.45024  | -0.550272  | 0.0403066  |
| CASK         | 1.59999   | 1.21105  | -0.401802  | 0.30972    |
| GNG5         | 314.068   | 343.305  | 0.128411   | 0.917325   |
| PPIA         | 683.67    | 771.559  | 0.174476   | 0.826927   |
| MAP3K10      | 10.557    | 6.66485  | -0.663552  | 0.030994   |
| ABLIM2       | 0.455633  | 0.172627 | -1.40021   | 0.036526   |
| RPP30        | 7.24393   | 6.97048  | -0.0555146 | 0.979215   |
| ELL3         | 1.72557   | 1.99194  | 0.207105   | 0.991767   |
| KPNA4        | 9.15677   | 11.4478  | 0.322155   | 0.374085   |
| PHF5A        | 71.7152   | 103.182  | 0.524846   | 0.0536165  |
| PGRMC2       | 20.0418   | 19.8738  | -0.0121481 | 0.995464   |
| SMPD2        | 10.6531   | 16.0552  | 0.591773   | 0.0584113  |
| ERCC6L       | 1.95446   | 2.74664  | 0.490899   | 0.530201   |
| ZNF346       | 3.46218   | 4.1035   | 0.245173   | 0.710179   |
| NUP37        | 34.6244   | 24.3899  | -0.505505  | 0.0780546  |
| LONRF1       | 3.93865   | 3.83945  | -0.0368011 | 0.987334   |
| FDPS         | 73.9577   | 88.258   | 0.255027   | 0.737796   |
| SPTY2D1      | 3.17192   | 3.66948  | 0.210221   | 0.72467    |
| FIBP         | 106.239   | 103.269  | -0.0409142 | 0.981616   |
| HSPB1        | 950.727   | 1726.73  | 0.860938   | 0.00134142 |
| FXR2         | 45.261    | 49.2446  | 0.121699   | 0.935939   |
| TXNDC15      | 8.55513   | 8.33178  | -0.0381658 | 0.983594   |
| FAM96B       | 188.346   | 203.435  | 0.111187   | 0.911676   |
| SLC25A5      | 528.722   | 474.558  | -0.155923  | 0.836851   |
| CSK          | 75.5009   | 102.503  | 0.441093   | 0.128787   |
| STRIP1       | 7.59522   | 8.43199  | 0.150781   | 0.863873   |
| DSE          | 3.20543   | 2.75245  | -0.219804  | 0.742233   |
| NPM3         | 178.502   | 220.947  | 0.307762   | 0.402127   |
| USP28        | 5.31289   | 3.72045  | -0.51402   | 0.0914856  |
| TEX261       | 30.9446   | 32.7266  | 0.080776   | 0.950929   |
| PSMD13       | 125.754   | 134.587  | 0.0979381  | 0.9316     |
| OCLN         | 5.6806    | 4.97628  | -0.190975  | 0.757054   |
| TELO2        | 29.5373   | 53.699   | 0.862358   | 0.00243047 |
| SENP8        | 1.23162   | 0.489101 | -1.33236   | 0.241608   |
| SLC39A11     | 5.39001   | 4.37257  | -0.301807  | 0.571203   |
| CD164        | 44.9258   | 45.7015  | 0.0246973  | 0.990857   |
| CD320        | 298.819   | 383.265  | 0.359071   | 0.291851   |
| NCOA2        | 0.315005  | 0.239168 | -0.397347  | 1          |
| CERS6-AS1    | 6.54841   | 6.18382  | -0.0826453 | 0.976225   |
| C2orf76      | 1.42188   | 1.96     | 0.463048   | 0.564226   |
| SLC9A2       | 0.167977  | 0.29891  | 0.831445   | 1          |
| EPB41L2      | 15.4122   | 13.1444  | -0.229617  | 0.651388   |
| THRA         | 10.0068   | 7.30064  | -0.454889  | 0.516824   |
| C9orf91      | 9.70971   | 6.73901  | -0.526892  | 0.0675751  |
| METAP2       | 27.8707   | 29.19    | 0.0667223  | 0.963457   |
| PRAF2        | 2.89229   | 1.56161  | -0.889172  | 0.0868006  |
| CUL1         | 23.3869   | 34.8236  | 0.574362   | 0.0270114  |
| PDGFRB       | 0.0185557 | 0        | #NAME?     | 1          |
| TMPO         | 28.7577   | 34.0996  | 0.245806   | 0.600596   |
| SDHAF2       | 35.1615   | 40.2933  | 0.196544   | 0.739331   |
| COMMD9       | 6.90403   | 9.42501  | 0.449056   | 0.15219    |
| TBC1D24      | 3.36016   | 4.86449  | 0.533758   | 0.0838642  |
| MKNK1        | 8.90315   | 6.96036  | -0.355153  | 0.374085   |
| APBB2        | 1.0897    | 0.866261 | -0.331053  | 0.561776   |
| MPHOSPH8     | 10.1441   | 9.46267  | -0.100323  | 0.92856    |
| PPME1        | 45.5729   | 42.7438  | -0.0924606 | 0.935939   |
| PHF10        | 21.9553   | 16.9167  | -0.376119  | 0.52114    |
| CCT7         | 348.967   | 411.713  | 0.238551   | 0.648246   |
| LOC100216545 | 2.08415   | 2.43887  | 0.226754   | 0.797015   |
| LBR          | 11.8498   | 17.4456  | 0.558009   | 0.0288382  |
| HOXD9        | 10.7875   | 8.67103  | -0.31509   | 0.573322   |
| ADCK2        | 48.9742   | 36.2738  | -0.433094  | 0.151982   |
| IRF3         | 67.8634   | 70.5949  | 0.0569303  | 0.979701   |
| NACK         | 14.9398   | 18.1346  | 0.279587   | 0.559109   |
| SLC35B3      | 7.85933   | 6.87885  | -0.192239  | 0.799188   |
| PEPD         | 43.657    | 51.4351  | 0.236538   | 0.618093   |
| KRTAP4-9     | 0.893052  | 0.339682 | -1.39456   | 0.138798   |
| HIST2H2AC    | 4.9286    | 5.99305  | 0.282111   | 0.895818   |
| PLBD1        | 17.6894   | 13.1702  | -0.425605  | 0.179301   |
| C14orf1      | 37.0857   | 33.7934  | -0.134123  | 0.876899   |

|           |          |          |             |            |
|-----------|----------|----------|-------------|------------|
| SMG5      | 19.3746  | 34.7129  | 0.841304    | 0.00134142 |
| MEIS2     | 2.71092  | 2.32362  | -0.222412   | 0.79485    |
| CRCP      | 12.6673  | 10.4164  | -0.282259   | 0.528722   |
| S100A16   | 875.704  | 1127.04  | 0.364021    | 0.293861   |
| MRPS9     | 34.706   | 28.7226  | -0.273      | 0.514922   |
| SNORA74A  | 1.06359  | 1.40681  | 0.40349     | 0.989411   |
| NUBP1     | 17.5408  | 27.174   | 0.631515    | 0.0178668  |
| ABCD3     | 10.2347  | 16.1937  | 0.661964    | 0.030994   |
| RRP1B     | 15.6768  | 30.4204  | 0.956409    | 0.00134142 |
| RUVBL2    | 237.956  | 262.216  | 0.140064    | 0.863571   |
| CCNE1     | 14.4206  | 31.6001  | 1.1318      | 0.00134142 |
| EFHD2     | 54.9838  | 93.6388  | 0.7681      | 0.00134142 |
| NCOA3     | 1.26033  | 1.34239  | 0.0909933   | 0.952371   |
| ADI1      | 23.9093  | 38.5006  | 0.687309    | 0.00593755 |
| KREMEN1   | 2.90573  | 1.8697   | -0.636096   | 0.0451064  |
| CHMP4A    | 38.2084  | 27.3547  | -0.482104   | 0.0986455  |
| BCAN      | 3.42239  | 3.01142  | -0.184564   | 0.858563   |
| AKAP1     | 13.4544  | 21.8693  | 0.700823    | 0.00243047 |
| RIOK1     | 13.4758  | 22.2071  | 0.720648    | 0.00672555 |
| SNAPIN    | 40.6201  | 30.7153  | -0.403235   | 0.913628   |
| EFTUD2    | 37.9428  | 44.3743  | 0.225899    | 0.654699   |
| ATP1A1    | 85.8151  | 91.8043  | 0.0973305   | 0.931473   |
| FHOD1     | 9.9136   | 17.1455  | 0.790347    | 0.00134142 |
| FAXC      | 0.551636 | 0.753733 | 0.450337    | 0.300705   |
| PRIM1     | 14.5289  | 6.7199   | -1.11241    | 0.00134142 |
| TMEM64    | 6.94293  | 8.89333  | 0.357178    | 0.295961   |
| C10orf82  | 0.107858 | 0.105532 | -0.0314624  | 1          |
| AK2       | 77.1654  | 79.9146  | 0.0505057   | 0.977332   |
| SGTB      | 2.62839  | 2.14158  | -0.295507   | 0.736532   |
| MSTO1     | 8.63375  | 15.0297  | 0.799759    | 0.00134142 |
| MRFAP1    | 151.143  | 243.372  | 0.687253    | 0.00243047 |
| TMEM41B   | 27.345   | 24.6526  | -0.149537   | 0.874758   |
| ANGPTL4   | 104.486  | 93.759   | -0.156284   | 0.845125   |
| GLT25D2   | 0.571804 | 0.179393 | -1.67239    | 0.00134142 |
| KLF4      | 6.45231  | 2.22827  | -1.53389    | 0.00134142 |
| CAP1      | 82.8888  | 91.2646  | 0.138878    | 0.86414    |
| RBBP5     | 3.45809  | 3.75774  | 0.11989     | 0.917453   |
| ALDH18A1  | 45.5104  | 46.5067  | 0.0312417   | 0.987693   |
| MAD2L2    | 142.275  | 134.401  | -0.0821431  | 0.946765   |
| ZNF410    | 19.1112  | 17.5695  | -0.12134    | 0.902703   |
| CTSZ      | 92.7826  | 93.9359  | 0.0178227   | 0.993379   |
| SFMBT1    | 2.72242  | 3.57328  | 0.392358    | 0.3074     |
| SART1     | 27.6735  | 30.5131  | 0.140927    | 0.857478   |
| DNAJC21   | 3.52302  | 3.1622   | -0.155886   | 0.845125   |
| ARHGEF10L | 5.74807  | 4.38916  | -0.389135   | 0.334316   |
| THYN1     | 62.6352  | 41.1931  | -0.604571   | 0.0227017  |
| SNHG10    | 6.04891  | 10.5467  | 0.802044    | 0.0189207  |
| HMOX2     | 36.7511  | 71.3081  | 0.956281    | 0.00425224 |
| SLC2A3    | 15.427   | 5.24656  | -1.55601    | 0.00134142 |
| TACC2     | 8.59632  | 9.22307  | 0.101528    | 0.931473   |
| PPP1R7    | 63.8647  | 57.6058  | -0.148807   | 0.839737   |
| PAQR3     | 4.97272  | 6.70989  | 0.432254    | 0.176673   |
| CCDC125   | 1.988    | 0.980818 | -1.01926    | 0.00134142 |
| MCRS1     | 35.139   | 46.9658  | 0.41854     | 0.170841   |
| PRCC      | 25.2597  | 38.3308  | 0.601671    | 0.0183825  |
| PES1      | 86.5291  | 126.84   | 0.551754    | 0.0377654  |
| AURKB     | 102.812  | 127.81   | 0.313989    | 0.393497   |
| DRG1      | 62.9323  | 62.7906  | -0.00325169 | 0.998526   |
| PARK7     | 343.686  | 372.531  | 0.116268    | 0.907657   |
| MBNL1     | 6.85481  | 6.19536  | -0.14593    | 0.854605   |
| MBOAT1    | 1.57843  | 1.1338   | -0.477332   | 0.313191   |
| TRAM1     | 46.6185  | 42.5348  | -0.13226    | 0.874631   |
| UGGT2     | 2.3713   | 2.25654  | -0.0715646  | 0.967901   |
| RNGTT     | 3.2037   | 3.60315  | 0.169519    | 0.83481    |
| NDUFS2    | 59.4185  | 44.5338  | -0.41601    | 0.168676   |
| RANBP9    | 11.6135  | 8.26522  | -0.490678   | 0.0920155  |
| SHOC2     | 5.08271  | 3.82254  | -0.411064   | 0.233215   |
| ILKAP     | 35.2189  | 44.0216  | 0.32186     | 0.383463   |
| MB21D1    | 4.43698  | 8.05685  | 0.860636    | 0.00672555 |
| GPHN      | 5.95529  | 5.00632  | -0.25042    | 0.635935   |
| SIVA1     | 167.274  | 250.941  | 0.585134    | 0.0250278  |
| SNORA12   | 43.3581  | 1.54949  | -4.80644    | 0.872554   |
| LYPLA1    | 37.5635  | 34.1304  | -0.138277   | 0.86583    |
| KCNQ4     | 5.77344  | 6.20297  | 0.10353     | 0.943036   |
| ALAS1     | 31.7992  | 36.378   | 0.194074    | 0.736907   |
| SFTA1P    | 434.114  | 395.907  | -0.13291    | 0.876899   |
| TRIP10    | 44.6003  | 47.3218  | 0.0854508   | 0.945247   |
| LARP4     | 3.02726  | 4.96452  | 0.713642    | 0.00818401 |
| ELP3      | 11.3791  | 7.63439  | -0.575808   | 0.0382315  |

|            |          |          |             |            |
|------------|----------|----------|-------------|------------|
| SSU72      | 159.245  | 206.552  | 0.375251    | 0.250722   |
| ZNF598     | 45.0034  | 49.9426  | 0.150235    | 0.836762   |
| FUCA1      | 8.32416  | 8.16205  | -0.0283726  | 0.990315   |
| SNRPB2     | 45.9576  | 56.2922  | 0.29263     | 0.46354    |
| FECH       | 2.18271  | 2.50486  | 0.198605    | 0.772073   |
| CYB5D1     | 5.13577  | 8.85888  | 0.786545    | 0.064193   |
| PSEN1      | 7.2179   | 5.07922  | -0.506971   | 0.0713011  |
| CSGALNACT2 | 4.69056  | 2.8536   | -0.716977   | 0.0132924  |
| PPP1R15B   | 9.4738   | 7.73848  | -0.291894   | 0.466328   |
| LMNB2      | 47.1608  | 64.0851  | 0.442401    | 0.140336   |
| TMEM128    | 14.1615  | 8.33899  | -0.764033   | 0.00743393 |
| ZNF702P    | 1.67311  | 1.68543  | 0.0105791   | 0.997036   |
| DDX19A     | 12.6403  | 22.4045  | 0.825763    | 0.00134142 |
| SFXN1      | 14.3759  | 14.7192  | 0.0340534   | 0.985921   |
| BOLA3      | 88.4144  | 101.315  | 0.196497    | 0.760508   |
| NACC1      | 34.6252  | 54.9271  | 0.665695    | 0.009453   |
| SCARB1     | 62.9458  | 93.7411  | 0.574572    | 0.0266793  |
| BRIP1      | 1.84183  | 0.712324 | -1.37053    | 0.00134142 |
| SLC25A16   | 2.79633  | 3.33114  | 0.252478    | 0.737375   |
| ENDOV      | 9.68827  | 8.88032  | -0.125627   | 0.967901   |
| BUD13      | 14.1422  | 13.2318  | -0.0959885  | 0.941513   |
| NDUFAF5    | 6.13709  | 7.8407   | 0.35343     | 0.384848   |
| HNRNPUL1   | 65.1117  | 51.4952  | -0.33848    | 0.320081   |
| DEPDC7     | 1.69665  | 2.11722  | 0.319486    | 0.678263   |
| YWHAE      | 377.612  | 400.952  | 0.0865265   | 0.950929   |
| CISD1      | 12.8278  | 12.8757  | 0.00537285  | 0.99714    |
| TECPR1     | 5.07673  | 4.27428  | -0.248219   | 0.646852   |
| APLF       | 0.326464 | 0.190324 | -0.778467   | 1          |
| CIRH1A     | 38.2325  | 44.2421  | 0.210622    | 0.690092   |
| IMMT       | 42.9569  | 32.9797  | -0.38131    | 0.236307   |
| TMED5      | 7.73302  | 9.93299  | 0.361196    | 0.274527   |
| TRIM24     | 4.35922  | 3.24553  | -0.425612   | 0.238477   |
| ATP7B      | 1.22296  | 1.38385  | 0.178306    | 0.874709   |
| SHPK,TRPV1 | 5.33953  | 7.86816  | 0.559312    | 0.0710419  |
| ILF3       | 66.5116  | 81.5728  | 0.294481    | 0.483862   |
| SLC16A11   | 0.279271 | 0.271764 | -0.039311   | 1          |
| AKIRIN1    | 20.2458  | 20.9645  | 0.0503291   | 0.978424   |
| DNM1L      | 11.7873  | 12.1987  | 0.0494878   | 0.977332   |
| CHD7       | 1.85544  | 2.39866  | 0.370468    | 0.292855   |
| GALNT11    | 13.9668  | 13.4886  | -0.0502645  | 0.97854    |
| TEKT4      | 0.621123 | 0.544378 | -0.190271   | 0.959465   |
| FAM161A    | 1.10108  | 1.15171  | 0.0648538   | 0.979701   |
| FANCD2     | 2.78183  | 1.74881  | -0.669665   | 0.0274653  |
| LGMN       | 32.0861  | 29.2586  | -0.133088   | 0.877493   |
| PSMD8      | 320.962  | 357.582  | 0.155869    | 0.830662   |
| ATP5B      | 499.315  | 497.301  | -0.00583119 | 0.99714    |
| HOXC9      | 1.22607  | 1.75282  | 0.515638    | 0.508949   |
| CCDC90A    | 5.64016  | 6.12274  | 0.118441    | 0.907689   |
| MOC52      | 18.5755  | 25.1315  | 0.436093    | 0.162023   |
| SPTBN2     | 13.4437  | 13.3248  | -0.0128121  | 0.994615   |
| TDRD3      | 4.78264  | 2.67362  | -0.839014   | 0.00509212 |
| MMEL1      | 3.22731  | 5.38729  | 0.739229    | 0.530238   |
| RAP1A      | 22.025   | 17.4029  | -0.33982    | 0.328112   |
| PTCHD3P1   | 6.09396  | 8.67524  | 0.509523    | 0.119072   |
| NUDCD1     | 22.2688  | 23.4625  | 0.0753381   | 0.956373   |
| SELT       | 25.5887  | 35.6476  | 0.478295    | 0.0935542  |
| MRT04      | 49.6922  | 94.7016  | 0.930368    | 0.00134142 |
| TMEM181    | 4.71499  | 6.7158   | 0.510303    | 0.0671701  |
| SMIM8      | 2.13419  | 2.24488  | 0.072948    | 0.974044   |
| SLC35G1    | 2.3318   | 3.56472  | 0.612341    | 0.0953833  |
| EMC1       | 5.86354  | 6.50255  | 0.149235    | 0.849892   |
| MPHOSPH9   | 1.58581  | 0.830452 | -0.933251   | 0.00509212 |
| LOC81691   | 6.44809  | 2.30516  | -1.484      | 0.00243047 |
| NDUFA7     | 172.676  | 153.465  | -0.170165   | 0.806843   |
| TK1        | 132.906  | 116.645  | -0.18828    | 0.750137   |
| TMEM199    | 8.76346  | 13.928   | 0.66842     | 0.0261279  |
| SFXN4      | 50.648   | 43.6764  | -0.213652   | 0.676123   |
| MALSU1     | 66.444   | 80.868   | 0.28343     | 0.509535   |
| CCDC12     | 41.2835  | 58.6674  | 0.506996    | 0.243408   |
| DNAJA4     | 6.25693  | 16.9033  | 1.43378     | 0.00134142 |
| RBM3       | 71.4255  | 64.6346  | -0.144132   | 0.856449   |
| MAK16      | 8.92684  | 12.0764  | 0.435963    | 0.240188   |
| SLC7A5P1   | 0.583611 | 0.55966  | -0.0604563  | 0.996079   |
| DNAJB2     | 39.0768  | 27.2138  | -0.521974   | 0.0678232  |
| TPRKB      | 52.6556  | 48.2901  | -0.124861   | 0.893557   |
| ATPIF1     | 298.629  | 321.885  | 0.108191    | 0.919413   |
| C14orf2    | 395.483  | 438.803  | 0.149958    | 0.845974   |
| MYO19      | 14.7829  | 17.8936  | 0.275515    | 0.797015   |
| HSD17B7    | 8.36497  | 6.63892  | -0.333413   | 0.495756   |

|                        |           |           |             |            |
|------------------------|-----------|-----------|-------------|------------|
| CHMP4C                 | 53.4455   | 26.0158   | -1.03868    | 0.00134142 |
| EHBP1L1                | 10.0541   | 10.8269   | 0.10684     | 0.924301   |
| BCAT2                  | 98.7872   | 90.1765   | -0.131573   | 0.881073   |
| PGRMC1                 | 103.46    | 93.9057   | -0.139792   | 0.86642    |
| RELT                   | 12.5661   | 14.7368   | 0.229888    | 0.654231   |
| PAQR7                  | 19.3637   | 15.5545   | -0.31602    | 0.393212   |
| AQP7P1                 | 0.0222624 | 0.0318128 | 0.514995    | 1          |
| ACER3                  | 1.31282   | 1.7668    | 0.428473    | 0.335614   |
| CCDC86                 | 46.8282   | 138.567   | 1.56513     | 0.00134142 |
| FYN                    | 7.78737   | 4.49341   | -0.793327   | 0.00425224 |
| MVK                    | 15.4681   | 18.1647   | 0.231842    | 0.693403   |
| TTC17                  | 9.06567   | 5.43767   | -0.737424   | 0.00337323 |
| XPR1                   | 2.15146   | 2.18491   | 0.0222567   | 0.991767   |
| TYMS                   | 23.697    | 26.77     | 0.175914    | 0.950929   |
| KIAA0355               | 1.30384   | 0.722188  | -0.852315   | 0.0156972  |
| SRPR                   | 22.0685   | 26.7403   | 0.277031    | 0.607259   |
| PTER                   | 5.52468   | 2.47929   | -1.15596    | 0.00134142 |
| AAMP                   | 139.178   | 177.215   | 0.348561    | 0.302329   |
| PARN                   | 10.851    | 8.10272   | -0.421351   | 0.200394   |
| AURKAIP1               | 258.178   | 367.172   | 0.508093    | 0.066512   |
| RNF14                  | 5.30484   | 4.55212   | -0.22077    | 0.716439   |
| TNFRSF10A              | 6.40037   | 8.7241    | 0.446851    | 0.249298   |
| CSTF3                  | 17.6952   | 20.3024   | 0.198287    | 0.917379   |
| PIP5K1C                | 8.96582   | 14.6198   | 0.705414    | 0.00672555 |
| MGAT5                  | 4.20555   | 5.32495   | 0.340473    | 0.342123   |
| RBBP7                  | 47.6002   | 48.5312   | 0.0279426   | 0.988165   |
| DUSP5                  | 112.289   | 78.7666   | -0.511562   | 0.0637115  |
| MOB2                   | 28.0579   | 28.877    | 0.0415133   | 0.994978   |
| NARS2                  | 7.33388   | 7.43494   | 0.0197434   | 0.993379   |
| ANKRD54                | 14.9747   | 24.039    | 0.682847    | 0.009453   |
| PTH1R                  | 6.69897   | 1.48708   | -2.17146    | 0.00134142 |
| SLC1A1                 | 2.09104   | 1.03409   | -1.01587    | 0.00134142 |
| AIDA                   | 23.8491   | 20.7557   | -0.200423   | 0.717812   |
| SF1                    | 86.7655   | 97.4336   | 0.167299    | 0.813924   |
| UBE3C                  | 19.2344   | 24.5578   | 0.352494    | 0.291851   |
| PIK3R4                 | 2.80742   | 4.31527   | 0.620204    | 0.0373672  |
| MIPEPP3                | 0.57104   | 0.457924  | -0.318482   | 0.987693   |
| SCAMP3                 | 56.7765   | 77.1789   | 0.442911    | 0.128873   |
| C2orf47                | 19.1777   | 24.2773   | 0.340174    | 0.516701   |
| TAF11                  | 17.8443   | 20.6094   | 0.207846    | 0.726892   |
| CLTC                   | 24.7972   | 23.1624   | -0.0983906  | 0.931471   |
| TCF7L2                 | 4.17198   | 3.47461   | -0.263883   | 0.641082   |
| UBE2M                  | 145.296   | 188.45    | 0.375185    | 0.240028   |
| CLPP                   | 209.368   | 223.302   | 0.0929547   | 0.935062   |
| FAM72D                 | 1.40865   | 0.828625  | -0.76552    | 0.0972878  |
| FAM47E,FAM47E-STBD1,S' | 10.2628   | 7.72344   | -0.410109   | 0.229068   |
| SNX19                  | 2.16057   | 2.46233   | 0.188612    | 0.819258   |
| ABHD16A                | 29.0959   | 22.6165   | -0.363439   | 0.311781   |
| SGK223                 | 2.62922   | 3.64693   | 0.472047    | 0.249612   |
| LARGE                  | 4.10869   | 4.46264   | 0.119218    | 0.921047   |
| TM9SF3                 | 26.8451   | 22.9538   | -0.225929   | 0.656683   |
| TCEB2                  | 538.857   | 655.117   | 0.281849    | 0.534473   |
| SRP14                  | 239.064   | 253.777   | 0.0861642   | 0.945946   |
| COBL                   | 3.82787   | 3.38242   | -0.178486   | 0.820463   |
| ELMOD2                 | 3.1027    | 1.88737   | -0.717151   | 0.0167292  |
| ABCC4                  | 3.79163   | 3.89369   | 0.0383173   | 0.984692   |
| RDH11                  | 21.0368   | 17.2325   | -0.287783   | 0.485249   |
| FGD4                   | 0.0937605 | 0.0317367 | -1.56283    | 1          |
| RNF121                 | 10.7716   | 13.0926   | 0.281513    | 0.529932   |
| ZNF384                 | 17.0248   | 15.7088   | -0.116061   | 0.911367   |
| ABCF2                  | 50.4403   | 95.7727   | 0.925037    | 0.00134142 |
| PHAX                   | 6.60345   | 8.05231   | 0.286184    | 0.501458   |
| GIPC1                  | 146.812   | 173.968   | 0.244852    | 0.61004    |
| PLOD3                  | 51.4751   | 66.615    | 0.371973    | 0.614283   |
| OTUD6B                 | 4.32451   | 7.58661   | 0.810917    | 0.00243047 |
| GMEB2                  | 7.26393   | 6.19189   | -0.23037    | 0.701805   |
| ARSJ                   | 2.2574    | 2.24739   | -0.00641271 | 0.997082   |
| NDUFS7                 | 176.907   | 168.68    | -0.0687026  | 0.962032   |
| PRODH                  | 1.17764   | 0.549263  | -1.10033    | 0.0605453  |
| TMT4                   | 4.27649   | 2.22036   | -0.945638   | 0.00134142 |
| EIF4G1                 | 40.699    | 66.9935   | 0.719028    | 0.00337323 |
| RNMTL1                 | 29.0977   | 40.1812   | 0.465616    | 0.396027   |
| ALDH9A1                | 36.2551   | 28.0183   | -0.371814   | 0.240188   |
| LOC202181              | 0.683818  | 0.684578  | 0.00160277  | 0.99926    |
| MYO9A                  | 0.233066  | 0.153549  | -0.602037   | 1          |
| PPIL3                  | 15.3      | 8.8155    | -0.795422   | 0.00593755 |
| PKP2                   | 3.5478    | 2.64614   | -0.423036   | 0.260275   |
| TOR2A                  | 47.6829   | 50.4766   | 0.0821436   | 0.95467    |
| NDUFA8                 | 162.445   | 158.443   | -0.0359907  | 0.984917   |

|                   |           |            |            |            |
|-------------------|-----------|------------|------------|------------|
| EIF3B             | 80.8129   | 119.291    | 0.561828   | 0.0306129  |
| MEN1              | 36.3545   | 53.7929    | 0.565283   | 0.0322484  |
| ICA1              | 3.52759   | 1.34807    | -1.38779   | 0.00134142 |
| MRPS30            | 43.7549   | 31.2144    | -0.487234  | 0.0888791  |
| HAUS5             | 6.66592   | 5.14888    | -0.372543  | 0.33045    |
| DKC1              | 43.333    | 71.3469    | 0.719386   | 0.00134142 |
| POLR3A            | 5.35775   | 6.11675    | 0.191139   | 0.754842   |
| LACTB2            | 17.893    | 10.0823    | -0.827567  | 0.00134142 |
| MTA2              | 40.1982   | 64.6106    | 0.684642   | 0.00672555 |
| DYNC11            | 0.147161  | 0.101045   | -0.542397  | 1          |
| DNAJC19           | 14.4937   | 11.0611    | -0.389931  | 0.285008   |
| ADORA2A-AS1       | 0.0699885 | 0.0793305  | 0.180758   | 1          |
| C19orf25          | 37.5834   | 38.6401    | 0.0400061  | 0.983594   |
| ADCK4             | 22.2584   | 10.4944    | -1.08473   | 0.00134142 |
| COX7B             | 356.383   | 387.56     | 0.12099    | 0.895818   |
| C5orf28           | 3.24097   | 2.22478    | -0.542762  | 0.144914   |
| CAPN5             | 6.2777    | 4.47341    | -0.488861  | 0.135879   |
| MAP7D3            | 5.29147   | 3.47001    | -0.608728  | 0.0314167  |
| MRPL21            | 109.953   | 110.539    | 0.00765994 | 0.997036   |
| TPK1              | 0.635377  | 0.806402   | 0.343886   | 0.729897   |
| SYT13             | 0.0109622 | 0.00188882 | -2.53697   | 1          |
| CCNO              | 18.8061   | 31.9609    | 0.765106   | 0.009453   |
| THOP1             | 72.135    | 82.5249    | 0.194129   | 0.736907   |
| PPWD1             | 9.79252   | 9.49575    | -0.044399  | 0.979944   |
| KIAA1804          | 2.91389   | 3.63645    | 0.319586   | 0.47416    |
| ICA1L             | 0.454139  | 0.370285   | -0.294499  | 0.750866   |
| HMGXB3            | 16.9674   | 16.7716    | -0.0167469 | 0.99351    |
| CLEC18B           | 0.15213   | 0.0795167  | -0.93597   | 1          |
| IL4R              | 7.83536   | 9.44512    | 0.269569   | 0.559547   |
| HAUS6             | 5.19305   | 4.86885    | -0.0930007 | 0.937765   |
| BLMH              | 16.435    | 24.3949    | 0.569812   | 0.0318033  |
| SLTM              | 7.89752   | 10.197     | 0.368668   | 0.27191    |
| TTC32             | 3.32546   | 2.60328    | -0.353222  | 0.703835   |
| EIF2AK3           | 2.14241   | 1.55811    | -0.459441  | 0.255519   |
| GRWD1             | 36.3495   | 73.7888    | 1.02147    | 0.00134142 |
| KIF21B            | 0.102398  | 0.0815592  | -0.328269  | 1          |
| SLC35A4           | 28.8113   | 45.6267    | 0.663246   | 0.010797   |
| TGS1              | 8.44277   | 8.20428    | -0.0413409 | 0.987858   |
| TSTD1             | 101.595   | 98.7659    | -0.0407458 | 0.983604   |
| PSENIEN           | 92.0341   | 85.1766    | -0.111711  | 0.917325   |
| NPFF              | 1.8702    | 2.40616    | 0.363535   | 0.806888   |
| KCND1             | 0.423628  | 0.211136   | -1.00463   | 0.0925999  |
| FA2H              | 2.99579   | 1.1044     | -1.43967   | 0.00134142 |
| SERPINA1          | 0.0945485 | 0.805197   | 3.09022    | 0.00134142 |
| LSM4              | 163.868   | 162.386    | -0.0131063 | 0.994615   |
| FBXO36            | 0.633838  | 0.216044   | -1.55279   | 0.009453   |
| WHAMM             | 5.56714   | 4.13873    | -0.427749  | 0.24199    |
| SETD8             | 20.8597   | 23.4056    | 0.166137   | 0.806888   |
| SHMT2             | 292.013   | 214.553    | -0.4447    | 0.164652   |
| RCC2              | 25.6668   | 41.537     | 0.694491   | 0.00882987 |
| FABP3             | 0.0678758 | 0.141328   | 1.05808    | 1          |
| POLG2             | 5.64311   | 7.62581    | 0.434399   | 0.289311   |
| PLA2G15           | 12.4191   | 13.0914    | 0.0760582  | 0.958814   |
| ATOX1             | 123.447   | 161.506    | 0.387691   | 0.216539   |
| RNF183            | 0.0675335 | 0.0377068  | -0.840778  | 1          |
| ACRC              | 0.223329  | 0.197589   | -0.176669  | 1          |
| SEL1L3            | 11.0858   | 5.67242    | -0.966682  | 0.00134142 |
| IDH3A             | 15.691    | 27.7504    | 0.822569   | 0.00134142 |
| TSN               | 22.3497   | 25.6187    | 0.19694    | 0.731346   |
| NFKB1             | 7.80853   | 11.7186    | 0.585677   | 0.0222212  |
| MEMO1             | 28.466    | 28.8793    | 0.0207925  | 0.991767   |
| FKBP1A,SDCBP2     | 140.391   | 174.344    | 0.312486   | 0.411923   |
| KIAA0317          | 5.51272   | 8.12426    | 0.559473   | 0.0423316  |
| NAA60             | 23.8663   | 27.6079    | 0.210109   | 0.708504   |
| PIGK              | 3.58236   | 2.28145    | -0.650961  | 0.0278845  |
| FRMD8             | 12.1109   | 27.2054    | 1.16759    | 0.00134142 |
| APAF1             | 1.58903   | 1.05035    | -0.597284  | 0.290965   |
| GFD02             | 16.6157   | 28.7007    | 0.788537   | 0.0101293  |
| YIPF5             | 7.66601   | 6.26239    | -0.291763  | 0.506538   |
| PEX16             | 27.042    | 20.8164    | -0.37748   | 0.29298    |
| TMIE              | 0.312133  | 0.0679143  | -2.20037   | 1          |
| DTX3L             | 1.85925   | 1.97256    | 0.0853436  | 0.966946   |
| PPM1H             | 1.59136   | 0.958159   | -0.731925  | 0.0283563  |
| SSBP4             | 69.4117   | 98.9317    | 0.511254   | 0.0778493  |
| TMEM55B           | 31.9669   | 33.7327    | 0.0775684  | 0.955799   |
| CCDC117           | 4.72842   | 5.18728    | 0.133618   | 0.894319   |
| EXOSC2            | 33.8592   | 47.2709    | 0.481404   | 0.0870955  |
| LOC646762,ZNRF2P2 | 2.22895   | 2.0905     | -0.0925214 | 0.955758   |
| HIVEP2            | 2.2431    | 1.21517    | -0.884337  | 0.00134142 |



|             |           |           |            |            |
|-------------|-----------|-----------|------------|------------|
| PDIA6       | 153.813   | 171.852   | 0.159985   | 0.832722   |
| ZNF407      | 0.821061  | 1.53532   | 0.902975   | 0.00134142 |
| MRPS25      | 13.0249   | 14.4755   | 0.152346   | 0.914041   |
| SAR1B       | 3.50178   | 4.01321   | 0.196667   | 0.748691   |
| GAS2        | 0.0675516 | 0.0936879 | 0.471873   | 1          |
| TRMT61A     | 15.4432   | 33.7586   | 1.12828    | 0.00134142 |
| AIFM2       | 23.0453   | 18.4122   | -0.323806  | 0.498673   |
| SMARCC1     | 20.1364   | 18.6704   | -0.109055  | 0.916969   |
| INTS10      | 26.8268   | 38.492    | 0.520884   | 0.0566185  |
| RARS        | 36.6961   | 42.4386   | 0.209752   | 0.686445   |
| USF1        | 23.195    | 36.1402   | 0.639794   | 0.00743393 |
| UBP1        | 17.4738   | 25.389    | 0.539013   | 0.0410573  |
| GEMIN5      | 5.69305   | 11.2328   | 0.980439   | 0.00134142 |
| PPM1B       | 9.35823   | 6.978     | -0.423422  | 0.298465   |
| PSMD10      | 30.8992   | 28.7225   | -0.105384  | 0.922024   |
| SYNC        | 30.0229   | 24.8283   | -0.274079  | 0.712164   |
| ERCC8       | 3.63963   | 2.72965   | -0.415075  | 0.349479   |
| DCAF12      | 10.7535   | 12.5094   | 0.218205   | 0.679455   |
| PTPN11      | 10.8548   | 13.4539   | 0.309694   | 0.39314    |
| MRPL51      | 232.51    | 298.711   | 0.36146    | 0.275929   |
| TSEN54      | 34.2714   | 56.6233   | 0.724392   | 0.00134142 |
| ANKRD27     | 7.40374   | 10.0911   | 0.446761   | 0.134015   |
| MORF4L1     | 80.8904   | 80.306    | -0.0104605 | 0.996079   |
| SNRPF       | 152.074   | 179.946   | 0.242793   | 0.602221   |
| THRAP3      | 27.3057   | 22.7794   | -0.261471  | 0.539856   |
| FAM73B      | 20.488    | 29.8708   | 0.543956   | 0.0439989  |
| HEXIM1      | 14.6875   | 18.979    | 0.369817   | 0.259619   |
| TUBB2A      | 14.2081   | 30.8684   | 1.11942    | 0.00134142 |
| PPP1R16A    | 38.7352   | 55.564    | 0.520504   | 0.0645318  |
| PCBD2       | 3.10817   | 2.4905    | -0.31963   | 0.605975   |
| ALDH4A1     | 15.7071   | 14.9659   | -0.0697333 | 0.963669   |
| NAF1        | 9.16056   | 10.9413   | 0.25627    | 0.631941   |
| PRPF18      | 11.2442   | 11.3407   | 0.0123352  | 0.995957   |
| KDM3B       | 8.07549   | 6.71945   | -0.265208  | 0.540366   |
| SIMC1       | 10.1869   | 12.1667   | 0.256222   | 0.622505   |
| NDUFA1      | 307.368   | 341.275   | 0.15097    | 0.870466   |
| LRRFIP1     | 11.831    | 10.0117   | -0.240883  | 0.629756   |
| SLC38A9     | 4.72158   | 3.24565   | -0.540761  | 0.13087    |
| MRS2        | 8.5836    | 11.8744   | 0.468195   | 0.115185   |
| CENPV       | 69.3673   | 92.6116   | 0.416938   | 0.164416   |
| LSR         | 57.6272   | 57.0846   | -0.0136506 | 0.994615   |
| PSMD9       | 35.5756   | 49.8632   | 0.487089   | 0.0841079  |
| DTYMK       | 81.3997   | 110.683   | 0.443339   | 0.12752    |
| PTPDC1      | 1.98931   | 0.8384    | -1.24656   | 0.00134142 |
| RRN3        | 14.5942   | 15.4862   | 0.0855902  | 0.944284   |
| SDF2L1      | 91.4439   | 178.474   | 0.964752   | 0.00134142 |
| RSBN1L      | 2.85021   | 3.04279   | 0.0943228  | 0.966946   |
| SPTBN1      | 9.97492   | 7.99048   | -0.320022  | 0.374382   |
| SUMO3       | 35.5843   | 37.4503   | 0.0737343  | 0.955758   |
| ATP11C      | 1.99592   | 2.01865   | 0.0163375  | 0.994615   |
| CSNK1G2     | 39.3043   | 54.431    | 0.46974    | 0.0972878  |
| LOC283693   | 0.0480763 | 0.0211905 | -1.18191   | 1          |
| TMX3        | 5.17008   | 4.71334   | -0.133438  | 0.880645   |
| TTLL5       | 2.72557   | 1.97546   | -0.464365  | 0.200886   |
| SLC2A9      | 0.0505482 | 0.0148023 | -1.77184   | 1          |
| MAFG        | 10.439    | 10.7795   | 0.0463065  | 0.979484   |
| KIAA1704    | 2.79469   | 2.92372   | 0.0651151  | 0.979701   |
| CTNND1,TMX2 | 67.934    | 82.5772   | 0.281608   | 0.804951   |
| GORASP2     | 37.2781   | 44.6041   | 0.258848   | 0.537216   |
| FUT8        | 2.43919   | 2.74784   | 0.171895   | 0.844167   |
| EWSR1       | 113.983   | 144.743   | 0.344674   | 0.325034   |
| CSNK1G1     | 2.1048    | 1.92105   | -0.131783  | 0.898711   |
| AGPAT6      | 17.1762   | 21.5965   | 0.33038    | 0.354465   |
| PSMA2       | 104.308   | 105.645   | 0.0183755  | 0.99316    |
| CLASP1      | 3.35794   | 2.71107   | -0.308713  | 0.46195    |
| DEK         | 49.0369   | 42.0063   | -0.223262  | 0.664504   |
| ZNF703      | 6.0261    | 7.34332   | 0.285209   | 0.735932   |
| VWA8        | 2.07477   | 1.80078   | -0.204329  | 0.870173   |
| TCEA1       | 54.3071   | 34.5099   | -0.654132  | 0.0101293  |
| TP73        | 4.25189   | 4.76746   | 0.165119   | 0.846469   |
| ERLIN1      | 18.4093   | 13.5359   | -0.443642  | 0.130554   |
| PUF60       | 235.842   | 356.806   | 0.597321   | 0.0222212  |
| RSAD1       | 32.4114   | 33.7178   | 0.0570087  | 0.972989   |
| RHNO1       | 8.75893   | 5.3597    | -0.708602  | 0.647747   |
| NUPL1       | 12.0091   | 10.7288   | -0.162636  | 0.819877   |
| SNRNP200    | 29.147    | 26.7479   | -0.123925  | 0.893337   |
| YIF1A       | 81.4458   | 85.7389   | 0.0741083  | 0.956807   |
| SLC4A11     | 12.0757   | 19.2223   | 0.670677   | 0.0120701  |
| TMEM198     | 2.86323   | 3.16359   | 0.143915   | 0.937419   |

|                        |           |           |            |            |
|------------------------|-----------|-----------|------------|------------|
| TMEM65                 | 5.45943   | 3.3856    | -0.689338  | 0.0120701  |
| LONP1                  | 110.494   | 82.1652   | -0.427375  | 0.152605   |
| H3F3B                  | 211.117   | 220.221   | 0.0609092  | 0.972111   |
| ABHD11                 | 20.0097   | 25.2445   | 0.335272   | 0.430271   |
| MRPL47                 | 39.931    | 44.2339   | 0.147642   | 0.845125   |
| PKNOX1                 | 2.28275   | 2.64229   | 0.211017   | 0.774191   |
| FAM117B                | 1.50355   | 1.23578   | -0.28295   | 0.651901   |
| XPO1                   | 29.2689   | 25.2288   | -0.214295  | 0.688363   |
| C12orf44               | 74.6758   | 96.4533   | 0.369191   | 0.252563   |
| TONSL                  | 28.1288   | 39.3345   | 0.48375    | 0.0865352  |
| TMEM140                | 0.567126  | 0.707064  | 0.318173   | 0.979701   |
| IGHMBP2                | 6.78482   | 7.89161   | 0.218008   | 0.731614   |
| DDX18                  | 16.0198   | 21.3724   | 0.415895   | 0.158178   |
| GTF2B                  | 18.5177   | 14.0078   | -0.402675  | 0.218319   |
| ZNF669                 | 2.16486   | 1.62136   | -0.417073  | 0.498883   |
| HN1                    | 145.085   | 181.211   | 0.32077    | 0.385425   |
| FLJ39051               | 2.11139   | 1.57858   | -0.419564  | 0.97028    |
| PAPOLA                 | 26.9058   | 29.9458   | 0.154433   | 0.833863   |
| AKIRIN2                | 20.0243   | 14.7654   | -0.439527  | 0.187886   |
| GPR107                 | 16.977    | 12.254    | -0.47032   | 0.0938606  |
| LOC100129034           | 19.4996   | 17.5291   | -0.153697  | 0.954677   |
| C17orf49,RNASEK        | 446.309   | 449.797   | 0.0112325  | 0.996079   |
| HIGD1A                 | 16.5194   | 20.2376   | 0.292875   | 0.44885    |
| THOC7                  | 39.8613   | 39.1578   | -0.0256899 | 0.989869   |
| AAR2                   | 19.5461   | 21.5932   | 0.143692   | 0.850947   |
| KIF26A                 | 3.01836   | 4.55211   | 0.59277    | 0.0732879  |
| AGPS                   | 3.92018   | 4.15114   | 0.0825882  | 0.950929   |
| SLC43A1                | 28.8935   | 15.3838   | -0.90933   | 0.00134142 |
| PSMA5                  | 32.215    | 38.4705   | 0.256021   | 0.572211   |
| ZFAND3                 | 22.9133   | 16.758    | -0.451336  | 0.125756   |
| SLC25A10               | 80.1005   | 89.6357   | 0.162262   | 0.81342    |
| TIMM21                 | 16.8517   | 23.293    | 0.467001   | 0.124319   |
| TMEM184A               | 4.80872   | 7.32212   | 0.606608   | 0.145048   |
| TMEM116                | 4.90699   | 1.79661   | -1.44956   | 0.00134142 |
| MATN4                  | 0.0601891 | 0.0817518 | 0.441749   | 1          |
| NDUFC1                 | 214.36    | 216.182   | 0.0122079  | 0.996648   |
| UBXN2A                 | 5.22598   | 3.58819   | -0.542445  | 0.11492    |
| SERINC3                | 19.5236   | 9.11066   | -1.09959   | 0.00134142 |
| RNF138                 | 8.37596   | 8.20584   | -0.0296043 | 0.988657   |
| ARHGEF2                | 53.2475   | 22.3073   | -1.2552    | 0.00134142 |
| UFD1L                  | 31.0023   | 40.8625   | 0.398401   | 0.194171   |
| LINC00467              | 8.61145   | 4.79193   | -0.845648  | 0.0292254  |
| NARR_RAB34             | 0.0912712 | 0.0321709 | -1.5044    | 1          |
| HNRNPR                 | 51.2435   | 78.1207   | 0.608335   | 0.0183825  |
| CENPJ                  | 1.3478    | 1.91786   | 0.508891   | 0.158777   |
| COX19                  | 4.57361   | 5.01817   | 0.133828   | 0.892588   |
| LIME1                  | 7.68772   | 12.2773   | 0.675362   | 0.0909525  |
| ATG7                   | 5.30767   | 3.64532   | -0.542032  | 0.387171   |
| ISCU                   | 60.3937   | 59.3111   | -0.0260969 | 0.98986    |
| RNF20                  | 6.73317   | 5.30842   | -0.343003  | 0.368292   |
| C4orf29                | 0.775729  | 0.559955  | -0.470244  | 0.832662   |
| BTG3                   | 28.3748   | 29.1603   | 0.0393953  | 0.982703   |
| HNRNPL                 | 201.391   | 172.425   | -0.224033  | 0.67146    |
| COQ10B                 | 19.9475   | 15.5496   | -0.359333  | 0.295347   |
| PPP5D1                 | 0.165324  | 0.193691  | 0.228461   | 1          |
| MBOAT2                 | 5.25413   | 4.14838   | -0.340903  | 0.400128   |
| SAP18                  | 45.8827   | 54.1972   | 0.240268   | 0.603292   |
| UPP1                   | 597.907   | 268.302   | -1.15607   | 0.00134142 |
| RBX1                   | 75.1904   | 81.5138   | 0.116495   | 0.906892   |
| APITD1,APITD1-CORT,COF | 11.0632   | 16.0682   | 0.538436   | 0.113441   |
| TVP23B                 | 8.36024   | 7.08506   | -0.238764  | 0.691693   |
| RFWD3                  | 8.76042   | 9.73704   | 0.152483   | 0.836632   |
| TPH1P2                 | 0.186862  | 0.144571  | -0.3702    | 1          |
| FCF1                   | 11.6567   | 11.3155   | -0.0428565 | 0.981753   |
| CCT3                   | 330.145   | 387.074   | 0.229513   | 0.674264   |
| ANKRD16                | 12.9851   | 11.9855   | -0.115564  | 0.979701   |
| COX10-AS1              | 1.16052   | 1.01836   | -0.188536  | 0.977103   |
| GDPD1                  | 3.3278    | 1.36398   | -1.28675   | 0.00134142 |
| TECR                   | 130.255   | 136.072   | 0.0630337  | 0.966946   |
| SCAF1                  | 17.8576   | 24.8884   | 0.478932   | 0.102329   |
| POLR3K                 | 36.9516   | 102.028   | 1.46526    | 0.00134142 |
| TSSK3                  | 1.24775   | 1.20223   | -0.0536251 | 0.989344   |
| SGPP1                  | 5.69901   | 5.77993   | 0.0203399  | 0.99316    |
| CTAGE5                 | 5.48259   | 3.48537   | -0.653546  | 0.0340561  |
| PPCDC                  | 6.53907   | 4.86316   | -0.427191  | 0.295777   |
| KIAA0020               | 15.2904   | 22.4724   | 0.555526   | 0.0349222  |
| SRI                    | 76.5871   | 69.9746   | -0.130269  | 0.906464   |
| LYPD6                  | 0.997784  | 0.79952   | -0.319593  | 0.650855   |
| TMEM62                 | 9.55312   | 6.39815   | -0.578317  | 0.0531423  |

|                         |            |            |             |            |
|-------------------------|------------|------------|-------------|------------|
| SNRPE                   | 69.2514    | 82.9511    | 0.260418    | 0.537947   |
| TEX30                   | 0.217357   | 0.514605   | 1.2434      | 0.156099   |
| GOT2                    | 89.0735    | 96.8971    | 0.121458    | 0.896485   |
| BRIX1                   | 35.7503    | 57.8003    | 0.69312     | 0.00243047 |
| ITGAM                   | 0.0179023  | 0.0218916  | 0.290234    | 1          |
| LOC401052               | 1.7972     | 2.28851    | 0.348662    | 0.664776   |
| USP7                    | 17.4586    | 21.133     | 0.275561    | 0.493822   |
| C14orf169               | 13.2242    | 18.295     | 0.468266    | 0.148987   |
| ILF2                    | 151.827    | 192.089    | 0.339352    | 0.363528   |
| SLC2A6                  | 19.709     | 52.91      | 1.42469     | 0.00134142 |
| ZUFSP                   | 5.94684    | 5.70355    | -0.0602641  | 0.976595   |
| RAD51AP1                | 5.74854    | 4.96387    | -0.21173    | 0.757141   |
| OAF                     | 53.2331    | 55.8786    | 0.0699703   | 0.96103    |
| UBE2MP1                 | 3.52784    | 4.47694    | 0.343728    | 0.68115    |
| ANAPC13                 | 34.7665    | 36.377     | 0.0653282   | 0.971373   |
| PDE12                   | 9.46638    | 13.7511    | 0.538657    | 0.052      |
| CASP4                   | 141.737    | 92.849     | -0.610256   | 0.0183825  |
| NFC                     | 9.83194    | 9.92738    | 0.0139375   | 0.994615   |
| TTC9                    | 0.694222   | 0.355845   | -0.964151   | 0.0245451  |
| XRCC5                   | 82.9785    | 81.0889    | -0.0332322  | 0.986822   |
| PA2G4                   | 128.646    | 170.31     | 0.404753    | 0.202623   |
| ZDHC5                   | 19.764     | 20.5747    | 0.0579955   | 0.970558   |
| ACTB                    | 2116.8     | 2855.35    | 0.431786    | 0.252563   |
| WDR45                   | 40.8598    | 31.7587    | -0.363533   | 0.285331   |
| DEPDC5                  | 1.52661    | 1.31375    | -0.216641   | 0.813072   |
| SLC25A28                | 20.1452    | 22.4627    | 0.157091    | 0.845969   |
| UBAC2                   | 22.2084    | 16.3742    | -0.439687   | 0.143695   |
| UPF2                    | 5.34386    | 7.09431    | 0.408779    | 0.19102    |
| ARPC1B                  | 164.719    | 190.802    | 0.212072    | 0.890667   |
| ZFP69                   | 1.89129    | 2.6183     | 0.469256    | 0.29688    |
| RUSC1-AS1               | 11.7044    | 15.517     | 0.406806    | 0.935939   |
| UBE2B                   | 23.3806    | 17.4172    | -0.424795   | 0.155066   |
| E2F4                    | 57.7339    | 96.636     | 0.743142    | 0.00134142 |
| ETV4                    | 74.5395    | 40.5701    | -0.877589   | 0.00134142 |
| HIST1H2BJ               | 2.56191    | 4.91804    | 0.940866    | 0.187511   |
| IQCJ,IQCJ-SCHIP1,SCHIP1 | 7.50302    | 6.42082    | -0.224715   | 0.757853   |
| DFNB59                  | 0.709025   | 0.292044   | -1.27965    | 0.925586   |
| PIH1D1                  | 104.484    | 91.0344    | -0.198803   | 0.727505   |
| TIMM50                  | 57.247     | 61.9226    | 0.113265    | 0.909435   |
| FAR1                    | 6.92715    | 8.66467    | 0.322883    | 0.371065   |
| ST5                     | 1.6701     | 2.06617    | 0.307024    | 0.686668   |
| C6orf211                | 5.40264    | 4.50543    | -0.261999   | 0.637163   |
| RCC1                    | 118.777    | 130.681    | 0.137791    | 0.872284   |
| JAZF1                   | 2.35875    | 2.30749    | -0.0316976  | 0.990324   |
| EIF4A1,SENP3            | 901.912    | 907.037    | 0.0081743   | 0.997036   |
| DHRS4L1                 | 0.194958   | 0.0698533  | -1.48076    | 1          |
| NANOS3                  | 3.00372    | 4.35932    | 0.537353    | 0.457353   |
| CDC23                   | 8.43155    | 8.40442    | -0.00464908 | 0.998342   |
| HIST1H1C                | 134.051    | 119.024    | -0.171532   | 0.802008   |
| GPS2                    | 42.9372    | 49.9529    | 0.218342    | 0.674962   |
| GALE                    | 94.3153    | 55.3746    | -0.768268   | 0.00243047 |
| KIAA1524                | 2.25049    | 3.43899    | 0.611744    | 0.103887   |
| PLCD4                   | 0.409278   | 0.770907   | 0.913475    | 0.0775297  |
| C22orf46                | 1.62709    | 1.30758    | -0.315397   | 0.563967   |
| C9orf64                 | 10.1597    | 9.70812    | -0.0655875  | 0.968858   |
| TJP1                    | 5.54103    | 6.01509    | 0.118434    | 0.905942   |
| ZNF575                  | 0.945478   | 0.439314   | -1.10579    | 0.185878   |
| CRNDE                   | 21.8347    | 16.7055    | -0.386297   | 0.376157   |
| ZC3H18                  | 9.25713    | 14.867     | 0.683478    | 0.0114515  |
| C19orf10                | 164.375    | 195.894    | 0.253082    | 0.571203   |
| FSBP,RAD54B             | 4.52989    | 4.13178    | -0.132711   | 0.909694   |
| IGSF9B                  | 0.143297   | 0.16573    | 0.209828    | 1          |
| LRRC69                  | 0.153466   | 0.235951   | 0.620569    | 1          |
| TOR1A                   | 42.1682    | 54.1311    | 0.360302    | 0.275042   |
| PYCR1                   | 23.3663    | 37.7292    | 0.691252    | 0.00593755 |
| CNDP2                   | 17.223     | 21.1359    | 0.29536     | 0.450737   |
| KIF2A                   | 5.61465    | 5.0944     | -0.140283   | 0.877187   |
| LOC286190               | 0.00938519 | 0.00452995 | -1.05089    | 1          |
| UTP18                   | 40.8213    | 49.817     | 0.287315    | 0.465131   |
| PSMC2                   | 35.1757    | 37.6092    | 0.096505    | 0.930157   |
| ST6GALNAC4              | 228.185    | 522.39     | 1.19492     | 0.00134142 |
| WDR53                   | 2.90259    | 3.7474     | 0.368552    | 0.536279   |
| HRAS                    | 48.483     | 84.9066    | 0.808398    | 0.00134142 |
| GUSBP1                  | 2.89771    | 3.35724    | 0.212363    | 0.854334   |
| SPAST                   | 2.10212    | 2.51733    | 0.260051    | 0.642142   |
| SCLY,UBE2F              | 32.9493    | 42.1787    | 0.356265    | 0.281574   |
| TERF1                   | 13.8252    | 13.5437    | -0.0296882  | 0.987693   |
| GCDH                    | 31.0825    | 31.8287    | 0.0342252   | 0.986822   |
| SGPL1                   | 8.09106    | 6.54276    | -0.30643    | 0.420042   |

|          |           |           |            |            |
|----------|-----------|-----------|------------|------------|
| PSMA1    | 151.215   | 156.727   | 0.0516482  | 0.976618   |
| LOXL3    | 6.24546   | 8.41605   | 0.430334   | 0.931471   |
| LIMK2    | 10.4415   | 9.62415   | -0.117594  | 0.913628   |
| ZW10     | 4.94858   | 5.3589    | 0.114923   | 0.921861   |
| ARHGEF1  | 46.1309   | 46.5195   | 0.0121017  | 0.995302   |
| SLX4     | 1.55133   | 1.5711    | 0.0182633  | 0.99449    |
| PSMD6    | 88.943    | 93.3677   | 0.0700417  | 0.961224   |
| PRDM7    | 0.0155468 | 0.0032917 | -2.23971   | 1          |
| ACIN1    | 64.6889   | 74.0591   | 0.19516    | 0.852548   |
| ASUN     | 8.65931   | 6.05813   | -0.515378  | 0.0941664  |
| CLPTM1L  | 52.0069   | 82.8459   | 0.671725   | 0.0120701  |
| PRPF38B  | 11.1768   | 16.225    | 0.537715   | 0.0511722  |
| ADRBK2   | 0.492235  | 0.535474  | 0.121469   | 0.94404    |
| NFATC2IP | 10.0322   | 9.32007   | -0.106224  | 0.921047   |
| TFDP1    | 24.8296   | 43.0202   | 0.792951   | 0.00243047 |
| RNF149   | 16.7546   | 12.8516   | -0.382608  | 0.249084   |
| STAMBP   | 6.29824   | 3.58148   | -0.814392  | 0.00134142 |
| RNPS1    | 149.224   | 189.427   | 0.344166   | 0.328112   |
| CD9      | 294.795   | 226.261   | -0.38172   | 0.243457   |
| LIF      | 19.8982   | 20.8795   | 0.06945    | 0.961331   |
| SGOL1    | 3.31423   | 3.02863   | -0.130011  | 0.92969    |
| SLC35C1  | 11.3329   | 25.4078   | 1.16475    | 0.00134142 |
| PANK3    | 3.10888   | 2.75755   | -0.173011  | 0.85377    |
| NSUN5    | 32.3741   | 36.9458   | 0.19057    | 0.752981   |
| ATP6V1C1 | 16.7389   | 17.1506   | 0.0350578  | 0.985982   |
| TSSC4    | 45.3469   | 67.7843   | 0.579947   | 0.0235476  |
| DHX15    | 37.6323   | 48.5614   | 0.367839   | 0.267105   |
| C12orf45 | 54.6573   | 46.4926   | -0.233412  | 0.674264   |
| CASP2    | 13.5949   | 16.4412   | 0.274252   | 0.509535   |
| PTPN1    | 21.6933   | 22.513    | 0.0535073  | 0.975831   |
| MRPS35   | 39.8926   | 35.7464   | -0.15832   | 0.823266   |
| NUP188   | 33.8262   | 43.0741   | 0.34868    | 0.36389    |
| RAD54L   | 10.3013   | 9.88666   | -0.0592777 | 0.988165   |
| USP43    | 1.39188   | 1.28299   | -0.117524  | 0.95467    |
| L3MBTL2  | 11.0018   | 21.3305   | 0.955174   | 0.00134142 |
| AGAP5    | 0.755137  | 0.521176  | -0.534966  | 0.482416   |
| ERLEC1   | 13.2466   | 11.3272   | -0.225833  | 0.774191   |
| SLC25A33 | 24.3832   | 27.3333   | 0.164767   | 0.828589   |
| RHOBTB2  | 4.35611   | 5.39831   | 0.309469   | 0.935328   |
| HAUS7    | 22.0553   | 28.2955   | 0.359448   | 0.342445   |
| FBR5     | 25.1556   | 24.6329   | -0.030294  | 0.987693   |
| ATXN2    | 6.19305   | 5.39154   | -0.199953  | 0.754447   |
| PON2     | 37.9268   | 36.0053   | -0.0750065 | 0.955544   |
| GTF2H1   | 10.9023   | 11.4449   | 0.070064   | 0.960591   |
| RHBDD1   | 3.27118   | 1.98855   | -0.7181    | 0.0205623  |
| PVRL1    | 10.4133   | 17.564    | 0.754199   | 0.030994   |
| TDRD6    | 0.0308089 | 0.0210317 | -0.550781  | 1          |
| DNTTIP1  | 87.7575   | 43.6222   | -1.00846   | 0.00134142 |
| SLC9A1   | 9.86562   | 14.1751   | 0.522881   | 0.0584113  |
| PPM1G    | 125.132   | 144.451   | 0.207135   | 0.701805   |
| ECM1     | 1.55338   | 1.38158   | -0.169087  | 0.922257   |
| RAB6B    | 0.574652  | 0.805118  | 0.486512   | 0.355611   |
| LSM6     | 27.8981   | 35.5304   | 0.348886   | 0.365353   |
| FIP1L1   | 9.46821   | 7.94903   | -0.252314  | 0.633551   |
| PRELID1  | 196.122   | 271.971   | 0.471705   | 0.218449   |
| PCF11    | 3.36291   | 2.91087   | -0.20826   | 0.739702   |
| DDN      | 5.47538   | 5.53312   | 0.0151346  | 0.994978   |
| CDC42EP1 | 130.326   | 80.5868   | -0.693515  | 0.00425224 |
| FARSA    | 98.816    | 143.89    | 0.542153   | 0.0423316  |
| WBP4     | 4.781     | 3.55635   | -0.426915  | 0.276007   |
| NUDT9    | 8.16287   | 9.72058   | 0.251966   | 0.605597   |
| TUBGCP3  | 3.98182   | 3.55164   | -0.164942  | 0.855662   |
| CSE1L    | 49.5092   | 41.6643   | -0.248887  | 0.581733   |
| BICD2    | 12.0515   | 16.6968   | 0.47036    | 0.098844   |
| DNAJC16  | 2.34833   | 2.5917    | 0.142266   | 0.946765   |
| PHACTR4  | 4.58155   | 4.3635    | -0.0703502 | 0.96275    |
| HOXA7    | 14.3706   | 14.1103   | -0.0263792 | 0.993379   |
| FAM114A2 | 3.95145   | 2.91308   | -0.439835  | 0.249983   |
| MED20    | 4.22376   | 2.4428    | -0.789994  | 0.0145499  |
| MGC45800 | 0.839854  | 1.03152   | 0.296559   | 0.721145   |
| EXOSC3   | 19.3854   | 29.9378   | 0.626998   | 0.0132924  |
| IFI16    | 38.9212   | 24.4418   | -0.671204  | 0.00425224 |
| IFITM3   | 367.375   | 422.462   | 0.201569   | 0.716114   |
| LMO4     | 5.19952   | 2.08615   | -1.31753   | 0.00134142 |
| FAM86A   | 11.4641   | 20.0675   | 0.807738   | 0.021138   |
| XYLB     | 1.79546   | 1.16445   | -0.624697  | 0.123604   |
| EXTL3    | 16.1986   | 21.0931   | 0.380907   | 0.344674   |
| HBA1     | 0.302906  | 0.802412  | 1.40548    | 0.470491   |
| PBRM1    | 1.99073   | 2.03297   | 0.0302928  | 0.989268   |

|           |           |           |             |            |
|-----------|-----------|-----------|-------------|------------|
| RHBDF1    | 21.0271   | 11.9656   | -0.813351   | 0.00243047 |
| IL17RA    | 3.91152   | 5.12409   | 0.389567    | 0.238477   |
| ABCD1     | 11.9309   | 20.5493   | 0.784389    | 0.00134142 |
| HJURP     | 17.38     | 14.8726   | -0.224775   | 0.671358   |
| TRAF4     | 23.2384   | 34.6726   | 0.577288    | 0.0235476  |
| COQ4      | 82.8777   | 78.075    | -0.0861237  | 0.945946   |
| KIF22     | 65.5915   | 74.2809   | 0.179482    | 0.773208   |
| PRKDC     | 11.7394   | 9.70306   | -0.274849   | 0.509535   |
| LOC729737 | 0.236983  | 0.143018  | -0.728588   | 1          |
| ABTB2     | 2.27326   | 4.98699   | 1.13341     | 0.00134142 |
| CDC40     | 4.77301   | 3.58068   | -0.414664   | 0.232758   |
| SLC25A14  | 6.24053   | 6.5689    | 0.0739836   | 0.967901   |
| RFXANK    | 42.9638   | 41.0722   | -0.064957   | 0.983952   |
| LAS1L     | 27.6391   | 27.4513   | -0.00983933 | 0.996453   |
| DHDDS     | 7.38891   | 7.8206    | 0.0819178   | 0.956752   |
| ERGIC2    | 17.7167   | 14.1055   | -0.32885    | 0.369215   |
| POFUT1    | 7.64483   | 7.62732   | -0.00330731 | 0.998514   |
| MTFR1     | 16.0815   | 15.9309   | -0.0135744  | 0.994615   |
| G3BP1     | 38.0016   | 64.0789   | 0.753787    | 0.00134142 |
| SLC9A6    | 2.36355   | 2.46211   | 0.0589396   | 0.977652   |
| NUPL2     | 11.3834   | 12.9482   | 0.185819    | 0.790844   |
| TPST2     | 17.2585   | 21.397    | 0.3101      | 0.452642   |
| DBR1      | 5.82538   | 6.44884   | 0.146687    | 0.87488    |
| PRDX3     | 97.8418   | 100.312   | 0.0359777   | 0.984917   |
| PHF6      | 4.3732    | 3.75699   | -0.219112   | 0.709472   |
| OIP5-AS1  | 10.1014   | 8.94968   | -0.174647   | 0.826656   |
| MLF2      | 217.458   | 278.113   | 0.354932    | 0.30509    |
| SLC16A9   | 3.37908   | 3.32355   | -0.0239043  | 0.992651   |
| DUT       | 48.2159   | 44.6197   | -0.111827   | 0.913628   |
| CNOT4     | 4.59844   | 3.71876   | -0.306321   | 0.561351   |
| C6orf136  | 28.4335   | 26.9202   | -0.0788999  | 0.979733   |
| BMS1      | 9.29268   | 14.8814   | 0.67934     | 0.00743393 |
| C1GALT1C1 | 9.20505   | 11.6583   | 0.340857    | 0.403093   |
| PRAM1     | 0.199923  | 0.0859006 | -1.2187     | 1          |
| TBC1D20   | 12.0788   | 9.64234   | -0.325023   | 0.3703     |
| SASS6     | 1.66819   | 1.50283   | -0.150594   | 0.902978   |
| SNRPD3    | 44.9584   | 56.2424   | 0.323068    | 0.36192    |
| SNAP23    | 24.8557   | 29.229    | 0.233819    | 0.638558   |
| OXNAD1    | 1.99907   | 1.93654   | -0.0458455  | 0.985094   |
| VARS      | 62.027    | 57.0572   | -0.120486   | 0.900463   |
| AKIP1     | 24.5517   | 18.042    | -0.444468   | 0.187039   |
| RRP36     | 31.0622   | 61.1939   | 0.978227    | 0.00134142 |
| VANGL1    | 1.84713   | 1.99732   | 0.112785    | 0.924371   |
| TP53      | 30.6282   | 15.5026   | -0.982351   | 0.009453   |
| CENPL     | 4.47822   | 3.29086   | -0.444461   | 0.29743    |
| IPPK      | 7.45815   | 11.0273   | 0.564188    | 0.274686   |
| SLC25A19  | 27.4835   | 51.2741   | 0.899664    | 0.00134142 |
| C19orf48  | 369.246   | 285.474   | -0.371223   | 0.266094   |
| MAD2L1BP  | 41.6882   | 49.6887   | 0.253281    | 0.571704   |
| HERPUD1   | 64.4075   | 15.1732   | -2.08571    | 0.00134142 |
| TRAF2     | 40.9233   | 81.1264   | 0.987248    | 0.00134142 |
| SPCS3     | 17.8977   | 22.0654   | 0.302006    | 0.420042   |
| CLDN12    | 14.3554   | 9.32276   | -0.622764   | 0.0172978  |
| TIMM13    | 92.1886   | 139.571   | 0.59834     | 0.0162707  |
| NDUFAF2   | 105.754   | 128.274   | 0.278524    | 0.482596   |
| KCNK15    | 0.0973432 | 0.0485103 | -1.00479    | 1          |
| BUB3      | 120.339   | 122.414   | 0.0246612   | 0.991094   |
| RRP7A     | 27.6278   | 49.0416   | 0.827886    | 0.00134142 |
| SEMA4A    | 0.0293915 | 0.0160927 | -0.868993   | 1          |
| LETM2     | 4.03423   | 4.58492   | 0.184601    | 0.851389   |
| MFSD9     | 1.93171   | 2.56579   | 0.409525    | 0.435326   |
| WDR73     | 10.6372   | 15.3283   | 0.527082    | 0.0817307  |
| NDUFS8    | 205.927   | 195.772   | -0.0729579  | 0.958201   |
| RAN       | 413.701   | 550.588   | 0.412384    | 0.194995   |
| ZNF263    | 13.1762   | 18.5857   | 0.496261    | 0.0792619  |
| AZI2      | 17.4214   | 8.94895   | -0.96107    | 0.00337323 |
| PJA1      | 8.63979   | 8.71457   | 0.012432    | 0.996079   |
| SLC35B4   | 3.59829   | 4.29134   | 0.254113    | 0.609835   |
| CEACAM19  | 12.9006   | 11.4087   | -0.177306   | 0.806888   |
| CSNK1A1   | 34.127    | 20.5287   | -0.733273   | 0.00134142 |
| DFIT1     | 66.5987   | 83.0211   | 0.317985    | 0.385425   |
| PCNT      | 2.38229   | 2.1711    | -0.133919   | 0.893663   |
| CLTB      | 138.604   | 186.57    | 0.428741    | 0.139762   |
| BTN2A2    | 3.581     | 2.57697   | -0.47469    | 0.232929   |
| RECQL4    | 33.1279   | 49.8229   | 0.588763    | 0.0205623  |
| PIGW      | 5.18337   | 11.9552   | 1.20567     | 0.00134142 |
| DLEU1     | 7.91154   | 14.0235   | 0.825813    | 0.240573   |
| INPP5K    | 15.804    | 9.85062   | -0.682006   | 0.00882987 |
| NELFCD    | 42.6085   | 47.5052   | 0.156944    | 0.827004   |

|                         |           |           |             |            |
|-------------------------|-----------|-----------|-------------|------------|
| BCL11B                  | 0.168333  | 0.0462013 | -1.86532    | 1          |
| UBLCP1                  | 9.77198   | 12.5704   | 0.363302    | 0.294609   |
| NDUFS1                  | 11.7461   | 8.40553   | -0.482768   | 0.101333   |
| FAM49B                  | 24.7727   | 28.2834   | 0.191203    | 0.74397    |
| DNAJC3                  | 7.5143    | 7.97831   | 0.0864437   | 0.945946   |
| LBX2-AS1                | 8.92639   | 5.93284   | -0.589355   | 0.44093    |
| TAF1B                   | 4.0271    | 3.6433    | -0.144494   | 0.901454   |
| TUBA1B                  | 804.533   | 1173.98   | 0.545181    | 0.0694871  |
| CCZ1B                   | 7.36714   | 7.41182   | 0.0087219   | 0.997036   |
| CCPG1,DYX1C1            | 3.59229   | 2.04058   | -0.815924   | 0.114012   |
| FAM177A1                | 5.0138    | 5.61163   | 0.162516    | 0.844123   |
| RAB21                   | 13.9354   | 14.2979   | 0.0370506   | 0.985921   |
| CTR9                    | 9.51842   | 10.2757   | 0.110439    | 0.91373    |
| SHMT1                   | 19.5358   | 15.8087   | -0.305407   | 0.599424   |
| DCUN1D1                 | 3.91605   | 3.13729   | -0.319882   | 0.480572   |
| MMD                     | 2.93094   | 2.43437   | -0.267813   | 0.702128   |
| CTNS                    | 5.2461    | 8.05024   | 0.617787    | 0.751467   |
| UROD                    | 153.339   | 172.812   | 0.172481    | 0.79799    |
| PMM2                    | 22.5269   | 34.6913   | 0.622923    | 0.0194494  |
| IREB2                   | 4.21757   | 4.36964   | 0.0511021   | 0.977332   |
| FBXL17                  | 1.22888   | 0.812325  | -0.597215   | 0.168166   |
| TPCN2                   | 3.35787   | 2.57993   | -0.380213   | 0.384483   |
| FAM69A                  | 2.83921   | 2.79127   | -0.0245697  | 0.99714    |
| POLR3G                  | 4.1604    | 8.28661   | 0.994059    | 0.00134142 |
| AKNA                    | 4.16511   | 1.49092   | -1.48215    | 0.00134142 |
| ACLY                    | 36.9856   | 43.8513   | 0.245656    | 0.606811   |
| GCN1L1                  | 15.6994   | 17.7966   | 0.180892    | 0.769276   |
| BLOC1S5,EEF1E1,TXNDC5   | 133.057   | 176.495   | 0.407587    | 0.267079   |
| MYH10                   | 0.0967439 | 0.142204  | 0.555716    | 1          |
| ABHD6                   | 6.36172   | 8.8614    | 0.478119    | 0.170154   |
| CAPN8                   | 0.032302  | 0         | #NAME?      | 1          |
| CCM2                    | 23.0053   | 28.1007   | 0.288638    | 0.503409   |
| SLC39A6                 | 22.1842   | 25.5104   | 0.201551    | 0.707294   |
| ENOSF1                  | 16.8498   | 17.3079   | 0.0386992   | 0.986822   |
| LOC100505978            | 0.0960196 | 0.0941733 | -0.0280115  | 1          |
| CD83                    | 4.93556   | 6.69238   | 0.439304    | 0.232252   |
| IFRD2                   | 91.718    | 156.1     | 0.767194    | 0.00134142 |
| NEDD1                   | 4.32695   | 3.30911   | -0.386907   | 0.29342    |
| CORO1C                  | 104.232   | 103.766   | -0.00646564 | 0.997036   |
| CLDN2                   | 0.0452329 | 0.0509201 | 0.170861    | 1          |
| RNF126                  | 84.9448   | 102.598   | 0.272404    | 0.5127     |
| SCPEP1                  | 12.1605   | 8.50554   | -0.515722   | 0.0925999  |
| G6PD                    | 25.8501   | 31.4058   | 0.280865    | 0.627251   |
| UTP15                   | 4.03445   | 6.62524   | 0.7156      | 0.010797   |
| STYK1                   | 0.199518  | 0.0423993 | -2.23441    | 1          |
| KCTD14,NDUFC2,NDUFC2-   | 24.3149   | 32.0186   | 0.39707     | 0.462141   |
| TMED8                   | 0.252734  | 0.276541  | 0.129876    | 1          |
| NACC2                   | 8.4772    | 13.9177   | 0.715262    | 0.00243047 |
| VARS2                   | 17.8823   | 15.5022   | -0.206055   | 0.714085   |
| ALG5                    | 36.3118   | 28.4489   | -0.352066   | 0.313367   |
| COG8,PDF                | 32.4991   | 40.4135   | 0.314439    | 0.821056   |
| SLC25A22                | 22.6235   | 44.9512   | 0.990538    | 0.00134142 |
| XKR8                    | 12.8655   | 13.5803   | 0.0780035   | 0.959465   |
| SEC61B                  | 260.078   | 373.892   | 0.523677    | 0.0504457  |
| NRL                     | 0.538376  | 0.466581  | -0.206485   | 0.944601   |
| FPGT,FPGT-TNNI3K,TNNI3  | 1.52137   | 1.09357   | -0.47632    | 0.262317   |
| NCAPH                   | 5.54443   | 5.18727   | -0.0960637  | 0.939631   |
| OAZ1                    | 994.723   | 1257.53   | 0.33823     | 0.360219   |
| LOC283335               | 0.382991  | 0.362433  | -0.0795936  | 0.969728   |
| UTP6                    | 21.0108   | 22.7829   | 0.116822    | 0.906895   |
| PDAP1                   | 108.084   | 123.034   | 0.186913    | 0.845153   |
| CSPG5                   | 1.47204   | 1.74161   | 0.242605    | 0.84403    |
| HOXD-AS2                | 8.54788   | 6.27932   | -0.444959   | 0.609543   |
| CYB5B                   | 14.4529   | 16.4845   | 0.189758    | 0.744425   |
| ANKRD61                 | 0.14033   | 0.248391  | 0.823786    | 1          |
| SOAT1                   | 3.78902   | 4.11492   | 0.119039    | 0.910376   |
| DENR                    | 23.1012   | 21.779    | -0.0850357  | 0.94678    |
| LIMA1                   | 4.6699    | 4.69961   | 0.00914957  | 0.997036   |
| IHH                     | 0.0742996 | 0.320423  | 2.10855     | 1          |
| LTBP1                   | 1.68839   | 0.896017  | -0.914047   | 0.00593755 |
| NVL                     | 6.74911   | 8.03914   | 0.252344    | 0.631187   |
| C8orf76,ZHX1,ZHX1-C8ORF | 37.9996   | 47.7218   | 0.328664    | 0.41953    |
| SSRP1                   | 113.909   | 106.921   | -0.0913354  | 0.939418   |
| TXN                     | 877.341   | 1075.37   | 0.29363     | 0.466904   |
| LIMD1                   | 5.01414   | 6.71915   | 0.422276    | 0.299254   |
| RPGR                    | 1.3613    | 0.99874   | -0.446802   | 0.406576   |
| ZC3H15                  | 32.5487   | 38.3564   | 0.236871    | 0.612206   |
| HES6                    | 162.2     | 256.89    | 0.663378    | 0.009453   |
| NFKBID                  | 2.43456   | 4.78429   | 0.974647    | 0.0132924  |

|                      |           |           |            |            |
|----------------------|-----------|-----------|------------|------------|
| C16orf72             | 8.37284   | 6.58062   | -0.347494  | 0.33875    |
| PIGB                 | 3.21515   | 2.15224   | -0.579049  | 0.568626   |
| TMEM208              | 88.3032   | 125.388   | 0.505857   | 0.0688198  |
| NAA50                | 19.1982   | 35.1269   | 0.871603   | 0.00134142 |
| NMT1                 | 22.806    | 25.4574   | 0.158672   | 0.817762   |
| ACSL1                | 8.71017   | 12.9283   | 0.569756   | 0.0314167  |
| RM12                 | 7.50587   | 4.33587   | -0.791696  | 0.0297125  |
| HSPA4                | 45.1746   | 72.1972   | 0.67643    | 0.009453   |
| KIAA0586             | 0.587705  | 0.383378  | -0.616325  | 0.811161   |
| NDUFB6               | 66.7095   | 69.257    | 0.0540664  | 0.974044   |
| HIST1H2AD,HIST1H3D   | 3.29616   | 4.54983   | 0.465028   | 0.631465   |
| MICB                 | 8.83475   | 15.7894   | 0.837692   | 0.00243047 |
| HIST2H2BE            | 6.53876   | 5.98527   | -0.127601  | 0.920028   |
| PSMD7                | 52.4853   | 48.554    | -0.112323  | 0.907689   |
| RPA1                 | 15.523    | 15.8192   | 0.027266   | 0.989268   |
| RIOK2                | 7.26021   | 6.5322    | -0.152442  | 0.85421    |
| ACE                  | 4.3995    | 2.85582   | -0.623435  | 0.0835598  |
| MEF2B,MEF2BNB,MEF2BN | 15.3509   | 16.2567   | 0.0827177  | 0.989268   |
| CWC25                | 7.25834   | 7.65178   | 0.0761562  | 0.958814   |
| PRKX                 | 6.49471   | 6.60264   | 0.0237773  | 0.990994   |
| DLAT                 | 5.05604   | 5.71141   | 0.175839   | 0.820463   |
| MICALCL              | 0.337826  | 0.201187  | -0.747748  | 1          |
| MMS22L               | 1.38385   | 1.06066   | -0.383729  | 0.348936   |
| DIRC2                | 11.5959   | 4.4429    | -1.38405   | 0.00134142 |
| BAK1                 | 53.8742   | 77.5708   | 0.525919   | 0.0539552  |
| CNOT6                | 5.49767   | 5.82234   | 0.0827788  | 0.950929   |
| POLE3                | 46.5162   | 73.6363   | 0.662682   | 0.00882987 |
| TIPRL                | 11.1126   | 8.49891   | -0.386847  | 0.263143   |
| PFND6                | 109.994   | 126.376   | 0.200291   | 0.72393    |
| TIMM44               | 31.4749   | 34.5222   | 0.133324   | 0.881073   |
| HES7                 | 13.3879   | 19.2688   | 0.525342   | 0.123604   |
| PLEKHM3              | 0.372797  | 0.130302  | -1.51653   | 0.00243047 |
| THBS2                | 0.384307  | 0.505144  | 0.394435   | 0.624281   |
| ZNRF3                | 1.66005   | 2.42684   | 0.547851   | 0.108427   |
| LOC100505933         | 0.0473023 | 0.0229004 | -1.04654   | 1          |
| UTP14A               | 11.2281   | 15.1488   | 0.43208    | 0.162218   |
| POLR3D               | 27.7836   | 28.001    | 0.0112427  | 0.995528   |
| HMGCS1               | 3.08563   | 5.12816   | 0.732876   | 0.00743393 |
| SRP19                | 21.407    | 31.3453   | 0.550166   | 0.467588   |
| TRIM23               | 1.76099   | 1.66338   | -0.0822695 | 0.978446   |
| RND3                 | 6.63858   | 4.9456    | -0.424729  | 0.226489   |
| C9orf156             | 6.50279   | 6.59539   | 0.0204008  | 0.99351    |
| ZNRD1-AS1            | 0.588754  | 0.362654  | -0.69907   | 0.616141   |
| GAL                  | 153.596   | 281.102   | 0.87195    | 0.00134142 |
| SC5DL                | 2.86404   | 3.07794   | 0.103912   | 0.92969    |
| SLC16A3              | 233.256   | 195.233   | -0.256714  | 0.572217   |
| SLC38A10             | 25.6456   | 19.7419   | -0.377446  | 0.250623   |
| SPEM1                | 0.6445    | 0.589146  | -0.129555  | 0.978981   |
| RSPH3                | 1.96586   | 1.02581   | -0.938393  | 0.0297125  |
| RAI14                | 6.07988   | 7.20267   | 0.24449    | 0.605597   |
| LRRC8B               | 1.64187   | 1.91635   | 0.223017   | 0.72669    |
| CCDC59               | 21.4706   | 23.4199   | 0.125367   | 0.895717   |
| FANCM                | 0.49792   | 0.699579  | 0.490572   | 0.290965   |
| HMG2                 | 225.003   | 211.324   | -0.0904826 | 0.943036   |
| XPNPEP1              | 34.3977   | 26.4908   | -0.376823  | 0.241608   |
| TEX9                 | 0.484933  | 0.335952  | -0.529531  | 0.78953    |
| NKX2-5               | 30.9702   | 33.4164   | 0.109678   | 0.92969    |
| NIT1                 | 34.7873   | 13.4805   | -1.36768   | 0.253758   |
| LRWD1                | 33.474    | 64.8122   | 0.953226   | 0.0172978  |
| DIMT1                | 30.5422   | 33.5604   | 0.135956   | 0.871957   |
| WDSUB1               | 6.53988   | 4.60673   | -0.505522  | 0.165314   |
| PIK3C3               | 8.81018   | 5.68223   | -0.632716  | 0.0217078  |
| SOD1                 | 378.97    | 412.658   | 0.122862   | 0.898626   |
| LOC100129794         | 1.30711   | 0.394704  | -1.72753   | 0.216565   |
| TMEM170A             | 5.7905    | 4.1809    | -0.469874  | 0.348416   |
| CALU                 | 32.2054   | 32.8949   | 0.0305626  | 0.987858   |
| ARMC6                | 24.3915   | 52.7366   | 1.11243    | 0.00134142 |
| PEX5                 | 34.6801   | 27.2824   | -0.346134  | 0.321414   |
| WIBG                 | 18.7028   | 17.1416   | -0.125758  | 0.913628   |
| HACL1                | 13.38     | 8.45041   | -0.662988  | 0.0194494  |
| RABEP1               | 8.53358   | 9.61556   | 0.172219   | 0.790844   |
| CTDP1                | 12.8448   | 17.2619   | 0.426414   | 0.18287    |
| MANEAL               | 12.2832   | 18.1021   | 0.559471   | 0.052      |
| DERL1                | 34.3445   | 38.1146   | 0.150266   | 0.837966   |
| ACOT9                | 27.2765   | 23.1829   | -0.234598  | 0.624464   |
| TFCP2                | 3.03943   | 3.28574   | 0.112416   | 0.933827   |
| TPMT                 | 4.89973   | 5.0661    | 0.0481714  | 0.979733   |
| MAPK8                | 8.55985   | 5.34099   | -0.680479  | 0.0345327  |
| UBB                  | 1180.1    | 1637.03   | 0.472174   | 0.129356   |

|              |           |            |            |            |
|--------------|-----------|------------|------------|------------|
| SLC30A4      | 0.128292  | 0.105869   | -0.277139  | 1          |
| CAPZA1       | 82.2543   | 77.6641    | -0.0828431 | 0.950929   |
| C17orf100    | 0.586886  | 0.29242    | -1.00504   | 0.223576   |
| LPCAT1       | 29.956    | 47.7925    | 0.67394    | 0.00882987 |
| REXO4        | 76.9559   | 128.323    | 0.73767    | 0.00134142 |
| GFM1         | 8.34394   | 11.603     | 0.475702   | 0.163378   |
| ELAC2        | 31.1217   | 44.1323    | 0.503913   | 0.0885273  |
| MERTK        | 1.01033   | 0.652747   | -0.630224  | 0.207314   |
| KIAA1919     | 0.624264  | 0.530119   | -0.235838  | 0.852548   |
| SLC2A10      | 2.62587   | 1.3787     | -0.92949   | 0.00425224 |
| COX6C        | 410.256   | 430.196    | 0.068472   | 0.962215   |
| NDUFAF4      | 11.0356   | 19.9742    | 0.855982   | 0.00134142 |
| PCNA-AS1     | 58.3663   | 79.2176    | 0.440684   | 0.930066   |
| WDR67        | 2.57211   | 1.80599    | -0.510158  | 0.183686   |
| MAP3K5       | 0.720511  | 1.12529    | 0.6432     | 0.108704   |
| CLN8         | 2.47506   | 2.44639    | -0.0168084 | 0.994615   |
| FOSL1        | 372.945   | 303.184    | -0.298767  | 0.441752   |
| GFPT1        | 7.23029   | 4.8324     | -0.581313  | 0.0278845  |
| ADPRH        | 0.923735  | 0.633711   | -0.543654  | 0.345217   |
| ADCY3        | 18.7938   | 22.0601    | 0.231185   | 0.74878    |
| PEX3         | 8.42028   | 6.18734    | -0.444549  | 0.184498   |
| MON1B,SYCE1L | 10.863    | 9.61889    | -0.175482  | 0.811389   |
| FAM168A      | 1.67489   | 0.626707   | -1.4182    | 0.00743393 |
| FAHD1        | 16.261    | 23.3462    | 0.521777   | 0.070203   |
| NAP1L4       | 52.1196   | 69.1098    | 0.407065   | 0.179646   |
| NECAP1       | 9.0886    | 8.16687    | -0.154275  | 0.851892   |
| EMC7         | 99.8571   | 103.479    | 0.0514005  | 0.977391   |
| LRP8         | 2.80286   | 5.77325    | 1.04248    | 0.0431891  |
| ACVR1        | 5.23833   | 2.60857    | -1.00585   | 0.00134142 |
| USP10        | 28.8713   | 30.945     | 0.10007    | 0.928354   |
| BRI3BP       | 15.4513   | 27.9188    | 0.85351    | 0.00337323 |
| AKAP6        | 0.0142207 | 0.00274939 | -2.37081   | 1          |
| VPS45        | 6.37395   | 6.66947    | 0.0653843  | 0.96926    |
| RSRC1        | 4.17018   | 3.59991    | -0.21215   | 0.81342    |
| PANK2        | 15.7002   | 13.5294    | -0.214686  | 0.716794   |
| ZNF281       | 2.15138   | 1.22698    | -0.810159  | 0.025628   |
| HDAC9        | 6.21425   | 0.953811   | -2.7038    | 0.00134142 |
| RPN1         | 94.5862   | 103.393    | 0.128436   | 0.883256   |
| CSNK2A1      | 42.1499   | 28.2375    | -0.577918  | 0.0240561  |
| RRP1         | 54.5351   | 93.8661    | 0.783419   | 0.00134142 |
| YAE1D1       | 12.6033   | 12.2175    | -0.0448539 | 0.983118   |
| PLAGL2       | 5.30797   | 6.13562    | 0.209049   | 0.724424   |
| HOXB4        | 6.66426   | 8.20542    | 0.300134   | 0.598176   |
| KLHL5        | 1.53338   | 1.20542    | -0.347182  | 0.440749   |
| HIST1H2AE    | 13.4538   | 10.8923    | -0.30471   | 0.744516   |
| FER          | 1.08057   | 0.621461   | -0.798056  | 0.0658487  |
| RNASEH2B     | 22.6669   | 18.8944    | -0.262628  | 0.57289    |
| GMPR         | 17.7082   | 11.5269    | -0.619412  | 0.036526   |
| C11orf82     | 2.32628   | 3.49787    | 0.588451   | 0.0713011  |
| LINC00310    | 0.15435   | 0.119332   | -0.371225  | 1          |
| PASK         | 2.18418   | 2.72926    | 0.321416   | 0.557685   |
| CASP3        | 6.62919   | 6.80292    | 0.0373221  | 0.986822   |
| GCSH         | 13.5708   | 18.2441    | 0.426923   | 0.183567   |
| ARMC7        | 9.29612   | 14.1766    | 0.608814   | 0.559809   |
| NAA38        | 4.6196    | 4.11194    | -0.167948  | 0.802508   |
| NR1H3        | 3.87847   | 1.65235    | -1.23097   | 0.22718    |
| SAFB         | 40.6798   | 57.5637    | 0.500846   | 0.0764532  |
| TXNDC9       | 4.36237   | 5.16223    | 0.242883   | 0.74078    |
| XRCC6        | 224.359   | 236.943    | 0.0787336  | 0.954768   |
| MTHFD1       | 35.0868   | 34.296     | -0.032887  | 0.986822   |
| HECW1        | 0.0473773 | 0.0251619  | -0.912954  | 1          |
| WRAP73       | 28.336    | 33.941     | 0.260396   | 0.55945    |
| MCMDC2       | 0.200075  | 0.241724   | 0.272823   | 1          |
| SLC35B2      | 48.0526   | 48.253     | 0.00600408 | 0.997082   |
| C1orf63      | 13.3402   | 14.4672    | 0.117007   | 0.928755   |
| ATF3         | 20.7177   | 4.92351    | -2.07311   | 0.00134142 |
| LIX1L        | 9.06356   | 5.40878    | -0.744776  | 0.0297125  |
| NUP155       | 6.19299   | 4.02769    | -0.620683  | 0.0231741  |
| LOC728431    | 0.784025  | 0.253605   | -1.62832   | 0.0470437  |
| SLC37A3      | 11.1732   | 9.82746    | -0.185151  | 0.772137   |
| ABCB8        | 5.47821   | 6.60583    | 0.270035   | 0.584658   |
| C10orf25     | 0.44885   | 0.499963   | 0.155588   | 0.986822   |
| ACTN3        | 0.0340101 | 0.0220121  | -0.627669  | 1          |
| KCNK5        | 5.11197   | 8.18989    | 0.679964   | 0.0231741  |
| YBX1         | 710.184   | 858.141    | 0.273021   | 0.556606   |
| DCTPP1       | 111.857   | 227.088    | 1.0216     | 0.00134142 |
| KIF3C        | 2.95737   | 1.913      | -0.628479  | 0.0562227  |
| ATP2A2       | 16.2544   | 24.2684    | 0.578243   | 0.0231741  |
| CHMP1A       | 53.3204   | 72.4204    | 0.441709   | 0.158178   |



|                        |           |           |            |            |
|------------------------|-----------|-----------|------------|------------|
| PPIH                   | 94.8516   | 98.4288   | 0.0534091  | 0.975414   |
| MINOS1P1               | 0.0201596 | 0.0384544 | 0.931683   | 1          |
| SLC10A7                | 0.645372  | 0.521423  | -0.307676  | 0.745077   |
| MED10                  | 52.2582   | 63.1148   | 0.272322   | 0.52114    |
| PMS2P4                 | 1.56588   | 1.38417   | -0.177958  | 0.953101   |
| ABCF1                  | 16.0235   | 25.1034   | 0.647691   | 0.0120701  |
| GADD45A                | 149.511   | 55.7367   | -1.42355   | 0.00134142 |
| PAK1IP1                | 16.2814   | 24.7891   | 0.606478   | 0.0245451  |
| EP400NL                | 0.332849  | 0.454419  | 0.449155   | 0.797015   |
| WDR34                  | 157.74    | 142.141   | -0.150227  | 0.935836   |
| PUS1                   | 39.8239   | 84.2788   | 1.08154    | 0.00134142 |
| SLC38A1                | 33.3094   | 24.6126   | -0.436535  | 0.140867   |
| TMEM214                | 32.0004   | 35.3715   | 0.144499   | 0.851892   |
| HOXA-AS4               | 0.869346  | 0.767519  | -0.179728  | 0.986822   |
| MEPCE                  | 61.4421   | 80.4989   | 0.389742   | 0.229068   |
| SF3B4                  | 69.0583   | 84.6727   | 0.294083   | 0.44093    |
| RAB3IP                 | 3.66226   | 2.48379   | -0.560191  | 0.0386414  |
| SYPL1                  | 51.0459   | 47.9884   | -0.0891117 | 0.938194   |
| GET4                   | 48.4575   | 66.1857   | 0.449798   | 0.119625   |
| YARS2                  | 36.0052   | 36.4777   | 0.0188103  | 0.993379   |
| SLC18B1                | 10.3688   | 11.2588   | 0.118798   | 0.913204   |
| RNF24                  | 3.40197   | 2.37897   | -0.516033  | 0.18287    |
| SIK3                   | 3.24894   | 2.58439   | -0.330148  | 0.450475   |
| C1QTNF9B-AS1           | 0.296356  | 0.605634  | 1.03111    | 0.942519   |
| IDH3B                  | 51.5244   | 53.2783   | 0.0482927  | 0.978703   |
| FTSJ3                  | 16.8934   | 27.0803   | 0.680786   | 0.281587   |
| SH3PXD2B               | 3.98462   | 2.88333   | -0.46671   | 0.141232   |
| PSMC5                  | 97.7098   | 113.827   | 0.220274   | 0.793371   |
| PUS7L                  | 2.18288   | 2.03472   | -0.101403  | 0.950929   |
| KAZN                   | 6.1269    | 12.6986   | 1.05145    | 0.00134142 |
| CDKN2AIP               | 6.08241   | 5.61047   | -0.116519  | 0.928653   |
| RPS19BP1               | 146.127   | 269.68    | 0.884029   | 0.00134142 |
| ARFGEF2                | 1.78666   | 1.65209   | -0.112968  | 0.926258   |
| EXOSC7                 | 74.1007   | 82.9082   | 0.162027   | 0.81342    |
| ACTL6A                 | 31.5187   | 25.228    | -0.321184  | 0.398469   |
| ICT1                   | 51.2999   | 33.916    | -0.59699   | 0.0292254  |
| TRIM38                 | 2.22721   | 1.32805   | -0.745932  | 0.0145499  |
| NPL                    | 0.973581  | 0.802509  | -0.278785  | 0.819681   |
| UCLH3                  | 51.392    | 73.345    | 0.513156   | 0.0611798  |
| MRPS21                 | 396.945   | 423.189   | 0.0923648  | 0.942747   |
| BST2                   | 452.634   | 560.898   | 0.309395   | 0.41836    |
| INPP5A                 | 7.1802    | 9.71283   | 0.435867   | 0.212399   |
| SMTN                   | 93.1312   | 111.082   | 0.254282   | 0.572126   |
| PPIF                   | 65.9844   | 127.199   | 0.946893   | 0.00134142 |
| ERO1LB                 | 1.65675   | 1.37283   | -0.271209  | 0.674625   |
| DPP9                   | 17.7578   | 23.1831   | 0.384622   | 0.225213   |
| TCEB1                  | 67.8095   | 88.3346   | 0.381492   | 0.255176   |
| RPA3                   | 20.0386   | 16.6511   | -0.267167  | 0.649372   |
| LRP12                  | 3.65553   | 2.68911   | -0.442951  | 0.209943   |
| BLM                    | 2.61688   | 2.25796   | -0.212826  | 0.768707   |
| ERV3-1,ZNF117          | 0.854153  | 0.68155   | -0.325676  | 0.723979   |
| RER1                   | 40.6258   | 42.4595   | 0.0636889  | 0.971854   |
| PYCR2                  | 69.751    | 74.4545   | 0.0941444  | 0.935062   |
| HMGCR                  | 5.76464   | 7.75923   | 0.428684   | 0.16323    |
| SRFBP1                 | 21.0871   | 13.3304   | -0.661641  | 0.0126858  |
| PIGS                   | 21.4251   | 17.8087   | -0.266717  | 0.547475   |
| CLCN3                  | 7.22442   | 3.70436   | -0.963656  | 0.00134142 |
| PSPC1                  | 21.344    | 24.5352   | 0.201021   | 0.732817   |
| CCDC51                 | 18.0299   | 24.917    | 0.466736   | 0.132134   |
| SPIRE2                 | 9.85635   | 10.5418   | 0.0970023  | 0.944568   |
| LCTL                   | 0.52564   | 0.655395  | 0.318291   | 0.962247   |
| ATAD3A                 | 56.5203   | 86.6133   | 0.615818   | 0.0222212  |
| PCDH1                  | 5.70326   | 4.58354   | -0.315325  | 0.487792   |
| RELL2                  | 7.64325   | 6.96195   | -0.134696  | 0.967901   |
| ATP1B3                 | 98.6959   | 147.724   | 0.581845   | 0.0318033  |
| CCDC47                 | 22.7491   | 23.1555   | 0.0255401  | 0.989598   |
| SKA1                   | 10.3751   | 7.91051   | -0.391279  | 0.264345   |
| SERPINE1               | 436.869   | 380.365   | -0.199815  | 0.754842   |
| COX6A1                 | 744.843   | 834.796   | 0.164487   | 0.813924   |
| LCP1                   | 96.9519   | 73.6153   | -0.397264  | 0.219954   |
| GOSR2                  | 7.38519   | 10.6323   | 0.525753   | 0.126498   |
| GPR125                 | 5.52079   | 9.06362   | 0.715212   | 0.00818401 |
| RHCE                   | 0.306865  | 0.123224  | -1.31633   | 1          |
| CRYBB2                 | 8.08782   | 8.90881   | 0.139482   | 0.930066   |
| NOLC1                  | 26.4071   | 42.1383   | 0.674206   | 0.00672555 |
| CDC14A                 | 1.04502   | 0.562309  | -0.894095  | 0.0261279  |
| SRP9                   | 135.59    | 126.471   | -0.100447  | 0.927422   |
| PPP1CA                 | 233.04    | 256.374   | 0.137672   | 0.871957   |
| BCL2L2,BCL2L2-PABPN1,P | 129.527   | 164.876   | 0.348131   | 0.318259   |

|                   |           |           |            |            |
|-------------------|-----------|-----------|------------|------------|
| NCAPG2            | 11.4376   | 9.27351   | -0.302599  | 0.44093    |
| FNIP2             | 0.374261  | 0.271966  | -0.460618  | 0.522318   |
| ELF3              | 0.0654798 | 0.0301284 | -1.11992   | 1          |
| TSPAN4            | 57.1692   | 36.2998   | -0.655276  | 0.0114515  |
| BCL2L12           | 45.9991   | 50.707    | 0.14058    | 0.946765   |
| PQLC2             | 30.6834   | 28.6086   | -0.101008  | 0.930922   |
| BANF1             | 285.077   | 341.762   | 0.261643   | 0.615468   |
| TOPBP1            | 7.39383   | 6.78585   | -0.123793  | 0.89748    |
| PAIP2             | 52.6629   | 33.4464   | -0.654938  | 0.0114515  |
| KCNK1             | 15.9373   | 12.1662   | -0.389522  | 0.24748    |
| TNFAIP3           | 0.795178  | 0.73589   | -0.111786  | 0.958201   |
| ADAM17            | 3.66293   | 2.42124   | -0.597257  | 0.0704662  |
| GMDS              | 22.8747   | 18.6946   | -0.291133  | 0.512321   |
| VPS4B             | 6.5618    | 5.49525   | -0.255907  | 0.622934   |
| PSMC4             | 52.0391   | 94.0483   | 0.853805   | 0.00134142 |
| JMJD4             | 19.0517   | 28.2253   | 0.567065   | 0.264491   |
| NDUFAB1           | 189.931   | 237.449   | 0.322143   | 0.364877   |
| LILRA6            | 0.0435769 | 0.0876421 | 1.00806    | 1          |
| SURF4             | 185.599   | 262.052   | 0.497659   | 0.0873591  |
| TXNDC17           | 36.7804   | 42.4301   | 0.206151   | 0.772137   |
| IL18BP            | 1.35433   | 1.30777   | -0.0504761 | 0.996453   |
| SAE1              | 74.8352   | 84.5213   | 0.175599   | 0.78938    |
| PVR               | 18.5183   | 20.7137   | 0.161637   | 0.819513   |
| CBWD1             | 10.5125   | 13.0714   | 0.314306   | 0.439379   |
| KPNA5             | 0.739585  | 0.681647  | -0.117691  | 0.961432   |
| PSMD3             | 97.0293   | 120.061   | 0.307272   | 0.409587   |
| GTF2F2            | 26.4472   | 30.9319   | 0.22598    | 0.657414   |
| ATXN2L            | 55.3885   | 32.1614   | -0.784256  | 0.00134142 |
| MARCH8            | 0.845714  | 0.456541  | -0.889428  | 0.115185   |
| TMEM175           | 8.18008   | 6.59778   | -0.310135  | 0.613686   |
| TSPAN7            | 0.781583  | 0.645558  | -0.275852  | 0.857478   |
| HNRNPH3           | 41.7205   | 49.4672   | 0.245717   | 0.605597   |
| NDUFB2            | 418.124   | 604.452   | 0.531699   | 0.0474163  |
| WDHD1             | 2.77473   | 2.00832   | -0.466363  | 0.168861   |
| RBM17             | 39.4227   | 44.92     | 0.188331   | 0.747687   |
| SMEK2             | 7.60706   | 5.58169   | -0.446637  | 0.140336   |
| EXPH5             | 0.292752  | 0.169884  | -0.785125  | 1          |
| IL17RB            | 3.45891   | 3.3481    | -0.0469732 | 0.985577   |
| MRAP2             | 1.4583    | 0.818202  | -0.833756  | 0.0648441  |
| ATP6V1G2,DDX39B   | 167.687   | 176.541   | 0.074235   | 0.956752   |
| MPZL1             | 16.6011   | 24.7046   | 0.573501   | 0.0274653  |
| NFATC1            | 3.57162   | 4.01768   | 0.169781   | 0.890666   |
| ATG4B             | 27.5455   | 30.9843   | 0.169724   | 0.805637   |
| RP2               | 1.34722   | 0.966307  | -0.479431  | 0.30221    |
| SNX24             | 12.997    | 8.55342   | -0.603607  | 0.036221   |
| RPF1              | 22.8406   | 25.3448   | 0.150086   | 0.954768   |
| SRM               | 187.556   | 401.812   | 1.0992     | 0.00134142 |
| DLG5-AS1          | 0.925339  | 0.614614  | -0.590301  | 0.307454   |
| L3MBTL3           | 1.25418   | 1.69278   | 0.432652   | 0.330411   |
| DPH2              | 23.8723   | 55.8722   | 1.22679    | 0.00134142 |
| TICRR             | 4.01936   | 3.8231    | -0.0722233 | 0.978859   |
| PLS1              | 3.76296   | 3.17775   | -0.243864  | 0.666069   |
| RDH10             | 4.79743   | 8.48832   | 0.823218   | 0.00134142 |
| SCD5              | 16.0655   | 14.0482   | -0.193572  | 0.749584   |
| MRPS22            | 48.565    | 35.127    | -0.467337  | 0.0986455  |
| TLR3              | 0.228955  | 0.103482  | -1.14569   | 1          |
| FAM206A           | 20.716    | 16.1502   | -0.359194  | 0.3074     |
| CD97              | 28.5659   | 22.9      | -0.318946  | 0.390876   |
| SDC1              | 27.97     | 43.4088   | 0.634105   | 0.0101293  |
| WDR12             | 16.3412   | 14.4873   | -0.173721  | 0.801827   |
| FAM91A2,LINC00623 | 5.27202   | 4.40774   | -0.258316  | 0.802508   |
| COMMD1            | 27.9512   | 34.6553   | 0.310164   | 0.487      |
| COPS5             | 69.5492   | 58.8039   | -0.242122  | 0.601838   |
| SEC23B            | 12.5245   | 11.5997   | -0.110673  | 0.916838   |
| SLC39A1           | 131.952   | 108.978   | -0.275982  | 0.783569   |
| RAB33B            | 1.58158   | 0.774237  | -1.03052   | 0.00593755 |
| PAPD5             | 1.5976    | 2.51176   | 0.652789   | 0.0231741  |
| RPL7L1            | 17.7316   | 19.2484   | 0.118416   | 0.916876   |
| NDUFB3            | 70.7177   | 67.99     | -0.0567482 | 0.972601   |
| MICAL3            | 4.22579   | 5.6979    | 0.431209   | 0.166676   |
| SIRT6             | 31.2747   | 33.4973   | 0.0990458  | 0.932231   |
| TRUB2             | 76.5554   | 72.3261   | -0.0819879 | 0.950929   |
| CENPM             | 39.1663   | 40.7679   | 0.0578229  | 0.976756   |
| FANCC             | 3.78344   | 3.70407   | -0.0305871 | 0.989365   |
| RSRC2             | 24.039    | 24.3777   | 0.0201823  | 0.991767   |
| PTPN7             | 29.1805   | 38.3947   | 0.395906   | 0.206153   |
| VDR               | 1.56249   | 1.70528   | 0.126161   | 0.933023   |
| ARHGEF16          | 14.2578   | 12.3497   | -0.207271  | 0.740365   |
| TTC1              | 47.0645   | 32.4385   | -0.536933  | 0.0523239  |

|           |           |           |             |            |
|-----------|-----------|-----------|-------------|------------|
| MFAP3     | 3.17502   | 3.02268   | -0.0709398  | 0.966946   |
| E2F2      | 2.95361   | 3.58505   | 0.279514    | 0.599424   |
| MRPS17    | 72.4879   | 131.465   | 0.858873    | 0.00134142 |
| SLC30A5   | 6.18836   | 8.31752   | 0.426597    | 0.371379   |
| DBN1      | 115.008   | 120.578   | 0.0682383   | 0.963451   |
| TIMP1     | 602.173   | 803.524   | 0.416164    | 0.218084   |
| MND1      | 38.6231   | 20.8138   | -0.891923   | 0.00134142 |
| CYP4V2    | 1.08192   | 0.546358  | -0.98567    | 0.0162707  |
| DNTTIP2   | 19.4051   | 32.083    | 0.725376    | 0.00337323 |
| PPP1R3B   | 18.2382   | 5.63318   | -1.69494    | 0.00134142 |
| TMUB2     | 12.6339   | 10.1217   | -0.31985    | 0.478792   |
| ZNF562    | 3.6787    | 3.04796   | -0.271352   | 0.568534   |
| NHP2      | 262.519   | 350.166   | 0.415618    | 0.173795   |
| SMAP2     | 16.9068   | 16.826    | -0.00691528 | 0.997036   |
| TNPO2     | 14.7025   | 26.9275   | 0.873018    | 0.00134142 |
| DDX21     | 27.9966   | 38.6333   | 0.464595    | 0.109667   |
| RALGPS1   | 1.01022   | 0.808906  | -0.32063    | 0.759487   |
| MAD1L1    | 10.0043   | 11.4085   | 0.189495    | 0.796546   |
| SENP1     | 3.58742   | 3.6351    | 0.0190494   | 0.997036   |
| ARPC5     | 33.5025   | 38.9816   | 0.218522    | 0.66311    |
| KRTAP4-7  | 0.307347  | 0.0923861 | -1.73412    | 1          |
| HINT2     | 20.0262   | 9.71649   | -1.04338    | 0.00425224 |
| LAP3      | 27.7473   | 31.8387   | 0.198438    | 0.721117   |
| ANKRD17   | 6.11423   | 5.88354   | -0.0554852  | 0.972601   |
| DMRTA2    | 7.38309   | 10.7568   | 0.542957    | 0.115606   |
| HOXD1     | 0.147627  | 0.082616  | -0.837462   | 1          |
| GALNT2    | 10.229    | 12.0991   | 0.242229    | 0.617065   |
| MLKL      | 7.71289   | 13.54     | 0.811882    | 0.00337323 |
| RPN2      | 97.0207   | 93.7076   | -0.0501271  | 0.977332   |
| FERMT3    | 0.435868  | 0.734149  | 0.752181    | 0.887791   |
| NOL7      | 125.886   | 141.71    | 0.170822    | 0.790844   |
| ZNF71     | 4.488     | 5.98728   | 0.415829    | 0.292417   |
| TTI1      | 6.09197   | 7.70444   | 0.33878     | 0.366894   |
| TMED9     | 207.827   | 235.869   | 0.182604    | 0.772113   |
| MRPL38    | 108.994   | 130.41    | 0.258811    | 0.550138   |
| TUBAL3    | 1.0572    | 1.0304    | -0.0370435  | 0.991857   |
| HIVEP1    | 0.241549  | 0.259013  | 0.10071     | 1          |
| DPM2      | 162.428   | 190.851   | 0.232639    | 0.633936   |
| ARL13B    | 0.80955   | 0.917432  | 0.180481    | 0.896811   |
| RBL1      | 0.677843  | 0.483522  | -0.487368   | 0.401233   |
| SHCBP1    | 6.18792   | 6.21045   | 0.00524243  | 0.99714    |
| EHBP1     | 2.50593   | 2.22407   | -0.172142   | 0.842533   |
| ADCY9     | 1.55392   | 2.20247   | 0.503214    | 0.177737   |
| PSEN2     | 6.71277   | 10.9525   | 0.706284    | 0.010797   |
| PEMT      | 75.4535   | 82.8212   | 0.134413    | 0.875751   |
| ADAM10    | 2.81312   | 2.05576   | -0.452498   | 0.244595   |
| BARD1     | 0.254565  | 0.181862  | -0.485189   | 1          |
| UHRF1BP1  | 3.6983    | 1.93805   | -0.932258   | 0.00134142 |
| EXOC5     | 3.64374   | 3.55264   | -0.0365312  | 0.987627   |
| UBE4A     | 6.77876   | 5.30531   | -0.353586   | 0.858457   |
| KATNA1    | 13.2803   | 9.78398   | -0.440789   | 0.170338   |
| CCDC82    | 2.24315   | 1.57299   | -0.512024   | 0.222647   |
| SLC7A1    | 19.0542   | 15.1332   | -0.332392   | 0.348909   |
| BTBD10    | 11.2407   | 9.6967    | -0.213169   | 0.713878   |
| SEH1L     | 24.3129   | 37.8083   | 0.636981    | 0.0222212  |
| ACTR3     | 45.5932   | 49.5267   | 0.119389    | 0.903723   |
| TARS2     | 29.641    | 13.7591   | -1.10721    | 0.00134142 |
| MFN1      | 6.66108   | 6.6615    | 9.12E-05    | 0.999929   |
| SEC22B    | 13.7375   | 14.4334   | 0.0712945   | 0.963209   |
| DNA2      | 1.20018   | 1.4632    | 0.285881    | 0.671358   |
| C2CD3     | 0.306037  | 0.337993  | 0.143286    | 1          |
| WDR77     | 16.9351   | 49.1244   | 1.53643     | 0.00509212 |
| EIF1AX    | 32.7617   | 46.0439   | 0.491       | 0.0739785  |
| BCAS2     | 26.4501   | 24.969    | -0.0831338  | 0.950929   |
| IMMP1L    | 5.26228   | 4.56535   | -0.204962   | 0.945247   |
| HIRIP3    | 11.1102   | 9.3632    | -0.24681    | 0.663064   |
| TMEM88    | 1.42787   | 1.52067   | 0.0908456   | 0.984917   |
| CCL3L1    | 0.309185  | 0.0798572 | -1.95297    | 1          |
| MON1A     | 11.9026   | 31.0013   | 1.38105     | 0.00134142 |
| GABPB1    | 8.27061   | 8.74661   | 0.0807308   | 0.970195   |
| POMP      | 96.2815   | 142.564   | 0.566282    | 0.030165   |
| TPM3      | 77.6458   | 93.443    | 0.267178    | 0.525963   |
| TRMT61B   | 9.70197   | 9.76092   | 0.00873935  | 0.997036   |
| CHCHD2    | 866.269   | 873.063   | 0.0112698   | 0.995957   |
| NIPAL3    | 6.83596   | 2.6463    | -1.36917    | 0.00134142 |
| LOC286059 | 0.0540994 | 0.0105163 | -2.36299    | 1          |
| ETV5      | 14.5412   | 11.3379   | -0.358995   | 0.29688    |
| IFI27     | 46.395    | 35.2378   | -0.396848   | 0.294485   |
| SH3RF1    | 2.10374   | 1.84002   | -0.19324    | 0.81526    |

|               |           |           |             |            |
|---------------|-----------|-----------|-------------|------------|
| PRRG1         | 2.30678   | 2.37597   | 0.0426348   | 0.988165   |
| CCDC111       | 2.61251   | 1.1676    | -1.16189    | 0.255424   |
| ENKD1         | 2.21389   | 2.84167   | 0.36016     | 0.697734   |
| IRX2          | 8.61514   | 10.2202   | 0.246476    | 0.71532    |
| HLA-DOB       | 0.0853289 | 0.19134   | 1.16503     | 1          |
| YES1          | 10.3104   | 10.0069   | -0.0430987  | 0.979733   |
| DNAJC13       | 2.72442   | 1.88362   | -0.532446   | 0.0678232  |
| GPAA1         | 147.804   | 174.383   | 0.238572    | 0.61078    |
| RARG          | 10.3377   | 14.5843   | 0.496504    | 0.111788   |
| LRRC8A        | 15.0402   | 19.0381   | 0.340071    | 0.329296   |
| SAMD8         | 3.85174   | 3.1687    | -0.281619   | 0.509306   |
| RP1L1         | 0.0113422 | 0.0272043 | 1.26213     | 1          |
| TSC22D4       | 51.3824   | 47.5092   | -0.113068   | 0.912172   |
| LLPH          | 60.3259   | 101.842   | 0.755477    | 0.00134142 |
| SSB           | 51.2552   | 62.6962   | 0.290681    | 0.598176   |
| ACBD6         | 32.4283   | 32.3388   | -0.0039878  | 0.997535   |
| NAE1          | 45.9461   | 49.2386   | 0.0998463   | 0.927082   |
| COPS3         | 45.7471   | 49.9693   | 0.127362    | 0.884369   |
| FOXD4         | 1.212     | 5.40189   | 2.15607     | 0.00134142 |
| GALNT6        | 16.1563   | 11.0041   | -0.554047   | 0.0688198  |
| C2CD4C        | 11.2941   | 9.94214   | -0.183941   | 0.823379   |
| C7orf26       | 22.9114   | 33.8444   | 0.562852    | 0.0377654  |
| TBP           | 10.6485   | 12.1029   | 0.18471     | 0.800416   |
| FUZ           | 2.7977    | 2.27601   | -0.297736   | 0.976756   |
| TUBA1C        | 533.124   | 906.746   | 0.766227    | 0.00243047 |
| FAM96A        | 58.7886   | 58.6028   | -0.00456644 | 0.99714    |
| ITGB1         | 349.451   | 251.706   | -0.473351   | 0.13673    |
| TAF3          | 2.84706   | 3.3213    | 0.222274    | 0.771625   |
| LARS2         | 5.88956   | 6.98417   | 0.245929    | 0.631395   |
| HDHD1         | 13.9404   | 14.7625   | 0.0826689   | 0.954559   |
| TNFRSF10B     | 42.2882   | 34.567    | -0.290863   | 0.535022   |
| MCFD2         | 25.501    | 26.661    | 0.0641809   | 0.970053   |
| UBASH3B       | 1.95155   | 2.92901   | 0.585789    | 0.0485415  |
| ENSA          | 160.124   | 143.456   | -0.158583   | 0.845125   |
| DTNBP1        | 25.8903   | 20.8153   | -0.31477    | 0.445956   |
| RRP9          | 79.5772   | 168.39    | 1.08138     | 0.00134142 |
| ETF1          | 34.1252   | 48.9913   | 0.521689    | 0.0587985  |
| KIAA1407      | 0.242601  | 0.101841  | -1.25226    | 1          |
| CRIP1         | 8.30042   | 6.44676   | -0.36461    | 0.373169   |
| NAA30         | 3.92745   | 3.94917   | 0.00795799  | 0.997036   |
| FASTKD5,UBOX5 | 12.3623   | 14.7176   | 0.251598    | 0.594487   |
| CXXC1         | 25.4153   | 32.5272   | 0.355948    | 0.281353   |
| C16orf74      | 57.6399   | 36.9883   | -0.639999   | 0.0222212  |
| ST7L          | 3.72957   | 2.24564   | -0.731884   | 0.0245451  |
| TMEM254-AS1   | 0.0297786 | 0.0105613 | -1.49549    | 1          |
| VPS37B        | 49.6416   | 49.8315   | 0.00550941  | 0.99714    |
| SCO1          | 19.628    | 24.3764   | 0.312572    | 0.409402   |
| C6orf203      | 15.4495   | 13.751    | -0.168028   | 0.844957   |
| ATP11A        | 2.29587   | 2.38289   | 0.053671    | 0.977995   |
| CBX6          | 6.45212   | 18.853    | 1.54695     | 0.00134142 |
| FHDC1         | 0.398532  | 0.495181  | 0.313258    | 0.732521   |
| RPP40         | 10.8815   | 18.1225   | 0.735905    | 0.00882987 |
| SMG9          | 39.2107   | 32.5307   | -0.269444   | 0.521183   |
| INTS2         | 1.80493   | 1.31468   | -0.457232   | 0.222468   |
| TTL11         | 2.49055   | 4.20307   | 0.75498     | 0.0835598  |
| SPOCD1        | 15.0179   | 13.2972   | -0.175555   | 0.790283   |
| MAPRE1        | 28.4786   | 34.9442   | 0.295172    | 0.434948   |
| FBXL6         | 59.9788   | 98.0841   | 0.709566    | 0.00243047 |
| TOMM5         | 117.473   | 241.075   | 1.03715     | 0.00134142 |
| ESAM          | 11.4725   | 6.72539   | -0.770495   | 0.00882987 |
| NDUFB11       | 149.725   | 153.723   | 0.0380109   | 0.983414   |
| GDPD3         | 1.92018   | 1.59078   | -0.271504   | 0.859569   |
| FAM63B        | 0.491483  | 0.141731  | -1.79398    | 0.00134142 |
| GXYLT1        | 1.63611   | 1.52769   | -0.0989242  | 0.944601   |
| MMP25         | 3.1372    | 2.56096   | -0.292791   | 0.691423   |
| SSR1          | 10.7212   | 10.3339   | -0.0530867  | 0.976214   |
| NEK3          | 9.32284   | 5.15336   | -0.855257   | 0.00425224 |
| TADA2A        | 4.10482   | 2.39766   | -0.775689   | 0.0423316  |
| PAPSS2        | 0.166387  | 0.0735878 | -1.177      | 1          |
| UGGT1         | 4.18594   | 3.88165   | -0.108883   | 0.917379   |
| STARD3NL      | 13.0717   | 12.3839   | -0.0779854  | 0.959465   |
| ERLIN2        | 4.87705   | 3.10352   | -0.652103   | 0.0189207  |
| SNORA62       | 6.85255   | 7.59172   | 0.147788    | 0.99351    |
| EFCAB2        | 2.00371   | 1.88053   | -0.0915383  | 0.974044   |
| POMT2         | 3.28605   | 3.72846   | 0.182227    | 0.830028   |
| LSG1          | 8.12442   | 16.4628   | 1.01887     | 0.00134142 |
| EGFL8,PPT2    | 42.9572   | 39.2632   | -0.129722   | 0.950929   |
| SCAMP2        | 44.325    | 35.4134   | -0.323825   | 0.399303   |
| GJC1          | 9.25165   | 5.74943   | -0.686291   | 0.00425224 |

|           |           |           |            |            |
|-----------|-----------|-----------|------------|------------|
| SMNDC1    | 52.172    | 60.1591   | 0.205506   | 0.702128   |
| HNRPDL    | 50.4928   | 60.9994   | 0.272716   | 0.523387   |
| CCDC94    | 22.6886   | 22.8035   | 0.0072881  | 0.997036   |
| PIGQ      | 38.8215   | 28.6661   | -0.437512  | 0.142648   |
| NSUN3     | 1.53973   | 0.879586  | -0.807777  | 0.320081   |
| PSMC1     | 89.3249   | 101.13    | 0.179081   | 0.773687   |
| KLHL2     | 2.86518   | 3.18665   | 0.153412   | 0.882983   |
| HSPA1L    | 0.157105  | 0.157308  | 0.00186793 | 1          |
| AGK       | 12.104    | 10.0681   | -0.265694  | 0.571704   |
| CD274     | 1.18759   | 0.855423  | -0.473324  | 0.339736   |
| GRIPAP1   | 12.5314   | 9.55877   | -0.390653  | 0.24631    |
| ZNF622    | 35.4615   | 30.7373   | -0.206265  | 0.714703   |
| LMBRD2    | 0.359742  | 0.145283  | -1.30809   | 0.0403066  |
| HSD17B4   | 12.9238   | 9.8767    | -0.387931  | 0.23692    |
| GFOD1     | 1.44201   | 1.69578   | 0.233867   | 0.844829   |
| USP6NL    | 3.46492   | 2.53945   | -0.448307  | 0.211132   |
| GSS       | 72.2418   | 53.6797   | -0.428458  | 0.153149   |
| ARHGDI    | 303.115   | 378.233   | 0.31941    | 0.378081   |
| SNRNP40   | 42.2155   | 46.0523   | 0.125503   | 0.890466   |
| PYROXD1   | 3.09976   | 1.39911   | -1.14765   | 0.0562227  |
| SART3     | 12.9166   | 14.5889   | 0.175644   | 0.782228   |
| CDK17     | 12.0073   | 9.17814   | -0.387633  | 0.228416   |
| SMARCA2   | 5.32387   | 3.03431   | -0.811107  | 0.00243047 |
| TRIB1     | 21.3742   | 23.2867   | 0.123639   | 0.898291   |
| MAX       | 41.0909   | 55.7436   | 0.439988   | 0.516201   |
| AVIL      | 0.278439  | 0.164488  | -0.759382  | 1          |
| RUSC2     | 10.9319   | 6.95025   | -0.65341   | 0.0139368  |
| ARIH2     | 19.6024   | 23.5025   | 0.261789   | 0.535493   |
| FAM73A    | 1.17857   | 0.810151  | -0.540769  | 0.170154   |
| CMC1      | 49.7029   | 40.7493   | -0.286555  | 0.536731   |
| TXNL4A    | 82.924    | 107.231   | 0.370858   | 0.249826   |
| ATP5G1    | 194.736   | 224.179   | 0.203126   | 0.714729   |
| USP50     | 0.963543  | 0.660263  | -0.545308  | 0.93549    |
| GNL2      | 32.8173   | 33.4734   | 0.0285549  | 0.988165   |
| ANKRD34A  | 2.13384   | 2.47227   | 0.212384   | 0.83059    |
| KHSRP     | 67.8828   | 68.514    | 0.0133526  | 0.994615   |
| TMEM182   | 0.739198  | 0.438462  | -0.75351   | 0.128341   |
| SPOP      | 14.1413   | 15.1822   | 0.102474   | 0.924847   |
| HDHD2     | 4.46748   | 3.49798   | -0.352937  | 0.456952   |
| CEL       | 0.951856  | 0.91902   | -0.0506475 | 0.98922    |
| BCLAF1    | 10.5232   | 13.326    | 0.340671   | 0.318543   |
| SNAPC5    | 9.14309   | 9.7343    | 0.0903956  | 0.991767   |
| SLC25A25  | 18.2646   | 17.5203   | -0.0600217 | 0.970053   |
| ACTG1P4   | 0.0607881 | 0.0420823 | -0.530575  | 1          |
| ATG9A     | 29.3022   | 23.7425   | -0.303537  | 0.419149   |
| NT5C3     | 17.2912   | 16.05     | -0.107469  | 0.919029   |
| USP37     | 1.38255   | 1.03537   | -0.417184  | 0.287459   |
| TMEM161A  | 56.9841   | 47.32     | -0.268111  | 0.52724    |
| AADAT     | 6.75548   | 7.78134   | 0.20396    | 0.760668   |
| RDH13     | 9.8571    | 18.962    | 0.943875   | 0.00134142 |
| BZW2      | 90.8761   | 97.5389   | 0.102076   | 0.927082   |
| DDAH1     | 21.8806   | 18.607    | -0.233807  | 0.612062   |
| MGST1     | 160.243   | 167.372   | 0.0627986  | 0.967901   |
| FOXRED1   | 28.9619   | 20.6786   | -0.486022  | 0.101849   |
| EBP       | 82.2125   | 104.14    | 0.341099   | 0.317439   |
| SPRYD7    | 6.50785   | 5.57066   | -0.224332  | 0.697569   |
| GKAP1     | 2.92224   | 1.81271   | -0.688928  | 0.0897447  |
| MRPS18A   | 75.6569   | 64.1082   | -0.238963  | 0.609543   |
| C17orf104 | 0.0930521 | 0.125597  | 0.432689   | 1          |
| FABP6     | 14.1042   | 8.10319   | -0.799563  | 0.0349222  |
| USB1      | 33.5201   | 51.7085   | 0.625377   | 0.0120701  |
| RSF1      | 2.42647   | 1.48327   | -0.710076  | 0.0235476  |
| MROH6     | 4.8739    | 8.39077   | 0.783726   | 0.0101293  |
| RGP1      | 1.69149   | 1.32826   | -0.348761  | 0.777414   |
| FAM107B   | 8.84887   | 6.44888   | -0.456445  | 0.144914   |
| PAICS     | 108.536   | 96.3438   | -0.171916  | 0.798756   |
| GHITM     | 93.7395   | 82.6259   | -0.182063  | 0.778392   |
| LEMD2     | 32.731    | 22.1909   | -0.560689  | 0.0326415  |
| GMPPA     | 34.1378   | 31.9178   | -0.0970051 | 0.93549    |
| DNAJA3    | 41.0463   | 42.6955   | 0.0568344  | 0.972176   |
| VASP      | 69.5725   | 77.353    | 0.152939   | 0.830101   |
| KIN       | 2.07787   | 2.29915   | 0.145996   | 0.885618   |
| METTL17   | 44.6628   | 42.0785   | -0.0859924 | 0.943335   |
| SLC38A7   | 2.41589   | 2.68256   | 0.151057   | 0.918342   |
| FLVCR1    | 3.2701    | 5.54252   | 0.761209   | 0.00134142 |
| FRG1      | 35.7643   | 26.5304   | -0.430875  | 0.172302   |
| R3HCC1L   | 7.60823   | 7.40809   | -0.0384595 | 0.987423   |
| TMA16     | 12.3795   | 12.1704   | -0.024569  | 0.991459   |
| MAP3K15   | 0.806913  | 0.920068  | 0.189326   | 0.987423   |

|                       |           |           |            |            |
|-----------------------|-----------|-----------|------------|------------|
| PIP4K2A               | 8.50131   | 11.8836   | 0.483213   | 0.0924793  |
| ARID3C                | 0.20576   | 0.0901407 | -1.19072   | 1          |
| CTSC                  | 53.0413   | 60.0187   | 0.178296   | 0.830101   |
| HSPA13                | 8.0294    | 3.997     | -1.00638   | 0.00134142 |
| LOC100130705          | 1.09714   | 1.97683   | 0.849442   | 0.0390303  |
| UFL1                  | 4.58243   | 2.76474   | -0.728973  | 0.0114515  |
| MICAL2                | 4.77343   | 3.7944    | -0.331155  | 0.464668   |
| EMC8                  | 32.4678   | 50.2991   | 0.63152    | 0.0114515  |
| PDCD11                | 11.0469   | 16.7788   | 0.602998   | 0.0205623  |
| PXK                   | 2.19172   | 1.5854    | -0.467214  | 0.400128   |
| MCM4                  | 44.1831   | 52.9836   | 0.262051   | 0.549171   |
| DMBT1                 | 0.0516524 | 0.011992  | -2.10677   | 1          |
| ZNF280C               | 1.8723    | 1.15604   | -0.695616  | 0.0459324  |
| PPP2R2D               | 14.7928   | 18.9734   | 0.359081   | 0.316696   |
| STIP1                 | 156.491   | 292.948   | 0.904565   | 0.00134142 |
| NDUFB8                | 288.071   | 283.265   | -0.0242705 | 0.990857   |
| NFE2L3                | 3.86941   | 6.05136   | 0.645146   | 0.0292254  |
| RAB8A                 | 32.294    | 44.9135   | 0.475882   | 0.0835598  |
| POR                   | 49.5834   | 65.1454   | 0.393806   | 0.315584   |
| HNRNPU                | 50.1405   | 69.0425   | 0.461509   | 0.126783   |
| PIAL4G                | 0.0617088 | 0.261983  | 2.08593    | 1          |
| E2F8                  | 1.43532   | 1.96204   | 0.450987   | 0.32997    |
| ZKSCAN1               | 2.20528   | 1.25273   | -0.815883  | 0.0101293  |
| SLC52A2               | 128.461   | 242.743   | 0.918106   | 0.00134142 |
| LEMD1                 | 0.0734059 | 0.021358  | -1.78112   | 1          |
| PSMD11                | 29.7005   | 40.9854   | 0.464622   | 0.0925999  |
| SLC24A6               | 12.7033   | 12.843    | 0.0157837  | 0.99451    |
| OGDH                  | 7.93414   | 9.04129   | 0.188453   | 0.767427   |
| SEC24B-AS1            | 0.526014  | 0.488341  | -0.107214  | 0.980177   |
| ATP6V0C               | 292.998   | 373.835   | 0.351509   | 0.290771   |
| TMEM158               | 33.4412   | 42.7283   | 0.353566   | 0.348909   |
| SCARNA12              | 11.1904   | 10.8837   | -0.0400798 | 0.997323   |
| SUMF1                 | 9.56074   | 6.24787   | -0.613757  | 0.0485415  |
| HIST1H2AH             | 1.73423   | 1.82689   | 0.0750933  | 0.989514   |
| EXOC6                 | 3.42799   | 3.02658   | -0.179675  | 0.825012   |
| DCAF13                | 53.525    | 78.7142   | 0.55641    | 0.105593   |
| POLR3H                | 23.6299   | 42.2821   | 0.839436   | 0.00509212 |
| ATPAF1                | 27.8844   | 19.2449   | -0.53498   | 0.0626518  |
| DPP3                  | 18.2674   | 18.8628   | 0.0462795  | 0.979701   |
| RBM45                 | 5.62493   | 7.60483   | 0.435079   | 0.266094   |
| ATP1B1                | 9.83136   | 6.17428   | -0.67112   | 0.101591   |
| SLC12A8               | 4.95704   | 5.13776   | 0.0516587  | 0.979701   |
| KRT80                 | 1.11447   | 0.668256  | -0.737883  | 0.12752    |
| RASGRP1               | 0.715601  | 0.475678  | -0.589169  | 0.245133   |
| CCDC43                | 8.83473   | 9.40236   | 0.0898361  | 0.950684   |
| TMEM70                | 33.7542   | 53.4994   | 0.664457   | 0.00425224 |
| IKBKE                 | 2.95323   | 2.13065   | -0.470998  | 0.290328   |
| PRPH                  | 0.0996058 | 0.059676  | -0.739078  | 1          |
| ANKRD13B              | 10.1345   | 19.8805   | 0.972074   | 0.00134142 |
| DDX5                  | 77.7819   | 81.5334   | 0.0679555  | 0.962618   |
| MGAT1                 | 36.755    | 62.86     | 0.774204   | 0.00134142 |
| EXO5                  | 4.4755    | 5.26263   | 0.233735   | 0.731968   |
| WDR18                 | 88.7904   | 97.4622   | 0.134438   | 0.873144   |
| PSMA7                 | 320.989   | 423.682   | 0.400456   | 0.203111   |
| TPD52L2               | 107.264   | 108.15    | 0.0118719  | 0.995528   |
| TRIP4                 | 6.33808   | 6.52704   | 0.0423825  | 0.985283   |
| COX8A                 | 1087.33   | 1137.46   | 0.0650181  | 0.966946   |
| SYVN1                 | 19.2969   | 18.8938   | -0.0304572 | 0.99714    |
| AARSD1,PTGES3L,PTGES: | 35.204    | 33.943    | -0.0526239 | 0.977332   |
| PSMD2                 | 339.676   | 301.707   | -0.171009  | 0.816045   |
| BRD2                  | 40.5688   | 40.694    | 0.0044421  | 0.997342   |
| FAF2                  | 12.2381   | 10.1843   | -0.265041  | 0.534834   |
| GBP1                  | 0.0421822 | 0.0548263 | 0.378234   | 1          |
| CENPH                 | 27.6755   | 15.3857   | -0.847018  | 0.00134142 |
| SLC26A3               | 0.0138214 | 0         | #NAME?     | 1          |
| ACADM                 | 11.3721   | 9.31715   | -0.287533  | 0.511488   |
| PDIA5                 | 9.07607   | 9.23537   | 0.0251019  | 0.991767   |
| FGFRL1                | 14.9616   | 14.65     | -0.0303625 | 0.987858   |
| SLC12A6               | 1.26102   | 0.883843  | -0.512725  | 0.83059    |
| DEGS1                 | 27.5142   | 50.6993   | 0.881789   | 0.00134142 |
| ECHDC1                | 22.4191   | 27.5344   | 0.296508   | 0.44532    |
| INIP                  | 6.3432    | 5.04298   | -0.330934  | 0.5209     |
| STT3A                 | 42.8682   | 40.5345   | -0.0807567 | 0.950929   |
| DNAJC24               | 3.34189   | 3.5465    | 0.0857324  | 0.96275    |
| DROSHA                | 4.26477   | 4.20381   | -0.0207704 | 0.993108   |
| AIMP2                 | 13.1214   | 14.8314   | 0.176736   | 0.976618   |
| CACYBP                | 51.9436   | 92.174    | 0.827413   | 0.00134142 |
| MGC72080              | 16.0034   | 13.7854   | -0.215236  | 0.820463   |
| ACTR1A                | 37.7987   | 57.3209   | 0.600724   | 0.0178668  |

|              |           |           |             |            |
|--------------|-----------|-----------|-------------|------------|
| MTRF1L       | 8.77016   | 10.6561   | 0.280997    | 0.500126   |
| STXBP5       | 0.585067  | 0.631976  | 0.111267    | 0.947761   |
| KPNA2        | 99.7536   | 171.497   | 0.781746    | 0.00337323 |
| PSMC3IP      | 25.1258   | 31.5363   | 0.327845    | 0.706446   |
| PDCL3        | 19.3222   | 31.5711   | 0.708348    | 0.00593755 |
| TSPAN12      | 1.58837   | 2.13208   | 0.424709    | 0.39951    |
| C14orf80     | 19.137    | 20.4659   | 0.096861    | 0.948088   |
| SEPHS2       | 61.5633   | 66.7484   | 0.116664    | 0.907689   |
| PACRGL       | 2.90789   | 3.46538   | 0.25304     | 0.749558   |
| TRMT10B      | 3.13874   | 1.94017   | -0.694004   | 0.0655915  |
| ZNF714       | 0.567578  | 0.420097  | -0.434096   | 0.394553   |
| BCL2         | 2.26344   | 1.22941   | -0.880546   | 0.350008   |
| POLD1        | 34.2182   | 36.2984   | 0.0851419   | 0.947008   |
| LSM3         | 122.402   | 140.616   | 0.200136    | 0.717812   |
| CMTM8        | 17.5175   | 14.1114   | -0.311936   | 0.541522   |
| COQ3         | 12.6037   | 8.58592   | -0.553801   | 0.0897447  |
| GMFB         | 7.84139   | 9.11264   | 0.216759    | 0.680624   |
| EDEM3        | 0.946234  | 1.01475   | 0.100859    | 0.952216   |
| RTKN         | 22.3596   | 34.6803   | 0.633221    | 0.0126858  |
| SNX4         | 5.62963   | 5.96957   | 0.0845866   | 0.95534    |
| SURF2        | 83.4814   | 88.7417   | 0.0881573   | 0.947008   |
| TAF15        | 75.7552   | 73.4839   | -0.0439155  | 0.979701   |
| ATG3         | 37.3737   | 29.4394   | -0.344274   | 0.326714   |
| TM9SF2       | 17.5022   | 17.9534   | 0.0367159   | 0.98468    |
| MED17        | 9.73228   | 10.9878   | 0.175059    | 0.794296   |
| CTTNBP2      | 0.710285  | 0.534844  | -0.409279   | 0.500802   |
| HM13         | 138.621   | 159.776   | 0.204913    | 0.713826   |
| LOC440356    | 0.250958  | 0.0931755 | -1.42942    | 1          |
| PPIL1        | 26.3285   | 38.5687   | 0.550808    | 0.036221   |
| GLB1L2       | 18.335    | 26.0108   | 0.504506    | 0.0658487  |
| SGTA         | 81.3184   | 130.672   | 0.6843      | 0.00593755 |
| ECE1         | 16.0117   | 15.8864   | -0.0113338  | 0.995957   |
| MSANTD1      | 0.157517  | 0.186844  | 0.246324    | 1          |
| MAN1A2       | 0.9367    | 1.01015   | 0.108916    | 0.950929   |
| SACM1L       | 5.6508    | 6.8121    | 0.269646    | 0.563736   |
| MED8         | 23.5177   | 22.8647   | -0.0406261  | 0.982907   |
| GBP3         | 1.94498   | 2.18803   | 0.169882    | 0.873144   |
| TIMM10       | 67.9197   | 113.948   | 0.746472    | 0.00509212 |
| RAE1         | 32.6078   | 37.5238   | 0.202588    | 0.866932   |
| TRAPPC4      | 59.2522   | 77.9316   | 0.395339    | 0.200886   |
| JPH1         | 3.27417   | 4.51312   | 0.462994    | 0.182316   |
| MSH2         | 8.60929   | 7.96698   | -0.111862   | 0.91547    |
| TLN2         | 1.20196   | 0.978281  | -0.297065   | 0.576223   |
| LOC728752    | 1.38438   | 1.10656   | -0.323156   | 0.815706   |
| PEX14        | 26.17     | 23.7906   | -0.137519   | 0.879372   |
| RABGEF1      | 5.1767    | 4.50498   | -0.200511   | 0.870466   |
| KIF21A       | 0.893296  | 0.742774  | -0.266215   | 0.713567   |
| C4orf32      | 4.93836   | 5.08605   | 0.042512    | 0.98439    |
| MCM5         | 43.0135   | 42.783    | -0.00775013 | 0.997036   |
| ERCC1        | 255.551   | 196.006   | -0.382712   | 0.305504   |
| KPNB1        | 43.1601   | 45.5249   | 0.0769575   | 0.95534    |
| IL6R         | 2.33396   | 2.97669   | 0.350929    | 0.457353   |
| ZNF704       | 0.334013  | 0.203518  | -0.714745   | 1          |
| HELLS        | 4.31947   | 5.84457   | 0.436245    | 0.205908   |
| NDUFA9       | 62.0209   | 60.0071   | -0.0476206  | 0.978981   |
| AP4E1        | 1.44826   | 1.45975   | 0.0114048   | 0.996079   |
| KIAA1467     | 1.94104   | 1.56724   | -0.308606   | 0.590127   |
| DAXX         | 37.8462   | 50.584    | 0.41853     | 0.155313   |
| PRPS1        | 28.5374   | 42.1389   | 0.562297    | 0.0270114  |
| KLF10        | 13.551    | 12.1553   | -0.156816   | 0.835511   |
| SLC39A5      | 0.0452385 | 0.0276211 | -0.711781   | 1          |
| TTC5         | 10.6994   | 9.92199   | -0.108832   | 0.931471   |
| LOC100507424 | 0.716015  | 0.705389  | -0.0215715  | 0.998514   |
| HSD17B12     | 31.9438   | 21.9035   | -0.544371   | 0.0423316  |
| MASTL        | 7.02122   | 5.14364   | -0.448933   | 0.177737   |
| ACD          | 46.4769   | 49.9047   | 0.102662    | 0.925129   |
| SCAF4        | 10.1674   | 10.2291   | 0.00872344  | 0.997036   |
| DIAPH1       | 13.2392   | 18.4938   | 0.48227     | 0.0862993  |
| POLR2F       | 39.2703   | 66.5161   | 0.760262    | 0.00134142 |
| TOR1AIP1     | 16.8471   | 13.9248   | -0.274841   | 0.501695   |
| ETFDH        | 3.5585    | 3.18847   | -0.158401   | 0.887208   |
| DHCR7        | 45.474    | 88.6856   | 0.963658    | 0.00134142 |
| AP1B1        | 27.5678   | 29.7005   | 0.107501    | 0.917379   |
| ARID3B       | 4.31232   | 3.08038   | -0.485355   | 0.181132   |
| GRIN2D       | 22.7084   | 20.5308   | -0.145439   | 0.857265   |
| GCA          | 2.96112   | 1.42135   | -1.05888    | 0.00134142 |
| PHB          | 187.968   | 264.218   | 0.491246    | 0.0844105  |
| TIMELESS     | 7.43261   | 5.87826   | -0.338478   | 0.358376   |
| METTL3       | 14.1584   | 25.2304   | 0.833503    | 0.0675751  |

|              |            |           |             |            |
|--------------|------------|-----------|-------------|------------|
| HRSP12       | 54.1751    | 44.5435   | -0.282415   | 0.480501   |
| DGKZ         | 28.5556    | 42.1907   | 0.563151    | 0.0349222  |
| SLC4A2       | 73.8677    | 118.549   | 0.682465    | 0.00818401 |
| AMOTL2       | 23.2014    | 7.01096   | -1.72653    | 0.00134142 |
| ITPK1-AS1    | 0.0163013  | 0.0281038 | 0.785776    | 1          |
| LMNB1        | 12.4291    | 22.1783   | 0.835435    | 0.00134142 |
| DNAJA1       | 97.6915    | 274.939   | 1.49281     | 0.00134142 |
| ALG1         | 5.85237    | 7.5659    | 0.37049     | 0.615252   |
| TNFRSF12A    | 632.263    | 449.064   | -0.493605   | 0.0775297  |
| CCND3        | 36.1674    | 70.7021   | 0.967063    | 0.00134142 |
| DHODH        | 7.70284    | 7.39444   | -0.0589497  | 0.977103   |
| SECTM1       | 7.32098    | 11.099    | 0.600327    | 0.0713011  |
| STAG3        | 0.216677   | 0.272609  | 0.331288    | 1          |
| TSFM         | 27.3116    | 31.6298   | 0.21177     | 0.685156   |
| CLUH         | 35.31      | 66.3526   | 0.910076    | 0.00134142 |
| TDG          | 4.4222     | 4.64369   | 0.0705095   | 0.966946   |
| NAA15        | 8.31377    | 14.7524   | 0.827379    | 0.0314167  |
| CMTM7        | 91.2091    | 112.477   | 0.302382    | 0.425831   |
| PDCL         | 4.92371    | 4.73567   | -0.0561753  | 0.977332   |
| NSF          | 6.73274    | 7.96732   | 0.242901    | 0.611615   |
| TMEM178B     | 0.00363061 | 0         | #NAME?      | 1          |
| SNRPG        | 305.273    | 381.773   | 0.322614    | 0.381083   |
| ZNF568       | 0.0730487  | 0.0143996 | -2.34283    | 1          |
| EPS8L1       | 9.42507    | 9.12854   | -0.0461191  | 0.984772   |
| PGAM5        | 48.3262    | 95.2723   | 0.979251    | 0.00134142 |
| VRK1         | 14.2206    | 16.7905   | 0.239661    | 0.6442     |
| PCDHB13      | 2.19447    | 1.46041   | -0.587506   | 0.161633   |
| EPHB2        | 9.27417    | 9.21804   | -0.00875789 | 0.997036   |
| EXOSC9       | 20.5505    | 21.6288   | 0.0737779   | 0.979733   |
| ARMC5        | 7.73419    | 10.6377   | 0.459862    | 0.19939    |
| ICAM2        | 9.57064    | 8.04515   | -0.250497   | 0.753531   |
| TRIM25       | 22.2345    | 11.1584   | -0.994662   | 0.00134142 |
| GATAD2A      | 19.5257    | 27.326    | 0.484898    | 0.0917667  |
| NAGPA        | 10.0295    | 15.6322   | 0.640273    | 0.030165   |
| EFR3B        | 0.193518   | 0.165246  | -0.227856   | 1          |
| ZNF815P      | 0.75483    | 0.662978  | -0.187191   | 0.917687   |
| TRIP13       | 9.05146    | 13.5805   | 0.585313    | 0.0357572  |
| GALNT1       | 5.6261     | 7.16776   | 0.349387    | 0.340882   |
| PGM2         | 9.06002    | 8.13352   | -0.155635   | 0.842998   |
| LIAS         | 9.02153    | 5.42755   | -0.73307    | 0.0132924  |
| TYW1         | 4.54926    | 5.18404   | 0.188446    | 0.797849   |
| SCAND3       | 0.556879   | 0.460101  | -0.275412   | 0.779421   |
| PHLPP1       | 3.30076    | 2.19196   | -0.590577   | 0.0601893  |
| TM4SF1       | 68.3046    | 97.0376   | 0.506561    | 0.0775297  |
| FBXL14       | 2.17771    | 2.16254   | -0.0100886  | 0.997036   |
| ZBTB37       | 0.208907   | 0.107817  | -0.954278   | 1          |
| ARID3A       | 5.89737    | 2.92806   | -1.01012    | 0.00134142 |
| EOGT         | 4.9165     | 4.51912   | -0.121587   | 0.908769   |
| CLEC16A      | 2.73083    | 3.77044   | 0.465393    | 0.161828   |
| DHX9         | 32.539     | 48.8621   | 0.586548    | 0.0297125  |
| IFFO1        | 0.0775197  | 0.139863  | 0.851381    | 1          |
| PCMT1        | 64.4018    | 62.8104   | -0.0360959  | 0.986175   |
| SUPT16H      | 29.9096    | 28.4      | -0.0747189  | 0.956807   |
| DUS2L        | 12.6954    | 13.8267   | 0.123158    | 0.95631    |
| PNPT1        | 9.28868    | 13.1579   | 0.50238     | 0.0658487  |
| FOXRED2      | 11.1579    | 8.39577   | -0.410328   | 0.194686   |
| UQCC         | 21.1401    | 21.6595   | 0.0350181   | 0.986529   |
| PIGO         | 11.783     | 7.58301   | -0.635861   | 0.0270114  |
| TAF6L        | 12.6193    | 13.0822   | 0.0519745   | 0.979701   |
| AMDHD2       | 25.81      | 14.6376   | -0.818255   | 0.162979   |
| LOC100132781 | 0.0227973  | 0.0271098 | 0.249953    | 1          |
| NFYC         | 19.8001    | 16.0193   | -0.305698   | 0.480683   |
| FAM91A1      | 11.6908    | 12.4369   | 0.0892522   | 0.942827   |
| PSMA4        | 117.269    | 146.018   | 0.316327    | 0.400128   |
| LOC400684    | 1.69054    | 0.784314  | -1.10798    | 0.159615   |
| GGH          | 56.2054    | 54.1335   | -0.0541861  | 0.974044   |
| LDLR         | 16.5764    | 23.6539   | 0.512945    | 0.061906   |
| KCTD3        | 5.36659    | 6.51892   | 0.280626    | 0.545588   |
| CCDC28A      | 20.909     | 7.65552   | -1.44955    | 0.00134142 |
| PHF12        | 4.5677     | 5.60607   | 0.295521    | 0.531475   |
| GPATCH3      | 9.68711    | 10.7816   | 0.154427    | 0.867828   |
| PPAPDC1B     | 38.4006    | 32.2747   | -0.250724   | 0.721145   |
| DAZAP1       | 118.935    | 101.983   | -0.221837   | 0.664776   |
| SNRNP70      | 140.609    | 219.553   | 0.642881    | 0.0145499  |
| CD101        | 0.46842    | 0.569986  | 0.283124    | 0.803587   |
| REXO2        | 91.9963    | 87.5827   | -0.0709302  | 0.958814   |
| DCLRE1A      | 3.01823    | 2.08466   | -0.533891   | 0.114012   |
| C19orf81     | 1.71349    | 1.25952   | -0.444066   | 0.799188   |
| MAT2B        | 22.8889    | 19.2376   | -0.250724   | 0.585568   |



|               |           |           |             |            |
|---------------|-----------|-----------|-------------|------------|
| RHEBL1        | 12.5277   | 18.1903   | 0.538048    | 0.105061   |
| ERP29         | 120.724   | 90.9027   | -0.409323   | 0.173163   |
| PTGES2        | 187.397   | 245.528   | 0.389789    | 0.242372   |
| C11orf30      | 0.834705  | 0.837007  | 0.00397332  | 0.998514   |
| NABP2         | 61.4849   | 49.6962   | -0.307097   | 0.416586   |
| TBCCD1        | 1.91902   | 3.03027   | 0.659074    | 0.0739785  |
| ARG2          | 25.1574   | 17.7706   | -0.501487   | 0.498538   |
| HCG4B         | 0.179569  | 0.173845  | -0.0467379  | 1          |
| PDIA3P        | 1.54889   | 1.32105   | -0.229553   | 0.845182   |
| IER5          | 28.2438   | 23.9192   | -0.239768   | 0.648914   |
| ATE1          | 1.44186   | 1.22282   | -0.237725   | 0.832174   |
| RPIA          | 21.159    | 38.2175   | 0.852964    | 0.00134142 |
| CCDC157       | 0.566576  | 0.584193  | 0.0441752   | 0.995589   |
| YIF1B         | 26.2171   | 18.5902   | -0.495961   | 0.536279   |
| RYR2          | 0.207295  | 0.111077  | -0.900134   | 1          |
| C14orf23      | 0.0160391 | 0.0132071 | -0.280273   | 1          |
| RAB35         | 24.7322   | 37.5848   | 0.60376     | 0.0167292  |
| IGSF3         | 1.83987   | 1.79604   | -0.0347814  | 0.988104   |
| UBE2N         | 43.273    | 67.1469   | 0.633852    | 0.0132924  |
| MPC1          | 22.206    | 26.0079   | 0.228       | 0.713671   |
| FGF11         | 1.88277   | 1.96036   | 0.0582617   | 0.982348   |
| PIGU          | 20.7715   | 17.5447   | -0.243567   | 0.631812   |
| PSMC3         | 88.0206   | 112.544   | 0.354578    | 0.290705   |
| PIM3          | 52.1248   | 50.2765   | -0.0520867  | 0.976756   |
| HIST1H4B      | 1.16388   | 1.02058   | -0.189553   | 0.977103   |
| ABRACL        | 109.688   | 104.063   | -0.0759469  | 0.956382   |
| HIATL1        | 20.8947   | 23.2553   | 0.154423    | 0.829054   |
| UST           | 3.06059   | 2.55732   | -0.259173   | 0.657573   |
| SLC25A13      | 6.29291   | 8.56269   | 0.444336    | 0.170338   |
| ROBO3         | 3.47995   | 1.03613   | -1.74786    | 0.00134142 |
| LOC440288     | 2.92132   | 1.40441   | -1.05666    | 0.0261279  |
| LEPREL4       | 25.3347   | 31.2114   | 0.300957    | 0.44885    |
| DRAM1         | 7.50941   | 6.35247   | -0.241383   | 0.653383   |
| TMEM120B      | 7.28847   | 11.4872   | 0.656335    | 0.406031   |
| LOC100009676  | 2.53969   | 2.382     | -0.0924802  | 0.980556   |
| IDI1          | 20.7516   | 30.5436   | 0.557648    | 0.0897447  |
| OCIAD1        | 45.8849   | 25.5719   | -0.843462   | 0.00134142 |
| PIGN          | 3.60529   | 2.10442   | -0.776692   | 0.009453   |
| UBE2T         | 54.5569   | 63.5332   | 0.219749    | 0.664149   |
| TRIM14        | 13.0421   | 17.7377   | 0.443643    | 0.620336   |
| SPCS2         | 32.6339   | 34.6368   | 0.0859363   | 0.945946   |
| RASGRP3       | 0.0568001 | 0.0287434 | -0.982664   | 1          |
| SLX1B,SULT1A4 | 0.669698  | 0.461678  | -0.536624   | 0.776313   |
| EIF2S2        | 101.428   | 84.3069   | -0.266726   | 0.558145   |
| LOC100335030  | 0.324237  | 0.288524  | -0.168354   | 1          |
| MFSD11        | 4.13033   | 4.06187   | -0.0241111  | 0.99714    |
| MB21D2        | 2.01253   | 1.95828   | -0.0394264  | 0.987693   |
| PIK3CA        | 1.30322   | 0.995654  | -0.388365   | 0.482736   |
| GPRASP1       | 0.0788478 | 0.0556521 | -0.502636   | 1          |
| APOE          | 0.886652  | 1.36003   | 0.617199    | 0.619929   |
| PLAU          | 36.7845   | 41.0368   | 0.15782     | 0.823658   |
| TRIM44        | 5.78044   | 5.78579   | 0.00133574  | 0.99926    |
| LYSMD2        | 11.3162   | 18.6822   | 0.723271    | 0.00672555 |
| WVOX          | 6.77174   | 6.14567   | -0.139956   | 0.960071   |
| PLRG1         | 14.3139   | 10.4197   | -0.458101   | 0.11492    |
| SUPT20H       | 11.9972   | 8.98155   | -0.417667   | 0.612792   |
| FAM32A        | 51.7933   | 60.9085   | 0.233878    | 0.624874   |
| VIMP          | 49.6383   | 56.4046   | 0.184359    | 0.754842   |
| PHTF2         | 3.13722   | 2.89373   | -0.116557   | 0.926446   |
| SUGT1         | 32.5708   | 32.5378   | -0.00146328 | 0.998921   |
| C19orf44      | 2.03669   | 2.72331   | 0.419137    | 0.887791   |
| EXOC6B        | 0.41031   | 0.409365  | -0.00332644 | 0.998951   |
| AHSA1         | 172.196   | 307.871   | 0.838277    | 0.00134142 |
| GLTPD2        | 0.23519   | 0.547901  | 1.22009     | 0.582397   |
| TMEM185B      | 13.3874   | 16.6732   | 0.31666     | 0.370833   |
| HARS          | 46.6396   | 63.763    | 0.451164    | 0.187625   |
| ACSF3         | 5.63563   | 4.89436   | -0.203456   | 0.797744   |
| EFCAB6        | 0.0229909 | 0.0112649 | -1.02923    | 1          |
| ANK2          | 0.427895  | 0.131593  | -1.70117    | 0.00134142 |
| EPT1          | 3.83183   | 5.60371   | 0.54835     | 0.0322484  |
| RAMP1         | 52.84     | 52.2831   | -0.0152858  | 0.994615   |
| MINPP1        | 8.04793   | 8.96719   | 0.156039    | 0.863051   |
| TMEM253       | 0.347845  | 0.322061  | -0.111112   | 0.995221   |
| SEC23A        | 4.48272   | 3.52716   | -0.345866   | 0.393496   |
| MTDH          | 32.1734   | 36.8492   | 0.195761    | 0.738724   |
| CATSPER3      | 0.698418  | 0.60068   | -0.217493   | 0.930157   |
| CNOT10        | 14.9092   | 11.1914   | -0.413801   | 0.181833   |
| H2AFX         | 237.593   | 531.586   | 1.16181     | 0.00134142 |
| SHFM1         | 488.094   | 542.667   | 0.152906    | 0.841583   |

|          |           |           |            |            |
|----------|-----------|-----------|------------|------------|
| CDKN2A   | 2.25108   | 1.91831   | -0.230778  | 0.89937    |
| EGFL7    | 226.399   | 197.2     | -0.199206  | 0.721071   |
| DUXA     | 0.0108777 | 0.019052  | 0.808571   | 1          |
| SLC35F2  | 25.2388   | 29.28     | 0.214272   | 0.674962   |
| LETM1    | 17.5578   | 32.0533   | 0.868359   | 0.00134142 |
| ANKRD11  | 15.1815   | 17.1659   | 0.177232   | 0.880739   |
| DNAJB11  | 28.8122   | 48.0722   | 0.738521   | 0.00243047 |
| ZNF70    | 0.68504   | 0.697754  | 0.0265303  | 0.99351    |
| PFN1     | 1520.85   | 1804.4    | 0.246636   | 0.633206   |
| KLRAP1   | 0.207447  | 0.189651  | -0.12939   | 1          |
| ACRV1    | 0.130078  | 0.173743  | 0.417575   | 1          |
| RNF13    | 6.90458   | 4.02874   | -0.777225  | 0.00882987 |
| LIN52    | 1.17967   | 1.31552   | 0.157244   | 0.935939   |
| ATAD3B   | 42.6434   | 119.56    | 1.48735    | 0.00134142 |
| AGPAT5   | 10.6823   | 11.9213   | 0.158312   | 0.819681   |
| GPR3     | 7.31619   | 11.1864   | 0.612586   | 0.0515434  |
| TNFSF9   | 23.3227   | 22.1289   | -0.0758016 | 0.96128    |
| PSMB1    | 263.099   | 257.741   | -0.0296885 | 0.987693   |
| LPIN1    | 9.11747   | 7.45      | -0.291393  | 0.475774   |
| USMG5    | 421.856   | 496.362   | 0.234645   | 0.683364   |
| BTN2A1   | 6.24103   | 6.16128   | -0.0185543 | 0.99351    |
| SPINT1   | 61.6965   | 63.321    | 0.0374957  | 0.984917   |
| CD81     | 385.877   | 443.466   | 0.200683   | 0.721145   |
| STPG1    | 5.99875   | 2.38718   | -1.32935   | 0.00134142 |
| CPT1A    | 10.3234   | 8.00456   | -0.36702   | 0.275535   |
| KREMEN2  | 22.5171   | 36.3321   | 0.690223   | 0.0162707  |
| GALNT18  | 39.194    | 27.7804   | -0.496566  | 0.0761023  |
| PDCD5    | 200.834   | 267.91    | 0.415745   | 0.173927   |
| GLB1L    | 0.68173   | 0.395939  | -0.783921  | 0.204595   |
| CENPQ    | 6.39142   | 4.38591   | -0.543261  | 0.114315   |
| NDUFA12  | 117.821   | 119.2     | 0.0167889  | 0.99351    |
| PRMT1    | 333.361   | 493.663   | 0.566442   | 0.0318033  |
| ORC3     | 10.1913   | 5.56808   | -0.872085  | 0.00134142 |
| RBM15    | 5.57749   | 4.78821   | -0.22013   | 0.742477   |
| QSOX1    | 60.3524   | 57.4507   | -0.0710868 | 0.965148   |
| HMGN5    | 2.83298   | 2.3209    | -0.287639  | 0.917325   |
| CCNE2    | 3.94848   | 5.80781   | 0.556699   | 0.649424   |
| PDHA1    | 33.838    | 31.5847   | -0.0994181 | 0.930157   |
| MEGF9    | 1.34226   | 1.14496   | -0.229364  | 0.755776   |
| SRP54    | 11.1455   | 10.5406   | -0.0805    | 0.95534    |
| OVOL1    | 0.0269313 | 0.0041549 | -2.6964    | 1          |
| NARS     | 47.2087   | 38.9161   | -0.278684  | 0.509535   |
| LEO1     | 8.42366   | 10.0172   | 0.249953   | 0.630542   |
| SAT1     | 123.71    | 94.1666   | -0.393679  | 0.211132   |
| LAMP1    | 80.7017   | 94.2715   | 0.224223   | 0.658361   |
| MIS12    | 11.6053   | 9.25533   | -0.32643   | 0.415077   |
| TUBE1    | 8.88099   | 3.66379   | -1.27738   | 0.00134142 |
| EFCAB11  | 12.5189   | 7.3177    | -0.774649  | 0.036526   |
| CEP112   | 1.71361   | 0.61973   | -1.46733   | 0.00134142 |
| MDFI     | 33.7695   | 44.5891   | 0.400971   | 0.21876    |
| EIF3A    | 29.6052   | 38.1317   | 0.365137   | 0.260275   |
| PRKCQ    | 1.62483   | 1.13325   | -0.519824  | 0.258219   |
| MSTN     | 0.0119901 | 0         | #NAME?     | 1          |
| BMPR1A   | 3.38057   | 2.9693    | -0.187142  | 0.826046   |
| TOP1     | 22.3818   | 24.9354   | 0.155872   | 0.830321   |
| CELSR1   | 0.0589364 | 0.103485  | 0.812191   | 1          |
| PIGF     | 24.0332   | 17.9361   | -0.422166  | 0.72508    |
| NLRP11   | 0.363308  | 0.252798  | -0.523206  | 0.52606    |
| DANCR    | 120.69    | 163.471   | 0.437721   | 0.130354   |
| CD276    | 29.7371   | 33.2219   | 0.159872   | 0.819258   |
| C21orf59 | 43.0251   | 49.3743   | 0.198581   | 0.724741   |
| ARV1     | 7.93759   | 7.28988   | -0.122805  | 0.923433   |
| MAGI1    | 0.934209  | 0.293419  | -1.67078   | 0.00134142 |
| HSP90B2P | 0.0363999 | 0.02791   | -0.383155  | 1          |
| HSPD1    | 461.827   | 524.844   | 0.184535   | 0.850795   |
| PSME3    | 36.995    | 66.3432   | 0.842618   | 0.00134142 |
| CLN3     | 30.7518   | 33.9834   | 0.144159   | 0.862722   |
| XXYLT1   | 3.41687   | 6.53675   | 0.935896   | 0.00134142 |
| SNRNP25  | 33.1156   | 66.3052   | 1.00161    | 0.00134142 |
| USP14    | 13.0562   | 16.1672   | 0.308335   | 0.397773   |
| ZNRF2    | 1.47129   | 1.00274   | -0.553141  | 0.284624   |
| ORC5     | 22.429    | 23.3531   | 0.058249   | 0.968521   |
| PHF14    | 4.35159   | 4.94933   | 0.18569    | 0.813829   |
| PSPH     | 17.6017   | 7.20253   | -1.28914   | 0.00134142 |
| AKT1S1   | 57.951    | 64.453    | 0.153415   | 0.833863   |
| SFT2D1   | 124.024   | 110.024   | -0.172798  | 0.790283   |
| TBK1     | 7.53698   | 6.83933   | -0.140131  | 0.870541   |
| TEFM     | 9.7295    | 10.7705   | 0.146644   | 0.885624   |
| DRG2     | 29.4564   | 29.6672   | 0.0102843  | 0.996453   |

|                     |           |           |            |            |
|---------------------|-----------|-----------|------------|------------|
| PNP                 | 81.232    | 140.663   | 0.792122   | 0.00134142 |
| UCP3                | 0.188881  | 0.444756  | 1.23554    | 0.0841079  |
| TTC28               | 0.494169  | 0.198681  | -1.31455   | 0.151522   |
| QDPR                | 38.9075   | 42.1453   | 0.115322   | 0.908129   |
| LEMD3               | 3.89246   | 3.56597   | -0.126386  | 0.907657   |
| PLAA                | 9.09538   | 7.16419   | -0.344329  | 0.367283   |
| C16orf80            | 46.2499   | 44.7503   | -0.0475538 | 0.979701   |
| NFE2L1              | 27.4232   | 23.4071   | -0.228453  | 0.637571   |
| SEC61A1             | 98.0395   | 127.989   | 0.384589   | 0.24551    |
| HYOU1               | 26.4124   | 36.7836   | 0.47785    | 0.0882057  |
| ABCC6               | 1.21953   | 0.653627  | -0.899784  | 0.365183   |
| DCUN1D5             | 5.04799   | 4.956     | -0.0265312 | 0.989748   |
| MAP2K3              | 60.092    | 93.9448   | 0.64464    | 0.009453   |
| GOLM1               | 57.1544   | 65.1252   | 0.188351   | 0.755364   |
| CHSY1               | 4.09769   | 5.47016   | 0.416772   | 0.234793   |
| DLD                 | 28.7111   | 25.3307   | -0.180723  | 0.768789   |
| DNAJC22             | 5.21895   | 3.01669   | -0.790793  | 0.0349222  |
| TMEM48              | 7.63187   | 8.61859   | 0.175415   | 0.793112   |
| CTPS1               | 22.9267   | 38.5751   | 0.75064    | 0.00134142 |
| EDF1                | 990.137   | 994.444   | 0.00626256 | 0.997036   |
| BAAT                | 0.133095  | 0.151805  | 0.189765   | 1          |
| RGL1                | 0.363288  | 0.344891  | -0.0749753 | 0.979701   |
| GINS1               | 8.97694   | 10.7144   | 0.255251   | 0.592589   |
| LOC100127983        | 0.153964  | 0.0828303 | -0.89436   | 1          |
| PROSER1             | 7.24305   | 7.36474   | 0.0240354  | 0.990857   |
| C19orf47            | 10.279    | 15.9461   | 0.633498   | 0.486673   |
| MOSPD1              | 3.80577   | 3.48577   | -0.126709  | 0.925094   |
| MRPL28              | 132.45    | 139.01    | 0.0697438  | 0.961224   |
| P2RY2               | 0.704554  | 1.94915   | 1.46806    | 0.00134142 |
| CRELD2              | 14.3957   | 33.6981   | 1.22703    | 0.00134142 |
| ARSB                | 0.814427  | 1.72866   | 1.0858     | 0.0114515  |
| RGS19               | 26.9011   | 26.5982   | -0.0163337 | 0.994615   |
| TIMMDC1             | 38.5398   | 30.4351   | -0.340614  | 0.33121    |
| DBNL                | 45.0573   | 49.0689   | 0.123049   | 0.897072   |
| LOC643406           | 0.126051  | 0.140254  | 0.154042   | 1          |
| SLAMF7              | 0.236867  | 0.118694  | -0.99683   | 1          |
| NOC2L               | 81.5313   | 105.693   | 0.374457   | 0.250467   |
| SERINC5             | 1.87248   | 1.832     | -0.0315347 | 0.989365   |
| CYP26B1             | 1.21553   | 1.06312   | -0.193277  | 0.876927   |
| NUP43               | 11.2683   | 9.2252    | -0.288622  | 0.469503   |
| HAX1                | 82.6219   | 52.4485   | -0.655624  | 0.0150729  |
| FAM174A             | 8.56734   | 6.24813   | -0.455423  | 0.282566   |
| POLRMT              | 44.7341   | 58.1788   | 0.379121   | 0.22859    |
| MCCC2               | 24.3017   | 22.929    | -0.0838879 | 0.946274   |
| NIPA2               | 22.3822   | 33.7716   | 0.593459   | 0.0250278  |
| BTBD18              | 0.0170836 | 0.0513307 | 1.58721    | 1          |
| FANCI               | 7.99259   | 5.81484   | -0.458923  | 0.605597   |
| MYEOV               | 9.00942   | 10.9436   | 0.280585   | 0.590923   |
| PSMC6               | 33.6453   | 34.2943   | 0.0275646  | 0.989514   |
| BCL10               | 33.0908   | 15.6366   | -1.0815    | 0.00134142 |
| ABHD2               | 3.06554   | 2.45012   | -0.323287  | 0.426734   |
| CCT2                | 205.201   | 294.111   | 0.519326   | 0.0637115  |
| DDI2,RSC1A1         | 2.5547    | 2.87042   | 0.168109   | 0.882497   |
| MAN1C1              | 0.122499  | 0.0593448 | -1.04557   | 1          |
| NUP107              | 16.9146   | 14.9938   | -0.173907  | 0.788214   |
| NR4A1               | 15.1333   | 7.59633   | -0.994355  | 0.00134142 |
| PSME2               | 119.63    | 168.204   | 0.491634   | 0.0841079  |
| LOC100507462        | 0.118479  | 0.0314752 | -1.91234   | 1          |
| TMEM33              | 9.06848   | 13.3379   | 0.556596   | 0.0336095  |
| SGMS1               | 2.97039   | 2.47522   | -0.263095  | 0.662283   |
| TMBIM6              | 323.004   | 267.187   | -0.273701  | 0.532823   |
| ALDH2               | 70.024    | 52.8913   | -0.404819  | 0.172529   |
| MITF                | 0.550517  | 0.434851  | -0.340268  | 0.671358   |
| WIZ                 | 18.6754   | 19.2662   | 0.0449332  | 0.979733   |
| PET100              | 185.196   | 196.341   | 0.084307   | 0.952905   |
| C2CD2               | 26.2615   | 27.095    | 0.0450746  | 0.979733   |
| TMEM205             | 116.675   | 109.305   | -0.0941305 | 0.935939   |
| NUDT9P1             | 0.309433  | 0.0957528 | -1.69224   | 1          |
| UNC50               | 31.0582   | 30.1253   | -0.043997  | 0.979733   |
| EIF2S1              | 22.0138   | 26.1598   | 0.248945   | 0.577456   |
| KDM1B               | 1.99215   | 1.37611   | -0.533732  | 0.168676   |
| ZNF595,ZNF718       | 0.534608  | 0.462435  | -0.209233  | 0.909489   |
| PTPRE               | 1.04194   | 0.878956  | -0.245408  | 0.771991   |
| H2AFY               | 81.3222   | 87.866    | 0.111656   | 0.913825   |
| TPP2                | 9.86984   | 9.58676   | -0.0419836 | 0.980177   |
| RRM1                | 32.3832   | 22.9251   | -0.498321  | 0.0780546  |
| CHPF                | 58.939    | 80.2327   | 0.444967   | 0.116242   |
| LATS2               | 4.62535   | 2.92221   | -0.662504  | 0.0178668  |
| LINC00623,LOC728875 | 1.08055   | 1.08361   | 0.00406741 | 0.99862    |

|                        |          |           |             |            |
|------------------------|----------|-----------|-------------|------------|
| TMEM206                | 12.2422  | 14.8452   | 0.27813     | 0.548564   |
| PTPLAD1                | 34.9309  | 45.8455   | 0.392277    | 0.210564   |
| SLC25A46               | 6.62778  | 6.33661   | -0.0648152  | 0.972339   |
| MIR4461                | 3654     | 3974.66   | 0.121355    | 0.99351    |
| PPAP2C                 | 95.1425  | 82.7391   | -0.20152    | 0.714446   |
| SERPINB9               | 13.6702  | 19.7062   | 0.527611    | 0.0504457  |
| GART                   | 34.5964  | 28.0281   | -0.303747   | 0.456016   |
| TUFM                   | 361.663  | 333.422   | -0.117299   | 0.906464   |
| TMEM242                | 4.08405  | 3.66655   | -0.155576   | 0.851892   |
| AFAP1                  | 1.22558  | 1.48438   | 0.276394    | 0.660278   |
| GPANK1                 | 20.8549  | 18.4769   | -0.174666   | 0.964792   |
| SNRPA                  | 149.815  | 64.8412   | -1.2082     | 0.00134142 |
| EMC2                   | 36.3205  | 24.5132   | -0.567228   | 0.0345327  |
| CCDC137                | 29.9188  | 56.8518   | 0.926152    | 0.00134142 |
| LRRRC16A               | 1.91359  | 1.33703   | -0.517253   | 0.157777   |
| BIK                    | 5.60805  | 8.61873   | 0.619976    | 0.167979   |
| CLIC4                  | 25.8845  | 17.4891   | -0.565634   | 0.0357572  |
| CABP1                  | 1.423    | 2.48505   | 0.80434     | 0.141232   |
| ARPC4,ARPC4-TTLL3,TTLL | 139.291  | 169.187   | 0.280521    | 0.654699   |
| MRPL39                 | 53.6832  | 42.489    | -0.337382   | 0.325204   |
| DMBX1                  | 1.90003  | 0.894721  | -1.08651    | 0.0126858  |
| PLXNA2                 | 0.497808 | 0.617221  | 0.310198    | 0.654699   |
| TNFSF4                 | 0.047077 | 0.026348  | -0.83733    | 1          |
| TMEM165                | 52.0996  | 45.6066   | -0.192032   | 0.731968   |
| SHQ1                   | 4.95043  | 8.65133   | 0.805368    | 0.00243047 |
| NUDT1                  | 60.4458  | 58.9155   | -0.0369953  | 0.986353   |
| C15orf41               | 2.37471  | 1.41126   | -0.750772   | 0.0410573  |
| MRPL4                  | 176.336  | 256.819   | 0.542421    | 0.0431891  |
| HTATSF1                | 7.89233  | 12.0144   | 0.606238    | 0.0261279  |
| RBM14,RBM14-RBM4,RBM   | 109.04   | 124.779   | 0.194526    | 0.8561     |
| VTI1A                  | 4.76466  | 4.57472   | -0.0586884  | 0.974922   |
| NR1I3                  | 1.81838  | 2.48213   | 0.448927    | 0.921164   |
| XRCC3                  | 14.0445  | 20.1663   | 0.521943    | 0.387393   |
| CYB5A                  | 13.1958  | 13.6286   | 0.0465613   | 0.98439    |
| ITGA6                  | 2.65603  | 3.11758   | 0.231152    | 0.695538   |
| GTF2H3                 | 9.00687  | 6.6077    | -0.446878   | 0.52044    |
| LOC100131691           | 0.332715 | 0.15885   | -1.06663    | 1          |
| KLC2                   | 37.4075  | 60.1763   | 0.685868    | 0.00509212 |
| CPEB4                  | 0.63999  | 0.37864   | -0.757221   | 0.0580464  |
| CDS1                   | 2.21697  | 2.01948   | -0.134608   | 0.913628   |
| AP5M1                  | 5.07205  | 5.13395   | 0.0175007   | 0.996453   |
| CENPW                  | 79.3763  | 99.399    | 0.324523    | 0.401233   |
| NCL                    | 284.593  | 453.311   | 0.671601    | 0.0132924  |
| RUVBL1                 | 50.401   | 54.9509   | 0.124692    | 0.888975   |
| BTBD11                 | 0.421113 | 0.313339  | -0.426483   | 0.649554   |
| CCZ1                   | 10.9574  | 11.0478   | 0.0118502   | 0.995957   |
| RTN4                   | 175.075  | 162.841   | -0.104513   | 0.924009   |
| WIPI1                  | 11.088   | 4.33361   | -1.35535    | 0.00134142 |
| ACP2                   | 10.4713  | 8.35112   | -0.326404   | 0.54069    |
| ASB16                  | 0.2062   | 0.256372  | 0.314199    | 1          |
| DAPK1                  | 3.00547  | 2.65959   | -0.176384   | 0.832286   |
| SLC45A3                | 7.21776  | 9.50494   | 0.397125    | 0.274388   |
| G6PC3                  | 74.6936  | 63.2803   | -0.239228   | 0.610406   |
| CNPY2,PAN2             | 118.095  | 137.596   | 0.220498    | 0.688434   |
| NOP16                  | 106.716  | 228.477   | 1.09827     | 0.00134142 |
| GBP4                   | 0.008281 | 0.0084753 | 0.0334601   | 1          |
| CCDC127                | 14.2601  | 14.8901   | 0.0623746   | 0.974335   |
| C8orf47                | 8.0855   | 10.3433   | 0.355285    | 0.606953   |
| SPNS1                  | 33.9693  | 38.9611   | 0.197804    | 0.737171   |
| ZNF462                 | 1.12523  | 0.610019  | -0.883293   | 0.009453   |
| SSTR2                  | 0.018352 | 0.0171128 | -0.100856   | 1          |
| KATNB1                 | 41.7108  | 37.8408   | -0.140479   | 0.855981   |
| PPARGC1B               | 0.516262 | 0.847529  | 0.715161    | 0.0467709  |
| BCL11A                 | 0.913232 | 0.681188  | -0.422929   | 0.582968   |
| IQCK                   | 2.73659  | 1.91009   | -0.518738   | 0.646377   |
| FLJ42875               | 6.41105  | 5.18154   | -0.307179   | 0.825928   |
| E2F1                   | 20.7475  | 25.8799   | 0.318894    | 0.385575   |
| PSMB7                  | 298.823  | 297.7     | -0.00543231 | 0.99714    |
| CDC37                  | 285.173  | 343.943   | 0.270328    | 0.713826   |
| NDUFAF1                | 15.5085  | 15.237    | -0.0254867  | 0.990857   |
| NAV3                   | 6.27666  | 4.6514    | -0.432331   | 0.158777   |
| NOL12                  | 7.74512  | 14.3586   | 0.890555    | 0.00134142 |
| LTBP2                  | 0.701536 | 0.447622  | -0.648237   | 0.14313    |
| SIPA1L1                | 5.95836  | 3.77673   | -0.657777   | 0.0150729  |
| CYB561                 | 15.1871  | 25.1399   | 0.727131    | 0.00243047 |
| FAM98A                 | 12.2623  | 27.2912   | 1.1542      | 0.00134142 |
| SERPINH1               | 130.86   | 259.444   | 0.9874      | 0.00134142 |
| TMEM39A                | 5.09509  | 3.82554   | -0.413445   | 0.211458   |
| WDR61                  | 27.2114  | 31.7635   | 0.223157    | 0.672931   |

|           |            |           |            |            |
|-----------|------------|-----------|------------|------------|
| AMN1      | 1.22738    | 0.572993  | -1.09899   | 0.0200038  |
| GPT2      | 26.64      | 16.5148   | -0.689835  | 0.009453   |
| FRA10AC1  | 6.30733    | 3.29225   | -0.937955  | 0.00134142 |
| LIG1      | 22.2145    | 21.3929   | -0.0543654 | 0.976595   |
| PRAME     | 17.4185    | 29.8899   | 0.779034   | 0.00134142 |
| MCM6      | 19.6971    | 22.274    | 0.177375   | 0.776313   |
| U2AF1     | 221.965    | 275.944   | 0.314045   | 0.397705   |
| PYCR1     | 236.935    | 204.303   | -0.213785  | 0.696279   |
| NUP160    | 6.91978    | 6.33421   | -0.127561  | 0.888528   |
| RRM2      | 51.2778    | 61.6671   | 0.266167   | 0.541507   |
| LOC731223 | 0.478109   | 0.287691  | -0.732819  | 0.85843    |
| MYPN      | 0.00776858 | 0.0016029 | -2.27697   | 1          |
| LUC7L3    | 21.9157    | 41.7512   | 0.929852   | 0.00134142 |
| MRPL13    | 119.91     | 109.05    | -0.136966  | 0.876196   |
| CHRNA7    | 1.70555    | 1.1547    | -0.56272   | 0.240188   |
| STIM2     | 1.16855    | 1.88929   | 0.693121   | 0.0403066  |
| NOC4L     | 36.2949    | 62.9109   | 0.793542   | 0.00134142 |
| USP18     | 4.29415    | 2.89453   | -0.569044  | 0.161153   |
| CBX4      | 28.9724    | 16.6447   | -0.799617  | 0.00134142 |
| OSGEP     | 32.6589    | 27.465    | -0.249883  | 0.589808   |
| ZNF394    | 16.2106    | 17.241    | 0.0889049  | 0.946274   |
| C7orf50   | 109.116    | 117.617   | 0.108235   | 0.923433   |
| DMRT2     | 2.84701    | 3.04979   | 0.0992665  | 0.959465   |
| SLC39A14  | 28.1441    | 35.1858   | 0.322162   | 0.37325    |
| STK40     | 16.8591    | 14.9729   | -0.171172  | 0.809695   |
| TMEM87B   | 3.5889     | 1.85315   | -0.953563  | 0.00134142 |
| LOC90784  | 3.62226    | 5.40031   | 0.576152   | 0.0652056  |
| ACSL3     | 13.0939    | 11.3443   | -0.206929  | 0.714291   |
| MCM2      | 41.6888    | 37.3481   | -0.158626  | 0.821622   |
| TMEM63A   | 6.22029    | 5.33307   | -0.222015  | 0.836602   |
| MAP2      | 0.10081    | 0.0343371 | -1.5538    | 1          |
| FOXO4     | 1.74519    | 1.23334   | -0.500817  | 0.314308   |
| SYMPK     | 20.6281    | 17.2897   | -0.254696  | 0.566856   |
| SRSF10    | 29.3311    | 35.7414   | 0.285167   | 0.485911   |
| RFC2      | 39.7511    | 32.8047   | -0.277093  | 0.499123   |
| NGDN      | 25.424     | 32.8811   | 0.371065   | 0.285008   |
| KCNAB1    | 1.336      | 2.00015   | 0.582191   | 0.12797    |
| ATF5      | 42.2427    | 41.7759   | -0.0160306 | 0.997036   |
| RAPGEF3   | 0.581178   | 0.212887  | -1.44889   | 0.00509212 |
| MRPS28    | 48.9215    | 67.0683   | 0.455163   | 0.12699    |
| LDLRAD3   | 3.09873    | 2.42214   | -0.355391  | 0.518295   |
| TSPAN15   | 8.7236     | 6.81292   | -0.35665   | 0.464668   |
| TTC26     | 2.23435    | 1.74266   | -0.358566  | 0.582397   |
| WTIP      | 1.71168    | 1.62694   | -0.0732475 | 0.981485   |
| CLCN7     | 46.814     | 42.2037   | -0.14957   | 0.840803   |
| C5orf56   | 0.755734   | 0.783002  | 0.0511383  | 0.99351    |
| CMSS1     | 40.9996    | 38.5556   | -0.0886698 | 0.950929   |
| PARP2     | 15.4321    | 12.5594   | -0.297164  | 0.478347   |
| UBE2V2    | 24.8856    | 21.4317   | -0.215567  | 0.688363   |
| ODC1      | 214.384    | 282.098   | 0.395993   | 0.234285   |
| PRKCQ-AS1 | 3.17963    | 2.34795   | -0.437458  | 0.354126   |
| TRA2B     | 31.9366    | 34.8306   | 0.125146   | 0.887588   |
| TMEM92    | 0.133453   | 0.0202419 | -2.72091   | 1          |
| LEPROTL1  | 11.7867    | 14.2516   | 0.273957   | 0.873144   |
| PTDSS1    | 110.95     | 172.169   | 0.63392    | 0.0145499  |
| ARHGAP42  | 0.343085   | 0.233783  | -0.553395  | 1          |
| ATP6V0D1  | 71.8568    | 106.148   | 0.562876   | 0.0322484  |
| HIST1H2BG | 3.42341    | 4.41876   | 0.368206   | 0.797015   |
| TBC1D7    | 6.88507    | 6.94657   | 0.0128296  | 0.996453   |
| LOC283663 | 0.19908    | 0.245199  | 0.300605   | 1          |
| UBR1      | 1.51775    | 1.20263   | -0.335746  | 0.459984   |
| OSTM1     | 3.4756     | 2.79565   | -0.314077  | 0.509535   |
| PCCA      | 1.46044    | 0.968234  | -0.592973  | 0.516248   |
| SPTB      | 0.766653   | 0.285407  | -1.42556   | 0.00134142 |
| SRSF2     | 100.207    | 263.138   | 1.39284    | 0.00134142 |
| ANP32B    | 222.362    | 241.893   | 0.12146    | 0.902188   |
| FITM1     | 1.24908    | 1.12108   | -0.155974  | 0.965148   |
| CBLB      | 0.617631   | 0.388937  | -0.66721   | 0.208364   |
| RQCD1     | 20.7532    | 29.2292   | 0.494076   | 0.0786602  |
| TRA2A     | 36.7863    | 37.4197   | 0.0246282  | 0.99037    |
| NUPR1     | 2.29669    | 0.214118  | -3.42308   | 0.009453   |
| GTF3C5    | 113.096    | 101.453   | -0.156748  | 0.828589   |
| FOXN3-AS1 | 2.11668    | 1.16427   | -0.862376  | 0.750955   |
| SSUH2     | 0.12348    | 0.0917581 | -0.428372  | 1          |
| TFB2M     | 17.6624    | 25.5999   | 0.53546    | 0.0559179  |
| DDX52     | 5.3336     | 5.04691   | -0.0797106 | 0.955758   |
| CHD4      | 19.3544    | 20.5138   | 0.0839346  | 0.947008   |
| MED27     | 60.7639    | 61.4317   | 0.0157683  | 0.99351    |
| SPATA13   | 1.76854    | 2.72441   | 0.623389   | 0.0410573  |

|                  |            |            |             |            |
|------------------|------------|------------|-------------|------------|
| LOC257358        | 0.0277452  | 0.0116371  | -1.25351    | 1          |
| SLC35B1          | 54.549     | 67.0856    | 0.298451    | 0.434948   |
| IQCE             | 1.07891    | 1.89482    | 0.812488    | 0.0139368  |
| MPHOSPH6         | 23.5911    | 30.0609    | 0.349644    | 0.314771   |
| EIF2B3           | 7.56742    | 11.2719    | 0.574853    | 0.0562227  |
| FAM53C           | 18.9761    | 14.1709    | -0.421245   | 0.166117   |
| GGCT             | 37.3097    | 40.8224    | 0.12981     | 0.895818   |
| GDPGP1           | 0.826369   | 0.983299   | 0.250845    | 0.909694   |
| CMC2             | 60.4195    | 85.4037    | 0.499285    | 0.468776   |
| SNRPC            | 134.628    | 160.934    | 0.257495    | 0.551356   |
| SLC44A2          | 21.9637    | 6.75134    | -1.70188    | 0.00134142 |
| BCCIP            | 62.0269    | 101.154    | 0.705583    | 0.0235476  |
| FAM208B          | 2.94036    | 7.48948    | 1.34887     | 0.00134142 |
| CLN5             | 6.56736    | 5.12068    | -0.358977   | 0.366794   |
| MESDC2           | 9.37589    | 12.4917    | 0.413947    | 0.172529   |
| PPP2R1B          | 7.52551    | 7.25766    | -0.0522846  | 0.980177   |
| TP53I3           | 16.4154    | 16.0414    | -0.0332522  | 0.987858   |
| MRPL46           | 28.3356    | 32.6589    | 0.204861    | 0.739609   |
| AGER             | 1.94118    | 1.78937    | -0.11748    | 0.958201   |
| S100A11          | 946.663    | 1325.13    | 0.485211    | 0.0908564  |
| FUBP1            | 22.5385    | 23.8277    | 0.0802438   | 0.950929   |
| MANSC1           | 4.57883    | 2.29215    | -0.998277   | 0.00243047 |
| LRRTM2           | 0.0083568  | 0.00577702 | -0.532624   | 1          |
| ZDHHC24          | 39.7248    | 32.5522    | -0.287287   | 0.543643   |
| RAET1G           | 0.619933   | 0.561413   | -0.143049   | 0.990857   |
| RPAP3            | 5.45584    | 5.7924     | 0.0863611   | 0.950929   |
| GOLT1B           | 10.5966    | 10.5676    | -0.00396607 | 0.997342   |
| SUMO1            | 76.8031    | 65.5524    | -0.228515   | 0.648312   |
| VSTM2L           | 0.0579356  | 0.13495    | 1.2199      | 1          |
| UBR7             | 11.0472    | 10.8151    | -0.0306426  | 0.988657   |
| NUP93            | 24.2396    | 32.8979    | 0.440627    | 0.128787   |
| UXS1             | 11.1482    | 16.0973    | 0.530008    | 0.0668932  |
| SIPA1L2          | 0.398099   | 0.415009   | 0.0600166   | 0.984917   |
| LOC348761        | 0.0187129  | 0.018478   | -0.0182267  | 1          |
| MFSD1            | 14.669     | 15.3408    | 0.0645958   | 0.966946   |
| GPR126           | 3.31508    | 2.67412    | -0.309979   | 0.464668   |
| PLEKHA8          | 2.59917    | 1.8597     | -0.482985   | 0.369736   |
| SAAL1            | 23.5928    | 22.373     | -0.0765892  | 0.956382   |
| IFIT3            | 0.363822   | 0.722857   | 0.99048     | 0.0611798  |
| C1D              | 23.5409    | 19.4424    | -0.275968   | 0.529261   |
| LOC100131257     | 0.00522649 | 0.0029196  | -0.84007    | 1          |
| BAZ1A            | 4.74231    | 7.18464    | 0.599326    | 0.0222212  |
| ADORA1           | 2.72923    | 3.56978    | 0.387344    | 0.484559   |
| CNNM4            | 3.98638    | 3.367      | -0.243616   | 0.691366   |
| XPOT             | 19.9313    | 12.9942    | -0.61717    | 0.0200038  |
| BNIP2            | 13.4965    | 9.97956    | -0.435539   | 0.155896   |
| DGKI             | 2.0897     | 0.57936    | -1.85076    | 0.00134142 |
| DDX27            | 13.9239    | 16.702     | 0.262459    | 0.563034   |
| PDZD8            | 2.07093    | 2.3194     | 0.163478    | 0.878389   |
| ANKRD42          | 0.378122   | 0.547232   | 0.533299    | 0.481568   |
| BCL7B            | 51.7323    | 53.5441    | 0.049662    | 0.977332   |
| C1QBP            | 367.029    | 464.226    | 0.338933    | 0.460263   |
| SNORA23          | 6.9254     | 2.7386     | -1.33846    | 0.909768   |
| GCSPH3           | 2.42661    | 2.15992    | -0.167964   | 0.926258   |
| FKBP3            | 41.1291    | 36.5933    | -0.16858    | 0.863458   |
| HMGB1            | 91.2909    | 104.107    | 0.189518    | 0.765568   |
| B3GNTL1          | 5.88645    | 4.40219    | -0.419177   | 0.471747   |
| PTGFRN           | 9.46698    | 8.94743    | -0.0814318  | 0.950929   |
| STK31            | 0.0531545  | 0.063709   | 0.261306    | 1          |
| NCEH1            | 2.29235    | 2.21389    | -0.0502437  | 0.981044   |
| SNORD22          | 46.8685    | 72.4869    | 0.6291      | 0.967901   |
| PNN              | 18.9043    | 29.3577    | 0.635024    | 0.0120701  |
| SNX11            | 10.5992    | 10.8637    | 0.0355527   | 0.987334   |
| SSSCA1           | 80.3667    | 118.13     | 0.555712    | 0.0507992  |
| DDX11            | 14.1399    | 15.7844    | 0.158724    | 0.831797   |
| PCSK5            | 1.97857    | 0.97542    | -1.02036    | 0.00882987 |
| XRCC2            | 1.11637    | 1.15205    | 0.0453902   | 0.987627   |
| CLDN6            | 0.150096   | 0.13525    | -0.150257   | 1          |
| TCTEX1D2,TM4SF19 | 94.1989    | 41.8155    | -1.17167    | 0.00134142 |
| DISP2            | 0.85915    | 0.824903   | -0.0586846  | 0.984917   |
| CDK5RAP1         | 19.8192    | 18.0964    | -0.131198   | 0.882523   |
| PRNP             | 34.9375    | 31.6881    | -0.140839   | 0.860362   |
| C5orf34          | 2.83297    | 1.63072    | -0.796804   | 0.030165   |
| SMIM13           | 3.2263     | 3.06291    | -0.0749797  | 0.965148   |
| CEP104           | 3.6483     | 3.68822    | 0.0157001   | 0.99451    |
| TMEM164          | 2.60649    | 2.89052    | 0.149222    | 0.886707   |
| UTP11L           | 23.3817    | 34.9471    | 0.579793    | 0.0270114  |
| AGPAT1           | 41.5174    | 35.8313    | -0.212499   | 0.836371   |
| PMPCA            | 139.386    | 200.364    | 0.523535    | 0.0511722  |

|              |           |            |            |            |
|--------------|-----------|------------|------------|------------|
| LOC100287314 | 6.01113   | 2.99839    | -1.00345   | 0.00425224 |
| SAMHD1       | 1.24076   | 2.73963    | 1.14276    | 0.00134142 |
| TRMU         | 22.1478   | 39.8225    | 0.846422   | 0.00134142 |
| DNAJB9       | 12.2176   | 7.39687    | -0.723977  | 0.00509212 |
| GLT25D1      | 64.6817   | 81.2771    | 0.329493   | 0.354217   |
| NOP10        | 571.457   | 649.235    | 0.184098   | 0.769283   |
| ACAT2        | 15.332    | 19.7925    | 0.368409   | 0.942519   |
| KLHL21       | 40.7119   | 40.1122    | -0.0214093 | 0.991767   |
| TMEM241      | 3.3323    | 3.27569    | -0.0247172 | 0.991884   |
| PARP9        | 1.99824   | 1.58623    | -0.33313   | 0.785477   |
| ADAT3.SCAMP4 | 44.3421   | 54.2337    | 0.290512   | 0.576551   |
| TDRD5        | 0.427275  | 0.373758   | -0.193058  | 0.925753   |
| TNS1         | 0.155766  | 0.112861   | -0.464827  | 1          |
| ST7          | 11.758    | 14.1576    | 0.267934   | 0.619929   |
| NDUFS6       | 156.202   | 226.703    | 0.537394   | 0.0467709  |
| DDRK1        | 106.794   | 93.7393    | -0.188105  | 0.751467   |
| SLC5A2       | 0.21529   | 0.111545   | -0.948654  | 1          |
| TANGO6       | 3.06009   | 4.16792    | 0.445752   | 0.201532   |
| MED19        | 6.86513   | 6.53041    | -0.0721117 | 0.97028    |
| UBAP1L       | 1.24575   | 2.38958    | 0.939748   | 0.110937   |
| PNPLA8       | 2.22794   | 1.40365    | -0.666533  | 0.0373672  |
| GTF3C6       | 63.763    | 109.346    | 0.778109   | 0.00134142 |
| SH3TC1       | 4.58338   | 3.76282    | -0.284596  | 0.628611   |
| PSMB2        | 37.6953   | 45.8608    | 0.28288    | 0.494889   |
| SQLI         | 20.9953   | 37.9471    | 0.853927   | 0.00134142 |
| TRMT6        | 11.6181   | 15.8886    | 0.451621   | 0.122378   |
| LAMB3        | 78.8019   | 30.0642    | -1.39019   | 0.00134142 |
| GAR1         | 53.0416   | 84.921     | 0.678997   | 0.00134142 |
| PIGX         | 4.98461   | 3.60649    | -0.466888  | 0.188988   |
| SPDYE3       | 0.379783  | 0.18225    | -1.05925   | 0.955758   |
| CLIP1        | 5.48403   | 4.58006    | -0.259871  | 0.564578   |
| NQO2         | 111.804   | 110.859    | -0.0122449 | 0.995039   |
| SRBD1        | 1.38712   | 0.807305   | -0.780904  | 0.0414844  |
| BCAR4        | 0.264988  | 0.40645    | 0.617151   | 0.786958   |
| TMX1         | 21.7095   | 23.1466    | 0.0924708  | 0.935939   |
| TCP1         | 105.568   | 174.858    | 0.728011   | 0.00882987 |
| ATF6         | 8.96309   | 6.05273    | -0.566409  | 0.0340561  |
| LRRC59       | 51.5208   | 104.707    | 1.02313    | 0.00134142 |
| RSPH4A       | 0.176857  | 0.257346   | 0.541127   | 1          |
| SLC4A7       | 1.67729   | 1.48797    | -0.172783  | 0.845125   |
| SYNE1        | 0.0134302 | 0.00336439 | -1.99707   | 1          |
| SUV39H2      | 6.18834   | 9.7405     | 0.654443   | 0.0162707  |
| GRPEL1       | 74.1808   | 109.223    | 0.558165   | 0.030994   |
| HSPA9        | 192.492   | 158.232    | -0.282759  | 0.505225   |
| FAM13B       | 2.64696   | 2.14287    | -0.304793  | 0.538041   |
| EMC10        | 43.0101   | 58.007     | 0.431553   | 0.147239   |
| FAM221A      | 6.39502   | 3.75017    | -0.769995  | 0.0318033  |
| NCKAP5L      | 7.47203   | 7.67781    | 0.0391943  | 0.985626   |
| NSUN2        | 28.1807   | 47.6222    | 0.756927   | 0.00134142 |
| ZCCHC4       | 2.62453   | 2.09573    | -0.32461   | 0.571535   |
| NPPA         | 0.211831  | 0.507497   | 1.26048    | 0.926225   |
| CTH          | 16.9351   | 1.3578     | -3.64068   | 0.00134142 |
| PSMD14       | 91.7211   | 74.7025    | -0.296097  | 0.44093    |
| ZNF577       | 0.40333   | 0.310168   | -0.378909  | 0.877497   |
| HOXD8        | 3.20953   | 2.40375    | -0.417076  | 0.464668   |
| NOP56        | 92.4893   | 152.675    | 0.723106   | 0.00134142 |
| OAS3         | 2.26881   | 2.20302    | -0.0424489 | 0.984003   |
| POLD3        | 2.29988   | 2.06889    | -0.152701  | 0.893663   |
| DDX1         | 34.0295   | 31.3491    | -0.118363  | 0.898291   |
| DNAJC7       | 39.1833   | 44.6865    | 0.189603   | 0.903126   |
| ZNF37A       | 2.23803   | 4.13587    | 0.885961   | 0.00134142 |
| FAM120C      | 3.28003   | 2.62164    | -0.323239  | 0.834859   |
| TSR1         | 24.5824   | 32.2141    | 0.390069   | 0.217771   |
| LINC00654    | 0.0159749 | 0.00851211 | -0.908218  | 1          |
| NSMCE4A      | 22.5757   | 21.3883    | -0.0779499 | 0.956296   |
| RFT1         | 9.96065   | 8.57344    | -0.216365  | 0.697789   |
| ARPC5L       | 121.903   | 223.423    | 0.874042   | 0.00134142 |
| MLF1IP       | 11.7748   | 6.38832    | -0.8822    | 0.00134142 |
| FAM186B      | 0.116209  | 0.0977866  | -0.24901   | 1          |
| SF3A3        | 39.9389   | 46.138     | 0.208159   | 0.703567   |
| MAPRE2       | 3.56262   | 4.61994    | 0.374939   | 0.335449   |
| IL7          | 0.894522  | 0.66419    | -0.429519  | 0.602446   |
| ANKS4B       | 0.0139873 | 0.00603418 | -1.21289   | 1          |
| NOP58        | 46.7663   | 67.2101    | 0.523208   | 0.0481547  |
| HNRNPAB      | 163.963   | 317.025    | 0.951228   | 0.00134142 |
| THTPA        | 11.5462   | 12.2625    | 0.0868424  | 0.98038    |
| GLRX         | 612.645   | 246.05     | -1.3161    | 0.00134142 |
| TNFRSF11A    | 1.06533   | 0.636786   | -0.74242   | 0.10104    |
| RYR1         | 0.0054373 | 0.00405306 | -0.423878  | 1          |

|              |            |            |             |            |
|--------------|------------|------------|-------------|------------|
| MRPL50       | 50.1189    | 67.9026    | 0.438111    | 0.134793   |
| KDELC1       | 5.20347    | 5.7755     | 0.150473    | 0.976214   |
| GPR64        | 0.00811864 | 0          | #NAME?      | 1          |
| SEC24D       | 4.17177    | 4.11242    | -0.0206722  | 0.992841   |
| LOC147646    | 0.0616784  | 0.0221478  | -1.4776     | 1          |
| DNASE2       | 50.1439    | 23.6762    | -1.08264    | 0.00134142 |
| INTS7        | 4.0861     | 4.49799    | 0.138558    | 0.953101   |
| HEATR2       | 21.6092    | 20.1206    | -0.102969   | 0.961      |
| DOCK4        | 0.49352    | 0.594447   | 0.268439    | 0.743924   |
| ZSWIM5       | 0.198988   | 0.0359987  | -2.46667    | 1          |
| PSMB6        | 287.74     | 320.795    | 0.156888    | 0.826046   |
| NDUFB9       | 725.557    | 765.44     | 0.0772014   | 0.955406   |
| TRIM41       | 12.5648    | 9.34276    | -0.427473   | 0.190086   |
| FBXL18       | 1.75938    | 2.25915    | 0.360716    | 0.434118   |
| PPP5C        | 36.4611    | 45.7037    | 0.325953    | 0.354779   |
| LRRC40       | 4.20239    | 3.07169    | -0.452177   | 0.220369   |
| PLCH1        | 0.45036    | 0.195293   | -1.20544    | 0.00425224 |
| CCDC163P     | 1.32325    | 1.00794    | -0.392685   | 0.650855   |
| TMEM57       | 6.18163    | 4.42976    | -0.480758   | 0.124106   |
| GSTCD        | 2.00689    | 1.69476    | -0.243879   | 0.741805   |
| SNF8         | 97.9872    | 104.051    | 0.0866228   | 0.945946   |
| ATP6V0B      | 218.983    | 340.387    | 0.636354    | 0.0114515  |
| MT1X         | 1980.76    | 2163.98    | 0.127636    | 0.891884   |
| ATF7IP       | 2.35689    | 1.21745    | -0.953021   | 0.00134142 |
| ZC3H4        | 6.84187    | 5.92394    | -0.207832   | 0.729849   |
| CDC25A       | 7.88459    | 16.2544    | 1.04372     | 0.00134142 |
| ARHGAP9      | 0.0953621  | 0.0171659  | -2.47387    | 1          |
| SPNS3        | 0.386951   | 0.252303   | -0.616991   | 0.715552   |
| PARP1        | 30.822     | 33.3617    | 0.114231    | 0.907874   |
| ITGB3BP      | 19.0912    | 11.8922    | -0.682889   | 0.0183825  |
| WDR92        | 2.85876    | 2.58682    | -0.144208   | 0.916105   |
| CKMT1A       | 0.101372   | 0.0796481  | -0.347951   | 1          |
| TMEM234      | 6.11583    | 5.85791    | -0.0621626  | 0.979701   |
| LRRC34       | 1.53744    | 0.640995   | -1.26215    | 0.00593755 |
| TLR6         | 0.795549   | 0.215172   | -1.88646    | 0.00134142 |
| BUD31        | 78.4349    | 77.7341    | -0.0129475  | 0.997148   |
| PSMA3        | 90.1585    | 121.85     | 0.434573    | 0.248226   |
| LOC100128881 | 22.1005    | 32.396     | 0.551732    | 0.546865   |
| CCDC134      | 5.32104    | 5.67224    | 0.0922115   | 0.964222   |
| SRSF1        | 23.7125    | 47.9634    | 1.01629     | 0.00134142 |
| PLEKHA5      | 2.02584    | 1.0103     | -1.00374    | 0.00509212 |
| KGFLP1       | 0.172278   | 0.132392   | -0.379929   | 1          |
| GAREM        | 0.425905   | 0.414264   | -0.0399801  | 0.990324   |
| SMAGP        | 186.691    | 188.801    | 0.0162141   | 0.994615   |
| KLHL29       | 3.64968    | 3.24855    | -0.167975   | 0.849892   |
| RRP15        | 1.15593    | 1.83585    | 0.667392    | 0.0217078  |
| LOC100133315 | 0.459543   | 0.421889   | -0.123334   | 0.977332   |
| ADAM11       | 3.30772    | 2.66878    | -0.309658   | 0.582802   |
| HIST1H3H     | 2.61827    | 3.2423     | 0.308403    | 0.903126   |
| MRPL16       | 78.5405    | 86.8751    | 0.145506    | 0.848326   |
| FAM166B      | 0.855969   | 0.472916   | -0.855975   | 0.976595   |
| HSD17B10     | 132.691    | 157.601    | 0.248201    | 0.576888   |
| QRICH2       | 1.29956    | 1.59387    | 0.294513    | 0.663653   |
| CCT6A        | 98.9863    | 159.443    | 0.687735    | 0.00882987 |
| GGN          | 0.995887   | 0.810081   | -0.297917   | 0.883756   |
| MCM3         | 35.2974    | 53.7016    | 0.605404    | 0.0139368  |
| ZNF565       | 0.751757   | 0.522525   | -0.524765   | 0.985921   |
| RAD21L1      | 0.0188655  | 0.00390332 | -2.27298    | 1          |
| SNRPB        | 555.39     | 848.547    | 0.611494    | 0.0245451  |
| CPSF3        | 25.1293    | 17.8853    | -0.490597   | 0.0753213  |
| REEP4        | 63.4335    | 57.6004    | -0.139166   | 0.869078   |
| XRCC4        | 7.18362    | 4.00272    | -0.843731   | 0.00425224 |
| STRAP        | 94.0934    | 123.317    | 0.390209    | 0.212399   |
| CRMP1        | 2.88261    | 2.4534     | -0.23259    | 0.782422   |
| CNPY4        | 2.11977    | 3.01422    | 0.507873    | 0.982703   |
| PRSS54       | 0.588612   | 0.249144   | -1.24034    | 0.580744   |
| PIK3AP1      | 2.23348    | 2.36077    | 0.0799626   | 0.963669   |
| SLC35A2      | 19.3001    | 25.4485    | 0.398974    | 0.261756   |
| TARS         | 60.9448    | 55.3591    | -0.138684   | 0.8725     |
| ACOT7        | 121.956    | 152.565    | 0.323068    | 0.363804   |
| RPA2         | 33.1806    | 38.0466    | 0.197427    | 0.727261   |
| ITGA10       | 0.16177    | 0.16181    | 0.000362251 | 1          |
| MACROD2      | 0.00800947 | 0.0128062  | 0.677067    | 1          |
| FKBP2        | 103.649    | 105.623    | 0.0272158   | 0.989365   |
| SLC29A1      | 100.139    | 118.845    | 0.247077    | 0.593697   |
| WDR44        | 1.42326    | 1.06963    | -0.412091   | 0.409132   |
| FH           | 58.9522    | 59.2534    | 0.00735229  | 0.997036   |
| SAMD13       | 0.162855   | 0.0589031  | -1.46717    | 1          |
| SLC31A1      | 18.1404    | 12.972     | -0.483802   | 0.092295   |



|                      |           |           |             |            |
|----------------------|-----------|-----------|-------------|------------|
| BCAP31               | 277.145   | 300.976   | 0.119009    | 0.906003   |
| WDR76                | 7.37636   | 5.44062   | -0.439137   | 0.173569   |
| INO80C               | 14.2894   | 22.9093   | 0.680991    | 0.0235476  |
| LRCH3                | 1.71241   | 0.998793  | -0.777768   | 0.0875912  |
| GPATCH4              | 24.5865   | 51.761    | 1.074       | 0.00134142 |
| APOBEC3A,APOBEC3A_B, | 20.2537   | 11.0741   | -0.870999   | 0.00134142 |
| MCM7                 | 140.252   | 123.181   | -0.187242   | 0.833623   |
| KIDINS220            | 2.71176   | 1.83596   | -0.562697   | 0.0608269  |
| C12orf4              | 1.94206   | 1.82239   | -0.0917604  | 0.958201   |
| ALMS1                | 0.683507  | 0.501503  | -0.446699   | 0.274547   |
| USP54                | 1.16866   | 1.29431   | 0.147327    | 0.909435   |
| MRPS18C              | 22.1875   | 22.8477   | 0.0423034   | 0.986822   |
| OIP5                 | 12.4315   | 12.367    | -0.00750148 | 0.997036   |
| SERPINE3             | 0.04835   | 0.0264241 | -0.871663   | 1          |
| TOPORS               | 3.04762   | 2.57512   | -0.243045   | 0.724473   |
| SRSF6                | 32.6812   | 35.4964   | 0.119212    | 0.900578   |
| CCDC62               | 0.128773  | 0.129735  | 0.0107382   | 1          |
| MAP1LC3C             | 1.05307   | 1.7224    | 0.70981     | 0.29298    |
| RECQL                | 5.97469   | 5.06347   | -0.238737   | 0.765576   |
| PRRT3-AS1            | 5.92854   | 5.41767   | -0.130005   | 0.966946   |
| TMEM138              | 19.8469   | 33.6901   | 0.763414    | 0.646497   |
| SLC19A1              | 25.295    | 46.3596   | 0.874015    | 0.00134142 |
| DCHS1                | 0.0353019 | 0.0558042 | 0.660627    | 1          |
| DERL2                | 35.813    | 34.2977   | -0.0623705  | 0.970053   |
| CRY1                 | 11.116    | 9.95164   | -0.159636   | 0.833258   |
| SSBP1                | 306.691   | 340.554   | 0.151101    | 0.849166   |
| FST                  | 0.0287728 | 0.0195429 | -0.558059   | 1          |
| IL15RA               | 16.3875   | 13.4873   | -0.280987   | 0.601061   |
| PBDC1                | 24.6147   | 32.4038   | 0.396641    | 0.228296   |
| RAD54L2              | 0.303839  | 0.344152  | 0.179739    | 1          |
| LOC401074            | 0.127925  | 0.0907928 | -0.494651   | 1          |
| RNF123               | 10.2572   | 8.86274   | -0.210815   | 0.810878   |
| AKAP3                | 0.246031  | 0.0778498 | -1.66007    | 1          |
| LOC100126784         | 3.44574   | 1.40134   | -1.29801    | 0.255176   |
| SRSF7                | 55.4651   | 77.5435   | 0.483425    | 0.0796329  |
| TNFRSF8              | 0.342353  | 0.110751  | -1.62817    | 1          |
| SRF                  | 30.3366   | 27.4481   | -0.144353   | 0.849027   |
| ZDHHC6               | 18.5137   | 24.0049   | 0.374737    | 0.250722   |
| BRCC3                | 3.62494   | 3.42095   | -0.0835622  | 0.95835    |
| FKBP1B               | 0.0583306 | 0.085159  | 0.545905    | 1          |
| GPX2                 | 0.0463969 | 0.0242824 | -0.934116   | 1          |
| CDKN1A               | 91.914    | 121.018   | 0.396862    | 0.20514    |
| AP2S1                | 229.903   | 285.266   | 0.311282    | 0.3984     |
| HNRNPH1              | 81.5067   | 136.646   | 0.745451    | 0.00243047 |
| RNFT2                | 2.44236   | 1.49988   | -0.70343    | 0.0757505  |
| PFAS                 | 10.3424   | 12.2484   | 0.244023    | 0.605459   |
| PLAC8                | 0.0870013 | 0.0103843 | -3.06663    | 1          |
| CLN6                 | 59.6444   | 65.9472   | 0.144923    | 0.849892   |
| ZC3H13               | 1.06358   | 1.24777   | 0.230417    | 0.753531   |
| EXOSC8               | 41.7034   | 30.4831   | -0.452154   | 0.36389    |
| ASF1A                | 6.05363   | 4.45669   | -0.441828   | 0.3058     |
| SARS                 | 199.25    | 120.994   | -0.719637   | 0.00509212 |
| AP1AR                | 8.17925   | 5.31764   | -0.621184   | 0.0270114  |
| GDAP2                | 1.37896   | 1.45219   | 0.0746548   | 0.977527   |
| EVC                  | 6.89717   | 5.1079    | -0.433274   | 0.172803   |
| SGMS2                | 3.28217   | 3.62713   | 0.144178    | 0.869168   |
| RSPH10B              | 0.0174376 | 0.011577  | -0.590938   | 1          |
| GPR82                | 0.011009  | 0.0152669 | 0.471721    | 1          |
| DNAJC2               | 26.8929   | 41.0899   | 0.611561    | 0.264053   |
| SUV39H1              | 11.7593   | 12.9486   | 0.138992    | 0.877493   |
| FOXD4L1              | 0.673861  | 1.67404   | 1.31281     | 0.0270114  |
| PAPLN                | 0.149603  | 0.125326  | -0.25546    | 1          |
| TFAM                 | 7.5824    | 9.14789   | 0.270785    | 0.525846   |
| BAZ1B                | 10.5209   | 13.3004   | 0.338213    | 0.321586   |
| ATXN7L1              | 1.28545   | 1.09044   | -0.23737    | 0.879021   |
| LOC654433            | 2.89981   | 2.16304   | -0.4229     | 0.71349    |
| TIMM23               | 131.82    | 183.435   | 0.476697    | 0.0917667  |
| SLC20A2              | 6.75653   | 8.48244   | 0.328196    | 0.763481   |
| IGFBP7               | 0.0573667 | 0.0874232 | 0.607803    | 1          |
| C16orf95             | 3.8919    | 3.24527   | -0.262137   | 0.835119   |
| CITED1               | 13.1181   | 22.0728   | 0.750711    | 0.0167292  |
| C17orf53             | 5.57304   | 3.73956   | -0.575596   | 0.10531    |
| MOB1A                | 25.2726   | 21.9616   | -0.202588   | 0.744425   |
| TSPAN13              | 6.70489   | 5.99705   | -0.160962   | 0.869898   |
| SLC12A2              | 1.90047   | 3.21226   | 0.757237    | 0.00337323 |
| PSMD1                | 24.4503   | 34.6018   | 0.500996    | 0.0691409  |
| SFN                  | 83.2218   | 297.64    | 1.83854     | 0.00134142 |
| FANCB                | 0.459161  | 0.563956  | 0.296583    | 0.793038   |
| NEK8                 | 0.938292  | 0.739466  | -0.343553   | 0.733876   |

|              |           |            |           |            |
|--------------|-----------|------------|-----------|------------|
| ARHGAP31     | 1.54289   | 1.8763     | 0.282252  | 0.606953   |
| PVRL4        | 0.0937939 | 0.0770588  | -0.283534 | 1          |
| PRMT5        | 74.7101   | 65.579     | -0.188068 | 0.762783   |
| ACER2        | 0.111418  | 0.153012   | 0.457662  | 1          |
| APC2         | 0.858951  | 0.978827   | 0.188478  | 0.979701   |
| DHFR         | 16.0254   | 14.1401    | -0.18057  | 0.907689   |
| MAP1LC3B     | 87.1489   | 52.1723    | -0.740197 | 0.00425224 |
| HSPBP1       | 47.579    | 62.3825    | 0.390816  | 0.207172   |
| HAS2         | 0.583341  | 0.496448   | -0.232698 | 0.875964   |
| U2AF2        | 73.5932   | 146.13     | 0.98961   | 0.00134142 |
| FAM225B      | 0.526772  | 0.27901    | -0.916862 | 0.0573356  |
| RNF6         | 13.4707   | 8.6672     | -0.63619  | 0.0162707  |
| SFT2D2       | 4.16938   | 3.39879    | -0.29481  | 0.763725   |
| SHROOM2      | 0.650387  | 0.450897   | -0.5285   | 0.350616   |
| KCTD5        | 32.899    | 45.1397    | 0.456355  | 0.112365   |
| ZDHHC13      | 8.68946   | 6.13478    | -0.502253 | 0.10328    |
| CHAC2        | 5.09233   | 10.1355    | 0.993016  | 0.258427   |
| LOC100507266 | 0.220304  | 0.156755   | -0.490986 | 1          |
| KBTBD8       | 1.14898   | 1.28703    | 0.163687  | 0.885254   |
| PSMD12       | 37.3879   | 48.7768    | 0.383626  | 0.216539   |
| SLC30A7      | 2.61589   | 2.72628    | 0.0596338 | 0.972989   |
| MC1R         | 2.83131   | 2.45547    | -0.205475 | 0.849725   |
| BCYRN1       | 34.8466   | 72.1424    | 1.04983   | 0.923894   |
| SRPRB        | 27.9927   | 40.3941    | 0.529094  | 0.0470437  |
| ARL6         | 1.36867   | 0.958717   | -0.513596 | 0.471178   |
| UBXN7        | 2.09143   | 1.25732    | -0.734136 | 0.0278845  |
| MTAP         | 35.6917   | 40.9189    | 0.197181  | 0.736907   |
| MAGOH        | 79.3762   | 109.939    | 0.469928  | 0.281574   |
| NUDT5        | 121.729   | 124.082    | 0.027621  | 0.994615   |
| C8orf48      | 2.8254    | 1.82626    | -0.629568 | 0.177959   |
| GLRX3        | 131.629   | 122.735    | -0.100931 | 0.927082   |
| NFKBIB       | 28.9745   | 33.4314    | 0.20642   | 0.920028   |
| PSMB3        | 365.254   | 409.278    | 0.16418   | 0.809171   |
| FBLIM1       | 0.444777  | 0.2314     | -0.942693 | 0.298465   |
| PCGF6        | 10.658    | 9.21701    | -0.209563 | 0.735667   |
| NTN1         | 3.49121   | 4.69016    | 0.425911  | 0.265804   |
| SHC4         | 0.0252068 | 0.00764845 | -1.72058  | 1          |
| TSR2         | 32.5219   | 35.0383    | 0.107522  | 0.916838   |
| CTSK         | 1.38232   | 0.574561   | -1.26656  | 0.009453   |
| DNAJC9       | 48.5395   | 64.85      | 0.417947  | 0.173163   |
| FGD6         | 0.11663   | 0.0717577  | -0.70073  | 1          |
| SPC25        | 17.7699   | 16.4322    | -0.112909 | 0.918342   |
| COL23A1      | 0.0304792 | 0.0112925  | -1.43245  | 1          |
| FADS2        | 9.52153   | 6.24624    | -0.608205 | 0.0463932  |
| PDRG1        | 35.0402   | 48.7773    | 0.477199  | 0.090094   |
| CA2          | 9.36999   | 13.6727    | 0.545182  | 0.0704662  |
| YWHAB        | 61.0192   | 73.3119    | 0.264782  | 0.525783   |
| TMEM109      | 36.6      | 51.3249    | 0.487813  | 0.0824049  |
| PSMG1        | 83.3668   | 95.819     | 0.20084   | 0.716439   |
| SPHK2        | 11.057    | 9.95058    | -0.15211  | 0.98972    |
| IRX5         | 0.565425  | 0.22942    | -1.30135  | 0.109152   |
| RBM8A        | 28.1316   | 30.8575    | 0.133429  | 0.906464   |
| MPP7         | 0.221694  | 0.0818278  | -1.43791  | 1          |
| KLHL11       | 0.45232   | 0.331981   | -0.446242 | 0.700897   |
| COASY        | 58.4919   | 53.5333    | -0.127801 | 0.888907   |
| GLIS3        | 0.120483  | 0.0231263  | -2.38122  | 1          |
| BMP8B        | 1.03931   | 0.617611   | -0.750853 | 0.887208   |
| TMEM9B-AS1   | 0.387124  | 0.148363   | -1.38366  | 0.271746   |
| C16orf46     | 0.387523  | 0.477195   | 0.300297  | 0.863467   |
| SKA2         | 20.7499   | 17.5207    | -0.244045 | 0.605975   |
| TMEM194A     | 7.81882   | 4.05935    | -0.945702 | 0.00134142 |
| LOC100132356 | 0.201707  | 0.250816   | 0.314368  | 1          |
| CLEC18A      | 0.263279  | 0.111104   | -1.24552  | 1          |
| C14orf142    | 6.47773   | 7.7468     | 0.258113  | 0.92313    |
| DDX49        | 41.5801   | 60.3371    | 0.537152  | 0.0394523  |
| LOC339666    | 0.215687  | 0.111239   | -0.955281 | 1          |
| VEPH1        | 1.48071   | 0.855702   | -0.79111  | 0.342771   |
| GABPB2       | 1.20658   | 0.491831   | -1.29469  | 0.0120701  |
| MAFF         | 49.7431   | 28.2328    | -0.817122 | 0.00134142 |
| SNRPD1       | 82.8934   | 104.876    | 0.339359  | 0.33202    |
| GLRX2        | 22.4949   | 26.2113    | 0.220589  | 0.737265   |
| POLA2        | 11.4157   | 10.5526    | -0.113432 | 0.923575   |
| HNRNPD       | 150.727   | 174.911    | 0.214682  | 0.703835   |
| SLC25A45     | 1.65035   | 0.662968   | -1.31576  | 0.00818401 |
| MYADM        | 53.5292   | 31.5094    | -0.764544 | 0.00134142 |
| NCBP1        | 13.7193   | 14.8585    | 0.115084  | 0.926899   |
| C1orf159     | 17.4225   | 20.1848    | 0.212318  | 0.751467   |
| SLC1A5       | 268.815   | 230.55     | -0.221535 | 0.689101   |
| TOMM20L      | 1.33501   | 0.47105    | -1.5029   | 0.927569   |

|              |            |            |            |            |
|--------------|------------|------------|------------|------------|
| UNC79        | 0.00486843 | 0.00240845 | -1.01535   | 1          |
| TBPL1        | 10.2319    | 9.46992    | -0.111653  | 0.92969    |
| SLIRP        | 356.462    | 481.75     | 0.434537   | 0.133508   |
| C3AR1        | 0.190462   | 0.0537779  | -1.82442   | 1          |
| DHCR24       | 54.0913    | 97.7298    | 0.853402   | 0.00134142 |
| CMAS         | 19.9377    | 15.1473    | -0.396433  | 0.224736   |
| ZNF655       | 21.8656    | 20.7859    | -0.0730598 | 0.979701   |
| KIAA1656     | 0.656104   | 0.610024   | -0.105057  | 0.993845   |
| TRIM36       | 2.49122    | 1.94036    | -0.36053   | 0.416586   |
| H2AFZ        | 576.389    | 716.228    | 0.313377   | 0.410986   |
| HNF1A        | 0.612462   | 0.925369   | 0.595408   | 0.378668   |
| DPM1         | 47.1053    | 41.1308    | -0.195671  | 0.729849   |
| PRDX1        | 577.996    | 865.559    | 0.582574   | 0.0340561  |
| HAUS8        | 12.8095    | 14.6819    | 0.196823   | 0.787681   |
| TOMM40       | 132.216    | 251.69     | 0.928749   | 0.00134142 |
| PDE6D        | 11.6918    | 6.3463     | -0.881508  | 0.00509212 |
| SNORA71D     | 4.82725    | 16.7833    | 1.79776    | 0.819677   |
| MFS2A        | 12.9996    | 37.7793    | 1.53913    | 0.00134142 |
| CACNG6       | 0.0453618  | 0.0113191  | -2.00272   | 1          |
| LOC100133091 | 4.40316    | 4.83074    | 0.133706   | 0.96115    |
| SSR3         | 274.091    | 216.662    | -0.339208  | 0.375577   |
| DNMT1        | 21.8505    | 26.9099    | 0.30047    | 0.421778   |
| RAD51C       | 27.0766    | 27.5766    | 0.0264012  | 0.991767   |
| PCYT1A       | 8.35955    | 9.42832    | 0.173577   | 0.845971   |
| C2CD2L       | 8.21674    | 12.5499    | 0.611039   | 0.0349222  |
| NOL10        | 7.607      | 11.6209    | 0.611318   | 0.0189207  |
| SOWAHC       | 8.51281    | 12.2746    | 0.527968   | 0.0562227  |
| CEP19        | 0.48153    | 0.696445   | 0.532384   | 0.496589   |
| MTSS1        | 2.3921     | 2.49311    | 0.0596651  | 0.976618   |
| NQO1         | 24.4356    | 24.7283    | 0.0171794  | 0.993379   |
| FAM225A      | 0.91595    | 0.622226   | -0.557829  | 0.258636   |
| DNAJC11      | 21.6344    | 26.7094    | 0.304019   | 0.535133   |
| TMC5         | 1.80739    | 1.49756    | -0.271292  | 0.716242   |
| MED22        | 51.8608    | 80.1966    | 0.628896   | 0.0601893  |
| HBG2         | 0.873829   | 1.64976    | 0.91683    | 0.265309   |
| HIST1H4A     | 0.592598   | 0.190825   | -1.6348    | 0.421895   |
| TMEM229B     | 0.368306   | 0.327982   | -0.167286  | 0.946986   |
| CTSL1        | 135.861    | 137.906    | 0.0215494  | 0.991767   |
| AP1S3        | 0.0102777  | 0.00941666 | -0.126237  | 1          |
| FBXO24       | 0.363149   | 0.112665   | -1.68852   | 0.885624   |
| EIF3J        | 17.552     | 27.3147    | 0.638045   | 0.049309   |
| SLC2A12      | 0.750005   | 0.372598   | -1.00928   | 0.0167292  |
| MYPOP        | 13.949     | 19.8645    | 0.510033   | 0.120065   |
| MYOM2        | 0.0397497  | 0.0280402  | -0.503445  | 1          |
| DUSP6        | 22.1706    | 13.0184    | -0.768095  | 0.00134142 |
| ANP32A       | 60.9663    | 72.8687    | 0.257286   | 0.550445   |
| MIPEP        | 12.8801    | 9.03675    | -0.511269  | 0.0997646  |
| PTPRG        | 1.60061    | 0.846621   | -0.91883   | 0.00243047 |
| TCF19        | 10.8416    | 10.111     | -0.100647  | 0.930922   |
| HRH1         | 2.42939    | 2.55139    | 0.0706885  | 0.969963   |
| C1QTNF2      | 1.48361    | 0.81319    | -0.86745   | 0.0630479  |
| SMC1A        | 5.86975    | 6.35361    | 0.114276   | 0.907929   |
| MCL1         | 87.9283    | 71.8538    | -0.291262  | 0.4748     |
| EIF2AK2      | 3.09592    | 2.95932    | -0.0651001 | 0.973792   |
| PSD3         | 0.00680664 | 0.00178924 | -1.92759   | 1          |
| NHLRC2       | 1.31304    | 0.784414   | -0.743219  | 0.0318033  |
| HS2ST1       | 4.38011    | 3.67936    | -0.251514  | 0.70613    |
| CEBPB        | 111.694    | 40.2553    | -1.4723    | 0.00134142 |
| REP15        | 0.940054   | 2.32843    | 1.30854    | 0.009453   |
| FIZ1         | 7.64414    | 9.29874    | 0.282682   | 0.602446   |
| REC8         | 0.787775   | 1.23486    | 0.648487   | 0.979875   |
| MOB3B        | 0.698682   | 0.928719   | 0.410606   | 0.447323   |
| RAB23        | 2.18902    | 2.71222    | 0.309187   | 0.592589   |
| NTSR1        | 9.65686    | 12.8471    | 0.411811   | 0.21876    |
| CREM         | 23.606     | 13.6972    | -0.78527   | 0.00818401 |
| PRKAR2A      | 1.16245    | 1.32288    | 0.186504   | 0.902703   |
| CTHRC1       | 0.0381976  | 0.0371114  | -0.0416206 | 1          |
| C1QTNF9B     | 0.457875   | 0.858175   | 0.906316   | 0.913628   |
| HSPB11       | 46.3268    | 44.8329    | -0.0472919 | 0.979701   |
| GRHL3        | 0.0121823  | 0.025537   | 1.0678     | 1          |
| PCNA         | 105.643    | 134.296    | 0.346215   | 0.340063   |
| MRPL20       | 174.62     | 242.89     | 0.476084   | 0.122086   |
| ARL9         | 0.298402   | 0.150282   | -0.98958   | 1          |
| LINC00511    | 0.0449689  | 0.0177376  | -1.34212   | 1          |
| ZNF8         | 2.61581    | 2.67663    | 0.0331623  | 0.990857   |
| FKBP5        | 7.76314    | 9.98085    | 0.362523   | 0.286255   |
| C4orf27      | 18.9673    | 16.9446    | -0.162691  | 0.833863   |
| ALDH16A1     | 12.722     | 14.9569    | 0.233488   | 0.670632   |
| ENOX2        | 1.49772    | 1.4015     | -0.0957974 | 0.96099    |

|              |            |            |              |            |
|--------------|------------|------------|--------------|------------|
| ARL5B        | 2.96978    | 1.44474    | -1.03955     | 0.00134142 |
| MED6         | 20.4771    | 20.5243    | 0.00332701   | 0.998342   |
| BTN2A3P      | 0.302777   | 0.359298   | 0.246924     | 0.905597   |
| RTN4IP1      | 3.80086    | 3.98127    | 0.0669056    | 0.974169   |
| MRPL32       | 74.8543    | 94.8834    | 0.342071     | 0.298707   |
| PTRH2        | 56.3385    | 75.617     | 0.42459      | 0.16323    |
| AGTRAP       | 89.665     | 52.2633    | -0.778748    | 0.00243047 |
| ADRM1        | 175.128    | 257.694    | 0.55725      | 0.0349222  |
| HPS5         | 1.91544    | 2.04121    | 0.0917495    | 0.956033   |
| NCLN         | 60.1418    | 89.3866    | 0.571691     | 0.0270114  |
| POU5F1P3     | 0.0541347  | 0.0287661  | -0.912184    | 1          |
| G0S2         | 267.035    | 324.112    | 0.279463     | 0.503721   |
| AGO2         | 22.0582    | 13.9677    | -0.659224    | 0.010797   |
| EFCAB7       | 0.92193    | 0.817632   | -0.173206    | 0.930157   |
| CELF3        | 0.0207137  | 0.0243986  | 0.236214     | 1          |
| KALRN        | 0.0297129  | 0.0274072  | -0.116539    | 1          |
| DNAAF1       | 0.0251622  | 0.0038632  | -2.70339     | 1          |
| SMN2         | 4.83196    | 5.1457     | 0.0907589    | 0.958117   |
| SLC46A3      | 3.74438    | 8.12601    | 1.11782      | 0.00134142 |
| SLC33A1      | 5.18772    | 3.56873    | -0.53969     | 0.101591   |
| COMMD4       | 162.844    | 154.845    | -0.0726656   | 0.957507   |
| CACHD1       | 1.44698    | 1.15085    | -0.330339    | 0.546592   |
| WDR4         | 9.11984    | 19.0524    | 1.06289      | 0.00134142 |
| CTSS         | 0.0317753  | 0.0317563  | -0.000861638 | 1          |
| BRCA1        | 4.5847     | 2.08933    | -1.13379     | 0.00134142 |
| PFDN1        | 93.8272    | 109.463    | 0.22236      | 0.654699   |
| LOC400927    | 1.27268    | 0.767727   | -0.729208    | 0.6442     |
| NDOR1        | 14.7243    | 23.3987    | 0.668223     | 0.009453   |
| CDCP1        | 30.9646    | 20.1445    | -0.620232    | 0.0145499  |
| C9orf3       | 2.59249    | 3.36598    | 0.376684     | 0.415129   |
| UPF3B        | 5.83396    | 5.2541     | -0.15103     | 0.872235   |
| KBTD7        | 0.254821   | 0.141424   | -0.849455    | 1          |
| MEP1B        | 0.0152122  | 0.00828965 | -0.875843    | 1          |
| FBF1         | 1.458      | 1.04913    | -0.4748      | 0.41836    |
| CCT5         | 92.922     | 138.243    | 0.573111     | 0.0306129  |
| SDSL         | 35.515     | 19.8775    | -0.837294    | 0.00134142 |
| RFPL2        | 0.274437   | 0.367801   | 0.422451     | 0.772137   |
| HIST1H2BD    | 19.1012    | 24.9593    | 0.385918     | 0.529836   |
| APIP         | 17.1485    | 13.6504    | -0.329145    | 0.675022   |
| PDSS1        | 7.58613    | 11.1718    | 0.558429     | 0.598176   |
| EIF4EBP1     | 388.95     | 262.861    | -0.565286    | 0.0314167  |
| RPL13AP6     | 0.419357   | 0.370308   | -0.179455    | 0.992797   |
| IGF2R        | 6.35991    | 4.2736     | -0.573554    | 0.0326415  |
| IARS         | 83.1277    | 58.5153    | -0.506515    | 0.066512   |
| KIAA1875     | 0.126281   | 0.119061   | -0.084937    | 1          |
| MTMR2        | 7.49868    | 6.605      | -0.183078    | 0.780271   |
| DAGLA        | 1.47982    | 1.54742    | 0.0644496    | 0.979701   |
| C22orf26     | 0.28725    | 0.266308   | -0.109215    | 1          |
| PLAUR        | 130.519    | 127.84     | -0.029926    | 0.987693   |
| ATP6V0A1     | 13.0624    | 13.3213    | 0.028309     | 0.988714   |
| DPAGT1       | 28.6248    | 22.0629    | -0.375647    | 0.252718   |
| CHAC1        | 45.4066    | 2.33898    | -4.27895     | 0.00134142 |
| RBM19        | 15.427     | 22.9344    | 0.572058     | 0.0318033  |
| C8orf31      | 1.20913    | 1.01599    | -0.251074    | 0.858276   |
| FAM196A      | 0.00971596 | 0.0135748  | 0.482501     | 1          |
| HFE          | 1.44279    | 0.497374   | -1.53646     | 0.00134142 |
| STX18        | 17.8735    | 12.9814    | -0.461377    | 0.118443   |
| GTF2H2       | 0.967945   | 0.950815   | -0.0257616   | 0.99451    |
| SLC39A7      | 57.3285    | 77.4855    | 0.434674     | 0.147583   |
| EPRS         | 29.522     | 16.6388    | -0.827239    | 0.0608269  |
| ST3GAL1      | 6.99642    | 7.32239    | 0.065698     | 0.965573   |
| PCSK7        | 10.12      | 14.1771    | 0.486347     | 0.0925999  |
| ALOXE3       | 6.16125    | 1.53303    | -2.00684     | 0.00134142 |
| ANKS1B       | 3.66945    | 2.65648    | -0.466046    | 0.546683   |
| GMNN         | 26.8446    | 33.562     | 0.322197     | 0.407645   |
| ZWINT        | 37.8272    | 41.6465    | 0.138772     | 0.868469   |
| MT1E         | 1984.15    | 1706.89    | -0.217144    | 0.70303    |
| EXO1         | 6.86744    | 6.24367    | -0.137378    | 0.885254   |
| LACE1        | 1.20503    | 0.342022   | -1.8169      | 0.00134142 |
| LOC100133985 | 2.48453    | 1.27586    | -0.9615      | 0.298707   |
| CCDC64       | 1.50124    | 3.38269    | 1.17202      | 0.00243047 |
| FAM172BP     | 0.399048   | 0.0718774  | -2.47295     | 0.0250278  |
| NUP88        | 29.7338    | 22.9914    | -0.37101     | 0.878808   |
| LXN          | 10.8764    | 4.99299    | -1.12323     | 0.168166   |
| HOXC13       | 0.390458   | 0.322315   | -0.276699    | 0.917325   |
| DNMBP-AS1    | 0.0147502  | 0.017603   | 0.255086     | 1          |
| LCLAT1       | 3.80844    | 4.40676    | 0.21052      | 0.730493   |
| RPL26L1      | 90.3547    | 97.1647    | 0.104832     | 0.919165   |
| HUNK         | 0.511304   | 0.883288   | 0.788703     | 0.0390303  |

|                       |            |            |            |            |
|-----------------------|------------|------------|------------|------------|
| SLC3A2                | 258.868    | 169.135    | -0.61404   | 0.0222212  |
| LOC441204             | 0.0782459  | 0.00527411 | -3.89102   | 1          |
| ZFP69B                | 1.46766    | 0.846335   | -0.794215  | 0.107348   |
| MARVELD3              | 1.63968    | 1.65958    | 0.0174021  | 0.995957   |
| EIF6                  | 309.601    | 374.143    | 0.273178   | 0.535903   |
| TESC                  | 57.6999    | 68.0545    | 0.23812    | 0.627322   |
| SLC5A6                | 22.2965    | 47.8295    | 1.10109    | 0.00134142 |
| KIF16B                | 1.62354    | 1.95014    | 0.26443    | 0.67787    |
| HIST1H4C              | 1.48723    | 1.09498    | -0.441728  | 0.880065   |
| CYCS                  | 27.2936    | 53.8919    | 0.981507   | 0.00134142 |
| TPST1                 | 3.18312    | 2.43077    | -0.389026  | 0.470491   |
| ERH                   | 283.73     | 313.97     | 0.146107   | 0.853208   |
| FAM154B               | 0.045235   | 0.0503421  | 0.154326   | 1          |
| ULK4                  | 0.405602   | 0.242059   | -0.744707  | 0.20932    |
| S100A14               | 0.33931    | 0.426614   | 0.330329   | 0.901686   |
| WNK4                  | 1.35284    | 0.570035   | -1.24687   | 0.00243047 |
| CARD9                 | 1.61425    | 1.97951    | 0.294271   | 0.807726   |
| NASP                  | 56.4318    | 51.8883    | -0.121099  | 0.906606   |
| LOC100133161          | 0.163705   | 0.079043   | -1.05039   | 1          |
| FABP5                 | 272.105    | 562.336    | 1.04727    | 0.00134142 |
| ADCY7                 | 7.15387    | 6.75006    | -0.0838227 | 0.950929   |
| RNF39                 | 0.0869703  | 0.0336413  | -1.37029   | 1          |
| ZC3H12A               | 4.54988    | 5.43075    | 0.255324   | 0.709472   |
| MTFR2                 | 13.4814    | 12.3873    | -0.122116  | 0.909435   |
| C21orf67              | 1.8961     | 0.951387   | -0.994932  | 0.102638   |
| ARID5B                | 0.244139   | 0.0464284  | -2.39462   | 1          |
| AMOT                  | 0.285535   | 0.101206   | -1.49637   | 1          |
| FLJ45513              | 0.0652037  | 0.0812565  | 0.317528   | 1          |
| WDFY2                 | 4.29015    | 3.20311    | -0.421553  | 0.279046   |
| MORC2-AS1             | 1.01809    | 1.9029     | 0.902345   | 0.401647   |
| GJA9,MYCBP            | 10.5246    | 15.2882    | 0.538659   | 0.0544049  |
| N6AMT2                | 9.53769    | 10.6933    | 0.164998   | 0.883143   |
| EXTL2                 | 6.75334    | 5.50193    | -0.295664  | 0.500068   |
| MEIG1                 | 0.208498   | 0.0961526  | -1.11663   | 1          |
| SP140                 | 0.152342   | 0.05259    | -1.53446   | 1          |
| EPHA2                 | 91.2262    | 83.305     | -0.131044  | 0.880115   |
| EBNA1BP2              | 95.8079    | 177.847    | 0.892421   | 0.00134142 |
| SMURF2                | 87.3171    | 79.77      | -0.130417  | 0.882983   |
| CHIC2                 | 21.4958    | 11.4608    | -0.907344  | 0.00243047 |
| FAM90A2P              | 0.0743014  | 0.0666061  | -0.157734  | 1          |
| ZC3H12C               | 0.931777   | 0.820306   | -0.183822  | 0.832742   |
| TMPRSS6               | 0.0499574  | 0.0728513  | 0.544256   | 1          |
| MCM8                  | 2.55184    | 1.801      | -0.502739  | 0.188097   |
| HNRNPA3               | 51.8879    | 61.4299    | 0.243542   | 0.61004    |
| TCOF1                 | 32.1702    | 40.5979    | 0.335683   | 0.342801   |
| GDF15                 | 196.187    | 57.9797    | -1.75861   | 0.00134142 |
| CDC123                | 154.264    | 193.213    | 0.324789   | 0.580834   |
| PAXB1-AS1             | 0.0956116  | 0.0622591  | -0.6189    | 1          |
| JUP                   | 0.0268097  | 0.0392357  | 0.549412   | 1          |
| DHRS7B                | 13.8328    | 11.8597    | -0.222028  | 0.708923   |
| LPP-AS2               | 0.42464    | 0.239164   | -0.82824   | 0.966566   |
| LYAR                  | 29.9082    | 67.2487    | 1.16896    | 0.00134142 |
| SLC37A1               | 8.08772    | 10.2949    | 0.348122   | 0.37259    |
| PKI55                 | 1.68916    | 2.1963     | 0.378766   | 0.439129   |
| COL6A3                | 0.00520804 | 0          | #NAME?     | 1          |
| LOC399815             | 0.432017   | 0.239742   | -0.849608  | 0.757853   |
| C9orf72               | 4.36607    | 1.94684    | -1.1652    | 0.00134142 |
| GMFG                  | 0.371239   | 0.20536    | -0.854197  | 0.700137   |
| UHL5                  | 12.5121    | 13.3194    | 0.09021    | 0.966409   |
| PDZK1                 | 0.0925474  | 0.102165   | 0.142639   | 1          |
| KCNMB2                | 0.0141492  | 0          | #NAME?     | 1          |
| CFP                   | 0.280096   | 0.493432   | 0.816933   | 0.435273   |
| ZMPSTE24              | 10.6363    | 14.2711    | 0.424098   | 0.159615   |
| CD160                 | 0.1954     | 0.142511   | -0.45536   | 1          |
| SLFN1                 | 0.203339   | 0.132316   | -0.619899  | 1          |
| C17orf107             | 0.164172   | 0.296386   | 0.852266   | 1          |
| CCDC58                | 50.5872    | 54.8212    | 0.115962   | 0.911876   |
| SLC9A8                | 3.83062    | 2.87502    | -0.414006  | 0.266731   |
| MELK                  | 13.297     | 10.4417    | -0.34875   | 0.356483   |
| SLCO1B1               | 0.0583381  | 0.0256817  | -1.1837    | 1          |
| SNORA80               | 15.9977    | 6.09681    | -1.39174   | 0.899904   |
| RFC3                  | 7.75499    | 8.28098    | 0.0946763  | 0.948088   |
| SRSF3                 | 88.0611    | 103.522    | 0.233359   | 0.634692   |
| TXNL4B                | 7.57722    | 6.95441    | -0.123739  | 0.972989   |
| SNAI1                 | 11.0722    | 10.1491    | -0.125592  | 0.921047   |
| HSPE1,HSPE1-MOB4,MOB- | 435.497    | 950.071    | 1.12537    | 0.141455   |
| ZFHX2                 | 0.201983   | 0.152857   | -0.402054  | 1          |
| C6orf52               | 3.0617     | 2.10211    | -0.54249   | 0.539871   |
| STAR                  | 0.102664   | 0.0594265  | -0.788748  | 1          |

|                        |            |            |            |            |
|------------------------|------------|------------|------------|------------|
| TPE2P1                 | 0.0142097  | 0.00220875 | -2.68558   | 1          |
| LOC642852              | 0.956575   | 0.685232   | -0.481286  | 0.300705   |
| RRN3P2                 | 0.0720251  | 0.0376685  | -0.935142  | 1          |
| LOC100506083           | 0.369006   | 0.134417   | -1.45693   | 0.925191   |
| LOC619207              | 0.133508   | 0.146587   | 0.134835   | 1          |
| RFC4                   | 36.1159    | 27.5324    | -0.391506  | 0.917325   |
| LOC100507117           | 0.0197453  | 0.0402015  | 1.02574    | 1          |
| SLC45A4                | 5.95365    | 7.85051    | 0.399012   | 0.322788   |
| JMJD6                  | 29.6291    | 53.2705    | 0.846322   | 0.00134142 |
| NPTN                   | 25.4518    | 26.1608    | 0.0396341  | 0.982703   |
| PRPF3                  | 11.8771    | 15.3238    | 0.367592   | 0.2823     |
| PLBD2                  | 10.6262    | 9.14012    | -0.217341  | 0.737966   |
| PTPRCAP                | 2.00228    | 1.23005    | -0.70292   | 0.44885    |
| CARS                   | 35.277     | 13.327     | -1.40438   | 0.00134142 |
| SPATA5                 | 0.846558   | 0.897464   | 0.0842448  | 0.96128    |
| SFPQ                   | 74.6618    | 89.7626    | 0.265744   | 0.53058    |
| PRICKLE1               | 0.00974718 | 0          | #NAME?     | 1          |
| MIR17,MIR17HG,MIR18A,M | 5.82248    | 7.70596    | 0.404341   | 0.548694   |
| DPY19L1                | 3.73194    | 3.89576    | 0.0619801  | 0.972989   |
| ATG4C                  | 2.73663    | 2.03773    | -0.425441  | 0.334518   |
| WAS                    | 0.24474    | 0.083371   | -1.55363   | 1          |
| TYW1B                  | 1.11301    | 1.34997    | 0.278466   | 0.738508   |
| MAGOHB                 | 4.23439    | 5.65904    | 0.418402   | 0.249612   |
| RNF217                 | 0.590353   | 0.255615   | -1.20761   | 0.0732879  |
| KRTAP5-8               | 0.114366   | 0.104092   | -0.135797  | 1          |
| CACNA1I                | 0.00630179 | 0.00184568 | -1.77161   | 1          |
| DDO                    | 0.0260942  | 0.00997379 | -1.38752   | 1          |
| KLHDC7B                | 0.119535   | 0.0109749  | -3.44516   | 1          |
| C16orf45               | 0.101157   | 0.0636896  | -0.667459  | 1          |
| SLC39A3                | 34.3803    | 42.4333    | 0.303616   | 0.585223   |
| SATB2                  | 1.5654     | 1.54829    | -0.0158538 | 0.994978   |
| NES                    | 8.45029    | 8.15249    | -0.0517602 | 0.977103   |
| MT2A                   | 9042.26    | 10489.5    | 0.214192   | 0.728863   |
| ATP6V1H                | 41.7024    | 25.8055    | -0.692451  | 0.00593755 |
| TRIM56                 | 1.83422    | 2.50158    | 0.447672   | 0.377924   |
| LG12                   | 0.209794   | 0.175069   | -0.261053  | 1          |
| PDCL3P4                | 0.156773   | 0.0373432  | -2.06976   | 1          |
| DDX46                  | 6.13452    | 8.00618    | 0.384165   | 0.227784   |
| RPA4                   | 0.331671   | 0.493343   | 0.572837   | 0.954559   |
| KIAA0922               | 3.04965    | 3.58392    | 0.232895   | 0.711277   |
| TSLP                   | 4.28121    | 0.373282   | -3.51968   | 0.00134142 |
| DDX39A                 | 82.7713    | 121.213    | 0.550338   | 0.0377654  |
| C11orf75               | 17.6477    | 18.4361    | 0.063057   | 0.974169   |
| TANK                   | 8.14538    | 7.55213    | -0.109098  | 0.958814   |
| GOT1                   | 42.4848    | 22.3255    | -0.928251  | 0.00134142 |
| NPB                    | 1.04484    | 1.2862     | 0.299829   | 0.990857   |
| SLC7A11                | 2.26995    | 0.171503   | -3.72636   | 0.00134142 |
| GPR114                 | 2.59823    | 2.50328    | -0.0537062 | 0.979875   |
| PAPL                   | 16.4684    | 7.88386    | -1.06273   | 0.00134142 |
| ATAD2                  | 13.9131    | 10.8332    | -0.36098   | 0.284624   |
| ZWILCH                 | 5.42852    | 5.65006    | 0.0577067  | 0.976214   |
| LRR1                   | 19.8758    | 27.2908    | 0.457402   | 0.215245   |
| ZNF121                 | 1.4867     | 1.20943    | -0.297796  | 0.748946   |
| KLLN                   | 0.1689     | 0.113759   | -0.570198  | 1          |
| ALG8                   | 29.0937    | 30.7067    | 0.077846   | 0.977402   |
| FLJ27352               | 1.29037    | 0.526421   | -1.29349   | 0.908114   |
| HPCAL4                 | 1.33831    | 0.58993    | -1.18179   | 0.00134142 |
| GINS4                  | 6.30422    | 6.37352    | 0.0157731  | 0.994615   |
| CDCA5                  | 44.8949    | 45.8885    | 0.0315803  | 0.987693   |
| IFLTD1                 | 0.0153612  | 0.0136304  | -0.172468  | 1          |
| ZNF326                 | 6.0932     | 6.38355    | 0.0671583  | 0.967901   |
| LINC00242              | 0.446615   | 0.568653   | 0.348517   | 0.830163   |
| HOXD4                  | 1.32727    | 0.930125   | -0.51297   | 0.617065   |
| SLC27A4                | 59.9969    | 116.123    | 0.9527     | 0.00134142 |
| SNORA70                | 77.0767    | 63.7874    | -0.273023  | 0.986822   |
| CD4                    | 0.0429067  | 0.0910064  | 1.08477    | 1          |
| ALKBH8                 | 1.10712    | 1.30921    | 0.241886   | 0.75896    |
| FLJ44313               | 0.539981   | 0.374729   | -0.527063  | 0.606359   |
| MAP1LC3B2              | 4.71827    | 3.90207    | -0.274019  | 0.787338   |
| AIFM1                  | 41.862     | 38.3892    | -0.124942  | 0.900876   |
| SLCO5A1                | 2.54885    | 2.45899    | -0.0517787 | 0.981753   |
| LOC100653515           | 0.0239464  | 0.017547   | -0.448581  | 1          |
| ANXA1                  | 295.464    | 270.938    | -0.125022  | 0.895818   |
| LAMC2                  | 0.145309   | 0.025094   | -2.53371   | 1          |
| FAR2                   | 3.62752    | 1.59624    | -1.18431   | 0.00134142 |
| QLAH                   | 0.0486382  | 0.0778916  | 0.679378   | 1          |
| DTL                    | 8.3613     | 6.6847     | -0.322865  | 0.573076   |
| PRTFDC1                | 6.30322    | 4.76238    | -0.404407  | 0.331815   |
| RANBP1                 | 194.117    | 295.02     | 0.603885   | 0.0231741  |

|                  |            |            |            |            |
|------------------|------------|------------|------------|------------|
| SERPINI1         | 0.418732   | 0.26345    | -0.668498  | 0.457945   |
| ZNF860           | 0.0649159  | 0.0777457  | 0.260191   | 1          |
| TXNRD1           | 31.1564    | 34.5781    | 0.150332   | 0.845971   |
| SLC35F6          | 22.3606    | 20.3892    | -0.133157  | 0.877191   |
| THSD1            | 1.13149    | 1.24883    | 0.142355   | 0.934181   |
| WBSCR22          | 134.384    | 121.546    | -0.144859  | 0.851127   |
| RAD18            | 4.22339    | 4.80101    | 0.184939   | 0.7854     |
| C5orf4           | 0.0151784  | 0.0358942  | 1.24173    | 1          |
| SUN3             | 29.9444    | 12.7491    | -1.23189   | 0.00134142 |
| ABHD8            | 11.2101    | 8.07044    | -0.474081  | 0.24748    |
| ABCC5            | 6.42402    | 7.43935    | 0.211699   | 0.82731    |
| NUDC             | 507.022    | 472.263    | -0.102458  | 0.92969    |
| ADAM21           | 0.0490864  | 0.0209527  | -1.22819   | 1          |
| YRDC             | 35.1405    | 48.0055    | 0.450068   | 0.427193   |
| CPLX1            | 6.65785    | 12.9742    | 0.962513   | 0.00337323 |
| PHGDH            | 154.509    | 79.1788    | -0.964509  | 0.00134142 |
| SLC6A9           | 4.9476     | 2.18057    | -1.18202   | 0.14478    |
| DHX34            | 13.1704    | 24.2947    | 0.883338   | 0.00134142 |
| MOCOS            | 18.2761    | 6.58511    | -1.47268   | 0.00134142 |
| ENTPD7           | 3.3249     | 1.87324    | -0.827775  | 0.284421   |
| BFSP1            | 0.307191   | 0.30265    | -0.0214861 | 1          |
| RIN2             | 0.0548173  | 0.0308959  | -0.827216  | 1          |
| RNASEH1          | 11.874     | 12.5476    | 0.0796097  | 0.958814   |
| FAM71F2          | 0.0633574  | 0.0369527  | -0.777832  | 1          |
| AQP6             | 0.0204569  | 0.00576159 | -1.82805   | 1          |
| ALG6             | 3.1435     | 2.75124    | -0.192292  | 0.810854   |
| APOO             | 15.8908    | 11.2759    | -0.494953  | 0.16323    |
| AGPAT9           | 7.4161     | 5.36225    | -0.467821  | 0.167189   |
| DOHH             | 22.9463    | 37.445     | 0.706511   | 0.00882987 |
| FRMD3            | 0.0221038  | 0.0377309  | 0.771452   | 1          |
| GLIPR1L2         | 0.106405   | 0.0572385  | -0.894504  | 1          |
| ITGA2            | 1.27715    | 0.602683   | -1.08345   | 0.00134142 |
| MRPL1            | 11.1805    | 13.4467    | 0.266258   | 0.619929   |
| ULBP1            | 1.54588    | 0.478988   | -1.69036   | 0.00134142 |
| OXCT1            | 24.4332    | 18.419     | -0.407646  | 0.189877   |
| RAB37            | 0.118545   | 0.0437125  | -1.43931   | 1          |
| GPD2             | 4.94363    | 3.69474    | -0.420099  | 0.180352   |
| TERT             | 1.12391    | 1.38571    | 0.302098   | 0.761311   |
| DNAJC6           | 2.02344    | 1.37885    | -0.553346  | 0.0925999  |
| ACER1            | 0.499557   | 0.490216   | -0.0272336 | 0.996079   |
| PPP1R15A         | 248.519    | 55.9365    | -2.1515    | 0.00134142 |
| AANAT            | 0.175104   | 0.170445   | -0.0389072 | 1          |
| UHRF1            | 23.4321    | 43.2452    | 0.88405    | 0.00134142 |
| LDLRAD4          | 0.0743143  | 0.05106    | -0.541447  | 1          |
| FKBP14           | 2.89441    | 3.24956    | 0.166976   | 0.844196   |
| SESN2            | 75.4562    | 9.64074    | -2.96842   | 0.00134142 |
| NRBF2            | 8.00305    | 5.74127    | -0.479181  | 0.169924   |
| GOLGA6L10        | 0.0782574  | 0.0326855  | -1.25958   | 1          |
| GTF2I            | 1.07519    | 0.971748   | -0.145942  | 0.92313    |
| KIF9             | 1.154      | 1.33835    | 0.213813   | 0.966946   |
| CFL1             | 934.875    | 1278.41    | 0.451501   | 0.152398   |
| MREG             | 6.54934    | 10.5415    | 0.686657   | 0.0101293  |
| CCDC102B         | 0.0538941  | 0.0221426  | -1.28331   | 1          |
| IDI2-AS1         | 1.85777    | 3.12059    | 0.748242   | 0.937765   |
| TBC1D3P1-DHX40P1 | 0.0311964  | 0          | #NAME?     | 1          |
| HAT1             | 31.1309    | 30.809     | -0.014993  | 0.99449    |
| NHSL1            | 1.0169     | 0.929064   | -0.130323  | 0.930505   |
| SNORA71B         | 5.27986    | 3.80551    | -0.472411  | 0.982256   |
| EIF5A            | 1114.26    | 1611.2     | 0.53205    | 0.0708615  |
| KLB              | 0.0546345  | 0.0790968  | 0.533807   | 1          |
| SOAT2            | 0.189916   | 0.0884254  | -1.10283   | 1          |
| LOC153684        | 0.202387   | 0.314618   | 0.636484   | 1          |
| ARHGAP40         | 1.84395    | 0.699997   | -1.39738   | 0.00243047 |
| RAD21-AS1        | 0.0885723  | 0.0486263  | -0.865119  | 1          |
| NPR3             | 0.00902376 | 0.00110116 | -3.03471   | 1          |
| CHAF1A           | 16.8747    | 20.2179    | 0.26077    | 0.574725   |
| DOC2B            | 1.1502     | 1.23342    | 0.100777   | 0.979733   |
| IQGAP2           | 0.00967685 | 0.00349283 | -1.47014   | 1          |
| ALG3             | 82.4445    | 84.2841    | 0.0318367  | 0.987693   |
| NRP2             | 0.981531   | 1.16716    | 0.249895   | 0.76182    |
| FAM49A           | 0.0327264  | 0.0017244  | -4.24628   | 1          |
| POLA1            | 2.79487    | 2.19579    | -0.348037  | 0.396027   |
| MTHFD2           | 101.789    | 58.6885    | -0.794436  | 0.00337323 |
| RBM26-AS1        | 0.234562   | 0.138192   | -0.763299  | 1          |
| GP1BA            | 0.161706   | 0.106606   | -0.601086  | 1          |
| KIF24            | 0.835444   | 0.446468   | -0.903985  | 0.630254   |
| FLJ34208         | 0.0765826  | 0          | #NAME?     | 1          |
| RGPD3            | 0.0449098  | 0.0278039  | -0.691747  | 1          |
| ABCA12           | 0.00438125 | 0.00292612 | -0.582353  | 1          |

|            |            |            |            |            |
|------------|------------|------------|------------|------------|
| CSRNP1     | 10.1008    | 12.6936    | 0.329629   | 0.421895   |
| SNRPA1     | 63.2576    | 78.7142    | 0.315384   | 0.392997   |
| TMEM51     | 6.57089    | 14.4741    | 1.13932    | 0.00134142 |
| PDE3B      | 1.16628    | 1.71396    | 0.555415   | 0.125756   |
| EMP2       | 4.57016    | 5.25123    | 0.20041    | 0.746516   |
| C11orf65   | 0.47234    | 0.143438   | -1.7194    | 0.115486   |
| PPP1R3F    | 1.02281    | 1.46947    | 0.522762   | 0.35352    |
| RNF144B    | 0.303025   | 0.0665511  | -2.1869    | 1          |
| PRR22      | 12.7085    | 12.4719    | -0.027112  | 0.991767   |
| GINS3      | 7.63953    | 12.83      | 0.747968   | 0.00593755 |
| CRYBB3     | 0.340472   | 0.400769   | 0.235235   | 0.965573   |
| UPK3B      | 1.58439    | 3.47215    | 1.1319     | 0.0167292  |
| C16orf59   | 12.2072    | 13.6777    | 0.164085   | 0.87016    |
| PHLDA2     | 136.679    | 322.326    | 1.23773    | 0.00134142 |
| RASSF8     | 0.156757   | 0.0917671  | -0.772477  | 1          |
| CTAGE4     | 0.115498   | 0.0826111  | -0.483465  | 1          |
| SNORD97    | 7.8939     | 11.3175    | 0.519749   | 0.979701   |
| DIXDC1     | 1.02882    | 1.036      | 0.0100225  | 0.997036   |
| CCDC151    | 0.663777   | 0.318507   | -1.05937   | 0.148987   |
| CAMKMT     | 3.57653    | 2.80312    | -0.351527  | 0.588286   |
| MGC16142   | 1.1657     | 1.64468    | 0.496607   | 0.500802   |
| COL24A1    | 0.00516324 | 0.00718247 | 0.476203   | 1          |
| RASSF5     | 0.671182   | 0.528549   | -0.344665  | 0.720797   |
| HNRNPA2B1  | 190.028    | 195.037    | 0.0375368  | 0.985921   |
| FIGNL1     | 3.61598    | 2.40558    | -0.588004  | 0.0688198  |
| MYBL2      | 24.0965    | 23.861     | -0.014172  | 0.994615   |
| TBX2       | 0.109634   | 0.0256853  | -2.09367   | 1          |
| GRIN3A     | 0.0551477  | 0.0408909  | -0.43152   | 1          |
| NR3C2      | 0.280821   | 0.0762448  | -1.88094   | 1          |
| KLF2       | 50.5771    | 23.8264    | -1.08592   | 0.00134142 |
| C3orf58    | 3.30832    | 3.52071    | 0.0897709  | 0.956296   |
| FBXO16     | 1.00263    | 0.349415   | -1.52077   | 0.0205623  |
| VKORC1L1   | 10.8311    | 11.8722    | 0.132403   | 0.913984   |
| FAM43A     | 4.20822    | 3.09463    | -0.443444  | 0.370983   |
| LOC440173  | 0.033729   | 0.0220146  | -0.615528  | 1          |
| SCARNA9L   | 1.30919    | 1.54304    | 0.237103   | 0.991076   |
| YY2        | 0.677327   | 0.768662   | 0.182497   | 0.970053   |
| ALOX5AP    | 0.0593399  | 0          | #NAME?     | 1          |
| ANKFN1     | 0.092342   | 0.0145375  | -2.66721   | 1          |
| HIST1H3G   | 1.77061    | 2.77399    | 0.647714   | 0.657112   |
| SGPP2      | 0.958203   | 0.577396   | -0.730769  | 0.425831   |
| TCHP       | 5.27487    | 5.77932    | 0.131764   | 0.903932   |
| DNAH6      | 0.0240621  | 0.00292244 | -3.04152   | 1          |
| NECAB2     | 0.149068   | 0.0453665  | -1.71627   | 1          |
| SLC16A14   | 3.19334    | 2.63773    | -0.275768  | 0.617065   |
| TMEM194B   | 12.6512    | 5.94797    | -1.08881   | 0.00134142 |
| APOBR      | 0.0412117  | 0.0147336  | -1.48394   | 1          |
| BNIP3      | 0.0456379  | 0.0404695  | -0.173397  | 1          |
| SLC7A5     | 118.305    | 119.424    | 0.0135855  | 0.994978   |
| SLCO3A1    | 2.69589    | 2.58222    | -0.0621469 | 0.979733   |
| CXorf48    | 0.0135767  | 0.0295714  | 1.12307    | 1          |
| RBM28      | 24.0855    | 24.4414    | 0.0211615  | 0.991767   |
| SFXN2      | 7.84367    | 5.19869    | -0.593381  | 0.0539552  |
| C4orf26    | 0.0349812  | 0.0247486  | -0.49923   | 1          |
| CPEB1      | 0.0151883  | 0.0200622  | 0.401516   | 1          |
| TENM3      | 0.262913   | 0.144759   | -0.860931  | 1          |
| PSG5       | 0.02562    | 0          | #NAME?     | 1          |
| DKK3       | 0.217043   | 0.0198283  | -3.45235   | 1          |
| ENPP6      | 0.0434604  | 0.00515347 | -3.07608   | 1          |
| NRGN       | 23.0693    | 24.474     | 0.085274   | 0.957507   |
| C15orf48   | 0.136199   | 0.174639   | 0.35866    | 1          |
| TMEM209    | 7.77051    | 3.4521     | -1.17054   | 0.00134142 |
| TCTE1      | 0.112922   | 0.0777594  | -0.538234  | 1          |
| GARS       | 96.4142    | 51.5035    | -0.904576  | 0.00134142 |
| PARD6G-AS1 | 0.634909   | 0.905221   | 0.51172    | 0.949303   |
| KLF6       | 12.0694    | 6.90866    | -0.804871  | 0.00134142 |
| MACC1      | 0.00976192 | 0.00397341 | -1.29679   | 1          |
| THAP10     | 1.19756    | 0.669036   | -0.839941  | 0.119771   |
| SLC1A4     | 11.4692    | 5.42603    | -1.0798    | 0.00134142 |
| ISG20      | 55.1337    | 30.286     | -0.864282  | 0.00134142 |
| ZNF528     | 0.0241731  | 0.00388688 | -2.63672   | 1          |
| FRRS1      | 0.598787   | 0.205748   | -1.54116   | 0.00672555 |
| C3orf52    | 8.65896    | 11.9728    | 0.467492   | 0.138263   |
| YARS       | 81.1672    | 61.7437    | -0.394605  | 0.274963   |
| FBLL1      | 0.337532   | 0.666819   | 0.982269   | 0.509077   |
| GINS2      | 34.0508    | 52.9596    | 0.637202   | 0.009453   |
| SLC4A8     | 1.21207    | 1.09873    | -0.141636  | 0.969296   |
| TRIB3      | 165.921    | 27.952     | -2.56947   | 0.00134142 |
| LILRB3     | 0.0346934  | 0.0737961  | 1.08888    | 1          |



|              |            |            |             |            |
|--------------|------------|------------|-------------|------------|
| ALPK3        | 0.0420663  | 0.0217047  | -0.954661   | 1          |
| LOC100128568 | 0.0905159  | 0.128127   | 0.501332    | 1          |
| PKMYT1       | 75.9628    | 70.6793    | -0.104005   | 0.952469   |
| SRR          | 0.962686   | 0.684995   | -0.490973   | 0.980556   |
| PABPC3       | 0.0362448  | 0.00868435 | -2.06129    | 1          |
| PINLYP       | 1.07863    | 1.14254    | 0.0830384   | 0.987693   |
| ATP5EP2      | 1.23589    | 1.23192    | -0.00464387 | 0.99714    |
| COL9A3       | 17.3354    | 9.38553    | -0.885212   | 0.0150729  |
| DOLPP1       | 25.3087    | 28.1609    | 0.15406     | 0.842695   |
| JPH3         | 0.0568913  | 0.0428991  | -0.407261   | 1          |
| ESCO2        | 3.50846    | 3.57196    | 0.0258779   | 0.991569   |
| SAMD12-AS1   | 0.117935   | 0.150479   | 0.351577    | 1          |
| ANGPT2       | 0.018047   | 0.022991   | 0.349307    | 1          |
| LINC00507    | 0.0547008  | 0.0199515  | -1.45507    | 1          |
| ULBP2        | 17.423     | 15.4956    | -0.169137   | 0.830816   |
| RAD51        | 10.0681    | 10.6109    | 0.0757512   | 0.959465   |
| UBXN8        | 7.8949     | 8.28373    | 0.0693596   | 0.970558   |
| MIS18A       | 21.0102    | 20.4885    | -0.0362762  | 0.985982   |
| PTGDR2       | 1.35721    | 3.54834    | 1.3865      | 0.606431   |
| CDC6         | 11.754     | 16.315     | 0.473047    | 0.108219   |
| LAMP3        | 1.14178    | 0.459385   | -1.31351    | 0.00337323 |
| PFDN2        | 335.795    | 347.511    | 0.0494785   | 0.982156   |
| PKD1L1       | 0.143432   | 0.0861603  | -0.735267   | 1          |
| FUS          | 61.4199    | 76.1499    | 0.310137    | 0.475737   |
| ZNF488       | 0.376479   | 0.484304   | 0.363344    | 0.748691   |
| FAM83A       | 0.0408666  | 0.036259   | -0.17258    | 1          |
| SLC27A2      | 17.6766    | 11.8802    | -0.57328    | 0.036526   |
| CDC45        | 22.7127    | 17.7639    | -0.354546   | 0.334685   |
| CLSPN        | 1.27434    | 2.15906    | 0.760647    | 0.00743393 |
| SLC30A1      | 5.05827    | 3.05618    | -0.726918   | 0.036526   |
| NFKBIA       | 45.6416    | 36.259     | -0.332012   | 0.362074   |
| PYY          | 0.137626   | 0.0511152  | -1.42893    | 1          |
| ANKRD32      | 1.05942    | 1.21511    | 0.197809    | 0.853235   |
| IFI30        | 68.1645    | 91.0996    | 0.418426    | 0.1718     |
| SKA3         | 14.8135    | 14.0123    | -0.0802225  | 0.979701   |
| LOC100505679 | 0.449933   | 0.401572   | -0.164049   | 0.982497   |
| ZNF573       | 0.188635   | 0.177897   | -0.0845488  | 1          |
| CHRNA5       | 2.41371    | 3.76048    | 0.639667    | 0.0419471  |
| SEC11C       | 40.3466    | 55.4003    | 0.457445    | 0.135879   |
| PPID         | 32.0628    | 48.7192    | 0.60359     | 0.0167292  |
| BEST3        | 0.41037    | 0.0986733  | -2.0562     | 0.00337323 |
| EZH2         | 25.442     | 18.2021    | -0.483103   | 0.0924793  |
| CSTF2        | 11.6269    | 13.5814    | 0.224174    | 0.700392   |
| AMMECR1      | 1.75266    | 1.34825    | -0.378453   | 0.415129   |
| MEI1         | 0.0213133  | 0.00593488 | -1.84446    | 1          |
| MDH1B        | 0.238719   | 0.0798884  | -1.57925    | 1          |
| LNPEP        | 0.873357   | 0.627521   | -0.476908   | 0.392573   |
| DGKH         | 0.346621   | 0.267658   | -0.372971   | 1          |
| NCKAP1L      | 0.0517606  | 0.0071649  | -2.85284    | 1          |
| SLC41A2      | 0.842353   | 0.597434   | -0.495647   | 0.379176   |
| HMSD         | 7.25841    | 4.25506    | -0.770475   | 0.0854642  |
| FAM134B      | 0.690269   | 0.323092   | -1.09521    | 0.0183825  |
| TSNAXIP1     | 0.0518341  | 0.0405881  | -0.352843   | 1          |
| CNSH6.4      | 0.16226    | 0.247223   | 0.607509    | 1          |
| CHM          | 2.22712    | 1.24478    | -0.839286   | 0.0156972  |
| ATAD3C       | 0.19041    | 0.151462   | -0.330157   | 1          |
| WNT3         | 1.70023    | 0.854269   | -0.992972   | 0.101591   |
| ABRA         | 0.0225798  | 0.00621799 | -1.86051    | 1          |
| LHX4         | 0.945711   | 1.17921    | 0.318344    | 0.899352   |
| PCDH11Y      | 0.0395146  | 0.020666   | -0.935128   | 1          |
| KIAA0101     | 34.0302    | 16.7805    | -1.02003    | 0.00134142 |
| HTR2B        | 0.0406982  | 0.135843   | 1.73891     | 1          |
| HIVEP3       | 0.31636    | 0.36579    | 0.209448    | 0.909694   |
| MYO1F        | 0.0899418  | 0.078626   | -0.193986   | 1          |
| GFPT2        | 25.8173    | 46.646     | 0.853417    | 0.00134142 |
| LOC284009    | 0.116681   | 0.265901   | 1.18832     | 1          |
| GALNS        | 12.5651    | 10.7288    | -0.227934   | 0.698688   |
| TRIM67       | 0.00606384 | 0.0080193  | 0.403244    | 1          |
| ARMC9        | 3.22353    | 2.41718    | -0.415317   | 0.414208   |
| KCNA6        | 0.00899642 | 0          | #NAME?      | 1          |
| LINC00565    | 0.680858   | 0.413997   | -0.717733   | 0.315951   |
| HOXB-AS5     | 2.04748    | 1.74529    | -0.230378   | 0.933023   |
| LOC389634    | 1.40765    | 1.34131    | -0.0696491  | 0.990857   |
| LHFPL5       | 0.0675193  | 0.00975292 | -2.79139    | 1          |
| AKAP12       | 2.23805    | 0.887672   | -1.33414    | 0.00134142 |
| PTPLB        | 0.685851   | 0.827111   | 0.270186    | 0.889644   |
| RFTN1        | 0.0159568  | 0.0383295  | 1.26429     | 1          |
| GADD45B      | 85.3584    | 29.717     | -1.52224    | 0.00134142 |
| TIPIN        | 8.17739    | 9.9801     | 0.287414    | 0.588125   |

|              |            |            |            |            |
|--------------|------------|------------|------------|------------|
| ENO4         | 0.172715   | 0.222884   | 0.367901   | 1          |
| FAM81A       | 0.969415   | 1.33103    | 0.45736    | 0.386225   |
| C1orf116     | 0.00801107 | 0          | #NAME?     | 1          |
| FSCN2        | 0.142858   | 0.124032   | -0.203866  | 1          |
| HCLS1        | 1.33194    | 1.00611    | -0.404732  | 0.631872   |
| TAF13        | 12.7647    | 20.1845    | 0.661094   | 0.0599768  |
| KIF26B       | 0.287519   | 0.423439   | 0.558496   | 0.420042   |
| SH3BP5L      | 96.1048    | 95.3553    | -0.0112954 | 0.995957   |
| SLC44A4      | 0.0610765  | 0.0113628  | -2.42629   | 1          |
| ALYREF       | 156.205    | 229.574    | 0.555521   | 0.0331269  |
| PAPPA2       | 0.00973644 | 0.00854743 | -0.187904  | 1          |
| KIAA0513     | 0.883354   | 0.859819   | -0.0389585 | 0.989268   |
| LOC100131496 | 0.0220414  | 0.0119943  | -0.877865  | 1          |
| IL13RA2      | 158.833    | 124.952    | -0.346137  | 0.339736   |
| CCRL2        | 2.65829    | 1.01841    | -1.38418   | 0.00134142 |
| PLD1         | 0.243844   | 0.13995    | -0.801049  | 1          |
| GOLIM4       | 0.892971   | 1.48665    | 0.735376   | 0.0851035  |
| LOC641367    | 0.0641312  | 0.0193898  | -1.72573   | 1          |
| SPATA17      | 0.25868    | 0.0143342  | -4.17363   | 1          |
| IL18R1       | 0.18837    | 0.123228   | -0.61224   | 1          |
| TSEN15       | 17.2275    | 10.343     | -0.736064  | 0.00818401 |
| PCDHB4       | 0.051832   | 0.0444491  | -0.221689  | 1          |
| TMEM180      | 7.71604    | 7.5201     | -0.0371076 | 0.986822   |
| BMP4         | 0.847014   | 1.76293    | 1.05752    | 0.0278845  |
| SLC16A6      | 0.545651   | 0.285535   | -0.93431   | 0.217352   |
| RIMS4        | 0.0104113  | 0.0112783  | 0.115393   | 1          |
| ZNF781       | 0.0877842  | 0.0543469  | -0.691763  | 1          |
| MYH3         | 0.221235   | 0.413623   | 0.902739   | 0.0698587  |
| MAGIX        | 0.96851    | 1.00124    | 0.0479498  | 0.990857   |
| MX2          | 0.0531157  | 0.0110352  | -2.26702   | 1          |
| KIF5A        | 0.0118258  | 0          | #NAME?     | 1          |
| GK           | 1.27412    | 0.649743   | -0.971558  | 0.00672555 |
| ACTR3C       | 0.826916   | 0.927583   | 0.165735   | 0.993528   |
| ABHD3        | 5.27915    | 6.79145    | 0.363413   | 0.386225   |
| EIF5AL1      | 4.25899    | 5.86699    | 0.462109   | 0.142081   |
| ELOVL6       | 9.23309    | 11.3819    | 0.301861   | 0.447323   |
| PCK2         | 84.6047    | 31.4597    | -1.42723   | 0.00134142 |
| SLC4A5       | 6.06016    | 4.99021    | -0.280255  | 0.508719   |
| RHOB         | 47.8566    | 27.853     | -0.780886  | 0.00134142 |
| LOC553103    | 0.281103   | 0.187758   | -0.582227  | 1          |
| PRSS22       | 12.1385    | 41.9309    | 1.78842    | 0.00134142 |
| TSSK2        | 0.927263   | 1.86524    | 1.00831    | 0.621939   |
| RPL19P12     | 0.093593   | 0.0416658  | -1.16754   | 1          |
| ADM          | 87.8328    | 53.8588    | -0.705577  | 0.00509212 |
| MTBP         | 3.26786    | 2.25952    | -0.532333  | 0.869283   |
| FEN1         | 28.1695    | 52.0107    | 0.884674   | 0.00134142 |
| LINC00628    | 0.130663   | 0.0854941  | -0.611955  | 1          |
| SEC1P        | 0.0388097  | 0.0373616  | -0.054862  | 1          |
| HSH2D        | 0.481263   | 0.713673   | 0.568436   | 0.474875   |
| PRKXP1       | 0.176612   | 0.228913   | 0.374213   | 1          |
| WDR88        | 0.0489333  | 0          | #NAME?     | 1          |
| LOC100616530 | 0.249577   | 0.303263   | 0.281087   | 1          |
| ITGB1BP2     | 0.545571   | 0.480038   | -0.18462   | 0.991578   |
| COL5A2       | 0.0422494  | 0.00757676 | -2.47928   | 1          |
| STOML1       | 6.08575    | 4.32169    | -0.493838  | 0.289628   |
| MFNG         | 0.172156   | 0.0938842  | -0.874763  | 1          |
| C1orf106     | 0.36825    | 0.193522   | -0.928186  | 0.158777   |
| AMIGO3       | 3.99698    | 6.58047    | 0.71928    | 0.524713   |
| CBWD3        | 0.462076   | 0.478035   | 0.048987   | 0.990371   |
| GPR113       | 0.0209888  | 0.0367724  | 0.809001   | 1          |
| ZDHHC14      | 1.85358    | 3.38257    | 0.867805   | 0.0240561  |
| SNX22        | 0.671623   | 0.548748   | -0.291507  | 0.987423   |
| KCND3        | 0.024592   | 0.0761797  | 1.63122    | 1          |
| LOC100506207 | 0.180948   | 0.0721935  | -1.32563   | 1          |
| MIRLET7DHG   | 0.74879    | 0.604382   | -0.3091    | 0.83713    |
| FBXL22       | 0.204407   | 0.176993   | -0.207753  | 1          |
| OASL         | 0.0154237  | 0          | #NAME?     | 1          |
| FLVCR1-AS1   | 3.02189    | 2.39543    | -0.335166  | 0.742477   |
| CXorf22      | 0.0227316  | 0.00197883 | -3.52198   | 1          |
| CCDC87       | 0.0303449  | 0.045944   | 0.598421   | 1          |
| ZNF672       | 152.354    | 165.06     | 0.115568   | 0.909036   |
| LOC100292680 | 0.0258732  | 0.0246239  | -0.0713954 | 1          |
| MPP6         | 4.37621    | 5.26932    | 0.267935   | 0.645335   |
| CCDC148      | 0.0806727  | 0.0255124  | -1.66088   | 1          |
| LOC646626    | 3.88532    | 2.60082    | -0.579068  | 0.956033   |
| POP1         | 6.75262    | 12.0074    | 0.830408   | 0.00134142 |
| SLC43A2      | 5.33696    | 6.6624     | 0.320022   | 0.548564   |
| ORC6         | 19.5752    | 28.2821    | 0.530861   | 0.0569429  |
| MGC2889      | 0.0583338  | 0.0311593  | -0.904669  | 1          |

|                |            |            |             |            |
|----------------|------------|------------|-------------|------------|
| LONRF3         | 3.00849    | 2.4382     | -0.303227   | 0.674264   |
| VAMP5          | 0.104683   | 0.0502897  | -1.05769    | 1          |
| KRTAP2-2       | 0.15567    | 0.0438601  | -1.82751    | 1          |
| HIST1H2BM      | 0.204237   | 0.209815   | 0.0388724   | 1          |
| RBMS1          | 0.17612    | 0.106558   | -0.724922   | 1          |
| LOC100129534   | 0.68053    | 0.254063   | -1.42147    | 0.0764532  |
| C17orf82       | 0.539638   | 0.337097   | -0.678829   | 0.75494    |
| BCL2A1         | 45.5799    | 38.1539    | -0.256568   | 0.576888   |
| BMP8A          | 0.271406   | 0.239271   | -0.181803   | 1          |
| APOBEC2        | 0.0440747  | 0.0242064  | -0.864563   | 1          |
| SERTAD1        | 111.434    | 118.883    | 0.0933534   | 0.937403   |
| KRT81          | 0.782327   | 0.972746   | 0.314292    | 0.837012   |
| MIR22,MIR22HG  | 6.15447    | 12.7264    | 1.04812     | 0.00134142 |
| LOC100505648   | 0.432376   | 0.171377   | -1.33511    | 0.245718   |
| HIST1H2BL      | 1.95006    | 1.65936    | -0.232891   | 0.947247   |
| OR7E37P        | 0.241202   | 0.15328    | -0.654072   | 1          |
| C21orf7        | 0.195006   | 0.0903761  | -1.1095     | 1          |
| HCG17          | 0.592927   | 0.425243   | -0.479566   | 0.979733   |
| SLFNL1-AS1     | 0.19548    | 0.21708    | 0.151202    | 1          |
| FKRP           | 3.61551    | 4.55566    | 0.333461    | 0.948179   |
| SNORA53        | 2.32998    | 1.60138    | -0.541007   | 0.967901   |
| LOC100129269   | 0.0459602  | 0.110608   | 1.26699     | 1          |
| SERPINB8       | 8.37117    | 5.82113    | -0.524131   | 0.0868006  |
| NCR3LG1        | 0.327378   | 0.287922   | -0.18528    | 1          |
| CEP41          | 1.5945     | 1.25995    | -0.339738   | 0.529836   |
| MRO            | 0.00494956 | 0.0016042  | -1.62545    | 1          |
| AIG1           | 42.4729    | 21.9069    | -0.955157   | 0.00134142 |
| GCNT4          | 0.0431992  | 0.0137614  | -1.65038    | 1          |
| ZBED3-AS1      | 0.242453   | 0.165508   | -0.550802   | 1          |
| DSCC1          | 8.13215    | 11.7305    | 0.52855     | 0.0710419  |
| HVCN1          | 0.0719129  | 0.0987427  | 0.457424    | 1          |
| ALG10          | 1.7696     | 1.13137    | -0.645359   | 0.123542   |
| C4A,C4B        | 0.023765   | 0.0120462  | -0.980263   | 1          |
| KIAA0408,SOGA3 | 0.00797552 | 0.00524394 | -0.604929   | 1          |
| PIANP          | 0.113297   | 0.0332068  | -1.77056    | 1          |
| SLC28A2        | 0.0415889  | 0.0100149  | -2.05406    | 1          |
| POLE2          | 6.60154    | 6.69677    | 0.0206627   | 0.99351    |
| PPP4R4         | 0.577946   | 0.592104   | 0.0349154   | 0.995302   |
| MESP2          | 0.0973148  | 0.016698   | -2.54299    | 1          |
| TAP2           | 26.4301    | 28.6651    | 0.117115    | 0.925586   |
| SLC25A34       | 0.224466   | 0.0869191  | -1.36875    | 1          |
| HBEGF          | 28.4037    | 33.8645    | 0.253697    | 0.568619   |
| RND1           | 2.47332    | 1.01849    | -1.28001    | 0.00243047 |
| SPPL2A         | 4.86353    | 5.25194    | 0.110845    | 0.934644   |
| CHDC2          | 0.0120356  | 0          | #NAME?      | 1          |
| MCM10          | 5.49524    | 8.74112    | 0.669636    | 0.00882987 |
| LOC100505865   | 0.26319    | 0.061969   | -2.08649    | 1          |
| KCNE1L         | 0.885939   | 0.590037   | -0.586403   | 0.58256    |
| SNORA68        | 12.7117    | 15.7275    | 0.307124    | 0.986822   |
| DUSP18         | 0.414375   | 0.409959   | -0.0154578  | 0.997036   |
| GSTT2          | 1.18405    | 1.81367    | 0.615179    | 0.400128   |
| MYLPF          | 0.215274   | 0.23236    | 0.110183    | 1          |
| ACTL8          | 2.45162    | 1.96638    | -0.318192   | 0.727456   |
| KRT15          | 0.119669   | 0.0393882  | -1.60321    | 1          |
| LOC100652770   | 0.171039   | 0.186882   | 0.127804    | 1          |
| PSAT1          | 96.9428    | 35.8558    | -1.43493    | 0.00134142 |
| SLC22A14       | 0.0450207  | 0.0316661  | -0.50765    | 1          |
| RASIP1         | 0.318093   | 0.275522   | -0.20728    | 1          |
| LINC00574      | 0.147373   | 0.120919   | -0.28543    | 1          |
| ZNF648         | 0.0424166  | 0.00599107 | -2.82374    | 1          |
| NLRP9          | 0.0965923  | 0.0615963  | -0.649066   | 1          |
| RARB           | 0.097151   | 0.0835415  | -0.217736   | 1          |
| ZBED6          | 0.132933   | 0.180029   | 0.437531    | 1          |
| ARHGDI8        | 0.0593659  | 0.0535124  | -0.149761   | 1          |
| FBXL2          | 0.044123   | 0.0797533  | 0.854013    | 1          |
| ARHGEF38       | 0.00386727 | 0.0108772  | 1.49192     | 1          |
| FOXP3          | 0.262841   | 0.261361   | -0.00814717 | 1          |
| MRPL42P5       | 0.496558   | 0.634835   | 0.35442     | 0.887135   |
| ACOX2          | 1.10995    | 0.619867   | -0.840461   | 0.14478    |
| EVI2B          | 0.0227385  | 0.00783081 | -1.53791    | 1          |
| IER3           | 65.9582    | 62.0741    | -0.0875612  | 0.945946   |
| POU5F1B        | 0.612146   | 0.276628   | -1.14593    | 0.174284   |
| AP4S1          | 0.636708   | 0.824218   | 0.372394    | 0.919029   |
| HIST1H2BH      | 19.5149    | 13.6781    | -0.512704   | 0.3703     |
| FLJ42289       | 0.0507725  | 0.0457934  | -0.148907   | 1          |
| CRYM           | 0.96154    | 0.685851   | -0.487453   | 0.729625   |
| C14orf105      | 0.0238807  | 0.0203062  | -0.233923   | 1          |
| NIPAL2         | 0.282965   | 0.255691   | -0.146223   | 1          |
| SCG5           | 0.332211   | 0.490825   | 0.563109    | 0.619231   |

|                 |            |             |             |            |
|-----------------|------------|-------------|-------------|------------|
| MT1G            | 0.624097   | 1.06778     | 0.774772    | 0.763851   |
| USP29           | 0.00608596 | 0.00258441  | -1.23565    | 1          |
| GPR56           | 0.0270858  | 0.0371715   | 0.45666     | 1          |
| ICAM4           | 0.256445   | 0.468511    | 0.869434    | 0.416586   |
| SYCE1           | 0.0556586  | 0.0430309   | -0.371231   | 1          |
| LOC653786       | 0.0268965  | 0.0286114   | 0.0891698   | 1          |
| FAM151B         | 0.200416   | 0.160407    | -0.321262   | 1          |
| OPCML           | 0.00383318 | 0.00564235  | 0.557757    | 1          |
| DOK3            | 4.91643    | 5.93554     | 0.271769    | 0.723754   |
| SPATA25         | 0.169204   | 0.293533    | 0.794757    | 1          |
| SOX6            | 0.00286569 | 0.000981922 | -1.5452     | 1          |
| DISP1           | 0.260217   | 0.118111    | -1.13957    | 1          |
| TMEM221         | 0.166723   | 0.255337    | 0.614951    | 1          |
| SLC16A13        | 15.4096    | 6.09218     | -1.3388     | 0.00134142 |
| LOC100507346    | 0.0514595  | 0.0319027   | -0.689758   | 1          |
| MTRNR2L3        | 0.192039   | 0.149119    | -0.364936   | 1          |
| MTUS2           | 0.111254   | 0.057089    | -0.962575   | 1          |
| C9orf117        | 0.49164    | 0.850985    | 0.791532    | 0.886142   |
| RNF148          | 0.310871   | 0.205286    | -0.598681   | 1          |
| MPZL3           | 0.22618    | 0.072081    | -1.64978    | 1          |
| CHN1            | 0.059119   | 0.0373078   | -0.664145   | 1          |
| PCAT1           | 0.0485025  | 0.00432168  | -3.48839    | 1          |
| BNIP1           | 0.240889   | 0.181054    | -0.411951   | 1          |
| ARHGAP24        | 0.157437   | 0.124157    | -0.342608   | 1          |
| FLJ13197        | 0.0130653  | 0.0242596   | 0.892818    | 1          |
| ZNF280A         | 0.0120231  | 0.00426475  | -1.49528    | 1          |
| TSPAN10         | 1.43619    | 0.444052    | -1.69345    | 0.0390303  |
| CNKSR1          | 0.566707   | 0.954406    | 0.752001    | 0.215985   |
| CTAGE9          | 0.0857     | 0.0651431   | -0.395683   | 1          |
| YY1P2           | 0.0860698  | 0.0435847   | -0.981686   | 1          |
| HIST1H2AM       | 5.80997    | 4.28695     | -0.438579   | 0.721071   |
| ESPNL           | 0.100183   | 0.0677616   | -0.5641     | 1          |
| LOC284837       | 0.0507209  | 0.0675083   | 0.412486    | 1          |
| GDAP1           | 2.27604    | 2.03259     | -0.16321    | 0.874734   |
| GCNT2           | 0.00548865 | 0           | #NAME?      | 1          |
| SPARCL1         | 0.00716128 | 0.0148949   | 1.05653     | 1          |
| PSMD6-AS2       | 0.247198   | 0.132463    | -0.900076   | 1          |
| DSEL            | 0.00258176 | 0.0010155   | -1.34616    | 1          |
| BEST1           | 0.226143   | 0.0114665   | -4.30192    | 1          |
| TMEM220         | 0.0945447  | 0.0526913   | -0.843434   | 1          |
| GTF2H2C,GTF2H2D | 1.65587    | 1.6334      | -0.0197187  | 0.995221   |
| RBMXL2          | 0.0721     | 0.0350794   | -1.03937    | 1          |
| ASRGL1          | 1.58088    | 1.56508     | -0.0144946  | 0.996631   |
| FAM173B         | 2.02411    | 2.143       | 0.0823396   | 0.966946   |
| LOC100288846    | 0.537599   | 0.206574    | -1.37987    | 0.911837   |
| OR7E12P         | 0.0281913  | 0.0417861   | 0.567774    | 1          |
| CCBP2           | 0.0243007  | 0.0103199   | -1.23557    | 1          |
| HOXB-AS3        | 1.3291     | 0.752666    | -0.820366   | 0.869168   |
| FITM2           | 1.57551    | 2.41281     | 0.614897    | 0.396027   |
| FGF1            | 0.0376972  | 0.102837    | 1.44783     | 1          |
| TNNC2           | 0.302963   | 0.321751    | 0.0868075   | 1          |
| SUSD2           | 0.17166    | 0.0559071   | -1.61845    | 1          |
| SIGLEC11        | 0.0310933  | 0.0104181   | -1.57751    | 1          |
| LAT2            | 0.931182   | 1.16854     | 0.327578    | 0.770579   |
| AQP7P3          | 0.546649   | 0.45164     | -0.275441   | 0.950929   |
| SCN4A           | 0.0156167  | 0.00763992  | -1.03146    | 1          |
| ADM5            | 4.4876     | 6.2706      | 0.482662    | 0.29172    |
| CALHM2          | 0.445915   | 0.866751    | 0.958849    | 0.140336   |
| NEK5            | 0.251903   | 0.11346     | -1.15069    | 1          |
| DACT1           | 0.00973761 | 0.00338144  | -1.52593    | 1          |
| F10             | 0.308574   | 0.172319    | -0.840531   | 1          |
| TMEM17          | 0.786761   | 0.252173    | -1.64151    | 0.0162707  |
| CRIP1           | 0.306556   | 0.210719    | -0.540833   | 1          |
| BDNF            | 0.0565565  | 0.0467283   | -0.275397   | 1          |
| LDB3            | 0.0311353  | 0.0260707   | -0.256122   | 1          |
| FBXW4P1         | 0.423701   | 0.703925    | 0.732376    | 0.948179   |
| ALMS1P          | 0.0161918  | 0.0396635   | 1.29255     | 1          |
| GPR19           | 0.482382   | 0.123837    | -1.96173    | 0.0322484  |
| POPDC2          | 0.291438   | 0.172298    | -0.758286   | 1          |
| SRL             | 0.00727419 | 0.00232336  | -1.64658    | 1          |
| CDYL2           | 0.213369   | 0.160998    | -0.406312   | 1          |
| CHRNA10         | 1.61088    | 2.11139     | 0.390341    | 0.654699   |
| SLC26A8         | 0.00870889 | 0.00270688  | -1.68586    | 1          |
| PDE6A           | 0.0166352  | 0.0142927   | -0.218957   | 1          |
| HTRA4           | 0.0291224  | 0.00956757  | -1.60591    | 1          |
| TLR5            | 0.0243997  | 0           | #NAME?      | 1          |
| CCDC17          | 0.363449   | 0.272708    | -0.414396   | 0.822719   |
| LMCD1           | 0.114664   | 0.143439    | 0.32303     | 1          |
| ITGB7           | 0.0503778  | 0.0501266   | -0.00721075 | 1          |

|                 |            |            |            |            |
|-----------------|------------|------------|------------|------------|
| SELPLG          | 0.158479   | 0.174465   | 0.138643   | 1          |
| EPN2-IT1        | 0.0393221  | 0.02907    | -0.435811  | 1          |
| GRASP           | 0.605935   | 0.542978   | -0.158269  | 0.965265   |
| LRRRC71         | 0.598052   | 0.129969   | -2.2021    | 0.0403066  |
| SP7             | 0.0113815  | 0.0124786  | 0.132762   | 1          |
| CDC14C          | 0.0087053  | 0.0147885  | 0.764513   | 1          |
| ZNF426          | 0.0300649  | 0.00339142 | -3.14812   | 1          |
| TOP1P1          | 0.108264   | 0.074508   | -0.539085  | 1          |
| DDX25           | 0.0150959  | 0.0319864  | 1.0833     | 1          |
| LOC646903       | 0.138985   | 0.180892   | 0.380198   | 1          |
| SCARNA9         | 6.94133    | 5.52031    | -0.330463  | 0.930488   |
| TRIM61          | 0.0183646  | 0.00563763 | -1.70377   | 1          |
| SAMD15          | 0.0635582  | 0.122439   | 0.945918   | 1          |
| C6orf99         | 0.478055   | 0.145437   | -1.71678   | 0.334316   |
| MESTIT1         | 0.00763557 | 0.00615521 | -0.310927  | 1          |
| TTC25           | 0.0712457  | 0.00406306 | -4.13216   | 1          |
| RIMBP2          | 0.00494378 | 0.00579313 | 0.228727   | 1          |
| EID3            | 0.272295   | 0.341586   | 0.327082   | 1          |
| SCARNA7         | 22.6122    | 19.5821    | -0.207564  | 0.986529   |
| AURKAPS1        | 0.899525   | 0.670967   | -0.422921  | 0.945946   |
| LY6G6C          | 0.0511132  | 0.0553301  | 0.114368   | 1          |
| SCARNA1         | 1.38475    | 1.59144    | 0.200712   | 0.991459   |
| EDN1            | 0.0295219  | 0.00495615 | -2.57449   | 1          |
| LRRRC4          | 0.00763807 | 0.049471   | 2.6953     | 1          |
| MAGEA12         | 0.0188461  | 0.0259848  | 0.463404   | 1          |
| FAM46B          | 1.27296    | 0.195338   | -2.70414   | 0.00243047 |
| FLJ40292        | 0.0236942  | 0.0157386  | -0.590229  | 1          |
| LOC100505676    | 0.0214189  | 0.0171027  | -0.324661  | 1          |
| WDR65           | 0.0180503  | 0.0117699  | -0.616923  | 1          |
| HIST1H2AJ       | 1.91165    | 1.20966    | -0.660214  | 0.721145   |
| LOC100134259    | 0.0262399  | 0.0288337  | 0.135992   | 1          |
| AKNAD1          | 0.0239153  | 0.0121226  | -0.980236  | 1          |
| CDKN2B-AS1      | 0.249773   | 0.210303   | -0.248148  | 1          |
| PSTPIP2         | 0.0248141  | 0.0429817  | 0.792559   | 1          |
| HIGD2B          | 0.0359344  | 0.0262662  | -0.45216   | 1          |
| ZNF699          | 0.0570255  | 0.0371741  | -0.61731   | 1          |
| HRC             | 0.0486355  | 0.01462    | -1.73407   | 1          |
| ADAMTS9         | 0.19941    | 0.242302   | 0.28107    | 1          |
| OR51B4          | 0.06874    | 0.0144737  | -2.24772   | 1          |
| SETBP1          | 0.00281353 | 0.00307541 | 0.1284     | 1          |
| HRASLS2         | 0.0519169  | 0.0731631  | 0.494914   | 1          |
| APOA2           | 1.09002    | 0.566164   | -0.945066  | 0.5209     |
| SLC22A1         | 0.0840148  | 0.178617   | 1.08815    | 1          |
| CXCR2           | 0.0110596  | 0.00773438 | -0.515941  | 1          |
| CHST5           | 0.51378    | 0.569361   | 0.148194   | 0.956807   |
| C16orf3         | 0.0405079  | 0.0171807  | -1.23742   | 1          |
| ART5            | 0.907217   | 0.258963   | -1.8087    | 0.0470437  |
| SLC38A4         | 0.088633   | 0.0376973  | -1.23338   | 1          |
| GLDC            | 0.0296569  | 0.020366   | -0.542203  | 1          |
| ADCYAP1R1       | 0.0294376  | 0.00441462 | -2.7373    | 1          |
| MIP             | 0.0496457  | 0.0213712  | -1.216     | 1          |
| MLLT10P1        | 0.132874   | 0.0878414  | -0.597083  | 1          |
| AQPEP           | 0.0208546  | 0.00209903 | -3.31257   | 1          |
| GPR84           | 0.0243532  | 0          | #NAME?     | 1          |
| LOC644961       | 0.182614   | 0.176162   | -0.0518904 | 1          |
| TGFB1           | 0.0115327  | 0.0324559  | 1.49275    | 1          |
| CD163L1         | 0.265237   | 0.138135   | -0.941205  | 1          |
| C17orf74        | 0.907713   | 0.355641   | -1.35182   | 0.064193   |
| C2orf66         | 0.20551    | 0.159925   | -0.361809  | 1          |
| SORBS1          | 0.249617   | 0.101622   | -1.29651   | 1          |
| GNAT2           | 0.101772   | 0.0548454  | -0.891902  | 1          |
| C5AR2           | 0.0395677  | 0          | #NAME?     | 1          |
| ZNF671          | 0.011255   | 0.0147095  | 0.386176   | 1          |
| ALDOB           | 0.0786431  | 0.111269   | 0.500658   | 1          |
| LOC145783       | 0.271946   | 0.104317   | -1.38235   | 1          |
| LRRN4           | 2.385      | 1.16845    | -1.0294    | 0.0222212  |
| BATF2           | 0.359694   | 0.0828711  | -2.11783   | 0.0713011  |
| SCARNA14        | 39.7266    | 4.52344    | -3.13461   | 0.71659    |
| TAGLN3          | 0.0341923  | 0.0348416  | 0.027139   | 1          |
| NHLRC4          | 0.0212024  | 0.00767822 | -1.46539   | 1          |
| ROR1            | 0.0738059  | 0.0402609  | -0.874357  | 1          |
| NINJ2           | 1.30297    | 1.56154    | 0.261169   | 0.892501   |
| DQX1            | 0.0654287  | 0.0423019  | -0.629199  | 1          |
| GPATCH11        | 1.29544    | 0.956349   | -0.437835  | 0.600127   |
| TLR9            | 0.0116719  | 0.0216592  | 0.891934   | 1          |
| SCARNA17        | 8.39468    | 7.32665    | -0.196321  | 0.921047   |
| TF              | 0.0107906  | 0.00762204 | -0.501529  | 1          |
| MIR3651,SNORA84 | 38.0936    | 14.6986    | -1.37387   | 0.844123   |
| FOXDL6          | 0.0761311  | 0.183373   | 1.26823    | 1          |

|              |            |            |             |           |
|--------------|------------|------------|-------------|-----------|
| GNMT         | 0.41335    | 0.832895   | 1.01077     | 0.895717  |
| MARS         | 51.5511    | 33.7668    | -0.610396   | 0.111587  |
| KRT222       | 0.108084   | 0.0710399  | -0.605453   | 1         |
| RAMP2-AS1    | 0.0417602  | 0.0415059  | -0.00881389 | 1         |
| MIXL1        | 0.112166   | 0          | #NAME?      | 1         |
| SNORA40      | 29.5723    | 12.7654    | -1.21201    | 0.501903  |
| C1orf101     | 0.00756959 | 0.0231592  | 1.6133      | 1         |
| APOL1        | 0.0612186  | 0.0673757  | 0.138258    | 1         |
| C2orf50      | 0.0794549  | 0          | #NAME?      | 1         |
| HIST1H1D     | 2.04507    | 0.667814   | -1.61463    | 0.0326415 |
| GGT8P        | 0.0136598  | 0.0127756  | -0.0965451  | 1         |
| SNORA21      | 39.2712    | 35.2798    | -0.15463    | 0.993108  |
| GNAT1        | 0.00916046 | 0.00275589 | -1.7329     | 1         |
| HERC5        | 0.071666   | 0.044422   | -0.690014   | 1         |
| RSPH10B2     | 0.0262513  | 0.0337019  | 0.360442    | 1         |
| QRFP         | 1.99101    | 1.5446     | -0.366267   | 0.904096  |
| CD74         | 0.048528   | 0.0250583  | -0.95353    | 1         |
| IFITM5       | 0.0760884  | 0.055216   | -0.46259    | 1         |
| SNORA61      | 55.7567    | 97.5349    | 0.806775    | 0.972339  |
| HIST1H4H     | 5.30857    | 2.79151    | -0.927279   | 0.193966  |
| PTGER4       | 0.292994   | 0.0989329  | -1.56635    | 1         |
| SNORA4       | 7.45104    | 4.89387    | -0.606466   | 0.965607  |
| NID2         | 0.0936894  | 0.0746899  | -0.326972   | 1         |
| OCM          | 0.0938077  | 0.0848568  | -0.144675   | 1         |
| FAM129C      | 0.167001   | 0.0769061  | -1.11868    | 1         |
| SNORA32      | 14.8159    | 2.43223    | -2.6068     | 0.651698  |
| ZC2HC1C      | 0.238723   | 0.105586   | -1.17693    | 1         |
| EPCN         | 0.01959    | 0.0205471  | 0.0688183   | 1         |
| RPL21P44     | 0.0556753  | 0.0353654  | -0.654699   | 1         |
| GAL3ST1      | 0.0377557  | 0.0139683  | -1.43454    | 1         |
| MCF2         | 0.0061481  | 0.0064565  | 0.0706126   | 1         |
| HIST1H2AG    | 2.31666    | 2.47366    | 0.0946005   | 0.984481  |
| ODF3L2       | 0.843926   | 0.258318   | -1.70797    | 0.0743087 |
| NBEA         | 0.00207432 | 0.00247577 | 0.255237    | 1         |
| MYCT1        | 0.0338577  | 0.00347899 | -3.28274    | 1         |
| NAT2         | 0.0196492  | 0          | #NAME?      | 1         |
| UBAC2-AS1    | 0.441153   | 0.147143   | -1.58405    | 0.90439   |
| PP2D1        | 0.0490825  | 0.0388838  | -0.336041   | 1         |
| SNORA16A     | 8.43867    | 4.3471     | -0.956962   | 0.953061  |
| DMGDH        | 0.00749899 | 0.0023659  | -1.66431    | 1         |
| LOC440600    | 0.15621    | 0.0997782  | -0.646687   | 1         |
| RYR3         | 0.00518349 | 0.0190965  | 1.88131     | 1         |
| LOC100996291 | 0.012997   | 0.00396104 | -1.71423    | 1         |
| ISPD         | 0.101736   | 0.0836407  | -0.282547   | 1         |
| SLC7A11-AS1  | 0.0160888  | 0          | #NAME?      | 1         |
| MYLK2        | 0.474543   | 1.05378    | 1.15096     | 0.0250278 |
| KCNH6        | 0.0988114  | 0.0557936  | -0.824579   | 1         |
| GPR1         | 0.012819   | 0.00851487 | -0.590222   | 1         |
| PPL          | 0.00603731 | 0.00663581 | 0.136368    | 1         |
| TVP23A       | 0.161538   | 0.0974763  | -0.72875    | 1         |
| KANSL1-AS1   | 0.819718   | 0.571921   | -0.51931    | 0.983187  |
| SCARNA8      | 6.90437    | 1.05711    | -2.70739    | 0.798756  |
| C17orf50     | 0.0785492  | 0          | #NAME?      | 1         |
| CASC1        | 0.00895633 | 0          | #NAME?      | 1         |
| USHBP1       | 0.278077   | 0.319475   | 0.200218    | 1         |
| TM4SF20      | 0.010744   | 0.018009   | 0.745189    | 1         |
| FLJ40852     | 0.0566953  | 0.0208137  | -1.44569    | 1         |
| HOGA1        | 0.0462731  | 0.0419764  | -0.140596   | 1         |
| LINC00312    | 0.0168134  | 0.00508024 | -1.72665    | 1         |
| ENG          | 2.81281    | 2.6526     | -0.0846053  | 0.970195  |
| DHX58        | 0.0444509  | 0.0317726  | -0.484428   | 1         |
| RPL23AP64    | 0.357509   | 0.356781   | -0.0029424  | 0.998514  |
| CABP4        | 0.0143033  | 0.00531754 | -1.42751    | 1         |
| SCARNA2      | 4.75027    | 4.51906    | -0.0719864  | 0.987627  |
| CST6         | 0.104436   | 0          | #NAME?      | 1         |
| F13B         | 0.00937517 | 0.0160379  | 0.774571    | 1         |
| SYNPO2       | 0.00590295 | 0.00214645 | -1.45948    | 1         |
| TREX2        | 0.55987    | 1.2312     | 1.13691     | 0.202966  |
| LOC100240735 | 0.0388845  | 0          | #NAME?      | 1         |
| C6orf58      | 0.0770946  | 0.0165804  | -2.21715    | 1         |
| NRXN2        | 0.0489192  | 0.00596506 | -3.03579    | 1         |
| DHRS2        | 0.183292   | 0.149337   | -0.295579   | 1         |
| TPH1         | 0.0137348  | 0.0358429  | 1.38385     | 1         |
| TMIGD2       | 0.0351606  | 0.0244233  | -0.525701   | 1         |
| DFNA5        | 0.0130963  | 0          | #NAME?      | 1         |
| TMEM169      | 0.0152665  | 0.0124688  | -0.292041   | 1         |
| SHE          | 0.00439503 | 0.00974732 | 1.14913     | 1         |
| SYNGR4       | 0.211261   | 0.0168683  | -3.64664    | 1         |
| GPX3         | 0.0546053  | 0.0188048  | -1.53794    | 1         |

|               |            |            |            |           |
|---------------|------------|------------|------------|-----------|
| S100A5        | 0.0448174  | 0          | #NAME?     | 1         |
| PLEKHH2       | 0.00332603 | 0.00337003 | 0.0189628  | 1         |
| CALCB         | 0.0996312  | 0          | #NAME?     | 1         |
| GRM2          | 0.075045   | 0.0166561  | -2.1717    | 1         |
| PON1          | 0.0278956  | 0.0394747  | 0.500891   | 1         |
| KCNMA1        | 0.00468175 | 0          | #NAME?     | 1         |
| PSPN          | 0.606991   | 0.866818   | 0.514055   | 0.89195   |
| MT1B          | 0.35056    | 0.0599693  | -2.54737   | 0.671133  |
| TMEM156       | 0.0263846  | 0.00446545 | -2.56282   | 1         |
| SNORD8        | 16.2993    | 12.1015    | -0.429619  | 0.979733  |
| C9orf152      | 0.0236951  | 0.0440858  | 0.895722   | 1         |
| HAS2-AS1      | 0.0436717  | 0.0703752  | 0.688369   | 1         |
| MMP23B        | 0.0651424  | 0.082726   | 0.344744   | 1         |
| CXADR         | 0.0355346  | 0.0595484  | 0.744836   | 1         |
| CHST11        | 0.00978691 | 0.0171327  | 0.807831   | 1         |
| INSM1         | 0.317397   | 0.229187   | -0.469765  | 1         |
| CCL3          | 0.0567757  | 0.0910522  | 0.68142    | 1         |
| CPNE5         | 0.118359   | 0.0639714  | -0.887675  | 1         |
| H3F3C         | 0.0325572  | 0.0604626  | 0.893067   | 1         |
| SPOCK2        | 0.0418238  | 0.0169115  | -1.30632   | 1         |
| CACNA1G-AS1   | 0.0245062  | 0.0165394  | -0.567243  | 1         |
| KBTBD12       | 0.0102753  | 0.00682772 | -0.589706  | 1         |
| MTUS1         | 0.389205   | 0.166175   | -1.22782   | 0.0349222 |
| NFATC2        | 0.0044602  | 0.00684655 | 0.618269   | 1         |
| PDZRN4        | 0.00793204 | 0.011172   | 0.494129   | 1         |
| LOC727896     | 0.0160991  | 0.0180429  | 0.164449   | 1         |
| LRG1          | 0.0746771  | 0.079246   | 0.0856722  | 1         |
| CCDC65        | 0.0145917  | 0.0652823  | 2.16155    | 1         |
| CLDN20        | 0.0233248  | 0.0176767  | -0.400014  | 1         |
| ACRBP         | 0.333035   | 0.0640698  | -2.37796   | 1         |
| OTUD7A        | 0.132559   | 0.0926292  | -0.517091  | 1         |
| DNAH7         | 0.00186996 | 0.00124501 | -0.586847  | 1         |
| TAS1R1        | 0.0192512  | 0.00611723 | -1.654     | 1         |
| ARHGEF26-AS1  | 0.0307298  | 0.0302489  | -0.0227539 | 1         |
| GRIN1         | 0.0947797  | 0.134735   | 0.50747    | 1         |
| PIP5K1B       | 0.148872   | 0.0432112  | -1.7846    | 1         |
| PP14571       | 0.0540357  | 0.0405322  | -0.414846  | 1         |
| LUST          | 0.202137   | 0.184558   | -0.131253  | 1         |
| CCDC108       | 0.00576944 | 0.00484996 | -0.250459  | 1         |
| OR5K2         | 0.0326659  | 0.0318609  | -0.036     | 1         |
| FABP5P3       | 0.037511   | 0.0269288  | -0.478164  | 1         |
| LIN28A        | 0.00712862 | 0.00570404 | -0.321638  | 1         |
| SCARNA16      | 16.4784    | 4.35591    | -1.91953   | 0.902188  |
| ZNF876P       | 0.135401   | 0.056292   | -1.26624   | 1         |
| CXCCL3        | 0.662447   | 0.389577   | -0.765897  | 0.432091  |
| LOC100506368  | 0.242359   | 0.00987239 | -4.6176    | 1         |
| BDNF-AS       | 0.188449   | 0.0494349  | -1.93057   | 1         |
| SLC6A20       | 0.0115428  | 0.00542784 | -1.08855   | 1         |
| SPDYE2L       | 0.0337731  | 0.0374296  | 0.148307   | 1         |
| OAS2          | 0.0330279  | 0.0298101  | -0.147883  | 1         |
| SNORA20       | 4.80368    | 3.48821    | -0.461652  | 0.979701  |
| FAM209A       | 0.383396   | 0.163458   | -1.22991   | 0.926104  |
| FMO5          | 0.169627   | 0.0618289  | -1.45601   | 1         |
| ADRA1A        | 0.0214541  | 0.0159297  | -0.429534  | 1         |
| PTAFR         | 0.0665059  | 0.0897004  | 0.431633   | 1         |
| DSCR9         | 0.0803567  | 0.060029   | -0.420758  | 1         |
| MAB21L2       | 0.0275911  | 0.0306048  | 0.149558   | 1         |
| TPI1P3        | 0.0544713  | 0.0662532  | 0.282495   | 1         |
| NCF1          | 0.0383998  | 0.0602864  | 0.650734   | 1         |
| TNS4          | 0.00843327 | 0.0145915  | 0.790967   | 1         |
| POU2AF1       | 0.0125283  | 0.00422087 | -1.56958   | 1         |
| LINC00659     | 0.959641   | 0.416854   | -1.20295   | 0.317328  |
| C6orf165      | 0.0376043  | 0.0194056  | -0.954425  | 1         |
| PCDHB19P      | 0.0151019  | 0.0103305  | -0.547814  | 1         |
| C11orf86      | 0.0387676  | 0          | #NAME?     | 1         |
| ESRP1         | 0.0310813  | 0          | #NAME?     | 1         |
| EME2          | 0.48626    | 0.60383    | 0.312413   | 0.930066  |
| CYP17A1       | 0.035107   | 0.0140295  | -1.3233    | 1         |
| LSP1          | 0.0278366  | 0          | #NAME?     | 1         |
| RSPH1         | 0.479528   | 0.160197   | -1.58177   | 0.0925999 |
| KIAA1751      | 0.008094   | 0          | #NAME?     | 1         |
| HIST1H3J      | 0.157685   | 0.0567242  | -1.47501   | 1         |
| ARX           | 0.0232875  | 0.00965631 | -1.27001   | 1         |
| SLC25A18      | 0.130398   | 0.185382   | 0.507579   | 1         |
| CPNE9         | 0.0967728  | 0.198028   | 1.03303    | 1         |
| NFE2          | 0.0470505  | 0.0323109  | -0.542189  | 1         |
| DOK7          | 0.0506037  | 0          | #NAME?     | 1         |
| GPR35         | 0.753187   | 0.732471   | -0.0402361 | 0.993379  |
| GPR89B,GPR89C | 0.112408   | 0.124121   | 0.142998   | 1         |

|                       |            |            |            |           |
|-----------------------|------------|------------|------------|-----------|
| TRIM59                | 0.151356   | 0.191001   | 0.335633   | 1         |
| PRSS57                | 0.0601059  | 0          | #NAME?     | 1         |
| ESRG                  | 0.0919617  | 0.143535   | 0.642297   | 1         |
| PPP4R1L               | 0.18382    | 0.0696559  | -1.39998   | 1         |
| COL9A2                | 0.0158594  | 0.0148801  | -0.0919573 | 1         |
| S1PR4                 | 0.0454249  | 0.0163728  | -1.47219   | 1         |
| WDR38                 | 0.0358991  | 0.0241702  | -0.570721  | 1         |
| AMN                   | 0.126451   | 0.020651   | -2.61429   | 1         |
| HIPK4                 | 0.189651   | 0.0911404  | -1.05718   | 1         |
| LOC388553             | 0.0317355  | 0          | #NAME?     | 1         |
| ACPT                  | 0.0457578  | 0          | #NAME?     | 1         |
| STAT4                 | 0.0306798  | 0.00579949 | -2.40329   | 1         |
| SLC5A11               | 0.0339348  | 0.024242   | -0.485259  | 1         |
| DCAF4L1               | 0.154963   | 0.197531   | 0.350156   | 1         |
| TREM1                 | 0.037316   | 0.00624005 | -2.58016   | 1         |
| AFF3                  | 0.00891242 | 0.00398381 | -1.16167   | 1         |
| KRTAP2-3              | 2.67789    | 1.14462    | -1.22624   | 0.0640789 |
| GTF2A1L,STON1,STON1-G | 0.0105737  | 0.00465184 | -1.1846    | 1         |
| SNORA31               | 10.153     | 9.42888    | -0.106742  | 0.995528  |
| LIPG                  | 0.117249   | 0.102561   | -0.193091  | 1         |
| KCNK7                 | 0.733235   | 1.15938    | 0.661009   | 0.435611  |
| LAIR1                 | 0.0641959  | 0.0950803  | 0.566664   | 1         |
| CILP2                 | 0.122137   | 0.0755158  | -0.69365   | 1         |
| CYP26A1               | 0.0804688  | 0.0625844  | -0.362627  | 1         |
| KRTAP4-6              | 0.229998   | 0.0703295  | -1.70942   | 1         |
| SEMA3E                | 0.00944023 | 0.0207847  | 1.13863    | 1         |
| FEZ1                  | 0.0615695  | 0.0144166  | -2.09448   | 1         |
| KRTAP5-9              | 0.16427    | 0.156374   | -0.071067  | 1         |
| ANPEP                 | 0.035314   | 0.0380484  | 0.107594   | 1         |
| ZFP3                  | 0.0248548  | 0.0762747  | 1.61768    | 1         |
| CABP7                 | 0.0601932  | 0.0694502  | 0.20638    | 1         |
| SLC35F1               | 0.0139235  | 0.00415922 | -1.74314   | 1         |
| PRR23C                | 0.0331381  | 0.0209763  | -0.659728  | 1         |
| CASQ1                 | 0.0362245  | 0.00892236 | -2.02147   | 1         |
| SLC4A9                | 0.0935373  | 0.0130397  | -2.84263   | 1         |
| RSPH9                 | 0.161854   | 0.147311   | -0.135827  | 1         |
| LCE1B                 | 0.106776   | 0.0298353  | -1.8395    | 1         |
| EIF3C,EIF3CL          | 0.0477448  | 0.0287764  | -0.730458  | 1         |
| AHCTF1P1              | 0.00637566 | 0.00356039 | -0.840539  | 1         |
| MATN3                 | 0.0254803  | 0.0213461  | -0.255408  | 1         |
| TAS1R3                | 0.242384   | 0.208298   | -0.218647  | 1         |
| LGR5                  | 0.0360615  | 0.0165354  | -1.1249    | 1         |
| VN1R2                 | 0.076442   | 0.0287468  | -1.41097   | 1         |
| AMH                   | 0.527444   | 0.589419   | 0.160276   | 0.979944  |
| ACTA1                 | 1.18462    | 1.41283    | 0.25416    | 0.897976  |
| LY96                  | 1.97237    | 0.50279    | -1.9719    | 0.0245451 |
| MYBPC2                | 0.0242559  | 0.0242971  | 0.00244677 | 1         |
| PTPRM                 | 0.0246873  | 0.00326179 | -2.92003   | 1         |
| ATP8B5P               | 0.0420766  | 0.0147212  | -1.51513   | 1         |
| CALCRLL               | 0.00911547 | 0.00110493 | -3.04436   | 1         |
| HUS1B                 | 1.02415    | 1.00389    | -0.0288271 | 0.997323  |
| RFPL4A                | 0.311316   | 0.0789231  | -1.97986   | 1         |
| LOC730227             | 0.0155569  | 0.0104596  | -0.57272   | 1         |
| CALHM1                | 0.0394881  | 0.0460514  | 0.221825   | 1         |
| MYH7B                 | 0.0790011  | 0.0257419  | -1.61775   | 1         |
| C19orf35              | 0.0904157  | 0.0736588  | -0.295716  | 1         |
| PDE6G                 | 0.0667577  | 0.123332   | 0.885538   | 1         |
| ATP6V0A4              | 0.0243579  | 0          | #NAME?     | 1         |
| KRT5                  | 0.217182   | 0.256874   | 0.242152   | 1         |
| ANKRD30BL             | 0.0939355  | 0.0492033  | -0.932915  | 1         |
| MPP4                  | 0.0253084  | 0.00989401 | -1.35499   | 1         |
| SAMD14                | 0.0379278  | 0.0157452  | -1.26834   | 1         |
| ZNRF3-AS1             | 0.0636813  | 0.00474854 | -3.74531   | 1         |
| CCM2L                 | 0.0540431  | 0.016034   | -1.75297   | 1         |
| HIST1H3E              | 0.44991    | 0.49652    | 0.142215   | 0.990857  |
| VPREB3                | 0.721583   | 0.572661   | -0.333485  | 0.931473  |
| SBSN                  | 0.07508    | 0.107089   | 0.512305   | 1         |
| LCN2                  | 0.17267    | 0.0864681  | -0.997782  | 1         |
| VN1R5                 | 0.0452095  | 0.0197401  | -1.1955    | 1         |
| BVES                  | 0.00664647 | 0.00411373 | -0.692141  | 1         |
| LTA                   | 0.189791   | 0.0710241  | -1.41803   | 1         |
| NOX1                  | 0.0684175  | 0.129299   | 0.918274   | 1         |
| SPIB                  | 0.181914   | 0.153919   | -0.241086  | 1         |
| DEFB131               | 1.37073    | 0.568807   | -1.26893   | 0.780271  |
| LRRC33                | 0.267707   | 0.11623    | -1.20367   | 1         |
| FRK                   | 0.0345758  | 0          | #NAME?     | 1         |
| PLG                   | 0.0182989  | 0          | #NAME?     | 1         |
| SRD5A3-AS1            | 0.0779716  | 0.0568241  | -0.456446  | 1         |
| PTPRG-AS1             | 0.0155038  | 0.010076   | -0.621693  | 1         |



|              |            |            |            |           |
|--------------|------------|------------|------------|-----------|
| PRICKLE2-AS3 | 0.0131577  | 0.0131857  | 0.00306517 | 1         |
| SLA2         | 0.0525027  | 0.0294651  | -0.833386  | 1         |
| GOLGA6C      | 0.00669765 | 0.00962718 | 0.523458   | 1         |
| NLRP6        | 0.0666743  | 0.018398   | -1.85758   | 1         |
| C22orf24     | 0.0707369  | 0.0662596  | -0.0943348 | 1         |
| SLC7A14      | 0.00359222 | 0.00190687 | -0.91367   | 1         |
| FCER2        | 0.170173   | 0.0787568  | -1.11153   | 1         |
| HIST3H2BB    | 0.356327   | 0.521304   | 0.548924   | 0.929005  |
| PRR18        | 0.0289372  | 0.0411454  | 0.507807   | 1         |
| NBPF7        | 0.0929472  | 0.136509   | 0.554508   | 1         |
| CD79B        | 0.0522591  | 0          | #NAME?     | 1         |
| MBOAT4       | 0.0311656  | 0.0464935  | 0.577074   | 1         |
| HIF3A        | 0.00991567 | 0.00917692 | -0.1117    | 1         |
| LINC00304    | 0.131077   | 0.140844   | 0.103679   | 1         |
| SYN1         | 0.0358552  | 0.118116   | 1.71994    | 1         |
| RAB40AL      | 0.101399   | 0.116931   | 0.205617   | 1         |
| TNF          | 0.0317338  | 0.0215653  | -0.557309  | 1         |
| DPY19L2P4    | 0.0589405  | 0.0228977  | -1.36406   | 1         |
| PROSER2-AS1  | 0.014295   | 0.0104075  | -0.457889  | 1         |
| LOC100288842 | 0.685809   | 0.206124   | -1.73429   | 0.306997  |
| HSD52        | 0.126426   | 0.0322543  | -1.97073   | 1         |
| TMEM119      | 0.0198345  | 0          | #NAME?     | 1         |
| ASAH2        | 0.0644066  | 0.0664396  | 0.0448341  | 1         |
| KLHL14       | 0.0383695  | 0.00839245 | -2.1928    | 1         |
| CAMK2B       | 0.0450775  | 0          | #NAME?     | 1         |
| CD7          | 0.174007   | 0.0614334  | -1.50205   | 1         |
| GPBAR1       | 0.532541   | 0.824207   | 0.630116   | 0.674625  |
| MAP1LC3A     | 0.28637    | 0.0571656  | -2.32466   | 1         |
| TACSTD2      | 0.0382635  | 0          | #NAME?     | 1         |
| GNG3         | 0.173299   | 0.186552   | 0.106313   | 1         |
| TLL2         | 0.0380366  | 0.0113181  | -1.74875   | 1         |
| GJC2         | 0.148166   | 0.880986   | 2.5719     | 0.0292254 |
| PDE1B        | 0.0161103  | 0          | #NAME?     | 1         |
| SNORA27      | 53.0312    | 31.2986    | -0.760743  | 0.948088  |
| RASL10A      | 0.449691   | 0.402386   | -0.160354  | 0.979701  |
| HIST1H4D     | 1.10105    | 0.723133   | -0.606545  | 0.82657   |
| LOC100133669 | 0.102654   | 0          | #NAME?     | 1         |
| BEX4         | 0.227127   | 0.102052   | -1.1542    | 1         |
| SH2D6        | 0.0826655  | 0          | #NAME?     | 1         |
| USP44        | 0.0101745  | 0.0207944  | 1.03124    | 1         |
| LCN1         | 0.0836056  | 0.0350163  | -1.25557   | 1         |
| SPTBN5       | 0.0261562  | 0.0448657  | 0.778456   | 1         |
| MSN          | 0.022209   | 0.0157768  | -0.493338  | 1         |
| SCARNA22     | 79.476     | 8.96995    | -3.14735   | 0.642621  |
| LPAR6        | 0.0145296  | 0.00317954 | -2.1921    | 1         |
| UOX          | 0.0227734  | 0.00475108 | -2.26102   | 1         |
| PACSIN1      | 0.0415916  | 0.00954393 | -2.12364   | 1         |
| KRT86        | 0.0734947  | 0.0351154  | -1.06554   | 1         |
| SLC22A9      | 0.0379497  | 0.00857573 | -2.14576   | 1         |
| GNG13        | 0.0753011  | 0.0555877  | -0.437905  | 1         |
| CHRFAM7A     | 0.0790994  | 0.0408325  | -0.953949  | 1         |
| AFAP1-AS1    | 0.0133039  | 0.00506072 | -1.39444   | 1         |
| KIAA1456     | 0.0122459  | 0.0136856  | 0.160352   | 1         |
| MYEF2        | 0.00657897 | 0.0034739  | -0.921305  | 1         |
| LOC158572    | 0.0628513  | 0.0500356  | -0.328986  | 1         |
| CPB2-AS1     | 0.00988008 | 0.00224893 | -2.13528   | 1         |
| NLRP3        | 0.207113   | 0.0722982  | -1.51839   | 1         |
| DDX43        | 0.013397   | 0.0776831  | 2.53569    | 1         |
| SNORA65      | 15.874     | 11.3793    | -0.480255  | 0.979484  |
| NCAM1        | 0.00674437 | 0.00619739 | -0.122023  | 1         |
| C14orf183    | 0.100295   | 0.0759956  | -0.400257  | 1         |
| PREX1        | 0.0331107  | 0.0139974  | -1.24214   | 1         |
| FLT4         | 0.0137674  | 0.00312571 | -2.139     | 1         |
| C1orf54      | 0.511888   | 0.32406    | -0.659564  | 0.773888  |
| NR2E3        | 0.0855961  | 0.0349579  | -1.29193   | 1         |
| ZNF521       | 0.0907392  | 0.0071078  | -3.67425   | 1         |
| MMP10        | 0.0215405  | 0.00939427 | -1.1972    | 1         |
| SYCE3        | 0.3354     | 0.244638   | -0.455237  | 1         |
| C13orf45     | 0.0383549  | 0.0104116  | -1.88122   | 1         |
| SNORA6       | 5.61503    | 7.16567    | 0.351809   | 0.987693  |
| PDCL2        | 0.0472323  | 0.12001    | 1.34531    | 1         |
| NSG1         | 0.0193378  | 0.0189141  | -0.0319606 | 1         |
| SNORD33      | 158.495    | 103.745    | -0.611389  | 0.965607  |
| SIGLEC10     | 0.0178159  | 0.00428874 | -2.05454   | 1         |
| LUZP4        | 0.021394   | 0          | #NAME?     | 1         |
| FRZB         | 0.0164604  | 0.0123604  | -0.413266  | 1         |
| CNTN4        | 0.00713186 | 0.00188638 | -1.91866   | 1         |
| PAPPA        | 0.00363782 | 0.0007371  | -2.30314   | 1         |
| C1orf227     | 0.117599   | 0.0804125  | -0.54839   | 1         |

|              |            |            |            |            |
|--------------|------------|------------|------------|------------|
| PNLDC1       | 0.0726018  | 0.161731   | 1.15552    | 1          |
| HIGD1B       | 0.265567   | 0.323083   | 0.282827   | 1          |
| CELA1        | 0.0609036  | 0.0294696  | -1.0473    | 1          |
| HIST1H2BF    | 0.986284   | 0.597487   | -0.723096  | 0.797015   |
| FADS1        | 0.00957256 | 0.0155241  | 0.697534   | 1          |
| GPA33        | 0.0174981  | 0.00850501 | -1.04081   | 1          |
| FAM65C       | 0.0132465  | 0.00380659 | -1.79903   | 1          |
| WDR11-AS1    | 0.0540911  | 0.0252769  | -1.09757   | 1          |
| FOXDL3       | 0.0334676  | 0.090672   | 1.43789    | 1          |
| PRCD         | 0.290365   | 0.109857   | -1.40224   | 1          |
| C10orf62     | 0.0408912  | 0          | #NAME?     | 1          |
| LOC100996455 | 0.0392215  | 0.00450202 | -3.123     | 1          |
| SLC6A17      | 0.00834337 | 0.00229138 | -1.86441   | 1          |
| SNX29P1      | 0.0591668  | 0.145019   | 1.29338    | 1          |
| KISS1        | 0.128093   | 0.036978   | -1.79245   | 1          |
| TEX40        | 0.100276   | 0.0772452  | -0.37646   | 1          |
| SLC22A20     | 0.189836   | 0.0932507  | -1.02557   | 1          |
| WFD3         | 0.117419   | 0.0424349  | -1.46834   | 1          |
| SNORA41      | 7.02834    | 4.8157     | -0.545438  | 0.979701   |
| CSF2         | 0.0792525  | 0.403317   | 2.34739    | 0.312486   |
| KRTAP3-3     | 0.0827036  | 0          | #NAME?     | 1          |
| SNX29P2      | 0.0393918  | 0.0593901  | 0.592328   | 1          |
| CYP27A1      | 0.0604038  | 0.206309   | 1.77209    | 1          |
| SCRT1        | 0.0298322  | 0.0759473  | 1.34813    | 1          |
| L1CAM        | 0.0115817  | 0          | #NAME?     | 1          |
| MAF          | 0.0157629  | 0.00285402 | -2.46547   | 1          |
| GPR22        | 0.0144767  | 0.0136019  | -0.0899258 | 1          |
| CLIC3        | 0.170063   | 0.0878043  | -0.953708  | 1          |
| SYNE4        | 0.308088   | 0.0568385  | -2.4384    | 1          |
| FSIP1        | 0.0288338  | 0.0297944  | 0.047281   | 1          |
| EPHX3        | 0.154595   | 0.0343161  | -2.17153   | 1          |
| NOX01        | 0.688664   | 3.32065    | 2.26959    | 0.00134142 |
| IDO1         | 0.101252   | 0.0640481  | -0.660724  | 1          |
| CERS1        | 0.223566   | 0.116955   | -0.93475   | 1          |
| LOC100506321 | 0.127546   | 0.14126    | 0.147331   | 1          |
| ASB4         | 0.0102324  | 0          | #NAME?     | 1          |
| LRRN4CL      | 0.16249    | 0.200591   | 0.303909   | 1          |
| TMEM150C     | 0.0766688  | 0.0363644  | -1.07611   | 1          |
| CAPNS2       | 0.0590493  | 0.108574   | 0.878688   | 1          |
| DLG2         | 0.0170615  | 0.00403187 | -2.08122   | 1          |
| HEPACAM2     | 0.0237064  | 0.00768785 | -1.62462   | 1          |
| SLC19A3      | 0.0140995  | 0.0121993  | -0.208848  | 1          |
| PIP5K1P1     | 0.0137023  | 0.00281025 | -2.28564   | 1          |
| IL13         | 0.192436   | 0.0282842  | -2.76631   | 1          |
| GZMM         | 0.670645   | 0.564554   | -0.248438  | 0.950031   |
| C10orf131    | 0.127439   | 0.0579161  | -1.13777   | 1          |
| S100A1       | 0.493157   | 0.320812   | -0.620318  | 0.961432   |
| OXTR         | 0.197146   | 0.25155    | 0.351581   | 1          |
| TAL2         | 0.452944   | 0.580881   | 0.35891    | 0.912153   |
| SEPT7L       | 0.148043   | 0.0904669  | -0.710552  | 1          |
| WNT16        | 0.0359607  | 0.0256933  | -0.485029  | 1          |
| BTBD8        | 0.0770358  | 0.0176877  | -2.12278   | 1          |
| FAM215A      | 0.142969   | 0.0785834  | -0.863409  | 1          |
| SFTP3        | 0.0504752  | 0.0639595  | 0.341585   | 1          |
| DCDC2B       | 0.0514127  | 0.0526741  | 0.0349694  | 1          |
| MTTP         | 0.0242997  | 0.00206577 | -3.55618   | 1          |
| DMC1         | 0.0591572  | 0.0101136  | -2.54826   | 1          |
| OPN4         | 0.0374522  | 0.00802555 | -2.22238   | 1          |
| CFB          | 0.021994   | 0.0156917  | -0.487108  | 1          |
| AKR7A2P1     | 0.110399   | 0.0394963  | -1.48293   | 1          |
| AEBP1        | 0.0193593  | 0.0201516  | 0.0578666  | 1          |
| C12orf70     | 0.161345   | 0.0809238  | -0.995516  | 1          |
| LOC100506385 | 0.0434023  | 0.00358215 | -3.59887   | 1          |
| CCDC173      | 0.0194352  | 0.0284215  | 0.548309   | 1          |
| MYH16        | 0.0275687  | 0          | #NAME?     | 1          |
| ACTL7B       | 0.0849332  | 0.0593948  | -0.515993  | 1          |
| LRRC46       | 0.541013   | 0.245268   | -1.1413    | 0.908114   |
| DPF3         | 0.214415   | 0.0538847  | -1.99245   | 1          |
| LSAMP        | 0.00484483 | 0          | #NAME?     | 1          |
| GUSBP2       | 0.157299   | 0.162065   | 0.0430602  | 1          |
| LRFN1        | 0.0512097  | 0          | #NAME?     | 1          |
| LINC00629    | 0.0418502  | 0.0552269  | 0.400138   | 1          |
| ANKRD26P1    | 0.00782671 | 0.0028775  | -1.44359   | 1          |
| PACRG        | 0.0429001  | 0.00659429 | -2.70169   | 1          |
| LURAP1       | 0.0369216  | 0.0283961  | -0.378773  | 1          |
| GPR135       | 0.393751   | 0.476593   | 0.275473   | 0.947731   |
| CHRM5        | 0.0181187  | 0.0104555  | -0.793217  | 1          |
| CPED1        | 0.00883267 | 0.00794667 | -0.152499  | 1          |
| C1orf61      | 0.0852366  | 0          | #NAME?     | 1          |

|              |            |            |           |          |
|--------------|------------|------------|-----------|----------|
| SYPL2        | 0.0195466  | 0.046722   | 1.25719   | 1        |
| CXCL1        | 0.431821   | 0.348264   | -0.310252 | 0.896051 |
| BTBD19       | 0.0795017  | 0.0644822  | -0.302085 | 1        |
| HSPB6        | 0.0707317  | 0.0248444  | -1.50944  | 1        |
| HGFAC        | 0.0598103  | 0.0659568  | 0.141127  | 1        |
| MYO1A        | 0.0521882  | 0.00917296 | -2.50826  | 1        |
| PPP1R36      | 0.0493011  | 0.0390822  | -0.335108 | 1        |
| FOXN4        | 0.0510597  | 0          | #NAME?    | 1        |
| CASP1        | 0.208035   | 0.0735804  | -1.49943  | 1        |
| EFHB         | 0.0355714  | 0.0152851  | -1.21859  | 1        |
| LOC91948     | 0.0719403  | 0.0388     | -0.890744 | 1        |
| ECT2L        | 0.0973009  | 0.117931   | 0.27742   | 1        |
| SEMA3G       | 0.0185245  | 0.00500843 | -1.887    | 1        |
| SLC8A2       | 0.0248325  | 0.00433484 | -2.51818  | 1        |
| VWF          | 0.0097387  | 0          | #NAME?    | 1        |
| OLFML2A      | 0.0137025  | 0.0113862  | -0.267147 | 1        |
| CCR6         | 0.0815592  | 0.0576245  | -0.501165 | 1        |
| PDZD2        | 0.00635177 | 0.00262901 | -1.27264  | 1        |
| PIGR         | 0.0194861  | 0.0196568  | 0.0125869 | 1        |
| SLC6A10P     | 0.0686056  | 0.0291315  | -1.23574  | 1        |
| PPP1R27      | 0.183288   | 0.243752   | 0.411308  | 1        |
| YBX2         | 0.0724492  | 0.0104122  | -2.79869  | 1        |
| CXorf58      | 0.0451519  | 0.0119276  | -1.92048  | 1        |
| PTGER2       | 0.0672184  | 0.00928727 | -2.85553  | 1        |
| C7orf57      | 0.0368847  | 0.0236581  | -0.640691 | 1        |
| CCDC144B     | 0.0061784  | 0.0014832  | -2.05852  | 1        |
| CNNM1        | 0.0137801  | 0.00411221 | -1.7446   | 1        |
| CFL1P1       | 0.0328756  | 0.0291428  | -0.173874 | 1        |
| GDAP1L1      | 0.0320776  | 0          | #NAME?    | 1        |
| TP53AIP1     | 0.0839609  | 0.00423575 | -4.30903  | 1        |
| CRB2         | 0.0693268  | 0.0346954  | -0.998668 | 1        |
| APOA1        | 0.16116    | 0.137424   | -0.229865 | 1        |
| NHLH1        | 0.14438    | 0.159095   | 0.140019  | 1        |
| ZNF890P      | 0.0639808  | 0.0411541  | -0.636605 | 1        |
| RLTPR        | 0.0335161  | 0.0476959  | 0.509012  | 1        |
| SCUBE2       | 0.0225713  | 0.0139711  | -0.692043 | 1        |
| IL8          | 0.373558   | 0.638581   | 0.773536  | 0.234285 |
| GPR179       | 0.0114817  | 0.0051444  | -1.15827  | 1        |
| KRTAP3-2     | 0.195305   | 0.0594512  | -1.71595  | 1        |
| DNAL1        | 0.037266   | 0.0285074  | -0.386524 | 1        |
| SLC46A2      | 0.0621934  | 0.00947596 | -2.71442  | 1        |
| ACR          | 0.120647   | 0.0371318  | -1.70006  | 1        |
| LOC100128164 | 0.018857   | 0.00505184 | -1.90022  | 1        |
| IL12RB2      | 0.0302251  | 0.0165495  | -0.86896  | 1        |
| RAB44        | 0.0432354  | 0.0146346  | -1.56283  | 1        |
| ROBO4        | 0.154435   | 0.014617   | -3.40128  | 1        |
| SPACA4       | 0.283133   | 0.131944   | -1.10155  | 1        |
| LOC100506895 | 0.0513273  | 0.00575189 | -3.15762  | 1        |
| NRN1L        | 0.660143   | 0.665894   | 0.0125143 | 0.997082 |
| SSC5D        | 0.0476913  | 0.00677896 | -2.81459  | 1        |
| DIRAS1       | 0.0846426  | 0.0615859  | -0.458784 | 1        |
| RNU12        | 1.83511    | 0.614388   | -1.57864  | 0.870173 |
| SNORD47      | 433.509    | 618.965    | 0.513796  | 0.980663 |
| SNORD55      | 340.835    | 98.3399    | -1.79322  | 0.871957 |
| SNORD36A     | 201.26     | 391.464    | 0.959815  | 0.947008 |
| MIR4442      | 579.061    | 0          | #NAME?    | 0.363804 |
| SNORD60      | 74.0416    | 314.601    | 2.08712   | 0.738415 |
| SNORD104     | 89.7563    | 105.445    | 0.232411  | 0.977332 |
| SNORA79      | 37.3936    | 1.32474    | -4.81901  | 0.668261 |
| SCARNA21     | 3.21514    | 0          | #NAME?    | 0.501458 |
| SCARNA23     | 4.85069    | 1.597      | -1.60282  | 0.902309 |
| SCARNA11     | 3.83053    | 0          | #NAME?    | 0.539577 |
| SNORD45A     | 69.7027    | 78.7762    | 0.176544  | 0.988154 |
| MIR23B       | 44.6711    | 0          | #NAME?    | 0.532616 |
| SNORA1       | 2.02204    | 5.77021    | 1.51281   | 0.845726 |
| SNORA71C     | 1.6281     | 8.04569    | 2.30503   | 0.849892 |
| SNORA7B      | 1.50144    | 5.75142    | 1.93757   | 0.909016 |
| VTRNA1-1     | 21.7197    | 35.5256    | 0.709857  | 0.944284 |
| SNORD46      | 12.1732    | 17.4475    | 0.519316  | 0.967901 |
| MIR3911      | 6.03159    | 8.18844    | 0.441049  | 0.979701 |
| ESPN         | 0.0383756  | 0.048763   | 0.345598  | 1        |
| PADI4        | 0.0225138  | 0          | #NAME?    | 1        |
| KLHDC7A      | 0.00694766 | 0.0022277  | -1.64097  | 1        |
| CDA          | 0.0209364  | 0          | #NAME?    | 1        |
| ALPL         | 0.00895567 | 0.0617363  | 2.78525   | 1        |
| LDLRAD2      | 0.0162109  | 0.0117889  | -0.459533 | 1        |
| EPHA8        | 0.0294368  | 0          | #NAME?    | 1        |
| CATSPER4     | 0.0133201  | 0          | #NAME?    | 1        |
| ZBTB8B       | 0.00337844 | 0          | #NAME?    | 1        |

|            |            |             |            |   |
|------------|------------|-------------|------------|---|
| TEKT2      | 0.0117916  | 0.010292    | -0.196245  | 1 |
| TMCO2      | 0.0226433  | 0           | #NAME?     | 1 |
| FOXE3      | 0.0443389  | 0.0750836   | 0.759926   | 1 |
| C1orf177   | 0.00960438 | 0.0144528   | 0.589585   | 1 |
| AK5        | 0.0080412  | 0           | #NAME?     | 1 |
| GIPC2      | 0.0128826  | 0.00850576  | -0.598916  | 1 |
| PRKACB     | 0.00725705 | 0.00168638  | -2.10545   | 1 |
| CLCA3P     | 0.00323969 | 0.00428242  | 0.402571   | 1 |
| BRDT       | 0.00346142 | 0           | #NAME?     | 1 |
| LOC643355  | 0.0130805  | 0           | #NAME?     | 1 |
| HIST2H2AA3 | 0.070308   | 0.0461621   | -0.60698   | 1 |
| LCE5A      | 0.0260864  | 0           | #NAME?     | 1 |
| POU5F1P4   | 0.0180131  | 0.045515    | 1.3373     | 1 |
| RXFP4      | 0.0675683  | 0           | #NAME?     | 1 |
| RAB25      | 0.093195   | 0.0539005   | -0.789955  | 1 |
| CD1D       | 0.0112967  | 0           | #NAME?     | 1 |
| KCNJ9      | 0.0114145  | 0.00467749  | -1.28706   | 1 |
| ATP1A2     | 0.00279099 | 0           | #NAME?     | 1 |
| LOC440700  | 0.0134545  | 0           | #NAME?     | 1 |
| RCSB1      | 0.0144741  | 0.00301283  | -2.26428   | 1 |
| XCL1       | 0.0098268  | 0           | #NAME?     | 1 |
| C1orf105   | 0.014688   | 0.0124026   | -0.244003  | 1 |
| LAX1       | 0.00409282 | 0.00290907  | -0.492534  | 1 |
| CNTN2      | 0.00220054 | 0.00806165  | 1.87321    | 1 |
| LINC00538  | 0.00719316 | 0           | #NAME?     | 1 |
| TGFB2      | 0.00223515 | 0.00778622  | 1.80055    | 1 |
| LOC339529  | 0.00751671 | 0           | #NAME?     | 1 |
| TTC34      | 0.0165221  | 0.0107416   | -0.621194  | 1 |
| C1orf127   | 0.006753   | 0           | #NAME?     | 1 |
| HTR1D      | 0.00579526 | 0.00351492  | -0.721381  | 1 |
| LAPTM5     | 0.0211747  | 0.00441681  | -2.26127   | 1 |
| COL16A1    | 0.0134229  | 0           | #NAME?     | 1 |
| GUCA2A     | 0.08321    | 0           | #NAME?     | 1 |
| LDLRAD1    | 0.00663332 | 0.00474756  | -0.482545  | 1 |
| LINC00466  | 0.00803568 | 0.0047808   | -0.749168  | 1 |
| C1orf141   | 0.00540094 | 0           | #NAME?     | 1 |
| PTPN22     | 0.00991466 | 0.0050617   | -0.969942  | 1 |
| SYT6       | 0.00318629 | 0           | #NAME?     | 1 |
| VTCN1      | 0.00549264 | 0           | #NAME?     | 1 |
| LINGO4     | 0.00817835 | 0           | #NAME?     | 1 |
| NUP210L    | 0.0139763  | 0.013224    | -0.0798263 | 1 |
| KCNN3      | 0.00206077 | 0.00070243  | -1.55275   | 1 |
| VHLL       | 0.0963413  | 0.0407688   | -1.24069   | 1 |
| INSRR      | 0.0052433  | 0           | #NAME?     | 1 |
| SPTA1      | 0.00159044 | 0           | #NAME?     | 1 |
| IGSF9      | 0.0110537  | 0.00354397  | -1.64109   | 1 |
| CD84       | 0.00157531 | 0.000935374 | -0.752025  | 1 |
| ADAMTS4    | 0.0135077  | 0.00983793  | -0.45736   | 1 |
| MPZ        | 0.0186702  | 0           | #NAME?     | 1 |
| C1orf111   | 0.0181258  | 0.0123216   | -0.556855  | 1 |
| RXRG       | 0.00962588 | 0           | #NAME?     | 1 |
| ADCY10     | 0.00700015 | 0.00302987  | -1.20813   | 1 |
| F5         | 0.00121189 | 0           | #NAME?     | 1 |
| SEC16B     | 0.0036348  | 0.00231981  | -0.64787   | 1 |
| NPHS2      | 0.00915459 | 0.00648542  | -0.497295  | 1 |
| POBEC4     | 0.00480352 | 0           | #NAME?     | 1 |
| FAM129A    | 0.00384592 | 0.00115351  | -1.7373    | 1 |
| LOC401980  | 0.0154882  | 0.0367019   | 1.24468    | 1 |
| MYOG       | 0.0141391  | 0           | #NAME?     | 1 |
| IL10       | 0.00895066 | 0           | #NAME?     | 1 |
| AGT        | 0.00683252 | 0           | #NAME?     | 1 |
| AKR1C3     | 0.0119711  | 0           | #NAME?     | 1 |
| CELF2      | 0.00169879 | 0.00425628  | 1.32508    | 1 |
| TMEM236    | 0.00460894 | 0           | #NAME?     | 1 |
| ANXA8L2    | 0.00769919 | 0           | #NAME?     | 1 |
| C10orf71   | 0.00511029 | 0.00429779  | -0.249809  | 1 |
| SRGN       | 0.0123841  | 0           | #NAME?     | 1 |
| LINC00856  | 0.00589751 | 0.00475081  | -0.311933  | 1 |
| LINC00595  | 0.0225978  | 0.037266    | 0.721675   | 1 |
| PLAC9      | 0.323361   | 0           | #NAME?     | 1 |
| SH2D4B     | 0.0203096  | 0           | #NAME?     | 1 |
| FFAR4      | 0.00402187 | 0           | #NAME?     | 1 |
| CYP2C9     | 0.00754715 | 0.0120419   | 0.674058   | 1 |
| PLEKHS1    | 0.0071878  | 0.00303827  | -1.2423    | 1 |
| HMX2       | 0.0187333  | 0           | #NAME?     | 1 |
| TUBB8      | 0.0240276  | 0           | #NAME?     | 1 |
| SFMBT2     | 0.00178765 | 0.00253448  | 0.503629   | 1 |
| ITIH5      | 0.00868765 | 0.00404437  | -1.10305   | 1 |
| EBLN1      | 0.0108112  | 0           | #NAME?     | 1 |

|                        |            |            |           |   |
|------------------------|------------|------------|-----------|---|
| ZNF33BP1               | 0.00868937 | 0.0120651  | 0.473517  | 1 |
| RASGEF1A               | 0.00982508 | 0          | #NAME?    | 1 |
| TMEM72-AS1             | 0.00836542 | 0          | #NAME?    | 1 |
| RSU1P2                 | 0.00751921 | 0          | #NAME?    | 1 |
| M1                     | 0.046042   | 0.179033   | 1.9592    | 1 |
| ANK3                   | 0.00135644 | 0.00100631 | -0.430752 | 1 |
| NODAL                  | 0.0156178  | 0.0108615  | -0.52397  | 1 |
| MAT1A                  | 0.00462852 | 0          | #NAME?    | 1 |
| HPSE2                  | 0.00364075 | 0          | #NAME?    | 1 |
| MMP21                  | 0.00941064 | 0.0162196  | 0.785377  | 1 |
| LOC650368              | 0.0261255  | 0.0083451  | -1.64646  | 1 |
| C11orf42               | 0.0382116  | 0.0436612  | 0.19234   | 1 |
| KRT8P41                | 0.00902292 | 0          | #NAME?    | 1 |
| LDHAL6A                | 0.0207345  | 0.00888681 | -1.22229  | 1 |
| F2                     | 0.0186194  | 0.0420491  | 1.17526   | 1 |
| FAM180B                | 0.0132857  | 0.0466281  | 1.81133   | 1 |
| P2RX3                  | 0.0242415  | 0          | #NAME?    | 1 |
| MS4A10                 | 0.00758644 | 0.00641404 | -0.242189 | 1 |
| TBC1D10C               | 0.0333157  | 0.0142393  | -1.22632  | 1 |
| SHANK2-AS1             | 0.00611555 | 0.0043988  | -0.475371 | 1 |
| SHANK2-AS3             | 0.0165355  | 0          | #NAME?    | 1 |
| FOLR1                  | 0.0201971  | 0          | #NAME?    | 1 |
| PLEKHB1                | 0.0181203  | 0.0477857  | 1.39897   | 1 |
| OMP                    | 0.18147    | 0.0443978  | -2.03117  | 1 |
| TTC36                  | 0.0530909  | 0          | #NAME?    | 1 |
| CXCR5                  | 0.00674256 | 0.00576635 | -0.225636 | 1 |
| KCNJ5                  | 0.00557763 | 0.00712916 | 0.35408   | 1 |
| OR5111                 | 0.0177625  | 0          | #NAME?    | 1 |
| UBQLNL                 | 0.00602508 | 0          | #NAME?    | 1 |
| CYB5R2                 | 0.0112411  | 0.0266225  | 1.24386   | 1 |
| MRV11                  | 0.002398   | 0          | #NAME?    | 1 |
| PLEKHA7                | 0.0034973  | 0.00448779 | 0.359765  | 1 |
| MPPED2                 | 0.00244299 | 0.00145086 | -0.751737 | 1 |
| DCDC1                  | 0.00782286 | 0          | #NAME?    | 1 |
| ELF5                   | 0.0186919  | 0.00384455 | -2.28153  | 1 |
| PAMR1                  | 0.017313   | 0          | #NAME?    | 1 |
| C11orf94               | 0.102886   | 0.0864703  | -0.250772 | 1 |
| GPHA2                  | 0.0289292  | 0.0208904  | -0.469686 | 1 |
| FLJ42102               | 0.00771291 | 0.0110205  | 0.514843  | 1 |
| KCNE3                  | 0.00420069 | 0.00563283 | 0.423236  | 1 |
| LRR32                  | 0.00425557 | 0          | #NAME?    | 1 |
| CCDC89                 | 0.00564367 | 0.00790229 | 0.485637  | 1 |
| TRPC6                  | 0.00272091 | 0          | #NAME?    | 1 |
| MMP3                   | 0.00708895 | 0.00568377 | -0.318724 | 1 |
| LOC643733              | 0.0293169  | 0.0572858  | 0.966443  | 1 |
| CARD18                 | 0.0240608  | 0          | #NAME?    | 1 |
| IL18                   | 0.0131575  | 0.0251149  | 0.932654  | 1 |
| LOC100131626           | 0.0316224  | 0          | #NAME?    | 1 |
| MCAM                   | 0.0103733  | 0.00431415 | -1.26573  | 1 |
| TRIM29                 | 0.0202897  | 0          | #NAME?    | 1 |
| MIR100HG               | 0.00374808 | 0.004897   | 0.385746  | 1 |
| HEPACAM                | 0.0102579  | 0          | #NAME?    | 1 |
| KLRD1                  | 0.0127366  | 0.00257962 | -2.30375  | 1 |
| H2AFJ                  | 0.00789186 | 0          | #NAME?    | 1 |
| PTPRO                  | 0.00307804 | 0          | #NAME?    | 1 |
| IAPP                   | 0.00643476 | 0.00974964 | 0.599461  | 1 |
| H1FNT                  | 0.0195562  | 0          | #NAME?    | 1 |
| LINC00592              | 0.0174847  | 0.0236824  | 0.437725  | 1 |
| AMHR2                  | 0.012566   | 0          | #NAME?    | 1 |
| LOC100240734           | 0.0477698  | 0.0392192  | -0.284537 | 1 |
| DTX3                   | 0.0311636  | 0          | #NAME?    | 1 |
| KCNMB4                 | 0.00592593 | 0.00620619 | 0.0666676 | 1 |
| SYT1                   | 0.00245989 | 0.00171785 | -0.517985 | 1 |
| NTS                    | 0.0204219  | 0          | #NAME?    | 1 |
| PLEKHG7                | 0.00679864 | 0          | #NAME?    | 1 |
| SLC17A8                | 0.00311784 | 0          | #NAME?    | 1 |
| STAB2                  | 0.00468841 | 0.00211407 | -1.14908  | 1 |
| DTX1                   | 0.0076292  | 0          | #NAME?    | 1 |
| MIR5188                | 4.06858    | 0          | #NAME?    | 1 |
| P2RX2                  | 0.0410657  | 0.0381223  | -0.107299 | 1 |
| CACNA2D4               | 0.00303805 | 0.00431232 | 0.505319  | 1 |
| FGF23                  | 0.00516292 | 0.0076089  | 0.559501  | 1 |
| ANO2                   | 0.00399648 | 0.00685901 | 0.779271  | 1 |
| CD163                  | 0.00297733 | 0          | #NAME?    | 1 |
| KLRC4,KLRC4-KLRK1,KLR1 | 0.00838894 | 0          | #NAME?    | 1 |
| TAS2R9                 | 0.0132626  | 0          | #NAME?    | 1 |
| C12orf36               | 0.00398284 | 0          | #NAME?    | 1 |
| LMO3                   | 0.00354771 | 0          | #NAME?    | 1 |
| BCAT1                  | 0.00116761 | 0          | #NAME?    | 1 |

|              |            |            |             |   |
|--------------|------------|------------|-------------|---|
| TMTC1        | 0.00273611 | 0          | #NAME?      | 1 |
| ABCD2        | 0.00219284 | 0          | #NAME?      | 1 |
| FAM186A      | 0.00179818 | 0          | #NAME?      | 1 |
| FIGNL2       | 0.00553778 | 0          | #NAME?      | 1 |
| KRT4         | 0.00738139 | 0.0224694  | 1.60599     | 1 |
| HOXC-AS5     | 0.0141454  | 0.0121637  | -0.217748   | 1 |
| TESPA1       | 0.00346685 | 0          | #NAME?      | 1 |
| APOF         | 0.00809904 | 0          | #NAME?      | 1 |
| TAC3         | 0.0291619  | 0          | #NAME?      | 1 |
| LUM          | 0.00600691 | 0          | #NAME?      | 1 |
| TRPV4        | 0.00783408 | 0.0119788  | 0.612652    | 1 |
| MYL2         | 0.0692254  | 0.0443679  | -0.641786   | 1 |
| SDS          | 0.0129994  | 0.0751879  | 2.53206     | 1 |
| NOS1         | 0.00274003 | 0          | #NAME?      | 1 |
| HPD          | 0.0217964  | 0          | #NAME?      | 1 |
| GPC6         | 0.00352001 | 0          | #NAME?      | 1 |
| ANKRD20A19P  | 0.00666741 | 0.00234322 | -1.50864    | 1 |
| SHISA2       | 0.0111324  | 0          | #NAME?      | 1 |
| LINC00571    | 0.0751173  | 0          | #NAME?      | 1 |
| LINC00598    | 0.00800791 | 0.00552122 | -0.536439   | 1 |
| LINC00330    | 0.013131   | 0.00395675 | -1.73059    | 1 |
| KCTD4        | 0.00604178 | 0          | #NAME?      | 1 |
| LINC00563    | 0.0194366  | 0          | #NAME?      | 1 |
| RNASEH2B-AS1 | 0.0542035  | 0.0541649  | -0.00102691 | 1 |
| LECT1        | 0.0103024  | 0.0139277  | 0.434967    | 1 |
| NYNRIN       | 0.00220427 | 0          | #NAME?      | 1 |
| GNG2         | 0.00316988 | 0          | #NAME?      | 1 |
| HSPA2        | 0.0231731  | 0.0115784  | -1.00102    | 1 |
| VSX2         | 0.013718   | 0          | #NAME?      | 1 |
| SLC24A4      | 0.00307556 | 0.00126595 | -1.28063    | 1 |
| LINC00521    | 0.00903555 | 0          | #NAME?      | 1 |
| SNORA28      | 2.23269    | 0          | #NAME?      | 1 |
| TDRD9        | 0.00266132 | 0.00168555 | -0.658921   | 1 |
| SLC7A8       | 0.00776404 | 0          | #NAME?      | 1 |
| SLC22A17     | 0.0139171  | 0          | #NAME?      | 1 |
| ADCY4        | 0.00595327 | 0          | #NAME?      | 1 |
| RIPK3        | 0.00924164 | 0          | #NAME?      | 1 |
| NOVA1        | 0.0143923  | 0          | #NAME?      | 1 |
| MDGA2        | 0.00209848 | 0          | #NAME?      | 1 |
| FRMD6-AS2    | 0.0289968  | 0          | #NAME?      | 1 |
| SLC35F4      | 0.00836123 | 0          | #NAME?      | 1 |
| PROX2        | 0.0249137  | 0.0126424  | -0.978663   | 1 |
| NGB          | 0.0129625  | 0          | #NAME?      | 1 |
| STON2        | 0.0119869  | 0.0024809  | -2.27253    | 1 |
| LINC00341    | 0.00505206 | 0          | #NAME?      | 1 |
| SYNE3        | 0.00621649 | 0          | #NAME?      | 1 |
| NPAP1        | 0.00174777 | 0.00481661 | 1.46251     | 1 |
| SNRPN,SNURF  | 0.0399061  | 0          | #NAME?      | 1 |
| IPW          | 0.00273621 | 0          | #NAME?      | 1 |
| HERC2P10     | 0.115171   | 0.0486233  | -1.24406    | 1 |
| HMG2P46      | 0.0348424  | 0.014644   | -1.25053    | 1 |
| FGF7         | 0.00577155 | 0.00170125 | -1.76236    | 1 |
| DCAF13P3     | 0.00413776 | 0.0237004  | 2.51799     | 1 |
| LDHAL6B      | 0.0150315  | 0          | #NAME?      | 1 |
| GCNT3        | 0.00572381 | 0.00363578 | -0.654712   | 1 |
| KBTBD13      | 0.026398   | 0          | #NAME?      | 1 |
| ISLR2        | 0.00792309 | 0          | #NAME?      | 1 |
| ODF3L1       | 0.0187162  | 0.0563446  | 1.58999     | 1 |
| GOLGA6L9     | 0.00279476 | 0          | #NAME?      | 1 |
| EFTUD1P1     | 0.0262692  | 0          | #NAME?      | 1 |
| NBEAP1       | 0.0444834  | 0.0681124  | 0.614649    | 1 |
| GOLGA6L7P    | 0.013521   | 0          | #NAME?      | 1 |
| GPR176       | 0.00397307 | 0          | #NAME?      | 1 |
| PPP1R14D     | 0.0286826  | 0          | #NAME?      | 1 |
| DUOX2        | 0.00831873 | 0          | #NAME?      | 1 |
| BCL2L10      | 0.185191   | 0.0501882  | -1.8836     | 1 |
| CILP         | 0.0133628  | 0.00271899 | -2.29708    | 1 |
| SNORD16      | 15.2684    | 9.5636     | -0.674922   | 1 |
| LARP6        | 0.00814046 | 0          | #NAME?      | 1 |
| CT62         | 0.00836342 | 0          | #NAME?      | 1 |
| GRAMD2       | 0.00446182 | 0          | #NAME?      | 1 |
| HCN4         | 0.00306582 | 0          | #NAME?      | 1 |
| LOC283731    | 0.00791372 | 0.0117893  | 0.575049    | 1 |
| STRA6        | 0.0161074  | 0          | #NAME?      | 1 |
| LINGO1       | 0.00866714 | 0          | #NAME?      | 1 |
| LOC283688    | 0.00450866 | 0          | #NAME?      | 1 |
| HDGFRP3      | 0.00600469 | 0          | #NAME?      | 1 |
| NTRK3        | 0.00750041 | 0          | #NAME?      | 1 |
| GABARAPL3    | 0.00735136 | 0.00521035 | -0.49663    | 1 |

|              |            |            |            |   |
|--------------|------------|------------|------------|---|
| CERS3        | 0.0426661  | 0.00975209 | -2.12931   | 1 |
| RNF151       | 0.0391945  | 0.187319   | 2.25677    | 1 |
| PRSS21       | 0.0192708  | 0          | #NAME?     | 1 |
| OR1F2P       | 0.0196659  | 0          | #NAME?     | 1 |
| MPV17L       | 0.00779468 | 0.00533017 | -0.548308  | 1 |
| SYT17        | 0.0214814  | 0          | #NAME?     | 1 |
| VWA3A        | 0.00335411 | 0          | #NAME?     | 1 |
| IL21R        | 0.00354183 | 0.0025574  | -0.469817  | 1 |
| ITGAL        | 0.0033383  | 0          | #NAME?     | 1 |
| AHSP         | 0.0384998  | 0.0331773  | -0.214655  | 1 |
| IRX6         | 0.0311133  | 0.00659763 | -2.23751   | 1 |
| MT1H         | 0.183615   | 0.056443   | -1.70182   | 1 |
| CETP         | 0.0210295  | 0.00889724 | -1.24099   | 1 |
| IL17C        | 0.025865   | 0.0218463  | -0.243613  | 1 |
| LOC400558    | 0.0187436  | 0.0553121  | 1.5612     | 1 |
| SSTR5-AS1    | 0.00796032 | 0          | #NAME?     | 1 |
| PTX4         | 0.0413242  | 0.0350597  | -0.237174  | 1 |
| MEIOB        | 0.0071322  | 0.00850026 | 0.253161   | 1 |
| SEPT12       | 0.0269143  | 0          | #NAME?     | 1 |
| ERN2         | 0.0110955  | 0.0153475  | 0.46803    | 1 |
| SULT1A2      | 0.0670992  | 0.0399383  | -0.748523  | 1 |
| CSDAP1       | 0.020526   | 0          | #NAME?     | 1 |
| ZNF423       | 0.00420647 | 0          | #NAME?     | 1 |
| DPEP2        | 0.0109142  | 0.00937706 | -0.218999  | 1 |
| PABPN1L      | 0.0887293  | 0.0763185  | -0.217377  | 1 |
| LOC100506388 | 0.0198382  | 0          | #NAME?     | 1 |
| SMTNL2       | 0.0114323  | 0          | #NAME?     | 1 |
| ALOX15B      | 0.007452   | 0.0128414  | 0.785098   | 1 |
| MEIS3P1      | 0.00962548 | 0          | #NAME?     | 1 |
| PPP1R1B      | 0.0122619  | 0          | #NAME?     | 1 |
| CD300LG      | 0.00693752 | 0          | #NAME?     | 1 |
| ABI3         | 0.0193269  | 0          | #NAME?     | 1 |
| MYCBPAP      | 0.00953614 | 0          | #NAME?     | 1 |
| MSX2P1       | 0.0148734  | 0          | #NAME?     | 1 |
| EPX          | 0.00746696 | 0.00481277 | -0.633653  | 1 |
| BZRAP1-AS1   | 0.0388312  | 0.0486983  | 0.326655   | 1 |
| C17orf64     | 0.0205776  | 0          | #NAME?     | 1 |
| TBX4         | 0.00660668 | 0          | #NAME?     | 1 |
| MILR1        | 0.0591841  | 0.03997    | -0.566292  | 1 |
| MAP2K6       | 0.00733008 | 0          | #NAME?     | 1 |
| DNAI2        | 0.00797417 | 0          | #NAME?     | 1 |
| OTOP2        | 0.0105066  | 0          | #NAME?     | 1 |
| OTOP3        | 0.00940891 | 0          | #NAME?     | 1 |
| AATK-AS1     | 0.0278323  | 0          | #NAME?     | 1 |
| TRPV3        | 0.00245595 | 0          | #NAME?     | 1 |
| SLC52A1      | 0.00897596 | 0.0164822  | 0.876768   | 1 |
| PIK3R5       | 0.0205751  | 0.0025729  | -2.99943   | 1 |
| RCVRN        | 0.0172827  | 0          | #NAME?     | 1 |
| MAGOH2       | 0.0242549  | 0          | #NAME?     | 1 |
| LINC00675    | 0.0109772  | 0.00748586 | -0.552265  | 1 |
| KRT16P2      | 0.0115185  | 0.0297122  | 1.3671     | 1 |
| SMCR5        | 0.0057392  | 0.00463383 | -0.308644  | 1 |
| NOS2         | 0.00389783 | 0          | #NAME?     | 1 |
| OMG          | 0.0126308  | 0.00411103 | -1.61938   | 1 |
| TBC1D3C      | 0.0356114  | 0.0305953  | -0.219031  | 1 |
| TBC1D3G      | 0.00880751 | 0          | #NAME?     | 1 |
| STAC2        | 0.00571981 | 0.00692885 | 0.276649   | 1 |
| NEUROD2      | 0.00994793 | 0          | #NAME?     | 1 |
| KRTAP4-11    | 0.0189686  | 0          | #NAME?     | 1 |
| HCRT         | 0.101454   | 0          | #NAME?     | 1 |
| SOST         | 0.00849081 | 0          | #NAME?     | 1 |
| MARCH10      | 0.00449487 | 0          | #NAME?     | 1 |
| PECAM1       | 0.00337281 | 0.00240781 | -0.486227  | 1 |
| ABCA6        | 0.0022234  | 0.00294711 | 0.406536   | 1 |
| SDK2         | 0.00169954 | 0          | #NAME?     | 1 |
| LOC100507410 | 0.0186322  | 0.0134882  | -0.466105  | 1 |
| GREB1L       | 0.0064879  | 0.0064573  | -0.0068216 | 1 |
| AQP4-AS1     | 0.00572014 | 0.00837394 | 0.549858   | 1 |
| ST8SIA3      | 0.0011423  | 0          | #NAME?     | 1 |
| ZNF532       | 0.00203098 | 0          | #NAME?     | 1 |
| DOK6         | 0.00130352 | 0          | #NAME?     | 1 |
| C18orf42     | 0.00540394 | 0          | #NAME?     | 1 |
| MC2R         | 0.00966173 | 0.00427455 | -1.17651   | 1 |
| AQP4         | 0.00214468 | 0          | #NAME?     | 1 |
| ZNF396       | 0.00430899 | 0          | #NAME?     | 1 |
| TCF4         | 0.00338742 | 0          | #NAME?     | 1 |
| CCBE1        | 0.00646288 | 0.00612444 | -0.077599  | 1 |
| CREB3L3      | 0.013054   | 0          | #NAME?     | 1 |
| FSD1         | 0.023274   | 0.00751604 | -1.63068   | 1 |

|              |             |             |           |   |
|--------------|-------------|-------------|-----------|---|
| EMR1         | 0.0114631   | 0           | #NAME?    | 1 |
| CLEC4GP1     | 0.0109051   | 0.00951333  | -0.196982 | 1 |
| CERS4        | 0.0117792   | 0           | #NAME?    | 1 |
| TDRD12       | 0.0154176   | 0.00636074  | -1.27731  | 1 |
| CD22         | 0.0120203   | 0.0031897   | -1.91398  | 1 |
| NCCRP1       | 0.0109815   | 0           | #NAME?    | 1 |
| LOC100505622 | 0.0325279   | 0           | #NAME?    | 1 |
| IRGC         | 0.0198263   | 0.0141341   | -0.488235 | 1 |
| FOXA3        | 0.00999393  | 0.0143521   | 0.522142  | 1 |
| SNORD23      | 6.24622     | 3.82745     | -0.7066   | 1 |
| ERVV-2       | 0.00581559  | 0           | #NAME?    | 1 |
| FCAR         | 0.0322264   | 0.00975217  | -1.72445  | 1 |
| TMEM190      | 0.151419    | 0.153268    | 0.0175063 | 1 |
| ZNF542       | 0.00354676  | 0           | #NAME?    | 1 |
| ZNF304       | 0.00555101  | 0.00184518  | -1.58898  | 1 |
| LOC100128398 | 0.00736207  | 0           | #NAME?    | 1 |
| LPPR3        | 0.0196561   | 0           | #NAME?    | 1 |
| RAX2         | 0.0255747   | 0           | #NAME?    | 1 |
| FUT6         | 0.0135287   | 0.00480824  | -1.49244  | 1 |
| FBN3         | 0.00228436  | 0           | #NAME?    | 1 |
| MUC16        | 0.000296411 | 0.000234797 | -0.336184 | 1 |
| PTGER1       | 0.0423285   | 0.0378107   | -0.162836 | 1 |
| EMR2         | 0.0073656   | 0           | #NAME?    | 1 |
| CIB3         | 0.029469    | 0           | #NAME?    | 1 |
| IL12RB1      | 0.00984471  | 0           | #NAME?    | 1 |
| HAPLN4       | 0.00677775  | 0.00977424  | 0.528177  | 1 |
| TM6SF2       | 0.014751    | 0           | #NAME?    | 1 |
| ZNF626       | 0.00186896  | 0.00143293  | -0.383276 | 1 |
| SCGB2B2      | 0.0593846   | 0.0508763   | -0.223095 | 1 |
| FAM187B      | 0.0365709   | 0.0112262   | -1.70382  | 1 |
| RASGRP4      | 0.0152733   | 0.0182024   | 0.25312   | 1 |
| CEACAM1      | 0.0164289   | 0.0096866   | -0.762178 | 1 |
| CEACAM8      | 0.0178914   | 0.00754812  | -1.24508  | 1 |
| PSG3         | 0.00711283  | 0           | #NAME?    | 1 |
| PSG1         | 0.00577078  | 0           | #NAME?    | 1 |
| PSG2         | 0.00856193  | 0           | #NAME?    | 1 |
| PSG4         | 0.00672918  | 0.00566587  | -0.248133 | 1 |
| CEACAM20     | 0.0112929   | 0           | #NAME?    | 1 |
| PTGIR        | 0.0126401   | 0           | #NAME?    | 1 |
| KCNA7        | 0.00399132  | 0.0108255   | 1.43949   | 1 |
| PTH2         | 0.215637    | 0           | #NAME?    | 1 |
| KCNC3        | 0.0108884   | 0.00682393  | -0.674118 | 1 |
| KLK4         | 0.0162701   | 0.04437     | 1.44736   | 1 |
| KLK8         | 0.0174345   | 0           | #NAME?    | 1 |
| SIGLEC14     | 0.025649    | 0.0231019   | -0.150889 | 1 |
| HAS1         | 0.0318053   | 0.023593    | -0.430907 | 1 |
| ZNF677       | 0.00299206  | 0           | #NAME?    | 1 |
| VSTM1        | 0.017768    | 0.0113421   | -0.647589 | 1 |
| LILRA5       | 0.0141457   | 0.00969122  | -0.545609 | 1 |
| SYT5         | 0.0137847   | 0.00894845  | -0.623357 | 1 |
| TMEM150B     | 0.0600036   | 0           | #NAME?    | 1 |
| SBK2         | 0.0405134   | 0           | #NAME?    | 1 |
| ZSCAN5B      | 0.0196145   | 0.0353126   | 0.848264  | 1 |
| ZNF667       | 0.0125816   | 0.00245553  | -2.35721  | 1 |
| C19orf18     | 0.0168862   | 0.0120137   | -0.491168 | 1 |
| SNTG2        | 0.0290831   | 0.00604015  | -2.26752  | 1 |
| RSAD2        | 0.0103922   | 0.00427824  | -1.28042  | 1 |
| LOC100506274 | 0.0298338   | 0           | #NAME?    | 1 |
| MFSD2B       | 0.0154459   | 0.00988062  | -0.644551 | 1 |
| ABHD1        | 0.0541429   | 0.0201871   | -1.42334  | 1 |
| TRIM54       | 0.0113148   | 0           | #NAME?    | 1 |
| FAM179A      | 0.00611036  | 0.0122254   | 1.00056   | 1 |
| QPCT         | 0.0085025   | 0           | #NAME?    | 1 |
| SLC3A1       | 0.00577858  | 0           | #NAME?    | 1 |
| EPCAM        | 0.0079234   | 0           | #NAME?    | 1 |
| PLEK         | 0.00897691  | 0           | #NAME?    | 1 |
| C2orf78      | 0.00898769  | 0           | #NAME?    | 1 |
| ANAPC1P1     | 0.0147225   | 0.00450649  | -1.70795  | 1 |
| PLGLB2       | 0.00833652  | 0.0033001   | -1.33694  | 1 |
| IL1RL1       | 0.0050236   | 0           | #NAME?    | 1 |
| IL18RAP      | 0.00473082  | 0           | #NAME?    | 1 |
| SULT1C2      | 0.00422663  | 0.00854597  | 1.01574   | 1 |
| SULT1C4      | 0.00739795  | 0           | #NAME?    | 1 |
| LIMS3L       | 0.0243257   | 0           | #NAME?    | 1 |
| FBLN7        | 0.0107088   | 0           | #NAME?    | 1 |
| GPR39        | 0.00681199  | 0.0186064   | 1.44965   | 1 |
| LOC100507600 | 0.00635541  | 0.0044767   | -0.505549 | 1 |
| TBR1         | 0.0076897   | 0           | #NAME?    | 1 |
| LOC100506134 | 0.0456506   | 0           | #NAME?    | 1 |



|              |             |             |           |   |
|--------------|-------------|-------------|-----------|---|
| SATB2-AS1    | 0.00539458  | 0           | #NAME?    | 1 |
| CPO          | 0.0431527   | 0.0497088   | 0.20405   | 1 |
| UNC80        | 0.000942125 | 0.000790818 | -0.252572 | 1 |
| TUBA4B       | 0.0126797   | 0.0498195   | 1.97419   | 1 |
| FAM150B      | 0.0152403   | 0.0127966   | -0.252127 | 1 |
| PXDN         | 0.00259413  | 0.00165974  | -0.644294 | 1 |
| OSR1         | 0.0144321   | 0           | #NAME?    | 1 |
| OTOF         | 0.00430015  | 0           | #NAME?    | 1 |
| MYADML       | 0.0109676   | 0.0067651   | -0.697061 | 1 |
| LOC375196    | 0.0322597   | 0.0264591   | -0.285971 | 1 |
| C2orf61      | 0.0190967   | 0           | #NAME?    | 1 |
| FLJ16341     | 0.00942917  | 0           | #NAME?    | 1 |
| LOC339803    | 0.0111154   | 0           | #NAME?    | 1 |
| SNORA36C     | 2.05969     | 0           | #NAME?    | 1 |
| LOC442028    | 0.00478856  | 0.00409113  | -0.227092 | 1 |
| ADRA2B       | 0.00643747  | 0.00397452  | -0.695713 | 1 |
| LOC100499194 | 0.035997    | 0.00621674  | -2.53365  | 1 |
| EN1          | 0.0108844   | 0.00914664  | -0.250949 | 1 |
| SCTR         | 0.0112695   | 0           | #NAME?    | 1 |
| LOC440905    | 0.00257058  | 0           | #NAME?    | 1 |
| LYPD1        | 0.0769708   | 0           | #NAME?    | 1 |
| LOC100144595 | 0.00561205  | 0.00372317  | -0.591996 | 1 |
| FIGN         | 0.00281178  | 0           | #NAME?    | 1 |
| LRP2         | 0.000796498 | 0           | #NAME?    | 1 |
| LINC00607    | 0.00368004  | 0           | #NAME?    | 1 |
| EPHA4        | 0.00204176  | 0           | #NAME?    | 1 |
| KIF1A        | 0.00477494  | 0           | #NAME?    | 1 |
| C2orf54      | 0.00952431  | 0           | #NAME?    | 1 |
| TGM3         | 0.00603334  | 0           | #NAME?    | 1 |
| UBOX5-AS1    | 0.0184853   | 0.0251802   | 0.445908  | 1 |
| SPTLC3       | 0.00329588  | 0           | #NAME?    | 1 |
| BANF2        | 0.0668634   | 0           | #NAME?    | 1 |
| PAX1         | 0.00646863  | 0           | #NAME?    | 1 |
| NNAT         | 0.0379721   | 0.176457    | 2.21631   | 1 |
| SLC12A5      | 0.00316077  | 0.00202275  | -0.643955 | 1 |
| TSHZ2        | 0.00111207  | 0           | #NAME?    | 1 |
| C2orf195     | 0.0510469   | 0           | #NAME?    | 1 |
| CPXM1        | 0.00953919  | 0.0372861   | 1.9667    | 1 |
| SIGLEC1      | 0.00877202  | 0.0037856   | -1.21239  | 1 |
| FLRT3        | 0.00292293  | 0           | #NAME?    | 1 |
| LINC00261    | 0.00249488  | 0           | #NAME?    | 1 |
| GGT7         | 0.0080827   | 0.00670075  | -0.270513 | 1 |
| FAM83C       | 0.00538001  | 0.0142361   | 1.40387   | 1 |
| GDF5         | 0.0169006   | 0.00599822  | -1.49447  | 1 |
| MAFB         | 0.00674491  | 0           | #NAME?    | 1 |
| CTCFL        | 0.00869566  | 0           | #NAME?    | 1 |
| GNAS-AS1     | 0.0190052   | 0           | #NAME?    | 1 |
| HRH3         | 0.0110234   | 0           | #NAME?    | 1 |
| NKAIN4       | 0.015985    | 0           | #NAME?    | 1 |
| ABCC13       | 0.00436305  | 0           | #NAME?    | 1 |
| CHODL        | 0.00569133  | 0           | #NAME?    | 1 |
| DSCR6        | 0.0161714   | 0           | #NAME?    | 1 |
| ZNF295-AS1   | 0.0422672   | 0.0967767   | 1.19512   | 1 |
| UMODL1       | 0.00361213  | 0           | #NAME?    | 1 |
| LINC00158    | 0.00830282  | 0.00655646  | -0.340685 | 1 |
| CYYR1        | 0.00431276  | 0           | #NAME?    | 1 |
| TIAM1        | 0.00889789  | 0           | #NAME?    | 1 |
| CBS          | 0.00922308  | 0.0057206   | -0.689081 | 1 |
| FTCD         | 0.0147073   | 0           | #NAME?    | 1 |
| SPATC1L      | 0.0594632   | 0.107175    | 0.849893  | 1 |
| DGCR10       | 0.0179176   | 0.0260614   | 0.540537  | 1 |
| HORMAD2      | 0.0064838   | 0           | #NAME?    | 1 |
| SLC5A1       | 0.00267296  | 0.00674699  | 1.3358    | 1 |
| CYTH4        | 0.0115189   | 0.0287324   | 1.31868   | 1 |
| APOBEC3H     | 0.0349889   | 0.0440539   | 0.332371  | 1 |
| MCHR1        | 0.00820751  | 0           | #NAME?    | 1 |
| WBP2NL       | 0.0109649   | 0           | #NAME?    | 1 |
| FBLN1        | 0.0101987   | 0           | #NAME?    | 1 |
| FAM19A5      | 0.0180373   | 0           | #NAME?    | 1 |
| CCT8L2       | 0.00863862  | 0           | #NAME?    | 1 |
| TUBA3FP      | 0.00928849  | 0.0186707   | 1.00726   | 1 |
| PIWIL3       | 0.00338636  | 0.00240647  | -0.492818 | 1 |
| PDGFB        | 0.00779687  | 0.0217817   | 1.48215   | 1 |
| SNORD83A     | 26.0083     | 15.2733     | -0.767957 | 1 |
| MLC1         | 0.00565608  | 0           | #NAME?    | 1 |
| FBLN2        | 0.0051719   | 0.00834774  | 0.690691  | 1 |
| FAM198A      | 0.00507798  | 0           | #NAME?    | 1 |
| TDGF1        | 0.00839084  | 0           | #NAME?    | 1 |
| NRADDP       | 0.112123    | 0.132239    | 0.23806   | 1 |

|                        |             |             |            |   |
|------------------------|-------------|-------------|------------|---|
| CCDC36                 | 0.00962374  | 0.00616536  | -0.642413  | 1 |
| GPR62                  | 0.0372207   | 0.0563365   | 0.597964   | 1 |
| FAM19A1                | 0.00798193  | 0           | #NAME?     | 1 |
| TMEM30C                | 0.124495    | 0.0487816   | -1.35168   | 1 |
| CCDC54                 | 0.00946501  | 0           | #NAME?     | 1 |
| CD200                  | 0.00630211  | 0           | #NAME?     | 1 |
| BOC                    | 0.00442814  | 0           | #NAME?     | 1 |
| UPK1B                  | 0.00685304  | 0.00415863  | -0.720635  | 1 |
| ARGFX                  | 0.00479774  | 0           | #NAME?     | 1 |
| CCDC37                 | 0.0173131   | 0.0122436   | -0.499831  | 1 |
| ALG1L2                 | 0.0212331   | 0.0581068   | 1.45239    | 1 |
| EPHB1                  | 0.00653489  | 0           | #NAME?     | 1 |
| LOC201651              | 0.00951955  | 0           | #NAME?     | 1 |
| C3orf55                | 0.017833    | 0           | #NAME?     | 1 |
| MLF1                   | 0.0111392   | 0.00819007  | -0.443696  | 1 |
| FETUB                  | 0.00972959  | 0           | #NAME?     | 1 |
| BHLHE40-AS1            | 0.0636293   | 0           | #NAME?     | 1 |
| CIDEC                  | 0.0169337   | 0.0216962   | 0.357543   | 1 |
| EPM2AIP1               | 0.00326988  | 0           | #NAME?     | 1 |
| XIRP1                  | 0.00272732  | 0.0265506   | 3.28319    | 1 |
| XCR1                   | 0.0182247   | 0           | #NAME?     | 1 |
| IQCF5                  | 0.158712    | 0           | #NAME?     | 1 |
| IQCF1                  | 0.0576314   | 0.020222    | -1.51093   | 1 |
| PDZRN3                 | 0.00454522  | 0.00328911  | -0.466653  | 1 |
| LOC440970              | 0.0014644   | 0.000911552 | -0.683914  | 1 |
| CD200R1                | 0.00507197  | 0.0063177   | 0.316852   | 1 |
| ZNF80                  | 0.00456014  | 0.00272594  | -0.742324  | 1 |
| IGSF11                 | 0.012016    | 0           | #NAME?     | 1 |
| CD80                   | 0.0043923   | 0.0035008   | -0.327294  | 1 |
| ALDH1L1                | 0.00674133  | 0           | #NAME?     | 1 |
| GATA2                  | 0.0132024   | 0           | #NAME?     | 1 |
| FAM194A                | 0.00636942  | 0.00989347  | 0.635314   | 1 |
| GPR87                  | 0.0353768   | 0           | #NAME?     | 1 |
| FGF12                  | 0.00208334  | 0           | #NAME?     | 1 |
| MUC4                   | 0.00528056  | 0.00325116  | -0.699737  | 1 |
| C4orf6                 | 0.0354236   | 0           | #NAME?     | 1 |
| S100P                  | 0.0808772   | 0.0590814   | -0.45303   | 1 |
| DRD5                   | 0.0101679   | 0           | #NAME?     | 1 |
| LOC285540              | 0.0128861   | 0.00760153  | -0.761457  | 1 |
| C4orf19                | 0.00335747  | 0.0065814   | 0.971019   | 1 |
| NSUN7                  | 0.00721128  | 0.00226967  | -1.66777   | 1 |
| GRXCR1                 | 0.0155957   | 0           | #NAME?     | 1 |
| PDGFRA                 | 0.00382646  | 0.00229022  | -0.740525  | 1 |
| STAP1                  | 0.0221885   | 0.0401106   | 0.854171   | 1 |
| SLC4A4                 | 0.00150679  | 0.000936273 | -0.68648   | 1 |
| PTPN13                 | 0.00565918  | 0           | #NAME?     | 1 |
| DMP1                   | 0.00432636  | 0           | #NAME?     | 1 |
| NPNT                   | 0.00284386  | 0.00190385  | -0.57893   | 1 |
| GUSBP5                 | 0.0128813   | 0           | #NAME?     | 1 |
| FGB                    | 0.00336686  | 0.00723605  | 1.1038     | 1 |
| LRAT                   | 0.00250412  | 0           | #NAME?     | 1 |
| TDO2                   | 0.00706608  | 0           | #NAME?     | 1 |
| LOC344967              | 0.0141293   | 0.0087426   | -0.692551  | 1 |
| UGT2B17                | 0.00578023  | 0           | #NAME?     | 1 |
| IGJ                    | 0.00893954  | 0.0265569   | 1.57081    | 1 |
| SLC10A6                | 0.0200073   | 0.0191203   | -0.0654175 | 1 |
| DDIT4L                 | 0.00457046  | 0           | #NAME?     | 1 |
| TTC29                  | 0.00747422  | 0           | #NAME?     | 1 |
| ANXA2P1                | 0.0201487   | 0.0225481   | 0.162321   | 1 |
| CLDN24                 | 0.0259988   | 0           | #NAME?     | 1 |
| LOC731424              | 0.0040594   | 0.0114523   | 1.4963     | 1 |
| SORBS2                 | 0.00317025  | 0           | #NAME?     | 1 |
| CDH6                   | 0.00133043  | 0           | #NAME?     | 1 |
| OSMR                   | 0.00218104  | 0           | #NAME?     | 1 |
| C7                     | 0.0100139   | 0.00445593  | -1.1682    | 1 |
| GHR                    | 0.00268154  | 0.00167757  | -0.676688  | 1 |
| VCAN                   | 0.00116465  | 0           | #NAME?     | 1 |
| GPR98                  | 0.000600662 | 0.000761234 | 0.341788   | 1 |
| C5orf27                | 0.00793687  | 0.0210423   | 1.40665    | 1 |
| KCNN2                  | 0.00930008  | 0           | #NAME?     | 1 |
| C5orf48                | 0.0450199   | 0.131514    | 1.54658    | 1 |
| PCDHB17                | 0.0178512   | 0           | #NAME?     | 1 |
| LOC100505658           | 0.014205    | 0.00735848  | -0.948916  | 1 |
| MIR143,MIR143HG,MIR145 | 0.00318171  | 0.00337579  | 0.0854204  | 1 |
| LOC285593              | 0.0082673   | 0.009815    | 0.247572   | 1 |
| LOC100507387           | 0.0361621   | 0.0114338   | -1.66118   | 1 |
| ARL10                  | 0.00705667  | 0.021437    | 1.60304    | 1 |
| LOC729506              | 0.00831312  | 0           | #NAME?     | 1 |
| SEMA5A                 | 0.00112733  | 0           | #NAME?     | 1 |

|                |            |             |           |   |
|----------------|------------|-------------|-----------|---|
| LOC285696      | 0.00506332 | 0           | #NAME?    | 1 |
| SLC45A2        | 0.0100487  | 0           | #NAME?    | 1 |
| CDC20B         | 0.015377   | 0.0194172   | 0.336566  | 1 |
| PLK2           | 0.0143035  | 0.0102704   | -0.477869 | 1 |
| ST8SIA4        | 0.00182495 | 0.00126521  | -0.528474 | 1 |
| NEUROG1        | 0.0184996  | 0           | #NAME?    | 1 |
| CXCL14         | 0.0100329  | 0           | #NAME?    | 1 |
| LOC389332      | 0.0457799  | 0           | #NAME?    | 1 |
| SPOCK1         | 0.00265919 | 0           | #NAME?    | 1 |
| ECSCR          | 0.0237978  | 0           | #NAME?    | 1 |
| GPR151         | 0.0128671  | 0.00820597  | -0.648941 | 1 |
| DPYSL3         | 0.00562135 | 0           | #NAME?    | 1 |
| JAKMIP2        | 0.00127383 | 0.000892548 | -0.513168 | 1 |
| ZNF300P1       | 0.00473096 | 0           | #NAME?    | 1 |
| TIMD4          | 0.0103313  | 0           | #NAME?    | 1 |
| HAVCR1         | 0.00930055 | 0           | #NAME?    | 1 |
| ADAM19         | 0.0025229  | 0.00457275  | 0.857981  | 1 |
| KCNMB1         | 0.0242355  | 0           | #NAME?    | 1 |
| GMCL1P1        | 0.00436323 | 0           | #NAME?    | 1 |
| C5orf60        | 0.0160126  | 0.0355897   | 1.15226   | 1 |
| RASGEF1C       | 0.0100821  | 0.00619316  | -0.703041 | 1 |
| FOXC1          | 0.00580494 | 0.00390864  | -0.570614 | 1 |
| BMP6           | 0.00508287 | 0.0107093   | 1.07514   | 1 |
| TRIM40         | 0.0155126  | 0.00655535  | -1.2427   | 1 |
| DPCR1          | 0.00230805 | 0           | #NAME?    | 1 |
| HCP5           | 0.0475967  | 0.0708712   | 0.574339  | 1 |
| LST1           | 0.0382188  | 0           | #NAME?    | 1 |
| LY6G6D         | 0.0687874  | 0.0890806   | 0.372967  | 1 |
| C6orf25        | 0.0169273  | 0           | #NAME?    | 1 |
| PNPLA1         | 0.0122327  | 0.0117439   | -0.058834 | 1 |
| GUCA1A         | 0.0100042  | 0           | #NAME?    | 1 |
| CAPN11         | 0.00601276 | 0           | #NAME?    | 1 |
| GPR111         | 0.00247874 | 0.00194836  | -0.347345 | 1 |
| FAM83B         | 0.00358506 | 0           | #NAME?    | 1 |
| COL19A1        | 0.00136267 | 0           | #NAME?    | 1 |
| TSG1           | 0.00223125 | 0           | #NAME?    | 1 |
| PRDM13         | 0.00847128 | 0           | #NAME?    | 1 |
| HEY2           | 0.00573573 | 0           | #NAME?    | 1 |
| QKI            | 0.00126485 | 0           | #NAME?    | 1 |
| MYLK4          | 0.0047084  | 0.00162949  | -1.53082  | 1 |
| LINC00518      | 0.00395985 | 0.0079848   | 1.01181   | 1 |
| HIST1H1A       | 0.0300641  | 0           | #NAME?    | 1 |
| HIST1H1T       | 0.0278054  | 0           | #NAME?    | 1 |
| HIST1H3I       | 0.0908536  | 0           | #NAME?    | 1 |
| OR2B3          | 0.0134762  | 0           | #NAME?    | 1 |
| LTB            | 0.0772017  | 0.139337    | 0.851871  | 1 |
| HLA-DPA1       | 0.00820441 | 0.0104624   | 0.350744  | 1 |
| GCM1           | 0.00539371 | 0.00428942  | -0.330496 | 1 |
| LGSN           | 0.00211615 | 0.00468056  | 1.14524   | 1 |
| IMPG1          | 0.0039097  | 0.00260744  | -0.584421 | 1 |
| SRSF12         | 0.0171133  | 0.00788598  | -1.11776  | 1 |
| RRAGD          | 0.0024814  | 0           | #NAME?    | 1 |
| RAET1E         | 0.00649676 | 0.00411839  | -0.657639 | 1 |
| IPCEF1         | 0.00182313 | 0           | #NAME?    | 1 |
| CYP2W1         | 0.0137863  | 0.0101615   | -0.440126 | 1 |
| SDK1           | 0.00187215 | 0           | #NAME?    | 1 |
| RPL23P8        | 0.0674306  | 0.107278    | 0.669878  | 1 |
| RPS2P32        | 0.0255034  | 0           | #NAME?    | 1 |
| BMPER          | 0.00541181 | 0           | #NAME?    | 1 |
| ABCA13         | 0.00141816 | 0.000433842 | -1.70878  | 1 |
| NCF1B          | 0.0165247  | 0.0115103   | -0.521699 | 1 |
| RUNDC3B        | 0.00311242 | 0.0068893   | 1.14632   | 1 |
| PTPRZ1         | 0.00213173 | 0           | #NAME?    | 1 |
| LMOD2          | 0.01246    | 0           | #NAME?    | 1 |
| FSCN3          | 0.0372019  | 0           | #NAME?    | 1 |
| LOC407835      | 0.0154919  | 0.032508    | 1.06928   | 1 |
| RAB19          | 0.0183563  | 0           | #NAME?    | 1 |
| CLCN1          | 0.00581415 | 0           | #NAME?    | 1 |
| OR2A20P,OR2A9P | 0.0217904  | 0           | #NAME?    | 1 |
| CNTNAP2        | 0.00127457 | 0           | #NAME?    | 1 |
| DPP6           | 0.00374624 | 0.00306696  | -0.288635 | 1 |
| MEOX2          | 0.00631869 | 0           | #NAME?    | 1 |
| CRHR2          | 0.0134863  | 0.0149515   | 0.148802  | 1 |
| LOC100130673   | 0.00899267 | 0.0113176   | 0.331742  | 1 |
| DPY19L2P1      | 0.00448855 | 0           | #NAME?    | 1 |
| ELMO1          | 0.004096   | 0           | #NAME?    | 1 |
| EGFR-AS1       | 0.00559851 | 0.0037784   | -0.567265 | 1 |
| TRIM50         | 0.0125963  | 0.00814325  | -0.629321 | 1 |
| NCF1C          | 0.0557057  | 0.0649273   | 0.221     | 1 |

|                      |            |            |           |   |
|----------------------|------------|------------|-----------|---|
| ST7-AS2              | 0.0321443  | 0          | #NAME?    | 1 |
| FAM180A              | 0.0093188  | 0.00589854 | -0.659786 | 1 |
| OR2A1                | 0.0250621  | 0          | #NAME?    | 1 |
| TMEM176B             | 0.016716   | 0          | #NAME?    | 1 |
| WDR86                | 0.0199923  | 0.0174769  | -0.193997 | 1 |
| CRYGN                | 0.0339209  | 0          | #NAME?    | 1 |
| ERICH1-AS1           | 0.0305459  | 0          | #NAME?    | 1 |
| FAM90A10P            | 0.043295   | 0          | #NAME?    | 1 |
| FAM66D               | 0.0194551  | 0          | #NAME?    | 1 |
| PIWIL2               | 0.00774507 | 0.0023993  | -1.69067  | 1 |
| ADAM28               | 0.00326256 | 0          | #NAME?    | 1 |
| UNC5D                | 0.00174551 | 0.00138048 | -0.338477 | 1 |
| TRIM55               | 0.0148152  | 0.010532   | -0.492298 | 1 |
| LINC00534            | 0.02177    | 0          | #NAME?    | 1 |
| NACAP1               | 0.0662752  | 0          | #NAME?    | 1 |
| GRHL2                | 0.00278665 | 0          | #NAME?    | 1 |
| ZFPM2                | 0.00867674 | 0          | #NAME?    | 1 |
| COL14A1              | 0.00184171 | 0          | #NAME?    | 1 |
| LINC00051            | 0.0142842  | 0.00848604 | -0.751253 | 1 |
| FAM203A              | 0.0113174  | 0.0137677  | 0.282746  | 1 |
| SGCZ                 | 0.00639423 | 0          | #NAME?    | 1 |
| MSR1                 | 0.00762811 | 0          | #NAME?    | 1 |
| LZTS1                | 0.00787989 | 0          | #NAME?    | 1 |
| LG13                 | 0.00741831 | 0          | #NAME?    | 1 |
| STMN4                | 0.0126192  | 0.0402272  | 1.67255   | 1 |
| CHRNA2               | 0.00449459 | 0          | #NAME?    | 1 |
| C8orf86              | 0.0127167  | 0          | #NAME?    | 1 |
| RNF5P1               | 0.0183403  | 0.0116673  | -0.652554 | 1 |
| SFRP1                | 0.00359462 | 0          | #NAME?    | 1 |
| SNAI2                | 0.00686929 | 0          | #NAME?    | 1 |
| VLDLR                | 0.00385114 | 0          | #NAME?    | 1 |
| TEK                  | 0.00263391 | 0.00208669 | -0.335992 | 1 |
| ANKRD18B             | 0.0030239  | 0.00775814 | 1.3593    | 1 |
| RECK                 | 0.00875124 | 0          | #NAME?    | 1 |
| FAM27A               | 0.0332326  | 0.020519   | -0.695641 | 1 |
| LOC100133920         | 0.0146676  | 0          | #NAME?    | 1 |
| FAM189A2             | 0.00853312 | 0          | #NAME?    | 1 |
| MAMDC2               | 0.00387338 | 0          | #NAME?    | 1 |
| BSPRY                | 0.00771471 | 0.00628927 | -0.29472  | 1 |
| LMX1B                | 0.00342945 | 0.0119038  | 1.79537   | 1 |
| TTC16                | 0.0203249  | 0          | #NAME?    | 1 |
| PHYHD1               | 0.130134   | 0.0193743  | -2.74778  | 1 |
| LOC100128593         | 0.0090668  | 0          | #NAME?    | 1 |
| RNF224               | 0.0160931  | 0.0118183  | -0.445417 | 1 |
| FLJ35024             | 0.0218052  | 0.0130135  | -0.744658 | 1 |
| C9orf92              | 0.0589912  | 0          | #NAME?    | 1 |
| PTPLAD2              | 0.00893342 | 0.0448022  | 2.32628   | 1 |
| LOC653501,ZNF658B    | 0.00260164 | 0          | #NAME?    | 1 |
| LOC100507244         | 0.00816117 | 0.0171721  | 1.07322   | 1 |
| LOC392364            | 0.0190008  | 0.0152299  | -0.319158 | 1 |
| ASPN                 | 0.00485708 | 0.00337029 | -0.527215 | 1 |
| PLCXD1               | 0.0108151  | 0.00793562 | -0.446629 | 1 |
| LOC100288814         | 0.0625937  | 0          | #NAME?    | 1 |
| GRPR                 | 0.0210332  | 0.0222217  | 0.0793031 | 1 |
| PTCHD1               | 0.00244327 | 0.00163092 | -0.583125 | 1 |
| MPC1L                | 0.144887   | 0.0619287  | -1.22624  | 1 |
| RGN                  | 0.00952976 | 0.0172852  | 0.859024  | 1 |
| GAGE12D,GAGE12F,GAGE | 0.0381156  | 0          | #NAME?    | 1 |
| TRO                  | 0.0174083  | 0.00679099 | -1.35808  | 1 |
| OTUD6A               | 0.0421655  | 0          | #NAME?    | 1 |
| TMEM35               | 0.0142116  | 0          | #NAME?    | 1 |
| TCEAL2               | 0.0112878  | 0.0162178  | 0.522812  | 1 |
| SOWAHD               | 0.1029     | 0.0600073  | -0.778036 | 1 |
| AKAP14               | 0.0817343  | 0          | #NAME?    | 1 |
| FMR1NB               | 0.0350116  | 0.023888   | -0.551544 | 1 |
| MAGEA4               | 0.00947064 | 0.00575079 | -0.719703 | 1 |
| DUSP9                | 0.0126009  | 0          | #NAME?    | 1 |
| AVPR2                | 0.0283831  | 0          | #NAME?    | 1 |
| ACE2                 | 0.00309275 | 0.00260051 | -0.250096 | 1 |
| PCYT1B               | 0.0026506  | 0.00157905 | -0.747266 | 1 |
| SSX5                 | 0.0112365  | 0          | #NAME?    | 1 |
| SHROOM4              | 0.0025742  | 0          | #NAME?    | 1 |
| WNK3                 | 0.00196467 | 0.00130231 | -0.59322  | 1 |
| ITIH6                | 0.00575239 | 0          | #NAME?    | 1 |
| UQCRBP1              | 0.031518   | 0.0219652  | -0.520955 | 1 |
| TEX11                | 0.00378203 | 0          | #NAME?    | 1 |
| INGX                 | 0.0738012  | 0.0234334  | -1.65508  | 1 |
| CXCR3                | 0.036606   | 0          | #NAME?    | 1 |
| POF1B                | 0.00262688 | 0          | #NAME?    | 1 |

|                        |            |                |           |           |
|------------------------|------------|----------------|-----------|-----------|
| TCEAL5                 | 0.0114823  | 0.00738575     | -0.636594 | 1         |
| COL4A6                 | 0.00217867 | 0.00187229     | -0.218643 | 1         |
| CHRD1                  | 0.00331594 | 0              | #NAME?    | 1         |
| SMARCA1                | 0.00296569 | 0              | #NAME?    | 1         |
| FGF13                  | 0.0248987  | 0.00422934     | -2.55757  | 1         |
| FAM223B                | 0.108164   | 0.193008       | 0.835448  | 1         |
| RAB39B                 | 0.00359079 | 0.00517726     | 0.527887  | 1         |
| F8A1                   | 0.0207657  | 0              | #NAME?    | 1         |
| PLCXD1                 | 0.0108151  | 0              | #NAME?    | 1         |
| UTY                    | 0.0019891  | 0              | #NAME?    | 1         |
| MIR181D                | 0          | 0              | 0         | 1         |
| SNORD21                | 0          | 0              | 0         | 1         |
| SNORD58C               | 0          | 31.1713 inf    |           | 1         |
| SNORD15A               | 0          | 4.90218 inf    |           | 0.0732879 |
| MIR29C                 | 0          | 0              | 0         | 1         |
| MIR320A                | 0          | 0              | 0         | 1         |
| SNORD95                | 0          | 0              | 0         | 1         |
| SNORD35A               | 0          | 0              | 0         | 1         |
| SNORD50A               | 0          | 0              | 0         | 1         |
| SNORA50                | 0          | 2.31404 inf    |           | 0.509535  |
| MIR590                 | 0          | 0              | 0         | 1         |
| MIR5047                | 0          | 29.5443 inf    |           | 0.509077  |
| SNORA5C                | 0          | 0              | 0         | 1         |
| SCARNA3                | 0          | 0.704306 inf   |           | 1         |
| SNORA46                | 0          | 0              | 0         | 1         |
| SNORD29                | 0          | 0              | 0         | 1         |
| SNORA5B                | 0          | 0              | 0         | 1         |
| SNORD110               | 0          | 110.303 inf    |           | 1         |
| SNORA22                | 0          | 0.931133 inf   |           | 1         |
| MIR637                 | 0          | 0              | 0         | 1         |
| MIR762                 | 0          | 118.416 inf    |           | 0.539391  |
| SNORA36A               | 0          | 7.90738 inf    |           | 0.433505  |
| SNORA44                | 0          | 5.85958 inf    |           | 0.479126  |
| SNORA5A                | 0          | 2.24765 inf    |           | 0.545483  |
| LOC100132062,LOC100133 | 0          | 0              | 0         | 1         |
| RBP7                   | 0          | 0              | 0         | 1         |
| MDS2                   | 0          | 0              | 0         | 1         |
| CD52                   | 0          | 0.0278946 inf  |           | 1         |
| GJB5                   | 0          | 0              | 0         | 1         |
| GJB3                   | 0          | 0.00923746 inf |           | 1         |
| GPX7                   | 0          | 0.00844504 inf |           | 1         |
| TMEM61                 | 0          | 0.0227529 inf  |           | 1         |
| PCSK9                  | 0          | 0              | 0         | 1         |
| FOXD3                  | 0          | 0              | 0         | 1         |
| CLCA2                  | 0          | 0.00172485 inf |           | 1         |
| SRG7                   | 0          | 0              | 0         | 1         |
| GPR61                  | 0          | 0.00814916 inf |           | 1         |
| HSD3B2                 | 0          | 0              | 0         | 1         |
| HFE2                   | 0          | 0              | 0         | 1         |
| PRR9                   | 0          | 0.00963986 inf |           | 1         |
| NPR1                   | 0          | 0              | 0         | 1         |
| LENEP                  | 0          | 0.0883695 inf  |           | 1         |
| DCST1                  | 0          | 0.00796652 inf |           | 1         |
| HAPLN2                 | 0          | 0.031049 inf   |           | 1         |
| SUMO1P3                | 0          | 0.0206104 inf  |           | 1         |
| FCGR2C                 | 0          | 0.00384738 inf |           | 1         |
| HSPA7                  | 0          | 0.005903 inf   |           | 1         |
| FCGR2B                 | 0          | 0              | 0         | 1         |
| FCRLA                  | 0          | 0.0251153 inf  |           | 1         |
| MAEL                   | 0          | 0.010739 inf   |           | 1         |
| FAM163A                | 0          | 0.00898619 inf |           | 1         |
| PTPRC                  | 0          | 0              | 0         | 1         |
| PKP1                   | 0          | 0              | 0         | 1         |
| IL19                   | 0          | 0              | 0         | 1         |
| LOC148696              | 0          | 0.0266174 inf  |           | 1         |
| FAM71A                 | 0          | 0.00492257 inf |           | 1         |
| FAM177B                | 0          | 0              | 0         | 1         |
| C1orf95                | 0          | 0              | 0         | 1         |
| SLC35F3                | 0          | 0              | 0         | 1         |
| LOC100506810           | 0          | 0.0022645 inf  |           | 1         |
| KMO                    | 0          | 0              | 0         | 1         |
| SDCCAG8                | 0          | 0.00285458 inf |           | 1         |
| ANKRD65                | 0          | 0.0249322 inf  |           | 1         |
| TMEM240                | 0          | 0.118812 inf   |           | 1         |
| MYOM3                  | 0          | 0              | 0         | 1         |
| FCN3                   | 0          | 0.0176557 inf  |           | 1         |
| COL8A2                 | 0          | 0.00594658 inf |           | 1         |
| HEYL                   | 0          | 0              | 0         | 1         |
| RPS15AP10              | 0          | 0.0720955 inf  |           | 1         |

|              |   |            |     |   |
|--------------|---|------------|-----|---|
| PTGER3       | 0 | 0.00105192 | inf | 1 |
| C1orf180     | 0 | 0.00379199 | inf | 1 |
| LPAR3        | 0 | 0          | 0   | 1 |
| DPYD         | 0 | 0.00428127 | inf | 1 |
| C1orf194     | 0 | 0          | 0   | 1 |
| LRIF1        | 0 | 0.0165813  | inf | 1 |
| ADORA3       | 0 | 0          | 0   | 1 |
| GJA5         | 0 | 0          | 0   | 1 |
| RORC         | 0 | 0          | 0   | 1 |
| KCNJ10       | 0 | 0.0015114  | inf | 1 |
| RPL31P11     | 0 | 0.00561581 | inf | 1 |
| C1orf114     | 0 | 0.0349152  | inf | 1 |
| TEDDM1       | 0 | 0.00753389 | inf | 1 |
| PDC          | 0 | 0          | 0   | 1 |
| B3GALT2      | 0 | 0          | 0   | 1 |
| GOLT1A       | 0 | 0.0158292  | inf | 1 |
| LRRN2        | 0 | 0.0148388  | inf | 1 |
| LOC284578    | 0 | 0          | 0   | 1 |
| KCNH1        | 0 | 0.00397479 | inf | 1 |
| RD3          | 0 | 0          | 0   | 1 |
| MRC1         | 0 | 0          | 0   | 1 |
| GJD4         | 0 | 0.0135255  | inf | 1 |
| RET          | 0 | 0          | 0   | 1 |
| FXD4         | 0 | 0          | 0   | 1 |
| CTSL1P2      | 0 | 0.0115628  | inf | 1 |
| WDFY4        | 0 | 0.00237141 | inf | 1 |
| FAM133CP     | 0 | 0          | 0   | 1 |
| ZNF365       | 0 | 0          | 0   | 1 |
| DYDC2        | 0 | 0          | 0   | 1 |
| SNCG         | 0 | 0          | 0   | 1 |
| WNT8B        | 0 | 0.00893608 | inf | 1 |
| ADRA2A       | 0 | 0          | 0   | 1 |
| PNLIPRP2     | 0 | 0          | 0   | 1 |
| C10orf91     | 0 | 0          | 0   | 1 |
| SYNPO2L      | 0 | 0          | 0   | 1 |
| DUSP13       | 0 | 0          | 0   | 1 |
| GRID1        | 0 | 0          | 0   | 1 |
| BLNK         | 0 | 0.0067269  | inf | 1 |
| CPN1         | 0 | 0.00746742 | inf | 1 |
| NRAP         | 0 | 0.00313038 | inf | 1 |
| AFAP1L2      | 0 | 0          | 0   | 1 |
| GFRA1        | 0 | 0          | 0   | 1 |
| CPXM2        | 0 | 0.00776691 | inf | 1 |
| TCERG1L      | 0 | 0          | 0   | 1 |
| KCNQ1DN      | 0 | 0          | 0   | 1 |
| TRPC2        | 0 | 0          | 0   | 1 |
| OR5211       | 0 | 0          | 0   | 1 |
| OR56B4       | 0 | 0.0122709  | inf | 1 |
| OLFML1       | 0 | 0.0209447  | inf | 1 |
| C11orf96     | 0 | 0.0362156  | inf | 1 |
| CREB3L1      | 0 | 0.0108841  | inf | 1 |
| SMTNL1       | 0 | 0.0128022  | inf | 1 |
| SLC22A11     | 0 | 0          | 0   | 1 |
| MIR612       | 0 | 0          | 0   | 1 |
| SNX32        | 0 | 0.00778015 | inf | 1 |
| LOC100129216 | 0 | 0          | 0   | 1 |
| FOLR3        | 0 | 0.055441   | inf | 1 |
| P2RY6        | 0 | 0          | 0   | 1 |
| C11orf70     | 0 | 0          | 0   | 1 |
| GRIA4        | 0 | 0.00175765 | inf | 1 |
| POU2F3       | 0 | 0.00387143 | inf | 1 |
| BARX2        | 0 | 0          | 0   | 1 |
| NTM          | 0 | 0          | 0   | 1 |
| SCT          | 0 | 0.0550082  | inf | 1 |
| TRPM5        | 0 | 0          | 0   | 1 |
| OR2AG2       | 0 | 0          | 0   | 1 |
| OR6A2        | 0 | 0          | 0   | 1 |
| OR2D2        | 0 | 0          | 0   | 1 |
| STK33        | 0 | 0.00337422 | inf | 1 |
| ALX4         | 0 | 0.00885169 | inf | 1 |
| LOC100130348 | 0 | 0          | 0   | 1 |
| MAP6         | 0 | 0.00533853 | inf | 1 |
| NOX4         | 0 | 0.00196526 | inf | 1 |
| VSTM5        | 0 | 0          | 0   | 1 |
| ANGPTL5      | 0 | 0          | 0   | 1 |
| CARD16       | 0 | 0          | 0   | 1 |
| C11orf34     | 0 | 0.00581799 | inf | 1 |
| AMICA1       | 0 | 0.00561648 | inf | 1 |
| THY1         | 0 | 0.0169804  | inf | 1 |

|                 |   |                |   |   |
|-----------------|---|----------------|---|---|
| CLMP            | 0 | 0              | 0 | 1 |
| CACNA1C         | 0 | 0.00097089 inf |   | 1 |
| CLEC4D          | 0 | 0.0099297 inf  |   | 1 |
| A2ML1           | 0 | 0              | 0 | 1 |
| BCL2L14         | 0 | 0              | 0 | 1 |
| SLCO1C1         | 0 | 0              | 0 | 1 |
| TSPAN11         | 0 | 0.00501317 inf |   | 1 |
| DENND5B-AS1     | 0 | 0.0536086 inf  |   | 1 |
| OR8S1           | 0 | 0              | 0 | 1 |
| LOC255411       | 0 | 0.0230308 inf  |   | 1 |
| SCN8A           | 0 | 0              | 0 | 1 |
| ACVRL1          | 0 | 0.00270843 inf |   | 1 |
| IRAK3           | 0 | 0.00119951 inf |   | 1 |
| CUX2            | 0 | 0.00186838 inf |   | 1 |
| SRRM4           | 0 | 0.00303211 inf |   | 1 |
| LRRC43          | 0 | 0.0208084 inf  |   | 1 |
| LOC100507091    | 0 | 0.00594146 inf |   | 1 |
| LOC100507206    | 0 | 0.00900575 inf |   | 1 |
| GLT1D1          | 0 | 0              | 0 | 1 |
| LOC100130238    | 0 | 0              | 0 | 1 |
| LPAR5           | 0 | 0              | 0 | 1 |
| A2M             | 0 | 0.00412654 inf |   | 1 |
| KLRC2           | 0 | 0.0148595 inf  |   | 1 |
| TAS2R10         | 0 | 0              | 0 | 1 |
| TAS2R31         | 0 | 0.0436828 inf  |   | 1 |
| TAS2R46         | 0 | 0              | 0 | 1 |
| TAS2R43         | 0 | 0              | 0 | 1 |
| GYS2            | 0 | 0.00488276 inf |   | 1 |
| C12orf71        | 0 | 0.0148805 inf  |   | 1 |
| PTHLH           | 0 | 0              | 0 | 1 |
| LALBA           | 0 | 0              | 0 | 1 |
| SNORA2A         | 0 | 1.96398 inf    |   | 1 |
| WNT10B          | 0 | 0.00762142 inf |   | 1 |
| FAIM2           | 0 | 0              | 0 | 1 |
| DCD             | 0 | 0.102009 inf   |   | 1 |
| LOC100130075    | 0 | 0.0296446 inf  |   | 1 |
| LRRC10          | 0 | 0.00495634 inf |   | 1 |
| C12orf50        | 0 | 0.00479592 inf |   | 1 |
| SVOP            | 0 | 0              | 0 | 1 |
| GALNT9          | 0 | 0              | 0 | 1 |
| WASF3           | 0 | 0              | 0 | 1 |
| FREM2           | 0 | 0              | 0 | 1 |
| TPTE2P3         | 0 | 0              | 0 | 1 |
| GPC5            | 0 | 0              | 0 | 1 |
| MYO16           | 0 | 0.00151801 inf |   | 1 |
| TPTE2           | 0 | 0              | 0 | 1 |
| FLT1            | 0 | 0.00331133 inf |   | 1 |
| LINC00426       | 0 | 0              | 0 | 1 |
| ZAR1L           | 0 | 0.0295748 inf  |   | 1 |
| ENOX1           | 0 | 0              | 0 | 1 |
| SIAH3           | 0 | 0              | 0 | 1 |
| DLEU7           | 0 | 0              | 0 | 1 |
| COL4A1          | 0 | 0              | 0 | 1 |
| RNASE3          | 0 | 0              | 0 | 1 |
| ECRP            | 0 | 0              | 0 | 1 |
| COCH            | 0 | 0.00329219 inf |   | 1 |
| NPAS3           | 0 | 0              | 0 | 1 |
| RPL13AP3        | 0 | 0.0632347 inf  |   | 1 |
| PRKCH           | 0 | 0.00535715 inf |   | 1 |
| LINC00238       | 0 | 0              | 0 | 1 |
| ACTN1-AS1       | 0 | 0              | 0 | 1 |
| GALNT16         | 0 | 0.00512422 inf |   | 1 |
| SMOC1           | 0 | 0              | 0 | 1 |
| C14orf178       | 0 | 0.0214161 inf  |   | 1 |
| LOC283587       | 0 | 0              | 0 | 1 |
| SNORA11B        | 0 | 0              | 0 | 1 |
| LINC00637       | 0 | 0              | 0 | 1 |
| OR11H2          | 0 | 0              | 0 | 1 |
| RNASE11,RNASE12 | 0 | 0              | 0 | 1 |
| NDRG2           | 0 | 0.00475993 inf |   | 1 |
| LOC100506071    | 0 | 0.00420555 inf |   | 1 |
| PTCSC3          | 0 | 0.00821084 inf |   | 1 |
| SLC10A1         | 0 | 0.0136115 inf  |   | 1 |
| ADAM21P1        | 0 | 0.00360561 inf |   | 1 |
| DIO2            | 0 | 0.00154512 inf |   | 1 |
| SERPINA10       | 0 | 0.0212391 inf  |   | 1 |
| GPR132          | 0 | 0.0128068 inf  |   | 1 |
| PAR5            | 0 | 0              | 0 | 1 |
| DKFZP434L187    | 0 | 0              | 0 | 1 |

|                     |   |            |     |   |
|---------------------|---|------------|-----|---|
| C2CD4A              | 0 | 0          | 0   | 1 |
| LOC729739           | 0 | 0          | 0   | 1 |
| ISL2                | 0 | 0          | 0   | 1 |
| C15orf26            | 0 | 0.00586121 | inf | 1 |
| LOC100506874        | 0 | 0          | 0   | 1 |
| SLC28A1             | 0 | 0.00869394 | inf | 1 |
| ASB9P1              | 0 | 0.00715413 | inf | 1 |
| OCA2                | 0 | 0.00334511 | inf | 1 |
| CSNK1A1P1           | 0 | 0          | 0   | 1 |
| ANKRD63             | 0 | 0.16411    | inf | 1 |
| PLA2G4D             | 0 | 0.00326391 | inf | 1 |
| HDC                 | 0 | 0.0073657  | inf | 1 |
| TNFAIP8L3           | 0 | 0.00445306 | inf | 1 |
| ONECUT1             | 0 | 0          | 0   | 1 |
| IGDCC3              | 0 | 0.00299668 | inf | 1 |
| LOC338963           | 0 | 0          | 0   | 1 |
| PGPEP1L             | 0 | 0.0166948  | inf | 1 |
| C16orf11            | 0 | 0.0225656  | inf | 1 |
| SSTR5               | 0 | 0.0103427  | inf | 1 |
| LOC440335           | 0 | 0          | 0   | 1 |
| ITGAD               | 0 | 0          | 0   | 1 |
| FLJ26245, RNA5SP411 | 0 | 0          | 0   | 1 |
| CDH5                | 0 | 0          | 0   | 1 |
| HP                  | 0 | 0.0162202  | inf | 1 |
| C1QTNF8             | 0 | 0          | 0   | 1 |
| PRSS33              | 0 | 0          | 0   | 1 |
| PRSS30P             | 0 | 0.00472901 | inf | 1 |
| MEFV                | 0 | 0.0155129  | inf | 1 |
| C16orf89            | 0 | 0.00795284 | inf | 1 |
| PLA2G10             | 0 | 0.0445383  | inf | 1 |
| DNAH3               | 0 | 0.0036974  | inf | 1 |
| PDZD9               | 0 | 0.0215051  | inf | 1 |
| LOC283867           | 0 | 0          | 0   | 1 |
| KCTD19              | 0 | 0          | 0   | 1 |
| FENRR               | 0 | 0          | 0   | 1 |
| LOC339166           | 0 | 0          | 0   | 1 |
| XAF1                | 0 | 0.00464503 | inf | 1 |
| EFNB3               | 0 | 0.0356446  | inf | 1 |
| DNAH9               | 0 | 0          | 0   | 1 |
| FAM106CP            | 0 | 0          | 0   | 1 |
| LOC100287072        | 0 | 0.00345822 | inf | 1 |
| KCNJ12, KCNJ18      | 0 | 0          | 0   | 1 |
| DPRXP4              | 0 | 0.0787256  | inf | 1 |
| SPACA3              | 0 | 0          | 0   | 1 |
| UNC45B              | 0 | 0          | 0   | 1 |
| C17orf78            | 0 | 0          | 0   | 1 |
| AOC4                | 0 | 0.0273715  | inf | 1 |
| G6PC                | 0 | 0          | 0   | 1 |
| MYL4                | 0 | 0.236326   | inf | 1 |
| NXPH3               | 0 | 0          | 0   | 1 |
| SMIM6               | 0 | 0          | 0   | 1 |
| ZACN                | 0 | 0.0589756  | inf | 1 |
| ATP2A3              | 0 | 0          | 0   | 1 |
| AIPL1               | 0 | 0.00513708 | inf | 1 |
| SLC13A5             | 0 | 0          | 0   | 1 |
| TEKT1               | 0 | 0          | 0   | 1 |
| KRBA2               | 0 | 0.00393453 | inf | 1 |
| CCDC42              | 0 | 0          | 0   | 1 |
| GAS7                | 0 | 0.00279544 | inf | 1 |
| MYH1                | 0 | 0          | 0   | 1 |
| EVI2A               | 0 | 0.0111047  | inf | 1 |
| ARGFXP2             | 0 | 0.00823833 | inf | 1 |
| SLFN13              | 0 | 0          | 0   | 1 |
| KRTAP2-1            | 0 | 0.0395547  | inf | 1 |
| KRTAP2-4            | 0 | 0.0458928  | inf | 1 |
| LINC00671           | 0 | 0.0123747  | inf | 1 |
| MEOX1               | 0 | 0.00451595 | inf | 1 |
| PPY                 | 0 | 0          | 0   | 1 |
| ITGA2B              | 0 | 0          | 0   | 1 |
| GFAP                | 0 | 0.00860077 | inf | 1 |
| SPATA32             | 0 | 0.0349     | inf | 1 |
| RPRML               | 0 | 0.187008   | inf | 1 |
| PRR15L              | 0 | 0.0356696  | inf | 1 |
| HSF5                | 0 | 0.00225751 | inf | 1 |
| SCARNA20            | 0 | 1.53294    | inf | 1 |
| NACA2               | 0 | 0          | 0   | 1 |
| CD300E              | 0 | 0          | 0   | 1 |
| FLJ45079            | 0 | 0          | 0   | 1 |
| ZNF750              | 0 | 0.0505801  | inf | 1 |



|              |   |            |     |   |
|--------------|---|------------|-----|---|
| EMILIN2      | 0 | 0          | 0   | 1 |
| SLC14A2      | 0 | 0.00312028 | inf | 1 |
| RAB27B       | 0 | 0          | 0   | 1 |
| LINC00470    | 0 | 0.0103082  | inf | 1 |
| LINC-ROR     | 0 | 0          | 0   | 1 |
| ALPK2        | 0 | 0          | 0   | 1 |
| CD226        | 0 | 0.00843846 | inf | 1 |
| MADCAM1      | 0 | 0.0275659  | inf | 1 |
| AZU1         | 0 | 0          | 0   | 1 |
| PRTN3        | 0 | 0          | 0   | 1 |
| ELANE        | 0 | 0          | 0   | 1 |
| MIR7-3HG     | 0 | 0          | 0   | 1 |
| CLEC4M       | 0 | 0          | 0   | 1 |
| C19orf80     | 0 | 0.0220138  | inf | 1 |
| RLN3         | 0 | 0          | 0   | 1 |
| CLEC17A      | 0 | 0          | 0   | 1 |
| SYDE1        | 0 | 0.0240131  | inf | 1 |
| CYP4F3       | 0 | 0.00305318 | inf | 1 |
| ZNF492       | 0 | 0.00160572 | inf | 1 |
| FXYP3        | 0 | 0          | 0   | 1 |
| HAMP         | 0 | 0.055368   | inf | 1 |
| OVOL3        | 0 | 0.0758515  | inf | 1 |
| LOC100129935 | 0 | 0          | 0   | 1 |
| CYP2F1       | 0 | 0.0571478  | inf | 1 |
| DACT3-AS1    | 0 | 0.0651459  | inf | 1 |
| LILRB1       | 0 | 0.00980548 | inf | 1 |
| ZIK1         | 0 | 0          | 0   | 1 |
| CSNK1G2-AS1  | 0 | 0.0318645  | inf | 1 |
| LINGO3       | 0 | 0          | 0   | 1 |
| PTPRS        | 0 | 0          | 0   | 1 |
| LYL1         | 0 | 0.0123051  | inf | 1 |
| CYP4F2       | 0 | 0.00493934 | inf | 1 |
| CALR3        | 0 | 0.0224463  | inf | 1 |
| LRRC25       | 0 | 0.0374361  | inf | 1 |
| ZNF682       | 0 | 0          | 0   | 1 |
| ZNF208       | 0 | 0.00226721 | inf | 1 |
| ZNF99        | 0 | 0.00189414 | inf | 1 |
| HAVCR1P1     | 0 | 0.0222744  | inf | 1 |
| UPK1A-AS1    | 0 | 0.0479249  | inf | 1 |
| COX7A1       | 0 | 0.0372824  | inf | 1 |
| ZFP82        | 0 | 0          | 0   | 1 |
| WDR87        | 0 | 0.00101501 | inf | 1 |
| PSG9         | 0 | 0.0054504  | inf | 1 |
| EXOC3L2      | 0 | 0.010156   | inf | 1 |
| CKM          | 0 | 0.0431373  | inf | 1 |
| PNMAL1       | 0 | 0          | 0   | 1 |
| CGB          | 0 | 0.046732   | inf | 1 |
| ASPDH        | 0 | 0          | 0   | 1 |
| SIGLEC5      | 0 | 0          | 0   | 1 |
| LOC284379    | 0 | 0          | 0   | 1 |
| SHISA7       | 0 | 0.00259924 | inf | 1 |
| ZNF772       | 0 | 0.00737951 | inf | 1 |
| CCDC164      | 0 | 0          | 0   | 1 |
| KCNK3        | 0 | 0.0148282  | inf | 1 |
| MEIS1        | 0 | 0.0139511  | inf | 1 |
| VAX2         | 0 | 0.0377003  | inf | 1 |
| ITPRIPL1     | 0 | 0          | 0   | 1 |
| GPR45        | 0 | 0.0087322  | inf | 1 |
| RGPD4        | 0 | 0.00206926 | inf | 1 |
| IL37         | 0 | 0.0211671  | inf | 1 |
| INHBB        | 0 | 0.00461136 | inf | 1 |
| MYO7B        | 0 | 0.00467059 | inf | 1 |
| RAB6C        | 0 | 0          | 0   | 1 |
| TUBA3D       | 0 | 0.0287764  | inf | 1 |
| HNMT         | 0 | 0.0151782  | inf | 1 |
| PABPC1P2     | 0 | 0          | 0   | 1 |
| KCNJ3        | 0 | 0.00162301 | inf | 1 |
| DHRS9        | 0 | 0.00645842 | inf | 1 |
| KLHL41       | 0 | 0.0040608  | inf | 1 |
| HOXD13       | 0 | 0          | 0   | 1 |
| AOX2P        | 0 | 0.00480578 | inf | 1 |
| DES          | 0 | 0.00627669 | inf | 1 |
| SPEG         | 0 | 0.00351917 | inf | 1 |
| ASIC4        | 0 | 0.00694971 | inf | 1 |
| COL4A3       | 0 | 0          | 0   | 1 |
| LOC643387    | 0 | 0          | 0   | 1 |
| NEU4         | 0 | 0.0363011  | inf | 1 |
| LOC645949    | 0 | 0.00343681 | inf | 1 |
| DBIL5P2      | 0 | 0          | 0   | 1 |

|              |   |                |   |   |
|--------------|---|----------------|---|---|
| ADD2         | 0 | 0              | 0 | 1 |
| TACR1        | 0 | 0.0146051 inf  |   | 1 |
| LYG2         | 0 | 0.0497152 inf  |   | 1 |
| EDAR         | 0 | 0.00505057 inf |   | 1 |
| C1QL2        | 0 | 0              | 0 | 1 |
| LOC100216479 | 0 | 0.00722294 inf |   | 1 |
| WTH3DI       | 0 | 0              | 0 | 1 |
| SCN3A        | 0 | 0              | 0 | 1 |
| NEUROD1      | 0 | 0              | 0 | 1 |
| LOC100130452 | 0 | 0.0613094 inf  |   | 1 |
| ALS2CR12     | 0 | 0.0091613 inf  |   | 1 |
| FEV          | 0 | 0.031015 inf   |   | 1 |
| SNORA75      | 0 | 1.31778 inf    |   | 1 |
| MGC16025     | 0 | 0.0271409 inf  |   | 1 |
| OTOS         | 0 | 0.0308687 inf  |   | 1 |
| TMC2         | 0 | 0              | 0 | 1 |
| ISM1         | 0 | 0              | 0 | 1 |
| C20orf26     | 0 | 0.010711 inf   |   | 1 |
| ASIP         | 0 | 0.0568483 inf  |   | 1 |
| SNORA39      | 0 | 0              | 0 | 1 |
| WISP2        | 0 | 0              | 0 | 1 |
| WFDC10A      | 0 | 0              | 0 | 1 |
| WFDC13       | 0 | 0              | 0 | 1 |
| APCDD1L-AS1  | 0 | 0.00539514 inf |   | 1 |
| LOC100144597 | 0 | 0              | 0 | 1 |
| MYT1         | 0 | 0              | 0 | 1 |
| ANGPT4       | 0 | 0              | 0 | 1 |
| JPH2         | 0 | 0              | 0 | 1 |
| WFDC5        | 0 | 0              | 0 | 1 |
| SULF2        | 0 | 0.00302807 inf |   | 1 |
| GCNT7        | 0 | 0.0103402 inf  |   | 1 |
| LINC00029    | 0 | 0              | 0 | 1 |
| SRMS         | 0 | 0.0124577 inf  |   | 1 |
| LINC00161    | 0 | 0.0183868 inf  |   | 1 |
| LINC00189    | 0 | 0.0158448 inf  |   | 1 |
| MRAP         | 0 | 0              | 0 | 1 |
| LINC00649    | 0 | 0.0275202 inf  |   | 1 |
| KCNJ15       | 0 | 0              | 0 | 1 |
| LINC00319    | 0 | 0              | 0 | 1 |
| ITGB2-AS1    | 0 | 0.0123007 inf  |   | 1 |
| KCNE1        | 0 | 0              | 0 | 1 |
| RUNX1-IT1    | 0 | 0.00636908 inf |   | 1 |
| LOC100133286 | 0 | 0              | 0 | 1 |
| ITGB2        | 0 | 0.0107557 inf  |   | 1 |
| LINC00162    | 0 | 0              | 0 | 1 |
| COL18A1-AS2  | 0 | 0              | 0 | 1 |
| COL18A1-AS1  | 0 | 0.0107792 inf  |   | 1 |
| MYO18B       | 0 | 0              | 0 | 1 |
| RFPL3        | 0 | 0.0210595 inf  |   | 1 |
| GRAP2        | 0 | 0.00649865 inf |   | 1 |
| RIBC2        | 0 | 0              | 0 | 1 |
| MOV10L1      | 0 | 0.0248063 inf  |   | 1 |
| XKR3         | 0 | 0              | 0 | 1 |
| POM121L1P    | 0 | 0.0270443 inf  |   | 1 |
| RTDR1        | 0 | 0.0324285 inf  |   | 1 |
| TMEM211      | 0 | 0              | 0 | 1 |
| SEC14L3      | 0 | 0              | 0 | 1 |
| PLA2G3       | 0 | 0              | 0 | 1 |
| SHISA8       | 0 | 0              | 0 | 1 |
| C22orf34     | 0 | 0              | 0 | 1 |
| IL17REL      | 0 | 0              | 0 | 1 |
| FGD5         | 0 | 0              | 0 | 1 |
| GALNT15      | 0 | 0.00431821 inf |   | 1 |
| ITGA9        | 0 | 0.0082343 inf  |   | 1 |
| DLEC1        | 0 | 0.00208089 inf |   | 1 |
| TGM4         | 0 | 0.0038042 inf  |   | 1 |
| C3orf49      | 0 | 0.00684232 inf |   | 1 |
| FRG2C        | 0 | 0.0054824 inf  |   | 1 |
| EPHA3        | 0 | 0.00369886 inf |   | 1 |
| LINC00636    | 0 | 0.0185398 inf  |   | 1 |
| SLC35G2      | 0 | 0.00675405 inf |   | 1 |
| ESYT3        | 0 | 0.00756952 inf |   | 1 |
| GRK7         | 0 | 0              | 0 | 1 |
| EGFEM1P      | 0 | 0.00936017 inf |   | 1 |
| CLDN11       | 0 | 0.00358307 inf |   | 1 |
| LINC00578    | 0 | 0              | 0 | 1 |
| KCNMB2-IT1   | 0 | 0              | 0 | 1 |
| AHSG         | 0 | 0              | 0 | 1 |
| TPRG1        | 0 | 0              | 0 | 1 |

|              |   |            |     |   |
|--------------|---|------------|-----|---|
| CLDN16       | 0 | 0.00254712 | inf | 1 |
| LMCD1-AS1    | 0 | 0          | 0   | 1 |
| ATP2B2       | 0 | 0.00581302 | inf | 1 |
| SCN11A       | 0 | 0          | 0   | 1 |
| CX3CR1       | 0 | 0.00669081 | inf | 1 |
| LARS2-AS1    | 0 | 0.0103018  | inf | 1 |
| LRRC2        | 0 | 0.0069521  | inf | 1 |
| DNASE1L3     | 0 | 0          | 0   | 1 |
| FAM107A      | 0 | 0          | 0   | 1 |
| FRMD4B       | 0 | 0.00150235 | inf | 1 |
| STX19        | 0 | 0.0205829  | inf | 1 |
| PVRL3-AS1    | 0 | 0.0240693  | inf | 1 |
| SLC9C1       | 0 | 0.0084121  | inf | 1 |
| HGD          | 0 | 0.0202865  | inf | 1 |
| MUC13        | 0 | 0.0164691  | inf | 1 |
| KY           | 0 | 0.00171953 | inf | 1 |
| PRR23A       | 0 | 0          | 0   | 1 |
| CLRN1        | 0 | 0          | 0   | 1 |
| TPRG1-AS2    | 0 | 0          | 0   | 1 |
| ATP13A4      | 0 | 0          | 0   | 1 |
| OPA1-AS1     | 0 | 0          | 0   | 1 |
| LRRC15       | 0 | 0.00766743 | inf | 1 |
| GP5          | 0 | 0.00393525 | inf | 1 |
| EREG         | 0 | 0          | 0   | 1 |
| SPP1         | 0 | 0.0261018  | inf | 1 |
| FGF2         | 0 | 0.00359584 | inf | 1 |
| SLC25A31     | 0 | 0.00540489 | inf | 1 |
| IL15         | 0 | 0.00760091 | inf | 1 |
| ZFP42        | 0 | 0          | 0   | 1 |
| BEND4        | 0 | 0          | 0   | 1 |
| COX7B2       | 0 | 0          | 0   | 1 |
| TMPRSS11D    | 0 | 0          | 0   | 1 |
| CCDC158      | 0 | 0.0136176  | inf | 1 |
| SOWAHB       | 0 | 0.00569848 | inf | 1 |
| ADH6         | 0 | 0.00725074 | inf | 1 |
| NEUROG2      | 0 | 0          | 0   | 1 |
| FAM198B      | 0 | 0          | 0   | 1 |
| FSTL5        | 0 | 0          | 0   | 1 |
| HPGD         | 0 | 0          | 0   | 1 |
| SLED1        | 0 | 0.0566409  | inf | 1 |
| LRRC14B      | 0 | 0          | 0   | 1 |
| ROPN1L       | 0 | 0.0515426  | inf | 1 |
| NIM1         | 0 | 0.00787619 | inf | 1 |
| IL31RA       | 0 | 0.010033   | inf | 1 |
| PMCHL2       | 0 | 0          | 0   | 1 |
| SNORA13      | 0 | 1.45972    | inf | 1 |
| PCDHB6       | 0 | 0.00364342 | inf | 1 |
| AFAP1L1      | 0 | 0.00222641 | inf | 1 |
| PPP1R2P3     | 0 | 0          | 0   | 1 |
| EFCAB9       | 0 | 0          | 0   | 1 |
| HMP19        | 0 | 0          | 0   | 1 |
| CDHR2        | 0 | 0.0100668  | inf | 1 |
| AGXT2        | 0 | 0.00484174 | inf | 1 |
| RANBP3L      | 0 | 0          | 0   | 1 |
| LOC100303749 | 0 | 0          | 0   | 1 |
| LOC647859    | 0 | 0.0372908  | inf | 1 |
| ACOT12       | 0 | 0          | 0   | 1 |
| LOC100133050 | 0 | 0          | 0   | 1 |
| C5orf63      | 0 | 0.00611452 | inf | 1 |
| ACSL6        | 0 | 0.00497725 | inf | 1 |
| KLHL3        | 0 | 0          | 0   | 1 |
| SLC23A1      | 0 | 0.0103618  | inf | 1 |
| NRG2         | 0 | 0.00452612 | inf | 1 |
| SLC25A2      | 0 | 0          | 0   | 1 |
| SPINK1       | 0 | 0.1629     | inf | 1 |
| SLC36A2      | 0 | 0.0126029  | inf | 1 |
| FNDC9        | 0 | 0.00403391 | inf | 1 |
| PFN3         | 0 | 0.309625   | inf | 1 |
| GRM6         | 0 | 0.0113147  | inf | 1 |
| CBY3         | 0 | 0          | 0   | 1 |
| ELOVL2-AS1   | 0 | 0          | 0   | 1 |
| PHACTR1      | 0 | 0.0132061  | inf | 1 |
| NRSN1        | 0 | 0          | 0   | 1 |
| HIST1H2BE    | 0 | 0.236935   | inf | 1 |
| NKAPL        | 0 | 0.010759   | inf | 1 |
| LOC554223    | 0 | 0.0191724  | inf | 1 |
| MCCD1        | 0 | 0.021057   | inf | 1 |
| GGNBP1       | 0 | 0.0238754  | inf | 1 |
| TSPO2        | 0 | 0.0118487  | inf | 1 |

|                       |   |            |     |   |
|-----------------------|---|------------|-----|---|
| FAM26F                | 0 | 0.0242877  | inf | 1 |
| FAM26E                | 0 | 0          | 0   | 1 |
| BRD7P3                | 0 | 0.0132043  | inf | 1 |
| PLN                   | 0 | 0          | 0   | 1 |
| FABP7                 | 0 | 0          | 0   | 1 |
| LAMA2                 | 0 | 0          | 0   | 1 |
| SMLR1                 | 0 | 0          | 0   | 1 |
| ENPP3                 | 0 | 0.00224523 | inf | 1 |
| SUMO4                 | 0 | 0.0296572  | inf | 1 |
| PLEKHG1               | 0 | 0          | 0   | 1 |
| VIP                   | 0 | 0          | 0   | 1 |
| LOC100507194          | 0 | 0.00634796 | inf | 1 |
| PSORS1C3              | 0 | 0          | 0   | 1 |
| NCR3                  | 0 | 0          | 0   | 1 |
| HLA-DRB6              | 0 | 0.0297742  | inf | 1 |
| CLPS                  | 0 | 0          | 0   | 1 |
| PXT1                  | 0 | 0.0151119  | inf | 1 |
| TREM2                 | 0 | 0.0115662  | inf | 1 |
| GPR110                | 0 | 0          | 0   | 1 |
| OEEP                  | 0 | 0.090004   | inf | 1 |
| FILIP1                | 0 | 0          | 0   | 1 |
| GABRR2                | 0 | 0.00482211 | inf | 1 |
| COL10A1               | 0 | 0.016219   | inf | 1 |
| NHEG1                 | 0 | 0          | 0   | 1 |
| NMBR                  | 0 | 0          | 0   | 1 |
| LOC285740             | 0 | 0.0323477  | inf | 1 |
| PARK2                 | 0 | 0.0153282  | inf | 1 |
| TCTE3                 | 0 | 0.014398   | inf | 1 |
| AMZ1                  | 0 | 0.0074484  | inf | 1 |
| SCIN                  | 0 | 0.0029723  | inf | 1 |
| ABCB5                 | 0 | 0.00507636 | inf | 1 |
| LOC100506178          | 0 | 0          | 0   | 1 |
| FKBP6                 | 0 | 0.0190948  | inf | 1 |
| CD36                  | 0 | 0          | 0   | 1 |
| AZGP1P1               | 0 | 0          | 0   | 1 |
| COL26A1               | 0 | 0          | 0   | 1 |
| CFTR                  | 0 | 0          | 0   | 1 |
| ASB15                 | 0 | 0          | 0   | 1 |
| FAM71F1               | 0 | 0.0141368  | inf | 1 |
| TMEM213               | 0 | 0          | 0   | 1 |
| WEE2                  | 0 | 0.00624779 | inf | 1 |
| EPHA1-AS1             | 0 | 0          | 0   | 1 |
| ABP1                  | 0 | 0.00610708 | inf | 1 |
| LINC00244             | 0 | 0          | 0   | 1 |
| MMD2                  | 0 | 0          | 0   | 1 |
| RNF216-IT1            | 0 | 0          | 0   | 1 |
| SOSTDC1               | 0 | 0          | 0   | 1 |
| NACAD                 | 0 | 0.00305629 | inf | 1 |
| LOC100093631          | 0 | 0.00277984 | inf | 1 |
| SGCE                  | 0 | 0          | 0   | 1 |
| CYP3A7,CYP3A7-CYP3AP1 | 0 | 0.00421283 | inf | 1 |
| OR2AE1                | 0 | 0.0117042  | inf | 1 |
| ACTL6B                | 0 | 0          | 0   | 1 |
| MOGAT3                | 0 | 0.0339139  | inf | 1 |
| SLC26A4-AS1           | 0 | 0.00505809 | inf | 1 |
| GPR85                 | 0 | 0          | 0   | 1 |
| ASZ1                  | 0 | 0          | 0   | 1 |
| GRM8                  | 0 | 0.00447049 | inf | 1 |
| SLC13A4               | 0 | 0.0388717  | inf | 1 |
| PRSS37                | 0 | 0          | 0   | 1 |
| KEL                   | 0 | 0.0161079  | inf | 1 |
| OR2A20P,OR2A9P        | 0 | 0          | 0   | 1 |
| ATP6V0E2-AS1          | 0 | 0          | 0   | 1 |
| VIPR2                 | 0 | 0          | 0   | 1 |
| C8orf12,TDH           | 0 | 0.026967   | inf | 1 |
| DEFB135               | 0 | 0          | 0   | 1 |
| LOC100507156          | 0 | 0          | 0   | 1 |
| SMIM18                | 0 | 0          | 0   | 1 |
| LOC100287846          | 0 | 0          | 0   | 1 |
| FAM110B               | 0 | 0.00850833 | inf | 1 |
| DNAJC5B               | 0 | 0.00850459 | inf | 1 |
| BAALC                 | 0 | 0          | 0   | 1 |
| RIMS2                 | 0 | 0.00359591 | inf | 1 |
| DEFB134               | 0 | 0          | 0   | 1 |
| DOK2                  | 0 | 0.00885284 | inf | 1 |
| SCARA5                | 0 | 0          | 0   | 1 |
| PURG                  | 0 | 0          | 0   | 1 |
| LOC728024             | 0 | 0.006292   | inf | 1 |
| ANK1                  | 0 | 0.0053012  | inf | 1 |

|                     |   |                |   |   |
|---------------------|---|----------------|---|---|
| DKK4                | 0 | 0              | 0 | 1 |
| PXDNL               | 0 | 0              | 0 | 1 |
| ST18                | 0 | 0              | 0 | 1 |
| OPRK1               | 0 | 0              | 0 | 1 |
| LOC100130301        | 0 | 0.0185615 inf  |   | 1 |
| DCAF4L2             | 0 | 0              | 0 | 1 |
| GDF6                | 0 | 0              | 0 | 1 |
| ENPP2               | 0 | 0              | 0 | 1 |
| KLHL38              | 0 | 0              | 0 | 1 |
| LOC100130231        | 0 | 0              | 0 | 1 |
| ASAP1-IT1           | 0 | 0.0388251 inf  |   | 1 |
| HPYR1               | 0 | 0.0206418 inf  |   | 1 |
| KCNK9               | 0 | 0.0315571 inf  |   | 1 |
| LYNX1               | 0 | 0              | 0 | 1 |
| MLANA               | 0 | 0.00639678 inf |   | 1 |
| IFNA8               | 0 | 0              | 0 | 1 |
| LOC100506422        | 0 | 0.0098148 inf  |   | 1 |
| HRCT1               | 0 | 0              | 0 | 1 |
| LOC158376           | 0 | 0              | 0 | 1 |
| FAM27C              | 0 | 0.0902531 inf  |   | 1 |
| ANKRD20A1,ANKRD20A3 | 0 | 0.00888028 inf |   | 1 |
| GDA                 | 0 | 0              | 0 | 1 |
| LOC100506834        | 0 | 0              | 0 | 1 |
| NXNL2               | 0 | 0.104652 inf   |   | 1 |
| C9orf47,S1PR3       | 0 | 0.00190568 inf |   | 1 |
| ACTL7A              | 0 | 0.0289767 inf  |   | 1 |
| ORM2                | 0 | 0              | 0 | 1 |
| MORN5               | 0 | 0              | 0 | 1 |
| OR1L6               | 0 | 0              | 0 | 1 |
| C9orf171            | 0 | 0              | 0 | 1 |
| GF11B               | 0 | 0              | 0 | 1 |
| PAEP                | 0 | 0              | 0 | 1 |
| TUBBP5              | 0 | 0.0257631 inf  |   | 1 |
| FLJ41200            | 0 | 0              | 0 | 1 |
| FAM154A             | 0 | 0              | 0 | 1 |
| IFNA17              | 0 | 0              | 0 | 1 |
| LINC00032           | 0 | 0              | 0 | 1 |
| CNTFR               | 0 | 0.00905191 inf |   | 1 |
| FOXDL5              | 0 | 0.00538082 inf |   | 1 |
| LOC100507299        | 0 | 0.0252687 inf  |   | 1 |
| ALDH1A1             | 0 | 0              | 0 | 1 |
| SLC28A3             | 0 | 0              | 0 | 1 |
| STOM                | 0 | 0.0117124 inf  |   | 1 |
| NR5A1               | 0 | 0.0281204 inf  |   | 1 |
| C9orf50             | 0 | 0              | 0 | 1 |
| FUT7                | 0 | 0.0146635 inf  |   | 1 |
| XG                  | 0 | 0.00259379 inf |   | 1 |
| CXorf28             | 0 | 0              | 0 | 1 |
| MAGEB6              | 0 | 0.00467556 inf |   | 1 |
| LANCL3              | 0 | 0.00377885 inf |   | 1 |
| OTC                 | 0 | 0              | 0 | 1 |
| ERAS                | 0 | 0.018234 inf   |   | 1 |
| PAGE4               | 0 | 0              | 0 | 1 |
| HEPH                | 0 | 0.00192172 inf |   | 1 |
| DGAT2L6             | 0 | 0.0180771 inf  |   | 1 |
| GDPD2               | 0 | 0.00508738 inf |   | 1 |
| AGTR2               | 0 | 0              | 0 | 1 |
| ZCCHC12             | 0 | 0.00598587 inf |   | 1 |
| GLUD2               | 0 | 0              | 0 | 1 |
| GRIA3               | 0 | 0.0106873 inf  |   | 1 |
| CD40LG              | 0 | 0.00470367 inf |   | 1 |
| SLITRK2             | 0 | 0              | 0 | 1 |
| MAMLD1              | 0 | 0              | 0 | 1 |
| TKTL1               | 0 | 0.00416451 inf |   | 1 |
| ZFX-AS1             | 0 | 0              | 0 | 1 |
| FTH1P18             | 0 | 0.0525229 inf  |   | 1 |
| CXorf36             | 0 | 0              | 0 | 1 |
| PCSK1N              | 0 | 0              | 0 | 1 |
| SPIN2A              | 0 | 0              | 0 | 1 |
| AWAT2               | 0 | 0              | 0 | 1 |
| P2RY4               | 0 | 0.0107299 inf  |   | 1 |
| IL2RG               | 0 | 0              | 0 | 1 |
| ZDHHC15             | 0 | 0              | 0 | 1 |
| TEX13B              | 0 | 0              | 0 | 1 |
| CAPN6               | 0 | 0              | 0 | 1 |
| CT45A5              | 0 | 0              | 0 | 1 |
| SMIM9               | 0 | 0              | 0 | 1 |
| TMLHE-AS1           | 0 | 0.00498618 inf |   | 1 |
| GYG2P1              | 0 | 0              | 0 | 1 |



Supplemental Table 3b. Analysis of genes that are differentially expressed in CAP-D3 shRNA expressing HT-29 cells as a result of infection.

| Uninfected 1/2hr - time 0 |                 |                           |          |          |                   |            |
|---------------------------|-----------------|---------------------------|----------|----------|-------------------|------------|
| gene_id                   | gene            | locus                     | t0       | t5       | log2(fold_change) | q_value    |
| XLOC_004445               | SYTL2           | chr11:85405264-85522178   | 0.730107 | 0.118199 | -2.62688          | 0.00153868 |
| XLOC_000830               | HSPA6           | chr1:161494035-161496687  | 0.742602 | 0.177302 | -2.06638          | 0.024868   |
| XLOC_022336               | CA9             | chr9:35673914-35681154    | 184.183  | 46.6043  | -1.98261          | 0.00153868 |
| XLOC_017041               | TRIML2          | chr4:189012426-189026408  | 0.956458 | 0.251401 | -1.92771          | 0.034328   |
| XLOC_005157               | B3GNT4          | chr12:122688227-122692084 | 1.44368  | 0.38769  | -1.89677          | 0.0276283  |
| XLOC_009306               | MGAT5B          | chr17:74864797-74946471   | 3.23849  | 0.925096 | -1.80765          | 0.00153868 |
| XLOC_023696               | PLXNB3          | chrX:153029650-153044801  | 1.19693  | 0.344001 | -1.79886          | 0.00153868 |
| XLOC_008678               | LDHD            | chr16:75145757-75150670   | 4.14606  | 1.37858  | -1.58856          | 0.00153868 |
| XLOC_018342               | C6orf141        | chr6:49518112-49519808    | 1.65381  | 0.556654 | -1.57094          | 0.0294837  |
| XLOC_015463               | SOX2-OT         | chr3:180774467-181460013  | 1.30685  | 0.44057  | -1.56866          | 0.00274688 |
| XLOC_015716               | AMT, NICN1      | chr3:49454210-49466757    | 2.41353  | 0.818604 | -1.5599           | 0.00274688 |
| XLOC_000938               | PLA2G4A         | chr1:186798031-186958113  | 1.48864  | 0.526043 | -1.50074          | 0.00153868 |
| XLOC_022188               | NDRG1           | chr8:134249413-134309547  | 343.625  | 125.74   | -1.45039          | 0.00153868 |
| XLOC_003942               | MIR210HG        | chr11:565656-568457       | 12.5353  | 4.65413  | -1.42941          | 0.00153868 |
| XLOC_014922               | BHLHE40         | chr3:5021096-5026865      | 37.9537  | 14.1303  | -1.42545          | 0.00153868 |
| XLOC_014921               | ITPR1           | chr3:4535031-4889524      | 2.50605  | 0.949392 | -1.40034          | 0.00153868 |
| XLOC_003613               | NEAT1           | chr11:65190268-65194003   | 64.3069  | 24.3803  | -1.39925          | 0.00153868 |
| XLOC_015689               | PFKFB4          | chr3:48555116-48594227    | 52.1481  | 20.3135  | -1.36018          | 0.00153868 |
| XLOC_020707               | CAV1            | chr7:116164838-116201239  | 9.84976  | 3.86948  | -1.34795          | 0.00153868 |
| XLOC_022095               | GEM             | chr8:95261484-95274547    | 1.81103  | 0.719639 | -1.33147          | 0.00659556 |
| XLOC_020767               | CALD1           | chr7:134464163-134655480  | 21.3953  | 8.50306  | -1.33124          | 0.00153868 |
| XLOC_002510               | DDIT4           | chr10:74033676-74035797   | 136.542  | 55.2343  | -1.30571          | 0.00153868 |
| XLOC_000287               | SH3D21          | chr1:36771993-36786948    | 5.43711  | 2.20856  | -1.29973          | 0.00153868 |
| XLOC_009572               | ALDOC           | chr17:26900132-26903951   | 174.74   | 70.9923  | -1.29948          | 0.00153868 |
| XLOC_015870               | CCDC80          | chr3:112323408-112359977  | 1.16184  | 0.473676 | -1.29443          | 0.00897284 |
| XLOC_007613               | RORA            | chr15:60780482-61521502   | 1.42357  | 0.58215  | -1.29005          | 0.00153868 |
| XLOC_002519               | FUT11           | chr10:75532048-75535976   | 3.63619  | 1.52388  | -1.25468          | 0.00659556 |
| XLOC_020601               | AKAP9           | chr7:91570188-91739987    | 0.848107 | 0.357232 | -1.24738          | 0.00153868 |
| XLOC_012113               | FOSL2           | chr2:28615778-28637516    | 5.17904  | 2.21642  | -1.22445          | 0.00153868 |
| XLOC_017738               | ARRDC3          | chr5:90664540-90716532    | 5.34835  | 2.30497  | -1.21435          | 0.00153868 |
| XLOC_006739               | DHRS1           | chr14:24759803-24769039   | 2.45206  | 1.07174  | -1.19403          | 0.0374759  |
| XLOC_003096               | SEC31B          | chr10:102246402-102279595 | 0.608805 | 0.266773 | -1.19037          | 0.0471668  |
| XLOC_009986               | RNF157          | chr17:74132414-74236390   | 0.5302   | 0.233405 | -1.1837           | 0.0460785  |
| XLOC_016494               | SPRY1           | chr4:124317949-124324915  | 1.89329  | 0.839812 | -1.17276          | 0.0117316  |
| XLOC_015515               | IL1RAP          | chr3:190231839-190374986  | 2.67348  | 1.18933  | -1.16856          | 0.00380811 |
| XLOC_018631               | NRN1            | chr6:5998232-6007633      | 32.8587  | 14.7303  | -1.15749          | 0.00153868 |
| XLOC_020817               | FAM115C         | chr7:143318044-143427173  | 1.74945  | 0.786961 | -1.15254          | 0.00820276 |
| XLOC_014114               | MIR155, MIR155H | chr21:26934456-26947480   | 4.09683  | 1.86017  | -1.13908          | 0.0365493  |
| XLOC_018274               | PIM1            | chr6:37137921-37143204    | 18.2524  | 8.30418  | -1.13618          | 0.00153868 |
| XLOC_000319               | RIMKLA          | chr1:42846467-42889900    | 2.43155  | 1.10819  | -1.13368          | 0.00153868 |
| XLOC_012286               | KDM3A           | chr2:86668270-86719839    | 18.9878  | 8.65549  | -1.13339          | 0.00153868 |
| XLOC_013304               | CLK1            | chr2:201717731-201729467  | 25.9124  | 11.8676  | -1.12662          | 0.00153868 |
| XLOC_016109               | BCL6            | chr3:187416046-187463513  | 3.88945  | 1.7961   | -1.1147           | 0.00274688 |
| XLOC_021143               | SEMA3A          | chr7:83587658-83824217    | 1.53913  | 0.717346 | -1.10138          | 0.00572929 |
| XLOC_004634               | LOC283174       | chr11:133766329-133771635 | 0.977015 | 0.458893 | -1.09022          | 0.0130226  |
| XLOC_023119               | FIBCD1          | chr9:133777824-133814455  | 6.82824  | 3.21252  | -1.08781          | 0.00380811 |

|             |                |                           |          |          |           |            |
|-------------|----------------|---------------------------|----------|----------|-----------|------------|
| XLOC_004689 | ENO2           | chr12:7023613-7032859     | 259.897  | 122.824  | -1.08135  | 0.00153868 |
| XLOC_021225 | NAT16          | chr7:100813773-100823557  | 2.57719  | 1.22655  | -1.07119  | 0.0290262  |
| XLOC_000680 | ADAMTSL4       | chr1:150521897-150533412  | 3.79552  | 1.81868  | -1.06141  | 0.00274688 |
| XLOC_000388 | CDKN2C         | chr1:51434366-51440309    | 14.043   | 6.74836  | -1.05724  | 0.00153868 |
| XLOC_007618 | CA12           | chr15:63615729-63674075   | 9.20069  | 4.46176  | -1.04413  | 0.00153868 |
| XLOC_000944 | RGS2           | chr1:192778168-192781407  | 5.11588  | 2.48287  | -1.04297  | 0.0163491  |
| XLOC_012203 | OTX1           | chr2:63277191-63284966    | 2.35214  | 1.14391  | -1.04     | 0.0407657  |
| XLOC_001663 | F3             | chr1:94994731-95007413    | 2.6278   | 1.27839  | -1.03952  | 0.0220668  |
| XLOC_022000 | PLAG1          | chr8:57073467-57123859    | 1.19163  | 0.580172 | -1.03838  | 0.00820276 |
| XLOC_015825 | GBE1           | chr3:81538849-81810950    | 30.1124  | 14.6614  | -1.03834  | 0.00153868 |
| XLOC_007171 | STARD9         | chr15:42867856-43013196   | 0.451662 | 0.222738 | -1.01989  | 0.0111246  |
| XLOC_010801 | ARHGAP33       | chr19:36266416-36279724   | 2.15841  | 1.06866  | -1.01416  | 0.0324264  |
| XLOC_011472 | LOC284454,MIR2 | chr19:13945329-13947173   | 10.8284  | 5.40596  | -1.00219  | 0.00572929 |
| XLOC_021785 | MAPK15         | chr8:144798506-144804633  | 5.57767  | 2.79814  | -0.995192 | 0.0280907  |
| XLOC_002287 | ZNF669         | chr1:247263263-247267674  | 3.45249  | 1.73362  | -0.993851 | 0.0280907  |
| XLOC_012401 | INSIG2         | chr2:118846049-118867597  | 12.9558  | 6.56941  | -0.979763 | 0.00153868 |
| XLOC_016322 | SRD5A3         | chr4:56212387-56251747    | 5.39667  | 2.75642  | -0.969276 | 0.00380811 |
| XLOC_004628 | PRDM10         | chr11:129769600-129875381 | 1.16003  | 0.595368 | -0.962313 | 0.0276283  |
| XLOC_000442 | PDE4B          | chr1:66258192-66840262    | 1.21549  | 0.628121 | -0.952428 | 0.0365493  |
| XLOC_001226 | MEGF6          | chr1:3404505-3528059      | 1.07567  | 0.557907 | -0.947144 | 0.0393841  |
| XLOC_002640 | SCD            | chr10:102106771-102124588 | 91.7868  | 47.6542  | -0.945683 | 0.00153868 |
| XLOC_016426 | HERC3          | chr4:89513573-89629693    | 2.96883  | 1.54226  | -0.944843 | 0.0150346  |
| XLOC_002244 | EGLN1          | chr1:231499496-231560790  | 18.8551  | 9.89369  | -0.930372 | 0.00153868 |
| XLOC_018400 | ZNF292         | chr6:87865268-87973406    | 1.68629  | 0.886776 | -0.927209 | 0.00274688 |
| XLOC_002990 | P4HA1          | chr10:74766979-74856732   | 31.5556  | 16.6787  | -0.919892 | 0.00153868 |
| XLOC_021506 | C8orf58        | chr8:22457113-22461662    | 28.8689  | 15.2613  | -0.91964  | 0.00153868 |
| XLOC_000472 | DNAJB4         | chr1:78470635-78482995    | 3.07625  | 1.63453  | -0.912298 | 0.0280907  |
| XLOC_020706 | CAV2           | chr7:116139654-116148595  | 3.134    | 1.66666  | -0.911049 | 0.0169799  |
| XLOC_006222 | RAB20          | chr13:111175412-111214071 | 23.278   | 12.3884  | -0.909981 | 0.00274688 |
| XLOC_012516 | PDK1           | chr2:173420778-173463862  | 23.1925  | 12.38    | -0.905644 | 0.00153868 |
| XLOC_021523 | BNIP3L         | chr8:26240522-26270644    | 47.8021  | 25.5647  | -0.90292  | 0.00274688 |
| XLOC_018520 | KIAA1244       | chr6:138483052-138665800  | 2.84452  | 1.52846  | -0.896107 | 0.00153868 |
| XLOC_015292 | FAM162A        | chr3:122103022-122128961  | 336.095  | 181.047  | -0.892502 | 0.00274688 |
| XLOC_006061 | HSPH1          | chr13:31710762-31736117   | 4.32039  | 2.33036  | -0.89061  | 0.00380811 |
| XLOC_010598 | ZNF627         | chr19:11708234-11729974   | 4.00189  | 2.15935  | -0.890083 | 0.00820276 |
| XLOC_000978 | KDM5B-AS1      | chr1:202780073-202781041  | 24.8557  | 13.4854  | -0.882171 | 0.0487873  |
| XLOC_016908 | C4orf3         | chr4:120217573-120225600  | 97.3648  | 52.9174  | -0.879658 | 0.00153868 |
| XLOC_023713 | PLXNA3         | chrX:153686622-153701985  | 6.53425  | 3.55375  | -0.878682 | 0.00274688 |
| XLOC_021742 | ZNF572         | chr8:125985538-125991630  | 1.674    | 0.91219  | -0.87589  | 0.0475987  |
| XLOC_001826 | S100A10        | chr1:151955385-151966714  | 235.447  | 128.897  | -0.869187 | 0.00274688 |
| XLOC_022228 | NRBP2          | chr8:144915754-144923146  | 12.2649  | 6.72679  | -0.866549 | 0.00153868 |
| XLOC_024067 | APLN           | chrX:128779235-128788933  | 5.33105  | 2.92814  | -0.864438 | 0.0226901  |
| XLOC_007490 | GOLGA8A        | chr15:34671269-34729667   | 16.5986  | 9.16876  | -0.85626  | 0.00153868 |
| XLOC_013244 | KIAA1715       | chr2:176790409-176867018  | 4.29825  | 2.38359  | -0.850616 | 0.00572929 |
| XLOC_013627 | SPAG4          | chr20:34203808-34208965   | 23.0442  | 12.8066  | -0.847514 | 0.020985   |
| XLOC_018374 | SMAP1          | chr6:71377478-71666788    | 3.52602  | 1.96318  | -0.844853 | 0.0304296  |
| XLOC_018408 | PNRC1          | chr6:89790428-89794879    | 29.4823  | 16.476   | -0.83948  | 0.00153868 |
| XLOC_021524 | DPYSL2         | chr8:26371708-26515693    | 7.9156   | 4.43104  | -0.837052 | 0.00970147 |
| XLOC_017989 | CLK4           | chr5:178029664-178054054  | 4.50443  | 2.53274  | -0.830648 | 0.0169799  |



|             |           |                           |         |         |           |            |
|-------------|-----------|---------------------------|---------|---------|-----------|------------|
| XLOC_022820 | TPM2      | chr9:35681989-35690053    | 94.1706 | 52.9663 | -0.830203 | 0.00478151 |
| XLOC_012260 | HK2       | chr2:75059781-75120481    | 41.2196 | 23.442  | -0.814238 | 0.00153868 |
| XLOC_004936 | LRP1      | chr12:57522281-57607125   | 7.02234 | 4.01137 | -0.807858 | 0.00478151 |
| XLOC_023490 | PGK1      | chrX:77359665-77382324    | 775.512 | 443.307 | -0.806842 | 0.0130226  |
| XLOC_017795 | P4HA2     | chr5:131528303-131563556  | 29.9817 | 17.1556 | -0.805409 | 0.00659556 |
| XLOC_006812 | ERO1L     | chr14:53108604-53162419   | 37.9246 | 21.8064 | -0.79838  | 0.00478151 |
| XLOC_006998 | NUDT14    | chr14:105639273-105647660 | 41.2776 | 24.0044 | -0.782059 | 0.0143403  |
| XLOC_007316 | SNX33     | chr15:75941347-75950968   | 25.0336 | 14.6189 | -0.776035 | 0.00572929 |
| XLOC_018064 | MYLIP     | chr6:16129316-16148478    | 4.763   | 2.78785 | -0.772717 | 0.0355697  |
| XLOC_020733 | HILPDA    | chr7:128095883-128098472  | 26.8359 | 15.7109 | -0.772396 | 0.0156935  |
| XLOC_010349 | PIAS2     | chr18:44390022-44497495   | 10.2475 | 6.00436 | -0.771192 | 0.00739414 |
| XLOC_003357 | LDHA      | chr11:18415935-18429765   | 1009.89 | 596.318 | -0.760043 | 0.0253664  |
| XLOC_003218 | ATHL1     | chr11:289137-295688       | 27.3367 | 16.1546 | -0.758894 | 0.00970147 |
| XLOC_023106 | CCBL1     | chr9:131595391-131644354  | 10.7887 | 6.39723 | -0.754    | 0.0360613  |
| XLOC_008924 | WSB1      | chr17:25621105-25640645   | 43.9651 | 26.1378 | -0.750223 | 0.00274688 |
| XLOC_018209 | HSPA1B    | chr6:31795511-31798031    | 47.0754 | 27.9919 | -0.749967 | 0.0117316  |
| XLOC_001000 | CDK18     | chr1:205473683-205501921  | 8.72852 | 5.1906  | -0.749835 | 0.0285456  |
| XLOC_000572 | GSTM1     | chr1:110230417-110236367  | 29.6255 | 17.6396 | -0.748022 | 0.0243026  |
| XLOC_000433 | PGM1      | chr1:64058946-64125916    | 44.1042 | 26.3548 | -0.742846 | 0.0117316  |
| XLOC_008231 | ZNRF1     | chr16:75032914-75144892   | 14.6183 | 8.74859 | -0.740658 | 0.0169799  |
| XLOC_013828 | PROSAPIP1 | chr20:3143272-3149207     | 4.41544 | 2.66001 | -0.731127 | 0.0438785  |
| XLOC_007010 | TUBGCP5   | chr15:22833394-22873891   | 5.19048 | 3.13961 | -0.725283 | 0.0276283  |
| XLOC_008045 | ALDOA     | chr16:30064410-30081741   | 4268.37 | 2585.32 | -0.723343 | 0.0370145  |
| XLOC_005862 | COG6      | chr13:40229763-40365802   | 3.34129 | 2.03136 | -0.717957 | 0.0487873  |
| XLOC_000304 | RLF       | chr1:40627040-40706593    | 4.0382  | 2.48019 | -0.703265 | 0.0226901  |
| XLOC_000036 | TNFRSF14  | chr1:2487207-2495267      | 18.5414 | 11.4007 | -0.701623 | 0.0420136  |
| XLOC_002655 | DPCD      | chr10:103348088-103369410 | 83.532  | 51.5637 | -0.695972 | 0.0187307  |
| XLOC_016392 | CCNG2     | chr4:78078356-78091213    | 6.76405 | 4.17922 | -0.694655 | 0.0198871  |
| XLOC_015396 | TSC22D2   | chr3:150126787-150177615  | 8.43122 | 5.25252 | -0.682731 | 0.0370145  |
| XLOC_009086 | RUNDC1    | chr17:41132581-41145707   | 5.97177 | 3.72445 | -0.68113  | 0.0420136  |
| XLOC_021934 | ZNF395    | chr8:28203101-28243977    | 14.0737 | 8.79494 | -0.678259 | 0.0270318  |
| XLOC_023940 | XIST      | chrX:73012039-73072588    | 6.05188 | 3.78778 | -0.676032 | 0.0187307  |
| XLOC_008811 | KCTD11    | chr17:7255207-7258262     | 14.7715 | 9.25287 | -0.674846 | 0.0304296  |
| XLOC_007303 | CLK3      | chr15:74900712-74922542   | 18.1181 | 11.36   | -0.673477 | 0.0334318  |
| XLOC_017747 | ELL2      | chr5:95220801-95297775    | 4.58964 | 2.87928 | -0.672673 | 0.0379922  |
| XLOC_006074 | SMAD9     | chr13:37418967-37494409   | 4.0037  | 2.51206 | -0.672461 | 0.0456351  |
| XLOC_001915 | CRABP2    | chr1:156669399-156675608  | 181.129 | 114.302 | -0.664169 | 0.0318822  |
| XLOC_001351 | ID3       | chr1:23884420-23886285    | 332.829 | 210.504 | -0.660933 | 0.030086   |
| XLOC_002077 | IVNS1ABP  | chr1:185265521-185286461  | 16.1141 | 10.355  | -0.637993 | 0.0313688  |
| XLOC_018243 | PHF1      | chr6:33378772-33384230    | 27.9185 | 17.9766 | -0.635106 | 0.0374759  |
| XLOC_014824 | DDX17     | chr22:38864082-38902345   | 63.7647 | 41.2618 | -0.62795  | 0.0467998  |
| XLOC_017461 | CCNG1     | chr5:162864576-162872022  | 54.7583 | 35.951  | -0.607044 | 0.0429833  |
| XLOC_005108 | ERP29     | chr12:112451151-112461024 | 95.8888 | 145.966 | 0.606201  | 0.0407657  |
| XLOC_006054 | SLC7A1    | chr13:30083550-30169825   | 14.7536 | 22.4756 | 0.60729   | 0.0484091  |
| XLOC_000738 | HAX1      | chr1:154245038-154248355  | 70.5868 | 108.026 | 0.613904  | 0.0484091  |
| XLOC_021502 | SLC39A14  | chr8:22224761-22291640    | 22.4181 | 34.4442 | 0.619595  | 0.0484091  |
| XLOC_008336 | CLCN7     | chr16:1494933-1525085     | 38.2058 | 58.9431 | 0.62553   | 0.0285456  |
| XLOC_010555 | HNRNPM    | chr19:8509802-8554002     | 75.8007 | 116.97  | 0.625857  | 0.0355697  |
| XLOC_004963 | XPOT      | chr12:64798152-64842463   | 16.3586 | 25.2861 | 0.628288  | 0.0420136  |

|             |          |                           |         |         |          |            |
|-------------|----------|---------------------------|---------|---------|----------|------------|
| XLOC_023179 | EDF1     | chr9:139756570-139760738  | 877.983 | 1358.43 | 0.629675 | 0.034328   |
| XLOC_021902 | REEP4    | chr8:21995532-21999448    | 45.8603 | 71.2185 | 0.635008 | 0.0270318  |
| XLOC_008071 | FUS      | chr16:31191430-31206192   | 45.404  | 70.6345 | 0.637554 | 0.0313688  |
| XLOC_002329 | FAM208B  | chr10:5726800-5805703     | 2.58162 | 4.04926 | 0.64938  | 0.0442243  |
| XLOC_022687 | NDOR1    | chr9:140100118-140113813  | 11.1605 | 17.5901 | 0.656372 | 0.0290262  |
| XLOC_005120 | SDSL     | chr12:113860215-113876081 | 33.556  | 52.915  | 0.657105 | 0.0215444  |
| XLOC_006768 | NFKBIA   | chr14:35870715-35873960   | 30.1799 | 47.8314 | 0.66437  | 0.0294837  |
| XLOC_018800 | TAP2     | chr6:32789609-32806547    | 19.136  | 30.5557 | 0.675155 | 0.0475987  |
| XLOC_021382 | EZH2     | chr7:148504463-148581441  | 13.6169 | 21.7624 | 0.676442 | 0.0215444  |
| XLOC_013479 | RBCK1    | chr20:388708-411610       | 36.9301 | 59.312  | 0.683527 | 0.0198871  |
| XLOC_001440 | SFPQ     | chr1:35649200-35658743    | 59.4068 | 95.694  | 0.687801 | 0.0243026  |
| XLOC_006668 | C14orf80 | chr14:105956191-105965585 | 14.2739 | 23.2166 | 0.701777 | 0.0399087  |
| XLOC_001025 | G0S2     | chr1:209848669-209849735  | 262.405 | 426.871 | 0.702007 | 0.0130226  |
| XLOC_022585 | SLC27A4  | chr9:131102838-131123749  | 45.1469 | 74.0319 | 0.713522 | 0.0156935  |
| XLOC_013941 | EIF6     | chr20:33866708-33872619   | 254.362 | 417.412 | 0.714588 | 0.0117316  |
| XLOC_001427 | YARS     | chr1:33240839-33324480    | 61.4312 | 101.265 | 0.7211   | 0.0192959  |
| XLOC_012087 | SLC35F6  | chr2:26987141-27004099    | 16.8812 | 27.9226 | 0.726014 | 0.0123712  |
| XLOC_012956 | GFPT1    | chr2:69546900-69614386    | 7.49258 | 12.3956 | 0.726294 | 0.00739414 |
| XLOC_007156 | CHAC1    | chr15:41245635-41248717   | 26.0921 | 43.2353 | 0.728595 | 0.0187307  |
| XLOC_009932 | WIPI1    | chr17:66417421-66453653   | 9.5551  | 15.8588 | 0.730941 | 0.0238313  |
| XLOC_010842 | PAPL     | chr19:39574944-39602128   | 12.6066 | 20.9338 | 0.731655 | 0.020985   |
| XLOC_008120 | MT1E     | chr16:56659584-56661024   | 1463.54 | 2431.94 | 0.732642 | 0.0130226  |
| XLOC_021058 | SUN3     | chr7:48026745-48068716    | 26.7598 | 44.4948 | 0.733568 | 0.0156935  |
| XLOC_010220 | SEC11C   | chr18:56807124-56826063   | 25.1216 | 42.2732 | 0.750815 | 0.0169799  |
| XLOC_012250 | MTHFD2   | chr2:74425689-74442424    | 74.5707 | 126.134 | 0.758276 | 0.00739414 |
| XLOC_022512 | SLC31A1  | chr9:115983807-116026772  | 12.781  | 21.663  | 0.761231 | 0.00572929 |
| XLOC_006334 | CTAGE5   | chr14:39734475-39820397   | 4.52265 | 7.68407 | 0.764702 | 0.0181648  |
| XLOC_009859 | TRIM25   | chr17:54965269-54991409   | 16.6037 | 28.3415 | 0.771407 | 0.00572929 |
| XLOC_018891 | GTPBP2   | chr6:43543877-43596936    | 32.4657 | 55.7364 | 0.779704 | 0.0123712  |
| XLOC_010664 | KLF2     | chr19:16435650-16438339   | 45.5296 | 78.2112 | 0.78057  | 0.0111246  |
| XLOC_010178 | MOCOS    | chr18:33767479-33848685   | 13.2805 | 22.8254 | 0.781335 | 0.00897284 |
| XLOC_000302 | MFSD2A   | chr1:40420783-40435628    | 9.90622 | 17.1558 | 0.79229  | 0.0130226  |
| XLOC_000114 | TMEM51   | chr1:15479027-15546974    | 4.13637 | 7.16695 | 0.792993 | 0.038486   |
| XLOC_008277 | MAP1LC3B | chr16:87425800-87438380   | 66.0392 | 115.271 | 0.80364  | 0.00739414 |
| XLOC_012987 | SLC4A5   | chr2:74443368-74570534    | 4.272   | 7.46629 | 0.805481 | 0.00659556 |
| XLOC_000455 | CTH      | chr1:70876900-70905534    | 12.6888 | 22.3215 | 0.814877 | 0.00897284 |
| XLOC_010623 | IER2     | chr19:13261281-13265718   | 120.194 | 211.688 | 0.816582 | 0.00153868 |
| XLOC_000229 | SESN2    | chr1:28585962-28609002    | 46.8868 | 82.7034 | 0.818766 | 0.00739414 |
| XLOC_018005 | GFPT2    | chr5:179727699-179780315  | 27.9795 | 49.6948 | 0.828725 | 0.00478151 |
| XLOC_003978 | PHLDA2   | chr11:2949502-2950650     | 97.4132 | 173.092 | 0.829354 | 0.00380811 |
| XLOC_006293 | PCK2     | chr14:24563482-24573339   | 65.9224 | 117.678 | 0.836001 | 0.00153868 |
| XLOC_011342 | PRR22    | chr19:5782970-5784776     | 8.37095 | 15.0293 | 0.844314 | 0.0329313  |
| XLOC_010236 | SERPINB8 | chr18:61637262-61656608   | 6.85437 | 12.3823 | 0.85318  | 0.00153868 |
| XLOC_013045 | DUSP2    | chr2:96808907-96811179    | 21.9778 | 39.839  | 0.858135 | 0.00572929 |
| XLOC_003981 | CARS     | chr11:3022151-3078681     | 27.8159 | 50.4273 | 0.858295 | 0.00478151 |
| XLOC_007577 | SPPL2A   | chr15:50999736-51057910   | 2.95655 | 5.36886 | 0.860699 | 0.0220668  |
| XLOC_009472 | ALOXE3   | chr17:7999217-8022234     | 6.45871 | 11.8561 | 0.876317 | 0.00153868 |
| XLOC_003569 | SLC3A2   | chr11:62623483-62656355   | 177.061 | 330.119 | 0.898739 | 0.00153868 |
| XLOC_020427 | GARS     | chr7:30634180-30673648    | 84.9968 | 159.157 | 0.904967 | 0.00153868 |

|             |                |                           |          |             |                   |            |
|-------------|----------------|---------------------------|----------|-------------|-------------------|------------|
| XLOC_002171 | SLC30A1        | chr1:211748380-211752099  | 3.25081  | 6.1094      | 0.910233          | 0.0238313  |
| XLOC_010943 | FOSB           | chr19:45971252-45978437   | 3.8313   | 7.23078     | 0.916318          | 0.00478151 |
| XLOC_011786 | SLC1A5         | chr19:47278139-47291842   | 189.811  | 362.555     | 0.933635          | 0.00153868 |
| XLOC_019111 | NHSL1          | chr6:138743180-138893668  | 0.596258 | 1.15104     | 0.948934          | 0.0329313  |
| XLOC_023028 | AKNA           | chr9:117096432-117156685  | 3.79408  | 7.50302     | 0.983721          | 0.00153868 |
| XLOC_018746 | IER3           | chr6:30710975-30712327    | 49.0773  | 97.7447     | 0.993962          | 0.00153868 |
| XLOC_011302 | SLC39A3        | chr19:2732522-2740074     | 28.3037  | 57.3423     | 1.01861           | 0.00380811 |
| XLOC_018106 | HIST1H2BH      | chr6:26251878-26252303    | 16.2062  | 32.8385     | 1.01884           | 0.0270318  |
| XLOC_008805 | SLC16A13       | chr17:6939393-6943440     | 8.90606  | 18.0716     | 1.02086           | 0.00478151 |
| XLOC_003130 | ITPRIP         | chr10:106069453-106098251 | 5.36932  | 11.0571     | 1.04217           | 0.00153868 |
| XLOC_007426 | ARRDC4         | chr15:98503932-98517068   | 1.38197  | 2.86896     | 1.0538            | 0.00478151 |
| XLOC_021908 | EGR3           | chr8:22545173-22550815    | 1.37035  | 2.89847     | 1.08075           | 0.00659556 |
| XLOC_022404 | PSAT1          | chr9:80912058-80945009    | 64.0677  | 135.74      | 1.08318           | 0.00153868 |
| XLOC_003547 | RPLP0P2        | chr11:61382507-61406921   | 1.52003  | 3.29478     | 1.11608           | 0.00380811 |
| XLOC_015077 | CCRL2          | chr3:46448720-46451014    | 2.05092  | 4.45019     | 1.11759           | 0.00572929 |
| XLOC_017258 | TSLP           | chr5:110405777-110413722  | 2.98168  | 6.48329     | 1.1206            | 0.00274688 |
| XLOC_018553 | ULBP1          | chr6:150285142-150294846  | 0.801345 | 1.76881     | 1.14229           | 0.0123712  |
| XLOC_010614 | JUNB           | chr19:12902309-12904125   | 28.9494  | 64.4527     | 1.15471           | 0.00153868 |
| XLOC_004943 | MARS           | chr12:57881735-57914300   | 31.4069  | 69.9251     | 1.15473           | 0.0464744  |
| XLOC_005123 | MAP1LC3B2      | chr12:116997185-117014425 | 3.23517  | 7.20884     | 1.15593           | 0.0117316  |
| XLOC_013478 | TRIB3          | chr20:361307-378203       | 86.9998  | 196.131     | 1.17274           | 0.00153868 |
| XLOC_000637 | TXNIP          | chr1:145438461-145442628  | 24.3009  | 55.1876     | 1.18333           | 0.00153868 |
| XLOC_012210 | SLC1A4         | chr2:65215578-65251000    | 6.60125  | 15.1473     | 1.19825           | 0.00153868 |
| XLOC_003085 | GOT1           | chr10:101156626-101190530 | 28.3258  | 65.0037     | 1.1984            | 0.00153868 |
| XLOC_021181 | ASNS           | chr7:97481428-97501854    | 121.67   | 279.956     | 1.20222           | 0.00153868 |
| XLOC_002495 | HKDC1          | chr10:70980058-71027315   | 0.807765 | 1.90201     | 1.23552           | 0.00572929 |
| XLOC_008718 | SLC7A5         | chr16:87863628-87903100   | 72.9445  | 172.618     | 1.24271           | 0.00153868 |
| XLOC_004941 | INHBE          | chr12:57849095-57851791   | 0.715687 | 1.78933     | 1.32202           | 0.0137404  |
| XLOC_020549 | LAT2           | chr7:73624086-73644164    | 0.488238 | 1.2277      | 1.3303            | 0.0294837  |
| XLOC_006973 | WARS           | chr14:100800124-100842680 | 49.5459  | 125.762     | 1.34385           | 0.00153868 |
| XLOC_006453 | FOS            | chr14:75745480-75748937   | 3.86396  | 9.94934     | 1.36452           | 0.00153868 |
| XLOC_006235 | LINC00565      | chr13:114629486-114631964 | 0.391075 | 1.00899     | 1.36739           | 0.0491395  |
| XLOC_010698 | GDF15          | chr19:18496967-18499986   | 144.133  | 379.777     | 1.39775           | 0.00153868 |
| XLOC_009698 | KRTAP2-3       | chr17:39215492-39216344   | 1.74374  | 4.61657     | 1.40463           | 0.0308509  |
| XLOC_016933 | SLC7A11        | chr4:138948576-139163503  | 1.48605  | 4.03336     | 1.4405            | 0.00153868 |
| XLOC_015065 | TMEM42         | chr3:44903379-44907154    | 11.6616  | 31.8366     | 1.44892           | 0.00153868 |
| XLOC_000667 | HIST2H2AC      | chr1:149858524-149858961  | 4.8598   | 13.3543     | 1.45833           | 0.0304296  |
| XLOC_018683 | HIST1H2AD,HIST | chr6:26197011-26199521    | 1.59222  | 4.79837     | 1.59151           | 0.0290262  |
| XLOC_000559 | SCARNA2        | chr1:109642814-109643234  | 2.95508  | 9.25931     | 1.64771           | 0.0347593  |
| XLOC_006682 | RPPH1          | chr14:20811229-20811570   | 52.1132  | 163.768     | 1.65193           | 0.00153868 |
| XLOC_019081 | CTGF           | chr6:132269316-132272518  | 13.6548  | 47.2122     | 1.78975           | 0.00153868 |
| XLOC_017345 | EGR1           | chr5:137801180-137805004  | 14.6991  | 55.2164     | 1.90937           | 0.00153868 |
| XLOC_022818 | RMRP           | chr9:35657747-35658015    | 111.431  | 433.034     | 1.95834           | 0.00153868 |
| XLOC_018098 | HIST1H1E       | chr6:26156558-26157343    | 1.92281  | 7.53524     | 1.97043           | 0.00380811 |
| XLOC_016793 | CXCL2          | chr4:74962753-74964997    | 0.264681 | 1.13081     | 2.09502           | 0.038486   |
| XLOC_007737 | RPS17          | chr15:82821160-82824865   | 0        | 1.91314 inf |                   | 0.00153868 |
| XLOC_018682 | HIST1H4D       | chr6:26188937-26189304    | 0        | 2.4889 inf  |                   | 0.00153868 |
| gene_id     | gene           | locus                     | t0       | t5          | log2(fold_change) | q_value    |
| XLOC_010184 | LOC284260      | chr18:39766632-40271389   | 0.13629  | 0.00673286  | -4.33932          | 1          |

|             |              |                           |            |             |          |          |
|-------------|--------------|---------------------------|------------|-------------|----------|----------|
| XLOC_023445 | STARD8       | chrX:67867510-67945684    | 0.0642379  | 0.00320027  | -4.32716 | 1        |
| XLOC_018126 | LOC100507173 | chr6:27661813-27678001    | 0.0962465  | 0.00603575  | -3.99513 | 1        |
| XLOC_012150 | TMEM178A     | chr2:39892637-39945104    | 0.411326   | 0.026225    | -3.97127 | 0.482379 |
| XLOC_003240 | MUC5B        | chr11:1244294-1283406     | 0.0492425  | 0.00392563  | -3.64891 | 1        |
| XLOC_015910 | MYLK         | chr3:123304402-123603149  | 0.0277447  | 0.002449    | -3.50195 | 1        |
| XLOC_011316 | ZFR2         | chr19:3804021-3869027     | 0.0699802  | 0.0062955   | -3.47455 | 1        |
| XLOC_013456 | PP14571      | chr2:241375114-241407495  | 0.0839271  | 0.00763361  | -3.4587  | 1        |
| XLOC_000771 | SEMA4A       | chr1:156119734-156147542  | 0.0775354  | 0.00712832  | -3.44322 | 1        |
| XLOC_004491 | MMP10        | chr11:102641232-102651359 | 0.0671801  | 0.00624064  | -3.42827 | 1        |
| XLOC_015884 | LSAMP        | chr3:115521209-116164385  | 0.0109204  | 0.00104311  | -3.38807 | 1        |
| XLOC_017684 | LOC100272216 | chr5:68926979-68929028    | 0.151672   | 0.0152663   | -3.31253 | 1        |
| XLOC_015021 | SLC22A13     | chr3:38307297-38319806    | 0.058047   | 0.0059726   | -3.28079 | 1        |
| XLOC_015059 | ZNF660       | chr3:44626455-44637557    | 0.0424024  | 0.00443253  | -3.25794 | 1        |
| XLOC_016278 | PTTG2        | chr4:37892704-38140796    | 0.251676   | 0.0272569   | -3.20687 | 1        |
| XLOC_000554 | FNDC7        | chr1:109255555-109285367  | 0.0345895  | 0.00376831  | -3.19834 | 1        |
| XLOC_003166 | WDR11-AS1    | chr10:122216465-122806858 | 0.0394968  | 0.0043327   | -3.1884  | 1        |
| XLOC_022433 | LOC100128076 | chr9:94895115-94900911    | 0.103099   | 0.0118846   | -3.11686 | 1        |
| XLOC_021503 | PPP3CC       | chr8:22298482-22398657    | 0.0948868  | 0.011426    | -3.05389 | 1        |
| XLOC_001708 | DENND2D      | chr1:111728590-111747160  | 0.0296717  | 0.00369731  | -3.00454 | 1        |
| XLOC_003766 | HEPHL1       | chr11:93754377-93847374   | 0.0131512  | 0.00170231  | -2.94963 | 1        |
| XLOC_000592 | LOC100506343 | chr1:112264685-112310199  | 0.0511727  | 0.00663006  | -2.94828 | 1        |
| XLOC_002485 | TET1         | chr10:70320116-70454239   | 0.0126009  | 0.00164193  | -2.94006 | 1        |
| XLOC_000573 | GSTM5        | chr1:110254863-110260890  | 0.170222   | 0.0225012   | -2.91935 | 1        |
| XLOC_009775 | SLC4A1       | chr17:42325757-42345502   | 0.0312844  | 0.00416309  | -2.90972 | 1        |
| XLOC_007776 | ANPEP        | chr15:90328125-90358072   | 0.0464797  | 0.0062242   | -2.90064 | 1        |
| XLOC_000813 | SUMO1P3      | chr1:160258376-160328742  | 0.0669182  | 0.00897685  | -2.89812 | 1        |
| XLOC_001152 | TRIM58       | chr1:248020500-248043438  | 0.0189099  | 0.00260503  | -2.85977 | 1        |
| XLOC_014465 | POM121L9P    | chr22:24647588-24661492   | 0.0201264  | 0.0027818   | -2.855   | 1        |
| XLOC_003946 | CDHR5        | chr11:616564-625067       | 0.0405589  | 0.0058208   | -2.80073 | 1        |
| XLOC_005878 | TSC22D1-AS1  | chr13:45006278-45154568   | 0.179248   | 0.0259993   | -2.78541 | 1        |
| XLOC_015872 | CD200R1      | chr3:112641531-112693937  | 0.0307035  | 0.00449733  | -2.77126 | 1        |
| XLOC_009871 | RNF43        | chr17:56378587-56494931   | 0.0399116  | 0.0059604   | -2.74333 | 1        |
| XLOC_008832 | DNAH2        | chr17:7623038-7737058     | 0.00660358 | 0.000988949 | -2.73928 | 1        |
| XLOC_018376 | RIMS1        | chr6:72596405-73112845    | 0.0649596  | 0.00987098  | -2.71828 | 1        |
| XLOC_015150 | CACNA1D      | chr3:53529075-53846492    | 0.0155896  | 0.00237416  | -2.7151  | 1        |
| XLOC_021917 | STC1         | chr8:23699433-23712320    | 0.0390198  | 0.00596632  | -2.70929 | 1        |
| XLOC_018551 | LOC100652739 | chr6:150139893-150244214  | 0.227213   | 0.0357354   | -2.66861 | 1        |
| XLOC_014301 | C21orf62     | chr21:34144410-34186053   | 0.0265292  | 0.00417754  | -2.66685 | 1        |
| XLOC_010091 | CLUL1        | chr18:596997-712662       | 0.0339046  | 0.0053771   | -2.65658 | 1        |
| XLOC_023002 | C9orf152     | chr9:112961845-112970413  | 0.0644151  | 0.0103856   | -2.63281 | 1        |
| XLOC_013636 | C20orf118    | chr20:35504569-35580246   | 0.0424705  | 0.00688095  | -2.62578 | 1        |
| XLOC_014652 | ACR          | chr22:51176651-51183727   | 0.0797048  | 0.0129466   | -2.62209 | 1        |
| XLOC_021689 | MATN2        | chr8:98881310-99048946    | 0.0172784  | 0.00282659  | -2.61184 | 1        |
| XLOC_007818 | PDIA2        | chr16:333117-337209       | 0.179306   | 0.0294623   | -2.60548 | 1        |
| XLOC_003938 | ANO9         | chr11:417929-442011       | 0.179325   | 0.0295895   | -2.59942 | 1        |
| XLOC_014862 | NFAM1        | chr22:42776413-42828401   | 0.0166129  | 0.00274273  | -2.59862 | 1        |
| XLOC_001428 | FNDC5        | chr1:33327868-33338082    | 0.0403151  | 0.00667391  | -2.59472 | 1        |
| XLOC_023113 | PTGES        | chr9:132500614-132515344  | 0.160308   | 0.0266061   | -2.59101 | 1        |
| XLOC_015174 | PRICKLE2-AS3 | chr3:64053639-64211131    | 0.0223608  | 0.00373504  | -2.58178 | 1        |

|             |              |                           |            |            |          |          |
|-------------|--------------|---------------------------|------------|------------|----------|----------|
| XLOC_012488 | SCN2A        | chr2:166095911-166248820  | 0.00692609 | 0.00115724 | -2.58135 | 1        |
| XLOC_014390 | LOC101101776 | chr22:16162065-16172265   | 0.280744   | 0.0478019  | -2.55411 | 1        |
| XLOC_015301 | KALRN        | chr3:123813557-124440036  | 0.0172499  | 0.00294084 | -2.55229 | 1        |
| XLOC_000996 | NFASC        | chr1:204797781-204991950  | 0.0113202  | 0.00193242 | -2.55042 | 1        |
| XLOC_011084 | ZNF880       | chr19:52873169-52889046   | 0.050977   | 0.00878033 | -2.5375  | 1        |
| XLOC_013070 | AFF3         | chr2:100163715-100759037  | 0.0175849  | 0.00305935 | -2.52304 | 1        |
| XLOC_016655 | PPP2R2C      | chr4:6322304-6565327      | 0.0178609  | 0.00312605 | -2.51439 | 1        |
| XLOC_014793 | APOL4        | chr22:36585175-36600879   | 0.020018   | 0.00350522 | -2.51372 | 1        |
| XLOC_002980 | UNC5B-AS1    | chr10:72972291-73062635   | 1.63611    | 0.287453   | -2.50887 | 0.691509 |
| XLOC_016399 | LOC100505875 | chr4:79892901-80229953    | 0.429436   | 0.0758055  | -2.50207 | 0.21252  |
| XLOC_002390 | LINC00264    | chr10:26878793-26883251   | 0.115549   | 0.0204601  | -2.49762 | 1        |
| XLOC_013874 | LINC00652    | chr20:18768614-18776709   | 0.0676771  | 0.0121293  | -2.48017 | 1        |
| XLOC_004526 | CRYAB        | chr11:111779349-111782473 | 0.472208   | 0.0847718  | -2.47777 | 0.386509 |
| XLOC_014125 | GRIK1-AS2    | chr21:30909253-31312282   | 0.0625846  | 0.011285   | -2.4714  | 1        |
| XLOC_012322 | ZAP70        | chr2:98330030-98356323    | 0.272725   | 0.0498443  | -2.45194 | 1        |
| XLOC_017261 | STARD4-AS1   | chr5:110834021-111353003  | 0.0103563  | 0.00190701 | -2.44112 | 1        |
| XLOC_001954 | KCNJ10       | chr1:160007256-160040051  | 0.0114407  | 0.00213992 | -2.41855 | 1        |
| XLOC_021775 | GPIHBP1      | chr8:144295067-144299044  | 0.0398415  | 0.00749925 | -2.40945 | 1        |
| XLOC_000963 | IGFN1        | chr1:201159952-201198080  | 0.00508052 | 0.00095955 | -2.40455 | 1        |
| XLOC_000581 | PROK1        | chr1:110993787-110999976  | 0.0608676  | 0.0115284  | -2.40048 | 1        |
| XLOC_004502 | CASP1        | chr11:104896236-104905884 | 0.144264   | 0.027447   | -2.39399 | 1        |
| XLOC_013378 | PTPRN        | chr2:220154344-220174295  | 0.139444   | 0.0268726  | -2.37547 | 1        |
| XLOC_002899 | C10orf10     | chr10:45455218-45490172   | 0.0898782  | 0.0175796  | -2.35407 | 1        |
| XLOC_015439 | LRRIQ4       | chr3:169539709-169555560  | 0.0730968  | 0.0143803  | -2.34572 | 1        |
| XLOC_002186 | LOC643723    | chr1:219254316-219347130  | 0.104364   | 0.0206518  | -2.33728 | 1        |
| XLOC_009549 | MFAP4        | chr17:19240866-19290532   | 0.044653   | 0.00900536 | -2.3099  | 1        |
| XLOC_013347 | ABCA12       | chr2:215796265-216003151  | 0.00630627 | 0.00127222 | -2.30944 | 1        |
| XLOC_012517 | RAPGEF4      | chr2:173587917-173917620  | 0.0952646  | 0.0192611  | -2.30625 | 1        |
| XLOC_004632 | OPCML        | chr11:132284874-133402403 | 0.00841117 | 0.0017014  | -2.30558 | 1        |
| XLOC_016029 | PA2G4P4      | chr3:156465131-156534851  | 0.0193583  | 0.00393348 | -2.29908 | 1        |
| XLOC_004128 | DCDC5        | chr11:30885149-31014233   | 0.0154878  | 0.00318105 | -2.28356 | 1        |
| XLOC_004212 | SLC43A3      | chr11:57174426-57195053   | 0.220655   | 0.0453218  | -2.28352 | 1        |
| XLOC_013951 | SLA2         | chr20:35201875-35274619   | 0.066454   | 0.0136594  | -2.28246 | 1        |
| XLOC_010757 | WDR88        | chr19:33622997-33666703   | 0.0405054  | 0.00843239 | -2.2641  | 1        |
| XLOC_018750 | PSORS1C2     | chr6:31082607-31107869    | 0.112836   | 0.0235634  | -2.25961 | 1        |
| XLOC_000349 | C1orf228     | chr1:45140393-45191263    | 0.194281   | 0.0408224  | -2.25071 | 1        |
| XLOC_015908 | ADCY5        | chr3:123001142-123167392  | 0.0415961  | 0.00881844 | -2.23785 | 1        |
| XLOC_020809 | TMEM139      | chr7:142982039-142985141  | 0.0506922  | 0.0107641  | -2.23553 | 1        |
| XLOC_009578 | NARR,RAB34   | chr17:27041298-27045286   | 0.246683   | 0.0531019  | -2.21583 | 1        |
| XLOC_013201 | AHCTF1P1     | chr2:162355577-162364413  | 0.00751864 | 0.00162076 | -2.2138  | 1        |
| XLOC_003199 | BNIP3        | chr10:133781203-133795435 | 0.0722968  | 0.015615   | -2.211   | 1        |
| XLOC_016931 | PCDH18       | chr4:138440073-138453629  | 0.0467917  | 0.0101113  | -2.21029 | 1        |
| XLOC_014783 | SLC5A4       | chr22:32614462-32651318   | 0.158831   | 0.0343225  | -2.21026 | 1        |
| XLOC_009909 | CD79B        | chr17:62006097-62009704   | 0.0841809  | 0.018194   | -2.21003 | 1        |
| XLOC_013662 | L3MBTL1      | chr20:42136319-42170535   | 0.356169   | 0.0773431  | -2.20322 | 1        |
| XLOC_014768 | GAL3ST1      | chr22:30950623-30960876   | 0.10588    | 0.0231776  | -2.19163 | 1        |
| XLOC_008869 | TBC1D26      | chr17:15635590-15648098   | 0.192886   | 0.0423029  | -2.18892 | 1        |
| XLOC_013402 | SLC19A3      | chr2:228549925-228582745  | 0.0136371  | 0.00300719 | -2.18105 | 1        |
| XLOC_009236 | RGS9         | chr17:63133455-63223821   | 0.109129   | 0.0240966  | -2.17913 | 1        |

|             |               |                           |            |            |          |          |
|-------------|---------------|---------------------------|------------|------------|----------|----------|
| XLOC_004056 | STK33         | chr11:8413417-8615503     | 0.0162972  | 0.00360566 | -2.17629 | 1        |
| XLOC_007356 | AGSK1,LOC7278 | chr15:82944792-82986427   | 0.044647   | 0.00992845 | -2.16892 | 1        |
| XLOC_002008 | C1orf114      | chr1:169337193-169396670  | 0.0234623  | 0.0052184  | -2.16866 | 1        |
| XLOC_010154 | HRH4          | chr18:22040592-22059921   | 0.0168119  | 0.00374962 | -2.16467 | 1        |
| XLOC_005258 | RBP5          | chr12:7276279-7281466     | 0.154178   | 0.0345412  | -2.15821 | 1        |
| XLOC_012075 | FAM228A       | chr2:24397971-24414567    | 0.0500991  | 0.0112283  | -2.15765 | 1        |
| XLOC_023085 | ENG           | chr9:130577290-130617047  | 0.360513   | 0.0809132  | -2.15561 | 1        |
| XLOC_018135 | OR2B6         | chr6:27925018-27925960    | 0.0997317  | 0.0223986  | -2.15464 | 1        |
| XLOC_010415 | LOC100131655  | chr18:74506687-74534251   | 0.0545257  | 0.0122974  | -2.14859 | 1        |
| XLOC_016095 | LIPH          | chr3:185225569-185270369  | 0.0199439  | 0.00453229 | -2.13764 | 1        |
| XLOC_014154 | KCNE2         | chr21:35736322-35743440   | 0.229521   | 0.0526812  | -2.12327 | 1        |
| XLOC_016126 | LRRC15        | chr3:194075975-194090472  | 0.0101235  | 0.0023298  | -2.11943 | 1        |
| XLOC_004648 | LRTM2         | chr12:1901122-2027870     | 0.0296117  | 0.00684633 | -2.11276 | 1        |
| XLOC_012274 | SH2D6         | chr2:85661917-85664152    | 0.140491   | 0.0329651  | -2.09146 | 1        |
| XLOC_005068 | CHST11        | chr12:104850691-105155792 | 0.0132     | 0.00309838 | -2.09095 | 1        |
| XLOC_003421 | TSPAN18       | chr11:44785975-44972857   | 0.0149568  | 0.0035196  | -2.08731 | 1        |
| XLOC_000065 | ENO1-AS1      | chr1:8921058-8939943      | 0.275893   | 0.0649512  | -2.08668 | 1        |
| XLOC_003141 | NRAP          | chr10:115310589-115423829 | 0.00930801 | 0.00219374 | -2.08508 | 1        |
| XLOC_014519 | SLC5A1        | chr22:32439018-32509011   | 0.0148472  | 0.00350294 | -2.08356 | 1        |
| XLOC_012114 | PLB1          | chr2:28718937-28866653    | 0.0157303  | 0.00371858 | -2.08072 | 1        |
| XLOC_014551 | GALR3         | chr22:38219388-38221502   | 1.33644    | 0.31638    | -2.07867 | 0.213961 |
| XLOC_005679 | TMEM119       | chr12:108983621-108991894 | 0.0345781  | 0.00822248 | -2.07221 | 1        |
| XLOC_021331 | SLC13A4       | chr7:135365986-135412933  | 0.0216776  | 0.00515545 | -2.07203 | 1        |
| XLOC_005901 | DLEU7-AS1     | chr13:51286758-51424041   | 0.0266449  | 0.00635232 | -2.06851 | 1        |
| XLOC_000056 | TAS1R1        | chr1:6615337-6639817      | 0.0358858  | 0.00855673 | -2.06828 | 1        |
| XLOC_015758 | SEMA3G        | chr3:52467267-52479043    | 0.0194257  | 0.0046331  | -2.06792 | 1        |
| XLOC_011324 | TMIGD2        | chr19:4292224-4302428     | 0.0862017  | 0.020568   | -2.06731 | 1        |
| XLOC_018799 | HLA-DOB       | chr6:32780539-32784825    | 0.187182   | 0.0446665  | -2.06718 | 1        |
| XLOC_003342 | SPON1         | chr11:13984183-14289679   | 0.044005   | 0.0105184  | -2.06475 | 1        |
| XLOC_015591 | COL6A4P1      | chr3:15206868-15247466    | 0.0462147  | 0.0110746  | -2.06109 | 1        |
| XLOC_007349 | IL16          | chr15:81489218-81616524   | 0.0412166  | 0.00992405 | -2.05422 | 1        |
| XLOC_023021 | RNF183        | chr9:116059372-116061320  | 0.119961   | 0.028979   | -2.04949 | 1        |
| XLOC_014001 | SPATA25       | chr20:44515129-44516238   | 0.293828   | 0.071054   | -2.04799 | 1        |
| XLOC_007187 | TRIM69        | chr15:45028559-45060025   | 0.275767   | 0.066971   | -2.04184 | 1        |
| XLOC_011204 | ZNF582-AS1    | chr19:56905044-56910544   | 0.101484   | 0.0247019  | -2.03855 | 1        |
| XLOC_007976 | ACSM3         | chr16:20775311-20860990   | 0.336532   | 0.0820885  | -2.03549 | 1        |
| XLOC_005431 | DHH           | chr12:49483205-49488602   | 0.0582296  | 0.0142286  | -2.03296 | 1        |
| XLOC_015492 | C3orf65       | chr3:185361526-185542827  | 0.0971297  | 0.0237623  | -2.03124 | 1        |
| XLOC_022682 | C9orf139      | chr9:139901685-139931234  | 0.0199088  | 0.00487821 | -2.02898 | 1        |
| XLOC_002751 | LOC283038     | chr10:127371811-127408062 | 0.0507916  | 0.0126002  | -2.01115 | 1        |
| XLOC_018795 | HLA-DRB6      | chr6:32520489-32527779    | 0.116172   | 0.0288729  | -2.00848 | 1        |
| XLOC_005329 | GUCY2C        | chr12:14765567-14849519   | 0.0108652  | 0.00270309 | -2.00703 | 1        |
| XLOC_011600 | KRTDAP        | chr19:35978225-35981433   | 0.583318   | 0.146233   | -1.99601 | 0.651207 |
| XLOC_008618 | EXOC3L1       | chr16:67218281-67224107   | 0.142456   | 0.0358744  | -1.98948 | 1        |
| XLOC_021283 | FEZF1         | chr7:121941447-121950131  | 0.208681   | 0.0525612  | -1.98923 | 1        |
| XLOC_001745 | TBX15         | chr1:119425665-119532179  | 0.0273553  | 0.00690078 | -1.98699 | 1        |
| XLOC_006271 | RPGRIP1       | chr14:21756135-21819460   | 0.015608   | 0.00395693 | -1.97983 | 1        |
| XLOC_022692 | C9orf173      | chr9:140144670-140147949  | 0.28138    | 0.0723641  | -1.95917 | 1        |
| XLOC_017961 | LOC643201     | chr5:175570087-175626298  | 0.0608338  | 0.0157258  | -1.95173 | 1        |

|             |              |                           |            |            |          |   |
|-------------|--------------|---------------------------|------------|------------|----------|---|
| XLOC_006097 | ENOX1        | chr13:43787665-44361116   | 0.0185307  | 0.00479237 | -1.9511  | 1 |
| XLOC_021644 | ZFHX4        | chr8:77523113-77779521    | 0.0108854  | 0.00282604 | -1.94554 | 1 |
| XLOC_009485 | RNF222       | chr17:8294022-8301144     | 0.0293934  | 0.00765092 | -1.94179 | 1 |
| XLOC_006436 | ACOT4        | chr14:74058409-74062470   | 0.0431563  | 0.0112411  | -1.94079 | 1 |
| XLOC_022859 | AQP7P1       | chr9:67270214-67289492    | 0.0150622  | 0.0039262  | -1.93973 | 1 |
| XLOC_021289 | IQUB         | chr7:123092235-123174718  | 0.0360214  | 0.00940583 | -1.93723 | 1 |
| XLOC_001403 | MATN1        | chr1:31184123-31199593    | 0.10168    | 0.0265733  | -1.93598 | 1 |
| XLOC_018020 | IRF4         | chr6:391738-411443        | 0.0672161  | 0.0178006  | -1.91688 | 1 |
| XLOC_001027 | TRAF3IP3     | chr1:209929393-209957890  | 0.0204914  | 0.00550852 | -1.89528 | 1 |
| XLOC_004679 | LAG3         | chr12:6881669-6887621     | 0.0972157  | 0.0263551  | -1.88311 | 1 |
| XLOC_005234 | ANO2         | chr12:5671816-6055398     | 0.0187957  | 0.00510687 | -1.87989 | 1 |
| XLOC_010560 | OR7D2        | chr19:9296269-9299493     | 0.0705926  | 0.0191825  | -1.87973 | 1 |
| XLOC_012171 | LOC100134259 | chr2:47055002-47086145    | 0.0600714  | 0.0163488  | -1.87749 | 1 |
| XLOC_004934 | GPR182       | chr12:57388354-57390469   | 0.0433877  | 0.0118157  | -1.87658 | 1 |
| XLOC_009539 | USP32P2      | chr17:18414575-18424566   | 0.119933   | 0.032777   | -1.87147 | 1 |
| XLOC_013280 | MSTN         | chr2:190920425-190927455  | 0.0128398  | 0.00351201 | -1.87026 | 1 |
| XLOC_001415 | COL16A1      | chr1:32117847-32169768    | 0.0107299  | 0.00294425 | -1.86567 | 1 |
| XLOC_002097 | SMIM16       | chr1:200311671-200342920  | 0.0305189  | 0.0083919  | -1.86263 | 1 |
| XLOC_015243 | HHLA2        | chr3:108021331-108097126  | 0.0144893  | 0.00401388 | -1.85192 | 1 |
| XLOC_014679 | CLDN5        | chr22:19510546-19512860   | 0.0501204  | 0.0139309  | -1.84711 | 1 |
| XLOC_023251 | VCX3B        | chrX:8432870-8434551      | 0.0459764  | 0.0127806  | -1.84694 | 1 |
| XLOC_013500 | GNRH2        | chr20:3024267-3026391     | 0.2282     | 0.0636379  | -1.84234 | 1 |
| XLOC_015336 | COL6A6       | chr3:130279177-130395888  | 0.00440843 | 0.00123679 | -1.83366 | 1 |
| XLOC_000419 | LOC100131060 | chr1:59250822-59365384    | 0.0565775  | 0.0159299  | -1.82849 | 1 |
| XLOC_009887 | LOC645638    | chr17:58160926-58165828   | 0.103225   | 0.0290963  | -1.82689 | 1 |
| XLOC_006399 | PPP1R36      | chr14:65016619-65056096   | 0.0308335  | 0.00869128 | -1.82686 | 1 |
| XLOC_009257 | SSTR2        | chr17:71161159-71168062   | 0.0142829  | 0.00402684 | -1.82657 | 1 |
| XLOC_006137 | LINC00282    | chr13:52387482-52419286   | 0.0206982  | 0.00583601 | -1.82645 | 1 |
| XLOC_004791 | TSPAN11      | chr12:31079837-31149537   | 0.0129527  | 0.00365562 | -1.82507 | 1 |
| XLOC_016966 | ANXA2P1      | chr4:154074269-154260474  | 0.0298558  | 0.00843184 | -1.82409 | 1 |
| XLOC_005488 | SP7          | chr12:53720359-53730004   | 0.0178774  | 0.00505036 | -1.82368 | 1 |
| XLOC_020387 | RPL23P8      | chr7:20866916-20867439    | 0.1059     | 0.0299349  | -1.82281 | 1 |
| XLOC_014056 | SYCP2        | chr20:58438617-58507209   | 0.041511   | 0.0117548  | -1.82025 | 1 |
| XLOC_015094 | FBXW12       | chr3:48413708-48436190    | 0.0580869  | 0.0165484  | -1.81152 | 1 |
| XLOC_022657 | PAEP         | chr9:138453603-138458622  | 0.0672789  | 0.0191763  | -1.81083 | 1 |
| XLOC_006310 | C14orf23     | chr14:29241909-29264000   | 0.0308155  | 0.00878371 | -1.81076 | 1 |
| XLOC_018155 | OR2H2        | chr6:29555682-29556745    | 0.245828   | 0.0701101  | -1.80995 | 1 |
| XLOC_013800 | LINC00266-1  | chr20:62921737-62934707   | 0.0794389  | 0.0227055  | -1.8068  | 1 |
| XLOC_021193 | CYP3A5       | chr7:99245812-99277621    | 0.0392688  | 0.0112375  | -1.80506 | 1 |
| XLOC_015723 | UBA7         | chr3:49842637-49851391    | 0.153196   | 0.0439025  | -1.80301 | 1 |
| XLOC_014078 | EEF1A2       | chr20:62119364-62130668   | 0.045957   | 0.0131857  | -1.80132 | 1 |
| XLOC_003571 | SLC22A9      | chr11:63014620-63330855   | 0.0374522  | 0.0107501  | -1.8007  | 1 |
| XLOC_011549 | TM6SF2       | chr19:19375173-19384074   | 0.0454439  | 0.0130465  | -1.80043 | 1 |
| XLOC_011675 | CNTD2        | chr19:40728114-40732597   | 0.0488173  | 0.0140626  | -1.79553 | 1 |
| XLOC_011878 | KLK1         | chr19:51322403-51327043   | 0.0952803  | 0.0274575  | -1.79498 | 1 |
| XLOC_023924 | INGX         | chrX:70430034-70948962    | 0.0555701  | 0.0160415  | -1.7925  | 1 |
| XLOC_004572 | CCDC153      | chr11:119060962-119066584 | 0.245566   | 0.0710521  | -1.78916 | 1 |
| XLOC_020747 | SMO          | chr7:128828712-128853385  | 0.0782404  | 0.0226435  | -1.78882 | 1 |
| XLOC_016385 | C4orf26      | chr4:76481257-76491103    | 0.0553295  | 0.0160388  | -1.78648 | 1 |

|             |              |                           |            |            |          |          |
|-------------|--------------|---------------------------|------------|------------|----------|----------|
| XLOC_011257 | FLJ45445     | chr19:197015-202209       | 0.0368016  | 0.0107809  | -1.7713  | 1        |
| XLOC_009287 | SMIM5        | chr17:73584138-73663269   | 0.10814    | 0.0317324  | -1.76887 | 1        |
| XLOC_013755 | CDH4         | chr20:59827481-60515673   | 0.0449993  | 0.0132503  | -1.76388 | 1        |
| XLOC_023784 | MAP7D2       | chrX:20024830-20135114    | 0.0303144  | 0.00893963 | -1.76171 | 1        |
| XLOC_006859 | FUT8-AS1     | chr14:65877309-66210839   | 0.219084   | 0.0646293  | -1.76122 | 1        |
| XLOC_003309 | NLRP14       | chr11:7041699-7092757     | 0.0178654  | 0.00531807 | -1.74819 | 1        |
| XLOC_007707 | TYRO3P       | chr15:76508628-76603810   | 0.0882537  | 0.0263755  | -1.74246 | 1        |
| XLOC_013284 | STAT4        | chr2:191894301-192016322  | 0.0379482  | 0.0113631  | -1.73968 | 1        |
| XLOC_014142 | C21orf49     | chr21:34144410-34186053   | 0.0708899  | 0.0212315  | -1.73938 | 1        |
| XLOC_017893 | PDGFRB       | chr5:149493401-149535422  | 0.0124924  | 0.00376237 | -1.73133 | 1        |
| XLOC_011598 | LGI4         | chr19:35615416-35626178   | 0.0322417  | 0.00973488 | -1.72769 | 1        |
| XLOC_002409 | LOC100129055 | chr10:38464598-38503273   | 0.0819437  | 0.0247478  | -1.72733 | 1        |
| XLOC_007207 | FGF7         | chr15:49447975-49913118   | 0.00795103 | 0.00240461 | -1.72534 | 1        |
| XLOC_017794 | ACSL6        | chr5:131285666-131347761  | 0.00859279 | 0.00261304 | -1.7174  | 1        |
| XLOC_000254 | DCDC2B       | chr1:32674694-32681797    | 0.0881665  | 0.0268931  | -1.713   | 1        |
| XLOC_021605 | CLVS1        | chr8:62200524-62627199    | 0.0326386  | 0.0100185  | -1.70392 | 1        |
| XLOC_012101 | LOC100505624 | chr2:27548715-27579901    | 0.137388   | 0.0422389  | -1.70161 | 1        |
| XLOC_018539 | LOC100507557 | chr6:145946439-146285233  | 0.0336606  | 0.010424   | -1.69115 | 1        |
| XLOC_010597 | CNN1         | chr19:11649578-11661138   | 0.161627   | 0.0502498  | -1.68548 | 1        |
| XLOC_000571 | GSTM2        | chr1:110210643-110226619  | 0.31541    | 0.098105   | -1.68483 | 1        |
| XLOC_004216 | YPEL4        | chr11:57412559-57417417   | 0.51728    | 0.160945   | -1.68437 | 0.108351 |
| XLOC_018253 | SCUBE3       | chr6:35182189-35218609    | 0.0203647  | 0.00634795 | -1.68171 | 1        |
| XLOC_016708 | TLR1         | chr4:38797875-38806412    | 0.0356989  | 0.0111558  | -1.67808 | 1        |
| XLOC_004089 | SOX6         | chr11:15987994-16497935   | 0.00791518 | 0.00247366 | -1.67797 | 1        |
| XLOC_021985 | SNAI2        | chr8:49830238-49833999    | 0.0192522  | 0.00602384 | -1.67627 | 1        |
| XLOC_020979 | HOXA6        | chr7:27179982-27196296    | 0.461419   | 0.144458   | -1.67542 | 0.859038 |
| XLOC_005667 | ALDH1L2      | chr12:105413561-105478341 | 0.00430574 | 0.00135    | -1.6733  | 1        |
| XLOC_006814 | FERMT2       | chr14:53323988-53417815   | 0.028771   | 0.00906385 | -1.66642 | 1        |
| XLOC_016599 | ANKRD37      | chr4:186317839-186347139  | 9.78827    | 3.08593    | -1.66535 | 0.185874 |
| XLOC_023666 | LOC100272228 | chrX:149106765-149185018  | 0.130377   | 0.0411053  | -1.6653  | 1        |
| XLOC_011927 | ZNF347       | chr19:53641956-53662322   | 0.00707974 | 0.00223241 | -1.66509 | 1        |
| XLOC_015668 | LRRC2        | chr3:46556877-46608040    | 0.0065013  | 0.00205602 | -1.66087 | 1        |
| XLOC_022760 | MIR31HG      | chr9:21454266-21559697    | 0.56421    | 0.178629   | -1.65927 | 0.106773 |
| XLOC_022178 | LOC100507117 | chr8:131064350-131455906  | 0.0173915  | 0.00551239 | -1.65764 | 1        |
| XLOC_018052 | SYCP2L       | chr6:10887063-10974541    | 0.199536   | 0.0633629  | -1.65494 | 1        |
| XLOC_012033 | ALLC         | chr2:3705785-3750260      | 0.174      | 0.0552587  | -1.65482 | 1        |
| XLOC_023971 | PCDH19       | chrX:99546641-99665271    | 0.00458183 | 0.00145898 | -1.65096 | 1        |
| XLOC_007742 | CPEB1        | chr15:83211950-83378635   | 0.0137508  | 0.00438059 | -1.65031 | 1        |
| XLOC_005394 | RACGAP1P     | chr12:45456400-45459194   | 0.0118161  | 0.00377525 | -1.64611 | 1        |
| XLOC_015882 | ZBTB20       | chr3:114056946-114866127  | 0.0675192  | 0.0215733  | -1.64605 | 1        |
| XLOC_004989 | LGR5         | chr12:71833812-71978621   | 0.0139472  | 0.00446569 | -1.64302 | 1        |
| XLOC_009606 | ARGFXP2      | chr17:30469472-30552746   | 0.0321633  | 0.0103091  | -1.64149 | 1        |
| XLOC_001725 | BCL2L15      | chr1:114356432-114447741  | 0.0584597  | 0.0188906  | -1.62978 | 1        |
| XLOC_011401 | ZNF426       | chr19:9638680-9649303     | 0.0460543  | 0.0149405  | -1.62411 | 1        |
| XLOC_015360 | CLDN18       | chr3:137717657-137752494  | 0.0263265  | 0.00856227 | -1.62045 | 1        |
| XLOC_018115 | HCG11        | chr6:26521933-26527612    | 0.00850632 | 0.00276971 | -1.6188  | 1        |
| XLOC_000395 | GPX7         | chr1:53068042-53074723    | 0.0360677  | 0.0117534  | -1.61763 | 1        |
| XLOC_015976 | PRR23C       | chr3:138760943-138763734  | 0.0444076  | 0.0144791  | -1.61683 | 1        |
| XLOC_008392 | SRL          | chr16:4239374-4292081     | 0.00990579 | 0.00323341 | -1.61522 | 1        |



|             |              |                           |           |            |          |          |
|-------------|--------------|---------------------------|-----------|------------|----------|----------|
| XLOC_016030 | LOC339894    | chr3:156799455-156840791  | 0.0195692 | 0.00639515 | -1.61354 | 1        |
| XLOC_006471 | C14orf178    | chr14:78183943-78236085   | 0.089793  | 0.0294299  | -1.60932 | 1        |
| XLOC_008265 | CRISPLD2     | chr16:84853586-84943116   | 0.0358459 | 0.0117764  | -1.60591 | 1        |
| XLOC_021933 | NUGGC        | chr8:27879480-27941388    | 0.0100006 | 0.00329128 | -1.60336 | 1        |
| XLOC_019049 | COL10A1      | chr6:116421998-116566853  | 0.0259572 | 0.00856944 | -1.59886 | 1        |
| XLOC_001579 | HSD52        | chr1:59597607-59612479    | 0.219199  | 0.0724348  | -1.59749 | 1        |
| XLOC_012383 | IL37         | chr2:113670547-113676458  | 0.129635  | 0.0428586  | -1.5968  | 1        |
| XLOC_000543 | ACTG1P4      | chr1:104068577-104122149  | 0.0482405 | 0.0159545  | -1.59629 | 1        |
| XLOC_014187 | ZNF295-AS1   | chr21:43442112-43445060   | 0.0561469 | 0.0186007  | -1.59385 | 1        |
| XLOC_017065 | ADAMTS16     | chr5:5140442-5320412      | 0.0169388 | 0.00562304 | -1.59091 | 1        |
| XLOC_005662 | GNN          | chr12:104237526-104323989 | 0.0430021 | 0.0142892  | -1.58948 | 1        |
| XLOC_007980 | ANKS4B       | chr16:21245015-21263750   | 0.017658  | 0.00587602 | -1.58741 | 1        |
| XLOC_016427 | FAM13A-AS1   | chr4:89630939-89978346    | 0.258361  | 0.0861027  | -1.58526 | 1        |
| XLOC_010244 | LOC100505817 | chr18:70992175-71017124   | 0.0422829 | 0.0141059  | -1.58377 | 1        |
| XLOC_021188 | KPNA7        | chr7:98771196-98805089    | 0.0265466 | 0.00885971 | -1.5832  | 1        |
| XLOC_018010 | HEIH         | chr5:180256953-180262726  | 0.0368133 | 0.0123047  | -1.58102 | 1        |
| XLOC_005264 | SLC2A14      | chr12:7966396-8025495     | 0.0289748 | 0.0097358  | -1.57343 | 1        |
| XLOC_012636 | RUFY4        | chr2:218899656-218955304  | 0.0229377 | 0.00772078 | -1.5709  | 1        |
| XLOC_009729 | KRT42P       | chr17:39782578-39796451   | 0.015619  | 0.00527134 | -1.56706 | 1        |
| XLOC_016667 | SLC2A9       | chr4:9827847-10041872     | 0.0632738 | 0.0213754  | -1.56566 | 1        |
| XLOC_003744 | CCDC81       | chr11:86085777-86134151   | 0.10629   | 0.0360309  | -1.5607  | 1        |
| XLOC_023293 | PHEX         | chrX:22050920-22266478    | 0.0413073 | 0.0140095  | -1.55999 | 1        |
| XLOC_002405 | GJD4         | chr10:35894337-35897863   | 0.0477965 | 0.0162253  | -1.55866 | 1        |
| XLOC_003360 | SPTY2D1-AS1  | chr11:18621350-18656020   | 0.0590306 | 0.0201146  | -1.55322 | 1        |
| XLOC_003825 | ANKK1        | chr11:113258512-113271140 | 0.171896  | 0.0586147  | -1.5522  | 1        |
| XLOC_015106 | BSN          | chr3:49591921-49708982    | 0.0496136 | 0.0169338  | -1.55083 | 1        |
| XLOC_011995 | ZNF671       | chr19:58231118-58238995   | 0.0395666 | 0.0135601  | -1.54492 | 1        |
| XLOC_011825 | CGB          | chr19:49526125-49527632   | 0.116055  | 0.0399664  | -1.53795 | 1        |
| XLOC_008291 | LOC400558    | chr16:89232790-89235555   | 0.0458837 | 0.0158059  | -1.53752 | 1        |
| XLOC_002765 | DPYSL4       | chr10:134000413-134019280 | 0.0435497 | 0.0150289  | -1.53492 | 1        |
| XLOC_012510 | CYBRD1       | chr2:172378756-172414643  | 0.0073051 | 0.0025288  | -1.53045 | 1        |
| XLOC_021173 | PDK4         | chr7:95212808-95225925    | 0.291077  | 0.10082    | -1.52962 | 1        |
| XLOC_013905 | FAM182B      | chr20:25744101-25781927   | 0.113469  | 0.0393498  | -1.52787 | 1        |
| XLOC_010191 | RNF165       | chr18:43914186-44040783   | 0.333849  | 0.115891   | -1.52643 | 1        |
| XLOC_007661 | ANP32A-IT1   | chr15:69070874-69113261   | 0.0248927 | 0.00865796 | -1.52362 | 1        |
| XLOC_010167 | MEP1B        | chr18:29769986-29800366   | 0.0312432 | 0.0108827  | -1.5215  | 1        |
| XLOC_000136 | PADI1        | chr1:17531620-17572501    | 0.0602007 | 0.0209815  | -1.52066 | 1        |
| XLOC_016189 | DOK7         | chr4:3465032-3496209      | 0.0313435 | 0.0109784  | -1.5135  | 1        |
| XLOC_012730 | RBM44        | chr2:238707387-238751451  | 0.108678  | 0.0381503  | -1.51029 | 1        |
| XLOC_015049 | CCBP2        | chr3:42850963-42908775    | 0.0305267 | 0.0107206  | -1.50968 | 1        |
| XLOC_002178 | C1orf227     | chr1:213003484-213020991  | 0.193594  | 0.0681444  | -1.50636 | 1        |
| XLOC_023196 | LOC100129722 | chr9:140144670-140147949  | 0.455542  | 0.160494   | -1.50506 | 0.249717 |
| XLOC_007766 | HAPLN3       | chr15:89420518-89438770   | 0.453577  | 0.160618   | -1.49772 | 0.266689 |
| XLOC_001147 | NLRP3        | chr1:247579457-247612406  | 0.0976301 | 0.0346078  | -1.49623 | 1        |
| XLOC_011484 | PTGER1       | chr19:14583277-14586174   | 0.104257  | 0.0372272  | -1.48572 | 1        |
| XLOC_008535 | PRSS8        | chr16:31142753-31147151   | 0.318927  | 0.114238   | -1.48118 | 1        |
| XLOC_008467 | PDZD9        | chr16:21995185-22012431   | 0.029016  | 0.0104022  | -1.47996 | 1        |
| XLOC_000174 | C1orf213     | chr1:23685940-23698330    | 1.35571   | 0.486506   | -1.47852 | 0.592657 |
| XLOC_016589 | FAM92A1P2    | chr4:183958817-183961272  | 0.0125181 | 0.00449338 | -1.47815 | 1        |

|             |              |                           |            |            |          |          |
|-------------|--------------|---------------------------|------------|------------|----------|----------|
| XLOC_012356 | RGPD4        | chr2:108443387-108509000  | 0.00384506 | 0.00138083 | -1.47748 | 1        |
| XLOC_019168 | AIRN         | chr6:160390130-160527583  | 0.0271607  | 0.00979339 | -1.47164 | 1        |
| XLOC_006809 | FRMD6-AS1    | chr14:51921229-52197444   | 0.301722   | 0.108817   | -1.47132 | 1        |
| XLOC_005849 | STARD13-AS   | chr13:33677271-34250932   | 0.0832387  | 0.0300648  | -1.46918 | 1        |
| XLOC_007701 | CSPG4        | chr15:75966662-76005189   | 0.0211523  | 0.00764365 | -1.46848 | 1        |
| XLOC_012281 | ATOH8        | chr2:85980908-86018506    | 0.0146532  | 0.00530712 | -1.46521 | 1        |
| XLOC_009992 | ST6GALNAC2   | chr17:74561460-74582145   | 0.143767   | 0.0520946  | -1.46453 | 1        |
| XLOC_004707 | ZNF705A      | chr12:8325149-8332642     | 0.00815433 | 0.00295478 | -1.46451 | 1        |
| XLOC_021335 | PTN          | chr7:136912091-137028546  | 0.566968   | 0.205584   | -1.46354 | 0.104824 |
| XLOC_015122 | DOCK3        | chr3:50712671-51421629    | 0.038148   | 0.0138372  | -1.46305 | 1        |
| XLOC_007012 | GOLGA8I      | chr15:23255241-23262743   | 0.0711293  | 0.0258223  | -1.46183 | 1        |
| XLOC_011654 | LOC643669    | chr19:39399619-39402798   | 0.579131   | 0.210859   | -1.45761 | 0.278484 |
| XLOC_009325 | CARD14       | chr17:78143790-78194199   | 0.172522   | 0.0628299  | -1.45726 | 1        |
| XLOC_001519 | RPS15AP10    | chr1:46092975-46152302    | 0.142015   | 0.0517812  | -1.45555 | 1        |
| XLOC_001434 | CSMD2        | chr1:33979608-34631443    | 0.0160288  | 0.00585621 | -1.45263 | 1        |
| XLOC_001804 | CTSS         | chr1:150702671-150738433  | 0.0246897  | 0.00902565 | -1.45181 | 1        |
| XLOC_009168 | EPN3         | chr17:48610047-48621111   | 0.0327218  | 0.01198    | -1.44962 | 1        |
| XLOC_015885 | IGSF11       | chr3:118619478-118864898  | 0.00916797 | 0.00336442 | -1.44625 | 1        |
| XLOC_017384 | PCDHB18      | chr5:140613937-140617101  | 0.0254279  | 0.0093386  | -1.44513 | 1        |
| XLOC_023955 | PGAM4        | chrX:77166193-77305892    | 0.146201   | 0.0537443  | -1.44377 | 1        |
| XLOC_000265 | HPCA         | chr1:33352097-33366953    | 0.167331   | 0.0616592  | -1.44032 | 1        |
| XLOC_008915 | CCDC144C     | chr17:20224486-20305504   | 0.00565474 | 0.00208837 | -1.43708 | 1        |
| XLOC_016010 | GPR87        | chr3:150804675-151176497  | 0.0421726  | 0.0156141  | -1.43346 | 1        |
| XLOC_021626 | SULF1        | chr8:70378858-70573147    | 0.0130704  | 0.00484099 | -1.43293 | 1        |
| XLOC_013842 | RASSF2       | chr20:4760668-4804291     | 0.0144023  | 0.00534231 | -1.43077 | 1        |
| XLOC_005819 | PABPC3       | chr13:25670275-25672704   | 0.0139705  | 0.00518945 | -1.42873 | 1        |
| XLOC_009839 | LOC284080    | chr17:48127712-48133103   | 0.189446   | 0.0704798  | -1.42651 | 1        |
| XLOC_023598 | GLUD2        | chrX:120181461-120183796  | 0.0218224  | 0.00812412 | -1.42552 | 1        |
| XLOC_023982 | ARMCX2       | chrX:100910267-100914863  | 0.128596   | 0.048024   | -1.42102 | 1        |
| XLOC_006501 | COX8C        | chr14:93799564-94173689   | 0.117307   | 0.0438162  | -1.42075 | 1        |
| XLOC_018497 | ARG1         | chr6:131894343-131949379  | 0.0200363  | 0.00749063 | -1.41946 | 1        |
| XLOC_000516 | LOC100129046 | chr1:94027342-94312706    | 0.0346835  | 0.0129924  | -1.41658 | 1        |
| XLOC_014462 | LOC391322    | chr22:24373116-24374043   | 3.17057    | 1.18771    | -1.41656 | 0.142786 |
| XLOC_003261 | LOC650368    | chr11:3402190-3430378     | 0.0751366  | 0.0281601  | -1.41586 | 1        |
| XLOC_017212 | THBS4        | chr5:79331169-79379107    | 0.318302   | 0.119383   | -1.4148  | 1        |
| XLOC_008892 | MYO15A       | chr17:18012019-18083116   | 0.025948   | 0.00973559 | -1.41428 | 1        |
| XLOC_011211 | SMIM17       | chr19:57154526-57168614   | 0.275087   | 0.103354   | -1.41229 | 1        |
| XLOC_023537 | MORF4L2-AS1  | chrX:102930425-102947484  | 0.0993549  | 0.0373594  | -1.41112 | 1        |
| XLOC_018152 | OR2H1        | chr6:29426229-29432099    | 0.0102412  | 0.00385427 | -1.40985 | 1        |
| XLOC_001978 | C1orf192     | chr1:161284165-161337673  | 0.0740872  | 0.027896   | -1.40916 | 1        |
| XLOC_005781 | LOC387895    | chr12:127215246-127256808 | 0.273982   | 0.103339   | -1.4067  | 1        |
| XLOC_011530 | PDE4C        | chr19:18318770-18359010   | 0.146093   | 0.0551331  | -1.40589 | 1        |
| XLOC_004364 | ACY3         | chr11:67410025-67418130   | 0.127314   | 0.0482011  | -1.40125 | 1        |
| XLOC_017090 | LOC643401    | chr5:27472398-27496508    | 0.0329805  | 0.0124896  | -1.40089 | 1        |
| XLOC_001642 | GBP2         | chr1:89573309-89591799    | 0.0108163  | 0.00410114 | -1.39911 | 1        |
| XLOC_011657 | FBXO27       | chr19:39514662-39523198   | 0.117229   | 0.0445034  | -1.39734 | 1        |
| XLOC_018206 | C6orf25      | chr6:31691120-31694485    | 0.0192632  | 0.00731593 | -1.39673 | 1        |
| XLOC_006877 | ADAM20P1     | chr14:70935595-70950473   | 0.147054   | 0.0558565  | -1.39655 | 1        |
| XLOC_014495 | RFPL1        | chr22:29833003-29838444   | 0.0243285  | 0.00924482 | -1.39593 | 1        |

|             |                |                           |            |            |          |           |
|-------------|----------------|---------------------------|------------|------------|----------|-----------|
| XLOC_013090 | SH3RF3-AS1     | chr2:109743783-110262207  | 0.0736682  | 0.0280842  | -1.39129 | 1         |
| XLOC_022660 | KCNT1          | chr9:138594030-138684993  | 0.0227282  | 0.00867598 | -1.38939 | 1         |
| XLOC_013640 | NNAT           | chr20:36145818-36156333   | 0.0600072  | 0.0229449  | -1.38696 | 1         |
| XLOC_015625 | SUSD5          | chr3:33191536-33260707    | 0.0460089  | 0.0175986  | -1.38645 | 1         |
| XLOC_018318 | RSPH9          | chr6:43612766-43638748    | 0.227571   | 0.0874575  | -1.37966 | 1         |
| XLOC_015288 | SLC15A2        | chr3:121613170-121663034  | 0.0147243  | 0.00566468 | -1.37813 | 1         |
| XLOC_022343 | LOC158376      | chr9:35909479-35911617    | 0.026382   | 0.0101523  | -1.37775 | 1         |
| XLOC_016145 | C3orf43        | chr3:196233749-196242237  | 0.110263   | 0.0424389  | -1.37748 | 1         |
| XLOC_008477 | ERN2           | chr16:23690200-23724821   | 0.0248588  | 0.00959625 | -1.37321 | 1         |
| XLOC_017417 | MIR143,MIR143H | chr5:148786439-148812399  | 0.00344613 | 0.00133128 | -1.37217 | 1         |
| XLOC_006053 | MTUS2-AS1      | chr13:29598747-30080084   | 0.171535   | 0.0663366  | -1.37063 | 1         |
| XLOC_016027 | TIPARP-AS1     | chr3:156390959-156424557  | 0.327553   | 0.126784   | -1.36935 | 1         |
| XLOC_012710 | EFHD1          | chr2:233470766-233547491  | 0.0242402  | 0.00938789 | -1.36853 | 1         |
| XLOC_007290 | ADPGK-AS1      | chr15:73043707-73090540   | 0.109253   | 0.0424532  | -1.36373 | 1         |
| XLOC_014613 | PARVG          | chr22:44568835-44603035   | 0.118707   | 0.0461663  | -1.36249 | 1         |
| XLOC_000811 | CASQ1          | chr1:160160284-160171676  | 0.0160811  | 0.0062762  | -1.35741 | 1         |
| XLOC_000779 | HAPLN2         | chr1:156589085-156595517  | 0.0561481  | 0.0219203  | -1.35697 | 1         |
| XLOC_018197 | LST1           | chr6:31553955-31560762    | 0.0861481  | 0.0336539  | -1.35605 | 1         |
| XLOC_007583 | BCL2L10        | chr15:52401821-52404972   | 0.11938    | 0.0466585  | -1.35535 | 1         |
| XLOC_018826 | SPDEF          | chr6:34505578-34524110    | 0.0413911  | 0.0162016  | -1.35318 | 1         |
| XLOC_012998 | M1AP           | chr2:74785009-74875164    | 0.0130219  | 0.00511102 | -1.34926 | 1         |
| XLOC_009223 | KCNH6          | chr17:61600694-61626338   | 0.281036   | 0.110315   | -1.34913 | 1         |
| XLOC_022534 | MORN5          | chr9:124922189-124962367  | 0.0512244  | 0.020128   | -1.34763 | 1         |
| XLOC_018860 | UNC5CL         | chr6:40994639-41006938    | 0.619059   | 0.243707   | -1.34493 | 0.0695357 |
| XLOC_008124 | MT1DP          | chr16:56677598-56678853   | 6.86498    | 2.71438    | -1.33863 | 0.127354  |
| XLOC_015343 | CCRL1          | chr3:132276981-132593050  | 0.03507    | 0.0139054  | -1.33459 | 1         |
| XLOC_005088 | MYO1H          | chr12:109826523-109886176 | 0.0201595  | 0.00799455 | -1.33437 | 1         |
| XLOC_007605 | HSP90AB4P      | chr15:58888509-59042177   | 0.0515511  | 0.0205007  | -1.33033 | 1         |
| XLOC_011357 | DENND1C        | chr19:6464259-6481798     | 0.409734   | 0.163216   | -1.3279  | 0.342031  |
| XLOC_017316 | CCNI2          | chr5:132083136-132113561  | 0.0417175  | 0.0166196  | -1.32777 | 1         |
| XLOC_001055 | TGFB2          | chr1:218517537-218617961  | 0.0147919  | 0.00589471 | -1.32732 | 1         |
| XLOC_015524 | FLJ34208       | chr3:194207868-194209274  | 0.0548528  | 0.0218786  | -1.32605 | 1         |
| XLOC_020964 | DFNA5          | chr7:24737973-24797639    | 0.0145222  | 0.00581769 | -1.31974 | 1         |
| XLOC_012714 | INPP5D         | chr2:233925035-234116549  | 0.219109   | 0.0877786  | -1.31971 | 1         |
| XLOC_010435 | PRTN3          | chr19:840984-848175       | 0.0952544  | 0.0382194  | -1.31748 | 1         |
| XLOC_022503 | ZNF483         | chr9:114287446-114362135  | 0.268276   | 0.108085   | -1.31155 | 1         |
| XLOC_011934 | NLRP12         | chr19:54296854-54327648   | 0.0319071  | 0.0128716  | -1.30968 | 1         |
| XLOC_009038 | GSDMA          | chr17:38119225-38134019   | 0.0169491  | 0.0068376  | -1.30965 | 1         |
| XLOC_003000 | SYNPO2L        | chr10:75404643-75415832   | 0.0226639  | 0.00914577 | -1.30922 | 1         |
| XLOC_021434 | MYOM2          | chr8:1993157-2093380      | 0.0425341  | 0.0171658  | -1.30908 | 1         |
| XLOC_002713 | PNLIPRP1       | chr10:118350489-118368686 | 0.0307824  | 0.0124287  | -1.30843 | 1         |
| XLOC_016188 | HGFAC          | chr4:3443725-3451213      | 0.0458945  | 0.0185422  | -1.30751 | 1         |
| XLOC_016722 | ATP8A1         | chr4:42410391-42659122    | 0.337118   | 0.136608   | -1.30321 | 1         |
| XLOC_015446 | TMEM212        | chr3:171561138-171577108  | 0.0808988  | 0.0328461  | -1.3004  | 1         |
| XLOC_006797 | C14orf182      | chr14:50448429-50474238   | 0.0545243  | 0.022149   | -1.29966 | 1         |
| XLOC_020329 | FLJ44511       | chr7:560027-564869        | 0.118222   | 0.0480676  | -1.29836 | 1         |
| XLOC_005158 | LOC100507066   | chr12:122755980-122907116 | 0.0537739  | 0.0218713  | -1.29787 | 1         |
| XLOC_018217 | C4A,C4B        | chr6:31949833-31970458    | 0.0176332  | 0.00718608 | -1.29502 | 1         |
| XLOC_007719 | CHRNA3         | chr15:78857861-78913637   | 0.189048   | 0.0773728  | -1.28886 | 1         |

|             |              |                           |            |            |          |           |
|-------------|--------------|---------------------------|------------|------------|----------|-----------|
| XLOC_009564 | KRT18P55     | chr17:26603011-26634408   | 0.0185627  | 0.00760023 | -1.28829 | 1         |
| XLOC_014536 | NCF4         | chr22:37257029-37274059   | 0.0442124  | 0.018104   | -1.28814 | 1         |
| XLOC_009722 | KRT15        | chr17:39669996-39675270   | 0.0474455  | 0.0194569  | -1.28599 | 1         |
| XLOC_012597 | ALS2CR8      | chr2:203776977-203851060  | 0.203922   | 0.0837204  | -1.28437 | 1         |
| XLOC_005454 | CELA1        | chr12:51722226-51740463   | 0.0626718  | 0.0257773  | -1.28172 | 1         |
| XLOC_011059 | ACPT         | chr19:51293671-51298481   | 0.0664414  | 0.0273331  | -1.28143 | 1         |
| XLOC_017525 | ZNF454       | chr5:178368193-178393218  | 0.0439881  | 0.0180967  | -1.28138 | 1         |
| XLOC_006209 | TEX30        | chr13:103418462-103426149 | 0.227043   | 0.0934711  | -1.28037 | 1         |
| XLOC_015013 | C3orf35      | chr3:37440967-37476988    | 0.283187   | 0.116661   | -1.27943 | 1         |
| XLOC_001041 | FAM71A       | chr1:212797788-212800120  | 0.0146602  | 0.00604098 | -1.27905 | 1         |
| XLOC_016415 | PTPN13       | chr4:87515467-87736328    | 0.00444472 | 0.0018325  | -1.27828 | 1         |
| XLOC_011986 | ZNF835       | chr19:57174019-57183123   | 0.0211928  | 0.00873821 | -1.27816 | 1         |
| XLOC_002922 | LOC399753    | chr10:49218158-49239658   | 0.250229   | 0.103191   | -1.27794 | 1         |
| XLOC_018942 | GUSBP4       | chr6:58246158-58287724    | 0.633506   | 0.261404   | -1.27708 | 0.381587  |
| XLOC_009783 | GFAP         | chr17:42982993-42992920   | 0.0369865  | 0.015274   | -1.27592 | 1         |
| XLOC_020389 | DNAH11       | chr7:21582832-21985542    | 0.00260715 | 0.00107927 | -1.27242 | 1         |
| XLOC_011573 | ZNF724P      | chr19:23406606-23433172   | 0.324019   | 0.134283   | -1.27081 | 1         |
| XLOC_023718 | SNORA36A     | chrX:153991030-154005964  | 6.48791    | 2.68905    | -1.27066 | 0.890489  |
| XLOC_019110 | PBOV1        | chr6:138483052-138665800  | 0.0159073  | 0.00659972 | -1.26921 | 1         |
| XLOC_004331 | EFEMP2       | chr11:65627871-65640405   | 2.62838    | 1.09215    | -1.26701 | 0.790277  |
| XLOC_017197 | IQGAP2       | chr5:75699148-76003957    | 0.00588385 | 0.00245018 | -1.26387 | 1         |
| XLOC_024176 | PNCK         | chrX:152935187-152939816  | 0.123197   | 0.0514154  | -1.2607  | 1         |
| XLOC_006261 | RNASE3       | chr14:21359561-21360507   | 0.0723762  | 0.0302119  | -1.2604  | 1         |
| XLOC_000483 | WDR63        | chr1:85527992-85598821    | 0.123799   | 0.0518327  | -1.25606 | 1         |
| XLOC_008694 | PKD1L2       | chr16:81134483-81253975   | 0.0904658  | 0.0379765  | -1.25226 | 1         |
| XLOC_016116 | UTS2D        | chr3:190984943-191116459  | 0.0284796  | 0.0119963  | -1.24734 | 1         |
| XLOC_011830 | NTF4         | chr19:49564396-49567124   | 1.71201    | 0.721739   | -1.24614 | 0.164978  |
| XLOC_011063 | SIGLEC9      | chr19:51628136-51639520   | 0.133451   | 0.0562772  | -1.24568 | 1         |
| XLOC_001222 | LOC100133445 | chr1:2487207-2495267      | 1.9095     | 0.806124   | -1.24412 | 0.740566  |
| XLOC_004534 | TMPRSS5      | chr11:113558267-113577068 | 0.44971    | 0.189853   | -1.24411 | 0.221615  |
| XLOC_020677 | SPDYE2L      | chr7:102178365-102213068  | 0.0347474  | 0.0146747  | -1.24357 | 1         |
| XLOC_020732 | LEP          | chr7:127881330-127897682  | 0.023851   | 0.0100785  | -1.24276 | 1         |
| XLOC_004670 | PLEKHG6      | chr12:6419601-6437672     | 0.0287417  | 0.0121525  | -1.24189 | 1         |
| XLOC_013044 | ASTL         | chr2:96789588-96804175    | 0.141846   | 0.060245   | -1.23541 | 1         |
| XLOC_008623 | TPPP3        | chr16:67423711-67427421   | 0.182147   | 0.0775744  | -1.23145 | 1         |
| XLOC_001755 | ANKRD20A12P  | chr1:142697420-142713605  | 0.710824   | 0.302865   | -1.23082 | 0.0864363 |
| XLOC_016888 | SEC24B-AS1   | chr4:110351118-110461615  | 0.615845   | 0.26257    | -1.22987 | 0.905545  |
| XLOC_006872 | LOC100289511 | chr14:70232999-70238722   | 0.131272   | 0.056091   | -1.22672 | 1         |
| XLOC_006638 | AMN          | chr14:103388992-103397179 | 0.154369   | 0.0659866  | -1.22614 | 1         |
| XLOC_003371 | GAS2         | chr11:22688159-22834547   | 0.0670316  | 0.0287562  | -1.22097 | 1         |
| XLOC_010049 | MYADML2      | chr17:79897520-79905109   | 0.0746312  | 0.0320813  | -1.21805 | 1         |
| XLOC_001880 | DCST2        | chr1:154991002-155006257  | 0.131348   | 0.0564836  | -1.21749 | 1         |
| XLOC_015233 | PDCL3P4      | chr3:101431277-101432260  | 0.19475    | 0.0839678  | -1.21371 | 1         |
| XLOC_008028 | RRN3P2       | chr16:29086162-29128038   | 0.101684   | 0.0439114  | -1.21143 | 1         |
| XLOC_018589 | PLG          | chr6:161123224-161175085  | 0.0292099  | 0.0126314  | -1.20944 | 1         |
| XLOC_009216 | EFCAB3       | chr17:60447578-60493839   | 0.478817   | 0.207779   | -1.20442 | 0.180595  |
| XLOC_018642 | MAK          | chr6:10762955-10838788    | 0.12293    | 0.0533983  | -1.20297 | 1         |
| XLOC_013107 | RGPD8        | chr2:113125945-113191222  | 0.109092   | 0.0474976  | -1.19962 | 1         |
| XLOC_023199 | ENTPD8       | chr9:140317846-140335901  | 0.277042   | 0.120816   | -1.19729 | 1         |

|             |              |                           |           |            |          |          |
|-------------|--------------|---------------------------|-----------|------------|----------|----------|
| XLOC_014787 | SYN3         | chr22:32908539-33454377   | 0.0172701 | 0.00754512 | -1.19466 | 1        |
| XLOC_000352 | SNORD55      | chr1:45241245-45244412    | 636.833   | 278.732    | -1.19203 | 0.905545 |
| XLOC_014835 | SNORD83B     | chr22:39708886-39715670   | 136.083   | 59.6111    | -1.19084 | 0.905545 |
| XLOC_002935 | AGAP7        | chr10:51464150-51486327   | 0.418239  | 0.183782   | -1.18633 | 0.185432 |
| XLOC_005897 | CTAGE10P     | chr13:50464544-50467516   | 0.0168592 | 0.0074091  | -1.18616 | 1        |
| XLOC_003730 | MYO7A        | chr11:76839309-76926286   | 0.148588  | 0.065327   | -1.18557 | 1        |
| XLOC_020795 | TAS2R5       | chr7:141490016-141491166  | 0.459538  | 0.202041   | -1.18553 | 0.403093 |
| XLOC_008262 | ATP2C2       | chr16:84402132-84497793   | 0.073083  | 0.0321344  | -1.18542 | 1        |
| XLOC_011620 | LINC00665    | chr19:36803962-36822620   | 0.0626827 | 0.0275644  | -1.18526 | 1        |
| XLOC_022341 | FP588        | chr9:35860270-35865515    | 0.150878  | 0.0663484  | -1.18525 | 1        |
| XLOC_016445 | LOC256880    | chr4:100871635-100873620  | 0.157199  | 0.0693717  | -1.18017 | 1        |
| XLOC_002856 | LINC00202-1  | chr10:27220134-27230930   | 0.15487   | 0.0684791  | -1.17732 | 1        |
| XLOC_013549 | LOC100270804 | chr20:18768614-18776709   | 0.395682  | 0.175192   | -1.17541 | 0.205834 |
| XLOC_020334 | GPR146       | chr7:1036622-1177893      | 4.7559    | 2.10705    | -1.17449 | 0.713997 |
| XLOC_017380 | PCDHB11      | chr5:140579347-140582618  | 0.429685  | 0.190424   | -1.17407 | 0.163304 |
| XLOC_019174 | PARK2        | chr6:161768589-163745505  | 0.047723  | 0.0211583  | -1.17346 | 1        |
| XLOC_009286 | MYO15B       | chr17:73584138-73663269   | 0.481721  | 0.213708   | -1.17255 | 0.6523   |
| XLOC_017222 | ATP6AP1L     | chr5:81601165-81614147    | 1.37702   | 0.611707   | -1.17064 | 0.274831 |
| XLOC_018240 | B3GALT4      | chr6:33244916-33246602    | 0.33711   | 0.149778   | -1.17039 | 1        |
| XLOC_008195 | CDH3         | chr16:68678150-68732957   | 0.197948  | 0.0880574  | -1.16861 | 1        |
| XLOC_004886 | FLJ12825     | chr12:54452037-54516018   | 0.177257  | 0.078967   | -1.16652 | 1        |
| XLOC_006356 | GPR137C      | chr14:53019865-53104431   | 0.128763  | 0.0574176  | -1.16515 | 1        |
| XLOC_010460 | LOC100288123 | chr19:1815244-1848452     | 0.158333  | 0.0706539  | -1.16412 | 1        |
| XLOC_007510 | PLCB2        | chr15:40580097-40600174   | 0.187262  | 0.0836172  | -1.16319 | 1        |
| XLOC_015718 | MST1         | chr3:49721379-49726196    | 1.67778   | 0.750837   | -1.15998 | 0.057213 |
| XLOC_013573 | FAM182A      | chr20:26035249-26067553   | 0.035534  | 0.0159473  | -1.15588 | 1        |
| XLOC_020984 | HOXA13       | chr7:27236498-27239725    | 0.856439  | 0.384503   | -1.15536 | 0.126736 |
| XLOC_001507 | BEST4        | chr1:45249256-45253426    | 0.0654198 | 0.0294495  | -1.15149 | 1        |
| XLOC_004696 | C1S          | chr12:7167979-7178335     | 0.394711  | 0.178005   | -1.14887 | 0.127654 |
| XLOC_014115 | JAM2         | chr21:27011593-27089874   | 0.0663218 | 0.029916   | -1.14856 | 1        |
| XLOC_004555 | SCN4B        | chr11:118004091-118023630 | 0.099592  | 0.0449976  | -1.14618 | 1        |
| XLOC_010022 | AATK         | chr17:79008946-79156964   | 0.499444  | 0.225734   | -1.1457  | 0.815894 |
| XLOC_005275 | LINC00612    | chr12:9208184-9217666     | 0.035764  | 0.0161698  | -1.14521 | 1        |
| XLOC_011872 | SYT3         | chr19:51125233-51143092   | 0.0639823 | 0.0289407  | -1.14457 | 1        |
| XLOC_018831 | TULP1        | chr6:35465650-35480647    | 0.0697834 | 0.0316029  | -1.14283 | 1        |
| XLOC_005180 | TMEM132B     | chr12:125811161-126143589 | 0.0170089 | 0.00770812 | -1.14184 | 1        |
| XLOC_016975 | CTSO         | chr4:156845269-156875048  | 0.330498  | 0.15006    | -1.1391  | 1        |
| XLOC_017842 | LRRTM2       | chr5:138089106-138270723  | 0.0156039 | 0.00709609 | -1.13681 | 1        |
| XLOC_020797 | MGAM         | chr7:141695678-141806547  | 0.0327003 | 0.0148845  | -1.13549 | 1        |
| XLOC_018567 | CLDN20       | chr6:155411422-155635617  | 0.0443081 | 0.0201759  | -1.13494 | 1        |
| XLOC_011994 | ZNF154       | chr19:58211809-58220579   | 0.0382467 | 0.0174179  | -1.13477 | 1        |
| XLOC_018647 | ADTRP        | chr6:11713887-11779280    | 0.432389  | 0.197011   | -1.13406 | 0.226921 |
| XLOC_011001 | FUT2         | chr19:49199227-49209191   | 0.192412  | 0.0878463  | -1.13114 | 1        |
| XLOC_016798 | PPEF2        | chr4:76781025-76823681    | 0.0482994 | 0.0220568  | -1.13078 | 1        |
| XLOC_015866 | GCSAM        | chr3:111839687-111852152  | 0.268828  | 0.122874   | -1.12951 | 1        |
| XLOC_004706 | CLEC4A       | chr12:8276227-8291203     | 0.732409  | 0.334964   | -1.12864 | 0.191481 |
| XLOC_010241 | CCDC102B     | chr18:66382490-66722426   | 0.0665302 | 0.0304811  | -1.12609 | 1        |
| XLOC_011075 | LINC00085    | chr19:52196592-52208443   | 0.619862  | 0.28448    | -1.12362 | 0.194669 |
| XLOC_014182 | FAM3B        | chr21:42688660-42729654   | 0.216773  | 0.0996001  | -1.12196 | 1        |

|             |               |                           |            |            |          |           |
|-------------|---------------|---------------------------|------------|------------|----------|-----------|
| XLOC_020657 | EPO           | chr7:100318422-100321323  | 0.13567    | 0.0623487  | -1.12167 | 1         |
| XLOC_021907 | FLJ14107      | chr8:22462144-22526661    | 0.0431737  | 0.0199269  | -1.11544 | 1         |
| XLOC_015192 | LOC401074     | chr3:75721431-75728454    | 0.196878   | 0.0910374  | -1.11277 | 1         |
| XLOC_017712 | DMGDH         | chr5:78293428-78365449    | 0.0178955  | 0.0082906  | -1.11005 | 1         |
| XLOC_012272 | TCF7L1        | chr2:85360582-85537511    | 0.0749827  | 0.0347397  | -1.10997 | 1         |
| XLOC_018783 | TNXB          | chr6:32006092-32077151    | 0.0293589  | 0.0136053  | -1.10962 | 1         |
| XLOC_010037 | PDE6G         | chr17:79617488-79623607   | 0.0668095  | 0.0310058  | -1.10752 | 1         |
| XLOC_011518 | USHBP1        | chr19:17360848-17375544   | 0.0220394  | 0.0102346  | -1.10663 | 1         |
| XLOC_000030 | CALML6        | chr1:1846265-1848733      | 0.186127   | 0.0864827  | -1.1058  | 1         |
| XLOC_005686 | FOXN4         | chr12:109715782-109747025 | 0.0513101  | 0.0238513  | -1.10517 | 1         |
| XLOC_017427 | MYOZ3         | chr5:150040402-150058930  | 0.0276288  | 0.012856   | -1.10374 | 1         |
| XLOC_017413 | ABLIM3        | chr5:148521053-148639999  | 0.0261013  | 0.0121464  | -1.10359 | 1         |
| XLOC_016330 | ARL9          | chr4:57371374-57390058    | 0.134363   | 0.0625501  | -1.10305 | 1         |
| XLOC_013513 | LOC728228     | chr20:4173736-4176600     | 0.122727   | 0.0571716  | -1.10209 | 1         |
| XLOC_012532 | HOXD1         | chr2:177037923-177055635  | 0.10206    | 0.0475859  | -1.10081 | 1         |
| XLOC_015599 | RFTN1         | chr3:16357351-16555222    | 0.0196478  | 0.00916531 | -1.10011 | 1         |
| XLOC_015642 | EIF1B-AS1     | chr3:39851302-40353915    | 0.0997178  | 0.0465465  | -1.09918 | 1         |
| XLOC_013991 | TP53TG5       | chr20:43990576-44039250   | 0.862942   | 0.403051   | -1.0983  | 0.883459  |
| XLOC_005284 | CLEC2B        | chr12:10004967-10022458   | 0.242464   | 0.113257   | -1.09817 | 1         |
| XLOC_011100 | ZNF813        | chr19:53970988-53997546   | 0.00749192 | 0.00350736 | -1.09495 | 1         |
| XLOC_013191 | ACVR1C        | chr2:158383278-158485399  | 0.0101029  | 0.00473293 | -1.09396 | 1         |
| XLOC_001960 | CD84          | chr1:160510883-160549306  | 0.00417422 | 0.00195724 | -1.09269 | 1         |
| XLOC_009312 | TMC8          | chr17:76108998-76139049   | 0.177634   | 0.0833076  | -1.09239 | 1         |
| XLOC_021094 | CALN1         | chr7:71244475-71877360    | 0.00395815 | 0.00186151 | -1.08835 | 1         |
| XLOC_002911 | ANXA8         | chr10:47157983-47174143   | 0.0313738  | 0.0147659  | -1.08729 | 1         |
| XLOC_018591 | PACRG         | chr6:161768589-163745505  | 0.0286293  | 0.013482   | -1.08646 | 1         |
| XLOC_014337 | PLAC4         | chr21:42539727-42648524   | 0.0984471  | 0.0464309  | -1.08426 | 1         |
| XLOC_020449 | LOC100506776  | chr7:38381177-38418238    | 0.0101127  | 0.00477235 | -1.0834  | 1         |
| XLOC_024152 | LOC100131434  | chrX:148609131-148621312  | 0.0473668  | 0.0223629  | -1.08277 | 1         |
| XLOC_013240 | CHN1          | chr2:175664041-175870107  | 0.0708454  | 0.0334806  | -1.08135 | 1         |
| XLOC_023963 | RPS6KA6       | chrX:83313353-83442943    | 0.00378038 | 0.00178674 | -1.0812  | 1         |
| XLOC_023275 | CA5B          | chrX:15756411-15805748    | 0.801002   | 0.379388   | -1.07813 | 0.0813147 |
| XLOC_000863 | TBX19         | chr1:168250277-168283664  | 0.56329    | 0.26686    | -1.0778  | 0.15618   |
| XLOC_014623 | LOC730668     | chr22:46402495-46406657   | 0.0386138  | 0.0182978  | -1.07745 | 1         |
| XLOC_017352 | PSD2          | chr5:139175405-139224048  | 0.00985611 | 0.00467732 | -1.07534 | 1         |
| XLOC_019201 | LINC00242     | chr6:170188885-170202969  | 0.565406   | 0.268359   | -1.07512 | 0.254699  |
| XLOC_008344 | MEIOB         | chr16:1877224-1922179     | 0.0192562  | 0.00914512 | -1.07425 | 1         |
| XLOC_004798 | FGD4          | chr12:32655040-32798984   | 0.0899497  | 0.0427313  | -1.07383 | 1         |
| XLOC_022368 | AQP7P3        | chr9:42844369-42893137    | 0.764654   | 0.363266   | -1.07378 | 0.491486  |
| XLOC_006426 | LOC145474     | chr14:71954577-71956420   | 0.0187367  | 0.00891536 | -1.0715  | 1         |
| XLOC_021514 | LOC100507156  | chr8:23154409-23261722    | 0.00910486 | 0.00433269 | -1.07137 | 1         |
| XLOC_016992 | DDX60         | chr4:169137441-169239958  | 0.255725   | 0.121704   | -1.07122 | 1         |
| XLOC_013252 | LOC100130691  | chr2:178148235-178257419  | 0.120196   | 0.0572269  | -1.07062 | 1         |
| XLOC_018665 | KIAA0319      | chr6:24544331-24646383    | 0.0825002  | 0.0393067  | -1.06962 | 1         |
| XLOC_001772 | NBPF11,NBPF24 | chr1:146032541-146082765  | 0.0191917  | 0.00914573 | -1.06931 | 1         |
| XLOC_001686 | AKNAD1        | chr1:109358519-109401146  | 0.0579102  | 0.0276001  | -1.06915 | 1         |
| XLOC_004559 | MPZL2         | chr11:118124130-118135251 | 0.0129171  | 0.00615826 | -1.06868 | 1         |
| XLOC_023512 | SRPX2         | chrX:99899162-99926296    | 0.0176868  | 0.00845448 | -1.06489 | 1         |
| XLOC_021370 | LOC154761     | chr7:143509060-143533810  | 1.89734    | 0.909141   | -1.0614  | 0.0523053 |

|             |              |                           |            |            |           |           |
|-------------|--------------|---------------------------|------------|------------|-----------|-----------|
| XLOC_007627 | RBPMS2       | chr15:65032094-65067770   | 0.0592372  | 0.0284776  | -1.05667  | 1         |
| XLOC_000235 | RNU11        | chr1:28975111-28975246    | 50.6798    | 24.3935    | -1.05491  | 0.457462  |
| XLOC_017988 | COL23A1      | chr5:177664616-178017556  | 0.0190815  | 0.00918764 | -1.05441  | 1         |
| XLOC_007517 | PPP1R14D     | chr15:41107642-41120907   | 0.0723328  | 0.034862   | -1.05299  | 1         |
| XLOC_005496 | LOC100240735 | chr12:54452037-54516018   | 0.0539424  | 0.0260467  | -1.05032  | 1         |
| XLOC_015188 | EBLN2        | chr3:73046118-73115011    | 0.121699   | 0.0587916  | -1.04963  | 1         |
| XLOC_010196 | LIPG         | chr18:47088426-47119278   | 0.0727786  | 0.0351801  | -1.04875  | 1         |
| XLOC_017993 | ADAMTS2      | chr5:178537851-178772431  | 0.0831493  | 0.0402393  | -1.0471   | 1         |
| XLOC_004479 | MAML2        | chr11:95711439-96076344   | 0.0171094  | 0.00828415 | -1.04636  | 1         |
| XLOC_003133 | LOC100505933 | chr10:111705316-111895323 | 0.0888189  | 0.0430785  | -1.0439   | 1         |
| XLOC_012443 | GPR39        | chr2:133174146-133429070  | 0.0603912  | 0.0293367  | -1.04163  | 1         |
| XLOC_005546 | DDIT3        | chr12:57881735-57914300   | 110.028    | 53.4514    | -1.04157  | 0.145921  |
| XLOC_011154 | CACNG7       | chr19:54415990-54446969   | 0.874636   | 0.425139   | -1.04075  | 0.243499  |
| XLOC_018524 | ECT2L        | chr6:139117247-139225207  | 0.0991296  | 0.0483758  | -1.03503  | 1         |
| XLOC_003227 | DRD4         | chr11:637304-640705       | 1.87486    | 0.91546    | -1.03421  | 0.379543  |
| XLOC_017356 | SLC4A9       | chr5:139739786-139754722  | 0.0961405  | 0.0469693  | -1.03343  | 1         |
| XLOC_007284 | HEXA-AS1     | chr15:72635777-72671129   | 0.0580609  | 0.0283662  | -1.0334   | 1         |
| XLOC_003423 | PRDM11       | chr11:45115563-45256675   | 0.333196   | 0.162829   | -1.03301  | 1         |
| XLOC_011369 | LOC100128573 | chr19:7537722-7538247     | 0.11886    | 0.0581834  | -1.03059  | 1         |
| XLOC_007566 | SHC4         | chr15:49115933-49255641   | 0.0221839  | 0.010886   | -1.02704  | 1         |
| XLOC_010137 | CYP4F35P     | chr18:14337421-14342523   | 0.349254   | 0.1714     | -1.02691  | 1         |
| XLOC_014362 | TSPEAR       | chr21:45917774-46131495   | 0.0317861  | 0.0156297  | -1.0241   | 1         |
| XLOC_003945 | IRF7         | chr11:612554-615999       | 0.0369043  | 0.018165   | -1.02262  | 1         |
| XLOC_017920 | HAVCR2       | chr5:156512842-156536248  | 0.0536773  | 0.0264418  | -1.02149  | 1         |
| XLOC_011053 | MYBPC2       | chr19:50936159-50969583   | 0.0791092  | 0.0390171  | -1.01974  | 1         |
| XLOC_002780 | CYP2E1       | chr10:135340866-135352620 | 2.18076    | 1.07601    | -1.01914  | 0.0576107 |
| XLOC_002053 | ANGPTL1      | chr1:178694299-178889237  | 0.015801   | 0.00780901 | -1.0168   | 1         |
| XLOC_022843 | ANKRD18A     | chr9:38571360-38620360    | 0.486572   | 0.240601   | -1.01601  | 0.107753  |
| XLOC_009174 | TOB1-AS1     | chr17:48939586-48945732   | 0.898779   | 0.444469   | -1.01588  | 0.867291  |
| XLOC_001713 | LOC100129269 | chr1:112141628-112150940  | 0.105145   | 0.0520429  | -1.0146   | 1         |
| XLOC_007340 | KIAA1024     | chr15:79724857-79764642   | 0.214899   | 0.106527   | -1.01244  | 1         |
| XLOC_016405 | BMP3         | chr4:81952118-81978685    | 0.0788896  | 0.0391645  | -1.01029  | 1         |
| XLOC_015728 | LUST         | chr3:50126340-50156397    | 0.0962078  | 0.0477956  | -1.00928  | 1         |
| XLOC_022770 | LRRC19       | chr9:26903367-27062931    | 0.0137185  | 0.00682369 | -1.0075   | 1         |
| XLOC_004493 | MMP3         | chr11:102654406-102714342 | 0.0238941  | 0.0118956  | -1.00623  | 1         |
| XLOC_000766 | SYT11        | chr1:155829259-155854990  | 0.00896851 | 0.00447445 | -1.00316  | 1         |
| XLOC_009577 | PROCA1       | chr17:27030533-27038872   | 0.950413   | 0.474704   | -1.00153  | 0.270224  |
| XLOC_000935 | PRG4         | chr1:185703682-186446655  | 0.0492253  | 0.0246195  | -0.999598 | 1         |
| XLOC_012848 | CCDC121      | chr2:27848505-27917847    | 0.24251    | 0.1213     | -0.999467 | 1         |
| XLOC_017119 | LOC153684    | chr5:43042235-43045370    | 0.114432   | 0.0572381  | -0.999438 | 1         |
| XLOC_003820 | TEX12        | chr11:112038094-112043279 | 0.182448   | 0.0913846  | -0.997462 | 1         |
| XLOC_003015 | ZMIZ1-AS1    | chr10:80703082-80827205   | 0.0480882  | 0.0241167  | -0.995651 | 1         |
| XLOC_001597 | DIRAS3       | chr1:68167148-68698284    | 0.238961   | 0.119848   | -0.995564 | 1         |
| XLOC_003358 | LDHC         | chr11:18433852-18472793   | 0.0839509  | 0.0421125  | -0.995298 | 1         |
| XLOC_022491 | LOC286367    | chr9:107536632-107540045  | 0.600774   | 0.30139    | -0.995191 | 0.129159  |
| XLOC_024103 | CXorf48      | chrX:134290460-134305751  | 0.0273975  | 0.0137496  | -0.994656 | 1         |
| XLOC_001305 | MST1L        | chr1:17081128-17090975    | 0.438857   | 0.220291   | -0.994342 | 0.145411  |
| XLOC_002143 | LEMD1        | chr1:205342379-205391214  | 0.039356   | 0.0197699  | -0.993278 | 1         |
| XLOC_008917 | LOC100287072 | chr17:20615758-20641178   | 0.0241082  | 0.0121116  | -0.99313  | 1         |

|             |              |                           |           |            |           |           |
|-------------|--------------|---------------------------|-----------|------------|-----------|-----------|
| XLOC_005302 | PRH1,PRR4    | chr12:10998447-11328619   | 2.62749   | 1.32413    | -0.988637 | 0.795289  |
| XLOC_007982 | SNX29P1      | chr16:21360683-21397254   | 0.181134  | 0.0914122  | -0.986602 | 1         |
| XLOC_020960 | KLHL7-AS1    | chr7:23140846-23145322    | 0.0652908 | 0.032959   | -0.986209 | 1         |
| XLOC_017652 | CDC20B       | chr5:54408798-54469005    | 0.0223576 | 0.0112905  | -0.98566  | 1         |
| XLOC_011372 | PCP2         | chr19:7694670-7698634     | 0.724971  | 0.36642    | -0.984427 | 0.912368  |
| XLOC_007281 | THSD4        | chr15:71433787-72075722   | 0.143295  | 0.0725972  | -0.981004 | 1         |
| XLOC_017717 | CRSP8P       | chr5:79646423-79647785    | 0.0514647 | 0.0260737  | -0.980986 | 1         |
| XLOC_009134 | EFCAB13      | chr17:45401326-45518677   | 0.0185425 | 0.00939941 | -0.980191 | 1         |
| XLOC_005649 | DEPDC4       | chr12:100646041-100660857 | 0.294192  | 0.149146   | -0.980037 | 1         |
| XLOC_005237 | SCNN1A       | chr12:6456008-6500737     | 1.13115   | 0.575549   | -0.974782 | 0.853083  |
| XLOC_004967 | TBC1D30      | chr12:65218351-65274798   | 0.0856284 | 0.0435723  | -0.974676 | 1         |
| XLOC_000883 | DNM3         | chr1:171810620-172381857  | 0.0171184 | 0.00871264 | -0.974363 | 1         |
| XLOC_021129 | FDPSL2A      | chr7:76090971-76135312    | 0.0325616 | 0.0165731  | -0.974329 | 1         |
| XLOC_005672 | LOC100505978 | chr12:106751435-107283094 | 0.0795957 | 0.0406042  | -0.971059 | 1         |
| XLOC_013731 | FAM209B      | chr20:55108301-55111574   | 1.13662   | 0.580011   | -0.970596 | 0.430376  |
| XLOC_010321 | LOC100652770 | chr18:29078026-29136874   | 0.0814966 | 0.041605   | -0.969984 | 1         |
| XLOC_004865 | SOAT2        | chr12:53497273-53518323   | 0.0764485 | 0.0390808  | -0.968029 | 1         |
| XLOC_023141 | SARDH        | chr9:136528683-136605077  | 0.495825  | 0.253628   | -0.967116 | 0.249574  |
| XLOC_014823 | KCNJ4        | chr22:38822332-38851205   | 0.0588314 | 0.0301035  | -0.966657 | 1         |
| XLOC_013237 | GPR155       | chr2:175296299-175351816  | 0.34943   | 0.17893    | -0.965606 | 1         |
| XLOC_005226 | NRIP2        | chr12:2934513-2944221     | 0.15823   | 0.0810718  | -0.964753 | 1         |
| XLOC_014424 | TMEM191A     | chr22:21055401-21058891   | 1.03283   | 0.529449   | -0.964037 | 0.241921  |
| XLOC_023198 | EXD3         | chr9:140201347-140317714  | 2.87157   | 1.47278    | -0.963295 | 0.0533774 |
| XLOC_011829 | CGB7         | chr19:49557530-49558997   | 0.731067  | 0.375283   | -0.962027 | 0.592157  |
| XLOC_008523 | ZNF785       | chr16:30591993-30597092   | 2.03158   | 1.04312    | -0.961689 | 0.0515699 |
| XLOC_002288 | C1orf229     | chr1:247273461-247275719  | 0.591091  | 0.30373    | -0.960593 | 0.416627  |
| XLOC_022669 | KIAA1984     | chr9:139690789-139735639  | 0.219966  | 0.113098   | -0.959705 | 1         |
| XLOC_000317 | SLFNL1-AS1   | chr1:41480261-41707815    | 0.167929  | 0.0863773  | -0.959125 | 1         |
| XLOC_018491 | C6orf58      | chr6:127898318-127912963  | 0.0920068 | 0.0473509  | -0.958349 | 1         |
| XLOC_015530 | MUC20        | chr3:195447752-195464540  | 0.0444506 | 0.0228931  | -0.957293 | 1         |
| XLOC_008183 | TSNAXIP1     | chr16:67841009-67861971   | 0.137481  | 0.0708687  | -0.956012 | 1         |
| XLOC_001333 | KIF17        | chr1:20990506-21044317    | 0.629774  | 0.325396   | -0.952637 | 0.1743    |
| XLOC_013643 | VSTM2L       | chr20:36531498-36573747   | 0.102293  | 0.0528705  | -0.952172 | 1         |
| XLOC_010388 | CCBE1        | chr18:57098170-57364644   | 0.0124412 | 0.00643162 | -0.951874 | 1         |
| XLOC_010971 | NAPA-AS1     | chr19:47987538-48018515   | 4.16692   | 2.15542    | -0.951011 | 0.850951  |
| XLOC_020560 | TRIM74       | chr7:75024902-75034888    | 0.775647  | 0.40156    | -0.949784 | 0.410554  |
| XLOC_003352 | MRGPRX3      | chr11:18142501-18160027   | 0.118396  | 0.0615575  | -0.943612 | 1         |
| XLOC_011338 | TINCR        | chr19:5558177-5568005     | 0.255575  | 0.133028   | -0.942017 | 1         |
| XLOC_008771 | SPNS2        | chr17:4402128-4458681     | 0.913015  | 0.475589   | -0.940924 | 0.91609   |
| XLOC_002583 | IFIT1        | chr10:91152302-91166244   | 0.126902  | 0.0662164  | -0.938458 | 1         |
| XLOC_005249 | PIANP        | chr12:6802956-6810009     | 0.123484  | 0.0644991  | -0.936979 | 1         |
| XLOC_022118 | FBXO43       | chr8:101145587-101158099  | 0.135331  | 0.0707274  | -0.936147 | 1         |
| XLOC_001367 | LOC646471    | chr1:26146396-26159433    | 0.28119   | 0.147091   | -0.934837 | 1         |
| XLOC_008482 | IL21R-AS1    | chr16:27413482-27464714   | 0.0432616 | 0.0226331  | -0.934654 | 1         |
| XLOC_018163 | HLA-J        | chr6:29968787-30028961    | 1.60119   | 0.838806   | -0.932739 | 0.539689  |
| XLOC_012637 | CXCR2        | chr2:218990012-219001976  | 0.0265791 | 0.0139493  | -0.930099 | 1         |
| XLOC_004888 | LOC400043    | chr12:54519854-54526626   | 0.158092  | 0.0830359  | -0.928957 | 1         |
| XLOC_014574 | GRAP2        | chr22:40297085-40367384   | 0.0593844 | 0.0311981  | -0.928628 | 1         |
| XLOC_000259 | TSSK3        | chr1:32827861-32829924    | 1.60135   | 0.842336   | -0.92682  | 0.209577  |



|             |               |                           |            |            |           |           |
|-------------|---------------|---------------------------|------------|------------|-----------|-----------|
| XLOC_012995 | DQX1          | chr2:74745257-74753408    | 0.0333961  | 0.0175823  | -0.925556 | 1         |
| XLOC_016838 | HSD17B13      | chr4:88224940-88244056    | 0.0525028  | 0.0276487  | -0.925183 | 1         |
| XLOC_009658 | PLXDC1        | chr17:37213271-37307902   | 0.100408   | 0.0529468  | -0.923265 | 1         |
| XLOC_000962 | C1orf106      | chr1:200860626-200884864  | 0.202864   | 0.106985   | -0.923111 | 1         |
| XLOC_020875 | LOC100132707  | chr7:154720226-154794682  | 0.763474   | 0.402749   | -0.922698 | 0.824372  |
| XLOC_021476 | KIAA1456      | chr8:12803182-12887284    | 0.012256   | 0.0064664  | -0.922451 | 1         |
| XLOC_008258 | NECAB2        | chr16:84002236-84036379   | 0.352562   | 0.186059   | -0.922114 | 1         |
| XLOC_008274 | FLJ30679      | chr16:86588925-86590905   | 0.167156   | 0.088259   | -0.921383 | 1         |
| XLOC_023697 | SRPK3         | chrX:153046455-153051187  | 0.0694365  | 0.0366909  | -0.920273 | 1         |
| XLOC_015379 | TRPC1         | chr3:142443265-142526729  | 0.172771   | 0.091395   | -0.918677 | 1         |
| XLOC_016872 | SLC9B1        | chr4:103790134-103940896  | 0.301819   | 0.159673   | -0.918563 | 1         |
| XLOC_023015 | SLC46A2       | chr9:115641199-115653193  | 0.0250766  | 0.0132974  | -0.915196 | 1         |
| XLOC_021810 | ZNF252P-AS1   | chr8:146198974-146231432  | 0.152803   | 0.0810738  | -0.914362 | 1         |
| XLOC_010338 | LINC00669     | chr18:36786887-37331959   | 0.383068   | 0.203545   | -0.912255 | 0.319848  |
| XLOC_018749 | CDSN          | chr6:31082607-31107869    | 0.12478    | 0.0663402  | -0.911429 | 1         |
| XLOC_021867 | DEFB134       | chr8:11851488-11853760    | 0.529917   | 0.281739   | -0.911408 | 1         |
| XLOC_021147 | TP53TG1       | chr7:86954663-86974808    | 6.095      | 3.24065    | -0.911342 | 0.12195   |
| XLOC_017033 | CCDC110       | chr4:186350544-186392913  | 0.104588   | 0.0556556  | -0.910122 | 1         |
| XLOC_014589 | CSDC2         | chr22:41957013-41972670   | 0.059065   | 0.0314343  | -0.909966 | 1         |
| XLOC_012698 | B3GNT7        | chr2:232260334-232265875  | 0.159821   | 0.0853039  | -0.905777 | 1         |
| XLOC_002761 | CTAGE7P       | chr10:131862161-131909081 | 0.0720842  | 0.0384902  | -0.905193 | 1         |
| XLOC_008786 | ZFP3          | chr17:4981753-4999669     | 0.0384002  | 0.0205132  | -0.904562 | 1         |
| XLOC_001773 | LOC728989     | chr1:146490894-146514599  | 0.055262   | 0.0295404  | -0.903599 | 1         |
| XLOC_007685 | SEMA7A        | chr15:74701629-74726299   | 0.204979   | 0.109607   | -0.90314  | 1         |
| XLOC_015464 | SOX2          | chr3:180774467-181460013  | 0.076326   | 0.0408361  | -0.90233  | 1         |
| XLOC_007558 | DUOX2         | chr15:45384851-45406359   | 0.00905164 | 0.00485415 | -0.898961 | 1         |
| XLOC_021364 | KEL           | chr7:142638200-142659503  | 0.022492   | 0.0120813  | -0.896636 | 1         |
| XLOC_001594 | C1orf141      | chr1:67557858-67600654    | 0.0215998  | 0.011628   | -0.893424 | 1         |
| XLOC_013253 | TTC30B        | chr2:178414880-178417524  | 0.223953   | 0.120717   | -0.891573 | 1         |
| XLOC_011940 | TMC4          | chr19:54663833-54676944   | 0.913244   | 0.492405   | -0.891156 | 0.268917  |
| XLOC_007619 | LOC100130855  | chr15:63796709-63894620   | 0.436461   | 0.235345   | -0.891074 | 0.937401  |
| XLOC_018208 | HSPA1A        | chr6:31783290-31785719    | 2.69163    | 1.45208    | -0.890353 | 0.0949082 |
| XLOC_009419 | VMO1          | chr17:4688579-4689729     | 1.16448    | 0.62842    | -0.889885 | 0.507856  |
| XLOC_007111 | GOLGA8T       | chr15:30427989-30439395   | 0.219685   | 0.118562   | -0.889803 | 1         |
| XLOC_008588 | PLLP          | chr16:57290008-57318584   | 1.41823    | 0.766404   | -0.887913 | 0.296679  |
| XLOC_021793 | KIAA1875      | chr8:145162628-145173218  | 0.149203   | 0.080678   | -0.887032 | 1         |
| XLOC_024181 | ARHGAP4       | chrX:153172829-153191714  | 0.355919   | 0.192494   | -0.886734 | 1         |
| XLOC_012059 | FAM84A        | chr2:14772809-14780168    | 0.0055667  | 0.00301751 | -0.883461 | 1         |
| XLOC_015222 | TMEM30C       | chr3:99904667-99913030    | 0.0949803  | 0.0514987  | -0.883092 | 1         |
| XLOC_012327 | C2orf15       | chr2:99613723-99771187    | 1.197      | 0.649128   | -0.882843 | 0.292     |
| XLOC_008062 | CTF1          | chr16:30907927-30914881   | 0.786128   | 0.427104   | -0.880179 | 0.479652  |
| XLOC_004508 | GUCY1A2       | chr11:106544737-106889171 | 0.00111966 | 0.00060839 | -0.879993 | 1         |
| XLOC_017354 | IGIP          | chr5:139505520-139508391  | 0.922903   | 0.502098   | -0.878211 | 0.127354  |
| XLOC_006880 | MAP3K9        | chr14:71194853-71275888   | 0.486586   | 0.26478    | -0.877902 | 0.185432  |
| XLOC_002436 | FAM35BP       | chr10:46897640-46939145   | 0.00837915 | 0.00455992 | -0.877797 | 1         |
| XLOC_022982 | ALDOB         | chr9:104182841-104198062  | 0.0977061  | 0.0531836  | -0.877469 | 1         |
| XLOC_022376 | ANKRD20A1,ANK | chr9:67926760-67970293    | 0.0123495  | 0.00672393 | -0.877078 | 1         |
| XLOC_004658 | PRMT8         | chr12:3490514-3703138     | 0.917414   | 0.499653   | -0.876647 | 0.213391  |
| XLOC_022716 | RLN2          | chr9:5299865-5304611      | 0.0787451  | 0.0429027  | -0.87612  | 1         |

|             |              |                           |            |            |           |           |
|-------------|--------------|---------------------------|------------|------------|-----------|-----------|
| XLOC_008782 | GP1BA        | chr17:4835591-4838325     | 0.252046   | 0.13734    | -0.875931 | 1         |
| XLOC_005332 | C12orf69     | chr12:14956505-14976791   | 0.0322495  | 0.017578   | -0.87551  | 1         |
| XLOC_004439 | RAB30        | chr11:82692477-82782884   | 0.319357   | 0.174111   | -0.875166 | 1         |
| XLOC_010358 | SMAD7        | chr18:46446222-46477081   | 3.41369    | 1.8615     | -0.874864 | 0.0596515 |
| XLOC_008049 | MYLPF        | chr16:30386122-30389310   | 0.192752   | 0.105127   | -0.874613 | 1         |
| XLOC_012598 | NBEAL1       | chr2:203879601-204082717  | 0.0580267  | 0.0316516  | -0.874437 | 1         |
| XLOC_010909 | ZNF221       | chr19:44455396-44471752   | 0.124953   | 0.0682133  | -0.873266 | 1         |
| XLOC_002435 | GLUD1P7      | chr10:46764667-46768346   | 0.00510086 | 0.00278611 | -0.872491 | 1         |
| XLOC_011912 | ZNF614       | chr19:52516576-52531680   | 0.23907    | 0.130654   | -0.871684 | 1         |
| XLOC_000937 | OCLM         | chr1:185703682-186446655  | 0.195656   | 0.106949   | -0.871399 | 1         |
| XLOC_018945 | EYS          | chr6:64429875-66417118    | 0.0129314  | 0.00707384 | -0.87031  | 1         |
| XLOC_010473 | ZNF555       | chr19:2841432-2860472     | 0.54282    | 0.297138   | -0.869338 | 0.0580068 |
| XLOC_004777 | SSPN         | chr12:26348268-26387708   | 0.00457743 | 0.00250686 | -0.868655 | 1         |
| XLOC_011629 | ZNF829       | chr19:37288451-37407193   | 0.0083464  | 0.00457442 | -0.867566 | 1         |
| XLOC_008280 | ZNF469       | chr16:88493878-88507165   | 0.0124077  | 0.00680272 | -0.867057 | 1         |
| XLOC_022934 | OGN          | chr9:95059639-95432547    | 0.00642999 | 0.00352572 | -0.866897 | 1         |
| XLOC_010162 | DSG3         | chr18:29027731-29058665   | 0.0226913  | 0.0124439  | -0.866699 | 1         |
| XLOC_017232 | GPR98        | chr5:89854616-90460033    | 0.00138044 | 0.00075758 | -0.865653 | 1         |
| XLOC_021285 | RNF133       | chr7:121958477-122526813  | 0.0141729  | 0.00778077 | -0.865146 | 1         |
| XLOC_016484 | MYOZ2        | chr4:120056938-120108944  | 0.00669356 | 0.00367563 | -0.864783 | 1         |
| XLOC_009826 | HOXB13       | chr17:46802126-46806111   | 1.04603    | 0.574452   | -0.864671 | 0.179176  |
| XLOC_012664 | SPEG         | chr2:220299699-220358354  | 0.0168173  | 0.00923858 | -0.864204 | 1         |
| XLOC_008158 | BEAN1        | chr16:66461199-66527432   | 0.201411   | 0.110752   | -0.862812 | 1         |
| XLOC_003968 | H19.MIR675   | chr11:2016405-2019065     | 2.45206    | 1.34845    | -0.862696 | 0.229719  |
| XLOC_000785 | LRRRC71      | chr1:156890423-156902880  | 0.547477   | 0.301097   | -0.862571 | 0.440962  |
| XLOC_016400 | LOC100506035 | chr4:80413746-80497614    | 0.00976473 | 0.00537398 | -0.861589 | 1         |
| XLOC_013311 | ALS2CR11     | chr2:202352143-202483905  | 0.0110794  | 0.00609832 | -0.8614   | 1         |
| XLOC_011984 | ZNF582       | chr19:56894647-56904889   | 0.0275649  | 0.0151753  | -0.861107 | 1         |
| XLOC_016735 | TEC          | chr4:48137799-48271814    | 1.00761    | 0.55473    | -0.861085 | 0.0981523 |
| XLOC_012292 | PLGLB2       | chr2:88047605-88285309    | 0.00634653 | 0.00349773 | -0.859547 | 1         |
| XLOC_018663 | DCDC2        | chr6:24171982-24383520    | 0.948618   | 0.522925   | -0.859224 | 0.0832671 |
| XLOC_018839 | PXT1         | chr6:36358328-36458315    | 0.0161348  | 0.00889619 | -0.858916 | 1         |
| XLOC_024117 | MCF2         | chrX:138663929-138790381  | 0.00491992 | 0.00271331 | -0.858579 | 1         |
| XLOC_002755 | FANK1        | chr10:127585107-127698161 | 0.937067   | 0.517224   | -0.857363 | 0.335344  |
| XLOC_016660 | FLJ36777     | chr4:7099150-7105103      | 0.0458021  | 0.0252936  | -0.856642 | 1         |
| XLOC_003746 | LOC100506368 | chr11:86666662-86711989   | 0.28363    | 0.156654   | -0.856425 | 1         |
| XLOC_000047 | LOC100133612 | chr1:3816967-3832011      | 0.121255   | 0.0670486  | -0.85476  | 1         |
| XLOC_005273 | MFAP5        | chr12:8798539-8815433     | 0.0069666  | 0.00385276 | -0.85456  | 1         |
| XLOC_023911 | EDA2R        | chrX:65815481-65859140    | 0.0061121  | 0.0033816  | -0.853964 | 1         |
| XLOC_021389 | ZNF467       | chr7:149461452-149470295  | 1.99784    | 1.10558    | -0.853635 | 0.239441  |
| XLOC_004566 | RPL23AP64    | chr11:118868851-118889057 | 0.296086   | 0.163941   | -0.852836 | 1         |
| XLOC_008074 | ITGAX        | chr16:31366508-31394318   | 1.6108     | 0.892515   | -0.851827 | 0.0605998 |
| XLOC_009269 | RAB37        | chr17:72667255-72743474   | 0.141701   | 0.0785239  | -0.851645 | 1         |
| XLOC_016262 | LOC285540    | chr4:25162293-25200127    | 0.0193507  | 0.010725   | -0.851406 | 1         |
| XLOC_004623 | KCNJ1        | chr11:128707908-128737268 | 0.00761377 | 0.00421998 | -0.851375 | 1         |
| XLOC_014752 | RFPL1-AS1    | chr22:29833003-29838444   | 0.00999176 | 0.00554436 | -0.849717 | 1         |
| XLOC_001247 | TNFRSF9      | chr1:7975930-8003225      | 0.00341887 | 0.00189744 | -0.849468 | 1         |
| XLOC_013309 | ALS2CR12     | chr2:202153146-202222101  | 0.0234358  | 0.0130126  | -0.848802 | 1         |
| XLOC_004846 | METTL7A      | chr12:51318533-51326300   | 0.00703482 | 0.00390608 | -0.848793 | 1         |

|             |              |                           |            |            |           |          |
|-------------|--------------|---------------------------|------------|------------|-----------|----------|
| XLOC_023079 | SNORA65      | chr9:130209952-130213711  | 7.55343    | 4.19533    | -0.848347 | 0.934251 |
| XLOC_014418 | LOC150197    | chr22:20193854-20196060   | 0.299703   | 0.166508   | -0.847939 | 1        |
| XLOC_008669 | PMFBP1       | chr16:72152995-72206349   | 0.076355   | 0.0424238  | -0.847846 | 1        |
| XLOC_005213 | SLC6A12      | chr12:299242-323371       | 0.123629   | 0.068739   | -0.846811 | 1        |
| XLOC_001624 | C1orf180     | chr1:85093912-85100703    | 0.00718461 | 0.00399555 | -0.846515 | 1        |
| XLOC_005447 | FAM186A      | chr12:50721094-50790405   | 0.00399646 | 0.00222414 | -0.845476 | 1        |
| XLOC_012343 | IL18RAP      | chr2:103035253-103069024  | 0.00714142 | 0.00397592 | -0.844921 | 1        |
| XLOC_008556 | MYLK3        | chr16:46736193-46782221   | 0.00506322 | 0.00282338 | -0.842631 | 1        |
| XLOC_018961 | COL12A1      | chr6:75794041-75915623    | 0.0036574  | 0.00203952 | -0.842586 | 1        |
| XLOC_013528 | SNAP25       | chr20:10004459-10288066   | 0.0099949  | 0.00557396 | -0.842489 | 1        |
| XLOC_007114 | ARHGAP11B    | chr15:30918878-30931013   | 1.16817    | 0.651604   | -0.842187 | 0.352286 |
| XLOC_005199 | EP400NL      | chr12:132568827-132610885 | 0.449121   | 0.250649   | -0.841437 | 0.530183 |
| XLOC_021711 | ZFPM2        | chr8:106331146-106816767  | 0.00434803 | 0.0024273  | -0.841007 | 1        |
| XLOC_023452 | DGAT2L6      | chrX:69397335-69425553    | 0.0135429  | 0.00756462 | -0.840195 | 1        |
| XLOC_002075 | FAM129A      | chr1:184760165-184943682  | 0.00289376 | 0.00161659 | -0.83999  | 1        |
| XLOC_020881 | LINC00244    | chr7:156333184-156333795  | 0.0514838  | 0.0287734  | -0.839382 | 1        |
| XLOC_017373 | PCDHB6       | chr5:140529838-140532868  | 0.00900933 | 0.00503861 | -0.838394 | 1        |
| XLOC_019124 | LOC285740    | chr6:143875466-143890476  | 0.0105017  | 0.00587723 | -0.837416 | 1        |
| XLOC_007813 | HBA2         | chr16:222845-223709       | 0.362009   | 0.202608   | -0.837334 | 1        |
| XLOC_017312 | C5orf56      | chr5:131746464-131811736  | 1.10838    | 0.620542   | -0.836851 | 0.538721 |
| XLOC_011577 | HAVCR1P1     | chr19:24344994-24346249   | 0.0580762  | 0.0325214  | -0.836557 | 1        |
| XLOC_004511 | SLN          | chr11:107578100-107582787 | 0.0847334  | 0.0474555  | -0.836354 | 1        |
| XLOC_021032 | RASA4CP      | chr7:44068485-44083895    | 0.189393   | 0.106093   | -0.836052 | 1        |
| XLOC_013289 | HECW2        | chr2:197063976-197457335  | 0.00286841 | 0.00160717 | -0.835729 | 1        |
| XLOC_023177 | LCN15        | chr9:139654085-139658965  | 0.599298   | 0.335848   | -0.835466 | 0.663419 |
| XLOC_002517 | GLUD1P3      | chr10:75491298-75495367   | 0.37759    | 0.211831   | -0.833911 | 0.40199  |
| XLOC_004782 | C12orf70     | chr12:27619742-27655118   | 0.12953    | 0.0726764  | -0.833724 | 1        |
| XLOC_010650 | CYP4F3       | chr19:15751706-15771570   | 0.00763305 | 0.00428449 | -0.833137 | 1        |
| XLOC_008033 | QPRT         | chr16:29690440-29709314   | 0.126731   | 0.0711393  | -0.83305  | 1        |
| XLOC_015169 | C3orf49      | chr3:63805040-63849597    | 0.0153792  | 0.00863406 | -0.832872 | 1        |
| XLOC_002534 | LINC00595    | chr10:80027084-80039970   | 0.0696481  | 0.0391064  | -0.832679 | 1        |
| XLOC_016369 | ALB          | chr4:74269971-74287129    | 0.00953128 | 0.00535172 | -0.832667 | 1        |
| XLOC_021061 | DDC          | chr7:50526133-50633154    | 0.0208644  | 0.0117243  | -0.831543 | 1        |
| XLOC_016796 | CDKL2        | chr4:76501703-76555721    | 0.158352   | 0.0889846  | -0.831508 | 1        |
| XLOC_021858 | RP1L1        | chr8:10463859-10512617    | 0.0185419  | 0.0104268  | -0.830491 | 1        |
| XLOC_023471 | RPS26P11     | chrX:71130937-71363424    | 1.73795    | 0.977525   | -0.830178 | 0.488373 |
| XLOC_016818 | TMEM150C     | chr4:83405603-83483126    | 0.0115688  | 0.00650781 | -0.829999 | 1        |
| XLOC_004060 | ASCL3        | chr11:8959118-8964580     | 0.0570982  | 0.0321238  | -0.8298   | 1        |
| XLOC_010140 | GREB1L       | chr18:18822202-19102791   | 0.00341053 | 0.00191932 | -0.829402 | 1        |
| XLOC_019193 | MLLT4-AS1    | chr6:168224569-168227476  | 0.1378     | 0.0775742  | -0.828931 | 1        |
| XLOC_018159 | HLA-G        | chr6:29794755-29798899    | 0.0644519  | 0.0363019  | -0.828177 | 1        |
| XLOC_011005 | DHDH         | chr19:49436938-49448226   | 7.3859     | 4.1617     | -0.827603 | 0.112314 |
| XLOC_012759 | NEU4         | chr2:242750159-242758739  | 0.0470659  | 0.0265306  | -0.827027 | 1        |
| XLOC_004337 | GAL3ST3      | chr11:65808235-65816651   | 0.00978151 | 0.00551474 | -0.826764 | 1        |
| XLOC_004009 | HBBP1        | chr11:5263184-5264822     | 0.113579   | 0.0640469  | -0.82649  | 1        |
| XLOC_010527 | EMR1         | chr19:6887559-6940464     | 0.00863152 | 0.00486943 | -0.825861 | 1        |
| XLOC_000620 | FAM46C       | chr1:118148603-118171011  | 0.314686   | 0.177562   | -0.825595 | 1        |
| XLOC_012156 | LOC100129726 | chr2:43454349-43455994    | 0.0252716  | 0.0142622  | -0.82532  | 1        |
| XLOC_021919 | GNRH1        | chr8:25276773-25282556    | 0.755328   | 0.426577   | -0.824297 | 0.295146 |

|             |              |                           |            |            |           |           |
|-------------|--------------|---------------------------|------------|------------|-----------|-----------|
| XLOC_001998 | CD247        | chr1:167399876-167487847  | 0.0382348  | 0.0216014  | -0.823761 | 1         |
| XLOC_012314 | FER1L5       | chr2:97308573-97370624    | 0.0325367  | 0.0184009  | -0.822291 | 1         |
| XLOC_007674 | HIGD2B       | chr15:72968122-72978490   | 0.0549001  | 0.0310538  | -0.822038 | 1         |
| XLOC_014764 | SEC14L3      | chr22:30855215-30868034   | 0.0106054  | 0.00600012 | -0.82173  | 1         |
| XLOC_016498 | INTU         | chr4:128554086-128637934  | 0.968215   | 0.548076   | -0.820953 | 0.150849  |
| XLOC_009738 | DHX58        | chr17:40253421-40264751   | 0.045672   | 0.0258614  | -0.82051  | 1         |
| XLOC_023937 | NAP1L6       | chrX:72345875-72347919    | 0.01110141 | 0.00623701 | -0.820431 | 1         |
| XLOC_011529 | RAB3A        | chr19:18307610-18314874   | 1.85758    | 1.05195    | -0.820355 | 0.291005  |
| XLOC_012822 | DNAJC27      | chr2:25166504-25194963    | 0.875294   | 0.495688   | -0.820335 | 0.101019  |
| XLOC_009288 | SMIM6        | chr17:73584138-73663269   | 0.0363201  | 0.0205898  | -0.818837 | 1         |
| XLOC_004292 | HRASLS2      | chr11:63014620-63330855   | 0.0399584  | 0.0226601  | -0.818341 | 1         |
| XLOC_018456 | TPI1P3       | chr6:116262692-116381921  | 0.0289692  | 0.0164286  | -0.818314 | 1         |
| XLOC_016731 | CORIN        | chr4:47596017-47840059    | 0.148034   | 0.0840114  | -0.817273 | 1         |
| XLOC_021510 | TNFRSF10C    | chr8:22941867-22974950    | 1.66828    | 0.946828   | -0.817185 | 0.342031  |
| XLOC_001437 | LOC653160    | chr1:35441299-35444307    | 0.980698   | 0.55694    | -0.816287 | 0.401008  |
| XLOC_007960 | NOMO3        | chr16:16326388-16388668   | 0.0265872  | 0.0151008  | -0.816109 | 1         |
| XLOC_012858 | XDH          | chr2:31557187-31637611    | 0.00359467 | 0.00204238 | -0.815606 | 1         |
| XLOC_014564 | APOBEC3D     | chr22:39417117-39429256   | 0.161632   | 0.0918348  | -0.815603 | 1         |
| XLOC_014496 | NEFH         | chr22:29876180-29887277   | 0.0135463  | 0.0076993  | -0.815103 | 1         |
| XLOC_017195 | ANKDD1B      | chr5:74916139-74966865    | 0.0154676  | 0.00879397 | -0.814665 | 1         |
| XLOC_000683 | ANXA9        | chr1:150954498-150968114  | 0.380329   | 0.21633    | -0.814015 | 0.514757  |
| XLOC_014036 | BCAS1        | chr20:52560078-52687304   | 0.00593153 | 0.00337404 | -0.813927 | 1         |
| XLOC_002907 | BMS1P5       | chr10:46737612-46762892   | 0.197611   | 0.112417   | -0.813799 | 1         |
| XLOC_002334 | LOC399715    | chr10:6319649-6377937     | 0.276684   | 0.157404   | -0.813764 | 1         |
| XLOC_009436 | AIPL1        | chr17:6327058-6338519     | 0.013679   | 0.00778248 | -0.81366  | 1         |
| XLOC_002026 | LOC100506023 | chr1:173204198-173446294  | 0.0327536  | 0.0186417  | -0.813122 | 1         |
| XLOC_010947 | GIPR         | chr19:46171501-46185717   | 0.579448   | 0.329874   | -0.812761 | 0.455871  |
| XLOC_014395 | CECR5-AS1    | chr22:17618409-17646335   | 0.511358   | 0.291168   | -0.812483 | 0.93174   |
| XLOC_014473 | SGSM1        | chr22:25202135-25322813   | 1.03245    | 0.588192   | -0.811716 | 0.0847952 |
| XLOC_012319 | LOC100506123 | chr2:97948228-97957632    | 1.16219    | 0.662477   | -0.810906 | 0.141482  |
| XLOC_009024 | LINC00672    | chr17:37081420-37085637   | 0.105599   | 0.0602035  | -0.810679 | 1         |
| XLOC_017248 | LOC100289230 | chr5:98264837-98266713    | 0.509147   | 0.29042    | -0.809943 | 0.458976  |
| XLOC_013663 | SGK2         | chr20:42187634-42214273   | 0.197518   | 0.112677   | -0.809789 | 1         |
| XLOC_007528 | PLA2G4E      | chr15:42273779-42342901   | 0.00502654 | 0.00286876 | -0.809139 | 1         |
| XLOC_017015 | WWC2-AS2     | chr4:184018173-184020352  | 0.985508   | 0.562475   | -0.809077 | 0.389795  |
| XLOC_011563 | ZNF737       | chr19:20720797-20748626   | 0.776472   | 0.443354   | -0.808476 | 0.0525851 |
| XLOC_008962 | SH3GL1P2     | chr17:28903482-28964484   | 0.0500575  | 0.0285882  | -0.808169 | 1         |
| XLOC_004039 | DCHS1        | chr11:6642557-6677074     | 0.0511475  | 0.0292219  | -0.807613 | 1         |
| XLOC_023992 | TCEAL5       | chrX:102528617-102531797  | 0.0180411  | 0.0103156  | -0.80645  | 1         |
| XLOC_000189 | RHD          | chr1:25598980-25656936    | 0.0905731  | 0.0517941  | -0.806297 | 1         |
| XLOC_011645 | RASGRP4      | chr19:38893774-38916945   | 0.0115336  | 0.00660313 | -0.804615 | 1         |
| XLOC_003126 | COL17A1      | chr10:105791045-105845638 | 0.0151917  | 0.00870891 | -0.802721 | 1         |
| XLOC_009084 | AOC4         | chr17:41019161-41021234   | 0.0137276  | 0.00787522 | -0.801691 | 1         |
| XLOC_010738 | ZNF254       | chr19:24269975-24312654   | 0.926184   | 0.531893   | -0.800163 | 0.11953   |
| XLOC_004151 | ALX4         | chr11:44282277-44331716   | 0.00533394 | 0.00306369 | -0.799934 | 1         |
| XLOC_008593 | CNGB1        | chr16:57916243-58005020   | 0.00445933 | 0.00256193 | -0.799597 | 1         |
| XLOC_021901 | HR           | chr8:21971931-21988565    | 1.31909    | 0.757837   | -0.79958  | 0.123296  |
| XLOC_003536 | CD5          | chr11:60869929-60895323   | 0.012965   | 0.00744941 | -0.79942  | 1         |
| XLOC_021156 | LRRD1        | chr7:91774197-91794590    | 0.0404342  | 0.0232365  | -0.799184 | 1         |

|             |                |                           |            |            |           |           |
|-------------|----------------|---------------------------|------------|------------|-----------|-----------|
| XLOC_004945 | KIF5A          | chr12:57943846-57978554   | 0.00590385 | 0.00339282 | -0.799171 | 1         |
| XLOC_011219 | ZNF543         | chr19:57831864-57842144   | 0.688412   | 0.395736   | -0.798733 | 0.202575  |
| XLOC_018100 | HIST1H2BE      | chr6:26184023-26184458    | 0.120024   | 0.0690518  | -0.797578 | 1         |
| XLOC_003696 | FOLR3          | chr11:71846770-71850934   | 0.054405   | 0.031306   | -0.7973   | 1         |
| XLOC_005881 | TPT1-AS1       | chr13:45915479-45965618   | 6.07353    | 3.49497    | -0.797256 | 0.0940497 |
| XLOC_010113 | ANKRD12        | chr18:9136750-9285983     | 0.640386   | 0.368729   | -0.796381 | 0.0584523 |
| XLOC_002081 | PDC            | chr1:185703682-186446655  | 0.0149833  | 0.00862771 | -0.796303 | 1         |
| XLOC_003919 | LINC00167      | chr11:129769600-129875381 | 0.0914764  | 0.0526812  | -0.796112 | 1         |
| XLOC_011954 | GP6            | chr19:55525074-55549632   | 0.151524   | 0.0873321  | -0.794961 | 1         |
| XLOC_011450 | ZNF709         | chr19:12571997-12595632   | 0.972703   | 0.560788   | -0.794544 | 0.101539  |
| XLOC_012277 | VAMP5          | chr2:85811530-85820511    | 0.0517071  | 0.0298121  | -0.794464 | 1         |
| XLOC_000510 | SNORD21        | chr1:93297593-93427079    | 52.0223    | 30.0037    | -0.793991 | 0.913875  |
| XLOC_010469 | TMPRSS9        | chr19:2389783-2427875     | 0.0248814  | 0.0143622  | -0.792789 | 1         |
| XLOC_005201 | LOC100130238   | chr12:132680916-132905905 | 0.0190835  | 0.0110208  | -0.792101 | 1         |
| XLOC_000157 | LOC100506801   | chr1:21543739-21672034    | 0.0930491  | 0.053758   | -0.791512 | 1         |
| XLOC_010796 | ZBTB32         | chr19:36203829-36207940   | 0.0970166  | 0.0560948  | -0.790364 | 1         |
| XLOC_023961 | BRWD3          | chrX:79924986-80065233    | 0.579981   | 0.335501   | -0.78969  | 0.0508243 |
| XLOC_020576 | CCDC146        | chr7:76751933-76924521    | 0.495601   | 0.286719   | -0.789542 | 0.262263  |
| XLOC_013086 | RGPD3          | chr2:107021135-107084801  | 0.0462322  | 0.026748   | -0.789464 | 1         |
| XLOC_001214 | KIAA1751       | chr1:1884751-1935276      | 0.0085467  | 0.00494693 | -0.788835 | 1         |
| XLOC_022862 | PGM5P2         | chr9:69080243-69147854    | 0.114854   | 0.0664884  | -0.78863  | 1         |
| XLOC_007871 | RAB26          | chr16:2198650-2204141     | 10.7573    | 6.22803    | -0.788472 | 0.0650492 |
| XLOC_009458 | YBX2           | chr17:7191570-7197876     | 0.0217341  | 0.0125859  | -0.788156 | 1         |
| XLOC_014625 | MIR4763,MIRLET | chr22:46481876-46509808   | 0.701662   | 0.406334   | -0.788109 | 0.754905  |
| XLOC_016209 | SORCS2         | chr4:7194373-7744564      | 0.0050662  | 0.00293416 | -0.787959 | 1         |
| XLOC_014439 | CCDC116        | chr22:21987085-21991616   | 0.127589   | 0.0739043  | -0.787776 | 1         |
| XLOC_023326 | CYBB           | chrX:37639269-37672714    | 0.0419619  | 0.0243137  | -0.787312 | 1         |
| XLOC_023517 | DRP2           | chrX:100474932-100519485  | 0.0276474  | 0.0160257  | -0.786759 | 1         |
| XLOC_011398 | ZNF699         | chr19:9405985-9415795     | 0.0856466  | 0.0496454  | -0.786735 | 1         |
| XLOC_003248 | TNNI2          | chr11:1860232-1862910     | 0.0440122  | 0.0255148  | -0.786568 | 1         |
| XLOC_023183 | FUT7           | chr9:139901685-139931234  | 0.0150939  | 0.00875677 | -0.785494 | 1         |
| XLOC_002557 | OPN4           | chr10:88414313-88426216   | 0.0142916  | 0.00829343 | -0.785122 | 1         |
| XLOC_002499 | COL13A1        | chr10:71561643-71718904   | 3.16446    | 1.83664    | -0.784892 | 0.0884345 |
| XLOC_002137 | LRRN2          | chr1:204586302-204654597  | 0.00981681 | 0.00570108 | -0.784018 | 1         |
| XLOC_013469 | PDCD1          | chr2:242792032-242801058  | 0.143377   | 0.0832782  | -0.7838   | 1         |
| XLOC_008342 | IGFALS         | chr16:1840413-1844909     | 0.163933   | 0.0954704  | -0.779977 | 1         |
| XLOC_008278 | JPH3           | chr16:87635440-87731761   | 0.0198775  | 0.0115835  | -0.779071 | 1         |
| XLOC_017685 | GUSBP3         | chr5:68935289-69006272    | 0.0789483  | 0.0460576  | -0.77747  | 1         |
| XLOC_004316 | NAALADL1       | chr11:64808375-64826009   | 0.0158107  | 0.00922939 | -0.776591 | 1         |
| XLOC_022215 | RHPN1-AS1      | chr8:144448792-144450805  | 2.63387    | 1.5396     | -0.774629 | 0.176195  |
| XLOC_015846 | ABI3BP         | chr3:100468178-100712334  | 0.0177418  | 0.010378   | -0.773622 | 1         |
| XLOC_005409 | COL2A1         | chr12:48366747-48398285   | 0.0158107  | 0.00925039 | -0.773319 | 1         |
| XLOC_018188 | HCG27          | chr6:31165536-31171745    | 0.411584   | 0.240884   | -0.772845 | 0.521457  |
| XLOC_006304 | NFATC4         | chr14:24836144-24848810   | 0.346818   | 0.203023   | -0.77254  | 1         |
| XLOC_006760 | ARHGAP5-AS1    | chr14:32544624-32545905   | 2.81183    | 1.64637    | -0.772222 | 0.221487  |
| XLOC_010058 | CD7            | chr17:80272745-80275480   | 0.0757584  | 0.0443767  | -0.771603 | 1         |
| XLOC_001904 | PAQR6          | chr1:156182778-156217908  | 3.54714    | 2.07782    | -0.771588 | 0.705198  |
| XLOC_000159 | ALPL           | chr1:21835857-21904905    | 0.0183981  | 0.0107938  | -0.769358 | 1         |
| XLOC_011295 | C19orf35       | chr19:2274630-2282181     | 0.0262552  | 0.0154042  | -0.769281 | 1         |

|             |                 |                           |           |            |           |           |
|-------------|-----------------|---------------------------|-----------|------------|-----------|-----------|
| XLOC_000487 | CLCA2           | chr1:86889768-86922240    | 0.0145236 | 0.00852277 | -0.769001 | 1         |
| XLOC_016875 | CENPE           | chr4:104026962-104119566  | 0.470073  | 0.276115   | -0.767612 | 0.128687  |
| XLOC_017474 | LOC257358       | chr5:169758434-169762104  | 0.0403545 | 0.0237491  | -0.764857 | 1         |
| XLOC_007514 | LOC100505648    | chr15:40985952-40987303   | 0.341617  | 0.201111   | -0.764388 | 1         |
| XLOC_017215 | FAM151B         | chr5:79783799-79838382    | 0.292231  | 0.172073   | -0.764088 | 1         |
| XLOC_017482 | NEURL1B         | chr5:172068275-172118533  | 0.351735  | 0.207172   | -0.76366  | 1         |
| XLOC_005203 | P2RX2           | chr12:133195402-133198972 | 0.0203316 | 0.0119779  | -0.763351 | 1         |
| XLOC_012276 | VAMP8           | chr2:85804613-85809156    | 1.328     | 0.78274    | -0.762651 | 0.489185  |
| XLOC_010476 | TLE6            | chr19:2977535-2995182     | 7.61706   | 4.49205    | -0.761861 | 0.0603207 |
| XLOC_022690 | SLC34A3         | chr9:140125208-140131006  | 0.0207323 | 0.0122267  | -0.761844 | 1         |
| XLOC_001092 | OBSCN           | chr1:228391206-228566575  | 0.741108  | 0.437079   | -0.76179  | 0.0603207 |
| XLOC_002857 | ANKRD26         | chr10:27293044-27389427   | 0.28525   | 0.16826    | -0.761536 | 1         |
| XLOC_008484 | GSG1L           | chr16:27798849-28074830   | 0.0140459 | 0.00828645 | -0.761326 | 1         |
| XLOC_011914 | ZNF841          | chr19:52567718-52599018   | 1.68276   | 0.99277    | -0.761299 | 0.0854415 |
| XLOC_018710 | ZKSCAN4         | chr6:28212489-28220002    | 1.40009   | 0.82637    | -0.760658 | 0.201515  |
| XLOC_000594 | LOC643355       | chr1:112533189-112541463  | 0.0227577 | 0.0134384  | -0.759992 | 1         |
| XLOC_008799 | XAF1            | chr17:6659155-6678964     | 0.0143541 | 0.0084847  | -0.758526 | 1         |
| XLOC_023977 | TAF7L           | chrX:100523240-100548059  | 0.0627988 | 0.0371276  | -0.758244 | 1         |
| XLOC_018410 | ANKRD6          | chr6:90142896-90348474    | 0.0542784 | 0.0321295  | -0.756479 | 1         |
| XLOC_005613 | CEP290          | chr12:88429267-88535993   | 0.619514  | 0.366761   | -0.756296 | 0.703707  |
| XLOC_018373 | C6orf57         | chr6:71276624-71298606    | 16.5916   | 9.82547    | -0.755856 | 0.112063  |
| XLOC_015784 | ASB14           | chr3:57261764-57326710    | 0.270984  | 0.160478   | -0.755832 | 1         |
| XLOC_012733 | ESPNL           | chr2:239008950-239041928  | 0.0694925 | 0.0411622  | -0.755537 | 1         |
| XLOC_008540 | ZNF843          | chr16:31446884-31454348   | 0.0308916 | 0.0183066  | -0.75485  | 1         |
| XLOC_010826 | ZNF540          | chr19:38039850-38105079   | 0.232377  | 0.137744   | -0.754477 | 1         |
| XLOC_021725 | COLEC10         | chr8:120079423-120119202  | 0.0436851 | 0.0259     | -0.754189 | 1         |
| XLOC_014355 | HSF2BP          | chr21:44949071-45079374   | 1.45465   | 0.862876   | -0.753442 | 0.252932  |
| XLOC_020522 | KCTD7           | chr7:66093867-66108216    | 1.32625   | 0.787078   | -0.75278  | 0.129711  |
| XLOC_013196 | CD302,LY75,LY7E | chr2:160625138-160761267  | 0.382774  | 0.227208   | -0.752477 | 0.289507  |
| XLOC_003229 | EPS8L2          | chr11:706119-727727       | 1.33487   | 0.792814   | -0.751644 | 0.275381  |
| XLOC_009925 | AXIN2           | chr17:63524682-63557740   | 0.746116  | 0.443204   | -0.751428 | 0.262704  |
| XLOC_007705 | NRG4            | chr15:76234327-76304785   | 0.502301  | 0.298437   | -0.751127 | 0.431214  |
| XLOC_010720 | ZNF93           | chr19:20011721-20046382   | 0.0741857 | 0.0441293  | -0.749405 | 1         |
| XLOC_012653 | WNT10A          | chr2:219745254-219758651  | 1.29034   | 0.767625   | -0.749274 | 0.353347  |
| XLOC_021113 | GTF2IRD2        | chr7:74210483-74267841    | 0.19743   | 0.117468   | -0.749071 | 1         |
| XLOC_007431 | HSP90B2P        | chr15:99791651-99926498   | 0.0204629 | 0.0121755  | -0.749025 | 1         |
| XLOC_014235 | C21orf15        | chr21:15215453-15220685   | 0.410043  | 0.243994   | -0.748929 | 0.608336  |
| XLOC_013019 | ST3GAL5         | chr2:86066270-86116157    | 1.97847   | 1.17791    | -0.748157 | 0.141952  |
| XLOC_005816 | TPTE2P6         | chr13:25154345-25171812   | 0.0208503 | 0.0124231  | -0.747039 | 1         |
| XLOC_018186 | PSORS1C1        | chr6:31082607-31107869    | 0.822608  | 0.490302   | -0.746534 | 0.687824  |
| XLOC_005635 | USP44           | chr12:95910887-95945263   | 0.0127845 | 0.00763043 | -0.744558 | 1         |
| XLOC_006811 | TXNDC16         | chr14:52897307-53019301   | 0.519456  | 0.310162   | -0.743979 | 0.234263  |
| XLOC_021138 | SEMA3C          | chr7:80371853-80548667    | 0.305702  | 0.182574   | -0.743644 | 1         |
| XLOC_008506 | TBX6            | chr16:30097114-30103205   | 1.14932   | 0.687207   | -0.74196  | 0.444145  |
| XLOC_010192 | KATNAL2         | chr18:44526786-44628614   | 0.130586  | 0.0780826  | -0.741928 | 1         |
| XLOC_011802 | PLA2G4C         | chr19:48551099-48614109   | 0.160208  | 0.0957969  | -0.7419   | 1         |
| XLOC_007553 | FRMD5           | chr15:44165729-44487429   | 2.02181   | 1.20962    | -0.741087 | 0.20598   |
| XLOC_014404 | DGCR5           | chr22:18958010-18982142   | 0.113752  | 0.068108   | -0.74     | 1         |
| XLOC_006348 | ABHD12B         | chr14:51338877-51371688   | 0.0473318 | 0.0283585  | -0.739028 | 1         |

|             |          |                           |            |            |           |           |
|-------------|----------|---------------------------|------------|------------|-----------|-----------|
| XLOC_017314 | IL13     | chr5:131993864-131996801  | 0.11694    | 0.0701352  | -0.737554 | 1         |
| XLOC_011552 | PBX4     | chr19:19672515-19729725   | 1.56647    | 0.939518   | -0.737526 | 0.357833  |
| XLOC_023303 | PDK3     | chrX:24483343-24568583    | 6.79285    | 4.07442    | -0.737422 | 0.236532  |
| XLOC_011943 | LILRA6   | chr19:54740468-54746724   | 0.0564833  | 0.0338842  | -0.737212 | 1         |
| XLOC_018803 | HLA-DMB  | chr6:32902405-32908847    | 0.0458394  | 0.0275057  | -0.736858 | 1         |
| XLOC_003897 | CCDC15   | chr11:124824016-124911385 | 0.075197   | 0.0451241  | -0.736776 | 1         |
| XLOC_002507 | CDH23    | chr10:73156690-73575704   | 0.0336817  | 0.0202317  | -0.73535  | 1         |
| XLOC_014461 | GSTT2    | chr22:24322313-24326106   | 1.16834    | 0.702315   | -0.734271 | 0.489743  |
| XLOC_013049 | NEURL3   | chr2:97163382-97173846    | 0.0587691  | 0.0353345  | -0.733982 | 1         |
| XLOC_001272 | DHRS3    | chr1:12627938-12677820    | 0.321708   | 0.193431   | -0.733933 | 1         |
| XLOC_011235 | ZNF586   | chr19:58281019-58291984   | 0.467269   | 0.28115    | -0.732912 | 0.400815  |
| XLOC_007481 | WHAMMP1  | chr15:32812048-32825942   | 0.916844   | 0.551827   | -0.73246  | 0.359287  |
| XLOC_011525 | UNC13A   | chr19:17712136-17799008   | 0.0134151  | 0.00807469 | -0.732384 | 1         |
| XLOC_014291 | TIAM1    | chr21:32490735-32931290   | 0.00921907 | 0.00554993 | -0.732152 | 1         |
| XLOC_023829 | CXorf31  | chrX:46746853-46759139    | 0.255287   | 0.15373    | -0.731715 | 1         |
| XLOC_006506 | IFI27    | chr14:94577078-94583033   | 26.3474    | 15.8699    | -0.731362 | 0.0705331 |
| XLOC_005307 | TAS2R19  | chr12:10998447-11328619   | 0.0757879  | 0.0457047  | -0.729627 | 1         |
| XLOC_013769 | DPHP3P1  | chr20:61448413-61493115   | 1.19325    | 0.719618   | -0.729587 | 0.902199  |
| XLOC_013425 | KCNJ13   | chr2:233562014-233725289  | 0.0191712  | 0.0115657  | -0.729083 | 1         |
| XLOC_005511 | ITGA7    | chr12:56075329-56106089   | 3.85765    | 2.32754    | -0.728919 | 0.173695  |
| XLOC_023767 | FIGF,PIR | chrX:15363712-15511711    | 0.609177   | 0.367878   | -0.727635 | 0.462426  |
| XLOC_010387 | LMAN1    | chr18:56995055-57026508   | 2.25889    | 1.36447    | -0.727275 | 0.0550104 |
| XLOC_022624 | NTNG2    | chr9:135037333-135118220  | 1.90237    | 1.14913    | -0.727258 | 0.258195  |
| XLOC_008866 | MGC12916 | chr17:14204505-14249492   | 2.98088    | 1.80213    | -0.726041 | 0.176195  |
| XLOC_013496 | EBF4     | chr20:2673523-2740754     | 1.07363    | 0.649084   | -0.726015 | 0.379552  |
| XLOC_013193 | CCDC148  | chr2:159023161-159313265  | 0.101072   | 0.0611488  | -0.724988 | 1         |
| XLOC_015109 | FAM212A  | chr3:49840686-49842463    | 8.73599    | 5.2892     | -0.723924 | 0.133324  |
| XLOC_012604 | PARD3B   | chr2:205410515-206484886  | 0.369161   | 0.223577   | -0.723476 | 1         |
| XLOC_022328 | DNAJB5   | chr9:34989637-34998430    | 4.10193    | 2.48519    | -0.722949 | 0.0792007 |
| XLOC_018203 | LY6G5B   | chr6:31638727-31640227    | 4.38979    | 2.66015    | -0.722647 | 0.315938  |
| XLOC_000404 | DIO1     | chr1:54359860-54376759    | 0.0397179  | 0.0240704  | -0.722528 | 1         |
| XLOC_016600 | C4orf47  | chr4:186350544-186392913  | 1.42727    | 0.865037   | -0.722421 | 0.518305  |
| XLOC_018734 | TRIM31   | chr6:30070673-30080867    | 0.0481341  | 0.029197   | -0.721239 | 1         |
| XLOC_008037 | PRRT2    | chr16:29823408-29827202   | 0.159112   | 0.0965428  | -0.7208   | 1         |
| XLOC_017531 | LTC4S    | chr5:179220985-179223513  | 1.60293    | 0.972688   | -0.720661 | 0.732443  |
| XLOC_008017 | APOBR    | chr16:28505969-28510291   | 0.0521685  | 0.0316928  | -0.719025 | 1         |
| XLOC_010310 | OSBPL1A  | chr18:21742010-21977833   | 2.8103     | 1.70806    | -0.718365 | 0.0827369 |
| XLOC_009960 | USH1G    | chr17:72912175-72919351   | 0.688712   | 0.418699   | -0.717987 | 0.369131  |
| XLOC_004681 | GPR162   | chr12:6930962-6936583     | 3.93183    | 2.39163    | -0.717204 | 0.210123  |
| XLOC_010607 | ZNF844   | chr19:12175545-12188626   | 1.11305    | 0.678605   | -0.713878 | 0.204123  |
| XLOC_014830 | NPTXR    | chr22:39214455-39240017   | 0.478559   | 0.291844   | -0.713502 | 0.303067  |
| XLOC_007753 | GOLGA6L5 | chr15:85045805-85060078   | 0.263859   | 0.160991   | -0.712787 | 1         |
| XLOC_022582 | DNM1     | chr9:130928343-131017527  | 10.084     | 6.1609     | -0.710857 | 0.79984   |
| XLOC_016536 | FAM160A1 | chr4:152330397-152584784  | 1.4989     | 0.916905   | -0.709059 | 0.136379  |
| XLOC_012006 | A1BG     | chr19:58858171-58874214   | 0.419155   | 0.256551   | -0.708236 | 0.871053  |
| XLOC_018238 | HCG25    | chr6:33217312-33239662    | 0.270744   | 0.165811   | -0.707394 | 1         |
| XLOC_018332 | SLC25A27 | chr6:46620651-46645927    | 1.34211    | 0.822081   | -0.707146 | 0.213825  |
| XLOC_002226 | C1orf145 | chr1:228391206-228566575  | 0.633043   | 0.387822   | -0.706907 | 0.911712  |
| XLOC_005657 | IGF1     | chr12:102789644-102874378 | 0.00472064 | 0.00289225 | -0.70679  | 1         |

|             |           |                           |            |            |           |           |
|-------------|-----------|---------------------------|------------|------------|-----------|-----------|
| XLOC_021322 | FLJ43663  | chr7:130628918-130793562  | 5.5577     | 3.40612    | -0.706357 | 0.0748376 |
| XLOC_012304 | PROM2     | chr2:95940200-95957055    | 0.253691   | 0.155625   | -0.705004 | 1         |
| XLOC_012559 | ANKAR     | chr2:190540710-190611376  | 0.187805   | 0.1153     | -0.703839 | 1         |
| XLOC_000838 | NOS1AP    | chr1:162039580-162339813  | 0.185923   | 0.114222   | -0.702864 | 1         |
| XLOC_003640 | CNIH2     | chr11:66045671-66051685   | 0.568357   | 0.349274   | -0.702441 | 0.646113  |
| XLOC_014775 | PIK3IP1   | chr22:31677578-31688520   | 3.20019    | 1.96706    | -0.702117 | 0.153369  |
| XLOC_023953 | ATRX      | chrX:76760355-77041719    | 1.46002    | 0.898378   | -0.700598 | 0.0580068 |
| XLOC_001001 | MFSD4     | chr1:205538111-205572046  | 0.0788425  | 0.0485333  | -0.699998 | 1         |
| XLOC_005723 | HRK       | chr12:117298224-117319232 | 2.29504    | 1.41321    | -0.699548 | 0.322956  |
| XLOC_015970 | NME9      | chr3:137906114-138048728  | 0.172307   | 0.106118   | -0.699318 | 1         |
| XLOC_001710 | OVGP1     | chr1:111956936-111970399  | 1.10871    | 0.683379   | -0.698117 | 0.307694  |
| XLOC_003028 | MMRN2     | chr10:88695297-88717425   | 0.317251   | 0.19557    | -0.69794  | 1         |
| XLOC_023625 | ZNF449    | chrX:134478695-134497338  | 0.51848    | 0.319934   | -0.696515 | 0.319187  |
| XLOC_011030 | RCN3      | chr19:50030874-50046890   | 4.36932    | 2.6972     | -0.695947 | 0.200395  |
| XLOC_005795 | CHFR      | chr12:133416937-133464204 | 0.331509   | 0.204675   | -0.695712 | 1         |
| XLOC_017381 | PCDHB12   | chr5:140588290-140591698  | 0.143033   | 0.0884567  | -0.693302 | 1         |
| XLOC_002382 | OTUD1     | chr10:23728197-23731310   | 3.81851    | 2.3618     | -0.693124 | 0.101019  |
| XLOC_011596 | ZNF792    | chr19:35447257-35454953   | 1.18224    | 0.731283   | -0.693023 | 0.191481  |
| XLOC_011734 | LYPD5     | chr19:44300078-44324808   | 0.40263    | 0.249158   | -0.692394 | 0.503669  |
| XLOC_006719 | PPP1R3E   | chr14:23765111-23772057   | 1.4852     | 0.919505   | -0.691733 | 0.177708  |
| XLOC_018901 | ENPP5     | chr6:46127761-46138717    | 0.372257   | 0.230486   | -0.691616 | 1         |
| XLOC_002444 | AGAP9     | chr10:48215723-48237508   | 0.109286   | 0.0676717  | -0.691484 | 1         |
| XLOC_006889 | ALDH6A1   | chr14:74486058-74551196   | 2.64431    | 1.63867    | -0.69037  | 0.232203  |
| XLOC_004010 | HBG1      | chr11:5269501-5271087     | 0.26082    | 0.161716   | -0.689593 | 1         |
| XLOC_004715 | A2M-AS1   | chr12:9217772-9268558     | 0.074403   | 0.0461482  | -0.689085 | 1         |
| XLOC_011903 | FLJ30403  | chr19:52095035-52097633   | 0.870463   | 0.540152   | -0.688416 | 0.455427  |
| XLOC_009437 | PITPNM3   | chr17:6354582-6459877     | 0.212461   | 0.131844   | -0.688371 | 1         |
| XLOC_007708 | SCAPER    | chr15:76640526-77176217   | 2.26276    | 1.40559    | -0.686907 | 0.0788604 |
| XLOC_020648 | PILRA     | chr7:99971067-99997722    | 0.589732   | 0.366428   | -0.686532 | 0.599713  |
| XLOC_012149 | LOC728730 | chr2:39664556-39828484    | 0.540243   | 0.335758   | -0.686189 | 0.400165  |
| XLOC_006300 | TSSK4     | chr14:24674925-24677454   | 0.0894387  | 0.0556103  | -0.685546 | 1         |
| XLOC_019016 | BVES      | chr6:105544698-105585049  | 0.00616765 | 0.00383583 | -0.685184 | 1         |
| XLOC_005933 | KLF5      | chr13:73633141-73651676   | 1.65581    | 1.03046    | -0.684253 | 0.187143  |
| XLOC_023814 | BCOR      | chrX:39910498-40036582    | 1.5763     | 0.981039   | -0.684155 | 0.111557  |
| XLOC_016592 | ING2      | chr4:184426219-184432249  | 8.59325    | 5.34861    | -0.684039 | 0.112565  |
| XLOC_009125 | LRRC37A   | chr17:44372496-44439163   | 0.0677355  | 0.0421789  | -0.683389 | 1         |
| XLOC_021770 | LY6K      | chr8:143781528-143808391  | 0.238639   | 0.148659   | -0.682826 | 1         |
| XLOC_010172 | ZNF397    | chr18:32820993-32870196   | 2.77085    | 1.72624    | -0.682691 | 0.431436  |
| XLOC_017523 | ZNF354B   | chr5:178286953-178311424  | 1.52685    | 0.951748   | -0.681905 | 0.242582  |
| XLOC_004244 | SLC15A3   | chr11:60691912-60719257   | 2.66413    | 1.66071    | -0.681863 | 0.887978  |
| XLOC_005693 | C12orf76  | chr12:110478982-110505500 | 1.87332    | 1.16826    | -0.681241 | 0.227806  |
| XLOC_020456 | C7orf10   | chr7:40174574-40900366    | 0.359939   | 0.224755   | -0.6794   | 1         |
| XLOC_021953 | RNF122    | chr8:33405272-33424643    | 3.28445    | 2.05128    | -0.679124 | 0.220205  |
| XLOC_006785 | KLHL28    | chr14:45393526-45431179   | 0.777098   | 0.485443   | -0.678796 | 0.174212  |
| XLOC_009803 | OSBPL7    | chr17:45884732-45899147   | 3.54344    | 2.21499    | -0.677853 | 0.117359  |
| XLOC_023770 | INE2      | chrX:15756411-15805748    | 2.00804    | 1.2555     | -0.677526 | 0.436714  |
| XLOC_009503 | TMEM220   | chr17:10616638-10718481   | 0.0896899  | 0.0560882  | -0.677247 | 1         |
| XLOC_024110 | ARHGEF6   | chrX:135747711-135863503  | 0.369299   | 0.230964   | -0.677123 | 1         |
| XLOC_008964 | ATAD5     | chr17:29159022-29222295   | 0.640081   | 0.400357   | -0.676965 | 0.208603  |



|             |               |                           |           |            |           |           |
|-------------|---------------|---------------------------|-----------|------------|-----------|-----------|
| XLOC_010600 | ZNF441        | chr19:11877814-11894893   | 0.630405  | 0.394385   | -0.676674 | 0.245231  |
| XLOC_021859 | SOX7          | chr8:10581277-10588022    | 0.144304  | 0.0902968  | -0.676368 | 1         |
| XLOC_008006 | LOC554206     | chr16:25043061-25044098   | 0.940717  | 0.588757   | -0.676089 | 0.567668  |
| XLOC_012104 | KRTCAP3       | chr2:27665232-27712571    | 1.18256   | 0.740357   | -0.675623 | 0.879418  |
| XLOC_000848 | PBX1          | chr1:164528596-164821060  | 0.173458  | 0.108671   | -0.674614 | 1         |
| XLOC_023979 | BTK           | chrX:100604434-100641212  | 0.0171883 | 0.0107685  | -0.674611 | 1         |
| XLOC_002845 | SKIDA1        | chr10:21802408-21814611   | 0.231624  | 0.145178   | -0.673959 | 1         |
| XLOC_015425 | IL12A         | chr3:159706622-159713806  | 1.5739    | 0.987062   | -0.673128 | 0.353435  |
| XLOC_001751 | NBPF7         | chr1:120377387-120387779  | 0.130308  | 0.0818333  | -0.671166 | 1         |
| XLOC_017636 | ANXA2R        | chr5:43039181-43040447    | 3.1323    | 1.96708    | -0.671165 | 0.332823  |
| XLOC_020694 | SLC26A4       | chr7:107296960-107358252  | 0.0604092 | 0.0379793  | -0.669557 | 1         |
| XLOC_005643 | LOC643770     | chr12:98879321-98897633   | 0.295037  | 0.185521   | -0.669315 | 1         |
| XLOC_011165 | LAIR2         | chr19:55014012-55021900   | 2.4029    | 1.51116    | -0.669114 | 0.501582  |
| XLOC_005680 | SELPLG        | chr12:109015679-109027670 | 0.235523  | 0.148159   | -0.66872  | 1         |
| XLOC_012179 | GTF2A1L,STON1 | chr2:48757063-49003656    | 0.0117637 | 0.00740115 | -0.668515 | 1         |
| XLOC_010497 | SHD           | chr19:4278597-4290720     | 0.472034  | 0.297052   | -0.668172 | 0.633194  |
| XLOC_013534 | MACROD2       | chr20:13976145-16033841   | 0.0209329 | 0.0131873  | -0.666615 | 1         |
| XLOC_008096 | HEATR3        | chr16:50099880-50139375   | 2.33048   | 1.46821    | -0.666565 | 0.195931  |
| XLOC_015226 | TMEM45A       | chr3:100211462-100296285  | 15.3301   | 9.65862    | -0.666478 | 0.0550104 |
| XLOC_020876 | LOC202781     | chr7:154795142-154797413  | 8.75383   | 5.516      | -0.666293 | 0.0705331 |
| XLOC_004158 | CHRM4         | chr11:46406639-46408107   | 0.188157  | 0.118588   | -0.665974 | 1         |
| XLOC_009737 | ZNF385C       | chr17:40118758-40190044   | 0.0294999 | 0.018605   | -0.665017 | 1         |
| XLOC_020539 | VPS37D        | chr7:73082173-73086440    | 20.1076   | 12.6831    | -0.664827 | 0.0699076 |
| XLOC_022861 | LOC642236     | chr9:68427782-68454375    | 0.227784  | 0.143697   | -0.664638 | 1         |
| XLOC_000635 | NBPF10        | chr1:145293370-145368684  | 0.234049  | 0.147665   | -0.664485 | 1         |
| XLOC_012609 | ZDBF2         | chr2:207139522-207179148  | 0.576991  | 0.364078   | -0.664302 | 0.14587   |
| XLOC_009117 | MAP3K14-AS1   | chr17:43325302-43394414   | 1.05512   | 0.665795   | -0.664261 | 0.876609  |
| XLOC_016446 | FLJ20021      | chr4:102268933-102270040  | 2.89624   | 1.82832    | -0.663664 | 0.494997  |
| XLOC_007482 | FMN1          | chr15:33057746-33360085   | 0.122779  | 0.0775221  | -0.663381 | 1         |
| XLOC_017274 | COMMD10       | chr5:115420726-115628978  | 6.82769   | 4.31125    | -0.663292 | 0.113276  |
| XLOC_010880 | TMEM91        | chr19:41860321-41889987   | 5.9651    | 3.769      | -0.662363 | 0.512429  |
| XLOC_015709 | LAMB2P1       | chr3:49190291-49191834    | 0.728229  | 0.460144   | -0.662308 | 0.548698  |
| XLOC_006257 | ANG,RNASE4    | chr14:21152335-21168758   | 24.7781   | 15.6569    | -0.662265 | 0.086788  |
| XLOC_003351 | KCNC1         | chr11:17757494-17804602   | 0.0168676 | 0.0106635  | -0.661581 | 1         |
| XLOC_017916 | C5orf4        | chr5:154198051-154230213  | 0.0263605 | 0.0166676  | -0.661333 | 1         |
| XLOC_004708 | FAM66C        | chr12:8332804-8353596     | 0.0472646 | 0.0298943  | -0.660889 | 1         |
| XLOC_013214 | LOC100506124  | chr2:166713985-166728451  | 0.477984  | 0.30263    | -0.659409 | 0.576342  |
| XLOC_009926 | CEP112        | chr17:63631657-64188212   | 1.66556   | 1.05473    | -0.65913  | 0.350325  |
| XLOC_011440 | ACP5          | chr19:11685474-11689801   | 0.177937  | 0.112685   | -0.659071 | 1         |
| XLOC_004826 | PRPH          | chr12:49688908-49692481   | 0.119436  | 0.0756771  | -0.658313 | 1         |
| XLOC_002764 | JAKMIP3       | chr10:133918312-133998313 | 0.0754926 | 0.047875   | -0.657065 | 1         |
| XLOC_012936 | LOC100132215  | chr2:62900985-63275656    | 0.192645  | 0.122228   | -0.656365 | 1         |
| XLOC_003093 | SNORA12       | chr10:101992054-102027437 | 39.5902   | 25.1219    | -0.656198 | 0.960032  |
| XLOC_009888 | LOC653653     | chr17:58179120-58180280   | 0.0737596 | 0.0468202  | -0.6557   | 1         |
| XLOC_007633 | UBAP1L        | chr15:65385341-65398697   | 1.09053   | 0.692427   | -0.655293 | 0.589805  |
| XLOC_019140 | RAET1G        | chr6:150139893-150244214  | 0.536936  | 0.341497   | -0.652876 | 0.950862  |
| XLOC_000035 | PLCH2         | chr1:2407753-2436964      | 0.0857374 | 0.0545522  | -0.652288 | 1         |
| XLOC_013719 | PARD6B        | chr20:49348080-49370278   | 1.9654    | 1.25077    | -0.652003 | 0.131526  |
| XLOC_014262 | GRIK1         | chr21:30909253-31312282   | 0.0312535 | 0.0198903  | -0.651953 | 1         |

|             |              |                          |           |           |           |           |
|-------------|--------------|--------------------------|-----------|-----------|-----------|-----------|
| XLOC_011632 | LOC284412    | chr19:37756840-37759912  | 0.427125  | 0.271981  | -0.651155 | 0.566136  |
| XLOC_002580 | IFIT2        | chr10:91061705-91069033  | 0.104822  | 0.0668136 | -0.649722 | 1         |
| XLOC_003330 | AMPD3        | chr11:10471867-10529126  | 4.00202   | 2.55151   | -0.649376 | 0.0738934 |
| XLOC_002848 | LOC100499489 | chr10:22724353-22726858  | 2.12014   | 1.35198   | -0.649087 | 0.31192   |
| XLOC_008910 | RNF112       | chr17:19314490-19320589  | 0.240425  | 0.153363  | -0.648634 | 1         |
| XLOC_012651 | CYP27A1      | chr2:219646471-219680016 | 0.0462534 | 0.029516  | -0.64806  | 1         |
| XLOC_015794 | FHIT         | chr3:59735035-61237133   | 15.8535   | 10.1182   | -0.64785  | 0.0894386 |
| XLOC_021306 | OPN1SW       | chr7:128379345-128415844 | 0.124259  | 0.0793969 | -0.646195 | 1         |
| XLOC_018110 | BTN3A1       | chr6:26402464-26415444   | 1.33969   | 0.85615   | -0.645966 | 0.219838  |
| XLOC_019028 | SESN1        | chr6:109307639-109415708 | 3.82339   | 2.44342   | -0.645948 | 0.11953   |
| XLOC_021142 | SEMA3E       | chr7:82993221-83278479   | 0.0206335 | 0.0131933 | -0.645184 | 1         |
| XLOC_006279 | REM2         | chr14:23352431-23356889  | 0.42456   | 0.271482  | -0.645114 | 0.692701  |
| XLOC_017774 | FEM1C        | chr5:114856607-114880591 | 3.23319   | 2.06762   | -0.644992 | 0.0603207 |
| XLOC_013183 | CACNB4       | chr2:152689285-152955593 | 0.598998  | 0.383118  | -0.644765 | 0.19932   |
| XLOC_001083 | LOC100130093 | chr1:227916239-227968932 | 0.711547  | 0.455252  | -0.644292 | 0.958439  |
| XLOC_022043 | LOC100130301 | chr8:74153658-74171737   | 0.0813419 | 0.0520433 | -0.644287 | 1         |
| XLOC_013582 | ID1          | chr20:30193085-30194317  | 55.9281   | 35.7846   | -0.644234 | 0.057213  |
| XLOC_010481 | CELF5        | chr19:3224700-3297073    | 0.463866  | 0.296931  | -0.643579 | 0.575077  |
| XLOC_020572 | UPK3B        | chr7:76139744-76157199   | 1.83775   | 1.1766    | -0.643319 | 0.46688   |
| XLOC_009443 | LOC100506713 | chr17:6888441-6915653    | 1.97513   | 1.2646    | -0.64327  | 0.579352  |
| XLOC_002166 | C1orf74      | chr1:209929393-209957890 | 1.89282   | 1.21224   | -0.642854 | 0.342315  |
| XLOC_009703 | KRTAP4-6     | chr17:39295684-39296739  | 0.182204  | 0.116738  | -0.642278 | 1         |
| XLOC_022941 | ZNF484       | chr9:95607312-95640320   | 0.992651  | 0.636065  | -0.642113 | 0.232203  |
| XLOC_017765 | STARD4       | chr5:110834021-111353003 | 1.33204   | 0.853748  | -0.641755 | 0.307111  |
| XLOC_012116 | SPDYA        | chr2:29033699-29093175   | 0.155448  | 0.0996413 | -0.641612 | 1         |
| XLOC_020508 | LOC649395    | chr7:63894070-63895895   | 0.0197077 | 0.0126373 | -0.641073 | 1         |
| XLOC_008462 | LOC100190986 | chr16:21443344-21445776  | 0.862424  | 0.553039  | -0.641018 | 0.390477  |
| XLOC_000672 | C1orf54      | chr1:150245182-150253335 | 0.469716  | 0.30131   | -0.64054  | 0.799656  |
| XLOC_014437 | TMEM191C     | chr22:21821458-21824224  | 0.40322   | 0.258795  | -0.639756 | 0.813083  |
| XLOC_003967 | MRPL23-AS1   | chr11:2004438-2011150    | 0.084393  | 0.054167  | -0.639709 | 1         |
| XLOC_017780 | LOX          | chr5:121398889-121414055 | 1.12029   | 0.719371  | -0.639068 | 0.21812   |
| XLOC_015695 | CELSR3       | chr3:48673895-48700348   | 0.955155  | 0.613571  | -0.638504 | 0.614163  |
| XLOC_016578 | SAP30        | chr4:174292092-174298683 | 41.0992   | 26.4035   | -0.63838  | 0.0600393 |
| XLOC_005802 | ZMYM2        | chr13:20532809-20665968  | 2.13322   | 1.371     | -0.637805 | 0.0554201 |
| XLOC_005306 | TAS2R20      | chr12:10998447-11328619  | 0.297807  | 0.19141   | -0.637711 | 1         |
| XLOC_012776 | RNF144A-AS1  | chr2:7052406-7184309     | 0.0158837 | 0.0102101 | -0.637556 | 1         |
| XLOC_010180 | KIAA1328     | chr18:33877701-34805288  | 0.355297  | 0.228501  | -0.636823 | 1         |
| XLOC_000368 | LURAP1       | chr1:46654352-46686928   | 0.0428463 | 0.0275615 | -0.636515 | 1         |
| XLOC_000933 | SWT1         | chr1:185087217-185260913 | 0.971825  | 0.625308  | -0.63613  | 0.669767  |
| XLOC_023282 | NHS          | chrX:17393542-17754113   | 0.0265001 | 0.0170519 | -0.636068 | 1         |
| XLOC_010903 | ZNF575       | chr19:44037339-44040284  | 0.975258  | 0.627853  | -0.635356 | 0.626914  |
| XLOC_011585 | SLC7A9       | chr19:33321418-33360683  | 0.21707   | 0.139748  | -0.635336 | 1         |
| XLOC_002168 | SERTAD4-AS1  | chr1:210404803-210416440 | 3.48486   | 2.24395   | -0.63506  | 0.479755  |
| XLOC_011621 | ZFP14        | chr19:36825354-36870105  | 0.239188  | 0.154059  | -0.634664 | 1         |
| XLOC_023286 | PPEF1        | chrX:18709044-18846034   | 0.172032  | 0.110813  | -0.634554 | 1         |
| XLOC_010444 | HMHA1        | chr19:1065921-1095391    | 24.6132   | 15.8838   | -0.63188  | 0.629512  |
| XLOC_004081 | LOC100506305 | chr11:13001080-13011095  | 0.0259281 | 0.0167434 | -0.630921 | 1         |
| XLOC_013529 | SLX4IP       | chr20:10415950-10604027  | 0.267571  | 0.17279   | -0.6309   | 1         |
| XLOC_022232 | PARP10       | chr8:145051319-145060635 | 4.38677   | 2.83298   | -0.630837 | 0.147146  |

|             |              |                          |            |            |           |           |
|-------------|--------------|--------------------------|------------|------------|-----------|-----------|
| XLOC_022302 | CDKN2B-AS1   | chr9:21994789-22121093   | 0.186642   | 0.120576   | -0.630329 | 1         |
| XLOC_012048 | C2orf48      | chr2:10281980-10350942   | 1.79309    | 1.15839    | -0.630325 | 0.578553  |
| XLOC_011644 | GGN          | chr19:38874991-38878668  | 0.743233   | 0.480278   | -0.629946 | 0.66669   |
| XLOC_022254 | ZNF250       | chr8:146102335-146126846 | 1.43237    | 0.925955   | -0.629386 | 0.140535  |
| XLOC_004271 | ZBTB3        | chr11:62518434-62521656  | 1.36085    | 0.879923   | -0.629061 | 0.33638   |
| XLOC_024001 | LOC286437    | chrX:103139054-103401708 | 0.251225   | 0.162442   | -0.629055 | 1         |
| XLOC_008781 | C17orf107    | chr17:4736634-4806369    | 0.192869   | 0.124738   | -0.628717 | 1         |
| XLOC_007957 | C16orf45     | chr16:15528324-15682116  | 0.113507   | 0.0734326  | -0.628283 | 1         |
| XLOC_015199 | ZNF654       | chr3:88101099-88207115   | 1.65525    | 1.07108    | -0.627989 | 0.649964  |
| XLOC_004838 | ASIC1        | chr12:50451419-50477405  | 7.12159    | 4.60866    | -0.627851 | 0.0805827 |
| XLOC_022568 | GARNL3       | chr9:130026755-130155828 | 1.64641    | 1.06622    | -0.626816 | 0.221358  |
| XLOC_020465 | FLJ35390     | chr7:44068485-44083895   | 1.10952    | 0.71854    | -0.626793 | 0.626866  |
| XLOC_003944 | LOC143666    | chr11:573807-575885      | 1.04143    | 0.674619   | -0.626414 | 0.500234  |
| XLOC_023017 | ZFP37        | chr9:115804173-115818996 | 2.37233    | 1.53677    | -0.626403 | 0.166833  |
| XLOC_003420 | CD82         | chr11:44587140-44641315  | 2.20439    | 1.42884    | -0.625531 | 0.393124  |
| XLOC_017018 | LOC389247    | chr4:184415889-184425668 | 0.600535   | 0.389419   | -0.624923 | 0.803166  |
| XLOC_007981 | CRYM-AS1     | chr16:21269838-21329912  | 0.196241   | 0.127283   | -0.62459  | 1         |
| XLOC_000290 | DNALI1       | chr1:38022519-38061586   | 0.0141208  | 0.00916091 | -0.624255 | 1         |
| XLOC_015942 | RPL32P3      | chr3:129101676-129118282 | 2.14698    | 1.39301    | -0.624104 | 0.289821  |
| XLOC_008955 | EFCAB5       | chr17:27952964-28435470  | 0.0221377  | 0.014366   | -0.623844 | 1         |
| XLOC_000059 | THAP3        | chr1:6684924-6761966     | 25.3046    | 16.4288    | -0.62317  | 0.472234  |
| XLOC_021144 | SEMA3D       | chr7:84624871-84751247   | 3.56904    | 2.31768    | -0.622851 | 0.0576107 |
| XLOC_013437 | RAB17        | chr2:238482964-238499769 | 0.0554147  | 0.0359866  | -0.622807 | 1         |
| XLOC_002920 | BMS1P1       | chr10:48927373-48952629  | 0.0905132  | 0.0588083  | -0.622109 | 1         |
| XLOC_011757 | GPR4         | chr19:46093022-46105466  | 0.0388242  | 0.0252296  | -0.621841 | 1         |
| XLOC_015539 | MFI2-AS1     | chr3:196728611-196756687 | 2.96417    | 1.92667    | -0.621518 | 0.884031  |
| XLOC_009766 | MPP2         | chr17:41952726-41985113  | 5.1727     | 3.36264    | -0.621322 | 0.103663  |
| XLOC_007898 | LINC00514    | chr16:3039054-3044510    | 0.28955    | 0.188237   | -0.62126  | 1         |
| XLOC_022639 | C9orf96      | chr9:136243283-136324508 | 0.123906   | 0.0806236  | -0.619969 | 1         |
| XLOC_013998 | WFDC3        | chr20:44402846-44420547  | 0.152422   | 0.0992161  | -0.619427 | 1         |
| XLOC_002115 | SYT2         | chr1:202559724-202679551 | 0.0208689  | 0.0135919  | -0.618606 | 1         |
| XLOC_010475 | ZNF57        | chr19:2900895-2918474    | 3.37116    | 2.1958     | -0.6185   | 0.179887  |
| XLOC_019198 | WDR27        | chr6:169857302-170102159 | 1.5429     | 1.00559    | -0.617596 | 0.299896  |
| XLOC_018467 | DCBLD1       | chr6:117803819-117923705 | 0.638753   | 0.416435   | -0.617166 | 0.902666  |
| XLOC_001186 | LOC100130417 | chr1:852952-854817       | 0.27386    | 0.178561   | -0.617019 | 1         |
| XLOC_018095 | HFE          | chr6:26087508-26095469   | 1.94188    | 1.26645    | -0.616661 | 0.346208  |
| XLOC_007252 | ANKDD1A      | chr15:65204100-65251041  | 1.24168    | 0.809941   | -0.616402 | 0.312665  |
| XLOC_000601 | LRIG2        | chr1:113615830-113667342 | 1.83427    | 1.19692    | -0.615883 | 0.189056  |
| XLOC_017278 | TNFAIP8      | chr5:118604417-118730294 | 2.93511    | 1.9169     | -0.614638 | 0.222215  |
| XLOC_002516 | DNAJC9-AS1   | chr10:75007124-75118617  | 0.0558047  | 0.0364511  | -0.614426 | 1         |
| XLOC_009647 | GPR179       | chr17:36481492-36499693  | 0.00603129 | 0.00394023 | -0.614187 | 1         |
| XLOC_017647 | LOC642366    | chr5:50668570-50690563   | 0.0625372  | 0.0408588  | -0.614066 | 1         |
| XLOC_000577 | UBL4B        | chr1:110655061-110656569 | 0.160601   | 0.104931   | -0.614034 | 1         |
| XLOC_011048 | FLJ26850     | chr19:50553936-50570052  | 1.65777    | 1.08366    | -0.613331 | 0.469274  |
| XLOC_021199 | AZGP1        | chr7:99564349-99573735   | 0.14409    | 0.0942199  | -0.612865 | 1         |
| XLOC_015981 | NMNAT3       | chr3:139279022-139396885 | 2.6203     | 1.71348    | -0.612803 | 0.272179  |
| XLOC_018769 | DDAH2        | chr6:31694816-31698039   | 38.3999    | 25.1118    | -0.612738 | 0.0600393 |
| XLOC_002419 | ZNF487P      | chr10:43932573-43978007  | 0.348546   | 0.227968   | -0.612522 | 1         |
| XLOC_000241 | MATN1-AS1    | chr1:31184123-31199593   | 1.08651    | 0.710695   | -0.612402 | 0.523804  |

|             |              |                           |            |            |           |           |
|-------------|--------------|---------------------------|------------|------------|-----------|-----------|
| XLOC_006311 | G2E3         | chr14:31028328-31089046   | 1.05357    | 0.689197   | -0.612298 | 0.206324  |
| XLOC_007507 | BMF          | chr15:40380090-40401085   | 0.366658   | 0.239922   | -0.611868 | 1         |
| XLOC_003839 | BACE1-AS     | chr11:117103403-117186972 | 0.806701   | 0.527905   | -0.611755 | 0.946021  |
| XLOC_014034 | ZNF217       | chr20:52183609-52199636   | 1.9643     | 1.28554    | -0.611646 | 0.138886  |
| XLOC_012303 | ZNF2         | chr2:95831182-95850064    | 1.26475    | 0.828199   | -0.610805 | 0.293852  |
| XLOC_011441 | ZNF823       | chr19:11832079-11849760   | 1.88048    | 1.23151    | -0.61068  | 0.255234  |
| XLOC_016734 | TXK          | chr4:48068409-48136273    | 0.100018   | 0.0655035  | -0.610617 | 1         |
| XLOC_007308 | MPI          | chr15:75182409-75190565   | 51.6988    | 33.8672    | -0.610242 | 0.0554201 |
| XLOC_003837 | TAGLN        | chr11:117049938-117075508 | 51.3847    | 33.6626    | -0.610193 | 0.199218  |
| XLOC_021557 | PLEKHA2      | chr8:38758752-38831430    | 10.8302    | 7.09721    | -0.609734 | 0.0554201 |
| XLOC_014532 | RASD2        | chr22:35937351-35950045   | 1.15506    | 0.757392   | -0.608859 | 0.41867   |
| XLOC_011556 | ZNF14        | chr19:19821280-19843921   | 2.26662    | 1.48653    | -0.608598 | 0.19572   |
| XLOC_014806 | C1QTNF6      | chr22:37576205-37584330   | 1.1718     | 0.768744   | -0.608145 | 0.518305  |
| XLOC_008169 | FBXL8,HSF4   | chr16:67193890-67203848   | 9.63176    | 6.31901    | -0.6081   | 0.257743  |
| XLOC_014157 | LOC100506385 | chr21:36118121-36157168   | 0.0308556  | 0.0202483  | -0.607732 | 1         |
| XLOC_023182 | ABCA2        | chr9:139901685-139931234  | 23.3096    | 15.2971    | -0.607665 | 0.0525851 |
| XLOC_013808 | SLC52A3      | chr20:740723-749228       | 0.024651   | 0.0161786  | -0.607559 | 1         |
| XLOC_000902 | C1orf220     | chr1:178511930-178518024  | 0.0987572  | 0.0648192  | -0.607466 | 1         |
| XLOC_012749 | SNED1        | chr2:241938254-242041747  | 0.469979   | 0.308491   | -0.607367 | 0.810501  |
| XLOC_011652 | RINL         | chr19:39358471-39368919   | 1.108      | 0.727492   | -0.606957 | 0.387473  |
| XLOC_009099 | NAGS         | chr17:42082031-42086436   | 6.82615    | 4.48462    | -0.606088 | 0.209241  |
| XLOC_012032 | COLEC11      | chr2:3642421-3692234      | 0.468838   | 0.308027   | -0.606033 | 0.547882  |
| XLOC_011911 | ZNF615       | chr19:52494586-52511483   | 0.761879   | 0.500576   | -0.605973 | 0.306773  |
| XLOC_012507 | GAD1         | chr2:171673199-171717659  | 9.40281    | 6.17928    | -0.605654 | 0.291131  |
| XLOC_006021 | CRYL1        | chr13:20977805-21100012   | 30.3383    | 19.941     | -0.605402 | 0.0657182 |
| XLOC_022741 | MLLT3        | chr9:20344967-20622514    | 3.55407    | 2.33677    | -0.604957 | 0.142786  |
| XLOC_016492 | FGF2         | chr4:123747862-123844159  | 0.00731875 | 0.00481314 | -0.60462  | 1         |
| XLOC_009483 | KRBA2        | chr17:8271972-8274858     | 0.0416842  | 0.0274155  | -0.60451  | 1         |
| XLOC_006749 | STXBP6       | chr14:25281305-25519095   | 1.00169    | 0.658878   | -0.604345 | 0.493358  |
| XLOC_011539 | CRLF1        | chr19:18704034-18717660   | 1.0498     | 0.69055    | -0.604291 | 0.59512   |
| XLOC_005597 | CSRP2        | chr12:77252495-77272799   | 30.5974    | 20.1423    | -0.603181 | 0.0940496 |
| XLOC_008337 | PTX4         | chr16:1535939-1538468     | 0.0802281  | 0.0528178  | -0.603084 | 1         |
| XLOC_006855 | GPX2         | chr14:65381078-65569413   | 0.0831084  | 0.0547241  | -0.60282  | 1         |
| XLOC_001315 | IFFO2        | chr1:19230773-19282826    | 6.87403    | 4.52667    | -0.602707 | 0.0748376 |
| XLOC_001126 | CHRM3        | chr1:239792372-240072717  | 0.133038   | 0.0876537  | -0.601956 | 1         |
| XLOC_021768 | BAI1         | chr8:143545376-143626368  | 0.588814   | 0.387984   | -0.601815 | 0.499306  |
| XLOC_006878 | ADAM20       | chr14:70989077-71001732   | 0.0157736  | 0.0103966  | -0.601408 | 1         |
| XLOC_017637 | LOC100132356 | chr5:43065288-43067073    | 0.215523   | 0.142093   | -0.601006 | 1         |
| XLOC_000931 | C1orf21      | chr1:184356149-184598155  | 2.69792    | 1.779      | -0.600783 | 0.0745439 |
| XLOC_011925 | ZNF160       | chr19:53569866-53606687   | 4.95178    | 3.26664    | -0.600142 | 0.0860839 |
| XLOC_015996 | HLTF         | chr3:148747903-148820610  | 0.0547437  | 0.0361209  | -0.599859 | 1         |
| XLOC_001620 | TTL7         | chr1:84259597-84464833    | 0.162498   | 0.107244   | -0.599528 | 1         |
| XLOC_012345 | SLC9A4       | chr2:103089761-103150431  | 0.080023   | 0.0528215  | -0.59929  | 1         |
| XLOC_007371 | GOLGA6L4     | chr15:84904524-84914120   | 0.180588   | 0.119218   | -0.599106 | 1         |
| XLOC_002282 | SMYD3        | chr1:245912641-246670644  | 22.8781    | 15.1127    | -0.598204 | 0.076039  |
| XLOC_013878 | RALGAPA2     | chr20:20370271-20693266   | 1.15237    | 0.761754   | -0.597214 | 0.160098  |
| XLOC_014331 | LCA5L        | chr21:40777769-40816128   | 0.23103    | 0.15273    | -0.597097 | 1         |
| XLOC_010765 | GPI          | chr19:34855644-34893318   | 312.004    | 206.293    | -0.596871 | 0.0699076 |
| XLOC_017159 | MAST4        | chr5:65892175-66465423    | 0.707765   | 0.468213   | -0.596105 | 0.419248  |

|             |               |                           |           |           |           |           |
|-------------|---------------|---------------------------|-----------|-----------|-----------|-----------|
| XLOC_005304 | TAS2R14       | chr12:10998447-11328619   | 0.270341  | 0.178847  | -0.596055 | 1         |
| XLOC_018081 | KAAG1         | chr6:24171982-24383520    | 0.715595  | 0.473551  | -0.595625 | 0.844608  |
| XLOC_007013 | HERC2P7       | chr15:23390721-23393943   | 3.43011   | 2.27031   | -0.595364 | 0.266518  |
| XLOC_020650 | NYAP1         | chr7:100081549-100092424  | 2.36501   | 1.56547   | -0.595249 | 0.289501  |
| XLOC_022919 | SHC3          | chr9:91620685-91793682    | 0.0517724 | 0.0342704 | -0.595222 | 1         |
| XLOC_012463 | MBD5          | chr2:148602569-149271044  | 0.155212  | 0.10278   | -0.59468  | 1         |
| XLOC_023029 | DFNB31        | chr9:117164359-117267736  | 13.0129   | 8.62337   | -0.593619 | 0.0857306 |
| XLOC_018771 | VWA7          | chr6:31733370-31745108    | 0.0963439 | 0.0638464 | -0.593589 | 1         |
| XLOC_020366 | PMS2CL        | chr7:6774935-6791232      | 2.42673   | 1.60897   | -0.592877 | 0.321184  |
| XLOC_013390 | AP1S3         | chr2:224620046-224702319  | 0.0215784 | 0.0143072 | -0.592845 | 1         |
| XLOC_009298 | AANAT         | chr17:74449432-74466199   | 0.240359  | 0.159371  | -0.592805 | 1         |
| XLOC_021384 | ZNF786        | chr7:148766732-148787869  | 3.58575   | 2.3784    | -0.592284 | 0.197192  |
| XLOC_010540 | C19orf59      | chr19:7741942-7744719     | 0.0712987 | 0.047292  | -0.59228  | 1         |
| XLOC_002274 | MAP1LC3C      | chr1:242158791-242162385  | 0.690043  | 0.457709  | -0.592255 | 0.678853  |
| XLOC_007454 | LOC283683     | chr15:23094330-23115254   | 0.184705  | 0.122539  | -0.591989 | 1         |
| XLOC_013542 | ZNF133        | chr20:18269120-18297640   | 6.14344   | 4.07635   | -0.591769 | 0.148406  |
| XLOC_002423 | ZNF32-AS2     | chr10:44124264-44170147   | 0.652755  | 0.433432  | -0.590736 | 0.923571  |
| XLOC_015521 | MGC2889       | chr3:192958916-192988644  | 0.0343241 | 0.0227971 | -0.59037  | 1         |
| XLOC_005775 | CCDC92        | chr12:124420954-124457163 | 2.47513   | 1.64411   | -0.590202 | 0.384101  |
| XLOC_017779 | DTWD2         | chr5:118172568-118324240  | 0.61191   | 0.406464  | -0.590192 | 0.362482  |
| XLOC_011623 | ZNF566        | chr19:36936020-36980463   | 2.07382   | 1.37767   | -0.590066 | 0.153369  |
| XLOC_012569 | SLC39A10      | chr2:196521531-196602426  | 3.35558   | 2.23015   | -0.589419 | 0.0976116 |
| XLOC_016913 | PRDM5         | chr4:121615928-121844013  | 1.35813   | 0.902825  | -0.589102 | 0.343792  |
| XLOC_016166 | IDUA          | chr4:972862-998317        | 4.46303   | 2.96706   | -0.58899  | 0.376356  |
| XLOC_013293 | PGAP1         | chr2:197697727-197791454  | 0.904284  | 0.60141   | -0.588427 | 0.148137  |
| XLOC_021369 | CTAGE6P       | chr7:143452181-143454843  | 0.0411829 | 0.027408  | -0.587451 | 1         |
| XLOC_020727 | FSCN3         | chr7:127233688-127241851  | 0.0242106 | 0.0161216 | -0.586645 | 1         |
| XLOC_017398 | SH3RF2        | chr5:145316125-145442879  | 0.433678  | 0.288821  | -0.586448 | 0.59533   |
| XLOC_005551 | CYP27B1       | chr12:58156116-58160976   | 2.2385    | 1.49116   | -0.586101 | 0.349708  |
| XLOC_004837 | AQP6          | chr12:50366619-50370922   | 0.0178114 | 0.0118664 | -0.585921 | 1         |
| XLOC_000253 | IQCC          | chr1:32671235-32674288    | 1.47052   | 0.979716  | -0.585886 | 0.375852  |
| XLOC_012378 | ZC3H6         | chr2:113033177-113097640  | 0.180822  | 0.120496  | -0.585591 | 1         |
| XLOC_010893 | ZNF526        | chr19:42724491-42732353   | 4.05473   | 2.70211   | -0.58552  | 0.152079  |
| XLOC_011842 | RRAS          | chr19:50138551-50143400   | 32.8371   | 21.8848   | -0.585399 | 0.122719  |
| XLOC_007733 | MEX3B         | chr15:82334118-82338484   | 0.984227  | 0.65614   | -0.584987 | 0.439308  |
| XLOC_015848 | SENP7         | chr3:101043117-101232085  | 1.10672   | 0.738031  | -0.584533 | 0.242802  |
| XLOC_000590 | C1orf162      | chr1:112016603-112021134  | 0.868679  | 0.579314  | -0.584478 | 0.688092  |
| XLOC_007420 | MCTP2         | chr15:94841429-95027181   | 0.764396  | 0.509865  | -0.584206 | 0.412597  |
| XLOC_004822 | CACNB3        | chr12:49208214-49222726   | 22.0379   | 14.7412   | -0.580129 | 0.0634008 |
| XLOC_009923 | AMZ2P1        | chr17:62962667-62971703   | 2.0607    | 1.37841   | -0.580123 | 0.22341   |
| XLOC_002052 | RASAL2-AS1    | chr1:178060642-178448648  | 0.060022  | 0.040165  | -0.579555 | 1         |
| XLOC_005630 | CCDC41        | chr12:94702055-94853764   | 1.97825   | 1.32396   | -0.579357 | 0.221487  |
| XLOC_001629 | SYDE2         | chr1:85623355-85666728    | 1.65617   | 1.10864   | -0.579055 | 0.214151  |
| XLOC_017430 | GPX3          | chr5:150399998-150408554  | 0.0236473 | 0.015832  | -0.578833 | 1         |
| XLOC_008204 | NFAT5         | chr16:69599868-69738569   | 3.37597   | 2.26114   | -0.578254 | 0.064033  |
| XLOC_018249 | PACSIN1       | chr6:34433837-34503000    | 0.0421573 | 0.0282408 | -0.578002 | 1         |
| XLOC_015442 | GPR160        | chr3:169755734-169803183  | 18.917    | 12.6741   | -0.577798 | 0.0881203 |
| XLOC_004680 | CD4           | chr12:6898637-6929976     | 0.0674802 | 0.0452145 | -0.577679 | 1         |
| XLOC_016388 | FAM47E,FAM47E | chr4:77135192-77232283    | 7.60138   | 5.09456   | -0.577304 | 0.104245  |

|             |              |                           |            |            |           |           |
|-------------|--------------|---------------------------|------------|------------|-----------|-----------|
| XLOC_006853 | ZBTB25       | chr14:64953554-64970554   | 2.91962    | 1.95746    | -0.5768   | 0.33192   |
| XLOC_018596 | CCR6         | chr6:167525294-167552629  | 0.0805158  | 0.0540309  | -0.575489 | 1         |
| XLOC_017426 | SYNPO        | chr5:149980641-150038792  | 0.606319   | 0.406942   | -0.575252 | 0.437301  |
| XLOC_015186 | GXYLT2       | chr3:72937384-73024522    | 0.610254   | 0.409594   | -0.575213 | 0.647073  |
| XLOC_022719 | ERMP1        | chr9:5784571-5833081      | 4.10272    | 2.7537     | -0.575208 | 0.118071  |
| XLOC_014162 | MORC3        | chr21:37692486-37748944   | 3.51518    | 2.36059    | -0.57445  | 0.12195   |
| XLOC_012236 | DYSF         | chr2:71680752-71913893    | 0.157529   | 0.105798   | -0.574306 | 1         |
| XLOC_012197 | C2orf74      | chr2:61372242-61391964    | 0.0980508  | 0.0658735  | -0.573831 | 1         |
| XLOC_007819 | LOC100134368 | chr16:432240-442960       | 0.256836   | 0.172597   | -0.573437 | 1         |
| XLOC_014992 | ZCWPW2       | chr3:28431986-28566632    | 0.0884016  | 0.0594172  | -0.573193 | 1         |
| XLOC_014650 | MAPK8IP2     | chr22:51039130-51049979   | 1.13257    | 0.761564   | -0.572568 | 0.510347  |
| XLOC_013621 | MYH7B        | chr20:33543703-33680618   | 0.0476916  | 0.0320701  | -0.572505 | 1         |
| XLOC_009451 | DLG4         | chr17:7093209-7128586     | 20.2561    | 13.6231    | -0.572293 | 0.67336   |
| XLOC_001673 | LRRC39       | chr1:100598705-100643829  | 0.512375   | 0.344679   | -0.571949 | 0.839471  |
| XLOC_007546 | STRC         | chr15:43663312-43910998   | 0.128784   | 0.0866611  | -0.571493 | 1         |
| XLOC_000761 | POU5F1P4     | chr1:155305051-155533735  | 0.0455317  | 0.0306407  | -0.571425 | 1         |
| XLOC_015137 | DNAH1        | chr3:52350334-52434513    | 0.179333   | 0.120718   | -0.570992 | 1         |
| XLOC_007849 | BAIAP3       | chr16:1383605-1401873     | 2.06484    | 1.39       | -0.57094  | 0.861774  |
| XLOC_017763 | PJA2         | chr5:108670409-108745675  | 3.36353    | 2.26579    | -0.56996  | 0.128429  |
| XLOC_009514 | TEKT3        | chr17:15207128-15244958   | 0.207874   | 0.140036   | -0.569908 | 1         |
| XLOC_010099 | TGIF1        | chr18:3412071-3458406     | 39.4078    | 26.5555    | -0.569473 | 0.0784883 |
| XLOC_021098 | STAG3L3      | chr7:72467988-72476448    | 0.417252   | 0.281208   | -0.569284 | 0.679452  |
| XLOC_006461 | ESRRB        | chr14:76837689-76968180   | 0.187979   | 0.126707   | -0.569071 | 1         |
| XLOC_018350 | LOC730101    | chr6:52529198-52533951    | 1.47326    | 0.993245   | -0.568795 | 0.285815  |
| XLOC_011966 | COX6B2       | chr19:55861069-55866182   | 0.620398   | 0.418324   | -0.568574 | 0.699213  |
| XLOC_001723 | RSBN1        | chr1:114304453-11435070   | 2.44214    | 1.64686    | -0.568429 | 0.140686  |
| XLOC_007377 | ALPK3        | chr15:85359910-85416713   | 0.024141   | 0.0162846  | -0.567972 | 1         |
| XLOC_003955 | MUC6         | chr11:1012823-1036706     | 0.0581998  | 0.0392728  | -0.567482 | 1         |
| XLOC_009080 | CNTD1        | chr17:40950853-40976310   | 0.226839   | 0.153145   | -0.566765 | 1         |
| XLOC_018321 | C6orf223     | chr6:43968336-43973694    | 0.0775059  | 0.0523342  | -0.566552 | 1         |
| XLOC_007688 | CYP1A1       | chr15:75011882-75017877   | 0.324869   | 0.219378   | -0.566437 | 1         |
| XLOC_011083 | ZNF610       | chr19:52839497-52870376   | 0.0508827  | 0.0343656  | -0.566209 | 1         |
| XLOC_006066 | N4BP2L2-IT2  | chr13:33006929-33112936   | 0.415793   | 0.281024   | -0.565173 | 0.89301   |
| XLOC_017778 | SEMA6A       | chr5:115779250-115910551  | 0.0428255  | 0.0289475  | -0.565033 | 1         |
| XLOC_014822 | LOC400927    | chr22:38740669-38794931   | 1.21       | 0.818107   | -0.564649 | 0.784659  |
| XLOC_004809 | ANO6         | chr12:45566816-45834187   | 11.6166    | 7.85652    | -0.564223 | 0.0860839 |
| XLOC_021171 | PON3         | chr7:94989183-95025687    | 0.773529   | 0.523179   | -0.564149 | 0.631566  |
| XLOC_000333 | MPL          | chr1:43803474-43820135    | 0.0558254  | 0.0377638  | -0.56392  | 1         |
| XLOC_001320 | LOC100506730 | chr1:19619740-19622230    | 2.38187    | 1.6114     | -0.563778 | 0.286272  |
| XLOC_011315 | MATK         | chr19:3777966-3801810     | 1.62044    | 1.09637    | -0.563648 | 0.518395  |
| XLOC_017934 | C5orf54      | chr5:159820154-159827060  | 1.17894    | 0.797673   | -0.563625 | 0.394465  |
| XLOC_023550 | TBC1D8B      | chrX:106045918-106119377  | 0.729999   | 0.494337   | -0.5624   | 0.452276  |
| XLOC_020878 | INSIG1       | chr7:155089485-155101945  | 12.0902    | 8.18784    | -0.562279 | 0.100423  |
| XLOC_009474 | PER1         | chr17:8043787-8055753     | 5.10662    | 3.46086    | -0.561238 | 0.159184  |
| XLOC_003783 | TMEM133      | chr11:100862810-100864666 | 0.5026     | 0.340715   | -0.560845 | 0.61138   |
| XLOC_000089 | PLOD1        | chr1:11994723-12035599    | 103.118    | 69.9141    | -0.560644 | 0.077173  |
| XLOC_010825 | ZNF793       | chr19:37997840-38034239   | 0.0100853  | 0.00683997 | -0.560192 | 1         |
| XLOC_016909 | FABP2        | chr4:120238404-120243316  | 0.00649185 | 0.00440392 | -0.55984  | 1         |
| XLOC_009127 | LRRC37A2     | chr17:44590075-44657088   | 0.210796   | 0.143041   | -0.559417 | 1         |

|             |              |                           |            |            |           |           |
|-------------|--------------|---------------------------|------------|------------|-----------|-----------|
| XLOC_001611 | CRYZ         | chr1:75171171-75232360    | 18.2516    | 12.3858    | -0.559343 | 0.384475  |
| XLOC_008219 | CALB2        | chr16:71392615-71424342   | 16.6829    | 11.3217    | -0.559284 | 0.132239  |
| XLOC_022816 | CD72         | chr9:35605280-35618424    | 0.61068    | 0.41451    | -0.559008 | 0.937886  |
| XLOC_015012 | GOLGA4       | chr3:37284681-37408370    | 2.39298    | 1.62454    | -0.55878  | 0.164242  |
| XLOC_005209 | ZNF10        | chr12:133707213-133736049 | 2.47346    | 1.67978    | -0.558261 | 0.169914  |
| XLOC_022340 | TMEM8B       | chr9:35829221-35854844    | 4.46725    | 3.03383    | -0.558248 | 0.286272  |
| XLOC_003427 | CRY2         | chr11:45868668-45904799   | 4.58024    | 3.11061    | -0.558224 | 0.153799  |
| XLOC_002202 | CAPN8        | chr1:223714971-223853436  | 0.0295038  | 0.0200373  | -0.558212 | 1         |
| XLOC_022267 | SLC1A1       | chr9:4490426-4587469      | 2.01801    | 1.37085    | -0.557863 | 0.246092  |
| XLOC_016751 | AASDH        | chr4:57204456-57253638    | 2.22601    | 1.51274    | -0.557294 | 0.235343  |
| XLOC_009936 | ABCA9        | chr17:66970772-67057136   | 0.011727   | 0.00796977 | -0.55722  | 1         |
| XLOC_000694 | CGN          | chr1:151483861-151511167  | 1.80066    | 1.224      | -0.556921 | 0.26191   |
| XLOC_011223 | ZNF17        | chr19:57922528-57933307   | 1.35017    | 0.91805    | -0.556498 | 0.351582  |
| XLOC_011739 | ZNF235       | chr19:44790500-44809178   | 0.39578    | 0.269154   | -0.556268 | 0.546288  |
| XLOC_000908 | AXDND1       | chr1:179334854-179545084  | 0.656347   | 0.446391   | -0.556152 | 0.419248  |
| XLOC_022529 | LOC100288842 | chr9:123555774-123561009  | 0.97501    | 0.663194   | -0.555987 | 0.774461  |
| XLOC_013178 | RBM43        | chr2:152104727-152118389  | 1.60076    | 1.08887    | -0.55592  | 0.276847  |
| XLOC_000520 | LOC729970    | chr1:95393583-95428826    | 1.88595    | 1.28287    | -0.55591  | 0.525673  |
| XLOC_011389 | MYO1F        | chr19:8585673-8642331     | 0.113302   | 0.077081   | -0.555722 | 1         |
| XLOC_023201 | PNPLA7       | chr9:140354404-140444986  | 1.81311    | 1.23386    | -0.555281 | 0.314399  |
| XLOC_009368 | NXN          | chr17:702552-882998       | 10.8682    | 7.39795    | -0.554914 | 0.133822  |
| XLOC_010088 | ROCK1P1      | chr18:109064-122222       | 0.366047   | 0.249238   | -0.554503 | 1         |
| XLOC_009248 | LOC440461    | chr17:66194800-66196443   | 0.135278   | 0.0921392  | -0.554037 | 1         |
| XLOC_010889 | CD79A        | chr19:42381189-42385439   | 0.935382   | 0.637319   | -0.553541 | 0.637594  |
| XLOC_005065 | HCFC2        | chr12:104458235-104500304 | 0.715087   | 0.487282   | -0.553362 | 0.331994  |
| XLOC_002585 | KIF20B       | chr10:91461366-91534700   | 1.032      | 0.703329   | -0.553173 | 0.266026  |
| XLOC_002619 | C10orf12     | chr10:98741040-98745585   | 0.55038    | 0.375173   | -0.552872 | 0.438842  |
| XLOC_011361 | C3           | chr19:6677845-6720662     | 0.00840964 | 0.00573274 | -0.552819 | 1         |
| XLOC_020550 | CLIP2        | chr7:73703804-73820273    | 17.587     | 11.9921    | -0.552422 | 0.0763878 |
| XLOC_014937 | IL17RE       | chr3:9944295-9958084      | 0.783729   | 0.534694   | -0.551642 | 0.564045  |
| XLOC_007696 | MAN2C1       | chr15:75648132-75660968   | 11.6091    | 7.92213    | -0.551301 | 0.131988  |
| XLOC_016958 | NR3C2        | chr4:148999914-149363672  | 0.243273   | 0.166025   | -0.551179 | 1         |
| XLOC_003493 | SERPING1     | chr11:57365026-57382326   | 0.0393684  | 0.026868   | -0.551153 | 1         |
| XLOC_005077 | C12orf23     | chr12:107349543-107367813 | 11.5681    | 7.89517    | -0.551111 | 0.0878381 |
| XLOC_022290 | SH3GL2       | chr9:17578952-17797122    | 0.0367046  | 0.0250605  | -0.550542 | 1         |
| XLOC_013300 | FONG         | chr2:200625258-200715896  | 1.58572    | 1.08298    | -0.550131 | 0.668024  |
| XLOC_015632 | PLCD1        | chr3:38048986-38071154    | 4.08698    | 2.79155    | -0.549969 | 0.266026  |
| XLOC_014498 | CABP7        | chr22:30116343-30162969   | 0.07702    | 0.0526157  | -0.54974  | 1         |
| XLOC_006666 | CRIP2        | chr14:105939274-105946507 | 31.6571    | 21.6324    | -0.549332 | 0.1743    |
| XLOC_018712 | ZSCAN12      | chr6:28346597-28367544    | 0.602853   | 0.411961   | -0.5493   | 0.430428  |
| XLOC_010772 | ZNF30        | chr19:35417806-35436076   | 0.588155   | 0.402055   | -0.548803 | 0.533928  |
| XLOC_016057 | PHC3         | chr3:169805367-169899537  | 1.69158    | 1.15643    | -0.548685 | 0.125565  |
| XLOC_007735 | GOLGA6L10    | chr15:82633122-82641706   | 0.0358307  | 0.0245     | -0.548412 | 1         |
| XLOC_000552 | FAM102B      | chr1:109102970-109181949  | 1.84601    | 1.26254    | -0.548077 | 0.204323  |
| XLOC_008122 | MT1JP        | chr16:56669650-56670998   | 1.22777    | 0.839802   | -0.547916 | 0.840893  |
| XLOC_022842 | LOC100289137 | chr9:38540563-38545369    | 2.98395    | 2.04129    | -0.547742 | 0.274062  |
| XLOC_008531 | STX1B        | chr16:31000576-31021829   | 0.635345   | 0.434758   | -0.547329 | 0.460999  |
| XLOC_010898 | LOC100996307 | chr19:42901299-43156507   | 0.243157   | 0.16647    | -0.546624 | 1         |
| XLOC_003747 | TMEM135      | chr11:86748885-87039876   | 2.41309    | 1.65238    | -0.546339 | 0.105364  |

|             |              |                           |            |            |           |           |
|-------------|--------------|---------------------------|------------|------------|-----------|-----------|
| XLOC_023627 | DDX26B       | chrX:134654554-134716460  | 1.20681    | 0.826375   | -0.546325 | 0.342693  |
| XLOC_008893 | ALKBH5       | chr17:18086866-18113267   | 52.1292    | 35.6968    | -0.546295 | 0.0732377 |
| XLOC_009067 | HSPB9        | chr17:40274755-40275371   | 0.119039   | 0.0815189  | -0.546229 | 1         |
| XLOC_017980 | DDX41        | chr5:176938577-176943967  | 48.6863    | 33.3541    | -0.545653 | 0.0940496 |
| XLOC_016500 | HSPA4L       | chr4:128703452-128754526  | 3.09496    | 2.12128    | -0.544985 | 0.20701   |
| XLOC_017230 | TMEM161B-AS1 | chr5:87564698-87732491    | 2.18736    | 1.49921    | -0.544985 | 0.59916   |
| XLOC_023045 | C5           | chr9:123714613-123812554  | 0.332341   | 0.227855   | -0.544551 | 1         |
| XLOC_013136 | LIMS2        | chr2:128395995-128439360  | 0.0408333  | 0.0280118  | -0.543713 | 1         |
| XLOC_007498 | ATPBD4       | chr15:35663169-36151202   | 3.7882     | 2.59941    | -0.543329 | 0.282119  |
| XLOC_015532 | SLC51A       | chr3:195943382-195960301  | 0.209678   | 0.143903   | -0.543078 | 1         |
| XLOC_003241 | LOC255512    | chr11:1330937-1331937     | 3.13293    | 2.15054    | -0.542818 | 0.591586  |
| XLOC_013326 | KLF7         | chr2:207938861-208031970  | 0.0230743  | 0.0158403  | -0.542687 | 1         |
| XLOC_004935 | NAB2         | chr12:57482676-57505196   | 39.5782    | 27.1726    | -0.542553 | 0.467415  |
| XLOC_021765 | PTP4A3       | chr8:142432006-142441620  | 12.7137    | 8.72945    | -0.542416 | 0.285666  |
| XLOC_008400 | ZNF500       | chr16:4800814-4817166     | 4.19571    | 2.88173    | -0.54198  | 0.249717  |
| XLOC_022326 | IL11RA       | chr9:34652181-34662689    | 0.959608   | 0.659101   | -0.541947 | 0.581347  |
| XLOC_021088 | LOC493754    | chr7:66018552-66043498    | 5.19441    | 3.56918    | -0.541368 | 0.1743    |
| XLOC_010789 | GAPDHS       | chr19:36024313-36038429   | 0.223595   | 0.153662   | -0.541125 | 1         |
| XLOC_020513 | CCT6P3       | chr7:64498731-64535091    | 3.22337    | 2.21551    | -0.540932 | 0.259004  |
| XLOC_011060 | MGC45922     | chr19:51320936-51322134   | 0.41186    | 0.283244   | -0.540107 | 0.858729  |
| XLOC_011993 | ZNF416       | chr19:58082933-58090243   | 3.88007    | 2.66899    | -0.539788 | 0.222759  |
| XLOC_010602 | ZNF440       | chr19:11925106-11946016   | 2.86688    | 1.97276    | -0.539267 | 0.180192  |
| XLOC_003611 | TIGD3        | chr11:65122281-65125082   | 2.2966     | 1.58037    | -0.539235 | 0.474059  |
| XLOC_016268 | RBPJ         | chr4:26321331-26436752    | 9.37267    | 6.45023    | -0.539109 | 0.0923379 |
| XLOC_005787 | RIMBP2       | chr12:130880680-131002410 | 0.0121625  | 0.00837253 | -0.538705 | 1         |
| XLOC_008180 | RLTPR        | chr16:67679029-67694718   | 0.0474168  | 0.0326419  | -0.538676 | 1         |
| XLOC_010510 | KDM4B        | chr19:4969123-5153608     | 12.5316    | 8.62931    | -0.538247 | 0.117237  |
| XLOC_020371 | GLCC1        | chr7:8008373-8128709      | 0.779691   | 0.536942   | -0.538137 | 0.419248  |
| XLOC_010911 | ZNF230       | chr19:44507076-44518072   | 0.840035   | 0.578658   | -0.537774 | 0.375271  |
| XLOC_011013 | LIN7B        | chr19:49617617-49622397   | 2.78345    | 1.9175     | -0.537648 | 0.705248  |
| XLOC_021085 | LOC441242    | chr7:65111923-65235797    | 0.0550239  | 0.0379072  | -0.537587 | 1         |
| XLOC_021114 | STAG3L2      | chr7:74298262-74306731    | 1.59225    | 1.09695    | -0.537566 | 0.506451  |
| XLOC_022508 | KIAA1958     | chr9:115249247-115422706  | 0.655949   | 0.451958   | -0.537396 | 0.570316  |
| XLOC_008722 | SNAI3        | chr16:88729780-88753594   | 2.18709    | 1.50698    | -0.537351 | 0.703553  |
| XLOC_008728 | PABPN1L      | chr16:88929747-88933068   | 0.0436626  | 0.0300941  | -0.536919 | 1         |
| XLOC_002129 | ETNK2        | chr1:204100189-204121307  | 1.20504    | 0.830577   | -0.5369   | 0.508136  |
| XLOC_011565 | ZNF708       | chr19:21473962-21512212   | 1.22335    | 0.843225   | -0.536843 | 0.330706  |
| XLOC_004765 | SLCO1B7      | chr12:21168629-21243040   | 0.338056   | 0.233089   | -0.536381 | 1         |
| XLOC_021505 | PDLIM2       | chr8:22436253-22455538    | 135.13     | 93.1757    | -0.536317 | 0.0900926 |
| XLOC_021763 | DENND3       | chr8:142138719-142205900  | 1.03255    | 0.711985   | -0.536287 | 0.382564  |
| XLOC_001347 | ZNF436       | chr1:23685940-23698330    | 1.58166    | 1.09093    | -0.535887 | 0.305306  |
| XLOC_020735 | FLJ45340     | chr7:128281294-128301052  | 4.59597    | 3.17007    | -0.535852 | 0.112663  |
| XLOC_008106 | IRX6         | chr16:55358470-55364672   | 0.0262727  | 0.0181288  | -0.535285 | 1         |
| XLOC_021131 | FGL2         | chr7:76751933-76924521    | 0.00324626 | 0.00224117 | -0.534528 | 1         |
| XLOC_013811 | TMEM74B      | chr20:1161214-1165117     | 15.2692    | 10.5436    | -0.534252 | 0.15618   |
| XLOC_023461 | NLGN3        | chrX:70364680-70391051    | 0.853449   | 0.589355   | -0.534166 | 0.484507  |
| XLOC_005808 | FGF9         | chr13:22245214-22278640   | 0.523652   | 0.36162    | -0.534134 | 0.487462  |
| XLOC_007717 | ACSBG1       | chr15:78463186-78527049   | 0.0937339  | 0.0647439  | -0.533826 | 1         |
| XLOC_005384 | SLC2A13      | chr12:40148822-40499661   | 0.480312   | 0.3318     | -0.533659 | 0.419912  |



|             |              |                           |            |            |           |           |
|-------------|--------------|---------------------------|------------|------------|-----------|-----------|
| XLOC_002646 | SEMA4G       | chr10:102732285-102747272 | 4.3563     | 3.00943    | -0.533612 | 0.713685  |
| XLOC_018874 | GUCA1B       | chr6:42151021-42162694    | 1.41787    | 0.979766   | -0.533215 | 0.45742   |
| XLOC_015875 | SPICE1       | chr3:113161564-113234034  | 1.23862    | 0.856014   | -0.533303 | 0.28785   |
| XLOC_013634 | MYL9         | chr20:35169886-35178226   | 76.2918    | 52.7259    | -0.533016 | 0.0981523 |
| XLOC_000133 | MST1P2       | chr1:16972068-16976915    | 1.02656    | 0.709514   | -0.532914 | 0.556537  |
| XLOC_000439 | AK4          | chr1:65613231-65697828    | 17.0275    | 11.7692    | -0.532854 | 0.094542  |
| XLOC_006984 | CKB          | chr14:103985994-103989196 | 7.08913    | 4.90053    | -0.53267  | 0.389589  |
| XLOC_009323 | CCDC40       | chr17:78010430-78074412   | 0.474376   | 0.328021   | -0.532241 | 0.554994  |
| XLOC_009602 | EVI2B        | chr17:29421944-29704695   | 0.0180286  | 0.0124705  | -0.531767 | 1         |
| XLOC_010004 | DNAH17       | chr17:76374734-76573476   | 0.191014   | 0.132256   | -0.530348 | 1         |
| XLOC_008949 | PIPOX        | chr17:27369917-27384236   | 0.110826   | 0.0767391  | -0.530261 | 1         |
| XLOC_005364 | C12orf71     | chr12:27233989-27235455   | 0.0673369  | 0.0466583  | -0.529265 | 1         |
| XLOC_009345 | NPB          | chr17:79860071-79869340   | 1.05382    | 0.730223   | -0.529224 | 0.96692   |
| XLOC_021814 | C8orf42      | chr8:439789-495781        | 0.00993532 | 0.00688498 | -0.529113 | 1         |
| XLOC_017173 | LOC441081    | chr5:69776869-69881549    | 0.222567   | 0.15428    | -0.528685 | 1         |
| XLOC_010487 | CACTIN-AS1   | chr19:3607244-3626813     | 0.148617   | 0.103061   | -0.528099 | 1         |
| XLOC_018903 | CYP39A1      | chr6:46517444-46620523    | 0.419349   | 0.290878   | -0.527738 | 0.637815  |
| XLOC_023831 | ZNF41        | chrX:47305560-47342345    | 0.298981   | 0.207436   | -0.527388 | 1         |
| XLOC_000276 | ZMYM1        | chr1:35544971-35581455    | 2.08257    | 1.44505    | -0.527252 | 0.239441  |
| XLOC_005022 | PLEKHG7      | chr12:93130264-93165868   | 0.00420957 | 0.00292129 | -0.527067 | 1         |
| XLOC_018935 | KLHL31       | chr6:53512698-53530506    | 0.0365316  | 0.0253574  | -0.52674  | 1         |
| XLOC_017096 | NPR3         | chr5:32710742-32791830    | 0.0160495  | 0.0111408  | -0.526673 | 1         |
| XLOC_011465 | SYCE2        | chr19:13001973-13030086   | 1.49011    | 1.03445    | -0.526561 | 0.928378  |
| XLOC_004764 | SLCO1B3      | chr12:20963637-21069843   | 9.1775     | 6.37144    | -0.526482 | 0.126915  |
| XLOC_004876 | LOC100652999 | chr12:53901639-54020199   | 0.167411   | 0.116231   | -0.526396 | 1         |
| XLOC_018449 | KIAA1919     | chr6:111580481-111590261  | 0.605973   | 0.420742   | -0.526318 | 0.502187  |
| XLOC_023484 | UPRT         | chrX:74493893-74524732    | 5.94304    | 4.12729    | -0.526006 | 0.20598   |
| XLOC_012333 | NPAS2        | chr2:101436612-101613287  | 8.5934     | 5.97021    | -0.525448 | 0.146782  |
| XLOC_013858 | JAG1         | chr20:10618331-10654694   | 1.55026    | 1.07753    | -0.524783 | 0.285746  |
| XLOC_004580 | MIR100HG     | chr11:121959810-122073770 | 0.00450269 | 0.00313034 | -0.524469 | 1         |
| XLOC_000987 | ATP2B4       | chr1:203595914-203713209  | 1.59373    | 1.10841    | -0.523909 | 0.211369  |
| XLOC_012046 | KLF11        | chr2:10183681-10194963    | 1.76144    | 1.22506    | -0.523904 | 0.296127  |
| XLOC_003108 | KCNIP2       | chr10:103578824-103603677 | 0.254931   | 0.177349   | -0.523514 | 1         |
| XLOC_023027 | KIF12        | chr9:116853917-116861337  | 0.988512   | 0.687932   | -0.522992 | 0.626245  |
| XLOC_023755 | MID1         | chrX:10413349-10851809    | 0.0267808  | 0.0186383  | -0.522929 | 1         |
| XLOC_024203 | F8           | chrX:154064063-154250998  | 3.18334    | 2.21615    | -0.522483 | 0.418727  |
| XLOC_012374 | BCL2L11      | chr2:111878490-111926022  | 2.43517    | 1.69596    | -0.521926 | 0.246196  |
| XLOC_002779 | LOC619207    | chr10:135267431-135281953 | 0.160026   | 0.111452   | -0.521882 | 1         |
| XLOC_011444 | ZNF20,ZNF625 | chr19:12242167-12267546   | 1.96268    | 1.36703    | -0.521785 | 0.319187  |
| XLOC_004626 | ARHGAP32     | chr11:128834954-129062093 | 1.63015    | 1.13542    | -0.521776 | 0.189324  |
| XLOC_015499 | EIF4A2       | chr3:186501360-186524484  | 153.747    | 107.129    | -0.52121  | 0.148853  |
| XLOC_015045 | NKTR         | chr3:42589458-42690233    | 1.54728    | 1.0782     | -0.521105 | 0.646217  |
| XLOC_012505 | SP5          | chr2:171571856-171574498  | 0.680874   | 0.47457    | -0.520766 | 0.764456  |
| XLOC_021788 | SPATC1       | chr8:145086581-145102015  | 0.0920123  | 0.0641381  | -0.520644 | 1         |
| XLOC_023904 | AMER1        | chrX:63404996-63425624    | 0.631123   | 0.440043   | -0.520276 | 0.363109  |
| XLOC_011234 | ZNF776       | chr19:58258163-58269527   | 1.39322    | 0.972005   | -0.519392 | 0.284182  |
| XLOC_016217 | CPZ          | chr4:8594386-8621488      | 25.666     | 17.9067    | -0.51936  | 0.141952  |
| XLOC_021807 | ZNF517       | chr8:146024260-146034529  | 7.12534    | 4.97263    | -0.518951 | 0.280619  |
| XLOC_023117 | LOC100272217 | chr9:133452736-133454881  | 0.833035   | 0.581371   | -0.518918 | 0.589734  |

|             |               |                           |            |            |           |          |
|-------------|---------------|---------------------------|------------|------------|-----------|----------|
| XLOC_022738 | PLIN2         | chr9:19115758-19127604    | 38.8877    | 27.1398    | -0.518906 | 0.115592 |
| XLOC_017579 | CMBL          | chr5:10277706-10308168    | 18.3938    | 12.838     | -0.5188   | 0.108871 |
| XLOC_012940 | PELI1         | chr2:64319785-64371605    | 1.98096    | 1.38317    | -0.518221 | 0.315938 |
| XLOC_001421 | MTMR9LP       | chr1:32697260-32707311    | 3.23023    | 2.25695    | -0.517264 | 0.412343 |
| XLOC_006394 | SYNE2         | chr14:64319682-64693167   | 2.67159    | 1.86669    | -0.517215 | 0.424678 |
| XLOC_017387 | PCDHGA1,PCDH1 | chr5:140710251-140892548  | 7.79943    | 5.45181    | -0.516635 | 0.268574 |
| XLOC_010641 | ZNF333        | chr19:14800869-14831772   | 1.0386     | 0.72599    | -0.51662  | 0.419619 |
| XLOC_004719 | CLEC2D        | chr12:9822303-9852151     | 0.564289   | 0.394565   | -0.516171 | 0.435859 |
| XLOC_002530 | C10orf11      | chr10:77542518-78317126   | 13.592     | 9.50435    | -0.516098 | 0.265881 |
| XLOC_007193 | GATM-AS1      | chr15:45653321-45672321   | 0.088447   | 0.061855   | -0.515924 | 1        |
| XLOC_015086 | KIF9-AS1      | chr3:47205859-47388306    | 0.329872   | 0.2307     | -0.515888 | 1        |
| XLOC_013351 | PECR          | chr2:216903110-216946539  | 3.41442    | 2.38835    | -0.515625 | 0.325655 |
| XLOC_011653 | SIRT2         | chr19:39369194-39399534   | 38.7815    | 27.137     | -0.515104 | 0.347688 |
| XLOC_007580 | DMXL2         | chr15:51739920-51914967   | 2.08552    | 1.45987    | -0.514569 | 0.173509 |
| XLOC_008008 | AQP8          | chr16:25228284-25240253   | 0.123982   | 0.0868282  | -0.513896 | 1        |
| XLOC_009266 | GPRC5C        | chr17:72427666-72443568   | 0.269725   | 0.188909   | -0.513799 | 1        |
| XLOC_015965 | MSL2          | chr3:135867759-135914688  | 4.8459     | 3.39457    | -0.513534 | 0.169244 |
| XLOC_017545 | SLC9A3        | chr5:473333-524549        | 0.455775   | 0.319307   | -0.513375 | 0.726456 |
| XLOC_016903 | ARSJ          | chr4:114821439-114900878  | 2.01439    | 1.4116     | -0.513016 | 0.272973 |
| XLOC_010603 | ZNF439        | chr19:11976843-11980306   | 1.39539    | 0.978132   | -0.512566 | 0.423783 |
| XLOC_002772 | KNDC1         | chr10:134973970-135039916 | 0.923208   | 0.647383   | -0.512035 | 0.458151 |
| XLOC_010318 | DSC3          | chr18:28570051-28622781   | 0.00203905 | 0.00142989 | -0.511993 | 1        |
| XLOC_009941 | LINC00673     | chr17:70399462-70588943   | 0.37679    | 0.264236   | -0.511935 | 0.723759 |
| XLOC_012321 | LOC728537     | chr2:98286205-98319529    | 1.04538    | 0.733371   | -0.511406 | 0.612746 |
| XLOC_021252 | EFCAB10       | chr7:105172531-105221976  | 0.69335    | 0.486424   | -0.51137  | 0.938441 |
| XLOC_022190 | ZFAT          | chr8:135490030-135725292  | 1.47465    | 1.03489    | -0.510888 | 0.35997  |
| XLOC_002560 | SNCG          | chr10:88718287-88723017   | 0.0802452  | 0.0563348  | -0.510389 | 1        |
| XLOC_015027 | TTC21A        | chr3:39149151-39180394    | 0.290136   | 0.203716   | -0.51017  | 1        |
| XLOC_006093 | KBTBD7        | chr13:41765710-41768702   | 0.248993   | 0.174866   | -0.50986  | 1        |
| XLOC_011055 | SNAR-F        | chr19:51108219-51108342   | 11.7813    | 8.27402    | -0.509844 | 0.824472 |
| XLOC_001566 | FAM151A       | chr1:55013806-55100417    | 0.310151   | 0.217825   | -0.5098   | 1        |
| XLOC_000236 | GMEB1         | chr1:28995239-29042115    | 2.05851    | 1.44588    | -0.509654 | 0.349308 |
| XLOC_017325 | SEC24A        | chr5:133984474-134063601  | 2.2519     | 1.58183    | -0.509548 | 0.207194 |
| XLOC_019125 | PLAGL1        | chr6:144261436-144385735  | 11.6854    | 8.21067    | -0.509137 | 0.171199 |
| XLOC_009462 | ZBTB4         | chr17:7362684-7387568     | 7.7203     | 5.42465    | -0.509127 | 0.140298 |
| XLOC_018948 | B3GAT2        | chr6:71377478-71666788    | 1.39222    | 0.978404   | -0.508885 | 0.869275 |
| XLOC_009989 | UBE2O         | chr17:74385612-74449288   | 9.73684    | 6.84377    | -0.508663 | 0.131526 |
| XLOC_010608 | ZNF788        | chr19:12203077-12225494   | 0.0783746  | 0.0550949  | -0.508467 | 1        |
| XLOC_007219 | TMOD3         | chr15:52121824-52204331   | 5.01131    | 3.52307    | -0.508354 | 0.165955 |
| XLOC_002489 | DDX50         | chr10:70661033-70706603   | 29.187     | 20.5195    | -0.508334 | 0.112314 |
| XLOC_005011 | METTL25       | chr12:82746082-82873016   | 0.633833   | 0.446005   | -0.507043 | 0.91689  |
| XLOC_007682 | LOC283731     | chr15:74418713-74421619   | 0.0298051  | 0.0209735  | -0.506992 | 1        |
| XLOC_011179 | FCAR          | chr19:55385548-55401839   | 0.0128753  | 0.00906195 | -0.506714 | 1        |
| XLOC_011447 | ZNF442        | chr19:12460184-12476475   | 0.452777   | 0.318706   | -0.506576 | 0.620958 |
| XLOC_005837 | USPL1         | chr13:31191829-31233686   | 2.55374    | 1.79757    | -0.506569 | 0.26469  |
| XLOC_021125 | TMEM120A      | chr7:75544419-75623992    | 32.5675    | 22.9257    | -0.506468 | 0.642777 |
| XLOC_008681 | CFDP1         | chr16:75327607-75467387   | 26.0223    | 18.3237    | -0.506041 | 0.153369 |
| XLOC_018367 | PHF3          | chr6:64356430-64424405    | 5.73472    | 4.03831    | -0.505973 | 0.132239 |
| XLOC_005754 | LOC338799     | chr12:122233172-122241390 | 2.40043    | 1.69063    | -0.505731 | 0.531494 |

|             |              |                           |            |            |           |          |
|-------------|--------------|---------------------------|------------|------------|-----------|----------|
| XLOC_005549 | AGAP2        | chr12:58118075-58135944   | 0.503455   | 0.354622   | -0.505579 | 0.911564 |
| XLOC_016491 | BBS12        | chr4:123653856-123666098  | 1.0902     | 0.767918   | -0.505563 | 0.434764 |
| XLOC_007195 | C15orf48     | chr15:45722726-45725647   | 0.155732   | 0.109708   | -0.505396 | 1        |
| XLOC_000424 | INADL        | chr1:62208148-62629591    | 1.75864    | 1.23892    | -0.505371 | 0.204028 |
| XLOC_020745 | LOC407835    | chr7:128766324-128768050  | 0.0451871  | 0.0318357  | -0.505265 | 1        |
| XLOC_016845 | FAM13A       | chr4:89630939-89978346    | 1.51881    | 1.07011    | -0.505177 | 0.297472 |
| XLOC_009227 | LOC729683    | chr17:61777697-61780045   | 0.539975   | 0.380478   | -0.505081 | 0.722238 |
| XLOC_018752 | POU5F1       | chr6:31132113-31138451    | 0.086987   | 0.0613215  | -0.504407 | 1        |
| XLOC_022055 | TPD52        | chr8:80947104-81083836    | 32.7947    | 23.1265    | -0.503914 | 0.121719 |
| XLOC_018070 | FAM8A1       | chr6:17600517-17611950    | 1.43732    | 1.0136     | -0.503889 | 0.334038 |
| XLOC_013014 | LOC100630918 | chr2:85764589-85766009    | 2.09162    | 1.47527    | -0.503639 | 0.550777 |
| XLOC_011486 | DNAJB1       | chr19:14625581-14629201   | 71.0447    | 50.1136    | -0.503523 | 0.128171 |
| XLOC_023489 | ATP7A        | chrX:77166193-77305892    | 0.562277   | 0.396706   | -0.503212 | 0.390341 |
| XLOC_005136 | SIRT4        | chr12:120740123-120751045 | 1.85362    | 1.30781    | -0.503196 | 0.588016 |
| XLOC_002570 | CFL1P1       | chr10:89578069-89605369   | 0.0631064  | 0.0445303  | -0.503    | 1        |
| XLOC_011387 | PRAM1        | chr19:8554939-8567538     | 0.230779   | 0.162865   | -0.502836 | 1        |
| XLOC_009159 | ITGA3        | chr17:48133339-48167849   | 42.2922    | 29.8466    | -0.502824 | 0.125565 |
| XLOC_014587 | TEF          | chr22:41763336-41795332   | 2.36314    | 1.66853    | -0.502124 | 0.318076 |
| XLOC_013915 | HM13-AS1     | chr20:30102240-30161066   | 0.278999   | 0.197039   | -0.501782 | 1        |
| XLOC_015764 | ITIH4        | chr3:52847005-52864717    | 0.357491   | 0.252474   | -0.501771 | 1        |
| XLOC_015806 | SUCLG2       | chr3:67410883-67705038    | 27.4361    | 19.382     | -0.501358 | 0.129159 |
| XLOC_005807 | MIPEPP3      | chr13:21872263-22033508   | 0.422796   | 0.298768   | -0.500937 | 0.960032 |
| XLOC_002566 | FAM22D       | chr10:89117476-89130452   | 0.181928   | 0.128561   | -0.500915 | 1        |
| XLOC_021987 | PCMTD1       | chr8:52730139-52811735    | 2.72364    | 1.92471    | -0.500893 | 0.243499 |
| XLOC_021656 | CA3          | chr8:86351055-86361267    | 0.687138   | 0.485754   | -0.500375 | 0.657627 |
| XLOC_016071 | ZMAT3        | chr3:178735010-178789656  | 3.22738    | 2.28181    | -0.500185 | 0.164535 |
| XLOC_013887 | NAPB         | chr20:23355155-23402156   | 1.77603    | 1.25612    | -0.499681 | 0.333648 |
| XLOC_016064 | PLD1         | chr3:171318194-171528284  | 0.219299   | 0.155222   | -0.498565 | 1        |
| XLOC_002873 | ZNF438       | chr10:31133564-31320866   | 1.35172    | 0.957079   | -0.498089 | 0.462169 |
| XLOC_015237 | ZPLD1        | chr3:102153858-102198685  | 0.018481   | 0.0130895  | -0.497629 | 1        |
| XLOC_004970 | MSRB3        | chr12:65672422-65860687   | 0.497287   | 0.352376   | -0.496961 | 0.531391 |
| XLOC_011823 | LHB          | chr19:49519236-49520347   | 2.39218    | 1.6952     | -0.496875 | 0.771216 |
| XLOC_012814 | ATAD2B       | chr2:23971533-24149936    | 0.401916   | 0.284918   | -0.496346 | 0.455427 |
| XLOC_001796 | MTMR11       | chr1:149900542-149908791  | 2.74296    | 1.94458    | -0.496271 | 0.355674 |
| XLOC_001063 | HLX          | chr1:221052742-221058400  | 0.381353   | 0.270439   | -0.495823 | 0.810133 |
| XLOC_008666 | ZNF821       | chr16:71893582-71918093   | 4.7381     | 3.36029    | -0.495723 | 0.349063 |
| XLOC_018944 | LGSN         | chr6:63985855-64029882    | 0.00263543 | 0.00186946 | -0.495419 | 1        |
| XLOC_015614 | NGLY1        | chr3:25760434-25831530    | 17.5301    | 12.4361    | -0.495298 | 0.143573 |
| XLOC_019141 | RAET1K       | chr6:150319154-150326280  | 1.4954     | 1.06092    | -0.49521  | 0.529456 |
| XLOC_002141 | NUAK2        | chr1:205271190-205290883  | 0.272275   | 0.193182   | -0.495109 | 1        |
| XLOC_007607 | MYO1E        | chr15:59428167-59665071   | 5.67968    | 4.03019    | -0.494961 | 0.155896 |
| XLOC_003042 | PANK1        | chr10:91339253-91405329   | 0.293937   | 0.208633   | -0.494544 | 1        |
| XLOC_011217 | ZNF805       | chr19:57752052-57774106   | 1.18019    | 0.837693   | -0.494524 | 0.260371 |
| XLOC_014558 | KDEL3        | chr22:38864082-38902345   | 14.8615    | 10.5501    | -0.494324 | 0.8626   |
| XLOC_007184 | CTDSPL2      | chr15:44719578-44819429   | 2.82955    | 2.00882    | -0.494222 | 0.227562 |
| XLOC_006270 | TMEM253      | chr14:21558204-21572863   | 0.531104   | 0.377133   | -0.493922 | 0.96692  |
| XLOC_015691 | COL7A1       | chr3:48601505-48632593    | 0.598569   | 0.425056   | -0.493864 | 0.842605 |
| XLOC_000980 | LOC148709    | chr1:202830881-202844369  | 0.189312   | 0.134481   | -0.49336  | 1        |
| XLOC_022316 | ANKRD18B     | chr9:33524410-33573001    | 0.00355659 | 0.0025266  | -0.493298 | 1        |

|             |              |                           |            |            |           |          |
|-------------|--------------|---------------------------|------------|------------|-----------|----------|
| XLOC_023923 | ZMYM3        | chrX:70430034-70948962    | 7.28454    | 5.1759     | -0.493028 | 0.905011 |
| XLOC_022437 | ANKRD19P     | chr9:95571892-95600739    | 0.806582   | 0.573142   | -0.492928 | 0.608991 |
| XLOC_020516 | CCT6P1       | chr7:65111923-65235797    | 3.30439    | 2.34881    | -0.492456 | 0.384698 |
| XLOC_008145 | GPR56        | chr16:57653909-57698944   | 0.0422518  | 0.0300372  | -0.492263 | 1        |
| XLOC_021682 | PLEKHF2      | chr8:96145948-96168913    | 6.63261    | 4.71642    | -0.491887 | 0.201416 |
| XLOC_012883 | THUMPD2      | chr2:39963199-40006416    | 9.47502    | 6.7391     | -0.491573 | 0.196771 |
| XLOC_012365 | CCDC138      | chr2:109403218-109492847  | 1.08152    | 0.769434   | -0.491184 | 0.522408 |
| XLOC_021270 | C7orf60      | chr7:112459201-112579932  | 3.5532     | 2.52794    | -0.491155 | 0.234549 |
| XLOC_013241 | ATF2         | chr2:175936977-176032934  | 4.09563    | 2.91502    | -0.490578 | 0.204123 |
| XLOC_021275 | ST7-AS1      | chr7:116592500-116870075  | 4.94663    | 3.52074    | -0.490568 | 0.832978 |
| XLOC_022846 | ZNF658       | chr9:40771401-40792112    | 0.235937   | 0.167958   | -0.490305 | 1        |
| XLOC_010605 | ZNF700       | chr19:12035882-12061588   | 3.51289    | 2.50152    | -0.48985  | 0.28126  |
| XLOC_015370 | SLC25A36     | chr3:140660661-140698785  | 14.9841    | 10.673     | -0.489468 | 0.138886 |
| XLOC_008314 | RGS11        | chr16:318309-325914       | 13.2252    | 9.42582    | -0.488595 | 0.2196   |
| XLOC_013927 | SNTA1        | chr20:31995762-32031698   | 15.0774    | 10.7495    | -0.488118 | 0.227385 |
| XLOC_006197 | GPR183       | chr13:99848627-100058554  | 0.00901928 | 0.00643091 | -0.48799  | 1        |
| XLOC_009563 | LYRM9        | chr17:26205339-26220409   | 3.0314     | 2.16152    | -0.487937 | 0.499226 |
| XLOC_007621 | DAPK2        | chr15:64199234-64338521   | 0.739292   | 0.527259   | -0.487634 | 0.604499 |
| XLOC_000846 | RGS4         | chr1:163038395-163046592  | 10.4933    | 7.48437    | -0.487517 | 0.158909 |
| XLOC_010424 | GZMM         | chr19:544033-549920       | 0.287094   | 0.204788   | -0.487395 | 1        |
| XLOC_022961 | ZNF510       | chr9:99518146-99540328    | 1.63425    | 1.1662     | -0.486809 | 0.289507 |
| XLOC_007205 | GALK2        | chr15:49447975-49913118   | 9.71129    | 6.93187    | -0.486417 | 0.173695 |
| XLOC_015374 | RASA2        | chr3:141205925-141331197  | 0.593857   | 0.42393    | -0.486291 | 0.601696 |
| XLOC_001497 | SLC2A1       | chr1:43391045-43449029    | 89.4849    | 63.8804    | -0.486271 | 0.139366 |
| XLOC_004561 | LOC100131626 | chr11:118230295-118289530 | 0.0566076  | 0.0404115  | -0.48623  | 1        |
| XLOC_011462 | RTBDN        | chr19:12936290-12946242   | 0.792742   | 0.566038   | -0.485953 | 0.781103 |
| XLOC_022878 | KLF9         | chr9:72999512-73029573    | 1.26157    | 0.900954   | -0.485697 | 0.398125 |
| XLOC_013374 | ABCB6        | chr2:220074487-220083712  | 9.95282    | 7.1107     | -0.485113 | 0.244537 |
| XLOC_017480 | FGF18        | chr5:170846666-170884630  | 0.211512   | 0.151134   | -0.484918 | 1        |
| XLOC_010914 | ZNF284       | chr19:44576296-44591623   | 0.738776   | 0.527919   | -0.48482  | 0.59237  |
| XLOC_016249 | BST1         | chr4:15704572-15733796    | 0.442867   | 0.316496   | -0.484684 | 0.781034 |
| XLOC_007177 | MAP1A        | chr15:43663312-43910998   | 0.137235   | 0.0980761  | -0.484675 | 1        |
| XLOC_014550 | GCAT         | chr22:38203911-38213183   | 109.791    | 78.4663    | -0.484615 | 0.15255  |
| XLOC_011999 | ZNF417       | chr19:58417141-58427978   | 0.486393   | 0.347629   | -0.484571 | 0.527718 |
| XLOC_010916 | ZNF225       | chr19:44617547-44637255   | 0.59567    | 0.42578    | -0.484406 | 0.581797 |
| XLOC_008885 | NT5M         | chr17:17206679-17250977   | 9.9987     | 7.14839    | -0.484121 | 0.334498 |
| XLOC_003301 | DNHD1        | chr11:6518525-6593254     | 0.819319   | 0.585758   | -0.484121 | 0.626566 |
| XLOC_008610 | CCDC79       | chr16:66788878-66835523   | 0.00560309 | 0.00400599 | -0.484063 | 1        |
| XLOC_010495 | EBI3         | chr19:4229539-4237524     | 0.409221   | 0.2926     | -0.483952 | 0.854567 |
| XLOC_010990 | ZNF114       | chr19:48774653-48790863   | 7.24313    | 5.18054    | -0.48351  | 0.247848 |
| XLOC_012139 | GPATCH11     | chr2:37311593-37323738    | 1.14707    | 0.820561   | -0.483265 | 0.616012 |
| XLOC_005360 | BHLHE41      | chr12:26272958-26278003   | 2.80096    | 2.00386    | -0.483138 | 0.321184 |
| XLOC_006329 | MIPOL1       | chr14:37667117-38020464   | 0.342999   | 0.245433   | -0.482873 | 1        |
| XLOC_013997 | WFDC10B      | chr20:44313289-44337456   | 0.192255   | 0.137619   | -0.482344 | 1        |
| XLOC_017792 | RAPGEF6      | chr5:130759613-130970929  | 1.03393    | 0.740295   | -0.481967 | 0.307517 |
| XLOC_007834 | RHBDL1       | chr16:726074-728267       | 2.17519    | 1.55833    | -0.48114  | 0.642161 |
| XLOC_004176 | C1QTNF4      | chr11:47611215-47615961   | 0.731552   | 0.5241     | -0.481119 | 0.852189 |
| XLOC_006832 | C14orf37     | chr14:58470807-58618847   | 1.23949    | 0.888035   | -0.48106  | 0.462752 |
| XLOC_002954 | RHOBTB1      | chr10:62629197-62761198   | 0.476119   | 0.34118    | -0.480786 | 0.571989 |

|             |              |                           |            |            |           |          |
|-------------|--------------|---------------------------|------------|------------|-----------|----------|
| XLOC_003326 | WEE1         | chr11:9595227-9611313     | 25.4263    | 18.2207    | -0.480743 | 0.152767 |
| XLOC_001683 | SLC25A24     | chr1:108677343-108742980  | 4.48332    | 3.2131     | -0.480603 | 0.233004 |
| XLOC_011593 | ZNF599       | chr19:35248978-35264134   | 0.375911   | 0.269409   | -0.480594 | 0.665303 |
| XLOC_000984 | BTG2         | chr1:203274663-203278729  | 10.1817    | 7.2971     | -0.480581 | 0.214827 |
| XLOC_014436 | HIC2         | chr22:21771692-21805750   | 1.6528     | 1.18471    | -0.480382 | 0.354262 |
| XLOC_015951 | LOC339874    | chr3:130745693-131100319  | 0.219327   | 0.157247   | -0.480052 | 1        |
| XLOC_006994 | AHNAK2       | chr14:105403590-105444694 | 1.60703    | 1.15219    | -0.480015 | 0.188723 |
| XLOC_011094 | VN1R2        | chr19:53761544-53762855   | 0.026096   | 0.0187161  | -0.479547 | 1        |
| XLOC_020416 | CREB5        | chr7:28338939-28865511    | 2.67245    | 1.91773    | -0.478765 | 0.215447 |
| XLOC_016823 | THAP9-AS1    | chr4:83814604-83841284    | 13.2913    | 9.54031    | -0.478372 | 0.227562 |
| XLOC_016444 | DAPP1        | chr4:100737980-100791346  | 0.00511339 | 0.00367034 | -0.478365 | 1        |
| XLOC_021284 | CADPS2       | chr7:121958477-122526813  | 0.657194   | 0.471843   | -0.478012 | 0.494479 |
| XLOC_011819 | HSD17B14     | chr19:49316273-49339934   | 26.4794    | 19.0168    | -0.477591 | 0.226046 |
| XLOC_007263 | SMAD3        | chr15:67358194-67487533   | 4.04698    | 2.90672    | -0.477456 | 0.206918 |
| XLOC_010823 | ZNF527       | chr19:37862058-37883966   | 0.97461    | 0.700045   | -0.477378 | 0.405811 |
| XLOC_020370 | LOC729852    | chr7:7676574-7918851      | 2.67619    | 1.92227    | -0.477365 | 0.720043 |
| XLOC_007264 | IQCH         | chr15:67493012-67819641   | 0.8858     | 0.6364     | -0.477048 | 0.945336 |
| XLOC_003836 | SIDT2        | chr11:117049938-117075508 | 3.74972    | 2.69451    | -0.476761 | 0.767959 |
| XLOC_013667 | LOC100505783 | chr20:42839599-42854667   | 1.2155     | 0.873635   | -0.476445 | 0.626914 |
| XLOC_022898 | FRMD3        | chr9:85857904-86153348    | 0.0309067  | 0.0222148  | -0.4764   | 1        |
| XLOC_007745 | LOC283693    | chr15:83394649-83408532   | 0.0404941  | 0.029106   | -0.476396 | 1        |
| XLOC_012561 | C2orf88      | chr2:191002485-191068210  | 0.995777   | 0.715842   | -0.476182 | 0.436399 |
| XLOC_003173 | IKZF5        | chr10:124750321-124768366 | 3.70331    | 2.66292    | -0.475806 | 0.226032 |
| XLOC_009593 | SSH2         | chr17:27952964-28435470   | 0.96837    | 0.696379   | -0.475684 | 0.322788 |
| XLOC_007260 | MAP2K1       | chr15:66679210-66790146   | 47.7516    | 34.3431    | -0.475528 | 0.172285 |
| XLOC_018023 | FOXC1        | chr6:1610680-1614129      | 0.00678253 | 0.0048784  | -0.475416 | 1        |
| XLOC_003440 | DDB2         | chr11:47236492-47260769   | 25.8318    | 18.5799    | -0.475403 | 0.190177 |
| XLOC_020976 | HOXA3        | chr7:27145808-27166639    | 0.634729   | 0.456621   | -0.475143 | 0.685036 |
| XLOC_007492 | GOLGA8B      | chr15:34817483-34875771   | 5.08434    | 3.65842    | -0.474839 | 0.236701 |
| XLOC_021628 | XKR9         | chr8:71581599-71648177    | 0.147467   | 0.106117   | -0.47473  | 1        |
| XLOC_022287 | SNAPC3       | chr9:15422781-15461627    | 2.63506    | 1.89747    | -0.473759 | 0.347779 |
| XLOC_002378 | SPAG6        | chr10:22634373-22706539   | 0.00630971 | 0.00454425 | -0.47353  | 1        |
| XLOC_005371 | CAPRIN2      | chr12:30862485-30907448   | 22.2824    | 16.0506    | -0.473276 | 0.15831  |
| XLOC_008901 | TRIM16L      | chr17:18625401-18639431   | 5.51747    | 3.97456    | -0.473211 | 0.326758 |
| XLOC_018787 | LOC100507547 | chr6:32120578-32145888    | 2.69467    | 1.94155    | -0.472897 | 0.940466 |
| XLOC_013209 | COBLL1       | chr2:165541257-165697928  | 0.0950707  | 0.068519   | -0.472498 | 1        |
| XLOC_004140 | ELF5         | chr11:34500341-34535347   | 0.00749716 | 0.00540347 | -0.47246  | 1        |
| XLOC_004477 | FAM76B       | chr11:95502105-95522954   | 1.74679    | 1.25901    | -0.472415 | 0.361658 |
| XLOC_001299 | FBXO42       | chr1:16576558-16678948    | 7.93306    | 5.71787    | -0.4724   | 0.234263 |
| XLOC_002887 | ZNF25        | chr10:38238794-38265453   | 1.72432    | 1.24296    | -0.472255 | 0.360418 |
| XLOC_004860 | KRT86        | chr12:52695648-52702947   | 0.0802082  | 0.0578216  | -0.472141 | 1        |
| XLOC_020685 | MLL5         | chr7:104654636-104754532  | 5.16734    | 3.72757    | -0.471186 | 0.181992 |
| XLOC_020512 | ZNF273       | chr7:64363619-64391955    | 1.14808    | 0.828292   | -0.471018 | 0.426107 |
| XLOC_007668 | MYO9A        | chr15:72118360-72433311   | 0.226848   | 0.163687   | -0.470786 | 1        |
| XLOC_006743 | CBLN3        | chr14:24895739-24898731   | 0.284662   | 0.205407   | -0.470763 | 1        |
| XLOC_017766 | NREP         | chr5:110834021-111353003  | 0.0434422  | 0.0313506  | -0.470606 | 1        |
| XLOC_016870 | MANBA        | chr4:103552642-103682151  | 10.3949    | 7.50216    | -0.470499 | 0.203478 |
| XLOC_006231 | DCUN1D2      | chr13:114110133-114145023 | 3.56873    | 2.57569    | -0.470451 | 0.343792 |
| XLOC_000045 | SMIM1        | chr1:3689351-3692546      | 5.60939    | 4.04879    | -0.470354 | 0.663419 |

|             |               |                           |            |            |           |          |
|-------------|---------------|---------------------------|------------|------------|-----------|----------|
| XLOC_014869 | ARFGAP3       | chr22:43192531-43253408   | 6.67077    | 4.81498    | -0.470325 | 0.260371 |
| XLOC_005831 | PDX1          | chr13:28494167-28500451   | 2.32429    | 1.67793    | -0.470111 | 0.539268 |
| XLOC_016902 | CAMK2D        | chr4:114372187-114683083  | 3.97454    | 2.86968    | -0.469896 | 0.229368 |
| XLOC_001301 | CROCCP3       | chr1:16793930-16819196    | 0.350192   | 0.252925   | -0.469433 | 1        |
| XLOC_012763 | SH3YL1        | chr2:218135-264068        | 6.51489    | 4.70697    | -0.468942 | 0.307111 |
| XLOC_003389 | DEPDC7        | chr11:33037409-33055128   | 1.69372    | 1.2241     | -0.46847  | 0.517375 |
| XLOC_003407 | RAG1          | chr11:36589562-36601310   | 0.0631667  | 0.0456538  | -0.468431 | 1        |
| XLOC_008512 | LOC613037     | chr16:30234349-30256932   | 4.69182    | 3.39168    | -0.468149 | 0.337548 |
| XLOC_017740 | FAM172A       | chr5:92919042-93447404    | 2.23568    | 1.61639    | -0.467934 | 0.57     |
| XLOC_005239 | VAMP1         | chr12:6561176-6579843     | 3.72587    | 2.69388    | -0.467894 | 0.633706 |
| XLOC_005718 | TBX3          | chr12:115108058-115121969 | 1.73965    | 1.25864    | -0.46693  | 0.424678 |
| XLOC_004882 | HOXC9         | chr12:54393876-54397120   | 1.48143    | 1.07193    | -0.466784 | 0.679486 |
| XLOC_002733 | PLEKHA1       | chr10:124134093-124191871 | 3.82922    | 2.77141    | -0.466432 | 0.267205 |
| XLOC_002196 | DUSP10        | chr1:221874763-221915516  | 0.889484   | 0.643867   | -0.466205 | 0.651571 |
| XLOC_004923 | ZC3H10        | chr12:56512029-56516278   | 3.15027    | 2.28096    | -0.465835 | 0.439356 |
| XLOC_022984 | GRIN3A        | chr9:104331633-104500862  | 0.0532812  | 0.0386145  | -0.464486 | 1        |
| XLOC_012973 | PAIP2B        | chr2:71409867-71454233    | 2.05138    | 1.48679    | -0.464398 | 0.29502  |
| XLOC_023935 | FAM226A       | chrX:72161567-72163589    | 0.481388   | 0.34893    | -0.464264 | 0.736361 |
| XLOC_011478 | PALM3         | chr19:14164178-14169971   | 13.8671    | 10.0519    | -0.464199 | 0.218676 |
| XLOC_015251 | PHLDB2,PLCXD2 | chr3:111393522-111695364  | 0.58603    | 0.424853   | -0.464011 | 0.485379 |
| XLOC_016482 | METTL14       | chr4:119606573-119632077  | 3.07122    | 2.22666    | -0.463934 | 0.380666 |
| XLOC_008382 | TIGD7         | chr16:3348807-3368576     | 0.126338   | 0.091636   | -0.4633   | 1        |
| XLOC_008810 | ACAP1         | chr17:7239847-7254793     | 0.613426   | 0.445035   | -0.462972 | 0.698819 |
| XLOC_014089 | ZNF512B       | chr20:62571181-62601223   | 0.0469131  | 0.0340425  | -0.462654 | 1        |
| XLOC_015453 | KCNMB2-IT1    | chr3:178136988-178175093  | 0.0354923  | 0.0257552  | -0.462643 | 1        |
| XLOC_014714 | C22orf43      | chr22:23950638-23974508   | 0.186603   | 0.135414   | -0.462594 | 1        |
| XLOC_021693 | OSR2          | chr8:99956630-99964326    | 10.0279    | 7.27784    | -0.46243  | 0.343792 |
| XLOC_003801 | ATM           | chr11:108093558-108239826 | 1.48487    | 1.07773    | -0.462337 | 0.23883  |
| XLOC_021321 | LOC646329     | chr7:130565750-130598069  | 23.3882    | 16.979     | -0.462029 | 0.179759 |
| XLOC_000523 | PTBP2         | chr1:97187174-97280605    | 3.64074    | 2.64326    | -0.461915 | 0.307111 |
| XLOC_020670 | CUX1          | chr7:101459183-101927250  | 26.2965    | 19.092     | -0.461906 | 0.364942 |
| XLOC_002277 | CEP170        | chr1:243287729-243418708  | 0.00190771 | 0.00138513 | -0.461821 | 1        |
| XLOC_011574 | ZNF91         | chr19:23540497-23578269   | 1.04706    | 0.76068    | -0.460984 | 0.409203 |
| XLOC_001413 | FABP3         | chr1:31838099-31845923    | 0.0853518  | 0.0620233  | -0.460612 | 1        |
| XLOC_011249 | ZNF324B       | chr19:58962970-58969199   | 2.67111    | 1.94168    | -0.460134 | 0.461109 |
| XLOC_017760 | EFNA5         | chr5:106712589-107006596  | 0.949627   | 0.690351   | -0.46003  | 0.472023 |
| XLOC_013169 | DARS          | chr2:136664253-136743222  | 61.8936    | 44.9952    | -0.460021 | 0.176426 |
| XLOC_008546 | SLC6A10P      | chr16:32888796-32896463   | 0.0373454  | 0.0271503  | -0.459962 | 1        |
| XLOC_000569 | AMPD2         | chr1:110162434-110174677  | 38.7625    | 28.1837    | -0.459801 | 0.186094 |
| XLOC_001985 | C1orf110      | chr1:162824086-162838605  | 0.168104   | 0.122265   | -0.459342 | 1        |
| XLOC_008198 | HAS3          | chr16:69139466-69166493   | 1.35586    | 0.986223   | -0.459223 | 0.928548 |
| XLOC_003105 | FGF8          | chr10:103529886-103540126 | 1.08515    | 0.789473   | -0.458934 | 0.773721 |
| XLOC_000336 | PTPRF         | chr1:43996546-44089343    | 24.2236    | 17.6237    | -0.458892 | 0.177166 |
| XLOC_017252 | C5orf30       | chr5:102594441-102614361  | 4.83575    | 3.51875    | -0.458678 | 0.274988 |
| XLOC_002747 | LHPP          | chr10:126150340-126302710 | 9.78206    | 7.1185     | -0.458564 | 0.347606 |
| XLOC_017759 | NUDT12        | chr5:102884555-102898490  | 3.29165    | 2.39556    | -0.458448 | 0.30074  |
| XLOC_014627 | PPARA         | chr22:46546498-46639653   | 1.10288    | 0.803047   | -0.457716 | 0.343199 |
| XLOC_017739 | FLJ42709      | chr5:92745064-92917003    | 0.432852   | 0.315257   | -0.457345 | 0.796752 |
| XLOC_023127 | AK8           | chr9:135600964-135754198  | 1.09068    | 0.794395   | -0.457298 | 0.635064 |

|             |              |                           |            |            |           |          |
|-------------|--------------|---------------------------|------------|------------|-----------|----------|
| XLOC_007817 | ARHGDIG      | chr16:330605-333003       | 0.561619   | 0.409058   | -0.457286 | 0.851639 |
| XLOC_017509 | FGFR4        | chr5:176513920-176525126  | 13.7033    | 9.9864     | -0.456488 | 0.243499 |
| XLOC_011453 | MAN2B1       | chr19:12757321-12777591   | 27.8977    | 20.3402    | -0.455807 | 0.193285 |
| XLOC_013040 | ZNF514       | chr2:95813399-95825263    | 1.34329    | 0.979651   | -0.455428 | 0.480199 |
| XLOC_013797 | OPRL1        | chr20:62711470-62731996   | 2.25962    | 1.64798    | -0.45538  | 0.464778 |
| XLOC_010881 | BCKDHA       | chr19:41903693-41930910   | 113.265    | 82.6133    | -0.455251 | 0.199834 |
| XLOC_011294 | JSRP1        | chr19:2252249-2256422     | 33.3912    | 24.355     | -0.455247 | 0.30248  |
| XLOC_007398 | SEMA4B       | chr15:90728151-90772892   | 13.1453    | 9.58803    | -0.455241 | 0.205834 |
| XLOC_007779 | IDH2         | chr15:90627211-90645708   | 57.4657    | 41.9219    | -0.454998 | 0.197245 |
| XLOC_010728 | ZNF493       | chr19:21579920-21610296   | 1.07297    | 0.783031   | -0.454464 | 0.703227 |
| XLOC_000359 | LOC400752    | chr1:45769581-45771291    | 0.773456   | 0.564482   | -0.454393 | 0.722089 |
| XLOC_006106 | SLC25A30     | chr13:45967453-45992516   | 0.693812   | 0.506499   | -0.453986 | 0.576342 |
| XLOC_016851 | TSPAN5       | chr4:99391517-99579812    | 3.99568    | 2.91712    | -0.453897 | 0.343762 |
| XLOC_006410 | PLEKHH1      | chr14:68000007-68067017   | 2.15967    | 1.57682    | -0.453794 | 0.703975 |
| XLOC_011446 | ZNF563       | chr19:12428303-12444534   | 0.925918   | 0.676146   | -0.45355  | 0.565791 |
| XLOC_011434 | EPOR         | chr19:11487880-11495018   | 6.2078     | 4.53492    | -0.453006 | 0.355674 |
| XLOC_005357 | IFLTD1       | chr12:25629015-25801496   | 0.012535   | 0.00915721 | -0.452983 | 1        |
| XLOC_003418 | ACCS         | chr11:44087728-44105569   | 1.57618    | 1.15149    | -0.45293  | 0.597564 |
| XLOC_010019 | LOC100294362 | chr17:78234659-78411884   | 0.13414    | 0.0979988  | -0.4529   | 1        |
| XLOC_016926 | ANKRD50      | chr4:125585203-125633887  | 0.974892   | 0.712241   | -0.452876 | 0.367028 |
| XLOC_011666 | EID2B        | chr19:40021629-40023494   | 2.36978    | 1.73133    | -0.452871 | 0.532954 |
| XLOC_002947 | IPMK         | chr10:59951277-60027694   | 1.86784    | 1.36463    | -0.452863 | 0.304304 |
| XLOC_003847 | MLL          | chr11:118307204-118397539 | 0.964678   | 0.704973   | -0.452479 | 0.28265  |
| XLOC_010275 | MYOM1        | chr18:3066804-3220106     | 0.129287   | 0.094521   | -0.451868 | 1        |
| XLOC_005482 | LOC283335    | chr12:53436972-53473204   | 0.483958   | 0.353895   | -0.451559 | 0.955124 |
| XLOC_013666 | TOX2         | chr20:42543491-42698254   | 11.651     | 8.52419    | -0.450826 | 0.276029 |
| XLOC_010918 | ZNF226       | chr19:44669214-44681838   | 4.95454    | 3.62654    | -0.450159 | 0.523431 |
| XLOC_005539 | MYO1A        | chr12:57422300-57444549   | 0.0574095  | 0.0420271  | -0.44997  | 1        |
| XLOC_022135 | ABRA         | chr8:107771710-107782472  | 0.00520017 | 0.00380706 | -0.449882 | 1        |
| XLOC_023281 | REPS2        | chrX:16964813-17171403    | 0.37522    | 0.274726   | -0.449742 | 0.552302 |
| XLOC_023129 | RALGDS       | chr9:135973106-136024607  | 50.1253    | 36.7076    | -0.449459 | 0.18775  |
| XLOC_015738 | CACNA2D2     | chr3:50400230-50540892    | 0.183856   | 0.134653   | -0.449329 | 1        |
| XLOC_001885 | THBS3        | chr1:155165378-155177772  | 2.11157    | 1.54658    | -0.449237 | 0.452215 |
| XLOC_022156 | HAS2         | chr8:122625270-122657564  | 0.359626   | 0.263493   | -0.448731 | 1        |
| XLOC_011355 | SLC25A41     | chr19:6426047-6433790     | 1.2423     | 0.910932   | -0.447603 | 0.684734 |
| XLOC_009930 | C17orf58     | chr17:65987216-65989765   | 17.8426    | 13.084     | -0.447524 | 0.267888 |
| XLOC_005634 | FGD6         | chr12:95470524-95611240   | 0.0863894  | 0.0633564  | -0.447364 | 1        |
| XLOC_013480 | FAM110A      | chr20:814355-826922       | 10.3059    | 7.55904    | -0.447196 | 0.40075  |
| XLOC_008648 | PDXDC2P      | chr16:70010201-70099851   | 2.67018    | 1.95924    | -0.446639 | 0.360418 |
| XLOC_010472 | ZNF554       | chr19:2819871-2836733     | 1.33057    | 0.976312   | -0.446632 | 0.50443  |
| XLOC_007555 | LOC645212    | chr15:44826702-44829121   | 4.48964    | 3.29451    | -0.446537 | 0.40838  |
| XLOC_010726 | ZNF431       | chr19:21324839-21368805   | 2.08377    | 1.52908    | -0.446529 | 0.357338 |
| XLOC_002264 | LGALS8-AS1   | chr1:236681513-236767841  | 0.582953   | 0.427797   | -0.446451 | 0.970185 |
| XLOC_013618 | MAP1LC3A     | chr20:33134687-33148149   | 0.115828   | 0.0850024  | -0.446404 | 1        |
| XLOC_001341 | WNT4         | chr1:22443797-22469519    | 0.361807   | 0.265531   | -0.44634  | 1        |
| XLOC_000434 | ROR1         | chr1:64239689-64647179    | 0.0653476  | 0.0479701  | -0.445999 | 1        |
| XLOC_007656 | CALML4       | chr15:68483042-68498448   | 2.03241    | 1.49211    | -0.445843 | 0.356798 |
| XLOC_017875 | PRELID2      | chr5:145138581-145214899  | 6.5212     | 4.78849    | -0.445569 | 0.325989 |
| XLOC_012564 | NAB1         | chr2:191513847-191557492  | 4.82344    | 3.54216    | -0.445433 | 0.247052 |

|             |           |                           |           |           |           |          |
|-------------|-----------|---------------------------|-----------|-----------|-----------|----------|
| XLOC_013716 | LOC284751 | chr20:48909256-48931456   | 0.363563  | 0.267078  | -0.444942 | 1        |
| XLOC_016407 | THAP9     | chr4:83814604-83841284    | 0.925827  | 0.680288  | -0.444597 | 0.831834 |
| XLOC_002752 | C10orf137 | chr10:127408083-127452712 | 1.76627   | 1.29788   | -0.444546 | 0.407744 |
| XLOC_020837 | ZNF398    | chr7:148823507-148880118  | 3.09996   | 2.27799   | -0.444489 | 0.296434 |
| XLOC_015309 | CHST13    | chr3:126243130-126262134  | 0.648937  | 0.476886  | -0.444434 | 0.832563 |
| XLOC_023061 | ZBTB6     | chr9:125670334-125675607  | 3.02598   | 2.22432   | -0.444036 | 0.321184 |
| XLOC_002737 | DMBT1     | chr10:124320180-124403252 | 0.0652431 | 0.0479596 | -0.444007 | 1        |
| XLOC_012659 | ANKZF1    | chr2:220094478-220101391  | 40.053    | 29.449    | -0.44369  | 0.217777 |
| XLOC_018698 | ZNF184    | chr6:27418520-27440897    | 1.98554   | 1.46002   | -0.44354  | 0.446894 |
| XLOC_011811 | DBP       | chr19:49133816-49140639   | 14.815    | 10.8965   | -0.443195 | 0.382784 |
| XLOC_005870 | DGKH      | chr13:42614171-42803891   | 0.320003  | 0.235419  | -0.442854 | 1        |
| XLOC_009850 | TOB1      | chr17:48939586-48945732   | 11.1694   | 8.21958   | -0.442419 | 0.283682 |
| XLOC_005970 | CLYBL     | chr13:100258918-100549388 | 0.625051  | 0.459975  | -0.442419 | 0.569689 |
| XLOC_014318 | CBR3-AS1  | chr21:37504064-37528606   | 0.768091  | 0.565303  | -0.442253 | 0.938489 |
| XLOC_014500 | MTMR3     | chr22:30279157-30426857   | 4.41763   | 3.25149   | -0.44217  | 0.227684 |
| XLOC_000382 | LINC00853 | chr1:47644921-47646011    | 1.75918   | 1.29512   | -0.441813 | 0.765218 |
| XLOC_007231 | FAM63B    | chr15:59063392-59149734   | 0.429035  | 0.315904  | -0.44161  | 0.61138  |
| XLOC_000753 | EFNA1     | chr1:155100348-155107386  | 20.0247   | 14.7488   | -0.441182 | 0.249473 |
| XLOC_008376 | HCFC1R1   | chr16:3072625-3077756     | 358.34    | 263.995   | -0.440816 | 0.50443  |
| XLOC_007150 | GCHFR     | chr15:41056284-41059911   | 71.7001   | 52.8271   | -0.440695 | 0.268716 |
| XLOC_021686 | CPQ       | chr8:97657498-98155722    | 7.92871   | 5.84182   | -0.440668 | 0.324946 |
| XLOC_000505 | BTBD8     | chr1:92545861-92613401    | 0.0789642 | 0.0581805 | -0.440663 | 1        |
| XLOC_014297 | TCP10L    | chr21:33947150-33957845   | 0.660334  | 0.486551  | -0.440605 | 0.689784 |
| XLOC_014492 | EMID1     | chr22:29601900-29655586   | 8.56315   | 6.31088   | -0.440301 | 0.371307 |
| XLOC_007990 | SMG1P1    | chr16:22430866-22503541   | 0.0650761 | 0.0479615 | -0.440251 | 1        |
| XLOC_002605 | PLCE1     | chr10:95753745-96088148   | 0.0563741 | 0.0415487 | -0.440229 | 1        |
| XLOC_021388 | ZNF767    | chr7:149244244-149321881  | 2.18521   | 1.6111    | -0.439726 | 0.500957 |
| XLOC_022835 | ZBTB5     | chr9:37438099-37465407    | 2.61304   | 1.92678   | -0.439539 | 0.334498 |
| XLOC_006396 | AKAP5     | chr14:64932216-64941221   | 0.128395  | 0.0946776 | -0.439497 | 1        |
| XLOC_010609 | ZNF136    | chr19:12273871-12300064   | 1.17835   | 0.869073  | -0.439221 | 0.523539 |
| XLOC_013324 | MDH1B     | chr2:207602488-207630050  | 0.283665  | 0.209217  | -0.439188 | 1        |
| XLOC_021996 | TMEM68    | chr8:56651319-56738005    | 9.06188   | 6.68425   | -0.439045 | 0.599023 |
| XLOC_009836 | FAM117A   | chr17:47787686-47841518   | 11.2617   | 8.3075    | -0.438941 | 0.293297 |
| XLOC_017079 | ANKRD33B  | chr5:10564434-10657928    | 1.67004   | 1.23199   | -0.438895 | 0.348299 |
| XLOC_006050 | PAN3-AS1  | chr13:28710979-28869475   | 0.777623  | 0.573687  | -0.438806 | 0.935245 |
| XLOC_006683 | TEP1      | chr14:20833825-20881579   | 1.13822   | 0.839799  | -0.438657 | 0.355674 |
| XLOC_007731 | STARD5    | chr15:81489218-81616524   | 1.50296   | 1.10895   | -0.438617 | 0.691843 |
| XLOC_016986 | MARCH1    | chr4:164445449-165304407  | 0.163005  | 0.120287  | -0.43843  | 1        |
| XLOC_001366 | RHCE      | chr1:25664788-25747363    | 0.438442  | 0.323578  | -0.438272 | 0.961459 |
| XLOC_006355 | PTGER2    | chr14:52781015-52795322   | 0.0238678 | 0.017615  | -0.438263 | 1        |
| XLOC_012165 | EPAS1     | chr2:46524540-46613842    | 2.5607    | 1.8899    | -0.43823  | 0.374985 |
| XLOC_020357 | OCM       | chr7:5920428-5925994      | 0.178205  | 0.131529  | -0.438159 | 1        |
| XLOC_013233 | MLK7-AS1  | chr2:173940564-174146764  | 0.0430123 | 0.0317509 | -0.437952 | 1        |
| XLOC_018726 | GABBR1    | chr6:29570004-29600962    | 4.08039   | 3.01275   | -0.437624 | 0.358432 |
| XLOC_009668 | GSDMB     | chr17:38060847-38074903   | 1.74507   | 1.28856   | -0.437523 | 0.594489 |
| XLOC_019078 | MED23     | chr6:131894343-131949379  | 2.08295   | 1.53828   | -0.437306 | 0.371609 |
| XLOC_020333 | CYP2W1    | chr7:1022834-1029276      | 0.0490678 | 0.0362385 | -0.437253 | 1        |
| XLOC_006835 | GPR135    | chr14:59930239-59932059   | 0.306417  | 0.226315  | -0.437162 | 1        |
| XLOC_008521 | ZNF764    | chr16:30565084-30569642   | 3.45348   | 2.55078   | -0.437114 | 0.464856 |



|             |               |                           |            |            |           |          |
|-------------|---------------|---------------------------|------------|------------|-----------|----------|
| XLOC_002826 | ACBD7         | chr10:15117473-15130775   | 1.61536    | 1.19339    | -0.436785 | 0.470928 |
| XLOC_015983 | GK5           | chr3:141876368-141944449  | 0.719762   | 0.531762   | -0.43674  | 0.413974 |
| XLOC_008536 | PRSS36        | chr16:31150246-31161415   | 0.539572   | 0.398688   | -0.436555 | 0.74538  |
| XLOC_011711 | CEACAM8       | chr19:42901299-43156507   | 0.00712138 | 0.00526208 | -0.436524 | 1        |
| XLOC_008292 | CDH15         | chr16:89238162-89261900   | 0.783465   | 0.578925   | -0.436493 | 0.710632 |
| XLOC_008938 | SPAG5-AS1     | chr17:26926150-26972177   | 0.399758   | 0.295398   | -0.43647  | 0.967458 |
| XLOC_017793 | FNIP1         | chr5:130977406-131132756  | 6.15072    | 4.54506    | -0.436454 | 0.239441 |
| XLOC_001866 | RAB13         | chr1:153954092-153958853  | 104.553    | 77.2685    | -0.436279 | 0.197138 |
| XLOC_000932 | RNF2          | chr1:185014550-185071740  | 9.71312    | 7.18441    | -0.435065 | 0.235968 |
| XLOC_009806 | SP6           | chr17:45922279-45933240   | 2.4468     | 1.80989    | -0.434994 | 0.453921 |
| XLOC_002250 | TARBP1        | chr1:234527058-234614849  | 4.61374    | 3.4129     | -0.434939 | 0.278484 |
| XLOC_003544 | PPP1R32       | chr11:61248584-61258400   | 0.834314   | 0.617177   | -0.434907 | 0.747289 |
| XLOC_021097 | NSUN5P2       | chr7:72349935-72425302    | 6.88548    | 5.09356    | -0.434881 | 0.867291 |
| XLOC_001477 | HPCAL4        | chr1:40144644-40157089    | 1.01299    | 0.749414   | -0.434789 | 0.535571 |
| XLOC_013059 | ACTR1B        | chr2:98272401-98280561    | 86.8477    | 64.257     | -0.434633 | 0.237487 |
| XLOC_012595 | BMPR2         | chr2:203241049-203432474  | 0.788881   | 0.583739   | -0.434485 | 0.384173 |
| XLOC_006008 | LOC100506394  | chr13:114567149-114569805 | 0.133241   | 0.0985948  | -0.43446  | 1        |
| XLOC_022717 | RLN1          | chr9:5334931-5339873      | 0.0194514  | 0.0143998  | -0.433822 | 1        |
| XLOC_012928 | PUS10         | chr2:61167547-61279125    | 0.471814   | 0.349417   | -0.433267 | 0.872122 |
| XLOC_001318 | AKR7L         | chr1:19592475-19600568    | 2.09987    | 1.55523    | -0.433171 | 0.513296 |
| XLOC_014160 | CBR3          | chr21:37504064-37528606   | 17.436     | 12.9145    | -0.433076 | 0.360333 |
| XLOC_009540 | FAM106A       | chr17:18427879-18430160   | 0.00722556 | 0.00535245 | -0.432911 | 1        |
| XLOC_002349 | LOC283070     | chr10:12875132-12877545   | 8.32626    | 6.16816    | -0.432829 | 0.314731 |
| XLOC_013972 | EMILIN3       | chr20:39969559-39995498   | 3.20335    | 2.37339    | -0.43263  | 0.626692 |
| XLOC_010719 | ZNF253        | chr19:19976713-20004293   | 1.43123    | 1.06046    | -0.432558 | 0.539297 |
| XLOC_015058 | ZKSCAN7       | chr3:44596712-44624973    | 0.634715   | 0.470427   | -0.432136 | 0.659523 |
| XLOC_014229 | DIP2A-IT1     | chr21:47878861-47989926   | 0.0504156  | 0.0373687  | -0.432037 | 1        |
| XLOC_022386 | TJP2          | chr9:71736179-71870124    | 4.78869    | 3.55017    | -0.431743 | 0.303067 |
| XLOC_008048 | SLX1B,SULT1A4 | chr16:30204255-30218248   | 0.679569   | 0.503829   | -0.431688 | 0.831614 |
| XLOC_015971 | CEP70         | chr3:138213186-138313129  | 3.03173    | 2.24813    | -0.431411 | 0.39733  |
| XLOC_019044 | LAMA4         | chr6:112429133-112575917  | 0.0019616  | 0.00145473 | -0.431282 | 1        |
| XLOC_007106 | WHAMMP2       | chr15:28982728-29003508   | 0.0366688  | 0.0271954  | -0.431188 | 1        |
| XLOC_003712 | RNF169        | chr11:74459912-74660232   | 1.33687    | 0.991738   | -0.430823 | 0.791387 |
| XLOC_007644 | MEGF11        | chr15:66187633-66546075   | 0.0214771  | 0.0159328  | -0.430802 | 1        |
| XLOC_012762 | FAM110C       | chr2:38813-46588          | 1.15671    | 0.858215   | -0.430614 | 0.525673 |
| XLOC_014427 | CRKL          | chr22:21271713-21308037   | 12.6598    | 9.39536    | -0.43023  | 0.232203 |
| XLOC_014120 | LINC00161     | chr21:29911639-29912677   | 0.0356872  | 0.0264986  | -0.429489 | 1        |
| XLOC_002523 | VCL           | chr10:75757871-75879914   | 12.6265    | 9.37604    | -0.429402 | 0.229368 |
| XLOC_022640 | ADAMTS13      | chr9:136243283-136324508  | 3.91367    | 2.90644    | -0.429269 | 0.915089 |
| XLOC_008442 | NOMO2         | chr16:18511181-18573434   | 0.874855   | 0.649824   | -0.428996 | 0.581803 |
| XLOC_010126 | TUBB6         | chr18:12308256-12326568   | 4.58291    | 3.40422    | -0.428938 | 0.501678 |
| XLOC_022051 | PEX2          | chr8:77892493-77913280    | 7.64449    | 5.67908    | -0.428763 | 0.267401 |
| XLOC_001184 | LINC00115     | chr1:761585-762902        | 1.64003    | 1.21838    | -0.42876  | 0.693923 |
| XLOC_021495 | FGF17         | chr8:21900427-21906319    | 2.93101    | 2.17755    | -0.428693 | 0.677271 |
| XLOC_000519 | SLC44A3       | chr1:95285897-95360803    | 0.71808    | 0.533535   | -0.42856  | 0.663419 |
| XLOC_004676 | GAPDH         | chr12:6643584-6647537     | 8392.36    | 6235.84    | -0.428493 | 0.532767 |
| XLOC_014651 | SHANK3        | chr22:51113069-51171640   | 6.45462    | 4.79609    | -0.428474 | 0.297228 |
| XLOC_009942 | LINC00511     | chr17:70594179-70636611   | 0.0291474  | 0.0216616  | -0.428225 | 1        |
| XLOC_008752 | SERPINF1      | chr17:1665258-1680859     | 0.28916    | 0.214903   | -0.428182 | 1        |

|             |              |                          |            |            |           |          |
|-------------|--------------|--------------------------|------------|------------|-----------|----------|
| XLOC_010819 | ZNF568       | chr19:37407230-37488834  | 0.0850076  | 0.0632038  | -0.42758  | 1        |
| XLOC_011077 | FPR3         | chr19:52298410-52329334  | 0.0181593  | 0.0135052  | -0.427186 | 1        |
| XLOC_010636 | LOC100507373 | chr19:14247963-14316997  | 0.50462    | 0.375369   | -0.426888 | 0.944779 |
| XLOC_013188 | NR4A2        | chr2:157180943-157189287 | 0.446765   | 0.332434   | -0.426446 | 0.699261 |
| XLOC_015444 | SKIL         | chr3:170075472-170114637 | 1.28484    | 0.956207   | -0.426195 | 0.386855 |
| XLOC_022901 | KIF27        | chr9:86451614-86536380   | 0.373571   | 0.278042   | -0.426081 | 0.642898 |
| XLOC_005637 | CCDC38       | chr12:96260825-96336428  | 0.00752019 | 0.00559734 | -0.426028 | 1        |
| XLOC_012090 | MAPRE3       | chr2:27193524-27250087   | 0.947907   | 0.705564   | -0.425967 | 0.707003 |
| XLOC_022196 | TRAPP9       | chr8:140742585-141468678 | 8.66673    | 6.45146    | -0.425863 | 0.283754 |
| XLOC_022798 | FAM219A      | chr9:34398181-34458568   | 8.66026    | 6.44834    | -0.425483 | 0.296311 |
| XLOC_012566 | MYO1B        | chr2:192110106-192290115 | 10.3841    | 7.73193    | -0.42547  | 0.237712 |
| XLOC_016404 | C4orf22      | chr4:81256873-81884910   | 2.40211    | 1.78863    | -0.425452 | 0.664469 |
| XLOC_011782 | DACT3        | chr19:47150868-47220384  | 2.74448    | 2.0439     | -0.425208 | 0.872122 |
| XLOC_017238 | ARSK         | chr5:94890824-94940806   | 1.02409    | 0.762706   | -0.42515  | 0.572663 |
| XLOC_019074 | ARHGAP18     | chr6:129898239-130031370 | 1.39138    | 1.03646    | -0.424855 | 0.504902 |
| XLOC_014151 | LINC00649    | chr21:35303515-35343487  | 0.00613425 | 0.00456997 | -0.424702 | 1        |
| XLOC_016658 | CCDC96       | chr4:6911170-7059677     | 0.680773   | 0.507188   | -0.424653 | 0.96256  |
| XLOC_017240 | RFESD        | chr5:94982480-94992849   | 1.71079    | 1.27465    | -0.424561 | 0.59526  |
| XLOC_013519 | C20orf196    | chr20:5731042-5844559    | 1.9361     | 1.4428     | -0.42428  | 0.662782 |
| XLOC_011630 | ZNF585A      | chr19:37641000-37663615  | 0.894655   | 0.666732   | -0.424225 | 0.537327 |
| XLOC_022927 | NFIL3        | chr9:94171326-94186144   | 27.3259    | 20.3645    | -0.424214 | 0.239387 |
| XLOC_013057 | LOC100506123 | chr2:98081675-98091049   | 2.10706    | 1.57029    | -0.4242   | 0.473572 |
| XLOC_011041 | PTOV1        | chr19:50341902-50363999  | 62.7901    | 46.7956    | -0.424166 | 0.267888 |
| XLOC_016938 | MAML3        | chr4:140586921-141075233 | 0.885301   | 0.659819   | -0.424097 | 0.850797 |
| XLOC_015894 | FSTL1        | chr3:120113060-120169918 | 0.0199395  | 0.0148617  | -0.424027 | 1        |
| XLOC_018125 | ZNF391       | chr6:27356523-27369227   | 0.614839   | 0.458291   | -0.423944 | 0.73703  |
| XLOC_001512 | ZSWIM5       | chr1:45482075-45672250   | 0.219941   | 0.163975   | -0.423635 | 1        |
| XLOC_020889 | WDR60        | chr7:158649268-158738883 | 2.41904    | 1.80363    | -0.423532 | 0.421289 |
| XLOC_001784 | NBPF14       | chr1:148003641-148025848 | 2.78267    | 2.07487    | -0.423451 | 0.380311 |
| XLOC_013904 | ZNF337       | chr20:25654850-25677469  | 4.05296    | 3.02207    | -0.423439 | 0.346485 |
| XLOC_017638 | HMGCS1       | chr5:43287571-43313614   | 2.62961    | 1.96079    | -0.423412 | 0.328608 |
| XLOC_009939 | ABCA10,ABCA5 | chr17:67144147-67323323  | 0.486022   | 0.362437   | -0.423292 | 0.525673 |
| XLOC_011690 | B9D2         | chr19:41860321-41889987  | 7.9762     | 5.94883    | -0.423096 | 0.628025 |
| XLOC_005375 | AMN1         | chr12:31824070-31882108  | 1.11529    | 0.83188    | -0.422977 | 0.641817 |
| XLOC_021236 | RASA4        | chr7:102220092-102257205 | 5.18008    | 3.86437    | -0.422741 | 0.306541 |
| XLOC_009988 | PRPSAP1      | chr17:74306867-74350230  | 24.9832    | 18.6385    | -0.422671 | 0.246893 |
| XLOC_021670 | LRRRC69      | chr8:92114846-92231464   | 0.136766   | 0.10204    | -0.42258  | 1        |
| XLOC_008591 | CCDC102A     | chr16:57546089-57570477  | 5.44435    | 4.06206    | -0.422548 | 0.479652 |
| XLOC_022126 | RRM2B        | chr8:103216728-103251346 | 9.23744    | 6.89383    | -0.422189 | 0.245231 |
| XLOC_014458 | SLC2A11      | chr22:24199058-24227725  | 2.94454    | 2.1975     | -0.422177 | 0.52085  |
| XLOC_008077 | TGFB11       | chr16:31483475-31489281  | 57.6022    | 42.9905    | -0.422106 | 0.241211 |
| XLOC_009665 | PGAP3        | chr17:37827374-37844310  | 1.6944     | 1.26472    | -0.421954 | 0.61138  |
| XLOC_021554 | DDHD2        | chr8:38089008-38120287   | 3.74105    | 2.79256    | -0.421854 | 0.326259 |
| XLOC_021409 | MLL3         | chr7:151832009-152133090 | 1.40129    | 1.04624    | -0.421535 | 0.28861  |
| XLOC_000320 | PPCS         | chr1:42922172-42926086   | 41.6997    | 31.1459    | -0.420992 | 0.255063 |
| XLOC_000187 | SRRM1        | chr1:24969593-24999772   | 19.013     | 14.2033    | -0.420753 | 0.251718 |
| XLOC_011448 | ZNF799       | chr19:12500827-12512088  | 1.74865    | 1.30665    | -0.420363 | 0.544748 |
| XLOC_022100 | TP53INP1     | chr8:95938199-95961615   | 2.07099    | 1.54762    | -0.420271 | 0.371307 |
| XLOC_006336 | C14orf28     | chr14:45366506-45376460  | 1.1767     | 0.879517   | -0.419964 | 0.57751  |

|             |                 |                           |            |            |           |          |
|-------------|-----------------|---------------------------|------------|------------|-----------|----------|
| XLOC_012694 | C2orf72         | chr2:231902280-231914427  | 6.65675    | 4.97654    | -0.419675 | 0.343169 |
| XLOC_022763 | CDKN2A          | chr9:21967137-21994490    | 2.61896    | 1.95806    | -0.419571 | 0.708756 |
| XLOC_015899 | GOLGB1          | chr3:121382045-121468614  | 2.71119    | 2.02714    | -0.41948  | 0.314558 |
| XLOC_022492 | SLC44A1         | chr9:108006928-108153682  | 11.1474    | 8.33533    | -0.419401 | 0.256851 |
| XLOC_005937 | LMO7            | chr13:76194569-76434006   | 2.56144    | 1.91528    | -0.4194   | 0.318772 |
| XLOC_002965 | RUFY2           | chr10:70103274-70167051   | 1.96452    | 1.46906    | -0.419288 | 0.416068 |
| XLOC_001949 | CCDC19          | chr1:159842153-159869906  | 0.129046   | 0.0965413  | -0.418663 | 1        |
| XLOC_018000 | TBC1D9B         | chr5:179289070-179334856  | 29.8272    | 22.3239    | -0.418043 | 0.230069 |
| XLOC_004507 | KBTBD3          | chr11:105921824-105969419 | 0.630711   | 0.472115   | -0.41784  | 0.913256 |
| XLOC_021248 | LOC100216546    | chr7:104622193-104631612  | 0.211795   | 0.158553   | -0.417702 | 1        |
| XLOC_022467 | TMOD1           | chr9:100263461-100436029  | 1.05853    | 0.792451   | -0.41767  | 0.95937  |
| XLOC_005078 | BTBD11          | chr12:107712196-108053419 | 0.415209   | 0.310884   | -0.41746  | 0.691509 |
| XLOC_002167 | IRF6            | chr1:209958967-209979520  | 0.00357328 | 0.00267588 | -0.417235 | 1        |
| XLOC_011451 | ZNF564          | chr19:12636183-12662356   | 1.91948    | 1.4375     | -0.417152 | 0.499226 |
| XLOC_020533 | LOC541473       | chr7:72440191-72443668    | 0.634715   | 0.475439   | -0.416849 | 0.840956 |
| XLOC_011153 | PRKCG           | chr19:54385466-54410901   | 5.26296    | 3.94276    | -0.41667  | 0.424799 |
| XLOC_010927 | BCAM            | chr19:45312315-45324678   | 36.2677    | 27.1731    | -0.416503 | 0.270565 |
| XLOC_015242 | LINC00636       | chr3:107602051-107647753  | 0.017004   | 0.012742   | -0.416291 | 1        |
| XLOC_000332 | TIE1            | chr1:43766565-43788781    | 0.0688313  | 0.0515823  | -0.416187 | 1        |
| XLOC_022900 | GKAP1           | chr9:86354335-86432752    | 2.17316    | 1.62868    | -0.416094 | 0.571238 |
| XLOC_005972 | ZIC2            | chr13:100634025-100639019 | 5.29426    | 3.96804    | -0.416002 | 0.456287 |
| XLOC_000758 | HCN3            | chr1:155247217-155271225  | 0.652903   | 0.489352   | -0.415997 | 0.759124 |
| XLOC_021145 | KIAA1324L       | chr7:86506222-86689014    | 0.289326   | 0.216896   | -0.41569  | 1        |
| XLOC_013412 | HTR2B           | chr2:231921577-232037540  | 0.0573631  | 0.0430045  | -0.415635 | 1        |
| XLOC_001879 | SHC1            | chr1:154934773-154946959  | 162.78     | 122.051    | -0.415444 | 0.251081 |
| XLOC_007909 | FLJ39639        | chr16:3313767-3317566     | 0.23082    | 0.173084   | -0.415295 | 1        |
| XLOC_009104 | RUNDC3A         | chr17:42385926-42396038   | 0.823686   | 0.61767    | -0.41526  | 0.740207 |
| XLOC_014754 | NIPSNAP1        | chr22:29950797-29977326   | 77.0939    | 57.83      | -0.414798 | 0.258646 |
| XLOC_016468 | ENPEP           | chr4:111397228-111484493  | 0.0275947  | 0.0207004  | -0.414729 | 1        |
| XLOC_018639 | TFAP2A          | chr6:10396915-10419797    | 3.28417    | 2.46412    | -0.414455 | 0.485845 |
| XLOC_006806 | PYGL            | chr14:51371934-51411248   | 59.5173    | 44.6607    | -0.414303 | 0.246092 |
| XLOC_002688 | MXI1            | chr10:111967362-112047123 | 13.0418    | 9.78635    | -0.414299 | 0.279083 |
| XLOC_012963 | TIA1            | chr2:70436575-70475779    | 7.42796    | 5.57727    | -0.413408 | 0.289046 |
| XLOC_012626 | SPAG16          | chr2:214149102-215275225  | 7.27173    | 5.46082    | -0.41318  | 0.45082  |
| XLOC_023610 | RAB33A          | chrX:129305772-129318844  | 0.190795   | 0.143284   | -0.413145 | 1        |
| XLOC_014522 | LOC339666       | chr22:32772650-32780329   | 0.123676   | 0.0928807  | -0.413111 | 1        |
| XLOC_010729 | LOC400680       | chr19:21666516-21686040   | 0.52213    | 0.392145   | -0.413023 | 0.655536 |
| XLOC_010517 | VMAC            | chr19:5904851-5910263     | 1.3594     | 1.02103    | -0.412947 | 0.715356 |
| XLOC_006981 | ANKRD9          | chr14:102973197-102976128 | 17.5132    | 13.1552    | -0.412816 | 0.480199 |
| XLOC_013256 | PRKRA           | chr2:179059207-179672150  | 21.4349    | 16.1015    | -0.412763 | 0.521695 |
| XLOC_002622 | PGAM1           | chr10:99186026-99193198   | 479.619    | 360.284    | -0.412754 | 0.283957 |
| XLOC_011923 | ZNF816,ZNF816-2 | chr19:53430387-53466164   | 3.21933    | 2.41844    | -0.412682 | 0.458482 |
| XLOC_020762 | EXOC4           | chr7:132937822-133750513  | 17.747     | 13.3326    | -0.412621 | 0.239825 |
| XLOC_011996 | ZNF552          | chr19:58318449-58326281   | 1.98439    | 1.49081    | -0.4126   | 0.522543 |
| XLOC_020510 | ZNF107          | chr7:64126510-64171401    | 0.732037   | 0.550012   | -0.412453 | 0.547882 |
| XLOC_003325 | ZNF143          | chr11:9482511-9550071     | 4.03517    | 3.03198    | -0.412367 | 0.38271  |
| XLOC_014546 | LGALS1          | chr22:38071612-38075809   | 2086.2     | 1567.8     | -0.41213  | 0.276165 |
| XLOC_018077 | SOX4            | chr6:21593971-21598849    | 8.36926    | 6.28962    | -0.412128 | 0.297593 |
| XLOC_021296 | GRM8            | chr7:126078651-126892428  | 0.00417936 | 0.00314096 | -0.412078 | 1        |

|             |              |                           |           |           |           |          |
|-------------|--------------|---------------------------|-----------|-----------|-----------|----------|
| XLOC_018882 | CUL7         | chr6:43005354-43021683    | 5.98738   | 4.50101   | -0.411675 | 0.304538 |
| XLOC_005247 | ING4         | chr12:6759703-6772308     | 6.45944   | 4.85606   | -0.411622 | 0.482583 |
| XLOC_013376 | GLB1L        | chr2:220101502-220110131  | 0.832289  | 0.625707  | -0.411597 | 0.67336  |
| XLOC_022293 | RRAGA        | chr9:19049371-19051021    | 66.649    | 50.1067   | -0.411582 | 0.255653 |
| XLOC_023769 | TMEM27       | chrX:15645440-15683154    | 0.448735  | 0.337406  | -0.411377 | 0.78593  |
| XLOC_010552 | ANGPTL4      | chr19:8429010-8439257     | 114.478   | 86.0816   | -0.411293 | 0.230647 |
| XLOC_013432 | ARL4C        | chr2:235401685-235405693  | 0.133603  | 0.100464  | -0.411278 | 1        |
| XLOC_016597 | SLC25A4      | chr4:186064416-186071538  | 16.0143   | 12.0435   | -0.411105 | 0.267401 |
| XLOC_012178 | PPP1R21      | chr2:48667907-48742531    | 3.78753   | 2.84984   | -0.410376 | 0.384698 |
| XLOC_010202 | SMAD4        | chr18:48556582-48611411   | 4.2926    | 3.23009   | -0.410278 | 0.274812 |
| XLOC_012107 | ZNF512       | chr2:27805835-27846082    | 4.1202    | 3.1005    | -0.410211 | 0.363127 |
| XLOC_011910 | ZNF350       | chr19:52467592-52490079   | 2.86091   | 2.1529    | -0.410191 | 0.46587  |
| XLOC_004012 | HBE1         | chr11:5289579-5291373     | 130.114   | 97.9346   | -0.40988  | 0.261731 |
| XLOC_003898 | SLC37A2      | chr11:124933012-124960412 | 0.324408  | 0.244185  | -0.409837 | 1        |
| XLOC_005229 | PARP11       | chr12:3918026-3982608     | 1.14862   | 0.8648    | -0.409463 | 0.525673 |
| XLOC_013962 | TGM2         | chr20:36756863-36793700   | 151.297   | 113.922   | -0.409334 | 0.273369 |
| XLOC_006701 | RAB2B        | chr14:21927178-21945132   | 3.84313   | 2.8938    | -0.409316 | 0.413477 |
| XLOC_008738 | C16orf3      | chr16:90089007-90114191   | 0.128376  | 0.0966758 | -0.409149 | 1        |
| XLOC_017621 | RICTOR       | chr5:38938021-39074501    | 1.58055   | 1.1903    | -0.409096 | 0.361509 |
| XLOC_008461 | NPIPL3       | chr16:21413454-21436658   | 3.81224   | 2.87134   | -0.408914 | 0.461694 |
| XLOC_005827 | RASL11A      | chr13:27844463-27847827   | 3.11824   | 2.34897   | -0.408705 | 0.653588 |
| XLOC_000982 | PPFIA4       | chr1:203020310-203047864  | 0.106882  | 0.0805366 | -0.408308 | 1        |
| XLOC_013990 | SDC4         | chr20:43953928-43977064   | 58.9641   | 44.4361   | -0.408105 | 0.263786 |
| XLOC_024032 | SLC25A5-AS1  | chrX:118599995-118605359  | 0.340679  | 0.256782  | -0.407871 | 1        |
| XLOC_012685 | DAW1         | chr2:228736326-228789026  | 0.0279049 | 0.0210329 | -0.407868 | 1        |
| XLOC_021083 | ZNF680       | chr7:63980254-64023505    | 1.5552    | 1.1723    | -0.407758 | 0.524638 |
| XLOC_018731 | HCG4B        | chr6:29892368-29893428    | 0.434923  | 0.327851  | -0.407719 | 0.853998 |
| XLOC_014166 | TTC3         | chr21:38445570-38575408   | 2.81199   | 2.12023   | -0.40737  | 0.314509 |
| XLOC_004954 | METTTL21B    | chr12:58166382-58176324   | 3.39109   | 2.55689   | -0.407359 | 0.472269 |
| XLOC_022611 | ASS1         | chr9:133320093-133376661  | 135.933   | 102.504   | -0.407214 | 0.256339 |
| XLOC_016443 | MTPP         | chr4:100485239-100545154  | 0.0258147 | 0.019471  | -0.406865 | 1        |
| XLOC_007557 | PATL2        | chr15:44957929-44969086   | 0.238545  | 0.179952  | -0.406649 | 1        |
| XLOC_022850 | KGFLP2       | chr9:41958801-42019584    | 0.164238  | 0.123909  | -0.406504 | 1        |
| XLOC_018888 | LRRRC73      | chr6:43474702-43478081    | 2.9892    | 2.25555   | -0.406282 | 0.648569 |
| XLOC_021889 | MTMR7        | chr8:17104400-17271040    | 1.08037   | 0.81521   | -0.406279 | 0.763754 |
| XLOC_010973 | EHD2         | chr19:48216600-48246391   | 7.99474   | 6.03273   | -0.40624  | 0.38144  |
| XLOC_016082 | MCF2L2       | chr3:182895830-183145855  | 0.139602  | 0.105346  | -0.406187 | 1        |
| XLOC_016856 | ADH6         | chr4:100010007-100222513  | 0.0206293 | 0.0155682 | -0.406094 | 1        |
| XLOC_009165 | ACSF2        | chr17:48503518-48552200   | 6.69399   | 5.05222   | -0.40595  | 0.400165 |
| XLOC_004778 | FGFR1OP2     | chr12:27091304-27119581   | 8.38686   | 6.33011   | -0.405901 | 0.549268 |
| XLOC_022530 | LOC253039    | chr9:123605319-123616651  | 2.47796   | 1.87031   | -0.405875 | 0.450304 |
| XLOC_003564 | GNG3         | chr11:62457733-62494857   | 0.182398  | 0.137672  | -0.405854 | 1        |
| XLOC_009014 | TBC1D3       | chr17:36283959-36295098   | 0.201651  | 0.152221  | -0.405687 | 1        |
| XLOC_014882 | LOC100506714 | chr22:45529638-45559662   | 1.50003   | 1.13237   | -0.405648 | 0.703707 |
| XLOC_011752 | ERCC2        | chr19:45843997-45873845   | 25.3493   | 19.1369   | -0.405589 | 0.53682  |
| XLOC_012503 | UBR3         | chr2:170684017-170940639  | 1.91468   | 1.44552   | -0.405522 | 0.361509 |
| XLOC_023152 | LOC100506599 | chr9:138354564-138364095  | 0.757086  | 0.571578  | -0.405507 | 0.664469 |
| XLOC_005973 | PCCA         | chr13:100741268-101241046 | 1.44697   | 1.09306   | -0.404672 | 0.739517 |
| XLOC_012074 | FAM228B      | chr2:24346349-24392507    | 1.27377   | 0.962242  | -0.404638 | 0.696791 |

|             |              |                          |            |            |           |          |
|-------------|--------------|--------------------------|------------|------------|-----------|----------|
| XLOC_014730 | POM121L10P   | chr22:25028881-25055114  | 0.0172966  | 0.0130689  | -0.404356 | 1        |
| XLOC_008757 | SGSM2        | chr17:2240805-2284348    | 9.62473    | 7.27235    | -0.404325 | 0.298867 |
| XLOC_005415 | KANSL2       | chr12:49046994-49076035  | 11.732     | 8.86706    | -0.403927 | 0.308679 |
| XLOC_004096 | SERGEF       | chr11:17809596-18034637  | 20.4663    | 15.469     | -0.403871 | 0.318402 |
| XLOC_014855 | TNFRSF13C    | chr22:42321035-42322821  | 1.50866    | 1.14042    | -0.403703 | 0.798083 |
| XLOC_011735 | ZNF404       | chr19:44376514-44384288  | 2.32358    | 1.7567     | -0.403476 | 0.569689 |
| XLOC_011527 | JAK3         | chr19:17935592-17958841  | 1.36927    | 1.03536    | -0.403273 | 0.554644 |
| XLOC_016154 | LOC220729    | chr3:197340897-197354752 | 1.15031    | 0.869862   | -0.403166 | 0.699003 |
| XLOC_001479 | OXCT2        | chr1:40204516-40254533   | 1.44987    | 1.09647    | -0.403063 | 0.93855  |
| XLOC_000397 | ZYG11B       | chr1:53192130-53293013   | 1.78839    | 1.35291    | -0.402596 | 0.379385 |
| XLOC_018728 | HLA-F-AS1    | chr6:29691116-29716826   | 1.19112    | 0.901416   | -0.402049 | 0.945399 |
| XLOC_011507 | CYP4F11      | chr19:16023179-16045676  | 0.133655   | 0.101149   | -0.40204  | 1        |
| XLOC_002478 | JMJD1C-AS1   | chr10:64926987-65226322  | 0.538168   | 0.4074     | -0.40161  | 0.977021 |
| XLOC_003397 | CAT          | chr11:34460471-34493607  | 7.50977    | 5.68631    | -0.401277 | 0.384554 |
| XLOC_011625 | ZNF529       | chr19:37034516-37096178  | 1.75209    | 1.32667    | -0.401267 | 0.482819 |
| XLOC_011184 | SUV420H2     | chr19:55851220-55859489  | 8.27504    | 6.26679    | -0.40104  | 0.453879 |
| XLOC_001033 | TRAF5        | chr1:211499956-211548286 | 4.29928    | 3.2561     | -0.400952 | 0.346329 |
| XLOC_005294 | KLRAP1       | chr12:10741076-10752434  | 0.197037   | 0.149235   | -0.400885 | 1        |
| XLOC_001859 | S100A13      | chr1:153591275-153618782 | 524.11     | 396.969    | -0.400845 | 0.505511 |
| XLOC_014690 | PI4KAP1      | chr22:20383730-20398695  | 12.4077    | 9.39831    | -0.400762 | 0.358175 |
| XLOC_006951 | SERPINA10    | chr14:94749649-94759608  | 0.00715525 | 0.00542199 | -0.400179 | 1        |
| XLOC_003704 | ARHGEF17     | chr11:73019662-73080425  | 3.31609    | 2.51297    | -0.400088 | 0.381513 |
| XLOC_013687 | WFDC13       | chr20:44313289-44337456  | 0.0116356  | 0.00881938 | -0.399793 | 1        |
| XLOC_022357 | FAM201A      | chr9:38621084-38623277   | 4.09305    | 3.10284    | -0.399587 | 0.602867 |
| XLOC_015469 | YEATS2       | chr3:183415605-183530413 | 11.7648    | 8.91995    | -0.399375 | 0.273449 |
| XLOC_012217 | APLF         | chr2:68694690-68807294   | 0.309923   | 0.235036   | -0.399031 | 1        |
| XLOC_017431 | GM2A         | chr5:150632612-150649953 | 11.5022    | 8.7238     | -0.398878 | 0.308793 |
| XLOC_014205 | PFKL         | chr21:45719924-45747261  | 64.9081    | 49.2327    | -0.398783 | 0.297472 |
| XLOC_022714 | AK3          | chr9:4709556-4742043     | 8.30006    | 6.29563    | -0.398771 | 0.307985 |
| XLOC_011822 | GYS1         | chr19:49471381-49496610  | 57.6903    | 43.7584    | -0.398768 | 0.30896  |
| XLOC_006771 | MBIP         | chr14:36767763-36789882  | 5.25088    | 3.98341    | -0.398554 | 0.459016 |
| XLOC_021668 | NECAB1       | chr8:91803920-91997485   | 0.0473152  | 0.0358954  | -0.398506 | 1        |
| XLOC_007430 | LRRRC28      | chr15:99791651-99926498  | 5.10623    | 3.87419    | -0.398365 | 0.544831 |
| XLOC_008968 | NF1          | chr17:29421944-29704695  | 1.03054    | 0.781981   | -0.39819  | 0.510602 |
| XLOC_016315 | RASL11B      | chr4:53728494-53733002   | 0.00947861 | 0.00719368 | -0.397945 | 1        |
| XLOC_006804 | SAV1         | chr14:51100297-51135071  | 13.734     | 10.4247    | -0.397736 | 0.303947 |
| XLOC_014995 | TGFBR2       | chr3:30647993-30735633   | 1.023      | 0.776532   | -0.397691 | 0.570328 |
| XLOC_016502 | C4orf29      | chr4:128838959-128952455 | 0.851341   | 0.646427   | -0.397251 | 0.862353 |
| XLOC_002561 | ADIRF,AGAP11 | chr10:88728187-88769960  | 52.4221    | 39.8153    | -0.396851 | 0.378821 |
| XLOC_002606 | TBC1D12      | chr10:96162185-96296089  | 1.52862    | 1.16123    | -0.396572 | 0.473572 |
| XLOC_018940 | DST          | chr6:56137688-56615138   | 1.13779    | 0.864391   | -0.396476 | 0.356496 |
| XLOC_012553 | GULP1        | chr2:189156395-189460652 | 2.1847     | 1.65988    | -0.396359 | 0.489743 |
| XLOC_008232 | ZFP1         | chr16:75182420-75206132  | 2.15048    | 1.63394    | -0.396308 | 0.485751 |
| XLOC_008105 | IRX5         | chr16:54965110-54968395  | 0.470767   | 0.357751   | -0.396057 | 0.831291 |
| XLOC_016808 | CCNI         | chr4:77969176-77997125   | 63.615     | 48.349     | -0.395882 | 0.284182 |
| XLOC_012543 | SSFA2        | chr2:182756471-182795464 | 6.72823    | 5.11377    | -0.39584  | 0.297533 |
| XLOC_023187 | LOC100289341 | chr9:139979397-139981269 | 1.95835    | 1.4887     | -0.395583 | 0.685186 |
| XLOC_002383 | KIAA1217     | chr10:23983674-24836772  | 2.5061     | 1.90515    | -0.395539 | 0.421289 |
| XLOC_016127 | GP5          | chr3:194115549-194119995 | 0.00710067 | 0.00539846 | -0.395407 | 1        |

|             |              |                           |            |            |           |          |
|-------------|--------------|---------------------------|------------|------------|-----------|----------|
| XLOC_003773 | AMOTL1       | chr11:94501507-94609918   | 0.0673049  | 0.0511707  | -0.395395 | 1        |
| XLOC_001250 | ENO1         | chr1:8921058-8939943      | 2308.94    | 1755.56    | -0.395299 | 0.387751 |
| XLOC_003127 | WDR96        | chr10:105889645-105992120 | 0.064438   | 0.0489973  | -0.39521  | 1        |
| XLOC_017199 | F2R          | chr5:76011867-76031595    | 0.823492   | 0.626187   | -0.395162 | 0.638482 |
| XLOC_009221 | TANC2        | chr17:60778674-61505067   | 1.73041    | 1.31612    | -0.394818 | 0.384397 |
| XLOC_023948 | ABCB7        | chrX:74273006-74376175    | 15.0741    | 11.4676    | -0.394512 | 0.299896 |
| XLOC_000729 | S100A1       | chr1:153591275-153618782  | 0.556575   | 0.423419   | -0.394491 | 0.967458 |
| XLOC_008497 | LOC440354    | chr16:29538928-29577540   | 0.270932   | 0.206125   | -0.394411 | 1        |
| XLOC_017957 | BOD1         | chr5:173034147-173043666  | 36.7855    | 27.9872    | -0.394371 | 0.28349  |
| XLOC_007332 | AGPHD1       | chr15:78799905-78829715   | 2.78508    | 2.11939    | -0.394069 | 0.70237  |
| XLOC_013307 | FAM126B      | chr2:201838440-201936392  | 1.18851    | 0.904443   | -0.394048 | 0.416867 |
| XLOC_017773 | CCDC112      | chr5:114602884-114632458  | 2.51005    | 1.91052    | -0.393755 | 0.506617 |
| XLOC_014692 | SCARF2       | chr22:20778873-20792146   | 1.61401    | 1.22858    | -0.393657 | 0.706316 |
| XLOC_017051 | PLEKHG4B     | chr5:140372-190087        | 0.00465129 | 0.00354093 | -0.393502 | 1        |
| XLOC_008672 | CLEC18B      | chr16:74442528-74455368   | 0.203384   | 0.154852   | -0.393317 | 1        |
| XLOC_002172 | NEK2         | chr1:211831598-211848972  | 11.0528    | 8.41667    | -0.393085 | 0.338996 |
| XLOC_006234 | GAS6         | chr13:114518582-114567046 | 24.8262    | 18.9071    | -0.392939 | 0.322408 |
| XLOC_021653 | LRRCC1       | chr8:86019322-86058314    | 1.66035    | 1.2646     | -0.392801 | 0.500861 |
| XLOC_013062 | MGAT4A       | chr2:99235568-99347589    | 0.941212   | 0.717046   | -0.392455 | 0.586001 |
| XLOC_007269 | FEM1B        | chr15:68570140-68583640   | 1.52993    | 1.16555    | -0.392455 | 0.637543 |
| XLOC_007350 | FAM154B      | chr15:82555151-82577267   | 0.0892271  | 0.0679806  | -0.392357 | 1        |
| XLOC_023072 | SCAI         | chr9:127704887-127905838  | 1.16119    | 0.884792   | -0.392191 | 0.39951  |
| XLOC_024205 | CMC4,MTCP1   | chrX:154289899-154299547  | 15.3038    | 11.6613    | -0.392163 | 0.518305 |
| XLOC_009874 | SEPT4        | chr17:56597610-56618179   | 0.358695   | 0.273405   | -0.391717 | 1        |
| XLOC_014057 | PPP1R3D      | chr20:58508818-58523702   | 1.91869    | 1.46276    | -0.39143  | 0.73942  |
| XLOC_011523 | TMEM221      | chr19:17546317-17559376   | 0.212548   | 0.162043   | -0.391409 | 1        |
| XLOC_012053 | PQLC3        | chr2:11295539-11318998    | 9.24391    | 7.04807    | -0.391274 | 0.416925 |
| XLOC_007564 | FBN1         | chr15:48700502-48937985   | 0.0179174  | 0.0136626  | -0.391131 | 1        |
| XLOC_018386 | LOC100288198 | chr6:79910961-79946517    | 0.520507   | 0.396967   | -0.3909   | 0.938516 |
| XLOC_017931 | PWWP2A       | chr5:159502891-159546452  | 5.77769    | 4.40681    | -0.390759 | 0.373268 |
| XLOC_010100 | DLGAP1-AS1   | chr18:3496029-4455266     | 2.30713    | 1.75974    | -0.390733 | 0.722646 |
| XLOC_007570 | FAM227B      | chr15:49447975-49913118   | 0.558212   | 0.42584    | -0.390503 | 0.954143 |
| XLOC_016138 | SDHAP1       | chr3:195686791-195717150  | 1.0747     | 0.819869   | -0.390475 | 0.692564 |
| XLOC_012223 | ANXA4        | chr2:69969126-70053596    | 20.9488    | 15.9848    | -0.390166 | 0.303477 |
| XLOC_015853 | LOC100302640 | chr3:106828636-106959485  | 0.406293   | 0.310035   | -0.39009  | 0.905739 |
| XLOC_020495 | GBAS         | chr7:56032269-56067875    | 31.0272    | 23.6776    | -0.390008 | 0.306541 |
| XLOC_001794 | SV2A         | chr1:149874871-149889434  | 0.0448827  | 0.0342516  | -0.389987 | 1        |
| XLOC_008259 | DNAAF1       | chr16:84178864-84220676   | 0.0201436  | 0.015374   | -0.389833 | 1        |
| XLOC_011455 | DHPS         | chr19:12777617-12792701   | 48.2553    | 36.8471    | -0.389136 | 0.765267 |
| XLOC_020584 | GNAI1        | chr7:79764139-79848725    | 3.64293    | 2.78182    | -0.38907  | 0.416685 |
| XLOC_014628 | TTC38        | chr22:46663860-46689905   | 17.9533    | 13.7101    | -0.389009 | 0.333549 |
| XLOC_008297 | CPNE7        | chr16:89642175-89663654   | 44.8589    | 34.2766    | -0.388167 | 0.298867 |
| XLOC_011615 | CLIP3        | chr19:36505561-36523797   | 0.345126   | 0.263734   | -0.38804  | 1        |
| XLOC_011325 | STAP2        | chr19:4324039-4338847     | 18.2523    | 13.948     | -0.388015 | 0.393192 |
| XLOC_002641 | LINC00263    | chr10:102133332-102148111 | 14.102     | 10.7805    | -0.387482 | 0.467566 |
| XLOC_006903 | TGFB3        | chr14:76424441-76448092   | 1.87647    | 1.43458    | -0.387394 | 0.572669 |
| XLOC_009818 | HOXB5        | chr17:46667822-46683774   | 2.20293    | 1.68429    | -0.387282 | 0.841384 |
| XLOC_018817 | MNF1         | chr6:33664537-33679528    | 29.8588    | 22.8307    | -0.387181 | 0.359287 |
| XLOC_004069 | SBF2         | chr11:9776316-10315754    | 2.20892    | 1.68902    | -0.387156 | 0.608336 |

|             |              |                           |            |            |           |          |
|-------------|--------------|---------------------------|------------|------------|-----------|----------|
| XLOC_023907 | ZC4H2        | chrX:64135681-64254624    | 5.13523    | 3.92698    | -0.387008 | 0.439637 |
| XLOC_001120 | EDARADD      | chr1:236557679-236648008  | 0.602997   | 0.461156   | -0.386898 | 0.709707 |
| XLOC_017547 | TPPP         | chr5:659976-693510        | 1.39586    | 1.0677     | -0.386647 | 0.554334 |
| XLOC_010264 | PAR6G-AS1    | chr18:77905806-78005397   | 0.249524   | 0.190886   | -0.386468 | 1        |
| XLOC_003654 | KDM2A        | chr11:66886739-67025550   | 11.0074    | 8.42151    | -0.386319 | 0.312715 |
| XLOC_002679 | LOC100505839 | chr10:105353783-105615164 | 0.0162196  | 0.012412   | -0.386007 | 1        |
| XLOC_014422 | MED15        | chr22:20861885-20941919   | 20.9673    | 16.0455    | -0.385969 | 0.307517 |
| XLOC_004146 | RAG2         | chr11:36613492-36680817   | 0.0141579  | 0.0108363  | -0.38574  | 1        |
| XLOC_014450 | GNAZ         | chr22:23401592-23484241   | 4.08817    | 3.12952    | -0.385511 | 0.49621  |
| XLOC_017027 | LOC731424    | chr4:185764449-185768200  | 0.00471121 | 0.00360664 | -0.385442 | 1        |
| XLOC_010949 | QPCTL        | chr19:46195740-46207248   | 17.4451    | 13.3574    | -0.385186 | 0.348636 |
| XLOC_010474 | ZNF556       | chr19:2867332-2878501     | 1.5719     | 1.20361    | -0.385147 | 0.673323 |
| XLOC_024188 | MECP2        | chrX:153287263-153363188  | 28.2477    | 21.632     | -0.38497  | 0.396533 |
| XLOC_006974 | BEGAIN       | chr14:101003483-101036131 | 4.20771    | 3.22241    | -0.384896 | 0.576635 |
| XLOC_001890 | CLK2         | chr1:155232658-155243281  | 16.2986    | 12.482     | -0.384891 | 0.362943 |
| XLOC_004525 | FDXACB1      | chr11:111744779-111754797 | 1.63887    | 1.25547    | -0.384465 | 0.818403 |
| XLOC_018069 | CAP2         | chr6:17393735-17558023    | 4.69715    | 3.59876    | -0.384283 | 0.426631 |
| XLOC_013337 | KANSL1L      | chr2:210867351-211036051  | 3.25964    | 2.49773    | -0.384095 | 0.538721 |
| XLOC_013574 | FRG1B        | chr20:29611878-29634007   | 8.16965    | 6.26209    | -0.38363  | 0.518305 |
| XLOC_000197 | PDIK1L       | chr1:26437655-26452039    | 2.33929    | 1.79371    | -0.383123 | 0.447714 |
| XLOC_013843 | SLC23A2      | chr20:4833001-4990939     | 1.1254     | 0.862939   | -0.383107 | 0.525398 |
| XLOC_012043 | IAH1         | chr2:9614669-9628591      | 44.173     | 33.8725    | -0.383051 | 0.362399 |
| XLOC_005705 | MAPKAPK5-AS1 | chr12:112277572-112331228 | 9.75783    | 7.48267    | -0.383007 | 0.704729 |
| XLOC_004398 | FAM168A      | chr11:73117027-73309228   | 1.46697    | 1.125      | -0.382916 | 0.70639  |
| XLOC_007918 | VASN         | chr16:4390251-4466962     | 2.37009    | 1.81777    | -0.382773 | 0.949188 |
| XLOC_006927 | FOXN3        | chr14:89622515-90085494   | 2.69342    | 2.06592    | -0.382656 | 0.419619 |
| XLOC_015178 | SLC25A26     | chr3:66119284-66550845    | 19.9915    | 15.3349    | -0.382573 | 0.459565 |
| XLOC_010768 | WTIP         | chr19:34972879-34992085   | 1.49993    | 1.15061    | -0.382502 | 0.743493 |
| XLOC_009585 | DHRS13       | chr17:27224798-27230089   | 32.1738    | 24.6824    | -0.382405 | 0.337645 |
| XLOC_017694 | FOXD1        | chr5:72742084-72744352    | 90.8608    | 69.7258    | -0.381966 | 0.304772 |
| XLOC_012396 | RABL2A       | chr2:114384816-114400975  | 1.664      | 1.27694    | -0.381966 | 0.658942 |
| XLOC_016489 | KIAA1109     | chr4:123091757-123283914  | 0.861577   | 0.661273   | -0.381734 | 0.41602  |
| XLOC_008804 | BCL6B        | chr17:6926368-6932961     | 0.00534588 | 0.00410456 | -0.381201 | 1        |
| XLOC_017932 | CCNJL        | chr5:159678670-159739573  | 6.54346    | 5.02409    | -0.381192 | 0.412911 |
| XLOC_011520 | ANO8         | chr19:17420336-17445638   | 2.28272    | 1.75294    | -0.380975 | 0.884031 |
| XLOC_023501 | ZNF711       | chrX:84498996-84528368    | 1.24964    | 0.959823   | -0.380675 | 0.554334 |
| XLOC_009089 | RND2         | chr17:41177257-41184058   | 0.55152    | 0.423683   | -0.380427 | 0.705194 |
| XLOC_016280 | FAM114A1     | chr4:38869353-38947365    | 4.82549    | 3.70758    | -0.380195 | 0.400165 |
| XLOC_017903 | ANXA6        | chr5:150480266-150537443  | 49.311     | 37.8891    | -0.380129 | 0.305306 |
| XLOC_009468 | LOC284023    | chr17:7816639-7819265     | 6.59727    | 5.06919    | -0.380115 | 0.442213 |
| XLOC_004368 | CHKA         | chr11:67820325-67888858   | 23.3937    | 17.976     | -0.38005  | 0.322682 |
| XLOC_010205 | POLI         | chr18:51795848-51824604   | 2.77955    | 2.13609    | -0.379883 | 0.395334 |
| XLOC_015686 | PLXNB1       | chr3:48445260-48471460    | 4.70029    | 3.61246    | -0.379769 | 0.382212 |
| XLOC_011384 | KANK3        | chr19:8387467-8408146     | 4.40317    | 3.38446    | -0.379618 | 0.598397 |
| XLOC_019173 | AGPAT4-IT1   | chr6:161551056-161695107  | 0.0110009  | 0.0084575  | -0.379321 | 1        |
| XLOC_015468 | KLHL24       | chr3:183353410-183402304  | 2.55515    | 1.9645     | -0.379245 | 0.392586 |
| XLOC_001738 | ATP1A1OS     | chr1:116915794-116961244  | 3.70672    | 2.84994    | -0.379213 | 0.94749  |
| XLOC_004492 | MMP1         | chr11:102654406-102714342 | 0.182287   | 0.140158   | -0.379164 | 1        |
| XLOC_022177 | ASAP1        | chr8:131064350-131455906  | 13.3453    | 10.261     | -0.37916  | 0.303947 |

|             |               |                           |            |            |           |          |
|-------------|---------------|---------------------------|------------|------------|-----------|----------|
| XLOC_005485 | ITGB7         | chr12:53585106-53601000   | 0.0946     | 0.07275    | -0.378893 | 1        |
| XLOC_002807 | ITIH5         | chr10:7601231-7708961     | 0.00731325 | 0.00562498 | -0.378664 | 1        |
| XLOC_014996 | STT3B         | chr3:31574490-31677556    | 8.33456    | 6.41101    | -0.378553 | 0.390067 |
| XLOC_015509 | LPP           | chr3:187868993-188608460  | 1.89084    | 1.45447    | -0.378534 | 0.358175 |
| XLOC_015438 | MYNN          | chr3:169490852-169507504  | 2.38611    | 1.83548    | -0.378501 | 0.43048  |
| XLOC_008174 | SLC9A5        | chr16:67282854-67306094   | 4.86073    | 3.73932    | -0.378399 | 0.448579 |
| XLOC_003099 | PDZD7         | chr10:102756863-102790914 | 2.2681     | 1.74507    | -0.3782   | 0.946416 |
| XLOC_022323 | DNAI1         | chr9:34458810-34520982    | 0.0241463  | 0.018579   | -0.378126 | 1        |
| XLOC_006867 | ZFP36L1       | chr14:69254371-69262960   | 128.601    | 98.9802    | -0.377688 | 0.336576 |
| XLOC_014765 | SDC4P         | chr22:30877276-30877743   | 0.045365   | 0.0349211  | -0.37748  | 1        |
| XLOC_003077 | AVPI1         | chr10:99437180-99447015   | 16.9719    | 13.0647    | -0.377469 | 0.427182 |
| XLOC_011913 | ZNF432        | chr19:52536676-52552073   | 1.22722    | 0.944715   | -0.377446 | 0.637294 |
| XLOC_012642 | SLC11A1       | chr2:219246751-219261617  | 0.158942   | 0.122354   | -0.377441 | 1        |
| XLOC_000784 | PEAR1         | chr1:156863522-156886226  | 1.43273    | 1.1039     | -0.376155 | 0.596588 |
| XLOC_006960 | CLMN          | chr14:95648275-95786245   | 1.28513    | 0.990311   | -0.375956 | 0.427611 |
| XLOC_017603 | AMACR,C1QTNF: | chr5:33987090-34124633    | 2.37812    | 1.83256    | -0.375956 | 0.517848 |
| XLOC_011684 | NUMBL         | chr19:41171811-41196556   | 11.4583    | 8.82984    | -0.375938 | 0.376868 |
| XLOC_023088 | ST6GALNAC6    | chr9:130647600-130661871  | 99.5991    | 76.7534    | -0.375903 | 0.320187 |
| XLOC_002231 | CCSAP         | chr1:229456751-229478688  | 1.73794    | 1.33932    | -0.375885 | 0.499734 |
| XLOC_016144 | RNF168        | chr3:196195656-196230639  | 5.76799    | 4.44558    | -0.375697 | 0.367775 |
| XLOC_010408 | FBXO15        | chr18:71740587-71815100   | 0.586779   | 0.452358   | -0.375351 | 0.786862 |
| XLOC_004665 | KCNA6         | chr12:4918341-4960278     | 0.00333829 | 0.00257391 | -0.375147 | 1        |
| XLOC_011893 | VSIG10L       | chr19:51834794-51845378   | 1.40574    | 1.08439    | -0.374446 | 0.659523 |
| XLOC_022596 | ENDOG         | chr9:131580778-131592100  | 36.7474    | 28.3499    | -0.374301 | 0.861006 |
| XLOC_006139 | NEK5          | chr13:52638899-52703214   | 0.255567   | 0.197173   | -0.374245 | 1        |
| XLOC_003394 | KIAA1549L     | chr11:33563876-33695646   | 1.22238    | 0.943128   | -0.374162 | 0.436615 |
| XLOC_004371 | MTL5          | chr11:68474907-68518988   | 1.80851    | 1.39551    | -0.374009 | 0.628907 |
| XLOC_009728 | KRT17         | chr17:39775691-39780882   | 0.155679   | 0.120163   | -0.373584 | 1        |
| XLOC_005085 | USP30         | chr12:109489845-109525831 | 2.38872    | 1.84377    | -0.373575 | 0.52352  |
| XLOC_020977 | HOXA4         | chr7:27168125-27170399    | 4.43624    | 3.42433    | -0.373515 | 0.60307  |
| XLOC_002819 | PHYH          | chr10:13319795-13342130   | 37.1136    | 28.6588    | -0.37297  | 0.343451 |
| XLOC_013757 | SS18L1        | chr20:60718821-60757566   | 2.97658    | 2.29851    | -0.372956 | 0.472938 |
| XLOC_004823 | CCDC65        | chr12:49297892-49315359   | 0.0164053  | 0.0126697  | -0.372786 | 1        |
| XLOC_004728 | PRH2          | chr12:10998447-11328619   | 0.0145432  | 0.0112315  | -0.372785 | 1        |
| XLOC_011682 | SERTAD3       | chr19:40946747-40950282   | 15.5936    | 12.0447    | -0.372555 | 0.444812 |
| XLOC_015391 | HPS3          | chr3:148847370-148939832  | 3.22798    | 2.49339    | -0.372522 | 0.569924 |
| XLOC_008335 | CCDC154       | chr16:1484388-1494490     | 0.333686   | 0.257754   | -0.372497 | 1        |
| XLOC_001634 | COL24A1       | chr1:86194915-86622121    | 0.00877864 | 0.00678191 | -0.372305 | 1        |
| XLOC_019038 | CDK19         | chr6:110931180-111136412  | 1.72139    | 1.32993    | -0.372222 | 0.487833 |
| XLOC_004548 | LOC100652768  | chr11:117049938-117075508 | 1.32176    | 1.02125    | -0.372119 | 0.964442 |
| XLOC_004740 | RPL13AP20     | chr12:13028410-13029070   | 2.37748    | 1.83706    | -0.372033 | 0.796502 |
| XLOC_012198 | AHSA2         | chr2:61404554-61697849    | 4.86339    | 3.75806    | -0.371975 | 0.781103 |
| XLOC_020955 | CDCA7L        | chr7:21582832-21985542    | 38.1091    | 29.4485    | -0.371943 | 0.334695 |
| XLOC_023509 | DIAPH2        | chrX:95939661-96855597    | 5.24656    | 4.05476    | -0.371755 | 0.409203 |
| XLOC_002657 | LOC100289509  | chr10:103578824-103603677 | 0.482705   | 0.373074   | -0.37168  | 0.915223 |
| XLOC_017439 | CNOT8         | chr5:154238197-154256352  | 29.3819    | 22.7091    | -0.371656 | 0.341011 |
| XLOC_005144 | ACADS         | chr12:121163570-121177811 | 51.3018    | 39.6615    | -0.37127  | 0.344831 |
| XLOC_010862 | ZNF546        | chr19:40502942-40523514   | 0.26402    | 0.20413    | -0.371155 | 1        |
| XLOC_003926 | JAM3          | chr11:133938819-134021652 | 0.32277    | 0.249572   | -0.371047 | 1        |



|             |              |                          |            |            |           |          |
|-------------|--------------|--------------------------|------------|------------|-----------|----------|
| XLOC_017081 | TRIO         | chr5:14143828-14509458   | 2.46963    | 1.90961    | -0.371018 | 0.402378 |
| XLOC_005961 | MBNL2        | chr13:97874549-98046374  | 3.3999     | 2.62921    | -0.370864 | 0.438793 |
| XLOC_011231 | ZNF211       | chr19:58144534-58154147  | 1.43622    | 1.11073    | -0.370767 | 0.626866 |
| XLOC_020418 | CHN2         | chr7:29234120-29553944   | 0.436763   | 0.337798   | -0.37069  | 0.765218 |
| XLOC_015602 | SATB1        | chr3:18389132-18480265   | 3.62054    | 2.8002     | -0.370676 | 0.441009 |
| XLOC_022570 | ZNF79        | chr9:130186652-130207651 | 4.00261    | 3.09577    | -0.370643 | 0.571768 |
| XLOC_010254 | ZNF236       | chr18:74536115-74682682  | 0.760457   | 0.588206   | -0.370545 | 0.582102 |
| XLOC_011867 | NAPSA        | chr19:50861733-50868931  | 0.0466581  | 0.0360931  | -0.370405 | 1        |
| XLOC_001136 | ZBTB18       | chr1:244214560-244220778 | 2.26659    | 1.75359    | -0.370209 | 0.524475 |
| XLOC_018168 | HLA-L        | chr6:30201815-30314635   | 0.0134031  | 0.0103708  | -0.370044 | 1        |
| XLOC_007670 | PKM          | chr15:72491369-72523727  | 1322.34    | 1023.29    | -0.36987  | 0.432815 |
| XLOC_014963 | SLC6A6       | chr3:14444105-14583588   | 4.03241    | 3.12104    | -0.369617 | 0.570304 |
| XLOC_011778 | PPP5D1       | chr19:46984044-47104457  | 0.142217   | 0.11008    | -0.36954  | 1        |
| XLOC_022683 | UAP1L1       | chr9:139971952-139978990 | 35.8553    | 27.7557    | -0.369404 | 0.342315 |
| XLOC_008170 | NOL3         | chr16:67204399-67217883  | 19.9282    | 15.4277    | -0.369282 | 0.623292 |
| XLOC_006898 | MLH3         | chr14:75480466-75518235  | 1.19135    | 0.922537   | -0.368915 | 0.501868 |
| XLOC_012092 | AGBL5        | chr2:27274490-27294567   | 12.6081    | 9.76781    | -0.368248 | 0.847078 |
| XLOC_018218 | CYP21A2      | chr6:31973358-31981050   | 0.0853122  | 0.0661156  | -0.367763 | 1        |
| XLOC_011824 | LOC101059948 | chr19:49521504-49522741  | 0.430854   | 0.333922   | -0.367688 | 0.925922 |
| XLOC_003585 | VEGFB        | chr11:64002055-64006736  | 73.4179    | 56.9074    | -0.367515 | 0.340084 |
| XLOC_020956 | RAPGEF5      | chr7:22157907-22396533   | 0.916003   | 0.710072   | -0.367386 | 0.562114 |
| XLOC_003053 | MYOF         | chr10:95066185-95242074  | 16.0366    | 12.433     | -0.367194 | 0.325447 |
| XLOC_011703 | DEDD2        | chr19:42702744-42724304  | 39.0525    | 30.2782    | -0.367136 | 0.371136 |
| XLOC_015127 | GRM2         | chr3:51741080-51752625   | 0.102227   | 0.0792627  | -0.367058 | 1        |
| XLOC_004736 | CDKN1B       | chr12:12870301-12875305  | 9.08962    | 7.04785    | -0.367037 | 0.426282 |
| XLOC_008714 | C16orf95     | chr16:87336403-87351026  | 4.80894    | 3.72924    | -0.366837 | 0.692701 |
| XLOC_016874 | BDH2         | chr4:103998781-104021024 | 6.3678     | 4.93896    | -0.366588 | 0.425029 |
| XLOC_010014 | CBX8         | chr17:77768175-77770915  | 14.9685    | 11.61      | -0.366562 | 0.458976 |
| XLOC_020570 | ZP3          | chr7:76018645-76071388   | 12.8181    | 9.94299    | -0.36643  | 0.482717 |
| XLOC_022295 | ACER2        | chr9:19408924-19452500   | 0.0907464  | 0.0704046  | -0.366171 | 1        |
| XLOC_009928 | HELZ         | chr17:65066553-65241319  | 2.0198     | 1.56728    | -0.365953 | 0.371609 |
| XLOC_023811 | SRPX         | chrX:38008587-38080177   | 12.3213    | 9.56206    | -0.365757 | 0.44926  |
| XLOC_023080 | FAM129B      | chr9:130267617-130341268 | 121.598    | 94.3679    | -0.365749 | 0.362167 |
| XLOC_017849 | ECSCR        | chr5:138784244-138842320 | 0.0256969  | 0.0199485  | -0.365313 | 1        |
| XLOC_002260 | LYST         | chr1:235824344-236030220 | 0.283609   | 0.220179   | -0.365231 | 1        |
| XLOC_008172 | ELMO3        | chr16:67233027-67237927  | 2.34402    | 1.81986    | -0.365158 | 0.65671  |
| XLOC_015696 | NCKIPSD      | chr3:48711277-48723334   | 21.9625    | 17.0528    | -0.365035 | 0.38271  |
| XLOC_012205 | UGP2         | chr2:64068097-64118696   | 15.0837    | 11.7121    | -0.364985 | 0.378445 |
| XLOC_014712 | ZDHC8P1      | chr22:23732791-23744799  | 0.701965   | 0.545146   | -0.364757 | 0.79183  |
| XLOC_019058 | CEP85L       | chr6:118781934-119031238 | 0.531497   | 0.412772   | -0.364716 | 0.765759 |
| XLOC_011749 | TRAPPC6A     | chr19:45666185-45681501  | 31.4109    | 24.4015    | -0.364297 | 0.502136 |
| XLOC_006886 | ELMSAN1      | chr14:74181824-74253896  | 3.15484    | 2.45139    | -0.363963 | 0.435859 |
| XLOC_003637 | PACS1        | chr11:65837823-66012218  | 19.7431    | 15.3423    | -0.363833 | 0.350415 |
| XLOC_008385 | ZNF597       | chr16:3486109-3493490    | 1.14585    | 0.890618   | -0.363543 | 0.727839 |
| XLOC_002370 | CACNB2       | chr10:18429605-18830688  | 0.0917185  | 0.0712899  | -0.363515 | 1        |
| XLOC_012252 | WDR54        | chr2:74648884-74652882   | 90.5128    | 70.3724    | -0.363112 | 0.363587 |
| XLOC_010253 | LOC284276    | chr18:74240611-74271784  | 0.00850461 | 0.00661269 | -0.363008 | 1        |
| XLOC_008961 | LRRC37BP1    | chr17:28903482-28964484  | 4.41465    | 3.4327     | -0.362956 | 0.414285 |
| XLOC_022695 | NOXA1        | chr9:140317846-140335901 | 8.86279    | 6.89483    | -0.362245 | 0.594419 |

|             |              |                           |           |            |           |          |
|-------------|--------------|---------------------------|-----------|------------|-----------|----------|
| XLOC_003731 | AQP11        | chr11:77300679-77321401   | 1.05372   | 0.819796   | -0.362156 | 0.746288 |
| XLOC_002400 | MAP3K8       | chr10:30722949-30750762   | 1.10086   | 0.856537   | -0.362043 | 0.679691 |
| XLOC_011928 | ZNF665       | chr19:53666551-53696619   | 0.0240099 | 0.0186828  | -0.36192  | 1        |
| XLOC_015956 | ACAD11,NPHP3 | chr3:132276981-132593050  | 10.512    | 8.18116    | -0.361657 | 0.612746 |
| XLOC_020851 | LOC728743    | chr7:150102839-150109558  | 0.728146  | 0.566773   | -0.361456 | 0.761614 |
| XLOC_017676 | ADAMTS6      | chr5:64444562-64777704    | 0.0416075 | 0.0323895  | -0.361319 | 1        |
| XLOC_005833 | PAN3         | chr13:28710979-28869475   | 3.55349   | 2.76645    | -0.361204 | 0.453878 |
| XLOC_004990 | THAP2        | chr12:72003378-72074428   | 0.564338  | 0.439387   | -0.361068 | 0.86224  |
| XLOC_024212 | TMLHE        | chrX:154696200-154842622  | 7.1176    | 5.54175    | -0.361051 | 0.567291 |
| XLOC_002069 | SMG7-AS1     | chr1:183430010-183441117  | 0.0460432 | 0.0358492  | -0.361046 | 1        |
| XLOC_004410 | XRRA1        | chr11:74459912-74660232   | 10.3879   | 8.08816    | -0.361016 | 0.439829 |
| XLOC_001249 | RERE         | chr1:8412463-8877699      | 3.79813   | 2.95739    | -0.360966 | 0.453878 |
| XLOC_001806 | ARNT         | chr1:150782180-150849244  | 5.36868   | 4.18065    | -0.36084  | 0.409203 |
| XLOC_012409 | EPB41L5      | chr2:120770603-120936697  | 1.61131   | 1.25498    | -0.360569 | 0.527665 |
| XLOC_012864 | MYADML       | chr2:33951127-33953284    | 0.0120339 | 0.00937511 | -0.360196 | 1        |
| XLOC_001577 | MYSM1        | chr1:59120410-59165747    | 1.58262   | 1.23305    | -0.36009  | 0.472023 |
| XLOC_018207 | MSH5,SAPCD1  | chr6:31707724-31732624    | 9.01629   | 7.02489    | -0.360058 | 0.551241 |
| XLOC_001090 | GJC2         | chr1:228337414-228347527  | 0.0600238 | 0.0467671  | -0.360041 | 1        |
| XLOC_005173 | TCTN2        | chr12:124155659-124192950 | 2.06166   | 1.60649    | -0.359895 | 0.628907 |
| XLOC_017902 | TNIP1        | chr5:150409503-150467221  | 67.6625   | 52.7362    | -0.359563 | 0.365235 |
| XLOC_010297 | ZNF519       | chr18:14075988-14132489   | 0.352078  | 0.274469   | -0.359253 | 1        |
| XLOC_000734 | SLC27A3      | chr1:153747767-153752633  | 6.96381   | 5.42938    | -0.359088 | 0.549024 |
| XLOC_009358 | FN3K         | chr17:80693451-80709073   | 35.7124   | 27.8511    | -0.35869  | 0.421836 |
| XLOC_019136 | LATS1        | chr6:149979288-150039392  | 2.15664   | 1.68193    | -0.358665 | 0.689772 |
| XLOC_002853 | ENKUR        | chr10:25270907-25351208   | 0.192577  | 0.150202   | -0.358526 | 1        |
| XLOC_014601 | LOC100132273 | chr22:42486936-42521354   | 1.37954   | 1.07614    | -0.358326 | 0.752435 |
| XLOC_004443 | CREBZF       | chr11:85368607-85376182   | 5.33598   | 4.16284    | -0.358184 | 0.416512 |
| XLOC_013607 | CBFA2T2      | chr20:32077927-32237837   | 2.41929   | 1.88757    | -0.358054 | 0.463403 |
| XLOC_022566 | ZBTB34       | chr9:129622943-129648156  | 2.40198   | 1.87438    | -0.357813 | 0.475587 |
| XLOC_024047 | CUL4B        | chrX:119658445-119709684  | 7.25645   | 5.66321    | -0.357644 | 0.354349 |
| XLOC_020841 | LOC155060    | chr7:148982371-148994403  | 3.93979   | 3.07572    | -0.357197 | 0.538959 |
| XLOC_002280 | HNRNPU-AS1   | chr1:244998638-245010243  | 5.72396   | 4.4691     | -0.357029 | 0.478004 |
| XLOC_017031 | LRP2BP       | chr4:186131283-186300152  | 0.379211  | 0.296092   | -0.356959 | 0.905257 |
| XLOC_011237 | ZNF587       | chr19:58361180-58376491   | 1.60118   | 1.25029    | -0.356868 | 0.511483 |
| XLOC_011637 | ZNF607       | chr19:38187263-38210691   | 1.58244   | 1.23605    | -0.356416 | 0.571233 |
| XLOC_008458 | DNAH3        | chr16:20944475-21191937   | 0.0024324 | 0.00190009 | -0.356313 | 1        |
| XLOC_000149 | OTUD3        | chr1:20208887-20239437    | 1.61029   | 1.25812    | -0.356052 | 0.530079 |
| XLOC_018768 | LY6G6C       | chr6:31686424-31689511    | 0.0865088 | 0.067593   | -0.355973 | 1        |
| XLOC_007547 | CATSPER2     | chr15:43922771-43941039   | 0.735276  | 0.57464    | -0.355629 | 0.779038 |
| XLOC_018436 | FOXO3        | chr6:108881025-109005971  | 5.37894   | 4.2042     | -0.35549  | 0.384403 |
| XLOC_015726 | MST1R        | chr3:49924435-49941306    | 4.8266    | 3.77423    | -0.354824 | 0.487833 |
| XLOC_005639 | LTA4H        | chr12:96394530-96437298   | 101.499   | 79.373     | -0.354744 | 0.361509 |
| XLOC_004236 | PATL1        | chr11:59404191-59436511   | 13.9316   | 10.8951    | -0.354684 | 0.371962 |
| XLOC_016829 | FAM175A      | chr4:84377117-84406290    | 7.04222   | 5.50845    | -0.354383 | 0.647419 |
| XLOC_011500 | AKAP8L       | chr19:15490858-15529833   | 26.9631   | 21.0997    | -0.353766 | 0.400165 |
| XLOC_011304 | ZNF77        | chr19:2933215-2944969     | 2.69383   | 2.10822    | -0.353634 | 0.609868 |
| XLOC_007372 | DNM1P41      | chr15:85045805-85060078   | 0.236903  | 0.185408   | -0.353594 | 1        |
| XLOC_006881 | DPF3         | chr14:73136659-73360809   | 0.121193  | 0.0948658  | -0.353349 | 1        |
| XLOC_017745 | SPATA9       | chr5:94994019-95018714    | 0.0290158 | 0.02272    | -0.352879 | 1        |

|             |              |                           |            |            |           |          |
|-------------|--------------|---------------------------|------------|------------|-----------|----------|
| XLOC_020599 | CDK14        | chr7:90338711-90839904    | 0.0066779  | 0.00522901 | -0.352857 | 1        |
| XLOC_002797 | TUBAL3       | chr10:5435060-5446793     | 0.943955   | 0.739151   | -0.352848 | 0.765759 |
| XLOC_008410 | CARHSP1      | chr16:8946801-8962863     | 25.8638    | 20.253     | -0.352801 | 0.392176 |
| XLOC_002061 | ZNF648       | chr1:182023704-182030847  | 0.0238021  | 0.018645   | -0.352297 | 1        |
| XLOC_002252 | IRF2BP2      | chr1:234740014-234745271  | 21.0724    | 16.5071    | -0.352263 | 0.368002 |
| XLOC_006347 | ATL1         | chr14:50999799-51099784   | 0.54881    | 0.429948   | -0.352146 | 0.748388 |
| XLOC_001292 | FLJ37453     | chr1:16160709-16266950    | 2.9646     | 2.3227     | -0.352033 | 0.902527 |
| XLOC_018112 | BTN3A3       | chr6:26440699-26453643    | 0.947842   | 0.742637   | -0.35199  | 0.720751 |
| XLOC_016934 | ELF2         | chr4:139978870-140060630  | 4.00816    | 3.14137    | -0.351547 | 0.506642 |
| XLOC_000555 | STXBP3       | chr1:109289284-109352148  | 6.8807     | 5.39489    | -0.350962 | 0.452276 |
| XLOC_006921 | STON2        | chr14:81726993-81893748   | 0.00964262 | 0.00756056 | -0.350932 | 1        |
| XLOC_007994 | HS3ST2       | chr16:22825859-22927659   | 0.0118055  | 0.00925732 | -0.35079  | 1        |
| XLOC_011512 | SLC35E1      | chr19:16660647-16683193   | 15.6252    | 12.2557    | -0.350425 | 0.38623  |
| XLOC_022711 | RFX3         | chr9:3224646-3525983      | 0.606041   | 0.47539    | -0.350304 | 0.748685 |
| XLOC_000945 | TROVE2       | chr1:192981495-193060906  | 6.22267    | 4.88147    | -0.350218 | 0.838517 |
| XLOC_010020 | NPTX1        | chr17:78440632-78450404   | 0.00372125 | 0.00291928 | -0.350175 | 1        |
| XLOC_018033 | C6orf201     | chr6:4068592-4135831      | 0.0105211  | 0.00825497 | -0.349944 | 1        |
| XLOC_021759 | ZFAT-AS1     | chr8:135490030-135725292  | 0.058558   | 0.0459494  | -0.34982  | 1        |
| XLOC_000844 | DDR2         | chr1:162602227-162750247  | 0.0876613  | 0.0687975  | -0.349584 | 1        |
| XLOC_018381 | CD109        | chr6:74405507-74538041    | 1.24601    | 0.977971   | -0.349446 | 0.494255 |
| XLOC_017247 | RGMB         | chr5:98104998-98132198    | 7.31733    | 5.74479    | -0.349063 | 0.423417 |
| XLOC_006141 | MRPS31P5     | chr13:52741844-52768602   | 2.06512    | 1.62136    | -0.349015 | 0.629512 |
| XLOC_015249 | PVRL3        | chr3:110790605-110913016  | 1.27111    | 0.997981   | -0.349001 | 0.570778 |
| XLOC_015252 | ABHD10       | chr3:111697722-111712215  | 13.3653    | 10.4957    | -0.348694 | 0.401008 |
| XLOC_010354 | HDHD2        | chr18:44633780-44676871   | 5.98567    | 4.70116    | -0.348496 | 0.478829 |
| XLOC_009595 | SLC6A4       | chr17:28521336-28562986   | 0.0617427  | 0.0484957  | -0.348412 | 1        |
| XLOC_017331 | MIR4461      | chr5:134240809-134298336  | 6328.36    | 4971.71    | -0.348091 | 0.960032 |
| XLOC_005982 | LINC00460    | chr13:107028910-107030142 | 0.675655   | 0.530826   | -0.348047 | 0.858806 |
| XLOC_018127 | LOC100131289 | chr6:27729522-27730966    | 0.79739    | 0.626716   | -0.347474 | 0.875956 |
| XLOC_020928 | ZNF12        | chr7:6728063-6746566      | 4.19387    | 3.2967     | -0.347258 | 0.450976 |
| XLOC_014090 | SAMD10       | chr20:62605465-62610995   | 3.61565    | 2.84224    | -0.34723  | 0.658043 |
| XLOC_014108 | CXADR        | chr21:18885223-18965897   | 0.0449518  | 0.0353393  | -0.347107 | 1        |
| XLOC_018409 | PM20D2       | chr6:89855768-89875288    | 10.8902    | 8.56288    | -0.346867 | 0.392178 |
| XLOC_007175 | TUBGCP4      | chr15:43663312-43910998   | 7.06195    | 5.55353    | -0.346661 | 0.80614  |
| XLOC_006122 | CAB39L       | chr13:49882785-50018221   | 3.13837    | 2.4681     | -0.346617 | 0.527718 |
| XLOC_022489 | NIPSNAP3A    | chr9:107509968-107522403  | 5.7809     | 4.54689    | -0.346414 | 0.552533 |
| XLOC_017411 | FBXO38       | chr5:147763497-147822399  | 6.47821    | 5.0971     | -0.345917 | 0.437585 |
| XLOC_016134 | PPP1R2       | chr3:195241220-195270224  | 9.87535    | 7.7702     | -0.34588  | 0.415024 |
| XLOC_008814 | NLGN2        | chr17:7311501-7323179     | 22.9662    | 18.0706    | -0.34587  | 0.392176 |
| XLOC_004431 | GAB2         | chr11:77926335-78128868   | 2.56543    | 2.01898    | -0.345574 | 0.490914 |
| XLOC_009322 | CBX2         | chr17:77751976-77761449   | 7.30914    | 5.7527     | -0.345463 | 0.45332  |
| XLOC_013659 | PLCG1        | chr20:39766160-39804357   | 13.3964    | 10.5438    | -0.345449 | 0.384397 |
| XLOC_007985 | UQCRC2       | chr16:21964608-21994668   | 91.1353    | 71.7303    | -0.345426 | 0.398652 |
| XLOC_012706 | PRSS56       | chr2:233385172-233390425  | 0.379996   | 0.299098   | -0.345364 | 0.894866 |
| XLOC_016712 | RPL9         | chr4:39455744-39460568    | 5320.63    | 4188.29    | -0.345237 | 0.459346 |
| XLOC_001808 | FAM63A       | chr1:150969300-150980854  | 5.15168    | 4.05535    | -0.345216 | 0.569689 |
| XLOC_005374 | DENND5B      | chr12:31535156-31768285   | 0.554328   | 0.436385   | -0.345137 | 0.622503 |
| XLOC_014305 | DNAJC28      | chr21:34860237-34864023   | 0.291823   | 0.229733   | -0.345134 | 1        |
| XLOC_023897 | SPIN2B       | chrX:57146114-57147979    | 2.45696    | 1.9342     | -0.345133 | 0.736934 |

|             |           |                           |            |            |           |          |
|-------------|-----------|---------------------------|------------|------------|-----------|----------|
| XLOC_016534 | RPS3A     | chr4:152020724-152025804  | 3954.68    | 3113.85    | -0.344864 | 0.460632 |
| XLOC_023828 | SLC9A7    | chrX:46458685-46618607    | 5.42031    | 4.26855    | -0.344632 | 0.385393 |
| XLOC_006736 | TINF2     | chr14:24708850-24711880   | 16.7388    | 13.1822    | -0.344602 | 0.435859 |
| XLOC_018048 | GCNT2     | chr6:10521567-10629601    | 0.00754461 | 0.0059417  | -0.34457  | 1        |
| XLOC_010062 | WDR45B    | chr17:80572437-80606411   | 46.6113    | 36.7085    | -0.344565 | 0.386855 |
| XLOC_022723 | C9orf123  | chr9:7796490-7799799      | 28.8569    | 22.728     | -0.344447 | 0.396333 |
| XLOC_018362 | KIAA1586  | chr6:56911383-56920023    | 3.05487    | 2.40614    | -0.344391 | 0.539141 |
| XLOC_012037 | RSAD2     | chr2:7017795-7038363      | 0.00953243 | 0.00750838 | -0.344343 | 1        |
| XLOC_023496 | SH3BGR1   | chrX:80369199-80554046    | 18.2814    | 14.4024    | -0.344068 | 0.483696 |
| XLOC_005900 | ST13P4    | chr13:50746153-50747751   | 0.155029   | 0.122145   | -0.343944 | 1        |
| XLOC_006906 | IRF2BPL   | chr14:77490885-77495042   | 9.42439    | 7.42665    | -0.343687 | 0.480199 |
| XLOC_014420 | TMEM191B  | chr22:20377668-20380440   | 1.70318    | 1.34224    | -0.343581 | 0.836571 |
| XLOC_010672 | OCEL1     | chr19:17337054-17340028   | 27.7666    | 21.883     | -0.343536 | 0.485006 |
| XLOC_010724 | ZNF430    | chr19:21203425-21242852   | 1.26894    | 1.00009    | -0.343493 | 0.619423 |
| XLOC_014434 | POM121L8P | chr22:21636713-21652015   | 0.321516   | 0.253415   | -0.343387 | 1        |
| XLOC_003312 | OLFML1    | chr11:7506599-7532606     | 0.0125174  | 0.00986642 | -0.343338 | 1        |
| XLOC_003217 | NLRP6     | chr11:278569-285388       | 0.0790671  | 0.0623259  | -0.343245 | 1        |
| XLOC_006159 | COMMD6    | chr13:76099349-76111991   | 68.9891    | 54.3832    | -0.343207 | 0.379103 |
| XLOC_001697 | GSTM3     | chr1:110276553-110283660  | 16.111     | 12.7047    | -0.342688 | 0.390823 |
| XLOC_005265 | SLC2A3    | chr12:8071823-8088892     | 15.1158    | 11.9204    | -0.342617 | 0.414159 |
| XLOC_006104 | TPT1      | chr13:45911303-45915297   | 4754.84    | 3749.87    | -0.342556 | 0.462129 |
| XLOC_021748 | MYC       | chr8:128748314-128753680  | 277.342    | 218.727    | -0.342535 | 0.421289 |
| XLOC_011080 | ZNF766    | chr19:52772823-52795976   | 4.63408    | 3.65477    | -0.342503 | 0.501773 |
| XLOC_011349 | RFX2      | chr19:5978413-6110664     | 2.58234    | 2.03672    | -0.342427 | 0.606266 |
| XLOC_021213 | C7orf61   | chr7:100054237-100061894  | 0.336332   | 0.265277   | -0.342387 | 1        |
| XLOC_000687 | MLLT11    | chr1:151032150-151040973  | 0.755961   | 0.596254   | -0.342383 | 0.774876 |
| XLOC_003949 | PDCC1     | chr11:767222-777487       | 15.9235    | 12.5604    | -0.342273 | 0.403473 |
| XLOC_018898 | SUPT3H    | chr6:44794466-45518819    | 4.03776    | 3.18504    | -0.342245 | 0.598605 |
| XLOC_014782 | RFPL2     | chr22:32586421-32600718   | 0.292091   | 0.23041    | -0.342214 | 1        |
| XLOC_005000 | ZDHHC17   | chr12:77157853-77247474   | 2.46018    | 1.94097    | -0.341984 | 0.503549 |
| XLOC_023418 | GPR173    | chrX:53078505-53109796    | 0.00409002 | 0.003227   | -0.341912 | 1        |
| XLOC_002724 | BAG3      | chr10:121410881-121437329 | 28.0317    | 22.1205    | -0.341673 | 0.401008 |
| XLOC_017649 | ARL15     | chr5:53180613-53606403    | 1.34621    | 1.06235    | -0.341653 | 0.682986 |
| XLOC_012600 | ABI2      | chr2:204193002-204296892  | 7.96045    | 6.28383    | -0.341206 | 0.393326 |
| XLOC_000432 | DLEU2L    | chr1:63989012-64038364    | 0.126425   | 0.0998088  | -0.341038 | 1        |
| XLOC_002963 | ATOH7     | chr10:69990351-69991870   | 0.178868   | 0.141222   | -0.340928 | 1        |
| XLOC_015809 | TMF1      | chr3:69068977-69101484    | 3.23157    | 2.55221    | -0.34049  | 0.438793 |
| XLOC_016402 | PRDM8     | chr4:81106423-81125482    | 20.1912    | 15.953     | -0.339901 | 0.416925 |
| XLOC_010925 | BCL3      | chr19:45251977-45263301   | 7.54535    | 5.9627     | -0.339621 | 0.618251 |
| XLOC_003599 | PPP2R5B   | chr11:64692142-64703360   | 17.6175    | 13.923     | -0.339541 | 0.423172 |
| XLOC_012471 | FMNL2     | chr2:153191750-153506348  | 8.09401    | 6.39957    | -0.33888  | 0.41883  |
| XLOC_000644 | PIAS3     | chr1:145575987-145589435  | 6.8543     | 5.42041    | -0.338609 | 0.517556 |
| XLOC_012580 | AOX1      | chr2:201450730-201536217  | 0.173421   | 0.137143   | -0.338596 | 1        |
| XLOC_023292 | SMS       | chrX:21958690-22012955    | 208.723    | 165.064    | -0.338566 | 0.402378 |
| XLOC_022474 | TGFBR1    | chr9:101867411-101916473  | 6.64791    | 5.25788    | -0.338421 | 0.409331 |
| XLOC_013424 | TIGD1     | chr2:233412778-233415283  | 1.82104    | 1.44043    | -0.338263 | 0.740711 |
| XLOC_009092 | TMEM106A  | chr17:41363893-41371589   | 0.733265   | 0.580043   | -0.338176 | 0.765718 |
| XLOC_008293 | ZNF778    | chr16:89284110-89295965   | 0.395981   | 0.313251   | -0.338112 | 0.779038 |
| XLOC_009299 | PRCD      | chr17:74523429-74541458   | 0.0959475  | 0.0759028  | -0.338091 | 1        |

|             |              |                          |           |            |           |          |
|-------------|--------------|--------------------------|-----------|------------|-----------|----------|
| XLOC_016084 | MAP6D1       | chr3:183533663-183543393 | 8.18986   | 6.47891    | -0.338088 | 0.540163 |
| XLOC_005449 | CSRP2        | chr12:51454987-51477454  | 5.21043   | 4.12261    | -0.337846 | 0.46756  |
| XLOC_015005 | CRTAP        | chr3:33155449-33189265   | 36.9721   | 29.2533    | -0.337841 | 0.406581 |
| XLOC_011216 | AURKC        | chr19:57742376-57746916  | 1.08625   | 0.859738   | -0.337383 | 0.810769 |
| XLOC_021327 | AKR1B1       | chr7:134127106-134143888 | 0.0121204 | 0.00959353 | -0.337299 | 1        |
| XLOC_020690 | HBP1         | chr7:106809405-107218968 | 5.35276   | 4.23764    | -0.337022 | 0.855458 |
| XLOC_016511 | RAB33B       | chr4:140374960-140397069 | 1.37362   | 1.0875     | -0.336967 | 0.652401 |
| XLOC_006161 | FBXL3        | chr13:77579388-77601331  | 5.97328   | 4.72948    | -0.336844 | 0.46587  |
| XLOC_004468 | SNORA18      | chr11:93466631-93466763  | 30.2551   | 23.9555    | -0.336821 | 0.922274 |
| XLOC_021746 | PCAT1        | chr8:128025398-128033259 | 0.0718919 | 0.0569234  | -0.336808 | 1        |
| XLOC_021576 | HOOK3        | chr8:42752032-42885682   | 1.05191   | 0.832912   | -0.33677  | 0.498276 |
| XLOC_013001 | GCFC2        | chr2:75889831-75938111   | 12.9396   | 10.2462    | -0.3367   | 0.625587 |
| XLOC_002332 | PFKFB3       | chr10:6186842-6277507    | 18.5211   | 14.6668    | -0.336617 | 0.403473 |
| XLOC_003565 | TTC9C        | chr11:62495951-62506108  | 22.3663   | 17.7119    | -0.336607 | 0.492305 |
| XLOC_022911 | GAS1         | chr9:89559276-89562104   | 0.535863  | 0.424361   | -0.336573 | 0.840418 |
| XLOC_015967 | DZIP1L       | chr3:137780826-137834451 | 2.2253    | 1.76246    | -0.336403 | 0.61923  |
| XLOC_007991 | LOC100132247 | chr16:22524843-22547841  | 2.19775   | 1.74073    | -0.336335 | 0.643053 |
| XLOC_020828 | OR2A1        | chr7:144015217-144016150 | 0.0270266 | 0.0214092  | -0.336147 | 1        |
| XLOC_005898 | KCNRG,TRIM13 | chr13:50556687-50699677  | 3.98723   | 3.15857    | -0.336117 | 0.539141 |
| XLOC_017120 | ZNF131       | chr5:43121641-43175823   | 3.67496   | 2.9116     | -0.335917 | 0.566136 |
| XLOC_010704 | TMEM59L      | chr19:18723681-18731849  | 0.0914494 | 0.072456   | -0.335868 | 1        |
| XLOC_018239 | RPS18        | chr6:33239851-33244281   | 14181.1   | 11235.9    | -0.335856 | 0.531358 |
| XLOC_002822 | FRMD4A       | chr10:13685705-14372866  | 13.2113   | 10.4679    | -0.335798 | 0.409203 |
| XLOC_022926 | AUH          | chr9:93976096-94124206   | 7.96969   | 6.31489    | -0.335765 | 0.547145 |
| XLOC_015984 | XRN1         | chr3:142025448-142166853 | 1.38228   | 1.09537    | -0.335631 | 0.514509 |
| XLOC_015038 | ZNF619       | chr3:40518603-40531728   | 0.681295  | 0.539899   | -0.33559  | 0.722516 |
| XLOC_016638 | ZFYVE28      | chr4:2271323-2420370     | 5.45007   | 4.31974    | -0.335533 | 0.610478 |
| XLOC_006437 | ACOT6        | chr14:74083547-74086592  | 0.0431445 | 0.0341984  | -0.335247 | 1        |
| XLOC_016035 | RARRES1      | chr3:158414896-158450275 | 1.52988   | 1.21281    | -0.33506  | 0.768328 |
| XLOC_018804 | HLA-DMA      | chr6:32916390-32920899   | 0.717972  | 0.569184   | -0.335032 | 0.859197 |
| XLOC_015818 | RYBP         | chr3:72423743-72495774   | 6.30997   | 5.00259    | -0.33496  | 0.458592 |
| XLOC_022435 | CENPP        | chr9:95059639-95432547   | 1.80034   | 1.42756    | -0.334715 | 0.919793 |
| XLOC_015265 | GRAMD1C      | chr3:113557680-113666021 | 0.729303  | 0.578313   | -0.334669 | 0.715378 |
| XLOC_010278 | LINC00526    | chr18:5236722-5238028    | 1.77076   | 1.40422    | -0.334596 | 0.773721 |
| XLOC_007716 | CIB2         | chr15:78396947-78423877  | 23.3366   | 18.5065    | -0.33456  | 0.4662   |
| XLOC_015782 | IL17RD       | chr3:57124009-57199403   | 1.4065    | 1.11558    | -0.334323 | 0.532783 |
| XLOC_002618 | LCOR         | chr10:98592016-98724198  | 1.53646   | 1.21865    | -0.334321 | 0.519864 |
| XLOC_011753 | PPP1R13L     | chr19:45882891-45927177  | 2.86294   | 2.27108    | -0.334121 | 0.983243 |
| XLOC_002875 | ARHGAP12     | chr10:32094325-32217804  | 5.61372   | 4.45332    | -0.334075 | 0.450505 |
| XLOC_022821 | TLN1         | chr9:35697333-35749225   | 15.3749   | 12.1968    | -0.334072 | 0.633194 |
| XLOC_001303 | CROCCP2      | chr1:16944750-16957401   | 19.521    | 15.4873    | -0.333934 | 0.491782 |
| XLOC_004013 | OR51B4       | chr11:5322243-5323176    | 0.0955411 | 0.0758016  | -0.333894 | 1        |
| XLOC_010822 | HKR1         | chr19:37825579-37855357  | 7.43609   | 5.89985    | -0.333867 | 0.470786 |
| XLOC_010324 | TRAPPC8      | chr18:29409135-29523091  | 2.0866    | 1.65557    | -0.333826 | 0.522524 |
| XLOC_015833 | PROS1        | chr3:93591880-93692934   | 12.3924   | 9.83354    | -0.333675 | 0.412911 |
| XLOC_004040 | MRPL17       | chr11:6701615-6704632    | 48.3744   | 38.3877    | -0.333598 | 0.418432 |
| XLOC_017401 | TCERG1       | chr5:145826872-145891069 | 11.7359   | 9.31352    | -0.333532 | 0.428853 |
| XLOC_008128 | MT1IP        | chr16:56709648-56711653  | 0.0109831 | 0.00871717 | -0.333352 | 1        |
| XLOC_000752 | EFNA3        | chr1:155051347-155060014 | 36.8629   | 29.2604    | -0.333217 | 0.444284 |

|             |                |                           |            |            |           |          |
|-------------|----------------|---------------------------|------------|------------|-----------|----------|
| XLOC_003964 | IFITM10        | chr11:1490684-1785501     | 0.690085   | 0.547842   | -0.333012 | 0.978269 |
| XLOC_010477 | GNA11          | chr19:3094407-3121454     | 7.72286    | 6.13145    | -0.332906 | 0.627868 |
| XLOC_020443 | EEPD1          | chr7:36192835-36341152    | 1.8157     | 1.44158    | -0.332873 | 0.633194 |
| XLOC_017108 | NIPBL          | chr5:36876860-37065921    | 1.59399    | 1.26575    | -0.332642 | 0.490042 |
| XLOC_018235 | HSD17B8        | chr6:33172413-33174608    | 6.25361    | 4.96594    | -0.332623 | 0.663177 |
| XLOC_016173 | FGFR3          | chr4:1795038-1810599      | 4.89676    | 3.88862    | -0.332568 | 0.552635 |
| XLOC_000867 | ATP1B1         | chr1:169075946-169337186  | 8.95029    | 7.10769    | -0.332554 | 0.72546  |
| XLOC_008617 | KIAA0895L      | chr16:67204399-67217883   | 5.48054    | 4.35241    | -0.332503 | 0.736122 |
| XLOC_023194 | RNF208         | chr9:140114698-140115775  | 53.2139    | 42.27      | -0.332169 | 0.472657 |
| XLOC_016993 | DDX60L         | chr4:169277885-169401638  | 0.304299   | 0.241762   | -0.331902 | 1        |
| XLOC_009073 | MLX            | chr17:40719077-40729849   | 29.9905    | 23.8335    | -0.331516 | 0.571238 |
| XLOC_003392 | CSTF3-AS1      | chr11:33183202-33213142   | 0.0218359  | 0.0173554  | -0.331317 | 1        |
| XLOC_015061 | ZNF35          | chr3:44690232-44702283    | 2.30101    | 1.82893    | -0.331273 | 0.623996 |
| XLOC_017210 | PAPD4          | chr5:78908242-78982471    | 6.08621    | 4.83756    | -0.331265 | 0.478623 |
| XLOC_011432 | RAB3D          | chr19:11406823-11450344   | 11.8222    | 9.39758    | -0.331135 | 0.437702 |
| XLOC_011917 | ZNF83          | chr19:53115617-53193886   | 3.29662    | 2.62065    | -0.331064 | 0.554334 |
| XLOC_001338 | RAP1GAP        | chr1:21922707-21995856    | 3.76578    | 2.99413    | -0.330811 | 0.580093 |
| XLOC_007574 | FLJ10038       | chr15:50569388-50650503   | 0.91032    | 0.723833   | -0.330717 | 0.869722 |
| XLOC_003006 | C10orf55       | chr10:75669726-75682535   | 0.202646   | 0.161132   | -0.330714 | 1        |
| XLOC_012301 | TEKT4          | chr2:95534429-95613087    | 0.488393   | 0.388346   | -0.3307   | 0.886464 |
| XLOC_022310 | LOC100129250   | chr9:32540541-32553015    | 16.1639    | 12.855     | -0.330446 | 0.912548 |
| XLOC_023965 | SATL1          | chrX:84258897-84363974    | 0.502994   | 0.400027   | -0.330442 | 0.943284 |
| XLOC_011935 | VSTM1          | chr19:54544079-54567207   | 0.0276204  | 0.0219667  | -0.330414 | 1        |
| XLOC_015804 | MAG11          | chr3:65339905-66024509    | 0.875971   | 0.696711   | -0.330323 | 0.647257 |
| XLOC_003777 | ENDOD1         | chr11:94822973-94865815   | 0.293208   | 0.233215   | -0.330263 | 1        |
| XLOC_014662 | CECR1          | chr22:17660191-17690779   | 0.0151251  | 0.0120305  | -0.330255 | 1        |
| XLOC_020335 | GPER           | chr7:1036622-1177893      | 0.188881   | 0.150243   | -0.330183 | 1        |
| XLOC_003036 | ACTA2          | chr10:90694830-90775542   | 2.60891    | 2.07524    | -0.330169 | 0.870297 |
| XLOC_017990 | ZNF354A        | chr5:178138521-178157703  | 6.33659    | 5.04052    | -0.330135 | 0.500983 |
| XLOC_019073 | PTPRK          | chr6:128289923-128841870  | 1.33944    | 1.06549    | -0.33012  | 0.587446 |
| XLOC_009966 | GGA3           | chr17:73232693-73267311   | 11.334     | 9.01596    | -0.330102 | 0.773159 |
| XLOC_014597 | SEPT3          | chr22:42372930-42394225   | 7.94693    | 6.32192    | -0.330035 | 0.517827 |
| XLOC_010710 | SLC25A42       | chr19:19174802-19223841   | 3.70519    | 2.94779    | -0.329915 | 0.612717 |
| XLOC_006017 | ZMYM5          | chr13:20397623-20437776   | 4.61119    | 3.66928    | -0.32964  | 0.655872 |
| XLOC_012106 | C2orf16        | chr2:27799388-27805589    | 0.120864   | 0.0961779  | -0.329611 | 1        |
| XLOC_001379 | NR0B2          | chr1:27237974-27240567    | 0.0263305  | 0.0209544  | -0.329487 | 1        |
| XLOC_006978 | HSP90AA1       | chr14:102547074-102606086 | 331.074    | 263.503    | -0.329332 | 0.454256 |
| XLOC_022158 | LOC100131726   | chr8:124194751-124222318  | 0.0474533  | 0.0377726  | -0.329171 | 1        |
| XLOC_001741 | TRIM45         | chr1:117653676-117664411  | 0.429376   | 0.341813   | -0.329031 | 0.797588 |
| XLOC_020400 | STK31          | chr7:23749785-23872130    | 0.0584687  | 0.0465474  | -0.328963 | 1        |
| XLOC_011096 | ZNF845         | chr19:53837001-53858122   | 1.20207    | 0.957008   | -0.32892  | 0.62969  |
| XLOC_018648 | LOC100130357   | chr6:12717036-13295818    | 0.212488   | 0.169171   | -0.3289   | 1        |
| XLOC_000557 | GPSM2          | chr1:109419602-109506111  | 1.44244    | 1.14858    | -0.328664 | 0.899947 |
| XLOC_003021 | MAT1A          | chr10:82031575-82049434   | 0.00517015 | 0.00411687 | -0.328659 | 1        |
| XLOC_007752 | LOC388152,LOC6 | chr15:84860599-84898920   | 13.3342    | 10.6179    | -0.328631 | 0.46877  |
| XLOC_020995 | LOC401320      | chr7:30587972-30617395    | 0.610068   | 0.48592    | -0.32825  | 0.74612  |
| XLOC_021534 | HMBOX1         | chr8:28747910-28910242    | 0.85276    | 0.679244   | -0.32821  | 0.732319 |
| XLOC_010894 | CIC            | chr19:42788816-42799949   | 9.90706    | 7.89125    | -0.328203 | 0.462752 |
| XLOC_013371 | NHEJ1          | chr2:219940045-220025587  | 8.48751    | 6.76175    | -0.327946 | 0.533383 |

|             |                   |                           |           |           |           |          |
|-------------|-------------------|---------------------------|-----------|-----------|-----------|----------|
| XLOC_006351 | FRMD6             | chr14:51921229-52197444   | 18.5296   | 14.7634   | -0.327812 | 0.424678 |
| XLOC_021570 | AP3M2             | chr8:42010463-42028701    | 4.9762    | 3.96488   | -0.327768 | 0.508043 |
| XLOC_006838 | RTN1              | chr14:60062693-60337557   | 0.0273705 | 0.0218175 | -0.327137 | 1        |
| XLOC_009921 | MIR4315-1,PLEKHA1 | chr17:62780958-62833302   | 1.99315   | 1.58892   | -0.327004 | 0.784328 |
| XLOC_013633 | DLGAP4            | chr20:34995443-35157040   | 23.8929   | 19.0483   | -0.326921 | 0.439404 |
| XLOC_013952 | NDRG3             | chr20:35280168-35374541   | 5.93781   | 4.73518   | -0.326514 | 0.506617 |
| XLOC_019094 | SGK1              | chr6:134490383-134639196  | 2.6996    | 2.153     | -0.326393 | 0.658831 |
| XLOC_023528 | LINC00630         | chrX:102024094-102140338  | 0.238521  | 0.190277  | -0.326021 | 1        |
| XLOC_018131 | HIST1H4J          | chr6:27791902-27792258    | 1.454     | 1.15999   | -0.325924 | 0.923579 |
| XLOC_017385 | PCDHB19P          | chr5:140619688-140624312  | 0.0346837 | 0.0276725 | -0.325805 | 1        |
| XLOC_007923 | NUDT16L1          | chr16:4743693-4745860     | 29.4655   | 23.5108   | -0.325707 | 0.499006 |
| XLOC_001219 | PANK4             | chr1:2439974-2458035      | 10.4826   | 8.36529   | -0.325505 | 0.529265 |
| XLOC_010021 | BAIAP2-AS1        | chr17:79002932-79008519   | 3.02109   | 2.41098   | -0.325447 | 0.584417 |
| XLOC_021140 | CACNA2D1          | chr7:81579417-82073031    | 0.149831  | 0.119603  | -0.325091 | 1        |
| XLOC_018392 | DOPEY1            | chr6:83777384-83906256    | 0.342018  | 0.273045  | -0.324935 | 1        |
| XLOC_006667 | CRIP1             | chr14:105953256-105955124 | 0.78979   | 0.630567  | -0.32482  | 0.922216 |
| XLOC_021162 | SAMD9L            | chr7:92759367-92777680    | 0.0701079 | 0.0559873 | -0.324475 | 1        |
| XLOC_020640 | AP4M1             | chr7:99690403-99723128    | 23.9656   | 19.1409   | -0.324305 | 0.946021 |
| XLOC_000058 | PHF13             | chr1:6673755-6684093      | 5.6859    | 4.54126   | -0.324296 | 0.531494 |
| XLOC_021347 | JHDM1D            | chr7:139784545-139876741  | 1.63216   | 1.30361   | -0.324269 | 0.532219 |
| XLOC_004829 | SPATS2            | chr12:49760687-49921207   | 9.57292   | 7.64653   | -0.324153 | 0.473081 |
| XLOC_022113 | STK3              | chr8:99466858-99954799    | 5.99737   | 4.79092   | -0.324026 | 0.521675 |
| XLOC_022294 | DENND4C           | chr9:19230762-19374137    | 2.52025   | 2.0139    | -0.323574 | 0.494507 |
| XLOC_014460 | DDTL              | chr22:24309025-24322019   | 2.01949   | 1.61408   | -0.323274 | 0.961218 |
| XLOC_018514 | MYB               | chr6:135502452-135540311  | 0.914136  | 0.730672  | -0.323185 | 0.730925 |
| XLOC_001914 | NES               | chr1:156638555-156647189  | 5.89377   | 4.7112    | -0.323096 | 0.495723 |
| XLOC_018303 | GNMT              | chr6:42928499-42946981    | 0.236948  | 0.189405  | -0.323095 | 1        |
| XLOC_007242 | LACTB             | chr15:63413998-63434260   | 7.45029   | 5.95557   | -0.323056 | 0.541442 |
| XLOC_018487 | TRMT11            | chr6:126307575-126360420  | 7.77611   | 6.21607   | -0.323047 | 0.538495 |
| XLOC_005567 | RPSAP52           | chr12:66151799-66360071   | 1.97744   | 1.5809    | -0.322892 | 0.968469 |
| XLOC_012615 | CREB1             | chr2:208394615-208470284  | 1.7937    | 1.43406   | -0.322836 | 0.519005 |
| XLOC_013695 | PCIF1             | chr20:44563316-44576662   | 10.8048   | 8.63867   | -0.322788 | 0.530096 |
| XLOC_019009 | USP45             | chr6:99880183-99963252    | 1.2371    | 0.989091  | -0.322784 | 0.604499 |
| XLOC_007804 | TM2D3             | chr15:102182048-102192594 | 19.9034   | 15.9143   | -0.32269  | 0.492699 |
| XLOC_007601 | ZNF280D           | chr15:56922373-57025787   | 2.98863   | 2.38967   | -0.322675 | 0.654938 |
| XLOC_010913 | ZNF223            | chr19:44556163-44572142   | 1.05371   | 0.842603  | -0.322549 | 0.74244  |
| XLOC_003635 | CST6              | chr11:65779461-65780976   | 0.0531433 | 0.0424983 | -0.322484 | 1        |
| XLOC_022485 | SMC2              | chr9:106856540-106903700  | 4.85467   | 3.88261   | -0.322347 | 0.459456 |
| XLOC_006338 | PRPF39            | chr14:45553301-45603732   | 6.60265   | 5.28068   | -0.322321 | 0.831614 |
| XLOC_002091 | ZBTB41            | chr1:197122813-197169672  | 0.462955  | 0.370316  | -0.322115 | 0.689772 |
| XLOC_012588 | STRADB            | chr2:202316391-202345574  | 18.6548   | 14.922    | -0.322102 | 0.459975 |
| XLOC_020662 | MUC12             | chr7:100612903-100662230  | 0.309547  | 0.247625  | -0.322006 | 1        |
| XLOC_013556 | PLK1S1            | chr20:21106623-21227258   | 5.9297    | 4.74405   | -0.321841 | 0.557559 |
| XLOC_016129 | TMEM44            | chr3:194304996-194354150  | 15.3953   | 12.3171   | -0.321832 | 0.527718 |
| XLOC_004741 | GPRC5A            | chr12:13043955-13066600   | 8.88983   | 7.113     | -0.321697 | 0.54033  |
| XLOC_015297 | LOC100129550      | chr3:122605359-122611263  | 1.12718   | 0.901947  | -0.321607 | 0.643053 |
| XLOC_002766 | LRRRC27           | chr10:134145613-134195010 | 3.66495   | 2.93263   | -0.321601 | 0.70878  |
| XLOC_005815 | C1QTNF9           | chr13:24883715-24896669   | 0.019572  | 0.0156628 | -0.321442 | 1        |
| XLOC_016880 | TBCK              | chr4:106967232-107270381  | 1.54798   | 1.23881   | -0.321432 | 0.935543 |

|             |                |                           |           |            |           |          |
|-------------|----------------|---------------------------|-----------|------------|-----------|----------|
| XLOC_009519 | NCOR1          | chr17:15933407-16118874   | 1.54414   | 1.23577    | -0.321397 | 0.568837 |
| XLOC_003071 | ARHGAP19,SLIT1 | chr10:98757794-99052430   | 2.09763   | 1.67874    | -0.321385 | 0.569924 |
| XLOC_014610 | PNPLA3         | chr22:44319618-44343448   | 0.915608  | 0.732866   | -0.321182 | 0.774876 |
| XLOC_007511 | C15orf52       | chr15:40623652-40633168   | 0.0621808 | 0.0497745  | -0.321062 | 1        |
| XLOC_009206 | VMP1           | chr17:57784862-57917952   | 62.6757   | 50.1739    | -0.320968 | 0.439781 |
| XLOC_018869 | FRS3           | chr6:41737913-41747630    | 4.05731   | 3.24828    | -0.320848 | 0.663419 |
| XLOC_007402 | ZNF774         | chr15:90895476-90904715   | 0.576374  | 0.461477   | -0.320747 | 0.837065 |
| XLOC_005411 | ASB8           | chr12:48541571-48551377   | 5.37946   | 4.30726    | -0.320689 | 0.566913 |
| XLOC_001197 | ACAP3          | chr1:1227763-1243269      | 6.74573   | 5.4016     | -0.320589 | 0.565714 |
| XLOC_006055 | UBL3           | chr13:30338544-30424820   | 4.68091   | 3.74843    | -0.320504 | 0.519884 |
| XLOC_009152 | ABI3           | chr17:47283595-47300587   | 0.0148468 | 0.0118894  | -0.320479 | 1        |
| XLOC_022282 | KDM4C          | chr9:6720862-7175648      | 3.49022   | 2.79571    | -0.320105 | 0.538524 |
| XLOC_017786 | MARCH3         | chr5:126203405-126366440  | 0.364802  | 0.292219   | -0.320067 | 1        |
| XLOC_023846 | PIM2           | chrX:48770458-48776413    | 17.9768   | 14.4006    | -0.320007 | 0.486619 |
| XLOC_006884 | HEATR4         | chr14:73945188-74025651   | 0.0309475 | 0.024791   | -0.320007 | 1        |
| XLOC_008909 | MAPK7          | chr17:19240866-19290532   | 8.25351   | 6.61192    | -0.319938 | 0.817355 |
| XLOC_022306 | IFT74          | chr9:26903367-27062931    | 3.58855   | 2.87494    | -0.319865 | 0.897568 |
| XLOC_000027 | MIB2           | chr1:1550794-1565990      | 9.78418   | 7.83861    | -0.319853 | 0.554064 |
| XLOC_012924 | FANCL          | chr2:58273776-58468515    | 8.19171   | 6.56283    | -0.319847 | 0.644608 |
| XLOC_019116 | CITED2         | chr6:139693391-139695787  | 7.52192   | 6.02698    | -0.319667 | 0.593292 |
| XLOC_010190 | C18orf25       | chr18:43753987-43846955   | 1.90896   | 1.52963    | -0.319607 | 0.600802 |
| XLOC_005725 | FBXO21         | chr12:117581584-117628300 | 4.48457   | 3.59394    | -0.319405 | 0.538721 |
| XLOC_018778 | ZBTB12         | chr6:31865561-31913449    | 5.51441   | 4.41944    | -0.319343 | 0.673957 |
| XLOC_020943 | ANKMY2         | chr7:16639400-16685442    | 6.18761   | 4.9601     | -0.319014 | 0.545465 |
| XLOC_018959 | EEF1A1         | chr6:74225472-74230755    | 6817.99   | 5465.43    | -0.319012 | 0.418773 |
| XLOC_014463 | CABIN1         | chr22:24407764-24574596   | 9.37978   | 7.52008    | -0.318807 | 0.472023 |
| XLOC_016118 | MB21D2         | chr3:192514604-192635950  | 1.96978   | 1.5796     | -0.31848  | 0.664979 |
| XLOC_014795 | MYH9           | chr22:36677322-36784063   | 63.0665   | 50.5748    | -0.318456 | 0.460482 |
| XLOC_007243 | RAB8B          | chr15:63481727-63559973   | 5.28652   | 4.23945    | -0.318442 | 0.491753 |
| XLOC_002397 | BAMBI          | chr10:28966423-28971868   | 6.28412   | 5.03979    | -0.318348 | 0.629512 |
| XLOC_004380 | SHANK2         | chr11:70313960-70935808   | 0.642202  | 0.515294   | -0.317631 | 0.681053 |
| XLOC_018836 | SLC26A8        | chr6:35911290-35992413    | 0.0117813 | 0.00945381 | -0.31753  | 1        |
| XLOC_011817 | FUT1           | chr19:49251267-49258647   | 2.82591   | 2.26775    | -0.317448 | 0.622631 |
| XLOC_000740 | ATP8B2         | chr1:154298035-154323780  | 0.869698  | 0.697939   | -0.317413 | 0.699749 |
| XLOC_015354 | PPP2R3A        | chr3:135684514-135866752  | 1.08057   | 0.867193   | -0.317364 | 0.677269 |
| XLOC_021312 | UBE2H          | chr7:129470572-129592800  | 11.3602   | 9.11732    | -0.317311 | 0.444766 |
| XLOC_005594 | NAP1L1         | chr12:76438671-76478738   | 171.341   | 137.515    | -0.317275 | 0.4662   |
| XLOC_022255 | ZNF16          | chr8:146155743-146176274  | 12.4978   | 10.0312    | -0.317184 | 0.49034  |
| XLOC_021120 | POM121C        | chr7:75039623-75115568    | 10.6164   | 8.52145    | -0.317117 | 0.519754 |
| XLOC_011288 | BTBD2          | chr19:1985446-2015702     | 81.4473   | 65.3841    | -0.316927 | 0.447327 |
| XLOC_016598 | SNX25          | chr4:186131283-186300152  | 4.92288   | 3.95204    | -0.316905 | 0.566829 |
| XLOC_022086 | TMEM55A        | chr8:92006501-92053203    | 7.90946   | 6.34981    | -0.316865 | 0.539268 |
| XLOC_002439 | FAM35DP        | chr10:47379719-47421238   | 0.216723  | 0.173999   | -0.316774 | 1        |
| XLOC_022509 | SNX30          | chr9:115513133-115637267  | 2.59265   | 2.08156    | -0.316762 | 0.521734 |
| XLOC_006803 | MAP4K5         | chr14:50885210-50999376   | 9.32373   | 7.48606    | -0.316702 | 0.459935 |
| XLOC_010816 | ZNF567         | chr19:37180301-37212225   | 2.86116   | 2.29726    | -0.316688 | 0.612379 |
| XLOC_015253 | TAGLN3         | chr3:111717585-111732735  | 0.0183037 | 0.0146971  | -0.316604 | 1        |
| XLOC_005692 | GIT2           | chr12:110367606-110434194 | 7.42778   | 5.96429    | -0.316581 | 0.580016 |
| XLOC_012040 | ID2            | chr2:8822112-8824583      | 2.50081   | 2.00821    | -0.316485 | 0.754905 |



|             |                |                           |            |            |           |          |
|-------------|----------------|---------------------------|------------|------------|-----------|----------|
| XLOC_022166 | TMEM65         | chr8:125323158-125384940  | 4.93498    | 3.96297    | -0.316462 | 0.527718 |
| XLOC_010679 | SLC27A1        | chr19:17581299-17616977   | 5.92624    | 4.75912    | -0.316423 | 0.590662 |
| XLOC_003799 | CUL5           | chr11:107879407-107978488 | 2.2613     | 1.81613    | -0.316287 | 0.542456 |
| XLOC_000654 | NBPF15,NBPF16  | chr1:148558187-148596267  | 6.13291    | 4.92635    | -0.316053 | 0.500835 |
| XLOC_017687 | GUSBP9,SMA5    | chr5:69776869-69881549    | 0.622822   | 0.500293   | -0.316046 | 0.881554 |
| XLOC_023877 | KDM5C          | chrX:53220502-53254604    | 21.2652    | 17.083     | -0.31593  | 0.444192 |
| XLOC_015669 | ALS2CL         | chr3:46710484-46735194    | 6.37611    | 5.12281    | -0.31574  | 0.537566 |
| XLOC_000338 | ST3GAL3        | chr1:44173203-44396837    | 3.60459    | 2.89622    | -0.315663 | 0.672955 |
| XLOC_011197 | RFPL4A         | chr19:56270506-56274541   | 0.271627   | 0.218281   | -0.315441 | 1        |
| XLOC_000871 | GORAB          | chr1:170501262-170522974  | 2.0286     | 1.63084    | -0.314873 | 0.664469 |
| XLOC_000762 | ASH1L-AS1      | chr1:155305051-155533735  | 1.94768    | 1.56579    | -0.314871 | 0.93305  |
| XLOC_001950 | TAGLN2         | chr1:159887902-159895284  | 73.0729    | 58.7535    | -0.31466  | 0.472305 |
| XLOC_003507 | DTX4           | chr11:58939811-58980494   | 1.45824    | 1.17259    | -0.314529 | 0.648844 |
| XLOC_015601 | TBC1D5         | chr3:17198653-17784240    | 3.59429    | 2.89048    | -0.3144   | 0.502454 |
| XLOC_005742 | LOC100506668   | chr12:120907659-120936298 | 4.53586    | 3.64802    | -0.314261 | 0.938925 |
| XLOC_007166 | JMJD7,JMJD7-PL | chr15:42120282-42186275   | 18.6849    | 15.0293    | -0.314101 | 0.572911 |
| XLOC_014773 | PLA2G3         | chr22:31530792-31536469   | 0.0104289  | 0.00838984 | -0.313879 | 1        |
| XLOC_020924 | FAM220A        | chr7:6369039-6388590      | 6.73014    | 5.4147     | -0.313756 | 0.58701  |
| XLOC_008147 | CCDC135        | chr16:57728712-57765367   | 0.0981982  | 0.0790107  | -0.313648 | 1        |
| XLOC_020511 | ZNF138         | chr7:64254765-64314178    | 3.2903     | 2.64834    | -0.313134 | 0.612746 |
| XLOC_009570 | UNC119         | chr17:26873724-26879646   | 74.3144    | 59.8202    | -0.313009 | 0.461367 |
| XLOC_021383 | PDIA4          | chr7:148700153-148725782  | 63.0214    | 50.7308    | -0.312979 | 0.472728 |
| XLOC_007637 | PARP16         | chr15:65550436-65579018   | 7.71372    | 6.20974    | -0.312893 | 0.558912 |
| XLOC_004363 | TBX10          | chr11:67398773-67407031   | 0.0189138  | 0.0152279  | -0.312719 | 1        |
| XLOC_012977 | RAB11FIP5      | chr2:73300509-73340146    | 20.0373    | 16.1326    | -0.312714 | 0.465794 |
| XLOC_004553 | TMPRSS13       | chr11:117771355-117800168 | 0.00552095 | 0.0044451  | -0.312702 | 1        |
| XLOC_022281 | UHRF2          | chr9:6413150-6507051      | 5.55712    | 4.47492    | -0.312478 | 0.529265 |
| XLOC_004308 | CDC42BPG       | chr11:64591661-64612041   | 0.0847663  | 0.0682616  | -0.312418 | 1        |
| XLOC_018123 | PRSS16         | chr6:27215501-27224399    | 1.94285    | 1.56461    | -0.31237  | 0.727856 |
| XLOC_008397 | CDIP1          | chr16:4560676-4588816     | 0.00769036 | 0.00619395 | -0.312192 | 1        |
| XLOC_007739 | GOLGA6L10      | chr15:83009406-83018198   | 0.0548898  | 0.0442141  | -0.312031 | 1        |
| XLOC_023554 | MID2           | chrX:107069083-107174867  | 1.3496     | 1.08717    | -0.311951 | 0.611781 |
| XLOC_006443 | CCDC176        | chr14:74486058-74551196   | 0.53237    | 0.428852   | -0.311951 | 0.877022 |
| XLOC_007343 | FAH            | chr15:80445232-80478924   | 30.1326    | 24.2743    | -0.311899 | 0.492276 |
| XLOC_011920 | ZNF28          | chr19:53300660-53324922   | 1.4916     | 1.20181    | -0.311653 | 0.636892 |
| XLOC_015207 | CRYBG3         | chr3:97540883-97691295    | 0.27433    | 0.221034   | -0.311645 | 1        |
| XLOC_018161 | HLA-A          | chr6:29910246-29913661    | 1184.17    | 954.146    | -0.311591 | 0.506569 |
| XLOC_007692 | FAM219B        | chr15:75192327-75199462   | 9.23194    | 7.43969    | -0.311392 | 0.503669 |
| XLOC_014624 | LOC150381      | chr22:46446338-46454402   | 3.50186    | 2.8225     | -0.311149 | 0.711195 |
| XLOC_021474 | LOC100506990   | chr8:12294521-12523120    | 4.18369    | 3.37215    | -0.311108 | 0.700234 |
| XLOC_020847 | C7orf29        | chr7:149944300-150035245  | 17.0482    | 13.7422    | -0.311    | 0.712857 |
| XLOC_015997 | CP             | chr3:148847370-148939832  | 1.6508     | 1.33075    | -0.31092  | 0.773194 |
| XLOC_017251 | PPIP5K2        | chr5:102455957-102539224  | 2.545      | 2.05171    | -0.310843 | 0.548709 |
| XLOC_002924 | ARHGAP22       | chr10:49654067-49864310   | 37.074     | 29.8906    | -0.310713 | 0.476106 |
| XLOC_003916 | KCNJ5          | chr11:128761312-128787951 | 0.0123623  | 0.00996762 | -0.310623 | 1        |
| XLOC_020393 | KLHL7          | chr7:23145352-23215038    | 11.9226    | 9.61421    | -0.310465 | 0.705123 |
| XLOC_007218 | TMOD2          | chr15:52043757-52108558   | 0.826011   | 0.666092   | -0.31044  | 0.629512 |
| XLOC_006423 | TTC9           | chr14:71108503-71142077   | 0.6578     | 0.530624   | -0.309961 | 0.739517 |
| XLOC_019014 | HACE1          | chr6:105175967-105307794  | 0.885253   | 0.714206   | -0.30975  | 0.714911 |

|             |                |                          |            |            |           |          |
|-------------|----------------|--------------------------|------------|------------|-----------|----------|
| XLOC_015200 | C3orf38        | chr3:88101099-88207115   | 4.85507    | 3.91718    | -0.309676 | 0.838902 |
| XLOC_008417 | SOCS1          | chr16:11348273-11350039  | 2.72408    | 2.19792    | -0.309632 | 0.840418 |
| XLOC_011000 | SEC1P          | chr19:49141271-49185502  | 0.081271   | 0.0655844  | -0.309389 | 1        |
| XLOC_013195 | BAZ2B          | chr2:160175489-160473059 | 0.988312   | 0.79778    | -0.308975 | 0.614872 |
| XLOC_012718 | SAG            | chr2:234216308-234255701 | 0.0247504  | 0.0199815  | -0.308788 | 1        |
| XLOC_017803 | GDF9           | chr5:132196877-132200477 | 0.127735   | 0.103132   | -0.308662 | 1        |
| XLOC_016689 | LCORL          | chr4:17812435-18023483   | 3.23082    | 2.60856    | -0.308647 | 0.844936 |
| XLOC_018043 | PIP5K1P1       | chr6:7727010-8102828     | 0.0145883  | 0.0117787  | -0.308635 | 1        |
| XLOC_009662 | FBXL20         | chr17:37408896-37557909  | 2.35011    | 1.8976     | -0.308553 | 0.513296 |
| XLOC_011164 | LENG8          | chr19:54960064-54974894  | 9.75764    | 7.87959    | -0.308413 | 0.71451  |
| XLOC_015816 | EIF4E3         | chr3:71728439-71804328   | 3.19977    | 2.58451    | -0.308077 | 0.536166 |
| XLOC_005624 | BTG1,LOC256021 | chr12:92378751-92539673  | 16.1453    | 13.0416    | -0.307986 | 0.474825 |
| XLOC_014181 | BACE2          | chr21:42539727-42648524  | 19.1994    | 15.509     | -0.307958 | 0.495723 |
| XLOC_018475 | HSF2           | chr6:122720695-122754264 | 6.53303    | 5.27733    | -0.307943 | 0.536181 |
| XLOC_014906 | DENND6B        | chr22:50750391-50765489  | 3.71981    | 3.00494    | -0.307893 | 0.711466 |
| XLOC_008296 | RPL13          | chr16:89627064-89633237  | 971.512    | 784.917    | -0.307693 | 0.542539 |
| XLOC_003242 | BRSK2          | chr11:1411128-1483919    | 10.2055    | 8.24539    | -0.307682 | 0.540678 |
| XLOC_018627 | ECI2           | chr6:4068592-4135831     | 32.9054    | 26.5915    | -0.307358 | 0.50153  |
| XLOC_004831 | KCNH3          | chr12:49932939-49952077  | 0.780969   | 0.631126   | -0.307339 | 0.8041   |
| XLOC_003429 | GYLTL1B        | chr11:45943195-45950647  | 0.0146264  | 0.0118225  | -0.307034 | 1        |
| XLOC_015462 | FXR1           | chr3:180630233-180700539 | 5.93557    | 4.79785    | -0.306998 | 0.480807 |
| XLOC_012270 | TMSB10         | chr2:85132762-85133799   | 5367.34    | 4339       | -0.306847 | 0.533297 |
| XLOC_012189 | CCDC104        | chr2:55746739-55772216   | 56.7834    | 45.9092    | -0.306685 | 0.473045 |
| XLOC_001502 | HYI            | chr1:43855555-43919918   | 22.1261    | 17.8908    | -0.306537 | 0.713975 |
| XLOC_011101 | ZNF331         | chr19:54024176-54083523  | 0.390173   | 0.315494   | -0.306504 | 0.778654 |
| XLOC_017308 | CSF2           | chr5:131409484-131411863 | 0.0785056  | 0.0634804  | -0.306486 | 1        |
| XLOC_000632 | NBPF9          | chr1:144614958-144828810 | 1.06314    | 0.859773   | -0.3063   | 0.744215 |
| XLOC_006891 | SYNDIG1L       | chr14:74872595-74892805  | 0.0182755  | 0.0147808  | -0.306189 | 1        |
| XLOC_013697 | SLC12A5        | chr20:44650328-44688789  | 0.00348151 | 0.00281627 | -0.305928 | 1        |
| XLOC_022032 | LOC100505718   | chr8:69824037-70016425   | 4.15805    | 3.36362    | -0.305889 | 0.625139 |
| XLOC_001454 | LOC728431      | chr1:37920479-37940044   | 0.87212    | 0.705622   | -0.305631 | 0.85132  |
| XLOC_006777 | FOXA1          | chr14:38058756-38064325  | 1.31995    | 1.06798    | -0.30559  | 0.747819 |
| XLOC_022772 | EQTN           | chr9:27284653-27297137   | 0.0694171  | 0.0561665  | -0.305581 | 1        |
| XLOC_010114 | TWSG1          | chr18:9334764-9402418    | 8.45467    | 6.84099    | -0.305542 | 0.501582 |
| XLOC_000765 | MSTO2P         | chr1:155715558-155826972 | 0.291324   | 0.235789   | -0.30513  | 1        |
| XLOC_012531 | HOXD3          | chr2:177028804-177037826 | 0.997224   | 0.807238   | -0.304924 | 0.816181 |
| XLOC_002228 | TRIM17         | chr1:228595635-228604583 | 0.0161694  | 0.0130907  | -0.304717 | 1        |
| XLOC_006454 | LOC731223      | chr14:75761106-75763111  | 0.495265   | 0.400975   | -0.30469  | 0.951036 |
| XLOC_015241 | BBX            | chr3:107241782-107530176 | 2.32146    | 1.88054    | -0.303884 | 0.558755 |
| XLOC_022888 | C9orf41        | chr9:77597872-77643310   | 0.941062   | 0.76234    | -0.303856 | 0.788779 |
| XLOC_009135 | NPEPPS         | chr17:45608443-45700642  | 16.5398    | 13.3999    | -0.303717 | 0.48457  |
| XLOC_013329 | FZD5           | chr2:208627309-208634143 | 2.53487    | 2.05388    | -0.303555 | 0.59484  |
| XLOC_000743 | CHRN2          | chr1:154540256-154552353 | 0.00668627 | 0.00541799 | -0.303445 | 1        |
| XLOC_007311 | C15orf39       | chr15:75494220-75504510  | 6.89584    | 5.58882    | -0.303184 | 0.557321 |
| XLOC_009355 | NARF           | chr17:80416059-80446143  | 75.3812    | 61.1011    | -0.303007 | 0.488643 |
| XLOC_020462 | BLVRA          | chr7:43798271-43846941   | 47.2492    | 38.303     | -0.302834 | 0.504261 |
| XLOC_023521 | ARMCX3         | chrX:100878119-100882831 | 8.63625    | 7.00116    | -0.302812 | 0.513296 |
| XLOC_011586 | CEP89          | chr19:33369903-33462869  | 2.74624    | 2.2264     | -0.302746 | 0.666304 |
| XLOC_005479 | KRT79          | chr12:53215230-53228077  | 0.699424   | 0.567031   | -0.302739 | 0.838891 |

|             |                |                           |            |            |           |          |
|-------------|----------------|---------------------------|------------|------------|-----------|----------|
| XLOC_008976 | RHOT1          | chr17:30469472-30552746   | 5.95773    | 4.83013    | -0.302702 | 0.553492 |
| XLOC_009075 | TUBG2          | chr17:40811265-40819024   | 14.2231    | 11.5334    | -0.302421 | 0.58485  |
| XLOC_009251 | PRKAR1A        | chr17:66507920-66597095   | 23.1567    | 18.7789    | -0.302315 | 0.545877 |
| XLOC_009523 | ZNF624         | chr17:16524047-16557167   | 0.337997   | 0.2741     | -0.302306 | 1        |
| XLOC_000006 | SAMD11         | chr1:861120-894679        | 1.98787    | 1.6121     | -0.302276 | 0.867427 |
| XLOC_022551 | NEK6           | chr9:127019884-127114719  | 32.1395    | 26.0646    | -0.302257 | 0.483429 |
| XLOC_010034 | ACTG1          | chr17:79476996-79479892   | 3180.3     | 2579.26    | -0.302208 | 0.574318 |
| XLOC_003780 | JRKL           | chr11:96123157-96126727   | 1.57674    | 1.27882    | -0.302133 | 0.677271 |
| XLOC_009045 | RAPGEFL1       | chr17:38334241-38351906   | 3.00966    | 2.4413     | -0.301948 | 0.642802 |
| XLOC_016485 | USP53          | chr4:120133781-120216673  | 0.973255   | 0.789501   | -0.301877 | 0.666681 |
| XLOC_023516 | CENPI          | chrX:100354797-100417978  | 0.606262   | 0.4918     | -0.301868 | 0.804051 |
| XLOC_003185 | UROS           | chr10:127477146-127511837 | 23.6782    | 19.2122    | -0.301533 | 0.535354 |
| XLOC_005024 | MRPL42         | chr12:93861265-93897548   | 13.1147    | 10.6417    | -0.301458 | 0.504261 |
| XLOC_004260 | EEF1G          | chr11:62327072-62341460   | 4479.46    | 3634.86    | -0.301426 | 0.589089 |
| XLOC_008563 | SIAH1          | chr16:48274602-48420559   | 10.9984    | 8.92473    | -0.301407 | 0.847763 |
| XLOC_005155 | MLXIP          | chr12:122516651-122628967 | 5.08322    | 4.12491    | -0.301378 | 0.567137 |
| XLOC_018825 | NUDT3,RPS10,Rf | chr6:34254972-34393902    | 6157.33    | 4996.89    | -0.301275 | 0.554074 |
| XLOC_008622 | KCTD19         | chr16:67311412-67360661   | 0.00565121 | 0.00458652 | -0.30116  | 1        |
| XLOC_005517 | PMEL           | chr12:56347888-56360496   | 0.89932    | 0.729905   | -0.301126 | 0.804889 |
| XLOC_023500 | APOOL          | chrX:84258897-84363974    | 2.29714    | 1.86464    | -0.300936 | 0.599775 |
| XLOC_001123 | MTR            | chr1:236958580-237067281  | 1.83534    | 1.48982    | -0.300904 | 0.560049 |
| XLOC_007773 | PLIN1          | chr15:90207599-90222648   | 0.10458    | 0.0848949  | -0.30085  | 1        |
| XLOC_004105 | IGSF22         | chr11:18720350-18747777   | 0.0142763  | 0.0115934  | -0.300323 | 1        |
| XLOC_011804 | CARD8          | chr19:48711342-48761450   | 3.10501    | 2.52185    | -0.300113 | 0.89325  |
| XLOC_008473 | GGA2           | chr16:23474862-23521815   | 9.68656    | 7.86749    | -0.300082 | 0.502085 |
| XLOC_020711 | ST7-OT4        | chr7:116592500-116870075  | 0.0954599  | 0.0775359  | -0.30003  | 1        |
| XLOC_014069 | TCFL5          | chr20:61448413-61493115   | 7.98983    | 6.48971    | -0.300011 | 0.830017 |
| XLOC_016458 | HADH           | chr4:108910869-108956331  | 42.2403    | 34.3098    | -0.300001 | 0.502454 |
| XLOC_002410 | HSD17B7P2      | chr10:38645307-38667433   | 0.642526   | 0.521977   | -0.299771 | 0.866938 |
| XLOC_015704 | IMPDH2         | chr3:49061761-49066875    | 320.567    | 260.466    | -0.299532 | 0.510068 |
| XLOC_015062 | ZNF502         | chr3:44754134-44765323    | 1.58696    | 1.28961    | -0.299337 | 0.693923 |
| XLOC_020992 | FKBP14         | chr7:30050198-30066417    | 2.48926    | 2.02297    | -0.299244 | 0.59477  |
| XLOC_023110 | IER5L          | chr9:131937830-131940540  | 26.5705    | 21.6005    | -0.298756 | 0.535571 |
| XLOC_008064 | ORAI3          | chr16:30960404-30966259   | 16.7395    | 13.6085    | -0.298747 | 0.539689 |
| XLOC_021057 | HUS1           | chr7:48002884-48019222    | 5.23245    | 4.25399    | -0.298672 | 0.620178 |
| XLOC_008428 | CPPED1         | chr16:12753655-12897744   | 1.43823    | 1.16936    | -0.298566 | 0.642802 |
| XLOC_020826 | CTAGE4         | chr7:143880547-143883173  | 0.237956   | 0.193479   | -0.298513 | 1        |
| XLOC_022479 | MSANTD3,MSAN   | chr9:103189494-103339918  | 82.8345    | 67.3598    | -0.298344 | 0.499979 |
| XLOC_021526 | EPHX2          | chr8:27348518-27402439    | 5.57252    | 4.53198    | -0.298187 | 0.633246 |
| XLOC_011194 | CCDC106        | chr19:56158953-56164526   | 0.809364   | 0.658256   | -0.298141 | 0.87748  |
| XLOC_001455 | MEAF6          | chr1:37955560-37980420    | 12.2835    | 9.99036    | -0.298114 | 0.502136 |
| XLOC_012137 | CRIM1          | chr2:36583369-36778278    | 9.11332    | 7.41238    | -0.298041 | 0.503119 |
| XLOC_005617 | GALNT4,POC1B,f | chr12:89813497-89920039   | 5.78543    | 4.70613    | -0.297884 | 0.571314 |
| XLOC_000774 | TMEM79         | chr1:156252703-156262234  | 3.31163    | 2.69395    | -0.297818 | 0.720322 |
| XLOC_011838 | SLC17A7        | chr19:49932654-49944808   | 0.417221   | 0.339495   | -0.297422 | 0.867031 |
| XLOC_011915 | ZNF616         | chr19:52617652-52643191   | 1.22418    | 0.996311   | -0.297146 | 0.730157 |
| XLOC_011043 | TBC1D17        | chr19:50380681-50392007   | 11.6555    | 9.48607    | -0.297124 | 0.592657 |
| XLOC_010526 | VAV1           | chr19:6772678-6857377     | 0.0987784  | 0.0803953  | -0.297084 | 1        |
| XLOC_009327 | RNF213         | chr17:78234659-78411884   | 1.15246    | 0.938123   | -0.296868 | 0.683985 |

|             |            |                           |            |            |           |          |
|-------------|------------|---------------------------|------------|------------|-----------|----------|
| XLOC_019033 | AKD1       | chr6:109814058-110012415  | 0.662548   | 0.539359   | -0.296778 | 0.811316 |
| XLOC_013839 | RNF24      | chr20:3912068-3996216     | 3.07636    | 2.50442    | -0.296744 | 0.650147 |
| XLOC_010193 | CTIF       | chr18:46065426-46389586   | 10.7938    | 8.78743    | -0.296693 | 0.522524 |
| XLOC_007805 | TARSL2     | chr15:102193954-102264645 | 3.07696    | 2.5053     | -0.296521 | 0.630699 |
| XLOC_014259 | LTN1       | chr21:30300465-30365277   | 1.14371    | 0.931259   | -0.29647  | 0.638482 |
| XLOC_022956 | HSD17B3    | chr9:98997588-99064434    | 0.445218   | 0.362538   | -0.296379 | 0.897332 |
| XLOC_018876 | TRERF1     | chr6:42192668-42419783    | 2.75094    | 2.24026    | -0.29626  | 0.579868 |
| XLOC_022840 | SHB        | chr9:37915894-38069210    | 10.2476    | 8.34534    | -0.296247 | 0.527665 |
| XLOC_007567 | SECISBP2L  | chr15:49280834-49338760   | 2.10691    | 1.71624    | -0.295882 | 0.581347 |
| XLOC_005206 | ZNF26      | chr12:133562933-133589154 | 4.77401    | 3.88891    | -0.295835 | 0.589734 |
| XLOC_021895 | CSGALNACT1 | chr8:19261671-19540261    | 0.0992563  | 0.0808673  | -0.295603 | 1        |
| XLOC_003186 | DHX32      | chr10:127512103-127569884 | 13.859     | 11.2916    | -0.295569 | 0.802621 |
| XLOC_006158 | TBC1D4     | chr13:75858808-76056250   | 4.92399    | 4.01189    | -0.295544 | 0.542718 |
| XLOC_010111 | SOGA2      | chr18:8717368-8832775     | 3.86568    | 3.14969    | -0.295515 | 0.590448 |
| XLOC_014759 | GATSL3     | chr22:30681106-30685616   | 3.61099    | 2.94252    | -0.295343 | 0.766913 |
| XLOC_004031 | PRKCDPB    | chr11:6340175-6341740     | 25.4446    | 20.7393    | -0.294993 | 0.6442   |
| XLOC_008841 | ALOX15B    | chr17:7942357-7952451     | 0.00813444 | 0.00663039 | -0.294951 | 1        |
| XLOC_002626 | HOGA1      | chr10:99344101-99372555   | 0.0934335  | 0.0761578  | -0.294947 | 1        |
| XLOC_014902 | HDAC10     | chr22:50683612-50689834   | 12.556     | 10.2348    | -0.294887 | 0.586579 |
| XLOC_001515 | CCDC163P   | chr1:45959597-45965751    | 0.991485   | 0.808235   | -0.294816 | 0.804694 |
| XLOC_010767 | UBA2       | chr19:34919267-34960798   | 24.2078    | 19.7367    | -0.294593 | 0.508556 |
| XLOC_017556 | SLC6A3     | chr5:1392904-1445543      | 0.00778171 | 0.00634446 | -0.294589 | 1        |
| XLOC_009994 | MXRA7      | chr17:74671808-74707056   | 50.8173    | 41.4361    | -0.294433 | 0.51348  |
| XLOC_022516 | RGS3       | chr9:116207008-116360023  | 8.93983    | 7.28961    | -0.294406 | 0.6565   |
| XLOC_017723 | SSBP2      | chr5:80256507-81047072    | 1.64961    | 1.3452     | -0.294306 | 0.907121 |
| XLOC_001118 | TBCE       | chr1:235530727-235667781  | 5.04058    | 4.1111     | -0.294064 | 0.862406 |
| XLOC_016929 | SCLT1      | chr4:129805151-130014764  | 2.06631    | 1.68533    | -0.294023 | 0.677324 |
| XLOC_017138 | IL31RA     | chr5:55147206-55218682    | 0.0269223  | 0.0219632  | -0.293717 | 1        |
| XLOC_005266 | C3AR1      | chr12:8210918-8218955     | 0.302466   | 0.246778   | -0.293558 | 1        |
| XLOC_011381 | FBN3       | chr19:8130286-8212385     | 0.00347169 | 0.00283261 | -0.293506 | 1        |
| XLOC_017250 | PAM        | chr5:102201526-102366808  | 11.2189    | 9.15392    | -0.293476 | 0.516809 |
| XLOC_001048 | SMYD2      | chr1:214454564-214510477  | 21.5246    | 17.5634    | -0.293412 | 0.539297 |
| XLOC_011248 | ZNF584     | chr19:58920062-58929692   | 6.22597    | 5.08022    | -0.293408 | 0.627235 |
| XLOC_007844 | SSTR5      | chr16:1114081-1131454     | 0.0176145  | 0.0143731  | -0.293395 | 1        |
| XLOC_022739 | RPS6       | chr9:19376253-19380235    | 5128.89    | 4185.1     | -0.293383 | 0.581347 |
| XLOC_011027 | RPS11      | chr19:49999621-50002969   | 6434.47    | 5250.45    | -0.29338  | 0.568199 |
| XLOC_001891 | PKLR       | chr1:155247217-155271225  | 0.373553   | 0.304818   | -0.293366 | 0.905545 |
| XLOC_018292 | PRICKLE4   | chr6:41748499-41755110    | 1.94731    | 1.58929    | -0.293099 | 0.798422 |
| XLOC_013594 | ASXL1      | chr20:30946146-31027122   | 11.9385    | 9.74409    | -0.293023 | 0.743033 |
| XLOC_017528 | RUFY1      | chr5:178977561-179037027  | 11.1914    | 9.13462    | -0.292972 | 0.565031 |
| XLOC_002687 | ADD3       | chr10:111705316-111895323 | 3.04517    | 2.48559    | -0.292936 | 0.599713 |
| XLOC_001439 | ZMYM6      | chr1:35451766-35497569    | 1.80066    | 1.46983    | -0.292879 | 0.633281 |
| XLOC_018160 | HLA-H      | chr6:29855382-29858856    | 13.9372    | 11.3778    | -0.292723 | 0.593645 |
| XLOC_013685 | WFDC2      | chr20:44098393-44110172   | 0.0504658  | 0.0412122  | -0.292234 | 1        |
| XLOC_021118 | GATSL2     | chr7:74807604-74867341    | 0.0345014  | 0.0281809  | -0.291935 | 1        |
| XLOC_010045 | PCYT2      | chr17:79860071-79869340   | 13.7803    | 11.2564    | -0.291865 | 0.560668 |
| XLOC_011576 | ZNF681     | chr19:23921996-23941693   | 0.445025   | 0.363533   | -0.291801 | 0.758088 |
| XLOC_001831 | HRNR       | chr1:152184551-152196672  | 0.0026691  | 0.00218051 | -0.291684 | 1        |
| XLOC_005386 | YAF2       | chr12:42550906-42632154   | 2.66395    | 2.17656    | -0.291514 | 0.623996 |

|             |              |                           |           |           |           |          |
|-------------|--------------|---------------------------|-----------|-----------|-----------|----------|
| XLOC_014512 | INPP5J       | chr22:31518960-31530683   | 2.83959   | 2.32049   | -0.291253 | 0.737677 |
| XLOC_008472 | COG7         | chr16:23399813-23464512   | 5.96475   | 4.87486   | -0.291102 | 0.607733 |
| XLOC_006124 | EBPL         | chr13:50234809-50265623   | 133.959   | 109.516   | -0.29065  | 0.509743 |
| XLOC_016822 | SEC31A       | chr4:83739813-83812419    | 6.42643   | 5.25412   | -0.290568 | 0.565953 |
| XLOC_018980 | SNX14        | chr6:86215214-86303629    | 11.4605   | 9.37051   | -0.290473 | 0.527664 |
| XLOC_011575 | ZNF675       | chr19:23835707-23870017   | 1.9834    | 1.62173   | -0.290435 | 0.722516 |
| XLOC_022889 | NMRK1        | chr9:77676115-77703133    | 10.1644   | 8.31186   | -0.290284 | 0.629991 |
| XLOC_021066 | SEC61G       | chr7:54819939-54826939    | 361.543   | 295.675   | -0.290152 | 0.52085  |
| XLOC_015950 | ASTE1        | chr3:130569368-130745646  | 2.03887   | 1.66746   | -0.290116 | 0.935829 |
| XLOC_004116 | FANCF        | chr11:22644078-22647387   | 4.26637   | 3.48926   | -0.290088 | 0.630584 |
| XLOC_017863 | HDAC3        | chr5:141000442-141016423  | 69.0139   | 56.4471   | -0.289987 | 0.523254 |
| XLOC_004361 | DOC2GP       | chr11:67380994-67383135   | 0.132295  | 0.108209  | -0.289933 | 1        |
| XLOC_008576 | RPGRIP1L     | chr16:53633817-53737771   | 0.348429  | 0.284995  | -0.289928 | 1        |
| XLOC_020344 | LFNG         | chr7:2552162-2568810      | 2.99391   | 2.44886   | -0.289919 | 0.779998 |
| XLOC_002515 | FAM149B1     | chr10:74927876-75001939   | 1.98885   | 1.62693   | -0.289777 | 0.700234 |
| XLOC_008295 | SPG7         | chr16:89574804-89624174   | 22.2448   | 18.1986   | -0.289637 | 0.525848 |
| XLOC_014758 | OSM          | chr22:30658818-30662829   | 0.012378  | 0.0101292 | -0.289251 | 1        |
| XLOC_005259 | CD163L1      | chr12:7507556-7596749     | 0.174934  | 0.14316   | -0.28918  | 1        |
| XLOC_006892 | NPC2         | chr14:74946642-74960084   | 254.309   | 208.136   | -0.28906  | 0.781136 |
| XLOC_013959 | BLCAP        | chr20:36145818-36156333   | 35.9101   | 29.3913   | -0.289003 | 0.530857 |
| XLOC_015287 | EAF2         | chr3:121554033-121605373  | 1.51688   | 1.24176   | -0.288719 | 0.821824 |
| XLOC_007589 | FAM214A      | chr15:52873517-52970820   | 1.66172   | 1.3604    | -0.288651 | 0.679452 |
| XLOC_003174 | CPXM2        | chr10:125505151-125651500 | 0.0140436 | 0.0114972 | -0.288634 | 1        |
| XLOC_023941 | FTX          | chrX:73164158-73513409    | 0.603299  | 0.493962  | -0.288473 | 0.914371 |
| XLOC_009320 | ENGASE       | chr17:77071018-77084685   | 4.44905   | 3.64403   | -0.287961 | 0.630699 |
| XLOC_012108 | GPN1         | chr2:27848505-27917847    | 28.5824   | 23.4119   | -0.287884 | 0.776629 |
| XLOC_007191 | DUOX1        | chr15:45422191-45457774   | 0.0260495 | 0.0213401 | -0.287689 | 1        |
| XLOC_008585 | BBS2         | chr16:56518258-56554008   | 12.8918   | 10.5623   | -0.287529 | 0.552291 |
| XLOC_003033 | KLLN         | chr10:89618917-89623194   | 0.274509  | 0.22492   | -0.287441 | 1        |
| XLOC_013619 | TP53INP2     | chr20:33292147-33301237   | 6.69662   | 5.48747   | -0.287292 | 0.58823  |
| XLOC_022276 | KIAA1432     | chr9:56291118-5776556     | 1.4339    | 1.175     | -0.28728  | 0.650967 |
| XLOC_022335 | CCDC107      | chr9:35658286-35665278    | 14.0359   | 11.5027   | -0.287157 | 0.818092 |
| XLOC_005397 | LOC400027    | chr12:46119502-46121704   | 6.71866   | 5.50634   | -0.28708  | 0.636892 |
| XLOC_009309 | SEPT9        | chr17:75277491-75496678   | 42.2229   | 34.605    | -0.287044 | 0.533447 |
| XLOC_003224 | LRRC56       | chr11:537521-560779       | 2.38597   | 1.95551   | -0.287033 | 0.771042 |
| XLOC_016532 | DCLK2        | chr4:150999425-151178608  | 0.621443  | 0.509333  | -0.287014 | 0.80614  |
| XLOC_018863 | TREM2        | chr6:41126243-41130924    | 0.0351594 | 0.0288184 | -0.28692  | 1        |
| XLOC_015893 | LRRC58       | chr3:120043575-120068186  | 4.51869   | 3.70408   | -0.286791 | 0.533297 |
| XLOC_022463 | LOC441454    | chr9:99671356-99672737    | 0.319721  | 0.262089  | -0.286757 | 1        |
| XLOC_003382 | ELP4         | chr11:31531296-31805329   | 12.5497   | 10.288    | -0.286691 | 0.597911 |
| XLOC_015621 | OSBPL10      | chr3:31702316-32033228    | 6.87394   | 5.63529   | -0.286647 | 0.584417 |
| XLOC_017284 | ZNF474       | chr5:121465214-121489266  | 8.70234   | 7.13428   | -0.286637 | 0.61138  |
| XLOC_022958 | ZNF367       | chr9:99148224-99180669    | 3.4137    | 2.79864   | -0.286608 | 0.633533 |
| XLOC_004567 | RPS25        | chr11:118868851-118889057 | 4964.48   | 4071.3    | -0.286153 | 0.568684 |
| XLOC_015064 | KIF15        | chr3:44803208-44894748    | 2.1336    | 1.75022   | -0.285748 | 0.644761 |
| XLOC_010718 | ZNF101       | chr19:19779662-19791138   | 3.23095   | 2.6506    | -0.285637 | 0.726061 |
| XLOC_010279 | ZBTB14       | chr18:5289017-5297052     | 1.70424   | 1.39816   | -0.285596 | 0.713886 |
| XLOC_008474 | EARS2        | chr16:23533333-23568696   | 10.1279   | 8.30985   | -0.285447 | 0.543076 |
| XLOC_020872 | LOC100128822 | chr7:152161208-152162630  | 7.53278   | 6.1808    | -0.285389 | 0.729546 |

|             |           |                           |            |            |           |          |
|-------------|-----------|---------------------------|------------|------------|-----------|----------|
| XLOC_005803 | IFT88     | chr13:21141207-21265576   | 1.20844    | 0.991612   | -0.285294 | 0.749717 |
| XLOC_016377 | MTHFD2L   | chr4:75023828-75168814    | 0.911969   | 0.748464   | -0.28505  | 0.802177 |
| XLOC_013355 | DIRC3     | chr2:218148745-218621316  | 0.00475407 | 0.00390216 | -0.284891 | 1        |
| XLOC_005536 | RDH16     | chr12:57345215-57351418   | 0.159609   | 0.131011   | -0.284856 | 1        |
| XLOC_016463 | CCDC109B  | chr4:110481354-110608872  | 37.5543    | 30.8285    | -0.284712 | 0.552726 |
| XLOC_007418 | CHD2      | chr15:93443550-93571237   | 7.28239    | 5.97818    | -0.284706 | 0.679486 |
| XLOC_008387 | NLRC3     | chr16:3550944-3627392     | 0.181904   | 0.149327   | -0.284702 | 1        |
| XLOC_012917 | CCDC88A   | chr2:55514977-55647057    | 1.28827    | 1.05769    | -0.284514 | 0.639952 |
| XLOC_003257 | KCNQ1     | chr11:2466220-2870340     | 11.3052    | 9.28288    | -0.284338 | 0.714086 |
| XLOC_000767 | RXFP4     | chr1:155911479-155912625  | 0.0480425  | 0.0394507  | -0.28426  | 1        |
| XLOC_012668 | INHA      | chr2:220436953-220440435  | 0.559914   | 0.459809   | -0.28417  | 0.89785  |
| XLOC_005708 | HECTD4    | chr12:112597991-112819896 | 0.796212   | 0.653925   | -0.284028 | 0.667588 |
| XLOC_008692 | C16orf46  | chr16:81087101-81110872   | 0.407707   | 0.33488    | -0.283887 | 0.875956 |
| XLOC_008980 | CDK5R1    | chr17:30814104-30818271   | 2.51454    | 2.06554    | -0.283779 | 0.681951 |
| XLOC_004685 | TPI1      | chr12:6976583-6982521     | 1065.69    | 875.422    | -0.283735 | 0.599023 |
| XLOC_003363 | NAV2      | chr11:19372270-20143147   | 5.83275    | 4.79162    | -0.283662 | 0.61305  |
| XLOC_001548 | ORC1      | chr1:52838500-52870143    | 3.74737    | 3.079      | -0.283415 | 0.657199 |
| XLOC_005095 | IFT81     | chr12:110562139-110656600 | 1.15826    | 0.951721   | -0.283351 | 0.764456 |
| XLOC_013247 | HOXD-AS1  | chr2:177037923-177055635  | 2.1627     | 1.77762    | -0.282883 | 0.686715 |
| XLOC_002458 | AGAP6     | chr10:51748077-51770259   | 4.01131    | 3.29718    | -0.282841 | 0.66486  |
| XLOC_000160 | LDLRAD2   | chr1:22138757-22263750    | 0.0198274  | 0.0162982  | -0.282779 | 1        |
| XLOC_018328 | CDC5L     | chr6:44355250-44418161    | 5.60045    | 4.60379    | -0.282718 | 0.541428 |
| XLOC_013947 | NFS1      | chr20:34256609-34288902   | 12.1407    | 9.98036    | -0.282693 | 0.852179 |
| XLOC_005251 | CDCA3     | chr12:6957971-6960456     | 24.1544    | 19.8568    | -0.282652 | 0.59484  |
| XLOC_001664 | CNN3      | chr1:95362506-95392735    | 71.5698    | 58.839     | -0.282578 | 0.538721 |
| XLOC_007474 | CHRFAM7A  | chr15:30653442-30685864   | 0.0380981  | 0.0313262  | -0.282351 | 1        |
| XLOC_006769 | RALGAPA1  | chr14:36007557-36278432   | 1.17057    | 0.962605   | -0.282193 | 0.666074 |
| XLOC_008257 | OSGIN1    | chr16:83986826-83999937   | 19.1358    | 15.7367    | -0.282137 | 0.599775 |
| XLOC_004698 | CLSTN3    | chr12:7282966-7311530     | 8.44087    | 6.94201    | -0.282039 | 0.59582  |
| XLOC_014217 | ITGB2-AS1 | chr21:46305867-46349595   | 0.0169548  | 0.013947   | -0.281732 | 1        |
| XLOC_008737 | DBNDD1    | chr16:90071278-90085937   | 37.0793    | 30.5036    | -0.281637 | 0.539268 |
| XLOC_016785 | COX18     | chr4:73920415-73935472    | 4.32621    | 3.55923    | -0.281539 | 0.60545  |
| XLOC_023827 | ZNF674    | chrX:46357159-46404892    | 0.520429   | 0.428175   | -0.2815   | 0.78865  |
| XLOC_000327 | ZNF691    | chr1:43312243-43318146    | 8.49122    | 6.98621    | -0.281462 | 0.657683 |
| XLOC_009235 | CEP95     | chr17:62503157-62534062   | 7.05152    | 5.80281    | -0.281181 | 0.592657 |
| XLOC_011089 | ZNF701    | chr19:53073525-53090427   | 0.16386    | 0.134852   | -0.281084 | 1        |
| XLOC_014228 | DIP2A     | chr21:47878861-47989926   | 3.78905    | 3.11861    | -0.28093  | 0.691843 |
| XLOC_018691 | ZNF322    | chr6:26634610-26659980    | 3.39068    | 2.79085    | -0.28087  | 0.602936 |
| XLOC_002496 | HK1       | chr10:71029755-71161637   | 75.7929    | 62.3879    | -0.280797 | 0.535586 |
| XLOC_001401 | SRSF4     | chr1:29474249-29508637    | 44.8614    | 36.9303    | -0.280668 | 0.547145 |
| XLOC_012389 | PSD4      | chr2:113931559-113960677  | 1.88245    | 1.54973    | -0.280591 | 0.700954 |
| XLOC_011442 | ZNF433    | chr19:12125531-12146525   | 1.51681    | 1.24878    | -0.280528 | 0.765267 |
| XLOC_002885 | ZNF248    | chr10:38065453-38147012   | 1.37322    | 1.13059    | -0.280483 | 0.713886 |
| XLOC_008557 | C16orf87  | chr16:46835958-46865074   | 3.14471    | 2.58926    | -0.280385 | 0.747301 |
| XLOC_003782 | ARHGAP42  | chr11:100558406-100861656 | 0.246136   | 0.202699   | -0.280114 | 1        |
| XLOC_009863 | VEZF1     | chr17:56048909-56065615   | 7.08292    | 5.83315    | -0.280071 | 0.553823 |
| XLOC_013726 | FAM210B   | chr20:54933982-54943718   | 22.9131    | 18.8717    | -0.279954 | 0.53652  |
| XLOC_001764 | PDE4DIP   | chr1:144851423-145076186  | 0.617978   | 0.509011   | -0.27986  | 0.762574 |
| XLOC_010830 | C19orf33  | chr19:38794199-38806606   | 322.19     | 265.384    | -0.279831 | 0.73154  |

|             |              |                           |           |            |           |          |
|-------------|--------------|---------------------------|-----------|------------|-----------|----------|
| XLOC_011951 | CDC42EP5     | chr19:54976209-54984422   | 26.9854   | 22.2311    | -0.279599 | 0.722053 |
| XLOC_022423 | SPIN1        | chr9:91003296-91093622    | 9.22171   | 7.5984     | -0.279339 | 0.552646 |
| XLOC_007320 | C15orf27     | chr15:76352298-76497304   | 0.0255313 | 0.0210381  | -0.279262 | 1        |
| XLOC_011692 | B3GNT8       | chr19:41931263-41934635   | 0.0395236 | 0.0325684  | -0.279241 | 1        |
| XLOC_007947 | MKL2         | chr16:14165195-14360630   | 0.997498  | 0.822015   | -0.27915  | 0.679691 |
| XLOC_001797 | OTUD7B       | chr1:149912231-149982686  | 2.38561   | 1.9661     | -0.279021 | 0.628907 |
| XLOC_001354 | HMGCL        | chr1:24128366-24151949    | 41.9967   | 34.6158    | -0.278843 | 0.539395 |
| XLOC_011305 | TLE2         | chr19:2997635-3047633     | 34.835    | 28.7138    | -0.278793 | 0.5612   |
| XLOC_011968 | IL11         | chr19:55875749-55881831   | 12.1127   | 9.98458    | -0.278749 | 0.604499 |
| XLOC_007664 | UACA         | chr15:70946892-71055850   | 1.04127   | 0.85845    | -0.278541 | 0.685742 |
| XLOC_012846 | IFT172       | chr2:27665232-27712571    | 2.35199   | 1.93933    | -0.278326 | 0.65387  |
| XLOC_013346 | BARD1        | chr2:215593274-215674428  | 0.225951  | 0.186312   | -0.278295 | 1        |
| XLOC_006823 | DLGAP5       | chr14:55614833-55658396   | 7.23644   | 5.96728    | -0.278206 | 0.587374 |
| XLOC_021267 | IMMP2L       | chr7:110303105-111202573  | 12.4113   | 10.235     | -0.278145 | 0.635021 |
| XLOC_014567 | APOBEC3H     | chr22:39493228-39500072   | 0.0545052 | 0.04495    | -0.278073 | 1        |
| XLOC_014503 | SEC14L2      | chr22:30792929-30821291   | 8.92178   | 7.35857    | -0.277905 | 0.578315 |
| XLOC_010966 | CCDC9        | chr19:47759730-47775210   | 6.6141    | 5.45559    | -0.277811 | 0.681816 |
| XLOC_011551 | TSSK6        | chr19:19625027-19626469   | 1.35588   | 1.11842    | -0.277777 | 0.881798 |
| XLOC_009006 | DHRS11       | chr17:34948225-34957233   | 12.1463   | 10.0197    | -0.27768  | 0.643442 |
| XLOC_009832 | ZNF652       | chr17:47366567-47439835   | 0.971174  | 0.801145   | -0.277667 | 0.648214 |
| XLOC_019032 | ZBTB24       | chr6:109783718-109804440  | 3.7192    | 3.06811    | -0.27764  | 0.817472 |
| XLOC_004011 | HBG2         | chr11:5274420-5276011     | 0.864055  | 0.712801   | -0.277622 | 0.906898 |
| XLOC_006375 | ARID4A       | chr14:58765221-58840451   | 0.606858  | 0.500637   | -0.277594 | 0.746288 |
| XLOC_008249 | CMIP         | chr16:81478774-81745367   | 9.24993   | 7.63113    | -0.277545 | 0.581347 |
| XLOC_012657 | FAM134A      | chr2:220042938-220050197  | 28.1663   | 23.2389    | -0.277429 | 0.553492 |
| XLOC_002203 | TP53BP2      | chr1:223967594-224033674  | 10.939    | 9.02636    | -0.277272 | 0.54699  |
| XLOC_021558 | HTRA4        | chr8:38831667-38846181    | 0.0112181 | 0.00925715 | -0.277192 | 1        |
| XLOC_001714 | FAM212B      | chr1:112264685-112310199  | 1.03938   | 0.857728   | -0.277133 | 0.897804 |
| XLOC_010295 | FAM210A      | chr18:13663345-13726591   | 6.96965   | 5.75174    | -0.277088 | 0.568192 |
| XLOC_004797 | BICD1        | chr12:32260184-32531141   | 0.349093  | 0.2881     | -0.27704  | 1        |
| XLOC_018929 | GSTA4        | chr6:52842745-52860178    | 12.9421   | 10.681     | -0.277034 | 0.635495 |
| XLOC_022527 | TRIM32       | chr9:119187503-120177317  | 8.58799   | 7.08787    | -0.276969 | 0.622746 |
| XLOC_014361 | LRRRC3-AS1   | chr21:45870868-45875167   | 0.0375077 | 0.0309566  | -0.276938 | 1        |
| XLOC_005574 | MDM1         | chr12:68688345-68726161   | 2.54598   | 2.10135    | -0.276904 | 0.7048   |
| XLOC_019064 | C6orf170     | chr6:121400626-121655644  | 0.298053  | 0.24604    | -0.276675 | 1        |
| XLOC_018330 | RUNX2        | chr6:44794466-45518819    | 1.84876   | 1.52619    | -0.276619 | 0.823485 |
| XLOC_004340 | RIN1         | chr11:66099541-66104000   | 52.1914   | 43.0874    | -0.276545 | 0.560215 |
| XLOC_011388 | ZNF414       | chr19:8575461-8579048     | 11.3901   | 9.40379    | -0.276467 | 0.734384 |
| XLOC_014576 | LOC100130899 | chr22:40428335-40432581   | 5.05257   | 4.17149    | -0.276455 | 0.6172   |
| XLOC_009457 | CLDN7        | chr17:7155371-7166512     | 0.179676  | 0.14835    | -0.276393 | 1        |
| XLOC_010055 | FASN         | chr17:80036213-80056106   | 37.7467   | 31.1659    | -0.276384 | 0.553492 |
| XLOC_003625 | KAT5         | chr11:65479472-65488409   | 11.3969   | 9.41024    | -0.276342 | 0.840937 |
| XLOC_003123 | CALHM3       | chr10:105232560-105238997 | 0.0170049 | 0.0140452  | -0.27587  | 1        |
| XLOC_000198 | FAM110D      | chr1:26485510-26489119    | 0.82873   | 0.68451    | -0.275831 | 0.900639 |
| XLOC_005086 | UNG          | chr12:109535398-109548798 | 31.3491   | 25.8941    | -0.275798 | 0.577506 |
| XLOC_005688 | MMAB         | chr12:109991520-110011358 | 6.1958    | 5.11846    | -0.27558  | 0.592657 |
| XLOC_004137 | FBXO3        | chr11:33762489-33796071   | 6.86145   | 5.66886    | -0.275455 | 0.627868 |
| XLOC_000062 | PER3         | chr1:7844762-7905237      | 0.223772  | 0.184888   | -0.275378 | 1        |
| XLOC_013764 | SLCO4A1      | chr20:61273796-61303647   | 31.4844   | 26.0161    | -0.275231 | 0.567745 |

|             |              |                           |            |            |           |          |
|-------------|--------------|---------------------------|------------|------------|-----------|----------|
| XLOC_018029 | BPHL         | chr6:3118925-3153432      | 19.5627    | 16.1677    | -0.274996 | 0.60545  |
| XLOC_004092 | PIK3C2A      | chr11:17108123-17191354   | 2.89262    | 2.39104    | -0.274739 | 0.588875 |
| XLOC_013691 | SNX21        | chr20:44462469-44486048   | 10.3007    | 8.51485    | -0.274689 | 0.696867 |
| XLOC_017146 | ZSWIM6       | chr5:60628099-60841999    | 2.28988    | 1.89302    | -0.274583 | 0.674009 |
| XLOC_006316 | ARHGAP5      | chr14:32546494-32628934   | 2.53661    | 2.09706    | -0.274529 | 0.584417 |
| XLOC_014258 | N6AMT1       | chr21:30244512-30257695   | 3.09326    | 2.55741    | -0.274445 | 0.803409 |
| XLOC_005842 | B3GALTL      | chr13:31774111-31906411   | 1.45831    | 1.20571    | -0.27442  | 0.72151  |
| XLOC_022413 | LOC389765    | chr9:88420916-88457794    | 0.652462   | 0.539472   | -0.274346 | 0.854706 |
| XLOC_007108 | LOC646278    | chr15:29034979-29101720   | 0.339707   | 0.280939   | -0.27403  | 1        |
| XLOC_010543 | CLEC4GP1     | chr19:7852369-7855898     | 0.0289094  | 0.0239085  | -0.274016 | 1        |
| XLOC_007410 | RCCD1        | chr15:91498105-91506355   | 10.0069    | 8.27637    | -0.273919 | 0.610876 |
| XLOC_011029 | FCGRT        | chr19:50015535-50029685   | 40.3006    | 33.3316    | -0.273912 | 0.585996 |
| XLOC_013743 | NPEPL1,STX16 | chr20:57226308-57290900   | 34.9864    | 28.9364    | -0.273912 | 0.643713 |
| XLOC_017296 | PRRC1        | chr5:126853308-126890780  | 7.09812    | 5.87087    | -0.273863 | 0.576341 |
| XLOC_019027 | SNX3         | chr6:108532716-108582464  | 135.967    | 112.464    | -0.273793 | 0.556775 |
| XLOC_019059 | MCM9         | chr6:119134611-119256327  | 1.10952    | 0.917762   | -0.273741 | 0.895686 |
| XLOC_014485 | MIAT         | chr22:27053445-27072440   | 0.0429746  | 0.0355482  | -0.273709 | 1        |
| XLOC_003011 | ZNF503       | chr10:77157602-77168740   | 8.96843    | 7.41928    | -0.273576 | 0.678853 |
| XLOC_007829 | RAB40C       | chr16:639356-679273       | 16.7246    | 13.8358    | -0.273566 | 0.599981 |
| XLOC_008819 | CHRNA1       | chr17:7348405-7360932     | 33.5133    | 27.7249    | -0.273552 | 0.547473 |
| XLOC_009947 | SDK2         | chr17:71330522-71640227   | 0.00182566 | 0.00151055 | -0.273351 | 1        |
| XLOC_017892 | CSF1R        | chr5:149432853-149492935  | 0.00460091 | 0.00380683 | -0.273331 | 1        |
| XLOC_009484 | RPL26        | chr17:8280833-8286565     | 6148.24    | 5087.15    | -0.273316 | 0.612746 |
| XLOC_023325 | XK           | chrX:37545132-37591383    | 0.564731   | 0.467378   | -0.272974 | 0.795726 |
| XLOC_009573 | SPAG5        | chr17:26904582-26926056   | 16.3172    | 13.5049    | -0.272911 | 0.559892 |
| XLOC_022246 | FOXH1        | chr8:145691737-145701718  | 10.3383    | 8.55701    | -0.272818 | 0.823743 |
| XLOC_005217 | RAD52        | chr12:1021254-1058863     | 3.28587    | 2.72005    | -0.272642 | 0.703707 |
| XLOC_013219 | STK39        | chr2:168810529-169104105  | 5.99051    | 4.95907    | -0.27261  | 0.627743 |
| XLOC_003717 | RPS3         | chr11:75110534-75133345   | 3278.41    | 2713.97    | -0.272592 | 0.659814 |
| XLOC_004817 | H1FNT        | chr12:48722762-48724062   | 0.0394453  | 0.0326557  | -0.272518 | 1        |
| XLOC_010188 | SIGLEC15     | chr18:43405544-43422521   | 0.026474   | 0.0219183  | -0.272443 | 1        |
| XLOC_005135 | PXN-AS1      | chr12:120639093-120703574 | 2.80752    | 2.32462    | -0.272302 | 0.978996 |
| XLOC_006980 | CINP         | chr14:102814618-102829253 | 27.4229    | 22.7064    | -0.272228 | 0.624059 |
| XLOC_014735 | HPS4         | chr22:26846848-26879829   | 6.38108    | 5.28408    | -0.272149 | 0.606595 |
| XLOC_009046 | WIPF2        | chr17:38375573-38438439   | 4.62864    | 3.83291    | -0.272147 | 0.601902 |
| XLOC_020596 | C7orf63      | chr7:89874487-89940377    | 0.807366   | 0.668592   | -0.272098 | 0.782307 |
| XLOC_014844 | ST13         | chr22:41220600-41252687   | 98.1661    | 81.3055    | -0.271871 | 0.561661 |
| XLOC_008003 | RBBP6        | chr16:24550907-24584183   | 7.562      | 6.26319    | -0.271871 | 0.721793 |
| XLOC_009882 | TUBD1        | chr17:57936840-57970306   | 1.67609    | 1.3883     | -0.271781 | 0.785865 |
| XLOC_001032 | RCOR3        | chr1:211432707-211489725  | 3.90664    | 3.23622    | -0.271618 | 0.699335 |
| XLOC_006160 | KCTD12       | chr13:77454303-77460540   | 1.95875    | 1.62278    | -0.27147  | 0.674951 |
| XLOC_002030 | GAS5         | chr1:173832385-173837125  | 1527.94    | 1266.01    | -0.271298 | 0.578771 |
| XLOC_007936 | ATF7IP2      | chr16:10479911-10577495   | 1.55527    | 1.28876    | -0.271181 | 0.727839 |
| XLOC_006653 | C14orf180    | chr14:105046055-105056183 | 0.0309756  | 0.0256677  | -0.271178 | 1        |
| XLOC_023620 | HPRT1        | chrX:133594174-133634698  | 76.4821    | 63.3886    | -0.2709   | 0.559158 |
| XLOC_015982 | TFDP2        | chr3:141663269-141868386  | 3.44811    | 2.85792    | -0.270843 | 0.592657 |
| XLOC_020985 | HIBADH       | chr7:27565058-27702620    | 14.2727    | 11.8299    | -0.270817 | 0.608991 |
| XLOC_002741 | PSTK         | chr10:124739555-124749907 | 3.10481    | 2.57456    | -0.270176 | 0.775022 |
| XLOC_000399 | SCP2         | chr1:53392900-53517289    | 35.6343    | 29.5488    | -0.270164 | 0.587374 |



|             |              |                          |            |            |           |          |
|-------------|--------------|--------------------------|------------|------------|-----------|----------|
| XLOC_021679 | INTS8        | chr8:95835517-95907482   | 15.3293    | 12.7125    | -0.270043 | 0.642563 |
| XLOC_022119 | RNF19A       | chr8:101269287-101322379 | 7.32849    | 6.07896    | -0.269692 | 0.59187  |
| XLOC_006710 | HAUS4        | chr14:23415436-23426351  | 41.9217    | 34.7777    | -0.269535 | 0.570304 |
| XLOC_014744 | CHEK2        | chr22:29083730-29137822  | 12.2268    | 10.1441    | -0.269406 | 0.633194 |
| XLOC_007769 | POLG         | chr15:89787193-89878026  | 14.8136    | 12.2911    | -0.269313 | 0.731905 |
| XLOC_006480 | SPATA7       | chr14:88851987-88904804  | 4.38752    | 3.64044    | -0.269295 | 0.702162 |
| XLOC_009753 | COA3         | chr17:40949635-40950743  | 54.913     | 45.5634    | -0.26927  | 0.610478 |
| XLOC_004832 | PRPF40B      | chr12:50017196-50101197  | 0.765551   | 0.635329   | -0.268995 | 0.95717  |
| XLOC_009093 | ARL4D        | chr17:41476352-41478504  | 0.018168   | 0.0150776  | -0.268992 | 1        |
| XLOC_012186 | EML6         | chr2:54952148-55199156   | 0.489031   | 0.405849   | -0.268984 | 0.7704   |
| XLOC_014942 | BRK1         | chr3:10157332-10168874   | 89.4753    | 74.278     | -0.268554 | 0.558746 |
| XLOC_010445 | GPX4         | chr19:1103935-1106787    | 386.366    | 320.743    | -0.26855  | 0.568365 |
| XLOC_022996 | CTNNAL1      | chr9:111704850-111775764 | 29.7081    | 24.6673    | -0.268255 | 0.572905 |
| XLOC_002148 | NUCKS1       | chr1:205681946-205719372 | 17.8269    | 14.8024    | -0.268228 | 0.572512 |
| XLOC_008069 | BCKDK        | chr16:31119614-31124112  | 127.256    | 105.673    | -0.268125 | 0.591871 |
| XLOC_010820 | ZNF420       | chr19:37569381-37620651  | 1.0787     | 0.895963   | -0.267786 | 0.780762 |
| XLOC_017627 | LOC100506548 | chr5:40825364-40829244   | 27.5121    | 22.8514    | -0.26778  | 0.57751  |
| XLOC_015300 | MYLK-AS1     | chr3:123304402-123603149 | 0.183033   | 0.152029   | -0.267757 | 1        |
| XLOC_019121 | LOC100507489 | chr6:143287558-143358719 | 0.111932   | 0.0929722  | -0.26775  | 1        |
| XLOC_009527 | FLCN         | chr17:17115526-17140502  | 17.181     | 14.2726    | -0.267568 | 0.646705 |
| XLOC_022882 | FAM108B1     | chr9:74477367-74526148   | 4.64389    | 3.85819    | -0.267407 | 0.666451 |
| XLOC_019095 | ALDH8A1      | chr6:135238527-135271260 | 0.150899   | 0.125372   | -0.267363 | 1        |
| XLOC_018046 | LOC100130275 | chr6:10396915-10419797   | 2.17293    | 1.80539    | -0.267333 | 0.926169 |
| XLOC_021251 | PUS7         | chr7:105096959-105162685 | 9.06301    | 7.53012    | -0.267318 | 0.592657 |
| XLOC_015311 | CHCHD6       | chr3:126423062-126679263 | 70.2195    | 58.3562    | -0.266984 | 0.593786 |
| XLOC_010599 | ZNF833P      | chr19:11784812-11797384  | 0.553085   | 0.459644   | -0.266984 | 0.851628 |
| XLOC_005002 | SYT1         | chr12:79257772-79845788  | 0.00787984 | 0.00654883 | -0.26693  | 1        |
| XLOC_008217 | IL34         | chr16:70613797-70694585  | 0.0129722  | 0.0107813  | -0.266894 | 1        |
| XLOC_013083 | FHL2         | chr2:105977282-106055230 | 393.011    | 326.635    | -0.266892 | 0.581794 |
| XLOC_012256 | TLX2         | chr2:74741595-74744275   | 0.0171045  | 0.0142171  | -0.266748 | 1        |
| XLOC_002206 | WDR26        | chr1:224572844-224622001 | 7.90642    | 6.57195    | -0.266703 | 0.568843 |
| XLOC_004335 | EIF1AD       | chr11:65764015-65771617  | 11.3129    | 9.40461    | -0.266527 | 0.92367  |
| XLOC_002126 | LOC730227    | chr1:203267885-203274453 | 0.0410223  | 0.0341047  | -0.266439 | 1        |
| XLOC_011895 | CLDND2       | chr19:51870351-51872257  | 0.337605   | 0.280683   | -0.266395 | 1        |
| XLOC_011071 | ZNF175       | chr19:52074530-52092991  | 1.57926    | 1.31348    | -0.265861 | 0.727839 |
| XLOC_008969 | RAB11FIP4    | chr17:29718641-29865232  | 3.97721    | 3.30823    | -0.265695 | 0.663286 |
| XLOC_018490 | RNF146       | chr6:127587826-127609705 | 6.43934    | 5.35702    | -0.265482 | 0.664979 |
| XLOC_016187 | RGS12        | chr4:3315873-3441640     | 1.94864    | 1.62153    | -0.26511  | 0.739297 |
| XLOC_008895 | SMCR7        | chr17:18163847-18169095  | 23.6975    | 19.7202    | -0.265061 | 0.611649 |
| XLOC_007839 | MSLN         | chr16:810764-818865      | 0.0330092  | 0.0274721  | -0.264901 | 1        |
| XLOC_009507 | ZNF18        | chr17:11880761-11900689  | 2.02639    | 1.68664    | -0.26476  | 0.752349 |
| XLOC_021712 | OXR1         | chr8:107282405-107764921 | 9.68013    | 8.05788    | -0.264626 | 0.624761 |
| XLOC_018063 | JARID2       | chr6:15246205-15522273   | 2.14988    | 1.78992    | -0.264362 | 0.699166 |
| XLOC_018595 | FGFR1OP      | chr6:167412815-167454066 | 7.00473    | 5.83209    | -0.264316 | 0.664979 |
| XLOC_014360 | C21orf2      | chr21:45748826-45759285  | 4.78037    | 3.98012    | -0.264308 | 0.743519 |
| XLOC_005238 | CD27-AS1     | chr12:6548166-6560884    | 4.29978    | 3.58       | -0.264303 | 0.705198 |
| XLOC_009479 | LINC00324    | chr17:8123947-8127361    | 0.831304   | 0.692194   | -0.2642   | 0.864118 |
| XLOC_018908 | PTCHD4       | chr6:47845763-48036425   | 0.155804   | 0.129734   | -0.264172 | 1        |
| XLOC_001295 | FAM131C      | chr1:16384263-16400127   | 26.2527    | 21.8659    | -0.263784 | 0.626629 |

|             |               |                           |            |            |           |          |
|-------------|---------------|---------------------------|------------|------------|-----------|----------|
| XLOC_007736 | AGSK1,LOC7278 | chr15:82753446-82798352   | 0.24826    | 0.20678    | -0.263756 | 1        |
| XLOC_014677 | C22orf39      | chr22:19428409-19435755   | 13.2516    | 11.0377    | -0.263731 | 0.650967 |
| XLOC_022403 | CEP78         | chr9:80850990-80881983    | 3.93111    | 3.2747     | -0.263572 | 0.699342 |
| XLOC_002645 | FAM178A       | chr10:102672325-102724891 | 3.58295    | 2.98469    | -0.263568 | 0.879418 |
| XLOC_013903 | NANP          | chr20:25593572-25604648   | 2.685      | 2.23669    | -0.263558 | 0.689772 |
| XLOC_014456 | MMP11         | chr22:24115035-24126503   | 8.41448    | 7.01028    | -0.263402 | 0.688092 |
| XLOC_023065 | DENND1A       | chr9:126141932-126692417  | 13.974     | 11.6423    | -0.263371 | 0.633819 |
| XLOC_011916 | ZNF836        | chr19:52658124-52674896   | 1.48323    | 1.23575    | -0.263354 | 0.748812 |
| XLOC_007890 | SRRM2         | chr16:2787076-2821413     | 39.6715    | 33.053     | -0.263321 | 0.583757 |
| XLOC_013631 | EPB41L1       | chr20:34679425-34820721   | 4.67343    | 3.89385    | -0.263283 | 0.62495  |
| XLOC_004795 | METTL20       | chr12:31800093-31822016   | 0.455309   | 0.379361   | -0.263275 | 0.868076 |
| XLOC_006826 | KTN1-AS1      | chr14:56042874-56046810   | 1.41425    | 1.17842    | -0.26318  | 0.825529 |
| XLOC_003954 | CHID1         | chr11:867858-915058       | 24.1503    | 20.1253    | -0.263031 | 0.592657 |
| XLOC_017477 | RANBP17       | chr5:170288895-170727019  | 0.515456   | 0.429652   | -0.262681 | 0.814656 |
| XLOC_023063 | MIR600HG      | chr9:125871772-125877756  | 0.896214   | 0.747108   | -0.262526 | 0.769079 |
| XLOC_006186 | DZIP1         | chr13:96085852-96296960   | 0.00531744 | 0.00443296 | -0.262462 | 1        |
| XLOC_013624 | MMP24         | chr20:33814538-33864804   | 5.26161    | 4.38643    | -0.262458 | 0.664979 |
| XLOC_011950 | LENG9         | chr19:54960064-54974894   | 16.0185    | 13.3543    | -0.26244  | 0.837945 |
| XLOC_000600 | AKR7A2P1      | chr1:113454469-113498975  | 0.0765023  | 0.0637938  | -0.262085 | 1        |
| XLOC_002903 | MARCH8        | chr10:45952816-46090354   | 0.818698   | 0.682718   | -0.26204  | 0.844936 |
| XLOC_009017 | ARHGAP23      | chr17:36584719-36668628   | 2.31115    | 1.92731    | -0.262023 | 0.72856  |
| XLOC_006057 | KATNAL1       | chr13:30776766-30881624   | 0.337215   | 0.281272   | -0.261699 | 1        |
| XLOC_007266 | MAP2K5        | chr15:67835020-68099455   | 13.1345    | 10.9563    | -0.261593 | 0.640604 |
| XLOC_014478 | CRYBB2P1      | chr22:25844053-25857645   | 20.8441    | 17.3877    | -0.261577 | 0.61305  |
| XLOC_019041 | TRAF3IP2      | chr6:111804674-111927477  | 4.51098    | 3.76301    | -0.261553 | 0.662987 |
| XLOC_000351 | RPS8          | chr1:45241245-45244412    | 6033.65    | 5033.28    | -0.261532 | 0.642802 |
| XLOC_010771 | ZNF181        | chr19:35225479-35233774   | 2.08149    | 1.73645    | -0.261472 | 0.71967  |
| XLOC_014459 | MIF           | chr22:24235896-24241117   | 3557.14    | 2967.83    | -0.261311 | 0.619611 |
| XLOC_000195 | MTFR1L        | chr1:26146396-26159433    | 23.22      | 19.3732    | -0.261306 | 0.608864 |
| XLOC_001121 | LGALS8        | chr1:236681513-236767841  | 7.66955    | 6.39964    | -0.261151 | 0.77849  |
| XLOC_020748 | AHCYL2        | chr7:128864854-129070052  | 2.44532    | 2.04053    | -0.261081 | 0.674827 |
| XLOC_011957 | TNNT1         | chr19:55644160-55660606   | 156.368    | 130.498    | -0.260918 | 0.584417 |
| XLOC_002592 | BTA1F1        | chr10:93683735-93790080   | 3.42408    | 2.85762    | -0.260901 | 0.622185 |
| XLOC_009365 | VPS53         | chr17:411907-618096       | 3.24097    | 2.70523    | -0.260675 | 0.600595 |
| XLOC_010759 | CEBPA-AS1     | chr19:33793762-33795963   | 3.24985    | 2.71291    | -0.26053  | 0.779868 |
| XLOC_002525 | KAT6B         | chr10:76586170-76792380   | 1.2067     | 1.00739    | -0.26044  | 0.712072 |
| XLOC_008779 | PLD2          | chr17:4710395-4726727     | 11.0132    | 9.19453    | -0.260385 | 0.618187 |
| XLOC_010853 | DLL3          | chr19:39989556-39999121   | 0.0215091  | 0.0179594  | -0.260203 | 1        |
| XLOC_015557 | SRGAP3        | chr3:9022275-9291369      | 0.0212508  | 0.0177446  | -0.260142 | 1        |
| XLOC_018533 | PEX3          | chr6:143771917-143811751  | 8.67861    | 7.24671    | -0.260138 | 0.63426  |
| XLOC_016395 | FRAS1         | chr4:78978723-79465423    | 0.908262   | 0.758415   | -0.260121 | 0.667772 |
| XLOC_015839 | CPOX          | chr3:98298289-98312455    | 13.2082    | 11.0292    | -0.26011  | 0.612808 |
| XLOC_022170 | LOC100130231  | chr8:126934766-126963441  | 0.00355845 | 0.0029714  | -0.260106 | 1        |
| XLOC_001810 | SEMA6C        | chr1:151104162-151119140  | 2.4806     | 2.07142    | -0.26007  | 0.758273 |
| XLOC_000007 | KLHL17        | chr1:895966-901099        | 17.195     | 14.3588    | -0.260052 | 0.646705 |
| XLOC_013922 | C20orf112     | chr20:31030861-31172875   | 1.31908    | 1.10151    | -0.260041 | 0.739517 |
| XLOC_012100 | TRIM54        | chr2:27505296-27531130    | 0.0114549  | 0.00956731 | -0.25978  | 1        |
| XLOC_003125 | OBFC1         | chr10:105637317-105678045 | 2.48001    | 2.07161    | -0.259593 | 0.659662 |
| XLOC_018429 | PRDM1         | chr6:106534194-106557814  | 0.200881   | 0.167803   | -0.259573 | 1        |

|             |               |                           |            |            |           |          |
|-------------|---------------|---------------------------|------------|------------|-----------|----------|
| XLOC_000067 | H6PD          | chr1:9294862-9331394      | 3.58417    | 2.99408    | -0.259528 | 0.638482 |
| XLOC_018476 | PKIB          | chr6:122793061-123047518  | 0.0834888  | 0.0697528  | -0.259332 | 1        |
| XLOC_012689 | SP100         | chr2:231280870-231410317  | 17.3243    | 14.4752    | -0.259215 | 0.691019 |
| XLOC_005673 | MTERFD3       | chr12:107371068-107380944 | 3.40905    | 2.84857    | -0.259134 | 0.736305 |
| XLOC_000052 | KCNAB2        | chr1:5922869-6161253      | 35.7811    | 29.899     | -0.2591   | 0.622503 |
| XLOC_012872 | PRKD3         | chr2:37477645-37544222    | 2.2349     | 1.86789    | -0.258801 | 0.667772 |
| XLOC_007671 | PARP6         | chr15:72533521-72563628   | 6.9939     | 5.84626    | -0.258582 | 0.65387  |
| XLOC_016679 | FBXL5         | chr4:15606006-15657035    | 8.54368    | 7.14211    | -0.258506 | 0.617993 |
| XLOC_003948 | DEAF1         | chr11:644224-705028       | 40.19      | 33.5971    | -0.258502 | 0.667022 |
| XLOC_015093 | ZNF589        | chr3:48282595-48312479    | 4.63629    | 3.87575    | -0.258496 | 0.67663  |
| XLOC_005094 | ANKRD13A      | chr12:110437234-110477235 | 29.5831    | 24.7306    | -0.25848  | 0.588874 |
| XLOC_004844 | ATF1          | chr12:51157788-51214943   | 6.42404    | 5.37065    | -0.258385 | 0.651207 |
| XLOC_007838 | HAGHL         | chr16:777265-779715       | 88.0324    | 73.5998    | -0.258332 | 0.607733 |
| XLOC_010329 | ZSCAN30       | chr18:32820993-32870196   | 1.55693    | 1.30172    | -0.258285 | 0.837434 |
| XLOC_020699 | ZNF277        | chr7:111846642-111983989  | 11.7494    | 9.82375    | -0.258246 | 0.61138  |
| XLOC_008463 | LOC100271836  | chr16:21458003-21513602   | 0.0751614  | 0.0628446  | -0.258203 | 1        |
| XLOC_010946 | LOC100287177  | chr19:46112657-46148775   | 25.2026    | 21.0735    | -0.258139 | 0.849964 |
| XLOC_006842 | SIX4          | chr14:61176255-61190852   | 1.96557    | 1.64378    | -0.257929 | 0.684702 |
| XLOC_009461 | PLSCR3,TMEM25 | chr17:7284292-7307450     | 268.918    | 224.906    | -0.257846 | 0.762043 |
| XLOC_010797 | MLL4          | chr19:36208920-36229779   | 5.93121    | 4.96056    | -0.257823 | 0.616881 |
| XLOC_007151 | C15orf62      | chr15:41060066-41106767   | 0.284545   | 0.237981   | -0.257812 | 1        |
| XLOC_005866 | NAA16         | chr13:41885340-41951166   | 2.6454     | 2.21251    | -0.257798 | 0.706316 |
| XLOC_004959 | MON2          | chr12:62860596-62991363   | 1.07982    | 0.903133   | -0.257785 | 0.688092 |
| XLOC_009798 | ARL17A        | chr17:44590075-44657088   | 0.283992   | 0.237548   | -0.257631 | 1        |
| XLOC_018316 | POLH          | chr6:43543877-43596936    | 2.03624    | 1.70341    | -0.257484 | 0.934861 |
| XLOC_000751 | EFNA4         | chr1:155006281-155042029  | 29.6618    | 24.8141    | -0.257449 | 0.933717 |
| XLOC_012362 | GCC2          | chr2:109065576-109125854  | 0.755998   | 0.632472   | -0.25738  | 0.751958 |
| XLOC_017341 | KIF20A        | chr5:137514416-137549032  | 6.19708    | 5.18496    | -0.257254 | 0.84361  |
| XLOC_012368 | RGPD5,RGPD6   | chr2:110550334-110615282  | 0.00250577 | 0.00209682 | -0.257056 | 1        |
| XLOC_024037 | RPL39         | chrX:118920468-118925606  | 9303.56    | 7785.42    | -0.257008 | 0.633194 |
| XLOC_006882 | ZFYVE1        | chr14:73436158-73493920   | 7.10095    | 5.94278    | -0.256874 | 0.692155 |
| XLOC_020744 | TP1P2         | chr7:128695276-128697293  | 0.177796   | 0.148814   | -0.256715 | 1        |
| XLOC_018664 | GPLD1         | chr6:24426061-24489850    | 0.348358   | 0.291586   | -0.256665 | 1        |
| XLOC_006364 | LGALS3        | chr14:55595934-55612148   | 54.9309    | 45.9799    | -0.256617 | 0.610681 |
| XLOC_012202 | EHBP1         | chr2:62900985-63275656    | 2.52147    | 2.1106     | -0.256613 | 0.678167 |
| XLOC_008787 | USP6          | chr17:5031686-5078324     | 0.188682   | 0.157943   | -0.256554 | 1        |
| XLOC_018499 | ENPP1         | chr6:132129155-132216295  | 0.742451   | 0.621545   | -0.256437 | 0.757708 |
| XLOC_017483 | ERGIC1        | chr5:172261222-172379688  | 87.491     | 73.2438    | -0.256428 | 0.605515 |
| XLOC_008723 | RNF166        | chr16:88762902-88772829   | 16.8725    | 14.128     | -0.256113 | 0.687955 |
| XLOC_023439 | ZC3H12B       | chrX:64708614-64727767    | 0.2647     | 0.221652   | -0.256067 | 1        |
| XLOC_002108 | PHLDA3        | chr1:201434606-201438299  | 96.1768    | 80.5437    | -0.255919 | 0.6084   |
| XLOC_017185 | FCHO2         | chr5:72251807-72386349    | 1.83238    | 1.53467    | -0.255797 | 0.71124  |
| XLOC_006302 | NOP9          | chr14:24769097-24774374   | 2.41373    | 2.02171    | -0.255683 | 0.796907 |
| XLOC_006100 | TSC22D1       | chr13:45006278-45154568   | 15.8693    | 13.2922    | -0.255662 | 0.612247 |
| XLOC_022390 | SMC5          | chr9:72873877-72969789    | 3.28118    | 2.74841    | -0.255617 | 0.64267  |
| XLOC_015007 | PDCD6IP       | chr3:33840062-33911199    | 17.2422    | 14.4443    | -0.255439 | 0.598397 |
| XLOC_005669 | NUAK1         | chr12:106457124-106533811 | 1.15156    | 0.9649     | -0.255133 | 0.753783 |
| XLOC_008041 | TMEM219       | chr16:29973350-29984373   | 109.62     | 91.8527    | -0.255115 | 0.59561  |
| XLOC_008677 | WDR59         | chr16:74907470-75019017   | 13.3007    | 11.1452    | -0.255088 | 0.619985 |

|             |              |                           |            |            |           |          |
|-------------|--------------|---------------------------|------------|------------|-----------|----------|
| XLOC_000636 | HFE2         | chr1:145413190-145417545  | 0.0151051  | 0.0126577  | -0.25502  | 1        |
| XLOC_016580 | CEP44        | chr4:175157809-175254531  | 1.8321     | 1.53526    | -0.255017 | 0.840828 |
| XLOC_016073 | GNB4         | chr3:179113875-179169371  | 0.0810762  | 0.0679471  | -0.254866 | 1        |
| XLOC_010952 | CCDC61       | chr19:46498718-46521874   | 7.70455    | 6.45694    | -0.254859 | 0.754837 |
| XLOC_009324 | GAA          | chr17:78075354-78093679   | 59.6032    | 49.9549    | -0.254765 | 0.611201 |
| XLOC_005128 | SUDS3        | chr12:118814357-118855840 | 6.41607    | 5.37758    | -0.254732 | 0.629512 |
| XLOC_006827 | LINC00520    | chr14:56247852-56263392   | 0.251241   | 0.210589   | -0.254642 | 1        |
| XLOC_004655 | TULP3        | chr12:3000032-3050306     | 9.05402    | 7.5897     | -0.254516 | 0.640772 |
| XLOC_016736 | FRYL         | chr4:48499379-48782316    | 1.17599    | 0.985907   | -0.25435  | 0.679452 |
| XLOC_016450 | TET2         | chr4:106067031-106200960  | 0.573322   | 0.480731   | -0.254117 | 0.751881 |
| XLOC_000926 | LAMC1        | chr1:182992594-183114727  | 10.2157    | 8.56618    | -0.254065 | 0.605249 |
| XLOC_004020 | TRIM5        | chr11:5684424-5706339     | 1.86782    | 1.56636    | -0.253943 | 0.776418 |
| XLOC_009237 | PRKCA        | chr17:64298925-64806862   | 0.946078   | 0.793415   | -0.253884 | 0.736417 |
| XLOC_009656 | SNORA21      | chr17:37006320-37010053   | 40.6919    | 34.1261    | -0.253868 | 0.978818 |
| XLOC_006780 | SEC23A       | chr14:39501122-39572437   | 4.17117    | 3.4983     | -0.253799 | 0.66979  |
| XLOC_010302 | ESCO1        | chr18:19109261-19180693   | 1.99337    | 1.67185    | -0.253764 | 0.715755 |
| XLOC_019018 | PREP         | chr6:105725441-105850999  | 14.6917    | 12.3224    | -0.253716 | 0.624445 |
| XLOC_018144 | ZKSCAN3      | chr6:28317690-28336954    | 1.05937    | 0.888574   | -0.25365  | 0.782475 |
| XLOC_009619 | SLFN13       | chr17:33762114-33775856   | 0.00219635 | 0.00184224 | -0.253642 | 1        |
| XLOC_022325 | GALT         | chr9:34646585-34650595    | 13.0488    | 10.9454    | -0.253601 | 0.695161 |
| XLOC_001623 | CTBS         | chr1:85018803-85040163    | 3.9769     | 3.33587    | -0.253581 | 0.696339 |
| XLOC_022138 | EIF3E        | chr8:109213971-109260959  | 786.296    | 659.56     | -0.253569 | 0.639952 |
| XLOC_011544 | SUGP2        | chr19:19101696-19144380   | 7.29896    | 6.12275    | -0.25351  | 0.640496 |
| XLOC_009087 | RPL27        | chr17:41150445-41154971   | 5333.27    | 4474.08    | -0.253431 | 0.642563 |
| XLOC_023518 | HNRNP28L     | chrX:100645877-100669128  | 1762.98    | 1479.01    | -0.253387 | 0.638761 |
| XLOC_011626 | ZNF461       | chr19:37128282-37157739   | 0.363447   | 0.304918   | -0.253323 | 1        |
| XLOC_015138 | PHF7         | chr3:52444526-52457657    | 1.46674    | 1.23072    | -0.253114 | 0.822512 |
| XLOC_020605 | MGC16142     | chr7:92167788-92169079    | 1.1409     | 0.957427   | -0.252932 | 0.862836 |
| XLOC_018384 | MYO6         | chr6:76458908-76629254    | 2.01808    | 1.69364    | -0.252863 | 0.656414 |
| XLOC_007486 | KATNBL1      | chr15:34432874-34502297   | 7.27659    | 6.10703    | -0.252791 | 0.642777 |
| XLOC_012325 | INPP4A       | chr2:99061320-99207496    | 2.29045    | 1.9224     | -0.252724 | 0.686965 |
| XLOC_023974 | NOX1         | chrX:100098312-100129334  | 0.0389006  | 0.0326499  | -0.252713 | 1        |
| XLOC_011558 | ZNF506       | chr19:19903519-19932560   | 2.13683    | 1.79349    | -0.252697 | 0.734343 |
| XLOC_012942 | SERTAD2      | chr2:64858754-64881046    | 5.90295    | 4.95575    | -0.252333 | 0.637294 |
| XLOC_015151 | IL17RB       | chr3:53880576-53899827    | 2.73251    | 2.29421    | -0.252226 | 0.773721 |
| XLOC_001578 | JUN          | chr1:59246462-59249785    | 152.301    | 127.881    | -0.25213  | 0.633194 |
| XLOC_007635 | CLPX         | chr15:65442783-65477563   | 11.6172    | 9.75601    | -0.251898 | 0.639922 |
| XLOC_022109 | RPL30        | chr8:99053937-99057818    | 7071.91    | 5939.11    | -0.251854 | 0.660902 |
| XLOC_007568 | COPS2        | chr15:49417470-49447854   | 17.7658    | 14.9202    | -0.251835 | 0.608533 |
| XLOC_009949 | MGC16275     | chr17:72206134-72209460   | 2.59522    | 2.17998    | -0.251537 | 0.76721  |
| XLOC_022594 | LOC100506100 | chr9:131486740-131534213  | 6.44203    | 5.41133    | -0.251532 | 0.975454 |
| XLOC_005556 | LOC100506844 | chr12:58325231-58329947   | 15.9466    | 13.3957    | -0.251483 | 0.727236 |
| XLOC_001627 | MCOLN2       | chr1:85391265-85462796    | 6.42523    | 5.3975     | -0.251459 | 0.660035 |
| XLOC_014724 | GSTT1        | chr22:24376138-24384284   | 52.4595    | 44.0688    | -0.251447 | 0.631444 |
| XLOC_014219 | ADARB1       | chr21:46494492-46646478   | 3.79152    | 3.1851     | -0.251438 | 0.714064 |
| XLOC_021423 | ESYT2        | chr7:158523688-158622319  | 7.49777    | 6.2987     | -0.251408 | 0.619985 |
| XLOC_001700 | LOC440600    | chr1:110828998-110881793  | 0.0932312  | 0.078323   | -0.251377 | 1        |
| XLOC_018654 | ATXN1        | chr6:16299342-16761721    | 0.290773   | 0.244294   | -0.251273 | 1        |
| XLOC_021435 | MCPH1        | chr8:6264112-6501140      | 3.14669    | 2.64406    | -0.251081 | 0.726122 |

|             |              |                           |            |            |           |          |
|-------------|--------------|---------------------------|------------|------------|-----------|----------|
| XLOC_020843 | SSPO         | chr7:149473130-149531053  | 0.0206077  | 0.0173165  | -0.251035 | 1        |
| XLOC_018967 | PHIP         | chr6:79644135-79788011    | 2.07162    | 1.74083    | -0.250991 | 0.646705 |
| XLOC_004483 | TRPC6        | chr11:101322294-101454659 | 0.00433477 | 0.00364291 | -0.250867 | 1        |
| XLOC_007571 | ATP8B4       | chr15:50150434-50411419   | 0.0282542  | 0.0237447  | -0.25086  | 1        |
| XLOC_005668 | APPL2        | chr12:105567074-105630008 | 4.90537    | 4.12259    | -0.25081  | 0.687345 |
| XLOC_019101 | MAP7         | chr6:136663418-136871957  | 5.59489    | 4.70263    | -0.250641 | 0.65482  |
| XLOC_008210 | CLEC18C      | chr16:70207927-70220798   | 0.0111547  | 0.00937671 | -0.2505   | 1        |
| XLOC_014985 | RPL15        | chr3:23933571-23965187    | 1297.42    | 1090.62    | -0.25049  | 0.657199 |
| XLOC_004913 | TMEM198B     | chr12:56211805-56236767   | 2.35404    | 1.97888    | -0.250451 | 0.950837 |
| XLOC_001896 | RIT1         | chr1:155867598-155881193  | 5.52885    | 4.64779    | -0.250434 | 0.667129 |
| XLOC_001995 | TADA1        | chr1:166825748-166845654  | 7.17829    | 6.03465    | -0.250369 | 0.681867 |
| XLOC_000611 | MAB21L3      | chr1:116654375-116677861  | 0.111846   | 0.0940276  | -0.250359 | 1        |
| XLOC_001492 | FOXJ3        | chr1:42642209-42801548    | 8.53048    | 7.17214    | -0.250225 | 0.624761 |
| XLOC_022720 | KIAA2026     | chr9:5919007-6008003      | 0.585637   | 0.492404   | -0.250163 | 0.783744 |
| XLOC_018358 | FAM83B       | chr6:54711568-54809897    | 0.00280053 | 0.0023547  | -0.25016  | 1        |
| XLOC_017696 | ENC1         | chr5:73923230-73937249    | 14.8798    | 12.5112    | -0.250137 | 0.631444 |
| XLOC_020751 | NRF1         | chr7:129251554-129396922  | 3.50207    | 2.94461    | -0.250131 | 0.774876 |
| XLOC_002316 | WDR37        | chr10:1102775-1178237     | 6.00842    | 5.052      | -0.25013  | 0.647649 |
| XLOC_002025 | TNFSF4       | chr1:173152869-173176471  | 0.0566506  | 0.0476358  | -0.250045 | 1        |
| XLOC_003112 | PSD          | chr10:104162373-104182893 | 1.06281    | 0.893764   | -0.249912 | 0.954535 |
| XLOC_011743 | ZNF180       | chr19:44979858-45004574   | 2.475      | 2.08137    | -0.249893 | 0.736853 |
| XLOC_014552 | EIF3L        | chr22:38245378-38284789   | 283.375    | 238.312    | -0.249858 | 0.614106 |
| XLOC_007489 | LPCAT4       | chr15:34651088-34659395   | 29.9562    | 25.1933    | -0.249816 | 0.643053 |
| XLOC_012797 | NBAS         | chr2:15307031-15701472    | 7.29236    | 6.13314    | -0.249761 | 0.613009 |
| XLOC_020614 | ASB4         | chr7:95115212-95169543    | 0.0047159  | 0.0039663  | -0.249739 | 1        |
| XLOC_001630 | C1orf52      | chr1:85715636-85725355    | 17.4255    | 14.6557    | -0.249733 | 0.612746 |
| XLOC_015736 | NPRL2        | chr3:50384918-50391496    | 18.847     | 15.8523    | -0.24964  | 0.844766 |
| XLOC_013377 | TUBA4A       | chr2:220110191-220136910  | 80.4447    | 67.6744    | -0.249388 | 0.700874 |
| XLOC_002138 | TMEM81       | chr1:205052256-205053588  | 2.42073    | 2.03654    | -0.249318 | 0.821371 |
| XLOC_021255 | NAMPT        | chr7:105888731-105925638  | 20.5696    | 17.306     | -0.249241 | 0.605515 |
| XLOC_021238 | FBXL13       | chr7:102453307-102715288  | 0.118304   | 0.0995381  | -0.249181 | 1        |
| XLOC_022212 | LOC100133669 | chr8:144063447-144099807  | 0.0355015  | 0.029874   | -0.248992 | 1        |
| XLOC_001881 | LOC100505666 | chr1:155006281-155042029  | 0.90968    | 0.765529   | -0.248902 | 0.975492 |
| XLOC_015710 | CCDC71       | chr3:49199967-49203785    | 16.1819    | 13.6177    | -0.248896 | 0.675713 |
| XLOC_018574 | GTF2H5       | chr6:158589378-158620376  | 3.92437    | 3.30264    | -0.24884  | 0.642898 |
| XLOC_006758 | DTD2         | chr14:31915242-31926680   | 5.14029    | 4.32627    | -0.248724 | 0.695914 |
| XLOC_013896 | GGTLC1       | chr20:23965689-23969416   | 0.181548   | 0.152843   | -0.248306 | 1        |
| XLOC_022438 | FGD3         | chr9:95709600-95798518    | 3.90141    | 3.28464    | -0.24826  | 0.727856 |
| XLOC_011939 | LENG1        | chr19:54641435-54663446   | 12.051     | 10.1465    | -0.248174 | 0.906934 |
| XLOC_019040 | REV3L        | chr6:111620233-111804414  | 0.607517   | 0.511515   | -0.248148 | 0.756518 |
| XLOC_004652 | ITFG2        | chr12:2921786-2934237     | 3.72672    | 3.13802    | -0.248054 | 0.743519 |
| XLOC_013946 | CPNE1,RBM12  | chr20:34213952-34252878   | 92.4336    | 77.8321    | -0.248052 | 0.704283 |
| XLOC_000391 | OSBPL9       | chr1:52082545-52344609    | 14.7224    | 12.397     | -0.24802  | 0.845153 |
| XLOC_002289 | ZNF124       | chr1:247285276-247335318  | 2.56963    | 2.16384    | -0.247965 | 0.79479  |
| XLOC_006386 | SLC38A6      | chr14:61447831-61550451   | 4.07208    | 3.42913    | -0.24792  | 0.769085 |
| XLOC_001335 | HP1BP3       | chr1:21069170-21113181    | 26.9888    | 22.73      | -0.247764 | 0.612746 |
| XLOC_008404 | PPL          | chr16:4932507-4987136     | 0.0179846  | 0.0151471  | -0.247723 | 1        |
| XLOC_000459 | TYW3         | chr1:751711171-75232360   | 10.593     | 8.92258    | -0.247575 | 0.752311 |
| XLOC_018244 | SYNGAP1      | chr6:33387846-33421466    | 3.52692    | 2.97084    | -0.24754  | 0.732699 |

|             |           |                           |           |           |           |          |
|-------------|-----------|---------------------------|-----------|-----------|-----------|----------|
| XLOC_000280 | AGO4      | chr1:36273827-36323490    | 1.79338   | 1.51079   | -0.24738  | 0.70045  |
| XLOC_007799 | LINS      | chr15:101109427-101142445 | 2.12706   | 1.792     | -0.247294 | 0.780035 |
| XLOC_002783 | DIP2C     | chr10:320129-735608       | 2.21696   | 1.86779   | -0.247244 | 0.693923 |
| XLOC_017695 | ANKRA2    | chr5:72848024-72861511    | 2.84404   | 2.39626   | -0.247159 | 0.76721  |
| XLOC_008780 | MINK1     | chr17:4736634-4806369     | 19.5217   | 16.4497   | -0.247016 | 0.656753 |
| XLOC_014871 | TTL1      | chr22:43435522-43485434   | 3.22408   | 2.71686   | -0.246944 | 0.7898   |
| XLOC_008806 | ACADVL    | chr17:7093209-7128586     | 144.671   | 121.918   | -0.24686  | 0.669949 |
| XLOC_015548 | CRBN      | chr3:3191316-3221401      | 6.6689    | 5.62107   | -0.246603 | 0.672291 |
| XLOC_002337 | ITIH2     | chr10:7745235-7791483     | 0.024452  | 0.0206101 | -0.246603 | 1        |
| XLOC_000602 | MAGI3     | chr1:113933474-114228545  | 0.361447  | 0.30466   | -0.246583 | 1        |
| XLOC_012757 | D2HGDH    | chr2:242674029-242708231  | 9.64981   | 8.13388   | -0.246557 | 0.703945 |
| XLOC_015874 | WDR52     | chr3:112931374-113160361  | 0.222966  | 0.187979  | -0.246247 | 1        |
| XLOC_006346 | ATP5S     | chr14:50779046-50792946   | 6.08302   | 5.12867   | -0.246203 | 0.749866 |
| XLOC_011068 | IGLON5    | chr19:51815101-51834102   | 0.0347942 | 0.0293407 | -0.245944 | 1        |
| XLOC_009978 | TRIM65    | chr17:73885040-73893084   | 16.4263   | 13.8527   | -0.245843 | 0.642611 |
| XLOC_001757 | PPIAL4G   | chr1:143767143-143767881  | 0.195273  | 0.164681  | -0.24582  | 1        |
| XLOC_010273 | LPIN2     | chr18:2916991-3011945     | 4.58363   | 3.86565   | -0.245779 | 0.663419 |
| XLOC_017646 | EMB       | chr5:49692030-49737234    | 2.13113   | 1.79747   | -0.245651 | 0.736305 |
| XLOC_009202 | YPEL2     | chr17:57409052-57479095   | 1.17769   | 0.993347  | -0.245588 | 0.776697 |
| XLOC_004514 | C11orf65  | chr11:108253726-108338258 | 0.549975  | 0.463896  | -0.245567 | 0.905839 |
| XLOC_001266 | FBXO2     | chr1:11708417-11723384    | 2.18185   | 1.84045   | -0.245494 | 0.965252 |
| XLOC_021619 | ADHFE1    | chr8:67344717-67381044    | 0.369721  | 0.311886  | -0.245419 | 1        |
| XLOC_018083 | ALDH5A1   | chr6:24495196-24537435    | 3.84465   | 3.24327   | -0.245402 | 0.687955 |
| XLOC_020452 | LOC646999 | chr7:39649085-39651687    | 0.035479  | 0.0299299 | -0.245375 | 1        |
| XLOC_012005 | ZNF329    | chr19:58637694-58662148   | 3.20538   | 2.70435   | -0.245214 | 0.709934 |
| XLOC_005207 | ZNF84     | chr12:133613877-133639885 | 3.91284   | 3.30136   | -0.245154 | 0.629465 |
| XLOC_001514 | TESK2     | chr1:45794913-45956840    | 2.30454   | 1.94454   | -0.245047 | 0.920464 |
| XLOC_011356 | SLC25A23  | chr19:6440074-6459781     | 34.4834   | 29.0969   | -0.245034 | 0.612746 |
| XLOC_020365 | ZNF853    | chr7:6655526-6663921      | 0.116821  | 0.0985784 | -0.244955 | 1        |
| XLOC_018538 | UTRN      | chr6:144612872-145174170  | 0.986591  | 0.832587  | -0.244851 | 0.699464 |
| XLOC_015740 | CISH      | chr3:50643884-50649262    | 2.50426   | 2.11349   | -0.244758 | 0.802621 |
| XLOC_000656 | NBPF16    | chr1:148739441-148758311  | 4.6965    | 3.96374   | -0.244722 | 0.678167 |
| XLOC_006799 | METTTL21D | chr14:50575349-50583297   | 4.83763   | 4.08285   | -0.244721 | 0.752397 |
| XLOC_006315 | NUBPL     | chr14:32030590-32330429   | 1.76728   | 1.49164   | -0.244636 | 0.774237 |
| XLOC_010931 | APOC1     | chr19:45417920-45422606   | 11.7258   | 9.89742   | -0.244561 | 0.824898 |
| XLOC_022819 | ARHGEF39  | chr9:35658286-35665278    | 7.04244   | 5.94451   | -0.244518 | 0.742612 |
| XLOC_016539 | FHDC1     | chr4:153864134-153900848  | 0.3722    | 0.31419   | -0.244443 | 0.840433 |
| XLOC_006460 | GPATCH2L  | chr14:76618258-76669134   | 1.40893   | 1.18966   | -0.244056 | 0.810757 |
| XLOC_013538 | DSTN      | chr20:17550598-17588652   | 63.6184   | 53.7198   | -0.24399  | 0.626566 |
| XLOC_006440 | PTGR2     | chr14:74318533-74352168   | 2.45061   | 2.06942   | -0.243918 | 0.765218 |
| XLOC_023956 | TAF9B     | chrX:77385244-77395179    | 8.43736   | 7.12562   | -0.243777 | 0.665195 |
| XLOC_004627 | NFRKB     | chr11:129733669-129765490 | 5.09677   | 4.30494   | -0.243589 | 0.674529 |
| XLOC_018656 | KIF13A    | chr6:17759413-17987854    | 1.47468   | 1.24563   | -0.243523 | 0.830017 |
| XLOC_018537 | STX11     | chr6:144471653-144513076  | 0.197329  | 0.166699  | -0.243363 | 1        |
| XLOC_018393 | RWDD2A    | chr6:83777384-83906256    | 3.73904   | 3.15876   | -0.243309 | 0.939068 |
| XLOC_004296 | RCOR2     | chr11:63678692-63684316   | 12.8008   | 10.8147   | -0.243238 | 0.678939 |
| XLOC_008494 | RABEP2    | chr16:28889808-28936532   | 22.7801   | 19.2458   | -0.243237 | 0.699749 |
| XLOC_023613 | FAM45B    | chrX:129628914-129631421  | 0.0528898 | 0.0446871 | -0.243129 | 1        |
| XLOC_001248 | ERRF1     | chr1:8071778-8086393      | 64.4901   | 54.494    | -0.242982 | 0.663395 |

|             |              |                          |           |           |           |          |
|-------------|--------------|--------------------------|-----------|-----------|-----------|----------|
| XLOC_016805 | SCARB2       | chr4:77079891-77135052   | 22.5404   | 19.0466   | -0.24298  | 0.629512 |
| XLOC_021210 | PMS2P1       | chr7:99905324-99965454   | 11.3667   | 9.60517   | -0.242928 | 0.913931 |
| XLOC_010674 | ANKLE1       | chr19:17392453-17398454  | 0.61943   | 0.52345   | -0.24289  | 0.867824 |
| XLOC_011022 | RPL13A       | chr19:49990810-49995564  | 10477.2   | 8854.39   | -0.242793 | 0.755233 |
| XLOC_014353 | SIK1         | chr21:44834397-44847002  | 12.6304   | 10.6743   | -0.242757 | 0.639922 |
| XLOC_003447 | PTPRJ        | chr11:48002109-48192394  | 3.89789   | 3.29422   | -0.242755 | 0.720534 |
| XLOC_003725 | TSKU         | chr11:76493356-76509198  | 16.0726   | 13.5843   | -0.242664 | 0.659108 |
| XLOC_001570 | USP24        | chr1:55532031-55681039   | 3.26645   | 2.7611    | -0.242483 | 0.643713 |
| XLOC_009760 | LOC100130581 | chr17:41447212-41466266  | 0.64963   | 0.549181  | -0.242336 | 0.86523  |
| XLOC_011977 | ZNF784       | chr19:56132106-56135941  | 8.5123    | 7.1962    | -0.242313 | 0.737313 |
| XLOC_020763 | LRGUK        | chr7:133812104-133948933 | 0.189191  | 0.159942  | -0.242296 | 1        |
| XLOC_020464 | SPDYE1       | chr7:43966034-44058748   | 0.0966479 | 0.0817123 | -0.242186 | 1        |
| XLOC_008104 | FTO          | chr16:53737874-54148379  | 2.03374   | 1.71955   | -0.242105 | 0.738519 |
| XLOC_019203 | DLL1         | chr6:170591293-170599697 | 6.25434   | 5.28923   | -0.241801 | 0.722516 |
| XLOC_009208 | RPS6KB1      | chr17:57970406-58027786  | 2.94189   | 2.48795   | -0.241788 | 0.689267 |
| XLOC_007167 | GANC         | chr15:42566365-42645864  | 0.529308  | 0.447634  | -0.241786 | 0.847872 |
| XLOC_015708 | LAMB2        | chr3:49158546-49170599   | 13.8379   | 11.7034   | -0.241696 | 0.648844 |
| XLOC_012809 | PUM2         | chr2:20448452-20527144   | 12.6084   | 10.6639   | -0.241647 | 0.629512 |
| XLOC_011673 | ZNF780A      | chr19:40575058-40596845  | 1.56662   | 1.32505   | -0.2416   | 0.806525 |
| XLOC_009641 | SYNRG        | chr17:35874899-35969486  | 3.16388   | 2.67615   | -0.241533 | 0.665141 |
| XLOC_018610 | HUS1B        | chr6:485137-693141       | 0.778607  | 0.658605  | -0.241483 | 0.910997 |
| XLOC_014000 | ACOT8        | chr20:44462469-44486048  | 18.7993   | 15.9031   | -0.241375 | 0.845215 |
| XLOC_018263 | MAPK14       | chr6:35995453-36079013   | 9.80711   | 8.29651   | -0.241323 | 0.647731 |
| XLOC_017737 | LYSMD3       | chr5:89811444-89825401   | 1.88273   | 1.59281   | -0.241245 | 0.740831 |
| XLOC_022084 | TMEM64       | chr8:91634222-91658133   | 6.2301    | 5.27078   | -0.24124  | 0.65998  |
| XLOC_006358 | STYX         | chr14:53196882-53241705  | 3.44211   | 2.91215   | -0.24121  | 0.693923 |
| XLOC_021185 | BAIAP2L1     | chr7:97910978-98030427   | 24.0975   | 20.3874   | -0.241201 | 0.853245 |
| XLOC_003952 | PIDD         | chr11:799178-805250      | 13.3289   | 11.2772   | -0.241157 | 0.692563 |
| XLOC_023437 | FAAH2        | chrX:57313109-57515629   | 0.745177  | 0.630484  | -0.241124 | 0.865746 |
| XLOC_013114 | DDX11L2      | chr2:114341229-114361294 | 0.628917  | 0.53216   | -0.241008 | 0.962754 |
| XLOC_011608 | HSPB6        | chr19:36245466-36247930  | 0.0718683 | 0.0608122 | -0.240995 | 1        |
| XLOC_022520 | ORM1         | chr9:117085302-117088759 | 0.0333732 | 0.0282401 | -0.240946 | 1        |
| XLOC_020354 | SLC29A4      | chr7:5322560-5343704     | 13.1898   | 11.1621   | -0.240814 | 0.683545 |
| XLOC_010843 | PAK4         | chr19:39616419-39670046  | 33.3442   | 28.2185   | -0.240796 | 0.654583 |
| XLOC_004815 | PFKM         | chr12:48436680-48540187  | 53.7785   | 45.5131   | -0.240749 | 0.664806 |
| XLOC_021403 | SMARCD3      | chr7:150936058-150974231 | 63.3598   | 53.6224   | -0.240733 | 0.643266 |
| XLOC_009608 | MYO1D        | chr17:30819627-31203902  | 3.18799   | 2.69828   | -0.240605 | 0.705202 |
| XLOC_001956 | DCAF8        | chr1:160185504-160232350 | 14.278    | 12.0856   | -0.240502 | 0.666852 |
| XLOC_012582 | BZW1         | chr2:201676268-201688569 | 72.0022   | 60.9486   | -0.240447 | 0.638482 |
| XLOC_021662 | CPNE3        | chr8:87526655-87573726   | 22.8556   | 19.3472   | -0.240421 | 0.632073 |
| XLOC_020405 | SNX10        | chr7:26331514-26413949   | 11.5781   | 9.80139   | -0.240341 | 0.658942 |
| XLOC_001897 | KIAA0907     | chr1:155882835-155904188 | 7.71098   | 6.52805   | -0.240263 | 0.672486 |
| XLOC_001021 | CD46         | chr1:207925382-207968861 | 9.34285   | 7.91      | -0.240184 | 0.64889  |
| XLOC_012313 | ARID5A       | chr2:97202463-97218371   | 9.81728   | 8.31235   | -0.240066 | 0.715378 |
| XLOC_008326 | GNG13        | chr16:838621-850733      | 0.0256606 | 0.0217292 | -0.239919 | 1        |
| XLOC_008501 | SEZ6L2       | chr16:29882479-29910585  | 27.1483   | 22.9904   | -0.239831 | 0.652401 |
| XLOC_017804 | AFF4         | chr5:132211070-132299354 | 3.25413   | 2.75617   | -0.239607 | 0.659398 |
| XLOC_000558 | TMEM167B     | chr1:109633402-109639554 | 7.86678   | 6.66314   | -0.239572 | 0.677754 |
| XLOC_012162 | CAMKMT       | chr2:44589042-44999731   | 3.12319   | 2.64534   | -0.239566 | 0.800413 |

|             |           |                           |           |            |           |          |
|-------------|-----------|---------------------------|-----------|------------|-----------|----------|
| XLOC_006762 | SPTSSA    | chr14:34902143-34931468   | 12.4288   | 10.528     | -0.239459 | 0.659662 |
| XLOC_009652 | PIP4K2B   | chr17:36921943-36956158   | 6.94655   | 5.88444    | -0.239391 | 0.653218 |
| XLOC_023104 | ZER1      | chr9:131486740-131534213  | 32.1654   | 27.2486    | -0.239329 | 0.650967 |
| XLOC_004438 | PRCP      | chr11:82535408-82611557   | 35.4727   | 30.0506    | -0.239319 | 0.633646 |
| XLOC_021911 | TNFRSF10D | chr8:22993100-23021543    | 32.7872   | 27.7764    | -0.239273 | 0.628907 |
| XLOC_014734 | LRP5L     | chr22:25747384-25777544   | 5.1654    | 4.3765     | -0.239105 | 0.772699 |
| XLOC_012938 | WDPCP     | chr2:63348534-63834330    | 0.458963  | 0.388976   | -0.238698 | 0.975928 |
| XLOC_017669 | DEPDC1B   | chr5:59892738-59995993    | 6.87259   | 5.825      | -0.238594 | 0.699749 |
| XLOC_002311 | ZNF692    | chr1:249144202-249153315  | 20.3587   | 17.2561    | -0.238533 | 0.688092 |
| XLOC_000071 | PIK3CD    | chr1:9711789-9884550      | 2.45266   | 2.07902    | -0.238439 | 0.944348 |
| XLOC_007268 | PIAS1     | chr15:68346571-68480404   | 3.79718   | 3.21889    | -0.238365 | 0.756508 |
| XLOC_017214 | ZFYVE16   | chr5:79703837-79775498    | 1.47324   | 1.24888    | -0.238363 | 0.720882 |
| XLOC_010705 | KLHL26    | chr19:18747837-18781302   | 5.77241   | 4.89337    | -0.238345 | 0.749866 |
| XLOC_006143 | VPS36     | chr13:52986736-53024763   | 4.65352   | 3.94494    | -0.238322 | 0.675401 |
| XLOC_002234 | ABCB10    | chr1:229652328-229694442  | 3.41143   | 2.89222    | -0.238198 | 0.72912  |
| XLOC_016554 | TMEM144   | chr4:159131400-159176439  | 7.63772   | 6.47547    | -0.238157 | 0.667022 |
| XLOC_001321 | AKR7A2    | chr1:19629201-19638640    | 38.2083   | 32.3945    | -0.238138 | 0.643713 |
| XLOC_004303 | RASGRP2   | chr11:64494382-64512928   | 0.683707  | 0.579675   | -0.238134 | 0.885883 |
| XLOC_003354 | LOC494141 | chr11:18230684-18235111   | 0.0101609 | 0.00861564 | -0.238004 | 1        |
| XLOC_001259 | DFFA      | chr1:10520602-10532613    | 18.2032   | 15.4351    | -0.237978 | 0.684382 |
| XLOC_015372 | ACPL2     | chr3:140950681-141013486  | 3.82938   | 3.24706    | -0.237976 | 0.7154   |
| XLOC_016329 | SRP72     | chr4:57333761-57369847    | 20.0191   | 16.9761    | -0.237871 | 0.637594 |
| XLOC_003337 | PARVA     | chr11:12399025-12556903   | 4.01961   | 3.40901    | -0.237702 | 0.653926 |
| XLOC_000017 | SCNN1D    | chr1:1215815-1227409      | 1.51973   | 1.28906    | -0.23749  | 0.84864  |
| XLOC_012509 | DCAF17    | chr2:172173912-172341562  | 1.96099   | 1.66336    | -0.237476 | 0.861337 |
| XLOC_001969 | ARHGAP30  | chr1:161016731-161039760  | 0.0771438 | 0.0654399  | -0.23738  | 1        |
| XLOC_011226 | ZNF773    | chr19:58011308-58019510   | 1.03421   | 0.877351   | -0.237297 | 0.84703  |
| XLOC_013175 | ORC4      | chr2:148602569-149271044  | 4.48577   | 3.80543    | -0.237295 | 0.689784 |
| XLOC_002160 | YOD1      | chr1:207217193-207226325  | 1.88817   | 1.6019     | -0.237202 | 0.723759 |
| XLOC_000466 | MSH4      | chr1:76262555-76378923    | 0.564651  | 0.479088   | -0.237069 | 0.858806 |
| XLOC_023381 | CCDC22    | chrX:49091926-49121288    | 19.2568   | 16.3401    | -0.236959 | 0.685405 |
| XLOC_016153 | BDH1      | chr3:197236653-197300194  | 22.1422   | 18.7904    | -0.236804 | 0.642611 |
| XLOC_002616 | ZNF518A   | chr10:97889471-97923517   | 1.2853    | 1.09076    | -0.236764 | 0.726595 |
| XLOC_011430 | KANK2     | chr19:11274942-11308243   | 2.25904   | 1.9172     | -0.236709 | 0.764196 |
| XLOC_004568 | SLC37A4   | chr11:118895060-118901616 | 24.8802   | 21.1184    | -0.236496 | 0.679452 |
| XLOC_001140 | COX20     | chr1:244998638-245010243  | 4.40357   | 3.7379     | -0.236445 | 0.879418 |
| XLOC_009113 | ACBD4     | chr17:43209966-43221543   | 9.45676   | 8.02771    | -0.236357 | 0.73942  |
| XLOC_000995 | MDM4      | chr1:204485506-204527248  | 4.03324   | 3.42384    | -0.236322 | 0.654907 |
| XLOC_003941 | C11orf35  | chr11:537521-560779       | 1.91601   | 1.62661    | -0.23624  | 0.919354 |
| XLOC_018265 | BRPF3     | chr6:36164549-36200567    | 4.3043    | 3.65446    | -0.236117 | 0.694736 |
| XLOC_022617 | AIF1L     | chr9:133971862-133998539  | 41.0203   | 34.828     | -0.23609  | 0.647731 |
| XLOC_017800 | KIF3A     | chr5:132028322-132073265  | 1.8949    | 1.60885    | -0.236086 | 0.725228 |
| XLOC_009465 | SAT2      | chr17:7494547-7536700     | 107.97    | 91.6806    | -0.235944 | 0.843686 |
| XLOC_012775 | CMPK2     | chr2:6980683-7006766      | 0.326695  | 0.277411   | -0.235917 | 1        |
| XLOC_011193 | ZNF581    | chr19:56154985-56156989   | 154.715   | 131.38     | -0.235865 | 0.639922 |
| XLOC_019013 | ASCC3     | chr6:100956607-101329224  | 3.83822   | 3.2598     | -0.235654 | 0.703087 |
| XLOC_004458 | CHORDC1   | chr11:89933596-89956532   | 9.1305    | 7.75532    | -0.235507 | 0.662604 |
| XLOC_002722 | GRK5      | chr10:120967196-121215131 | 6.01694   | 5.111      | -0.235425 | 0.723911 |
| XLOC_000977 | PPP1R12B  | chr1:202317829-202557697  | 0.385228  | 0.327235   | -0.235386 | 0.83186  |



|             |              |                           |            |            |           |          |
|-------------|--------------|---------------------------|------------|------------|-----------|----------|
| XLOC_008975 | SH3GL1P1     | chr17:30348154-30380519   | 0.339316   | 0.288237   | -0.235373 | 1        |
| XLOC_007105 | HERC2P9      | chr15:28899587-28930410   | 3.51284    | 2.98418    | -0.235304 | 0.745547 |
| XLOC_004460 | SLC36A4      | chr11:92880849-92931095   | 3.70556    | 3.14791    | -0.235298 | 0.756508 |
| XLOC_022024 | SNHG6        | chr8:67782983-67837777    | 1044.76    | 887.558    | -0.235264 | 0.64985  |
| XLOC_007911 | ZNF75A       | chr16:3348807-3368576     | 1.24714    | 1.05965    | -0.235041 | 0.852271 |
| XLOC_006512 | DICER1-AS1   | chr14:95624024-95646270   | 2.92276    | 2.48339    | -0.235022 | 0.871464 |
| XLOC_003378 | METTL15      | chr11:28129797-28355054   | 3.54365    | 3.01095    | -0.235018 | 0.704283 |
| XLOC_011392 | ZNF558       | chr19:8920381-8933565     | 4.64079    | 3.94323    | -0.234994 | 0.722814 |
| XLOC_010630 | NANOS3       | chr19:13988062-13991571   | 2.8558     | 2.42686    | -0.234808 | 0.882554 |
| XLOC_013340 | LANCL1       | chr2:211295972-211341499  | 4.92277    | 4.18337    | -0.234804 | 0.687314 |
| XLOC_016515 | ZNF330       | chr4:142142048-142155850  | 26.3344    | 22.3809    | -0.234682 | 0.656809 |
| XLOC_009873 | MTMR4        | chr17:56566892-56595251   | 6.96495    | 5.92018    | -0.23447  | 0.66009  |
| XLOC_014316 | SETD4        | chr21:37406838-37432819   | 8.80607    | 7.48521    | -0.234454 | 0.779038 |
| XLOC_021654 | E2F5         | chr8:86089618-86132643    | 8.59197    | 7.30444    | -0.234216 | 0.945778 |
| XLOC_022644 | LINC00094    | chr9:136890560-136933141  | 2.85238    | 2.42498    | -0.234195 | 0.886622 |
| XLOC_016382 | PARM1        | chr4:75858284-75975325    | 1.4087     | 1.19772    | -0.23408  | 0.776524 |
| XLOC_016185 | HTT          | chr4:3076407-3245687      | 4.17139    | 3.54694    | -0.233954 | 0.67189  |
| XLOC_003404 | LDLRAD3      | chr11:35965611-36252841   | 3.23586    | 2.75153    | -0.233914 | 0.765218 |
| XLOC_007842 | PRR25        | chr16:855442-863861       | 0.0274088  | 0.0233099  | -0.233694 | 1        |
| XLOC_002650 | SFXN3        | chr10:102790995-102800998 | 36.3167    | 30.8874    | -0.233615 | 0.649964 |
| XLOC_007767 | MFGE8        | chr15:89441913-89456663   | 12.7878    | 10.8772    | -0.233457 | 0.702001 |
| XLOC_018457 | NT5DC1       | chr6:116421998-116566853  | 10.7205    | 9.11994    | -0.233279 | 0.660186 |
| XLOC_002956 | RTKN2        | chr10:63952952-64028466   | 0.182237   | 0.155033   | -0.233243 | 1        |
| XLOC_020709 | CAPZA2       | chr7:116502562-116559313  | 46.178     | 39.2886    | -0.233097 | 0.646705 |
| XLOC_002482 | SIRT1        | chr10:69644426-69678147   | 3.84694    | 3.27315    | -0.233034 | 0.720194 |
| XLOC_011085 | ZNF528       | chr19:52901120-52921657   | 0.0410231  | 0.0349089  | -0.232838 | 1        |
| XLOC_018300 | RPL7L1       | chr6:42847670-42854731    | 19.2358    | 16.3689    | -0.232833 | 0.691019 |
| XLOC_001615 | ZZZ3         | chr1:78030189-78148343    | 3.00462    | 2.5569     | -0.232791 | 0.722516 |
| XLOC_013137 | WDR33        | chr2:128461807-128568761  | 11.8362    | 10.0725    | -0.23278  | 0.664657 |
| XLOC_009476 | TMEM107      | chr17:8076296-8079714     | 10.3972    | 8.84802    | -0.232761 | 0.726595 |
| XLOC_007774 | PEX11A       | chr15:90224761-90234015   | 2.97595    | 2.5326     | -0.232732 | 0.758847 |
| XLOC_005166 | C12orf65     | chr12:123717843-123742506 | 9.46249    | 8.05286    | -0.232719 | 0.713662 |
| XLOC_010723 | ZNF85        | chr19:21106058-21133503   | 1.50755    | 1.28298    | -0.2327   | 0.825017 |
| XLOC_013660 | LPIN3        | chr20:39969559-39995498   | 3.34794    | 2.84956    | -0.232538 | 0.804694 |
| XLOC_009256 | SOX9         | chr17:70117160-70122560   | 0.00765618 | 0.00651664 | -0.232497 | 1        |
| XLOC_021371 | FAM115A      | chr7:143548460-143599278  | 8.83999    | 7.52477    | -0.232397 | 0.663013 |
| XLOC_004300 | BAD          | chr11:64037299-64056972   | 78.2157    | 66.5845    | -0.232271 | 0.776769 |
| XLOC_016799 | NAAA         | chr4:76831807-76862166    | 10.2769    | 8.74912    | -0.232191 | 0.72151  |
| XLOC_012606 | EEF1B2       | chr2:207024317-207027653  | 2377.46    | 2024.09    | -0.232146 | 0.678167 |
| XLOC_010625 | MRI1         | chr19:13875336-13885096   | 12.8054    | 10.9021    | -0.232142 | 0.684767 |
| XLOC_001549 | ZCCHC11      | chr1:52888947-53018762    | 2.06614    | 1.75906    | -0.232135 | 0.725271 |
| XLOC_017549 | BRD9         | chr5:863849-892939        | 13.4963    | 11.4912    | -0.232041 | 0.68834  |
| XLOC_008058 | LOC100862671 | chr16:30751511-30756517   | 4.66755    | 3.97419    | -0.232005 | 0.765908 |
| XLOC_011870 | ASPDH        | chr19:51014856-51017947   | 0.0661365  | 0.0563237  | -0.231703 | 1        |
| XLOC_015581 | RPL32        | chr3:12876443-12883081    | 1469.09    | 1251.33    | -0.231468 | 0.691892 |
| XLOC_011513 | MED26        | chr19:16685717-16739015   | 5.91615    | 5.03944    | -0.231395 | 0.74725  |
| XLOC_019051 | TSPYL1       | chr6:116596021-116601280  | 22.2469    | 18.9505    | -0.231371 | 0.644644 |
| XLOC_004298 | TRPT1        | chr11:63974151-63993726   | 68.6679    | 58.4935    | -0.231359 | 0.686965 |
| XLOC_007148 | CASC5        | chr15:40886446-40954881   | 0.42438    | 0.361507   | -0.231331 | 0.81604  |

|             |              |                           |           |           |           |          |
|-------------|--------------|---------------------------|-----------|-----------|-----------|----------|
| XLOC_014804 | TMPRSS6      | chr22:37461478-37499693   | 0.0686139 | 0.0584493 | -0.231314 | 1        |
| XLOC_015849 | ZBTB11       | chr3:101368282-101398057  | 1.8343    | 1.5626    | -0.231277 | 0.805129 |
| XLOC_013971 | ZHX3         | chr20:39807088-39928739   | 2.16488   | 1.84428   | -0.231229 | 0.705839 |
| XLOC_012041 | ASAP2        | chr2:9346893-9545812      | 3.65232   | 3.11174   | -0.231091 | 0.709979 |
| XLOC_014901 | TUBGCP6      | chr22:50656117-50683400   | 5.68272   | 4.842     | -0.230981 | 0.708212 |
| XLOC_001383 | MAP3K6       | chr1:27681669-27693337    | 2.41974   | 2.06176   | -0.230975 | 0.797249 |
| XLOC_004397 | FCHSD2       | chr11:72547789-72853143   | 4.17268   | 3.55543   | -0.230952 | 0.714666 |
| XLOC_010143 | MIB1         | chr18:19321544-19450912   | 2.13098   | 1.81581   | -0.230905 | 0.69194  |
| XLOC_018221 | CYP21A2      | chr6:32006092-32077151    | 0.058089  | 0.0494976 | -0.230905 | 1        |
| XLOC_023483 | SLC16A2      | chrX:73641327-73753764    | 4.58164   | 3.90411   | -0.23087  | 0.72151  |
| XLOC_021132 | PION         | chr7:76940067-77045717    | 0.993255  | 0.846547  | -0.230574 | 0.83199  |
| XLOC_016192 | ZBTB49       | chr4:4291923-4323513      | 1.65811   | 1.41327   | -0.2305   | 0.809647 |
| XLOC_016637 | MXD4         | chr4:2249159-2263739      | 29.982    | 25.5557   | -0.230449 | 0.65872  |
| XLOC_007277 | RPLP1        | chr15:69745158-69747884   | 11564.3   | 9857.99   | -0.230309 | 0.699003 |
| XLOC_006229 | GRTP1        | chr13:113978504-114018463 | 10.8155   | 9.22017   | -0.230233 | 0.758199 |
| XLOC_007155 | DLL4         | chr15:41221530-41231258   | 1.06787   | 0.910354  | -0.230233 | 0.861774 |
| XLOC_001339 | USP48        | chr1:22004791-22109688    | 8.41056   | 7.17001   | -0.230226 | 0.696463 |
| XLOC_010974 | GLTSCR2      | chr19:48248792-48260323   | 781.299   | 666.09    | -0.230158 | 0.659482 |
| XLOC_011624 | ZNF260       | chr19:37001588-37019248   | 2.70124   | 2.3031    | -0.23005  | 0.712633 |
| XLOC_022562 | PBX3         | chr9:128509616-128729655  | 21.7547   | 18.5498   | -0.22993  | 0.662987 |
| XLOC_012976 | SFXN5        | chr2:73169164-73298965    | 0.780736  | 0.66575   | -0.229855 | 0.848628 |
| XLOC_002680 | SLK          | chr10:105727469-105787342 | 4.29772   | 3.66476   | -0.229853 | 0.687762 |
| XLOC_011057 | CLEC11A      | chr19:51226604-51228981   | 234.76    | 200.203   | -0.229728 | 0.675003 |
| XLOC_020760 | MKLN1        | chr7:130794854-131181398  | 6.05501   | 5.1637    | -0.229724 | 0.64819  |
| XLOC_024151 | IDS          | chrX:148560294-148586884  | 12.3684   | 10.5479   | -0.2297   | 0.7704   |
| XLOC_014358 | ICOSLG       | chr21:45646721-45660834   | 2.77632   | 2.36785   | -0.229597 | 0.78336  |
| XLOC_008218 | LOC100130894 | chr16:70721341-70835061   | 0.140157  | 0.119537  | -0.229589 | 1        |
| XLOC_014772 | SELM         | chr22:31500762-31503551   | 400.349   | 341.495   | -0.229392 | 0.660475 |
| XLOC_007734 | EFTUD1       | chr15:82422560-82555104   | 15.6055   | 13.3116   | -0.229369 | 0.654938 |
| XLOC_002877 | EPC1         | chr10:32556643-32667726   | 5.60821   | 4.78433   | -0.229225 | 0.687824 |
| XLOC_021802 | KIFC2        | chr8:145691737-145701718  | 15.3616   | 13.1053   | -0.229173 | 0.773721 |
| XLOC_008300 | CDK10        | chr16:89753075-89768121   | 35.1533   | 29.9905   | -0.229155 | 0.790277 |
| XLOC_017953 | DUSP1        | chr5:172195092-172198203  | 79.9807   | 68.2364   | -0.229109 | 0.700208 |
| XLOC_007456 | HERC2P2      | chr15:23282264-23378259   | 1.62686   | 1.38798   | -0.229104 | 0.764196 |
| XLOC_008154 | NDRG4        | chr16:58497548-58547523   | 4.79408   | 4.09027   | -0.229059 | 0.74547  |
| XLOC_016460 | RPL34        | chr4:109541721-109551639  | 1159.26   | 989.121   | -0.228988 | 0.680271 |
| XLOC_002385 | THNSL1       | chr10:25270907-25351208   | 12.2731   | 10.4721   | -0.228952 | 0.673323 |
| XLOC_011056 | C19orf81     | chr19:51152701-51162567   | 1.45611   | 1.24244   | -0.22895  | 0.92921  |
| XLOC_012882 | MAP4K3       | chr2:39476406-39664453    | 2.91758   | 2.48967   | -0.228819 | 0.734343 |
| XLOC_004672 | CD27         | chr12:6548166-6560884     | 0.222866  | 0.190195  | -0.228692 | 1        |
| XLOC_014702 | YPEL1        | chr22:22020272-22090071   | 2.92039   | 2.49231   | -0.228675 | 0.871648 |
| XLOC_002558 | LDB3         | chr10:88428205-88495824   | 0.0371135 | 0.0316759 | -0.228559 | 1        |
| XLOC_010157 | TAF4B        | chr18:23806408-23971650   | 1.81841   | 1.55205   | -0.228511 | 0.765267 |
| XLOC_014729 | FAM211B      | chr22:24979717-25024972   | 10.3857   | 8.8646    | -0.228474 | 0.901277 |
| XLOC_003221 | B4GALNT4     | chr11:369794-382117       | 12.8352   | 10.9561   | -0.228368 | 0.714086 |
| XLOC_023342 | KRBOX4       | chrX:46306623-46334074    | 4.32487   | 3.69184   | -0.228317 | 0.748337 |
| XLOC_000991 | ZC3H11A      | chr1:203764750-203823256  | 16.3623   | 13.9682   | -0.228226 | 0.662946 |
| XLOC_006328 | LOC100129794 | chr14:37147125-37642998   | 1.43452   | 1.22463   | -0.228224 | 0.913875 |
| XLOC_009852 | MBTD1        | chr17:49254785-49337427   | 2.56204   | 2.18734   | -0.228117 | 0.723506 |

|             |              |                           |            |            |           |          |
|-------------|--------------|---------------------------|------------|------------|-----------|----------|
| XLOC_004866 | ZNF740       | chr12:53551446-53584654   | 6.54072    | 5.58428    | -0.22808  | 0.70237  |
| XLOC_016279 | KLF3         | chr4:38614321-38703129    | 3.23056    | 2.75825    | -0.228034 | 0.705194 |
| XLOC_011837 | PTH2         | chr19:49925670-49926698   | 0.219485   | 0.187397   | -0.22802  | 1        |
| XLOC_014004 | ZNF335       | chr20:44577291-44600833   | 6.09551    | 5.20443    | -0.228008 | 0.708849 |
| XLOC_000736 | RPS27        | chr1:153963238-153964631  | 11965.1    | 10216.1    | -0.227982 | 0.703975 |
| XLOC_015582 | IQSEC1       | chr3:12938541-13114617    | 6.34364    | 5.41645    | -0.227964 | 0.699342 |
| XLOC_016885 | RPL34-AS1    | chr4:109459345-109541613  | 0.00507909 | 0.00433682 | -0.227932 | 1        |
| XLOC_009023 | LASP1        | chr17:37026111-37078023   | 55.6364    | 47.5073    | -0.22788  | 0.663419 |
| XLOC_013963 | KIAA1755     | chr20:36838906-36889174   | 2.16982    | 1.85285    | -0.227829 | 0.751293 |
| XLOC_021198 | GJC3         | chr7:99520891-99527243    | 0.0928037  | 0.0792596  | -0.227597 | 1        |
| XLOC_013732 | TFAP2C       | chr20:55204357-55214338   | 0.422016   | 0.360439   | -0.227546 | 0.900997 |
| XLOC_011650 | ECH1         | chr19:39306061-39322497   | 124.915    | 106.692    | -0.2275   | 0.664632 |
| XLOC_017194 | POLK         | chr5:74666927-74895646    | 1.52562    | 1.30315    | -0.227398 | 0.906169 |
| XLOC_020946 | SNX13        | chr7:17830384-17980131    | 2.79461    | 2.38734    | -0.227241 | 0.712633 |
| XLOC_012350 | MRPS9        | chr2:105654482-105716418  | 30.5463    | 26.0956    | -0.227193 | 0.675661 |
| XLOC_014322 | DSCR3        | chr21:38595725-38639833   | 15.0105    | 12.8234    | -0.227189 | 0.673957 |
| XLOC_023451 | IGBP1        | chrX:69353317-69386173    | 69.0289    | 58.9759    | -0.227076 | 0.661795 |
| XLOC_006824 | ATG14        | chr14:55833108-55878576   | 3.23279    | 2.762      | -0.227062 | 0.726353 |
| XLOC_000755 | TRIM46       | chr1:155146262-155157447  | 0.074564   | 0.0637061  | -0.227049 | 1        |
| XLOC_015163 | KCTD6        | chr3:58477822-58488087    | 5.77832    | 4.93735    | -0.226913 | 0.775892 |
| XLOC_010109 | PTPRM        | chr18:7567313-8406859     | 0.0262784  | 0.022459   | -0.226584 | 1        |
| XLOC_013756 | LSM14B       | chr20:60697516-60710434   | 22.5214    | 19.2509    | -0.226372 | 0.676146 |
| XLOC_020958 | TOMM7        | chr7:22852250-22862471    | 339.039    | 289.805    | -0.226365 | 0.664979 |
| XLOC_019127 | EPM2A        | chr6:145946439-146285233  | 0.523661   | 0.447621   | -0.226355 | 0.967296 |
| XLOC_018416 | MANEA        | chr6:96025372-96057328    | 1.44004    | 1.23094    | -0.226348 | 0.779476 |
| XLOC_009283 | KIAA0195     | chr17:73452663-73511627   | 11.2748    | 9.63766    | -0.226346 | 0.732443 |
| XLOC_004392 | CLPB         | chr11:72003469-72145724   | 6.83246    | 5.84068    | -0.226267 | 0.724473 |
| XLOC_009648 | SRCIN1       | chr17:36686258-36762183   | 0.564209   | 0.482387   | -0.226039 | 0.858227 |
| XLOC_011215 | ZNF264       | chr19:57702867-57734214   | 1.39771    | 1.19506    | -0.225986 | 0.726595 |
| XLOC_020493 | ZNF713       | chr7:55980330-56008433    | 0.202289   | 0.172972   | -0.22588  | 1        |
| XLOC_000770 | LMNA         | chr1:156052368-156109880  | 84.1929    | 71.9959    | -0.225784 | 0.690491 |
| XLOC_002707 | FAM160B1     | chr10:116581502-116659586 | 2.1052     | 1.80022    | -0.225782 | 0.742691 |
| XLOC_017313 | RAD50        | chr5:131892615-131980313  | 3.18381    | 2.72287    | -0.225625 | 0.70088  |
| XLOC_015891 | GSK3B        | chr3:119540801-119813264  | 5.21469    | 4.45981    | -0.225599 | 0.689772 |
| XLOC_011919 | ZNF600       | chr19:53268747-53290034   | 4.76838    | 4.07816    | -0.225583 | 0.73942  |
| XLOC_010610 | ZNF791       | chr19:12721731-12740676   | 1.17662    | 1.00635    | -0.225519 | 0.840753 |
| XLOC_012214 | ETAA1        | chr2:67624441-67637533    | 2.8644     | 2.44991    | -0.225503 | 0.752397 |
| XLOC_012011 | SLC27A5      | chr19:59009699-59023432   | 17.5774    | 15.0348    | -0.225411 | 0.7048   |
| XLOC_016935 | MGARP        | chr4:140187316-140201492  | 0.243545   | 0.208354   | -0.225153 | 1        |
| XLOC_011300 | GNG7         | chr19:2511217-2702746     | 1.52559    | 1.30518    | -0.225111 | 0.825475 |
| XLOC_010134 | RNMT         | chr18:13726703-13764554   | 8.85007    | 7.57207    | -0.225001 | 0.673957 |
| XLOC_012390 | LOC654433    | chr2:113973573-114036498  | 3.31214    | 2.83392    | -0.224963 | 0.903455 |
| XLOC_014152 | MRPS6,SLC5A3 | chr21:35445822-35515334   | 59.6589    | 51.0457    | -0.224948 | 0.72443  |
| XLOC_014308 | CRYZL1       | chr21:34961647-35014160   | 5.56886    | 4.76532    | -0.224809 | 0.765267 |
| XLOC_014971 | BTD          | chr3:15643254-15687325    | 1.17996    | 1.0097     | -0.224806 | 0.8626   |
| XLOC_019161 | RSPH3        | chr6:159398265-159421198  | 2.04582    | 1.75079    | -0.224677 | 0.825017 |
| XLOC_004065 | DENND5A      | chr11:9160374-9286873     | 9.44267    | 8.08144    | -0.224583 | 0.677271 |
| XLOC_003428 | MAPK8IP1     | chr11:45907046-45928016   | 0.836624   | 0.716066   | -0.224486 | 0.883608 |
| XLOC_015713 | USP4         | chr3:49314576-49377536    | 3.5312     | 3.02252    | -0.22441  | 0.73154  |

|             |                 |                           |          |          |           |          |
|-------------|-----------------|---------------------------|----------|----------|-----------|----------|
| XLOC_003710 | PPME1           | chr11:73882107-73965748   | 43.4461  | 37.1895  | -0.224331 | 0.670458 |
| XLOC_020921 | PMS2            | chr7:6012869-6048737      | 1.40849  | 1.20566  | -0.22433  | 0.832978 |
| XLOC_011371 | XAB2            | chr19:7684410-7694439     | 31.6463  | 27.0948  | -0.224023 | 0.687824 |
| XLOC_017141 | GPBP1           | chr5:56469774-56560506    | 13.801   | 11.8175  | -0.223855 | 0.674951 |
| XLOC_023016 | ZNF883          | chr9:115759399-115774472  | 8.14395  | 6.9738   | -0.223785 | 0.703481 |
| XLOC_005434 | TUBA1A          | chr12:49578577-49583107   | 43.3373  | 37.1129  | -0.223689 | 0.684018 |
| XLOC_023876 | FAM156A,FAM156B | chrX:52976463-53024651    | 0.527775 | 0.451995 | -0.223616 | 0.88464  |
| XLOC_021197 | TRIM4           | chr7:99488029-99517223    | 9.23046  | 7.90512  | -0.223615 | 0.691685 |
| XLOC_010009 | LGALS3BP        | chr17:76967334-76976061   | 39.2104  | 33.5853  | -0.223408 | 0.681816 |
| XLOC_022684 | MAN1B1          | chr9:139981378-140003639  | 39.8302  | 34.1166  | -0.22339  | 0.673323 |
| XLOC_023544 | FAM199X         | chrX:103411155-103440582  | 3.30396  | 2.83006  | -0.223365 | 0.69753  |
| XLOC_006068 | STARD13         | chr13:33677271-34250932   | 1.4903   | 1.27658  | -0.223312 | 0.779038 |
| XLOC_004849 | DAZAP2          | chr12:51632507-51664202   | 28.6157  | 24.5132  | -0.223251 | 0.916584 |
| XLOC_023972 | TSPAN6          | chrX:99883794-99891794    | 17.6523  | 15.1225  | -0.223161 | 0.687955 |
| XLOC_013291 | GTF3C3          | chr2:197627755-197664492  | 11.4642  | 9.82145  | -0.223125 | 0.669767 |
| XLOC_000356 | PLK3            | chr1:45266035-45272957    | 16.4011  | 14.0513  | -0.22309  | 0.714086 |
| XLOC_016883 | PAPSS1          | chr4:108534821-108641419  | 16.0709  | 13.7684  | -0.223086 | 0.691509 |
| XLOC_017126 | ITGA1,PELO      | chr5:52083773-52249485    | 14.4977  | 12.4214  | -0.222999 | 0.696463 |
| XLOC_001104 | GNPAT           | chr1:231359508-231413719  | 17.5484  | 15.0378  | -0.222746 | 0.72013  |
| XLOC_013591 | TM9SF4          | chr20:30697308-30755061   | 14.9513  | 12.8123  | -0.222743 | 0.687955 |
| XLOC_016907 | SEC24D          | chr4:119643977-119757326  | 3.08331  | 2.6422   | -0.222742 | 0.756508 |
| XLOC_000373 | LOC729041       | chr1:46899498-46911374    | 1.97568  | 1.69317  | -0.222618 | 0.861774 |
| XLOC_015015 | CTDSPL          | chr3:37903668-38025960    | 5.76647  | 4.94228  | -0.222513 | 0.717262 |
| XLOC_002649 | LZTS2           | chr10:102756863-102790914 | 54.9507  | 47.0976  | -0.222486 | 0.687114 |
| XLOC_015541 | FYTTD1          | chr3:197398258-197511317  | 8.93901  | 7.66162  | -0.222466 | 0.77012  |
| XLOC_006360 | CGRRF1          | chr14:54976586-55005334   | 6.55026  | 5.61514  | -0.222231 | 0.785794 |
| XLOC_017625 | TTC33           | chr5:40711677-40756072    | 1.56253  | 1.33952  | -0.222171 | 0.761614 |
| XLOC_013288 | STK17B          | chr2:196998306-197036336  | 2.82969  | 2.42584  | -0.222155 | 0.733086 |
| XLOC_009378 | RILP            | chr17:1549444-1553392     | 19.9415  | 17.0984  | -0.221917 | 0.745547 |
| XLOC_016139 | TFRC            | chr3:195776154-195809032  | 8.01921  | 6.87632  | -0.221823 | 0.688049 |
| XLOC_021264 | THAP5           | chr7:108202670-108210167  | 5.64803  | 4.84328  | -0.221765 | 0.715999 |
| XLOC_009544 | FAM83G          | chr17:18853988-18950336   | 12.1506  | 10.4203  | -0.221638 | 0.727839 |
| XLOC_002801 | ANKRD16         | chr10:5903688-5979558     | 12.8421  | 11.0133  | -0.22163  | 0.931662 |
| XLOC_010577 | PDE4A           | chr19:10527448-10580307   | 1.31522  | 1.12798  | -0.221567 | 0.829483 |
| XLOC_009739 | KAT2A           | chr17:40265128-40273382   | 37.4354  | 32.1061  | -0.221556 | 0.684382 |
| XLOC_022673 | PHPT1           | chr9:139743255-139745490  | 116.562  | 99.9695  | -0.221543 | 0.679486 |
| XLOC_004334 | C11orf68        | chr11:65684282-65686531   | 51.2052  | 43.9161  | -0.221539 | 0.685136 |
| XLOC_006424 | PCNX            | chr14:71374121-71582099   | 2.731    | 2.34247  | -0.221397 | 0.689366 |
| XLOC_016070 | TBL1XR1         | chr3:176738541-176915048  | 17.1932  | 14.7478  | -0.221334 | 0.677376 |
| XLOC_014489 | CCDC117         | chr22:29168661-29185283   | 4.99164  | 4.2817   | -0.221329 | 0.720534 |
| XLOC_009789 | MAP3K14         | chr17:43325302-43394414   | 3.02553  | 2.59536  | -0.221251 | 0.7704   |
| XLOC_007208 | DTWD1           | chr15:49913225-49937333   | 8.44904  | 7.24782  | -0.221241 | 0.708873 |
| XLOC_010514 | RPL36           | chr19:5690271-5691678     | 5939.39  | 5095.07  | -0.221213 | 0.701277 |
| XLOC_009995 | JMJD6           | chr17:74708913-74722881   | 21.6851  | 18.6031  | -0.221162 | 0.713685 |
| XLOC_016137 | TNK2            | chr3:195590235-195635880  | 8.62717  | 7.40161  | -0.221048 | 0.722089 |
| XLOC_022062 | IMPA1           | chr8:82569150-82598589    | 9.3203   | 7.99763  | -0.220804 | 0.696059 |
| XLOC_011224 | ZNF749          | chr19:57946692-57957191   | 0.770857 | 0.661463 | -0.220802 | 0.854497 |
| XLOC_003927 | VPS26B          | chr11:134094560-134117686 | 15.912   | 13.6546  | -0.220731 | 0.689784 |
| XLOC_000905 | FAM20B          | chr1:178995073-179045702  | 8.00257  | 6.86732  | -0.220716 | 0.681529 |

|             |                |                           |          |          |           |          |
|-------------|----------------|---------------------------|----------|----------|-----------|----------|
| XLOC_012334 | RPL31          | chr2:101618690-101767846  | 5028.8   | 4315.95  | -0.220535 | 0.714019 |
| XLOC_010554 | MARCH2         | chr19:8478186-8503899     | 14.2686  | 12.2463  | -0.220491 | 0.765908 |
| XLOC_002787 | IDI1           | chr10:1064846-1095061     | 17.0812  | 14.6605  | -0.220473 | 0.759309 |
| XLOC_023419 | TSPYL2         | chrX:53111541-53117728    | 13.7219  | 11.7774  | -0.220466 | 0.70174  |
| XLOC_005481 | KRT8           | chr12:53290970-53346685   | 21.7829  | 18.6995  | -0.220201 | 0.946581 |
| XLOC_021159 | FAM133B        | chr7:92190071-92219706    | 12.9637  | 11.129   | -0.220156 | 0.710024 |
| XLOC_000670 | PLEKH01        | chr1:150122169-150131825  | 22.8544  | 19.6212  | -0.220056 | 0.715955 |
| XLOC_008103 | RBL2           | chr16:53468350-53537170   | 3.5744   | 3.06883  | -0.220009 | 0.835517 |
| XLOC_023272 | MOSPD2         | chrX:14891526-14939459    | 0.793665 | 0.681425 | -0.219975 | 0.849964 |
| XLOC_022482 | ZNF189         | chr9:104161162-104172942  | 5.9408   | 5.10073  | -0.219955 | 0.71967  |
| XLOC_021957 | RAB11FIP1      | chr8:37716464-37757015    | 4.78693  | 4.11011  | -0.219924 | 0.704283 |
| XLOC_008021 | SH2B1          | chr16:28875077-28885534   | 13.4233  | 11.5261  | -0.21984  | 0.714019 |
| XLOC_023354 | ARAF           | chrX:47420498-47479256    | 18.1465  | 15.5823  | -0.219783 | 0.954469 |
| XLOC_002756 | DOCK1          | chr10:128594022-129250780 | 5.94543  | 5.10539  | -0.219758 | 0.684734 |
| XLOC_008509 | MAPK3          | chr16:30125425-30134630   | 72.0585  | 61.8785  | -0.21973  | 0.681274 |
| XLOC_017359 | TMCO6          | chr5:140019011-140027370  | 9.74122  | 8.3663   | -0.219513 | 0.907121 |
| XLOC_018390 | BCKDHB         | chr6:80816343-81055987    | 7.63787  | 6.56035  | -0.219398 | 0.779021 |
| XLOC_009552 | ULK2           | chr17:19674142-19771239   | 1.56153  | 1.34126  | -0.219369 | 0.818403 |
| XLOC_013278 | OSGEPL1        | chr2:190611385-190627924  | 2.02648  | 1.74066  | -0.219342 | 0.823349 |
| XLOC_004357 | TMEM134        | chr11:67231818-67236748   | 44.5146  | 38.2375  | -0.219291 | 0.733299 |
| XLOC_023836 | ZNF182         | chrX:47834249-47863394    | 1.17493  | 1.00927  | -0.219258 | 0.818547 |
| XLOC_010499 | MPND           | chr19:4343523-4360083     | 23.2535  | 19.9752  | -0.21924  | 0.72546  |
| XLOC_016006 | SIAH2          | chr3:150458909-150481263  | 15.8554  | 13.6204  | -0.219205 | 0.720235 |
| XLOC_016841 | ABCG2          | chr4:89011415-89152474    | 0.533199 | 0.458058 | -0.219145 | 0.853245 |
| XLOC_010867 | LTBP4          | chr19:41099071-41135725   | 16.0043  | 13.7493  | -0.219096 | 0.699559 |
| XLOC_004639 | LOC100288778   | chr12:87983-91263         | 13.308   | 11.4336  | -0.219016 | 0.767216 |
| XLOC_009764 | DUSP3          | chr17:41843488-41856368   | 22.3656  | 19.2188  | -0.218762 | 0.678596 |
| XLOC_016523 | SMAD1          | chr4:146402950-146480325  | 3.90977  | 3.35997  | -0.218634 | 0.764456 |
| XLOC_013069 | REV1           | chr2:100016937-100106480  | 2.90981  | 2.50063  | -0.218632 | 0.751293 |
| XLOC_007979 | TMEM159        | chr16:20944475-21191937   | 48.1301  | 41.3657  | -0.218505 | 0.684169 |
| XLOC_005063 | HSP90B1        | chr12:104324111-104341708 | 91.4025  | 78.5602  | -0.218436 | 0.687065 |
| XLOC_020591 | ADAM22         | chr7:87563565-87832204    | 0.520395 | 0.44729  | -0.218396 | 0.844936 |
| XLOC_023900 | SPIN4          | chrX:62567106-62571218    | 1.44223  | 1.23965  | -0.218375 | 0.814132 |
| XLOC_008594 | ZNF319         | chr16:58028572-58033762   | 3.14934  | 2.70705  | -0.218332 | 0.779476 |
| XLOC_008102 | CHD9           | chr16:53088944-53361414   | 1.76532  | 1.51769  | -0.218057 | 0.719979 |
| XLOC_023711 | GDI1           | chrX:153665258-153671814  | 50.7635  | 43.6479  | -0.217878 | 0.682121 |
| XLOC_006046 | LNX2           | chr13:28120049-28194720   | 1.63938  | 1.40963  | -0.217833 | 0.787439 |
| XLOC_017628 | RPL37          | chr5:40831429-40835387    | 1110.69  | 955.051  | -0.21781  | 0.709189 |
| XLOC_008245 | ATMIN          | chr16:81069457-81080951   | 4.11869  | 3.54194  | -0.217647 | 0.727472 |
| XLOC_013361 | USP37          | chr2:219314973-219433084  | 1.21781  | 1.04728  | -0.21763  | 0.76146  |
| XLOC_021432 | ARHGEF10       | chr8:1772148-1906807      | 6.18831  | 5.32195  | -0.217589 | 0.704283 |
| XLOC_020673 | LOC100289561,P | chr7:102004307-102067129  | 31.6664  | 27.2339  | -0.217549 | 0.732699 |
| XLOC_023616 | MST4           | chrX:131157244-131209971  | 11.2917  | 9.71117  | -0.217541 | 0.70088  |
| XLOC_015824 | ROBO1          | chr3:78646387-79817059    | 1.03952  | 0.894042 | -0.217504 | 0.798422 |
| XLOC_010799 | LIN37          | chr19:36239261-36245420   | 9.3905   | 8.07833  | -0.217145 | 0.801209 |
| XLOC_005398 | SCAF11         | chr12:46312913-46384401   | 4.28482  | 3.68613  | -0.217127 | 0.703507 |
| XLOC_014528 | TOM1           | chr22:35695267-35743987   | 17.1085  | 14.7182  | -0.217117 | 0.70639  |
| XLOC_018452 | FAM229B        | chr6:112391859-112423993  | 2.55799  | 2.20061  | -0.217102 | 0.947261 |
| XLOC_017548 | ZDHHC11        | chr5:795719-851101        | 3.37918  | 2.90725  | -0.217018 | 0.79984  |

|             |                   |                           |           |           |           |          |
|-------------|-------------------|---------------------------|-----------|-----------|-----------|----------|
| XLOC_014384 | FTCD              | chr21:47556175-47575481   | 0.0151648 | 0.0130476 | -0.216942 | 1        |
| XLOC_013909 | MLLT10P1          | chr20:29637583-29638138   | 0.13144   | 0.113097  | -0.216845 | 1        |
| XLOC_010130 | CEP192            | chr18:12991360-13125051   | 0.978568  | 0.842087  | -0.216703 | 0.778822 |
| XLOC_001707 | DRAM2             | chr1:111659953-111727724  | 21.7039   | 18.6775   | -0.21665  | 0.790277 |
| XLOC_023438 | ZXDB              | chrX:57618268-57623910    | 4.4255    | 3.80861   | -0.216578 | 0.734343 |
| XLOC_001520 | IPP               | chr1:46153846-46216485    | 1.32932   | 1.14402   | -0.216578 | 0.969922 |
| XLOC_010336 | TPGS2             | chr18:33877701-34805288   | 35.1109   | 30.2166   | -0.216577 | 0.774988 |
| XLOC_013766 | MRGBP             | chr20:61427804-61431945   | 40.7995   | 35.1144   | -0.216491 | 0.698498 |
| XLOC_005484 | CSAD              | chr12:53551446-53584654   | 2.11517   | 1.82058   | -0.216374 | 0.946021 |
| XLOC_012318 | ANKRD36           | chr2:97779232-97930257    | 0.310932  | 0.267633  | -0.216343 | 1        |
| XLOC_015020 | OXSR1             | chr3:38207025-38296979    | 8.80323   | 7.57763   | -0.216285 | 0.703975 |
| XLOC_007275 | PAQR5             | chr15:69591293-69699976   | 2.81426   | 2.42247   | -0.21628  | 0.756947 |
| XLOC_000405 | LRRC42            | chr1:54411998-54433841    | 27.3061   | 23.5054   | -0.21623  | 0.696059 |
| XLOC_005513 | SARNP             | chr12:56137063-56211540   | 43.3286   | 37.3002   | -0.216139 | 0.779038 |
| XLOC_008660 | ZNF19             | chr16:71507975-71523254   | 0.756274  | 0.651091  | -0.21605  | 0.872122 |
| XLOC_011452 | ZNF490            | chr19:12686919-12721623   | 1.77553   | 1.52861   | -0.216027 | 0.773721 |
| XLOC_000508 | RPAP2             | chr1:92711954-92853732    | 4.80971   | 4.14095   | -0.215987 | 0.824372 |
| XLOC_003222 | PKP3              | chr11:394216-404908       | 42.3071   | 36.4259   | -0.215936 | 0.700403 |
| XLOC_011783 | PRKD2             | chr19:47150868-47220384   | 16.1745   | 13.9262   | -0.215922 | 0.731905 |
| XLOC_022291 | ADAMTSL1          | chr9:18474078-18910947    | 0.50641   | 0.436047  | -0.215823 | 0.908076 |
| XLOC_015328 | IFT122            | chr3:129149786-129239191  | 3.0361    | 2.61437   | -0.215756 | 0.901684 |
| XLOC_015811 | UBA3              | chr3:69103880-69129524    | 15.5477   | 13.3882   | -0.21574  | 0.703707 |
| XLOC_004615 | CDON              | chr11:125826712-125933187 | 0.253587  | 0.218407  | -0.215461 | 1        |
| XLOC_001340 | HSPG2             | chr1:22138757-22263750    | 1.64671   | 1.41836   | -0.215366 | 0.759979 |
| XLOC_004516 | EXPH5             | chr11:108376157-108464374 | 0.295075  | 0.25416   | -0.215345 | 1        |
| XLOC_010443 | ABCA7             | chr19:1040101-1065570     | 2.30286   | 1.98368   | -0.215252 | 0.792587 |
| XLOC_022214 | TOP1MT            | chr8:144391496-144442147  | 114.16    | 98.3504   | -0.215054 | 0.690491 |
| XLOC_018866 | TREM1             | chr6:41242998-41254457    | 0.0978412 | 0.084305  | -0.214825 | 1        |
| XLOC_012451 | UBXN4             | chr2:136499188-136542633  | 16.5215   | 14.237    | -0.214695 | 0.698621 |
| XLOC_005997 | MCF2L             | chr13:113623534-113754053 | 1.59543   | 1.37491   | -0.21461  | 0.794913 |
| XLOC_004486 | TMEM123           | chr11:102267055-102323775 | 44.2528   | 38.1386   | -0.214518 | 0.695702 |
| XLOC_015231 | PCNP              | chr3:101293041-101313281  | 44.5858   | 38.429    | -0.214386 | 0.68826  |
| XLOC_014253 | APP               | chr21:27252860-27543446   | 74.3017   | 64.0444   | -0.214322 | 0.7038   |
| XLOC_022972 | CORO2A            | chr9:100883256-100954956  | 5.57063   | 4.80195   | -0.214218 | 0.708528 |
| XLOC_010821 | ZNF383            | chr19:37717365-37734574   | 1.99367   | 1.71858   | -0.214208 | 0.840956 |
| XLOC_022004 | IMPAD1            | chr8:57870487-57906430    | 10.353    | 8.9247    | -0.21418  | 0.690264 |
| XLOC_017344 | REEP2             | chr5:137774689-137782658  | 49.1583   | 42.3765   | -0.21417  | 0.700234 |
| XLOC_010574 | ICAM1             | chr19:10381516-10397291   | 28.5677   | 24.6284   | -0.214059 | 0.696839 |
| XLOC_002021 | VAMP4             | chr1:171669295-171711379  | 2.81514   | 2.4272    | -0.213912 | 0.796099 |
| XLOC_004862 | EIF4B             | chr12:53400061-53435993   | 169.658   | 146.283   | -0.213866 | 0.703507 |
| XLOC_021621 | C8orf44,C8orf44-5 | chr8:67579786-67774257    | 2.33243   | 2.01118   | -0.213794 | 0.825602 |
| XLOC_021329 | WDR91             | chr7:134868589-134896316  | 2.4389    | 2.10305   | -0.213745 | 0.775951 |
| XLOC_016509 | CCRN4L            | chr4:139936942-139967095  | 12.1919   | 10.5146   | -0.213529 | 0.745301 |
| XLOC_005593 | PHLDA1            | chr12:76419226-76425556   | 70.2845   | 60.6187   | -0.213444 | 0.7048   |
| XLOC_014939 | CRELD1            | chr3:9975523-9987097      | 11.6948   | 10.087    | -0.213372 | 0.741015 |
| XLOC_023595 | ZBTB33            | chrX:119384606-119392251  | 3.93213   | 3.39164   | -0.213331 | 0.730157 |
| XLOC_016568 | MSMO1             | chr4:166248817-166264314  | 19.0637   | 16.4457   | -0.213111 | 0.706799 |
| XLOC_012206 | LGALS1            | chr2:64681326-64688517    | 5.67866   | 4.89927   | -0.212983 | 0.733299 |
| XLOC_014905 | PLXNB2            | chr22:50713407-50746001   | 22.7982   | 19.6692   | -0.212978 | 0.699342 |

|             |                |                           |          |           |           |          |
|-------------|----------------|---------------------------|----------|-----------|-----------|----------|
| XLOC_021135 | MAGI2          | chr7:77646373-79100524    | 0.241489 | 0.208365  | -0.212844 | 1        |
| XLOC_001293 | ZBTB17         | chr1:16268363-16302627    | 12.1987  | 10.5255   | -0.21284  | 0.744582 |
| XLOC_024061 | THOC2          | chrX:122734411-122866904  | 3.5368   | 3.05179   | -0.21279  | 0.731108 |
| XLOC_007741 | RPS17L         | chr15:83205503-83209208   | 0.962944 | 0.830965  | -0.212664 | 0.950837 |
| XLOC_009893 | BRIP1          | chr17:59756546-59940920   | 1.43131  | 1.23526   | -0.212527 | 0.763906 |
| XLOC_022836 | FBXO10         | chr9:37510888-37576250    | 2.43723  | 2.10346   | -0.212477 | 0.784528 |
| XLOC_021256 | CCDC71L        | chr7:106297210-106301634  | 3.00072  | 2.58979   | -0.212472 | 0.7704   |
| XLOC_000307 | SMAP2          | chr1:40839377-40888998    | 15.8101  | 13.6453   | -0.212444 | 0.714933 |
| XLOC_003977 | SLC22A18AS     | chr11:2909326-2946476     | 0.986316 | 0.85129   | -0.212399 | 0.958143 |
| XLOC_015111 | RBM5           | chr3:50126340-50156397    | 23.9876  | 20.7039   | -0.212384 | 0.700712 |
| XLOC_016000 | WWTR1          | chr3:149235021-149421060  | 2.22841  | 1.92341   | -0.212347 | 0.771216 |
| XLOC_013281 | HIBCH          | chr2:191069359-191184771  | 2.46741  | 2.1297    | -0.212346 | 0.83199  |
| XLOC_000894 | RABGAP1L       | chr1:174128551-174964445  | 2.72274  | 2.35012   | -0.212328 | 0.898731 |
| XLOC_023368 | TBC1D25        | chrX:48398074-48420997    | 6.17022  | 5.32692   | -0.212019 | 0.743519 |
| XLOC_008004 | TNRC6A         | chr16:24741048-24837547   | 1.39964  | 1.20839   | -0.211969 | 0.773721 |
| XLOC_002975 | LRRC20         | chr10:72058728-72142382   | 6.11986  | 5.28371   | -0.211948 | 0.752311 |
| XLOC_020739 | CCDC136        | chr7:128431463-128462187  | 6.23479  | 5.38314   | -0.211894 | 0.795696 |
| XLOC_005847 | PDS5B          | chr13:33160563-33352158   | 1.8993   | 1.63996   | -0.21181  | 0.749866 |
| XLOC_014924 | EDEM1          | chr3:5229358-5261650      | 9.99839  | 8.63341   | -0.211764 | 0.704939 |
| XLOC_024178 | IDH3G          | chrX:153051220-153063967  | 67.3951  | 58.1966   | -0.211709 | 0.907499 |
| XLOC_017004 | FBXO8          | chr4:175157809-175254531  | 3.73124  | 3.22205   | -0.211677 | 0.878705 |
| XLOC_023078 | RPL12          | chr9:130209952-130213711  | 10135.5  | 8754.06   | -0.211397 | 0.756508 |
| XLOC_023896 | SPIN3          | chrX:57002802-57021988    | 2.09104  | 1.80617   | -0.211285 | 0.863853 |
| XLOC_011724 | LYPD3          | chr19:43964945-43969831   | 0.448855 | 0.387716  | -0.211248 | 0.934861 |
| XLOC_012115 | PPP1CB         | chr2:28974613-29025806    | 22.641   | 19.5611   | -0.210951 | 0.69048  |
| XLOC_016911 | PDE5A          | chr4:120375937-120549981  | 0.338432 | 0.292437  | -0.210736 | 1        |
| XLOC_011828 | CGB8           | chr19:49550894-49552368   | 0.826995 | 0.714679  | -0.210583 | 0.94188  |
| XLOC_008894 | LLGL1          | chr17:18128935-18162230   | 17.8173  | 15.3978   | -0.210559 | 0.927002 |
| XLOC_010359 | DYM            | chr18:46570171-46987079   | 9.42435  | 8.14463   | -0.210544 | 0.732699 |
| XLOC_018790 | PBX2           | chr6:32152509-32157963    | 29.5435  | 25.5348   | -0.210374 | 0.699944 |
| XLOC_010888 | RPS19          | chr19:42363987-42375484   | 6186.11  | 5346.91   | -0.210329 | 0.745547 |
| XLOC_016714 | SMIM14         | chr4:39529458-39640481    | 1.35251  | 1.16906   | -0.210297 | 0.940466 |
| XLOC_000604 | DCLRE1B        | chr1:114447914-114456708  | 2.80533  | 2.42508   | -0.210134 | 0.7883   |
| XLOC_000438 | RAVER2         | chr1:65210777-65432187    | 5.23691  | 4.52747   | -0.21001  | 0.905903 |
| XLOC_007400 | TTLL13         | chr15:90792763-90802312   | 0.126438 | 0.109315  | -0.209939 | 1        |
| XLOC_017981 | FAM193B        | chr5:176946789-176981548  | 9.05876  | 7.83207   | -0.20992  | 0.758236 |
| XLOC_004515 | KDELC2         | chr11:108342832-108369159 | 4.10617  | 3.55043   | -0.2098   | 0.747301 |
| XLOC_000431 | EFCAB7         | chr1:63989012-64038364    | 0.894701 | 0.77361   | -0.2098   | 0.869296 |
| XLOC_004450 | RAB38          | chr11:87846414-87908635   | 22.7029  | 19.6319   | -0.209678 | 0.730925 |
| XLOC_021038 | CAMK2B         | chr7:44256748-44365230    | 0.06306  | 0.0545305 | -0.209661 | 1        |
| XLOC_011279 | MEX3D          | chr19:1554667-1568057     | 25.2282  | 21.8162   | -0.209637 | 0.740059 |
| XLOC_009349 | RAC3           | chr17:79989531-79992080   | 234.259  | 202.582   | -0.209604 | 0.703945 |
| XLOC_017073 | LOC100505738,M | chr5:8457799-8463209      | 2.5586   | 2.21269   | -0.209555 | 0.852189 |
| XLOC_004336 | CATSPER1       | chr11:65784222-65793988   | 2.1493   | 1.859     | -0.209344 | 0.851662 |
| XLOC_016391 | SEPT11         | chr4:77870894-77959768    | 13.7949  | 11.9326   | -0.209228 | 0.704939 |
| XLOC_013761 | RPS21          | chr20:60962120-60963576   | 7610.47  | 6583.18   | -0.209201 | 0.730157 |
| XLOC_017785 | ALDH7A1        | chr5:125877532-125931082  | 14.7981  | 12.8019   | -0.209044 | 0.707665 |
| XLOC_021553 | BAG4           | chr8:38020838-38070819    | 3.86005  | 3.33938   | -0.209037 | 0.88321  |
| XLOC_009822 | HOXB9          | chr17:46698518-46703835   | 23.3776  | 20.2294   | -0.208671 | 0.71967  |

|             |           |                           |            |            |           |          |
|-------------|-----------|---------------------------|------------|------------|-----------|----------|
| XLOC_022962 | ZNF782    | chr9:99579272-99616389    | 0.614762   | 0.531978   | -0.208663 | 0.868782 |
| XLOC_017913 | FLJ38109  | chr5:153570294-153825382  | 0.0608279  | 0.0526369  | -0.208659 | 1        |
| XLOC_010065 | B3GNTL1   | chr17:80901666-81009686   | 6.03695    | 5.22433    | -0.208575 | 0.835542 |
| XLOC_011038 | CPT1C     | chr19:50194364-50216988   | 4.95544    | 4.2887     | -0.208474 | 0.807468 |
| XLOC_023795 | KLHL15    | chrX:24001832-24045303    | 1.50711    | 1.30435    | -0.208455 | 0.781758 |
| XLOC_005887 | MED4-AS1  | chr13:48649863-48669277   | 3.64859    | 3.15822    | -0.208227 | 0.977857 |
| XLOC_003985 | ZNF195    | chr11:3379156-3400452     | 7.04889    | 6.10165    | -0.208198 | 0.740791 |
| XLOC_001719 | PPM1J     | chr1:113252615-113257950  | 22.239     | 19.2522    | -0.208067 | 0.732699 |
| XLOC_022572 | STXBP1    | chr9:130374485-130454995  | 20.1552    | 17.4488    | -0.208024 | 0.707415 |
| XLOC_017663 | IL6ST     | chr5:55230924-55290821    | 2.91642    | 2.52494    | -0.207949 | 0.733842 |
| XLOC_021781 | TIGD5     | chr8:144680073-144682485  | 27.4881    | 23.7988    | -0.207916 | 0.736361 |
| XLOC_015339 | NUDT16P1  | chr3:130745693-131100319  | 3.83469    | 3.32006    | -0.207899 | 0.827846 |
| XLOC_020604 | RBM48     | chr7:92158086-92166823    | 7.57622    | 6.55948    | -0.207896 | 0.76721  |
| XLOC_012193 | PAPOLG    | chr2:60983364-61029221    | 1.6518     | 1.43021    | -0.207814 | 0.767689 |
| XLOC_001387 | AHDC1     | chr1:27860755-27930143    | 1.47526    | 1.27735    | -0.207813 | 0.831151 |
| XLOC_004713 | PHC1      | chr12:9067315-9102357     | 4.28912    | 3.71463    | -0.207462 | 0.954501 |
| XLOC_015456 | ZNF639    | chr3:179041550-179053320  | 9.51535    | 8.24117    | -0.207409 | 0.734869 |
| XLOC_020720 | FEZF1-AS1 | chr7:121941447-121950131  | 2.51902    | 2.18181    | -0.207339 | 0.857446 |
| XLOC_015759 | TNNC1     | chr3:52485106-52488057    | 0.438487   | 0.37983    | -0.207182 | 0.951036 |
| XLOC_009510 | COX10-AS1 | chr17:13932608-14111996   | 1.44376    | 1.2507     | -0.2071   | 0.952184 |
| XLOC_012596 | FAM117B   | chr2:203499900-203634480  | 1.44965    | 1.25581    | -0.207087 | 0.800138 |
| XLOC_010620 | DAND5     | chr19:13080431-13085567   | 0.102548   | 0.0888408  | -0.207001 | 1        |
| XLOC_001662 | ARHGAP29  | chr1:94634462-94703307    | 33.193     | 28.7567    | -0.206981 | 0.708142 |
| XLOC_000032 | PRKCZ     | chr1:1981908-2144159      | 18.9491    | 16.4167    | -0.206964 | 0.885634 |
| XLOC_008868 | ZNF286A   | chr17:15602890-15624100   | 2.313      | 2.00437    | -0.206615 | 0.765267 |
| XLOC_023689 | ZNF275    | chrX:152599612-152618384  | 2.97389    | 2.57708    | -0.206611 | 0.766358 |
| XLOC_015060 | ZNF197    | chr3:44666510-44689963    | 3.10622    | 2.69178    | -0.206602 | 0.785473 |
| XLOC_005349 | ST8SIA1   | chr12:22346324-22487648   | 0.00471242 | 0.00408395 | -0.206503 | 1        |
| XLOC_007408 | MAN2A2    | chr15:91447419-91465815   | 7.45828    | 6.46371    | -0.206479 | 0.720534 |
| XLOC_017449 | LSM11     | chr5:157170754-157183746  | 1.51321    | 1.31146    | -0.206433 | 0.862353 |
| XLOC_004062 | NRIP3     | chr11:9002122-9025596     | 0.0194327  | 0.0168419  | -0.206432 | 1        |
| XLOC_007855 | MAPK8IP3  | chr16:1756220-1820318     | 9.26667    | 8.03135    | -0.206409 | 0.735532 |
| XLOC_010177 | ELP2      | chr18:33709836-33754688   | 28.1892    | 24.4341    | -0.206241 | 0.719384 |
| XLOC_021250 | SRPK2     | chr7:104756822-105029341  | 9.06941    | 7.86224    | -0.206068 | 0.723701 |
| XLOC_000493 | LOC339524 | chr1:87595447-87634886    | 0.0212214  | 0.0183968  | -0.206065 | 1        |
| XLOC_006647 | ZFYVE21   | chr14:104182080-104200005 | 27.6461    | 23.9666    | -0.20605  | 0.736305 |
| XLOC_003934 | SIRT3     | chr11:208529-236362       | 12.0989    | 10.489     | -0.206004 | 0.933451 |
| XLOC_001775 | FMO5      | chr1:146655883-146697230  | 0.139268   | 0.120738   | -0.205982 | 1        |
| XLOC_023070 | RPL35     | chr9:127615695-127624240  | 10398.7    | 9015.47    | -0.205932 | 0.747781 |
| XLOC_010442 | CNN2      | chr19:1026297-1039064     | 118.26     | 102.534    | -0.205857 | 0.703754 |
| XLOC_018504 | RPS12     | chr6:133135707-133138703  | 9250.97    | 8021.01    | -0.20582  | 0.753604 |
| XLOC_009779 | GPATCH8   | chr17:42472644-42580957   | 4.78873    | 4.15211    | -0.205799 | 0.721923 |
| XLOC_022576 | CDK9      | chr9:130548304-130553052  | 49.257     | 42.7097    | -0.205765 | 0.711466 |
| XLOC_015459 | NDUFB5    | chr3:179322574-179342288  | 76.7138    | 66.5242    | -0.205607 | 0.710632 |
| XLOC_020611 | CASD1     | chr7:94139169-94186328    | 3.81051    | 3.30439    | -0.205597 | 0.764456 |
| XLOC_004929 | COQ10A    | chr12:56660641-56664750   | 12.806     | 11.1051    | -0.205594 | 0.770634 |
| XLOC_006883 | NUMB      | chr14:73741917-73925286   | 10.5629    | 9.1602     | -0.205555 | 0.730925 |
| XLOC_004965 | RASSF3    | chr12:65004292-65091347   | 6.12568    | 5.31278    | -0.205404 | 0.75446  |
| XLOC_014561 | GTPBP1    | chr22:39101806-39129592   | 13.789     | 11.9608    | -0.205201 | 0.720043 |



|             |              |                           |            |            |           |          |
|-------------|--------------|---------------------------|------------|------------|-----------|----------|
| XLOC_012487 | GCA          | chr2:163200582-163219148  | 2.4152     | 2.09506    | -0.205154 | 0.7996   |
| XLOC_022462 | LOC100132781 | chr9:99631181-99634510    | 0.023182   | 0.0201107  | -0.205045 | 1        |
| XLOC_015223 | TBC1D23      | chr3:99979660-100044096   | 10.2181    | 8.86461    | -0.205004 | 0.717284 |
| XLOC_003959 | KRTAP5-1     | chr11:1490684-1785501     | 0.110298   | 0.0956936  | -0.204909 | 1        |
| XLOC_004635 | IGSF9B       | chr11:133785184-133826880 | 0.134498   | 0.116694   | -0.204848 | 1        |
| XLOC_007531 | VPS39        | chr15:42450898-42500502   | 8.36666    | 7.25948    | -0.204786 | 0.726498 |
| XLOC_008974 | LRR37B       | chr17:30348154-30380519   | 1.82511    | 1.5836     | -0.204781 | 0.844936 |
| XLOC_013902 | NINL         | chr20:25433337-25566153   | 2.08436    | 1.80854    | -0.20478  | 0.80614  |
| XLOC_018886 | ZNF318       | chr6:43303807-43337181    | 2.40652    | 2.08823    | -0.20467  | 0.749328 |
| XLOC_015701 | DALRD3       | chr3:49044636-49060926    | 36.32      | 31.5188    | -0.204554 | 0.9183   |
| XLOC_004760 | AEBP2        | chr12:19592607-19675173   | 1.79281    | 1.55584    | -0.204524 | 0.796473 |
| XLOC_017551 | SLC12A7      | chr5:1050488-1112172      | 12.8134    | 11.1202    | -0.204472 | 0.713685 |
| XLOC_012511 | DYNC112      | chr2:172543918-172606668  | 13.5914    | 11.796     | -0.204385 | 0.712857 |
| XLOC_003632 | TSGA10IP     | chr11:65713114-65727434   | 0.645351   | 0.560116   | -0.204359 | 0.921269 |
| XLOC_006136 | DHRS12       | chr13:52342128-52378298   | 2.50104    | 2.17076    | -0.204329 | 0.879055 |
| XLOC_008090 | PHKB         | chr16:47495209-47735434   | 3.75348    | 3.25877    | -0.203903 | 0.740552 |
| XLOC_009076 | CNTNAP1      | chr17:40834631-40852011   | 6.5814     | 5.71404    | -0.203883 | 0.756518 |
| XLOC_021900 | NUDT18       | chr8:21964382-21966932    | 11.7824    | 10.23      | -0.203828 | 0.7898   |
| XLOC_008339 | NME3         | chr16:1820320-1821710     | 70.6554    | 61.3511    | -0.203712 | 0.75445  |
| XLOC_001457 | SNIP1        | chr1:38000049-38019945    | 3.96191    | 3.44019    | -0.203709 | 0.77012  |
| XLOC_020845 | ATP6V0E2     | chr7:149564782-149577787  | 0.00996869 | 0.00865616 | -0.203677 | 1        |
| XLOC_021220 | GIGYF1       | chr7:100277129-100286870  | 21.3073    | 18.502     | -0.203667 | 0.710992 |
| XLOC_001496 | CCDC23       | chr1:43272722-43310660    | 11.3612    | 9.86604    | -0.203579 | 0.86364  |
| XLOC_003534 | TMEM132A     | chr11:60691912-60719257   | 31.5701    | 27.4155    | -0.203567 | 0.731166 |
| XLOC_009924 | GNA13        | chr17:63005406-63052920   | 5.84774    | 5.07837    | -0.203512 | 0.728025 |
| XLOC_000970 | SHISA4       | chr1:201857796-201861715  | 11.7787    | 10.2294    | -0.203455 | 0.784626 |
| XLOC_012826 | DTNB         | chr2:25600066-25896516    | 14.4625    | 12.5612    | -0.203344 | 0.749866 |
| XLOC_002064 | RNASEL       | chr1:182542768-182558394  | 0.452083   | 0.392663   | -0.203297 | 0.885215 |
| XLOC_015731 | HYAL1        | chr3:50337319-50349812    | 0.0317536  | 0.027583   | -0.203142 | 1        |
| XLOC_001567 | PARS2        | chr1:55222570-55230226    | 5.92295    | 5.1454     | -0.203032 | 0.785473 |
| XLOC_011587 | RHPN2        | chr19:33469497-33555824   | 5.18869    | 4.50778    | -0.202953 | 0.765267 |
| XLOC_023722 | FUNDC2       | chrX:154255063-154285191  | 20.311     | 17.6461    | -0.202908 | 0.726456 |
| XLOC_006912 | VIPAS39      | chr14:77893017-77923983   | 5.89683    | 5.12325    | -0.20288  | 0.784983 |
| XLOC_014486 | TTC28-AS1    | chr22:28315363-29075853   | 13.2962    | 11.5529    | -0.202759 | 0.852179 |
| XLOC_002100 | DDX59        | chr1:200613164-200639126  | 4.81926    | 4.18749    | -0.202725 | 0.786895 |
| XLOC_001210 | SLC35E2      | chr1:1656276-1677438      | 3.43793    | 2.9874     | -0.20265  | 0.865084 |
| XLOC_022571 | LRSAM1       | chr9:130213764-130265780  | 16.7848    | 14.5864    | -0.202534 | 0.737328 |
| XLOC_011275 | GAMT         | chr19:1397024-1401569     | 0.256211   | 0.222661   | -0.202487 | 1        |
| XLOC_011669 | DYRK1B       | chr19:40315989-40324841   | 1.07151    | 0.931374   | -0.202218 | 0.892568 |
| XLOC_010265 | THOC1        | chr18:214519-268059       | 8.25488    | 7.17556    | -0.202156 | 0.7548   |
| XLOC_000453 | SRSF11       | chr1:70671364-70717701    | 34.3251    | 29.8405    | -0.201991 | 0.725228 |
| XLOC_013977 | C20orf111    | chr20:42824580-42839546   | 28.1677    | 24.4888    | -0.201923 | 0.725739 |
| XLOC_015655 | ZNF445       | chr3:44481261-44519162    | 1.10369    | 0.959583   | -0.201849 | 0.783531 |
| XLOC_023766 | PIGA         | chrX:15337572-15353676    | 2.58787    | 2.25011    | -0.201772 | 0.81053  |
| XLOC_003082 | HPS1         | chr10:100175954-100206704 | 31.8286    | 27.6747    | -0.201755 | 0.761906 |
| XLOC_009382 | SMYD4        | chr17:1682828-1733175     | 2.11894    | 1.84242    | -0.201739 | 0.809839 |
| XLOC_003958 | DUSP8        | chr11:1490684-1785501     | 4.76929    | 4.14716    | -0.201651 | 0.976134 |
| XLOC_023744 | LOC389906    | chrX:3735575-3761935      | 17.7184    | 15.4084    | -0.201535 | 0.761869 |
| XLOC_005867 | OR7E37P      | chr13:42016699-42017902   | 0.227651   | 0.197978   | -0.201485 | 1        |

|             |              |                           |           |           |           |          |
|-------------|--------------|---------------------------|-----------|-----------|-----------|----------|
| XLOC_000946 | CDC73        | chr1:193091087-193223942  | 5.24082   | 4.55823   | -0.20132  | 0.733299 |
| XLOC_004674 | NCAPD2       | chr12:6603297-6641132     | 29.3025   | 25.4874   | -0.201236 | 0.722089 |
| XLOC_014549 | H1F0         | chr22:38201113-38203443   | 193.138   | 167.993   | -0.20123  | 0.734097 |
| XLOC_009408 | CAMKK1       | chr17:3763616-3796337     | 5.8534    | 5.09138   | -0.201219 | 0.774988 |
| XLOC_009390 | MNT          | chr17:2287353-2304258     | 6.98505   | 6.0759    | -0.201172 | 0.756518 |
| XLOC_014594 | SREBF2       | chr22:42229105-42302375   | 26.4495   | 23.0071   | -0.201161 | 0.712857 |
| XLOC_012833 | OST4         | chr2:27274490-27294567    | 515.391   | 448.325   | -0.201124 | 0.765267 |
| XLOC_021367 | FAM131B      | chr7:143050492-143059840  | 5.5191    | 4.80121   | -0.201036 | 0.763798 |
| XLOC_021352 | BRAF         | chr7:140433812-140624564  | 2.02443   | 1.76124   | -0.200926 | 0.832068 |
| XLOC_004869 | PFDN5        | chr12:53689234-53693234   | 512.632   | 445.999   | -0.200883 | 0.724387 |
| XLOC_015384 | C3orf58      | chr3:143690639-143711210  | 3.24317   | 2.82196   | -0.200707 | 0.784296 |
| XLOC_016585 | NEIL3        | chr4:178230990-178284092  | 1.55239   | 1.35082   | -0.200653 | 0.857377 |
| XLOC_022349 | LOC100506710 | chr9:37079892-37090398    | 7.38191   | 6.42372   | -0.200584 | 0.736595 |
| XLOC_011078 | ZNF613       | chr19:52430687-52449011   | 1.54167   | 1.34158   | -0.200558 | 0.858729 |
| XLOC_008302 | ZNF276       | chr16:89773540-89883065   | 5.66525   | 4.9304    | -0.200436 | 0.899621 |
| XLOC_014584 | EP300        | chr22:41488613-41576081   | 1.33698   | 1.16357   | -0.200415 | 0.785794 |
| XLOC_014929 | THUMPD3      | chr3:9404716-9428475      | 11.8024   | 10.2738   | -0.200112 | 0.730432 |
| XLOC_012979 | FBXO41       | chr2:73481809-73496758    | 6.48177   | 5.64245   | -0.200068 | 0.745913 |
| XLOC_015850 | RPL24        | chr3:101399933-101405563  | 4624.83   | 4026.03   | -0.200044 | 0.751293 |
| XLOC_022465 | C9orf174     | chr9:100000707-100139577  | 0.411394  | 0.358169  | -0.199988 | 0.891828 |
| XLOC_000010 | AGRN         | chr1:955502-991499        | 13.8827   | 12.0866   | -0.199879 | 0.739297 |
| XLOC_013254 | TTC30A       | chr2:178479025-178483694  | 0.123495  | 0.107519  | -0.199867 | 1        |
| XLOC_000084 | FBXO44       | chr1:11708417-11723384    | 21.1328   | 18.4014   | -0.199666 | 0.738263 |
| XLOC_005761 | RSRC2        | chr12:122989189-123011560 | 22.1011   | 19.2458   | -0.199576 | 0.731357 |
| XLOC_006740 | CIDEB        | chr14:24774392-24787242   | 1.69935   | 1.47982   | -0.199564 | 0.940598 |
| XLOC_001894 | YY1AP1       | chr1:155629232-155658823  | 19.5017   | 16.9833   | -0.199484 | 0.743375 |
| XLOC_022909 | ISCA1        | chr9:88879462-88897490    | 26.8018   | 23.3417   | -0.199417 | 0.732054 |
| XLOC_013058 | ANKRD36B     | chr2:98121260-98206428    | 0.299397  | 0.26075   | -0.19939  | 1        |
| XLOC_022152 | TAF2         | chr8:120743013-120845074  | 5.53184   | 4.81809   | -0.199297 | 0.746108 |
| XLOC_011399 | ZNF266       | chr19:9523101-9546254     | 9.01706   | 7.85395   | -0.199239 | 0.740088 |
| XLOC_008313 | LUC7L        | chr16:238969-279449       | 23.0165   | 20.0485   | -0.199169 | 0.759668 |
| XLOC_004975 | DYRK2        | chr12:68042511-68056444   | 3.28492   | 2.86136   | -0.199158 | 0.765218 |
| XLOC_012756 | ING5         | chr2:242641455-242668896  | 3.451     | 3.00637   | -0.198991 | 0.783744 |
| XLOC_001743 | GDAP2        | chr1:118406106-118472302  | 1.34265   | 1.16969   | -0.198955 | 0.864624 |
| XLOC_008923 | MTRNR2L1     | chr17:22022436-22023991   | 0.596248  | 0.519442  | -0.198949 | 0.919547 |
| XLOC_014612 | PARVB        | chr22:44395090-44565112   | 39.6481   | 34.5417   | -0.198912 | 0.733086 |
| XLOC_006344 | KLHDC2       | chr14:50234786-50249856   | 17.9097   | 15.6042   | -0.198805 | 0.754724 |
| XLOC_007941 | SNN          | chr16:11762288-11836648   | 7.74667   | 6.7499    | -0.19871  | 0.857115 |
| XLOC_003659 | RAD9A        | chr11:67159422-67169376   | 5.44879   | 4.74774   | -0.198695 | 0.975484 |
| XLOC_011479 | SAMD1        | chr19:14199228-14201232   | 49.6682   | 43.2804   | -0.198609 | 0.756518 |
| XLOC_002590 | HECTD2       | chr10:93066718-93371217   | 0.794704  | 0.692544  | -0.19851  | 0.886581 |
| XLOC_022056 | ZNF704       | chr8:81540685-81787016    | 0.369172  | 0.321724  | -0.198471 | 1        |
| XLOC_023588 | SLC25A43     | chrX:118533257-118588437  | 7.94972   | 6.92871   | -0.198319 | 0.774294 |
| XLOC_011160 | TSEN34       | chr19:54694118-54698394   | 56.0757   | 48.8746   | -0.198292 | 0.725398 |
| XLOC_008966 | RNF135       | chr17:29297955-29326929   | 6.59876   | 5.75143   | -0.198275 | 0.804859 |
| XLOC_006915 | ALKBH1       | chr14:78138748-78174356   | 4.61655   | 4.02384   | -0.198243 | 0.790594 |
| XLOC_022532 | GSN          | chr9:124030379-124095120  | 32.0424   | 27.9289   | -0.198223 | 0.73849  |
| XLOC_000252 | CCDC28B      | chr1:32666201-32670991    | 8.13466   | 7.09111   | -0.198071 | 0.856226 |
| XLOC_015605 | PP2D1        | chr3:19988571-20053765    | 0.0522608 | 0.0455644 | -0.197823 | 1        |

|             |              |                           |           |           |           |          |
|-------------|--------------|---------------------------|-----------|-----------|-----------|----------|
| XLOC_008126 | MT1F         | chr16:56691854-56693215   | 90.9661   | 79.312    | -0.197789 | 0.785307 |
| XLOC_003603 | TM7SF2,VPS51 | chr11:64863586-64883707   | 68.0553   | 59.3396   | -0.197713 | 0.775056 |
| XLOC_005586 | ZFC3H1       | chr12:72003378-72074428   | 1.57922   | 1.37717   | -0.197499 | 0.816962 |
| XLOC_007518 | RHOV         | chr15:41164411-41166487   | 6.19831   | 5.40627   | -0.19724  | 0.831535 |
| XLOC_000515 | FNBP1L       | chr1:93913687-94020218    | 4.74165   | 4.13584   | -0.197209 | 0.765759 |
| XLOC_005031 | VEZT         | chr12:95611521-95696566   | 6.05943   | 5.28537   | -0.197178 | 0.748171 |
| XLOC_006225 | ANKRD10      | chr13:111530886-111567416 | 8.15203   | 7.11106   | -0.197095 | 0.780759 |
| XLOC_006754 | STRN3        | chr14:31363004-31565656   | 4.46117   | 3.89171   | -0.197018 | 0.788779 |
| XLOC_005651 | ARL1         | chr12:101786902-101801572 | 15.3715   | 13.4094   | -0.197014 | 0.734869 |
| XLOC_024191 | DNASE1L1     | chrX:153626570-153650063  | 15.9857   | 13.9458   | -0.196951 | 0.975492 |
| XLOC_010811 | ZNF146       | chr19:36673186-36729675   | 16.3968   | 14.3045   | -0.196944 | 0.730925 |
| XLOC_004122 | LGR4         | chr11:27387507-27494334   | 1.18677   | 1.03547   | -0.196756 | 0.834292 |
| XLOC_019147 | FBXO5        | chr6:153291657-153304740  | 8.48254   | 7.40133   | -0.196711 | 0.771653 |
| XLOC_017897 | RPS14        | chr5:149823791-149829319  | 4713.99   | 4113.32   | -0.196645 | 0.764196 |
| XLOC_007358 | GOLGA6L9     | chr15:83098709-83108111   | 0.194093  | 0.169365  | -0.196614 | 1        |
| XLOC_002742 | ACADSB       | chr10:124768428-124817806 | 2.45998   | 2.14676   | -0.196488 | 0.779038 |
| XLOC_005401 | SLC38A4      | chr12:47158543-47219780   | 0.0383834 | 0.0334967 | -0.196463 | 1        |
| XLOC_002278 | AKT3         | chr1:243419306-244006886  | 1.4246    | 1.24324   | -0.196443 | 0.806331 |
| XLOC_007497 | ZNF770       | chr15:35270541-35280497   | 8.24661   | 7.19685   | -0.196436 | 0.745796 |
| XLOC_007455 | WHAMMP3      | chr15:23187728-23208357   | 0.179968  | 0.157059  | -0.196429 | 1        |
| XLOC_018526 | HECA         | chr6:139456248-139501946  | 4.49823   | 3.92596   | -0.19631  | 0.762618 |
| XLOC_004038 | TPP1         | chr11:6633996-6640692     | 32.6975   | 28.5383   | -0.196279 | 0.736595 |
| XLOC_007232 | RNF111       | chr15:59279864-59389618   | 2.2765    | 1.98701   | -0.196224 | 0.783706 |
| XLOC_004575 | USP2         | chr11:119225924-119252436 | 0.555088  | 0.484515  | -0.196177 | 0.902819 |
| XLOC_006792 | RPS29        | chr14:50044041-50053094   | 10577.4   | 9233.25   | -0.19607  | 0.757708 |
| XLOC_022322 | NUDT2        | chr9:34329503-34343711    | 51.5765   | 45.0246   | -0.195999 | 0.755497 |
| XLOC_015878 | KIAA1407     | chr3:113682983-113775460  | 0.380867  | 0.332504  | -0.195917 | 0.891328 |
| XLOC_021990 | RB1CC1       | chr8:53535017-53627026    | 6.00055   | 5.23872   | -0.19588  | 0.748635 |
| XLOC_019023 | PDSS2        | chr6:107473760-107780779  | 2.40474   | 2.09964   | -0.195739 | 0.819558 |
| XLOC_011088 | ZNF808       | chr19:53030908-53059303   | 0.569604  | 0.497354  | -0.195685 | 0.883168 |
| XLOC_010749 | ZNF507       | chr19:32836513-32878573   | 1.48732   | 1.29867   | -0.195678 | 0.790722 |
| XLOC_012405 | TMEM37       | chr2:120189445-120196096  | 0.243649  | 0.212806  | -0.195266 | 1        |
| XLOC_010365 | MYO5B        | chr18:47349155-47721451   | 1.02886   | 0.898632  | -0.195239 | 0.81114  |
| XLOC_010118 | VAPA         | chr18:9913954-9960018     | 17.4907   | 15.2779   | -0.195137 | 0.733086 |
| XLOC_021161 | SAMD9        | chr7:92728825-92747336    | 0.215311  | 0.188076  | -0.19511  | 1        |
| XLOC_006729 | NRL          | chr14:24549315-24553832   | 0.6153    | 0.537516  | -0.194981 | 0.924931 |
| XLOC_002350 | OPTN         | chr10:13142081-13180276   | 28.3207   | 24.7409   | -0.194962 | 0.735353 |
| XLOC_023105 | C9orf114     | chr9:131580778-131592100  | 32.9524   | 28.7876   | -0.194934 | 0.759934 |
| XLOC_021532 | FZD3         | chr8:28351721-28431785    | 1.40272   | 1.22553   | -0.194827 | 0.773229 |
| XLOC_003987 | ART5         | chr11:3659735-3663546     | 0.491025  | 0.429065  | -0.1946   | 0.943077 |
| XLOC_007183 | CASC4        | chr15:44580908-44707959   | 9.84278   | 8.60084   | -0.194588 | 0.743283 |
| XLOC_004087 | CYP2R1       | chr11:14899555-14913751   | 10.8034   | 9.44166   | -0.194368 | 0.779141 |
| XLOC_006937 | FBLN5        | chr14:92335754-92414046   | 2.59734   | 2.27008   | -0.194288 | 0.84639  |
| XLOC_006657 | ZBTB42       | chr14:105266932-105271048 | 4.58594   | 4.00913   | -0.193928 | 0.8041   |
| XLOC_019083 | STX7         | chr6:132778662-132834337  | 4.83745   | 4.23001   | -0.193586 | 0.764773 |
| XLOC_016416 | AFF1         | chr4:87856153-88062206    | 2.15235   | 1.8821    | -0.193566 | 0.773085 |
| XLOC_016503 | LARP1B       | chr4:128982502-129132289  | 5.13122   | 4.48715   | -0.193502 | 0.787439 |
| XLOC_009377 | SCARF1       | chr17:1537151-1549041     | 0.748319  | 0.654404  | -0.193471 | 0.899621 |
| XLOC_012811 | C2orf43      | chr2:20884817-21022827    | 3.00258   | 2.62601   | -0.193333 | 0.81114  |

|             |              |                          |           |            |           |          |
|-------------|--------------|--------------------------|-----------|------------|-----------|----------|
| XLOC_007700 | IMP3         | chr15:75931425-75932664  | 128.213   | 112.139    | -0.193265 | 0.739148 |
| XLOC_017032 | UFSP2        | chr4:186317839-186347139 | 10.1996   | 8.92089    | -0.19325  | 0.783744 |
| XLOC_019096 | HBS1L        | chr6:135281516-135376036 | 5.92495   | 5.18271    | -0.193097 | 0.773721 |
| XLOC_004136 | CD59         | chr11:33724555-33758025  | 16.1249   | 14.105     | -0.193081 | 0.741411 |
| XLOC_011277 | PCSK4        | chr19:1481426-1490407    | 1.0642    | 0.930897   | -0.19308  | 0.907121 |
| XLOC_017583 | ANKH         | chr5:14704908-14871887   | 4.17204   | 3.64969    | -0.192976 | 0.764456 |
| XLOC_014930 | SETD5        | chr3:9439402-9519838     | 7.02744   | 6.14798    | -0.192886 | 0.746653 |
| XLOC_012157 | PLEKHH2      | chr2:43864438-43995126   | 0.006509  | 0.00569461 | -0.192838 | 1        |
| XLOC_002215 | ACBD3        | chr1:226332379-226374423 | 8.40112   | 7.35008    | -0.192821 | 0.757708 |
| XLOC_017744 | TTC37        | chr5:94799598-94890709   | 1.34188   | 1.17406    | -0.192757 | 0.818403 |
| XLOC_013485 | SDCBP2-AS1   | chr20:1290554-1373816    | 0.296445  | 0.25937    | -0.192753 | 1        |
| XLOC_008435 | KIAA0430     | chr16:15688225-15737023  | 1.72164   | 1.50636    | -0.192718 | 0.795912 |
| XLOC_008443 | RPS15A       | chr16:18794276-18801656  | 4838.6    | 4233.59    | -0.192709 | 0.76395  |
| XLOC_012670 | SLC4A3       | chr2:220492291-220506702 | 3.76705   | 3.29606    | -0.192694 | 0.81699  |
| XLOC_003327 | SWAP70       | chr11:9685627-9774507    | 5.89336   | 5.1574     | -0.192446 | 0.762654 |
| XLOC_018693 | LOC100270746 | chr6:26924771-26991753   | 2.49624   | 2.18465    | -0.192357 | 0.915911 |
| XLOC_001117 | GGPS1        | chr1:235491752-235507844 | 9.28529   | 8.12716    | -0.192196 | 0.764196 |
| XLOC_005596 | OSBPL8       | chr12:76745577-76953589  | 3.93431   | 3.44369    | -0.192153 | 0.751304 |
| XLOC_000266 | ADC          | chr1:33546713-33585995   | 3.56674   | 3.12197    | -0.192147 | 0.852189 |
| XLOC_015843 | FILIP1L      | chr3:99273152-99897476   | 2.9696    | 2.59933    | -0.19213  | 0.934331 |
| XLOC_020338 | PSMG3-AS1    | chr7:1609708-1629261     | 0.336205  | 0.294312   | -0.191993 | 1        |
| XLOC_000886 | SUCO         | chr1:172502259-172580973 | 2.83366   | 2.48068    | -0.191932 | 0.781528 |
| XLOC_008902 | FBXW10       | chr17:18647325-18682662  | 0.0486313 | 0.0425739  | -0.191918 | 1        |
| XLOC_023261 | PRPS2        | chrX:12809473-12842346   | 28.6873   | 25.1152    | -0.191853 | 0.736178 |
| XLOC_006389 | HIF1A        | chr14:62162118-62215807  | 2.11486   | 1.85157    | -0.191812 | 0.926868 |
| XLOC_007868 | SLC9A3R2     | chr16:2076868-2089027    | 39.9777   | 35.0012    | -0.191793 | 0.752794 |
| XLOC_004091 | RPS13        | chr11:17095938-17099220  | 3763.89   | 3295.57    | -0.191698 | 0.76146  |
| XLOC_022620 | PRRC2B       | chr9:134305476-134375575 | 19.9234   | 17.4451    | -0.191638 | 0.736564 |
| XLOC_012158 | DYNC2LI1     | chr2:44001177-44037149   | 12.7314   | 11.1479    | -0.19161  | 0.783706 |
| XLOC_014230 | PRMT2        | chr21:48055506-48085155  | 19.5222   | 17.0952    | -0.191524 | 0.760301 |
| XLOC_001422 | MARCKSL1     | chr1:32799429-32801840   | 254.216   | 222.648    | -0.191293 | 0.746731 |
| XLOC_001100 | COG2         | chr1:230778201-230829731 | 6.20889   | 5.43912    | -0.19096  | 0.786446 |
| XLOC_013133 | MAP3K2       | chr2:128056244-128100805 | 1.51539   | 1.32759    | -0.190881 | 0.779038 |
| XLOC_004430 | KCTD21       | chr11:77882297-77899664  | 0.946067  | 0.828832   | -0.190864 | 0.880754 |
| XLOC_007901 | THOC6        | chr16:3072625-3077756    | 140.421   | 123.022    | -0.190842 | 0.870942 |
| XLOC_003610 | DPF2         | chr11:65101224-65120451  | 28.4698   | 24.9441    | -0.190732 | 0.748685 |
| XLOC_023341 | KDM6A        | chrX:44732422-44971845   | 2.24375   | 1.96594    | -0.190691 | 0.802567 |
| XLOC_013825 | PCED1A       | chr20:2815960-3019315    | 15.4812   | 13.565     | -0.190631 | 0.934331 |
| XLOC_020388 | SP4          | chr7:21467688-21554151   | 0.570165  | 0.499601   | -0.190601 | 0.86835  |
| XLOC_000420 | FGGY         | chr1:59762624-60228402   | 8.76168   | 7.67904    | -0.190282 | 0.802621 |
| XLOC_023287 | PHKA2-AS1    | chrX:18908413-19002480   | 0.106483  | 0.0933257  | -0.190282 | 1        |
| XLOC_017769 | MCC          | chr5:112312406-112824527 | 0.0241704 | 0.0211855  | -0.190164 | 1        |
| XLOC_016439 | METAP1       | chr4:99916787-99983960   | 29.7398   | 26.0681    | -0.190105 | 0.742915 |
| XLOC_011004 | NUCB1        | chr19:49403306-49426540  | 107.124   | 93.9042    | -0.190024 | 0.750681 |
| XLOC_000415 | LOC100507634 | chr1:55681080-55683128   | 0.594355  | 0.521008   | -0.19002  | 0.926279 |
| XLOC_019104 | IL20RA       | chr6:137321107-137366298 | 0.801123  | 0.702292   | -0.189953 | 0.879615 |
| XLOC_002828 | NMT2         | chr10:15147770-15210695  | 3.77775   | 3.31188    | -0.189876 | 0.780035 |
| XLOC_001260 | CASZ1        | chr1:10696665-10856733   | 2.18373   | 1.91458    | -0.189767 | 0.851662 |
| XLOC_023433 | RRAGB        | chrX:55744109-55785207   | 3.00863   | 2.63784    | -0.189746 | 0.844936 |

|             |           |                           |          |          |           |          |
|-------------|-----------|---------------------------|----------|----------|-----------|----------|
| XLOC_014378 | SSR4P1    | chr21:46490870-46493126   | 0.573196 | 0.502565 | -0.189717 | 0.919709 |
| XLOC_018462 | RWDD1     | chr6:116892582-116914436  | 37.4923  | 32.8738  | -0.189655 | 0.751293 |
| XLOC_000530 | AGL       | chr1:100315639-100389579  | 1.71575  | 1.50444  | -0.189621 | 0.798113 |
| XLOC_008768 | GSG2      | chr17:3617918-3704537     | 3.42894  | 3.00663  | -0.189617 | 0.891717 |
| XLOC_021676 | PDP1      | chr8:94929082-94938296    | 5.67431  | 4.97662  | -0.189281 | 0.774988 |
| XLOC_005060 | PARPBP    | chr12:102513955-102591614 | 1.58623  | 1.39131  | -0.18916  | 0.859937 |
| XLOC_000085 | FBXO6     | chr1:11724149-11734409    | 15.1698  | 13.3059  | -0.189132 | 0.79145  |
| XLOC_005391 | TWF1      | chr12:44187525-44200178   | 28.4574  | 24.9631  | -0.18901  | 0.74725  |
| XLOC_007189 | SORD      | chr15:45315301-45367287   | 43.9517  | 38.5555  | -0.188981 | 0.742598 |
| XLOC_012440 | LOC150776 | chr2:132202795-132360468  | 8.95537  | 7.85621  | -0.18892  | 0.944059 |
| XLOC_017855 | APBB3     | chr5:139937852-139944189  | 7.87208  | 6.9059   | -0.188914 | 0.810443 |
| XLOC_021513 | R3HCC1    | chr8:23145611-23153792    | 46.1428  | 40.4829  | -0.188796 | 0.751881 |
| XLOC_018032 | PRPF4B    | chr6:4021568-4065217      | 2.97726  | 2.61207  | -0.188789 | 0.7777   |
| XLOC_013973 | CHD6      | chr20:40031169-40247133   | 1.29555  | 1.13678  | -0.188618 | 0.802089 |
| XLOC_020974 | HOXA1     | chr7:27132613-27135625    | 1.26185  | 1.10724  | -0.188581 | 0.885634 |
| XLOC_010877 | AXL       | chr19:41725107-41767671   | 214.736  | 188.453  | -0.188362 | 0.759934 |
| XLOC_018549 | GINM1     | chr6:149887527-149912067  | 14.3074  | 12.5567  | -0.188309 | 0.790372 |
| XLOC_006397 | ZBTB1     | chr14:64971291-65000408   | 4.35662  | 3.82352  | -0.188308 | 0.785865 |
| XLOC_023532 | WBP5      | chrX:102611379-102613397  | 46.6628  | 40.9551  | -0.188229 | 0.756733 |
| XLOC_016180 | FAM193A   | chr4:2627158-2734302      | 4.30288  | 3.77659  | -0.18822  | 0.792996 |
| XLOC_020419 | PRR15     | chr7:29603426-29606911    | 2.05291  | 1.80192  | -0.188135 | 0.900642 |
| XLOC_020839 | ZNF212    | chr7:148936741-148952700  | 8.3466   | 7.32628  | -0.188108 | 0.787473 |
| XLOC_021779 | RHPN1     | chr8:144451024-144466390  | 26.768   | 23.4963  | -0.188075 | 0.762566 |
| XLOC_011445 | ZNF44     | chr19:12382624-12405714   | 1.9673   | 1.72688  | -0.188047 | 0.852179 |
| XLOC_022149 | SAMD12    | chr8:119201694-119738306  | 1.70568  | 1.49727  | -0.188008 | 0.79557  |
| XLOC_003705 | RELT      | chr11:73087404-73108519   | 11.6446  | 10.2219  | -0.18799  | 0.769834 |
| XLOC_010976 | SEPW1     | chr19:48281841-48287943   | 188.279  | 165.28   | -0.187955 | 0.75677  |
| XLOC_009751 | EZH1      | chr17:40852292-40897071   | 4.13384  | 3.62926  | -0.187808 | 0.79507  |
| XLOC_008989 | ZNF830    | chr17:33288548-33290205   | 12.2434  | 10.7505  | -0.187596 | 0.790436 |
| XLOC_017130 | NDUFS4    | chr5:52856464-52979171    | 69.6877  | 61.1914  | -0.187575 | 0.763798 |
| XLOC_002407 | ZNF33A    | chr10:38299577-38348995   | 2.6504   | 2.32761  | -0.187364 | 0.781103 |
| XLOC_000842 | UHMK1     | chr1:162466963-162499419  | 10.7013  | 9.39808  | -0.18735  | 0.756508 |
| XLOC_016132 | ACAP2     | chr3:194995464-195163817  | 3.83974  | 3.37224  | -0.187302 | 0.774237 |
| XLOC_013522 | CRLS1     | chr20:5986738-6020697     | 17.0047  | 14.9351  | -0.187222 | 0.748388 |
| XLOC_010403 | RTTN      | chr18:67671042-67872962   | 0.8415   | 0.739098 | -0.187197 | 0.848653 |
| XLOC_021522 | PPP2R2A   | chr8:26149006-26230195    | 19.4489  | 17.0823  | -0.187186 | 0.755993 |
| XLOC_014848 | TOB2      | chr22:41829491-41843027   | 15.8639  | 13.9343  | -0.18711  | 0.753039 |
| XLOC_018960 | SLC17A5   | chr6:74303101-74363737    | 8.74737  | 7.68348  | -0.187088 | 0.77663  |
| XLOC_004263 | EML3      | chr11:62369690-62382592   | 19.2285  | 16.8899  | -0.187078 | 0.774876 |
| XLOC_005071 | KIAA1033  | chr12:105501491-105562906 | 2.56358  | 2.25211  | -0.186882 | 0.79557  |
| XLOC_008338 | IFT140    | chr16:1543351-1662109     | 4.97593  | 4.37151  | -0.186835 | 0.929808 |
| XLOC_015768 | TKT       | chr3:53258722-53290130    | 293.288  | 257.666  | -0.186814 | 0.758199 |
| XLOC_000893 | ZBTB37    | chr1:173837492-173855774  | 0.222026 | 0.195061 | -0.186803 | 1        |
| XLOC_017891 | TIGD6     | chr5:149372685-149432706  | 1.07016  | 0.940389 | -0.186495 | 0.968703 |
| XLOC_013010 | TRABD2A   | chr2:85048795-85108252    | 18.1187  | 15.9229  | -0.186377 | 0.784561 |
| XLOC_021001 | DPY19L1P1 | chr7:32535175-32758780    | 0.618679 | 0.543717 | -0.186335 | 0.964628 |
| XLOC_005046 | APAF1     | chr12:99039077-100378432  | 1.45904  | 1.28228  | -0.186304 | 0.877848 |
| XLOC_010942 | CD3EAP    | chr19:45882891-45927177   | 2.11794  | 1.86139  | -0.186277 | 0.929058 |
| XLOC_009249 | AMZ2      | chr17:66244144-66253305   | 49.1421  | 43.1915  | -0.186211 | 0.756508 |

|             |                |                           |          |          |           |          |
|-------------|----------------|---------------------------|----------|----------|-----------|----------|
| XLOC_009598 | CRLF3          | chr17:29109701-29151778   | 6.29652  | 5.53426  | -0.186163 | 0.785473 |
| XLOC_008592 | KIFC3          | chr16:57792128-57836439   | 45.0003  | 39.556   | -0.186037 | 0.752083 |
| XLOC_014893 | CERK           | chr22:47080306-47134152   | 12.1774  | 10.7042  | -0.186028 | 0.764456 |
| XLOC_014124 | BACH1          | chr21:30671219-30734217   | 2.82721  | 2.48521  | -0.186012 | 0.79183  |
| XLOC_015046 | ZBTB47         | chr3:42695175-42709072    | 1.84154  | 1.61883  | -0.185965 | 0.840893 |
| XLOC_021512 | CHMP7          | chr8:23101149-23119512    | 18.5331  | 16.2918  | -0.185958 | 0.764456 |
| XLOC_004328 | RNASEH2C       | chr11:65479472-65488409   | 21.101   | 18.5493  | -0.185946 | 0.819558 |
| XLOC_014681 | C22orf29,GNB1L | chr22:19775933-19842462   | 14.2162  | 12.4984  | -0.185798 | 0.891105 |
| XLOC_013235 | OLA1           | chr2:174937174-175113365  | 49.2441  | 43.2942  | -0.185775 | 0.756518 |
| XLOC_003102 | POLL           | chr10:103338638-103348027 | 22.1437  | 19.4689  | -0.185725 | 0.767223 |
| XLOC_011758 | EML2           | chr19:46112657-46148775   | 15.9644  | 14.0361  | -0.185713 | 0.832407 |
| XLOC_009250 | ARSG           | chr17:66255322-66417000   | 0.844384 | 0.742439 | -0.185627 | 0.931798 |
| XLOC_002058 | ACBD6          | chr1:180257351-180472022  | 34.1015  | 29.9843  | -0.185626 | 0.7704   |
| XLOC_017328 | C5orf24        | chr5:134181369-134195425  | 5.94845  | 5.23052  | -0.18556  | 0.77012  |
| XLOC_009068 | STAT5A         | chr17:40439564-40463960   | 8.84501  | 7.7777   | -0.185519 | 0.774294 |
| XLOC_022204 | JRK            | chr8:143738873-143751401  | 7.19254  | 6.32496  | -0.185445 | 0.814529 |
| XLOC_004796 | KIAA1551       | chr12:32112352-32146043   | 0.781371 | 0.687138 | -0.185408 | 0.861006 |
| XLOC_018999 | MAP3K7         | chr6:91223291-91297020    | 5.93136  | 5.21617  | -0.185372 | 0.76721  |
| XLOC_005451 | POU6F1         | chr12:51580718-51611477   | 1.6888   | 1.48522  | -0.18532  | 0.83652  |
| XLOC_002535 | ZMIZ1          | chr10:80828791-81076285   | 2.13763  | 1.88006  | -0.185229 | 0.815686 |
| XLOC_005127 | PEBP1          | chr12:118573869-118583390 | 173.752  | 152.817  | -0.185225 | 0.761687 |
| XLOC_023749 | PNPLA4         | chrX:7866803-7895780      | 9.27921  | 8.16119  | -0.185223 | 0.779175 |
| XLOC_015485 | POLR2H         | chr3:184081193-184086363  | 234.403  | 206.171  | -0.18515  | 0.757708 |
| XLOC_000249 | TMEM39B        | chr1:32538502-32568467    | 17.5596  | 15.445   | -0.185118 | 0.79183  |
| XLOC_011225 | ZNF419         | chr19:57999078-58006048   | 2.6074   | 2.29385  | -0.184839 | 0.844936 |
| XLOC_001044 | VASH2          | chr1:213123886-213164927  | 0.486554 | 0.428076 | -0.184734 | 0.896706 |
| XLOC_009805 | SCRN2          | chr17:45908992-45918699   | 43.9198  | 38.6426  | -0.184679 | 0.773721 |
| XLOC_020331 | SUN1           | chr7:855193-914557        | 16.2281  | 14.2791  | -0.184592 | 0.763379 |
| XLOC_005457 | KRT80          | chr12:52562779-52585784   | 0.536492 | 0.47206  | -0.184585 | 0.91015  |
| XLOC_005824 | RPL21          | chr13:27825691-27830702   | 4097.89  | 3605.86  | -0.184538 | 0.781758 |
| XLOC_021573 | VDAC3          | chr8:42249278-42263455    | 109.746  | 96.5702  | -0.184516 | 0.756508 |
| XLOC_012122 | YPEL5          | chr2:30369749-30383399    | 16.9955  | 14.9561  | -0.184422 | 0.771688 |
| XLOC_012565 | GLS            | chr2:191745546-191830270  | 11.0058  | 9.68528  | -0.184394 | 0.767216 |
| XLOC_007165 | MAPKBP1        | chr15:42066631-42120053   | 2.60049  | 2.28853  | -0.184361 | 0.806275 |
| XLOC_006662 | BTBD6          | chr14:105675622-105864484 | 46.1861  | 40.6468  | -0.184317 | 0.869162 |
| XLOC_003334 | USP47          | chr11:11862969-11980872   | 5.99304  | 5.27442  | -0.184275 | 0.764196 |
| XLOC_021157 | KRIT1          | chr7:91828282-91875414    | 4.34383  | 3.82304  | -0.184247 | 0.783706 |
| XLOC_023166 | SDCCAG3        | chr9:139296373-139305054  | 111.29   | 97.9515  | -0.184178 | 0.756508 |
| XLOC_002377 | BMI1,COMMD3,C  | chr10:22605311-22620414   | 81.1598  | 71.4349  | -0.184137 | 0.831834 |
| XLOC_006714 | CDH24          | chr14:23516269-23526747   | 9.42358  | 8.29449  | -0.184122 | 0.800138 |
| XLOC_022397 | PCSK5          | chr9:78505559-78977255    | 1.52479  | 1.34216  | -0.184057 | 0.875961 |
| XLOC_009613 | CCT6B          | chr17:33254877-33288528   | 1.75056  | 1.54094  | -0.184005 | 0.879418 |
| XLOC_020461 | STK17A         | chr7:43622691-43666978    | 6.81139  | 5.99595  | -0.183961 | 0.779476 |
| XLOC_000591 | RAP1A          | chr1:112162404-112256101  | 21.2453  | 18.703   | -0.183876 | 0.765759 |
| XLOC_006764 | SNX6           | chr14:35030617-35099366   | 25.5435  | 22.4869  | -0.183868 | 0.755093 |
| XLOC_007584 | GNB5           | chr15:52413122-52483565   | 8.22688  | 7.24295  | -0.183768 | 0.785538 |
| XLOC_006868 | ACTN1          | chr14:69340839-69446083   | 71.7666  | 63.1889  | -0.18364  | 0.765267 |
| XLOC_017940 | PANK3          | chr5:167982627-168006614  | 3.75368  | 3.30508  | -0.183621 | 0.809535 |
| XLOC_021577 | FNTA           | chr8:42911441-42940932    | 59.0688  | 52.0099  | -0.183611 | 0.759934 |

|             |            |                           |           |           |           |          |
|-------------|------------|---------------------------|-----------|-----------|-----------|----------|
| XLOC_002962 | HERC4      | chr10:69681655-69835103   | 5.89419   | 5.19035   | -0.183462 | 0.773721 |
| XLOC_012660 | STK16      | chr2:220110191-220136910  | 11.5589   | 10.179    | -0.183413 | 0.921452 |
| XLOC_011262 | SHC2       | chr19:416582-460996       | 17.734    | 15.6177   | -0.183336 | 0.795382 |
| XLOC_006301 | GMPR2      | chr14:24701647-24708447   | 42.0761   | 37.0572   | -0.183246 | 0.757708 |
| XLOC_004952 | TSPAN31    | chr12:58138783-58146230   | 7.58171   | 6.67772   | -0.183168 | 0.978818 |
| XLOC_010052 | DCXR       | chr17:79993756-79995573   | 235.626   | 207.536   | -0.183136 | 0.765759 |
| XLOC_018331 | ENPP4      | chr6:46097700-46114436    | 1.58741   | 1.39829   | -0.183011 | 0.836478 |
| XLOC_010503 | TNFAIP8L1  | chr19:4639526-4655580     | 6.40986   | 5.64641   | -0.18296  | 0.794882 |
| XLOC_016093 | EHHADH     | chr3:184880688-184971886  | 0.629937  | 0.554918  | -0.182934 | 0.886331 |
| XLOC_014563 | APOBEC3C   | chr22:39410264-39414825   | 15.1531   | 13.3503   | -0.182742 | 0.82094  |
| XLOC_010770 | ZNF302     | chr19:35168566-35177302   | 4.328     | 3.81312   | -0.182727 | 0.810757 |
| XLOC_004914 | DGKA       | chr12:56324945-56347807   | 10.3139   | 9.0872    | -0.182687 | 0.783261 |
| XLOC_016853 | ADH5       | chr4:99992129-100009931   | 47.3689   | 41.7351   | -0.18268  | 0.7667   |
| XLOC_002644 | PAX2       | chr10:102505467-102589698 | 1.85872   | 1.63774   | -0.182602 | 0.875692 |
| XLOC_005139 | DYNLL1     | chr12:120907659-120936298 | 296.264   | 261.045   | -0.182586 | 0.774876 |
| XLOC_014386 | LSS        | chr21:47608359-47648738   | 14.5505   | 12.8212   | -0.182538 | 0.772902 |
| XLOC_014989 | OXSM       | chr3:25831562-25836025    | 18.3267   | 16.1491   | -0.182498 | 0.797341 |
| XLOC_010588 | C19orf52   | chr19:11039423-11040916   | 17.8481   | 15.7276   | -0.182477 | 0.813026 |
| XLOC_017615 | C5orf42    | chr5:37106329-37249530    | 0.174769  | 0.154011  | -0.182411 | 1        |
| XLOC_011554 | GMIP       | chr19:19740284-19754455   | 15.763    | 13.8911   | -0.182375 | 0.775619 |
| XLOC_010991 | EMP3       | chr19:48828628-48833810   | 167.366   | 147.502   | -0.182275 | 0.757708 |
| XLOC_003338 | TEAD1      | chr11:12695968-12966284   | 4.56724   | 4.02528   | -0.182235 | 0.770389 |
| XLOC_022148 | EXT1       | chr8:118811601-119124058  | 12.6472   | 11.147    | -0.182159 | 0.774876 |
| XLOC_004629 | ZBTB44     | chr11:130096573-130184607 | 2.75251   | 2.42603   | -0.182152 | 0.779476 |
| XLOC_023046 | RAB14      | chr9:123940414-123964365  | 22.0507   | 19.4355   | -0.182129 | 0.756556 |
| XLOC_000471 | NEXN       | chr1:78354199-78409578    | 0.0134228 | 0.0118315 | -0.182057 | 1        |
| XLOC_022633 | RPL7A      | chr9:136215068-136218280  | 11596.1   | 10221.6   | -0.182019 | 0.846896 |
| XLOC_003075 | MMS19      | chr10:99218080-99258366   | 22.5798   | 19.9038   | -0.181986 | 0.764196 |
| XLOC_019109 | PERP       | chr6:138409641-138428660  | 30.6705   | 27.0378   | -0.181873 | 0.764456 |
| XLOC_021224 | VGFB       | chr7:100805789-100808852  | 29.6654   | 26.1526   | -0.181824 | 0.788779 |
| XLOC_007015 | GOLGA8S    | chr15:23599894-23613471   | 0.304613  | 0.268547  | -0.181805 | 1        |
| XLOC_012847 | FNDC4      | chr2:27714749-27718126    | 11.6612   | 10.2808   | -0.181771 | 0.816944 |
| XLOC_017965 | RNF44      | chr5:175953699-175964421  | 9.74337   | 8.59127   | -0.181548 | 0.785866 |
| XLOC_007133 | SPRED1     | chr15:38545051-38649450   | 3.56416   | 3.14276   | -0.181531 | 0.783706 |
| XLOC_010756 | GPATCH1    | chr19:33571785-33621318   | 1.87717   | 1.6553    | -0.181467 | 0.859197 |
| XLOC_021678 | DPY19L4    | chr8:95732102-95806076    | 4.58343   | 4.04204   | -0.181343 | 0.778822 |
| XLOC_013750 | FAM217B    | chr20:58508818-58523702   | 2.04231   | 1.80121   | -0.181234 | 0.863535 |
| XLOC_007286 | ARIH1      | chr15:72766666-72878896   | 9.51323   | 8.39021   | -0.181229 | 0.768938 |
| XLOC_023884 | PHF8       | chrX:53963112-54071569    | 7.7853    | 6.86627   | -0.181227 | 0.772942 |
| XLOC_005962 | RAP2A      | chr13:98086474-98120252   | 3.1896    | 2.81331   | -0.181107 | 0.80916  |
| XLOC_011509 | EPS15L1    | chr19:16466054-16582823   | 13.4215   | 11.8401   | -0.180857 | 0.775951 |
| XLOC_011250 | ZNF324     | chr19:58978411-58984945   | 4.61914   | 4.07509   | -0.180794 | 0.827081 |
| XLOC_003003 | ZSWIM8-AS1 | chr10:75545381-75561556   | 3.46377   | 3.05608   | -0.180658 | 0.952184 |
| XLOC_005661 | NT5DC3     | chr12:104166080-104234975 | 2.82119   | 2.48918   | -0.180633 | 0.795382 |
| XLOC_007648 | RPL4       | chr15:66791652-66797193   | 3594.68   | 3171.8    | -0.180561 | 0.804859 |
| XLOC_023022 | WDR31      | chr9:116077930-116102620  | 0.388335  | 0.342672  | -0.180472 | 0.920464 |
| XLOC_002200 | TLR5       | chr1:223282747-223316624  | 0.0241913 | 0.0213482 | -0.180369 | 1        |
| XLOC_021583 | KIAA0146   | chr8:48173488-48648563    | 8.54092   | 7.53816   | -0.18018  | 0.794882 |
| XLOC_007913 | ZNF174     | chr16:3451189-3459364     | 4.03338   | 3.56016   | -0.180046 | 0.861253 |

|             |           |                           |            |            |           |          |
|-------------|-----------|---------------------------|------------|------------|-----------|----------|
| XLOC_014606 | BIK       | chr22:43506753-43525718   | 6.45851    | 5.7012     | -0.179935 | 0.878923 |
| XLOC_000075 | KIF1B     | chr1:10270763-10441661    | 3.90734    | 3.44921    | -0.179921 | 0.779038 |
| XLOC_015836 | MINA      | chr3:97540883-97691295    | 8.03181    | 7.09029    | -0.179881 | 0.784296 |
| XLOC_022107 | MTERFD1   | chr8:97251644-97273796    | 33.8166    | 29.8545    | -0.179783 | 0.773016 |
| XLOC_017701 | COL4A3BP  | chr5:74666927-74895646    | 4.9262     | 4.3491     | -0.179758 | 0.818403 |
| XLOC_003107 | MGEA5     | chr10:103544199-103578222 | 21.6597    | 19.1228    | -0.179722 | 0.763718 |
| XLOC_024040 | RNF113A   | chrX:119004494-119010629  | 33.6452    | 29.7049    | -0.1797   | 0.914757 |
| XLOC_007551 | SERINC4   | chr15:44038589-44094769   | 1.4964     | 1.32117    | -0.179685 | 0.983174 |
| XLOC_004979 | MDM2      | chr12:69201970-69239320   | 14.6201    | 12.9097    | -0.179495 | 0.76946  |
| XLOC_016182 | ADD1      | chr4:2845583-2931802      | 20.0135    | 17.6728    | -0.179438 | 0.765718 |
| XLOC_023782 | CXorf23   | chrX:19930979-19988382    | 0.450937   | 0.398204   | -0.179419 | 0.882208 |
| XLOC_021279 | CTTNBP2   | chr7:117350705-117513561  | 0.619394   | 0.546984   | -0.179359 | 0.877043 |
| XLOC_009646 | LOC440434 | chr17:36351795-36413256   | 9.66672    | 8.53708    | -0.179284 | 0.812322 |
| XLOC_003800 | ACAT1     | chr11:107992257-108018891 | 52.9828    | 46.7956    | -0.179151 | 0.764456 |
| XLOC_017962 | KIAA1191  | chr5:175773065-175788809  | 32.0639    | 28.3212    | -0.179067 | 0.765908 |
| XLOC_000131 | NECAP2    | chr1:16767166-16786584    | 23.8725    | 21.0875    | -0.178967 | 0.77012  |
| XLOC_012634 | RPL37A    | chr2:217363519-217366188  | 11179.5    | 9875.39    | -0.178952 | 0.800869 |
| XLOC_004085 | COPB1     | chr11:14479048-14521441   | 22.3972    | 19.7845    | -0.178947 | 0.767049 |
| XLOC_018439 | CEP57L1   | chr6:109416355-109485115  | 1.67587    | 1.48048    | -0.178841 | 0.866938 |
| XLOC_007245 | USP3      | chr15:63796709-63894620   | 9.64357    | 8.52024    | -0.178672 | 0.775892 |
| XLOC_004297 | MACROD1   | chr11:63766029-63933585   | 97.9614    | 86.5517    | -0.178651 | 0.777831 |
| XLOC_015488 | VPS8      | chr3:184529930-184770402  | 3.44159    | 3.04103    | -0.178518 | 0.797588 |
| XLOC_005097 | FAM216A   | chr12:110890290-110928192 | 35.1264    | 31.0436    | -0.178257 | 0.865084 |
| XLOC_010735 | ZNF492    | chr19:22817125-22850472   | 0.00653828 | 0.00577841 | -0.178239 | 1        |
| XLOC_000912 | CEP350    | chr1:179923907-180084015  | 1.21164    | 1.0709     | -0.178141 | 0.800722 |
| XLOC_009920 | LOC146880 | chr17:62745779-62778117   | 11.1006    | 9.8118     | -0.178051 | 0.831834 |
| XLOC_022289 | CNTLN     | chr9:17135037-17503917    | 1.06826    | 0.944282   | -0.177978 | 0.85718  |
| XLOC_017030 | KIAA1430  | chr4:186080818-186125182  | 9.70784    | 8.58156    | -0.177911 | 0.774911 |
| XLOC_016207 | TBC1D14   | chr4:6911170-7059677      | 1.00223    | 0.886071   | -0.177717 | 0.971528 |
| XLOC_013149 | CCDC115   | chr2:131095815-131099922  | 16.0081    | 14.1528    | -0.177712 | 0.802089 |
| XLOC_022507 | HSDL2     | chr9:115142188-115234685  | 19.2635    | 17.0315    | -0.177671 | 0.775517 |
| XLOC_013629 | PHF20     | chr20:34359922-34538288   | 3.04567    | 2.69305    | -0.177522 | 0.803409 |
| XLOC_023526 | GPRASP1   | chrX:101854095-101972661  | 0.11917    | 0.105382   | -0.17739  | 1        |
| XLOC_023069 | NR6A1     | chr9:127284702-127533576  | 0.721636   | 0.638208   | -0.177244 | 0.924456 |
| XLOC_006815 | DDHD1     | chr14:53503457-53620046   | 1.37471    | 1.2161     | -0.176872 | 0.80606  |
| XLOC_006711 | AJUBA     | chr14:23440409-23451848   | 12.3357    | 10.9129    | -0.176808 | 0.780964 |
| XLOC_005964 | FARP1     | chr13:98795433-99102023   | 13.0634    | 11.5574    | -0.176713 | 0.77849  |
| XLOC_009354 | HEXDC     | chr17:80347085-80408707   | 3.06264    | 2.70977    | -0.176607 | 0.970539 |
| XLOC_007329 | DNAJA4    | chr15:78556486-78574538   | 5.55453    | 4.91455    | -0.176606 | 0.814132 |
| XLOC_022042 | SBSPON    | chr8:73976777-74005507    | 0.249744   | 0.220975   | -0.176572 | 1        |
| XLOC_021021 | VPS41     | chr7:38763542-38948800    | 2.81417    | 2.49006    | -0.176534 | 0.818403 |
| XLOC_011403 | ZNF561    | chr19:9718001-9731916     | 4.655      | 4.11889    | -0.176523 | 0.796442 |
| XLOC_005222 | DCP1B     | chr12:2055213-2113677     | 9.64977    | 8.53851    | -0.17651  | 0.805817 |
| XLOC_023378 | CCDC120   | chrX:48910960-48927510    | 0.316397   | 0.279962   | -0.176504 | 1        |
| XLOC_000262 | RBBP4     | chr1:33116748-33168361    | 7.68723    | 6.80275    | -0.176346 | 0.889122 |
| XLOC_002238 | C1orf198  | chr1:230972864-231005335  | 9.14356    | 8.09192    | -0.176274 | 0.787439 |
| XLOC_011243 | ZNF8      | chr19:58790317-58807254   | 2.29734    | 2.03314    | -0.176251 | 0.876977 |
| XLOC_004536 | USP28     | chr11:113668596-113746256 | 4.65471    | 4.11966    | -0.176167 | 0.794913 |
| XLOC_016406 | ENOPH1    | chr4:83351725-83382244    | 18.8009    | 16.6411    | -0.176054 | 0.784985 |



|             |                  |                           |            |            |           |          |
|-------------|------------------|---------------------------|------------|------------|-----------|----------|
| XLOC_021457 | TNKS             | chr8:9413444-9639856      | 3.57322    | 3.1628     | -0.176024 | 0.781658 |
| XLOC_003020 | ANXA11           | chr10:81914879-81965328   | 67.5693    | 59.809     | -0.176007 | 0.778819 |
| XLOC_020589 | RUNDC3B          | chr7:87133178-87461613    | 0.00789075 | 0.00698456 | -0.175993 | 1        |
| XLOC_010686 | RPL18A           | chr19:17970686-17974133   | 5974.07    | 5288.31    | -0.175908 | 0.797588 |
| XLOC_000064 | SLC45A1          | chr1:8384389-8404227      | 3.41073    | 3.01981    | -0.175621 | 0.877654 |
| XLOC_005515 | MMP19            | chr12:56211805-56236767   | 2.1081     | 1.86649    | -0.175614 | 0.962935 |
| XLOC_004731 | ETV6             | chr12:11802787-12079107   | 1.86491    | 1.6513     | -0.175507 | 0.838244 |
| XLOC_023109 | CRAT             | chr9:131857072-131873070  | 84.0008    | 74.3804    | -0.175481 | 0.772902 |
| XLOC_017206 | SCAMP1           | chr5:77656338-77776562    | 6.45047    | 5.71177    | -0.175468 | 0.777535 |
| XLOC_009660 | CACNB1           | chr17:37329708-37353956   | 4.86606    | 4.30911    | -0.175363 | 0.830244 |
| XLOC_005367 | ERGIC2           | chr12:29493578-29534143   | 17.6062    | 15.5912    | -0.175347 | 0.784528 |
| XLOC_001657 | LOC100131564     | chr1:93775665-93811368    | 0.42779    | 0.378848   | -0.175284 | 0.906934 |
| XLOC_021354 | KIAA1147         | chr7:141356527-141401953  | 4.36826    | 3.86961    | -0.17487  | 0.7898   |
| XLOC_003390 | TCP11L1          | chr11:33060962-33095109   | 3.62111    | 3.20777    | -0.174862 | 0.845191 |
| XLOC_018363 | ZNF451           | chr6:56954807-57035098    | 3.58192    | 3.17308    | -0.174852 | 0.808807 |
| XLOC_017437 | SAP30L           | chr5:153825516-153840613  | 2.64753    | 2.34551    | -0.174747 | 0.821796 |
| XLOC_017775 | TICAM2, TMED7, T | chr5:114914338-114961876  | 14.4702    | 12.8199    | -0.1747   | 0.782739 |
| XLOC_000603 | AP4B1-AS1        | chr1:114356432-114447741  | 0.0930332  | 0.0824233  | -0.174695 | 1        |
| XLOC_018547 | TAB2             | chr6:149639435-149732747  | 8.5316     | 7.55862    | -0.174693 | 0.780135 |
| XLOC_022402 | VPS13A           | chr9:79791671-80032399    | 1.36912    | 1.21303    | -0.174626 | 0.81109  |
| XLOC_004076 | ZBED5            | chr11:10874250-10879620   | 10.5674    | 9.36297    | -0.174587 | 0.79183  |
| XLOC_014629 | GTSE1            | chr22:46692637-46726707   | 9.8477     | 8.72586    | -0.174489 | 0.806275 |
| XLOC_008963 | SUZ12P1          | chr17:29036625-29097068   | 4.33637    | 3.84272    | -0.174361 | 0.898731 |
| XLOC_009744 | STAT5B           | chr17:40351194-40428424   | 8.76768    | 7.77052    | -0.174185 | 0.783938 |
| XLOC_002430 | ZNF22            | chr10:45493145-45500777   | 9.09876    | 8.06404    | -0.174167 | 0.810769 |
| XLOC_007611 | ANXA2            | chr15:60639349-60690185   | 666.476    | 590.73     | -0.174053 | 0.79183  |
| XLOC_005773 | RILPL1           | chr12:123955908-124018265 | 9.6054     | 8.51406    | -0.173998 | 0.809839 |
| XLOC_017269 | YTHDC2           | chr5:112849390-112930984  | 2.07052    | 1.83538    | -0.173912 | 0.825017 |
| XLOC_021549 | PROSC            | chr8:37620100-37637286    | 29.6979    | 26.3296    | -0.173678 | 0.776524 |
| XLOC_017266 | APC              | chr5:112043201-112181936  | 0.936678   | 0.830488   | -0.173594 | 0.831535 |
| XLOC_003587 | PLCB3            | chr11:64018994-64036924   | 22.4223    | 19.8822    | -0.173457 | 0.780526 |
| XLOC_006153 | DACH1            | chr13:72012097-72441330   | 0.199227   | 0.176664   | -0.173404 | 1        |
| XLOC_017167 | MARVELD2         | chr5:68710938-68737890    | 0.500826   | 0.444138   | -0.173302 | 0.926251 |
| XLOC_014535 | APOL1            | chr22:36649116-36663577   | 0.0868666  | 0.0770359  | -0.173271 | 1        |
| XLOC_008424 | ZC3H7A           | chr16:11844441-11891114   | 5.14729    | 4.56524    | -0.173122 | 0.807527 |
| XLOC_010551 | RPS28            | chr19:8386383-8387280     | 7371.97    | 6539.26    | -0.172923 | 0.801178 |
| XLOC_022428 | SECISBP2         | chr9:91933411-91974561    | 7.72607    | 6.85373    | -0.172847 | 0.79984  |
| XLOC_020395 | GNPMB            | chr7:23286315-23314729    | 0.120741   | 0.10711    | -0.17282  | 1        |
| XLOC_015838 | CLDND1           | chr3:98234316-98241910    | 22.4951    | 19.9568    | -0.172735 | 0.789544 |
| XLOC_005751 | KDM2B            | chr12:121866899-122018920 | 8.72557    | 7.74138    | -0.172658 | 0.785307 |
| XLOC_005087 | ACACB            | chr12:109577201-109706030 | 0.367763   | 0.326289   | -0.172625 | 1        |
| XLOC_007556 | SPG11            | chr15:44829265-44955876   | 3.87196    | 3.43551    | -0.172539 | 0.906423 |
| XLOC_013787 | SLC2A4RG         | chr20:62371210-62436856   | 55.5994    | 49.3328    | -0.172522 | 0.802089 |
| XLOC_022920 | SEMA4D           | chr9:91975705-92094611    | 7.76437    | 6.88967    | -0.172435 | 0.802416 |
| XLOC_012228 | PCYOX1           | chr2:70485230-70508317    | 5.36662    | 4.76234    | -0.172345 | 0.802416 |
| XLOC_012328 | LIPT1            | chr2:99771417-99779613    | 7.87419    | 6.98767    | -0.17232  | 0.83652  |
| XLOC_018755 | HLA-B            | chr6:31321648-31324989    | 460.548    | 408.705    | -0.172291 | 0.783706 |
| XLOC_021756 | PHF20L1          | chr8:133787603-133861052  | 3.3633     | 2.9849     | -0.172193 | 0.832459 |
| XLOC_012744 | RNPEPL1          | chr2:241508003-241518149  | 45.8945    | 40.7345    | -0.172071 | 0.779242 |

|             |            |                          |           |           |           |          |
|-------------|------------|--------------------------|-----------|-----------|-----------|----------|
| XLOC_014102 | USP25      | chr21:17102495-17252377  | 3.82714   | 3.39691   | -0.172046 | 0.803014 |
| XLOC_007780 | CIB1       | chr15:90773476-90777279  | 194.475   | 172.621   | -0.171978 | 0.779038 |
| XLOC_000969 | IPO9       | chr1:201798287-201853422 | 5.27501   | 4.68234   | -0.171943 | 0.783706 |
| XLOC_013224 | FASTKD1    | chr2:170386262-170430424 | 10.0634   | 8.93277   | -0.171939 | 0.80005  |
| XLOC_020986 | JAZF1      | chr7:27870192-28280996   | 2.05963   | 1.82828   | -0.171894 | 0.863994 |
| XLOC_007679 | LOXL1-AS1  | chr15:74209808-74244478  | 1.30683   | 1.16006   | -0.171865 | 0.947962 |
| XLOC_005570 | GRIP1      | chr12:66741210-67072925  | 0.349405  | 0.310165  | -0.171863 | 1        |
| XLOC_007983 | METTL9     | chr16:21610855-21668792  | 26.1094   | 23.1788   | -0.171765 | 0.783294 |
| XLOC_004175 | KBTBD4     | chr11:47586981-47606115  | 7.35152   | 6.52639   | -0.171757 | 0.954501 |
| XLOC_011495 | ILVBL      | chr19:15218213-15236577  | 40.6927   | 36.1271   | -0.171691 | 0.781034 |
| XLOC_022373 | KGFLP1     | chr9:46687556-46746820   | 0.274248  | 0.243492  | -0.171605 | 1        |
| XLOC_017714 | MTX3       | chr5:79272538-79287088   | 1.37429   | 1.22029   | -0.171467 | 0.836107 |
| XLOC_015586 | XPC        | chr3:14186647-14220172   | 12.0853   | 10.732    | -0.171325 | 0.791355 |
| XLOC_012541 | UBE2E3     | chr2:181845111-181928150 | 48.71     | 43.258    | -0.17125  | 0.782309 |
| XLOC_009245 | BPTF       | chr17:65821779-65980494  | 1.60329   | 1.42391   | -0.171118 | 0.813843 |
| XLOC_012194 | REL        | chr2:61108751-61150178   | 0.196348  | 0.174388  | -0.171116 | 1        |
| XLOC_009392 | METTL16    | chr17:2319347-2415200    | 5.12743   | 4.55419   | -0.171041 | 0.797899 |
| XLOC_012245 | STAMBP     | chr2:74056042-74094295   | 6.21568   | 5.52082   | -0.171028 | 0.79183  |
| XLOC_021200 | ZNF3       | chr7:99647416-99679371   | 19.7523   | 17.5451   | -0.170959 | 0.823716 |
| XLOC_006958 | DICER1     | chr14:95552564-95623759  | 1.73073   | 1.53737   | -0.170913 | 0.808394 |
| XLOC_013555 | INSM1      | chr20:20348764-20351592  | 0.234235  | 0.208076  | -0.170846 | 1        |
| XLOC_007722 | CTSH       | chr15:79214091-79237420  | 18.8136   | 16.7131   | -0.170795 | 0.810133 |
| XLOC_015099 | WDR6       | chr3:49044636-49060926   | 28.1647   | 25.0206   | -0.17077  | 0.885883 |
| XLOC_022641 | CACFD1     | chr9:136325086-136335909 | 5.10614   | 4.53651   | -0.170649 | 0.852179 |
| XLOC_011376 | FLJ22184   | chr19:7933604-7939326    | 12.724    | 11.3047   | -0.170633 | 0.806275 |
| XLOC_001671 | FRRS1      | chr1:100111430-100231349 | 0.463363  | 0.411706  | -0.170528 | 0.925405 |
| XLOC_003975 | KCNQ1OT1   | chr11:2466220-2870340    | 0.0660832 | 0.0587201 | -0.170429 | 1        |
| XLOC_009810 | CBX1       | chr17:46147413-46178883  | 47.5287   | 42.2357   | -0.170336 | 0.782309 |
| XLOC_010165 | RNF125     | chr18:29598444-29653154  | 2.15863   | 1.91827   | -0.170307 | 0.836427 |
| XLOC_014691 | RIMBP3     | chr22:20455993-20461786  | 0.0420125 | 0.0373376 | -0.17019  | 1        |
| XLOC_024157 | CD99L2     | chrX:149934808-150067289 | 6.34138   | 5.63615   | -0.170087 | 0.817192 |
| XLOC_001817 | POGZ       | chr1:151375199-151431941 | 4.87036   | 4.32876   | -0.170075 | 0.796783 |
| XLOC_017158 | SREK1      | chr5:65440045-65479444   | 3.98978   | 3.54633   | -0.169982 | 0.800138 |
| XLOC_016761 | UBA6       | chr4:68481478-68566889   | 6.64054   | 5.90284   | -0.169891 | 0.789321 |
| XLOC_012249 | BOLA3-AS1  | chr2:74375107-74379516   | 3.33723   | 2.96654   | -0.169867 | 0.952355 |
| XLOC_020561 | NSUN5P1    | chr7:75039623-75115568   | 8.18463   | 7.27557   | -0.169857 | 0.945597 |
| XLOC_008913 | ALDH3A2    | chr17:19552063-19580908  | 8.2467    | 7.33149   | -0.169711 | 0.804694 |
| XLOC_000570 | GSTM4      | chr1:110198697-110208123 | 13.9151   | 12.3709   | -0.169706 | 0.828968 |
| XLOC_002209 | ENAH       | chr1:225674533-225840845 | 3.84768   | 3.4208    | -0.169657 | 0.790277 |
| XLOC_012097 | ATRAID     | chr2:27422454-27440046   | 110.03    | 97.8259   | -0.169613 | 0.86876  |
| XLOC_014912 | CHKB,CPT1B | chr22:51007289-51021428  | 17.2579   | 15.3445   | -0.169533 | 0.827363 |
| XLOC_018811 | RLG2       | chr6:33259430-33267165   | 25.7548   | 22.8995   | -0.169529 | 0.784457 |
| XLOC_018333 | TDRD6      | chr6:46655611-46703430   | 0.0365649 | 0.0325154 | -0.169335 | 1        |
| XLOC_015455 | PIK3CA     | chr3:178866310-178952497 | 1.28839   | 1.14586   | -0.169147 | 0.871917 |
| XLOC_008907 | EPN2       | chr17:19140689-19240028  | 9.56426   | 8.50617   | -0.169144 | 0.802119 |
| XLOC_023128 | TSC1       | chr9:135766734-135820020 | 4.01614   | 3.57201   | -0.169074 | 0.79833  |
| XLOC_018880 | PEX6       | chr6:42928499-42946981   | 7.03035   | 6.25306   | -0.169035 | 0.820202 |
| XLOC_004911 | GDF11      | chr12:56137063-56211540  | 4.59143   | 4.08403   | -0.168951 | 0.913104 |
| XLOC_010018 | SGSH       | chr17:78143790-78194199  | 16.8698   | 15.006    | -0.168909 | 0.804859 |

|             |                  |                           |           |           |           |          |
|-------------|------------------|---------------------------|-----------|-----------|-----------|----------|
| XLOC_014340 | RIPK4            | chr21:43159528-43187249   | 0.0249917 | 0.0222318 | -0.168824 | 1        |
| XLOC_010492 | PIAS4            | chr19:4007748-4038067     | 10.2687   | 9.13504   | -0.168769 | 0.844936 |
| XLOC_004396 | STARD10          | chr11:72465773-72504750   | 29.3799   | 26.1373   | -0.168719 | 0.79796  |
| XLOC_015999 | TM4SF1           | chr3:149086804-149095568  | 68.3611   | 60.8276   | -0.168449 | 0.785865 |
| XLOC_015876 | KIAA2018         | chr3:113367232-113415493  | 0.539194  | 0.479866  | -0.168174 | 0.858729 |
| XLOC_022296 | FOCAD            | chr9:20658308-20995954    | 2.14028   | 1.90487   | -0.168107 | 0.831834 |
| XLOC_013391 | WDFY1            | chr2:224740064-224810052  | 4.83246   | 4.30125   | -0.168    | 0.809839 |
| XLOC_014388 | C21orf58         | chr21:47721046-47743785   | 1.56025   | 1.3888    | -0.167934 | 0.900642 |
| XLOC_007810 | MPG              | chr16:127017-188697       | 197.418   | 175.732   | -0.167872 | 0.870063 |
| XLOC_018852 | SAYS1            | chr6:39071839-39082865    | 4.11594   | 3.66413   | -0.167755 | 0.865674 |
| XLOC_009982 | EVPL             | chr17:74002926-74023507   | 5.19276   | 4.62296   | -0.167686 | 0.824756 |
| XLOC_023375 | HDAC6            | chrX:48660486-48683380    | 1.97776   | 1.76076   | -0.16767  | 0.868932 |
| XLOC_015443 | PRKCI            | chr3:169940219-170023770  | 8.04531   | 7.16271   | -0.167644 | 0.795912 |
| XLOC_012623 | RPE              | chr2:210867351-211036051  | 6.0015    | 5.34377   | -0.167466 | 0.900034 |
| XLOC_015748 | RPL29            | chr3:52027643-52029958    | 5747.94   | 5118.29   | -0.167381 | 0.818631 |
| XLOC_021039 | NUDCD3           | chr7:44421964-44530385    | 12.5148   | 11.1447   | -0.167283 | 0.798113 |
| XLOC_015559 | LHFPL4           | chr3:9540044-9595486      | 1.2167    | 1.08351   | -0.167267 | 0.884126 |
| XLOC_003861 | HINFP            | chr11:118992232-119005765 | 10.4151   | 9.27616   | -0.16708  | 0.825017 |
| XLOC_007843 | SOX8             | chr16:1031807-1036979     | 17.6542   | 15.7238   | -0.167058 | 0.80614  |
| XLOC_015282 | NDUFB4           | chr3:120315127-120321258  | 263.238   | 234.455   | -0.167055 | 0.789703 |
| XLOC_012810 | HS1BP3           | chr2:20817563-20850864    | 20.259    | 18.0439   | -0.16705  | 0.80416  |
| XLOC_000284 | ADPRHL2          | chr1:36554452-36559533    | 36.4635   | 32.4769   | -0.167038 | 0.799656 |
| XLOC_023466 | OGT              | chrX:70430034-70948962    | 17.4799   | 15.5697   | -0.16696  | 0.949    |
| XLOC_004030 | FAM160A2         | chr11:6232563-6255941     | 9.47017   | 8.43557   | -0.166905 | 0.8146   |
| XLOC_006801 | L2HGDH           | chr14:50709151-50778947   | 2.99056   | 2.66405   | -0.166791 | 0.82411  |
| XLOC_012994 | PCGF1            | chr2:74724643-74734821    | 18.25     | 16.2578   | -0.166766 | 0.908661 |
| XLOC_000282 | AGO3             | chr1:36396682-36522063    | 1.30335   | 1.16108   | -0.166748 | 0.880754 |
| XLOC_002319 | PFKP             | chr10:3109711-3178997     | 85.9535   | 76.5748   | -0.166687 | 0.786155 |
| XLOC_003584 | DNAJC4           | chr11:63997752-64001753   | 21.159    | 18.8504   | -0.166672 | 0.836398 |
| XLOC_022398 | RPSAP9           | chr9:79013514-79014954    | 9.61441   | 8.56562   | -0.16664  | 0.839812 |
| XLOC_001108 | NTPCR            | chr1:233086369-233114219  | 41.9282   | 37.3566   | -0.166558 | 0.812769 |
| XLOC_007672 | CELF6            | chr15:72577067-72612525   | 0.895549  | 0.797922  | -0.166523 | 0.911799 |
| XLOC_006763 | EAPP             | chr14:34985134-35008943   | 23.8889   | 21.2869   | -0.166373 | 0.80614  |
| XLOC_015913 | ITGB5            | chr3:124481794-124606144  | 24.5062   | 21.8378   | -0.166318 | 0.795726 |
| XLOC_004423 | PAK1             | chr11:77033059-77185108   | 20.4137   | 18.1919   | -0.166245 | 0.785865 |
| XLOC_020412 | HOTTIP           | chr7:27240039-27246130    | 0.0803717 | 0.0716282 | -0.166159 | 1        |
| XLOC_009889 | USP32            | chr17:58254690-58469586   | 3.71345   | 3.30961   | -0.166096 | 0.804694 |
| XLOC_003858 | VPS11            | chr11:118938492-118952688 | 11.1938   | 9.977     | -0.166025 | 0.804948 |
| XLOC_020922 | EIF2AK1          | chr7:6048881-6098860      | 29.8297   | 26.5889   | -0.165929 | 0.802177 |
| XLOC_005331 | WBP11            | chr12:14939411-14956401   | 26.5925   | 23.7034   | -0.165927 | 0.791197 |
| XLOC_010361 | C18orf32,RPL17,F | chr18:47007547-47018935   | 4176.06   | 3722.41   | -0.165904 | 0.824472 |
| XLOC_019188 | RNASSET2         | chr6:167343003-167370077  | 55.8899   | 49.8196   | -0.165874 | 0.802799 |
| XLOC_003976 | CDKN1C           | chr11:2904447-2906995     | 11.6827   | 10.4142   | -0.16582  | 0.8626   |
| XLOC_008952 | TAOK1            | chr17:27717942-27878921   | 3.45376   | 3.07898   | -0.165718 | 0.801665 |
| XLOC_001097 | RAB4A,SPHAR      | chr1:229406808-229441640  | 9.74039   | 8.68399   | -0.165621 | 0.814388 |
| XLOC_003664 | AIP              | chr11:67250504-67258579   | 59.3463   | 52.9136   | -0.165522 | 0.802621 |
| XLOC_022721 | RANBP6           | chr9:6011018-6015640      | 4.91046   | 4.37831   | -0.165483 | 0.818403 |
| XLOC_005648 | GOLGA2P5         | chr12:100550174-100567121 | 1.35868   | 1.21152   | -0.165381 | 0.901045 |
| XLOC_008040 | ASPHD1           | chr16:29912146-29917377   | 33.5753   | 29.9405   | -0.165302 | 0.810299 |

|             |                 |                           |          |           |           |          |
|-------------|-----------------|---------------------------|----------|-----------|-----------|----------|
| XLOC_008251 | PLCG2           | chr16:81812898-81991899   | 3.04652  | 2.71678   | -0.165261 | 0.84703  |
| XLOC_013657 | DHX35           | chr20:37590980-37668366   | 3.61908  | 3.22751   | -0.165199 | 0.852179 |
| XLOC_016094 | TMEM41A         | chr3:185207388-185216845  | 8.75846  | 7.8109    | -0.165189 | 0.818547 |
| XLOC_004471 | TAF1D           | chr11:93469095-93474703   | 36.503   | 32.5562   | -0.165085 | 0.799901 |
| XLOC_007803 | PCSK6           | chr15:101844132-102030187 | 5.9298   | 5.28917   | -0.164942 | 0.8626   |
| XLOC_001484 | RIMS3           | chr1:41086351-41131324    | 0.761011 | 0.678882  | -0.164756 | 0.886094 |
| XLOC_016590 | WWC2            | chr4:184020462-184241929  | 0.84124  | 0.750475  | -0.164713 | 0.883608 |
| XLOC_020471 | ZMIZ2           | chr7:44788529-44809479    | 13.4604  | 12.0084   | -0.164687 | 0.805402 |
| XLOC_005707 | NAA25           | chr12:112464492-112546635 | 4.85023  | 4.32725   | -0.164603 | 0.809839 |
| XLOC_021034 | POLM            | chr7:44111846-44122129    | 6.70438  | 5.98162   | -0.164566 | 0.844936 |
| XLOC_023548 | CXorf57         | chrX:105855159-105922673  | 1.42798  | 1.27407   | -0.164532 | 0.879055 |
| XLOC_004973 | HELB            | chr12:66696334-66737423   | 0.406083 | 0.362328  | -0.164477 | 0.917732 |
| XLOC_020434 | AVL9            | chr7:32535175-32758780    | 4.40374  | 3.92935   | -0.164437 | 0.861774 |
| XLOC_015707 | USP19           | chr3:49145478-49158371    | 8.49509  | 7.58039   | -0.164356 | 0.809514 |
| XLOC_005788 | STX2            | chr12:131274144-131323819 | 3.66395  | 3.26991   | -0.164146 | 0.846716 |
| XLOC_004974 | CAND1           | chr12:67663060-67708388   | 16.7095  | 14.9128   | -0.164119 | 0.792618 |
| XLOC_016677 | BOD1L1          | chr4:13570365-13629328    | 0.732339 | 0.65361   | -0.164081 | 0.862353 |
| XLOC_014828 | SUN2            | chr22:39130718-39152024   | 17.6443  | 15.7477   | -0.164061 | 0.797341 |
| XLOC_017277 | DMXL1           | chr5:118407083-118584822  | 0.725542 | 0.647585  | -0.16399  | 0.854567 |
| XLOC_011319 | EEF2            | chr19:3976053-3985461     | 2545.63  | 2272.27   | -0.16389  | 0.842531 |
| XLOC_005073 | TCP11L2         | chr12:106696580-106740792 | 0.560641 | 0.500441  | -0.163878 | 0.92475  |
| XLOC_012038 | RNF144A         | chr2:7052406-7184309      | 1.86277  | 1.6628    | -0.163837 | 0.855739 |
| XLOC_016635 | NELFA           | chr4:1984440-2010962      | 37.3955  | 33.3812   | -0.163831 | 0.796502 |
| XLOC_012187 | RPS27A          | chr2:55399686-55462989    | 1989.08  | 1775.6    | -0.163792 | 0.818631 |
| XLOC_008935 | SARM1           | chr17:26698986-26733230   | 0.722765 | 0.645217  | -0.163743 | 0.961218 |
| XLOC_006269 | ARHGEF40        | chr14:21538526-21558036   | 2.47742  | 2.21169   | -0.163693 | 0.852718 |
| XLOC_011616 | THAP8           | chr19:36525886-36545664   | 2.91617  | 2.60347   | -0.163642 | 0.899607 |
| XLOC_020891 | PDGFA           | chr7:536896-559481        | 6.42767  | 5.73846   | -0.163632 | 0.859937 |
| XLOC_009420 | CHRNE           | chr17:4736634-4806369     | 3.81015  | 3.40167   | -0.163604 | 0.968057 |
| XLOC_009304 | METTL23         | chr17:74722911-74729962   | 25.267   | 22.5584   | -0.163586 | 0.83399  |
| XLOC_010606 | ZNF763          | chr19:12075868-12091198   | 0.808005 | 0.721392  | -0.163582 | 0.907121 |
| XLOC_012865 | LOC100288911    | chr2:36581891-36582713    | 10.1909  | 9.09897   | -0.163509 | 0.895326 |
| XLOC_021342 | ZC3HAV1         | chr7:138728265-138794465  | 6.0019   | 5.35881   | -0.163506 | 0.841788 |
| XLOC_000495 | PKN2            | chr1:89149921-89301938    | 4.06989  | 3.63416   | -0.163368 | 0.816507 |
| XLOC_004352 | CLCF1           | chr11:67085309-67159158   | 6.42105  | 5.73361   | -0.163365 | 0.943077 |
| XLOC_015397 | EIF2A           | chr3:150264573-150303803  | 20.2434  | 18.0766   | -0.163324 | 0.79984  |
| XLOC_016815 | RASGEF1B        | chr4:82348218-82393061    | 0.03447  | 0.0307864 | -0.163049 | 1        |
| XLOC_021853 | SGK223          | chr8:8175257-8239257      | 2.59457  | 2.3174    | -0.162991 | 0.867031 |
| XLOC_001049 | CENPF           | chr1:214776531-214837914  | 4.61723  | 4.12418   | -0.162918 | 0.809839 |
| XLOC_000446 | MIER1           | chr1:67390577-67454302    | 6.21197  | 5.54875   | -0.162889 | 0.820912 |
| XLOC_008878 | C17orf76-AS1,SN | chr17:16342300-16395505   | 1498.12  | 1338.19   | -0.162869 | 0.81852  |
| XLOC_009003 | ZNHIT3          | chr17:34842472-34891305   | 79.7006  | 71.1993   | -0.162727 | 0.865419 |
| XLOC_013042 | GPAT2           | chr2:96676298-96700727    | 0.10105  | 0.0902759 | -0.162654 | 1        |
| XLOC_020646 | SPDYE3          | chr7:99905324-99965454    | 0.300688 | 0.26863   | -0.162645 | 1        |
| XLOC_003179 | METTL10         | chr10:126447405-126480439 | 3.21248  | 2.8702    | -0.162536 | 0.864016 |
| XLOC_006765 | CFL2            | chr14:35179587-35184029   | 14.0715  | 12.5732   | -0.162425 | 0.805817 |
| XLOC_010163 | DSG2            | chr18:29078026-29136874   | 10.4158  | 9.30706   | -0.162375 | 0.78932  |
| XLOC_016164 | PCGF3           | chr4:699572-764427        | 4.84924  | 4.33357   | -0.162203 | 0.824472 |
| XLOC_014491 | KREMEN1         | chr22:29469065-29564321   | 2.56514  | 2.29238   | -0.162191 | 0.846451 |

|             |              |                           |           |           |           |          |
|-------------|--------------|---------------------------|-----------|-----------|-----------|----------|
| XLOC_022910 | ZCCHC6       | chr9:88902647-88969402    | 2.76978   | 2.4753    | -0.162171 | 0.839812 |
| XLOC_021778 | ZNF696       | chr8:144373558-144382120  | 6.45846   | 5.77202   | -0.162116 | 0.824372 |
| XLOC_002429 | RASSF4       | chr10:45455218-45490172   | 3.8712    | 3.45989   | -0.162057 | 0.873675 |
| XLOC_021260 | LAMB1        | chr7:107564245-107643804  | 17.2335   | 15.4027   | -0.162029 | 0.79613  |
| XLOC_021744 | NSMCE2       | chr8:126104082-126379367  | 22.6888   | 20.2805   | -0.161886 | 0.818403 |
| XLOC_002584 | IFIT5        | chr10:91174324-91180759   | 3.07604   | 2.74957   | -0.161869 | 0.847391 |
| XLOC_017399 | RBM27        | chr5:145583162-145668784  | 2.84162   | 2.54005   | -0.161857 | 0.819969 |
| XLOC_023842 | SLC38A5      | chrX:48316926-48328644    | 183.469   | 164.005   | -0.161799 | 0.804678 |
| XLOC_021786 | LOC100128338 | chr8:144816309-144828507  | 11.4635   | 10.2475   | -0.16178  | 0.818092 |
| XLOC_017156 | NLN          | chr5:65018022-65125111    | 3.58831   | 3.20781   | -0.161716 | 0.811033 |
| XLOC_004621 | ETS1         | chr11:128328655-128457453 | 25.217    | 22.5435   | -0.16169  | 0.801546 |
| XLOC_000847 | NUF2         | chr1:163291722-163325553  | 11.2827   | 10.0866   | -0.161678 | 0.824372 |
| XLOC_017758 | GIN1         | chr5:102421703-102455842  | 1.13601   | 1.01562   | -0.161618 | 0.883168 |
| XLOC_012513 | METAP1D      | chr2:172864803-172945587  | 1.02703   | 0.918325  | -0.161404 | 0.929057 |
| XLOC_014002 | NEURL2       | chr20:44517110-44541003   | 2.11701   | 1.89301   | -0.161348 | 0.985692 |
| XLOC_009590 | ABHD15       | chr17:27887688-27894042   | 6.02288   | 5.38608   | -0.161217 | 0.845191 |
| XLOC_013770 | GID8         | chr20:61569440-61579827   | 15.715    | 14.0545   | -0.161108 | 0.8041   |
| XLOC_007523 | LTK          | chr15:41795839-41806085   | 42.2962   | 37.8278   | -0.161081 | 0.805817 |
| XLOC_001392 | PTAFR        | chr1:28473676-28520447    | 0.0382551 | 0.0342147 | -0.161036 | 1        |
| XLOC_014403 | DGCR6        | chr22:18893735-18899601   | 23.493    | 21.0125   | -0.160981 | 0.840937 |
| XLOC_000441 | LEPR,LEPROT  | chr1:65886130-66103176    | 7.13279   | 6.37974   | -0.160969 | 0.935259 |
| XLOC_013061 | COA5         | chr2:99215785-99224981    | 9.36168   | 8.37386   | -0.160875 | 0.840133 |
| XLOC_001646 | FLJ27354     | chr1:90090407-90098453    | 0.75214   | 0.672782  | -0.160862 | 0.954501 |
| XLOC_006934 | SMEK1        | chr14:91923955-91976644   | 10.9602   | 9.80455   | -0.160748 | 0.806419 |
| XLOC_002256 | ARID4B       | chr1:235330209-235491532  | 1.28693   | 1.15126   | -0.160714 | 0.85718  |
| XLOC_011908 | ZNF577       | chr19:52359055-52391229   | 0.369576  | 0.330619  | -0.160703 | 1        |
| XLOC_015918 | ZNF148       | chr3:124944512-125094198  | 1.84679   | 1.65218   | -0.160642 | 0.832978 |
| XLOC_017798 | IRF1         | chr5:131817300-131826465  | 2.98868   | 2.67392   | -0.16055  | 0.86136  |
| XLOC_018458 | DSE          | chr6:116601282-116759442  | 2.99528   | 2.67984   | -0.160545 | 0.848939 |
| XLOC_005736 | RPLP0        | chr12:120634502-120639014 | 7642.75   | 6837.98   | -0.160521 | 0.858249 |
| XLOC_023465 | TAF1         | chrX:70430034-70948962    | 2.08077   | 1.8617    | -0.160496 | 0.978818 |
| XLOC_003317 | RPL27A       | chr11:8703994-8711419     | 426.957   | 382.022   | -0.160434 | 0.82411  |
| XLOC_009158 | DLX4         | chr17:48046561-48052323   | 0.7944    | 0.710794  | -0.160433 | 0.93571  |
| XLOC_014544 | SH3BP1       | chr22:38035683-38052050   | 21.6077   | 19.3341   | -0.160393 | 0.812055 |
| XLOC_015083 | PTH1R        | chr3:46919235-46945289    | 6.26038   | 5.60176   | -0.160372 | 0.872122 |
| XLOC_012237 | SPR          | chr2:73114511-73119289    | 71.873    | 64.3123   | -0.160354 | 0.802444 |
| XLOC_017271 | AP3S1        | chr5:115177618-115249778  | 45.5313   | 40.7417   | -0.160354 | 0.806275 |
| XLOC_000695 | TUFT1        | chr1:151512780-151556059  | 12.054    | 10.7864   | -0.160298 | 0.824372 |
| XLOC_011810 | RPL18        | chr19:49118583-49133663   | 3673.71   | 3287.65   | -0.160184 | 0.826133 |
| XLOC_008092 | LONP2        | chr16:48274602-48420559   | 14.1243   | 12.6411   | -0.160061 | 0.84576  |
| XLOC_002118 | KLHL12       | chr1:202860229-202896371  | 10.0451   | 8.99058   | -0.160007 | 0.8146   |
| XLOC_010940 | MARK4        | chr19:45754515-45808541   | 12.097    | 10.8272   | -0.159995 | 0.806301 |
| XLOC_011522 | BST2         | chr19:17513754-17516384   | 358.924   | 321.307   | -0.159725 | 0.804694 |
| XLOC_000125 | FBLIM1       | chr1:16085254-16113084    | 0.506091  | 0.453056  | -0.159708 | 0.938925 |
| XLOC_010115 | RALBP1       | chr18:9475529-9538106     | 15.5713   | 13.9407   | -0.159589 | 0.806275 |
| XLOC_017753 | CHD1         | chr5:98190907-98262238    | 3.09737   | 2.77305   | -0.159569 | 0.825475 |
| XLOC_002134 | LINC00628    | chr1:204337557-204338847  | 0.0430114 | 0.0385089 | -0.15953  | 1        |
| XLOC_017244 | CAST         | chr5:95997740-96149848    | 34.2518   | 30.6674   | -0.159473 | 0.845191 |
| XLOC_004810 | ARID2        | chr12:46123619-46301819   | 1.75185   | 1.56858   | -0.159417 | 0.841788 |

|             |          |                           |           |           |           |          |
|-------------|----------|---------------------------|-----------|-----------|-----------|----------|
| XLOC_002658 | HPS6     | chr10:103825123-103827795 | 17.7702   | 15.9113   | -0.159402 | 0.818403 |
| XLOC_017171 | SMN2     | chr5:69345349-69373422    | 2.45165   | 2.19521   | -0.159396 | 0.890882 |
| XLOC_006009 | CDC16    | chr13:115000361-115038150 | 26.9395   | 24.1221   | -0.159368 | 0.802621 |
| XLOC_011680 | PRX      | chr19:40899670-40919271   | 1.47468   | 1.3206    | -0.159211 | 0.888541 |
| XLOC_008887 | MED9     | chr17:17380299-17396534   | 9.20603   | 8.24418   | -0.159203 | 0.850428 |
| XLOC_016205 | BLOC1S4  | chr4:6717841-6719387      | 24.7328   | 22.1488   | -0.159197 | 0.826026 |
| XLOC_003933 | BET1L    | chr11:202923-207422       | 21.918    | 19.629    | -0.159135 | 0.801756 |
| XLOC_022355 | DCAF10   | chr9:37800789-37867665    | 2.78306   | 2.49267   | -0.158977 | 0.831125 |
| XLOC_007376 | ZNF592   | chr15:85291817-85349663   | 3.29946   | 2.95524   | -0.158956 | 0.825017 |
| XLOC_004786 | KLHL42   | chr12:27933186-27955973   | 3.29748   | 2.95387   | -0.158755 | 0.828851 |
| XLOC_003329 | ADM      | chr11:10326641-10328923   | 55.1019   | 49.3613   | -0.158721 | 0.811998 |
| XLOC_005443 | RACGAP1  | chr12:50382944-50419307   | 15.1432   | 13.5659   | -0.158691 | 0.810133 |
| XLOC_013182 | ARL5A    | chr2:152657479-152685009  | 12.5201   | 11.216    | -0.158684 | 0.809368 |
| XLOC_022874 | PTAR1    | chr9:72324437-72374876    | 1.52604   | 1.36711   | -0.15866  | 0.839812 |
| XLOC_008432 | NTAN1    | chr16:15131709-15149936   | 24.5591   | 22.0048   | -0.158441 | 0.825017 |
| XLOC_000019 | GLTPD1   | chr1:1260142-1264276      | 21.5904   | 19.3449   | -0.158436 | 0.829536 |
| XLOC_013052 | ANKRD23  | chr2:97503650-97509758    | 1.6008    | 1.43432   | -0.158424 | 0.908115 |
| XLOC_006182 | TGDS     | chr13:95226307-95248511   | 5.81205   | 5.20766   | -0.158412 | 0.858272 |
| XLOC_001543 | EPS15    | chr1:51819934-51984995    | 6.12767   | 5.49073   | -0.158341 | 0.81727  |
| XLOC_017077 | MARCH6   | chr5:10353750-10440500    | 9.50748   | 8.52036   | -0.158148 | 0.80639  |
| XLOC_007544 | TP53BP1  | chr15:43663312-43910998   | 3.05641   | 2.73918   | -0.15809  | 0.933717 |
| XLOC_008774 | MED11    | chr17:4634722-4643223     | 23.3819   | 20.9563   | -0.158004 | 0.948673 |
| XLOC_014728 | GUCD1    | chr22:24936405-24951275   | 21.2709   | 19.0645   | -0.157997 | 0.804859 |
| XLOC_009315 | AFMID    | chr17:76183397-76203782   | 19.0379   | 17.065    | -0.157836 | 0.854032 |
| XLOC_016890 | PLA2G12A | chr4:110631144-110651242  | 3.918     | 3.51203   | -0.157812 | 0.831832 |
| XLOC_001060 | C1orf115 | chr1:220863627-220872499  | 3.08422   | 2.76481   | -0.157728 | 0.872122 |
| XLOC_009109 | ADAM11   | chr17:42836567-42859214   | 2.26132   | 2.02732   | -0.157595 | 0.871295 |
| XLOC_014819 | PLA2G6   | chr22:38507501-38577836   | 2.52895   | 2.26729   | -0.15757  | 0.884031 |
| XLOC_017254 | FER      | chr5:108083522-108523373  | 0.890851  | 0.798684  | -0.157558 | 0.902666 |
| XLOC_000018 | PUSL1    | chr1:1243993-1260067      | 41.3537   | 37.0785   | -0.157432 | 0.951036 |
| XLOC_020602 | ANKIB1   | chr7:91875547-92030698    | 2.67136   | 2.39524   | -0.157406 | 0.838902 |
| XLOC_000023 | VWA1     | chr1:1370902-1378262      | 5.07926   | 4.55429   | -0.157391 | 0.860285 |
| XLOC_001691 | PSRC1    | chr1:109822175-109825790  | 27.085    | 24.2864   | -0.157349 | 0.824372 |
| XLOC_002014 | METTL18  | chr1:169761669-169764061  | 4.77891   | 4.28521   | -0.157317 | 0.868954 |
| XLOC_011246 | RPS5     | chr19:58898635-58906171   | 5233.31   | 4693.16   | -0.157163 | 0.83652  |
| XLOC_005820 | NUPL1    | chr13:25875665-25916561   | 9.99212   | 8.96083   | -0.157158 | 0.81114  |
| XLOC_008940 | RPL23A   | chr17:27046999-27053949   | 2534.15   | 2272.66   | -0.157117 | 0.832511 |
| XLOC_011477 | RFX1     | chr19:14072341-14117134   | 2.94967   | 2.64535   | -0.157096 | 0.879418 |
| XLOC_023204 | C9orf37  | chr9:140500095-140513308  | 5.66454   | 5.08031   | -0.157043 | 0.975492 |
| XLOC_013265 | CERKL    | chr2:182321618-182521834  | 0.0294522 | 0.0264148 | -0.157028 | 1        |
| XLOC_012145 | GALM     | chr2:38893051-38961909    | 5.19094   | 4.65587   | -0.156945 | 0.858729 |
| XLOC_004864 | IGFBP6   | chr12:53491435-53496128   | 248.913   | 223.261   | -0.156906 | 0.81114  |
| XLOC_003814 | C11orf1  | chr11:111744779-111754797 | 18.1194   | 16.2536   | -0.15678  | 0.861337 |
| XLOC_006114 | ESD      | chr13:47345390-47371367   | 62.4227   | 55.9949   | -0.156775 | 0.810769 |
| XLOC_002060 | STX6     | chr1:180942175-180992046  | 5.68628   | 5.10084   | -0.156752 | 0.824372 |
| XLOC_021888 | CNOT7    | chr8:17086739-17104387    | 28.0829   | 25.1925   | -0.156695 | 0.808452 |
| XLOC_000741 | IL6R     | chr1:154377668-154441926  | 2.52867   | 2.26846   | -0.156664 | 0.854032 |
| XLOC_006663 | PACS2    | chr14:105675622-105864484 | 9.63176   | 8.64084   | -0.156628 | 0.921452 |
| XLOC_012716 | SCARNA5  | chr2:234160216-234204320  | 2.1226    | 1.90434   | -0.156537 | 0.96074  |

|             |              |                           |           |          |           |          |
|-------------|--------------|---------------------------|-----------|----------|-----------|----------|
| XLOC_007251 | PLEKHO2      | chr15:65134081-65160201   | 5.05259   | 4.53312  | -0.156519 | 0.848628 |
| XLOC_009226 | MAP3K3       | chr17:61699800-61777519   | 4.16988   | 3.74178  | -0.156281 | 0.908914 |
| XLOC_003068 | TLL2         | chr10:98124362-98273683   | 0.0204466 | 0.018348 | -0.15624  | 1        |
| XLOC_023837 | ZNF630       | chrX:47917566-47931025    | 0.458576  | 0.411509 | -0.156236 | 0.929145 |
| XLOC_021396 | ATG9B        | chr7:150688143-150721586  | 1.32029   | 1.18488  | -0.156112 | 0.960032 |
| XLOC_005528 | BAZ2A        | chr12:56915608-57030163   | 9.74008   | 8.74172  | -0.156016 | 0.878705 |
| XLOC_011431 | DOCK6        | chr19:11309968-11373168   | 11.9767   | 10.7498  | -0.155927 | 0.811033 |
| XLOC_016364 | RUFY3        | chr4:71570653-71674336    | 2.11404   | 1.89751  | -0.155895 | 0.86364  |
| XLOC_000584 | CEPT1        | chr1:111659953-111727724  | 11.1066   | 9.96915  | -0.155869 | 0.913887 |
| XLOC_013450 | NDUFA10      | chr2:240896788-240964819  | 21.03     | 18.8777  | -0.155763 | 0.817735 |
| XLOC_007475 | MTMR10       | chr15:31196054-31283807   | 2.29506   | 2.06026  | -0.155703 | 0.902834 |
| XLOC_007370 | LOC440300    | chr15:84860599-84898920   | 0.154133  | 0.13837  | -0.155652 | 1        |
| XLOC_006636 | RCOR1        | chr14:103058995-103196913 | 5.41411   | 4.86042  | -0.155644 | 0.830663 |
| XLOC_015355 | PCCB         | chr3:135969166-136049013  | 84.21     | 75.6025  | -0.155557 | 0.810443 |
| XLOC_009535 | ATPAF2       | chr17:17921333-17942480   | 11.9106   | 10.6947  | -0.15535  | 0.856579 |
| XLOC_013319 | INO80D       | chr2:206858444-206950906  | 0.543519  | 0.488043 | -0.155322 | 0.875692 |
| XLOC_023670 | MTMR1        | chrX:149861868-149933575  | 3.44619   | 3.09464  | -0.155233 | 0.869722 |
| XLOC_005280 | DDX12P       | chr12:9570286-9600768     | 3.25451   | 2.92291  | -0.155035 | 0.869513 |
| XLOC_002874 | ZEB1-AS1     | chr10:31605456-31608024   | 3.49515   | 3.13914  | -0.154984 | 0.879418 |
| XLOC_005038 | ELK3         | chr12:96588206-96661606   | 10.9995   | 9.8792   | -0.154968 | 0.843561 |
| XLOC_022319 | UBE2R2       | chr9:33817181-33920401    | 16.5149   | 14.8342  | -0.154838 | 0.810769 |
| XLOC_023035 | ASTN2        | chr9:119187503-120177317  | 3.09138   | 2.77685  | -0.154801 | 0.961706 |
| XLOC_003685 | NADSYN1      | chr11:71164216-71212581   | 31.1314   | 27.9683  | -0.154579 | 0.818388 |
| XLOC_006337 | FAM179B      | chr14:45431415-45543634   | 0.712107  | 0.639769 | -0.154544 | 0.889871 |
| XLOC_018011 | ZFP62        | chr5:180274610-180288286  | 2.47454   | 2.22322  | -0.154511 | 0.863994 |
| XLOC_007642 | DENND4A      | chr15:65952956-66084631   | 1.16342   | 1.04535  | -0.154391 | 0.865084 |
| XLOC_005350 | C2CD5        | chr12:22601517-22697452   | 4.03303   | 3.62421  | -0.154198 | 0.841165 |
| XLOC_011155 | CACNG8       | chr19:54466289-54493469   | 0.156315  | 0.140471 | -0.154181 | 1        |
| XLOC_010262 | RBFA         | chr18:77794345-77810652   | 5.47364   | 4.91885  | -0.154178 | 0.838891 |
| XLOC_009467 | LSMD1        | chr17:7760002-7765600     | 49.5875   | 44.5641  | -0.154094 | 0.905839 |
| XLOC_006400 | PLEKHG3      | chr14:65171192-65211060   | 11.0502   | 9.9313   | -0.154019 | 0.824419 |
| XLOC_021750 | PVT1         | chr8:128902873-129113499  | 31.93     | 28.6977  | -0.153979 | 0.817298 |
| XLOC_022472 | GALNT12      | chr9:101569980-101612363  | 8.95961   | 8.05264  | -0.153975 | 0.844936 |
| XLOC_000311 | ZNF684       | chr1:40997232-41013841    | 0.995807  | 0.89504  | -0.153913 | 0.916694 |
| XLOC_015170 | ATXN7        | chr3:63850232-63989136    | 1.67182   | 1.50269  | -0.153869 | 0.869513 |
| XLOC_000263 | KIAA1522     | chr1:33207511-33240571    | 13.1409   | 11.8121  | -0.153801 | 0.838861 |
| XLOC_016297 | SLC30A9      | chr4:41992522-42089551    | 16.2238   | 14.5833  | -0.153792 | 0.8146   |
| XLOC_017777 | ATG12        | chr5:115163893-115177548  | 9.31503   | 8.37347  | -0.153734 | 0.818547 |
| XLOC_016698 | CCDC149      | chr4:24807738-24981826    | 1.26314   | 1.13549  | -0.153703 | 0.896288 |
| XLOC_010594 | LPPR2        | chr19:11466061-11476374   | 18.0179   | 16.197   | -0.153699 | 0.836937 |
| XLOC_006365 | FBXO34       | chr14:55738020-55820329   | 4.76302   | 4.28186  | -0.153638 | 0.846427 |
| XLOC_016022 | C3orf33      | chr3:155480400-155524055  | 3.88454   | 3.49216  | -0.153621 | 0.880754 |
| XLOC_000825 | FCER1G       | chr1:161185086-161189038  | 0.736807  | 0.662427 | -0.153525 | 0.962865 |
| XLOC_012169 | SOCS5        | chr2:46926098-46989927    | 1.8553    | 1.66806  | -0.15348  | 0.869253 |
| XLOC_014887 | LOC100271722 | chr22:46435786-46440748   | 2.32774   | 2.09291  | -0.153422 | 0.909496 |
| XLOC_000366 | MAST2        | chr1:46269284-46501796    | 19.3601   | 17.4084  | -0.1533   | 0.818092 |
| XLOC_023778 | PHKA2        | chrX:18908413-19002480    | 3.95893   | 3.55989  | -0.153281 | 0.845932 |
| XLOC_022010 | ASPH         | chr8:62200524-62627199    | 48.3742   | 43.4994  | -0.153243 | 0.824372 |
| XLOC_008381 | MEFV         | chr16:3292027-3306627     | 0.04638   | 0.041707 | -0.153214 | 1        |

|             |              |                           |           |           |           |          |
|-------------|--------------|---------------------------|-----------|-----------|-----------|----------|
| XLOC_009189 | MSI2         | chr17:55333930-55757299   | 5.31714   | 4.78187   | -0.153075 | 0.888409 |
| XLOC_014527 | HMGXB4       | chr22:35653444-35691800   | 4.56972   | 4.11016   | -0.152909 | 0.846848 |
| XLOC_007545 | PPIP5K1      | chr15:43663312-43910998   | 4.61028   | 4.14694   | -0.152806 | 0.93053  |
| XLOC_016906 | PRSS12       | chr4:119201192-119273922  | 1.44086   | 1.29606   | -0.152803 | 0.883818 |
| XLOC_010356 | SMAD2        | chr18:45359465-45457517   | 5.36794   | 4.82884   | -0.152692 | 0.81802  |
| XLOC_024045 | TMEM255A     | chrX:119392504-119445391  | 0.0204571 | 0.0184035 | -0.152627 | 1        |
| XLOC_013723 | PFDN4        | chr20:52824501-52836492   | 28.4011   | 25.5501   | -0.152618 | 0.828968 |
| XLOC_018613 | C6orf195     | chr6:2622971-2635298      | 0.121176  | 0.109019  | -0.152527 | 1        |
| XLOC_018164 | ZNRD1        | chr6:30029035-30032686    | 95.4153   | 85.8434   | -0.152513 | 0.824392 |
| XLOC_000512 | MTF2         | chr1:93544791-93604638    | 5.82217   | 5.23818   | -0.152491 | 0.836801 |
| XLOC_008322 | FBXL16       | chr16:742499-755825       | 23.9131   | 21.5146   | -0.152488 | 0.825683 |
| XLOC_001234 | NPHP4        | chr1:5922869-6161253      | 2.71096   | 2.43918   | -0.152405 | 0.967343 |
| XLOC_002272 | OPN3         | chr1:241695433-241803701  | 0.238059  | 0.214224  | -0.152198 | 1        |
| XLOC_014415 | DGCR8        | chr22:20067754-20104818   | 5.66126   | 5.09446   | -0.152195 | 0.920934 |
| XLOC_015088 | PTPN23       | chr3:47422490-47454931    | 7.16666   | 6.44918   | -0.152186 | 0.838891 |
| XLOC_001352 | LOC100506963 | chr1:24069855-24104787    | 3.1841    | 2.86542   | -0.152138 | 0.95238  |
| XLOC_005719 | MED13L       | chr12:116396380-116714991 | 1.51508   | 1.36349   | -0.152094 | 0.855926 |
| XLOC_006655 | ADSSL1       | chr14:105190533-105213647 | 2.20425   | 1.98378   | -0.152036 | 0.912532 |
| XLOC_012868 | HEATR5B      | chr2:37208152-37311485    | 1.88424   | 1.69584   | -0.15198  | 0.858729 |
| XLOC_012915 | CLHC1        | chr2:55399686-55462989    | 0.42905   | 0.386157  | -0.15196  | 0.985984 |
| XLOC_003401 | CD44         | chr11:35160416-35253949   | 82.8102   | 74.5326   | -0.151936 | 0.825017 |
| XLOC_016171 | CRIPAK       | chr4:1385339-1389782      | 1.24467   | 1.1204    | -0.151752 | 0.896977 |
| XLOC_023059 | RC3H2        | chr9:125611731-125667562  | 3.05005   | 2.74553   | -0.151749 | 0.867427 |
| XLOC_009895 | MED13        | chr17:60019965-60142643   | 2.53166   | 2.27892   | -0.151734 | 0.837793 |
| XLOC_003376 | BDNF-AS      | chr11:27528398-27743605   | 0.350216  | 0.315263  | -0.151692 | 1        |
| XLOC_000326 | ERMAP        | chr1:43272722-43310660    | 1.97407   | 1.77709   | -0.151661 | 0.914269 |
| XLOC_004843 | DIP2B        | chr12:50898767-51142450   | 2.94149   | 2.64816   | -0.151556 | 0.83928  |
| XLOC_009891 | APPBP2       | chr17:58520519-58603580   | 3.06722   | 2.7616    | -0.151424 | 0.840956 |
| XLOC_015115 | GNAI2        | chr3:50273646-50296786    | 57.4343   | 51.7181   | -0.151244 | 0.821611 |
| XLOC_004524 | ALG9         | chr11:111652918-111742305 | 3.77985   | 3.40382   | -0.151173 | 0.840543 |
| XLOC_005256 | C1R          | chr12:7187514-7245043     | 0.45819   | 0.41261   | -0.151169 | 0.945399 |
| XLOC_003871 | ARHGEF12     | chr11:120207617-120360645 | 5.13681   | 4.62588   | -0.151145 | 0.821994 |
| XLOC_023669 | MTM1         | chrX:149737046-149841616  | 0.81033   | 0.729755  | -0.151099 | 0.911314 |
| XLOC_000532 | HIAT1        | chr1:100503788-100548929  | 12.4654   | 11.226    | -0.151081 | 0.834318 |
| XLOC_011205 | ZNF583       | chr19:56915382-56936400   | 0.948627  | 0.854317  | -0.151069 | 0.916308 |
| XLOC_018902 | RCAN2        | chr6:46188466-46459804    | 0.0324772 | 0.029249  | -0.151041 | 1        |
| XLOC_003699 | INPPL1       | chr11:71935881-71955220   | 16.3676   | 14.7408   | -0.151027 | 0.825017 |
| XLOC_011674 | TTC9B        | chr19:40721964-40724306   | 1.46706   | 1.32127   | -0.150999 | 0.956177 |
| XLOC_022661 | GPSM1        | chr9:139221931-139254057  | 51.6      | 46.4725   | -0.150995 | 0.831834 |
| XLOC_009064 | TTC25        | chr17:40086887-40117668   | 0.0768229 | 0.0691908 | -0.150957 | 1        |
| XLOC_000208 | RPS6KA1      | chr1:26856248-26901520    | 20.1563   | 18.1542   | -0.150926 | 0.832459 |
| XLOC_019080 | CTAGE9       | chr6:131958441-132068550  | 0.0495108 | 0.044599  | -0.150732 | 1        |
| XLOC_006680 | CCNB1IP1     | chr14:20779526-20801471   | 157.945   | 142.276   | -0.150728 | 0.825602 |
| XLOC_006296 | PSME1        | chr14:24605377-24610797   | 171.7     | 154.669   | -0.150702 | 0.839406 |
| XLOC_008177 | HSD11B2      | chr16:67465035-67471454   | 9.29618   | 8.37465   | -0.15061  | 0.875956 |
| XLOC_022309 | ACO1         | chr9:32384600-32450832    | 14.8412   | 13.3708   | -0.150514 | 0.824372 |
| XLOC_012271 | KCMF1        | chr2:85198230-85286595    | 10.1704   | 9.16414   | -0.150303 | 0.818403 |
| XLOC_011990 | VN1R1        | chr19:57966541-57968107   | 0.308125  | 0.277642  | -0.150291 | 1        |
| XLOC_016325 | EXOC1        | chr4:56719815-56771244    | 5.98972   | 5.39763   | -0.150163 | 0.843686 |



|             |                |                           |           |           |           |          |
|-------------|----------------|---------------------------|-----------|-----------|-----------|----------|
| XLOC_004084 | RRAS2          | chr11:14299465-14386052   | 18.6137   | 16.7742   | -0.150116 | 0.831561 |
| XLOC_023565 | ALG13          | chrX:110924345-111003875  | 4.35549   | 3.92508   | -0.150114 | 0.859038 |
| XLOC_003150 | KIAA1598       | chr10:118642887-118886097 | 3.48311   | 3.13896   | -0.15009  | 0.853105 |
| XLOC_000130 | SZRD1          | chr1:16693524-16724643    | 42.1258   | 37.9642   | -0.150066 | 0.824472 |
| XLOC_007527 | EHD4           | chr15:42191638-42264755   | 14.3653   | 12.9466   | -0.150021 | 0.839214 |
| XLOC_000682 | SETDB1         | chr1:150898814-150937220  | 4.35162   | 3.92222   | -0.149882 | 0.879376 |
| XLOC_014761 | SF3A1          | chr22:30727976-30773894   | 21.3669   | 19.261    | -0.149693 | 0.83627  |
| XLOC_001518 | GPBP1L1        | chr1:46092975-46152302    | 13.9151   | 12.5452   | -0.14952  | 0.824756 |
| XLOC_007235 | FAM81A         | chr15:59730371-59815751   | 0.555389  | 0.500723  | -0.149488 | 0.925922 |
| XLOC_011098 | ZNF765         | chr19:53898396-53915262   | 1.0315    | 0.929989  | -0.149457 | 0.891995 |
| XLOC_010522 | ALKBH7         | chr19:6372443-6375261     | 68.2376   | 61.5239   | -0.149419 | 0.831614 |
| XLOC_013305 | PPIL3          | chr2:201735678-201753849  | 13.8265   | 12.4665   | -0.149381 | 0.854239 |
| XLOC_001469 | RRAGC          | chr1:39303868-39325495    | 12.5758   | 11.3395   | -0.149299 | 0.836801 |
| XLOC_003200 | STK32C         | chr10:134020995-134121477 | 10.1588   | 9.16053   | -0.149221 | 0.870275 |
| XLOC_012546 | DUSP19         | chr2:183943286-183964722  | 0.471197  | 0.424902  | -0.149201 | 0.91609  |
| XLOC_023269 | RAB9A          | chrX:13707239-13727944    | 12.6314   | 11.3911   | -0.149099 | 0.859038 |
| XLOC_022129 | AZIN1          | chr8:103838535-103876397  | 28.6863   | 25.8699   | -0.149089 | 0.821796 |
| XLOC_015522 | OPA1           | chr3:193310932-193415600  | 8.84213   | 7.97427   | -0.149043 | 0.836133 |
| XLOC_012382 | SLC20A1        | chr2:113403433-113421400  | 9.1653    | 8.26607   | -0.14898  | 0.840618 |
| XLOC_008826 | CD68           | chr17:7482804-7485429     | 424.619   | 382.966   | -0.148953 | 0.831693 |
| XLOC_014986 | NR1D2          | chr3:23986750-24022109    | 3.42888   | 3.09272   | -0.148864 | 0.849905 |
| XLOC_020899 | INTS1          | chr7:1509912-1544018      | 20.722    | 18.6915   | -0.148784 | 0.834042 |
| XLOC_018969 | LCA5           | chr6:80194707-80247147    | 0.271855  | 0.245241  | -0.148634 | 1        |
| XLOC_023707 | RPL10          | chrX:153626570-153650063  | 1890.22   | 1705.25   | -0.14857  | 0.860871 |
| XLOC_021497 | FAM160B2       | chr8:21946713-21961891    | 19.0837   | 17.2166   | -0.148547 | 0.831693 |
| XLOC_022350 | ZCCHC7         | chr9:37120468-37358145    | 10.083    | 9.09661   | -0.148521 | 0.843736 |
| XLOC_008093 | LOC100507577   | chr16:48274602-48420559   | 0.424827  | 0.383285  | -0.14846  | 0.945857 |
| XLOC_003219 | IFITM2         | chr11:308106-309410       | 579.651   | 522.971   | -0.148451 | 0.836107 |
| XLOC_004932 | RBMS2          | chr12:56915608-57030163   | 7.80167   | 7.03908   | -0.148397 | 0.902819 |
| XLOC_021468 | NEIL2          | chr8:11627171-11644854    | 23.0549   | 20.8028   | -0.148295 | 0.836427 |
| XLOC_005698 | PPTC7          | chr12:110972236-111021064 | 1.22363   | 1.10411   | -0.14828  | 0.899607 |
| XLOC_006420 | SRSF5          | chr14:70232999-70238722   | 78.7457   | 71.0551   | -0.148264 | 0.825017 |
| XLOC_005445 | LIMA1          | chr12:50569562-50677353   | 4.10276   | 3.70221   | -0.14821  | 0.862406 |
| XLOC_004035 | ARFIP2         | chr11:6495912-6505911     | 10.2231   | 9.22501   | -0.148207 | 0.898873 |
| XLOC_016512 | MGST2          | chr4:140586921-141075233  | 66.774    | 60.2553   | -0.148197 | 0.852271 |
| XLOC_022761 | IFNE           | chr9:21454266-21559697    | 0.0923452 | 0.0833302 | -0.148197 | 1        |
| XLOC_005893 | CDADC1         | chr13:49822046-49867622   | 1.62422   | 1.46576   | -0.148102 | 0.904905 |
| XLOC_006090 | SUGT1P3,TPTE2I | chr13:41363546-41495910   | 0.306405  | 0.276537  | -0.147966 | 1        |
| XLOC_017678 | TRIM23         | chr5:64885506-64920187    | 1.74896   | 1.57859   | -0.147865 | 0.92117  |
| XLOC_005732 | CIT            | chr12:120123594-120315095 | 3.75622   | 3.39045   | -0.147805 | 0.869339 |
| XLOC_005909 | CKAP2          | chr13:53029494-53050763   | 13.6842   | 12.3522   | -0.147745 | 0.828851 |
| XLOC_005324 | HEBP1          | chr12:13127798-13153243   | 64.0754   | 57.8401   | -0.147699 | 0.831834 |
| XLOC_000900 | RASAL2         | chr1:178060642-178448648  | 0.828432  | 0.747822  | -0.147688 | 0.881102 |
| XLOC_020740 | FLNC           | chr7:128470482-128499328  | 0.0166104 | 0.0149944 | -0.147662 | 1        |
| XLOC_004688 | LRRC23         | chr12:7013896-7023406     | 6.99281   | 6.31326   | -0.147488 | 0.879376 |
| XLOC_016593 | TRAPPC11       | chr4:184580419-184634747  | 5.60387   | 5.05971   | -0.14737  | 0.841065 |
| XLOC_010604 | ZNF69          | chr19:11998669-12025365   | 2.61844   | 2.36422   | -0.147345 | 0.902527 |
| XLOC_000509 | RPL5           | chr1:93297593-93427079    | 2421.74   | 2186.82   | -0.147209 | 0.851898 |
| XLOC_017951 | UBTD2          | chr5:171636649-171710795  | 6.93437   | 6.26195   | -0.147154 | 0.850429 |

|             |              |                           |           |           |           |          |
|-------------|--------------|---------------------------|-----------|-----------|-----------|----------|
| XLOC_018108 | BTN3A2       | chr6:26365397-26378548    | 7.25026   | 6.54742   | -0.147106 | 0.849964 |
| XLOC_008673 | GLG1         | chr16:74481325-74641042   | 17.4058   | 15.7189   | -0.147067 | 0.828851 |
| XLOC_011676 | AKT2         | chr19:40736223-40791302   | 16.0478   | 14.4969   | -0.146634 | 0.832615 |
| XLOC_016277 | TBC1D1       | chr4:37892704-38140796    | 16.1964   | 14.6319   | -0.146561 | 0.842721 |
| XLOC_009114 | HEXIM1       | chr17:43224683-43229468   | 12.9466   | 11.6974   | -0.146379 | 0.838583 |
| XLOC_012455 | SPOPL        | chr2:139259349-139330805  | 1.39832   | 1.26343   | -0.146357 | 0.878705 |
| XLOC_008928 | NLK          | chr17:26369687-26523404   | 2.72129   | 2.4588    | -0.146339 | 0.879418 |
| XLOC_016711 | RFC1         | chr4:39289068-39368001    | 7.26816   | 6.56734   | -0.146281 | 0.83793  |
| XLOC_018285 | NFYA         | chr6:41040706-41108573    | 3.73033   | 3.37081   | -0.146209 | 0.85132  |
| XLOC_021904 | PHYHIP       | chr8:22077215-22089851    | 0.176241  | 0.159262  | -0.146148 | 1        |
| XLOC_003771 | FUT4         | chr11:94277016-94283064   | 3.26511   | 2.95061   | -0.146122 | 0.860087 |
| XLOC_022829 | GNE          | chr9:36214438-36277053    | 2.3753    | 2.1465    | -0.14612  | 0.869744 |
| XLOC_002198 | TAF1A        | chr1:222731243-222763275  | 3.28005   | 2.96421   | -0.146067 | 0.892992 |
| XLOC_012618 | IDH1-AS1     | chr2:209119956-209120918  | 0.903402  | 0.816439  | -0.146022 | 0.967343 |
| XLOC_008269 | GSE1         | chr16:85645028-85709812   | 5.35845   | 4.84333   | -0.145817 | 0.842721 |
| XLOC_014303 | LOC100288432 | chr21:34637936-34638565   | 0.271598  | 0.245531  | -0.145568 | 1        |
| XLOC_018709 | TOB2P1       | chr6:28183115-28186707    | 0.857207  | 0.774983  | -0.14548  | 0.917832 |
| XLOC_020442 | SEPT7        | chr7:35840595-35946715    | 19.2432   | 17.3974   | -0.145477 | 0.831834 |
| XLOC_023520 | ARMCX1       | chrX:100805513-100809675  | 0.103557  | 0.0936266 | -0.14544  | 1        |
| XLOC_014944 | IRAK2        | chr3:10206562-10285427    | 0.912672  | 0.825171  | -0.145403 | 0.919777 |
| XLOC_003658 | LOC100130987 | chr11:67085309-67159158   | 0.991317  | 0.896294  | -0.145375 | 0.980052 |
| XLOC_008743 | FAM57A       | chr17:635846-646075       | 26.6871   | 24.129    | -0.145372 | 0.839812 |
| XLOC_014313 | RUNX1        | chr21:36160097-36421595   | 7.85762   | 7.10512   | -0.145234 | 0.87608  |
| XLOC_010513 | HSD11B1L     | chr19:5678432-5688534     | 1.2067    | 1.09121   | -0.145134 | 0.986862 |
| XLOC_014208 | C21orf90     | chr21:45917774-46131495   | 0.68485   | 0.619366  | -0.144995 | 0.960032 |
| XLOC_010736 | RPSAP58      | chr19:23945815-24010919   | 53.7149   | 48.5837   | -0.144852 | 0.831693 |
| XLOC_007614 | VPS13C       | chr15:62144589-62352664   | 1.33891   | 1.21109   | -0.144759 | 0.854216 |
| XLOC_014070 | DIDO1        | chr20:61509089-61569304   | 5.61385   | 5.07795   | -0.144744 | 0.901045 |
| XLOC_008703 | COTL1        | chr16:84599203-84651669   | 244.137   | 220.836   | -0.144716 | 0.838861 |
| XLOC_023394 | CLCN5        | chrX:49687224-49863892    | 0.654492  | 0.592107  | -0.144518 | 0.899506 |
| XLOC_011159 | CNOT3        | chr19:54641435-54663446   | 17.1059   | 15.4758   | -0.144488 | 0.86364  |
| XLOC_007832 | WDR90        | chr16:699362-717829       | 6.57773   | 5.95103   | -0.144452 | 0.865667 |
| XLOC_015771 | ACTR8        | chr3:53901093-53916229    | 3.63418   | 3.28817   | -0.144345 | 0.869189 |
| XLOC_009043 | MSL1         | chr17:38278789-38293045   | 5.86082   | 5.30294   | -0.14431  | 0.84975  |
| XLOC_003098 | MRPL43       | chr10:102732285-102747272 | 86.9975   | 78.7196   | -0.14425  | 0.872095 |
| XLOC_011610 | NPHS1        | chr19:36316273-36342895   | 0.0399816 | 0.0361775 | -0.144243 | 1        |
| XLOC_015030 | RPSA         | chr3:39448203-39454032    | 4311.4    | 3901.26   | -0.144216 | 0.864982 |
| XLOC_003232 | RPLP2        | chr11:809935-812876       | 7238.2    | 6551.2    | -0.143871 | 0.851628 |
| XLOC_015536 | PAK2         | chr3:196466727-196559518  | 11.7208   | 10.609    | -0.143785 | 0.832978 |
| XLOC_018697 | ZNF204P      | chr6:27325601-27343153    | 1.29903   | 1.17581   | -0.143784 | 0.906934 |
| XLOC_016332 | REST         | chr4:57774041-57802010    | 4.17588   | 3.77994   | -0.143716 | 0.846365 |
| XLOC_017865 | ARAP3        | chr5:141032967-141061800  | 6.34984   | 5.74801   | -0.143658 | 0.852189 |
| XLOC_000371 | NSUN4        | chr1:46805848-46830824    | 6.99665   | 6.33362   | -0.143634 | 0.846427 |
| XLOC_018036 | FARS2        | chr6:5261583-5771816      | 8.26335   | 7.48034   | -0.143623 | 0.868932 |
| XLOC_020615 | DYNC111      | chr7:95401817-95727736    | 0.102639  | 0.0929171 | -0.143562 | 1        |
| XLOC_009357 | FN3KRP       | chr17:80674581-80685893   | 18.1192   | 16.4042   | -0.143456 | 0.848628 |
| XLOC_002518 | SEC24C       | chr10:75504130-75531933   | 10.7307   | 9.71509   | -0.143446 | 0.838902 |
| XLOC_000641 | PEX11B       | chr1:145516164-145523732  | 12.4905   | 11.3085   | -0.143421 | 0.861494 |
| XLOC_001089 | GUK1         | chr1:228327784-228336655  | 274.848   | 248.849   | -0.143365 | 0.840956 |

|             |              |                          |           |           |           |          |
|-------------|--------------|--------------------------|-----------|-----------|-----------|----------|
| XLOC_001349 | ASAP3        | chr1:23755055-23810750   | 5.70432   | 5.16498   | -0.143291 | 0.858806 |
| XLOC_006116 | SUCLA2       | chr13:48516790-48575462  | 7.59938   | 6.88096   | -0.143272 | 0.862353 |
| XLOC_015304 | FAM86JP      | chr3:125635443-125655887 | 1.3041    | 1.18082   | -0.143259 | 0.933369 |
| XLOC_007588 | ARPP19       | chr15:52839431-52861213  | 16.953    | 15.3506   | -0.143251 | 0.83354  |
| XLOC_007879 | ABCA17P      | chr16:2390922-2476700    | 0.0886625 | 0.0802937 | -0.143039 | 1        |
| XLOC_010215 | NEDD4L       | chr18:55711609-56068772  | 8.3805    | 7.59112   | -0.142724 | 0.836478 |
| XLOC_022198 | PTK2         | chr8:141668480-142011412 | 26.9152   | 24.381    | -0.142665 | 0.836427 |
| XLOC_007295 | LOXL1        | chr15:74209808-74244478  | 6.49128   | 5.8801    | -0.142663 | 0.919122 |
| XLOC_017221 | ATG10        | chr5:81267843-81551216   | 2.08308   | 1.88705   | -0.142585 | 0.899607 |
| XLOC_023932 | PHKA1        | chrX:71798663-71934029   | 6.10196   | 5.52781   | -0.142564 | 0.848628 |
| XLOC_012570 | CCDC150      | chr2:197504355-197597530 | 1.02997   | 0.933066  | -0.142553 | 0.907121 |
| XLOC_000158 | NBPF3        | chr1:21766620-21811393   | 4.83241   | 4.37787   | -0.142514 | 0.862733 |
| XLOC_011007 | FTL          | chr19:49468565-49470136  | 10066.7   | 9119.95   | -0.142489 | 0.87083  |
| XLOC_007194 | SPATA5L1     | chr15:45694518-45713616  | 10.8294   | 9.8112    | -0.142452 | 0.858729 |
| XLOC_012195 | PEX13        | chr2:61167547-61279125   | 3.59321   | 3.25577   | -0.142274 | 0.871648 |
| XLOC_002352 | PRPF18       | chr10:13628938-13672868  | 10.4156   | 9.4377    | -0.142246 | 0.861337 |
| XLOC_008242 | WWOX         | chr16:78133326-79246564  | 5.39645   | 4.89018   | -0.142124 | 0.914269 |
| XLOC_023460 | MED12        | chrX:70338405-70362304   | 3.3047    | 2.99476   | -0.142079 | 0.863898 |
| XLOC_004166 | LRP4         | chr11:46867961-46940173  | 1.33823   | 1.21275   | -0.142045 | 0.884031 |
| XLOC_022096 | FSBP,RAD54B  | chr8:95384187-95487343   | 3.7651    | 3.41214   | -0.14201  | 0.872122 |
| XLOC_006458 | TTLL5        | chr14:76127550-76421425  | 2.60487   | 2.36077   | -0.141951 | 0.876392 |
| XLOC_017614 | LOC646719    | chr5:36871462-36876796   | 2.29365   | 2.07883   | -0.141871 | 0.876141 |
| XLOC_008773 | ARRB2        | chr17:4613788-4624795    | 93.646    | 84.8766   | -0.141851 | 0.83928  |
| XLOC_013465 | STK25        | chr2:242295663-242448987 | 76.7805   | 69.5947   | -0.141762 | 0.844936 |
| XLOC_012880 | SOS1         | chr2:39208689-39347604   | 1.79717   | 1.62903   | -0.141716 | 0.868221 |
| XLOC_000634 | NOTCH2NL     | chr1:145209110-145285912 | 5.88639   | 5.33577   | -0.141685 | 0.851225 |
| XLOC_016062 | TNIK         | chr3:170780291-171178197 | 6.25618   | 5.67144   | -0.141567 | 0.945399 |
| XLOC_004259 | AHNAK        | chr11:62201013-62314332  | 17.1762   | 15.5709   | -0.141555 | 0.920543 |
| XLOC_020398 | CCDC126      | chr7:23636997-23684327   | 1.17975   | 1.06954   | -0.141495 | 0.916694 |
| XLOC_008634 | LCAT,SLC12A4 | chr16:67973786-68002597  | 22.5687   | 20.4605   | -0.141478 | 0.884031 |
| XLOC_000112 | PRDM2        | chr1:14026734-14151574   | 2.21555   | 2.00878   | -0.141347 | 0.899607 |
| XLOC_004342 | B3GNT1       | chr11:66112842-66115161  | 11.4635   | 10.3938   | -0.141314 | 0.872122 |
| XLOC_016894 | TIFA         | chr4:113196781-113207059 | 6.15672   | 5.58256   | -0.141234 | 0.861774 |
| XLOC_020728 | SND1         | chr7:127292201-127732659 | 91.3305   | 82.8155   | -0.141194 | 0.843686 |
| XLOC_022802 | DCTN3        | chr9:34613547-34620496   | 96.0794   | 87.1222   | -0.141187 | 0.839812 |
| XLOC_020701 | C7orf53      | chr7:112120907-112130943 | 0.524009  | 0.475202  | -0.141049 | 0.949188 |
| XLOC_017418 | ARHGEF37     | chr5:148961134-149014527 | 0.535219  | 0.485419  | -0.140899 | 0.926279 |
| XLOC_009444 | MIR497HG     | chr17:6915735-6922973    | 1.19965   | 1.08809   | -0.140816 | 0.990851 |
| XLOC_023743 | PRKX         | chrX:3522383-3631675     | 5.49588   | 4.98487   | -0.140794 | 0.852271 |
| XLOC_007850 | GNPTG        | chr16:1401899-1464705    | 20.7311   | 18.8071   | -0.14052  | 0.89785  |
| XLOC_003549 | MYRF         | chr11:61520120-61555989  | 3.97264   | 3.60395   | -0.140518 | 0.866938 |
| XLOC_008138 | ARL2BP       | chr16:57279037-57287545  | 36.1843   | 32.8278   | -0.140445 | 0.839406 |
| XLOC_016294 | LIMCH1       | chr4:41362803-41702061   | 1.71521   | 1.55612   | -0.140435 | 0.879418 |
| XLOC_006170 | SPRY2        | chr13:80910111-80915086  | 6.15772   | 5.58697   | -0.140328 | 0.878705 |
| XLOC_023762 | GEMIN8       | chrX:14024844-14048035   | 7.56547   | 6.86475   | -0.140222 | 0.86392  |
| XLOC_007612 | NARG2        | chr15:60711807-60771359  | 2.30545   | 2.09193   | -0.140214 | 0.873278 |
| XLOC_022252 | RPL8         | chr8:146015153-146017805 | 12080.8   | 10962.4   | -0.14016  | 0.880754 |
| XLOC_000211 | PIGV         | chr1:27114453-27124894   | 5.09846   | 4.62647   | -0.140151 | 0.881798 |
| XLOC_000684 | PRUNE        | chr1:150980972-151008189 | 5.27527   | 4.7871    | -0.140093 | 0.871443 |

|             |           |                           |           |           |           |          |
|-------------|-----------|---------------------------|-----------|-----------|-----------|----------|
| XLOC_008306 | TUBB3     | chr16:89988416-90002505   | 86.9287   | 78.8847   | -0.140087 | 0.840956 |
| XLOC_004145 | TRAF6     | chr11:36505316-36531863   | 1.60262   | 1.4545    | -0.139902 | 0.872122 |
| XLOC_003396 | NAT10     | chr11:34127110-34168458   | 31.3096   | 28.4161   | -0.139896 | 0.84361  |
| XLOC_014509 | MORC2-AS1 | chr22:31318294-31364187   | 1.05177   | 0.954596  | -0.139853 | 0.972711 |
| XLOC_014193 | NDUFV3    | chr21:44313377-44329773   | 30.1046   | 27.3238   | -0.139822 | 0.869972 |
| XLOC_018972 | FAM46A    | chr6:82455446-82462428    | 0.361108  | 0.32776   | -0.139795 | 1        |
| XLOC_001545 | RAB3B     | chr1:52373627-52456436    | 3.02465   | 2.74534   | -0.139779 | 0.845408 |
| XLOC_017445 | CYFIP2    | chr5:156693090-156822606  | 9.67918   | 8.78567   | -0.139731 | 0.845932 |
| XLOC_017713 | HOMER1    | chr5:78669785-78809700    | 0.940275  | 0.853534  | -0.139634 | 0.910997 |
| XLOC_002042 | RC3H1     | chr1:173900351-173962210  | 1.26293   | 1.14644   | -0.139624 | 0.870185 |
| XLOC_009137 | TBKBP1    | chr17:45772629-45789429   | 6.0604    | 5.50144   | -0.139603 | 0.872122 |
| XLOC_003058 | NOC3L     | chr10:96092988-96122683   | 8.36911   | 7.59768   | -0.139516 | 0.852718 |
| XLOC_005179 | AACS      | chr12:125549924-125627871 | 10.2546   | 9.30939   | -0.139508 | 0.858729 |
| XLOC_012414 | LOC254128 | chr2:122407229-122494503  | 1.71609   | 1.55791   | -0.139508 | 0.987173 |
| XLOC_018545 | SASH1     | chr6:148663728-148873184  | 1.09069   | 0.990157  | -0.139507 | 0.891383 |
| XLOC_018310 | CUL9      | chr6:43149921-43192325    | 2.22191   | 2.01716   | -0.139479 | 0.872122 |
| XLOC_023804 | TAB3      | chrX:30845558-30907511    | 1.76678   | 1.60409   | -0.139368 | 0.877848 |
| XLOC_014988 | RARB      | chr3:25469753-25705863    | 0.0804667 | 0.0730591 | -0.139329 | 1        |
| XLOC_015037 | RPL14     | chr3:40498782-40503863    | 3181.21   | 2888.54   | -0.139231 | 0.862509 |
| XLOC_002749 | ZRANB1    | chr10:126630691-126676005 | 4.13873   | 3.75897   | -0.138849 | 0.8626   |
| XLOC_017070 | PAPD7     | chr5:6714717-6757161      | 10.0731   | 9.14892   | -0.138836 | 0.859038 |
| XLOC_009543 | ZNF286B   | chr17:18561741-18585572   | 2.52582   | 2.29436   | -0.138658 | 0.879418 |
| XLOC_021980 | THAP1     | chr8:42691816-42698474    | 6.32188   | 5.7426    | -0.138648 | 0.878516 |
| XLOC_003332 | CTR9      | chr11:10772810-10801290   | 8.65614   | 7.86316   | -0.138615 | 0.848628 |
| XLOC_012309 | LOC285033 | chr2:96850602-96908362    | 1.50386   | 1.36614   | -0.138564 | 0.982733 |
| XLOC_001145 | LOC149134 | chr1:246952918-246954788  | 1.46745   | 1.33307   | -0.138554 | 0.942352 |
| XLOC_001674 | DBT       | chr1:100652477-100715409  | 1.31134   | 1.19128   | -0.138523 | 0.869722 |
| XLOC_013721 | MOCOS3    | chr20:49575350-49578399   | 5.23065   | 4.75246   | -0.138317 | 0.875956 |
| XLOC_003333 | LOC729013 | chr11:10879763-10900823   | 7.70434   | 7.00126   | -0.138057 | 0.896288 |
| XLOC_010007 | TIMP2     | chr17:76849058-76921472   | 7.14492   | 6.49373   | -0.137871 | 0.862984 |
| XLOC_002285 | AHCTF1    | chr1:247002401-247094726  | 2.2303    | 2.02704   | -0.137861 | 0.864931 |
| XLOC_018777 | EHMT2     | chr6:31847536-31865464    | 22.5008   | 20.4506   | -0.137831 | 0.844936 |
| XLOC_011015 | TRPM4     | chr19:49661015-49715098   | 8.34503   | 7.58479   | -0.137808 | 0.874045 |
| XLOC_001322 | CAPZB     | chr1:19665266-19812066    | 89.8108   | 81.6323   | -0.13775  | 0.842965 |
| XLOC_001862 | DENND4B   | chr1:153901976-153919154  | 10.9458   | 9.94914   | -0.137734 | 0.853468 |
| XLOC_009020 | CISD3     | chr17:36886509-36904558   | 14.6248   | 13.294    | -0.137646 | 0.944033 |
| XLOC_010245 | TIMM21    | chr18:71815745-71826204   | 15.7305   | 14.3      | -0.137546 | 0.863742 |
| XLOC_008181 | PARD6A    | chr16:67694850-67696681   | 14.5007   | 13.183    | -0.137437 | 0.887997 |
| XLOC_009242 | PITPNC1   | chr17:65373396-65693379   | 6.59088   | 5.99211   | -0.137405 | 0.848219 |
| XLOC_022906 | AGTPBP1   | chr9:88161453-88356944    | 4.86025   | 4.41884   | -0.137364 | 0.861337 |
| XLOC_002855 | ABI1      | chr10:26986594-27150016   | 16.6419   | 15.1307   | -0.137338 | 0.867291 |
| XLOC_009211 | PPM1D     | chr17:58677543-58743640   | 2.02363   | 1.83993   | -0.137297 | 0.886248 |
| XLOC_008638 | ESRP2     | chr16:68119268-68270136   | 10.4619   | 9.51288   | -0.137193 | 0.905257 |
| XLOC_014379 | POFUT2    | chr21:46683842-46707811   | 8.79218   | 7.99599   | -0.136945 | 0.869722 |
| XLOC_023600 | XIAP      | chrX:122993661-123047829  | 2.39686   | 2.17988   | -0.136896 | 0.868996 |
| XLOC_009276 | KCTD2     | chr17:73043278-73061981   | 7.52863   | 6.84723   | -0.136867 | 0.864909 |
| XLOC_022240 | CPSF1     | chr8:145597730-145634733  | 31.9106   | 29.0238   | -0.136802 | 0.870063 |
| XLOC_019005 | FBXL4     | chr6:99321600-99395849    | 3.38098   | 3.07527   | -0.136726 | 0.882208 |
| XLOC_018559 | C6orf211  | chr6:151773421-151791232  | 5.34454   | 4.86134   | -0.136712 | 0.877776 |

|             |           |                           |           |           |           |          |
|-------------|-----------|---------------------------|-----------|-----------|-----------|----------|
| XLOC_002116 | KDM5B     | chr1:202696531-202777549  | 6.53829   | 5.94742   | -0.13665  | 0.849035 |
| XLOC_010967 | PRR24     | chr19:47777658-47778980   | 22.4426   | 20.4144   | -0.136648 | 0.906423 |
| XLOC_014062 | LAMA5     | chr20:60884120-60942368   | 3.19639   | 2.90765   | -0.136591 | 0.901277 |
| XLOC_002001 | MPC2      | chr1:167885912-168045083  | 15.0577   | 13.6975   | -0.136588 | 0.905545 |
| XLOC_007534 | ZFP106    | chr15:42705020-42749730   | 3.77531   | 3.43472   | -0.136404 | 0.848567 |
| XLOC_012715 | ATG16L1   | chr2:234160216-234204320  | 4.89469   | 4.45323   | -0.136364 | 0.879376 |
| XLOC_008721 | MVD       | chr16:88718347-88729495   | 30.3644   | 27.6258   | -0.136363 | 0.863994 |
| XLOC_012519 | CDCA7     | chr2:174219560-174233718  | 19.5198   | 17.7601   | -0.136305 | 0.849964 |
| XLOC_006228 | PCID2     | chr13:113831852-113863029 | 29.1981   | 26.5664   | -0.136275 | 0.853316 |
| XLOC_001903 | MEX3A     | chr1:156041803-156051789  | 5.30525   | 4.82714   | -0.13625  | 0.86364  |
| XLOC_003176 | OAT       | chr10:126085871-126107545 | 49.4943   | 45.0358   | -0.136192 | 0.853975 |
| XLOC_010042 | P4HB      | chr17:79801033-79818544   | 399.338   | 363.391   | -0.136085 | 0.858227 |
| XLOC_010996 | CYTH2     | chr19:48972464-48985571   | 19.5377   | 17.7795   | -0.136045 | 0.848939 |
| XLOC_022764 | CDKN2B    | chr9:21994789-22121093    | 3.33291   | 3.03301   | -0.136033 | 0.881554 |
| XLOC_015239 | LOC344595 | chr3:106959538-107045811  | 0.833546  | 0.758586  | -0.135948 | 0.923579 |
| XLOC_015337 | ATP2C1    | chr3:130569368-130745646  | 15.1866   | 13.821    | -0.135941 | 0.863994 |
| XLOC_009983 | SRP68     | chr17:74034855-74068607   | 40.9126   | 37.236    | -0.135848 | 0.856226 |
| XLOC_022811 | FANCG     | chr9:35073834-35080013    | 15.6954   | 14.285    | -0.135845 | 0.862353 |
| XLOC_022022 | VCPIP1    | chr8:67542487-67579452    | 2.44103   | 2.22173   | -0.135806 | 0.866749 |
| XLOC_006382 | PCNXL4    | chr14:60558628-60601532   | 11.9776   | 10.902    | -0.135745 | 0.858729 |
| XLOC_024041 | NKAP      | chrX:119059012-119077735  | 19.479    | 17.7298   | -0.135744 | 0.863994 |
| XLOC_014913 | ARSA      | chr22:51061181-51066601   | 7.97302   | 7.25713   | -0.135728 | 0.86876  |
| XLOC_023042 | PSMD5     | chr9:123578331-123605299  | 18.4069   | 16.7582   | -0.135382 | 0.850666 |
| XLOC_005895 | PHF11     | chr13:50069800-50103117   | 9.04586   | 8.23562   | -0.135382 | 0.879376 |
| XLOC_002327 | NET1      | chr10:5454513-5501019     | 7.54854   | 6.87253   | -0.135356 | 0.861337 |
| XLOC_023632 | FHL1      | chrX:135228860-135293518  | 0.0805899 | 0.073376  | -0.13529  | 1        |
| XLOC_008175 | PLEKHG4   | chr16:67311412-67360661   | 4.7443    | 4.31966   | -0.135278 | 0.879055 |
| XLOC_022565 | ZBTB43    | chr9:129567284-129600487  | 4.33546   | 3.94751   | -0.135243 | 0.865084 |
| XLOC_013229 | METTL8    | chr2:172173912-172341562  | 2.61109   | 2.37749   | -0.135213 | 0.89785  |
| XLOC_023423 | MAGED2    | chrX:54834170-54842445    | 35.6702   | 32.4795   | -0.135191 | 0.853869 |
| XLOC_015698 | PRKAR2A   | chr3:48788092-48885270    | 1.18904   | 1.08274   | -0.135103 | 0.929102 |
| XLOC_010920 | ZNF233    | chr19:44764032-44779470   | 0.365589  | 0.332908  | -0.135097 | 1        |
| XLOC_006415 | EXD2      | chr14:69658193-69710737   | 4.2992    | 3.91527   | -0.134955 | 0.869693 |
| XLOC_008664 | AP1G1     | chr16:71762904-71842976   | 5.9591    | 5.42797   | -0.134681 | 0.853292 |
| XLOC_012111 | BRE       | chr2:28004265-28561767    | 35.0272   | 31.9086   | -0.134532 | 0.860087 |
| XLOC_012834 | CGREF1    | chr2:27309610-27341995    | 20.8492   | 18.9931   | -0.134521 | 0.886622 |
| XLOC_002253 | TOMM20    | chr1:235272657-235292256  | 61.3862   | 55.924    | -0.134445 | 0.851921 |
| XLOC_006794 | DNAAF2    | chr14:50091891-50101948   | 7.41846   | 6.75867   | -0.13438  | 0.879418 |
| XLOC_013185 | PRPF40A   | chr2:153508106-153573975  | 11.1624   | 10.17     | -0.134336 | 0.853094 |
| XLOC_001146 | VN1R5     | chr1:247419373-247420447  | 0.0366677 | 0.0334096 | -0.134246 | 1        |
| XLOC_009062 | FKBP10    | chr17:39968961-39979469   | 134.724   | 122.756   | -0.134212 | 0.856216 |
| XLOC_005532 | PTGES3    | chr12:57057124-57082078   | 180.271   | 164.259   | -0.134194 | 0.857203 |
| XLOC_012031 | RPS7      | chr2:3622852-3628509      | 4554.42   | 4150.07   | -0.13413  | 0.870275 |
| XLOC_016174 | WHSC1     | chr4:1873122-1983934      | 10.0394   | 9.14852   | -0.134064 | 0.854216 |
| XLOC_011363 | SH2D3A    | chr19:6752172-6767523     | 6.16509   | 5.61853   | -0.133928 | 0.896288 |
| XLOC_015562 | RPUSD3    | chr3:9879532-9885702      | 67.724    | 61.7221   | -0.133878 | 0.853152 |
| XLOC_003831 | RBM7      | chr11:114271383-114279635 | 11.0671   | 10.087    | -0.133782 | 0.867615 |
| XLOC_018469 | SLC35F1   | chr6:118228688-118638839  | 0.0120115 | 0.0109478 | -0.133772 | 1        |
| XLOC_002721 | FAM45A    | chr10:120863610-120897376 | 7.52494   | 6.85874   | -0.133736 | 0.872776 |

|             |              |                          |          |           |           |          |
|-------------|--------------|--------------------------|----------|-----------|-----------|----------|
| XLOC_016752 | PPAT         | chr4:57259528-57301802   | 7.74829  | 7.0625    | -0.1337   | 0.865746 |
| XLOC_008349 | RPS2         | chr16:2012061-2014827    | 12688.9  | 11566     | -0.133674 | 0.886641 |
| XLOC_015832 | CGGBP1       | chr3:88101099-88207115   | 7.79945  | 7.10972   | -0.13358  | 0.890882 |
| XLOC_009746 | PTRF         | chr17:40554466-40575338  | 62.2171  | 56.7181   | -0.133504 | 0.857423 |
| XLOC_010618 | CALR         | chr19:13049413-13055304  | 435.307  | 396.836   | -0.133492 | 0.864302 |
| XLOC_022884 | ZFAND5       | chr9:74966340-74980163   | 13.2654  | 12.094    | -0.133367 | 0.854125 |
| XLOC_010701 | KXD1         | chr19:18668571-18680197  | 134.877  | 122.972   | -0.133309 | 0.851733 |
| XLOC_018044 | LOC100506207 | chr6:8435855-8785678     | 0.192979 | 0.17595   | -0.133284 | 1        |
| XLOC_015903 | WDR5B        | chr3:122130699-122134882 | 1.11116  | 1.01312   | -0.13326  | 0.913887 |
| XLOC_014883 | KIAA0930     | chr22:45588122-45636650  | 11.6024  | 10.5793   | -0.133169 | 0.854216 |
| XLOC_009048 | RARA         | chr17:38465422-38513895  | 9.59065  | 8.74574   | -0.133048 | 0.875956 |
| XLOC_002505 | UNC5B        | chr10:72972291-73062635  | 2.16172  | 1.97134   | -0.133007 | 0.890563 |
| XLOC_004449 | FZD4         | chr11:86656716-86666440  | 0.915346 | 0.834748  | -0.132976 | 0.905756 |
| XLOC_011306 | AES          | chr19:3052907-3062964    | 191.826  | 174.937   | -0.132962 | 0.860871 |
| XLOC_016003 | PFN2         | chr3:149682690-149688741 | 48.6665  | 44.3831   | -0.13292  | 0.854216 |
| XLOC_022321 | UBAP1        | chr9:34179002-34329198   | 19.062   | 17.386    | -0.132773 | 0.867356 |
| XLOC_020587 | DMTF1        | chr7:86781676-86849031   | 3.62189  | 3.30347   | -0.132761 | 0.917306 |
| XLOC_013013 | CAPG         | chr2:85621870-85641197   | 135.762  | 123.84    | -0.132607 | 0.853094 |
| XLOC_006023 | N6AMT2       | chr13:21303072-21348057  | 8.75959  | 7.99047   | -0.132583 | 0.905839 |
| XLOC_021930 | PBK          | chr8:27667137-27695349   | 25.3402  | 23.1154   | -0.132576 | 0.860871 |
| XLOC_009404 | SHPK,TRPV1   | chr17:3468739-3539616    | 4.73153  | 4.3163    | -0.132512 | 0.886468 |
| XLOC_003442 | MADD         | chr11:47290926-47351582  | 5.96348  | 5.44031   | -0.132465 | 0.862353 |
| XLOC_001411 | NKAIN1       | chr1:31652591-31712734   | 2.08765  | 1.90457   | -0.132412 | 0.9183   |
| XLOC_023043 | PHF19        | chr9:123617930-123639606 | 71.0388  | 64.8113   | -0.132362 | 0.900573 |
| XLOC_015112 | SEMA3F       | chr3:50192847-50226508   | 5.95372  | 5.43214   | -0.132272 | 0.882208 |
| XLOC_017106 | SKP2         | chr5:36152144-36184142   | 8.48333  | 7.74064   | -0.132178 | 0.919765 |
| XLOC_022147 | RAD21        | chr8:117858172-117889107 | 57.6955  | 52.6474   | -0.132095 | 0.859038 |
| XLOC_017544 | PP7080       | chr5:470624-473080       | 13.3331  | 12.1666   | -0.132088 | 0.879376 |
| XLOC_024156 | CXorf40B     | chrX:149100414-149106716 | 16.1775  | 14.7628   | -0.132021 | 0.879418 |
| XLOC_004964 | TBK1         | chr12:64845839-64895899  | 7.05263  | 6.43622   | -0.131949 | 0.869722 |
| XLOC_010063 | RAB40B       | chr17:80614942-80656598  | 13.2613  | 12.1027   | -0.131894 | 0.879055 |
| XLOC_016770 | YTHDC1       | chr4:69176104-69215824   | 5.36737  | 4.8985    | -0.131877 | 0.861774 |
| XLOC_014910 | ODF3B        | chr22:50968837-50971008  | 11.8148  | 10.7829   | -0.131852 | 0.925922 |
| XLOC_016504 | PHF17        | chr4:129730778-129796379 | 6.48777  | 5.92118   | -0.131838 | 0.872122 |
| XLOC_002971 | TYSND1       | chr10:71897736-71906496  | 15.7049  | 14.3339   | -0.131783 | 0.867291 |
| XLOC_018140 | ZSCAN9       | chr6:28193028-28201264   | 6.57344  | 6.00031   | -0.131612 | 0.890806 |
| XLOC_021155 | CYP51A1      | chr7:91741462-91764059   | 28.1607  | 25.7066   | -0.131541 | 0.854216 |
| XLOC_001058 | IARS2        | chr1:220046618-220321383 | 29.0995  | 26.5641   | -0.131516 | 0.935203 |
| XLOC_012269 | DNAH6        | chr2:84743578-85046713   | 0.031997 | 0.0292098 | -0.131485 | 1        |
| XLOC_010601 | ZNF491       | chr19:11909390-11919306  | 0.276307 | 0.252239  | -0.131481 | 1        |
| XLOC_014149 | SON          | chr21:34915349-34949812  | 13.0082  | 11.8757   | -0.131407 | 0.858729 |
| XLOC_011380 | ELAVL1       | chr19:8023456-8070529    | 17.0108  | 15.5302   | -0.131372 | 0.858729 |
| XLOC_010706 | CRTC1        | chr19:18794424-18893143  | 3.83998  | 3.50604   | -0.131258 | 0.879418 |
| XLOC_021643 | HNF4G        | chr8:76452202-76479061   | 0.542972 | 0.495763  | -0.131226 | 0.934604 |
| XLOC_017353 | PURA         | chr5:139493707-139499001 | 3.99823  | 3.65082   | -0.131141 | 0.872122 |
| XLOC_020532 | POM121       | chr7:72349935-72425302   | 11.3217  | 10.3388   | -0.131027 | 0.875956 |
| XLOC_017361 | WDR55        | chr5:140044383-140053171 | 18.4612  | 16.8585   | -0.131022 | 0.879055 |
| XLOC_016517 | USP38        | chr4:144106069-144143141 | 3.07972  | 2.8124    | -0.130998 | 0.881554 |
| XLOC_001820 | TDRKH        | chr1:151744040-151763010 | 2.09224  | 1.91076   | -0.130904 | 0.909496 |

|             |              |                           |           |           |           |          |
|-------------|--------------|---------------------------|-----------|-----------|-----------|----------|
| XLOC_010908 | ZNF283       | chr19:44331472-44353050   | 1.8424    | 1.68273   | -0.130781 | 0.913088 |
| XLOC_015961 | RYK          | chr3:133875977-133969586  | 18.6328   | 17.0182   | -0.130759 | 0.859038 |
| XLOC_015543 | RPL35A       | chr3:197615945-197686886  | 4372.65   | 3993.9    | -0.130709 | 0.867427 |
| XLOC_006630 | PPP2R5C      | chr14:102228134-102394328 | 36.8631   | 33.6728   | -0.130595 | 0.881798 |
| XLOC_003688 | KRTAP5-9     | chr11:71259465-71260653   | 0.199956  | 0.182654  | -0.130568 | 1        |
| XLOC_015773 | ESRG         | chr3:54156692-55108584    | 0.10264   | 0.0937588 | -0.13056  | 1        |
| XLOC_009412 | ANKFY1       | chr17:4066664-4167274     | 3.94039   | 3.59964   | -0.130488 | 0.871485 |
| XLOC_006905 | ANGEL1       | chr14:77253585-77279283   | 6.65148   | 6.07636   | -0.13047  | 0.876412 |
| XLOC_018001 | RNF130       | chr5:179382473-179499109  | 52.1628   | 47.6634   | -0.130138 | 0.858806 |
| XLOC_022756 | KLHL9        | chr9:21331017-21335429    | 7.81861   | 7.14443   | -0.130092 | 0.86835  |
| XLOC_005390 | PUS7L        | chr12:44122409-44152620   | 2.36326   | 2.15952   | -0.130063 | 0.895596 |
| XLOC_002457 | NCOA4        | chr10:51565107-51590734   | 54.2405   | 49.5677   | -0.12997  | 0.859038 |
| XLOC_009359 | TBCD         | chr17:80709939-80901062   | 12.7785   | 11.6781   | -0.129908 | 0.865317 |
| XLOC_001867 | NUP210L      | chr1:153965167-154127592  | 0.0120102 | 0.0109761 | -0.129899 | 1        |
| XLOC_011833 | HRC          | chr19:49654455-49658681   | 0.0193695 | 0.0177026 | -0.129825 | 1        |
| XLOC_013056 | FAHD2B       | chr2:97749322-97760582    | 19.7414   | 18.0428   | -0.129794 | 0.874872 |
| XLOC_001877 | PBXIP1       | chr1:154916558-154928567  | 7.57826   | 6.92648   | -0.129743 | 0.880612 |
| XLOC_020603 | GATAD1       | chr7:92076761-92089381    | 14.6144   | 13.3575   | -0.129735 | 0.859937 |
| XLOC_015441 | SEC62        | chr3:169684579-169716161  | 9.18892   | 8.39892   | -0.129692 | 0.860285 |
| XLOC_012140 | LOC100505876 | chr2:37423634-37458740    | 10.8838   | 9.94894   | -0.129566 | 0.911597 |
| XLOC_003787 | YAP1         | chr11:101981191-102104154 | 11.863    | 10.8442   | -0.129554 | 0.862939 |
| XLOC_015597 | ANKRD28      | chr3:15708743-15901053    | 4.00652   | 3.66244   | -0.129546 | 0.866466 |
| XLOC_003769 | ANKRD49      | chr11:94227152-94232744   | 5.32309   | 4.86608   | -0.129506 | 0.894866 |
| XLOC_023995 | MORF4L2      | chrX:102930425-102947484  | 71.8921   | 65.7202   | -0.129498 | 0.866022 |
| XLOC_017336 | SMAD5        | chr5:135465202-135518422  | 3.75806   | 3.43546   | -0.129484 | 0.872122 |
| XLOC_022384 | FAM122A      | chr9:71320615-71624091    | 2.7184    | 2.48512   | -0.129446 | 0.899217 |
| XLOC_010910 | ZNF155       | chr19:44488321-44502477   | 1.6663    | 1.52337   | -0.129383 | 0.917559 |
| XLOC_015638 | GORASP1      | chr3:39138090-39149130    | 9.28187   | 8.48596   | -0.129337 | 0.875251 |
| XLOC_017624 | DAB2         | chr5:39371775-39425335    | 0.0189057 | 0.0172855 | -0.129262 | 1        |
| XLOC_012912 | PSME4        | chr2:54091203-54197977    | 9.38222   | 8.57851   | -0.129203 | 0.862353 |
| XLOC_021927 | CLU          | chr8:27454433-27472328    | 40.6953   | 37.2105   | -0.129155 | 0.860109 |
| XLOC_019106 | IFNGR1       | chr6:137518620-137540567  | 7.24511   | 6.62471   | -0.129151 | 0.880754 |
| XLOC_005875 | LACC1        | chr13:44410488-44468068   | 1.04386   | 0.954482  | -0.129137 | 0.933369 |
| XLOC_011871 | LRRC4B       | chr19:51020149-51071302   | 0.943026  | 0.862283  | -0.129136 | 0.949526 |
| XLOC_009673 | TOP2A        | chr17:38544772-38574202   | 10.519    | 9.61848   | -0.12912  | 0.863898 |
| XLOC_004614 | PUS3         | chr11:125753508-125773116 | 10.0091   | 9.1531    | -0.128976 | 0.905257 |
| XLOC_006322 | KIAA0391     | chr14:35591526-35743284   | 15.51     | 14.1863   | -0.128695 | 0.886228 |
| XLOC_001571 | PPAP2B       | chr1:56960418-57045257    | 0.530781  | 0.485506  | -0.12863  | 0.943284 |
| XLOC_009423 | SPAG7        | chr17:4862520-4871132     | 39.1709   | 35.8301   | -0.128611 | 0.872122 |
| XLOC_014085 | ZBTB46       | chr20:62371210-62436856   | 2.23184   | 2.04159   | -0.128537 | 0.971663 |
| XLOC_009911 | ICAM2        | chr17:62075710-62097994   | 4.38272   | 4.00934   | -0.12846  | 0.925922 |
| XLOC_016208 | TADA2B       | chr4:6911170-7059677      | 5.55411   | 5.08095   | -0.128458 | 0.946416 |
| XLOC_015769 | DCP1A        | chr3:53317444-53381654    | 3.13641   | 2.86942   | -0.128357 | 0.879418 |
| XLOC_002988 | MICU1        | chr10:74119697-74385949   | 29.5603   | 27.0443   | -0.128337 | 0.865957 |
| XLOC_007186 | B2M          | chr15:45003684-45010357   | 765.388   | 700.261   | -0.128299 | 0.869513 |
| XLOC_009115 | HEXIM2       | chr17:43238263-43247406   | 5.83491   | 5.33848   | -0.128282 | 0.917559 |
| XLOC_009589 | NUFIP2       | chr17:27582853-27621166   | 4.64568   | 4.25076   | -0.128169 | 0.862285 |
| XLOC_014715 | GUSBP11      | chr22:23980674-24059610   | 4.1795    | 3.82505   | -0.12785  | 0.902037 |
| XLOC_012008 | ZNF837       | chr19:58878989-58892389   | 2.50714   | 2.29461   | -0.127795 | 0.944779 |

|             |                |                           |           |           |           |          |
|-------------|----------------|---------------------------|-----------|-----------|-----------|----------|
| XLOC_004123 | LIN7C          | chr11:27515964-27528326   | 5.77543   | 5.28606   | -0.127735 | 0.871917 |
| XLOC_007626 | OAZ2           | chr15:64979772-64995462   | 35.4186   | 32.4191   | -0.127663 | 0.864909 |
| XLOC_017332 | CATSPER3       | chr5:134303595-134347397  | 0.630769  | 0.577361  | -0.127638 | 0.960032 |
| XLOC_001895 | GON4L          | chr1:155715558-155826972  | 2.06781   | 1.89281   | -0.127576 | 0.886468 |
| XLOC_005125 | FBXW8          | chr12:117348760-117468953 | 1.76021   | 1.61128   | -0.127538 | 0.905545 |
| XLOC_001109 | KIAA1804       | chr1:233463513-233520894  | 2.60842   | 2.38795   | -0.127407 | 0.891105 |
| XLOC_011820 | PLEKHA4        | chr19:49340353-49371884   | 9.43051   | 8.63354   | -0.127384 | 0.879055 |
| XLOC_016699 | LGI2           | chr4:25000470-25032414    | 0.0695283 | 0.0636561 | -0.127302 | 1        |
| XLOC_002002 | GPR161         | chr1:168048779-168106905  | 2.28507   | 2.0921    | -0.127288 | 0.881554 |
| XLOC_005647 | UHRF1BP1L      | chr12:100430862-100536642 | 1.44947   | 1.32707   | -0.127281 | 0.920464 |
| XLOC_017861 | TAF7           | chr5:140698056-140700351  | 32.9179   | 30.1395   | -0.127217 | 0.864624 |
| XLOC_012590 | FZD7           | chr2:202899309-202903160  | 3.85675   | 3.53148   | -0.127111 | 0.89852  |
| XLOC_000854 | POGK           | chr1:166808723-166823709  | 13.5548   | 12.4119   | -0.127078 | 0.865957 |
| XLOC_010026 | AZI1           | chr17:79163392-79196751   | 9.94895   | 9.1106    | -0.126998 | 0.879055 |
| XLOC_001534 | FOXD2-AS1      | chr1:47897806-47900313    | 2.86161   | 2.62052   | -0.126971 | 0.925997 |
| XLOC_004807 | IRAK4          | chr12:44152746-44183346   | 3.96774   | 3.63375   | -0.126859 | 0.880041 |
| XLOC_001861 | GATAD2B        | chr1:153777202-153895451  | 5.70455   | 5.22439   | -0.12685  | 0.869722 |
| XLOC_008137 | RSPRY1         | chr16:57220240-57272947   | 2.46933   | 2.26152   | -0.126826 | 0.919777 |
| XLOC_012164 | PRKCE          | chr2:45879042-46415129    | 1.34166   | 1.22877   | -0.126798 | 0.907121 |
| XLOC_010412 | ZADH2          | chr18:72909277-72921281   | 6.92595   | 6.34425   | -0.126561 | 0.872122 |
| XLOC_018275 | TBC1D22B       | chr6:37179953-37300746    | 3.73426   | 3.42067   | -0.126546 | 0.892013 |
| XLOC_009757 | VAT1           | chr17:41166621-41174459   | 178.072   | 163.123   | -0.126499 | 0.86747  |
| XLOC_023366 | PORCN          | chrX:48367370-48379202    | 17.4374   | 15.9735   | -0.126498 | 0.879418 |
| XLOC_000904 | RALGPS2        | chr1:178694299-178889237  | 2.15126   | 1.97073   | -0.126455 | 0.886829 |
| XLOC_019122 | ADAT2          | chr6:143743968-143771841  | 2.51914   | 2.30791   | -0.126341 | 0.884031 |
| XLOC_007409 | UNC45A         | chr15:91473409-91497323   | 32.3881   | 29.6729   | -0.126317 | 0.882554 |
| XLOC_018351 | TMEM14A        | chr6:52535883-52551385    | 23.3171   | 21.3624   | -0.126312 | 0.879418 |
| XLOC_023188 | DPP7           | chr9:140004991-140009195  | 350.265   | 320.915   | -0.126255 | 0.867427 |
| XLOC_016557 | FNIP2          | chr4:159690181-159956333  | 0.31438   | 0.288079  | -0.126044 | 1        |
| XLOC_013099 | LOC151009,LOC4 | chr2:111132685-111142113  | 3.80524   | 3.48727   | -0.125892 | 0.89785  |
| XLOC_004424 | CLNS1A         | chr11:77327195-77348851   | 109.127   | 100.009   | -0.125875 | 0.863898 |
| XLOC_004228 | LPXN           | chr11:58294343-58345639   | 1.63425   | 1.49772   | -0.125857 | 0.935829 |
| XLOC_000750 | ADAM15         | chr1:155006281-155042029  | 104.145   | 95.4497   | -0.12578  | 0.879418 |
| XLOC_008082 | ZNF267         | chr16:31885078-31928629   | 2.52323   | 2.31259   | -0.125763 | 0.896541 |
| XLOC_012751 | ANO7           | chr2:242127923-242164791  | 2.60816   | 2.39046   | -0.125744 | 0.915223 |
| XLOC_005963 | IPO5           | chr13:98605928-98676550   | 28.6277   | 26.2392   | -0.125685 | 0.867291 |
| XLOC_007197 | BLOC1S6        | chr15:45879416-45901909   | 10.5643   | 9.68328   | -0.125628 | 0.869722 |
| XLOC_021527 | SCARA3         | chr8:27491576-27534286    | 10.4502   | 9.57964   | -0.125482 | 0.876392 |
| XLOC_015643 | ENTPD3-AS1     | chr3:40428672-40494799    | 0.140973  | 0.129231  | -0.125462 | 1        |
| XLOC_003505 | FAM111B        | chr11:58874657-58894888   | 1.33981   | 1.22825   | -0.125426 | 0.917748 |
| XLOC_014600 | C22orf32       | chr22:42475694-42480288   | 25.9178   | 23.7598   | -0.125423 | 0.876679 |
| XLOC_001106 | DISC1,TSNAX    | chr1:231664398-232177019  | 10.1534   | 9.30805   | -0.125417 | 0.877622 |
| XLOC_006464 | KIAA1737       | chr14:77564577-77583630   | 3.33131   | 3.05415   | -0.125321 | 0.893674 |
| XLOC_001330 | CAMK2N1        | chr1:20808883-20812728    | 25.2063   | 23.1094   | -0.1253   | 0.870275 |
| XLOC_008190 | NFATC3         | chr16:68119268-68270136   | 3.88231   | 3.55939   | -0.125287 | 0.931457 |
| XLOC_011456 | FBXW9          | chr19:12799729-12807455   | 10.9205   | 10.0125   | -0.125234 | 0.901684 |
| XLOC_020808 | GSTK1          | chr7:142960521-142966222  | 133.345   | 122.259   | -0.125223 | 0.865746 |
| XLOC_016962 | FBXW7          | chr4:153242409-153456393  | 2.83843   | 2.60255   | -0.125169 | 0.900642 |
| XLOC_016739 | SGCB           | chr4:52886860-52904485    | 3.36065   | 3.08139   | -0.125157 | 0.892586 |



|             |           |                           |           |           |           |          |
|-------------|-----------|---------------------------|-----------|-----------|-----------|----------|
| XLOC_023578 | PLS3      | chrX:114795176-114885179  | 11.5163   | 10.5594   | -0.12514  | 0.874024 |
| XLOC_019008 | PNISR     | chr6:99847840-99873207    | 6.3774    | 5.84795   | -0.125036 | 0.879418 |
| XLOC_019129 | SHPRH     | chr6:145946439-146285233  | 0.701935  | 0.643701  | -0.124946 | 0.960032 |
| XLOC_002564 | FAM22A    | chr10:88985204-88994733   | 0.942193  | 0.864029  | -0.124942 | 0.939068 |
| XLOC_016267 | C4orf52   | chr4:25915813-25931501    | 29.4371   | 26.9952   | -0.124932 | 0.879418 |
| XLOC_016076 | CCDC39    | chr3:180331795-180397283  | 0.0278344 | 0.0255261 | -0.124893 | 1        |
| XLOC_013862 | ESF1      | chr20:13694968-13765579   | 2.78865   | 2.55758   | -0.124787 | 0.895686 |
| XLOC_005395 | PLEKHA8P1 | chr12:45566816-45834187   | 2.0483    | 1.87875   | -0.124655 | 0.981022 |
| XLOC_008161 | CMTM3     | chr16:66637934-66647795   | 58.4411   | 53.6063   | -0.124581 | 0.870524 |
| XLOC_001813 | VPS72     | chr1:151148775-151162689  | 39.881    | 36.5822   | -0.12456  | 0.87368  |
| XLOC_004686 | RPL13P5   | chr12:6993144-6993768     | 0.801847  | 0.735557  | -0.124491 | 0.968154 |
| XLOC_010671 | USE1      | chr19:17326154-17330638   | 41.0404   | 37.6478   | -0.12448  | 0.883608 |
| XLOC_022441 | WNK2      | chr9:95947211-96108696    | 5.77662   | 5.29961   | -0.124337 | 0.884968 |
| XLOC_003225 | RASSF7    | chr11:560970-564025       | 32.927    | 30.2097   | -0.124256 | 0.878903 |
| XLOC_015142 | GNL3      | chr3:52719935-52742197    | 68.2195   | 62.5899   | -0.124255 | 0.92085  |
| XLOC_016163 | MYL5      | chr4:671710-682973        | 7.82202   | 7.17678   | -0.124204 | 0.93285  |
| XLOC_022967 | TSTD2     | chr9:100263461-100436029  | 5.04128   | 4.62575   | -0.124102 | 0.95395  |
| XLOC_017462 | HMMR      | chr5:162887516-162918953  | 1.71228   | 1.57121   | -0.124049 | 0.915223 |
| XLOC_017324 | PHF15     | chr5:133861797-133918918  | 3.5121    | 3.22275   | -0.124041 | 0.884031 |
| XLOC_012567 | NABP1     | chr2:192542797-192553248  | 21.7894   | 19.9959   | -0.123922 | 0.87763  |
| XLOC_000021 | LOC148413 | chr1:1334909-1342693      | 9.40581   | 8.63227   | -0.123813 | 0.965886 |
| XLOC_005210 | ZNF268    | chr12:133757994-133783697 | 1.64386   | 1.50867   | -0.123808 | 0.896541 |
| XLOC_015780 | FAM208A   | chr3:56591183-56717135    | 4.75625   | 4.36534   | -0.123732 | 0.884031 |
| XLOC_017796 | LOC553103 | chr5:131630144-131731306  | 0.242503  | 0.222577  | -0.123698 | 1        |
| XLOC_001603 | ANKRD13C  | chr1:70724684-70820417    | 1.92934   | 1.77084   | -0.123677 | 0.898467 |
| XLOC_011221 | ZNF547    | chr19:57874878-57890925   | 10.1522   | 9.3185    | -0.123629 | 0.921691 |
| XLOC_020647 | PILRB     | chr7:99905324-99965454    | 42.4417   | 38.9576   | -0.123576 | 0.897677 |
| XLOC_011924 | ZNF702P   | chr19:53471503-53496784   | 1.72236   | 1.58103   | -0.123524 | 0.913887 |
| XLOC_004475 | CWC15     | chr11:94695786-94706776   | 25.8305   | 23.7111   | -0.123512 | 0.869513 |
| XLOC_022496 | TMEM38B   | chr9:108456805-108538892  | 11.8935   | 10.9182   | -0.123442 | 0.875956 |
| XLOC_000697 | SNX27     | chr1:151584661-151671559  | 3.31044   | 3.03903   | -0.123413 | 0.881122 |
| XLOC_008068 | ZNF646    | chr16:31085742-31100130   | 2.37589   | 2.18128   | -0.123298 | 0.921553 |
| XLOC_007932 | ABAT      | chr16:87688443-8878432    | 1.61361   | 1.48148   | -0.123258 | 0.906423 |
| XLOC_007749 | BTBD1     | chr15:83685180-83736167   | 23.0393   | 21.1534   | -0.123208 | 0.869039 |
| XLOC_009536 | FLII      | chr17:18128935-18162230   | 73.5958   | 67.5726   | -0.123186 | 0.890282 |
| XLOC_013771 | SLC17A9   | chr20:61583998-61599949   | 22.405    | 20.5734   | -0.12304  | 0.879418 |
| XLOC_017588 | MYO10     | chr5:16662015-16936385    | 6.22147   | 5.71299   | -0.12301  | 0.870275 |
| XLOC_013060 | TMEM131   | chr2:98372800-98612354    | 4.2816    | 3.93166   | -0.12301  | 0.879418 |
| XLOC_004509 | CWF19L2   | chr11:107197071-107328572 | 1.74859   | 1.60576   | -0.122937 | 0.911075 |
| XLOC_013215 | TTC21B    | chr2:166729871-166810348  | 1.63107   | 1.49795   | -0.122822 | 0.905257 |
| XLOC_006275 | OXA1L     | chr14:23235730-23240998   | 174.771   | 160.51    | -0.122804 | 0.869722 |
| XLOC_017455 | PTTG1     | chr5:159848864-159855746  | 188.482   | 173.113   | -0.122717 | 0.874851 |
| XLOC_013310 | TRAK2     | chr2:202241929-202316319  | 1.25359   | 1.15137   | -0.122708 | 0.905839 |
| XLOC_023902 | ARHGEF9   | chrX:62854847-63005426    | 2.08676   | 1.91675   | -0.1226   | 0.900642 |
| XLOC_008097 | PAPD5     | chr16:50186828-50269219   | 1.51645   | 1.39316   | -0.122339 | 0.897459 |
| XLOC_007822 | RAB11FIP3 | chr16:475667-572481       | 15.4594   | 14.2027   | -0.122324 | 0.875956 |
| XLOC_008287 | CDT1      | chr16:88870185-88875666   | 68.4043   | 62.8454   | -0.122281 | 0.87368  |
| XLOC_017810 | SKP1      | chr5:133492081-133512724  | 112.945   | 103.776   | -0.122147 | 0.869345 |
| XLOC_022006 | NSMAF     | chr8:59496063-59572404    | 18.2987   | 16.8135   | -0.122121 | 0.869495 |

|             |            |                           |           |           |           |          |
|-------------|------------|---------------------------|-----------|-----------|-----------|----------|
| XLOC_020514 | ZNF92      | chr7:64838767-64865998    | 1.86594   | 1.71457   | -0.122053 | 0.913887 |
| XLOC_001526 | MOB3C      | chr1:47073386-47082563    | 5.00955   | 4.6034    | -0.121982 | 0.896541 |
| XLOC_003016 | ZCCHC24    | chr10:81142082-81205383   | 1.43462   | 1.31831   | -0.121977 | 0.91876  |
| XLOC_023009 | PTGR1      | chr9:114287446-114362135  | 78.8897   | 72.4948   | -0.12196  | 0.872122 |
| XLOC_018827 | C6orf106   | chr6:34555065-34664625    | 14.5863   | 13.4043   | -0.121926 | 0.874024 |
| XLOC_002546 | FAM213A    | chr10:82167584-82192753   | 17.3676   | 15.9604   | -0.121901 | 0.879055 |
| XLOC_004550 | BACE1      | chr11:117103403-117186972 | 2.25684   | 2.0742    | -0.121745 | 0.934861 |
| XLOC_006632 | WDR20      | chr14:102606188-102690010 | 9.40639   | 8.64536   | -0.121716 | 0.88856  |
| XLOC_019134 | PPIL4      | chr6:149825630-149867238  | 8.09392   | 7.4391    | -0.12171  | 0.880754 |
| XLOC_007380 | AKAP13     | chr15:85923846-86292589   | 1.59641   | 1.46728   | -0.121692 | 0.896977 |
| XLOC_005338 | EPS8       | chr12:15773074-15942510   | 2.2806    | 2.09619   | -0.121643 | 0.903596 |
| XLOC_003657 | SSH3       | chr11:67070918-67080078   | 19.6191   | 18.0336   | -0.121574 | 0.878023 |
| XLOC_022944 | FAM120AOS  | chr9:96208781-96328397    | 18.4819   | 16.9901   | -0.121423 | 0.957857 |
| XLOC_011417 | ICAM3      | chr19:10444451-10450345   | 9.88818   | 9.09037   | -0.121366 | 0.901751 |
| XLOC_021299 | GCC1       | chr7:127220681-127225654  | 6.54112   | 6.01366   | -0.121294 | 0.884031 |
| XLOC_011665 | RPS16      | chr19:39923846-39926618   | 5727.92   | 5266.35   | -0.12121  | 0.886331 |
| XLOC_012702 | DIS3L2     | chr2:232826292-233208678  | 4.9979    | 4.59535   | -0.121147 | 0.890095 |
| XLOC_008516 | SEPT1      | chr16:30389453-30411429   | 0.899742  | 0.827288  | -0.121122 | 0.987173 |
| XLOC_011662 | GMFG       | chr19:39818998-39826726   | 0.326824  | 0.300506  | -0.12112  | 1        |
| XLOC_004996 | ATXN7L3B   | chr12:74931550-74935232   | 14.8613   | 13.6649   | -0.121086 | 0.875956 |
| XLOC_016102 | TBCCD1     | chr3:186263855-186288332  | 2.01081   | 1.84894   | -0.121081 | 0.925922 |
| XLOC_019102 | MAP3K5     | chr6:136878186-137113656  | 0.722842  | 0.664724  | -0.120926 | 0.930048 |
| XLOC_005387 | ZCRB1      | chr12:42705887-42719932   | 22.3865   | 20.5868   | -0.120908 | 0.875956 |
| XLOC_003647 | CCS        | chr11:66360689-66373490   | 37.2888   | 34.2933   | -0.120813 | 0.884031 |
| XLOC_017661 | RNF138P1   | chr5:54603575-54830873    | 0.039583  | 0.0364038 | -0.120794 | 1        |
| XLOC_013228 | TLK1       | chr2:171847332-172087824  | 6.41623   | 5.90117   | -0.120726 | 0.877776 |
| XLOC_011628 | ZNF790     | chr19:37288451-37407193   | 0.492932  | 0.453408  | -0.120577 | 0.958829 |
| XLOC_000222 | STX12      | chr1:28099693-28150963    | 10.2836   | 9.45967   | -0.120486 | 0.879418 |
| XLOC_012816 | SF3B14     | chr2:24290453-24299314    | 273.907   | 251.979   | -0.120383 | 0.871648 |
| XLOC_012861 | DPY30      | chr2:32248971-32264844    | 54.9879   | 50.5867   | -0.120356 | 0.879055 |
| XLOC_011553 | LPAR2      | chr19:19734465-19739039   | 13.1657   | 12.1121   | -0.120332 | 0.898484 |
| XLOC_009534 | TOM1L2     | chr17:17746821-17875784   | 4.18629   | 3.85137   | -0.120301 | 0.890207 |
| XLOC_015505 | ST6GAL1    | chr3:186648314-186796341  | 5.2289    | 4.81073   | -0.120251 | 0.886228 |
| XLOC_009261 | RPL38      | chr17:72199794-72206019   | 4838.44   | 4451.51   | -0.120246 | 0.879418 |
| XLOC_000061 | VAMP3      | chr1:7831328-7841492      | 22.3952   | 20.6047   | -0.120214 | 0.875956 |
| XLOC_005245 | LPAR5      | chr12:6728000-6745297     | 0.0360272 | 0.0331469 | -0.120213 | 1        |
| XLOC_003439 | C11orf49   | chr11:46958250-47198676   | 20.6886   | 19.0356   | -0.120131 | 0.953159 |
| XLOC_015068 | CLEC3B     | chr3:45067758-45077563    | 1.38951   | 1.27851   | -0.120105 | 0.964442 |
| XLOC_004828 | DNAJC22    | chr12:49741040-49745685   | 5.32996   | 4.90433   | -0.120069 | 0.913875 |
| XLOC_014569 | TAB1       | chr22:39795758-39833133   | 11.908    | 10.9573   | -0.120044 | 0.884621 |
| XLOC_015156 | APPL1      | chr3:57261764-57326710    | 3.98532   | 3.66719   | -0.120022 | 0.882208 |
| XLOC_016522 | ABCE1      | chr4:145915726-146050676  | 20.649    | 19.001    | -0.119997 | 0.884031 |
| XLOC_014907 | SBF1       | chr22:50781745-50913464   | 8.81924   | 8.11682   | -0.11974  | 0.92441  |
| XLOC_015590 | ZFYVE20    | chr3:15111579-15140655    | 3.43133   | 3.15813   | -0.119697 | 0.886093 |
| XLOC_022044 | RPL7       | chr8:74202873-74205869    | 7167.44   | 6597.11   | -0.119624 | 0.899607 |
| XLOC_023142 | VAV2       | chr9:136627015-136857446  | 14.6506   | 13.4849   | -0.119618 | 0.875231 |
| XLOC_007704 | FBXO22-AS1 | chr15:76196199-76227608   | 49.5125   | 45.5747   | -0.119559 | 0.948523 |
| XLOC_022106 | UQCRB      | chr8:97238903-97247862    | 55.11     | 50.7271   | -0.119557 | 0.879055 |
| XLOC_009291 | UNK        | chr17:73780919-73821886   | 8.43101   | 7.76106   | -0.119452 | 0.909176 |

|             |              |                           |           |           |           |          |
|-------------|--------------|---------------------------|-----------|-----------|-----------|----------|
| XLOC_002994 | TTC18        | chr10:75007124-75118617   | 0.494467  | 0.45521   | -0.11934  | 0.988025 |
| XLOC_004661 | RAD51AP1     | chr12:4647949-4669213     | 5.31672   | 4.89479   | -0.119291 | 0.895686 |
| XLOC_004447 | ME3          | chr11:86152149-86383678   | 10.2077   | 9.3979    | -0.119244 | 0.900232 |
| XLOC_013672 | TTPAL        | chr20:43104525-43123244   | 4.30588   | 3.96448   | -0.119177 | 0.884754 |
| XLOC_013509 | MAVS         | chr20:3827445-3856770     | 3.69778   | 3.40475   | -0.11911  | 0.879418 |
| XLOC_017991 | AACSP1       | chr5:178191863-178203277  | 0.93945   | 0.865012  | -0.119095 | 0.946021 |
| XLOC_006201 | TMTC4        | chr13:101256089-101327103 | 3.99257   | 3.6763    | -0.119062 | 0.900642 |
| XLOC_006438 | DNAL1        | chr14:74111577-74170431   | 0.571332  | 0.526091  | -0.119015 | 0.922851 |
| XLOC_011416 | RAVER1       | chr19:10426888-10444314   | 26.9367   | 24.8057   | -0.118899 | 0.879055 |
| XLOC_018486 | HINT3        | chr6:126277860-126301389  | 5.9619    | 5.49052   | -0.118827 | 0.89002  |
| XLOC_010485 | HMG20B       | chr19:3572942-3579081     | 105.443   | 97.1109   | -0.118762 | 0.87935  |
| XLOC_013120 | CCDC93       | chr2:118673053-118771739  | 4.45961   | 4.10727   | -0.118739 | 0.880754 |
| XLOC_023456 | KIF4A        | chrX:69509878-69640774    | 5.76406   | 5.30873   | -0.11872  | 0.885443 |
| XLOC_015528 | SDHAP2       | chr3:195384909-195415735  | 0.94454   | 0.86994   | -0.118696 | 0.945857 |
| XLOC_009821 | HOXB8        | chr17:46689707-46692301   | 3.35474   | 3.08992   | -0.11863  | 0.940327 |
| XLOC_008095 | CNEP1R1      | chr16:50059188-50070999   | 5.43527   | 5.00622   | -0.118629 | 0.903683 |
| XLOC_021964 | FGFR1        | chr8:38268655-38326352    | 21.2664   | 19.5883   | -0.118585 | 0.876141 |
| XLOC_021920 | KCTD9        | chr8:25285363-25315984    | 6.0677    | 5.58898   | -0.118566 | 0.887977 |
| XLOC_007820 | NME4         | chr16:447191-450754       | 74.2825   | 68.4234   | -0.118533 | 0.879055 |
| XLOC_018454 | MARCKS       | chr6:114178526-114184652  | 11.2109   | 10.3268   | -0.118504 | 0.879518 |
| XLOC_000315 | KCNQ4        | chr1:41249683-41306124    | 5.64584   | 5.20079   | -0.118457 | 0.896288 |
| XLOC_017761 | FBXL17       | chr5:107194733-107717799  | 1.2795    | 1.17868   | -0.118406 | 0.92085  |
| XLOC_002597 | EXOC6        | chr10:94594469-94819251   | 3.11606   | 2.87097   | -0.118185 | 0.900642 |
| XLOC_002669 | TRIM8        | chr10:104404251-104418076 | 33.7322   | 31.079    | -0.118183 | 0.880754 |
| XLOC_007641 | VWA9         | chr15:65871095-65903627   | 29.8888   | 27.5387   | -0.118147 | 0.875956 |
| XLOC_012686 | FBXO36       | chr2:230787206-230877825  | 0.57963   | 0.534056  | -0.118143 | 0.94824  |
| XLOC_015414 | TIPARP       | chr3:156390959-156424557  | 12.8686   | 11.8573   | -0.118083 | 0.879418 |
| XLOC_002181 | PTPN14       | chr1:214522038-214725024  | 1.71922   | 1.58427   | -0.117941 | 0.890806 |
| XLOC_009749 | PLEKHH3      | chr17:40819931-40829048   | 10.4494   | 9.62926   | -0.117921 | 0.906951 |
| XLOC_020568 | SRRM3        | chr7:75831215-75916605    | 12.8084   | 11.8034   | -0.117892 | 0.886622 |
| XLOC_022127 | UBR5         | chr8:103264501-103424917  | 6.12801   | 5.64741   | -0.11783  | 0.877776 |
| XLOC_001585 | DOCK7        | chr1:62920396-63154039    | 3.19205   | 2.94189   | -0.11774  | 0.889589 |
| XLOC_013530 | BTBD3        | chr20:11871476-11907243   | 2.39102   | 2.20387   | -0.117586 | 0.906423 |
| XLOC_015040 | ZNF621       | chr3:40566375-40581043    | 2.4504    | 2.25863   | -0.117567 | 0.89536  |
| XLOC_017318 | UQCRQ        | chr5:132202318-132204536  | 99.1482   | 91.3893   | -0.117561 | 0.879418 |
| XLOC_017870 | SPRY4        | chr5:141689991-141704620  | 51.1934   | 47.1876   | -0.11755  | 0.875256 |
| XLOC_009553 | AKAP10       | chr17:19807764-19881169   | 4.06513   | 3.74748   | -0.117382 | 0.897031 |
| XLOC_000631 | LOC100130000 | chr1:143687129-143714180  | 0.0947696 | 0.0873645 | -0.117377 | 1        |
| XLOC_021003 | KBTBD2       | chr7:32907777-32931468    | 8.22739   | 7.5846    | -0.117362 | 0.882208 |
| XLOC_013093 | SEPT10       | chr2:110300373-110371783  | 16.9614   | 15.6364   | -0.117349 | 0.877654 |
| XLOC_007630 | SPG21        | chr15:65255362-65282251   | 82.4232   | 75.9855   | -0.117326 | 0.879376 |
| XLOC_001702 | LAMTOR5      | chr1:110943876-110950546  | 142.833   | 131.681   | -0.117289 | 0.879418 |
| XLOC_011245 | A1BG-AS1     | chr19:58858171-58874214   | 0.177392  | 0.163544  | -0.117269 | 1        |
| XLOC_023041 | FBXW2        | chr9:123519253-123555740  | 8.6473    | 7.97267   | -0.117187 | 0.879269 |
| XLOC_011449 | ZNF443       | chr19:12540519-12551926   | 1.52846   | 1.40922   | -0.117183 | 0.930356 |
| XLOC_007565 | CEP152       | chr15:49030134-49103343   | 1.05869   | 0.976114  | -0.117156 | 0.914993 |
| XLOC_023024 | ALAD         | chr9:116148591-116163618  | 7.81216   | 7.20327   | -0.117069 | 0.890882 |
| XLOC_000301 | PPIE         | chr1:40204516-40254533    | 40.6154   | 37.4543   | -0.116894 | 0.915911 |
| XLOC_001811 | LYSMD1       | chr1:151129104-151148547  | 1.57439   | 1.45186   | -0.116886 | 0.974593 |

|             |               |                           |           |           |           |          |
|-------------|---------------|---------------------------|-----------|-----------|-----------|----------|
| XLOC_017216 | MSH3          | chr5:79922044-80172634    | 0.449949  | 0.414938  | -0.116865 | 0.987159 |
| XLOC_006011 | CHAMP1        | chr13:115079964-115092803 | 5.38964   | 4.97036   | -0.116839 | 0.890058 |
| XLOC_001081 | ADCK3         | chr1:227127937-227175246  | 23.8068   | 21.955    | -0.116821 | 0.881798 |
| XLOC_017724 | RPS23         | chr5:81569138-81574235    | 488.202   | 450.228   | -0.116821 | 0.886468 |
| XLOC_001547 | CC2D1B        | chr1:52816264-52831877    | 4.73587   | 4.36755   | -0.116808 | 0.888333 |
| XLOC_001350 | E2F2          | chr1:23832919-23857712    | 2.39796   | 2.21168   | -0.116666 | 0.91609  |
| XLOC_005372 | DDX11-AS1     | chr12:31173696-31257725   | 0.867038  | 0.799716  | -0.116607 | 0.982903 |
| XLOC_017083 | FAM105B       | chr5:14664782-14699842    | 2.22812   | 2.05513   | -0.116597 | 0.894373 |
| XLOC_017692 | MRPS27        | chr5:71515235-71616084    | 40.3285   | 37.1983   | -0.116564 | 0.879055 |
| XLOC_004922 | RPL41         | chr12:56510373-56511616   | 13662.6   | 12602.8   | -0.116487 | 0.896288 |
| XLOC_013102 | BUB1          | chr2:111395408-111435684  | 14.6891   | 13.5503   | -0.116423 | 0.883517 |
| XLOC_012724 | AGAP1         | chr2:236402732-237040444  | 3.56177   | 3.28566   | -0.116414 | 0.885923 |
| XLOC_011087 | ZNF578        | chr19:52956828-53020131   | 1.43428   | 1.32312   | -0.116381 | 0.911227 |
| XLOC_016518 | GAB1          | chr4:144257982-144395718  | 0.265212  | 0.244677  | -0.116265 | 1        |
| XLOC_004642 | B4GALNT3      | chr12:569542-671058       | 2.16821   | 2.00048   | -0.116161 | 0.922427 |
| XLOC_021301 | LRRRC4        | chr7:127292201-127732659  | 0.0388479 | 0.0358432 | -0.116137 | 1        |
| XLOC_020654 | MOSPD3        | chr7:100209724-100213000  | 47.1475   | 43.5027   | -0.116077 | 0.891105 |
| XLOC_015476 | AP2M1         | chr3:183892633-183901879  | 212.914   | 196.483   | -0.115873 | 0.879055 |
| XLOC_023771 | AP1S2         | chrX:15843928-15873137    | 12.8003   | 11.8129   | -0.115811 | 0.886622 |
| XLOC_009977 | TRIM47        | chr17:73870244-73874656   | 15.6128   | 14.4092   | -0.115738 | 0.899621 |
| XLOC_005140 | RNF10         | chr12:120972131-121015397 | 29.3295   | 27.0688   | -0.115723 | 0.879418 |
| XLOC_015518 | CCDC50        | chr3:190984943-191116459  | 6.98818   | 6.44956   | -0.115715 | 0.879269 |
| XLOC_013872 | DZANK1        | chr20:18364010-18447829   | 0.224308  | 0.207027  | -0.115662 | 1        |
| XLOC_010272 | CBX3P2        | chr18:2652168-2655394     | 0.365768  | 0.337595  | -0.115635 | 1        |
| XLOC_015084 | NBEAL2        | chr3:46963230-47051194    | 5.45252   | 5.03259   | -0.115621 | 0.926868 |
| XLOC_012972 | MCEE          | chr2:71336805-71357394    | 4.32486   | 3.99226   | -0.115447 | 0.936002 |
| XLOC_001957 | PEX19         | chr1:160246598-160254941  | 15.5883   | 14.3898   | -0.115418 | 0.880612 |
| XLOC_006385 | MNAT1         | chr14:61201458-61435398   | 22.5733   | 20.8382   | -0.115383 | 0.884031 |
| XLOC_012335 | CNOT11        | chr2:101869344-101886778  | 24.4786   | 22.5975   | -0.115361 | 0.880513 |
| XLOC_016438 | RAP1GDS1      | chr4:99182526-99365012    | 10.6679   | 9.8483    | -0.115327 | 0.883608 |
| XLOC_008609 | DYNC1L1I2     | chr16:66754798-66785525   | 8.05837   | 7.43964   | -0.115255 | 0.884031 |
| XLOC_006836 | L3HYPDH       | chr14:59939405-59951073   | 3.04639   | 2.81255   | -0.115224 | 0.939356 |
| XLOC_007869 | TSC2          | chr16:2097989-2185899     | 10.9552   | 10.1144   | -0.115205 | 0.928207 |
| XLOC_012873 | CDC42EP3      | chr2:37869024-37899678    | 1.93075   | 1.78281   | -0.115005 | 0.910997 |
| XLOC_001693 | SORT1         | chr1:109852187-109940563  | 5.6201    | 5.18963   | -0.114965 | 0.881798 |
| XLOC_002239 | TTC13         | chr1:231041986-231114618  | 1.14669   | 1.05888   | -0.114936 | 0.933736 |
| XLOC_006045 | MTIF3         | chr13:27998680-28024739   | 31.1132   | 28.7311   | -0.114914 | 0.962314 |
| XLOC_016706 | FLJ13197      | chr4:38614321-38703129    | 0.0155967 | 0.0144033 | -0.114848 | 1        |
| XLOC_011424 | AP1M2         | chr19:10683346-10697991   | 2.86431   | 2.6456    | -0.114459 | 0.935301 |
| XLOC_002571 | PTEN          | chr10:89623194-89728532   | 7.9104    | 7.30642   | -0.114585 | 0.883608 |
| XLOC_010213 | ONECUT2       | chr18:55102916-55158530   | 0.346343  | 0.319899  | -0.114585 | 1        |
| XLOC_021133 | RSBN1L-AS1    | chr7:77313167-77409120    | 4.20034   | 3.87987   | -0.114499 | 0.955497 |
| XLOC_012352 | C2orf49       | chr2:105954012-105961984  | 8.48519   | 7.83801   | -0.114459 | 0.915223 |
| XLOC_011340 | C19orf70      | chr19:5678432-5688534     | 106.588   | 98.4599   | -0.114438 | 0.884754 |
| XLOC_014533 | APOL6         | chr22:36044423-36064456   | 0.103445  | 0.0955623 | -0.114347 | 1        |
| XLOC_000659 | LOC388692     | chr1:149279475-149291742  | 0.302819  | 0.279746  | -0.114339 | 1        |
| XLOC_000521 | RWDD3, TMEM56 | chr1:95558072-95712781    | 11.3716   | 10.5053   | -0.11432  | 0.922274 |
| XLOC_003851 | PHLDB1        | chr11:118477212-118528748 | 3.16481   | 2.9237    | -0.114319 | 0.908098 |
| XLOC_011736 | LOC100505715  | chr19:44395955-44405955   | 0.274316  | 0.253428  | -0.114266 | 1        |

|             |               |                           |           |           |           |          |
|-------------|---------------|---------------------------|-----------|-----------|-----------|----------|
| XLOC_003911 | DCPS          | chr11:126173646-126225482 | 32.6493   | 30.1638   | -0.114233 | 0.891976 |
| XLOC_010092 | TYMS          | chr18:596997-712662       | 20.0253   | 18.5009   | -0.114223 | 0.960032 |
| XLOC_016254 | MED28         | chr4:17616272-17626160    | 40.7697   | 37.6674   | -0.114179 | 0.885904 |
| XLOC_001236 | RPL22         | chr1:6245079-6259679      | 352.183   | 325.437   | -0.113949 | 0.886886 |
| XLOC_010743 | PLEKHF1       | chr19:30156326-30166383   | 7.26      | 6.70888   | -0.113898 | 0.926079 |
| XLOC_008065 | SETD1A        | chr16:30968614-30995981   | 8.14745   | 7.52902   | -0.113887 | 0.886331 |
| XLOC_016951 | ANAPC10       | chr4:145915726-146050676  | 6.67642   | 6.16972   | -0.113871 | 0.974593 |
| XLOC_003670 | TCIRG1        | chr11:67806461-67818366   | 38.0138   | 35.131    | -0.113776 | 0.886848 |
| XLOC_004036 | RRP8          | chr11:6621143-6624880     | 11.7245   | 10.8357   | -0.113735 | 0.905545 |
| XLOC_017217 | RASGRF2       | chr5:80256507-81047072    | 0.0567094 | 0.0524121 | -0.113688 | 1        |
| XLOC_007228 | GCOM1,MYZAP,F | chr15:57884101-58009755   | 9.47264   | 8.75485   | -0.113684 | 0.889608 |
| XLOC_022330 | UNC13B        | chr9:35161988-35405332    | 1.21841   | 1.12615   | -0.113602 | 0.919563 |
| XLOC_011273 | C19orf26      | chr19:1229946-1237990     | 2.94886   | 2.72575   | -0.113502 | 0.938663 |
| XLOC_018143 | PGBD1         | chr6:28249313-28270326    | 1.97958   | 1.82986   | -0.113465 | 0.920543 |
| XLOC_005682 | SSH1          | chr12:109176465-109251359 | 5.9934    | 5.54014   | -0.113452 | 0.900642 |
| XLOC_020743 | IRF5          | chr7:128577993-128590088  | 24.2803   | 22.4451   | -0.11339  | 0.884758 |
| XLOC_009285 | LLGL2         | chr17:73521782-73571290   | 28.965    | 26.7765   | -0.113345 | 0.905839 |
| XLOC_016540 | TRIM2         | chr4:154074269-154260474  | 1.77231   | 1.63841   | -0.113342 | 0.907121 |
| XLOC_016725 | GNPDA2        | chr4:44703811-44728651    | 4.18144   | 3.86559   | -0.113309 | 0.917306 |
| XLOC_023984 | ZMAT1         | chrX:101137259-101187039  | 0.142238  | 0.131511  | -0.113123 | 1        |
| XLOC_008690 | CDYL2         | chr16:80637675-80838175   | 0.208908  | 0.193154  | -0.113112 | 1        |
| XLOC_015225 | LNP1          | chr3:100082302-100175170  | 1.94113   | 1.79494   | -0.112963 | 0.981441 |
| XLOC_002189 | BPNT1         | chr1:220046618-220321383  | 9.7597    | 9.02501   | -0.112908 | 0.977657 |
| XLOC_015896 | RABL3         | chr3:120405527-120461384  | 4.39387   | 4.06428   | -0.112494 | 0.901719 |
| XLOC_017512 | RGS14         | chr5:176784843-176799599  | 5.2476    | 4.85415   | -0.112439 | 0.922457 |
| XLOC_008070 | KAT8          | chr16:31128984-31142714   | 21.4383   | 19.8313   | -0.112408 | 0.894866 |
| XLOC_011429 | SPC24         | chr19:11257830-11266484   | 8.49986   | 7.86283   | -0.112391 | 0.940466 |
| XLOC_016128 | ATP13A3       | chr3:194123402-194188968  | 7.24738   | 6.70447   | -0.112336 | 0.889871 |
| XLOC_019050 | TSPYL4        | chr6:116571130-116575261  | 3.40538   | 3.1504    | -0.112283 | 0.907121 |
| XLOC_007524 | RPAP1         | chr15:41809374-41836464   | 7.57002   | 7.00327   | -0.112268 | 0.896977 |
| XLOC_023855 | SYP           | chrX:49044264-49056661    | 0.257901  | 0.238618  | -0.112115 | 1        |
| XLOC_020340 | ELFN1         | chr7:1748797-1787590      | 2.38281   | 2.20481   | -0.112009 | 0.935543 |
| XLOC_001271 | KIAA2013      | chr1:11979644-11986485    | 50.6994   | 46.9131   | -0.111978 | 0.884031 |
| XLOC_013596 | DNMT3B        | chr20:31350190-31397162   | 1.47449   | 1.36441   | -0.111943 | 0.933093 |
| XLOC_013693 | ZSWIM1        | chr20:44509847-44513905   | 4.43161   | 4.10088   | -0.111897 | 0.913239 |
| XLOC_021150 | SLC25A40      | chr7:87463813-87538856    | 2.24124   | 2.07404   | -0.11186  | 0.963003 |
| XLOC_021511 | LOC389641     | chr8:23082733-23088439    | 5.33117   | 4.93362   | -0.111807 | 0.924916 |
| XLOC_007318 | UBE2Q2        | chr15:76135621-76193388   | 13.1335   | 12.1546   | -0.111748 | 0.885883 |
| XLOC_014223 | COL6A1        | chr21:47401662-47424963   | 20.6361   | 19.0985   | -0.111709 | 0.888841 |
| XLOC_018850 | GLO1          | chr6:38643701-38670952    | 108.447   | 100.374   | -0.111611 | 0.886331 |
| XLOC_017157 | ERBB2IP       | chr5:65222381-65376851    | 6.07733   | 5.62504   | -0.111575 | 0.889814 |
| XLOC_007549 | ELL3          | chr15:44038589-44094769   | 1.58168   | 1.46397   | -0.111572 | 0.993157 |
| XLOC_010144 | GATA6         | chr18:19749403-19782491   | 2.98094   | 2.75911   | -0.111564 | 0.926279 |
| XLOC_010944 | PPM1N         | chr19:46001730-46005764   | 5.00013   | 4.62829   | -0.111488 | 0.933925 |
| XLOC_014300 | PAXBP1        | chr21:34100424-34144169   | 11.0941   | 10.2695   | -0.111425 | 0.893453 |
| XLOC_007162 | TYRO3         | chr15:41851219-41871536   | 16.7107   | 15.4689   | -0.111406 | 0.889046 |
| XLOC_016149 | PIGZ          | chr3:196673213-196695704  | 0.879775  | 0.814416  | -0.11137  | 0.951272 |
| XLOC_015182 | ARL6IP5       | chr3:69134089-69155239    | 19.5462   | 18.0946   | -0.111327 | 0.890564 |
| XLOC_015101 | KLHDC8B       | chr3:49209017-49213919    | 8.59035   | 7.95257   | -0.111295 | 0.91015  |

|             |              |                           |           |           |           |          |
|-------------|--------------|---------------------------|-----------|-----------|-----------|----------|
| XLOC_000850 | MGST3        | chr1:165600109-165625372  | 79.2945   | 73.4097   | -0.111251 | 0.884031 |
| XLOC_006306 | KHNYN        | chr14:24899140-24912007   | 12.4852   | 11.5592   | -0.111173 | 0.921904 |
| XLOC_021158 | PEX1         | chr7:92116336-92157845    | 4.42023   | 4.09266   | -0.11108  | 0.898682 |
| XLOC_009655 | RPL23        | chr17:37006320-37010053   | 4875.07   | 4514.1    | -0.110985 | 0.897332 |
| XLOC_013932 | AHCY         | chr20:32868070-32899608   | 192.054   | 177.837   | -0.110954 | 0.884758 |
| XLOC_022356 | ALDH1B1      | chr9:38392660-38398662    | 20.9471   | 19.3979   | -0.11085  | 0.885177 |
| XLOC_022089 | TRIQQ        | chr8:93895757-93978372    | 2.17784   | 2.01695   | -0.110729 | 0.919979 |
| XLOC_010224 | KIAA1468     | chr18:59854523-59974355   | 2.14701   | 1.9885    | -0.11065  | 0.911075 |
| XLOC_008590 | DOK4         | chr16:57496550-57520385   | 13.5261   | 12.5287   | -0.110508 | 0.955713 |
| XLOC_005492 | ATP5G2       | chr12:54058943-54070512   | 825.434   | 764.585   | -0.110475 | 0.882958 |
| XLOC_001541 | FAF1         | chr1:50906934-51425936    | 26.6623   | 24.6973   | -0.110448 | 0.891383 |
| XLOC_016748 | CLOCK        | chr4:56294067-56413076    | 0.732318  | 0.678373  | -0.110392 | 0.919516 |
| XLOC_022477 | STX17        | chr9:102668914-102736818  | 2.8593    | 2.64884   | -0.110301 | 0.900642 |
| XLOC_022822 | GBA2         | chr9:35697333-35749225    | 9.04347   | 8.37833   | -0.110213 | 0.971173 |
| XLOC_001639 | CCBL2,RBML1  | chr1:89401455-89458643    | 16.0501   | 14.8697   | -0.110201 | 0.910891 |
| XLOC_013312 | TMEM237      | chr2:202484906-202508252  | 3.8298    | 3.54818   | -0.11019  | 0.898963 |
| XLOC_017419 | PPARGC1B     | chr5:149109814-149234585  | 0.488354  | 0.452447  | -0.110179 | 0.933523 |
| XLOC_010060 | OGFOD3       | chr17:80347085-80408707   | 6.01835   | 5.57678   | -0.109936 | 0.955641 |
| XLOC_014674 | SLC25A1      | chr22:19163087-19166338   | 153.208   | 141.967   | -0.109935 | 0.888541 |
| XLOC_013184 | STAM2        | chr2:152973314-153032506  | 1.60595   | 1.48813   | -0.109928 | 0.916694 |
| XLOC_002532 | RPS24        | chr10:79793517-79816571   | 3598.63   | 3334.74   | -0.109873 | 0.900639 |
| XLOC_013953 | DSN1         | chr20:35380193-35402230   | 8.87744   | 8.22648   | -0.109869 | 0.907121 |
| XLOC_017858 | DND1         | chr5:140044383-140053171  | 9.63021   | 8.92445   | -0.109804 | 0.964843 |
| XLOC_021997 | RPS20        | chr8:56980738-56987140    | 3904.55   | 3618.62   | -0.109715 | 0.902819 |
| XLOC_003687 | KRTAP5-8     | chr11:71249070-71250253   | 0.0606903 | 0.0562478 | -0.109668 | 1        |
| XLOC_011839 | PIH1D1       | chr19:49949549-49955115   | 95.3909   | 88.4165   | -0.109536 | 0.890489 |
| XLOC_005871 | AKAP11       | chr13:42846288-42897403   | 2.16785   | 2.00941   | -0.109495 | 0.897319 |
| XLOC_013258 | TTN          | chr2:179059207-179672150  | 0.0165099 | 0.0153035 | -0.109463 | 1        |
| XLOC_005991 | ARHGEF7      | chr13:111767623-111958081 | 8.47771   | 7.85849   | -0.109421 | 0.891476 |
| XLOC_004772 | ETNK1        | chr12:22778075-22843608   | 5.58197   | 5.17493   | -0.109234 | 0.961952 |
| XLOC_016668 | WDR1         | chr4:10075962-10118573    | 126.282   | 117.077   | -0.109198 | 0.894409 |
| XLOC_005117 | C12orf52     | chr12:113623554-113630119 | 22.8947   | 21.2259   | -0.109192 | 0.899607 |
| XLOC_003137 | RPL13AP6     | chr10:112679300-112773425 | 0.175447  | 0.162675  | -0.109039 | 1        |
| XLOC_001737 | NHLH2        | chr1:116378998-116383747  | 0.507298  | 0.470391  | -0.108973 | 0.958439 |
| XLOC_015466 | B3GNT5       | chr3:182895830-183145855  | 2.57244   | 2.38537   | -0.108922 | 0.91609  |
| XLOC_002748 | FAM175B      | chr10:126490353-126525239 | 4.88591   | 4.53091   | -0.108827 | 0.908881 |
| XLOC_017635 | LOC648987    | chr5:43014830-43018913    | 1.38995   | 1.28897   | -0.108809 | 0.945416 |
| XLOC_021872 | FAM90A2P     | chr8:12030962-12034776    | 0.170837  | 0.158434  | -0.108737 | 1        |
| XLOC_022718 | PLGRKT       | chr9:5357966-5437937      | 14.4184   | 13.3735   | -0.108534 | 0.91609  |
| XLOC_006861 | PLEK2        | chr14:67853699-67878828   | 48.088    | 44.6042   | -0.108497 | 0.892124 |
| XLOC_000324 | C1orf50      | chr1:43232915-43241413    | 11.5825   | 10.7456   | -0.108189 | 0.92438  |
| XLOC_009361 | FLJ43681     | chr17:81174665-81188573   | 0.584464  | 0.542245  | -0.108169 | 0.957719 |
| XLOC_001256 | CLSTN1       | chr1:9711789-9884550      | 28.0307   | 26.0059   | -0.108166 | 0.898682 |
| XLOC_022604 | LOC100506190 | chr9:132250938-132275965  | 12.8402   | 11.9131   | -0.108115 | 0.906633 |
| XLOC_013844 | TMEM230      | chr20:5080483-5093733     | 61.9699   | 57.4965   | -0.108094 | 0.886622 |
| XLOC_001404 | LAPTM5       | chr1:31205314-31230683    | 0.0192272 | 0.017841  | -0.107956 | 1        |
| XLOC_014870 | PACSL1       | chr22:43265771-43411184   | 16.162    | 14.9971   | -0.107915 | 0.895596 |
| XLOC_010838 | ACTN4        | chr19:39138266-39235114   | 56.079    | 52.0415   | -0.107798 | 0.901684 |
| XLOC_016828 | HELQ         | chr4:84328498-84377025    | 2.07727   | 1.92781   | -0.107728 | 0.92475  |

|             |                |                           |           |           |           |          |
|-------------|----------------|---------------------------|-----------|-----------|-----------|----------|
| XLOC_018881 | MEA1           | chr6:42952236-42981618    | 134.994   | 125.281   | -0.107725 | 0.919777 |
| XLOC_020438 | BBS9           | chr7:33169151-33645680    | 1.09908   | 1.02007   | -0.107627 | 0.936813 |
| XLOC_000165 | ZBTB40         | chr1:22778343-22857650    | 2.23696   | 2.07617   | -0.107613 | 0.908098 |
| XLOC_023435 | UBQLN2         | chrX:56590025-56593443    | 11.6353   | 10.799    | -0.107607 | 0.895686 |
| XLOC_017809 | VDAC1          | chr5:133307565-133340824  | 161.575   | 149.962   | -0.107603 | 0.894373 |
| XLOC_020375 | TMEM106B       | chr7:12250847-12276890    | 3.62434   | 3.36395   | -0.107562 | 0.89785  |
| XLOC_017241 | RHOBTB3        | chr5:95066849-95132071    | 7.59701   | 7.05137   | -0.107528 | 0.893876 |
| XLOC_019128 | FBXO30         | chr6:145946439-146285233  | 4.74796   | 4.4072    | -0.107444 | 0.916937 |
| XLOC_023601 | STAG2          | chrX:123094474-123236505  | 8.60052   | 7.98653   | -0.106856 | 0.895686 |
| XLOC_000731 | SNAPIN         | chr1:153631129-153643504  | 39.8548   | 37.0101   | -0.106835 | 0.975928 |
| XLOC_008327 | LMF1           | chr16:903634-1031318      | 27.574    | 25.6061   | -0.106817 | 0.902527 |
| XLOC_010668 | SIN3B          | chr19:16940208-16991164   | 8.95991   | 8.32051   | -0.106811 | 0.900285 |
| XLOC_014309 | ATP5O          | chr21:35275756-35288158   | 327.162   | 303.822   | -0.106778 | 0.893766 |
| XLOC_012579 | SGOL2          | chr2:201390864-201448818  | 2.24419   | 2.08424   | -0.106676 | 0.915089 |
| XLOC_007706 | ETFA           | chr15:76508628-76603810   | 99.2498   | 92.1814   | -0.106587 | 0.894866 |
| XLOC_020870 | GALNT11        | chr7:151722777-151819427  | 12.7203   | 11.8144   | -0.106578 | 0.900639 |
| XLOC_008785 | KIF1C          | chr17:4901242-4931694     | 20.7567   | 19.2789   | -0.10656  | 0.895596 |
| XLOC_016096 | IGF2BP2        | chr3:185361526-185542827  | 30.805    | 28.6117   | -0.106558 | 0.89536  |
| XLOC_019172 | AGPAT4         | chr6:161551056-161695107  | 0.376003  | 0.349238  | -0.106534 | 0.945399 |
| XLOC_005133 | PRKAB1         | chr12:120105760-120119429 | 9.45364   | 8.7809    | -0.106501 | 0.910813 |
| XLOC_023929 | RPS4X          | chrX:71492452-71497141    | 3497.61   | 3248.82   | -0.106451 | 0.908098 |
| XLOC_015155 | SPATA12        | chr3:56761445-57113336    | 0.0809185 | 0.0751711 | -0.106292 | 1        |
| XLOC_015694 | SLC26A6        | chr3:48663155-48672926    | 8.26481   | 7.67799   | -0.106254 | 0.91353  |
| XLOC_022768 | CAAP1          | chr9:26840682-26892826    | 4.37738   | 4.06679   | -0.106177 | 0.91609  |
| XLOC_012866 | FEZ2           | chr2:36779403-36825332    | 135.672   | 126.049   | -0.106135 | 0.89785  |
| XLOC_007617 | RPS27L         | chr15:63445538-63449741   | 75.9401   | 70.5563   | -0.106086 | 0.894574 |
| XLOC_017493 | MSX2           | chr5:174151574-174157902  | 2.39617   | 2.22637   | -0.106033 | 0.940466 |
| XLOC_008513 | LOC440354,LOC5 | chr16:30278913-30346695   | 1.97388   | 1.83412   | -0.105951 | 0.926279 |
| XLOC_000513 | CCDC18         | chr1:93646280-93744287    | 0.44498   | 0.413489  | -0.10589  | 0.950251 |
| XLOC_013220 | CERS6-AS1      | chr2:169312758-169642939  | 6.18301   | 5.74643   | -0.105642 | 0.943284 |
| XLOC_008758 | PAFAH1B1       | chr17:2496922-2588909     | 13.6774   | 12.7121   | -0.105591 | 0.89325  |
| XLOC_017192 | NSA2           | chr5:73980968-74072737    | 149.535   | 138.982   | -0.105586 | 0.939068 |
| XLOC_008437 | FOPNL          | chr16:15959576-15982447   | 13.2878   | 12.3505   | -0.105534 | 0.902269 |
| XLOC_021646 | ZC2HC1A        | chr8:79578281-79631997    | 1.77407   | 1.64898   | -0.105492 | 0.93053  |
| XLOC_001258 | LZIC           | chr1:9989775-10002826     | 10.8782   | 10.1115   | -0.105453 | 0.915223 |
| XLOC_017362 | HARS2          | chr5:140053489-140078890  | 9.09075   | 8.45002   | -0.105445 | 0.966647 |
| XLOC_016760 | CENPC1         | chr4:68337988-68411256    | 2.21174   | 2.05595   | -0.105379 | 0.923897 |
| XLOC_004121 | CCDC34         | chr11:27360060-27384795   | 10.102    | 9.3906    | -0.105353 | 0.917927 |
| XLOC_001061 | MARC2          | chr1:220921675-220957596  | 4.64285   | 4.31603   | -0.105306 | 0.934861 |
| XLOC_021520 | DOCK5          | chr8:25042286-25270619    | 0.642137  | 0.596936  | -0.105306 | 0.93855  |
| XLOC_000264 | S100PBP        | chr1:33240839-33324480    | 3.64391   | 3.38754   | -0.105249 | 0.981297 |
| XLOC_018076 | CDKAL1         | chr6:20534687-21232634    | 2.85345   | 2.6527    | -0.105248 | 0.924162 |
| XLOC_011727 | XRCC1          | chr19:44047463-44079730   | 17.5194   | 16.2869   | -0.105241 | 0.906932 |
| XLOC_008425 | BCAR4          | chr16:11913691-11922689   | 0.290059  | 0.269657  | -0.105219 | 1        |
| XLOC_018978 | KIAA1009       | chr6:84833959-84937335    | 0.27104   | 0.251986  | -0.105164 | 1        |
| XLOC_006939 | ATXN3          | chr14:92524895-92572965   | 1.7479    | 1.62506   | -0.105125 | 0.911478 |
| XLOC_023891 | FAM104B        | chrX:55169534-55187628    | 6.55782   | 6.09716   | -0.105079 | 0.93113  |
| XLOC_003361 | TMEM86A        | chr11:18720350-18747777   | 1.25877   | 1.17051   | -0.104878 | 0.940675 |
| XLOC_000531 | SLC35A3        | chr1:100435344-100492534  | 2.48677   | 2.31244   | -0.104855 | 0.913595 |

|             |                |                           |           |           |           |          |
|-------------|----------------|---------------------------|-----------|-----------|-----------|----------|
| XLOC_004369 | SUV420H1       | chr11:67923506-67980784   | 6.02108   | 5.59967   | -0.10468  | 0.91015  |
| XLOC_018963 | TMEM30A        | chr6:75962637-75994632    | 12.302    | 11.4418   | -0.104586 | 0.897332 |
| XLOC_010122 | CHMP1B         | chr18:11689013-11908796   | 18.1478   | 16.8817   | -0.104332 | 0.933523 |
| XLOC_005255 | LPCAT3         | chr12:7085346-7125842     | 9.78079   | 9.099     | -0.104243 | 0.914837 |
| XLOC_006478 | GPR65          | chr14:88471467-88481155   | 0.0129154 | 0.0120153 | -0.104224 | 1        |
| XLOC_023536 | TCEAL1         | chrX:102883647-102885876  | 11.2422   | 10.4588   | -0.104206 | 0.924931 |
| XLOC_001070 | FBXO28         | chr1:224301788-224349749  | 6.50404   | 6.0511    | -0.104137 | 0.898467 |
| XLOC_012392 | CBWD2          | chr2:114195267-114253781  | 1.36285   | 1.26805   | -0.104016 | 0.948316 |
| XLOC_014719 | DERL3          | chr22:24129149-24181199   | 1.33956   | 1.2465    | -0.103874 | 0.991785 |
| XLOC_000330 | WDR65          | chr1:43629844-43720029    | 0.0262234 | 0.0244036 | -0.103758 | 1        |
| XLOC_006091 | ELF1           | chr13:41506054-41593508   | 7.5854    | 7.0592    | -0.10372  | 0.900642 |
| XLOC_004604 | SIAE           | chr11:124492741-124564687 | 8.25555   | 7.68332   | -0.103634 | 0.946416 |
| XLOC_005348 | ABCC9          | chr12:21950323-22089628   | 0.54564   | 0.507853  | -0.103536 | 0.937886 |
| XLOC_016602 | FAM149A        | chr4:187065994-187093817  | 1.18667   | 1.10455   | -0.103459 | 0.949726 |
| XLOC_004432 | NARS2          | chr11:78147006-78285909   | 7.47814   | 6.96078   | -0.103431 | 0.916694 |
| XLOC_006154 | MZT1           | chr13:73282494-73301938   | 15.8995   | 14.8007   | -0.103313 | 0.902527 |
| XLOC_014225 | MCM3AP-AS1     | chr21:47649157-47705236   | 0.146414  | 0.136303  | -0.103236 | 1        |
| XLOC_021983 | PRKDC          | chr8:48685668-48872743    | 10.1094   | 9.41207   | -0.103113 | 0.89785  |
| XLOC_000639 | LIX1L          | chr1:145477084-145499091  | 9.0588    | 8.43415   | -0.103077 | 0.92921  |
| XLOC_000548 | PRMT6          | chr1:107599266-107601916  | 6.98063   | 6.49933   | -0.103066 | 0.916082 |
| XLOC_023823 | FUNDC1         | chrX:44382884-44402221    | 14.1007   | 13.1286   | -0.103055 | 0.916308 |
| XLOC_010257 | ATP9B          | chr18:76829396-77138282   | 2.41851   | 2.25184   | -0.103014 | 0.928422 |
| XLOC_015739 | C3orf18        | chr3:50595455-50622421    | 6.2686    | 5.83663   | -0.103008 | 0.965886 |
| XLOC_010814 | LOC728752      | chr19:36980528-36981942   | 1.25199   | 1.16572   | -0.103    | 0.961218 |
| XLOC_018026 | DKFZP686I15217 | chr6:2988200-2991405      | 1.15678   | 1.07707   | -0.102998 | 0.954397 |
| XLOC_007710 | PEAK1          | chr15:77400497-77712446   | 1.18751   | 1.10573   | -0.102937 | 0.91609  |
| XLOC_002101 | KIF21B         | chr1:200938513-200992828  | 0.111461  | 0.103808  | -0.102623 | 1        |
| XLOC_008445 | SMG1           | chr16:18816174-18937726   | 2.36824   | 2.20564   | -0.102617 | 0.904905 |
| XLOC_003623 | SIPA1          | chr11:65405577-65418391   | 13.1888   | 12.2843   | -0.102502 | 0.91207  |
| XLOC_016099 | DGKG           | chr3:185864989-186080023  | 2.00412   | 1.86697   | -0.102267 | 0.92351  |
| XLOC_000536 | CDC14A         | chr1:100818022-100985833  | 0.965787  | 0.899703  | -0.102255 | 0.939929 |
| XLOC_017169 | GTF2H2C,GTF2H  | chr5:68856050-68888729    | 1.58957   | 1.48083   | -0.102229 | 0.948369 |
| XLOC_020569 | HSPB1          | chr7:75931874-75933614    | 820.539   | 764.412   | -0.102222 | 0.900642 |
| XLOC_013939 | TRPC4AP        | chr20:33543703-33680618   | 39.1733   | 36.4943   | -0.102199 | 0.899607 |
| XLOC_008402 | ROGDI          | chr16:4846962-4852951     | 9.36932   | 8.72876   | -0.102167 | 0.928904 |
| XLOC_022983 | TMEM246        | chr9:104237607-104249475  | 26.9653   | 25.1219   | -0.102156 | 0.901751 |
| XLOC_005438 | FMNL3          | chr12:50017196-50101197   | 3.39892   | 3.16677   | -0.102063 | 0.907121 |
| XLOC_008685 | TMEM231        | chr16:75572014-75590184   | 12.4635   | 11.6123   | -0.102055 | 0.907121 |
| XLOC_003918 | TMEM45B        | chr11:129685740-129729898 | 0.0315038 | 0.0293529 | -0.102025 | 1        |
| XLOC_021956 | BRF2           | chr8:37654400-37707431    | 10.774    | 10.039    | -0.101944 | 0.916584 |
| XLOC_015460 | USP13          | chr3:179370932-179507189  | 1.58435   | 1.47629   | -0.101913 | 0.919765 |
| XLOC_020923 | CYTH3          | chr7:6201411-6312242      | 4.41859   | 4.11727   | -0.101898 | 0.915223 |
| XLOC_002527 | VDAC2          | chr10:76969911-76991207   | 185.757   | 173.097   | -0.101838 | 0.901045 |
| XLOC_001441 | KIAA0319L      | chr1:35899090-36023037    | 7.63599   | 7.11585   | -0.10178  | 0.905305 |
| XLOC_015063 | ZNF501         | chr3:44771097-44778575    | 0.636308  | 0.592975  | -0.101755 | 0.952184 |
| XLOC_017177 | BDP1           | chr5:70751441-70863649    | 0.961394  | 0.895986  | -0.101651 | 0.922738 |
| XLOC_018690 | LOC285819      | chr6:26458152-26482737    | 0.293411  | 0.273457  | -0.10161  | 1        |
| XLOC_011327 | UBXN6          | chr19:4445002-4457791     | 148.647   | 138.538   | -0.101602 | 0.904214 |
| XLOC_021208 | GPC2           | chr7:99767228-99774990    | 1.86138   | 1.73491   | -0.101515 | 0.948523 |



|             |            |                           |          |          |            |          |
|-------------|------------|---------------------------|----------|----------|------------|----------|
| XLOC_012878 | DHX57      | chr2:39024875-39103021    | 3.36225  | 3.13387  | -0.101481  | 0.91609  |
| XLOC_001056 | LYPLAL1    | chr1:219347191-219386207  | 12.8809  | 12.0074  | -0.101303  | 0.906932 |
| XLOC_022269 | CDC37L1    | chr9:4679565-4706594      | 6.64734  | 6.19698  | -0.101212  | 0.925922 |
| XLOC_000994 | SOX13      | chr1:204042245-204096871  | 4.42898  | 4.12899  | -0.101185  | 0.923427 |
| XLOC_005099 | TCTN1      | chr12:111051831-111127617 | 8.23617  | 7.67903  | -0.101049  | 0.921553 |
| XLOC_014494 | GAS2L1     | chr22:29702996-29708774   | 15.0734  | 14.0542  | -0.101004  | 0.915911 |
| XLOC_014203 | C21orf33   | chr21:45553493-45565605   | 76.7562  | 71.5676  | -0.100976  | 0.89785  |
| XLOC_013861 | TASP1      | chr20:13370035-13619583   | 3.29281  | 3.07037  | -0.100905  | 0.930173 |
| XLOC_002615 | CCNJ       | chr10:97471535-97849992   | 3.92218  | 3.65733  | -0.100867  | 0.945336 |
| XLOC_000033 | SKI        | chr1:2160133-2241652      | 9.10849  | 8.49431  | -0.100716  | 0.908098 |
| XLOC_018619 | SERPINB6   | chr6:2948392-2972399      | 109.355  | 101.983  | -0.100692  | 0.900997 |
| XLOC_002673 | CNNM2      | chr10:104678074-104838344 | 3.21034  | 2.99392  | -0.100687  | 0.948304 |
| XLOC_007210 | GABPB1-AS1 | chr15:50569388-50650503   | 1.36385  | 1.27191  | -0.100685  | 0.973295 |
| XLOC_017665 | MIER3      | chr5:56205086-56247954    | 1.84078  | 1.71675  | -0.100635  | 0.938335 |
| XLOC_020652 | FBXO24     | chr7:100183955-100205798  | 0.384255 | 0.358371 | -0.100612  | 0.991446 |
| XLOC_015592 | SH3BP5     | chr3:15295690-15382901    | 6.55794  | 6.11622  | -0.100603  | 0.930948 |
| XLOC_006862 | TMEM229B   | chr14:67936982-67982021   | 0.492046 | 0.458942 | -0.100481  | 0.958439 |
| XLOC_003887 | VWA5A      | chr11:123986110-124017618 | 4.23028  | 3.94575  | -0.100452  | 0.926279 |
| XLOC_009454 | PHF23      | chr17:7138346-7142825     | 17.1158  | 15.9651  | -0.10041   | 0.910956 |
| XLOC_007296 | PML        | chr15:74287013-74340155   | 13.633   | 12.7166  | -0.100393  | 0.919811 |
| XLOC_012701 | COPS7B     | chr2:232651161-232673434  | 19.4433  | 18.1388  | -0.100194  | 0.911075 |
| XLOC_015787 | DENND6A    | chr3:57611180-57678816    | 3.15149  | 2.94006  | -0.100188  | 0.919765 |
| XLOC_015187 | PPP4R2     | chr3:73046118-73115011    | 4.3053   | 4.01649  | -0.100177  | 0.934604 |
| XLOC_014017 | STAU1      | chr20:47729875-47804904   | 31.09    | 29.0045  | -0.100172  | 0.901684 |
| XLOC_004618 | FLJ39051   | chr11:126173646-126225482 | 2.10523  | 1.96411  | -0.100107  | 0.990104 |
| XLOC_002692 | PDCD4      | chr10:112631552-112679124 | 15.1738  | 14.1568  | -0.10009   | 0.923897 |
| XLOC_002054 | ABL2       | chr1:179068461-179198819  | 19.2226  | 17.935   | -0.100027  | 0.902527 |
| XLOC_018336 | CD2AP      | chr6:47445524-47594996    | 5.80304  | 5.41443  | -0.099997  | 0.908026 |
| XLOC_018571 | SNX9       | chr6:158244293-158366109  | 12.3539  | 11.5269  | -0.0999654 | 0.907121 |
| XLOC_012204 | MDH1       | chr2:63348534-63834330    | 94.2532  | 87.9508  | -0.0998447 | 0.906423 |
| XLOC_007748 | C15orf40   | chr15:83654954-83680393   | 17.0005  | 15.8646  | -0.0997685 | 0.964628 |
| XLOC_014328 | BRWD1      | chr21:40557403-40685712   | 2.14082  | 1.99804  | -0.0995804 | 0.956177 |
| XLOC_012135 | LTBP1      | chr2:33172368-33624575    | 1.62402  | 1.51574  | -0.0995528 | 0.934712 |
| XLOC_011566 | ZNF100     | chr19:21906842-21950430   | 1.63726  | 1.52813  | -0.0995148 | 0.931668 |
| XLOC_007315 | NEIL1      | chr15:75639330-75647592   | 10.0786  | 9.40712  | -0.0994648 | 0.927404 |
| XLOC_020967 | C7orf31    | chr7:25174315-25219817    | 1.5048   | 1.40458  | -0.0994397 | 0.937332 |
| XLOC_008775 | ZMYND15    | chr17:4643309-4649414     | 1.78798  | 1.66906  | -0.099292  | 0.950862 |
| XLOC_004590 | ZNF202     | chr11:123594996-123612363 | 3.46349  | 3.23325  | -0.0992399 | 0.922274 |
| XLOC_012380 | POLR1B     | chr2:113299491-113334727  | 9.06716  | 8.46457  | -0.0992147 | 0.905839 |
| XLOC_021574 | C8orf40    | chr8:42273979-42408140    | 51.7152  | 48.2793  | -0.099184  | 0.931567 |
| XLOC_023816 | MED14      | chrX:40508794-40594804    | 4.82605  | 4.50572  | -0.0990842 | 0.906934 |
| XLOC_022312 | DNAJA1     | chr9:33025208-33039062    | 86.522   | 80.7806  | -0.0990574 | 0.906423 |
| XLOC_004638 | B3GAT1     | chr11:134248397-134281812 | 7.35911  | 6.8711   | -0.0989897 | 0.91609  |
| XLOC_007159 | NUSAP1     | chr15:41624891-41673248   | 34.1782  | 31.9118  | -0.0989884 | 0.906934 |
| XLOC_001069 | CAPN2      | chr1:223889294-223963720  | 154.146  | 143.93   | -0.0989313 | 0.903933 |
| XLOC_002840 | NSUN6      | chr10:18834263-18940550   | 3.96739  | 3.70447  | -0.0989207 | 0.926279 |
| XLOC_024016 | ACSL4      | chrX:108884563-108976621  | 9.753    | 9.10726  | -0.0988284 | 0.907121 |
| XLOC_011962 | TMEM86B    | chr19:55738001-55740632   | 1.81669  | 1.69696  | -0.0983597 | 0.959811 |
| XLOC_008608 | CMTM4      | chr16:66648652-66730610   | 11.9725  | 11.1836  | -0.0983448 | 0.913887 |

|             |               |                           |            |            |            |          |
|-------------|---------------|---------------------------|------------|------------|------------|----------|
| XLOC_015267 | QTRTD1        | chr3:113775581-113807268  | 5.55625    | 5.19069    | -0.0981861 | 0.916584 |
| XLOC_014632 | TBC1D22A      | chr22:47158517-47571342   | 14.384     | 13.4376    | -0.0981838 | 0.908661 |
| XLOC_012177 | FOXN2         | chr2:48541794-48606434    | 2.65101    | 2.47661    | -0.0981715 | 0.92192  |
| XLOC_001143 | CNST          | chr1:246729638-246831884  | 3.37668    | 3.15462    | -0.0981376 | 0.928348 |
| XLOC_018618 | SERPINB9      | chr6:2887499-2903546      | 12.686     | 11.852     | -0.0981098 | 0.906288 |
| XLOC_002701 | CASP7         | chr10:115438920-115490668 | 4.05446    | 3.78801    | -0.098068  | 0.93305  |
| XLOC_001732 | CSDE1,NRAS    | chr1:115247084-115300671  | 38.0025    | 35.5052    | -0.0980667 | 0.913887 |
| XLOC_023197 | NRARP         | chr9:140194082-140196703  | 44.041     | 41.1472    | -0.0980536 | 0.905903 |
| XLOC_016287 | UGDH-AS1      | chr4:39529458-39640481    | 2.53465    | 2.36814    | -0.0980323 | 0.942011 |
| XLOC_015139 | NISCH         | chr3:52489523-52527088    | 16.598     | 15.5078    | -0.0980139 | 0.913611 |
| XLOC_014159 | CBR1          | chr21:37441939-37498938   | 48.3219    | 45.1489    | -0.0979866 | 0.907121 |
| XLOC_018157 | HLA-F         | chr6:29691116-29716826    | 62.9778    | 58.8436    | -0.0979578 | 0.908148 |
| XLOC_009903 | SMARCD2       | chr17:61909440-61920351   | 44.0402    | 41.1494    | -0.0979519 | 0.906934 |
| XLOC_021893 | PSD3          | chr8:18384812-18871196    | 0.00562297 | 0.00525411 | -0.0978865 | 1        |
| XLOC_021666 | DECR1         | chr8:91013579-91064227    | 121.366    | 113.405    | -0.0978803 | 0.906423 |
| XLOC_001863 | CRTC2         | chr1:153920147-153931132  | 15.6325    | 14.608     | -0.0977932 | 0.911227 |
| XLOC_001805 | CTSK          | chr1:150768683-150780917  | 0.951035   | 0.888713   | -0.09778   | 0.957675 |
| XLOC_012278 | RNF181        | chr2:85822836-85824831    | 170.974    | 159.773    | -0.097759  | 0.905305 |
| XLOC_018304 | PPP2R5D       | chr6:42952236-42981618    | 20.4456    | 19.1063    | -0.0977469 | 0.954741 |
| XLOC_006383 | PPM1A         | chr14:60712469-60765805   | 3.89333    | 3.6383     | -0.0977402 | 0.91609  |
| XLOC_007289 | BBS4          | chr15:72978519-73030817   | 5.60033    | 5.23393    | -0.0976181 | 0.922274 |
| XLOC_008713 | MTHFSD        | chr16:86563781-86588841   | 4.87438    | 4.55574    | -0.0975337 | 0.93285  |
| XLOC_005147 | P2RX4         | chr12:121647663-121671909 | 14.3907    | 13.4502    | -0.0975134 | 0.919756 |
| XLOC_000890 | KLHL20        | chr1:173684079-173755840  | 1.75666    | 1.64198    | -0.0973957 | 0.938335 |
| XLOC_021233 | ALKBH4        | chr7:102073976-102105321  | 10.9518    | 10.2373    | -0.0973358 | 0.958829 |
| XLOC_002524 | ADK           | chr10:75910942-76469061   | 17.2781    | 16.1509    | -0.0973304 | 0.910829 |
| XLOC_022613 | PRDM12        | chr9:133539980-133558384  | 1.44725    | 1.35297    | -0.0971783 | 0.960078 |
| XLOC_017517 | B4GALT7       | chr5:177027118-177037346  | 32.6834    | 30.5597    | -0.0969296 | 0.910956 |
| XLOC_022830 | RNF38         | chr9:36336398-36401195    | 2.86017    | 2.67434    | -0.0969167 | 0.923897 |
| XLOC_017188 | BTF3          | chr5:72794249-72801448    | 869.184    | 812.727    | -0.096891  | 0.912401 |
| XLOC_010917 | ZNF234        | chr19:44645709-44664462   | 0.985014   | 0.921051   | -0.0968622 | 0.944033 |
| XLOC_013869 | SNX5          | chr20:17922243-17949490   | 47.9993    | 44.8911    | -0.0965869 | 0.91015  |
| XLOC_001144 | SCCPDH        | chr1:246887377-246931440  | 29.5455    | 27.6342    | -0.0964842 | 0.906934 |
| XLOC_004806 | PPHLN1        | chr12:42719946-42842422   | 20.5631    | 19.2332    | -0.0964614 | 0.926279 |
| XLOC_021012 | KIAA0895      | chr7:36363758-36493400    | 0.582314   | 0.544653   | -0.0964607 | 0.984084 |
| XLOC_020577 | PTPN12        | chr7:77166772-77269388    | 8.01118    | 7.49307    | -0.0964582 | 0.915223 |
| XLOC_015264 | ATP6V1A       | chr3:113465865-113530905  | 6.46779    | 6.04964    | -0.0964231 | 0.915911 |
| XLOC_006442 | COQ6          | chr14:74399694-74429813   | 17.3964    | 16.2728    | -0.0963257 | 0.920543 |
| XLOC_004537 | C11orf71      | chr11:114262169-114271272 | 6.65156    | 6.22205    | -0.0963028 | 0.962865 |
| XLOC_004540 | CADM1         | chr11:115044344-115375241 | 5.7022     | 5.33417    | -0.0962557 | 0.917149 |
| XLOC_010576 | ICAM5         | chr19:10400654-10407454   | 1.98057    | 1.85277    | -0.0962351 | 0.954981 |
| XLOC_021295 | POT1          | chr7:124462439-124570037  | 2.85813    | 2.67379    | -0.0961867 | 0.929057 |
| XLOC_008223 | IST1          | chr16:71928310-72033877   | 25.9169    | 24.2464    | -0.0961246 | 0.907875 |
| XLOC_020444 | ANLN          | chr7:36363758-36493400    | 9.64071    | 9.0194     | -0.0961093 | 0.915105 |
| XLOC_000218 | LOC644961     | chr1:27648635-27662891    | 0.163956   | 0.153395   | -0.0960567 | 1        |
| XLOC_001242 | PLEKHG5,TNFRS | chr1:6521213-6580121      | 17.1127    | 16.0106    | -0.0960337 | 0.946021 |
| XLOC_009091 | NBR1          | chr17:41322497-41363707   | 21.7854    | 20.3828    | -0.0960052 | 0.907875 |
| XLOC_021493 | XPO7          | chr8:21777179-21864096    | 14.146     | 13.2355    | -0.095987  | 0.907979 |
| XLOC_015275 | ARHGAP31      | chr3:119013219-119138323  | 1.44908    | 1.35583    | -0.0959577 | 0.93102  |

|             |              |                           |            |           |            |          |
|-------------|--------------|---------------------------|------------|-----------|------------|----------|
| XLOC_008059 | PHKG2        | chr16:30759619-30787628   | 7.43349    | 6.95515   | -0.0959566 | 0.968154 |
| XLOC_024316 | CD24         | chrY:21094584-21239302    | 5.20935    | 4.87423   | -0.0959297 | 0.928348 |
| XLOC_001096 | RHO          | chr1:228780393-228882416  | 0.26861    | 0.251346  | -0.0958372 | 1        |
| XLOC_004320 | FAU          | chr11:64888098-64902003   | 2089.48    | 1955.24   | -0.0958016 | 0.921683 |
| XLOC_015318 | EEFSEC       | chr3:127872312-128127489  | 14.3666    | 13.4441   | -0.0957472 | 0.917701 |
| XLOC_009475 | VAMP2        | chr17:8062464-8066293     | 29.5025    | 27.6093   | -0.095686  | 0.908098 |
| XLOC_014999 | GPD1L        | chr3:32148002-32210207    | 3.17391    | 2.97046   | -0.0955738 | 0.926279 |
| XLOC_004327 | RELA         | chr11:65421066-65430443   | 58.7759    | 55.0105   | -0.095519  | 0.910956 |
| XLOC_010097 | MYL12A       | chr18:3247527-3256234     | 380.737    | 356.353   | -0.0954883 | 0.913595 |
| XLOC_018252 | ANKS1A       | chr6:34857037-35059190    | 4.09374    | 3.83157   | -0.0954833 | 0.922201 |
| XLOC_010941 | KLC3         | chr19:45843997-45873845   | 34.2037    | 32.0144   | -0.0954338 | 0.945208 |
| XLOC_015856 | IFT57        | chr3:107879658-107941417  | 8.71123    | 8.15363   | -0.0954334 | 0.916757 |
| XLOC_022091 | LINC00535    | chr8:94358694-94712661    | 0.0929733  | 0.0870252 | -0.0953829 | 1        |
| XLOC_013740 | RAB22A       | chr20:56884770-56942563   | 3.82629    | 3.58155   | -0.0953592 | 0.915911 |
| XLOC_023011 | C9orf84      | chr9:114448900-114545779  | 0.00858366 | 0.0080349 | -0.0953123 | 1        |
| XLOC_018615 | SERPINB1     | chr6:2832565-2842283      | 75.6235    | 70.7898   | -0.0952923 | 0.9117   |
| XLOC_004323 | LTBP3        | chr11:65292547-65325699   | 8.51406    | 7.97021   | -0.095229  | 0.97268  |
| XLOC_008080 | CLUHP3       | chr16:31711933-31718745   | 0.271973   | 0.254615  | -0.0951448 | 1        |
| XLOC_020454 | LINC00265    | chr7:39773166-39834222    | 3.26349    | 3.05525   | -0.0951269 | 0.934251 |
| XLOC_008486 | EIF3C,EIF3CL | chr16:28390899-28437775   | 0.0291276  | 0.0272703 | -0.0950581 | 1        |
| XLOC_014705 | TOP3B        | chr22:22311402-22337147   | 8.28269    | 7.75511   | -0.0949524 | 0.924931 |
| XLOC_010150 | TTC39C       | chr18:21572736-21715574   | 23.4927    | 21.9983   | -0.0948207 | 0.953219 |
| XLOC_007629 | PIF1         | chr15:65107832-65117838   | 5.36016    | 5.01972   | -0.094668  | 0.934331 |
| XLOC_018808 | RXRB         | chr6:33161361-33168473    | 23.6665    | 22.1635   | -0.0946593 | 0.913853 |
| XLOC_018530 | VTA1         | chr6:142468409-142542085  | 7.71637    | 7.2268    | -0.0945667 | 0.917123 |
| XLOC_009204 | DHX40        | chr17:57642885-57685713   | 6.23394    | 5.83875   | -0.0944851 | 0.917559 |
| XLOC_016662 | AFAP1        | chr4:7755816-7941653      | 1.14469    | 1.07217   | -0.0944212 | 0.938489 |
| XLOC_008607 | TK2          | chr16:66541905-66584315   | 4.78185    | 4.47951   | -0.0942303 | 0.923079 |
| XLOC_002154 | EIF2D        | chr1:206764973-206785904  | 31.1784    | 29.2074   | -0.094213  | 0.915223 |
| XLOC_004704 | FOXJ2        | chr12:8185358-8208118     | 2.05656    | 1.9266    | -0.094175  | 0.934505 |
| XLOC_009984 | EXOC7        | chr17:74075262-74099868   | 28.4971    | 26.6971   | -0.0941321 | 0.909952 |
| XLOC_013029 | LOC285074    | chr2:87257797-87303536    | 11.1004    | 10.4      | -0.0940351 | 0.921553 |
| XLOC_006727 | AP1G2,JPH4   | chr14:23980968-24048009   | 13.5695    | 12.7133   | -0.0940308 | 0.938071 |
| XLOC_006092 | KBTBD6       | chr13:41701708-41706936   | 1.33823    | 1.25382   | -0.0939991 | 0.938489 |
| XLOC_010292 | CEP76        | chr18:12658737-12725739   | 1.48366    | 1.39018   | -0.0938921 | 0.984547 |
| XLOC_011557 | LINC00663    | chr19:19867180-19887222   | 1.33607    | 1.25192   | -0.0938525 | 0.953159 |
| XLOC_021317 | COPG2,TSGA13 | chr7:130126015-130371406  | 13.6758    | 12.8147   | -0.0938229 | 0.954361 |
| XLOC_004131 | PAX6         | chr11:31806339-31908587   | 0.0674433  | 0.0632005 | -0.0937379 | 1        |
| XLOC_008655 | MTSS1L       | chr16:70695106-70719954   | 13.4768    | 12.629    | -0.0937361 | 0.91609  |
| XLOC_004418 | WNT11        | chr11:75897369-75917574   | 7.47004    | 7.00078   | -0.0936002 | 0.938335 |
| XLOC_016839 | HSD17B11     | chr4:88257690-88312455    | 30.6179    | 28.6957   | -0.0935412 | 0.912417 |
| XLOC_021349 | MKRN1        | chr7:140152839-140179369  | 44.5229    | 41.7279   | -0.0935331 | 0.917149 |
| XLOC_011699 | ATP1A3       | chr19:42470733-42498428   | 8.9323     | 8.37207   | -0.0934468 | 0.922274 |
| XLOC_022045 | STAU2        | chr8:74332308-74659943    | 6.58866    | 6.17545   | -0.0934413 | 0.9183   |
| XLOC_023686 | ZNF185       | chrX:152082985-152142025  | 0.157819   | 0.14793   | -0.0933561 | 1        |
| XLOC_002637 | CUTC         | chr10:101419262-101515894 | 17.9765    | 16.8502   | -0.0933509 | 0.975484 |
| XLOC_015705 | QRICH1       | chr3:49067141-49131504    | 17.8606    | 16.7438   | -0.0931576 | 0.915426 |
| XLOC_018276 | RNF8         | chr6:37321747-37362514    | 6.07846    | 5.69855   | -0.0931107 | 0.917559 |
| XLOC_024035 | SEPT6        | chrX:118749687-118827333  | 7.58223    | 7.10844   | -0.0930874 | 0.923177 |

|             |            |                          |           |           |            |          |
|-------------|------------|--------------------------|-----------|-----------|------------|----------|
| XLOC_006813 | GNPNAT1    | chr14:53241910-53258386  | 20.4642   | 19.1856   | -0.093077  | 0.912368 |
| XLOC_013236 | CIR1       | chr2:175212877-175260443 | 12.4945   | 11.7141   | -0.0930518 | 0.920094 |
| XLOC_007604 | ADAM10     | chr15:58888509-59042177  | 2.74086   | 2.56991   | -0.0929059 | 0.93305  |
| XLOC_011282 | TCF3       | chr19:1609288-1652328    | 28.7145   | 26.9245   | -0.0928578 | 0.912532 |
| XLOC_018315 | POLR1C     | chr6:43484776-43489246   | 58.5356   | 54.8873   | -0.0928428 | 0.913767 |
| XLOC_017093 | C5orf22    | chr5:31532372-31555165   | 4.12181   | 3.86503   | -0.0927955 | 0.930216 |
| XLOC_013109 | CKAP2L     | chr2:113495443-113522254 | 2.27458   | 2.13301   | -0.0927032 | 0.938335 |
| XLOC_016538 | ARFIP1     | chr4:153701111-153833063 | 6.14273   | 5.76099   | -0.0925623 | 0.923162 |
| XLOC_011918 | ZNF611     | chr19:53206065-53238307  | 0.508832  | 0.477214  | -0.0925539 | 0.955832 |
| XLOC_000335 | SZT2       | chr1:43855555-43919918   | 1.35368   | 1.26957   | -0.092548  | 0.952184 |
| XLOC_021892 | ASAH1      | chr8:17913924-17942507   | 27.0162   | 25.3385   | -0.0924933 | 0.912368 |
| XLOC_020816 | CTAGE15P   | chr7:143268893-143271480 | 0.0969727 | 0.0909543 | -0.0924378 | 1        |
| XLOC_016461 | OSTC       | chr4:109571740-109588978 | 70.3013   | 65.9466   | -0.0922522 | 0.913121 |
| XLOC_021486 | NAT2       | chr8:18248754-18258723   | 0.0277119 | 0.0259962 | -0.0922047 | 1        |
| XLOC_020406 | LOC441204  | chr7:26443107-26535986   | 0.0466229 | 0.0437429 | -0.0919902 | 1        |
| XLOC_012650 | TTLL4      | chr2:219575567-219620138 | 6.13065   | 5.75233   | -0.0918943 | 0.919694 |
| XLOC_023535 | TCEAL3     | chrX:102862833-102864855 | 15.6854   | 14.7177   | -0.0918718 | 0.930048 |
| XLOC_017582 | DNAH5      | chr5:13690436-13944589   | 0.0156686 | 0.014702  | -0.0918588 | 1        |
| XLOC_000068 | SPSB1      | chr1:9352940-9429590     | 15.5472   | 14.5886   | -0.0918159 | 0.915223 |
| XLOC_016001 | COMMD2     | chr3:149456256-149470286 | 3.86832   | 3.62984   | -0.0918035 | 0.92989  |
| XLOC_019152 | TFB1M      | chr6:155411422-155635617 | 6.59181   | 6.1857    | -0.0917375 | 0.925179 |
| XLOC_000177 | TCEB3      | chr1:24069855-24104787   | 1.86648   | 1.75154   | -0.0916939 | 0.945399 |
| XLOC_004930 | IL23A      | chr12:56732662-56734194  | 0.919304  | 0.862699  | -0.0916837 | 0.971282 |
| XLOC_015617 | SLC4A7     | chr3:27414211-27525911   | 1.49994   | 1.40763   | -0.0916383 | 0.933369 |
| XLOC_024077 | RAP2C      | chrX:131337051-131353508 | 6.68143   | 6.27027   | -0.0916298 | 0.92085  |
| XLOC_023950 | TTC3P1     | chrX:74960372-74962914   | 0.157327  | 0.147648  | -0.0916029 | 1        |
| XLOC_023605 | OCRL       | chrX:128674251-128726530 | 8.51892   | 7.99493   | -0.0915847 | 0.913546 |
| XLOC_006406 | GPHN       | chr14:66974124-67648525  | 5.65714   | 5.30926   | -0.0915639 | 0.926214 |
| XLOC_017170 | SERF1A     | chr5:69321071-69338940   | 0.0999945 | 0.0938674 | -0.0912241 | 1        |
| XLOC_012682 | MFF        | chr2:228192227-228222549 | 27.7245   | 26.0287   | -0.0910566 | 0.914505 |
| XLOC_018521 | HEBP2      | chr6:138725335-138734582 | 52.3269   | 49.1266   | -0.0910499 | 0.91609  |
| XLOC_011187 | ZNF628     | chr19:55987698-55995854  | 5.23095   | 4.91103   | -0.0910493 | 0.94188  |
| XLOC_015730 | HYAL3,NAT6 | chr3:50330258-50336899   | 26.0432   | 24.4512   | -0.0910035 | 0.929057 |
| XLOC_013675 | KCNK15     | chr20:43374487-43438979  | 0.0883424 | 0.0829438 | -0.0909724 | 1        |
| XLOC_010546 | MAP2K7     | chr19:7968764-7979363    | 19.854    | 18.6408   | -0.090962  | 0.919485 |
| XLOC_008659 | ZNF23      | chr16:71481502-71496117  | 7.58676   | 7.12329   | -0.0909393 | 0.923927 |
| XLOC_008507 | YPEL3      | chr16:30103634-30107537  | 20.9063   | 19.6315   | -0.0907687 | 0.937886 |
| XLOC_015082 | TMIE       | chr3:46742822-46752413   | 0.361134  | 0.339121  | -0.0907366 | 1        |
| XLOC_009769 | TMEM101    | chr17:42088555-42092345  | 41.8781   | 39.3259   | -0.0907182 | 0.916694 |
| XLOC_000046 | DFFB       | chr1:3773844-3801993     | 3.85301   | 3.61836   | -0.0906479 | 0.938335 |
| XLOC_004383 | DHCR7      | chr11:71145456-71159477  | 34.4972   | 32.399    | -0.0905313 | 0.915911 |
| XLOC_007206 | NDUFAF4P1  | chr15:49447975-49913118  | 0.0181934 | 0.017087  | -0.090514  | 1        |
| XLOC_014771 | MORC2      | chr22:31318294-31364187  | 4.30153   | 4.04021   | -0.0904175 | 0.934251 |
| XLOC_011251 | ZNF446     | chr19:58987794-58992597  | 7.60243   | 7.14092   | -0.090351  | 0.936242 |
| XLOC_014716 | ZNF70      | chr22:24083771-24093279  | 0.712983  | 0.66972   | -0.0903092 | 0.958143 |
| XLOC_022318 | PRSS3      | chr9:33750463-33799229   | 54.0278   | 50.7504   | -0.0902832 | 0.924471 |
| XLOC_002985 | ASCC1      | chr10:73855789-73995618  | 8.90632   | 8.36631   | -0.0902389 | 0.967296 |
| XLOC_020363 | ZDHHC4     | chr7:6617064-6628610     | 38.8612   | 36.5057   | -0.090209  | 0.9183   |
| XLOC_001460 | C1orf109   | chr1:38147241-38156192   | 7.09685   | 6.66684   | -0.0901755 | 0.934331 |

|             |                |                           |           |           |            |          |
|-------------|----------------|---------------------------|-----------|-----------|------------|----------|
| XLOC_012910 | ASB3,GPR75,GPF | chr2:53897116-54087170    | 4.17241   | 3.91982   | -0.0900936 | 0.974348 |
| XLOC_024192 | LAGE3          | chrX:153705240-153707596  | 18.5976   | 17.4718   | -0.09009   | 0.928237 |
| XLOC_005557 | LRIG3          | chr12:59265936-59314319   | 0.910835  | 0.855701  | -0.0900838 | 0.952539 |
| XLOC_017736 | MBLAC2         | chr5:89754019-89770585    | 1.59025   | 1.49401   | -0.0900703 | 0.944046 |
| XLOC_010530 | ZNF557         | chr19:7069470-7087978     | 1.85721   | 1.74482   | -0.0900582 | 0.935829 |
| XLOC_023818 | CASK           | chrX:41374188-41782287    | 1.40016   | 1.3155    | -0.0899874 | 0.934043 |
| XLOC_003388 | QSER1          | chr11:32914791-33001814   | 2.43572   | 2.28855   | -0.0899103 | 0.924033 |
| XLOC_011949 | LAIR1          | chr19:54865234-54876721   | 0.0514882 | 0.0483846 | -0.0896933 | 1        |
| XLOC_017520 | N4BP3          | chr5:177540555-177553107  | 4.19893   | 3.9461    | -0.0895953 | 0.929476 |
| XLOC_014433 | BCRP2          | chr22:21457304-21476575   | 2.97524   | 2.79624   | -0.0895195 | 0.946896 |
| XLOC_006094 | MTRF1          | chr13:41790515-41837713   | 2.66335   | 2.5032    | -0.0894663 | 0.945208 |
| XLOC_016791 | CXCL3          | chr4:74902311-74904490    | 0.390644  | 0.367163  | -0.0894345 | 0.976105 |
| XLOC_002146 | ELK4           | chr1:205577070-205602000  | 4.12181   | 3.87405   | -0.0894333 | 0.945416 |
| XLOC_009774 | UBTF           | chr17:42282400-42298994   | 18.1105   | 17.0236   | -0.0892905 | 0.919354 |
| XLOC_013255 | PDE11A         | chr2:178487976-178973066  | 0.0807399 | 0.0758978 | -0.0892225 | 1        |
| XLOC_016408 | COPS4          | chr4:83956238-83996971    | 24.8254   | 23.3371   | -0.0891932 | 0.919811 |
| XLOC_008541 | C16orf58       | chr16:31494438-31519706   | 43.7923   | 41.1674   | -0.089174  | 0.9183   |
| XLOC_004399 | RAB6A          | chr11:73386682-73472201   | 26.4499   | 24.8648   | -0.0891598 | 0.917306 |
| XLOC_021609 | YTHDF3         | chr8:64081120-64125346    | 7.98879   | 7.51014   | -0.0891361 | 0.921553 |
| XLOC_019199 | PHF10          | chr6:170102256-170124106  | 19.8465   | 18.6584   | -0.0890548 | 0.947962 |
| XLOC_012082 | HADHB          | chr2:26467615-26513333    | 71.8919   | 67.5883   | -0.0890545 | 0.920331 |
| XLOC_018199 | PRRC2A         | chr6:31588449-31605554    | 33.1729   | 31.1873   | -0.0890428 | 0.916191 |
| XLOC_018215 | SKIV2L         | chr6:31919863-31937532    | 7.65136   | 7.19387   | -0.0889482 | 0.974073 |
| XLOC_008281 | ZFFM1          | chr16:88520013-88601574   | 2.36161   | 2.22044   | -0.0889256 | 0.957519 |
| XLOC_016365 | MOB1B          | chr4:71768056-71853891    | 1.52549   | 1.43443   | -0.0887956 | 0.935829 |
| XLOC_020781 | UBN2           | chr7:138916230-138992982  | 1.14358   | 1.07532   | -0.0887921 | 0.929461 |
| XLOC_006047 | CDX2           | chr13:28536204-28543505   | 13.2447   | 12.4543   | -0.0887705 | 0.930948 |
| XLOC_010200 | ME2            | chr18:48405431-48476162   | 18.2301   | 17.1431   | -0.0886907 | 0.915911 |
| XLOC_016462 | SEC24B         | chr4:110351118-110461615  | 5.89416   | 5.54298   | -0.0886262 | 0.927701 |
| XLOC_016080 | MCCC1          | chr3:182733005-182817365  | 14.8361   | 13.9528   | -0.0885556 | 0.922472 |
| XLOC_018600 | MLLT4          | chr6:168227670-168372700  | 4.80517   | 4.51918   | -0.0885288 | 0.919811 |
| XLOC_017428 | SMIM3          | chr5:150157507-150176298  | 8.82614   | 8.30111   | -0.0884781 | 0.933523 |
| XLOC_012081 | GAREML         | chr2:26395959-26412532    | 7.07505   | 6.65423   | -0.0884671 | 0.933651 |
| XLOC_005527 | GLS2           | chr12:56862300-56882181   | 10.5198   | 9.89418   | -0.0884614 | 0.949726 |
| XLOC_017672 | SMIM15         | chr5:60453535-60458302    | 14.0038   | 13.1712   | -0.0884262 | 0.917917 |
| XLOC_008311 | RHBDF1         | chr16:108057-122629       | 18.4649   | 17.3674   | -0.0884067 | 0.925922 |
| XLOC_006111 | LCP1           | chr13:46700057-46756459   | 73.3019   | 68.945    | -0.0884053 | 0.917559 |
| XLOC_005148 | RNF34          | chr12:121837885-121862155 | 8.13433   | 7.6511    | -0.0883559 | 0.938335 |
| XLOC_014507 | OSBP2          | chr22:31090792-31303811   | 5.58875   | 5.25688   | -0.0883169 | 0.930356 |
| XLOC_009367 | GLOD4          | chr17:662548-695741       | 34.6198   | 32.5648   | -0.0882862 | 0.947364 |
| XLOC_009900 | STRADA         | chr17:61780191-61819330   | 13.5049   | 12.7039   | -0.0882166 | 0.928904 |
| XLOC_010227 | PHLPP1         | chr18:60382671-60647676   | 2.80339   | 2.63719   | -0.0881689 | 0.934251 |
| XLOC_002509 | ANAPC16        | chr10:73855789-73995618   | 21.8247   | 20.5318   | -0.0881019 | 0.935543 |
| XLOC_006254 | APEX1          | chr14:20923289-20925931   | 198.48    | 186.726   | -0.0880705 | 0.919777 |
| XLOC_009671 | NR1D1          | chr17:38218445-38256978   | 9.59824   | 9.02988   | -0.088062  | 0.960067 |
| XLOC_012806 | MATN3          | chr2:20191812-20212455    | 0.0137775 | 0.0129626 | -0.0879492 | 1        |
| XLOC_014834 | RPL3           | chr22:39708886-39715670   | 4289.17   | 4035.7    | -0.0878797 | 0.934312 |
| XLOC_004045 | ZNF214         | chr11:7020548-7041586     | 0.374565  | 0.352463  | -0.0877438 | 0.968057 |
| XLOC_000346 | DMAP1          | chr1:44679124-44686351    | 14.2236   | 13.3861   | -0.0875458 | 0.935543 |

|             |             |                           |           |           |            |          |
|-------------|-------------|---------------------------|-----------|-----------|------------|----------|
| XLOC_008849 | NDEL1       | chr17:8339169-8371495     | 5.75695   | 5.41802   | -0.0875377 | 0.935437 |
| XLOC_011099 | ZNF761      | chr19:53935226-53961515   | 2.98981   | 2.81387   | -0.0874967 | 0.937886 |
| XLOC_024068 | ZDHHC9      | chrX:128937263-128977910  | 14.6849   | 13.8218   | -0.0873868 | 0.919532 |
| XLOC_004643 | WNK1        | chr12:862088-1020618      | 3.65469   | 3.44013   | -0.0872822 | 0.925292 |
| XLOC_011636 | ZNF781      | chr19:38158649-38183216   | 0.0560544 | 0.0527638 | -0.0872785 | 1        |
| XLOC_021665 | OSGIN2      | chr8:90914095-90940095    | 9.54214   | 8.98212   | -0.0872562 | 0.922403 |
| XLOC_016191 | ADRA2C      | chr4:3768295-3770253      | 17.1311   | 16.1262   | -0.0872133 | 0.936242 |
| XLOC_003438 | LRP4-AS1    | chr11:46867961-46940173   | 0.336908  | 0.317164  | -0.0871253 | 1        |
| XLOC_001551 | ECHDC2      | chr1:53361581-53387446    | 9.48995   | 8.93404   | -0.0870874 | 0.939323 |
| XLOC_002043 | MRPS14      | chr1:174982093-174992591  | 10.8093   | 10.1762   | -0.0870066 | 0.926488 |
| XLOC_018258 | RPL10A      | chr6:35436177-35438558    | 3337.52   | 3142.77   | -0.0867382 | 0.930048 |
| XLOC_002133 | PLEKHA6     | chr1:204187978-204329057  | 1.44834   | 1.36391   | -0.0866579 | 0.943183 |
| XLOC_005554 | CTDSP2      | chr12:58213709-58240747   | 22.3525   | 21.0496   | -0.0866432 | 0.919107 |
| XLOC_001999 | CREG1       | chr1:167510250-167523056  | 38.3816   | 36.1445   | -0.0866384 | 0.919964 |
| XLOC_021134 | TMEM60      | chr7:77423044-77427747    | 24.6462   | 23.2126   | -0.086459  | 0.93571  |
| XLOC_009149 | UBE2Z       | chr17:46985730-47006422   | 44.3335   | 41.755    | -0.0864485 | 0.919765 |
| XLOC_017326 | CAMLG       | chr5:134074169-134087850  | 53.9447   | 50.8094   | -0.0863865 | 0.92085  |
| XLOC_004273 | NXF1        | chr11:62559597-62572964   | 26.2977   | 24.7698   | -0.0863502 | 0.924048 |
| XLOC_015652 | GTDC2       | chr3:43120720-43147575    | 9.17051   | 8.63799   | -0.086307  | 0.93571  |
| XLOC_002621 | FRAT1       | chr10:99079021-99081672   | 4.11515   | 3.87625   | -0.0862848 | 0.949913 |
| XLOC_016591 | CDKN2AIP    | chr4:184365788-184369049  | 5.24806   | 4.94344   | -0.0862665 | 0.939068 |
| XLOC_002704 | ADRB1       | chr10:115803805-115806667 | 0.335916  | 0.316423  | -0.0862443 | 1        |
| XLOC_008658 | FTSJD1      | chr16:71316202-71323509   | 6.42549   | 6.05288   | -0.0861843 | 0.929057 |
| XLOC_014661 | CECR5       | chr22:17618409-17646335   | 108.24    | 101.974   | -0.0860385 | 0.922503 |
| XLOC_017227 | COX7C       | chr5:85913783-85916583    | 1257.55   | 1184.81   | -0.0859565 | 0.922503 |
| XLOC_017229 | RASA1       | chr5:86564069-86687743    | 3.02625   | 2.85142   | -0.0858509 | 0.938335 |
| XLOC_015395 | LOC646903   | chr3:149689065-149691029  | 0.135832  | 0.127991  | -0.0857851 | 1        |
| XLOC_006933 | CCDC88C     | chr14:91737666-91884188   | 3.24085   | 3.05378   | -0.0857783 | 0.933523 |
| XLOC_012789 | PDIA6       | chr2:10861774-10952960    | 121.772   | 114.743   | -0.085765  | 0.922427 |
| XLOC_022674 | MAMDC4      | chr9:139746818-139755251  | 2.52949   | 2.38366   | -0.0856674 | 0.952184 |
| XLOC_011740 | ZFP112      | chr19:44830705-44860856   | 0.776648  | 0.7319    | -0.0856128 | 0.955713 |
| XLOC_022449 | ZNF169      | chr9:97021577-97065291    | 0.669404  | 0.630843  | -0.0855949 | 0.961236 |
| XLOC_015135 | PPM1M       | chr3:52279808-52284615    | 8.82193   | 8.31386   | -0.0855767 | 0.935829 |
| XLOC_021499 | BMP1        | chr8:22022652-22069840    | 8.08952   | 7.62369   | -0.0855647 | 0.934251 |
| XLOC_006288 | DHRS4       | chr14:24407939-24438488   | 15.7702   | 14.8625   | -0.0855314 | 0.952184 |
| XLOC_010891 | ZNF574      | chr19:42580289-42585720   | 10.8599   | 10.2355   | -0.0854273 | 0.933523 |
| XLOC_010864 | PLD3        | chr19:40826966-40884390   | 49.1373   | 46.3158   | -0.0853122 | 0.934043 |
| XLOC_015352 | CEP63       | chr3:134196545-134293855  | 2.10066   | 1.98005   | -0.0853114 | 0.980052 |
| XLOC_002103 | ASCL5       | chr1:201083080-201084500  | 0.391154  | 0.368722  | -0.085201  | 0.987159 |
| XLOC_011813 | NTN5        | chr19:49141271-49185502   | 0.681333  | 0.642263  | -0.085196  | 0.985748 |
| XLOC_013499 | PTPRA,VPS16 | chr20:2815960-3019315     | 29.951    | 28.2346   | -0.0851407 | 0.937886 |
| XLOC_005268 | FAM90A1     | chr12:8373855-8380214     | 0.592875  | 0.558911  | -0.0851086 | 0.968709 |
| XLOC_004272 | TMEM223     | chr11:62554873-62559486   | 15.4557   | 14.5704   | -0.0851034 | 0.975928 |
| XLOC_006366 | KTN1        | chr14:56046924-56151302   | 14.2561   | 13.4399   | -0.0850515 | 0.928392 |
| XLOC_003553 | INCENP      | chr11:61891444-61920635   | 6.88041   | 6.48701   | -0.0849404 | 0.934043 |
| XLOC_001472 | PPIEL       | chr1:39957317-40025370    | 0.122313  | 0.11532   | -0.0849391 | 1        |
| XLOC_018604 | C6orf70     | chr6:170151720-170181617  | 7.69203   | 7.25229   | -0.0849284 | 0.936242 |
| XLOC_005595 | BBS10       | chr12:76738265-76742222   | 2.40883   | 2.27117   | -0.0848937 | 0.943284 |
| XLOC_009731 | JUP         | chr17:39910858-39942964   | 0.0409801 | 0.0386436 | -0.084696  | 1        |

|             |            |                           |          |          |            |          |
|-------------|------------|---------------------------|----------|----------|------------|----------|
| XLOC_000053 | RNF207     | chr1:6266188-6296044      | 1.87573  | 1.76884  | -0.0846453 | 0.980827 |
| XLOC_018293 | TOMM6      | chr6:41755180-41757634    | 132.1    | 124.575  | -0.0846169 | 0.92475  |
| XLOC_010868 | ITPKC      | chr19:41223007-41255828   | 6.12303  | 5.77438  | -0.0845811 | 0.954981 |
| XLOC_021795 | MROH1      | chr8:145202918-145316843  | 23.8058  | 22.4506  | -0.0845579 | 0.933451 |
| XLOC_005050 | SCYL2      | chr12:100661548-100733914 | 4.72642  | 4.45768  | -0.0844537 | 0.935543 |
| XLOC_022788 | AQP3       | chr9:33441151-33447631    | 0.195515 | 0.1844   | -0.0844404 | 1        |
| XLOC_021481 | VPS37A     | chr8:17104400-17271040    | 3.44424  | 3.24849  | -0.0844191 | 0.944099 |
| XLOC_015373 | ZBTB38     | chr3:141043054-141168632  | 2.66179  | 2.51063  | -0.0843495 | 0.933384 |
| XLOC_011186 | RPL28      | chr19:55897299-55903451   | 2097.5   | 1978.5   | -0.0842657 | 0.952184 |
| XLOC_007163 | MGA        | chr15:41952609-42062141   | 1.15721  | 1.09164  | -0.0841448 | 0.935543 |
| XLOC_006449 | YLPM1      | chr14:75230068-75304013   | 2.8762   | 2.71335  | -0.0840851 | 0.933451 |
| XLOC_003653 | RHOD       | chr11:66824288-66839488   | 71.4263  | 67.3856  | -0.0840156 | 0.927701 |
| XLOC_010448 | MIDN       | chr19:1248551-1259142     | 13.5692  | 12.8038  | -0.0837666 | 0.934604 |
| XLOC_006869 | DCAF5      | chr14:69517636-69619914   | 4.69478  | 4.43004  | -0.0837377 | 0.930048 |
| XLOC_022968 | XPA        | chr9:100437190-100459691  | 7.69167  | 7.25813  | -0.0836997 | 0.940466 |
| XLOC_018018 | TRIM52     | chr5:180683385-180688119  | 1.56942  | 1.48104  | -0.0836225 | 0.956177 |
| XLOC_007899 | CLDN9      | chr16:3062456-3064506     | 0.391196 | 0.36919  | -0.0835277 | 0.977897 |
| XLOC_013928 | NECAB3     | chr20:32244892-32262264   | 32.9325  | 31.0815  | -0.0834581 | 0.93305  |
| XLOC_004677 | COPS7A     | chr12:6833149-6841041     | 51.2624  | 48.3816  | -0.0834442 | 0.925922 |
| XLOC_011961 | PTPRH      | chr19:55692614-55720874   | 0.852913 | 0.804994 | -0.0834206 | 0.962865 |
| XLOC_002291 | ZNF496     | chr1:247463621-247495045  | 6.58587  | 6.21603  | -0.0833798 | 0.944779 |
| XLOC_000998 | TMCC2      | chr1:205197037-205242471  | 1.67107  | 1.57724  | -0.0833692 | 0.957014 |
| XLOC_010153 | IMPACT     | chr18:22006608-22033494   | 4.6388   | 4.37848  | -0.0833219 | 0.933684 |
| XLOC_009777 | FAM171A2   | chr17:42431100-42441235   | 8.41927  | 7.94701  | -0.0832829 | 0.945989 |
| XLOC_017378 | PCDHB9     | chr5:140566892-140571111  | 0.41944  | 0.395919 | -0.0832607 | 0.967343 |
| XLOC_014879 | LDOC1L     | chr22:44888449-44894005   | 6.57641  | 6.20777  | -0.0832247 | 0.930062 |
| XLOC_016952 | OTUD4      | chr4:146054801-146100832  | 4.01053  | 3.78603  | -0.083104  | 0.935829 |
| XLOC_005142 | MLEC       | chr12:121124948-121139667 | 22.0102  | 20.7782  | -0.0831018 | 0.925277 |
| XLOC_015770 | CHDH       | chr3:53850323-53880420    | 4.34062  | 4.09783  | -0.0830404 | 0.940466 |
| XLOC_001699 | ALX3       | chr1:110602996-110613322  | 1.47023  | 1.38804  | -0.0829933 | 0.970452 |
| XLOC_016809 | CNOT6L     | chr4:78634540-78740544    | 2.47049  | 2.33241  | -0.082976  | 0.933426 |
| XLOC_009027 | RPL19      | chr17:37356535-37360980   | 6068.55  | 5729.84  | -0.0828554 | 0.934946 |
| XLOC_019098 | AHI1       | chr6:135605109-135818903  | 1.59111  | 1.5023   | -0.0828551 | 0.945399 |
| XLOC_015131 | PARP3      | chr3:51976360-51982883    | 12.0904  | 11.416   | -0.0828004 | 0.933369 |
| XLOC_023724 | VBP1       | chrX:154444700-154468098  | 29.3304  | 27.6947  | -0.0827886 | 0.931581 |
| XLOC_008422 | LITAF      | chr16:11641577-11681322   | 27.604   | 26.0652  | -0.0827526 | 0.926279 |
| XLOC_006715 | ACIN1      | chr14:23527773-23569665   | 60.1061  | 56.756   | -0.0827384 | 0.950251 |
| XLOC_014708 | PRAME      | chr22:22890122-22901696   | 15.2074  | 14.3625  | -0.0824682 | 0.935067 |
| XLOC_020868 | PRKAG2-AS1 | chr7:151253200-151576308  | 16.3908  | 15.4807  | -0.0824159 | 0.97664  |
| XLOC_015432 | NMD3       | chr3:160939098-160969795  | 14.3192  | 13.525   | -0.0823252 | 0.929461 |
| XLOC_015583 | NUP210     | chr3:13357736-13461809    | 14.2375  | 13.4487  | -0.0822356 | 0.926279 |
| XLOC_017857 | NDUFA2     | chr5:140019011-140027370  | 114.953  | 108.586  | -0.0822107 | 0.940327 |
| XLOC_017448 | THG1L      | chr5:157158322-157166772  | 23.2022  | 21.9186  | -0.0821071 | 0.933684 |
| XLOC_018025 | WRNIP1     | chr6:2765665-2785979      | 35.1411  | 33.1979  | -0.0820659 | 0.924931 |
| XLOC_003399 | PDHX       | chr11:34903842-35017675   | 10.5671  | 9.98335  | -0.0819774 | 0.953159 |
| XLOC_005722 | C12orf49   | chr12:117153595-117175843 | 6.91653  | 6.53497  | -0.0818673 | 0.93855  |
| XLOC_022242 | SLC39A4    | chr8:145637797-145642273  | 38.4125  | 36.2937  | -0.0818592 | 0.932768 |
| XLOC_003912 | ST3GAL4    | chr11:126225539-126284536 | 18.7919  | 17.7554  | -0.0818523 | 0.933451 |
| XLOC_012640 | PNKD       | chr2:219135114-219211516  | 45.9965  | 43.4599  | -0.0818398 | 0.981441 |

|             |           |                           |          |          |            |          |
|-------------|-----------|---------------------------|----------|----------|------------|----------|
| XLOC_021092 | PMS2P4    | chr7:66741117-66767429    | 1.19095  | 1.12529  | -0.0818158 | 0.975654 |
| XLOC_020634 | ZSCAN25   | chr7:99214570-99230030    | 3.17468  | 2.99965  | -0.0818151 | 0.940466 |
| XLOC_014683 | ARVCF     | chr22:19863039-20004309   | 13.5162  | 12.772   | -0.0816973 | 0.976134 |
| XLOC_010659 | TPM4      | chr19:16178316-16213813   | 249.156  | 235.439  | -0.0816931 | 0.933451 |
| XLOC_013699 | SLC2A10   | chr20:45338278-45364985   | 2.41864  | 2.28582  | -0.0814845 | 0.945399 |
| XLOC_013234 | SP3       | chr2:174771186-174830430  | 5.36196  | 5.06769  | -0.0814317 | 0.928363 |
| XLOC_008136 | CPNE2     | chr16:57126454-57181878   | 29.5137  | 27.8971  | -0.081269  | 0.92921  |
| XLOC_002720 | NANOS1    | chr10:120789227-120793854 | 2.81468  | 2.66061  | -0.0812126 | 0.940991 |
| XLOC_014516 | SFI1      | chr22:31892124-32026810   | 7.10082  | 6.71219  | -0.0812031 | 0.970321 |
| XLOC_016090 | THPO      | chr3:184089772-184095932  | 0.247609 | 0.234058 | -0.081198  | 1        |
| XLOC_002511 | MCU       | chr10:74451888-74647452   | 6.46866  | 6.11497  | -0.0811208 | 0.937886 |
| XLOC_001360 | IFNLR1    | chr1:24480646-24513765    | 1.50245  | 1.4203   | -0.0811142 | 0.953159 |
| XLOC_017987 | AGXT2L2   | chr5:177631507-177659803  | 10.0901  | 9.53846  | -0.0811089 | 0.985768 |
| XLOC_008285 | SNAI3-AS1 | chr16:88729780-88753594   | 1.40373  | 1.32703  | -0.0810583 | 0.981975 |
| XLOC_005931 | BORA      | chr13:73302041-73590591   | 4.26681  | 4.03431  | -0.080837  | 0.977897 |
| XLOC_013141 | HS6ST1    | chr2:129023053-129076171  | 11.3374  | 10.7196  | -0.0808354 | 0.934331 |
| XLOC_020382 | AHR       | chr7:17338275-17385775    | 0.30492  | 0.288307 | -0.0808235 | 1        |
| XLOC_008403 | GLYR1     | chr16:4853203-4897303     | 11.2361  | 10.624   | -0.0808135 | 0.933369 |
| XLOC_003680 | PPFIA1    | chr11:70116805-70230607   | 5.58914  | 5.28505  | -0.080709  | 0.935543 |
| XLOC_022146 | EIF3H     | chr8:117657054-117768062  | 567.886  | 537      | -0.0806803 | 0.933617 |
| XLOC_004252 | TMEM258   | chr11:61556601-61560085   | 493.907  | 467.048  | -0.0806699 | 0.928904 |
| XLOC_004926 | MYL6      | chr12:56552044-56555366   | 815.232  | 770.914  | -0.0806412 | 0.931457 |
| XLOC_021951 | FUT10     | chr8:33228343-33330664    | 2.84972  | 2.6948   | -0.0806397 | 0.945208 |
| XLOC_018679 | HIST1H1C  | chr6:26055967-26056699    | 44.9805  | 42.5385  | -0.0805301 | 0.940421 |
| XLOC_022317 | ANXA2P2   | chr9:33624222-33625532    | 4.30648  | 4.0727   | -0.0805232 | 0.953488 |
| XLOC_018481 | RNF217    | chr6:125304513-125404661  | 0.501088 | 0.473887 | -0.0805211 | 0.974073 |
| XLOC_002140 | DSTYK     | chr1:205111630-205180727  | 1.85806  | 1.75722  | -0.0805087 | 0.940327 |
| XLOC_007375 | SCAND2P   | chr15:85174690-85185694   | 2.62823  | 2.48571  | -0.0804343 | 0.946021 |
| XLOC_018814 | CUTA      | chr6:33384318-33386065    | 299.102  | 282.886  | -0.0804192 | 0.933684 |
| XLOC_008214 | SF3B3     | chr16:70557690-70611571   | 24.2941  | 22.977   | -0.0804191 | 0.929053 |
| XLOC_007117 | FAN1      | chr15:31196054-31283807   | 3.19688  | 3.02359  | -0.0803994 | 0.952355 |
| XLOC_005027 | PLXNC1    | chr12:94542498-94701451   | 0.551341 | 0.521469 | -0.0803638 | 0.965052 |
| XLOC_007198 | SQRDL     | chr15:45923345-45983492   | 10.992   | 10.3967  | -0.0803304 | 0.939323 |
| XLOC_001638 | GTF2B     | chr1:89318320-89357301    | 17.0482  | 16.1252  | -0.0803058 | 0.935507 |
| XLOC_003328 | SBF2-AS1  | chr11:9776316-10315754    | 2.60745  | 2.46634  | -0.080267  | 0.974573 |
| XLOC_012619 | PIKFYVE   | chr2:209130990-209223475  | 1.42044  | 1.34358  | -0.0802582 | 0.942197 |
| XLOC_023297 | PRDX4     | chrX:23685644-23704514    | 220.992  | 209.039  | -0.0802226 | 0.93053  |
| XLOC_002465 | CISD1     | chr10:60028861-60049019   | 11.6721  | 11.0415  | -0.0801256 | 0.934331 |
| XLOC_001523 | LRRC41    | chr1:46713366-46769038    | 30.9502  | 29.28    | -0.0800367 | 0.941566 |
| XLOC_007966 | COQ7      | chr16:19078916-19091417   | 3.5992   | 3.40499  | -0.0800248 | 0.947962 |
| XLOC_013639 | SRC       | chr20:35973087-36033821   | 19.2721  | 18.2324  | -0.0800084 | 0.929727 |
| XLOC_001319 | AKR7A3    | chr1:19609056-19615280    | 10.864   | 10.2782  | -0.0799713 | 0.948368 |
| XLOC_013689 | DNTTIP1   | chr20:44420575-44440066   | 81.2522  | 76.8755  | -0.0798837 | 0.931457 |
| XLOC_014865 | POLDIP3   | chr22:42979726-43010962   | 27.4891  | 26.0107  | -0.0797533 | 0.928178 |
| XLOC_006001 | CUL4A     | chr13:113863085-113919392 | 17.7889  | 16.8325  | -0.0797252 | 0.932848 |
| XLOC_020620 | BHLHA15   | chr7:97841565-97842271    | 2.10332  | 1.99026  | -0.0797105 | 0.97664  |
| XLOC_006274 | ABHD4     | chr14:23067146-23081265   | 7.47647  | 7.07477  | -0.0796739 | 0.942352 |
| XLOC_000231 | PHACTR4   | chr1:28696092-28826881    | 4.00582  | 3.79091  | -0.0795564 | 0.934331 |
| XLOC_017709 | AP3B1     | chr5:77298149-77590579    | 5.80655  | 5.49528  | -0.0794886 | 0.933523 |



|             |               |                           |          |          |            |          |
|-------------|---------------|---------------------------|----------|----------|------------|----------|
| XLOC_020653 | PCOLCE        | chr7:100183955-100205798  | 15.5584  | 14.7253  | -0.0793992 | 0.945208 |
| XLOC_002459 | FAM21A,FAM21B | chr10:51827683-51893269   | 1.7906   | 1.69487  | -0.0792714 | 0.948523 |
| XLOC_006162 | MYCBP2        | chr13:77618791-77901177   | 1.46059  | 1.38254  | -0.0792238 | 0.937373 |
| XLOC_010834 | SPRED3        | chr19:38880839-38890523   | 1.73034  | 1.63789  | -0.0792171 | 0.951891 |
| XLOC_023071 | GOLGA1        | chr9:127640572-127703386  | 5.18717  | 4.91108  | -0.0789079 | 0.936242 |
| XLOC_013127 | TFCP2L1       | chr2:121974163-122042778  | 0.865942 | 0.819911 | -0.0788039 | 0.952184 |
| XLOC_000176 | RPL11         | chr1:24018268-24022915    | 4337.57  | 4107.03  | -0.0787901 | 0.939356 |
| XLOC_008890 | GID4          | chr17:17942610-17971718   | 4.15552  | 3.9348   | -0.0787385 | 0.942091 |
| XLOC_006698 | CHD8          | chr14:21853352-21905457   | 3.50969  | 3.32328  | -0.0787335 | 0.93571  |
| XLOC_015475 | DVL3          | chr3:183873283-183891314  | 16.9001  | 16.0028  | -0.0787109 | 0.933369 |
| XLOC_023334 | USP9X         | chrX:40944887-41095832    | 6.34797  | 6.01131  | -0.0786163 | 0.931035 |
| XLOC_003315 | EIF3F         | chr11:8008866-8017719     | 421.272  | 398.942  | -0.078572  | 0.934043 |
| XLOC_008836 | CYB5D1        | chr17:7760002-7765600     | 5.47621  | 5.18605  | -0.0785433 | 0.96385  |
| XLOC_012791 | ROCK2         | chr2:11321777-11484711    | 1.14739  | 1.08662  | -0.078504  | 0.950251 |
| XLOC_000491 | SH3GLB1       | chr1:87170252-87213867    | 8.76818  | 8.30421  | -0.0784344 | 0.931457 |
| XLOC_017351 | CXXC5         | chr5:139028300-139062680  | 4.62762  | 4.38285  | -0.0784    | 0.962754 |
| XLOC_009044 | CASC3         | chr17:38296506-38328431   | 24.8918  | 23.5754  | -0.07839   | 0.933465 |
| XLOC_013673 | PKIG          | chr20:43160435-43247678   | 24.8905  | 23.5747  | -0.0783606 | 0.941849 |
| XLOC_005600 | PPP1R12A      | chr12:80167342-80329235   | 4.06909  | 3.85408  | -0.0783201 | 0.935095 |
| XLOC_024183 | RENBP         | chrX:153200721-153210232  | 0.415874 | 0.393909 | -0.0782816 | 0.978031 |
| XLOC_005749 | CAMKK2        | chr12:121675494-121736111 | 10.3246  | 9.77969  | -0.078232  | 0.935988 |
| XLOC_002003 | ANKRD36BP1    | chr1:168214818-168216668  | 0.113847 | 0.107838 | -0.0782196 | 1        |
| XLOC_011738 | LOC100379224  | chr19:44598481-44617336   | 1.91025  | 1.80955  | -0.0781315 | 0.953159 |
| XLOC_022270 | RCL1          | chr9:4792833-4861064      | 13.088   | 12.3984  | -0.078084  | 0.935829 |
| XLOC_005740 | TRIAP1        | chr12:120881763-120884215 | 23.0362  | 21.8243  | -0.0779726 | 0.935829 |
| XLOC_004071 | RNF141        | chr11:10533224-10562774   | 3.88804  | 3.68353  | -0.0779572 | 0.940766 |
| XLOC_009855 | MMD           | chr17:53469973-53499341   | 2.34784  | 2.22473  | -0.0777053 | 0.952795 |
| XLOC_008444 | ARL6IP1       | chr16:18802990-18812857   | 69.0069  | 65.3886  | -0.077702  | 0.933451 |
| XLOC_015344 | UBA5          | chr3:132276981-132593050  | 10.2595  | 9.72178  | -0.0776686 | 0.959358 |
| XLOC_014231 | TEKT4P2       | chr21:9907188-9968593     | 9.32038  | 8.83259  | -0.0775519 | 0.964843 |
| XLOC_006492 | CPSF2         | chr14:92588297-92630543   | 6.69081  | 6.34069  | -0.0775409 | 0.934861 |
| XLOC_018844 | MTCH1         | chr6:36935910-36954327    | 28.14    | 26.6705  | -0.0773803 | 0.935543 |
| XLOC_022891 | RFK           | chr9:79000432-79009444    | 10.4981  | 9.95001  | -0.0773599 | 0.937886 |
| XLOC_000650 | CHD1L         | chr1:146714290-146767447  | 33.1609  | 31.4297  | -0.0773586 | 0.933736 |
| XLOC_012780 | MBOAT2        | chr2:8996700-9143876      | 4.71071  | 4.46488  | -0.0773231 | 0.940466 |
| XLOC_018982 | SNHG5         | chr6:86386724-86388451    | 1416.83  | 1342.92  | -0.0772847 | 0.935543 |
| XLOC_013727 | CSTF1         | chr20:54967426-54979582   | 12.6756  | 12.0149  | -0.0772219 | 0.938516 |
| XLOC_013626 | ERGIC3        | chr20:34129777-34145405   | 150.239  | 142.413  | -0.0771796 | 0.933736 |
| XLOC_001028 | DIEXF         | chr1:210001311-210030910  | 4.18106  | 3.96329  | -0.0771696 | 0.935808 |
| XLOC_013166 | ZRANB3        | chr2:135957573-136288806  | 0.484329 | 0.459113 | -0.0771388 | 0.967296 |
| XLOC_014889 | CDPF1         | chr22:46639909-46646193   | 5.31614  | 5.03937  | -0.0771347 | 0.953524 |
| XLOC_019057 | GOPC          | chr6:117803819-117923705  | 5.10145  | 4.8359   | -0.0771239 | 0.939068 |
| XLOC_002243 | EXOC8         | chr1:231468481-231473578  | 2.17367  | 2.06062  | -0.0770532 | 0.948369 |
| XLOC_015680 | CSPG5         | chr3:47603727-47621730    | 1.27737  | 1.21095  | -0.0770418 | 0.967343 |
| XLOC_011725 | PHLDB3        | chr19:43979254-44008985   | 8.86937  | 8.40822  | -0.0770301 | 0.945399 |
| XLOC_003302 | ILK           | chr11:6624963-6633475     | 64.3347  | 60.9955  | -0.0768935 | 0.950064 |
| XLOC_013441 | PER2          | chr2:239152678-239197207  | 1.91757  | 1.81805  | -0.0768825 | 0.950064 |
| XLOC_005886 | NUDT15        | chr13:48611702-48621282   | 9.42316  | 8.93453  | -0.0768188 | 0.942378 |
| XLOC_022588 | CERCAM        | chr9:131182758-131199630  | 76.8208  | 72.8415  | -0.076738  | 0.935507 |

|             |                |                           |           |           |            |          |
|-------------|----------------|---------------------------|-----------|-----------|------------|----------|
| XLOC_005978 | BIVM,BIVM-ERCC | chr13:103436630-103528351 | 17.5416   | 16.6332   | -0.0767194 | 0.938925 |
| XLOC_006901 | TMED10         | chr14:75598170-75643349   | 25.8936   | 24.5535   | -0.0766693 | 0.933717 |
| XLOC_013516 | PCNA-AS1       | chr20:5095598-5107268     | 47.3703   | 44.9199   | -0.0766273 | 0.985283 |
| XLOC_020411 | HOXA11-AS      | chr7:27225026-27228912    | 1.96646   | 1.86476   | -0.0766141 | 0.971173 |
| XLOC_002441 | FAM21B         | chr10:47894022-47949417   | 1.09742   | 1.04068   | -0.0765917 | 0.956177 |
| XLOC_000828 | SDHC           | chr1:161284165-161337673  | 36.3944   | 34.516    | -0.0764517 | 0.934861 |
| XLOC_020880 | RBM33          | chr7:155437202-155574179  | 3.77285   | 3.57854   | -0.0762807 | 0.937401 |
| XLOC_022288 | CCDC171        | chr9:15553096-15971897    | 0.361963  | 0.343329  | -0.0762512 | 1        |
| XLOC_005747 | C12orf43       | chr12:121440847-121454300 | 6.30762   | 5.98297   | -0.0762342 | 0.949638 |
| XLOC_015656 | KIAA1143       | chr3:44790235-44803173    | 8.6818    | 8.23495   | -0.0762334 | 0.935543 |
| XLOC_005126 | RFC5           | chr12:118454505-118470042 | 12.6129   | 11.9638   | -0.0762329 | 0.938489 |
| XLOC_018050 | TMEM14C        | chr6:10723147-10731362    | 165.45    | 156.939   | -0.0761917 | 0.935217 |
| XLOC_017259 | WDR36          | chr5:110427869-110466200  | 6.57888   | 6.24128   | -0.0759983 | 0.935829 |
| XLOC_023760 | TRAPPC2        | chrX:13730360-13752754    | 11.2194   | 10.6441   | -0.0759449 | 0.939356 |
| XLOC_018463 | RSPH4A         | chr6:116937641-116954148  | 0.209027  | 0.198309  | -0.0759422 | 1        |
| XLOC_011655 | SARS2          | chr19:39405903-39423659   | 16.346    | 15.5086   | -0.0758703 | 0.975484 |
| XLOC_017139 | MAP3K1         | chr5:56110899-56191978    | 0.799547  | 0.758614  | -0.075816  | 0.954397 |
| XLOC_011979 | NLRP11         | chr19:56296762-56393220   | 0.395247  | 0.375015  | -0.0758084 | 0.970185 |
| XLOC_005404 | RPAP3          | chr12:48055714-48099844   | 5.12663   | 4.86496   | -0.0755825 | 0.943284 |
| XLOC_009819 | HOXB6          | chr17:46667822-46683774   | 5.87124   | 5.57171   | -0.0755449 | 0.965398 |
| XLOC_002136 | PIK3C2B        | chr1:204391757-204459474  | 1.43956   | 1.36623   | -0.0754203 | 0.951854 |
| XLOC_009604 | COPRS          | chr17:30178883-30186326   | 112.821   | 107.076   | -0.0753996 | 0.935543 |
| XLOC_002112 | ARL8A          | chr1:202102531-202113871  | 24.5876   | 23.3373   | -0.075295  | 0.938489 |
| XLOC_004924 | ESYT1          | chr12:56521985-56538460   | 37.1511   | 35.2633   | -0.0752405 | 0.937886 |
| XLOC_011222 | ZNF548         | chr19:57901217-57913919   | 1.36522   | 1.29602   | -0.0750472 | 0.953159 |
| XLOC_014026 | ADNP           | chr20:49506882-49547527   | 10.9322   | 10.3783   | -0.0750094 | 0.935766 |
| XLOC_002057 | LOC100527964   | chr1:180199432-180244188  | 1.60069   | 1.51966   | -0.0749379 | 0.9682   |
| XLOC_009351 | SLC16A3        | chr17:80186281-80197375   | 211.61    | 200.918   | -0.0748026 | 0.937886 |
| XLOC_022352 | POLR1E         | chr9:37485944-37503693    | 39.1016   | 37.1265   | -0.0747786 | 0.935543 |
| XLOC_022498 | RAD23B         | chr9:110045516-110094475  | 50.3381   | 47.797    | -0.0747317 | 0.935507 |
| XLOC_014435 | RIMBP3C        | chr22:21737662-21743455   | 0.0339428 | 0.0322321 | -0.07461   | 1        |
| XLOC_022734 | BNC2           | chr9:16409500-16870786    | 0.813385  | 0.772441  | -0.0745127 | 0.948523 |
| XLOC_008822 | TNFSF12,TNFSF1 | chr17:7452374-7464925     | 16.334    | 15.5121   | -0.0744883 | 0.948368 |
| XLOC_024169 | CETN2          | chrX:151995870-151999301  | 29.6369   | 28.146    | -0.074463  | 0.939319 |
| XLOC_023193 | TMEM203        | chr9:140098534-140100090  | 66.1554   | 62.8356   | -0.0742768 | 0.936418 |
| XLOC_009492 | STX8           | chr17:9153787-9479275     | 40.5119   | 38.4792   | -0.0742692 | 0.940964 |
| XLOC_015266 | ZDHHC23        | chr3:113666747-113681827  | 3.41627   | 3.24496   | -0.0742202 | 0.948075 |
| XLOC_018171 | PRR3           | chr6:30509154-30532473    | 5.71865   | 5.43245   | -0.0740711 | 0.97822  |
| XLOC_012176 | MSH6           | chr2:48010220-48132932    | 6.71734   | 6.38125   | -0.0740518 | 0.96692  |
| XLOC_000043 | TP73           | chr1:3569128-3663937      | 3.34996   | 3.18242   | -0.0740235 | 0.950064 |
| XLOC_021146 | TMEM243        | chr7:86781676-86849031    | 14.5181   | 13.7928   | -0.0739354 | 0.963608 |
| XLOC_011317 | DAPK3          | chr19:3958451-3969826     | 125.409   | 119.148   | -0.0738826 | 0.935543 |
| XLOC_012076 | NCOA1          | chr2:24807345-24993570    | 1.98218   | 1.88326   | -0.0738555 | 0.9473   |
| XLOC_013476 | SOX12          | chr20:306214-310872       | 19.2504   | 18.2899   | -0.073842  | 0.936799 |
| XLOC_017808 | C5orf15        | chr5:133291197-133304406  | 10.8048   | 10.2657   | -0.0738391 | 0.943721 |
| XLOC_003193 | EBF3           | chr10:131633495-131762091 | 0.0468485 | 0.0445116 | -0.0738227 | 1        |
| XLOC_022351 | GRHPR          | chr9:37422706-37436986    | 118.093   | 112.209   | -0.0737424 | 0.93578  |
| XLOC_014161 | DOPEY2         | chr21:37536838-37666572   | 1.52212   | 1.44627   | -0.0737369 | 0.952233 |
| XLOC_017801 | SEPT8          | chr5:132083136-132113561  | 9.03301   | 8.58328   | -0.0736774 | 0.939451 |

|             |           |                           |           |            |            |          |
|-------------|-----------|---------------------------|-----------|------------|------------|----------|
| XLOC_008471 | USP31     | chr16:23072727-23160591   | 1.60175   | 1.52204    | -0.0736425 | 0.945597 |
| XLOC_015357 | NCK1      | chr3:136581049-136667968  | 6.51713   | 6.19286    | -0.0736301 | 0.950089 |
| XLOC_021560 | ADAM32    | chr8:38965049-39142436    | 0.0248235 | 0.0235884  | -0.0736272 | 1        |
| XLOC_015238 | ALCAM     | chr3:105085556-105295757  | 6.32492   | 6.01053    | -0.0735534 | 0.940466 |
| XLOC_012500 | PPIG      | chr2:170440849-170494254  | 7.33548   | 6.97097    | -0.0735324 | 0.943284 |
| XLOC_004034 | TRIM3     | chr11:6469842-6495689     | 3.54324   | 3.36718    | -0.0735273 | 0.955413 |
| XLOC_006359 | CDKN3     | chr14:54863672-54886934   | 35.6436   | 33.8737    | -0.0734806 | 0.943024 |
| XLOC_000362 | MMACHC    | chr1:45965855-45988562    | 4.01527   | 3.81589    | -0.0734778 | 0.987377 |
| XLOC_021480 | ZDHHC2    | chr8:17013835-17080241    | 6.5702    | 6.24414    | -0.073434  | 0.943414 |
| XLOC_017094 | PDZD2     | chr5:31799030-32111038    | 0.002734  | 0.00259836 | -0.0734148 | 1        |
| XLOC_011728 | IRGQ      | chr19:44088518-44100287   | 2.18295   | 2.07473    | -0.0733551 | 0.945857 |
| XLOC_014920 | SETMAR    | chr3:4344987-4358949      | 5.16244   | 4.9066     | -0.0733292 | 0.957484 |
| XLOC_004925 | MYL6B     | chr12:56546203-56551771   | 119.686   | 113.758    | -0.0732904 | 0.936242 |
| XLOC_018612 | GMD5      | chr6:1624034-2245868      | 18.2998   | 17.3938    | -0.0732554 | 0.945208 |
| XLOC_000135 | CROCC     | chr1:17248444-17299474    | 5.57467   | 5.2989     | -0.0731956 | 0.944033 |
| XLOC_012167 | RHOQ      | chr2:46769866-46844251    | 15.8472   | 15.0635    | -0.0731758 | 0.945399 |
| XLOC_020643 | LAMTOR4   | chr7:99746529-99751833    | 282.567   | 268.594    | -0.0731668 | 0.936242 |
| XLOC_007872 | TRAF7     | chr16:2205798-2246465     | 33.7999   | 32.1295    | -0.0731119 | 0.949526 |
| XLOC_004916 | RAB5B     | chr12:56367696-56390467   | 10.5101   | 9.99084    | -0.0731026 | 0.939356 |
| XLOC_013664 | IFT52     | chr20:42219578-42275862   | 12.8107   | 12.1778    | -0.0730949 | 0.945399 |
| XLOC_009107 | C17orf104 | chr17:42733761-42753165   | 0.0891648 | 0.0847626  | -0.0730471 | 1        |
| XLOC_014504 | MTFP1     | chr22:30821610-30825041   | 132.452   | 125.917    | -0.0730001 | 0.938335 |
| XLOC_023946 | RLIM      | chrX:73802810-73834461    | 4.5072    | 4.28482    | -0.0729939 | 0.939356 |
| XLOC_008533 | PRSS53    | chr16:31085742-31100130   | 4.17027   | 3.96462    | -0.0729578 | 0.974348 |
| XLOC_012514 | DLX1      | chr2:172950207-172954401  | 5.021     | 4.77343    | -0.0729496 | 0.955832 |
| XLOC_001769 | CD160     | chr1:145695797-145715565  | 0.125056  | 0.118899   | -0.0728483 | 1        |
| XLOC_005193 | SFSWAP    | chr12:132195631-132284283 | 8.96211   | 8.52114    | -0.0727909 | 0.943284 |
| XLOC_008904 | PRPSAP2   | chr17:18759611-18834599   | 22.0249   | 20.9429    | -0.0726711 | 0.938649 |
| XLOC_017530 | MAML1     | chr5:179159850-179204287  | 5.35579   | 5.09276    | -0.0726516 | 0.943183 |
| XLOC_009407 | C17orf85  | chr17:3710044-3749545     | 2.70681   | 2.57394    | -0.0726114 | 0.944779 |
| XLOC_020873 | ACTR3B    | chr7:152456833-152552464  | 12.8928   | 12.2601    | -0.0725945 | 0.945581 |
| XLOC_010053 | RFNG      | chr17:80005777-80009650   | 69.2779   | 65.8783    | -0.0725928 | 0.937886 |
| XLOC_004057 | TRIM66    | chr11:8633583-8680383     | 0.59097   | 0.561978   | -0.0725728 | 0.959927 |
| XLOC_006965 | ATG2B     | chr14:96747594-96829678   | 1.18256   | 1.12455    | -0.0725667 | 0.950089 |
| XLOC_021975 | KAT6A     | chr8:41786996-41909505    | 3.32776   | 3.16501    | -0.0723394 | 0.941566 |
| XLOC_009958 | FDXR      | chr17:72858618-72869156   | 44.401    | 42.2325    | -0.0722395 | 0.941934 |
| XLOC_019065 | SERINC1   | chr6:122764492-122792952  | 17.6242   | 16.764     | -0.0721888 | 0.93855  |
| XLOC_006495 | GOLGA5    | chr14:93260649-93306304   | 7.13276   | 6.78476    | -0.072161  | 0.9444   |
| XLOC_018629 | LYRM4     | chr6:5108652-5261172      | 22.3675   | 21.2795    | -0.0719389 | 0.943183 |
| XLOC_005122 | LINC00173 | chr12:116971226-116974318 | 0.224035  | 0.21314    | -0.07192   | 1        |
| XLOC_014397 | SLC25A18  | chr22:18043182-18073647   | 0.106313  | 0.101143   | -0.0719162 | 1        |
| XLOC_001802 | GOLPH3L   | chr1:150618700-150669672  | 5.42418   | 5.1605     | -0.0718925 | 0.947923 |
| XLOC_014479 | ADRBK2    | chr22:25960860-26125258   | 0.439494  | 0.418169   | -0.0717562 | 0.961459 |
| XLOC_003044 | FLJ37201  | chr10:91451056-91457685   | 0.0397865 | 0.0378561  | -0.0717526 | 1        |
| XLOC_003778 | CEP57     | chr11:95523624-95565857   | 9.51489   | 9.05325    | -0.0717511 | 0.943024 |
| XLOC_024097 | FAM122B   | chrX:133903595-133988641  | 5.20123   | 4.94937    | -0.0716075 | 0.951891 |
| XLOC_001014 | PFKFB2    | chr1:207226619-207254368  | 1.66595   | 1.58533    | -0.0715592 | 0.952978 |
| XLOC_011012 | SNRNP70   | chr19:49588464-49611870   | 108.348   | 103.113    | -0.0714456 | 0.938335 |
| XLOC_015754 | WDR82     | chr3:52288437-52312659    | 16.0553   | 15.2797    | -0.0714285 | 0.940991 |

|             |                |                           |           |           |            |          |
|-------------|----------------|---------------------------|-----------|-----------|------------|----------|
| XLOC_007620 | HERC1          | chr15:63900816-64126147   | 0.615128  | 0.585445  | -0.0713537 | 0.952772 |
| XLOC_008191 | PLA2G15        | chr16:68279246-68294961   | 10.7955   | 10.2746   | -0.071341  | 0.947567 |
| XLOC_018973 | IBTK           | chr6:82879955-82957448    | 4.68465   | 4.45869   | -0.0713222 | 0.94188  |
| XLOC_012207 | AFTPH          | chr2:64751438-64820138    | 6.13718   | 5.84119   | -0.0713145 | 0.943721 |
| XLOC_011607 | U2AF1L4        | chr19:36233427-36236336   | 2.89138   | 2.75194   | -0.071308  | 0.973011 |
| XLOC_018829 | TCP11          | chr6:35085848-35109187    | 0.0194133 | 0.0184777 | -0.0712557 | 1        |
| XLOC_015244 | DZIP3          | chr3:108268717-108413693  | 1.07505   | 1.02326   | -0.0712253 | 0.974573 |
| XLOC_022628 | C9orf9         | chr9:135754289-135765418  | 10.5492   | 10.0412   | -0.0712075 | 0.961236 |
| XLOC_003846 | ATP5L          | chr11:118230295-118289530 | 148.112   | 140.98    | -0.0711918 | 0.948799 |
| XLOC_012781 | ITGB1BP1       | chr2:9545814-9563643      | 28.2152   | 26.8574   | -0.0711494 | 0.942184 |
| XLOC_023912 | OPHN1          | chrX:67262185-67653299    | 1.93465   | 1.84169   | -0.071041  | 0.950837 |
| XLOC_016917 | ANXA5          | chr4:122589151-122618147  | 265.532   | 252.785   | -0.0709783 | 0.939651 |
| XLOC_013257 | FKBP7          | chr2:179059207-179672150  | 1.60986   | 1.53258   | -0.0709731 | 0.987007 |
| XLOC_006422 | ADAM21         | chr14:70918873-70926622   | 0.0854709 | 0.0813685 | -0.0709619 | 1        |
| XLOC_007362 | WHAMM          | chr15:83477972-83503613   | 4.93807   | 4.70125   | -0.070904  | 0.949388 |
| XLOC_014841 | MKL1           | chr22:40766594-41032690   | 4.02486   | 3.83189   | -0.0708809 | 0.975043 |
| XLOC_012225 | SNRNP27        | chr2:70121074-70132368    | 20.5253   | 19.5414   | -0.0708733 | 0.944869 |
| XLOC_008129 | MT1X           | chr16:56716381-56718108   | 2077.67   | 1978.12   | -0.0708387 | 0.943838 |
| XLOC_001386 | WASF2          | chr1:27730733-27816678    | 18.0097   | 17.1479   | -0.0707385 | 0.939356 |
| XLOC_009558 | TMEM11         | chr17:21101262-21117908   | 23.8776   | 22.7354   | -0.0707207 | 0.949    |
| XLOC_022824 | SPAG8          | chr9:35792405-35812259    | 0.0803327 | 0.0764899 | -0.0707171 | 1        |
| XLOC_007178 | CKMT1B         | chr15:43663312-43910998   | 13.2365   | 12.6054   | -0.0704891 | 0.975928 |
| XLOC_008959 | GOSR1          | chr17:28804425-28853832   | 5.52234   | 5.25928   | -0.0704158 | 0.945208 |
| XLOC_002402 | C10orf68,CCDC7 | chr10:32735040-33171792   | 0.600561  | 0.571965  | -0.0703854 | 0.975023 |
| XLOC_014699 | PI4KAP2        | chr22:21827286-21871780   | 12.0351   | 11.4621   | -0.0703748 | 0.948523 |
| XLOC_003764 | C11orf54       | chr11:93474792-93496247   | 4.32181   | 4.11632   | -0.0702798 | 0.952674 |
| XLOC_012224 | GMCL1          | chr2:70056817-70106727    | 2.09643   | 1.99706   | -0.0700577 | 0.960821 |
| XLOC_008699 | HSDL1          | chr16:84155743-84178800   | 6.27024   | 5.97324   | -0.070006  | 0.946416 |
| XLOC_023301 | ZFX            | chrX:24164341-24234372    | 2.11244   | 2.01246   | -0.0699487 | 0.950862 |
| XLOC_013067 | LYG1           | chr2:99900700-99917639    | 2.68037   | 2.55398   | -0.069859  | 0.970533 |
| XLOC_000076 | PGD            | chr1:10459084-10480201    | 113.988   | 108.618   | -0.0696296 | 0.943038 |
| XLOC_008882 | USP32P1        | chr17:16690205-16707819   | 0.129905  | 0.123785  | -0.0696291 | 1        |
| XLOC_009517 | TRIM16         | chr17:15531279-15586193   | 3.61226   | 3.44222   | -0.0695625 | 0.957719 |
| XLOC_023587 | PGRMC1         | chrX:118370210-118378429  | 97.2685   | 92.6908   | -0.0695471 | 0.942533 |
| XLOC_013708 | ZFAS1          | chr20:47862438-47905795   | 718.278   | 684.474   | -0.0695456 | 0.945399 |
| XLOC_023854 | PRICKLE3       | chrX:49031905-49042776    | 13.9415   | 13.2859   | -0.0694949 | 0.952184 |
| XLOC_012930 | USP34          | chr2:61404554-61697849    | 2.90154   | 2.76535   | -0.0693593 | 0.952233 |
| XLOC_021333 | MTPN           | chr7:135611502-135662204  | 35.9303   | 34.245    | -0.0693061 | 0.944033 |
| XLOC_003410 | TTC17          | chr11:43380434-43516483   | 7.88375   | 7.51403   | -0.0692955 | 0.943284 |
| XLOC_023478 | CHIC1          | chrX:72782983-72906937    | 0.984677  | 0.938504  | -0.0692871 | 0.958439 |
| XLOC_018262 | LHFPL5         | chr6:35773070-35791852    | 0.0530337 | 0.0505474 | -0.0692727 | 1        |
| XLOC_006168 | RBM26          | chr13:79894099-79979923   | 6.7882    | 6.47016   | -0.0692269 | 0.945597 |
| XLOC_008996 | RASL10B        | chr17:34058678-34070540   | 9.92667   | 9.46175   | -0.0692034 | 0.948523 |
| XLOC_008958 | CPD            | chr17:28705941-28796675   | 4.32929   | 4.12674   | -0.0691287 | 0.940466 |
| XLOC_013983 | TOMM34         | chr20:43570770-43589114   | 88.4446   | 84.3092   | -0.069085  | 0.943414 |
| XLOC_016263 | PI4K2B         | chr4:25235652-25280831    | 2.82061   | 2.68904   | -0.0689138 | 0.953231 |
| XLOC_000712 | LCE1F          | chr1:152748847-152749445  | 0.431295  | 0.411185  | -0.0688859 | 0.983243 |
| XLOC_004473 | GPR83          | chr11:94110476-94134585   | 0.189527  | 0.180691  | -0.0688827 | 1        |
| XLOC_015381 | U2SURP         | chr3:142720371-142779567  | 8.21163   | 7.82898   | -0.0688444 | 0.943748 |

|             |                |                           |           |           |            |          |
|-------------|----------------|---------------------------|-----------|-----------|------------|----------|
| XLOC_008633 | PSMB10         | chr16:67968406-67970780   | 42.6329   | 40.6516   | -0.0686558 | 0.950064 |
| XLOC_000443 | SGIP1          | chr1:66999824-67210768    | 0.971455  | 0.926431  | -0.0684641 | 0.965185 |
| XLOC_001008 | RASSF5         | chr1:206680878-206762616  | 0.68217   | 0.650567  | -0.0684352 | 0.971768 |
| XLOC_015533 | FBXO45         | chr3:196295724-196315930  | 3.62154   | 3.45383   | -0.0684078 | 0.946375 |
| XLOC_009961 | HID1           | chr17:72946838-72968900   | 17.7446   | 16.9229   | -0.0684001 | 0.945208 |
| XLOC_021880 | LONRF1         | chr8:12579405-12612992    | 3.13815   | 2.99287   | -0.0683866 | 0.954501 |
| XLOC_023527 | BHLHB9         | chrX:101975641-102007369  | 0.11174   | 0.106567  | -0.0683812 | 1        |
| XLOC_005533 | NACA           | chr12:57106210-57119326   | 1206.08   | 1150.27   | -0.0683523 | 0.945416 |
| XLOC_014873 | TTLL12         | chr22:43562627-43583137   | 54.7483   | 52.2157   | -0.0683309 | 0.944658 |
| XLOC_016151 | DLG1           | chr3:196769430-197030621  | 3.56352   | 3.3988    | -0.0682764 | 0.950837 |
| XLOC_016155 | KIAA0226       | chr3:197398258-197511317  | 2.84123   | 2.70995   | -0.0682488 | 0.975484 |
| XLOC_006413 | RAD51B         | chr14:68286495-69062738   | 5.32931   | 5.08364   | -0.068087  | 0.958285 |
| XLOC_022017 | ARMC1          | chr8:66514690-66546452    | 11.0968   | 10.5853   | -0.0680851 | 0.946021 |
| XLOC_016953 | ZNF827         | chr4:146681887-146859607  | 0.259479  | 0.247518  | -0.0680826 | 1        |
| XLOC_014033 | ZFP64          | chr20:50700549-50808524   | 5.87196   | 5.60152   | -0.0680241 | 0.954143 |
| XLOC_005663 | C12orf73       | chr12:104343980-104350993 | 2.74919   | 2.62259   | -0.0680157 | 0.96715  |
| XLOC_018364 | BAG2           | chr6:57037103-57050012    | 22.0632   | 21.0475   | -0.0679982 | 0.945399 |
| XLOC_010121 | GNAL           | chr18:11689013-11908796   | 3.51686   | 3.35504   | -0.0679591 | 0.976572 |
| XLOC_009530 | PEMT           | chr17:17408876-17495017   | 70.9209   | 67.6583   | -0.0679438 | 0.945416 |
| XLOC_010535 | PNPLA6         | chr19:7599037-7626653     | 29.3157   | 27.9698   | -0.0678013 | 0.945597 |
| XLOC_012234 | MPHOSPH10      | chr2:71357443-71377232    | 8.91966   | 8.5103    | -0.0677785 | 0.947923 |
| XLOC_013348 | FN1            | chr2:216225178-216300791  | 0.0246643 | 0.0235344 | -0.0676569 | 1        |
| XLOC_003708 | PAAF1          | chr11:73583712-73638781   | 16.0623   | 15.3272   | -0.0675825 | 0.97562  |
| XLOC_012783 | YWHAQ          | chr2:9724105-9771106      | 154.99    | 147.898   | -0.0675767 | 0.945597 |
| XLOC_014163 | CHAF1B         | chr21:37757688-37789125   | 8.61787   | 8.22395   | -0.0675    | 0.951854 |
| XLOC_006521 | AK7            | chr14:96858447-96955764   | 0.186042  | 0.177546  | -0.0674412 | 1        |
| XLOC_013934 | NCOA6          | chr20:33302577-33413433   | 3.2024    | 3.05622   | -0.0674025 | 0.952795 |
| XLOC_018403 | C6orf164       | chr6:88106841-88109459    | 0.116191  | 0.110904  | -0.0671902 | 1        |
| XLOC_008193 | PRMT7          | chr16:68344876-68391169   | 12.3355   | 11.7744   | -0.0671635 | 0.951036 |
| XLOC_001588 | JAK1           | chr1:65210777-65432187    | 14.6293   | 13.9642   | -0.06713   | 0.952184 |
| XLOC_016505 | C4orf33        | chr4:130014828-130033843  | 5.01017   | 4.78249   | -0.067099  | 0.957663 |
| XLOC_003840 | CEP164         | chr11:117192493-117283982 | 2.52209   | 2.40748   | -0.0670925 | 0.953598 |
| XLOC_008647 | NOB1           | chr16:69775756-69788871   | 144.239   | 137.685   | -0.0670889 | 0.945399 |
| XLOC_016957 | PRMT10         | chr4:148559533-148605280  | 2.21343   | 2.11331   | -0.066777  | 0.95935  |
| XLOC_015197 | CHMP2B         | chr3:87276412-87304698    | 16.7587   | 16.0007   | -0.0667764 | 0.945887 |
| XLOC_017160 | PIK3R1         | chr5:67511583-67597649    | 0.990575  | 0.94582   | -0.0667003 | 0.960529 |
| XLOC_024046 | LAMP2          | chrX:119560002-119603204  | 12.9671   | 12.382    | -0.0666176 | 0.945208 |
| XLOC_012057 | TRIB2          | chr2:12856997-12882858    | 0.86526   | 0.826269  | -0.0665208 | 0.971663 |
| XLOC_011894 | ETFB           | chr19:51848408-51869672   | 95.8486   | 91.5325   | -0.0664732 | 0.945399 |
| XLOC_006525 | CCNK           | chr14:99947738-100070727  | 16.683    | 15.9341   | -0.0662598 | 0.971057 |
| XLOC_010301 | ROCK1          | chr18:18529702-18691812   | 2.59545   | 2.47894   | -0.0662573 | 0.952163 |
| XLOC_006289 | DHRS4L2        | chr14:24439082-24475617   | 13.2915   | 12.6949   | -0.0662568 | 0.955713 |
| XLOC_012211 | CEP68          | chr2:65283494-65357435    | 2.68782   | 2.56732   | -0.0661731 | 0.982866 |
| XLOC_012391 | LOC654433      | chr2:113973573-114036498  | 2.45868   | 2.34864   | -0.0660542 | 0.975928 |
| XLOC_004917 | SUOX           | chr12:56391042-56399309   | 5.50172   | 5.25562   | -0.0660223 | 0.956273 |
| XLOC_004944 | MBD6           | chr12:57916658-57941114   | 12.2133   | 11.6674   | -0.065977  | 0.978818 |
| XLOC_021237 | POLR2J2,UPK3Bl | chr7:102277194-102312176  | 46.5111   | 44.4332   | -0.0659385 | 0.945887 |
| XLOC_002347 | CAMK1D         | chr10:12391582-12871733   | 3.6838    | 3.51953   | -0.0658086 | 0.963969 |
| XLOC_014643 | SELO           | chr22:50639407-50656045   | 24.1463   | 23.07     | -0.0657834 | 0.950513 |

|             |           |                           |          |          |            |          |
|-------------|-----------|---------------------------|----------|----------|------------|----------|
| XLOC_009169 | SPATA20   | chr17:48624449-48633213   | 36.4688  | 34.8461  | -0.0656651 | 0.947567 |
| XLOC_017838 | CDC25C    | chr5:137620958-137667516  | 5.29601  | 5.06043  | -0.0656479 | 0.957728 |
| XLOC_022120 | ANKRD46   | chr8:101521979-101572014  | 3.59032  | 3.43064  | -0.0656332 | 0.956896 |
| XLOC_004249 | CPSF7     | chr11:61170119-61197464   | 15.1227  | 14.4504  | -0.0656057 | 0.947795 |
| XLOC_022612 | FUBP3     | chr9:133454959-133513739  | 21.2466  | 20.3023  | -0.0655859 | 0.945568 |
| XLOC_020973 | SKAP2     | chr7:26706687-26904341    | 4.06781  | 3.88711  | -0.0655545 | 0.952795 |
| XLOC_011049 | MYH14     | chr19:50706884-50813801   | 5.00222  | 4.78036  | -0.065449  | 0.952392 |
| XLOC_024075 | LOC286467 | chrX:130836677-130964671  | 0.894877 | 0.855224 | -0.0653876 | 0.971057 |
| XLOC_022567 | RALGPS1   | chr9:129677052-129985445  | 0.894059 | 0.854444 | -0.0653839 | 0.973687 |
| XLOC_004264 | B3GAT3    | chr11:62382767-62389647   | 34.9834  | 33.4335  | -0.0653766 | 0.946021 |
| XLOC_009013 | DUSP14    | chr17:35849950-35873588   | 37.7019  | 36.0343  | -0.0652655 | 0.948304 |
| XLOC_021496 | EPB49     | chr8:21911080-21940036    | 19.4739  | 18.6126  | -0.0652635 | 0.950837 |
| XLOC_021801 | ADCK5     | chr8:145597730-145634733  | 20.1331  | 19.2432  | -0.0652226 | 0.979006 |
| XLOC_020988 | CPVL      | chr7:29019582-29186153    | 12.5691  | 12.0138  | -0.0651943 | 0.951891 |
| XLOC_005104 | ACAD10    | chr12:112123856-112194911 | 2.13279  | 2.0387   | -0.0650924 | 0.961236 |
| XLOC_008151 | MMP15     | chr16:58059281-58080804   | 6.64489  | 6.35202  | -0.0650287 | 0.954167 |
| XLOC_005406 | RAPGEF3   | chr12:48128452-48152889   | 0.563941 | 0.539109 | -0.0649674 | 0.970994 |
| XLOC_000514 | DR1       | chr1:93811477-93828148    | 15.7477  | 15.0554  | -0.0648611 | 0.947923 |
| XLOC_015947 | TMCC1     | chr3:129366634-129612419  | 1.10939  | 1.06064  | -0.0648435 | 0.962068 |
| XLOC_016640 | MFSD10    | chr4:2932287-2936586      | 165.861  | 158.58   | -0.0647628 | 0.945887 |
| XLOC_002460 | ASAH2B    | chr10:52499687-52514569   | 0.201617 | 0.192766 | -0.0647627 | 1        |
| XLOC_020838 | ZNF282    | chr7:148892576-148923339  | 23.3321  | 22.3083  | -0.0647384 | 0.947567 |
| XLOC_006018 | GJA3      | chr13:20712394-20735183   | 0.739926 | 0.707484 | -0.0646831 | 0.970185 |
| XLOC_010166 | RNF138    | chr18:29671817-29711524   | 8.33838  | 7.97292  | -0.0646599 | 0.952101 |
| XLOC_002214 | SDE2      | chr1:226170402-226187066  | 4.15935  | 3.97713  | -0.0646294 | 0.954276 |
| XLOC_005645 | IKBIP     | chr12:99007181-99038829   | 13.1644  | 12.5879  | -0.0646054 | 0.956177 |
| XLOC_012332 | PDCL3     | chr2:101179417-101193201  | 15.6498  | 14.9649  | -0.0645651 | 0.953195 |
| XLOC_000686 | C1orf56   | chr1:151020258-151032125  | 4.63189  | 4.42919  | -0.0645575 | 0.989954 |
| XLOC_013173 | GTDC1     | chr2:144703580-145090083  | 1.47829  | 1.41361  | -0.0645429 | 0.967866 |
| XLOC_012876 | HNRPLL    | chr2:38790327-38830178    | 7.94416  | 7.59694  | -0.064477  | 0.951854 |
| XLOC_006490 | C14orf159 | chr14:91580356-91691703   | 6.56461  | 6.27798  | -0.0644099 | 0.954501 |
| XLOC_023279 | SYAP1     | chrX:16737706-16780807    | 24.1087  | 23.0576  | -0.064313  | 0.947795 |
| XLOC_015654 | ANO10     | chr3:43407817-43663560    | 7.59693  | 7.26618  | -0.0642187 | 0.954501 |
| XLOC_020551 | GTF2IRD1  | chr7:73868119-74016920    | 19.8306  | 18.9684  | -0.0641252 | 0.949188 |
| XLOC_008018 | CCDC101   | chr16:28565248-28603111   | 12.4382  | 11.8979  | -0.0640764 | 0.960529 |
| XLOC_002708 | TRUB1     | chr10:116697951-116737439 | 4.25591  | 4.07109  | -0.0640517 | 0.954397 |
| XLOC_015706 | QARS      | chr3:49133364-49142562    | 93.2401  | 89.1978  | -0.063943  | 0.948368 |
| XLOC_007265 | C15orf61  | chr15:67493012-67819641   | 12.911   | 12.3516  | -0.0639076 | 0.978031 |
| XLOC_021121 | PMS2P3    | chr7:75137068-75157453    | 0.971524 | 0.929431 | -0.0639027 | 0.976866 |
| XLOC_011082 | ZNF480    | chr19:52800425-52829174   | 1.50899  | 1.44368  | -0.0638379 | 0.96024  |
| XLOC_009005 | GGNBP2    | chr17:34900736-34946276   | 13.7577  | 13.1633  | -0.0637148 | 0.950538 |
| XLOC_023268 | TCEANC    | chrX:13671306-13682247    | 0.320679 | 0.306827 | -0.0637059 | 1        |
| XLOC_011382 | CD320     | chr19:8367010-8373240     | 273.612  | 261.798  | -0.0636759 | 0.947567 |
| XLOC_016036 | IFT80     | chr3:159974773-160117320  | 2.14893  | 2.05617  | -0.0636617 | 0.958899 |
| XLOC_007157 | CHP1      | chr15:41523436-41574083   | 47.8854  | 45.8192  | -0.0636353 | 0.948444 |
| XLOC_013799 | PCMTD2    | chr20:62887047-62907579   | 5.42941  | 5.19554  | -0.0635232 | 0.952184 |
| XLOC_014341 | PRDM15    | chr21:43218384-43299591   | 0.637283 | 0.609884 | -0.0634002 | 0.968157 |
| XLOC_016878 | PPA2      | chr4:106290233-106395227  | 42.3577  | 40.5386  | -0.0633276 | 0.945857 |
| XLOC_009915 | POLG2     | chr17:62473901-62493184   | 5.66057  | 5.41765  | -0.0632795 | 0.961218 |

|             |            |                           |          |           |            |          |
|-------------|------------|---------------------------|----------|-----------|------------|----------|
| XLOC_009379 | PRPF8      | chr17:1553922-1588176     | 37.2974  | 35.6979   | -0.063239  | 0.950837 |
| XLOC_014859 | CYP2D6     | chr22:42522500-42526883   | 1.3868   | 1.32749   | -0.0630568 | 0.978016 |
| XLOC_011975 | ZNF579     | chr19:56088890-56092211   | 30.8516  | 29.5329   | -0.0630258 | 0.952429 |
| XLOC_010722 | ZNF486     | chr19:20278022-20311299   | 1.65842  | 1.58755   | -0.0630097 | 0.963969 |
| XLOC_015624 | GLB1,TMPPE | chr3:33038099-33138694    | 28.1321  | 26.9306   | -0.0629713 | 0.950862 |
| XLOC_006193 | DOCK9      | chr13:99445740-99738660   | 0.918711 | 0.879502  | -0.0629247 | 0.965831 |
| XLOC_022250 | ZNF251     | chr8:145946293-145980970  | 7.71015  | 7.38154   | -0.0628381 | 0.951854 |
| XLOC_011663 | PAF1       | chr19:39876269-39881835   | 14.1577  | 13.5546   | -0.0628046 | 0.951036 |
| XLOC_004157 | PHF21A     | chr11:45950869-46142985   | 3.13219  | 2.99878   | -0.0627934 | 0.952954 |
| XLOC_003838 | RNF214     | chr11:117103403-117186972 | 3.50183  | 3.35271   | -0.0627844 | 0.975484 |
| XLOC_011834 | SLC6A16    | chr19:49792891-49828474   | 0.167325 | 0.160208  | -0.0627153 | 1        |
| XLOC_004412 | ARRB1      | chr11:74971165-75062875   | 5.11795  | 4.90029   | -0.0626987 | 0.951272 |
| XLOC_012410 | RALB       | chr2:121010413-121052286  | 19.565   | 18.7348   | -0.0625517 | 0.950176 |
| XLOC_002934 | AGAP8      | chr10:51026324-51371331   | 0.734944 | 0.70376   | -0.0625499 | 0.990368 |
| XLOC_005195 | ULK1       | chr12:132379278-132407707 | 6.68338  | 6.40004   | -0.0624968 | 0.956177 |
| XLOC_011909 | ZNF649     | chr19:52392487-52408305   | 0.137155 | 0.131348  | -0.0624196 | 1        |
| XLOC_015315 | ABTB1      | chr3:127391780-127399769  | 17.7061  | 16.957    | -0.0623648 | 0.954729 |
| XLOC_017440 | MRPL22     | chr5:154320632-154348971  | 12.3799  | 11.8568   | -0.0622889 | 0.949638 |
| XLOC_012934 | CCT4       | chr2:62095261-62115806    | 106.232  | 101.745   | -0.0622519 | 0.949913 |
| XLOC_022610 | NCS1       | chr9:132934856-13299583   | 48.4863  | 46.4436   | -0.0620959 | 0.947962 |
| XLOC_009182 | PCTP       | chr17:53828339-53854748   | 8.82185  | 8.4504    | -0.0620613 | 0.95781  |
| XLOC_005171 | DDX55      | chr12:124086671-124105482 | 9.59936  | 9.19523   | -0.0620536 | 0.953159 |
| XLOC_017082 | FAM105A    | chr5:14581890-14616287    | 0.845876 | 0.810362  | -0.0618802 | 0.963969 |
| XLOC_017899 | DCTN4      | chr5:150088308-150138657  | 12.2779  | 11.763    | -0.0618072 | 0.951891 |
| XLOC_017599 | MTMR12     | chr5:32227110-32313114    | 3.81568  | 3.65574   | -0.0617755 | 0.953159 |
| XLOC_003795 | AASDHPPT   | chr11:105921824-105969419 | 13.6096  | 13.0394   | -0.0617553 | 0.952772 |
| XLOC_008360 | BRICD5     | chr16:2255177-2261069     | 4.69698  | 4.50039   | -0.0616832 | 0.994068 |
| XLOC_020617 | ACN9       | chr7:96745904-96811075    | 11.8803  | 11.3832   | -0.0616714 | 0.954501 |
| XLOC_008583 | AMFR       | chr16:56395363-56459450   | 32.2813  | 30.9322   | -0.061589  | 0.950064 |
| XLOC_022134 | LRP12      | chr8:105501458-105601252  | 3.24749  | 3.11179   | -0.0615783 | 0.958285 |
| XLOC_023001 | PTPN3      | chr9:112137973-112260593  | 5.66176  | 5.42542   | -0.0615145 | 0.952637 |
| XLOC_020840 | ZNF783     | chr7:148959261-148982085  | 2.14157  | 2.0522    | -0.0614976 | 0.964843 |
| XLOC_023253 | SHROOM2    | chrX:9754495-9917481      | 0.507576 | 0.486398  | -0.0614892 | 0.972758 |
| XLOC_017928 | RNF145     | chr5:158584416-158637061  | 30.0415  | 28.7885   | -0.0614643 | 0.950563 |
| XLOC_021672 | SLC26A7    | chr8:92261515-92410378    | 0.017034 | 0.0163248 | -0.0613564 | 1        |
| XLOC_021282 | AASS       | chr7:121713597-121784344  | 5.2733   | 5.05378   | -0.061341  | 0.952221 |
| XLOC_003387 | PRRG4      | chr11:32851480-32879669   | 2.38073  | 2.2817    | -0.0612959 | 0.960529 |
| XLOC_022704 | WASH1      | chr9:11986-29739          | 5.8634   | 5.61956   | -0.0612823 | 0.964628 |
| XLOC_011079 | PPP2R1A    | chr19:52693054-52729678   | 199.532  | 191.255   | -0.0611198 | 0.952184 |
| XLOC_014147 | IFNAR1     | chr21:34697213-34732128   | 5.51587  | 5.28723   | -0.0610749 | 0.953159 |
| XLOC_006744 | SDR39U1    | chr14:24899140-24912007   | 48.35    | 46.3476   | -0.0610222 | 0.975492 |
| XLOC_012188 | PRORS1P    | chr2:55509454-55511607    | 0.482762 | 0.462777  | -0.0609954 | 0.978818 |
| XLOC_007543 | ZSCAN29    | chr15:43650369-43662258   | 3.29896  | 3.16252   | -0.0609365 | 0.955124 |
| XLOC_008676 | FA2H       | chr16:74746855-74808729   | 2.42209  | 2.32193   | -0.0609304 | 0.971173 |
| XLOC_017847 | SPATA24    | chr5:138732455-138739776  | 1.8705   | 1.79317   | -0.0609081 | 0.97822  |
| XLOC_006982 | CDC42BPB   | chr14:103398715-103523742 | 9.80066  | 9.39584   | -0.0608568 | 0.952184 |
| XLOC_006214 | EFNB2      | chr13:107142078-107187388 | 1.17364  | 1.12517   | -0.0608504 | 0.967354 |
| XLOC_012765 | TMEM18     | chr2:667972-677439        | 17.9291  | 17.1903   | -0.0607064 | 0.952184 |
| XLOC_017495 | SFXN1      | chr5:174905513-174955621  | 13.4654  | 12.9106   | -0.0606958 | 0.952294 |

|             |              |                           |           |           |            |          |
|-------------|--------------|---------------------------|-----------|-----------|------------|----------|
| XLOC_011050 | NR1H2        | chr19:50879679-50886285   | 34.4593   | 33.0414   | -0.0606191 | 0.952184 |
| XLOC_005330 | HIST4H4      | chr12:14923653-14924065   | 0.811916  | 0.778593  | -0.0604602 | 0.983529 |
| XLOC_020983 | HOXA11       | chr7:27220775-27224835    | 5.40452   | 5.18293   | -0.0603964 | 0.960032 |
| XLOC_008559 | NETO2        | chr16:47115430-47177936   | 12.3086   | 11.8039   | -0.0603963 | 0.952184 |
| XLOC_006860 | ATP6V1D      | chr14:67804580-67826720   | 28.2659   | 27.1092   | -0.0602784 | 0.952184 |
| XLOC_023058 | PDCL         | chr9:125580375-125590935  | 4.49897   | 4.31566   | -0.0600131 | 0.960488 |
| XLOC_012804 | TTC32        | chr2:20096513-20101744    | 3.69669   | 3.54618   | -0.0599691 | 0.974787 |
| XLOC_020351 | RNF216P1     | chr7:5013615-5037800      | 10.5801   | 10.1497   | -0.0599237 | 0.95794  |
| XLOC_015431 | PPM1L        | chr3:160473995-160788817  | 0.377215  | 0.361871  | -0.0599104 | 0.978269 |
| XLOC_011532 | KIAA1683     | chr19:18367905-18385319   | 0.0189037 | 0.0181352 | -0.0598708 | 1        |
| XLOC_012479 | PKP4         | chr2:159313475-159537940  | 8.37568   | 8.0353    | -0.0598549 | 0.952221 |
| XLOC_018325 | HSP90AB1     | chr6:44213902-44221625    | 848.56    | 814.082   | -0.0598422 | 0.956884 |
| XLOC_008615 | B3GNT9       | chr16:67143914-67184902   | 8.96399   | 8.59988   | -0.0598252 | 0.969077 |
| XLOC_004616 | RPUSD4       | chr11:126071988-126081587 | 22.3533   | 21.4455   | -0.0598117 | 0.952184 |
| XLOC_015203 | NSUN3        | chr3:93776765-93845630    | 1.42837   | 1.37038   | -0.0597985 | 0.983334 |
| XLOC_012044 | TAF1B        | chr2:9983570-10074545     | 4.2032    | 4.03267   | -0.0597516 | 0.960032 |
| XLOC_009827 | TTLL6        | chr17:46839592-46894469   | 0.053387  | 0.0512214 | -0.0597427 | 1        |
| XLOC_016961 | PET112       | chr4:152591808-152682175  | 13.9103   | 13.3465   | -0.0596875 | 0.954143 |
| XLOC_010263 | ADNP2        | chr18:77866914-77898228   | 10.008    | 9.60242   | -0.05968   | 0.952233 |
| XLOC_000223 | PPP1R8       | chr1:28157251-28178183    | 20.9136   | 20.0665   | -0.0596551 | 0.952184 |
| XLOC_001264 | EXOSC10      | chr1:11126675-11159938    | 21.1846   | 20.3265   | -0.0596527 | 0.952184 |
| XLOC_013426 | NGEF         | chr2:233743395-233877951  | 12.5486   | 12.0404   | -0.0596395 | 0.955413 |
| XLOC_016804 | NUP54        | chr4:77035816-77069655    | 12.6255   | 12.1143   | -0.0596235 | 0.953159 |
| XLOC_013625 | CEP250       | chr20:34043222-34099803   | 9.88662   | 9.48681   | -0.0595544 | 0.953159 |
| XLOC_015576 | TAMM41       | chr3:11831918-11888352    | 7.7631    | 7.44938   | -0.0595112 | 0.96385  |
| XLOC_004848 | LETMD1       | chr12:51442081-51454207   | 44.0267   | 42.2517   | -0.0593683 | 0.952184 |
| XLOC_008820 | SLC35G6      | chr17:7362684-7387568     | 0.0506952 | 0.0486551 | -0.0592603 | 1        |
| XLOC_010110 | RAB12        | chr18:8609442-8639380     | 11.4549   | 10.9941   | -0.0592374 | 0.956622 |
| XLOC_001688 | WDR47        | chr1:109512837-109584850  | 1.67694   | 1.60955   | -0.059176  | 0.965296 |
| XLOC_014665 | BID          | chr22:18216905-18257431   | 31.3794   | 30.1197   | -0.0591096 | 0.952233 |
| XLOC_004659 | CCND2        | chr12:4382901-4414522     | 23.3427   | 22.4067   | -0.0590431 | 0.952355 |
| XLOC_007011 | CYFIP1       | chr15:22892683-23003603   | 45.958    | 44.1186   | -0.0589291 | 0.951036 |
| XLOC_002233 | NUP133       | chr1:229577043-229644088  | 9.66049   | 9.27386   | -0.058926  | 0.952795 |
| XLOC_007152 | ZFYVE19      | chr15:41060066-41106767   | 21.0522   | 20.2118   | -0.0587788 | 0.964843 |
| XLOC_018398 | NT5E         | chr6:86159301-86205509    | 0.751443  | 0.721458  | -0.0587483 | 0.97394  |
| XLOC_005741 | SRSF9        | chr12:120884240-120907558 | 287.005   | 275.557   | -0.0587258 | 0.957728 |
| XLOC_007503 | RASGRP1      | chr15:38780301-38857007   | 0.750818  | 0.720879  | -0.058706  | 0.970185 |
| XLOC_001039 | NENF         | chr1:212606228-212619721  | 133.558   | 128.233   | -0.0587034 | 0.952184 |
| XLOC_008433 | RRN3         | chr16:15153878-15188158   | 13.7807   | 13.2312   | -0.0586973 | 0.953732 |
| XLOC_001767 | NUDT17       | chr1:145575987-145589435  | 1.62018   | 1.55563   | -0.0586523 | 0.992304 |
| XLOC_022590 | GLE1         | chr9:131266970-131304580  | 33.9327   | 32.5828   | -0.0585638 | 0.952184 |
| XLOC_014067 | LOC100127888 | chr20:61273796-61303647   | 1.05672   | 1.01468   | -0.0585618 | 0.991446 |
| XLOC_006793 | RPL36AL      | chr14:50085406-50087349   | 576.488   | 553.575   | -0.0585131 | 0.952319 |
| XLOC_010483 | FZR1         | chr19:3506294-3536755     | 23.5482   | 22.6129   | -0.0584723 | 0.952978 |
| XLOC_008808 | SLC2A4       | chr17:7185053-7191367     | 0.684549  | 0.657365  | -0.0584597 | 0.977897 |
| XLOC_007599 | RFX7         | chr15:56382730-56535483   | 1.94078   | 1.86371   | -0.0584553 | 0.95935  |
| XLOC_001986 | RGS5         | chr1:163112088-163291581  | 0.383879  | 0.368651  | -0.0583939 | 0.981602 |
| XLOC_005049 | ACTR6        | chr12:100593864-100618202 | 12.7405   | 12.236    | -0.0582843 | 0.955641 |
| XLOC_000172 | KDM1A        | chr1:23345940-23410184    | 52.8777   | 50.7848   | -0.0582629 | 0.952184 |



|             |              |                          |           |           |            |          |
|-------------|--------------|--------------------------|-----------|-----------|------------|----------|
| XLOC_020666 | AP1S1        | chr7:100797685-100804557 | 166.814   | 160.217   | -0.0582164 | 0.954501 |
| XLOC_016873 | SLC9B2       | chr4:103946651-103998170 | 7.58348   | 7.28364   | -0.0582019 | 0.954535 |
| XLOC_018423 | TSTD3        | chr6:99968869-99981059   | 0.915329  | 0.879142  | -0.0581937 | 0.976602 |
| XLOC_002791 | PITRM1       | chr10:3179918-3215033    | 22.9659   | 22.0585   | -0.0581608 | 0.954535 |
| XLOC_017191 | HEXB         | chr5:73980968-74072737   | 66.7815   | 64.1435   | -0.0581448 | 0.977897 |
| XLOC_004113 | LOC100126784 | chr11:19372270-20143147  | 3.91264   | 3.75809   | -0.0581425 | 0.983243 |
| XLOC_011506 | CYP4F2       | chr19:15988833-16008884  | 0.0154493 | 0.0148392 | -0.0581294 | 1        |
| XLOC_009520 | CENPV        | chr17:16245847-16256812  | 65.6956   | 63.1012   | -0.058129  | 0.952978 |
| XLOC_004839 | SMARCD1      | chr12:50478982-50494494  | 23.316    | 22.3962   | -0.0580653 | 0.954397 |
| XLOC_021601 | UBXN2B       | chr8:59323822-59364060   | 5.56006   | 5.34084   | -0.0580335 | 0.955832 |
| XLOC_011581 | C19orf12     | chr19:30189792-30206696  | 4.76959   | 4.58177   | -0.0579605 | 0.959917 |
| XLOC_015361 | ARMC8        | chr3:137906114-138048728 | 3.85093   | 3.69969   | -0.0578003 | 0.962184 |
| XLOC_011537 | ELL          | chr19:18553472-18632937  | 10.9036   | 10.4754   | -0.0577919 | 0.957728 |
| XLOC_015322 | ACAD9        | chr3:128598332-128631957 | 13.4546   | 12.9264   | -0.0577692 | 0.955785 |
| XLOC_005804 | IL17D        | chr13:21277481-21297237  | 2.47891   | 2.38174   | -0.0576878 | 0.975484 |
| XLOC_002973 | PPA1         | chr10:71962585-71993190  | 198.804   | 191.012   | -0.0576801 | 0.954993 |
| XLOC_008056 | SRCAP        | chr16:30710461-30751450  | 5.46638   | 5.25217   | -0.0576721 | 0.954535 |
| XLOC_009417 | PELP1        | chr17:4574678-4607632    | 20.2092   | 19.4173   | -0.0576699 | 0.952625 |
| XLOC_010417 | PQLC1        | chr18:77662419-77711653  | 40.2106   | 38.6356   | -0.0576458 | 0.954501 |
| XLOC_008367 | ERVK13-1     | chr16:2708389-2723440    | 1.042     | 1.0012    | -0.0576309 | 0.96513  |
| XLOC_017488 | BNIP1        | chr5:172571444-172591390 | 14.9451   | 14.3616   | -0.0574483 | 0.960217 |
| XLOC_014763 | RNF215       | chr22:30774802-30783302  | 18.3651   | 17.6498   | -0.0573145 | 0.960032 |
| XLOC_008255 | HSBP1        | chr16:83841507-83846607  | 55.1318   | 52.9868   | -0.0572509 | 0.953159 |
| XLOC_001658 | BCAR3        | chr1:94027342-94312706   | 5.85624   | 5.62852   | -0.0572203 | 0.961218 |
| XLOC_004662 | DYRK4        | chr12:4699243-4723041    | 12.2062   | 11.732    | -0.0571704 | 0.960032 |
| XLOC_019092 | SLC2A12      | chr6:134308718-134373789 | 0.528537  | 0.508008  | -0.0571557 | 0.974348 |
| XLOC_016448 | NFKB1        | chr4:103422485-103538459 | 7.15152   | 6.87375   | -0.0571523 | 0.957719 |
| XLOC_001722 | PHTF1        | chr1:114239823-114301777 | 2.0574    | 1.97751   | -0.057141  | 0.96645  |
| XLOC_021257 | COG5         | chr7:106809405-107218968 | 12.4208   | 11.9386   | -0.0571312 | 0.964628 |
| XLOC_002276 | LOC731275    | chr1:243219615-243265046 | 0.401591  | 0.386007  | -0.0570994 | 0.978818 |
| XLOC_022116 | COX6C        | chr8:100890222-100906242 | 339.38    | 326.244   | -0.0569484 | 0.95448  |
| XLOC_006929 | NRDE2        | chr14:90744397-90798481  | 1.95796   | 1.88219   | -0.0569448 | 0.967296 |
| XLOC_016797 | G3BP2        | chr4:76567952-76598667   | 15.7489   | 15.1396   | -0.056927  | 0.954373 |
| XLOC_021130 | POMZP3       | chr7:76178657-76257299   | 8.42572   | 8.09979   | -0.056915  | 0.97664  |
| XLOC_019010 | CCNC         | chr6:99990262-100016690  | 22.9501   | 22.064    | -0.056808  | 0.953219 |
| XLOC_014653 | RPL23AP82    | chr22:51195513-51238065  | 5.28849   | 5.08454   | -0.0567382 | 0.978818 |
| XLOC_015029 | SLC25A38     | chr3:39424814-39438819   | 45.9548   | 44.1828   | -0.0567329 | 0.953159 |
| XLOC_015925 | KLF15        | chr3:126061477-126076236 | 4.62876   | 4.4504    | -0.05669   | 0.967226 |
| XLOC_024048 | C1GALT1C1    | chrX:119759528-119764005 | 8.81173   | 8.4722    | -0.0566898 | 0.963155 |
| XLOC_002859 | ACBD5        | chr10:27484142-27531068  | 6.04285   | 5.81023   | -0.0566332 | 0.959846 |
| XLOC_022460 | HABP4        | chr9:99212413-99253618   | 15.3665   | 14.7749   | -0.0566327 | 0.95781  |
| XLOC_006970 | CCDC85C      | chr14:99947738-100070727 | 17.7261   | 17.0445   | -0.0565661 | 0.967226 |
| XLOC_013295 | SF3B1        | chr2:198256697-198299771 | 32.5912   | 31.3381   | -0.0565627 | 0.952355 |
| XLOC_003072 | FRAT2        | chr10:99092253-99094458  | 14.8519   | 14.2809   | -0.0565541 | 0.960032 |
| XLOC_022511 | SLC31A2      | chr9:115913237-115926422 | 8.44351   | 8.1191    | -0.0565234 | 0.964356 |
| XLOC_011410 | ANGPTL6      | chr19:10196805-10213425  | 3.40522   | 3.27459   | -0.0564323 | 0.983243 |
| XLOC_023991 | TCEAL8       | chrX:102507922-102510121 | 44.7286   | 43.0163   | -0.0563137 | 0.955041 |
| XLOC_006044 | USP12        | chr13:27640286-27746033  | 6.76046   | 6.50211   | -0.056214  | 0.957014 |
| XLOC_020883 | NOM1         | chr7:156742416-156765876 | 7.84298   | 7.54411   | -0.0560518 | 0.956644 |

|             |                |                           |           |           |            |          |
|-------------|----------------|---------------------------|-----------|-----------|------------|----------|
| XLOC_012944 | RAB1A          | chr2:65283494-65357435    | 42.1759   | 40.571    | -0.0559677 | 0.958864 |
| XLOC_021044 | PURB           | chr7:44915891-44924960    | 3.96651   | 3.81566   | -0.055937  | 0.957719 |
| XLOC_018418 | UFL1           | chr6:96969701-97003151    | 4.36871   | 4.20266   | -0.055904  | 0.959358 |
| XLOC_001257 | CTNNBIP1       | chr1:9908333-9970316      | 7.32068   | 7.04292   | -0.0558029 | 0.961683 |
| XLOC_003032 | ATAD1          | chr10:89512874-89577917   | 10.4558   | 10.0608   | -0.0555559 | 0.95781  |
| XLOC_015890 | COX17          | chr3:119388371-119396243  | 89.1091   | 85.7443   | -0.0555315 | 0.961132 |
| XLOC_018307 | KLC4           | chr6:43027371-43042833    | 5.01417   | 4.82496   | -0.0554961 | 0.965765 |
| XLOC_013050 | KANSL3         | chr2:97258891-97304116    | 7.34954   | 7.07277   | -0.0553786 | 0.95781  |
| XLOC_017487 | CREBRF         | chr5:172483354-172566291  | 1.80351   | 1.73575   | -0.05525   | 0.967343 |
| XLOC_003636 | SF3B2          | chr11:65819815-65836382   | 83.2974   | 80.1677   | -0.0552492 | 0.957728 |
| XLOC_016015 | MBNL1-AS1      | chr3:151980404-152183569  | 0.106795  | 0.102783  | -0.055241  | 1        |
| XLOC_021042 | TMED4          | chr7:44618761-44621827    | 36.6865   | 35.3133   | -0.0550359 | 0.960032 |
| XLOC_009311 | TNRC6C         | chr17:76000317-76107880   | 0.434412  | 0.418181  | -0.0549359 | 0.978031 |
| XLOC_004987 | CNOT2          | chr12:70636773-70748773   | 17.5639   | 16.9079   | -0.0549163 | 0.955964 |
| XLOC_001635 | ODF2L          | chr1:86812506-86862025    | 3.06473   | 2.95035   | -0.054873  | 0.962865 |
| XLOC_002338 | ATP5C1         | chr10:7830092-7849762     | 232.721   | 224.047   | -0.0548043 | 0.956177 |
| XLOC_009425 | INCA1          | chr17:4891424-4900905     | 0.514658  | 0.495502  | -0.0547222 | 0.983243 |
| XLOC_007324 | HMG20A         | chr15:77713242-77777945   | 6.83466   | 6.58034   | -0.0547072 | 0.95935  |
| XLOC_014083 | STMN3          | chr20:62271057-62284963   | 18.74     | 18.0428   | -0.0546993 | 0.960148 |
| XLOC_006839 | DHRS7          | chr14:60611499-60632211   | 55.5442   | 53.4784   | -0.05468   | 0.955797 |
| XLOC_010330 | ZNF24          | chr18:32912177-32924426   | 5.53445   | 5.32938   | -0.0544718 | 0.95781  |
| XLOC_023981 | ARMCX6         | chrX:100870107-100872991  | 32.6236   | 31.4166   | -0.0543905 | 0.961236 |
| XLOC_020374 | PHF14          | chr7:11013498-11209250    | 4.1931    | 4.038     | -0.0543764 | 0.964843 |
| XLOC_011647 | CAPN12         | chr19:39138266-39235114   | 14.9391   | 14.3874   | -0.0542794 | 0.984084 |
| XLOC_006504 | OTUB2          | chr14:94492723-94515276   | 1.05163   | 1.0128    | -0.0542763 | 0.974108 |
| XLOC_002150 | SLC41A1        | chr1:205758220-205782161  | 12.1481   | 11.7007   | -0.0541437 | 0.957728 |
| XLOC_020368 | C1GALT1        | chr7:7222245-7288280      | 3.41682   | 3.29101   | -0.0541241 | 0.960032 |
| XLOC_006408 | MPP5           | chr14:67708011-67802778   | 4.57557   | 4.4071    | -0.0541202 | 0.958829 |
| XLOC_011334 | TICAM1         | chr19:4815935-4831754     | 14.6676   | 14.1277   | -0.0541061 | 0.960529 |
| XLOC_016195 | MSX1           | chr4:4861391-4865660      | 20.5356   | 19.7808   | -0.0540254 | 0.961458 |
| XLOC_012050 | ATP6V1C2       | chr2:10861774-10952960    | 0.220345  | 0.212251  | -0.0539925 | 1        |
| XLOC_012447 | CCNT2          | chr2:135676391-135716915  | 2.50592   | 2.41402   | -0.0539    | 0.961132 |
| XLOC_021805 | MFSD3          | chr8:145734551-145736589  | 47.7019   | 45.9526   | -0.0538994 | 0.961218 |
| XLOC_022065 | SNX16          | chr8:82711817-82754521    | 2.68941   | 2.59079   | -0.0538973 | 0.967296 |
| XLOC_016327 | KIAA1211       | chr4:57036360-57196890    | 2.40714   | 2.31892   | -0.053866  | 0.963701 |
| XLOC_022315 | NFX1           | chr9:33290417-33371155    | 6.5466    | 6.30681   | -0.0538374 | 0.960032 |
| XLOC_016826 | COQ2           | chr4:84184976-84206067    | 14.9881   | 14.4394   | -0.0538124 | 0.961132 |
| XLOC_004919 | RPS26          | chr12:56435685-56438007   | 2265.2    | 2182.35   | -0.0537554 | 0.96024  |
| XLOC_007973 | IQCK           | chr16:19717673-19868859   | 2.71619   | 2.61693   | -0.0537084 | 0.979995 |
| XLOC_005696 | GPN3           | chr12:110890290-110928192 | 22.8444   | 22.0096   | -0.0537043 | 0.974777 |
| XLOC_003662 | RPS6KB2        | chr11:67195934-67202879   | 50.2164   | 48.3823   | -0.0536809 | 0.957014 |
| XLOC_000088 | CLCN6          | chr1:11845786-11907840    | 2.49673   | 2.40565   | -0.0536149 | 0.978818 |
| XLOC_017626 | PRKAA1         | chr5:40759480-40798297    | 5.21215   | 5.02201   | -0.0536146 | 0.960032 |
| XLOC_008851 | WDR16          | chr17:9479943-9546776     | 0.109567  | 0.105574  | -0.0535544 | 1        |
| XLOC_003005 | CAMK2G         | chr10:75572258-75634349   | 5.72959   | 5.52084   | -0.0535427 | 0.964843 |
| XLOC_001632 | DDAH1          | chr1:85784167-86044046    | 20.5806   | 19.833    | -0.0533837 | 0.957014 |
| XLOC_011182 | EPS8L1         | chr19:55587220-55599291   | 8.9381    | 8.61347   | -0.0533723 | 0.968157 |
| XLOC_012551 | ITGAV          | chr2:187454789-187545628  | 2.21771   | 2.13728   | -0.0532967 | 0.964843 |
| XLOC_001948 | C1orf204,VSIG8 | chr1:159796478-159832447  | 0.0299626 | 0.0288769 | -0.0532464 | 1        |

|             |           |                           |           |           |            |          |
|-------------|-----------|---------------------------|-----------|-----------|------------|----------|
| XLOC_005888 | ITM2B     | chr13:48807273-48836232   | 48.5921   | 46.8343   | -0.0531577 | 0.957728 |
| XLOC_012240 | SMYD5     | chr2:73441365-73454355    | 22.1941   | 21.3913   | -0.0531481 | 0.959358 |
| XLOC_010029 | LINC00482 | chr17:79276623-79283048   | 0.0634413 | 0.0611507 | -0.0530547 | 1        |
| XLOC_023160 | LHX3      | chr9:139088095-139096955  | 0.416353  | 0.40132   | -0.0530536 | 0.983243 |
| XLOC_009450 | ASGR1     | chr17:7076750-7082883     | 15.4399   | 14.8839   | -0.0529153 | 0.964843 |
| XLOC_013427 | USP40     | chr2:234384164-234474236  | 3.62018   | 3.48991   | -0.0528696 | 0.962161 |
| XLOC_022869 | PGM5-AS1  | chr9:70970108-71145977    | 0.180866  | 0.174365  | -0.052812  | 1        |
| XLOC_021596 | CHCHD7    | chr8:57124314-57131176    | 19.4162   | 18.7185   | -0.0527974 | 0.959358 |
| XLOC_007342 | ZFAND6    | chr15:80351909-80430735   | 27.3551   | 26.3743   | -0.0526783 | 0.960032 |
| XLOC_001966 | F11R      | chr1:160965000-160991133  | 4.94471   | 4.76745   | -0.0526683 | 0.962709 |
| XLOC_002488 | STOX1     | chr10:70587293-70655209   | 2.64166   | 2.54699   | -0.0526519 | 0.980706 |
| XLOC_012621 | MAP2      | chr2:210288770-210598834  | 0.0771037 | 0.0743405 | -0.0526512 | 1        |
| XLOC_018603 | C6orf120  | chr6:170102256-170124106  | 6.1945    | 5.97315   | -0.0524953 | 0.9771   |
| XLOC_015762 | GLT8D1    | chr3:52719935-52742197    | 15.1848   | 14.6429   | -0.0524274 | 0.99107  |
| XLOC_004880 | HOXC10    | chr12:54378945-54384062   | 7.05286   | 6.80166   | -0.0523222 | 0.968512 |
| XLOC_009316 | BIRC5     | chr17:76210276-76221716   | 38.251    | 36.8897   | -0.0522785 | 0.961132 |
| XLOC_006417 | SLC39A9   | chr14:69865095-69929107   | 12.8004   | 12.3449   | -0.0522759 | 0.967866 |
| XLOC_016556 | ETFDH     | chr4:159593276-159629841  | 2.92681   | 2.82276   | -0.052222  | 0.971528 |
| XLOC_023180 | FBXW5     | chr9:139834884-139839206  | 141.872   | 136.83    | -0.0522018 | 0.958829 |
| XLOC_001649 | ZNF644    | chr1:91380856-91487812    | 6.84613   | 6.60303   | -0.0521615 | 0.96645  |
| XLOC_001852 | S100A6    | chr1:153507075-153508717  | 2494.96   | 2406.39   | -0.0521455 | 0.961132 |
| XLOC_010094 | NDC80     | chr18:2571509-2616634     | 9.77917   | 9.43282   | -0.0520238 | 0.963155 |
| XLOC_015897 | POLQ      | chr3:121150272-121264853  | 0.613061  | 0.591366  | -0.0519789 | 0.970185 |
| XLOC_005861 | NHLRC3    | chr13:39612447-39624244   | 2.92529   | 2.82188   | -0.0519253 | 0.967343 |
| XLOC_015024 | ACVR2B    | chr3:38492517-38534633    | 1.26469   | 1.22011   | -0.0517682 | 0.967343 |
| XLOC_001102 | ARV1      | chr1:231114822-231136479  | 6.64304   | 6.40895   | -0.0517548 | 0.968733 |
| XLOC_005537 | ZBTB39    | chr12:57392616-57400297   | 1.70035   | 1.64044   | -0.0517485 | 0.967458 |
| XLOC_015448 | ECT2      | chr3:172468474-172539264  | 9.89633   | 9.54774   | -0.0517335 | 0.961459 |
| XLOC_004208 | TNKS1BP1  | chr11:57067102-57092413   | 11.4328   | 11.0307   | -0.0516467 | 0.961459 |
| XLOC_009156 | KAT7      | chr17:47865980-47906458   | 9.0867    | 8.76782   | -0.051538  | 0.961459 |
| XLOC_010697 | PGPEP1    | chr19:18451407-18480763   | 7.14234   | 6.89173   | -0.0515297 | 0.961459 |
| XLOC_009944 | FAM104A   | chr17:71189172-71228533   | 13.4254   | 12.9544   | -0.0515175 | 0.969439 |
| XLOC_022480 | MURC      | chr9:103340335-103350173  | 0.17332   | 0.167254  | -0.051395  | 1        |
| XLOC_010147 | RIOK3     | chr18:21032786-21063099   | 10.5796   | 10.2105   | -0.0512298 | 0.961132 |
| XLOC_014945 | TATDN2    | chr3:10290176-10335133    | 7.67409   | 7.40639   | -0.0512257 | 0.962687 |
| XLOC_012583 | NIF3L1    | chr2:201754049-201768655  | 18.7869   | 18.1326   | -0.0511366 | 0.963969 |
| XLOC_010243 | SOCS6     | chr18:67956136-67997434   | 2.19704   | 2.12053   | -0.0511305 | 0.967296 |
| XLOC_004779 | MED21     | chr12:27175454-27183606   | 5.27695   | 5.09325   | -0.0511182 | 0.967226 |
| XLOC_016338 | LOC550112 | chr4:68566995-68588222    | 6.25225   | 6.03469   | -0.0510973 | 0.967296 |
| XLOC_004419 | PRKRIR    | chr11:76061003-76091880   | 11.3703   | 10.9749   | -0.0510662 | 0.961218 |
| XLOC_020734 | METTL2B   | chr7:128116782-128142978  | 6.43127   | 6.20773   | -0.0510378 | 0.96692  |
| XLOC_018411 | CASP8AP2  | chr6:90539618-90584155    | 0.501115  | 0.483715  | -0.050983  | 0.975492 |
| XLOC_008821 | POLR2A    | chr17:7387697-7417935     | 11.2323   | 10.8425   | -0.0509535 | 0.959927 |
| XLOC_018962 | COX7A2    | chr6:75947390-75953644    | 266.127   | 256.904   | -0.0508827 | 0.960125 |
| XLOC_005419 | CCNT1     | chr12:49082240-49110781   | 4.09055   | 3.94909   | -0.0507742 | 0.964476 |
| XLOC_016184 | GRK4      | chr4:2965342-3042474      | 0.557106  | 0.537843  | -0.050768  | 0.981735 |
| XLOC_002080 | TPR       | chr1:185703682-186446655  | 4.98936   | 4.81704   | -0.0507063 | 0.975484 |
| XLOC_000621 | WDR3      | chr1:118472371-118727848  | 12.397    | 11.9695   | -0.0506304 | 0.960529 |
| XLOC_003104 | FBXW4     | chr10:103370420-103454743 | 23.6925   | 22.8759   | -0.0505984 | 0.963969 |

|             |               |                           |           |           |            |          |
|-------------|---------------|---------------------------|-----------|-----------|------------|----------|
| XLOC_002265 | HEATR1        | chr1:236681513-236767841  | 6.09664   | 5.88684   | -0.0505205 | 0.973099 |
| XLOC_000773 | BGLAP,PMF1,PM | chr1:156182778-156217908  | 43.4704   | 41.9779   | -0.0504037 | 0.964843 |
| XLOC_021290 | NDUFA5        | chr7:123181082-123197958  | 32.9565   | 31.8265   | -0.0503362 | 0.961132 |
| XLOC_023622 | FAM122C       | chrX:133903595-133988641  | 0.669212  | 0.646282  | -0.0502995 | 0.992882 |
| XLOC_008186 | EDC4          | chr16:67906925-67918417   | 14.9392   | 14.4275   | -0.0502861 | 0.962754 |
| XLOC_008644 | TERF2         | chr16:69389463-69419891   | 11.1742   | 10.7918   | -0.0502361 | 0.963969 |
| XLOC_020554 | PMS2P5        | chr7:74306893-74336166    | 3.18957   | 3.08047   | -0.0502095 | 0.975928 |
| XLOC_020639 | COPS6         | chr7:99686582-99689822    | 162.38    | 156.834   | -0.0501312 | 0.960345 |
| XLOC_010545 | LRRCE         | chr19:7953389-7966908     | 16.0916   | 15.5422   | -0.0501246 | 0.963969 |
| XLOC_002099 | KIF14         | chr1:200520624-200589862  | 1.25183   | 1.20912   | -0.0500919 | 0.967343 |
| XLOC_021929 | CCDC25        | chr8:27590832-27630170    | 12.2359   | 11.8186   | -0.0500639 | 0.961447 |
| XLOC_006031 | SACS          | chr13:23902964-24007841   | 0.794879  | 0.767828  | -0.0499521 | 0.967226 |
| XLOC_018587 | SLC22A1       | chr6:160542862-160579750  | 0.0725282 | 0.0700618 | -0.0499131 | 1        |
| XLOC_011793 | MEIS3         | chr19:47906374-47922785   | 59.4463   | 57.4272   | -0.0498518 | 0.961412 |
| XLOC_011538 | FKBP8         | chr19:18642567-18654383   | 275.489   | 266.138   | -0.0498159 | 0.963969 |
| XLOC_012227 | PCBP1         | chr2:70314584-70316334    | 195.309   | 188.682   | -0.0498033 | 0.960798 |
| XLOC_022547 | RABGAP1       | chr9:125703287-125867147  | 4.56957   | 4.41453   | -0.0497996 | 0.965296 |
| XLOC_005346 | LDHB          | chr12:21788274-21810789   | 845.927   | 817.287   | -0.0496907 | 0.964843 |
| XLOC_002539 | BEND3P3       | chr10:81442730-81448650   | 0.0193217 | 0.0186678 | -0.0496724 | 1        |
| XLOC_023463 | NONO          | chrX:70430034-70948962    | 163.033   | 157.52    | -0.0496314 | 0.969535 |
| XLOC_006843 | TRMT5         | chr14:61438166-61447782   | 4.83856   | 4.67511   | -0.0495786 | 0.963969 |
| XLOC_011252 | TRIM28        | chr19:59055835-59062082   | 187.601   | 181.277   | -0.0494701 | 0.964628 |
| XLOC_010455 | RPS15         | chr19:1438362-1440492     | 5135.49   | 4962.9    | -0.0493201 | 0.964843 |
| XLOC_015484 | FAM131A       | chr3:184053716-184079439  | 17.6121   | 17.0202   | -0.0493159 | 0.97267  |
| XLOC_004879 | HOXC11        | chr12:54356091-54370203   | 6.18329   | 5.9764    | -0.0490982 | 0.975492 |
| XLOC_014304 | TMEM50B       | chr21:34775201-34852316   | 7.76688   | 7.50701   | -0.0490979 | 0.983243 |
| XLOC_001701 | SLC16A4       | chr1:110905472-110933704  | 0.0791461 | 0.0765087 | -0.0488938 | 1        |
| XLOC_015735 | ZMYND10       | chr3:50378536-50383156    | 0.769401  | 0.743778  | -0.0488643 | 0.98206  |
| XLOC_014821 | CSNK1E        | chr22:38686696-38714089   | 70.9917   | 68.6295   | -0.0488212 | 0.961459 |
| XLOC_009894 | INTS2         | chr17:59942727-60005377   | 1.8334    | 1.77253   | -0.0487152 | 0.968157 |
| XLOC_003865 | CBL           | chr11:119076985-119178859 | 3.18068   | 3.07525   | -0.0486313 | 0.964843 |
| XLOC_002775 | ZNF511        | chr10:135092133-135126666 | 32.1321   | 31.0677   | -0.0485989 | 0.98225  |
| XLOC_009455 | GABARAP       | chr17:7143737-7145753     | 353.996   | 342.27    | -0.0485986 | 0.964487 |
| XLOC_014241 | NRIP1         | chr21:16333555-16437126   | 0.520049  | 0.502831  | -0.0485727 | 0.975928 |
| XLOC_014722 | DDT           | chr22:24309025-24322019   | 262.957   | 254.256   | -0.0485467 | 0.964639 |
| XLOC_014832 | CBX7          | chr22:39526778-39548538   | 10.7049   | 10.3509   | -0.0485181 | 0.965831 |
| XLOC_000458 | FPGT,FPGT-TNN | chr1:74663895-75010116    | 1.51374   | 1.46371   | -0.0484886 | 0.971663 |
| XLOC_022175 | FAM49B        | chr8:130851838-131028897  | 21.798    | 21.0776   | -0.048486  | 0.962755 |
| XLOC_017771 | TRIM36        | chr5:114460458-114516243  | 2.23511   | 2.16133   | -0.0484255 | 0.969933 |
| XLOC_004358 | PITPNM1       | chr11:67259238-67272843   | 15.565    | 15.0516   | -0.0483946 | 0.964843 |
| XLOC_006708 | RBM23         | chr14:23369853-23388396   | 24.9916   | 24.1674   | -0.0483849 | 0.963969 |
| XLOC_018313 | ABCC10        | chr6:43395291-43423786    | 2.26439   | 2.18992   | -0.0482422 | 0.972453 |
| XLOC_006390 | SNAPC1        | chr14:62229074-62263146   | 5.94649   | 5.75099   | -0.0482273 | 0.967343 |
| XLOC_001893 | ASH1L         | chr1:155305051-155533735  | 0.995476  | 0.96275   | -0.0482257 | 0.982632 |
| XLOC_001553 | C1orf123      | chr1:53662100-53686289    | 28.5597   | 27.6214   | -0.0481952 | 0.975484 |
| XLOC_013615 | ITCH          | chr20:32951040-33099198   | 4.39687   | 4.25241   | -0.048195  | 0.964843 |
| XLOC_006972 | SLC25A29      | chr14:100757452-100772860 | 42.3951   | 41.0052   | -0.0480906 | 0.963969 |
| XLOC_009857 | C17orf67      | chr17:54869273-54911256   | 1.29914   | 1.25656   | -0.048072  | 0.978818 |
| XLOC_017642 | PAIP1         | chr5:43526369-43557521    | 35.4148   | 34.2547   | -0.0480521 | 0.96385  |

|             |               |                          |            |            |            |          |
|-------------|---------------|--------------------------|------------|------------|------------|----------|
| XLOC_003425 | DKFZp779M0652 | chr11:45792982-45793909  | 1.14668    | 1.10922    | -0.0479202 | 0.992563 |
| XLOC_021794 | FAM203A       | chr8:145192671-145195620 | 1.89294    | 1.83113    | -0.0478932 | 0.978818 |
| XLOC_012080 | RAB10         | chr2:26256728-26360323   | 27.157     | 26.2713    | -0.0478338 | 0.964442 |
| XLOC_012283 | PTCD3         | chr2:86333304-86369280   | 11.0721    | 10.7112    | -0.0478006 | 0.964628 |
| XLOC_014938 | IL17RC        | chr3:9958757-9975305     | 15.8065    | 15.2922    | -0.0477262 | 0.967343 |
| XLOC_011438 | ECSIT_ZNF653  | chr19:11594241-11639987  | 41.4163    | 40.0702    | -0.0476695 | 0.967343 |
| XLOC_014261 | CCT8          | chr21:30428647-30446010  | 185.217    | 179.208    | -0.047579  | 0.964628 |
| XLOC_016693 | GPR125        | chr4:22388996-22517677   | 5.13285    | 4.96648    | -0.0475359 | 0.967296 |
| XLOC_000210 | ARID1A        | chr1:27022521-27108601   | 4.19902    | 4.06305    | -0.0474876 | 0.966307 |
| XLOC_005829 | POLR1D        | chr13:28194879-28241559  | 237.674    | 229.985    | -0.047443  | 0.967226 |
| XLOC_017056 | CEP72         | chr5:612404-653666       | 8.22079    | 7.95501    | -0.047414  | 0.968157 |
| XLOC_015647 | SEC22C        | chr3:42589458-42690233   | 8.09114    | 7.82964    | -0.0473971 | 0.983165 |
| XLOC_013813 | NSFL1C        | chr20:1422806-1448337    | 20.2605    | 19.607     | -0.0473051 | 0.963259 |
| XLOC_004863 | TENC1         | chr12:53436972-53473204  | 0.735794   | 0.712063   | -0.047296  | 0.994593 |
| XLOC_006465 | TMEM63C       | chr14:77648101-77725838  | 1.32702    | 1.28425    | -0.0472642 | 0.975484 |
| XLOC_016889 | CASP6         | chr4:110609784-110624629 | 10.5527    | 10.2128    | -0.0472316 | 0.970533 |
| XLOC_022823 | MSMP          | chr9:35749276-35754274   | 1.82208    | 1.76346    | -0.0471825 | 0.989371 |
| XLOC_013980 | ADA           | chr20:43248162-43280376  | 21.8912    | 21.1869    | -0.047175  | 0.965501 |
| XLOC_016924 | CETN4P        | chr4:123651343-123653613 | 0.177392   | 0.171686   | -0.0471634 | 1        |
| XLOC_005361 | ITPR2         | chr12:26488284-26986131  | 0.363885   | 0.352187   | -0.0471387 | 1        |
| XLOC_017960 | THOC3         | chr5:175386533-175395545 | 17.8443    | 17.2732    | -0.0469329 | 0.967343 |
| XLOC_004179 | FNBP4         | chr11:47738068-47788993  | 8.22511    | 7.96226    | -0.0468563 | 0.965765 |
| XLOC_000547 | LOC100129138  | chr1:104615644-104619693 | 0.0861536  | 0.0834065  | -0.0467527 | 1        |
| XLOC_010897 | MEGF8         | chr19:42829760-42882921  | 1.47384    | 1.42687    | -0.046724  | 0.970185 |
| XLOC_015123 | MANF          | chr3:51422691-51426828   | 74.0102    | 71.6524    | -0.0467083 | 0.963969 |
| XLOC_018165 | PPP1R11       | chr6:30034931-30043628   | 40.109     | 38.8331    | -0.0466384 | 0.964843 |
| XLOC_004753 | DERA          | chr12:16064185-16190315  | 16.9484    | 16.41      | -0.0465792 | 0.967343 |
| XLOC_014059 | TAF4          | chr20:60549853-60640866  | 4.28679    | 4.15077    | -0.0465168 | 0.968448 |
| XLOC_008973 | SUZ12         | chr17:30264043-30328057  | 9.80826    | 9.49719    | -0.0464972 | 0.964843 |
| XLOC_009801 | CDC27         | chr17:45195310-45266665  | 6.98252    | 6.76135    | -0.0464359 | 0.966307 |
| XLOC_013381 | DNPEP         | chr2:220238179-220252662 | 46.1723    | 44.7107    | -0.0464072 | 0.965196 |
| XLOC_014914 | RABL2B        | chr22:51195513-51238065  | 7.15164    | 6.92544    | -0.0463681 | 0.975454 |
| XLOC_010289 | MPPE1         | chr18:11689013-11908796  | 8.47175    | 8.2043     | -0.0462803 | 0.983738 |
| XLOC_008430 | PLA2G10       | chr16:14766404-14788526  | 0.0768122  | 0.0743991  | -0.0460508 | 1        |
| XLOC_016636 | HAUS3, POLN   | chr4:2073644-2243860     | 1.79241    | 1.73618    | -0.0459853 | 0.971768 |
| XLOC_012481 | TANC1         | chr2:159825145-160089170 | 1.80361    | 1.74715    | -0.045882  | 0.970185 |
| XLOC_014548 | TRIOBP        | chr22:38092994-38172563  | 10.2145    | 9.8951     | -0.0458275 | 0.975465 |
| XLOC_012441 | CCDC74A       | chr2:132202795-132360468 | 12.9012    | 12.4986    | -0.0457436 | 0.993157 |
| XLOC_012576 | C2orf69       | chr2:200775978-200792996 | 3.90681    | 3.78511    | -0.0456568 | 0.970185 |
| XLOC_002591 | TNKS2         | chr10:93558150-93625232  | 3.49827    | 3.38933    | -0.0456427 | 0.967343 |
| XLOC_014954 | MKRN2         | chr3:12598512-12705700   | 10.5738    | 10.2449    | -0.0455875 | 0.981441 |
| XLOC_001443 | C1orf216      | chr1:36179476-36184790   | 8.2197     | 7.96423    | -0.0455506 | 0.968512 |
| XLOC_004041 | GVINP1        | chr11:6734380-6743110    | 0.00798912 | 0.00774115 | -0.0454893 | 1        |
| XLOC_022577 | FPGS          | chr9:130565153-130576556 | 128.679    | 124.687    | -0.0454644 | 0.96715  |
| XLOC_021483 | PDGFRL        | chr8:17433941-17500642   | 4.50644    | 4.36716    | -0.0452925 | 0.975484 |
| XLOC_012829 | HADHA         | chr2:26413503-26467594   | 93.2387    | 90.3589    | -0.045261  | 0.967296 |
| XLOC_008286 | CTU2          | chr16:88772890-88851372  | 18.5746    | 18.0012    | -0.0452378 | 0.986998 |
| XLOC_011097 | ZNF525        | chr19:53868967-53889841  | 0.989938   | 0.959396   | -0.0452125 | 0.975492 |
| XLOC_017343 | KDM3B         | chr5:137688284-137772716 | 7.30204    | 7.07688    | -0.0451851 | 0.967296 |

|             |          |                           |          |          |            |          |
|-------------|----------|---------------------------|----------|----------|------------|----------|
| XLOC_009277 | SLC16A5  | chr17:73083821-73102255   | 6.31348  | 6.11899  | -0.0451431 | 0.97562  |
| XLOC_009439 | MED31    | chr17:6481644-6554954     | 8.28573  | 8.03052  | -0.0451361 | 0.987173 |
| XLOC_002830 | FAM171A1 | chr10:15253643-15413058   | 15.0349  | 14.5726  | -0.0450618 | 0.967343 |
| XLOC_004506 | MSANTD4  | chr11:105878628-105892954 | 3.84924  | 3.73108  | -0.0449797 | 0.969767 |
| XLOC_007786 | FAM174B  | chr15:93160678-93199031   | 8.28672  | 8.0327   | -0.0449169 | 0.970185 |
| XLOC_009666 | MIEN1    | chr17:37885408-37886788   | 91.3259  | 88.5298  | -0.0448611 | 0.967343 |
| XLOC_023073 | PPP6C    | chr9:127908851-127952218  | 16.7621  | 16.2493  | -0.0448276 | 0.965501 |
| XLOC_001602 | LRRC40   | chr1:70610484-70671361    | 4.02284  | 3.89998  | -0.044748  | 0.971528 |
| XLOC_012558 | ASNSD1   | chr2:190526124-190535557  | 17.9836  | 17.4355  | -0.0446504 | 0.967226 |
| XLOC_007800 | CHSY1    | chr15:101715927-101792137 | 3.71431  | 3.60121  | -0.0446117 | 0.971057 |
| XLOC_020917 | ACTB     | chr7:5566778-5570232      | 1764.21  | 1710.49  | -0.0446098 | 0.96875  |
| XLOC_001888 | FAM189B  | chr1:155216995-155225274  | 61.8945  | 60.0117  | -0.0445674 | 0.966749 |
| XLOC_000778 | APOA1BP  | chr1:156561557-156564091  | 141.492  | 137.198  | -0.0444588 | 0.966398 |
| XLOC_008298 | DPEP1    | chr16:89679715-89704839   | 0.189666 | 0.183912 | -0.0444439 | 1        |
| XLOC_017182 | PTCD2    | chr5:71616199-71655180    | 2.73152  | 2.6487   | -0.0444198 | 0.976134 |
| XLOC_012263 | MRPL19   | chr2:75873908-75889334    | 7.7522   | 7.51776  | -0.0443033 | 0.967343 |
| XLOC_003671 | LRP5     | chr11:68080107-68216743   | 11.7155  | 11.3613  | -0.0442858 | 0.967458 |
| XLOC_018884 | DNPH1    | chr6:43193366-43197211    | 193.627  | 187.778  | -0.0442539 | 0.967296 |
| XLOC_021723 | MED30    | chr8:118532964-118552501  | 33.2429  | 32.24    | -0.0441919 | 0.969954 |
| XLOC_013064 | TSGA10   | chr2:99613723-99771187    | 0.156957 | 0.152224 | -0.0441718 | 1        |
| XLOC_005523 | STAT2    | chr12:56735381-56754037   | 5.97738  | 5.79824  | -0.0438985 | 0.968744 |
| XLOC_015019 | MYD88    | chr3:38179968-38184512    | 13.4348  | 13.0324  | -0.0438719 | 0.968448 |
| XLOC_013617 | DYNLRB1  | chr20:33104203-33128762   | 169.798  | 164.722  | -0.0437844 | 0.967343 |
| XLOC_001416 | BAI2     | chr1:32192717-32229648    | 3.2014   | 3.10605  | -0.0436206 | 0.97362  |
| XLOC_011726 | ETHE1    | chr19:44010870-44031396   | 138.713  | 134.585  | -0.0435937 | 0.967343 |
| XLOC_008905 | SLC5A10  | chr17:18853988-18950336   | 0.689675 | 0.669153 | -0.0435797 | 0.994734 |
| XLOC_014556 | PICK1    | chr22:38453261-38471708   | 15.9575  | 15.4842  | -0.0434382 | 0.969482 |
| XLOC_014342 | C2CD2    | chr21:43305218-43373999   | 28.0928  | 27.2603  | -0.0433984 | 0.967343 |
| XLOC_023446 | EFNB1    | chrX:68048839-68062006    | 8.3036   | 8.05755  | -0.0433959 | 0.971768 |
| XLOC_014063 | CABLES2  | chr20:60963685-60982339   | 1.5582   | 1.51206  | -0.0433655 | 0.978818 |
| XLOC_012852 | TRMT61B  | chr2:29033699-29093175    | 9.49769  | 9.2167   | -0.0433258 | 0.970533 |
| XLOC_006522 | PAPOLA   | chr14:96968712-97033453   | 23.2808  | 22.5925  | -0.0432943 | 0.968154 |
| XLOC_016912 | MAD2L1   | chr4:120980578-120988013  | 48.2167  | 46.7952  | -0.0431719 | 0.967458 |
| XLOC_015579 | RAF1     | chr3:12598512-12705700    | 18.934   | 18.376   | -0.043159  | 0.975454 |
| XLOC_013314 | ALS2     | chr2:202564985-202645895  | 3.92132  | 3.80578  | -0.0431483 | 0.975492 |
| XLOC_008209 | PDPR     | chr16:70147528-70195184   | 1.8936   | 1.83781  | -0.0431405 | 0.97394  |
| XLOC_010616 | MAST1    | chr19:12949258-12985766   | 5.17365  | 5.02141  | -0.0430894 | 0.974073 |
| XLOC_023124 | SETX     | chr9:135136826-135230372  | 4.18103  | 4.05808  | -0.043062  | 0.967978 |
| XLOC_014689 | DGCR6L   | chr22:20301760-20307628   | 77.3541  | 75.0854  | -0.0429445 | 0.96935  |
| XLOC_013330 | PLEKHM3  | chr2:208686011-208890284  | 0.366752 | 0.355996 | -0.0429414 | 1        |
| XLOC_014356 | CSTB     | chr21:45193545-45196256   | 266.739  | 258.918  | -0.0429336 | 0.968613 |
| XLOC_023013 | SUSD1    | chr9:114758831-115112545  | 5.09931  | 4.94982  | -0.0429235 | 0.987173 |
| XLOC_009217 | METTTL2A | chr17:60501245-60527454   | 9.87483  | 9.58542  | -0.0429141 | 0.968591 |
| XLOC_011670 | FBL      | chr19:40325092-40337054   | 545.764  | 529.786  | -0.0428679 | 0.96829  |
| XLOC_005891 | FNDC3A   | chr13:49550047-49783915   | 4.82613  | 4.68486  | -0.0428589 | 0.970185 |
| XLOC_018751 | CCHCR1   | chr6:31110215-31126015    | 9.85521  | 9.56757  | -0.0427335 | 0.972717 |
| XLOC_009575 | KIAA0100 | chr17:26926150-26972177   | 15.11    | 14.6692  | -0.0427123 | 0.967458 |
| XLOC_022471 | NANS     | chr9:100818958-100881488  | 118.249  | 114.801  | -0.0426998 | 0.974573 |
| XLOC_003580 | FLRT1    | chr11:63766029-63933585   | 0.117901 | 0.114463 | -0.0426976 | 1        |

|             |              |                           |            |            |            |          |
|-------------|--------------|---------------------------|------------|------------|------------|----------|
| XLOC_004470 | SNORA40      | chr11:93468275-93468402   | 27.4969    | 26.6958    | -0.0426537 | 0.985956 |
| XLOC_016172 | TACC3        | chr4:1723216-1746905      | 37.6955    | 36.5978    | -0.0426356 | 0.967343 |
| XLOC_015042 | TRAK1        | chr3:42132745-42267382    | 3.74041    | 3.63167    | -0.0425623 | 0.972183 |
| XLOC_012867 | STRN         | chr2:37064840-37193615    | 0.942844   | 0.915459   | -0.0425248 | 0.972183 |
| XLOC_001473 | PABPC4       | chr1:40026484-40042521    | 118.357    | 114.921    | -0.0424925 | 0.9682   |
| XLOC_017543 | C5orf55      | chr5:441642-443258        | 3.27937    | 3.1842     | -0.0424885 | 0.978818 |
| XLOC_003288 | TRIM22       | chr11:5710816-5732093     | 0.108512   | 0.105366   | -0.0424535 | 1        |
| XLOC_008862 | ARHGAP44     | chr17:12692828-12921381   | 2.7656     | 2.68542    | -0.0424478 | 0.993208 |
| XLOC_007783 | PRC1         | chr15:91509267-91537881   | 17.5316    | 17.0237    | -0.0424095 | 0.971173 |
| XLOC_001212 | GNB1         | chr1:1716724-1822526      | 100.131    | 97.2305    | -0.0424015 | 0.968591 |
| XLOC_004295 | C11orf95     | chr11:63527363-63536113   | 5.22833    | 5.07702    | -0.0423687 | 0.971528 |
| XLOC_003928 | ACAD8        | chr11:134123433-134135746 | 14.5512    | 14.1314    | -0.0422358 | 0.970185 |
| XLOC_001074 | DNAH14       | chr1:225117355-225586996  | 4.22092    | 4.09916    | -0.0422301 | 0.980744 |
| XLOC_020606 | CCDC132      | chr7:92861652-92990435    | 2.30474    | 2.23826    | -0.0422248 | 0.971997 |
| XLOC_018397 | MRAP2        | chr6:84743419-84800605    | 1.3254     | 1.2872     | -0.0421994 | 0.981441 |
| XLOC_001562 | TMEM59       | chr1:54497348-54519111    | 68.9893    | 67.0011    | -0.0421878 | 0.968703 |
| XLOC_012842 | EIF2B4       | chr2:27587218-27593324    | 29.2472    | 28.4046    | -0.0421761 | 0.967866 |
| XLOC_009181 | HLF          | chr17:53342320-53402426   | 0.0447274  | 0.0434389  | -0.0421716 | 1        |
| XLOC_012320 | COX5B        | chr2:98262520-98264657    | 477.053    | 463.348    | -0.0420542 | 0.967343 |
| XLOC_001075 | SRP9         | chr1:225965514-225978168  | 120.662    | 117.198    | -0.0420228 | 0.967343 |
| XLOC_010692 | MAST3        | chr19:18208602-18262499   | 3.40398    | 3.30642    | -0.0419502 | 0.974747 |
| XLOC_022615 | ABL1         | chr9:133589267-133763062  | 41.1902    | 40.0107    | -0.0419137 | 0.967343 |
| XLOC_021815 | ERICH1       | chr8:614199-681226        | 9.90151    | 9.61827    | -0.0418718 | 0.972515 |
| XLOC_005055 | UTP20        | chr12:101673904-101780397 | 1.64714    | 1.60019    | -0.0417125 | 0.974538 |
| XLOC_008478 | ARHGAP17     | chr16:24930711-25026675   | 9.6445     | 9.37006    | -0.0416491 | 0.970533 |
| XLOC_002726 | SEC23IP      | chr10:121652084-121704170 | 2.8916     | 2.80939    | -0.0416115 | 0.972131 |
| XLOC_020810 | CASP2        | chr7:142985307-143004789  | 11.5626    | 11.2339    | -0.0416087 | 0.970185 |
| XLOC_002967 | SLC25A16     | chr10:70242089-70287280   | 2.62658    | 2.552      | -0.0415589 | 0.97803  |
| XLOC_010046 | SIRT7        | chr17:79869814-79876058   | 21.0394    | 20.4425    | -0.0415232 | 0.97055  |
| XLOC_024193 | UBL4A        | chrX:153712055-153714932  | 25.3825    | 24.6642    | -0.0414161 | 0.968919 |
| XLOC_006910 | TMED8        | chr14:77808113-77843396   | 0.250922   | 0.243823   | -0.0414044 | 1        |
| XLOC_015560 | CAMK1        | chr3:9791627-9811668      | 32.7956    | 31.8679    | -0.041399  | 0.975928 |
| XLOC_017203 | AGGF1        | chr5:76326209-76361058    | 4.18883    | 4.07037    | -0.0413886 | 0.971314 |
| XLOC_013164 | LOC100129961 | chr2:135596185-135676176  | 0.22632    | 0.219922   | -0.0413732 | 1        |
| XLOC_004425 | RSF1         | chr11:77377273-77531880   | 2.07816    | 2.01945    | -0.0413427 | 0.974573 |
| XLOC_005432 | LMBR1L       | chr12:49490922-49504680   | 9.96698    | 9.68574    | -0.0412938 | 0.973295 |
| XLOC_014513 | RNF185       | chr22:31556137-31603005   | 19.7734    | 19.2162    | -0.0412361 | 0.969964 |
| XLOC_005028 | LOC144486    | chr12:94853778-94856344   | 0.144827   | 0.140751   | -0.0411879 | 1        |
| XLOC_000374 | DMBX1        | chr1:46972667-46979886    | 1.41446    | 1.37481    | -0.0410226 | 0.981335 |
| XLOC_017055 | EXOC3        | chr5:443333-467409        | 13.5086    | 13.1304    | -0.0409701 | 0.971768 |
| XLOC_016573 | PALLD        | chr4:169418216-169849608  | 5.44887    | 5.29631    | -0.0409689 | 0.972473 |
| XLOC_015018 | DLEC1        | chr3:38080695-38178733    | 0.00634116 | 0.00616383 | -0.0409199 | 1        |
| XLOC_019053 | ZUFSP        | chr6:116956780-116989973  | 5.46283    | 5.31046    | -0.0408118 | 0.97516  |
| XLOC_008854 | ADPRM        | chr17:10600926-10614875   | 6.87853    | 6.68702    | -0.0407376 | 0.975484 |
| XLOC_008639 | SLC7A6OS     | chr16:68298418-68344868   | 11.8356    | 11.5062    | -0.0407196 | 0.983243 |
| XLOC_012904 | CALM2        | chr2:47387220-47403740    | 272.727    | 265.147    | -0.040667  | 0.970533 |
| XLOC_023264 | TMSB4X       | chrX:12993225-12995346    | 234.201    | 227.71     | -0.0405516 | 0.970533 |
| XLOC_004446 | PICALM       | chr11:85668213-85780923   | 22.6616    | 22.0338    | -0.0405304 | 0.969699 |
| XLOC_008426 | RSL1D1       | chr16:11928054-11945442   | 71.4212    | 69.4474    | -0.0404309 | 0.970421 |

|             |                 |                           |           |           |            |          |
|-------------|-----------------|---------------------------|-----------|-----------|------------|----------|
| XLOC_007775 | MESP1           | chr15:90293097-90294540   | 32.5632   | 31.664    | -0.0403992 | 0.975492 |
| XLOC_016632 | SLBP            | chr4:1694526-1714030      | 46.3688   | 45.0912   | -0.0403099 | 0.970533 |
| XLOC_000147 | C1orf151-NBL1,M | chr1:19923470-19984949    | 98.5148   | 95.8039   | -0.0402562 | 0.971768 |
| XLOC_000206 | DHDDS           | chr1:26758772-26797795    | 6.90578   | 6.71594   | -0.0402157 | 0.974348 |
| XLOC_016386 | USO1            | chr4:76649828-76735366    | 9.64303   | 9.37803   | -0.040202  | 0.970533 |
| XLOC_018004 | MAPK9           | chr5:179660594-179719071  | 10.3252   | 10.0417   | -0.0401759 | 0.970185 |
| XLOC_007138 | EIF2AK4         | chr15:40226346-40327797   | 8.1239    | 7.90091   | -0.0401539 | 0.970185 |
| XLOC_012674 | ACSL3           | chr2:223725731-223808119  | 10.181    | 9.90212   | -0.0400754 | 0.970681 |
| XLOC_011499 | AKAP8           | chr19:15464331-15490612   | 11.1395   | 10.8344   | -0.0400705 | 0.971324 |
| XLOC_008624 | ZDHHC1          | chr16:67428321-67450339   | 4.24634   | 4.13007   | -0.040056  | 0.980753 |
| XLOC_003205 | TUBGCP2         | chr10:135092133-135126666 | 21.8632   | 21.2654   | -0.0399991 | 0.975492 |
| XLOC_013104 | LOC541471       | chr2:112124590-112252692  | 406.53    | 395.42    | -0.0399739 | 0.968068 |
| XLOC_016501 | PLK4            | chr4:128802015-128820377  | 4.2014    | 4.08675   | -0.0399186 | 0.974593 |
| XLOC_016530 | ARHGAP10        | chr4:148653452-148993927  | 4.58847   | 4.46345   | -0.039856  | 0.975484 |
| XLOC_000370 | UQCRH           | chr1:46769379-46782447    | 905.489   | 880.852   | -0.0397979 | 0.971282 |
| XLOC_014897 | BRD1            | chr22:50166936-50218452   | 5.65487   | 5.50105   | -0.0397847 | 0.97468  |
| XLOC_001348 | TCEA3           | chr1:23707554-23751261    | 0.0544047 | 0.0529271 | -0.0397247 | 1        |
| XLOC_021235 | POLR2J3         | chr7:102178365-102213068  | 2.67109   | 2.59867   | -0.0396546 | 0.981441 |
| XLOC_005486 | RARG            | chr12:53604349-53626040   | 10.5503   | 10.2648   | -0.0395904 | 0.975454 |
| XLOC_002683 | GSTO2           | chr10:106028630-106059176 | 38.4456   | 37.4069   | -0.0395138 | 0.971663 |
| XLOC_018775 | NEU1            | chr6:31826828-31830709    | 79.6884   | 77.5386   | -0.0394548 | 0.970185 |
| XLOC_001605 | ZRANB2          | chr1:71318035-71546972    | 14.2781   | 13.893    | -0.039444  | 0.971919 |
| XLOC_005159 | KNTC1           | chr12:123011808-123110947 | 1.70831   | 1.66228   | -0.0394114 | 0.975484 |
| XLOC_018194 | NFKBIL1         | chr6:31514627-31526606    | 38.5968   | 37.5572   | -0.0393925 | 0.971919 |
| XLOC_009627 | RDM1            | chr17:34245084-34257780   | 1.84349   | 1.79394   | -0.0393128 | 0.983453 |
| XLOC_012102 | SNX17           | chr2:27593362-27603611    | 42.8439   | 41.6928   | -0.0392947 | 0.975492 |
| XLOC_006462 | VASH1           | chr14:77228234-77249363   | 2.29673   | 2.23503   | -0.0392891 | 0.97562  |
| XLOC_005846 | BRCA2           | chr13:32889616-32973809   | 0.151083  | 0.147025  | -0.0392799 | 1        |
| XLOC_007585 | MYO5C           | chr15:52484514-52587995   | 0.619264  | 0.602662  | -0.039205  | 0.980184 |
| XLOC_020771 | NUP205          | chr7:135242661-135333499  | 16.0764   | 15.6459   | -0.0391533 | 0.970681 |
| XLOC_008142 | COQ9            | chr16:57462086-57495187   | 29.7278   | 28.934    | -0.0390441 | 0.981441 |
| XLOC_006865 | RDH11           | chr14:68143518-68162510   | 16.5207   | 16.0801   | -0.0389997 | 0.972183 |
| XLOC_014791 | RBFOX2          | chr22:36134782-36424585   | 16.6948   | 16.2498   | -0.0389776 | 0.970539 |
| XLOC_011806 | TMEM143         | chr19:48835615-48867186   | 3.68462   | 3.58643   | -0.0389677 | 0.978996 |
| XLOC_005208 | ZNF140          | chr12:133657036-133684258 | 7.07945   | 6.89093   | -0.0389399 | 0.974348 |
| XLOC_001654 | EVI5            | chr1:92974252-93257961    | 1.65051   | 1.60658   | -0.0389242 | 0.975484 |
| XLOC_014588 | ACO2            | chr22:41865128-41940479   | 22.0873   | 21.4994   | -0.0389219 | 0.98206  |
| XLOC_016937 | SETD7           | chr4:140427191-140477577  | 6.52621   | 6.3526    | -0.0388978 | 0.972484 |
| XLOC_000281 | AGO1            | chr1:36348809-36389899    | 3.23318   | 3.1472    | -0.038885  | 0.973852 |
| XLOC_009140 | SP2             | chr17:45973515-46006323   | 4.55      | 4.42924   | -0.0388078 | 0.976906 |
| XLOC_008022 | ATP2A1          | chr16:28889808-28936532   | 1.12982   | 1.09985   | -0.0387858 | 0.994068 |
| XLOC_023108 | SH3GLB2         | chr9:131770312-131790579  | 138.877   | 135.196   | -0.0387532 | 0.970994 |
| XLOC_008990 | LIG3            | chr17:33307516-33332088   | 5.56956   | 5.4222    | -0.0386861 | 0.975484 |
| XLOC_020918 | RNF216          | chr7:5659671-5821361      | 9.31712   | 9.07157   | -0.0385316 | 0.972737 |
| XLOC_023698 | SSR4            | chrX:153051220-153063967  | 447.241   | 435.461   | -0.0385084 | 0.975928 |
| XLOC_011017 | DKKL1           | chr19:49866986-49878373   | 0.622064  | 0.605684  | -0.0384986 | 0.991446 |
| XLOC_006499 | UBR7            | chr14:93669236-93695561   | 9.51268   | 9.26233   | -0.0384768 | 0.977897 |
| XLOC_008995 | AP2B1           | chr17:33914281-34053436   | 44.024    | 42.8665   | -0.0384384 | 0.972717 |
| XLOC_004978 | SLC35E3         | chr12:69139935-69159853   | 5.58339   | 5.43678   | -0.0383906 | 0.976876 |



|             |                |                           |           |           |            |          |
|-------------|----------------|---------------------------|-----------|-----------|------------|----------|
| XLOC_003788 | BIRC3          | chr11:102188180-102210135 | 0.470323  | 0.457992  | -0.0383305 | 0.982229 |
| XLOC_019145 | RMND1          | chr6:151725896-151773316  | 31.0279   | 30.2153   | -0.0382881 | 0.972152 |
| XLOC_002668 | SUFU           | chr10:104263718-104393214 | 3.98878   | 3.88436   | -0.0382705 | 0.977209 |
| XLOC_001521 | PIK3R3         | chr1:46505811-46598708    | 0.955353  | 0.93037   | -0.0382304 | 0.979812 |
| XLOC_008159 | CKLF,CKLF-CMTI | chr16:66586465-66613038   | 56.9616   | 55.4742   | -0.0381724 | 0.973295 |
| XLOC_020355 | FSCN1          | chr7:5632435-5646287      | 161.603   | 157.385   | -0.0381572 | 0.972525 |
| XLOC_015299 | SEC22A         | chr3:122920773-122992982  | 4.18102   | 4.07197   | -0.0381285 | 0.975532 |
| XLOC_022099 | CCNE2          | chr8:95835517-95907482    | 3.53997   | 3.44785   | -0.03804   | 0.991167 |
| XLOC_017907 | FAT2           | chr5:150883652-150948505  | 0.0124265 | 0.0121033 | -0.0380168 | 1        |
| XLOC_008621 | FHOD1          | chr16:67263291-67281425   | 9.23455   | 8.9944    | -0.0380145 | 0.974593 |
| XLOC_010151 | CABYR          | chr18:21718954-21741564   | 0.60055   | 0.584956  | -0.0379569 | 0.988061 |
| XLOC_017921 | MED7           | chr5:156565450-156569921  | 8.38027   | 8.16292   | -0.0379111 | 0.978016 |
| XLOC_002279 | ADSS           | chr1:244571793-244615436  | 10.3996   | 10.1303   | -0.0378496 | 0.974073 |
| XLOC_003163 | RGS10          | chr10:121259338-121302222 | 161.364   | 157.188   | -0.0378331 | 0.971919 |
| XLOC_011348 | RANBP3         | chr19:5914192-5978320     | 22.7024   | 22.1172   | -0.0376796 | 0.974777 |
| XLOC_007427 | IGF1R          | chr15:99192760-99507759   | 2.12217   | 2.06777   | -0.0374667 | 0.975484 |
| XLOC_000279 | TFAP2E         | chr1:36038970-36060927    | 3.77142   | 3.67493   | -0.03739   | 0.980686 |
| XLOC_021387 | ZNF746         | chr7:149169883-149194898  | 12.2459   | 11.9331   | -0.0373257 | 0.974348 |
| XLOC_016820 | SCD5           | chr4:83550689-83720010    | 13.5389   | 13.1942   | -0.0372046 | 0.974348 |
| XLOC_000360 | HPDL           | chr1:45792544-45794346    | 12.9645   | 12.6346   | -0.0371859 | 0.975928 |
| XLOC_007516 | DNAJC17        | chr15:41060066-41106767   | 17.4453   | 17.002    | -0.0371343 | 0.986782 |
| XLOC_015224 | NIT2           | chr3:100053561-100074478  | 66.1663   | 64.4891   | -0.0370409 | 0.97266  |
| XLOC_003259 | SLC22A18       | chr11:2909326-2946476     | 14.1512   | 13.7929   | -0.0369991 | 0.978818 |
| XLOC_010364 | ACAA2          | chr18:47309873-47340251   | 32.9357   | 32.1019   | -0.0369924 | 0.974348 |
| XLOC_007283 | SENP8          | chr15:72118360-72433311   | 1.59823   | 1.55786   | -0.0369107 | 0.986681 |
| XLOC_007582 | LEO1           | chr15:52230221-52263958   | 7.62019   | 7.42783   | -0.0368868 | 0.975492 |
| XLOC_003893 | SPA17          | chr11:124492741-124564687 | 7.54147   | 7.35146   | -0.036815  | 0.992304 |
| XLOC_014978 | RAB5A          | chr3:19988571-20053765    | 13.9719   | 13.6199   | -0.036809  | 0.97467  |
| XLOC_022399 | GCNT1          | chr9:79056581-79122332    | 1.00029   | 0.975159  | -0.0367102 | 0.980228 |
| XLOC_010371 | MEX3C          | chr18:48700919-48724051   | 6.24377   | 6.08708   | -0.0366656 | 0.97515  |
| XLOC_009588 | MYO18A,TIAF1   | chr17:27400527-27507407   | 9.88175   | 9.63455   | -0.0365486 | 0.978031 |
| XLOC_015781 | ARHGEF3        | chr3:56761445-57113336    | 1.32062   | 1.28761   | -0.0365139 | 0.981543 |
| XLOC_007168 | CAPN3          | chr15:42651697-42704515   | 2.01779   | 1.96736   | -0.0365138 | 0.982903 |
| XLOC_000390 | RNF11          | chr1:51701944-51739119    | 16.8622   | 16.442    | -0.0364043 | 0.973697 |
| XLOC_001183 | LOC100288069   | chr1:700244-714068        | 0.946871  | 0.923286  | -0.0363907 | 0.988974 |
| XLOC_000957 | NEK7           | chr1:198126107-198291548  | 3.06688   | 2.99051   | -0.0363798 | 0.976971 |
| XLOC_013525 | PLCB4          | chr20:9049700-9461462     | 0.593035  | 0.578274  | -0.0363656 | 0.981441 |
| XLOC_022122 | PABPC1         | chr8:101715143-101734315  | 942.182   | 918.762   | -0.0363154 | 0.975612 |
| XLOC_001488 | SCMH1          | chr1:41480261-41707815    | 12.7417   | 12.4251   | -0.0362992 | 0.975484 |
| XLOC_010322 | B4GALT6        | chr18:29202208-29264686   | 3.5533    | 3.46505   | -0.0362812 | 0.975928 |
| XLOC_015732 | HYAL2          | chr3:50355220-50360281    | 19.52     | 19.0354   | -0.0362659 | 0.975492 |
| XLOC_012407 | TMEM177        | chr2:120436742-120439694  | 34.6861   | 33.8257   | -0.0362379 | 0.974593 |
| XLOC_014815 | C22orf23       | chr22:38339056-38365319   | 4.52401   | 4.41193   | -0.0361925 | 0.994058 |
| XLOC_016283 | WDR19          | chr4:39184023-39287430    | 2.74112   | 2.67336   | -0.0361126 | 0.976295 |
| XLOC_010763 | LSM14A         | chr19:34663351-34720420   | 26.6235   | 25.9687   | -0.0359246 | 0.974593 |
| XLOC_004362 | NUDT8          | chr11:67395408-67397408   | 43.6703   | 42.5982   | -0.035858  | 0.9771   |
| XLOC_014599 | FAM109B        | chr22:42470254-42475442   | 3.05604   | 2.98108   | -0.0358301 | 0.980725 |
| XLOC_021515 | SLC25A37       | chr8:23386362-23430063    | 26.4649   | 25.8181   | -0.0356983 | 0.975484 |
| XLOC_016253 | LAP3           | chr4:17578926-17609590    | 26.8679   | 26.2114   | -0.0356896 | 0.974348 |

|             |               |                           |            |            |            |          |
|-------------|---------------|---------------------------|------------|------------|------------|----------|
| XLOC_005653 | GNPTAB        | chr12:102139274-102224645 | 2.59538    | 2.53204    | -0.0356444 | 0.97719  |
| XLOC_021419 | PTPRN2        | chr7:157331749-158380482  | 2.3256     | 2.26896    | -0.0355745 | 0.980228 |
| XLOC_018039 | RIOK1         | chr6:7390061-7418270      | 13.1157    | 12.7965    | -0.0355458 | 0.975492 |
| XLOC_008163 | PDP2          | chr16:66914382-66925002   | 2.24681    | 2.19217    | -0.0355191 | 0.9771   |
| XLOC_003606 | CAPN1         | chr11:64948685-64979477   | 90.6181    | 88.4186    | -0.0354487 | 0.975484 |
| XLOC_010287 | PPP4R1        | chr18:9546788-9614605     | 8.68111    | 8.47085    | -0.0353719 | 0.975454 |
| XLOC_005076 | RIC8B         | chr12:106751435-107283094 | 1.55627    | 1.51858    | -0.0353673 | 0.982189 |
| XLOC_006493 | SLC24A4       | chr14:92788924-92967825   | 0.00474325 | 0.00462845 | -0.035345  | 1        |
| XLOC_005493 | CALCOCO1      | chr12:54104901-54121307   | 9.30546    | 9.08043    | -0.0353179 | 0.975592 |
| XLOC_002255 | RBM34         | chr1:235294497-235324571  | 26.2084    | 25.5755    | -0.0352638 | 0.975492 |
| XLOC_004068 | LOC440028     | chr11:9776316-10315754    | 1.8245     | 1.78046    | -0.0352519 | 0.992304 |
| XLOC_022202 | TSNARE1       | chr8:143293440-143484543  | 5.46067    | 5.32908    | -0.0351934 | 0.980725 |
| XLOC_013644 | RPRD1B        | chr20:36661947-36720766   | 6.39004    | 6.23608    | -0.0351854 | 0.975492 |
| XLOC_017869 | GNPDA1        | chr5:141380233-141392620  | 101.323    | 98.8835    | -0.0351662 | 0.975484 |
| XLOC_016795 | RCHY1         | chr4:76404246-76439640    | 5.78776    | 5.64856    | -0.0351231 | 0.975484 |
| XLOC_006876 | COX16,SYNJ2BP | chr14:70791797-70883807   | 31.5476    | 30.7923    | -0.0349618 | 0.975928 |
| XLOC_020812 | ZYX           | chr7:143078359-143220540  | 334.774    | 326.766    | -0.0349287 | 0.975211 |
| XLOC_003575 | C11orf84      | chr11:63580922-63595190   | 43.738     | 42.6918    | -0.034926  | 0.974348 |
| XLOC_022314 | CHMP5         | chr9:33264876-33282067    | 34.0224    | 33.2089    | -0.0349156 | 0.974777 |
| XLOC_008390 | CREBBP        | chr16:3775055-3930121     | 3.22223    | 3.14545    | -0.0347957 | 0.975492 |
| XLOC_017166 | RAD17         | chr5:68647552-68710630    | 7.67572    | 7.49289    | -0.0347802 | 0.992304 |
| XLOC_023125 | TTF1          | chr9:135250936-135282238  | 8.71759    | 8.51046    | -0.0346917 | 0.977897 |
| XLOC_015765 | MUSTN1,TMEM1  | chr3:52867130-52931597    | 5.47557    | 5.34552    | -0.0346789 | 0.983243 |
| XLOC_015946 | PLXND1        | chr3:129274055-129325582  | 8.33176    | 8.13394    | -0.0346678 | 0.975928 |
| XLOC_009790 | ARHGAP27      | chr17:43471267-43503012   | 6.65195    | 6.49406    | -0.0346567 | 0.978016 |
| XLOC_005583 | PTPRB         | chr12:70910631-71031220   | 0.00755192 | 0.00737294 | -0.0346042 | 1        |
| XLOC_022915 | CDK20         | chr9:90581358-90589695    | 8.31014    | 8.11326    | -0.0345909 | 0.977897 |
| XLOC_004961 | TMEM5         | chr12:64173636-64202887   | 10.0326    | 9.79524    | -0.0345389 | 0.978818 |
| XLOC_003818 | C11orf57      | chr11:111944967-111957522 | 9.67172    | 9.4431     | -0.0345119 | 0.981602 |
| XLOC_023480 | JPX           | chrX:73164158-73513409    | 3.18859    | 3.11334    | -0.0344582 | 0.982866 |
| XLOC_003132 | XPNPEP1       | chr10:111624523-111683311 | 31.1685    | 30.4334    | -0.0344361 | 0.975492 |
| XLOC_005178 | BRI3BP        | chr12:125478193-125510349 | 13.8742    | 13.5471    | -0.0344249 | 0.978996 |
| XLOC_011873 | SHANK1        | chr19:51165083-51220195   | 5.28074    | 5.1563     | -0.0344048 | 0.978016 |
| XLOC_001359 | IL22RA1       | chr1:24446260-24469775    | 0.417834   | 0.408023   | -0.0342805 | 0.988974 |
| XLOC_003990 | RHOG          | chr11:3848207-3862213     | 54.7584    | 53.4732    | -0.0342627 | 0.975654 |
| XLOC_007257 | RAB11A        | chr15:66161796-66184329   | 23.3152    | 22.7687    | -0.0342191 | 0.975654 |
| XLOC_008460 | CRYM          | chr16:21269838-21329912   | 0.857521   | 0.837455   | -0.0341598 | 0.990965 |
| XLOC_008239 | NUDT7         | chr16:77756388-77776157   | 4.17065    | 4.07306    | -0.0341591 | 0.98226  |
| XLOC_000966 | NAV1          | chr1:201617449-201796102  | 1.48452    | 1.4498     | -0.0341422 | 0.977857 |
| XLOC_016449 | CISD2         | chr4:103790134-103940896  | 6.54614    | 6.39311    | -0.0341266 | 0.975492 |
| XLOC_010936 | CLASRP        | chr19:45542297-45574214   | 18.816     | 18.3782    | -0.0339699 | 0.976572 |
| XLOC_015161 | RPP14         | chr3:58291971-58305920    | 5.89921    | 5.76204    | -0.0339439 | 0.97713  |
| XLOC_008224 | DHODH         | chr16:72042642-72059316   | 7.03454    | 6.8712     | -0.0338939 | 0.978016 |
| XLOC_020978 | HOXA5         | chr7:27179982-27196296    | 8.89275    | 8.68633    | -0.0338815 | 0.988442 |
| XLOC_012329 | MRPL30        | chr2:99797541-99816020    | 17.2535    | 16.8533    | -0.0338615 | 0.975492 |
| XLOC_004993 | TBC1D15       | chr12:72233486-72320629   | 5.58939    | 5.46005    | -0.0337763 | 0.975492 |
| XLOC_000297 | NDUFS5        | chr1:39491966-39500308    | 366.32     | 357.849    | -0.0337539 | 0.975492 |
| XLOC_021504 | SORBS3        | chr8:22409250-22433008    | 103.475    | 101.084    | -0.0337255 | 0.975484 |
| XLOC_014671 | DGCR2         | chr22:19023794-19109967   | 16.958     | 16.5667    | -0.0336823 | 0.975502 |

|             |                |                           |          |           |            |          |
|-------------|----------------|---------------------------|----------|-----------|------------|----------|
| XLOC_006010 | UPF3A          | chr13:115047058-115071291 | 14.5919  | 14.2556   | -0.0336435 | 0.975592 |
| XLOC_012253 | INO80B,WBP1    | chr2:74682149-74688018    | 72.1223  | 70.4624   | -0.0335933 | 0.975928 |
| XLOC_002473 | ARID5B         | chr10:63661012-63856707   | 0.217362 | 0.212372  | -0.0335096 | 1        |
| XLOC_016692 | LOC100505912   | chr4:22328989-22341289    | 0.221754 | 0.216669  | -0.033469  | 1        |
| XLOC_021855 | PPP1R3B        | chr8:8993763-9009152      | 15.9013  | 15.5367   | -0.0334661 | 0.97562  |
| XLOC_012850 | RBKS           | chr2:28004265-28561767    | 2.65772  | 2.5968    | -0.0334572 | 0.994593 |
| XLOC_021105 | TBL2           | chr7:72983276-72993013    | 19.694   | 19.2427   | -0.0334475 | 0.97562  |
| XLOC_017648 | MOCS2          | chr5:52393894-52405598    | 16.7213  | 16.3396   | -0.0333131 | 0.977897 |
| XLOC_015119 | HEMK1          | chr3:50595455-50622421    | 5.17582  | 5.05774   | -0.033293  | 0.980228 |
| XLOC_012988 | DCTN1          | chr2:74588280-74621008    | 31.9139  | 31.1861   | -0.0332822 | 0.97562  |
| XLOC_013849 | GPCPD1         | chr20:5525079-5591672     | 3.07573  | 3.00591   | -0.0331292 | 0.978016 |
| XLOC_009765 | MPP3           | chr17:41878166-41910547   | 5.64572  | 5.51766   | -0.0331011 | 0.978818 |
| XLOC_022933 | NOL8           | chr9:95059639-95432547    | 6.69409  | 6.54226   | -0.0331    | 0.983237 |
| XLOC_004611 | FEZ1           | chr11:125315640-125366206 | 0.072995 | 0.0713456 | -0.0329733 | 1        |
| XLOC_007792 | TTC23          | chr15:99676527-99789815   | 3.21289  | 3.14039   | -0.03293   | 0.978996 |
| XLOC_015929 | TXNRD3, TXNRD3 | chr3:126290621-126373967  | 3.68832  | 3.60515   | -0.032901  | 0.980052 |
| XLOC_000402 | LOC100507564   | chr1:53692563-53793821    | 0.180967 | 0.176895  | -0.0328382 | 1        |
| XLOC_009815 | HOXB3          | chr17:46626231-46651810   | 3.60595  | 3.52512   | -0.0327082 | 0.98003  |
| XLOC_015594 | COLQ           | chr3:15491639-15563258    | 0.498364 | 0.487202  | -0.0326812 | 0.987759 |
| XLOC_012951 | PPP3R1         | chr2:68405988-68479651    | 12.4933  | 12.2137   | -0.0326611 | 0.976134 |
| XLOC_017383 | PCDHB14        | chr5:140603077-140605860  | 2.94545  | 2.87959   | -0.032623  | 0.981441 |
| XLOC_005626 | EEA1           | chr12:93166284-93323107   | 1.07157  | 1.04766   | -0.0325556 | 0.980228 |
| XLOC_015412 | GMPS           | chr3:155588324-155655520  | 43.0288  | 42.0699   | -0.032517  | 0.975484 |
| XLOC_005044 | SLC25A3        | chr12:98987402-98995778   | 483.25   | 472.491   | -0.0324831 | 0.97664  |
| XLOC_023284 | SCML1          | chrX:17755591-17773105    | 3.03177  | 2.96433   | -0.0324542 | 0.981441 |
| XLOC_014116 | GABPA          | chr21:27096790-27144771   | 3.00555  | 2.93875   | -0.032426  | 0.992304 |
| XLOC_007867 | NPW            | chr16:2069520-2070756     | 0.412054 | 0.402899  | -0.0324137 | 0.982152 |
| XLOC_023772 | CTPS2          | chrX:16606121-16731059    | 3.93475  | 3.8476    | -0.0323128 | 0.978818 |
| XLOC_012700 | PTMA           | chr2:232573234-232578250  | 1071.43  | 1047.71   | -0.0322964 | 0.977897 |
| XLOC_001077 | H3F3A          | chr1:226250407-226259703  | 402.736  | 393.825   | -0.0322774 | 0.977021 |
| XLOC_015085 | NRADDP         | chr3:47053031-47054957    | 0.096625 | 0.094491  | -0.032219  | 1        |
| XLOC_000692 | ZNF687         | chr1:151254790-151300191  | 7.33333  | 7.17161   | -0.0321721 | 0.987341 |
| XLOC_003167 | FGFR2          | chr10:123237843-123357972 | 0.99447  | 0.972541  | -0.0321685 | 0.982922 |
| XLOC_000230 | MED18          | chr1:28655512-28662478    | 11.4632  | 11.2105   | -0.0321507 | 0.979267 |
| XLOC_007180 | PDIA3          | chr15:44038589-44094769   | 105.154  | 102.837   | -0.032136  | 0.983738 |
| XLOC_003679 | FADD           | chr11:70049268-70053508   | 30.3601  | 29.6914   | -0.0321301 | 0.97664  |
| XLOC_016179 | RNF4           | chr4:2470794-2517586      | 17.2654  | 16.8857   | -0.0320822 | 0.978016 |
| XLOC_008119 | MT1L           | chr16:56651372-56652730   | 1080.87  | 1057.12   | -0.0320588 | 0.977897 |
| XLOC_003682 | CTTN           | chr11:70244611-70282690   | 73.7219  | 72.1088   | -0.0319187 | 0.97562  |
| XLOC_006321 | FAM177A1       | chr14:35514112-35552589   | 4.66704  | 4.5651    | -0.0318597 | 0.978818 |
| XLOC_022605 | NTMT1          | chr9:132388434-132404448  | 134.477  | 131.543   | -0.0318263 | 0.985692 |
| XLOC_004215 | UBE2L6         | chr11:57319127-57335803   | 28.0057  | 27.3956   | -0.0317775 | 0.978016 |
| XLOC_000575 | AHCYL1         | chr1:110527386-110566364  | 23.3156  | 22.8077   | -0.0317758 | 0.975928 |
| XLOC_009118 | CRHR1          | chr17:43697709-43913194   | 7.4779   | 7.31541   | -0.031693  | 0.981735 |
| XLOC_005495 | HOTAIR         | chr12:54356091-54370203   | 0.624867 | 0.611293  | -0.0316842 | 0.994204 |
| XLOC_002563 | FAM35A         | chr10:88854952-88951222   | 4.25209  | 4.15978   | -0.0316646 | 0.978838 |
| XLOC_014637 | ZBED4          | chr22:50247496-50283726   | 3.94291  | 3.85733   | -0.0316584 | 0.977897 |
| XLOC_006488 | CALM1          | chr14:90863326-90874619   | 40.1071  | 39.2367   | -0.0316562 | 0.977295 |
| XLOC_013063 | KIAA1211L      | chr2:99410308-99552684    | 0.243847 | 0.238568  | -0.0315717 | 1        |

|             |               |                           |           |           |            |          |
|-------------|---------------|---------------------------|-----------|-----------|------------|----------|
| XLOC_017363 | ZMAT2         | chr5:140080031-140086239  | 34.5875   | 33.8389   | -0.0315696 | 0.975928 |
| XLOC_007496 | AQR           | chr15:35148551-35261995   | 4.40322   | 4.30815   | -0.0314897 | 0.977897 |
| XLOC_008873 | TTC19         | chr17:15879874-15932723   | 23.2437   | 22.7429   | -0.0314237 | 0.978818 |
| XLOC_014660 | CECR6         | chr22:17597188-17602257   | 0.449542  | 0.43986   | -0.0314114 | 0.989954 |
| XLOC_022799 | ENHO          | chr9:34521039-34523037    | 15.6708   | 15.3336   | -0.031381  | 0.981543 |
| XLOC_011533 | JUND          | chr19:18390562-18392432   | 114.555   | 112.107   | -0.0311701 | 0.977897 |
| XLOC_013243 | ATP5G3        | chr2:176040985-176046490  | 64.5591   | 63.1801   | -0.0311502 | 0.97664  |
| XLOC_017233 | ARRDC3-AS1    | chr5:90664540-90716532    | 0.10557   | 0.103323  | -0.0310362 | 1        |
| XLOC_001480 | TRIT1         | chr1:40306705-40349177    | 15.5185   | 15.1883   | -0.0310252 | 0.977897 |
| XLOC_011683 | BLVRB         | chr19:40953690-40971725   | 163.746   | 160.265   | -0.0310004 | 0.9771   |
| XLOC_004387 | NUMA1         | chr11:71709957-71823822   | 18.046    | 17.6624   | -0.0309946 | 0.983243 |
| XLOC_010518 | CAPS          | chr19:5914192-5978320     | 2.24455   | 2.1969    | -0.0309526 | 0.996186 |
| XLOC_003819 | SDHD          | chr11:111957570-111966518 | 55.0126   | 53.8461   | -0.0309192 | 0.976906 |
| XLOC_006925 | PTPN21        | chr14:88932121-89021123   | 1.3569    | 1.32815   | -0.0308918 | 0.98206  |
| XLOC_002607 | HELLS         | chr10:96305573-96361856   | 3.37791   | 3.30637   | -0.0308825 | 0.981019 |
| XLOC_006531 | YY1           | chr14:100705101-100744804 | 17.3311   | 16.9654   | -0.0307659 | 0.978249 |
| XLOC_011959 | DNAAF3        | chr19:55670028-55678090   | 27.2945   | 26.7192   | -0.030731  | 0.978016 |
| XLOC_011921 | ZNF468        | chr19:53341784-53360902   | 2.15476   | 2.10941   | -0.0306875 | 0.981441 |
| XLOC_014760 | TBC1D10A      | chr22:30687978-30722955   | 13.8945   | 13.6022   | -0.0306747 | 0.978818 |
| XLOC_003013 | DLG5          | chr10:79550548-79686348   | 4.38018   | 4.28812   | -0.0306469 | 0.978818 |
| XLOC_022672 | C9orf172      | chr9:139738866-139741797  | 0.926388  | 0.906926  | -0.0306317 | 0.994204 |
| XLOC_007140 | BUB1B,PAK6    | chr15:40453209-40569688   | 16.2189   | 15.8789   | -0.0305662 | 0.978818 |
| XLOC_010414 | ZNF516        | chr18:74069636-74207146   | 2.44589   | 2.39465   | -0.0305453 | 0.979338 |
| XLOC_014251 | MRPL39        | chr21:26957967-26979801   | 48.6357   | 47.6171   | -0.0305361 | 0.977897 |
| XLOC_017939 | NUDCD2        | chr5:162880585-162887143  | 39.0523   | 38.2412   | -0.0302788 | 0.978818 |
| XLOC_016053 | ACTRT3        | chr3:169484710-169487683  | 1.11204   | 1.08895   | -0.0302761 | 0.988974 |
| XLOC_014319 | CLDN14        | chr21:37832919-37948867   | 0.0419873 | 0.0411154 | -0.030276  | 1        |
| XLOC_006849 | WDR89         | chr14:64063756-64108641   | 3.2259    | 3.15892   | -0.0302727 | 0.980228 |
| XLOC_016730 | COMMD8        | chr4:47452810-47465676    | 10.1314   | 9.92126   | -0.0302414 | 0.98003  |
| XLOC_018223 | RNF5          | chr6:32146161-32148570    | 67.8738   | 66.4681   | -0.0301925 | 0.978818 |
| XLOC_013713 | RNF114        | chr20:48552913-48570422   | 31.7764   | 31.1191   | -0.0301557 | 0.977897 |
| XLOC_006447 | ISCA2         | chr14:74960422-74962271   | 29.0615   | 28.4612   | -0.0301132 | 0.978818 |
| XLOC_012612 | FASTKD2       | chr2:207630111-207660911  | 5.51523   | 5.40152   | -0.0300561 | 0.977897 |
| XLOC_015904 | KPNA1         | chr3:122140747-122233786  | 5.77114   | 5.65218   | -0.0300468 | 0.97822  |
| XLOC_003862 | ABCG4         | chr11:119019749-119033374 | 1.3863    | 1.35777   | -0.0300094 | 0.985975 |
| XLOC_023694 | SLC6A8        | chrX:152953751-152962048  | 61.8625   | 60.59     | -0.0299847 | 0.978016 |
| XLOC_022953 | LINC00476     | chr9:98568369-98731122    | 4.26034   | 4.17277   | -0.0299631 | 0.990737 |
| XLOC_009199 | PRR11         | chr17:57232859-57284070   | 6.1358    | 6.0102    | -0.0298392 | 0.978818 |
| XLOC_022589 | ODF2          | chr9:131217433-131263571  | 20.7762   | 20.3511   | -0.0298221 | 0.978818 |
| XLOC_008066 | HSD3B7        | chr16:30996518-31000473   | 32.9464   | 32.2737   | -0.0297643 | 0.97823  |
| XLOC_008687 | KARS          | chr16:75661621-75681585   | 76.6045   | 75.0427   | -0.0297173 | 0.978031 |
| XLOC_008047 | CORO1A        | chr16:30194730-30200575   | 19.1143   | 18.7247   | -0.0297061 | 0.979338 |
| XLOC_020346 | TTYH3         | chr7:2671602-2704436      | 20.7416   | 20.3216   | -0.0295133 | 0.978031 |
| XLOC_013541 | CSRP2BP,PET11 | chr20:18118498-18169031   | 17.3673   | 17.0156   | -0.0295131 | 0.981441 |
| XLOC_007379 | PDE8A         | chr15:85523743-85682376   | 5.05225   | 4.95012   | -0.0294623 | 0.980228 |
| XLOC_017682 | CCDC125       | chr5:68576518-68616410    | 2.14197   | 2.09886   | -0.0293326 | 0.982229 |
| XLOC_005563 | C12orf66      | chr12:64586418-64616076   | 1.08486   | 1.06303   | -0.0293314 | 0.987687 |
| XLOC_000060 | CAMTA1        | chr1:6845383-7829766      | 57.7163   | 56.5553   | -0.0293173 | 0.979348 |
| XLOC_009071 | HSD17B1       | chr17:40703983-40707232   | 30.0338   | 29.4306   | -0.02927   | 0.978818 |

|             |            |                           |           |           |            |          |
|-------------|------------|---------------------------|-----------|-----------|------------|----------|
| XLOC_015753 | TWF2       | chr3:52262625-52273183    | 113.342   | 111.076   | -0.0291288 | 0.978818 |
| XLOC_004775 | LYRM5      | chr12:25348149-25357949   | 7.946     | 7.78732   | -0.0291027 | 0.981963 |
| XLOC_004246 | VWCE       | chr11:61025757-61062788   | 0.43169   | 0.423073  | -0.029089  | 0.990183 |
| XLOC_012347 | TMEM182    | chr2:103378489-103434138  | 0.699315  | 0.68538   | -0.0290388 | 0.987377 |
| XLOC_013054 | SEMA4C     | chr2:97525472-97535735    | 12.0378   | 11.7987   | -0.0289413 | 0.98003  |
| XLOC_017912 | FAM114A2   | chr5:153371268-153418497  | 3.89204   | 3.81487   | -0.0288935 | 0.981602 |
| XLOC_000261 | ZBTB8A     | chr1:33004771-33071542    | 1.61531   | 1.58329   | -0.0288898 | 0.981543 |
| XLOC_018237 | RING1      | chr6:33176285-33180499    | 37.74     | 36.9934   | -0.0288288 | 0.978818 |
| XLOC_022082 | NBN        | chr8:90945563-90996899    | 10.1883   | 9.98687   | -0.0288157 | 0.978818 |
| XLOC_010912 | ZNF222     | chr19:44529493-44537262   | 3.19114   | 3.12809   | -0.0287869 | 0.98338  |
| XLOC_012711 | GIGYF2     | chr2:233562014-233725289  | 5.83129   | 5.7161    | -0.0287837 | 0.978996 |
| XLOC_011646 | MAP4K1     | chr19:39078280-39108643   | 0.27388   | 0.268483  | -0.0287128 | 1        |
| XLOC_002593 | MARCH5     | chr10:94050919-94113721   | 10.3425   | 10.1388   | -0.0286981 | 0.978818 |
| XLOC_014904 | MAPK11     | chr22:50702141-50708779   | 13.8824   | 13.6091   | -0.0286778 | 0.980696 |
| XLOC_000193 | MAN1C1     | chr1:25943958-26111258    | 0.083661  | 0.0820147 | -0.0286729 | 1        |
| XLOC_018770 | CLIC1      | chr6:31698357-31704341    | 558.193   | 547.21    | -0.0286696 | 0.978818 |
| XLOC_016079 | DCUN1D1    | chr3:182660558-182698326  | 3.87078   | 3.79471   | -0.0286343 | 0.981602 |
| XLOC_020693 | BCAP29     | chr7:107220421-107263762  | 9.87363   | 9.67983   | -0.0285992 | 0.978818 |
| XLOC_014523 | FBXO7      | chr22:32870706-32894818   | 63.6104   | 62.3673   | -0.0284727 | 0.978818 |
| XLOC_004982 | YEATS4     | chr12:69753531-69784576   | 27.4272   | 26.8913   | -0.0284667 | 0.979451 |
| XLOC_014704 | PPM1F      | chr22:22273791-22307250   | 12.1818   | 11.9449   | -0.0283292 | 0.978838 |
| XLOC_014079 | PTK6       | chr20:62159775-62168723   | 4.28625   | 4.20296   | -0.0283105 | 0.983738 |
| XLOC_010095 | SMCHD1     | chr18:2655885-2805015     | 2.86689   | 2.81122   | -0.0282878 | 0.979267 |
| XLOC_000363 | AKR1A1     | chr1:46016454-46035723    | 128.383   | 125.893   | -0.0282508 | 0.978818 |
| XLOC_001815 | RFX5       | chr1:151313115-151319769  | 15.4217   | 15.1228   | -0.0282418 | 0.978818 |
| XLOC_023270 | OFD1       | chrX:13752831-13787480    | 4.9519    | 4.85594   | -0.0282315 | 0.981335 |
| XLOC_023143 | BRD3       | chr9:136890560-136933141  | 8.27297   | 8.11294   | -0.0281817 | 0.98206  |
| XLOC_006102 | NUFIP1     | chr13:45513383-45563613   | 2.5701    | 2.52064   | -0.0280364 | 0.98206  |
| XLOC_002730 | WDR11      | chr10:122216465-122806858 | 3.90867   | 3.83371   | -0.0279354 | 0.981441 |
| XLOC_022959 | CDC14B     | chr9:99262394-99382112    | 3.94923   | 3.87354   | -0.0279171 | 0.981    |
| XLOC_003817 | DLAT       | chr11:111895537-111944895 | 4.88792   | 4.79434   | -0.0278897 | 0.981441 |
| XLOC_004781 | ARNTL2     | chr12:27485786-27578746   | 3.10153   | 3.04223   | -0.0278474 | 0.980228 |
| XLOC_009981 | ACOX1      | chr17:73937588-74002080   | 4.24231   | 4.16142   | -0.0277747 | 0.984445 |
| XLOC_021209 | GATS       | chr7:99775537-99869855    | 1.65288   | 1.62139   | -0.027748  | 0.987173 |
| XLOC_009622 | PEX12      | chr17:33901813-33905656   | 1.20712   | 1.18414   | -0.0277227 | 0.98807  |
| XLOC_002104 | TMEM9      | chr1:201103899-201123632  | 72.1119   | 70.741    | -0.0276902 | 0.978996 |
| XLOC_003689 | KRTAP5-10  | chr11:71276608-71277666   | 0.0506629 | 0.0497013 | -0.0276484 | 1        |
| XLOC_020588 | CROT       | chr7:86974950-87029112    | 0.645179  | 0.632944  | -0.0276217 | 0.991175 |
| XLOC_005772 | RILPL2     | chr12:123899935-123921264 | 28.2027   | 27.6696   | -0.0275323 | 0.980744 |
| XLOC_012317 | CNNM3      | chr2:97481990-97501121    | 7.55249   | 7.41001   | -0.0274769 | 0.980228 |
| XLOC_003498 | C11orf31   | chr11:57479994-57586652   | 163.45    | 160.367   | -0.0274676 | 0.988052 |
| XLOC_010136 | ANKRD20A5P | chr18:14179095-14227049   | 0.0593694 | 0.0582512 | -0.027433  | 1        |
| XLOC_018652 | CCDC90A    | chr6:13786780-13814792    | 4.96336   | 4.87      | -0.0273976 | 0.981441 |
| XLOC_018786 | PRRT1      | chr6:32116139-32119720    | 2.65745   | 2.60758   | -0.0273328 | 0.990165 |
| XLOC_021485 | NAT1       | chr8:18027970-18081198    | 1.89789   | 1.86233   | -0.0272911 | 0.987173 |
| XLOC_006430 | RBM25      | chr14:73525220-73588076   | 12.0978   | 11.8713   | -0.0272734 | 0.979267 |
| XLOC_008455 | THUMPDI    | chr16:20744988-20753199   | 4.15896   | 4.08135   | -0.0271767 | 0.981441 |
| XLOC_013105 | ANAPC1     | chr2:112525213-112641741  | 6.27939   | 6.16272   | -0.0270584 | 0.980228 |
| XLOC_021484 | PCM1       | chr8:17780365-17887457    | 5.06998   | 4.9759    | -0.0270227 | 0.978996 |

|             |          |                           |           |           |            |          |
|-------------|----------|---------------------------|-----------|-----------|------------|----------|
| XLOC_015057 | TCAIM    | chr3:44379610-44450940    | 6.25783   | 6.14201   | -0.0269523 | 0.982866 |
| XLOC_022813 | STOML2   | chr9:35099888-35103154    | 310.548   | 304.804   | -0.0269342 | 0.981179 |
| XLOC_015720 | GMPPB    | chr3:49726949-49761384    | 6.86353   | 6.73718   | -0.0268071 | 0.994068 |
| XLOC_012470 | RIF1     | chr2:152266396-152333860  | 2.02248   | 1.98525   | -0.0268011 | 0.981441 |
| XLOC_007536 | CDAN1    | chr15:43015759-43029417   | 4.98459   | 4.89286   | -0.0267968 | 0.981602 |
| XLOC_005362 | ASUN     | chr12:27058111-27091254   | 10.4394   | 10.2481   | -0.0266806 | 0.980228 |
| XLOC_017726 | SCARNA18 | chr5:82348664-82373272    | 11.7818   | 11.5659   | -0.0266752 | 0.983243 |
| XLOC_012013 | CHMP2A   | chr19:59062932-59066486   | 101.159   | 99.3064   | -0.0266662 | 0.98003  |
| XLOC_005026 | CRADD    | chr12:94071150-94244531   | 9.874     | 9.6932    | -0.0266618 | 0.984093 |
| XLOC_017749 | ERAP1    | chr5:95997740-96149848    | 2.47472   | 2.42945   | -0.0266306 | 0.994507 |
| XLOC_014198 | PDXK     | chr21:45138977-45182188   | 16.8226   | 16.5154   | -0.0265871 | 0.978818 |
| XLOC_000567 | GNAI3    | chr1:110091185-110138454  | 15.4274   | 15.1462   | -0.0265399 | 0.980228 |
| XLOC_017698 | FAM169A  | chr5:74073398-74162663    | 2.42312   | 2.37917   | -0.0264058 | 0.98206  |
| XLOC_012662 | DNAJB2   | chr2:220144039-220151622  | 34.2351   | 33.615    | -0.0263703 | 0.981441 |
| XLOC_021595 | LYN      | chr8:56792385-56925006    | 11.171    | 10.9691   | -0.0263199 | 0.980228 |
| XLOC_010850 | PLEKHG2  | chr19:39903749-39919055   | 5.66598   | 5.56358   | -0.0263134 | 0.981441 |
| XLOC_014387 | MCM3AP   | chr21:47649157-47705236   | 8.23021   | 8.08236   | -0.0261519 | 0.981441 |
| XLOC_014545 | PDXP     | chr22:38054736-38062939   | 46.072    | 45.2455   | -0.0261151 | 0.981441 |
| XLOC_004299 | PPP1R14B | chr11:64011950-64014413   | 434.592   | 426.804   | -0.0260878 | 0.98004  |
| XLOC_013610 | ZNF341   | chr20:32319807-32380075   | 1.61647   | 1.58754   | -0.0260539 | 0.987759 |
| XLOC_008584 | NUDT21   | chr16:56463047-56485261   | 23.3862   | 22.9692   | -0.0259579 | 0.980228 |
| XLOC_005550 | CDK4     | chr12:58138783-58146230   | 190.302   | 186.911   | -0.0259376 | 0.981364 |
| XLOC_007989 | POLR3E   | chr16:22308695-22346424   | 9.62145   | 9.45029   | -0.0258958 | 0.981735 |
| XLOC_008399 | ANKS3    | chr16:4746510-4799397     | 7.46942   | 7.33684   | -0.0258364 | 0.983243 |
| XLOC_016625 | DGKQ     | chr4:952671-967348        | 5.90989   | 5.80516   | -0.0257963 | 0.982229 |
| XLOC_017612 | NADKD1   | chr5:36192693-36242258    | 3.81251   | 3.74524   | -0.0256841 | 0.98244  |
| XLOC_012196 | KIAA1841 | chr2:61293005-61365169    | 0.331839  | 0.325986  | -0.0256771 | 1        |
| XLOC_011413 | S1PR2    | chr19:10332108-10341948   | 5.86234   | 5.7594    | -0.0255577 | 0.983243 |
| XLOC_008504 | DOC2A    | chr16:30007530-30022401   | 13.2254   | 12.9935   | -0.0255242 | 0.991951 |
| XLOC_012805 | WDR35    | chr2:20110028-20189884    | 2.48751   | 2.44389   | -0.0255203 | 0.981659 |
| XLOC_014426 | SNAP29   | chr22:21213291-21245501   | 6.81723   | 6.69777   | -0.0255047 | 0.981441 |
| XLOC_012448 | RAB3GAP1 | chr2:135809834-135928279  | 8.84422   | 8.68991   | -0.0253943 | 0.981441 |
| XLOC_004573 | MCAM     | chr11:119179233-119187840 | 0.0109533 | 0.0107625 | -0.0253497 | 1        |
| XLOC_009770 | LSM12    | chr17:42112002-42144987   | 60.9779   | 59.9186   | -0.0252836 | 0.981441 |
| XLOC_021151 | SRI      | chr7:87834431-87856308    | 66.8729   | 65.7128   | -0.0252466 | 0.982623 |
| XLOC_007634 | PDCD7    | chr15:65409716-65426174   | 16.5916   | 16.3045   | -0.025189  | 0.981504 |
| XLOC_002466 | UBE2D1   | chr10:60094738-60130513   | 10.6742   | 10.4908   | -0.0249992 | 0.981975 |
| XLOC_017069 | SRD5A1   | chr5:6633499-6669675      | 3.40168   | 3.34335   | -0.0249541 | 0.987159 |
| XLOC_020579 | PHTF2    | chr7:77428108-77586821    | 2.4321    | 2.39048   | -0.0249051 | 0.984547 |
| XLOC_000981 | TMEM183A | chr1:202976533-202993197  | 34.1132   | 33.53     | -0.0248766 | 0.981441 |
| XLOC_006117 | MED4     | chr13:48649863-48669277   | 15.1132   | 14.8557   | -0.0247937 | 0.981543 |
| XLOC_010051 | STRA13   | chr17:79976578-79980785   | 75.288    | 74.008    | -0.024738  | 0.98206  |
| XLOC_000226 | SMPDL3B  | chr1:28261503-28285663    | 1.54046   | 1.51431   | -0.0247006 | 0.991446 |
| XLOC_001202 | CCNL2    | chr1:1321090-1334718      | 30.1652   | 29.6533   | -0.0246962 | 0.981975 |
| XLOC_018084 | ACOT13   | chr6:24667262-24719403    | 6.85482   | 6.73855   | -0.0246811 | 0.992882 |
| XLOC_010003 | SOCS3    | chr17:76352858-76356158   | 22.4947   | 22.1135   | -0.0246583 | 0.981441 |
| XLOC_022784 | SMU1     | chr9:33041849-33076714    | 9.76237   | 9.59838   | -0.02444   | 0.981441 |
| XLOC_007997 | UBFD1    | chr16:23568861-23585710   | 7.48087   | 7.3555    | -0.0243826 | 0.982248 |
| XLOC_004624 | C11orf45 | chr11:128761312-128787951 | 0.0254163 | 0.0249908 | -0.024357  | 1        |

|             |                |                           |          |           |            |          |
|-------------|----------------|---------------------------|----------|-----------|------------|----------|
| XLOC_015681 | SMARCC1        | chr3:47627377-47823405    | 18.2497  | 17.9444   | -0.0243398 | 0.981441 |
| XLOC_021422 | NCAPG2         | chr7:158424002-158497520  | 8.71678  | 8.57104   | -0.0243237 | 0.981543 |
| XLOC_001583 | TM2D1          | chr1:62146718-62191095    | 25.9553  | 25.5224   | -0.0242606 | 0.983243 |
| XLOC_007115 | LOC100288637   | chr15:30938317-31065209   | 1.14087  | 1.12189   | -0.0242049 | 0.987173 |
| XLOC_008213 | FUK            | chr16:70488497-70514177   | 4.15915  | 4.08999   | -0.0241921 | 0.985175 |
| XLOC_012212 | ACTR2          | chr2:65454828-65498390    | 35.4139  | 34.8253   | -0.0241817 | 0.981441 |
| XLOC_010939 | BLOC1S3        | chr19:45682002-45685058   | 10.9386  | 10.757    | -0.0241488 | 0.983243 |
| XLOC_020429 | AQP1           | chr7:30951414-30965131    | 0.192021 | 0.188834  | -0.024144  | 1        |
| XLOC_022245 | CYHR1          | chr8:145675314-145691031  | 68.3508  | 67.2192   | -0.024086  | 0.98206  |
| XLOC_004814 | TMEM106C       | chr12:48357329-48362661   | 96.6331  | 95.0361   | -0.0240425 | 0.981659 |
| XLOC_007917 | GLIS2          | chr16:4382224-4389598     | 12.135   | 11.9352   | -0.0239563 | 0.98338  |
| XLOC_001438 | ZMYM6NB        | chr1:35447126-35450948    | 33.4964  | 32.9452   | -0.0239362 | 0.982641 |
| XLOC_002119 | ADIPOR1        | chr1:202909959-202927700  | 50.2103  | 49.3859   | -0.0238846 | 0.981441 |
| XLOC_010334 | RPRD1A         | chr18:33569791-33647373   | 10.0721  | 9.90679   | -0.0238753 | 0.98206  |
| XLOC_000408 | MRPL37         | chr1:54665839-54684056    | 180.153  | 177.197   | -0.0238712 | 0.981441 |
| XLOC_001528 | EFCAB14        | chr1:47139707-47184736    | 6.41026  | 6.30538   | -0.0238008 | 0.982623 |
| XLOC_005498 | CBX5           | chr12:54624730-54673915   | 4.14178  | 4.07404   | -0.0237888 | 0.985175 |
| XLOC_023407 | GSPT2          | chrX:51486480-51489326    | 4.46476  | 4.39176   | -0.0237828 | 0.985175 |
| XLOC_003728 | CAPN5          | chr11:76777991-76837198   | 5.07019  | 4.98764   | -0.0236829 | 0.983529 |
| XLOC_019046 | HDAC2          | chr6:114257319-114292359  | 6.37427  | 6.27062   | -0.0236522 | 0.98206  |
| XLOC_018946 | LMBRD1         | chr6:70385640-70507049    | 8.10999  | 7.97835   | -0.023609  | 0.984228 |
| XLOC_019100 | BCLAF1         | chr6:136578000-136610989  | 10.3582  | 10.1903   | -0.0235838 | 0.981441 |
| XLOC_003238 | AP2A2          | chr11:925808-1012245      | 13.3963  | 13.1793   | -0.0235625 | 0.982229 |
| XLOC_000286 | THRAP3         | chr1:36690016-36770957    | 25.3141  | 24.9054   | -0.0234846 | 0.981602 |
| XLOC_012482 | MARCH7         | chr2:160569009-160625084  | 12.7163  | 12.5113   | -0.0234476 | 0.981602 |
| XLOC_010915 | ZNF224         | chr19:44598481-44617336   | 0.029087 | 0.0286181 | -0.0234473 | 1        |
| XLOC_008380 | ZNF200         | chr16:3272324-3285457     | 3.14343  | 3.09284   | -0.0234104 | 0.986782 |
| XLOC_013620 | ACSS2          | chr20:33462765-33515769   | 6.44487  | 6.34134   | -0.0233631 | 0.984318 |
| XLOC_005990 | ING1           | chr13:111364969-111373421 | 5.88273  | 5.78831   | -0.0233451 | 0.985739 |
| XLOC_011011 | CGB5           | chr19:49547101-49548568   | 0.397243 | 0.390869  | -0.0233375 | 0.985492 |
| XLOC_002273 | CHML           | chr1:241695433-241803701  | 1.61926  | 1.59339   | -0.0232345 | 0.985492 |
| XLOC_021811 | C8orf33        | chr8:146277823-146281416  | 38.4402  | 37.8274   | -0.0231829 | 0.982866 |
| XLOC_018788 | AGPAT1         | chr6:32120578-32145888    | 32.4479  | 31.9307   | -0.0231794 | 0.991175 |
| XLOC_010835 | FAM98C         | chr19:38893774-38916945   | 45.2884  | 44.5694   | -0.0230888 | 0.982866 |
| XLOC_017971 | RAB24          | chr5:176728198-176730744  | 26.0063  | 25.5955   | -0.0229723 | 0.983243 |
| XLOC_008185 | NUTF2          | chr16:67862059-67905219   | 255.751  | 251.724   | -0.0229007 | 0.985768 |
| XLOC_007441 | HERC2P3        | chr15:20613649-20711433   | 0.474716 | 0.467243  | -0.0228934 | 0.992304 |
| XLOC_007241 | TPM1           | chr15:63334837-63364113   | 47.0099  | 46.2733   | -0.0227864 | 0.982623 |
| XLOC_012155 | MTA3           | chr2:42795670-42936353    | 12.7001  | 12.5012   | -0.0227696 | 0.983529 |
| XLOC_010624 | CCDC130        | chr19:13858752-13874106   | 19.4638  | 19.1598   | -0.0227147 | 0.984084 |
| XLOC_010000 | TMC6           | chr17:76108998-76139049   | 30.7906  | 30.3113   | -0.0226327 | 0.98217  |
| XLOC_021771 | THEM6          | chr8:143808620-143818350  | 71.7943  | 70.68     | -0.0225664 | 0.982866 |
| XLOC_004813 | SLC48A1        | chr12:48166966-48213763   | 8.47781  | 8.347     | -0.0224331 | 0.992737 |
| XLOC_009591 | GIT1           | chr17:27900486-27916610   | 36.196   | 35.6391   | -0.0223709 | 0.981659 |
| XLOC_013263 | CWC22          | chr2:180809603-180871780  | 4.07945  | 4.01701   | -0.022253  | 0.985492 |
| XLOC_014013 | SLC13A3,TP53RK | chr20:45186461-45318276   | 6.64051  | 6.53901   | -0.0222217 | 0.983962 |
| XLOC_023039 | CDK5RAP2       | chr9:123151146-123342448  | 4.56911  | 4.49943   | -0.0221724 | 0.983529 |
| XLOC_009247 | LINC00674      | chr17:66097695-66132070   | 2.54002  | 2.50131   | -0.0221588 | 0.983243 |
| XLOC_020491 | EGFR           | chr7:55086724-55275031    | 1.03992  | 1.02415   | -0.0220434 | 0.990368 |

|             |              |                           |           |           |            |          |
|-------------|--------------|---------------------------|-----------|-----------|------------|----------|
| XLOC_016455 | AIMP1        | chr4:106967232-107270381  | 19.9533   | 19.6513   | -0.0220046 | 0.983243 |
| XLOC_012004 | ZSCAN18      | chr19:58595208-58629793   | 0.0565212 | 0.055667  | -0.0219711 | 1        |
| XLOC_001616 | USP33        | chr1:78161673-78225564    | 6.48939   | 6.39205   | -0.0218028 | 0.984228 |
| XLOC_001753 | NOTCH2       | chr1:120454175-120612317  | 4.15017   | 4.08803   | -0.0217657 | 0.983243 |
| XLOC_009745 | STAT3        | chr17:40465342-40540513   | 8.69693   | 8.56726   | -0.0216715 | 0.984445 |
| XLOC_023422 | GNL3L        | chrX:54556643-54593720    | 3.67698   | 3.62218   | -0.0216621 | 0.98439  |
| XLOC_017697 | GFM2         | chr5:73980968-74072737    | 11.4357   | 11.2657   | -0.0216004 | 0.994734 |
| XLOC_008769 | CYB5D2       | chr17:4046461-4060995     | 15.4125   | 15.1844   | -0.0215089 | 0.986998 |
| XLOC_015235 | NFKBIZ,NXPE3 | chr3:101498028-101579869  | 18.2101   | 17.9406   | -0.0215072 | 0.984084 |
| XLOC_008321 | WDR24        | chr16:734701-740400       | 6.8166    | 6.71627   | -0.0213931 | 0.986998 |
| XLOC_020850 | ZNF775       | chr7:150076405-150095719  | 8.4599    | 8.33555   | -0.0213617 | 0.988761 |
| XLOC_005168 | SNRNP35      | chr12:123942650-123950941 | 11.3091   | 11.143    | -0.0213407 | 0.988974 |
| XLOC_010017 | EIF4A3       | chr17:78109012-78120982   | 75.1799   | 74.078    | -0.0213027 | 0.983243 |
| XLOC_008016 | SBK1         | chr16:28303839-28335170   | 3.84816   | 3.79203   | -0.0211996 | 0.98791  |
| XLOC_017791 | HINT1        | chr5:130494975-130501041  | 701.083   | 690.871   | -0.0211683 | 0.984309 |
| XLOC_005023 | NUDT4        | chr12:93771700-93797024   | 16.6716   | 16.4291   | -0.0211377 | 0.983664 |
| XLOC_023020 | CDC26        | chr9:116029289-116037869  | 57.3127   | 56.4795   | -0.0211282 | 0.984547 |
| XLOC_013464 | HDLBP        | chr2:242166681-242293441  | 30.9596   | 30.5101   | -0.021097  | 0.991167 |
| XLOC_020409 | HOXA-AS3     | chr7:27179982-27196296    | 0.028398  | 0.0279881 | -0.0209767 | 1        |
| XLOC_020621 | BRI3         | chr7:97910978-98030427    | 334.094   | 329.291   | -0.020888  | 0.989716 |
| XLOC_001652 | GLMN         | chr1:92711954-92853732    | 5.12641   | 5.05273   | -0.0208871 | 0.992304 |
| XLOC_008631 | CENPT        | chr16:67862059-67905219   | 17.8196   | 17.5636   | -0.02087   | 0.994734 |
| XLOC_021345 | HIPK2        | chr7:139246315-139477693  | 1.71267   | 1.68819   | -0.0207671 | 0.985712 |
| XLOC_001407 | PUM1         | chr1:31404352-31538564    | 8.07596   | 7.96118   | -0.0206526 | 0.985373 |
| XLOC_017140 | SETD9        | chr5:56205086-56247954    | 3.38215   | 3.33412   | -0.0206334 | 0.994125 |
| XLOC_020700 | IFRD1        | chr7:112063198-112117258  | 16.7006   | 16.4637   | -0.0206122 | 0.985692 |
| XLOC_007916 | DNASE1       | chr16:3702939-3767598     | 0.52099   | 0.5136    | -0.0206105 | 0.997814 |
| XLOC_024082 | GPC4         | chrX:132435063-132549205  | 5.68302   | 5.60295   | -0.0204722 | 0.985492 |
| XLOC_004920 | ERBB3        | chr12:56473808-56497291   | 4.21874   | 4.15958   | -0.0203721 | 0.992304 |
| XLOC_023815 | CXorf38      | chrX:40486172-40506819    | 2.38202   | 2.34867   | -0.0203379 | 0.989716 |
| XLOC_018785 | FKBP1        | chr6:32096483-32098067    | 5.28528   | 5.21139   | -0.0203125 | 0.991175 |
| XLOC_023408 | MAGED1       | chrX:51546154-51645450    | 21.7913   | 21.4879   | -0.0202254 | 0.984084 |
| XLOC_004780 | STK38L       | chr12:27397077-27478890   | 2.83923   | 2.7998    | -0.0201744 | 0.987386 |
| XLOC_024069 | ELF4         | chrX:129198894-129244688  | 7.82134   | 7.71282   | -0.0201569 | 0.985768 |
| XLOC_007147 | RPUSD2       | chr15:40861536-40866661   | 17.758    | 17.512    | -0.0201214 | 0.986681 |
| XLOC_020638 | ZSCAN21      | chr7:99647416-99679371    | 1.41177   | 1.39224   | -0.0200981 | 0.997314 |
| XLOC_022810 | VCP          | chr9:35056064-35072739    | 59.9509   | 59.1229   | -0.0200644 | 0.986108 |
| XLOC_004651 | FKBP4        | chr12:2904107-2914587     | 67.506    | 66.5777   | -0.0199762 | 0.986181 |
| XLOC_006900 | NEK9         | chr14:75548817-75593778   | 5.95011   | 5.86832   | -0.0199699 | 0.986181 |
| XLOC_007339 | TMED3        | chr15:79603490-79615189   | 106.522   | 105.061   | -0.0199288 | 0.985692 |
| XLOC_008165 | CES3         | chr16:66995131-67009052   | 5.91552   | 5.83441   | -0.0199186 | 0.988513 |
| XLOC_013654 | ACTR5        | chr20:37377096-37401089   | 5.24874   | 5.17678   | -0.0199144 | 0.988327 |
| XLOC_020414 | TAX1BP1      | chr7:27778991-27869386    | 15.2331   | 15.0263   | -0.0197185 | 0.986743 |
| XLOC_009877 | TRIM37       | chr17:56833229-57184266   | 4.25009   | 4.19242   | -0.0197084 | 0.987159 |
| XLOC_018432 | C6orf203     | chr6:107349406-107372547  | 14.8695   | 14.6682   | -0.0196663 | 0.988549 |
| XLOC_018742 | PPP1R18      | chr6:30644165-30655672    | 54.9359   | 54.1936   | -0.019626  | 0.984445 |
| XLOC_018322 | TMEM63B      | chr6:44095375-44123256    | 10.6382   | 10.4945   | -0.0196103 | 0.986782 |
| XLOC_016862 | LAMTOR3      | chr4:100799494-100815703  | 5.11604   | 5.0471    | -0.0195738 | 0.986844 |
| XLOC_018807 | COL11A2      | chr6:33130468-33160245    | 0.285385  | 0.281565  | -0.0194379 | 1        |



|             |           |                           |           |           |            |          |
|-------------|-----------|---------------------------|-----------|-----------|------------|----------|
| XLOC_002447 | ZNF488    | chr10:48355088-48373866   | 0.222491  | 0.219522  | -0.0193826 | 1        |
| XLOC_006829 | EXOC5     | chr14:57669193-57756797   | 3.1089    | 3.06742   | -0.0193805 | 0.989716 |
| XLOC_017746 | GLRX      | chr5:95149552-95158577    | 635.494   | 627.015   | -0.0193775 | 0.985839 |
| XLOC_005175 | DNAH10    | chr12:124247041-124420267 | 0.0811963 | 0.0801144 | -0.0193524 | 1        |
| XLOC_000965 | RPS10P7   | chr1:201489031-201489720  | 1.92035   | 1.8948    | -0.019325  | 0.995328 |
| XLOC_008446 | GDE1      | chr16:19513014-19533450   | 22.7434   | 22.4409   | -0.0193174 | 0.985956 |
| XLOC_006363 | MAPK11P1L | chr14:55518361-55536912   | 10.3037   | 10.1669   | -0.019284  | 0.986439 |
| XLOC_009965 | SUMO2     | chr17:73163824-73179098   | 292.728   | 288.859   | -0.0191942 | 0.98512  |
| XLOC_021567 | GOLGA7    | chr8:41348080-41368499    | 34.6006   | 34.1438   | -0.0191742 | 0.986181 |
| XLOC_012779 | KIDINS220 | chr2:8868986-8977755      | 2.20394   | 2.17502   | -0.0190551 | 0.989512 |
| XLOC_010693 | PIK3R2    | chr19:18263987-18281343   | 27.1664   | 26.8103   | -0.0190363 | 0.985768 |
| XLOC_015835 | DHFR1L    | chr3:93776765-93845630    | 0.935765  | 0.923541  | -0.0189699 | 0.993528 |
| XLOC_022167 | TATDN1    | chr8:125487007-125551329  | 60.6086   | 59.8182   | -0.0189374 | 0.992304 |
| XLOC_021865 | CTSB      | chr8:11700033-11725646    | 46.2256   | 45.6257   | -0.0188451 | 0.985492 |
| XLOC_021948 | PPP2CB    | chr8:30643125-30670352    | 38.117    | 37.6248   | -0.0187524 | 0.986916 |
| XLOC_005428 | PRKAG1    | chr12:49396054-49412629   | 45.61     | 45.0224   | -0.018707  | 0.986458 |
| XLOC_001394 | SNHG12    | chr1:28879528-28908366    | 30.5645   | 30.171    | -0.0186935 | 0.994582 |
| XLOC_007971 | CCP110    | chr16:19535178-19564728   | 1.75439   | 1.73189   | -0.0186165 | 0.990042 |
| XLOC_016398 | BMP2K     | chr4:79697531-79833341    | 2.19611   | 2.16798   | -0.0185987 | 0.991446 |
| XLOC_017066 | KIAA0947  | chr5:5422785-5490347      | 2.9043    | 2.86734   | -0.0184738 | 0.987759 |
| XLOC_017115 | C5orf51   | chr5:41904469-41921738    | 4.4723    | 4.41547   | -0.0184477 | 0.988327 |
| XLOC_013194 | WDSUB1    | chr2:160092303-160143236  | 5.48553   | 5.41584   | -0.0184452 | 0.991044 |
| XLOC_017036 | FLJ38576  | chr4:187110185-187112644  | 0.0652841 | 0.0644566 | -0.0184026 | 1        |
| XLOC_001238 | GPR153    | chr1:6307405-6321035      | 5.26679   | 5.20006   | -0.0183972 | 0.991167 |
| XLOC_002663 | NFKB2     | chr10:104153866-104162286 | 41.7594   | 41.2312   | -0.0183669 | 0.987759 |
| XLOC_012508 | GORASP2   | chr2:171784947-171823643  | 33.6952   | 33.2696   | -0.0183389 | 0.986681 |
| XLOC_007959 | ABCC1     | chr16:16043433-16236930   | 10.6105   | 10.4773   | -0.0182331 | 0.987168 |
| XLOC_015919 | SNX4      | chr3:125165487-125239058  | 4.87454   | 4.81354   | -0.018169  | 0.990631 |
| XLOC_023202 | WDR85     | chr9:140449360-140473387  | 34.9146   | 34.4819   | -0.0179901 | 0.988114 |
| XLOC_014443 | PPIL2     | chr22:22020272-22090071   | 7.74541   | 7.64948   | -0.0179807 | 0.991515 |
| XLOC_023093 | NAIF1     | chr9:130823511-130829599  | 3.39916   | 3.35719   | -0.0179231 | 0.991167 |
| XLOC_001976 | NR113     | chr1:161195832-161208000  | 1.38824   | 1.37112   | -0.0179022 | 0.997552 |
| XLOC_018059 | SIRT5     | chr6:13574760-13615390    | 4.69877   | 4.64098   | -0.0178522 | 0.990711 |
| XLOC_015612 | TOP2B     | chr3:25469753-25705863    | 13.4251   | 13.2608   | -0.0177688 | 0.987173 |
| XLOC_005569 | TMBIM4    | chr12:66530716-66563807   | 30.6518   | 30.2768   | -0.0177586 | 0.987173 |
| XLOC_000605 | HIPK1     | chr1:114471995-114520491  | 2.35689   | 2.32806   | -0.017756  | 0.990711 |
| XLOC_002905 | AGAP4     | chr10:46321049-46342921   | 0.820452  | 0.810422  | -0.0177457 | 0.993578 |
| XLOC_021906 | BIN3      | chr8:22462144-22526661    | 16.3299   | 16.1305   | -0.0177254 | 0.994734 |
| XLOC_010837 | EIF3K     | chr19:39109721-39127595   | 294.376   | 290.789   | -0.0176889 | 0.987173 |
| XLOC_008795 | TXNDC17   | chr17:6481644-6554954     | 32.7073   | 32.3101   | -0.0176249 | 0.991193 |
| XLOC_005636 | NTN4      | chr12:96043030-96184536   | 0.436974  | 0.431698  | -0.0175238 | 0.993828 |
| XLOC_022443 | PHF2      | chr9:96338908-96441869    | 4.25238   | 4.20111   | -0.0175005 | 0.990104 |
| XLOC_011066 | CD33      | chr19:51728334-51743274   | 0.0766865 | 0.0757701 | -0.0173432 | 1        |
| XLOC_023581 | WDR44     | chrX:117480035-117583923  | 1.44488   | 1.42764   | -0.0173258 | 0.992304 |
| XLOC_015017 | VILL      | chr3:38035077-38048676    | 0.357753  | 0.353517  | -0.0171849 | 1        |
| XLOC_013130 | BIN1      | chr2:127805598-127864903  | 33.3063   | 32.9142   | -0.0170834 | 0.988779 |
| XLOC_006236 | RASA3     | chr13:114747193-114898095 | 17.0123   | 16.8122   | -0.0170702 | 0.989291 |
| XLOC_000645 | RNF115    | chr1:145611035-145688776  | 7.20404   | 7.1194    | -0.0170518 | 0.991175 |
| XLOC_008222 | ATXN1L    | chr16:71879893-71891236   | 2.04342   | 2.01944   | -0.0170263 | 0.990711 |

|             |              |                          |          |          |            |          |
|-------------|--------------|--------------------------|----------|----------|------------|----------|
| XLOC_003579 | OTUB1        | chr11:63753324-63765892  | 63.2115  | 62.4703  | -0.0170166 | 0.987759 |
| XLOC_004969 | LEMD3        | chr12:65563350-65642141  | 3.18512  | 3.14811  | -0.016862  | 0.990781 |
| XLOC_022517 | ZNF618       | chr9:116638561-116818875 | 2.12893  | 2.10429  | -0.0167963 | 0.990684 |
| XLOC_015041 | CTNNB1       | chr3:41240941-41281939   | 55.901   | 55.2555  | -0.016756  | 0.989716 |
| XLOC_008468 | CDR2         | chr16:22357256-22385938  | 7.7082   | 7.61963  | -0.0166717 | 0.990667 |
| XLOC_006401 | CHURC1,CHURC | chr14:65381078-65569413  | 23.9836  | 23.7084  | -0.0166516 | 0.994068 |
| XLOC_006481 | ZC3H14       | chr14:89029252-89079853  | 9.25654  | 9.15034  | -0.016647  | 0.990614 |
| XLOC_021053 | SEPT7P2      | chr7:45763385-45808617   | 1.46918  | 1.45235  | -0.0166249 | 0.993578 |
| XLOC_012906 | FBXO11       | chr2:48010220-48132932   | 8.52336  | 8.42624  | -0.0165328 | 0.992882 |
| XLOC_007699 | SNUPN        | chr15:75890423-75918719  | 17.8488  | 17.6467  | -0.016429  | 0.990368 |
| XLOC_016147 | CEP19        | chr3:196433147-196439123 | 0.582862 | 0.576274 | -0.0163997 | 0.994953 |
| XLOC_018878 | TBCC         | chr6:42712233-42713884   | 18.0398  | 17.837   | -0.0163101 | 0.991175 |
| XLOC_000918 | IER5         | chr1:181057637-181059979 | 21.4741  | 21.2334  | -0.0162623 | 0.991167 |
| XLOC_009070 | NAGLU        | chr17:40687950-40696466  | 19.4693  | 19.2511  | -0.0162582 | 0.990421 |
| XLOC_008235 | TERF2IP      | chr16:75681634-75691341  | 24.6753  | 24.3992  | -0.0162353 | 0.989716 |
| XLOC_007690 | ULK3         | chr15:75128458-75135552  | 25.0045  | 24.7251  | -0.0162151 | 0.989442 |
| XLOC_015398 | SELT         | chr3:150321065-150348234 | 26.8234  | 26.526   | -0.0160844 | 0.988398 |
| XLOC_020453 | RALA         | chr7:39663151-39747723   | 13.2197  | 13.0731  | -0.0160834 | 0.989857 |
| XLOC_022442 | FAM120A      | chr9:96208781-96328397   | 43.5596  | 43.0799  | -0.0159739 | 0.991149 |
| XLOC_023525 | ARMCX5,ARMCX | chrX:101854095-101972661 | 3.03873  | 3.00533  | -0.0159458 | 0.992304 |
| XLOC_021559 | ADAM9        | chr8:38854504-38962779   | 13.3738  | 13.2272  | -0.0159042 | 0.990781 |
| XLOC_003609 | CDC42EP2     | chr11:65082288-65089900  | 21.6145  | 21.3778  | -0.0158889 | 0.991175 |
| XLOC_008234 | GABARAPL2    | chr16:75600248-75611779  | 102.221  | 101.102  | -0.0158776 | 0.991175 |
| XLOC_016959 | LRBA         | chr4:151185810-151936649 | 4.14156  | 4.09632  | -0.0158465 | 0.988974 |
| XLOC_001365 | C1orf63      | chr1:25568739-25573985   | 10.5218  | 10.4073  | -0.0157781 | 0.991698 |
| XLOC_013306 | ORC2         | chr2:201774893-201828424 | 3.2235   | 3.18856  | -0.0157231 | 0.991515 |
| XLOC_017416 | PCYOX1L      | chr5:148737569-148749221 | 5.46467  | 5.40549  | -0.01571   | 0.991515 |
| XLOC_001246 | UTS2         | chr1:7907671-7913551     | 4.7799   | 4.72884  | -0.015492  | 0.994116 |
| XLOC_012258 | DOK1         | chr2:74753774-74784678   | 20.0144  | 19.801   | -0.0154681 | 0.997314 |
| XLOC_012141 | NDUFAF7      | chr2:37458773-37476303   | 7.72765  | 7.64594  | -0.0153347 | 0.991446 |
| XLOC_005328 | PLBD1        | chr12:14656596-14720791  | 15.4079  | 15.2454  | -0.0152922 | 0.990711 |
| XLOC_022036 | TRAM1        | chr8:71485452-71520694   | 41.6913  | 41.252   | -0.0152813 | 0.990491 |
| XLOC_009793 | LRRRC37A4P   | chr17:43583248-43597889  | 1.12767  | 1.11585  | -0.0151955 | 0.992823 |
| XLOC_004682 | LEPREL2      | chr12:6937571-6949018    | 18.6362  | 18.4441  | -0.0149514 | 0.991167 |
| XLOC_012820 | PTRHD1       | chr2:25013135-25142055   | 51.7665  | 51.233   | -0.0149463 | 0.995437 |
| XLOC_010803 | APLP1        | chr19:36359400-36370699  | 14.8998  | 14.7467  | -0.0149006 | 0.991515 |
| XLOC_001369 | PAQR7        | chr1:26187974-26197744   | 16.7011  | 16.5296  | -0.0148958 | 0.991167 |
| XLOC_012726 | COPS8        | chr2:237994083-238007489 | 31.4004  | 31.0786  | -0.0148576 | 0.991167 |
| XLOC_020567 | MDH2         | chr7:75677392-75695930   | 337.283  | 333.83   | -0.014847  | 0.991167 |
| XLOC_018015 | GNB2L1       | chr5:180663927-180670906 | 3347.56  | 3313.34  | -0.0148265 | 0.991637 |
| XLOC_009369 | ABR          | chr17:906757-1090616     | 18.8211  | 18.6299  | -0.0147353 | 0.991324 |
| XLOC_004933 | HSD17B6      | chr12:57157107-57181574  | 0.569476 | 0.563691 | -0.0147292 | 0.995387 |
| XLOC_023379 | MAGIX        | chrX:49019180-49023836   | 1.08394  | 1.07298  | -0.0146567 | 0.994734 |
| XLOC_005016 | C12orf29     | chr12:88429267-88535993  | 4.42489  | 4.38022  | -0.0146372 | 0.994116 |
| XLOC_022066 | C8orf59      | chr8:86089618-86132643   | 151.872  | 150.342  | -0.0146083 | 0.991515 |
| XLOC_015295 | PARP14       | chr3:122399671-122449687 | 2.86094  | 2.83214  | -0.014598  | 0.991175 |
| XLOC_014829 | DNAL4        | chr22:39174512-39190161  | 11.7022  | 11.5845  | -0.0145895 | 0.992304 |
| XLOC_016893 | PITX2        | chr4:111538579-111563279 | 8.26987  | 8.18807  | -0.0143415 | 0.993157 |
| XLOC_002149 | RAB7L1       | chr1:205737113-205744610 | 8.52109  | 8.43687  | -0.0143301 | 0.991515 |

|             |                |                           |           |           |            |          |
|-------------|----------------|---------------------------|-----------|-----------|------------|----------|
| XLOC_023919 | SNX12          | chrX:70279096-70293276    | 15.9566   | 15.7993   | -0.0142928 | 0.991324 |
| XLOC_014991 | CMC1           | chr3:28283123-28361263    | 46.955    | 46.4924   | -0.0142834 | 0.991776 |
| XLOC_007344 | ARNT2          | chr15:80696691-80890277   | 1.83918   | 1.82117   | -0.0141904 | 0.993157 |
| XLOC_022501 | AKAP2,PALM2,PA | chr9:112403067-112934791  | 6.24411   | 6.18309   | -0.0141674 | 0.991167 |
| XLOC_007233 | CCNB2          | chr15:59397283-59417244   | 42.9042   | 42.4856   | -0.0141477 | 0.991402 |
| XLOC_007793 | LYSMD4         | chr15:100267611-100273626 | 2.87384   | 2.84622   | -0.0139317 | 0.993173 |
| XLOC_012395 | WASH2P         | chr2:114341229-114361294  | 8.71789   | 8.63441   | -0.0138814 | 0.99309  |
| XLOC_005889 | RB1            | chr13:48877882-49056026   | 5.10594   | 5.05718   | -0.0138425 | 0.992194 |
| XLOC_016168 | CTBP1-AS1      | chr4:1243227-1246795      | 3.45287   | 3.42003   | -0.013787  | 0.993595 |
| XLOC_008628 | ENKD1          | chr16:67696849-67700628   | 2.09472   | 2.07506   | -0.0136076 | 0.994793 |
| XLOC_015465 | ATP11B         | chr3:182511290-182639421  | 3.8046    | 3.7691    | -0.0135225 | 0.992304 |
| XLOC_022977 | LOC441461      | chr9:102648599-102668883  | 2.08464   | 2.06533   | -0.0134236 | 0.995202 |
| XLOC_004407 | LIPT2          | chr11:74202922-74204755   | 1.27527   | 1.26347   | -0.0134176 | 0.994734 |
| XLOC_002832 | FAM188A        | chr10:15820174-15902519   | 11.1705   | 11.0678   | -0.0133253 | 0.992304 |
| XLOC_008323 | CCDC78         | chr16:771141-776473       | 4.19706   | 4.15849   | -0.0133206 | 0.996942 |
| XLOC_010312 | SS18           | chr18:23596216-23670611   | 13.9339   | 13.8062   | -0.0132818 | 0.992012 |
| XLOC_015972 | PIK3CB         | chr3:138371539-138478201  | 2.60088   | 2.57728   | -0.0131493 | 0.992882 |
| XLOC_011196 | EPN1           | chr19:56186560-56207133   | 91.4327   | 90.6068   | -0.0130908 | 0.992304 |
| XLOC_005408 | VDR            | chr12:48235319-48298814   | 1.46307   | 1.44999   | -0.0129637 | 0.994204 |
| XLOC_022801 | RPP25L         | chr9:34610481-34612110    | 85.2778   | 84.5157   | -0.0129505 | 0.992298 |
| XLOC_008384 | ZSCAN32        | chr16:3432084-3451025     | 4.94631   | 4.90216   | -0.0129333 | 0.993157 |
| XLOC_001756 | LOC100286793   | chr1:143718512-143744587  | 0.657395  | 0.651632  | -0.0127037 | 0.994734 |
| XLOC_006028 | EFHA1          | chr13:22066827-22178355   | 12.9499   | 12.8368   | -0.012651  | 0.992304 |
| XLOC_010615 | RNASEH2A       | chr19:12917427-12924462   | 58.9468   | 58.4322   | -0.0126496 | 0.992882 |
| XLOC_009477 | C17orf59       | chr17:8091650-8093564     | 13.7399   | 13.6208   | -0.0125613 | 0.994058 |
| XLOC_005911 | HNRNPA1L2      | chr13:53191604-53217919   | 9.1337    | 9.05464   | -0.0125414 | 0.992312 |
| XLOC_012098 | CAD            | chr2:27440257-27466654    | 13.3082   | 13.1931   | -0.0125315 | 0.992304 |
| XLOC_010578 | ATG4D          | chr19:10654646-10676702   | 19.1767   | 19.0119   | -0.0124579 | 0.994734 |
| XLOC_022234 | SHARPIN        | chr8:145153535-145159140  | 87.851    | 87.098    | -0.0124189 | 0.992537 |
| XLOC_015157 | PDE12          | chr3:57541980-57547768    | 9.21032   | 9.13185   | -0.0123435 | 0.992823 |
| XLOC_009750 | CCR10          | chr17:40831419-40833845   | 24.563    | 24.3562   | -0.0121975 | 0.994068 |
| XLOC_007222 | PIGB           | chr15:55611132-55800432   | 3.1965    | 3.1696    | -0.0121933 | 0.996429 |
| XLOC_004067 | LOC644656      | chr11:9481102-9482245     | 1.72108   | 1.70668   | -0.0121145 | 0.997371 |
| XLOC_020349 | FOXK1          | chr7:4721929-4811074      | 8.55969   | 8.48816   | -0.0121069 | 0.992806 |
| XLOC_022975 | ANKS6          | chr9:101494290-101558794  | 9.23918   | 9.16297   | -0.0119491 | 0.992304 |
| XLOC_011969 | TMEM238        | chr19:55890611-55895627   | 21.9838   | 21.8035   | -0.0118793 | 0.994734 |
| XLOC_004690 | ATN1           | chr12:7033625-7051484     | 37.813    | 37.5039   | -0.0118428 | 0.992312 |
| XLOC_016541 | MND1           | chr4:154265800-154336247  | 32.8456   | 32.5799   | -0.0117174 | 0.993157 |
| XLOC_017592 | CDH12          | chr5:21750972-22853731    | 0.0422513 | 0.0419104 | -0.0116878 | 1        |
| XLOC_021302 | MGC27345       | chr7:127937737-127947816  | 1.92566   | 1.91034   | -0.0115241 | 0.993157 |
| XLOC_013075 | RNF149         | chr2:101892062-101925178  | 17.0973   | 16.9621   | -0.0114549 | 0.993578 |
| XLOC_000369 | RAD54L         | chr1:46713366-46769038    | 7.70719   | 7.64641   | -0.011424  | 0.996186 |
| XLOC_012871 | CEBPZ          | chr2:37423634-37458740    | 8.02844   | 7.96537   | -0.011378  | 0.994593 |
| XLOC_017279 | HSD17B4        | chr5:118788137-118878030  | 11.3541   | 11.2652   | -0.0113386 | 0.993157 |
| XLOC_021128 | SRCRB4D        | chr7:76018645-76017388    | 0.752711  | 0.746841  | -0.0112932 | 0.998382 |
| XLOC_015276 | POGLUT1        | chr3:119187784-119213554  | 3.25156   | 3.22621   | -0.0112931 | 0.994116 |
| XLOC_016472 | LARP7          | chr4:113460488-113578748  | 8.31053   | 8.2461    | -0.0112291 | 0.994116 |
| XLOC_012501 | KLHL23,PHOSPH  | chr2:170550963-170608396  | 6.36084   | 6.31163   | -0.0112049 | 0.994159 |
| XLOC_001221 | LOC115110      | chr1:2481358-2484284      | 0.922038  | 0.914941  | -0.0111489 | 0.997552 |

|             |               |                           |           |           |             |          |
|-------------|---------------|---------------------------|-----------|-----------|-------------|----------|
| XLOC_018348 | PAQR8         | chr6:52226925-52272575    | 1.87247   | 1.85814   | -0.0110892  | 0.994279 |
| XLOC_003340 | ARNTL         | chr11:13299324-13408812   | 3.71821   | 3.68983   | -0.0110541  | 0.994204 |
| XLOC_008702 | KIAA1609      | chr16:84509965-84538288   | 5.68448   | 5.64109   | -0.0110531  | 0.994058 |
| XLOC_023167 | INPP5E        | chr9:139323066-139334256  | 21.9765   | 21.8091   | -0.0110263  | 0.994067 |
| XLOC_022140 | NUDCD1        | chr8:110253147-110346350  | 20.9412   | 20.782    | -0.0110129  | 0.992882 |
| XLOC_008060 | RNF40         | chr16:30759619-30787628   | 15.5641   | 15.4469   | -0.0109013  | 0.994313 |
| XLOC_015407 | P2RY1         | chr3:152552735-152555843  | 0.0786713 | 0.0780817 | -0.010853   | 1        |
| XLOC_008696 | MPHOSPH6      | chr16:82181766-82203829   | 21.3054   | 21.1459   | -0.0108386  | 0.994068 |
| XLOC_023558 | NXT2          | chrX:108779009-108787927  | 1.95112   | 1.93655   | -0.0108124  | 0.994734 |
| XLOC_000268 | ZSCAN20       | chr1:33938231-33961995    | 0.360518  | 0.357827  | -0.0108084  | 1        |
| XLOC_000343 | B4GALT2       | chr1:44444873-44456843    | 43.5203   | 43.1976   | -0.0107376  | 0.994058 |
| XLOC_001625 | SSX2IP        | chr1:85109389-85156240    | 3.13097   | 3.10776   | -0.0107359  | 0.994116 |
| XLOC_006520 | GSKIP         | chr14:96829788-96853627   | 5.0728    | 5.03567   | -0.0105966  | 0.994279 |
| XLOC_016170 | UVSSA         | chr4:1341103-1381837      | 1.18301   | 1.17438   | -0.0105595  | 0.994734 |
| XLOC_009007 | MRM1          | chr17:34958024-34965407   | 9.16463   | 9.09788   | -0.0105462  | 0.994279 |
| XLOC_004270 | BSCL2,HNRNPUL | chr11:62457733-62494857   | 28.7145   | 28.5063   | -0.0104982  | 0.994593 |
| XLOC_009175 | NME1,NME1-NME | chr17:49230896-49249105   | 1792.18   | 1779.2    | -0.0104886  | 0.994068 |
| XLOC_020991 | SCRN1         | chr7:29959718-30029905    | 0.0194972 | 0.0193561 | -0.0104812  | 1        |
| XLOC_009972 | GALK1         | chr17:73754017-73761280   | 49.9172   | 49.5581   | -0.010416   | 0.994068 |
| XLOC_022123 | YWHAZ         | chr8:101930803-101965623  | 237.105   | 235.4     | -0.0104122  | 0.994158 |
| XLOC_022233 | OPLAH         | chr8:145106166-145115584  | 43.4191   | 43.1087   | -0.0103508  | 0.993923 |
| XLOC_014497 | NF2           | chr22:29999544-30094589   | 7.65612   | 7.60217   | -0.010203   | 0.994102 |
| XLOC_018308 | PTK7          | chr6:43044005-43129458    | 27.7949   | 27.599    | -0.0102028  | 0.994068 |
| XLOC_020954 | SP8           | chr7:20821893-20826508    | 0.322755  | 0.320496  | -0.0101333  | 1        |
| XLOC_011511 | CHERP         | chr19:16607204-16653263   | 19.8918   | 19.7527   | -0.0101241  | 0.994204 |
| XLOC_017926 | CLINT1        | chr5:157212750-157286183  | 8.43041   | 8.37149   | -0.0101194  | 0.994116 |
| XLOC_011737 | ZNF45         | chr19:44416775-44439411   | 1.84207   | 1.82924   | -0.0100826  | 0.994593 |
| XLOC_007143 | KNSTRN        | chr15:40674921-40686489   | 21.4821   | 21.3331   | -0.0100412  | 0.994068 |
| XLOC_009371 | YWHAE         | chr17:1247833-1303556     | 367.804   | 365.256   | -0.0100298  | 0.994116 |
| XLOC_008416 | DEXI          | chr16:11022747-11036257   | 30.241    | 30.0318   | -0.0100167  | 0.994204 |
| XLOC_013457 | ANKMY1        | chr2:241418838-241497405  | 1.49789   | 1.48754   | -0.0100039  | 0.994953 |
| XLOC_010057 | CSNK1D        | chr17:80200536-80231594   | 41.4218   | 41.137    | -0.00995481 | 0.994068 |
| XLOC_003581 | STIP1         | chr11:63953586-63972020   | 136.912   | 135.971   | -0.0099546  | 0.994068 |
| XLOC_022478 | INVS          | chr9:102861501-103063426  | 4.7188    | 4.68644   | -0.00992837 | 0.994204 |
| XLOC_000857 | POU2F1        | chr1:167190065-167396582  | 0.880895  | 0.874904  | -0.00984633 | 0.994593 |
| XLOC_021122 | HIP1          | chr7:75162618-75368283    | 3.7067    | 3.68153   | -0.00983088 | 0.994116 |
| XLOC_016869 | SLC39A8       | chr4:103172197-103266655  | 10.0869   | 10.0185   | -0.00981798 | 0.994204 |
| XLOC_013794 | PRPF6         | chr20:62612430-62664453   | 31.0671   | 30.8564   | -0.00981534 | 0.994068 |
| XLOC_021411 | PAXIP1        | chr7:154720226-154794682  | 5.28371   | 5.24815   | -0.00974034 | 0.994204 |
| XLOC_009784 | KIF18B        | chr17:43002078-43025079   | 8.90432   | 8.84456   | -0.00971566 | 0.994313 |
| XLOC_005729 | VSIG10        | chr12:118501397-118541810 | 3.79656   | 3.77118   | -0.00967692 | 0.994212 |
| XLOC_002497 | TSPAN15       | chr10:71211225-71267423   | 5.58076   | 5.54349   | -0.00966735 | 0.994734 |
| XLOC_001921 | ARHGEF11      | chr1:156904631-157015162  | 2.84084   | 2.82192   | -0.00963763 | 0.994593 |
| XLOC_002630 | MARVELD1      | chr10:99473464-99477909   | 16.1903   | 16.0826   | -0.00962613 | 0.994116 |
| XLOC_022943 | C9orf129      | chr9:95947211-96108696    | 2.03656   | 2.02309   | -0.00957205 | 0.998593 |
| XLOC_023612 | RBMX2         | chrX:129535942-129547317  | 19.209    | 19.0826   | -0.00952342 | 0.994204 |
| XLOC_003791 | DYNC2H1       | chr11:102980159-103350591 | 1.0358    | 1.02901   | -0.00948157 | 0.994204 |
| XLOC_018024 | LOC100508120  | chr6:2245986-2413825      | 0.499944  | 0.496689  | -0.00942256 | 0.994734 |
| XLOC_008194 | ZFP90         | chr16:68573660-68601039   | 3.15177   | 3.13146   | -0.00932555 | 0.994313 |

|             |              |                           |          |          |             |          |
|-------------|--------------|---------------------------|----------|----------|-------------|----------|
| XLOC_023986 | BEX5         | chrX:101408678-101410986  | 11.6278  | 11.5537  | -0.00922199 | 0.994734 |
| XLOC_021735 | WDYHV1       | chr8:124428964-124454260  | 12.2251  | 12.1476  | -0.00916665 | 0.994582 |
| XLOC_014559 | CBY1         | chr22:39052657-39069855   | 31.3736  | 31.1756  | -0.00913547 | 0.994159 |
| XLOC_001084 | SNAP47       | chr1:227916239-227968932  | 17.8696  | 17.7581  | -0.00902789 | 0.995808 |
| XLOC_014664 | ATP6V1E1     | chr22:18074902-18111588   | 53.0618  | 52.7313  | -0.00901226 | 0.994204 |
| XLOC_002479 | REEP3        | chr10:65281122-65384883   | 3.57911  | 3.55692  | -0.00897307 | 0.994507 |
| XLOC_005107 | ADAM1A       | chr12:112336866-112339706 | 0.590743 | 0.5872   | -0.00867956 | 0.997773 |
| XLOC_003630 | CCDC85B      | chr11:65657874-65659106   | 281.411  | 279.737  | -0.00860866 | 0.994204 |
| XLOC_001555 | LRP8         | chr1:53692563-53793821    | 2.5903   | 2.57532  | -0.00836679 | 0.997479 |
| XLOC_022960 | AAED1        | chr9:99403532-99417599    | 28.6388  | 28.4739  | -0.00832732 | 0.994582 |
| XLOC_024034 | NKRF         | chrX:118722299-118739846  | 4.84609  | 4.81859  | -0.00821086 | 0.994734 |
| XLOC_010851 | SUPT5H       | chr19:39936185-39967308   | 33.2562  | 33.0712  | -0.00804898 | 0.994507 |
| XLOC_020498 | SUMF2        | chr7:56131916-56160689    | 69.6851  | 69.3037  | -0.00791742 | 0.995202 |
| XLOC_015978 | COPB2        | chr3:139076432-139108522  | 22.8296  | 22.7048  | -0.00791384 | 0.994593 |
| XLOC_001393 | DNAJC8       | chr1:28526789-28559542    | 84.5458  | 84.0844  | -0.00789515 | 0.994593 |
| XLOC_012472 | ARL6IP6      | chr2:153574406-153617767  | 4.84262  | 4.81621  | -0.00788839 | 0.994734 |
| XLOC_021813 | RPL23AP53    | chr8:158344-197339        | 1.64984  | 1.64088  | -0.00785579 | 0.995546 |
| XLOC_009180 | STXBP4       | chr17:53046125-53241449   | 0.246511 | 0.245184 | -0.00779141 | 1        |
| XLOC_001993 | FAM78B       | chr1:166039255-166135958  | 3.28783  | 3.27037  | -0.00768215 | 0.996035 |
| XLOC_011335 | PLIN3        | chr19:4838345-4867780     | 70.0831  | 69.7125  | -0.00764792 | 0.994593 |
| XLOC_011032 | PRR12        | chr19:50094911-50129696   | 4.9949   | 4.96872  | -0.00758114 | 0.994734 |
| XLOC_022618 | NUP214       | chr9:134000980-134109091  | 7.79034  | 7.74968  | -0.00754823 | 0.994734 |
| XLOC_015375 | RNF7         | chr3:141457050-141465645  | 54.0524  | 53.7721  | -0.00750088 | 0.994734 |
| XLOC_000126 | SPEN         | chr1:16160709-16266950    | 3.09469  | 3.07898  | -0.0073389  | 0.99481  |
| XLOC_013328 | METTTL21A    | chr2:208473838-208489973  | 8.38345  | 8.34092  | -0.00733783 | 0.994734 |
| XLOC_014330 | HMGNI        | chr21:40714240-40721047   | 207.99   | 206.947  | -0.00725618 | 0.994734 |
| XLOC_004951 | LOC100130776 | chr12:58118075-58135944   | 69.3867  | 69.04    | -0.00722586 | 0.994734 |
| XLOC_012110 | MRPL33       | chr2:27994583-28002608    | 119.616  | 119.02   | -0.00721518 | 0.994953 |
| XLOC_021806 | LRR14        | chr8:145743348-145754458  | 9.43211  | 9.38625  | -0.00703055 | 0.997552 |
| XLOC_012875 | ATL2         | chr2:38522028-38604432    | 11.0671  | 11.0134  | -0.00701536 | 0.994734 |
| XLOC_015789 | PDHB         | chr3:58413356-58419579    | 28.5543  | 28.4159  | -0.00700956 | 0.994734 |
| XLOC_021298 | ZNF800       | chr7:127010353-127032767  | 2.8569   | 2.84308  | -0.00699747 | 0.996035 |
| XLOC_007446 | LOC646214    | chr15:21932513-21940739   | 0.212382 | 0.211361 | -0.00695126 | 1        |
| XLOC_014579 | SGSM3        | chr22:40766594-41032690   | 15.4831  | 15.4087  | -0.00694673 | 0.995202 |
| XLOC_015900 | IQCB1        | chr3:121488609-121553926  | 13.6966  | 13.6312  | -0.00690962 | 0.994734 |
| XLOC_007204 | EID1         | chr15:49115933-49255641   | 25.4071  | 25.2858  | -0.00690223 | 0.994734 |
| XLOC_002760 | MGMT         | chr10:131265453-131565783 | 76.5394  | 76.1762  | -0.00686191 | 0.994734 |
| XLOC_021029 | COA1         | chr7:43670750-43769140    | 47.22    | 46.9975  | -0.00681399 | 0.995202 |
| XLOC_004586 | HSPA8        | chr11:122928199-122932901 | 659.692  | 656.586  | -0.00680855 | 0.994734 |
| XLOC_017864 | FCHSD1       | chr5:141016516-141030986  | 11.4832  | 11.4295  | -0.00676771 | 0.995209 |
| XLOC_014168 | DYRK1A       | chr21:38739858-38887679   | 4.88571  | 4.86287  | -0.0067603  | 0.995209 |
| XLOC_001466 | FHL3         | chr1:38462441-38471187    | 37.5261  | 37.3529  | -0.0066753  | 0.995209 |
| XLOC_010702 | UBA52        | chr19:18682613-18688270   | 393.843  | 392.044  | -0.00660481 | 0.995202 |
| XLOC_004873 | PRR13        | chr12:53835432-53840427   | 88.0318  | 87.6305  | -0.00659268 | 0.994734 |
| XLOC_009095 | DHX8         | chr17:41561333-41601680   | 6.28879  | 6.26021  | -0.00657099 | 0.995019 |
| XLOC_011807 | KDEL1        | chr19:48885826-48894810   | 277.617  | 276.364  | -0.00652811 | 0.995188 |
| XLOC_004637 | THYN1        | chr11:134118172-134123260 | 55.6236  | 55.3739  | -0.00649047 | 0.995395 |
| XLOC_003228 | TMEM80       | chr11:644224-705028       | 12.5527  | 12.4967  | -0.00645007 | 0.998382 |
| XLOC_010001 | TK1          | chr17:76170159-76183285   | 94.3237  | 93.9043  | -0.00642912 | 0.995202 |

|             |                |                           |           |            |             |          |
|-------------|----------------|---------------------------|-----------|------------|-------------|----------|
| XLOC_005373 | FAM60A         | chr12:31433519-31479159   | 31.5045   | 31.3647    | -0.00641212 | 0.994818 |
| XLOC_010589 | SMARCA4        | chr19:11071597-11172958   | 34.2405   | 34.0895    | -0.00637922 | 0.995019 |
| XLOC_009584 | FLOT2          | chr17:27206356-27224715   | 37.1189   | 36.9566    | -0.00632143 | 0.994953 |
| XLOC_007374 | ZSCAN2         | chr15:85144248-85166947   | 5.7339    | 5.7092     | -0.00622861 | 0.997552 |
| XLOC_013025 | CHMP3,RNF103,F | chr2:86730552-87005164    | 22.6983   | 22.6009    | -0.00620287 | 0.997191 |
| XLOC_006641 | EIF5           | chr14:103800338-103811361 | 22.6808   | 22.5852    | -0.00608923 | 0.995197 |
| XLOC_016158 | ZNF595,ZNF718  | chr4:53226-156490         | 0.45755   | 0.455624   | -0.00608635 | 0.997371 |
| XLOC_022243 | VPS28          | chr8:145648999-145653927  | 334.003   | 332.599    | -0.00607785 | 0.995656 |
| XLOC_021739 | RNF139         | chr8:125487007-125551329  | 17.8147   | 17.7407    | -0.00600698 | 0.997576 |
| XLOC_008184 | THAP11         | chr16:67862059-67905219   | 23.8391   | 23.7409    | -0.00595863 | 0.998572 |
| XLOC_008864 | COX10          | chr17:13932608-14111996   | 8.09777   | 8.06442    | -0.00595277 | 0.996244 |
| XLOC_001426 | SYNC           | chr1:33116748-33168361    | 26.2912   | 26.183     | -0.00594911 | 0.997371 |
| XLOC_014174 | WRB            | chr21:40752212-40769815   | 17.9455   | 17.8717    | -0.00594037 | 0.995783 |
| XLOC_010582 | QTRT1          | chr19:10812111-10824043   | 52.1214   | 51.9095    | -0.00587864 | 0.995437 |
| XLOC_023178 | KIAA1984-AS1   | chr9:139690789-139735639  | 0.709761  | 0.706899   | -0.00582919 | 0.998382 |
| XLOC_013985 | KCNS1          | chr20:43720949-43729753   | 0.0100335 | 0.00999371 | -0.00573513 | 1        |
| XLOC_010972 | GLTSCR1        | chr19:48111452-48206534   | 2.24241   | 2.23358    | -0.00568957 | 0.997371 |
| XLOC_012585 | CFLAR          | chr2:201980876-202037411  | 3.79873   | 3.78393    | -0.00563301 | 0.998382 |
| XLOC_010293 | PTPN2          | chr18:12785476-12884334   | 19.4115   | 19.3362    | -0.00561089 | 0.996244 |
| XLOC_003866 | RNF26          | chr11:119205209-119208024 | 22.3478   | 22.2624    | -0.00551871 | 0.996035 |
| XLOC_020933 | ICA1           | chr7:8152814-8302242      | 3.5137    | 3.50035    | -0.00549121 | 0.997552 |
| XLOC_017154 | PPWD1          | chr5:64859062-64883376    | 9.21096   | 9.17721    | -0.00529574 | 0.997032 |
| XLOC_000542 | AMY2B,RNPC3    | chr1:104068577-104122149  | 3.25568   | 3.24387    | -0.00524496 | 0.997552 |
| XLOC_012012 | ZBTB45         | chr19:59024896-59030921   | 12.384    | 12.3397    | -0.00516618 | 0.997552 |
| XLOC_007967 | ITPR1L2        | chr16:19125253-19132952   | 4.33207   | 4.31659    | -0.00516279 | 0.996244 |
| XLOC_000202 | CEP85          | chr1:26560692-26605299    | 5.14796   | 5.12971    | -0.00512188 | 0.996965 |
| XLOC_009901 | CCDC47         | chr17:61822609-61851088   | 20.5522   | 20.4793    | -0.00512179 | 0.996965 |
| XLOC_018830 | TEAD3          | chr6:35441373-35464861    | 11.4038   | 11.3635    | -0.00510267 | 0.997314 |
| XLOC_014684 | TRMT2A         | chr22:20067754-20104818   | 15.5193   | 15.4647    | -0.00508611 | 0.997552 |
| XLOC_018609 | EXOC2          | chr6:485137-693141        | 3.53811   | 3.52567    | -0.00507994 | 0.997191 |
| XLOC_000194 | SEPN1          | chr1:26126666-26144713    | 72.2706   | 72.0166    | -0.00507944 | 0.996765 |
| XLOC_007715 | TBC1D2B        | chr15:78287326-78369994   | 3.2678    | 3.25633    | -0.00507258 | 0.997371 |
| XLOC_017124 | PARP8          | chr5:49961732-50142356    | 2.30343   | 2.29535    | -0.00506819 | 0.997314 |
| XLOC_001042 | TATDN3         | chr1:212965169-212990167  | 4.77445   | 4.75779    | -0.00504474 | 0.997552 |
| XLOC_022779 | DDX58          | chr9:32455299-32526322    | 0.506816  | 0.505069   | -0.00498039 | 0.998382 |
| XLOC_017999 | C5orf45        | chr5:179224597-179285840  | 45.7958   | 45.6389    | -0.00495117 | 0.999234 |
| XLOC_000526 | SNX7           | chr1:99127235-99226056    | 11.1992   | 11.1609    | -0.00493996 | 0.997479 |
| XLOC_013316 | ICA1L          | chr2:203637872-203736371  | 0.406124  | 0.404765   | -0.004835   | 0.998382 |
| XLOC_016040 | B3GALNT1       | chr3:160801670-160823160  | 6.08099   | 6.06096    | -0.00475893 | 0.997191 |
| XLOC_022698 | EHMT1          | chr9:140513443-140730578  | 10.8676   | 10.832     | -0.00473708 | 0.997547 |
| XLOC_016619 | ZNF721         | chr4:419223-533320        | 3.74151   | 3.72932    | -0.00470833 | 0.998382 |
| XLOC_015639 | CSRNP1         | chr3:39183341-39195102    | 8.37025   | 8.34346    | -0.00462578 | 0.997552 |
| XLOC_000757 | MTX1           | chr1:155178489-155197325  | 47.1298   | 46.9821    | -0.00452813 | 0.997479 |
| XLOC_001728 | TRIM33         | chr1:114935398-115053781  | 2.82134   | 2.8126     | -0.00447703 | 0.997659 |
| XLOC_020352 | RBAK,RBAK-LOC  | chr7:5085451-5112854      | 32.5164   | 32.4156    | -0.00447607 | 0.998609 |
| XLOC_021727 | NOV            | chr8:120428551-120436678  | 4.10714   | 4.09457    | -0.00442282 | 0.997773 |
| XLOC_013138 | POLR2D         | chr2:128603839-128615729  | 12.0551   | 12.019     | -0.00432215 | 0.997552 |
| XLOC_000730 | CHTOP          | chr1:153591275-153618782  | 57.4951   | 57.3232    | -0.00431952 | 0.99855  |
| XLOC_006109 | ZC3H13         | chr13:46536313-46626894   | 0.982529  | 0.979608   | -0.00429521 | 0.997576 |

|             |             |                           |          |          |             |          |
|-------------|-------------|---------------------------|----------|----------|-------------|----------|
| XLOC_002401 | ZEB1        | chr10:31608100-31818742   | 3.97778  | 3.96599  | -0.00428185 | 0.997371 |
| XLOC_012049 | HPCAL1      | chr2:10443029-10567743    | 47.7762  | 47.6364  | -0.00422771 | 0.997314 |
| XLOC_018655 | NUP153      | chr6:17615268-17706818    | 6.13022  | 6.11254  | -0.00416704 | 0.997552 |
| XLOC_021981 | RNF170      | chr8:42704779-42751866    | 5.43671  | 5.42111  | -0.00414543 | 0.997552 |
| XLOC_009418 | CXCL16      | chr17:4634722-4643223     | 42.5971  | 42.4749  | -0.00414479 | 0.997773 |
| XLOC_005885 | LRCH1       | chr13:47127295-47327175   | 2.58624  | 2.579    | -0.00404059 | 0.997773 |
| XLOC_014226 | YBEY        | chr21:47706266-47717665   | 20.7552  | 20.6992  | -0.00390145 | 0.997667 |
| XLOC_003560 | ROM1        | chr11:62369690-62382592   | 2.18941  | 2.18354  | -0.00387015 | 0.999234 |
| XLOC_022046 | UBE2W       | chr8:74692331-74791145    | 4.7367   | 4.72408  | -0.00384982 | 0.997897 |
| XLOC_022653 | PPP1R26     | chr9:138371647-138380739  | 16.5594  | 16.5155  | -0.00382592 | 0.997552 |
| XLOC_003631 | DRAP1       | chr11:65686727-65689048   | 467.934  | 466.702  | -0.00380556 | 0.997552 |
| XLOC_011210 | ZNF71       | chr19:57106663-57135544   | 4.31259  | 4.30133  | -0.00377389 | 0.998382 |
| XLOC_014721 | GSTT2       | chr22:24299600-24303393   | 1.0094   | 1.00678  | -0.00375947 | 0.994734 |
| XLOC_010928 | PVRL2       | chr19:45349392-45392485   | 41.2364  | 41.1299  | -0.00373117 | 0.997584 |
| XLOC_000888 | PRDX6       | chr1:173446485-173457946  | 286.714  | 285.974  | -0.00372395 | 0.997913 |
| XLOC_015026 | WDR48       | chr3:39093506-39137881    | 5.48116  | 5.46715  | -0.00369211 | 0.997773 |
| XLOC_009224 | DCAF7       | chr17:61627795-61671642   | 27.5814  | 27.5115  | -0.00365951 | 0.998382 |
| XLOC_006848 | PPP2R5E     | chr14:63841354-64010079   | 4.18723  | 4.17696  | -0.00353998 | 0.998124 |
| XLOC_011425 | ILF3-AS1    | chr19:10762537-10764548   | 5.88791  | 5.87381  | -0.00345996 | 0.998382 |
| XLOC_018389 | TTK         | chr6:80714321-80752244    | 5.08828  | 5.0762   | -0.00343011 | 0.998382 |
| XLOC_014018 | ZNFX1       | chr20:47862438-47905795   | 2.38031  | 2.3747   | -0.00340915 | 0.999234 |
| XLOC_017377 | PCDHB16     | chr5:140560979-140565796  | 1.0102   | 1.00785  | -0.00337053 | 0.999201 |
| XLOC_005771 | SBNO1       | chr12:123773655-123834988 | 3.25906  | 3.25146  | -0.00336865 | 0.997576 |
| XLOC_021622 | MCMDC2      | chr8:67782983-67837777    | 0.195862 | 0.195406 | -0.00336808 | 1        |
| XLOC_000233 | TRNAU1AP    | chr1:28879528-28908366    | 13.507   | 13.4757  | -0.00334018 | 0.998593 |
| XLOC_015107 | APEH        | chr3:49711434-49720934    | 98.9205  | 98.6999  | -0.00322052 | 0.997781 |
| XLOC_014842 | SLC25A17    | chr22:41165638-41215392   | 12.5933  | 12.5661  | -0.00311672 | 0.998382 |
| XLOC_023023 | HDHD3       | chr9:116135697-116138341  | 29.4267  | 29.3643  | -0.00306393 | 0.998272 |
| XLOC_013283 | STAT1       | chr2:191833761-191878976  | 6.49344  | 6.48038  | -0.00290526 | 0.998382 |
| XLOC_004671 | LTBR        | chr12:6456008-6500737     | 37.151   | 37.0768  | -0.00288469 | 0.998382 |
| XLOC_012397 | ACTR3       | chr2:114647536-114716167  | 39.7863  | 39.7075  | -0.0028596  | 0.998382 |
| XLOC_021063 | COBL        | chr7:51083908-51384515    | 3.98764  | 3.97984  | -0.00282432 | 0.998382 |
| XLOC_010252 | FLJ44313    | chr18:74207476-74210045   | 0.527976 | 0.526946 | -0.0028178  | 0.996446 |
| XLOC_010430 | C19orf21    | chr19:751145-764318       | 0.391106 | 0.390347 | -0.00280135 | 0.994734 |
| XLOC_015633 | ACAA1       | chr3:38080695-38178733    | 36.9108  | 36.8422  | -0.00268461 | 0.998382 |
| XLOC_002076 | TRMT1L      | chr1:185087217-185260913  | 3.47921  | 3.47279  | -0.0026622  | 0.998734 |
| XLOC_010516 | NRTN        | chr19:5823817-5828335     | 8.92038  | 8.90397  | -0.00265573 | 0.998382 |
| XLOC_016157 | ANKRD18DP   | chr3:197784403-197807542  | 0.126656 | 0.12643  | -0.00257928 | 1        |
| XLOC_007694 | RPP25       | chr15:75247442-75249775   | 61.2847  | 61.1796  | -0.00247511 | 0.998382 |
| XLOC_009614 | RAD51D,RFFL | chr17:33336130-33448541   | 12.7384  | 12.7171  | -0.002418   | 0.999032 |
| XLOC_006494 | RIN3        | chr14:92980124-93155334   | 10.8792  | 10.8611  | -0.00241327 | 0.998593 |
| XLOC_006949 | DDX24       | chr14:94517267-94547558   | 35.9108  | 35.8516  | -0.00237958 | 0.998593 |
| XLOC_015608 | NKIRAS1     | chr3:23933571-23965187    | 4.24821  | 4.24124  | -0.00237198 | 0.999274 |
| XLOC_016156 | IQCG        | chr3:197615945-197686886  | 10.4294  | 10.4125  | -0.00234129 | 0.998593 |
| XLOC_012191 | VRK2        | chr2:58273776-58468515    | 3.07684  | 3.07207  | -0.00223879 | 0.999234 |
| XLOC_018117 | ABT1        | chr6:26597170-26600277    | 24.0764  | 24.0393  | -0.00222561 | 0.998593 |
| XLOC_017019 | RWDD4       | chr4:184560788-184580331  | 9.68018  | 9.66533  | -0.00221617 | 0.998617 |
| XLOC_008270 | COX4I1      | chr16:85833172-85840607   | 605.479  | 604.557  | -0.0021976  | 0.998842 |
| XLOC_017572 | FASTKD3     | chr5:7859271-7869150      | 9.4055   | 9.39139  | -0.00216546 | 0.998726 |

|             |              |                           |           |           |              |          |
|-------------|--------------|---------------------------|-----------|-----------|--------------|----------|
| XLOC_000422 | NFIA         | chr1:61542945-61928460    | 1.21327   | 1.21152   | -0.00208005  | 0.999201 |
| XLOC_015389 | GYG1         | chr3:148709194-148745456  | 33.1816   | 33.1342   | -0.00206317  | 0.999032 |
| XLOC_010627 | ZSWIM4       | chr19:13906273-13943044   | 5.9786    | 5.97074   | -0.00189816  | 0.999032 |
| XLOC_012562 | INPP1        | chr2:191208195-191236391  | 10.4775   | 10.4638   | -0.00189446  | 0.999234 |
| XLOC_018447 | RPF2         | chr6:111303290-111346794  | 50.3449   | 50.2798   | -0.00186748  | 0.999187 |
| XLOC_016054 | LRRC34       | chr3:169511215-169530574  | 1.69034   | 1.68818   | -0.00184263  | 0.999234 |
| XLOC_020981 | HOXA10,HOXA9 | chr7:27202056-27219880    | 29.2482   | 29.2126   | -0.00175591  | 0.999201 |
| XLOC_000781 | RRNAD1       | chr1:156698262-156706752  | 14.4799   | 14.4623   | -0.00175467  | 0.999201 |
| XLOC_004247 | DDB1         | chr11:61066918-61136975   | 65.2299   | 65.1531   | -0.00169997  | 0.999215 |
| XLOC_014373 | PTTG1IP      | chr21:46269499-46293818   | 81.0004   | 80.907    | -0.00166571  | 0.99913  |
| XLOC_017658 | DHX29        | chr5:54552072-54603521    | 3.48225   | 3.47853   | -0.00153948  | 0.999215 |
| XLOC_006834 | TIMM9        | chr14:58862643-59015549   | 44.1756   | 44.1288   | -0.00152834  | 0.999234 |
| XLOC_003409 | API5         | chr11:43333504-43366080   | 26.0157   | 25.9889   | -0.00148371  | 0.999234 |
| XLOC_023157 | UBAC1        | chr9:138824814-138853226  | 38.7852   | 38.7454   | -0.00148154  | 0.999215 |
| XLOC_003223 | PTDSS2       | chr11:450279-491387       | 48.1679   | 48.1186   | -0.00147752  | 0.999215 |
| XLOC_004771 | CMAS         | chr12:22199109-22218606   | 17.7672   | 17.7497   | -0.00142873  | 0.999234 |
| XLOC_005118 | TPCN1        | chr12:113659259-113736389 | 5.43875   | 5.43453   | -0.00112234  | 0.999234 |
| XLOC_007404 | CRTC3        | chr15:91073117-91188577   | 6.0736    | 6.06905   | -0.00108112  | 0.999234 |
| XLOC_013623 | PROCR        | chr20:33759773-33765165   | 165.867   | 165.746   | -0.00105349  | 0.999234 |
| XLOC_009663 | MED1         | chr17:37560537-37607527   | 4.67787   | 4.67456   | -0.00102126  | 0.999234 |
| XLOC_017014 | DCTD         | chr4:183811243-183838630  | 63.0814   | 63.0394   | -0.000961205 | 0.999234 |
| XLOC_007225 | TCF12        | chr15:57210832-57580714   | 8.1413    | 8.13601   | -0.000936232 | 0.999234 |
| XLOC_022591 | SPTAN1       | chr9:131314836-131419129  | 32.1767   | 32.1564   | -0.000908377 | 0.999234 |
| XLOC_002867 | SVIL         | chr10:29746276-30024730   | 1.49115   | 1.49028   | -0.000845234 | 0.999234 |
| XLOC_009771 | HDAC5        | chr17:42154120-42201014   | 15.1495   | 15.1406   | -0.000844314 | 0.999234 |
| XLOC_011805 | CCDC114      | chr19:48799708-48823332   | 0.0674232 | 0.0673838 | -0.000844105 | 1        |
| XLOC_008630 | RANBP10      | chr16:67757004-67840555   | 5.09231   | 5.08939   | -0.000827524 | 0.999234 |
| XLOC_004415 | GDPD5        | chr11:75145684-75236599   | 7.73189   | 7.72765   | -0.000791293 | 0.999234 |
| XLOC_003380 | ARL14EP      | chr11:30344648-30359165   | 5.63318   | 5.63021   | -0.000761411 | 0.999234 |
| XLOC_016868 | PPP3CA       | chr4:101944586-102268628  | 2.09396   | 2.09303   | -0.000640969 | 0.999274 |
| XLOC_008304 | TCF25        | chr16:89939993-89977792   | 94.4783   | 94.4421   | -0.000553315 | 0.999234 |
| XLOC_012841 | GTF3C2       | chr2:27548715-27579901    | 11.6538   | 11.6494   | -0.000537249 | 0.999234 |
| XLOC_006345 | ARF6         | chr14:50359735-50363772   | 19.127    | 19.1222   | -0.000368503 | 0.999234 |
| XLOC_000164 | CDC42        | chr1:22379119-22419436    | 77.4667   | 77.4477   | -0.000354557 | 0.999404 |
| XLOC_005252 | SPSB2        | chr12:6976583-6982521     | 9.10359   | 9.10144   | -0.000340906 | 0.999818 |
| XLOC_003707 | MRPL48       | chr11:73498916-73575656   | 23.0958   | 23.0905   | -0.000329603 | 0.999234 |
| XLOC_017349 | PAIP2        | chr5:138677518-138719039  | 47.8981   | 47.8907   | -0.000224812 | 0.99971  |
| XLOC_000196 | EXTL1        | chr1:26348270-26362954    | 0.038153  | 0.0381479 | -0.000192781 | 1        |
| XLOC_006993 | AKT1         | chr14:105235686-105262080 | 67.4175   | 67.4093   | -0.000176511 | 0.999404 |
| XLOC_015447 | FNDC3B       | chr3:171757417-172118492  | 1.69845   | 1.69826   | -0.000163374 | 0.99971  |
| XLOC_007291 | NEO1         | chr15:73344824-73597547   | 5.59947   | 5.59893   | -0.000140579 | 0.99971  |
| XLOC_017898 | RBM22        | chr5:150070351-150080669  | 21.3924   | 21.3908   | -0.00010364  | 0.999404 |
| XLOC_004684 | USP5         | chr12:6961284-6975795     | 30.4454   | 30.4436   | -8.62E-05    | 0.999826 |
| XLOC_015611 | MIR4792      | chr3:24562852-24562926    | 0         | 0         | 0            | 1        |
| XLOC_018983 | SNORD50A     | chr6:86386724-86388451    | 0         | 0         | 0            | 1        |
| XLOC_020497 | SNORA15      | chr7:56119377-56131682    | 0         | 0         | 0            | 1        |
| XLOC_006699 | SNORD9       | chr14:21853352-21905457   | 0         | 0         | 0            | 1        |
| XLOC_006696 | HNRNPC       | chr14:21677295-21737638   | 163.913   | 153.16    | 0            | 1        |
| XLOC_000002 | OR4F5        | chr1:69090-70008          | 0         | 0         | 0            | 1        |



|             |               |                        |   |   |   |   |
|-------------|---------------|------------------------|---|---|---|---|
| XLOC_000004 | OR4F3         | chr1:367658-368597     | 0 | 0 | 0 | 1 |
| XLOC_000011 | LOC254099     | chr1:1072396-1079434   | 0 | 0 | 0 | 1 |
| XLOC_000012 | MIR200B       | chr1:1102483-1102578   | 0 | 0 | 0 | 1 |
| XLOC_000013 | MIR200A       | chr1:1103242-1103332   | 0 | 0 | 0 | 1 |
| XLOC_000014 | MIR429        | chr1:1104384-1104467   | 0 | 0 | 0 | 1 |
| XLOC_000015 | TLL10         | chr1:1109285-1133313   | 0 | 0 | 0 | 1 |
| XLOC_000022 | TMEM88B       | chr1:1361507-1363167   | 0 | 0 | 0 | 1 |
| XLOC_000029 | MMP23A        | chr1:1571099-1655791   | 0 | 0 | 0 | 1 |
| XLOC_000031 | GABRD         | chr1:1950767-1962192   | 0 | 0 | 0 | 1 |
| XLOC_000038 | ACTRT2        | chr1:2938045-2939467   | 0 | 0 | 0 | 1 |
| XLOC_000040 | MIR4251       | chr1:2985741-3355185   | 0 | 0 | 0 | 1 |
| XLOC_000044 | CCDC27        | chr1:3668964-3688209   | 0 | 0 | 0 | 1 |
| XLOC_000048 | LOC728716     | chr1:4000671-4012643   | 0 | 0 | 0 | 1 |
| XLOC_000049 | LOC284661     | chr1:4472110-4484744   | 0 | 0 | 0 | 1 |
| XLOC_000050 | AJAP1         | chr1:4715104-4843851   | 0 | 0 | 0 | 1 |
| XLOC_000051 | MIR4417       | chr1:5624130-5624203   | 0 | 0 | 0 | 1 |
| XLOC_000054 | HES3          | chr1:6304251-6305638   | 0 | 0 | 0 | 1 |
| XLOC_000073 | RBP7          | chr1:10057254-10076078 | 0 | 0 | 0 | 1 |
| XLOC_000080 | MTOR-AS1      | chr1:11166587-11322608 | 0 | 0 | 0 | 1 |
| XLOC_000081 | ANGPTL7       | chr1:11166587-11322608 | 0 | 0 | 0 | 1 |
| XLOC_000083 | PTCHD2        | chr1:11539294-11597640 | 0 | 0 | 0 | 1 |
| XLOC_000086 | DRAXIN        | chr1:11751780-11780336 | 0 | 0 | 0 | 1 |
| XLOC_000095 | SNORA59A      | chr1:12290112-12572098 | 0 | 0 | 0 | 1 |
| XLOC_000096 | AADACL4       | chr1:12704565-12727097 | 0 | 0 | 0 | 1 |
| XLOC_000097 | AADACL3       | chr1:12776117-12788726 | 0 | 0 | 0 | 1 |
| XLOC_000098 | C1orf158      | chr1:12806162-12821102 | 0 | 0 | 0 | 1 |
| XLOC_000099 | PRAMEF12      | chr1:12834983-12838048 | 0 | 0 | 0 | 1 |
| XLOC_000100 | PRAMEF1       | chr1:12851545-12856777 | 0 | 0 | 0 | 1 |
| XLOC_000101 | PRAMEF2       | chr1:12916940-12921764 | 0 | 0 | 0 | 1 |
| XLOC_000102 | PRAMEF7,PRAM  | chr1:12976449-12980568 | 0 | 0 | 0 | 1 |
| XLOC_000103 | PRAMEF22      | chr1:13035542-13038381 | 0 | 0 | 0 | 1 |
| XLOC_000104 | PRAMEF5       | chr1:13359818-13369057 | 0 | 0 | 0 | 1 |
| XLOC_000105 | PRAMEF9       | chr1:13421175-13428191 | 0 | 0 | 0 | 1 |
| XLOC_000106 | PRAMEF16      | chr1:13495253-13498259 | 0 | 0 | 0 | 1 |
| XLOC_000107 | PRAMEF20,PRAM | chr1:13516065-13526943 | 0 | 0 | 0 | 1 |
| XLOC_000108 | PRAMEF9       | chr1:13641972-13648988 | 0 | 0 | 0 | 1 |
| XLOC_000109 | PRAMEF17      | chr1:13716087-13719064 | 0 | 0 | 0 | 1 |
| XLOC_000110 | PRAMEF20,PRAM | chr1:13736906-13747803 | 0 | 0 | 0 | 1 |
| XLOC_000111 | PDPN          | chr1:13910251-13944452 | 0 | 0 | 0 | 1 |
| XLOC_000118 | CELA2A        | chr1:15783222-15798586 | 0 | 0 | 0 | 1 |
| XLOC_000119 | CELA2B        | chr1:15802595-15817895 | 0 | 0 | 0 | 1 |
| XLOC_000124 | TMEM82        | chr1:16068986-16074292 | 0 | 0 | 0 | 1 |
| XLOC_000129 | CLCNKB        | chr1:16370230-16383821 | 0 | 0 | 0 | 1 |
| XLOC_000132 | MIR3675       | chr1:16875408-16875482 | 0 | 0 | 0 | 1 |
| XLOC_000134 | MIR3675       | chr1:17007749-17007823 | 0 | 0 | 0 | 1 |
| XLOC_000138 | PADI4         | chr1:17634689-17690495 | 0 | 0 | 0 | 1 |
| XLOC_000139 | PADI6         | chr1:17698740-17728195 | 0 | 0 | 0 | 1 |
| XLOC_000142 | IGSF21        | chr1:18434239-18704977 | 0 | 0 | 0 | 1 |
| XLOC_000143 | KLHDC7A       | chr1:18807423-18812480 | 0 | 0 | 0 | 1 |

|             |             |                        |   |   |   |   |
|-------------|-------------|------------------------|---|---|---|---|
| XLOC_000144 | PAX7        | chr1:18957499-19075360 | 0 | 0 | 0 | 1 |
| XLOC_000148 | HTR6        | chr1:19991779-20006055 | 0 | 0 | 0 | 1 |
| XLOC_000150 | PLA2G5      | chr1:20396700-20418394 | 0 | 0 | 0 | 1 |
| XLOC_000151 | PLA2G2F     | chr1:20465822-20476879 | 0 | 0 | 0 | 1 |
| XLOC_000152 | UBXN10      | chr1:20512577-20519942 | 0 | 0 | 0 | 1 |
| XLOC_000153 | VWA5B1      | chr1:20617411-20681387 | 0 | 0 | 0 | 1 |
| XLOC_000154 | FAM43B      | chr1:20878931-20881513 | 0 | 0 | 0 | 1 |
| XLOC_000161 | CELA3B      | chr1:22303417-22315847 | 0 | 0 | 0 | 1 |
| XLOC_000162 | CELA3A      | chr1:22328148-22339035 | 0 | 0 | 0 | 1 |
| XLOC_000166 | EPHA8       | chr1:22890003-22930087 | 0 | 0 | 0 | 1 |
| XLOC_000167 | C1QA        | chr1:22963117-22966175 | 0 | 0 | 0 | 1 |
| XLOC_000168 | C1QC        | chr1:22970117-22974603 | 0 | 0 | 0 | 1 |
| XLOC_000169 | C1QB        | chr1:22979681-22988029 | 0 | 0 | 0 | 1 |
| XLOC_000171 | MIR4684     | chr1:23037330-23241823 | 0 | 0 | 0 | 1 |
| XLOC_000173 | MIR3115     | chr1:23345940-23410184 | 0 | 0 | 0 | 1 |
| XLOC_000180 | MIR378F     | chr1:24255559-24255637 | 0 | 0 | 0 | 1 |
| XLOC_000182 | LOC284632   | chr1:24526729-24538180 | 0 | 0 | 0 | 1 |
| XLOC_000186 | NCMAP       | chr1:24882566-24935818 | 0 | 0 | 0 | 1 |
| XLOC_000201 | CATSPER4    | chr1:26517118-26529033 | 0 | 0 | 0 | 1 |
| XLOC_000204 | CD52        | chr1:26608772-26647014 | 0 | 0 | 0 | 1 |
| XLOC_000209 | MIR1976     | chr1:26856248-26901520 | 0 | 0 | 0 | 1 |
| XLOC_000238 | OPRD1       | chr1:29138653-29190208 | 0 | 0 | 0 | 1 |
| XLOC_000244 | LOC149086   | chr1:31971838-31974167 | 0 | 0 | 0 | 1 |
| XLOC_000245 | LOC284551   | chr1:31984035-31989846 | 0 | 0 | 0 | 1 |
| XLOC_000269 | HMGB4       | chr1:33979608-34631443 | 0 | 0 | 0 | 1 |
| XLOC_000270 | LOC402779   | chr1:33979608-34631443 | 0 | 0 | 0 | 1 |
| XLOC_000271 | C1orf94     | chr1:34632623-34684731 | 0 | 0 | 0 | 1 |
| XLOC_000272 | GJB5        | chr1:35220647-35224113 | 0 | 0 | 0 | 1 |
| XLOC_000273 | GJB4        | chr1:35225341-35229325 | 0 | 0 | 0 | 1 |
| XLOC_000275 | GJA4        | chr1:35258598-35261348 | 0 | 0 | 0 | 1 |
| XLOC_000283 | TEKT2       | chr1:36549675-36553876 | 0 | 0 | 0 | 1 |
| XLOC_000288 | MIR4255     | chr1:37627163-37627235 | 0 | 0 | 0 | 1 |
| XLOC_000295 | MIR3659     | chr1:38554902-38555001 | 0 | 0 | 0 | 1 |
| XLOC_000313 | MIR30E      | chr1:41154751-41237275 | 0 | 0 | 0 | 1 |
| XLOC_000314 | MIR30C1     | chr1:41154751-41237275 | 0 | 0 | 0 | 1 |
| XLOC_000318 | GUCA2B      | chr1:42619091-42621495 | 0 | 0 | 0 | 1 |
| XLOC_000331 | TMEM125     | chr1:43735664-43739673 | 0 | 0 | 0 | 1 |
| XLOC_000345 | KLF17       | chr1:44584521-44600809 | 0 | 0 | 0 | 1 |
| XLOC_000348 | MIR5584     | chr1:44870959-45117396 | 0 | 0 | 0 | 1 |
| XLOC_000354 | SNORD38A    | chr1:45241245-45244412 | 0 | 0 | 0 | 1 |
| XLOC_000355 | SNORD38B    | chr1:45241245-45244412 | 0 | 0 | 0 | 1 |
| XLOC_000377 | EFCAB14-AS1 | chr1:47139707-47184736 | 0 | 0 | 0 | 1 |
| XLOC_000378 | CYP4B1      | chr1:47264669-47285021 | 0 | 0 | 0 | 1 |
| XLOC_000379 | CYP4X1      | chr1:47489239-47516423 | 0 | 0 | 0 | 1 |
| XLOC_000380 | CYP4Z1      | chr1:47533159-47583992 | 0 | 0 | 0 | 1 |
| XLOC_000381 | CYP4A22     | chr1:47603106-47614526 | 0 | 0 | 0 | 1 |
| XLOC_000386 | SLC5A9      | chr1:48688356-48714316 | 0 | 0 | 0 | 1 |
| XLOC_000387 | ELAVL4      | chr1:50513685-50667540 | 0 | 0 | 0 | 1 |
| XLOC_000389 | C1orf185    | chr1:51567905-51613754 | 0 | 0 | 0 | 1 |

|             |              |                          |   |   |   |   |
|-------------|--------------|--------------------------|---|---|---|---|
| XLOC_000400 | PODN         | chr1:53527723-53551174   | 0 | 0 | 0 | 1 |
| XLOC_000403 | DMRTB1       | chr1:53925071-53933158   | 0 | 0 | 0 | 1 |
| XLOC_000407 | MIR4781      | chr1:54519273-54565416   | 0 | 0 | 0 | 1 |
| XLOC_000411 | C1orf177     | chr1:55271735-55307937   | 0 | 0 | 0 | 1 |
| XLOC_000413 | BSND         | chr1:55464616-55474465   | 0 | 0 | 0 | 1 |
| XLOC_000414 | PCSK9        | chr1:55505148-55530526   | 0 | 0 | 0 | 1 |
| XLOC_000416 | MIR4422      | chr1:55691313-55691396   | 0 | 0 | 0 | 1 |
| XLOC_000418 | C8A          | chr1:57320442-57383894   | 0 | 0 | 0 | 1 |
| XLOC_000435 | UBE2U        | chr1:64669489-64710027   | 0 | 0 | 0 | 1 |
| XLOC_000437 | MIR4794      | chr1:64936475-65158741   | 0 | 0 | 0 | 1 |
| XLOC_000444 | MIR3117      | chr1:66999824-67210768   | 0 | 0 | 0 | 1 |
| XLOC_000445 | TCTEX1D1     | chr1:67218139-67244730   | 0 | 0 | 0 | 1 |
| XLOC_000452 | PIN1P1       | chr1:70225857-70589171   | 0 | 0 | 0 | 1 |
| XLOC_000460 | LHX8         | chr1:75594118-75627218   | 0 | 0 | 0 | 1 |
| XLOC_000463 | SNORD45C     | chr1:76251878-76260775   | 0 | 0 | 0 | 1 |
| XLOC_000465 | SNORD45B     | chr1:76251878-76260775   | 0 | 0 | 0 | 1 |
| XLOC_000468 | ST6GALNAC5   | chr1:77333185-77529737   | 0 | 0 | 0 | 1 |
| XLOC_000469 | AK5          | chr1:77747661-78025654   | 0 | 0 | 0 | 1 |
| XLOC_000473 | GIPC2        | chr1:78511588-78603112   | 0 | 0 | 0 | 1 |
| XLOC_000474 | MGC27382     | chr1:78695282-78835147   | 0 | 0 | 0 | 1 |
| XLOC_000475 | PTGFR        | chr1:78956727-79006386   | 0 | 0 | 0 | 1 |
| XLOC_000478 | LPHN2        | chr1:82266081-82458107   | 0 | 0 | 0 | 1 |
| XLOC_000484 | MIR4423      | chr1:85599476-85599556   | 0 | 0 | 0 | 1 |
| XLOC_000488 | CLCA1        | chr1:86934525-86965974   | 0 | 0 | 0 | 1 |
| XLOC_000489 | CLCA4        | chr1:87012758-87046432   | 0 | 0 | 0 | 1 |
| XLOC_000497 | GBP1P1       | chr1:89873237-89890493   | 0 | 0 | 0 | 1 |
| XLOC_000507 | C1orf146     | chr1:92683572-92711367   | 0 | 0 | 0 | 1 |
| XLOC_000511 | SNORA66      | chr1:93297593-93427079   | 0 | 0 | 0 | 1 |
| XLOC_000517 | MIR760       | chr1:94027342-94312706   | 0 | 0 | 0 | 1 |
| XLOC_000524 | DPYD-AS1     | chr1:97543299-98386615   | 0 | 0 | 0 | 1 |
| XLOC_000525 | LOC729987    | chr1:98676266-98738214   | 0 | 0 | 0 | 1 |
| XLOC_000527 | LOC100129620 | chr1:99355800-99614408   | 0 | 0 | 0 | 1 |
| XLOC_000528 | LPPR4        | chr1:99729847-99775138   | 0 | 0 | 0 | 1 |
| XLOC_000529 | PALMD        | chr1:100111430-100231349 | 0 | 0 | 0 | 1 |
| XLOC_000535 | MIR553       | chr1:100731713-100758325 | 0 | 0 | 0 | 1 |
| XLOC_000537 | GPR88        | chr1:101003727-101007583 | 0 | 0 | 0 | 1 |
| XLOC_000538 | VCAM1        | chr1:101185195-101204601 | 0 | 0 | 0 | 1 |
| XLOC_000540 | S1PR1        | chr1:101702304-101707076 | 0 | 0 | 0 | 1 |
| XLOC_000541 | DNAJA1P5     | chr1:102268126-102462790 | 0 | 0 | 0 | 1 |
| XLOC_000544 | AMY2A        | chr1:104159998-104168400 | 0 | 0 | 0 | 1 |
| XLOC_000545 | AMY1A        | chr1:104198140-104207173 | 0 | 0 | 0 | 1 |
| XLOC_000546 | AMY1A        | chr1:104292278-104301311 | 0 | 0 | 0 | 1 |
| XLOC_000549 | NTNG1        | chr1:107682628-108024475 | 0 | 0 | 0 | 1 |
| XLOC_000550 | VAV3-AS1     | chr1:108113781-108537229 | 0 | 0 | 0 | 1 |
| XLOC_000551 | NBPF6        | chr1:108992903-109013260 | 0 | 0 | 0 | 1 |
| XLOC_000556 | SRG7         | chr1:109358519-109401146 | 0 | 0 | 0 | 1 |
| XLOC_000568 | MIR197       | chr1:110141514-110141589 | 0 | 0 | 0 | 1 |
| XLOC_000578 | SLC6A17      | chr1:110693131-110744823 | 0 | 0 | 0 | 1 |
| XLOC_000582 | CYMP         | chr1:111023387-111033891 | 0 | 0 | 0 | 1 |

|             |              |                          |   |   |   |   |
|-------------|--------------|--------------------------|---|---|---|---|
| XLOC_000583 | CD53         | chr1:111413820-111442558 | 0 | 0 | 0 | 1 |
| XLOC_000585 | CHI3L2       | chr1:111770280-111786062 | 0 | 0 | 0 | 1 |
| XLOC_000587 | CHIA         | chr1:111833473-111863188 | 0 | 0 | 0 | 1 |
| XLOC_000588 | PIFO         | chr1:111889194-111895639 | 0 | 0 | 0 | 1 |
| XLOC_000607 | SYCP1        | chr1:115397454-115537990 | 0 | 0 | 0 | 1 |
| XLOC_000608 | TSHB         | chr1:115572414-115576941 | 0 | 0 | 0 | 1 |
| XLOC_000613 | MIR320B1     | chr1:117214370-117214449 | 0 | 0 | 0 | 1 |
| XLOC_000614 | CD2          | chr1:117297085-117311851 | 0 | 0 | 0 | 1 |
| XLOC_000618 | MIR942       | chr1:117602948-117645491 | 0 | 0 | 0 | 1 |
| XLOC_000623 | HSD3B2       | chr1:119957553-119965662 | 0 | 0 | 0 | 1 |
| XLOC_000624 | HSD3B1       | chr1:120049825-120057681 | 0 | 0 | 0 | 1 |
| XLOC_000628 | HIST2H2BA    | chr1:120906033-120914842 | 0 | 0 | 0 | 1 |
| XLOC_000630 | EMBP1        | chr1:121260909-121313686 | 0 | 0 | 0 | 1 |
| XLOC_000647 | GPR89C       | chr1:145883867-145924049 | 0 | 0 | 0 | 1 |
| XLOC_000652 | GJA8         | chr1:147374945-147381395 | 0 | 0 | 0 | 1 |
| XLOC_000655 | PPIAL4E      | chr1:148644010-148644795 | 0 | 0 | 0 | 1 |
| XLOC_000657 | PPIAL4D      | chr1:148806014-148806799 | 0 | 0 | 0 | 1 |
| XLOC_000660 | FCGR1C       | chr1:149369293-149378297 | 0 | 0 | 0 | 1 |
| XLOC_000661 | PPIAL4B      | chr1:149553002-149553787 | 0 | 0 | 0 | 1 |
| XLOC_000663 | FCGR1A       | chr1:149754244-149783928 | 0 | 0 | 0 | 1 |
| XLOC_000664 | HIST2H4B     | chr1:149804220-149804616 | 0 | 0 | 0 | 1 |
| XLOC_000665 | HIST2H2AA3   | chr1:149822627-149823161 | 0 | 0 | 0 | 1 |
| XLOC_000666 | HIST2H3C     | chr1:149824180-149824687 | 0 | 0 | 0 | 1 |
| XLOC_000681 | MIR4257      | chr1:150521897-150533412 | 0 | 0 | 0 | 1 |
| XLOC_000696 | MIR554       | chr1:151512780-151556059 | 0 | 0 | 0 | 1 |
| XLOC_000698 | RIAD1        | chr1:151694012-151702082 | 0 | 0 | 0 | 1 |
| XLOC_000700 | LOC100132111 | chr1:151810338-151816641 | 0 | 0 | 0 | 1 |
| XLOC_000701 | LCE5A        | chr1:152483319-152484653 | 0 | 0 | 0 | 1 |
| XLOC_000702 | CRCT1        | chr1:152486977-152488481 | 0 | 0 | 0 | 1 |
| XLOC_000703 | LCE3C        | chr1:152573137-152573562 | 0 | 0 | 0 | 1 |
| XLOC_000704 | LCE3B        | chr1:152586286-152586574 | 0 | 0 | 0 | 1 |
| XLOC_000705 | LCE2D        | chr1:152635886-152637135 | 0 | 0 | 0 | 1 |
| XLOC_000706 | LCE2C        | chr1:152647790-152649049 | 0 | 0 | 0 | 1 |
| XLOC_000707 | LCE2B        | chr1:152658598-152659876 | 0 | 0 | 0 | 1 |
| XLOC_000708 | LCE2A        | chr1:152670839-152671918 | 0 | 0 | 0 | 1 |
| XLOC_000709 | LCE4A        | chr1:152681522-152681910 | 0 | 0 | 0 | 1 |
| XLOC_000710 | C1orf68      | chr1:152691997-152692905 | 0 | 0 | 0 | 1 |
| XLOC_000711 | KPRP         | chr1:152730505-152734529 | 0 | 0 | 0 | 1 |
| XLOC_000714 | LCE1D        | chr1:152769226-152770657 | 0 | 0 | 0 | 1 |
| XLOC_000716 | LCE1A        | chr1:152799948-152800573 | 0 | 0 | 0 | 1 |
| XLOC_000717 | LCE6A        | chr1:152815329-152816459 | 0 | 0 | 0 | 1 |
| XLOC_000718 | SMCP         | chr1:152850797-152857523 | 0 | 0 | 0 | 1 |
| XLOC_000719 | IVL          | chr1:152881038-152884362 | 0 | 0 | 0 | 1 |
| XLOC_000720 | SPRR4        | chr1:152943127-152945069 | 0 | 0 | 0 | 1 |
| XLOC_000721 | SPRR1A       | chr1:152956563-152958290 | 0 | 0 | 0 | 1 |
| XLOC_000722 | SPRR3        | chr1:152974222-152976332 | 0 | 0 | 0 | 1 |
| XLOC_000723 | SPRR1B       | chr1:153003678-153005376 | 0 | 0 | 0 | 1 |
| XLOC_000724 | LELP1        | chr1:153175905-153177601 | 0 | 0 | 0 | 1 |
| XLOC_000725 | PRR9         | chr1:153190059-153191793 | 0 | 0 | 0 | 1 |

|             |              |                          |   |   |   |   |
|-------------|--------------|--------------------------|---|---|---|---|
| XLOC_000726 | LOR          | chr1:153232178-153234600 | 0 | 0 | 0 | 1 |
| XLOC_000727 | S100A9       | chr1:153330329-153333503 | 0 | 0 | 0 | 1 |
| XLOC_000728 | S100A7A      | chr1:153388999-153395701 | 0 | 0 | 0 | 1 |
| XLOC_000732 | NPR1         | chr1:153651163-153666468 | 0 | 0 | 0 | 1 |
| XLOC_000739 | AQP10        | chr1:154293591-154297801 | 0 | 0 | 0 | 1 |
| XLOC_000745 | MIR4258      | chr1:154947117-154951725 | 0 | 0 | 0 | 1 |
| XLOC_000747 | LENEP        | chr1:154966061-154966791 | 0 | 0 | 0 | 1 |
| XLOC_000749 | DCST1        | chr1:155006281-155042029 | 0 | 0 | 0 | 1 |
| XLOC_000756 | MIR92B       | chr1:155164967-155165063 | 0 | 0 | 0 | 1 |
| XLOC_000777 | TTC24        | chr1:156549518-156556562 | 0 | 0 | 0 | 1 |
| XLOC_000786 | CYCSP52      | chr1:157094458-157108383 | 0 | 0 | 0 | 1 |
| XLOC_000789 | CD1A         | chr1:158223926-158228058 | 0 | 0 | 0 | 1 |
| XLOC_000790 | CD1C         | chr1:158259562-158264564 | 0 | 0 | 0 | 1 |
| XLOC_000791 | CD1E         | chr1:158323485-158327343 | 0 | 0 | 0 | 1 |
| XLOC_000792 | OR10K1       | chr1:158435351-158436293 | 0 | 0 | 0 | 1 |
| XLOC_000793 | OR10R2       | chr1:158449667-158450675 | 0 | 0 | 0 | 1 |
| XLOC_000794 | OR10Z1       | chr1:158576228-158577170 | 0 | 0 | 0 | 1 |
| XLOC_000795 | OR6K6        | chr1:158724605-158725637 | 0 | 0 | 0 | 1 |
| XLOC_000796 | MNDA         | chr1:158801167-158819270 | 0 | 0 | 0 | 1 |
| XLOC_000797 | PYHIN1       | chr1:158901336-158946849 | 0 | 0 | 0 | 1 |
| XLOC_000799 | CADM3        | chr1:159141376-159172932 | 0 | 0 | 0 | 1 |
| XLOC_000800 | DARC         | chr1:159173802-159176290 | 0 | 0 | 0 | 1 |
| XLOC_000801 | FCER1A       | chr1:159259503-159278014 | 0 | 0 | 0 | 1 |
| XLOC_000802 | OR10J1       | chr1:159409511-159410600 | 0 | 0 | 0 | 1 |
| XLOC_000803 | APCS         | chr1:159557615-159558661 | 0 | 0 | 0 | 1 |
| XLOC_000805 | FCRL6        | chr1:159772172-159786047 | 0 | 0 | 0 | 1 |
| XLOC_000806 | SLAMF8       | chr1:159796478-159832447 | 0 | 0 | 0 | 1 |
| XLOC_000807 | LOC100505633 | chr1:159931013-159948876 | 0 | 0 | 0 | 1 |
| XLOC_000810 | ATP1A4       | chr1:160121351-160156767 | 0 | 0 | 0 | 1 |
| XLOC_000831 | FCGR2C       | chr1:161551128-161571010 | 0 | 0 | 0 | 1 |
| XLOC_000833 | FCGR2B       | chr1:161632904-161648444 | 0 | 0 | 0 | 1 |
| XLOC_000839 | MIR4654      | chr1:162039580-162339813 | 0 | 0 | 0 | 1 |
| XLOC_000840 | MIR556       | chr1:162039580-162339813 | 0 | 0 | 0 | 1 |
| XLOC_000849 | LRRC52       | chr1:165446078-165551341 | 0 | 0 | 0 | 1 |
| XLOC_000851 | LOC440700    | chr1:165667986-165679199 | 0 | 0 | 0 | 1 |
| XLOC_000853 | FMO9P        | chr1:166573152-166594473 | 0 | 0 | 0 | 1 |
| XLOC_000856 | DUSP27       | chr1:167064086-167098402 | 0 | 0 | 0 | 1 |
| XLOC_000864 | MIR557       | chr1:168344761-168344859 | 0 | 0 | 0 | 1 |
| XLOC_000865 | XCL1         | chr1:168545710-168551315 | 0 | 0 | 0 | 1 |
| XLOC_000866 | LINC00626    | chr1:168756178-168762126 | 0 | 0 | 0 | 1 |
| XLOC_000870 | METTL11B     | chr1:170115187-170136923 | 0 | 0 | 0 | 1 |
| XLOC_000872 | PRRX1        | chr1:170633312-170708541 | 0 | 0 | 0 | 1 |
| XLOC_000873 | MROH9        | chr1:170904611-171033906 | 0 | 0 | 0 | 1 |
| XLOC_000874 | FMO3         | chr1:171060017-171086959 | 0 | 0 | 0 | 1 |
| XLOC_000875 | MIR1295B     | chr1:171060017-171086959 | 0 | 0 | 0 | 1 |
| XLOC_000876 | FMO6P        | chr1:171106878-171130702 | 0 | 0 | 0 | 1 |
| XLOC_000877 | FMO2         | chr1:171154387-171181822 | 0 | 0 | 0 | 1 |
| XLOC_000878 | FMO1         | chr1:171217662-171255113 | 0 | 0 | 0 | 1 |
| XLOC_000884 | MIR3120      | chr1:171810620-172381857 | 0 | 0 | 0 | 1 |

|             |           |                          |   |   |   |   |
|-------------|-----------|--------------------------|---|---|---|---|
| XLOC_000885 | C1orf105  | chr1:172389827-172437969 | 0 | 0 | 0 | 1 |
| XLOC_000887 | FASLG     | chr1:172628184-172636012 | 0 | 0 | 0 | 1 |
| XLOC_000889 | LOC730159 | chr1:173577474-173639001 | 0 | 0 | 0 | 1 |
| XLOC_000897 | TNN       | chr1:175036993-175117202 | 0 | 0 | 0 | 1 |
| XLOC_000899 | FAM5B     | chr1:177140632-177251558 | 0 | 0 | 0 | 1 |
| XLOC_000901 | TEX35     | chr1:178482211-178492635 | 0 | 0 | 0 | 1 |
| XLOC_000903 | MIR4424   | chr1:178646883-178646969 | 0 | 0 | 0 | 1 |
| XLOC_000910 | FAM163A   | chr1:179712297-179785333 | 0 | 0 | 0 | 1 |
| XLOC_000919 | GM140     | chr1:181205523-181207740 | 0 | 0 | 0 | 1 |
| XLOC_000920 | CACNA1E   | chr1:181452685-181775921 | 0 | 0 | 0 | 1 |
| XLOC_000921 | LINC00272 | chr1:182376755-182383948 | 0 | 0 | 0 | 1 |
| XLOC_000922 | RGSL1     | chr1:182419255-182529732 | 0 | 0 | 0 | 1 |
| XLOC_000923 | LOC284648 | chr1:182584274-182585764 | 0 | 0 | 0 | 1 |
| XLOC_000934 | HMCN1     | chr1:185703682-186446655 | 0 | 0 | 0 | 1 |
| XLOC_000939 | LOC440704 | chr1:190594019-190770788 | 0 | 0 | 0 | 1 |
| XLOC_000940 | RGS18     | chr1:192127591-192154945 | 0 | 0 | 0 | 1 |
| XLOC_000941 | RGS21     | chr1:192286121-192336414 | 0 | 0 | 0 | 1 |
| XLOC_000942 | RGS1      | chr1:192544856-192549159 | 0 | 0 | 0 | 1 |
| XLOC_000943 | RGS13     | chr1:192605267-192629440 | 0 | 0 | 0 | 1 |
| XLOC_000947 | MIR1278   | chr1:193091087-193223942 | 0 | 0 | 0 | 1 |
| XLOC_000948 | CFH       | chr1:196621007-196716634 | 0 | 0 | 0 | 1 |
| XLOC_000949 | CFHR3     | chr1:196743929-196763203 | 0 | 0 | 0 | 1 |
| XLOC_000950 | CFHR1     | chr1:196788860-196801319 | 0 | 0 | 0 | 1 |
| XLOC_000951 | CFHR4     | chr1:196857143-196887843 | 0 | 0 | 0 | 1 |
| XLOC_000952 | CFHR2     | chr1:196912933-196928356 | 0 | 0 | 0 | 1 |
| XLOC_000956 | LHX9      | chr1:197881634-197899273 | 0 | 0 | 0 | 1 |
| XLOC_000958 | PTPRC     | chr1:198608097-198726605 | 0 | 0 | 0 | 1 |
| XLOC_000961 | GPR25     | chr1:200842082-200843306 | 0 | 0 | 0 | 1 |
| XLOC_000964 | PKP1      | chr1:201252579-201302121 | 0 | 0 | 0 | 1 |
| XLOC_000967 | MIR5191   | chr1:201617449-201796102 | 0 | 0 | 0 | 1 |
| XLOC_000968 | MIR1231   | chr1:201617449-201796102 | 0 | 0 | 0 | 1 |
| XLOC_000974 | GPR37L1   | chr1:202092028-202098634 | 0 | 0 | 0 | 1 |
| XLOC_000979 | LOC641515 | chr1:202794328-202795421 | 0 | 0 | 0 | 1 |
| XLOC_000988 | SNORA77   | chr1:203595914-203713209 | 0 | 0 | 0 | 1 |
| XLOC_000990 | LAX1      | chr1:203734283-203745480 | 0 | 0 | 0 | 1 |
| XLOC_001005 | CTSE      | chr1:206317458-206332104 | 0 | 0 | 0 | 1 |
| XLOC_001011 | IL19      | chr1:206972214-207016326 | 0 | 0 | 0 | 1 |
| XLOC_001012 | IL20      | chr1:207039153-207042568 | 0 | 0 | 0 | 1 |
| XLOC_001016 | C4BPA     | chr1:207277606-207318317 | 0 | 0 | 0 | 1 |
| XLOC_001018 | CR2       | chr1:207627644-207663240 | 0 | 0 | 0 | 1 |
| XLOC_001020 | CR1L      | chr1:207818457-207897036 | 0 | 0 | 0 | 1 |
| XLOC_001023 | MIR205HG  | chr1:209602167-209605892 | 0 | 0 | 0 | 1 |
| XLOC_001029 | SYT14     | chr1:210111518-210337633 | 0 | 0 | 0 | 1 |
| XLOC_001030 | SERTAD4   | chr1:210404803-210416440 | 0 | 0 | 0 | 1 |
| XLOC_001036 | MIR3122   | chr1:212113740-212278187 | 0 | 0 | 0 | 1 |
| XLOC_001038 | SNORA16B  | chr1:212458878-212535205 | 0 | 0 | 0 | 1 |
| XLOC_001046 | LINC00538 | chr1:214098091-214099996 | 0 | 0 | 0 | 1 |
| XLOC_001050 | KCNK2     | chr1:215178884-215410436 | 0 | 0 | 0 | 1 |
| XLOC_001053 | LINC00210 | chr1:218066241-218094146 | 0 | 0 | 0 | 1 |

|             |              |                          |   |   |   |   |
|-------------|--------------|--------------------------|---|---|---|---|
| XLOC_001057 | RNU5F-1      | chr1:220046618-220321383 | 0 | 0 | 0 | 1 |
| XLOC_001059 | MARK1        | chr1:220701567-220837799 | 0 | 0 | 0 | 1 |
| XLOC_001068 | C1orf65      | chr1:223566714-223568812 | 0 | 0 | 0 | 1 |
| XLOC_001078 | MIXL1        | chr1:226411382-226413513 | 0 | 0 | 0 | 1 |
| XLOC_001079 | C1orf95      | chr1:226736500-226796915 | 0 | 0 | 0 | 1 |
| XLOC_001085 | PRSS38       | chr1:228003417-228034171 | 0 | 0 | 0 | 1 |
| XLOC_001086 | WNT3A        | chr1:228194722-228248972 | 0 | 0 | 0 | 1 |
| XLOC_001088 | MIR3620      | chr1:228270360-228286913 | 0 | 0 | 0 | 1 |
| XLOC_001094 | MIR4666A     | chr1:228649774-228649853 | 0 | 0 | 0 | 1 |
| XLOC_001101 | CAPN9        | chr1:230883129-230937749 | 0 | 0 | 0 | 1 |
| XLOC_001107 | MAP10        | chr1:232940637-232946092 | 0 | 0 | 0 | 1 |
| XLOC_001111 | MIR4427      | chr1:233749749-233808258 | 0 | 0 | 0 | 1 |
| XLOC_001112 | SLC35F3      | chr1:234040678-234460262 | 0 | 0 | 0 | 1 |
| XLOC_001113 | MIR4671      | chr1:234040678-234460262 | 0 | 0 | 0 | 1 |
| XLOC_001122 | ACTN2        | chr1:236849769-236927558 | 0 | 0 | 0 | 1 |
| XLOC_001125 | LOC100130331 | chr1:238025474-238091619 | 0 | 0 | 0 | 1 |
| XLOC_001127 | RPS7P5       | chr1:240170823-240176560 | 0 | 0 | 0 | 1 |
| XLOC_001128 | FMN2         | chr1:240255184-240638489 | 0 | 0 | 0 | 1 |
| XLOC_001129 | MIR3123      | chr1:240938816-241520478 | 0 | 0 | 0 | 1 |
| XLOC_001131 | WDR64        | chr1:241815579-241965434 | 0 | 0 | 0 | 1 |
| XLOC_001134 | MIR4677      | chr1:243419306-244006886 | 0 | 0 | 0 | 1 |
| XLOC_001135 | LOC339529    | chr1:244080703-244210619 | 0 | 0 | 0 | 1 |
| XLOC_001137 | C1orf100     | chr1:244515936-244552388 | 0 | 0 | 0 | 1 |
| XLOC_001148 | OR2W5        | chr1:247654369-247655711 | 0 | 0 | 0 | 1 |
| XLOC_001149 | GCSAML       | chr1:247712450-247739848 | 0 | 0 | 0 | 1 |
| XLOC_001150 | OR2G2        | chr1:247751661-247752615 | 0 | 0 | 0 | 1 |
| XLOC_001151 | OR2G3        | chr1:247768887-247769817 | 0 | 0 | 0 | 1 |
| XLOC_001153 | OR2W3        | chr1:248058888-248059833 | 0 | 0 | 0 | 1 |
| XLOC_001154 | OR2T8        | chr1:248084319-248085258 | 0 | 0 | 0 | 1 |
| XLOC_001155 | OR2L13       | chr1:248100492-248264224 | 0 | 0 | 0 | 1 |
| XLOC_001156 | OR2L8        | chr1:248100492-248264224 | 0 | 0 | 0 | 1 |
| XLOC_001157 | OR2AK2       | chr1:248100492-248264224 | 0 | 0 | 0 | 1 |
| XLOC_001158 | OR2L1P       | chr1:248100492-248264224 | 0 | 0 | 0 | 1 |
| XLOC_001159 | OR2L5        | chr1:248100492-248264224 | 0 | 0 | 0 | 1 |
| XLOC_001160 | OR2L2        | chr1:248100492-248264224 | 0 | 0 | 0 | 1 |
| XLOC_001161 | OR2L3        | chr1:248100492-248264224 | 0 | 0 | 0 | 1 |
| XLOC_001162 | OR2M1P       | chr1:248285437-248286082 | 0 | 0 | 0 | 1 |
| XLOC_001163 | OR2M5        | chr1:248308449-248309388 | 0 | 0 | 0 | 1 |
| XLOC_001164 | OR2M2        | chr1:248343287-248344331 | 0 | 0 | 0 | 1 |
| XLOC_001165 | OR2M3        | chr1:248366369-248367308 | 0 | 0 | 0 | 1 |
| XLOC_001166 | OR2M4        | chr1:248402230-248403166 | 0 | 0 | 0 | 1 |
| XLOC_001167 | OR14C36      | chr1:248512076-248513015 | 0 | 0 | 0 | 1 |
| XLOC_001168 | OR2T4        | chr1:248524882-248525929 | 0 | 0 | 0 | 1 |
| XLOC_001169 | OR2T6        | chr1:248550909-248551836 | 0 | 0 | 0 | 1 |
| XLOC_001170 | OR2T1        | chr1:248569295-248570405 | 0 | 0 | 0 | 1 |
| XLOC_001171 | OR2T2        | chr1:248616098-248617073 | 0 | 0 | 0 | 1 |
| XLOC_001172 | OR2T3        | chr1:248636651-248637608 | 0 | 0 | 0 | 1 |
| XLOC_001173 | OR2T5        | chr1:248651889-248652837 | 0 | 0 | 0 | 1 |
| XLOC_001174 | OR2G6        | chr1:248684947-248685898 | 0 | 0 | 0 | 1 |

|             |               |                          |   |   |   |   |
|-------------|---------------|--------------------------|---|---|---|---|
| XLOC_001175 | MIR3124       | chr1:249120575-249120642 | 0 | 0 | 0 | 1 |
| XLOC_001179 | FAM138F       | chr1:34610-36081         | 0 | 0 | 0 | 1 |
| XLOC_001181 | OR4F3         | chr1:621095-622034       | 0 | 0 | 0 | 1 |
| XLOC_001192 | TNFRSF18      | chr1:1138887-1142089     | 0 | 0 | 0 | 1 |
| XLOC_001220 | HES5          | chr1:2460183-2461684     | 0 | 0 | 0 | 1 |
| XLOC_001227 | MIR551A       | chr1:3404505-3528059     | 0 | 0 | 0 | 1 |
| XLOC_001229 | TP73-AS1      | chr1:3569128-3663937     | 0 | 0 | 0 | 1 |
| XLOC_001233 | MIR4689       | chr1:5922731-5922801     | 0 | 0 | 0 | 1 |
| XLOC_001241 | MIR4252       | chr1:6484847-6521004     | 0 | 0 | 0 | 1 |
| XLOC_001254 | MIR34A        | chr1:9211726-9211836     | 0 | 0 | 0 | 1 |
| XLOC_001255 | C1orf200      | chr1:9711789-9884550     | 0 | 0 | 0 | 1 |
| XLOC_001273 | PRAMEF11      | chr1:12884467-12891264   | 0 | 0 | 0 | 1 |
| XLOC_001274 | HNRNPCL1,LOC6 | chr1:12907235-12908578   | 0 | 0 | 0 | 1 |
| XLOC_001275 | PRAMEF4       | chr1:12939032-12946025   | 0 | 0 | 0 | 1 |
| XLOC_001276 | PRAMEF10      | chr1:12952726-12958094   | 0 | 0 | 0 | 1 |
| XLOC_001277 | PRAMEF6       | chr1:12998301-13007406   | 0 | 0 | 0 | 1 |
| XLOC_001278 | PRAMEF5       | chr1:13108513-13117751   | 0 | 0 | 0 | 1 |
| XLOC_001279 | LOC440563     | chr1:13182959-13184326   | 0 | 0 | 0 | 1 |
| XLOC_001280 | PRAMEF3       | chr1:13328195-13331692   | 0 | 0 | 0 | 1 |
| XLOC_001281 | PRAMEF8       | chr1:13386646-13390765   | 0 | 0 | 0 | 1 |
| XLOC_001282 | PRAMEF13,PRAM | chr1:13447413-13452656   | 0 | 0 | 0 | 1 |
| XLOC_001283 | PRAMEF18      | chr1:13474052-13477569   | 0 | 0 | 0 | 1 |
| XLOC_001284 | PRAMEF7,PRAM  | chr1:13607430-13611550   | 0 | 0 | 0 | 1 |
| XLOC_001285 | PRAMEF14      | chr1:13668268-13673511   | 0 | 0 | 0 | 1 |
| XLOC_001286 | PRAMEF18      | chr1:13694888-13698405   | 0 | 0 | 0 | 1 |
| XLOC_001287 | LRRRC38       | chr1:13801444-13840242   | 0 | 0 | 0 | 1 |
| XLOC_001294 | HSPB7         | chr1:16340522-16345285   | 0 | 0 | 0 | 1 |
| XLOC_001304 | ESPNP         | chr1:17017712-17046652   | 0 | 0 | 0 | 1 |
| XLOC_001306 | MIR3675       | chr1:17185443-17185516   | 0 | 0 | 0 | 1 |
| XLOC_001310 | PADI2         | chr1:17393255-17445948   | 0 | 0 | 0 | 1 |
| XLOC_001312 | TAS1R2        | chr1:19166092-19186155   | 0 | 0 | 0 | 1 |
| XLOC_001314 | MIR4695       | chr1:19197923-19229293   | 0 | 0 | 0 | 1 |
| XLOC_001324 | RNF186        | chr1:20140521-20141771   | 0 | 0 | 0 | 1 |
| XLOC_001325 | PLA2G2E       | chr1:20246799-20250110   | 0 | 0 | 0 | 1 |
| XLOC_001326 | PLA2G2A       | chr1:20301923-20306932   | 0 | 0 | 0 | 1 |
| XLOC_001328 | PLA2G2C       | chr1:20490483-20501687   | 0 | 0 | 0 | 1 |
| XLOC_001329 | LOC339505     | chr1:20686293-20755287   | 0 | 0 | 0 | 1 |
| XLOC_001342 | MIR4253       | chr1:23037330-23241823   | 0 | 0 | 0 | 1 |
| XLOC_001363 | RUNX3         | chr1:25226001-25291501   | 0 | 0 | 0 | 1 |
| XLOC_001372 | SLC30A2       | chr1:26364513-26372604   | 0 | 0 | 0 | 1 |
| XLOC_001373 | TRIM63        | chr1:26377795-26394125   | 0 | 0 | 0 | 1 |
| XLOC_001376 | ZNF683        | chr1:26688124-26699266   | 0 | 0 | 0 | 1 |
| XLOC_001380 | C1orf172      | chr1:27276046-27286901   | 0 | 0 | 0 | 1 |
| XLOC_001384 | FCN3          | chr1:27695600-27701315   | 0 | 0 | 0 | 1 |
| XLOC_001385 | CD164L2       | chr1:27705595-27709805   | 0 | 0 | 0 | 1 |
| XLOC_001388 | FGR           | chr1:27938800-27961727   | 0 | 0 | 0 | 1 |
| XLOC_001405 | MIR4420       | chr1:31205314-31230683   | 0 | 0 | 0 | 1 |
| XLOC_001408 | SNORD103A     | chr1:31404352-31538564   | 0 | 0 | 0 | 1 |
| XLOC_001409 | SNORD103A     | chr1:31404352-31538564   | 0 | 0 | 0 | 1 |



|             |                |                        |   |   |   |   |
|-------------|----------------|------------------------|---|---|---|---|
| XLOC_001410 | SNORD85        | chr1:31404352-31538564 | 0 | 0 | 0 | 1 |
| XLOC_001417 | MIR4254        | chr1:32192717-32229648 | 0 | 0 | 0 | 1 |
| XLOC_001452 | CSF3R          | chr1:36931643-36948915 | 0 | 0 | 0 | 1 |
| XLOC_001453 | GRIK3          | chr1:37261127-37499844 | 0 | 0 | 0 | 1 |
| XLOC_001456 | MIR5581        | chr1:37955560-37980420 | 0 | 0 | 0 | 1 |
| XLOC_001459 | RSPO1          | chr1:38076950-38100595 | 0 | 0 | 0 | 1 |
| XLOC_001468 | LOC339442      | chr1:38674705-38680439 | 0 | 0 | 0 | 1 |
| XLOC_001474 | SNORA55        | chr1:40026484-40042521 | 0 | 0 | 0 | 1 |
| XLOC_001475 | HEYL           | chr1:40089102-40105348 | 0 | 0 | 0 | 1 |
| XLOC_001476 | NT5C1A         | chr1:40124792-40137710 | 0 | 0 | 0 | 1 |
| XLOC_001494 | CLDN19         | chr1:43198763-43205925 | 0 | 0 | 0 | 1 |
| XLOC_001524 | KNCN           | chr1:47004367-47069966 | 0 | 0 | 0 | 1 |
| XLOC_001531 | PDZK1IP1       | chr1:47649260-47655771 | 0 | 0 | 0 | 1 |
| XLOC_001532 | TAL1           | chr1:47681962-47695443 | 0 | 0 | 0 | 1 |
| XLOC_001536 | SKINTL         | chr1:48567386-48648100 | 0 | 0 | 0 | 1 |
| XLOC_001538 | AGBL4          | chr1:48998526-50489626 | 0 | 0 | 0 | 1 |
| XLOC_001539 | BEND5          | chr1:48998526-50489626 | 0 | 0 | 0 | 1 |
| XLOC_001552 | SLC1A7         | chr1:53552854-53608289 | 0 | 0 | 0 | 1 |
| XLOC_001556 | SLC25A3P1      | chr1:53904042-53905693 | 0 | 0 | 0 | 1 |
| XLOC_001561 | LDLRAD1        | chr1:54472970-54483859 | 0 | 0 | 0 | 1 |
| XLOC_001563 | CDCP2          | chr1:54604667-54618679 | 0 | 0 | 0 | 1 |
| XLOC_001568 | TTC22          | chr1:55246751-55266941 | 0 | 0 | 0 | 1 |
| XLOC_001572 | C1orf168       | chr1:57184476-57285369 | 0 | 0 | 0 | 1 |
| XLOC_001573 | C8B            | chr1:57394882-57431688 | 0 | 0 | 0 | 1 |
| XLOC_001574 | DAB1           | chr1:57463578-58716211 | 0 | 0 | 0 | 1 |
| XLOC_001580 | MIR4711        | chr1:59762624-60228402 | 0 | 0 | 0 | 1 |
| XLOC_001581 | CYP2J2         | chr1:60358979-60392423 | 0 | 0 | 0 | 1 |
| XLOC_001582 | C1orf87        | chr1:60456065-60539442 | 0 | 0 | 0 | 1 |
| XLOC_001584 | KANK4          | chr1:62701836-62785083 | 0 | 0 | 0 | 1 |
| XLOC_001589 | MIR3671        | chr1:65523437-65523525 | 0 | 0 | 0 | 1 |
| XLOC_001590 | MIR101-1       | chr1:65524116-65524191 | 0 | 0 | 0 | 1 |
| XLOC_001591 | INSL5          | chr1:67263423-67266942 | 0 | 0 | 0 | 1 |
| XLOC_001599 | MIR1262        | chr1:68167148-68698284 | 0 | 0 | 0 | 1 |
| XLOC_001600 | RPE65          | chr1:68894506-68915642 | 0 | 0 | 0 | 1 |
| XLOC_001604 | PTGER3         | chr1:71318035-71546972 | 0 | 0 | 0 | 1 |
| XLOC_001606 | MIR186         | chr1:71318035-71546972 | 0 | 0 | 0 | 1 |
| XLOC_001607 | NEGR1          | chr1:71868624-72748277 | 0 | 0 | 0 | 1 |
| XLOC_001608 | NEGR1-IT1      | chr1:71868624-72748277 | 0 | 0 | 0 | 1 |
| XLOC_001610 | C1orf173       | chr1:75033794-75139422 | 0 | 0 | 0 | 1 |
| XLOC_001612 | SLC44A5        | chr1:75667815-76076799 | 0 | 0 | 0 | 1 |
| XLOC_001613 | ASB17          | chr1:76384557-76398116 | 0 | 0 | 0 | 1 |
| XLOC_001618 | ELTD1          | chr1:79355448-79472495 | 0 | 0 | 0 | 1 |
| XLOC_001619 | MIR548AP       | chr1:84259597-84464833 | 0 | 0 | 0 | 1 |
| XLOC_001637 | LOC100505768   | chr1:87819209-87837338 | 0 | 0 | 0 | 1 |
| XLOC_001643 | GBP7           | chr1:89597433-89641723 | 0 | 0 | 0 | 1 |
| XLOC_001645 | GBP5           | chr1:89724633-89738544 | 0 | 0 | 0 | 1 |
| XLOC_001648 | BARHL2         | chr1:91177578-91182794 | 0 | 0 | 0 | 1 |
| XLOC_001650 | HFM1           | chr1:91726322-91870426 | 0 | 0 | 0 | 1 |
| XLOC_001667 | MIR137,MIR137H | chr1:98453555-98515249 | 0 | 0 | 0 | 1 |

|             |              |                          |   |   |   |   |
|-------------|--------------|--------------------------|---|---|---|---|
| XLOC_001668 | MIR2682      | chr1:98453555-98515249   | 0 | 0 | 0 | 1 |
| XLOC_001669 | LPPR5        | chr1:99355800-99614408   | 0 | 0 | 0 | 1 |
| XLOC_001675 | LOC100128787 | chr1:101092605-101112560 | 0 | 0 | 0 | 1 |
| XLOC_001678 | RNU6-6       | chr1:101806424-101806451 | 0 | 0 | 0 | 1 |
| XLOC_001679 | OLFM3        | chr1:102268126-102462790 | 0 | 0 | 0 | 1 |
| XLOC_001680 | COL11A1      | chr1:103342022-103574052 | 0 | 0 | 0 | 1 |
| XLOC_001681 | AMY1A        | chr1:104230039-104239073 | 0 | 0 | 0 | 1 |
| XLOC_001682 | VAV3         | chr1:108113781-108537229 | 0 | 0 | 0 | 1 |
| XLOC_001684 | NBPF4        | chr1:108765962-108786703 | 0 | 0 | 0 | 1 |
| XLOC_001685 | HENMT1       | chr1:109190909-109204148 | 0 | 0 | 0 | 1 |
| XLOC_001692 | MYBPHL       | chr1:109834986-109849663 | 0 | 0 | 0 | 1 |
| XLOC_001698 | EPS8L3       | chr1:110292701-110306644 | 0 | 0 | 0 | 1 |
| XLOC_001703 | KCNA10       | chr1:111059838-111061797 | 0 | 0 | 0 | 1 |
| XLOC_001704 | KCNA2        | chr1:111136201-111174096 | 0 | 0 | 0 | 1 |
| XLOC_001705 | KCNA3        | chr1:111214309-111217655 | 0 | 0 | 0 | 1 |
| XLOC_001706 | LRIF1        | chr1:111489811-111506566 | 0 | 0 | 0 | 1 |
| XLOC_001709 | PGCP1        | chr1:111927140-111932473 | 0 | 0 | 0 | 1 |
| XLOC_001712 | ADORA3       | chr1:112025969-112106597 | 0 | 0 | 0 | 1 |
| XLOC_001716 | MIR4256      | chr1:113004391-113004455 | 0 | 0 | 0 | 1 |
| XLOC_001721 | LOC643441    | chr1:113739403-113748875 | 0 | 0 | 0 | 1 |
| XLOC_001727 | SYT6         | chr1:114631913-114696472 | 0 | 0 | 0 | 1 |
| XLOC_001730 | DENND2C      | chr1:115127195-115212732 | 0 | 0 | 0 | 1 |
| XLOC_001734 | TSPAN2       | chr1:115590632-115632121 | 0 | 0 | 0 | 1 |
| XLOC_001735 | NGF          | chr1:115828536-115880857 | 0 | 0 | 0 | 1 |
| XLOC_001742 | VTCN1        | chr1:117686208-117753582 | 0 | 0 | 0 | 1 |
| XLOC_001744 | SPAG17       | chr1:118472371-118727848 | 0 | 0 | 0 | 1 |
| XLOC_001749 | HMGCS2       | chr1:120290618-120311555 | 0 | 0 | 0 | 1 |
| XLOC_001752 | ADAM30       | chr1:120436155-120439147 | 0 | 0 | 0 | 1 |
| XLOC_001760 | PPIAL4B      | chr1:144363461-144364246 | 0 | 0 | 0 | 1 |
| XLOC_001763 | LOC653513    | chr1:144614958-144828810 | 0 | 0 | 0 | 1 |
| XLOC_001771 | PDZK1P1      | chr1:145924387-145942619 | 0 | 0 | 0 | 1 |
| XLOC_001776 | LINC00624    | chr1:146853913-146989699 | 0 | 0 | 0 | 1 |
| XLOC_001778 | GJA5         | chr1:147228331-147245484 | 0 | 0 | 0 | 1 |
| XLOC_001779 | PDZK1P1      | chr1:147466093-147484331 | 0 | 0 | 0 | 1 |
| XLOC_001781 | MIR5087      | chr1:147806602-147806678 | 0 | 0 | 0 | 1 |
| XLOC_001782 | FLJ39739     | chr1:147906021-147931980 | 0 | 0 | 0 | 1 |
| XLOC_001783 | PPIAL4B      | chr1:147954634-147955419 | 0 | 0 | 0 | 1 |
| XLOC_001785 | PPIAL4D      | chr1:148201751-148202536 | 0 | 0 | 0 | 1 |
| XLOC_001788 | HIST2H3A     | chr1:149812258-149812765 | 0 | 0 | 0 | 1 |
| XLOC_001791 | HIST2H4A     | chr1:149832329-149832725 | 0 | 0 | 0 | 1 |
| XLOC_001803 | HORMAD1      | chr1:150670534-150693364 | 0 | 0 | 0 | 1 |
| XLOC_001816 | SELENBP1     | chr1:151336777-151345210 | 0 | 0 | 0 | 1 |
| XLOC_001821 | LINGO4       | chr1:151772764-151777882 | 0 | 0 | 0 | 1 |
| XLOC_001823 | C2CD4D       | chr1:151810338-151816641 | 0 | 0 | 0 | 1 |
| XLOC_001824 | THEM5        | chr1:151819576-151826173 | 0 | 0 | 0 | 1 |
| XLOC_001828 | TCHHL1       | chr1:152056619-152061540 | 0 | 0 | 0 | 1 |
| XLOC_001829 | TCHH         | chr1:152078792-152087930 | 0 | 0 | 0 | 1 |
| XLOC_001830 | RPTN         | chr1:152126070-152131704 | 0 | 0 | 0 | 1 |
| XLOC_001833 | FLG2         | chr1:152321212-152332482 | 0 | 0 | 0 | 1 |

|             |              |                          |   |   |   |   |
|-------------|--------------|--------------------------|---|---|---|---|
| XLOC_001834 | CRNN         | chr1:152381718-152386750 | 0 | 0 | 0 | 1 |
| XLOC_001835 | LCE3E        | chr1:152538174-152539229 | 0 | 0 | 0 | 1 |
| XLOC_001836 | LCE3D        | chr1:152551859-152552980 | 0 | 0 | 0 | 1 |
| XLOC_001837 | LCE3A        | chr1:152595309-152595579 | 0 | 0 | 0 | 1 |
| XLOC_001839 | SPRR2D       | chr1:153012200-153013594 | 0 | 0 | 0 | 1 |
| XLOC_001840 | SPRR2A       | chr1:153028595-153029988 | 0 | 0 | 0 | 1 |
| XLOC_001841 | SPRR2B       | chr1:153042717-153044084 | 0 | 0 | 0 | 1 |
| XLOC_001842 | SPRR2E       | chr1:153065610-153067001 | 0 | 0 | 0 | 1 |
| XLOC_001843 | SPRR2F       | chr1:153084612-153085989 | 0 | 0 | 0 | 1 |
| XLOC_001844 | SPRR2C       | chr1:153112593-153113969 | 0 | 0 | 0 | 1 |
| XLOC_001845 | SPRR2G       | chr1:153122057-153123427 | 0 | 0 | 0 | 1 |
| XLOC_001846 | PGLYRP3      | chr1:153270337-153283194 | 0 | 0 | 0 | 1 |
| XLOC_001847 | PGLYRP4      | chr1:153302596-153321022 | 0 | 0 | 0 | 1 |
| XLOC_001848 | S100A12      | chr1:153346183-153348075 | 0 | 0 | 0 | 1 |
| XLOC_001849 | S100A8       | chr1:153362507-153363664 | 0 | 0 | 0 | 1 |
| XLOC_001850 | S100A7L2     | chr1:153409470-153412503 | 0 | 0 | 0 | 1 |
| XLOC_001851 | S100A7       | chr1:153430219-153433137 | 0 | 0 | 0 | 1 |
| XLOC_001869 | MIR190B      | chr1:154166140-154166219 | 0 | 0 | 0 | 1 |
| XLOC_001898 | SNORA42      | chr1:155882835-155904188 | 0 | 0 | 0 | 1 |
| XLOC_001909 | C1orf61      | chr1:156374054-156399184 | 0 | 0 | 0 | 1 |
| XLOC_001910 | MIR9-1       | chr1:156374054-156399184 | 0 | 0 | 0 | 1 |
| XLOC_001920 | INSRR        | chr1:156776034-156851642 | 0 | 0 | 0 | 1 |
| XLOC_001922 | MIR765       | chr1:156904631-157015162 | 0 | 0 | 0 | 1 |
| XLOC_001923 | ETV3L        | chr1:157061834-157069600 | 0 | 0 | 0 | 1 |
| XLOC_001925 | FCRL5        | chr1:157483166-157522310 | 0 | 0 | 0 | 1 |
| XLOC_001926 | FCRL4        | chr1:157543538-157567870 | 0 | 0 | 0 | 1 |
| XLOC_001927 | FCRL3        | chr1:157647977-157670647 | 0 | 0 | 0 | 1 |
| XLOC_001928 | FCRL2        | chr1:157715522-157746922 | 0 | 0 | 0 | 1 |
| XLOC_001929 | FCRL1        | chr1:157764193-157789940 | 0 | 0 | 0 | 1 |
| XLOC_001930 | CD5L         | chr1:157800703-157811634 | 0 | 0 | 0 | 1 |
| XLOC_001931 | LOC646268    | chr1:158101833-158110430 | 0 | 0 | 0 | 1 |
| XLOC_001932 | CD1B         | chr1:158297739-158301321 | 0 | 0 | 0 | 1 |
| XLOC_001933 | OR10T2       | chr1:158368311-158369256 | 0 | 0 | 0 | 1 |
| XLOC_001934 | OR10K2       | chr1:158389717-158390656 | 0 | 0 | 0 | 1 |
| XLOC_001935 | OR6Y1        | chr1:158516917-158517895 | 0 | 0 | 0 | 1 |
| XLOC_001936 | OR6P1        | chr1:158532440-158533394 | 0 | 0 | 0 | 1 |
| XLOC_001937 | OR10X1       | chr1:158548708-158549689 | 0 | 0 | 0 | 1 |
| XLOC_001938 | SPTA1        | chr1:158580495-158656506 | 0 | 0 | 0 | 1 |
| XLOC_001939 | OR6K2        | chr1:158669467-158670442 | 0 | 0 | 0 | 1 |
| XLOC_001940 | OR6K3        | chr1:158686957-158687905 | 0 | 0 | 0 | 1 |
| XLOC_001941 | OR6N1        | chr1:158735533-158736472 | 0 | 0 | 0 | 1 |
| XLOC_001942 | OR6N2        | chr1:158746471-158747425 | 0 | 0 | 0 | 1 |
| XLOC_001943 | AIM2         | chr1:159032274-159046647 | 0 | 0 | 0 | 1 |
| XLOC_001944 | LOC100131825 | chr1:159141376-159172932 | 0 | 0 | 0 | 1 |
| XLOC_001945 | OR10J3       | chr1:159283459-159284449 | 0 | 0 | 0 | 1 |
| XLOC_001946 | OR10J5       | chr1:159504867-159505797 | 0 | 0 | 0 | 1 |
| XLOC_001947 | CRP          | chr1:159682078-159684379 | 0 | 0 | 0 | 1 |
| XLOC_001951 | IGSF9        | chr1:159896828-159915386 | 0 | 0 | 0 | 1 |
| XLOC_001952 | SLAMF9       | chr1:159921281-159924044 | 0 | 0 | 0 | 1 |

|             |              |                          |   |   |   |   |
|-------------|--------------|--------------------------|---|---|---|---|
| XLOC_001959 | SLAMF6       | chr1:160454819-160493052 | 0 | 0 | 0 | 1 |
| XLOC_001961 | SLAMF1       | chr1:160579890-160617081 | 0 | 0 | 0 | 1 |
| XLOC_001963 | CD244        | chr1:160799949-160832692 | 0 | 0 | 0 | 1 |
| XLOC_001964 | ITLN1        | chr1:160846329-160854960 | 0 | 0 | 0 | 1 |
| XLOC_001965 | ITLN2        | chr1:160914815-160924589 | 0 | 0 | 0 | 1 |
| XLOC_001977 | MPZ          | chr1:161274524-161279762 | 0 | 0 | 0 | 1 |
| XLOC_001979 | FCGR3A       | chr1:161511550-161520413 | 0 | 0 | 0 | 1 |
| XLOC_001980 | FCGR3B       | chr1:161592987-161601753 | 0 | 0 | 0 | 1 |
| XLOC_001983 | C1orf111     | chr1:162343514-162346644 | 0 | 0 | 0 | 1 |
| XLOC_001987 | LOC100505795 | chr1:164528596-164821060 | 0 | 0 | 0 | 1 |
| XLOC_001988 | LMX1A        | chr1:165171103-165325952 | 0 | 0 | 0 | 1 |
| XLOC_001989 | RXRG         | chr1:165370158-165414592 | 0 | 0 | 0 | 1 |
| XLOC_001994 | MIR921       | chr1:166039255-166135958 | 0 | 0 | 0 | 1 |
| XLOC_002000 | ADCY10       | chr1:167778624-167883453 | 0 | 0 | 0 | 1 |
| XLOC_002005 | XCL2         | chr1:168510002-168513235 | 0 | 0 | 0 | 1 |
| XLOC_002006 | DPT          | chr1:168664694-168698442 | 0 | 0 | 0 | 1 |
| XLOC_002011 | SELP         | chr1:169558087-169599377 | 0 | 0 | 0 | 1 |
| XLOC_002013 | SELE         | chr1:169691780-169703220 | 0 | 0 | 0 | 1 |
| XLOC_002017 | MIR3119-1    | chr1:170115187-170136923 | 0 | 0 | 0 | 1 |
| XLOC_002018 | LOC284688    | chr1:170240545-170253349 | 0 | 0 | 0 | 1 |
| XLOC_002019 | MIR1295A     | chr1:171060017-171086959 | 0 | 0 | 0 | 1 |
| XLOC_002020 | MYOC         | chr1:171604556-171621773 | 0 | 0 | 0 | 1 |
| XLOC_002022 | DNM3OS       | chr1:171810620-172381857 | 0 | 0 | 0 | 1 |
| XLOC_002024 | TNFSF18      | chr1:173010359-173020103 | 0 | 0 | 0 | 1 |
| XLOC_002027 | SLC9C2       | chr1:173469603-173572233 | 0 | 0 | 0 | 1 |
| XLOC_002031 | SNORD81      | chr1:173832385-173837125 | 0 | 0 | 0 | 1 |
| XLOC_002034 | SNORD79      | chr1:173832385-173837125 | 0 | 0 | 0 | 1 |
| XLOC_002035 | SNORD78      | chr1:173832385-173837125 | 0 | 0 | 0 | 1 |
| XLOC_002036 | SNORD44      | chr1:173832385-173837125 | 0 | 0 | 0 | 1 |
| XLOC_002037 | SNORD77      | chr1:173832385-173837125 | 0 | 0 | 0 | 1 |
| XLOC_002039 | SNORD75      | chr1:173832385-173837125 | 0 | 0 | 0 | 1 |
| XLOC_002040 | SNORD74      | chr1:173832385-173837125 | 0 | 0 | 0 | 1 |
| XLOC_002045 | TNR          | chr1:175291934-175712752 | 0 | 0 | 0 | 1 |
| XLOC_002049 | MIR488       | chr1:176830202-177134024 | 0 | 0 | 0 | 1 |
| XLOC_002051 | LOC730102    | chr1:177975274-178007142 | 0 | 0 | 0 | 1 |
| XLOC_002059 | MIR3121      | chr1:180257351-180472022 | 0 | 0 | 0 | 1 |
| XLOC_002066 | RGS8         | chr1:182615791-182642067 | 0 | 0 | 0 | 1 |
| XLOC_002067 | SHCBP1L      | chr1:182868999-182922553 | 0 | 0 | 0 | 1 |
| XLOC_002078 | LOC100288079 | chr1:185292978-185304171 | 0 | 0 | 0 | 1 |
| XLOC_002079 | MIR548F1     | chr1:185703682-186446655 | 0 | 0 | 0 | 1 |
| XLOC_002082 | PTGS2        | chr1:186640943-186649559 | 0 | 0 | 0 | 1 |
| XLOC_002083 | FAM5C        | chr1:190066796-190446759 | 0 | 0 | 0 | 1 |
| XLOC_002087 | KCNT2        | chr1:196194912-196577499 | 0 | 0 | 0 | 1 |
| XLOC_002088 | MIR4735      | chr1:196194912-196577499 | 0 | 0 | 0 | 1 |
| XLOC_002092 | DENND1B      | chr1:197473878-197744623 | 0 | 0 | 0 | 1 |
| XLOC_002093 | ATP6V1G3     | chr1:198492351-198510075 | 0 | 0 | 0 | 1 |
| XLOC_002095 | MIR181B1     | chr1:198777131-198906558 | 0 | 0 | 0 | 1 |
| XLOC_002096 | MIR181A1     | chr1:198777131-198906558 | 0 | 0 | 0 | 1 |
| XLOC_002102 | CACNA1S      | chr1:201008639-201081694 | 0 | 0 | 0 | 1 |

|             |                |                          |   |   |   |   |
|-------------|----------------|--------------------------|---|---|---|---|
| XLOC_002105 | TNNT2          | chr1:201328135-201346828 | 0 | 0 | 0 | 1 |
| XLOC_002106 | LAD1           | chr1:201349965-201368669 | 0 | 0 | 0 | 1 |
| XLOC_002110 | RNU6-79        | chr1:201617449-201796102 | 0 | 0 | 0 | 1 |
| XLOC_002123 | MYBPH          | chr1:203136938-203144942 | 0 | 0 | 0 | 1 |
| XLOC_002124 | CHI3L1         | chr1:203148058-203155922 | 0 | 0 | 0 | 1 |
| XLOC_002125 | CHIT1          | chr1:203185206-203198860 | 0 | 0 | 0 | 1 |
| XLOC_002127 | FMOD           | chr1:203309751-203320289 | 0 | 0 | 0 | 1 |
| XLOC_002128 | LINC00303      | chr1:204001574-204010392 | 0 | 0 | 0 | 1 |
| XLOC_002142 | KLHDC8A        | chr1:205305192-205326218 | 0 | 0 | 0 | 1 |
| XLOC_002144 | MIR135B        | chr1:205417429-205417526 | 0 | 0 | 0 | 1 |
| XLOC_002145 | LOC284578      | chr1:205523400-205525763 | 0 | 0 | 0 | 1 |
| XLOC_002151 | PM20D1         | chr1:205797149-205819276 | 0 | 0 | 0 | 1 |
| XLOC_002152 | SLC26A9        | chr1:205882176-205912588 | 0 | 0 | 0 | 1 |
| XLOC_002153 | C1orf186       | chr1:206238881-206288236 | 0 | 0 | 0 | 1 |
| XLOC_002156 | FAIM3          | chr1:207070787-207095378 | 0 | 0 | 0 | 1 |
| XLOC_002158 | FCAMR          | chr1:207131311-207143970 | 0 | 0 | 0 | 1 |
| XLOC_002161 | MIR29C         | chr1:207975196-207975284 | 0 | 0 | 0 | 1 |
| XLOC_002162 | MIR29B2        | chr1:207975787-207975868 | 0 | 0 | 0 | 1 |
| XLOC_002163 | CD34           | chr1:208059882-208084683 | 0 | 0 | 0 | 1 |
| XLOC_002170 | RD3            | chr1:211649863-211666259 | 0 | 0 | 0 | 1 |
| XLOC_002183 | ESRRG          | chr1:216676587-217311097 | 0 | 0 | 0 | 1 |
| XLOC_002185 | LOC728463      | chr1:218517537-218617961 | 0 | 0 | 0 | 1 |
| XLOC_002187 | SLC30A10       | chr1:220046618-220321383 | 0 | 0 | 0 | 1 |
| XLOC_002190 | MIR215         | chr1:220046618-220321383 | 0 | 0 | 0 | 1 |
| XLOC_002191 | MIR194-1       | chr1:220046618-220321383 | 0 | 0 | 0 | 1 |
| XLOC_002193 | MIR664,SNORA3f | chr1:220321609-220445843 | 0 | 0 | 0 | 1 |
| XLOC_002195 | C1orf140       | chr1:221503269-221509638 | 0 | 0 | 0 | 1 |
| XLOC_002205 | MIR320B2       | chr1:224415035-224517891 | 0 | 0 | 0 | 1 |
| XLOC_002207 | MIR4742        | chr1:224572844-224622001 | 0 | 0 | 0 | 1 |
| XLOC_002211 | LEFTY1         | chr1:226073981-226076846 | 0 | 0 | 0 | 1 |
| XLOC_002220 | ZNF847P        | chr1:227884732-227885408 | 0 | 0 | 0 | 1 |
| XLOC_002222 | WNT9A          | chr1:228109164-228135676 | 0 | 0 | 0 | 1 |
| XLOC_002223 | MIR5008        | chr1:228109164-228135676 | 0 | 0 | 0 | 1 |
| XLOC_002229 | HIST3H3        | chr1:228612545-228613026 | 0 | 0 | 0 | 1 |
| XLOC_002236 | PGBD5          | chr1:230457391-230561674 | 0 | 0 | 0 | 1 |
| XLOC_002241 | LOC149373      | chr1:231298673-231357314 | 0 | 0 | 0 | 1 |
| XLOC_002246 | LINC00582      | chr1:231664398-232177019 | 0 | 0 | 0 | 1 |
| XLOC_002251 | LOC100506795   | chr1:234663636-234667525 | 0 | 0 | 0 | 1 |
| XLOC_002257 | MIR4753        | chr1:235330209-235491532 | 0 | 0 | 0 | 1 |
| XLOC_002261 | MIR1537        | chr1:235824344-236030220 | 0 | 0 | 0 | 1 |
| XLOC_002262 | NID1           | chr1:236139131-236228481 | 0 | 0 | 0 | 1 |
| XLOC_002266 | MT1P2          | chr1:237167402-237167718 | 0 | 0 | 0 | 1 |
| XLOC_002267 | ZP4            | chr1:238025474-238091619 | 0 | 0 | 0 | 1 |
| XLOC_002268 | LOC339535      | chr1:238643683-238649317 | 0 | 0 | 0 | 1 |
| XLOC_002269 | GREM2          | chr1:240652872-240775462 | 0 | 0 | 0 | 1 |
| XLOC_002270 | RGS7           | chr1:240938816-241520478 | 0 | 0 | 0 | 1 |
| XLOC_002275 | PLD5           | chr1:242251688-242687998 | 0 | 0 | 0 | 1 |
| XLOC_002283 | LOC255654      | chr1:246679340-246687589 | 0 | 0 | 0 | 1 |
| XLOC_002290 | MIR3916        | chr1:247365268-247365362 | 0 | 0 | 0 | 1 |

|             |              |                          |   |   |   |   |
|-------------|--------------|--------------------------|---|---|---|---|
| XLOC_002292 | OR2B11       | chr1:247614330-247615284 | 0 | 0 | 0 | 1 |
| XLOC_002293 | OR2C3        | chr1:247687980-247697141 | 0 | 0 | 0 | 1 |
| XLOC_002294 | OR13G1       | chr1:247835419-247836343 | 0 | 0 | 0 | 1 |
| XLOC_002295 | OR6F1        | chr1:247875130-247876057 | 0 | 0 | 0 | 1 |
| XLOC_002296 | OR1C1        | chr1:247920763-247921708 | 0 | 0 | 0 | 1 |
| XLOC_002297 | OR14A16      | chr1:247978101-247979031 | 0 | 0 | 0 | 1 |
| XLOC_002298 | OR11L1       | chr1:248004229-248005198 | 0 | 0 | 0 | 1 |
| XLOC_002299 | OR2T33       | chr1:248436153-248437116 | 0 | 0 | 0 | 1 |
| XLOC_002300 | OR2T12       | chr1:248457917-248458880 | 0 | 0 | 0 | 1 |
| XLOC_002301 | OR2M7        | chr1:248486931-248487870 | 0 | 0 | 0 | 1 |
| XLOC_002302 | OR2T29       | chr1:248721844-248722792 | 0 | 0 | 0 | 1 |
| XLOC_002303 | OR2T34       | chr1:248737101-248738058 | 0 | 0 | 0 | 1 |
| XLOC_002304 | OR2T10       | chr1:248756130-248757069 | 0 | 0 | 0 | 1 |
| XLOC_002305 | OR2T11       | chr1:248789478-248790429 | 0 | 0 | 0 | 1 |
| XLOC_002306 | OR2T35       | chr1:248801587-248802559 | 0 | 0 | 0 | 1 |
| XLOC_002307 | OR2T27       | chr1:248813231-248814185 | 0 | 0 | 0 | 1 |
| XLOC_002308 | OR14I1       | chr1:248844669-248845605 | 0 | 0 | 0 | 1 |
| XLOC_002309 | LYPD8        | chr1:248902716-248903151 | 0 | 0 | 0 | 1 |
| XLOC_002317 | LINC00200    | chr10:1205707-1210612    | 0 | 0 | 0 | 1 |
| XLOC_002318 | ADARB2-AS1   | chr10:1223252-1779670    | 0 | 0 | 0 | 1 |
| XLOC_002321 | LINC00705    | chr10:4692376-4720262    | 0 | 0 | 0 | 1 |
| XLOC_002322 | AKR1E2       | chr10:4868368-4890251    | 0 | 0 | 0 | 1 |
| XLOC_002323 | AKR1C1       | chr10:5005453-5020158    | 0 | 0 | 0 | 1 |
| XLOC_002325 | AKR1C4       | chr10:5238797-5260910    | 0 | 0 | 0 | 1 |
| XLOC_002326 | UCN3         | chr10:5406975-5416169    | 0 | 0 | 0 | 1 |
| XLOC_002328 | CALML3       | chr10:5566923-5568225    | 0 | 0 | 0 | 1 |
| XLOC_002333 | MIR3155A     | chr10:6186842-6277507    | 0 | 0 | 0 | 1 |
| XLOC_002340 | GATA3        | chr10:8096666-8117164    | 0 | 0 | 0 | 1 |
| XLOC_002342 | ECHDC3       | chr10:11784355-11806065  | 0 | 0 | 0 | 1 |
| XLOC_002348 | MIR4480      | chr10:12391582-12871733  | 0 | 0 | 0 | 1 |
| XLOC_002353 | MIR1265      | chr10:14478574-14478660  | 0 | 0 | 0 | 1 |
| XLOC_002361 | ST8SIA6-AS1  | chr10:17362675-17496254  | 0 | 0 | 0 | 1 |
| XLOC_002364 | MRC1         | chr10:17851361-17953178  | 0 | 0 | 0 | 1 |
| XLOC_002365 | MIR511-1     | chr10:17851361-17953178  | 0 | 0 | 0 | 1 |
| XLOC_002367 | MRC1         | chr10:18098351-18200091  | 0 | 0 | 0 | 1 |
| XLOC_002368 | MIR511-2     | chr10:18098351-18200091  | 0 | 0 | 0 | 1 |
| XLOC_002369 | SLC39A12     | chr10:18240767-18332221  | 0 | 0 | 0 | 1 |
| XLOC_002372 | PLXDC2       | chr10:20105371-20569115  | 0 | 0 | 0 | 1 |
| XLOC_002373 | MIR4675      | chr10:20840898-20840975  | 0 | 0 | 0 | 1 |
| XLOC_002374 | NEBL-AS1     | chr10:21068902-21463852  | 0 | 0 | 0 | 1 |
| XLOC_002376 | LOC100130992 | chr10:22541000-22547477  | 0 | 0 | 0 | 1 |
| XLOC_002379 | ARMC3        | chr10:23216953-23326514  | 0 | 0 | 0 | 1 |
| XLOC_002381 | PTF1A        | chr10:23481459-23483181  | 0 | 0 | 0 | 1 |
| XLOC_002384 | MIR603       | chr10:23983674-24836772  | 0 | 0 | 0 | 1 |
| XLOC_002387 | MYO3A        | chr10:26223001-26501465  | 0 | 0 | 0 | 1 |
| XLOC_002388 | GAD2         | chr10:26505235-26593491  | 0 | 0 | 0 | 1 |
| XLOC_002389 | APBB1IP      | chr10:26727265-26856732  | 0 | 0 | 0 | 1 |
| XLOC_002391 | LINC00202-2  | chr10:26932036-26942383  | 0 | 0 | 0 | 1 |
| XLOC_002396 | MIR5586      | chr10:28821421-28912041  | 0 | 0 | 0 | 1 |

|             |                |                         |   |   |   |   |
|-------------|----------------|-------------------------|---|---|---|---|
| XLOC_002398 | LYZL1          | chr10:29577989-29600158 | 0 | 0 | 0 | 1 |
| XLOC_002406 | ANKRD30A       | chr10:37414784-37521495 | 0 | 0 | 0 | 1 |
| XLOC_002412 | ACTR3BP5       | chr10:38989726-38991371 | 0 | 0 | 0 | 1 |
| XLOC_002413 | LINC00839      | chr10:42970938-42990785 | 0 | 0 | 0 | 1 |
| XLOC_002415 | MIR5100        | chr10:43493010-43493129 | 0 | 0 | 0 | 1 |
| XLOC_002416 | RET            | chr10:43572516-43625797 | 0 | 0 | 0 | 1 |
| XLOC_002418 | FXYD4          | chr10:43867091-43871783 | 0 | 0 | 0 | 1 |
| XLOC_002424 | LINC00619      | chr10:44340753-44346070 | 0 | 0 | 0 | 1 |
| XLOC_002425 | LINC00840      | chr10:44354858-44390881 | 0 | 0 | 0 | 1 |
| XLOC_002426 | LINC00841      | chr10:44404751-44465355 | 0 | 0 | 0 | 1 |
| XLOC_002427 | LOC100130539   | chr10:44788197-44790097 | 0 | 0 | 0 | 1 |
| XLOC_002428 | TMEM72         | chr10:45306471-45455137 | 0 | 0 | 0 | 1 |
| XLOC_002431 | ANKRD30BP3     | chr10:45650109-45681489 | 0 | 0 | 0 | 1 |
| XLOC_002432 | MIR3156-1      | chr10:45650109-45681489 | 0 | 0 | 0 | 1 |
| XLOC_002438 | PPYR1          | chr10:47083533-47088320 | 0 | 0 | 0 | 1 |
| XLOC_002440 | ANXA8L2        | chr10:47746919-47763040 | 0 | 0 | 0 | 1 |
| XLOC_002443 | BMS1P2         | chr10:48185838-48203780 | 0 | 0 | 0 | 1 |
| XLOC_002445 | FAM25C         | chr10:48247661-48252125 | 0 | 0 | 0 | 1 |
| XLOC_002446 | ANXA8          | chr10:48255203-48271368 | 0 | 0 | 0 | 1 |
| XLOC_002451 | FAM170B-AS1    | chr10:50329883-50359592 | 0 | 0 | 0 | 1 |
| XLOC_002452 | C10orf71       | chr10:50507186-50535537 | 0 | 0 | 0 | 1 |
| XLOC_002453 | CHAT           | chr10:50817140-50873150 | 0 | 0 | 0 | 1 |
| XLOC_002454 | SLC18A3        | chr10:50817140-50873150 | 0 | 0 | 0 | 1 |
| XLOC_002455 | C10orf53       | chr10:50887683-50916956 | 0 | 0 | 0 | 1 |
| XLOC_002456 | MSMB           | chr10:51549552-51562518 | 0 | 0 | 0 | 1 |
| XLOC_002461 | PRKG1          | chr10:52750910-54073888 | 0 | 0 | 0 | 1 |
| XLOC_002462 | MIR605         | chr10:52750910-54073888 | 0 | 0 | 0 | 1 |
| XLOC_002463 | DKK1           | chr10:54074040-54077417 | 0 | 0 | 0 | 1 |
| XLOC_002468 | BICC1          | chr10:60272903-60588845 | 0 | 0 | 0 | 1 |
| XLOC_002469 | FAM133CP       | chr10:60272903-60588845 | 0 | 0 | 0 | 1 |
| XLOC_002470 | PHYHIPL        | chr10:60936347-61122661 | 0 | 0 | 0 | 1 |
| XLOC_002472 | C10orf107      | chr10:63422718-63526091 | 0 | 0 | 0 | 1 |
| XLOC_002474 | MIR548AV       | chr10:63661012-63856707 | 0 | 0 | 0 | 1 |
| XLOC_002480 | ANXA2P3        | chr10:66585284-66586634 | 0 | 0 | 0 | 1 |
| XLOC_002481 | LRRTM3         | chr10:67679724-69455949 | 0 | 0 | 0 | 1 |
| XLOC_002483 | MYPN           | chr10:69865873-69971773 | 0 | 0 | 0 | 1 |
| XLOC_002487 | SNORD98        | chr10:70480970-70551309 | 0 | 0 | 0 | 1 |
| XLOC_002492 | SRGN           | chr10:70847827-70864567 | 0 | 0 | 0 | 1 |
| XLOC_002508 | CHST3          | chr10:73724119-73773322 | 0 | 0 | 0 | 1 |
| XLOC_002512 | MIR4676        | chr10:74451888-74647452 | 0 | 0 | 0 | 1 |
| XLOC_002513 | OIT3           | chr10:74653338-74692787 | 0 | 0 | 0 | 1 |
| XLOC_002528 | ZNF503-AS1     | chr10:77056140-77121436 | 0 | 0 | 0 | 1 |
| XLOC_002533 | LINC00856      | chr10:80008381-80012402 | 0 | 0 | 0 | 1 |
| XLOC_002538 | SFTPA1         | chr10:81370694-81375199 | 0 | 0 | 0 | 1 |
| XLOC_002541 | LOC100288974,M | chr10:81664653-81691557 | 0 | 0 | 0 | 1 |
| XLOC_002543 | PLAC9          | chr10:81892257-81904784 | 0 | 0 | 0 | 1 |
| XLOC_002548 | SH2D4B         | chr10:82297657-82406316 | 0 | 0 | 0 | 1 |
| XLOC_002549 | NRG3           | chr10:83635069-84746935 | 0 | 0 | 0 | 1 |
| XLOC_002551 | C10orf99       | chr10:85933553-85945050 | 0 | 0 | 0 | 1 |

|             |              |                           |   |   |   |   |
|-------------|--------------|---------------------------|---|---|---|---|
| XLOC_002552 | CDHR1        | chr10:85954411-85979376   | 0 | 0 | 0 | 1 |
| XLOC_002553 | RGR          | chr10:86004808-86018944   | 0 | 0 | 0 | 1 |
| XLOC_002554 | LINC00858    | chr10:86039735-86054415   | 0 | 0 | 0 | 1 |
| XLOC_002556 | GRID1-AS1    | chr10:87337487-88126250   | 0 | 0 | 0 | 1 |
| XLOC_002567 | MIR4678      | chr10:89263637-89263711   | 0 | 0 | 0 | 1 |
| XLOC_002572 | LIPJ         | chr10:90346518-90366733   | 0 | 0 | 0 | 1 |
| XLOC_002573 | LIPF         | chr10:90424145-90438572   | 0 | 0 | 0 | 1 |
| XLOC_002574 | LIPK         | chr10:90484300-90512513   | 0 | 0 | 0 | 1 |
| XLOC_002575 | LIPN         | chr10:90521162-90537999   | 0 | 0 | 0 | 1 |
| XLOC_002576 | LIPM         | chr10:90562486-90611732   | 0 | 0 | 0 | 1 |
| XLOC_002579 | MIR4679-1    | chr10:90823091-90823168   | 0 | 0 | 0 | 1 |
| XLOC_002582 | IFIT1B       | chr10:91137812-91144962   | 0 | 0 | 0 | 1 |
| XLOC_002586 | LOC643529    | chr10:91589249-91600618   | 0 | 0 | 0 | 1 |
| XLOC_002588 | LINC00502    | chr10:92805564-92821916   | 0 | 0 | 0 | 1 |
| XLOC_002594 | MARK2P9      | chr10:94178417-94179363   | 0 | 0 | 0 | 1 |
| XLOC_002596 | HHEX         | chr10:94449680-94455408   | 0 | 0 | 0 | 1 |
| XLOC_002598 | CYP26C1      | chr10:94821020-94828454   | 0 | 0 | 0 | 1 |
| XLOC_002602 | PDE6C        | chr10:95372344-95425429   | 0 | 0 | 0 | 1 |
| XLOC_002603 | LGI1         | chr10:95517565-95557916   | 0 | 0 | 0 | 1 |
| XLOC_002608 | CYP2C18      | chr10:96443250-96495947   | 0 | 0 | 0 | 1 |
| XLOC_002609 | CYP2C19      | chr10:96522462-96612671   | 0 | 0 | 0 | 1 |
| XLOC_002611 | C10orf129    | chr10:96953956-96988686   | 0 | 0 | 0 | 1 |
| XLOC_002617 | DNTT         | chr10:98064084-98098321   | 0 | 0 | 0 | 1 |
| XLOC_002620 | LOC100505540 | chr10:98757794-99052430   | 0 | 0 | 0 | 1 |
| XLOC_002628 | MIR5692C2    | chr10:99344101-99372555   | 0 | 0 | 0 | 1 |
| XLOC_002635 | NKX2-3       | chr10:101292689-101296280 | 0 | 0 | 0 | 1 |
| XLOC_002647 | MIR608       | chr10:102732285-102747272 | 0 | 0 | 0 | 1 |
| XLOC_002653 | FLJ41350     | chr10:102989350-102998616 | 0 | 0 | 0 | 1 |
| XLOC_002661 | ELOVL3       | chr10:103986142-103989344 | 0 | 0 | 0 | 1 |
| XLOC_002665 | MIR146B      | chr10:104196268-104196341 | 0 | 0 | 0 | 1 |
| XLOC_002674 | LOC729020    | chr10:105005643-105007773 | 0 | 0 | 0 | 1 |
| XLOC_002675 | INA          | chr10:105036919-105050108 | 0 | 0 | 0 | 1 |
| XLOC_002685 | SORCS3       | chr10:106400858-107024993 | 0 | 0 | 0 | 1 |
| XLOC_002686 | RNU6-53      | chr10:110930414-110999490 | 0 | 0 | 0 | 1 |
| XLOC_002691 | RBM20        | chr10:112404154-112599227 | 0 | 0 | 0 | 1 |
| XLOC_002695 | TECTB        | chr10:114043492-114063070 | 0 | 0 | 0 | 1 |
| XLOC_002698 | MIR4295      | chr10:114206755-114578504 | 0 | 0 | 0 | 1 |
| XLOC_002700 | HABP2        | chr10:115310589-115423829 | 0 | 0 | 0 | 1 |
| XLOC_002705 | TDRD1        | chr10:115939028-115992063 | 0 | 0 | 0 | 1 |
| XLOC_002706 | VWA2         | chr10:115999012-116054259 | 0 | 0 | 0 | 1 |
| XLOC_002709 | ATRN1        | chr10:116853123-117708496 | 0 | 0 | 0 | 1 |
| XLOC_002710 | CCDC172      | chr10:118083939-118139541 | 0 | 0 | 0 | 1 |
| XLOC_002711 | PNLIPRP3     | chr10:118187423-118237468 | 0 | 0 | 0 | 1 |
| XLOC_002712 | PNLIP        | chr10:118305427-118327367 | 0 | 0 | 0 | 1 |
| XLOC_002714 | PNLIPRP2     | chr10:118380464-118404654 | 0 | 0 | 0 | 1 |
| XLOC_002716 | KCNK18       | chr10:118956999-118969810 | 0 | 0 | 0 | 1 |
| XLOC_002718 | EMX2         | chr10:119243803-119309057 | 0 | 0 | 0 | 1 |
| XLOC_002723 | MIR4681      | chr10:120967196-121215131 | 0 | 0 | 0 | 1 |
| XLOC_002727 | MIR4682      | chr10:121718024-121718104 | 0 | 0 | 0 | 1 |



|             |               |                           |   |   |   |   |
|-------------|---------------|---------------------------|---|---|---|---|
| XLOC_002728 | PPAPDC1A      | chr10:122216465-122806858 | 0 | 0 | 0 | 1 |
| XLOC_002729 | MIR5694       | chr10:122216465-122806858 | 0 | 0 | 0 | 1 |
| XLOC_002734 | MIR3941       | chr10:124134093-124191871 | 0 | 0 | 0 | 1 |
| XLOC_002740 | FAM24A        | chr10:124670216-124672627 | 0 | 0 | 0 | 1 |
| XLOC_002746 | GPR26         | chr10:125425870-125456913 | 0 | 0 | 0 | 1 |
| XLOC_002750 | LOC100169752  | chr10:127262939-127267014 | 0 | 0 | 0 | 1 |
| XLOC_002757 | NPS           | chr10:129347612-129350935 | 0 | 0 | 0 | 1 |
| XLOC_002758 | FOXI2         | chr10:129535537-129539450 | 0 | 0 | 0 | 1 |
| XLOC_002768 | C10orf91      | chr10:134258713-134261825 | 0 | 0 | 0 | 1 |
| XLOC_002770 | LOC399829     | chr10:134779037-134790001 | 0 | 0 | 0 | 1 |
| XLOC_002771 | GPR123        | chr10:134901408-134945179 | 0 | 0 | 0 | 1 |
| XLOC_002773 | UTF1          | chr10:135043777-135045062 | 0 | 0 | 0 | 1 |
| XLOC_002776 | PRAP1         | chr10:135160843-135166187 | 0 | 0 | 0 | 1 |
| XLOC_002781 | DUX2,DUX4,DUX | chr10:135480367-135498492 | 0 | 0 | 0 | 1 |
| XLOC_002784 | MIR5699       | chr10:320129-735608       | 0 | 0 | 0 | 1 |
| XLOC_002788 | ADARB2        | chr10:1223252-1779670     | 0 | 0 | 0 | 1 |
| XLOC_002789 | LINC00700     | chr10:2047666-2056542     | 0 | 0 | 0 | 1 |
| XLOC_002790 | LINC00701     | chr10:2342512-2357268     | 0 | 0 | 0 | 1 |
| XLOC_002793 | LINC00704     | chr10:4692376-4720262     | 0 | 0 | 0 | 1 |
| XLOC_002794 | AKR1C6P       | chr10:4913858-4958465     | 0 | 0 | 0 | 1 |
| XLOC_002795 | AKR1C2        | chr10:5029967-5060225     | 0 | 0 | 0 | 1 |
| XLOC_002796 | AKR1CL1       | chr10:5196654-5227150     | 0 | 0 | 0 | 1 |
| XLOC_002798 | CALML5        | chr10:5540657-5541533     | 0 | 0 | 0 | 1 |
| XLOC_002803 | IL2RA         | chr10:6052656-6104333     | 0 | 0 | 0 | 1 |
| XLOC_002804 | MIR3155B      | chr10:6186842-6277507     | 0 | 0 | 0 | 1 |
| XLOC_002806 | SFMBT2        | chr10:7200585-7453448     | 0 | 0 | 0 | 1 |
| XLOC_002809 | GATA3-AS1     | chr10:8092412-8095447     | 0 | 0 | 0 | 1 |
| XLOC_002811 | LINC00710     | chr10:10976902-10994126   | 0 | 0 | 0 | 1 |
| XLOC_002812 | CELF2-AS2     | chr10:11047258-11378672   | 0 | 0 | 0 | 1 |
| XLOC_002818 | UCMA          | chr10:13263766-13276328   | 0 | 0 | 0 | 1 |
| XLOC_002829 | PPIAP30       | chr10:15147770-15210695   | 0 | 0 | 0 | 1 |
| XLOC_002831 | ITGA8         | chr10:15559087-15761770   | 0 | 0 | 0 | 1 |
| XLOC_002839 | LOC100129213  | chr10:18240767-18332221   | 0 | 0 | 0 | 1 |
| XLOC_002842 | C10orf113     | chr10:21068902-21463852   | 0 | 0 | 0 | 1 |
| XLOC_002844 | MIR1915       | chr10:21783420-21786213   | 0 | 0 | 0 | 1 |
| XLOC_002847 | EBLN1         | chr10:22497742-22498912   | 0 | 0 | 0 | 1 |
| XLOC_002850 | C10orf67      | chr10:23605519-23633772   | 0 | 0 | 0 | 1 |
| XLOC_002854 | GPR158-AS1    | chr10:25447000-25891157   | 0 | 0 | 0 | 1 |
| XLOC_002861 | PTCHD3        | chr10:27687116-27703297   | 0 | 0 | 0 | 1 |
| XLOC_002862 | MKX           | chr10:27961802-28034778   | 0 | 0 | 0 | 1 |
| XLOC_002863 | ARMC4         | chr10:28101096-28287977   | 0 | 0 | 0 | 1 |
| XLOC_002866 | LINC00837     | chr10:29078239-29084979   | 0 | 0 | 0 | 1 |
| XLOC_002868 | MIR604        | chr10:29746276-30024730   | 0 | 0 | 0 | 1 |
| XLOC_002869 | MIR938        | chr10:29746276-30024730   | 0 | 0 | 0 | 1 |
| XLOC_002870 | KIAA1462      | chr10:30301728-30348488   | 0 | 0 | 0 | 1 |
| XLOC_002872 | LYZL2         | chr10:30900707-30918647   | 0 | 0 | 0 | 1 |
| XLOC_002880 | LINC00838     | chr10:34048640-34061608   | 0 | 0 | 0 | 1 |
| XLOC_002884 | MTRNR2L7      | chr10:37890365-37891859   | 0 | 0 | 0 | 1 |
| XLOC_002892 | RASGEF1A      | chr10:43689983-43762367   | 0 | 0 | 0 | 1 |

|             |               |                         |   |   |   |   |
|-------------|---------------|-------------------------|---|---|---|---|
| XLOC_002896 | HNRNPA3P1     | chr10:44282859-44285865 | 0 | 0 | 0 | 1 |
| XLOC_002897 | CXCL12        | chr10:44865604-44880545 | 0 | 0 | 0 | 1 |
| XLOC_002901 | RSU1P2        | chr10:45594923-45650044 | 0 | 0 | 0 | 1 |
| XLOC_002904 | ZFAND4        | chr10:46111038-46168251 | 0 | 0 | 0 | 1 |
| XLOC_002906 | PTPN20A,PTPN2 | chr10:46550122-46641003 | 0 | 0 | 0 | 1 |
| XLOC_002912 | FAM25C        | chr10:47177221-47181688 | 0 | 0 | 0 | 1 |
| XLOC_002913 | AGAP9         | chr10:47191843-47213626 | 0 | 0 | 0 | 1 |
| XLOC_002917 | GDF10         | chr10:48425787-48439138 | 0 | 0 | 0 | 1 |
| XLOC_002918 | PTPN20A,PTPN2 | chr10:48737041-48827924 | 0 | 0 | 0 | 1 |
| XLOC_002919 | FRMPD2P1      | chr10:48844035-48862688 | 0 | 0 | 0 | 1 |
| XLOC_002921 | FAM25C        | chr10:49203372-49207825 | 0 | 0 | 0 | 1 |
| XLOC_002923 | FRMPD2        | chr10:49364600-49482941 | 0 | 0 | 0 | 1 |
| XLOC_002925 | LRRC18        | chr10:49893517-50191001 | 0 | 0 | 0 | 1 |
| XLOC_002926 | MIR4294       | chr10:50193556-50193632 | 0 | 0 | 0 | 1 |
| XLOC_002928 | FAM170B       | chr10:50329883-50359592 | 0 | 0 | 0 | 1 |
| XLOC_002929 | C10orf128     | chr10:50363890-50396407 | 0 | 0 | 0 | 1 |
| XLOC_002930 | DRGX          | chr10:50574160-50604062 | 0 | 0 | 0 | 1 |
| XLOC_002932 | OGDHL         | chr10:50942686-50970425 | 0 | 0 | 0 | 1 |
| XLOC_002942 | PRKG1-AS1     | chr10:52750910-54073888 | 0 | 0 | 0 | 1 |
| XLOC_002943 | MBL2          | chr10:54525139-54531460 | 0 | 0 | 0 | 1 |
| XLOC_002944 | PCDH15        | chr10:55562532-56561051 | 0 | 0 | 0 | 1 |
| XLOC_002946 | MIR3924       | chr10:59064238-59064319 | 0 | 0 | 0 | 1 |
| XLOC_002948 | FAM13C        | chr10:60936347-61122661 | 0 | 0 | 0 | 1 |
| XLOC_002950 | M1            | chr10:61496747-61513203 | 0 | 0 | 0 | 1 |
| XLOC_002952 | C10orf40      | chr10:61717974-61720671 | 0 | 0 | 0 | 1 |
| XLOC_002955 | TMEM26        | chr10:63166400-63213208 | 0 | 0 | 0 | 1 |
| XLOC_002959 | MIR1296       | chr10:64926987-65226322 | 0 | 0 | 0 | 1 |
| XLOC_002960 | CTNNA3        | chr10:67679724-69455949 | 0 | 0 | 0 | 1 |
| XLOC_002969 | NEUROG3       | chr10:71331790-71333210 | 0 | 0 | 0 | 1 |
| XLOC_002974 | NPFFR1        | chr10:72014712-72043450 | 0 | 0 | 0 | 1 |
| XLOC_002978 | TBATA         | chr10:72530994-72545157 | 0 | 0 | 0 | 1 |
| XLOC_002982 | C10orf54      | chr10:73156690-73575704 | 0 | 0 | 0 | 1 |
| XLOC_002987 | MIR1256       | chr10:74119697-74385949 | 0 | 0 | 0 | 1 |
| XLOC_002989 | PLA2G12B      | chr10:74694937-74714510 | 0 | 0 | 0 | 1 |
| XLOC_003008 | DUPD1         | chr10:76797593-76818272 | 0 | 0 | 0 | 1 |
| XLOC_003017 | SFTPA2        | chr10:81315607-81320163 | 0 | 0 | 0 | 1 |
| XLOC_003018 | SFTPD         | chr10:81697495-81708861 | 0 | 0 | 0 | 1 |
| XLOC_003022 | DYDC1         | chr10:82095860-82127829 | 0 | 0 | 0 | 1 |
| XLOC_003023 | LRIT2         | chr10:85980248-85985284 | 0 | 0 | 0 | 1 |
| XLOC_003024 | LRIT1         | chr10:85991275-86001217 | 0 | 0 | 0 | 1 |
| XLOC_003026 | MIR346        | chr10:87337487-88126250 | 0 | 0 | 0 | 1 |
| XLOC_003031 | LOC728218     | chr10:89156330-89167457 | 0 | 0 | 0 | 1 |
| XLOC_003034 | RNLS          | chr10:90033620-90343082 | 0 | 0 | 0 | 1 |
| XLOC_003035 | ANKRD22       | chr10:90562486-90611732 | 0 | 0 | 0 | 1 |
| XLOC_003038 | MIR4679-2     | chr10:90823091-90823168 | 0 | 0 | 0 | 1 |
| XLOC_003039 | CH25H         | chr10:90965693-90967071 | 0 | 0 | 0 | 1 |
| XLOC_003041 | SLC16A12      | chr10:91190050-91295313 | 0 | 0 | 0 | 1 |
| XLOC_003043 | MIR107        | chr10:91339253-91405329 | 0 | 0 | 0 | 1 |
| XLOC_003045 | HTR7          | chr10:92500575-92617671 | 0 | 0 | 0 | 1 |

|             |              |                           |   |   |   |   |
|-------------|--------------|---------------------------|---|---|---|---|
| XLOC_003049 | PPP1R3C      | chr10:93388196-93392858   | 0 | 0 | 0 | 1 |
| XLOC_003054 | RBP4         | chr10:95351592-95360993   | 0 | 0 | 0 | 1 |
| XLOC_003057 | LOC100128054 | chr10:95753745-96088148   | 0 | 0 | 0 | 1 |
| XLOC_003059 | CYP2C8       | chr10:96796528-96829254   | 0 | 0 | 0 | 1 |
| XLOC_003060 | PDLIM1       | chr10:96997324-97050905   | 0 | 0 | 0 | 1 |
| XLOC_003065 | MIR3157      | chr10:97471535-97849992   | 0 | 0 | 0 | 1 |
| XLOC_003066 | BLNK         | chr10:97951454-98031333   | 0 | 0 | 0 | 1 |
| XLOC_003067 | OPALIN       | chr10:98102974-98119092   | 0 | 0 | 0 | 1 |
| XLOC_003078 | SFRP5        | chr10:99526507-99531756   | 0 | 0 | 0 | 1 |
| XLOC_003083 | MIR4685      | chr10:100175954-100206704 | 0 | 0 | 0 | 1 |
| XLOC_003084 | HPSE2        | chr10:100216833-100995632 | 0 | 0 | 0 | 1 |
| XLOC_003089 | CPN1         | chr10:101802064-101841642 | 0 | 0 | 0 | 1 |
| XLOC_003095 | PKD2L1       | chr10:102047902-102090243 | 0 | 0 | 0 | 1 |
| XLOC_003100 | TLX1NB       | chr10:102849077-102890903 | 0 | 0 | 0 | 1 |
| XLOC_003101 | LBX1         | chr10:102986732-102988717 | 0 | 0 | 0 | 1 |
| XLOC_003103 | MIR3158-2    | chr10:103348088-103369410 | 0 | 0 | 0 | 1 |
| XLOC_003111 | PITX3        | chr10:103989945-104001231 | 0 | 0 | 0 | 1 |
| XLOC_003128 | MIR609       | chr10:105889645-105992120 | 0 | 0 | 0 | 1 |
| XLOC_003129 | MIR4482-1    | chr10:106028093-106028163 | 0 | 0 | 0 | 1 |
| XLOC_003131 | SORCS1       | chr10:108333420-108924466 | 0 | 0 | 0 | 1 |
| XLOC_003139 | GUCY2GP      | chr10:114067935-114116353 | 0 | 0 | 0 | 1 |
| XLOC_003142 | MIR4483      | chr10:115511212-115542192 | 0 | 0 | 0 | 1 |
| XLOC_003145 | AFAP1L2      | chr10:116054582-116164515 | 0 | 0 | 0 | 1 |
| XLOC_003147 | GFRA1        | chr10:117816441-118033126 | 0 | 0 | 0 | 1 |
| XLOC_003151 | VAX1         | chr10:118888031-118897812 | 0 | 0 | 0 | 1 |
| XLOC_003152 | MIR3663      | chr10:118927188-118927285 | 0 | 0 | 0 | 1 |
| XLOC_003157 | PRLHR        | chr10:120352915-120355160 | 0 | 0 | 0 | 1 |
| XLOC_003160 | SNORA19      | chr10:120794540-120840334 | 0 | 0 | 0 | 1 |
| XLOC_003170 | C10orf120    | chr10:124457224-124459338 | 0 | 0 | 0 | 1 |
| XLOC_003177 | NKX1-2       | chr10:126135997-126138550 | 0 | 0 | 0 | 1 |
| XLOC_003181 | MIR4296      | chr10:126676417-126849624 | 0 | 0 | 0 | 1 |
| XLOC_003182 | TEX36        | chr10:127344262-127371713 | 0 | 0 | 0 | 1 |
| XLOC_003184 | MMP21        | chr10:127455026-127464390 | 0 | 0 | 0 | 1 |
| XLOC_003188 | LINC00601    | chr10:128102437-128110448 | 0 | 0 | 0 | 1 |
| XLOC_003189 | C10orf90     | chr10:128113573-128210010 | 0 | 0 | 0 | 1 |
| XLOC_003191 | CLRN3        | chr10:129676113-129691211 | 0 | 0 | 0 | 1 |
| XLOC_003194 | MIR4297      | chr10:131633495-131762091 | 0 | 0 | 0 | 1 |
| XLOC_003196 | MIR378C      | chr10:132760850-132760931 | 0 | 0 | 0 | 1 |
| XLOC_003201 | NKX6-2       | chr10:134598319-134599537 | 0 | 0 | 0 | 1 |
| XLOC_003202 | TTC40        | chr10:134621895-134756089 | 0 | 0 | 0 | 1 |
| XLOC_003203 | MIR202       | chr10:135061014-135061124 | 0 | 0 | 0 | 1 |
| XLOC_003206 | CALY         | chr10:135138927-135150475 | 0 | 0 | 0 | 1 |
| XLOC_003207 | FUOM         | chr10:135168657-135171529 | 0 | 0 | 0 | 1 |
| XLOC_003209 | MIR3944      | chr10:135175986-135186908 | 0 | 0 | 0 | 1 |
| XLOC_003212 | FRG2B        | chr10:135438602-135440299 | 0 | 0 | 0 | 1 |
| XLOC_003213 | SCGB1C1      | chr11:193079-194573       | 0 | 0 | 0 | 1 |
| XLOC_003214 | ODF3         | chr11:196760-200258       | 0 | 0 | 0 | 1 |
| XLOC_003239 | MUC2         | chr11:1074874-1104417     | 0 | 0 | 0 | 1 |
| XLOC_003244 | KRTAP5-5     | chr11:1490684-1785501     | 0 | 0 | 0 | 1 |

|             |            |                         |   |   |   |   |
|-------------|------------|-------------------------|---|---|---|---|
| XLOC_003245 | FAM99A     | chr11:1490684-1785501   | 0 | 0 | 0 | 1 |
| XLOC_003246 | KRTAP5-6   | chr11:1490684-1785501   | 0 | 0 | 0 | 1 |
| XLOC_003247 | SYT8       | chr11:1855673-1858750   | 0 | 0 | 0 | 1 |
| XLOC_003250 | TNNT3      | chr11:1940798-1959936   | 0 | 0 | 0 | 1 |
| XLOC_003252 | IGF2-AS    | chr11:2150341-2182439   | 0 | 0 | 0 | 1 |
| XLOC_003253 | MIR4686    | chr11:2194292-2194368   | 0 | 0 | 0 | 1 |
| XLOC_003254 | TSPAN32    | chr11:2323242-2339430   | 0 | 0 | 0 | 1 |
| XLOC_003258 | KCNQ1DN    | chr11:2891262-2893336   | 0 | 0 | 0 | 1 |
| XLOC_003260 | MRGPRG-AS1 | chr11:3239173-3244361   | 0 | 0 | 0 | 1 |
| XLOC_003262 | TRPC2      | chr11:3647689-3658789   | 0 | 0 | 0 | 1 |
| XLOC_003263 | ART1       | chr11:3666360-3685646   | 0 | 0 | 0 | 1 |
| XLOC_003268 | OR52K2     | chr11:4470524-4471591   | 0 | 0 | 0 | 1 |
| XLOC_003269 | OR52K1     | chr11:4510108-4511138   | 0 | 0 | 0 | 1 |
| XLOC_003270 | OR52M1     | chr11:4566420-4567374   | 0 | 0 | 0 | 1 |
| XLOC_003271 | OR52I2     | chr11:4608020-4609135   | 0 | 0 | 0 | 1 |
| XLOC_003272 | OR52I1     | chr11:4615268-4616243   | 0 | 0 | 0 | 1 |
| XLOC_003273 | OR51D1     | chr11:4660944-4662068   | 0 | 0 | 0 | 1 |
| XLOC_003274 | OR51E1     | chr11:4665155-4676716   | 0 | 0 | 0 | 1 |
| XLOC_003275 | OR51F2     | chr11:4842615-4843644   | 0 | 0 | 0 | 1 |
| XLOC_003276 | OR51T1     | chr11:4903048-4904113   | 0 | 0 | 0 | 1 |
| XLOC_003277 | OR51A7     | chr11:4928599-4929538   | 0 | 0 | 0 | 1 |
| XLOC_003278 | MMP26      | chr11:5009423-5013659   | 0 | 0 | 0 | 1 |
| XLOC_003279 | OR51L1     | chr11:5020212-5021160   | 0 | 0 | 0 | 1 |
| XLOC_003280 | OR52J3     | chr11:5067755-5068691   | 0 | 0 | 0 | 1 |
| XLOC_003281 | OR51B6     | chr11:5362112-5526882   | 0 | 0 | 0 | 1 |
| XLOC_003282 | OR51M1     | chr11:5362112-5526882   | 0 | 0 | 0 | 1 |
| XLOC_003283 | OR51Q1     | chr11:5362112-5526882   | 0 | 0 | 0 | 1 |
| XLOC_003286 | OR52B6     | chr11:5602106-5603114   | 0 | 0 | 0 | 1 |
| XLOC_003289 | OR56B1     | chr11:5757677-5758768   | 0 | 0 | 0 | 1 |
| XLOC_003290 | OR52N4     | chr11:5775922-5776959   | 0 | 0 | 0 | 1 |
| XLOC_003291 | OR52N2     | chr11:5841565-5842531   | 0 | 0 | 0 | 1 |
| XLOC_003292 | OR52E4     | chr11:5905522-5906461   | 0 | 0 | 0 | 1 |
| XLOC_003293 | OR56A3     | chr11:5968576-5969524   | 0 | 0 | 0 | 1 |
| XLOC_003294 | OR56B4     | chr11:6129008-6129968   | 0 | 0 | 0 | 1 |
| XLOC_003295 | OR52W1     | chr11:6220453-6221416   | 0 | 0 | 0 | 1 |
| XLOC_003296 | C11orf42   | chr11:6226797-6232365   | 0 | 0 | 0 | 1 |
| XLOC_003298 | CCKBR      | chr11:6280903-6293357   | 0 | 0 | 0 | 1 |
| XLOC_003304 | OR10A5     | chr11:6866913-6867867   | 0 | 0 | 0 | 1 |
| XLOC_003306 | OR10A4     | chr11:6897855-6898850   | 0 | 0 | 0 | 1 |
| XLOC_003311 | SYT9       | chr11:7273180-7490276   | 0 | 0 | 0 | 1 |
| XLOC_003314 | OR5E1P     | chr11:7870597-7871118   | 0 | 0 | 0 | 1 |
| XLOC_003316 | TUB        | chr11:8060179-8190590   | 0 | 0 | 0 | 1 |
| XLOC_003322 | KRT8P41    | chr11:9115909-9117737   | 0 | 0 | 0 | 1 |
| XLOC_003339 | RASSF10    | chr11:13030969-13033653 | 0 | 0 | 0 | 1 |
| XLOC_003350 | MYOD1      | chr11:17741109-17743678 | 0 | 0 | 0 | 1 |
| XLOC_003353 | MRGPRX4    | chr11:18194383-18195827 | 0 | 0 | 0 | 1 |
| XLOC_003364 | MIR4486    | chr11:19372270-20143147 | 0 | 0 | 0 | 1 |
| XLOC_003367 | SLC6A5     | chr11:20620945-20676610 | 0 | 0 | 0 | 1 |
| XLOC_003368 | NELL1      | chr11:20691116-21597229 | 0 | 0 | 0 | 1 |

|             |               |                         |   |   |   |   |
|-------------|---------------|-------------------------|---|---|---|---|
| XLOC_003369 | ANO5          | chr11:22214721-22304913 | 0 | 0 | 0 | 1 |
| XLOC_003370 | SLC17A6       | chr11:22359666-22401046 | 0 | 0 | 0 | 1 |
| XLOC_003372 | LUZP2         | chr11:24518515-25104186 | 0 | 0 | 0 | 1 |
| XLOC_003373 | ANO3          | chr11:26353677-26684836 | 0 | 0 | 0 | 1 |
| XLOC_003374 | FIBIN         | chr11:27015627-27018632 | 0 | 0 | 0 | 1 |
| XLOC_003377 | MIR610        | chr11:28042162-28129746 | 0 | 0 | 0 | 1 |
| XLOC_003383 | DKFZp686K1684 | chr11:31806339-31908587 | 0 | 0 | 0 | 1 |
| XLOC_003385 | WT1-AS        | chr11:32457284-32461620 | 0 | 0 | 0 | 1 |
| XLOC_003398 | EHF           | chr11:34642587-34684834 | 0 | 0 | 0 | 1 |
| XLOC_003400 | MIR1343       | chr11:34903842-35017675 | 0 | 0 | 0 | 1 |
| XLOC_003405 | MIR3973       | chr11:35965611-36252841 | 0 | 0 | 0 | 1 |
| XLOC_003411 | MIR670        | chr11:43581205-43581303 | 0 | 0 | 0 | 1 |
| XLOC_003412 | MIR129-2      | chr11:43602943-43603033 | 0 | 0 | 0 | 1 |
| XLOC_003422 | LOC221122     | chr11:44995452-44999578 | 0 | 0 | 0 | 1 |
| XLOC_003424 | LOC100507384  | chr11:45743857-45746106 | 0 | 0 | 0 | 1 |
| XLOC_003432 | MIR4688       | chr11:46354454-46402104 | 0 | 0 | 0 | 1 |
| XLOC_003434 | MIR3160-2     | chr11:46417961-46615619 | 0 | 0 | 0 | 1 |
| XLOC_003448 | OR4B1         | chr11:48238361-48239291 | 0 | 0 | 0 | 1 |
| XLOC_003449 | OR4X2         | chr11:48266655-48267567 | 0 | 0 | 0 | 1 |
| XLOC_003450 | OR4X1         | chr11:48285412-48286330 | 0 | 0 | 0 | 1 |
| XLOC_003451 | OR4S1         | chr11:48327774-48328704 | 0 | 0 | 0 | 1 |
| XLOC_003452 | OR4C3         | chr11:48346492-48347482 | 0 | 0 | 0 | 1 |
| XLOC_003453 | OR4A47        | chr11:48510344-48511274 | 0 | 0 | 0 | 1 |
| XLOC_003454 | TRIM49B       | chr11:49053151-49059529 | 0 | 0 | 0 | 1 |
| XLOC_003455 | LOC440040     | chr11:49580079-49831969 | 0 | 0 | 0 | 1 |
| XLOC_003456 | OR4C13        | chr11:49973942-49974971 | 0 | 0 | 0 | 1 |
| XLOC_003457 | LOC646813     | chr11:50368317-50379802 | 0 | 0 | 0 | 1 |
| XLOC_003458 | OR4C46        | chr11:51515281-51516211 | 0 | 0 | 0 | 1 |
| XLOC_003459 | TRIM48        | chr11:55029657-55038595 | 0 | 0 | 0 | 1 |
| XLOC_003460 | OR4A16        | chr11:55110676-55111663 | 0 | 0 | 0 | 1 |
| XLOC_003461 | OR4A15        | chr11:55135359-55136394 | 0 | 0 | 0 | 1 |
| XLOC_003462 | OR4C15        | chr11:55321782-55322895 | 0 | 0 | 0 | 1 |
| XLOC_003463 | OR4C16        | chr11:55339603-55340536 | 0 | 0 | 0 | 1 |
| XLOC_003464 | OR4P4         | chr11:55405833-55406772 | 0 | 0 | 0 | 1 |
| XLOC_003465 | OR4S2         | chr11:55418379-55419315 | 0 | 0 | 0 | 1 |
| XLOC_003466 | OR4C6         | chr11:55432642-55433572 | 0 | 0 | 0 | 1 |
| XLOC_003467 | OR5D13        | chr11:55540913-55541858 | 0 | 0 | 0 | 1 |
| XLOC_003468 | OR5D14        | chr11:55563031-55563976 | 0 | 0 | 0 | 1 |
| XLOC_003469 | OR5L1         | chr11:55578942-55579878 | 0 | 0 | 0 | 1 |
| XLOC_003470 | OR5D18        | chr11:55587105-55588047 | 0 | 0 | 0 | 1 |
| XLOC_003471 | OR5L2         | chr11:55594694-55595630 | 0 | 0 | 0 | 1 |
| XLOC_003472 | OR5D16        | chr11:55606227-55607214 | 0 | 0 | 0 | 1 |
| XLOC_003473 | TRIM51        | chr11:55650772-55659284 | 0 | 0 | 0 | 1 |
| XLOC_003474 | OR5AS1        | chr11:55797894-55798869 | 0 | 0 | 0 | 1 |
| XLOC_003475 | OR8I2         | chr11:55860783-55861716 | 0 | 0 | 0 | 1 |
| XLOC_003476 | OR8H2         | chr11:55872518-55873457 | 0 | 0 | 0 | 1 |
| XLOC_003477 | OR8H3         | chr11:55889848-55890787 | 0 | 0 | 0 | 1 |
| XLOC_003478 | OR5J2         | chr11:55944093-55945032 | 0 | 0 | 0 | 1 |
| XLOC_003479 | OR5T3         | chr11:56019675-56020698 | 0 | 0 | 0 | 1 |

|             |             |                         |   |   |   |   |
|-------------|-------------|-------------------------|---|---|---|---|
| XLOC_003480 | OR5T1       | chr11:56043114-56044095 | 0 | 0 | 0 | 1 |
| XLOC_003481 | OR8K3       | chr11:56085782-56086721 | 0 | 0 | 0 | 1 |
| XLOC_003482 | OR8K1       | chr11:56113514-56114474 | 0 | 0 | 0 | 1 |
| XLOC_003483 | OR8J1       | chr11:56127690-56128764 | 0 | 0 | 0 | 1 |
| XLOC_003484 | OR8U1,OR8U8 | chr11:56143099-56508560 | 0 | 0 | 0 | 1 |
| XLOC_003485 | OR5AR1      | chr11:56143099-56508560 | 0 | 0 | 0 | 1 |
| XLOC_003486 | OR9G9       | chr11:56143099-56508560 | 0 | 0 | 0 | 1 |
| XLOC_003487 | OR5AK2      | chr11:56756388-56757318 | 0 | 0 | 0 | 1 |
| XLOC_003488 | OR5AK4P     | chr11:56805008-56805935 | 0 | 0 | 0 | 1 |
| XLOC_003489 | LRRC55      | chr11:56949220-56959188 | 0 | 0 | 0 | 1 |
| XLOC_003490 | P2RX3       | chr11:57105840-57137549 | 0 | 0 | 0 | 1 |
| XLOC_003494 | MIR130A     | chr11:57408670-57408759 | 0 | 0 | 0 | 1 |
| XLOC_003499 | OR9Q1       | chr11:57791352-57949038 | 0 | 0 | 0 | 1 |
| XLOC_003500 | OR6Q1       | chr11:57791352-57949038 | 0 | 0 | 0 | 1 |
| XLOC_003501 | OR9Q2       | chr11:57957905-57958990 | 0 | 0 | 0 | 1 |
| XLOC_003502 | OR1S1       | chr11:57982216-57983194 | 0 | 0 | 0 | 1 |
| XLOC_003504 | GLYATL1     | chr11:58695101-58825925 | 0 | 0 | 0 | 1 |
| XLOC_003508 | OR5AN1      | chr11:59131931-59132867 | 0 | 0 | 0 | 1 |
| XLOC_003509 | OR5A1       | chr11:59210641-59211589 | 0 | 0 | 0 | 1 |
| XLOC_003510 | OR4D6       | chr11:59224433-59225378 | 0 | 0 | 0 | 1 |
| XLOC_003511 | OR4D10      | chr11:59244902-59245838 | 0 | 0 | 0 | 1 |
| XLOC_003512 | OR4D11      | chr11:59271048-59271984 | 0 | 0 | 0 | 1 |
| XLOC_003513 | OR4D9       | chr11:59282385-59283330 | 0 | 0 | 0 | 1 |
| XLOC_003516 | PLAC1L      | chr11:59807747-59815516 | 0 | 0 | 0 | 1 |
| XLOC_003517 | MS4A3       | chr11:59824100-59838588 | 0 | 0 | 0 | 1 |
| XLOC_003518 | MS4A2       | chr11:59856136-59865940 | 0 | 0 | 0 | 1 |
| XLOC_003519 | MS4A4A      | chr11:60048013-60076445 | 0 | 0 | 0 | 1 |
| XLOC_003520 | MS4A6E      | chr11:60102354-60108441 | 0 | 0 | 0 | 1 |
| XLOC_003523 | MS4A5       | chr11:60197061-60215265 | 0 | 0 | 0 | 1 |
| XLOC_003524 | MS4A1       | chr11:60223281-60238225 | 0 | 0 | 0 | 1 |
| XLOC_003525 | MS4A12      | chr11:60260250-60274901 | 0 | 0 | 0 | 1 |
| XLOC_003526 | MS4A13      | chr11:60282885-60310191 | 0 | 0 | 0 | 1 |
| XLOC_003527 | LINC00301   | chr11:60383223-60454621 | 0 | 0 | 0 | 1 |
| XLOC_003528 | MS4A8B      | chr11:60467046-60483285 | 0 | 0 | 0 | 1 |
| XLOC_003529 | MS4A15      | chr11:60524339-60544204 | 0 | 0 | 0 | 1 |
| XLOC_003530 | MS4A10      | chr11:60552820-60568778 | 0 | 0 | 0 | 1 |
| XLOC_003537 | PGA3        | chr11:60970983-60980350 | 0 | 0 | 0 | 1 |
| XLOC_003538 | PGA4        | chr11:60989820-60999179 | 0 | 0 | 0 | 1 |
| XLOC_003539 | PGA5        | chr11:61008643-61018929 | 0 | 0 | 0 | 1 |
| XLOC_003545 | MIR4488     | chr11:61276067-61276129 | 0 | 0 | 0 | 1 |
| XLOC_003546 | LRRC10B     | chr11:61276271-61278490 | 0 | 0 | 0 | 1 |
| XLOC_003554 | SCGB1D1     | chr11:61957709-61961009 | 0 | 0 | 0 | 1 |
| XLOC_003555 | SCGB2A1     | chr11:61976139-61981411 | 0 | 0 | 0 | 1 |
| XLOC_003556 | SCGB1D2     | chr11:62009723-62012280 | 0 | 0 | 0 | 1 |
| XLOC_003557 | SCGB2A2     | chr11:62037629-62040628 | 0 | 0 | 0 | 1 |
| XLOC_003559 | SCGB1A1     | chr11:62186506-62190678 | 0 | 0 | 0 | 1 |
| XLOC_003572 | LGALS12     | chr11:63014620-63330855 | 0 | 0 | 0 | 1 |
| XLOC_003595 | MIR1237     | chr11:64126624-64139687 | 0 | 0 | 0 | 1 |
| XLOC_003598 | SLC22A12    | chr11:64358281-64369825 | 0 | 0 | 0 | 1 |

|             |                |                           |   |   |   |   |
|-------------|----------------|---------------------------|---|---|---|---|
| XLOC_003605 | SPDYC          | chr11:64937706-64940688   | 0 | 0 | 0 | 1 |
| XLOC_003616 | MIR548AR       | chr11:65282807-65282828   | 0 | 0 | 0 | 1 |
| XLOC_003622 | MIR4690        | chr11:65383782-65404910   | 0 | 0 | 0 | 1 |
| XLOC_003624 | MIR4489        | chr11:65405577-65418391   | 0 | 0 | 0 | 1 |
| XLOC_003629 | CTSW           | chr11:65647283-65656010   | 0 | 0 | 0 | 1 |
| XLOC_003642 | NPAS4          | chr11:66188474-66194177   | 0 | 0 | 0 | 1 |
| XLOC_003651 | C11orf86       | chr11:66742753-66744479   | 0 | 0 | 0 | 1 |
| XLOC_003660 | TBC1D10C       | chr11:67171383-67177561   | 0 | 0 | 0 | 1 |
| XLOC_003669 | MIR4691        | chr11:67798083-67804114   | 0 | 0 | 0 | 1 |
| XLOC_003678 | ANO1           | chr11:69924407-70035652   | 0 | 0 | 0 | 1 |
| XLOC_003681 | MIR548K        | chr11:70116805-70230607   | 0 | 0 | 0 | 1 |
| XLOC_003684 | SHANK2-AS3     | chr11:70313960-70935808   | 0 | 0 | 0 | 1 |
| XLOC_003691 | DEFB108B       | chr11:71544245-71548608   | 0 | 0 | 0 | 1 |
| XLOC_003692 | LOC100129216   | chr11:71576554-71639493   | 0 | 0 | 0 | 1 |
| XLOC_003697 | FOLR1          | chr11:71900601-71907367   | 0 | 0 | 0 | 1 |
| XLOC_003698 | FOLR2          | chr11:71927818-71932994   | 0 | 0 | 0 | 1 |
| XLOC_003700 | MIR4692        | chr11:72465773-72504750   | 0 | 0 | 0 | 1 |
| XLOC_003715 | SLCO2B1        | chr11:74862031-74917445   | 0 | 0 | 0 | 1 |
| XLOC_003716 | TPBGL          | chr11:74951949-74954749   | 0 | 0 | 0 | 1 |
| XLOC_003721 | MOGAT2         | chr11:75428933-75442331   | 0 | 0 | 0 | 1 |
| XLOC_003733 | THRSP          | chr11:77726760-77850699   | 0 | 0 | 0 | 1 |
| XLOC_003741 | CCDC83         | chr11:85566143-85631051   | 0 | 0 | 0 | 1 |
| XLOC_003748 | GRM5-AS1       | chr11:88237743-88796816   | 0 | 0 | 0 | 1 |
| XLOC_003749 | TYR            | chr11:88911039-89028927   | 0 | 0 | 0 | 1 |
| XLOC_003750 | FOLH1B         | chr11:89392464-89431886   | 0 | 0 | 0 | 1 |
| XLOC_003751 | TRIM77         | chr11:89443466-89451040   | 0 | 0 | 0 | 1 |
| XLOC_003752 | MIR5692A1      | chr11:89570045-89673722   | 0 | 0 | 0 | 1 |
| XLOC_003753 | TRIM53AP       | chr11:89570045-89673722   | 0 | 0 | 0 | 1 |
| XLOC_003754 | TRIM49D1P,TRIM | chr11:89570045-89673722   | 0 | 0 | 0 | 1 |
| XLOC_003755 | TRIM64         | chr11:89701671-89707240   | 0 | 0 | 0 | 1 |
| XLOC_003756 | TRIM49C        | chr11:89764273-89775193   | 0 | 0 | 0 | 1 |
| XLOC_003757 | UBTFL1         | chr11:89819117-89820299   | 0 | 0 | 0 | 1 |
| XLOC_003759 | FAT3           | chr11:92085261-92629635   | 0 | 0 | 0 | 1 |
| XLOC_003760 | MTNR1B         | chr11:92702788-92715948   | 0 | 0 | 0 | 1 |
| XLOC_003761 | CCDC67         | chr11:93063882-93171636   | 0 | 0 | 0 | 1 |
| XLOC_003770 | LOC643037      | chr11:94245694-94265289   | 0 | 0 | 0 | 1 |
| XLOC_003775 | KDM4E          | chr11:94758421-94760760   | 0 | 0 | 0 | 1 |
| XLOC_003779 | MIR1260B       | chr11:95711439-96076344   | 0 | 0 | 0 | 1 |
| XLOC_003781 | CNTN5          | chr11:98891705-100229616  | 0 | 0 | 0 | 1 |
| XLOC_003784 | LOC101054525   | chr11:100900354-101030001 | 0 | 0 | 0 | 1 |
| XLOC_003790 | WTAPP1         | chr11:102654406-102714342 | 0 | 0 | 0 | 1 |
| XLOC_003792 | MIR4693        | chr11:103720633-103720708 | 0 | 0 | 0 | 1 |
| XLOC_003793 | DDI1           | chr11:103777913-104035027 | 0 | 0 | 0 | 1 |
| XLOC_003797 | LOC643923      | chr11:107461816-107537505 | 0 | 0 | 0 | 1 |
| XLOC_003798 | RAB39A         | chr11:107799276-107834208 | 0 | 0 | 0 | 1 |
| XLOC_003803 | C11orf87       | chr11:109292845-109299893 | 0 | 0 | 0 | 1 |
| XLOC_003808 | MIR4491        | chr11:111218481-111218547 | 0 | 0 | 0 | 1 |
| XLOC_003809 | MIR34B         | chr11:111383662-111383746 | 0 | 0 | 0 | 1 |
| XLOC_003810 | MIR34C         | chr11:111384163-111384240 | 0 | 0 | 0 | 1 |

|             |              |                           |   |   |   |   |
|-------------|--------------|---------------------------|---|---|---|---|
| XLOC_003812 | LAYN         | chr11:111411232-111432470 | 0 | 0 | 0 | 1 |
| XLOC_003826 | CLDN25       | chr11:113650517-113651207 | 0 | 0 | 0 | 1 |
| XLOC_003827 | HTR3B        | chr11:113775517-113817283 | 0 | 0 | 0 | 1 |
| XLOC_003828 | HTR3A        | chr11:113845796-113861034 | 0 | 0 | 0 | 1 |
| XLOC_003829 | ZBTB16       | chr11:113930430-114121397 | 0 | 0 | 0 | 1 |
| XLOC_003833 | NXPE2        | chr11:114549199-114577652 | 0 | 0 | 0 | 1 |
| XLOC_003834 | APOC3        | chr11:116700623-116703787 | 0 | 0 | 0 | 1 |
| XLOC_003842 | TMPRSS4      | chr11:117886486-117990556 | 0 | 0 | 0 | 1 |
| XLOC_003843 | CD3E         | chr11:118175294-118186890 | 0 | 0 | 0 | 1 |
| XLOC_003844 | CD3G         | chr11:118215058-118224497 | 0 | 0 | 0 | 1 |
| XLOC_003853 | MIR4492      | chr11:118754474-118781613 | 0 | 0 | 0 | 1 |
| XLOC_003855 | FOXR1        | chr11:118842416-118851995 | 0 | 0 | 0 | 1 |
| XLOC_003872 | GRIK4        | chr11:120531027-120856969 | 0 | 0 | 0 | 1 |
| XLOC_003876 | SORL1        | chr11:121322911-121504471 | 0 | 0 | 0 | 1 |
| XLOC_003878 | CRTAM        | chr11:122709254-122743347 | 0 | 0 | 0 | 1 |
| XLOC_003880 | LOC341056    | chr11:122888273-122890319 | 0 | 0 | 0 | 1 |
| XLOC_003882 | OR8D4        | chr11:123777138-123778083 | 0 | 0 | 0 | 1 |
| XLOC_003883 | OR4D5        | chr11:123810323-123811280 | 0 | 0 | 0 | 1 |
| XLOC_003884 | OR10G4       | chr11:123886281-123887217 | 0 | 0 | 0 | 1 |
| XLOC_003885 | OR10G9       | chr11:123893719-123894655 | 0 | 0 | 0 | 1 |
| XLOC_003886 | OR10G8       | chr11:123900329-123901265 | 0 | 0 | 0 | 1 |
| XLOC_003888 | OR8G2        | chr11:124095397-124096312 | 0 | 0 | 0 | 1 |
| XLOC_003889 | OR8G1,OR8G5  | chr11:124120422-124135763 | 0 | 0 | 0 | 1 |
| XLOC_003890 | OR8A1        | chr11:124439964-124440945 | 0 | 0 | 0 | 1 |
| XLOC_003891 | PANX3        | chr11:124481452-124490251 | 0 | 0 | 0 | 1 |
| XLOC_003896 | HEPN1        | chr11:124789145-124806308 | 0 | 0 | 0 | 1 |
| XLOC_003899 | PKNOX2       | chr11:125034558-125303285 | 0 | 0 | 0 | 1 |
| XLOC_003903 | PATE1        | chr11:125616187-125619743 | 0 | 0 | 0 | 1 |
| XLOC_003904 | PATE3        | chr11:125658005-125661495 | 0 | 0 | 0 | 1 |
| XLOC_003913 | KIRREL3-AS2  | chr11:126293395-126870766 | 0 | 0 | 0 | 1 |
| XLOC_003914 | KIRREL3-AS3  | chr11:126872804-126875953 | 0 | 0 | 0 | 1 |
| XLOC_003923 | C11orf44     | chr11:130542850-130587247 | 0 | 0 | 0 | 1 |
| XLOC_003924 | NTM          | chr11:131240370-132206716 | 0 | 0 | 0 | 1 |
| XLOC_003925 | LOC100128239 | chr11:133902166-133911236 | 0 | 0 | 0 | 1 |
| XLOC_003935 | IFITM5       | chr11:298200-299526       | 0 | 0 | 0 | 1 |
| XLOC_003961 | KRTAP5-3     | chr11:1490684-1785501     | 0 | 0 | 0 | 1 |
| XLOC_003962 | KRTAP5-4     | chr11:1490684-1785501     | 0 | 0 | 0 | 1 |
| XLOC_003963 | FAM99B       | chr11:1490684-1785501     | 0 | 0 | 0 | 1 |
| XLOC_003966 | MIR4298      | chr11:1874199-1913493     | 0 | 0 | 0 | 1 |
| XLOC_003970 | MIR483       | chr11:2150341-2182439     | 0 | 0 | 0 | 1 |
| XLOC_003971 | TH           | chr11:2185158-2193035     | 0 | 0 | 0 | 1 |
| XLOC_003972 | ASCL2        | chr11:2289727-2292182     | 0 | 0 | 0 | 1 |
| XLOC_003973 | C11orf21     | chr11:2317506-2323143     | 0 | 0 | 0 | 1 |
| XLOC_003983 | MRGPRG       | chr11:3239173-3244361     | 0 | 0 | 0 | 1 |
| XLOC_003984 | MRGPRE       | chr11:3249040-3253616     | 0 | 0 | 0 | 1 |
| XLOC_003991 | OR52B4       | chr11:4388492-4389616     | 0 | 0 | 0 | 1 |
| XLOC_003993 | C11orf40     | chr11:4592652-4599050     | 0 | 0 | 0 | 1 |
| XLOC_003995 | OR51E2       | chr11:4701400-4719076     | 0 | 0 | 0 | 1 |
| XLOC_003996 | OR51F1       | chr11:4790208-4791147     | 0 | 0 | 0 | 1 |



|             |                |                         |   |   |   |   |
|-------------|----------------|-------------------------|---|---|---|---|
| XLOC_003997 | OR52R1         | chr11:4824662-4825610   | 0 | 0 | 0 | 1 |
| XLOC_003998 | OR51S1         | chr11:4869466-4870438   | 0 | 0 | 0 | 1 |
| XLOC_003999 | OR51G2         | chr11:4935948-4936893   | 0 | 0 | 0 | 1 |
| XLOC_004000 | OR51G1         | chr11:4944603-4945569   | 0 | 0 | 0 | 1 |
| XLOC_004001 | OR51A4         | chr11:4967388-4968330   | 0 | 0 | 0 | 1 |
| XLOC_004002 | OR51A2         | chr11:4976001-4976943   | 0 | 0 | 0 | 1 |
| XLOC_004003 | OR52E2         | chr11:5079879-5080857   | 0 | 0 | 0 | 1 |
| XLOC_004004 | OR52A5         | chr11:5152921-5153872   | 0 | 0 | 0 | 1 |
| XLOC_004005 | OR52A1         | chr11:5172660-5173599   | 0 | 0 | 0 | 1 |
| XLOC_004006 | OR51V1         | chr11:5220964-5221930   | 0 | 0 | 0 | 1 |
| XLOC_004007 | HBB            | chr11:5246695-5248301   | 0 | 0 | 0 | 1 |
| XLOC_004008 | HBD            | chr11:5254058-5255858   | 0 | 0 | 0 | 1 |
| XLOC_004014 | OR51B2         | chr11:5344527-5345582   | 0 | 0 | 0 | 1 |
| XLOC_004016 | OR51I1         | chr11:5362112-5526882   | 0 | 0 | 0 | 1 |
| XLOC_004017 | UBQLN3         | chr11:5528529-5531153   | 0 | 0 | 0 | 1 |
| XLOC_004018 | UBQLNL         | chr11:5535622-5537956   | 0 | 0 | 0 | 1 |
| XLOC_004019 | OR52H1         | chr11:5565790-5566753   | 0 | 0 | 0 | 1 |
| XLOC_004021 | OR52N5         | chr11:5798863-5799897   | 0 | 0 | 0 | 1 |
| XLOC_004022 | OR52N1         | chr11:5809083-5810046   | 0 | 0 | 0 | 1 |
| XLOC_004023 | OR52E6         | chr11:5862185-5863127   | 0 | 0 | 0 | 1 |
| XLOC_004024 | OR52E8         | chr11:5877978-5878932   | 0 | 0 | 0 | 1 |
| XLOC_004025 | OR56A5         | chr11:5988782-5989724   | 0 | 0 | 0 | 1 |
| XLOC_004026 | OR52L1         | chr11:6007121-6008215   | 0 | 0 | 0 | 1 |
| XLOC_004027 | OR56A4         | chr11:6023280-6024378   | 0 | 0 | 0 | 1 |
| XLOC_004028 | OR56A1         | chr11:6047900-6048971   | 0 | 0 | 0 | 1 |
| XLOC_004029 | OR52B2         | chr11:6190584-6191556   | 0 | 0 | 0 | 1 |
| XLOC_004042 | OR2AG2         | chr11:6789237-6790188   | 0 | 0 | 0 | 1 |
| XLOC_004043 | OR6A2          | chr11:6815755-6817139   | 0 | 0 | 0 | 1 |
| XLOC_004046 | CYB5R2         | chr11:7686325-7694821   | 0 | 0 | 0 | 1 |
| XLOC_004047 | OVCH2          | chr11:7710668-7727941   | 0 | 0 | 0 | 1 |
| XLOC_004048 | OR5P2          | chr11:7817520-7818489   | 0 | 0 | 0 | 1 |
| XLOC_004049 | OR5P3          | chr11:7846583-7847519   | 0 | 0 | 0 | 1 |
| XLOC_004050 | LOC283299      | chr11:7872297-7927502   | 0 | 0 | 0 | 1 |
| XLOC_004051 | OR10A6         | chr11:7949264-7950209   | 0 | 0 | 0 | 1 |
| XLOC_004052 | OR10A3         | chr11:7960122-7961067   | 0 | 0 | 0 | 1 |
| XLOC_004053 | NLRP10         | chr11:7981155-7985059   | 0 | 0 | 0 | 1 |
| XLOC_004054 | RIC3           | chr11:8060179-8190590   | 0 | 0 | 0 | 1 |
| XLOC_004055 | LMO1           | chr11:8245850-8290182   | 0 | 0 | 0 | 1 |
| XLOC_004064 | MIR5691        | chr11:9041046-9113150   | 0 | 0 | 0 | 1 |
| XLOC_004072 | LYVE1          | chr11:10562782-10715535 | 0 | 0 | 0 | 1 |
| XLOC_004073 | MRVI1          | chr11:10562782-10715535 | 0 | 0 | 0 | 1 |
| XLOC_004079 | MIR4299        | chr11:11678197-11678269 | 0 | 0 | 0 | 1 |
| XLOC_004083 | PTH            | chr11:13513600-13517567 | 0 | 0 | 0 | 1 |
| XLOC_004088 | CALCA          | chr11:14988214-14993832 | 0 | 0 | 0 | 1 |
| XLOC_004094 | ABCC8          | chr11:17414431-17498449 | 0 | 0 | 0 | 1 |
| XLOC_004099 | SAA3P          | chr11:18134018-18137679 | 0 | 0 | 0 | 1 |
| XLOC_004100 | SAA2,SAA2-SAA4 | chr11:18252901-18270221 | 0 | 0 | 0 | 1 |
| XLOC_004106 | PTPN5          | chr11:18749474-18813389 | 0 | 0 | 0 | 1 |
| XLOC_004107 | MRGPRX1        | chr11:18955359-18956549 | 0 | 0 | 0 | 1 |

|             |              |                         |   |   |   |   |
|-------------|--------------|-------------------------|---|---|---|---|
| XLOC_004108 | MRGPRX2      | chr11:19076002-19082228 | 0 | 0 | 0 | 1 |
| XLOC_004109 | CSRP3        | chr11:19203576-19232118 | 0 | 0 | 0 | 1 |
| XLOC_004111 | NAV2-AS5     | chr11:19372270-20143147 | 0 | 0 | 0 | 1 |
| XLOC_004112 | NAV2-AS4     | chr11:19372270-20143147 | 0 | 0 | 0 | 1 |
| XLOC_004114 | MIR4694      | chr11:19372270-20143147 | 0 | 0 | 0 | 1 |
| XLOC_004115 | DBX1         | chr11:20177759-20181870 | 0 | 0 | 0 | 1 |
| XLOC_004118 | CCDC179      | chr11:22868467-22881972 | 0 | 0 | 0 | 1 |
| XLOC_004126 | KCNA4        | chr11:30031287-30038577 | 0 | 0 | 0 | 1 |
| XLOC_004129 | DCDC1        | chr11:31284170-31391357 | 0 | 0 | 0 | 1 |
| XLOC_004132 | WT1          | chr11:32409321-32457081 | 0 | 0 | 0 | 1 |
| XLOC_004142 | SLC1A2       | chr11:35272751-35441610 | 0 | 0 | 0 | 1 |
| XLOC_004147 | LRRRC4C      | chr11:40135750-41481186 | 0 | 0 | 0 | 1 |
| XLOC_004148 | LOC100507205 | chr11:42209292-42275240 | 0 | 0 | 0 | 1 |
| XLOC_004149 | HNRNPKP3     | chr11:43283053-43290919 | 0 | 0 | 0 | 1 |
| XLOC_004155 | C11orf94     | chr11:45928085-45928833 | 0 | 0 | 0 | 1 |
| XLOC_004160 | MIR3160-1    | chr11:46417961-46615619 | 0 | 0 | 0 | 1 |
| XLOC_004164 | MIR5582      | chr11:46765083-46867859 | 0 | 0 | 0 | 1 |
| XLOC_004170 | MYBPC3       | chr11:47352956-47374253 | 0 | 0 | 0 | 1 |
| XLOC_004181 | OR4C45       | chr11:48366899-48373999 | 0 | 0 | 0 | 1 |
| XLOC_004182 | TRIM64C      | chr11:49075265-49080664 | 0 | 0 | 0 | 1 |
| XLOC_004183 | FOLH1        | chr11:49168186-49230222 | 0 | 0 | 0 | 1 |
| XLOC_004184 | OR4C12       | chr11:50003008-50004071 | 0 | 0 | 0 | 1 |
| XLOC_004185 | LOC441601    | chr11:50238998-50257633 | 0 | 0 | 0 | 1 |
| XLOC_004186 | OR4A5        | chr11:51411377-51412448 | 0 | 0 | 0 | 1 |
| XLOC_004187 | TRIM51HP     | chr11:55061178-55065708 | 0 | 0 | 0 | 1 |
| XLOC_004188 | OR4C11       | chr11:55370829-55371874 | 0 | 0 | 0 | 1 |
| XLOC_004189 | OR5W2        | chr11:55681125-55682058 | 0 | 0 | 0 | 1 |
| XLOC_004190 | OR5I1        | chr11:55702931-55703876 | 0 | 0 | 0 | 1 |
| XLOC_004191 | OR10AG1      | chr11:55735033-55735939 | 0 | 0 | 0 | 1 |
| XLOC_004192 | OR7E5P       | chr11:55746178-55753881 | 0 | 0 | 0 | 1 |
| XLOC_004193 | OR5F1        | chr11:55761156-55762101 | 0 | 0 | 0 | 1 |
| XLOC_004194 | OR8J3        | chr11:55904246-55905194 | 0 | 0 | 0 | 1 |
| XLOC_004195 | OR8K5        | chr11:55926869-55927793 | 0 | 0 | 0 | 1 |
| XLOC_004196 | OR5T2        | chr11:55999581-56000661 | 0 | 0 | 0 | 1 |
| XLOC_004197 | OR8H1        | chr11:56057602-56058538 | 0 | 0 | 0 | 1 |
| XLOC_004198 | OR5R1        | chr11:56143099-56508560 | 0 | 0 | 0 | 1 |
| XLOC_004199 | OR5M9        | chr11:56143099-56508560 | 0 | 0 | 0 | 1 |
| XLOC_004200 | OR5M3        | chr11:56143099-56508560 | 0 | 0 | 0 | 1 |
| XLOC_004201 | OR5M8        | chr11:56143099-56508560 | 0 | 0 | 0 | 1 |
| XLOC_004202 | OR5M11       | chr11:56143099-56508560 | 0 | 0 | 0 | 1 |
| XLOC_004203 | OR5M10       | chr11:56143099-56508560 | 0 | 0 | 0 | 1 |
| XLOC_004204 | OR5M1        | chr11:56143099-56508560 | 0 | 0 | 0 | 1 |
| XLOC_004205 | OR5AP2       | chr11:56143099-56508560 | 0 | 0 | 0 | 1 |
| XLOC_004206 | OR9G4        | chr11:56510303-56511287 | 0 | 0 | 0 | 1 |
| XLOC_004207 | APLNR        | chr11:57001051-57004927 | 0 | 0 | 0 | 1 |
| XLOC_004210 | PRG3         | chr11:57144241-57148623 | 0 | 0 | 0 | 1 |
| XLOC_004219 | OR9I1        | chr11:57791352-57949038 | 0 | 0 | 0 | 1 |
| XLOC_004220 | OR1S2        | chr11:57970675-57971653 | 0 | 0 | 0 | 1 |
| XLOC_004221 | OR10Q1       | chr11:57995353-57996390 | 0 | 0 | 0 | 1 |

|             |              |                         |   |   |   |   |
|-------------|--------------|-------------------------|---|---|---|---|
| XLOC_004222 | OR10W1       | chr11:58034263-58035732 | 0 | 0 | 0 | 1 |
| XLOC_004223 | OR5B17       | chr11:58125597-58126542 | 0 | 0 | 0 | 1 |
| XLOC_004224 | OR5B3        | chr11:58169937-58170882 | 0 | 0 | 0 | 1 |
| XLOC_004225 | OR5B2        | chr11:58189737-58190786 | 0 | 0 | 0 | 1 |
| XLOC_004226 | OR5B12       | chr11:58206592-58207646 | 0 | 0 | 0 | 1 |
| XLOC_004227 | OR5B21       | chr11:58274648-58275578 | 0 | 0 | 0 | 1 |
| XLOC_004229 | GLYAT        | chr11:58476229-58499447 | 0 | 0 | 0 | 1 |
| XLOC_004230 | GLYATL2      | chr11:58601539-58611997 | 0 | 0 | 0 | 1 |
| XLOC_004231 | LOC283194    | chr11:58695101-58825925 | 0 | 0 | 0 | 1 |
| XLOC_004232 | MPEG1        | chr11:58939811-58980494 | 0 | 0 | 0 | 1 |
| XLOC_004233 | OR5A2        | chr11:59189451-59190426 | 0 | 0 | 0 | 1 |
| XLOC_004235 | MIR3162      | chr11:59341870-59383617 | 0 | 0 | 0 | 1 |
| XLOC_004237 | OR10V1       | chr11:59480388-59481318 | 0 | 0 | 0 | 1 |
| XLOC_004239 | GIF          | chr11:59596745-59612974 | 0 | 0 | 0 | 1 |
| XLOC_004240 | TCN1         | chr11:59620280-59634041 | 0 | 0 | 0 | 1 |
| XLOC_004241 | MS4A6A       | chr11:59939079-59952139 | 0 | 0 | 0 | 1 |
| XLOC_004254 | MIR1908      | chr11:61567096-61584529 | 0 | 0 | 0 | 1 |
| XLOC_004258 | SCGB1D4      | chr11:62063753-62066536 | 0 | 0 | 0 | 1 |
| XLOC_004279 | SNORD30      | chr11:62619459-62623360 | 0 | 0 | 0 | 1 |
| XLOC_004280 | SNORD29      | chr11:62619459-62623360 | 0 | 0 | 0 | 1 |
| XLOC_004283 | SNORD26      | chr11:62619459-62623360 | 0 | 0 | 0 | 1 |
| XLOC_004284 | SNORD25      | chr11:62619459-62623360 | 0 | 0 | 0 | 1 |
| XLOC_004286 | SLC22A6      | chr11:62744068-62752495 | 0 | 0 | 0 | 1 |
| XLOC_004287 | SLC22A8      | chr11:62760295-62783317 | 0 | 0 | 0 | 1 |
| XLOC_004288 | SLC22A24     | chr11:62847411-62911693 | 0 | 0 | 0 | 1 |
| XLOC_004289 | SLC22A25     | chr11:62931295-62997124 | 0 | 0 | 0 | 1 |
| XLOC_004290 | MIR3680-2    | chr11:63014620-63330855 | 0 | 0 | 0 | 1 |
| XLOC_004291 | HRASLS5      | chr11:63014620-63330855 | 0 | 0 | 0 | 1 |
| XLOC_004310 | MIR192       | chr11:64658608-64658718 | 0 | 0 | 0 | 1 |
| XLOC_004311 | MIR194-2     | chr11:64658826-64658911 | 0 | 0 | 0 | 1 |
| XLOC_004313 | GPHA2        | chr11:64692142-64703360 | 0 | 0 | 0 | 1 |
| XLOC_004314 | C11orf85     | chr11:64705928-64727609 | 0 | 0 | 0 | 1 |
| XLOC_004318 | LOC100130348 | chr11:64851693-64856542 | 0 | 0 | 0 | 1 |
| XLOC_004339 | CD248        | chr11:66081957-66084515 | 0 | 0 | 0 | 1 |
| XLOC_004346 | CTSF         | chr11:66330934-66336047 | 0 | 0 | 0 | 1 |
| XLOC_004356 | GPR152       | chr11:67218771-67220200 | 0 | 0 | 0 | 1 |
| XLOC_004360 | CABP2        | chr11:67286417-67290899 | 0 | 0 | 0 | 1 |
| XLOC_004374 | MRGPRD       | chr11:68747489-68748455 | 0 | 0 | 0 | 1 |
| XLOC_004375 | MRGPRF       | chr11:68771861-68780850 | 0 | 0 | 0 | 1 |
| XLOC_004377 | FGF19        | chr11:69513005-69519106 | 0 | 0 | 0 | 1 |
| XLOC_004378 | FGF4         | chr11:69587796-69590171 | 0 | 0 | 0 | 1 |
| XLOC_004379 | FGF3         | chr11:69624735-69634192 | 0 | 0 | 0 | 1 |
| XLOC_004381 | MIR3664      | chr11:70313960-70935808 | 0 | 0 | 0 | 1 |
| XLOC_004384 | KRTAP5-11    | chr11:71292900-71293921 | 0 | 0 | 0 | 1 |
| XLOC_004388 | MIR3165      | chr11:71709957-71823822 | 0 | 0 | 0 | 1 |
| XLOC_004394 | MIR139       | chr11:72287183-72385497 | 0 | 0 | 0 | 1 |
| XLOC_004406 | KCNE3        | chr11:74165885-74178600 | 0 | 0 | 0 | 1 |
| XLOC_004408 | CHRD2        | chr11:74407473-74442186 | 0 | 0 | 0 | 1 |
| XLOC_004409 | MIR4696      | chr11:74407473-74442186 | 0 | 0 | 0 | 1 |

|             |                |                           |   |   |   |   |
|-------------|----------------|---------------------------|---|---|---|---|
| XLOC_004411 | OR2AT4         | chr11:74799795-74800758   | 0 | 0 | 0 | 1 |
| XLOC_004413 | MIR326         | chr11:74971165-75062875   | 0 | 0 | 0 | 1 |
| XLOC_004417 | LOC283214      | chr11:75469499-75479692   | 0 | 0 | 0 | 1 |
| XLOC_004420 | LRRRC32        | chr11:76368567-76381791   | 0 | 0 | 0 | 1 |
| XLOC_004421 | GUCY2EP        | chr11:76391209-76432833   | 0 | 0 | 0 | 1 |
| XLOC_004422 | GDPD4          | chr11:76927602-76998463   | 0 | 0 | 0 | 1 |
| XLOC_004428 | RNU6-83        | chr11:77726760-77850699   | 0 | 0 | 0 | 1 |
| XLOC_004434 | MIR708         | chr11:78364327-79151695   | 0 | 0 | 0 | 1 |
| XLOC_004435 | MIR5579        | chr11:78364327-79151695   | 0 | 0 | 0 | 1 |
| XLOC_004436 | MIR4300        | chr11:81601782-81601878   | 0 | 0 | 0 | 1 |
| XLOC_004437 | FAM181B        | chr11:82443045-82444906   | 0 | 0 | 0 | 1 |
| XLOC_004440 | SNORA70E       | chr11:82692477-82782884   | 0 | 0 | 0 | 1 |
| XLOC_004448 | OR7E2P         | chr11:86567972-86568996   | 0 | 0 | 0 | 1 |
| XLOC_004452 | GRM5           | chr11:88237743-88796816   | 0 | 0 | 0 | 1 |
| XLOC_004454 | TRIM49         | chr11:89530822-89541743   | 0 | 0 | 0 | 1 |
| XLOC_004455 | TRIM64B        | chr11:89570045-89673722   | 0 | 0 | 0 | 1 |
| XLOC_004456 | TRIM49D1P,TRIM | chr11:89570045-89673722   | 0 | 0 | 0 | 1 |
| XLOC_004457 | TRIM53AP       | chr11:89726708-89735676   | 0 | 0 | 0 | 1 |
| XLOC_004459 | MIR4490        | chr11:90288941-90289025   | 0 | 0 | 0 | 1 |
| XLOC_004467 | SNORD5         | chr11:93466393-93466466   | 0 | 0 | 0 | 1 |
| XLOC_004469 | MIR1304        | chr11:93466839-93466930   | 0 | 0 | 0 | 1 |
| XLOC_004481 | JRKL-AS1       | chr11:96176445-96240041   | 0 | 0 | 0 | 1 |
| XLOC_004482 | PGR            | chr11:100900354-101030001 | 0 | 0 | 0 | 1 |
| XLOC_004484 | MIR3920        | chr11:101322294-101454659 | 0 | 0 | 0 | 1 |
| XLOC_004485 | ANGPTL5        | chr11:101761404-101871793 | 0 | 0 | 0 | 1 |
| XLOC_004488 | MMP20          | chr11:102447565-102496063 | 0 | 0 | 0 | 1 |
| XLOC_004489 | MMP27          | chr11:102562414-102576468 | 0 | 0 | 0 | 1 |
| XLOC_004490 | MMP8           | chr11:102582525-102595685 | 0 | 0 | 0 | 1 |
| XLOC_004494 | MMP12          | chr11:102733463-102745764 | 0 | 0 | 0 | 1 |
| XLOC_004495 | MMP13          | chr11:102813720-102826463 | 0 | 0 | 0 | 1 |
| XLOC_004497 | PDGFD          | chr11:103777913-104035027 | 0 | 0 | 0 | 1 |
| XLOC_004498 | CASP12         | chr11:104756444-104769397 | 0 | 0 | 0 | 1 |
| XLOC_004504 | CARD17         | chr11:104963195-104972158 | 0 | 0 | 0 | 1 |
| XLOC_004505 | CARD18         | chr11:105008447-105010461 | 0 | 0 | 0 | 1 |
| XLOC_004518 | ARHGAP20       | chr11:110447758-110583912 | 0 | 0 | 0 | 1 |
| XLOC_004521 | LOC100132078   | chr11:111284966-111288911 | 0 | 0 | 0 | 1 |
| XLOC_004522 | BTG4           | chr11:111338255-111383079 | 0 | 0 | 0 | 1 |
| XLOC_004529 | IL18           | chr11:112013973-112034840 | 0 | 0 | 0 | 1 |
| XLOC_004531 | LOC100288346   | chr11:112831968-113149158 | 0 | 0 | 0 | 1 |
| XLOC_004532 | DRD2           | chr11:113280316-113346001 | 0 | 0 | 0 | 1 |
| XLOC_004533 | MIR4301        | chr11:113280316-113346001 | 0 | 0 | 0 | 1 |
| XLOC_004538 | NXPE1          | chr11:114392436-114430580 | 0 | 0 | 0 | 1 |
| XLOC_004539 | NXPE4          | chr11:114441312-114466484 | 0 | 0 | 0 | 1 |
| XLOC_004541 | LOC283143      | chr11:115626050-115630918 | 0 | 0 | 0 | 1 |
| XLOC_004544 | APOA5          | chr11:116660085-116663136 | 0 | 0 | 0 | 1 |
| XLOC_004551 | DSCAML1        | chr11:117298488-117667976 | 0 | 0 | 0 | 1 |
| XLOC_004554 | TMPRSS4-AS1    | chr11:117886486-117990556 | 0 | 0 | 0 | 1 |
| XLOC_004556 | SCN2B          | chr11:118033518-118047337 | 0 | 0 | 0 | 1 |
| XLOC_004557 | AMICA1         | chr11:118064441-118095809 | 0 | 0 | 0 | 1 |

|             |             |                           |   |   |   |   |
|-------------|-------------|---------------------------|---|---|---|---|
| XLOC_004563 | TREH        | chr11:118528941-118550381 | 0 | 0 | 0 | 1 |
| XLOC_004574 | MFRP        | chr11:119209651-119217383 | 0 | 0 | 0 | 1 |
| XLOC_004576 | THY1        | chr11:119252487-119369944 | 0 | 0 | 0 | 1 |
| XLOC_004578 | TRIM29      | chr11:119981993-120008863 | 0 | 0 | 0 | 1 |
| XLOC_004579 | LOC649133   | chr11:120107348-120190653 | 0 | 0 | 0 | 1 |
| XLOC_004581 | MIR125B1    | chr11:121959810-122073770 | 0 | 0 | 0 | 1 |
| XLOC_004582 | BLID        | chr11:121959810-122073770 | 0 | 0 | 0 | 1 |
| XLOC_004583 | MIRLET7A2   | chr11:121959810-122073770 | 0 | 0 | 0 | 1 |
| XLOC_004584 | MIR100      | chr11:121959810-122073770 | 0 | 0 | 0 | 1 |
| XLOC_004585 | BSX         | chr11:122848356-122852379 | 0 | 0 | 0 | 1 |
| XLOC_004588 | MIR4493     | chr11:123252147-123252220 | 0 | 0 | 0 | 1 |
| XLOC_004591 | OR6X1       | chr11:123624287-123625226 | 0 | 0 | 0 | 1 |
| XLOC_004592 | OR6M1       | chr11:123676115-123677057 | 0 | 0 | 0 | 1 |
| XLOC_004593 | TMEM225     | chr11:123753632-123756340 | 0 | 0 | 0 | 1 |
| XLOC_004594 | OR6T1       | chr11:123813573-123814545 | 0 | 0 | 0 | 1 |
| XLOC_004595 | OR10S1      | chr11:123847402-123848398 | 0 | 0 | 0 | 1 |
| XLOC_004596 | OR10G7      | chr11:123908772-123909708 | 0 | 0 | 0 | 1 |
| XLOC_004597 | OR8D1       | chr11:124179735-124180662 | 0 | 0 | 0 | 1 |
| XLOC_004598 | OR8D2       | chr11:124189157-124190093 | 0 | 0 | 0 | 1 |
| XLOC_004599 | OR8B2       | chr11:124252297-124253239 | 0 | 0 | 0 | 1 |
| XLOC_004600 | OR8B3       | chr11:124266305-124267247 | 0 | 0 | 0 | 1 |
| XLOC_004601 | OR8B4       | chr11:124293837-124294767 | 0 | 0 | 0 | 1 |
| XLOC_004602 | OR8B8       | chr11:124310045-124310981 | 0 | 0 | 0 | 1 |
| XLOC_004603 | OR8B12      | chr11:124412617-124413550 | 0 | 0 | 0 | 1 |
| XLOC_004609 | HEPACAM     | chr11:124789145-124806308 | 0 | 0 | 0 | 1 |
| XLOC_004613 | PATE2       | chr11:125646027-125648714 | 0 | 0 | 0 | 1 |
| XLOC_004620 | MIR3167     | chr11:126293395-126870766 | 0 | 0 | 0 | 1 |
| XLOC_004622 | FLI1-AS1    | chr11:128556429-128683162 | 0 | 0 | 0 | 1 |
| XLOC_004633 | SPATA19     | chr11:133710516-133715392 | 0 | 0 | 0 | 1 |
| XLOC_004649 | CACNA1C     | chr12:2162415-2807115     | 0 | 0 | 0 | 1 |
| XLOC_004650 | CACNA1C-IT3 | chr12:2162415-2807115     | 0 | 0 | 0 | 1 |
| XLOC_004666 | KCNA1       | chr12:5019072-5027422     | 0 | 0 | 0 | 1 |
| XLOC_004667 | KCNA5       | chr12:5153084-5155954     | 0 | 0 | 0 | 1 |
| XLOC_004668 | NTF3        | chr12:5541279-5604465     | 0 | 0 | 0 | 1 |
| XLOC_004693 | MIR200C     | chr12:7072861-7072929     | 0 | 0 | 0 | 1 |
| XLOC_004694 | MIR141      | chr12:7073259-7073354     | 0 | 0 | 0 | 1 |
| XLOC_004700 | ACSM4       | chr12:7456927-7480969     | 0 | 0 | 0 | 1 |
| XLOC_004701 | DPPA3       | chr12:7864088-7870152     | 0 | 0 | 0 | 1 |
| XLOC_004702 | NANOGNB     | chr12:7917811-7926717     | 0 | 0 | 0 | 1 |
| XLOC_004709 | CLEC6A      | chr12:8608590-8630926     | 0 | 0 | 0 | 1 |
| XLOC_004710 | CLEC4D      | chr12:8666135-8674960     | 0 | 0 | 0 | 1 |
| XLOC_004720 | KLRF1       | chr12:9980076-9997603     | 0 | 0 | 0 | 1 |
| XLOC_004721 | KLRF2       | chr12:10034087-10048432   | 0 | 0 | 0 | 1 |
| XLOC_004722 | CLEC12A     | chr12:10103914-10138194   | 0 | 0 | 0 | 1 |
| XLOC_004723 | CLEC12B     | chr12:10163230-10171399   | 0 | 0 | 0 | 1 |
| XLOC_004724 | CLEC9A      | chr12:10183275-10218565   | 0 | 0 | 0 | 1 |
| XLOC_004725 | TMEM52B     | chr12:10331556-10344403   | 0 | 0 | 0 | 1 |
| XLOC_004733 | MIR1244-2   | chr12:12264885-12264967   | 0 | 0 | 0 | 1 |
| XLOC_004738 | MIR613      | chr12:12878850-12944399   | 0 | 0 | 0 | 1 |

|             |              |                         |   |   |   |   |
|-------------|--------------|-------------------------|---|---|---|---|
| XLOC_004742 | MIR614       | chr12:13068762-13068852 | 0 | 0 | 0 | 1 |
| XLOC_004750 | PDE6H        | chr12:15125955-15134799 | 0 | 0 | 0 | 1 |
| XLOC_004751 | PTPRO        | chr12:15475190-15751265 | 0 | 0 | 0 | 1 |
| XLOC_004755 | SKP1P2       | chr12:17141680-17143562 | 0 | 0 | 0 | 1 |
| XLOC_004756 | MIR3974      | chr12:17826232-17826328 | 0 | 0 | 0 | 1 |
| XLOC_004757 | PIK3C2G      | chr12:18414473-18801352 | 0 | 0 | 0 | 1 |
| XLOC_004758 | CAPZA3       | chr12:18891044-18892122 | 0 | 0 | 0 | 1 |
| XLOC_004761 | LOC100506393 | chr12:20167618-20251802 | 0 | 0 | 0 | 1 |
| XLOC_004762 | PDE3A        | chr12:20522178-20837041 | 0 | 0 | 0 | 1 |
| XLOC_004773 | MIR920       | chr12:23685230-24715383 | 0 | 0 | 0 | 1 |
| XLOC_004774 | LRMP         | chr12:25205180-25348094 | 0 | 0 | 0 | 1 |
| XLOC_004789 | LOC101055625 | chr12:29542226-29650619 | 0 | 0 | 0 | 1 |
| XLOC_004802 | C12orf40     | chr12:40019971-40115720 | 0 | 0 | 0 | 1 |
| XLOC_004803 | LRRK2        | chr12:40618812-40763086 | 0 | 0 | 0 | 1 |
| XLOC_004804 | CNTN1        | chr12:41086243-41466213 | 0 | 0 | 0 | 1 |
| XLOC_004811 | MIR4698      | chr12:47581594-47581674 | 0 | 0 | 0 | 1 |
| XLOC_004812 | PCED1B       | chr12:47602202-47630443 | 0 | 0 | 0 | 1 |
| XLOC_004816 | C12orf68     | chr12:48577365-48579709 | 0 | 0 | 0 | 1 |
| XLOC_004818 | ANP32D       | chr12:48866447-48866843 | 0 | 0 | 0 | 1 |
| XLOC_004820 | OR8S1        | chr12:48919414-48921886 | 0 | 0 | 0 | 1 |
| XLOC_004821 | LOC255411    | chr12:49121217-49159569 | 0 | 0 | 0 | 1 |
| XLOC_004824 | WNT1         | chr12:49372235-49376396 | 0 | 0 | 0 | 1 |
| XLOC_004835 | AQP2         | chr12:50344523-50352664 | 0 | 0 | 0 | 1 |
| XLOC_004836 | AQP5         | chr12:50355278-50359465 | 0 | 0 | 0 | 1 |
| XLOC_004845 | TMPRSS12     | chr12:51236700-51281663 | 0 | 0 | 0 | 1 |
| XLOC_004847 | HIGD1C       | chr12:51347781-51364289 | 0 | 0 | 0 | 1 |
| XLOC_004852 | ANKRD33      | chr12:52281792-52285505 | 0 | 0 | 0 | 1 |
| XLOC_004878 | HOXC12       | chr12:54348713-54350350 | 0 | 0 | 0 | 1 |
| XLOC_004881 | MIR196A2     | chr12:54385521-54385631 | 0 | 0 | 0 | 1 |
| XLOC_004885 | MIR615       | chr12:54410641-54449814 | 0 | 0 | 0 | 1 |
| XLOC_004887 | LOC100240734 | chr12:54452037-54516018 | 0 | 0 | 0 | 1 |
| XLOC_004891 | MIR148B      | chr12:54718873-54745635 | 0 | 0 | 0 | 1 |
| XLOC_004894 | MUCL1        | chr12:55248298-55252174 | 0 | 0 | 0 | 1 |
| XLOC_004895 | NEUROD4      | chr12:55413728-55423801 | 0 | 0 | 0 | 1 |
| XLOC_004896 | OR9K2        | chr12:55523552-55524560 | 0 | 0 | 0 | 1 |
| XLOC_004897 | OR10A7       | chr12:55614808-55615759 | 0 | 0 | 0 | 1 |
| XLOC_004898 | OR6C74       | chr12:55641071-55642010 | 0 | 0 | 0 | 1 |
| XLOC_004899 | OR6C1        | chr12:55714383-55715322 | 0 | 0 | 0 | 1 |
| XLOC_004900 | OR6C3        | chr12:55725484-55726420 | 0 | 0 | 0 | 1 |
| XLOC_004901 | OR6C75       | chr12:55758894-55759833 | 0 | 0 | 0 | 1 |
| XLOC_004902 | OR6C65       | chr12:55794312-55795251 | 0 | 0 | 0 | 1 |
| XLOC_004903 | OR6C76       | chr12:55820037-55820976 | 0 | 0 | 0 | 1 |
| XLOC_004904 | OR6C2        | chr12:55845997-55846936 | 0 | 0 | 0 | 1 |
| XLOC_004905 | OR6C68       | chr12:55886161-55887100 | 0 | 0 | 0 | 1 |
| XLOC_004906 | OR6C4        | chr12:55945010-55945940 | 0 | 0 | 0 | 1 |
| XLOC_004907 | OR2AP1       | chr12:55968198-55969128 | 0 | 0 | 0 | 1 |
| XLOC_004908 | OR10P1       | chr12:56030675-56031617 | 0 | 0 | 0 | 1 |
| XLOC_004937 | MIR1228      | chr12:57522281-57607125 | 0 | 0 | 0 | 1 |
| XLOC_004947 | DTX3         | chr12:57998603-58003583 | 0 | 0 | 0 | 1 |

|             |                |                           |   |   |   |   |
|-------------|----------------|---------------------------|---|---|---|---|
| XLOC_004948 | ARHGEF25       | chr12:58003962-58011028   | 0 | 0 | 0 | 1 |
| XLOC_004949 | SLC26A10       | chr12:58013692-58027022   | 0 | 0 | 0 | 1 |
| XLOC_004960 | MIRLET71       | chr12:62997465-62997549   | 0 | 0 | 0 | 1 |
| XLOC_004966 | MIR548C        | chr12:65004292-65091347   | 0 | 0 | 0 | 1 |
| XLOC_004968 | FLJ41278       | chr12:65277553-65371302   | 0 | 0 | 0 | 1 |
| XLOC_004972 | IRAK3          | chr12:66582977-66648394   | 0 | 0 | 0 | 1 |
| XLOC_004984 | MIR3913-2      | chr12:69978501-69978603   | 0 | 0 | 0 | 1 |
| XLOC_004994 | TPH2           | chr12:72332625-72426221   | 0 | 0 | 0 | 1 |
| XLOC_004995 | TRHDE          | chr12:72647286-73059422   | 0 | 0 | 0 | 1 |
| XLOC_005003 | MIR1252        | chr12:79257772-79845788   | 0 | 0 | 0 | 1 |
| XLOC_005004 | MIR5692B       | chr12:79850650-79852440   | 0 | 0 | 0 | 1 |
| XLOC_005006 | PTPRQ          | chr12:80838125-81073968   | 0 | 0 | 0 | 1 |
| XLOC_005007 | MYF6           | chr12:81101407-81103256   | 0 | 0 | 0 | 1 |
| XLOC_005008 | MYF5           | chr12:81110707-81113447   | 0 | 0 | 0 | 1 |
| XLOC_005009 | ACSS3          | chr12:81471808-81649582   | 0 | 0 | 0 | 1 |
| XLOC_005010 | MIR4699        | chr12:81471808-81649582   | 0 | 0 | 0 | 1 |
| XLOC_005013 | LRRIQ1         | chr12:85430098-85638883   | 0 | 0 | 0 | 1 |
| XLOC_005014 | ALX1           | chr12:85674035-85695561   | 0 | 0 | 0 | 1 |
| XLOC_005015 | NTS            | chr12:86268072-86276770   | 0 | 0 | 0 | 1 |
| XLOC_005019 | LINC00615      | chr12:91311799-91342446   | 0 | 0 | 0 | 1 |
| XLOC_005020 | CLLU1          | chr12:92813869-92824778   | 0 | 0 | 0 | 1 |
| XLOC_005021 | C12orf74       | chr12:93096618-93102325   | 0 | 0 | 0 | 1 |
| XLOC_005029 | MIR5700        | chr12:94955564-94955635   | 0 | 0 | 0 | 1 |
| XLOC_005030 | KRT19P2,MIR492 | chr12:95228173-95228804   | 0 | 0 | 0 | 1 |
| XLOC_005032 | MIR331         | chr12:95702195-95702289   | 0 | 0 | 0 | 1 |
| XLOC_005033 | MIR3685        | chr12:95703698-95703760   | 0 | 0 | 0 | 1 |
| XLOC_005035 | PGAM1P5        | chr12:96043030-96184536   | 0 | 0 | 0 | 1 |
| XLOC_005040 | RMST           | chr12:97858798-97927544   | 0 | 0 | 0 | 1 |
| XLOC_005041 | MIR1251        | chr12:97858798-97927544   | 0 | 0 | 0 | 1 |
| XLOC_005042 | MIR135A2       | chr12:97957589-97957689   | 0 | 0 | 0 | 1 |
| XLOC_005048 | MIR1827        | chr12:100583661-100583727 | 0 | 0 | 0 | 1 |
| XLOC_005051 | SLC17A8        | chr12:100750856-100815837 | 0 | 0 | 0 | 1 |
| XLOC_005052 | NR1H4          | chr12:100867550-100957645 | 0 | 0 | 0 | 1 |
| XLOC_005056 | SPIC           | chr12:101871334-101880775 | 0 | 0 | 0 | 1 |
| XLOC_005057 | MYBPC1         | chr12:101988708-102079658 | 0 | 0 | 0 | 1 |
| XLOC_005062 | STAB2          | chr12:103981068-104160502 | 0 | 0 | 0 | 1 |
| XLOC_005069 | MIR3922        | chr12:104850691-105155792 | 0 | 0 | 0 | 1 |
| XLOC_005075 | RFX4           | chr12:106751435-107283094 | 0 | 0 | 0 | 1 |
| XLOC_005080 | ASCL4          | chr12:108168161-108170421 | 0 | 0 | 0 | 1 |
| XLOC_005081 | WSCD2          | chr12:108523510-108644313 | 0 | 0 | 0 | 1 |
| XLOC_005084 | DAO            | chr12:109273856-109294710 | 0 | 0 | 0 | 1 |
| XLOC_005092 | MIR4497        | chr12:110220891-110271241 | 0 | 0 | 0 | 1 |
| XLOC_005100 | CCDC63         | chr12:111284810-111345338 | 0 | 0 | 0 | 1 |
| XLOC_005101 | LOC100131138   | chr12:111374405-111375250 | 0 | 0 | 0 | 1 |
| XLOC_005121 | TBX5-AS1       | chr12:114791734-114850637 | 0 | 0 | 0 | 1 |
| XLOC_005131 | CCDC60         | chr12:119772516-119978852 | 0 | 0 | 0 | 1 |
| XLOC_005132 | TMEM233        | chr12:120031263-120079363 | 0 | 0 | 0 | 1 |
| XLOC_005177 | MIR5188        | chr12:125400092-125400205 | 0 | 0 | 0 | 1 |
| XLOC_005181 | LOC100128554   | chr12:126927026-126957331 | 0 | 0 | 0 | 1 |

|             |                |                           |   |   |   |   |
|-------------|----------------|---------------------------|---|---|---|---|
| XLOC_005185 | TMEM132C       | chr12:128751947-129192460 | 0 | 0 | 0 | 1 |
| XLOC_005186 | MIR3612        | chr12:128751947-129192460 | 0 | 0 | 0 | 1 |
| XLOC_005188 | FZD10          | chr12:130647003-130650285 | 0 | 0 | 0 | 1 |
| XLOC_005189 | PIWIL1         | chr12:130822432-130856877 | 0 | 0 | 0 | 1 |
| XLOC_005211 | FAM138D        | chr12:147945-149412       | 0 | 0 | 0 | 1 |
| XLOC_005212 | LOC574538      | chr12:176048-287625       | 0 | 0 | 0 | 1 |
| XLOC_005219 | MIR3649        | chr12:1769480-1769546     | 0 | 0 | 0 | 1 |
| XLOC_005220 | CACNA2D4       | chr12:1901122-2027870     | 0 | 0 | 0 | 1 |
| XLOC_005223 | CACNA1C-AS4    | chr12:2162415-2807115     | 0 | 0 | 0 | 1 |
| XLOC_005224 | CACNA1C-AS1    | chr12:2162415-2807115     | 0 | 0 | 0 | 1 |
| XLOC_005225 | LOC283440      | chr12:2870365-2880835     | 0 | 0 | 0 | 1 |
| XLOC_005230 | FGF23          | chr12:4477392-4488894     | 0 | 0 | 0 | 1 |
| XLOC_005231 | FGF6           | chr12:4543307-4554780     | 0 | 0 | 0 | 1 |
| XLOC_005244 | SCARNA11       | chr12:6679247-6716551     | 0 | 0 | 0 | 1 |
| XLOC_005260 | CD163          | chr12:7623411-7656414     | 0 | 0 | 0 | 1 |
| XLOC_005261 | APOBEC1        | chr12:7801995-7818502     | 0 | 0 | 0 | 1 |
| XLOC_005262 | GDF3           | chr12:7842380-7848360     | 0 | 0 | 0 | 1 |
| XLOC_005263 | CLEC4C         | chr12:7882010-7902069     | 0 | 0 | 0 | 1 |
| XLOC_005271 | CLEC4E         | chr12:8685900-8693558     | 0 | 0 | 0 | 1 |
| XLOC_005272 | AICDA          | chr12:8754761-8765442     | 0 | 0 | 0 | 1 |
| XLOC_005277 | PZP            | chr12:9301435-9360966     | 0 | 0 | 0 | 1 |
| XLOC_005278 | A2MP1          | chr12:9381128-9386803     | 0 | 0 | 0 | 1 |
| XLOC_005279 | MIR1244-1      | chr12:9392065-9392147     | 0 | 0 | 0 | 1 |
| XLOC_005281 | KLRB1          | chr12:9747869-9760497     | 0 | 0 | 0 | 1 |
| XLOC_005283 | CD69           | chr12:9905081-9913497     | 0 | 0 | 0 | 1 |
| XLOC_005285 | CLEC2A         | chr12:10065825-10084980   | 0 | 0 | 0 | 1 |
| XLOC_005286 | CLEC1B         | chr12:10145661-10151899   | 0 | 0 | 0 | 1 |
| XLOC_005287 | CLEC1A         | chr12:10223079-10251605   | 0 | 0 | 0 | 1 |
| XLOC_005289 | OLR1           | chr12:10310898-10324790   | 0 | 0 | 0 | 1 |
| XLOC_005290 | KLRC4,KLRC4-KL | chr12:10524951-10562745   | 0 | 0 | 0 | 1 |
| XLOC_005291 | KLRC3          | chr12:10564913-10573194   | 0 | 0 | 0 | 1 |
| XLOC_005292 | KLRC2          | chr12:10583205-10588592   | 0 | 0 | 0 | 1 |
| XLOC_005293 | KLRC1          | chr12:10598637-10607215   | 0 | 0 | 0 | 1 |
| XLOC_005298 | TAS2R7         | chr12:10954130-10955226   | 0 | 0 | 0 | 1 |
| XLOC_005299 | TAS2R8         | chr12:10958649-10959579   | 0 | 0 | 0 | 1 |
| XLOC_005300 | TAS2R9         | chr12:10961692-10962767   | 0 | 0 | 0 | 1 |
| XLOC_005303 | TAS2R13        | chr12:10998447-11328619   | 0 | 0 | 0 | 1 |
| XLOC_005309 | TAS2R46        | chr12:10998447-11328619   | 0 | 0 | 0 | 1 |
| XLOC_005312 | TAS2R42        | chr12:11338598-11339543   | 0 | 0 | 0 | 1 |
| XLOC_005314 | PRB4           | chr12:11460014-11463369   | 0 | 0 | 0 | 1 |
| XLOC_005315 | PRB1           | chr12:11504756-11508524   | 0 | 0 | 0 | 1 |
| XLOC_005316 | PRB2           | chr12:11544473-11548498   | 0 | 0 | 0 | 1 |
| XLOC_005317 | RNU6-19        | chr12:11802787-12079107   | 0 | 0 | 0 | 1 |
| XLOC_005326 | C12orf36       | chr12:13523604-13529679   | 0 | 0 | 0 | 1 |
| XLOC_005327 | GRIN2B         | chr12:13714409-14133022   | 0 | 0 | 0 | 1 |
| XLOC_005333 | ART4           | chr12:14982244-14996413   | 0 | 0 | 0 | 1 |
| XLOC_005334 | MGP            | chr12:15034114-15038853   | 0 | 0 | 0 | 1 |
| XLOC_005335 | ERP27          | chr12:15066975-15091463   | 0 | 0 | 0 | 1 |
| XLOC_005337 | RERG           | chr12:15260715-15374411   | 0 | 0 | 0 | 1 |



|             |              |                         |   |   |   |   |
|-------------|--------------|-------------------------|---|---|---|---|
| XLOC_005339 | SLC15A5      | chr12:16341418-16430619 | 0 | 0 | 0 | 1 |
| XLOC_005340 | LMO3         | chr12:16701305-16761148 | 0 | 0 | 0 | 1 |
| XLOC_005341 | RERGL        | chr12:18233802-18243114 | 0 | 0 | 0 | 1 |
| XLOC_005342 | PLCZ1        | chr12:18836109-18890993 | 0 | 0 | 0 | 1 |
| XLOC_005347 | KCNJ8        | chr12:21917888-21927755 | 0 | 0 | 0 | 1 |
| XLOC_005351 | SOX5         | chr12:23685230-24715383 | 0 | 0 | 0 | 1 |
| XLOC_005352 | LINC00477    | chr12:24719897-24737102 | 0 | 0 | 0 | 1 |
| XLOC_005354 | C12orf77     | chr12:25146364-25150373 | 0 | 0 | 0 | 1 |
| XLOC_005358 | MIR4302      | chr12:26026952-26027012 | 0 | 0 | 0 | 1 |
| XLOC_005359 | LOC100506451 | chr12:26107587-26232825 | 0 | 0 | 0 | 1 |
| XLOC_005365 | MANSC4       | chr12:27915598-27924209 | 0 | 0 | 0 | 1 |
| XLOC_005368 | OVCH1        | chr12:29542226-29650619 | 0 | 0 | 0 | 1 |
| XLOC_005369 | TMTC1        | chr12:29653745-29937692 | 0 | 0 | 0 | 1 |
| XLOC_005377 | RNU6-78      | chr12:32146772-32146802 | 0 | 0 | 0 | 1 |
| XLOC_005380 | SYT10        | chr12:33528347-33592754 | 0 | 0 | 0 | 1 |
| XLOC_005381 | CPNE8        | chr12:39046001-39299420 | 0 | 0 | 0 | 1 |
| XLOC_005383 | ABCD2        | chr12:39945021-40013843 | 0 | 0 | 0 | 1 |
| XLOC_005389 | ADAMTS20     | chr12:43748011-43945724 | 0 | 0 | 0 | 1 |
| XLOC_005393 | DBX2         | chr12:45408538-45444882 | 0 | 0 | 0 | 1 |
| XLOC_005396 | RNY5         | chr12:45566816-45834187 | 0 | 0 | 0 | 1 |
| XLOC_005402 | AMIGO2       | chr12:47469489-47473734 | 0 | 0 | 0 | 1 |
| XLOC_005403 | PCED1B-AS1   | chr12:47602202-47630443 | 0 | 0 | 0 | 1 |
| XLOC_005412 | OR10AD1      | chr12:48596121-48597075 | 0 | 0 | 0 | 1 |
| XLOC_005414 | LALBA        | chr12:48961466-48963829 | 0 | 0 | 0 | 1 |
| XLOC_005418 | SNORA2B      | chr12:49046994-49076035 | 0 | 0 | 0 | 1 |
| XLOC_005421 | MIR4701      | chr12:49159974-49182820 | 0 | 0 | 0 | 1 |
| XLOC_005442 | LOC283332    | chr12:50302665-50305646 | 0 | 0 | 0 | 1 |
| XLOC_005446 | MIR1293      | chr12:50569562-50677353 | 0 | 0 | 0 | 1 |
| XLOC_005456 | FIGNL2       | chr12:52211675-52225701 | 0 | 0 | 0 | 1 |
| XLOC_005458 | LOC283403    | chr12:52599364-52604639 | 0 | 0 | 0 | 1 |
| XLOC_005461 | KRT85        | chr12:52753789-52761309 | 0 | 0 | 0 | 1 |
| XLOC_005462 | KRT84        | chr12:52771595-52779417 | 0 | 0 | 0 | 1 |
| XLOC_005463 | KRT82        | chr12:52787734-52800176 | 0 | 0 | 0 | 1 |
| XLOC_005465 | KRT6B        | chr12:52840434-52845910 | 0 | 0 | 0 | 1 |
| XLOC_005466 | KRT6C        | chr12:52862299-52867569 | 0 | 0 | 0 | 1 |
| XLOC_005467 | KRT6A        | chr12:52880957-52887181 | 0 | 0 | 0 | 1 |
| XLOC_005469 | KRT71        | chr12:52937692-52946931 | 0 | 0 | 0 | 1 |
| XLOC_005470 | KRT74        | chr12:52959602-52967609 | 0 | 0 | 0 | 1 |
| XLOC_005471 | KRT72        | chr12:52979372-52995322 | 0 | 0 | 0 | 1 |
| XLOC_005472 | KRT73        | chr12:53001353-53012343 | 0 | 0 | 0 | 1 |
| XLOC_005473 | KRT2         | chr12:53038341-53045959 | 0 | 0 | 0 | 1 |
| XLOC_005475 | KRT77        | chr12:53083410-53097247 | 0 | 0 | 0 | 1 |
| XLOC_005476 | KRT76        | chr12:53161938-53171129 | 0 | 0 | 0 | 1 |
| XLOC_005477 | KRT3         | chr12:53183468-53189892 | 0 | 0 | 0 | 1 |
| XLOC_005478 | KRT4         | chr12:53200326-53207900 | 0 | 0 | 0 | 1 |
| XLOC_005494 | HOXC-AS5     | chr12:54329111-54340328 | 0 | 0 | 0 | 1 |
| XLOC_005503 | GTSF1        | chr12:54849735-54867386 | 0 | 0 | 0 | 1 |
| XLOC_005504 | PPP1R1A      | chr12:54973023-54982443 | 0 | 0 | 0 | 1 |
| XLOC_005505 | GLYCAM1      | chr12:55001970-55004246 | 0 | 0 | 0 | 1 |

|             |              |                           |   |   |   |   |
|-------------|--------------|---------------------------|---|---|---|---|
| XLOC_005506 | LACRT        | chr12:55024622-55028663   | 0 | 0 | 0 | 1 |
| XLOC_005508 | TESPA1       | chr12:55342086-55378530   | 0 | 0 | 0 | 1 |
| XLOC_005509 | OR6C6        | chr12:55688071-55689016   | 0 | 0 | 0 | 1 |
| XLOC_005510 | OR6C70       | chr12:55862983-55863922   | 0 | 0 | 0 | 1 |
| XLOC_005524 | APOF         | chr12:56754354-56756583   | 0 | 0 | 0 | 1 |
| XLOC_005530 | SNORD59B     | chr12:57031958-57039852   | 0 | 0 | 0 | 1 |
| XLOC_005531 | SNORD59A     | chr12:57031958-57039852   | 0 | 0 | 0 | 1 |
| XLOC_005538 | TAC3         | chr12:57403780-57410344   | 0 | 0 | 0 | 1 |
| XLOC_005548 | B4GALNT1     | chr12:58013692-58027022   | 0 | 0 | 0 | 1 |
| XLOC_005555 | MIR26A2      | chr12:58213709-58240747   | 0 | 0 | 0 | 1 |
| XLOC_005561 | AVPR1A       | chr12:63536538-63546590   | 0 | 0 | 0 | 1 |
| XLOC_005564 | C12orf56     | chr12:64660762-64784345   | 0 | 0 | 0 | 1 |
| XLOC_005571 | IFNG         | chr12:68548549-68553521   | 0 | 0 | 0 | 1 |
| XLOC_005572 | IL26         | chr12:68595128-68619571   | 0 | 0 | 0 | 1 |
| XLOC_005573 | IL22         | chr12:68642024-68647281   | 0 | 0 | 0 | 1 |
| XLOC_005575 | SNORA70G     | chr12:69004618-69054385   | 0 | 0 | 0 | 1 |
| XLOC_005579 | MIR1279      | chr12:69633316-69668138   | 0 | 0 | 0 | 1 |
| XLOC_005580 | MIR3913-1    | chr12:69978501-69978603   | 0 | 0 | 0 | 1 |
| XLOC_005588 | TRHDE-AS1    | chr12:72647286-73059422   | 0 | 0 | 0 | 1 |
| XLOC_005589 | LOC100507377 | chr12:74526955-74686411   | 0 | 0 | 0 | 1 |
| XLOC_005590 | KCNC2        | chr12:75433857-75603528   | 0 | 0 | 0 | 1 |
| XLOC_005601 | LIN7A        | chr12:81191170-81331694   | 0 | 0 | 0 | 1 |
| XLOC_005602 | MIR617       | chr12:81191170-81331694   | 0 | 0 | 0 | 1 |
| XLOC_005603 | MIR618       | chr12:81191170-81331694   | 0 | 0 | 0 | 1 |
| XLOC_005604 | PPFIA2       | chr12:81652044-82153109   | 0 | 0 | 0 | 1 |
| XLOC_005606 | SLC6A15      | chr12:85253266-85306608   | 0 | 0 | 0 | 1 |
| XLOC_005608 | RASSF9       | chr12:86198330-86230318   | 0 | 0 | 0 | 1 |
| XLOC_005609 | MGAT4C       | chr12:86373036-87232681   | 0 | 0 | 0 | 1 |
| XLOC_005610 | MIR548AL     | chr12:86373036-87232681   | 0 | 0 | 0 | 1 |
| XLOC_005611 | MKRN9P       | chr12:88176662-88178488   | 0 | 0 | 0 | 1 |
| XLOC_005619 | CCER1        | chr12:91345991-91348953   | 0 | 0 | 0 | 1 |
| XLOC_005620 | EPYC         | chr12:91357455-91398803   | 0 | 0 | 0 | 1 |
| XLOC_005621 | KERA         | chr12:91444270-91452131   | 0 | 0 | 0 | 1 |
| XLOC_005623 | DCN          | chr12:91539034-91576806   | 0 | 0 | 0 | 1 |
| XLOC_005625 | CLLU1OS      | chr12:92813869-92824778   | 0 | 0 | 0 | 1 |
| XLOC_005627 | LOC643339    | chr12:93397533-93771512   | 0 | 0 | 0 | 1 |
| XLOC_005641 | MIR4303      | chr12:98389160-98389226   | 0 | 0 | 0 | 1 |
| XLOC_005642 | SLC9A7P1     | chr12:98847618-98850923   | 0 | 0 | 0 | 1 |
| XLOC_005650 | SLC5A8       | chr12:101549993-101604016 | 0 | 0 | 0 | 1 |
| XLOC_005659 | PAH          | chr12:103232103-103311381 | 0 | 0 | 0 | 1 |
| XLOC_005660 | C12orf42     | chr12:103695732-103889749 | 0 | 0 | 0 | 1 |
| XLOC_005671 | LOC100287944 | chr12:106751435-107283094 | 0 | 0 | 0 | 1 |
| XLOC_005676 | LOC728739    | chr12:108296926-108297548 | 0 | 0 | 0 | 1 |
| XLOC_005677 | CMKLR1       | chr12:108681820-108733094 | 0 | 0 | 0 | 1 |
| XLOC_005683 | SVOP         | chr12:109304657-109458845 | 0 | 0 | 0 | 1 |
| XLOC_005710 | RASAL1       | chr12:113536623-113574044 | 0 | 0 | 0 | 1 |
| XLOC_005715 | LHX5         | chr12:113900693-113909877 | 0 | 0 | 0 | 1 |
| XLOC_005717 | TBX5         | chr12:114791734-114850637 | 0 | 0 | 0 | 1 |
| XLOC_005720 | MIR620       | chr12:116396380-116714991 | 0 | 0 | 0 | 1 |

|             |              |                           |   |   |   |   |
|-------------|--------------|---------------------------|---|---|---|---|
| XLOC_005721 | MIR4472-2    | chr12:116866056-116866123 | 0 | 0 | 0 | 1 |
| XLOC_005727 | KSR2         | chr12:117890816-118406028 | 0 | 0 | 0 | 1 |
| XLOC_005731 | LOC144742    | chr12:119721629-119741185 | 0 | 0 | 0 | 1 |
| XLOC_005735 | MIR4498      | chr12:120565013-120632513 | 0 | 0 | 0 | 1 |
| XLOC_005752 | MORN3        | chr12:122089292-122107560 | 0 | 0 | 0 | 1 |
| XLOC_005756 | IL31         | chr12:122652265-122688018 | 0 | 0 | 0 | 1 |
| XLOC_005768 | MIR4304      | chr12:123468026-123594975 | 0 | 0 | 0 | 1 |
| XLOC_005780 | LOC400084    | chr12:126443233-126467920 | 0 | 0 | 0 | 1 |
| XLOC_005782 | LOC440117    | chr12:127354039-127359236 | 0 | 0 | 0 | 1 |
| XLOC_005784 | TMEM132D     | chr12:129556270-130388212 | 0 | 0 | 0 | 1 |
| XLOC_005785 | LOC100190940 | chr12:130518356-130526887 | 0 | 0 | 0 | 1 |
| XLOC_005791 | LRCOL1       | chr12:133179735-133187037 | 0 | 0 | 0 | 1 |
| XLOC_005797 | ANHX         | chr12:133794897-133812422 | 0 | 0 | 0 | 1 |
| XLOC_005798 | LINC00442    | chr13:19582398-19586774   | 0 | 0 | 0 | 1 |
| XLOC_005799 | RNU6-52      | chr13:19717121-19717217   | 0 | 0 | 0 | 1 |
| XLOC_005800 | LINC00421    | chr13:19919188-19920889   | 0 | 0 | 0 | 1 |
| XLOC_005809 | SGCG         | chr13:23755059-23899304   | 0 | 0 | 0 | 1 |
| XLOC_005810 | LINC00327    | chr13:24043650-24061603   | 0 | 0 | 0 | 1 |
| XLOC_005811 | TNFRSF19     | chr13:24144508-24250244   | 0 | 0 | 0 | 1 |
| XLOC_005814 | MIR2276      | chr13:24734860-24881212   | 0 | 0 | 0 | 1 |
| XLOC_005818 | RNF17        | chr13:25338300-25454058   | 0 | 0 | 0 | 1 |
| XLOC_005821 | ATP8A2       | chr13:25946208-26595420   | 0 | 0 | 0 | 1 |
| XLOC_005825 | SNORD102     | chr13:27825691-27830702   | 0 | 0 | 0 | 1 |
| XLOC_005830 | GSX1         | chr13:28366779-28368089   | 0 | 0 | 0 | 1 |
| XLOC_005836 | LINC00544    | chr13:30510667-30524625   | 0 | 0 | 0 | 1 |
| XLOC_005839 | LINC00398    | chr13:31377342-31384782   | 0 | 0 | 0 | 1 |
| XLOC_005840 | MEDAG        | chr13:31456971-31506745   | 0 | 0 | 0 | 1 |
| XLOC_005841 | TEX26        | chr13:31506833-31549153   | 0 | 0 | 0 | 1 |
| XLOC_005843 | RXFP2        | chr13:32313678-32377009   | 0 | 0 | 0 | 1 |
| XLOC_005844 | EEF1DP3      | chr13:32420919-32533721   | 0 | 0 | 0 | 1 |
| XLOC_005848 | KL           | chr13:33590570-33640282   | 0 | 0 | 0 | 1 |
| XLOC_005852 | SPG20OS      | chr13:36875774-36944317   | 0 | 0 | 0 | 1 |
| XLOC_005853 | CCNA1        | chr13:37005966-37017019   | 0 | 0 | 0 | 1 |
| XLOC_005854 | SERTM1       | chr13:37248048-37271975   | 0 | 0 | 0 | 1 |
| XLOC_005857 | LINC00547    | chr13:38109076-38125673   | 0 | 0 | 0 | 1 |
| XLOC_005859 | LINC00366    | chr13:39141860-39153653   | 0 | 0 | 0 | 1 |
| XLOC_005860 | FREM2        | chr13:39261172-39461267   | 0 | 0 | 0 | 1 |
| XLOC_005863 | LINC00332    | chr13:40755945-40763167   | 0 | 0 | 0 | 1 |
| XLOC_005868 | RGCC         | chr13:42031541-42045013   | 0 | 0 | 0 | 1 |
| XLOC_005872 | TNFSF11      | chr13:43136871-43182149   | 0 | 0 | 0 | 1 |
| XLOC_005873 | FAM216B      | chr13:43355685-43365685   | 0 | 0 | 0 | 1 |
| XLOC_005876 | LINC00284    | chr13:44596470-44604599   | 0 | 0 | 0 | 1 |
| XLOC_005877 | SERP2        | chr13:44947977-44971850   | 0 | 0 | 0 | 1 |
| XLOC_005890 | CYSLTR2      | chr13:49280950-49283498   | 0 | 0 | 0 | 1 |
| XLOC_005896 | ARL11        | chr13:50202434-50208008   | 0 | 0 | 0 | 1 |
| XLOC_005905 | MIR4703      | chr13:52126724-52126803   | 0 | 0 | 0 | 1 |
| XLOC_005913 | MIR759       | chr13:53384184-53384275   | 0 | 0 | 0 | 1 |
| XLOC_005914 | OLFM4        | chr13:53602875-53626196   | 0 | 0 | 0 | 1 |
| XLOC_005915 | LINC00558    | chr13:54389553-54450254   | 0 | 0 | 0 | 1 |

|             |            |                           |   |   |   |   |
|-------------|------------|---------------------------|---|---|---|---|
| XLOC_005916 | MIR5007    | chr13:55748588-55748683   | 0 | 0 | 0 | 1 |
| XLOC_005917 | PRR20B     | chr13:57715051-57718073   | 0 | 0 | 0 | 1 |
| XLOC_005918 | PRR20D     | chr13:57721621-57724643   | 0 | 0 | 0 | 1 |
| XLOC_005919 | PRR20E     | chr13:57728194-57731216   | 0 | 0 | 0 | 1 |
| XLOC_005920 | PRR20A     | chr13:57734765-57737787   | 0 | 0 | 0 | 1 |
| XLOC_005921 | PRR20A     | chr13:57741330-57744352   | 0 | 0 | 0 | 1 |
| XLOC_005922 | PCDH17     | chr13:58205788-58303065   | 0 | 0 | 0 | 1 |
| XLOC_005923 | DIAPH3-AS1 | chr13:60239720-60738119   | 0 | 0 | 0 | 1 |
| XLOC_005924 | DIAPH3-AS2 | chr13:60239720-60738119   | 0 | 0 | 0 | 1 |
| XLOC_005926 | OR7E156P   | chr13:64311567-64316701   | 0 | 0 | 0 | 1 |
| XLOC_005927 | PCDH9-AS2  | chr13:66876965-67804468   | 0 | 0 | 0 | 1 |
| XLOC_005928 | PCDH9-AS3  | chr13:66876965-67804468   | 0 | 0 | 0 | 1 |
| XLOC_005929 | ATXN8OS    | chr13:70274724-70713885   | 0 | 0 | 0 | 1 |
| XLOC_005930 | LINC00348  | chr13:71589272-71742549   | 0 | 0 | 0 | 1 |
| XLOC_005934 | LINC00381  | chr13:74993309-75009296   | 0 | 0 | 0 | 1 |
| XLOC_005935 | LINC00347  | chr13:75126979-75131257   | 0 | 0 | 0 | 1 |
| XLOC_005939 | BTF3P11    | chr13:77502584-77503224   | 0 | 0 | 0 | 1 |
| XLOC_005940 | IRG1       | chr13:77526623-77532776   | 0 | 0 | 0 | 1 |
| XLOC_005942 | MYCBP2-AS1 | chr13:77618791-77901177   | 0 | 0 | 0 | 1 |
| XLOC_005943 | SCEL       | chr13:78109808-78219398   | 0 | 0 | 0 | 1 |
| XLOC_005944 | SLAIN1     | chr13:78271988-78338377   | 0 | 0 | 0 | 1 |
| XLOC_005945 | LINC00446  | chr13:78587017-78627730   | 0 | 0 | 0 | 1 |
| XLOC_005946 | POU4F1-AS1 | chr13:78628989-79233314   | 0 | 0 | 0 | 1 |
| XLOC_005949 | LINC00333  | chr13:84714736-85180903   | 0 | 0 | 0 | 1 |
| XLOC_005950 | LINC00351  | chr13:85937737-86118797   | 0 | 0 | 0 | 1 |
| XLOC_005951 | SLITRK5    | chr13:88324869-88331870   | 0 | 0 | 0 | 1 |
| XLOC_005952 | LINC00433  | chr13:89193083-89197764   | 0 | 0 | 0 | 1 |
| XLOC_005953 | MIR622     | chr13:90883435-90883531   | 0 | 0 | 0 | 1 |
| XLOC_005955 | GPC5       | chr13:92050934-93519487   | 0 | 0 | 0 | 1 |
| XLOC_005956 | GPC6       | chr13:93879077-95060273   | 0 | 0 | 0 | 1 |
| XLOC_005958 | CLDN10     | chr13:96085852-96296960   | 0 | 0 | 0 | 1 |
| XLOC_005960 | HS6ST3     | chr13:96743092-97491816   | 0 | 0 | 0 | 1 |
| XLOC_005965 | MIR3170    | chr13:98795433-99102023   | 0 | 0 | 0 | 1 |
| XLOC_005967 | FKSG29     | chr13:99848627-100058554  | 0 | 0 | 0 | 1 |
| XLOC_005968 | MIR623     | chr13:99848627-100058554  | 0 | 0 | 0 | 1 |
| XLOC_005971 | MIR4306    | chr13:100258918-100549388 | 0 | 0 | 0 | 1 |
| XLOC_005975 | ITGBL1     | chr13:102104943-103054124 | 0 | 0 | 0 | 1 |
| XLOC_005976 | FGF14-AS2  | chr13:102104943-103054124 | 0 | 0 | 0 | 1 |
| XLOC_005980 | DAOA       | chr13:106111405-106158030 | 0 | 0 | 0 | 1 |
| XLOC_005981 | LINC00343  | chr13:106359217-106414143 | 0 | 0 | 0 | 1 |
| XLOC_005983 | LINC00551  | chr13:107270157-107284006 | 0 | 0 | 0 | 1 |
| XLOC_005984 | LINC00443  | chr13:107306227-107324528 | 0 | 0 | 0 | 1 |
| XLOC_005987 | MYO16      | chr13:109248499-109860355 | 0 | 0 | 0 | 1 |
| XLOC_005988 | COL4A2     | chr13:110959630-111165373 | 0 | 0 | 0 | 1 |
| XLOC_005993 | SOX1       | chr13:112721912-112726020 | 0 | 0 | 0 | 1 |
| XLOC_005994 | SPACA7     | chr13:113030650-113089009 | 0 | 0 | 0 | 1 |
| XLOC_005995 | C13orf35   | chr13:113301357-113338811 | 0 | 0 | 0 | 1 |
| XLOC_006006 | TMEM255B   | chr13:114462215-114514899 | 0 | 0 | 0 | 1 |
| XLOC_006013 | TUBA3C     | chr13:19747909-19755992   | 0 | 0 | 0 | 1 |

|             |               |                         |   |   |   |   |
|-------------|---------------|-------------------------|---|---|---|---|
| XLOC_006014 | ANKRD26P3     | chr13:19836939-19919113 | 0 | 0 | 0 | 1 |
| XLOC_006019 | GJB2          | chr13:20761603-20767114 | 0 | 0 | 0 | 1 |
| XLOC_006020 | GJB6          | chr13:20796100-20806534 | 0 | 0 | 0 | 1 |
| XLOC_006022 | MIR4499       | chr13:20977805-21100012 | 0 | 0 | 0 | 1 |
| XLOC_006029 | LINC00424     | chr13:22446934-22452299 | 0 | 0 | 0 | 1 |
| XLOC_006030 | BASP1P1       | chr13:23471168-23472320 | 0 | 0 | 0 | 1 |
| XLOC_006035 | SPATA13-AS1   | chr13:24734860-24881212 | 0 | 0 | 0 | 1 |
| XLOC_006039 | AMER2         | chr13:25742671-25745857 | 0 | 0 | 0 | 1 |
| XLOC_006041 | SHISA2        | chr13:26618734-26625198 | 0 | 0 | 0 | 1 |
| XLOC_006048 | PRHOXNB       | chr13:28552242-28562774 | 0 | 0 | 0 | 1 |
| XLOC_006049 | FLT3          | chr13:28577410-28674729 | 0 | 0 | 0 | 1 |
| XLOC_006051 | FLT1          | chr13:28874482-29069265 | 0 | 0 | 0 | 1 |
| XLOC_006056 | LINC00297     | chr13:30446749-30462542 | 0 | 0 | 0 | 1 |
| XLOC_006058 | LINC00426     | chr13:30914406-30948036 | 0 | 0 | 0 | 1 |
| XLOC_006060 | TEX26-AS1     | chr13:31456971-31506745 | 0 | 0 | 0 | 1 |
| XLOC_006067 | LINC00423     | chr13:33383327-33485790 | 0 | 0 | 0 | 1 |
| XLOC_006069 | LINC00457     | chr13:35009590-35214822 | 0 | 0 | 0 | 1 |
| XLOC_006070 | MAB21L1       | chr13:35516423-36705514 | 0 | 0 | 0 | 1 |
| XLOC_006071 | DCLK1         | chr13:35516423-36705514 | 0 | 0 | 0 | 1 |
| XLOC_006072 | CCDC169,CCDC1 | chr13:36742344-36871992 | 0 | 0 | 0 | 1 |
| XLOC_006073 | SPG20         | chr13:36875774-36944317 | 0 | 0 | 0 | 1 |
| XLOC_006077 | CSNK1A1L      | chr13:37677396-37679801 | 0 | 0 | 0 | 1 |
| XLOC_006078 | POSTN         | chr13:38136718-38172981 | 0 | 0 | 0 | 1 |
| XLOC_006079 | TRPC4         | chr13:38210772-38443939 | 0 | 0 | 0 | 1 |
| XLOC_006080 | LINC00571     | chr13:38624953-38717369 | 0 | 0 | 0 | 1 |
| XLOC_006083 | LHFP          | chr13:39917028-40177356 | 0 | 0 | 0 | 1 |
| XLOC_006084 | MIR4305       | chr13:40229763-40365802 | 0 | 0 | 0 | 1 |
| XLOC_006085 | LINC00548     | chr13:40768645-40794639 | 0 | 0 | 0 | 1 |
| XLOC_006088 | MIR320D1      | chr13:41301963-41302011 | 0 | 0 | 0 | 1 |
| XLOC_006099 | SMIM2-IT1     | chr13:44720605-44732358 | 0 | 0 | 0 | 1 |
| XLOC_006101 | LINC00330     | chr13:45373639-45383766 | 0 | 0 | 0 | 1 |
| XLOC_006107 | FAM194B       | chr13:46115431-46189874 | 0 | 0 | 0 | 1 |
| XLOC_006108 | SIAH3         | chr13:46354415-46425846 | 0 | 0 | 0 | 1 |
| XLOC_006113 | KIAA0226L     | chr13:46916136-46961635 | 0 | 0 | 0 | 1 |
| XLOC_006115 | HTR2A         | chr13:47405676-47471211 | 0 | 0 | 0 | 1 |
| XLOC_006128 | MIR3613       | chr13:50556687-50699677 | 0 | 0 | 0 | 1 |
| XLOC_006129 | MIR16-1       | chr13:50556687-50699677 | 0 | 0 | 0 | 1 |
| XLOC_006130 | MIR15A        | chr13:50556687-50699677 | 0 | 0 | 0 | 1 |
| XLOC_006133 | GUCY1B2       | chr13:51568646-51640293 | 0 | 0 | 0 | 1 |
| XLOC_006134 | MIR5693       | chr13:51915167-52027275 | 0 | 0 | 0 | 1 |
| XLOC_006144 | LECT1         | chr13:53277399-53313947 | 0 | 0 | 0 | 1 |
| XLOC_006145 | PCDH8         | chr13:53418108-53422775 | 0 | 0 | 0 | 1 |
| XLOC_006146 | MIR1297       | chr13:54886106-54886183 | 0 | 0 | 0 | 1 |
| XLOC_006148 | MIR3169       | chr13:61773931-61774014 | 0 | 0 | 0 | 1 |
| XLOC_006149 | PCDH20        | chr13:61983818-61989655 | 0 | 0 | 0 | 1 |
| XLOC_006150 | PCDH9         | chr13:66876965-67804468 | 0 | 0 | 0 | 1 |
| XLOC_006151 | LINC00550     | chr13:69435416-69459457 | 0 | 0 | 0 | 1 |
| XLOC_006152 | KLHL1         | chr13:70274724-70713885 | 0 | 0 | 0 | 1 |
| XLOC_006163 | MIR3665       | chr13:78271988-78338377 | 0 | 0 | 0 | 1 |

|             |              |                           |   |   |   |   |
|-------------|--------------|---------------------------|---|---|---|---|
| XLOC_006164 | EDNRB        | chr13:78469615-78549674   | 0 | 0 | 0 | 1 |
| XLOC_006167 | LINC00331    | chr13:79361453-79414160   | 0 | 0 | 0 | 1 |
| XLOC_006169 | NDFIP2-AS1   | chr13:80051498-80130212   | 0 | 0 | 0 | 1 |
| XLOC_006171 | SLITRK1      | chr13:84451342-84456528   | 0 | 0 | 0 | 1 |
| XLOC_006172 | SLITRK6      | chr13:86366921-86373483   | 0 | 0 | 0 | 1 |
| XLOC_006174 | MIR4500      | chr13:88096241-88323218   | 0 | 0 | 0 | 1 |
| XLOC_006175 | LINC00353    | chr13:90201047-90216667   | 0 | 0 | 0 | 1 |
| XLOC_006176 | LINC00559    | chr13:90712500-90771971   | 0 | 0 | 0 | 1 |
| XLOC_006177 | LINC00410    | chr13:91543207-91578851   | 0 | 0 | 0 | 1 |
| XLOC_006178 | LINC00379    | chr13:91779866-91863952   | 0 | 0 | 0 | 1 |
| XLOC_006179 | GPC5-AS1     | chr13:92050934-93519487   | 0 | 0 | 0 | 1 |
| XLOC_006180 | GPC6-AS2     | chr13:93879077-95060273   | 0 | 0 | 0 | 1 |
| XLOC_006183 | SOX21        | chr13:95361878-95364389   | 0 | 0 | 0 | 1 |
| XLOC_006185 | CLDN10-AS1   | chr13:96085852-96296960   | 0 | 0 | 0 | 1 |
| XLOC_006188 | LINC00359    | chr13:97593534-97636426   | 0 | 0 | 0 | 1 |
| XLOC_006189 | OXGR1        | chr13:97637972-97646604   | 0 | 0 | 0 | 1 |
| XLOC_006195 | MIR548AN     | chr13:99848627-100058554  | 0 | 0 | 0 | 1 |
| XLOC_006199 | PCCA-AS1     | chr13:100741268-101241046 | 0 | 0 | 0 | 1 |
| XLOC_006202 | NALCN        | chr13:101360578-102068813 | 0 | 0 | 0 | 1 |
| XLOC_006203 | FGF14        | chr13:102104943-103054124 | 0 | 0 | 0 | 1 |
| XLOC_006204 | MIR2681      | chr13:102104943-103054124 | 0 | 0 | 0 | 1 |
| XLOC_006205 | MIR4705      | chr13:102104943-103054124 | 0 | 0 | 0 | 1 |
| XLOC_006206 | FGF14-IT1    | chr13:102104943-103054124 | 0 | 0 | 0 | 1 |
| XLOC_006207 | METTL21C     | chr13:103338096-103346871 | 0 | 0 | 0 | 1 |
| XLOC_006211 | SLC10A2      | chr13:103696347-103719196 | 0 | 0 | 0 | 1 |
| XLOC_006212 | MIR548AS     | chr13:103934828-103934848 | 0 | 0 | 0 | 1 |
| XLOC_006213 | DAOA-AS1     | chr13:106111405-106158030 | 0 | 0 | 0 | 1 |
| XLOC_006216 | FAM155A      | chr13:107820878-108519460 | 0 | 0 | 0 | 1 |
| XLOC_006218 | MYO16-AS1    | chr13:109248499-109860355 | 0 | 0 | 0 | 1 |
| XLOC_006220 | COL4A1       | chr13:110801309-110959496 | 0 | 0 | 0 | 1 |
| XLOC_006221 | COL4A2-AS1   | chr13:110959630-111165373 | 0 | 0 | 0 | 1 |
| XLOC_006232 | ATP4B        | chr13:114303121-114312513 | 0 | 0 | 0 | 1 |
| XLOC_006233 | LINC00552    | chr13:114451483-114454062 | 0 | 0 | 0 | 1 |
| XLOC_006237 | OR11H12      | chr14:19377593-19378574   | 0 | 0 | 0 | 1 |
| XLOC_006238 | POTEG        | chr14:19553364-19584942   | 0 | 0 | 0 | 1 |
| XLOC_006239 | LOC101101776 | chr14:19894368-19904572   | 0 | 0 | 0 | 1 |
| XLOC_006240 | OR4Q3        | chr14:20215586-20216528   | 0 | 0 | 0 | 1 |
| XLOC_006241 | OR4M1        | chr14:20248481-20249423   | 0 | 0 | 0 | 1 |
| XLOC_006242 | OR4N2        | chr14:20295607-20296531   | 0 | 0 | 0 | 1 |
| XLOC_006243 | OR4K2        | chr14:20344426-20345371   | 0 | 0 | 0 | 1 |
| XLOC_006244 | OR4K5        | chr14:20388765-20389737   | 0 | 0 | 0 | 1 |
| XLOC_006245 | OR4K1        | chr14:20403766-20404842   | 0 | 0 | 0 | 1 |
| XLOC_006246 | OR4K15       | chr14:20443677-20444724   | 0 | 0 | 0 | 1 |
| XLOC_006247 | OR4L1        | chr14:20528203-20529142   | 0 | 0 | 0 | 1 |
| XLOC_006248 | OR4K17       | chr14:20585565-20586597   | 0 | 0 | 0 | 1 |
| XLOC_006249 | OR4N5        | chr14:20611894-20612821   | 0 | 0 | 0 | 1 |
| XLOC_006250 | OR11G2       | chr14:20665494-20666532   | 0 | 0 | 0 | 1 |
| XLOC_006251 | OR11H6       | chr14:20691868-20692861   | 0 | 0 | 0 | 1 |
| XLOC_006252 | OR11H4       | chr14:20710950-20711925   | 0 | 0 | 0 | 1 |

|             |            |                         |   |   |   |   |
|-------------|------------|-------------------------|---|---|---|---|
| XLOC_006256 | RNASE10    | chr14:20978630-20979281 | 0 | 0 | 0 | 1 |
| XLOC_006258 | EDDM3A     | chr14:21214098-21216539 | 0 | 0 | 0 | 1 |
| XLOC_006259 | EDDM3B     | chr14:21236585-21239107 | 0 | 0 | 0 | 1 |
| XLOC_006260 | RNASE6     | chr14:21249209-21250626 | 0 | 0 | 0 | 1 |
| XLOC_006262 | ECRP       | chr14:21387499-21388335 | 0 | 0 | 0 | 1 |
| XLOC_006266 | TPPP2      | chr14:21498344-21500332 | 0 | 0 | 0 | 1 |
| XLOC_006273 | OR4E2      | chr14:22133296-22134238 | 0 | 0 | 0 | 1 |
| XLOC_006280 | PSMB11     | chr14:23511375-23513269 | 0 | 0 | 0 | 1 |
| XLOC_006283 | IL25       | chr14:23842017-23845612 | 0 | 0 | 0 | 1 |
| XLOC_006284 | CMTM5      | chr14:23846016-23848981 | 0 | 0 | 0 | 1 |
| XLOC_006292 | CPNE6      | chr14:24540755-24547296 | 0 | 0 | 0 | 1 |
| XLOC_006307 | MIR4307    | chr14:27377847-27377931 | 0 | 0 | 0 | 1 |
| XLOC_006308 | LINC00645  | chr14:28081793-28108842 | 0 | 0 | 0 | 1 |
| XLOC_006309 | FOXG1      | chr14:29236277-29239483 | 0 | 0 | 0 | 1 |
| XLOC_006318 | NPAS3      | chr14:33408458-34273382 | 0 | 0 | 0 | 1 |
| XLOC_006319 | IGBP1P1    | chr14:35409127-35409702 | 0 | 0 | 0 | 1 |
| XLOC_006324 | INSM2      | chr14:36003247-36006260 | 0 | 0 | 0 | 1 |
| XLOC_006326 | LINC00609  | chr14:36539632-36645857 | 0 | 0 | 0 | 1 |
| XLOC_006333 | MIA2       | chr14:39703124-39722575 | 0 | 0 | 0 | 1 |
| XLOC_006335 | LRFN5      | chr14:42076763-42373752 | 0 | 0 | 0 | 1 |
| XLOC_006339 | SNORD127   | chr14:45553301-45603732 | 0 | 0 | 0 | 1 |
| XLOC_006352 | GNG2       | chr14:52327021-52436518 | 0 | 0 | 0 | 1 |
| XLOC_006354 | PTGDR      | chr14:52734430-52743442 | 0 | 0 | 0 | 1 |
| XLOC_006370 | OTX2-AS1   | chr14:57279900-57397550 | 0 | 0 | 0 | 1 |
| XLOC_006381 | LRR9       | chr14:60386430-60530277 | 0 | 0 | 0 | 1 |
| XLOC_006384 | SIX6       | chr14:60975937-60978525 | 0 | 0 | 0 | 1 |
| XLOC_006387 | PRKCH      | chr14:61788514-62017698 | 0 | 0 | 0 | 1 |
| XLOC_006388 | FLJ22447   | chr14:62037257-62121431 | 0 | 0 | 0 | 1 |
| XLOC_006391 | SYT16      | chr14:62462540-62568427 | 0 | 0 | 0 | 1 |
| XLOC_006392 | LINC00643  | chr14:62584074-62600903 | 0 | 0 | 0 | 1 |
| XLOC_006393 | RHOJ       | chr14:63671101-63760230 | 0 | 0 | 0 | 1 |
| XLOC_006398 | HSPA2      | chr14:65007185-65009954 | 0 | 0 | 0 | 1 |
| XLOC_006402 | MIR4706    | chr14:65381078-65569413 | 0 | 0 | 0 | 1 |
| XLOC_006405 | LINC00238  | chr14:66953108-66965271 | 0 | 0 | 0 | 1 |
| XLOC_006407 | FAM71D     | chr14:67656109-67695267 | 0 | 0 | 0 | 1 |
| XLOC_006416 | GALNT16    | chr14:69726680-69821190 | 0 | 0 | 0 | 1 |
| XLOC_006425 | SNORD56B   | chr14:71865053-71865124 | 0 | 0 | 0 | 1 |
| XLOC_006428 | RGS6       | chr14:72398816-73033238 | 0 | 0 | 0 | 1 |
| XLOC_006439 | MIR4505    | chr14:74181824-74253896 | 0 | 0 | 0 | 1 |
| XLOC_006445 | VSX2       | chr14:74706174-74729441 | 0 | 0 | 0 | 1 |
| XLOC_006446 | VRTN       | chr14:74815165-74826711 | 0 | 0 | 0 | 1 |
| XLOC_006456 | BATF       | chr14:75988783-76013334 | 0 | 0 | 0 | 1 |
| XLOC_006463 | C14orf166B | chr14:77292724-77336645 | 0 | 0 | 0 | 1 |
| XLOC_006466 | MIR1260A   | chr14:77731833-77737655 | 0 | 0 | 0 | 1 |
| XLOC_006473 | NRXN3      | chr14:78636715-80334633 | 0 | 0 | 0 | 1 |
| XLOC_006474 | DIO2-AS1   | chr14:80663867-80921810 | 0 | 0 | 0 | 1 |
| XLOC_006476 | FLRT2      | chr14:85996487-86094270 | 0 | 0 | 0 | 1 |
| XLOC_006477 | LOC283585  | chr14:87372121-87389099 | 0 | 0 | 0 | 1 |
| XLOC_006479 | LOC283587  | chr14:88490893-88553688 | 0 | 0 | 0 | 1 |

|             |             |                           |   |   |   |   |
|-------------|-------------|---------------------------|---|---|---|---|
| XLOC_006484 | FOXN3-AS2   | chr14:89622515-90085494   | 0 | 0 | 0 | 1 |
| XLOC_006486 | KCNK13      | chr14:90528107-90652195   | 0 | 0 | 0 | 1 |
| XLOC_006489 | LINC00642   | chr14:90921573-90925249   | 0 | 0 | 0 | 1 |
| XLOC_006502 | FAM181A     | chr14:94371075-94395954   | 0 | 0 | 0 | 1 |
| XLOC_006503 | LINC00521   | chr14:94463615-94478041   | 0 | 0 | 0 | 1 |
| XLOC_006508 | SERPINA4    | chr14:95027782-95036243   | 0 | 0 | 0 | 1 |
| XLOC_006509 | SERPINA5    | chr14:95047705-95059457   | 0 | 0 | 0 | 1 |
| XLOC_006511 | SERPINA13P  | chr14:95107061-95113331   | 0 | 0 | 0 | 1 |
| XLOC_006514 | TCL6        | chr14:96117514-96139789   | 0 | 0 | 0 | 1 |
| XLOC_006515 | TCL1B       | chr14:96152753-96158980   | 0 | 0 | 0 | 1 |
| XLOC_006516 | LINC00617   | chr14:96343108-96391908   | 0 | 0 | 0 | 1 |
| XLOC_006518 | BDKRB2      | chr14:96671134-96710666   | 0 | 0 | 0 | 1 |
| XLOC_006519 | BDKRB1      | chr14:96722546-96731100   | 0 | 0 | 0 | 1 |
| XLOC_006524 | C14orf177   | chr14:99177949-99184103   | 0 | 0 | 0 | 1 |
| XLOC_006526 | HHIPL1      | chr14:100111479-100143011 | 0 | 0 | 0 | 1 |
| XLOC_006527 | MIR5698     | chr14:100111479-100143011 | 0 | 0 | 0 | 1 |
| XLOC_006529 | EML1        | chr14:100259744-100408395 | 0 | 0 | 0 | 1 |
| XLOC_006530 | EVL         | chr14:100531750-100610573 | 0 | 0 | 0 | 1 |
| XLOC_006532 | MIR345      | chr14:100774195-100774293 | 0 | 0 | 0 | 1 |
| XLOC_006533 | SLC25A47    | chr14:100789678-100796715 | 0 | 0 | 0 | 1 |
| XLOC_006535 | LINC00523   | chr14:101123604-101139081 | 0 | 0 | 0 | 1 |
| XLOC_006536 | DLK1        | chr14:101193201-101201467 | 0 | 0 | 0 | 1 |
| XLOC_006537 | MIR2392     | chr14:101280827-101280911 | 0 | 0 | 0 | 1 |
| XLOC_006538 | MEG3,MIR770 | chr14:101292444-101327360 | 0 | 0 | 0 | 1 |
| XLOC_006539 | MIR493      | chr14:101335396-101335485 | 0 | 0 | 0 | 1 |
| XLOC_006540 | MIR337      | chr14:101340829-101340922 | 0 | 0 | 0 | 1 |
| XLOC_006541 | MIR665      | chr14:101341369-101341441 | 0 | 0 | 0 | 1 |
| XLOC_006542 | MIR431      | chr14:101346991-101351184 | 0 | 0 | 0 | 1 |
| XLOC_006543 | MIR433      | chr14:101346991-101351184 | 0 | 0 | 0 | 1 |
| XLOC_006544 | MIR127      | chr14:101346991-101351184 | 0 | 0 | 0 | 1 |
| XLOC_006545 | MIR432      | chr14:101346991-101351184 | 0 | 0 | 0 | 1 |
| XLOC_006546 | MIR136      | chr14:101346991-101351184 | 0 | 0 | 0 | 1 |
| XLOC_006547 | MEG8        | chr14:101361106-101373305 | 0 | 0 | 0 | 1 |
| XLOC_006548 | SNORD113-1  | chr14:101391157-101391227 | 0 | 0 | 0 | 1 |
| XLOC_006549 | SNORD113-2  | chr14:101393678-101393749 | 0 | 0 | 0 | 1 |
| XLOC_006550 | SNORD113-4  | chr14:101402827-101402901 | 0 | 0 | 0 | 1 |
| XLOC_006551 | SNORD113-5  | chr14:101404523-101404600 | 0 | 0 | 0 | 1 |
| XLOC_006552 | SNORD113-6  | chr14:101405892-101405966 | 0 | 0 | 0 | 1 |
| XLOC_006553 | SNORD113-7  | chr14:101407462-101407538 | 0 | 0 | 0 | 1 |
| XLOC_006554 | SNORD113-9  | chr14:101411985-101412056 | 0 | 0 | 0 | 1 |
| XLOC_006555 | SNORD114-1  | chr14:101416169-101416240 | 0 | 0 | 0 | 1 |
| XLOC_006556 | SNORD114-2  | chr14:101418192-101418269 | 0 | 0 | 0 | 1 |
| XLOC_006557 | SNORD114-3  | chr14:101419685-101419759 | 0 | 0 | 0 | 1 |
| XLOC_006558 | SNORD114-4  | chr14:101420680-101420784 | 0 | 0 | 0 | 1 |
| XLOC_006559 | SNORD114-5  | chr14:101421706-101421775 | 0 | 0 | 0 | 1 |
| XLOC_006560 | SNORD114-6  | chr14:101423502-101423573 | 0 | 0 | 0 | 1 |
| XLOC_006561 | SNORD114-7  | chr14:101429390-101429466 | 0 | 0 | 0 | 1 |
| XLOC_006562 | SNORD114-8  | chr14:101431117-101431188 | 0 | 0 | 0 | 1 |
| XLOC_006563 | SNORD114-9  | chr14:101432365-101432436 | 0 | 0 | 0 | 1 |



|             |             |                           |   |   |   |   |
|-------------|-------------|---------------------------|---|---|---|---|
| XLOC_006564 | SNORD114-10 | chr14:101433388-101433459 | 0 | 0 | 0 | 1 |
| XLOC_006565 | SNORD114-11 | chr14:101434447-101434521 | 0 | 0 | 0 | 1 |
| XLOC_006566 | SNORD114-12 | chr14:101435284-101435358 | 0 | 0 | 0 | 1 |
| XLOC_006567 | SNORD114-13 | chr14:101436215-101436288 | 0 | 0 | 0 | 1 |
| XLOC_006568 | SNORD114-14 | chr14:101438439-101438513 | 0 | 0 | 0 | 1 |
| XLOC_006569 | SNORD114-15 | chr14:101439006-101439077 | 0 | 0 | 0 | 1 |
| XLOC_006570 | SNORD114-16 | chr14:101439931-101440000 | 0 | 0 | 0 | 1 |
| XLOC_006571 | SNORD114-17 | chr14:101441142-101441216 | 0 | 0 | 0 | 1 |
| XLOC_006572 | SNORD114-18 | chr14:101442161-101442232 | 0 | 0 | 0 | 1 |
| XLOC_006573 | SNORD114-19 | chr14:101442813-101442887 | 0 | 0 | 0 | 1 |
| XLOC_006574 | SNORD114-20 | chr14:101447340-101447411 | 0 | 0 | 0 | 1 |
| XLOC_006575 | SNORD114-21 | chr14:101448311-101448382 | 0 | 0 | 0 | 1 |
| XLOC_006576 | SNORD114-22 | chr14:101449262-101449333 | 0 | 0 | 0 | 1 |
| XLOC_006577 | SNORD114-23 | chr14:101450212-101450283 | 0 | 0 | 0 | 1 |
| XLOC_006578 | SNORD114-24 | chr14:101451113-101451184 | 0 | 0 | 0 | 1 |
| XLOC_006579 | SNORD114-25 | chr14:101452393-101452464 | 0 | 0 | 0 | 1 |
| XLOC_006580 | SNORD114-26 | chr14:101453382-101453453 | 0 | 0 | 0 | 1 |
| XLOC_006581 | SNORD114-27 | chr14:101454497-101454566 | 0 | 0 | 0 | 1 |
| XLOC_006582 | SNORD114-28 | chr14:101455466-101455537 | 0 | 0 | 0 | 1 |
| XLOC_006583 | SNORD114-29 | chr14:101456427-101456496 | 0 | 0 | 0 | 1 |
| XLOC_006584 | SNORD114-30 | chr14:101458255-101458326 | 0 | 0 | 0 | 1 |
| XLOC_006585 | SNORD114-31 | chr14:101459572-101459646 | 0 | 0 | 0 | 1 |
| XLOC_006586 | MIR379      | chr14:101488402-101488469 | 0 | 0 | 0 | 1 |
| XLOC_006587 | MIR411      | chr14:101489661-101489757 | 0 | 0 | 0 | 1 |
| XLOC_006588 | MIR299      | chr14:101490130-101490193 | 0 | 0 | 0 | 1 |
| XLOC_006589 | MIR380      | chr14:101491353-101491414 | 0 | 0 | 0 | 1 |
| XLOC_006590 | MIR1197     | chr14:101491900-101491988 | 0 | 0 | 0 | 1 |
| XLOC_006591 | MIR323A     | chr14:101492068-101492154 | 0 | 0 | 0 | 1 |
| XLOC_006592 | MIR758      | chr14:101492356-101492444 | 0 | 0 | 0 | 1 |
| XLOC_006593 | MIR329-1    | chr14:101493121-101493201 | 0 | 0 | 0 | 1 |
| XLOC_006594 | MIR329-2    | chr14:101493436-101493520 | 0 | 0 | 0 | 1 |
| XLOC_006595 | MIR494      | chr14:101495970-101496051 | 0 | 0 | 0 | 1 |
| XLOC_006596 | MIR1193     | chr14:101496388-101496466 | 0 | 0 | 0 | 1 |
| XLOC_006597 | MIR543      | chr14:101498323-101498401 | 0 | 0 | 0 | 1 |
| XLOC_006598 | MIR495      | chr14:101500091-101500173 | 0 | 0 | 0 | 1 |
| XLOC_006599 | MIR376C     | chr14:101506026-101506092 | 0 | 0 | 0 | 1 |
| XLOC_006600 | MIR376A2    | chr14:101506405-101506485 | 0 | 0 | 0 | 1 |
| XLOC_006601 | MIR654      | chr14:101506555-101506636 | 0 | 0 | 0 | 1 |
| XLOC_006602 | MIR376B     | chr14:101506772-101506872 | 0 | 0 | 0 | 1 |
| XLOC_006603 | MIR376A1    | chr14:101507118-101507186 | 0 | 0 | 0 | 1 |
| XLOC_006604 | MIR300      | chr14:101507699-101507781 | 0 | 0 | 0 | 1 |
| XLOC_006605 | MIR1185-1   | chr14:101509313-101509398 | 0 | 0 | 0 | 1 |
| XLOC_006606 | MIR1185-2   | chr14:101510534-101510619 | 0 | 0 | 0 | 1 |
| XLOC_006607 | MIR381      | chr14:101512256-101512331 | 0 | 0 | 0 | 1 |
| XLOC_006608 | MIR487B     | chr14:101512791-101512875 | 0 | 0 | 0 | 1 |
| XLOC_006609 | MIR539      | chr14:101513657-101513735 | 0 | 0 | 0 | 1 |
| XLOC_006610 | MIR889      | chr14:101514237-101514316 | 0 | 0 | 0 | 1 |
| XLOC_006611 | MIR655      | chr14:101515886-101515983 | 0 | 0 | 0 | 1 |
| XLOC_006612 | MIR487A     | chr14:101518782-101518862 | 0 | 0 | 0 | 1 |

|             |              |                           |   |   |   |   |
|-------------|--------------|---------------------------|---|---|---|---|
| XLOC_006613 | MIR382       | chr14:101520642-101520718 | 0 | 0 | 0 | 1 |
| XLOC_006614 | MIR134       | chr14:101521023-101521096 | 0 | 0 | 0 | 1 |
| XLOC_006615 | MIR668       | chr14:101521594-101521660 | 0 | 0 | 0 | 1 |
| XLOC_006616 | MIR485       | chr14:101521755-101521828 | 0 | 0 | 0 | 1 |
| XLOC_006617 | MIR323B      | chr14:101522555-101522637 | 0 | 0 | 0 | 1 |
| XLOC_006618 | MIR154       | chr14:101526091-101526175 | 0 | 0 | 0 | 1 |
| XLOC_006619 | MIR496       | chr14:101526909-101527011 | 0 | 0 | 0 | 1 |
| XLOC_006620 | MIR377       | chr14:101528386-101528455 | 0 | 0 | 0 | 1 |
| XLOC_006621 | MIR541       | chr14:101530831-101530915 | 0 | 0 | 0 | 1 |
| XLOC_006622 | MIR409       | chr14:101531636-101531715 | 0 | 0 | 0 | 1 |
| XLOC_006623 | MIR412       | chr14:101531783-101531874 | 0 | 0 | 0 | 1 |
| XLOC_006624 | MIR369       | chr14:101531934-101532004 | 0 | 0 | 0 | 1 |
| XLOC_006625 | MIR410       | chr14:101532248-101532328 | 0 | 0 | 0 | 1 |
| XLOC_006626 | MIR656       | chr14:101533060-101533138 | 0 | 0 | 0 | 1 |
| XLOC_006627 | MEG9         | chr14:101536247-101539273 | 0 | 0 | 0 | 1 |
| XLOC_006635 | MIR4309      | chr14:103005980-103006063 | 0 | 0 | 0 | 1 |
| XLOC_006649 | TDRD9        | chr14:104394816-104519004 | 0 | 0 | 0 | 1 |
| XLOC_006651 | MIR203       | chr14:104583741-104583851 | 0 | 0 | 0 | 1 |
| XLOC_006660 | PLD4         | chr14:105391186-105399573 | 0 | 0 | 0 | 1 |
| XLOC_006670 | KIAA0125     | chr14:106383837-106398502 | 0 | 0 | 0 | 1 |
| XLOC_006671 | LINC00226    | chr14:106744268-106744966 | 0 | 0 | 0 | 1 |
| XLOC_006672 | LINC00221    | chr14:106938454-106951529 | 0 | 0 | 0 | 1 |
| XLOC_006673 | LOC642426    | chr14:19407014-19410111   | 0 | 0 | 0 | 1 |
| XLOC_006674 | LOC101101776 | chr14:19670791-19681016   | 0 | 0 | 0 | 1 |
| XLOC_006675 | POTEM        | chr14:19983953-20020272   | 0 | 0 | 0 | 1 |
| XLOC_006676 | OR11H2       | chr14:20181062-20182491   | 0 | 0 | 0 | 1 |
| XLOC_006677 | OR4K14       | chr14:20482419-20483352   | 0 | 0 | 0 | 1 |
| XLOC_006678 | OR4K13       | chr14:20502002-20502917   | 0 | 0 | 0 | 1 |
| XLOC_006681 | SNORD126     | chr14:20779526-20801471   | 0 | 0 | 0 | 1 |
| XLOC_006684 | KLHL33       | chr14:20896969-20903801   | 0 | 0 | 0 | 1 |
| XLOC_006687 | RNASE9       | chr14:21024251-21029090   | 0 | 0 | 0 | 1 |
| XLOC_006689 | OR6S1        | chr14:21108854-21109850   | 0 | 0 | 0 | 1 |
| XLOC_006690 | RNASE1       | chr14:21269514-21271036   | 0 | 0 | 0 | 1 |
| XLOC_006692 | RNASE13      | chr14:21500978-21502944   | 0 | 0 | 0 | 1 |
| XLOC_006694 | OR5AU1       | chr14:21623095-21624184   | 0 | 0 | 0 | 1 |
| XLOC_006703 | SALL2        | chr14:21989231-22005337   | 0 | 0 | 0 | 1 |
| XLOC_006704 | OR10G3       | chr14:22037933-22038875   | 0 | 0 | 0 | 1 |
| XLOC_006705 | OR10G2       | chr14:22102065-22102998   | 0 | 0 | 0 | 1 |
| XLOC_006716 | CEBPE        | chr14:23586514-23588820   | 0 | 0 | 0 | 1 |
| XLOC_006717 | SLC7A8       | chr14:23594503-23652869   | 0 | 0 | 0 | 1 |
| XLOC_006720 | SLC22A17     | chr14:23815526-23822080   | 0 | 0 | 0 | 1 |
| XLOC_006721 | EF3          | chr14:23825610-23834842   | 0 | 0 | 0 | 1 |
| XLOC_006723 | MIR208A      | chr14:23851198-23877486   | 0 | 0 | 0 | 1 |
| XLOC_006725 | MIR208B      | chr14:23881946-23904870   | 0 | 0 | 0 | 1 |
| XLOC_006742 | RIPK3        | chr14:24805226-24809242   | 0 | 0 | 0 | 1 |
| XLOC_006745 | CMA1         | chr14:24974711-24977471   | 0 | 0 | 0 | 1 |
| XLOC_006746 | CTSG         | chr14:25042723-25045466   | 0 | 0 | 0 | 1 |
| XLOC_006747 | GZMH         | chr14:25075685-25078926   | 0 | 0 | 0 | 1 |
| XLOC_006748 | GZMB         | chr14:25100160-25103432   | 0 | 0 | 0 | 1 |

|             |              |                           |   |   |   |   |
|-------------|--------------|---------------------------|---|---|---|---|
| XLOC_006750 | NOVA1        | chr14:26915088-27066960   | 0 | 0 | 0 | 1 |
| XLOC_006751 | MIR548AI     | chr14:29896116-30396899   | 0 | 0 | 0 | 1 |
| XLOC_006755 | MIR624       | chr14:31363004-31565656   | 0 | 0 | 0 | 1 |
| XLOC_006759 | GPR33        | chr14:31952149-31957151   | 0 | 0 | 0 | 1 |
| XLOC_006772 | SFTA3        | chr14:36942493-36982990   | 0 | 0 | 0 | 1 |
| XLOC_006773 | NKX2-1       | chr14:36985603-36989430   | 0 | 0 | 0 | 1 |
| XLOC_006774 | NKX2-8       | chr14:37049215-37051786   | 0 | 0 | 0 | 1 |
| XLOC_006776 | MIR4503      | chr14:37147125-37642998   | 0 | 0 | 0 | 1 |
| XLOC_006778 | CLEC14A      | chr14:38723204-38725575   | 0 | 0 | 0 | 1 |
| XLOC_006779 | LINC00639    | chr14:39218542-39386086   | 0 | 0 | 0 | 1 |
| XLOC_006784 | FSCB         | chr14:44973353-44976499   | 0 | 0 | 0 | 1 |
| XLOC_006788 | RPL10L       | chr14:47120219-47121028   | 0 | 0 | 0 | 1 |
| XLOC_006789 | MDGA2        | chr14:47308827-48144157   | 0 | 0 | 0 | 1 |
| XLOC_006790 | MIR548Y      | chr14:48230197-48230307   | 0 | 0 | 0 | 1 |
| XLOC_006791 | LINC00648    | chr14:48234155-48264217   | 0 | 0 | 0 | 1 |
| XLOC_006816 | MIR5580      | chr14:54415144-54415202   | 0 | 0 | 0 | 1 |
| XLOC_006821 | MIR4308      | chr14:55308723-55369542   | 0 | 0 | 0 | 1 |
| XLOC_006825 | TBPL2        | chr14:55880929-55907263   | 0 | 0 | 0 | 1 |
| XLOC_006840 | C14orf39     | chr14:60902673-60952764   | 0 | 0 | 0 | 1 |
| XLOC_006841 | SIX1         | chr14:61111416-61116155   | 0 | 0 | 0 | 1 |
| XLOC_006844 | TMEM30B      | chr14:61744088-61748530   | 0 | 0 | 0 | 1 |
| XLOC_006846 | KCNH5        | chr14:63173944-63568584   | 0 | 0 | 0 | 1 |
| XLOC_006847 | GPHB5        | chr14:63779548-63785593   | 0 | 0 | 0 | 1 |
| XLOC_006858 | MIR4708      | chr14:65801835-65801901   | 0 | 0 | 0 | 1 |
| XLOC_006871 | CCDC177      | chr14:70036530-70041600   | 0 | 0 | 0 | 1 |
| XLOC_006874 | SLC8A3       | chr14:70510933-70655787   | 0 | 0 | 0 | 1 |
| XLOC_006904 | RNU6-6       | chr14:76737449-76737476   | 0 | 0 | 0 | 1 |
| XLOC_006907 | ZDHHC22      | chr14:77597612-77608134   | 0 | 0 | 0 | 1 |
| XLOC_006908 | NGB          | chr14:77731833-77737655   | 0 | 0 | 0 | 1 |
| XLOC_006917 | DIO2         | chr14:80663867-80921810   | 0 | 0 | 0 | 1 |
| XLOC_006923 | GALC         | chr14:88399357-88460009   | 0 | 0 | 0 | 1 |
| XLOC_006924 | KCNK10       | chr14:88646451-88793256   | 0 | 0 | 0 | 1 |
| XLOC_006935 | CATSPERB     | chr14:92047117-92198413   | 0 | 0 | 0 | 1 |
| XLOC_006946 | PRIMA1       | chr14:94184643-94254766   | 0 | 0 | 0 | 1 |
| XLOC_006947 | FAM181A-AS1  | chr14:94371075-94395954   | 0 | 0 | 0 | 1 |
| XLOC_006948 | ASB2         | chr14:94400498-94443076   | 0 | 0 | 0 | 1 |
| XLOC_006954 | SERPINA11    | chr14:94908800-94919122   | 0 | 0 | 0 | 1 |
| XLOC_006955 | SERPINA9     | chr14:94929057-94942670   | 0 | 0 | 0 | 1 |
| XLOC_006956 | SERPINA12    | chr14:94953619-94984181   | 0 | 0 | 0 | 1 |
| XLOC_006957 | GSC          | chr14:95234559-95236499   | 0 | 0 | 0 | 1 |
| XLOC_006959 | MIR3173      | chr14:95552564-95623759   | 0 | 0 | 0 | 1 |
| XLOC_006961 | LINC00341    | chr14:95873603-95876427   | 0 | 0 | 0 | 1 |
| XLOC_006962 | SYNE3        | chr14:95883830-95942173   | 0 | 0 | 0 | 1 |
| XLOC_006964 | TCL1A        | chr14:96176303-96180533   | 0 | 0 | 0 | 1 |
| XLOC_006966 | LOC100129345 | chr14:98098983-98152995   | 0 | 0 | 0 | 1 |
| XLOC_006967 | C14orf64     | chr14:98391946-98444461   | 0 | 0 | 0 | 1 |
| XLOC_006975 | RTL1         | chr14:101346991-101351184 | 0 | 0 | 0 | 1 |
| XLOC_006976 | DIO3OS       | chr14:102018559-102022013 | 0 | 0 | 0 | 1 |
| XLOC_006977 | MIR1247      | chr14:102026623-102026759 | 0 | 0 | 0 | 1 |

|             |             |                           |   |   |   |   |
|-------------|-------------|---------------------------|---|---|---|---|
| XLOC_006983 | LINC00605   | chr14:103653557-103655365 | 0 | 0 | 0 | 1 |
| XLOC_006989 | RD3L        | chr14:104394816-104519004 | 0 | 0 | 0 | 1 |
| XLOC_006990 | MIR3545     | chr14:104583741-104583851 | 0 | 0 | 0 | 1 |
| XLOC_006991 | TMEM179     | chr14:105060419-105071097 | 0 | 0 | 0 | 1 |
| XLOC_006992 | MIR4710     | chr14:105144030-105144086 | 0 | 0 | 0 | 1 |
| XLOC_007000 | ELK2AP      | chr14:106135913-106139144 | 0 | 0 | 0 | 1 |
| XLOC_007001 | ADAM6       | chr14:106435818-106438358 | 0 | 0 | 0 | 1 |
| XLOC_007002 | CHEK2P2     | chr15:20487996-20496811   | 0 | 0 | 0 | 1 |
| XLOC_007003 | GOLGA8CP    | chr15:20767673-20781026   | 0 | 0 | 0 | 1 |
| XLOC_007004 | CT60        | chr15:21145766-21198633   | 0 | 0 | 0 | 1 |
| XLOC_007005 | OR4M2       | chr15:22278031-22371088   | 0 | 0 | 0 | 1 |
| XLOC_007006 | OR4N4       | chr15:22382472-22383815   | 0 | 0 | 0 | 1 |
| XLOC_007008 | RERP3       | chr15:22546564-22570831   | 0 | 0 | 0 | 1 |
| XLOC_007009 | GOLGA6L1    | chr15:22736245-22746002   | 0 | 0 | 0 | 1 |
| XLOC_007014 | GOLGA8EP    | chr15:23435069-23448423   | 0 | 0 | 0 | 1 |
| XLOC_007016 | MKRN3       | chr15:23810453-23813166   | 0 | 0 | 0 | 1 |
| XLOC_007017 | PWRN1       | chr15:24803303-24832926   | 0 | 0 | 0 | 1 |
| XLOC_007022 | SNORD109A   | chr15:25287120-25287187   | 0 | 0 | 0 | 1 |
| XLOC_007023 | SNORD116-1  | chr15:25296622-25296719   | 0 | 0 | 0 | 1 |
| XLOC_007024 | SNORD116-2  | chr15:25299355-25299452   | 0 | 0 | 0 | 1 |
| XLOC_007025 | SNORD116-9  | chr15:25302005-25302102   | 0 | 0 | 0 | 1 |
| XLOC_007026 | SNORD116-4  | chr15:25304683-25304781   | 0 | 0 | 0 | 1 |
| XLOC_007027 | SNORD116-5  | chr15:25307478-25307575   | 0 | 0 | 0 | 1 |
| XLOC_007028 | SNORD116-6  | chr15:25310171-25310269   | 0 | 0 | 0 | 1 |
| XLOC_007029 | SNORD116-7  | chr15:25312933-25313030   | 0 | 0 | 0 | 1 |
| XLOC_007030 | SNORD116-8  | chr15:25315577-25315674   | 0 | 0 | 0 | 1 |
| XLOC_007031 | SNORD116-9  | chr15:25318252-25318349   | 0 | 0 | 0 | 1 |
| XLOC_007032 | SNORD116-10 | chr15:25319259-25319363   | 0 | 0 | 0 | 1 |
| XLOC_007033 | SNORD116-11 | chr15:25321074-25321168   | 0 | 0 | 0 | 1 |
| XLOC_007034 | SNORD116-12 | chr15:25322196-25322290   | 0 | 0 | 0 | 1 |
| XLOC_007035 | SNORD116-13 | chr15:25324203-25324297   | 0 | 0 | 0 | 1 |
| XLOC_007036 | SNORD116-14 | chr15:25325287-25325381   | 0 | 0 | 0 | 1 |
| XLOC_007037 | SNORD116-15 | chr15:25326432-25326526   | 0 | 0 | 0 | 1 |
| XLOC_007038 | SNORD116-16 | chr15:25327913-25328007   | 0 | 0 | 0 | 1 |
| XLOC_007039 | SNORD116-17 | chr15:25328733-25328827   | 0 | 0 | 0 | 1 |
| XLOC_007040 | SNORD116-18 | chr15:25330530-25330624   | 0 | 0 | 0 | 1 |
| XLOC_007041 | SNORD116-19 | chr15:25331672-25331766   | 0 | 0 | 0 | 1 |
| XLOC_007042 | SNORD116-20 | chr15:25332807-25332901   | 0 | 0 | 0 | 1 |
| XLOC_007043 | SNORD116-21 | chr15:25333949-25334043   | 0 | 0 | 0 | 1 |
| XLOC_007044 | SNORD116-22 | chr15:25335068-25335162   | 0 | 0 | 0 | 1 |
| XLOC_007045 | SNORD116-23 | chr15:25336931-25337025   | 0 | 0 | 0 | 1 |
| XLOC_007046 | SNORD116-24 | chr15:25339182-25339276   | 0 | 0 | 0 | 1 |
| XLOC_007047 | SNORD116-25 | chr15:25342808-25342902   | 0 | 0 | 0 | 1 |
| XLOC_007048 | SNORD116-26 | chr15:25344644-25344742   | 0 | 0 | 0 | 1 |
| XLOC_007049 | SNORD116-27 | chr15:25346720-25346814   | 0 | 0 | 0 | 1 |
| XLOC_007050 | SNORD116-28 | chr15:25349787-25349880   | 0 | 0 | 0 | 1 |
| XLOC_007051 | SNORD116-29 | chr15:25351666-25351751   | 0 | 0 | 0 | 1 |
| XLOC_007052 | IPW         | chr15:25361691-25367623   | 0 | 0 | 0 | 1 |
| XLOC_007053 | PAR1        | chr15:25380788-25383200   | 0 | 0 | 0 | 1 |

|             |                |                         |   |   |   |   |
|-------------|----------------|-------------------------|---|---|---|---|
| XLOC_007054 | SNORD115-1     | chr15:25415869-25415951 | 0 | 0 | 0 | 1 |
| XLOC_007055 | SNORD115-2     | chr15:25417781-25417863 | 0 | 0 | 0 | 1 |
| XLOC_007056 | SNORD115-3     | chr15:25420073-25420155 | 0 | 0 | 0 | 1 |
| XLOC_007057 | SNORD115-4     | chr15:25421978-25422060 | 0 | 0 | 0 | 1 |
| XLOC_007058 | SNORD115-5     | chr15:25423884-25423966 | 0 | 0 | 0 | 1 |
| XLOC_007059 | SNORD115-6     | chr15:25425643-25425725 | 0 | 0 | 0 | 1 |
| XLOC_007060 | SNORD115-7     | chr15:25427531-25427613 | 0 | 0 | 0 | 1 |
| XLOC_007061 | SNORD115-8     | chr15:25429452-25429534 | 0 | 0 | 0 | 1 |
| XLOC_007062 | SNORD115-9     | chr15:25430777-25430859 | 0 | 0 | 0 | 1 |
| XLOC_007063 | SNORD115-10    | chr15:25432682-25432763 | 0 | 0 | 0 | 1 |
| XLOC_007064 | SNORD115-43    | chr15:25434560-25434642 | 0 | 0 | 0 | 1 |
| XLOC_007065 | SNORD115-10    | chr15:25436562-25436644 | 0 | 0 | 0 | 1 |
| XLOC_007066 | SNORD115-13    | chr15:25438467-25438549 | 0 | 0 | 0 | 1 |
| XLOC_007067 | SNORD115-14    | chr15:25440067-25440148 | 0 | 0 | 0 | 1 |
| XLOC_007068 | SNORD115-16    | chr15:25444594-25444676 | 0 | 0 | 0 | 1 |
| XLOC_007069 | SNORD115-18    | chr15:25446469-25446551 | 0 | 0 | 0 | 1 |
| XLOC_007070 | SNORD115-18    | chr15:25448373-25448455 | 0 | 0 | 0 | 1 |
| XLOC_007071 | SNORD115-17    | chr15:25449503-25449585 | 0 | 0 | 0 | 1 |
| XLOC_007072 | SNORD115-15,Sh | chr15:25451408-25477615 | 0 | 0 | 0 | 1 |
| XLOC_007073 | SNORD115-22    | chr15:25451408-25477615 | 0 | 0 | 0 | 1 |
| XLOC_007074 | PAR4           | chr15:25451408-25477615 | 0 | 0 | 0 | 1 |
| XLOC_007075 | SNORD115-24    | chr15:25451408-25477615 | 0 | 0 | 0 | 1 |
| XLOC_007076 | SNORD115-25    | chr15:25451408-25477615 | 0 | 0 | 0 | 1 |
| XLOC_007077 | SNORD115-26    | chr15:25451408-25477615 | 0 | 0 | 0 | 1 |
| XLOC_007078 | SNORD115-27    | chr15:25451408-25477615 | 0 | 0 | 0 | 1 |
| XLOC_007079 | SNORD115-28    | chr15:25451408-25477615 | 0 | 0 | 0 | 1 |
| XLOC_007080 | SNORD115-11    | chr15:25451408-25477615 | 0 | 0 | 0 | 1 |
| XLOC_007081 | SNORD115-30    | chr15:25451408-25477615 | 0 | 0 | 0 | 1 |
| XLOC_007082 | SNORD115-31    | chr15:25451408-25477615 | 0 | 0 | 0 | 1 |
| XLOC_007083 | SNORD115-32    | chr15:25451408-25477615 | 0 | 0 | 0 | 1 |
| XLOC_007084 | SNORD115-33    | chr15:25451408-25477615 | 0 | 0 | 0 | 1 |
| XLOC_007085 | SNORD115-35    | chr15:25479393-25479475 | 0 | 0 | 0 | 1 |
| XLOC_007086 | SNORD115-11    | chr15:25481231-25481313 | 0 | 0 | 0 | 1 |
| XLOC_007087 | SNORD115-37    | chr15:25483132-25483214 | 0 | 0 | 0 | 1 |
| XLOC_007088 | SNORD115-38    | chr15:25484984-25485066 | 0 | 0 | 0 | 1 |
| XLOC_007089 | SNORD115-39    | chr15:25486892-25486974 | 0 | 0 | 0 | 1 |
| XLOC_007090 | SNORD115-40    | chr15:25488760-25488842 | 0 | 0 | 0 | 1 |
| XLOC_007091 | SNORD115-41    | chr15:25490624-25490706 | 0 | 0 | 0 | 1 |
| XLOC_007092 | SNORD115-10    | chr15:25492491-25492573 | 0 | 0 | 0 | 1 |
| XLOC_007093 | SNORD115-11    | chr15:25494344-25494426 | 0 | 0 | 0 | 1 |
| XLOC_007094 | SNORD115-44    | chr15:25496005-25496087 | 0 | 0 | 0 | 1 |
| XLOC_007095 | SNORD115-45    | chr15:25509673-25509726 | 0 | 0 | 0 | 1 |
| XLOC_007096 | SNORD115-47    | chr15:25513663-25513696 | 0 | 0 | 0 | 1 |
| XLOC_007097 | SNORD115-48    | chr15:25514929-25515005 | 0 | 0 | 0 | 1 |
| XLOC_007098 | SNORD109B      | chr15:25523489-25523556 | 0 | 0 | 0 | 1 |
| XLOC_007099 | LOC100128714   | chr15:26147506-26298267 | 0 | 0 | 0 | 1 |
| XLOC_007100 | LOC503519      | chr15:26360959-26378184 | 0 | 0 | 0 | 1 |
| XLOC_007101 | GABRA5         | chr15:27111865-27194357 | 0 | 0 | 0 | 1 |
| XLOC_007102 | GABRG3         | chr15:27216428-27778373 | 0 | 0 | 0 | 1 |

|             |              |                         |   |   |   |   |
|-------------|--------------|-------------------------|---|---|---|---|
| XLOC_007103 | GOLGA8F,GOLG | chr15:28623783-28637171 | 0 | 0 | 0 | 1 |
| XLOC_007104 | MIR4509-1    | chr15:28671636-28671730 | 0 | 0 | 0 | 1 |
| XLOC_007107 | LOC100289656 | chr15:29033388-29034538 | 0 | 0 | 0 | 1 |
| XLOC_007110 | ULK4P3       | chr15:30395934-30423948 | 0 | 0 | 0 | 1 |
| XLOC_007113 | ULK4P2       | chr15:30864757-30892911 | 0 | 0 | 0 | 1 |
| XLOC_007122 | GREM1        | chr15:33010204-33026870 | 0 | 0 | 0 | 1 |
| XLOC_007129 | ATPBD4-AS1   | chr15:35663169-36151202 | 0 | 0 | 0 | 1 |
| XLOC_007130 | MIR4510      | chr15:36219056-36219124 | 0 | 0 | 0 | 1 |
| XLOC_007132 | TMCO5A       | chr15:38227456-38243623 | 0 | 0 | 0 | 1 |
| XLOC_007135 | C15orf53     | chr15:38988798-38992239 | 0 | 0 | 0 | 1 |
| XLOC_007136 | C15orf54     | chr15:39542884-39547048 | 0 | 0 | 0 | 1 |
| XLOC_007137 | THBS1        | chr15:39873279-39889668 | 0 | 0 | 0 | 1 |
| XLOC_007141 | PHGR1        | chr15:40643233-40648634 | 0 | 0 | 0 | 1 |
| XLOC_007164 | MIR626       | chr15:41952609-42062141 | 0 | 0 | 0 | 1 |
| XLOC_007176 | RNU6-28      | chr15:43663312-43910998 | 0 | 0 | 0 | 1 |
| XLOC_007188 | C15orf43     | chr15:45248899-45271421 | 0 | 0 | 0 | 1 |
| XLOC_007190 | DUOXA2       | chr15:45406522-45422075 | 0 | 0 | 0 | 1 |
| XLOC_007199 | SEMA6D       | chr15:47476402-48066420 | 0 | 0 | 0 | 1 |
| XLOC_007200 | SLC24A5      | chr15:48413168-48470558 | 0 | 0 | 0 | 1 |
| XLOC_007201 | CTXN2        | chr15:48483866-48495951 | 0 | 0 | 0 | 1 |
| XLOC_007202 | SLC12A1      | chr15:48498497-48596275 | 0 | 0 | 0 | 1 |
| XLOC_007211 | MIR4712      | chr15:50652525-50652607 | 0 | 0 | 0 | 1 |
| XLOC_007215 | MIR4713      | chr15:51500253-51630795 | 0 | 0 | 0 | 1 |
| XLOC_007216 | GLDN         | chr15:51633712-51700209 | 0 | 0 | 0 | 1 |
| XLOC_007221 | UNC13C       | chr15:54305100-54920806 | 0 | 0 | 0 | 1 |
| XLOC_007229 | AQP9         | chr15:58430407-58478110 | 0 | 0 | 0 | 1 |
| XLOC_007230 | LIPC         | chr15:58724174-58861073 | 0 | 0 | 0 | 1 |
| XLOC_007236 | GCNT3        | chr15:59903981-59912210 | 0 | 0 | 0 | 1 |
| XLOC_007237 | FOXB1        | chr15:60296420-60298142 | 0 | 0 | 0 | 1 |
| XLOC_007240 | MIR190A      | chr15:62939509-63136829 | 0 | 0 | 0 | 1 |
| XLOC_007254 | KBTBD13      | chr15:65369153-65372276 | 0 | 0 | 0 | 1 |
| XLOC_007258 | MIR4311      | chr15:66187633-66546075 | 0 | 0 | 0 | 1 |
| XLOC_007271 | MIR548H4     | chr15:69116302-69564544 | 0 | 0 | 0 | 1 |
| XLOC_007272 | NOX5,SPESP1  | chr15:69116302-69564544 | 0 | 0 | 0 | 1 |
| XLOC_007273 | LINC00277    | chr15:69116302-69564544 | 0 | 0 | 0 | 1 |
| XLOC_007279 | LINC00593    | chr15:70127572-70135306 | 0 | 0 | 0 | 1 |
| XLOC_007285 | TMEM202      | chr15:72690667-72700708 | 0 | 0 | 0 | 1 |
| XLOC_007287 | MIR630       | chr15:72879557-72879654 | 0 | 0 | 0 | 1 |
| XLOC_007288 | GOLGA6B      | chr15:72947037-72959738 | 0 | 0 | 0 | 1 |
| XLOC_007292 | C15orf60     | chr15:73735498-73925753 | 0 | 0 | 0 | 1 |
| XLOC_007294 | TBC1D21      | chr15:74165967-74181556 | 0 | 0 | 0 | 1 |
| XLOC_007297 | ISLR2        | chr15:74421714-74429143 | 0 | 0 | 0 | 1 |
| XLOC_007298 | ISLR         | chr15:74466086-74469212 | 0 | 0 | 0 | 1 |
| XLOC_007299 | CCDC33       | chr15:74528629-74628482 | 0 | 0 | 0 | 1 |
| XLOC_007300 | LOC729739    | chr15:74630102-74660081 | 0 | 0 | 0 | 1 |
| XLOC_007306 | LMAN1L       | chr15:75105193-75118099 | 0 | 0 | 0 | 1 |
| XLOC_007313 | GOLGA6D      | chr15:75575181-75588148 | 0 | 0 | 0 | 1 |
| XLOC_007321 | ISL2         | chr15:76629146-76634816 | 0 | 0 | 0 | 1 |
| XLOC_007325 | LOC253044    | chr15:77934105-77941581 | 0 | 0 | 0 | 1 |

|             |               |                           |   |   |   |   |
|-------------|---------------|---------------------------|---|---|---|---|
| XLOC_007326 | MIR5003       | chr15:78375874-78375901   | 0 | 0 | 0 | 1 |
| XLOC_007327 | SH2D7         | chr15:78384926-78396393   | 0 | 0 | 0 | 1 |
| XLOC_007330 | CRABP1        | chr15:78632665-78640572   | 0 | 0 | 0 | 1 |
| XLOC_007337 | MIR184        | chr15:79484048-79590581   | 0 | 0 | 0 | 1 |
| XLOC_007338 | ANKRD34C      | chr15:79484048-79590581   | 0 | 0 | 0 | 1 |
| XLOC_007348 | C15orf26      | chr15:81426643-81441516   | 0 | 0 | 0 | 1 |
| XLOC_007351 | LOC390660     | chr15:82585620-82626915   | 0 | 0 | 0 | 1 |
| XLOC_007352 | UBE2Q2P2,UBE2 | chr15:82647285-82708204   | 0 | 0 | 0 | 1 |
| XLOC_007353 | GOLGA6L9      | chr15:82722184-82731586   | 0 | 0 | 0 | 1 |
| XLOC_007354 | LOC440297     | chr15:82753446-82798352   | 0 | 0 | 0 | 1 |
| XLOC_007355 | LOC390660     | chr15:82882945-82924242   | 0 | 0 | 0 | 1 |
| XLOC_007359 | LOC440297     | chr15:83130032-83182930   | 0 | 0 | 0 | 1 |
| XLOC_007360 | LOC283692     | chr15:83211950-83378635   | 0 | 0 | 0 | 1 |
| XLOC_007361 | SCARNA15      | chr15:83424696-83424823   | 0 | 0 | 0 | 1 |
| XLOC_007364 | MIR4515       | chr15:83685180-83736167   | 0 | 0 | 0 | 1 |
| XLOC_007365 | TM6SF1        | chr15:83776323-83806111   | 0 | 0 | 0 | 1 |
| XLOC_007367 | ADAMTSL3      | chr15:84322837-84708593   | 0 | 0 | 0 | 1 |
| XLOC_007368 | EFTUD1P1      | chr15:84748938-84795353   | 0 | 0 | 0 | 1 |
| XLOC_007378 | SLC28A1       | chr15:85427912-85489027   | 0 | 0 | 0 | 1 |
| XLOC_007381 | AGBL1         | chr15:86685241-87572283   | 0 | 0 | 0 | 1 |
| XLOC_007382 | LINC00052     | chr15:88120159-88122917   | 0 | 0 | 0 | 1 |
| XLOC_007383 | NTRK3-AS1     | chr15:88419987-88814297   | 0 | 0 | 0 | 1 |
| XLOC_007385 | MIR1179       | chr15:89151337-89151428   | 0 | 0 | 0 | 1 |
| XLOC_007386 | MIR7-2        | chr15:89155055-89155165   | 0 | 0 | 0 | 1 |
| XLOC_007389 | ACAN          | chr15:89346673-89418585   | 0 | 0 | 0 | 1 |
| XLOC_007392 | MIR9-3        | chr15:89911247-89911337   | 0 | 0 | 0 | 1 |
| XLOC_007393 | LOC254559     | chr15:89921272-89941718   | 0 | 0 | 0 | 1 |
| XLOC_007414 | ST8SIA2       | chr15:92937139-93011958   | 0 | 0 | 0 | 1 |
| XLOC_007415 | C15orf32      | chr15:93014906-93044347   | 0 | 0 | 0 | 1 |
| XLOC_007419 | MIR3175       | chr15:93443550-93571237   | 0 | 0 | 0 | 1 |
| XLOC_007422 | LOC145820     | chr15:95976321-96051076   | 0 | 0 | 0 | 1 |
| XLOC_007424 | MIR1469       | chr15:96869156-96883492   | 0 | 0 | 0 | 1 |
| XLOC_007425 | SPATA8        | chr15:97326678-97328845   | 0 | 0 | 0 | 1 |
| XLOC_007428 | MIR4714       | chr15:99192760-99507759   | 0 | 0 | 0 | 1 |
| XLOC_007436 | OR4F6         | chr15:102345922-102346861 | 0 | 0 | 0 | 1 |
| XLOC_007437 | OR4F15        | chr15:102358389-102359328 | 0 | 0 | 0 | 1 |
| XLOC_007438 | OR4F13P       | chr15:102382321-102390527 | 0 | 0 | 0 | 1 |
| XLOC_007439 | FAM138E       | chr15:102495087-102496558 | 0 | 0 | 0 | 1 |
| XLOC_007442 | GOLGA6L6      | chr15:20737093-20747114   | 0 | 0 | 0 | 1 |
| XLOC_007443 | NBEAP1        | chr15:20874796-20961480   | 0 | 0 | 0 | 1 |
| XLOC_007444 | POTEB         | chr15:21040700-21071977   | 0 | 0 | 0 | 1 |
| XLOC_007445 | NF1P2         | chr15:21122020-21134625   | 0 | 0 | 0 | 1 |
| XLOC_007447 | CXADRP2       | chr15:22014419-22016878   | 0 | 0 | 0 | 1 |
| XLOC_007448 | POTEB         | chr15:22051852-22083137   | 0 | 0 | 0 | 1 |
| XLOC_007449 | NF1P2         | chr15:22133180-22145802   | 0 | 0 | 0 | 1 |
| XLOC_007450 | MIR4509-3     | chr15:22675147-22675241   | 0 | 0 | 0 | 1 |
| XLOC_007457 | LOC440243     | chr15:23569671-23579379   | 0 | 0 | 0 | 1 |
| XLOC_007458 | MIR4508       | chr15:23807208-23807278   | 0 | 0 | 0 | 1 |
| XLOC_007459 | MAGEL2        | chr15:23888695-23892993   | 0 | 0 | 0 | 1 |

|             |              |                         |   |   |   |   |
|-------------|--------------|-------------------------|---|---|---|---|
| XLOC_007460 | NDN          | chr15:23930553-23932450 | 0 | 0 | 0 | 1 |
| XLOC_007461 | PWRN2        | chr15:24409925-24415053 | 0 | 0 | 0 | 1 |
| XLOC_007463 | ATP10A       | chr15:25923859-26108349 | 0 | 0 | 0 | 1 |
| XLOC_007464 | MIR4715      | chr15:25923859-26108349 | 0 | 0 | 0 | 1 |
| XLOC_007466 | OCA2         | chr15:28000022-28344458 | 0 | 0 | 0 | 1 |
| XLOC_007468 | MIR4509-1    | chr15:28735897-28735991 | 0 | 0 | 0 | 1 |
| XLOC_007469 | GOLGA8F,GOLG | chr15:28764756-28778143 | 0 | 0 | 0 | 1 |
| XLOC_007470 | GOLGA6L7P    | chr15:29034979-29101720 | 0 | 0 | 0 | 1 |
| XLOC_007471 | FAM189A1     | chr15:29412454-29862927 | 0 | 0 | 0 | 1 |
| XLOC_007476 | TRPM1        | chr15:31293263-31453476 | 0 | 0 | 0 | 1 |
| XLOC_007477 | MIR211       | chr15:31293263-31453476 | 0 | 0 | 0 | 1 |
| XLOC_007478 | LOC283710    | chr15:31514970-31523050 | 0 | 0 | 0 | 1 |
| XLOC_007483 | TMCO5B       | chr15:33528676-33539756 | 0 | 0 | 0 | 1 |
| XLOC_007491 | MIR1233-2    | chr15:34671269-34729667 | 0 | 0 | 0 | 1 |
| XLOC_007493 | MIR1233-1    | chr15:34817483-34875771 | 0 | 0 | 0 | 1 |
| XLOC_007494 | GJD2         | chr15:35044641-35046782 | 0 | 0 | 0 | 1 |
| XLOC_007499 | MIR3942      | chr15:35663169-36151202 | 0 | 0 | 0 | 1 |
| XLOC_007501 | LOC145845    | chr15:37156643-37178734 | 0 | 0 | 0 | 1 |
| XLOC_007505 | GPR176       | chr15:40091222-40213093 | 0 | 0 | 0 | 1 |
| XLOC_007526 | MIR4310      | chr15:42120282-42186275 | 0 | 0 | 0 | 1 |
| XLOC_007530 | PLA2G4F      | chr15:42433331-42448839 | 0 | 0 | 0 | 1 |
| XLOC_007532 | MIR627       | chr15:42450898-42500502 | 0 | 0 | 0 | 1 |
| XLOC_007539 | EPB42        | chr15:43489425-43513323 | 0 | 0 | 0 | 1 |
| XLOC_007540 | TGM5         | chr15:43524792-43559055 | 0 | 0 | 0 | 1 |
| XLOC_007541 | TGM7         | chr15:43568478-43594453 | 0 | 0 | 0 | 1 |
| XLOC_007542 | LCMT2        | chr15:43619973-43622820 | 0 | 0 | 0 | 1 |
| XLOC_007569 | MIR4716      | chr15:49447975-49913118 | 0 | 0 | 0 | 1 |
| XLOC_007578 | TNFAIP8L3    | chr15:51348798-51397473 | 0 | 0 | 0 | 1 |
| XLOC_007579 | CYP19A1      | chr15:51500253-51630795 | 0 | 0 | 0 | 1 |
| XLOC_007586 | MIR1266      | chr15:52484514-52587995 | 0 | 0 | 0 | 1 |
| XLOC_007590 | ONECUT1      | chr15:53049159-53082209 | 0 | 0 | 0 | 1 |
| XLOC_007591 | WDR72        | chr15:53805937-54051859 | 0 | 0 | 0 | 1 |
| XLOC_007595 | MIR628       | chr15:55611132-55800432 | 0 | 0 | 0 | 1 |
| XLOC_007596 | PYGO1        | chr15:55838220-55881050 | 0 | 0 | 0 | 1 |
| XLOC_007597 | PRTG         | chr15:55903738-56035177 | 0 | 0 | 0 | 1 |
| XLOC_007603 | ALDH1A2      | chr15:58245621-58358121 | 0 | 0 | 0 | 1 |
| XLOC_007608 | MIR2116      | chr15:59428167-59665071 | 0 | 0 | 0 | 1 |
| XLOC_007615 | C2CD4B       | chr15:62455736-62457482 | 0 | 0 | 0 | 1 |
| XLOC_007616 | MGC15885     | chr15:62929370-62937380 | 0 | 0 | 0 | 1 |
| XLOC_007628 | MIR1272      | chr15:65032094-65067770 | 0 | 0 | 0 | 1 |
| XLOC_007643 | MIR4511      | chr15:65952956-66084631 | 0 | 0 | 0 | 1 |
| XLOC_007649 | SNORD18C     | chr15:66791652-66797193 | 0 | 0 | 0 | 1 |
| XLOC_007650 | SNORD18B     | chr15:66791652-66797193 | 0 | 0 | 0 | 1 |
| XLOC_007652 | SNORD18A     | chr15:66791652-66797193 | 0 | 0 | 0 | 1 |
| XLOC_007660 | MIR4312      | chr15:69070874-69113261 | 0 | 0 | 0 | 1 |
| XLOC_007663 | MIR629       | chr15:70340542-70390256 | 0 | 0 | 0 | 1 |
| XLOC_007665 | LARP6        | chr15:71123888-71146498 | 0 | 0 | 0 | 1 |
| XLOC_007667 | CT62         | chr15:71402582-71407839 | 0 | 0 | 0 | 1 |
| XLOC_007669 | GRAMD2       | chr15:72452146-72490136 | 0 | 0 | 0 | 1 |



|             |           |                           |   |   |   |   |
|-------------|-----------|---------------------------|---|---|---|---|
| XLOC_007676 | HCN4      | chr15:73612199-73661605   | 0 | 0 | 0 | 1 |
| XLOC_007678 | C15orf59  | chr15:74032140-74043816   | 0 | 0 | 0 | 1 |
| XLOC_007681 | GOLGA6A   | chr15:74362197-74374891   | 0 | 0 | 0 | 1 |
| XLOC_007683 | STRA6     | chr15:74471807-74502046   | 0 | 0 | 0 | 1 |
| XLOC_007684 | CYP11A1   | chr15:74630102-74660081   | 0 | 0 | 0 | 1 |
| XLOC_007689 | MIR4513   | chr15:75074424-75095539   | 0 | 0 | 0 | 1 |
| XLOC_007695 | MIR631    | chr15:75639330-75647592   | 0 | 0 | 0 | 1 |
| XLOC_007703 | MIR4313   | chr15:76054555-76054656   | 0 | 0 | 0 | 1 |
| XLOC_007712 | LINGO1    | chr15:77905368-77924709   | 0 | 0 | 0 | 1 |
| XLOC_007713 | LOC645752 | chr15:78206558-78219188   | 0 | 0 | 0 | 1 |
| XLOC_007720 | CHRNA4    | chr15:78916635-78933587   | 0 | 0 | 0 | 1 |
| XLOC_007724 | LOC729911 | chr15:79484048-79590581   | 0 | 0 | 0 | 1 |
| XLOC_007727 | LOC283688 | chr15:80555409-80634147   | 0 | 0 | 0 | 1 |
| XLOC_007728 | MIR549    | chr15:81071711-81243999   | 0 | 0 | 0 | 1 |
| XLOC_007730 | MIR4514   | chr15:81289757-81289814   | 0 | 0 | 0 | 1 |
| XLOC_007732 | TMC3      | chr15:81624759-81666418   | 0 | 0 | 0 | 1 |
| XLOC_007750 | HDGFRP3   | chr15:83806803-83876770   | 0 | 0 | 0 | 1 |
| XLOC_007751 | BNC1      | chr15:83924654-83953468   | 0 | 0 | 0 | 1 |
| XLOC_007758 | LOC642423 | chr15:85747906-85748518   | 0 | 0 | 0 | 1 |
| XLOC_007760 | MIR1276   | chr15:86302558-86338189   | 0 | 0 | 0 | 1 |
| XLOC_007761 | LOC727915 | chr15:86685241-87572283   | 0 | 0 | 0 | 1 |
| XLOC_007765 | MIR3529   | chr15:89155055-89155165   | 0 | 0 | 0 | 1 |
| XLOC_007768 | RLBP1     | chr15:89753097-89764922   | 0 | 0 | 0 | 1 |
| XLOC_007770 | RHCG      | chr15:90014637-90039799   | 0 | 0 | 0 | 1 |
| XLOC_007771 | LOC283761 | chr15:90048160-90067265   | 0 | 0 | 0 | 1 |
| XLOC_007778 | MIR5094   | chr15:90373830-90456222   | 0 | 0 | 0 | 1 |
| XLOC_007781 | GABARAPL3 | chr15:90889762-90892679   | 0 | 0 | 0 | 1 |
| XLOC_007787 | RGMA      | chr15:93586635-93632443   | 0 | 0 | 0 | 1 |
| XLOC_007788 | LOC400456 | chr15:95822518-95870329   | 0 | 0 | 0 | 1 |
| XLOC_007790 | FAM169B   | chr15:98980390-99057611   | 0 | 0 | 0 | 1 |
| XLOC_007791 | PGPEP1L   | chr15:99511458-99551024   | 0 | 0 | 0 | 1 |
| XLOC_007794 | DNM1P46   | chr15:100330360-100347132 | 0 | 0 | 0 | 1 |
| XLOC_007806 | OR4F4     | chr15:102462344-102463262 | 0 | 0 | 0 | 1 |
| XLOC_007807 | DDX11L9   | chr15:102501015-102519296 | 0 | 0 | 0 | 1 |
| XLOC_007808 | DDX11L10  | chr16:61554-64090         | 0 | 0 | 0 | 1 |
| XLOC_007811 | HBZ       | chr16:202853-204504       | 0 | 0 | 0 | 1 |
| XLOC_007812 | HBM       | chr16:215972-216767       | 0 | 0 | 0 | 1 |
| XLOC_007815 | HBQ1      | chr16:230332-231178       | 0 | 0 | 0 | 1 |
| XLOC_007824 | MIR5587   | chr16:577855-604636       | 0 | 0 | 0 | 1 |
| XLOC_007825 | MIR3176   | chr16:577855-604636       | 0 | 0 | 0 | 1 |
| XLOC_007840 | MIR662    | chr16:820182-820277       | 0 | 0 | 0 | 1 |
| XLOC_007846 | TPSAB1    | chr16:1290677-1292555     | 0 | 0 | 0 | 1 |
| XLOC_007847 | TPSD1     | chr16:1306272-1308494     | 0 | 0 | 0 | 1 |
| XLOC_007856 | MIR3177   | chr16:1756220-1820318     | 0 | 0 | 0 | 1 |
| XLOC_007863 | RNF151    | chr16:2016874-2018976     | 0 | 0 | 0 | 1 |
| XLOC_007870 | MIR4516   | chr16:2097989-2185899     | 0 | 0 | 0 | 1 |
| XLOC_007876 | MIR3677   | chr16:2320713-2320773     | 0 | 0 | 0 | 1 |
| XLOC_007877 | MIR940    | chr16:2321747-2321841     | 0 | 0 | 0 | 1 |
| XLOC_007878 | MIR4717   | chr16:2324620-2324692     | 0 | 0 | 0 | 1 |

|             |                |                         |   |   |   |   |
|-------------|----------------|-------------------------|---|---|---|---|
| XLOC_007882 | NTN3           | chr16:2521499-2524146   | 0 | 0 | 0 | 1 |
| XLOC_007891 | PRSS41         | chr16:2848485-2855133   | 0 | 0 | 0 | 1 |
| XLOC_007892 | PRSS21         | chr16:2867163-2871723   | 0 | 0 | 0 | 1 |
| XLOC_007893 | ZG16B          | chr16:2880172-2882285   | 0 | 0 | 0 | 1 |
| XLOC_007907 | OR1F1          | chr16:3254246-3255185   | 0 | 0 | 0 | 1 |
| XLOC_007908 | OR1F2P         | chr16:3265561-3266546   | 0 | 0 | 0 | 1 |
| XLOC_007912 | OR2C1          | chr16:3405888-3406924   | 0 | 0 | 0 | 1 |
| XLOC_007921 | C16orf96       | chr16:4606490-4650318   | 0 | 0 | 0 | 1 |
| XLOC_007927 | SEC14L5        | chr16:5008317-5069156   | 0 | 0 | 0 | 1 |
| XLOC_007930 | RBFOX1         | chr16:6069131-7763340   | 0 | 0 | 0 | 1 |
| XLOC_007935 | MIR548X        | chr16:9328773-9328803   | 0 | 0 | 0 | 1 |
| XLOC_007938 | CIITA          | chr16:10971054-11018840 | 0 | 0 | 0 | 1 |
| XLOC_007942 | TNFRSF17       | chr16:12058963-12061925 | 0 | 0 | 0 | 1 |
| XLOC_007944 | MIR4718        | chr16:12753655-12897744 | 0 | 0 | 0 | 1 |
| XLOC_007948 | MIR193B        | chr16:14397823-14397906 | 0 | 0 | 0 | 1 |
| XLOC_007949 | MIR365A        | chr16:14403141-14403228 | 0 | 0 | 0 | 1 |
| XLOC_007952 | MIR3179-3      | chr16:14995364-14995448 | 0 | 0 | 0 | 1 |
| XLOC_007953 | MIR3180-3      | chr16:15005076-15005170 | 0 | 0 | 0 | 1 |
| XLOC_007961 | MIR3179-1      | chr16:16394015-16394099 | 0 | 0 | 0 | 1 |
| XLOC_007962 | MIR3180-1      | chr16:16403731-16403825 | 0 | 0 | 0 | 1 |
| XLOC_007964 | ABCC6P1        | chr16:18582569-18609607 | 0 | 0 | 0 | 1 |
| XLOC_007969 | CLEC19A        | chr16:19297104-19322269 | 0 | 0 | 0 | 1 |
| XLOC_007975 | ACSM2A         | chr16:20462858-20498991 | 0 | 0 | 0 | 1 |
| XLOC_007993 | MIR548D2       | chr16:22729602-22803363 | 0 | 0 | 0 | 1 |
| XLOC_007995 | SCNN1G         | chr16:23194039-23228200 | 0 | 0 | 0 | 1 |
| XLOC_007996 | SCNN1B         | chr16:23313590-23392620 | 0 | 0 | 0 | 1 |
| XLOC_008000 | CHP2           | chr16:23765947-23770256 | 0 | 0 | 0 | 1 |
| XLOC_008001 | PRKCB          | chr16:23847299-24231932 | 0 | 0 | 0 | 1 |
| XLOC_008002 | CACNG3         | chr16:24266873-24373737 | 0 | 0 | 0 | 1 |
| XLOC_008009 | HS3ST4         | chr16:25703346-26149009 | 0 | 0 | 0 | 1 |
| XLOC_008010 | C16orf82       | chr16:27078218-27080487 | 0 | 0 | 0 | 1 |
| XLOC_008023 | CD19           | chr16:28943259-28950668 | 0 | 0 | 0 | 1 |
| XLOC_008025 | MIR4517        | chr16:28962317-28977767 | 0 | 0 | 0 | 1 |
| XLOC_008030 | LOC606724      | chr16:29460665-29461236 | 0 | 0 | 0 | 1 |
| XLOC_008034 | ZG16           | chr16:29789560-29792969 | 0 | 0 | 0 | 1 |
| XLOC_008044 | C16orf92       | chr16:30034654-30042186 | 0 | 0 | 0 | 1 |
| XLOC_008053 | MIR4518        | chr16:30483982-30534506 | 0 | 0 | 0 | 1 |
| XLOC_008075 | ITGAD          | chr16:31404632-31437826 | 0 | 0 | 0 | 1 |
| XLOC_008079 | AHSP           | chr16:31539202-31540124 | 0 | 0 | 0 | 1 |
| XLOC_008083 | TP53TG3D       | chr16:32264649-32267243 | 0 | 0 | 0 | 1 |
| XLOC_008084 | TP53TG3,TP53TC | chr16:33205584-33208179 | 0 | 0 | 0 | 1 |
| XLOC_008085 | TP53TG3,TP53TC | chr16:33262119-33264719 | 0 | 0 | 0 | 1 |
| XLOC_008086 | LOC283914      | chr16:34597786-34626084 | 0 | 0 | 0 | 1 |
| XLOC_008091 | MIR548AE2      | chr16:48274602-48420559 | 0 | 0 | 0 | 1 |
| XLOC_008094 | C16orf78       | chr16:49407807-49433319 | 0 | 0 | 0 | 1 |
| XLOC_008107 | MMP2           | chr16:55513080-55540586 | 0 | 0 | 0 | 1 |
| XLOC_008110 | SLC6A2         | chr16:55689541-55740104 | 0 | 0 | 0 | 1 |
| XLOC_008111 | CES1P2         | chr16:55758836-55784123 | 0 | 0 | 0 | 1 |
| XLOC_008112 | CES1P1         | chr16:55794510-55808826 | 0 | 0 | 0 | 1 |

|             |              |                         |   |   |   |   |
|-------------|--------------|-------------------------|---|---|---|---|
| XLOC_008114 | MIR3935      | chr16:56225250-56391356 | 0 | 0 | 0 | 1 |
| XLOC_008116 | MT4          | chr16:56598960-56602869 | 0 | 0 | 0 | 1 |
| XLOC_008117 | MT3          | chr16:56623266-56625000 | 0 | 0 | 0 | 1 |
| XLOC_008131 | MIR138-2     | chr16:56892429-56892513 | 0 | 0 | 0 | 1 |
| XLOC_008134 | CETP         | chr16:56995834-57017756 | 0 | 0 | 0 | 1 |
| XLOC_008139 | CCL22        | chr16:57392694-57400102 | 0 | 0 | 0 | 1 |
| XLOC_008140 | CX3CL1       | chr16:57406413-57418956 | 0 | 0 | 0 | 1 |
| XLOC_008141 | CCL17        | chr16:57438678-57449974 | 0 | 0 | 0 | 1 |
| XLOC_008149 | TEPP         | chr16:58010338-58022017 | 0 | 0 | 0 | 1 |
| XLOC_008176 | LRRC36       | chr16:67360746-67419109 | 0 | 0 | 0 | 1 |
| XLOC_008196 | CDH1         | chr16:68771194-68869444 | 0 | 0 | 0 | 1 |
| XLOC_008206 | MIR140       | chr16:69796186-69975644 | 0 | 0 | 0 | 1 |
| XLOC_008208 | MIR1972-2    | chr16:70010201-70099851 | 0 | 0 | 0 | 1 |
| XLOC_008215 | SNORD111B    | chr16:70557690-70611571 | 0 | 0 | 0 | 1 |
| XLOC_008216 | SNORD111     | chr16:70557690-70611571 | 0 | 0 | 0 | 1 |
| XLOC_008220 | CHST4        | chr16:71560022-71572493 | 0 | 0 | 0 | 1 |
| XLOC_008226 | HPR          | chr16:72097124-72111145 | 0 | 0 | 0 | 1 |
| XLOC_008228 | HTA          | chr16:73126247-73127672 | 0 | 0 | 0 | 1 |
| XLOC_008229 | LOC100506172 | chr16:73420703-73455295 | 0 | 0 | 0 | 1 |
| XLOC_008233 | CTRB1        | chr16:75252883-75258822 | 0 | 0 | 0 | 1 |
| XLOC_008236 | CNTNAP4      | chr16:76311175-76593135 | 0 | 0 | 0 | 1 |
| XLOC_008237 | MIR4719      | chr16:76902832-76902916 | 0 | 0 | 0 | 1 |
| XLOC_008240 | VAT1L        | chr16:77822482-78014001 | 0 | 0 | 0 | 1 |
| XLOC_008241 | CLEC3A       | chr16:78056442-78066001 | 0 | 0 | 0 | 1 |
| XLOC_008243 | DYNLRB2      | chr16:80574853-80584541 | 0 | 0 | 0 | 1 |
| XLOC_008246 | BCMO1        | chr16:81272295-81324747 | 0 | 0 | 0 | 1 |
| XLOC_008248 | MIR4720      | chr16:81418622-81418698 | 0 | 0 | 0 | 1 |
| XLOC_008252 | HSD17B2      | chr16:82068857-82132139 | 0 | 0 | 0 | 1 |
| XLOC_008254 | MIR3182      | chr16:82660398-83830215 | 0 | 0 | 0 | 1 |
| XLOC_008260 | ADAD2        | chr16:84224722-84230772 | 0 | 0 | 0 | 1 |
| XLOC_008261 | WFDC1        | chr16:84328400-84363450 | 0 | 0 | 0 | 1 |
| XLOC_008267 | LOC400548    | chr16:85170755-85183049 | 0 | 0 | 0 | 1 |
| XLOC_008271 | IRF8         | chr16:85932773-85956211 | 0 | 0 | 0 | 1 |
| XLOC_008272 | LOC146513    | chr16:86320036-86326995 | 0 | 0 | 0 | 1 |
| XLOC_008282 | MIR5189      | chr16:88520013-88601574 | 0 | 0 | 0 | 1 |
| XLOC_008330 | TPSG1        | chr16:1203240-1275254   | 0 | 0 | 0 | 1 |
| XLOC_008331 | TPSB2        | chr16:1278335-1280185   | 0 | 0 | 0 | 1 |
| XLOC_008345 | LINC00254    | chr16:1928285-1934232   | 0 | 0 | 0 | 1 |
| XLOC_008346 | HS3ST6       | chr16:1961464-1968231   | 0 | 0 | 0 | 1 |
| XLOC_008348 | RPL3L        | chr16:1994579-2004679   | 0 | 0 | 0 | 1 |
| XLOC_008356 | MIR1225      | chr16:2097989-2185899   | 0 | 0 | 0 | 1 |
| XLOC_008357 | MIR3180-5    | chr16:2185977-2186130   | 0 | 0 | 0 | 1 |
| XLOC_008358 | SNORD60      | chr16:2205023-2205106   | 0 | 0 | 0 | 1 |
| XLOC_008366 | MIR3178      | chr16:2581922-2582006   | 0 | 0 | 0 | 1 |
| XLOC_008371 | PRSS33       | chr16:2833953-2836708   | 0 | 0 | 0 | 1 |
| XLOC_008386 | C16orf90     | chr16:3543483-3545421   | 0 | 0 | 0 | 1 |
| XLOC_008406 | C16orf89     | chr16:5094122-5116146   | 0 | 0 | 0 | 1 |
| XLOC_008408 | TMEM114      | chr16:8619501-8622226   | 0 | 0 | 0 | 1 |
| XLOC_008412 | GRIN2A       | chr16:9847264-10276611  | 0 | 0 | 0 | 1 |

|             |              |                         |   |   |   |   |
|-------------|--------------|-------------------------|---|---|---|---|
| XLOC_008418 | TNP2         | chr16:11361713-11363160 | 0 | 0 | 0 | 1 |
| XLOC_008419 | PRM3         | chr16:11367143-11367452 | 0 | 0 | 0 | 1 |
| XLOC_008420 | PRM2         | chr16:11369492-11370337 | 0 | 0 | 0 | 1 |
| XLOC_008421 | PRM1         | chr16:11374692-11375192 | 0 | 0 | 0 | 1 |
| XLOC_008431 | ABCC6P2      | chr16:14916288-14918559 | 0 | 0 | 0 | 1 |
| XLOC_008434 | MIR3180-4    | chr16:15248706-15248859 | 0 | 0 | 0 | 1 |
| XLOC_008440 | MIR3180-1    | chr16:18496034-18496128 | 0 | 0 | 0 | 1 |
| XLOC_008441 | MIR3179-1    | chr16:18505750-18505834 | 0 | 0 | 0 | 1 |
| XLOC_008448 | GPRC5B       | chr16:19870292-19896151 | 0 | 0 | 0 | 1 |
| XLOC_008449 | GPR139       | chr16:20043042-20085100 | 0 | 0 | 0 | 1 |
| XLOC_008450 | GP2          | chr16:20321810-20338835 | 0 | 0 | 0 | 1 |
| XLOC_008451 | UMOD         | chr16:20344372-20364037 | 0 | 0 | 0 | 1 |
| XLOC_008452 | PDILT        | chr16:20370491-20416033 | 0 | 0 | 0 | 1 |
| XLOC_008459 | ZP2          | chr16:21208772-21222868 | 0 | 0 | 0 | 1 |
| XLOC_008465 | IGSF6        | chr16:21610855-21668792 | 0 | 0 | 0 | 1 |
| XLOC_008470 | MIR548AA2    | chr16:22729602-22803363 | 0 | 0 | 0 | 1 |
| XLOC_008488 | IL27         | chr16:28510682-28518155 | 0 | 0 | 0 | 1 |
| XLOC_008495 | BOLA2B       | chr16:29464913-29478899 | 0 | 0 | 0 | 1 |
| XLOC_008496 | LOC388242    | chr16:29464913-29478899 | 0 | 0 | 0 | 1 |
| XLOC_008499 | C16orf54     | chr16:29753785-29757340 | 0 | 0 | 0 | 1 |
| XLOC_008510 | BOLA2B       | chr16:30204255-30218248 | 0 | 0 | 0 | 1 |
| XLOC_008528 | MIR4519      | chr16:30886586-30886644 | 0 | 0 | 0 | 1 |
| XLOC_008539 | COX6A2       | chr16:31439051-31439749 | 0 | 0 | 0 | 1 |
| XLOC_008542 | CSDAP1       | chr16:31579087-31580845 | 0 | 0 | 0 | 1 |
| XLOC_008544 | LOC390705    | chr16:32300867-32301302 | 0 | 0 | 0 | 1 |
| XLOC_008545 | TP53TG3      | chr16:32684848-32687448 | 0 | 0 | 0 | 1 |
| XLOC_008547 | LOC390705    | chr16:33298267-33298702 | 0 | 0 | 0 | 1 |
| XLOC_008548 | RNU6-76      | chr16:33463506-33563243 | 0 | 0 | 0 | 1 |
| XLOC_008551 | LOC146481    | chr16:34711784-34714967 | 0 | 0 | 0 | 1 |
| XLOC_008552 | LOC100130700 | chr16:34739458-34740840 | 0 | 0 | 0 | 1 |
| XLOC_008561 | ABCC12       | chr16:48116883-48180681 | 0 | 0 | 0 | 1 |
| XLOC_008565 | CBLN1        | chr16:49311828-49315742 | 0 | 0 | 0 | 1 |
| XLOC_008566 | ZNF423       | chr16:49524514-49891830 | 0 | 0 | 0 | 1 |
| XLOC_008568 | SNX20        | chr16:50700210-50715264 | 0 | 0 | 0 | 1 |
| XLOC_008569 | SALL1        | chr16:51169885-51185183 | 0 | 0 | 0 | 1 |
| XLOC_008570 | C16orf97     | chr16:52060263-52107847 | 0 | 0 | 0 | 1 |
| XLOC_008571 | LOC100505619 | chr16:52116976-52119021 | 0 | 0 | 0 | 1 |
| XLOC_008572 | TOX3         | chr16:52471917-52581714 | 0 | 0 | 0 | 1 |
| XLOC_008573 | LOC643714    | chr16:52585998-52640887 | 0 | 0 | 0 | 1 |
| XLOC_008574 | LOC643802    | chr16:53403273-53405041 | 0 | 0 | 0 | 1 |
| XLOC_008577 | IRX3         | chr16:54317211-54320378 | 0 | 0 | 0 | 1 |
| XLOC_008579 | CES1         | chr16:55836763-55867075 | 0 | 0 | 0 | 1 |
| XLOC_008580 | CES5A        | chr16:55880065-55989943 | 0 | 0 | 0 | 1 |
| XLOC_008581 | LOC283856    | chr16:56126898-56225006 | 0 | 0 | 0 | 1 |
| XLOC_008582 | DKFZP434H168 | chr16:56225250-56391356 | 0 | 0 | 0 | 1 |
| XLOC_008603 | LOC644649    | chr16:59788044-59789095 | 0 | 0 | 0 | 1 |
| XLOC_008604 | CDH8         | chr16:61685914-62070739 | 0 | 0 | 0 | 1 |
| XLOC_008606 | LOC283867    | chr16:65318401-65610203 | 0 | 0 | 0 | 1 |
| XLOC_008612 | CDH16        | chr16:66942024-66952887 | 0 | 0 | 0 | 1 |

|             |              |                         |   |   |   |   |
|-------------|--------------|-------------------------|---|---|---|---|
| XLOC_008619 | MIR328       | chr16:67233027-67237927 | 0 | 0 | 0 | 1 |
| XLOC_008626 | AGRP         | chr16:67516473-67517716 | 0 | 0 | 0 | 1 |
| XLOC_008635 | DPEP3        | chr16:68009565-68014452 | 0 | 0 | 0 | 1 |
| XLOC_008645 | MIR1538      | chr16:69599710-69599771 | 0 | 0 | 0 | 1 |
| XLOC_008661 | TAT          | chr16:71600753-71610998 | 0 | 0 | 0 | 1 |
| XLOC_008663 | SNORA70D     | chr16:71678851-71748704 | 0 | 0 | 0 | 1 |
| XLOC_008665 | SNORD71      | chr16:71762904-71842976 | 0 | 0 | 0 | 1 |
| XLOC_008679 | CTRB2        | chr16:75237993-75241072 | 0 | 0 | 0 | 1 |
| XLOC_008688 | ADAMTS18     | chr16:77316024-77469011 | 0 | 0 | 0 | 1 |
| XLOC_008695 | SDR42E1      | chr16:82031250-82045093 | 0 | 0 | 0 | 1 |
| XLOC_008701 | KCNG4        | chr16:84254740-84273356 | 0 | 0 | 0 | 1 |
| XLOC_008705 | FAM92B       | chr16:85131964-85146114 | 0 | 0 | 0 | 1 |
| XLOC_008706 | MIR5093      | chr16:85339831-85339931 | 0 | 0 | 0 | 1 |
| XLOC_008709 | MIR1910      | chr16:85741123-85784689 | 0 | 0 | 0 | 1 |
| XLOC_008711 | LOC732275    | chr16:86365455-86379285 | 0 | 0 | 0 | 1 |
| XLOC_008719 | CA5A         | chr16:87921624-87970112 | 0 | 0 | 0 | 1 |
| XLOC_008725 | MIR4722      | chr16:88772890-88851372 | 0 | 0 | 0 | 1 |
| XLOC_008747 | BHLHA9       | chr17:1173857-1174565   | 0 | 0 | 0 | 1 |
| XLOC_008760 | OR1A2        | chr17:3100812-3101742   | 0 | 0 | 0 | 1 |
| XLOC_008761 | OR1A1        | chr17:3118914-3119844   | 0 | 0 | 0 | 1 |
| XLOC_008762 | OR1D4        | chr17:3143969-3144559   | 0 | 0 | 0 | 1 |
| XLOC_008763 | OR3A4P       | chr17:3213538-3214740   | 0 | 0 | 0 | 1 |
| XLOC_008764 | OR3A3        | chr17:3323861-3324827   | 0 | 0 | 0 | 1 |
| XLOC_008765 | ASPA         | chr17:3377403-3402700   | 0 | 0 | 0 | 1 |
| XLOC_008776 | TM4SF5       | chr17:4675186-4686506   | 0 | 0 | 0 | 1 |
| XLOC_008788 | LOC100130950 | chr17:5095378-5138931   | 0 | 0 | 0 | 1 |
| XLOC_008793 | WSCD1        | chr17:5973933-6027747   | 0 | 0 | 0 | 1 |
| XLOC_008797 | MIR4520B     | chr17:6558758-6558828   | 0 | 0 | 0 | 1 |
| XLOC_008800 | FBXO39       | chr17:6679551-6690965   | 0 | 0 | 0 | 1 |
| XLOC_008801 | ALOX12P2     | chr17:6756894-6803668   | 0 | 0 | 0 | 1 |
| XLOC_008812 | TMEM95       | chr17:7258496-7260538   | 0 | 0 | 0 | 1 |
| XLOC_008829 | ATP1B2       | chr17:7554253-7561089   | 0 | 0 | 0 | 1 |
| XLOC_008833 | RPL29P2      | chr17:7623038-7737058   | 0 | 0 | 0 | 1 |
| XLOC_008838 | SCARNA21     | chr17:7788122-7816075   | 0 | 0 | 0 | 1 |
| XLOC_008840 | GUCY2D       | chr17:7905987-7923658   | 0 | 0 | 0 | 1 |
| XLOC_008842 | MIR4314      | chr17:7991373-7991465   | 0 | 0 | 0 | 1 |
| XLOC_008843 | MIR4521      | chr17:8090262-8090322   | 0 | 0 | 0 | 1 |
| XLOC_008844 | MIR3676      | chr17:8090492-8090577   | 0 | 0 | 0 | 1 |
| XLOC_008847 | ARHGEF15     | chr17:8213555-8225834   | 0 | 0 | 0 | 1 |
| XLOC_008848 | ODF4         | chr17:8243187-8249363   | 0 | 0 | 0 | 1 |
| XLOC_008853 | GLP2R        | chr17:9729380-9793022   | 0 | 0 | 0 | 1 |
| XLOC_008855 | TMEM220-AS1  | chr17:10616638-10718481 | 0 | 0 | 0 | 1 |
| XLOC_008856 | SHISA6       | chr17:11144739-11467380 | 0 | 0 | 0 | 1 |
| XLOC_008857 | DNAH9        | chr17:11501747-11873065 | 0 | 0 | 0 | 1 |
| XLOC_008859 | MIR744       | chr17:11924134-12047051 | 0 | 0 | 0 | 1 |
| XLOC_008860 | LINC00670    | chr17:12453284-12540504 | 0 | 0 | 0 | 1 |
| XLOC_008861 | MYOCD        | chr17:12569206-12670651 | 0 | 0 | 0 | 1 |
| XLOC_008867 | CDRT7        | chr17:14934291-14935274 | 0 | 0 | 0 | 1 |
| XLOC_008870 | CDRT15P2     | chr17:15668016-15669003 | 0 | 0 | 0 | 1 |

|             |           |                         |   |   |   |   |
|-------------|-----------|-------------------------|---|---|---|---|
| XLOC_008871 | MEIS3P1   | chr17:15690163-15693019 | 0 | 0 | 0 | 1 |
| XLOC_008875 | MIR1288   | chr17:16120508-16229573 | 0 | 0 | 0 | 1 |
| XLOC_008879 | SNORD49A  | chr17:16342300-16395505 | 0 | 0 | 0 | 1 |
| XLOC_008880 | SNORD65   | chr17:16342300-16395505 | 0 | 0 | 0 | 1 |
| XLOC_008883 | FAM106CP  | chr17:16690205-16707819 | 0 | 0 | 0 | 1 |
| XLOC_008886 | SMCR9     | chr17:17322657-17326728 | 0 | 0 | 0 | 1 |
| XLOC_008897 | EVPLL     | chr17:18281078-18292960 | 0 | 0 | 0 | 1 |
| XLOC_008898 | LOC339240 | chr17:18325494-18328647 | 0 | 0 | 0 | 1 |
| XLOC_008899 | KRT16P1   | chr17:18343221-18346208 | 0 | 0 | 0 | 1 |
| XLOC_008900 | LGALS9C   | chr17:18380098-18398259 | 0 | 0 | 0 | 1 |
| XLOC_008911 | SLC47A1   | chr17:19437166-19482346 | 0 | 0 | 0 | 1 |
| XLOC_008912 | SNORA59B  | chr17:19437166-19482346 | 0 | 0 | 0 | 1 |
| XLOC_008916 | CDRT15L2  | chr17:20483036-20484224 | 0 | 0 | 0 | 1 |
| XLOC_008921 | FAM27L    | chr17:21825369-21826499 | 0 | 0 | 0 | 1 |
| XLOC_008922 | FLJ36000  | chr17:21904061-21913070 | 0 | 0 | 0 | 1 |
| XLOC_008925 | TBC1D3P5  | chr17:25745030-25758649 | 0 | 0 | 0 | 1 |
| XLOC_008930 | PPY2      | chr17:26574469-26575315 | 0 | 0 | 0 | 1 |
| XLOC_008934 | MIR4723   | chr17:26684686-26689089 | 0 | 0 | 0 | 1 |
| XLOC_008936 | SLC13A2   | chr17:26800663-26824798 | 0 | 0 | 0 | 1 |
| XLOC_008937 | FOXN1     | chr17:26850958-26865175 | 0 | 0 | 0 | 1 |
| XLOC_008941 | SNORD42B  | chr17:27046999-27053949 | 0 | 0 | 0 | 1 |
| XLOC_008943 | SNORD42A  | chr17:27046999-27053949 | 0 | 0 | 0 | 1 |
| XLOC_008948 | MIR451B   | chr17:27188386-27188458 | 0 | 0 | 0 | 1 |
| XLOC_008957 | MIR423    | chr17:28443824-28513493 | 0 | 0 | 0 | 1 |
| XLOC_008960 | TBC1D29   | chr17:28886583-28890509 | 0 | 0 | 0 | 1 |
| XLOC_008967 | DPRXP4    | chr17:29297955-29326929 | 0 | 0 | 0 | 1 |
| XLOC_008970 | MIR193A   | chr17:29887014-29887102 | 0 | 0 | 0 | 1 |
| XLOC_008971 | MIR4725   | chr17:29902287-29902377 | 0 | 0 | 0 | 1 |
| XLOC_008972 | MIR365B   | chr17:29902429-29902540 | 0 | 0 | 0 | 1 |
| XLOC_008982 | SPACA3    | chr17:31318881-31324892 | 0 | 0 | 0 | 1 |
| XLOC_008983 | CCL2      | chr17:32582295-32584220 | 0 | 0 | 0 | 1 |
| XLOC_008984 | CCL7      | chr17:32597234-32599261 | 0 | 0 | 0 | 1 |
| XLOC_008985 | CCL11     | chr17:32612686-32615199 | 0 | 0 | 0 | 1 |
| XLOC_008986 | CCL8      | chr17:32646065-32648421 | 0 | 0 | 0 | 1 |
| XLOC_008987 | CCL13     | chr17:32683470-32685629 | 0 | 0 | 0 | 1 |
| XLOC_008988 | TMEM132E  | chr17:32907767-32966337 | 0 | 0 | 0 | 1 |
| XLOC_008994 | SNORD7    | chr17:33900675-33900772 | 0 | 0 | 0 | 1 |
| XLOC_008997 | C17orf50  | chr17:34087915-34092098 | 0 | 0 | 0 | 1 |
| XLOC_008999 | CCL18     | chr17:34391642-34398841 | 0 | 0 | 0 | 1 |
| XLOC_009000 | CCL4      | chr17:34431219-34433014 | 0 | 0 | 0 | 1 |
| XLOC_009001 | CCL4L1    | chr17:34538467-34540274 | 0 | 0 | 0 | 1 |
| XLOC_009002 | CCL4L2    | chr17:34640033-34641840 | 0 | 0 | 0 | 1 |
| XLOC_009010 | MIR2909   | chr17:35306174-35414171 | 0 | 0 | 0 | 1 |
| XLOC_009019 | MIR4726   | chr17:36861872-36886056 | 0 | 0 | 0 | 1 |
| XLOC_009022 | MIR4727   | chr17:36982090-36982145 | 0 | 0 | 0 | 1 |
| XLOC_009029 | PPP1R1B   | chr17:37783176-37792878 | 0 | 0 | 0 | 1 |
| XLOC_009032 | PNMT      | chr17:37824233-37826728 | 0 | 0 | 0 | 1 |
| XLOC_009034 | MIR4728   | chr17:37844392-37884915 | 0 | 0 | 0 | 1 |
| XLOC_009036 | ZPBP2     | chr17:38024454-38034149 | 0 | 0 | 0 | 1 |

|             |              |                         |   |   |   |   |
|-------------|--------------|-------------------------|---|---|---|---|
| XLOC_009037 | LRR3C        | chr17:38097726-38100987 | 0 | 0 | 0 | 1 |
| XLOC_009040 | CSF3         | chr17:38171613-38174066 | 0 | 0 | 0 | 1 |
| XLOC_009041 | SNORD124     | chr17:38175349-38210889 | 0 | 0 | 0 | 1 |
| XLOC_009049 | IGFBP4       | chr17:38599675-38613982 | 0 | 0 | 0 | 1 |
| XLOC_009053 | KRTAP9-1     | chr17:39346138-39346891 | 0 | 0 | 0 | 1 |
| XLOC_009054 | KRTAP9-2     | chr17:39382899-39383904 | 0 | 0 | 0 | 1 |
| XLOC_009055 | KRTAP9-3     | chr17:39388714-39389706 | 0 | 0 | 0 | 1 |
| XLOC_009056 | KRTAP9-8     | chr17:39394269-39395256 | 0 | 0 | 0 | 1 |
| XLOC_009057 | KRTAP9-4     | chr17:39405938-39406905 | 0 | 0 | 0 | 1 |
| XLOC_009058 | KRTAP9-9     | chr17:39411635-39412616 | 0 | 0 | 0 | 1 |
| XLOC_009059 | LOC100505782 | chr17:39558667-39568840 | 0 | 0 | 0 | 1 |
| XLOC_009061 | GAST         | chr17:39868577-39872221 | 0 | 0 | 0 | 1 |
| XLOC_009077 | RAMP2        | chr17:40905946-40915060 | 0 | 0 | 0 | 1 |
| XLOC_009085 | G6PC         | chr17:41052813-41066450 | 0 | 0 | 0 | 1 |
| XLOC_009094 | MIR2117      | chr17:41522173-41522253 | 0 | 0 | 0 | 1 |
| XLOC_009096 | C17orf105    | chr17:41857802-41862054 | 0 | 0 | 0 | 1 |
| XLOC_009120 | SPPL2C       | chr17:43920721-44105699 | 0 | 0 | 0 | 1 |
| XLOC_009122 | MAPT-IT1     | chr17:43920721-44105699 | 0 | 0 | 0 | 1 |
| XLOC_009123 | STH          | chr17:43920721-44105699 | 0 | 0 | 0 | 1 |
| XLOC_009126 | NSFP1        | chr17:44450178-44500463 | 0 | 0 | 0 | 1 |
| XLOC_009129 | WNT9B        | chr17:44928967-44954437 | 0 | 0 | 0 | 1 |
| XLOC_009131 | MIR5089      | chr17:45050382-45050466 | 0 | 0 | 0 | 1 |
| XLOC_009133 | ITGB3        | chr17:45331207-45390077 | 0 | 0 | 0 | 1 |
| XLOC_009138 | TBX21        | chr17:45810609-45823485 | 0 | 0 | 0 | 1 |
| XLOC_009151 | B4GALNT2     | chr17:47209821-47247351 | 0 | 0 | 0 | 1 |
| XLOC_009153 | FLJ40194     | chr17:47325604-47336027 | 0 | 0 | 0 | 1 |
| XLOC_009154 | NGFR         | chr17:47572654-47592382 | 0 | 0 | 0 | 1 |
| XLOC_009161 | SGCA         | chr17:48243365-48253293 | 0 | 0 | 0 | 1 |
| XLOC_009171 | ABCC3        | chr17:48712217-48769063 | 0 | 0 | 0 | 1 |
| XLOC_009173 | WFIKKN2      | chr17:48912604-48919709 | 0 | 0 | 0 | 1 |
| XLOC_009177 | C17orf112    | chr17:51062879-51065012 | 0 | 0 | 0 | 1 |
| XLOC_009178 | KIF2B        | chr17:51900238-51902573 | 0 | 0 | 0 | 1 |
| XLOC_009184 | NOG          | chr17:54671059-54672951 | 0 | 0 | 0 | 1 |
| XLOC_009187 | RNF126P1     | chr17:55122838-55124156 | 0 | 0 | 0 | 1 |
| XLOC_009191 | OR4D1        | chr17:56232514-56233447 | 0 | 0 | 0 | 1 |
| XLOC_009192 | MSX2P1       | chr17:56234319-56236480 | 0 | 0 | 0 | 1 |
| XLOC_009193 | OR4D2        | chr17:56247016-56247940 | 0 | 0 | 0 | 1 |
| XLOC_009203 | MIR4729      | chr17:57409052-57479095 | 0 | 0 | 0 | 1 |
| XLOC_009207 | MIR21        | chr17:57918626-57918698 | 0 | 0 | 0 | 1 |
| XLOC_009209 | CA4          | chr17:58227301-58236906 | 0 | 0 | 0 | 1 |
| XLOC_009220 | MIR548W      | chr17:60778674-61505067 | 0 | 0 | 0 | 1 |
| XLOC_009230 | TCAM1P       | chr17:61934375-61941739 | 0 | 0 | 0 | 1 |
| XLOC_009238 | MIR634       | chr17:64298925-64806862 | 0 | 0 | 0 | 1 |
| XLOC_009239 | CACNG5       | chr17:64873390-64881395 | 0 | 0 | 0 | 1 |
| XLOC_009240 | CACNG4       | chr17:64960979-65029518 | 0 | 0 | 0 | 1 |
| XLOC_009241 | CACNG1       | chr17:65040651-65052911 | 0 | 0 | 0 | 1 |
| XLOC_009252 | MIR4524B     | chr17:67074846-67138015 | 0 | 0 | 0 | 1 |
| XLOC_009253 | MAP2K6       | chr17:67410837-67538470 | 0 | 0 | 0 | 1 |
| XLOC_009254 | KCNJ16       | chr17:68071365-68131746 | 0 | 0 | 0 | 1 |

|             |              |                         |   |   |   |   |
|-------------|--------------|-------------------------|---|---|---|---|
| XLOC_009255 | KCNJ2        | chr17:68165675-68176183 | 0 | 0 | 0 | 1 |
| XLOC_009260 | LOC400620    | chr17:71745408-71824676 | 0 | 0 | 0 | 1 |
| XLOC_009263 | DNAI2        | chr17:72270385-72311023 | 0 | 0 | 0 | 1 |
| XLOC_009264 | KIF19        | chr17:72322350-72351959 | 0 | 0 | 0 | 1 |
| XLOC_009265 | GPR142       | chr17:72363644-72368739 | 0 | 0 | 0 | 1 |
| XLOC_009268 | C17orf77     | chr17:72576110-72590348 | 0 | 0 | 0 | 1 |
| XLOC_009273 | OTOP3        | chr17:72931896-72946087 | 0 | 0 | 0 | 1 |
| XLOC_009282 | MIR3678      | chr17:73402149-73402243 | 0 | 0 | 0 | 1 |
| XLOC_009295 | RNF157-AS1   | chr17:74132414-74236390 | 0 | 0 | 0 | 1 |
| XLOC_009301 | SNORD1C      | chr17:74553845-74561430 | 0 | 0 | 0 | 1 |
| XLOC_009302 | SNORD1B      | chr17:74553845-74561430 | 0 | 0 | 0 | 1 |
| XLOC_009303 | SNORD1A      | chr17:74553845-74561430 | 0 | 0 | 0 | 1 |
| XLOC_009310 | LOC100507351 | chr17:75543022-75561103 | 0 | 0 | 0 | 1 |
| XLOC_009313 | C17orf99     | chr17:76142433-76162364 | 0 | 0 | 0 | 1 |
| XLOC_009317 | TMEM235      | chr17:76227390-76237068 | 0 | 0 | 0 | 1 |
| XLOC_009321 | ENPP7        | chr17:77704881-77716021 | 0 | 0 | 0 | 1 |
| XLOC_009329 | MIR4730      | chr17:78234659-78411884 | 0 | 0 | 0 | 1 |
| XLOC_009333 | MIR3065      | chr17:79008946-79156964 | 0 | 0 | 0 | 1 |
| XLOC_009334 | AATK-AS1     | chr17:79008946-79156964 | 0 | 0 | 0 | 1 |
| XLOC_009343 | GCGR         | chr17:79762009-79771889 | 0 | 0 | 0 | 1 |
| XLOC_009353 | UTS2R        | chr17:80332200-80333370 | 0 | 0 | 0 | 1 |
| XLOC_009370 | MIR3183      | chr17:906757-1090616    | 0 | 0 | 0 | 1 |
| XLOC_009383 | RTN4RL1      | chr17:1837970-1928178   | 0 | 0 | 0 | 1 |
| XLOC_009384 | MIR132       | chr17:1953201-1953302   | 0 | 0 | 0 | 1 |
| XLOC_009385 | MIR212       | chr17:1953564-1953674   | 0 | 0 | 0 | 1 |
| XLOC_009388 | SNORD91B     | chr17:2207247-2240678   | 0 | 0 | 0 | 1 |
| XLOC_009389 | SNORD91A     | chr17:2207247-2240678   | 0 | 0 | 0 | 1 |
| XLOC_009394 | MIR1253      | chr17:2651371-2651476   | 0 | 0 | 0 | 1 |
| XLOC_009395 | OR1D5        | chr17:2965962-2966901   | 0 | 0 | 0 | 1 |
| XLOC_009396 | OR1D2        | chr17:2995351-2996290   | 0 | 0 | 0 | 1 |
| XLOC_009397 | OR1G1        | chr17:3029903-3030845   | 0 | 0 | 0 | 1 |
| XLOC_009398 | OR3A2        | chr17:3181183-3182268   | 0 | 0 | 0 | 1 |
| XLOC_009399 | OR3A1        | chr17:3194928-3195876   | 0 | 0 | 0 | 1 |
| XLOC_009400 | OR1E1        | chr17:3300759-3301704   | 0 | 0 | 0 | 1 |
| XLOC_009401 | OR1E2        | chr17:3336163-3337135   | 0 | 0 | 0 | 1 |
| XLOC_009403 | TRPV3        | chr17:3413795-3461289   | 0 | 0 | 0 | 1 |
| XLOC_009426 | SLC52A1      | chr17:4935896-4938727   | 0 | 0 | 0 | 1 |
| XLOC_009428 | ZNF594       | chr17:5082830-5095178   | 0 | 0 | 0 | 1 |
| XLOC_009429 | SCIMP        | chr17:5095378-5138931   | 0 | 0 | 0 | 1 |
| XLOC_009440 | MIR4520A     | chr17:6558758-6558828   | 0 | 0 | 0 | 1 |
| XLOC_009442 | TEKT1        | chr17:6703299-6735060   | 0 | 0 | 0 | 1 |
| XLOC_009445 | MIR195       | chr17:6915735-6922973   | 0 | 0 | 0 | 1 |
| XLOC_009446 | MIR497       | chr17:6915735-6922973   | 0 | 0 | 0 | 1 |
| XLOC_009448 | CLEC10A      | chr17:6977855-6983600   | 0 | 0 | 0 | 1 |
| XLOC_009449 | ASGR2        | chr17:7004640-7018130   | 0 | 0 | 0 | 1 |
| XLOC_009452 | MIR324       | chr17:7093209-7128586   | 0 | 0 | 0 | 1 |
| XLOC_009487 | CCDC42       | chr17:8633245-8648154   | 0 | 0 | 0 | 1 |
| XLOC_009488 | SPDYE4       | chr17:8656423-8661877   | 0 | 0 | 0 | 1 |
| XLOC_009489 | MFSD6L       | chr17:8700427-8702667   | 0 | 0 | 0 | 1 |



|             |             |                         |   |   |   |   |
|-------------|-------------|-------------------------|---|---|---|---|
| XLOC_009490 | PIK3R6      | chr17:8706054-8770994   | 0 | 0 | 0 | 1 |
| XLOC_009493 | DHRS7C      | chr17:9674750-9694614   | 0 | 0 | 0 | 1 |
| XLOC_009494 | RCVRN       | chr17:9801026-9808684   | 0 | 0 | 0 | 1 |
| XLOC_009496 | MYH13       | chr17:10204182-10276322 | 0 | 0 | 0 | 1 |
| XLOC_009497 | MYH8        | chr17:10293641-10325267 | 0 | 0 | 0 | 1 |
| XLOC_009498 | MYH4        | chr17:10346607-10372876 | 0 | 0 | 0 | 1 |
| XLOC_009499 | MYH1        | chr17:10395626-10421859 | 0 | 0 | 0 | 1 |
| XLOC_009500 | MYH2        | chr17:10424464-10453017 | 0 | 0 | 0 | 1 |
| XLOC_009505 | LINC00675   | chr17:10616638-10718481 | 0 | 0 | 0 | 1 |
| XLOC_009506 | PIRT        | chr17:10725791-10741418 | 0 | 0 | 0 | 1 |
| XLOC_009509 | HS3ST3A1    | chr17:13399005-13505244 | 0 | 0 | 0 | 1 |
| XLOC_009511 | CDRT15      | chr17:14139172-14140150 | 0 | 0 | 0 | 1 |
| XLOC_009513 | MIR4731     | chr17:15133095-15168644 | 0 | 0 | 0 | 1 |
| XLOC_009522 | ZNF287      | chr17:16453630-16472520 | 0 | 0 | 0 | 1 |
| XLOC_009525 | TNFRSF13B   | chr17:16842397-16875402 | 0 | 0 | 0 | 1 |
| XLOC_009533 | MIR33B      | chr17:17584786-17740325 | 0 | 0 | 0 | 1 |
| XLOC_009548 | MIR1180     | chr17:19240866-19290532 | 0 | 0 | 0 | 1 |
| XLOC_009551 | ALDH3A1     | chr17:19641297-19651746 | 0 | 0 | 0 | 1 |
| XLOC_009554 | LGALS9B     | chr17:20353175-20370848 | 0 | 0 | 0 | 1 |
| XLOC_009555 | KRT16P3     | chr17:20404826-20407811 | 0 | 0 | 0 | 1 |
| XLOC_009556 | CCDC144NL   | chr17:20766707-20799453 | 0 | 0 | 0 | 1 |
| XLOC_009561 | MIR4522     | chr17:25620935-25621022 | 0 | 0 | 0 | 1 |
| XLOC_009567 | SEBOX       | chr17:26691289-26692265 | 0 | 0 | 0 | 1 |
| XLOC_009581 | MIR451A     | chr17:27188386-27188458 | 0 | 0 | 0 | 1 |
| XLOC_009582 | MIR144      | chr17:27188550-27188636 | 0 | 0 | 0 | 1 |
| XLOC_009583 | MIR4732     | chr17:27188672-27188748 | 0 | 0 | 0 | 1 |
| XLOC_009594 | MIR3184     | chr17:28443824-28513493 | 0 | 0 | 0 | 1 |
| XLOC_009597 | TMIGD1      | chr17:28643365-28661065 | 0 | 0 | 0 | 1 |
| XLOC_009600 | MIR4733     | chr17:29421367-29421443 | 0 | 0 | 0 | 1 |
| XLOC_009609 | ASIC2       | chr17:31340105-32483825 | 0 | 0 | 0 | 1 |
| XLOC_009610 | AA06        | chr17:31340105-32483825 | 0 | 0 | 0 | 1 |
| XLOC_009611 | CCL1        | chr17:32687398-32690252 | 0 | 0 | 0 | 1 |
| XLOC_009612 | C17orf102   | chr17:32901141-32906388 | 0 | 0 | 0 | 1 |
| XLOC_009617 | SLFN11      | chr17:33677328-33700720 | 0 | 0 | 0 | 1 |
| XLOC_009618 | SLFN12      | chr17:33738080-33759543 | 0 | 0 | 0 | 1 |
| XLOC_009620 | SLFN12L     | chr17:33801941-33814758 | 0 | 0 | 0 | 1 |
| XLOC_009624 | MMP28       | chr17:34092875-34122640 | 0 | 0 | 0 | 1 |
| XLOC_009625 | C17orf66    | chr17:34181959-34195895 | 0 | 0 | 0 | 1 |
| XLOC_009628 | LYZL6       | chr17:34261522-34270703 | 0 | 0 | 0 | 1 |
| XLOC_009629 | CCL16       | chr17:34303534-34308523 | 0 | 0 | 0 | 1 |
| XLOC_009630 | CCL14,CCL15 | chr17:34310691-34329084 | 0 | 0 | 0 | 1 |
| XLOC_009631 | CCL23       | chr17:34340096-34345005 | 0 | 0 | 0 | 1 |
| XLOC_009633 | TBC1D3B     | chr17:34493060-34503988 | 0 | 0 | 0 | 1 |
| XLOC_009636 | CCL3L1      | chr17:34623841-34625730 | 0 | 0 | 0 | 1 |
| XLOC_009638 | TBC1D3G     | chr17:34797174-34808103 | 0 | 0 | 0 | 1 |
| XLOC_009644 | LOC284100   | chr17:36202572-36244363 | 0 | 0 | 0 | 1 |
| XLOC_009645 | TBC1D3      | chr17:36337527-36348666 | 0 | 0 | 0 | 1 |
| XLOC_009650 | MIR4734     | chr17:36858514-36858584 | 0 | 0 | 0 | 1 |
| XLOC_009657 | FBXO47      | chr17:37092684-37123655 | 0 | 0 | 0 | 1 |

|             |           |                         |   |   |   |   |
|-------------|-----------|-------------------------|---|---|---|---|
| XLOC_009659 | ARL5C     | chr17:37313146-37322414 | 0 | 0 | 0 | 1 |
| XLOC_009678 | KRT24     | chr17:38854242-38860002 | 0 | 0 | 0 | 1 |
| XLOC_009679 | KRT25     | chr17:38904272-38911584 | 0 | 0 | 0 | 1 |
| XLOC_009680 | KRT26     | chr17:38922489-38928411 | 0 | 0 | 0 | 1 |
| XLOC_009681 | KRT27     | chr17:38933059-38938786 | 0 | 0 | 0 | 1 |
| XLOC_009682 | KRT28     | chr17:38948447-38956211 | 0 | 0 | 0 | 1 |
| XLOC_009684 | KRT12     | chr17:39017429-39023462 | 0 | 0 | 0 | 1 |
| XLOC_009685 | KRT20     | chr17:39032140-39041495 | 0 | 0 | 0 | 1 |
| XLOC_009686 | KRT23     | chr17:39078951-39093836 | 0 | 0 | 0 | 1 |
| XLOC_009687 | KRT39     | chr17:39114668-39123144 | 0 | 0 | 0 | 1 |
| XLOC_009688 | KRT40     | chr17:39133967-39143387 | 0 | 0 | 0 | 1 |
| XLOC_009691 | KRTAP3-1  | chr17:39164773-39165366 | 0 | 0 | 0 | 1 |
| XLOC_009692 | KRTAP1-5  | chr17:39182278-39183454 | 0 | 0 | 0 | 1 |
| XLOC_009693 | KRTAP1-4  | chr17:39185928-39186377 | 0 | 0 | 0 | 1 |
| XLOC_009694 | KRTAP1-3  | chr17:39190136-39191107 | 0 | 0 | 0 | 1 |
| XLOC_009695 | KRTAP1-1  | chr17:39196810-39197713 | 0 | 0 | 0 | 1 |
| XLOC_009699 | KRTAP2-4  | chr17:39221367-39222131 | 0 | 0 | 0 | 1 |
| XLOC_009704 | KRTAP4-5  | chr17:39305175-39306054 | 0 | 0 | 0 | 1 |
| XLOC_009705 | KRTAP4-4  | chr17:39315905-39316983 | 0 | 0 | 0 | 1 |
| XLOC_009706 | KRTAP4-3  | chr17:39323482-39324424 | 0 | 0 | 0 | 1 |
| XLOC_009707 | KRTAP4-2  | chr17:39333697-39334460 | 0 | 0 | 0 | 1 |
| XLOC_009708 | KRTAP4-1  | chr17:39340351-39341147 | 0 | 0 | 0 | 1 |
| XLOC_009709 | KRTAP29-1 | chr17:39458077-39459103 | 0 | 0 | 0 | 1 |
| XLOC_009710 | KRTAP16-1 | chr17:39463951-39465505 | 0 | 0 | 0 | 1 |
| XLOC_009711 | KRTAP17-1 | chr17:39471168-39471947 | 0 | 0 | 0 | 1 |
| XLOC_009712 | KRT33A    | chr17:39502344-39507064 | 0 | 0 | 0 | 1 |
| XLOC_009713 | KRT33B    | chr17:39519745-39526052 | 0 | 0 | 0 | 1 |
| XLOC_009715 | KRT31     | chr17:39549976-39553844 | 0 | 0 | 0 | 1 |
| XLOC_009716 | KRT37     | chr17:39576808-39580822 | 0 | 0 | 0 | 1 |
| XLOC_009717 | KRT38     | chr17:39592620-39597596 | 0 | 0 | 0 | 1 |
| XLOC_009718 | KRT32     | chr17:39615764-39623638 | 0 | 0 | 0 | 1 |
| XLOC_009719 | KRT35     | chr17:39632940-39637392 | 0 | 0 | 0 | 1 |
| XLOC_009720 | KRT36     | chr17:39642387-39646116 | 0 | 0 | 0 | 1 |
| XLOC_009721 | KRT13     | chr17:39657232-39661865 | 0 | 0 | 0 | 1 |
| XLOC_009724 | LOC147093 | chr17:39705857-39710747 | 0 | 0 | 0 | 1 |
| XLOC_009725 | KRT9      | chr17:39722093-39728310 | 0 | 0 | 0 | 1 |
| XLOC_009726 | KRT14     | chr17:39738530-39743147 | 0 | 0 | 0 | 1 |
| XLOC_009730 | HAP1      | chr17:39878890-39890898 | 0 | 0 | 0 | 1 |
| XLOC_009741 | KCNH4     | chr17:40308909-40333296 | 0 | 0 | 0 | 1 |
| XLOC_009742 | HCRT      | chr17:40336077-40337470 | 0 | 0 | 0 | 1 |
| XLOC_009755 | LINC00671 | chr17:41026690-41050751 | 0 | 0 | 0 | 1 |
| XLOC_009762 | MEOX1     | chr17:41717757-41739262 | 0 | 0 | 0 | 1 |
| XLOC_009767 | PPY       | chr17:42018171-42019833 | 0 | 0 | 0 | 1 |
| XLOC_009785 | C1QL1     | chr17:43037060-43045644 | 0 | 0 | 0 | 1 |
| XLOC_009794 | LOC644172 | chr17:43677490-43679748 | 0 | 0 | 0 | 1 |
| XLOC_009795 | MAPT-AS1  | chr17:43920721-44105699 | 0 | 0 | 0 | 1 |
| XLOC_009809 | MIR152    | chr17:46103532-46115152 | 0 | 0 | 0 | 1 |
| XLOC_009811 | SKAP1     | chr17:46210801-46507594 | 0 | 0 | 0 | 1 |
| XLOC_009812 | MIR1203   | chr17:46210801-46507594 | 0 | 0 | 0 | 1 |

|             |              |                         |   |   |   |   |
|-------------|--------------|-------------------------|---|---|---|---|
| XLOC_009813 | HOXB1        | chr17:46606806-46608272 | 0 | 0 | 0 | 1 |
| XLOC_009823 | MIR196A1     | chr17:46709851-46709921 | 0 | 0 | 0 | 1 |
| XLOC_009824 | PRAC         | chr17:46799081-46799882 | 0 | 0 | 0 | 1 |
| XLOC_009825 | MIR3185      | chr17:46800541-46802119 | 0 | 0 | 0 | 1 |
| XLOC_009829 | GIP          | chr17:47035917-47045955 | 0 | 0 | 0 | 1 |
| XLOC_009830 | GNGT2        | chr17:47283595-47300587 | 0 | 0 | 0 | 1 |
| XLOC_009831 | PHOSPHO1     | chr17:47300731-47308128 | 0 | 0 | 0 | 1 |
| XLOC_009842 | HILS1        | chr17:48243365-48253293 | 0 | 0 | 0 | 1 |
| XLOC_009853 | CA10         | chr17:49707673-50237377 | 0 | 0 | 0 | 1 |
| XLOC_009856 | TMEM100      | chr17:53796987-53809482 | 0 | 0 | 0 | 1 |
| XLOC_009867 | BZRAP1       | chr17:56378587-56494931 | 0 | 0 | 0 | 1 |
| XLOC_009868 | MIR142       | chr17:56378587-56494931 | 0 | 0 | 0 | 1 |
| XLOC_009869 | MIR4736      | chr17:56378587-56494931 | 0 | 0 | 0 | 1 |
| XLOC_009879 | MIR454       | chr17:57187307-57232800 | 0 | 0 | 0 | 1 |
| XLOC_009880 | MIR301A      | chr17:57187307-57232800 | 0 | 0 | 0 | 1 |
| XLOC_009892 | NACA2        | chr17:59667793-59668563 | 0 | 0 | 0 | 1 |
| XLOC_009897 | MARCH10      | chr17:60778674-61505067 | 0 | 0 | 0 | 1 |
| XLOC_009904 | CSH2         | chr17:61949371-61951089 | 0 | 0 | 0 | 1 |
| XLOC_009905 | GH2          | chr17:61957571-61959302 | 0 | 0 | 0 | 1 |
| XLOC_009906 | CSH1         | chr17:61972267-61974021 | 0 | 0 | 0 | 1 |
| XLOC_009907 | CSHL1        | chr17:61986964-61988618 | 0 | 0 | 0 | 1 |
| XLOC_009908 | GH1          | chr17:61994562-61996198 | 0 | 0 | 0 | 1 |
| XLOC_009914 | PECAM1       | chr17:62396776-62407083 | 0 | 0 | 0 | 1 |
| XLOC_009927 | APOH         | chr17:64208146-64225556 | 0 | 0 | 0 | 1 |
| XLOC_009933 | MIR635       | chr17:66417421-66453653 | 0 | 0 | 0 | 1 |
| XLOC_009935 | ABCA8        | chr17:66863430-66951533 | 0 | 0 | 0 | 1 |
| XLOC_009937 | ABCA6        | chr17:67074846-67138015 | 0 | 0 | 0 | 1 |
| XLOC_009938 | MIR4524A     | chr17:67074846-67138015 | 0 | 0 | 0 | 1 |
| XLOC_009940 | KCNJ2-AS1    | chr17:68163101-68165543 | 0 | 0 | 0 | 1 |
| XLOC_009945 | CPSF4L       | chr17:71228775-71258019 | 0 | 0 | 0 | 1 |
| XLOC_009948 | LINC00469    | chr17:71745408-71824676 | 0 | 0 | 0 | 1 |
| XLOC_009951 | CD300LB      | chr17:72517312-72527613 | 0 | 0 | 0 | 1 |
| XLOC_009953 | CD300LD      | chr17:72576110-72590348 | 0 | 0 | 0 | 1 |
| XLOC_009954 | CD300E       | chr17:72606021-72619897 | 0 | 0 | 0 | 1 |
| XLOC_009955 | CD300LF      | chr17:72667255-72743474 | 0 | 0 | 0 | 1 |
| XLOC_009959 | FADS6        | chr17:72873472-72889705 | 0 | 0 | 0 | 1 |
| XLOC_009974 | MIR4738      | chr17:73780601-73780688 | 0 | 0 | 0 | 1 |
| XLOC_009993 | ST6GALNAC1   | chr17:74620844-74639894 | 0 | 0 | 0 | 1 |
| XLOC_009997 | MIR4316      | chr17:75277491-75496678 | 0 | 0 | 0 | 1 |
| XLOC_009998 | FLJ45079     | chr17:75875082-75880169 | 0 | 0 | 0 | 1 |
| XLOC_010011 | LOC100507410 | chr17:77015290-77045870 | 0 | 0 | 0 | 1 |
| XLOC_010013 | MIR4739      | chr17:77680984-77681058 | 0 | 0 | 0 | 1 |
| XLOC_010023 | MIR657       | chr17:79008946-79156964 | 0 | 0 | 0 | 1 |
| XLOC_010024 | MIR338       | chr17:79008946-79156964 | 0 | 0 | 0 | 1 |
| XLOC_010025 | MIR1250      | chr17:79008946-79156964 | 0 | 0 | 0 | 1 |
| XLOC_010030 | TMEM105      | chr17:79285071-79304474 | 0 | 0 | 0 | 1 |
| XLOC_010032 | MIR4740      | chr17:79373539-79433358 | 0 | 0 | 0 | 1 |
| XLOC_010033 | MIR3186      | chr17:79373539-79433358 | 0 | 0 | 0 | 1 |
| XLOC_010090 | CETN1        | chr18:580368-581524     | 0 | 0 | 0 | 1 |

|             |              |                         |   |   |   |   |
|-------------|--------------|-------------------------|---|---|---|---|
| XLOC_010093 | ADCYAP1      | chr18:904943-912173     | 0 | 0 | 0 | 1 |
| XLOC_010101 | DLGAP1-AS3   | chr18:3496029-4455266   | 0 | 0 | 0 | 1 |
| XLOC_010102 | DLGAP1-AS5   | chr18:3496029-4455266   | 0 | 0 | 0 | 1 |
| XLOC_010104 | LOC645355    | chr18:5748817-5795900   | 0 | 0 | 0 | 1 |
| XLOC_010105 | MIR3976      | chr18:5840693-5840832   | 0 | 0 | 0 | 1 |
| XLOC_010106 | LOC100130480 | chr18:6511414-6590652   | 0 | 0 | 0 | 1 |
| XLOC_010107 | ARHGAP28     | chr18:6834431-6915712   | 0 | 0 | 0 | 1 |
| XLOC_010108 | LRRRC30      | chr18:7231136-7232042   | 0 | 0 | 0 | 1 |
| XLOC_010116 | RAB31        | chr18:9708227-9862553   | 0 | 0 | 0 | 1 |
| XLOC_010117 | TXNDC2       | chr18:9885722-9888156   | 0 | 0 | 0 | 1 |
| XLOC_010119 | APCDD1       | chr18:10454624-10488698 | 0 | 0 | 0 | 1 |
| XLOC_010124 | C18orf61     | chr18:12200777-12224709 | 0 | 0 | 0 | 1 |
| XLOC_010125 | CIDEA        | chr18:12254317-12277594 | 0 | 0 | 0 | 1 |
| XLOC_010132 | MIR5190      | chr18:13218728-13652753 | 0 | 0 | 0 | 1 |
| XLOC_010133 | MIR4526      | chr18:13218728-13652753 | 0 | 0 | 0 | 1 |
| XLOC_010135 | MC5R         | chr18:13825542-13826861 | 0 | 0 | 0 | 1 |
| XLOC_010138 | ANKRD30B     | chr18:14748238-14852737 | 0 | 0 | 0 | 1 |
| XLOC_010139 | MIR3156-2    | chr18:14748238-14852737 | 0 | 0 | 0 | 1 |
| XLOC_010142 | MIR320C1     | chr18:19230857-19284766 | 0 | 0 | 0 | 1 |
| XLOC_010149 | LAMA3        | chr18:21269561-21535029 | 0 | 0 | 0 | 1 |
| XLOC_010152 | MIR320C2     | chr18:21742010-21977833 | 0 | 0 | 0 | 1 |
| XLOC_010155 | LOC729950    | chr18:22208145-22242162 | 0 | 0 | 0 | 1 |
| XLOC_010156 | PSMA8        | chr18:23713815-23773319 | 0 | 0 | 0 | 1 |
| XLOC_010159 | MIR302F      | chr18:27878875-27878926 | 0 | 0 | 0 | 1 |
| XLOC_010160 | DSG1         | chr18:28898051-28937393 | 0 | 0 | 0 | 1 |
| XLOC_010161 | DSG4         | chr18:28956739-28993880 | 0 | 0 | 0 | 1 |
| XLOC_010164 | TTR          | chr18:29171729-29178986 | 0 | 0 | 0 | 1 |
| XLOC_010168 | WBP11P1      | chr18:30091625-30094597 | 0 | 0 | 0 | 1 |
| XLOC_010169 | ASXL3        | chr18:31158540-31327399 | 0 | 0 | 0 | 1 |
| XLOC_010170 | DTNA         | chr18:32073253-32471808 | 0 | 0 | 0 | 1 |
| XLOC_010174 | MIR3975      | chr18:33171700-33171770 | 0 | 0 | 0 | 1 |
| XLOC_010181 | MIR4318      | chr18:35237097-35237178 | 0 | 0 | 0 | 1 |
| XLOC_010182 | MIR5583-1    | chr18:36786887-37331959 | 0 | 0 | 0 | 1 |
| XLOC_010194 | MIR4743      | chr18:46065426-46389586 | 0 | 0 | 0 | 1 |
| XLOC_010195 | MIR1539      | chr18:47007547-47018935 | 0 | 0 | 0 | 1 |
| XLOC_010199 | MAPK4        | chr18:48086483-48258196 | 0 | 0 | 0 | 1 |
| XLOC_010203 | LOC100287225 | chr18:48918411-49088839 | 0 | 0 | 0 | 1 |
| XLOC_010204 | DCC          | chr18:49866541-51062273 | 0 | 0 | 0 | 1 |
| XLOC_010207 | DYNAP        | chr18:52258389-52266724 | 0 | 0 | 0 | 1 |
| XLOC_010208 | RAB27B       | chr18:52495707-52562747 | 0 | 0 | 0 | 1 |
| XLOC_010209 | MIR4529      | chr18:52889561-53303188 | 0 | 0 | 0 | 1 |
| XLOC_010211 | BOD1L2       | chr18:54814292-54817639 | 0 | 0 | 0 | 1 |
| XLOC_010216 | MIR122       | chr18:56118305-56118390 | 0 | 0 | 0 | 1 |
| XLOC_010218 | ZNF532       | chr18:56530060-56653709 | 0 | 0 | 0 | 1 |
| XLOC_010219 | OACYLP       | chr18:56702970-56720446 | 0 | 0 | 0 | 1 |
| XLOC_010221 | GRP          | chr18:56887399-56898002 | 0 | 0 | 0 | 1 |
| XLOC_010228 | SERPINB5     | chr18:61144143-61172318 | 0 | 0 | 0 | 1 |
| XLOC_010229 | SERPINB12    | chr18:61223392-61234244 | 0 | 0 | 0 | 1 |
| XLOC_010230 | SERPINB13    | chr18:61254533-61266433 | 0 | 0 | 0 | 1 |

|             |              |                         |   |   |   |   |
|-------------|--------------|-------------------------|---|---|---|---|
| XLOC_010231 | SERPINB11    | chr18:61370193-61391122 | 0 | 0 | 0 | 1 |
| XLOC_010234 | SERPINB10    | chr18:61582744-61602476 | 0 | 0 | 0 | 1 |
| XLOC_010237 | LOC284294    | chr18:61747242-62090827 | 0 | 0 | 0 | 1 |
| XLOC_010238 | CDH7         | chr18:63417487-63548175 | 0 | 0 | 0 | 1 |
| XLOC_010239 | MIR5011      | chr18:64748820-64748923 | 0 | 0 | 0 | 1 |
| XLOC_010240 | LOC643542    | chr18:65173818-65566856 | 0 | 0 | 0 | 1 |
| XLOC_010242 | DOK6         | chr18:67068283-67516322 | 0 | 0 | 0 | 1 |
| XLOC_010251 | LOC339298    | chr18:73834952-73857210 | 0 | 0 | 0 | 1 |
| XLOC_010255 | GALR1        | chr18:74962007-74982096 | 0 | 0 | 0 | 1 |
| XLOC_010256 | SALL3        | chr18:76740274-76758969 | 0 | 0 | 0 | 1 |
| XLOC_010260 | KCNG2        | chr18:77623667-77659816 | 0 | 0 | 0 | 1 |
| XLOC_010266 | COLEC12      | chr18:319354-500729     | 0 | 0 | 0 | 1 |
| XLOC_010280 | EPB41L3      | chr18:5392387-5543986   | 0 | 0 | 0 | 1 |
| XLOC_010281 | TMEM200C     | chr18:5890183-5892103   | 0 | 0 | 0 | 1 |
| XLOC_010282 | L3MBTL4      | chr18:5954704-6414910   | 0 | 0 | 0 | 1 |
| XLOC_010283 | MIR4317      | chr18:5954704-6414910   | 0 | 0 | 0 | 1 |
| XLOC_010284 | LINC00668    | chr18:6925472-6929868   | 0 | 0 | 0 | 1 |
| XLOC_010286 | LOC100192426 | chr18:7567313-8406859   | 0 | 0 | 0 | 1 |
| XLOC_010288 | PIEZO2       | chr18:10670243-11148761 | 0 | 0 | 0 | 1 |
| XLOC_010294 | LOC100288122 | chr18:13218728-13652753 | 0 | 0 | 0 | 1 |
| XLOC_010298 | CXADRP3      | chr18:14477953-14498705 | 0 | 0 | 0 | 1 |
| XLOC_010299 | POTEC        | chr18:14511736-14543599 | 0 | 0 | 0 | 1 |
| XLOC_010300 | LOC644669    | chr18:15313554-15325918 | 0 | 0 | 0 | 1 |
| XLOC_010304 | MIR133A1     | chr18:19321544-19450912 | 0 | 0 | 0 | 1 |
| XLOC_010305 | MIR1-2       | chr18:19321544-19450912 | 0 | 0 | 0 | 1 |
| XLOC_010306 | CTAGE1       | chr18:19993563-19997878 | 0 | 0 | 0 | 1 |
| XLOC_010309 | ANKRD29      | chr18:21179977-21242849 | 0 | 0 | 0 | 1 |
| XLOC_010314 | LOC728606    | chr18:24267584-24283602 | 0 | 0 | 0 | 1 |
| XLOC_010315 | AQP4         | chr18:24432007-24765302 | 0 | 0 | 0 | 1 |
| XLOC_010316 | CHST9        | chr18:24432007-24765302 | 0 | 0 | 0 | 1 |
| XLOC_010317 | CDH2         | chr18:25530929-25757445 | 0 | 0 | 0 | 1 |
| XLOC_010319 | DSC2         | chr18:28645941-28682388 | 0 | 0 | 0 | 1 |
| XLOC_010320 | DSC1         | chr18:28709213-28742819 | 0 | 0 | 0 | 1 |
| XLOC_010327 | CCDC178      | chr18:30517365-31020685 | 0 | 0 | 0 | 1 |
| XLOC_010328 | NOL4         | chr18:31431063-31803515 | 0 | 0 | 0 | 1 |
| XLOC_010331 | ZNF396       | chr18:32946660-32957301 | 0 | 0 | 0 | 1 |
| XLOC_010333 | MIR187       | chr18:33484780-33484889 | 0 | 0 | 0 | 1 |
| XLOC_010337 | CELF4        | chr18:34823007-35146000 | 0 | 0 | 0 | 1 |
| XLOC_010339 | MIR5583-2    | chr18:36786887-37331959 | 0 | 0 | 0 | 1 |
| XLOC_010340 | KC6          | chr18:39060235-39100561 | 0 | 0 | 0 | 1 |
| XLOC_010341 | RIT2         | chr18:40323182-40695657 | 0 | 0 | 0 | 1 |
| XLOC_010342 | SYT4         | chr18:40847856-40857615 | 0 | 0 | 0 | 1 |
| XLOC_010343 | MIR4319      | chr18:42260137-42648475 | 0 | 0 | 0 | 1 |
| XLOC_010347 | LOXHD1       | chr18:44056934-44236996 | 0 | 0 | 0 | 1 |
| XLOC_010350 | TCEB3CL2     | chr18:44526786-44628614 | 0 | 0 | 0 | 1 |
| XLOC_010351 | TCEB3CL2     | chr18:44526786-44628614 | 0 | 0 | 0 | 1 |
| XLOC_010352 | TCEB3C       | chr18:44526786-44628614 | 0 | 0 | 0 | 1 |
| XLOC_010353 | TCEB3B       | chr18:44526786-44628614 | 0 | 0 | 0 | 1 |
| XLOC_010360 | MIR4744      | chr18:46570171-46987079 | 0 | 0 | 0 | 1 |

|             |              |                         |   |   |   |   |
|-------------|--------------|-------------------------|---|---|---|---|
| XLOC_010366 | MIR4320      | chr18:47349155-47721451 | 0 | 0 | 0 | 1 |
| XLOC_010374 | STARD6       | chr18:51851061-51880943 | 0 | 0 | 0 | 1 |
| XLOC_010375 | CCDC68       | chr18:52568739-52626739 | 0 | 0 | 0 | 1 |
| XLOC_010376 | TCF4         | chr18:52889561-53303188 | 0 | 0 | 0 | 1 |
| XLOC_010377 | LOC100505474 | chr18:53750586-53804767 | 0 | 0 | 0 | 1 |
| XLOC_010379 | LINC-ROR     | chr18:54721803-54739350 | 0 | 0 | 0 | 1 |
| XLOC_010383 | MIR3591      | chr18:56118305-56118390 | 0 | 0 | 0 | 1 |
| XLOC_010384 | ALPK2        | chr18:56148481-56296189 | 0 | 0 | 0 | 1 |
| XLOC_010385 | RAX          | chr18:56934266-56940625 | 0 | 0 | 0 | 1 |
| XLOC_010386 | CPLX4        | chr18:56962635-56985881 | 0 | 0 | 0 | 1 |
| XLOC_010389 | MC4R         | chr18:58038563-58040001 | 0 | 0 | 0 | 1 |
| XLOC_010395 | SERPINB4     | chr18:61304492-61311502 | 0 | 0 | 0 | 1 |
| XLOC_010396 | SERPINB3     | chr18:61322430-61329197 | 0 | 0 | 0 | 1 |
| XLOC_010397 | LINC00305    | chr18:61747242-62090827 | 0 | 0 | 0 | 1 |
| XLOC_010398 | LOC400654    | chr18:61747242-62090827 | 0 | 0 | 0 | 1 |
| XLOC_010399 | CDH19        | chr18:64168423-64271375 | 0 | 0 | 0 | 1 |
| XLOC_010404 | LOC100505776 | chr18:69187199-69246192 | 0 | 0 | 0 | 1 |
| XLOC_010405 | CBLN2        | chr18:70203914-70211723 | 0 | 0 | 0 | 1 |
| XLOC_010406 | NETO1        | chr18:70409548-70534810 | 0 | 0 | 0 | 1 |
| XLOC_010410 | FAM69C       | chr18:72102962-72124503 | 0 | 0 | 0 | 1 |
| XLOC_010413 | C18orf62     | chr18:73121826-73139589 | 0 | 0 | 0 | 1 |
| XLOC_010420 | OR4F17       | chr19:110678-111596     | 0 | 0 | 0 | 1 |
| XLOC_010427 | FGF22        | chr19:639925-643604     | 0 | 0 | 0 | 1 |
| XLOC_010429 | PALM         | chr19:708952-748330     | 0 | 0 | 0 | 1 |
| XLOC_010432 | MIR4745      | chr19:797391-812327     | 0 | 0 | 0 | 1 |
| XLOC_010433 | MIR3187      | chr19:812487-821952     | 0 | 0 | 0 | 1 |
| XLOC_010438 | KISS1R       | chr19:917341-921015     | 0 | 0 | 0 | 1 |
| XLOC_010459 | ONECUT3      | chr19:1753661-1775444   | 0 | 0 | 0 | 1 |
| XLOC_010491 | NMRK2        | chr19:3933100-3942414   | 0 | 0 | 0 | 1 |
| XLOC_010501 | MIR4746      | chr19:4445002-4457791   | 0 | 0 | 0 | 1 |
| XLOC_010506 | MIR7-3       | chr19:4769116-4772568   | 0 | 0 | 0 | 1 |
| XLOC_010509 | MIR4747      | chr19:4909509-4962165   | 0 | 0 | 0 | 1 |
| XLOC_010511 | ZNRF4        | chr19:5455425-5456867   | 0 | 0 | 0 | 1 |
| XLOC_010515 | CATSPERD     | chr19:5720687-5778742   | 0 | 0 | 0 | 1 |
| XLOC_010528 | MBD3L5       | chr19:7030593-7033022   | 0 | 0 | 0 | 1 |
| XLOC_010529 | MBD3L2       | chr19:7049350-7051746   | 0 | 0 | 0 | 1 |
| XLOC_010539 | RETN         | chr19:7733971-7735340   | 0 | 0 | 0 | 1 |
| XLOC_010542 | CLEC4M       | chr19:7828034-7834491   | 0 | 0 | 0 | 1 |
| XLOC_010549 | CCL25        | chr19:8117645-8127547   | 0 | 0 | 0 | 1 |
| XLOC_010556 | OR2Z1        | chr19:8841390-8842335   | 0 | 0 | 0 | 1 |
| XLOC_010557 | MBD3L1       | chr19:8953268-8954016   | 0 | 0 | 0 | 1 |
| XLOC_010558 | OR1M1        | chr19:9203920-9204862   | 0 | 0 | 0 | 1 |
| XLOC_010561 | OR7E24       | chr19:9361719-9362739   | 0 | 0 | 0 | 1 |
| XLOC_010567 | C3P1         | chr19:10152031-10184813 | 0 | 0 | 0 | 1 |
| XLOC_010570 | SNORD105     | chr19:10216898-10230599 | 0 | 0 | 0 | 1 |
| XLOC_010572 | MIR4322      | chr19:10332108-10341948 | 0 | 0 | 0 | 1 |
| XLOC_010579 | MIR1238      | chr19:10654646-10676702 | 0 | 0 | 0 | 1 |
| XLOC_010584 | MIR638       | chr19:10828728-10942586 | 0 | 0 | 0 | 1 |
| XLOC_010585 | MIR4748      | chr19:10828728-10942586 | 0 | 0 | 0 | 1 |

|             |               |                         |   |   |   |   |
|-------------|---------------|-------------------------|---|---|---|---|
| XLOC_010592 | TSPAN16       | chr19:11406823-11450344 | 0 | 0 | 0 | 1 |
| XLOC_010613 | BEST2         | chr19:12863406-12869271 | 0 | 0 | 0 | 1 |
| XLOC_010628 | MIR181C       | chr19:13985512-13985622 | 0 | 0 | 0 | 1 |
| XLOC_010629 | MIR181D       | chr19:13985688-13985825 | 0 | 0 | 0 | 1 |
| XLOC_010633 | RLN3          | chr19:14139016-14141783 | 0 | 0 | 0 | 1 |
| XLOC_010640 | CLEC17A       | chr19:14693895-14721956 | 0 | 0 | 0 | 1 |
| XLOC_010642 | OR7C2         | chr19:15052300-15053260 | 0 | 0 | 0 | 1 |
| XLOC_010643 | CCDC105       | chr19:15121538-15134083 | 0 | 0 | 0 | 1 |
| XLOC_010645 | OR111         | chr19:15197876-15198944 | 0 | 0 | 0 | 1 |
| XLOC_010647 | MIR1470       | chr19:15532317-15560762 | 0 | 0 | 0 | 1 |
| XLOC_010648 | CYP4F22       | chr19:15619335-15663128 | 0 | 0 | 0 | 1 |
| XLOC_010649 | CYP4F8        | chr19:15726028-15740447 | 0 | 0 | 0 | 1 |
| XLOC_010651 | CYP4F12       | chr19:15783827-15807984 | 0 | 0 | 0 | 1 |
| XLOC_010652 | OR10H2        | chr19:15838833-15839862 | 0 | 0 | 0 | 1 |
| XLOC_010653 | OR10H3        | chr19:15852202-15853153 | 0 | 0 | 0 | 1 |
| XLOC_010654 | OR10H5        | chr19:15904858-15905806 | 0 | 0 | 0 | 1 |
| XLOC_010656 | OR10H4        | chr19:16059817-16060768 | 0 | 0 | 0 | 1 |
| XLOC_010657 | LINC00661     | chr19:16126443-16138272 | 0 | 0 | 0 | 1 |
| XLOC_010658 | FLJ25328      | chr19:16144522-16152918 | 0 | 0 | 0 | 1 |
| XLOC_010669 | F2RL3         | chr19:16999825-17002830 | 0 | 0 | 0 | 1 |
| XLOC_010685 | B3GNT3        | chr19:17905918-17924385 | 0 | 0 | 0 | 1 |
| XLOC_010699 | MIR3189       | chr19:18496967-18499986 | 0 | 0 | 0 | 1 |
| XLOC_010712 | NCAN          | chr19:19322781-19363061 | 0 | 0 | 0 | 1 |
| XLOC_010732 | ZNF257        | chr19:22235265-22273903 | 0 | 0 | 0 | 1 |
| XLOC_010733 | ZNF729        | chr19:22469251-22499978 | 0 | 0 | 0 | 1 |
| XLOC_010734 | LOC440518     | chr19:22779058-22786352 | 0 | 0 | 0 | 1 |
| XLOC_010737 | ZNF726        | chr19:24097683-24116769 | 0 | 0 | 0 | 1 |
| XLOC_010739 | LOC148145     | chr19:29456037-29460055 | 0 | 0 | 0 | 1 |
| XLOC_010740 | LOC100505835  | chr19:29493461-29504862 | 0 | 0 | 0 | 1 |
| XLOC_010741 | VSTM2B        | chr19:30017490-30055226 | 0 | 0 | 0 | 1 |
| XLOC_010746 | ZNF536        | chr19:30863327-31048965 | 0 | 0 | 0 | 1 |
| XLOC_010747 | DKFZp566F0947 | chr19:31640782-31641311 | 0 | 0 | 0 | 1 |
| XLOC_010748 | THEG5         | chr19:32083186-32083945 | 0 | 0 | 0 | 1 |
| XLOC_010761 | CHST8         | chr19:34112860-34264414 | 0 | 0 | 0 | 1 |
| XLOC_010769 | SCGB2B3P      | chr19:35136777-35136957 | 0 | 0 | 0 | 1 |
| XLOC_010775 | HPN           | chr19:35531409-35597208 | 0 | 0 | 0 | 1 |
| XLOC_010776 | FXYD3         | chr19:35606731-35615228 | 0 | 0 | 0 | 1 |
| XLOC_010783 | MAG           | chr19:35782988-35804709 | 0 | 0 | 0 | 1 |
| XLOC_010785 | FFAR1         | chr19:35842444-35843367 | 0 | 0 | 0 | 1 |
| XLOC_010786 | FFAR3         | chr19:35849487-35851389 | 0 | 0 | 0 | 1 |
| XLOC_010787 | LOC100128682  | chr19:35896508-35907742 | 0 | 0 | 0 | 1 |
| XLOC_010788 | FFAR2         | chr19:35940616-35942669 | 0 | 0 | 0 | 1 |
| XLOC_010802 | KIRREL2       | chr19:36347809-36358048 | 0 | 0 | 0 | 1 |
| XLOC_010812 | LOC100134317  | chr19:36802244-36803570 | 0 | 0 | 0 | 1 |
| XLOC_010813 | LOC644189     | chr19:36912075-36913799 | 0 | 0 | 0 | 1 |
| XLOC_010839 | LGALS7B       | chr19:39279849-39282394 | 0 | 0 | 0 | 1 |
| XLOC_010844 | NCCRP1        | chr19:39687603-39692522 | 0 | 0 | 0 | 1 |
| XLOC_010845 | IFNL2         | chr19:39759156-39760732 | 0 | 0 | 0 | 1 |
| XLOC_010846 | IFNL1         | chr19:39786964-39789312 | 0 | 0 | 0 | 1 |

|             |               |                         |   |   |   |   |
|-------------|---------------|-------------------------|---|---|---|---|
| XLOC_010854 | SELV          | chr19:40005752-40011326 | 0 | 0 | 0 | 1 |
| XLOC_010855 | LGALS13       | chr19:40093168-40098114 | 0 | 0 | 0 | 1 |
| XLOC_010856 | LOC100129935  | chr19:40129324-40133041 | 0 | 0 | 0 | 1 |
| XLOC_010857 | LGALS16       | chr19:40146557-40151287 | 0 | 0 | 0 | 1 |
| XLOC_010858 | LGALS17A      | chr19:40170013-40177013 | 0 | 0 | 0 | 1 |
| XLOC_010859 | LGALS14       | chr19:40194945-40200088 | 0 | 0 | 0 | 1 |
| XLOC_010860 | LEUTX         | chr19:40267233-40276775 | 0 | 0 | 0 | 1 |
| XLOC_010872 | CYP2B7P1      | chr19:41430169-41456565 | 0 | 0 | 0 | 1 |
| XLOC_010873 | CYP2B6        | chr19:41497203-41524301 | 0 | 0 | 0 | 1 |
| XLOC_010874 | CYP2A13       | chr19:41594355-41602100 | 0 | 0 | 0 | 1 |
| XLOC_010876 | CYP2S1        | chr19:41699114-41713444 | 0 | 0 | 0 | 1 |
| XLOC_010882 | C19orf69      | chr19:41949062-41950670 | 0 | 0 | 0 | 1 |
| XLOC_010883 | CEACAM21      | chr19:42082530-42093197 | 0 | 0 | 0 | 1 |
| XLOC_010884 | CEACAM5       | chr19:42212529-42234437 | 0 | 0 | 0 | 1 |
| XLOC_010886 | CEACAM3       | chr19:42300533-42315591 | 0 | 0 | 0 | 1 |
| XLOC_010887 | DMRTC2        | chr19:42349085-42356397 | 0 | 0 | 0 | 1 |
| XLOC_010899 | LOC100289650  | chr19:43326014-43331030 | 0 | 0 | 0 | 1 |
| XLOC_010900 | PRG1          | chr19:43853207-43853700 | 0 | 0 | 0 | 1 |
| XLOC_010901 | CD177         | chr19:43857824-43867480 | 0 | 0 | 0 | 1 |
| XLOC_010924 | CEACAM16      | chr19:45202420-45213986 | 0 | 0 | 0 | 1 |
| XLOC_010926 | CBLC          | chr19:45281125-45303903 | 0 | 0 | 0 | 1 |
| XLOC_010933 | APOC2,APOC4   | chr19:45445494-45452822 | 0 | 0 | 0 | 1 |
| XLOC_010948 | MIR642A       | chr19:46171501-46185717 | 0 | 0 | 0 | 1 |
| XLOC_010951 | FOXA3         | chr19:46367517-46377055 | 0 | 0 | 0 | 1 |
| XLOC_010953 | MIR769        | chr19:46522189-46522307 | 0 | 0 | 0 | 1 |
| XLOC_010955 | DKFZp434J0226 | chr19:46713498-46718094 | 0 | 0 | 0 | 1 |
| XLOC_010956 | IGFL1         | chr19:46720994-46846690 | 0 | 0 | 0 | 1 |
| XLOC_010965 | MIR3190       | chr19:47724078-47736023 | 0 | 0 | 0 | 1 |
| XLOC_010978 | SNAR-A13      | chr19:48410934-48411056 | 0 | 0 | 0 | 1 |
| XLOC_010979 | SNAR-C2       | chr19:48416307-48416427 | 0 | 0 | 0 | 1 |
| XLOC_010980 | SNAR-A2       | chr19:48421685-48421807 | 0 | 0 | 0 | 1 |
| XLOC_010981 | SNAR-A8       | chr19:48427035-48427156 | 0 | 0 | 0 | 1 |
| XLOC_010982 | SNAR-C5       | chr19:48432074-48432194 | 0 | 0 | 0 | 1 |
| XLOC_010983 | SNAR-A2       | chr19:48437437-48437559 | 0 | 0 | 0 | 1 |
| XLOC_010984 | SNAR-C4       | chr19:48442797-48442917 | 0 | 0 | 0 | 1 |
| XLOC_010985 | SNAR-A13      | chr19:48448178-48448300 | 0 | 0 | 0 | 1 |
| XLOC_010986 | SNAR-C3       | chr19:48453552-48453671 | 0 | 0 | 0 | 1 |
| XLOC_010987 | SNAR-C5       | chr19:48458938-48459058 | 0 | 0 | 0 | 1 |
| XLOC_010988 | ELSPBP1       | chr19:48497907-48528410 | 0 | 0 | 0 | 1 |
| XLOC_011002 | FGF21         | chr19:49259343-49261582 | 0 | 0 | 0 | 1 |
| XLOC_011018 | CCDC155       | chr19:49891474-49921256 | 0 | 0 | 0 | 1 |
| XLOC_011025 | SNORD34       | chr19:49990810-49995564 | 0 | 0 | 0 | 1 |
| XLOC_011036 | MIR5088       | chr19:50180408-50191707 | 0 | 0 | 0 | 1 |
| XLOC_011042 | MIR4749       | chr19:50341902-50363999 | 0 | 0 | 0 | 1 |
| XLOC_011044 | MIR4750       | chr19:50380681-50392007 | 0 | 0 | 0 | 1 |
| XLOC_011061 | KLK3          | chr19:51358170-51364020 | 0 | 0 | 0 | 1 |
| XLOC_011064 | SIGLEC7       | chr19:51645557-51656783 | 0 | 0 | 0 | 1 |
| XLOC_011065 | SIGLEC7P      | chr19:51670584-51676780 | 0 | 0 | 0 | 1 |
| XLOC_011067 | SIGLECL1      | chr19:51760963-51772582 | 0 | 0 | 0 | 1 |



|             |           |                         |   |   |   |   |
|-------------|-----------|-------------------------|---|---|---|---|
| XLOC_011070 | CEACAM18  | chr19:51979837-51986611 | 0 | 0 | 0 | 1 |
| XLOC_011072 | MIR99B    | chr19:52195864-52195934 | 0 | 0 | 0 | 1 |
| XLOC_011073 | MIRLET7E  | chr19:52196038-52196117 | 0 | 0 | 0 | 1 |
| XLOC_011074 | MIR125A   | chr19:52196506-52196592 | 0 | 0 | 0 | 1 |
| XLOC_011076 | FPR2      | chr19:52264452-52273779 | 0 | 0 | 0 | 1 |
| XLOC_011081 | MIR643    | chr19:52772823-52795976 | 0 | 0 | 0 | 1 |
| XLOC_011086 | ZNF534    | chr19:52934666-52942699 | 0 | 0 | 0 | 1 |
| XLOC_011092 | ERVV-2    | chr19:53547990-53554380 | 0 | 0 | 0 | 1 |
| XLOC_011095 | FAM90A27P | chr19:53785542-53787602 | 0 | 0 | 0 | 1 |
| XLOC_011102 | DPRX      | chr19:54135309-54140263 | 0 | 0 | 0 | 1 |
| XLOC_011103 | MIR512-2  | chr19:54169926-54170024 | 0 | 0 | 0 | 1 |
| XLOC_011104 | MIR512-2  | chr19:54172410-54172508 | 0 | 0 | 0 | 1 |
| XLOC_011105 | MIR1323   | chr19:54175221-54175294 | 0 | 0 | 0 | 1 |
| XLOC_011106 | MIR498    | chr19:54177450-54177574 | 0 | 0 | 0 | 1 |
| XLOC_011107 | MIR520E   | chr19:54178964-54179051 | 0 | 0 | 0 | 1 |
| XLOC_011108 | MIR515-2  | chr19:54182256-54182339 | 0 | 0 | 0 | 1 |
| XLOC_011109 | MIR519E   | chr19:54183193-54183277 | 0 | 0 | 0 | 1 |
| XLOC_011110 | MIR520F   | chr19:54185412-54185499 | 0 | 0 | 0 | 1 |
| XLOC_011111 | MIR515-1  | chr19:54188262-54188345 | 0 | 0 | 0 | 1 |
| XLOC_011112 | MIR519C   | chr19:54189722-54189809 | 0 | 0 | 0 | 1 |
| XLOC_011113 | MIR1283-1 | chr19:54191734-54191821 | 0 | 0 | 0 | 1 |
| XLOC_011114 | MIR520A   | chr19:54194134-54194219 | 0 | 0 | 0 | 1 |
| XLOC_011115 | MIR526B   | chr19:54197646-54197729 | 0 | 0 | 0 | 1 |
| XLOC_011116 | MIR519B   | chr19:54198466-54198547 | 0 | 0 | 0 | 1 |
| XLOC_011117 | MIR525    | chr19:54200786-54200871 | 0 | 0 | 0 | 1 |
| XLOC_011118 | MIR523    | chr19:54201638-54201725 | 0 | 0 | 0 | 1 |
| XLOC_011119 | MIR518F   | chr19:54203268-54203355 | 0 | 0 | 0 | 1 |
| XLOC_011120 | MIR520B   | chr19:54204480-54204541 | 0 | 0 | 0 | 1 |
| XLOC_011121 | MIR518B   | chr19:54205990-54206073 | 0 | 0 | 0 | 1 |
| XLOC_011122 | MIR526A1  | chr19:54209505-54209590 | 0 | 0 | 0 | 1 |
| XLOC_011123 | MIR520C   | chr19:54210706-54210793 | 0 | 0 | 0 | 1 |
| XLOC_011124 | MIR518C   | chr19:54211988-54212089 | 0 | 0 | 0 | 1 |
| XLOC_011125 | MIR524    | chr19:54214255-54214342 | 0 | 0 | 0 | 1 |
| XLOC_011126 | MIR517A   | chr19:54215521-54215608 | 0 | 0 | 0 | 1 |
| XLOC_011127 | MIR519D   | chr19:54216600-54216688 | 0 | 0 | 0 | 1 |
| XLOC_011128 | MIR521-2  | chr19:54219847-54219934 | 0 | 0 | 0 | 1 |
| XLOC_011129 | MIR520D   | chr19:54223349-54223436 | 0 | 0 | 0 | 1 |
| XLOC_011130 | MIR517B   | chr19:54224329-54224396 | 0 | 0 | 0 | 1 |
| XLOC_011131 | MIR520G   | chr19:54225419-54225509 | 0 | 0 | 0 | 1 |
| XLOC_011132 | MIR516B2  | chr19:54228695-54228780 | 0 | 0 | 0 | 1 |
| XLOC_011133 | MIR526A2  | chr19:54230175-54230240 | 0 | 0 | 0 | 1 |
| XLOC_011134 | MIR518E   | chr19:54233091-54233179 | 0 | 0 | 0 | 1 |
| XLOC_011135 | MIR518A1  | chr19:54234259-54234344 | 0 | 0 | 0 | 1 |
| XLOC_011136 | MIR518D   | chr19:54238130-54238217 | 0 | 0 | 0 | 1 |
| XLOC_011137 | MIR516B1  | chr19:54240098-54240188 | 0 | 0 | 0 | 1 |
| XLOC_011138 | MIR518A2  | chr19:54242586-54242673 | 0 | 0 | 0 | 1 |
| XLOC_011139 | MIR517C   | chr19:54244566-54244661 | 0 | 0 | 0 | 1 |
| XLOC_011140 | MIR520H   | chr19:54245765-54245853 | 0 | 0 | 0 | 1 |
| XLOC_011141 | MIR521-1  | chr19:54251889-54251976 | 0 | 0 | 0 | 1 |

|             |                |                         |   |   |   |   |
|-------------|----------------|-------------------------|---|---|---|---|
| XLOC_011142 | MIR522         | chr19:54254464-54254551 | 0 | 0 | 0 | 1 |
| XLOC_011143 | MIR519A1       | chr19:54255650-54255735 | 0 | 0 | 0 | 1 |
| XLOC_011144 | MIR527         | chr19:54257271-54257356 | 0 | 0 | 0 | 1 |
| XLOC_011145 | MIR516A1       | chr19:54259994-54260084 | 0 | 0 | 0 | 1 |
| XLOC_011146 | MIR1283-2      | chr19:54261485-54261572 | 0 | 0 | 0 | 1 |
| XLOC_011147 | MIR516A2       | chr19:54264386-54264476 | 0 | 0 | 0 | 1 |
| XLOC_011148 | MIR519A2       | chr19:54265597-54265684 | 0 | 0 | 0 | 1 |
| XLOC_011149 | MIR371A        | chr19:54290928-54290996 | 0 | 0 | 0 | 1 |
| XLOC_011150 | MIR372         | chr19:54291143-54291210 | 0 | 0 | 0 | 1 |
| XLOC_011151 | MIR373         | chr19:54291958-54292027 | 0 | 0 | 0 | 1 |
| XLOC_011162 | MIR4752        | chr19:54785963-54786035 | 0 | 0 | 0 | 1 |
| XLOC_011166 | KIR3DX1        | chr19:55043908-55055195 | 0 | 0 | 0 | 1 |
| XLOC_011168 | LILRA1         | chr19:55105040-55113687 | 0 | 0 | 0 | 1 |
| XLOC_011170 | LILRB4         | chr19:55174123-55179846 | 0 | 0 | 0 | 1 |
| XLOC_011171 | LILRP2         | chr19:55219600-55224887 | 0 | 0 | 0 | 1 |
| XLOC_011172 | KIR3DL3        | chr19:55235983-55248003 | 0 | 0 | 0 | 1 |
| XLOC_011173 | KIR2DL3        | chr19:55249973-55264504 | 0 | 0 | 0 | 1 |
| XLOC_011174 | KIR2DL1        | chr19:55281264-55295778 | 0 | 0 | 0 | 1 |
| XLOC_011175 | KIR2DL4,LOC100 | chr19:55304499-55325972 | 0 | 0 | 0 | 1 |
| XLOC_011176 | KIR3DL1        | chr19:55327892-55342233 | 0 | 0 | 0 | 1 |
| XLOC_011177 | KIR2DS4        | chr19:55344173-55360023 | 0 | 0 | 0 | 1 |
| XLOC_011178 | KIR3DL2        | chr19:55361897-55378670 | 0 | 0 | 0 | 1 |
| XLOC_011180 | NCR1           | chr19:55417507-55424439 | 0 | 0 | 0 | 1 |
| XLOC_011181 | NLRP2          | chr19:55476651-55512510 | 0 | 0 | 0 | 1 |
| XLOC_011200 | NLRP5          | chr19:56511091-56573174 | 0 | 0 | 0 | 1 |
| XLOC_011202 | GALP           | chr19:56687388-56697144 | 0 | 0 | 0 | 1 |
| XLOC_011206 | LOC100128252   | chr19:56989242-57006805 | 0 | 0 | 0 | 1 |
| XLOC_011207 | ZNF471         | chr19:57019211-57040269 | 0 | 0 | 0 | 1 |
| XLOC_011209 | ZNF470         | chr19:57078889-57094262 | 0 | 0 | 0 | 1 |
| XLOC_011212 | PEG3-AS1       | chr19:57285922-57352097 | 0 | 0 | 0 | 1 |
| XLOC_011213 | MIMT1          | chr19:57352269-57359922 | 0 | 0 | 0 | 1 |
| XLOC_011214 | USP29          | chr19:57631508-57643293 | 0 | 0 | 0 | 1 |
| XLOC_011229 | ZNF530         | chr19:58111252-58119637 | 0 | 0 | 0 | 1 |
| XLOC_011230 | ZNF134         | chr19:58125829-58133636 | 0 | 0 | 0 | 1 |
| XLOC_011232 | ZSCAN4         | chr19:58180302-58190520 | 0 | 0 | 0 | 1 |
| XLOC_011238 | LOC100128398   | chr19:58488440-58518574 | 0 | 0 | 0 | 1 |
| XLOC_011239 | ZSCAN1         | chr19:58545433-58565999 | 0 | 0 | 0 | 1 |
| XLOC_011240 | ZNF135         | chr19:58570606-58581110 | 0 | 0 | 0 | 1 |
| XLOC_011247 | LOC646862      | chr19:58907456-58908446 | 0 | 0 | 0 | 1 |
| XLOC_011256 | FAM138A        | chr19:76219-77690       | 0 | 0 | 0 | 1 |
| XLOC_011260 | THEG           | chr19:362056-376013     | 0 | 0 | 0 | 1 |
| XLOC_011267 | LPPR3          | chr19:812487-821952     | 0 | 0 | 0 | 1 |
| XLOC_011293 | MIR1227        | chr19:2233154-2236328   | 0 | 0 | 0 | 1 |
| XLOC_011314 | RAX2           | chr19:3769088-3772219   | 0 | 0 | 0 | 1 |
| XLOC_011320 | SNORD37        | chr19:3976053-3985461   | 0 | 0 | 0 | 1 |
| XLOC_011336 | ARRDC5         | chr19:4890448-4902879   | 0 | 0 | 0 | 1 |
| XLOC_011337 | PTPRS          | chr19:5205518-5340814   | 0 | 0 | 0 | 1 |
| XLOC_011366 | MBD3L4         | chr19:7037754-7040184   | 0 | 0 | 0 | 1 |
| XLOC_011367 | MBD3L3         | chr19:7056215-7058645   | 0 | 0 | 0 | 1 |

|             |              |                         |   |   |   |   |
|-------------|--------------|-------------------------|---|---|---|---|
| XLOC_011374 | CLEC4G       | chr19:7793842-7797057   | 0 | 0 | 0 | 1 |
| XLOC_011386 | MIR4999      | chr19:8439259-8469317   | 0 | 0 | 0 | 1 |
| XLOC_011390 | ADAMTS10     | chr19:8645125-8675588   | 0 | 0 | 0 | 1 |
| XLOC_011391 | ACTL9        | chr19:8807750-8809172   | 0 | 0 | 0 | 1 |
| XLOC_011393 | MUC16        | chr19:8959519-9092018   | 0 | 0 | 0 | 1 |
| XLOC_011394 | OR7G2        | chr19:9212944-9213982   | 0 | 0 | 0 | 1 |
| XLOC_011395 | OR7G1        | chr19:9225503-9226439   | 0 | 0 | 0 | 1 |
| XLOC_011396 | OR7G3        | chr19:9236687-9237626   | 0 | 0 | 0 | 1 |
| XLOC_011397 | OR7D4        | chr19:9324525-9325547   | 0 | 0 | 0 | 1 |
| XLOC_011405 | ZNF812       | chr19:9800813-9811493   | 0 | 0 | 0 | 1 |
| XLOC_011409 | COL5A3       | chr19:10070236-10121147 | 0 | 0 | 0 | 1 |
| XLOC_011426 | MIR199A1     | chr19:10828728-10942586 | 0 | 0 | 0 | 1 |
| XLOC_011458 | SNORD41      | chr19:12810007-12834810 | 0 | 0 | 0 | 1 |
| XLOC_011471 | CACNA1A      | chr19:13317255-13617274 | 0 | 0 | 0 | 1 |
| XLOC_011473 | MIR27A       | chr19:13947253-13947331 | 0 | 0 | 0 | 1 |
| XLOC_011474 | MIR23A       | chr19:13947400-13947473 | 0 | 0 | 0 | 1 |
| XLOC_011488 | EMR3         | chr19:14730050-14785730 | 0 | 0 | 0 | 1 |
| XLOC_011490 | OR7C1        | chr19:14909985-14910948 | 0 | 0 | 0 | 1 |
| XLOC_011491 | OR7A5        | chr19:14937138-14939276 | 0 | 0 | 0 | 1 |
| XLOC_011492 | OR7A10       | chr19:14951759-14952689 | 0 | 0 | 0 | 1 |
| XLOC_011493 | OR7A17       | chr19:14991237-14992167 | 0 | 0 | 0 | 1 |
| XLOC_011494 | SLC1A6       | chr19:15060844-15121455 | 0 | 0 | 0 | 1 |
| XLOC_011502 | RASAL3       | chr19:15562437-15575382 | 0 | 0 | 0 | 1 |
| XLOC_011503 | PGLYRP2      | chr19:15579456-15590315 | 0 | 0 | 0 | 1 |
| XLOC_011504 | CYP4F24P     | chr19:15870143-15890798 | 0 | 0 | 0 | 1 |
| XLOC_011508 | CIB3         | chr19:16272178-16284286 | 0 | 0 | 0 | 1 |
| XLOC_011515 | CPAMD8       | chr19:17003761-17137625 | 0 | 0 | 0 | 1 |
| XLOC_011528 | IL12RB1      | chr19:18170370-18197697 | 0 | 0 | 0 | 1 |
| XLOC_011531 | LOC729966    | chr19:18360759-18366229 | 0 | 0 | 0 | 1 |
| XLOC_011540 | COMP         | chr19:18893582-18902114 | 0 | 0 | 0 | 1 |
| XLOC_011548 | HAPLN4       | chr19:19366451-19373596 | 0 | 0 | 0 | 1 |
| XLOC_011559 | ZNF682       | chr19:20115226-20150277 | 0 | 0 | 0 | 1 |
| XLOC_011560 | MIR1270-2    | chr19:20510080-20510163 | 0 | 0 | 0 | 1 |
| XLOC_011561 | ZNF826P      | chr19:20578625-20607771 | 0 | 0 | 0 | 1 |
| XLOC_011562 | MIR1270-2    | chr19:20578625-20607771 | 0 | 0 | 0 | 1 |
| XLOC_011564 | ZNF626       | chr19:20802744-20844402 | 0 | 0 | 0 | 1 |
| XLOC_011569 | ZNF676       | chr19:22361902-22379753 | 0 | 0 | 0 | 1 |
| XLOC_011570 | ZNF98        | chr19:22573898-22605148 | 0 | 0 | 0 | 1 |
| XLOC_011572 | ZNF728       | chr19:23157684-23186010 | 0 | 0 | 0 | 1 |
| XLOC_011580 | LOC284395    | chr19:29777917-30016659 | 0 | 0 | 0 | 1 |
| XLOC_011582 | TSHZ3        | chr19:31765850-31840190 | 0 | 0 | 0 | 1 |
| XLOC_011594 | LOC400685    | chr19:35307057-35323773 | 0 | 0 | 0 | 1 |
| XLOC_011595 | LOC100652909 | chr19:35382932-35389847 | 0 | 0 | 0 | 1 |
| XLOC_011597 | LOC100128675 | chr19:35531409-35597208 | 0 | 0 | 0 | 1 |
| XLOC_011604 | ATP4A        | chr19:36041094-36054560 | 0 | 0 | 0 | 1 |
| XLOC_011609 | PRODH2       | chr19:36290891-36304201 | 0 | 0 | 0 | 1 |
| XLOC_011612 | TYROBP       | chr19:36395302-36399211 | 0 | 0 | 0 | 1 |
| XLOC_011639 | LOC100631378 | chr19:38308050-38345836 | 0 | 0 | 0 | 1 |
| XLOC_011642 | PPP1R14A     | chr19:38741876-38747231 | 0 | 0 | 0 | 1 |

|             |           |                         |   |   |   |   |
|-------------|-----------|-------------------------|---|---|---|---|
| XLOC_011648 | LGALS7    | chr19:39261607-39264157 | 0 | 0 | 0 | 1 |
| XLOC_011658 | SYCN      | chr19:39693561-39694906 | 0 | 0 | 0 | 1 |
| XLOC_011659 | IFNL3     | chr19:39734271-39735611 | 0 | 0 | 0 | 1 |
| XLOC_011660 | IFNL4     | chr19:39736953-39739496 | 0 | 0 | 0 | 1 |
| XLOC_011661 | LRFN1     | chr19:39797456-39805976 | 0 | 0 | 0 | 1 |
| XLOC_011664 | MIR4530   | chr19:39900262-39900318 | 0 | 0 | 0 | 1 |
| XLOC_011668 | CLC       | chr19:40221892-40228669 | 0 | 0 | 0 | 1 |
| XLOC_011677 | MIR641    | chr19:40736223-40791302 | 0 | 0 | 0 | 1 |
| XLOC_011688 | CYP2A7    | chr19:41381343-41388657 | 0 | 0 | 0 | 1 |
| XLOC_011695 | CEACAM4   | chr19:42125343-42133442 | 0 | 0 | 0 | 1 |
| XLOC_011696 | CEACAM7   | chr19:42177234-42192096 | 0 | 0 | 0 | 1 |
| XLOC_011702 | MIR4323   | chr19:42636780-42641251 | 0 | 0 | 0 | 1 |
| XLOC_011709 | CXCL17    | chr19:42901299-43156507 | 0 | 0 | 0 | 1 |
| XLOC_011714 | PSG10P    | chr19:43341148-43359870 | 0 | 0 | 0 | 1 |
| XLOC_011716 | PSG6      | chr19:43406233-43422076 | 0 | 0 | 0 | 1 |
| XLOC_011717 | PSG7      | chr19:43428283-43441330 | 0 | 0 | 0 | 1 |
| XLOC_011719 | PSG2      | chr19:43568361-43586893 | 0 | 0 | 0 | 1 |
| XLOC_011721 | PSG4      | chr19:43696853-43709926 | 0 | 0 | 0 | 1 |
| XLOC_011722 | LOC284344 | chr19:43715942-43752798 | 0 | 0 | 0 | 1 |
| XLOC_011744 | CEACAM20  | chr19:45010210-45033548 | 0 | 0 | 0 | 1 |
| XLOC_011746 | MIR4531   | chr19:45147097-45169428 | 0 | 0 | 0 | 1 |
| XLOC_011759 | MIR330    | chr19:46112657-46148775 | 0 | 0 | 0 | 1 |
| XLOC_011760 | MIR642B   | chr19:46171501-46185717 | 0 | 0 | 0 | 1 |
| XLOC_011770 | NANOS2    | chr19:46416472-46418036 | 0 | 0 | 0 | 1 |
| XLOC_011771 | NOVA2     | chr19:46442770-46476657 | 0 | 0 | 0 | 1 |
| XLOC_011773 | IGFL4     | chr19:46543005-46544274 | 0 | 0 | 0 | 1 |
| XLOC_011774 | IGFL3     | chr19:46623327-46627931 | 0 | 0 | 0 | 1 |
| XLOC_011775 | RNU6-66   | chr19:46720994-46846690 | 0 | 0 | 0 | 1 |
| XLOC_011776 | CCDC8     | chr19:46913585-46916919 | 0 | 0 | 0 | 1 |
| XLOC_011777 | PNMAL1    | chr19:46969747-46974820 | 0 | 0 | 0 | 1 |
| XLOC_011779 | PNMAL2    | chr19:46984044-47104457 | 0 | 0 | 0 | 1 |
| XLOC_011780 | PTGIR     | chr19:47123724-47128354 | 0 | 0 | 0 | 1 |
| XLOC_011784 | MIR320E   | chr19:47150868-47220384 | 0 | 0 | 0 | 1 |
| XLOC_011787 | SNAR-E    | chr19:47333841-47333961 | 0 | 0 | 0 | 1 |
| XLOC_011792 | MIR3191   | chr19:47724078-47736023 | 0 | 0 | 0 | 1 |
| XLOC_011797 | ZNF541    | chr19:48023946-48059113 | 0 | 0 | 0 | 1 |
| XLOC_011798 | TPRX1     | chr19:48304499-48306861 | 0 | 0 | 0 | 1 |
| XLOC_011799 | SULT2A1   | chr19:48373722-48389654 | 0 | 0 | 0 | 1 |
| XLOC_011800 | BSPH1     | chr19:48471302-48495427 | 0 | 0 | 0 | 1 |
| XLOC_011826 | SNAR-G2   | chr19:49534925-49535044 | 0 | 0 | 0 | 1 |
| XLOC_011835 | MIR4324   | chr19:49792891-49828474 | 0 | 0 | 0 | 1 |
| XLOC_011840 | MIR150    | chr19:50004041-50004125 | 0 | 0 | 0 | 1 |
| XLOC_011844 | TSKS      | chr19:50243010-50266515 | 0 | 0 | 0 | 1 |
| XLOC_011852 | SNAR-A8   | chr19:50595745-50595866 | 0 | 0 | 0 | 1 |
| XLOC_011853 | SNAR-A4   | chr19:50601082-50601203 | 0 | 0 | 0 | 1 |
| XLOC_011854 | SNAR-A10  | chr19:50604147-50604268 | 0 | 0 | 0 | 1 |
| XLOC_011855 | SNAR-A7   | chr19:50607211-50607332 | 0 | 0 | 0 | 1 |
| XLOC_011856 | SNAR-A14  | chr19:50610270-50610391 | 0 | 0 | 0 | 1 |
| XLOC_011857 | SNAR-A3   | chr19:50615624-50615745 | 0 | 0 | 0 | 1 |

|             |           |                         |   |   |   |   |
|-------------|-----------|-------------------------|---|---|---|---|
| XLOC_011858 | SNAR-A6   | chr19:50620976-50621097 | 0 | 0 | 0 | 1 |
| XLOC_011859 | SNAR-A10  | chr19:50626330-50626451 | 0 | 0 | 0 | 1 |
| XLOC_011860 | SNAR-A8   | chr19:50631658-50631779 | 0 | 0 | 0 | 1 |
| XLOC_011861 | SNAR-B1   | chr19:50637001-50637121 | 0 | 0 | 0 | 1 |
| XLOC_011862 | SNAR-B2   | chr19:50642374-50642494 | 0 | 0 | 0 | 1 |
| XLOC_011863 | SNAR-D    | chr19:50643458-50643577 | 0 | 0 | 0 | 1 |
| XLOC_011864 | IZUMO2    | chr19:50655804-50666538 | 0 | 0 | 0 | 1 |
| XLOC_011865 | KCNC3     | chr19:50818764-50832634 | 0 | 0 | 0 | 1 |
| XLOC_011866 | NAPSB     | chr19:50837056-50848005 | 0 | 0 | 0 | 1 |
| XLOC_011875 | SNORD88B  | chr19:51300960-51307974 | 0 | 0 | 0 | 1 |
| XLOC_011877 | SNORD88C  | chr19:51300960-51307974 | 0 | 0 | 0 | 1 |
| XLOC_011882 | KLK5      | chr19:51446558-51456344 | 0 | 0 | 0 | 1 |
| XLOC_011884 | KLK7      | chr19:51479734-51487320 | 0 | 0 | 0 | 1 |
| XLOC_011885 | KLK8      | chr19:51499263-51504958 | 0 | 0 | 0 | 1 |
| XLOC_011886 | KLK9      | chr19:51505768-51512890 | 0 | 0 | 0 | 1 |
| XLOC_011889 | KLK12     | chr19:51532347-51538148 | 0 | 0 | 0 | 1 |
| XLOC_011890 | KLK13     | chr19:51559462-51568367 | 0 | 0 | 0 | 1 |
| XLOC_011896 | NKG7      | chr19:51874873-51875960 | 0 | 0 | 0 | 1 |
| XLOC_011897 | LIM2      | chr19:51883162-51891210 | 0 | 0 | 0 | 1 |
| XLOC_011900 | SIGLEC8   | chr19:51954250-51961708 | 0 | 0 | 0 | 1 |
| XLOC_011902 | SIGLEC6   | chr19:52022783-52035110 | 0 | 0 | 0 | 1 |
| XLOC_011904 | SIGLEC5   | chr19:52114755-52133727 | 0 | 0 | 0 | 1 |
| XLOC_011905 | SIGLEC14  | chr19:52145805-52150132 | 0 | 0 | 0 | 1 |
| XLOC_011907 | FPR1      | chr19:52249022-52255150 | 0 | 0 | 0 | 1 |
| XLOC_011926 | ZNF415    | chr19:53611131-53636173 | 0 | 0 | 0 | 1 |
| XLOC_011930 | VN1R4     | chr19:53770012-53770918 | 0 | 0 | 0 | 1 |
| XLOC_011931 | BIRC8     | chr19:53792853-53794875 | 0 | 0 | 0 | 1 |
| XLOC_011932 | LOC284379 | chr19:54102884-54106751 | 0 | 0 | 0 | 1 |
| XLOC_011933 | MIR371B   | chr19:54290928-54290996 | 0 | 0 | 0 | 1 |
| XLOC_011936 | TARM1     | chr19:54573200-54584634 | 0 | 0 | 0 | 1 |
| XLOC_011944 | LILRB5    | chr19:54754269-54761167 | 0 | 0 | 0 | 1 |
| XLOC_011945 | LILRB2    | chr19:54777674-54785033 | 0 | 0 | 0 | 1 |
| XLOC_011946 | LILRA3    | chr19:54799854-54804265 | 0 | 0 | 0 | 1 |
| XLOC_011947 | LILRA5    | chr19:54818352-54824409 | 0 | 0 | 0 | 1 |
| XLOC_011948 | LILRA4    | chr19:54844691-54850421 | 0 | 0 | 0 | 1 |
| XLOC_011952 | NLRP7     | chr19:55434876-55458873 | 0 | 0 | 0 | 1 |
| XLOC_011953 | RNU6-64   | chr19:55471012-55471043 | 0 | 0 | 0 | 1 |
| XLOC_011967 | FAM71E2   | chr19:55866275-55874620 | 0 | 0 | 0 | 1 |
| XLOC_011973 | SBK2      | chr19:56041099-56048435 | 0 | 0 | 0 | 1 |
| XLOC_011974 | SGK110    | chr19:56052022-56056909 | 0 | 0 | 0 | 1 |
| XLOC_011980 | NLRP13    | chr19:56407310-56443702 | 0 | 0 | 0 | 1 |
| XLOC_011987 | PEG3,ZIM2 | chr19:57285922-57352097 | 0 | 0 | 0 | 1 |
| XLOC_011988 | ZIM3      | chr19:57645463-57656570 | 0 | 0 | 0 | 1 |
| XLOC_012000 | ZNF418    | chr19:58433251-58446740 | 0 | 0 | 0 | 1 |
| XLOC_012001 | ZNF256    | chr19:58452200-58459077 | 0 | 0 | 0 | 1 |
| XLOC_012002 | C19orf18  | chr19:58469804-58485902 | 0 | 0 | 0 | 1 |
| XLOC_012003 | ZNF606    | chr19:58488440-58518574 | 0 | 0 | 0 | 1 |
| XLOC_012009 | MIR4754   | chr19:58898136-58898225 | 0 | 0 | 0 | 1 |
| XLOC_012027 | TPO       | chr2:1417232-1546499    | 0 | 0 | 0 | 1 |

|             |              |                        |   |   |   |   |
|-------------|--------------|------------------------|---|---|---|---|
| XLOC_012028 | LOC730811    | chr2:1792884-2335045   | 0 | 0 | 0 | 1 |
| XLOC_012035 | LOC150622    | chr2:6072818-6120350   | 0 | 0 | 0 | 1 |
| XLOC_012036 | LOC400940    | chr2:6122109-6128364   | 0 | 0 | 0 | 1 |
| XLOC_012051 | KCNF1        | chr2:11052062-11054351 | 0 | 0 | 0 | 1 |
| XLOC_012058 | MIR3125      | chr2:12856997-12882858 | 0 | 0 | 0 | 1 |
| XLOC_012061 | MYCN         | chr2:16080019-16087129 | 0 | 0 | 0 | 1 |
| XLOC_012064 | MSGN1        | chr2:17997785-17998367 | 0 | 0 | 0 | 1 |
| XLOC_012065 | KCNS3        | chr2:18059944-18114225 | 0 | 0 | 0 | 1 |
| XLOC_012066 | MIR4757      | chr2:19548189-19548266 | 0 | 0 | 0 | 1 |
| XLOC_012067 | FLJ12334     | chr2:20068614-20084808 | 0 | 0 | 0 | 1 |
| XLOC_012069 | GDF7         | chr2:20866423-20871250 | 0 | 0 | 0 | 1 |
| XLOC_012072 | MFSD2B       | chr2:24232952-24247145 | 0 | 0 | 0 | 1 |
| XLOC_012085 | C2orf70      | chr2:26785480-26802395 | 0 | 0 | 0 | 1 |
| XLOC_012096 | TCF23        | chr2:27371944-27375819 | 0 | 0 | 0 | 1 |
| XLOC_012099 | DNAJC5G      | chr2:27498288-27504296 | 0 | 0 | 0 | 1 |
| XLOC_012112 | MIR4263      | chr2:28004265-28561767 | 0 | 0 | 0 | 1 |
| XLOC_012118 | SNORD92      | chr2:29117532-29171080 | 0 | 0 | 0 | 1 |
| XLOC_012119 | SNORD53      | chr2:29117532-29171080 | 0 | 0 | 0 | 1 |
| XLOC_012125 | EHD3         | chr2:31456879-31491260 | 0 | 0 | 0 | 1 |
| XLOC_012130 | MIR558       | chr2:32582095-32843965 | 0 | 0 | 0 | 1 |
| XLOC_012132 | MIR4765      | chr2:32853086-33046118 | 0 | 0 | 0 | 1 |
| XLOC_012133 | LINC00486    | chr2:33050509-33171202 | 0 | 0 | 0 | 1 |
| XLOC_012134 | LOC100271832 | chr2:33050509-33171202 | 0 | 0 | 0 | 1 |
| XLOC_012138 | VIT          | chr2:36923832-37041937 | 0 | 0 | 0 | 1 |
| XLOC_012152 | LOC388942    | chr2:42104694-42121186 | 0 | 0 | 0 | 1 |
| XLOC_012159 | ABCG8        | chr2:44066102-44105605 | 0 | 0 | 0 | 1 |
| XLOC_012174 | MIR559       | chr2:47596286-47614167 | 0 | 0 | 0 | 1 |
| XLOC_012190 | CCDC85A      | chr2:56411257-56613309 | 0 | 0 | 0 | 1 |
| XLOC_012192 | FLJ30838     | chr2:58747887-59290901 | 0 | 0 | 0 | 1 |
| XLOC_012201 | MIR5192      | chr2:62423261-62451866 | 0 | 0 | 0 | 1 |
| XLOC_012208 | MIR4434      | chr2:64751438-64820138 | 0 | 0 | 0 | 1 |
| XLOC_012209 | LOC339807    | chr2:64834445-64843616 | 0 | 0 | 0 | 1 |
| XLOC_012216 | PLEK         | chr2:68592321-68624585 | 0 | 0 | 0 | 1 |
| XLOC_012218 | PROKR1       | chr2:68872953-68882708 | 0 | 0 | 0 | 1 |
| XLOC_012220 | GKN1         | chr2:69201704-69208112 | 0 | 0 | 0 | 1 |
| XLOC_012221 | ANTXR1       | chr2:69240275-69476459 | 0 | 0 | 0 | 1 |
| XLOC_012222 | MIR3126      | chr2:69240275-69476459 | 0 | 0 | 0 | 1 |
| XLOC_012232 | OR7E91P      | chr2:71251204-71257060 | 0 | 0 | 0 | 1 |
| XLOC_012238 | EMX1         | chr2:73144603-73162020 | 0 | 0 | 0 | 1 |
| XLOC_012239 | NOTO         | chr2:73429385-73438340 | 0 | 0 | 0 | 1 |
| XLOC_012244 | C2orf78      | chr2:74011315-74044274 | 0 | 0 | 0 | 1 |
| XLOC_012262 | MIR5000      | chr2:75273589-75426645 | 0 | 0 | 0 | 1 |
| XLOC_012264 | REG3G        | chr2:79252811-79255630 | 0 | 0 | 0 | 1 |
| XLOC_012265 | REG1A        | chr2:79347583-79350545 | 0 | 0 | 0 | 1 |
| XLOC_012267 | LOC1720      | chr2:83083926-83084893 | 0 | 0 | 0 | 1 |
| XLOC_012268 | FUNDC2P2     | chr2:84517805-84519324 | 0 | 0 | 0 | 1 |
| XLOC_012289 | RGPD1,RGPD2  | chr2:87140934-87248973 | 0 | 0 | 0 | 1 |
| XLOC_012291 | MIR4435-1    | chr2:87929273-87929353 | 0 | 0 | 0 | 1 |
| XLOC_012293 | SMYD1        | chr2:88367298-88412902 | 0 | 0 | 0 | 1 |

|             |                 |                          |   |   |   |   |
|-------------|-----------------|--------------------------|---|---|---|---|
| XLOC_012294 | THNSL2          | chr2:88469813-88486156   | 0 | 0 | 0 | 1 |
| XLOC_012298 | MIR4436A        | chr2:89111883-89111968   | 0 | 0 | 0 | 1 |
| XLOC_012300 | ACTR3BP2        | chr2:92129158-92130496   | 0 | 0 | 0 | 1 |
| XLOC_012302 | MAL             | chr2:95691399-95719737   | 0 | 0 | 0 | 1 |
| XLOC_012307 | TRIM43          | chr2:96257765-96265469   | 0 | 0 | 0 | 1 |
| XLOC_012311 | ITPRIPL1        | chr2:96991061-96994091   | 0 | 0 | 0 | 1 |
| XLOC_012316 | MIR3127         | chr2:97426638-97477628   | 0 | 0 | 0 | 1 |
| XLOC_012323 | VWA3B           | chr2:98703594-98929410   | 0 | 0 | 0 | 1 |
| XLOC_012324 | CNGA3           | chr2:98962617-99015064   | 0 | 0 | 0 | 1 |
| XLOC_012331 | NMS             | chr2:101086943-101099742 | 0 | 0 | 0 | 1 |
| XLOC_012336 | MIR5696         | chr2:101925911-101925996 | 0 | 0 | 0 | 1 |
| XLOC_012338 | IL1R2           | chr2:102608305-102644884 | 0 | 0 | 0 | 1 |
| XLOC_012340 | IL1RL2          | chr2:102803432-102855811 | 0 | 0 | 0 | 1 |
| XLOC_012344 | MIR4772         | chr2:103035253-103069024 | 0 | 0 | 0 | 1 |
| XLOC_012348 | LOC150568       | chr2:105050804-105129215 | 0 | 0 | 0 | 1 |
| XLOC_012349 | POU3F3          | chr2:105471968-105473471 | 0 | 0 | 0 | 1 |
| XLOC_012351 | GPR45           | chr2:105858199-105859924 | 0 | 0 | 0 | 1 |
| XLOC_012355 | PLGLA           | chr2:106998569-107007851 | 0 | 0 | 0 | 1 |
| XLOC_012357 | SLC5A7          | chr2:108602994-108630443 | 0 | 0 | 0 | 1 |
| XLOC_012358 | SULT1C3         | chr2:108863650-108881807 | 0 | 0 | 0 | 1 |
| XLOC_012360 | SULT1C2P1       | chr2:108938693-108970254 | 0 | 0 | 0 | 1 |
| XLOC_012361 | SULT1C4         | chr2:108994420-109004270 | 0 | 0 | 0 | 1 |
| XLOC_012369 | LIMS3L          | chr2:110656008-110726149 | 0 | 0 | 0 | 1 |
| XLOC_012371 | LOC100507334    | chr2:111003214-111024135 | 0 | 0 | 0 | 1 |
| XLOC_012372 | MIR4436B2       | chr2:111042429-111042520 | 0 | 0 | 0 | 1 |
| XLOC_012373 | ACOXL           | chr2:111490149-111875799 | 0 | 0 | 0 | 1 |
| XLOC_012384 | IL36G           | chr2:113735605-113743227 | 0 | 0 | 0 | 1 |
| XLOC_012385 | IL36A           | chr2:113763448-113765621 | 0 | 0 | 0 | 1 |
| XLOC_012386 | IL36RN          | chr2:113816214-113822320 | 0 | 0 | 0 | 1 |
| XLOC_012387 | IL1F10          | chr2:113825546-113833427 | 0 | 0 | 0 | 1 |
| XLOC_012388 | IL1RN           | chr2:113875469-113891593 | 0 | 0 | 0 | 1 |
| XLOC_012394 | FAM138B         | chr2:114334958-114336429 | 0 | 0 | 0 | 1 |
| XLOC_012399 | DPP10           | chr2:115199898-116602326 | 0 | 0 | 0 | 1 |
| XLOC_012402 | MARCO           | chr2:119699744-119752236 | 0 | 0 | 0 | 1 |
| XLOC_012406 | PCDP1           | chr2:120302007-120414237 | 0 | 0 | 0 | 1 |
| XLOC_012412 | GLI2            | chr2:121554866-121750229 | 0 | 0 | 0 | 1 |
| XLOC_012416 | CNTNAP5         | chr2:124782863-125672863 | 0 | 0 | 0 | 1 |
| XLOC_012417 | GYPC            | chr2:127413510-127454251 | 0 | 0 | 0 | 1 |
| XLOC_012420 | GPR17           | chr2:128395995-128439360 | 0 | 0 | 0 | 1 |
| XLOC_012423 | RAB6C           | chr2:130724164-130740311 | 0 | 0 | 0 | 1 |
| XLOC_012428 | CFC1B           | chr2:131278666-131285565 | 0 | 0 | 0 | 1 |
| XLOC_012429 | LOC646743,TISP2 | chr2:131328401-131341734 | 0 | 0 | 0 | 1 |
| XLOC_012430 | CYP4F30P        | chr2:131437622-131443435 | 0 | 0 | 0 | 1 |
| XLOC_012431 | GPR148          | chr2:131486642-131487909 | 0 | 0 | 0 | 1 |
| XLOC_012435 | POTEE           | chr2:131975923-132022416 | 0 | 0 | 0 | 1 |
| XLOC_012437 | LOC389043       | chr2:132160473-132165801 | 0 | 0 | 0 | 1 |
| XLOC_012438 | RNU6-81         | chr2:132202795-132360468 | 0 | 0 | 0 | 1 |
| XLOC_012444 | MIR3679         | chr2:134884695-134884763 | 0 | 0 | 0 | 1 |
| XLOC_012446 | ACMSD           | chr2:135596185-135676176 | 0 | 0 | 0 | 1 |

|             |               |                          |   |   |   |   |
|-------------|---------------|--------------------------|---|---|---|---|
| XLOC_012450 | MIR128-1      | chr2:136289082-136482839 | 0 | 0 | 0 | 1 |
| XLOC_012452 | LOC100507600  | chr2:136545414-136594750 | 0 | 0 | 0 | 1 |
| XLOC_012453 | THSD7B        | chr2:137748461-138435287 | 0 | 0 | 0 | 1 |
| XLOC_012454 | HNMT          | chr2:138721807-138773934 | 0 | 0 | 0 | 1 |
| XLOC_012457 | KYNU          | chr2:143635194-143799885 | 0 | 0 | 0 | 1 |
| XLOC_012458 | ARHGAP15      | chr2:143886898-144525921 | 0 | 0 | 0 | 1 |
| XLOC_012459 | ZEB2-AS1      | chr2:145141941-145278465 | 0 | 0 | 0 | 1 |
| XLOC_012460 | DKFZp686O1327 | chr2:145425533-145834291 | 0 | 0 | 0 | 1 |
| XLOC_012465 | KIF5C         | chr2:149632791-149883273 | 0 | 0 | 0 | 1 |
| XLOC_012466 | LYPD6B        | chr2:149894980-150071772 | 0 | 0 | 0 | 1 |
| XLOC_012468 | TNFAIP6       | chr2:152214105-152236562 | 0 | 0 | 0 | 1 |
| XLOC_012469 | MIR4773-1     | chr2:152214105-152236562 | 0 | 0 | 0 | 1 |
| XLOC_012473 | GALNT13       | chr2:154728425-155313950 | 0 | 0 | 0 | 1 |
| XLOC_012474 | KCNJ3         | chr2:155555092-155714864 | 0 | 0 | 0 | 1 |
| XLOC_012476 | GALNT5        | chr2:158114339-158167913 | 0 | 0 | 0 | 1 |
| XLOC_012477 | UPP2          | chr2:158851690-158992666 | 0 | 0 | 0 | 1 |
| XLOC_012478 | CCDC148-AS1   | chr2:159023161-159313265 | 0 | 0 | 0 | 1 |
| XLOC_012480 | DAPL1         | chr2:159651828-159672496 | 0 | 0 | 0 | 1 |
| XLOC_012486 | SLC4A10       | chr2:162480844-162841786 | 0 | 0 | 0 | 1 |
| XLOC_012489 | CSRNP3        | chr2:166326156-166545917 | 0 | 0 | 0 | 1 |
| XLOC_012490 | LOC100506134  | chr2:166729871-166810348 | 0 | 0 | 0 | 1 |
| XLOC_012491 | XIRP2         | chr2:167744996-168116261 | 0 | 0 | 0 | 1 |
| XLOC_012494 | MIR4774       | chr2:169312758-169642939 | 0 | 0 | 0 | 1 |
| XLOC_012496 | G6PC2         | chr2:169757749-169766510 | 0 | 0 | 0 | 1 |
| XLOC_012497 | DHRS9         | chr2:169921298-169952677 | 0 | 0 | 0 | 1 |
| XLOC_012499 | KLHL41        | chr2:170366211-170382772 | 0 | 0 | 0 | 1 |
| XLOC_012504 | MYO3B         | chr2:171034654-171511674 | 0 | 0 | 0 | 1 |
| XLOC_012520 | LOC285084     | chr2:175190754-175195370 | 0 | 0 | 0 | 1 |
| XLOC_012521 | SP9           | chr2:175199820-175202268 | 0 | 0 | 0 | 1 |
| XLOC_012523 | HOXD13        | chr2:176957531-176960666 | 0 | 0 | 0 | 1 |
| XLOC_012524 | HOXD12        | chr2:176964529-176965488 | 0 | 0 | 0 | 1 |
| XLOC_012526 | HOXD10        | chr2:176981491-176984670 | 0 | 0 | 0 | 1 |
| XLOC_012529 | MIR10B        | chr2:177015030-177015140 | 0 | 0 | 0 | 1 |
| XLOC_012537 | OSBPL6        | chr2:179059207-179672150 | 0 | 0 | 0 | 1 |
| XLOC_012542 | ITGA4         | chr2:182321618-182521834 | 0 | 0 | 0 | 1 |
| XLOC_012544 | PPP1R1C       | chr2:182818967-182996109 | 0 | 0 | 0 | 1 |
| XLOC_012548 | ZNF804A       | chr2:185463092-185804214 | 0 | 0 | 0 | 1 |
| XLOC_012554 | MIR561        | chr2:189156395-189460652 | 0 | 0 | 0 | 1 |
| XLOC_012555 | COL3A1        | chr2:189839098-189877472 | 0 | 0 | 0 | 1 |
| XLOC_012556 | MIR1245A      | chr2:189839098-189877472 | 0 | 0 | 0 | 1 |
| XLOC_012568 | PCGEM1        | chr2:193614570-193641625 | 0 | 0 | 0 | 1 |
| XLOC_012574 | PLCL1         | chr2:198669425-199014608 | 0 | 0 | 0 | 1 |
| XLOC_012581 | AOX2P         | chr2:201560445-201658941 | 0 | 0 | 0 | 1 |
| XLOC_012589 | CDK15         | chr2:202671151-202760273 | 0 | 0 | 0 | 1 |
| XLOC_012592 | SNORD70       | chr2:203130514-203168384 | 0 | 0 | 0 | 1 |
| XLOC_012593 | SNORD11B      | chr2:203130514-203168384 | 0 | 0 | 0 | 1 |
| XLOC_012594 | SNORD11       | chr2:203130514-203168384 | 0 | 0 | 0 | 1 |
| XLOC_012601 | CD28          | chr2:204571197-204603636 | 0 | 0 | 0 | 1 |
| XLOC_012602 | CTLA4         | chr2:204732510-204738683 | 0 | 0 | 0 | 1 |



|             |               |                          |   |   |   |   |
|-------------|---------------|--------------------------|---|---|---|---|
| XLOC_012603 | ICOS          | chr2:204801470-204826298 | 0 | 0 | 0 | 1 |
| XLOC_012607 | SNORD51       | chr2:207024317-207027653 | 0 | 0 | 0 | 1 |
| XLOC_012610 | ADAM23        | chr2:207308367-207482679 | 0 | 0 | 0 | 1 |
| XLOC_012611 | LOC200726     | chr2:207507141-207514173 | 0 | 0 | 0 | 1 |
| XLOC_012613 | MIR3130-2     | chr2:207630111-207660911 | 0 | 0 | 0 | 1 |
| XLOC_012617 | LOC100507443  | chr2:208983852-209021486 | 0 | 0 | 0 | 1 |
| XLOC_012620 | PTH2R         | chr2:209224568-209359231 | 0 | 0 | 0 | 1 |
| XLOC_012622 | UNC80         | chr2:210636716-210864024 | 0 | 0 | 0 | 1 |
| XLOC_012625 | CPS1-IT1      | chr2:211342405-211543831 | 0 | 0 | 0 | 1 |
| XLOC_012627 | VWC2L         | chr2:215276460-215440653 | 0 | 0 | 0 | 1 |
| XLOC_012628 | VWC2L-IT1     | chr2:215276460-215440653 | 0 | 0 | 0 | 1 |
| XLOC_012644 | MIR26B        | chr2:219263060-219270664 | 0 | 0 | 0 | 1 |
| XLOC_012645 | VIL1          | chr2:219283837-219314248 | 0 | 0 | 0 | 1 |
| XLOC_012652 | WNT6          | chr2:219724545-219738954 | 0 | 0 | 0 | 1 |
| XLOC_012654 | CDK5R2        | chr2:219824349-219826877 | 0 | 0 | 0 | 1 |
| XLOC_012655 | LINC00608     | chr2:219841005-219842644 | 0 | 0 | 0 | 1 |
| XLOC_012656 | LOC100129175  | chr2:219866936-219906245 | 0 | 0 | 0 | 1 |
| XLOC_012663 | DES           | chr2:220283098-220291461 | 0 | 0 | 0 | 1 |
| XLOC_012671 | CCDC140       | chr2:223064605-223169936 | 0 | 0 | 0 | 1 |
| XLOC_012673 | MOGAT1        | chr2:223536456-223574649 | 0 | 0 | 0 | 1 |
| XLOC_012677 | NYAP2         | chr2:226265601-226518734 | 0 | 0 | 0 | 1 |
| XLOC_012678 | MIR548AR      | chr2:226628160-226628181 | 0 | 0 | 0 | 1 |
| XLOC_012679 | LOC646736     | chr2:227007509-227044778 | 0 | 0 | 0 | 1 |
| XLOC_012681 | COL4A3        | chr2:228029280-228179508 | 0 | 0 | 0 | 1 |
| XLOC_012684 | CCL20         | chr2:228678557-228682280 | 0 | 0 | 0 | 1 |
| XLOC_012692 | LOC151484     | chr2:231751260-231769232 | 0 | 0 | 0 | 1 |
| XLOC_012693 | SPATA3        | chr2:231860838-231871999 | 0 | 0 | 0 | 1 |
| XLOC_012697 | MIR4777       | chr2:232063293-232238606 | 0 | 0 | 0 | 1 |
| XLOC_012699 | C2orf57       | chr2:232457574-232458994 | 0 | 0 | 0 | 1 |
| XLOC_012703 | ALPP          | chr2:233243347-233247599 | 0 | 0 | 0 | 1 |
| XLOC_012704 | ALPPL2        | chr2:233271551-233275424 | 0 | 0 | 0 | 1 |
| XLOC_012705 | ALPI          | chr2:233320832-233324742 | 0 | 0 | 0 | 1 |
| XLOC_012707 | CHRNA         | chr2:233390869-233401375 | 0 | 0 | 0 | 1 |
| XLOC_012713 | NEU2          | chr2:233897381-233899767 | 0 | 0 | 0 | 1 |
| XLOC_012720 | UGT1A1,UGT1A1 | chr2:234526290-234681951 | 0 | 0 | 0 | 1 |
| XLOC_012721 | TRPM8         | chr2:234826042-234928166 | 0 | 0 | 0 | 1 |
| XLOC_012722 | SPP2          | chr2:234959345-234985776 | 0 | 0 | 0 | 1 |
| XLOC_012725 | CXCR7         | chr2:237478379-237490994 | 0 | 0 | 0 | 1 |
| XLOC_012727 | MLPH          | chr2:238395877-238463961 | 0 | 0 | 0 | 1 |
| XLOC_012728 | PRLH          | chr2:238475216-238475818 | 0 | 0 | 0 | 1 |
| XLOC_012735 | LOC643387     | chr2:239140326-239142985 | 0 | 0 | 0 | 1 |
| XLOC_012738 | TWIST2        | chr2:239756672-239832237 | 0 | 0 | 0 | 1 |
| XLOC_012739 | MIR4269       | chr2:239969863-240322643 | 0 | 0 | 0 | 1 |
| XLOC_012740 | LOC150935     | chr2:240684553-240722356 | 0 | 0 | 0 | 1 |
| XLOC_012742 | MIR149        | chr2:241375114-241407495 | 0 | 0 | 0 | 1 |
| XLOC_012747 | AQP12A        | chr2:241631261-241637900 | 0 | 0 | 0 | 1 |
| XLOC_012748 | AGXT          | chr2:241808161-241818536 | 0 | 0 | 0 | 1 |
| XLOC_012760 | CXXC11        | chr2:242811885-242815482 | 0 | 0 | 0 | 1 |
| XLOC_012766 | LOC339822     | chr2:779836-864112       | 0 | 0 | 0 | 1 |

|             |              |                        |   |   |   |   |
|-------------|--------------|------------------------|---|---|---|---|
| XLOC_012767 | PXDN         | chr2:1635658-1748291   | 0 | 0 | 0 | 1 |
| XLOC_012768 | MYT1L        | chr2:1792884-2335045   | 0 | 0 | 0 | 1 |
| XLOC_012772 | LOC100505964 | chr2:4005244-4021622   | 0 | 0 | 0 | 1 |
| XLOC_012773 | LOC727982    | chr2:4675807-4703812   | 0 | 0 | 0 | 1 |
| XLOC_012774 | LINC00487    | chr2:6869299-6910442   | 0 | 0 | 0 | 1 |
| XLOC_012777 | LOC339788    | chr2:8062555-8116945   | 0 | 0 | 0 | 1 |
| XLOC_012778 | LINC00299    | chr2:8147900-8468549   | 0 | 0 | 0 | 1 |
| XLOC_012784 | CYS1         | chr2:10196925-10220538 | 0 | 0 | 0 | 1 |
| XLOC_012785 | MIR4261      | chr2:10281980-10350942 | 0 | 0 | 0 | 1 |
| XLOC_012790 | FLJ33534     | chr2:11239976-11272302 | 0 | 0 | 0 | 1 |
| XLOC_012793 | MIR4429      | chr2:11674241-11782912 | 0 | 0 | 0 | 1 |
| XLOC_012794 | NTSR2        | chr2:11798303-11810329 | 0 | 0 | 0 | 1 |
| XLOC_012795 | MIR4262      | chr2:11977058-11977112 | 0 | 0 | 0 | 1 |
| XLOC_012796 | LOC100506474 | chr2:13106907-13147138 | 0 | 0 | 0 | 1 |
| XLOC_012798 | MYCNOS       | chr2:16080019-16087129 | 0 | 0 | 0 | 1 |
| XLOC_012800 | RAD51AP2     | chr2:17691985-17699706 | 0 | 0 | 0 | 1 |
| XLOC_012803 | OSR1         | chr2:19551245-19558372 | 0 | 0 | 0 | 1 |
| XLOC_012812 | APOB         | chr2:21224300-21266945 | 0 | 0 | 0 | 1 |
| XLOC_012823 | POMC         | chr2:25383721-25391559 | 0 | 0 | 0 | 1 |
| XLOC_012825 | MIR1301      | chr2:25455829-25565459 | 0 | 0 | 0 | 1 |
| XLOC_012836 | C2orf53      | chr2:27359714-27362332 | 0 | 0 | 0 | 1 |
| XLOC_012838 | SLC30A3      | chr2:27477439-27485960 | 0 | 0 | 0 | 1 |
| XLOC_012853 | C2orf71      | chr2:29284555-29297127 | 0 | 0 | 0 | 1 |
| XLOC_012854 | ALK          | chr2:29415639-30144477 | 0 | 0 | 0 | 1 |
| XLOC_012855 | CAPN13       | chr2:30945637-31030311 | 0 | 0 | 0 | 1 |
| XLOC_012856 | GALNT14      | chr2:31133330-31361592 | 0 | 0 | 0 | 1 |
| XLOC_012857 | CAPN14       | chr2:31395921-31440411 | 0 | 0 | 0 | 1 |
| XLOC_012859 | SRD5A2       | chr2:31749655-31806040 | 0 | 0 | 0 | 1 |
| XLOC_012870 | SULT6B1      | chr2:37394962-37415690 | 0 | 0 | 0 | 1 |
| XLOC_012881 | CDKL4        | chr2:39405687-39456673 | 0 | 0 | 0 | 1 |
| XLOC_012884 | SLC8A1       | chr2:40144773-40739575 | 0 | 0 | 0 | 1 |
| XLOC_012885 | C2orf91      | chr2:42162507-42180943 | 0 | 0 | 0 | 1 |
| XLOC_012887 | KCNG3        | chr2:42669156-42721237 | 0 | 0 | 0 | 1 |
| XLOC_012888 | OXER1        | chr2:42989638-42991401 | 0 | 0 | 0 | 1 |
| XLOC_012889 | HAAO         | chr2:42994228-43019751 | 0 | 0 | 0 | 1 |
| XLOC_012892 | LOC728819    | chr2:43864438-43995126 | 0 | 0 | 0 | 1 |
| XLOC_012893 | ABCG5        | chr2:44039610-44065958 | 0 | 0 | 0 | 1 |
| XLOC_012896 | MIR548AD     | chr2:44589042-44999731 | 0 | 0 | 0 | 1 |
| XLOC_012897 | SIX2         | chr2:45232323-45236542 | 0 | 0 | 0 | 1 |
| XLOC_012898 | UNQ6975      | chr2:45401479-45482080 | 0 | 0 | 0 | 1 |
| XLOC_012903 | C2orf61      | chr2:47314129-47382517 | 0 | 0 | 0 | 1 |
| XLOC_012905 | KCNK12       | chr2:47747914-47797470 | 0 | 0 | 0 | 1 |
| XLOC_012907 | LHCGR        | chr2:48757063-49003656 | 0 | 0 | 0 | 1 |
| XLOC_012908 | FSHR         | chr2:49189295-49381666 | 0 | 0 | 0 | 1 |
| XLOC_012911 | MIR3682      | chr2:53897116-54087170 | 0 | 0 | 0 | 1 |
| XLOC_012913 | TSPYL6       | chr2:54342409-54532435 | 0 | 0 | 0 | 1 |
| XLOC_012921 | MIR217       | chr2:56210101-56210211 | 0 | 0 | 0 | 1 |
| XLOC_012922 | MIR216A      | chr2:56216084-56216194 | 0 | 0 | 0 | 1 |
| XLOC_012923 | MIR216B      | chr2:56227848-56227930 | 0 | 0 | 0 | 1 |

|             |              |                          |   |   |   |   |
|-------------|--------------|--------------------------|---|---|---|---|
| XLOC_012925 | MIR4432      | chr2:60614496-60614580   | 0 | 0 | 0 | 1 |
| XLOC_012927 | FLJ16341     | chr2:61074894-61108449   | 0 | 0 | 0 | 1 |
| XLOC_012931 | SNORA70B     | chr2:61404554-61697849   | 0 | 0 | 0 | 1 |
| XLOC_012937 | DBIL5P2      | chr2:63344985-63346677   | 0 | 0 | 0 | 1 |
| XLOC_012941 | LINC00309    | chr2:64412212-64432619   | 0 | 0 | 0 | 1 |
| XLOC_012946 | MIR4778      | chr2:66585380-66585460   | 0 | 0 | 0 | 1 |
| XLOC_012947 | MEIS1-AS3    | chr2:66650474-66660602   | 0 | 0 | 0 | 1 |
| XLOC_012948 | LOC644838    | chr2:67350488-67442451   | 0 | 0 | 0 | 1 |
| XLOC_012952 | CNRIP1       | chr2:68511302-68547183   | 0 | 0 | 0 | 1 |
| XLOC_012954 | BMP10        | chr2:69092612-69098649   | 0 | 0 | 0 | 1 |
| XLOC_012955 | GKN2         | chr2:69172363-69180102   | 0 | 0 | 0 | 1 |
| XLOC_012959 | SNORA36C     | chr2:69685126-69870977   | 0 | 0 | 0 | 1 |
| XLOC_012968 | FIGLA        | chr2:71004441-71017775   | 0 | 0 | 0 | 1 |
| XLOC_012969 | CLEC4F       | chr2:71035775-71047732   | 0 | 0 | 0 | 1 |
| XLOC_012970 | CD207        | chr2:71057342-71062953   | 0 | 0 | 0 | 1 |
| XLOC_012980 | EGR4         | chr2:73518056-73520829   | 0 | 0 | 0 | 1 |
| XLOC_012981 | NAT8         | chr2:73867849-73869537   | 0 | 0 | 0 | 1 |
| XLOC_012982 | NAT8B        | chr2:73927635-73928467   | 0 | 0 | 0 | 1 |
| XLOC_013000 | EVA1A        | chr2:75719443-75796848   | 0 | 0 | 0 | 1 |
| XLOC_013002 | LRRTM4       | chr2:76974849-77749502   | 0 | 0 | 0 | 1 |
| XLOC_013003 | SNAR-H       | chr2:78182032-78182152   | 0 | 0 | 0 | 1 |
| XLOC_013004 | REG1B        | chr2:79312148-79315150   | 0 | 0 | 0 | 1 |
| XLOC_013005 | REG1P        | chr2:79362628-79365553   | 0 | 0 | 0 | 1 |
| XLOC_013007 | MIR4264      | chr2:79740059-80875988   | 0 | 0 | 0 | 1 |
| XLOC_013008 | LRRTM1       | chr2:79740059-80875988   | 0 | 0 | 0 | 1 |
| XLOC_013023 | MIR4779      | chr2:86371054-86422893   | 0 | 0 | 0 | 1 |
| XLOC_013027 | CD8B         | chr2:87042459-87122165   | 0 | 0 | 0 | 1 |
| XLOC_013032 | MIR4780      | chr2:88367298-88412902   | 0 | 0 | 0 | 1 |
| XLOC_013041 | TRIM43B      | chr2:96142714-96150479   | 0 | 0 | 0 | 1 |
| XLOC_013072 | CHST10       | chr2:101008321-101034130 | 0 | 0 | 0 | 1 |
| XLOC_013076 | CREG2        | chr2:101964815-102003965 | 0 | 0 | 0 | 1 |
| XLOC_013077 | RFX8         | chr2:102013822-102091165 | 0 | 0 | 0 | 1 |
| XLOC_013079 | LOC100287010 | chr2:104995307-105024790 | 0 | 0 | 0 | 1 |
| XLOC_013080 | LOC284998    | chr2:105363094-105374177 | 0 | 0 | 0 | 1 |
| XLOC_013081 | LOC100506421 | chr2:105421882-105467934 | 0 | 0 | 0 | 1 |
| XLOC_013084 | LOC285000    | chr2:106209553-106227016 | 0 | 0 | 0 | 1 |
| XLOC_013088 | LOC729121    | chr2:108439519-108442583 | 0 | 0 | 0 | 1 |
| XLOC_013091 | MIR4265      | chr2:109743783-110262207 | 0 | 0 | 0 | 1 |
| XLOC_013092 | MIR4266      | chr2:109743783-110262207 | 0 | 0 | 0 | 1 |
| XLOC_013094 | MIR4267      | chr2:110827537-110827619 | 0 | 0 | 0 | 1 |
| XLOC_013096 | MIR4436B1    | chr2:110841446-110874143 | 0 | 0 | 0 | 1 |
| XLOC_013100 | LIMS3        | chr2:111160495-111230652 | 0 | 0 | 0 | 1 |
| XLOC_013101 | RGPD5,RGPD6  | chr2:111271378-111336309 | 0 | 0 | 0 | 1 |
| XLOC_013103 | MIR4435-1    | chr2:112078588-112078668 | 0 | 0 | 0 | 1 |
| XLOC_013111 | IL1B         | chr2:113587336-113594356 | 0 | 0 | 0 | 1 |
| XLOC_013112 | IL36B        | chr2:113779667-113810440 | 0 | 0 | 0 | 1 |
| XLOC_013117 | MIR4782      | chr2:114471932-114514400 | 0 | 0 | 0 | 1 |
| XLOC_013119 | LOC389023    | chr2:115199898-116602326 | 0 | 0 | 0 | 1 |
| XLOC_013124 | SCTR         | chr2:120197418-120282028 | 0 | 0 | 0 | 1 |

|             |                |                          |   |   |   |   |
|-------------|----------------|--------------------------|---|---|---|---|
| XLOC_013126 | LOC84931       | chr2:121221910-121223925 | 0 | 0 | 0 | 1 |
| XLOC_013131 | CYP27C1        | chr2:127941411-127963343 | 0 | 0 | 0 | 1 |
| XLOC_013134 | MIR4783        | chr2:128175995-128186822 | 0 | 0 | 0 | 1 |
| XLOC_013142 | LOC389033      | chr2:130680434-130691890 | 0 | 0 | 0 | 1 |
| XLOC_013143 | LOC100131320   | chr2:130724164-130740311 | 0 | 0 | 0 | 1 |
| XLOC_013144 | LOC440905      | chr2:130783571-130808704 | 0 | 0 | 0 | 1 |
| XLOC_013145 | POTEF          | chr2:130831107-130886795 | 0 | 0 | 0 | 1 |
| XLOC_013150 | LOC100216479   | chr2:131174325-131186119 | 0 | 0 | 0 | 1 |
| XLOC_013151 | LOC646743,TISP | chr2:131294142-131307488 | 0 | 0 | 0 | 1 |
| XLOC_013152 | CFC1,CFC1B     | chr2:131349737-131357251 | 0 | 0 | 0 | 1 |
| XLOC_013155 | LOC401010      | chr2:132199733-132202467 | 0 | 0 | 0 | 1 |
| XLOC_013157 | MIR4784        | chr2:132202795-132360468 | 0 | 0 | 0 | 1 |
| XLOC_013158 | C2orf27B       | chr2:132552533-132559234 | 0 | 0 | 0 | 1 |
| XLOC_013162 | NCKAP5         | chr2:133429371-134326031 | 0 | 0 | 0 | 1 |
| XLOC_013165 | MAP3K19        | chr2:135722272-135782248 | 0 | 0 | 0 | 1 |
| XLOC_013170 | CXCR4          | chr2:136871918-136875725 | 0 | 0 | 0 | 1 |
| XLOC_013171 | NXP2           | chr2:139426726-139537811 | 0 | 0 | 0 | 1 |
| XLOC_013172 | LRP1B          | chr2:140988995-142889270 | 0 | 0 | 0 | 1 |
| XLOC_013174 | ZEB2           | chr2:145141941-145278465 | 0 | 0 | 0 | 1 |
| XLOC_013186 | RPRM           | chr2:154333851-154335322 | 0 | 0 | 0 | 1 |
| XLOC_013189 | ERMN           | chr2:158175124-158184146 | 0 | 0 | 0 | 1 |
| XLOC_013190 | CYTIP          | chr2:158271130-158300604 | 0 | 0 | 0 | 1 |
| XLOC_013197 | PLA2R1         | chr2:160797259-160919126 | 0 | 0 | 0 | 1 |
| XLOC_013198 | ITGB6          | chr2:160958232-161056590 | 0 | 0 | 0 | 1 |
| XLOC_013200 | MIR4785        | chr2:161128661-161350318 | 0 | 0 | 0 | 1 |
| XLOC_013202 | DPP4           | chr2:162848754-162931052 | 0 | 0 | 0 | 1 |
| XLOC_013203 | GCG            | chr2:162999378-163008914 | 0 | 0 | 0 | 1 |
| XLOC_013206 | KCNH7          | chr2:163227916-163695257 | 0 | 0 | 0 | 1 |
| XLOC_013207 | FIGN           | chr2:164464117-164592513 | 0 | 0 | 0 | 1 |
| XLOC_013208 | GRB14          | chr2:165349322-165478360 | 0 | 0 | 0 | 1 |
| XLOC_013210 | SNORA70F       | chr2:165541257-165697928 | 0 | 0 | 0 | 1 |
| XLOC_013211 | SLC38A11       | chr2:165754708-165812035 | 0 | 0 | 0 | 1 |
| XLOC_013212 | SCN3A          | chr2:165944029-166060577 | 0 | 0 | 0 | 1 |
| XLOC_013216 | SCN1A          | chr2:166845669-167005642 | 0 | 0 | 0 | 1 |
| XLOC_013217 | SCN9A          | chr2:167051696-167232497 | 0 | 0 | 0 | 1 |
| XLOC_013218 | SCN7A          | chr2:167260082-167343481 | 0 | 0 | 0 | 1 |
| XLOC_013222 | ABCB11         | chr2:169779448-169887833 | 0 | 0 | 0 | 1 |
| XLOC_013223 | LRP2           | chr2:169983618-170219122 | 0 | 0 | 0 | 1 |
| XLOC_013239 | CHRNA1         | chr2:175612322-175629200 | 0 | 0 | 0 | 1 |
| XLOC_013242 | MIR933         | chr2:175936977-176032934 | 0 | 0 | 0 | 1 |
| XLOC_013245 | EVX2           | chr2:176944834-176948690 | 0 | 0 | 0 | 1 |
| XLOC_013248 | MIR1246        | chr2:177465707-177465780 | 0 | 0 | 0 | 1 |
| XLOC_013251 | MIR3128        | chr2:178095030-178129859 | 0 | 0 | 0 | 1 |
| XLOC_013262 | MIR1258        | chr2:180306710-180726232 | 0 | 0 | 0 | 1 |
| XLOC_013264 | MIR4437        | chr2:182170319-182170379 | 0 | 0 | 0 | 1 |
| XLOC_013266 | NEUROD1        | chr2:182540832-182545392 | 0 | 0 | 0 | 1 |
| XLOC_013267 | PDE1A          | chr2:183004761-183387572 | 0 | 0 | 0 | 1 |
| XLOC_013270 | ZSWIM2         | chr2:187692206-187713897 | 0 | 0 | 0 | 1 |
| XLOC_013273 | DIRC1          | chr2:189598464-189654831 | 0 | 0 | 0 | 1 |

|             |              |                          |   |   |   |   |
|-------------|--------------|--------------------------|---|---|---|---|
| XLOC_013274 | MIR1245B     | chr2:189839098-189877472 | 0 | 0 | 0 | 1 |
| XLOC_013276 | MIR3129      | chr2:189896640-190044605 | 0 | 0 | 0 | 1 |
| XLOC_013277 | SLC40A1      | chr2:190425315-190445537 | 0 | 0 | 0 | 1 |
| XLOC_013285 | SDPR         | chr2:192699031-192712006 | 0 | 0 | 0 | 1 |
| XLOC_013286 | TMEFF2       | chr2:192814746-193059644 | 0 | 0 | 0 | 1 |
| XLOC_013308 | CFLAR-AS1    | chr2:201980876-202037411 | 0 | 0 | 0 | 1 |
| XLOC_013323 | DYTN         | chr2:207516344-207583120 | 0 | 0 | 0 | 1 |
| XLOC_013327 | MIR2355      | chr2:207938861-208031970 | 0 | 0 | 0 | 1 |
| XLOC_013331 | CRYGD        | chr2:208983852-209021486 | 0 | 0 | 0 | 1 |
| XLOC_013332 | CRYGC        | chr2:208983852-209021486 | 0 | 0 | 0 | 1 |
| XLOC_013333 | CRYGB        | chr2:208983852-209021486 | 0 | 0 | 0 | 1 |
| XLOC_013334 | CRYGA        | chr2:209025463-209028297 | 0 | 0 | 0 | 1 |
| XLOC_013335 | C2orf80      | chr2:209030070-209054773 | 0 | 0 | 0 | 1 |
| XLOC_013338 | ACADL        | chr2:211052715-211090215 | 0 | 0 | 0 | 1 |
| XLOC_013339 | MYL1         | chr2:211154867-211179895 | 0 | 0 | 0 | 1 |
| XLOC_013341 | ERBB4        | chr2:212240441-213403352 | 0 | 0 | 0 | 1 |
| XLOC_013342 | MIR548F2     | chr2:212240441-213403352 | 0 | 0 | 0 | 1 |
| XLOC_013343 | MIR4776-2    | chr2:213790980-213791060 | 0 | 0 | 0 | 1 |
| XLOC_013353 | IGFBP5       | chr2:217536827-217560272 | 0 | 0 | 0 | 1 |
| XLOC_013354 | TNP1         | chr2:217724181-217724782 | 0 | 0 | 0 | 1 |
| XLOC_013357 | CXCR2P1      | chr2:218899656-218955304 | 0 | 0 | 0 | 1 |
| XLOC_013358 | CXCR1        | chr2:219027567-219031716 | 0 | 0 | 0 | 1 |
| XLOC_013364 | PRKAG3       | chr2:219687105-219696512 | 0 | 0 | 0 | 1 |
| XLOC_013365 | FEV          | chr2:219845808-219850379 | 0 | 0 | 0 | 1 |
| XLOC_013366 | CRYBA2       | chr2:219854911-219858127 | 0 | 0 | 0 | 1 |
| XLOC_013367 | MIR375       | chr2:219866366-219866430 | 0 | 0 | 0 | 1 |
| XLOC_013370 | MIR3131      | chr2:219919141-219925238 | 0 | 0 | 0 | 1 |
| XLOC_013379 | MIR153-1     | chr2:220154344-220174295 | 0 | 0 | 0 | 1 |
| XLOC_013380 | RESP18       | chr2:220192130-220197899 | 0 | 0 | 0 | 1 |
| XLOC_013383 | MIR3132      | chr2:220408744-220415317 | 0 | 0 | 0 | 1 |
| XLOC_013385 | MIR4268      | chr2:220771222-220771286 | 0 | 0 | 0 | 1 |
| XLOC_013387 | PAX3         | chr2:223064605-223169936 | 0 | 0 | 0 | 1 |
| XLOC_013389 | SCG2         | chr2:224461657-224467217 | 0 | 0 | 0 | 1 |
| XLOC_013395 | DOCK10       | chr2:225629806-225907330 | 0 | 0 | 0 | 1 |
| XLOC_013396 | MIR4439      | chr2:225629806-225907330 | 0 | 0 | 0 | 1 |
| XLOC_013397 | MIR5702      | chr2:227523425-227523509 | 0 | 0 | 0 | 1 |
| XLOC_013401 | C2orf83      | chr2:228474805-228498036 | 0 | 0 | 0 | 1 |
| XLOC_013403 | SPHKAP       | chr2:228844669-229046361 | 0 | 0 | 0 | 1 |
| XLOC_013404 | PID1         | chr2:229888688-230136057 | 0 | 0 | 0 | 1 |
| XLOC_013405 | DNER         | chr2:230222344-230579286 | 0 | 0 | 0 | 1 |
| XLOC_013415 | SNORD20      | chr2:232319458-232329205 | 0 | 0 | 0 | 1 |
| XLOC_013416 | SNORD82      | chr2:232319458-232329205 | 0 | 0 | 0 | 1 |
| XLOC_013418 | NMUR1        | chr2:232387870-232395182 | 0 | 0 | 0 | 1 |
| XLOC_013420 | MIR1471      | chr2:232756951-232757008 | 0 | 0 | 0 | 1 |
| XLOC_013421 | NPPC         | chr2:232786804-232791038 | 0 | 0 | 0 | 1 |
| XLOC_013422 | ECEL1P2      | chr2:233250459-233251754 | 0 | 0 | 0 | 1 |
| XLOC_013423 | ECEL1        | chr2:233344536-233352532 | 0 | 0 | 0 | 1 |
| XLOC_013428 | DNAJB3       | chr2:234526290-234681951 | 0 | 0 | 0 | 1 |
| XLOC_013429 | LOC100286922 | chr2:234526290-234681951 | 0 | 0 | 0 | 1 |

|             |              |                          |   |   |   |   |
|-------------|--------------|--------------------------|---|---|---|---|
| XLOC_013433 | GBX2         | chr2:237074306-237076652 | 0 | 0 | 0 | 1 |
| XLOC_013435 | IQCA1        | chr2:237232789-237416178 | 0 | 0 | 0 | 1 |
| XLOC_013439 | LOC151174    | chr2:239133753-239140318 | 0 | 0 | 0 | 1 |
| XLOC_013443 | FLJ43879     | chr2:239840997-239847965 | 0 | 0 | 0 | 1 |
| XLOC_013445 | MIR4440      | chr2:239969863-240322643 | 0 | 0 | 0 | 1 |
| XLOC_013446 | MIR4441      | chr2:239969863-240322643 | 0 | 0 | 0 | 1 |
| XLOC_013448 | MIR2467      | chr2:239969863-240322643 | 0 | 0 | 0 | 1 |
| XLOC_013449 | MIR4786      | chr2:240882431-240882511 | 0 | 0 | 0 | 1 |
| XLOC_013451 | OR6B2        | chr2:240968907-240969846 | 0 | 0 | 0 | 1 |
| XLOC_013452 | PRR21        | chr2:240981229-240982399 | 0 | 0 | 0 | 1 |
| XLOC_013453 | OR6B3        | chr2:240984493-240985489 | 0 | 0 | 0 | 1 |
| XLOC_013455 | OTOS         | chr2:241078445-241080073 | 0 | 0 | 0 | 1 |
| XLOC_013458 | AQP12B       | chr2:241615834-241622317 | 0 | 0 | 0 | 1 |
| XLOC_013459 | KIF1A        | chr2:241653180-241759725 | 0 | 0 | 0 | 1 |
| XLOC_013461 | LOC200772    | chr2:241894035-241906868 | 0 | 0 | 0 | 1 |
| XLOC_013470 | DEFB125      | chr20:68350-77296        | 0 | 0 | 0 | 1 |
| XLOC_013471 | DEFB126      | chr20:123251-126392      | 0 | 0 | 0 | 1 |
| XLOC_013472 | DEFB127      | chr20:138110-139804      | 0 | 0 | 0 | 1 |
| XLOC_013473 | DEFB129      | chr20:207898-210527      | 0 | 0 | 0 | 1 |
| XLOC_013474 | DEFB132      | chr20:238376-241736      | 0 | 0 | 0 | 1 |
| XLOC_013489 | TGM6         | chr20:2361553-2413399    | 0 | 0 | 0 | 1 |
| XLOC_013492 | SNORD110     | chr20:2633177-2639039    | 0 | 0 | 0 | 1 |
| XLOC_013493 | SNORA51      | chr20:2633177-2639039    | 0 | 0 | 0 | 1 |
| XLOC_013494 | SNORD56      | chr20:2633177-2639039    | 0 | 0 | 0 | 1 |
| XLOC_013495 | SNORD57      | chr20:2633177-2639039    | 0 | 0 | 0 | 1 |
| XLOC_013497 | C2orf141     | chr20:2795632-2796476    | 0 | 0 | 0 | 1 |
| XLOC_013498 | TMEM239      | chr20:2796975-2797804    | 0 | 0 | 0 | 1 |
| XLOC_013511 | MIR103A2     | chr20:3869485-3904502    | 0 | 0 | 0 | 1 |
| XLOC_013515 | PRND         | chr20:4702555-4709106    | 0 | 0 | 0 | 1 |
| XLOC_013520 | CHGB         | chr20:5891973-5906005    | 0 | 0 | 0 | 1 |
| XLOC_013524 | PLCB1        | chr20:8113295-8865547    | 0 | 0 | 0 | 1 |
| XLOC_013526 | LAMP5        | chr20:9495004-9511171    | 0 | 0 | 0 | 1 |
| XLOC_013527 | ANKEF1       | chr20:10004459-10288066  | 0 | 0 | 0 | 1 |
| XLOC_013531 | SPTLC3       | chr20:12989626-13147411  | 0 | 0 | 0 | 1 |
| XLOC_013532 | ISM1         | chr20:13202417-13281297  | 0 | 0 | 0 | 1 |
| XLOC_013536 | OTOR         | chr20:16729002-16732809  | 0 | 0 | 0 | 1 |
| XLOC_013537 | PCSK2        | chr20:17206751-17465222  | 0 | 0 | 0 | 1 |
| XLOC_013539 | BANF2        | chr20:17674319-17716517  | 0 | 0 | 0 | 1 |
| XLOC_013543 | LINC00851    | chr20:18359692-18362127  | 0 | 0 | 0 | 1 |
| XLOC_013545 | MIR3192      | chr20:18448032-18465286  | 0 | 0 | 0 | 1 |
| XLOC_013550 | SCP2D1       | chr20:18790371-18810839  | 0 | 0 | 0 | 1 |
| XLOC_013559 | LOC100270679 | chr20:22034727-22055292  | 0 | 0 | 0 | 1 |
| XLOC_013560 | SSTR4        | chr20:23016056-23017314  | 0 | 0 | 0 | 1 |
| XLOC_013563 | CSTL1        | chr20:23420321-23425567  | 0 | 0 | 0 | 1 |
| XLOC_013564 | CST8         | chr20:23471765-23476655  | 0 | 0 | 0 | 1 |
| XLOC_013565 | CST13P       | chr20:23499782-23522655  | 0 | 0 | 0 | 1 |
| XLOC_013566 | FLJ33581     | chr20:24180402-24205224  | 0 | 0 | 0 | 1 |
| XLOC_013567 | SYNDIG1      | chr20:24449834-24647167  | 0 | 0 | 0 | 1 |
| XLOC_013575 | DEFB115      | chr20:29845466-29847435  | 0 | 0 | 0 | 1 |

|             |              |                         |   |   |   |   |
|-------------|--------------|-------------------------|---|---|---|---|
| XLOC_013576 | DEFB118      | chr20:29956420-29961705 | 0 | 0 | 0 | 1 |
| XLOC_013577 | DEFB123      | chr20:30028410-30038060 | 0 | 0 | 0 | 1 |
| XLOC_013578 | REM1         | chr20:30063104-30072708 | 0 | 0 | 0 | 1 |
| XLOC_013579 | LINC00028    | chr20:30073580-30075377 | 0 | 0 | 0 | 1 |
| XLOC_013583 | MIR3193      | chr20:30194988-30195043 | 0 | 0 | 0 | 1 |
| XLOC_013584 | COX4I2       | chr20:30225690-30232800 | 0 | 0 | 0 | 1 |
| XLOC_013588 | XKR7         | chr20:30555804-30586256 | 0 | 0 | 0 | 1 |
| XLOC_013595 | LOC149950    | chr20:31175280-31196694 | 0 | 0 | 0 | 1 |
| XLOC_013598 | BPIFB2       | chr20:31595383-31611515 | 0 | 0 | 0 | 1 |
| XLOC_013599 | BPIFB6       | chr20:31619453-31631853 | 0 | 0 | 0 | 1 |
| XLOC_013600 | BPIFB3       | chr20:31643229-31661434 | 0 | 0 | 0 | 1 |
| XLOC_013601 | BPIFB4       | chr20:31669317-31699557 | 0 | 0 | 0 | 1 |
| XLOC_013602 | BPIFA2       | chr20:31755959-31769223 | 0 | 0 | 0 | 1 |
| XLOC_013603 | BPIFA4P      | chr20:31781410-31798268 | 0 | 0 | 0 | 1 |
| XLOC_013604 | BPIFA3       | chr20:31805134-31815559 | 0 | 0 | 0 | 1 |
| XLOC_013605 | BPIFA1       | chr20:31823801-31831115 | 0 | 0 | 0 | 1 |
| XLOC_013606 | BPIFB1       | chr20:31870940-31897684 | 0 | 0 | 0 | 1 |
| XLOC_013613 | MIR4755      | chr20:32581457-32670991 | 0 | 0 | 0 | 1 |
| XLOC_013616 | MIR644A      | chr20:32951040-33099198 | 0 | 0 | 0 | 1 |
| XLOC_013622 | MIR499A      | chr20:33543703-33680618 | 0 | 0 | 0 | 1 |
| XLOC_013645 | BPI          | chr20:36932551-36965905 | 0 | 0 | 0 | 1 |
| XLOC_013646 | LBP          | chr20:36974813-37005653 | 0 | 0 | 0 | 1 |
| XLOC_013648 | SNORA39      | chr20:37075296-37079564 | 0 | 0 | 0 | 1 |
| XLOC_013649 | SNORA60      | chr20:37075296-37079564 | 0 | 0 | 0 | 1 |
| XLOC_013653 | SLC32A1      | chr20:37353104-37358015 | 0 | 0 | 0 | 1 |
| XLOC_013655 | PPP1R16B     | chr20:37434347-37551667 | 0 | 0 | 0 | 1 |
| XLOC_013669 | R3HDML       | chr20:42965625-42979875 | 0 | 0 | 0 | 1 |
| XLOC_013671 | MIR3646      | chr20:42984440-43061485 | 0 | 0 | 0 | 1 |
| XLOC_013674 | WISP2        | chr20:43343884-43356452 | 0 | 0 | 0 | 1 |
| XLOC_013680 | SEMG1        | chr20:43835637-43838414 | 0 | 0 | 0 | 1 |
| XLOC_013681 | SEMG2        | chr20:43850009-43853099 | 0 | 0 | 0 | 1 |
| XLOC_013682 | RBPJL        | chr20:43922086-43946464 | 0 | 0 | 0 | 1 |
| XLOC_013686 | WFDC10A      | chr20:44236577-44259907 | 0 | 0 | 0 | 1 |
| XLOC_013688 | SPINT4       | chr20:44350987-44354335 | 0 | 0 | 0 | 1 |
| XLOC_013696 | MMP9         | chr20:44637546-44645200 | 0 | 0 | 0 | 1 |
| XLOC_013700 | EYA2         | chr20:45523262-45817492 | 0 | 0 | 0 | 1 |
| XLOC_013701 | MIR3616      | chr20:45523262-45817492 | 0 | 0 | 0 | 1 |
| XLOC_013702 | LOC100131496 | chr20:45838380-45985474 | 0 | 0 | 0 | 1 |
| XLOC_013709 | SNORD12C     | chr20:47862438-47905795 | 0 | 0 | 0 | 1 |
| XLOC_013710 | SNORD12B     | chr20:47862438-47905795 | 0 | 0 | 0 | 1 |
| XLOC_013711 | SNORD12      | chr20:47862438-47905795 | 0 | 0 | 0 | 1 |
| XLOC_013718 | MIR645       | chr20:49202322-49202416 | 0 | 0 | 0 | 1 |
| XLOC_013724 | DOK5         | chr20:53092265-53267710 | 0 | 0 | 0 | 1 |
| XLOC_013725 | MC3R         | chr20:54823787-54824871 | 0 | 0 | 0 | 1 |
| XLOC_013733 | SPO11        | chr20:55904830-55998278 | 0 | 0 | 0 | 1 |
| XLOC_013734 | MIR5095      | chr20:55904830-55998278 | 0 | 0 | 0 | 1 |
| XLOC_013737 | PCK1         | chr20:56136136-56141513 | 0 | 0 | 0 | 1 |
| XLOC_013738 | MIR4532      | chr20:56470449-56470500 | 0 | 0 | 0 | 1 |
| XLOC_013739 | C20orf85     | chr20:56725982-56736183 | 0 | 0 | 0 | 1 |

|             |                 |                         |   |   |   |   |
|-------------|-----------------|-------------------------|---|---|---|---|
| XLOC_013742 | APCDD1L-AS1     | chr20:57090434-57194948 | 0 | 0 | 0 | 1 |
| XLOC_013747 | ZNF831          | chr20:57766074-57834167 | 0 | 0 | 0 | 1 |
| XLOC_013748 | EDN3            | chr20:57875498-57901047 | 0 | 0 | 0 | 1 |
| XLOC_013749 | PHACTR3         | chr20:58152563-58422766 | 0 | 0 | 0 | 1 |
| XLOC_013752 | C20orf197       | chr20:58630979-58648008 | 0 | 0 | 0 | 1 |
| XLOC_013754 | MIR4533         | chr20:59053168-59053239 | 0 | 0 | 0 | 1 |
| XLOC_013762 | C20orf166       | chr20:61141437-61167971 | 0 | 0 | 0 | 1 |
| XLOC_013763 | MIR1-1          | chr20:61141437-61167971 | 0 | 0 | 0 | 1 |
| XLOC_013772 | LOC63930        | chr20:61640734-61716423 | 0 | 0 | 0 | 1 |
| XLOC_013773 | LOC100144597    | chr20:61640734-61716423 | 0 | 0 | 0 | 1 |
| XLOC_013774 | HAR1A           | chr20:61726844-61735737 | 0 | 0 | 0 | 1 |
| XLOC_013775 | MIR124-3        | chr20:61809851-61809938 | 0 | 0 | 0 | 1 |
| XLOC_013777 | MIR3196         | chr20:61867275-61871854 | 0 | 0 | 0 | 1 |
| XLOC_013778 | FLJ16779        | chr20:61872135-61892967 | 0 | 0 | 0 | 1 |
| XLOC_013780 | MIR4326         | chr20:61904164-61921142 | 0 | 0 | 0 | 1 |
| XLOC_013781 | COL20A1         | chr20:61924537-61962285 | 0 | 0 | 0 | 1 |
| XLOC_013791 | MIR941-1,MIR941 | chr20:62526454-62567384 | 0 | 0 | 0 | 1 |
| XLOC_013792 | MIR941-2,MIR941 | chr20:62526454-62567384 | 0 | 0 | 0 | 1 |
| XLOC_013801 | DEFB128         | chr20:168526-170264     | 0 | 0 | 0 | 1 |
| XLOC_013807 | SCRT2           | chr20:642239-656823     | 0 | 0 | 0 | 1 |
| XLOC_013810 | RSPO4           | chr20:939095-982907     | 0 | 0 | 0 | 1 |
| XLOC_013814 | SIRPB2          | chr20:1455235-1472233   | 0 | 0 | 0 | 1 |
| XLOC_013815 | SIRPD           | chr20:1514896-1538343   | 0 | 0 | 0 | 1 |
| XLOC_013816 | SIRPB1          | chr20:1545028-1600689   | 0 | 0 | 0 | 1 |
| XLOC_013817 | SIRPG           | chr20:1609797-1638425   | 0 | 0 | 0 | 1 |
| XLOC_013818 | LOC100289473    | chr20:1754010-1760392   | 0 | 0 | 0 | 1 |
| XLOC_013819 | PDYN            | chr20:1959401-1974931   | 0 | 0 | 0 | 1 |
| XLOC_013821 | SNORD119        | chr20:2442280-2451499   | 0 | 0 | 0 | 1 |
| XLOC_013824 | CPXM1           | chr20:2774714-2781292   | 0 | 0 | 0 | 1 |
| XLOC_013826 | AVP             | chr20:3063201-3065370   | 0 | 0 | 0 | 1 |
| XLOC_013831 | C20orf194       | chr20:3229947-3388309   | 0 | 0 | 0 | 1 |
| XLOC_013833 | ADAM33          | chr20:3648619-3662738   | 0 | 0 | 0 | 1 |
| XLOC_013838 | MIR103B2        | chr20:3869485-3904502   | 0 | 0 | 0 | 1 |
| XLOC_013840 | ADRA1D          | chr20:4201277-4229659   | 0 | 0 | 0 | 1 |
| XLOC_013841 | PRNT            | chr20:4711927-4721314   | 0 | 0 | 0 | 1 |
| XLOC_013846 | PROKR2          | chr20:5282685-5295015   | 0 | 0 | 0 | 1 |
| XLOC_013853 | HAO1            | chr20:7863630-7921093   | 0 | 0 | 0 | 1 |
| XLOC_013855 | PAK7            | chr20:9518036-9819687   | 0 | 0 | 0 | 1 |
| XLOC_013856 | SNAP25-AS1      | chr20:10004459-10288066 | 0 | 0 | 0 | 1 |
| XLOC_013859 | LOC339593       | chr20:11247306-11254031 | 0 | 0 | 0 | 1 |
| XLOC_013860 | ISM1-AS1        | chr20:13202417-13281297 | 0 | 0 | 0 | 1 |
| XLOC_013863 | SEL1L2          | chr20:13830043-13975979 | 0 | 0 | 0 | 1 |
| XLOC_013864 | FLRT3           | chr20:13976145-16033841 | 0 | 0 | 0 | 1 |
| XLOC_013865 | MACROD2-AS1     | chr20:13976145-16033841 | 0 | 0 | 0 | 1 |
| XLOC_013875 | C20orf78        | chr20:18790371-18810839 | 0 | 0 | 0 | 1 |
| XLOC_013876 | LOC100130264    | chr20:19193289-19703541 | 0 | 0 | 0 | 1 |
| XLOC_013879 | NKX2-4          | chr20:21376004-21378047 | 0 | 0 | 0 | 1 |
| XLOC_013880 | NKX2-2          | chr20:21491659-21494664 | 0 | 0 | 0 | 1 |
| XLOC_013881 | LOC284788       | chr20:22380970-22401281 | 0 | 0 | 0 | 1 |



|             |           |                         |   |   |   |   |
|-------------|-----------|-------------------------|---|---|---|---|
| XLOC_013882 | LINC00261 | chr20:22541191-22559280 | 0 | 0 | 0 | 1 |
| XLOC_013883 | FOXA2     | chr20:22561641-22566101 | 0 | 0 | 0 | 1 |
| XLOC_013884 | THBD      | chr20:23026269-23030301 | 0 | 0 | 0 | 1 |
| XLOC_013886 | LINC00656 | chr20:23105704-23113273 | 0 | 0 | 0 | 1 |
| XLOC_013888 | CST11     | chr20:23431040-23433482 | 0 | 0 | 0 | 1 |
| XLOC_013889 | CST9L     | chr20:23545369-23549386 | 0 | 0 | 0 | 1 |
| XLOC_013890 | CST9      | chr20:23583046-23586610 | 0 | 0 | 0 | 1 |
| XLOC_013892 | CST4      | chr20:23666276-23669662 | 0 | 0 | 0 | 1 |
| XLOC_013893 | CST1      | chr20:23728189-23731574 | 0 | 0 | 0 | 1 |
| XLOC_013894 | CST2      | chr20:23804403-23807312 | 0 | 0 | 0 | 1 |
| XLOC_013895 | CST5      | chr20:23856571-23860380 | 0 | 0 | 0 | 1 |
| XLOC_013899 | VSX1      | chr20:25051520-25063015 | 0 | 0 | 0 | 1 |
| XLOC_013900 | LOC284798 | chr20:25121433-25129426 | 0 | 0 | 0 | 1 |
| XLOC_013910 | DEFB116   | chr20:29891014-29896388 | 0 | 0 | 0 | 1 |
| XLOC_013911 | DEFB119   | chr20:29964965-29978452 | 0 | 0 | 0 | 1 |
| XLOC_013912 | DEFB121   | chr20:29992647-30000641 | 0 | 0 | 0 | 1 |
| XLOC_013913 | DEFB122   | chr20:30009241-30016983 | 0 | 0 | 0 | 1 |
| XLOC_013914 | DEFB124   | chr20:30053308-30060816 | 0 | 0 | 0 | 1 |
| XLOC_013917 | FOXS1     | chr20:30432102-30433420 | 0 | 0 | 0 | 1 |
| XLOC_013923 | C20orf203 | chr20:31219426-31239783 | 0 | 0 | 0 | 1 |
| XLOC_013925 | SUN5      | chr20:31571580-31592239 | 0 | 0 | 0 | 1 |
| XLOC_013935 | HMGB3P1   | chr20:33421377-33422265 | 0 | 0 | 0 | 1 |
| XLOC_013936 | GGT7      | chr20:33432522-33460661 | 0 | 0 | 0 | 1 |
| XLOC_013938 | MIR499B   | chr20:33543703-33680618 | 0 | 0 | 0 | 1 |
| XLOC_013945 | C20orf173 | chr20:34108569-34117481 | 0 | 0 | 0 | 1 |
| XLOC_013958 | GHRH      | chr20:35879489-35885299 | 0 | 0 | 0 | 1 |
| XLOC_013960 | LINC00489 | chr20:36247699-36251521 | 0 | 0 | 0 | 1 |
| XLOC_013969 | LOC339568 | chr20:37842423-37853391 | 0 | 0 | 0 | 1 |
| XLOC_013974 | PTPRT     | chr20:40701391-41818557 | 0 | 0 | 0 | 1 |
| XLOC_013981 | LOC79015  | chr20:43285091-43300380 | 0 | 0 | 0 | 1 |
| XLOC_013986 | WFDC5     | chr20:43738092-43743813 | 0 | 0 | 0 | 1 |
| XLOC_013987 | WFDC12    | chr20:43752066-43753106 | 0 | 0 | 0 | 1 |
| XLOC_013988 | SLPI      | chr20:43880878-43883206 | 0 | 0 | 0 | 1 |
| XLOC_013992 | SPINT3    | chr20:44141100-44144264 | 0 | 0 | 0 | 1 |
| XLOC_013994 | WFDC8     | chr20:44179790-44207965 | 0 | 0 | 0 | 1 |
| XLOC_013995 | WFDC9     | chr20:44236577-44259907 | 0 | 0 | 0 | 1 |
| XLOC_013996 | WFDC11    | chr20:44277201-44298878 | 0 | 0 | 0 | 1 |
| XLOC_014006 | CDH22     | chr20:44802371-44937137 | 0 | 0 | 0 | 1 |
| XLOC_014009 | ZNF663    | chr20:45085131-45086282 | 0 | 0 | 0 | 1 |
| XLOC_014010 | MKRN7P    | chr20:45092298-45093931 | 0 | 0 | 0 | 1 |
| XLOC_014011 | ZNF334    | chr20:45128268-45142198 | 0 | 0 | 0 | 1 |
| XLOC_014012 | OCSTAMP   | chr20:45169669-45179213 | 0 | 0 | 0 | 1 |
| XLOC_014019 | KCNB1     | chr20:47988504-48099181 | 0 | 0 | 0 | 1 |
| XLOC_014023 | LINC00651 | chr20:48657243-48658166 | 0 | 0 | 0 | 1 |
| XLOC_014030 | MIR3194   | chr20:50003493-50179370 | 0 | 0 | 0 | 1 |
| XLOC_014035 | SUMO1P1   | chr20:52491039-52492248 | 0 | 0 | 0 | 1 |
| XLOC_014037 | MIR4756   | chr20:52560078-52687304 | 0 | 0 | 0 | 1 |
| XLOC_014039 | CBLN4     | chr20:54572412-54580528 | 0 | 0 | 0 | 1 |
| XLOC_014042 | BMP7      | chr20:55743808-55841707 | 0 | 0 | 0 | 1 |

|             |               |                         |   |   |   |   |
|-------------|---------------|-------------------------|---|---|---|---|
| XLOC_014043 | MIR4325       | chr20:55896557-55896647 | 0 | 0 | 0 | 1 |
| XLOC_014045 | CTCFL         | chr20:56071020-56100708 | 0 | 0 | 0 | 1 |
| XLOC_014046 | ZBP1          | chr20:56178901-56195632 | 0 | 0 | 0 | 1 |
| XLOC_014049 | APCDD1L       | chr20:57034425-57089949 | 0 | 0 | 0 | 1 |
| XLOC_014050 | MIR296        | chr20:57392669-57392749 | 0 | 0 | 0 | 1 |
| XLOC_014051 | MIR298        | chr20:57393280-57393368 | 0 | 0 | 0 | 1 |
| XLOC_014052 | GNAS-AS1      | chr20:57393972-57486250 | 0 | 0 | 0 | 1 |
| XLOC_014055 | LOC100506384  | chr20:58152563-58422766 | 0 | 0 | 0 | 1 |
| XLOC_014058 | MIR1257       | chr20:60528601-60528718 | 0 | 0 | 0 | 1 |
| XLOC_014064 | RBBP8NL       | chr20:60985292-61002629 | 0 | 0 | 0 | 1 |
| XLOC_014066 | C20orf166-AS1 | chr20:61141437-61167971 | 0 | 0 | 0 | 1 |
| XLOC_014071 | BHLHE23       | chr20:61637330-61638387 | 0 | 0 | 0 | 1 |
| XLOC_014072 | LINC00029     | chr20:61640734-61716423 | 0 | 0 | 0 | 1 |
| XLOC_014073 | HAR1B         | chr20:61726844-61735737 | 0 | 0 | 0 | 1 |
| XLOC_014075 | NKAIN4        | chr20:61872135-61892967 | 0 | 0 | 0 | 1 |
| XLOC_014076 | CHRNA4        | chr20:61974661-61992748 | 0 | 0 | 0 | 1 |
| XLOC_014087 | MIR1914       | chr20:62571181-62601223 | 0 | 0 | 0 | 1 |
| XLOC_014088 | MIR647        | chr20:62571181-62601223 | 0 | 0 | 0 | 1 |
| XLOC_014091 | SOX18         | chr20:62679078-62680979 | 0 | 0 | 0 | 1 |
| XLOC_014093 | C20orf201     | chr20:62711470-62731996 | 0 | 0 | 0 | 1 |
| XLOC_014094 | NPBWR2        | chr20:62737182-62738184 | 0 | 0 | 0 | 1 |
| XLOC_014096 | MIR3687       | chr21:9826202-9826263   | 0 | 0 | 0 | 1 |
| XLOC_014098 | POTED         | chr21:14982497-15013906 | 0 | 0 | 0 | 1 |
| XLOC_014099 | RBM11         | chr21:15588465-15600693 | 0 | 0 | 0 | 1 |
| XLOC_014100 | ABCC13        | chr21:15646119-15673692 | 0 | 0 | 0 | 1 |
| XLOC_014101 | SAMSN1-AS1    | chr21:15857548-16015428 | 0 | 0 | 0 | 1 |
| XLOC_014103 | LINC00478     | chr21:17442841-17982094 | 0 | 0 | 0 | 1 |
| XLOC_014104 | MIR99A        | chr21:17442841-17982094 | 0 | 0 | 0 | 1 |
| XLOC_014105 | MIRLET7C      | chr21:17442841-17982094 | 0 | 0 | 0 | 1 |
| XLOC_014106 | MIR125B2      | chr21:17442841-17982094 | 0 | 0 | 0 | 1 |
| XLOC_014107 | C21orf37      | chr21:18811207-18821503 | 0 | 0 | 0 | 1 |
| XLOC_014110 | NCAM2         | chr21:22370632-22912517 | 0 | 0 | 0 | 1 |
| XLOC_014111 | RNU6-67       | chr21:22370632-22912517 | 0 | 0 | 0 | 1 |
| XLOC_014112 | LINC00308     | chr21:23470935-23488847 | 0 | 0 | 0 | 1 |
| XLOC_014113 | LOC339622     | chr21:26212863-26430056 | 0 | 0 | 0 | 1 |
| XLOC_014117 | MIR4759       | chr21:28290230-28339439 | 0 | 0 | 0 | 1 |
| XLOC_014118 | LINC00113     | chr21:28659821-29283529 | 0 | 0 | 0 | 1 |
| XLOC_014119 | LINC00314     | chr21:29385681-29395528 | 0 | 0 | 0 | 1 |
| XLOC_014126 | GRIK1-AS1     | chr21:30909253-31312282 | 0 | 0 | 0 | 1 |
| XLOC_014127 | KRTAP13-1     | chr21:31768391-31769138 | 0 | 0 | 0 | 1 |
| XLOC_014128 | KRTAP13-4     | chr21:31802593-31803076 | 0 | 0 | 0 | 1 |
| XLOC_014129 | KRTAP15-1     | chr21:31812645-31813098 | 0 | 0 | 0 | 1 |
| XLOC_014130 | KRTAP6-3      | chr21:31964758-31965374 | 0 | 0 | 0 | 1 |
| XLOC_014131 | KRTAP22-1     | chr21:31973439-31973586 | 0 | 0 | 0 | 1 |
| XLOC_014132 | KRTAP20-1     | chr21:31988773-31988944 | 0 | 0 | 0 | 1 |
| XLOC_014133 | KRTAP20-4     | chr21:31992945-31993169 | 0 | 0 | 0 | 1 |
| XLOC_014134 | KRTAP20-2     | chr21:32007582-32007780 | 0 | 0 | 0 | 1 |
| XLOC_014135 | KRTAP20-3     | chr21:32015182-32015455 | 0 | 0 | 0 | 1 |
| XLOC_014143 | OLIG2         | chr21:34398215-34401503 | 0 | 0 | 0 | 1 |

|             |               |                         |   |   |   |   |
|-------------|---------------|-------------------------|---|---|---|---|
| XLOC_014144 | OLIG1         | chr21:34442449-34444728 | 0 | 0 | 0 | 1 |
| XLOC_014156 | CLIC6         | chr21:36041687-36090519 | 0 | 0 | 0 | 1 |
| XLOC_014158 | MIR802        | chr21:37093012-37093106 | 0 | 0 | 0 | 1 |
| XLOC_014169 | DSCR8         | chr21:39493544-39528605 | 0 | 0 | 0 | 1 |
| XLOC_014170 | DSCR10        | chr21:39578249-39580738 | 0 | 0 | 0 | 1 |
| XLOC_014171 | KCNJ15        | chr21:39601836-39673746 | 0 | 0 | 0 | 1 |
| XLOC_014173 | BRWD1-AS1     | chr21:40687632-40695144 | 0 | 0 | 0 | 1 |
| XLOC_014179 | DSCAM-AS1     | chr21:41384342-42219039 | 0 | 0 | 0 | 1 |
| XLOC_014180 | MIR3197       | chr21:42539483-42539556 | 0 | 0 | 0 | 1 |
| XLOC_014185 | LINC00111     | chr21:43099461-43117496 | 0 | 0 | 0 | 1 |
| XLOC_014186 | LINC00112     | chr21:43136595-43137742 | 0 | 0 | 0 | 1 |
| XLOC_014188 | UMODL1        | chr21:43483067-43563105 | 0 | 0 | 0 | 1 |
| XLOC_014190 | UBASH3A       | chr21:43823970-43867790 | 0 | 0 | 0 | 1 |
| XLOC_014192 | PDE9A         | chr21:44073861-44195618 | 0 | 0 | 0 | 1 |
| XLOC_014195 | CRYAA         | chr21:44589140-44592913 | 0 | 0 | 0 | 1 |
| XLOC_014204 | AIRE          | chr21:45705720-45718102 | 0 | 0 | 0 | 1 |
| XLOC_014206 | TRPM2         | chr21:45773483-45862964 | 0 | 0 | 0 | 1 |
| XLOC_014209 | KRTAP10-4     | chr21:45917774-46131495 | 0 | 0 | 0 | 1 |
| XLOC_014210 | KRTAP10-7     | chr21:45917774-46131495 | 0 | 0 | 0 | 1 |
| XLOC_014211 | KRTAP10-8     | chr21:45917774-46131495 | 0 | 0 | 0 | 1 |
| XLOC_014212 | KRTAP10-9     | chr21:45917774-46131495 | 0 | 0 | 0 | 1 |
| XLOC_014213 | KRTAP10-10    | chr21:45917774-46131495 | 0 | 0 | 0 | 1 |
| XLOC_014214 | KRTAP10-11    | chr21:45917774-46131495 | 0 | 0 | 0 | 1 |
| XLOC_014215 | KRTAP12-3     | chr21:45917774-46131495 | 0 | 0 | 0 | 1 |
| XLOC_014216 | KRTAP10-12    | chr21:45917774-46131495 | 0 | 0 | 0 | 1 |
| XLOC_014232 | TPTE          | chr21:10906742-10990920 | 0 | 0 | 0 | 1 |
| XLOC_014233 | BAGE,BAGE3,BA | chr21:11020841-11098937 | 0 | 0 | 0 | 1 |
| XLOC_014234 | MIR3156-3     | chr21:14778704-14778781 | 0 | 0 | 0 | 1 |
| XLOC_014236 | ANKRD20A11P   | chr21:15316095-15352765 | 0 | 0 | 0 | 1 |
| XLOC_014237 | LIPI          | chr21:15481134-15579254 | 0 | 0 | 0 | 1 |
| XLOC_014239 | SAMSN1        | chr21:15857548-16015428 | 0 | 0 | 0 | 1 |
| XLOC_014240 | LOC388813     | chr21:15857548-16015428 | 0 | 0 | 0 | 1 |
| XLOC_014244 | CHODL-AS1     | chr21:19207988-19257925 | 0 | 0 | 0 | 1 |
| XLOC_014245 | TMPRSS15      | chr21:19641432-19775970 | 0 | 0 | 0 | 1 |
| XLOC_014246 | LINC00320     | chr21:22114912-22175426 | 0 | 0 | 0 | 1 |
| XLOC_014247 | LINC00317     | chr21:23095612-23109639 | 0 | 0 | 0 | 1 |
| XLOC_014248 | D21S2088E     | chr21:24733425-24757156 | 0 | 0 | 0 | 1 |
| XLOC_014249 | LINC00158     | chr21:26758132-26804013 | 0 | 0 | 0 | 1 |
| XLOC_014254 | CYYR1         | chr21:27838527-27945581 | 0 | 0 | 0 | 1 |
| XLOC_014255 | ADAMTS1       | chr21:28208605-28217728 | 0 | 0 | 0 | 1 |
| XLOC_014257 | MIR5009       | chr21:28659821-29283529 | 0 | 0 | 0 | 1 |
| XLOC_014263 | CLDN17        | chr21:31538240-31538971 | 0 | 0 | 0 | 1 |
| XLOC_014264 | LINC00307     | chr21:31581468-31584101 | 0 | 0 | 0 | 1 |
| XLOC_014265 | CLDN8         | chr21:31586323-31588469 | 0 | 0 | 0 | 1 |
| XLOC_014266 | KRTAP24-1     | chr21:31653626-31655276 | 0 | 0 | 0 | 1 |
| XLOC_014267 | KRTAP25-1     | chr21:31661462-31661832 | 0 | 0 | 0 | 1 |
| XLOC_014268 | KRTAP26-1     | chr21:31691449-31692607 | 0 | 0 | 0 | 1 |
| XLOC_014269 | KRTAP27-1     | chr21:31709330-31710012 | 0 | 0 | 0 | 1 |
| XLOC_014270 | KRTAP23-1     | chr21:31720716-31720924 | 0 | 0 | 0 | 1 |

|             |              |                         |   |   |   |   |
|-------------|--------------|-------------------------|---|---|---|---|
| XLOC_014271 | KRTAP13-2    | chr21:31743708-31744557 | 0 | 0 | 0 | 1 |
| XLOC_014272 | MIR4327      | chr21:31747611-31747696 | 0 | 0 | 0 | 1 |
| XLOC_014273 | KRTAP13-3    | chr21:31797710-31798230 | 0 | 0 | 0 | 1 |
| XLOC_014274 | KRTAP19-1    | chr21:31852363-31852636 | 0 | 0 | 0 | 1 |
| XLOC_014275 | KRTAP19-2    | chr21:31859508-31859667 | 0 | 0 | 0 | 1 |
| XLOC_014276 | KRTAP19-3    | chr21:31863781-31864275 | 0 | 0 | 0 | 1 |
| XLOC_014277 | KRTAP19-4    | chr21:31869173-31869428 | 0 | 0 | 0 | 1 |
| XLOC_014278 | KRTAP19-5    | chr21:31874189-31874408 | 0 | 0 | 0 | 1 |
| XLOC_014279 | KRTAP19-6    | chr21:31913853-31914181 | 0 | 0 | 0 | 1 |
| XLOC_014280 | KRTAP19-7    | chr21:31933416-31933608 | 0 | 0 | 0 | 1 |
| XLOC_014281 | KRTAP22-2    | chr21:31962423-31962716 | 0 | 0 | 0 | 1 |
| XLOC_014282 | KRTAP6-2     | chr21:31971004-31971193 | 0 | 0 | 0 | 1 |
| XLOC_014283 | KRTAP6-1     | chr21:31986004-31986223 | 0 | 0 | 0 | 1 |
| XLOC_014284 | KRTAP21-3    | chr21:32090842-32091095 | 0 | 0 | 0 | 1 |
| XLOC_014285 | KRTAP21-2    | chr21:32119268-32119520 | 0 | 0 | 0 | 1 |
| XLOC_014286 | KRTAP21-1    | chr21:32127456-32127696 | 0 | 0 | 0 | 1 |
| XLOC_014287 | KRTAP8-1     | chr21:32185014-32185570 | 0 | 0 | 0 | 1 |
| XLOC_014288 | KRTAP7-1     | chr21:32201357-32202051 | 0 | 0 | 0 | 1 |
| XLOC_014289 | KRTAP11-1    | chr21:32252963-32253874 | 0 | 0 | 0 | 1 |
| XLOC_014290 | KRTAP19-8    | chr21:32410477-32410795 | 0 | 0 | 0 | 1 |
| XLOC_014293 | LINC00159    | chr21:33452793-33458608 | 0 | 0 | 0 | 1 |
| XLOC_014302 | C21orf54     | chr21:34537775-34542541 | 0 | 0 | 0 | 1 |
| XLOC_014312 | LINC00160    | chr21:36096104-36109479 | 0 | 0 | 0 | 1 |
| XLOC_014314 | RUNX1-IT1    | chr21:36160097-36421595 | 0 | 0 | 0 | 1 |
| XLOC_014315 | LOC100506403 | chr21:36744804-36953062 | 0 | 0 | 0 | 1 |
| XLOC_014323 | KCNJ6        | chr21:38996784-39288741 | 0 | 0 | 0 | 1 |
| XLOC_014324 | DSCR4        | chr21:39426312-39493454 | 0 | 0 | 0 | 1 |
| XLOC_014325 | ERG          | chr21:39739182-40033704 | 0 | 0 | 0 | 1 |
| XLOC_014326 | LINC00114    | chr21:40110878-40145401 | 0 | 0 | 0 | 1 |
| XLOC_014332 | C21orf88     | chr21:40969074-40984749 | 0 | 0 | 0 | 1 |
| XLOC_014333 | DSCAM        | chr21:41384342-42219039 | 0 | 0 | 0 | 1 |
| XLOC_014334 | MIR4760      | chr21:41384342-42219039 | 0 | 0 | 0 | 1 |
| XLOC_014335 | DSCAM-IT1    | chr21:41384342-42219039 | 0 | 0 | 0 | 1 |
| XLOC_014336 | LINC00323    | chr21:42513426-42519991 | 0 | 0 | 0 | 1 |
| XLOC_014338 | TMPRSS2      | chr21:42836477-42880085 | 0 | 0 | 0 | 1 |
| XLOC_014339 | LINC00479    | chr21:43131679-43135935 | 0 | 0 | 0 | 1 |
| XLOC_014344 | C21orf128    | chr21:43483067-43563105 | 0 | 0 | 0 | 1 |
| XLOC_014345 | TFF3         | chr21:43731776-43735706 | 0 | 0 | 0 | 1 |
| XLOC_014346 | TFF2         | chr21:43766466-43771208 | 0 | 0 | 0 | 1 |
| XLOC_014347 | TFF1         | chr21:43782390-43786644 | 0 | 0 | 0 | 1 |
| XLOC_014348 | TMPRSS3      | chr21:43791995-43816955 | 0 | 0 | 0 | 1 |
| XLOC_014351 | CBS          | chr21:44473300-44496472 | 0 | 0 | 0 | 1 |
| XLOC_014363 | KRTAP10-1    | chr21:45917774-46131495 | 0 | 0 | 0 | 1 |
| XLOC_014364 | KRTAP10-2    | chr21:45917774-46131495 | 0 | 0 | 0 | 1 |
| XLOC_014365 | KRTAP10-3    | chr21:45917774-46131495 | 0 | 0 | 0 | 1 |
| XLOC_014366 | KRTAP10-5    | chr21:45917774-46131495 | 0 | 0 | 0 | 1 |
| XLOC_014367 | KRTAP10-6    | chr21:45917774-46131495 | 0 | 0 | 0 | 1 |
| XLOC_014368 | KRTAP12-4    | chr21:45917774-46131495 | 0 | 0 | 0 | 1 |
| XLOC_014369 | KRTAP12-2    | chr21:45917774-46131495 | 0 | 0 | 0 | 1 |

|             |              |                         |   |   |   |   |
|-------------|--------------|-------------------------|---|---|---|---|
| XLOC_014370 | KRTAP12-1    | chr21:45917774-46131495 | 0 | 0 | 0 | 1 |
| XLOC_014374 | ITGB2        | chr21:46305867-46349595 | 0 | 0 | 0 | 1 |
| XLOC_014377 | LINC00162    | chr21:46419126-46424642 | 0 | 0 | 0 | 1 |
| XLOC_014380 | COL18A1-AS2  | chr21:46825096-46933634 | 0 | 0 | 0 | 1 |
| XLOC_014383 | LOC100129027 | chr21:47247754-47256333 | 0 | 0 | 0 | 1 |
| XLOC_014389 | S100B        | chr21:48018530-48025035 | 0 | 0 | 0 | 1 |
| XLOC_014391 | TPTEP1       | chr22:17082800-17129720 | 0 | 0 | 0 | 1 |
| XLOC_014392 | HSFY1P1      | chr22:17308363-17310225 | 0 | 0 | 0 | 1 |
| XLOC_014399 | FLJ41941     | chr22:18512150-18520734 | 0 | 0 | 0 | 1 |
| XLOC_014414 | MIR185       | chr22:20008630-20053447 | 0 | 0 | 0 | 1 |
| XLOC_014423 | POM121L4P    | chr22:21043842-21046009 | 0 | 0 | 0 | 1 |
| XLOC_014425 | SERPIND1     | chr22:21061978-21213100 | 0 | 0 | 0 | 1 |
| XLOC_014432 | LOC400891    | chr22:21400248-21418457 | 0 | 0 | 0 | 1 |
| XLOC_014441 | MIR301B      | chr22:22007269-22007347 | 0 | 0 | 0 | 1 |
| XLOC_014442 | MIR130B      | chr22:22007592-22007674 | 0 | 0 | 0 | 1 |
| XLOC_014444 | VPREB1       | chr22:22599199-22599926 | 0 | 0 | 0 | 1 |
| XLOC_014448 | MIR650       | chr22:23165269-23165365 | 0 | 0 | 0 | 1 |
| XLOC_014449 | IGLL5        | chr22:23229959-23238013 | 0 | 0 | 0 | 1 |
| XLOC_014455 | C22orf15     | chr22:24105207-24110141 | 0 | 0 | 0 | 1 |
| XLOC_014480 | MYO18B       | chr22:26138119-26427007 | 0 | 0 | 0 | 1 |
| XLOC_014481 | SEZ6L        | chr22:26565439-26779563 | 0 | 0 | 0 | 1 |
| XLOC_014487 | MIR3199-2    | chr22:28315363-29075853 | 0 | 0 | 0 | 1 |
| XLOC_014501 | HORMAD2      | chr22:30476452-30573062 | 0 | 0 | 0 | 1 |
| XLOC_014508 | MIR3200      | chr22:31090792-31303811 | 0 | 0 | 0 | 1 |
| XLOC_014520 | AP1B1P1      | chr22:32517963-32529456 | 0 | 0 | 0 | 1 |
| XLOC_014521 | RFPL3        | chr22:32750871-32767063 | 0 | 0 | 0 | 1 |
| XLOC_014524 | TIMP3        | chr22:32908539-33454377 | 0 | 0 | 0 | 1 |
| XLOC_014529 | MIR3909      | chr22:35695267-35743987 | 0 | 0 | 0 | 1 |
| XLOC_014534 | APOL5        | chr22:36113918-36125529 | 0 | 0 | 0 | 1 |
| XLOC_014538 | LOC100506241 | chr22:37361288-37364213 | 0 | 0 | 0 | 1 |
| XLOC_014541 | CYTH4        | chr22:37678494-37711389 | 0 | 0 | 0 | 1 |
| XLOC_014555 | MIR4534      | chr22:38384800-38384860 | 0 | 0 | 0 | 1 |
| XLOC_014568 | SYNGR1       | chr22:39745953-39781593 | 0 | 0 | 0 | 1 |
| XLOC_014580 | MCHR1        | chr22:41075181-41078818 | 0 | 0 | 0 | 1 |
| XLOC_014583 | MIR1281      | chr22:41488516-41488570 | 0 | 0 | 0 | 1 |
| XLOC_014595 | MIR33A       | chr22:42229105-42302375 | 0 | 0 | 0 | 1 |
| XLOC_014608 | MPPED1       | chr22:43808019-43902800 | 0 | 0 | 0 | 1 |
| XLOC_014609 | EFCAB6-AS1   | chr22:43912133-44208217 | 0 | 0 | 0 | 1 |
| XLOC_014614 | LINC00207    | chr22:44965219-44968329 | 0 | 0 | 0 | 1 |
| XLOC_014617 | UPK3A        | chr22:45680867-45691755 | 0 | 0 | 0 | 1 |
| XLOC_014619 | RIBC2        | chr22:45809571-45828302 | 0 | 0 | 0 | 1 |
| XLOC_014620 | FBLN1        | chr22:45898718-45997014 | 0 | 0 | 0 | 1 |
| XLOC_014622 | MIR4762      | chr22:46067677-46241187 | 0 | 0 | 0 | 1 |
| XLOC_014626 | MIR3619      | chr22:46481876-46509808 | 0 | 0 | 0 | 1 |
| XLOC_014633 | MIR3201      | chr22:48670175-48670227 | 0 | 0 | 0 | 1 |
| XLOC_014634 | FAM19A5      | chr22:48885287-49147744 | 0 | 0 | 0 | 1 |
| XLOC_014635 | MIR4535      | chr22:49176106-49176165 | 0 | 0 | 0 | 1 |
| XLOC_014636 | LOC100128946 | chr22:49262581-49294198 | 0 | 0 | 0 | 1 |
| XLOC_014641 | PANX2        | chr22:50609159-50618724 | 0 | 0 | 0 | 1 |

|             |               |                         |   |   |   |   |
|-------------|---------------|-------------------------|---|---|---|---|
| XLOC_014645 | ADM2          | chr22:50919984-50924866 | 0 | 0 | 0 | 1 |
| XLOC_014646 | MIOX          | chr22:50925212-50928750 | 0 | 0 | 0 | 1 |
| XLOC_014654 | POTEH         | chr22:16256331-16287937 | 0 | 0 | 0 | 1 |
| XLOC_014655 | OR11H1        | chr22:16448823-16449804 | 0 | 0 | 0 | 1 |
| XLOC_014656 | CCT8L2        | chr22:17071647-17073700 | 0 | 0 | 0 | 1 |
| XLOC_014657 | ANKRD62P1-PAR | chr22:17134598-17156430 | 0 | 0 | 0 | 1 |
| XLOC_014658 | XKR3          | chr22:17264305-17302584 | 0 | 0 | 0 | 1 |
| XLOC_014659 | GAB4          | chr22:17442826-17489112 | 0 | 0 | 0 | 1 |
| XLOC_014663 | CECR3         | chr22:17737749-17747623 | 0 | 0 | 0 | 1 |
| XLOC_014666 | MIR3198-1     | chr22:18216905-18257431 | 0 | 0 | 0 | 1 |
| XLOC_014668 | MIR648        | chr22:18270415-18507325 | 0 | 0 | 0 | 1 |
| XLOC_014673 | GSC2          | chr22:19136503-19137796 | 0 | 0 | 0 | 1 |
| XLOC_014680 | LOC150185     | chr22:19553652-19554362 | 0 | 0 | 0 | 1 |
| XLOC_014686 | LOC284865     | chr22:20186252-20192441 | 0 | 0 | 0 | 1 |
| XLOC_014688 | MIR1286       | chr22:20228937-20255816 | 0 | 0 | 0 | 1 |
| XLOC_014696 | TUBA3FP       | chr22:21354060-21368576 | 0 | 0 | 0 | 1 |
| XLOC_014697 | SLC7A4        | chr22:21383006-21386847 | 0 | 0 | 0 | 1 |
| XLOC_014698 | P2RX6P        | chr22:21396680-21398538 | 0 | 0 | 0 | 1 |
| XLOC_014706 | ZNF280B       | chr22:22838771-22863505 | 0 | 0 | 0 | 1 |
| XLOC_014707 | ZNF280A       | chr22:22868060-22874613 | 0 | 0 | 0 | 1 |
| XLOC_014709 | POM121L1P     | chr22:22974027-22987012 | 0 | 0 | 0 | 1 |
| XLOC_014711 | CES5AP1       | chr22:23701792-23724313 | 0 | 0 | 0 | 1 |
| XLOC_014713 | IGLL1         | chr22:23915312-23922495 | 0 | 0 | 0 | 1 |
| XLOC_014725 | GSTTP2        | chr22:24385937-24401899 | 0 | 0 | 0 | 1 |
| XLOC_014726 | GGT5          | chr22:24615621-24641110 | 0 | 0 | 0 | 1 |
| XLOC_014731 | PIWIL3        | chr22:25115000-25170687 | 0 | 0 | 0 | 1 |
| XLOC_014732 | TMEM211       | chr22:25331207-25335314 | 0 | 0 | 0 | 1 |
| XLOC_014738 | MIR548J       | chr22:26921713-26986089 | 0 | 0 | 0 | 1 |
| XLOC_014739 | CRYBB1        | chr22:26995361-27013991 | 0 | 0 | 0 | 1 |
| XLOC_014742 | MIR3199-1     | chr22:28315363-29075853 | 0 | 0 | 0 | 1 |
| XLOC_014747 | C22orf31      | chr22:29454659-29457907 | 0 | 0 | 0 | 1 |
| XLOC_014751 | MIR3653       | chr22:29723668-29784572 | 0 | 0 | 0 | 1 |
| XLOC_014767 | SEC14L6       | chr22:30920916-30942669 | 0 | 0 | 0 | 1 |
| XLOC_014774 | MIR3928       | chr22:31556047-31556105 | 0 | 0 | 0 | 1 |
| XLOC_014781 | C22orf42      | chr22:32545518-32555243 | 0 | 0 | 0 | 1 |
| XLOC_014786 | BPIFC         | chr22:32809833-32853373 | 0 | 0 | 0 | 1 |
| XLOC_014789 | MIR4764       | chr22:33669061-34316416 | 0 | 0 | 0 | 1 |
| XLOC_014790 | MB            | chr22:36002810-36019401 | 0 | 0 | 0 | 1 |
| XLOC_014792 | APOL3         | chr22:36536370-36562225 | 0 | 0 | 0 | 1 |
| XLOC_014799 | CACNG2        | chr22:36956915-37098690 | 0 | 0 | 0 | 1 |
| XLOC_014801 | PVALB         | chr22:37196744-37215517 | 0 | 0 | 0 | 1 |
| XLOC_014802 | TEX33         | chr22:37387159-37403877 | 0 | 0 | 0 | 1 |
| XLOC_014805 | IL2RB         | chr22:37521879-37545962 | 0 | 0 | 0 | 1 |
| XLOC_014807 | SSTR3         | chr22:37602244-37608353 | 0 | 0 | 0 | 1 |
| XLOC_014809 | ELFN2         | chr22:37763999-37823505 | 0 | 0 | 0 | 1 |
| XLOC_014812 | LGALS2        | chr22:37966252-37976024 | 0 | 0 | 0 | 1 |
| XLOC_014814 | MIR659        | chr22:38243684-38243781 | 0 | 0 | 0 | 1 |
| XLOC_014816 | SOX10         | chr22:38368318-38380539 | 0 | 0 | 0 | 1 |
| XLOC_014837 | RNU86         | chr22:39708886-39715670 | 0 | 0 | 0 | 1 |

|             |             |                         |   |   |   |   |
|-------------|-------------|-------------------------|---|---|---|---|
| XLOC_014838 | SNORD43     | chr22:39708886-39715670 | 0 | 0 | 0 | 1 |
| XLOC_014840 | ENTHD1      | chr22:40139048-40289794 | 0 | 0 | 0 | 1 |
| XLOC_014843 | MIR4766     | chr22:41165638-41215392 | 0 | 0 | 0 | 1 |
| XLOC_014854 | SHISA8      | chr22:42305557-42310671 | 0 | 0 | 0 | 1 |
| XLOC_014867 | ATP5L2      | chr22:43013845-43045405 | 0 | 0 | 0 | 1 |
| XLOC_014876 | SULT4A1     | chr22:44220386-44258378 | 0 | 0 | 0 | 1 |
| XLOC_014877 | PNPLA5      | chr22:44275557-44287893 | 0 | 0 | 0 | 1 |
| XLOC_014880 | LINC00229   | chr22:45002207-45021299 | 0 | 0 | 0 | 1 |
| XLOC_014881 | PHF21B      | chr22:45277042-45405809 | 0 | 0 | 0 | 1 |
| XLOC_014884 | MIR1249     | chr22:45588122-45636650 | 0 | 0 | 0 | 1 |
| XLOC_014894 | FLJ46257    | chr22:48016791-48027318 | 0 | 0 | 0 | 1 |
| XLOC_014895 | LOC284933   | chr22:48885287-49147744 | 0 | 0 | 0 | 1 |
| XLOC_014896 | C22orf34    | chr22:50013289-50051190 | 0 | 0 | 0 | 1 |
| XLOC_014899 | IL17REL     | chr22:50432941-50451055 | 0 | 0 | 0 | 1 |
| XLOC_014915 | CHL1        | chr3:238278-451097      | 0 | 0 | 0 | 1 |
| XLOC_014916 | CNTN6       | chr3:1134628-1445278    | 0 | 0 | 0 | 1 |
| XLOC_014919 | LRRN1       | chr3:3841120-3889387    | 0 | 0 | 0 | 1 |
| XLOC_014925 | GRM7        | chr3:6902801-7783218    | 0 | 0 | 0 | 1 |
| XLOC_014927 | LINC00312   | chr3:8613467-8616354    | 0 | 0 | 0 | 1 |
| XLOC_014928 | CAV3        | chr3:8775485-8788451    | 0 | 0 | 0 | 1 |
| XLOC_014947 | SLC6A11     | chr3:10857916-10980146  | 0 | 0 | 0 | 1 |
| XLOC_014948 | SLC6A1      | chr3:11034419-11080935  | 0 | 0 | 0 | 1 |
| XLOC_014951 | SYN2        | chr3:12045861-12233532  | 0 | 0 | 0 | 1 |
| XLOC_014952 | PPARG       | chr3:12329348-12475855  | 0 | 0 | 0 | 1 |
| XLOC_014959 | FGD5P1      | chr3:13974552-13978444  | 0 | 0 | 0 | 1 |
| XLOC_014960 | TPRXL       | chr3:13978806-14107481  | 0 | 0 | 0 | 1 |
| XLOC_014966 | FGD5        | chr3:14860468-14976072  | 0 | 0 | 0 | 1 |
| XLOC_014972 | MIR563      | chr3:15915277-15915356  | 0 | 0 | 0 | 1 |
| XLOC_014976 | LOC339862   | chr3:18004063-18310410  | 0 | 0 | 0 | 1 |
| XLOC_014981 | VENTXP7     | chr3:21447217-21448177  | 0 | 0 | 0 | 1 |
| XLOC_014982 | UBE2E2      | chr3:23244783-23648882  | 0 | 0 | 0 | 1 |
| XLOC_014983 | MIR548AC    | chr3:23244783-23648882  | 0 | 0 | 0 | 1 |
| XLOC_014987 | THRB-AS1    | chr3:24158644-24541502  | 0 | 0 | 0 | 1 |
| XLOC_014990 | LRR3B       | chr3:26664299-26752265  | 0 | 0 | 0 | 1 |
| XLOC_014993 | LINC00693   | chr3:28616768-28799828  | 0 | 0 | 0 | 1 |
| XLOC_014997 | OSBPL10-AS1 | chr3:31702316-32033228  | 0 | 0 | 0 | 1 |
| XLOC_015003 | TRIM71      | chr3:32859509-32933771  | 0 | 0 | 0 | 1 |
| XLOC_015004 | CCR4        | chr3:32993065-32996403  | 0 | 0 | 0 | 1 |
| XLOC_015008 | ARPP21      | chr3:35680665-35835988  | 0 | 0 | 0 | 1 |
| XLOC_015009 | MIR128-2    | chr3:35680665-35835988  | 0 | 0 | 0 | 1 |
| XLOC_015010 | STAC        | chr3:36422096-36589496  | 0 | 0 | 0 | 1 |
| XLOC_015011 | MLH1        | chr3:37034840-37092337  | 0 | 0 | 0 | 1 |
| XLOC_015016 | MIR26A1     | chr3:37903668-38025960  | 0 | 0 | 0 | 1 |
| XLOC_015028 | CCR8        | chr3:39371196-39375171  | 0 | 0 | 0 | 1 |
| XLOC_015036 | ENTPD3      | chr3:40428672-40494799  | 0 | 0 | 0 | 1 |
| XLOC_015047 | KLHL40      | chr3:42727010-42733938  | 0 | 0 | 0 | 1 |
| XLOC_015048 | CCDC13-AS1  | chr3:42749873-42814745  | 0 | 0 | 0 | 1 |
| XLOC_015051 | KRBOX1      | chr3:42977833-42984283  | 0 | 0 | 0 | 1 |
| XLOC_015055 | MIR138-1    | chr3:44155703-44155802  | 0 | 0 | 0 | 1 |

|             |              |                        |   |   |   |   |
|-------------|--------------|------------------------|---|---|---|---|
| XLOC_015056 | TOPAZ1       | chr3:44283377-44373590 | 0 | 0 | 0 | 1 |
| XLOC_015074 | CCR3         | chr3:46283871-46308197 | 0 | 0 | 0 | 1 |
| XLOC_015075 | CCR2         | chr3:46395234-46402413 | 0 | 0 | 0 | 1 |
| XLOC_015076 | CCR5         | chr3:46411632-46417697 | 0 | 0 | 0 | 1 |
| XLOC_015078 | RTP3         | chr3:46539484-46542439 | 0 | 0 | 0 | 1 |
| XLOC_015079 | LRRC2-AS1    | chr3:46556877-46608040 | 0 | 0 | 0 | 1 |
| XLOC_015080 | TDGF1        | chr3:46616044-46623952 | 0 | 0 | 0 | 1 |
| XLOC_015081 | LOC100132146 | chr3:46653924-46668033 | 0 | 0 | 0 | 1 |
| XLOC_015090 | MIR1226      | chr3:47844398-47891686 | 0 | 0 | 0 | 1 |
| XLOC_015091 | MIR4443      | chr3:48238053-48238106 | 0 | 0 | 0 | 1 |
| XLOC_015092 | CAMP         | chr3:48264836-48266981 | 0 | 0 | 0 | 1 |
| XLOC_015103 | MIR4271      | chr3:49306029-49314508 | 0 | 0 | 0 | 1 |
| XLOC_015114 | SLC38A3      | chr3:50242691-50258406 | 0 | 0 | 0 | 1 |
| XLOC_015121 | MIR4787      | chr3:50712510-50712594 | 0 | 0 | 0 | 1 |
| XLOC_015129 | IQCF3        | chr3:51860898-51864874 | 0 | 0 | 0 | 1 |
| XLOC_015130 | IQCF2        | chr3:51895644-51897440 | 0 | 0 | 0 | 1 |
| XLOC_015143 | SNORD19      | chr3:52719935-52742197 | 0 | 0 | 0 | 1 |
| XLOC_015144 | SNORD19B     | chr3:52719935-52742197 | 0 | 0 | 0 | 1 |
| XLOC_015145 | SNORD69      | chr3:52719935-52742197 | 0 | 0 | 0 | 1 |
| XLOC_015148 | ITIH3        | chr3:52828783-52843025 | 0 | 0 | 0 | 1 |
| XLOC_015152 | CACNA2D3     | chr3:54156692-55108584 | 0 | 0 | 0 | 1 |
| XLOC_015154 | ARHGFEF3-AS1 | chr3:56761445-57113336 | 0 | 0 | 0 | 1 |
| XLOC_015166 | LINC00698    | chr3:63088363-63110737 | 0 | 0 | 0 | 1 |
| XLOC_015167 | SYNPR        | chr3:63263913-63602597 | 0 | 0 | 0 | 1 |
| XLOC_015168 | SNTN         | chr3:63638343-63650891 | 0 | 0 | 0 | 1 |
| XLOC_015172 | PRICKLE2-AS1 | chr3:64053639-64211131 | 0 | 0 | 0 | 1 |
| XLOC_015173 | PRICKLE2-AS2 | chr3:64053639-64211131 | 0 | 0 | 0 | 1 |
| XLOC_015175 | ADAMTS9-AS2  | chr3:64501330-64997143 | 0 | 0 | 0 | 1 |
| XLOC_015176 | MIR548A2     | chr3:64501330-64997143 | 0 | 0 | 0 | 1 |
| XLOC_015177 | MAGI1-AS1    | chr3:65339905-66024509 | 0 | 0 | 0 | 1 |
| XLOC_015180 | MIR4272      | chr3:67275887-67275951 | 0 | 0 | 0 | 1 |
| XLOC_015184 | GPR27        | chr3:71728439-71804328 | 0 | 0 | 0 | 1 |
| XLOC_015185 | LOC201617    | chr3:72200407-72223490 | 0 | 0 | 0 | 1 |
| XLOC_015189 | MIR4444-1    | chr3:75263626-75263699 | 0 | 0 | 0 | 1 |
| XLOC_015190 | MIR1324      | chr3:75679913-75680009 | 0 | 0 | 0 | 1 |
| XLOC_015193 | MIR4273      | chr3:75786028-75834255 | 0 | 0 | 0 | 1 |
| XLOC_015195 | CADM2        | chr3:85008132-86123579 | 0 | 0 | 0 | 1 |
| XLOC_015196 | MIR5688      | chr3:85008132-86123579 | 0 | 0 | 0 | 1 |
| XLOC_015198 | HTR1F        | chr3:88031725-88042919 | 0 | 0 | 0 | 1 |
| XLOC_015204 | LOC255025    | chr3:94657106-94710169 | 0 | 0 | 0 | 1 |
| XLOC_015205 | EPHA6        | chr3:96533424-97467786 | 0 | 0 | 0 | 1 |
| XLOC_015208 | OR5AC2       | chr3:97806016-97806946 | 0 | 0 | 0 | 1 |
| XLOC_015209 | OR5H1        | chr3:97851541-97852483 | 0 | 0 | 0 | 1 |
| XLOC_015210 | OR5H14       | chr3:97868229-97869162 | 0 | 0 | 0 | 1 |
| XLOC_015211 | OR5H15       | chr3:97887543-97888485 | 0 | 0 | 0 | 1 |
| XLOC_015212 | OR5H6        | chr3:97983128-97984106 | 0 | 0 | 0 | 1 |
| XLOC_015213 | OR5H2        | chr3:98001731-98002676 | 0 | 0 | 0 | 1 |
| XLOC_015214 | OR5K4        | chr3:98072697-98073663 | 0 | 0 | 0 | 1 |
| XLOC_015215 | OR5K3        | chr3:98109509-98110475 | 0 | 0 | 0 | 1 |



|             |             |                          |   |   |   |   |
|-------------|-------------|--------------------------|---|---|---|---|
| XLOC_015216 | OR5K1       | chr3:98188420-98189372   | 0 | 0 | 0 | 1 |
| XLOC_015218 | GPR15       | chr3:98250742-98251994   | 0 | 0 | 0 | 1 |
| XLOC_015220 | COL8A1      | chr3:99273152-99897476   | 0 | 0 | 0 | 1 |
| XLOC_015240 | CCDC54      | chr3:107096187-107097481 | 0 | 0 | 0 | 1 |
| XLOC_015245 | TRAT1       | chr3:108541630-108573714 | 0 | 0 | 0 | 1 |
| XLOC_015246 | FLJ22763    | chr3:108855560-108868951 | 0 | 0 | 0 | 1 |
| XLOC_015247 | LINC00488   | chr3:108897011-108904108 | 0 | 0 | 0 | 1 |
| XLOC_015248 | FLJ25363    | chr3:109128836-109214014 | 0 | 0 | 0 | 1 |
| XLOC_015254 | TMPRSS7     | chr3:111758464-111800116 | 0 | 0 | 0 | 1 |
| XLOC_015256 | MIR567      | chr3:111805181-111837073 | 0 | 0 | 0 | 1 |
| XLOC_015260 | BOC         | chr3:112931374-113160361 | 0 | 0 | 0 | 1 |
| XLOC_015261 | WDR52-AS1   | chr3:112931374-113160361 | 0 | 0 | 0 | 1 |
| XLOC_015263 | MIR4446     | chr3:113251217-113348422 | 0 | 0 | 0 | 1 |
| XLOC_015269 | ZBTB20-AS1  | chr3:114056946-114866127 | 0 | 0 | 0 | 1 |
| XLOC_015270 | GAP43       | chr3:115342150-115440334 | 0 | 0 | 0 | 1 |
| XLOC_015271 | LSAMP-AS3   | chr3:116428634-116435887 | 0 | 0 | 0 | 1 |
| XLOC_015272 | IGSF11-AS1  | chr3:118619478-118864898 | 0 | 0 | 0 | 1 |
| XLOC_015273 | C3orf30     | chr3:118864996-118870302 | 0 | 0 | 0 | 1 |
| XLOC_015274 | UPK1B       | chr3:118892424-118924000 | 0 | 0 | 0 | 1 |
| XLOC_015280 | MAATS1      | chr3:119421868-119485949 | 0 | 0 | 0 | 1 |
| XLOC_015289 | CD86        | chr3:121774208-121839988 | 0 | 0 | 0 | 1 |
| XLOC_015290 | CASR        | chr3:121902529-122005344 | 0 | 0 | 0 | 1 |
| XLOC_015294 | PARP15      | chr3:122296448-122355536 | 0 | 0 | 0 | 1 |
| XLOC_015302 | MIR5002     | chr3:123813557-124440036 | 0 | 0 | 0 | 1 |
| XLOC_015305 | ROPN1B      | chr3:125688027-125702296 | 0 | 0 | 0 | 1 |
| XLOC_015306 | ALDH1L1-AS1 | chr3:125822403-125929011 | 0 | 0 | 0 | 1 |
| XLOC_015307 | ALDH1L1-AS2 | chr3:125822403-125929011 | 0 | 0 | 0 | 1 |
| XLOC_015310 | NUP210P1    | chr3:126380923-126390782 | 0 | 0 | 0 | 1 |
| XLOC_015319 | DNAJB8-AS1  | chr3:128181274-128191160 | 0 | 0 | 0 | 1 |
| XLOC_015320 | LOC90246    | chr3:128226677-128229429 | 0 | 0 | 0 | 1 |
| XLOC_015323 | EFCC1       | chr3:128720471-128759585 | 0 | 0 | 0 | 1 |
| XLOC_015324 | GP9         | chr3:128779644-128781253 | 0 | 0 | 0 | 1 |
| XLOC_015329 | RHO         | chr3:129247481-129254187 | 0 | 0 | 0 | 1 |
| XLOC_015330 | H1FOO       | chr3:129262056-129270204 | 0 | 0 | 0 | 1 |
| XLOC_015332 | TRH         | chr3:129693113-129696779 | 0 | 0 | 0 | 1 |
| XLOC_015335 | COL6A5      | chr3:130064358-130203688 | 0 | 0 | 0 | 1 |
| XLOC_015341 | ACPP        | chr3:132036210-132087146 | 0 | 0 | 0 | 1 |
| XLOC_015345 | NPHP3-AS1   | chr3:132276981-132593050 | 0 | 0 | 0 | 1 |
| XLOC_015346 | TMEM108     | chr3:132757170-133116619 | 0 | 0 | 0 | 1 |
| XLOC_015347 | BFSP2       | chr3:133118789-133194056 | 0 | 0 | 0 | 1 |
| XLOC_015351 | MIR4788     | chr3:134156668-134156748 | 0 | 0 | 0 | 1 |
| XLOC_015356 | SLC35G2     | chr3:136537860-136574734 | 0 | 0 | 0 | 1 |
| XLOC_015359 | SOX14       | chr3:137483133-137485172 | 0 | 0 | 0 | 1 |
| XLOC_015363 | ESYT3       | chr3:138153414-138197256 | 0 | 0 | 0 | 1 |
| XLOC_015366 | BPESC1      | chr3:138823026-138844005 | 0 | 0 | 0 | 1 |
| XLOC_015368 | CLSTN2      | chr3:139654026-140286919 | 0 | 0 | 0 | 1 |
| XLOC_015369 | TRIM42      | chr3:140396865-140419992 | 0 | 0 | 0 | 1 |
| XLOC_015371 | SPSB4       | chr3:140770742-140867453 | 0 | 0 | 0 | 1 |
| XLOC_015376 | GRK7        | chr3:141497042-141535892 | 0 | 0 | 0 | 1 |

|             |              |                          |   |   |   |   |
|-------------|--------------|--------------------------|---|---|---|---|
| XLOC_015380 | LOC100507389 | chr3:142645516-142661378 | 0 | 0 | 0 | 1 |
| XLOC_015382 | CHST2        | chr3:142838617-142842856 | 0 | 0 | 0 | 1 |
| XLOC_015383 | SLC9A9-AS1   | chr3:142984063-143567373 | 0 | 0 | 0 | 1 |
| XLOC_015385 | ZIC1         | chr3:147127180-147134506 | 0 | 0 | 0 | 1 |
| XLOC_015386 | AGTR1        | chr3:148415657-148460790 | 0 | 0 | 0 | 1 |
| XLOC_015387 | CPB1         | chr3:148545587-148577972 | 0 | 0 | 0 | 1 |
| XLOC_015388 | CPA3         | chr3:148583042-148614872 | 0 | 0 | 0 | 1 |
| XLOC_015390 | HLTF-AS1     | chr3:148747903-148820610 | 0 | 0 | 0 | 1 |
| XLOC_015392 | TM4SF4       | chr3:149192367-149221181 | 0 | 0 | 0 | 1 |
| XLOC_015399 | CLRN1-AS1    | chr3:150643949-150797617 | 0 | 0 | 0 | 1 |
| XLOC_015400 | MED12L       | chr3:150804675-151176497 | 0 | 0 | 0 | 1 |
| XLOC_015401 | MIR548H2     | chr3:151347319-151546276 | 0 | 0 | 0 | 1 |
| XLOC_015402 | AADACL2      | chr3:151347319-151546276 | 0 | 0 | 0 | 1 |
| XLOC_015403 | LOC201651    | chr3:151347319-151546276 | 0 | 0 | 0 | 1 |
| XLOC_015405 | SUCNR1       | chr3:151591430-151599876 | 0 | 0 | 0 | 1 |
| XLOC_015411 | MME          | chr3:154797435-154901518 | 0 | 0 | 0 | 1 |
| XLOC_015416 | LOC100498859 | chr3:156799455-156840791 | 0 | 0 | 0 | 1 |
| XLOC_015418 | C3orf55      | chr3:157261132-157319021 | 0 | 0 | 0 | 1 |
| XLOC_015420 | MLF1         | chr3:158288952-158324249 | 0 | 0 | 0 | 1 |
| XLOC_015424 | MIR3919      | chr3:158787040-159615155 | 0 | 0 | 0 | 1 |
| XLOC_015428 | MIR15B       | chr3:160117429-160152741 | 0 | 0 | 0 | 1 |
| XLOC_015429 | MIR16-2      | chr3:160117429-160152741 | 0 | 0 | 0 | 1 |
| XLOC_015433 | OTOL1        | chr3:161214595-161221730 | 0 | 0 | 0 | 1 |
| XLOC_015435 | LOC646168    | chr3:167613735-167641797 | 0 | 0 | 0 | 1 |
| XLOC_015436 | EGFEM1P      | chr3:167967309-168548374 | 0 | 0 | 0 | 1 |
| XLOC_015437 | MIR551B      | chr3:167967309-168548374 | 0 | 0 | 0 | 1 |
| XLOC_015440 | SAMD7        | chr3:169629481-169656948 | 0 | 0 | 0 | 1 |
| XLOC_015449 | NLGN1        | chr3:173116243-174001116 | 0 | 0 | 0 | 1 |
| XLOC_015450 | NAALADL2     | chr3:174577110-175523428 | 0 | 0 | 0 | 1 |
| XLOC_015451 | MIR4789      | chr3:174577110-175523428 | 0 | 0 | 0 | 1 |
| XLOC_015452 | LINC00578    | chr3:177159708-177470492 | 0 | 0 | 0 | 1 |
| XLOC_015470 | ABCC5-AS1    | chr3:183637723-183735727 | 0 | 0 | 0 | 1 |
| XLOC_015471 | HTR3D        | chr3:183749331-183757157 | 0 | 0 | 0 | 1 |
| XLOC_015472 | HTR3C        | chr3:183770834-183778461 | 0 | 0 | 0 | 1 |
| XLOC_015473 | HTR3E        | chr3:183814851-183824783 | 0 | 0 | 0 | 1 |
| XLOC_015479 | MIR1224      | chr3:183948316-183967313 | 0 | 0 | 0 | 1 |
| XLOC_015483 | SNORD66      | chr3:184032282-184053146 | 0 | 0 | 0 | 1 |
| XLOC_015487 | EPHB3        | chr3:184279586-184300196 | 0 | 0 | 0 | 1 |
| XLOC_015489 | EHHADH-AS1   | chr3:184880688-184971886 | 0 | 0 | 0 | 1 |
| XLOC_015493 | LOC344887    | chr3:185677757-185698665 | 0 | 0 | 0 | 1 |
| XLOC_015497 | HRG          | chr3:186383797-186396023 | 0 | 0 | 0 | 1 |
| XLOC_015498 | KNG1         | chr3:186435097-186462199 | 0 | 0 | 0 | 1 |
| XLOC_015500 | SNORD2       | chr3:186501360-186524484 | 0 | 0 | 0 | 1 |
| XLOC_015504 | ADIPOQ       | chr3:186560462-186576252 | 0 | 0 | 0 | 1 |
| XLOC_015506 | RTP1         | chr3:186915273-186919253 | 0 | 0 | 0 | 1 |
| XLOC_015507 | RTP4         | chr3:187086167-187089369 | 0 | 0 | 0 | 1 |
| XLOC_015508 | LOC100131635 | chr3:187416046-187463513 | 0 | 0 | 0 | 1 |
| XLOC_015512 | TP63         | chr3:189349215-189615068 | 0 | 0 | 0 | 1 |
| XLOC_015513 | MIR944       | chr3:189349215-189615068 | 0 | 0 | 0 | 1 |

|             |             |                          |   |   |   |   |
|-------------|-------------|--------------------------|---|---|---|---|
| XLOC_015516 | SNAR-I      | chr3:190595718-190595839 | 0 | 0 | 0 | 1 |
| XLOC_015517 | OSTN        | chr3:190930321-190967910 | 0 | 0 | 0 | 1 |
| XLOC_015519 | PYDC2       | chr3:191178951-191179245 | 0 | 0 | 0 | 1 |
| XLOC_015529 | MIR570      | chr3:195426271-195426368 | 0 | 0 | 0 | 1 |
| XLOC_015531 | LOC401109   | chr3:195869506-195887761 | 0 | 0 | 0 | 1 |
| XLOC_015545 | FAM157A     | chr3:197879236-197907728 | 0 | 0 | 0 | 1 |
| XLOC_015546 | CNTN4-AS2   | chr3:2140549-3099645     | 0 | 0 | 0 | 1 |
| XLOC_015547 | IL5RA       | chr3:3108007-3152058     | 0 | 0 | 0 | 1 |
| XLOC_015550 | EGOT        | chr3:4535031-4889524     | 0 | 0 | 0 | 1 |
| XLOC_015551 | BHLHE40-AS1 | chr3:4939913-4948186     | 0 | 0 | 0 | 1 |
| XLOC_015552 | MIR4790     | chr3:5291861-5291940     | 0 | 0 | 0 | 1 |
| XLOC_015553 | LMCD1-AS1   | chr3:8262833-8543344     | 0 | 0 | 0 | 1 |
| XLOC_015563 | CIDEC       | chr3:9908393-9921938     | 0 | 0 | 0 | 1 |
| XLOC_015568 | FANCD2OS    | chr3:10068112-10149915   | 0 | 0 | 0 | 1 |
| XLOC_015572 | MIR885      | chr3:10365706-10547268   | 0 | 0 | 0 | 1 |
| XLOC_015573 | LINC00606   | chr3:10801168-10805877   | 0 | 0 | 0 | 1 |
| XLOC_015574 | SLC6A1-AS1  | chr3:11034419-11080935   | 0 | 0 | 0 | 1 |
| XLOC_015577 | TIMP4       | chr3:12045861-12233532   | 0 | 0 | 0 | 1 |
| XLOC_015584 | WNT7A       | chr3:13860081-13921618   | 0 | 0 | 0 | 1 |
| XLOC_015595 | MIR4270     | chr3:15491639-15563258   | 0 | 0 | 0 | 1 |
| XLOC_015600 | DAZL        | chr3:16628300-16647006   | 0 | 0 | 0 | 1 |
| XLOC_015603 | MIR4791     | chr3:19190016-19577135   | 0 | 0 | 0 | 1 |
| XLOC_015607 | ZNF385D     | chr3:21462489-21792816   | 0 | 0 | 0 | 1 |
| XLOC_015609 | LINC00691   | chr3:24141464-24144738   | 0 | 0 | 0 | 1 |
| XLOC_015610 | THRB        | chr3:24158644-24541502   | 0 | 0 | 0 | 1 |
| XLOC_015613 | MIR4442     | chr3:25706363-25706430   | 0 | 0 | 0 | 1 |
| XLOC_015615 | LINC00692   | chr3:25900022-25915186   | 0 | 0 | 0 | 1 |
| XLOC_015618 | EOMES       | chr3:27757885-27763785   | 0 | 0 | 0 | 1 |
| XLOC_015620 | GADL1       | chr3:30767691-30936153   | 0 | 0 | 0 | 1 |
| XLOC_015628 | DCLK3       | chr3:36753912-36781352   | 0 | 0 | 0 | 1 |
| XLOC_015636 | SCN10A      | chr3:38738836-38835501   | 0 | 0 | 0 | 1 |
| XLOC_015637 | SCN11A      | chr3:38887259-38992052   | 0 | 0 | 0 | 1 |
| XLOC_015645 | CCK         | chr3:42299317-42307662   | 0 | 0 | 0 | 1 |
| XLOC_015646 | LYZL4       | chr3:42438574-42452065   | 0 | 0 | 0 | 1 |
| XLOC_015648 | HHATL       | chr3:42734154-42744319   | 0 | 0 | 0 | 1 |
| XLOC_015660 | LARS2-AS1   | chr3:45430074-45590328   | 0 | 0 | 0 | 1 |
| XLOC_015665 | XCR1        | chr3:46062290-46068979   | 0 | 0 | 0 | 1 |
| XLOC_015666 | CCR1        | chr3:46243199-46249832   | 0 | 0 | 0 | 1 |
| XLOC_015667 | LTF         | chr3:46477495-46506598   | 0 | 0 | 0 | 1 |
| XLOC_015671 | PRSS46      | chr3:46761072-46777921   | 0 | 0 | 0 | 1 |
| XLOC_015672 | PRSS45      | chr3:46783580-46786245   | 0 | 0 | 0 | 1 |
| XLOC_015673 | PRSS42      | chr3:46871893-46875585   | 0 | 0 | 0 | 1 |
| XLOC_015674 | MYL3        | chr3:46899356-46904973   | 0 | 0 | 0 | 1 |
| XLOC_015685 | SPINK8      | chr3:48348335-48369831   | 0 | 0 | 0 | 1 |
| XLOC_015702 | MIR425      | chr3:49044636-49060926   | 0 | 0 | 0 | 1 |
| XLOC_015703 | MIR191      | chr3:49044636-49060926   | 0 | 0 | 0 | 1 |
| XLOC_015711 | LOC646498   | chr3:49215068-49229291   | 0 | 0 | 0 | 1 |
| XLOC_015717 | BSN-AS2     | chr3:49586738-49591799   | 0 | 0 | 0 | 1 |
| XLOC_015722 | CDHR4       | chr3:49828166-49837254   | 0 | 0 | 0 | 1 |

|             |              |                          |   |   |   |   |
|-------------|--------------|--------------------------|---|---|---|---|
| XLOC_015725 | CAMKV        | chr3:49895421-49907369   | 0 | 0 | 0 | 1 |
| XLOC_015742 | IQCF6        | chr3:51812576-51813203   | 0 | 0 | 0 | 1 |
| XLOC_015743 | IQCF5        | chr3:51907736-51909600   | 0 | 0 | 0 | 1 |
| XLOC_015750 | LINC00696    | chr3:52096109-52099128   | 0 | 0 | 0 | 1 |
| XLOC_015755 | MIRLET7G     | chr3:52288437-52312659   | 0 | 0 | 0 | 1 |
| XLOC_015756 | MIR135A1     | chr3:52321835-52329272   | 0 | 0 | 0 | 1 |
| XLOC_015774 | CACNA2D3-AS1 | chr3:54156692-55108584   | 0 | 0 | 0 | 1 |
| XLOC_015775 | LRTM1        | chr3:54156692-55108584   | 0 | 0 | 0 | 1 |
| XLOC_015776 | WNT5A        | chr3:55499742-55521670   | 0 | 0 | 0 | 1 |
| XLOC_015777 | ERC2         | chr3:55542335-56502391   | 0 | 0 | 0 | 1 |
| XLOC_015778 | ERC2-IT1     | chr3:55542335-56502391   | 0 | 0 | 0 | 1 |
| XLOC_015779 | MIR3938      | chr3:55542335-56502391   | 0 | 0 | 0 | 1 |
| XLOC_015788 | DNASE1L3     | chr3:58178352-58196730   | 0 | 0 | 0 | 1 |
| XLOC_015791 | FAM107A      | chr3:58549844-58563491   | 0 | 0 | 0 | 1 |
| XLOC_015792 | FAM3D        | chr3:58619669-58652561   | 0 | 0 | 0 | 1 |
| XLOC_015793 | C3orf67      | chr3:58727736-59035715   | 0 | 0 | 0 | 1 |
| XLOC_015796 | FEZF2        | chr3:62355346-62359190   | 0 | 0 | 0 | 1 |
| XLOC_015798 | SYNPR-AS1    | chr3:63263913-63602597   | 0 | 0 | 0 | 1 |
| XLOC_015801 | LOC100287879 | chr3:64053639-64211131   | 0 | 0 | 0 | 1 |
| XLOC_015802 | PRICKLE2     | chr3:64053639-64211131   | 0 | 0 | 0 | 1 |
| XLOC_015807 | FAM19A4      | chr3:68780914-68981761   | 0 | 0 | 0 | 1 |
| XLOC_015810 | MIR3136      | chr3:69068977-69101484   | 0 | 0 | 0 | 1 |
| XLOC_015815 | MIR1284      | chr3:71003864-71633140   | 0 | 0 | 0 | 1 |
| XLOC_015817 | PROK2        | chr3:71820805-71834357   | 0 | 0 | 0 | 1 |
| XLOC_015820 | PDZRN3       | chr3:73431651-73674072   | 0 | 0 | 0 | 1 |
| XLOC_015821 | CNTN3        | chr3:74311721-74570343   | 0 | 0 | 0 | 1 |
| XLOC_015826 | LOC440970    | chr3:84687555-84918726   | 0 | 0 | 0 | 1 |
| XLOC_015827 | CADM2-AS2    | chr3:85008132-86123579   | 0 | 0 | 0 | 1 |
| XLOC_015828 | RNU6-69      | chr3:86490313-86490361   | 0 | 0 | 0 | 1 |
| XLOC_015829 | VGLL3        | chr3:86987122-87040257   | 0 | 0 | 0 | 1 |
| XLOC_015830 | MIR4795      | chr3:87275338-87275427   | 0 | 0 | 0 | 1 |
| XLOC_015831 | POU1F1       | chr3:87308782-87325737   | 0 | 0 | 0 | 1 |
| XLOC_015837 | GABRR3       | chr3:97705526-97754148   | 0 | 0 | 0 | 1 |
| XLOC_015840 | ST3GAL6-AS1  | chr3:98433176-98514689   | 0 | 0 | 0 | 1 |
| XLOC_015842 | MIR548G      | chr3:99273152-99897476   | 0 | 0 | 0 | 1 |
| XLOC_015844 | MIR3921      | chr3:99273152-99897476   | 0 | 0 | 0 | 1 |
| XLOC_015851 | MIR548A3     | chr3:103903475-103946105 | 0 | 0 | 0 | 1 |
| XLOC_015854 | LINC00635    | chr3:107560508-107596915 | 0 | 0 | 0 | 1 |
| XLOC_015859 | RETNLB       | chr3:108474485-108476130 | 0 | 0 | 0 | 1 |
| XLOC_015860 | GUCA1C       | chr3:108626641-108672677 | 0 | 0 | 0 | 1 |
| XLOC_015861 | MORC1        | chr3:108677086-108836993 | 0 | 0 | 0 | 1 |
| XLOC_015862 | DPPA2        | chr3:109012634-109035364 | 0 | 0 | 0 | 1 |
| XLOC_015863 | DPPA4        | chr3:109044987-109056419 | 0 | 0 | 0 | 1 |
| XLOC_015865 | ZBED2        | chr3:111260925-111371206 | 0 | 0 | 0 | 1 |
| XLOC_015871 | CD200R1L     | chr3:112534555-112564797 | 0 | 0 | 0 | 1 |
| XLOC_015879 | DRD3         | chr3:113847556-113897899 | 0 | 0 | 0 | 1 |
| XLOC_015881 | MIR568       | chr3:114035321-114035416 | 0 | 0 | 0 | 1 |
| XLOC_015883 | MIR4796      | chr3:114056946-114866127 | 0 | 0 | 0 | 1 |
| XLOC_015888 | CD80         | chr3:119243139-119278481 | 0 | 0 | 0 | 1 |

|             |              |                          |   |   |   |   |
|-------------|--------------|--------------------------|---|---|---|---|
| XLOC_015901 | ILDR1        | chr3:121706169-121741127 | 0 | 0 | 0 | 1 |
| XLOC_015907 | SEMA5B       | chr3:122628039-122747452 | 0 | 0 | 0 | 1 |
| XLOC_015912 | ROPN1        | chr3:123687878-123710199 | 0 | 0 | 0 | 1 |
| XLOC_015917 | MIR5092      | chr3:124801479-124931609 | 0 | 0 | 0 | 1 |
| XLOC_015921 | MIR54811     | chr3:125509246-125509395 | 0 | 0 | 0 | 1 |
| XLOC_015928 | C3orf22      | chr3:126268518-126277758 | 0 | 0 | 0 | 1 |
| XLOC_015935 | C3orf27      | chr3:128290842-128294929 | 0 | 0 | 0 | 1 |
| XLOC_015938 | KIAA1257     | chr3:128689781-128712986 | 0 | 0 | 0 | 1 |
| XLOC_015954 | CPNE4        | chr3:131253576-131753844 | 0 | 0 | 0 | 1 |
| XLOC_015955 | MIR5704      | chr3:131253576-131753844 | 0 | 0 | 0 | 1 |
| XLOC_015959 | C3orf36      | chr3:133646989-133648656 | 0 | 0 | 0 | 1 |
| XLOC_015960 | SLCO2A1      | chr3:133651539-133748920 | 0 | 0 | 0 | 1 |
| XLOC_015964 | KY           | chr3:134318764-134369864 | 0 | 0 | 0 | 1 |
| XLOC_015968 | A4GNT        | chr3:137842559-137851229 | 0 | 0 | 0 | 1 |
| XLOC_015973 | FOXL2        | chr3:138663065-138665982 | 0 | 0 | 0 | 1 |
| XLOC_015975 | PRR23B       | chr3:138737872-138739768 | 0 | 0 | 0 | 1 |
| XLOC_015977 | PISRT1       | chr3:138951833-138952364 | 0 | 0 | 0 | 1 |
| XLOC_015979 | RBP2         | chr3:139171725-139195352 | 0 | 0 | 0 | 1 |
| XLOC_015980 | RBP1         | chr3:139236275-139258671 | 0 | 0 | 0 | 1 |
| XLOC_015986 | PCOLCE2      | chr3:142536701-142608045 | 0 | 0 | 0 | 1 |
| XLOC_015987 | PAQR9        | chr3:142680073-142682178 | 0 | 0 | 0 | 1 |
| XLOC_015991 | PLSCR4       | chr3:145910123-145968966 | 0 | 0 | 0 | 1 |
| XLOC_015992 | PLSCR2       | chr3:146151074-146213778 | 0 | 0 | 0 | 1 |
| XLOC_015994 | PLSCR5       | chr3:146303624-146324003 | 0 | 0 | 0 | 1 |
| XLOC_015995 | ZIC4         | chr3:147103834-147124596 | 0 | 0 | 0 | 1 |
| XLOC_016002 | ANKUB1       | chr3:149478889-149510610 | 0 | 0 | 0 | 1 |
| XLOC_016007 | CLRN1        | chr3:150643949-150797617 | 0 | 0 | 0 | 1 |
| XLOC_016008 | GPR171       | chr3:150804675-151176497 | 0 | 0 | 0 | 1 |
| XLOC_016009 | P2RY14       | chr3:150804675-151176497 | 0 | 0 | 0 | 1 |
| XLOC_016011 | P2RY13       | chr3:150804675-151176497 | 0 | 0 | 0 | 1 |
| XLOC_016012 | P2RY12       | chr3:150804675-151176497 | 0 | 0 | 0 | 1 |
| XLOC_016013 | IGSF10       | chr3:150804675-151176497 | 0 | 0 | 0 | 1 |
| XLOC_016014 | MIR5186      | chr3:151283663-151283783 | 0 | 0 | 0 | 1 |
| XLOC_016019 | GPR149       | chr3:154055460-154147504 | 0 | 0 | 0 | 1 |
| XLOC_016024 | KCNAB1-AS2   | chr3:155838336-156256927 | 0 | 0 | 0 | 1 |
| XLOC_016025 | KCNAB1-AS1   | chr3:155838336-156256927 | 0 | 0 | 0 | 1 |
| XLOC_016028 | LOC730091    | chr3:156465131-156534851 | 0 | 0 | 0 | 1 |
| XLOC_016041 | SPTSSB       | chr3:161062579-161089871 | 0 | 0 | 0 | 1 |
| XLOC_016042 | CT64         | chr3:162895030-163021089 | 0 | 0 | 0 | 1 |
| XLOC_016044 | SLITRK3      | chr3:164904507-164914469 | 0 | 0 | 0 | 1 |
| XLOC_016045 | BCHE         | chr3:165490691-165555253 | 0 | 0 | 0 | 1 |
| XLOC_016046 | ZBBX         | chr3:166958076-167098085 | 0 | 0 | 0 | 1 |
| XLOC_016055 | LRR31        | chr3:169557028-169587660 | 0 | 0 | 0 | 1 |
| XLOC_016061 | SLC2A2       | chr3:170714136-170744768 | 0 | 0 | 0 | 1 |
| XLOC_016063 | MIR569       | chr3:170780291-171178197 | 0 | 0 | 0 | 1 |
| XLOC_016065 | GHSR         | chr3:172161080-172166246 | 0 | 0 | 0 | 1 |
| XLOC_016068 | SPATA16      | chr3:172607146-172859058 | 0 | 0 | 0 | 1 |
| XLOC_016069 | NAALADL2-AS3 | chr3:174577110-175523428 | 0 | 0 | 0 | 1 |
| XLOC_016078 | FLJ46066     | chr3:182164757-182204150 | 0 | 0 | 0 | 1 |

|             |              |                          |   |   |   |   |
|-------------|--------------|--------------------------|---|---|---|---|
| XLOC_016092 | C3orf70      | chr3:184795837-184870802 | 0 | 0 | 0 | 1 |
| XLOC_016100 | LOC253573    | chr3:186172769-186211450 | 0 | 0 | 0 | 1 |
| XLOC_016104 | ADIPOQ-AS1   | chr3:186560462-186576252 | 0 | 0 | 0 | 1 |
| XLOC_016105 | RPL39L       | chr3:186838740-186857263 | 0 | 0 | 0 | 1 |
| XLOC_016107 | SST          | chr3:187386693-187388201 | 0 | 0 | 0 | 1 |
| XLOC_016108 | RTP2         | chr3:187416046-187463513 | 0 | 0 | 0 | 1 |
| XLOC_016113 | CLDN1        | chr3:190023489-190040235 | 0 | 0 | 0 | 1 |
| XLOC_016114 | TMEM207      | chr3:190146443-190167665 | 0 | 0 | 0 | 1 |
| XLOC_016115 | GMNC         | chr3:190570525-190580465 | 0 | 0 | 0 | 1 |
| XLOC_016117 | FGF12        | chr3:191857181-192445388 | 0 | 0 | 0 | 1 |
| XLOC_016120 | ATP13A4      | chr3:193119865-193272696 | 0 | 0 | 0 | 1 |
| XLOC_016121 | OPA1-AS1     | chr3:193310932-193415600 | 0 | 0 | 0 | 1 |
| XLOC_016122 | LOC647323    | chr3:193675160-193721448 | 0 | 0 | 0 | 1 |
| XLOC_016123 | DPPA2P3      | chr3:193675160-193721448 | 0 | 0 | 0 | 1 |
| XLOC_016124 | LOC100131551 | chr3:194018988-194030593 | 0 | 0 | 0 | 1 |
| XLOC_016125 | CPN2         | chr3:194060493-194072057 | 0 | 0 | 0 | 1 |
| XLOC_016133 | MIR5692C1    | chr3:195208644-195208667 | 0 | 0 | 0 | 1 |
| XLOC_016135 | APOD         | chr3:195295572-195311076 | 0 | 0 | 0 | 1 |
| XLOC_016152 | MIR4797      | chr3:196769430-197030621 | 0 | 0 | 0 | 1 |
| XLOC_016160 | ZNF141       | chr4:331595-367691       | 0 | 0 | 0 | 1 |
| XLOC_016178 | LOC402160    | chr4:2420700-2464690     | 0 | 0 | 0 | 1 |
| XLOC_016190 | FLJ35424     | chr4:3578595-3592712     | 0 | 0 | 0 | 1 |
| XLOC_016196 | STK32B       | chr4:5053526-5502725     | 0 | 0 | 0 | 1 |
| XLOC_016199 | LOC285484    | chr4:6202459-6235663     | 0 | 0 | 0 | 1 |
| XLOC_016210 | MIR4798      | chr4:7194373-7744564     | 0 | 0 | 0 | 1 |
| XLOC_016211 | MIR4274      | chr4:7194373-7744564     | 0 | 0 | 0 | 1 |
| XLOC_016216 | GPR78        | chr4:8581963-8591750     | 0 | 0 | 0 | 1 |
| XLOC_016218 | LOC650293    | chr4:8951476-8952127     | 0 | 0 | 0 | 1 |
| XLOC_016219 | USP17L10     | chr4:9212382-9213975     | 0 | 0 | 0 | 1 |
| XLOC_016220 | USP17L18     | chr4:9217130-9218723     | 0 | 0 | 0 | 1 |
| XLOC_016221 | USP17L21     | chr4:9221877-9223470     | 0 | 0 | 0 | 1 |
| XLOC_016222 | USP17L13     | chr4:9226621-9228214     | 0 | 0 | 0 | 1 |
| XLOC_016223 | USP17L15     | chr4:9236110-9238060     | 0 | 0 | 0 | 1 |
| XLOC_016224 | USP17L17     | chr4:9245604-9247197     | 0 | 0 | 0 | 1 |
| XLOC_016225 | USP17L18     | chr4:9250355-9251948     | 0 | 0 | 0 | 1 |
| XLOC_016226 | USP17L19     | chr4:9255103-9256696     | 0 | 0 | 0 | 1 |
| XLOC_016227 | USP17L22     | chr4:9259849-9261442     | 0 | 0 | 0 | 1 |
| XLOC_016228 | USP17L12     | chr4:9264597-9266190     | 0 | 0 | 0 | 1 |
| XLOC_016229 | USP17L22     | chr4:9269344-9270937     | 0 | 0 | 0 | 1 |
| XLOC_016230 | USP17L28     | chr4:9326890-9328483     | 0 | 0 | 0 | 1 |
| XLOC_016231 | USP17L26     | chr4:9331636-9333229     | 0 | 0 | 0 | 1 |
| XLOC_016232 | USP17L24     | chr4:9336383-9337976     | 0 | 0 | 0 | 1 |
| XLOC_016233 | USP17L28     | chr4:9341128-9342721     | 0 | 0 | 0 | 1 |
| XLOC_016234 | USP17L25     | chr4:9345873-9347466     | 0 | 0 | 0 | 1 |
| XLOC_016235 | USP17L30     | chr4:9350618-9352211     | 0 | 0 | 0 | 1 |
| XLOC_016236 | USP17L27     | chr4:9355363-9356956     | 0 | 0 | 0 | 1 |
| XLOC_016237 | USP17L9P     | chr4:9360107-9361700     | 0 | 0 | 0 | 1 |
| XLOC_016238 | USP17L27     | chr4:9364854-9366447     | 0 | 0 | 0 | 1 |
| XLOC_016239 | USP17L6P     | chr4:9369599-9370796     | 0 | 0 | 0 | 1 |

|             |              |                        |   |   |   |   |
|-------------|--------------|------------------------|---|---|---|---|
| XLOC_016242 | MIR572       | chr4:11370450-11370545 | 0 | 0 | 0 | 1 |
| XLOC_016243 | MIR5091      | chr4:13629488-13629581 | 0 | 0 | 0 | 1 |
| XLOC_016244 | LOC152742    | chr4:14113591-14141676 | 0 | 0 | 0 | 1 |
| XLOC_016250 | CD38         | chr4:15779930-15850706 | 0 | 0 | 0 | 1 |
| XLOC_016252 | CLRN2        | chr4:17516787-17528727 | 0 | 0 | 0 | 1 |
| XLOC_016256 | SLIT2        | chr4:20255234-20620788 | 0 | 0 | 0 | 1 |
| XLOC_016257 | SLIT2-IT1    | chr4:20255234-20620788 | 0 | 0 | 0 | 1 |
| XLOC_016258 | MIR218-1     | chr4:20255234-20620788 | 0 | 0 | 0 | 1 |
| XLOC_016260 | GBA3         | chr4:22694547-22821192 | 0 | 0 | 0 | 1 |
| XLOC_016261 | SOD3         | chr4:24797084-24802467 | 0 | 0 | 0 | 1 |
| XLOC_016266 | SLC34A2      | chr4:25657434-25680368 | 0 | 0 | 0 | 1 |
| XLOC_016271 | MIR4275      | chr4:28821203-28821290 | 0 | 0 | 0 | 1 |
| XLOC_016272 | PCDH7        | chr4:30722029-31148423 | 0 | 0 | 0 | 1 |
| XLOC_016273 | DTHD1        | chr4:36283236-36346407 | 0 | 0 | 0 | 1 |
| XLOC_016274 | KIAA1239     | chr4:37246689-37451087 | 0 | 0 | 0 | 1 |
| XLOC_016281 | MIR574       | chr4:38869353-38947365 | 0 | 0 | 0 | 1 |
| XLOC_016291 | CHRNA9       | chr4:40337345-40357234 | 0 | 0 | 0 | 1 |
| XLOC_016292 | NSUN7        | chr4:40751913-40812002 | 0 | 0 | 0 | 1 |
| XLOC_016293 | UCHL1        | chr4:41258897-41270446 | 0 | 0 | 0 | 1 |
| XLOC_016298 | SHISA3       | chr4:42399855-42404504 | 0 | 0 | 0 | 1 |
| XLOC_016299 | GRXCR1       | chr4:42895282-43032675 | 0 | 0 | 0 | 1 |
| XLOC_016301 | GABRB1       | chr4:47033294-47428447 | 0 | 0 | 0 | 1 |
| XLOC_016308 | CWH43        | chr4:48988264-49064095 | 0 | 0 | 0 | 1 |
| XLOC_016310 | SPATA18      | chr4:52917592-52963458 | 0 | 0 | 0 | 1 |
| XLOC_016312 | MIR4449      | chr4:53578620-53580305 | 0 | 0 | 0 | 1 |
| XLOC_016314 | LOC152578    | chr4:53656160-53681631 | 0 | 0 | 0 | 1 |
| XLOC_016317 | LNX1-AS1     | chr4:54326436-54457753 | 0 | 0 | 0 | 1 |
| XLOC_016318 | LNX1-AS2     | chr4:54459122-54471548 | 0 | 0 | 0 | 1 |
| XLOC_016319 | GSX2         | chr4:54966247-54968122 | 0 | 0 | 0 | 1 |
| XLOC_016320 | PDGFRA       | chr4:55095263-55164412 | 0 | 0 | 0 | 1 |
| XLOC_016321 | KIT          | chr4:55524094-55606881 | 0 | 0 | 0 | 1 |
| XLOC_016324 | LOC644145    | chr4:56686236-56703430 | 0 | 0 | 0 | 1 |
| XLOC_016331 | THEGL        | chr4:57396774-57469489 | 0 | 0 | 0 | 1 |
| XLOC_016334 | LOC255130    | chr4:57845108-58071465 | 0 | 0 | 0 | 1 |
| XLOC_016335 | LPHN3        | chr4:62362838-62938168 | 0 | 0 | 0 | 1 |
| XLOC_016336 | LOC100144602 | chr4:66535678-66559104 | 0 | 0 | 0 | 1 |
| XLOC_016339 | LOC550113    | chr4:68918915-68995587 | 0 | 0 | 0 | 1 |
| XLOC_016340 | FTLP10       | chr4:69048009-69083798 | 0 | 0 | 0 | 1 |
| XLOC_016341 | TMPRSS11E    | chr4:69313166-69363322 | 0 | 0 | 0 | 1 |
| XLOC_016342 | UGT2B10      | chr4:69681712-69697741 | 0 | 0 | 0 | 1 |
| XLOC_016343 | UGT2B7       | chr4:69962192-69978705 | 0 | 0 | 0 | 1 |
| XLOC_016344 | UGT2B28      | chr4:70146216-70160768 | 0 | 0 | 0 | 1 |
| XLOC_016345 | CSN1S1       | chr4:70796798-70812288 | 0 | 0 | 0 | 1 |
| XLOC_016346 | STATH        | chr4:70861647-70868173 | 0 | 0 | 0 | 1 |
| XLOC_016347 | HTN3         | chr4:70894129-70902255 | 0 | 0 | 0 | 1 |
| XLOC_016348 | HTN1         | chr4:70916158-70924559 | 0 | 0 | 0 | 1 |
| XLOC_016349 | CSN1S2AP     | chr4:70933102-70950988 | 0 | 0 | 0 | 1 |
| XLOC_016350 | CSN1S2BP     | chr4:70999320-71012421 | 0 | 0 | 0 | 1 |
| XLOC_016351 | C4orf40      | chr4:71019903-71032326 | 0 | 0 | 0 | 1 |

|             |              |                          |   |   |   |   |
|-------------|--------------|--------------------------|---|---|---|---|
| XLOC_016352 | ODAM         | chr4:71062243-71070293   | 0 | 0 | 0 | 1 |
| XLOC_016353 | FDCSP        | chr4:71091787-71100968   | 0 | 0 | 0 | 1 |
| XLOC_016354 | CSN3         | chr4:71108332-71117145   | 0 | 0 | 0 | 1 |
| XLOC_016355 | CABS1        | chr4:71200670-71202833   | 0 | 0 | 0 | 1 |
| XLOC_016356 | SMR3A        | chr4:71226492-71232823   | 0 | 0 | 0 | 1 |
| XLOC_016357 | SMR3B        | chr4:71248794-71255961   | 0 | 0 | 0 | 1 |
| XLOC_016358 | PROL1        | chr4:71263598-71275914   | 0 | 0 | 0 | 1 |
| XLOC_016359 | MUC7         | chr4:71296208-71348714   | 0 | 0 | 0 | 1 |
| XLOC_016360 | AMTN         | chr4:71384297-71398459   | 0 | 0 | 0 | 1 |
| XLOC_016361 | AMBN         | chr4:71457974-71473004   | 0 | 0 | 0 | 1 |
| XLOC_016368 | NPFFR2       | chr4:72897520-73013918   | 0 | 0 | 0 | 1 |
| XLOC_016370 | AFP          | chr4:74301932-74321492   | 0 | 0 | 0 | 1 |
| XLOC_016371 | AFM          | chr4:74347461-74369718   | 0 | 0 | 0 | 1 |
| XLOC_016372 | LOC728040    | chr4:74374519-74394250   | 0 | 0 | 0 | 1 |
| XLOC_016374 | CXCL6        | chr4:74702272-74704477   | 0 | 0 | 0 | 1 |
| XLOC_016375 | PF4V1        | chr4:74719012-74720198   | 0 | 0 | 0 | 1 |
| XLOC_016380 | AREG         | chr4:75310852-75320726   | 0 | 0 | 0 | 1 |
| XLOC_016381 | AREG         | chr4:75480628-75490485   | 0 | 0 | 0 | 1 |
| XLOC_016383 | LOC441025    | chr4:76279285-76287776   | 0 | 0 | 0 | 1 |
| XLOC_016387 | ART3         | chr4:76932332-77033955   | 0 | 0 | 0 | 1 |
| XLOC_016390 | MIR4450      | chr4:77356252-77704405   | 0 | 0 | 0 | 1 |
| XLOC_016401 | GDEP         | chr4:80748624-80784401   | 0 | 0 | 0 | 1 |
| XLOC_016414 | MIR4451      | chr4:86396283-86923823   | 0 | 0 | 0 | 1 |
| XLOC_016418 | DSPP         | chr4:88529680-88538025   | 0 | 0 | 0 | 1 |
| XLOC_016419 | DMP1         | chr4:88571453-88585512   | 0 | 0 | 0 | 1 |
| XLOC_016420 | IBSP         | chr4:88720701-88733601   | 0 | 0 | 0 | 1 |
| XLOC_016421 | MEPE         | chr4:88742562-88767968   | 0 | 0 | 0 | 1 |
| XLOC_016429 | LOC644248    | chr4:90645249-90763142   | 0 | 0 | 0 | 1 |
| XLOC_016430 | MMRN1        | chr4:90816051-90875780   | 0 | 0 | 0 | 1 |
| XLOC_016431 | CCSER1       | chr4:91048683-92523370   | 0 | 0 | 0 | 1 |
| XLOC_016432 | GRID2        | chr4:93225549-94693649   | 0 | 0 | 0 | 1 |
| XLOC_016433 | ATOH1        | chr4:94750077-94751142   | 0 | 0 | 0 | 1 |
| XLOC_016436 | BMPR1B       | chr4:95679127-96079601   | 0 | 0 | 0 | 1 |
| XLOC_016437 | PDHA2        | chr4:96761238-96762625   | 0 | 0 | 0 | 1 |
| XLOC_016440 | MIR3684      | chr4:99916787-99983960   | 0 | 0 | 0 | 1 |
| XLOC_016442 | C4orf17      | chr4:100432160-100463460 | 0 | 0 | 0 | 1 |
| XLOC_016447 | BANK1        | chr4:102711763-102995969 | 0 | 0 | 0 | 1 |
| XLOC_016452 | ARHGEF38-IT1 | chr4:106473776-106602070 | 0 | 0 | 0 | 1 |
| XLOC_016474 | MIR1243      | chr4:113739238-114304896 | 0 | 0 | 0 | 1 |
| XLOC_016476 | MIR577       | chr4:115519610-115598202 | 0 | 0 | 0 | 1 |
| XLOC_016477 | MIR1973      | chr4:117220880-117220924 | 0 | 0 | 0 | 1 |
| XLOC_016478 | NDST3        | chr4:118955499-119179789 | 0 | 0 | 0 | 1 |
| XLOC_016481 | CEP170P1     | chr4:119437494-119475359 | 0 | 0 | 0 | 1 |
| XLOC_016487 | PP12613      | chr4:122680084-122687963 | 0 | 0 | 0 | 1 |
| XLOC_016495 | LOC285419    | chr4:124573939-124851518 | 0 | 0 | 0 | 1 |
| XLOC_016496 | FAT4         | chr4:126237566-126414087 | 0 | 0 | 0 | 1 |
| XLOC_016497 | MIR2054      | chr4:126428413-126428462 | 0 | 0 | 0 | 1 |
| XLOC_016499 | SLC25A31     | chr4:128651554-128695447 | 0 | 0 | 0 | 1 |
| XLOC_016506 | PCDH10       | chr4:134070469-134112732 | 0 | 0 | 0 | 1 |



|             |              |                          |   |   |   |   |
|-------------|--------------|--------------------------|---|---|---|---|
| XLOC_016508 | LINC00499    | chr4:139230864-139345498 | 0 | 0 | 0 | 1 |
| XLOC_016513 | SCOC         | chr4:141178439-141303710 | 0 | 0 | 0 | 1 |
| XLOC_016520 | GUSBP5       | chr4:144480624-144482613 | 0 | 0 | 0 | 1 |
| XLOC_016521 | HHIP         | chr4:145564067-145659881 | 0 | 0 | 0 | 1 |
| XLOC_016525 | C4orf51      | chr4:146601355-146653948 | 0 | 0 | 0 | 1 |
| XLOC_016528 | EDNRA        | chr4:148402068-148466106 | 0 | 0 | 0 | 1 |
| XLOC_016531 | MIR4799      | chr4:148653452-148993927 | 0 | 0 | 0 | 1 |
| XLOC_016535 | PRSS48       | chr4:152198324-152212605 | 0 | 0 | 0 | 1 |
| XLOC_016543 | TLR2         | chr4:154605440-154627242 | 0 | 0 | 0 | 1 |
| XLOC_016544 | FGF          | chr4:155484131-155493915 | 0 | 0 | 0 | 1 |
| XLOC_016546 | RBM46        | chr4:155702426-155749965 | 0 | 0 | 0 | 1 |
| XLOC_016547 | NPY2R        | chr4:156129780-156138228 | 0 | 0 | 0 | 1 |
| XLOC_016548 | GUCY1A3      | chr4:156587861-156658214 | 0 | 0 | 0 | 1 |
| XLOC_016549 | GUCY1B3      | chr4:156680125-156728783 | 0 | 0 | 0 | 1 |
| XLOC_016551 | GLRB         | chr4:157997276-158093242 | 0 | 0 | 0 | 1 |
| XLOC_016552 | GRIA2        | chr4:158141735-158287226 | 0 | 0 | 0 | 1 |
| XLOC_016553 | LOC340017    | chr4:158493641-158497303 | 0 | 0 | 0 | 1 |
| XLOC_016555 | RXFP1        | chr4:159442865-159574521 | 0 | 0 | 0 | 1 |
| XLOC_016558 | MIR3688-2    | chr4:160049953-160050046 | 0 | 0 | 0 | 1 |
| XLOC_016560 | NPY5R        | chr4:164265090-164273086 | 0 | 0 | 0 | 1 |
| XLOC_016562 | MIR5684      | chr4:165426541-165630646 | 0 | 0 | 0 | 1 |
| XLOC_016563 | LOC100505989 | chr4:165675282-165724947 | 0 | 0 | 0 | 1 |
| XLOC_016564 | LOC100506013 | chr4:165798155-165818676 | 0 | 0 | 0 | 1 |
| XLOC_016565 | FAM218A      | chr4:165875597-165898818 | 0 | 0 | 0 | 1 |
| XLOC_016566 | TRIM60       | chr4:165953150-165962896 | 0 | 0 | 0 | 1 |
| XLOC_016569 | CPE          | chr4:166300096-166419482 | 0 | 0 | 0 | 1 |
| XLOC_016570 | MIR578       | chr4:166300096-166419482 | 0 | 0 | 0 | 1 |
| XLOC_016571 | TLL1         | chr4:166794409-167025609 | 0 | 0 | 0 | 1 |
| XLOC_016572 | ANXA10       | chr4:169013687-169108893 | 0 | 0 | 0 | 1 |
| XLOC_016575 | LOC100506122 | chr4:171961752-171980311 | 0 | 0 | 0 | 1 |
| XLOC_016576 | GALNTL6      | chr4:172734574-173961558 | 0 | 0 | 0 | 1 |
| XLOC_016579 | NBLA00301    | chr4:174451608-174462981 | 0 | 0 | 0 | 1 |
| XLOC_016581 | MIR4276      | chr4:175344945-175345015 | 0 | 0 | 0 | 1 |
| XLOC_016582 | ADAM29       | chr4:175839508-175899331 | 0 | 0 | 0 | 1 |
| XLOC_016583 | WDR17        | chr4:176986984-177103979 | 0 | 0 | 0 | 1 |
| XLOC_016586 | LOC285501    | chr4:178649910-178911904 | 0 | 0 | 0 | 1 |
| XLOC_016587 | MIR1305      | chr4:183090445-183090531 | 0 | 0 | 0 | 1 |
| XLOC_016596 | HELT         | chr4:185940082-185941926 | 0 | 0 | 0 | 1 |
| XLOC_016605 | F11          | chr4:187187117-187422212 | 0 | 0 | 0 | 1 |
| XLOC_016606 | ZFP42        | chr4:188916924-188926199 | 0 | 0 | 0 | 1 |
| XLOC_016608 | LOC401164    | chr4:189376731-189523062 | 0 | 0 | 0 | 1 |
| XLOC_016610 | DUX2         | chr4:190988866-190990406 | 0 | 0 | 0 | 1 |
| XLOC_016611 | DUX4L4       | chr4:190992092-190993703 | 0 | 0 | 0 | 1 |
| XLOC_016612 | DUX4L5       | chr4:190995385-190996996 | 0 | 0 | 0 | 1 |
| XLOC_016613 | DUX4L6       | chr4:190998678-191000289 | 0 | 0 | 0 | 1 |
| XLOC_016614 | DUX4L4       | chr4:191001978-191003583 | 0 | 0 | 0 | 1 |
| XLOC_016615 | DUX4         | chr4:191005266-191006883 | 0 | 0 | 0 | 1 |
| XLOC_016616 | DUX4L3       | chr4:191008565-191010176 | 0 | 0 | 0 | 1 |
| XLOC_016617 | DUX4         | chr4:191011859-191013476 | 0 | 0 | 0 | 1 |

|             |              |                        |   |   |   |   |
|-------------|--------------|------------------------|---|---|---|---|
| XLOC_016627 | RNF212       | chr4:1065265-1107352   | 0 | 0 | 0 | 1 |
| XLOC_016628 | TMED11P      | chr4:1108984-1116952   | 0 | 0 | 0 | 1 |
| XLOC_016642 | HTT-AS1      | chr4:3064972-3076241   | 0 | 0 | 0 | 1 |
| XLOC_016644 | LOC100133461 | chr4:3675319-3679582   | 0 | 0 | 0 | 1 |
| XLOC_016650 | CYTL1        | chr4:5016313-5021197   | 0 | 0 | 0 | 1 |
| XLOC_016651 | EVC2         | chr4:5564145-5711275   | 0 | 0 | 0 | 1 |
| XLOC_016653 | MIR378D1     | chr4:5925001-5925055   | 0 | 0 | 0 | 1 |
| XLOC_016654 | JAKMIP1      | chr4:6027925-6202318   | 0 | 0 | 0 | 1 |
| XLOC_016661 | PSAPL1       | chr4:7194373-7744564   | 0 | 0 | 0 | 1 |
| XLOC_016665 | HMX1         | chr4:8868772-8873543   | 0 | 0 | 0 | 1 |
| XLOC_016666 | MIR548I2     | chr4:9557788-9557937   | 0 | 0 | 0 | 1 |
| XLOC_016669 | MIR3138      | chr4:10075962-10118573 | 0 | 0 | 0 | 1 |
| XLOC_016671 | CLNK         | chr4:10491837-10686386 | 0 | 0 | 0 | 1 |
| XLOC_016672 | HS3ST1       | chr4:11399987-11430537 | 0 | 0 | 0 | 1 |
| XLOC_016674 | LOC285547    | chr4:13527942-13533041 | 0 | 0 | 0 | 1 |
| XLOC_016675 | NKX3-2       | chr4:13542453-13546114 | 0 | 0 | 0 | 1 |
| XLOC_016676 | LOC285548    | chr4:13547699-13549448 | 0 | 0 | 0 | 1 |
| XLOC_016678 | LOC441009    | chr4:14911584-15003669 | 0 | 0 | 0 | 1 |
| XLOC_016680 | FGFBP1       | chr4:15937192-15940363 | 0 | 0 | 0 | 1 |
| XLOC_016681 | FGFBP2       | chr4:15961862-15964859 | 0 | 0 | 0 | 1 |
| XLOC_016684 | LDB2         | chr4:16503164-16900424 | 0 | 0 | 0 | 1 |
| XLOC_016685 | MIR548AX     | chr4:16503164-16900424 | 0 | 0 | 0 | 1 |
| XLOC_016691 | KCNIP4-IT1   | chr4:20730238-21950374 | 0 | 0 | 0 | 1 |
| XLOC_016694 | MIR548AJ2    | chr4:23199716-23464726 | 0 | 0 | 0 | 1 |
| XLOC_016696 | MIR573       | chr4:24521814-24521913 | 0 | 0 | 0 | 1 |
| XLOC_016702 | CCKAR        | chr4:26483017-26492042 | 0 | 0 | 0 | 1 |
| XLOC_016704 | MIR4801      | chr4:37243531-37243613 | 0 | 0 | 0 | 1 |
| XLOC_016716 | LOC344967    | chr4:40044536-40159872 | 0 | 0 | 0 | 1 |
| XLOC_016718 | MIR4802      | chr4:40425271-40631883 | 0 | 0 | 0 | 1 |
| XLOC_016720 | PHOX2B       | chr4:41746098-41750987 | 0 | 0 | 0 | 1 |
| XLOC_016721 | BEND4        | chr4:42112869-42154895 | 0 | 0 | 0 | 1 |
| XLOC_016723 | KCTD8        | chr4:44175919-44450824 | 0 | 0 | 0 | 1 |
| XLOC_016724 | YIPF7        | chr4:44624353-44653658 | 0 | 0 | 0 | 1 |
| XLOC_016727 | GABRA2       | chr4:46251580-46392056 | 0 | 0 | 0 | 1 |
| XLOC_016728 | COX7B2       | chr4:46736846-46911252 | 0 | 0 | 0 | 1 |
| XLOC_016729 | GABRA4       | chr4:46920916-46996424 | 0 | 0 | 0 | 1 |
| XLOC_016741 | ERVMER34-1   | chr4:53609683-53617807 | 0 | 0 | 0 | 1 |
| XLOC_016753 | HOPX         | chr4:57514153-57547872 | 0 | 0 | 0 | 1 |
| XLOC_016754 | SPINK2       | chr4:57676025-57688035 | 0 | 0 | 0 | 1 |
| XLOC_016757 | TECRL        | chr4:65144176-65275178 | 0 | 0 | 0 | 1 |
| XLOC_016758 | LOC401134    | chr4:65779998-65870218 | 0 | 0 | 0 | 1 |
| XLOC_016759 | EPHA5        | chr4:66185280-66535653 | 0 | 0 | 0 | 1 |
| XLOC_016763 | TMPRSS11D    | chr4:68686593-68749716 | 0 | 0 | 0 | 1 |
| XLOC_016764 | TMPRSS11A    | chr4:68776018-68829232 | 0 | 0 | 0 | 1 |
| XLOC_016765 | TMPRSS11GP   | chr4:68857529-68863157 | 0 | 0 | 0 | 1 |
| XLOC_016766 | TMPRSS11F    | chr4:68918915-68995587 | 0 | 0 | 0 | 1 |
| XLOC_016767 | SYT14L       | chr4:68918915-68995587 | 0 | 0 | 0 | 1 |
| XLOC_016768 | TMPRSS11BNL  | chr4:69048009-69083798 | 0 | 0 | 0 | 1 |
| XLOC_016769 | TMPRSS11B    | chr4:69092370-69111412 | 0 | 0 | 0 | 1 |

|             |           |                          |   |   |   |   |
|-------------|-----------|--------------------------|---|---|---|---|
| XLOC_016772 | UGT2B15   | chr4:69512314-69536494   | 0 | 0 | 0 | 1 |
| XLOC_016773 | UGT2A3    | chr4:69794176-69817509   | 0 | 0 | 0 | 1 |
| XLOC_016774 | UGT2B10   | chr4:69870294-69886113   | 0 | 0 | 0 | 1 |
| XLOC_016775 | UGT2B11   | chr4:70066050-70080449   | 0 | 0 | 0 | 1 |
| XLOC_016776 | UGT2B4    | chr4:70345882-70361626   | 0 | 0 | 0 | 1 |
| XLOC_016778 | SULT1B1   | chr4:70592685-70626430   | 0 | 0 | 0 | 1 |
| XLOC_016780 | CSN2      | chr4:70820973-70826726   | 0 | 0 | 0 | 1 |
| XLOC_016783 | GC        | chr4:72607410-72671237   | 0 | 0 | 0 | 1 |
| XLOC_016784 | ADAMTS3   | chr4:73146685-73434516   | 0 | 0 | 0 | 1 |
| XLOC_016787 | RASSF6    | chr4:74437266-74486348   | 0 | 0 | 0 | 1 |
| XLOC_016788 | PF4       | chr4:74846541-74847841   | 0 | 0 | 0 | 1 |
| XLOC_016789 | PPBP      | chr4:74852155-74853907   | 0 | 0 | 0 | 1 |
| XLOC_016790 | CXCL5     | chr4:74861358-74864416   | 0 | 0 | 0 | 1 |
| XLOC_016792 | PPBPP2    | chr4:74919754-74921116   | 0 | 0 | 0 | 1 |
| XLOC_016801 | CXCL9     | chr4:76922622-76928641   | 0 | 0 | 0 | 1 |
| XLOC_016802 | CXCL10    | chr4:76932332-77033955   | 0 | 0 | 0 | 1 |
| XLOC_016803 | CXCL11    | chr4:76932332-77033955   | 0 | 0 | 0 | 1 |
| XLOC_016807 | SOWAHB    | chr4:77816081-77819002   | 0 | 0 | 0 | 1 |
| XLOC_016811 | NAA11     | chr4:80238271-80247171   | 0 | 0 | 0 | 1 |
| XLOC_016812 | GK2       | chr4:80327506-80329372   | 0 | 0 | 0 | 1 |
| XLOC_016814 | PRKG2     | chr4:82009836-82126215   | 0 | 0 | 0 | 1 |
| XLOC_016819 | LINC00575 | chr4:83534265-83542590   | 0 | 0 | 0 | 1 |
| XLOC_016821 | MIR575    | chr4:83550689-83720010   | 0 | 0 | 0 | 1 |
| XLOC_016830 | NKX6-1    | chr4:85414435-85419387   | 0 | 0 | 0 | 1 |
| XLOC_016832 | MAPK10    | chr4:86936275-87374283   | 0 | 0 | 0 | 1 |
| XLOC_016837 | MIR5705   | chr4:88221646-88221735   | 0 | 0 | 0 | 1 |
| XLOC_016840 | SPARCL1   | chr4:88394487-88450655   | 0 | 0 | 0 | 1 |
| XLOC_016846 | GPRIN3    | chr4:90165428-90229161   | 0 | 0 | 0 | 1 |
| XLOC_016847 | SNCA      | chr4:90645249-90763142   | 0 | 0 | 0 | 1 |
| XLOC_016848 | HPGDS     | chr4:95219706-95264027   | 0 | 0 | 0 | 1 |
| XLOC_016849 | UNC5C     | chr4:96083655-96470361   | 0 | 0 | 0 | 1 |
| XLOC_016850 | STPG2     | chr4:98480024-99064391   | 0 | 0 | 0 | 1 |
| XLOC_016854 | ADH4      | chr4:100010007-100222513 | 0 | 0 | 0 | 1 |
| XLOC_016855 | PCNAP1    | chr4:100010007-100222513 | 0 | 0 | 0 | 1 |
| XLOC_016857 | ADH1A     | chr4:100010007-100222513 | 0 | 0 | 0 | 1 |
| XLOC_016858 | ADH1B     | chr4:100227526-100242572 | 0 | 0 | 0 | 1 |
| XLOC_016859 | ADH1C     | chr4:100257648-100273917 | 0 | 0 | 0 | 1 |
| XLOC_016860 | ADH7      | chr4:100333417-100356667 | 0 | 0 | 0 | 1 |
| XLOC_016865 | DDIT4L    | chr4:101107026-101111655 | 0 | 0 | 0 | 1 |
| XLOC_016866 | EMCN      | chr4:101316497-101439250 | 0 | 0 | 0 | 1 |
| XLOC_016867 | EMCN-IT3  | chr4:101581435-101596270 | 0 | 0 | 0 | 1 |
| XLOC_016876 | TACR3     | chr4:104510624-104640973 | 0 | 0 | 0 | 1 |
| XLOC_016881 | GIMD1     | chr4:107279339-107288592 | 0 | 0 | 0 | 1 |
| XLOC_016882 | DKK2      | chr4:107842958-107957453 | 0 | 0 | 0 | 1 |
| XLOC_016886 | AGXT2L1   | chr4:109663201-109684235 | 0 | 0 | 0 | 1 |
| XLOC_016891 | CFI       | chr4:110661847-110723335 | 0 | 0 | 0 | 1 |
| XLOC_016895 | NEUROG2   | chr4:113434671-113437328 | 0 | 0 | 0 | 1 |
| XLOC_016897 | MIR367    | chr4:113460488-113578748 | 0 | 0 | 0 | 1 |
| XLOC_016898 | MIR302D   | chr4:113460488-113578748 | 0 | 0 | 0 | 1 |

|             |              |                          |   |   |   |   |
|-------------|--------------|--------------------------|---|---|---|---|
| XLOC_016899 | MIR302A      | chr4:113460488-113578748 | 0 | 0 | 0 | 1 |
| XLOC_016900 | MIR302C      | chr4:113460488-113578748 | 0 | 0 | 0 | 1 |
| XLOC_016901 | MIR302B      | chr4:113460488-113578748 | 0 | 0 | 0 | 1 |
| XLOC_016904 | NDST4        | chr4:115748926-116035032 | 0 | 0 | 0 | 1 |
| XLOC_016905 | TRAM1L1      | chr4:118004709-118006736 | 0 | 0 | 0 | 1 |
| XLOC_016915 | TNIP3        | chr4:122052563-122148621 | 0 | 0 | 0 | 1 |
| XLOC_016916 | QRFPR        | chr4:122249796-122302181 | 0 | 0 | 0 | 1 |
| XLOC_016918 | TMEM155      | chr4:122680084-122687963 | 0 | 0 | 0 | 1 |
| XLOC_016921 | TRPC3        | chr4:122800182-122872909 | 0 | 0 | 0 | 1 |
| XLOC_016922 | IL2          | chr4:123372625-123377650 | 0 | 0 | 0 | 1 |
| XLOC_016923 | IL21         | chr4:123533782-123542212 | 0 | 0 | 0 | 1 |
| XLOC_016930 | PABPC4L      | chr4:135117488-135122903 | 0 | 0 | 0 | 1 |
| XLOC_016932 | LINC00616    | chr4:138948576-139163503 | 0 | 0 | 0 | 1 |
| XLOC_016939 | LOC100129858 | chr4:141178439-141303710 | 0 | 0 | 0 | 1 |
| XLOC_016940 | CLGN         | chr4:141309606-141348815 | 0 | 0 | 0 | 1 |
| XLOC_016941 | UCP1         | chr4:141481049-141489959 | 0 | 0 | 0 | 1 |
| XLOC_016942 | TBC1D9       | chr4:141541935-141677471 | 0 | 0 | 0 | 1 |
| XLOC_016943 | TNRC18P1     | chr4:141541935-141677471 | 0 | 0 | 0 | 1 |
| XLOC_016944 | RNF150       | chr4:141786724-142054616 | 0 | 0 | 0 | 1 |
| XLOC_016945 | INPP4B       | chr4:142949181-143767604 | 0 | 0 | 0 | 1 |
| XLOC_016946 | FREM3        | chr4:144498560-144621828 | 0 | 0 | 0 | 1 |
| XLOC_016947 | GYPE         | chr4:144792018-144826716 | 0 | 0 | 0 | 1 |
| XLOC_016948 | GYPB         | chr4:144917256-144940496 | 0 | 0 | 0 | 1 |
| XLOC_016949 | GYPA         | chr4:145030455-145061904 | 0 | 0 | 0 | 1 |
| XLOC_016954 | LOC100505545 | chr4:147030606-147043065 | 0 | 0 | 0 | 1 |
| XLOC_016956 | TTC29        | chr4:147628178-147867034 | 0 | 0 | 0 | 1 |
| XLOC_016963 | MIR3140      | chr4:153242409-153456393 | 0 | 0 | 0 | 1 |
| XLOC_016964 | TMEM154      | chr4:153547265-153601317 | 0 | 0 | 0 | 1 |
| XLOC_016967 | RNF175       | chr4:154631311-154681387 | 0 | 0 | 0 | 1 |
| XLOC_016968 | SFRP2        | chr4:154701741-154710228 | 0 | 0 | 0 | 1 |
| XLOC_016969 | DCHS2        | chr4:155155526-155412930 | 0 | 0 | 0 | 1 |
| XLOC_016971 | FGA          | chr4:155504279-155511897 | 0 | 0 | 0 | 1 |
| XLOC_016972 | FGG          | chr4:155525285-155533902 | 0 | 0 | 0 | 1 |
| XLOC_016973 | MAP9         | chr4:156263811-156298122 | 0 | 0 | 0 | 1 |
| XLOC_016974 | ASIC5        | chr4:156750880-156787425 | 0 | 0 | 0 | 1 |
| XLOC_016976 | PDGFC        | chr4:157682762-157892546 | 0 | 0 | 0 | 1 |
| XLOC_016980 | C4orf45      | chr4:159690181-159956333 | 0 | 0 | 0 | 1 |
| XLOC_016981 | MIR3688-1    | chr4:160049953-160050046 | 0 | 0 | 0 | 1 |
| XLOC_016982 | FSTL5        | chr4:162305043-163085186 | 0 | 0 | 0 | 1 |
| XLOC_016984 | NPY1R        | chr4:164245116-164253947 | 0 | 0 | 0 | 1 |
| XLOC_016985 | TKTL2        | chr4:164392246-164395047 | 0 | 0 | 0 | 1 |
| XLOC_016987 | ANP32C       | chr4:164445449-165304407 | 0 | 0 | 0 | 1 |
| XLOC_016988 | TRIM61       | chr4:165875597-165898818 | 0 | 0 | 0 | 1 |
| XLOC_016998 | LOC100506085 | chr4:170838911-170897053 | 0 | 0 | 0 | 1 |
| XLOC_017002 | SCRG1        | chr4:174309298-174320617 | 0 | 0 | 0 | 1 |
| XLOC_017003 | HAND2        | chr4:174447651-174451378 | 0 | 0 | 0 | 1 |
| XLOC_017005 | HPGD         | chr4:175411327-175444049 | 0 | 0 | 0 | 1 |
| XLOC_017006 | GLRA3        | chr4:175563197-175750465 | 0 | 0 | 0 | 1 |
| XLOC_017009 | ASB5         | chr4:177134825-177190373 | 0 | 0 | 0 | 1 |

|             |              |                          |   |   |   |   |
|-------------|--------------|--------------------------|---|---|---|---|
| XLOC_017010 | VEGFC        | chr4:177604690-177713895 | 0 | 0 | 0 | 1 |
| XLOC_017012 | LINC00290    | chr4:181985242-182080302 | 0 | 0 | 0 | 1 |
| XLOC_017021 | LOC728175    | chr4:185262183-185275130 | 0 | 0 | 0 | 1 |
| XLOC_017028 | MIR3945      | chr4:185772166-185772264 | 0 | 0 | 0 | 1 |
| XLOC_017029 | LOC100506229 | chr4:185814153-185820615 | 0 | 0 | 0 | 1 |
| XLOC_017034 | PDLIM3       | chr4:186421814-186456712 | 0 | 0 | 0 | 1 |
| XLOC_017035 | SORBS2       | chr4:186506597-186877870 | 0 | 0 | 0 | 1 |
| XLOC_017037 | LOC285441    | chr4:187187117-187422212 | 0 | 0 | 0 | 1 |
| XLOC_017038 | MTNR1A       | chr4:187454808-187476537 | 0 | 0 | 0 | 1 |
| XLOC_017040 | LOC339975    | chr4:188225236-188426767 | 0 | 0 | 0 | 1 |
| XLOC_017042 | FRG2         | chr4:190945522-190948412 | 0 | 0 | 0 | 1 |
| XLOC_017059 | SLC6A19      | chr5:1201709-1225230     | 0 | 0 | 0 | 1 |
| XLOC_017060 | SLC6A18      | chr5:1225469-1246304     | 0 | 0 | 0 | 1 |
| XLOC_017063 | IRX1         | chr5:3596167-3601517     | 0 | 0 | 0 | 1 |
| XLOC_017064 | LOC340094    | chr5:5034471-5070115     | 0 | 0 | 0 | 1 |
| XLOC_017067 | UBE2QL1      | chr5:6448735-6496834     | 0 | 0 | 0 | 1 |
| XLOC_017068 | LOC255167    | chr5:6582286-6588613     | 0 | 0 | 0 | 1 |
| XLOC_017071 | ADCY2        | chr5:7396342-7830194     | 0 | 0 | 0 | 1 |
| XLOC_017074 | LOC100505806 | chr5:9546311-9550409     | 0 | 0 | 0 | 1 |
| XLOC_017075 | SNORD123     | chr5:9546311-9550409     | 0 | 0 | 0 | 1 |
| XLOC_017080 | CT49         | chr5:12574968-12805295   | 0 | 0 | 0 | 1 |
| XLOC_017085 | FBXL7        | chr5:15500304-15939900   | 0 | 0 | 0 | 1 |
| XLOC_017086 | BASP1        | chr5:17130136-17276954   | 0 | 0 | 0 | 1 |
| XLOC_017088 | PMCHL1       | chr5:21750972-22853731   | 0 | 0 | 0 | 1 |
| XLOC_017089 | PRDM9        | chr5:23507723-23528706   | 0 | 0 | 0 | 1 |
| XLOC_017091 | LSP1P3       | chr5:28926976-28927420   | 0 | 0 | 0 | 1 |
| XLOC_017097 | LOC340113    | chr5:32947548-32962573   | 0 | 0 | 0 | 1 |
| XLOC_017099 | RXFP3        | chr5:33936490-33939023   | 0 | 0 | 0 | 1 |
| XLOC_017105 | IL7R         | chr5:35856976-35879705   | 0 | 0 | 0 | 1 |
| XLOC_017107 | SLC1A3       | chr5:36606456-36688436   | 0 | 0 | 0 | 1 |
| XLOC_017110 | EGFLAM       | chr5:38258510-38465582   | 0 | 0 | 0 | 1 |
| XLOC_017118 | CCDC152      | chr5:42756919-42812024   | 0 | 0 | 0 | 1 |
| XLOC_017122 | NNT          | chr5:43573286-43705668   | 0 | 0 | 0 | 1 |
| XLOC_017131 | HSPB3        | chr5:53751430-53752214   | 0 | 0 | 0 | 1 |
| XLOC_017132 | SNX18        | chr5:53813588-53842416   | 0 | 0 | 0 | 1 |
| XLOC_017133 | GZMK         | chr5:54320106-54329960   | 0 | 0 | 0 | 1 |
| XLOC_017134 | GZMA         | chr5:54398473-54406080   | 0 | 0 | 0 | 1 |
| XLOC_017142 | GAPT         | chr5:57787329-57792185   | 0 | 0 | 0 | 1 |
| XLOC_017143 | RAB3C        | chr5:57878938-58147406   | 0 | 0 | 0 | 1 |
| XLOC_017144 | PART1        | chr5:58264865-59843484   | 0 | 0 | 0 | 1 |
| XLOC_017147 | C5orf64      | chr5:60933635-61002362   | 0 | 0 | 0 | 1 |
| XLOC_017150 | RNF180       | chr5:63461670-63668696   | 0 | 0 | 0 | 1 |
| XLOC_017151 | RGS7BP       | chr5:63801773-63908121   | 0 | 0 | 0 | 1 |
| XLOC_017152 | FAM159B      | chr5:63986134-64064496   | 0 | 0 | 0 | 1 |
| XLOC_017174 | SERF1A       | chr5:70196489-70214357   | 0 | 0 | 0 | 1 |
| XLOC_017179 | CARTPT       | chr5:71014989-71016875   | 0 | 0 | 0 | 1 |
| XLOC_017181 | MIR4803      | chr5:71403117-71505397   | 0 | 0 | 0 | 1 |
| XLOC_017184 | MIR4804      | chr5:72112417-72210215   | 0 | 0 | 0 | 1 |
| XLOC_017187 | TMEM174      | chr5:72469022-72470970   | 0 | 0 | 0 | 1 |

|             |              |                          |   |   |   |   |
|-------------|--------------|--------------------------|---|---|---|---|
| XLOC_017196 | SV2C         | chr5:75379304-75621416   | 0 | 0 | 0 | 1 |
| XLOC_017198 | NCRUPAR      | chr5:76008227-76008713   | 0 | 0 | 0 | 1 |
| XLOC_017200 | F2RL1        | chr5:76114832-76131140   | 0 | 0 | 0 | 1 |
| XLOC_017201 | S100Z        | chr5:76145825-76217056   | 0 | 0 | 0 | 1 |
| XLOC_017202 | CRHBP        | chr5:76248679-76265299   | 0 | 0 | 0 | 1 |
| XLOC_017213 | SPZ1         | chr5:79615789-79617660   | 0 | 0 | 0 | 1 |
| XLOC_017218 | RNU5E-1      | chr5:80256507-81047072   | 0 | 0 | 0 | 1 |
| XLOC_017223 | MIR3977      | chr5:82135973-82136043   | 0 | 0 | 0 | 1 |
| XLOC_017225 | VCAN         | chr5:82767492-82878122   | 0 | 0 | 0 | 1 |
| XLOC_017226 | NBPF22P      | chr5:85578261-85593365   | 0 | 0 | 0 | 1 |
| XLOC_017228 | MIR3607      | chr5:85913783-85916583   | 0 | 0 | 0 | 1 |
| XLOC_017235 | MIR548AO     | chr5:92919042-93447404   | 0 | 0 | 0 | 1 |
| XLOC_017239 | GPR150       | chr5:94955979-94957284   | 0 | 0 | 0 | 1 |
| XLOC_017243 | MIR583       | chr5:95414841-95414916   | 0 | 0 | 0 | 1 |
| XLOC_017253 | RAB9BP1      | chr5:104435174-104435799 | 0 | 0 | 0 | 1 |
| XLOC_017256 | LOC100289673 | chr5:109218882-109221200 | 0 | 0 | 0 | 1 |
| XLOC_017260 | CAMK4        | chr5:110559946-110820748 | 0 | 0 | 0 | 1 |
| XLOC_017262 | NREP-AS1     | chr5:110834021-111353003 | 0 | 0 | 0 | 1 |
| XLOC_017264 | SNORA13      | chr5:111496222-111498198 | 0 | 0 | 0 | 1 |
| XLOC_017265 | FLJ11235     | chr5:111755279-111756677 | 0 | 0 | 0 | 1 |
| XLOC_017270 | KCNN2        | chr5:113698015-113832197 | 0 | 0 | 0 | 1 |
| XLOC_017273 | ARL14EPL     | chr5:115387162-115394827 | 0 | 0 | 0 | 1 |
| XLOC_017276 | MIR1244-2    | chr5:118172568-118324240 | 0 | 0 | 0 | 1 |
| XLOC_017281 | PRR16        | chr5:119800018-120022964 | 0 | 0 | 0 | 1 |
| XLOC_017282 | FTMT         | chr5:121187649-121188523 | 0 | 0 | 0 | 1 |
| XLOC_017291 | GRAMD3       | chr5:125695787-125829853 | 0 | 0 | 0 | 1 |
| XLOC_017295 | MEGF10       | chr5:126626455-126796910 | 0 | 0 | 0 | 1 |
| XLOC_017297 | CTXN3        | chr5:126984712-126994322 | 0 | 0 | 0 | 1 |
| XLOC_017299 | SLC27A6      | chr5:128301209-128369335 | 0 | 0 | 0 | 1 |
| XLOC_017301 | MIR4633      | chr5:128430441-128449719 | 0 | 0 | 0 | 1 |
| XLOC_017302 | ADAMTS19     | chr5:128796102-129074376 | 0 | 0 | 0 | 1 |
| XLOC_017303 | KIAA1024L    | chr5:129083883-129100756 | 0 | 0 | 0 | 1 |
| XLOC_017304 | CHSY3        | chr5:129240522-129522327 | 0 | 0 | 0 | 1 |
| XLOC_017307 | IL3          | chr5:131396346-131398896 | 0 | 0 | 0 | 1 |
| XLOC_017309 | PDLIM4       | chr5:131593350-131609147 | 0 | 0 | 0 | 1 |
| XLOC_017315 | IL4          | chr5:132009677-132018370 | 0 | 0 | 0 | 1 |
| XLOC_017334 | FBXL21       | chr5:135266005-135277367 | 0 | 0 | 0 | 1 |
| XLOC_017337 | NPY6R        | chr5:137136881-137146439 | 0 | 0 | 0 | 1 |
| XLOC_017340 | WNT8A        | chr5:137419773-137427199 | 0 | 0 | 0 | 1 |
| XLOC_017365 | VTRNA1-2     | chr5:140098510-140098598 | 0 | 0 | 0 | 1 |
| XLOC_017368 | PCDHB1       | chr5:140430978-140433512 | 0 | 0 | 0 | 1 |
| XLOC_017374 | PCDHB17      | chr5:140535579-140537990 | 0 | 0 | 0 | 1 |
| XLOC_017395 | MIR5197      | chr5:143059424-143059536 | 0 | 0 | 0 | 1 |
| XLOC_017396 | HMH1         | chr5:143191725-143200284 | 0 | 0 | 0 | 1 |
| XLOC_017402 | STK32A       | chr5:146614578-146763768 | 0 | 0 | 0 | 1 |
| XLOC_017403 | JAKMIP2-AS1  | chr5:146939556-147162411 | 0 | 0 | 0 | 1 |
| XLOC_017404 | SCGB3A2      | chr5:147258273-147261756 | 0 | 0 | 0 | 1 |
| XLOC_017405 | SPINK5       | chr5:147443534-147516925 | 0 | 0 | 0 | 1 |
| XLOC_017406 | SPINK14      | chr5:147549295-147554961 | 0 | 0 | 0 | 1 |

|             |                           |                          |   |   |   |   |
|-------------|---------------------------|--------------------------|---|---|---|---|
| XLOC_017407 | SPINK6                    | chr5:147582356-147594700 | 0 | 0 | 0 | 1 |
| XLOC_017408 | SPINK13                   | chr5:147648422-147665773 | 0 | 0 | 0 | 1 |
| XLOC_017409 | SPINK7                    | chr5:147691989-147695481 | 0 | 0 | 0 | 1 |
| XLOC_017410 | SPINK9                    | chr5:147715121-147719412 | 0 | 0 | 0 | 1 |
| XLOC_017422 | CDX1                      | chr5:149546343-149564121 | 0 | 0 | 0 | 1 |
| XLOC_017434 | GRIA1                     | chr5:152870083-153193429 | 0 | 0 | 0 | 1 |
| XLOC_017442 | SGCD                      | chr5:155753766-156194798 | 0 | 0 | 0 | 1 |
| XLOC_017444 | ITK                       | chr5:156607906-156682109 | 0 | 0 | 0 | 1 |
| XLOC_017446 | NIPAL4                    | chr5:156887026-156901730 | 0 | 0 | 0 | 1 |
| XLOC_017447 | C5orf52                   | chr5:157098560-157107162 | 0 | 0 | 0 | 1 |
| XLOC_017452 | ADRA1B                    | chr5:159343739-159400017 | 0 | 0 | 0 | 1 |
| XLOC_017456 | MIR3142                   | chr5:159901408-159901490 | 0 | 0 | 0 | 1 |
| XLOC_017457 | MIR146A                   | chr5:159912358-159912457 | 0 | 0 | 0 | 1 |
| XLOC_017458 | GABRA6                    | chr5:161112657-161129598 | 0 | 0 | 0 | 1 |
| XLOC_017459 | GABRA1                    | chr5:161274196-161326965 | 0 | 0 | 0 | 1 |
| XLOC_017460 | GABRG2                    | chr5:161494647-161582545 | 0 | 0 | 0 | 1 |
| XLOC_017468 | MIR103B1                  | chr5:167982627-168006614 | 0 | 0 | 0 | 1 |
| XLOC_017470 | DOCK2                     | chr5:169064250-169510386 | 0 | 0 | 0 | 1 |
| XLOC_017471 | MIR378E                   | chr5:169064250-169510386 | 0 | 0 | 0 | 1 |
| XLOC_017472 | FOXI1                     | chr5:169532916-169536729 | 0 | 0 | 0 | 1 |
| XLOC_017473 | C5orf58                   | chr5:169659949-169673235 | 0 | 0 | 0 | 1 |
| XLOC_017475 | KCNIP1                    | chr5:169780880-170163636 | 0 | 0 | 0 | 1 |
| XLOC_017476 | GABRP                     | chr5:170210722-170241050 | 0 | 0 | 0 | 1 |
| XLOC_017478 | TLX3                      | chr5:170736287-170739138 | 0 | 0 | 0 | 1 |
| XLOC_017491 | C5orf47                   | chr5:173416161-173433143 | 0 | 0 | 0 | 1 |
| XLOC_017492 | HMP19                     | chr5:173472606-173536182 | 0 | 0 | 0 | 1 |
| XLOC_017496 | HRH2                      | chr5:175085039-175113245 | 0 | 0 | 0 | 1 |
| XLOC_017497 | CPLX2                     | chr5:175223609-175311023 | 0 | 0 | 0 | 1 |
| XLOC_017498 | FAM153B                   | chr5:175490711-175541801 | 0 | 0 | 0 | 1 |
| XLOC_017499 | LOC100507387              | chr5:175546551-175552168 | 0 | 0 | 0 | 1 |
| XLOC_017505 | EIF4E1B                   | chr5:176057682-176073642 | 0 | 0 | 0 | 1 |
| XLOC_017526 | ZNF879                    | chr5:178450775-178461388 | 0 | 0 | 0 | 1 |
| XLOC_017527 | ZNF354C                   | chr5:178487606-178507691 | 0 | 0 | 0 | 1 |
| XLOC_017534 | LINC00847                 | chr5:180256953-180262726 | 0 | 0 | 0 | 1 |
| XLOC_017536 | BTNL3                     | chr5:180415844-180433727 | 0 | 0 | 0 | 1 |
| XLOC_017538 | OR2V2                     | chr5:180581942-180582890 | 0 | 0 | 0 | 1 |
| XLOC_017540 | LOC100132062,LOC100132062 | chr5:180750506-180755196 | 0 | 0 | 0 | 1 |
| XLOC_017541 | OR4F3                     | chr5:180794287-180795226 | 0 | 0 | 0 | 1 |
| XLOC_017546 | MIR4456                   | chr5:535954-535997       | 0 | 0 | 0 | 1 |
| XLOC_017550 | LOC100506688              | chr5:988424-997455       | 0 | 0 | 0 | 1 |
| XLOC_017552 | MIR4635                   | chr5:1050488-1112172     | 0 | 0 | 0 | 1 |
| XLOC_017554 | MIR4457                   | chr5:1309424-1309492     | 0 | 0 | 0 | 1 |
| XLOC_017560 | MIR4277                   | chr5:1708899-1708983     | 0 | 0 | 0 | 1 |
| XLOC_017562 | IRX4                      | chr5:1877540-1882880     | 0 | 0 | 0 | 1 |
| XLOC_017564 | LOC285577                 | chr5:3417265-3536208     | 0 | 0 | 0 | 1 |
| XLOC_017568 | MIR4278                   | chr5:6827965-6828034     | 0 | 0 | 0 | 1 |
| XLOC_017569 | MIR4454                   | chr5:7269415-7269467     | 0 | 0 | 0 | 1 |
| XLOC_017571 | C5orf49                   | chr5:7830490-7851603     | 0 | 0 | 0 | 1 |
| XLOC_017573 | LOC729506                 | chr5:8333595-8457677     | 0 | 0 | 0 | 1 |

|             |              |                        |   |   |   |   |
|-------------|--------------|------------------------|---|---|---|---|
| XLOC_017575 | MIR4636      | chr5:9035137-9546233   | 0 | 0 | 0 | 1 |
| XLOC_017576 | TAS2R1       | chr5:9629108-9630463   | 0 | 0 | 0 | 1 |
| XLOC_017577 | LOC285692    | chr5:9641426-9903936   | 0 | 0 | 0 | 1 |
| XLOC_017581 | CTNND2       | chr5:10971951-11904110 | 0 | 0 | 0 | 1 |
| XLOC_017584 | MIR4637      | chr5:14704908-14871887 | 0 | 0 | 0 | 1 |
| XLOC_017585 | MARCH11      | chr5:16067473-16179897 | 0 | 0 | 0 | 1 |
| XLOC_017589 | LOC285696    | chr5:17130136-17276954 | 0 | 0 | 0 | 1 |
| XLOC_017590 | LOC401177    | chr5:17379014-17387419 | 0 | 0 | 0 | 1 |
| XLOC_017591 | CDH18        | chr5:19473154-19988353 | 0 | 0 | 0 | 1 |
| XLOC_017593 | CDH10        | chr5:24487208-24645085 | 0 | 0 | 0 | 1 |
| XLOC_017594 | LOC340107    | chr5:24835388-24840692 | 0 | 0 | 0 | 1 |
| XLOC_017595 | CDH9         | chr5:26880708-27038689 | 0 | 0 | 0 | 1 |
| XLOC_017597 | MIR4279      | chr5:31799030-32111038 | 0 | 0 | 0 | 1 |
| XLOC_017601 | ADAMTS12     | chr5:33527286-33892124 | 0 | 0 | 0 | 1 |
| XLOC_017606 | PRLR         | chr5:35048860-35230823 | 0 | 0 | 0 | 1 |
| XLOC_017607 | CAPSL        | chr5:35904397-35938881 | 0 | 0 | 0 | 1 |
| XLOC_017608 | UGT3A1       | chr5:35953190-36001130 | 0 | 0 | 0 | 1 |
| XLOC_017609 | UGT3A2       | chr5:36035118-36067023 | 0 | 0 | 0 | 1 |
| XLOC_017611 | MIR580       | chr5:36103413-36152015 | 0 | 0 | 0 | 1 |
| XLOC_017618 | EGFLAM-AS4   | chr5:38258510-38465582 | 0 | 0 | 0 | 1 |
| XLOC_017619 | LIFR         | chr5:38475064-38595507 | 0 | 0 | 0 | 1 |
| XLOC_017620 | MIR3650      | chr5:38475064-38595507 | 0 | 0 | 0 | 1 |
| XLOC_017622 | FYB          | chr5:39105353-39270759 | 0 | 0 | 0 | 1 |
| XLOC_017623 | C9           | chr5:39284377-39364655 | 0 | 0 | 0 | 1 |
| XLOC_017629 | SNORD72      | chr5:40831429-40835387 | 0 | 0 | 0 | 1 |
| XLOC_017630 | MROH2B       | chr5:40998121-41071444 | 0 | 0 | 0 | 1 |
| XLOC_017631 | C6           | chr5:41142247-41261540 | 0 | 0 | 0 | 1 |
| XLOC_017632 | PLCXD3       | chr5:41307047-41510730 | 0 | 0 | 0 | 1 |
| XLOC_017639 | CCL28        | chr5:43381599-43412488 | 0 | 0 | 0 | 1 |
| XLOC_017643 | LOC100652772 | chr5:43573286-43705668 | 0 | 0 | 0 | 1 |
| XLOC_017644 | FGF10        | chr5:44305096-44388784 | 0 | 0 | 0 | 1 |
| XLOC_017645 | HCN1         | chr5:45255051-45696220 | 0 | 0 | 0 | 1 |
| XLOC_017650 | MIR581       | chr5:53180613-53606403 | 0 | 0 | 0 | 1 |
| XLOC_017651 | ESM1         | chr5:54273694-54281414 | 0 | 0 | 0 | 1 |
| XLOC_017653 | MIR449A      | chr5:54408798-54469005 | 0 | 0 | 0 | 1 |
| XLOC_017654 | MIR449B      | chr5:54408798-54469005 | 0 | 0 | 0 | 1 |
| XLOC_017655 | MIR449C      | chr5:54408798-54469005 | 0 | 0 | 0 | 1 |
| XLOC_017660 | MIR5687      | chr5:54603575-54830873 | 0 | 0 | 0 | 1 |
| XLOC_017664 | ANKRD55      | chr5:55395506-55529186 | 0 | 0 | 0 | 1 |
| XLOC_017666 | ACTBL2       | chr5:56775842-56778636 | 0 | 0 | 0 | 1 |
| XLOC_017674 | HTR1A        | chr5:63255874-63258119 | 0 | 0 | 0 | 1 |
| XLOC_017681 | CD180        | chr5:66478103-66492617 | 0 | 0 | 0 | 1 |
| XLOC_017693 | ZNF366       | chr5:71739233-71803249 | 0 | 0 | 0 | 1 |
| XLOC_017707 | OTP          | chr5:76924536-76934522 | 0 | 0 | 0 | 1 |
| XLOC_017716 | LOC644936    | chr5:79594916-79596297 | 0 | 0 | 0 | 1 |
| XLOC_017718 | ANKRD34B     | chr5:79852573-79866304 | 0 | 0 | 0 | 1 |
| XLOC_017722 | ACOT12       | chr5:80256507-81047072 | 0 | 0 | 0 | 1 |
| XLOC_017727 | HAPLN1       | chr5:82934016-83016896 | 0 | 0 | 0 | 1 |
| XLOC_017728 | EDIL3        | chr5:83238125-83680611 | 0 | 0 | 0 | 1 |



|             |                 |                          |   |   |   |   |
|-------------|-----------------|--------------------------|---|---|---|---|
| XLOC_017729 | MIR4280         | chr5:86410695-86410771   | 0 | 0 | 0 | 1 |
| XLOC_017732 | LINC00461,MIR9- | chr5:87836596-87980620   | 0 | 0 | 0 | 1 |
| XLOC_017734 | MIR3660         | chr5:89312437-89312537   | 0 | 0 | 0 | 1 |
| XLOC_017750 | LIX1            | chr5:96427573-96478520   | 0 | 0 | 0 | 1 |
| XLOC_017754 | LOC100133050    | chr5:99715208-99723958   | 0 | 0 | 0 | 1 |
| XLOC_017756 | SLCO4C1         | chr5:101569691-101632253 | 0 | 0 | 0 | 1 |
| XLOC_017757 | SLCO6A1         | chr5:101707651-101834720 | 0 | 0 | 0 | 1 |
| XLOC_017770 | TSSK1B          | chr5:112312406-112824527 | 0 | 0 | 0 | 1 |
| XLOC_017781 | MGC32805        | chr5:121647819-121814782 | 0 | 0 | 0 | 1 |
| XLOC_017784 | ZNF608          | chr5:123972609-124080805 | 0 | 0 | 0 | 1 |
| XLOC_017789 | FBN2            | chr5:127593600-127873735 | 0 | 0 | 0 | 1 |
| XLOC_017790 | MIR4460         | chr5:128732754-128732840 | 0 | 0 | 0 | 1 |
| XLOC_017797 | MIR3936         | chr5:131630144-131731306 | 0 | 0 | 0 | 1 |
| XLOC_017807 | MIR1289-2       | chr5:132532151-132948223 | 0 | 0 | 0 | 1 |
| XLOC_017816 | LOC340073       | chr5:134571923-134583867 | 0 | 0 | 0 | 1 |
| XLOC_017818 | C5orf20         | chr5:134779903-134783038 | 0 | 0 | 0 | 1 |
| XLOC_017819 | TIFAB           | chr5:134784557-134788089 | 0 | 0 | 0 | 1 |
| XLOC_017820 | NEUROG1         | chr5:134869971-134871639 | 0 | 0 | 0 | 1 |
| XLOC_017821 | CXCL14          | chr5:134906370-134914969 | 0 | 0 | 0 | 1 |
| XLOC_017822 | LOC340074       | chr5:134984371-134989624 | 0 | 0 | 0 | 1 |
| XLOC_017823 | IL9             | chr5:135227934-135231516 | 0 | 0 | 0 | 1 |
| XLOC_017824 | LECT2           | chr5:135282599-135290723 | 0 | 0 | 0 | 1 |
| XLOC_017825 | VTRNA2-1        | chr5:135416186-135416286 | 0 | 0 | 0 | 1 |
| XLOC_017828 | TRPC7           | chr5:135548998-135701164 | 0 | 0 | 0 | 1 |
| XLOC_017830 | KLHL3           | chr5:136953188-137071779 | 0 | 0 | 0 | 1 |
| XLOC_017831 | MIR874          | chr5:136953188-137071779 | 0 | 0 | 0 | 1 |
| XLOC_017841 | SNORD63         | chr5:137890570-137911318 | 0 | 0 | 0 | 1 |
| XLOC_017851 | NRG2            | chr5:139226363-139422884 | 0 | 0 | 0 | 1 |
| XLOC_017867 | LOC729080       | chr5:141275190-141276260 | 0 | 0 | 0 | 1 |
| XLOC_017872 | ARHGAP26-AS1    | chr5:142150291-142608572 | 0 | 0 | 0 | 1 |
| XLOC_017873 | NR3C1           | chr5:142657495-142815077 | 0 | 0 | 0 | 1 |
| XLOC_017876 | GRXCR2          | chr5:145239295-145252531 | 0 | 0 | 0 | 1 |
| XLOC_017879 | GPR151          | chr5:145894416-145895676 | 0 | 0 | 0 | 1 |
| XLOC_017880 | PPP2R2B         | chr5:145969066-146461083 | 0 | 0 | 0 | 1 |
| XLOC_017881 | PPP2R2B-IT1     | chr5:145969066-146461083 | 0 | 0 | 0 | 1 |
| XLOC_017882 | DPYSL3          | chr5:146770370-146889619 | 0 | 0 | 0 | 1 |
| XLOC_017883 | JAKMIP2         | chr5:146939556-147162411 | 0 | 0 | 0 | 1 |
| XLOC_017885 | C5orf46         | chr5:147272270-147286101 | 0 | 0 | 0 | 1 |
| XLOC_017886 | HTR4            | chr5:147830594-148033739 | 0 | 0 | 0 | 1 |
| XLOC_017894 | CAMK2A          | chr5:149599053-149669403 | 0 | 0 | 0 | 1 |
| XLOC_017901 | ZNF300P1        | chr5:150309997-150326146 | 0 | 0 | 0 | 1 |
| XLOC_017905 | SLC36A3         | chr5:150655925-150683334 | 0 | 0 | 0 | 1 |
| XLOC_017908 | SPARC           | chr5:151040656-151066615 | 0 | 0 | 0 | 1 |
| XLOC_017910 | GLRA1           | chr5:151202073-151304397 | 0 | 0 | 0 | 1 |
| XLOC_017911 | NMUR2           | chr5:151771101-151784840 | 0 | 0 | 0 | 1 |
| XLOC_017914 | HAND1           | chr5:153854531-153857824 | 0 | 0 | 0 | 1 |
| XLOC_017915 | MIR3141         | chr5:153975571-153975632 | 0 | 0 | 0 | 1 |
| XLOC_017918 | TIMD4           | chr5:156346292-156390266 | 0 | 0 | 0 | 1 |
| XLOC_017919 | HAVCR1          | chr5:156456530-156485970 | 0 | 0 | 0 | 1 |

|             |             |                          |   |   |   |   |
|-------------|-------------|--------------------------|---|---|---|---|
| XLOC_017922 | FAM71B      | chr5:156589343-156593279 | 0 | 0 | 0 | 1 |
| XLOC_017923 | FNDC9       | chr5:156693090-156822606 | 0 | 0 | 0 | 1 |
| XLOC_017929 | IL12B       | chr5:158741790-158757481 | 0 | 0 | 0 | 1 |
| XLOC_017930 | LOC285627   | chr5:158875563-158893284 | 0 | 0 | 0 | 1 |
| XLOC_017936 | ATP10B      | chr5:159990126-160279219 | 0 | 0 | 0 | 1 |
| XLOC_017937 | LOC285629   | chr5:160358785-160365633 | 0 | 0 | 0 | 1 |
| XLOC_017938 | GABRB2      | chr5:160715435-160975130 | 0 | 0 | 0 | 1 |
| XLOC_017941 | MIR103A1    | chr5:167982627-168006614 | 0 | 0 | 0 | 1 |
| XLOC_017942 | SLIT3       | chr5:168088737-168728133 | 0 | 0 | 0 | 1 |
| XLOC_017943 | MIR218-2    | chr5:168088737-168728133 | 0 | 0 | 0 | 1 |
| XLOC_017944 | MIR585      | chr5:168088737-168728133 | 0 | 0 | 0 | 1 |
| XLOC_017945 | FAM196B     | chr5:169064250-169510386 | 0 | 0 | 0 | 1 |
| XLOC_017946 | LCP2        | chr5:169675087-169724822 | 0 | 0 | 0 | 1 |
| XLOC_017947 | KCNMB1      | chr5:169780880-170163636 | 0 | 0 | 0 | 1 |
| XLOC_017948 | MIR3912     | chr5:170813659-170813764 | 0 | 0 | 0 | 1 |
| XLOC_017956 | STC2        | chr5:172741725-172756506 | 0 | 0 | 0 | 1 |
| XLOC_017958 | FLJ16171    | chr5:174346084-174422734 | 0 | 0 | 0 | 1 |
| XLOC_017959 | DRD1        | chr5:174867674-174871163 | 0 | 0 | 0 | 1 |
| XLOC_017967 | SNCB        | chr5:176047209-176057557 | 0 | 0 | 0 | 1 |
| XLOC_017968 | MIR4281     | chr5:176047209-176057557 | 0 | 0 | 0 | 1 |
| XLOC_017974 | PFN3        | chr5:176827107-176827637 | 0 | 0 | 0 | 1 |
| XLOC_017983 | FAM153A     | chr5:177150364-177207505 | 0 | 0 | 0 | 1 |
| XLOC_017998 | MIR1229     | chr5:179224597-179285840 | 0 | 0 | 0 | 1 |
| XLOC_018002 | MIR340      | chr5:179382473-179499109 | 0 | 0 | 0 | 1 |
| XLOC_018003 | RASGEF1C    | chr5:179527794-179636130 | 0 | 0 | 0 | 1 |
| XLOC_018006 | SCGB3A1     | chr5:180017104-180018487 | 0 | 0 | 0 | 1 |
| XLOC_018008 | OR2Y1       | chr5:180166122-180167058 | 0 | 0 | 0 | 1 |
| XLOC_018012 | OR2V1       | chr5:180551356-180552304 | 0 | 0 | 0 | 1 |
| XLOC_018014 | MIR4638     | chr5:180649565-180649633 | 0 | 0 | 0 | 1 |
| XLOC_018016 | SNORD96A    | chr5:180663927-180670906 | 0 | 0 | 0 | 1 |
| XLOC_018021 | FOXQ1       | chr6:1312674-1314993     | 0 | 0 | 0 | 1 |
| XLOC_018022 | FOXF2       | chr6:1390068-1395832     | 0 | 0 | 0 | 1 |
| XLOC_018031 | FAM50B      | chr6:3849631-3851551     | 0 | 0 | 0 | 1 |
| XLOC_018035 | PPP1R3G     | chr6:5085719-5087455     | 0 | 0 | 0 | 1 |
| XLOC_018037 | LY86        | chr6:6346697-6655216     | 0 | 0 | 0 | 1 |
| XLOC_018047 | MIR5689     | chr6:10439949-10440027   | 0 | 0 | 0 | 1 |
| XLOC_018053 | ELOVL2-AS1  | chr6:10980992-11079377   | 0 | 0 | 0 | 1 |
| XLOC_018055 | TMEM170B    | chr6:11538459-11583757   | 0 | 0 | 0 | 1 |
| XLOC_018061 | RNF182      | chr6:13924676-13980240   | 0 | 0 | 0 | 1 |
| XLOC_018065 | MIR4639     | chr6:16129316-16148478   | 0 | 0 | 0 | 1 |
| XLOC_018067 | STMND1      | chr6:17102488-17131603   | 0 | 0 | 0 | 1 |
| XLOC_018068 | RBM24       | chr6:17281808-17294099   | 0 | 0 | 0 | 1 |
| XLOC_018073 | MIR548A1    | chr6:18572014-18572111   | 0 | 0 | 0 | 1 |
| XLOC_018074 | ID4         | chr6:19837600-19842431   | 0 | 0 | 0 | 1 |
| XLOC_018078 | LINC00340   | chr6:21666674-22194616   | 0 | 0 | 0 | 1 |
| XLOC_018079 | HDGFL1      | chr6:22569677-22570750   | 0 | 0 | 0 | 1 |
| XLOC_018087 | SCGN        | chr6:25652428-25702008   | 0 | 0 | 0 | 1 |
| XLOC_018088 | HIST1H2BA   | chr6:25727136-25727573   | 0 | 0 | 0 | 1 |
| XLOC_018089 | HIST1H2APS1 | chr6:25732660-25733089   | 0 | 0 | 0 | 1 |

|             |              |                        |   |   |   |   |
|-------------|--------------|------------------------|---|---|---|---|
| XLOC_018090 | SLC17A4      | chr6:25754926-25781403 | 0 | 0 | 0 | 1 |
| XLOC_018094 | HIST1H3C     | chr6:26045638-26046097 | 0 | 0 | 0 | 1 |
| XLOC_018105 | HIST1H4F     | chr6:26240653-26241021 | 0 | 0 | 0 | 1 |
| XLOC_018114 | BTN1A1       | chr6:26501494-26510652 | 0 | 0 | 0 | 1 |
| XLOC_018122 | MIR3143      | chr6:27115404-27115467 | 0 | 0 | 0 | 1 |
| XLOC_018133 | HIST1H2AL    | chr6:27833106-27833576 | 0 | 0 | 0 | 1 |
| XLOC_018145 | GPX5         | chr6:28493788-28502728 | 0 | 0 | 0 | 1 |
| XLOC_018146 | LOC100129636 | chr6:29003999-29044517 | 0 | 0 | 0 | 1 |
| XLOC_018147 | OR2J3        | chr6:29079667-29080603 | 0 | 0 | 0 | 1 |
| XLOC_018148 | OR2J2        | chr6:29141310-29142351 | 0 | 0 | 0 | 1 |
| XLOC_018149 | OR14J1       | chr6:29274466-29275432 | 0 | 0 | 0 | 1 |
| XLOC_018150 | OR12D2       | chr6:29364415-29365448 | 0 | 0 | 0 | 1 |
| XLOC_018151 | OR10C1       | chr6:29407715-29408754 | 0 | 0 | 0 | 1 |
| XLOC_018153 | LOC100507362 | chr6:29497182-29501345 | 0 | 0 | 0 | 1 |
| XLOC_018154 | SNORD32B     | chr6:29550028-29550105 | 0 | 0 | 0 | 1 |
| XLOC_018156 | MOG          | chr6:29624757-29640149 | 0 | 0 | 0 | 1 |
| XLOC_018167 | TRIM15       | chr6:30130982-30140473 | 0 | 0 | 0 | 1 |
| XLOC_018173 | MIR877       | chr6:30539169-30559309 | 0 | 0 | 0 | 1 |
| XLOC_018179 | MIR4640      | chr6:30851860-30867933 | 0 | 0 | 0 | 1 |
| XLOC_018182 | DPCR1        | chr6:30908776-30921998 | 0 | 0 | 0 | 1 |
| XLOC_018183 | MUC21        | chr6:30951484-30957675 | 0 | 0 | 0 | 1 |
| XLOC_018184 | MUC22        | chr6:30973728-31003179 | 0 | 0 | 0 | 1 |
| XLOC_018185 | HCG22        | chr6:31021226-31027655 | 0 | 0 | 0 | 1 |
| XLOC_018191 | HCG26        | chr6:31439005-31440185 | 0 | 0 | 0 | 1 |
| XLOC_018196 | TNF          | chr6:31543343-31546112 | 0 | 0 | 0 | 1 |
| XLOC_018198 | AIF1         | chr6:31582993-31584798 | 0 | 0 | 0 | 1 |
| XLOC_018204 | LY6G6F       | chr6:31674683-31678372 | 0 | 0 | 0 | 1 |
| XLOC_018205 | LY6G6D       | chr6:31683132-31685581 | 0 | 0 | 0 | 1 |
| XLOC_018211 | SNORD48      | chr6:31802692-31807541 | 0 | 0 | 0 | 1 |
| XLOC_018212 | SNORD52      | chr6:31802692-31807541 | 0 | 0 | 0 | 1 |
| XLOC_018214 | CFB          | chr6:31913720-31919861 | 0 | 0 | 0 | 1 |
| XLOC_018219 | STK19        | chr6:31981517-31981961 | 0 | 0 | 0 | 1 |
| XLOC_018224 | HCG23        | chr6:32358286-32361468 | 0 | 0 | 0 | 1 |
| XLOC_018225 | HLA-DRA      | chr6:32407618-32412826 | 0 | 0 | 0 | 1 |
| XLOC_018226 | HLA-DQA1     | chr6:32605182-32611429 | 0 | 0 | 0 | 1 |
| XLOC_018227 | HLA-DQA2     | chr6:32709162-32714664 | 0 | 0 | 0 | 1 |
| XLOC_018232 | HLA-DPB1     | chr6:33032345-33057473 | 0 | 0 | 0 | 1 |
| XLOC_018233 | HLA-DPB2     | chr6:33080292-33096890 | 0 | 0 | 0 | 1 |
| XLOC_018236 | MIR219-1     | chr6:33175611-33175721 | 0 | 0 | 0 | 1 |
| XLOC_018260 | CLPSL2       | chr6:35744391-35747329 | 0 | 0 | 0 | 1 |
| XLOC_018261 | CLPSL1       | chr6:35748830-35755841 | 0 | 0 | 0 | 1 |
| XLOC_018272 | PI16         | chr6:36916038-36932613 | 0 | 0 | 0 | 1 |
| XLOC_018273 | FGD2         | chr6:36973422-36996845 | 0 | 0 | 0 | 1 |
| XLOC_018279 | DNAH8        | chr6:38683116-38998574 | 0 | 0 | 0 | 1 |
| XLOC_018280 | GLP1R        | chr6:39016556-39055520 | 0 | 0 | 0 | 1 |
| XLOC_018281 | DAAM2        | chr6:39760158-39902290 | 0 | 0 | 0 | 1 |
| XLOC_018282 | TDRG1        | chr6:40346162-40347631 | 0 | 0 | 0 | 1 |
| XLOC_018283 | TSPO2        | chr6:41010236-41012076 | 0 | 0 | 0 | 1 |
| XLOC_018286 | TREML4       | chr6:41196061-41206120 | 0 | 0 | 0 | 1 |

|             |            |                          |   |   |   |   |
|-------------|------------|--------------------------|---|---|---|---|
| XLOC_018287 | TREML5P    | chr6:41217114-41217327   | 0 | 0 | 0 | 1 |
| XLOC_018288 | NCR2       | chr6:41303527-41318625   | 0 | 0 | 0 | 1 |
| XLOC_018290 | MIR4641    | chr6:41514163-41570122   | 0 | 0 | 0 | 1 |
| XLOC_018298 | ATP6V0CP3  | chr6:42695313-42695932   | 0 | 0 | 0 | 1 |
| XLOC_018301 | PTCRA      | chr6:42883726-42893575   | 0 | 0 | 0 | 1 |
| XLOC_018312 | SLC22A7    | chr6:43265997-43276530   | 0 | 0 | 0 | 1 |
| XLOC_018327 | SPATS1     | chr6:44310396-44344904   | 0 | 0 | 0 | 1 |
| XLOC_018329 | MIR4642    | chr6:44355250-44418161   | 0 | 0 | 0 | 1 |
| XLOC_018334 | ANKRD66    | chr6:46714653-46726954   | 0 | 0 | 0 | 1 |
| XLOC_018335 | MEP1A      | chr6:46761093-46807519   | 0 | 0 | 0 | 1 |
| XLOC_018337 | GPR111     | chr6:47624325-47665533   | 0 | 0 | 0 | 1 |
| XLOC_018339 | OPN5       | chr6:47749774-47794116   | 0 | 0 | 0 | 1 |
| XLOC_018341 | GLYATL3    | chr6:49467670-49495777   | 0 | 0 | 0 | 1 |
| XLOC_018343 | TFAP2D     | chr6:50681256-50740746   | 0 | 0 | 0 | 1 |
| XLOC_018344 | TFAP2B     | chr6:50786438-50815326   | 0 | 0 | 0 | 1 |
| XLOC_018345 | MIR206     | chr6:52009146-52009232   | 0 | 0 | 0 | 1 |
| XLOC_018346 | MIR133B    | chr6:52013720-52013839   | 0 | 0 | 0 | 1 |
| XLOC_018347 | IL17A      | chr6:52051184-52055436   | 0 | 0 | 0 | 1 |
| XLOC_018353 | MIR5685    | chr6:53132195-53213977   | 0 | 0 | 0 | 1 |
| XLOC_018355 | MLIP-IT1   | chr6:53863687-53871950   | 0 | 0 | 0 | 1 |
| XLOC_018357 | TINAG      | chr6:54173202-54254950   | 0 | 0 | 0 | 1 |
| XLOC_018359 | HCRTR2     | chr6:55039070-55147418   | 0 | 0 | 0 | 1 |
| XLOC_018361 | BEND6      | chr6:56819772-56892142   | 0 | 0 | 0 | 1 |
| XLOC_018369 | SLC25A51P1 | chr6:66497771-66499376   | 0 | 0 | 0 | 1 |
| XLOC_018370 | BAI3       | chr6:69345631-70099403   | 0 | 0 | 0 | 1 |
| XLOC_018371 | COL19A1    | chr6:70576447-70922157   | 0 | 0 | 0 | 1 |
| XLOC_018372 | FAM135A    | chr6:71123106-71270877   | 0 | 0 | 0 | 1 |
| XLOC_018377 | KCNQ5      | chr6:73331570-73908573   | 0 | 0 | 0 | 1 |
| XLOC_018378 | KHDC3L     | chr6:74072399-74073898   | 0 | 0 | 0 | 1 |
| XLOC_018388 | RNY4       | chr6:80451635-80451669   | 0 | 0 | 0 | 1 |
| XLOC_018394 | PRSS35     | chr6:84222193-84235421   | 0 | 0 | 0 | 1 |
| XLOC_018395 | RIPPLY2    | chr6:84562984-84567234   | 0 | 0 | 0 | 1 |
| XLOC_018399 | HTR1E      | chr6:87647023-87726397   | 0 | 0 | 0 | 1 |
| XLOC_018407 | SPACA1     | chr6:88757506-88776550   | 0 | 0 | 0 | 1 |
| XLOC_018412 | GJA10      | chr6:90604187-90605819   | 0 | 0 | 0 | 1 |
| XLOC_018413 | MIR4464    | chr6:91022460-91022552   | 0 | 0 | 0 | 1 |
| XLOC_018414 | MIR4643    | chr6:92231377-92231455   | 0 | 0 | 0 | 1 |
| XLOC_018417 | FUT9       | chr6:96463844-96663488   | 0 | 0 | 0 | 1 |
| XLOC_018419 | FHL5       | chr6:97010423-97064512   | 0 | 0 | 0 | 1 |
| XLOC_018421 | MIR2113    | chr6:98472406-98472495   | 0 | 0 | 0 | 1 |
| XLOC_018422 | POU3F2     | chr6:99282579-99286666   | 0 | 0 | 0 | 1 |
| XLOC_018424 | PRDM13     | chr6:100054649-100063454 | 0 | 0 | 0 | 1 |
| XLOC_018425 | LOC728012  | chr6:100367785-100524295 | 0 | 0 | 0 | 1 |
| XLOC_018427 | LIN28B     | chr6:105404922-105531207 | 0 | 0 | 0 | 1 |
| XLOC_018428 | BVES-AS1   | chr6:105585561-105627858 | 0 | 0 | 0 | 1 |
| XLOC_018440 | CCDC162P   | chr6:109615505-109629423 | 0 | 0 | 0 | 1 |
| XLOC_018443 | GPR6       | chr6:110300297-110301924 | 0 | 0 | 0 | 1 |
| XLOC_018453 | RFPL4B     | chr6:112668531-112672498 | 0 | 0 | 0 | 1 |
| XLOC_018455 | FLJ34503   | chr6:114225550-114242806 | 0 | 0 | 0 | 1 |

|             |              |                          |   |   |   |   |
|-------------|--------------|--------------------------|---|---|---|---|
| XLOC_018459 | FAM26F       | chr6:116782532-116784934 | 0 | 0 | 0 | 1 |
| XLOC_018460 | FAM26E       | chr6:116817650-116880031 | 0 | 0 | 0 | 1 |
| XLOC_018461 | FAM26D       | chr6:116817650-116880031 | 0 | 0 | 0 | 1 |
| XLOC_018465 | RFX6         | chr6:117198375-117253326 | 0 | 0 | 0 | 1 |
| XLOC_018466 | VGLL2        | chr6:117586720-117594728 | 0 | 0 | 0 | 1 |
| XLOC_018472 | LOC100287632 | chr6:119103870-119104581 | 0 | 0 | 0 | 1 |
| XLOC_018474 | GJA1         | chr6:121756744-121770873 | 0 | 0 | 0 | 1 |
| XLOC_018477 | FABP7        | chr6:123100645-123105218 | 0 | 0 | 0 | 1 |
| XLOC_018479 | CLVS2        | chr6:123317581-123385063 | 0 | 0 | 0 | 1 |
| XLOC_018480 | NKAIN2       | chr6:124125068-125146786 | 0 | 0 | 0 | 1 |
| XLOC_018483 | LOC643623    | chr6:125995498-126041364 | 0 | 0 | 0 | 1 |
| XLOC_018484 | HEY2         | chr6:126070731-126082415 | 0 | 0 | 0 | 1 |
| XLOC_018489 | RSPO3        | chr6:127440047-127518184 | 0 | 0 | 0 | 1 |
| XLOC_018494 | TMEM200A     | chr6:130687425-130764210 | 0 | 0 | 0 | 1 |
| XLOC_018500 | LOC100507254 | chr6:132455117-132490514 | 0 | 0 | 0 | 1 |
| XLOC_018501 | TAAR9        | chr6:132859426-132860475 | 0 | 0 | 0 | 1 |
| XLOC_018502 | TAAR8        | chr6:132873831-132874860 | 0 | 0 | 0 | 1 |
| XLOC_018503 | TAAR6        | chr6:132891460-132892498 | 0 | 0 | 0 | 1 |
| XLOC_018505 | SNORD101     | chr6:133135707-133138703 | 0 | 0 | 0 | 1 |
| XLOC_018508 | LINC00326    | chr6:133409218-133427717 | 0 | 0 | 0 | 1 |
| XLOC_018509 | EYA4         | chr6:133562494-133853258 | 0 | 0 | 0 | 1 |
| XLOC_018510 | MGC34034     | chr6:134142284-134175130 | 0 | 0 | 0 | 1 |
| XLOC_018511 | TCF21        | chr6:134210258-134216675 | 0 | 0 | 0 | 1 |
| XLOC_018513 | LOC154092    | chr6:134758853-134825158 | 0 | 0 | 0 | 1 |
| XLOC_018515 | LINC00271    | chr6:135818938-136011976 | 0 | 0 | 0 | 1 |
| XLOC_018527 | LOC100132735 | chr6:140092209-140181608 | 0 | 0 | 0 | 1 |
| XLOC_018528 | MIR3668      | chr6:140526388-140526463 | 0 | 0 | 0 | 1 |
| XLOC_018529 | MIR4465      | chr6:141004950-141005020 | 0 | 0 | 0 | 1 |
| XLOC_018536 | ZC2HC1B      | chr6:144185572-144259483 | 0 | 0 | 0 | 1 |
| XLOC_018541 | RAB32        | chr6:146864827-146876086 | 0 | 0 | 0 | 1 |
| XLOC_018542 | ADGB         | chr6:146920135-147136597 | 0 | 0 | 0 | 1 |
| XLOC_018554 | PPP1R14C     | chr6:150464187-150571528 | 0 | 0 | 0 | 1 |
| XLOC_018555 | IYD          | chr6:150690027-150725765 | 0 | 0 | 0 | 1 |
| XLOC_018556 | PLEKHG1      | chr6:150920998-151164799 | 0 | 0 | 0 | 1 |
| XLOC_018561 | ESR1         | chr6:152011630-152424408 | 0 | 0 | 0 | 1 |
| XLOC_018564 | OPRM1        | chr6:154331630-154677900 | 0 | 0 | 0 | 1 |
| XLOC_018570 | MIR3692      | chr6:157802556-158094977 | 0 | 0 | 0 | 1 |
| XLOC_018573 | SYNJ2-IT1    | chr6:158402887-158520207 | 0 | 0 | 0 | 1 |
| XLOC_018579 | FNDC1        | chr6:159590428-159693140 | 0 | 0 | 0 | 1 |
| XLOC_018584 | MAS1         | chr6:160327973-160329107 | 0 | 0 | 0 | 1 |
| XLOC_018593 | LINC00602    | chr6:166337535-166403103 | 0 | 0 | 0 | 1 |
| XLOC_018597 | TCP10L2      | chr6:167584080-167596396 | 0 | 0 | 0 | 1 |
| XLOC_018598 | UNC93A       | chr6:167704802-167729502 | 0 | 0 | 0 | 1 |
| XLOC_018599 | TTLL2        | chr6:167738573-167756177 | 0 | 0 | 0 | 1 |
| XLOC_018601 | KIF25        | chr6:168418552-168445769 | 0 | 0 | 0 | 1 |
| XLOC_018607 | MIR4644      | chr6:170615843-170714237 | 0 | 0 | 0 | 1 |
| XLOC_018611 | LOC285768    | chr6:961240-1101567      | 0 | 0 | 0 | 1 |
| XLOC_018616 | MIR4645      | chr6:2854264-2854341     | 0 | 0 | 0 | 1 |
| XLOC_018622 | LOC100507194 | chr6:3183051-3196001     | 0 | 0 | 0 | 1 |

|             |           |                        |   |   |   |   |
|-------------|-----------|------------------------|---|---|---|---|
| XLOC_018625 | PXDC1     | chr6:3722835-3752246   | 0 | 0 | 0 | 1 |
| XLOC_018626 | FAM217A   | chr6:4068592-4135831   | 0 | 0 | 0 | 1 |
| XLOC_018630 | MIR3691   | chr6:5108652-5261172   | 0 | 0 | 0 | 1 |
| XLOC_018632 | F13A1     | chr6:6144310-6320924   | 0 | 0 | 0 | 1 |
| XLOC_018633 | LY86-AS1  | chr6:6346697-6655216   | 0 | 0 | 0 | 1 |
| XLOC_018637 | SCARNA27  | chr6:7727010-8102828   | 0 | 0 | 0 | 1 |
| XLOC_018643 | GCM2      | chr6:10873455-10882098 | 0 | 0 | 0 | 1 |
| XLOC_018657 | NHLRC1    | chr6:18120717-18122851 | 0 | 0 | 0 | 1 |
| XLOC_018661 | LOC729177 | chr6:21666674-22194616 | 0 | 0 | 0 | 1 |
| XLOC_018662 | PRL       | chr6:22287472-22303082 | 0 | 0 | 0 | 1 |
| XLOC_018669 | CMAHP     | chr6:25081294-25138620 | 0 | 0 | 0 | 1 |
| XLOC_018670 | HIST1H2AA | chr6:25726290-25726790 | 0 | 0 | 0 | 1 |
| XLOC_018671 | SLC17A1   | chr6:25783125-25832287 | 0 | 0 | 0 | 1 |
| XLOC_018672 | SLC17A3   | chr6:25845327-25874471 | 0 | 0 | 0 | 1 |
| XLOC_018673 | SLC17A2   | chr6:25912983-25930946 | 0 | 0 | 0 | 1 |
| XLOC_018674 | HIST1H1A  | chr6:26017259-26018040 | 0 | 0 | 0 | 1 |
| XLOC_018678 | HIST1H2BB | chr6:26043454-26043885 | 0 | 0 | 0 | 1 |
| XLOC_018680 | HIST1H1T  | chr6:26107639-26108364 | 0 | 0 | 0 | 1 |
| XLOC_018686 | HIST1H4G  | chr6:26246838-26247205 | 0 | 0 | 0 | 1 |
| XLOC_018696 | POM121L2  | chr6:27276841-27280011 | 0 | 0 | 0 | 1 |
| XLOC_018703 | HIST1H1B  | chr6:27834569-27835359 | 0 | 0 | 0 | 1 |
| XLOC_018705 | HIST1H4L  | chr6:27840925-27841289 | 0 | 0 | 0 | 1 |
| XLOC_018708 | OR2B2     | chr6:27878962-27880174 | 0 | 0 | 0 | 1 |
| XLOC_018713 | ZSCAN23   | chr6:28400431-28411279 | 0 | 0 | 0 | 1 |
| XLOC_018714 | GPX6      | chr6:28471072-28483570 | 0 | 0 | 0 | 1 |
| XLOC_018718 | ZNF311    | chr6:28962593-28973037 | 0 | 0 | 0 | 1 |
| XLOC_018719 | OR2W1     | chr6:29003999-29044517 | 0 | 0 | 0 | 1 |
| XLOC_018720 | OR2B3     | chr6:29053984-29055090 | 0 | 0 | 0 | 1 |
| XLOC_018721 | OR5V1     | chr6:29323006-29324054 | 0 | 0 | 0 | 1 |
| XLOC_018722 | OR12D3    | chr6:29341199-29343068 | 0 | 0 | 0 | 1 |
| XLOC_018723 | OR11A1    | chr6:29393280-29395509 | 0 | 0 | 0 | 1 |
| XLOC_018724 | MAS1L     | chr6:29454542-29455679 | 0 | 0 | 0 | 1 |
| XLOC_018727 | ZFP57     | chr6:29640168-29644931 | 0 | 0 | 0 | 1 |
| XLOC_018730 | HCG4      | chr6:29758807-29765584 | 0 | 0 | 0 | 1 |
| XLOC_018735 | TRIM10    | chr6:30119722-30128711 | 0 | 0 | 0 | 1 |
| XLOC_018747 | SFTA2     | chr6:30899126-30899952 | 0 | 0 | 0 | 1 |
| XLOC_018753 | PSORS1C3  | chr6:31141511-31145676 | 0 | 0 | 0 | 1 |
| XLOC_018758 | SNORD84   | chr6:31496738-31514625 | 0 | 0 | 0 | 1 |
| XLOC_018759 | LTB       | chr6:31548335-31550202 | 0 | 0 | 0 | 1 |
| XLOC_018760 | NCR3      | chr6:31553955-31560762 | 0 | 0 | 0 | 1 |
| XLOC_018766 | MIR4646   | chr6:31654725-31671137 | 0 | 0 | 0 | 1 |
| XLOC_018767 | LY6G6E    | chr6:31679752-31681842 | 0 | 0 | 0 | 1 |
| XLOC_018780 | MIR1236   | chr6:31919863-31937532 | 0 | 0 | 0 | 1 |
| XLOC_018782 | TNXB      | chr6:31973358-31981050 | 0 | 0 | 0 | 1 |
| XLOC_018792 | C6orf10   | chr6:32260474-32339656 | 0 | 0 | 0 | 1 |
| XLOC_018793 | BTNL2     | chr6:32362512-32374900 | 0 | 0 | 0 | 1 |
| XLOC_018797 | HLA-DQB1  | chr6:32627240-32634466 | 0 | 0 | 0 | 1 |
| XLOC_018798 | HLA-DQB2  | chr6:32723874-32731330 | 0 | 0 | 0 | 1 |
| XLOC_018805 | HLA-DOA   | chr6:32971959-32977389 | 0 | 0 | 0 | 1 |

|             |              |                        |   |   |   |   |
|-------------|--------------|------------------------|---|---|---|---|
| XLOC_018818 | IP6K3        | chr6:33689442-33714762 | 0 | 0 | 0 | 1 |
| XLOC_018820 | MLN          | chr6:33762448-33771793 | 0 | 0 | 0 | 1 |
| XLOC_018821 | LOC100507584 | chr6:33857287-33864684 | 0 | 0 | 0 | 1 |
| XLOC_018822 | MIR1275      | chr6:33967748-33967828 | 0 | 0 | 0 | 1 |
| XLOC_018823 | GRM4         | chr6:33989622-34123399 | 0 | 0 | 0 | 1 |
| XLOC_018833 | MIR5690      | chr6:35541361-35704724 | 0 | 0 | 0 | 1 |
| XLOC_018834 | CLPS         | chr6:35762758-35765121 | 0 | 0 | 0 | 1 |
| XLOC_018837 | C6orf222     | chr6:36283534-36304662 | 0 | 0 | 0 | 1 |
| XLOC_018838 | ETV7         | chr6:36321997-36355577 | 0 | 0 | 0 | 1 |
| XLOC_018841 | MIR3925      | chr6:36590212-36590289 | 0 | 0 | 0 | 1 |
| XLOC_018847 | MIR4462      | chr6:37523140-37523198 | 0 | 0 | 0 | 1 |
| XLOC_018848 | MDGA1        | chr6:37600283-37665766 | 0 | 0 | 0 | 1 |
| XLOC_018851 | LOC100131047 | chr6:38683116-38998574 | 0 | 0 | 0 | 1 |
| XLOC_018854 | KCNK17       | chr6:39266776-39282237 | 0 | 0 | 0 | 1 |
| XLOC_018855 | KCNK16       | chr6:39282473-39290330 | 0 | 0 | 0 | 1 |
| XLOC_018856 | KIF6         | chr6:39302875-39693181 | 0 | 0 | 0 | 1 |
| XLOC_018857 | MOCS1        | chr6:39760158-39902290 | 0 | 0 | 0 | 1 |
| XLOC_018858 | FLJ41649     | chr6:40312083-40323745 | 0 | 0 | 0 | 1 |
| XLOC_018859 | LRFN2        | chr6:40359372-40555126 | 0 | 0 | 0 | 1 |
| XLOC_018862 | TREML1       | chr6:41116998-41122087 | 0 | 0 | 0 | 1 |
| XLOC_018864 | TREML2       | chr6:41157551-41168925 | 0 | 0 | 0 | 1 |
| XLOC_018865 | TREML3P      | chr6:41176291-41185685 | 0 | 0 | 0 | 1 |
| XLOC_018868 | PGC          | chr6:41704448-41715139 | 0 | 0 | 0 | 1 |
| XLOC_018899 | MIR586       | chr6:44794466-45518819 | 0 | 0 | 0 | 1 |
| XLOC_018900 | CLIC5        | chr6:45866189-46048085 | 0 | 0 | 0 | 1 |
| XLOC_018904 | PLA2G7       | chr6:46655611-46703430 | 0 | 0 | 0 | 1 |
| XLOC_018905 | GPR116       | chr6:46820241-46922675 | 0 | 0 | 0 | 1 |
| XLOC_018906 | GPR110       | chr6:46967812-47010082 | 0 | 0 | 0 | 1 |
| XLOC_018910 | RHAG         | chr6:49572889-49604587 | 0 | 0 | 0 | 1 |
| XLOC_018911 | CRISP2       | chr6:49660070-49681303 | 0 | 0 | 0 | 1 |
| XLOC_018912 | CRISP3       | chr6:49695091-49712168 | 0 | 0 | 0 | 1 |
| XLOC_018913 | PGK2         | chr6:49753363-49755053 | 0 | 0 | 0 | 1 |
| XLOC_018914 | CRISP1       | chr6:49801978-49844809 | 0 | 0 | 0 | 1 |
| XLOC_018915 | DEFB133      | chr6:49913813-49917157 | 0 | 0 | 0 | 1 |
| XLOC_018916 | DEFB114      | chr6:49928004-49931818 | 0 | 0 | 0 | 1 |
| XLOC_018917 | DEFB113      | chr6:49936389-49937338 | 0 | 0 | 0 | 1 |
| XLOC_018918 | DEFB110      | chr6:49976850-49989694 | 0 | 0 | 0 | 1 |
| XLOC_018919 | DEFB112      | chr6:50011287-50016364 | 0 | 0 | 0 | 1 |
| XLOC_018920 | PKHD1        | chr6:51480144-51952423 | 0 | 0 | 0 | 1 |
| XLOC_018924 | GSTA7P       | chr6:52604260-52609957 | 0 | 0 | 0 | 1 |
| XLOC_018925 | GSTA2        | chr6:52614884-52628361 | 0 | 0 | 0 | 1 |
| XLOC_018926 | GSTA1        | chr6:52656177-52668664 | 0 | 0 | 0 | 1 |
| XLOC_018927 | GSTA5        | chr6:52696540-52710893 | 0 | 0 | 0 | 1 |
| XLOC_018928 | GSTA3        | chr6:52761438-52774496 | 0 | 0 | 0 | 1 |
| XLOC_018932 | ELOVL5       | chr6:53132195-53213977 | 0 | 0 | 0 | 1 |
| XLOC_018933 | RPS16P5      | chr6:53132195-53213977 | 0 | 0 | 0 | 1 |
| XLOC_018936 | HMGCLL1      | chr6:55299170-55444012 | 0 | 0 | 0 | 1 |
| XLOC_018937 | BMP5         | chr6:55620237-55740375 | 0 | 0 | 0 | 1 |
| XLOC_018938 | COL21A1      | chr6:55921387-56112378 | 0 | 0 | 0 | 1 |

|             |              |                          |   |   |   |   |
|-------------|--------------|--------------------------|---|---|---|---|
| XLOC_018939 | RNU6-71      | chr6:56137688-56615138   | 0 | 0 | 0 | 1 |
| XLOC_018943 | KHDRBS2      | chr6:62389864-62996100   | 0 | 0 | 0 | 1 |
| XLOC_018947 | COL9A1       | chr6:70925742-71012786   | 0 | 0 | 0 | 1 |
| XLOC_018949 | MIR30C2      | chr6:72086662-72086734   | 0 | 0 | 0 | 1 |
| XLOC_018950 | MIR30A       | chr6:72113253-72113324   | 0 | 0 | 0 | 1 |
| XLOC_018952 | MIR4282      | chr6:73331570-73908573   | 0 | 0 | 0 | 1 |
| XLOC_018953 | KCNQ5-AS1    | chr6:73331570-73908573   | 0 | 0 | 0 | 1 |
| XLOC_018954 | KHDC1L       | chr6:73933267-73935175   | 0 | 0 | 0 | 1 |
| XLOC_018955 | KHDC1        | chr6:73951037-74020088   | 0 | 0 | 0 | 1 |
| XLOC_018956 | DPPA5        | chr6:74062784-74063999   | 0 | 0 | 0 | 1 |
| XLOC_018965 | IMPG1        | chr6:76631061-76782335   | 0 | 0 | 0 | 1 |
| XLOC_018966 | HTR1B        | chr6:78171947-78173120   | 0 | 0 | 0 | 1 |
| XLOC_018970 | C6orf7       | chr6:80513303-80580137   | 0 | 0 | 0 | 1 |
| XLOC_018971 | ELOVL4       | chr6:80624528-80657315   | 0 | 0 | 0 | 1 |
| XLOC_018976 | ME1          | chr6:83920109-84140938   | 0 | 0 | 0 | 1 |
| XLOC_018977 | SNAP91       | chr6:84262604-84419127   | 0 | 0 | 0 | 1 |
| XLOC_018979 | TBX18        | chr6:85442215-85473954   | 0 | 0 | 0 | 1 |
| XLOC_018984 | SNORD50B     | chr6:86386724-86388451   | 0 | 0 | 0 | 1 |
| XLOC_018985 | CGA          | chr6:87795215-87804865   | 0 | 0 | 0 | 1 |
| XLOC_018989 | CNR1         | chr6:88849584-88875767   | 0 | 0 | 0 | 1 |
| XLOC_018992 | GABRR1       | chr6:89887222-89941007   | 0 | 0 | 0 | 1 |
| XLOC_018993 | GABRR2       | chr6:89966839-90025018   | 0 | 0 | 0 | 1 |
| XLOC_018995 | RRAGD        | chr6:90074334-90121995   | 0 | 0 | 0 | 1 |
| XLOC_019000 | EPHA7        | chr6:93949739-94129300   | 0 | 0 | 0 | 1 |
| XLOC_019003 | MIR548H3     | chr6:97372495-97862283   | 0 | 0 | 0 | 1 |
| XLOC_019011 | MCHR2        | chr6:100367785-100524295 | 0 | 0 | 0 | 1 |
| XLOC_019015 | LINC00577    | chr6:105384168-105388402 | 0 | 0 | 0 | 1 |
| XLOC_019017 | POPDC3       | chr6:105585561-105627858 | 0 | 0 | 0 | 1 |
| XLOC_019021 | LOC100422737 | chr6:107165326-107235300 | 0 | 0 | 0 | 1 |
| XLOC_019024 | SCML4        | chr6:108023363-108145521 | 0 | 0 | 0 | 1 |
| XLOC_019035 | METTL24      | chr6:110567148-110679475 | 0 | 0 | 0 | 1 |
| XLOC_019036 | DDO          | chr6:110713382-110736753 | 0 | 0 | 0 | 1 |
| XLOC_019037 | SLC22A16     | chr6:110745891-110797844 | 0 | 0 | 0 | 1 |
| XLOC_019047 | HS3ST5       | chr6:114376749-114384041 | 0 | 0 | 0 | 1 |
| XLOC_019052 | BET3L        | chr6:116817650-116880031 | 0 | 0 | 0 | 1 |
| XLOC_019054 | FAM162B      | chr6:117073359-117086886 | 0 | 0 | 0 | 1 |
| XLOC_019055 | GPRC6A       | chr6:117113247-117150198 | 0 | 0 | 0 | 1 |
| XLOC_019056 | ROS1         | chr6:117609529-117747018 | 0 | 0 | 0 | 1 |
| XLOC_019060 | FAM184A      | chr6:119280995-119470358 | 0 | 0 | 0 | 1 |
| XLOC_019061 | MIR548B      | chr6:119280995-119470358 | 0 | 0 | 0 | 1 |
| XLOC_019063 | LOC285762    | chr6:119773711-119812467 | 0 | 0 | 0 | 1 |
| XLOC_019066 | TRDN         | chr6:123537483-123958238 | 0 | 0 | 0 | 1 |
| XLOC_019069 | MIR5695      | chr6:126433836-126443762 | 0 | 0 | 0 | 1 |
| XLOC_019072 | THEMIS       | chr6:128029338-128239776 | 0 | 0 | 0 | 1 |
| XLOC_019075 | TMEM244      | chr6:130152388-130182416 | 0 | 0 | 0 | 1 |
| XLOC_019076 | SAMD3        | chr6:130465446-130686570 | 0 | 0 | 0 | 1 |
| XLOC_019082 | MOXD1        | chr6:132617193-132722664 | 0 | 0 | 0 | 1 |
| XLOC_019084 | TAAR5        | chr6:132909730-132910877 | 0 | 0 | 0 | 1 |
| XLOC_019085 | TAAR3        | chr6:132929363-132930441 | 0 | 0 | 0 | 1 |



|             |              |                          |   |   |   |   |
|-------------|--------------|--------------------------|---|---|---|---|
| XLOC_019086 | TAAR2        | chr6:132938288-132945414 | 0 | 0 | 0 | 1 |
| XLOC_019087 | TAAR1        | chr6:132966122-132967142 | 0 | 0 | 0 | 1 |
| XLOC_019088 | VNN1         | chr6:133001996-133035194 | 0 | 0 | 0 | 1 |
| XLOC_019089 | VNN3         | chr6:133043925-133055904 | 0 | 0 | 0 | 1 |
| XLOC_019090 | VNN2         | chr6:133065008-133084598 | 0 | 0 | 0 | 1 |
| XLOC_019097 | MIR3662      | chr6:135281516-135376036 | 0 | 0 | 0 | 1 |
| XLOC_019105 | IL22RA2      | chr6:137464956-137494785 | 0 | 0 | 0 | 1 |
| XLOC_019107 | OLIG3        | chr6:137813335-137815531 | 0 | 0 | 0 | 1 |
| XLOC_019112 | MIR3145      | chr6:138743180-138893668 | 0 | 0 | 0 | 1 |
| XLOC_019117 | LOC645434    | chr6:139790131-139795733 | 0 | 0 | 0 | 1 |
| XLOC_019118 | NMBR         | chr6:142396744-142409936 | 0 | 0 | 0 | 1 |
| XLOC_019119 | LOC153910    | chr6:142847591-142959026 | 0 | 0 | 0 | 1 |
| XLOC_019130 | LOC729176    | chr6:146920135-147136597 | 0 | 0 | 0 | 1 |
| XLOC_019132 | LOC100128176 | chr6:149068270-149398126 | 0 | 0 | 0 | 1 |
| XLOC_019150 | IPCEF1       | chr6:154331630-154677900 | 0 | 0 | 0 | 1 |
| XLOC_019153 | NOX3         | chr6:155716501-155777037 | 0 | 0 | 0 | 1 |
| XLOC_019154 | MIR4466      | chr6:157099063-157531913 | 0 | 0 | 0 | 1 |
| XLOC_019158 | MIR3918      | chr6:159071045-159185908 | 0 | 0 | 0 | 1 |
| XLOC_019162 | TAGAP        | chr6:159456026-159466184 | 0 | 0 | 0 | 1 |
| XLOC_019169 | SLC22A2      | chr6:160637793-160679963 | 0 | 0 | 0 | 1 |
| XLOC_019175 | PACRG-AS1    | chr6:161768589-163745505 | 0 | 0 | 0 | 1 |
| XLOC_019176 | DKFZp451B082 | chr6:163759373-163768065 | 0 | 0 | 0 | 1 |
| XLOC_019177 | CAHM         | chr6:163834096-163834982 | 0 | 0 | 0 | 1 |
| XLOC_019178 | C6orf118     | chr6:165693152-165723111 | 0 | 0 | 0 | 1 |
| XLOC_019179 | PDE10A       | chr6:165740775-166075588 | 0 | 0 | 0 | 1 |
| XLOC_019180 | LINC00473    | chr6:166337535-166403103 | 0 | 0 | 0 | 1 |
| XLOC_019181 | T            | chr6:166571145-166582157 | 0 | 0 | 0 | 1 |
| XLOC_019182 | PRR18        | chr6:166719167-166721871 | 0 | 0 | 0 | 1 |
| XLOC_019186 | RPS6KA2-IT1  | chr6:166822853-167275771 | 0 | 0 | 0 | 1 |
| XLOC_019187 | MIR1913      | chr6:166822853-167275771 | 0 | 0 | 0 | 1 |
| XLOC_019189 | MIR3939      | chr6:167411294-167411400 | 0 | 0 | 0 | 1 |
| XLOC_019190 | GPR31        | chr6:167570359-167571319 | 0 | 0 | 0 | 1 |
| XLOC_019191 | TCP10        | chr6:167786576-167797998 | 0 | 0 | 0 | 1 |
| XLOC_019194 | HGC6.3       | chr6:168376603-168377619 | 0 | 0 | 0 | 1 |
| XLOC_019195 | FRMD1        | chr6:168456463-168479839 | 0 | 0 | 0 | 1 |
| XLOC_019196 | DACT2        | chr6:168707583-168720402 | 0 | 0 | 0 | 1 |
| XLOC_019202 | LOC154449    | chr6:170563421-170571657 | 0 | 0 | 0 | 1 |
| XLOC_020326 | FAM20C       | chr7:192968-300740       | 0 | 0 | 0 | 1 |
| XLOC_020327 | LOC100288524 | chr7:330135-331454       | 0 | 0 | 0 | 1 |
| XLOC_020328 | LOC442497    | chr7:419390-422845       | 0 | 0 | 0 | 1 |
| XLOC_020336 | UNCX         | chr7:1272653-1276613     | 0 | 0 | 0 | 1 |
| XLOC_020348 | SDK1         | chr7:3341079-4308631     | 0 | 0 | 0 | 1 |
| XLOC_020372 | NXP1         | chr7:8473584-8792593     | 0 | 0 | 0 | 1 |
| XLOC_020373 | PER4         | chr7:9673899-9675447     | 0 | 0 | 0 | 1 |
| XLOC_020378 | LOC100506025 | chr7:16127151-16460947   | 0 | 0 | 0 | 1 |
| XLOC_020379 | LRRRC72      | chr7:16566504-16621114   | 0 | 0 | 0 | 1 |
| XLOC_020384 | MACC1-AS1    | chr7:20174278-20257013   | 0 | 0 | 0 | 1 |
| XLOC_020386 | ABCB5        | chr7:20655244-20796637   | 0 | 0 | 0 | 1 |
| XLOC_020390 | LOC100506178 | chr7:22602955-22613617   | 0 | 0 | 0 | 1 |

|             |              |                        |   |   |   |   |
|-------------|--------------|------------------------|---|---|---|---|
| XLOC_020391 | IL6          | chr7:22766765-22771621 | 0 | 0 | 0 | 1 |
| XLOC_020401 | NPY          | chr7:24323806-24331484 | 0 | 0 | 0 | 1 |
| XLOC_020407 | C7orf71      | chr7:26677489-26686924 | 0 | 0 | 0 | 1 |
| XLOC_020413 | EVX1         | chr7:27282163-27286192 | 0 | 0 | 0 | 1 |
| XLOC_020417 | LOC100506497 | chr7:29019582-29186153 | 0 | 0 | 0 | 1 |
| XLOC_020421 | WIPF3        | chr7:29846169-29956682 | 0 | 0 | 0 | 1 |
| XLOC_020425 | MIR550A1     | chr7:30323922-30407308 | 0 | 0 | 0 | 1 |
| XLOC_020430 | GHRHR        | chr7:31003635-31019146 | 0 | 0 | 0 | 1 |
| XLOC_020432 | CCDC129      | chr7:31553684-31698334 | 0 | 0 | 0 | 1 |
| XLOC_020433 | PPP1R17      | chr7:31726630-31748069 | 0 | 0 | 0 | 1 |
| XLOC_020440 | NPSR1        | chr7:34386123-34917944 | 0 | 0 | 0 | 1 |
| XLOC_020441 | LOC401324    | chr7:35353465-35416086 | 0 | 0 | 0 | 1 |
| XLOC_020445 | GPR141       | chr7:37779995-37780913 | 0 | 0 | 0 | 1 |
| XLOC_020446 | NME8         | chr7:37888198-37940002 | 0 | 0 | 0 | 1 |
| XLOC_020447 | EPDR1        | chr7:37960162-37991542 | 0 | 0 | 0 | 1 |
| XLOC_020450 | POU6F2       | chr7:39017608-39504390 | 0 | 0 | 0 | 1 |
| XLOC_020457 | INHBA-AS1    | chr7:41728600-41818976 | 0 | 0 | 0 | 1 |
| XLOC_020460 | MIR3943      | chr7:43152197-43602938 | 0 | 0 | 0 | 1 |
| XLOC_020468 | MIR4649      | chr7:44143959-44154159 | 0 | 0 | 0 | 1 |
| XLOC_020474 | RAMP3        | chr7:45197366-45223850 | 0 | 0 | 0 | 1 |
| XLOC_020476 | IGFBP1       | chr7:45927958-45933267 | 0 | 0 | 0 | 1 |
| XLOC_020477 | C7orf65      | chr7:47694841-47701246 | 0 | 0 | 0 | 1 |
| XLOC_020478 | LINC00525    | chr7:47801073-47806370 | 0 | 0 | 0 | 1 |
| XLOC_020479 | C7orf69      | chr7:47814249-47988071 | 0 | 0 | 0 | 1 |
| XLOC_020483 | CDC14C       | chr7:48964156-48967049 | 0 | 0 | 0 | 1 |
| XLOC_020484 | VWC2         | chr7:49813256-49952138 | 0 | 0 | 0 | 1 |
| XLOC_020485 | C7orf72      | chr7:50135681-50198852 | 0 | 0 | 0 | 1 |
| XLOC_020486 | IKZF1        | chr7:50344377-50472798 | 0 | 0 | 0 | 1 |
| XLOC_020487 | LOC100129427 | chr7:50526133-50633154 | 0 | 0 | 0 | 1 |
| XLOC_020488 | POM121L12    | chr7:53103348-53104618 | 0 | 0 | 0 | 1 |
| XLOC_020489 | VSTM2A       | chr7:54610018-54639419 | 0 | 0 | 0 | 1 |
| XLOC_020490 | LOC285878    | chr7:54610018-54639419 | 0 | 0 | 0 | 1 |
| XLOC_020499 | DKFZp434L192 | chr7:56563915-56564977 | 0 | 0 | 0 | 1 |
| XLOC_020500 | MIR3147      | chr7:57472730-57472796 | 0 | 0 | 0 | 1 |
| XLOC_020501 | ZNF716       | chr7:57509882-57533265 | 0 | 0 | 0 | 1 |
| XLOC_020502 | LOC100287704 | chr7:62809447-62812152 | 0 | 0 | 0 | 1 |
| XLOC_020503 | MIR4283-2    | chr7:63081467-63081547 | 0 | 0 | 0 | 1 |
| XLOC_020504 | ZNF727       | chr7:63505820-63538927 | 0 | 0 | 0 | 1 |
| XLOC_020505 | ZNF735       | chr7:63667580-63680668 | 0 | 0 | 0 | 1 |
| XLOC_020506 | ZNF679       | chr7:63688851-63727309 | 0 | 0 | 0 | 1 |
| XLOC_020507 | ZNF736       | chr7:63773185-63810017 | 0 | 0 | 0 | 1 |
| XLOC_020509 | LOC641746    | chr7:64042987-64044129 | 0 | 0 | 0 | 1 |
| XLOC_020528 | WBSR17       | chr7:70597522-71178586 | 0 | 0 | 0 | 1 |
| XLOC_020529 | MIR3914-2    | chr7:70597522-71178586 | 0 | 0 | 0 | 1 |
| XLOC_020530 | MIR4650-1    | chr7:72023728-72298813 | 0 | 0 | 0 | 1 |
| XLOC_020534 | PMS2L2       | chr7:72476588-72519691 | 0 | 0 | 0 | 1 |
| XLOC_020536 | NCF1B        | chr7:72634673-72649979 | 0 | 0 | 0 | 1 |
| XLOC_020538 | FZD9         | chr7:72848108-72850450 | 0 | 0 | 0 | 1 |
| XLOC_020541 | MIR4284      | chr7:73113534-73134017 | 0 | 0 | 0 | 1 |

|             |           |                          |   |   |   |   |
|-------------|-----------|--------------------------|---|---|---|---|
| XLOC_020548 | MIR590    | chr7:73588705-73611429   | 0 | 0 | 0 | 1 |
| XLOC_020555 | GATSL1    | chr7:74379082-74438803   | 0 | 0 | 0 | 1 |
| XLOC_020557 | SPDYE8P   | chr7:74936532-74946587   | 0 | 0 | 0 | 1 |
| XLOC_020558 | SPDYE8P   | chr7:74964559-74988306   | 0 | 0 | 0 | 1 |
| XLOC_020565 | MIR4651   | chr7:75544419-75623992   | 0 | 0 | 0 | 1 |
| XLOC_020566 | SNORA14A  | chr7:75544419-75623992   | 0 | 0 | 0 | 1 |
| XLOC_020580 | RPL13AP17 | chr7:77646373-79100524   | 0 | 0 | 0 | 1 |
| XLOC_020581 | MAGI2-AS2 | chr7:77646373-79100524   | 0 | 0 | 0 | 1 |
| XLOC_020583 | MIR548M   | chr7:79400571-79400606   | 0 | 0 | 0 | 1 |
| XLOC_020585 | CD36      | chr7:80231503-80308593   | 0 | 0 | 0 | 1 |
| XLOC_020592 | ZNF804B   | chr7:88388752-88966346   | 0 | 0 | 0 | 1 |
| XLOC_020607 | MIR4652   | chr7:93346239-93346317   | 0 | 0 | 0 | 1 |
| XLOC_020608 | GNGT1     | chr7:93535819-93540485   | 0 | 0 | 0 | 1 |
| XLOC_020609 | GNG11     | chr7:93551015-93555826   | 0 | 0 | 0 | 1 |
| XLOC_020610 | COL1A2    | chr7:94023872-94060544   | 0 | 0 | 0 | 1 |
| XLOC_020612 | PEG10     | chr7:94285636-94299006   | 0 | 0 | 0 | 1 |
| XLOC_020616 | DLX6      | chr7:96597826-96643377   | 0 | 0 | 0 | 1 |
| XLOC_020618 | TAC1      | chr7:97361270-97369784   | 0 | 0 | 0 | 1 |
| XLOC_020622 | NPTX2     | chr7:98246596-98259181   | 0 | 0 | 0 | 1 |
| XLOC_020624 | MIR3609   | chr7:98476112-98610866   | 0 | 0 | 0 | 1 |
| XLOC_020636 | AZGP1P1   | chr7:99578384-99581860   | 0 | 0 | 0 | 1 |
| XLOC_020658 | ZAN       | chr7:100331248-100395419 | 0 | 0 | 0 | 1 |
| XLOC_020663 | MUC17     | chr7:100663363-100702140 | 0 | 0 | 0 | 1 |
| XLOC_020667 | MIR4653   | chr7:100797685-100804557 | 0 | 0 | 0 | 1 |
| XLOC_020672 | MIR4285   | chr7:101928404-101962178 | 0 | 0 | 0 | 1 |
| XLOC_020676 | MIR4467   | chr7:102105389-102119381 | 0 | 0 | 0 | 1 |
| XLOC_020678 | SPDYE2L   | chr7:102277194-102312176 | 0 | 0 | 0 | 1 |
| XLOC_020684 | LHFPL3    | chr7:103969103-104567092 | 0 | 0 | 0 | 1 |
| XLOC_020688 | PIK3CG    | chr7:106505923-106547592 | 0 | 0 | 0 | 1 |
| XLOC_020689 | PRKAR2B   | chr7:106685177-106802256 | 0 | 0 | 0 | 1 |
| XLOC_020702 | FOXP2     | chr7:113726364-114333827 | 0 | 0 | 0 | 1 |
| XLOC_020703 | MIR3666   | chr7:113726364-114333827 | 0 | 0 | 0 | 1 |
| XLOC_020704 | MDFIC     | chr7:114562208-114659970 | 0 | 0 | 0 | 1 |
| XLOC_020714 | ANKRD7    | chr7:117864711-117882784 | 0 | 0 | 0 | 1 |
| XLOC_020715 | KCND2     | chr7:119913721-120390387 | 0 | 0 | 0 | 1 |
| XLOC_020719 | PTPRZ1    | chr7:121513158-121702090 | 0 | 0 | 0 | 1 |
| XLOC_020721 | ASB15     | chr7:123249111-123277932 | 0 | 0 | 0 | 1 |
| XLOC_020723 | HYALP1    | chr7:123454192-123459484 | 0 | 0 | 0 | 1 |
| XLOC_020724 | HYAL4     | chr7:123485222-123517531 | 0 | 0 | 0 | 1 |
| XLOC_020725 | SPAM1     | chr7:123565285-123611461 | 0 | 0 | 0 | 1 |
| XLOC_020730 | MIR593    | chr7:127292201-127732659 | 0 | 0 | 0 | 1 |
| XLOC_020731 | MIR129-1  | chr7:127847924-127847996 | 0 | 0 | 0 | 1 |
| XLOC_020756 | CPA5      | chr7:129984629-130008571 | 0 | 0 | 0 | 1 |
| XLOC_020757 | CPA1      | chr7:130020289-130027949 | 0 | 0 | 0 | 1 |
| XLOC_020759 | MIR335    | chr7:130126015-130371406 | 0 | 0 | 0 | 1 |
| XLOC_020761 | FLJ40288  | chr7:132333552-132413528 | 0 | 0 | 0 | 1 |
| XLOC_020764 | AKR1B10   | chr7:134212343-134226166 | 0 | 0 | 0 | 1 |
| XLOC_020770 | STRA8     | chr7:134916730-134943244 | 0 | 0 | 0 | 1 |
| XLOC_020773 | CHRM2     | chr7:136553398-136849088 | 0 | 0 | 0 | 1 |

|             |                |                          |   |   |   |   |
|-------------|----------------|--------------------------|---|---|---|---|
| XLOC_020774 | MIR490         | chr7:136553398-136849088 | 0 | 0 | 0 | 1 |
| XLOC_020776 | AKR1D1         | chr7:137761177-137803050 | 0 | 0 | 0 | 1 |
| XLOC_020777 | MIR4468        | chr7:137808503-137808567 | 0 | 0 | 0 | 1 |
| XLOC_020779 | TMEM213        | chr7:138391038-138490769 | 0 | 0 | 0 | 1 |
| XLOC_020783 | CLEC2L         | chr7:139208673-139229731 | 0 | 0 | 0 | 1 |
| XLOC_020796 | OR9A4          | chr7:141618675-141619620 | 0 | 0 | 0 | 1 |
| XLOC_020798 | LOC93432       | chr7:141811548-141843783 | 0 | 0 | 0 | 1 |
| XLOC_020801 | PRSS2          | chr7:142478756-142482399 | 0 | 0 | 0 | 1 |
| XLOC_020803 | C7orf34        | chr7:142636602-142637957 | 0 | 0 | 0 | 1 |
| XLOC_020804 | OR6V1          | chr7:142749437-142750379 | 0 | 0 | 0 | 1 |
| XLOC_020805 | PIP            | chr7:142829173-142836834 | 0 | 0 | 0 | 1 |
| XLOC_020806 | TAS2R39        | chr7:142880511-142881528 | 0 | 0 | 0 | 1 |
| XLOC_020807 | TAS2R40        | chr7:142919171-142920143 | 0 | 0 | 0 | 1 |
| XLOC_020814 | TAS2R60        | chr7:143078359-143220540 | 0 | 0 | 0 | 1 |
| XLOC_020815 | TAS2R41        | chr7:143078359-143220540 | 0 | 0 | 0 | 1 |
| XLOC_020818 | OR2F2          | chr7:143632325-143633279 | 0 | 0 | 0 | 1 |
| XLOC_020819 | OR2F1          | chr7:143657019-143658108 | 0 | 0 | 0 | 1 |
| XLOC_020820 | OR6B1          | chr7:143701089-143702025 | 0 | 0 | 0 | 1 |
| XLOC_020821 | OR2A5          | chr7:143747494-143748430 | 0 | 0 | 0 | 1 |
| XLOC_020822 | OR2A25         | chr7:143771312-143772245 | 0 | 0 | 0 | 1 |
| XLOC_020823 | OR2A12         | chr7:143792200-143793133 | 0 | 0 | 0 | 1 |
| XLOC_020824 | OR2A2          | chr7:143806675-143807632 | 0 | 0 | 0 | 1 |
| XLOC_020825 | OR2A14         | chr7:143826205-143827138 | 0 | 0 | 0 | 1 |
| XLOC_020827 | OR2A20P,OR2A9  | chr7:143996465-143997598 | 0 | 0 | 0 | 1 |
| XLOC_020829 | RNU6-57        | chr7:144038210-144038237 | 0 | 0 | 0 | 1 |
| XLOC_020832 | MIR548AQ       | chr7:145813452-148118088 | 0 | 0 | 0 | 1 |
| XLOC_020833 | MIR548F3       | chr7:145813452-148118088 | 0 | 0 | 0 | 1 |
| XLOC_020834 | MIR548T        | chr7:145813452-148118088 | 0 | 0 | 0 | 1 |
| XLOC_020835 | C7orf33        | chr7:148287656-148312952 | 0 | 0 | 0 | 1 |
| XLOC_020842 | KRBA1          | chr7:149412147-149431664 | 0 | 0 | 0 | 1 |
| XLOC_020848 | RNU6-33        | chr7:150064035-150064063 | 0 | 0 | 0 | 1 |
| XLOC_020852 | LOC285972      | chr7:150130741-150145228 | 0 | 0 | 0 | 1 |
| XLOC_020854 | GIMAP7         | chr7:150211944-150218161 | 0 | 0 | 0 | 1 |
| XLOC_020855 | GIMAP4         | chr7:150264457-150271041 | 0 | 0 | 0 | 1 |
| XLOC_020857 | GIMAP1,GIMAP1- | chr7:150413644-150440737 | 0 | 0 | 0 | 1 |
| XLOC_020858 | TMEM176A       | chr7:150488375-150502208 | 0 | 0 | 0 | 1 |
| XLOC_020859 | ABP1           | chr7:150549564-150558379 | 0 | 0 | 0 | 1 |
| XLOC_020867 | WDR86-AS1      | chr7:151078206-151110132 | 0 | 0 | 0 | 1 |
| XLOC_020869 | GALNTL5        | chr7:151653463-151717019 | 0 | 0 | 0 | 1 |
| XLOC_020877 | HTR5A          | chr7:154858778-154879102 | 0 | 0 | 0 | 1 |
| XLOC_020887 | LOC100506585   | chr7:157331749-158380482 | 0 | 0 | 0 | 1 |
| XLOC_020888 | MIR5707        | chr7:158384307-158384388 | 0 | 0 | 0 | 1 |
| XLOC_020890 | LINC00689      | chr7:158801044-158818929 | 0 | 0 | 0 | 1 |
| XLOC_020896 | MIR339         | chr7:1036622-1177893     | 0 | 0 | 0 | 1 |
| XLOC_020903 | MIR4655        | chr7:1855427-2272583     | 0 | 0 | 0 | 1 |
| XLOC_020908 | CARD11         | chr7:2945709-3083509     | 0 | 0 | 0 | 1 |
| XLOC_020909 | MIR4656        | chr7:4815261-4834026     | 0 | 0 | 0 | 1 |
| XLOC_020910 | RADIL          | chr7:4838739-4923335     | 0 | 0 | 0 | 1 |
| XLOC_020911 | PAPOLB         | chr7:4838739-4923335     | 0 | 0 | 0 | 1 |

|             |              |                        |   |   |   |   |
|-------------|--------------|------------------------|---|---|---|---|
| XLOC_020912 | MMD2         | chr7:4931875-4998844   | 0 | 0 | 0 | 1 |
| XLOC_020916 | MIR589       | chr7:5515427-5553399   | 0 | 0 | 0 | 1 |
| XLOC_020919 | RNF216-IT1   | chr7:5659671-5821361   | 0 | 0 | 0 | 1 |
| XLOC_020931 | COL28A1      | chr7:7398243-7575460   | 0 | 0 | 0 | 1 |
| XLOC_020935 | THSD7A       | chr7:11410061-11871824 | 0 | 0 | 0 | 1 |
| XLOC_020936 | VWDE         | chr7:12370508-12443852 | 0 | 0 | 0 | 1 |
| XLOC_020938 | DGKB         | chr7:14184673-14881075 | 0 | 0 | 0 | 1 |
| XLOC_020939 | AGMO         | chr7:15239942-15601640 | 0 | 0 | 0 | 1 |
| XLOC_020940 | MEOX2        | chr7:15650836-15726308 | 0 | 0 | 0 | 1 |
| XLOC_020942 | SOSTDC1      | chr7:16501105-16505474 | 0 | 0 | 0 | 1 |
| XLOC_020944 | AGR2         | chr7:16832263-16844738 | 0 | 0 | 0 | 1 |
| XLOC_020945 | AGR3         | chr7:16899029-16921613 | 0 | 0 | 0 | 1 |
| XLOC_020947 | PRPS1L1      | chr7:18066399-18067486 | 0 | 0 | 0 | 1 |
| XLOC_020948 | TWIST1       | chr7:19155090-19157295 | 0 | 0 | 0 | 1 |
| XLOC_020949 | FERD3L       | chr7:19184404-19185044 | 0 | 0 | 0 | 1 |
| XLOC_020951 | MIR3146      | chr7:19735084-19748660 | 0 | 0 | 0 | 1 |
| XLOC_020952 | TMEM196      | chr7:19758937-19812404 | 0 | 0 | 0 | 1 |
| XLOC_020963 | CLK2P        | chr7:23624334-23626146 | 0 | 0 | 0 | 1 |
| XLOC_020968 | NPVF         | chr7:25264190-25268105 | 0 | 0 | 0 | 1 |
| XLOC_020969 | RNU6-16      | chr7:25880600-25880630 | 0 | 0 | 0 | 1 |
| XLOC_020970 | MIR148A      | chr7:25989538-25989606 | 0 | 0 | 0 | 1 |
| XLOC_020972 | KIAA0087     | chr7:26572739-26578444 | 0 | 0 | 0 | 1 |
| XLOC_020982 | MIR196B      | chr7:27202056-27219880 | 0 | 0 | 0 | 1 |
| XLOC_020987 | TRIL         | chr7:28992973-28998029 | 0 | 0 | 0 | 1 |
| XLOC_020990 | MIR550A3     | chr7:29685537-29727859 | 0 | 0 | 0 | 1 |
| XLOC_020997 | NEUROD6      | chr7:31377074-31380538 | 0 | 0 | 0 | 1 |
| XLOC_020998 | PDE1C        | chr7:31792631-32338383 | 0 | 0 | 0 | 1 |
| XLOC_020999 | LOC100130673 | chr7:32496509-32498106 | 0 | 0 | 0 | 1 |
| XLOC_021002 | MIR550B2     | chr7:32772592-32772689 | 0 | 0 | 0 | 1 |
| XLOC_021007 | NPSR1-AS1    | chr7:34386123-34917944 | 0 | 0 | 0 | 1 |
| XLOC_021009 | DPY19L2P1    | chr7:35120898-35225774 | 0 | 0 | 0 | 1 |
| XLOC_021010 | TBX20        | chr7:35242041-35293711 | 0 | 0 | 0 | 1 |
| XLOC_021013 | AOAH         | chr7:36552548-36764154 | 0 | 0 | 0 | 1 |
| XLOC_021014 | AOAH-IT1     | chr7:36552548-36764154 | 0 | 0 | 0 | 1 |
| XLOC_021015 | ELMO1        | chr7:36892510-37488895 | 0 | 0 | 0 | 1 |
| XLOC_021016 | MIR1200      | chr7:36892510-37488895 | 0 | 0 | 0 | 1 |
| XLOC_021017 | SFRP4        | chr7:37945534-37956525 | 0 | 0 | 0 | 1 |
| XLOC_021018 | TARP         | chr7:38299243-38313248 | 0 | 0 | 0 | 1 |
| XLOC_021019 | AMPH         | chr7:38423296-38671167 | 0 | 0 | 0 | 1 |
| XLOC_021022 | POU6F2-AS1   | chr7:39017608-39504390 | 0 | 0 | 0 | 1 |
| XLOC_021025 | GLI3         | chr7:42000547-42276618 | 0 | 0 | 0 | 1 |
| XLOC_021036 | MYL7         | chr7:44178462-44180916 | 0 | 0 | 0 | 1 |
| XLOC_021037 | GCK          | chr7:44183869-44229022 | 0 | 0 | 0 | 1 |
| XLOC_021052 | SNORA5B      | chr7:45139698-45151346 | 0 | 0 | 0 | 1 |
| XLOC_021054 | IGFBP3       | chr7:45951843-45960871 | 0 | 0 | 0 | 1 |
| XLOC_021055 | TNS3         | chr7:47314751-47621742 | 0 | 0 | 0 | 1 |
| XLOC_021059 | ZPBP         | chr7:49977023-50132860 | 0 | 0 | 0 | 1 |
| XLOC_021064 | FLJ45974     | chr7:53723201-53879624 | 0 | 0 | 0 | 1 |
| XLOC_021065 | HPVC1        | chr7:54268916-54270114 | 0 | 0 | 0 | 1 |

|             |              |                          |   |   |   |   |
|-------------|--------------|--------------------------|---|---|---|---|
| XLOC_021074 | NUPR1L       | chr7:56182373-56184090   | 0 | 0 | 0 | 1 |
| XLOC_021075 | LOC650226    | chr7:56491396-56516068   | 0 | 0 | 0 | 1 |
| XLOC_021076 | LOC100130849 | chr7:56943077-56949839   | 0 | 0 | 0 | 1 |
| XLOC_021077 | MIR4283-2    | chr7:57023491-57023571   | 0 | 0 | 0 | 1 |
| XLOC_021079 | GUSBP10      | chr7:57233376-57247863   | 0 | 0 | 0 | 1 |
| XLOC_021081 | LOC100287834 | chr7:62856717-62859419   | 0 | 0 | 0 | 1 |
| XLOC_021082 | LOC100506050 | chr7:63484795-63490480   | 0 | 0 | 0 | 1 |
| XLOC_021091 | MIR4650-1    | chr7:66461791-66704507   | 0 | 0 | 0 | 1 |
| XLOC_021093 | MIR3914-1    | chr7:70597522-71178586   | 0 | 0 | 0 | 1 |
| XLOC_021117 | LOC100093631 | chr7:74601103-74653459   | 0 | 0 | 0 | 1 |
| XLOC_021119 | PMS2L2       | chr7:74964559-74988306   | 0 | 0 | 0 | 1 |
| XLOC_021124 | CCL24        | chr7:75441113-75443033   | 0 | 0 | 0 | 1 |
| XLOC_021136 | MIR548AU     | chr7:77646373-79100524   | 0 | 0 | 0 | 1 |
| XLOC_021137 | GNAT3        | chr7:80087986-80141242   | 0 | 0 | 0 | 1 |
| XLOC_021149 | ABCB1        | chr7:87133178-87461613   | 0 | 0 | 0 | 1 |
| XLOC_021153 | C7orf62      | chr7:88388752-88966346   | 0 | 0 | 0 | 1 |
| XLOC_021154 | MTERF        | chr7:91502020-91510016   | 0 | 0 | 0 | 1 |
| XLOC_021165 | MIR653       | chr7:93053798-93204042   | 0 | 0 | 0 | 1 |
| XLOC_021166 | MIR489       | chr7:93053798-93204042   | 0 | 0 | 0 | 1 |
| XLOC_021167 | TFPI2        | chr7:93514708-93520303   | 0 | 0 | 0 | 1 |
| XLOC_021169 | SGCE         | chr7:94214535-94285521   | 0 | 0 | 0 | 1 |
| XLOC_021175 | MIR591       | chr7:95749531-95951459   | 0 | 0 | 0 | 1 |
| XLOC_021176 | C7orf76      | chr7:96110937-96132835   | 0 | 0 | 0 | 1 |
| XLOC_021179 | DLX6-AS1     | chr7:96597826-96643377   | 0 | 0 | 0 | 1 |
| XLOC_021180 | DLX5         | chr7:96649701-96654143   | 0 | 0 | 0 | 1 |
| XLOC_021183 | OCM2         | chr7:97614012-97619416   | 0 | 0 | 0 | 1 |
| XLOC_021196 | OR2AE1       | chr7:99473684-99474656   | 0 | 0 | 0 | 1 |
| XLOC_021202 | MIR25        | chr7:99690403-99723128   | 0 | 0 | 0 | 1 |
| XLOC_021203 | MIR93        | chr7:99690403-99723128   | 0 | 0 | 0 | 1 |
| XLOC_021204 | MIR106B      | chr7:99690403-99723128   | 0 | 0 | 0 | 1 |
| XLOC_021219 | ACTL6B       | chr7:100240725-100254084 | 0 | 0 | 0 | 1 |
| XLOC_021231 | MYL10        | chr7:101256604-101272576 | 0 | 0 | 0 | 1 |
| XLOC_021243 | SLC26A5      | chr7:102987970-103086624 | 0 | 0 | 0 | 1 |
| XLOC_021246 | LHFPL3-AS1   | chr7:103969103-104567092 | 0 | 0 | 0 | 1 |
| XLOC_021247 | LHFPL3-AS2   | chr7:103969103-104567092 | 0 | 0 | 0 | 1 |
| XLOC_021258 | SLC26A4-AS1  | chr7:107296960-107358252 | 0 | 0 | 0 | 1 |
| XLOC_021259 | SLC26A3      | chr7:107405911-107443678 | 0 | 0 | 0 | 1 |
| XLOC_021261 | LAMB4        | chr7:107663995-107770801 | 0 | 0 | 0 | 1 |
| XLOC_021262 | NRCAM        | chr7:107788070-108096841 | 0 | 0 | 0 | 1 |
| XLOC_021265 | C7orf66      | chr7:108524037-108524637 | 0 | 0 | 0 | 1 |
| XLOC_021266 | EIF3IP1      | chr7:109599283-109600270 | 0 | 0 | 0 | 1 |
| XLOC_021273 | PPP1R3A      | chr7:113516881-113559082 | 0 | 0 | 0 | 1 |
| XLOC_021274 | TFEC         | chr7:115575201-115670867 | 0 | 0 | 0 | 1 |
| XLOC_021276 | ST7-AS2      | chr7:116592500-116870075 | 0 | 0 | 0 | 1 |
| XLOC_021277 | WNT2         | chr7:116916685-116963343 | 0 | 0 | 0 | 1 |
| XLOC_021278 | ASZ1         | chr7:117003275-117067577 | 0 | 0 | 0 | 1 |
| XLOC_021287 | TAS2R16      | chr7:122634758-122635754 | 0 | 0 | 0 | 1 |
| XLOC_021292 | TMEM229A     | chr7:123670969-123673523 | 0 | 0 | 0 | 1 |
| XLOC_021293 | GPR37        | chr7:124385654-124406079 | 0 | 0 | 0 | 1 |

|             |               |                          |   |   |   |   |
|-------------|---------------|--------------------------|---|---|---|---|
| XLOC_021294 | LOC154872     | chr7:124417345-124430864 | 0 | 0 | 0 | 1 |
| XLOC_021297 | MIR592        | chr7:126078651-126892428 | 0 | 0 | 0 | 1 |
| XLOC_021300 | PAX4          | chr7:127250345-127255780 | 0 | 0 | 0 | 1 |
| XLOC_021309 | MIR182        | chr7:129410222-129410332 | 0 | 0 | 0 | 1 |
| XLOC_021310 | MIR96         | chr7:129414532-129414609 | 0 | 0 | 0 | 1 |
| XLOC_021311 | MIR183        | chr7:129414744-129414854 | 0 | 0 | 0 | 1 |
| XLOC_021318 | KLF14         | chr7:130417395-130418888 | 0 | 0 | 0 | 1 |
| XLOC_021319 | MIR29A        | chr7:130561505-130561569 | 0 | 0 | 0 | 1 |
| XLOC_021320 | MIR29B1       | chr7:130562217-130562298 | 0 | 0 | 0 | 1 |
| XLOC_021332 | FAM180A       | chr7:135414345-135433594 | 0 | 0 | 0 | 1 |
| XLOC_021334 | LOC349160     | chr7:136553398-136849088 | 0 | 0 | 0 | 1 |
| XLOC_021338 | SVOPL         | chr7:138279029-138363790 | 0 | 0 | 0 | 1 |
| XLOC_021344 | KLRG2         | chr7:139138087-139168457 | 0 | 0 | 0 | 1 |
| XLOC_021356 | PRSS37        | chr7:141536077-141541221 | 0 | 0 | 0 | 1 |
| XLOC_021357 | CLEC5A        | chr7:141627156-141646783 | 0 | 0 | 0 | 1 |
| XLOC_021358 | TAS2R38       | chr7:141672430-141673573 | 0 | 0 | 0 | 1 |
| XLOC_021359 | MOXD2P        | chr7:141940555-141946886 | 0 | 0 | 0 | 1 |
| XLOC_021360 | PRSS58        | chr7:141951957-141957878 | 0 | 0 | 0 | 1 |
| XLOC_021361 | LOC730441     | chr7:141968100-141972068 | 0 | 0 | 0 | 1 |
| XLOC_021365 | OR9A2         | chr7:142723286-142724219 | 0 | 0 | 0 | 1 |
| XLOC_021368 | EPHA1         | chr7:143078359-143220540 | 0 | 0 | 0 | 1 |
| XLOC_021373 | RNU6-57       | chr7:143906939-143906966 | 0 | 0 | 0 | 1 |
| XLOC_021375 | OR2A20P,OR2A9 | chr7:143947563-143948696 | 0 | 0 | 0 | 1 |
| XLOC_021378 | NOBOX         | chr7:144094332-144107320 | 0 | 0 | 0 | 1 |
| XLOC_021380 | MIR548I4      | chr7:145813452-148118088 | 0 | 0 | 0 | 1 |
| XLOC_021381 | MIR548F4      | chr7:145813452-148118088 | 0 | 0 | 0 | 1 |
| XLOC_021390 | ATP6V0E2-AS1  | chr7:149564782-149577787 | 0 | 0 | 0 | 1 |
| XLOC_021392 | RARRES2       | chr7:150035406-150038763 | 0 | 0 | 0 | 1 |
| XLOC_021400 | GBX1          | chr7:150845675-150864867 | 0 | 0 | 0 | 1 |
| XLOC_021401 | ASB10         | chr7:150872784-150884919 | 0 | 0 | 0 | 1 |
| XLOC_021404 | WDR86         | chr7:151078206-151110132 | 0 | 0 | 0 | 1 |
| XLOC_021405 | CRYGN         | chr7:151127055-151137099 | 0 | 0 | 0 | 1 |
| XLOC_021406 | MIR3907       | chr7:151127055-151137099 | 0 | 0 | 0 | 1 |
| XLOC_021412 | LOC100128264  | chr7:154858778-154879102 | 0 | 0 | 0 | 1 |
| XLOC_021413 | CNPY1         | chr7:155293952-155326539 | 0 | 0 | 0 | 1 |
| XLOC_021414 | SHH           | chr7:155595557-155604967 | 0 | 0 | 0 | 1 |
| XLOC_021415 | LOC285889     | chr7:156230482-156238282 | 0 | 0 | 0 | 1 |
| XLOC_021420 | MIR153-2      | chr7:157331749-158380482 | 0 | 0 | 0 | 1 |
| XLOC_021421 | MIR595        | chr7:157331749-158380482 | 0 | 0 | 0 | 1 |
| XLOC_021424 | VIPR2         | chr7:158820865-158937649 | 0 | 0 | 0 | 1 |
| XLOC_021428 | ERICH1-AS1    | chr8:687586-1087777      | 0 | 0 | 0 | 1 |
| XLOC_021429 | DLGAP2        | chr8:1449568-1656642     | 0 | 0 | 0 | 1 |
| XLOC_021431 | MIR596        | chr8:1765396-1765473     | 0 | 0 | 0 | 1 |
| XLOC_021437 | MIR4659A      | chr8:6565877-6619021     | 0 | 0 | 0 | 1 |
| XLOC_021438 | LOC100652791  | chr8:6666040-6699975     | 0 | 0 | 0 | 1 |
| XLOC_021439 | DEFB109P1B    | chr8:7159132-7212876     | 0 | 0 | 0 | 1 |
| XLOC_021440 | USP17L1P      | chr8:7159132-7212876     | 0 | 0 | 0 | 1 |
| XLOC_021441 | USP17L4       | chr8:7159132-7212876     | 0 | 0 | 0 | 1 |
| XLOC_021442 | DEFB105B      | chr8:7345242-7347073     | 0 | 0 | 0 | 1 |

|             |               |                        |   |   |   |   |
|-------------|---------------|------------------------|---|---|---|---|
| XLOC_021443 | DEFB107A      | chr8:7353367-7366833   | 0 | 0 | 0 | 1 |
| XLOC_021445 | DEFB106B      | chr8:7682693-7686575   | 0 | 0 | 0 | 1 |
| XLOC_021446 | DEFB104B      | chr8:7693992-7698764   | 0 | 0 | 0 | 1 |
| XLOC_021447 | SPAG11A,SPAG1 | chr8:7705401-7721319   | 0 | 0 | 0 | 1 |
| XLOC_021448 | DEFB103A,DEFB | chr8:7738725-7740180   | 0 | 0 | 0 | 1 |
| XLOC_021449 | DEFB4A        | chr8:7752198-7754237   | 0 | 0 | 0 | 1 |
| XLOC_021450 | ZNF705B       | chr8:7783858-7809935   | 0 | 0 | 0 | 1 |
| XLOC_021451 | FAM66E        | chr8:7812534-7866277   | 0 | 0 | 0 | 1 |
| XLOC_021455 | MIR4660       | chr8:8905954-8906028   | 0 | 0 | 0 | 1 |
| XLOC_021458 | MIR597        | chr8:9413444-9639856   | 0 | 0 | 0 | 1 |
| XLOC_021460 | PRSS55        | chr8:10383055-10411676 | 0 | 0 | 0 | 1 |
| XLOC_021461 | C8orf74       | chr8:10530146-10558103 | 0 | 0 | 0 | 1 |
| XLOC_021466 | LINC00208     | chr8:11434043-11438850 | 0 | 0 | 0 | 1 |
| XLOC_021470 | DEFB135       | chr8:11839829-11842099 | 0 | 0 | 0 | 1 |
| XLOC_021472 | FAM66D        | chr8:11973290-12008698 | 0 | 0 | 0 | 1 |
| XLOC_021473 | FAM66A        | chr8:12219527-12268510 | 0 | 0 | 0 | 1 |
| XLOC_021475 | MIR3926-2     | chr8:12579405-12612992 | 0 | 0 | 0 | 1 |
| XLOC_021478 | TUSC3         | chr8:15397595-15624158 | 0 | 0 | 0 | 1 |
| XLOC_021479 | EFHA2         | chr8:16884746-16980148 | 0 | 0 | 0 | 1 |
| XLOC_021489 | LPL           | chr8:19796581-19824770 | 0 | 0 | 0 | 1 |
| XLOC_021491 | LZTS1-AS1     | chr8:20133283-20147969 | 0 | 0 | 0 | 1 |
| XLOC_021492 | LOC286114     | chr8:20831496-20852630 | 0 | 0 | 0 | 1 |
| XLOC_021516 | ADAM28        | chr8:24151579-24212726 | 0 | 0 | 0 | 1 |
| XLOC_021517 | ADAMDEC1      | chr8:24241797-24263526 | 0 | 0 | 0 | 1 |
| XLOC_021518 | ADAM7         | chr8:24298508-24367077 | 0 | 0 | 0 | 1 |
| XLOC_021519 | NEFM          | chr8:24771273-24776606 | 0 | 0 | 0 | 1 |
| XLOC_021528 | MIR3622A      | chr8:27559189-27559284 | 0 | 0 | 0 | 1 |
| XLOC_021531 | PNOC          | chr8:28174648-28200868 | 0 | 0 | 0 | 1 |
| XLOC_021535 | LOC286135     | chr8:29779028-29811123 | 0 | 0 | 0 | 1 |
| XLOC_021539 | SMIM18        | chr8:30436030-30515738 | 0 | 0 | 0 | 1 |
| XLOC_021542 | NRG1          | chr8:31497267-32622558 | 0 | 0 | 0 | 1 |
| XLOC_021543 | NRG1-IT3      | chr8:31497267-32622558 | 0 | 0 | 0 | 1 |
| XLOC_021545 | UNC5D         | chr8:35092974-35652181 | 0 | 0 | 0 | 1 |
| XLOC_021546 | KCNU1         | chr8:36641841-36793643 | 0 | 0 | 0 | 1 |
| XLOC_021562 | LOC100130964  | chr8:39420630-39437653 | 0 | 0 | 0 | 1 |
| XLOC_021563 | ADAM18        | chr8:39442086-39587583 | 0 | 0 | 0 | 1 |
| XLOC_021565 | IDO2          | chr8:39792473-39873910 | 0 | 0 | 0 | 1 |
| XLOC_021566 | C8orf4        | chr8:40010986-40012827 | 0 | 0 | 0 | 1 |
| XLOC_021575 | CHRNA3        | chr8:42552561-42592209 | 0 | 0 | 0 | 1 |
| XLOC_021580 | POTEA         | chr8:43147584-43218328 | 0 | 0 | 0 | 1 |
| XLOC_021581 | LINC00293     | chr8:47752507-47767407 | 0 | 0 | 0 | 1 |
| XLOC_021586 | C8orf22       | chr8:49966894-49988642 | 0 | 0 | 0 | 1 |
| XLOC_021587 | SNTG1         | chr8:50824596-51705427 | 0 | 0 | 0 | 1 |
| XLOC_021588 | NPBWR1        | chr8:53852467-53853454 | 0 | 0 | 0 | 1 |
| XLOC_021592 | RP1           | chr8:55528626-55543394 | 0 | 0 | 0 | 1 |
| XLOC_021593 | XKR4          | chr8:56015016-56438710 | 0 | 0 | 0 | 1 |
| XLOC_021597 | LOC100507651  | chr8:58131647-58145388 | 0 | 0 | 0 | 1 |
| XLOC_021598 | LOC286177     | chr8:58173784-58179170 | 0 | 0 | 0 | 1 |
| XLOC_021599 | LINC00588     | chr8:58192101-58197290 | 0 | 0 | 0 | 1 |



|             |              |                          |         |        |   |   |
|-------------|--------------|--------------------------|---------|--------|---|---|
| XLOC_021602 | SDCBP        | chr8:59465727-59495419   | 80.8162 | 64.506 | 0 | 1 |
| XLOC_021606 | MIR4470      | chr8:62627346-62627418   | 0       | 0      | 0 | 1 |
| XLOC_021607 | NKAIN3       | chr8:63161500-63903628   | 0       | 0      | 0 | 1 |
| XLOC_021608 | UG0898H09    | chr8:63161500-63903628   | 0       | 0      | 0 | 1 |
| XLOC_021610 | LOC286184    | chr8:64681987-64698054   | 0       | 0      | 0 | 1 |
| XLOC_021611 | LOC100130155 | chr8:65285774-65291386   | 0       | 0      | 0 | 1 |
| XLOC_021612 | MIR124-2     | chr8:65291705-65291814   | 0       | 0      | 0 | 1 |
| XLOC_021613 | BHLHE22      | chr8:65492794-65496191   | 0       | 0      | 0 | 1 |
| XLOC_021617 | LOC100505659 | chr8:67104348-67109554   | 0       | 0      | 0 | 1 |
| XLOC_021625 | C8orf34      | chr8:69215702-69731258   | 0       | 0      | 0 | 1 |
| XLOC_021629 | LOC100132891 | chr8:72753776-72987819   | 0       | 0      | 0 | 1 |
| XLOC_021630 | RNU6-83      | chr8:72753776-72987819   | 0       | 0      | 0 | 1 |
| XLOC_021631 | KCNB2        | chr8:73449625-73850584   | 0       | 0      | 0 | 1 |
| XLOC_021638 | MIR5681A     | chr8:75460777-75460852   | 0       | 0      | 0 | 1 |
| XLOC_021639 | FLJ39080     | chr8:75512100-75670587   | 0       | 0      | 0 | 1 |
| XLOC_021640 | MIR2052      | chr8:75512100-75670587   | 0       | 0      | 0 | 1 |
| XLOC_021642 | CRISPLD1     | chr8:75896707-75946793   | 0       | 0      | 0 | 1 |
| XLOC_021645 | PKIA         | chr8:79428335-79517502   | 0       | 0      | 0 | 1 |
| XLOC_021647 | STMN2        | chr8:80523048-80578410   | 0       | 0      | 0 | 1 |
| XLOC_021648 | MIR5708      | chr8:81153623-81153708   | 0       | 0      | 0 | 1 |
| XLOC_021649 | ZBTB10       | chr8:81398447-81434610   | 0       | 0      | 0 | 1 |
| XLOC_021652 | RALYL        | chr8:85095452-85834078   | 0       | 0      | 0 | 1 |
| XLOC_021658 | REXO1L2P     | chr8:86727072-86728150   | 0       | 0      | 0 | 1 |
| XLOC_021659 | REXO1L2P     | chr8:86748526-86749604   | 0       | 0      | 0 | 1 |
| XLOC_021663 | CNBD1        | chr8:87878675-88394955   | 0       | 0      | 0 | 1 |
| XLOC_021667 | LINC00534    | chr8:91233715-91400187   | 0       | 0      | 0 | 1 |
| XLOC_021671 | MIR4661      | chr8:92114846-92231464   | 0       | 0      | 0 | 1 |
| XLOC_021681 | MIR3150A     | chr8:96085138-96085224   | 0       | 0      | 0 | 1 |
| XLOC_021697 | MIR4471      | chr8:101394990-101395073 | 0       | 0      | 0 | 1 |
| XLOC_021699 | NACAP1       | chr8:102381120-102381823 | 0       | 0      | 0 | 1 |
| XLOC_021700 | GRHL2        | chr8:102504667-102681952 | 0       | 0      | 0 | 1 |
| XLOC_021701 | MIR5680      | chr8:103137659-103137743 | 0       | 0      | 0 | 1 |
| XLOC_021702 | ODF1         | chr8:103563847-103573245 | 0       | 0      | 0 | 1 |
| XLOC_021705 | MIR3151      | chr8:104145190-104242533 | 0       | 0      | 0 | 1 |
| XLOC_021709 | RIMS2        | chr8:104512975-105266656 | 0       | 0      | 0 | 1 |
| XLOC_021710 | DCSTAMP      | chr8:105352023-105368917 | 0       | 0      | 0 | 1 |
| XLOC_021716 | PKHD1L1      | chr8:110374705-110543500 | 0       | 0      | 0 | 1 |
| XLOC_021718 | MIR2053      | chr8:113235158-114449242 | 0       | 0      | 0 | 1 |
| XLOC_021721 | AARD         | chr8:117950463-117956239 | 0       | 0      | 0 | 1 |
| XLOC_021722 | SLC30A8      | chr8:117962511-118188953 | 0       | 0      | 0 | 1 |
| XLOC_021726 | MAL2         | chr8:120220609-120257914 | 0       | 0      | 0 | 1 |
| XLOC_021729 | COL14A1      | chr8:121137346-121384273 | 0       | 0      | 0 | 1 |
| XLOC_021737 | FER1L6       | chr8:124864226-125132302 | 0       | 0      | 0 | 1 |
| XLOC_021741 | LOC157381    | chr8:125954249-125963337 | 0       | 0      | 0 | 1 |
| XLOC_021749 | MIR1204      | chr8:128808207-128808274 | 0       | 0      | 0 | 1 |
| XLOC_021751 | MIR1205      | chr8:128902873-129113499 | 0       | 0      | 0 | 1 |
| XLOC_021752 | MIR1206      | chr8:128902873-129113499 | 0       | 0      | 0 | 1 |
| XLOC_021753 | MIR1207      | chr8:128902873-129113499 | 0       | 0      | 0 | 1 |
| XLOC_021754 | MIR1208      | chr8:129162361-129162434 | 0       | 0      | 0 | 1 |

|             |               |                          |   |   |   |   |
|-------------|---------------|--------------------------|---|---|---|---|
| XLOC_021758 | WISP1         | chr8:134203281-134243932 | 0 | 0 | 0 | 1 |
| XLOC_021760 | LOC286094     | chr8:136246373-136311962 | 0 | 0 | 0 | 1 |
| XLOC_021761 | KHDRBS3       | chr8:136469715-136659848 | 0 | 0 | 0 | 1 |
| XLOC_021764 | LOC731779     | chr8:142350647-142354720 | 0 | 0 | 0 | 1 |
| XLOC_021766 | MIR4472-1     | chr8:143257699-143257779 | 0 | 0 | 0 | 1 |
| XLOC_021767 | LINC00051     | chr8:143279716-143290364 | 0 | 0 | 0 | 1 |
| XLOC_021772 | GML           | chr8:143916216-143928262 | 0 | 0 | 0 | 1 |
| XLOC_021796 | SCXB          | chr8:145321516-145323045 | 0 | 0 | 0 | 1 |
| XLOC_021797 | FAM203A       | chr8:145437879-145440828 | 0 | 0 | 0 | 1 |
| XLOC_021798 | SCXA          | chr8:145486055-145515120 | 0 | 0 | 0 | 1 |
| XLOC_021812 | OR4F21        | chr8:116085-117024       | 0 | 0 | 0 | 1 |
| XLOC_021816 | LOC286083     | chr8:1244293-1250827     | 0 | 0 | 0 | 1 |
| XLOC_021817 | CSMD1         | chr8:2792874-4852328     | 0 | 0 | 0 | 1 |
| XLOC_021820 | MIR4659B      | chr8:6565877-6619021     | 0 | 0 | 0 | 1 |
| XLOC_021821 | XKR5          | chr8:6666040-6699975     | 0 | 0 | 0 | 1 |
| XLOC_021822 | DEFB1         | chr8:6728096-6735529     | 0 | 0 | 0 | 1 |
| XLOC_021823 | DEFA6         | chr8:6782215-6783598     | 0 | 0 | 0 | 1 |
| XLOC_021824 | DEFA4         | chr8:6793344-6795786     | 0 | 0 | 0 | 1 |
| XLOC_021825 | DEFA8P        | chr8:6808247-6809121     | 0 | 0 | 0 | 1 |
| XLOC_021826 | DEFA9P        | chr8:6816810-6817683     | 0 | 0 | 0 | 1 |
| XLOC_021827 | DEFA10P       | chr8:6825662-6826635     | 0 | 0 | 0 | 1 |
| XLOC_021828 | DEFA1B        | chr8:6835170-6837614     | 0 | 0 | 0 | 1 |
| XLOC_021829 | DEFT1P2       | chr8:6844699-6847243     | 0 | 0 | 0 | 1 |
| XLOC_021830 | DEFA1         | chr8:6854287-6856724     | 0 | 0 | 0 | 1 |
| XLOC_021831 | DEFT1P2       | chr8:6863802-6866346     | 0 | 0 | 0 | 1 |
| XLOC_021832 | DEFA1         | chr8:6873390-6875823     | 0 | 0 | 0 | 1 |
| XLOC_021833 | DEFA11P       | chr8:6886122-6887011     | 0 | 0 | 0 | 1 |
| XLOC_021834 | DEFA5         | chr8:6912828-6914259     | 0 | 0 | 0 | 1 |
| XLOC_021835 | LOC349196     | chr8:7118140-7121014     | 0 | 0 | 0 | 1 |
| XLOC_021836 | LOC349196     | chr8:7125762-7128636     | 0 | 0 | 0 | 1 |
| XLOC_021837 | LOC349196     | chr8:7141006-7143880     | 0 | 0 | 0 | 1 |
| XLOC_021838 | FAM66B        | chr8:7159132-7212876     | 0 | 0 | 0 | 1 |
| XLOC_021839 | ZNF705G       | chr8:7215497-7220490     | 0 | 0 | 0 | 1 |
| XLOC_021840 | DEFB4B        | chr8:7272384-7274354     | 0 | 0 | 0 | 1 |
| XLOC_021841 | DEFB103A,DEFB | chr8:7286415-7287870     | 0 | 0 | 0 | 1 |
| XLOC_021842 | SPAG11B       | chr8:7305275-7321192     | 0 | 0 | 0 | 1 |
| XLOC_021843 | DEFB104A      | chr8:7327829-7332604     | 0 | 0 | 0 | 1 |
| XLOC_021844 | DEFB106B      | chr8:7340025-7343909     | 0 | 0 | 0 | 1 |
| XLOC_021845 | FAM90A7P      | chr8:7413659-7416626     | 0 | 0 | 0 | 1 |
| XLOC_021846 | FAM90A7P      | chr8:7421309-7431920     | 0 | 0 | 0 | 1 |
| XLOC_021847 | DEFB107B      | chr8:7669241-7673238     | 0 | 0 | 0 | 1 |
| XLOC_021848 | DEFB105A      | chr8:7679529-7681360     | 0 | 0 | 0 | 1 |
| XLOC_021849 | USP17L8       | chr8:7812534-7866277     | 0 | 0 | 0 | 1 |
| XLOC_021850 | USP17L3       | chr8:7812534-7866277     | 0 | 0 | 0 | 1 |
| XLOC_021851 | DEFB109P1B    | chr8:7812534-7866277     | 0 | 0 | 0 | 1 |
| XLOC_021852 | MIR548I3      | chr8:7946462-7946611     | 0 | 0 | 0 | 1 |
| XLOC_021856 | LINC00599     | chr8:9757573-9760839     | 0 | 0 | 0 | 1 |
| XLOC_021857 | MIR124-1      | chr8:9760897-9760982     | 0 | 0 | 0 | 1 |
| XLOC_021861 | MIR1322       | chr8:10622883-10697299   | 0 | 0 | 0 | 1 |

|             |              |                        |   |   |   |   |
|-------------|--------------|------------------------|---|---|---|---|
| XLOC_021863 | MIR598       | chr8:10753656-11058875 | 0 | 0 | 0 | 1 |
| XLOC_021866 | DEFB136      | chr8:11831445-11832108 | 0 | 0 | 0 | 1 |
| XLOC_021868 | LOC100133267 | chr8:11921897-11929256 | 0 | 0 | 0 | 1 |
| XLOC_021869 | LOC392196    | chr8:11973290-12008698 | 0 | 0 | 0 | 1 |
| XLOC_021870 | USP17L7      | chr8:11973290-12008698 | 0 | 0 | 0 | 1 |
| XLOC_021871 | USP17L2      | chr8:11973290-12008698 | 0 | 0 | 0 | 1 |
| XLOC_021874 | DEFB130      | chr8:12168470-12175825 | 0 | 0 | 0 | 1 |
| XLOC_021875 | LOC649352    | chr8:12219527-12268510 | 0 | 0 | 0 | 1 |
| XLOC_021876 | DEFB109P1    | chr8:12219527-12268510 | 0 | 0 | 0 | 1 |
| XLOC_021881 | MIR3926-1    | chr8:12579405-12612992 | 0 | 0 | 0 | 1 |
| XLOC_021882 | LOC340357    | chr8:12623570-12668910 | 0 | 0 | 0 | 1 |
| XLOC_021885 | MIR383       | chr8:13947372-15095792 | 0 | 0 | 0 | 1 |
| XLOC_021887 | FGF20        | chr8:16850333-16859674 | 0 | 0 | 0 | 1 |
| XLOC_021891 | FGL1         | chr8:17721899-17753047 | 0 | 0 | 0 | 1 |
| XLOC_021894 | LOC100128993 | chr8:19041185-19103032 | 0 | 0 | 0 | 1 |
| XLOC_021896 | SLC18A1      | chr8:20002365-20040717 | 0 | 0 | 0 | 1 |
| XLOC_021897 | LZTS1        | chr8:20103675-20112803 | 0 | 0 | 0 | 1 |
| XLOC_021898 | GFRA2        | chr8:21549529-21646346 | 0 | 0 | 0 | 1 |
| XLOC_021899 | DOK2         | chr8:21766383-21771205 | 0 | 0 | 0 | 1 |
| XLOC_021903 | LGI3         | chr8:22004342-22014344 | 0 | 0 | 0 | 1 |
| XLOC_021905 | MIR320A      | chr8:22102474-22102556 | 0 | 0 | 0 | 1 |
| XLOC_021909 | PEBP4        | chr8:22570764-22785421 | 0 | 0 | 0 | 1 |
| XLOC_021916 | NKX2-6       | chr8:23559963-23564111 | 0 | 0 | 0 | 1 |
| XLOC_021918 | NEFL         | chr8:24808468-24814383 | 0 | 0 | 0 | 1 |
| XLOC_021921 | EBF2         | chr8:25699245-25902640 | 0 | 0 | 0 | 1 |
| XLOC_021924 | STMN4        | chr8:27093813-27115903 | 0 | 0 | 0 | 1 |
| XLOC_021926 | CHRNA2       | chr8:27317277-27336813 | 0 | 0 | 0 | 1 |
| XLOC_021928 | MIR3622B     | chr8:27559189-27559284 | 0 | 0 | 0 | 1 |
| XLOC_021931 | SCARA5       | chr8:27727398-27850369 | 0 | 0 | 0 | 1 |
| XLOC_021932 | MIR4287      | chr8:27727398-27850369 | 0 | 0 | 0 | 1 |
| XLOC_021936 | MIR4288      | chr8:28351721-28431785 | 0 | 0 | 0 | 1 |
| XLOC_021940 | LINC00589    | chr8:29578775-29605625 | 0 | 0 | 0 | 1 |
| XLOC_021941 | MIR3148      | chr8:29814787-29814864 | 0 | 0 | 0 | 1 |
| XLOC_021942 | MIR548O2     | chr8:29920257-30108213 | 0 | 0 | 0 | 1 |
| XLOC_021949 | TEX15        | chr8:30689059-30706533 | 0 | 0 | 0 | 1 |
| XLOC_021950 | PURG         | chr8:30853320-31031277 | 0 | 0 | 0 | 1 |
| XLOC_021954 | DUSP26       | chr8:33448853-33457439 | 0 | 0 | 0 | 1 |
| XLOC_021958 | GOT1L1       | chr8:37791799-37797647 | 0 | 0 | 0 | 1 |
| XLOC_021959 | ADRB3        | chr8:37820513-37824184 | 0 | 0 | 0 | 1 |
| XLOC_021965 | C8orf86      | chr8:38368351-38386180 | 0 | 0 | 0 | 1 |
| XLOC_021968 | ADAM3A       | chr8:39308563-39380508 | 0 | 0 | 0 | 1 |
| XLOC_021969 | ADAM2        | chr8:39601254-39695779 | 0 | 0 | 0 | 1 |
| XLOC_021970 | ZMAT4        | chr8:40388110-40755343 | 0 | 0 | 0 | 1 |
| XLOC_021971 | SFRP1        | chr8:41119475-41166990 | 0 | 0 | 0 | 1 |
| XLOC_021972 | NKX6-3       | chr8:41503828-41504878 | 0 | 0 | 0 | 1 |
| XLOC_021974 | MIR486       | chr8:41510743-41754280 | 0 | 0 | 0 | 1 |
| XLOC_021979 | CHRNA6       | chr8:42607779-42623929 | 0 | 0 | 0 | 1 |
| XLOC_021984 | EFCAB1       | chr8:49627473-49647870 | 0 | 0 | 0 | 1 |
| XLOC_021986 | PXDNL        | chr8:52232136-52722005 | 0 | 0 | 0 | 1 |

|             |              |                        |   |   |   |   |
|-------------|--------------|------------------------|---|---|---|---|
| XLOC_021988 | ST18         | chr8:53023391-53322439 | 0 | 0 | 0 | 1 |
| XLOC_021991 | OPRK1        | chr8:54138275-54164194 | 0 | 0 | 0 | 1 |
| XLOC_021995 | SBF1P1       | chr8:56015016-56438710 | 0 | 0 | 0 | 1 |
| XLOC_021998 | SNORD54      | chr8:56980738-56987140 | 0 | 0 | 0 | 1 |
| XLOC_021999 | MOS          | chr8:57025500-57026541 | 0 | 0 | 0 | 1 |
| XLOC_022001 | SDR16C5      | chr8:57212569-57233241 | 0 | 0 | 0 | 1 |
| XLOC_022002 | PENK         | chr8:57353512-57359282 | 0 | 0 | 0 | 1 |
| XLOC_022003 | LOC100507632 | chr8:57430877-57472382 | 0 | 0 | 0 | 1 |
| XLOC_022005 | CYP7A1       | chr8:59402736-59412720 | 0 | 0 | 0 | 1 |
| XLOC_022007 | TOX          | chr8:59717976-60031767 | 0 | 0 | 0 | 1 |
| XLOC_022008 | CA8          | chr8:61101422-61193954 | 0 | 0 | 0 | 1 |
| XLOC_022013 | LOC401463    | chr8:65486865-65489820 | 0 | 0 | 0 | 1 |
| XLOC_022014 | CYP7B1       | chr8:65508528-65711348 | 0 | 0 | 0 | 1 |
| XLOC_022015 | LINC00251    | chr8:66073379-66092575 | 0 | 0 | 0 | 1 |
| XLOC_022019 | CRH          | chr8:67088611-67090846 | 0 | 0 | 0 | 1 |
| XLOC_022023 | PTTG3P       | chr8:67579786-67774257 | 0 | 0 | 0 | 1 |
| XLOC_022025 | SNORD87      | chr8:67782983-67837777 | 0 | 0 | 0 | 1 |
| XLOC_022026 | TCF24        | chr8:67858735-67874825 | 0 | 0 | 0 | 1 |
| XLOC_022027 | PPP1R42      | chr8:67900366-67940786 | 0 | 0 | 0 | 1 |
| XLOC_022030 | CPA6         | chr8:68334404-68658620 | 0 | 0 | 0 | 1 |
| XLOC_022031 | LOC286189    | chr8:69215702-69731258 | 0 | 0 | 0 | 1 |
| XLOC_022034 | PRDM14       | chr8:70963885-70983562 | 0 | 0 | 0 | 1 |
| XLOC_022038 | EYA1         | chr8:72109667-72274467 | 0 | 0 | 0 | 1 |
| XLOC_022039 | MSC          | chr8:72753776-72987819 | 0 | 0 | 0 | 1 |
| XLOC_022040 | TRPA1        | chr8:72753776-72987819 | 0 | 0 | 0 | 1 |
| XLOC_022041 | LOC392232    | chr8:73117533-73163869 | 0 | 0 | 0 | 1 |
| XLOC_022049 | MIR5681B     | chr8:75460777-75460852 | 0 | 0 | 0 | 1 |
| XLOC_022050 | ZFH4-AS1     | chr8:77523113-77779521 | 0 | 0 | 0 | 1 |
| XLOC_022058 | PMP2         | chr8:82352563-82359719 | 0 | 0 | 0 | 1 |
| XLOC_022059 | FABP9        | chr8:82370617-82373758 | 0 | 0 | 0 | 1 |
| XLOC_022060 | FABP4        | chr8:82390731-82395473 | 0 | 0 | 0 | 1 |
| XLOC_022067 | CA1          | chr8:86240457-86290342 | 0 | 0 | 0 | 1 |
| XLOC_022068 | REXO1L2P     | chr8:86566827-86567905 | 0 | 0 | 0 | 1 |
| XLOC_022069 | REXO1L1      | chr8:86568694-86575726 | 0 | 0 | 0 | 1 |
| XLOC_022070 | REXO1L2P     | chr8:86756683-86757761 | 0 | 0 | 0 | 1 |
| XLOC_022071 | REXO1L1      | chr8:86758550-86789306 | 0 | 0 | 0 | 1 |
| XLOC_022072 | REXO1L2P     | chr8:86758550-86789306 | 0 | 0 | 0 | 1 |
| XLOC_022073 | REXO1L2P     | chr8:86802519-86803597 | 0 | 0 | 0 | 1 |
| XLOC_022074 | REXO1L2P     | chr8:86814712-86815790 | 0 | 0 | 0 | 1 |
| XLOC_022075 | REXO1L2P     | chr8:86839093-86840171 | 0 | 0 | 0 | 1 |
| XLOC_022076 | PSKH2        | chr8:87060690-87081851 | 0 | 0 | 0 | 1 |
| XLOC_022077 | SLC7A13      | chr8:87226287-87242604 | 0 | 0 | 0 | 1 |
| XLOC_022079 | CNGB3        | chr8:87586162-87755903 | 0 | 0 | 0 | 1 |
| XLOC_022080 | DCAF4L2      | chr8:88882970-88886296 | 0 | 0 | 0 | 1 |
| XLOC_022081 | MMP16        | chr8:89049459-89339717 | 0 | 0 | 0 | 1 |
| XLOC_022083 | CALB1        | chr8:91070837-91095107 | 0 | 0 | 0 | 1 |
| XLOC_022088 | FLJ46284     | chr8:93725189-93798288 | 0 | 0 | 0 | 1 |
| XLOC_022090 | C8orf87      | chr8:94146323-94179079 | 0 | 0 | 0 | 1 |
| XLOC_022093 | MIR378D2     | chr8:94928249-94928347 | 0 | 0 | 0 | 1 |

|             |              |                          |   |   |   |   |
|-------------|--------------|--------------------------|---|---|---|---|
| XLOC_022101 | MIR3150B     | chr8:96085138-96085224   | 0 | 0 | 0 | 1 |
| XLOC_022102 | C8orf69      | chr8:96219234-96228602   | 0 | 0 | 0 | 1 |
| XLOC_022104 | LOC100500773 | chr8:96959212-96960576   | 0 | 0 | 0 | 1 |
| XLOC_022105 | GDF6         | chr8:97154557-97173020   | 0 | 0 | 0 | 1 |
| XLOC_022108 | TSPYL5       | chr8:98285713-98290176   | 0 | 0 | 0 | 1 |
| XLOC_022114 | MIR599       | chr8:100025493-100889814 | 0 | 0 | 0 | 1 |
| XLOC_022115 | MIR875       | chr8:100025493-100889814 | 0 | 0 | 0 | 1 |
| XLOC_022117 | RGS22        | chr8:100973275-101118344 | 0 | 0 | 0 | 1 |
| XLOC_022130 | C8orf56      | chr8:104145190-104242533 | 0 | 0 | 0 | 1 |
| XLOC_022136 | ANGPT1       | chr8:108261709-108510254 | 0 | 0 | 0 | 1 |
| XLOC_022137 | RSPO2        | chr8:108911543-109095913 | 0 | 0 | 0 | 1 |
| XLOC_022142 | KCNV1        | chr8:110979232-110986959 | 0 | 0 | 0 | 1 |
| XLOC_022150 | TNFRSF11B    | chr8:119935795-119964383 | 0 | 0 | 0 | 1 |
| XLOC_022151 | ENPP2        | chr8:120569316-120651106 | 0 | 0 | 0 | 1 |
| XLOC_022159 | MIR4663      | chr8:124228027-124228103 | 0 | 0 | 0 | 1 |
| XLOC_022163 | KLHL38       | chr8:124657914-124665190 | 0 | 0 | 0 | 1 |
| XLOC_022164 | ANXA13       | chr8:124693033-124749647 | 0 | 0 | 0 | 1 |
| XLOC_022165 | FER1L6-AS1   | chr8:124864226-125132302 | 0 | 0 | 0 | 1 |
| XLOC_022172 | LOC727677    | chr8:128455594-128494384 | 0 | 0 | 0 | 1 |
| XLOC_022173 | LOC728724    | chr8:130228712-130253486 | 0 | 0 | 0 | 1 |
| XLOC_022174 | GSDMC        | chr8:130760441-130799134 | 0 | 0 | 0 | 1 |
| XLOC_022176 | MIR5194      | chr8:130851838-131028897 | 0 | 0 | 0 | 1 |
| XLOC_022180 | ADCY8        | chr8:131792546-132052835 | 0 | 0 | 0 | 1 |
| XLOC_022181 | OC90         | chr8:133036466-133071627 | 0 | 0 | 0 | 1 |
| XLOC_022187 | SLA          | chr8:133879204-134147143 | 0 | 0 | 0 | 1 |
| XLOC_022191 | MIR30B       | chr8:135812762-135812850 | 0 | 0 | 0 | 1 |
| XLOC_022192 | MIR30D       | chr8:135817118-135817188 | 0 | 0 | 0 | 1 |
| XLOC_022193 | FAM135B      | chr8:139142265-139509065 | 0 | 0 | 0 | 1 |
| XLOC_022194 | COL22A1      | chr8:139600477-139926236 | 0 | 0 | 0 | 1 |
| XLOC_022195 | KCNK9        | chr8:140624803-140715299 | 0 | 0 | 0 | 1 |
| XLOC_022200 | GPR20        | chr8:142366586-142377365 | 0 | 0 | 0 | 1 |
| XLOC_022201 | MROH5        | chr8:142443928-142517330 | 0 | 0 | 0 | 1 |
| XLOC_022206 | SLURP1       | chr8:143822361-143823829 | 0 | 0 | 0 | 1 |
| XLOC_022207 | LYPD2        | chr8:143831627-143833952 | 0 | 0 | 0 | 1 |
| XLOC_022208 | LYNX1        | chr8:143845755-143859640 | 0 | 0 | 0 | 1 |
| XLOC_022209 | LY6D         | chr8:143866297-143868008 | 0 | 0 | 0 | 1 |
| XLOC_022210 | CYP11B1      | chr8:143953772-143961236 | 0 | 0 | 0 | 1 |
| XLOC_022211 | CYP11B2      | chr8:143991974-143999259 | 0 | 0 | 0 | 1 |
| XLOC_022213 | LY6H         | chr8:144239330-144242053 | 0 | 0 | 0 | 1 |
| XLOC_022225 | MIR4664      | chr8:144806102-144815914 | 0 | 0 | 0 | 1 |
| XLOC_022231 | MIR661       | chr8:144989320-145050913 | 0 | 0 | 0 | 1 |
| XLOC_022257 | DDX11L5      | chr9:11986-29739         | 0 | 0 | 0 | 1 |
| XLOC_022261 | DMRT3        | chr9:976967-991732       | 0 | 0 | 0 | 1 |
| XLOC_022264 | VLDLR        | chr9:2535654-2654485     | 0 | 0 | 0 | 1 |
| XLOC_022266 | GLIS3-AS1    | chr9:3824127-4300035     | 0 | 0 | 0 | 1 |
| XLOC_022271 | MIR101-2     | chr9:4792833-4861064     | 0 | 0 | 0 | 1 |
| XLOC_022273 | INSL4        | chr9:5231418-5233967     | 0 | 0 | 0 | 1 |
| XLOC_022275 | PDCD1LG2     | chr9:5510544-5571282     | 0 | 0 | 0 | 1 |
| XLOC_022278 | MIR4665      | chr9:5919007-6008003     | 0 | 0 | 0 | 1 |

|             |               |                        |   |   |   |   |
|-------------|---------------|------------------------|---|---|---|---|
| XLOC_022279 | IL33          | chr9:6215785-6257983   | 0 | 0 | 0 | 1 |
| XLOC_022280 | TPD52L3       | chr9:6328348-6331900   | 0 | 0 | 0 | 1 |
| XLOC_022285 | LINC00583     | chr9:13927969-13945606 | 0 | 0 | 0 | 1 |
| XLOC_022286 | LOC389705     | chr9:14993324-15019722 | 0 | 0 | 0 | 1 |
| XLOC_022292 | MIR3152       | chr9:18474078-18910947 | 0 | 0 | 0 | 1 |
| XLOC_022297 | MIR491        | chr9:20658308-20995954 | 0 | 0 | 0 | 1 |
| XLOC_022298 | IFNA8         | chr9:21409145-21410184 | 0 | 0 | 0 | 1 |
| XLOC_022301 | C9orf53       | chr9:21967137-21994490 | 0 | 0 | 0 | 1 |
| XLOC_022303 | DMRTA1        | chr9:22446839-22452472 | 0 | 0 | 0 | 1 |
| XLOC_022304 | FLJ35282      | chr9:22646198-22824212 | 0 | 0 | 0 | 1 |
| XLOC_022308 | IFNK          | chr9:27325206-27529850 | 0 | 0 | 0 | 1 |
| XLOC_022311 | TMEM215       | chr9:32783496-32789199 | 0 | 0 | 0 | 1 |
| XLOC_022313 | SPINK4        | chr9:33240195-33248565 | 0 | 0 | 0 | 1 |
| XLOC_022320 | SNORD121B     | chr9:33921690-34048947 | 0 | 0 | 0 | 1 |
| XLOC_022324 | LOC415056     | chr9:34551429-34590138 | 0 | 0 | 0 | 1 |
| XLOC_022334 | MIR4667       | chr9:35605280-35618424 | 0 | 0 | 0 | 1 |
| XLOC_022342 | HRCT1         | chr9:35906188-35907138 | 0 | 0 | 0 | 1 |
| XLOC_022344 | RECK          | chr9:36036909-36124452 | 0 | 0 | 0 | 1 |
| XLOC_022345 | GLIPR2        | chr9:36136741-36163903 | 0 | 0 | 0 | 1 |
| XLOC_022358 | SPATA31A2     | chr9:39355698-39361959 | 0 | 0 | 0 | 1 |
| XLOC_022359 | SPATA31A2     | chr9:39884974-39891210 | 0 | 0 | 0 | 1 |
| XLOC_022360 | FAM74A1       | chr9:39900199-39907240 | 0 | 0 | 0 | 1 |
| XLOC_022361 | SPATA31A3     | chr9:40700290-40706537 | 0 | 0 | 0 | 1 |
| XLOC_022362 | FAM74A3       | chr9:40715523-40722679 | 0 | 0 | 0 | 1 |
| XLOC_022363 | SPATA31A5     | chr9:41500678-41506925 | 0 | 0 | 0 | 1 |
| XLOC_022364 | LOC643648     | chr9:41958801-42019584 | 0 | 0 | 0 | 1 |
| XLOC_022365 | ANKRD20A2,ANK | chr9:42368302-42411863 | 0 | 0 | 0 | 1 |
| XLOC_022366 | FAM95B1       | chr9:42468588-42474238 | 0 | 0 | 0 | 1 |
| XLOC_022367 | FOXD4L4       | chr9:42717233-42720342 | 0 | 0 | 0 | 1 |
| XLOC_022369 | CNTNAP3B      | chr9:43684884-43922473 | 0 | 0 | 0 | 1 |
| XLOC_022370 | LOC643648     | chr9:44387386-44391416 | 0 | 0 | 0 | 1 |
| XLOC_022372 | FAM27A        | chr9:45727028-45728283 | 0 | 0 | 0 | 1 |
| XLOC_022374 | LOC643648     | chr9:46829289-46833319 | 0 | 0 | 0 | 1 |
| XLOC_022379 | LOC100133920  | chr9:69651360-69664949 | 0 | 0 | 0 | 1 |
| XLOC_022388 | C9orf135      | chr9:72435730-72521148 | 0 | 0 | 0 | 1 |
| XLOC_022393 | TMC1          | chr9:75136716-75451267 | 0 | 0 | 0 | 1 |
| XLOC_022395 | RORB          | chr9:77112251-77302117 | 0 | 0 | 0 | 1 |
| XLOC_022400 | PCA3          | chr9:79226291-79521003 | 0 | 0 | 0 | 1 |
| XLOC_022401 | FOXB2         | chr9:79634570-79635869 | 0 | 0 | 0 | 1 |
| XLOC_022406 | SPATA31D5P    | chr9:84528351-84534842 | 0 | 0 | 0 | 1 |
| XLOC_022407 | SPATA31D4     | chr9:84543342-84549913 | 0 | 0 | 0 | 1 |
| XLOC_022408 | SPATA31D3     | chr9:84558414-84565009 | 0 | 0 | 0 | 1 |
| XLOC_022409 | SPATA31D1     | chr9:84603686-84610171 | 0 | 0 | 0 | 1 |
| XLOC_022415 | LOC100506834  | chr9:89563612-89616948 | 0 | 0 | 0 | 1 |
| XLOC_022416 | C9orf170      | chr9:89763558-89774641 | 0 | 0 | 0 | 1 |
| XLOC_022419 | CTSL3P        | chr9:90387829-90401799 | 0 | 0 | 0 | 1 |
| XLOC_022420 | CTSL1P8       | chr9:90459659-90462339 | 0 | 0 | 0 | 1 |
| XLOC_022421 | SPATA31E1     | chr9:90497771-90503814 | 0 | 0 | 0 | 1 |
| XLOC_022422 | SPATA31C1     | chr9:90532876-90538572 | 0 | 0 | 0 | 1 |

|             |                 |                          |   |   |   |   |
|-------------|-----------------|--------------------------|---|---|---|---|
| XLOC_022427 | MIR3153         | chr9:91926112-91931618   | 0 | 0 | 0 | 1 |
| XLOC_022430 | UNQ6494         | chr9:92254697-92334674   | 0 | 0 | 0 | 1 |
| XLOC_022432 | MIR3910-1       | chr9:94398532-94398643   | 0 | 0 | 0 | 1 |
| XLOC_022434 | LINC00475       | chr9:94903748-94921890   | 0 | 0 | 0 | 1 |
| XLOC_022439 | SUSD3           | chr9:95820988-95847415   | 0 | 0 | 0 | 1 |
| XLOC_022444 | MIR4291         | chr9:96581638-96581703   | 0 | 0 | 0 | 1 |
| XLOC_022446 | MIRLET7A1       | chr9:96938238-96938318   | 0 | 0 | 0 | 1 |
| XLOC_022447 | MIRLET7F1       | chr9:96938628-96938715   | 0 | 0 | 0 | 1 |
| XLOC_022453 | MIR2278         | chr9:97488950-97849500   | 0 | 0 | 0 | 1 |
| XLOC_022454 | MIR23B          | chr9:97488950-97849500   | 0 | 0 | 0 | 1 |
| XLOC_022455 | MIR27B          | chr9:97488950-97849500   | 0 | 0 | 0 | 1 |
| XLOC_022456 | MIR24-1         | chr9:97488950-97849500   | 0 | 0 | 0 | 1 |
| XLOC_022461 | LOC441455       | chr9:99488102-99489749   | 0 | 0 | 0 | 1 |
| XLOC_022469 | FOXO1           | chr9:100615536-100618997 | 0 | 0 | 0 | 1 |
| XLOC_022473 | COL15A1         | chr9:101706137-101833068 | 0 | 0 | 0 | 1 |
| XLOC_022481 | LPPR1           | chr9:103791030-104087417 | 0 | 0 | 0 | 1 |
| XLOC_022484 | CYLC2           | chr9:105757592-105780770 | 0 | 0 | 0 | 1 |
| XLOC_022486 | OR13F1          | chr9:107266543-107267503 | 0 | 0 | 0 | 1 |
| XLOC_022487 | OR13C8          | chr9:107331448-107332411 | 0 | 0 | 0 | 1 |
| XLOC_022488 | OR13D1          | chr9:107456702-107457743 | 0 | 0 | 0 | 1 |
| XLOC_022499 | ACTL7A          | chr9:111624602-111626035 | 0 | 0 | 0 | 1 |
| XLOC_022502 | MUSK            | chr9:113431050-113563278 | 0 | 0 | 0 | 1 |
| XLOC_022506 | MIR4668         | chr9:114659205-114695433 | 0 | 0 | 0 | 1 |
| XLOC_022514 | BSPRY           | chr9:116111811-116133513 | 0 | 0 | 0 | 1 |
| XLOC_022519 | MIR455          | chr9:116918230-117072975 | 0 | 0 | 0 | 1 |
| XLOC_022521 | ORM2            | chr9:117092068-117095536 | 0 | 0 | 0 | 1 |
| XLOC_022524 | DEC1            | chr9:117904096-118164923 | 0 | 0 | 0 | 1 |
| XLOC_022526 | LOC100128505    | chr9:119187503-120177317 | 0 | 0 | 0 | 1 |
| XLOC_022528 | TLR4            | chr9:120466452-120479769 | 0 | 0 | 0 | 1 |
| XLOC_022537 | OR1J2           | chr9:125273080-125274022 | 0 | 0 | 0 | 1 |
| XLOC_022538 | OR1J4           | chr9:125281419-125282361 | 0 | 0 | 0 | 1 |
| XLOC_022539 | OR1N2           | chr9:125315448-125316441 | 0 | 0 | 0 | 1 |
| XLOC_022541 | OR1L1           | chr9:125423994-125424927 | 0 | 0 | 0 | 1 |
| XLOC_022542 | OR1L3           | chr9:125437408-125438383 | 0 | 0 | 0 | 1 |
| XLOC_022543 | OR1L4           | chr9:125486268-125487204 | 0 | 0 | 0 | 1 |
| XLOC_022544 | OR1L6           | chr9:125512126-125513062 | 0 | 0 | 0 | 1 |
| XLOC_022545 | OR5C1           | chr9:125551211-125552174 | 0 | 0 | 0 | 1 |
| XLOC_022546 | OR1K1           | chr9:125562401-125563352 | 0 | 0 | 0 | 1 |
| XLOC_022548 | GPR21           | chr9:125703287-125867147 | 0 | 0 | 0 | 1 |
| XLOC_022550 | LHX2            | chr9:126773888-126795442 | 0 | 0 | 0 | 1 |
| XLOC_022553 | GPR144          | chr9:127213422-127239379 | 0 | 0 | 0 | 1 |
| XLOC_022554 | MIR181A2HG      | chr9:127284702-127533576 | 0 | 0 | 0 | 1 |
| XLOC_022555 | MIR181A2        | chr9:127284702-127533576 | 0 | 0 | 0 | 1 |
| XLOC_022556 | MIR181B2        | chr9:127284702-127533576 | 0 | 0 | 0 | 1 |
| XLOC_022575 | MIR2861,MIR396C | chr9:130548111-130548286 | 0 | 0 | 0 | 1 |
| XLOC_022587 | MIR2964A        | chr9:131154896-131154993 | 0 | 0 | 0 | 1 |
| XLOC_022603 | C9orf106        | chr9:132083294-132084882 | 0 | 0 | 0 | 1 |
| XLOC_022606 | PRRX2           | chr9:132427919-132484951 | 0 | 0 | 0 | 1 |
| XLOC_022621 | SNORD62A        | chr9:134305476-134375575 | 0 | 0 | 0 | 1 |

|             |              |                          |   |   |   |   |
|-------------|--------------|--------------------------|---|---|---|---|
| XLOC_022622 | SNORD62B     | chr9:134305476-134375575 | 0 | 0 | 0 | 1 |
| XLOC_022629 | GFI1B        | chr9:135854097-135867084 | 0 | 0 | 0 | 1 |
| XLOC_022632 | CELP         | chr9:135957925-135962478 | 0 | 0 | 0 | 1 |
| XLOC_022634 | SNORD24      | chr9:136215068-136218280 | 0 | 0 | 0 | 1 |
| XLOC_022635 | SNORD36B     | chr9:136215068-136218280 | 0 | 0 | 0 | 1 |
| XLOC_022637 | SNORD36C     | chr9:136215068-136218280 | 0 | 0 | 0 | 1 |
| XLOC_022643 | DBH          | chr9:136501484-136524466 | 0 | 0 | 0 | 1 |
| XLOC_022647 | MIR4669      | chr9:137218315-137332431 | 0 | 0 | 0 | 1 |
| XLOC_022649 | FCN2         | chr9:137772657-137779366 | 0 | 0 | 0 | 1 |
| XLOC_022650 | OLFM1        | chr9:137967088-138013030 | 0 | 0 | 0 | 1 |
| XLOC_022651 | LOC401557    | chr9:138073454-138079152 | 0 | 0 | 0 | 1 |
| XLOC_022652 | C9orf62      | chr9:138235094-138238404 | 0 | 0 | 0 | 1 |
| XLOC_022656 | OBP2A        | chr9:138437984-138441815 | 0 | 0 | 0 | 1 |
| XLOC_022658 | LOC100130954 | chr9:138466770-138478958 | 0 | 0 | 0 | 1 |
| XLOC_022659 | LCN9         | chr9:138555167-138557755 | 0 | 0 | 0 | 1 |
| XLOC_022665 | MIR126       | chr9:139553307-139567130 | 0 | 0 | 0 | 1 |
| XLOC_022671 | MIR4292      | chr9:139690789-139735639 | 0 | 0 | 0 | 1 |
| XLOC_022676 | MIR4479      | chr9:139780964-139821067 | 0 | 0 | 0 | 1 |
| XLOC_022679 | PTGDS        | chr9:139871955-139876194 | 0 | 0 | 0 | 1 |
| XLOC_022680 | LCNL1        | chr9:139877444-139880210 | 0 | 0 | 0 | 1 |
| XLOC_022700 | MIR602       | chr9:140732870-140732968 | 0 | 0 | 0 | 1 |
| XLOC_022701 | CACNA1B      | chr9:140772240-141019076 | 0 | 0 | 0 | 1 |
| XLOC_022705 | FAM138C      | chr9:34393-35864         | 0 | 0 | 0 | 1 |
| XLOC_022715 | INSL6        | chr9:5163862-5185618     | 0 | 0 | 0 | 1 |
| XLOC_022724 | PTPRD        | chr9:8314245-10612723    | 0 | 0 | 0 | 1 |
| XLOC_022725 | MPDZ         | chr9:13105702-13279563   | 0 | 0 | 0 | 1 |
| XLOC_022729 | CER1         | chr9:14719731-14722715   | 0 | 0 | 0 | 1 |
| XLOC_022730 | FREM1        | chr9:14734663-14910993   | 0 | 0 | 0 | 1 |
| XLOC_022733 | C9orf92      | chr9:16203932-16276311   | 0 | 0 | 0 | 1 |
| XLOC_022742 | MIR4473      | chr9:20344967-20622514   | 0 | 0 | 0 | 1 |
| XLOC_022743 | MIR4474      | chr9:20344967-20622514   | 0 | 0 | 0 | 1 |
| XLOC_022744 | PTPLAD2      | chr9:21006364-21031635   | 0 | 0 | 0 | 1 |
| XLOC_022745 | IFNB1        | chr9:21077103-21077943   | 0 | 0 | 0 | 1 |
| XLOC_022746 | IFNW1        | chr9:21140630-21142144   | 0 | 0 | 0 | 1 |
| XLOC_022747 | IFNA21       | chr9:21165635-21166659   | 0 | 0 | 0 | 1 |
| XLOC_022748 | IFNA4        | chr9:21186617-21187598   | 0 | 0 | 0 | 1 |
| XLOC_022749 | IFNA7        | chr9:21201467-21202204   | 0 | 0 | 0 | 1 |
| XLOC_022750 | IFNA10       | chr9:21206179-21207142   | 0 | 0 | 0 | 1 |
| XLOC_022751 | IFNA16       | chr9:21216371-21217310   | 0 | 0 | 0 | 1 |
| XLOC_022752 | IFNA17       | chr9:21227241-21228221   | 0 | 0 | 0 | 1 |
| XLOC_022753 | IFNA14       | chr9:21239200-21239978   | 0 | 0 | 0 | 1 |
| XLOC_022754 | IFNA22P      | chr9:21277686-21278562   | 0 | 0 | 0 | 1 |
| XLOC_022755 | IFNA5        | chr9:21304612-21305312   | 0 | 0 | 0 | 1 |
| XLOC_022757 | IFNA6        | chr9:21350316-21350886   | 0 | 0 | 0 | 1 |
| XLOC_022758 | IFNA13       | chr9:21367370-21368075   | 0 | 0 | 0 | 1 |
| XLOC_022759 | IFNA2        | chr9:21384253-21385396   | 0 | 0 | 0 | 1 |
| XLOC_022762 | MIR31        | chr9:21454266-21559697   | 0 | 0 | 0 | 1 |
| XLOC_022765 | ELAVL2       | chr9:23690102-23826063   | 0 | 0 | 0 | 1 |
| XLOC_022766 | IZUMO3       | chr9:24543212-24545674   | 0 | 0 | 0 | 1 |



|             |                |                        |   |   |   |   |
|-------------|----------------|------------------------|---|---|---|---|
| XLOC_022775 | LINGO2         | chr9:27948083-29212998 | 0 | 0 | 0 | 1 |
| XLOC_022776 | MIR876         | chr9:27948083-29212998 | 0 | 0 | 0 | 1 |
| XLOC_022777 | MIR873         | chr9:27948083-29212998 | 0 | 0 | 0 | 1 |
| XLOC_022778 | LOC401497      | chr9:30388932-30408452 | 0 | 0 | 0 | 1 |
| XLOC_022782 | TAF1L          | chr9:32629451-32635667 | 0 | 0 | 0 | 1 |
| XLOC_022787 | AQP7           | chr9:33384947-33402517 | 0 | 0 | 0 | 1 |
| XLOC_022790 | SUGT1P1        | chr9:33504534-33511164 | 0 | 0 | 0 | 1 |
| XLOC_022793 | SNORD121A      | chr9:33921690-34048947 | 0 | 0 | 0 | 1 |
| XLOC_022800 | CNTFR          | chr9:34551429-34590138 | 0 | 0 | 0 | 1 |
| XLOC_022805 | CCL27          | chr9:34652181-34662689 | 0 | 0 | 0 | 1 |
| XLOC_022806 | CCL19          | chr9:34689566-34691274 | 0 | 0 | 0 | 1 |
| XLOC_022807 | CCL21          | chr9:34709001-34710147 | 0 | 0 | 0 | 1 |
| XLOC_022808 | FAM205A        | chr9:34723049-34729535 | 0 | 0 | 0 | 1 |
| XLOC_022809 | FAM205B        | chr9:34830263-34838583 | 0 | 0 | 0 | 1 |
| XLOC_022817 | SIT1           | chr9:35649296-35650947 | 0 | 0 | 0 | 1 |
| XLOC_022826 | FAM221B        | chr9:35817013-35828744 | 0 | 0 | 0 | 1 |
| XLOC_022828 | OR2S2          | chr9:35957104-35958151 | 0 | 0 | 0 | 1 |
| XLOC_022831 | MIR4475        | chr9:36823535-36823596 | 0 | 0 | 0 | 1 |
| XLOC_022832 | PAX5           | chr9:36838530-37034476 | 0 | 0 | 0 | 1 |
| XLOC_022833 | MIR4540        | chr9:36838530-37034476 | 0 | 0 | 0 | 1 |
| XLOC_022834 | MIR4476        | chr9:36838530-37034476 | 0 | 0 | 0 | 1 |
| XLOC_022841 | IGFBPL1        | chr9:38406524-38424444 | 0 | 0 | 0 | 1 |
| XLOC_022844 | CNTNAP3        | chr9:39072763-39288300 | 0 | 0 | 0 | 1 |
| XLOC_022847 | SPATA31A4      | chr9:41321106-41327397 | 0 | 0 | 0 | 1 |
| XLOC_022848 | LOC653501,ZNF6 | chr9:41588832-41609544 | 0 | 0 | 0 | 1 |
| XLOC_022851 | LOC286297      | chr9:42844369-42893137 | 0 | 0 | 0 | 1 |
| XLOC_022852 | FAM95B1        | chr9:43027662-43033312 | 0 | 0 | 0 | 1 |
| XLOC_022853 | ANKRD20A2,ANK  | chr9:43089971-43133544 | 0 | 0 | 0 | 1 |
| XLOC_022854 | LOC642929      | chr9:43140536-43145484 | 0 | 0 | 0 | 1 |
| XLOC_022855 | SPATA31A6      | chr9:43624501-43630730 | 0 | 0 | 0 | 1 |
| XLOC_022856 | FAM74A2,FAM74  | chr9:65487272-65494386 | 0 | 0 | 0 | 1 |
| XLOC_022857 | SPATA31A5      | chr9:65503362-65509610 | 0 | 0 | 0 | 1 |
| XLOC_022858 | LOC286297      | chr9:67017374-67032072 | 0 | 0 | 0 | 1 |
| XLOC_022860 | FAM27B         | chr9:67792928-67794189 | 0 | 0 | 0 | 1 |
| XLOC_022866 | FOXD4L5        | chr9:70175706-70178815 | 0 | 0 | 0 | 1 |
| XLOC_022867 | FOXD4L4        | chr9:70426622-70429731 | 0 | 0 | 0 | 1 |
| XLOC_022871 | PRKACG         | chr9:71627448-71629039 | 0 | 0 | 0 | 1 |
| XLOC_022872 | BANCR          | chr9:71911596-71921972 | 0 | 0 | 0 | 1 |
| XLOC_022873 | APBA1          | chr9:72042448-72287275 | 0 | 0 | 0 | 1 |
| XLOC_022875 | LOC494558      | chr9:72434320-72435655 | 0 | 0 | 0 | 1 |
| XLOC_022876 | LOC100507244   | chr9:72658496-72873790 | 0 | 0 | 0 | 1 |
| XLOC_022880 | MIR204         | chr9:73149965-73736514 | 0 | 0 | 0 | 1 |
| XLOC_022883 | C9orf57        | chr9:74666296-74675521 | 0 | 0 | 0 | 1 |
| XLOC_022890 | MIR548H3       | chr9:78118511-78338744 | 0 | 0 | 0 | 1 |
| XLOC_022893 | VPS13A-AS1     | chr9:79791671-80032399 | 0 | 0 | 0 | 1 |
| XLOC_022904 | MIR7-1         | chr9:86582997-86595569 | 0 | 0 | 0 | 1 |
| XLOC_022905 | SLC28A3        | chr9:86890764-86983413 | 0 | 0 | 0 | 1 |
| XLOC_022913 | LOC494127      | chr9:89698800-89700140 | 0 | 0 | 0 | 1 |
| XLOC_022914 | LOC392364      | chr9:90472957-90473971 | 0 | 0 | 0 | 1 |

|             |              |                          |   |   |   |   |
|-------------|--------------|--------------------------|---|---|---|---|
| XLOC_022916 | SPATA31C2    | chr9:90744219-90749900   | 0 | 0 | 0 | 1 |
| XLOC_022917 | LOC286238    | chr9:91262093-91267075   | 0 | 0 | 0 | 1 |
| XLOC_022918 | MIR4289      | chr9:91360750-91360820   | 0 | 0 | 0 | 1 |
| XLOC_022921 | LOC286370    | chr9:92782935-92803781   | 0 | 0 | 0 | 1 |
| XLOC_022922 | MIR4290      | chr9:92782935-92803781   | 0 | 0 | 0 | 1 |
| XLOC_022923 | LOC340515    | chr9:93224713-93345028   | 0 | 0 | 0 | 1 |
| XLOC_022924 | DIRAS2       | chr9:93372113-93405108   | 0 | 0 | 0 | 1 |
| XLOC_022928 | MIR3910-2    | chr9:94398532-94398643   | 0 | 0 | 0 | 1 |
| XLOC_022929 | ROR2         | chr9:94484877-94712444   | 0 | 0 | 0 | 1 |
| XLOC_022938 | MIR4670      | chr9:95059639-95432547   | 0 | 0 | 0 | 1 |
| XLOC_022945 | BARX1        | chr9:96713908-96717608   | 0 | 0 | 0 | 1 |
| XLOC_022949 | FBP1         | chr9:97365420-97402531   | 0 | 0 | 0 | 1 |
| XLOC_022950 | MIR3074      | chr9:97488950-97849500   | 0 | 0 | 0 | 1 |
| XLOC_022955 | LOC158434    | chr9:98868942-98878693   | 0 | 0 | 0 | 1 |
| XLOC_022966 | LOC286359    | chr9:100153118-100158973 | 0 | 0 | 0 | 1 |
| XLOC_022970 | HEMGN        | chr9:100689072-100707134 | 0 | 0 | 0 | 1 |
| XLOC_022985 | PPP3R2       | chr9:104331633-104500862 | 0 | 0 | 0 | 1 |
| XLOC_022986 | OR13C4       | chr9:107288533-107289490 | 0 | 0 | 0 | 1 |
| XLOC_022987 | OR13C3       | chr9:107298050-107299094 | 0 | 0 | 0 | 1 |
| XLOC_022988 | OR13C5       | chr9:107360737-107361694 | 0 | 0 | 0 | 1 |
| XLOC_022989 | OR13C2       | chr9:107366951-107367908 | 0 | 0 | 0 | 1 |
| XLOC_022990 | OR13C9       | chr9:107379528-107380485 | 0 | 0 | 0 | 1 |
| XLOC_022992 | MIR548Q      | chr9:109625377-109848716 | 0 | 0 | 0 | 1 |
| XLOC_022998 | MIR32        | chr9:111777414-111882225 | 0 | 0 | 0 | 1 |
| XLOC_022999 | FRRS1L       | chr9:111899580-111929571 | 0 | 0 | 0 | 1 |
| XLOC_023004 | TXNDC8       | chr9:113065866-113100125 | 0 | 0 | 0 | 1 |
| XLOC_023006 | LPAR1        | chr9:113636053-113800365 | 0 | 0 | 0 | 1 |
| XLOC_023007 | OR2K2        | chr9:114089762-114090713 | 0 | 0 | 0 | 1 |
| XLOC_023010 | LRR37A5P     | chr9:114365110-114375833 | 0 | 0 | 0 | 1 |
| XLOC_023026 | AMBP         | chr9:116822407-116840752 | 0 | 0 | 0 | 1 |
| XLOC_023030 | LOC100505478 | chr9:117428713-117444369 | 0 | 0 | 0 | 1 |
| XLOC_023032 | TNFSF8       | chr9:117655622-117692875 | 0 | 0 | 0 | 1 |
| XLOC_023034 | LINC00474    | chr9:118650543-118687377 | 0 | 0 | 0 | 1 |
| XLOC_023036 | SNORA70C     | chr9:119187503-120177317 | 0 | 0 | 0 | 1 |
| XLOC_023037 | DBC1         | chr9:121928907-122131739 | 0 | 0 | 0 | 1 |
| XLOC_023038 | MIR147A      | chr9:123007256-123007328 | 0 | 0 | 0 | 1 |
| XLOC_023050 | MIR4478      | chr9:124882360-124882446 | 0 | 0 | 0 | 1 |
| XLOC_023052 | LHX6         | chr9:124964855-124991091 | 0 | 0 | 0 | 1 |
| XLOC_023054 | OR1J1        | chr9:125239236-125240205 | 0 | 0 | 0 | 1 |
| XLOC_023055 | OR1N1        | chr9:125288636-125289572 | 0 | 0 | 0 | 1 |
| XLOC_023056 | OR1L8        | chr9:125329826-125330756 | 0 | 0 | 0 | 1 |
| XLOC_023057 | OR1B1        | chr9:125390857-125391814 | 0 | 0 | 0 | 1 |
| XLOC_023060 | SNORD90      | chr9:125611731-125667562 | 0 | 0 | 0 | 1 |
| XLOC_023066 | MIR601       | chr9:126141932-126692417 | 0 | 0 | 0 | 1 |
| XLOC_023087 | MIR4672      | chr9:130628758-130640022 | 0 | 0 | 0 | 1 |
| XLOC_023097 | MIR199B      | chr9:130928343-131017527 | 0 | 0 | 0 | 1 |
| XLOC_023098 | MIR3154      | chr9:130928343-131017527 | 0 | 0 | 0 | 1 |
| XLOC_023101 | MIR219-2     | chr9:131154896-131154993 | 0 | 0 | 0 | 1 |
| XLOC_023111 | C9orf50      | chr9:132374503-132383055 | 0 | 0 | 0 | 1 |

|             |                   |                          |   |   |   |   |
|-------------|-------------------|--------------------------|---|---|---|---|
| XLOC_023130 | GBGT1             | chr9:136028339-136039301 | 0 | 0 | 0 | 1 |
| XLOC_023131 | OBP2B             | chr9:136080665-136084628 | 0 | 0 | 0 | 1 |
| XLOC_023139 | TMEM8C            | chr9:136379707-136390068 | 0 | 0 | 0 | 1 |
| XLOC_023140 | FAM163B           | chr9:136443536-136445368 | 0 | 0 | 0 | 1 |
| XLOC_023145 | MIR3689A,MIR3689C | chr9:137741020-137742490 | 0 | 0 | 0 | 1 |
| XLOC_023146 | MIR3689C          | chr9:137741020-137742490 | 0 | 0 | 0 | 1 |
| XLOC_023147 | MIR3689D1         | chr9:137741020-137742490 | 0 | 0 | 0 | 1 |
| XLOC_023148 | MIR3689B          | chr9:137741020-137742490 | 0 | 0 | 0 | 1 |
| XLOC_023149 | MIR3689D2         | chr9:137741020-137742490 | 0 | 0 | 0 | 1 |
| XLOC_023150 | MIR3689F          | chr9:137742587-137742653 | 0 | 0 | 0 | 1 |
| XLOC_023151 | FCN1              | chr9:137801430-137809806 | 0 | 0 | 0 | 1 |
| XLOC_023154 | GLT6D1            | chr9:138515501-138531386 | 0 | 0 | 0 | 1 |
| XLOC_023170 | MIR4673           | chr9:139388895-139440238 | 0 | 0 | 0 | 1 |
| XLOC_023171 | MIR4674           | chr9:139440624-139440711 | 0 | 0 | 0 | 1 |
| XLOC_023175 | LCN6              | chr9:139638468-139644363 | 0 | 0 | 0 | 1 |
| XLOC_023176 | LCN8              | chr9:139648839-139652731 | 0 | 0 | 0 | 1 |
| XLOC_023190 | MIR3621           | chr9:140033608-140064491 | 0 | 0 | 0 | 1 |
| XLOC_023233 | LINC00685         | chrX:281384-282054       | 0 | 0 | 0 | 1 |
| XLOC_023234 | SHOX              | chrX:585078-620146       | 0 | 0 | 0 | 1 |
| XLOC_023235 | CSF2RA            | chrX:1387692-1428828     | 0 | 0 | 0 | 1 |
| XLOC_023236 | MIR3690           | chrX:1387692-1428828     | 0 | 0 | 0 | 1 |
| XLOC_023237 | IL3RA             | chrX:1455508-1501582     | 0 | 0 | 0 | 1 |
| XLOC_023238 | ASMTL-AS1         | chrX:1519423-1572655     | 0 | 0 | 0 | 1 |
| XLOC_023239 | AKAP17A,ASMT      | chrX:1710485-1761974     | 0 | 0 | 0 | 1 |
| XLOC_023240 | CD99P1            | chrX:2527305-2575270     | 0 | 0 | 0 | 1 |
| XLOC_023241 | CD99              | chrX:2609227-2659350     | 0 | 0 | 0 | 1 |
| XLOC_023243 | GYG2              | chrX:2746862-2800861     | 0 | 0 | 0 | 1 |
| XLOC_023244 | ARSH              | chrX:2924653-2951426     | 0 | 0 | 0 | 1 |
| XLOC_023245 | ARSF              | chrX:2958274-3030770     | 0 | 0 | 0 | 1 |
| XLOC_023246 | CXorf28           | chrX:3189860-3202694     | 0 | 0 | 0 | 1 |
| XLOC_023247 | MIR4767           | chrX:6966960-7066231     | 0 | 0 | 0 | 1 |
| XLOC_023249 | VCX               | chrX:7810302-7812184     | 0 | 0 | 0 | 1 |
| XLOC_023250 | MIR651            | chrX:8095005-8095102     | 0 | 0 | 0 | 1 |
| XLOC_023256 | CLCN4             | chrX:10124984-10205699   | 0 | 0 | 0 | 1 |
| XLOC_023258 | AMELX             | chrX:11155662-11683821   | 0 | 0 | 0 | 1 |
| XLOC_023260 | FRMPD4            | chrX:12156584-12742642   | 0 | 0 | 0 | 1 |
| XLOC_023263 | TLR8              | chrX:12920935-12961419   | 0 | 0 | 0 | 1 |
| XLOC_023265 | LOC100093698      | chrX:13328770-13338518   | 0 | 0 | 0 | 1 |
| XLOC_023266 | LOC100133123      | chrX:13353359-13359944   | 0 | 0 | 0 | 1 |
| XLOC_023267 | EGFL6             | chrX:13587693-13651694   | 0 | 0 | 0 | 1 |
| XLOC_023271 | GLRA2             | chrX:14547419-14749933   | 0 | 0 | 0 | 1 |
| XLOC_023273 | BMX               | chrX:15518899-15574652   | 0 | 0 | 0 | 1 |
| XLOC_023278 | S100G             | chrX:16606121-16731059   | 0 | 0 | 0 | 1 |
| XLOC_023283 | MIR4768           | chrX:17393542-17754113   | 0 | 0 | 0 | 1 |
| XLOC_023289 | CNKSR2            | chrX:21392535-21672813   | 0 | 0 | 0 | 1 |
| XLOC_023294 | ZNF645            | chrX:22277913-23311263   | 0 | 0 | 0 | 1 |
| XLOC_023295 | DDX53             | chrX:22277913-23311263   | 0 | 0 | 0 | 1 |
| XLOC_023296 | PTCHD1            | chrX:23352984-23414918   | 0 | 0 | 0 | 1 |
| XLOC_023302 | SUPT20HL1         | chrX:24380877-24383541   | 0 | 0 | 0 | 1 |

|             |               |                        |   |   |   |   |
|-------------|---------------|------------------------|---|---|---|---|
| XLOC_023306 | MAGEB18       | chrX:26156459-26158853 | 0 | 0 | 0 | 1 |
| XLOC_023307 | MAGEB6        | chrX:26210556-26213763 | 0 | 0 | 0 | 1 |
| XLOC_023308 | MAGEB5        | chrX:26234285-26236387 | 0 | 0 | 0 | 1 |
| XLOC_023309 | VENTXP1       | chrX:26576453-26579169 | 0 | 0 | 0 | 1 |
| XLOC_023310 | DCAF8L2       | chrX:27764925-27766938 | 0 | 0 | 0 | 1 |
| XLOC_023311 | MAGEB10       | chrX:27826106-27841131 | 0 | 0 | 0 | 1 |
| XLOC_023312 | IL1RAPL1      | chrX:28605680-29974017 | 0 | 0 | 0 | 1 |
| XLOC_023314 | MAGEB3        | chrX:30248552-30255610 | 0 | 0 | 0 | 1 |
| XLOC_023315 | MAGEB1,MAGEB  | chrX:30260056-30270155 | 0 | 0 | 0 | 1 |
| XLOC_023317 | FAM47B        | chrX:34960912-34963034 | 0 | 0 | 0 | 1 |
| XLOC_023318 | MAGEB16       | chrX:35816458-35821852 | 0 | 0 | 0 | 1 |
| XLOC_023319 | CXorf22       | chrX:35937850-36008269 | 0 | 0 | 0 | 1 |
| XLOC_023320 | CHDC2         | chrX:36065052-36163187 | 0 | 0 | 0 | 1 |
| XLOC_023322 | FAM47C        | chrX:37026431-37029739 | 0 | 0 | 0 | 1 |
| XLOC_023327 | CXorf27       | chrX:37850069-37850570 | 0 | 0 | 0 | 1 |
| XLOC_023328 | SYTL5         | chrX:37865834-37988073 | 0 | 0 | 0 | 1 |
| XLOC_023333 | MPC1L         | chrX:40482817-40483388 | 0 | 0 | 0 | 1 |
| XLOC_023337 | GPR34         | chrX:41374188-41782287 | 0 | 0 | 0 | 1 |
| XLOC_023340 | DUSP21        | chrX:44703248-44704134 | 0 | 0 | 0 | 1 |
| XLOC_023347 | RGN           | chrX:46937774-46952712 | 0 | 0 | 0 | 1 |
| XLOC_023352 | ZNF157        | chrX:47229998-47273098 | 0 | 0 | 0 | 1 |
| XLOC_023353 | SNORA11C      | chrX:47229998-47273098 | 0 | 0 | 0 | 1 |
| XLOC_023356 | MIR4769       | chrX:47420498-47479256 | 0 | 0 | 0 | 1 |
| XLOC_023358 | CXXC1P1       | chrX:47566589-47596027 | 0 | 0 | 0 | 1 |
| XLOC_023360 | SPACA5,SPACA5 | chrX:47863733-47869128 | 0 | 0 | 0 | 1 |
| XLOC_023361 | SSX6          | chrX:47967366-47980068 | 0 | 0 | 0 | 1 |
| XLOC_023362 | SPACA5,SPACA5 | chrX:47986602-47991997 | 0 | 0 | 0 | 1 |
| XLOC_023363 | SSX1          | chrX:48114796-48126879 | 0 | 0 | 0 | 1 |
| XLOC_023364 | SSX4B         | chrX:48242956-48252785 | 0 | 0 | 0 | 1 |
| XLOC_023373 | GLOD5         | chrX:48620153-48632064 | 0 | 0 | 0 | 1 |
| XLOC_023374 | GATA1         | chrX:48644981-48652717 | 0 | 0 | 0 | 1 |
| XLOC_023376 | ERAS          | chrX:48684922-48688279 | 0 | 0 | 0 | 1 |
| XLOC_023383 | GAGE10        | chrX:49160124-49176311 | 0 | 0 | 0 | 1 |
| XLOC_023384 | GAGE12J       | chrX:49178515-49185866 | 0 | 0 | 0 | 1 |
| XLOC_023385 | GAGE12D,GAGE  | chrX:49188093-49313710 | 0 | 0 | 0 | 1 |
| XLOC_023386 | GAGE12D       | chrX:49315880-49323262 | 0 | 0 | 0 | 1 |
| XLOC_023387 | GAGE12D,GAGE  | chrX:49325433-49332821 | 0 | 0 | 0 | 1 |
| XLOC_023388 | GAGE12D,GAGE  | chrX:49334991-49342370 | 0 | 0 | 0 | 1 |
| XLOC_023389 | GAGE12D       | chrX:49344540-49351917 | 0 | 0 | 0 | 1 |
| XLOC_023390 | GAGE2A        | chrX:49354117-49361430 | 0 | 0 | 0 | 1 |
| XLOC_023391 | GAGE1         | chrX:49363615-49373139 | 0 | 0 | 0 | 1 |
| XLOC_023392 | PAGE4         | chrX:49593905-49598570 | 0 | 0 | 0 | 1 |
| XLOC_023395 | MIR532        | chrX:49687224-49863892 | 0 | 0 | 0 | 1 |
| XLOC_023396 | MIR188        | chrX:49687224-49863892 | 0 | 0 | 0 | 1 |
| XLOC_023397 | MIR500A       | chrX:49687224-49863892 | 0 | 0 | 0 | 1 |
| XLOC_023398 | MIR362        | chrX:49687224-49863892 | 0 | 0 | 0 | 1 |
| XLOC_023399 | MIR501        | chrX:49687224-49863892 | 0 | 0 | 0 | 1 |
| XLOC_023400 | MIR500B       | chrX:49687224-49863892 | 0 | 0 | 0 | 1 |
| XLOC_023401 | MIR660        | chrX:49687224-49863892 | 0 | 0 | 0 | 1 |

|             |                 |                        |   |   |   |   |
|-------------|-----------------|------------------------|---|---|---|---|
| XLOC_023402 | MIR502          | chrX:49687224-49863892 | 0 | 0 | 0 | 1 |
| XLOC_023404 | BMP15           | chrX:50653734-50659641 | 0 | 0 | 0 | 1 |
| XLOC_023405 | NUDT10          | chrX:51075082-51080377 | 0 | 0 | 0 | 1 |
| XLOC_023406 | CENPVP2         | chrX:51453924-51455226 | 0 | 0 | 0 | 1 |
| XLOC_023410 | MAGED4          | chrX:51927918-51935366 | 0 | 0 | 0 | 1 |
| XLOC_023411 | XAGE2,XAGE2B    | chrX:52112077-52118822 | 0 | 0 | 0 | 1 |
| XLOC_023412 | XAGE1C,XAGE1E   | chrX:52238809-52243953 | 0 | 0 | 0 | 1 |
| XLOC_023413 | XAGE1B,XAGE1C   | chrX:52511760-52516904 | 0 | 0 | 0 | 1 |
| XLOC_023414 | SSX8            | chrX:52651984-52662998 | 0 | 0 | 0 | 1 |
| XLOC_023415 | SSX2,SSX2B      | chrX:52780307-52790617 | 0 | 0 | 0 | 1 |
| XLOC_023416 | XAGE5           | chrX:52841227-52847322 | 0 | 0 | 0 | 1 |
| XLOC_023417 | FAM156A,FAM156B | chrX:52926321-52937585 | 0 | 0 | 0 | 1 |
| XLOC_023424 | SNORA11         | chrX:54834170-54842445 | 0 | 0 | 0 | 1 |
| XLOC_023428 | PAGE2           | chrX:55115496-55119260 | 0 | 0 | 0 | 1 |
| XLOC_023429 | PAGE5           | chrX:55246790-55250541 | 0 | 0 | 0 | 1 |
| XLOC_023430 | MIR4536-1       | chrX:55477892-55477953 | 0 | 0 | 0 | 1 |
| XLOC_023431 | MAGEH1          | chrX:55478537-55479999 | 0 | 0 | 0 | 1 |
| XLOC_023432 | FOXR2           | chrX:55649832-55652621 | 0 | 0 | 0 | 1 |
| XLOC_023434 | KLF8            | chrX:56258821-56314322 | 0 | 0 | 0 | 1 |
| XLOC_023441 | MIR223          | chrX:65238711-65238821 | 0 | 0 | 0 | 1 |
| XLOC_023442 | HEPH            | chrX:65382432-65487230 | 0 | 0 | 0 | 1 |
| XLOC_023443 | AR              | chrX:66763873-66950461 | 0 | 0 | 0 | 1 |
| XLOC_023447 | FAM155B         | chrX:68725077-68752351 | 0 | 0 | 0 | 1 |
| XLOC_023448 | EDA             | chrX:68835910-69259321 | 0 | 0 | 0 | 1 |
| XLOC_023449 | MIR676          | chrX:68835910-69259321 | 0 | 0 | 0 | 1 |
| XLOC_023450 | OTUD6A          | chrX:69282340-69284029 | 0 | 0 | 0 | 1 |
| XLOC_023453 | AWAT1           | chrX:69454504-69460511 | 0 | 0 | 0 | 1 |
| XLOC_023462 | GJB1            | chrX:70430034-70948962 | 0 | 0 | 0 | 1 |
| XLOC_023468 | FLJ46446        | chrX:70430034-70948962 | 0 | 0 | 0 | 1 |
| XLOC_023469 | CXorf49B        | chrX:70983139-70987051 | 0 | 0 | 0 | 1 |
| XLOC_023470 | NHSL2           | chrX:71130937-71363424 | 0 | 0 | 0 | 1 |
| XLOC_023472 | FLJ44635        | chrX:71364033-71381600 | 0 | 0 | 0 | 1 |
| XLOC_023474 | DMRTC1B         | chrX:72064875-72068636 | 0 | 0 | 0 | 1 |
| XLOC_023475 | LINC00684       | chrX:72158002-72158798 | 0 | 0 | 0 | 1 |
| XLOC_023476 | PABPC1L2B       | chrX:72223351-72225551 | 0 | 0 | 0 | 1 |
| XLOC_023477 | CDX4            | chrX:72667089-72674421 | 0 | 0 | 0 | 1 |
| XLOC_023481 | MIR374C         | chrX:73164158-73513409 | 0 | 0 | 0 | 1 |
| XLOC_023482 | ZCCHC13         | chrX:73524024-73524869 | 0 | 0 | 0 | 1 |
| XLOC_023486 | MAGEE1          | chrX:75648045-75651746 | 0 | 0 | 0 | 1 |
| XLOC_023487 | FGF16           | chrX:76709646-76712013 | 0 | 0 | 0 | 1 |
| XLOC_023491 | LPAR4           | chrX:78003205-78012578 | 0 | 0 | 0 | 1 |
| XLOC_023492 | P2RY10          | chrX:78200828-78217438 | 0 | 0 | 0 | 1 |
| XLOC_023493 | GPR174          | chrX:78426468-78427726 | 0 | 0 | 0 | 1 |
| XLOC_023494 | TBX22           | chrX:79270254-79287268 | 0 | 0 | 0 | 1 |
| XLOC_023495 | FAM46D          | chrX:79591002-79700810 | 0 | 0 | 0 | 1 |
| XLOC_023497 | POU3F4          | chrX:82763268-82764775 | 0 | 0 | 0 | 1 |
| XLOC_023498 | CYLC1           | chrX:83116133-83141708 | 0 | 0 | 0 | 1 |
| XLOC_023499 | UBE2DNL         | chrX:84189156-84189896 | 0 | 0 | 0 | 1 |
| XLOC_023502 | DACH2           | chrX:85403454-86087605 | 0 | 0 | 0 | 1 |

|             |               |                          |   |   |   |   |
|-------------|---------------|--------------------------|---|---|---|---|
| XLOC_023503 | KLHL4         | chrX:86772714-86925050   | 0 | 0 | 0 | 1 |
| XLOC_023504 | CPXCR1        | chrX:88002225-88009785   | 0 | 0 | 0 | 1 |
| XLOC_023505 | TGIF2LX       | chrX:89176939-89177882   | 0 | 0 | 0 | 1 |
| XLOC_023506 | PABPC5        | chrX:90689596-90693583   | 0 | 0 | 0 | 1 |
| XLOC_023511 | TNMD          | chrX:99839789-99854882   | 0 | 0 | 0 | 1 |
| XLOC_023514 | ARL13A        | chrX:100224696-100245820 | 0 | 0 | 0 | 1 |
| XLOC_023515 | TMEM35        | chrX:100333835-100351355 | 0 | 0 | 0 | 1 |
| XLOC_023523 | NXF2B         | chrX:101502093-101581634 | 0 | 0 | 0 | 1 |
| XLOC_023531 | TCEAL7        | chrX:102585113-102587251 | 0 | 0 | 0 | 1 |
| XLOC_023539 | PLP1          | chrX:103031438-103047547 | 0 | 0 | 0 | 1 |
| XLOC_023540 | TMSB15B       | chrX:103139054-103401708 | 0 | 0 | 0 | 1 |
| XLOC_023541 | H2BFXP        | chrX:103139054-103401708 | 0 | 0 | 0 | 1 |
| XLOC_023542 | H2BFM         | chrX:103139054-103401708 | 0 | 0 | 0 | 1 |
| XLOC_023543 | ZCCHC18       | chrX:103139054-103401708 | 0 | 0 | 0 | 1 |
| XLOC_023545 | IL1RAPL2      | chrX:103810995-105011822 | 0 | 0 | 0 | 1 |
| XLOC_023546 | NRK           | chrX:105066535-105202602 | 0 | 0 | 0 | 1 |
| XLOC_023547 | MUM1L1        | chrX:105412297-105452949 | 0 | 0 | 0 | 1 |
| XLOC_023549 | RNF128        | chrX:105937067-106040246 | 0 | 0 | 0 | 1 |
| XLOC_023557 | COL4A5        | chrX:107683073-107940775 | 0 | 0 | 0 | 1 |
| XLOC_023560 | MIR3978       | chrX:109245862-109421016 | 0 | 0 | 0 | 1 |
| XLOC_023562 | TDGF1P3       | chrX:109763539-109766249 | 0 | 0 | 0 | 1 |
| XLOC_023563 | PAK3          | chrX:110187512-110464173 | 0 | 0 | 0 | 1 |
| XLOC_023564 | DKFZp686D0853 | chrX:110754889-110765627 | 0 | 0 | 0 | 1 |
| XLOC_023566 | TRPC5OS       | chrX:111017541-111326004 | 0 | 0 | 0 | 1 |
| XLOC_023567 | ZCCHC16       | chrX:111326252-111700473 | 0 | 0 | 0 | 1 |
| XLOC_023568 | HTR2C         | chrX:113818550-114144624 | 0 | 0 | 0 | 1 |
| XLOC_023569 | SNORA35       | chrX:113818550-114144624 | 0 | 0 | 0 | 1 |
| XLOC_023570 | MIR764        | chrX:113818550-114144624 | 0 | 0 | 0 | 1 |
| XLOC_023571 | MIR1912       | chrX:113818550-114144624 | 0 | 0 | 0 | 1 |
| XLOC_023572 | MIR1264       | chrX:113818550-114144624 | 0 | 0 | 0 | 1 |
| XLOC_023573 | MIR1298       | chrX:113818550-114144624 | 0 | 0 | 0 | 1 |
| XLOC_023574 | MIR1911       | chrX:113818550-114144624 | 0 | 0 | 0 | 1 |
| XLOC_023575 | MIR448        | chrX:113818550-114144624 | 0 | 0 | 0 | 1 |
| XLOC_023576 | RBMXL3        | chrX:114345182-114468635 | 0 | 0 | 0 | 1 |
| XLOC_023579 | AGTR2         | chrX:115301957-115306225 | 0 | 0 | 0 | 1 |
| XLOC_023580 | SLC6A14       | chrX:115567746-115592625 | 0 | 0 | 0 | 1 |
| XLOC_023582 | MIR1277       | chrX:117480035-117583923 | 0 | 0 | 0 | 1 |
| XLOC_023585 | ZCCHC12       | chrX:117957786-117960931 | 0 | 0 | 0 | 1 |
| XLOC_023594 | RHOXF2B       | chrX:119292466-119297945 | 0 | 0 | 0 | 1 |
| XLOC_023596 | ATP1B4        | chrX:119495939-119517104 | 0 | 0 | 0 | 1 |
| XLOC_023599 | GRIA3         | chrX:122318095-122624766 | 0 | 0 | 0 | 1 |
| XLOC_023603 | LOC100129520  | chrX:124453968-124456950 | 0 | 0 | 0 | 1 |
| XLOC_023604 | CXorf64       | chrX:125953746-125955768 | 0 | 0 | 0 | 1 |
| XLOC_023606 | XPNPEP2       | chrX:128872945-128903525 | 0 | 0 | 0 | 1 |
| XLOC_023607 | SASH3         | chrX:128913891-128929176 | 0 | 0 | 0 | 1 |
| XLOC_023614 | ARHGAP36      | chrX:130192215-130223857 | 0 | 0 | 0 | 1 |
| XLOC_023615 | OR13H1        | chrX:130678047-130678974 | 0 | 0 | 0 | 1 |
| XLOC_023617 | HS6ST2-AS1    | chrX:131760037-132095423 | 0 | 0 | 0 | 1 |
| XLOC_023618 | CCDC160       | chrX:133371076-133379808 | 0 | 0 | 0 | 1 |

|             |                 |                          |   |   |   |   |
|-------------|-----------------|--------------------------|---|---|---|---|
| XLOC_023623 | SMIM10          | chrX:134124967-134126503 | 0 | 0 | 0 | 1 |
| XLOC_023624 | FAM127A         | chrX:134166332-134167575 | 0 | 0 | 0 | 1 |
| XLOC_023626 | LINC00086       | chrX:134555867-134560225 | 0 | 0 | 0 | 1 |
| XLOC_023628 | CT45A1          | chrX:134847184-134856988 | 0 | 0 | 0 | 1 |
| XLOC_023629 | CT45A2,CT45A3,( | chrX:134866213-134891519 | 0 | 0 | 0 | 1 |
| XLOC_023630 | SAGE1           | chrX:134975784-134995220 | 0 | 0 | 0 | 1 |
| XLOC_023633 | GPR112          | chrX:135383121-135499047 | 0 | 0 | 0 | 1 |
| XLOC_023634 | BRS3            | chrX:135570124-135574598 | 0 | 0 | 0 | 1 |
| XLOC_023636 | VGLL1           | chrX:135614310-135638966 | 0 | 0 | 0 | 1 |
| XLOC_023637 | MIR934          | chrX:135614310-135638966 | 0 | 0 | 0 | 1 |
| XLOC_023638 | LOC100128420    | chrX:135721701-135724588 | 0 | 0 | 0 | 1 |
| XLOC_023640 | ZIC3            | chrX:136648345-136654259 | 0 | 0 | 0 | 1 |
| XLOC_023641 | FGF13-AS1       | chrX:137713733-138287185 | 0 | 0 | 0 | 1 |
| XLOC_023642 | SRD5A1P1        | chrX:138528977-138531132 | 0 | 0 | 0 | 1 |
| XLOC_023643 | F9              | chrX:138612894-138645617 | 0 | 0 | 0 | 1 |
| XLOC_023644 | LOC389895       | chrX:139173825-139175070 | 0 | 0 | 0 | 1 |
| XLOC_023645 | RP1-177G6.2     | chrX:139791923-139796996 | 0 | 0 | 0 | 1 |
| XLOC_023646 | SPANXB2         | chrX:140084755-140085871 | 0 | 0 | 0 | 1 |
| XLOC_023647 | SPANXB1         | chrX:140096760-140097876 | 0 | 0 | 0 | 1 |
| XLOC_023649 | SPANXA2         | chrX:140590842-140738069 | 0 | 0 | 0 | 1 |
| XLOC_023650 | MAGEC3          | chrX:140926101-140985618 | 0 | 0 | 0 | 1 |
| XLOC_023651 | MAGEC1          | chrX:140991641-140997187 | 0 | 0 | 0 | 1 |
| XLOC_023652 | SPANXN4         | chrX:142113703-142122066 | 0 | 0 | 0 | 1 |
| XLOC_023653 | UBE2NL          | chrX:142967172-142968357 | 0 | 0 | 0 | 1 |
| XLOC_023654 | SPANXN1         | chrX:144329106-144337728 | 0 | 0 | 0 | 1 |
| XLOC_023656 | TMEM257         | chrX:144908927-144911370 | 0 | 0 | 0 | 1 |
| XLOC_023657 | CXorf51B        | chrX:145891301-145891929 | 0 | 0 | 0 | 1 |
| XLOC_023659 | FMR1NB          | chrX:147062848-147108187 | 0 | 0 | 0 | 1 |
| XLOC_023660 | AFF2            | chrX:147582138-148082193 | 0 | 0 | 0 | 1 |
| XLOC_023662 | MAGEA11         | chrX:148769902-148798928 | 0 | 0 | 0 | 1 |
| XLOC_023663 | HSFX2           | chrX:148855725-148858528 | 0 | 0 | 0 | 1 |
| XLOC_023664 | MAGEA9B         | chrX:148863592-148869399 | 0 | 0 | 0 | 1 |
| XLOC_023667 | MIR2114         | chrX:149396238-149396318 | 0 | 0 | 0 | 1 |
| XLOC_023668 | MAMLD1          | chrX:149531550-149682448 | 0 | 0 | 0 | 1 |
| XLOC_023672 | MIR4330         | chrX:150336693-150336798 | 0 | 0 | 0 | 1 |
| XLOC_023673 | GPR50           | chrX:150345055-150349937 | 0 | 0 | 0 | 1 |
| XLOC_023675 | PASD1           | chrX:150732006-150845211 | 0 | 0 | 0 | 1 |
| XLOC_023676 | PRRG3           | chrX:150863729-150870063 | 0 | 0 | 0 | 1 |
| XLOC_023677 | FATE1           | chrX:150884507-150891664 | 0 | 0 | 0 | 1 |
| XLOC_023678 | CNGA2           | chrX:150903217-150914036 | 0 | 0 | 0 | 1 |
| XLOC_023680 | GABRQ           | chrX:151806636-151821825 | 0 | 0 | 0 | 1 |
| XLOC_023682 | MAGEA2,MAGEA    | chrX:151883118-151887095 | 0 | 0 | 0 | 1 |
| XLOC_023684 | CSAG2,CSAG3     | chrX:151927733-151928738 | 0 | 0 | 0 | 1 |
| XLOC_023687 | PNMA3           | chrX:152224765-152228827 | 0 | 0 | 0 | 1 |
| XLOC_023688 | PNMA6C,PNMA6l   | chrX:152240726-152243402 | 0 | 0 | 0 | 1 |
| XLOC_023690 | ZFP92           | chrX:152683780-152687086 | 0 | 0 | 0 | 1 |
| XLOC_023692 | ATP2B3          | chrX:152801579-152848387 | 0 | 0 | 0 | 1 |
| XLOC_023699 | AVPR2           | chrX:153167984-153172620 | 0 | 0 | 0 | 1 |
| XLOC_023701 | MIR3202-1       | chrX:153237990-153248646 | 0 | 0 | 0 | 1 |

|             |              |                          |   |   |   |   |
|-------------|--------------|--------------------------|---|---|---|---|
| XLOC_023703 | OPN1MW       | chrX:153448084-153462352 | 0 | 0 | 0 | 1 |
| XLOC_023704 | OPN1MW       | chrX:153485202-153523564 | 0 | 0 | 0 | 1 |
| XLOC_023715 | FAM223B      | chrX:153799478-153800188 | 0 | 0 | 0 | 1 |
| XLOC_023716 | CTAG1B       | chrX:153813417-153815075 | 0 | 0 | 0 | 1 |
| XLOC_023719 | SNORA56      | chrX:153991030-154005964 | 0 | 0 | 0 | 1 |
| XLOC_023720 | H2AFB1       | chrX:154064063-154250998 | 0 | 0 | 0 | 1 |
| XLOC_023725 | H2AFB3       | chrX:154610427-154610944 | 0 | 0 | 0 | 1 |
| XLOC_023726 | F8A1         | chrX:154611748-154613450 | 0 | 0 | 0 | 1 |
| XLOC_023727 | MIR1184-3    | chrX:154686574-154688276 | 0 | 0 | 0 | 1 |
| XLOC_023728 | TMLHE-AS1    | chrX:154696200-154842622 | 0 | 0 | 0 | 1 |
| XLOC_023729 | SPRY3        | chrX:154997450-155012117 | 0 | 0 | 0 | 1 |
| XLOC_023730 | VAMP7        | chrX:155110942-155173433 | 0 | 0 | 0 | 1 |
| XLOC_023731 | IL9R         | chrX:155227245-155240482 | 0 | 0 | 0 | 1 |
| XLOC_023732 | GTPBP6       | chrX:221425-230887       | 0 | 0 | 0 | 1 |
| XLOC_023733 | PPP2R3B      | chrX:294667-347690       | 0 | 0 | 0 | 1 |
| XLOC_023734 | CRLF2        | chrX:1314886-1331530     | 0 | 0 | 0 | 1 |
| XLOC_023735 | SLC25A6      | chrX:1505044-1511039     | 0 | 0 | 0 | 1 |
| XLOC_023736 | ASMTL        | chrX:1519423-1572655     | 0 | 0 | 0 | 1 |
| XLOC_023737 | P2RY8        | chrX:1581465-1656037     | 0 | 0 | 0 | 1 |
| XLOC_023738 | DHRXS,ZBED1  | chrX:2137554-2419015     | 0 | 0 | 0 | 1 |
| XLOC_023741 | ARSE         | chrX:2852672-2882494     | 0 | 0 | 0 | 1 |
| XLOC_023742 | MXRA5        | chrX:3226608-3264684     | 0 | 0 | 0 | 1 |
| XLOC_023745 | NLGN4X       | chrX:5808082-6146706     | 0 | 0 | 0 | 1 |
| XLOC_023746 | MIR4770      | chrX:6301946-6302004     | 0 | 0 | 0 | 1 |
| XLOC_023750 | VCX2         | chrX:8137984-8139308     | 0 | 0 | 0 | 1 |
| XLOC_023751 | KAL1         | chrX:8496914-8700227     | 0 | 0 | 0 | 1 |
| XLOC_023752 | FAM9A        | chrX:8758836-8769424     | 0 | 0 | 0 | 1 |
| XLOC_023753 | FAM9B        | chrX:8993036-9001116     | 0 | 0 | 0 | 1 |
| XLOC_023756 | ARHGAP6      | chrX:11155662-11683821   | 0 | 0 | 0 | 1 |
| XLOC_023757 | TLR8-AS1     | chrX:12920935-12961419   | 0 | 0 | 0 | 1 |
| XLOC_023758 | FAM9C        | chrX:13053735-13062917   | 0 | 0 | 0 | 1 |
| XLOC_023759 | ATXN3L       | chrX:13328770-13338518   | 0 | 0 | 0 | 1 |
| XLOC_023764 | ASB9         | chrX:15262108-15288589   | 0 | 0 | 0 | 1 |
| XLOC_023765 | ASB11        | chrX:15299830-15333746   | 0 | 0 | 0 | 1 |
| XLOC_023774 | RAI2         | chrX:17818168-17879457   | 0 | 0 | 0 | 1 |
| XLOC_023776 | SCML2        | chrX:18257432-18372844   | 0 | 0 | 0 | 1 |
| XLOC_023777 | RS1          | chrX:18443724-18690223   | 0 | 0 | 0 | 1 |
| XLOC_023783 | LOC729609    | chrX:20004934-20007897   | 0 | 0 | 0 | 1 |
| XLOC_023785 | MIR23C       | chrX:20024830-20135114   | 0 | 0 | 0 | 1 |
| XLOC_023789 | KLHL34       | chrX:21673608-21676448   | 0 | 0 | 0 | 1 |
| XLOC_023790 | SMPX         | chrX:21724089-21776278   | 0 | 0 | 0 | 1 |
| XLOC_023791 | PHEX-AS1     | chrX:22050920-22266478   | 0 | 0 | 0 | 1 |
| XLOC_023792 | LOC100873065 | chrX:22277913-23311263   | 0 | 0 | 0 | 1 |
| XLOC_023796 | ZFX-AS1      | chrX:24164341-24234372   | 0 | 0 | 0 | 1 |
| XLOC_023797 | SUPT20HL2    | chrX:24328978-24331432   | 0 | 0 | 0 | 1 |
| XLOC_023798 | PCYT1B       | chrX:24576203-24690979   | 0 | 0 | 0 | 1 |
| XLOC_023799 | ARX          | chrX:25021812-25034065   | 0 | 0 | 0 | 1 |
| XLOC_023800 | SMEK3P       | chrX:27478327-27481458   | 0 | 0 | 0 | 1 |
| XLOC_023801 | DCAF8L1      | chrX:27996109-27999566   | 0 | 0 | 0 | 1 |



|             |               |                        |   |   |   |   |
|-------------|---------------|------------------------|---|---|---|---|
| XLOC_023802 | NR0B1         | chrX:30322538-30327495 | 0 | 0 | 0 | 1 |
| XLOC_023803 | CXorf21       | chrX:30576940-30596033 | 0 | 0 | 0 | 1 |
| XLOC_023805 | FTHL17        | chrX:31089357-31090170 | 0 | 0 | 0 | 1 |
| XLOC_023806 | DMD           | chrX:31137344-33357726 | 0 | 0 | 0 | 1 |
| XLOC_023807 | FAM47A        | chrX:34147868-34150447 | 0 | 0 | 0 | 1 |
| XLOC_023808 | TMEM47        | chrX:34645180-34675405 | 0 | 0 | 0 | 1 |
| XLOC_023813 | LOC286442     | chrX:39164209-39186616 | 0 | 0 | 0 | 1 |
| XLOC_023817 | LOC100132831  | chrX:40690469-40692449 | 0 | 0 | 0 | 1 |
| XLOC_023819 | PPP1R2P9      | chrX:42636616-42637486 | 0 | 0 | 0 | 1 |
| XLOC_023820 | MAOB          | chrX:43625856-43741721 | 0 | 0 | 0 | 1 |
| XLOC_023821 | NDP           | chrX:43808023-43832921 | 0 | 0 | 0 | 1 |
| XLOC_023822 | EFHC2         | chrX:44007127-44202923 | 0 | 0 | 0 | 1 |
| XLOC_023826 | MIR222        | chrX:45606420-45606530 | 0 | 0 | 0 | 1 |
| XLOC_023838 | SSX5          | chrX:48045655-48056199 | 0 | 0 | 0 | 1 |
| XLOC_023839 | SSX9          | chrX:48160984-48165614 | 0 | 0 | 0 | 1 |
| XLOC_023840 | SSX3          | chrX:48205862-48216142 | 0 | 0 | 0 | 1 |
| XLOC_023841 | SSX4B         | chrX:48261523-48271355 | 0 | 0 | 0 | 1 |
| XLOC_023843 | PCSK1N        | chrX:48689503-48694036 | 0 | 0 | 0 | 1 |
| XLOC_023856 | CACNA1F       | chrX:49061522-49089833 | 0 | 0 | 0 | 1 |
| XLOC_023858 | PAGE1         | chrX:49452053-49460596 | 0 | 0 | 0 | 1 |
| XLOC_023860 | AKAP4         | chrX:49955410-49965664 | 0 | 0 | 0 | 1 |
| XLOC_023861 | DGKK          | chrX:50111878-50213721 | 0 | 0 | 0 | 1 |
| XLOC_023863 | NUDT11        | chrX:51232862-51239459 | 0 | 0 | 0 | 1 |
| XLOC_023864 | CENPVP2       | chrX:51424145-51425447 | 0 | 0 | 0 | 1 |
| XLOC_023865 | MAGED4,MAGED  | chrX:51804922-51812368 | 0 | 0 | 0 | 1 |
| XLOC_023866 | SNORA11D      | chrX:51804922-51812368 | 0 | 0 | 0 | 1 |
| XLOC_023867 | SNORA11E      | chrX:51927918-51935366 | 0 | 0 | 0 | 1 |
| XLOC_023868 | XAGE1B,XAGE1C | chrX:52255219-52260363 | 0 | 0 | 0 | 1 |
| XLOC_023869 | XAGE2,XAGE2B  | chrX:52380351-52387096 | 0 | 0 | 0 | 1 |
| XLOC_023870 | XAGE1C        | chrX:52528159-52533303 | 0 | 0 | 0 | 1 |
| XLOC_023871 | XAGE1A,XAGE1C | chrX:52541053-52546197 | 0 | 0 | 0 | 1 |
| XLOC_023872 | SSX7          | chrX:52673110-52683950 | 0 | 0 | 0 | 1 |
| XLOC_023873 | SSX2          | chrX:52725945-52736249 | 0 | 0 | 0 | 1 |
| XLOC_023874 | SPANXN5       | chrX:52825185-52826388 | 0 | 0 | 0 | 1 |
| XLOC_023875 | XAGE3         | chrX:52891557-52897119 | 0 | 0 | 0 | 1 |
| XLOC_023882 | MIR98         | chrX:53559056-53713697 | 0 | 0 | 0 | 1 |
| XLOC_023883 | MIRLET7F2     | chrX:53559056-53713697 | 0 | 0 | 0 | 1 |
| XLOC_023888 | ITIH6         | chrX:54775331-54824673 | 0 | 0 | 0 | 1 |
| XLOC_023890 | ALAS2         | chrX:55035487-55057497 | 0 | 0 | 0 | 1 |
| XLOC_023893 | PAGE3         | chrX:55284848-55291165 | 0 | 0 | 0 | 1 |
| XLOC_023894 | USP51         | chrX:55511048-55515631 | 0 | 0 | 0 | 1 |
| XLOC_023898 | SPIN2A        | chrX:57162082-57164058 | 0 | 0 | 0 | 1 |
| XLOC_023899 | ZXDA          | chrX:57931863-57937067 | 0 | 0 | 0 | 1 |
| XLOC_023903 | MIR1468       | chrX:63005881-63005967 | 0 | 0 | 0 | 1 |
| XLOC_023905 | ASB12         | chrX:63444071-63450511 | 0 | 0 | 0 | 1 |
| XLOC_023906 | MTMR8         | chrX:63487960-63615333 | 0 | 0 | 0 | 1 |
| XLOC_023909 | FRMD8P1       | chrX:64770501-64772301 | 0 | 0 | 0 | 1 |
| XLOC_023910 | VSIG4         | chrX:65241579-65259967 | 0 | 0 | 0 | 1 |
| XLOC_023914 | AWAT2         | chrX:69260391-69269788 | 0 | 0 | 0 | 1 |

|             |           |                          |   |   |   |   |
|-------------|-----------|--------------------------|---|---|---|---|
| XLOC_023915 | P2RY4     | chrX:69478015-69479654   | 0 | 0 | 0 | 1 |
| XLOC_023917 | TEX11     | chrX:69748789-70128567   | 0 | 0 | 0 | 1 |
| XLOC_023918 | SLC7A3    | chrX:70145429-70150975   | 0 | 0 | 0 | 1 |
| XLOC_023920 | CXorf65   | chrX:70323738-70326638   | 0 | 0 | 0 | 1 |
| XLOC_023926 | CXorf49B  | chrX:70430034-70948962   | 0 | 0 | 0 | 1 |
| XLOC_023933 | LINC00684 | chrX:72001688-72002484   | 0 | 0 | 0 | 1 |
| XLOC_023934 | DMRTC1B   | chrX:72091858-72095622   | 0 | 0 | 0 | 1 |
| XLOC_023936 | PABPC1L2A | chrX:72297176-72299351   | 0 | 0 | 0 | 1 |
| XLOC_023938 | NAP1L2    | chrX:72432136-72434710   | 0 | 0 | 0 | 1 |
| XLOC_023942 | MIR421    | chrX:73164158-73513409   | 0 | 0 | 0 | 1 |
| XLOC_023943 | MIR374B   | chrX:73164158-73513409   | 0 | 0 | 0 | 1 |
| XLOC_023944 | MIR545    | chrX:73164158-73513409   | 0 | 0 | 0 | 1 |
| XLOC_023945 | MIR374A   | chrX:73164158-73513409   | 0 | 0 | 0 | 1 |
| XLOC_023947 | KIAA2022  | chrX:73952690-74145287   | 0 | 0 | 0 | 1 |
| XLOC_023951 | MAGEE2    | chrX:75002822-75005079   | 0 | 0 | 0 | 1 |
| XLOC_023952 | MIR384    | chrX:76139697-76139785   | 0 | 0 | 0 | 1 |
| XLOC_023957 | CYSLTR1   | chrX:77528129-77583087   | 0 | 0 | 0 | 1 |
| XLOC_023958 | ZCCHC5    | chrX:77911565-77914825   | 0 | 0 | 0 | 1 |
| XLOC_023959 | MIR4328   | chrX:78156690-78156746   | 0 | 0 | 0 | 1 |
| XLOC_023960 | ITM2A     | chrX:78615880-78623049   | 0 | 0 | 0 | 1 |
| XLOC_023964 | HDX       | chrX:83572881-83757487   | 0 | 0 | 0 | 1 |
| XLOC_023966 | POF1B     | chrX:84532394-84634748   | 0 | 0 | 0 | 1 |
| XLOC_023968 | NAP1L3    | chrX:92925924-92928682   | 0 | 0 | 0 | 1 |
| XLOC_023969 | LOC643486 | chrX:95592084-95592901   | 0 | 0 | 0 | 1 |
| XLOC_023970 | LOC442459 | chrX:98716599-99194841   | 0 | 0 | 0 | 1 |
| XLOC_023983 | NXF5      | chrX:101087084-101112549 | 0 | 0 | 0 | 1 |
| XLOC_023987 | NXF2      | chrX:101615315-101694929 | 0 | 0 | 0 | 1 |
| XLOC_023988 | TMSB15A   | chrX:101768609-101771699 | 0 | 0 | 0 | 1 |
| XLOC_023989 | BEX1      | chrX:102317580-102319168 | 0 | 0 | 0 | 1 |
| XLOC_023990 | NXF3      | chrX:102330749-102348022 | 0 | 0 | 0 | 1 |
| XLOC_023993 | BEX2      | chrX:102564273-102565974 | 0 | 0 | 0 | 1 |
| XLOC_023996 | GLRA4     | chrX:102962271-102983552 | 0 | 0 | 0 | 1 |
| XLOC_023999 | H2BFWT    | chrX:103139054-103401708 | 0 | 0 | 0 | 1 |
| XLOC_024000 | H2BFXP    | chrX:103139054-103401708 | 0 | 0 | 0 | 1 |
| XLOC_024002 | ESX1      | chrX:103494718-103499599 | 0 | 0 | 0 | 1 |
| XLOC_024003 | TEX13A    | chrX:103810995-105011822 | 0 | 0 | 0 | 1 |
| XLOC_024004 | SERPINA7  | chrX:105277189-105282718 | 0 | 0 | 0 | 1 |
| XLOC_024008 | NUP62CL   | chrX:106366656-106449670 | 0 | 0 | 0 | 1 |
| XLOC_024010 | TEX13B    | chrX:107224093-107225600 | 0 | 0 | 0 | 1 |
| XLOC_024013 | IRS4      | chrX:107975726-107979607 | 0 | 0 | 0 | 1 |
| XLOC_024014 | GUCY2F    | chrX:108616134-108725285 | 0 | 0 | 0 | 1 |
| XLOC_024018 | SNORD96B  | chrX:109437413-109699562 | 0 | 0 | 0 | 1 |
| XLOC_024019 | CHRDL1    | chrX:109917083-110039286 | 0 | 0 | 0 | 1 |
| XLOC_024020 | CAPN6     | chrX:110488326-110513774 | 0 | 0 | 0 | 1 |
| XLOC_024021 | DCX       | chrX:110537006-110664835 | 0 | 0 | 0 | 1 |
| XLOC_024022 | RNU6-28   | chrX:110537006-110664835 | 0 | 0 | 0 | 1 |
| XLOC_024023 | TRPC5     | chrX:111017541-111326004 | 0 | 0 | 0 | 1 |
| XLOC_024024 | LHFPL1    | chrX:111873878-111923375 | 0 | 0 | 0 | 1 |
| XLOC_024026 | MIR4329   | chrX:112018104-112084043 | 0 | 0 | 0 | 1 |

|             |                 |                          |   |   |   |   |
|-------------|-----------------|--------------------------|---|---|---|---|
| XLOC_024028 | LRCH2           | chrX:114345182-114468635 | 0 | 0 | 0 | 1 |
| XLOC_024029 | CXorf61         | chrX:115592852-115594194 | 0 | 0 | 0 | 1 |
| XLOC_024030 | KLHL13          | chrX:117031775-117251303 | 0 | 0 | 0 | 1 |
| XLOC_024036 | MIR766          | chrX:118749687-118827333 | 0 | 0 | 0 | 1 |
| XLOC_024042 | RHOXF2B         | chrX:119206228-119211707 | 0 | 0 | 0 | 1 |
| XLOC_024043 | RHOXF1          | chrX:119243010-119249847 | 0 | 0 | 0 | 1 |
| XLOC_024049 | CT47B1          | chrX:120006451-120009779 | 0 | 0 | 0 | 1 |
| XLOC_024050 | CT47A1,CT47A4   | chrX:120011344-120066151 | 0 | 0 | 0 | 1 |
| XLOC_024051 | CT47A8          | chrX:120067694-120071012 | 0 | 0 | 0 | 1 |
| XLOC_024052 | CT47A11         | chrX:120072555-120075873 | 0 | 0 | 0 | 1 |
| XLOC_024053 | CT47A5          | chrX:120077415-120080733 | 0 | 0 | 0 | 1 |
| XLOC_024054 | CT47A3          | chrX:120082276-120085594 | 0 | 0 | 0 | 1 |
| XLOC_024055 | CT47A7          | chrX:120087136-120090454 | 0 | 0 | 0 | 1 |
| XLOC_024056 | CT47A1,CT47A2,( | chrX:120092019-120100198 | 0 | 0 | 0 | 1 |
| XLOC_024057 | CT47A2          | chrX:120101740-120105058 | 0 | 0 | 0 | 1 |
| XLOC_024058 | CT47A9          | chrX:120106600-120109918 | 0 | 0 | 0 | 1 |
| XLOC_024059 | CT47A8          | chrX:120111460-120114778 | 0 | 0 | 0 | 1 |
| XLOC_024060 | CT47A6          | chrX:120116320-120119638 | 0 | 0 | 0 | 1 |
| XLOC_024062 | TENM1           | chrX:123509755-124097666 | 0 | 0 | 0 | 1 |
| XLOC_024063 | DCAF12L2        | chrX:125297481-125300080 | 0 | 0 | 0 | 1 |
| XLOC_024064 | DCAF12L1        | chrX:125683365-125686842 | 0 | 0 | 0 | 1 |
| XLOC_024072 | GPR119          | chrX:129518318-129519511 | 0 | 0 | 0 | 1 |
| XLOC_024076 | FRMD7           | chrX:131211020-131262050 | 0 | 0 | 0 | 1 |
| XLOC_024079 | HS6ST2          | chrX:131760037-132095423 | 0 | 0 | 0 | 1 |
| XLOC_024080 | USP26           | chrX:132159506-132162300 | 0 | 0 | 0 | 1 |
| XLOC_024081 | TFDP3           | chrX:132350696-132352376 | 0 | 0 | 0 | 1 |
| XLOC_024083 | GPC3            | chrX:132669775-133119673 | 0 | 0 | 0 | 1 |
| XLOC_024084 | MIR363          | chrX:133303407-133303482 | 0 | 0 | 0 | 1 |
| XLOC_024085 | MIR92A2         | chrX:133303567-133303642 | 0 | 0 | 0 | 1 |
| XLOC_024086 | MIR19B2         | chrX:133303700-133303796 | 0 | 0 | 0 | 1 |
| XLOC_024087 | MIR20B          | chrX:133303838-133303907 | 0 | 0 | 0 | 1 |
| XLOC_024088 | MIR18B          | chrX:133304070-133304141 | 0 | 0 | 0 | 1 |
| XLOC_024089 | MIR106A         | chrX:133304227-133304308 | 0 | 0 | 0 | 1 |
| XLOC_024090 | MIR450B         | chrX:133674214-133674292 | 0 | 0 | 0 | 1 |
| XLOC_024091 | MIR450A1        | chrX:133674370-133674461 | 0 | 0 | 0 | 1 |
| XLOC_024092 | MIR450A2        | chrX:133674537-133674637 | 0 | 0 | 0 | 1 |
| XLOC_024093 | MIR542          | chrX:133675370-133675467 | 0 | 0 | 0 | 1 |
| XLOC_024094 | MGC16121,MIR42  | chrX:133677406-133680741 | 0 | 0 | 0 | 1 |
| XLOC_024095 | MIR503          | chrX:133677406-133680741 | 0 | 0 | 0 | 1 |
| XLOC_024099 | FAM127C         | chrX:134154533-134156566 | 0 | 0 | 0 | 1 |
| XLOC_024100 | FAM127B         | chrX:134184962-134186221 | 0 | 0 | 0 | 1 |
| XLOC_024101 | LINC00087       | chrX:134229014-134232733 | 0 | 0 | 0 | 1 |
| XLOC_024102 | LINC00633       | chrX:134252881-134254405 | 0 | 0 | 0 | 1 |
| XLOC_024105 | CT45A4          | chrX:134928696-134936735 | 0 | 0 | 0 | 1 |
| XLOC_024106 | CT45A5          | chrX:134945650-134953994 | 0 | 0 | 0 | 1 |
| XLOC_024107 | CT45A6          | chrX:134963214-134971244 | 0 | 0 | 0 | 1 |
| XLOC_024112 | SNORD61         | chrX:135951352-135962939 | 0 | 0 | 0 | 1 |
| XLOC_024113 | GPR101          | chrX:136112306-136113833 | 0 | 0 | 0 | 1 |
| XLOC_024114 | LOC158696       | chrX:137696891-137699799 | 0 | 0 | 0 | 1 |

|             |              |                          |   |   |   |   |
|-------------|--------------|--------------------------|---|---|---|---|
| XLOC_024116 | MIR504       | chrX:137713733-138287185 | 0 | 0 | 0 | 1 |
| XLOC_024119 | MIR505       | chrX:139006306-139006390 | 0 | 0 | 0 | 1 |
| XLOC_024120 | CXorf66      | chrX:139037883-139047677 | 0 | 0 | 0 | 1 |
| XLOC_024121 | SOX3         | chrX:139585151-139587225 | 0 | 0 | 0 | 1 |
| XLOC_024122 | CDR1         | chrX:139865424-139866723 | 0 | 0 | 0 | 1 |
| XLOC_024123 | MIR320D2     | chrX:140008336-140008384 | 0 | 0 | 0 | 1 |
| XLOC_024124 | LDOC1        | chrX:140269930-140271310 | 0 | 0 | 0 | 1 |
| XLOC_024126 | SPANXA2      | chrX:140590842-140738069 | 0 | 0 | 0 | 1 |
| XLOC_024128 | MAGEC2       | chrX:141290127-141293076 | 0 | 0 | 0 | 1 |
| XLOC_024129 | SPANXN3      | chrX:142596563-142605307 | 0 | 0 | 0 | 1 |
| XLOC_024130 | SLITRK4      | chrX:142710594-142723926 | 0 | 0 | 0 | 1 |
| XLOC_024131 | SPANXN2      | chrX:142795054-142804516 | 0 | 0 | 0 | 1 |
| XLOC_024132 | MIR890       | chrX:145075792-145075869 | 0 | 0 | 0 | 1 |
| XLOC_024133 | MIR888       | chrX:145076301-145076378 | 0 | 0 | 0 | 1 |
| XLOC_024134 | MIR892A      | chrX:145078186-145078261 | 0 | 0 | 0 | 1 |
| XLOC_024135 | MIR892B      | chrX:145078715-145078792 | 0 | 0 | 0 | 1 |
| XLOC_024136 | MIR891B      | chrX:145082570-145082649 | 0 | 0 | 0 | 1 |
| XLOC_024137 | MIR891A      | chrX:145109311-145109390 | 0 | 0 | 0 | 1 |
| XLOC_024138 | CXorf51A     | chrX:145895621-145896249 | 0 | 0 | 0 | 1 |
| XLOC_024139 | MIR506       | chrX:146312237-146312361 | 0 | 0 | 0 | 1 |
| XLOC_024140 | MIR507       | chrX:146312501-146312595 | 0 | 0 | 0 | 1 |
| XLOC_024141 | MIR508       | chrX:146318430-146318545 | 0 | 0 | 0 | 1 |
| XLOC_024142 | MIR514B      | chrX:146331668-146331748 | 0 | 0 | 0 | 1 |
| XLOC_024143 | MIR509-1     | chrX:146340277-146340368 | 0 | 0 | 0 | 1 |
| XLOC_024144 | MIR509-3     | chrX:146341169-146341244 | 0 | 0 | 0 | 1 |
| XLOC_024145 | MIR509-1     | chrX:146342049-146342143 | 0 | 0 | 0 | 1 |
| XLOC_024146 | MIR510       | chrX:146353852-146353926 | 0 | 0 | 0 | 1 |
| XLOC_024147 | MIR514A1     | chrX:146360764-146360862 | 0 | 0 | 0 | 1 |
| XLOC_024148 | MIR514A2     | chrX:146363460-146363548 | 0 | 0 | 0 | 1 |
| XLOC_024149 | MIR514A3     | chrX:146366158-146366246 | 0 | 0 | 0 | 1 |
| XLOC_024153 | MAGEA9B      | chrX:148663308-148669116 | 0 | 0 | 0 | 1 |
| XLOC_024154 | HSFX2        | chrX:148674171-148676974 | 0 | 0 | 0 | 1 |
| XLOC_024158 | GABRE        | chrX:151121595-151143151 | 0 | 0 | 0 | 1 |
| XLOC_024159 | MIR452       | chrX:151121595-151143151 | 0 | 0 | 0 | 1 |
| XLOC_024161 | GABRA3       | chrX:151335633-151619831 | 0 | 0 | 0 | 1 |
| XLOC_024162 | MIR105-1     | chrX:151335633-151619831 | 0 | 0 | 0 | 1 |
| XLOC_024163 | MIR767       | chrX:151335633-151619831 | 0 | 0 | 0 | 1 |
| XLOC_024164 | MIR105-2     | chrX:151335633-151619831 | 0 | 0 | 0 | 1 |
| XLOC_024165 | CSAG2,CSAG3  | chrX:151876742-151877747 | 0 | 0 | 0 | 1 |
| XLOC_024166 | MAGEA12      | chrX:151895977-151903184 | 0 | 0 | 0 | 1 |
| XLOC_024167 | MAGEA2,MAGEA | chrX:151918387-151922364 | 0 | 0 | 0 | 1 |
| XLOC_024168 | MAGEA3       | chrX:151934651-151938240 | 0 | 0 | 0 | 1 |
| XLOC_024171 | PNMA6D       | chrX:152243995-152246070 | 0 | 0 | 0 | 1 |
| XLOC_024172 | MAGEA1       | chrX:152481521-152486116 | 0 | 0 | 0 | 1 |
| XLOC_024179 | PDZD4        | chrX:153067622-153096003 | 0 | 0 | 0 | 1 |
| XLOC_024185 | MIR3202-2    | chrX:153237990-153248646 | 0 | 0 | 0 | 1 |
| XLOC_024187 | MIR718       | chrX:153285370-153285440 | 0 | 0 | 0 | 1 |
| XLOC_024189 | TEX28        | chrX:153485202-153523564 | 0 | 0 | 0 | 1 |
| XLOC_024197 | CTAG1A       | chrX:153845864-153847522 | 0 | 0 | 0 | 1 |

|             |                |                          |   |   |   |   |
|-------------|----------------|--------------------------|---|---|---|---|
| XLOC_024199 | CTAG2          | chrX:153880245-153881853 | 0 | 0 | 0 | 1 |
| XLOC_024202 | SMIM9          | chrX:154051622-154062937 | 0 | 0 | 0 | 1 |
| XLOC_024204 | MIR1184-1      | chrX:154064063-154250998 | 0 | 0 | 0 | 1 |
| XLOC_024209 | MIR1184-3      | chrX:154611748-154613450 | 0 | 0 | 0 | 1 |
| XLOC_024210 | F8A1           | chrX:154686574-154688276 | 0 | 0 | 0 | 1 |
| XLOC_024211 | H2AFB3         | chrX:154689079-154689596 | 0 | 0 | 0 | 1 |
| XLOC_024213 | PLCXD1         | chrY:142990-170022       | 0 | 0 | 0 | 1 |
| XLOC_024214 | LINC00685      | chrY:231384-232054       | 0 | 0 | 0 | 1 |
| XLOC_024215 | SHOX           | chrY:535078-570146       | 0 | 0 | 0 | 1 |
| XLOC_024216 | CSF2RA         | chrY:1337692-1378828     | 0 | 0 | 0 | 1 |
| XLOC_024217 | MIR3690        | chrY:1337692-1378828     | 0 | 0 | 0 | 1 |
| XLOC_024218 | IL3RA          | chrY:1405508-1451582     | 0 | 0 | 0 | 1 |
| XLOC_024219 | ASMTL-AS1      | chrY:1469423-1522655     | 0 | 0 | 0 | 1 |
| XLOC_024220 | AKAP17A,ASMT   | chrY:1660485-1711974     | 0 | 0 | 0 | 1 |
| XLOC_024221 | CD99P1         | chrY:2477305-2525270     | 0 | 0 | 0 | 1 |
| XLOC_024222 | CD99           | chrY:2559227-2609350     | 0 | 0 | 0 | 1 |
| XLOC_024223 | XGPY2          | chrY:2620336-2643037     | 0 | 0 | 0 | 1 |
| XLOC_024224 | RPS4Y1         | chrY:2709622-2734997     | 0 | 0 | 0 | 1 |
| XLOC_024225 | ZFY            | chrY:2803111-2850547     | 0 | 0 | 0 | 1 |
| XLOC_024226 | LINC00278      | chrY:2871036-2970313     | 0 | 0 | 0 | 1 |
| XLOC_024227 | TGIF2LY        | chrY:3447125-3448082     | 0 | 0 | 0 | 1 |
| XLOC_024229 | TSPY2          | chrY:6114263-6117053     | 0 | 0 | 0 | 1 |
| XLOC_024230 | TTY1B          | chrY:6258441-6296485     | 0 | 0 | 0 | 1 |
| XLOC_024231 | TTY21          | chrY:6311474-6315118     | 0 | 0 | 0 | 1 |
| XLOC_024232 | TTY7,TTY7B     | chrY:6317508-6325947     | 0 | 0 | 0 | 1 |
| XLOC_024233 | TBL1Y          | chrY:6778726-6959724     | 0 | 0 | 0 | 1 |
| XLOC_024234 | PRKY           | chrY:7142012-7249588     | 0 | 0 | 0 | 1 |
| XLOC_024235 | TTY12          | chrY:7672964-7678723     | 0 | 0 | 0 | 1 |
| XLOC_024236 | TTY19          | chrY:8572512-8573324     | 0 | 0 | 0 | 1 |
| XLOC_024237 | TSPY3,TSPY4,TS | chrY:9195451-9368285     | 0 | 0 | 0 | 1 |
| XLOC_024238 | TSPY1          | chrY:9195451-9368285     | 0 | 0 | 0 | 1 |
| XLOC_024239 | TTY8B          | chrY:9528708-9531308     | 0 | 0 | 0 | 1 |
| XLOC_024240 | TTY2           | chrY:9573894-9611928     | 0 | 0 | 0 | 1 |
| XLOC_024241 | TTY22          | chrY:9638761-9650854     | 0 | 0 | 0 | 1 |
| XLOC_024242 | TTY23B         | chrY:9748406-9749571     | 0 | 0 | 0 | 1 |
| XLOC_024243 | TTY15          | chrY:14774297-14804153   | 0 | 0 | 0 | 1 |
| XLOC_024244 | USP9Y          | chrY:14813159-14972768   | 0 | 0 | 0 | 1 |
| XLOC_024245 | DDX3Y          | chrY:15016018-15032390   | 0 | 0 | 0 | 1 |
| XLOC_024246 | TMSB4Y         | chrY:15815446-15817902   | 0 | 0 | 0 | 1 |
| XLOC_024247 | VCY            | chrY:16168097-16168838   | 0 | 0 | 0 | 1 |
| XLOC_024248 | NLGN4Y         | chrY:16634487-16955848   | 0 | 0 | 0 | 1 |
| XLOC_024249 | FAM41AY1       | chrY:19612837-19628622   | 0 | 0 | 0 | 1 |
| XLOC_024250 | CDY2A,CDY2B    | chrY:20137666-20139627   | 0 | 0 | 0 | 1 |
| XLOC_024251 | XKRY           | chrY:20297334-20298915   | 0 | 0 | 0 | 1 |
| XLOC_024252 | FAM224A,FAM22  | chrY:20488418-20492736   | 0 | 0 | 0 | 1 |
| XLOC_024253 | HSFY1,HSFY2    | chrY:20708556-20752407   | 0 | 0 | 0 | 1 |
| XLOC_024254 | TTY9A          | chrY:20891767-20935621   | 0 | 0 | 0 | 1 |
| XLOC_024255 | TXLNG2P        | chrY:21729243-21769056   | 0 | 0 | 0 | 1 |
| XLOC_024256 | EIF1AY         | chrY:22737610-22755040   | 0 | 0 | 0 | 1 |

|             |                |                        |   |   |   |   |
|-------------|----------------|------------------------|---|---|---|---|
| XLOC_024257 | RPS4Y2         | chrY:22917953-22942918 | 0 | 0 | 0 | 1 |
| XLOC_024258 | RBM1B          | chrY:23673223-23687672 | 0 | 0 | 0 | 1 |
| XLOC_024259 | RBM1B          | chrY:23696764-23711212 | 0 | 0 | 0 | 1 |
| XLOC_024260 | TTY6,TTY6B     | chrY:24291111-24292981 | 0 | 0 | 0 | 1 |
| XLOC_024261 | RBM1F,RBM1J    | chrY:24455005-24564028 | 0 | 0 | 0 | 1 |
| XLOC_024262 | PRY2           | chrY:24636543-24660784 | 0 | 0 | 0 | 1 |
| XLOC_024263 | TTY17C         | chrY:24997730-24998862 | 0 | 0 | 0 | 1 |
| XLOC_024264 | TTY4           | chrY:25082601-25119431 | 0 | 0 | 0 | 1 |
| XLOC_024265 | BPY2           | chrY:25130409-25151610 | 0 | 0 | 0 | 1 |
| XLOC_024266 | DAZ2,DAZ3,DAZ4 | chrY:25365580-25437503 | 0 | 0 | 0 | 1 |
| XLOC_024267 | TTY17C         | chrY:26631478-26632610 | 0 | 0 | 0 | 1 |
| XLOC_024268 | TTY4           | chrY:26716348-26753172 | 0 | 0 | 0 | 1 |
| XLOC_024269 | BPY2           | chrY:26764150-26785352 | 0 | 0 | 0 | 1 |
| XLOC_024270 | DAZ2,DAZ3,DAZ4 | chrY:26979966-27053187 | 0 | 0 | 0 | 1 |
| XLOC_024271 | GOLGA2P2Y      | chrY:27601457-27606322 | 0 | 0 | 0 | 1 |
| XLOC_024272 | CSPG4P1Y       | chrY:27629054-27632852 | 0 | 0 | 0 | 1 |
| XLOC_024273 | CDY1           | chrY:27768263-27771048 | 0 | 0 | 0 | 1 |
| XLOC_024274 | TTY3           | chrY:27874636-27879535 | 0 | 0 | 0 | 1 |
| XLOC_024275 | SPRY3          | chrY:59100456-59115123 | 0 | 0 | 0 | 1 |
| XLOC_024276 | VAMP7          | chrY:59213948-59276439 | 0 | 0 | 0 | 1 |
| XLOC_024277 | IL9R           | chrY:59330251-59343488 | 0 | 0 | 0 | 1 |
| XLOC_024278 | GTPBP6         | chrY:171425-180887     | 0 | 0 | 0 | 1 |
| XLOC_024279 | PPP2R3B        | chrY:244667-297690     | 0 | 0 | 0 | 1 |
| XLOC_024280 | CRLF2          | chrY:1264886-1281530   | 0 | 0 | 0 | 1 |
| XLOC_024281 | SLC25A6        | chrY:1455044-1461039   | 0 | 0 | 0 | 1 |
| XLOC_024282 | ASMTL          | chrY:1469423-1522655   | 0 | 0 | 0 | 1 |
| XLOC_024283 | P2RY8          | chrY:1531465-1606037   | 0 | 0 | 0 | 1 |
| XLOC_024284 | DHRX,ZBED1     | chrY:2087554-2369015   | 0 | 0 | 0 | 1 |
| XLOC_024285 | SRY            | chrY:2654895-2655792   | 0 | 0 | 0 | 1 |
| XLOC_024286 | TTY23B         | chrY:6110486-6111651   | 0 | 0 | 0 | 1 |
| XLOC_024287 | TTY2           | chrY:6258441-6296485   | 0 | 0 | 0 | 1 |
| XLOC_024288 | TTY8B          | chrY:6339071-6341671   | 0 | 0 | 0 | 1 |
| XLOC_024289 | AMELY          | chrY:6733958-6742068   | 0 | 0 | 0 | 1 |
| XLOC_024290 | TTY16          | chrY:7567397-7569288   | 0 | 0 | 0 | 1 |
| XLOC_024291 | TTY18          | chrY:8551410-8551919   | 0 | 0 | 0 | 1 |
| XLOC_024292 | TTY11          | chrY:8651358-8685423   | 0 | 0 | 0 | 1 |
| XLOC_024293 | RBM1A3P        | chrY:9154669-9160483   | 0 | 0 | 0 | 1 |
| XLOC_024294 | TTY20          | chrY:9167488-9172441   | 0 | 0 | 0 | 1 |
| XLOC_024295 | FAM197Y5       | chrY:9187188-9192791   | 0 | 0 | 0 | 1 |
| XLOC_024296 | FAM197Y5       | chrY:9195451-9368285   | 0 | 0 | 0 | 1 |
| XLOC_024297 | FAM197Y2       | chrY:9195451-9368285   | 0 | 0 | 0 | 1 |
| XLOC_024298 | FAM197Y2       | chrY:9195451-9368285   | 0 | 0 | 0 | 1 |
| XLOC_024299 | FAM197Y2       | chrY:9195451-9368285   | 0 | 0 | 0 | 1 |
| XLOC_024300 | RBM13AP        | chrY:9448329-9452762   | 0 | 0 | 0 | 1 |
| XLOC_024301 | TTY7,TTY7B     | chrY:9544432-9552871   | 0 | 0 | 0 | 1 |
| XLOC_024302 | TTY21          | chrY:9555261-9558905   | 0 | 0 | 0 | 1 |
| XLOC_024303 | TTY1B          | chrY:9573894-9611928   | 0 | 0 | 0 | 1 |
| XLOC_024305 | UTY            | chrY:15360258-15592550 | 0 | 0 | 0 | 1 |
| XLOC_024306 | VCY            | chrY:16097651-16098392 | 0 | 0 | 0 | 1 |

|             |               |                           |           |           |             |          |
|-------------|---------------|---------------------------|-----------|-----------|-------------|----------|
| XLOC_024307 | NLGN4Y-AS1    | chrY:16634487-16955848    | 0         | 0         | 0           | 1        |
| XLOC_024308 | FAM224A,FAM22 | chrY:19687040-19691353    | 0         | 0         | 0           | 1        |
| XLOC_024309 | XKRY2         | chrY:19880859-19882440    | 0         | 0         | 0           | 1        |
| XLOC_024310 | CDY2A,CDY2B   | chrY:19990139-19992100    | 0         | 0         | 0           | 1        |
| XLOC_024311 | FAM41AY2      | chrY:20551155-20566932    | 0         | 0         | 0           | 1        |
| XLOC_024312 | TTY9B         | chrY:20708556-20752407    | 0         | 0         | 0           | 1        |
| XLOC_024313 | HSFY1,HSFY2   | chrY:20891767-20935621    | 0         | 0         | 0           | 1        |
| XLOC_024314 | NCRNA00185    | chrY:21034386-21040114    | 0         | 0         | 0           | 1        |
| XLOC_024315 | TTY14         | chrY:21094584-21239302    | 0         | 0         | 0           | 1        |
| XLOC_024317 | BCORP1        | chrY:21617316-21665039    | 0         | 0         | 0           | 1        |
| XLOC_024318 | KDM5D         | chrY:21867300-21906825    | 0         | 0         | 0           | 1        |
| XLOC_024319 | TTY10         | chrY:22627553-22681114    | 0         | 0         | 0           | 1        |
| XLOC_024320 | RBMV2EP       | chrY:23557033-23563448    | 0         | 0         | 0           | 1        |
| XLOC_024321 | TTY13         | chrY:23745485-23756552    | 0         | 0         | 0           | 1        |
| XLOC_024322 | RBMV1B        | chrY:24026222-24040673    | 0         | 0         | 0           | 1        |
| XLOC_024323 | RBMV1B        | chrY:24049764-24064214    | 0         | 0         | 0           | 1        |
| XLOC_024324 | PRY           | chrY:24217902-24242154    | 0         | 0         | 0           | 1        |
| XLOC_024325 | RBMV1J        | chrY:24314688-24329089    | 0         | 0         | 0           | 1        |
| XLOC_024326 | TTY5          | chrY:24442944-24445023    | 0         | 0         | 0           | 1        |
| XLOC_024327 | TTY6,TTY6B    | chrY:24585736-24587606    | 0         | 0         | 0           | 1        |
| XLOC_024328 | DAZ1,DAZ4     | chrY:25275501-25345254    | 0         | 0         | 0           | 1        |
| XLOC_024329 | TTY3B         | chrY:26082873-26087769    | 0         | 0         | 0           | 1        |
| XLOC_024330 | CDY1          | chrY:26191376-26194161    | 0         | 0         | 0           | 1        |
| XLOC_024331 | CSPG4P1Y      | chrY:26329580-26333378    | 0         | 0         | 0           | 1        |
| XLOC_024332 | GOLGA2P2Y     | chrY:26356113-26360978    | 0         | 0         | 0           | 1        |
| XLOC_024333 | DAZ3,DAZ4     | chrY:26909215-26959639    | 0         | 0         | 0           | 1        |
| XLOC_024334 | BPY2C         | chrY:27177049-27198251    | 0         | 0         | 0           | 1        |
| XLOC_024335 | TTY4B         | chrY:27209229-27246039    | 0         | 0         | 0           | 1        |
| XLOC_024336 | TTY17B        | chrY:27329789-27330920    | 0         | 0         | 0           | 1        |
| XLOC_003639 | RAB1B         | chr11:66036055-66044963   | 151.169   | 151.171   | 1.77E-05    | 0.999934 |
| XLOC_012633 | SMARCAL1      | chr2:217277136-217347774  | 7.82428   | 7.82449   | 3.99E-05    | 1        |
| XLOC_007145 | BAHD1         | chr15:40733410-40760441   | 10.0864   | 10.0875   | 0.000156792 | 0.999404 |
| XLOC_016177 | NAT8L         | chr4:2061238-2070816      | 0.0178157 | 0.0178183 | 0.000212121 | 1        |
| XLOC_012828 | KIF3C         | chr2:26149454-26205443    | 2.47596   | 2.47636   | 0.000231143 | 0.999234 |
| XLOC_016831 | WDFY3         | chr4:85590692-85887544    | 0.929125  | 0.929329  | 0.000316857 | 0.999234 |
| XLOC_014918 | TRNT1         | chr3:3168599-3190706      | 8.05753   | 8.06006   | 0.000452452 | 0.999274 |
| XLOC_007173 | CCNDBP1       | chr15:43477465-43489375   | 10.7382   | 10.7418   | 0.000476011 | 0.999234 |
| XLOC_005711 | DDX54         | chr12:113587662-113623284 | 32.5716   | 32.5829   | 0.000500407 | 0.999282 |
| XLOC_009016 | SOCS7         | chr17:36508006-36561846   | 1.87426   | 1.87491   | 0.000503351 | 0.999234 |
| XLOC_002808 | KIN           | chr10:7792924-7829990     | 2.02576   | 2.02651   | 0.000533352 | 0.999398 |
| XLOC_006782 | LOC100288846  | chr14:39734475-39820397   | 0.526973  | 0.527185  | 0.000580379 | 0.994593 |
| XLOC_010112 | NDUFV2        | chr18:9102627-9134343     | 166.813   | 166.881   | 0.000583658 | 0.999234 |
| XLOC_008525 | LOC730183     | chr16:30709024-30709810   | 2.6414    | 2.64249   | 0.00059688  | 0.994582 |
| XLOC_014964 | CCDC174       | chr3:14693252-14714166    | 5.08684   | 5.08906   | 0.000630944 | 0.999234 |
| XLOC_007831 | FAM195A       | chr16:691848-698474       | 108.94    | 108.989   | 0.000650434 | 0.999234 |
| XLOC_003491 | RTN4RL2       | chr11:57228338-57244384   | 23.4928   | 23.5034   | 0.000656546 | 0.999234 |
| XLOC_013736 | RBM38         | chr20:55904830-55998278   | 37.5773   | 37.5958   | 0.000709914 | 0.999274 |
| XLOC_006036 | PARP4         | chr13:24995068-25086948   | 14.0133   | 14.0206   | 0.000751054 | 0.999234 |
| XLOC_000344 | CCDC24        | chr1:44457279-44497164    | 8.16984   | 8.1741    | 0.000752137 | 0.999234 |

|             |            |                           |           |           |             |          |
|-------------|------------|---------------------------|-----------|-----------|-------------|----------|
| XLOC_021418 | MNX1       | chr7:156797546-156803347  | 17.8105   | 17.8211   | 0.000855075 | 0.999234 |
| XLOC_009780 | CCDC43     | chr17:42754804-42767165   | 7.49734   | 7.50181   | 0.000859345 | 0.999234 |
| XLOC_005655 | NUP37      | chr12:102467972-102512361 | 33.3539   | 33.3738   | 0.000860951 | 0.999234 |
| XLOC_010896 | TMEM145    | chr19:42817476-42829214   | 27.2413   | 27.2585   | 0.00090706  | 0.999234 |
| XLOC_015105 | DAG1       | chr3:49506135-49573051    | 10.7455   | 10.7525   | 0.000936072 | 0.999234 |
| XLOC_018216 | STK19      | chr6:31937587-31949223    | 6.14779   | 6.15182   | 0.000945133 | 0.99934  |
| XLOC_017236 | ANKRD32    | chr5:93954390-94031573    | 0.758875  | 0.7594    | 0.000997894 | 0.998609 |
| XLOC_017598 | GOLPH3     | chr5:32124823-32174425    | 17.2437   | 17.2566   | 0.0010822   | 0.999234 |
| XLOC_006325 | BRMS1L     | chr14:36295596-36341169   | 2.18537   | 2.18704   | 0.00110528  | 0.999234 |
| XLOC_020377 | ARL4A      | chr7:12726451-12730558    | 3.1586    | 3.16103   | 0.00110955  | 0.999234 |
| XLOC_014908 | LMF2       | chr22:50941375-50946135   | 51.7422   | 51.7828   | 0.00113223  | 0.999234 |
| XLOC_000240 | PTPRU      | chr1:29563027-29653325    | 12.3941   | 12.4039   | 0.00113985  | 0.999234 |
| XLOC_012131 | TTC27      | chr2:32853086-33046118    | 8.09152   | 8.09811   | 0.00117463  | 0.999234 |
| XLOC_024011 | PSMD10     | chrX:107327434-107334874  | 28.8731   | 28.8972   | 0.00120639  | 0.999234 |
| XLOC_016786 | ANKRD17    | chr4:73940501-74124502    | 5.4047    | 5.40933   | 0.00123415  | 0.999234 |
| XLOC_017868 | PCDH12     | chr5:141324529-141338627  | 0.0194095 | 0.0194263 | 0.00124144  | 1        |
| XLOC_006290 | DHRS4L1    | chr14:24505709-24520580   | 0.0874072 | 0.0874831 | 0.00125297  | 1        |
| XLOC_020752 | KLHDC10    | chr7:129710348-129775560  | 3.86782   | 3.87127   | 0.00128852  | 0.999234 |
| XLOC_013950 | LINC00657  | chr20:34633539-34638882   | 28.1547   | 28.1827   | 0.001431    | 0.999201 |
| XLOC_022599 | NUP188     | chr9:131707808-131769375  | 31.7412   | 31.7744   | 0.00150839  | 0.999234 |
| XLOC_023014 | INIP       | chr9:115448790-115480387  | 5.55965   | 5.56558   | 0.00153786  | 0.999234 |
| XLOC_023092 | FAM102A    | chr9:130702860-130742812  | 15.5629   | 15.5801   | 0.00159122  | 0.999201 |
| XLOC_010904 | PINLYP     | chr19:44080951-44086256   | 1.12474   | 1.12601   | 0.00162732  | 0.998558 |
| XLOC_001091 | IBA57      | chr1:228353428-228369958  | 1.71855   | 1.72059   | 0.00171221  | 0.999234 |
| XLOC_000780 | BCAN       | chr1:156611739-156629324  | 3.10332   | 3.1071    | 0.00175697  | 0.999234 |
| XLOC_022494 | FKTN       | chr9:108320410-108403399  | 3.37322   | 3.37741   | 0.00179028  | 0.999187 |
| XLOC_002821 | BEND7      | chr10:13480483-13544976   | 7.67654   | 7.68609   | 0.00179291  | 0.999234 |
| XLOC_014207 | LRRRC3     | chr21:45875392-45878739   | 1.34842   | 1.35012   | 0.001821    | 0.99814  |
| XLOC_021552 | ASH2L      | chr8:37963010-37997598    | 8.65414   | 8.66507   | 0.00182203  | 0.999114 |
| XLOC_016456 | SGMS2      | chr4:108745720-108836204  | 2.89897   | 2.90281   | 0.00191441  | 0.999209 |
| XLOC_016264 | ZCCHC4     | chr4:25314395-25372005    | 2.14367   | 2.14662   | 0.00197925  | 0.999234 |
| XLOC_005215 | KDM5A      | chr12:389222-551806       | 2.22298   | 2.22607   | 0.00200212  | 0.999032 |
| XLOC_005894 | SETDB2     | chr13:50018428-50069139   | 1.12292   | 1.12448   | 0.0020086   | 0.999215 |
| XLOC_015697 | IP6K2      | chr3:48725435-48754711    | 57.6954   | 57.7768   | 0.0020356   | 0.998593 |
| XLOC_009015 | MRPL45     | chr17:36452988-36479101   | 54.3278   | 54.4073   | 0.00211016  | 0.998593 |
| XLOC_016827 | HPSE       | chr4:84213613-84256306    | 2.6005    | 2.60431   | 0.00211364  | 0.998983 |
| XLOC_016248 | FAM200B    | chr4:15683351-15692070    | 3.49865   | 3.50383   | 0.00213475  | 0.999187 |
| XLOC_003144 | C10orf118  | chr10:115881973-115934364 | 0.239864  | 0.240229  | 0.00219629  | 1        |
| XLOC_021673 | FAM92A1    | chr8:94712772-94740671    | 33.1233   | 33.175    | 0.0022517   | 0.998593 |
| XLOC_003601 | SAC3D1     | chr11:64808375-64826009   | 43.1791   | 43.2485   | 0.00231667  | 0.998593 |
| XLOC_003620 | EHBP1L1    | chr11:65343508-65360116   | 9.84689   | 9.86275   | 0.0023216   | 0.998572 |
| XLOC_003365 | HTATIP2    | chr11:20385230-20405329   | 36.407    | 36.466    | 0.00233468  | 0.998382 |
| XLOC_002997 | PPP3CB     | chr10:75196562-75255782   | 8.48867   | 8.5029    | 0.00241565  | 0.998382 |
| XLOC_003656 | ANKRD13D   | chr11:67056761-67069955   | 17.2963   | 17.3265   | 0.00250929  | 0.998572 |
| XLOC_007548 | CATSPER2P1 | chr15:44028145-44038496   | 0.389782  | 0.390462  | 0.00251673  | 0.994582 |
| XLOC_013176 | MMADHC     | chr2:150426146-150444330  | 74.5746   | 74.7073   | 0.00256567  | 0.998572 |
| XLOC_012978 | PRADC1     | chr2:73455133-73460356    | 15.6043   | 15.6322   | 0.00257485  | 0.998382 |
| XLOC_009676 | SMARCE1    | chr17:38783975-38804103   | 35.0276   | 35.091    | 0.00260908  | 0.998382 |
| XLOC_012860 | MEMO1      | chr2:32092893-32235698    | 28.748    | 28.8001   | 0.00261345  | 0.998382 |



|             |              |                           |           |           |            |          |
|-------------|--------------|---------------------------|-----------|-----------|------------|----------|
| XLOC_002958 | JMJD1C       | chr10:64926987-65226322   | 5.12139   | 5.13075   | 0.00263332 | 0.998572 |
| XLOC_002890 | ZNF37BP      | chr10:43008960-43048280   | 1.81005   | 1.81338   | 0.00264997 | 0.998382 |
| XLOC_007170 | HAUS2        | chr15:42841010-42862190   | 9.97352   | 9.99224   | 0.00270533 | 0.998382 |
| XLOC_006885 | PNMA1        | chr14:74178485-74181128   | 22.7438   | 22.7865   | 0.00270534 | 0.998272 |
| XLOC_014860 | CYP2D7P1     | chr22:42536213-42540575   | 0.78008   | 0.781591  | 0.00279178 | 0.994953 |
| XLOC_002785 | LARP4B       | chr10:852853-977645       | 8.97276   | 8.99031   | 0.0028195  | 0.998382 |
| XLOC_005702 | FAM109A      | chr12:111798454-111806925 | 7.01834   | 7.03216   | 0.00283809 | 0.998382 |
| XLOC_012127 | SLC30A6      | chr2:32390909-32449181    | 3.7084    | 3.71574   | 0.00285158 | 0.998382 |
| XLOC_014417 | ZDHHC8       | chr22:20119363-20135530   | 10.3771   | 10.3977   | 0.00286144 | 0.998566 |
| XLOC_011761 | SNRPD2       | chr19:46190711-46195443   | 582.694   | 583.88    | 0.00293249 | 0.998382 |
| XLOC_013744 | GNAS         | chr20:57393972-57486250   | 453.776   | 454.712   | 0.00297336 | 0.998132 |
| XLOC_001565 | SSBP3        | chr1:54692194-54872092    | 14.897    | 14.93     | 0.00319429 | 0.998272 |
| XLOC_020860 | NOS3         | chr7:150688143-150721586  | 7.77924   | 7.79676   | 0.00324455 | 0.998382 |
| XLOC_016742 | SCFD2        | chr4:53739150-54232242    | 1.34743   | 1.35049   | 0.00327372 | 0.999187 |
| XLOC_001542 | TTC39A       | chr1:51752929-51810785    | 4.8634    | 4.87462   | 0.00332308 | 0.998572 |
| XLOC_011047 | ZNF473       | chr19:50529211-50552031   | 3.07261   | 3.0798    | 0.00337276 | 0.998382 |
| XLOC_022272 | JAK2         | chr9:4985244-5128183      | 0.292953  | 0.293661  | 0.00348507 | 1        |
| XLOC_017671 | ERCC8        | chr5:60169658-60240905    | 3.162     | 3.16993   | 0.00361645 | 0.997773 |
| XLOC_002177 | NSL1         | chr1:212899494-212965139  | 0.852465  | 0.854618  | 0.00364034 | 0.998272 |
| XLOC_023380 | PLP2         | chrX:49028183-49031468    | 436.113   | 437.219   | 0.0036542  | 0.997552 |
| XLOC_013462 | MTERFD2      | chr2:241938254-242041747  | 7.86615   | 7.88621   | 0.00367422 | 0.998382 |
| XLOC_022216 | MAFA         | chr8:144510229-144512602  | 5.16385   | 5.17728   | 0.00374656 | 0.999106 |
| XLOC_017715 | SERINC5      | chr5:79407049-79551898    | 1.67184   | 1.67619   | 0.00375234 | 0.998272 |
| XLOC_003406 | PRR5L        | chr11:36317724-36486754   | 1.21755   | 1.22073   | 0.00376217 | 0.998272 |
| XLOC_018277 | FTSJD2       | chr6:37400906-37449284    | 9.7996    | 9.82574   | 0.00384331 | 0.997552 |
| XLOC_005197 | EP400        | chr12:132434464-132565011 | 2.73467   | 2.74208   | 0.00389959 | 0.997552 |
| XLOC_005039 | NEDD1        | chr12:97301000-97347469   | 3.71776   | 3.72786   | 0.00391709 | 0.997913 |
| XLOC_014695 | THAP7        | chr22:21354060-21368576   | 28.0638   | 28.1413   | 0.00397886 | 0.997773 |
| XLOC_001031 | HHAT         | chr1:210501595-210849638  | 0.494748  | 0.496137  | 0.00404462 | 0.998382 |
| XLOC_016835 | LOC100506746 | chr4:87846045-87856002    | 0.532038  | 0.533535  | 0.00405358 | 0.996765 |
| XLOC_011161 | RPS9         | chr19:54704725-54711515   | 4658.29   | 4671.4    | 0.00405427 | 0.997552 |
| XLOC_018245 | ZBTB9        | chr6:33422355-33425320    | 6.57324   | 6.59182   | 0.00407164 | 0.997773 |
| XLOC_012427 | PTPN18       | chr2:131113579-131132982  | 14.0413   | 14.0814   | 0.00410976 | 0.997552 |
| XLOC_008188 | PSKH1        | chr16:67927174-67965778   | 6.67526   | 6.69432   | 0.00411411 | 0.997552 |
| XLOC_008485 | XPO6         | chr16:28109297-28223239   | 31.8039   | 31.8956   | 0.00415368 | 0.997552 |
| XLOC_012305 | KCNIP3       | chr2:95963071-96051825    | 2.90417   | 2.9126    | 0.00418228 | 0.99783  |
| XLOC_016715 | PDS5A        | chr4:39824482-39979576    | 7.30989   | 7.33135   | 0.00423031 | 0.997552 |
| XLOC_005777 | SCARB1       | chr12:125262173-125348519 | 55.6348   | 55.7982   | 0.00423142 | 0.997479 |
| XLOC_012308 | FAHD2CP      | chr2:96676298-96700727    | 5.28597   | 5.30171   | 0.00428926 | 0.998593 |
| XLOC_004324 | LOC254100    | chr11:65336690-65337884   | 0.693205  | 0.695279  | 0.0043101  | 0.999391 |
| XLOC_014419 | LOC729444    | chr22:20325589-20350461   | 0.0112298 | 0.0112641 | 0.00440737 | 1        |
| XLOC_003110 | LDB1         | chr10:103867324-103880210 | 17.6313   | 17.6861   | 0.00447592 | 0.997552 |
| XLOC_020898 | MICALL2      | chr7:1473994-1499109      | 2.7096    | 2.71811   | 0.00452094 | 0.998382 |
| XLOC_004086 | PSMA1        | chr11:14526421-14665180   | 135.083   | 135.513   | 0.00458114 | 0.997552 |
| XLOC_018113 | BTN2A1       | chr6:26458152-26482737    | 5.14766   | 5.16409   | 0.00459673 | 0.997551 |
| XLOC_023349 | UBA1         | chrX:47050198-47074527    | 101.452   | 101.778   | 0.00463381 | 0.997232 |
| XLOC_004248 | CYBASC3      | chr11:61066918-61136975   | 9.27571   | 9.30655   | 0.00478814 | 0.999234 |
| XLOC_006323 | PSMA6        | chr14:35761573-35786682   | 147.334   | 147.832   | 0.00487554 | 0.996733 |
| XLOC_018177 | TUBB         | chr6:30688156-30693195    | 443.492   | 445.012   | 0.0049347  | 0.997224 |

|             |                 |                           |           |          |            |          |
|-------------|-----------------|---------------------------|-----------|----------|------------|----------|
| XLOC_015627 | CLASP2          | chr3:33537738-33759705    | 2.28549   | 2.2938   | 0.00523472 | 0.996949 |
| XLOC_018040 | DSP             | chr6:7541869-7586946      | 2.36852   | 2.37715  | 0.00525108 | 0.996765 |
| XLOC_016051 | MECOM           | chr3:168801286-169381563  | 1.94375   | 1.95092  | 0.00531037 | 0.997538 |
| XLOC_009670 | MED24           | chr17:38175349-38210889   | 22.3805   | 22.4633  | 0.00532648 | 0.996421 |
| XLOC_016641 | NOP14           | chr4:2937277-2965118      | 24.4332   | 24.5246  | 0.00538489 | 0.996765 |
| XLOC_021738 | TRMT12          | chr8:125463047-125465266  | 5.21362   | 5.2335   | 0.00548958 | 0.99704  |
| XLOC_023685 | NSDHL           | chrX:151999510-152037907  | 23.7052   | 23.7957  | 0.00549445 | 0.996035 |
| XLOC_009640 | ACACA           | chr17:35441926-35766902   | 4.20485   | 4.2209   | 0.00549644 | 0.996035 |
| XLOC_007139 | LOC100131089    | chr15:40331511-40359710   | 5.15512   | 5.17494  | 0.0055375  | 0.998382 |
| XLOC_012572 | HSPE1,HSPE1-M   | chr2:198351307-198418423  | 354.438   | 355.837  | 0.00568193 | 0.999032 |
| XLOC_006787 | MIS18BP1        | chr14:45672392-45722605   | 2.79387   | 2.80495  | 0.00571119 | 0.996446 |
| XLOC_015423 | IQCJ,IQCJ-SCHIP | chr3:158787040-159615155  | 6.2012    | 6.22587  | 0.0057287  | 0.997314 |
| XLOC_007322 | RCN2            | chr15:77223961-77242601   | 25.576    | 25.6785  | 0.00577033 | 0.995664 |
| XLOC_001124 | RYR2            | chr1:237205701-237997288  | 0.125244  | 0.125752 | 0.0058381  | 1        |
| XLOC_016459 | LEF1-AS1        | chr4:108968700-109097586  | 0.381249  | 0.382803 | 0.00586603 | 0.99748  |
| XLOC_015663 | LZTFL1          | chr3:45864809-45957216    | 3.06507   | 3.07767  | 0.0059185  | 0.996765 |
| XLOC_021330 | CNOT4           | chr7:135046546-135194875  | 3.98882   | 4.00527  | 0.00593733 | 0.996948 |
| XLOC_017116 | FBXO4           | chr5:41925355-41941672    | 7.47993   | 7.51134  | 0.00604581 | 0.99611  |
| XLOC_005422 | DDX23           | chr12:49223538-49245957   | 20.5816   | 20.6723  | 0.00634448 | 0.995202 |
| XLOC_020993 | NOD1            | chr7:30464142-30518393    | 1.6151    | 1.62224  | 0.0063576  | 0.997479 |
| XLOC_020749 | STRIP2          | chr7:129074273-129128239  | 3.54966   | 3.56543  | 0.00639269 | 0.995268 |
| XLOC_002777 | PAOX            | chr10:135192740-135205198 | 6.07671   | 6.10382  | 0.00642319 | 0.997224 |
| XLOC_017292 | PHAX            | chr5:125936606-125962944  | 6.03376   | 6.06068  | 0.00642413 | 0.995529 |
| XLOC_022064 | ZFAND1          | chr8:82613565-82633539    | 45.2062   | 45.4083  | 0.00643291 | 0.994886 |
| XLOC_000394 | PRPF38A         | chr1:52870218-52883992    | 13.3707   | 13.4306  | 0.00644173 | 0.995202 |
| XLOC_008341 | SPSB3           | chr16:1826712-1832581     | 40.1822   | 40.3623  | 0.00645332 | 0.995437 |
| XLOC_017391 | KIAA0141        | chr5:141303384-141321612  | 12.0778   | 12.135   | 0.00681929 | 0.994878 |
| XLOC_008200 | SNTB2           | chr16:69221049-69342955   | 1.44557   | 1.45245  | 0.00684219 | 0.995437 |
| XLOC_004266 | INTS5           | chr11:62414319-62420774   | 12.551    | 12.6111  | 0.00689104 | 0.995019 |
| XLOC_018302 | CNPY3           | chr6:42896859-42907008    | 46.87     | 47.095   | 0.00690687 | 0.994734 |
| XLOC_013692 | ZSWIM3          | chr20:44486219-44507769   | 1.29435   | 1.30057  | 0.00691797 | 0.997371 |
| XLOC_006003 | TMCO3           | chr13:114145307-114204544 | 8.98999   | 9.03351  | 0.0069676  | 0.994953 |
| XLOC_024005 | RIPPLY1         | chrX:106143292-106174091  | 0.0654518 | 0.065771 | 0.00701946 | 1        |
| XLOC_023740 | ARSD            | chrX:2822010-2847416      | 4.89268   | 4.91656  | 0.00702432 | 0.995019 |
| XLOC_020578 | RSBN1L          | chr7:77313167-77409120    | 2.70031   | 2.71351  | 0.007039   | 0.996765 |
| XLOC_002699 | TCF7L2          | chr10:114710008-114927436 | 4.13985   | 4.16013  | 0.00704933 | 0.995019 |
| XLOC_001917 | MRPL24          | chr1:156707093-156710923  | 105.071   | 105.587  | 0.00708032 | 0.994734 |
| XLOC_013140 | SAP130          | chr2:128698790-128784869  | 6.17715   | 6.20776  | 0.00713216 | 0.995019 |
| XLOC_018651 | RANBP9          | chr6:13621729-13711796    | 9.82771   | 9.8767   | 0.00717295 | 0.994734 |
| XLOC_016631 | FAM53A          | chr4:1641607-1685988      | 3.92975   | 3.94945  | 0.00721108 | 0.996035 |
| XLOC_017783 | CEP120          | chr5:122680578-122759286  | 2.98101   | 2.99595  | 0.00721282 | 0.995202 |
| XLOC_003739 | TMEM126B        | chr11:85339616-85347583   | 35.5768   | 35.756   | 0.00724492 | 0.994734 |
| XLOC_012259 | SEMA4F          | chr2:74881354-74910981    | 4.06273   | 4.08327  | 0.00727748 | 0.994734 |
| XLOC_020965 | OSBPL3          | chr7:24836163-25019760    | 1.69229   | 1.70088  | 0.00729786 | 0.995202 |
| XLOC_006349 | TMX1            | chr14:51706885-51724372   | 18.2609   | 18.3536  | 0.00730418 | 0.994593 |
| XLOC_011406 | ZNF846          | chr19:9868150-9879410     | 0.349058  | 0.350832 | 0.00731307 | 1        |
| XLOC_008319 | C16orf13        | chr16:684428-686347       | 171.764   | 172.638  | 0.00731533 | 0.994734 |
| XLOC_017175 | SMN2            | chr5:70220767-70248842    | 4.74227   | 4.76641  | 0.00732495 | 0.995521 |
| XLOC_023810 | DYNLT3          | chrX:37698088-37706889    | 5.6521    | 5.68124  | 0.00741829 | 0.994978 |

|             |              |                           |           |           |            |          |
|-------------|--------------|---------------------------|-----------|-----------|------------|----------|
| XLOC_016148 | NCBP2        | chr3:196662272-196669464  | 32.3456   | 32.516    | 0.00757955 | 0.994734 |
| XLOC_015988 | LOC100289361 | chr3:142719686-142720309  | 7.19179   | 7.22982   | 0.00760919 | 0.998272 |
| XLOC_021579 | HGSNAT       | chr8:42995591-43057970    | 6.30475   | 6.33836   | 0.00767076 | 0.994734 |
| XLOC_021694 | VPS13B       | chr8:100025493-100889814  | 1.57297   | 1.58139   | 0.00770124 | 0.994734 |
| XLOC_003982 | OSBPL5       | chr11:3108345-3186582     | 4.47784   | 4.5019    | 0.0077311  | 0.995202 |
| XLOC_005709 | RPL6         | chr12:112842993-112847443 | 2825.1    | 2840.34   | 0.00776107 | 0.994734 |
| XLOC_018255 | DEF6         | chr6:35265594-35289548    | 20.0887   | 20.1991   | 0.00790509 | 0.994593 |
| XLOC_021313 | ZC3HC1       | chr7:129658125-129691233  | 19.6571   | 19.7655   | 0.00793123 | 0.994593 |
| XLOC_015649 | CCDC13       | chr3:42749873-42814745    | 0.0216223 | 0.0217432 | 0.00804676 | 1        |
| XLOC_008393 | LOC100507501 | chr16:4295825-4303790     | 2.95764   | 2.97424   | 0.00807533 | 0.996186 |
| XLOC_003936 | IFITM3       | chr11:319672-320914       | 325.793   | 327.662   | 0.00825198 | 0.994582 |
| XLOC_018297 | UBR2         | chr6:42531759-42661243    | 2.5791    | 2.59396   | 0.00828612 | 0.994593 |
| XLOC_011762 | FBXO46       | chr19:46213886-46234151   | 13.7414   | 13.8223   | 0.00847572 | 0.994593 |
| XLOC_001099 | GALNT2       | chr1:230202955-230417875  | 9.19303   | 9.24726   | 0.00848538 | 0.994593 |
| XLOC_018142 | ZSCAN26      | chr6:28234787-28245980    | 5.41931   | 5.45146   | 0.00853157 | 0.994734 |
| XLOC_022736 | HAUS6        | chr9:19053134-19102940    | 4.71784   | 4.74597   | 0.0085762  | 0.994475 |
| XLOC_000074 | UBE4B        | chr1:10093040-10241296    | 5.17746   | 5.20842   | 0.00860181 | 0.994279 |
| XLOC_008436 | MYH11        | chr16:15737123-15950887   | 0.0744493 | 0.0748967 | 0.00864288 | 1        |
| XLOC_002578 | FAS          | chr10:90694830-90775542   | 4.23635   | 4.26181   | 0.008646   | 0.994734 |
| XLOC_020597 | GTPBP10      | chr7:89975978-90020769    | 3.73553   | 3.75812   | 0.00870053 | 0.994567 |
| XLOC_002662 | GBF1         | chr10:104005254-104142656 | 5.68403   | 5.71872   | 0.00877914 | 0.994582 |
| XLOC_012643 | CTDSP1       | chr2:219263060-219270664  | 36.4186   | 36.6412   | 0.00879206 | 0.994475 |
| XLOC_019077 | EPB41L2      | chr6:131160487-131384462  | 13.6929   | 13.7776   | 0.00889657 | 0.994475 |
| XLOC_006943 | MOAP1        | chr14:93648540-93651249   | 18.5265   | 18.6412   | 0.00890593 | 0.994204 |
| XLOC_012709 | EIF4E2       | chr2:233415356-233433920  | 41.098    | 41.3555   | 0.0090115  | 0.994507 |
| XLOC_014343 | ZBTB21       | chr21:43406939-43430496   | 2.74043   | 2.75769   | 0.00905918 | 0.994593 |
| XLOC_009883 | RNFT1        | chr17:58029722-58042117   | 7.50431   | 7.55163   | 0.00906872 | 0.994593 |
| XLOC_011435 | RGL3         | chr19:11504731-11530018   | 11.2745   | 11.3462   | 0.00914833 | 0.994593 |
| XLOC_008839 | CNTROB       | chr17:7835441-7853237     | 13.1982   | 13.2834   | 0.00928703 | 0.994204 |
| XLOC_018230 | LOC100294145 | chr6:32861952-32871535    | 2.20215   | 2.21649   | 0.00935952 | 0.994661 |
| XLOC_023133 | SURF6        | chr9:136197551-136203047  | 59.4626   | 59.8512   | 0.00939911 | 0.994116 |
| XLOC_008308 | AFG3L1P      | chr16:90036182-90067195   | 4.07538   | 4.10206   | 0.00941383 | 0.994734 |
| XLOC_007423 | NR2F2        | chr15:96869156-96883492   | 3.16256   | 3.18328   | 0.00941889 | 0.994593 |
| XLOC_010390 | RNF152       | chr18:59482303-59560304   | 0.934036  | 0.940175  | 0.00945146 | 0.996948 |
| XLOC_024109 | MAP7D3       | chrX:135295378-135338641  | 5.54827   | 5.5857    | 0.00970016 | 0.994068 |
| XLOC_003178 | FAM53B       | chr10:126307862-126432930 | 6.35596   | 6.39886   | 0.00970451 | 0.994204 |
| XLOC_022029 | ARFGEF1      | chr8:68109883-68255912    | 4.11742   | 4.14541   | 0.00977326 | 0.994279 |
| XLOC_016925 | NUDT6        | chr4:123747862-123844159  | 5.08257   | 5.11717   | 0.00978758 | 0.99497  |
| XLOC_010120 | NAPG         | chr18:10525872-10552766   | 5.37319   | 5.40984   | 0.00980529 | 0.994204 |
| XLOC_005948 | NDFIP2       | chr13:80051498-80130212   | 6.26411   | 6.30704   | 0.00985244 | 0.994204 |
| XLOC_007508 | C15orf56     | chr15:40453209-40569688   | 1.92466   | 1.93786   | 0.00986127 | 0.998593 |
| XLOC_012918 | SMEK2        | chr2:55775513-55844796    | 6.67816   | 6.72428   | 0.00992929 | 0.994068 |
| XLOC_017127 | ITGA2        | chr5:52285155-52390609    | 1.10275   | 1.11037   | 0.00994152 | 0.994432 |
| XLOC_010439 | ARID3A       | chr19:926036-972803       | 5.57111   | 5.60974   | 0.00996859 | 0.994582 |
| XLOC_008168 | C16orf70     | chr16:67143914-67184902   | 5.31581   | 5.35284   | 0.010014   | 0.994734 |
| XLOC_001391 | EYA3         | chr1:28296854-28415148    | 4.16846   | 4.19765   | 0.0100695  | 0.994204 |
| XLOC_005670 | CKAP4        | chr12:106631658-106641713 | 21.7815   | 21.9346   | 0.0101049  | 0.994068 |
| XLOC_018879 | C6orf226     | chr6:42858002-42858554    | 11.825    | 11.9084   | 0.0101402  | 0.995019 |
| XLOC_002624 | UBTD1        | chr10:99258767-99330960   | 31.8524   | 32.0783   | 0.0101953  | 0.994102 |

|             |               |                           |           |          |           |          |
|-------------|---------------|---------------------------|-----------|----------|-----------|----------|
| XLOC_015623 | DYNC1L1       | chr3:32567462-32612366    | 19.0824   | 19.2188  | 0.0102767 | 0.994116 |
| XLOC_007865 | GFER          | chr16:2034149-2037750     | 29.5673   | 29.7791  | 0.0102949 | 0.994068 |
| XLOC_006027 | ZDHC20        | chr13:21872263-22033508   | 3.91413   | 3.94216  | 0.0102976 | 0.994068 |
| XLOC_009421 | SLC25A11      | chr17:4840425-4843462     | 69.1289   | 69.6246  | 0.0103088 | 0.994068 |
| XLOC_014148 | IFNGR2        | chr21:34775201-34852316   | 42.1053   | 42.4086  | 0.0103541 | 0.994279 |
| XLOC_016852 | EIF4E         | chr4:99799606-99851786    | 17.5113   | 17.6378  | 0.0103824 | 0.994116 |
| XLOC_003251 | MRPL23        | chr11:1968501-1977839     | 109.77    | 110.566  | 0.0104268 | 0.994068 |
| XLOC_010176 | C18orf21      | chr18:33552587-33559250   | 20.1156   | 20.2621  | 0.0104694 | 0.994068 |
| XLOC_022217 | ZC3H3         | chr8:144519824-144623620  | 18.7628   | 18.8995  | 0.0104706 | 0.994068 |
| XLOC_011233 | ZNF551        | chr19:58193336-58201169   | 0.892092  | 0.89867  | 0.0105981 | 0.994593 |
| XLOC_000470 | FAM73A        | chr1:78245308-78345225    | 1.05967   | 1.06749  | 0.0106047 | 0.994279 |
| XLOC_017183 | TNPO1         | chr5:72112417-72210215    | 9.37801   | 9.44738  | 0.0106326 | 0.99382  |
| XLOC_009804 | MRPL10        | chr17:45900637-45908907   | 87.4337   | 88.0857  | 0.0107191 | 0.993157 |
| XLOC_015606 | SGOL1         | chr3:20202084-20227919    | 2.7741    | 2.79494  | 0.0107971 | 0.994593 |
| XLOC_021192 | FAM200A       | chr7:99143922-99149757    | 3.3505    | 3.37576  | 0.0108384 | 0.994279 |
| XLOC_002411 | LOC399744     | chr10:38717073-38741081   | 2.10387   | 2.11974  | 0.0108461 | 0.994432 |
| XLOC_015682 | MAP4          | chr3:47892179-48130769    | 22.0536   | 22.2201  | 0.010849  | 0.993578 |
| XLOC_002434 | FAM21C        | chr10:46222647-46288412   | 5.6078    | 5.65029  | 0.0108905 | 0.994068 |
| XLOC_013871 | OVOL2         | chr20:18004795-18038521   | 3.42629   | 3.45234  | 0.0109263 | 0.995078 |
| XLOC_022097 | KIAA1429      | chr8:95500004-95565746    | 5.96683   | 6.01295  | 0.011107  | 0.994068 |
| XLOC_018170 | HLA-E         | chr6:30457182-30461982    | 151.997   | 153.172  | 0.0111157 | 0.99309  |
| XLOC_012538 | DFNB59        | chr2:179059207-179672150  | 1.14304   | 1.15189  | 0.0111216 | 0.997552 |
| XLOC_020520 | CRCP          | chr7:65579804-65619553    | 11.2954   | 11.3831  | 0.0111615 | 0.994058 |
| XLOC_000896 | CACYBP        | chr1:174968570-174981163  | 45.5282   | 45.8889  | 0.0113829 | 0.992823 |
| XLOC_004294 | ATL3          | chr11:63396436-63439083   | 9.44493   | 9.52116  | 0.0115968 | 0.993173 |
| XLOC_021883 | DLC1          | chr8:12940871-13372429    | 22.5025   | 22.6846  | 0.0116235 | 0.993208 |
| XLOC_015688 | SHISA5        | chr3:48509196-48542259    | 96.8762   | 97.6628  | 0.0116674 | 0.99284  |
| XLOC_020846 | LRRC61        | chr7:149944300-150035245  | 41.8113   | 42.1511  | 0.0116762 | 0.994593 |
| XLOC_008320 | JMJD8         | chr16:730114-734439       | 54.6443   | 55.0889  | 0.0116913 | 0.994221 |
| XLOC_000916 | KIAA1614      | chr1:180882312-180915239  | 0.0322423 | 0.032506 | 0.0117539 | 1        |
| XLOC_019031 | MICAL1        | chr6:109765265-109777190  | 17.5555   | 17.6994  | 0.0117735 | 0.993578 |
| XLOC_005685 | ALKBH2        | chr12:109525992-109531293 | 32.5099   | 32.7769  | 0.0117993 | 0.993578 |
| XLOC_015692 | UQCRC1        | chr3:48636431-48647098    | 222.975   | 224.809  | 0.0118183 | 0.992882 |
| XLOC_006482 | TTC8          | chr14:89290977-89344335   | 5.47356   | 5.51867  | 0.0118407 | 0.994017 |
| XLOC_020426 | DKFZP586I1420 | chr7:30409665-30412410    | 0.996373  | 1.00459  | 0.011844  | 0.994734 |
| XLOC_016664 | ACOX3         | chr4:8368008-8442452      | 5.91741   | 5.96633  | 0.0118772 | 0.994058 |
| XLOC_006783 | FBXO33        | chr14:39865576-39901704   | 2.62119   | 2.64291  | 0.0119076 | 0.994116 |
| XLOC_013249 | LOC375295     | chr2:177494308-177502302  | 20.1003   | 20.267   | 0.011916  | 0.993173 |
| XLOC_004234 | OSBP          | chr11:59341870-59383617   | 14.4343   | 14.5543  | 0.0119487 | 0.992312 |
| XLOC_003742 | EED           | chr11:85955805-85989785   | 12.1953   | 12.297   | 0.0119819 | 0.993923 |
| XLOC_009222 | ACE           | chr17:61554421-61575741   | 4.03307   | 4.06672  | 0.0119883 | 0.994204 |
| XLOC_001677 | DPH5          | chr1:101455179-101491362  | 19.5449   | 19.7085  | 0.0120269 | 0.992304 |
| XLOC_011487 | NDUFB7        | chr19:14676889-14682889   | 247.882   | 249.961  | 0.0120526 | 0.993578 |
| XLOC_011353 | GTF2F1        | chr19:6379579-6393291     | 56.7345   | 57.2168  | 0.0122127 | 0.993157 |
| XLOC_022796 | KIAA1161      | chr9:34368906-34376894    | 1.20796   | 1.21824  | 0.0122172 | 0.994734 |
| XLOC_023887 | FGD1          | chrX:54471886-54522599    | 10.2487   | 10.3364  | 0.0122902 | 0.993157 |
| XLOC_021168 | BET1          | chr7:93620999-93633690    | 9.77428   | 9.85813  | 0.0123233 | 0.992823 |
| XLOC_011851 | VRK3          | chr19:50479723-50528805   | 11.6367   | 11.737   | 0.0123836 | 0.993157 |
| XLOC_015661 | LIMD1-AS1     | chr3:45636322-45730374    | 5.51718   | 5.56483  | 0.012406  | 0.995437 |

|             |                   |                           |           |           |           |          |
|-------------|-------------------|---------------------------|-----------|-----------|-----------|----------|
| XLOC_005801 | MPHOSPH8          | chr13:20207787-20247599   | 9.42092   | 9.50239   | 0.0124224 | 0.992312 |
| XLOC_011791 | BBC3              | chr19:47724078-47736023   | 46.7035   | 47.1074   | 0.0124254 | 0.992298 |
| XLOC_020782 | C7orf55,C7orf55-L | chr7:139025104-139112272  | 43.5978   | 43.9786   | 0.012546  | 0.994068 |
| XLOC_005770 | CDK2AP1           | chr12:123745516-123756863 | 63.9655   | 64.5254   | 0.0125733 | 0.992304 |
| XLOC_001064 | MIA3              | chr1:222791443-222841351  | 3.99319   | 4.02823   | 0.0126067 | 0.992304 |
| XLOC_022616 | LAMC3             | chr9:133884503-133968446  | 0.0875163 | 0.0882889 | 0.0126811 | 1        |
| XLOC_002941 | CSTF2T            | chr10:52750910-54073888   | 4.87955   | 4.92305   | 0.0128056 | 0.992304 |
| XLOC_003062 | ALDH18A1          | chr10:97365685-97416567   | 42.0435   | 42.4185   | 0.0128102 | 0.991515 |
| XLOC_007160 | RTF1              | chr15:41709301-41775761   | 13.1677   | 13.2852   | 0.012819  | 0.992304 |
| XLOC_011641 | DPF1              | chr19:38701648-38720317   | 2.53771   | 2.56037   | 0.0128247 | 0.994582 |
| XLOC_017347 | MATR3             | chr5:138609440-138667366  | 41.2913   | 41.6612   | 0.0128678 | 0.992304 |
| XLOC_000383 | CMPK1             | chr1:47799468-47844511    | 26.9932   | 27.2353   | 0.0128796 | 0.992304 |
| XLOC_017128 | LOC257396         | chr5:52405686-52410952    | 1.57447   | 1.58863   | 0.0129112 | 0.994582 |
| XLOC_004871 | SP1               | chr12:53773978-53810226   | 7.51857   | 7.58621   | 0.0129218 | 0.992298 |
| XLOC_000334 | CDC20             | chr1:43824625-43828873    | 128.812   | 129.982   | 0.0130479 | 0.992304 |
| XLOC_007897 | PAQR4             | chr16:3019341-3030540     | 25.7983   | 26.0329   | 0.0130583 | 0.994734 |
| XLOC_022440 | C9orf89           | chr9:95858449-95875565    | 65.7878   | 66.3904   | 0.0131539 | 0.992304 |
| XLOC_021089 | GTF2IRD1P1        | chr7:66205642-66309813    | 9.68222   | 9.77107   | 0.0131785 | 0.994068 |
| XLOC_004347 | CCDC87            | chr11:66357639-66360554   | 0.106846  | 0.107827  | 0.0131873 | 1        |
| XLOC_000248 | KHDRBS1           | chr1:32479294-32526460    | 87.1206   | 87.9212   | 0.0131975 | 0.992298 |
| XLOC_010538 | STXBP2            | chr19:7701986-7712760     | 58.6757   | 59.2159   | 0.0132223 | 0.99209  |
| XLOC_013650 | RALGAPB           | chr20:37101485-37207504   | 3.21363   | 3.24328   | 0.0132491 | 0.992304 |
| XLOC_016085 | PARL              | chr3:183547172-183602693  | 46.8315   | 47.2647   | 0.0132854 | 0.991333 |
| XLOC_015714 | GPX1              | chr3:49394608-49395791    | 708.364   | 714.924   | 0.0132987 | 0.992304 |
| XLOC_009228 | DDX42             | chr17:61851566-61896677   | 17.268    | 17.4282   | 0.0133277 | 0.991515 |
| XLOC_005908 | ALG11,UTP14C      | chr13:52586522-52607736   | 1.90897   | 1.92699   | 0.0135545 | 0.994068 |
| XLOC_010468 | SPPL2B            | chr19:2328628-2355100     | 6.63958   | 6.70231   | 0.0135657 | 0.993173 |
| XLOC_016384 | THAP6             | chr4:76439653-76455236    | 1.81411   | 1.83134   | 0.0136386 | 0.993578 |
| XLOC_017016 | CLDN22            | chr4:184020462-184241929  | 1.31349   | 1.32596   | 0.0136418 | 0.994734 |
| XLOC_015491 | SENP2             | chr3:185304030-185348885  | 6.74879   | 6.81304   | 0.0136697 | 0.991776 |
| XLOC_017287 | SNX2              | chr5:122110749-122165802  | 25.5145   | 25.7583   | 0.01372   | 0.992194 |
| XLOC_011958 | TNNI3             | chr19:55663135-55669100   | 9.22865   | 9.31689   | 0.013728  | 0.994068 |
| XLOC_010129 | SEH1L             | chr18:12947982-12987536   | 23.5865   | 23.8132   | 0.0137999 | 0.991446 |
| XLOC_004163 | CKAP5             | chr11:46765083-46867859   | 14.147    | 14.2836   | 0.0138603 | 0.991175 |
| XLOC_007417 | LOC100507217      | chr15:93426072-93441977   | 35.4235   | 35.7657   | 0.0138702 | 0.991446 |
| XLOC_017220 | ZCCHC9            | chr5:80256507-81047072    | 21.0408   | 21.245    | 0.0139368 | 0.994068 |
| XLOC_000140 | ARHGEF10L         | chr1:17866329-18024370    | 4.9642    | 5.0124    | 0.0139392 | 0.992304 |
| XLOC_006125 | KPNA3             | chr13:50273442-50367057   | 6.95438   | 7.02219   | 0.0140003 | 0.991446 |
| XLOC_015749 | DUSP7             | chr3:52082936-52090461    | 28.5076   | 28.7874   | 0.0140938 | 0.991167 |
| XLOC_005072 | C12orf75          | chr12:105724413-105765296 | 23.3859   | 23.6164   | 0.0141531 | 0.992298 |
| XLOC_021239 | NAPEPLD           | chr7:102715327-102789569  | 2.13747   | 2.15857   | 0.0141756 | 0.996421 |
| XLOC_017917 | GEMIN5            | chr5:154266975-154317776  | 5.57477   | 5.62986   | 0.0141865 | 0.991637 |
| XLOC_006327 | PAX9              | chr14:37126772-37147011   | 1.60034   | 1.61624   | 0.0142673 | 0.994068 |
| XLOC_017319 | LEAP2             | chr5:132209357-132210582  | 0.505405  | 0.510431  | 0.014274  | 0.992304 |
| XLOC_013132 | ERCC3             | chr2:128014865-128051752  | 21.9566   | 22.1753   | 0.0143031 | 0.991175 |
| XLOC_010222 | PMAIP1            | chr18:57567191-57571538   | 10.5991   | 10.7051   | 0.0143532 | 0.991637 |
| XLOC_011691 | EXOSC5            | chr19:41892275-41903256   | 138.306   | 139.694   | 0.0144063 | 0.991175 |
| XLOC_000928 | SMG7              | chr1:183441505-183523328  | 8.17526   | 8.25754   | 0.0144489 | 0.991158 |
| XLOC_005691 | GLTP              | chr12:110288747-110318293 | 38.9266   | 39.3185   | 0.0144509 | 0.991175 |

|             |              |                          |          |          |           |          |
|-------------|--------------|--------------------------|----------|----------|-----------|----------|
| XLOC_021408 | PRKAG2       | chr7:151253200-151576308 | 19.8228  | 20.0237  | 0.0145471 | 0.992304 |
| XLOC_014560 | TOMM22       | chr22:39077953-39080766  | 89.2859  | 90.191   | 0.014551  | 0.99121  |
| XLOC_014086 | UCKL1        | chr20:62571181-62601223  | 30.6006  | 30.911   | 0.0145611 | 0.991175 |
| XLOC_008817 | TMEM102      | chr17:7338761-7340998    | 26.3302  | 26.5976  | 0.0145778 | 0.991515 |
| XLOC_016186 | MSANTD1      | chr4:3250766-3258342     | 0.143061 | 0.144515 | 0.0145854 | 1        |
| XLOC_006297 | RNF31        | chr14:24616658-24629870  | 10.5009  | 10.6079  | 0.0146279 | 0.991324 |
| XLOC_002520 | CHCHD1       | chr10:75541807-75543406  | 70.1858  | 70.908   | 0.0147697 | 0.991062 |
| XLOC_014864 | RRP7B        | chr22:42949924-42978017  | 4.48055  | 4.52687  | 0.0148391 | 0.992823 |
| XLOC_015575 | VGLL4        | chr3:11314009-11762220   | 9.01425  | 9.10771  | 0.0148807 | 0.994116 |
| XLOC_003308 | ZNF215       | chr11:6947653-6979278    | 1.7142   | 1.73198  | 0.0148894 | 0.993157 |
| XLOC_002799 | ASB13        | chr10:5680819-5708558    | 17.7957  | 17.9806  | 0.0149103 | 0.991167 |
| XLOC_023332 | ATP6AP2      | chrX:40440215-40465888   | 34.4418  | 34.7998  | 0.0149178 | 0.991167 |
| XLOC_020671 | SH2B2        | chr7:101928404-101962178 | 15.6995  | 15.8629  | 0.0149395 | 0.992304 |
| XLOC_001139 | DESI2        | chr1:244816351-244872334 | 14.7744  | 14.9294  | 0.015064  | 0.990042 |
| XLOC_013231 | DLX2         | chr2:172964165-172967478 | 1.75868  | 1.77717  | 0.015084  | 0.994068 |
| XLOC_019144 | ZBTB2        | chr6:151685249-151712677 | 4.81018  | 4.86105  | 0.0151753 | 0.991446 |
| XLOC_021584 | MCM4         | chr8:48872762-48890719   | 35.3524  | 35.7266  | 0.0151901 | 0.989857 |
| XLOC_012287 | RMND5A       | chr2:86730552-87005164   | 4.7219   | 4.77199  | 0.0152233 | 0.994582 |
| XLOC_015378 | PLS1         | chr3:142315228-142432505 | 2.95248  | 2.98382  | 0.0152307 | 0.99209  |
| XLOC_004032 | APBB1        | chr11:6416354-6440644    | 15.8499  | 16.0182  | 0.0152339 | 0.991446 |
| XLOC_010189 | HAUS1        | chr18:43684297-43708299  | 37.0407  | 37.4388  | 0.0154259 | 0.990421 |
| XLOC_000562 | CELSR2       | chr1:109792640-109818378 | 2.2228   | 2.24674  | 0.0154539 | 0.99142  |
| XLOC_016304 | SLAIN2       | chr4:48343612-48428215   | 3.22333  | 3.25807  | 0.0154641 | 0.99121  |
| XLOC_021521 | CDCA2        | chr8:25316512-25365425   | 1.93482  | 1.95567  | 0.0154653 | 0.992882 |
| XLOC_010919 | ZNF227       | chr19:44716690-44741421  | 3.65593  | 3.69538  | 0.0154858 | 0.992298 |
| XLOC_015067 | EXOSC7       | chr3:45017740-45054158   | 70.6514  | 71.4149  | 0.0155055 | 0.991026 |
| XLOC_012290 | LINC00152    | chr2:87754973-87821030   | 494.134  | 499.487  | 0.0155449 | 0.989954 |
| XLOC_021020 | FAM183B      | chr7:38724945-38726689   | 0.443657 | 0.448475 | 0.015585  | 0.994313 |
| XLOC_022602 | PPP2R4       | chr9:131873227-131911225 | 163.898  | 165.688  | 0.015669  | 0.990667 |
| XLOC_008532 | ZNF668       | chr16:31072163-31085641  | 8.95223  | 9.05039  | 0.0157319 | 0.992298 |
| XLOC_004743 | LOC100506314 | chr12:13127798-13153243  | 0.526567 | 0.532363 | 0.0157931 | 0.877848 |
| XLOC_023444 | YIPF6        | chrX:67718623-67757127   | 4.89287  | 4.94689  | 0.0158406 | 0.991167 |
| XLOC_004983 | FRS2         | chr12:69864128-69973562  | 1.9325   | 1.95385  | 0.0158455 | 0.992194 |
| XLOC_016629 | SPON2        | chr4:1160720-1202750     | 0.428136 | 0.432875 | 0.0158815 | 0.995202 |
| XLOC_013943 | UQCC         | chr20:33890368-33999945  | 20.1575  | 20.3813  | 0.0159284 | 0.98968  |
| XLOC_015535 | PIGX         | chr3:196439244-196462876 | 4.47734  | 4.52741  | 0.0160435 | 0.99128  |
| XLOC_014499 | UQCR10       | chr22:30163357-30166402  | 82.4037  | 83.3276  | 0.0160855 | 0.990104 |
| XLOC_009280 | MRPS7        | chr17:73232693-73267311  | 38.1014  | 38.5304  | 0.0161533 | 0.994058 |
| XLOC_015644 | ULK4         | chr3:41288089-42003660   | 0.322702 | 0.326349 | 0.0162146 | 1        |
| XLOC_017136 | SKIV2L2      | chr5:54603575-54830873   | 12.3331  | 12.4734  | 0.01632   | 0.990711 |
| XLOC_012403 | STEAP3       | chr2:119981383-120023227 | 14.8364  | 15.0052  | 0.0163222 | 0.990421 |
| XLOC_017966 | GPRIN1       | chr5:176022802-176037131 | 5.23197  | 5.29177  | 0.0163941 | 0.991324 |
| XLOC_004125 | KIF18A       | chr11:28042162-28129746  | 1.41185  | 1.42801  | 0.0164221 | 0.992312 |
| XLOC_008043 | INO80E       | chr16:30007530-30022401  | 59.6575  | 60.3425  | 0.0164719 | 0.991515 |
| XLOC_021808 | ZNF7         | chr8:146052902-146068606 | 18.0725  | 18.2802  | 0.016488  | 0.98938  |
| XLOC_009142 | CDK5RAP3     | chr17:46048428-46059147  | 30.962   | 31.3179  | 0.0164931 | 0.989451 |
| XLOC_022518 | COL27A1      | chr9:116918230-117072975 | 4.39814  | 4.44872  | 0.0164975 | 0.991167 |
| XLOC_012723 | SH3BP4       | chr2:235860627-235964358 | 3.60215  | 3.64365  | 0.0165258 | 0.991167 |
| XLOC_003346 | C11orf58     | chr11:16760147-16779901  | 25.8597  | 26.1592  | 0.0166167 | 0.98938  |

|             |               |                           |           |           |           |          |
|-------------|---------------|---------------------------|-----------|-----------|-----------|----------|
| XLOC_010123 | IMPA2         | chr18:11981426-12030885   | 27.0557   | 27.3695   | 0.0166395 | 0.990104 |
| XLOC_016328 | PAICS         | chr4:57301914-57327534    | 97.1363   | 98.2659   | 0.0166808 | 0.988761 |
| XLOC_015763 | NEK4          | chr3:52744795-52804965    | 3.1377    | 3.17419   | 0.016681  | 0.991167 |
| XLOC_000321 | CCDC30        | chr1:43000559-43120335    | 0.0455955 | 0.046126  | 0.0166877 | 1        |
| XLOC_000410 | MROH7,TTC4    | chr1:55107426-55208328    | 14.6608   | 14.8315   | 0.0167007 | 0.989274 |
| XLOC_007262 | SMAD6         | chr15:66994673-67074337   | 0.804254  | 0.813642  | 0.0167429 | 0.994961 |
| XLOC_022169 | KIAA0196      | chr8:126036502-126104061  | 11.3824   | 11.5169   | 0.0169403 | 0.988974 |
| XLOC_003088 | DNMBP         | chr10:101635333-101769676 | 1.89095   | 1.91347   | 0.0170746 | 0.990781 |
| XLOC_012279 | USP39         | chr2:85829964-85876407    | 29.487    | 29.8384   | 0.0170951 | 0.991341 |
| XLOC_003436 | ZNF408        | chr11:46722316-46727466   | 10.2898   | 10.4125   | 0.0171031 | 0.990368 |
| XLOC_012261 | POLE4         | chr2:75185774-75196859    | 83.1189   | 84.1134   | 0.0171604 | 0.988788 |
| XLOC_020682 | PMPCB         | chr7:102937872-102985320  | 27.1758   | 27.5011   | 0.0171631 | 0.991175 |
| XLOC_022969 | C9orf156      | chr9:100666771-100684852  | 5.77555   | 5.84489   | 0.0172162 | 0.991637 |
| XLOC_023200 | NSMF          | chr9:140342022-140353786  | 101.032   | 102.248   | 0.0172659 | 0.988052 |
| XLOC_001213 | TMEM52        | chr1:1849028-1850740      | 39.8987   | 40.3814   | 0.0173475 | 0.98938  |
| XLOC_008671 | LOC283922     | chr16:74366303-74402153   | 0.438234  | 0.443571  | 0.017463  | 0.995723 |
| XLOC_008888 | RAI1          | chr17:17584786-17740325   | 3.97702   | 4.02559   | 0.0175129 | 0.994593 |
| XLOC_000880 | TOP1P1        | chr1:171283485-171311223  | 0.0932416 | 0.0943817 | 0.0175331 | 1        |
| XLOC_004441 | CCDC90B       | chr11:82972501-82997377   | 22.089    | 22.3606   | 0.0176316 | 0.98938  |
| XLOC_012404 | DBI           | chr2:120124503-120130122  | 167.01    | 169.074   | 0.0177244 | 0.987173 |
| XLOC_014968 | CAPN7         | chr3:15247732-15294423    | 2.9659    | 3.00283   | 0.0178549 | 0.989716 |
| XLOC_001218 | PEX10         | chr1:2323213-2344010      | 20.1827   | 20.4344   | 0.0178757 | 0.994734 |
| XLOC_006469 | AHSA1         | chr14:77924372-77935815   | 150.94    | 152.829   | 0.0179407 | 0.988327 |
| XLOC_013690 | UBE2C         | chr20:44441254-44445596   | 275.879   | 279.348   | 0.0180255 | 0.987377 |
| XLOC_005124 | RNFT2         | chr12:117176095-117291436 | 1.85345   | 1.87676   | 0.0180287 | 0.992304 |
| XLOC_005592 | KRR1          | chr12:75874512-75905418   | 16.685    | 16.8954   | 0.0180763 | 0.992304 |
| XLOC_021160 | CDK6          | chr7:92234234-92465941    | 2.23094   | 2.25909   | 0.0180884 | 0.987519 |
| XLOC_008332 | TSR3          | chr16:1383605-1401873     | 104.235   | 105.551   | 0.0181013 | 0.987786 |
| XLOC_012426 | IMP4          | chr2:131100488-131104197  | 127.411   | 129.02    | 0.0181067 | 0.987173 |
| XLOC_019155 | TMEM242       | chr6:157710053-157745253  | 3.56336   | 3.60868   | 0.0182321 | 0.989371 |
| XLOC_002800 | GDI2          | chr10:5807185-5855512     | 169.972   | 172.155   | 0.0184074 | 0.987173 |
| XLOC_023763 | FANCB         | chrX:14861528-14891184    | 0.370844  | 0.375613  | 0.0184352 | 0.994068 |
| XLOC_018606 | FAM120B       | chr6:170615843-170714237  | 3.33444   | 3.37738   | 0.0184568 | 0.991167 |
| XLOC_001232 | C1orf174      | chr1:3805696-3816857      | 14.8618   | 15.0535   | 0.0184851 | 0.987786 |
| XLOC_005925 | TDRD3         | chr13:60970590-61148013   | 4.58402   | 4.64355   | 0.0186125 | 0.98938  |
| XLOC_021994 | LYPLA1        | chr8:54958937-55014577    | 38.5175   | 39.0224   | 0.0187899 | 0.986782 |
| XLOC_000960 | CAMSAP2       | chr1:200708685-200829831  | 2.2149    | 2.24398   | 0.0188163 | 0.988734 |
| XLOC_010831 | KCNK6         | chr19:38810483-38819649   | 11.5126   | 11.6642   | 0.0188724 | 0.98735  |
| XLOC_001105 | SPRTN         | chr1:231473681-231490769  | 1.66983   | 1.69188   | 0.0189228 | 0.991429 |
| XLOC_013116 | SLC35F5       | chr2:114471932-114514400  | 4.51469   | 4.57434   | 0.0189358 | 0.989716 |
| XLOC_011322 | MAP2K2        | chr19:4090319-4124126     | 166.612   | 168.816   | 0.0189558 | 0.985975 |
| XLOC_021854 | MFHAS1        | chr8:8641998-8751131      | 1.7795    | 1.80305   | 0.0189639 | 0.991515 |
| XLOC_018267 | KCTD20        | chr6:36358328-36458315    | 5.65863   | 5.73407   | 0.0191067 | 0.987696 |
| XLOC_002286 | ZNF670,ZNF695 | chr1:247108848-247242115  | 4.69745   | 4.76028   | 0.0191698 | 0.993182 |
| XLOC_002900 | C10orf25      | chr10:45493145-45500777   | 0.473958  | 0.480303  | 0.019187  | 0.996948 |
| XLOC_007988 | EEF2K         | chr16:22217591-22300066   | 5.00235   | 5.06934   | 0.019192  | 0.986681 |
| XLOC_016471 | ALPK1         | chr4:113218498-113363764  | 1.50249   | 1.52263   | 0.0192145 | 0.990667 |
| XLOC_018934 | GCLC          | chr6:53362139-53409927    | 6.10653   | 6.18859   | 0.0192588 | 0.986782 |
| XLOC_008067 | STX4          | chr16:31044415-31051488   | 48.8934   | 49.5543   | 0.0193722 | 0.985692 |

|             |           |                           |          |          |           |          |
|-------------|-----------|---------------------------|----------|----------|-----------|----------|
| XLOC_016150 | MFI2      | chr3:196728611-196756687  | 33.5427  | 33.9965  | 0.0193863 | 0.987173 |
| XLOC_020399 | FAM221A   | chr7:23719748-23742269    | 5.37445  | 5.44732  | 0.0194286 | 0.991446 |
| XLOC_009414 | MYBBP1A   | chr17:4402128-4458681     | 27.4015  | 27.7749  | 0.0195249 | 0.986862 |
| XLOC_015664 | FYCO1     | chr3:45959390-46037316    | 2.73415  | 2.77147  | 0.0195558 | 0.986916 |
| XLOC_000860 | DCAF6     | chr1:167885912-168045083  | 5.1669   | 5.2377   | 0.0196355 | 0.994068 |
| XLOC_017148 | KIF2A     | chr5:61601988-61683011    | 4.99442  | 5.06298  | 0.019668  | 0.987173 |
| XLOC_002386 | GPR158    | chr10:25447000-25891157   | 0.165847 | 0.168136 | 0.0197714 | 1        |
| XLOC_007319 | FBXO22    | chr15:76196199-76227608   | 7.4981   | 7.60185  | 0.0198253 | 0.991515 |
| XLOC_006738 | RABGGTA   | chr14:24734743-24740833   | 14.9724  | 15.1805  | 0.0199133 | 0.987159 |
| XLOC_010451 | EFNA2     | chr19:1286152-1301429     | 4.77106  | 4.83806  | 0.0201182 | 0.991167 |
| XLOC_016842 | PPM1K     | chr4:89178760-89205983    | 2.44141  | 2.4757   | 0.020122  | 0.986782 |
| XLOC_017300 | ISOC1     | chr5:128430441-128449719  | 7.67211  | 7.7804   | 0.02022   | 0.988549 |
| XLOC_016183 | NOP14-AS1 | chr4:2937277-2965118      | 3.17343  | 3.21837  | 0.0202887 | 0.994734 |
| XLOC_013156 | MZT2A     | chr2:132202795-132360468  | 364.78   | 369.949  | 0.0203011 | 0.98938  |
| XLOC_016524 | MMAA      | chr4:146540539-146581187  | 0.395885 | 0.401568 | 0.0205626 | 0.992298 |
| XLOC_021490 | ATP6V1B2  | chr8:20054703-20079207    | 32.4756  | 32.9464  | 0.0207644 | 0.984084 |
| XLOC_003515 | STX3      | chr11:59522531-59573355   | 13.2745  | 13.4674  | 0.0208212 | 0.98551  |
| XLOC_015457 | MFN1      | chr3:179065479-179111008  | 5.67601  | 5.75861  | 0.0208446 | 0.986181 |
| XLOC_004915 | CDK2      | chr12:56360555-56366568   | 29.6365  | 30.068   | 0.020854  | 0.984084 |
| XLOC_009557 | USP22     | chr17:20902905-20946352   | 37.1264  | 37.6671  | 0.0208582 | 0.984547 |
| XLOC_003824 | TTC12     | chr11:113185250-113237114 | 7.44291  | 7.5516   | 0.0209143 | 0.986998 |
| XLOC_008914 | SPECC1    | chr17:19912648-20218072   | 7.04245  | 7.14577  | 0.0210111 | 0.984084 |
| XLOC_013269 | NCKAP1    | chr2:183789604-183903229  | 25.8587  | 26.2381  | 0.0210138 | 0.983736 |
| XLOC_009101 | C17orf53  | chr17:42219273-42239844   | 4.50938  | 4.57571  | 0.0210691 | 0.987848 |
| XLOC_010727 | ZNF738    | chr19:21541734-21571384   | 0.772829 | 0.784212 | 0.0210946 | 0.987159 |
| XLOC_010626 | C19orf53  | chr19:13885256-13889586   | 138.349  | 140.388  | 0.0211135 | 0.98338  |
| XLOC_008389 | TRAP1     | chr16:3702939-3767598     | 182.893  | 185.612  | 0.0212869 | 0.984445 |
| XLOC_023619 | PHF6      | chrX:133507341-133562822  | 3.81598  | 3.87295  | 0.0213793 | 0.985712 |
| XLOC_012886 | COX7A2L   | chr2:42577644-42588356    | 116.137  | 117.873  | 0.0214004 | 0.983529 |
| XLOC_015325 | COPG1     | chr3:128968452-128996616  | 36.7019  | 37.2505  | 0.0214044 | 0.984084 |
| XLOC_004874 | PCBP2     | chr12:53845885-53893444   | 198.567  | 201.537  | 0.0214176 | 0.984941 |
| XLOC_005045 | SNORA53   | chr12:98987402-98995778   | 2.49864  | 2.53606  | 0.021445  | 0.994204 |
| XLOC_010416 | MBP       | chr18:74690788-74844774   | 3.24663  | 3.29533  | 0.021482  | 0.987173 |
| XLOC_001037 | PPP2R5A   | chr1:212458878-212535205  | 10.6246  | 10.784   | 0.0214926 | 0.983738 |
| XLOC_023519 | ARMCX4    | chrX:100673250-100790975  | 0.348304 | 0.35355  | 0.0215691 | 1        |
| XLOC_008438 | ABCC6     | chr16:16243421-16317328   | 1.27565  | 1.29486  | 0.0215707 | 0.994507 |
| XLOC_020519 | ASL       | chr7:65540775-65558329    | 41.1833  | 41.8053  | 0.0216268 | 0.983334 |
| XLOC_017172 | GTF2H2B   | chr5:69711196-69746189    | 1.97054  | 2.00034  | 0.0216534 | 0.987159 |
| XLOC_006916 | SNW1      | chr14:78183943-78236085   | 32.1278  | 32.6137  | 0.0216551 | 0.983243 |
| XLOC_009781 | GJC1      | chr17:42875815-42908179   | 6.78726  | 6.88997  | 0.0216689 | 0.982913 |
| XLOC_006654 | INF2      | chr14:105155942-105185947 | 36.5245  | 37.0778  | 0.0216907 | 0.987173 |
| XLOC_020660 | TRIP6     | chr7:100464949-100471076  | 290.966  | 295.39   | 0.0217693 | 0.983243 |
| XLOC_005750 | ANAPC5    | chr12:121746047-121792012 | 47.5056  | 48.2282  | 0.0217803 | 0.983529 |
| XLOC_003674 | IGHMBP2   | chr11:68671318-68708069   | 6.15651  | 6.2504   | 0.0218363 | 0.985956 |
| XLOC_021664 | RIPK2     | chr8:90769974-90803292    | 40.8017  | 41.4245  | 0.0218551 | 0.982866 |
| XLOC_013487 | STK35     | chr20:2082527-2129198     | 6.71278  | 6.81558  | 0.0219245 | 0.984237 |
| XLOC_020631 | ZKSCAN5   | chr7:99102272-99131445    | 4.52843  | 4.59779  | 0.0219272 | 0.985492 |
| XLOC_012172 | TTC7A     | chr2:47129008-47303275    | 3.06962  | 3.11671  | 0.0219636 | 0.995019 |
| XLOC_015966 | STAG1     | chr3:136055998-136471245  | 3.09995  | 3.14783  | 0.0221113 | 0.985692 |



|             |              |                           |           |           |           |          |
|-------------|--------------|---------------------------|-----------|-----------|-----------|----------|
| XLOC_009413 | UBE2G1       | chr17:4172511-4269969     | 10.9093   | 11.0779   | 0.0221286 | 0.983334 |
| XLOC_012464 | EPC2         | chr2:149402559-149545136  | 2.65514   | 2.69628   | 0.0221783 | 0.986978 |
| XLOC_015096 | ATRIP,TREX1  | chr3:48488113-48509044    | 5.52311   | 5.60889   | 0.0222359 | 0.986243 |
| XLOC_021661 | WWP1         | chr8:87354993-87480178    | 6.73256   | 6.83734   | 0.0222799 | 0.983443 |
| XLOC_004656 | TEAD4        | chr12:3068477-3149842     | 43.2986   | 43.9812   | 0.0225666 | 0.983243 |
| XLOC_016737 | OCIAD2       | chr4:48887404-48908815    | 258.888   | 262.97    | 0.0225685 | 0.982133 |
| XLOC_003667 | ALDH3B1      | chr11:67776047-67796743   | 0.0902604 | 0.0916841 | 0.0225782 | 1        |
| XLOC_013714 | SNAI1        | chr20:48599512-48605420   | 10.2093   | 10.3704   | 0.022596  | 0.985712 |
| XLOC_016928 | PGRMC2       | chr4:129190391-129209984  | 16.2657   | 16.5226   | 0.0226046 | 0.982229 |
| XLOC_008656 | VAC14        | chr16:70721341-70835061   | 29.7948   | 30.2662   | 0.0226498 | 0.98225  |
| XLOC_003900 | EI24         | chr11:125439297-125454575 | 47.1113   | 47.8611   | 0.0227818 | 0.98206  |
| XLOC_022132 | SLC25A32     | chr8:104410865-104455680  | 16.4755   | 16.7391   | 0.0229065 | 0.992882 |
| XLOC_018773 | LSM2         | chr6:31765168-31774761    | 109.495   | 111.248   | 0.022915  | 0.982229 |
| XLOC_013009 | SUCLG1       | chr2:84650646-84686586    | 45.9723   | 46.7096   | 0.0229534 | 0.98206  |
| XLOC_016088 | CAMK2N2      | chr3:183967444-184010819  | 55.6669   | 56.5599   | 0.0229598 | 0.990192 |
| XLOC_013260 | SESTD1       | chr2:179966418-180129350  | 0.388085  | 0.394312  | 0.0229656 | 0.98938  |
| XLOC_023099 | GOLGA2       | chr9:131018107-131038268  | 22.3921   | 22.7521   | 0.0230063 | 0.982377 |
| XLOC_017954 | LOC100268168 | chr5:172381785-172386371  | 3.84083   | 3.90262   | 0.0230236 | 0.990711 |
| XLOC_023393 | USP27X       | chrX:49644469-49647168    | 1.05091   | 1.06782   | 0.0230296 | 0.991175 |
| XLOC_018580 | WTAP         | chr6:160148029-160177352  | 35.0564   | 35.6211   | 0.0230547 | 0.982742 |
| XLOC_005865 | WBP4         | chr13:41635696-41658139   | 4.06471   | 4.1303    | 0.0230927 | 0.985175 |
| XLOC_005489 | MAP3K12      | chr12:53845885-53893444   | 7.32785   | 7.44649   | 0.0231715 | 0.952184 |
| XLOC_021221 | EPHB4        | chr7:100400186-100425143  | 32.8682   | 33.4028   | 0.0232779 | 0.982229 |
| XLOC_008263 | KLHL36       | chr16:84682130-84695916   | 10.837    | 11.0139   | 0.0233632 | 0.98495  |
| XLOC_006902 | C14orf1      | chr14:76117232-76127538   | 30.0756   | 30.5667   | 0.0233675 | 0.982714 |
| XLOC_003531 | CCDC86       | chr11:60609428-60623444   | 44.644    | 45.3741   | 0.0234034 | 0.982623 |
| XLOC_000203 | SH3BGRL3     | chr1:26606212-26608013    | 283.033   | 287.671   | 0.02345   | 0.98206  |
| XLOC_003208 | ECHS1        | chr10:135175986-135186908 | 147.98    | 150.406   | 0.0234615 | 0.981543 |
| XLOC_021703 | ATP6V1C1     | chr8:104033247-104085285  | 14.8042   | 15.0478   | 0.0235443 | 0.981543 |
| XLOC_017346 | CTNNA1       | chr5:138089106-138270723  | 55.6393   | 56.5549   | 0.0235468 | 0.981543 |
| XLOC_001595 | SERBP1       | chr1:67873492-67896123    | 40.5127   | 41.1821   | 0.0236425 | 0.981975 |
| XLOC_010463 | IZUMO4       | chr19:2096867-2099583     | 0.30339   | 0.308407  | 0.0236617 | 1        |
| XLOC_020905 | SNX8         | chr7:2291404-2354099      | 16.2301   | 16.4985   | 0.0236665 | 0.981543 |
| XLOC_002502 | PALD1        | chr10:72238563-72328206   | 10.0485   | 10.2152   | 0.0237274 | 0.981735 |
| XLOC_010226 | ZCCHC2       | chr18:60190657-60245818   | 1.28382   | 1.30514   | 0.0237596 | 0.988327 |
| XLOC_012719 | DGKD         | chr2:234263152-234380743  | 4.23809   | 4.30854   | 0.0237847 | 0.98338  |
| XLOC_001819 | MRPL9        | chr1:151732122-151743806  | 70.3693   | 71.5391   | 0.0237863 | 0.981543 |
| XLOC_014483 | SRRD         | chr22:26879849-26908437   | 15.9254   | 16.1903   | 0.0238    | 0.99114  |
| XLOC_009512 | PMP22        | chr17:15133095-15168644   | 32.7556   | 33.3008   | 0.0238118 | 0.982229 |
| XLOC_021952 | TTI2         | chr8:33342684-33370703    | 5.78036   | 5.87684   | 0.0238811 | 0.992304 |
| XLOC_001871 | C1orf43      | chr1:154179182-154243329  | 152.596   | 155.144   | 0.0238916 | 0.985184 |
| XLOC_022259 | KANK1        | chr9:470293-746106        | 2.30054   | 2.33913   | 0.0239982 | 0.984602 |
| XLOC_005170 | TMED2        | chr12:124069075-124082688 | 92.9666   | 94.5287   | 0.0240384 | 0.981441 |
| XLOC_013039 | MRPS5        | chr2:95752951-95787754    | 36.8249   | 37.4437   | 0.0240415 | 0.981543 |
| XLOC_017113 | CARD6        | chr5:40841409-40855456    | 1.15723   | 1.17668   | 0.024051  | 0.986998 |
| XLOC_009386 | SMG6         | chr17:1963132-2207069     | 11.152    | 11.34     | 0.0241182 | 0.981975 |
| XLOC_006712 | C14orf93     | chr14:23456109-23479360   | 6.18609   | 6.29085   | 0.0242266 | 0.984602 |
| XLOC_012731 | RAMP1        | chr2:238768186-238820755  | 44.9234   | 45.6845   | 0.0242359 | 0.982866 |
| XLOC_016879 | INTS12       | chr4:106603784-106629881  | 12.8309   | 13.0489   | 0.024297  | 0.983243 |

|             |            |                           |          |          |           |          |
|-------------|------------|---------------------------|----------|----------|-----------|----------|
| XLOC_021268 | DOCK4      | chr7:111366163-111846462  | 0.408551 | 0.415511 | 0.0243698 | 0.989716 |
| XLOC_003116 | ARL3       | chr10:104433483-104474190 | 5.73007  | 5.82798  | 0.0244441 | 0.98225  |
| XLOC_009607 | C17orf75   | chr17:30655459-30669228   | 2.27478  | 2.31366  | 0.0244517 | 0.985492 |
| XLOC_018256 | PPARD      | chr6:35310334-35395968    | 12.1379  | 12.3471  | 0.0246461 | 0.98206  |
| XLOC_011706 | PAFAH1B3   | chr19:42801184-42814973   | 102.193  | 103.959  | 0.0247132 | 0.98225  |
| XLOC_010380 | FECH       | chr18:55212072-55253969   | 1.86361  | 1.89584  | 0.0247349 | 0.984084 |
| XLOC_015969 | DBR1       | chr3:137879829-137893791  | 4.90974  | 4.99477  | 0.0247718 | 0.983664 |
| XLOC_021614 | MTFR1      | chr8:66556887-66622798    | 13.7159  | 13.9544  | 0.0248763 | 0.981543 |
| XLOC_008598 | CNOT1      | chr16:58549382-58663790   | 15.6604  | 15.934   | 0.0249931 | 0.981441 |
| XLOC_020897 | ZFAND2A    | chr7:1192542-1199855      | 17.2426  | 17.5451  | 0.0250873 | 0.984455 |
| XLOC_001402 | MECR       | chr1:29519384-29557454    | 16.184   | 16.4681  | 0.0251004 | 0.981441 |
| XLOC_008038 | MVP_PAGR1  | chr16:29827527-29859360   | 27.6878  | 28.1741  | 0.025123  | 0.981798 |
| XLOC_012750 | PPP1R7     | chr2:242089901-242122439  | 56.7932  | 57.793   | 0.0251761 | 0.981441 |
| XLOC_001003 | FAM72A     | chr1:206138910-206155074  | 1.03196  | 1.0502   | 0.0252804 | 0.991053 |
| XLOC_001051 | KCTD3      | chr1:215740734-215795149  | 4.60412  | 4.68562  | 0.0253141 | 0.982229 |
| XLOC_006379 | DAAM1      | chr14:59655380-59838123   | 0.507435 | 0.516421 | 0.025324  | 0.989715 |
| XLOC_003124 | SH3PXD2A   | chr10:105353783-105615164 | 1.2094   | 1.23087  | 0.0253794 | 0.983529 |
| XLOC_001527 | ATPAF1     | chr1:47100710-47134099    | 25.0487  | 25.4933  | 0.0253801 | 0.981441 |
| XLOC_001429 | TMEM54     | chr1:33352097-33366953    | 142.645  | 145.181  | 0.0254184 | 0.981441 |
| XLOC_020961 | IGF2BP3    | chr7:23349827-23509995    | 6.17885  | 6.28878  | 0.0254407 | 0.981659 |
| XLOC_003503 | CNTF_ZFP91 | chr11:58346586-58393205   | 6.47231  | 6.58764  | 0.0254815 | 0.981543 |
| XLOC_020681 | ARMC10     | chr7:102715327-102789569  | 36.9421  | 37.6037  | 0.0256122 | 0.981602 |
| XLOC_004265 | GANAB      | chr11:62392297-62414104   | 87.8723  | 89.4476  | 0.0256336 | 0.981441 |
| XLOC_013505 | ATRN       | chr20:3451664-3631769     | 3.55694  | 3.6207   | 0.0256345 | 0.982866 |
| XLOC_002858 | YME1L1     | chr10:27399039-27443349   | 24.974   | 25.4218  | 0.0256386 | 0.981441 |
| XLOC_004476 | SESN3      | chr11:94898676-94965705   | 0.116138 | 0.118229 | 0.0257495 | 1        |
| XLOC_010962 | ARHGAP35   | chr19:47421932-47508333   | 4.02819  | 4.10073  | 0.025752  | 0.981441 |
| XLOC_023835 | UXT        | chrX:47511190-47519776    | 126.323  | 128.608  | 0.0258686 | 0.981022 |
| XLOC_001593 | SLC35D1    | chr1:67465014-67520080    | 1.13822  | 1.15884  | 0.0258994 | 0.985692 |
| XLOC_004301 | TRMT112    | chr11:64073043-64085033   | 422.624  | 430.289  | 0.0259326 | 0.985373 |
| XLOC_014150 | ITSN1      | chr21:35014783-35261609   | 1.61603  | 1.6454   | 0.0259775 | 0.984034 |
| XLOC_014858 | NDUFA6     | chr22:42481529-42486888   | 60.1461  | 61.2429  | 0.0260716 | 0.980677 |
| XLOC_007784 | VPS33B     | chr15:91541773-91565833   | 7.46586  | 7.60227  | 0.0261231 | 0.98225  |
| XLOC_017812 | CDKL3      | chr5:133634114-133702765  | 0.838302 | 0.853658 | 0.0261887 | 0.991637 |
| XLOC_011941 | MBOAT7     | chr19:54677105-54693733   | 96.3895  | 98.1571  | 0.026217  | 0.980184 |
| XLOC_013012 | RETSAT     | chr2:85569077-85581821    | 17.2318  | 17.5484  | 0.0262587 | 0.980228 |
| XLOC_010367 | CCDC11     | chr18:47753562-47792865   | 1.31298  | 1.33711  | 0.0262726 | 0.990227 |
| XLOC_006945 | BTBD7      | chr14:93703895-93799385   | 2.62203  | 2.67066  | 0.0265142 | 0.98552  |
| XLOC_003052 | IDE        | chr10:94211440-94333852   | 3.48776  | 3.55247  | 0.0265228 | 0.981441 |
| XLOC_002651 | KAZALD1    | chr10:102820998-102825351 | 3.12026  | 3.17819  | 0.0265404 | 0.985848 |
| XLOC_013128 | CLASP1     | chr2:122095351-122407052  | 3.00981  | 3.0658   | 0.0265919 | 0.981354 |
| XLOC_018667 | C6orf62    | chr6:24667262-24719403    | 32.5547  | 33.1607  | 0.0266111 | 0.982866 |
| XLOC_001733 | SIKE1      | chr1:115312104-115323308  | 4.37149  | 4.45311  | 0.0266883 | 0.981335 |
| XLOC_013638 | MANBAL     | chr20:35918050-35945663   | 54.5506  | 55.5712  | 0.0267425 | 0.980024 |
| XLOC_013230 | SLC25A12   | chr2:172639914-172750816  | 4.04194  | 4.11795  | 0.0268801 | 0.982248 |
| XLOC_004177 | MTCH2      | chr11:47638857-47664206   | 42.5145  | 43.3162  | 0.0269511 | 0.980228 |
| XLOC_009243 | NOL11      | chr17:65714060-65740266   | 16.9512  | 17.271   | 0.0269577 | 0.980228 |
| XLOC_012649 | STK36      | chr2:219528586-219567440  | 3.25906  | 3.32057  | 0.0269747 | 0.991515 |
| XLOC_007341 | C15orf37   | chr15:80135888-80217196   | 2.17315  | 2.21418  | 0.0269856 | 0.994953 |

|             |           |                           |            |           |           |          |
|-------------|-----------|---------------------------|------------|-----------|-----------|----------|
| XLOC_019068 | HDDC2     | chr6:125596495-125623282  | 41.8093    | 42.6003   | 0.0270399 | 0.979267 |
| XLOC_010583 | DNM2      | chr19:10828728-10942586   | 39.4192    | 40.1651   | 0.0270422 | 0.980126 |
| XLOC_011542 | COPE      | chr19:19010322-19030199   | 255.271    | 260.111   | 0.0270998 | 0.978996 |
| XLOC_021469 | FDFT1     | chr8:11660189-11696818    | 56.9979    | 58.0793   | 0.0271141 | 0.980052 |
| XLOC_018444 | CDC40     | chr6:110501623-110553422  | 4.28501    | 4.36637   | 0.0271368 | 0.981441 |
| XLOC_004739 | DDX47     | chr12:12966279-12982915   | 32.8616    | 33.4866   | 0.027179  | 0.979792 |
| XLOC_021736 | FAM91A1   | chr8:124780881-124827690  | 10.1544    | 10.3478   | 0.0272173 | 0.980184 |
| XLOC_022693 | NELFB     | chr9:140149758-140168000  | 96.494     | 98.3371   | 0.0272977 | 0.979338 |
| XLOC_012493 | CERS6     | chr2:169312758-169642939  | 3.0427     | 3.10086   | 0.0273169 | 0.986782 |
| XLOC_021127 | YWHAG     | chr7:75956107-75988342    | 39.4181    | 40.1721   | 0.0273364 | 0.978996 |
| XLOC_022654 | MRPS2     | chr9:138392476-138396519  | 284.627    | 290.083   | 0.027391  | 0.98003  |
| XLOC_023892 | MTRNR2L10 | chrX:55207823-55208944    | 1.28329    | 1.30789   | 0.0273939 | 0.991446 |
| XLOC_008365 | CEMP1     | chr16:2570362-2581409     | 9.12445    | 9.29995   | 0.0274859 | 0.991446 |
| XLOC_018072 | RNF144B   | chr6:18387580-18469105    | 0.172341   | 0.17567   | 0.0276085 | 1        |
| XLOC_012985 | BOLA3     | chr2:74362527-74375039    | 80.9269    | 82.4959   | 0.0277023 | 0.981179 |
| XLOC_008527 | ZNF629    | chr16:30789769-30798523   | 6.41142    | 6.5358    | 0.0277194 | 0.98003  |
| XLOC_010547 | TGFBR3L   | chr19:7981031-7983980     | 0.611105   | 0.622964  | 0.02773   | 0.987173 |
| XLOC_008926 | KSR1      | chr17:25799035-25950718   | 0.189955   | 0.193658  | 0.0278544 | 1        |
| XLOC_000502 | CDC7      | chr1:91966403-91991321    | 2.2334     | 2.27696   | 0.027864  | 0.982567 |
| XLOC_018430 | AIM1      | chr6:106959729-107018334  | 0.00738958 | 0.0075342 | 0.027962  | 1        |
| XLOC_000518 | ABCD3     | chr1:94883932-94984219    | 9.1777     | 9.35812   | 0.0280859 | 0.982866 |
| XLOC_005228 | EFCAB4B   | chr12:3724493-3862366     | 1.46584    | 1.49468   | 0.0281103 | 0.987173 |
| XLOC_002693 | SHOC2     | chr10:112679300-112773425 | 4.93041    | 5.02766   | 0.0281779 | 0.981441 |
| XLOC_011635 | ZFP30     | chr19:38123388-38146313   | 1.00914    | 1.02913   | 0.0282919 | 0.984547 |
| XLOC_001195 | FAM132A   | chr1:1177825-1182102      | 1.07807    | 1.09942   | 0.0283034 | 0.994204 |
| XLOC_023658 | FMR1      | chrX:146990948-147032647  | 4.64196    | 4.73417   | 0.0283759 | 0.980228 |
| XLOC_017978 | PDLIM7    | chr5:176910394-176924602  | 85.6001    | 87.3017   | 0.0283968 | 0.978996 |
| XLOC_009962 | ATP5H     | chr17:73034954-73043074   | 278.217    | 283.752   | 0.0284204 | 0.978818 |
| XLOC_003134 | SMNDC1    | chr10:112052797-112064707 | 44.6208    | 45.5098   | 0.0284606 | 0.978818 |
| XLOC_014720 | LOC284889 | chr22:24235896-24241117   | 1.85574    | 1.89274   | 0.0284843 | 0.997798 |
| XLOC_015149 | PRKCD     | chr3:53195222-53226733    | 13.9868    | 14.2659   | 0.0285077 | 0.978818 |
| XLOC_008143 | POLR2C    | chr16:57496550-57520385   | 48.8312    | 49.8062   | 0.0285238 | 0.981441 |
| XLOC_015110 | RBM6      | chr3:49977476-50114685    | 12.7189    | 12.973    | 0.0285414 | 0.979802 |
| XLOC_002882 | CUL2      | chr10:35297478-35379570   | 8.38703    | 8.5548    | 0.0285731 | 0.978818 |
| XLOC_014454 | RGL4      | chr22:23980674-24059610   | 0.6517     | 0.664768  | 0.0286423 | 0.994204 |
| XLOC_014777 | EIF4ENIF1 | chr22:31835344-31885874   | 4.10411    | 4.18651   | 0.0286788 | 0.981441 |
| XLOC_007886 | PDPK1     | chr16:2587964-2653191     | 2.61229    | 2.66475   | 0.0286834 | 0.981441 |
| XLOC_002659 | PPRC1     | chr10:103892786-103910090 | 11.2136    | 11.4389   | 0.0286909 | 0.978818 |
| XLOC_005700 | PPP1CC    | chr12:111157612-111180783 | 93.3019    | 95.1764   | 0.028697  | 0.978818 |
| XLOC_009651 | PCGF2     | chr17:36886509-36904558   | 41.9632    | 42.8077   | 0.028747  | 0.981441 |
| XLOC_011584 | ANKRD27   | chr19:33087906-33166102   | 6.88149    | 7.02053   | 0.0288608 | 0.980126 |
| XLOC_006756 | HECTD1    | chr14:31569323-31676689   | 3.61118    | 3.68416   | 0.028863  | 0.978649 |
| XLOC_002881 | PARD3     | chr10:34398487-35104253   | 17.7319    | 18.091    | 0.0289281 | 0.978996 |
| XLOC_014008 | ELMO2     | chr20:44994689-45035271   | 4.49049    | 4.58156   | 0.0289675 | 0.98003  |
| XLOC_012518 | ZAK       | chr2:173940564-174146764  | 5.32422    | 5.43224   | 0.028977  | 0.981441 |
| XLOC_014145 | IFNAR2    | chr21:34602230-34636820   | 8.57838    | 8.75248   | 0.0289876 | 0.981441 |
| XLOC_001525 | MKKN1     | chr1:47004367-47069966    | 8.3987     | 8.56935   | 0.0290197 | 0.979451 |
| XLOC_016740 | USP46     | chr4:53457126-53525502    | 1.12782    | 1.15076   | 0.0290388 | 0.98206  |
| XLOC_013948 | RBM39     | chr20:34291530-34330258   | 43.4947    | 44.3803   | 0.0290785 | 0.978996 |

|             |            |                           |           |           |           |          |
|-------------|------------|---------------------------|-----------|-----------|-----------|----------|
| XLOC_003615 | MALAT1     | chr11:65265232-65273939   | 60.8082   | 62.0471   | 0.0290978 | 0.978818 |
| XLOC_011343 | DUS3L      | chr19:5785152-5791249     | 40.4807   | 41.306    | 0.0291188 | 0.978818 |
| XLOC_003158 | CACUL1     | chr10:120440493-120514758 | 7.41654   | 7.56779   | 0.0291254 | 0.978016 |
| XLOC_003135 | LOC282997  | chr10:112628647-112630662 | 2.14782   | 2.19168   | 0.0291613 | 0.985692 |
| XLOC_004426 | INTS4      | chr11:77589765-77705717   | 7.15785   | 7.30466   | 0.0292905 | 0.979338 |
| XLOC_016475 | UGT8       | chr4:115519610-115598202  | 3.16876   | 3.23384   | 0.0293311 | 0.981441 |
| XLOC_014798 | EIF3D      | chr22:36906896-36925277   | 219.118   | 223.624   | 0.0293667 | 0.978818 |
| XLOC_002671 | WBP1L      | chr10:104503726-104576021 | 5.44884   | 5.56143   | 0.0295055 | 0.978996 |
| XLOC_007146 | CHST14     | chr15:40763159-40765357   | 21.2526   | 21.6921   | 0.0295283 | 0.978818 |
| XLOC_013129 | MKI67IP    | chr2:122407229-122494503  | 49.797    | 50.8272   | 0.0295401 | 0.978818 |
| XLOC_013363 | RNF25      | chr2:219528586-219567440  | 26.5049   | 27.0544   | 0.0296043 | 0.981735 |
| XLOC_022490 | NIPSNAP3B  | chr9:107526450-107536291  | 0.372739  | 0.380467  | 0.0296054 | 0.994204 |
| XLOC_024033 | CXorf56    | chrX:118672111-118699397  | 10.1887   | 10.4001   | 0.0296202 | 0.979792 |
| XLOC_012310 | CIAO1      | chr2:96931883-96939900    | 20.7017   | 21.1313   | 0.0296296 | 0.978818 |
| XLOC_020866 | NUB1       | chr7:151038846-151075548  | 18.3497   | 18.7308   | 0.029654  | 0.978031 |
| XLOC_022391 | C9orf85    | chr9:74526422-74588371    | 7.87457   | 8.03818   | 0.0296682 | 0.981441 |
| XLOC_006775 | SLC25A21   | chr14:37147125-37642998   | 1.01945   | 1.04066   | 0.0297033 | 0.986782 |
| XLOC_002696 | ACSL5      | chr10:114133915-114188138 | 0.0224808 | 0.0229489 | 0.0297321 | 1        |
| XLOC_008931 | TMEM97     | chr17:26646120-26662515   | 23.9523   | 24.4519   | 0.0297838 | 0.981441 |
| XLOC_012342 | IL18R1     | chr2:102979096-103015217  | 0.152362  | 0.155548  | 0.0298597 | 1        |
| XLOC_010709 | ARMC6      | chr19:19144386-19168987   | 22.2999   | 22.7683   | 0.0299927 | 0.978818 |
| XLOC_001587 | ITGB3BP    | chr1:63906440-63988944    | 15.83     | 16.1634   | 0.0300687 | 0.980228 |
| XLOC_022018 | PDE7A      | chr8:66626568-66753969    | 1.59327   | 1.6269    | 0.0301344 | 0.981022 |
| XLOC_020661 | SRRT       | chr7:100472700-100486285  | 42.7913   | 43.6945   | 0.0301351 | 0.97803  |
| XLOC_001288 | TMEM51-AS1 | chr1:14925212-15478960    | 0.0837339 | 0.0855014 | 0.0301364 | 1        |
| XLOC_011263 | ODF3L2     | chr19:463345-474983       | 0.74724   | 0.76303   | 0.0301677 | 0.994204 |
| XLOC_014578 | ADSL       | chr22:40742503-40762575   | 65.56     | 66.9477   | 0.0302184 | 0.977897 |
| XLOC_009970 | CASKIN2    | chr17:73452663-73511627   | 3.97401   | 4.05816   | 0.0302308 | 0.991515 |
| XLOC_008273 | FOXF1      | chr16:86544132-86548070   | 1.72931   | 1.76597   | 0.0302621 | 0.987173 |
| XLOC_021433 | KBTBD11    | chr8:1922043-1955109      | 3.34717   | 3.41815   | 0.0302778 | 0.979792 |
| XLOC_007552 | MFAP1      | chr15:44096732-44116951   | 17.8358   | 18.2141   | 0.0302785 | 0.978031 |
| XLOC_011427 | TMED1      | chr19:10943113-10946983   | 29.541    | 30.1688   | 0.0303383 | 0.978818 |
| XLOC_023096 | CIZ1       | chr9:130928343-131017527  | 108.855   | 111.173   | 0.0303954 | 0.978818 |
| XLOC_004875 | TARBP2     | chr12:53894704-53900215   | 23.9927   | 24.5039   | 0.0304208 | 0.978818 |
| XLOC_016049 | PDCD10     | chr3:167401694-167452651  | 33.2023   | 33.9126   | 0.0305375 | 0.97803  |
| XLOC_022903 | HNRNPK     | chr9:86582997-86595569    | 191.182   | 195.281   | 0.0306073 | 0.978031 |
| XLOC_020975 | HOXA2      | chr7:27139972-27142394    | 0.138855  | 0.141843  | 0.0307211 | 1        |
| XLOC_010794 | COX6B1     | chr19:36139124-36149686   | 406.528   | 415.287   | 0.0307515 | 0.977897 |
| XLOC_002979 | PCBD1      | chr10:72643266-72648541   | 199.332   | 203.632   | 0.0307921 | 0.978818 |
| XLOC_022707 | CBWD1      | chr9:121037-179075        | 9.15203   | 9.34964   | 0.0308183 | 0.978818 |
| XLOC_005218 | FBXL14     | chr12:1675158-1703331     | 2.2869    | 2.33631   | 0.0308386 | 0.985768 |
| XLOC_018383 | SENP6      | chr6:76311621-76427994    | 5.0943    | 5.20478   | 0.0309539 | 0.977897 |
| XLOC_005109 | TRAFD1     | chr12:112563348-112591408 | 10.3195   | 10.5433   | 0.0309603 | 0.978818 |
| XLOC_006312 | SCFD1      | chr14:31091459-31205033   | 6.70552   | 6.85133   | 0.0310328 | 0.978818 |
| XLOC_003992 | TRIM21     | chr11:4406126-4414926     | 6.38553   | 6.52473   | 0.0311118 | 0.979338 |
| XLOC_003850 | ARCN1      | chr11:118443101-118473747 | 26.2581   | 26.8308   | 0.0311278 | 0.977897 |
| XLOC_020686 | RINT1      | chr7:105172531-105221976  | 9.30512   | 9.50809   | 0.0311319 | 0.978818 |
| XLOC_009103 | TMUB2      | chr17:42264353-42269099   | 10.0811   | 10.3012   | 0.0311573 | 0.980052 |
| XLOC_023631 | SLC9A6     | chrX:135067582-135129428  | 2.0788    | 2.12419   | 0.0311579 | 0.981441 |

|             |               |                           |           |           |           |          |
|-------------|---------------|---------------------------|-----------|-----------|-----------|----------|
| XLOC_016537 | DKFZP434I0714 | chr4:153457415-153460415  | 0.812593  | 0.830345  | 0.0311781 | 0.986449 |
| XLOC_014590 | XRCC6         | chr22:42017294-42060052   | 196.329   | 200.641   | 0.0313445 | 0.977857 |
| XLOC_017502 | HIGD2A        | chr5:175815783-175816751  | 241.859   | 247.182   | 0.0314067 | 0.976134 |
| XLOC_001182 | LOC100133331  | chr1:661138-665731        | 0.797923  | 0.815568  | 0.0315553 | 0.986998 |
| XLOC_020950 | TWISTNB       | chr7:19735084-19748660    | 5.03301   | 5.145     | 0.0317516 | 0.97803  |
| XLOC_009854 | COX11         | chr17:52978051-53046064   | 21.1956   | 21.6674   | 0.0317665 | 0.980228 |
| XLOC_007754 | UBE2Q2P1      | chr15:85070426-85123412   | 0.156598  | 0.160086  | 0.0317772 | 1        |
| XLOC_023135 | SURF1         | chr9:136218665-136223361  | 45.2444   | 46.2528   | 0.0318032 | 0.978031 |
| XLOC_020695 | CBLL1         | chr7:107384278-107402083  | 6.23456   | 6.3737    | 0.0318417 | 0.977897 |
| XLOC_021417 | LMBR1         | chr7:156473569-156685902  | 8.21075   | 8.39431   | 0.031897  | 0.97562  |
| XLOC_008515 | TBC1D10B      | chr16:30368421-30381522   | 21.9596   | 22.4512   | 0.0319397 | 0.97562  |
| XLOC_017306 | CDC42SE2      | chr5:130599701-130730382  | 5.43792   | 5.55972   | 0.031957  | 0.978743 |
| XLOC_016021 | PLCH1         | chr3:155197670-155421997  | 0.42511   | 0.434639  | 0.0319807 | 0.984084 |
| XLOC_007631 | MTFMT         | chr15:65293849-65321977   | 10.8331   | 11.0762   | 0.0320075 | 0.97666  |
| XLOC_021585 | UBE2V2        | chr8:48920994-48974454    | 21.7775   | 22.2663   | 0.0320247 | 0.976411 |
| XLOC_005253 | PHB2          | chr12:7074514-7079916     | 476.417   | 487.131   | 0.0320833 | 0.976134 |
| XLOC_010810 | CAPNS1        | chr19:36630917-36641255   | 269.395   | 275.453   | 0.032086  | 0.975928 |
| XLOC_006024 | XPO4          | chr13:21351467-21476913   | 2.61818   | 2.67707   | 0.0320944 | 0.977031 |
| XLOC_001882 | DPM3          | chr1:155112366-155112996  | 118.966   | 121.644   | 0.0321199 | 0.978016 |
| XLOC_000911 | TOR1AIP1      | chr1:179851176-179889212  | 15.5071   | 15.8572   | 0.0322052 | 0.976411 |
| XLOC_008279 | BANP          | chr16:87985037-88110924   | 5.41904   | 5.5414    | 0.032212  | 0.981441 |
| XLOC_018365 | PRIM2         | chr6:57182421-57513376    | 8.18766   | 8.37266   | 0.0322351 | 0.978678 |
| XLOC_016673 | RAB28         | chr4:13369346-13485989    | 9.16301   | 9.37013   | 0.0322472 | 0.978818 |
| XLOC_012599 | CYP20A1       | chr2:204103163-204170563  | 1.20219   | 1.22944   | 0.0323341 | 0.979338 |
| XLOC_012449 | R3HDM1        | chr2:136289082-136482839  | 3.80406   | 3.89062   | 0.0324578 | 0.978016 |
| XLOC_017190 | ARHGEF28      | chr5:72921982-73237818    | 9.82808   | 10.0517   | 0.0324595 | 0.976134 |
| XLOC_009028 | CDK12         | chr17:37617738-37690800   | 4.79633   | 4.90576   | 0.0325456 | 0.975928 |
| XLOC_018565 | SCAF8         | chr6:155054511-155155194  | 6.66173   | 6.81382   | 0.0325671 | 0.976582 |
| XLOC_011411 | EIF3G         | chr19:10216898-10230599   | 316.992   | 324.262   | 0.0327127 | 0.978818 |
| XLOC_021713 | EMC2          | chr8:109455852-109499136  | 33.265    | 34.0297   | 0.0327896 | 0.975928 |
| XLOC_009033 | ERBB2         | chr17:37844392-37884915   | 16.7805   | 17.1685   | 0.0329808 | 0.975512 |
| XLOC_008042 | TAOK2         | chr16:29985187-30003582   | 10.9556   | 11.2107   | 0.0332097 | 0.976134 |
| XLOC_021035 | POLD2         | chr7:44154278-44163169    | 153.619   | 157.198   | 0.0332218 | 0.975484 |
| XLOC_020830 | ARHGEF5       | chr7:144052488-144077725  | 3.29697   | 3.37407   | 0.0333478 | 0.978818 |
| XLOC_016366 | DCK           | chr4:71859264-71896629    | 5.5944    | 5.72524   | 0.0333533 | 0.978753 |
| XLOC_004350 | PC            | chr11:66615996-66725847   | 1.35697   | 1.38873   | 0.033377  | 0.994279 |
| XLOC_005986 | TNFSF13B      | chr13:108921976-108960832 | 0.0527201 | 0.0539548 | 0.0334    | 1        |
| XLOC_003835 | PAFAH1B2      | chr11:117014999-117047592 | 18.4128   | 18.8443   | 0.0334183 | 0.975492 |
| XLOC_017860 | SLC25A2       | chr5:140682195-140683612  | 0.0426208 | 0.0436213 | 0.0334727 | 1        |
| XLOC_022783 | APTX          | chr9:32972603-33001639    | 16.3163   | 16.6994   | 0.0334798 | 0.975928 |
| XLOC_022732 | PSIP1         | chr9:15464064-15511003    | 27.3127   | 27.9541   | 0.0334863 | 0.977897 |
| XLOC_009456 | CTDNEP1       | chr17:7146905-7155259     | 112.946   | 115.599   | 0.0334946 | 0.975492 |
| XLOC_007203 | DUT           | chr15:48623620-48635570   | 39.1875   | 40.108    | 0.0334963 | 0.97562  |
| XLOC_016326 | CEP135        | chr4:56814973-56899529    | 1.5132    | 1.54875   | 0.0335022 | 0.978818 |
| XLOC_015588 | FGD5-AS1      | chr3:14984285-15106816    | 11.5584   | 11.8302   | 0.0335287 | 0.986181 |
| XLOC_004890 | COPZ1         | chr12:54718873-54745635   | 95.8386   | 98.0932   | 0.0335466 | 0.975492 |
| XLOC_021212 | PPP1R35       | chr7:100032911-100034094  | 68.6698   | 70.2855   | 0.0335519 | 0.97717  |
| XLOC_006845 | HIF1A-AS2     | chr14:62162118-62215807   | 10.1008   | 10.3392   | 0.0336535 | 0.981179 |
| XLOC_005236 | TNFRSF1A      | chr12:6437922-6451283     | 27.8553   | 28.5135   | 0.033692  | 0.975928 |

|             |             |                           |           |           |           |          |
|-------------|-------------|---------------------------|-----------|-----------|-----------|----------|
| XLOC_009860 | COIL        | chr17:55015560-55038411   | 5.27998   | 5.40477   | 0.0337002 | 0.97822  |
| XLOC_022581 | C9orf16     | chr9:130922538-130926207  | 392.819   | 402.106   | 0.0337125 | 0.975484 |
| XLOC_005828 | GTF3A       | chr13:27998680-28024739   | 115.25    | 117.983   | 0.033819  | 0.977219 |
| XLOC_016633 | TMEM129     | chr4:1717678-1723084      | 25.1061   | 25.7024   | 0.0338635 | 0.97562  |
| XLOC_014074 | YTHDF1      | chr20:61826781-61847538   | 17.873    | 18.2977   | 0.0338806 | 0.975492 |
| XLOC_012754 | BOK         | chr2:242483800-242513553  | 56.7977   | 58.1474   | 0.0338838 | 0.975492 |
| XLOC_012408 | PTPN4       | chr2:120517206-120742474  | 0.544766  | 0.557735  | 0.0339437 | 0.980228 |
| XLOC_007462 | UBE3A       | chr15:25582395-25684175   | 8.76566   | 8.9745    | 0.0339689 | 0.975492 |
| XLOC_003313 | PPFIBP2     | chr11:7534995-7674996     | 1.80062   | 1.84353   | 0.0339799 | 0.981441 |
| XLOC_014703 | MAPK1       | chr22:22113946-22221970   | 9.66313   | 9.89349   | 0.0339893 | 0.978818 |
| XLOC_001598 | WLS         | chr1:68167148-68698284    | 36.0404   | 36.9003   | 0.0340198 | 0.986782 |
| XLOC_002016 | KIFAP3      | chr1:169890469-170043879  | 1.90162   | 1.94704   | 0.0340496 | 0.980677 |
| XLOC_022021 | MYBL1       | chr8:67474409-67525480    | 0.992122  | 1.0159    | 0.0341684 | 0.981603 |
| XLOC_005370 | IPO8        | chr12:30781914-30848929   | 6.9819    | 7.1494    | 0.0342014 | 0.975492 |
| XLOC_001695 | AMIGO1      | chr1:110049445-110052336  | 2.08677   | 2.13687   | 0.0342307 | 0.982133 |
| XLOC_009596 | BLMH        | chr17:28575212-28619184   | 14.8367   | 15.1938   | 0.0343098 | 0.975928 |
| XLOC_014827 | JOSD1       | chr22:39081547-39096459   | 21.0728   | 21.5803   | 0.0343393 | 0.975492 |
| XLOC_021657 | CA2         | chr8:86376130-86393721    | 7.68103   | 7.86614   | 0.0343563 | 0.978016 |
| XLOC_017970 | UIMC1       | chr5:176332005-176433795  | 10.6728   | 10.9302   | 0.0343731 | 0.975492 |
| XLOC_015561 | TADA3       | chr3:9821653-9878040      | 65.9516   | 67.5429   | 0.0343977 | 0.982903 |
| XLOC_009748 | FAM134C     | chr17:40731525-40767256   | 16.216    | 16.608    | 0.0344601 | 0.984445 |
| XLOC_018781 | DOM3Z       | chr6:31937587-31949223    | 10.9529   | 11.218    | 0.0345079 | 0.981735 |
| XLOC_006219 | IRS2        | chr13:110406183-110438914 | 3.88829   | 3.98268   | 0.0346015 | 0.977897 |
| XLOC_013683 | DBNDD2,SYS1 | chr20:43990576-44039250   | 204.155   | 209.11    | 0.0346016 | 0.975928 |
| XLOC_013153 | FAM168B     | chr2:131805448-131851004  | 10.0672   | 10.3116   | 0.0346075 | 0.975492 |
| XLOC_018711 | ZSCAN31     | chr6:28292514-28304152    | 0.988769  | 1.01279   | 0.0346235 | 0.983529 |
| XLOC_005025 | SOCS2       | chr12:93959403-93970521   | 9.00234   | 9.22101   | 0.0346241 | 0.975928 |
| XLOC_016425 | HERC5       | chr4:89378267-89427319    | 0.0578234 | 0.0592296 | 0.0346653 | 1        |
| XLOC_014164 | SIM2        | chr21:38071990-38122510   | 3.30854   | 3.38905   | 0.0346834 | 0.978574 |
| XLOC_010713 | MAU2        | chr19:19431629-19469563   | 6.87883   | 7.04642   | 0.0347277 | 0.975522 |
| XLOC_010290 | AFG3L2      | chr18:12328942-12377275   | 35.2908   | 36.151    | 0.034744  | 0.975454 |
| XLOC_021096 | SPDYE7P     | chr7:72333317-72339655    | 1.30044   | 1.33229   | 0.0349082 | 0.980184 |
| XLOC_013741 | VAPB        | chr20:56964174-57026156   | 6.63971   | 6.8028    | 0.0350079 | 0.975484 |
| XLOC_005880 | GTF2F2      | chr13:45694630-45858239   | 24.2698   | 24.8663   | 0.0350295 | 0.975492 |
| XLOC_014941 | FANCD2      | chr3:10068112-10149915    | 2.52221   | 2.58437   | 0.0351255 | 0.97822  |
| XLOC_009787 | PLCD3       | chr17:43189007-43209891   | 17.7071   | 18.1439   | 0.0351533 | 0.975484 |
| XLOC_005320 | LOH12CR2    | chr12:12508341-12510001   | 0.241623  | 0.247594  | 0.0352233 | 1        |
| XLOC_001911 | MEF2D       | chr1:156433512-156470634  | 9.01419   | 9.23831   | 0.0354313 | 0.975454 |
| XLOC_002643 | HIF1AN      | chr10:102295640-102313681 | 5.78823   | 5.93217   | 0.0354374 | 0.975231 |
| XLOC_007247 | SNX1        | chr15:64388082-64436433   | 5.72006   | 5.86238   | 0.0354559 | 0.975454 |
| XLOC_003220 | IFITM1      | chr11:313990-315272       | 1.11819   | 1.14608   | 0.0355412 | 0.994068 |
| XLOC_007309 | SCAMP5      | chr15:75287875-75313836   | 22.2111   | 22.7678   | 0.0357123 | 0.97515  |
| XLOC_006730 | EMC9        | chr14:24605377-24610797   | 33.9593   | 34.8104   | 0.0357158 | 0.993173 |
| XLOC_003226 | PHRF1       | chr11:576482-612222       | 8.93792   | 9.16233   | 0.0357747 | 0.975492 |
| XLOC_010502 | HDGFRP2     | chr19:4472254-4517716     | 38.5632   | 39.5319   | 0.0357905 | 0.975375 |
| XLOC_001414 | PEF1        | chr1:32095462-32110838    | 31.9802   | 32.7848   | 0.0358491 | 0.97517  |
| XLOC_002449 | MAPK8       | chr10:49609686-49643183   | 7.47613   | 7.66445   | 0.0358907 | 0.977897 |
| XLOC_023709 | TAZ         | chrX:153626570-153650063  | 20.1027   | 20.6097   | 0.0359401 | 0.995019 |
| XLOC_008230 | PSMD7       | chr16:74330672-74340186   | 47.1002   | 48.2931   | 0.036084  | 0.974073 |

|             |              |                           |           |           |           |          |
|-------------|--------------|---------------------------|-----------|-----------|-----------|----------|
| XLOC_010670 | MYO9B        | chr19:17186590-17324104   | 12.9525   | 13.2806   | 0.0360937 | 0.974083 |
| XLOC_001575 | OMA1         | chr1:58946390-59012446    | 6.33893   | 6.49968   | 0.0361297 | 0.978016 |
| XLOC_011014 | PPFIA3       | chr19:49622662-49654280   | 4.23436   | 4.34182   | 0.0361546 | 0.977897 |
| XLOC_005743 | COQ5         | chr12:120941081-120966964 | 15.4703   | 15.863    | 0.0361696 | 0.975492 |
| XLOC_018974 | UBE3D        | chr6:83602185-83775545    | 1.51394   | 1.55247   | 0.0362589 | 0.983243 |
| XLOC_023153 | C9orf116     | chr9:138387025-138391761  | 25.6331   | 26.2875   | 0.0363674 | 0.97822  |
| XLOC_022593 | PKN3         | chr9:131464801-131486408  | 76.6661   | 78.6274   | 0.0364432 | 0.975928 |
| XLOC_017580 | DAP          | chr5:10679341-10761387    | 35.4124   | 36.3188   | 0.0364604 | 0.974073 |
| XLOC_002865 | WAC-AS1      | chr10:28808845-28821283   | 17.5747   | 18.0246   | 0.0364677 | 0.974073 |
| XLOC_023879 | SMC1A        | chrX:53401069-53449618    | 4.78951   | 4.91249   | 0.0365764 | 0.973295 |
| XLOC_012691 | ITM2C        | chr2:231729620-231743963  | 100.138   | 102.712   | 0.0366063 | 0.973852 |
| XLOC_015480 | ECE2         | chr3:183967444-184010819  | 43.9394   | 45.0687   | 0.0366105 | 0.981441 |
| XLOC_012807 | LAPTM4A      | chr2:20232410-20251789    | 83.9564   | 86.1208   | 0.0367203 | 0.972779 |
| XLOC_014467 | ADORA2A      | chr22:24823529-24890783   | 1.27933   | 1.31232   | 0.0367353 | 0.985175 |
| XLOC_009844 | MRPL27       | chr17:48445227-48450562   | 66.2348   | 67.9477   | 0.0368359 | 0.974777 |
| XLOC_004909 | METTL7B      | chr12:56075329-56106089   | 3.23946   | 3.32336   | 0.0368872 | 0.990368 |
| XLOC_017949 | FBXW11       | chr5:171288555-171433877  | 8.38128   | 8.59839   | 0.0368948 | 0.974603 |
| XLOC_018366 | PTP4A1       | chr6:64281919-64293489    | 14.0798   | 14.4446   | 0.0369084 | 0.972923 |
| XLOC_015164 | PTPRG        | chr3:61547242-62304622    | 1.24405   | 1.27631   | 0.0369342 | 0.978818 |
| XLOC_023583 | DOCK11       | chrX:117629871-117820123  | 0.72282   | 0.741582  | 0.03697   | 0.978996 |
| XLOC_008288 | TRAPPC2L     | chr16:88923505-88927520   | 79.8581   | 81.9325   | 0.0369973 | 0.974348 |
| XLOC_000365 | TMEM69       | chr1:46153846-46216485    | 42.2761   | 43.3768   | 0.0370804 | 0.974073 |
| XLOC_010930 | APOE         | chr19:45409038-45412650   | 0.74616   | 0.765589  | 0.037085  | 0.993157 |
| XLOC_010428 | FSTL3        | chr19:676388-683392       | 38.0991   | 39.092    | 0.0371163 | 0.971919 |
| XLOC_017730 | CCNH         | chr5:86690078-86708850    | 28.0006   | 28.7307   | 0.0371365 | 0.974538 |
| XLOC_020790 | AGK          | chr7:141251077-141354209  | 11.7811   | 12.0883   | 0.0371383 | 0.974073 |
| XLOC_014540 | KCTD17       | chr22:37447778-37459430   | 23.1345   | 23.7384   | 0.0371748 | 0.975484 |
| XLOC_011693 | ATP5SL       | chr19:41937222-41945843   | 28.1383   | 28.8766   | 0.0373648 | 0.974777 |
| XLOC_010553 | RAB11B       | chr19:8439259-8469317     | 88.9866   | 91.3222   | 0.0373765 | 0.974348 |
| XLOC_002681 | SFR1         | chr10:105881815-105886143 | 4.80168   | 4.9279    | 0.0374339 | 0.978818 |
| XLOC_000243 | SERINC2      | chr1:31882411-31907527    | 31.7941   | 32.6306   | 0.0374687 | 0.97395  |
| XLOC_014511 | SMTN         | chr22:31477281-31500610   | 87.4478   | 89.75     | 0.0374911 | 0.974593 |
| XLOC_002895 | ZNF32        | chr10:44124264-44170147   | 25.748    | 26.4262   | 0.0375101 | 0.975484 |
| XLOC_001687 | CLCC1        | chr1:109419602-109506111  | 5.36538   | 5.50681   | 0.0375382 | 0.97664  |
| XLOC_014741 | PITPNB       | chr22:28247656-28315255   | 18.1705   | 18.6501   | 0.0375844 | 0.972717 |
| XLOC_017058 | NKD2         | chr5:1009076-1038927      | 13.4385   | 13.7932   | 0.0375848 | 0.975928 |
| XLOC_002629 | PI4K2A       | chr10:99400442-99436187   | 15.7242   | 16.1395   | 0.037611  | 0.97362  |
| XLOC_022580 | LCN2         | chr9:130911731-130915734  | 0.0910613 | 0.0934665 | 0.0376112 | 1        |
| XLOC_001485 | LOC100130557 | chr1:41154751-41237275    | 0.514159  | 0.527779  | 0.0377209 | 0.994593 |
| XLOC_002395 | WAC          | chr10:28821421-28912041   | 22.7529   | 23.3568   | 0.0377974 | 0.97362  |
| XLOC_007212 | USP8         | chr15:50716578-50838902   | 4.4313    | 4.54909   | 0.0378479 | 0.975191 |
| XLOC_014779 | PRR14L       | chr22:32077333-32146120   | 1.66451   | 1.70883   | 0.0379174 | 0.975454 |
| XLOC_007662 | TLE3         | chr15:70340542-70390256   | 8.57461   | 8.80321   | 0.0379591 | 0.974348 |
| XLOC_000782 | PRCC         | chr1:156737273-156770609  | 22.2849   | 22.8795   | 0.0379895 | 0.974348 |
| XLOC_011922 | ZNF320       | chr19:53379424-53394599   | 2.44735   | 2.51279   | 0.0380706 | 0.975492 |
| XLOC_008505 | FAM57B       | chr16:30034654-30042186   | 0.301785  | 0.309884  | 0.0382069 | 1        |
| XLOC_000347 | RNF220       | chr1:44870959-45117396    | 41.04     | 42.1432   | 0.0382706 | 0.970533 |
| XLOC_014776 | PATZ1        | chr22:31721789-31742249   | 19.3689   | 19.8904   | 0.0383348 | 0.974073 |
| XLOC_008739 | LOC100130015 | chr16:90089007-90114191   | 3.6221    | 3.71998   | 0.0384681 | 0.990368 |

|             |              |                           |          |          |           |          |
|-------------|--------------|---------------------------|----------|----------|-----------|----------|
| XLOC_023597 | MCTS1        | chrX:119737743-119755016  | 2.89515  | 2.9735   | 0.0385218 | 0.974073 |
| XLOC_015747 | ABHD14B      | chr3:52002525-52008646    | 46.5498  | 47.8095  | 0.0385222 | 0.971173 |
| XLOC_007647 | SNAPC5       | chr15:66679210-66790146   | 8.42604  | 8.65417  | 0.0385415 | 0.994507 |
| XLOC_021507 | KIAA1967     | chr8:22462144-22526661    | 38.0805  | 39.1129  | 0.0385928 | 0.975484 |
| XLOC_005695 | ARPC3        | chr12:110872705-110888158 | 275.288  | 282.768  | 0.0386782 | 0.972717 |
| XLOC_015898 | HCLS1        | chr3:121350245-121379791  | 0.380354 | 0.39071  | 0.0387532 | 0.986368 |
| XLOC_016435 | PDLIM5       | chr4:95373007-95589378    | 3.09382  | 3.1783   | 0.0388677 | 0.978818 |
| XLOC_023853 | GPKOW        | chrX:48969021-48980079    | 9.21226  | 9.46404  | 0.038901  | 0.973305 |
| XLOC_008036 | MAZ          | chr16:29817416-29822504   | 125.297  | 128.721  | 0.0389022 | 0.973775 |
| XLOC_008654 | COG4         | chr16:70514471-70557457   | 10.0916  | 10.3675  | 0.0389115 | 0.974348 |
| XLOC_016919 | CCNA2        | chr4:122722471-122745088  | 16.7606  | 17.2194  | 0.0389613 | 0.978216 |
| XLOC_023019 | FKBP15       | chr9:115927799-115983641  | 26.9393  | 27.6782  | 0.0390398 | 0.971768 |
| XLOC_005687 | KCTD10       | chr12:109886459-109915155 | 10.3092  | 10.5925  | 0.0391063 | 0.971768 |
| XLOC_021011 | HERPUD2      | chr7:35672269-35734772    | 6.57124  | 6.75191  | 0.0391295 | 0.974777 |
| XLOC_016647 | TMEM128      | chr4:4237268-4249934      | 13.7572  | 14.1358  | 0.0391639 | 0.974348 |
| XLOC_017290 | CSNK1G3      | chr5:122847792-122952738  | 6.10973  | 6.278    | 0.0391952 | 0.972779 |
| XLOC_024186 | IRAK1        | chrX:153275956-153285342  | 142.696  | 146.636  | 0.0392905 | 0.971663 |
| XLOC_021430 | CLN8         | chr8:1711869-1734736      | 2.34027  | 2.40495  | 0.0393333 | 0.975492 |
| XLOC_007131 | C15orf41     | chr15:36871811-37110707   | 2.09433  | 2.15242  | 0.0394722 | 0.978818 |
| XLOC_013053 | ANKRD39      | chr2:97513723-97523756    | 19.7541  | 20.3056  | 0.0397255 | 0.97562  |
| XLOC_012819 | ITSN2        | chr2:24425734-24583397    | 1.30394  | 1.34038  | 0.0397619 | 0.97664  |
| XLOC_023350 | CDK16        | chrX:47077527-47089394    | 42.0484  | 43.2268  | 0.0398757 | 0.971173 |
| XLOC_015293 | DTX3L        | chr3:122246759-122294049  | 1.55405  | 1.59763  | 0.0398977 | 0.98003  |
| XLOC_009453 | DVL2         | chr17:7128660-7137863     | 30.1835  | 31.0306  | 0.0399306 | 0.970681 |
| XLOC_008050 | ZNF48        | chr16:30389453-30411429   | 10.5232  | 10.8186  | 0.0399501 | 0.974073 |
| XLOC_007772 | KIF7         | chr15:90118817-90198682   | 8.91112  | 9.16177  | 0.0400199 | 0.98003  |
| XLOC_012381 | CHCHD5       | chr2:113342035-113346617  | 36.193   | 37.2117  | 0.0400487 | 0.975454 |
| XLOC_009976 | WBP2         | chr17:73841779-73851501   | 141.351  | 145.33   | 0.0400505 | 0.970185 |
| XLOC_018535 | LTV1         | chr6:144164507-144184943  | 14.3197  | 14.7234  | 0.0401119 | 0.971768 |
| XLOC_011244 | ZSCAN22      | chr19:58838384-58853712   | 1.29342  | 1.32991  | 0.0401332 | 0.978818 |
| XLOC_020552 | GTF2I        | chr7:74072029-74175022    | 1.02492  | 1.05384  | 0.0401484 | 0.979338 |
| XLOC_002690 | SMC3         | chr10:112327448-112364392 | 9.35994  | 9.62433  | 0.0401872 | 0.970533 |
| XLOC_017323 | UBE2B        | chr5:133706869-133727799  | 22.8343  | 23.4808  | 0.0402777 | 0.970994 |
| XLOC_022220 | EEF1D        | chr8:144661866-144679845  | 1358.5   | 1397.08  | 0.0403999 | 0.972717 |
| XLOC_021938 | KIF13B       | chr8:28924794-29120610    | 1.57362  | 1.61832  | 0.040407  | 0.975492 |
| XLOC_013518 | LOC643406    | chr20:5451841-5457780     | 0.160488 | 0.165051 | 0.0404498 | 1        |
| XLOC_018174 | MRPS18B      | chr6:30585485-30594174    | 79.2788  | 81.5362  | 0.0405058 | 0.969901 |
| XLOC_021572 | POLB         | chr8:42195972-42229331    | 21.8146  | 22.4361  | 0.0405258 | 0.971449 |
| XLOC_007158 | OIP5-AS1     | chr15:41576200-41591795   | 7.97469  | 8.20293  | 0.04071   | 0.974108 |
| XLOC_003171 | CUZD1,FAM24B | chr10:124591670-124658230 | 9.98454  | 10.2709  | 0.040799  | 0.981441 |
| XLOC_015100 | NDUFAF3      | chr3:49044636-49060926    | 68.0987  | 70.0555  | 0.0408706 | 0.988336 |
| XLOC_000039 | PRDM16       | chr1:2985741-3355185      | 1.53369  | 1.5778   | 0.0409144 | 0.975928 |
| XLOC_015631 | LRRFIP2      | chr3:37094116-37217851    | 8.76183  | 9.01477  | 0.0410581 | 0.970533 |
| XLOC_005704 | BRAP         | chr12:112079949-112123790 | 5.07744  | 5.2241   | 0.0410806 | 0.971282 |
| XLOC_012370 | LOC440894    | chr2:110744556-110752858  | 1.48558  | 1.5285   | 0.0410903 | 0.981441 |
| XLOC_004306 | MAP4K2       | chr11:64556608-64570713   | 15.7096  | 16.164   | 0.0411452 | 0.970185 |
| XLOC_014631 | GRAMD4       | chr22:47022657-47075688   | 9.03968  | 9.3012   | 0.0411461 | 0.971768 |
| XLOC_018034 | CDYL         | chr6:4706392-4955778      | 6.93096  | 7.1322   | 0.0412919 | 0.972923 |
| XLOC_017673 | DIMT1        | chr5:61684350-61699728    | 26.9258  | 27.7088  | 0.0413575 | 0.970185 |



|             |             |                           |          |          |           |          |
|-------------|-------------|---------------------------|----------|----------|-----------|----------|
| XLOC_005776 | NCOR2       | chr12:124808956-125052010 | 8.86904  | 9.1273   | 0.0414105 | 0.969826 |
| XLOC_010587 | CARM1       | chr19:10982252-11039357   | 49.5551  | 51.0015  | 0.0415065 | 0.973765 |
| XLOC_020865 | CHPF2       | chr7:150929584-150935905  | 37.3979  | 38.4895  | 0.0415089 | 0.977897 |
| XLOC_010937 | GEMIN7      | chr19:45582517-45594782   | 23.4216  | 24.1053  | 0.0415107 | 0.970185 |
| XLOC_022414 | NAA35       | chr9:88556056-88637217    | 8.98053  | 9.24298  | 0.0415585 | 0.971088 |
| XLOC_014421 | ZNF74       | chr22:20748404-20762753   | 7.81404  | 8.04271  | 0.0416135 | 0.971528 |
| XLOC_015909 | PTPLB       | chr3:123213362-123303924  | 0.660027 | 0.679437 | 0.0418139 | 0.984084 |
| XLOC_007533 | TMEM87A     | chr15:42502725-42565755   | 9.76378  | 10.0516  | 0.0419116 | 0.970332 |
| XLOC_002908 | SYT15       | chr10:46955443-46970601   | 0.748877 | 0.770961 | 0.0419293 | 0.988433 |
| XLOC_010563 | LOC284385   | chr19:9732157-9745538     | 2.2677   | 2.33458  | 0.0419294 | 0.978031 |
| XLOC_022780 | TOPORS      | chr9:32540541-32553015    | 2.64564  | 2.72381  | 0.0420082 | 0.975654 |
| XLOC_009300 | SNHG16      | chr17:74553845-74561430   | 132.672  | 136.598  | 0.0420697 | 0.969271 |
| XLOC_005932 | PIBF1       | chr13:73302041-73590591   | 1.65475  | 1.70377  | 0.0421122 | 0.993923 |
| XLOC_004093 | KCNJ11      | chr11:17406795-17410878   | 5.39203  | 5.55185  | 0.0421385 | 0.974348 |
| XLOC_018116 | HMGNA       | chr6:26538571-26547164    | 50.4299  | 51.9268  | 0.0422013 | 0.967866 |
| XLOC_022561 | GAPVD1      | chr9:128024110-128127290  | 6.08562  | 6.26649  | 0.0422521 | 0.967978 |
| XLOC_003734 | USP35       | chr11:77899857-77925757   | 2.62469  | 2.70275  | 0.0422814 | 0.975492 |
| XLOC_011938 | TFPT        | chr19:54610319-54635150   | 11.1606  | 11.4925  | 0.0422823 | 0.991515 |
| XLOC_001660 | GCLM        | chr1:94352589-94375012    | 2.92327  | 3.01041  | 0.0423774 | 0.975484 |
| XLOC_007955 | PDXDC1      | chr16:15068832-15131552   | 10.3     | 10.6077  | 0.0424559 | 0.969077 |
| XLOC_005879 | KIAA1704    | chr13:45563686-45602404   | 2.92944  | 3.01694  | 0.0424626 | 0.978564 |
| XLOC_016074 | MRPL47      | chr3:179306254-179322434  | 35.3166  | 36.3735  | 0.0425395 | 0.968919 |
| XLOC_015962 | AMOTL2      | chr3:134074189-134093406  | 20.5263  | 21.1407  | 0.0425474 | 0.967296 |
| XLOC_009110 | HIGD1B      | chr17:42923720-42976993   | 0.141241 | 0.145473 | 0.0425966 | 1        |
| XLOC_012761 | LOC728323   | chr2:243030843-243102469  | 0.333957 | 0.343985 | 0.0426796 | 1        |
| XLOC_020383 | HDAC9       | chr7:18126571-19036992    | 6.71185  | 6.91378  | 0.0427656 | 0.968712 |
| XLOC_004636 | NCAPD3      | chr11:134022336-134094426 | 1.38922  | 1.43103  | 0.0427755 | 0.97562  |
| XLOC_009518 | ZSWIM7      | chr17:15879874-15932723   | 9.04941  | 9.32192  | 0.0428028 | 0.988434 |
| XLOC_022978 | ERP44       | chr9:102741462-102861330  | 14.9751  | 15.4262  | 0.0428234 | 0.967458 |
| XLOC_007223 | FLJ27352    | chr15:55611132-55800432   | 1.28943  | 1.32829  | 0.0428352 | 0.994734 |
| XLOC_014933 | BRPF1       | chr3:9773433-9789699      | 5.33838  | 5.49929  | 0.0428426 | 0.970185 |
| XLOC_004104 | SPTY2D1     | chr11:18621350-18656020   | 2.5587   | 2.63584  | 0.0428506 | 0.972194 |
| XLOC_015486 | CHRD        | chr3:184097860-184107617  | 2.03638  | 2.09785  | 0.042906  | 0.978818 |
| XLOC_005410 | SENP1       | chr12:48436680-48540187   | 3.05568  | 3.14812  | 0.0429939 | 0.992882 |
| XLOC_015746 | PCBP4       | chr3:51989329-52001482    | 42.6905  | 43.9818  | 0.0429943 | 0.968279 |
| XLOC_008039 | LOC440356   | chr16:29875003-29879374   | 0.165194 | 0.170193 | 0.0430098 | 1        |
| XLOC_010457 | REEP6       | chr19:1491164-1497924     | 25.288   | 26.0534  | 0.0430201 | 0.971663 |
| XLOC_014616 | NUP50       | chr22:45559725-45583890   | 9.59909  | 9.88991  | 0.0430601 | 0.968154 |
| XLOC_002824 | CDNF        | chr10:14861250-14879983   | 1.86527  | 1.92183  | 0.0430968 | 0.980228 |
| XLOC_021946 | GTF2E2      | chr8:30436030-30515738    | 20.9017  | 21.5357  | 0.0431095 | 0.969826 |
| XLOC_023185 | ENTPD2      | chr9:139942550-139948503  | 154.476  | 159.174  | 0.0432254 | 0.967296 |
| XLOC_000678 | ECM1        | chr1:150480486-150486265  | 1.22368  | 1.26096  | 0.0432879 | 0.981441 |
| XLOC_009480 | CTC1        | chr17:8128138-8151413     | 2.58073  | 2.65948  | 0.0433617 | 0.971528 |
| XLOC_011818 | BCAT2       | chr19:49298318-49314320   | 95.1258  | 98.0289  | 0.0433713 | 0.967343 |
| XLOC_002931 | ERCC6,PGBD3 | chr10:50664490-50747147   | 1.49682  | 1.54255  | 0.0434129 | 0.978818 |
| XLOC_022646 | RXRA        | chr9:137218315-137332431  | 15.6572  | 16.1358  | 0.0434332 | 0.967343 |
| XLOC_001522 | POMGNT1     | chr1:46654352-46686928    | 30.9813  | 31.9313  | 0.0435724 | 0.967343 |
| XLOC_022396 | OSTF1       | chr9:77703397-77762114    | 15.2622  | 15.7305  | 0.0435976 | 0.970185 |
| XLOC_015700 | ARIH2OS     | chr3:48955220-49022971    | 1.71733  | 1.77003  | 0.0436088 | 0.93285  |

|             |          |                           |           |           |           |          |
|-------------|----------|---------------------------|-----------|-----------|-----------|----------|
| XLOC_011634 | ZNF571   | chr19:38039850-38105079   | 0.702663  | 0.724228  | 0.0436117 | 0.982805 |
| XLOC_003063 | TCTN3    | chr10:97423152-97453900   | 21.947    | 22.6208   | 0.0436252 | 0.967343 |
| XLOC_020526 | STAG3L4  | chr7:66767624-66786513    | 5.83274   | 6.01206   | 0.0436845 | 0.972064 |
| XLOC_012632 | PKI55    | chr2:217081611-217084915  | 1.29764   | 1.33755   | 0.0437076 | 0.977021 |
| XLOC_020369 | MIOS     | chr7:7606615-7647110      | 6.65141   | 6.85608   | 0.0437222 | 0.968712 |
| XLOC_012835 | PREB     | chr2:27346656-27357542    | 41.0565   | 42.3232   | 0.0438405 | 0.967458 |
| XLOC_022560 | RABEPK   | chr9:127962820-127996438  | 42.872    | 44.195    | 0.0438481 | 0.967343 |
| XLOC_002876 | KIF5B    | chr10:32297937-32345371   | 13.9422   | 14.3731   | 0.0439188 | 0.96692  |
| XLOC_012890 | ZFP36L2  | chr2:43449540-43453745    | 7.31564   | 7.54185   | 0.0439341 | 0.970185 |
| XLOC_016750 | NMU      | chr4:56461397-56502465    | 16.9618   | 17.4863   | 0.0439382 | 0.974777 |
| XLOC_000212 | ZDHHC18  | chr1:27153200-27182211    | 25.4761   | 26.2647   | 0.0439798 | 0.967343 |
| XLOC_010800 | C19orf55 | chr19:36249043-36260077   | 1.475     | 1.52071   | 0.0440273 | 0.981441 |
| XLOC_006380 | JKAMP    | chr14:59951160-60043549   | 14.8426   | 15.303    | 0.0440756 | 0.967675 |
| XLOC_015001 | CMTM7    | chr3:32433162-32496333    | 80.4967   | 82.9958   | 0.0441071 | 0.967226 |
| XLOC_008746 | TIMM22   | chr17:900356-905390       | 23.8909   | 24.6338   | 0.0441749 | 0.968512 |
| XLOC_011619 | ZNF565   | chr19:36673186-36729675   | 0.656752  | 0.677189  | 0.0442089 | 0.981441 |
| XLOC_007432 | MEF2A    | chr15:100106132-100256629 | 3.9876    | 4.11197   | 0.0443076 | 0.968157 |
| XLOC_023878 | IQSEC2   | chrX:53262057-53350522    | 6.98189   | 7.19964   | 0.0443083 | 0.978818 |
| XLOC_023335 | DDX3X    | chrX:41192650-41209524    | 30.2741   | 31.2184   | 0.0443098 | 0.967343 |
| XLOC_016710 | TMEM156  | chr4:38968440-39034041    | 0.0929234 | 0.0958277 | 0.0444    | 1        |
| XLOC_010773 | GRAMD1A  | chr19:35491245-35517373   | 78.6339   | 81.0918   | 0.044404  | 0.966577 |
| XLOC_018049 | PAK1IP1  | chr6:10695187-10709970    | 15.2762   | 15.7538   | 0.0444122 | 0.968157 |
| XLOC_010638 | PKN1     | chr19:14544165-14582679   | 110.357   | 113.808   | 0.0444226 | 0.967296 |
| XLOC_004953 | MARCH9   | chr12:58148880-58154193   | 14.2444   | 14.6903   | 0.0444715 | 0.967458 |
| XLOC_022405 | TLE4     | chr9:82186877-82341656    | 0.530469  | 0.547113  | 0.0445689 | 0.981441 |
| XLOC_020623 | TRRAP    | chr7:98476112-98610866    | 5.31606   | 5.48291   | 0.0445846 | 0.967296 |
| XLOC_022411 | RMI1     | chr9:86595636-86618987    | 1.93843   | 1.99928   | 0.044588  | 0.975484 |
| XLOC_019156 | SERAC1   | chr6:158530535-158589312  | 3.23094   | 3.33244   | 0.0446216 | 0.970539 |
| XLOC_004102 | TSG101   | chr11:18501857-18548503   | 36.5183   | 37.6672   | 0.0446871 | 0.964843 |
| XLOC_022431 | SYK      | chr9:93564011-93660842    | 8.63973   | 8.91154   | 0.0446885 | 0.967343 |
| XLOC_008632 | CTRL     | chr16:67927174-67965778   | 1.37237   | 1.41559   | 0.0447283 | 0.994204 |
| XLOC_016630 | CTBP1    | chr4:1205227-1242908      | 41.7231   | 43.037    | 0.0447301 | 0.967226 |
| XLOC_008884 | MPRIP    | chr17:16946073-17095962   | 8.57938   | 8.84986   | 0.0447808 | 0.966398 |
| XLOC_019019 | ATG5     | chr6:106632351-106773695  | 7.89659   | 8.14607   | 0.0448735 | 0.967343 |
| XLOC_009486 | MYH10    | chr17:8377522-8534079     | 0.0603961 | 0.0623089 | 0.0449811 | 1        |
| XLOC_017537 | BTNL9    | chr5:180467224-180488523  | 2.73744   | 2.82414   | 0.0449851 | 0.974757 |
| XLOC_011006 | BAX      | chr19:49458116-49465055   | 200.273   | 206.617   | 0.044991  | 0.967343 |
| XLOC_020547 | EIF4H    | chr7:73588705-73611429    | 188.728   | 194.714   | 0.0450482 | 0.967343 |
| XLOC_006866 | ZFYVE26  | chr14:68213236-68283306   | 1.59031   | 1.64082   | 0.0451149 | 0.970533 |
| XLOC_022623 | POMT1    | chr9:134378288-134406662  | 20.4809   | 21.1324   | 0.0451743 | 0.979358 |
| XLOC_018289 | FOXP4    | chr6:41514163-41570122    | 8.38355   | 8.65088   | 0.0452856 | 0.966771 |
| XLOC_021395 | KCNH2    | chr7:150642043-150675402  | 19.4336   | 20.0542   | 0.0453553 | 0.967296 |
| XLOC_000401 | CPT2     | chr1:53662100-53686289    | 10.3328   | 10.6628   | 0.0453559 | 0.977471 |
| XLOC_021372 | ARHGEF35 | chr7:143883175-143892791  | 1.5356    | 1.5847    | 0.0454023 | 0.978016 |
| XLOC_003740 | TMEM126A | chr11:85358962-85367597   | 27.7951   | 28.6842   | 0.0454254 | 0.969901 |
| XLOC_013609 | ACTL10   | chr20:32244892-32262264   | 2.49139   | 2.5711    | 0.0454321 | 0.993157 |
| XLOC_014081 | HELZ2    | chr20:62189438-62205592   | 2.56104   | 2.64301   | 0.0454548 | 0.972463 |
| XLOC_021308 | TNPO3    | chr7:128594233-128695227  | 14.6601   | 15.1307   | 0.0455847 | 0.966307 |
| XLOC_001076 | EPHX1    | chr1:225997796-226070420  | 16.03     | 16.5449   | 0.045612  | 0.97714  |

|             |              |                           |           |           |           |          |
|-------------|--------------|---------------------------|-----------|-----------|-----------|----------|
| XLOC_006786 | FKBP3        | chr14:45553301-45603732   | 36.3781   | 37.5483   | 0.0456789 | 0.971173 |
| XLOC_012154 | EML4         | chr2:42396489-42559688    | 4.56605   | 4.71302   | 0.0457035 | 0.967343 |
| XLOC_006087 | FOXO1        | chr13:41129800-41240734   | 1.2251    | 1.26454   | 0.045712  | 0.975492 |
| XLOC_007465 | GABRB3       | chr15:26788693-27018935   | 0.831323  | 0.858089  | 0.0457178 | 0.976381 |
| XLOC_005521 | CS           | chr12:56665482-56694175   | 65.5845   | 67.701    | 0.0458236 | 0.965534 |
| XLOC_005882 | COG3         | chr13:46039029-46110833   | 2.35509   | 2.43112   | 0.0458355 | 0.970185 |
| XLOC_006487 | PSMC1        | chr14:90722893-90738966   | 81.3073   | 83.9323   | 0.0458419 | 0.96623  |
| XLOC_001298 | RSG1         | chr1:16558181-16563659    | 1.71519   | 1.77064   | 0.0459014 | 0.981441 |
| XLOC_014298 | C21orf59     | chr21:33973983-33984918   | 36.845    | 38.0363   | 0.0459076 | 0.966058 |
| XLOC_003175 | CHST15       | chr10:125767181-125853123 | 8.33067   | 8.60021   | 0.0459403 | 0.967226 |
| XLOC_018761 | BAG6         | chr6:31606804-31625987    | 56.398    | 58.2259   | 0.0460159 | 0.967226 |
| XLOC_002354 | HSPA14       | chr10:14880260-14913740   | 16.8576   | 17.4046   | 0.0460672 | 0.967296 |
| XLOC_014146 | IL10RB       | chr21:34638664-34669539   | 18.395    | 18.9925   | 0.0461101 | 0.96645  |
| XLOC_021281 | FAM3C        | chr7:120988904-121036422  | 19.454    | 20.0865   | 0.0461622 | 0.965989 |
| XLOC_003643 | PELI3        | chr11:66233797-66244808   | 10.072    | 10.3996   | 0.0461811 | 0.970185 |
| XLOC_018450 | TRAF3IP2-AS1 | chr6:111804674-111927477  | 3.16867   | 3.2718    | 0.0462079 | 0.994204 |
| XLOC_018692 | GUSBP2       | chr6:26839265-26924333    | 0.225932  | 0.233288  | 0.0462256 | 1        |
| XLOC_018431 | QRSL1        | chr6:107077440-107116292  | 4.41992   | 4.56405   | 0.0462958 | 0.967343 |
| XLOC_001178 | WASH7P       | chr1:11873-29370          | 9.3175    | 9.62146   | 0.0463131 | 0.970533 |
| XLOC_021537 | DCTN6        | chr8:29920257-30108213    | 17.6799   | 18.2569   | 0.0463279 | 0.989274 |
| XLOC_018305 | KLHDC3       | chr6:42981840-42989036    | 46.6672   | 48.1915   | 0.0463695 | 0.963969 |
| XLOC_001720 | SLC16A1      | chr1:113454469-113498975  | 36.5614   | 37.756    | 0.0463845 | 0.963969 |
| XLOC_015133 | ABHD14A,ACY1 | chr3:52009041-52023218    | 100.176   | 103.452   | 0.0464188 | 0.967296 |
| XLOC_021947 | GSR          | chr8:30535579-30585486    | 21.1696   | 21.8639   | 0.0465559 | 0.964843 |
| XLOC_018590 | MAP3K4       | chr6:161412821-161538417  | 1.96926   | 2.0339    | 0.0465997 | 0.972152 |
| XLOC_012109 | SLC4A1AP     | chr2:27848505-27917847    | 7.1715    | 7.40743   | 0.0466995 | 0.985256 |
| XLOC_023259 | MSL3         | chrX:11776277-11793872    | 14.1259   | 14.5914   | 0.046772  | 0.965545 |
| XLOC_014371 | UBE2G2       | chr21:46188494-46221751   | 21.0269   | 21.7203   | 0.0468056 | 0.963608 |
| XLOC_012235 | ZNF638       | chr2:71558884-71662191    | 5.33521   | 5.51219   | 0.0470787 | 0.964442 |
| XLOC_018576 | TMEM181      | chr6:158957467-159056467  | 4.19463   | 4.33431   | 0.0472601 | 0.967343 |
| XLOC_022385 | FXN          | chr9:71650478-71715094    | 9.20074   | 9.50724   | 0.0472767 | 0.980529 |
| XLOC_002263 | ERO1LB       | chr1:236378421-236445339  | 1.58042   | 1.6331    | 0.0473057 | 0.971528 |
| XLOC_001370 | STMN1        | chr1:26210676-26233368    | 176.673   | 182.58    | 0.0474444 | 0.964843 |
| XLOC_016004 | SERP1        | chr3:150259779-150264428  | 45.0087   | 46.514    | 0.0474612 | 0.964628 |
| XLOC_012638 | ARPC2        | chr2:219081873-219119071  | 205.146   | 212.007   | 0.0474669 | 0.963969 |
| XLOC_018605 | LINC00574    | chr6:170188885-170202969  | 0.0937302 | 0.0968754 | 0.0476167 | 1        |
| XLOC_004343 | SLC29A2      | chr11:66129991-66139291   | 13.6601   | 14.119    | 0.0476789 | 0.967307 |
| XLOC_000322 | PPIH         | chr1:43124047-43142429    | 77.2109   | 79.8063   | 0.0476994 | 0.964334 |
| XLOC_000303 | CAP1         | chr1:40506254-40538321    | 72.139    | 74.5648   | 0.0477148 | 0.963969 |
| XLOC_020436 | LOC401321    | chr7:32797897-32802536    | 2.56971   | 2.65622   | 0.0477696 | 0.970185 |
| XLOC_005427 | DDN          | chr12:49388932-49393088   | 4.76183   | 4.92284   | 0.0479733 | 0.970463 |
| XLOC_013533 | NDUFAF5      | chr20:13765671-13799067   | 5.77564   | 5.97127   | 0.0480572 | 0.968512 |
| XLOC_005805 | SAP18        | chr13:21714652-21723224   | 42.5663   | 44.0083   | 0.0480646 | 0.964442 |
| XLOC_013782 | PPDPF        | chr20:62152132-62153524   | 554.721   | 573.532   | 0.048112  | 0.964442 |
| XLOC_009163 | XYLT2        | chr17:48423392-48438512   | 15.6111   | 16.1412   | 0.0481799 | 0.964345 |
| XLOC_014796 | TXN2         | chr22:36863092-36877687   | 95.5172   | 98.7625   | 0.0482029 | 0.963969 |
| XLOC_021407 | RHEB         | chr7:151163097-151217010  | 84.6331   | 87.5103   | 0.0482312 | 0.964843 |
| XLOC_009538 | SHMT1        | chr17:18218593-18266856   | 16.3441   | 16.9005   | 0.0482947 | 0.973011 |
| XLOC_009258 | COG1         | chr17:71189172-71228533   | 7.44042   | 7.69401   | 0.0483507 | 0.980292 |

|             |                  |                           |          |          |           |          |
|-------------|------------------|---------------------------|----------|----------|-----------|----------|
| XLOC_022627 | GTF3C4           | chr9:135469675-135565470  | 5.55694  | 5.74642  | 0.0483716 | 0.98225  |
| XLOC_020527 | AUTS2            | chr7:69063904-70257885    | 1.73548  | 1.79481  | 0.0484964 | 0.971173 |
| XLOC_017376 | PCDHB8           | chr5:140557370-140560081  | 1.47155  | 1.52188  | 0.0485197 | 0.978096 |
| XLOC_015814 | FOXP1            | chr3:71003864-71633140    | 2.7812   | 2.87683  | 0.048773  | 0.981441 |
| XLOC_006864 | VTI1B            | chr14:68086578-68141602   | 68.4113  | 70.7684  | 0.0488701 | 0.972923 |
| XLOC_001368 | AUNIP            | chr1:26160496-26185848    | 6.32039  | 6.53828  | 0.0488976 | 0.967653 |
| XLOC_023053 | RBM18            | chr9:125001833-125085742  | 7.37534  | 7.62973  | 0.0489227 | 0.981975 |
| XLOC_000072 | NMNAT1           | chr1:10003485-10045556    | 2.48659  | 2.57246  | 0.0489845 | 0.969826 |
| XLOC_009991 | CYGB             | chr17:74523429-74541458   | 0.233816 | 0.241897 | 0.049021  | 1        |
| XLOC_007777 | AP3S2,C15orf38,C | chr15:90373830-90456222   | 13.6113  | 14.0822  | 0.0490724 | 0.970185 |
| XLOC_006395 | MTHFD1           | chr14:64854758-64926725   | 32.5513  | 33.6777  | 0.0490787 | 0.961132 |
| XLOC_015585 | CHCHD4           | chr3:14153576-14166371    | 15.261   | 15.7892  | 0.0490821 | 0.96513  |
| XLOC_004883 | HOXC8            | chr12:54402889-54406545   | 2.3743   | 2.45662  | 0.0491729 | 0.975492 |
| XLOC_013373 | CNPPD1           | chr2:220036618-220041702  | 43.4534  | 44.9615  | 0.0492217 | 0.962642 |
| XLOC_015902 | CCDC58           | chr3:122078435-122102074  | 43.9001  | 45.4269  | 0.0493223 | 0.965886 |
| XLOC_023881 | HUWE1            | chrX:53559056-53713697    | 6.93529  | 7.17652  | 0.0493288 | 0.960809 |
| XLOC_011466 | FARSA            | chr19:13033283-13044558   | 98.1828  | 101.598  | 0.0493318 | 0.962766 |
| XLOC_005864 | SLC25A15         | chr13:41363546-41495910   | 5.09299  | 5.2702   | 0.0493458 | 0.967343 |
| XLOC_011423 | CDKN2D           | chr19:10677137-10679655   | 9.32267  | 9.64733  | 0.0493875 | 0.971919 |
| XLOC_021780 | GSDMD            | chr8:144635556-144645231  | 49.3555  | 51.0798  | 0.0495425 | 0.963608 |
| XLOC_010035 | C17orf70         | chr17:79506910-79519429   | 13.7932  | 14.2752  | 0.0495552 | 0.964843 |
| XLOC_017360 | IK               | chr5:140027383-140042065  | 20.4589  | 21.1739  | 0.0495576 | 0.963969 |
| XLOC_007440 | WASH3P           | chr15:102501015-102519296 | 11.6721  | 12.081   | 0.0496694 | 0.965398 |
| XLOC_011422 | KRI1             | chr19:10654646-10676702   | 19.9999  | 20.7005  | 0.0496734 | 0.967343 |
| XLOC_012296 | RPIA             | chr2:88991175-89050452    | 16.3519  | 16.9254  | 0.0497301 | 0.962946 |
| XLOC_001346 | HNRNPR           | chr1:23636275-23670853    | 49.0367  | 50.7568  | 0.04974   | 0.963259 |
| XLOC_006485 | TDP1             | chr14:90422245-90511108   | 8.16883  | 8.45594  | 0.0498352 | 0.964843 |
| XLOC_002725 | INPP5F           | chr10:121485558-121588662 | 4.39414  | 4.54861  | 0.049845  | 0.976866 |
| XLOC_021049 | TBRG4            | chr7:45139698-45151346    | 71.7004  | 74.2219  | 0.0498642 | 0.961459 |
| XLOC_018248 | HMGA1            | chr6:34204576-34214008    | 1284.69  | 1329.94  | 0.0499362 | 0.963969 |
| XLOC_006833 | FLJ31306         | chr14:58711522-58764855   | 10.8118  | 11.1929  | 0.0499657 | 0.981441 |
| XLOC_015741 | VPRBP            | chr3:51428698-51534018    | 2.4068   | 2.49164  | 0.0499844 | 0.984602 |
| XLOC_007951 | NOMO1            | chr16:14927642-14990014   | 13.6474  | 14.1292  | 0.0500561 | 0.96166  |
| XLOC_020362 | RAC1             | chr7:6414125-6443598      | 123.016  | 127.36   | 0.0500634 | 0.960786 |
| XLOC_002638 | ABCC2            | chr10:101542462-101611662 | 0.140159 | 0.145114 | 0.0501206 | 1        |
| XLOC_009212 | BCAS3            | chr17:58755171-59470199   | 2.63629  | 2.72954  | 0.0501486 | 0.970533 |
| XLOC_001982 | OLFML2B          | chr1:161952981-161993644  | 0.433474 | 0.448837 | 0.0502447 | 0.981543 |
| XLOC_014581 | XPNPEP3          | chr22:41253084-41328823   | 4.76642  | 4.9354   | 0.0502595 | 0.974573 |
| XLOC_009307 | SEC14L1          | chr17:75084724-75213181   | 14.5683  | 15.0849  | 0.0502714 | 0.967343 |
| XLOC_000564 | ATXN7L2          | chr1:110026560-110035420  | 8.32816  | 8.6242   | 0.0503929 | 0.967343 |
| XLOC_013108 | FLJ42351         | chr2:113399406-113401757  | 0.78533  | 0.813304 | 0.050496  | 0.991219 |
| XLOC_014923 | ARL8B            | chr3:5163929-5222601      | 20.4265  | 21.1551  | 0.0505581 | 0.960032 |
| XLOC_012932 | XPO1             | chr2:61705068-61765418    | 26.5966  | 27.5459  | 0.0505969 | 0.961218 |
| XLOC_004243 | PRPF19           | chr11:60658019-60674061   | 83.6507  | 86.6399  | 0.0506544 | 0.960032 |
| XLOC_022251 | ZNF34            | chr8:145998500-146012725  | 1.74404  | 1.80638  | 0.050671  | 0.977857 |
| XLOC_001431 | AK2              | chr1:33473540-33502512    | 71.8751  | 74.4536  | 0.0508511 | 0.961105 |
| XLOC_011705 | ERF              | chr19:42751716-42759309   | 27.2606  | 28.2393  | 0.0508862 | 0.962023 |
| XLOC_018922 | MCM3             | chr6:52128811-52149679    | 24.59    | 25.4733  | 0.0509147 | 0.960032 |
| XLOC_003875 | SC5DL            | chr11:121163387-121184119 | 2.5563   | 2.64832  | 0.0510186 | 0.964843 |

|             |              |                           |           |           |           |          |
|-------------|--------------|---------------------------|-----------|-----------|-----------|----------|
| XLOC_006718 | HOMEZ        | chr14:23742843-23755309   | 2.66706   | 2.76311   | 0.0510386 | 0.969848 |
| XLOC_009427 | ZNF232       | chr17:5009030-5026397     | 10.0664   | 10.429    | 0.0510534 | 0.964843 |
| XLOC_007535 | LRRC57       | chr15:42834719-42841002   | 3.80087   | 3.93782   | 0.0510672 | 0.968416 |
| XLOC_009542 | TBC1D28      | chr17:18538841-18547740   | 0.0300548 | 0.0311378 | 0.0510723 | 1        |
| XLOC_001308 | ATP13A2      | chr1:17312452-17338423    | 19.7755   | 20.4886   | 0.0511022 | 0.960683 |
| XLOC_005154 | BCL7A        | chr12:122459860-122499950 | 8.15774   | 8.4523    | 0.0511749 | 0.964843 |
| XLOC_003094 | BLOC1S2      | chr10:102033034-102046469 | 15.9386   | 16.5141   | 0.051175  | 0.960529 |
| XLOC_009586 | PHF12        | chr17:27232270-27278508   | 3.72754   | 3.86216   | 0.0511832 | 0.967343 |
| XLOC_011290 | MOB3A        | chr19:2071034-2096269     | 8.19053   | 8.48646   | 0.0512045 | 0.965152 |
| XLOC_021227 | PLOD3        | chr7:100849257-100867471  | 47.1662   | 48.8753   | 0.051352  | 0.97565  |
| XLOC_006706 | DAD1         | chr14:23033806-23058143   | 217.177   | 225.049   | 0.0513703 | 0.95904  |
| XLOC_011268 | MED16        | chr19:867961-893218       | 25.2915   | 26.2093   | 0.0514249 | 0.960786 |
| XLOC_002062 | GLUL         | chr1:182350838-182361341  | 21.6801   | 22.467    | 0.0514373 | 0.961218 |
| XLOC_001761 | LOC728875    | chr1:144480745-144521969  | 0.135823  | 0.140759  | 0.0514935 | 1        |
| XLOC_005675 | PRDM4        | chr12:108126642-108154914 | 10.0669   | 10.4329   | 0.0515135 | 0.96133  |
| XLOC_001080 | PSEN2        | chr1:227058272-227083804  | 6.95593   | 7.20949   | 0.0516531 | 0.967343 |
| XLOC_003402 | FJX1         | chr11:35639734-35642421   | 29.492    | 30.5685   | 0.051724  | 0.961319 |
| XLOC_011550 | SUGP1        | chr19:19387321-19431321   | 16.3452   | 16.9423   | 0.0517657 | 0.961401 |
| XLOC_005429 | MLL2         | chr12:49412757-49449107   | 1.81585   | 1.88226   | 0.0518166 | 0.961236 |
| XLOC_006135 | INTS6        | chr13:51915167-52027275   | 1.76624   | 1.83088   | 0.0518525 | 0.971768 |
| XLOC_006637 | TRAF3        | chr14:103243815-103377837 | 4.22548   | 4.38027   | 0.0519028 | 0.962526 |
| XLOC_018550 | PCMT1        | chr6:150070830-150132557  | 51.3367   | 53.2201   | 0.0519797 | 0.961649 |
| XLOC_002879 | NRP1         | chr10:33466418-33623833   | 0.92465   | 0.95859   | 0.0520063 | 0.977857 |
| XLOC_021323 | PODXL        | chr7:131185020-131241376  | 26.9983   | 27.9897   | 0.0520267 | 0.959358 |
| XLOC_008567 | BRD7         | chr16:50352928-50402845   | 26.1837   | 27.1457   | 0.0520571 | 0.95935  |
| XLOC_009270 | SLC9A3R1     | chr17:72744750-72765499   | 48.8483   | 50.6474   | 0.052179  | 0.971314 |
| XLOC_023916 | PDZD11       | chrX:69506210-69509798    | 18.3288   | 19.0045   | 0.052227  | 0.96298  |
| XLOC_023436 | LOC550643    | chrX:56755717-56844004    | 88.546    | 91.8121   | 0.0522576 | 0.960032 |
| XLOC_002330 | FBXO18       | chr10:5903688-5979558     | 19.2529   | 19.9663   | 0.0524892 | 0.966442 |
| XLOC_003645 | BBS1         | chr11:66278118-66301084   | 4.02826   | 4.17757   | 0.0525069 | 0.967226 |
| XLOC_022466 | TDRD7        | chr9:100174301-100258405  | 5.18972   | 5.38243   | 0.052601  | 0.96263  |
| XLOC_004519 | C11orf92     | chr11:111164113-111179460 | 0.0854349 | 0.0886102 | 0.0526475 | 1        |
| XLOC_004245 | VPS37C       | chr11:60897727-60928916   | 12.4319   | 12.8947   | 0.0527291 | 0.961459 |
| XLOC_015303 | UMPS         | chr3:124449212-124468119  | 5.21564   | 5.41003   | 0.052791  | 0.960032 |
| XLOC_003666 | NDUFV1       | chr11:67374322-67380012   | 173.042   | 179.497   | 0.0528323 | 0.960032 |
| XLOC_021773 | LY6E         | chr8:144099901-144103827  | 424.236   | 440.1     | 0.0529621 | 0.958887 |
| XLOC_009649 | C17orf96     | chr17:36827958-36831187   | 23.2608   | 24.1329   | 0.0531032 | 0.958285 |
| XLOC_008560 | ITFG1        | chr16:47189297-47495015   | 9.77201   | 10.1385   | 0.0531191 | 0.962865 |
| XLOC_023559 | TMEM164      | chrX:109245862-109421016  | 2.27039   | 2.35556   | 0.053128  | 0.967343 |
| XLOC_009160 | PDK2         | chr17:48172100-48207246   | 17.8509   | 18.5217   | 0.0532146 | 0.962865 |
| XLOC_020535 | LOC100093631 | chr7:72569011-72621336    | 0.413827  | 0.429384  | 0.0532401 | 0.979338 |
| XLOC_016031 | CCNL1        | chr3:156865585-156878482  | 21.5058   | 22.3153   | 0.0533096 | 0.959513 |
| XLOC_013628 | ROMO1        | chr20:34256609-34288902   | 426.132   | 442.186   | 0.0533517 | 0.965989 |
| XLOC_004376 | ORAOV1       | chr11:69480331-69490165   | 6.37737   | 6.61766   | 0.05336   | 0.966442 |
| XLOC_012182 | ACYP2        | chr2:54342409-54532435    | 3.45802   | 3.58851   | 0.0534409 | 0.975252 |
| XLOC_007910 | ZNF263       | chr16:3333486-3341459     | 11.529    | 11.9652   | 0.0535705 | 0.960032 |
| XLOC_013552 | RIN2         | chr20:19867164-19983103   | 0.0231709 | 0.0240475 | 0.0535706 | 1        |
| XLOC_010959 | CALM3        | chr19:47104511-47114039   | 78.6703   | 81.6481   | 0.0535999 | 0.957531 |
| XLOC_015537 | SENP5        | chr3:196594726-196661584  | 3.69462   | 3.83452   | 0.0536178 | 0.96074  |

|             |              |                           |           |           |           |          |
|-------------|--------------|---------------------------|-----------|-----------|-----------|----------|
| XLOC_007560 | SHF          | chr15:45459411-45493373   | 5.19408   | 5.39079   | 0.0536268 | 0.967296 |
| XLOC_012563 | MFSD6        | chr2:191273080-191367041  | 1.65535   | 1.71814   | 0.053711  | 0.967866 |
| XLOC_003724 | C11orf30     | chr11:76156068-76262589   | 0.676134  | 0.701892  | 0.0539412 | 0.975454 |
| XLOC_005541 | STAT6        | chr12:57482676-57505196   | 32.8662   | 34.1231   | 0.0541453 | 0.967343 |
| XLOC_003156 | FAM204A      | chr10:120068571-120101839 | 11.3081   | 11.741    | 0.0542042 | 0.960217 |
| XLOC_020864 | AGAP3        | chr7:150783825-150841523  | 38.1642   | 39.6256   | 0.0542139 | 0.961218 |
| XLOC_018994 | UBE2J1       | chr6:90036343-90062619    | 10.5302   | 10.9336   | 0.0542383 | 0.958994 |
| XLOC_001114 | COA6         | chr1:234509213-234519795  | 65.9631   | 68.495    | 0.0543396 | 0.95904  |
| XLOC_018406 | ORC3         | chr6:88299784-88377172    | 8.94366   | 9.2874    | 0.0544102 | 0.960032 |
| XLOC_006450 | DLST         | chr14:75348593-75370450   | 45.7587   | 47.5183   | 0.0544371 | 0.956644 |
| XLOC_021873 | FAM86B1      | chr8:12039612-12051624    | 5.07807   | 5.27362   | 0.054515  | 0.967296 |
| XLOC_009843 | COL1A1       | chr17:48261456-48279000   | 0.0506103 | 0.0525623 | 0.0545961 | 1        |
| XLOC_017320 | HSPA4        | chr5:132387661-132440709  | 42.7038   | 44.3514   | 0.0546137 | 0.95594  |
| XLOC_018744 | MDC1         | chr6:30667583-30685458    | 4.11302   | 4.27178   | 0.0546372 | 0.960274 |
| XLOC_021027 | PSMA2        | chr7:42956461-42971805    | 95.8186   | 99.5173   | 0.0546415 | 0.955641 |
| XLOC_011467 | GADD45GIP1   | chr19:13064969-13068068   | 208.318   | 216.367   | 0.0546875 | 0.958829 |
| XLOC_018849 | BTBD9        | chr6:38136226-38607924    | 1.43684   | 1.49236   | 0.0546985 | 0.96715  |
| XLOC_016782 | GRSF1        | chr4:71681498-71705627    | 23.6514   | 24.5662   | 0.0547505 | 0.957719 |
| XLOC_017329 | TXNDC15      | chr5:134209459-134237323  | 8.30051   | 8.62169   | 0.0547715 | 0.958829 |
| XLOC_017342 | FAM53C       | chr5:137673223-137685418  | 15.3338   | 15.9291   | 0.0549494 | 0.956177 |
| XLOC_022377 | LOC100132352 | chr9:68726540-68748372    | 4.83776   | 5.02591   | 0.0550445 | 0.970533 |
| XLOC_007506 | SRP14        | chr15:40327890-40331389   | 209.657   | 217.814   | 0.0550653 | 0.956477 |
| XLOC_021004 | RP9P         | chr7:32956426-32982782    | 8.38448   | 8.71076   | 0.055077  | 0.96691  |
| XLOC_014621 | ATXN10       | chr22:46067677-46241187   | 22.8752   | 23.7655   | 0.0550871 | 0.956728 |
| XLOC_016620 | ATP5I        | chr4:666224-668127        | 706.946   | 734.512   | 0.0551862 | 0.956177 |
| XLOC_010431 | PTBP1        | chr19:797391-812327       | 137.667   | 143.036   | 0.0551981 | 0.956393 |
| XLOC_017846 | PROB1        | chr5:138727634-138730885  | 0.607931  | 0.631654  | 0.0552271 | 0.981602 |
| XLOC_018941 | RAB23        | chr6:57053581-57087078    | 1.94802   | 2.0241    | 0.0552744 | 0.969826 |
| XLOC_017561 | MRPL36       | chr5:1798498-1799956      | 106.293   | 110.449   | 0.0553344 | 0.956644 |
| XLOC_011754 | ERCC1        | chr19:45882891-45927177   | 228.955   | 237.916   | 0.0553897 | 0.961218 |
| XLOC_008932 | TNFAIP1      | chr17:26662547-26684603   | 11.7058   | 12.1643   | 0.0554364 | 0.981441 |
| XLOC_016713 | UGDH         | chr4:39500374-39529218    | 6.91599   | 7.1871    | 0.0554725 | 0.959927 |
| XLOC_005644 | TMPO-AS1     | chr12:98906750-98944157   | 1.05643   | 1.09787   | 0.0555034 | 0.994116 |
| XLOC_003937 | SIGIRR       | chr11:405715-417397       | 43.7299   | 45.4502   | 0.0556659 | 0.956261 |
| XLOC_000181 | PNRC2        | chr1:24286300-24289949    | 39.8287   | 41.3961   | 0.055686  | 0.954501 |
| XLOC_017668 | PDE4D        | chr5:58264865-59843484    | 2.41432   | 2.50949   | 0.0557796 | 0.960032 |
| XLOC_020633 | LOC100289187 | chr7:99195901-99208456    | 0.86745   | 0.901675  | 0.0558269 | 0.981602 |
| XLOC_004077 | GALNT18      | chr11:11292420-11643561   | 33.1933   | 34.5033   | 0.0558433 | 0.954535 |
| XLOC_015873 | C3orf17      | chr3:112721291-112738555  | 8.92955   | 9.28212   | 0.0558676 | 0.954765 |
| XLOC_022668 | TMEM141      | chr9:139685776-139687769  | 148.074   | 153.926   | 0.0559236 | 0.954397 |
| XLOC_000042 | TPRG1L       | chr1:3541555-3546694      | 18.6485   | 19.3856   | 0.0559254 | 0.954981 |
| XLOC_014539 | MPST         | chr22:37406899-37425863   | 147.35    | 153.175   | 0.0559404 | 0.967226 |
| XLOC_012533 | MTX2         | chr2:177134122-177202753  | 36.097    | 37.5246   | 0.0559582 | 0.953524 |
| XLOC_013717 | PTPN1        | chr20:49126890-49201086   | 22.5832   | 23.477    | 0.0559942 | 0.953219 |
| XLOC_021939 | DUSP4        | chr8:29190578-29208267    | 0.510867  | 0.531098  | 0.0560292 | 0.975542 |
| XLOC_000170 | EPHB2        | chr1:23037330-23241823    | 8.37119   | 8.70314   | 0.0561045 | 0.955952 |
| XLOC_008152 | CCDC113      | chr16:58283839-58328951   | 1.65559   | 1.72125   | 0.0561143 | 0.967226 |
| XLOC_013475 | ZCCHC3       | chr20:278203-280963       | 13.927    | 14.4795   | 0.0561274 | 0.957719 |
| XLOC_001516 | PRDX1        | chr1:45965855-45988562    | 499.778   | 519.655   | 0.0562648 | 0.955713 |

|             |                |                           |          |          |           |          |
|-------------|----------------|---------------------------|----------|----------|-----------|----------|
| XLOC_013924 | COMMD7         | chr20:31290492-31331814   | 28.2633  | 29.3875  | 0.056274  | 0.95395  |
| XLOC_015283 | GTF2E1         | chr3:120461557-120501916  | 4.52737  | 4.70789  | 0.0564079 | 0.96369  |
| XLOC_008670 | ZFH3           | chr16:72816785-73092534   | 1.05131  | 1.0933   | 0.0564966 | 0.963969 |
| XLOC_016643 | LRPAP1         | chr4:3505323-3534224      | 15.4731  | 16.0913  | 0.0565246 | 0.954143 |
| XLOC_015458 | ACTL6A         | chr3:179280707-179306193  | 28.6232  | 29.769   | 0.056626  | 0.954535 |
| XLOC_019126 | SF3B5          | chr6:144416017-144416754  | 274.839  | 285.847  | 0.0566541 | 0.95395  |
| XLOC_011418 | TYK2           | chr19:10461203-10491248   | 18.2496  | 18.9834  | 0.0568738 | 0.955124 |
| XLOC_005164 | ARL6IP4        | chr12:123464879-123467460 | 196.057  | 203.975  | 0.0571194 | 0.954143 |
| XLOC_016920 | BBS7           | chr4:122745483-122791652  | 2.66476  | 2.77267  | 0.0572693 | 0.9634   |
| XLOC_015952 | MRPL3          | chr3:131181044-131221860  | 53.3352  | 55.4964  | 0.0573059 | 0.953866 |
| XLOC_019185 | RPS6KA2        | chr6:166822853-167275771  | 0.240396 | 0.250139 | 0.0573143 | 1        |
| XLOC_003732 | AAMDC          | chr11:77532207-77583398   | 23.4329  | 24.3834  | 0.0573653 | 0.965252 |
| XLOC_014980 | SGOL1-AS1      | chr3:20202084-20227919    | 1.4091   | 1.46628  | 0.0573855 | 0.994204 |
| XLOC_016510 | NAA15          | chr4:140211070-140311935  | 7.87171  | 8.19135  | 0.057424  | 0.974108 |
| XLOC_004138 | LMO2           | chr11:33880122-33913836   | 2.32371  | 2.41811  | 0.0574495 | 0.974073 |
| XLOC_023000 | EPB41L4B       | chr9:111934253-112083021  | 6.066    | 6.31255  | 0.057478  | 0.957719 |
| XLOC_005794 | GOLGA3         | chr12:133345494-133405426 | 5.62161  | 5.85033  | 0.0575348 | 0.953159 |
| XLOC_003204 | ADAM8          | chr10:135075919-135090407 | 0.782892 | 0.814747 | 0.0575388 | 0.97717  |
| XLOC_017805 | ZCCHC10        | chr5:132332677-132362240  | 3.55896  | 3.70385  | 0.0575698 | 0.967226 |
| XLOC_004168 | PACSIN3        | chr11:47199072-47208010   | 39.1884  | 40.7861  | 0.0576526 | 0.952942 |
| XLOC_017835 | BRD8           | chr5:137475458-137514358  | 11.3225  | 11.785   | 0.0577522 | 0.95395  |
| XLOC_002393 | MASTL          | chr10:27443752-27475848   | 5.28284  | 5.49868  | 0.0577725 | 0.957719 |
| XLOC_003774 | KDM4D          | chr11:94706844-94732676   | 0.375962 | 0.391354 | 0.0578875 | 0.979338 |
| XLOC_000691 | PSMD4          | chr1:151227196-151239954  | 164.364  | 171.098  | 0.0579268 | 0.95395  |
| XLOC_021205 | TAF6           | chr7:99690403-99723128    | 39.0536  | 40.6536  | 0.0579286 | 0.985956 |
| XLOC_003414 | ALKBH3         | chr11:43902356-43942494   | 19.704   | 20.5127  | 0.0580284 | 0.955641 |
| XLOC_014565 | APOBEC3F       | chr22:39436672-39451975   | 2.8958   | 3.01496  | 0.0581774 | 0.977897 |
| XLOC_015298 | PDIA5          | chr3:122785855-122880953  | 9.09732  | 9.47171  | 0.0581823 | 0.961459 |
| XLOC_000285 | MAP7D1         | chr1:36621802-36646441    | 36.5016  | 38.004   | 0.0581917 | 0.952674 |
| XLOC_006372 | NAA30          | chr14:57857270-57879466   | 3.74272  | 3.8968   | 0.0582032 | 0.959172 |
| XLOC_004351 | POLD4          | chr11:67085309-67159158   | 25.6939  | 26.7526  | 0.0582522 | 0.961218 |
| XLOC_012337 | MAP4K4         | chr2:102314164-102511152  | 7.72719  | 8.04588  | 0.0583054 | 0.954501 |
| XLOC_003672 | PPP6R3         | chr11:68228185-68382801   | 11.2093  | 11.6717  | 0.0583267 | 0.952294 |
| XLOC_016755 | NOA1           | chr4:57829515-57843826    | 37.2878  | 38.8268  | 0.0583481 | 0.95448  |
| XLOC_005783 | SLC15A4        | chr12:129277738-129308541 | 9.56235  | 9.95757  | 0.0584291 | 0.957728 |
| XLOC_012129 | BIRC6          | chr2:32582095-32843965    | 1.82626  | 1.90179  | 0.058469  | 0.954501 |
| XLOC_022248 | C8orf82,LRRC24 | chr8:145743348-145754458  | 79.7153  | 83.0147  | 0.0585099 | 0.966442 |
| XLOC_011708 | LIPE           | chr19:42901299-43156507   | 2.68399  | 2.79535  | 0.0586501 | 0.967343 |
| XLOC_011297 | LSM7           | chr19:2321519-2328614     | 246.505  | 256.736  | 0.0586682 | 0.952184 |
| XLOC_012818 | PFN4           | chr2:24338243-24346151    | 0.301757 | 0.31431  | 0.0587993 | 1        |
| XLOC_004349 | SPTBN2         | chr11:66452719-66488870   | 12.8161  | 13.3493  | 0.05881   | 0.952184 |
| XLOC_013362 | ZNF142         | chr2:219502639-219524355  | 2.67758  | 2.78906  | 0.0588488 | 0.961143 |
| XLOC_001316 | UBR4           | chr1:19400999-19536746    | 5.52224  | 5.75268  | 0.0589792 | 0.952355 |
| XLOC_012557 | WDR75          | chr2:190306158-190340264  | 10.2463  | 10.6739  | 0.0589902 | 0.953195 |
| XLOC_010437 | CFD            | chr19:859664-863610       | 22.6784  | 23.6252  | 0.0590082 | 0.962865 |
| XLOC_000163 | LINC00339      | chr1:22351706-22357715    | 11.0759  | 11.5384  | 0.0590263 | 0.964843 |
| XLOC_023003 | TXN            | chr9:113006091-113018920  | 805.691  | 839.401  | 0.059134  | 0.954035 |
| XLOC_020844 | ZNF862         | chr7:149535508-149564568  | 1.39439  | 1.45278  | 0.0591805 | 0.964843 |
| XLOC_000122 | PLEKHM2        | chr1:16010826-16061264    | 32.5243  | 33.8864  | 0.0591888 | 0.951854 |

|             |              |                           |          |          |           |          |
|-------------|--------------|---------------------------|----------|----------|-----------|----------|
| XLOC_004344 | MRPL11       | chr11:66202549-66206310   | 42.0828  | 43.8456  | 0.0592024 | 0.952184 |
| XLOC_002320 | PITRM1-AS1   | chr10:3179918-3215033     | 0.372999 | 0.388645 | 0.0592808 | 0.991167 |
| XLOC_007837 | FAM173A      | chr16:771141-776473       | 71.8336  | 74.847   | 0.0592858 | 0.96256  |
| XLOC_005989 | CARKD        | chr13:111267806-111292342 | 22.0829  | 23.0107  | 0.059377  | 0.952784 |
| XLOC_006156 | KLF12        | chr13:74260148-74708066   | 0.348345 | 0.363    | 0.0594542 | 1        |
| XLOC_000239 | EPB41        | chr1:29213602-29450421    | 3.68187  | 3.83685  | 0.0594824 | 0.965296 |
| XLOC_003441 | NR1H3        | chr11:47260852-47290584   | 3.56009  | 3.70996  | 0.0594895 | 0.982903 |
| XLOC_001424 | BSDC1        | chr1:32830704-32860062    | 17.9213  | 18.6772  | 0.0595965 | 0.952184 |
| XLOC_021508 | RHOBTB2      | chr8:22844929-22941132    | 3.82423  | 3.98557  | 0.0596157 | 0.987173 |
| XLOC_000063 | PARK7        | chr1:8021713-8045342      | 326.33   | 340.11   | 0.0596703 | 0.952184 |
| XLOC_012056 | LPIN1        | chr2:11817704-11967533    | 7.43685  | 7.75157  | 0.0597969 | 0.952184 |
| XLOC_014577 | TNRC6B       | chr22:40440820-40731812   | 1.21433  | 1.26581  | 0.0599025 | 0.955041 |
| XLOC_000824 | NDUFS2       | chr1:161169104-161184184  | 56.7169  | 59.1235  | 0.0599546 | 0.952184 |
| XLOC_013557 | XRN2         | chr20:21283941-21370463   | 22.4207  | 23.3723  | 0.0599705 | 0.952184 |
| XLOC_014474 | KIAA1671     | chr22:25423940-25593415   | 1.88165  | 1.96159  | 0.0600256 | 0.957739 |
| XLOC_009521 | FAM211A      | chr17:16342300-16395505   | 2.67773  | 2.7916   | 0.0600807 | 0.995202 |
| XLOC_017708 | TBCA         | chr5:76986994-77072185    | 301.722  | 314.553  | 0.0600844 | 0.952184 |
| XLOC_004958 | USP15        | chr12:62654120-62803501   | 4.0614   | 4.23453  | 0.0602242 | 0.96684  |
| XLOC_001799 | APH1A        | chr1:150237798-150241609  | 110.334  | 115.043  | 0.0603001 | 0.952163 |
| XLOC_021762 | CHRA1        | chr8:141521396-141527252  | 29.3206  | 30.5725  | 0.0603226 | 0.952184 |
| XLOC_008264 | USP10        | chr16:84733554-84813527   | 26.5708  | 27.7073  | 0.0604238 | 0.952184 |
| XLOC_018340 | CENPQ        | chr6:49431095-49460820    | 5.8593   | 6.11     | 0.060444  | 0.960217 |
| XLOC_020598 | CLDN12       | chr7:90032647-90045268    | 13.0994  | 13.6599  | 0.0604442 | 0.952184 |
| XLOC_015025 | EXOG         | chr3:38537762-38567796    | 3.28923  | 3.43003  | 0.0604716 | 0.96347  |
| XLOC_013572 | LOC100134868 | chr20:25990434-26002430   | 0.602708 | 0.628517 | 0.0604927 | 0.981141 |
| XLOC_005407 | HDAC7        | chr12:48166966-48213763   | 18.1978  | 18.9776  | 0.0605299 | 0.95904  |
| XLOC_018247 | ITPR3        | chr6:33589155-33664348    | 51.8093  | 54.0298  | 0.0605455 | 0.951854 |
| XLOC_006331 | GEMIN2       | chr14:39583487-39606177   | 8.34906  | 8.70697  | 0.0605568 | 0.960529 |
| XLOC_014260 | RWDD2B       | chr21:30378079-30391685   | 9.94809  | 10.3747  | 0.0605839 | 0.958285 |
| XLOC_006224 | LINC00346    | chr13:111516333-111522655 | 1.8108   | 1.88848  | 0.0605989 | 0.960032 |
| XLOC_007169 | SNAP23       | chr15:42787503-42825259   | 24.8693  | 25.9365  | 0.0606166 | 0.951272 |
| XLOC_008046 | PPP4C        | chr16:30087383-30096695   | 146.219  | 152.497  | 0.0606452 | 0.952184 |
| XLOC_009747 | PSMC3IP      | chr17:40719077-40729849   | 20.857   | 21.7528  | 0.0606718 | 0.97565  |
| XLOC_011681 | SERTAD1      | chr19:40928408-40931932   | 83.2994  | 86.8832  | 0.0607713 | 0.952184 |
| XLOC_019163 | SOD2         | chr6:160100148-160114353  | 29.8491  | 31.1344  | 0.0608204 | 0.955124 |
| XLOC_005379 | PKP2         | chr12:32943679-33049780   | 2.97557  | 3.10376  | 0.0608471 | 0.960032 |
| XLOC_016403 | FGF5         | chr4:81187741-81212171    | 0.887756 | 0.926001 | 0.0608521 | 0.967318 |
| XLOC_008354 | NTHL1        | chr16:2089815-2097867     | 34.2931  | 35.7712  | 0.0608776 | 0.954899 |
| XLOC_007512 | MRPL42P5     | chr15:40824082-40824749   | 0.699368 | 0.729561 | 0.0609769 | 0.983243 |
| XLOC_001209 | SLC35E2B     | chr1:1571099-1655791      | 6.37283  | 6.64797  | 0.0609801 | 0.969282 |
| XLOC_010725 | ZNF714       | chr19:21264952-21307883   | 0.480196 | 0.500933 | 0.0609956 | 0.967458 |
| XLOC_008334 | C16orf91     | chr16:1469744-1470801     | 30.3397  | 31.6502  | 0.0610103 | 0.956644 |
| XLOC_017616 | NUP155       | chr5:37291940-37371197    | 5.62361  | 5.86669  | 0.0610493 | 0.954143 |
| XLOC_017234 | NR2F1        | chr5:92919042-93447404    | 4.16023  | 4.34107  | 0.0613899 | 0.975928 |
| XLOC_013016 | TMEM150A     | chr2:85825669-85829822    | 12.0787  | 12.6038  | 0.0614041 | 0.958829 |
| XLOC_022997 | TMEM245      | chr9:111777414-111882225  | 5.90475  | 6.16174  | 0.0614638 | 0.952184 |
| XLOC_012573 | MARS2        | chr2:198570027-198573114  | 7.74274  | 8.07993  | 0.0614984 | 0.95395  |
| XLOC_001807 | CERS2        | chr1:150937648-150947479  | 76.2323  | 79.5522  | 0.0615004 | 0.948369 |
| XLOC_020524 | TMEM248      | chr7:66386202-66423538    | 16.6692  | 17.3952  | 0.0615041 | 0.950176 |



|             |         |                           |           |           |           |          |
|-------------|---------|---------------------------|-----------|-----------|-----------|----------|
| XLOC_014402 | USP18   | chr22:18632757-18660162   | 2.99315   | 3.12354   | 0.0615147 | 0.967296 |
| XLOC_008333 | UNKL    | chr16:1401899-1464705     | 4.3161    | 4.50414   | 0.0615229 | 0.978818 |
| XLOC_000227 | XKR8    | chr1:28286503-28294604    | 10.3707   | 10.8226   | 0.0615322 | 0.960032 |
| XLOC_021467 | GATA4   | chr8:11561716-11617509    | 7.40677   | 7.72994   | 0.0616136 | 0.957728 |
| XLOC_017909 | ATOX1   | chr5:151122382-151138210  | 118.503   | 123.675   | 0.0616279 | 0.952184 |
| XLOC_015477 | ABCF3   | chr3:183903862-183911795  | 20.2477   | 21.1314   | 0.0616344 | 0.952163 |
| XLOC_012502 | SSB     | chr2:170655321-170681353  | 50.5147   | 52.7202   | 0.0616535 | 0.961218 |
| XLOC_015877 | NAA50   | chr3:113435306-113465120  | 17.0683   | 17.8139   | 0.0616848 | 0.950787 |
| XLOC_003805 | FDX1    | chr11:110300660-110335608 | 7.77492   | 8.11485   | 0.0617369 | 0.952978 |
| XLOC_011814 | MAMSTR  | chr19:49216254-49222976   | 1.1569    | 1.20751   | 0.0617664 | 0.978031 |
| XLOC_017657 | CCNO    | chr5:54526980-54529508    | 18.2061   | 19.0029   | 0.0617923 | 0.960032 |
| XLOC_005912 | SUGT1   | chr13:53226830-53262433   | 27.1172   | 28.3041   | 0.0618007 | 0.952184 |
| XLOC_010419 | PARD6G  | chr18:77905806-78005397   | 2.62225   | 2.73735   | 0.0619755 | 0.963969 |
| XLOC_007922 | MGRN1   | chr16:4674824-4740975     | 18.0599   | 18.853    | 0.0620002 | 0.950837 |
| XLOC_015228 | TFG     | chr3:100428133-100467811  | 56.9461   | 59.4475   | 0.0620173 | 0.950862 |
| XLOC_003776 | SRSF8   | chr11:94800055-94804388   | 7.0632    | 7.37354   | 0.0620348 | 0.952184 |
| XLOC_023534 | TCEAL4  | chrX:102840418-102842655  | 49.4416   | 51.6237   | 0.0623068 | 0.948786 |
| XLOC_020741 | ATP6V1F | chr7:128502856-128505903  | 625.44    | 653.044   | 0.06231   | 0.950251 |
| XLOC_021755 | EFR3A   | chr8:132916355-133025886  | 4.92437   | 5.14218   | 0.062439  | 0.952674 |
| XLOC_014517 | DEPDC5  | chr22:32149936-32303020   | 1.32118   | 1.37962   | 0.0624495 | 0.964843 |
| XLOC_003582 | FERMT3  | chr11:63974151-63993726   | 0.384802  | 0.401826  | 0.0624544 | 0.994058 |
| XLOC_001062 | MARC1   | chr1:220960038-220987741  | 8.4554    | 8.83011   | 0.0625578 | 0.957728 |
| XLOC_005160 | DENR    | chr12:123237370-123255953 | 22.007    | 22.9827   | 0.0625851 | 0.949188 |
| XLOC_015676 | SETD2   | chr3:47057897-47205467    | 2.47441   | 2.58414   | 0.0625989 | 0.952184 |
| XLOC_017001 | HMGB2   | chr4:174252526-174255595  | 181.964   | 190.034   | 0.0626025 | 0.950637 |
| XLOC_011254 | MGC2752 | chr19:59086765-59095762   | 11.3891   | 11.8942   | 0.0626035 | 0.952795 |
| XLOC_002835 | CUBN    | chr10:16865964-17171816   | 0.880324  | 0.919369  | 0.0626105 | 0.958143 |
| XLOC_022939 | IPPK    | chr9:95059639-95432547    | 6.91472   | 7.22192   | 0.0627127 | 0.971314 |
| XLOC_015915 | HEG1    | chr3:124684553-124774802  | 2.14227   | 2.23748   | 0.0627295 | 0.953195 |
| XLOC_005544 | R3HDM2  | chr12:57647547-57704246   | 7.43226   | 7.76255   | 0.0627304 | 0.952184 |
| XLOC_000070 | TMEM201 | chr1:9648931-9674935      | 8.56354   | 8.94462   | 0.0628135 | 0.953159 |
| XLOC_010217 | MALT1   | chr18:56338617-56417370   | 4.56153   | 4.76528   | 0.0630424 | 0.952184 |
| XLOC_007406 | FURIN   | chr15:91411884-91426687   | 20.1033   | 21.0026   | 0.0631366 | 0.94824  |
| XLOC_006985 | BAG5    | chr14:104022880-104029151 | 5.55694   | 5.80651   | 0.0633795 | 0.951036 |
| XLOC_013301 | TYW5    | chr2:200793633-200828847  | 1.57887   | 1.64984   | 0.0634342 | 0.977897 |
| XLOC_020934 | NDUFA4  | chr7:10971579-10979813    | 70.4131   | 73.5786   | 0.0634427 | 0.948369 |
| XLOC_021544 | MAK16   | chr8:33342684-33370703    | 8.02636   | 8.38733   | 0.0634669 | 0.958829 |
| XLOC_008212 | DDX19A  | chr16:70380823-70407281   | 12.2158   | 12.7661   | 0.0635669 | 0.949739 |
| XLOC_008872 | ADORA2B | chr17:15848230-15879210   | 33.8386   | 35.3632   | 0.0635817 | 0.948761 |
| XLOC_001344 | LUZP1   | chr1:23410515-23495351    | 3.53185   | 3.69101   | 0.0635914 | 0.950064 |
| XLOC_017719 | DHFR    | chr5:79922044-80172634    | 11.6928   | 12.2201   | 0.0636341 | 0.970533 |
| XLOC_008164 | CES2    | chr16:66968346-66978994   | 8.86439   | 9.26416   | 0.063639  | 0.952184 |
| XLOC_008227 | DHX38   | chr16:72118755-72146811   | 12.9321   | 13.5154   | 0.0636423 | 0.962687 |
| XLOC_024228 | PCDH11Y | chrY:4868266-5610264      | 0.0243983 | 0.0254993 | 0.0636732 | 1        |
| XLOC_015326 | C3orf37 | chr3:128997683-129024135  | 36.6835   | 38.3392   | 0.0636915 | 0.948523 |
| XLOC_023257 | HCCS    | chrX:11129405-11141204    | 10.8419   | 11.3314   | 0.0637127 | 0.952184 |
| XLOC_021234 | POLR2J  | chr7:102105389-102119381  | 108.508   | 113.408   | 0.063713  | 0.965307 |
| XLOC_011191 | ZNF865  | chr19:56124958-56129907   | 7.99778   | 8.3592    | 0.0637666 | 0.952307 |
| XLOC_020356 | ZNF815P | chr7:5862790-5894066      | 0.570872  | 0.59668   | 0.0637913 | 0.975492 |

|             |                |                           |          |          |           |          |
|-------------|----------------|---------------------------|----------|----------|-----------|----------|
| XLOC_021086 | GUSB           | chr7:65425672-65447301    | 24.7619  | 25.8823  | 0.0638453 | 0.948152 |
| XLOC_005400 | SLC38A2        | chr12:46751970-46766645   | 33.3298  | 34.838   | 0.0638497 | 0.950064 |
| XLOC_007693 | COX5A          | chr15:75212616-75230495   | 337.39   | 352.677  | 0.0639309 | 0.947642 |
| XLOC_001461 | EPHA10         | chr1:38181645-38230824    | 0.859213 | 0.89815  | 0.0639394 | 0.970185 |
| XLOC_022339 | NPR2           | chr9:35792405-35812259    | 1.93936  | 2.02732  | 0.0639926 | 0.96513  |
| XLOC_002201 | SUSD4          | chr1:223394160-223537544  | 0.493445 | 0.515861 | 0.0640925 | 0.981543 |
| XLOC_012894 | LRPPRC         | chr2:44113362-44223144    | 30.1325  | 31.5022  | 0.0641354 | 0.948368 |
| XLOC_002362 | STAM           | chr10:17686123-17758821   | 6.61242  | 6.91324  | 0.0641836 | 0.951223 |
| XLOC_013949 | SCAND1         | chr20:34541538-34543281   | 150.391  | 157.239  | 0.0642419 | 0.950064 |
| XLOC_014410 | GP1BB,SEPT5    | chr22:19701986-19712297   | 8.3674   | 8.74857  | 0.064269  | 0.973233 |
| XLOC_023889 | PFKFB1         | chrX:54959566-55024967    | 0.162008 | 0.169388 | 0.0642714 | 1        |
| XLOC_022522 | ATP6V1G1       | chr9:117349993-117361152  | 107.124  | 112.013  | 0.0643825 | 0.946416 |
| XLOC_021068 | VOPP1          | chr7:55538305-55640200    | 21.3181  | 22.2915  | 0.0644143 | 0.945887 |
| XLOC_012484 | PSMD14         | chr2:162164785-162268228  | 86.3874  | 90.3328  | 0.064429  | 0.94749  |
| XLOC_021030 | MRPS24,URGCP   | chr7:43906156-43965996    | 306.252  | 320.274  | 0.0645874 | 0.952184 |
| XLOC_012840 | MPV17          | chr2:27532359-27545969    | 42.7718  | 44.731   | 0.0646153 | 0.950837 |
| XLOC_014970 | EAF1           | chr3:15469063-15484120    | 5.08592  | 5.31908  | 0.0646693 | 0.950837 |
| XLOC_009200 | SMG8           | chr17:57287370-57292611   | 6.45311  | 6.74908  | 0.0646963 | 0.952184 |
| XLOC_006950 | IFI27L2        | chr14:94594117-94595957   | 194.493  | 203.416  | 0.0647143 | 0.948811 |
| XLOC_011039 | AP2A1          | chr19:50270179-50316567   | 26.3619  | 27.5727  | 0.0647857 | 0.948686 |
| XLOC_007405 | BLM            | chr15:91260578-91358686   | 1.90468  | 1.99217  | 0.064797  | 0.960032 |
| XLOC_011283 | ATP8B3         | chr19:1782073-1812275     | 0.337048 | 0.352532 | 0.0647994 | 1        |
| XLOC_008409 | TMEM186        | chr16:8889036-8891505     | 13.1803  | 13.7862  | 0.064839  | 0.953159 |
| XLOC_018895 | NFKBIE         | chr6:44225902-44233525    | 10.472   | 10.9546  | 0.0649965 | 0.952163 |
| XLOC_021791 | CYC1           | chr8:145149959-145152428  | 230.914  | 241.555  | 0.0649992 | 0.94687  |
| XLOC_003029 | GLUD1          | chr10:88809958-88854776   | 39.3895  | 41.2058  | 0.0650346 | 0.945688 |
| XLOC_000689 | SCNM1,TNFAIP8l | chr1:151129104-151148547  | 10.9332  | 11.4375  | 0.0650523 | 0.954501 |
| XLOC_004734 | LOH12CR1       | chr12:12510019-12619838   | 4.11136  | 4.30113  | 0.0651024 | 0.962045 |
| XLOC_023788 | RPS6KA3        | chrX:20168028-20284750    | 3.28931  | 3.44119  | 0.0651198 | 0.949926 |
| XLOC_005385 | GXYLT1         | chr12:42475647-42538673   | 1.4964   | 1.56566  | 0.0652739 | 0.953159 |
| XLOC_010847 | SAMD4B         | chr19:39833107-39875537   | 10.6161  | 11.1076  | 0.0652865 | 0.946375 |
| XLOC_008953 | TP53I13        | chr17:27895738-27900175   | 54.0176  | 56.5196  | 0.065322  | 0.946375 |
| XLOC_001972 | DEDD           | chr1:161070345-161102478  | 19.1946  | 20.0838  | 0.0653318 | 0.981543 |
| XLOC_000008 | PLEKHN1        | chr1:901876-910484        | 2.01597  | 2.1094   | 0.0653578 | 0.971663 |
| XLOC_003816 | DIXDC1         | chr11:111797867-111893307 | 0.780526 | 0.816704 | 0.0653666 | 0.96692  |
| XLOC_008555 | VPS35          | chr16:46693588-46723144   | 15.2617  | 15.9691  | 0.0653685 | 0.945989 |
| XLOC_017164 | MRPS36         | chr5:68513572-68525985    | 20.3267  | 21.2698  | 0.0654288 | 0.951036 |
| XLOC_004348 | RBM4B          | chr11:66384052-66445275   | 9.42338  | 9.86071  | 0.0654476 | 0.986782 |
| XLOC_010677 | GTPBP3         | chr19:17445790-17453540   | 20.8406  | 21.8086  | 0.0655036 | 0.948523 |
| XLOC_021717 | EBAG9          | chr8:110551928-110577391  | 17.3956  | 18.2041  | 0.0655357 | 0.950252 |
| XLOC_012815 | C2orf44        | chr2:24252205-24270296    | 3.02017  | 3.16065  | 0.0655909 | 0.95448  |
| XLOC_013835 | C20orf27       | chr20:3734145-3749035     | 127.923  | 133.878  | 0.065644  | 0.944295 |
| XLOC_016201 | MAN2B2         | chr4:6576901-6624188      | 10.1134  | 10.5843  | 0.0656569 | 0.948152 |
| XLOC_004938 | NXPH4          | chr12:57610577-57620232   | 38.5247  | 40.3198  | 0.0657064 | 0.950837 |
| XLOC_021706 | FZD6           | chr8:104310660-104345094  | 8.75956  | 9.16806  | 0.0657579 | 0.950001 |
| XLOC_002933 | PARG           | chr10:51026324-51371331   | 3.81855  | 3.99715  | 0.0659442 | 0.959799 |
| XLOC_009782 | EFTUD2         | chr17:42923720-42976993   | 37.1684  | 38.9069  | 0.065951  | 0.945011 |
| XLOC_008359 | CASKIN1        | chr16:2205798-2246465     | 11.209   | 11.7343  | 0.0660844 | 0.975492 |
| XLOC_015772 | SELK           | chr3:53919225-53925989    | 52.9455  | 55.4273  | 0.0660895 | 0.946416 |

|             |          |                           |          |           |           |          |
|-------------|----------|---------------------------|----------|-----------|-----------|----------|
| XLOC_004564 | DDX6     | chr11:118618472-118661972 | 11.6388  | 12.1845   | 0.0661025 | 0.945399 |
| XLOC_005089 | UBE3B    | chr12:109915427-109974510 | 6.02814  | 6.31082   | 0.0661145 | 0.958829 |
| XLOC_003743 | C11orf73 | chr11:86013252-86056985   | 29.4223  | 30.8026   | 0.0661403 | 0.950837 |
| XLOC_003040 | LIPA     | chr10:90973325-91011660   | 11.3542  | 11.887    | 0.0661485 | 0.947962 |
| XLOC_005518 | SMARCC2  | chr12:56555635-56583351   | 14.7011  | 15.3911   | 0.066172  | 0.945689 |
| XLOC_016663 | ABLIM2   | chr4:7967036-8160559      | 0.400938 | 0.419767  | 0.06621   | 0.977897 |
| XLOC_008978 | ZNF207   | chr17:30677127-30697468   | 48.1613  | 50.4237   | 0.0662267 | 0.944479 |
| XLOC_003628 | MUS81    | chr11:65627871-65640405   | 26.7957  | 28.0553   | 0.0662716 | 0.950837 |
| XLOC_020920 | RSPH10B  | chr7:5965776-6010314      | 0.02474  | 0.0259048 | 0.0663747 | 1        |
| XLOC_014452 | BCR      | chr22:23522551-23660224   | 9.03141  | 9.45676   | 0.066395  | 0.945399 |
| XLOC_016333 | POLR2B   | chr4:57845108-58071465    | 23.1915  | 24.2839   | 0.0664029 | 0.944779 |
| XLOC_014445 | LOC96610 | chr22:22652462-22677324   | 2.42345  | 2.53782   | 0.0665271 | 0.964843 |
| XLOC_018883 | MRPL2    | chr6:43021766-43027242    | 44.1531  | 46.24     | 0.066625  | 0.946375 |
| XLOC_015715 | RHOA     | chr3:49396578-49449526    | 267.46   | 280.105   | 0.0666448 | 0.945399 |
| XLOC_010564 | UBL5     | chr19:9938555-9940797     | 520.073  | 544.698   | 0.0667439 | 0.944779 |
| XLOC_008834 | KDM6B    | chr17:7743234-7758118     | 6.3972   | 6.70039   | 0.0668052 | 0.948987 |
| XLOC_017123 | MRPS30   | chr5:44809026-44815618    | 41.146   | 43.0976   | 0.0668556 | 0.945416 |
| XLOC_007220 | MAPK6    | chr15:52311410-52358462   | 7.94584  | 8.32313   | 0.0669278 | 0.946235 |
| XLOC_007537 | TTBK2    | chr15:43036541-43213007   | 0.367482 | 0.384956  | 0.0670184 | 0.971768 |
| XLOC_003870 | TMEM136  | chr11:120195837-120204388 | 5.01623  | 5.25482   | 0.0670384 | 0.952184 |
| XLOC_002420 | ZNF485   | chr10:44101854-44113352   | 3.47799  | 3.64348   | 0.0670621 | 0.961132 |
| XLOC_003495 | CLP1     | chr11:57425215-57429337   | 11.5093  | 12.0572   | 0.0670944 | 0.950252 |
| XLOC_001636 | SEP15    | chr1:87328127-87380107    | 53.7083  | 56.2653   | 0.0671022 | 0.942879 |
| XLOC_021477 | C8orf48  | chr8:13424351-13425797    | 2.17542  | 2.27908   | 0.0671618 | 0.967458 |
| XLOC_009065 | CNP      | chr17:40118758-40190044   | 19.5413  | 20.4739   | 0.0672588 | 0.965534 |
| XLOC_002878 | ITGB1    | chr10:33189245-33247293   | 318.552  | 333.764   | 0.0673013 | 0.949676 |
| XLOC_015419 | RSRC1    | chr3:157827840-158262624  | 3.51117  | 3.67888   | 0.0673129 | 0.96074  |
| XLOC_007926 | UBN1     | chr16:4897911-4932363     | 4.85228  | 5.08417   | 0.0673496 | 0.947808 |
| XLOC_007472 | NDNL2    | chr15:29412454-29862927   | 16.0267  | 16.7928   | 0.0673647 | 0.948152 |
| XLOC_016843 | PYURF    | chr4:89442128-89444952    | 62.2861  | 65.2656   | 0.0674108 | 0.944934 |
| XLOC_017731 | TMEM161B | chr5:87491022-87564665    | 4.45412  | 4.6676    | 0.0675388 | 0.954143 |
| XLOC_005899 | DLEU1    | chr13:50556687-50699677   | 7.21606  | 7.56212   | 0.0675797 | 0.978818 |
| XLOC_009205 | CLTC     | chr17:57697049-57774317   | 22.7707  | 23.8632   | 0.0676091 | 0.944295 |
| XLOC_020926 | KDELR2   | chr7:6500711-6523849      | 54.0072  | 56.5984   | 0.0676116 | 0.940466 |
| XLOC_022767 | TUSC1    | chr9:25676386-25678856    | 10.0113  | 10.4917   | 0.0676254 | 0.952233 |
| XLOC_011547 | NR2C2AP  | chr19:19256375-19314238   | 43.1132  | 45.1827   | 0.0676392 | 0.967296 |
| XLOC_011543 | HOMER3   | chr19:19040009-19052041   | 87.5864  | 91.7947   | 0.0677041 | 0.945336 |
| XLOC_021187 | SMURF1   | chr7:98625057-98741743    | 6.37419  | 6.68055   | 0.067726  | 0.947261 |
| XLOC_021719 | UTP23    | chr8:117778741-117786921  | 7.52544  | 7.88786   | 0.0678571 | 0.946021 |
| XLOC_016688 | DCAF16   | chr4:17802277-17812381    | 9.10932  | 9.5485    | 0.0679308 | 0.944479 |
| XLOC_021590 | MRPL15   | chr8:55047780-55061074    | 62.0657  | 65.0581   | 0.0679341 | 0.943009 |
| XLOC_013398 | IRS1     | chr2:227596032-227663506  | 0.422368 | 0.442737  | 0.0679514 | 0.967296 |
| XLOC_005858 | UFM1     | chr13:38923941-38937143   | 13.998   | 14.6738   | 0.0680149 | 0.944779 |
| XLOC_022964 | CTSL2    | chr9:99791958-99801925    | 1.94657  | 2.04058   | 0.0680422 | 0.956177 |
| XLOC_007250 | ZNF609   | chr15:64791618-64978266   | 3.49263  | 3.66134   | 0.0680575 | 0.947795 |
| XLOC_001505 | ERI3     | chr1:44686741-44820939    | 53.5423  | 56.1298   | 0.0680869 | 0.942091 |
| XLOC_013562 | GZF1     | chr20:23345020-23353683   | 2.45397  | 2.5726    | 0.0681118 | 0.952184 |
| XLOC_022078 | RMDN1    | chr8:87484577-87521009    | 13.3804  | 14.0277   | 0.0681558 | 0.944479 |
| XLOC_006805 | NIN      | chr14:51186480-51297839   | 3.48318  | 3.65171   | 0.068165  | 0.947325 |

|             |            |                           |           |           |           |          |
|-------------|------------|---------------------------|-----------|-----------|-----------|----------|
| XLOC_014084 | ARFRP1     | chr20:62289162-62367494   | 15.3558   | 16.0989   | 0.0681766 | 0.969826 |
| XLOC_005424 | FKBP11     | chr12:49315741-49319330   | 157.495   | 165.12    | 0.0682059 | 0.944204 |
| XLOC_015940 | CNBP       | chr3:128886657-128902810  | 123.151   | 129.115   | 0.0682306 | 0.946021 |
| XLOC_006357 | PSMC6      | chr14:53173895-53194716   | 31.2119   | 32.7244   | 0.0682666 | 0.944658 |
| XLOC_014979 | KAT2B      | chr3:20081523-20195896    | 1.37773   | 1.44451   | 0.0682823 | 0.960032 |
| XLOC_007181 | HYPK,SERF2 | chr15:44038589-44094769   | 150.549   | 157.851   | 0.0683267 | 0.965967 |
| XLOC_005552 | METTL1     | chr12:58162350-58165914   | 8.34021   | 8.74473   | 0.0683303 | 0.956177 |
| XLOC_022249 | ARHGAP39   | chr8:145754562-145838888  | 5.55276   | 5.82217   | 0.0683526 | 0.952245 |
| XLOC_018349 | EFHC1      | chr6:52284993-52360583    | 1.2525    | 1.31328   | 0.0683605 | 0.958439 |
| XLOC_008784 | ENO3       | chr17:4854383-4860426     | 4.02834   | 4.22381   | 0.0683612 | 0.964628 |
| XLOC_008491 | SULT1A1    | chr16:28616907-28634907   | 10.3984   | 10.9032   | 0.0683791 | 0.95594  |
| XLOC_009899 | LIMD2      | chr17:61699800-61777519   | 7.33097   | 7.68696   | 0.0684097 | 0.964628 |
| XLOC_003762 | KIAA1731   | chr11:93394815-93463522   | 0.794612  | 0.833205  | 0.0684219 | 0.961459 |
| XLOC_001765 | POLR3GL    | chr1:145456235-145470387  | 28.5154   | 29.9006   | 0.068434  | 0.945208 |
| XLOC_006155 | DIS3       | chr13:73302041-73590591   | 6.56087   | 6.87964   | 0.0684458 | 0.952539 |
| XLOC_016519 | SMARCA5    | chr4:144434615-144478642  | 8.74964   | 9.17571   | 0.0685959 | 0.941566 |
| XLOC_010683 | MAP1S      | chr19:17830302-17845324   | 20.9925   | 22.0151   | 0.0686177 | 0.946021 |
| XLOC_014785 | C22orf28   | chr22:32783561-32808274   | 51.7358   | 54.2577   | 0.0686653 | 0.943361 |
| XLOC_002961 | DNAJC12    | chr10:69556426-69597937   | 32.2861   | 33.8603   | 0.0686822 | 0.945399 |
| XLOC_000821 | UFC1       | chr1:161123533-161128646  | 97.4398   | 102.191   | 0.0686867 | 0.941566 |
| XLOC_006629 | LINC00239  | chr14:102196773-102198862 | 0.185007  | 0.194029  | 0.068689  | 1        |
| XLOC_018987 | RARS2      | chr6:88224095-88299735    | 16.094    | 16.8793   | 0.0687353 | 0.947325 |
| XLOC_007866 | SYNGR3     | chr16:2039945-2044276     | 8.3481    | 8.75573   | 0.0687804 | 0.956465 |
| XLOC_012683 | AGFG1      | chr2:228336847-228425938  | 4.59636   | 4.8209    | 0.0688088 | 0.953159 |
| XLOC_011998 | ZNF814     | chr19:58380746-58400442   | 1.33144   | 1.39655   | 0.0688804 | 0.954421 |
| XLOC_020962 | TRA2A      | chr7:23544400-23571656    | 33.3082   | 34.9377   | 0.0689034 | 0.941566 |
| XLOC_003813 | SIK2       | chr11:111473169-111637169 | 1.64974   | 1.73047   | 0.0689237 | 0.975928 |
| XLOC_014172 | ETS2       | chr21:40177230-40196878   | 6.78951   | 7.12197   | 0.0689681 | 0.946021 |
| XLOC_007836 | METRN      | chr16:765172-767480       | 138.841   | 145.644   | 0.0690108 | 0.944632 |
| XLOC_017679 | SGTB       | chr5:64920557-65017941    | 2.4931    | 2.61534   | 0.0690601 | 0.967343 |
| XLOC_006665 | MTA1       | chr14:105886185-105937057 | 44.2925   | 46.4647   | 0.0690741 | 0.941566 |
| XLOC_018981 | SYNCRIP    | chr6:86317501-86353043    | 14.3738   | 15.0787   | 0.0690743 | 0.950563 |
| XLOC_018482 | TPD52L1    | chr6:125474878-125584644  | 24.2218   | 25.41     | 0.0690867 | 0.945887 |
| XLOC_010382 | ATP8B1     | chr18:55297533-55470327   | 0.0172942 | 0.0181427 | 0.0690946 | 1        |
| XLOC_013384 | OBSL1      | chr2:220415449-220436268  | 13.5102   | 14.1745   | 0.0692418 | 0.947923 |
| XLOC_009802 | MRPL45P2   | chr17:45527592-45569986   | 2.35925   | 2.47525   | 0.0692459 | 0.967343 |
| XLOC_001082 | ZNF678     | chr1:227751219-227850164  | 0.460917  | 0.483581  | 0.0692533 | 0.961218 |
| XLOC_020435 | ZNRF2P1    | chr7:32767561-32769595    | 0.788557  | 0.827357  | 0.0692944 | 0.977857 |
| XLOC_015043 | VIPR1      | chr3:42530790-42579065    | 0.883204  | 0.926679  | 0.069322  | 0.970618 |
| XLOC_017518 | LOC728554  | chr5:177302261-177311269  | 27.1688   | 28.5067   | 0.0693508 | 0.944792 |
| XLOC_014429 | LZTR1      | chr22:21336557-21353326   | 12.4774   | 13.0919   | 0.0693552 | 0.943284 |
| XLOC_003720 | SERPINH1   | chr11:75273100-75283849   | 98.5852   | 103.443   | 0.0693871 | 0.94188  |
| XLOC_016143 | UBXN7      | chr3:196080368-196159345  | 1.83753   | 1.92812   | 0.0694247 | 0.954167 |
| XLOC_012425 | MZT2B      | chr2:130908964-130948300  | 412.263   | 432.63    | 0.0695665 | 0.95395  |
| XLOC_011521 | PLVAP      | chr19:17462263-17488137   | 0.0214634 | 0.022524  | 0.0695833 | 1        |
| XLOC_017305 | LYRM7      | chr5:130506640-130541119  | 1.42637   | 1.49694   | 0.0696691 | 0.952978 |
| XLOC_015413 | KCNAB1     | chr3:155838336-156256927  | 1.15455   | 1.21172   | 0.0697172 | 0.962384 |
| XLOC_017479 | NPM1       | chr5:170814707-170837888  | 1545.55   | 1622.12   | 0.0697546 | 0.951036 |
| XLOC_001243 | NOL9       | chr1:6581406-6614658      | 7.02837   | 7.37655   | 0.0697556 | 0.944761 |

|             |                 |                          |          |          |           |          |
|-------------|-----------------|--------------------------|----------|----------|-----------|----------|
| XLOC_006732 | IPO4            | chr14:24641233-24658124  | 37.616   | 39.4832  | 0.0698934 | 0.941368 |
| XLOC_009128 | NSF             | chr17:44668034-44834828  | 6.39491  | 6.71246  | 0.0699174 | 0.944033 |
| XLOC_008480 | ZKSCAN2         | chr16:25247321-25268855  | 1.13611  | 1.19253  | 0.0699202 | 0.954981 |
| XLOC_017735 | CETN3           | chr5:89689528-89705603   | 20.1882  | 21.1911  | 0.0699396 | 0.945688 |
| XLOC_024195 | FAM3A           | chrX:153733326-153744566 | 15.4672  | 16.2367  | 0.0700465 | 0.944934 |
| XLOC_023812 | RPGR            | chrX:38128422-38186788   | 1.47098  | 1.54417  | 0.0700533 | 0.961093 |
| XLOC_021937 | INTS9           | chr8:28625174-28747698   | 10.5607  | 11.0864  | 0.0700937 | 0.946606 |
| XLOC_000690 | PIP5K1A         | chr1:151171020-151222007 | 25.2186  | 26.4755  | 0.0701737 | 0.940847 |
| XLOC_000250 | KPNA6           | chr1:32573643-32642168   | 8.17407  | 8.5817   | 0.0702076 | 0.940327 |
| XLOC_002404 | CCNY            | chr10:35535952-35860847  | 24.6642  | 25.8976  | 0.0703985 | 0.942091 |
| XLOC_014514 | LIMK2           | chr22:31608249-31676066  | 8.51851  | 8.94487  | 0.0704582 | 0.945399 |
| XLOC_016363 | UTP3            | chr4:71554195-71556268   | 23.1643  | 24.324   | 0.0704763 | 0.940421 |
| XLOC_021291 | WASL            | chr7:123321996-123389116 | 9.50451  | 9.98039  | 0.0704842 | 0.939224 |
| XLOC_000219 | SYTL1           | chr1:27668482-27680423   | 16.1409  | 16.9497  | 0.0705352 | 0.949113 |
| XLOC_013548 | DTD1            | chr20:18568555-18744560  | 64.753   | 67.9978  | 0.0705411 | 0.939929 |
| XLOC_019135 | KATNA1          | chr6:149916010-149969940 | 11.6645  | 12.2507  | 0.0707407 | 0.945208 |
| XLOC_011755 | RTN2            | chr19:45988545-46000313  | 14.2758  | 14.9934  | 0.0707603 | 0.952978 |
| XLOC_018996 | LYRM2           | chr6:90142896-90348474   | 4.07211  | 4.27686  | 0.0707757 | 0.944033 |
| XLOC_018909 | MUT             | chr6:49398072-49431041   | 5.6845   | 5.97039  | 0.0707927 | 0.945857 |
| XLOC_014457 | SMARCB1         | chr22:24129149-24181199  | 81.3488  | 85.4412  | 0.0708109 | 0.943284 |
| XLOC_004999 | GLIPR1          | chr12:75874512-75905418  | 14.5182  | 15.2487  | 0.0708157 | 0.961836 |
| XLOC_022952 | PTCH1           | chr9:98205263-98279247   | 1.6174   | 1.69884  | 0.0708713 | 0.952795 |
| XLOC_000251 | TXLNA           | chr1:32645344-32663886   | 21.728   | 22.8222  | 0.0708774 | 0.939948 |
| XLOC_017982 | LOC202181       | chr5:177045500-177099278 | 0.559285 | 0.587465 | 0.0709176 | 0.971173 |
| XLOC_018659 | DEK             | chr6:18224399-18264799   | 44.454   | 46.6981  | 0.0710489 | 0.940466 |
| XLOC_015259 | GTPBP8          | chr3:112709799-112720221 | 7.92299  | 8.32321  | 0.071095  | 0.952795 |
| XLOC_007709 | TSPAN3          | chr15:77336359-77363570  | 49.9354  | 52.4586  | 0.0711157 | 0.938636 |
| XLOC_000116 | EFHD2           | chr1:15736390-15756839   | 50.5696  | 53.1255  | 0.0711343 | 0.939929 |
| XLOC_008756 | SRR             | chr17:2207247-2240678    | 0.684332 | 0.718942 | 0.0711789 | 0.808631 |
| XLOC_003004 | NDST2           | chr10:75561668-75571589  | 6.00535  | 6.3091   | 0.0711871 | 0.947756 |
| XLOC_018442 | FIG4            | chr6:110012423-110146634 | 4.81096  | 5.05463  | 0.0712805 | 0.946375 |
| XLOC_008078 | SLC5A2          | chr16:31494438-31519706  | 0.132167 | 0.13887  | 0.0713778 | 1        |
| XLOC_021397 | CDK5            | chr7:150750898-150755052 | 34.3365  | 36.0812  | 0.0715051 | 0.944033 |
| XLOC_012736 | TRAF3IP1        | chr2:239229184-239309541 | 2.30833  | 2.42564  | 0.0715149 | 0.954501 |
| XLOC_011259 | MIER2           | chr19:305574-344791      | 12.1211  | 12.7371  | 0.071521  | 0.945597 |
| XLOC_008733 | SPATA2L         | chr16:89753075-89768121  | 15.3919  | 16.1742  | 0.0715259 | 0.974108 |
| XLOC_021603 | RAB2A           | chr8:61429468-61536203   | 24.4139  | 25.6551  | 0.071542  | 0.938489 |
| XLOC_004735 | CREBL2          | chr12:12764830-12798041  | 5.96968  | 6.27318  | 0.0715436 | 0.944361 |
| XLOC_007887 | LOC652276       | chr16:2653384-2680495    | 3.57577  | 3.75761  | 0.0715626 | 0.954981 |
| XLOC_009018 | MLLT6           | chr17:36861872-36886056  | 16.2278  | 17.0535  | 0.0715994 | 0.939929 |
| XLOC_015939 | ISY1,ISY1-RAB43 | chr3:128806411-128880073 | 19.813   | 20.8212  | 0.0716047 | 0.939451 |
| XLOC_014950 | ATG7            | chr3:11314009-11762220   | 5.75773  | 6.05111  | 0.0716977 | 0.960529 |
| XLOC_013698 | CD40            | chr20:44746905-44758384  | 15.7581  | 16.5616  | 0.0717521 | 0.9451   |
| XLOC_012578 | SPATS2L         | chr2:201170603-201346986 | 8.25254  | 8.67345  | 0.071768  | 0.940421 |
| XLOC_023345 | RP2             | chrX:46696346-46741791   | 1.33479  | 1.40288  | 0.0717756 | 0.958439 |
| XLOC_012071 | UBXN2A          | chr2:24163375-24223693   | 4.69005  | 4.92929  | 0.0717777 | 0.952539 |
| XLOC_015684 | NME6            | chr3:48335588-48342848   | 14.0812  | 14.7997  | 0.0717993 | 0.950862 |
| XLOC_022697 | ARRDC1          | chr9:140500095-140513308 | 90.7255  | 95.3572  | 0.0718336 | 0.939583 |
| XLOC_023064 | STRBP           | chr9:125883907-126030855 | 8.97326  | 9.43155  | 0.0718633 | 0.939306 |

|             |                 |                           |          |          |           |          |
|-------------|-----------------|---------------------------|----------|----------|-----------|----------|
| XLOC_006276 | MRPL52          | chr14:23299091-23304246   | 68.4828  | 71.9825  | 0.0719036 | 0.940847 |
| XLOC_014575 | FAM83F          | chr22:40390952-40426043   | 30.2564  | 31.8039  | 0.0719624 | 0.942918 |
| XLOC_004451 | CTSC            | chr11:88026759-88070941   | 41.019   | 43.1174  | 0.071975  | 0.951173 |
| XLOC_016289 | N4BP2           | chr4:40044536-40159872    | 0.420998 | 0.442536 | 0.0719805 | 0.961459 |
| XLOC_016697 | DHX15           | chr4:24529087-24586184    | 34.7434  | 36.5225  | 0.0720454 | 0.937886 |
| XLOC_002015 | SCYL3           | chr1:169764549-169863100  | 0.792729 | 0.833335 | 0.072068  | 0.982038 |
| XLOC_013360 | TMBIM1          | chr2:219135114-219211516  | 69.6592  | 73.2307  | 0.0721352 | 0.944033 |
| XLOC_003665 | GSTP1           | chr11:67351065-67354124   | 968.034  | 1017.67  | 0.0721413 | 0.940847 |
| XLOC_021799 | HSF1            | chr8:145515269-145550567  | 122.948  | 129.255  | 0.0721715 | 0.952184 |
| XLOC_018231 | BRD2            | chr6:32936436-32949282    | 33.6662  | 35.3935  | 0.0721807 | 0.939068 |
| XLOC_006646 | KLC1            | chr14:104095524-104181823 | 18.4981  | 19.4481  | 0.0722477 | 0.952184 |
| XLOC_021215 | SAP25           | chr7:100169852-100171270  | 1.27945  | 1.34517  | 0.0722718 | 0.978818 |
| XLOC_023343 | ZNF674-AS1      | chrX:46404924-46407910    | 1.9638   | 2.06471  | 0.0722928 | 0.964442 |
| XLOC_009190 | DYNLL2          | chr17:56160779-56167618   | 22.9165  | 24.0947  | 0.0723277 | 0.944204 |
| XLOC_016097 | TRA2B           | chr3:185632357-185655924  | 28.0119  | 29.4546  | 0.0724549 | 0.937188 |
| XLOC_008858 | MAP2K4          | chr17:11924134-12047051   | 5.41915  | 5.69835  | 0.0724779 | 0.945336 |
| XLOC_000993 | SNRPE           | chr1:203830739-203840280  | 59.5101  | 62.5791  | 0.0725472 | 0.938245 |
| XLOC_014682 | TXNRD2          | chr22:19863039-20004309   | 21.1438  | 22.2351  | 0.0726062 | 0.975592 |
| XLOC_015760 | NT5DC2          | chr3:52529355-52569093    | 95.6012  | 100.538  | 0.0726453 | 0.938741 |
| XLOC_014220 | LOC642852       | chr21:46707966-46717269   | 0.845913 | 0.88961  | 0.0726635 | 0.959358 |
| XLOC_022124 | ZNF706          | chr8:102209265-102218292  | 39.3336  | 41.3673  | 0.0727308 | 0.938489 |
| XLOC_023913 | PJA1            | chrX:68380580-68385365    | 7.38682  | 7.76886  | 0.0727501 | 0.948837 |
| XLOC_003910 | TIRAP           | chr11:126152981-126164828 | 1.85631  | 1.95232  | 0.0727536 | 0.967343 |
| XLOC_016936 | NDUFC1          | chr4:140211070-140311935  | 185.067  | 194.645  | 0.0727959 | 0.956884 |
| XLOC_010268 | ENOSF1          | chr18:596997-712662       | 13.5743  | 14.277   | 0.0728183 | 0.950837 |
| XLOC_008283 | ZC3H18          | chr16:88636788-88698372   | 7.87934  | 8.28747  | 0.0728561 | 0.944112 |
| XLOC_019143 | ULBP3           | chr6:150385742-150390202  | 2.39436  | 2.5184   | 0.0728624 | 0.972711 |
| XLOC_000764 | DAP3            | chr1:155658881-155708800  | 85.432   | 89.8612  | 0.072921  | 0.940466 |
| XLOC_004513 | NPAT            | chr11:108028118-108093365 | 1.24862  | 1.31338  | 0.0729503 | 0.952795 |
| XLOC_012957 | NFU1            | chr2:69623244-69664760    | 36.3301  | 38.2146  | 0.0729555 | 0.943284 |
| XLOC_008704 | ZDHHC7          | chr16:85008066-85045141   | 11.7526  | 12.3635  | 0.0731074 | 0.941288 |
| XLOC_006227 | MCF2L-AS1       | chr13:113621797-113622952 | 0.845503 | 0.889577 | 0.0733098 | 0.97664  |
| XLOC_007118 | KLF13           | chr15:31619082-31670102   | 6.67865  | 7.02688  | 0.0733271 | 0.939356 |
| XLOC_014766 | SEC14L4         | chr22:30884897-30901698   | 1.47313  | 1.55     | 0.0733856 | 0.964843 |
| XLOC_021787 | GRINA           | chr8:145064225-145067583  | 343.128  | 361.041  | 0.0734151 | 0.937886 |
| XLOC_021216 | LRCH4           | chr7:100171633-100183776  | 10.7925  | 11.3562  | 0.0734442 | 0.9451   |
| XLOC_004395 | ARAP1           | chr11:72396113-72463434   | 13.9661  | 14.6964  | 0.073535  | 0.938564 |
| XLOC_000598 | MOV10           | chr1:113217047-113243368  | 25.9358  | 27.2937  | 0.0736243 | 0.935381 |
| XLOC_005665 | NFYB            | chr12:104510857-104532040 | 5.18069  | 5.45235  | 0.0737338 | 0.942091 |
| XLOC_020902 | MAD1L1          | chr7:1855427-2272583      | 9.81598  | 10.3308  | 0.073747  | 0.945688 |
| XLOC_006281 | C14orf119       | chr14:23527773-23569665   | 25.6414  | 26.9873  | 0.0738081 | 0.965501 |
| XLOC_003287 | TRIM34,TRIM6,TF | chr11:5617330-5665625     | 0.219232 | 0.23074  | 0.0738109 | 1        |
| XLOC_005356 | KRAS            | chr12:25358179-25403854   | 4.7056   | 4.95271  | 0.0738383 | 0.940847 |
| XLOC_010905 | ZNF576          | chr19:44100543-44104587   | 5.72492  | 6.02558  | 0.0738452 | 0.952184 |
| XLOC_006997 | JAG2            | chr14:105607317-105635161 | 18.7119  | 19.6947  | 0.0738542 | 0.937188 |
| XLOC_010818 | ZNF345          | chr19:37288451-37407193   | 0.445369 | 0.468766 | 0.0738665 | 0.981441 |
| XLOC_022728 | ZDHHC21         | chr9:14611068-14693480    | 0.950899 | 1.00088  | 0.0739053 | 0.951036 |
| XLOC_002664 | FBXL15          | chr10:104162373-104182893 | 11.9401  | 12.5682  | 0.0739689 | 0.951272 |
| XLOC_016800 | SDAD1           | chr4:76871067-76912113    | 9.32762  | 9.81846  | 0.0739868 | 0.941566 |

|             |                 |                           |          |          |           |          |
|-------------|-----------------|---------------------------|----------|----------|-----------|----------|
| XLOC_000589 | ATP5F1          | chr1:111982511-112004525  | 87.0749  | 91.657   | 0.0739887 | 0.945399 |
| XLOC_011847 | PNKP            | chr19:50364459-50370822   | 34.3791  | 36.1883  | 0.0739911 | 0.94188  |
| XLOC_008977 | RHBDL3          | chr17:30593194-30651680   | 0.871936 | 0.917827 | 0.0739995 | 0.963771 |
| XLOC_003902 | CHEK1           | chr11:125495030-125550793 | 10.4861  | 11.0386  | 0.0740692 | 0.943388 |
| XLOC_005766 | ABCB9           | chr12:123405497-123451056 | 4.12885  | 4.34659  | 0.074142  | 0.953159 |
| XLOC_016983 | NAF1            | chr4:164047859-164088073  | 7.90356  | 8.32093  | 0.0742424 | 0.947923 |
| XLOC_008343 | HAGH            | chr16:1859103-1877195     | 36.9009  | 38.8517  | 0.0743219 | 0.937886 |
| XLOC_019138 | LRP11           | chr6:150139893-150244214  | 4.87013  | 5.12771  | 0.0743554 | 0.947795 |
| XLOC_004691 | C12orf57        | chr12:7053202-7055165     | 330.215  | 347.701  | 0.0744404 | 0.935543 |
| XLOC_001302 | NBPF1           | chr1:16890411-16939982    | 0.822968 | 0.866574 | 0.0744865 | 0.960529 |
| XLOC_011689 | TGFB1           | chr19:41836811-41859831   | 105.871  | 111.484  | 0.0745234 | 0.936242 |
| XLOC_000754 | SLC50A1         | chr1:155108287-155111334  | 39.4953  | 41.5891  | 0.0745268 | 0.938335 |
| XLOC_014820 | TMEM184B        | chr22:38615297-38669040   | 16.0466  | 16.8978  | 0.0745632 | 0.937886 |
| XLOC_001309 | SDHB            | chr1:17345224-17380665    | 117.742  | 123.997  | 0.0746725 | 0.934331 |
| XLOC_018666 | TDP2            | chr6:24650204-24667115    | 14.2305  | 14.9868  | 0.0747037 | 0.939068 |
| XLOC_009735 | ACLY            | chr17:40023178-40075272   | 33.3601  | 35.1355  | 0.0748039 | 0.935437 |
| XLOC_010344 | EPG5            | chr18:43427573-43547305   | 1.39811  | 1.47254  | 0.0748367 | 0.944033 |
| XLOC_009030 | STARD3          | chr17:37793332-37820454   | 26.324   | 27.7269  | 0.0749111 | 0.935543 |
| XLOC_000291 | CDCA8           | chr1:38158072-38175391    | 29.8678  | 31.4598  | 0.0749203 | 0.937188 |
| XLOC_023103 | ZDHHC12         | chr9:131464801-131486408  | 74.0721  | 78.0249  | 0.0750036 | 0.975484 |
| XLOC_008201 | VPS4A           | chr16:69345286-69358946   | 59.5217  | 62.6988  | 0.0750219 | 0.935829 |
| XLOC_010346 | ATP5A1          | chr18:43664109-43684199   | 266.62   | 280.866  | 0.0750976 | 0.936511 |
| XLOC_006138 | ATP7B           | chr13:52506805-52585630   | 1.18101  | 1.24416  | 0.0751567 | 0.956644 |
| XLOC_008466 | RRN3P1          | chr16:21807950-21830495   | 5.05861  | 5.32923  | 0.0751863 | 0.952184 |
| XLOC_022899 | UBQLN1          | chr9:86274877-86323168    | 32.1143  | 33.833   | 0.0752176 | 0.93571  |
| XLOC_015044 | SS18L2          | chr3:42589458-42690233    | 19.462   | 20.5054  | 0.0753445 | 0.967343 |
| XLOC_018754 | HLA-C           | chr6:31236525-31239913    | 686.023  | 722.812  | 0.0753625 | 0.938489 |
| XLOC_009626 | CCL5            | chr17:34198495-34207377   | 1.36413  | 1.43729  | 0.0753701 | 0.971663 |
| XLOC_018242 | KIFC1           | chr6:33359312-33377699    | 29.0749  | 30.6343  | 0.0753774 | 0.936242 |
| XLOC_008715 | FBXO31          | chr16:87362941-87425708   | 13.3737  | 14.0911  | 0.0753824 | 0.935843 |
| XLOC_010269 | YES1            | chr18:721591-812327       | 9.21353  | 9.70789  | 0.0754042 | 0.935829 |
| XLOC_006796 | NEMF            | chr14:50250531-50319539   | 3.67872  | 3.8764   | 0.0755156 | 0.944204 |
| XLOC_007859 | FAHD1           | chr16:1877224-1922179     | 15.1863  | 16.0029  | 0.0755605 | 0.941862 |
| XLOC_014582 | RBX1            | chr22:41347350-41369019   | 63.9195  | 67.3582  | 0.0755974 | 0.935829 |
| XLOC_009188 | AKAP1           | chr17:55162552-55198710   | 12.4098  | 13.0774  | 0.0756035 | 0.937886 |
| XLOC_001878 | PYGO2           | chr1:154929501-154934258  | 10.3476  | 10.9045  | 0.0756301 | 0.939356 |
| XLOC_011589 | CEBPA           | chr19:33790839-33793430   | 23.2445  | 24.4979  | 0.0757733 | 0.939929 |
| XLOC_009862 | CUEDC1          | chr17:55938603-56032684   | 5.89202  | 6.20994  | 0.0758166 | 0.945887 |
| XLOC_013481 | PSMF1           | chr20:1093905-1148426     | 32.8691  | 34.6439  | 0.0758686 | 0.935543 |
| XLOC_010355 | IER3IP1         | chr18:44681389-44702745   | 38.4722  | 40.5509  | 0.0759201 | 0.934857 |
| XLOC_001918 | HDGF            | chr1:156711898-156722240  | 170.816  | 180.048  | 0.075939  | 0.935245 |
| XLOC_017072 | MTRR            | chr5:7869216-7901235      | 5.0474   | 5.32032  | 0.0759741 | 0.945208 |
| XLOC_015570 | SEC13           | chr3:10342614-10362858    | 69.5625  | 73.324   | 0.0759748 | 0.934861 |
| XLOC_002631 | ZFYVE27         | chr10:99496877-99520664   | 14.5192  | 15.3043  | 0.0759749 | 0.939356 |
| XLOC_003953 | POLR2L          | chr11:839720-842529       | 166.825  | 175.845  | 0.075977  | 0.934712 |
| XLOC_003920 | APLP2           | chr11:129939715-130014706 | 77.1161  | 81.2921  | 0.0760828 | 0.937886 |
| XLOC_001873 | UBE2Q1          | chr1:154521050-154531120  | 19.9366  | 21.0162  | 0.0760843 | 0.935571 |
| XLOC_004889 | HNRNPA1         | chr12:54674487-54679030   | 813.979  | 858.127  | 0.0761991 | 0.939068 |
| XLOC_018169 | RPP21,TRIM39,TT | chr6:30201815-30314635    | 155.382  | 163.819  | 0.0762839 | 0.952184 |

|             |           |                           |          |           |           |          |
|-------------|-----------|---------------------------|----------|-----------|-----------|----------|
| XLOC_003162 | PRDX3     | chr10:120927214-120938345 | 89.8381  | 94.722    | 0.0763728 | 0.934684 |
| XLOC_013444 | HDAC4     | chr2:239969863-240322643  | 0.471605 | 0.497263  | 0.0764311 | 0.963969 |
| XLOC_018861 | OARD1     | chr6:41034530-41040188    | 11.6103  | 12.2426   | 0.0764981 | 0.946021 |
| XLOC_009106 | FZD2      | chr17:42634811-42638630   | 5.523    | 5.82387   | 0.0765254 | 0.945597 |
| XLOC_021222 | UFSP1     | chr7:100486343-100487339  | 3.88765  | 4.09986   | 0.0766764 | 0.968448 |
| XLOC_004133 | CCDC73    | chr11:32605312-32816187   | 3.91243  | 4.12601   | 0.0766824 | 0.982567 |
| XLOC_020590 | DBF4      | chr7:87463813-87538856    | 5.96801  | 6.29386   | 0.0766964 | 0.946222 |
| XLOC_005043 | TMPO      | chr12:98906750-98944157   | 25.941   | 27.3582   | 0.0767417 | 0.935543 |
| XLOC_013296 | HSPD1     | chr2:198351307-198418423  | 412.586  | 435.132   | 0.0767579 | 0.945689 |
| XLOC_007624 | CSNK1G1   | chr15:64457715-64648442   | 1.92326  | 2.02858   | 0.0769195 | 0.943284 |
| XLOC_024044 | NKAPP1    | chrX:119370308-119379122  | 0.381115 | 0.402014  | 0.0770191 | 0.974345 |
| XLOC_002117 | RAB1F     | chr1:202847409-202858385  | 3.07899  | 3.24795   | 0.0770728 | 0.948523 |
| XLOC_006444 | LIN52     | chr14:74551655-74667117   | 1.08222  | 1.1416    | 0.0770752 | 0.967343 |
| XLOC_002471 | CDK1      | chr10:62538088-62554610   | 38.5098  | 40.624    | 0.0771079 | 0.934331 |
| XLOC_015146 | SPCS1     | chr3:52719935-52742197    | 158.866  | 167.588   | 0.0771122 | 0.963969 |
| XLOC_008896 | SMCR8     | chr17:18218593-18266856   | 2.04724  | 2.15973   | 0.0771698 | 0.971768 |
| XLOC_018534 | PHACTR2   | chr6:143929316-144152322  | 1.86486  | 1.96743   | 0.0772408 | 0.938622 |
| XLOC_017975 | F12       | chr5:176829138-176836577  | 33.7963  | 35.6555   | 0.0772569 | 0.935543 |
| XLOC_001955 | IGSF8     | chr1:160061128-160068618  | 16.4474  | 17.3524   | 0.0772727 | 0.942184 |
| XLOC_006076 | SUPT20H   | chr13:37574677-37633850   | 10.1033  | 10.6594   | 0.0772955 | 0.969535 |
| XLOC_013845 | PCNA      | chr20:5095598-5107268     | 75.0235  | 79.1532   | 0.0773047 | 0.936242 |
| XLOC_020381 | TSPAN13   | chr7:16793350-16824161    | 4.74136  | 5.00249   | 0.0773464 | 0.949188 |
| XLOC_005090 | MVK       | chr12:110011499-110035071 | 13.1745  | 13.9012   | 0.0774584 | 0.941934 |
| XLOC_002939 | SGMS1     | chr10:52065344-52383737   | 2.46994  | 2.60625   | 0.0775019 | 0.948152 |
| XLOC_004332 | FIBP      | chr11:65647283-65656010   | 92.5746  | 97.6854   | 0.0775265 | 0.93305  |
| XLOC_005959 | DNAJC3    | chr13:96329392-96447243   | 5.76498  | 6.08373   | 0.0776399 | 0.935829 |
| XLOC_009350 | GPS1      | chr17:80009762-80015346   | 76.1059  | 80.3214   | 0.0777754 | 0.933064 |
| XLOC_013454 | MYEOV2    | chr2:241065979-241075764  | 215.905  | 227.865   | 0.0777795 | 0.933736 |
| XLOC_008179 | CTCF      | chr16:67596309-67673088   | 11.232   | 11.8542   | 0.0777824 | 0.935067 |
| XLOC_023159 | C9orf69   | chr9:139006426-139010731  | 42.8269  | 45.1996   | 0.077795  | 0.934861 |
| XLOC_010409 | CYB5A     | chr18:71920526-71959251   | 9.63639  | 10.1705   | 0.0778268 | 0.952539 |
| XLOC_019114 | REPS1     | chr6:139225619-139309398  | 15.7168  | 16.5885   | 0.0778712 | 0.935571 |
| XLOC_010423 | CDC34     | chr19:531732-542087       | 123      | 129.829   | 0.0779485 | 0.933369 |
| XLOC_005681 | CORO1C    | chr12:109038884-109125326 | 107.507  | 113.477   | 0.0779652 | 0.93305  |
| XLOC_016526 | LSM6      | chr4:147096834-147111213  | 23.8666  | 25.1936   | 0.0780674 | 0.943183 |
| XLOC_015916 | SLC12A8   | chr3:124801479-124931609  | 4.46059  | 4.709     | 0.0781864 | 0.942918 |
| XLOC_010507 | FEM1A     | chr19:4791727-4795571     | 14.7447  | 15.5668   | 0.0782694 | 0.934312 |
| XLOC_002358 | RPP38     | chr10:15137383-15146256   | 26.4711  | 27.9474   | 0.0782981 | 0.936971 |
| XLOC_015544 | LMLN      | chr3:197687070-197770591  | 0.584214 | 0.61682   | 0.0783522 | 0.955653 |
| XLOC_014136 | SOD1      | chr21:33031934-33041243   | 343.918  | 363.117   | 0.0783687 | 0.932268 |
| XLOC_004787 | CCDC91    | chr12:28410132-28703099   | 4.33575  | 4.57811   | 0.0784728 | 0.945399 |
| XLOC_006118 | LINC00441 | chr13:48870648-48877797   | 0.07675  | 0.0810513 | 0.0786697 | 1        |
| XLOC_002581 | IFIT3     | chr10:91087601-91100725   | 0.307223 | 0.324453  | 0.0787236 | 1        |
| XLOC_014048 | PPP4R1L   | chr20:56807832-56884495   | 0.16113  | 0.17017   | 0.078749  | 1        |
| XLOC_007841 | CHTF18    | chr16:838621-850733       | 14.4412  | 15.2519   | 0.0788041 | 0.939068 |
| XLOC_019002 | NDUFAF4   | chr6:97337186-97345767    | 10.3135  | 10.8935   | 0.0789384 | 0.935829 |
| XLOC_014946 | LINC00852 | chr3:10290176-10335133    | 0.852865 | 0.900856  | 0.0789784 | 0.994068 |
| XLOC_007675 | ADPGK     | chr15:73043707-73090540   | 17.5723  | 18.5613   | 0.0789943 | 0.934861 |
| XLOC_001119 | GPR137B   | chr1:236305831-236372209  | 10.5811  | 11.177    | 0.0790394 | 0.938335 |



|             |               |                           |           |           |           |          |
|-------------|---------------|---------------------------|-----------|-----------|-----------|----------|
| XLOC_007513 | C15orf57      | chr15:40845297-40857252   | 20.7362   | 21.9043   | 0.0790655 | 0.934312 |
| XLOC_020448 | STARD3NL      | chr7:38217807-38270272    | 21.3888   | 22.594    | 0.0790821 | 0.936311 |
| XLOC_022608 | USP20         | chr9:132597695-132644117  | 12.0802   | 12.7611   | 0.0791078 | 0.935829 |
| XLOC_007609 | GTF2A2        | chr15:59930260-59949737   | 25.7635   | 27.2159   | 0.0791223 | 0.934861 |
| XLOC_001958 | COPA          | chr1:160258376-160328742  | 20.6212   | 21.784    | 0.0791407 | 0.947338 |
| XLOC_008736 | CENPBD1       | chr16:90036182-90067195   | 1.47411   | 1.55737   | 0.079268  | 0.975492 |
| XLOC_005112 | OAS1          | chr12:113344738-113357712 | 0.0251676 | 0.0265892 | 0.0792729 | 1        |
| XLOC_003146 | ABLIM1        | chr10:116190868-116444414 | 9.04711   | 9.5583    | 0.079297  | 0.933369 |
| XLOC_016997 | C4orf27       | chr4:170650618-170679093  | 15.1665   | 16.0239   | 0.0793441 | 0.940466 |
| XLOC_004078 | CSNK2A3       | chr11:11292420-11643561   | 0.247103  | 0.261074  | 0.0793447 | 1        |
| XLOC_008315 | AXIN1         | chr16:337439-402676       | 29.6499   | 31.3264   | 0.0793517 | 0.930495 |
| XLOC_007904 | IL32          | chr16:3115312-3119668     | 379.952   | 401.438   | 0.0793579 | 0.93285  |
| XLOC_017490 | CPEB4         | chr5:173315330-173387313  | 0.628046  | 0.663565  | 0.0793668 | 0.956177 |
| XLOC_013113 | PAX8          | chr2:113973573-114036498  | 1.22044   | 1.28947   | 0.079379  | 0.97562  |
| XLOC_015331 | LOC100507032  | chr3:129612713-129627755  | 1.74896   | 1.84795   | 0.0794229 | 0.951185 |
| XLOC_005654 | CCDC53        | chr12:102406716-102455899 | 20.3582   | 21.5113   | 0.0794909 | 0.941365 |
| XLOC_015124 | RBM15B        | chr3:51428698-51534018    | 12.4572   | 13.1631   | 0.0795245 | 0.936827 |
| XLOC_000339 | ARTN          | chr1:44398991-44402912    | 0.196946  | 0.208111  | 0.0795551 | 1        |
| XLOC_010452 | MUM1          | chr19:1354975-1378430     | 8.82435   | 9.32542   | 0.0796784 | 0.934331 |
| XLOC_000533 | TRMT13        | chr1:100598705-100643829  | 2.16089   | 2.2836    | 0.0796859 | 0.952184 |
| XLOC_009580 | FAM222B       | chr17:27082995-27169841   | 4.88782   | 5.16568   | 0.0797684 | 0.939068 |
| XLOC_005757 | DIABLO        | chr12:122692208-122712068 | 41.7957   | 44.1738   | 0.0798366 | 0.929971 |
| XLOC_004037 | TAF10         | chr11:6624963-6633475     | 130.669   | 138.106   | 0.0798592 | 0.967226 |
| XLOC_012741 | GPC1          | chr2:241375114-241407495  | 31.5839   | 33.3818   | 0.0798752 | 0.930077 |
| XLOC_016996 | NEK1          | chr4:170314420-170533778  | 1.0044    | 1.06164   | 0.0799595 | 0.950837 |
| XLOC_018176 | C6orf136      | chr6:30614815-30640830    | 23.6642   | 25.0133   | 0.0799934 | 0.967296 |
| XLOC_004293 | PLA2G16       | chr11:63341943-63381941   | 66.154    | 69.9258   | 0.0799973 | 0.93305  |
| XLOC_009756 | AARSD1,PTGES3 | chr17:41102542-41132545   | 32.4474   | 34.2986   | 0.0800442 | 0.932188 |
| XLOC_010128 | PSMG2         | chr18:12658737-12725739   | 77.9565   | 82.4052   | 0.0800649 | 0.933451 |
| XLOC_023671 | HMGB3         | chrX:150151762-150159248  | 12.1405   | 12.8338   | 0.0801218 | 0.933617 |
| XLOC_008629 | GFOD2         | chr16:67708435-67753273   | 15.0049   | 15.8635   | 0.0802722 | 0.944348 |
| XLOC_001973 | B4GALT3       | chr1:161141099-161147758  | 30.0384   | 31.758    | 0.0803136 | 0.931798 |
| XLOC_016428 | TIGD2         | chr4:90033967-90036052    | 3.35468   | 3.54685   | 0.0803607 | 0.948824 |
| XLOC_001132 | EXO1          | chr1:242011492-242053241  | 4.81181   | 5.08752   | 0.0803825 | 0.93855  |
| XLOC_007333 | PSMA4         | chr15:78832746-78841563   | 104.179   | 110.155   | 0.0804725 | 0.930048 |
| XLOC_001211 | NADK          | chr1:1682670-1711508      | 42.6944   | 45.1474   | 0.080596  | 0.931457 |
| XLOC_014875 | EFCAB6        | chr22:43912133-44208217   | 0.0538189 | 0.0569151 | 0.0807008 | 1        |
| XLOC_002547 | TSPAN14       | chr10:82214037-82282391   | 4.2133    | 4.45589   | 0.0807652 | 0.935543 |
| XLOC_010038 | OXLD1         | chr17:79632065-79633618   | 47.7836   | 50.535    | 0.0807664 | 0.940466 |
| XLOC_001230 | LRRRC47       | chr1:3696783-3713068      | 32.2054   | 34.0608   | 0.080806  | 0.929645 |
| XLOC_003563 | C11orf83      | chr11:62430288-62441162   | 16.1557   | 17.0864   | 0.0808101 | 0.974348 |
| XLOC_014974 | OXNAD1        | chr3:16306666-16347594    | 1.76666   | 1.86846   | 0.0808255 | 0.951036 |
| XLOC_023051 | NDUFA8        | chr9:124906337-124922098  | 135.883   | 143.714   | 0.0808394 | 0.927701 |
| XLOC_012483 | TANK          | chr2:161993465-162092683  | 7.98222   | 8.44319   | 0.0809986 | 0.953159 |
| XLOC_018380 | MTO1          | chr6:74171453-74211179    | 5.50982   | 5.82819   | 0.0810443 | 0.939356 |
| XLOC_010790 | TMEM147       | chr19:36024313-36038429   | 204.782   | 216.64    | 0.0812089 | 0.934331 |
| XLOC_000393 | ZFYVE9        | chr1:52608045-52812358    | 2.69327   | 2.84926   | 0.0812254 | 0.938489 |
| XLOC_008456 | ERI2          | chr16:20775311-20860990   | 3.60899   | 3.81822   | 0.0813057 | 0.961847 |
| XLOC_015089 | DHX30         | chr3:47844398-47891686    | 33.4641   | 35.4046   | 0.0813229 | 0.929645 |

|             |              |                           |           |           |           |          |
|-------------|--------------|---------------------------|-----------|-----------|-----------|----------|
| XLOC_018897 | AARS2        | chr6:44266462-44281063    | 6.46165   | 6.83641   | 0.0813376 | 0.933684 |
| XLOC_006435 | ACOT2        | chr14:74034323-74042362   | 9.27711   | 9.81586   | 0.0814384 | 0.945208 |
| XLOC_009876 | TEX14        | chr17:56634037-56769416   | 0.0327823 | 0.0346863 | 0.0814454 | 1        |
| XLOC_000597 | CAPZA1       | chr1:113162074-113214241  | 76.102    | 80.5243   | 0.0814903 | 0.930495 |
| XLOC_002632 | GOLGA7B      | chr10:99609994-99790585   | 0.111502  | 0.117995  | 0.0816643 | 1        |
| XLOC_008717 | KLHDC4       | chr16:87741417-87799598   | 18.0151   | 19.0658   | 0.0817832 | 0.93571  |
| XLOC_005547 | DCTN2        | chr12:57916658-57941114   | 62.3512   | 65.9923   | 0.0818796 | 0.939929 |
| XLOC_013467 | THAP4        | chr2:242523819-242576725  | 84.8227   | 89.7832   | 0.0819947 | 0.941005 |
| XLOC_001601 | DEPDC1       | chr1:68939834-68962799    | 5.25335   | 5.56074   | 0.0820408 | 0.934331 |
| XLOC_014778 | PISD         | chr22:31892124-32026810   | 21.1115   | 22.3484   | 0.0821461 | 0.94749  |
| XLOC_002595 | KIF11        | chr10:94352824-94415152   | 7.5965    | 8.04161   | 0.0821496 | 0.926279 |
| XLOC_000372 | FAAH         | chr1:46859938-46879520    | 9.24214   | 9.78398   | 0.0821948 | 0.939651 |
| XLOC_002394 | RAB18        | chr10:27793102-27831166   | 10.648    | 11.2732   | 0.0823202 | 0.925922 |
| XLOC_018812 | TAPBP,ZBTB22 | chr6:33267471-33285719    | 29.6182   | 31.3575   | 0.0823255 | 0.933369 |
| XLOC_016910 | FLJ14186     | chr4:120326677-120331815  | 1.67783   | 1.77646   | 0.0824131 | 0.954981 |
| XLOC_002399 | PTCHD3P1     | chr10:29698500-29711299   | 5.25032   | 5.55916   | 0.08246   | 0.943284 |
| XLOC_008427 | GSPT1        | chr16:11961984-12010519   | 20.8852   | 22.1151   | 0.0825482 | 0.929461 |
| XLOC_018228 | LOC100507463 | chr6:32808493-32821748    | 0.972899  | 1.03021   | 0.0825734 | 0.992899 |
| XLOC_014200 | AGPAT3       | chr21:45285115-45407475   | 7.62916   | 8.07879   | 0.0826156 | 0.92921  |
| XLOC_013024 | REEP1        | chr2:86441119-86565206    | 0.568765  | 0.602322  | 0.0827011 | 0.960529 |
| XLOC_011803 | LIG1         | chr19:48618702-48673560   | 16.1544   | 17.1083   | 0.0827685 | 0.93285  |
| XLOC_007833 | RHOT2        | chr16:718082-724174       | 40.9558   | 43.3766   | 0.0828484 | 0.926868 |
| XLOC_000972 | RNPEP        | chr1:201951765-201975275  | 34.5713   | 36.6161   | 0.0829037 | 0.927701 |
| XLOC_022253 | COMMD5       | chr8:146075550-146078932  | 60.8951   | 64.5006   | 0.0829861 | 0.929645 |
| XLOC_008602 | GOT2         | chr16:58741034-58768246   | 83.5048   | 88.4524   | 0.0830429 | 0.925533 |
| XLOC_005519 | RNF41        | chr12:56596287-56615753   | 10.7892   | 11.4294   | 0.0831659 | 0.929057 |
| XLOC_008364 | ABCA3        | chr16:2325878-2390747     | 13.738    | 14.5537   | 0.0832124 | 0.925518 |
| XLOC_009292 | CDK3,TEN1    | chr17:73937588-74002080   | 35.873    | 38.0052   | 0.0832992 | 0.960032 |
| XLOC_002343 | PROSER2      | chr10:11865396-11936709   | 3.86965   | 4.09979   | 0.083348  | 0.944779 |
| XLOC_013790 | DNAJC5       | chr20:62526454-62567384   | 13.525    | 14.3294   | 0.0833483 | 0.926086 |
| XLOC_001672 | SASS6        | chr1:100549101-100598511  | 1.41861   | 1.50299   | 0.0833607 | 0.948101 |
| XLOC_020455 | CDK13        | chr7:39989958-40136733    | 1.71741   | 1.81957   | 0.0833618 | 0.940341 |
| XLOC_003583 | NUDT22       | chr11:63993729-63997488   | 53.6026   | 56.7973   | 0.0835216 | 0.931798 |
| XLOC_004992 | RAB21        | chr12:72148657-72181150   | 12.0311   | 12.7486   | 0.0835711 | 0.92921  |
| XLOC_002754 | BCCIP        | chr10:127512103-127569884 | 57.4563   | 60.8837   | 0.083593  | 0.945399 |
| XLOC_017514 | GRK6         | chr5:176853686-176883287  | 27.4621   | 29.1006   | 0.0836062 | 0.941368 |
| XLOC_006403 | LOC100506321 | chr14:65381078-65569413   | 0.117707  | 0.124733  | 0.0836381 | 1        |
| XLOC_012916 | MTIF2        | chr2:55463755-55496384    | 15.902    | 16.8515   | 0.0836712 | 0.926705 |
| XLOC_003939 | RNH1         | chr11:494511-507283       | 103.952   | 110.159   | 0.0836717 | 0.925922 |
| XLOC_022222 | TSTA3        | chr8:144694787-144699732  | 188.828   | 200.112   | 0.0837334 | 0.927701 |
| XLOC_021623 | CSPP1        | chr8:67976602-68108849    | 2.1694    | 2.29914   | 0.083799  | 0.938149 |
| XLOC_006230 | ADPRHL1      | chr13:114076259-114107839 | 3.52504   | 3.73622   | 0.083941  | 0.952184 |
| XLOC_023712 | FAM50A       | chrX:153672472-153679002  | 85.1793   | 90.2864   | 0.084006  | 0.925922 |
| XLOC_003677 | CCND1        | chr11:69455872-69469242   | 26.2074   | 27.78     | 0.0840727 | 0.925517 |
| XLOC_003149 | HSPA12A      | chr10:118430702-118502085 | 1.50307   | 1.5933    | 0.0841012 | 0.945597 |
| XLOC_004653 | LOC100507424 | chr12:2945981-2998691     | 0.695038  | 0.736796  | 0.0841737 | 0.99142  |
| XLOC_010525 | TRIP10       | chr19:6739706-6751529     | 40.0137   | 42.418    | 0.0841815 | 0.926086 |
| XLOC_009119 | CRHR1-JT1    | chr17:43697709-43913194   | 3.63789   | 3.85652   | 0.0841985 | 0.975928 |
| XLOC_004082 | BTBD10       | chr11:13409555-13484838   | 9.31707   | 9.87713   | 0.0842163 | 0.929461 |

|             |              |                           |          |          |           |          |
|-------------|--------------|---------------------------|----------|----------|-----------|----------|
| XLOC_022244 | TONSL        | chr8:145654162-145669812  | 23.3518  | 24.7567  | 0.0842872 | 0.925997 |
| XLOC_007411 | LOC100507118 | chr15:91509267-91537881   | 5.64108  | 5.98065  | 0.0843332 | 0.977857 |
| XLOC_001814 | PI4KB        | chr1:151254790-151300191  | 18.7714  | 19.9032  | 0.0844583 | 0.942996 |
| XLOC_008682 | TMEM170A     | chr16:75480922-75498584   | 4.80593  | 5.09572  | 0.0844688 | 0.952184 |
| XLOC_018085 | GMNN         | chr6:24775158-24786325    | 18.8141  | 19.9496  | 0.0845419 | 0.934005 |
| XLOC_003600 | ARL2,SNX15   | chr11:64781584-64808044   | 180.849  | 191.774  | 0.0846187 | 0.926251 |
| XLOC_003002 | BMS1P4       | chr10:75458908-75490272   | 0.414032 | 0.439045 | 0.0846292 | 0.971768 |
| XLOC_002180 | ANGEL2       | chr1:213165523-213189168  | 5.10304  | 5.41138  | 0.0846385 | 0.932687 |
| XLOC_015126 | TEX264       | chr3:51705221-51738339    | 93.4756  | 99.124   | 0.0846443 | 0.925997 |
| XLOC_018634 | SSR1         | chr6:7281287-7313541      | 9.17932  | 9.7344   | 0.0847042 | 0.92367  |
| XLOC_002731 | TACC2        | chr10:123748688-124014057 | 8.00711  | 8.49194  | 0.0848119 | 0.931567 |
| XLOC_009865 | MKS1         | chr17:56282796-56296966   | 9.58833  | 10.169   | 0.0848196 | 0.933451 |
| XLOC_008596 | CSNK2A2      | chr16:58191811-58231782   | 49.103   | 52.0786  | 0.0848805 | 0.921691 |
| XLOC_008529 | BCL7C        | chr16:30899115-30905399   | 104.121  | 110.437  | 0.0849724 | 0.924689 |
| XLOC_014202 | PWP2         | chr21:45527207-45551063   | 21.4996  | 22.8052  | 0.0850525 | 0.921683 |
| XLOC_014040 | AURKA        | chr20:54944444-54967351   | 23.5805  | 25.0125  | 0.0850554 | 0.927002 |
| XLOC_014092 | RGS19        | chr20:62704534-62711324   | 23.6351  | 25.0715  | 0.0851192 | 0.933369 |
| XLOC_014194 | PKNOX1       | chr21:44394642-44453688   | 1.93355  | 2.05113  | 0.085166  | 0.944348 |
| XLOC_008503 | HIRIP3       | chr16:30003641-30007417   | 9.03452  | 9.58397  | 0.0851744 | 0.937886 |
| XLOC_019030 | PPIL6        | chr6:109711417-109765122  | 0.463036 | 0.491204 | 0.0851992 | 0.982866 |
| XLOC_009332 | BAIAP2       | chr17:79008946-79156964   | 17.766   | 18.847   | 0.085212  | 0.926279 |
| XLOC_000237 | YTHDF2       | chr1:29063132-29096287    | 30.9015  | 32.7842  | 0.0853245 | 0.92085  |
| XLOC_003113 | CUEDC2       | chr10:104183001-104192423 | 89.0235  | 94.4586  | 0.0854964 | 0.921904 |
| XLOC_014053 | CTSZ         | chr20:57570241-57582309   | 81.1888  | 86.1456  | 0.0854967 | 0.922274 |
| XLOC_009262 | TTYH2        | chr17:72209695-72258157   | 9.29957  | 9.86772  | 0.0855533 | 0.931457 |
| XLOC_001550 | SELRC1       | chr1:53152013-53164038    | 4.77353  | 5.06527  | 0.0855841 | 0.940466 |
| XLOC_000009 | ISG15        | chr1:948846-949919        | 112.959  | 119.863  | 0.0855869 | 0.925922 |
| XLOC_015852 | CBLB         | chr3:105377108-105587887  | 0.489101 | 0.519016 | 0.0856452 | 0.962161 |
| XLOC_023377 | PQBP1        | chrX:48750729-48760422    | 77.1378  | 81.8564  | 0.0856574 | 0.961236 |
| XLOC_005413 | ZNF641       | chr12:48733792-48745029   | 1.98307  | 2.1044   | 0.0856742 | 0.939651 |
| XLOC_004827 | TROAP        | chr12:49716970-49725514   | 39.4156  | 41.8274  | 0.0856817 | 0.947923 |
| XLOC_011868 | FAM71E1      | chr19:50970044-50986608   | 3.81737  | 4.05096  | 0.0856872 | 0.990711 |
| XLOC_012901 | PIGF         | chr2:46769866-46844251    | 20.5927  | 21.8531  | 0.0857063 | 0.971663 |
| XLOC_006166 | RNF219       | chr13:78628989-79233314   | 3.50401  | 3.71848  | 0.0857067 | 0.934932 |
| XLOC_015567 | CIDECP       | chr3:10059236-10067820    | 5.26345  | 5.58575  | 0.085743  | 0.960032 |
| XLOC_008534 | VKORC1       | chr16:31102174-31106276   | 362.69   | 384.919  | 0.0858202 | 0.924162 |
| XLOC_014975 | PLCL2        | chr3:16926451-17132098    | 1.19323  | 1.26637  | 0.0858237 | 0.974593 |
| XLOC_009279 | NUP85        | chr17:73201596-73231854   | 21.1582  | 22.4562  | 0.0858917 | 0.92367  |
| XLOC_017149 | IPO11,LRRC70 | chr5:61708572-61924416    | 10.7057  | 11.3624  | 0.0858925 | 0.933451 |
| XLOC_012175 | MSH2         | chr2:47630205-47710367    | 8.00136  | 8.49383  | 0.0861693 | 0.926086 |
| XLOC_016206 | KIAA0232     | chr4:6784458-6885899      | 1.93333  | 2.05235  | 0.0861919 | 0.933369 |
| XLOC_015841 | DCBLD2       | chr3:98514813-98620533    | 2.79086  | 2.96269  | 0.0861997 | 0.932687 |
| XLOC_007587 | MYO5A        | chr15:52599479-52821247   | 2.30868  | 2.45089  | 0.0862382 | 0.927345 |
| XLOC_021715 | ENY2         | chr8:110346551-110358189  | 35.2296  | 37.4007  | 0.0862767 | 0.919765 |
| XLOC_001364 | SYF2         | chr1:25548766-25559013    | 37.9659  | 40.3065  | 0.0863061 | 0.922274 |
| XLOC_007934 | C16orf72     | chr16:9185536-9213555     | 7.09374  | 7.53125  | 0.086343  | 0.927099 |
| XLOC_008716 | ZCCHC14      | chr16:87439851-87525460   | 2.51779  | 2.67337  | 0.0865015 | 0.934058 |
| XLOC_009176 | UTP18        | chr17:49337896-49375292   | 37.433   | 39.7469  | 0.0865313 | 0.91974  |
| XLOC_016683 | TAPT1        | chr4:16162127-16228161    | 2.12338  | 2.25471  | 0.0865852 | 0.938335 |

|             |            |                           |            |            |           |          |
|-------------|------------|---------------------------|------------|------------|-----------|----------|
| XLOC_000593 | DDX20      | chr1:112264685-112310199  | 6.15048    | 6.53109    | 0.0866236 | 0.939306 |
| XLOC_017022 | IRF2       | chr4:185308875-185395726  | 4.58211    | 4.86589    | 0.086691  | 0.942168 |
| XLOC_000676 | RPRD2      | chr1:150336989-150449041  | 3.2107     | 3.40979    | 0.0867939 | 0.927553 |
| XLOC_001010 | MAPKAPK2   | chr1:206858364-206907630  | 31.8568    | 33.8356    | 0.086941  | 0.922118 |
| XLOC_002120 | CYB5R1     | chr1:202931000-202936404  | 25.6611    | 27.2556    | 0.0869703 | 0.924456 |
| XLOC_004366 | FAM86C2P   | chr11:67559237-67572807   | 0.977499   | 1.03825    | 0.0869877 | 0.967296 |
| XLOC_010752 | RGS9BP     | chr19:33166312-33169206   | 0.177546   | 0.188588   | 0.087043  | 1        |
| XLOC_007575 | USP50      | chr15:50716578-50838902   | 0.806596   | 0.856843   | 0.0871847 | 0.991167 |
| XLOC_012088 | CENPA      | chr2:27008881-27017455    | 17.7583    | 18.8646    | 0.0871902 | 0.933369 |
| XLOC_002851 | ARHGAP21   | chr10:24872537-25012597   | 4.62443    | 4.91268    | 0.087234  | 0.922427 |
| XLOC_014934 | OGG1       | chr3:9791627-9811668      | 13.3775    | 14.2114    | 0.0872402 | 0.967226 |
| XLOC_012737 | ASB1       | chr2:239335625-239360891  | 30.416     | 32.3121    | 0.0872442 | 0.919811 |
| XLOC_007576 | TRPM7      | chr15:50849351-50979012   | 2.43508    | 2.58718    | 0.0874139 | 0.929461 |
| XLOC_017053 | SDHA       | chr5:218355-256814        | 54.4129    | 57.8121    | 0.0874231 | 0.919811 |
| XLOC_005079 | PWP1       | chr12:108079589-108106257 | 32.6432    | 34.6831    | 0.0874474 | 0.921421 |
| XLOC_021398 | FASTK      | chr7:150773707-150777970  | 45.6869    | 48.5423    | 0.087463  | 0.92475  |
| XLOC_014672 | DGCR14     | chr22:19117791-19132190   | 4.62199    | 4.91093    | 0.0874831 | 0.931668 |
| XLOC_012984 | DUSP11     | chr2:73989324-74007284    | 17.8491    | 18.9654    | 0.0875141 | 0.924931 |
| XLOC_005110 | PTPN11     | chr12:112856535-112947717 | 10.5943    | 11.2574    | 0.0875941 | 0.919076 |
| XLOC_008564 | N4BP1      | chr16:48572636-48644120   | 2.6672     | 2.83417    | 0.0876034 | 0.933523 |
| XLOC_006936 | TC2N       | chr14:92246266-92333880   | 0.00291982 | 0.00310263 | 0.0876088 | 1        |
| XLOC_013729 | RTFDC1     | chr20:55043646-55101208   | 46.522     | 49.4349    | 0.0876169 | 0.919811 |
| XLOC_005420 | ADCY6      | chr12:49159974-49182820   | 6.37553    | 6.77501    | 0.0876792 | 0.925922 |
| XLOC_022531 | CNTRL      | chr9:123850573-123939886  | 1.68446    | 1.79002    | 0.0876821 | 0.934312 |
| XLOC_012181 | ERLEC1     | chr2:53897116-54087170    | 11.2741    | 11.9808    | 0.0877086 | 0.940466 |
| XLOC_021115 | WBSCR16    | chr7:74456282-74489699    | 34.9379    | 37.1292    | 0.0877605 | 0.92085  |
| XLOC_012939 | VPS54      | chr2:64119666-64246214    | 2.96135    | 3.14714    | 0.0877844 | 0.934861 |
| XLOC_005318 | LRP6       | chr12:12268960-12419811   | 1.01337    | 1.07694    | 0.0877891 | 0.937886 |
| XLOC_020404 | CBX3       | chr7:26240830-26253227    | 82.993     | 88.2005    | 0.0877977 | 0.920464 |
| XLOC_007345 | FAM108C1   | chr15:80987651-81047962   | 8.6972     | 9.24308    | 0.0878225 | 0.933651 |
| XLOC_014872 | MCAT       | chr22:43528211-43539403   | 18.5274    | 19.692     | 0.087946  | 0.925997 |
| XLOC_012891 | THADA      | chr2:43457974-43823185    | 1.96661    | 2.09043    | 0.0880936 | 0.933651 |
| XLOC_009352 | TEX19      | chr17:80317122-80321652   | 0.482895   | 0.513304   | 0.0881032 | 0.969667 |
| XLOC_001470 | GJA9,MYCBP | chr1:39328161-39347298    | 9.34694    | 9.93563    | 0.0881165 | 0.926458 |
| XLOC_020330 | HEATR2     | chr7:588833-826116        | 20.6479    | 21.9503    | 0.0882478 | 0.945399 |
| XLOC_017370 | PCDHB3     | chr5:140480233-140483406  | 0.153913   | 0.163623   | 0.0882608 | 1        |
| XLOC_021541 | WRN        | chr8:30853320-31031277    | 1.67026    | 1.77566    | 0.0882777 | 0.93855  |
| XLOC_004980 | CPSF6      | chr12:69633316-69668138   | 9.56875    | 10.1732    | 0.0883687 | 0.917228 |
| XLOC_017162 | CCNB1      | chr5:68462836-68474070    | 52.1119    | 55.4039    | 0.0883748 | 0.923579 |
| XLOC_023710 | ATP6AP1    | chrX:153656977-153664862  | 64.3748    | 68.4415    | 0.0883749 | 0.916584 |
| XLOC_019120 | HIVEP2     | chr6:143072603-143266338  | 2.27139    | 2.41494    | 0.0884145 | 0.929057 |
| XLOC_017510 | NSD1       | chr5:176560079-176727214  | 1.83694    | 1.95309    | 0.0884555 | 0.925922 |
| XLOC_010449 | CIRBP      | chr19:1267469-1274809     | 112.067    | 119.154    | 0.0884741 | 0.925922 |
| XLOC_017802 | SHROOM1    | chr5:132157832-132166590  | 9.03721    | 9.60968    | 0.0886107 | 0.933523 |
| XLOC_005444 | CERS5      | chr12:50523580-50561097   | 20.5269    | 21.8284    | 0.088692  | 0.920446 |
| XLOC_020772 | C7orf73    | chr7:135347220-135361160  | 12.9018    | 13.7207    | 0.0887787 | 0.923571 |
| XLOC_021126 | STYXL1     | chr7:75625654-75677321    | 16.8465    | 17.9171    | 0.0888922 | 0.93053  |
| XLOC_021000 | LSM5       | chr7:32524944-32534870    | 21.0098    | 22.3454    | 0.0889156 | 0.917338 |
| XLOC_010393 | KDSR       | chr18:60994970-61034506   | 21.3104    | 22.6659    | 0.0889623 | 0.917559 |

|             |              |                           |           |           |           |          |
|-------------|--------------|---------------------------|-----------|-----------|-----------|----------|
| XLOC_007816 | ITFG3        | chr16:284800-316119       | 23.3816   | 24.8693   | 0.0889913 | 0.920079 |
| XLOC_018517 | PEX7         | chr6:137143701-137235072  | 7.50285   | 7.98026   | 0.0889954 | 0.936242 |
| XLOC_014530 | HMOX1        | chr22:35777059-35790207   | 83.1052   | 88.3952   | 0.0890287 | 0.920464 |
| XLOC_021072 | PHKG1        | chr7:56131916-56160689    | 25.8883   | 27.5378   | 0.0891147 | 0.964442 |
| XLOC_006362 | SOCS4        | chr14:55493843-55516206   | 2.74963   | 2.92505   | 0.0892265 | 0.926279 |
| XLOC_017263 | EPB41L4A-AS1 | chr5:111496222-111498198  | 80.8219   | 85.9805   | 0.0892642 | 0.9183   |
| XLOC_018405 | SLC35A1      | chr6:88182642-88222057    | 6.50448   | 6.92041   | 0.0894242 | 0.93285  |
| XLOC_012571 | COQ10B       | chr2:198318230-198339851  | 19.4624   | 20.7074   | 0.0894597 | 0.9183   |
| XLOC_009363 | RPH3AL       | chr17:62179-202633        | 3.16055   | 3.36282   | 0.0894961 | 0.948369 |
| XLOC_015555 | OXTR         | chr3:8792094-8811300      | 0.0979532 | 0.104231  | 0.0896197 | 1        |
| XLOC_010056 | CCDC57       | chr17:80059345-80170689   | 4.36953   | 4.65002   | 0.0897596 | 0.938071 |
| XLOC_022731 | TTC39B       | chr9:15170841-15307358    | 0.341251  | 0.363164  | 0.0897874 | 1        |
| XLOC_021675 | TMEM67       | chr8:94767071-94831460    | 1.41855   | 1.50966   | 0.0898047 | 0.940466 |
| XLOC_008309 | GAS8         | chr16:90089007-90114191   | 4.57978   | 4.874     | 0.0898282 | 0.941368 |
| XLOC_001653 | GF11         | chr1:92940317-92952433    | 1.93039   | 2.05444   | 0.0898541 | 0.952294 |
| XLOC_022896 | TLE1         | chr9:84198597-84303596    | 6.36956   | 6.77904   | 0.0898868 | 0.931457 |
| XLOC_012933 | FAM161A      | chr2:62051982-62081278    | 0.964474  | 1.02648   | 0.089898  | 0.952184 |
| XLOC_000185 | RCAN3        | chr1:24822822-24863510    | 2.97294   | 3.16424   | 0.0899692 | 0.944202 |
| XLOC_021571 | IKBKB        | chr8:42128819-42190171    | 11.5145   | 12.2559   | 0.0900265 | 0.917149 |
| XLOC_003266 | RRM1         | chr11:4115923-4160106     | 27.2987   | 29.0575   | 0.0900763 | 0.915223 |
| XLOC_017189 | UTP15        | chr5:72861597-72877794    | 3.99948   | 4.25731   | 0.0901278 | 0.930021 |
| XLOC_018582 | MRPL18       | chr6:160211491-160219461  | 65.5483   | 69.7742   | 0.0901352 | 0.917958 |
| XLOC_013561 | NXT1         | chr20:23331372-23335408   | 35.2734   | 37.55     | 0.0902315 | 0.925029 |
| XLOC_022595 | TBC1D13      | chr9:131549509-131572711  | 18.5052   | 19.6996   | 0.0902399 | 0.916694 |
| XLOC_001809 | CDC42SE1     | chr1:151020258-151032125  | 33.2846   | 35.436    | 0.0903605 | 0.919777 |
| XLOC_010039 | ARL16        | chr17:79648223-79650954   | 23.8321   | 25.3734   | 0.0904074 | 0.925593 |
| XLOC_008675 | MLKL         | chr16:74705752-74734789   | 8.03778   | 8.55765   | 0.0904162 | 0.933523 |
| XLOC_007821 | DECR2        | chr16:451857-462487       | 19.1995   | 20.4446   | 0.09065   | 0.930948 |
| XLOC_021005 | NT5C3        | chr7:33053724-33102409    | 16.0912   | 17.1353   | 0.0906967 | 0.919777 |
| XLOC_018568 | ARID1B       | chr6:157099063-157531913  | 2.72057   | 2.89715   | 0.0907233 | 0.923579 |
| XLOC_012877 | SRSF7        | chr2:38970740-38978636    | 48.6163   | 51.773    | 0.0907623 | 0.915693 |
| XLOC_004744 | HTR7P1       | chr12:13153375-13157764   | 0.934329  | 0.995037  | 0.0908196 | 0.952978 |
| XLOC_016493 | SPATA5       | chr4:123844224-124240604  | 0.651841  | 0.694217  | 0.0908677 | 0.944671 |
| XLOC_004612 | ACRV1        | chr11:125495030-125550793 | 0.0807972 | 0.0860543 | 0.0909413 | 1        |
| XLOC_008693 | GCSH         | chr16:81115551-81129980   | 13.7257   | 14.6187   | 0.0909438 | 0.922289 |
| XLOC_017521 | RMND5B       | chr5:177558027-177575479  | 19.8184   | 21.109    | 0.091013  | 0.921553 |
| XLOC_016824 | LIN54        | chr4:83845755-83934040    | 1.84578   | 1.96607   | 0.0910845 | 0.934293 |
| XLOC_021069 | FKBP9L       | chr7:55748766-55772260    | 0.496018  | 0.528346  | 0.09109   | 0.967226 |
| XLOC_018396 | CYB5R4       | chr6:84569369-84670146    | 3.72724   | 3.97037   | 0.0911686 | 0.936071 |
| XLOC_023773 | RBBP7        | chrX:16862774-16888534    | 40.1422   | 42.7614   | 0.0911895 | 0.915239 |
| XLOC_000852 | UCK2         | chr1:165796731-165880855  | 24.1286   | 25.7043   | 0.091269  | 0.912694 |
| XLOC_012241 | CCT7         | chr2:73461363-73480150    | 328.471   | 349.931   | 0.0913066 | 0.921553 |
| XLOC_002883 | FZD8         | chr10:35927176-35930362   | 2.08945   | 2.22597   | 0.0913145 | 0.95395  |
| XLOC_003540 | DAK          | chr11:61066918-61136975   | 9.40845   | 10.0234   | 0.0913453 | 0.978818 |
| XLOC_008680 | BCAR1        | chr16:75262927-75301951   | 25.3442   | 27.0009   | 0.0913517 | 0.917716 |
| XLOC_000906 | TOR3A        | chr1:179051111-179065129  | 15.6832   | 16.7088   | 0.0913904 | 0.919811 |
| XLOC_009375 | PITPNA       | chr17:1420212-1466110     | 17.7311   | 18.8917   | 0.0914678 | 0.917559 |
| XLOC_017453 | TTC1         | chr5:159436179-159492550  | 42.7773   | 45.5775   | 0.091478  | 0.915911 |
| XLOC_000534 | RTCA         | chr1:100731713-100758325  | 16.2124   | 17.2741   | 0.0915117 | 0.916694 |

|             |               |                           |            |            |           |          |
|-------------|---------------|---------------------------|------------|------------|-----------|----------|
| XLOC_018404 | C6orf165      | chr6:88117689-88174191    | 0.0499361  | 0.0532082  | 0.0915666 | 1        |
| XLOC_008753 | RPA1          | chr17:1733272-1802848     | 14.086     | 15.0094    | 0.0916039 | 0.913887 |
| XLOC_020531 | SBDSP1        | chr7:72299951-72307978    | 15.4573    | 16.4711    | 0.0916447 | 0.919369 |
| XLOC_022670 | RABL6         | chr9:139690789-139735639  | 135.193    | 144.076    | 0.0918101 | 0.919516 |
| XLOC_003230 | TALDO1        | chr11:747431-765024       | 145.47     | 155.032    | 0.0918403 | 0.913931 |
| XLOC_016657 | LOC100129931  | chr4:6911170-7059677      | 10.2187    | 10.8914    | 0.0919763 | 0.939929 |
| XLOC_008991 | FNDC8         | chr17:33448630-33457751   | 1.02894    | 1.09671    | 0.0920264 | 0.967296 |
| XLOC_020437 | FKBP9         | chr7:32997004-33046543    | 9.55929    | 10.1896    | 0.0921245 | 0.919725 |
| XLOC_003701 | ATG16L2       | chr11:72525450-72540680   | 22.4945    | 23.9791    | 0.0922006 | 0.920543 |
| XLOC_014788 | LARGE         | chr22:33669061-34316416   | 3.64738    | 3.8881     | 0.0922072 | 0.931457 |
| XLOC_009274 | CDR2L         | chr17:72983726-73001892   | 15.1081    | 16.1055    | 0.0922227 | 0.919694 |
| XLOC_017874 | YIPF5         | chr5:143537722-143550278  | 7.43768    | 7.92877    | 0.0922445 | 0.922019 |
| XLOC_013135 | IWS1          | chr2:128238382-128284087  | 11.578     | 12.3427    | 0.0922743 | 0.915458 |
| XLOC_006373 | ACTR10        | chr14:58666832-58702353   | 13.4798    | 14.3707    | 0.0923352 | 0.920479 |
| XLOC_011498 | BRD4          | chr19:15348300-15391262   | 8.58894    | 9.15672    | 0.0923516 | 0.916694 |
| XLOC_001798 | ANP32E        | chr1:150190716-150208504  | 16.2172    | 17.2895    | 0.092367  | 0.915543 |
| XLOC_022268 | PPAPDC2       | chr9:4598315-4666674      | 4.27173    | 4.55422    | 0.0923828 | 0.940421 |
| XLOC_006126 | SPRYD7        | chr13:50486841-50510625   | 5.23512    | 5.5814     | 0.0924022 | 0.925922 |
| XLOC_002871 | MTPAP         | chr10:30598729-30638267   | 7.92327    | 8.44758    | 0.0924411 | 0.91534  |
| XLOC_003655 | ADRBK1        | chr11:67033904-67054029   | 36.0156    | 38.3998    | 0.0924794 | 0.91207  |
| XLOC_014736 | TFIP11        | chr22:26879849-26908437   | 11.8889    | 12.6773    | 0.0926334 | 0.940327 |
| XLOC_005565 | GNS           | chr12:65107221-65153226   | 8.81199    | 9.39725    | 0.0927697 | 0.912292 |
| XLOC_011480 | PRKACA        | chr19:14202506-14228559   | 22.7876    | 24.3014    | 0.0927897 | 0.913887 |
| XLOC_012991 | MOGS          | chr2:74688183-74692537    | 41.35      | 44.0979    | 0.0928229 | 0.912694 |
| XLOC_003087 | COX15         | chr10:101419262-101515894 | 9.40112    | 10.026     | 0.0928423 | 0.94086  |
| XLOC_015721 | IP6K1         | chr3:49761727-49823973    | 8.36017    | 8.91629    | 0.0929119 | 0.918791 |
| XLOC_018997 | MDN1          | chr6:90353230-90529442    | 0.727908   | 0.776329   | 0.0929126 | 0.926868 |
| XLOC_017755 | ST8SIA4       | chr5:100142638-100238987  | 0.00233538 | 0.00249076 | 0.0929271 | 1        |
| XLOC_013822 | ZNF343        | chr20:2462466-2489778     | 2.86592    | 3.05662    | 0.0929368 | 0.933451 |
| XLOC_001495 | LEPRE1        | chr1:43212005-43232755    | 16.395     | 17.4869    | 0.0930156 | 0.916356 |
| XLOC_021217 | PCOLCE-AS1    | chr7:100183955-100205798  | 0.0465385  | 0.0496389  | 0.0930448 | 1        |
| XLOC_001430 | RNF19B        | chr1:33402049-33430286    | 11.2702    | 12.0211    | 0.0930641 | 0.924033 |
| XLOC_022504 | DNAJC25,DNAJC | chr9:114393631-114432526  | 95.3073    | 101.663    | 0.0931428 | 0.913887 |
| XLOC_009074 | TUBG1         | chr17:40731525-40767256   | 38.8477    | 41.4388    | 0.0931502 | 0.954143 |
| XLOC_024118 | ATP11C        | chrX:138808504-138914447  | 2.05736    | 2.19466    | 0.0932076 | 0.925517 |
| XLOC_014054 | ATP5E,SLMO2   | chr20:57603732-57617901   | 659.296    | 703.331    | 0.0932774 | 0.939146 |
| XLOC_005760 | ZCCHC8        | chr12:122956145-122985543 | 4.41911    | 4.71436    | 0.0933056 | 0.925638 |
| XLOC_012353 | NCK2          | chr2:106361519-106510730  | 16.6795    | 17.7945    | 0.0933562 | 0.921553 |
| XLOC_006361 | SAMD4A        | chr14:55034329-55260033   | 2.92162    | 3.11702    | 0.0933962 | 0.930021 |
| XLOC_012400 | DDX18         | chr2:118572254-118589953  | 14.7081    | 15.6922    | 0.0934346 | 0.910997 |
| XLOC_013720 | BCAS4         | chr20:49411466-49493714   | 26.8011    | 28.5959    | 0.0935141 | 0.920543 |
| XLOC_003443 | SLC39A13      | chr11:47430045-47438051   | 32.7195    | 34.9112    | 0.0935393 | 0.914505 |
| XLOC_023706 | EMD           | chrX:153607596-153609883  | 121.264    | 129.396    | 0.0936368 | 0.912357 |
| XLOC_015314 | PODXL2        | chr3:127348001-127391653  | 47.8371    | 51.0455    | 0.0936542 | 0.910109 |
| XLOC_007593 | RAB27A        | chr15:55495163-55582013   | 1.84569    | 1.96951    | 0.0936754 | 0.939068 |
| XLOC_006726 | ZFHX2         | chr14:23980968-24048009   | 0.18204    | 0.194256   | 0.0936985 | 1        |
| XLOC_004976 | RAP1B         | chr12:69004618-69054385   | 81.2617    | 86.7149    | 0.0937056 | 0.912629 |
| XLOC_002371 | ARL5B         | chr10:18948312-18966940   | 2.44598    | 2.61013    | 0.0937077 | 0.934861 |
| XLOC_014321 | PIGP          | chr21:38437663-38445458   | 38.3223    | 40.8958    | 0.0937684 | 0.9194   |

|             |              |                           |          |          |           |          |
|-------------|--------------|---------------------------|----------|----------|-----------|----------|
| XLOC_015911 | CCDC14       | chr3:123632273-123680255  | 4.87223  | 5.19963  | 0.0938279 | 0.920779 |
| XLOC_009834 | SPOP         | chr17:47676245-47755525   | 11.9281  | 12.7297  | 0.0938318 | 0.916388 |
| XLOC_010267 | C18orf56     | chr18:596997-712662       | 5.16904  | 5.51689  | 0.0939602 | 0.985492 |
| XLOC_001874 | ADAR         | chr1:154554533-154600456  | 20.4221  | 21.7969  | 0.0939856 | 0.91015  |
| XLOC_023721 | F8A1         | chrX:154064063-154250998  | 6.75708  | 7.21203  | 0.094006  | 0.964843 |
| XLOC_015757 | BAP1         | chr3:52435024-52444009    | 23.6355  | 25.2276  | 0.0940472 | 0.911597 |
| XLOC_002192 | RAB3GAP2     | chr1:220321609-220445843  | 3.14084  | 3.35243  | 0.0940541 | 0.919777 |
| XLOC_011420 | KEAP1        | chr19:10596795-10614054   | 38.3021  | 40.8824  | 0.0940579 | 0.91015  |
| XLOC_006890 | ABCD4        | chr14:74751979-74769767   | 14.792   | 15.7887  | 0.0940687 | 0.914757 |
| XLOC_020410 | HOXA-AS4     | chr7:27202056-27219880    | 0.793917 | 0.847439 | 0.0941222 | 0.959358 |
| XLOC_002240 | FAM89A       | chr1:231154703-231175995  | 22.2797  | 23.7821  | 0.0941477 | 0.915089 |
| XLOC_010832 | CATSPERG     | chr19:38826442-38861589   | 0.182763 | 0.195092 | 0.094181  | 1        |
| XLOC_023608 | UTP14A       | chrX:129040096-129063738  | 11.2238  | 11.9816  | 0.0942506 | 0.915911 |
| XLOC_002891 | ZNF33B       | chr10:43084554-43133992   | 2.33638  | 2.4943   | 0.0943564 | 0.92401  |
| XLOC_001633 | ZNHIT6       | chr1:86115105-86174116    | 5.60073  | 5.97931  | 0.0943622 | 0.913875 |
| XLOC_006343 | KLHDC1       | chr14:50159822-50219870   | 0.119844 | 0.127946 | 0.0943784 | 1        |
| XLOC_017025 | ACSL1        | chr4:185676748-185747215  | 8.21549  | 8.77122  | 0.0944307 | 0.915911 |
| XLOC_013759 | OSBPL2       | chr20:60813579-60871269   | 8.31411  | 8.87688  | 0.0944911 | 0.913887 |
| XLOC_010036 | NPLOC4       | chr17:79523912-79604138   | 20.4701  | 21.8569  | 0.094568  | 0.907812 |
| XLOC_004726 | GABARAPL1    | chr12:10365488-10375724   | 7.33648  | 7.83391  | 0.0946456 | 0.929101 |
| XLOC_013394 | CUL3         | chr2:225334866-225450114  | 6.15019  | 6.56737  | 0.094686  | 0.910997 |
| XLOC_011601 | DMKN         | chr19:35988118-36004560   | 82.505   | 88.1022  | 0.0946964 | 0.922457 |
| XLOC_005745 | SPPL3        | chr12:121200312-121342155 | 12.9923  | 13.8744  | 0.0947732 | 0.915693 |
| XLOC_007782 | HDDC3        | chr15:91473409-91497323   | 17.4204  | 18.6034  | 0.0947835 | 0.974348 |
| XLOC_017529 | CANX         | chr5:179125929-179158639  | 78.4283  | 83.7548  | 0.0947963 | 0.909176 |
| XLOC_001098 | URB2         | chr1:229761980-229795946  | 2.59728  | 2.77367  | 0.0947985 | 0.925922 |
| XLOC_007915 | CLUAP1       | chr16:3550944-3627392     | 3.30868  | 3.53346  | 0.0948245 | 0.930559 |
| XLOC_022614 | EXOSC2       | chr9:133569157-133580452  | 32.1859  | 34.3739  | 0.0948834 | 0.908098 |
| XLOC_009786 | DCAKD        | chr17:43100705-43138473   | 15.9613  | 17.0465  | 0.0949029 | 0.917958 |
| XLOC_020463 | UBE2D4       | chr7:43966034-44058748    | 3.38945  | 3.61995  | 0.0949163 | 0.938232 |
| XLOC_005855 | RFXAP        | chr13:37393338-37403740   | 2.44573  | 2.61207  | 0.0949282 | 0.937886 |
| XLOC_000881 | PRRC2C       | chr1:171454665-171562650  | 4.55503  | 4.86486  | 0.0949373 | 0.907256 |
| XLOC_010391 | PIGN         | chr18:59711457-59854289   | 2.97718  | 3.17977  | 0.0949752 | 0.922274 |
| XLOC_011454 | WDR83OS      | chr19:12777617-12792701   | 184.598  | 197.168  | 0.0950396 | 0.936311 |
| XLOC_007331 | IREB2        | chr15:78730517-78793798   | 4.1518   | 4.4349   | 0.095165  | 0.915911 |
| XLOC_007403 | IQGAP1       | chr15:90931472-91045475   | 9.03497  | 9.65115  | 0.0951812 | 0.908661 |
| XLOC_006919 | GTF2A1       | chr14:81641795-81687575   | 2.96713  | 3.16975  | 0.0952987 | 0.921904 |
| XLOC_015542 | LRCH3        | chr3:197518144-197598456  | 1.76064  | 1.88093  | 0.0953454 | 0.950252 |
| XLOC_012160 | PPM1B        | chr2:44395999-44461742    | 7.70239  | 8.22901  | 0.0954115 | 0.934043 |
| XLOC_015657 | ZDHHC3       | chr3:44956752-45017674    | 2.88531  | 3.08271  | 0.0954722 | 0.911075 |
| XLOC_010617 | GCDH         | chr19:13001973-13030086   | 26.7749  | 28.607   | 0.095487  | 0.915009 |
| XLOC_006931 | RPS6KA5      | chr14:91337166-91526993   | 0.33267  | 0.355442 | 0.0955217 | 1        |
| XLOC_018594 | LOC100289495 | chr6:166756118-166764957  | 0.256527 | 0.274114 | 0.0956633 | 1        |
| XLOC_020361 | USP42        | chr7:6144549-6201195      | 2.31531  | 2.47419  | 0.0957528 | 0.93102  |
| XLOC_004697 | C1RL-AS1     | chr12:7247145-7274447     | 0.290306 | 0.310256 | 0.0958866 | 1        |
| XLOC_016215 | TRMT44       | chr4:8442531-8478282      | 4.30356  | 4.59932  | 0.095893  | 0.931457 |
| XLOC_007387 | AEN          | chr15:89164526-89175512   | 27.4045  | 29.2883  | 0.0959121 | 0.909496 |
| XLOC_000082 | UBIAD1       | chr1:11333254-11348491    | 9.60689  | 10.268   | 0.0960134 | 0.913931 |
| XLOC_022426 | CKS2         | chr9:91926112-91931618    | 425.445  | 454.723  | 0.0960135 | 0.911326 |

|             |               |                           |           |          |           |          |
|-------------|---------------|---------------------------|-----------|----------|-----------|----------|
| XLOC_017369 | PCDHB2        | chr5:140474236-140476964  | 2.48502   | 2.65613  | 0.0960712 | 0.945778 |
| XLOC_007756 | NMB           | chr15:85198359-85201802   | 35.1931   | 37.6165  | 0.0960719 | 0.923912 |
| XLOC_013388 | FARSB         | chr2:223436161-223520827  | 27.444    | 29.3337  | 0.0960721 | 0.908282 |
| XLOC_015819 | SHQ1          | chr3:72798427-72897598    | 4.86901   | 5.20431  | 0.0960777 | 0.926279 |
| XLOC_000595 | CTTNBP2NL     | chr1:112938799-113003786  | 4.61384   | 4.93158  | 0.0960816 | 0.91609  |
| XLOC_017533 | CNOT6         | chr5:179921416-180005353  | 4.96322   | 5.30519  | 0.0961307 | 0.91207  |
| XLOC_021178 | SHFM1         | chr7:96318078-96339203    | 392.248   | 419.276  | 0.0961334 | 0.907273 |
| XLOC_020472 | PPIA          | chr7:44836240-44842716    | 629.874   | 673.278  | 0.0961388 | 0.914725 |
| XLOC_005502 | ITGA5         | chr12:54789044-54813050   | 24.0844   | 25.744   | 0.0961408 | 0.906934 |
| XLOC_014411 | TBX1          | chr22:19744225-19771112   | 1.74763   | 1.8681   | 0.096166  | 0.963969 |
| XLOC_013642 | CTNBL1        | chr20:36322433-36500520   | 23.2708   | 24.8751  | 0.0961808 | 0.910891 |
| XLOC_022579 | LOC389791     | chr9:130890807-130892913  | 0.404693  | 0.432611 | 0.0962419 | 0.970533 |
| XLOC_004610 | TMEM218       | chr11:124964265-124981659 | 2.47676   | 2.64764  | 0.0962529 | 0.933523 |
| XLOC_020595 | STEAP2        | chr7:89840999-89866992    | 2.35654   | 2.51923  | 0.0963109 | 0.945399 |
| XLOC_020941 | ISPD          | chr7:16127151-16460947    | 0.0989207 | 0.105753 | 0.0963525 | 1        |
| XLOC_021745 | TRIB1         | chr8:126442562-126450644  | 21.6112   | 23.1038  | 0.0963546 | 0.905839 |
| XLOC_008391 | ADCY9         | chr16:4012649-4166186     | 1.44062   | 1.54022  | 0.0964461 | 0.935095 |
| XLOC_011383 | NDUFA7        | chr19:8376183-8386280     | 168.035   | 179.653  | 0.0964516 | 0.906356 |
| XLOC_004754 | MGST1         | chr12:16500075-16530123   | 142.044   | 151.877  | 0.0965636 | 0.907121 |
| XLOC_007654 | AAGAB         | chr15:67493012-67819641   | 11.639    | 12.4448  | 0.096584  | 0.930855 |
| XLOC_008837 | CHD3          | chr17:7788122-7816075     | 13.4254   | 14.3555  | 0.0966403 | 0.908661 |
| XLOC_002972 | SAR1A         | chr10:71909960-71930285   | 24.9922   | 26.7244  | 0.0966784 | 0.90073  |
| XLOC_020655 | GNB2          | chr7:100271362-100276792  | 416.564   | 445.443  | 0.096704  | 0.907121 |
| XLOC_009078 | VPS25         | chr17:40925453-40931617   | 83.962    | 89.7891  | 0.0968036 | 0.907121 |
| XLOC_018975 | PGM3          | chr6:83777384-83906256    | 4.53935   | 4.85453  | 0.0968451 | 0.934043 |
| XLOC_001906 | C1orf85       | chr1:156262477-156265480  | 31.752    | 33.9571  | 0.096864  | 0.915911 |
| XLOC_011008 | RUVBL2        | chr19:49497155-49519182   | 228.039   | 243.878  | 0.0968764 | 0.910891 |
| XLOC_002235 | TAF5L         | chr1:229728865-229761794  | 6.56853   | 7.02484  | 0.0968951 | 0.920779 |
| XLOC_002996 | MSS51         | chr10:75183336-75193319   | 0.585211  | 0.625932 | 0.0970497 | 0.961694 |
| XLOC_013205 | IFIH1         | chr2:163123588-163175218  | 0.4677    | 0.500274 | 0.0971339 | 0.956644 |
| XLOC_005270 | LOC389634     | chr12:8509559-8543348     | 1.2906    | 1.3805   | 0.0971477 | 0.975492 |
| XLOC_003649 | C11orf80,RCE1 | chr11:66512206-66614003   | 24.4154   | 26.1164  | 0.0971638 | 0.933523 |
| XLOC_013891 | CST3          | chr20:23614293-23618574   | 218.062   | 233.263  | 0.097221  | 0.90665  |
| XLOC_000482 | RPF1          | chr1:84944919-84972262    | 19.9951   | 21.3892  | 0.0972375 | 0.964843 |
| XLOC_000836 | DUSP12        | chr1:161719580-161726952  | 24.0604   | 25.7387  | 0.0972817 | 0.912629 |
| XLOC_004101 | HPS5          | chr11:18300216-18343721   | 1.87147   | 2.00215  | 0.0973781 | 0.930948 |
| XLOC_012200 | B3GNT2        | chr2:62423261-62451866    | 3.85049   | 4.11959  | 0.0974603 | 0.930187 |
| XLOC_001188 | C1orf170      | chr1:910578-917473        | 0.918056  | 0.982251 | 0.0975094 | 0.956261 |
| XLOC_017559 | LOC728613     | chr5:1597671-1634120      | 0.598588  | 0.640474 | 0.0975758 | 0.960125 |
| XLOC_011051 | POLD1         | chr19:50887579-50921275   | 28.6539   | 30.659   | 0.0975819 | 0.911326 |
| XLOC_011631 | ZNF585B       | chr19:37672480-37701451   | 0.853008  | 0.912721 | 0.0976142 | 0.937188 |
| XLOC_012147 | MORN2         | chr2:39103102-39109850    | 9.66603   | 10.3427  | 0.0976153 | 0.934043 |
| XLOC_007903 | MMP25         | chr16:3096681-3110724     | 2.55041   | 2.729    | 0.0976438 | 0.943284 |
| XLOC_001313 | ALDH4A1       | chr1:19197923-19229293    | 14.4738   | 15.4873  | 0.0976487 | 0.911326 |
| XLOC_015427 | SMC4          | chr3:160117429-160152741  | 6.32129   | 6.76399  | 0.0976547 | 0.908598 |
| XLOC_009141 | PNPO          | chr17:46018888-46026674   | 14.2      | 15.1971  | 0.0979045 | 0.907121 |
| XLOC_002991 | ECD           | chr10:74894281-74927853   | 10.9294   | 11.6976  | 0.0979974 | 0.913931 |
| XLOC_005204 | PXMP2         | chr12:133264191-133281577 | 12.9176   | 13.8259  | 0.0980329 | 0.934861 |
| XLOC_008783 | RNF167        | chr17:4843629-4848517     | 81.6558   | 87.3974  | 0.0980347 | 0.902851 |



|             |                 |                           |           |          |           |          |
|-------------|-----------------|---------------------------|-----------|----------|-----------|----------|
| XLOC_007896 | KREMEN2         | chr16:3014216-3018384     | 19.3126   | 20.6709  | 0.0980543 | 0.924033 |
| XLOC_006277 | MMP14           | chr14:23305792-23316803   | 17.7716   | 19.0218  | 0.0980827 | 0.905903 |
| XLOC_011764 | DMPK            | chr19:46272975-46285815   | 12.544    | 13.4275  | 0.0981934 | 0.925922 |
| XLOC_013547 | LINC00493       | chr20:18548072-18550203   | 129.866   | 139.017  | 0.0982385 | 0.907875 |
| XLOC_013592 | POFUT1          | chr20:30795695-30826467   | 6.95646   | 7.44706  | 0.0983169 | 0.907121 |
| XLOC_002007 | NME7            | chr1:169075946-169337186  | 8.8716    | 9.49731  | 0.0983252 | 0.954501 |
| XLOC_002139 | RBBP5           | chr1:205055269-205091150  | 3.13371   | 3.35494  | 0.0984132 | 0.92295  |
| XLOC_022476 | NR4A3           | chr9:102584136-102629173  | 0.250099  | 0.26779  | 0.0986006 | 1        |
| XLOC_007864 | TBL3            | chr16:2022063-2028751     | 30.7531   | 32.9291  | 0.0986316 | 0.907121 |
| XLOC_009318 | PGS1            | chr17:76374734-76573476   | 10.0858   | 10.7996  | 0.0986527 | 0.924033 |
| XLOC_023122 | RAPGEF1         | chr9:134452156-134612925  | 16.8154   | 18.0056  | 0.0986655 | 0.904922 |
| XLOC_023192 | TPRN            | chr9:140086068-140095163  | 45.3341   | 48.5436  | 0.0986846 | 0.90459  |
| XLOC_022663 | C9orf163        | chr9:139334547-139380519  | 0.277567  | 0.297223 | 0.0987079 | 1        |
| XLOC_021207 | GAL3ST4         | chr7:99756864-99766373    | 0.390034  | 0.417665 | 0.098748  | 0.970185 |
| XLOC_007363 | FAM103A1        | chr15:83654954-83680393   | 18.4076   | 19.7136  | 0.0988867 | 0.93305  |
| XLOC_021962 | PPAPDC1B        | chr8:38120649-38126738    | 34.6688   | 37.1292  | 0.0989155 | 0.934861 |
| XLOC_009902 | FTSJ3           | chr17:61896792-61909387   | 14.8302   | 15.8828  | 0.098926  | 0.959358 |
| XLOC_006781 | TRAPPC6B        | chr14:39617014-39639634   | 3.50652   | 3.75541  | 0.0989291 | 0.920543 |
| XLOC_008411 | USP7            | chr16:8985950-9057341     | 15.6429   | 16.7535  | 0.0989549 | 0.903631 |
| XLOC_014813 | ANKRD54         | chr22:38226861-38240378   | 13.3378   | 14.2848  | 0.0989599 | 0.916694 |
| XLOC_006353 | C14orf166       | chr14:52456227-52471420   | 188.39    | 201.774  | 0.0990164 | 0.905466 |
| XLOC_017155 | TRAPPC13        | chr5:64920557-65017941    | 5.43098   | 5.81699  | 0.0990596 | 0.948113 |
| XLOC_013705 | ARFGEF2         | chr20:47538274-47653230   | 1.70972   | 1.83143  | 0.0992066 | 0.917575 |
| XLOC_009792 | PLEKHM1         | chr17:43513265-43568146   | 11.4525   | 12.2688  | 0.0993374 | 0.906934 |
| XLOC_001040 | ATF3            | chr1:212738675-212794119  | 14.1227   | 15.1298  | 0.0993724 | 0.912532 |
| XLOC_023120 | FAM78A          | chr9:134133464-134151906  | 3.69867   | 3.96252  | 0.0994116 | 0.927404 |
| XLOC_007622 | FAM96A          | chr15:64364760-64386207   | 50.5229   | 54.1285  | 0.0994522 | 0.901045 |
| XLOC_023115 | C9orf78         | chr9:132589563-132597572  | 62.062    | 66.4924  | 0.0994793 | 0.903683 |
| XLOC_008903 | TVP23B          | chr17:18684581-18710026   | 9.94011   | 10.6502  | 0.0995421 | 0.91609  |
| XLOC_005034 | METAP2          | chr12:95867821-95909613   | 28.1357   | 30.1466  | 0.0995943 | 0.905839 |
| XLOC_021877 | FAM90A25P       | chr8:12272029-12275541    | 1.03401   | 1.10794  | 0.0996199 | 0.960032 |
| XLOC_009848 | ANKRD40         | chr17:48770550-48785270   | 10.0435   | 10.762   | 0.0996809 | 0.904905 |
| XLOC_007453 | NIPA1           | chr15:23043278-23086843   | 5.63509   | 6.03848  | 0.0997468 | 0.907121 |
| XLOC_022144 | TRPS1           | chr8:116420723-116681228  | 0.489639  | 0.524723 | 0.099839  | 0.938232 |
| XLOC_008007 | LCMT1           | chr16:25123046-25189551   | 36.4002   | 39.0085  | 0.0998401 | 0.901402 |
| XLOC_004543 | ZNF259          | chr11:116649275-116658739 | 37.1047   | 39.7664  | 0.0999511 | 0.901751 |
| XLOC_023928 | ERCC6L          | chrX:71401525-71483814    | 1.91133   | 2.04852  | 0.100004  | 0.954765 |
| XLOC_007853 | CRAMP1L         | chr16:1664640-1727909     | 1.93951   | 2.07873  | 0.100015  | 0.924931 |
| XLOC_000693 | PSMB4           | chr1:151372040-151374412  | 505.426   | 541.713  | 0.100028  | 0.90301  |
| XLOC_001007 | IKBKE           | chr1:206643585-206670223  | 2.60848   | 2.79594  | 0.100123  | 0.932511 |
| XLOC_004474 | MRE11A          | chr11:94150468-94227040   | 1.98331   | 2.12593  | 0.100184  | 0.922427 |
| XLOC_003215 | RIC8A           | chr11:208529-236362       | 67.7798   | 72.6584  | 0.100274  | 0.915911 |
| XLOC_017997 | MGAT4B          | chr5:179224597-179285840  | 97.6443   | 104.679  | 0.100361  | 0.967343 |
| XLOC_022712 | GLIS3           | chr9:3824127-4300035      | 0.157042  | 0.168365 | 0.100438  | 1        |
| XLOC_017751 | RIOK2           | chr5:96496570-96519005    | 6.75572   | 7.24303  | 0.100484  | 0.909433 |
| XLOC_009337 | FSCN2           | chr17:79495416-79504156   | 0.0966485 | 0.10362  | 0.100484  | 1        |
| XLOC_010562 | ZNF177,ZNF559,2 | chr19:9434447-9493293     | 2.34917   | 2.51873  | 0.100544  | 0.934861 |
| XLOC_009946 | CDC42EP4        | chr17:71279762-71308143   | 7.77392   | 8.33521  | 0.100576  | 0.917559 |
| XLOC_008850 | NTN1            | chr17:8924858-9147317     | 2.8011    | 3.0036   | 0.100699  | 0.926279 |

|             |          |                           |           |           |          |          |
|-------------|----------|---------------------------|-----------|-----------|----------|----------|
| XLOC_004868 | ESPL1    | chr12:53662082-53687427   | 4.67068   | 5.00853   | 0.100755 | 0.910956 |
| XLOC_015589 | MRPS25   | chr3:14984285-15106816    | 12.3106   | 13.2014   | 0.100789 | 0.938427 |
| XLOC_006223 | CARS2    | chr13:111293756-111358480 | 55.9199   | 59.9678   | 0.100828 | 0.900642 |
| XLOC_009576 | SDF2     | chr17:26975373-26989207   | 19.2096   | 20.6007   | 0.10087  | 0.911478 |
| XLOC_022012 | TPPA     | chr8:63972047-63998612    | 0.325352  | 0.348922  | 0.1009   | 1        |
| XLOC_013317 | WDR12    | chr2:203745322-203776949  | 15.3724   | 16.4862   | 0.10091  | 0.905839 |
| XLOC_020350 | AP5Z1    | chr7:4815261-4834026      | 10.6187   | 11.3883   | 0.10095  | 0.905545 |
| XLOC_018621 | TUBB2A   | chr6:3153901-3157783      | 13.1862   | 14.1419   | 0.100951 | 0.920464 |
| XLOC_001506 | TMEM53   | chr1:45119500-45140099    | 1.88391   | 2.02046   | 0.100953 | 0.954535 |
| XLOC_017245 | ERAP2    | chr5:96211643-96255406    | 3.0331    | 3.25296   | 0.100962 | 0.915442 |
| XLOC_000677 | TARS2    | chr1:150459839-150480085  | 26.0595   | 27.9491   | 0.100995 | 0.898731 |
| XLOC_002587 | RPP30    | chr10:92631708-92668312   | 5.51258   | 5.91239   | 0.101015 | 0.925638 |
| XLOC_002218 | ITPKB    | chr1:226819390-226926876  | 2.1677    | 2.32493   | 0.101024 | 0.927002 |
| XLOC_000927 | LAMC2    | chr1:183155173-183214262  | 0.127079  | 0.136312  | 0.101192 | 1        |
| XLOC_010689 | CCDC124  | chr19:18043823-18054794   | 217.433   | 233.237   | 0.101225 | 0.900639 |
| XLOC_010691 | ARRDC2   | chr19:18111943-18124911   | 16.0726   | 17.2424   | 0.10136  | 0.907226 |
| XLOC_008620 | LRRC29   | chr16:67241041-67260901   | 1.03556   | 1.11096   | 0.101387 | 0.966442 |
| XLOC_003109 | C10orf76 | chr10:103605355-103815932 | 3.92102   | 4.20665   | 0.101443 | 0.916308 |
| XLOC_007154 | VPS18    | chr15:41186627-41196173   | 14.4079   | 15.4576   | 0.101457 | 0.905839 |
| XLOC_021141 | PCLO     | chr7:82383320-82792197    | 0.0208724 | 0.0223955 | 0.101611 | 1        |
| XLOC_022930 | SPTLC1   | chr9:94793426-94877690    | 26.1813   | 28.0921   | 0.101627 | 0.919354 |
| XLOC_001857 | S100A16  | chr1:153579366-153585514  | 849.621   | 911.644   | 0.101651 | 0.905305 |
| XLOC_023723 | BRCC3    | chrX:154299694-154351349  | 3.04639   | 3.26882   | 0.101667 | 0.925922 |
| XLOC_006147 | DIAPH3   | chr13:60239720-60738119   | 6.04973   | 6.49196   | 0.101783 | 0.907256 |
| XLOC_017425 | NDST1    | chr5:149887673-149937773  | 4.57621   | 4.91079   | 0.1018   | 0.907121 |
| XLOC_009870 | SUPT4H1  | chr17:56378587-56494931   | 36.8938   | 39.5912   | 0.101803 | 0.903027 |
| XLOC_022337 | CREB3    | chr9:35697333-35749225    | 30.441    | 32.6672   | 0.101826 | 0.960032 |
| XLOC_003802 | DDX10    | chr11:108535815-108811648 | 9.56762   | 10.2682   | 0.101948 | 0.905579 |
| XLOC_000924 | NPL      | chr1:182758583-182799519  | 0.9073    | 0.973738  | 0.101954 | 0.953159 |
| XLOC_008256 | MLYCD    | chr16:83932729-83949787   | 8.33408   | 8.94436   | 0.101956 | 0.92085  |
| XLOC_013017 | C2orf68  | chr2:85829964-85876407    | 3.64047   | 3.9074    | 0.102085 | 0.967343 |
| XLOC_020750 | SMKR1    | chr7:129142319-129152773  | 6.32791   | 6.79192   | 0.10209  | 0.938622 |
| XLOC_011350 | MLLT1    | chr19:6210391-6279959     | 25.4973   | 27.367    | 0.102095 | 0.901277 |
| XLOC_015936 | RPN1     | chr3:128338812-128369719  | 78.6223   | 84.3895   | 0.102126 | 0.900642 |
| XLOC_012312 | NCAPH    | chr2:97001483-97041274    | 4.81456   | 5.16777   | 0.102136 | 0.909512 |
| XLOC_016309 | DCUN1D4  | chr4:52709275-52783003    | 5.18656   | 5.56762   | 0.102281 | 0.909176 |
| XLOC_004654 | RHNO1    | chr12:2945981-2998691     | 7.54927   | 8.10464   | 0.10241  | 0.974073 |
| XLOC_006441 | ZNF410   | chr14:74353317-74398991   | 16.0489   | 17.2297   | 0.102422 | 0.903116 |
| XLOC_001912 | IQGAP3   | chr1:156495196-156542396  | 8.58841   | 9.22038   | 0.102434 | 0.900677 |
| XLOC_008155 | SETD6    | chr16:58549382-58663790   | 5.01794   | 5.38718   | 0.102434 | 0.980024 |
| XLOC_003395 | CAPRIN1  | chr11:34073229-34124157   | 38.3563   | 41.1822   | 0.102556 | 0.899607 |
| XLOC_016686 | QDPR     | chr4:17488015-17513857    | 31.2706   | 33.577    | 0.102668 | 0.901684 |
| XLOC_000735 | CREB3L4  | chr1:153931574-153950451  | 5.73127   | 6.15403   | 0.102675 | 0.986782 |
| XLOC_000826 | TOMM40L  | chr1:161195832-161208000  | 9.16869   | 9.84533   | 0.102724 | 0.912292 |
| XLOC_001009 | DYRK3    | chr1:206808880-206822542  | 13.6969   | 14.7079   | 0.102744 | 0.905903 |
| XLOC_011311 | CACTIN   | chr19:3607244-3626813     | 13.0875   | 14.054    | 0.102798 | 0.907653 |
| XLOC_018740 | PPP1R10  | chr6:30568176-30585084    | 11.4152   | 12.2588   | 0.102858 | 0.9027   |
| XLOC_012808 | SDC1     | chr2:20400557-20425194    | 24.0274   | 25.8039   | 0.102905 | 0.899607 |
| XLOC_006659 | CEP170B  | chr14:105331649-105363107 | 11.5587   | 12.4134   | 0.10293  | 0.901045 |

|             |            |                           |          |          |          |          |
|-------------|------------|---------------------------|----------|----------|----------|----------|
| XLOC_007697 | SIN3A      | chr15:75661719-75748124   | 4.22183  | 4.53408  | 0.102943 | 0.906633 |
| XLOC_020746 | TSPAN33    | chr7:128784711-128809534  | 26.2817  | 28.227   | 0.103019 | 0.899621 |
| XLOC_015348 | CDV3       | chr3:133292433-133309118  | 37.5873  | 40.3704  | 0.10305  | 0.899607 |
| XLOC_006697 | SUPT16H    | chr14:21819630-21852425   | 29.165   | 31.3249  | 0.103072 | 0.902234 |
| XLOC_001180 | LOC729737  | chr1:134772-140566        | 0.258294 | 0.277427 | 0.10309  | 1        |
| XLOC_017375 | PCDHB7     | chr5:140552242-140555957  | 0.568464 | 0.610576 | 0.103103 | 0.954501 |
| XLOC_012849 | SUPT7L     | chr2:27848505-27917847    | 9.42176  | 10.1197  | 0.103105 | 0.952184 |
| XLOC_008457 | DCUN1D3    | chr16:20869395-20936328   | 1.75349  | 1.88352  | 0.103202 | 0.969826 |
| XLOC_020679 | FAM185A    | chr7:102389398-102449672  | 1.9469   | 2.09147  | 0.103338 | 0.939948 |
| XLOC_002199 | AIDA       | chr1:222841354-222885864  | 22.25    | 23.9024  | 0.103348 | 0.897568 |
| XLOC_004134 | CSTF3      | chr11:33106129-33183037   | 16.7906  | 18.0376  | 0.103358 | 0.954535 |
| XLOC_013035 | EIF2AK3    | chr2:88856258-88927094    | 1.77543  | 1.90732  | 0.103383 | 0.927002 |
| XLOC_017814 | SAR1B      | chr5:133936838-133968533  | 3.07971  | 3.30858  | 0.103419 | 0.907875 |
| XLOC_023850 | TFE3       | chrX:48886241-48900990    | 28.5318  | 30.6524  | 0.10343  | 0.896977 |
| XLOC_006856 | RAB15      | chr14:65381078-65569413   | 10.7705  | 11.5717  | 0.103518 | 0.967343 |
| XLOC_000733 | INTS3      | chr1:153700566-153746555  | 8.08976  | 8.6916   | 0.103525 | 0.90409  |
| XLOC_005103 | SH2B3      | chr12:111843751-111889427 | 12.6469  | 13.5879  | 0.103538 | 0.898538 |
| XLOC_017596 | DROSHA     | chr5:31400601-31532282    | 3.80842  | 4.09201  | 0.103619 | 0.905839 |
| XLOC_001628 | MCOLN3     | chr1:85483764-85514223    | 4.87855  | 5.24184  | 0.103621 | 0.917338 |
| XLOC_003737 | PCF11      | chr11:82868136-82896835   | 3.33728  | 3.58606  | 0.103728 | 0.908598 |
| XLOC_024006 | MORC4      | chrX:106183963-106243474  | 7.85988  | 8.44601  | 0.103764 | 0.901045 |
| XLOC_000350 | KIF2C      | chr1:45205489-45233438    | 29.325   | 31.5138  | 0.103853 | 0.899998 |
| XLOC_021914 | ENTPD4     | chr8:23286664-23315244    | 3.52472  | 3.78791  | 0.103891 | 0.908265 |
| XLOC_014400 | PEX26      | chr22:18560685-18573797   | 7.22085  | 7.76048  | 0.103977 | 0.906934 |
| XLOC_021452 | FAM86B3P   | chr8:8086091-8102387      | 2.72593  | 2.92966  | 0.103982 | 0.951272 |
| XLOC_003989 | NUP98      | chr11:3696239-3847601     | 7.38351  | 7.93539  | 0.103994 | 0.92921  |
| XLOC_010183 | PIK3C3     | chr18:39535198-39661446   | 8.63611  | 9.28195  | 0.104047 | 0.902428 |
| XLOC_007880 | CCNF       | chr16:2479394-2508859     | 8.31098  | 8.93265  | 0.104069 | 0.905545 |
| XLOC_023459 | FOXO4      | chrX:70315998-70323384    | 1.32932  | 1.42877  | 0.104079 | 0.943024 |
| XLOC_008340 | MRPS34     | chr16:1821895-1823140     | 161.414  | 173.51   | 0.104254 | 0.898467 |
| XLOC_001399 | TAF12      | chr1:28929608-28969604    | 37.8463  | 40.6842  | 0.104316 | 0.902497 |
| XLOC_001446 | TRAPPC3    | chr1:36602169-36621654    | 63.2944  | 68.0442  | 0.104395 | 0.899326 |
| XLOC_011313 | APBA3      | chr19:3708334-3761673     | 12.4297  | 13.3626  | 0.104409 | 0.916694 |
| XLOC_016994 | CBR4       | chr4:169908741-169931468  | 4.98424  | 5.35847  | 0.104446 | 0.910891 |
| XLOC_020932 | RPA3       | chr7:7676574-7918851      | 16.803   | 18.0655  | 0.104518 | 0.916937 |
| XLOC_005153 | WDR66      | chr12:122356462-122441832 | 0.178657 | 0.192084 | 0.104548 | 1        |
| XLOC_007161 | ITPKA      | chr15:41786055-41795757   | 31.227   | 33.5748  | 0.104587 | 0.906254 |
| XLOC_013021 | POLR1A     | chr2:86253450-86333278    | 5.24314  | 5.63779  | 0.104699 | 0.900639 |
| XLOC_018187 | TCF19      | chr6:31126302-31131992    | 7.30447  | 7.85488  | 0.10481  | 0.906934 |
| XLOC_008724 | PIEZO1     | chr16:88772890-88851372   | 20.0333  | 21.5437  | 0.104865 | 0.907256 |
| XLOC_018809 | VPS52      | chr6:33217312-33239662    | 8.18049  | 8.79739  | 0.104888 | 0.905839 |
| XLOC_003114 | C10orf95   | chr10:104209573-104216050 | 1.66224  | 1.78763  | 0.104922 | 0.983736 |
| XLOC_015159 | FLNB       | chr3:57994126-58157982    | 9.0127   | 9.69265  | 0.104933 | 0.894574 |
| XLOC_010762 | KCTD15     | chr19:34287750-34306666   | 11.8943  | 12.7931  | 0.105099 | 0.894574 |
| XLOC_009963 | NT5C       | chr17:73106081-73127890   | 125.873  | 135.395  | 0.105205 | 0.906423 |
| XLOC_013501 | MRPS26     | chr20:3026674-3028896     | 138.486  | 148.974  | 0.105323 | 0.896541 |
| XLOC_002529 | ZNF503-AS2 | chr10:77157602-77168740   | 1.96331  | 2.112    | 0.105325 | 0.976866 |
| XLOC_004918 | IKZF4      | chr12:56414688-56432219   | 1.13865  | 1.22506  | 0.105525 | 0.934861 |
| XLOC_021325 | CHCHD3     | chr7:132469622-132766828  | 73.4342  | 79.0082  | 0.10555  | 0.891142 |

|             |               |                           |           |           |          |          |
|-------------|---------------|---------------------------|-----------|-----------|----------|----------|
| XLOC_000737 | UBAP2L        | chr1:154179182-154243329  | 23.0625   | 24.8131   | 0.105555 | 0.960032 |
| XLOC_001622 | GN5           | chr1:84944919-84972262    | 289.73    | 311.727   | 0.105574 | 0.914269 |
| XLOC_010548 | SNAPC2        | chr19:7985193-7988136     | 53.7981   | 57.8833   | 0.105591 | 0.897319 |
| XLOC_001047 | PROX1         | chr1:214161277-214214847  | 0.0375023 | 0.0403504 | 0.105602 | 1        |
| XLOC_021046 | SNHG15        | chr7:45022626-45026259    | 142.651   | 153.49    | 0.10566  | 0.893931 |
| XLOC_007467 | HERC2         | chr15:28356182-28567298   | 2.66152   | 2.86376   | 0.105662 | 0.898032 |
| XLOC_023161 | QSOX2         | chr9:139098181-139137687  | 20.5729   | 22.1364   | 0.105678 | 0.894866 |
| XLOC_017357 | ANKHD1,ANKHD1 | chr5:139781398-139929163  | 29.3916   | 31.6256   | 0.105687 | 0.954981 |
| XLOC_009362 | DOC2B         | chr17:6010-31420          | 0.855623  | 0.920676  | 0.105718 | 0.971173 |
| XLOC_012992 | CCDC142,MRPL5 | chr2:74699084-74721691    | 101.918   | 109.673   | 0.105802 | 0.93053  |
| XLOC_000615 | PTGFRN        | chr1:117452688-117532972  | 6.96944   | 7.50002   | 0.105853 | 0.897332 |
| XLOC_018743 | NRM           | chr6:30655823-30659197    | 21.6974   | 23.3497   | 0.105881 | 0.91015  |
| XLOC_013837 | CENPB         | chr20:3764497-3767337     | 43.3329   | 46.646    | 0.106292 | 0.89536  |
| XLOC_017532 | SQSTM1        | chr5:179224597-179285840  | 203.945   | 219.553   | 0.106385 | 0.92539  |
| XLOC_017466 | RARS          | chr5:167913462-167946309  | 36.8374   | 39.6565   | 0.106388 | 0.890564 |
| XLOC_003633 | SART1         | chr11:65729159-65747607   | 24.1085   | 25.9538   | 0.106401 | 0.895433 |
| XLOC_021043 | H2AFV         | chr7:44866487-44887725    | 38.7172   | 41.6808   | 0.106409 | 0.914725 |
| XLOC_009148 | ATP5G1        | chr17:46970147-46973232   | 177.333   | 190.933   | 0.106607 | 0.89536  |
| XLOC_016453 | GSTCD         | chr4:106629940-106768882  | 1.69876   | 1.82908   | 0.106634 | 0.92475  |
| XLOC_010619 | RAD23A        | chr19:13056627-13064457   | 121.253   | 130.559   | 0.106688 | 0.893674 |
| XLOC_022976 | ALG2          | chr9:101978706-101984246  | 16.4342   | 17.6967   | 0.106783 | 0.898502 |
| XLOC_010378 | TXNL1         | chr18:54270052-54305920   | 72.534    | 78.1086   | 0.106824 | 0.893674 |
| XLOC_011756 | OPA3          | chr19:46031024-46088122   | 2.89065   | 3.11285   | 0.106844 | 0.951272 |
| XLOC_023533 | NGFRAP1       | chrX:102631267-102633001  | 154.899   | 166.807   | 0.106846 | 0.894866 |
| XLOC_002849 | PIP4K2A       | chr10:22823765-23003503   | 7.45984   | 8.03331   | 0.10685  | 0.898747 |
| XLOC_023592 | NDUFA1        | chrX:119004494-119010629  | 265.523   | 285.952   | 0.106934 | 0.910997 |
| XLOC_017933 | C1QTNF2       | chr5:159774774-159797648  | 0.962147  | 1.03618   | 0.106945 | 0.950837 |
| XLOC_001267 | MAD2L2        | chr1:11734536-11751678    | 119.55    | 128.75    | 0.106953 | 0.890882 |
| XLOC_012364 | RANBP2        | chr2:109335936-109402267  | 3.95705   | 4.26172   | 0.10701  | 0.895686 |
| XLOC_001215 | C1orf86       | chr1:1981908-2144159      | 146.329   | 157.598   | 0.107033 | 0.929145 |
| XLOC_002684 | CCDC147       | chr10:106113521-106214848 | 0.441448  | 0.475454  | 0.107061 | 0.952233 |
| XLOC_021530 | ELP3          | chr8:27950583-28048669    | 10.2298   | 11.018    | 0.107085 | 0.901045 |
| XLOC_001860 | ILF2          | chr1:153631129-153643504  | 148.236   | 159.66    | 0.107106 | 0.901684 |
| XLOC_003348 | NUCB2         | chr11:17298285-17353070   | 9.28908   | 10.0051   | 0.107126 | 0.906423 |
| XLOC_005822 | CDK8          | chr13:26828755-26978569   | 3.68865   | 3.97343   | 0.107291 | 0.926086 |
| XLOC_022786 | BAG1          | chr9:33252469-33264759    | 17.3308   | 18.6689   | 0.107298 | 0.889403 |
| XLOC_001651 | TGFBR3        | chr1:92145899-92371559    | 0.39326   | 0.423637  | 0.107347 | 0.944295 |
| XLOC_015920 | OSBPL11       | chr3:125247701-125314381  | 1.21701   | 1.31105   | 0.107375 | 0.928178 |
| XLOC_015619 | AZI2          | chr3:28363843-28390618    | 15.571    | 16.7756   | 0.1075   | 0.917559 |
| XLOC_023834 | ELK1          | chrX:47494918-47510003    | 27.3434   | 29.4598   | 0.107553 | 0.894866 |
| XLOC_010779 | FXYD5         | chr19:35645624-35660788   | 460.505   | 496.164   | 0.107601 | 0.89325  |
| XLOC_000768 | LAMTOR2       | chr1:156024516-156028301  | 93.0622   | 100.273   | 0.107673 | 0.897031 |
| XLOC_000277 | ZMYM4         | chr1:35734567-35887545    | 3.37887   | 3.64085   | 0.107737 | 0.897319 |
| XLOC_018387 | SH3BGR2       | chr6:80340999-80413369    | 1.38016   | 1.48718   | 0.107742 | 0.926488 |
| XLOC_012434 | PLEKHB2       | chr2:131862419-131907425  | 36.165    | 38.9693   | 0.107744 | 0.889403 |
| XLOC_010016 | TBC1D16       | chr17:77906141-78009657   | 4.61681   | 4.9748    | 0.107744 | 0.91609  |
| XLOC_009814 | HOXB2         | chr17:46620018-46622393   | 20.1689   | 21.7331   | 0.107766 | 0.911227 |
| XLOC_013868 | RRBP1         | chr20:17594322-17662928   | 15.8582   | 17.0885   | 0.107797 | 0.897319 |
| XLOC_009438 | KIAA0753      | chr17:6481644-6554954     | 2.30113   | 2.47992   | 0.107957 | 0.976134 |

|             |               |                           |          |          |          |          |
|-------------|---------------|---------------------------|----------|----------|----------|----------|
| XLOC_010450 | C19orf24      | chr19:1275519-1279243     | 113.877  | 122.729  | 0.108001 | 0.891828 |
| XLOC_021783 | ZNF707        | chr8:144766621-144777555  | 8.89478  | 9.58628  | 0.108011 | 0.917354 |
| XLOC_022814 | FAM214B       | chr9:35104117-35115893    | 3.90294  | 4.20685  | 0.108178 | 0.922274 |
| XLOC_001231 | CEP104        | chr1:3728644-3773797      | 3.23783  | 3.48998  | 0.108191 | 0.906423 |
| XLOC_014571 | SMCR7L        | chr22:39898283-39914137   | 9.49244  | 10.2321  | 0.108246 | 0.890489 |
| XLOC_010673 | BABAM1        | chr19:17378231-17390162   | 52.1295  | 56.192   | 0.108265 | 0.890282 |
| XLOC_018019 | DUSP22        | chr6:292100-351355        | 12.1558  | 13.1038  | 0.108335 | 0.916324 |
| XLOC_012676 | MRPL44        | chr2:224822120-224832431  | 26.2261  | 28.2729  | 0.108419 | 0.88809  |
| XLOC_010482 | NFIC          | chr19:3359560-3469215     | 9.0272   | 9.73175  | 0.10842  | 0.891828 |
| XLOC_017557 | LPCAT1        | chr5:1461541-1524076      | 28.7544  | 30.9988  | 0.10843  | 0.890882 |
| XLOC_003908 | FAM118B       | chr11:126081618-126138877 | 6.2416   | 6.72886  | 0.108447 | 0.970185 |
| XLOC_005633 | NR2C1         | chr12:95414004-95467404   | 5.13917  | 5.54122  | 0.10867  | 0.910997 |
| XLOC_006899 | ACYP1         | chr14:75519927-75530736   | 12.7445  | 13.7421  | 0.108722 | 0.929057 |
| XLOC_021328 | C7orf49       | chr7:134832765-134855578  | 20.6664  | 22.2842  | 0.108734 | 0.904125 |
| XLOC_022995 | IKBKAP        | chr9:111629799-111696608  | 4.64363  | 5.00743  | 0.108817 | 0.898467 |
| XLOC_012690 | CAB39         | chr2:231577556-231685790  | 9.07361  | 9.78505  | 0.108902 | 0.891309 |
| XLOC_017393 | NDFIP1        | chr5:141488323-141534008  | 26.2368  | 28.2943  | 0.108919 | 0.88839  |
| XLOC_018172 | ABCF1         | chr6:30539169-30559309    | 13.0722  | 14.0973  | 0.10892  | 0.893674 |
| XLOC_001198 | CPSF3L        | chr1:1243993-1260067      | 83.8593  | 90.4382  | 0.108961 | 0.908161 |
| XLOC_002514 | NUDT13        | chr10:74870209-74891581   | 0.824614 | 0.889307 | 0.108963 | 0.951272 |
| XLOC_005448 | SLC11A2       | chr12:51373565-51422058   | 6.69495  | 7.22024  | 0.108973 | 0.903596 |
| XLOC_011326 | SH3GL1        | chr19:4360363-4400565     | 64.2163  | 69.2579  | 0.109039 | 0.887394 |
| XLOC_003413 | HSD17B12      | chr11:43702142-43878169   | 26.0897  | 28.1395  | 0.109115 | 0.887223 |
| XLOC_017367 | PCDHA1,PCDHA1 | chr5:140165875-140391929  | 0.14113  | 0.15222  | 0.109133 | 1        |
| XLOC_003602 | ZFPL1         | chr11:64851693-64856542   | 36.6022  | 39.4786  | 0.109142 | 0.896977 |
| XLOC_018038 | RREB1         | chr6:7107829-7252213      | 2.77687  | 2.99517  | 0.109176 | 0.905839 |
| XLOC_016687 | FAM184B       | chr4:17633708-17783135    | 0.164638 | 0.177583 | 0.1092   | 1        |
| XLOC_001449 | LSM10         | chr1:36859030-36863493    | 59.725   | 64.4277  | 0.109347 | 0.89325  |
| XLOC_011470 | STX10         | chr19:13254871-13261188   | 88.6183  | 95.5967  | 0.109357 | 0.889122 |
| XLOC_013703 | NCOA3         | chr20:46130600-46285621   | 1.30436  | 1.40709  | 0.109364 | 0.914371 |
| XLOC_014687 | RTN4R         | chr22:20228937-20255816   | 15.1969  | 16.3939  | 0.109379 | 0.912385 |
| XLOC_009639 | MYO19         | chr17:34842472-34891305   | 12.1693  | 13.1279  | 0.109399 | 0.952184 |
| XLOC_001355 | FUCA1         | chr1:24171571-24194859    | 7.70061  | 8.30775  | 0.109486 | 0.906423 |
| XLOC_012648 | BCS1L         | chr2:219524378-219528166  | 26.4012  | 28.4835  | 0.109523 | 0.896541 |
| XLOC_013954 | SOGA1         | chr20:35405844-35492087   | 0.42245  | 0.455801 | 0.109624 | 0.954535 |
| XLOC_009605 | UTP6          | chr17:30190189-30228729   | 20.6092  | 22.237   | 0.109669 | 0.889889 |
| XLOC_023847 | OTUD5         | chrX:48779302-48815648    | 23.1943  | 25.0264  | 0.109676 | 0.890806 |
| XLOC_003445 | NDUFS3        | chr11:47586981-47606115   | 98.5369  | 106.329  | 0.109798 | 0.928348 |
| XLOC_007479 | OTUD7A        | chr15:31775328-31947542   | 0.134161 | 0.144773 | 0.109829 | 1        |
| XLOC_017688 | NAIP          | chr5:70264309-70320941    | 0.494872 | 0.534028 | 0.10986  | 0.94188  |
| XLOC_008627 | ACD           | chr16:67679029-67694718   | 36.5409  | 39.4326  | 0.109877 | 0.891105 |
| XLOC_006191 | STK24         | chr13:99102454-99229396   | 35.3075  | 38.1025  | 0.109911 | 0.886468 |
| XLOC_020726 | ARF5          | chr7:127228405-127231759  | 290.256  | 313.242  | 0.109954 | 0.890489 |
| XLOC_008653 | ST3GAL2       | chr16:70413337-70472991   | 3.59995  | 3.88513  | 0.109985 | 0.915693 |
| XLOC_000179 | LYPLA2        | chr1:24117645-24122029    | 95.851   | 103.447  | 0.110031 | 0.88552  |
| XLOC_018180 | GTF2H4        | chr6:30875976-30881880    | 27.1199  | 29.2691  | 0.110031 | 0.897319 |
| XLOC_002555 | CCSER2        | chr10:86088409-86278276   | 1.67812  | 1.81113  | 0.110044 | 0.908026 |
| XLOC_009009 | AATF          | chr17:35306174-35414171   | 48.2629  | 52.0904  | 0.110101 | 0.883608 |
| XLOC_015845 | TOMM70A       | chr3:100082302-100175170  | 18.8874  | 20.3897  | 0.110419 | 0.891086 |

|             |          |                           |            |            |          |          |
|-------------|----------|---------------------------|------------|------------|----------|----------|
| XLOC_012629 | ATIC     | chr2:216176678-216214496  | 70.3519    | 75.9494    | 0.11045  | 0.886094 |
| XLOC_003723 | UVRAG    | chr11:75526211-75855282   | 1.49233    | 1.61115    | 0.110525 | 0.920543 |
| XLOC_003090 | ERLIN1   | chr10:101909846-101945814 | 13.64      | 14.7261    | 0.11054  | 0.890301 |
| XLOC_022691 | TUBB4B   | chr9:140135710-140142222  | 781.333    | 843.652    | 0.110711 | 0.894866 |
| XLOC_003164 | TIAL1    | chr10:121332977-121356541 | 16.836     | 18.1792    | 0.110734 | 0.886331 |
| XLOC_010590 | LDLR     | chr19:11200037-11244505   | 12.5447    | 13.5457    | 0.110758 | 0.887788 |
| XLOC_018990 | RNGTT    | chr6:89319988-89673348    | 2.83242    | 3.05871    | 0.110888 | 0.907845 |
| XLOC_012025 | ACP1     | chr2:264868-278282        | 61.5579    | 66.4763    | 0.110897 | 0.884031 |
| XLOC_000499 | LRRRC8C  | chr1:90098643-90185094    | 3.6572     | 3.94952    | 0.11094  | 0.896489 |
| XLOC_002715 | ENO4     | chr10:118609022-118642112 | 0.169278   | 0.182809   | 0.110948 | 1        |
| XLOC_000289 | ZC3H12A  | chr1:37940118-37949978    | 3.65134    | 3.94361    | 0.11109  | 0.926243 |
| XLOC_021963 | WHSC1L1  | chr8:38132560-38239790    | 4.59898    | 4.96721    | 0.111123 | 0.900642 |
| XLOC_001746 | WARS2    | chr1:119573838-119683295  | 5.11314    | 5.52282    | 0.111194 | 0.903596 |
| XLOC_000917 | MR1      | chr1:181002560-181031074  | 1.19268    | 1.28844    | 0.11142  | 0.91671  |
| XLOC_009373 | MYO1C    | chr17:1367479-1396001     | 45.0327    | 48.6514    | 0.111508 | 0.883915 |
| XLOC_008611 | NAE1     | chr16:66836780-66864879   | 44.959     | 48.5718    | 0.111508 | 0.886331 |
| XLOC_012330 | EIF5B    | chr2:99953833-100016728   | 16.1329    | 17.4296    | 0.111529 | 0.886468 |
| XLOC_016245 | CPEB2    | chr4:15004297-15071777    | 0.156057   | 0.168605   | 0.111572 | 1        |
| XLOC_001072 | CNIH4    | chr1:224544594-224563695  | 128.389    | 138.724    | 0.111697 | 0.884031 |
| XLOC_000462 | RABGGTB  | chr1:76251878-76260775    | 61.4142    | 66.3612    | 0.111767 | 0.887299 |
| XLOC_022226 | SCRIB    | chr8:144873089-144897549  | 34.9805    | 37.799     | 0.111797 | 0.883608 |
| XLOC_004110 | E2F8     | chr11:19245609-19263202   | 0.989536   | 1.06929    | 0.111832 | 0.935766 |
| XLOC_018531 | GPR126   | chr6:142623055-142767403  | 2.48498    | 2.68528    | 0.111839 | 0.902445 |
| XLOC_003161 | SFXN4    | chr10:120900424-120925204 | 53.1109    | 57.3959    | 0.111939 | 0.884031 |
| XLOC_018264 | MAPK13   | chr6:36098260-36112301    | 17.0566    | 18.4369    | 0.112259 | 0.887789 |
| XLOC_012983 | TPRKB    | chr2:73956956-73964517    | 45.5415    | 49.2277    | 0.112288 | 0.89301  |
| XLOC_003956 | TOLLIP   | chr11:1295597-1330892     | 24.2837    | 26.2518    | 0.112429 | 0.885883 |
| XLOC_023367 | EBP      | chrX:48380163-48387104    | 61.0297    | 65.9794    | 0.112505 | 0.887676 |
| XLOC_023288 | PDHA1    | chrX:19362010-19533379    | 29.6526    | 32.0578    | 0.112517 | 0.885501 |
| XLOC_004162 | ARHGAP1  | chr11:46698624-46722215   | 18.5824    | 20.0901    | 0.11255  | 0.885501 |
| XLOC_000454 | HHLA3    | chr1:70820492-70833705    | 30.6966    | 33.1884    | 0.112596 | 0.901684 |
| XLOC_018741 | DHX16    | chr6:30614815-30640830    | 17.14      | 18.5322    | 0.112663 | 0.912921 |
| XLOC_018314 | TJAP1    | chr6:43445260-43474294    | 16.5427    | 17.8865    | 0.112679 | 0.887055 |
| XLOC_020665 | SERPINE1 | chr7:100770369-100782547  | 427.651    | 462.422    | 0.112776 | 0.890806 |
| XLOC_006025 | LATS2    | chr13:21547175-21635722   | 3.38511    | 3.66054    | 0.112852 | 0.902497 |
| XLOC_000041 | ARHGEF16 | chr1:3371146-3397677      | 12.9473    | 14.001     | 0.112871 | 0.894574 |
| XLOC_021254 | SYPL1    | chr7:105730813-105753093  | 45.5044    | 49.2078    | 0.11288  | 0.883608 |
| XLOC_023700 | TMEM187  | chrX:153237990-153248646  | 7.32962    | 7.9268     | 0.112999 | 0.926251 |
| XLOC_009669 | ORMDL3   | chr17:38077295-38083884   | 16.0731    | 17.3826    | 0.113    | 0.890882 |
| XLOC_005697 | VPS29    | chr12:110929329-110939916 | 46.694     | 50.5025    | 0.113118 | 0.885767 |
| XLOC_018498 | ENPP3    | chr6:131958441-132068550  | 0.00436117 | 0.00471699 | 0.11315  | 1        |
| XLOC_005425 | ARF3     | chr12:49329991-49351252   | 42.3766    | 45.8349    | 0.113178 | 0.883344 |
| XLOC_021943 | TMEM66   | chr8:29920257-30108213    | 54.8759    | 59.3547    | 0.11319  | 0.913979 |
| XLOC_016659 | GRPEL1   | chr4:7061779-7069800      | 65.703     | 71.0711    | 0.113304 | 0.882843 |
| XLOC_002366 | TMEM236  | chr10:18041226-18089854   | 0.0483497  | 0.0523     | 0.113304 | 1        |
| XLOC_008197 | TANGO6   | chr16:68877508-69119085   | 2.59349    | 2.80541    | 0.113319 | 0.905839 |
| XLOC_008751 | SERPINF2 | chr17:1646129-1658559     | 0.147855   | 0.159937   | 0.11332  | 1        |
| XLOC_021348 | SLC37A3  | chr7:140033551-140098311  | 10.0098    | 10.8282    | 0.113389 | 0.888541 |
| XLOC_017394 | ARHGAP26 | chr5:142150291-142608572  | 0.387795   | 0.419505   | 0.113392 | 0.935829 |

|             |                |                           |          |          |          |          |
|-------------|----------------|---------------------------|----------|----------|----------|----------|
| XLOC_017725 | TMEM167A       | chr5:82348664-82373272    | 7.41059  | 8.01776  | 0.113612 | 0.884203 |
| XLOC_004174 | CELF1          | chr11:47487488-47574792   | 18.7596  | 20.2967  | 0.113616 | 0.893268 |
| XLOC_004257 | FTH1           | chr11:61717355-61735132   | 594.358  | 643.108  | 0.113728 | 0.883517 |
| XLOC_016529 | TMEM184C       | chr4:148538538-148556672  | 3.67908  | 3.98092  | 0.113754 | 0.906934 |
| XLOC_012376 | TMEM87B        | chr2:112812799-112876895  | 3.05117  | 3.30177  | 0.113878 | 0.899929 |
| XLOC_011281 | UQCR11         | chr19:1597153-1605483     | 79.1385  | 85.6402  | 0.113909 | 0.881102 |
| XLOC_022513 | PRPF4          | chr9:116037913-116055185  | 16.435   | 17.7873  | 0.114072 | 0.88681  |
| XLOC_008396 | NMRAL1         | chr16:4511694-4560348     | 35.9411  | 38.8987  | 0.114086 | 0.942091 |
| XLOC_002114 | UBE2T          | chr1:202300784-202311094  | 45.0925  | 48.8033  | 0.114093 | 0.886331 |
| XLOC_005534 | PRIM1          | chr12:57125363-57146146   | 13.0369  | 14.1104  | 0.114163 | 0.899621 |
| XLOC_006928 | EFCAB11        | chr14:90263468-90421089   | 11.9826  | 12.9694  | 0.114174 | 0.921553 |
| XLOC_008108 | LPCAT2         | chr16:55542912-55620582   | 1.8202   | 1.97012  | 0.114186 | 0.907829 |
| XLOC_010098 | MYL12B         | chr18:3262110-3278282     | 552.475  | 598.021  | 0.114286 | 0.884911 |
| XLOC_018930 | ICK            | chr6:52866097-52926600    | 1.90392  | 2.06091  | 0.11431  | 0.907121 |
| XLOC_009615 | NLE1           | chr17:33458367-33469322   | 35.6907  | 38.6358  | 0.114392 | 0.888541 |
| XLOC_015000 | CMTM8          | chr3:32280170-32411813    | 15.0468  | 16.2888  | 0.114419 | 0.907499 |
| XLOC_020904 | FTSJ2          | chr7:2273925-2281833      | 17.0465  | 18.4552  | 0.114557 | 0.889065 |
| XLOC_014024 | TMEM189, TMEM1 | chr20:48697660-48770335   | 78.9305  | 85.4586  | 0.114644 | 0.883608 |
| XLOC_017193 | HMGCR          | chr5:74632992-74657926    | 5.11029  | 5.53305  | 0.11467  | 0.891086 |
| XLOC_004607 | MSANTD2        | chr11:124636393-124670299 | 1.52558  | 1.65184  | 0.114712 | 0.940466 |
| XLOC_018051 | TMEM14B        | chr6:10747994-10757214    | 89.5511  | 96.964   | 0.114737 | 0.881798 |
| XLOC_014644 | PPP6R2         | chr22:50781745-50913464   | 12.384   | 13.4099  | 0.114822 | 0.934604 |
| XLOC_015937 | LOC653712      | chr3:128580350-128590384  | 0.221459 | 0.239814 | 0.114872 | 1        |
| XLOC_000242 | ZCCHC17        | chr1:31769841-31837780    | 14.0235  | 15.1864  | 0.114933 | 0.891976 |
| XLOC_001883 | KRTCAP2        | chr1:155141883-155145804  | 355.444  | 384.925  | 0.114953 | 0.87935  |
| XLOC_005774 | EIF2B1         | chr12:124105569-124147151 | 13.3719  | 14.4813  | 0.114985 | 0.940964 |
| XLOC_003180 | CTBP2          | chr10:126676417-126849624 | 13.8339  | 14.9817  | 0.114993 | 0.881798 |
| XLOC_012247 | DGUOK          | chr2:74153952-74186088    | 59.8844  | 64.8542  | 0.11502  | 0.884031 |
| XLOC_004799 | DNM1L          | chr12:32832136-32898584   | 10.5728  | 11.4507  | 0.115069 | 0.882669 |
| XLOC_023191 | ANAPC2         | chr9:140069235-140084822  | 27.7241  | 30.026   | 0.115073 | 0.952184 |
| XLOC_008476 | PALB2          | chr16:23614482-23652678   | 3.2087   | 3.47524  | 0.115122 | 0.900837 |
| XLOC_010394 | VPS4B          | chr18:61056424-61089752   | 8.93749  | 9.68001  | 0.115139 | 0.889871 |
| XLOC_017358 | SLC35A4        | chr5:139944419-139948683  | 24.1259  | 26.1311  | 0.115184 | 0.881798 |
| XLOC_018382 | LOC100506804   | chr6:75994729-76001580    | 0.154543 | 0.167399 | 0.115287 | 1        |
| XLOC_015626 | UBP1           | chr3:33429828-33481897    | 16.3123  | 17.6698  | 0.115327 | 0.880754 |
| XLOC_020496 | CCT6A          | chr7:56119377-56131682    | 89.5561  | 97.0139  | 0.1154   | 0.880754 |
| XLOC_022236 | DGAT1          | chr8:145515269-145550567  | 31.2786  | 33.8835  | 0.115405 | 0.946581 |
| XLOC_012802 | NT5C1B, NT5C1B | chr2:18735988-18770846    | 10.7214  | 11.6149  | 0.115491 | 0.898467 |
| XLOC_021669 | OTUD6B         | chr8:92082423-92099323    | 4.02897  | 4.36484  | 0.115517 | 0.902527 |
| XLOC_012545 | DNAJC10        | chr2:183580767-183644750  | 6.46295  | 7.00175  | 0.115521 | 0.884031 |
| XLOC_005138 | GATC           | chr12:120884240-120907558 | 7.86169  | 8.51728  | 0.115553 | 0.970185 |
| XLOC_001451 | MRPS15         | chr1:36921361-36930040    | 115.512  | 125.146  | 0.115575 | 0.87832  |
| XLOC_017985 | NHP2           | chr5:177576464-177580961  | 233.939  | 253.465  | 0.115656 | 0.879376 |
| XLOC_012153 | PKDCC          | chr2:42275160-42285668    | 6.94671  | 7.52675  | 0.115697 | 0.907121 |
| XLOC_000228 | ATPIF1         | chr1:28562601-28564616    | 278.417  | 301.668  | 0.115717 | 0.885501 |
| XLOC_010214 | LOC100505549   | chr18:55297533-55470327   | 1.00287  | 1.08663  | 0.115737 | 0.948062 |
| XLOC_007336 | MORF4L1        | chr15:79165122-79190081   | 71.7854  | 77.7859  | 0.115817 | 0.879418 |
| XLOC_014737 | TPST2          | chr22:26921713-26986089   | 14.7202  | 15.9508  | 0.115828 | 0.895795 |
| XLOC_012712 | C2orf82        | chr2:233734993-233741107  | 4.17702  | 4.52635  | 0.115874 | 0.965041 |

|             |              |                           |            |            |          |          |
|-------------|--------------|---------------------------|------------|------------|----------|----------|
| XLOC_008562 | ABCC11       | chr16:48200821-48269088   | 0.0204576  | 0.0221724  | 0.116127 | 1        |
| XLOC_008735 | FANCA        | chr16:89773540-89883065   | 6.31755    | 6.84733    | 0.116175 | 0.953159 |
| XLOC_012949 | C1D          | chr2:68269331-68290159    | 20.276     | 21.9777    | 0.116264 | 0.890882 |
| XLOC_021967 | TM2D2        | chr8:38846326-38854041    | 8.94607    | 9.69721    | 0.116315 | 0.886331 |
| XLOC_017095 | SUB1         | chr5:32585604-32604185    | 27.4088    | 29.711     | 0.116358 | 0.877848 |
| XLOC_000814 | NCSTN        | chr1:160258376-160328742  | 22.3968    | 24.2784    | 0.116378 | 0.942918 |
| XLOC_013011 | TGOLN2       | chr2:85545140-85555419    | 13.8196    | 14.9808    | 0.116398 | 0.880754 |
| XLOC_022645 | WDR5         | chr9:137001209-137025094  | 42.0354    | 45.5681    | 0.116418 | 0.878725 |
| XLOC_012895 | PREPL        | chr2:44502596-44589001    | 4.53344    | 4.91444    | 0.11642  | 0.888541 |
| XLOC_014961 | TMEM43       | chr3:14166439-14185180    | 16.3099    | 17.6811    | 0.116468 | 0.882181 |
| XLOC_020637 | ZKSCAN1      | chr7:99613218-99635403    | 2.04296    | 2.2148     | 0.116517 | 0.900639 |
| XLOC_008481 | NSMCE1       | chr16:27236314-27301789   | 76.429     | 82.8579    | 0.116521 | 0.878705 |
| XLOC_012117 | WDR43        | chr2:29117532-29171080    | 21.9002    | 23.7424    | 0.116524 | 0.876679 |
| XLOC_011482 | LPHN1        | chr19:14247963-14316997   | 12.1735    | 13.1978    | 0.116556 | 0.879055 |
| XLOC_023112 | ASB6         | chr9:132388434-132404448  | 37.3195    | 40.4612    | 0.116612 | 0.916789 |
| XLOC_015622 | CMTM6        | chr3:32522803-32544403    | 13.4006    | 14.5289    | 0.116624 | 0.879418 |
| XLOC_002568 | MINPP1       | chr10:89264222-89313218   | 6.65015    | 7.21018    | 0.116647 | 0.899607 |
| XLOC_001377 | GPN2         | chr1:27205872-27216869    | 26.0115    | 28.2025    | 0.116676 | 0.889422 |
| XLOC_012752 | SEPT2        | chr2:242166681-242293441  | 43.0804    | 46.7129    | 0.116788 | 0.931668 |
| XLOC_011590 | PEPD         | chr19:33877854-34012799   | 40.5076    | 43.9257    | 0.116873 | 0.879418 |
| XLOC_014675 | CLTCL1       | chr22:19166986-19279239   | 1.61604    | 1.75246    | 0.116918 | 0.911326 |
| XLOC_010171 | MAPRE2       | chr18:32556891-32723432   | 2.86097    | 3.10277    | 0.117053 | 0.905545 |
| XLOC_021488 | INTS10       | chr8:19674917-19709586    | 25.912     | 28.1023    | 0.117068 | 0.877776 |
| XLOC_022048 | JPH1         | chr8:75146938-75233562    | 2.60563    | 2.82593    | 0.117091 | 0.907121 |
| XLOC_021249 | LOC100216545 | chr7:104650988-104654588  | 1.71067    | 1.85534    | 0.11712  | 0.927985 |
| XLOC_024104 | ZNF75D       | chrX:134419722-134429965  | 1.07388    | 1.16475    | 0.11718  | 0.933369 |
| XLOC_009516 | CDRT1        | chr17:15491976-15523018   | 0.0442054  | 0.0479486  | 0.117266 | 1        |
| XLOC_014898 | ALG12        | chr22:50296853-50312106   | 5.63265    | 6.10984    | 0.117322 | 0.909209 |
| XLOC_014642 | TRABD        | chr22:50624359-50638027   | 54.1282    | 58.7143    | 0.117331 | 0.87763  |
| XLOC_003892 | TBRG1        | chr11:124492741-124564687 | 4.36697    | 4.73699    | 0.117336 | 0.934331 |
| XLOC_003859 | HMBS         | chr11:118955586-118964259 | 23.223     | 25.1912    | 0.117366 | 0.883608 |
| XLOC_004641 | CCDC77       | chr12:389222-551806       | 3.15182    | 3.41912    | 0.117443 | 0.963969 |
| XLOC_003381 | DNAJC24      | chr11:31391376-31531169   | 2.76238    | 2.99678    | 0.117501 | 0.921553 |
| XLOC_020626 | ARPC1A       | chr7:98923495-98963885    | 116.142    | 126        | 0.117532 | 0.879055 |
| XLOC_007293 | CD276        | chr15:73976621-74006859   | 22.8199    | 24.7586    | 0.117641 | 0.879418 |
| XLOC_021353 | MRPS33       | chr7:140705960-140714781  | 29.5617    | 32.0734    | 0.117646 | 0.89536  |
| XLOC_022493 | FSD1L        | chr9:108210314-108311385  | 1.173      | 1.27274    | 0.11774  | 0.970185 |
| XLOC_006272 | TOX4         | chr14:21945334-21979457   | 9.76772    | 10.5988    | 0.11781  | 0.909226 |
| XLOC_013857 | MKKS         | chr20:10385427-10414887   | 12.3075    | 13.3551    | 0.11785  | 0.887789 |
| XLOC_022940 | BICD2        | chr9:95473644-95527083    | 9.70866    | 10.5352    | 0.117872 | 0.881554 |
| XLOC_018653 | DTNBP1       | chr6:15523031-15663289    | 20.1287    | 21.8424    | 0.117879 | 0.890564 |
| XLOC_004329 | AP5B1        | chr11:65541368-65548062   | 7.49354    | 8.13238    | 0.118031 | 0.88143  |
| XLOC_016101 | CRYGS        | chr3:186256231-186262167  | 1.74521    | 1.89406    | 0.118077 | 0.952184 |
| XLOC_013030 | RGPD1,RGPD2  | chr2:88047605-88285309    | 0.00191842 | 0.00208207 | 0.118104 | 1        |
| XLOC_005599 | PAWR         | chr12:79985744-80084790   | 15.25      | 16.5515    | 0.118154 | 0.885904 |
| XLOC_015474 | EIF2B5       | chr3:183852809-183863099  | 20.4206    | 22.1636    | 0.118164 | 0.878705 |
| XLOC_004355 | CORO1B       | chr11:67205517-67211292   | 125.033    | 135.707    | 0.118183 | 0.879418 |
| XLOC_013866 | KIF16B       | chr20:16252748-16554079   | 1.43097    | 1.5532     | 0.118255 | 0.913887 |
| XLOC_008777 | GLTPD2       | chr17:4692253-4693884     | 0.440753   | 0.478409   | 0.118273 | 0.981543 |



|             |          |                           |           |           |          |          |
|-------------|----------|---------------------------|-----------|-----------|----------|----------|
| XLOC_005150 | TMEM120B | chr12:122150657-122231594 | 6.77943   | 7.35889   | 0.118324 | 0.965956 |
| XLOC_022569 | SLC2A8   | chr9:130159416-130170170  | 24.5696   | 26.6708   | 0.118388 | 0.884507 |
| XLOC_008211 | DDX19B   | chr16:70323669-70380650   | 10.9586   | 11.8959   | 0.118399 | 0.895596 |
| XLOC_011730 | CADM4    | chr19:44126521-44143991   | 11.9627   | 12.9861   | 0.118432 | 0.895686 |
| XLOC_004209 | SSRP1    | chr11:57093458-57103351   | 104.176   | 113.091   | 0.118455 | 0.878705 |
| XLOC_009340 | HGS      | chr17:79650961-79669151   | 80.6425   | 87.5439   | 0.118467 | 0.87748  |
| XLOC_014911 | SYCE3    | chr22:50989540-51001328   | 0.54477   | 0.591433  | 0.118568 | 0.981441 |
| XLOC_023100 | TRUB2    | chr9:131071395-131084697  | 68.9049   | 74.8073   | 0.118573 | 0.876679 |
| XLOC_017104 | SPEF2    | chr5:35617988-35814713    | 0.55764   | 0.605433  | 0.118634 | 0.945416 |
| XLOC_008167 | CBFB     | chr16:67063049-67134958   | 16.3675   | 17.7705   | 0.118646 | 0.877022 |
| XLOC_012257 | HTRA2    | chr2:74753774-74784678    | 18.1081   | 19.6607   | 0.118683 | 0.971768 |
| XLOC_005767 | PITPNM2  | chr12:123468026-123594975 | 2.5371    | 2.75467   | 0.118702 | 0.906423 |
| XLOC_016995 | SH3RF1   | chr4:170015406-170192249  | 1.81426   | 1.96988   | 0.11873  | 0.908098 |
| XLOC_019204 | PSMB1    | chr6:170844203-170862417  | 213.827   | 232.175   | 0.118769 | 0.876838 |
| XLOC_000859 | MPZL1    | chr1:167691186-167761156  | 14.3236   | 15.5527   | 0.118778 | 0.8783   |
| XLOC_005616 | DUSP6    | chr12:89741836-89746296   | 18.6607   | 20.2642   | 0.118932 | 0.880754 |
| XLOC_008939 | SUPT6H   | chr17:26989301-27029249   | 16.7099   | 18.1458   | 0.11894  | 0.875256 |
| XLOC_002314 | GTPBP4   | chr10:1034348-1063708     | 53.4739   | 58.0696   | 0.118949 | 0.873257 |
| XLOC_011617 | POLR2I   | chr19:36602104-36616849   | 92.1924   | 100.12    | 0.119004 | 0.938071 |
| XLOC_017392 | RNF14    | chr5:141346401-141369856  | 5.42066   | 5.88719   | 0.119111 | 0.886331 |
| XLOC_007397 | ZNF710   | chr15:90544751-90625432   | 7.42477   | 8.06388   | 0.119129 | 0.885883 |
| XLOC_000891 | DARS2    | chr1:173793796-173827682  | 5.9609    | 6.47404   | 0.119134 | 0.884031 |
| XLOC_001656 | TMED5    | chr1:93615298-93646246    | 7.64167   | 8.29994   | 0.119213 | 0.876679 |
| XLOC_002216 | LIN9     | chr1:226418849-226497449  | 1.71568   | 1.8636    | 0.119306 | 0.919354 |
| XLOC_011190 | ZNF524   | chr19:56111729-56114504   | 26.4833   | 28.7665   | 0.11931  | 0.900483 |
| XLOC_014242 | BTG3     | chr21:18965967-18985268   | 26.0763   | 28.3278   | 0.11948  | 0.879418 |
| XLOC_007875 | DNASE1L2 | chr16:2286467-2288712     | 1.98765   | 2.15935   | 0.119533 | 0.950837 |
| XLOC_014851 | PMM1     | chr22:41972889-41985871   | 51.8995   | 56.3837   | 0.119557 | 0.879418 |
| XLOC_004059 | C11orf16 | chr11:8932700-8954553     | 0.0256684 | 0.0278863 | 0.119565 | 1        |
| XLOC_020470 | OGDH     | chr7:44646120-44748669    | 6.8832    | 7.47801   | 0.119575 | 0.880754 |
| XLOC_016203 | LOC93622 | chr4:6675820-6677774      | 20.774    | 22.5695   | 0.119601 | 0.887676 |
| XLOC_006064 | N4BP2L2  | chr13:33006929-33112936   | 12.8598   | 13.9731   | 0.119778 | 0.896541 |
| XLOC_009466 | TP53     | chr17:7571719-7606820     | 24.6638   | 26.7993   | 0.1198   | 0.907121 |
| XLOC_018028 | RIPK1    | chr6:3077057-3115421      | 6.11989   | 6.64982   | 0.119808 | 0.880754 |
| XLOC_008394 | TFAP4    | chr16:4307186-4323001     | 15.9622   | 17.3445   | 0.119822 | 0.889253 |
| XLOC_022347 | CLTA     | chr9:36190852-36212059    | 266.399   | 289.472   | 0.119834 | 0.878705 |
| XLOC_010368 | MBD1     | chr18:47793251-47808144   | 14.1522   | 15.3785   | 0.119887 | 0.880513 |
| XLOC_016861 | TRMT10A  | chr4:100467863-100485189  | 0.540175  | 0.587044  | 0.120042 | 0.939929 |
| XLOC_018136 | ZNF165   | chr6:28048481-28057340    | 8.23615   | 8.95095   | 0.12007  | 0.891513 |
| XLOC_022162 | FBXO32   | chr8:124510126-124553493  | 1.7919    | 1.94743   | 0.120081 | 0.895596 |
| XLOC_002654 | BTRC     | chr10:103113789-103317078 | 2.69824   | 2.93245   | 0.120092 | 0.890882 |
| XLOC_020492 | LANCL2   | chr7:55433140-55501435    | 2.45252   | 2.66567   | 0.120234 | 0.906423 |
| XLOC_003143 | DCLRE1A  | chr10:115594482-115614163 | 2.6061    | 2.83265   | 0.120264 | 0.897319 |
| XLOC_008813 | TNK1     | chr17:7284292-7307450     | 9.24072   | 10.0441   | 0.12027  | 0.96645  |
| XLOC_020892 | PRKAR1B  | chr7:588833-826116        | 18.6472   | 20.2686   | 0.120288 | 0.934861 |
| XLOC_023121 | UCK1     | chr9:134378288-134406662  | 42.7396   | 46.4576   | 0.120342 | 0.909209 |
| XLOC_016018 | DHX36    | chr3:153993456-154042286  | 6.65038   | 7.22898   | 0.120356 | 0.880754 |
| XLOC_009297 | SPHK1    | chr17:74380689-74383941   | 218.911   | 237.967   | 0.120415 | 0.874955 |
| XLOC_003772 | PIWIL4   | chr11:94300473-94354587   | 0.422024  | 0.458801  | 0.120544 | 0.947795 |

|             |           |                           |            |            |          |          |
|-------------|-----------|---------------------------|------------|------------|----------|----------|
| XLOC_009990 | RHBDF2    | chr17:74466974-74497509   | 5.68277    | 6.17825    | 0.120604 | 0.904905 |
| XLOC_009380 | TLCD2     | chr17:1606083-1613662     | 1.41764    | 1.54128    | 0.120636 | 0.908677 |
| XLOC_006089 | MRPS31    | chr13:41303431-41345347   | 8.61112    | 9.36221    | 0.120648 | 0.898873 |
| XLOC_006369 | C14orf101 | chr14:57046510-57116232   | 3.36778    | 3.66157    | 0.120664 | 0.898718 |
| XLOC_017836 | CDC23     | chr5:137514416-137549032  | 8.08511    | 8.79068    | 0.120707 | 0.926279 |
| XLOC_012015 | MZF1      | chr19:59070552-59086164   | 11.7641    | 12.7909    | 0.120725 | 0.900642 |
| XLOC_018352 | FBXO9     | chr6:52929795-52965670    | 6.02553    | 6.55156    | 0.120749 | 0.880161 |
| XLOC_008483 | GTF3C1    | chr16:27471933-27561251   | 6.44689    | 7.00994    | 0.1208   | 0.877848 |
| XLOC_022792 | UBAP2     | chr9:33921690-34048947    | 6.65225    | 7.23338    | 0.120827 | 0.877776 |
| XLOC_018893 | MRPL14    | chr6:44081372-44095191    | 118.103    | 128.423    | 0.120864 | 0.871443 |
| XLOC_003567 | TAF6L     | chr11:62538774-62554813   | 10.4324    | 11.3442    | 0.120888 | 0.897423 |
| XLOC_010464 | DOT1L     | chr19:2164147-2232577     | 7.16226    | 7.78836    | 0.120904 | 0.881554 |
| XLOC_015526 | FAM43A    | chr3:194406621-194409766  | 3.24653    | 3.53045    | 0.120956 | 0.921904 |
| XLOC_003713 | SPCS2     | chr11:74660291-74690076   | 25.5758    | 27.8127    | 0.120961 | 0.8761   |
| XLOC_002331 | RBM17     | chr10:6130948-6159422     | 35.2359    | 38.3199    | 0.12105  | 0.872122 |
| XLOC_016584 | SPCS3     | chr4:177241089-177253396  | 14.8707    | 16.1725    | 0.121076 | 0.872122 |
| XLOC_012743 | DUSP28    | chr2:241499470-241503431  | 2.82944    | 3.07715    | 0.121079 | 0.944779 |
| XLOC_022300 | MTAP      | chr9:21802634-21865969    | 32.2782    | 35.1054    | 0.121131 | 0.875511 |
| XLOC_008707 | GIN52     | chr16:85711279-85722588   | 24.1503    | 26.2661    | 0.121162 | 0.880612 |
| XLOC_010635 | LOC113230 | chr19:14183820-14185874   | 3.87576    | 4.21534    | 0.12117  | 0.945416 |
| XLOC_001640 | GBP3      | chr1:89472359-89488549    | 1.53963    | 1.67465    | 0.121271 | 0.917927 |
| XLOC_006419 | KIAA0247  | chr14:70078309-70181861   | 1.71766    | 1.86837    | 0.121335 | 0.907875 |
| XLOC_021184 | TECPR1    | chr7:97844754-97881563    | 4.84638    | 5.2717     | 0.121361 | 0.884621 |
| XLOC_005737 | PXN       | chr12:120639093-120703574 | 106.415    | 115.761    | 0.121446 | 0.873477 |
| XLOC_001317 | EMC1      | chr1:19542157-19578053    | 5.29394    | 5.759      | 0.121477 | 0.878705 |
| XLOC_008178 | FAM65A    | chr16:67562716-67580691   | 18.5157    | 20.1431    | 0.12154  | 0.871053 |
| XLOC_009183 | ANKFN1    | chr17:54230835-54560007   | 0.0763882  | 0.0831031  | 0.121551 | 1        |
| XLOC_002109 | CSRP1     | chr1:201452657-201476387  | 90.0343    | 97.9558    | 0.121656 | 0.87834  |
| XLOC_004801 | ALG10B    | chr12:38710556-38723528   | 0.499225   | 0.543162   | 0.121693 | 0.919354 |
| XLOC_014962 | LSM3      | chr3:14220227-14239869    | 97.7971    | 106.406    | 0.12171  | 0.872122 |
| XLOC_004962 | SRGAP1    | chr12:64238540-64541613   | 0.436737   | 0.475184   | 0.121722 | 0.927665 |
| XLOC_011407 | FBXL12    | chr19:9920942-9929731     | 12.3187    | 13.4036    | 0.121771 | 0.88839  |
| XLOC_010895 | PRR19     | chr19:42801184-42814973   | 7.00679    | 7.6244     | 0.12187  | 0.971768 |
| XLOC_004669 | CD9       | chr12:6309481-6347437     | 268.104    | 291.737    | 0.121874 | 0.871443 |
| XLOC_012094 | KHK       | chr2:27309610-27341995    | 6.04996    | 6.58386    | 0.122007 | 0.950837 |
| XLOC_015285 | ARGFX     | chr3:121286777-121309469  | 0.00291814 | 0.00317572 | 0.122035 | 1        |
| XLOC_013047 | TMEM127   | chr2:96915945-96931751    | 9.78281    | 10.6464    | 0.122051 | 0.876679 |
| XLOC_014199 | RRP1      | chr21:45209417-45223983   | 51.6329    | 56.1915    | 0.122061 | 0.870873 |
| XLOC_018624 | SLC22A23  | chr6:3269206-3456793      | 1.58939    | 1.72974    | 0.122076 | 0.908161 |
| XLOC_017485 | ATP6V0E1  | chr5:172410762-172461900  | 203.671    | 221.659    | 0.1221   | 0.869513 |
| XLOC_000037 | FAM213B   | chr1:2517898-2564481      | 19.805     | 21.5548    | 0.122146 | 0.886331 |
| XLOC_008199 | CIRH1A    | chr16:69166498-69202937   | 37.0774    | 40.3544    | 0.122186 | 0.871443 |
| XLOC_004400 | COA4      | chr11:73583712-73638781   | 101        | 109.927    | 0.122188 | 0.896541 |
| XLOC_008187 | NRN1L     | chr16:67918780-67920271   | 0.34715    | 0.377854   | 0.122273 | 0.980648 |
| XLOC_012577 | C2orf47   | chr2:200793633-200828847  | 18.9649    | 20.6425    | 0.122285 | 0.909496 |
| XLOC_003216 | PSMD13    | chr11:236807-252984       | 109.584    | 119.278    | 0.122297 | 0.872122 |
| XLOC_013506 | HSPA12B   | chr20:3713316-3733758     | 0.0858491  | 0.0934468  | 0.122342 | 1        |
| XLOC_009481 | SLC25A35  | chr17:8191081-8198170     | 1.60361    | 1.74571    | 0.122487 | 0.979267 |
| XLOC_002531 | DLG5-AS1  | chr10:79686569-79689583   | 0.714308   | 0.777619   | 0.122517 | 0.944099 |

|             |                  |                           |            |            |          |          |
|-------------|------------------|---------------------------|------------|------------|----------|----------|
| XLOC_016871 | UBE2D3           | chr4:103717132-103790032  | 114.157    | 124.277    | 0.122547 | 0.869446 |
| XLOC_014408 | MRPL40           | chr22:19420035-19423596   | 78.9873    | 86.0001    | 0.122718 | 0.875956 |
| XLOC_008674 | RFWD3            | chr16:74655296-74700779   | 8.56842    | 9.32957    | 0.122782 | 0.874024 |
| XLOC_005248 | ZNF384           | chr12:6775642-6798738     | 14.3859    | 15.6639    | 0.122791 | 0.878705 |
| XLOC_008519 | ZNF768           | chr16:30535321-30537910   | 47.9608    | 52.2245    | 0.12287  | 0.86876  |
| XLOC_021190 | ATP5J2,ATP5J2-F  | chr7:99006600-99063824    | 717.019    | 780.767    | 0.122881 | 0.930021 |
| XLOC_007126 | EMC4             | chr15:34517244-34630265   | 89.5126    | 97.473     | 0.122912 | 0.879961 |
| XLOC_005678 | SART3            | chr12:108915990-108955165 | 11.321     | 12.3285    | 0.122993 | 0.872122 |
| XLOC_008575 | AKTIP            | chr16:53468350-53537170   | 5.82141    | 6.34002    | 0.123118 | 0.937373 |
| XLOC_007305 | CSK              | chr15:75074424-75095539   | 71.6406    | 78.0311    | 0.123271 | 0.8709   |
| XLOC_016378 | EPGN             | chr4:75174186-75182520    | 0.0200285  | 0.0218161  | 0.123341 | 1        |
| XLOC_005792 | POLE             | chr12:133200347-133263945 | 5.64699    | 6.15112    | 0.123368 | 0.875573 |
| XLOC_018082 | MRS2             | chr6:24403152-24425816    | 9.23109    | 10.0552    | 0.123369 | 0.877022 |
| XLOC_021538 | RBPMS            | chr8:30239634-30429734    | 27.3718    | 29.8181    | 0.123495 | 0.895596 |
| XLOC_023068 | NR5A1            | chr9:127243514-127269699  | 0.0374187  | 0.0407673  | 0.123654 | 1        |
| XLOC_012522 | SCRN3            | chr2:175260456-175294303  | 1.40197    | 1.52748    | 0.123695 | 0.922274 |
| XLOC_021462 | MTMR9            | chr8:11141999-11185654    | 1.17102    | 1.27597    | 0.12384  | 0.902527 |
| XLOC_007861 | SNHG9            | chr16:2014996-2015505     | 59.4991    | 64.8337    | 0.123878 | 0.934331 |
| XLOC_016595 | CCDC111          | chr4:185570766-185655286  | 2.22598    | 2.42557    | 0.123884 | 0.964476 |
| XLOC_021674 | RBM12B-AS1       | chr8:94743730-94753224    | 0.931077   | 1.01456    | 0.123887 | 0.984084 |
| XLOC_000651 | BCL9             | chr1:147013181-147098015  | 1.54815    | 1.68697    | 0.123888 | 0.902819 |
| XLOC_016810 | PAQR3            | chr4:79839093-79860582    | 4.5698     | 4.9797     | 0.123928 | 0.885082 |
| XLOC_013051 | LMAN2L           | chr2:97371666-97405813    | 6.33586    | 6.90484    | 0.124069 | 0.891772 |
| XLOC_002227 | TRIM11           | chr1:228581376-228594517  | 19.6019    | 21.3628    | 0.124109 | 0.875256 |
| XLOC_007848 | UBE2I            | chr16:1359153-1377019     | 78.5742    | 85.6333    | 0.124116 | 0.868932 |
| XLOC_020778 | TRIM24           | chr7:138145078-138270332  | 3.68288    | 4.01391    | 0.124175 | 0.885883 |
| XLOC_008956 | NSRP1            | chr17:28443824-28513493   | 7.92912    | 8.64186    | 0.124181 | 0.878182 |
| XLOC_003574 | RTN3             | chr11:63448921-63527363   | 51.1683    | 55.7688    | 0.12421  | 0.870063 |
| XLOC_011633 | ZNF569           | chr19:37902059-37958339   | 0.00746107 | 0.00813219 | 0.124261 | 1        |
| XLOC_004859 | KRT7             | chr12:52626953-52642709   | 3.55247    | 3.87255    | 0.124464 | 0.933412 |
| XLOC_015675 | CCDC12           | chr3:46963230-47051194    | 37.5525    | 40.9375    | 0.124515 | 0.92441  |
| XLOC_012363 | LIMS1            | chr2:109150810-109303702  | 3.47688    | 3.79037    | 0.124547 | 0.889253 |
| XLOC_007725 | MTHFS,ST20,ST2   | chr15:80135888-80217196   | 18.0317    | 19.6579    | 0.124567 | 0.935273 |
| XLOC_018468 | NUS1             | chr6:117996616-118031886  | 11.2035    | 12.2139    | 0.124572 | 0.867824 |
| XLOC_024184 | HCFC1            | chrX:153213007-153236819  | 8.5801     | 9.35427    | 0.12463  | 0.871195 |
| XLOC_023589 | SLC25A5          | chrX:118599995-118605359  | 489.22     | 533.4      | 0.124735 | 0.872917 |
| XLOC_005813 | SPATA13          | chr13:24734860-24881212   | 1.52499    | 1.66272    | 0.124745 | 0.89785  |
| XLOC_018871 | MED20            | chr6:41873091-41888877    | 3.44853    | 3.76015    | 0.124807 | 0.900642 |
| XLOC_010848 | MED29            | chr19:39881962-39891203   | 9.3465     | 10.1918    | 0.124908 | 0.878705 |
| XLOC_008662 | PHLPP2           | chr16:71678851-71748704   | 1.3044     | 1.42253    | 0.125074 | 0.891309 |
| XLOC_023169 | NOTCH1           | chr9:139388895-139440238  | 6.52675    | 7.11786    | 0.12508  | 0.872122 |
| XLOC_004405 | PGM2L1           | chr11:74041360-74109502   | 0.39269    | 0.428276   | 0.125152 | 0.92475  |
| XLOC_002682 | GSTO1            | chr10:106013951-106027222 | 649.672    | 708.68     | 0.125421 | 0.87419  |
| XLOC_017904 | CCDC69           | chr5:150560612-150603654  | 3.90545    | 4.26043    | 0.12551  | 0.894684 |
| XLOC_023008 | KIAA0368         | chr9:114122972-114247025  | 18.3807    | 20.0524    | 0.125582 | 0.864901 |
| XLOC_018109 | BTN2A2           | chr6:26383323-26395100    | 2.91785    | 3.18353    | 0.125723 | 0.902869 |
| XLOC_013635 | C20orf24,TGIF2,T | chr20:35201875-35274619   | 80.8807    | 88.2484    | 0.125774 | 0.890095 |
| XLOC_022586 | URM1             | chr9:131133597-131154295  | 73.6028    | 80.3087    | 0.125796 | 0.869211 |
| XLOC_019022 | BEND3            | chr6:107386384-107435636  | 1.39161    | 1.51843    | 0.12582  | 0.905903 |

|             |              |                           |            |            |          |          |
|-------------|--------------|---------------------------|------------|------------|----------|----------|
| XLOC_018319 | VEGFA        | chr6:43737945-43754223    | 22.011     | 24.0174    | 0.125859 | 0.876679 |
| XLOC_003745 | PRSS23       | chr11:86511490-86522273   | 2.95413    | 3.22343    | 0.125863 | 0.896306 |
| XLOC_000869 | C1orf112     | chr1:169764549-169863100  | 2.88554    | 3.14866    | 0.125897 | 0.908098 |
| XLOC_020641 | CNPY4        | chr7:99690403-99723128    | 1.70716    | 1.86286    | 0.125919 | 0.991637 |
| XLOC_020849 | REPIN1       | chr7:150065878-150071133  | 104.843    | 114.406    | 0.125938 | 0.866944 |
| XLOC_009012 | TADA2A       | chr17:35766976-35837226   | 3.87116    | 4.22432    | 0.125953 | 0.911712 |
| XLOC_019157 | DYNLT1       | chr6:159057506-159065804  | 85.9805    | 93.8312    | 0.126058 | 0.866938 |
| XLOC_004275 | WDR74        | chr11:62600382-62607628   | 60.5813    | 66.114     | 0.126082 | 0.865317 |
| XLOC_015538 | LOC152217    | chr3:196669493-196670884  | 26.1585    | 28.5481    | 0.126112 | 0.876797 |
| XLOC_007623 | PPIB         | chr15:64443915-64455354   | 629.275    | 686.778    | 0.126153 | 0.872122 |
| XLOC_000255 | EIF3I        | chr1:32687970-32697205    | 236.925    | 258.581    | 0.126185 | 0.867947 |
| XLOC_012535 | AGPS         | chr2:178257470-178408564  | 3.72174    | 4.0623     | 0.12632  | 0.872122 |
| XLOC_024175 | FAM58A       | chrX:152853382-152864632  | 36.4636    | 39.8021    | 0.126384 | 0.874591 |
| XLOC_011461 | PRDX2        | chr19:12907633-12912694   | 560.606    | 611.984    | 0.126507 | 0.865004 |
| XLOC_017421 | HMGXB3       | chr5:149372685-149432706  | 14.7161    | 16.0652    | 0.126547 | 0.869722 |
| XLOC_012248 | TET3         | chr2:74273449-74335302    | 1.06249    | 1.15992    | 0.126584 | 0.897659 |
| XLOC_022662 | PMPCA        | chr9:139305115-139318213  | 136.262    | 148.763    | 0.126632 | 0.867969 |
| XLOC_013507 | CDC25B       | chr20:3776400-3786761     | 20.2551    | 22.1136    | 0.126647 | 0.869189 |
| XLOC_008081 | ZNF720       | chr16:31724549-31772886   | 2.17445    | 2.37397    | 0.126654 | 0.906423 |
| XLOC_011158 | PRPF31       | chr19:54610319-54635150   | 48.2136    | 52.6402    | 0.126725 | 0.875956 |
| XLOC_010565 | PIN1         | chr19:9945882-9960365     | 87.7105    | 95.7666    | 0.126773 | 0.867053 |
| XLOC_015481 | PSMD2        | chr3:184017021-184026840  | 315.437    | 344.435    | 0.126878 | 0.871074 |
| XLOC_002544 | LINC00857    | chr10:81967465-81979413   | 1.02744    | 1.12191    | 0.126896 | 0.937886 |
| XLOC_017109 | WDR70        | chr5:37379411-37752774    | 8.96451    | 9.78885    | 0.126914 | 0.879055 |
| XLOC_008745 | RNMTL1       | chr17:662548-695741       | 28.6418    | 31.2774    | 0.126999 | 0.926251 |
| XLOC_011299 | LMNB2        | chr19:2428162-2456966     | 42.7951    | 46.7349    | 0.127053 | 0.861337 |
| XLOC_013375 | ATG9A        | chr2:220084101-220094361  | 23.3597    | 25.514     | 0.127268 | 0.865746 |
| XLOC_016561 | TMA16        | chr4:164415672-164441691  | 11.3663    | 12.4146    | 0.127274 | 0.879055 |
| XLOC_009411 | ZZEF1        | chr17:3907738-4046253     | 1.71615    | 1.87451    | 0.127344 | 0.882208 |
| XLOC_005183 | FLJ37505     | chr12:128366161-128383184 | 0.00715157 | 0.00781153 | 0.127345 | 1        |
| XLOC_007999 | PLK1         | chr16:23690200-23724821   | 62.5959    | 68.3776    | 0.127456 | 0.864624 |
| XLOC_005996 | ATP11A       | chr13:113344642-113541482 | 2.17947    | 2.38079    | 0.12746  | 0.881573 |
| XLOC_016732 | NFXL1        | chr4:47849257-47916633    | 3.55661    | 3.88515    | 0.127467 | 0.881798 |
| XLOC_013779 | ARFGAP1      | chr20:61904164-61921142   | 28.4603    | 31.0895    | 0.127478 | 0.862406 |
| XLOC_014811 | CARD10       | chr22:37886399-37915210   | 7.0242     | 7.67319    | 0.127492 | 0.881554 |
| XLOC_021708 | DCAF13       | chr8:104410865-104455680  | 49.4895    | 54.0634    | 0.127531 | 0.890489 |
| XLOC_004180 | NUP160       | chr11:47799669-47870057   | 6.14263    | 6.71043    | 0.127548 | 0.863787 |
| XLOC_017467 | FBLL1        | chr5:167956581-167957639  | 0.317564   | 0.346919   | 0.127552 | 1        |
| XLOC_013272 | TFPI         | chr2:188328957-188419219  | 24.5103    | 26.7763    | 0.127572 | 0.897332 |
| XLOC_012445 | MGAT5        | chr2:135011829-135212192  | 3.83545    | 4.19035    | 0.127675 | 0.86876  |
| XLOC_014857 | NAGA         | chr22:42454337-42466846   | 11.6755    | 12.756     | 0.127695 | 0.869467 |
| XLOC_011331 | SEMA6B       | chr19:4542599-4559771     | 17.5038    | 19.1239    | 0.127709 | 0.869345 |
| XLOC_011733 | KCNN4        | chr19:44270684-44285409   | 18.0281    | 19.6975    | 0.127766 | 0.875956 |
| XLOC_009571 | PIGS         | chr17:26880405-26898887   | 17.7915    | 19.4392    | 0.127779 | 0.869189 |
| XLOC_004510 | ALKBH8       | chr11:107373452-107436461 | 0.979451   | 1.07023    | 0.127872 | 0.913887 |
| XLOC_016896 | C4orf21      | chr4:113460488-113578748  | 0.532886   | 0.582276   | 0.127878 | 0.96074  |
| XLOC_004386 | LOC100133315 | chr11:71576554-71639493   | 0.382284   | 0.417739   | 0.127959 | 0.964843 |
| XLOC_002224 | C1orf35      | chr1:228288427-228291022  | 29.2941    | 32.011     | 0.127961 | 0.877848 |
| XLOC_009102 | ASB16        | chr17:42248073-42264085   | 0.248053   | 0.27106    | 0.127964 | 1        |

|             |              |                          |            |            |          |          |
|-------------|--------------|--------------------------|------------|------------|----------|----------|
| XLOC_022727 | NFIB         | chr9:14081841-14398982   | 2.4323     | 2.65795    | 0.127993 | 0.877022 |
| XLOC_018060 | NOL7         | chr6:13615558-13621127   | 113.982    | 124.557    | 0.128009 | 0.860285 |
| XLOC_023609 | BCORL1       | chrX:129139163-129192058 | 2.5874     | 2.82766    | 0.12811  | 0.884031 |
| XLOC_005591 | CAPS2        | chr12:75669758-75723836  | 0.047607   | 0.0520307  | 0.128189 | 1        |
| XLOC_012422 | UGGT1        | chr2:128848753-128953249 | 3.5805     | 3.91324    | 0.128206 | 0.862165 |
| XLOC_017294 | LMNB1        | chr5:126112314-126172712 | 10.1376    | 11.0805    | 0.128314 | 0.875956 |
| XLOC_022247 | RECQL4       | chr8:145736666-145743210 | 25.6648    | 28.0524    | 0.128336 | 0.864177 |
| XLOC_009360 | METRNL       | chr17:81037566-81052591  | 57.9935    | 63.3894    | 0.128351 | 0.870439 |
| XLOC_015712 | C3orf62      | chr3:49306029-49314508   | 2.62372    | 2.86784    | 0.128353 | 0.893931 |
| XLOC_005344 | RECQL        | chr12:21590537-21654603  | 5.34234    | 5.83943    | 0.128356 | 0.915089 |
| XLOC_001768 | POLR3C       | chr1:145592604-145610884 | 14.5728    | 15.9291    | 0.128387 | 0.869972 |
| XLOC_017772 | PGGT1B       | chr5:114546526-114598569 | 4.03892    | 4.41482    | 0.128387 | 0.890489 |
| XLOC_017433 | G3BP1        | chr5:151151475-151184915 | 35.6396    | 38.9575    | 0.128418 | 0.861598 |
| XLOC_015342 | DNAJC13      | chr3:132136552-132257876 | 2.46363    | 2.69305    | 0.128453 | 0.877622 |
| XLOC_009754 | BECN1        | chr17:40950853-40976310  | 19.6186    | 21.4457    | 0.128468 | 0.864624 |
| XLOC_013303 | LOC100507140 | chr2:201560445-201658941 | 0.00888471 | 0.00971245 | 0.12851  | 1        |
| XLOC_002056 | TOR1AIP2     | chr1:179809101-179846941 | 18.8937    | 20.655     | 0.128589 | 0.86221  |
| XLOC_012168 | CRIP1        | chr2:46844324-46852881   | 7.3583     | 8.04432    | 0.128597 | 0.883517 |
| XLOC_011329 | PLIN5        | chr19:4522543-4535208    | 1.23944    | 1.35502    | 0.128621 | 0.936215 |
| XLOC_014984 | UBE2E1       | chr3:23847383-23933131   | 71.1499    | 77.7861    | 0.128653 | 0.864646 |
| XLOC_002029 | CENPL        | chr1:173768687-173793777 | 3.87566    | 4.23721    | 0.128673 | 0.896977 |
| XLOC_012792 | E2F6         | chr2:11584500-11606297   | 7.97939    | 8.72378    | 0.128674 | 0.872122 |
| XLOC_003695 | LRTOMT       | chr11:71709957-71823822  | 1.22988    | 1.34462    | 0.12868  | 0.990368 |
| XLOC_024177 | BCAP31       | chrX:152965946-152990201 | 236.075    | 258.102    | 0.128693 | 0.860285 |
| XLOC_011040 | MED25        | chr19:50321535-50340237  | 20.6604    | 22.5888    | 0.128738 | 0.873236 |
| XLOC_006065 | MINOS1P1     | chr13:33006929-33112936  | 0.0337368  | 0.0368879  | 0.128827 | 1        |
| XLOC_016288 | UBE2K        | chr4:39699663-39784410   | 14.1151    | 15.4337    | 0.128848 | 0.860285 |
| XLOC_004997 | GLIPR1L1     | chr12:75728462-75764169  | 0.0240794  | 0.026329   | 0.128854 | 1        |
| XLOC_001901 | SSR2         | chr1:155978838-155990758 | 306.468    | 335.107    | 0.128887 | 0.8626   |
| XLOC_002217 | PARP1        | chr1:226548391-226595801 | 25.5912    | 27.9828    | 0.128897 | 0.861029 |
| XLOC_009366 | GEMIN4       | chr17:647660-655501      | 19.3752    | 21.1862    | 0.128911 | 0.864177 |
| XLOC_015069 | LARS2        | chr3:45430074-45590328   | 5.65557    | 6.18442    | 0.128965 | 0.868221 |
| XLOC_012624 | CPS1         | chr2:211342405-211543831 | 0.663232   | 0.725263   | 0.128992 | 0.925548 |
| XLOC_004159 | AMBRA1       | chr11:46417961-46615619  | 5.57994    | 6.10193    | 0.129015 | 0.871917 |
| XLOC_017438 | LARP1        | chr5:154092461-154197163 | 25.1053    | 27.4547    | 0.129064 | 0.8626   |
| XLOC_001899 | SCARNA4      | chr1:155882835-155904188 | 1.97443    | 2.15924    | 0.129085 | 1        |
| XLOC_014826 | FAM227A      | chr22:38974124-39052634  | 0.180119   | 0.196984   | 0.129128 | 1        |
| XLOC_013873 | RBBP9        | chr20:18467187-18477887  | 2.78052    | 3.04091    | 0.129147 | 0.886331 |
| XLOC_009526 | PLD6         | chr17:17104308-17109646  | 13.7852    | 15.0763    | 0.129161 | 0.870397 |
| XLOC_008375 | CLDN6        | chr16:3064712-3068188    | 0.112451   | 0.122992   | 0.129257 | 1        |
| XLOC_002363 | TMEM236      | chr10:17794259-17842866  | 0.00658905 | 0.00720704 | 0.129338 | 1        |
| XLOC_018441 | SMPD2        | chr6:109711417-109765122 | 10.9743    | 12.0037    | 0.12935  | 0.891772 |
| XLOC_018075 | E2F3         | chr6:20402136-20493945   | 3.70549    | 4.05309    | 0.129355 | 0.880754 |
| XLOC_023248 | STS          | chrX:7137471-7272682     | 0.252844   | 0.276579   | 0.129443 | 1        |
| XLOC_022274 | CD274        | chr9:5450502-5470567     | 0.702966   | 0.768977   | 0.129485 | 0.928548 |
| XLOC_000392 | BTF3L4       | chr1:52521856-52556388   | 14.7035    | 16.0843    | 0.12949  | 0.861774 |
| XLOC_004663 | NDUFA9       | chr12:4758263-4796720    | 50.2581    | 54.9802    | 0.129555 | 0.86224  |
| XLOC_005560 | PPM1H        | chr12:63037762-63328665  | 1.43864    | 1.57389    | 0.129629 | 0.894684 |
| XLOC_010536 | CAMSAP3      | chr19:7660787-7683196    | 11.5899    | 12.6802    | 0.129721 | 0.871195 |

|             |           |                           |           |           |          |          |
|-------------|-----------|---------------------------|-----------|-----------|----------|----------|
| XLOC_002249 | PCNXL2    | chr1:233119881-233431459  | 1.06921   | 1.16985   | 0.12978  | 0.905839 |
| XLOC_018846 | CCDC167   | chr6:37450696-37467700    | 20.5224   | 22.4542   | 0.129791 | 0.89785  |
| XLOC_006679 | TTC5      | chr14:20757300-20774153   | 9.87676   | 10.8066   | 0.129798 | 0.879055 |
| XLOC_006215 | ARGLU1    | chr13:107195661-107220514 | 38.3338   | 41.9445   | 0.129863 | 0.861774 |
| XLOC_004319 | ZNHIT2    | chr11:64883874-64885170   | 25.3657   | 27.7551   | 0.129876 | 0.887375 |
| XLOC_004617 | SRPR      | chr11:126081618-126138877 | 23.9751   | 26.2336   | 0.129879 | 0.879418 |
| XLOC_011846 | PTOV1-AS1 | chr19:50341902-50363999   | 2.19656   | 2.40356   | 0.129926 | 0.97664  |
| XLOC_007274 | GLCE      | chr15:69116302-69564544   | 1.01522   | 1.11093   | 0.129981 | 0.908707 |
| XLOC_001631 | BCL10     | chr1:85731459-85743771    | 29.0173   | 31.7537   | 0.130012 | 0.862353 |
| XLOC_020423 | C7orf41   | chr7:30174551-30202381    | 3.21694   | 3.52043   | 0.130063 | 0.875956 |
| XLOC_016417 | NUDT9     | chr4:88343727-88380606    | 6.94907   | 7.6052    | 0.130165 | 0.876318 |
| XLOC_021385 | ZNF425    | chr7:148799877-148823438  | 0.748707  | 0.819431  | 0.130221 | 0.935829 |
| XLOC_007858 | NUBP2     | chr16:1832932-1839192     | 97.123    | 106.301   | 0.130266 | 0.86364  |
| XLOC_008192 | SLC7A6    | chr16:68298418-68344868   | 4.74013   | 5.18853   | 0.130399 | 0.899998 |
| XLOC_001447 | EVA1B     | chr1:36787631-36789755    | 26.0754   | 28.5423   | 0.13041  | 0.886622 |
| XLOC_003391 | LINC00294 | chr11:33097695-33101000   | 2.62854   | 2.87721   | 0.13041  | 0.89785  |
| XLOC_001905 | SMG5      | chr1:156219014-156252620  | 16.3101   | 17.8541   | 0.130496 | 0.860285 |
| XLOC_015490 | MAP3K13   | chr3:185000728-185206882  | 9.07555   | 9.93497   | 0.13053  | 0.879418 |
| XLOC_007581 | LYSMD2    | chr15:52015260-52043650   | 10.668    | 11.6783   | 0.130537 | 0.886581 |
| XLOC_014406 | DGCR10    | chr22:19010136-19011063   | 0.0210484 | 0.0230426 | 0.130598 | 1        |
| XLOC_017379 | PCDHB10   | chr5:140571951-140575213  | 0.363613  | 0.398066  | 0.130602 | 0.951272 |
| XLOC_001968 | USF1      | chr1:161009040-161015769  | 19.8819   | 21.7662   | 0.130633 | 0.865521 |
| XLOC_000258 | HDAC1     | chr1:32757707-32799224    | 61.661    | 67.5052   | 0.13064  | 0.860871 |
| XLOC_014756 | ASCC2     | chr22:30184596-30234293   | 19.8434   | 21.7244   | 0.130659 | 0.865746 |
| XLOC_001034 | LINC00467 | chr1:211556096-211605877  | 9.53122   | 10.4348   | 0.130673 | 0.901045 |
| XLOC_005321 | DUSP16    | chr12:12626215-12715448   | 2.4759    | 2.71066   | 0.13069  | 0.879418 |
| XLOC_002966 | DNA2      | chr10:70173820-70231730   | 0.912227  | 0.998727  | 0.130698 | 0.917306 |
| XLOC_010568 | C19orf66  | chr19:10196805-10213425   | 7.84471   | 8.58892   | 0.130757 | 0.897319 |
| XLOC_017454 | FABP6     | chr5:159614373-159665729  | 7.7213    | 8.45412   | 0.130811 | 0.922019 |
| XLOC_001412 | SNRNP40   | chr1:31732414-31769644    | 38.26     | 41.8916   | 0.130827 | 0.861141 |
| XLOC_001336 | EIF4G3    | chr1:21132784-21503381    | 3.36464   | 3.68419   | 0.130898 | 0.8709   |
| XLOC_010999 | SPHK2     | chr19:49118583-49133663   | 8.93625   | 9.78533   | 0.130952 | 0.98003  |
| XLOC_017153 | CWC27     | chr5:64064754-64314590    | 9.19628   | 10.0703   | 0.130981 | 0.871648 |
| XLOC_013031 | KRCC1     | chr2:88326723-8835248     | 3.41009   | 3.73427   | 0.131017 | 0.907121 |
| XLOC_007954 | NPIP      | chr16:15031299-15045931   | 46.2591   | 50.6591   | 0.131086 | 0.861774 |
| XLOC_018840 | STK38     | chr6:36461668-36515247    | 4.77228   | 5.22638   | 0.131135 | 0.879418 |
| XLOC_000298 | MACF1     | chr1:39547088-39952810    | 4.31876   | 4.72987   | 0.131183 | 0.860764 |
| XLOC_010478 | GNA15     | chr19:3136190-3163766     | 7.39505   | 8.09905   | 0.131193 | 0.891735 |
| XLOC_022609 | GPR107    | chr9:132815984-132902448  | 14.7703   | 16.1773   | 0.131272 | 0.861253 |
| XLOC_023348 | RBM10     | chrX:47004616-47046214    | 35.7118   | 39.1149   | 0.131317 | 0.861253 |
| XLOC_000216 | WDTC1     | chr1:27561006-27635124    | 1.03403   | 1.13264   | 0.131405 | 0.920543 |
| XLOC_013322 | GPR1      | chr2:207040041-207082771  | 0.0518279 | 0.0567727 | 0.131469 | 1        |
| XLOC_012254 | TTC31     | chr2:74699084-74721691    | 4.96474   | 5.43846   | 0.131479 | 0.94121  |
| XLOC_022227 | PUF60     | chr8:144898513-144911556  | 204.88    | 224.431   | 0.131499 | 0.864199 |
| XLOC_010596 | PRKCSH    | chr19:11546268-11561782   | 227.202   | 248.885   | 0.131504 | 0.858729 |
| XLOC_011955 | RDH13     | chr19:55555691-55580914   | 8.63965   | 9.46422   | 0.13151  | 0.890563 |
| XLOC_008954 | ANKRD13B  | chr17:27920526-27948441   | 8.85299   | 9.69856   | 0.131606 | 0.87763  |
| XLOC_010559 | ZNF317    | chr19:9251055-9274091     | 9.38163   | 10.2786   | 0.131733 | 0.865746 |
| XLOC_022464 | FAM22G    | chr9:99691285-99704572    | 0.10692   | 0.117158  | 0.131928 | 1        |

|             |           |                           |            |            |          |          |
|-------------|-----------|---------------------------|------------|------------|----------|----------|
| XLOC_021743 | SQLE      | chr8:126010719-126034525  | 16.6975    | 18.297     | 0.13197  | 0.860871 |
| XLOC_009508 | ELAC2     | chr17:12692828-12921381   | 29.0582    | 31.8425    | 0.132006 | 0.863898 |
| XLOC_014022 | SPATA2    | chr20:48519928-48532080   | 4.5416     | 4.97707    | 0.132095 | 0.880754 |
| XLOC_014718 | CHCHD10   | chr22:24105207-24110141   | 315.203    | 345.436    | 0.132136 | 0.860285 |
| XLOC_008683 | CHST6     | chr16:75507021-75528926   | 0.0245449  | 0.0269003  | 0.132197 | 1        |
| XLOC_000929 | RGL1      | chr1:183605207-183897666  | 0.322859   | 0.353858   | 0.132266 | 1        |
| XLOC_017976 | PRR7-AS1  | chr5:176853686-176883287  | 0.73466    | 0.8052     | 0.13227  | 0.990781 |
| XLOC_002476 | ADO       | chr10:64564515-64568239   | 7.34168    | 8.04662    | 0.132274 | 0.867824 |
| XLOC_009683 | KRT10     | chr17:38974368-38992526   | 14.6402    | 16.0461    | 0.132287 | 0.908707 |
| XLOC_020780 | TTC26     | chr7:138818489-138874550  | 2.24807    | 2.46428    | 0.132483 | 0.908161 |
| XLOC_001371 | PAFAH2    | chr1:26286257-26324648    | 3.12551    | 3.42611    | 0.132484 | 0.884031 |
| XLOC_003050 | FGFBP3    | chr10:93666344-93669258   | 1.56823    | 1.7192     | 0.132604 | 0.923897 |
| XLOC_021436 | AGPAT5    | chr8:6565877-6619021      | 9.40629    | 10.3119    | 0.13261  | 0.856226 |
| XLOC_022028 | COPS5     | chr8:67955314-67974562    | 62.9276    | 68.9878    | 0.132649 | 0.854286 |
| XLOC_010935 | RELB      | chr19:45504706-45541456   | 11.5688    | 12.6834    | 0.132704 | 0.882208 |
| XLOC_022057 | PAG1      | chr8:81880045-82024303    | 0.066285   | 0.0726773  | 0.132822 | 1        |
| XLOC_000461 | ACADM     | chr1:76190042-76229355    | 11.2084    | 12.2896    | 0.132854 | 0.865084 |
| XLOC_000936 | C1orf27   | chr1:185703682-186446655  | 2.93438    | 3.21779    | 0.133015 | 0.956489 |
| XLOC_007435 | LRRK1     | chr15:101459459-101610317 | 1.21022    | 1.32718    | 0.133096 | 0.899607 |
| XLOC_010745 | URI1      | chr19:30414550-30507519   | 12.2586    | 13.4435    | 0.133107 | 0.859197 |
| XLOC_005018 | LOC338758 | chr12:90102731-90105729   | 0.027112   | 0.0297347  | 0.133214 | 1        |
| XLOC_008852 | USP43     | chr17:9548853-9633003     | 1.14235    | 1.25288    | 0.133253 | 0.920543 |
| XLOC_008698 | MBTPS1    | chr16:84087368-84150517   | 14.7548    | 16.1826    | 0.133264 | 0.851662 |
| XLOC_009653 | CWC25     | chr17:36956686-36981603   | 6.09281    | 6.68285    | 0.133356 | 0.874414 |
| XLOC_000267 | ZNF362    | chr1:33722173-33766320    | 2.2808     | 2.50168    | 0.133363 | 0.910997 |
| XLOC_018294 | BYSL      | chr6:41888964-41900784    | 36.6581    | 40.21      | 0.133422 | 0.854216 |
| XLOC_006757 | HEATR5A   | chr14:31760993-31889788   | 0.780323   | 0.855991   | 0.133525 | 0.900642 |
| XLOC_018178 | DDR1      | chr6:30851860-30867933    | 9.76366    | 10.7105    | 0.133535 | 0.871053 |
| XLOC_001177 | PGBD2     | chr1:249200441-249213345  | 1.75327    | 1.92335    | 0.133571 | 0.918744 |
| XLOC_023954 | MAGT1     | chrX:77081861-77151065    | 8.15277    | 8.94375    | 0.13359  | 0.861774 |
| XLOC_022235 | BOP1      | chr8:145486055-145515120  | 71.8833    | 78.8608    | 0.133652 | 0.852016 |
| XLOC_000192 | LDLRAP1   | chr1:25870075-25895377    | 8.69183    | 9.53558    | 0.133661 | 0.872122 |
| XLOC_011033 | SCAF1     | chr19:50145381-50161906   | 16.1147    | 17.6799    | 0.133731 | 0.861472 |
| XLOC_009969 | GRB2      | chr17:73314156-73401790   | 37.498     | 41.1404    | 0.133741 | 0.854706 |
| XLOC_016836 | KLHL8     | chr4:88082213-88141674    | 1.42428    | 1.56273    | 0.133844 | 0.897332 |
| XLOC_022037 | LACTB2    | chr8:71520811-71581447    | 16.2118    | 17.7892    | 0.133959 | 0.861006 |
| XLOC_003593 | CCDC88B   | chr11:64107689-64125006   | 4.99568    | 5.48201    | 0.134024 | 0.879418 |
| XLOC_012539 | PLEKHA3   | chr2:179059207-179672150  | 6.08743    | 6.68019    | 0.134057 | 0.944295 |
| XLOC_015070 | LIMD1     | chr3:45636322-45730374    | 4.4727     | 4.90826    | 0.134064 | 0.891476 |
| XLOC_017114 | C7        | chr5:40909598-40983042    | 0.00375811 | 0.00412418 | 0.1341   | 1        |
| XLOC_010675 | MRPL34    | chr19:17416476-17417652   | 84.5828    | 92.8241    | 0.134136 | 0.852179 |
| XLOC_011765 | DMWD      | chr19:46286263-46296060   | 9.90735    | 10.8731    | 0.13419  | 0.874289 |
| XLOC_010938 | PPP1R37   | chr19:45596430-45650543   | 11.4662    | 12.586     | 0.134437 | 0.871053 |
| XLOC_004326 | MAP3K11   | chr11:65365225-65381720   | 16.7497    | 18.3865    | 0.13451  | 0.863898 |
| XLOC_003027 | WAPAL     | chr10:88195012-88281541   | 5.08338    | 5.58032    | 0.134559 | 0.859166 |
| XLOC_001544 | NRD1      | chr1:52082545-52344609    | 22.4182    | 24.6102    | 0.134588 | 0.889046 |
| XLOC_018635 | CAGE1     | chr6:7326886-7389942      | 0.0046927  | 0.00515192 | 0.134691 | 1        |
| XLOC_016457 | CYP2U1    | chr4:108852716-108874613  | 1.92608    | 2.11457    | 0.134697 | 0.885235 |
| XLOC_021860 | PINX1     | chr8:10622883-10697299    | 13.1129    | 14.3964    | 0.134729 | 0.879418 |

|             |              |                           |            |            |          |          |
|-------------|--------------|---------------------------|------------|------------|----------|----------|
| XLOC_001418 | SPOCD1       | chr1:32256024-32281580    | 12.1821    | 13.3748    | 0.134755 | 0.861472 |
| XLOC_006198 | ZIC5         | chr13:100615274-100624178 | 1.37526    | 1.50993    | 0.13478  | 0.908132 |
| XLOC_022277 | MLANA        | chr9:5890908-5909822      | 0.011139   | 0.0122304  | 0.134852 | 1        |
| XLOC_005628 | UBE2N        | chr12:93802087-93836026   | 39.518     | 43.3918    | 0.134911 | 0.849035 |
| XLOC_000759 | FDPS         | chr1:155278538-155300909  | 67.2194    | 73.8131    | 0.134999 | 0.89785  |
| XLOC_010655 | UCA1         | chr19:15939756-15947131   | 11.9877    | 13.1639    | 0.135025 | 0.877296 |
| XLOC_020785 | LOC100134229 | chr7:139877060-139879440  | 4.25134    | 4.6686     | 0.135074 | 0.89301  |
| XLOC_006448 | FCF1         | chr14:75179849-75203390   | 11.13      | 12.2225    | 0.13508  | 0.866966 |
| XLOC_022681 | C9orf142     | chr9:139886869-139888428  | 147.854    | 162.372    | 0.13513  | 0.848628 |
| XLOC_016200 | WFS1         | chr4:6271576-6304992      | 12.6751    | 13.9203    | 0.1352   | 0.862733 |
| XLOC_015134 | ALAS1        | chr3:52232098-52248343    | 29.5789    | 32.4864    | 0.135272 | 0.85025  |
| XLOC_014250 | LINC00515    | chr21:26955086-26955536   | 0.267356   | 0.293639   | 0.135278 | 1        |
| XLOC_015858 | KIAA1524     | chr3:108268717-108413693  | 1.95832    | 2.15085    | 0.135292 | 0.928178 |
| XLOC_016634 | LETM1        | chr4:1813205-1857974      | 13.6071    | 14.9453    | 0.135333 | 0.852179 |
| XLOC_001331 | MUL1         | chr1:20825940-20834674    | 17.9119    | 19.6743    | 0.135396 | 0.861382 |
| XLOC_018819 | LEMD2        | chr6:33738989-33756906    | 25.2739    | 27.7622    | 0.135477 | 0.851874 |
| XLOC_017889 | CSNK1A1      | chr5:148875456-148931115  | 31.5023    | 34.604     | 0.135483 | 0.844936 |
| XLOC_008203 | CYB5B        | chr16:69458497-69500167   | 11.3582    | 12.4774    | 0.13558  | 0.851662 |
| XLOC_018968 | HMG3         | chr6:79910961-79946517    | 24.0945    | 26.4687    | 0.135583 | 0.87748  |
| XLOC_013226 | METTL5       | chr2:170655321-170681353  | 61.5093    | 67.5722    | 0.135626 | 0.931457 |
| XLOC_013656 | FAM83D       | chr20:37554954-37581703   | 15.086     | 16.5734    | 0.135657 | 0.861141 |
| XLOC_009740 | RAB5C        | chr17:40276993-40307062   | 74.9049    | 82.2935    | 0.135718 | 0.845446 |
| XLOC_004854 | ACVR1B       | chr12:52345450-52390863   | 6.22253    | 6.83638    | 0.135732 | 0.861774 |
| XLOC_010544 | EVI5L        | chr19:7895160-7929862     | 6.59625    | 7.24773    | 0.135884 | 0.879418 |
| XLOC_015050 | ZNF662       | chr3:42947401-42960825    | 0.00270375 | 0.00297086 | 0.135921 | 1        |
| XLOC_015679 | ELP6         | chr3:47537129-47555199    | 26.8992    | 29.5572    | 0.135945 | 0.859038 |
| XLOC_013637 | RPN2         | chr20:35729628-35870025   | 77.2784    | 84.916     | 0.135971 | 0.848927 |
| XLOC_021730 | MTBP         | chr8:121408082-121535875  | 2.42865    | 2.66885    | 0.136061 | 0.975492 |
| XLOC_008589 | CIAPIN1      | chr16:57462086-57495187   | 23.5034    | 25.8312    | 0.136245 | 0.901045 |
| XLOC_007519 | INO80        | chr15:41271078-41408340   | 3.2278     | 3.54778    | 0.136365 | 0.869513 |
| XLOC_014307 | DONSON       | chr21:34949858-34961014   | 10.1481    | 11.1542    | 0.136386 | 0.861746 |
| XLOC_000005 | LOC643837    | chr1:762970-794826        | 2.1418     | 2.3542     | 0.136412 | 0.886331 |
| XLOC_023184 | NPDC1        | chr9:139933908-139940676  | 264.487    | 290.718    | 0.136423 | 0.851639 |
| XLOC_011284 | REXO1        | chr19:1815244-1848452     | 14.7129    | 16.1736    | 0.136556 | 0.854752 |
| XLOC_001748 | ZNF697       | chr1:120161999-120190390  | 1.71992    | 1.89077    | 0.136638 | 0.895596 |
| XLOC_004950 | OS9          | chr12:58087737-58115340   | 58.767     | 64.6074    | 0.136693 | 0.849964 |
| XLOC_012285 | MRPL35       | chr2:86426555-86440477    | 10.3537    | 11.3827    | 0.136696 | 0.872122 |
| XLOC_011183 | BRSK1        | chr19:55795533-55823903   | 9.19116    | 10.1049    | 0.136741 | 0.871053 |
| XLOC_020799 | MTRNR2L6     | chr7:142374130-142375525  | 0.846748   | 0.930966   | 0.136796 | 0.942181 |
| XLOC_020925 | DAGLB        | chr7:6448746-6487643      | 20.4792    | 22.5164    | 0.136815 | 0.859937 |
| XLOC_017255 | MAN2A1       | chr5:109025155-109203429  | 0.573187   | 0.630234   | 0.136882 | 0.922274 |
| XLOC_008558 | DNAJA2       | chr16:46989273-47007625   | 26.2669    | 28.8817    | 0.136912 | 0.851639 |
| XLOC_022771 | LINC00032    | chr9:27245681-27282791    | 0.00524123 | 0.00576301 | 0.136917 | 1        |
| XLOC_003190 | FAM196A      | chr10:128594022-129250780 | 0.0113195  | 0.0124464  | 0.136918 | 1        |
| XLOC_012467 | LYPD6        | chr2:150186498-150330659  | 0.856763   | 0.94206    | 0.136922 | 0.91207  |
| XLOC_010828 | SIPA1L3      | chr19:38397867-38699008   | 3.6979     | 4.06626    | 0.136997 | 0.869345 |
| XLOC_013022 | IMMT         | chr2:86371054-86422893    | 38.5146    | 42.3512    | 0.136998 | 0.840418 |
| XLOC_014845 | DNAJB7       | chr22:41253084-41328823   | 0.216997   | 0.238614   | 0.137003 | 1        |
| XLOC_020494 | MRPS17       | chr7:56019610-56023033    | 68.2019    | 74.9984    | 0.137049 | 0.860285 |



|             |           |                           |            |            |          |          |
|-------------|-----------|---------------------------|------------|------------|----------|----------|
| XLOC_003979 | NAP1L4    | chr11:2965659-3013607     | 47.1783    | 51.8816    | 0.137101 | 0.844657 |
| XLOC_010533 | ZNF358    | chr19:7581003-7585911     | 52.7635    | 58.0243    | 0.137117 | 0.852765 |
| XLOC_001235 | CHD5      | chr1:6161846-6240194      | 0.0367552  | 0.0404247  | 0.137289 | 1        |
| XLOC_020895 | C7orf50   | chr7:1036622-1177893      | 84.0694    | 92.4668    | 0.137354 | 0.860871 |
| XLOC_009886 | HEATR6    | chr17:58120551-58156292   | 2.83769    | 3.12125    | 0.13741  | 0.879418 |
| XLOC_004717 | LOC642846 | chr12:9436252-9466684     | 3.40964    | 3.75069    | 0.137535 | 0.889403 |
| XLOC_007920 | HMOX2     | chr16:4511694-4560348     | 37.0329    | 40.7385    | 0.137586 | 0.894574 |
| XLOC_021031 | POLR2J4   | chr7:43966034-44058748    | 0.816236   | 0.897953   | 0.137654 | 0.948523 |
| XLOC_010524 | TNFSF9    | chr19:6531009-6535939     | 17.9989    | 19.8014    | 0.137691 | 0.870275 |
| XLOC_005910 | TPTE2P3   | chr13:53063127-53161225   | 0.00594901 | 0.00654483 | 0.137707 | 1        |
| XLOC_001087 | ARF1      | chr1:228270360-228286913  | 297.107    | 326.865    | 0.137713 | 0.845432 |
| XLOC_000553 | PRPF38B   | chr1:109234931-109244422  | 10.245     | 11.2716    | 0.137775 | 0.844936 |
| XLOC_016323 | TMEM165   | chr4:56262079-56292342    | 43.7898    | 48.1781    | 0.137785 | 0.848579 |
| XLOC_016479 | SNHG8     | chr4:119199916-119200978  | 348.234    | 383.154    | 0.137869 | 0.875956 |
| XLOC_000576 | STRIP1    | chr1:110574198-110597263  | 6.5466     | 7.20317    | 0.137885 | 0.866444 |
| XLOC_024071 | ZNF280C   | chrX:129336672-129402922  | 1.81762    | 1.99994    | 0.137907 | 0.886331 |
| XLOC_009532 | SREBF1    | chr17:17584786-17740325   | 23.0074    | 25.3158    | 0.137942 | 0.872122 |
| XLOC_008616 | TRADD     | chr16:67188088-67193812   | 9.79369    | 10.7777    | 0.13812  | 0.899489 |
| XLOC_020337 | MAFK      | chr7:1570367-1596066      | 8.27385    | 9.10516    | 0.138126 | 0.916694 |
| XLOC_013302 | KCTD18    | chr2:201353683-201374792  | 2.56048    | 2.81821    | 0.138365 | 0.896288 |
| XLOC_023488 | COX7B     | chrX:77154960-77160881    | 319.068    | 351.188    | 0.138377 | 0.85025  |
| XLOC_015564 | PRRT3     | chr3:9987225-9996471      | 1.24058    | 1.3655     | 0.13842  | 0.941894 |
| XLOC_009460 | NEURL4    | chr17:7218950-7232638     | 3.30184    | 3.63444    | 0.138465 | 0.879269 |
| XLOC_005450 | TFCP2     | chr12:51487538-51566926   | 2.62147    | 2.88566    | 0.138524 | 0.879418 |
| XLOC_003873 | TBCEL     | chr11:120894802-120960354 | 1.31045    | 1.44255    | 0.138565 | 0.901564 |
| XLOC_003634 | BANF1     | chr11:65764015-65771617   | 230.574    | 253.824    | 0.138601 | 0.86364  |
| XLOC_016269 | TBC1D19   | chr4:26585545-26756918    | 1.79919    | 1.98085    | 0.138773 | 0.913887 |
| XLOC_014515 | DRG1      | chr22:31795538-31830172   | 60.6863    | 66.8139    | 0.138777 | 0.844936 |
| XLOC_023203 | ZMYND19   | chr9:140476530-140484937  | 83.0792    | 91.4679    | 0.138779 | 0.846872 |
| XLOC_011891 | KLK14     | chr19:51581153-51587502   | 0.173659   | 0.191198   | 0.138805 | 1        |
| XLOC_002009 | SLC19A2   | chr1:169433148-169455208  | 7.67671    | 8.45215    | 0.13883  | 0.863898 |
| XLOC_000609 | VANGL1    | chr1:116184573-116240845  | 1.58688    | 1.74725    | 0.138893 | 0.87046  |
| XLOC_003576 | MARK2     | chr11:63606399-63678492   | 10.2804    | 11.3196    | 0.138929 | 0.85718  |
| XLOC_020906 | BRAT1     | chr7:2577443-2595392      | 22.8896    | 25.2038    | 0.13895  | 0.850951 |
| XLOC_015587 | GRIP2     | chr3:14444105-14583588    | 0.0448405  | 0.049374   | 0.138951 | 1        |
| XLOC_014295 | URB1      | chr21:33664123-33765312   | 4.64127    | 5.11112    | 0.139118 | 0.85025  |
| XLOC_008202 | NIP7      | chr16:69362523-69377013   | 22.5468    | 24.8294    | 0.139129 | 0.883608 |
| XLOC_000292 | MANEAL    | chr1:38259773-38267278    | 11.443     | 12.6015    | 0.13913  | 0.86224  |
| XLOC_010707 | UPF1      | chr19:18942743-18979039   | 20.8228    | 22.9348    | 0.139375 | 0.847872 |
| XLOC_003014 | POLR3A    | chr10:79734906-79789298   | 4.82894    | 5.31883    | 0.139401 | 0.851639 |
| XLOC_018716 | LOC401242 | chr6:28827401-28831454    | 0.00631791 | 0.00695889 | 0.13941  | 1        |
| XLOC_015206 | ARL6      | chr3:97483594-97517373    | 0.835204   | 0.920051   | 0.139584 | 0.942365 |
| XLOC_004322 | SLC25A45  | chr11:65142662-65150142   | 1.762      | 1.94103    | 0.13961  | 0.920543 |
| XLOC_017600 | ZFR       | chr5:32354455-32444844    | 8.28686    | 9.12905    | 0.139638 | 0.84439  |
| XLOC_021090 | SBDS      | chr7:66452689-66460588    | 51.7575    | 57.0181    | 0.139652 | 0.839812 |
| XLOC_004547 | SIK3      | chr11:116714117-116968993 | 2.90558    | 3.20096    | 0.139681 | 0.867312 |
| XLOC_015258 | SLC35A5   | chr3:112280856-112303284  | 3.1243     | 3.44199    | 0.139709 | 0.880357 |
| XLOC_008726 | APRT      | chr16:88875876-88878342   | 224.103    | 246.893    | 0.139721 | 0.841384 |
| XLOC_016037 | TRIM59    | chr3:160153290-160167626  | 0.115556   | 0.127309   | 0.139749 | 1        |

|             |                |                           |            |            |          |          |
|-------------|----------------|---------------------------|------------|------------|----------|----------|
| XLOC_006505 | IFI27L1        | chr14:94547638-94569060   | 19.8151    | 21.8312    | 0.139791 | 0.885329 |
| XLOC_013147 | SMPD4          | chr2:130908964-130948300  | 20.2352    | 22.296     | 0.139918 | 0.94188  |
| XLOC_006661 | C14orf79       | chr14:105452615-105461855 | 6.78031    | 7.47246    | 0.140232 | 0.879055 |
| XLOC_008055 | FBRS           | chr16:30675777-30682131   | 23.429     | 25.8215    | 0.140278 | 0.844936 |
| XLOC_020882 | RNF32          | chr7:156433352-156469820  | 1.76851    | 1.94911    | 0.140285 | 0.916789 |
| XLOC_013929 | E2F1           | chr20:32263291-32274210   | 13.9604    | 15.3861    | 0.140287 | 0.860132 |
| XLOC_001726 | AP4B1          | chr1:114356432-114447741  | 5.99161    | 6.60388    | 0.140369 | 0.869018 |
| XLOC_017733 | MEF2C          | chr5:88014057-88199922    | 0.00298496 | 0.00329001 | 0.140378 | 1        |
| XLOC_003856 | CCDC84         | chr11:118868851-118889057 | 13.4802    | 14.8586    | 0.14045  | 0.986181 |
| XLOC_016276 | PGM2           | chr4:37828281-37864559    | 7.97433    | 8.78976    | 0.140462 | 0.851662 |
| XLOC_021106 | MLXIPL         | chr7:73007523-73038870    | 5.26802    | 5.80696    | 0.140521 | 0.880357 |
| XLOC_024190 | FLNA           | chrX:153576899-153603006  | 78.5627    | 86.6021    | 0.140558 | 0.848653 |
| XLOC_009344 | ANAPC11        | chr17:79849598-79858363   | 113.914    | 125.573    | 0.140582 | 0.844936 |
| XLOC_007931 | METTTL22       | chr16:8715526-8740079     | 6.61393    | 7.29143    | 0.140695 | 0.885443 |
| XLOC_006451 | EIF2B2         | chr14:75469611-75476294   | 18.0754    | 19.9272    | 0.140708 | 0.854216 |
| XLOC_019164 | LOC100129518   | chr6:160181290-160210735  | 0.214084   | 0.236024   | 0.140757 | 1        |
| XLOC_019034 | WASF1          | chr6:110421021-110501207  | 3.00066    | 3.30836    | 0.140834 | 0.890151 |
| XLOC_014197 | RRP1B          | chr21:45079431-45115960   | 15.225     | 16.7862    | 0.140841 | 0.840956 |
| XLOC_015800 | PSMD6          | chr3:63989697-64009686    | 81.8946    | 90.2985    | 0.140934 | 0.842721 |
| XLOC_011963 | PPP6R1         | chr19:55741146-55770038   | 39.4015    | 43.4485    | 0.141056 | 0.840433 |
| XLOC_022111 | HRSP12         | chr8:99114566-99129418    | 50.7702    | 55.9857    | 0.141078 | 0.841165 |
| XLOC_002951 | CCDC6          | chr10:61548505-61666414   | 9.29825    | 10.254     | 0.141162 | 0.840937 |
| XLOC_017382 | PCDHB13        | chr5:140593508-140596993  | 1.79368    | 1.97807    | 0.141175 | 0.900642 |
| XLOC_013106 | ZC3H8          | chr2:112973438-113012664  | 10.7425    | 11.847     | 0.141192 | 0.859038 |
| XLOC_001991 | ALDH9A1        | chr1:165631448-165667900  | 34.0574    | 37.5591    | 0.141197 | 0.838861 |
| XLOC_005227 | FOXN1          | chr12:2945981-2998691     | 21.6175    | 23.8414    | 0.14127  | 0.869722 |
| XLOC_003543 | SDHAF2         | chr11:61197596-61214239   | 31.2001    | 34.4117    | 0.141346 | 0.848579 |
| XLOC_016167 | FGFRL1         | chr4:1005609-1020686      | 11.3794    | 12.5509    | 0.141366 | 0.848579 |
| XLOC_004785 | MRPS35         | chr12:27863705-27909237   | 35.4509    | 39.102     | 0.14142  | 0.839812 |
| XLOC_003300 | TIMM10B        | chr11:6495912-6505911     | 8.64522    | 9.53581    | 0.141452 | 0.926868 |
| XLOC_003165 | MCMBP          | chr10:121588915-121633140 | 14.7123    | 16.228     | 0.141457 | 0.839581 |
| XLOC_005202 | FBRSL1         | chr12:133067156-133161773 | 18.7418    | 20.6729    | 0.141478 | 0.846475 |
| XLOC_011278 | ADAMTSL5       | chr19:1505016-1513188     | 4.99435    | 5.50902    | 0.141497 | 0.886228 |
| XLOC_009515 | CDRT4,TVP23C,T | chr17:15339331-15466945   | 8.55382    | 9.43547    | 0.141525 | 0.872122 |
| XLOC_004678 | PTMS           | chr12:6875540-6880118     | 213.857    | 235.905    | 0.141558 | 0.840433 |
| XLOC_023473 | PIN4           | chrX:71401525-71483814    | 11.1813    | 12.3343    | 0.141596 | 0.895415 |
| XLOC_005483 | SPRYD3         | chr12:53436972-53473204   | 27.1131    | 29.9104    | 0.141658 | 0.848243 |
| XLOC_016470 | AP1AR          | chr4:113152894-113191211  | 7.15535    | 7.89358    | 0.141658 | 0.864982 |
| XLOC_013758 | GTPBP5         | chr20:60758080-60777810   | 6.17007    | 6.80665    | 0.141659 | 0.87368  |
| XLOC_002090 | ASPM           | chr1:197053256-197115824  | 1.71219    | 1.88885    | 0.14167  | 0.87481  |
| XLOC_000079 | TARDBP         | chr1:11072678-11085549    | 16.0248    | 17.6789    | 0.14172  | 0.840058 |
| XLOC_009066 | NKIRAS2        | chr17:40118758-40190044   | 12.7998    | 14.1211    | 0.141738 | 0.964627 |
| XLOC_005576 | LOC100507250   | chr12:69068150-69080639   | 0.19306    | 0.212993   | 0.141754 | 1        |
| XLOC_018295 | TAF8           | chr6:42018250-42048644    | 4.65703    | 5.13793    | 0.141776 | 0.859038 |
| XLOC_012560 | PMS1           | chr2:190634992-190742355  | 3.84381    | 4.24076    | 0.141788 | 0.945597 |
| XLOC_023590 | UBE2A          | chrX:118708498-118718379  | 27.7685    | 30.6382    | 0.141879 | 0.844936 |
| XLOC_013964 | LOC388796      | chr20:37049238-37064018   | 114.784    | 126.652    | 0.141945 | 0.839214 |
| XLOC_021379 | TPK1           | chr7:144149033-144533146  | 0.632437   | 0.697827   | 0.141949 | 0.934932 |
| XLOC_021688 | LAPTM4B        | chr8:98787808-98864830    | 1.02787    | 1.13427    | 0.142115 | 0.926868 |

|             |              |                           |           |           |          |          |
|-------------|--------------|---------------------------|-----------|-----------|----------|----------|
| XLOC_001216 | MORN1        | chr1:2252695-2322993      | 1.02743   | 1.1338    | 0.142125 | 0.961214 |
| XLOC_004705 | NECAP1       | chr12:8234806-8250373     | 7.78324   | 8.58909   | 0.142134 | 0.8626   |
| XLOC_021108 | STX1A        | chr7:73113534-73134017    | 19.3864   | 21.394    | 0.142166 | 0.847186 |
| XLOC_005529 | ATP5B        | chr12:57031958-57039852   | 471.567   | 520.484   | 0.142391 | 0.842721 |
| XLOC_000145 | MRTO4        | chr1:19578074-19586622    | 45.3889   | 50.0973   | 0.142393 | 0.835834 |
| XLOC_005145 | HNF1A        | chr12:121416548-121440314 | 0.38806   | 0.428324  | 0.142423 | 0.946021 |
| XLOC_023458 | DLG3         | chrX:69664704-69725339    | 6.71269   | 7.40943   | 0.142473 | 0.844936 |
| XLOC_016434 | SMARCAD1     | chr4:95128758-95212443    | 2.22103   | 2.45157   | 0.142475 | 0.877848 |
| XLOC_017135 | GPX8         | chr5:54408798-54469005    | 13.8848   | 15.3264   | 0.142513 | 0.835937 |
| XLOC_014451 | RAB36        | chr22:23487512-23506531   | 3.34706   | 3.69461   | 0.142528 | 0.881798 |
| XLOC_002893 | HNRNPF       | chr10:43881064-43904696   | 110.712   | 122.209   | 0.142542 | 0.836347 |
| XLOC_008388 | SLX4         | chr16:3631183-3661585     | 1.22382   | 1.35094   | 0.142565 | 0.890563 |
| XLOC_010764 | KIAA0355     | chr19:34745455-34846471   | 1.25383   | 1.38428   | 0.142795 | 0.882554 |
| XLOC_017023 | CASP3        | chr4:185548849-185570629  | 5.98145   | 6.60395   | 0.142834 | 0.8626   |
| XLOC_018890 | XPO5         | chr6:43490067-43543812    | 17.3044   | 19.1081   | 0.143043 | 0.830497 |
| XLOC_009964 | HN1          | chr17:73131343-73150775   | 115.855   | 127.932   | 0.143061 | 0.839812 |
| XLOC_009347 | ASPSCR1      | chr17:79935425-79975282   | 22.4163   | 24.7534   | 0.143078 | 0.856147 |
| XLOC_013706 | CSE1L        | chr20:47662782-47713497   | 51.9874   | 57.408    | 0.143091 | 0.839406 |
| XLOC_021427 | FBXO25       | chr8:356807-419875        | 15.0155   | 16.582    | 0.143166 | 0.844936 |
| XLOC_004542 | BUD13        | chr11:116618885-116643714 | 11.2914   | 12.4695   | 0.143187 | 0.854216 |
| XLOC_018066 | GMPR         | chr6:16238810-16295780    | 12.8699   | 14.2128   | 0.143188 | 0.86364  |
| XLOC_021170 | PON1         | chr7:94927668-94953884    | 0.0191399 | 0.0211375 | 0.143221 | 1        |
| XLOC_016656 | MRFAP1L1     | chr4:6709428-6711606      | 36.5311   | 40.3445   | 0.143246 | 0.83354  |
| XLOC_009934 | FAM20A       | chr17:66507920-66597095   | 0.0163823 | 0.0180943 | 0.143398 | 1        |
| XLOC_009743 | GHDC         | chr17:40341104-40346550   | 13.9256   | 15.3829   | 0.143587 | 0.858729 |
| XLOC_009642 | DDX52        | chr17:35972362-36003493   | 4.86585   | 5.37536   | 0.14367  | 0.852016 |
| XLOC_010750 | DPY19L3      | chr19:32896654-32976799   | 2.29083   | 2.53079   | 0.143715 | 0.867118 |
| XLOC_013508 | AP5S1        | chr20:3801170-3805954     | 5.97247   | 6.5981    | 0.143723 | 0.884203 |
| XLOC_017675 | SREK1IP1     | chr5:63986134-64064496    | 3.59003   | 3.96623   | 0.143773 | 0.842721 |
| XLOC_017877 | PLAC8L1      | chr5:145463875-145483946  | 2.30127   | 2.54245   | 0.143786 | 0.936311 |
| XLOC_000069 | SLC25A33     | chr1:9599527-9642831      | 23.9283   | 26.436    | 0.143788 | 0.845446 |
| XLOC_006075 | ALG5         | chr13:37523907-37573504   | 32.5578   | 35.9703   | 0.143803 | 0.844936 |
| XLOC_003106 | NPM3         | chr10:103541081-103543170 | 166.194   | 183.616   | 0.143819 | 0.832978 |
| XLOC_016884 | LEF1         | chr4:108968700-109097586  | 7.93579   | 8.76781   | 0.143843 | 0.86364  |
| XLOC_021782 | ZNF623       | chr8:144718182-144735900  | 4.54139   | 5.0177    | 0.143893 | 0.860592 |
| XLOC_023584 | IL13RA1      | chrX:117861558-117928496  | 7.34454   | 8.11492   | 0.143906 | 0.846524 |
| XLOC_020885 | UBE3C        | chr7:156931654-157062066  | 17.1273   | 18.9241   | 0.143928 | 0.836571 |
| XLOC_022694 | TOR4A        | chr9:140172279-140177093  | 52.9173   | 58.4708   | 0.143978 | 0.830497 |
| XLOC_006340 | FANCM        | chr14:45605135-45670093   | 0.371468  | 0.410485  | 0.144092 | 0.910709 |
| XLOC_007302 | ARID3B       | chr15:74833547-74890472   | 3.58939   | 3.96643   | 0.1441   | 0.869513 |
| XLOC_014476 | CRYBB2       | chr22:25615611-25627836   | 6.48231   | 7.16339   | 0.144135 | 0.906135 |
| XLOC_012055 | GREB1        | chr2:11674241-11782912    | 0.0850083 | 0.0939428 | 0.144179 | 1        |
| XLOC_021925 | TRIM35       | chr8:27142403-27168834    | 5.46907   | 6.04441   | 0.144306 | 0.8574   |
| XLOC_012506 | LOC100505695 | chr2:171627603-171634757  | 2.71347   | 2.99895   | 0.144317 | 0.927017 |
| XLOC_008830 | WRAP53       | chr17:7571719-7606820     | 20.3237   | 22.4621   | 0.144329 | 0.939323 |
| XLOC_005779 | DHX37        | chr12:125431369-125473667 | 11.7517   | 12.9889   | 0.144405 | 0.84258  |
| XLOC_002813 | USP6NL       | chr10:11502508-11653679   | 2.88885   | 3.19309   | 0.144458 | 0.865674 |
| XLOC_020659 | SLC12A9      | chr7:100450340-100464634  | 25.3815   | 28.0587   | 0.144668 | 0.838861 |
| XLOC_001289 | CASP9        | chr1:15818768-15851285    | 4.10312   | 4.53608   | 0.144722 | 0.886468 |

|             |            |                           |           |           |          |          |
|-------------|------------|---------------------------|-----------|-----------|----------|----------|
| XLOC_021223 | ACHE       | chr7:100487614-100493541  | 5.47331   | 6.05096   | 0.144751 | 0.886468 |
| XLOC_004842 | LARP4      | chr12:50794591-50873788   | 2.55079   | 2.82008   | 0.144796 | 0.862406 |
| XLOC_017516 | TMED9      | chr5:177019212-177023099  | 166.792   | 184.416   | 0.144919 | 0.833791 |
| XLOC_009566 | POLDIP2    | chr17:26662547-26684603   | 54.7426   | 60.5273   | 0.144922 | 0.862353 |
| XLOC_020696 | DLD        | chr7:107531585-107561643  | 25.731    | 28.4533   | 0.14509  | 0.828968 |
| XLOC_007573 | GABPB1     | chr15:50569388-50650503   | 7.71111   | 8.5274    | 0.145168 | 0.883608 |
| XLOC_002717 | SLC18A2    | chr10:119000583-119038941 | 1.2057    | 1.33338   | 0.145207 | 0.898837 |
| XLOC_003957 | MOB2       | chr11:1490684-1785501     | 24.9281   | 27.5687   | 0.14526  | 0.96692  |
| XLOC_013854 | TMX4       | chr20:7961715-8000393     | 6.58354   | 7.28096   | 0.145263 | 0.864624 |
| XLOC_007592 | RSL24D1    | chr15:55473511-55489231   | 139.087   | 153.835   | 0.145399 | 0.835834 |
| XLOC_003120 | USMG5      | chr10:105127723-105156270 | 386.537   | 427.536   | 0.145438 | 0.843686 |
| XLOC_019200 | TCTE3      | chr6:170140214-170151638  | 0.0646636 | 0.0715298 | 0.145591 | 1        |
| XLOC_013517 | CDS2       | chr20:5107406-5178533     | 4.52873   | 5.00976   | 0.145633 | 0.836107 |
| XLOC_010173 | ZNF271     | chr18:32870235-32890730   | 3.23491   | 3.57874   | 0.145727 | 0.849345 |
| XLOC_004256 | RAB31L1    | chr11:61664767-61687741   | 5.27327   | 5.8338    | 0.145738 | 0.883608 |
| XLOC_007244 | APH1B      | chr15:63569748-63601325   | 3.68323   | 4.07531   | 0.145936 | 0.862353 |
| XLOC_002767 | PWWP2B     | chr10:134210701-134231358 | 23.369    | 25.857    | 0.145955 | 0.851628 |
| XLOC_018628 | RPP40      | chr6:4995279-5004271      | 10.9317   | 12.096    | 0.146014 | 0.869722 |
| XLOC_004130 | IMMP1L     | chr11:31391376-31531169   | 4.02302   | 4.45151   | 0.146017 | 0.957014 |
| XLOC_005058 | CHPT1      | chr12:102091416-102133250 | 13.8458   | 15.3217   | 0.146133 | 0.851662 |
| XLOC_010632 | DCAF15     | chr19:14041999-14072256   | 26.414    | 29.2302   | 0.146157 | 0.842396 |
| XLOC_005789 | DDX51      | chr12:132621139-132628880 | 8.73305   | 9.66467   | 0.146235 | 0.840937 |
| XLOC_017776 | CDO1       | chr5:115140429-115152405  | 0.0426084 | 0.0471555 | 0.146288 | 1        |
| XLOC_001758 | FAM72D     | chr1:143896451-143913143  | 1.39652   | 1.54561   | 0.146343 | 0.912504 |
| XLOC_008827 | MPDU1      | chr17:7486964-7493488     | 53.9982   | 59.7677   | 0.146455 | 0.828523 |
| XLOC_008754 | DPH1_OVCA2 | chr17:1933430-1946725     | 104.513   | 115.682   | 0.146488 | 0.842721 |
| XLOC_001740 | IGSF3      | chr1:117117030-117210314  | 1.3346    | 1.47727   | 0.146523 | 0.875956 |
| XLOC_008595 | C16orf80   | chr16:58147496-58163296   | 39.4868   | 43.7105   | 0.146609 | 0.83928  |
| XLOC_018784 | ATF6B      | chr6:32083044-32096017    | 39.5894   | 43.8283   | 0.146748 | 0.824392 |
| XLOC_004367 | UNC93B1    | chr11:67758574-67771593   | 32.2871   | 35.7455   | 0.146804 | 0.843317 |
| XLOC_000612 | ATP1A1     | chr1:116915794-116961244  | 78.2638   | 86.6555   | 0.146947 | 0.83354  |
| XLOC_022710 | KIAA0020   | chr9:2804154-2844130      | 14.2995   | 15.8332   | 0.146991 | 0.831834 |
| XLOC_014121 | USP16      | chr21:30396937-30426807   | 5.68472   | 6.29446   | 0.146994 | 0.852189 |
| XLOC_011651 | HNRNPL     | chr19:39327027-39342979   | 177.545   | 196.62    | 0.147221 | 0.828549 |
| XLOC_001908 | CCT3       | chr1:156278751-156316785  | 318.254   | 352.451   | 0.147244 | 0.831834 |
| XLOC_008732 | CHMP1A     | chr16:89710838-89736866   | 45.6193   | 50.5231   | 0.147299 | 0.844366 |
| XLOC_007686 | UBL7       | chr15:74738317-74753529   | 51.0895   | 56.5817   | 0.147308 | 0.829938 |
| XLOC_014243 | C21orf91   | chr21:19149720-19191703   | 1.26711   | 1.40343   | 0.147416 | 0.879418 |
| XLOC_023553 | PRPS1      | chrX:106871653-106894256  | 24.7297   | 27.3912   | 0.147466 | 0.831614 |
| XLOC_012986 | MOB1A      | chr2:74383210-74405995    | 23.0851   | 25.5743   | 0.147731 | 0.836427 |
| XLOC_008729 | CBFA2T3    | chr16:88941262-89043504   | 1.58136   | 1.75218   | 0.147981 | 0.906423 |
| XLOC_021915 | NKX3-1     | chr8:23536205-23540450    | 4.03978   | 4.47621   | 0.148002 | 0.870942 |
| XLOC_017283 | SRFBP1     | chr5:121297655-121364295  | 25.9099   | 28.7096   | 0.14803  | 0.836074 |
| XLOC_002360 | VIM        | chr10:17270257-17279592   | 8.94992   | 9.91735   | 0.14808  | 0.869189 |
| XLOC_010005 | CYTH1      | chr17:76670129-76778376   | 3.72418   | 4.12686   | 0.148123 | 0.869972 |
| XLOC_017503 | FAF2       | chr5:175875355-175937075  | 10.0307   | 11.1159   | 0.148203 | 0.831834 |
| XLOC_007698 | PTPN9      | chr15:75759461-75871625   | 6.53136   | 7.23816   | 0.148238 | 0.843869 |
| XLOC_009929 | PSMD12     | chr17:65336618-65362721   | 32.7939   | 36.3441   | 0.148294 | 0.824372 |
| XLOC_014618 | FAM118A    | chr22:45705080-45737836   | 5.15255   | 5.7105    | 0.148332 | 0.860786 |

|             |            |                           |            |            |          |          |
|-------------|------------|---------------------------|------------|------------|----------|----------|
| XLOC_014140 | EVA1C      | chr21:33784751-33887697   | 8.71506    | 9.65889    | 0.148346 | 0.865957 |
| XLOC_017813 | CDKN2AIPNL | chr5:133737755-133747598  | 32.1615    | 35.6495    | 0.148546 | 0.840418 |
| XLOC_010425 | BSG        | chr19:571276-583493       | 629.79     | 698.122    | 0.148608 | 0.835783 |
| XLOC_002403 | CREM       | chr10:35415768-35501886   | 19.1731    | 21.2535    | 0.148616 | 0.859038 |
| XLOC_008299 | C16orf55   | chr16:89710838-89736866   | 7.39037    | 8.19257    | 0.148669 | 0.975454 |
| XLOC_002703 | NHLRC2     | chr10:115614390-115672265 | 1.06857    | 1.18467    | 0.148802 | 0.88141  |
| XLOC_006467 | GSTZ1      | chr14:77787229-77797940   | 23.0562    | 25.5622    | 0.148858 | 0.84703  |
| XLOC_003444 | PTPMT1     | chr11:47586981-47606115   | 16.2595    | 18.0268    | 0.148868 | 0.930216 |
| XLOC_013612 | RALY       | chr20:32581457-32670991   | 41.1608    | 45.6351    | 0.148874 | 0.825017 |
| XLOC_005382 | KIF21A     | chr12:39687029-39837192   | 1.04253    | 1.15597    | 0.149011 | 0.876392 |
| XLOC_020692 | DUS4L      | chr7:106809405-107218968  | 5.71182    | 6.3334     | 0.14903  | 0.960032 |
| XLOC_012962 | C2orf42    | chr2:70377016-70418151    | 2.43117    | 2.69579    | 0.149058 | 0.886331 |
| XLOC_006969 | SETD3      | chr14:99864082-99947226   | 10.2315    | 11.3457    | 0.149133 | 0.844936 |
| XLOC_017553 | TERT       | chr5:1253286-1295162      | 1.03953    | 1.15281    | 0.149212 | 0.922274 |
| XLOC_018638 | SLC35B3    | chr6:8413300-8435794      | 7.12113    | 7.8971     | 0.149217 | 0.861253 |
| XLOC_015799 | THOC7      | chr3:63805040-63849597    | 40.3816    | 44.7836    | 0.149272 | 0.835783 |
| XLOC_021547 | ZNF703     | chr8:37553300-37556396    | 5.00599    | 5.55171    | 0.149278 | 0.908161 |
| XLOC_021023 | MPLKIP     | chr7:40172341-40174251    | 24.3133    | 26.9641    | 0.149296 | 0.858729 |
| XLOC_013225 | CCDC173    | chr2:170501934-170550931  | 0.0288397  | 0.0319864  | 0.149403 | 1        |
| XLOC_008767 | EMC6       | chr17:3539761-3599698     | 147.142    | 163.199    | 0.149417 | 0.933684 |
| XLOC_021454 | ERI1       | chr8:8860313-8890849      | 6.25279    | 6.93573    | 0.149546 | 0.840753 |
| XLOC_014866 | CYB5R3     | chr22:43013845-43045405   | 53.8195    | 59.6983    | 0.149561 | 0.825017 |
| XLOC_008035 | KIF22      | chr16:29802033-29816706   | 56.526     | 62.7052    | 0.149672 | 0.831265 |
| XLOC_002540 | LOC642361  | chr10:81585657-81587358   | 2.21501    | 2.45722    | 0.149712 | 0.929986 |
| XLOC_014155 | SMIM11     | chr21:35747748-35761452   | 15.7859    | 17.5122    | 0.149725 | 0.863898 |
| XLOC_008846 | RANGRF     | chr17:8191081-8198170     | 62.623     | 69.4755    | 0.149811 | 0.843686 |
| XLOC_007125 | PGBD4      | chr15:34394273-34396591   | 0.485482   | 0.538611   | 0.149825 | 0.937886 |
| XLOC_013078 | MFSD9      | chr2:103333665-103353337  | 1.94972    | 2.16318    | 0.14989  | 0.891976 |
| XLOC_001464 | INPP5B     | chr1:38326368-38412729    | 5.14499    | 5.7083     | 0.149892 | 0.841898 |
| XLOC_003323 | IPO7       | chr11:9406168-9469674     | 13.3154    | 14.7735    | 0.149908 | 0.825017 |
| XLOC_003930 | GLB1L2     | chr11:134201767-134246218 | 18.367     | 20.3789    | 0.149961 | 0.824372 |
| XLOC_007757 | SEC11A     | chr15:85212767-85259691   | 156.391    | 173.53     | 0.150033 | 0.825017 |
| XLOC_009348 | LRRC45     | chr17:79981279-79989027   | 8.69097    | 9.64355    | 0.150046 | 0.867427 |
| XLOC_001868 | TPM3       | chr1:154127779-154164609  | 65.6297    | 72.8256    | 0.150098 | 0.826133 |
| XLOC_002983 | PSAP       | chr10:73576054-73611082   | 215.826    | 239.492    | 0.150112 | 0.831614 |
| XLOC_011021 | FLT3LG     | chr19:49977465-49989488   | 7.85218    | 8.71336    | 0.150136 | 0.896288 |
| XLOC_006640 | TNFAIP2    | chr14:103592663-103603776 | 6.95665    | 7.71969    | 0.15015  | 0.844936 |
| XLOC_018317 | MAD2L1BP   | chr6:43597278-43608688    | 35.611     | 39.519     | 0.150225 | 0.828851 |
| XLOC_005205 | PGAM5      | chr12:133287392-133299323 | 40.7944    | 45.2717    | 0.150236 | 0.830017 |
| XLOC_016396 | ANXA3      | chr4:79472741-79531605    | 0.00948113 | 0.010522   | 0.150283 | 1        |
| XLOC_001919 | SH2D2A     | chr1:156776034-156851642  | 4.66157    | 5.1734     | 0.150295 | 0.898731 |
| XLOC_015783 | HESX1      | chr3:57231943-57234280    | 0.408167   | 0.452998   | 0.150344 | 0.955124 |
| XLOC_014647 | NCAPH2     | chr22:50946644-50968514   | 18.9205    | 20.9992    | 0.150385 | 0.908914 |
| XLOC_017906 | SLC36A2    | chr5:150694538-150727151  | 0.00516137 | 0.00572959 | 0.150678 | 1        |
| XLOC_008947 | ERAL1      | chr17:27182042-27188072   | 49.5767    | 55.0353    | 0.150696 | 0.828851 |
| XLOC_015985 | ATR        | chr3:142168076-142297668  | 0.946813   | 1.05107    | 0.150713 | 0.867658 |
| XLOC_014853 | NHP2L1     | chr22:42069936-42084913   | 146.272    | 162.385    | 0.150769 | 0.820487 |
| XLOC_015478 | VWA5B2     | chr3:183948316-183967313  | 3.25038    | 3.60862    | 0.15084  | 0.965831 |
| XLOC_006800 | SOS2       | chr14:50583845-50698099   | 1.61571    | 1.79381    | 0.150862 | 0.870275 |

|             |                |                           |            |            |          |          |
|-------------|----------------|---------------------------|------------|------------|----------|----------|
| XLOC_017231 | POLR3G         | chr5:89770680-89810369    | 3.88663    | 4.3151     | 0.150875 | 0.853245 |
| XLOC_003386 | EIF3M          | chr11:32605312-32816187   | 132.31     | 146.909    | 0.151004 | 0.840918 |
| XLOC_022951 | FANCC          | chr9:97861335-98079991    | 2.97357    | 3.30179    | 0.151052 | 0.86364  |
| XLOC_010742 | POP4           | chr19:30097169-30108162   | 12.6694    | 14.0687    | 0.151144 | 0.825683 |
| XLOC_015724 | TRAIP          | chr3:49866027-49893992    | 5.92177    | 6.57596    | 0.151173 | 0.864624 |
| XLOC_020716 | ING3           | chr7:120590816-120615711  | 7.48746    | 8.31525    | 0.151283 | 0.854102 |
| XLOC_005941 | CLN5           | chr13:77566058-77576652   | 5.65785    | 6.28359    | 0.151334 | 0.848628 |
| XLOC_006040 | MTMR6          | chr13:25820340-25861704   | 3.30772    | 3.67361    | 0.151361 | 0.842721 |
| XLOC_011710 | CEACAM1        | chr19:42901299-43156507   | 0.0291685  | 0.032395   | 0.151363 | 1        |
| XLOC_008361 | PGP            | chr16:2261602-2264822     | 10.2096    | 11.3389    | 0.151364 | 0.844936 |
| XLOC_023901 | LOC92249       | chrX:62646438-62780873    | 5.03996    | 5.59788    | 0.151468 | 0.859038 |
| XLOC_003767 | PANX1          | chr11:93862093-93915137   | 3.46844    | 3.85274    | 0.151599 | 0.870873 |
| XLOC_006037 | CENPJ          | chr13:25456411-25497027   | 1.11477    | 1.23832    | 0.15164  | 0.879418 |
| XLOC_003594 | RPS6KA4        | chr11:64126624-64139687   | 38.6657    | 42.9512    | 0.151644 | 0.820487 |
| XLOC_004238 | MRPL16         | chr11:59573607-59578345   | 62.9404    | 69.9205    | 0.151731 | 0.82411  |
| XLOC_011785 | STRN4          | chr19:47222767-47261832   | 43.5817    | 48.4151    | 0.151733 | 0.838244 |
| XLOC_005614 | KITLG          | chr12:88886569-88974250   | 0.186567   | 0.207265   | 0.151784 | 1        |
| XLOC_012753 | FARP2          | chr2:242295663-242448987  | 0.587374   | 0.652573   | 0.15186  | 0.945399 |
| XLOC_021386 | ZNF777         | chr7:149128453-149158053  | 15.6934    | 17.4373    | 0.152018 | 0.836801 |
| XLOC_006032 | MIPEP          | chr13:24304327-24471125   | 12.3441    | 13.7169    | 0.152134 | 0.828851 |
| XLOC_021305 | IMPDH1         | chr7:128032330-128050036  | 86.166     | 95.7557    | 0.152239 | 0.821371 |
| XLOC_002769 | INPP5A         | chr10:134351352-134596984 | 6.60061    | 7.33549    | 0.152293 | 0.852179 |
| XLOC_017743 | MCTP1          | chr5:94042288-94620279    | 4.39587    | 4.88564    | 0.152399 | 0.848291 |
| XLOC_002522 | PLAU           | chr10:75669726-75682535   | 24.5921    | 27.333     | 0.152447 | 0.823716 |
| XLOC_001503 | KDM4A-AS1      | chr1:44115796-44173012    | 0.421625   | 0.468619   | 0.152457 | 0.98206  |
| XLOC_003650 | LRFN4          | chr11:66615996-66725847   | 42.9998    | 47.7933    | 0.152479 | 0.832563 |
| XLOC_005176 | FAM101A,ZNF664 | chr12:124457761-124800570 | 16.923     | 18.8098    | 0.152492 | 0.820487 |
| XLOC_011428 | YIPF2          | chr19:10982252-11039357   | 28.9483    | 32.1767    | 0.152542 | 0.937886 |
| XLOC_010569 | P2RY11,PPAN,PF | chr19:10216898-10230599   | 44.0403    | 48.9552    | 0.152637 | 0.945887 |
| XLOC_015072 | CCR9           | chr3:45864809-45957216    | 0.00688576 | 0.00765431 | 0.152657 | 1        |
| XLOC_000638 | ANKRD34A       | chr1:145470507-145475647  | 2.22474    | 2.47307    | 0.152666 | 0.889795 |
| XLOC_018636 | BLOC1S5,EEF1E  | chr6:7727010-8102828      | 119.86     | 133.243    | 0.152707 | 0.858852 |
| XLOC_015415 | LEKR1          | chr3:156544095-156763918  | 0.104535   | 0.116209   | 0.152733 | 1        |
| XLOC_000426 | USP1           | chr1:62901974-62917475    | 9.93008    | 11.0391    | 0.152747 | 0.818547 |
| XLOC_008789 | RABEP1         | chr17:5185557-5289132     | 8.11043    | 9.01642    | 0.152776 | 0.817355 |
| XLOC_018572 | SYNJ2          | chr6:158402887-158520207  | 0.903584   | 1.00454    | 0.152805 | 0.880061 |
| XLOC_022429 | GADD45G        | chr9:92219926-92221469    | 1.5459     | 1.71869    | 0.152863 | 0.949526 |
| XLOC_014784 | RFPL3S         | chr22:32750871-32767063   | 1.55344    | 1.72719    | 0.152956 | 0.928904 |
| XLOC_011489 | EMR2           | chr19:14843508-14889353   | 0.00276467 | 0.00307392 | 0.152972 | 1        |
| XLOC_021913 | LOXL2          | chr8:23154409-23261722    | 0.420534   | 0.467587   | 0.153012 | 0.936242 |
| XLOC_018889 | YIPF3          | chr6:43479564-43484728    | 70.9794    | 78.9215    | 0.153018 | 0.815686 |
| XLOC_005098 | RAD9B          | chr12:110940004-110969891 | 0.451646   | 0.502198   | 0.153064 | 0.940466 |
| XLOC_008759 | RAP1GAP2       | chr17:2699731-2941035     | 5.67255    | 6.30759    | 0.153091 | 0.823431 |
| XLOC_005966 | UBAC2          | chr13:99848627-100058554  | 19.5326    | 21.7195    | 0.153107 | 0.831834 |
| XLOC_020380 | BZW2           | chr7:16685758-16746148    | 88.0422    | 97.9013    | 0.153133 | 0.820086 |
| XLOC_005834 | POMP           | chr13:29233140-29253093   | 83.821     | 93.212     | 0.153205 | 0.813202 |
| XLOC_011704 | GSK3A          | chr19:42734337-42746736   | 45.4015    | 50.489     | 0.153228 | 0.818092 |
| XLOC_017935 | SLU7           | chr5:159828647-159846168  | 9.15406    | 10.1801    | 0.153265 | 0.824372 |
| XLOC_015690 | UCN2           | chr3:48599150-48601201    | 0.10181    | 0.113223   | 0.153296 | 1        |

|             |               |                           |           |           |          |          |
|-------------|---------------|---------------------------|-----------|-----------|----------|----------|
| XLOC_020396 | MALSU1        | chr7:23338939-23349180    | 58.7459   | 65.3342   | 0.15335  | 0.832978 |
| XLOC_012902 | MCFD2         | chr2:47129008-47303275    | 22.8047   | 25.3655   | 0.153537 | 0.837945 |
| XLOC_018516 | PDE7B         | chr6:136172833-136516709  | 0.0819059 | 0.0911121 | 0.153674 | 1        |
| XLOC_006294 | DCAF11        | chr14:24583905-24594451   | 16.3824   | 18.2239   | 0.153687 | 0.817355 |
| XLOC_020836 | CUL1          | chr7:148395932-148498202  | 22.751    | 25.3113   | 0.153853 | 0.810769 |
| XLOC_005543 | STAC3         | chr12:57637241-57644969   | 0.396714  | 0.441363  | 0.153868 | 0.951867 |
| XLOC_022483 | RNF20         | chr9:104296132-104325626  | 6.39316   | 7.11271   | 0.15387  | 0.828398 |
| XLOC_001006 | SRGAP2,SRGAP2 | chr1:206516199-206637783  | 4.2773    | 4.75877   | 0.153887 | 0.8626   |
| XLOC_018828 | TAF11         | chr6:34845554-34855848    | 14.1152   | 15.7057   | 0.154039 | 0.836427 |
| XLOC_005618 | ATP2B1        | chr12:89981825-90049844   | 1.59082   | 1.77007   | 0.154039 | 0.856904 |
| XLOC_018608 | TBP           | chr6:170863420-170881958  | 9.10839   | 10.1352   | 0.154107 | 0.848939 |
| XLOC_012180 | CHAC2         | chr2:53897116-54087170    | 4.6898    | 5.2186    | 0.154137 | 0.955413 |
| XLOC_004274 | STX5          | chr11:62574331-62599563   | 26.3845   | 29.3599   | 0.154158 | 0.824372 |
| XLOC_009112 | NMT1          | chr17:43138679-43186382   | 20.6501   | 22.9801   | 0.154238 | 0.812379 |
| XLOC_018894 | SLC35B2       | chr6:44221837-44225283    | 41.0895   | 45.7274   | 0.154291 | 0.810769 |
| XLOC_023276 | ZRSR2         | chrX:15808573-15841382    | 5.93561   | 6.60573   | 0.154322 | 0.8626   |
| XLOC_002676 | TAF5          | chr10:105127723-105156270 | 2.53348   | 2.8196    | 0.154369 | 0.967296 |
| XLOC_008979 | PSMD11        | chr17:30771480-30810337   | 25.9803   | 28.916    | 0.154449 | 0.818403 |
| XLOC_013115 | RPL23AP7      | chr2:114368815-114384715  | 8.30494   | 9.24357   | 0.154448 | 0.91609  |
| XLOC_013139 | AMMECR1L      | chr2:128619206-128643514  | 5.86216   | 6.52495   | 0.154535 | 0.829483 |
| XLOC_013544 | POLR3F        | chr20:18448032-18465286   | 4.05425   | 4.51316   | 0.154701 | 0.86914  |
| XLOC_023040 | MEGF9         | chr9:123363195-123476765  | 1.03891   | 1.15651   | 0.154711 | 0.879041 |
| XLOC_011228 | ZIK1          | chr19:58095627-58103758   | 0.0125737 | 0.0139975 | 0.154759 | 1        |
| XLOC_012060 | DDX1          | chr2:15731744-15771235    | 30.2416   | 33.6676   | 0.154823 | 0.808952 |
| XLOC_004523 | PPP2R1B       | chr11:111473169-111637169 | 6.13218   | 6.82696   | 0.154843 | 0.884031 |
| XLOC_005977 | TPP2          | chr13:103249285-103331523 | 10.4003   | 11.579    | 0.154882 | 0.81416  |
| XLOC_013802 | C20orf96      | chr20:251503-271419       | 7.6713    | 8.54113   | 0.154957 | 0.862187 |
| XLOC_003822 | PTS           | chr11:112097087-112104695 | 14.4054   | 16.0398   | 0.155041 | 0.85132  |
| XLOC_006713 | PSMB5         | chr14:23495059-23504429   | 237.825   | 264.83    | 0.155168 | 0.817355 |
| XLOC_010766 | PDCD2L        | chr19:34895302-34917072   | 25.9613   | 28.9097   | 0.155191 | 0.840937 |
| XLOC_023978 | TIMM8A        | chrX:100600643-100603957  | 8.96929   | 9.98796   | 0.155197 | 0.891309 |
| XLOC_021112 | RFC2          | chr7:73645831-73668738    | 31.1587   | 34.6976   | 0.1552   | 0.813928 |
| XLOC_005694 | ANAPC7        | chr12:110810704-110841535 | 13.9615   | 15.5472   | 0.1552   | 0.821748 |
| XLOC_010666 | TMEM38A       | chr19:16771937-16799816   | 1.98868   | 2.21455   | 0.1552   | 0.911075 |
| XLOC_021732 | ZHX2          | chr8:123793900-123986755  | 2.1046    | 2.34374   | 0.155264 | 0.869473 |
| XLOC_016181 | SH3BP2        | chr4:2794749-2842823      | 6.65158   | 7.40744   | 0.155277 | 0.819558 |
| XLOC_014861 | TCF20         | chr22:42556018-42611445   | 3.98698   | 4.44005   | 0.155278 | 0.825683 |
| XLOC_016300 | GUF1          | chr4:44680432-44702697    | 8.25408   | 9.19216   | 0.155297 | 0.813026 |
| XLOC_016609 | FRG1          | chr4:190861973-190884359  | 31.7033   | 35.308    | 0.155361 | 0.824372 |
| XLOC_009278 | ARMC7         | chr17:73106081-73127890   | 6.16643   | 6.86766   | 0.155384 | 0.954535 |
| XLOC_013745 | NELFCD        | chr20:57556262-57570188   | 39.0187   | 43.4578   | 0.155446 | 0.809839 |
| XLOC_020563 | RHBDD2        | chr7:75508316-75518244    | 43.0367   | 47.9333   | 0.155461 | 0.812084 |
| XLOC_001560 | HSPB11        | chr1:54387233-54411288    | 33.76     | 37.6042   | 0.155582 | 0.842771 |
| XLOC_004167 | ARFGAP2       | chr11:46958250-47198676   | 27.0138   | 30.0922   | 0.155693 | 0.86876  |
| XLOC_007963 | PKD1P1        | chr16:16411465-16444465   | 16.3772   | 18.2437   | 0.155705 | 0.814411 |
| XLOC_012091 | TMEM214       | chr2:27255773-27264565    | 24.701    | 27.5162   | 0.15571  | 0.81727  |
| XLOC_013073 | TBC1D8        | chr2:101618690-101767846  | 1.96151   | 2.18513   | 0.155751 | 0.989716 |
| XLOC_020886 | DNAJB6        | chr7:157129709-157210133  | 70.5784   | 78.6251   | 0.155763 | 0.819558 |
| XLOC_005064 | TDG           | chr12:104359592-104382656 | 4.63693   | 5.16568   | 0.155788 | 0.842721 |

|             |               |                           |            |            |          |          |
|-------------|---------------|---------------------------|------------|------------|----------|----------|
| XLOC_005753 | RHOF          | chr12:122150657-122231594 | 131.22     | 146.184    | 0.155797 | 0.836107 |
| XLOC_010411 | LOC400657     | chr18:72259009-72265071   | 2.55398    | 2.84524    | 0.155801 | 0.867925 |
| XLOC_009130 | GOSR2         | chr17:45000485-45018733   | 6.51034    | 7.25281    | 0.155806 | 0.868876 |
| XLOC_007256 | SLC24A1       | chr15:65914269-65948598   | 1.07594    | 1.19874    | 0.155915 | 0.890489 |
| XLOC_006735 | MDP1,NEDD8,NE | chr14:24683142-24701576   | 272.477    | 303.593    | 0.156004 | 0.812055 |
| XLOC_009342 | SLC25A10      | chr17:79679265-79688046   | 65.8438    | 73.3675    | 0.156094 | 0.821056 |
| XLOC_001223 | MMEL1         | chr1:2517898-2564481      | 3.07591    | 3.42759    | 0.156179 | 0.952539 |
| XLOC_010201 | ELAC1         | chr18:48494386-48514490   | 2.30934    | 2.57344    | 0.156214 | 0.880754 |
| XLOC_005491 | ATF7          | chr12:53901639-54020199   | 2.90606    | 3.23855    | 0.156282 | 0.93285  |
| XLOC_016703 | ARAP2         | chr4:36067619-36245979    | 0.629893   | 0.701978   | 0.156319 | 0.882803 |
| XLOC_014398 | BCL2L13       | chr22:18121349-18213621   | 5.61851    | 6.2618     | 0.156391 | 0.828851 |
| XLOC_018958 | MB21D1        | chr6:74134855-74162043    | 4.10747    | 4.578      | 0.156468 | 0.882688 |
| XLOC_006737 | TGM1          | chr14:24718319-24732416   | 0.285429   | 0.318145   | 0.156555 | 1        |
| XLOC_017209 | JMY           | chr5:78531924-78623038    | 1.53727    | 1.71349    | 0.156568 | 0.846524 |
| XLOC_010521 | CLPP          | chr19:6361462-6368915     | 187.156    | 208.617    | 0.156611 | 0.810183 |
| XLOC_017257 | SLC25A46      | chr5:110074753-110098484  | 5.9236     | 6.60292    | 0.156631 | 0.847872 |
| XLOC_013789 | TPD52L2       | chr20:62496580-62522898   | 101.319    | 112.938    | 0.156633 | 0.807981 |
| XLOC_009700 | KRTAP4-8      | chr17:39253233-39254375   | 0.56487    | 0.629679   | 0.156697 | 0.955413 |
| XLOC_008700 | TAF1C         | chr16:84178864-84220676   | 14.1792    | 15.8062    | 0.15671  | 0.820487 |
| XLOC_015406 | MBNL1         | chr3:151980404-152183569  | 6.18381    | 6.89355    | 0.156751 | 0.828512 |
| XLOC_004262 | MTA2          | chr11:62360674-62369312   | 35.4345    | 39.5017    | 0.15676  | 0.80614  |
| XLOC_002242 | C1orf131      | chr1:231359508-231413719  | 5.06558    | 5.64744    | 0.15687  | 0.954397 |
| XLOC_013593 | KIF3B         | chr20:30865453-30922811   | 2.89191    | 3.22409    | 0.156871 | 0.836107 |
| XLOC_009851 | SPAG9         | chr17:49039534-49198226   | 3.52304    | 3.92797    | 0.156961 | 0.82034  |
| XLOC_003586 | FKBP2         | chr11:64008412-64011607   | 73.4097    | 81.8489    | 0.156993 | 0.82411  |
| XLOC_012161 | SLC3A1        | chr2:44502596-44589001    | 0.00654739 | 0.00730038 | 0.15705  | 1        |
| XLOC_010989 | LOC100505812  | chr19:48711342-48761450   | 2.14898    | 2.39619    | 0.157087 | 0.940327 |
| XLOC_021627 | LOC286190     | chr8:71520811-71581447    | 0.0100208  | 0.0111739  | 0.157135 | 1        |
| XLOC_011536 | ISYNA1        | chr19:18530145-18549111   | 4.96694    | 5.53897    | 0.157262 | 0.967343 |
| XLOC_020900 | TMEM184A      | chr7:1570367-1596066      | 4.54877    | 5.07266    | 0.157265 | 0.886114 |
| XLOC_004657 | TSPAN9        | chr12:3186520-3395730     | 2.24465    | 2.50329    | 0.157334 | 0.875956 |
| XLOC_000822 | USP21         | chr1:161129253-161135516  | 14.7469    | 16.4463    | 0.157351 | 0.828968 |
| XLOC_000804 | DUSP23        | chr1:159750758-159752333  | 29.4842    | 32.8891    | 0.157668 | 0.861337 |
| XLOC_012184 | SPTBN1        | chr2:54683453-54898583    | 8.52598    | 9.51063    | 0.157675 | 0.808631 |
| XLOC_003841 | IL10RA        | chr11:117857105-117872199 | 0.143407   | 0.159976   | 0.157738 | 1        |
| XLOC_022154 | MRPL13        | chr8:121408082-121535875  | 102.324    | 114.15     | 0.157792 | 0.815393 |
| XLOC_006830 | C14orf105     | chr14:57936594-57960576   | 0.0146221  | 0.0163125  | 0.157822 | 1        |
| XLOC_014755 | ZMAT5         | chr22:30116343-30162969   | 30.7962    | 34.3566    | 0.157839 | 0.83586  |
| XLOC_010879 | CCDC97        | chr19:41816093-41830788   | 15.2751    | 17.0429    | 0.15799  | 0.815686 |
| XLOC_010531 | ARHGEF18      | chr19:7459998-7537371     | 9.60944    | 10.7217    | 0.158007 | 0.811061 |
| XLOC_003069 | TM9SF3        | chr10:98277866-98346809   | 24.6691    | 27.5245    | 0.158009 | 0.809514 |
| XLOC_007873 | MLST8         | chr16:2255177-2261069     | 73.9204    | 82.4796    | 0.158065 | 0.810328 |
| XLOC_023830 | NDUFB11       | chrX:47001614-47004609    | 125.938    | 140.522    | 0.158083 | 0.806275 |
| XLOC_005706 | TMEM116       | chr12:112369086-112451023 | 3.24203    | 3.6175     | 0.158095 | 0.883608 |
| XLOC_007255 | PTPLAD1       | chr15:65822826-65870693   | 30.6096    | 34.1579    | 0.158235 | 0.804859 |
| XLOC_004268 | UBXN1         | chr11:62443971-62446527   | 144.841    | 161.635    | 0.158269 | 0.809959 |
| XLOC_000925 | DHX9          | chr1:182808438-182857117  | 29.6644    | 33.104     | 0.158274 | 0.810757 |
| XLOC_018988 | AKIRIN2       | chr6:88384577-88411985    | 17.7438    | 19.8044    | 0.158507 | 0.828851 |
| XLOC_012827 | ASXL2         | chr2:25962252-26101312    | 0.491911   | 0.549071   | 0.158595 | 0.894023 |



|             |           |                           |           |          |          |          |
|-------------|-----------|---------------------------|-----------|----------|----------|----------|
| XLOC_012926 | BCL11A    | chr2:60678301-60780633    | 0.814486  | 0.909162 | 0.158647 | 0.926279 |
| XLOC_002589 | PCGF5     | chr10:92922768-93044088   | 10.92     | 12.1896  | 0.158667 | 0.907121 |
| XLOC_023186 | SAPCD2    | chr9:139956578-139965028  | 51.5784   | 57.5763  | 0.158707 | 0.810757 |
| XLOC_002521 | ZSWIM8    | chr10:75545381-75561556   | 4.77623   | 5.33178  | 0.158746 | 0.851343 |
| XLOC_018835 | SRPK1     | chr6:35800810-35888957    | 24.6013   | 27.4634  | 0.158777 | 0.806525 |
| XLOC_004858 | LINC00592 | chr12:52604713-52617597   | 0.0185378 | 0.020695 | 0.158816 | 1        |
| XLOC_013192 | ACVR1     | chr2:158592957-158732374  | 4.53511   | 5.06311  | 0.158885 | 0.848628 |
| XLOC_007226 | LOC283663 | chr15:57592562-57599967   | 0.140559  | 0.156927 | 0.158911 | 1        |
| XLOC_023075 | MAPKAP1   | chr9:128199672-128469513  | 87.2037   | 97.3622  | 0.158973 | 0.83443  |
| XLOC_000449 | GADD45A   | chr1:68150859-68154021    | 135.031   | 150.761  | 0.158978 | 0.804282 |
| XLOC_011579 | UQCRFS1   | chr19:29698166-29704136   | 123.447   | 137.828  | 0.158978 | 0.806525 |
| XLOC_003264 | PGAP2     | chr11:3696239-3847601     | 20.8806   | 23.3146  | 0.159073 | 0.911445 |
| XLOC_005520 | ANKRD52   | chr12:56623819-56652143   | 5.12519   | 5.72275  | 0.159103 | 0.811969 |
| XLOC_005778 | UBC       | chr12:125396191-125399587 | 526.854   | 588.379  | 0.159342 | 0.820487 |
| XLOC_022563 | MVB12B    | chr9:129089122-129269320  | 5.70024   | 6.36594  | 0.159351 | 0.832068 |
| XLOC_020668 | ZNHIT1    | chr7:100849257-100867471  | 155.269   | 173.41   | 0.159421 | 0.877654 |
| XLOC_001433 | PHC2      | chr1:33789223-33841194    | 128.208   | 143.198  | 0.159531 | 0.8041   |
| XLOC_005096 | ATP2A2    | chr12:110719031-110788897 | 14.1296   | 15.7828  | 0.159638 | 0.806301 |
| XLOC_014440 | SDF2L1    | chr22:21996541-21998588   | 64.7913   | 72.3726  | 0.159643 | 0.824756 |
| XLOC_016989 | TMEM192   | chr4:165997229-166034024  | 3.09586   | 3.45825  | 0.159701 | 0.840133 |
| XLOC_022688 | C9orf169  | chr9:140119643-140120763  | 3.57245   | 3.99073  | 0.159738 | 0.925029 |
| XLOC_008370 | TCEB2     | chr16:2821414-2827297     | 486.518   | 543.494  | 0.159769 | 0.825475 |
| XLOC_011415 | FDX1L     | chr19:10420890-10426691   | 29.7948   | 33.2847  | 0.1598   | 0.836912 |
| XLOC_000812 | PEA15     | chr1:160175124-160185162  | 103.148   | 115.237  | 0.159886 | 0.808953 |
| XLOC_013177 | RND3      | chr2:151324706-151344209  | 5.70554   | 6.37462  | 0.159976 | 0.834266 |
| XLOC_012965 | FAM136A   | chr2:70523107-70529220    | 32.9759   | 36.8455  | 0.160076 | 0.805402 |
| XLOC_017950 | STK10     | chr5:171469073-171615346  | 7.15131   | 7.99075  | 0.160122 | 0.810183 |
| XLOC_006728 | DHRS4-AS1 | chr14:24407939-24438488   | 2.43746   | 2.7238   | 0.160244 | 0.939451 |
| XLOC_016202 | MRFAP1    | chr4:6641817-6644470      | 132.874   | 148.5    | 0.160399 | 0.806478 |
| XLOC_022592 | SET       | chr9:131445933-131458675  | 306.068   | 342.072  | 0.160448 | 0.818403 |
| XLOC_011892 | CTU1      | chr19:51600862-51611647   | 12.3959   | 13.8543  | 0.160471 | 0.849476 |
| XLOC_010923 | CEACAM19  | chr19:45174723-45187627   | 11.0619   | 12.3635  | 0.160481 | 0.835    |
| XLOC_021982 | CEBPD     | chr8:48649475-48650726    | 29.0662   | 32.4864  | 0.160492 | 0.847391 |
| XLOC_009579 | TLCD1     | chr17:27046999-27053949   | 12.4224   | 13.8852  | 0.160604 | 0.983243 |
| XLOC_020394 | NUPL2     | chr7:23221445-23240630    | 11.3154   | 12.6481  | 0.160624 | 0.835398 |
| XLOC_021687 | MTDH      | chr8:98656406-98742488    | 26.1369   | 29.216   | 0.160672 | 0.809514 |
| XLOC_000915 | XPR1      | chr1:180601145-180859415  | 1.79594   | 2.00761  | 0.160744 | 0.826133 |
| XLOC_020788 | NDUFB2    | chr7:140395135-140406446  | 335.677   | 375.263  | 0.160826 | 0.804859 |
| XLOC_018401 | SMIM8     | chr6:87992696-88052043    | 1.94886   | 2.17868  | 0.160826 | 0.880754 |
| XLOC_004061 | TMEM9B    | chr11:8968839-8985989     | 16.0893   | 17.9875  | 0.160897 | 0.818547 |
| XLOC_004307 | MEN1      | chr11:64570985-64578766   | 33.5719   | 37.5329  | 0.160901 | 0.806119 |
| XLOC_003091 | CHUK      | chr10:101948123-101989344 | 3.17548   | 3.55078  | 0.161161 | 0.841774 |
| XLOC_001141 | EFCAB2    | chr1:245133170-245288530  | 1.93312   | 2.16162  | 0.161183 | 0.909346 |
| XLOC_009406 | ITGAE     | chr17:3617918-3704537     | 2.83297   | 3.16791  | 0.161216 | 0.893858 |
| XLOC_001435 | SMIM12    | chr1:35315962-35325417    | 5.48178   | 6.12996  | 0.161233 | 0.814656 |
| XLOC_007874 | E4F1      | chr16:2273566-2285743     | 16.8606   | 18.8561  | 0.161379 | 0.818775 |
| XLOC_015095 | TMA7      | chr3:48481685-48485537    | 431.358   | 482.417  | 0.161394 | 0.804859 |
| XLOC_022505 | UGCG      | chr9:114659205-114695433  | 6.66529   | 7.45426  | 0.161398 | 0.853422 |
| XLOC_004496 | DCUN1D5   | chr11:102921412-102962944 | 4.61278   | 5.15936  | 0.161554 | 0.801665 |

|             |                 |                           |           |           |          |          |
|-------------|-----------------|---------------------------|-----------|-----------|----------|----------|
| XLOC_007239 | TLN2            | chr15:62939509-63136829   | 0.980064  | 1.09622   | 0.16159  | 0.854216 |
| XLOC_006656 | SIVA1           | chr14:105219469-105225996 | 143.939   | 161       | 0.161604 | 0.801516 |
| XLOC_011272 | SBNO2           | chr19:1107632-1174282     | 15.0276   | 16.8094   | 0.16165  | 0.809535 |
| XLOC_023156 | CAMSAP1         | chr9:138700332-138799005  | 7.55074   | 8.44635   | 0.16171  | 0.806301 |
| XLOC_021978 | SLC20A2         | chr8:42273979-42408140    | 5.52513   | 6.18076   | 0.161776 | 0.917559 |
| XLOC_000094 | VPS13D          | chr1:12290112-12572098    | 0.812889  | 0.909361  | 0.161794 | 0.838891 |
| XLOC_010878 | HNRNPUL1        | chr19:41768390-41813811   | 54.6889   | 61.1798   | 0.161806 | 0.80005  |
| XLOC_015321 | RAB7A           | chr3:128444978-128533641  | 100.767   | 112.727   | 0.161806 | 0.804859 |
| XLOC_022981 | MRPL50          | chr9:104152248-104160919  | 46.6458   | 52.1822   | 0.16181  | 0.800138 |
| XLOC_022686 | SSNA1           | chr9:140069235-140084822  | 185.88    | 207.95    | 0.161863 | 0.851628 |
| XLOC_003433 | MDK             | chr11:46402333-46405387   | 621.62    | 695.431   | 0.161873 | 0.802089 |
| XLOC_007977 | LOC81691        | chr16:20775311-20860990   | 5.71932   | 6.39847   | 0.161885 | 0.907121 |
| XLOC_015523 | HES1            | chr3:193853930-193856401  | 22.0302   | 24.6471   | 0.161935 | 0.831834 |
| XLOC_022160 | C8orf76,ZHX1,ZH | chr8:124232195-124287781  | 33.9334   | 37.9644   | 0.161944 | 0.832978 |
| XLOC_007134 | FAM98B          | chr15:38746327-38777063   | 4.38947   | 4.91128   | 0.162052 | 0.869765 |
| XLOC_017768 | REEP5           | chr5:112196884-112258031  | 24.7466   | 27.6885   | 0.162056 | 0.842396 |
| XLOC_009294 | ZACN            | chr17:74075262-74099868   | 0.0613093 | 0.0686031 | 0.162167 | 1        |
| XLOC_015596 | HACL1           | chr3:15602239-15643130    | 11.7396   | 13.137    | 0.162256 | 0.819248 |
| XLOC_008794 | FAM64A          | chr17:6347734-6354385     | 14.1449   | 15.8287   | 0.162264 | 0.838557 |
| XLOC_001777 | ACP6            | chr1:147119167-147142634  | 16.3261   | 18.2708   | 0.162362 | 0.820659 |
| XLOC_013877 | CRNKL1          | chr20:20015011-20341346   | 4.79289   | 5.36408   | 0.162434 | 0.817992 |
| XLOC_012273 | ELMOD3          | chr2:85581842-85618875    | 3.44681   | 3.85766   | 0.162465 | 0.870084 |
| XLOC_017670 | ELOVL7          | chr5:60047615-60140101    | 3.67563   | 4.11376   | 0.162466 | 0.839471 |
| XLOC_004745 | KIAA1467        | chr12:13197314-13236383   | 1.55179   | 1.73688   | 0.162567 | 0.865674 |
| XLOC_021280 | TSPAN12         | chr7:120427373-120498177  | 1.327     | 1.48529   | 0.162576 | 0.889122 |
| XLOC_006004 | TFDP1           | chr13:114239002-114295788 | 23.1563   | 25.9194   | 0.162624 | 0.802177 |
| XLOC_023168 | SEC16A          | chr9:139334547-139380519  | 15.7437   | 17.6227   | 0.162658 | 0.800413 |
| XLOC_005716 | RBM19           | chr12:114254542-114404176 | 12.5241   | 14.0189   | 0.162669 | 0.804859 |
| XLOC_021272 | LOC401397       | chr7:112756772-112758637  | 72.6486   | 81.3197   | 0.16267  | 0.800869 |
| XLOC_016488 | EXOSC9          | chr4:122722471-122745088  | 17.1341   | 19.1792   | 0.162676 | 0.905305 |
| XLOC_020687 | CDHR3           | chr7:105603656-105676877  | 0.0355452 | 0.039788  | 0.162678 | 1        |
| XLOC_007144 | IVD             | chr15:40697685-40713512   | 16.6554   | 18.644    | 0.162727 | 0.797218 |
| XLOC_001187 | NOC2L           | chr1:861120-894679        | 71.3569   | 79.8794   | 0.16277  | 0.800169 |
| XLOC_006377 | KIAA0586        | chr14:58862643-59015549   | 0.53318   | 0.59686   | 0.16277  | 0.970185 |
| XLOC_016559 | RAPGEF2         | chr4:160188997-160281301  | 1.37848   | 1.54319   | 0.162843 | 0.852189 |
| XLOC_018254 | ZNF76           | chr6:35227509-35263760    | 8.94723   | 10.0172   | 0.162967 | 0.821666 |
| XLOC_008019 | EIF3C,EIF3CL    | chr16:28699878-28747053   | 1.29169   | 1.44621   | 0.163008 | 0.890882 |
| XLOC_013852 | FERMT1          | chr20:6055491-6104191     | 4.87284   | 5.45583   | 0.163037 | 0.814132 |
| XLOC_009050 | TMEM99          | chr17:38974368-38992526   | 9.39334   | 10.5178   | 0.163122 | 0.91252  |
| XLOC_003299 | SMPD1           | chr11:6411643-6416228     | 5.99711   | 6.71501   | 0.163124 | 0.845446 |
| XLOC_021269 | TMEM168         | chr7:112405786-112430478  | 4.08879   | 4.57883   | 0.163303 | 0.831834 |
| XLOC_014167 | DSCR9           | chr21:38580803-38594037   | 0.068705  | 0.0769451 | 0.163414 | 1        |
| XLOC_003172 | C10orf88        | chr10:124690418-124713919 | 1.06785   | 1.19595   | 0.163447 | 0.891012 |
| XLOC_012801 | SMC6            | chr2:17845078-17935096    | 1.58807   | 1.77861   | 0.163471 | 0.845543 |
| XLOC_010261 | HSBP1L1         | chr18:77724581-77730822   | 72.5754   | 81.2834   | 0.163479 | 0.804859 |
| XLOC_010059 | SECTM1          | chr17:80278899-80291921   | 8.28955   | 9.2843    | 0.163499 | 0.850429 |
| XLOC_015116 | SEMA3B          | chr3:50305039-50314572    | 0.546397  | 0.612015  | 0.163618 | 0.936985 |
| XLOC_009179 | TOM1L1          | chr17:52978051-53046064   | 7.27554   | 8.14978   | 0.163708 | 0.922427 |
| XLOC_023365 | FTSJ1           | chrX:48334548-48344752    | 30.5722   | 34.2465   | 0.163737 | 0.802089 |

|             |           |                           |           |           |          |          |
|-------------|-----------|---------------------------|-----------|-----------|----------|----------|
| XLOC_009387 | TSR1      | chr17:2207247-2240678     | 21.9218   | 24.558    | 0.16383  | 0.797588 |
| XLOC_006253 | PARP2     | chr14:20811772-20826063   | 12.192    | 13.6586   | 0.163874 | 0.806119 |
| XLOC_018368 | LOC441155 | chr6:64429875-66417118    | 0.119197  | 0.133541  | 0.163933 | 1        |
| XLOC_006434 | ACOT1     | chr14:73945188-74025651   | 2.95073   | 3.30598   | 0.164004 | 0.95448  |
| XLOC_014438 | UBE2L3    | chr22:21899957-21978323   | 42.0867   | 47.1539   | 0.164012 | 0.797899 |
| XLOC_014557 | MAFF      | chr22:38597938-38612517   | 38.7543   | 43.4222   | 0.164074 | 0.802651 |
| XLOC_018257 | FANCE     | chr6:35420137-35434881    | 13.8221   | 15.4877   | 0.164149 | 0.816563 |
| XLOC_015734 | RASSF1    | chr3:50367216-50378367    | 17.9799   | 20.1468   | 0.164171 | 0.821721 |
| XLOC_017268 | DCP2      | chr5:112312406-112824527  | 1.84496   | 2.06745   | 0.164261 | 0.823771 |
| XLOC_006298 | IRF9      | chr14:24630421-24635774   | 2.40161   | 2.6915    | 0.164409 | 0.90073  |
| XLOC_014667 | MICAL3    | chr22:18270415-18507325   | 3.99204   | 4.47391   | 0.16441  | 0.808127 |
| XLOC_017659 | PPAP2A    | chr5:54603575-54830873    | 9.28226   | 10.4035   | 0.164523 | 0.94749  |
| XLOC_001916 | ISG20L2   | chr1:156692412-156697705  | 13.0835   | 14.6658   | 0.164706 | 0.808394 |
| XLOC_002046 | RFWD2     | chr1:175913966-176176370  | 8.78204   | 9.84438   | 0.164743 | 0.808394 |
| XLOC_002526 | SAMD8     | chr10:76871392-76941881   | 3.37797   | 3.78694   | 0.164874 | 0.811969 |
| XLOC_021728 | DEPTOR    | chr8:120885899-121063157  | 0.685354  | 0.768385  | 0.16498  | 0.915223 |
| XLOC_016648 | LYAR      | chr4:4269428-4291896      | 26.3387   | 29.5311   | 0.165049 | 0.804648 |
| XLOC_020907 | GNA12     | chr7:2767740-2883959      | 7.54846   | 8.4635    | 0.165071 | 0.813786 |
| XLOC_003765 | MED17     | chr11:93517404-93546496   | 9.08504   | 10.1868   | 0.16513  | 0.810757 |
| XLOC_003994 | TRIM68    | chr11:4619901-4629489     | 0.813683  | 0.912357  | 0.16513  | 0.901045 |
| XLOC_003758 | NAALAD2   | chr11:89867817-89925779   | 0.048053  | 0.0538805 | 0.165139 | 1        |
| XLOC_008597 | PRSS54    | chr16:58283839-58328951   | 0.73235   | 0.821177  | 0.165159 | 0.962958 |
| XLOC_007639 | IGDCC4    | chr15:65673824-65715410   | 0.173219  | 0.194229  | 0.165168 | 1        |
| XLOC_004390 | ANAPC15   | chr11:71709957-71823822   | 18.8041   | 21.0872   | 0.165317 | 0.965886 |
| XLOC_011460 | HOOK2     | chr19:12873816-12886434   | 9.37051   | 10.5083   | 0.165329 | 0.831834 |
| XLOC_018284 | APOBEC2   | chr6:41020939-41032630    | 0.0100795 | 0.0113038 | 0.165384 | 1        |
| XLOC_003345 | INSC      | chr11:15133969-15268754   | 0.0260614 | 0.0292291 | 0.16549  | 1        |
| XLOC_010335 | SLC39A6   | chr18:33688493-33709357   | 19.9747   | 22.4038   | 0.165571 | 0.798916 |
| XLOC_011286 | FAM108A1  | chr19:1876974-1885518     | 98.0324   | 109.955   | 0.165584 | 0.786511 |
| XLOC_013026 | CD8A      | chr2:87011727-87035519    | 0.104919  | 0.117685  | 0.165651 | 1        |
| XLOC_004359 | CDK2AP2   | chr11:67273960-67276199   | 43.4159   | 48.6991   | 0.165672 | 0.818403 |
| XLOC_015230 | TRMT10C   | chr3:101280679-101285290  | 24.9764   | 28.0159   | 0.165679 | 0.794882 |
| XLOC_000220 | GPR3      | chr1:27719147-27722317    | 5.49304   | 6.16152   | 0.165683 | 0.852189 |
| XLOC_002986 | DNAJB12   | chr10:74092587-74114907   | 14.8872   | 16.6994   | 0.165728 | 0.799165 |
| XLOC_010945 | VASP      | chr19:46010687-46030240   | 56.9203   | 63.8506   | 0.165757 | 0.785865 |
| XLOC_016927 | MFSD8     | chr4:128838959-128952455  | 1.13036   | 1.26803   | 0.165795 | 0.884031 |
| XLOC_007562 | SLC30A4   | chr15:45774679-45848928   | 0.0855988 | 0.0960253 | 0.165823 | 1        |
| XLOC_021494 | NPM2      | chr8:21882353-21894408    | 20.8583   | 23.4004   | 0.165916 | 0.828968 |
| XLOC_002600 | CEP55     | chr10:95256368-95288849   | 11.4711   | 12.8692   | 0.165917 | 0.804859 |
| XLOC_005744 | POP5      | chr12:121016847-121019201 | 27.629    | 30.997    | 0.165942 | 0.824472 |
| XLOC_009971 | RECQL5    | chr17:73584138-73663269   | 6.2247    | 6.98379   | 0.166006 | 0.839214 |
| XLOC_001458 | GNL2      | chr1:38022519-38061586    | 29.7064   | 33.3292   | 0.166012 | 0.785473 |
| XLOC_007857 | EME2      | chr16:1823228-1826239     | 0.480274  | 0.538858  | 0.166048 | 0.963155 |
| XLOC_010471 | THOP1     | chr19:2785505-2813599     | 73.2726   | 82.2112   | 0.166062 | 0.789321 |
| XLOC_010103 | LINC00667 | chr18:5238098-5246505     | 3.28627   | 3.68718   | 0.166068 | 0.835937 |
| XLOC_023351 | USP11     | chrX:47092313-47107727    | 11.4203   | 12.8137   | 0.166087 | 0.808953 |
| XLOC_013785 | ZGPAT     | chr20:62289162-62367494   | 13.2789   | 14.8994   | 0.166127 | 0.929645 |
| XLOC_018824 | C6orf1    | chr6:34214156-34216904    | 42.6841   | 47.8943   | 0.166154 | 0.810183 |
| XLOC_010890 | ARHGEF1   | chr19:42387266-42411604   | 41.2268   | 46.2605   | 0.166201 | 0.800869 |

|             |               |                           |            |            |          |          |
|-------------|---------------|---------------------------|------------|------------|----------|----------|
| XLOC_019029 | CD164         | chr6:109687716-109703762  | 40.002     | 44.8865    | 0.166211 | 0.80005  |
| XLOC_002666 | LOC100505761  | chr10:104209573-104216050 | 10.118     | 11.3535    | 0.16622  | 0.847871 |
| XLOC_017811 | PPP2CA        | chr5:133532147-133561950  | 46.3211    | 51.9798    | 0.166283 | 0.79145  |
| XLOC_012575 | SATB2-AS1     | chr2:200134222-200337481  | 0.00620812 | 0.00696666 | 0.166312 | 1        |
| XLOC_010581 | ILF3          | chr19:10764936-10803095   | 62.9403    | 70.6323    | 0.166344 | 0.809535 |
| XLOC_011545 | TMEM161A      | chr19:19230424-19249310   | 48.3669    | 54.2788    | 0.166369 | 0.794852 |
| XLOC_017084 | LOC100130744  | chr5:14704908-14871887    | 0.568815   | 0.638371   | 0.166437 | 0.979792 |
| XLOC_021314 | TMEM209       | chr7:129804554-129845338  | 6.64284    | 7.45548    | 0.166501 | 0.817528 |
| XLOC_009943 | SLC39A11      | chr17:70642084-71088853   | 4.78317    | 5.36841    | 0.166527 | 0.839214 |
| XLOC_006940 | NDUFB1        | chr14:92582467-92588153   | 166.451    | 186.823    | 0.166575 | 0.804694 |
| XLOC_000673 | C1orf51       | chr1:150255228-150259501  | 0.417352   | 0.468433   | 0.166578 | 0.944779 |
| XLOC_023849 | GRIPAP1       | chrX:48830133-48858675    | 11.1273    | 12.4893    | 0.166587 | 0.804859 |
| XLOC_016833 | SLC10A6       | chr4:87744620-87770416    | 0.0158046  | 0.0177392  | 0.166596 | 1        |
| XLOC_020353 | WIPI2         | chr7:5229834-5273486      | 27.6566    | 31.0424    | 0.16662  | 0.791893 |
| XLOC_008981 | TMEM98        | chr17:31254927-31268667   | 44.9054    | 50.4042    | 0.166657 | 0.792996 |
| XLOC_007522 | NDUFAF1       | chr15:41679546-41694658   | 14.0441    | 15.7656    | 0.166815 | 0.818547 |
| XLOC_004957 | SLC16A7       | chr12:59989820-60183635   | 0.155255   | 0.174297   | 0.166909 | 1        |
| XLOC_002501 | EIF4EBP2      | chr10:72163860-72188374   | 4.1041     | 4.60815    | 0.167122 | 0.806525 |
| XLOC_013812 | FKBP1A,SDCBP2 | chr20:1290554-1373816     | 126.682    | 142.249    | 0.167212 | 0.786895 |
| XLOC_010446 | STK11         | chr19:1205797-1228434     | 19.8958    | 22.3412    | 0.167242 | 0.806275 |
| XLOC_021680 | NDUFAF6       | chr8:96037213-96070944    | 9.3307     | 10.4784    | 0.167367 | 0.825017 |
| XLOC_006863 | PIGH          | chr14:68000007-68067017   | 14.6838    | 16.4908    | 0.167431 | 0.881023 |
| XLOC_013484 | SNPH          | chr20:1246959-1289971     | 1.2802     | 1.43779    | 0.167485 | 0.880141 |
| XLOC_023346 | PHF16         | chrX:46771735-46920641    | 2.30908    | 2.5936     | 0.167639 | 0.83838  |
| XLOC_006767 | PPP2R3C       | chr14:35554677-35591519   | 17.3336    | 19.4703    | 0.16771  | 0.806031 |
| XLOC_008742 | C17orf97      | chr17:260117-264457       | 7.06721    | 7.93861    | 0.167745 | 0.85718  |
| XLOC_013082 | TGFBRAP1      | chr2:105883539-105946148  | 1.41725    | 1.59206    | 0.167794 | 0.890282 |
| XLOC_004841 | COX14         | chr12:50505763-50514240   | 53.2145    | 59.7781    | 0.167799 | 0.80614  |
| XLOC_013684 | PIGT          | chr20:44044706-44054885   | 62.0789    | 69.7363    | 0.167806 | 0.794882 |
| XLOC_005242 | NOP2          | chr12:6666035-6677498     | 29.8583    | 33.5414    | 0.167814 | 0.79183  |
| XLOC_008317 | TMEM8A        | chr16:420775-431950       | 30.1856    | 33.9106    | 0.167876 | 0.793783 |
| XLOC_021548 | ERLIN2        | chr8:37594096-37615319    | 4.60288    | 5.17095    | 0.167894 | 0.806275 |
| XLOC_009341 | MRPL12        | chr17:79670399-79674556   | 145.274    | 163.213    | 0.167978 | 0.783706 |
| XLOC_017161 | SLC30A5       | chr5:68389775-68426899    | 5.8934     | 6.62128    | 0.168009 | 0.877848 |
| XLOC_014956 | HDAC11        | chr3:13521714-13547924    | 8.9166     | 10.0185    | 0.168095 | 0.816962 |
| XLOC_022333 | TESK1         | chr9:35605280-35618424    | 22.9546    | 25.7923    | 0.168155 | 0.805008 |
| XLOC_017435 | MFAP3         | chr5:153418518-153437014  | 2.77859    | 3.12262    | 0.168404 | 0.824372 |
| XLOC_009218 | TLK2          | chr17:60556385-60692841   | 4.05916    | 4.56203    | 0.168493 | 0.8146   |
| XLOC_011700 | GRIK5         | chr19:42502467-42569957   | 0.525909   | 0.591062   | 0.168496 | 0.926279 |
| XLOC_021634 | STAU2-AS1     | chr8:74332308-74659943    | 0.0183512  | 0.020625   | 0.168525 | 1        |
| XLOC_007384 | MRPS11        | chr15:89010683-89021861   | 24.7302    | 27.7947    | 0.16854  | 0.804694 |
| XLOC_021809 | TMED10P1      | chr8:146198974-146231432  | 0.114994   | 0.129247   | 0.168573 | 1        |
| XLOC_007301 | LOC440288     | chr15:74753605-74773633   | 2.27276    | 2.55468    | 0.168696 | 0.902834 |
| XLOC_011378 | CTXN1         | chr19:7989380-7991051     | 38.1289    | 42.859     | 0.16871  | 0.828968 |
| XLOC_010027 | ENTHD2        | chr17:79202076-79212891   | 12.3856    | 13.9224    | 0.168752 | 0.824372 |
| XLOC_014903 | MAPK12        | chr22:50691330-50700089   | 58.2958    | 65.5371    | 0.168919 | 0.785473 |
| XLOC_022011 | GGH           | chr8:63927638-63951610    | 43.001     | 48.3451    | 0.168999 | 0.790595 |
| XLOC_020787 | ADCK2         | chr7:140372952-140394908  | 38.8985    | 43.7333    | 0.169019 | 0.784594 |
| XLOC_006822 | WDHD1         | chr14:55405655-55493819   | 2.14818    | 2.41528    | 0.169077 | 0.824472 |

|             |              |                           |            |            |          |          |
|-------------|--------------|---------------------------|------------|------------|----------|----------|
| XLOC_008874 | PIGL         | chr17:16120508-16229573   | 5.35332    | 6.01902    | 0.169095 | 0.879055 |
| XLOC_014769 | PES1         | chr22:30972611-31003000   | 85.1169    | 95.7081    | 0.169195 | 0.785307 |
| XLOC_004912 | ORMDL2       | chr12:56211805-56236767   | 21.6376    | 24.3304    | 0.169222 | 0.898731 |
| XLOC_020894 | COX19        | chr7:1004485-1015235      | 3.98039    | 4.47583    | 0.169245 | 0.816962 |
| XLOC_013413 | NCL          | chr2:232319458-232329205  | 266.079    | 299.202    | 0.169265 | 0.803809 |
| XLOC_011459 | C19orf43     | chr19:12841453-12845529   | 277.353    | 311.895    | 0.169338 | 0.791956 |
| XLOC_021087 | LINC00174    | chr7:65841030-65865395    | 1.03167    | 1.16019    | 0.169379 | 0.898032 |
| XLOC_018139 | ZKSCAN8      | chr6:28109715-28125236    | 0.297686   | 0.334788   | 0.169458 | 1        |
| XLOC_012528 | HOXD8        | chr2:176994421-176997423  | 3.31369    | 3.72685    | 0.169522 | 0.87763  |
| XLOC_010307 | TMEM241      | chr18:20875978-21017925   | 2.81188    | 3.16258    | 0.169567 | 0.853269 |
| XLOC_024108 | MMGT1        | chrX:135044230-135056134  | 6.3694     | 7.16389    | 0.169587 | 0.809368 |
| XLOC_017267 | SRP19        | chr5:112196884-112258031  | 18.7036    | 21.0375    | 0.169644 | 0.924033 |
| XLOC_015733 | TUSC2        | chr3:50362340-50365668    | 19.5332    | 21.9713    | 0.169692 | 0.80005  |
| XLOC_010680 | PGLS         | chr19:17622431-17632097   | 139.043    | 156.409    | 0.169794 | 0.790722 |
| XLOC_005903 | FAM124A      | chr13:51796469-51858377   | 0.00506027 | 0.00569232 | 0.169804 | 1        |
| XLOC_010730 | ZNF429       | chr19:21688436-21721079   | 0.62494    | 0.703011   | 0.169831 | 0.908707 |
| XLOC_020403 | NFE2L3       | chr7:26191846-26226756    | 3.38891    | 3.81227    | 0.169832 | 0.832978 |
| XLOC_003877 | UBASH3B      | chr11:122526397-122685187 | 1.67441    | 1.88361    | 0.169845 | 0.835405 |
| XLOC_008891 | DRG2         | chr17:17991180-18011299   | 27.0406    | 30.4199    | 0.16989  | 0.788779 |
| XLOC_014027 | DPM1         | chr20:49551404-49575060   | 40.3871    | 45.435     | 0.169909 | 0.79145  |
| XLOC_007965 | TMC7         | chr16:18995255-19075262   | 1.03134    | 1.16027    | 0.169946 | 0.877848 |
| XLOC_006942 | ITPK1        | chr14:93403258-93582263   | 31.7646    | 35.7361    | 0.169964 | 0.779476 |
| XLOC_020341 | NUDT1        | chr7:2281856-2290780      | 46.2209    | 52.0011    | 0.169998 | 0.818092 |
| XLOC_015761 | PBRM1        | chr3:52579367-52719866    | 1.64314    | 1.8488     | 0.170133 | 0.821851 |
| XLOC_013279 | ORMDL1       | chr2:190634992-190742355  | 20.3512    | 22.8996    | 0.170206 | 0.828523 |
| XLOC_020367 | RSPH10B2     | chr7:6793739-6838396      | 0.0131979  | 0.0148511  | 0.170255 | 1        |
| XLOC_004528 | TIMM8B       | chr11:111944967-111957522 | 48.3891    | 54.4515    | 0.170291 | 0.87368  |
| XLOC_013535 | SNRPB2       | chr20:16710608-16722417   | 42.1847    | 47.4704    | 0.170309 | 0.78394  |
| XLOC_018765 | ABHD16A      | chr6:31654725-31671137    | 26.5384    | 29.8637    | 0.17031  | 0.802089 |
| XLOC_008363 | RNPS1        | chr16:2303099-2318413     | 131.874    | 148.402    | 0.170348 | 0.784261 |
| XLOC_023908 | LAS1L        | chrX:64732461-64754686    | 25.1558    | 28.3123    | 0.170538 | 0.791133 |
| XLOC_002417 | CSGALNACT2   | chr10:43633892-43680754   | 4.32763    | 4.87139    | 0.170758 | 0.816962 |
| XLOC_004250 | SYT7         | chr11:61281187-61348344   | 2.87572    | 3.23722    | 0.170831 | 0.822512 |
| XLOC_004535 | ZW10         | chr11:113603904-113644485 | 4.34009    | 4.88571    | 0.170842 | 0.821611 |
| XLOC_019159 | EZR          | chr6:159186772-159240456  | 71.4281    | 80.4081    | 0.170849 | 0.78932  |
| XLOC_005036 | SNRPF        | chr12:96252708-96260238   | 135.345    | 152.366    | 0.170899 | 0.780692 |
| XLOC_005070 | C12orf45     | chr12:105380097-105388505 | 45.7444    | 51.5039    | 0.171086 | 0.809647 |
| XLOC_005017 | TMTC3        | chr12:88536072-88593664   | 0.976069   | 1.09908    | 0.171241 | 0.851628 |
| XLOC_013320 | GCSHP3       | chr2:206980296-206981296  | 2.48832    | 2.80197    | 0.171268 | 0.897332 |
| XLOC_003097 | NDUFB8       | chr10:102283496-102289636 | 260.223    | 293.029    | 0.171293 | 0.785865 |
| XLOC_010906 | SRRM5        | chr19:44111375-44124014   | 0.57341    | 0.64575    | 0.17141  | 0.967296 |
| XLOC_002623 | ZDHHC16      | chr10:99205929-99217127   | 23.1939    | 26.1201    | 0.171413 | 0.799656 |
| XLOC_009796 | KANSL1       | chr17:44107281-44302740   | 6.06484    | 6.83024    | 0.171467 | 0.796502 |
| XLOC_001043 | FLVCR1       | chr1:213031596-213072705  | 3.02301    | 3.40482    | 0.171596 | 0.809535 |
| XLOC_014909 | SCO2,TYMP    | chr22:50946644-50968514   | 70.7163    | 79.65      | 0.17163  | 0.879055 |
| XLOC_021110 | CLDN3        | chr7:73183326-73184600    | 1.4636     | 1.64852    | 0.171651 | 0.938232 |
| XLOC_005163 | OGFOD2       | chr12:123459353-123464588 | 7.82854    | 8.81766    | 0.171652 | 0.843736 |
| XLOC_022552 | LOC100129034 | chr9:127115743-12717752   | 18.0583    | 20.3409    | 0.17172  | 0.917559 |
| XLOC_010660 | RAB8A        | chr19:16222489-16244445   | 26.1812    | 29.4905    | 0.171721 | 0.789065 |

|             |               |                           |            |            |          |          |
|-------------|---------------|---------------------------|------------|------------|----------|----------|
| XLOC_016639 | TNIP2         | chr4:2743386-2758103      | 44.3211    | 49.9234    | 0.171724 | 0.777535 |
| XLOC_021529 | ESCO2         | chr8:27632057-27662424    | 2.47329    | 2.78593    | 0.171724 | 0.842396 |
| XLOC_003548 | DAGLA         | chr11:61447904-61514474   | 1.41965    | 1.59912    | 0.171743 | 0.868825 |
| XLOC_004098 | SAAL1         | chr11:18101889-18127638   | 19.393     | 21.845     | 0.171777 | 0.794913 |
| XLOC_004152 | TP53I11       | chr11:44785975-44972857   | 11.8816    | 13.3853    | 0.17192  | 0.793469 |
| XLOC_021426 | ZNF596        | chr8:158344-197339        | 0.4479     | 0.504587   | 0.171927 | 0.963003 |
| XLOC_021482 | SLC7A2        | chr8:17354596-17428077    | 3.03382    | 3.4178     | 0.171931 | 0.802621 |
| XLOC_005734 | GCN1L1        | chr12:120565013-120632513 | 14.9344    | 16.8246    | 0.171934 | 0.775951 |
| XLOC_017249 | FAM174A       | chr5:99871123-99922440    | 6.90015    | 7.77437    | 0.172098 | 0.860412 |
| XLOC_014638 | CRELD2        | chr22:50312282-50321186   | 11.7083    | 13.1918    | 0.172109 | 0.844172 |
| XLOC_018041 | SNRNP48       | chr6:7590431-7612200      | 3.79467    | 4.27549    | 0.172113 | 0.8146   |
| XLOC_009144 | SNX11         | chr17:46184919-46200105   | 8.464      | 9.53739    | 0.172256 | 0.811033 |
| XLOC_003542 | TMEM216       | chr11:61159831-61166335   | 30.0555    | 33.8683    | 0.172309 | 0.795788 |
| XLOC_013250 | NFE2L2        | chr2:178095030-178129859  | 12.0562    | 13.5902    | 0.172781 | 0.798205 |
| XLOC_018736 | TRIM26        | chr6:30152231-30181271    | 14.2769    | 16.0942    | 0.172863 | 0.785865 |
| XLOC_002993 | MRPS16        | chr10:75007124-75118617   | 36.389     | 41.0227    | 0.172922 | 0.779038 |
| XLOC_022535 | MRRF          | chr9:125001833-125085742  | 42.5038    | 47.9181    | 0.172982 | 0.831834 |
| XLOC_006421 | SMOC1         | chr14:70346113-70499083   | 0.0047911  | 0.00540151 | 0.173006 | 1        |
| XLOC_014670 | PRODH         | chr22:18900286-18924066   | 1.01204    | 1.14098    | 0.17301  | 0.912629 |
| XLOC_008755 | HIC1          | chr17:1958392-1962981     | 4.8304     | 5.44586    | 0.173018 | 0.872122 |
| XLOC_021776 | ZFP41         | chr8:144328990-144344875  | 4.12678    | 4.6529     | 0.173114 | 0.844936 |
| XLOC_023095 | PTGES2        | chr9:130882971-130890741  | 164.74     | 185.747    | 0.173149 | 0.78316  |
| XLOC_000337 | KDM4A         | chr1:44115796-44173012    | 6.27684    | 7.07744    | 0.173189 | 0.796502 |
| XLOC_001345 | HTR1D         | chr1:23518387-23521222    | 0.00653512 | 0.0073692  | 0.173295 | 1        |
| XLOC_000323 | YBX1          | chr1:43148065-43168020    | 644.401    | 726.72     | 0.173442 | 0.788523 |
| XLOC_018843 | PPIL1         | chr6:36822605-36842800    | 23.2028    | 26.1702    | 0.17363  | 0.780656 |
| XLOC_017165 | CDK7          | chr5:68530621-68573257    | 40.967     | 46.2074    | 0.17366  | 0.779038 |
| XLOC_007998 | DCTN5         | chr16:23652686-23685068   | 5.8797     | 6.63192    | 0.173682 | 0.779704 |
| XLOC_011849 | IL4I1,NUP62   | chr19:50392912-50437193   | 22.5663    | 25.4554    | 0.1738   | 0.945857 |
| XLOC_001206 | SSU72         | chr1:1477052-1510262      | 139.622    | 157.503    | 0.173844 | 0.777535 |
| XLOC_011332 | C19orf10      | chr19:4657556-4670415     | 131.53     | 148.374    | 0.173852 | 0.774876 |
| XLOC_006693 | ZNF219        | chr14:21558204-21572863   | 17.3075    | 19.5247    | 0.173903 | 0.805462 |
| XLOC_001406 | SDC3          | chr1:31342312-31381480    | 4.54199    | 5.12411    | 0.173977 | 0.805462 |
| XLOC_022092 | RBM12B        | chr8:94743730-94753224    | 2.72917    | 3.07911    | 0.174047 | 0.823431 |
| XLOC_023355 | TIMP1         | chrX:47420498-47479256    | 551.809    | 622.569    | 0.174065 | 0.792429 |
| XLOC_001208 | CDK11A,CDK11B | chr1:1571099-1655791      | 15.7012    | 17.7151    | 0.174112 | 0.870063 |
| XLOC_023165 | SNAPC4        | chr9:139270028-139292889  | 13.1538    | 14.8414    | 0.174144 | 0.783744 |
| XLOC_003408 | C11orf74      | chr11:36613492-36680817   | 10.2285    | 11.5408    | 0.174146 | 0.847547 |
| XLOC_006431 | PSEN1         | chr14:73603142-73690399   | 5.82259    | 6.56975    | 0.174179 | 0.791956 |
| XLOC_020342 | EIF3B         | chr7:2394473-2420377      | 75.6407    | 85.3473    | 0.174182 | 0.776418 |
| XLOC_019062 | MAN1A1        | chr6:119498365-119670931  | 1.23978    | 1.39894    | 0.174255 | 0.856927 |
| XLOC_012128 | YIPF4         | chr2:32502957-32531658    | 14.4523    | 16.3081    | 0.174295 | 0.796286 |
| XLOC_000178 | PITHD1        | chr1:24104875-24114722    | 30.9932    | 34.9742    | 0.174337 | 0.783527 |
| XLOC_010934 | CLPTM1        | chr19:45457841-45496604   | 41.9818    | 47.3783    | 0.174462 | 0.773721 |
| XLOC_003073 | RRP12         | chr10:99116457-99161127   | 12.8903    | 14.5474    | 0.174467 | 0.786829 |
| XLOC_001194 | SDF4          | chr1:1152287-1167447      | 83.3479    | 94.0714    | 0.17461  | 0.773159 |
| XLOC_022781 | NDUFB6        | chr9:32553523-32573182    | 56.1669    | 63.3936    | 0.174617 | 0.781266 |
| XLOC_005902 | RNASEH2B      | chr13:51456514-51544596   | 19.9987    | 22.5719    | 0.174623 | 0.785963 |
| XLOC_013246 | HOXD-AS2      | chr2:176999568-177001826  | 7.50891    | 8.47514    | 0.174633 | 0.905839 |

|             |            |                           |            |            |          |          |
|-------------|------------|---------------------------|------------|------------|----------|----------|
| XLOC_017211 | CMYA5      | chr5:78985658-79096049    | 0.00196984 | 0.00222332 | 0.174642 | 1        |
| XLOC_003857 | TRAPPC4    | chr11:118889240-118894385 | 51.5124    | 58.1414    | 0.174646 | 0.783327 |
| XLOC_008749 | PITPNA-AS1 | chr17:1420212-1466110     | 11.8901    | 13.4202    | 0.174648 | 0.96513  |
| XLOC_006734 | CHMP4A     | chr14:24678786-24683036   | 33.3996    | 37.6993    | 0.174707 | 0.782409 |
| XLOC_012010 | ZNF132     | chr19:58944180-58951589   | 0.21919    | 0.247407   | 0.174707 | 1        |
| XLOC_008845 | PFAS       | chr17:8152595-8173809     | 9.3366     | 10.5391    | 0.174776 | 0.783744 |
| XLOC_003661 | CARNS1     | chr11:67183148-67193078   | 0.0688749  | 0.0777453  | 0.174778 | 1        |
| XLOC_012964 | SNRPG      | chr2:70508505-70520869    | 244.425    | 275.907    | 0.17479  | 0.777261 |
| XLOC_018354 | LRRC1      | chr6:53659777-53788919    | 3.19133    | 3.60252    | 0.174849 | 0.831834 |
| XLOC_006226 | TUBGCP3    | chr13:113139327-113242481 | 3.18553    | 3.59612    | 0.174909 | 0.821611 |
| XLOC_022789 | NOL6       | chr9:33461350-33473941    | 9.65357    | 10.8984    | 0.174976 | 0.773721 |
| XLOC_011264 | POLRMT     | chr19:617222-633568       | 38.9106    | 43.9296    | 0.17503  | 0.775951 |
| XLOC_017508 | ZNF346     | chr5:176449696-176493745  | 3.1421     | 3.54767    | 0.175143 | 0.839003 |
| XLOC_019091 | SLC18B1    | chr6:133090506-133119747  | 9.29061    | 10.4905    | 0.175235 | 0.803136 |
| XLOC_002467 | TFAM       | chr10:60144902-60158990   | 6.42947    | 7.2599     | 0.175251 | 0.775951 |
| XLOC_009759 | LINC00854  | chr17:41373436-41381062   | 0.0163196  | 0.0184275  | 0.175256 | 1        |
| XLOC_012755 | ATG4B      | chr2:242577026-242613271  | 23.3454    | 26.3614    | 0.175289 | 0.782177 |
| XLOC_006914 | SPTLC2     | chr14:77972339-78083110   | 6.61761    | 7.47281    | 0.175339 | 0.774294 |
| XLOC_018543 | STXBP5     | chr6:147162524-147711612  | 0.518661   | 0.585688   | 0.17534  | 0.860615 |
| XLOC_003118 | NT5C2      | chr10:104847773-104953063 | 6.50488    | 7.34553    | 0.175345 | 0.79507  |
| XLOC_000341 | DPH2       | chr1:44435652-44439043    | 22.5943    | 25.5144    | 0.175351 | 0.780964 |
| XLOC_011292 | PLEKHJ1    | chr19:2233154-2236328     | 96.356     | 108.811    | 0.175375 | 0.7704   |
| XLOC_001199 | DVL1       | chr1:1270657-1284492      | 77.3004    | 87.2964    | 0.175445 | 0.773721 |
| XLOC_012170 | LOC388948  | chr2:47043806-47049799    | 0.016123   | 0.0182099  | 0.175598 | 1        |
| XLOC_018772 | VAR5       | chr6:31745296-31763712    | 62.119     | 70.1666    | 0.17575  | 0.778822 |
| XLOC_000115 | FHAD1      | chr1:15573767-15724622    | 2.38152    | 2.6901     | 0.175776 | 0.832978 |
| XLOC_018558 | AKAP12     | chr6:151561133-151679694  | 1.06979    | 1.20851    | 0.175904 | 0.832978 |
| XLOC_002612 | ENTPD1     | chr10:97471535-97849992   | 1.03688    | 1.17138    | 0.175957 | 0.880754 |
| XLOC_007390 | ABHD2      | chr15:89631380-89745591   | 2.69416    | 3.0441     | 0.176179 | 0.79796  |
| XLOC_000312 | NFYC       | chr1:41154751-41237275    | 17.6639    | 19.9583    | 0.176187 | 0.798022 |
| XLOC_014543 | GGA1       | chr22:38004480-38029571   | 28.5843    | 32.2978    | 0.17621  | 0.774294 |
| XLOC_022794 | DCAF12     | chr9:34086380-34126771    | 9.79472    | 11.0673    | 0.176228 | 0.782475 |
| XLOC_003074 | EXOSC1     | chr10:99195665-99205768   | 27.7007    | 31.3001    | 0.176247 | 0.7898   |
| XLOC_009537 | TOP3A      | chr17:18177234-18218321   | 3.96456    | 4.4799     | 0.176305 | 0.8146   |
| XLOC_009913 | TEX2       | chr17:62224794-62340653   | 3.00055    | 3.39063    | 0.176327 | 0.809426 |
| XLOC_009733 | NT5C3B     | chr17:39981333-39992523   | 55.9157    | 63.1922    | 0.176492 | 0.773721 |
| XLOC_001865 | JTB        | chr1:153931574-153950451  | 154.776    | 174.922    | 0.176526 | 0.883935 |
| XLOC_024155 | TMEM185A   | chrX:148678215-148713487  | 5.43399    | 6.14141    | 0.176558 | 0.831614 |
| XLOC_007950 | BFAR       | chr16:14726667-14763093   | 18.6188    | 21.0464    | 0.176809 | 0.772159 |
| XLOC_000579 | KCNC4      | chr1:110753335-110776674  | 3.53965    | 4.0016     | 0.176969 | 0.844936 |
| XLOC_020571 | DTX2       | chr7:76090971-76135312    | 10.2219    | 11.5566    | 0.177051 | 0.818658 |
| XLOC_009761 | ETV4       | chr17:41605210-41623800   | 62.0048    | 70.1023    | 0.177083 | 0.76912  |
| XLOC_009736 | DNAJC7     | chr17:40118758-40190044   | 34.078     | 38.5297    | 0.177131 | 0.899621 |
| XLOC_007759 | KLHL25     | chr15:86302558-86338189   | 2.77697    | 3.13974    | 0.177134 | 0.85253  |
| XLOC_008508 | GDPD3      | chr16:30116130-30124878   | 1.04584    | 1.18266    | 0.177368 | 0.933369 |
| XLOC_018391 | TPBG       | chr6:83072922-83077133    | 10.4844    | 11.8563    | 0.177409 | 0.793248 |
| XLOC_002344 | DHTKD1     | chr10:12110933-12165224   | 3.32503    | 3.76015    | 0.177421 | 0.805817 |
| XLOC_006894 | KIAA0317   | chr14:75127954-75179807   | 4.9406     | 5.58736    | 0.177479 | 0.783527 |
| XLOC_008171 | E2F4       | chr16:67226067-67232821   | 53.625     | 60.6457    | 0.1775   | 0.773016 |

|             |              |                           |           |           |          |          |
|-------------|--------------|---------------------------|-----------|-----------|----------|----------|
| XLOC_006534 | WDR25        | chr14:100842754-100996640 | 4.35507   | 4.9253    | 0.177516 | 0.852718 |
| XLOC_017815 | PITX1        | chr5:134363423-134369964  | 28.2732   | 31.9753   | 0.177521 | 0.790404 |
| XLOC_006979 | MOK          | chr14:102690833-102771537 | 10.4242   | 11.7906   | 0.177697 | 0.833653 |
| XLOC_015957 | TOPBP1       | chr3:133319448-133380737  | 6.16253   | 6.97074   | 0.177788 | 0.774294 |
| XLOC_022607 | TOR1B        | chr9:132565431-132573560  | 18.5078   | 20.9359   | 0.177849 | 0.775951 |
| XLOC_007119 | CHRNA7       | chr15:32322685-32462384   | 1.37262   | 1.55271   | 0.177853 | 0.880754 |
| XLOC_006059 | HMGB1        | chr13:31032878-31040081   | 83.7016   | 94.6891   | 0.177943 | 0.774876 |
| XLOC_016863 | DNAJB14      | chr4:100820709-100867879  | 1.18792   | 1.3439    | 0.177997 | 0.879055 |
| XLOC_017567 | NSUN2        | chr5:6599351-6633473      | 24.0576   | 27.2178   | 0.178057 | 0.773721 |
| XLOC_014967 | NR2C2        | chr3:14984285-15106816    | 1.37685   | 1.55774   | 0.178083 | 0.954535 |
| XLOC_009459 | GPS2         | chr17:7215977-7218658     | 38.1586   | 43.1724   | 0.1781   | 0.777932 |
| XLOC_012945 | SPRED2       | chr2:65537984-65659656    | 9.31241   | 10.5363   | 0.178148 | 0.774227 |
| XLOC_021228 | CLDN15       | chr7:100875372-100882101  | 11.6032   | 13.1284   | 0.178171 | 0.838902 |
| XLOC_003010 | COMTD1       | chr10:76993728-76995770   | 46.3118   | 52.4011   | 0.178219 | 0.816181 |
| XLOC_013979 | SERINC3      | chr20:43124863-43150726   | 16.5434   | 18.7205   | 0.178365 | 0.784528 |
| XLOC_002339 | TAF3         | chr10:7860466-8057016     | 2.20086   | 2.49069   | 0.17848  | 0.847523 |
| XLOC_011698 | RABAC1       | chr19:42460832-42463528   | 136.733   | 154.74    | 0.178486 | 0.774294 |
| XLOC_003356 | GTF2H1       | chr11:18343815-18388590   | 9.0102    | 10.1972   | 0.17854  | 0.78394  |
| XLOC_011352 | PSPN         | chr19:6375304-6375860     | 0.564381  | 0.63877   | 0.178626 | 0.974073 |
| XLOC_017689 | GTF2H2       | chr5:70330950-70363497    | 0.946817  | 1.07162   | 0.178641 | 0.89536  |
| XLOC_023134 | MED22        | chr9:136207754-136214972  | 39.9463   | 45.2144   | 0.17872  | 0.816181 |
| XLOC_009776 | SLC25A39     | chr17:42396992-42402217   | 372.843   | 422.037   | 0.1788   | 0.771618 |
| XLOC_000090 | MFN2         | chr1:12040237-12073572    | 9.72477   | 11.008    | 0.178812 | 0.76757  |
| XLOC_023280 | TXLNG        | chrX:16804554-16862642    | 12.2513   | 13.868    | 0.178826 | 0.765759 |
| XLOC_023344 | CHST7        | chrX:46433191-46457838    | 0.996788  | 1.12838   | 0.178891 | 0.922274 |
| XLOC_012375 | MERTK        | chr2:112656190-112786945  | 0.847811  | 0.959746  | 0.17891  | 0.882803 |
| XLOC_011271 | POLR2E       | chr19:1065921-1095391     | 79.0624   | 89.5052   | 0.178979 | 0.818403 |
| XLOC_015097 | ARIH2        | chr3:48955220-49022971    | 16.3172   | 18.4734   | 0.179057 | 0.771286 |
| XLOC_007809 | SNRNP25      | chr16:103828-107669       | 27.8112   | 31.4901   | 0.179233 | 0.790054 |
| XLOC_002836 | TRDMT1       | chr10:17184981-17244070   | 0.569284  | 0.644598  | 0.179251 | 0.864484 |
| XLOC_016978 | C4orf46      | chr4:159587830-159593202  | 4.06867   | 4.60709   | 0.1793   | 0.8139   |
| XLOC_006633 | ZNF839       | chr14:102783713-102809511 | 5.06135   | 5.7312    | 0.179314 | 0.804816 |
| XLOC_018445 | AMD1         | chr6:111195986-111216913  | 19.9263   | 22.5638   | 0.179338 | 0.766913 |
| XLOC_010681 | FAM129C      | chr19:17634109-17664648   | 0.168228  | 0.190495  | 0.179339 | 1        |
| XLOC_022868 | CBWD3,CBWD5  | chr9:70431999-70490177    | 2.19465   | 2.48533   | 0.179442 | 0.868932 |
| XLOC_000146 | PQLC2        | chr1:19638739-19655794    | 26.6826   | 30.218    | 0.179511 | 0.783531 |
| XLOC_005664 | GLT8D2       | chr12:104382764-104443915 | 0.170226  | 0.19279   | 0.179575 | 1        |
| XLOC_015087 | KLHL18       | chr3:47205859-47388306    | 4.08897   | 4.63202   | 0.179904 | 0.834266 |
| XLOC_001237 | ICMT         | chr1:6266188-6296044      | 11.3744   | 12.8853   | 0.179939 | 0.783739 |
| XLOC_017832 | HNRNPA0      | chr5:137087072-137090039  | 49.4739   | 56.0598   | 0.180301 | 0.763906 |
| XLOC_020683 | PSMC2        | chr7:102987970-103086624  | 31.095    | 35.2378   | 0.180445 | 0.756518 |
| XLOC_012832 | CIB4         | chr2:26804072-26864211    | 0.0280841 | 0.0318271 | 0.180501 | 1        |
| XLOC_023126 | DDX31        | chr9:135469675-135565470  | 15.82     | 17.9287   | 0.180517 | 0.845932 |
| XLOC_013956 | RBL1         | chr20:35626177-35724410   | 0.498799  | 0.565343  | 0.180667 | 0.886619 |
| XLOC_021604 | CHD7         | chr8:61591323-61780586    | 1.67019   | 1.89326   | 0.180862 | 0.790372 |
| XLOC_022812 | PIGO         | chr9:35088684-35096598    | 9.57713   | 10.8569   | 0.180944 | 0.800869 |
| XLOC_020428 | FAM188B,INMT | chr7:30791750-30932002    | 0.955588  | 1.08334   | 0.181031 | 0.890507 |
| XLOC_005763 | HCAR3        | chr12:123199302-123201439 | 0.0117427 | 0.013313  | 0.181068 | 1        |
| XLOC_004910 | BLOC1S1,RDH5 | chr12:56109817-56118526   | 108.073   | 122.531   | 0.181146 | 0.772699 |



|             |           |                           |            |            |          |          |
|-------------|-----------|---------------------------|------------|------------|----------|----------|
| XLOC_017350 | UBE2D2    | chr5:138940750-139008018  | 34.8373    | 39.4982    | 0.181153 | 0.761869 |
| XLOC_016034 | LXN       | chr3:158362316-158410360  | 8.81875    | 9.99883    | 0.181186 | 0.913887 |
| XLOC_014566 | APOBEC3G  | chr22:39473009-39483748   | 0.00945224 | 0.0107175  | 0.181243 | 1        |
| XLOC_009469 | KCNAB3    | chr17:7825176-7832753     | 0.678356   | 0.76919    | 0.181297 | 0.91015  |
| XLOC_023793 | ACOT9     | chrX:23721776-23761407    | 27.393     | 31.0628    | 0.181379 | 0.764196 |
| XLOC_023611 | SLC25A14  | chrX:129474046-129507335  | 5.94449    | 6.74086    | 0.181379 | 0.832615 |
| XLOC_023717 | DKC1      | chrX:153991030-154005964  | 41.6668    | 47.25      | 0.181417 | 0.765218 |
| XLOC_014803 | TST       | chr22:37406899-37425863   | 78.9556    | 89.5374    | 0.18145  | 0.890882 |
| XLOC_008637 | DDX28     | chr16:68055176-68113226   | 16.2182    | 18.3931    | 0.181558 | 0.85132  |
| XLOC_003192 | MKI67     | chr10:129894924-129924468 | 8.27303    | 9.38337    | 0.181692 | 0.762618 |
| XLOC_009289 | SAP30BP   | chr17:73663398-73704139   | 23.5346    | 26.694     | 0.181731 | 0.765374 |
| XLOC_009470 | TRAPPC1   | chr17:7833662-7835317     | 141.831    | 160.876    | 0.181784 | 0.761614 |
| XLOC_014586 | ZC3H7B    | chr22:41697506-41756151   | 9.7371     | 11.0449    | 0.181821 | 0.770773 |
| XLOC_010781 | USF2      | chr19:35759895-35770718   | 93.5809    | 106.151    | 0.181832 | 0.761533 |
| XLOC_004141 | APIP      | chr11:34903842-35017675   | 12.9152    | 14.6517    | 0.181997 | 0.898731 |
| XLOC_012103 | NRBP1     | chr2:27651472-27665124    | 53.4235    | 60.6089    | 0.182055 | 0.759631 |
| XLOC_018158 | LOC554223 | chr6:29758807-29765584    | 0.0405177  | 0.0459687  | 0.182098 | 1        |
| XLOC_003265 | STIM1     | chr11:3876932-4114440     | 8.75739    | 9.93649    | 0.182236 | 0.779038 |
| XLOC_000091 | MIP       | chr1:12079298-12092106    | 32.5233    | 36.9025    | 0.182244 | 0.774227 |
| XLOC_017100 | RAI14     | chr5:34656432-34832717    | 5.23232    | 5.93716    | 0.182324 | 0.777864 |
| XLOC_011686 | C19orf54  | chr19:41223007-41255828   | 8.07744    | 9.16574    | 0.182354 | 0.860285 |
| XLOC_011152 | MYADM     | chr19:54369610-54379689   | 43.1246    | 48.935     | 0.182358 | 0.766907 |
| XLOC_020811 | CLCN1     | chr7:143013218-143049097  | 0.00640296 | 0.00726696 | 0.182614 | 1        |
| XLOC_022500 | FAM206A   | chr9:111696672-111703237  | 19.0356    | 21.605     | 0.182664 | 0.767689 |
| XLOC_022219 | NAPRT1    | chr8:144656954-144660513  | 65.6405    | 74.5049    | 0.182749 | 0.765718 |
| XLOC_015751 | POC1A     | chr3:52109248-52188706    | 15.6082    | 17.7165    | 0.182794 | 0.783527 |
| XLOC_020469 | YKT6      | chr7:44240577-44253893    | 30.4972    | 34.6174    | 0.18282  | 0.757708 |
| XLOC_023786 | EIF1AX    | chrX:20142635-20159966    | 31.6364    | 35.9124    | 0.182893 | 0.759419 |
| XLOC_010580 | SLC44A2   | chr19:10713120-10755235   | 17.4381    | 19.7954    | 0.182928 | 0.76757  |
| XLOC_014413 | TANGO2    | chr22:20008630-20053447   | 10.1616    | 11.5361    | 0.183023 | 0.786446 |
| XLOC_020758 | MEST      | chr7:130126015-130371406  | 14.1392    | 16.053     | 0.183141 | 0.84864  |
| XLOC_011195 | U2AF2     | chr19:56165415-56186082   | 61.9635    | 70.3555    | 0.183245 | 0.755384 |
| XLOC_009164 | EME1      | chr17:48450580-48474914   | 1.70723    | 1.93854    | 0.183307 | 0.977897 |
| XLOC_011767 | SYMPK     | chr19:46318699-46366548   | 19.0222    | 21.6011    | 0.183422 | 0.762698 |
| XLOC_003568 | TMEM179B  | chr11:62554873-62559486   | 60.1376    | 68.2908    | 0.183425 | 0.783706 |
| XLOC_004401 | UCP2      | chr11:73685715-73693889   | 58.8978    | 66.883     | 0.183426 | 0.758486 |
| XLOC_006062 | ZAR1L     | chr13:32877907-32886091   | 0.0217889  | 0.0247454  | 0.183569 | 1        |
| XLOC_022942 | NINJ1     | chr9:95883770-95896570    | 61.2428    | 69.553     | 0.183572 | 0.764492 |
| XLOC_022837 | TOMM5     | chr9:37588411-37592636    | 104.316    | 118.474    | 0.183602 | 0.759979 |
| XLOC_005119 | PLBD2     | chr12:113796370-113827458 | 9.50882    | 10.7994    | 0.183607 | 0.787246 |
| XLOC_014007 | SLC35C2   | chr20:44978176-44993064   | 29.8735    | 33.9297    | 0.183686 | 0.770074 |
| XLOC_000627 | FAM72B    | chr1:120839004-120855681  | 1.26695    | 1.43899    | 0.183702 | 0.879438 |
| XLOC_002486 | CCAR1     | chr10:70480970-70551309   | 6.69899    | 7.60876    | 0.183718 | 0.767223 |
| XLOC_012552 | FAM171B   | chr2:187558788-187628512  | 0.178182   | 0.202382   | 0.183734 | 1        |
| XLOC_010258 | NFATC1    | chr18:77155771-77289323   | 2.95407    | 3.35535    | 0.183762 | 0.869722 |
| XLOC_006498 | TMEM251   | chr14:93651295-93653431   | 22.989     | 26.1174    | 0.184065 | 0.797218 |
| XLOC_014800 | IFT27     | chr22:37154245-37172177   | 9.84936    | 11.19      | 0.184114 | 0.840008 |
| XLOC_013553 | NAA20     | chr20:19997933-20014273   | 86.726     | 98.5376    | 0.18421  | 0.754905 |
| XLOC_001902 | UBQLN4    | chr1:156005091-156023516  | 28.0376    | 31.8564    | 0.184221 | 0.757708 |

|             |              |                           |           |           |          |          |
|-------------|--------------|---------------------------|-----------|-----------|----------|----------|
| XLOC_010259 | CTDP1        | chr18:77439800-77514510   | 10.8821   | 12.3643   | 0.184226 | 0.780692 |
| XLOC_009275 | ICT1         | chr17:73008779-73017356   | 46.821    | 53.1984   | 0.184227 | 0.773016 |
| XLOC_005733 | RAB35        | chr12:120532898-120554643 | 22.1358   | 25.1512   | 0.184244 | 0.756395 |
| XLOC_012631 | XRCC5        | chr2:216974019-217071016  | 77.4825   | 88.0386   | 0.184266 | 0.764196 |
| XLOC_011242 | ZNF544       | chr19:58740069-58775008   | 4.26268   | 4.84353   | 0.184297 | 0.797588 |
| XLOC_011201 | ZNF444       | chr19:56652534-56672262   | 23.456    | 26.6526   | 0.184317 | 0.783744 |
| XLOC_009356 | FOXK2        | chr17:80477593-80562483   | 17.5819   | 19.9782   | 0.184338 | 0.75831  |
| XLOC_008646 | NQO1         | chr16:69743303-69760533   | 20.9874   | 23.8491   | 0.184415 | 0.763798 |
| XLOC_008691 | CMC2         | chr16:81009698-81066709   | 49.6009   | 56.3661   | 0.184446 | 0.881554 |
| XLOC_023962 | HMG5         | chrX:80369199-80554046    | 1.89667   | 2.15568   | 0.184676 | 0.951854 |
| XLOC_015687 | CCDC51       | chr3:48473579-48481529    | 17.0873   | 19.4217   | 0.184749 | 0.784528 |
| XLOC_007883 | TBC1D24      | chr16:2525146-2555734     | 3.03092   | 3.44501   | 0.184752 | 0.804051 |
| XLOC_018873 | C6orf132     | chr6:42068856-42110715    | 4.01773   | 4.56672   | 0.184779 | 0.778856 |
| XLOC_016622 | LOC100129917 | chr4:773936-775636        | 0.1764    | 0.200506  | 0.184789 | 1        |
| XLOC_004759 | PLEKHA5      | chr12:19282625-19529333   | 1.46832   | 1.66902   | 0.184831 | 0.840433 |
| XLOC_024098 | MOSPD1       | chrX:134021661-134049297  | 3.05925   | 3.47745   | 0.184852 | 0.833765 |
| XLOC_013098 | LINC00116    | chr2:110969105-110980517  | 13.018    | 14.7984   | 0.184934 | 0.785865 |
| XLOC_007120 | ARHGAP11A    | chr15:32907690-32931868   | 5.60996   | 6.37771   | 0.185049 | 0.765759 |
| XLOC_002815 | UPF2         | chr10:11962020-12085169   | 4.75635   | 5.40738   | 0.185074 | 0.76721  |
| XLOC_021206 | C7orf43      | chr7:99752042-99756302    | 9.61342   | 10.9294   | 0.185093 | 0.802621 |
| XLOC_017355 | CYSTM1       | chr5:139554652-139623374  | 87.1767   | 99.1192   | 0.185221 | 0.756508 |
| XLOC_013678 | STK4         | chr20:43595119-43708593   | 7.08795   | 8.05975   | 0.185366 | 0.764456 |
| XLOC_017848 | DNAJC18      | chr5:138745891-138775214  | 1.98485   | 2.25706   | 0.185414 | 0.816944 |
| XLOC_001997 | GPA33        | chr1:167022081-167059868  | 0.015255  | 0.0173476 | 0.18545  | 1        |
| XLOC_003711 | POLD3        | chr11:74303574-74354105   | 1.86787   | 2.12425   | 0.185562 | 0.831834 |
| XLOC_016039 | SCARNA7      | chr3:160212782-160283376  | 18.2258   | 20.7286   | 0.185645 | 0.975063 |
| XLOC_002604 | SLC35G1      | chr10:95653729-95662491   | 2.55877   | 2.91016   | 0.185647 | 0.845446 |
| XLOC_016255 | NCAPG        | chr4:17812435-18023483    | 5.16498   | 5.8743    | 0.185654 | 0.839812 |
| XLOC_000619 | MAN1A2       | chr1:117910084-118068320  | 0.795144  | 0.904439  | 0.185807 | 0.860592 |
| XLOC_017706 | WDR41        | chr5:76728068-76788332    | 11.5949   | 13.1888   | 0.185826 | 0.764196 |
| XLOC_010805 | LRFN3        | chr19:36428021-36436097   | 11.3478   | 12.9082   | 0.18587  | 0.809839 |
| XLOC_021509 | LOC286059    | chr8:22844929-22941132    | 0.0548037 | 0.0623406 | 0.185899 | 1        |
| XLOC_011333 | DPP9         | chr19:4675243-4723855     | 14.636    | 16.6496   | 0.185965 | 0.757708 |
| XLOC_013901 | ABHD12       | chr20:25228705-25371618   | 38.5791   | 43.8881   | 0.18601  | 0.886468 |
| XLOC_014401 | TUBA8        | chr22:18593452-18614498   | 5.6315    | 6.40692   | 0.186111 | 0.818547 |
| XLOC_008447 | C16orf88     | chr16:19717673-19868859   | 6.24428   | 7.10421   | 0.186141 | 0.848628 |
| XLOC_000633 | SEC22B       | chr1:145096406-145116997  | 12.6914   | 14.4401   | 0.186222 | 0.775896 |
| XLOC_023369 | RBM3         | chrX:48432740-48439553    | 70.2558   | 79.9428   | 0.186351 | 0.757708 |
| XLOC_011285 | KLF16        | chr19:1852397-1863564     | 49.2836   | 56.0791   | 0.186355 | 0.755918 |
| XLOC_002345 | SEC61A2      | chr10:12171639-12292589   | 7.88095   | 8.96822   | 0.186451 | 0.969954 |
| XLOC_020674 | ORAI2        | chr7:102073976-102105321  | 3.63679   | 4.1388    | 0.186548 | 0.824472 |
| XLOC_003236 | CD151        | chr11:832951-838835       | 359.62    | 409.28    | 0.186615 | 0.756518 |
| XLOC_011812 | CA11         | chr19:49141271-49185502   | 13.972    | 15.9026   | 0.186725 | 0.796161 |
| XLOC_020664 | TRIM56       | chr7:100728785-100733889  | 1.5176    | 1.72732   | 0.186752 | 0.871917 |
| XLOC_000113 | KAZN         | chr1:14925212-15478960    | 5.73001   | 6.52258   | 0.186905 | 0.799656 |
| XLOC_013735 | RAE1         | chr20:55904830-55998278   | 27.658    | 31.4839   | 0.186914 | 0.859038 |
| XLOC_008312 | NPRL3        | chr16:127017-188697       | 43.647    | 49.6864   | 0.186967 | 0.885904 |
| XLOC_001054 | RRP15        | chr1:218458628-218511325  | 1.02668   | 1.16885   | 0.187104 | 0.813083 |
| XLOC_015158 | SLMAP        | chr3:57743173-57914894    | 4.5469    | 5.17671   | 0.187153 | 0.774876 |

|             |              |                           |          |          |          |          |
|-------------|--------------|---------------------------|----------|----------|----------|----------|
| XLOC_003119 | PCGF6        | chr10:105062552-105110891 | 9.4238   | 10.7294  | 0.187193 | 0.776837 |
| XLOC_013406 | TRIP12       | chr2:230631929-230786655  | 9.08035  | 10.3388  | 0.187248 | 0.751293 |
| XLOC_004861 | KRT18        | chr12:53290970-53346685   | 204.744  | 233.126  | 0.187289 | 0.780964 |
| XLOC_003007 | AP3M1        | chr10:75880014-75910826   | 6.1288   | 6.97897  | 0.18741  | 0.765759 |
| XLOC_000057 | ZBTB48       | chr1:6640062-6649340      | 10.7737  | 12.269   | 0.187505 | 0.781103 |
| XLOC_017000 | AADAT        | chr4:170981372-171011372  | 6.03463  | 6.8722   | 0.187506 | 0.797341 |
| XLOC_005297 | CSDA         | chr12:10851675-10875953   | 134.843  | 153.566  | 0.187583 | 0.757207 |
| XLOC_016601 | TLR3         | chr4:186990308-187006252  | 0.180699 | 0.205799 | 0.187646 | 1        |
| XLOC_016709 | TLR6         | chr4:38825328-38858438    | 0.67738  | 0.771492 | 0.187685 | 0.855739 |
| XLOC_016247 | CC2D2A       | chr4:15471488-15603180    | 3.51004  | 3.998    | 0.18779  | 0.864624 |
| XLOC_005172 | GTF2H3       | chr12:124105569-124147151 | 8.85306  | 10.0845  | 0.187886 | 0.858806 |
| XLOC_006376 | TOMM20L      | chr14:58862643-59015549   | 0.98757  | 1.12503  | 0.188003 | 0.984602 |
| XLOC_003366 | PRMT3        | chr11:20409075-20530879   | 4.25777  | 4.85056  | 0.188053 | 0.799962 |
| XLOC_009967 | MIF4GD       | chr17:73232693-73267311   | 24.1213  | 27.4803  | 0.18809  | 0.916694 |
| XLOC_002184 | GPATCH2      | chr1:217603833-217804409  | 1.05819  | 1.20555  | 0.188095 | 0.879478 |
| XLOC_018732 | ZNRD1-AS1    | chr6:29968787-30028961    | 0.55462  | 0.631893 | 0.188181 | 0.943284 |
| XLOC_011517 | NR2F6        | chr19:17342693-17356151   | 107.17   | 122.104  | 0.188206 | 0.748337 |
| XLOC_000078 | PEX14        | chr1:10535002-10690815    | 21.8934  | 24.9457  | 0.188295 | 0.76721  |
| XLOC_016282 | KLHL5        | chr4:39046450-39127853    | 1.44626  | 1.648    | 0.188392 | 0.801756 |
| XLOC_012079 | EFR3B        | chr2:25264972-25382004    | 0.193864 | 0.220909 | 0.188405 | 1        |
| XLOC_023467 | ACRC         | chrX:70430034-70948962    | 0.187005 | 0.213129 | 0.188648 | 1        |
| XLOC_006941 | LGMN         | chr14:93170151-93215047   | 26.0154  | 29.6499  | 0.188658 | 0.751445 |
| XLOC_007401 | NGRN         | chr15:90808894-90815443   | 59.6798  | 68.0177  | 0.188668 | 0.745223 |
| XLOC_000215 | TRNP1        | chr1:27320194-27327377    | 14.2623  | 16.256   | 0.188769 | 0.784985 |
| XLOC_010054 | DUS1L        | chr17:80015747-80023697   | 59.2519  | 67.5358  | 0.18879  | 0.751484 |
| XLOC_007854 | HN1L         | chr16:1728277-1752073     | 18.5809  | 21.1787  | 0.188791 | 0.749866 |
| XLOC_021632 | TERF1        | chr8:73921096-73959987    | 11.7362  | 13.377   | 0.188798 | 0.762181 |
| XLOC_004921 | PA2G4        | chr12:56498102-56507694   | 121.655  | 138.665  | 0.188801 | 0.748287 |
| XLOC_002219 | CDC42BPA     | chr1:227177565-227505826  | 2.26491  | 2.58159  | 0.188805 | 0.770074 |
| XLOC_014292 | SCAF4        | chr21:33043312-33104431   | 7.98598  | 9.10285  | 0.188849 | 0.770768 |
| XLOC_001420 | TMEM234      | chr1:32681797-32687926    | 4.53328  | 5.16771  | 0.188969 | 0.865957 |
| XLOC_005812 | C1QTNF9B-AS1 | chr13:24304327-24471125   | 0.162521 | 0.18527  | 0.189008 | 1        |
| XLOC_023136 | SURF4        | chr9:136228339-136242970  | 143.13   | 163.166  | 0.189012 | 0.743519 |
| XLOC_018210 | C6orf48      | chr6:31802692-31807541    | 341.712  | 389.549  | 0.189023 | 0.749866 |
| XLOC_010866 | SHKBP1       | chr19:41082756-41097305   | 74.1325  | 84.5211  | 0.189206 | 0.736305 |
| XLOC_005728 | WSB2         | chr12:118470491-118498951 | 18.4809  | 21.0713  | 0.189243 | 0.748287 |
| XLOC_013350 | MREG         | chr2:216807313-216878346  | 6.55018  | 7.46847  | 0.189278 | 0.781269 |
| XLOC_017436 | GALNT10      | chr5:153570294-153825382  | 1.83856  | 2.09638  | 0.189324 | 0.810757 |
| XLOC_000156 | PINK1        | chr1:20959947-20978004    | 17.8847  | 20.3949  | 0.18948  | 0.754942 |
| XLOC_012540 | TTN-AS1      | chr2:179059207-179672150  | 0.116214 | 0.132529 | 0.189529 | 1        |
| XLOC_017288 | SNX24        | chr5:122181159-122344902  | 11.7302  | 13.3773  | 0.189565 | 0.774227 |
| XLOC_006342 | MGAT2        | chr14:50087488-50090199   | 16.1047  | 18.3666  | 0.189606 | 0.753077 |
| XLOC_002230 | HIST3H2A     | chr1:228645064-228645560  | 33.6066  | 38.3269  | 0.189612 | 0.852189 |
| XLOC_001766 | GNRHR2       | chr1:145507556-145516076  | 5.18877  | 5.91784  | 0.189679 | 0.921691 |
| XLOC_005936 | UCHL3        | chr13:76123615-76180156   | 49.8531  | 56.8592  | 0.189711 | 0.748337 |
| XLOC_002179 | FLVCR1-AS1   | chr1:213029945-213031480  | 2.40669  | 2.74494  | 0.189723 | 0.89785  |
| XLOC_014518 | YWHAH        | chr22:32329506-32353590   | 60.6805  | 69.215   | 0.189851 | 0.741465 |
| XLOC_012462 | ACVR2A       | chr2:148602569-149271044  | 0.683391 | 0.779557 | 0.189942 | 0.951036 |
| XLOC_015278 | ADPRH        | chr3:119298522-119308792  | 0.916914 | 1.04598  | 0.190002 | 0.871053 |

|             |          |                           |            |            |          |          |
|-------------|----------|---------------------------|------------|------------|----------|----------|
| XLOC_020786 | RAB19    | chr7:140103842-140126050  | 0.0205032  | 0.0233901  | 0.190052 | 1        |
| XLOC_018507 | SNORA33  | chr6:133135707-133138703  | 15.4391    | 17.6132    | 0.190063 | 0.978818 |
| XLOC_002778 | MTG1     | chr10:135207620-135238121 | 31.9527    | 36.4535    | 0.190119 | 0.766629 |
| XLOC_021966 | RNF5P1   | chr8:38457692-38458775    | 0.0418824  | 0.0477833  | 0.190161 | 1        |
| XLOC_017511 | PRELID1  | chr5:176730762-176739292  | 165.795    | 189.156    | 0.190178 | 0.813814 |
| XLOC_004276 | SNHG1    | chr11:62619459-62623360   | 164.943    | 188.199    | 0.19029  | 0.760301 |
| XLOC_000787 | KIRREL   | chr1:157963062-158065844  | 0.780881   | 0.890994   | 0.190313 | 0.891828 |
| XLOC_007521 | OIP5     | chr15:41601465-41624819   | 10.1842    | 11.621     | 0.190396 | 0.814274 |
| XLOC_021303 | RBM28    | chr7:127950435-127983962  | 20.3759    | 23.2512    | 0.190436 | 0.749032 |
| XLOC_021316 | MESTIT1  | chr7:130126015-130371406  | 0.00865226 | 0.00987542 | 0.190765 | 1        |
| XLOC_012146 | GEMIN6   | chr2:39005326-39009106    | 28.9544    | 33.0483    | 0.190793 | 0.781302 |
| XLOC_005656 | PMCH     | chr12:102513955-102591614 | 0.878614   | 1.00296    | 0.190961 | 0.970185 |
| XLOC_018268 | SRSF3    | chr6:36562089-36572244    | 74.6006    | 85.1602    | 0.190993 | 0.744778 |
| XLOC_010921 | IGSF23   | chr19:45116939-45140081   | 0.0267306  | 0.0305147  | 0.191013 | 1        |
| XLOC_003148 | C10orf82 | chr10:118423206-118429481 | 0.0470929  | 0.0537641  | 0.191135 | 1        |
| XLOC_006427 | SIPA1L1  | chr14:71996041-72206120   | 5.22853    | 5.96955    | 0.191217 | 0.765908 |
| XLOC_018189 | MICA     | chr6:31367560-31383090    | 25.0951    | 28.6528    | 0.19127  | 0.756508 |
| XLOC_021107 | DNAJC30  | chr7:73095247-73097781    | 11.0012    | 12.5609    | 0.191283 | 0.771216 |
| XLOC_009560 | C17orf51 | chr17:21431570-21454941   | 2.73832    | 3.12664    | 0.191321 | 0.77202  |
| XLOC_007673 | HEXA     | chr15:72635777-72671129   | 50.0161    | 57.1134    | 0.191438 | 0.731905 |
| XLOC_013168 | MCM6     | chr2:136597195-136634047  | 16.197     | 18.4962    | 0.191499 | 0.748993 |
| XLOC_009773 | ATXN7L3  | chr17:42269172-42275529   | 15.9308    | 18.1923    | 0.191502 | 0.749981 |
| XLOC_001357 | SRSF10   | chr1:24292936-24306953    | 25.9378    | 29.6216    | 0.191597 | 0.756246 |
| XLOC_001864 | SLC39A1  | chr1:153931574-153950451  | 106.637    | 121.795    | 0.191745 | 0.865128 |
| XLOC_018166 | TRIM40   | chr6:30104509-30116512    | 0.0121636  | 0.0138927  | 0.19176  | 1        |
| XLOC_013982 | RIMS4    | chr20:43374487-43438979   | 0.00373289 | 0.00426369 | 0.191808 | 1        |
| XLOC_011347 | NDUFA11  | chr19:5891286-5904024     | 463.9      | 529.894    | 0.191888 | 0.750965 |
| XLOC_006879 | MED6     | chr14:71050956-71067384   | 17.6225    | 20.1308    | 0.191983 | 0.766358 |
| XLOC_012047 | RRM2     | chr2:10262694-10271546    | 40.1628    | 45.8814    | 0.192049 | 0.742598 |
| XLOC_004117 | SVIP     | chr11:22843597-22851382   | 5.58766    | 6.38399    | 0.192215 | 0.824372 |
| XLOC_010662 | FAM32A   | chr19:16296234-16302857   | 41.791     | 47.7485    | 0.192262 | 0.740073 |
| XLOC_013632 | AAR2     | chr20:34824338-34844863   | 17.3812    | 19.8601    | 0.192342 | 0.754905 |
| XLOC_008686 | ADAT1    | chr16:75632246-75657221   | 0.716916   | 0.819322   | 0.192627 | 0.880754 |
| XLOC_010964 | SAE1     | chr19:47634079-47713893   | 63.0474    | 72.0547    | 0.192655 | 0.741504 |
| XLOC_013961 | TTI1     | chr20:36611422-36661833   | 5.44579    | 6.22381    | 0.192655 | 0.766358 |
| XLOC_010040 | FAM195B  | chr17:79780292-79791167   | 63.2286    | 72.2628    | 0.192676 | 0.748723 |
| XLOC_021533 | EXTL3    | chr8:28558989-28611207    | 13.5269    | 15.46      | 0.192713 | 0.781034 |
| XLOC_000882 | METTL13  | chr1:171750760-171766856  | 11.637     | 13.3002    | 0.192727 | 0.753745 |
| XLOC_014943 | VHL      | chr3:10183318-10195354    | 19.0193    | 21.7383    | 0.192778 | 0.745547 |
| XLOC_012550 | ZC3H15   | chr2:187350884-187374087  | 28.1138    | 32.1352    | 0.192873 | 0.739148 |
| XLOC_008189 | DUS2L    | chr16:68055176-68113226   | 11.8991    | 13.6016    | 0.192919 | 0.86876  |
| XLOC_013611 | CHMP4B   | chr20:32399109-32442173   | 61.7236    | 70.556     | 0.192946 | 0.737328 |
| XLOC_010753 | NUDT19   | chr19:33182866-33204702   | 16.5199    | 18.8858    | 0.193101 | 0.746171 |
| XLOC_005105 | ALDH2    | chr12:112204690-112247789 | 63.9413    | 73.1007    | 0.193138 | 0.736579 |
| XLOC_000699 | OAZ3     | chr1:151732122-151743806  | 3.22873    | 3.69148    | 0.193232 | 0.981441 |
| XLOC_022638 | SURF2    | chr9:136223420-136228040  | 76.1808    | 87.104     | 0.193311 | 0.74773  |
| XLOC_017720 | MTRNR2L2 | chr5:79922044-80172634    | 50.2243    | 57.4265    | 0.19333  | 0.851768 |
| XLOC_008554 | SHCBP1   | chr16:46614467-46655311   | 4.57749    | 5.23428    | 0.193435 | 0.77889  |
| XLOC_009393 | CLUH     | chr17:2592679-2614927     | 32.4287    | 37.0847    | 0.193555 | 0.737232 |

|             |               |                           |            |            |          |          |
|-------------|---------------|---------------------------|------------|------------|----------|----------|
| XLOC_011516 | HAUS8         | chr19:17160570-17186343   | 10.3486    | 11.8345    | 0.193561 | 0.798022 |
| XLOC_021111 | WBSCR27       | chr7:73248920-73256855    | 12.6614    | 14.4799    | 0.193613 | 0.824472 |
| XLOC_019171 | LPA           | chr6:160952514-161087407  | 0.00238639 | 0.00272924 | 0.193669 | 1        |
| XLOC_004261 | TUT1          | chr11:62342516-62359109   | 10.9455    | 12.5184    | 0.193704 | 0.765944 |
| XLOC_010008 | LOC100653515  | chr17:76849058-76921472   | 0.0165182  | 0.0188929  | 0.193785 | 1        |
| XLOC_019007 | COQ3          | chr6:99817347-99842082    | 10.0218    | 11.4632    | 0.193873 | 0.784985 |
| XLOC_007835 | STUB1         | chr16:730114-734439       | 57.9161    | 66.2462    | 0.193873 | 0.867291 |
| XLOC_007538 | UBR1          | chr15:43235097-43398286   | 1.21932    | 1.39496    | 0.194142 | 0.798824 |
| XLOC_011469 | TRMT1         | chr19:13215713-13227563   | 55.5801    | 63.5874    | 0.194172 | 0.736305 |
| XLOC_003604 | MRPL49        | chr11:64888098-64902003   | 30.7569    | 35.189     | 0.194215 | 0.961952 |
| XLOC_018762 | C6orf47       | chr6:31626074-31628549    | 8.06011    | 9.2218     | 0.19425  | 0.775951 |
| XLOC_004783 | PPFIBP1       | chr12:27677044-27848497   | 4.17672    | 4.77878    | 0.194272 | 0.757031 |
| XLOC_014488 | HSCB          | chr22:29138042-29153496   | 21.0914    | 24.1328    | 0.194339 | 0.766151 |
| XLOC_003310 | RBMXL2        | chr11:7110164-7112379     | 0.0429868  | 0.0491876  | 0.194403 | 1        |
| XLOC_006042 | RNF6          | chr13:26786904-26796508   | 12.6087    | 14.4287    | 0.19452  | 0.74612  |
| XLOC_002414 | BMS1          | chr10:43277953-4330385    | 8.37022    | 9.57896    | 0.194602 | 0.732699 |
| XLOC_019205 | PDCD2         | chr6:170884659-170893780  | 37.58      | 43.0135    | 0.194822 | 0.774988 |
| XLOC_012515 | ITGA6         | chr2:173292313-173371181  | 1.81572    | 2.07826    | 0.19483  | 0.798113 |
| XLOC_000296 | AKIRIN1       | chr1:39456915-39471737    | 18.2515    | 20.891     | 0.194863 | 0.732699 |
| XLOC_000643 | ANKRD35       | chr1:145549208-145568526  | 0.00554631 | 0.00634864 | 0.194918 | 1        |
| XLOC_000190 | TMEM50A       | chr1:25664788-25747363    | 32.3009    | 36.9801    | 0.195172 | 0.733168 |
| XLOC_021084 | ERV3-1_ZNF117 | chr7:64434829-64467124    | 0.706589   | 0.808959   | 0.195195 | 0.877022 |
| XLOC_011298 | TIMM13        | chr19:2389783-2427875     | 79.2596    | 90.7446    | 0.195225 | 0.731905 |
| XLOC_018375 | OGFRL1        | chr6:71998476-72011973    | 13.2978    | 15.2253    | 0.195276 | 0.766913 |
| XLOC_010235 | HMSD          | chr18:61616587-61627645   | 4.20457    | 4.81455    | 0.195445 | 0.880754 |
| XLOC_007182 | WDR76         | chr15:44119111-44160617   | 5.05727    | 5.79122    | 0.19551  | 0.758801 |
| XLOC_011167 | LILRA2        | chr19:55085256-55099027   | 0.0106719  | 0.0122208  | 0.195524 | 1        |
| XLOC_010206 | C18orf54      | chr18:51885170-51908404   | 1.15792    | 1.326      | 0.195551 | 0.824372 |
| XLOC_001967 | TSTD1         | chr1:161007421-161008774  | 94.9199    | 108.7      | 0.195563 | 0.756321 |
| XLOC_010977 | CRX           | chr19:48325098-48346586   | 0.00806313 | 0.00923374 | 0.195576 | 1        |
| XLOC_020364 | C7orf26       | chr7:6629914-6648355      | 19.0383    | 21.8036    | 0.195658 | 0.759979 |
| XLOC_001323 | TMCO4         | chr1:20008705-20126410    | 5.38622    | 6.1687     | 0.195694 | 0.791102 |
| XLOC_008514 | CD2BP2        | chr16:30362086-30366682   | 33.3948    | 38.2476    | 0.195745 | 0.731166 |
| XLOC_013048 | SNRNP200      | chr2:96940073-96971307    | 25.5924    | 29.3132    | 0.19583  | 0.734869 |
| XLOC_021006 | RP9           | chr7:33134409-33149002    | 12.9186    | 14.7985    | 0.195999 | 0.776524 |
| XLOC_019025 | SEC63         | chr6:108188959-108279482  | 5.54272    | 6.34943    | 0.196032 | 0.743322 |
| XLOC_017076 | CCT5          | chr5:10250281-10266501    | 77.9692    | 89.3271    | 0.196195 | 0.734343 |
| XLOC_023370 | WDR13         | chrX:48455879-48463582    | 34.5339    | 39.5651    | 0.196213 | 0.737823 |
| XLOC_009284 | TSEN54        | chr17:73512608-73520820   | 29.3586    | 33.6375    | 0.196285 | 0.745547 |
| XLOC_006643 | MARK3         | chr14:103851700-103970166 | 19.4005    | 22.2282    | 0.196294 | 0.736894 |
| XLOC_009328 | ENDOV         | chr17:78234659-78411884   | 8.09888    | 9.27939    | 0.196307 | 0.927701 |
| XLOC_004644 | ERC1          | chr12:1100403-1605099     | 2.36114    | 2.7054     | 0.196359 | 0.76146  |
| XLOC_015678 | SCAP          | chr3:47455183-47517445    | 25.0204    | 28.6691    | 0.196392 | 0.731108 |
| XLOC_017878 | LARS          | chr5:145492588-145562294  | 31.7636    | 36.3965    | 0.196426 | 0.735573 |
| XLOC_005796 | ZNF605        | chr12:133498018-133532892 | 1.51751    | 1.73898    | 0.196534 | 0.787792 |
| XLOC_013046 | STARD7        | chr2:96850602-96908362    | 35.6562    | 40.862     | 0.196606 | 0.733012 |
| XLOC_015202 | ARL13B        | chr3:93698982-93774522    | 0.754163   | 0.864341   | 0.196724 | 0.86364  |
| XLOC_006795 | POLE2         | chr14:50110269-50155098   | 4.73242    | 5.42441    | 0.196888 | 0.810443 |
| XLOC_014082 | GMEB2         | chr20:62218954-62258381   | 5.81413    | 6.66431    | 0.196892 | 0.774237 |

|             |           |                           |            |            |          |          |
|-------------|-----------|---------------------------|------------|------------|----------|----------|
| XLOC_005487 | AAAS      | chr12:53701239-53715412   | 22.3259    | 25.5914    | 0.196937 | 0.741465 |
| XLOC_016514 | ELMOD2    | chr4:141445311-141474924  | 2.84103    | 3.25685    | 0.19706  | 0.776663 |
| XLOC_006999 | BRF1      | chr14:105675622-105864484 | 15.5616    | 17.84      | 0.197133 | 0.922274 |
| XLOC_016059 | RPL22L1   | chr3:170582664-170588045  | 328.761    | 376.9      | 0.197142 | 0.748376 |
| XLOC_017542 | CCDC127   | chr5:204874-218297        | 12.1688    | 13.9514    | 0.197227 | 0.781758 |
| XLOC_018544 | SAMD5     | chr6:147829827-147891157  | 0.589881   | 0.676334   | 0.197313 | 0.85718  |
| XLOC_011505 | OR10H1    | chr19:15917816-15918936   | 0.0336053  | 0.0385306  | 0.197316 | 1        |
| XLOC_020458 | MRPL32    | chr7:42971938-42977453    | 62.3035    | 71.437     | 0.197359 | 0.731905 |
| XLOC_013359 | AAMP      | chr2:219128851-219134893  | 128.565    | 147.427    | 0.1975   | 0.732286 |
| XLOC_012960 | ASPRV1    | chr2:70187223-70314147    | 0.658441   | 0.755057   | 0.197532 | 0.898747 |
| XLOC_019148 | MTRF1L    | chr6:153308399-153323925  | 7.62712    | 8.7465     | 0.197567 | 0.737556 |
| XLOC_005433 | TUBA1B    | chr12:49521566-49525304   | 642.709    | 737.039    | 0.197575 | 0.75446  |
| XLOC_010061 | C17orf62  | chr17:80347085-80408707   | 34.0198    | 39.0129    | 0.197575 | 0.81114  |
| XLOC_006988 | C14orf2   | chr14:104378624-104387903 | 359.119    | 411.839    | 0.197618 | 0.722516 |
| XLOC_000093 | TNFRSF1B  | chr1:12227059-12269277    | 0.00545928 | 0.00626119 | 0.197725 | 1        |
| XLOC_023172 | AGPAT2    | chr9:139567594-139581911  | 263.204    | 301.87     | 0.197746 | 0.723182 |
| XLOC_020422 | PLEKHA8   | chr7:30067976-30157961    | 2.37003    | 2.71821    | 0.197751 | 0.849035 |
| XLOC_006429 | DCAF4     | chr14:73393039-73426357   | 8.94849    | 10.2635    | 0.197802 | 0.767258 |
| XLOC_006887 | FAM161B   | chr14:74399694-74429813   | 0.333304   | 0.382315   | 0.197924 | 0.967343 |
| XLOC_002312 | ZMYND11   | chr10:180404-300577       | 6.00355    | 6.88707    | 0.198076 | 0.754905 |
| XLOC_010833 | PSMD8     | chr19:38865189-38874464   | 306.166    | 351.232    | 0.198113 | 0.732319 |
| XLOC_021337 | CREB3L2   | chr7:137559724-137686847  | 2.89163    | 3.31741    | 0.198172 | 0.831834 |
| XLOC_014184 | MX1       | chr21:42792519-42831141   | 7.8972     | 9.06046    | 0.198243 | 0.765218 |
| XLOC_002689 | DUSP5     | chr10:112257624-112271302 | 107.583    | 123.431    | 0.198248 | 0.757708 |
| XLOC_000861 | TIPRL     | chr1:168148170-168171351  | 10.2068    | 11.7103    | 0.198251 | 0.775896 |
| XLOC_002648 | C10orf2   | chr10:102747292-102754158 | 20.3186    | 23.312     | 0.198269 | 0.739517 |
| XLOC_016169 | MAEA      | chr4:1283671-1333925      | 27.0991    | 31.0914    | 0.198271 | 0.735435 |
| XLOC_010372 | MBD2      | chr18:51677970-51751158   | 11.0228    | 12.647     | 0.198295 | 0.730157 |
| XLOC_001559 | YIPF1     | chr1:54317391-54355487    | 10.7459    | 12.3309    | 0.198486 | 0.76946  |
| XLOC_014931 | MTMR14    | chr3:9691116-9744078      | 21.6413    | 24.8349    | 0.19858  | 0.73942  |
| XLOC_021500 | POLR3D    | chr8:22102618-22108680    | 27.6823    | 31.7675    | 0.198584 | 0.739148 |
| XLOC_010141 | SNRPD1    | chr18:19192259-19210208   | 69.5788    | 79.8517    | 0.198674 | 0.730925 |
| XLOC_022979 | TEX10     | chr9:103064356-103115259  | 33.697     | 38.6735    | 0.198725 | 0.730925 |
| XLOC_017415 | GRPEL2    | chr5:148724976-148734146  | 9.16755    | 10.5215    | 0.198738 | 0.735435 |
| XLOC_009599 | TEFM      | chr17:29226000-29233286   | 8.08302    | 9.27832    | 0.198969 | 0.798514 |
| XLOC_005250 | MLF2      | chr12:6857157-6862636     | 192.973    | 221.513    | 0.198992 | 0.729714 |
| XLOC_004353 | PPP1CA    | chr11:67159422-67169376   | 186.698    | 214.334    | 0.199154 | 0.736823 |
| XLOC_004312 | ATG2A     | chr11:64662003-64684722   | 11.8172    | 13.5673    | 0.199245 | 0.725739 |
| XLOC_020705 | TES       | chr7:115850546-115898837  | 0.0225371  | 0.0258775  | 0.199399 | 1        |
| XLOC_006433 | C14orf169 | chr14:73945188-74025651   | 11.6874    | 13.4199    | 0.199426 | 0.783531 |
| XLOC_003080 | LOXL4     | chr10:100007442-100028007 | 0.00499509 | 0.00573562 | 0.19944  | 1        |
| XLOC_004370 | C11orf24  | chr11:68028802-68039469   | 18.3924    | 21.1209    | 0.199562 | 0.739148 |
| XLOC_005363 | TM7SF3    | chr12:27124505-27167339   | 8.61768    | 9.8962     | 0.199575 | 0.736178 |
| XLOC_023997 | RAB9B     | chrX:103077254-103087212  | 0.14421    | 0.165607   | 0.199586 | 1        |
| XLOC_002577 | STAMBPL1  | chr10:90639943-90683259   | 4.96032    | 5.6966     | 0.199668 | 0.798794 |
| XLOC_010489 | MRPL54    | chr19:3762664-3767563     | 73.3914    | 84.288     | 0.199716 | 0.746288 |
| XLOC_006645 | APOPT1    | chr14:104029298-104057236 | 22.5753    | 25.9273    | 0.199723 | 0.74725  |
| XLOC_018739 | GNL1      | chr6:30509154-30532473    | 13.0323    | 14.9677    | 0.199767 | 0.751211 |
| XLOC_000971 | TIMM17A   | chr1:201924618-201939789  | 37.3545    | 42.9044    | 0.199843 | 0.72151  |

|             |                |                           |           |           |          |          |
|-------------|----------------|---------------------------|-----------|-----------|----------|----------|
| XLOC_018650 | GFOD1          | chr6:13363586-13487869    | 1.02529   | 1.17764   | 0.199862 | 0.883608 |
| XLOC_014014 | ZMYND8         | chr20:45838380-45985474   | 2.40914   | 2.76727   | 0.199942 | 0.798793 |
| XLOC_011667 | EID2           | chr19:40029446-40030838   | 27.9177   | 32.0687   | 0.199985 | 0.748673 |
| XLOC_004373 | MRPL21         | chr11:68658745-68671303   | 106.797   | 122.677   | 0.199986 | 0.725398 |
| XLOC_005137 | COX6A1         | chr12:120875892-120878545 | 622.518   | 715.113   | 0.200055 | 0.727839 |
| XLOC_023123 | MED27          | chr9:134735496-134955274  | 50.4507   | 57.9621   | 0.200235 | 0.726353 |
| XLOC_007280 | LRRC49         | chr15:71184927-71342436   | 1.32869   | 1.52654   | 0.200265 | 0.848628 |
| XLOC_023062 | ZBTB26         | chr9:125680377-125693779  | 0.752355  | 0.864477  | 0.200414 | 0.892032 |
| XLOC_003551 | FADS2          | chr11:61595712-61634825   | 6.17179   | 7.09158   | 0.200416 | 0.779242 |
| XLOC_012042 | CPSF3          | chr2:9563665-9613239      | 22.7124   | 26.0973   | 0.200421 | 0.726595 |
| XLOC_006200 | GGACT          | chr13:100741268-101241046 | 1.3858    | 1.59283   | 0.200875 | 0.907121 |
| XLOC_021487 | SH2D4A         | chr8:19171080-19253729    | 3.81895   | 4.38949   | 0.20088  | 0.773721 |
| XLOC_020884 | LOC645249      | chr7:156803550-156809118  | 15.714    | 18.0617   | 0.200881 | 0.800413 |
| XLOC_009502 | SCO1           | chr17:10583648-10600885   | 18.822    | 21.6344   | 0.200904 | 0.743375 |
| XLOC_001801 | ENSA           | chr1:150594598-150602098  | 134.948   | 155.126   | 0.201039 | 0.733299 |
| XLOC_001017 | CD55           | chr1:207494816-207534311  | 18.1242   | 20.8347   | 0.201071 | 0.733694 |
| XLOC_004955 | TSFM           | chr12:58176527-58209852   | 24.6805   | 28.3716   | 0.201073 | 0.726353 |
| XLOC_000428 | ATG4C          | chr1:63249776-63330941    | 2.1801    | 2.50614   | 0.201078 | 0.810769 |
| XLOC_015786 | ARF4           | chr3:57557089-57583215    | 68.6926   | 78.9666   | 0.201089 | 0.720426 |
| XLOC_010780 | LSR            | chr19:35739558-35758867   | 45.2075   | 51.9709   | 0.201143 | 0.72856  |
| XLOC_012732 | SCLY,UBE2F     | chr2:238875586-239008054  | 31.7761   | 36.5329   | 0.201255 | 0.727839 |
| XLOC_002672 | AS3MT,C10orf32 | chr10:104613966-104661655 | 5.23717   | 6.02118   | 0.201259 | 0.784528 |
| XLOC_015790 | ACOX2          | chr3:58490862-58522929    | 1.12449   | 1.29283   | 0.201265 | 0.879055 |
| XLOC_013419 | PDE6D          | chr2:232597146-232645974  | 10.1949   | 11.7215   | 0.201313 | 0.801972 |
| XLOC_018776 | SLC44A4        | chr6:31830969-31846823    | 0.0485739 | 0.0558476 | 0.201314 | 1        |
| XLOC_012935 | TMEM17         | chr2:62727355-62733604    | 0.576744  | 0.663166  | 0.201439 | 0.906423 |
| XLOC_010861 | PSMC4          | chr19:40476911-40487671   | 49.9715   | 57.4636   | 0.201543 | 0.713886 |
| XLOC_003566 | POLR2G         | chr11:62529010-62534187   | 108.614   | 124.909   | 0.201668 | 0.713126 |
| XLOC_017424 | TCOF1          | chr5:149737201-149779871  | 25.5849   | 29.4249   | 0.201745 | 0.725398 |
| XLOC_014710 | RTDR1          | chr22:23401592-23484241   | 0.0405763 | 0.0466671 | 0.20177  | 1        |
| XLOC_011280 | MBD3           | chr19:1576677-1592652     | 61.2228   | 70.4215   | 0.201948 | 0.723659 |
| XLOC_008587 | FAM192A        | chr16:57186377-57219976   | 16.2775   | 18.7241   | 0.202019 | 0.727043 |
| XLOC_009968 | SLC25A19       | chr17:73267379-73285530   | 23.3937   | 26.9152   | 0.202299 | 0.743913 |
| XLOC_005957 | GPR180         | chr13:95254103-95286899   | 1.72713   | 1.98719   | 0.202356 | 0.765267 |
| XLOC_011157 | NDUFA3         | chr19:54606159-54610281   | 184.628   | 212.451   | 0.202513 | 0.739188 |
| XLOC_003619 | FAM89B         | chr11:65339819-65341669   | 31.7882   | 36.5789   | 0.20252  | 0.761269 |
| XLOC_001245 | DNAJC11        | chr1:6684924-6761966      | 18.8019   | 21.6355   | 0.202522 | 0.779038 |
| XLOC_012729 | LRRFIP1        | chr2:238536223-238690290  | 10.6045   | 12.2036   | 0.202623 | 0.731166 |
| XLOC_014047 | PMEPA1         | chr20:56223447-56286592   | 0.879908  | 1.01269   | 0.202767 | 0.858227 |
| XLOC_009039 | PSMD3          | chr17:38137020-38154213   | 81.829    | 94.1809   | 0.202823 | 0.719427 |
| XLOC_010791 | HAUS5          | chr19:36103645-36116251   | 5.57339   | 6.41487   | 0.202866 | 0.756508 |
| XLOC_007246 | FBXL22         | chr15:63796709-63894620   | 0.117218  | 0.134918  | 0.202891 | 1        |
| XLOC_004389 | LAMTOR1        | chr11:71709957-71823822   | 93.8541   | 108.031   | 0.202959 | 0.862733 |
| XLOC_017311 | SLC22A5        | chr5:131630144-131731306  | 2.60425   | 2.9979    | 0.203081 | 0.82034  |
| XLOC_001297 | ARHGEF19       | chr1:16524598-16539104    | 11.9118   | 13.7137   | 0.203223 | 0.749981 |
| XLOC_008024 | NFATC2IP       | chr16:28962317-28977767   | 8.77815   | 10.1062   | 0.203246 | 0.733012 |
| XLOC_004427 | KCTD14,NDUFC2  | chr11:77726760-77850699   | 20.8118   | 23.9609   | 0.203283 | 0.847523 |
| XLOC_009478 | AURKB          | chr17:8108048-8113944     | 83.3724   | 95.9894   | 0.203305 | 0.721367 |
| XLOC_001546 | KTI12,TXNDC12  | chr1:52485803-52521843    | 61.3492   | 70.6364   | 0.203367 | 0.73942  |

|             |              |                           |            |            |          |          |
|-------------|--------------|---------------------------|------------|------------|----------|----------|
| XLOC_001450 | OSCP1        | chr1:36883506-36916086    | 2.44549    | 2.81587    | 0.203456 | 0.890039 |
| XLOC_023976 | TRMT2B       | chrX:100264333-100307105  | 2.79357    | 3.21668    | 0.203462 | 0.797588 |
| XLOC_014596 | LINC00634    | chr22:42348190-42354946   | 0.222151   | 0.255809   | 0.203529 | 1        |
| XLOC_000914 | LHX4         | chr1:180199432-180244188  | 0.736      | 0.847537   | 0.20357  | 0.954981 |
| XLOC_011514 | SMIM7        | chr19:16756958-16770968   | 24.7549    | 28.5084    | 0.203677 | 0.736417 |
| XLOC_000845 | HSD17B7      | chr1:162760495-162782608  | 6.3622     | 7.32739    | 0.203774 | 0.790277 |
| XLOC_014469 | SNRPD3       | chr22:24951617-24968509   | 75.06      | 86.4476    | 0.203782 | 0.719979 |
| XLOC_007484 | AVEN         | chr15:34158427-34357287   | 6.41048    | 7.38419    | 0.204007 | 0.798205 |
| XLOC_008101 | CYLD         | chr16:50775960-50835846   | 2.07436    | 2.3896     | 0.204106 | 0.74612  |
| XLOC_005200 | NOC4L        | chr12:132628992-132636986 | 32.6932    | 37.6636    | 0.20418  | 0.73942  |
| XLOC_015634 | ACVR2B-AS1   | chr3:38492517-38534633    | 0.536312   | 0.617888   | 0.204273 | 0.964843 |
| XLOC_021341 | ZC3HAV1L     | chr7:138710451-138720775  | 1.84507    | 2.12575    | 0.204293 | 0.865317 |
| XLOC_006918 | CEP128       | chr14:80962820-81405884   | 0.352288   | 0.405886   | 0.204319 | 0.876818 |
| XLOC_015822 | FAM86DP      | chr3:75470702-75484266    | 5.88307    | 6.77901    | 0.204507 | 0.773721 |
| XLOC_009587 | SEZ6         | chr17:27281946-27333081   | 0.00663969 | 0.00765138 | 0.204603 | 1        |
| XLOC_004985 | CCT2         | chr12:69979207-69995357   | 192.865    | 222.255    | 0.204628 | 0.718986 |
| XLOC_018813 | DAXX         | chr6:33286334-33290793    | 30.7559    | 35.4432    | 0.204644 | 0.714867 |
| XLOC_007594 | CCPG1,DYX1C1 | chr15:55611132-55800432   | 3.70542    | 4.27067    | 0.204826 | 0.854032 |
| XLOC_001644 | GBP4         | chr1:89646830-89664633    | 0.0138428  | 0.0159555  | 0.204917 | 1        |
| XLOC_018385 | IRAK1BP1     | chr6:79577188-79608320    | 1.2901     | 1.48711    | 0.205034 | 0.900249 |
| XLOC_010994 | GRWD1        | chr19:48949029-48957164   | 32.6873    | 37.6801    | 0.205073 | 0.7154   |
| XLOC_010332 | INO80C       | chr18:33048290-33077955   | 11.0878    | 12.7816    | 0.205096 | 0.804859 |
| XLOC_003138 | GPAM         | chr10:113909621-113943537 | 1.19461    | 1.37725    | 0.205245 | 0.801574 |
| XLOC_012315 | CNNM4        | chr2:97426638-97477628    | 3.17701    | 3.66296    | 0.205339 | 0.773721 |
| XLOC_021026 | C7orf25      | chr7:42948871-42951689    | 5.75141    | 6.63122    | 0.205359 | 0.780692 |
| XLOC_018649 | TBC1D7       | chr6:13305183-13328787    | 6.14606    | 7.08702    | 0.205516 | 0.820487 |
| XLOC_001770 | GPR89A       | chr1:145764594-145827103  | 3.74253    | 4.31647    | 0.20584  | 0.794976 |
| XLOC_021214 | TSC22D4      | chr7:100064141-100076902  | 41.6915    | 48.0856    | 0.20585  | 0.720363 |
| XLOC_010593 | CCDC159      | chr19:11457180-11465620   | 2.79191    | 3.2203     | 0.205942 | 0.87419  |
| XLOC_010496 | CCDC94       | chr19:4247110-4269085     | 17.8093    | 20.5423    | 0.205965 | 0.755918 |
| XLOC_017871 | FGF1         | chr5:141971742-142077635  | 0.0250303  | 0.0288728  | 0.206035 | 1        |
| XLOC_015554 | SSUH2        | chr3:8661085-8693764      | 0.0828823  | 0.095608   | 0.206066 | 1        |
| XLOC_003608 | POLA2        | chr11:65029431-65065088   | 9.17869    | 10.5884    | 0.206123 | 0.743375 |
| XLOC_003738 | ANKRD42      | chr11:82905290-82960013   | 0.385463   | 0.444722   | 0.206313 | 0.902834 |
| XLOC_000214 | NUDC         | chr1:27248212-27273362    | 410.727    | 473.893    | 0.206383 | 0.726595 |
| XLOC_007185 | EIF3J        | chr15:44829265-44955876   | 16.043     | 18.511     | 0.206438 | 0.824372 |
| XLOC_013036 | LOC654342    | chr2:91824708-91847975    | 10.6945    | 12.3402    | 0.206504 | 0.828851 |
| XLOC_016567 | KLHL2        | chr4:166128769-166244308  | 2.24897    | 2.59531    | 0.20664  | 0.804051 |
| XLOC_008823 | EIF4A1,SENP3 | chr17:7465308-7482324     | 877.861    | 1013.1     | 0.206705 | 0.754905 |
| XLOC_000815 | NHLH1        | chr1:160336860-160342638  | 0.0296385  | 0.0342046  | 0.206715 | 1        |
| XLOC_001486 | CITED4       | chr1:41326727-41328018    | 90.605     | 104.573    | 0.206851 | 0.732699 |
| XLOC_013430 | HJURP        | chr2:234745485-234763212  | 15.0256    | 17.3422    | 0.206861 | 0.720363 |
| XLOC_000278 | NCDN         | chr1:36023392-36032380    | 10.3949    | 11.9978    | 0.206894 | 0.733168 |
| XLOC_013581 | PSIMCT-1     | chr20:30102240-30161066   | 1.25241    | 1.4456     | 0.206957 | 0.984547 |
| XLOC_007598 | NEDD4        | chr15:56119121-56285835   | 1.59167    | 1.83722    | 0.206986 | 0.776524 |
| XLOC_002774 | VENTX        | chr10:135051407-135055433 | 0.00940025 | 0.0108505  | 0.20699  | 1        |
| XLOC_000456 | ZRANB2-AS1   | chr1:71318035-71546972    | 0.0143051  | 0.0165133  | 0.207099 | 1        |
| XLOC_009833 | PHB          | chr17:47481419-47492242   | 165.735    | 191.32     | 0.207106 | 0.70878  |
| XLOC_009210 | C17orf64     | chr17:58499864-58508787   | 0.0299039  | 0.0345214  | 0.207157 | 1        |



|             |              |                           |           |           |          |          |
|-------------|--------------|---------------------------|-----------|-----------|----------|----------|
| XLOC_013463 | PASK         | chr2:242045513-242089394  | 2.0233    | 2.33586   | 0.207244 | 0.799656 |
| XLOC_017656 | MCIN         | chr5:54515424-54523143    | 1.7137    | 1.97851   | 0.207301 | 0.874955 |
| XLOC_004338 | YIF1A        | chr11:66052050-66056638   | 66.3632   | 76.6184   | 0.207308 | 0.722516 |
| XLOC_013554 | C20orf26     | chr20:20015011-20341346   | 0.0215771 | 0.0249121 | 0.207344 | 1        |
| XLOC_007937 | NUBP1        | chr16:10837697-10912621   | 14.5945   | 16.852    | 0.207496 | 0.754905 |
| XLOC_002375 | MLLT10       | chr10:21823100-22032559   | 8.37279   | 9.66839   | 0.207567 | 0.876609 |
| XLOC_008464 | SLC7A5P2     | chr16:21529229-21531765   | 0.348429  | 0.402364  | 0.207636 | 0.925922 |
| XLOC_009314 | SYNGR2       | chr17:76164670-76169009   | 91.7368   | 105.939   | 0.207658 | 0.700954 |
| XLOC_018575 | TULP4        | chr6:158733691-158932856  | 1.4659    | 1.69287   | 0.207684 | 0.765267 |
| XLOC_018299 | GLTSCR1L     | chr6:42788793-42836296    | 0.637526  | 0.736331  | 0.20787  | 0.838902 |
| XLOC_017995 | C5orf60      | chr5:179068557-179072047  | 0.0178764 | 0.0206477 | 0.207929 | 1        |
| XLOC_002559 | BMPR1A       | chr10:88516395-88684945   | 2.76167   | 3.19027   | 0.208138 | 0.776316 |
| XLOC_008266 | KIAA0513     | chr16:85061409-85127828   | 0.660341  | 0.762838  | 0.208164 | 0.838532 |
| XLOC_014252 | ATP5J        | chr21:27096790-27144771   | 151.61    | 175.147   | 0.208199 | 0.758847 |
| XLOC_004825 | TUBA1C       | chr12:49658864-49667113   | 450.586   | 520.588   | 0.208341 | 0.725721 |
| XLOC_011843 | IRF3         | chr19:50162825-50177173   | 57.0995   | 65.9751   | 0.208443 | 0.81727  |
| XLOC_022839 | SLC25A51     | chr9:37877571-37904350    | 2.95516   | 3.41455   | 0.208455 | 0.852718 |
| XLOC_008347 | MSRB1        | chr16:1988233-1993294     | 23.5014   | 27.1556   | 0.208501 | 0.736635 |
| XLOC_018577 | SYTL3        | chr6:159071045-159185908  | 0.652271  | 0.753716  | 0.208549 | 0.891976 |
| XLOC_015367 | MRPS22       | chr3:139062860-139075887  | 39.5978   | 45.7566   | 0.20856  | 0.712027 |
| XLOC_012843 | ZNF513       | chr2:27593362-27603611    | 9.39657   | 10.8588   | 0.208655 | 0.945887 |
| XLOC_007729 | MESDC2       | chr15:81268094-81282205   | 7.09966   | 8.20447   | 0.208659 | 0.716797 |
| XLOC_003153 | PDZD8        | chr10:119042605-119134937 | 1.73293   | 2.00259   | 0.208659 | 0.81727  |
| XLOC_004946 | PIP4K2C      | chr12:57984941-57997211   | 10.2486   | 11.8438   | 0.20871  | 0.7251   |
| XLOC_014591 | C22orf46     | chr22:42086546-42094140   | 1.64222   | 1.89786   | 0.208721 | 0.786222 |
| XLOC_014808 | RAC2         | chr22:37621309-37640305   | 9.1648    | 10.5915   | 0.208735 | 0.791418 |
| XLOC_016265 | ANAPC4       | chr4:25378847-25420120    | 5.37452   | 6.21125   | 0.20875  | 0.756508 |
| XLOC_016091 | MAGEF1       | chr3:184428154-184429836  | 33.799    | 39.0634   | 0.208836 | 0.719384 |
| XLOC_000409 | ACOT11       | chr1:55013806-55100417    | 0.239725  | 0.277065  | 0.208846 | 1        |
| XLOC_017463 | MAT2B        | chr5:162930069-162946359  | 18.6196   | 21.5211   | 0.208932 | 0.710272 |
| XLOC_021343 | LOC100129148 | chr7:139025104-139112272  | 1.85327   | 2.14206   | 0.208932 | 0.984445 |
| XLOC_003617 | SCYL1        | chr11:65292547-65325699   | 39.1312   | 45.2309   | 0.208989 | 0.753604 |
| XLOC_009861 | MRPS23       | chr17:55916286-55927433   | 37.3654   | 43.19     | 0.208992 | 0.704317 |
| XLOC_001400 | TMEM200B     | chr1:29213602-29450421    | 5.76571   | 6.66515   | 0.209139 | 0.885767 |
| XLOC_021734 | FAM83A       | chr8:124194751-124222318  | 0.0352613 | 0.0407623 | 0.209147 | 1        |
| XLOC_010050 | NOTUM        | chr17:79910382-79919057   | 4.70923   | 5.44405   | 0.20919  | 0.828851 |
| XLOC_003591 | ESRRA        | chr11:64073043-64085033   | 58.3615   | 67.4838   | 0.209524 | 0.872122 |
| XLOC_004927 | NABP2        | chr12:56618124-56623638   | 51.5505   | 59.6089   | 0.209541 | 0.704317 |
| XLOC_001290 | AGMAT        | chr1:15853351-15911605    | 7.70593   | 8.91068   | 0.209566 | 0.818092 |
| XLOC_020766 | BPGM         | chr7:134331530-134364567  | 3.65096   | 4.22198   | 0.209643 | 0.806275 |
| XLOC_001511 | HECTD3       | chr1:45468219-45477027    | 9.85772   | 11.3996   | 0.209654 | 0.720363 |
| XLOC_024111 | RBMX         | chrX:135951352-135962939  | 147.85    | 170.976   | 0.209663 | 0.711195 |
| XLOC_001332 | DDOST        | chr1:20978259-20988037    | 159.032   | 183.91    | 0.209679 | 0.709934 |
| XLOC_010751 | PDCD5        | chr19:33072093-33078358   | 178.22    | 206.103   | 0.209708 | 0.699003 |
| XLOC_014607 | TSPO         | chr22:43547519-43559248   | 417.094   | 482.387   | 0.209818 | 0.699755 |
| XLOC_012669 | STK11IP      | chr2:220462595-220481173  | 2.24685   | 2.59859   | 0.209822 | 0.813283 |
| XLOC_004870 | C12orf10     | chr12:53693469-53700965   | 43.2679   | 50.0436   | 0.209888 | 0.720235 |
| XLOC_022417 | DAPK1        | chr9:90112755-90323549    | 2.53914   | 2.93716   | 0.210082 | 0.76395  |
| XLOC_015650 | HIGD1A       | chr3:42824399-42846027    | 14.7587   | 17.0738   | 0.21022  | 0.70639  |

|             |               |                           |            |            |          |          |
|-------------|---------------|---------------------------|------------|------------|----------|----------|
| XLOC_011611 | NFKBID        | chr19:36379142-36391552   | 2.25202    | 2.6053     | 0.210228 | 0.8626   |
| XLOC_010612 | ASNA1         | chr19:12848305-12859137   | 93.8045    | 108.521    | 0.210248 | 0.700356 |
| XLOC_008697 | SLC38A8       | chr16:84043388-84075762   | 0.0494566  | 0.0572161  | 0.210257 | 1        |
| XLOC_013491 | NOP56         | chr20:2633177-2639039     | 72.5514    | 83.9481    | 0.210494 | 0.692701 |
| XLOC_022838 | EXOSC3        | chr9:37779710-37785089    | 18.0236    | 20.8549    | 0.2105   | 0.722876 |
| XLOC_010841 | MRPS12        | chr19:39405903-39423659   | 118.981    | 137.687    | 0.210666 | 0.761496 |
| XLOC_020629 | CPSF4         | chr7:99006600-99063824    | 61.4794    | 71.1511    | 0.210783 | 0.914837 |
| XLOC_011747 | ZNF296        | chr19:45574757-45579688   | 21.6557    | 25.0639    | 0.210865 | 0.755421 |
| XLOC_005765 | VPS37B        | chr12:123349874-123380712 | 45.5695    | 52.7465    | 0.211007 | 0.699464 |
| XLOC_022533 | DAB2IP        | chr9:124329398-124547809  | 5.98422    | 6.92678    | 0.211022 | 0.727839 |
| XLOC_016705 | RELL1         | chr4:37455551-37687999    | 5.56151    | 6.43763    | 0.211054 | 0.735654 |
| XLOC_002023 | PIGC          | chr1:172389827-172437969  | 10.8741    | 12.5874    | 0.211086 | 0.744765 |
| XLOC_022157 | DERL1         | chr8:124025403-124054663  | 28.5851    | 33.0901    | 0.211137 | 0.699003 |
| XLOC_015120 | MAPKAPK3      | chr3:50649292-50686728    | 69.2958    | 80.23      | 0.211375 | 0.701115 |
| XLOC_008429 | PARN          | chr16:14529556-14724128   | 9.44039    | 10.9313    | 0.211549 | 0.720363 |
| XLOC_000309 | ZFP69         | chr1:40943301-40962015    | 1.65413    | 1.91563    | 0.211753 | 0.835594 |
| XLOC_009229 | PSMC5         | chr17:61896792-61909387   | 85.9654    | 99.5562    | 0.211756 | 0.779834 |
| XLOC_000184 | NIPAL3        | chr1:24742244-24799473    | 6.41117    | 7.42528    | 0.211857 | 0.711465 |
| XLOC_020397 | RPS2P32       | chr7:23530006-23531031    | 0.038928   | 0.0450878  | 0.211931 | 1        |
| XLOC_009185 | DGKE          | chr17:54911459-54946036   | 1.93775    | 2.24454    | 0.212036 | 0.76165  |
| XLOC_002225 | MRPL55        | chr1:228294379-228297013  | 67.9595    | 78.7471    | 0.212553 | 0.727839 |
| XLOC_010863 | MAP3K10       | chr19:40697650-40721482   | 8.7        | 10.0811    | 0.21257  | 0.752397 |
| XLOC_000232 | RCC1          | chr1:28832454-28865708    | 106.633    | 123.578    | 0.212758 | 0.715378 |
| XLOC_015002 | CNOT10        | chr3:32726636-32815367    | 13.2895    | 15.4019    | 0.212824 | 0.705198 |
| XLOC_012366 | SH3RF3        | chr2:109743783-110262207  | 0.880077   | 1.02       | 0.212864 | 0.845191 |
| XLOC_008720 | CYBA          | chr16:88709696-88717492   | 365.899    | 424.089    | 0.212923 | 0.690491 |
| XLOC_010852 | TIMM50        | chr19:39971051-39981528   | 53.0352    | 61.4701    | 0.212934 | 0.685355 |
| XLOC_014196 | LINC00319     | chr21:44869903-44873771   | 0.0120115  | 0.013922   | 0.21295  | 1        |
| XLOC_021655 | CA13          | chr8:86157715-86196302    | 4.47107    | 5.18291    | 0.213143 | 0.744778 |
| XLOC_001065 | BROX          | chr1:222885905-222906106  | 1.04358    | 1.20976    | 0.213172 | 0.87763  |
| XLOC_021399 | TMUB1         | chr7:150778171-150780620  | 132.895    | 154.084    | 0.213427 | 0.692798 |
| XLOC_001419 | PTP4A2        | chr1:32372021-32403988    | 44.2137    | 51.2692    | 0.213599 | 0.699755 |
| XLOC_022238 | TMEM249       | chr8:145576885-145578574  | 1.39377    | 1.61619    | 0.213603 | 0.916694 |
| XLOC_014693 | KLHL22        | chr22:20795805-20850170   | 7.49686    | 8.69322    | 0.213604 | 0.756508 |
| XLOC_023844 | TIMM17B       | chrX:48750729-48760422    | 105.616    | 122.472    | 0.21363  | 0.824392 |
| XLOC_014593 | CCDC134       | chr22:42196677-42222303   | 4.05031    | 4.6968     | 0.213646 | 0.839471 |
| XLOC_020893 | ADAP1         | chr7:937536-994289        | 18.6007    | 21.5703    | 0.213689 | 0.726353 |
| XLOC_021048 | NACAD         | chr7:45120035-45128493    | 0.00439744 | 0.00509958 | 0.213714 | 1        |
| XLOC_000385 | FOXO2         | chr1:47901688-47906363    | 1.59308    | 1.84745    | 0.213717 | 0.840956 |
| XLOC_010440 | WDR18         | chr19:984327-994569       | 84.4998    | 97.9923    | 0.213721 | 0.698989 |
| XLOC_006963 | SNHG10        | chr14:95999248-96001209   | 5.7386     | 6.65497    | 0.213734 | 0.824372 |
| XLOC_013827 | FASTKD5,UBOX5 | chr20:3087556-3140556     | 10.941     | 12.6889    | 0.213816 | 0.700208 |
| XLOC_014554 | POLR2F        | chr22:38339056-38365319   | 34.9316    | 40.5146    | 0.213908 | 0.729463 |
| XLOC_017677 | CENPK         | chr5:64813592-64858995    | 2.55473    | 2.96305    | 0.213911 | 0.828968 |
| XLOC_007946 | ERCC4         | chr16:14014013-14046205   | 0.61197    | 0.709807   | 0.213967 | 0.828851 |
| XLOC_001432 | TRIM62        | chr1:33611002-33647671    | 2.92955    | 3.39794    | 0.213984 | 0.795912 |
| XLOC_005240 | MRPL51        | chr12:6601315-6602471     | 201.445    | 233.681    | 0.214156 | 0.692701 |
| XLOC_000217 | TMEM222       | chr1:27648635-27662891    | 33.9151    | 39.3428    | 0.214172 | 0.707665 |
| XLOC_008492 | TUFM          | chr16:28853731-28857729   | 317.852    | 368.741    | 0.214253 | 0.70174  |

|             |           |                           |           |           |          |          |
|-------------|-----------|---------------------------|-----------|-----------|----------|----------|
| XLOC_015098 | P4HTM     | chr3:49027340-49044581    | 16.2133   | 18.8094   | 0.214273 | 0.730925 |
| XLOC_023748 | HDHD1     | chrX:6966960-7066231      | 13.2358   | 15.3552   | 0.214276 | 0.715444 |
| XLOC_010541 | TRAPPC5   | chr19:7745706-7747748     | 205.204   | 238.087   | 0.214428 | 0.703707 |
| XLOC_011359 | CD70      | chr19:6585849-6591163     | 0.0329052 | 0.0381781 | 0.214431 | 1        |
| XLOC_001490 | HIVEP3    | chr1:41972035-42501596    | 0.218803  | 0.253883  | 0.214528 | 1        |
| XLOC_017566 | MED10     | chr5:6372038-6378639      | 50.3699   | 58.4478   | 0.214586 | 0.695914 |
| XLOC_005436 | MCRS1     | chr12:49952085-49961911   | 30.2594   | 35.1127   | 0.214609 | 0.698498 |
| XLOC_023107 | DOLK      | chr9:131707808-131769375  | 18.2652   | 21.1956   | 0.214669 | 0.931682 |
| XLOC_018086 | LRRC16A   | chr6:25279655-25620758    | 1.48005   | 1.71751   | 0.214671 | 0.780958 |
| XLOC_017102 | BRIX1     | chr5:34915819-34925787    | 32.7445   | 38.0011   | 0.214785 | 0.700524 |
| XLOC_003001 | AGAP5     | chr10:75434032-75457554   | 0.682863  | 0.792491  | 0.214799 | 0.880021 |
| XLOC_024182 | NAA10     | chrX:153195279-153200607  | 135.307   | 157.034   | 0.21484  | 0.699342 |
| XLOC_011808 | LMTK3     | chr19:48988527-49016446   | 0.530333  | 0.615549  | 0.214976 | 0.890806 |
| XLOC_005906 | WDFY2     | chr13:52158483-52336171   | 3.82831   | 4.4437    | 0.215051 | 0.752311 |
| XLOC_002422 | ZNF32-AS1 | chr10:44124264-44170147   | 18.4276   | 21.3901   | 0.215076 | 0.935437 |
| XLOC_015053 | SNRK      | chr3:43328003-43393454    | 0.466741  | 0.541784  | 0.215096 | 0.87763  |
| XLOC_021976 | PLAT      | chr8:42032235-42065194    | 0.785413  | 0.911735  | 0.215162 | 0.87179  |
| XLOC_000340 | IPO13     | chr1:44412477-44433694    | 5.61135   | 6.51416   | 0.21523  | 0.733529 |
| XLOC_022664 | EGFL7     | chr9:139553307-139567130  | 192.907   | 223.95    | 0.215273 | 0.687264 |
| XLOC_011555 | ATP13A1   | chr19:19756009-19774503   | 22.7176   | 26.3767   | 0.215453 | 0.692155 |
| XLOC_021041 | DDX56     | chr7:44605015-44614137    | 37.6258   | 43.6879   | 0.215511 | 0.695374 |
| XLOC_017955 | NKX2-5    | chr5:172659106-172662315  | 22.856    | 26.54     | 0.2156   | 0.748812 |
| XLOC_020769 | TMEM140   | chr7:134832765-134855578  | 0.601809  | 0.698813  | 0.215601 | 0.973099 |
| XLOC_013795 | LINC00176 | chr20:62665696-62671315   | 0.392176  | 0.455407  | 0.215656 | 0.881798 |
| XLOC_007906 | ZNF213    | chr16:3185056-3192805     | 8.24025   | 9.56945   | 0.215747 | 0.740791 |
| XLOC_022677 | C8G       | chr9:139839697-139841426  | 0.331009  | 0.384411  | 0.215777 | 0.960683 |
| XLOC_011678 | C19orf47  | chr19:40826966-40884390   | 7.83848   | 9.10361   | 0.215865 | 0.930948 |
| XLOC_001774 | PRKAB2    | chr1:146626684-146644129  | 2.90411   | 3.37294   | 0.215907 | 0.740552 |
| XLOC_016960 | SH3D19    | chr4:152041432-152149182  | 3.57085   | 4.14757   | 0.216    | 0.736305 |
| XLOC_002271 | FH        | chr1:241660856-241683085  | 49.3909   | 57.3715   | 0.216088 | 0.688049 |
| XLOC_023158 | NACC2     | chr9:138898382-138987131  | 7.95634   | 9.24199   | 0.216098 | 0.703945 |
| XLOC_011266 | PRSS57    | chr19:685545-695461       | 0.119065  | 0.138307  | 0.216125 | 1        |
| XLOC_004986 | RAB3IP    | chr12:70132630-70216984   | 3.15519   | 3.66515   | 0.216145 | 0.700356 |
| XLOC_018907 | TNFRSF21  | chr6:47199267-47277680    | 3.37287   | 3.91831   | 0.216256 | 0.759934 |
| XLOC_000955 | C1orf53   | chr1:197871681-197876497  | 1.92564   | 2.23712   | 0.216306 | 0.914505 |
| XLOC_001353 | GALE      | chr1:24122088-24127294    | 86.4815   | 100.471   | 0.216319 | 0.686965 |
| XLOC_022971 | TRIM14    | chr9:100818958-100881488  | 10.4374   | 12.1259   | 0.216328 | 0.883608 |
| XLOC_003785 | KIAA1377  | chr11:101761404-101871793 | 0.0860953 | 0.100027  | 0.216386 | 1        |
| XLOC_002846 | DNAJC1    | chr10:22045476-22292650   | 6.62771   | 7.70123   | 0.21658  | 0.756807 |
| XLOC_003435 | ATG13     | chr11:46638825-46697568   | 10.719    | 12.4553   | 0.216591 | 0.691509 |
| XLOC_007978 | LYRM1     | chr16:20869395-20936328   | 13.3939   | 15.5637   | 0.216611 | 0.765759 |
| XLOC_004683 | GNB3      | chr12:6949374-6956557     | 1.86962   | 2.17254   | 0.216638 | 0.85718  |
| XLOC_018435 | LACE1     | chr6:108616097-108844251  | 0.955983  | 1.11088   | 0.216643 | 0.863994 |
| XLOC_023323 | PRRG1     | chrX:37208527-37316548    | 1.9343    | 2.24772   | 0.216652 | 0.828968 |
| XLOC_002176 | BATF3     | chr1:212859758-212873327  | 24.2194   | 28.1445   | 0.21669  | 0.745547 |
| XLOC_002820 | SEPHS1    | chr10:13359437-13390298   | 21.4612   | 24.9397   | 0.216717 | 0.684432 |
| XLOC_014493 | EWSR1     | chr22:29663997-29696515   | 106.516   | 123.784   | 0.216747 | 0.689772 |
| XLOC_010225 | TNFRSF11A | chr18:59992519-60054943   | 0.80412   | 0.934517  | 0.21681  | 0.841788 |
| XLOC_008423 | TXNDC11   | chr16:11762288-11836648   | 8.00209   | 9.29975   | 0.216815 | 0.822744 |

|             |               |                          |          |          |          |          |
|-------------|---------------|--------------------------|----------|----------|----------|----------|
| XLOC_011362 | GPR108        | chr19:6729924-6737633    | 36.1813  | 42.0502  | 0.216869 | 0.688983 |
| XLOC_013803 | TBC1D20       | chr20:416123-443187      | 10.7017  | 12.4377  | 0.216873 | 0.696463 |
| XLOC_003726 | ACER3         | chr11:76571916-76734850  | 1.12581  | 1.30849  | 0.216941 | 0.808127 |
| XLOC_011218 | ZNF460        | chr19:57791852-57805436  | 0.362287 | 0.421121 | 0.217102 | 0.881798 |
| XLOC_001614 | PIGK          | chr1:77554666-77685132   | 2.99338  | 3.47953  | 0.217119 | 0.738519 |
| XLOC_004991 | TMEM19        | chr12:72079877-72097839  | 2.49922  | 2.90534  | 0.217226 | 0.756518 |
| XLOC_013571 | GINS1         | chr20:25388322-25429191  | 6.82171  | 7.93022  | 0.217228 | 0.708849 |
| XLOC_023018 | FAM225B       | chr9:115867002-115873957 | 0.367719 | 0.427497 | 0.217311 | 0.865084 |
| XLOC_005257 | C1RL          | chr12:7247145-7274447    | 4.76681  | 5.54179  | 0.217328 | 0.759742 |
| XLOC_010303 | ABHD3         | chr18:19230857-19284766  | 4.19649  | 4.87879  | 0.21734  | 0.773721 |
| XLOC_012782 | ADAM17        | chr2:9629410-9695917     | 3.27194  | 3.80403  | 0.217382 | 0.747378 |
| XLOC_023781 | SH3KBP1       | chrX:19552082-19905744   | 5.6897   | 6.61564  | 0.21753  | 0.71651  |
| XLOC_013504 | ITPA          | chr20:3189513-3204516    | 72.9224  | 84.7912  | 0.217552 | 0.702001 |
| XLOC_004074 | EIF4G2        | chr11:10818592-10830582  | 97.8339  | 113.762  | 0.217612 | 0.704135 |
| XLOC_012788 | NOL10         | chr2:10710891-10830113   | 6.36293  | 7.39904  | 0.217647 | 0.713886 |
| XLOC_008487 | CLN3          | chr16:28488599-28503623  | 23.0361  | 26.7879  | 0.217681 | 0.708142 |
| XLOC_021569 | AGPAT6        | chr8:41435706-41482520   | 14.8137  | 17.2263  | 0.217686 | 0.686247 |
| XLOC_012007 | ZNF497        | chr19:58858171-58874214  | 1.79993  | 2.0932   | 0.21777  | 0.845932 |
| XLOC_002864 | MPP7          | chr10:28339922-28571067  | 0.135293 | 0.157353 | 0.217916 | 1        |
| XLOC_002491 | KIAA1279      | chr10:70748476-70776739  | 5.95312  | 6.92379  | 0.217917 | 0.739148 |
| XLOC_013512 | SFOX          | chr20:4129425-4168394    | 18.0001  | 20.9355  | 0.21795  | 0.710992 |
| XLOC_001239 | ACOT7         | chr1:6324331-6453826     | 104.025  | 120.999  | 0.218067 | 0.680951 |
| XLOC_008650 | EXOSC6        | chr16:70284133-70285833  | 27.317   | 31.775   | 0.218097 | 0.72151  |
| XLOC_018779 | NELFE         | chr6:31919863-31937532   | 74.9311  | 87.164   | 0.218167 | 0.739148 |
| XLOC_016649 | STX18         | chr4:4387982-4543775     | 15.0164  | 17.4681  | 0.218183 | 0.703707 |
| XLOC_001694 | PSMA5         | chr1:109941652-109969108 | 29.4888  | 34.307   | 0.218335 | 0.683545 |
| XLOC_012030 | LOC100506054  | chr2:3605975-3609340     | 6.67759  | 7.76918  | 0.218435 | 0.809647 |
| XLOC_014863 | RRP7A         | chr22:42896584-42915829  | 25.1916  | 29.3104  | 0.218469 | 0.687824 |
| XLOC_000744 | CKS1B         | chr1:154947117-154951725 | 152.141  | 177.016  | 0.218471 | 0.680951 |
| XLOC_001142 | KIF26B        | chr1:245318286-245866428 | 0.246758 | 0.287108 | 0.2185   | 1        |
| XLOC_008244 | CENPN         | chr16:81009698-81066709  | 16.8313  | 19.584   | 0.218528 | 0.855739 |
| XLOC_017752 | FLJ35946      | chr5:98104998-98132198   | 0.251714 | 0.292889 | 0.218569 | 1        |
| XLOC_007718 | WDR61         | chr15:78575577-78591940  | 25.3624  | 29.5134  | 0.21868  | 0.702993 |
| XLOC_009259 | C17orf80      | chr17:71228775-71258019  | 2.78934  | 3.24614  | 0.218805 | 0.763906 |
| XLOC_011501 | WIZ           | chr19:15532317-15560762  | 15.7022  | 18.2738  | 0.218814 | 0.681002 |
| XLOC_024194 | SLC10A3       | chrX:153715649-153719002 | 29.2692  | 34.0655  | 0.218931 | 0.694378 |
| XLOC_010715 | NDUFA13       | chr19:19627018-19639013  | 556.228  | 647.49   | 0.219181 | 0.677719 |
| XLOC_003644 | DPP3          | chr11:66247483-66277130  | 15.0868  | 17.5622  | 0.21919  | 0.703975 |
| XLOC_000492 | HS2ST1        | chr1:87380334-87575681   | 3.78961  | 4.41142  | 0.219193 | 0.764456 |
| XLOC_009405 | P2RX5,TAX1BP3 | chr17:3539761-3599698    | 91.2549  | 106.232  | 0.219238 | 0.804694 |
| XLOC_016464 | GAR1          | chr4:110736665-110745893 | 46.5491  | 54.1954  | 0.219416 | 0.687824 |
| XLOC_003577 | NAA40         | chr11:63706441-63724446  | 4.59211  | 5.34666  | 0.21948  | 0.742954 |
| XLOC_021109 | ABHD11        | chr7:73150424-73153190   | 17.2778  | 20.1187  | 0.219617 | 0.733086 |
| XLOC_009069 | ATP6V0A1      | chr17:40610861-40674597  | 9.92664  | 11.5601  | 0.219772 | 0.696463 |
| XLOC_009172 | LUC7L3        | chr17:48796925-48830072  | 18.5082  | 21.5547  | 0.219832 | 0.724344 |
| XLOC_016424 | HERC6         | chr4:89299890-89364249   | 2.68724  | 3.13011  | 0.220089 | 0.754724 |
| XLOC_013707 | DDX27         | chr20:47835831-47860614  | 11.8097  | 13.7565  | 0.220144 | 0.699559 |
| XLOC_014611 | SAMM50        | chr22:44351260-44392412  | 21.9948  | 25.6233  | 0.220292 | 0.697809 |
| XLOC_022458 | ERCC6L2       | chr9:98568369-98731122   | 0.383027 | 0.446218 | 0.2203   | 0.923897 |

|             |                 |                          |           |           |          |          |
|-------------|-----------------|--------------------------|-----------|-----------|----------|----------|
| XLOC_004977 | NUP107          | chr12:69080730-69136473  | 14.8163   | 17.2612   | 0.22034  | 0.690491 |
| XLOC_011321 | ZBTB7A          | chr19:4045215-4066816    | 8.15139   | 9.49658   | 0.220361 | 0.713126 |
| XLOC_021696 | SPAG1           | chr8:101170262-101254132 | 3.82915   | 4.46122   | 0.220416 | 0.731905 |
| XLOC_008493 | LOC100289092    | chr16:28889808-28936532  | 6.94475   | 8.09133   | 0.220455 | 0.968157 |
| XLOC_007391 | FANCI           | chr15:89787193-89878026  | 6.09897   | 7.10603   | 0.220477 | 0.844936 |
| XLOC_022168 | MTSS1           | chr8:125563027-125740730 | 1.8049    | 2.10294   | 0.220492 | 0.776524 |
| XLOC_017145 | NDUFAF2         | chr5:60240955-60448864   | 97.9597   | 114.145   | 0.22061  | 0.679486 |
| XLOC_009845 | LRRCS59         | chr17:48450580-48474914  | 41.9144   | 48.8403   | 0.220628 | 0.684382 |
| XLOC_022957 | SLC35D2         | chr9:99082987-99145992   | 24.6592   | 28.7339   | 0.220631 | 0.693574 |
| XLOC_018581 | ACAT2           | chr6:160181290-160210735 | 11.0316   | 12.8553   | 0.22073  | 0.955832 |
| XLOC_011291 | AP3D1           | chr19:2100986-2151556    | 14.7942   | 17.2403   | 0.22075  | 0.68158  |
| XLOC_013569 | ENTPD6          | chr20:25176338-25207360  | 32.5778   | 37.9645   | 0.220761 | 0.673957 |
| XLOC_013836 | SPEF1           | chr20:3758150-3762102    | 0.181557  | 0.211577  | 0.220761 | 1        |
| XLOC_020546 | LIMK1           | chr7:73498106-73536855   | 18.243    | 21.2639   | 0.221069 | 0.693477 |
| XLOC_012646 | RQCD1           | chr2:219433302-219461158 | 17.8222   | 20.7753   | 0.221191 | 0.689772 |
| XLOC_017178 | MCCC2           | chr5:70883114-70954530   | 21.6744   | 25.2703   | 0.22145  | 0.672291 |
| XLOC_008054 | PRR14           | chr16:30662240-30667734  | 26.0845   | 30.4134   | 0.221512 | 0.693923 |
| XLOC_008946 | TRAF4           | chr17:27071022-27077976  | 19.0827   | 22.2527   | 0.221712 | 0.688049 |
| XLOC_010792 | RBM42           | chr19:36119979-36128587  | 56.3699   | 65.7382   | 0.221807 | 0.688872 |
| XLOC_018789 | AGER            | chr6:32148744-32152099   | 1.66431   | 1.94115   | 0.221991 | 0.849166 |
| XLOC_015317 | SEC61A1         | chr3:127771211-127790526 | 76.8821   | 89.6738   | 0.222038 | 0.673917 |
| XLOC_006123 | RCBTB1          | chr13:50106081-50159719  | 4.32543   | 5.04537   | 0.222117 | 0.722814 |
| XLOC_015558 | SETD5-AS1       | chr3:9430536-9439174     | 3.53652   | 4.12533   | 0.222178 | 0.788779 |
| XLOC_012839 | UCN             | chr2:27505296-27531130   | 2.49476   | 2.91017   | 0.222205 | 0.932026 |
| XLOC_013806 | SRXN1           | chr20:627267-634014      | 41.9246   | 48.9105   | 0.222349 | 0.673957 |
| XLOC_007755 | WDR73           | chr15:85186011-85197521  | 11.2972   | 13.1811   | 0.222508 | 0.708873 |
| XLOC_013658 | TOP1            | chr20:39657461-39753126  | 18.8651   | 22.0118   | 0.222552 | 0.673323 |
| XLOC_004305 | SF1             | chr11:64532075-64546316  | 78.5086   | 91.6094   | 0.222646 | 0.684483 |
| XLOC_012990 | RTKN            | chr2:74652987-74669060   | 18.5654   | 21.6642   | 0.222693 | 0.692203 |
| XLOC_008310 | POLR3K          | chr16:96978-103632       | 34.9577   | 40.7925   | 0.222694 | 0.706481 |
| XLOC_001892 | RUSC1-AS1       | chr1:155278538-155300909 | 8.62484   | 10.0647   | 0.222738 | 0.964843 |
| XLOC_010498 | FSD1            | chr19:4304590-4323843    | 0.012251  | 0.0142983 | 0.22295  | 1        |
| XLOC_003735 | C11orf82        | chr11:82612736-82645699  | 1.7766    | 2.07352   | 0.222961 | 0.784296 |
| XLOC_010210 | WDR7            | chr18:54318615-54697036  | 0.644442  | 0.752148  | 0.222967 | 0.805491 |
| XLOC_007914 | NAA60           | chr16:3493667-3536963    | 20.1228   | 23.4864   | 0.222997 | 0.691558 |
| XLOC_007687 | EDC3            | chr15:74922898-74988386  | 9.66687   | 11.2836   | 0.22311  | 0.688291 |
| XLOC_007860 | NDUFB10         | chr16:2009516-2011976    | 118.853   | 138.734   | 0.223134 | 0.676491 |
| XLOC_013940 | EDEM2           | chr20:33703159-33735161  | 9.69648   | 11.3192   | 0.223241 | 0.723463 |
| XLOC_011270 | TMEM259         | chr19:1000436-1021141    | 71.7687   | 83.7826   | 0.223295 | 0.668626 |
| XLOC_022558 | WDR38           | chr9:127615695-127624240 | 0.0184575 | 0.0215474 | 0.223305 | 1        |
| XLOC_004749 | C12orf60        | chr12:14956505-14976791  | 1.16239   | 1.35727   | 0.223621 | 0.879418 |
| XLOC_021391 | ACTR3C          | chr7:149944300-150035245 | 0.658794  | 0.76939   | 0.223887 | 0.982866 |
| XLOC_000760 | RUSC1           | chr1:155278538-155300909 | 26.3019   | 30.7214   | 0.22408  | 0.884488 |
| XLOC_022774 | C9orf72         | chr9:27546542-27573864   | 3.9428    | 4.60548   | 0.224132 | 0.746108 |
| XLOC_020408 | HOTAIRM1        | chr7:27135712-27139877   | 14.711    | 17.184    | 0.224168 | 0.769834 |
| XLOC_009147 | CALCOCO2        | chr17:46908349-46942607  | 12.5577   | 14.6689   | 0.224189 | 0.681478 |
| XLOC_006282 | BCL2L2,BCL2L2-f | chr14:23775970-23795394  | 120.681   | 140.971   | 0.224206 | 0.689317 |
| XLOC_021304 | PRRT4           | chr7:127990378-128001739 | 12.699    | 14.8347   | 0.224265 | 0.722602 |
| XLOC_009326 | SLC26A11        | chr17:78194199-78227308  | 6.34026   | 7.40671   | 0.224291 | 0.757949 |

|             |            |                           |           |           |          |          |
|-------------|------------|---------------------------|-----------|-----------|----------|----------|
| XLOC_002084 | UCHL5      | chr1:192981495-193060906  | 10.7908   | 12.6075   | 0.224491 | 0.804859 |
| XLOC_009108 | DBF4B      | chr17:42785975-42829636   | 5.57091   | 6.50914   | 0.224554 | 0.736579 |
| XLOC_023252 | TBL1X      | chrX:9431334-9687780      | 4.76101   | 5.56302   | 0.224602 | 0.703707 |
| XLOC_010806 | SDHAF1     | chr19:36486089-36487220   | 29.9576   | 35.005    | 0.224638 | 0.722053 |
| XLOC_005274 | M6PR       | chr12:9067315-9102357     | 67.8255   | 79.2605   | 0.224774 | 0.704283 |
| XLOC_006702 | METTL3     | chr14:21945334-21979457   | 11.7161   | 13.6917   | 0.224811 | 0.870725 |
| XLOC_009319 | C1QTNF1    | chr17:77015290-77045870   | 12.4281   | 14.5241   | 0.224846 | 0.699003 |
| XLOC_007347 | MESDC1     | chr15:81293294-81296345   | 16.3123   | 19.0664   | 0.22507  | 0.705408 |
| XLOC_001067 | DISP1      | chr1:222988430-223179337  | 0.19368   | 0.226396  | 0.225175 | 1        |
| XLOC_017286 | SNCAIP     | chr5:121647819-121814782  | 0.463171  | 0.541458  | 0.225303 | 0.879418 |
| XLOC_009464 | FXR2       | chr17:7494547-7536700     | 43.5368   | 50.8984   | 0.225385 | 0.772942 |
| XLOC_021174 | SLC25A13   | chr7:95749531-95951459    | 4.52306   | 5.2879    | 0.225396 | 0.728753 |
| XLOC_010512 | SAFB       | chr19:5623045-5668489     | 34.3244   | 40.1324   | 0.225534 | 0.66669  |
| XLOC_014320 | HLCS       | chr21:38123188-38362545   | 3.10147   | 3.62654   | 0.225641 | 0.708756 |
| XLOC_006897 | PGF        | chr14:75408532-75422467   | 14.0138   | 16.3876   | 0.22576  | 0.727874 |
| XLOC_017604 | RAD1       | chr5:34905365-34915780    | 4.2049    | 4.91719   | 0.225765 | 0.703227 |
| XLOC_004478 | MTMR2      | chr11:95566043-95657371   | 6.19362   | 7.24283   | 0.22577  | 0.678167 |
| XLOC_008863 | CDRT15P1   | chr17:13927814-13928915   | 0.2776    | 0.324633  | 0.225804 | 1        |
| XLOC_011732 | SMG9       | chr19:44235300-44259142   | 36.3852   | 42.5504   | 0.22582  | 0.674951 |
| XLOC_001252 | SLC2A5     | chr1:9097004-9129887      | 0.0171053 | 0.0200047 | 0.225894 | 1        |
| XLOC_009820 | HOXB7      | chr17:46684594-46688383   | 20.95     | 24.5022   | 0.22596  | 0.701881 |
| XLOC_013344 | IKZF2      | chr2:213864410-214016333  | 0.0391786 | 0.0458268 | 0.226126 | 1        |
| XLOC_002678 | NEURL      | chr10:105253734-105352309 | 5.95394   | 6.96439   | 0.226153 | 0.727043 |
| XLOC_007276 | KIF23      | chr15:69706626-69740764   | 9.59772   | 11.2267   | 0.226164 | 0.677324 |
| XLOC_022583 | SWI5       | chr9:131038424-131051268  | 35.6349   | 41.6842   | 0.226208 | 0.70055  |
| XLOC_015236 | LOC152225  | chr3:101659702-101716770  | 9.14216   | 10.6942   | 0.226224 | 0.708849 |
| XLOC_023163 | DNLZ       | chr9:139256351-139258263  | 87.7645   | 102.672   | 0.226339 | 0.692349 |
| XLOC_013372 | SLC23A3    | chr2:220026180-220034817  | 0.519024  | 0.607191  | 0.226348 | 0.890489 |
| XLOC_005378 | YARS2      | chr12:32899477-32908887   | 31.9136   | 37.3369   | 0.226429 | 0.668001 |
| XLOC_005162 | HIP1R      | chr12:123320038-123347507 | 14.4396   | 16.8965   | 0.226686 | 0.676906 |
| XLOC_022785 | B4GALT1    | chr9:33110638-33167356    | 8.53923   | 9.99244   | 0.22673  | 0.685573 |
| XLOC_018222 | EGFL8,PPT2 | chr6:32120578-32145888    | 37.6751   | 44.0931   | 0.226944 | 0.835405 |
| XLOC_018104 | HIST1H3E   | chr6:26225382-26225844    | 0.229227  | 0.268297  | 0.22705  | 1        |
| XLOC_008148 | KATNB1     | chr16:57769659-57791162   | 36.6911   | 42.9452   | 0.227068 | 0.665667 |
| XLOC_020613 | PPP1R9A    | chr7:94536948-94925727    | 1.42984   | 1.67357   | 0.227078 | 0.718323 |
| XLOC_004695 | EMG1       | chr12:7079943-7085165     | 34.1114   | 39.9272   | 0.227119 | 0.688291 |
| XLOC_010777 | FXD1       | chr19:35629731-35633954   | 1.00966   | 1.18186   | 0.227181 | 0.933523 |
| XLOC_005514 | DNAJC14    | chr12:56211805-56236767   | 9.92355   | 11.6163   | 0.22722  | 0.824372 |
| XLOC_017506 | TSPAN17    | chr5:176074387-176086059  | 25.5009   | 29.8513   | 0.227242 | 0.669949 |
| XLOC_017163 | CENPH      | chr5:68485374-68506184    | 23.7981   | 27.8586   | 0.227274 | 0.688371 |
| XLOC_012996 | AUP1       | chr2:74753774-74784678    | 165.483   | 193.723   | 0.227316 | 0.73942  |
| XLOC_003403 | TRIM44     | chr11:35684352-35830930   | 4.88213   | 5.71553   | 0.227377 | 0.694543 |
| XLOC_020451 | YAE1D1     | chr7:39606002-39612480    | 11.1788   | 13.0872   | 0.227395 | 0.747301 |
| XLOC_003693 | RNF121     | chr11:71639767-71708643   | 8.58579   | 10.0518   | 0.227434 | 0.700927 |
| XLOC_005969 | TM9SF2     | chr13:100153627-100216302 | 15.1873   | 17.7817   | 0.227529 | 0.659814 |
| XLOC_013933 | PIGU       | chr20:33148345-33265089   | 17.1395   | 20.0678   | 0.227558 | 0.699335 |
| XLOC_002204 | NVL        | chr1:224415035-224517891  | 5.93999   | 6.9558    | 0.227758 | 0.707665 |
| XLOC_002660 | NOLC1      | chr10:103911932-103923627 | 24.3887   | 28.5618   | 0.227877 | 0.659108 |
| XLOC_012688 | SP140L     | chr2:231191893-231268445  | 4.09685   | 4.79849   | 0.228067 | 0.731905 |

|             |              |                           |           |           |          |          |
|-------------|--------------|---------------------------|-----------|-----------|----------|----------|
| XLOC_006995 | CDCA4        | chr14:105475909-105487425 | 35.4253   | 41.4974   | 0.228243 | 0.671557 |
| XLOC_013989 | MATN4        | chr20:43922086-43946464   | 0.106548  | 0.124812  | 0.228251 | 1        |
| XLOC_002816 | NUDT5        | chr10:12171639-12292589   | 101.981   | 119.468   | 0.228325 | 0.864177 |
| XLOC_012275 | MAT2A        | chr2:85766100-85788657    | 29.3957   | 34.4366   | 0.228339 | 0.769079 |
| XLOC_011035 | PRMT1        | chr19:50180408-50191707   | 286.915   | 336.16    | 0.228526 | 0.664578 |
| XLOC_008173 | TMEM208      | chr16:67261015-67263182   | 74.285    | 87.0432   | 0.228662 | 0.674827 |
| XLOC_011841 | NOSIP        | chr19:50058724-50083829   | 70.6094   | 82.7407   | 0.228736 | 0.676146 |
| XLOC_012971 | TEX261       | chr2:71213067-71222001    | 27.9577   | 32.7639   | 0.228859 | 0.665775 |
| XLOC_021594 | TGS1         | chr8:56651319-56738005    | 7.50715   | 8.79813   | 0.228932 | 0.764456 |
| XLOC_005106 | MAPKAPK5     | chr12:112277572-112331228 | 11.5637   | 13.5526   | 0.228965 | 0.775892 |
| XLOC_009346 | MAFG-AS1     | chr17:79885704-79888629   | 5.69756   | 6.67785   | 0.229039 | 0.775951 |
| XLOC_023012 | PTBP3        | chr9:114758831-115112545  | 12.3244   | 14.4449   | 0.22905  | 0.731665 |
| XLOC_001569 | DHCR24       | chr1:55315299-55352921    | 40.2969   | 47.2316   | 0.229083 | 0.67467  |
| XLOC_000026 | ATAD3A       | chr1:1447522-1470067      | 53.8519   | 63.1195   | 0.229086 | 0.663419 |
| XLOC_004267 | C11orf48     | chr11:62430288-62441162   | 51.2575   | 60.0806   | 0.229134 | 0.757708 |
| XLOC_005806 | MRP63        | chr13:21727733-21753220   | 26.8961   | 31.5287   | 0.229272 | 0.768293 |
| XLOC_007249 | TRIP4        | chr15:64680002-64747502   | 6.27911   | 7.36266   | 0.229667 | 0.722132 |
| XLOC_022887 | C9orf40      | chr9:77561498-77567802    | 9.9195    | 11.6313   | 0.229674 | 0.704317 |
| XLOC_016130 | LSG1         | chr3:194361516-194393206  | 7.07238   | 8.29291   | 0.229683 | 0.684767 |
| XLOC_014694 | PI4KA        | chr22:21061978-21213100   | 12.1152   | 14.2084   | 0.229921 | 0.691019 |
| XLOC_020564 | POR          | chr7:75544419-75623992    | 42.8013   | 50.2048   | 0.230171 | 0.731665 |
| XLOC_014750 | AP1B1        | chr22:29723668-29784572   | 22.8596   | 26.8179   | 0.230398 | 0.662604 |
| XLOC_008550 | UBE2MP1      | chr16:34403801-34404762   | 3.38631   | 3.97295   | 0.230497 | 0.851733 |
| XLOC_004776 | RASSF8       | chr12:26107587-26232825   | 0.118436  | 0.138959  | 0.230553 | 1        |
| XLOC_006409 | EIF2S1       | chr14:67827033-67853233   | 19.1679   | 22.4917   | 0.230704 | 0.656753 |
| XLOC_004830 | LOC100335030 | chr12:49760687-49921207   | 0.234921  | 0.275659  | 0.230709 | 1        |
| XLOC_008303 | SPIRE2       | chr16:89894906-89937727   | 7.90184   | 9.27318   | 0.230875 | 0.713886 |
| XLOC_012379 | TTL          | chr2:113239742-113290222  | 9.9382    | 11.6633   | 0.230922 | 0.653218 |
| XLOC_012821 | ADCY3        | chr2:25013135-25142055    | 15.9966   | 18.7737   | 0.230951 | 0.744176 |
| XLOC_005167 | SETD8        | chr12:123868703-123893900 | 18.072    | 21.2114   | 0.231081 | 0.66768  |
| XLOC_015221 | CMSS1        | chr3:99273152-99897476    | 34.832    | 40.8856   | 0.231178 | 0.730925 |
| XLOC_021416 | C7orf13      | chr7:156431059-156433348  | 0.84419   | 0.991058  | 0.231402 | 0.872122 |
| XLOC_003070 | PIK3AP1      | chr10:98353068-98480279   | 1.84372   | 2.16465   | 0.23152  | 0.739517 |
| XLOC_018810 | WDR46        | chr6:33246879-33257304    | 38.1396   | 44.7809   | 0.231595 | 0.653982 |
| XLOC_006457 | FLVCR2       | chr14:76044939-76114512   | 0.850282  | 0.998422  | 0.231707 | 0.838891 |
| XLOC_023074 | HSPA5        | chr9:127997126-128003666  | 190.599   | 223.818   | 0.231782 | 0.688983 |
| XLOC_016441 | LOC100507053 | chr4:100010007-100222513  | 0.0399888 | 0.0469607 | 0.23186  | 1        |
| XLOC_002284 | TFB2M        | chr1:246703862-246729565  | 15.9501   | 18.7317   | 0.231917 | 0.681918 |
| XLOC_013408 | SP110        | chr2:231033644-231090444  | 1.61076   | 1.89177   | 0.232    | 0.815365 |
| XLOC_013830 | SLC4A11      | chr20:3208062-3219887     | 11.283    | 13.2522   | 0.232077 | 0.679452 |
| XLOC_016194 | LOC100507266 | chr4:4543857-4712664      | 0.177802  | 0.208847  | 0.23218  | 1        |
| XLOC_021229 | FIS1         | chr7:100882892-100888371  | 199.521   | 234.376   | 0.232284 | 0.642802 |
| XLOC_002786 | IDI2         | chr10:1064846-1095061     | 8.25942   | 9.70313   | 0.232411 | 0.887337 |
| XLOC_022171 | FAM84B       | chr8:127564682-127570711  | 5.55705   | 6.52852   | 0.232437 | 0.680049 |
| XLOC_007763 | MRPL46       | chr15:89002708-89010633   | 25.2109   | 29.6211   | 0.232575 | 0.691068 |
| XLOC_016067 | NCEH1        | chr3:172348434-172429008  | 1.94205   | 2.28192   | 0.232663 | 0.749866 |
| XLOC_012989 | C2orf81      | chr2:74641302-74644844    | 4.84907   | 5.69778   | 0.232693 | 0.775551 |
| XLOC_021189 | PDAP1        | chr7:98972297-99006305    | 95.1826   | 111.848   | 0.232773 | 0.759309 |
| XLOC_023931 | HDAC8        | chrX:71549365-71792953    | 9.27804   | 10.9027   | 0.232793 | 0.733529 |

|             |           |                           |           |           |          |          |
|-------------|-----------|---------------------------|-----------|-----------|----------|----------|
| XLOC_016624 | GAK       | chr4:843064-926174        | 18.0523   | 21.2137   | 0.232807 | 0.655368 |
| XLOC_004214 | TIMM10    | chr11:57295935-57298232   | 55.2168   | 64.8931   | 0.232958 | 0.686247 |
| XLOC_013804 | CSNK2A1   | chr20:463337-524482       | 38.6746   | 45.4614   | 0.233257 | 0.64913  |
| XLOC_023848 | KCND1     | chrX:48818638-48828251    | 0.316692  | 0.37227   | 0.233269 | 1        |
| XLOC_005083 | ISCU      | chr12:108956293-108963160 | 58.6734   | 68.9726   | 0.233318 | 0.655424 |
| XLOC_006095 | VWA8      | chr13:42140960-42535221   | 2.03411   | 2.39118   | 0.233323 | 0.804694 |
| XLOC_003064 | LOC728558 | chr10:97471535-97849992   | 0.0190672 | 0.0224156 | 0.233414 | 1        |
| XLOC_014506 | SLC35E4   | chr22:31031792-31043862   | 10.5925   | 12.4527   | 0.23342  | 0.707074 |
| XLOC_018801 | PSMB8     | chr6:32808493-32821748    | 67.3818   | 79.2202   | 0.23351  | 0.820912 |
| XLOC_003909 | FOXRED1   | chr11:126138934-126148027 | 25.5981   | 30.096    | 0.233533 | 0.668024 |
| XLOC_004956 | XRCC6BP1  | chr12:58335444-58351052   | 4.97594   | 5.85028   | 0.233538 | 0.775951 |
| XLOC_010621 | NFIX      | chr19:13106583-13209610   | 8.46263   | 9.94987   | 0.233571 | 0.659662 |
| XLOC_005214 | SLC6A13   | chr12:329786-372039       | 0.548525  | 0.645017  | 0.23378  | 0.896143 |
| XLOC_010467 | OAZ1      | chr19:2269519-2273487     | 864.401   | 1016.5    | 0.233836 | 0.668024 |
| XLOC_023885 | FAM120C   | chrX:54094756-54209714    | 3.10766   | 3.65448   | 0.233836 | 0.879418 |
| XLOC_003341 | FAR1      | chr11:13690205-13753893   | 6.24724   | 7.3469    | 0.233918 | 0.659662 |
| XLOC_015313 | MCM2      | chr3:127317199-127341278  | 31.7482   | 37.3409   | 0.234082 | 0.646622 |
| XLOC_009732 | LEPREL4   | chr17:39958204-39968451   | 22.8584   | 26.8851   | 0.234083 | 0.65422  |
| XLOC_020937 | ETV1      | chr7:13930855-14031050    | 0.516674  | 0.607692  | 0.234087 | 0.80005  |
| XLOC_005512 | CD63      | chr12:56119226-56123457   | 607.155   | 714.113   | 0.234088 | 0.658997 |
| XLOC_002569 | PAPSS2    | chr10:89419475-89507462   | 0.168668  | 0.198386  | 0.234123 | 1        |
| XLOC_021336 | DGKI      | chr7:137074384-137531609  | 2.05731   | 2.41989   | 0.234183 | 0.741372 |
| XLOC_005640 | CDK17     | chr12:96672038-96794366   | 10.3857   | 12.2161   | 0.234188 | 0.653588 |
| XLOC_010622 | NACC1     | chr19:13229101-13251961   | 32.423    | 38.1398   | 0.23428  | 0.637815 |
| XLOC_003709 | DNAJB13   | chr11:73661363-73681332   | 0.065455  | 0.0770051 | 0.234451 | 1        |
| XLOC_024174 | HAUS7     | chrX:152713122-152775004  | 17.2178   | 20.2568   | 0.234507 | 0.704283 |
| XLOC_012845 | FTH1P3    | chr2:27604065-27632550    | 0.176008  | 0.207078  | 0.234529 | 1        |
| XLOC_015598 | DPH3      | chr3:16298567-16306496    | 3.42981   | 4.0353    | 0.234547 | 0.703707 |
| XLOC_008289 | ACSF3     | chr16:89160216-89222171   | 4.88372   | 5.74628   | 0.234645 | 0.736361 |
| XLOC_010663 | AP1M1     | chr19:16308664-16346156   | 17.9444   | 21.1151   | 0.234738 | 0.668626 |
| XLOC_003210 | SPRN      | chr10:135207620-135238121 | 2.42367   | 2.85193   | 0.234744 | 0.933369 |
| XLOC_012635 | IGFBP2    | chr2:217498126-217529158  | 40.831    | 48.0465   | 0.234766 | 0.680577 |
| XLOC_008790 | RPAIN     | chr17:5289345-5342471     | 38.7086   | 45.552    | 0.234859 | 0.939306 |
| XLOC_011481 | ASF1B     | chr19:14230320-14247440   | 32.8634   | 38.6747   | 0.234911 | 0.651936 |
| XLOC_023980 | GLA       | chrX:100645877-100669128  | 18.3269   | 21.568    | 0.234924 | 0.926279 |
| XLOC_021684 | PTDSS1    | chr8:97274166-97346774    | 91.5922   | 107.825   | 0.235395 | 0.644608 |
| XLOC_015855 | CD47      | chr3:107761940-107809935  | 6.53196   | 7.6898    | 0.235431 | 0.657199 |
| XLOC_011457 | TNPO2     | chr19:12810007-12834810   | 13.571    | 15.9782   | 0.235571 | 0.65306  |
| XLOC_017057 | TRIP13    | chr5:892968-918164        | 7.33068   | 8.63177   | 0.235709 | 0.686965 |
| XLOC_005149 | ORAI1     | chr12:122064454-122079946 | 33.3965   | 39.3256   | 0.235771 | 0.678561 |
| XLOC_006278 | LRP10     | chr14:23340959-23347291   | 41.3473   | 48.6916   | 0.235878 | 0.642802 |
| XLOC_003092 | CWF19L1   | chr10:101992054-102027437 | 10.7891   | 12.706    | 0.235932 | 0.661135 |
| XLOC_004565 | BCL9L     | chr11:118754474-118781613 | 5.436     | 6.40182   | 0.235936 | 0.657199 |
| XLOC_001533 | STIL      | chr1:47715810-47779819    | 3.28346   | 3.86716   | 0.236058 | 0.680015 |
| XLOC_021104 | BCL7B     | chr7:72950682-72972065    | 41.6067   | 49.0103   | 0.23627  | 0.641994 |
| XLOC_015482 | EIF4G1    | chr3:184032282-184053146  | 39.021    | 45.9658   | 0.236309 | 0.633281 |
| XLOC_022865 | CBWD6     | chr9:69204537-69262593    | 3.29398   | 3.88031   | 0.23634  | 0.765218 |
| XLOC_010758 | LRP3      | chr19:33685598-33716756   | 33.5915   | 39.5722   | 0.236392 | 0.641463 |
| XLOC_004058 | ST5       | chr11:8714898-8932498     | 1.52487   | 1.79637   | 0.236403 | 0.814387 |



|             |            |                           |           |           |          |          |
|-------------|------------|---------------------------|-----------|-----------|----------|----------|
| XLOC_006142 | THSD1      | chr13:52951302-52980629   | 0.886404  | 1.04429   | 0.236484 | 0.828523 |
| XLOC_005632 | NDUFA12    | chr12:95365103-95397489   | 94.0296   | 110.786   | 0.236593 | 0.643112 |
| XLOC_023086 | AK1        | chr9:130628758-130640022  | 52.4444   | 61.7909   | 0.236606 | 0.642112 |
| XLOC_004070 | MTRNR2L8   | chr11:10529433-10530723   | 35.5176   | 41.8486   | 0.236645 | 0.643627 |
| XLOC_014350 | WDR4       | chr21:44263189-44299699   | 9.02828   | 10.6381   | 0.236724 | 0.751304 |
| XLOC_001201 | AURKAIP1   | chr1:1309109-1310818      | 229.363   | 270.277   | 0.236806 | 0.648683 |
| XLOC_013585 | TPX2       | chr20:30326903-30389603   | 31.8171   | 37.4949   | 0.236893 | 0.641512 |
| XLOC_011236 | ZNF587B    | chr19:58341661-58357606   | 2.44376   | 2.88025   | 0.237088 | 0.729864 |
| XLOC_009841 | PPP1R9B    | chr17:48211100-48227877   | 15.6354   | 18.4283   | 0.237105 | 0.648214 |
| XLOC_018623 | TUBB2B     | chr6:3224494-3227968      | 0.953502  | 1.12396   | 0.237285 | 0.869339 |
| XLOC_001185 | FAM41C     | chr1:803450-812182        | 0.419344  | 0.494353  | 0.237406 | 0.905903 |
| XLOC_006644 | TRMT61A    | chr14:103995508-104003410 | 12.6466   | 14.909    | 0.237441 | 0.679486 |
| XLOC_006404 | FUT8       | chr14:65877309-66210839   | 2.16405   | 2.55124   | 0.237466 | 0.735516 |
| XLOC_009305 | MFSD11     | chr17:74730196-74775336   | 3.24013   | 3.81987   | 0.237473 | 0.951198 |
| XLOC_016825 | PLAC8      | chr4:84011210-84035911    | 0.133146  | 0.156983  | 0.237602 | 1        |
| XLOC_012584 | NDUFB3     | chr2:201936461-201950473  | 61.3282   | 72.3146   | 0.237738 | 0.639952 |
| XLOC_013546 | SEC23B     | chr20:18488187-18542059   | 11.0943   | 13.0828   | 0.237856 | 0.645131 |
| XLOC_020994 | GGCT       | chr7:30536236-30544457    | 40.6235   | 47.9093   | 0.237989 | 0.654583 |
| XLOC_021340 | KIAA1549   | chr7:138516126-138666064  | 1.21686   | 1.43521   | 0.238102 | 0.703975 |
| XLOC_003578 | COX8A      | chr11:63742078-63744015   | 821.424   | 968.94    | 0.23828  | 0.642802 |
| XLOC_012899 | SRBD1      | chr2:45615818-45838433    | 1.22138   | 1.44077   | 0.238332 | 0.775951 |
| XLOC_001711 | WDR77      | chr1:111982511-112004525  | 14.2165   | 16.7718   | 0.238472 | 0.915223 |
| XLOC_020738 | CALU       | chr7:128379345-128415844  | 27.17     | 32.0539   | 0.238488 | 0.638761 |
| XLOC_003561 | METTL12    | chr11:62430288-62441162   | 4.73744   | 5.58947   | 0.238603 | 0.954535 |
| XLOC_012745 | CAPN10     | chr2:241526132-241538526  | 11.4062   | 13.4576   | 0.238605 | 0.696463 |
| XLOC_020523 | RABGEF1    | chr7:66205642-66309813    | 4.95498   | 5.8462    | 0.238619 | 0.802621 |
| XLOC_004687 | DSTNP2     | chr12:6993845-6994950     | 2.79294   | 3.29536   | 0.23865  | 0.827846 |
| XLOC_010175 | GALNT1     | chr18:33234532-33291798   | 4.6951    | 5.54013   | 0.238764 | 0.678167 |
| XLOC_013282 | TMEM194B   | chr2:191371618-191399468  | 11.5043   | 13.5751   | 0.238791 | 0.64961  |
| XLOC_007502 | MEIS2      | chr15:37183221-37393500   | 2.43946   | 2.87874   | 0.238874 | 0.765267 |
| XLOC_006938 | TRIP11     | chr14:92434242-92506403   | 0.922561  | 1.08874   | 0.238938 | 0.761342 |
| XLOC_019070 | ECHDC1     | chr6:127609856-127664754  | 20.6427   | 24.3615   | 0.238971 | 0.644946 |
| XLOC_007515 | RMDN3      | chr15:41028085-41047458   | 15.7432   | 18.5809   | 0.239094 | 0.659218 |
| XLOC_021733 | WDR67      | chr8:124084919-124164392  | 2.15375   | 2.54204   | 0.239137 | 0.743454 |
| XLOC_013294 | ANKRD44    | chr2:197851385-198175521  | 0.439244  | 0.518467  | 0.239229 | 0.838891 |
| XLOC_018229 | PSMB9      | chr6:32821937-32827628    | 16.2593   | 19.193    | 0.23931  | 0.707415 |
| XLOC_013788 | ABHD16B    | chr20:62492565-62494341   | 13.5939   | 16.047    | 0.23934  | 0.754762 |
| XLOC_012863 | FAM98A     | chr2:33808728-33824362    | 11.5774   | 13.6667   | 0.239354 | 0.653588 |
| XLOC_000688 | GABPB2     | chr1:151043079-151091007  | 1.06246   | 1.25424   | 0.2394   | 0.840418 |
| XLOC_020553 | NCF1       | chr7:74188308-74203659    | 0.0201114 | 0.0237431 | 0.239495 | 1        |
| XLOC_019001 | GPR63      | chr6:97241997-97285353    | 0.850667  | 1.00432   | 0.239557 | 0.776524 |
| XLOC_006285 | NGDN       | chr14:23938897-23947402   | 22.2948   | 26.3238   | 0.239659 | 0.665343 |
| XLOC_015549 | SUMF1      | chr3:4402828-4508966      | 8.17918   | 9.65898   | 0.239915 | 0.697011 |
| XLOC_005001 | NAV3       | chr12:78225068-78606790   | 7.1218    | 8.41042   | 0.239936 | 0.647315 |
| XLOC_003533 | TMEM109    | chr11:60681370-60690915   | 28.741    | 33.9415   | 0.239942 | 0.637815 |
| XLOC_011768 | IRF2BP1    | chr19:46386865-46389376   | 18.1675   | 21.457    | 0.240091 | 0.688092 |
| XLOC_021218 | TFR2       | chr7:100218038-100239173  | 17.4985   | 20.6675   | 0.240132 | 0.659218 |
| XLOC_023300 | EIF2S3     | chrX:24073064-24096927    | 96.28     | 113.718   | 0.24015  | 0.644142 |
| XLOC_021351 | NDUFB2-AS1 | chr7:140395135-140406446  | 1.38279   | 1.63369   | 0.24055  | 0.980024 |

|             |               |                           |           |           |          |          |
|-------------|---------------|---------------------------|-----------|-----------|----------|----------|
| XLOC_010369 | CXXC1         | chr18:47808712-47814692   | 20.033    | 23.6692   | 0.240632 | 0.638761 |
| XLOC_002759 | PTPRE         | chr10:129705324-129884164 | 1.02901   | 1.2159    | 0.240768 | 0.772124 |
| XLOC_002995 | ANXA7         | chr10:75135188-75173841   | 25.2049   | 29.7834   | 0.240801 | 0.633281 |
| XLOC_021376 | OR2A7         | chr7:143955788-143983096  | 0.74834   | 0.884278  | 0.240805 | 0.910891 |
| XLOC_003419 | EXT2          | chr11:44117098-44266980   | 19.0122   | 22.467    | 0.240881 | 0.633194 |
| XLOC_004631 | SNX19         | chr11:130745765-130786382 | 2.09027   | 2.47013   | 0.240898 | 0.708142 |
| XLOC_017103 | DNAJC21       | chr5:34929697-34959069    | 3.23478   | 3.82327   | 0.241139 | 0.667588 |
| XLOC_015118 | CYB561D2      | chr3:50384918-50391496    | 33.3841   | 39.4576   | 0.241144 | 0.813026 |
| XLOC_016577 | GALNT7        | chr4:174089903-174245118  | 3.53608   | 4.17951   | 0.241182 | 0.687345 |
| XLOC_008640 | SMPD3         | chr16:68392229-68482409   | 0.321822  | 0.380381  | 0.241184 | 0.880754 |
| XLOC_007764 | DET1          | chr15:89055713-89089912   | 2.84497   | 3.36265   | 0.241189 | 0.780964 |
| XLOC_019123 | FUCA2         | chr6:143815948-143833020  | 42.3508   | 50.0615   | 0.241312 | 0.635064 |
| XLOC_014428 | AIFM3         | chr22:21319417-21335649   | 0.786334  | 0.929523  | 0.241349 | 0.861774 |
| XLOC_016038 | KPNA4         | chr3:160212782-160283376  | 8.04133   | 9.50567   | 0.241354 | 0.647419 |
| XLOC_003393 | HIPK3         | chr11:33279167-33375939   | 0.316147  | 0.37374   | 0.241438 | 0.848627 |
| XLOC_014372 | SUMO3         | chr21:46225531-46238044   | 30.853    | 36.4756   | 0.241519 | 0.633758 |
| XLOC_001045 | RPS6KC1       | chr1:213224587-213446808  | 1.25051   | 1.4785    | 0.24161  | 0.759934 |
| XLOC_022047 | TCEB1         | chr8:74857372-74884522    | 57.8308   | 68.3742   | 0.241615 | 0.639922 |
| XLOC_006374 | PSMA3         | chr14:58711522-58764855   | 76.5174   | 90.4756   | 0.24174  | 0.736305 |
| XLOC_001609 | LRRIQ3        | chr1:74491701-74663871    | 0.127056  | 0.150291  | 0.2423   | 1        |
| XLOC_018202 | CSNK2B        | chr6:31629005-31637843    | 226.851   | 268.338   | 0.242304 | 0.691843 |
| XLOC_021635 | TMEM70        | chr8:74888376-74895018    | 31.2348   | 36.9488   | 0.242373 | 0.62768  |
| XLOC_004660 | C12orf5       | chr12:4430358-4469190     | 2.61946   | 3.09874   | 0.242411 | 0.667075 |
| XLOC_005196 | PUS1          | chr12:132413744-132428406 | 37.2152   | 44.025    | 0.242432 | 0.642802 |
| XLOC_007153 | SPINT1        | chr15:41136245-41149853   | 43.1535   | 51.0524   | 0.242503 | 0.630091 |
| XLOC_000748 | ZBTB7B        | chr1:154975105-154991001  | 9.31824   | 11.0239   | 0.242503 | 0.684382 |
| XLOC_011976 | FIZ1          | chr19:56102736-56110893   | 6.23409   | 7.37541   | 0.242545 | 0.732699 |
| XLOC_000430 | ALG6          | chr1:63833260-63904233    | 2.23566   | 2.645     | 0.242566 | 0.741755 |
| XLOC_006766 | BAZ1A         | chr14:35221936-35344853   | 4.37489   | 5.176     | 0.24259  | 0.647477 |
| XLOC_006063 | N4BP2L1       | chr13:32974859-33002315   | 0.420425  | 0.497435  | 0.24266  | 0.8626   |
| XLOC_010508 | UHRF1         | chr19:4909509-4962165     | 16.2557   | 19.2352   | 0.242805 | 0.633646 |
| XLOC_014935 | ARPC4,ARPC4-T | chr3:9821653-9878040      | 113.287   | 134.06    | 0.242896 | 0.773051 |
| XLOC_021789 | EXOSC4        | chr8:145133521-145135551  | 116.083   | 137.372   | 0.242932 | 0.640258 |
| XLOC_013597 | MAPRE1        | chr20:31407698-31438211   | 25.915    | 30.6677   | 0.242935 | 0.626914 |
| XLOC_016979 | PPID          | chr4:159630278-159644552  | 25.6555   | 30.3622   | 0.243006 | 0.630345 |
| XLOC_017700 | ANKRD31       | chr5:74364121-74532703    | 0.0603694 | 0.0714648 | 0.243415 | 1        |
| XLOC_014678 | UFD1L         | chr22:19437463-19466738   | 24.6443   | 29.1764   | 0.243546 | 0.640496 |
| XLOC_017420 | SLC26A2       | chr5:149340299-149366963  | 1.48157   | 1.75415   | 0.243641 | 0.697905 |
| XLOC_017817 | H2AFY         | chr5:134670070-134735577  | 68.3592   | 80.9397   | 0.243711 | 0.630399 |
| XLOC_009146 | HOXB-AS5      | chr17:46800541-46802119   | 1.93786   | 2.29453   | 0.243736 | 0.907256 |
| XLOC_000207 | HMG2          | chr1:26798901-26803133    | 179.91    | 213.077   | 0.244099 | 0.633194 |
| XLOC_006470 | SLIRP         | chr14:78174413-78183941   | 292.142   | 346.018   | 0.244177 | 0.628025 |
| XLOC_008475 | NDUFAB1       | chr16:23592334-23607639   | 174.866   | 207.12    | 0.244215 | 0.62186  |
| XLOC_023674 | VMA21         | chrX:150565656-150577836  | 11.3161   | 13.4048   | 0.244383 | 0.62768  |
| XLOC_021878 | FAM86B2       | chr8:12283123-12293852    | 1.3252    | 1.56984   | 0.244409 | 0.872122 |
| XLOC_003906 | HYLS1         | chr11:125753508-125773116 | 2.93751   | 3.47988   | 0.244444 | 0.891383 |
| XLOC_014852 | DESI1         | chr22:41994031-42017061   | 20.3649   | 24.1269   | 0.244561 | 0.628539 |
| XLOC_013315 | SUMO1         | chr2:203070902-203103322  | 63.6673   | 75.4354   | 0.24469  | 0.637294 |
| XLOC_012475 | GPD2          | chr2:157291964-157442915  | 3.69368   | 4.37648   | 0.244712 | 0.646705 |

|             |              |                           |           |           |          |          |
|-------------|--------------|---------------------------|-----------|-----------|----------|----------|
| XLOC_014021 | B4GALT5      | chr20:48249482-48330421   | 10.3718   | 12.2894   | 0.24475  | 0.62969  |
| XLOC_008121 | MT1M         | chr16:56666533-56667898   | 190.716   | 226.001   | 0.244905 | 0.633194 |
| XLOC_009431 | C1QBP        | chr17:5289345-5342471     | 330.187   | 391.294   | 0.244968 | 0.723759 |
| XLOC_022973 | TBC1D2       | chr9:100961279-101018003  | 8.5851    | 10.174    | 0.244986 | 0.700356 |
| XLOC_001510 | EIF2B3       | chr1:45316193-45452394    | 5.88321   | 6.97275   | 0.245123 | 0.712117 |
| XLOC_013921 | PLAGL2       | chr20:30780306-30795546   | 4.33879   | 5.14232   | 0.245128 | 0.664697 |
| XLOC_018192 | MICB         | chr6:31465854-31478901    | 6.88058   | 8.15497   | 0.245149 | 0.687345 |
| XLOC_020573 | LOC100133091 | chr7:76178657-76257299    | 3.84443   | 4.55658   | 0.24518  | 0.840418 |
| XLOC_003115 | ACTR1A       | chr10:104238985-104262512 | 28.9561   | 34.3206   | 0.245209 | 0.621348 |
| XLOC_013608 | C20orf144    | chr20:32244892-32262264   | 0.0726987 | 0.0861723 | 0.245295 | 1        |
| XLOC_010807 | WDR62        | chr19:36545782-36596012   | 5.21209   | 6.17813   | 0.245311 | 0.667588 |
| XLOC_012769 | TSSC1        | chr2:3192740-3381653      | 14.2069   | 16.8402   | 0.245322 | 0.67663  |
| XLOC_006631 | DYNC1H1      | chr14:102430864-102517135 | 25.3754   | 30.0813   | 0.245435 | 0.633281 |
| XLOC_012591 | NOP58        | chr2:203130514-203168384  | 42.7248   | 50.6536   | 0.245591 | 0.612746 |
| XLOC_000199 | ZNF593       | chr1:26496387-26497364    | 143.432   | 170.081   | 0.245855 | 0.63182  |
| XLOC_016060 | EIF5A2       | chr3:170606203-170626426  | 1.15728   | 1.37244   | 0.24601  | 0.740073 |
| XLOC_018717 | TRIM27       | chr6:28870778-28891768    | 33.0952   | 39.249    | 0.246031 | 0.622936 |
| XLOC_004172 | PSMC3        | chr11:47440319-47448024   | 77.1562   | 91.5032   | 0.246041 | 0.622936 |
| XLOC_006459 | IFT43        | chr14:76452095-76550416   | 36.4742   | 43.2569   | 0.246055 | 0.65671  |
| XLOC_022685 | GRIN1        | chr9:140033608-140064491  | 0.0758116 | 0.0899142 | 0.246131 | 1        |
| XLOC_008614 | FAM96B       | chr16:66965957-66968326   | 159.345   | 188.997   | 0.246205 | 0.622631 |
| XLOC_002949 | SLC16A9      | chr10:61410521-61469649   | 3.26907   | 3.87797   | 0.246419 | 0.699917 |
| XLOC_006857 | MAX          | chr14:65381078-65569413   | 37.5621   | 44.5674   | 0.24671  | 0.856904 |
| XLOC_012844 | PPM1G        | chr2:27604065-27632550    | 107.914   | 128.039   | 0.246712 | 0.612746 |
| XLOC_000913 | QSOX1        | chr1:180123967-180169859  | 50.2781   | 59.6641   | 0.246934 | 0.663419 |
| XLOC_013580 | HM13         | chr20:30102240-30161066   | 119.111   | 141.348   | 0.246937 | 0.635021 |
| XLOC_009281 | LOC100287042 | chr17:73267379-73285530   | 0.235005  | 0.278968  | 0.247406 | 1        |
| XLOC_020402 | MPP6         | chr7:24613084-24727498    | 3.17767   | 3.77222   | 0.247442 | 0.733086 |
| XLOC_013321 | NDUFS1       | chr2:206987802-207024243  | 10.4949   | 12.4586   | 0.247455 | 0.631444 |
| XLOC_005190 | RAN          | chr12:131356616-131360826 | 388.211   | 460.864   | 0.247502 | 0.629512 |
| XLOC_013661 | SRSF6        | chr20:42086503-42092244   | 28.6733   | 34.0433   | 0.247665 | 0.614872 |
| XLOC_020656 | POP7         | chr7:100303675-100305123  | 131.715   | 156.388   | 0.247717 | 0.623292 |
| XLOC_003832 | REXO2        | chr11:114310107-114321000 | 78.282    | 92.9524   | 0.247811 | 0.61923  |
| XLOC_014953 | TSEN2        | chr3:12525930-12574820    | 5.69667   | 6.76429   | 0.247821 | 0.703274 |
| XLOC_022470 | ANP32B       | chr9:100745488-100778224  | 191.485   | 227.39    | 0.247938 | 0.615677 |
| XLOC_023635 | HTATSF1      | chrX:135579237-135594503  | 7.08946   | 8.42204   | 0.248494 | 0.648214 |
| XLOC_020481 | UPP1         | chr7:48128354-48148330    | 517.685   | 615.012   | 0.24854  | 0.633194 |
| XLOC_003255 | CD81         | chr11:2398546-2418649     | 313.625   | 372.605   | 0.248605 | 0.612808 |
| XLOC_012587 | CASP8        | chr2:202098165-202152434  | 6.25691   | 7.43362   | 0.248613 | 0.656612 |
| XLOC_008130 | NUP93        | chr16:56764016-56878861   | 21.5323   | 25.582    | 0.248627 | 0.610939 |
| XLOC_008362 | ECI1         | chr16:2289872-2301602     | 156.821   | 186.317   | 0.248641 | 0.629574 |
| XLOC_001196 | UBE2J2       | chr1:1189291-1209234      | 31.1585   | 37.0207   | 0.248706 | 0.628907 |
| XLOC_013694 | CTSA         | chr20:44517110-44541003   | 52.6673   | 62.5821   | 0.248844 | 0.644317 |
| XLOC_015926 | ZXDC         | chr3:126156443-126194762  | 5.77029   | 6.8566    | 0.248852 | 0.776769 |
| XLOC_013898 | ACSS1        | chr20:24986865-25038818   | 1.056     | 1.25486   | 0.248915 | 0.819558 |
| XLOC_014218 | FAM207A      | chr21:46359954-46396888   | 90.8492   | 108.005   | 0.249554 | 0.628282 |
| XLOC_002494 | SUPV3L1      | chr10:70939992-70968849   | 19.6929   | 23.4121   | 0.249577 | 0.61923  |
| XLOC_004156 | PEX16        | chr11:45931219-45939674   | 24.2368   | 28.8144   | 0.249588 | 0.642802 |
| XLOC_008135 | NLRC5        | chr16:57050985-57117436   | 0.954604  | 1.13495   | 0.249651 | 0.765218 |

|             |                  |                           |          |          |          |          |
|-------------|------------------|---------------------------|----------|----------|----------|----------|
| XLOC_016486 | LOC645513        | chr4:120375937-120549981  | 2.20254  | 2.61871  | 0.249693 | 0.890564 |
| XLOC_005703 | ATXN2            | chr12:111890017-112037480 | 5.79088  | 6.88646  | 0.24998  | 0.654907 |
| XLOC_015556 | RAD18            | chr3:8918879-9005159      | 3.33551  | 3.96684  | 0.25008  | 0.649187 |
| XLOC_001793 | HIST2H2AB        | chr1:149859018-149859466  | 0.314115 | 0.373645 | 0.250373 | 0.970681 |
| XLOC_009330 | RPTOR            | chr17:78518624-78940173   | 5.93788  | 7.06354  | 0.250444 | 0.644258 |
| XLOC_009042 | THRA             | chr17:38218445-38256978   | 7.39597  | 8.79863  | 0.25054  | 0.865957 |
| XLOC_019165 | TCP1             | chr6:160181290-160210735  | 89.3572  | 106.305  | 0.250554 | 0.639079 |
| XLOC_004788 | FAR2             | chr12:29301935-29488549   | 3.259    | 3.87716  | 0.250573 | 0.694097 |
| XLOC_017330 | PCBD2            | chr5:134240809-134298336  | 2.79734  | 3.32803  | 0.250613 | 0.756508 |
| XLOC_021818 | LOC100287015     | chr8:6261076-6264069      | 1.69958  | 2.02205  | 0.250643 | 0.8041   |
| XLOC_002173 | LPGAT1           | chr1:211916798-212004114  | 4.36721  | 5.19622  | 0.250753 | 0.623882 |
| XLOC_010291 | SPIRE1           | chr18:12446510-12657912   | 5.50812  | 6.55422  | 0.250862 | 0.633194 |
| XLOC_018523 | CCDC28A          | chr6:139046347-139114456  | 17.8815  | 21.2801  | 0.251032 | 0.648133 |
| XLOC_018478 | SMPDL3A          | chr6:123109970-123130864  | 1.45494  | 1.73152  | 0.251081 | 0.802444 |
| XLOC_023094 | LOC100289019     | chr9:130873449-130881013  | 1.73244  | 2.06201  | 0.251251 | 0.764773 |
| XLOC_017555 | CLPTM1L          | chr5:1317999-1345002      | 44.0379  | 52.4157  | 0.251255 | 0.612746 |
| XLOC_008803 | C17orf49,RNASEH1 | chr17:6915735-6922973     | 376.452  | 448.076  | 0.251275 | 0.642053 |
| XLOC_008118 | MT2A             | chr16:56642477-56643409   | 7274.77  | 8659.89  | 0.251448 | 0.651936 |
| XLOC_019183 | SFT2D1           | chr6:166733516-166755991  | 103.781  | 123.542  | 0.251463 | 0.616946 |
| XLOC_017224 | XRCC4            | chr5:82373316-82649579    | 6.19254  | 7.3722   | 0.251565 | 0.698819 |
| XLOC_012063 | GEN1             | chr2:17935176-17966632    | 1.54537  | 1.84044  | 0.252095 | 0.699342 |
| XLOC_001244 | KLHL21           | chr1:6650783-6662929      | 38.7361  | 46.1348  | 0.252178 | 0.61405  |
| XLOC_014005 | NCOA5            | chr20:44689625-44718580   | 9.43585  | 11.2407  | 0.252514 | 0.632579 |
| XLOC_003951 | SLC25A22         | chr11:790474-798269       | 20.8315  | 24.8177  | 0.252604 | 0.62044  |
| XLOC_015338 | NEK11            | chr3:130745693-131100319  | 0.593909 | 0.707579 | 0.252649 | 0.912532 |
| XLOC_001537 | SPATA6           | chr1:48761043-48937876    | 0.572673 | 0.682284 | 0.25266  | 0.802416 |
| XLOC_000685 | BNIP1            | chr1:151009028-151020076  | 0.203158 | 0.24207  | 0.252823 | 1        |
| XLOC_018473 | ASF1A            | chr6:119134611-119256327  | 4.94017  | 5.88655  | 0.252861 | 0.72151  |
| XLOC_001729 | BCAS2            | chr1:115110180-115124265  | 22.7758  | 27.1397  | 0.252903 | 0.626914 |
| XLOC_020863 | SLC4A2           | chr7:150755298-150773614  | 64.1072  | 76.3921  | 0.252936 | 0.607733 |
| XLOC_008369 | SRRM2-AS1        | chr16:2787076-2821413     | 0.330462 | 0.393806 | 0.253003 | 0.976592 |
| XLOC_018493 | L3MBTL3          | chr6:130339727-130462594  | 1.04704  | 1.24783  | 0.253105 | 0.773332 |
| XLOC_011269 | R3HDM4           | chr19:896502-913225       | 86.7917  | 103.439  | 0.253156 | 0.605249 |
| XLOC_022224 | FAM83H           | chr8:144806102-144815914  | 34.723   | 41.385   | 0.253217 | 0.593433 |
| XLOC_000772 | SLC25A44         | chr1:156163729-156182587  | 5.88559  | 7.01592  | 0.253444 | 0.651514 |
| XLOC_017963 | NOP16            | chr5:175810939-175815763  | 92.6485  | 110.452  | 0.25358  | 0.607733 |
| XLOC_010127 | SLMO1            | chr18:12407894-12432236   | 6.96648  | 8.30556  | 0.253649 | 0.72856  |
| XLOC_001665 | ALG14            | chr1:95448278-95538507    | 5.27826  | 6.29325  | 0.253744 | 0.765218 |
| XLOC_008395 | CORO7,CORO7-F    | chr16:4390251-4466962     | 157.798  | 188.143  | 0.253754 | 0.73699  |
| XLOC_004729 | LOC100129361     | chr12:10998447-11328619   | 5.09302  | 6.07301  | 0.25389  | 0.640604 |
| XLOC_015540 | DLG1-AS1         | chr3:196769430-197030621  | 0.195464 | 0.233119 | 0.254162 | 1        |
| XLOC_001795 | SF3B4            | chr1:149895208-149900144  | 61.6585  | 73.5463  | 0.254354 | 0.593433 |
| XLOC_017952 | SH3PXD2B         | chr5:171760502-171881527  | 3.67574  | 4.38451  | 0.25438  | 0.633646 |
| XLOC_021101 | NSUN5            | chr7:72716513-72722864    | 29.5736  | 35.2825  | 0.254642 | 0.613583 |
| XLOC_014847 | RANGAP1          | chr22:41641614-41682216   | 93.7674  | 111.875  | 0.254728 | 0.614755 |
| XLOC_022475 | SEC61B           | chr9:101984569-101992901  | 306.88   | 366.143  | 0.254733 | 0.592657 |
| XLOC_012415 | TSN              | chr2:122513120-122525428  | 20.6978  | 24.6965  | 0.254832 | 0.599775 |
| XLOC_018552 | ULBP2            | chr6:150263135-150270368  | 11.4361  | 13.6458  | 0.254865 | 0.680049 |
| XLOC_010465 | SF3A2            | chr19:2236815-2248678     | 96.8721  | 115.599  | 0.254971 | 0.596658 |

|             |              |                           |           |           |          |          |
|-------------|--------------|---------------------------|-----------|-----------|----------|----------|
| XLOC_001263 | SRM          | chr1:11114648-11120091    | 166.807   | 199.062   | 0.255039 | 0.59484  |
| XLOC_009186 | SCPEP1       | chr17:55055467-55084129   | 10.1263   | 12.0846   | 0.25507  | 0.652401 |
| XLOC_021191 | ZNF394       | chr7:99090853-99097877    | 13.168    | 15.7161   | 0.255206 | 0.633194 |
| XLOC_000862 | SFT2D2       | chr1:168195254-168212088  | 3.38601   | 4.04122   | 0.255206 | 0.820487 |
| XLOC_002834 | RSU1         | chr10:16632616-16859453   | 11.5808   | 13.8227   | 0.2553   | 0.600595 |
| XLOC_000221 | FAM76A       | chr1:28052489-28089423    | 1.0539    | 1.25809   | 0.255494 | 0.7898   |
| XLOC_005689 | FAM222A-AS1  | chr12:110152186-110211292 | 3.43639   | 4.10284   | 0.255728 | 0.898682 |
| XLOC_007509 | ANKRD63      | chr15:40573644-40574787   | 0.0758386 | 0.0905473 | 0.25574  | 1        |
| XLOC_014615 | ARHGAP8,PRR5 | chr22:45064426-45258664   | 28.5555   | 34.0972   | 0.255883 | 0.632632 |
| XLOC_013955 | SAMHD1       | chr20:35504569-35580246   | 1.17689   | 1.40548   | 0.256076 | 0.779476 |
| XLOC_014299 | SYNJ1        | chr21:34001068-34100351   | 0.614487  | 0.733905  | 0.256211 | 0.760716 |
| XLOC_001035 | DTL          | chr1:212113740-212278187  | 5.99024   | 7.15495   | 0.256329 | 0.760301 |
| XLOC_002500 | H2AFY2       | chr10:71812356-71892690   | 19.0587   | 22.7647   | 0.256346 | 0.838269 |
| XLOC_005184 | LINC00507    | chr12:128399954-128436097 | 0.0653106 | 0.0780148 | 0.256429 | 1        |
| XLOC_000640 | RBM8A        | chr1:145507556-145516076  | 23.1532   | 27.6575   | 0.256458 | 0.664979 |
| XLOC_012421 | SFT2D3       | chr2:128458596-128461407  | 6.99907   | 8.36163   | 0.256619 | 0.677165 |
| XLOC_007905 | ZNF205       | chr16:3160460-3170518     | 17.4816   | 20.8861   | 0.256705 | 0.651993 |
| XLOC_013510 | PANK2        | chr20:3869485-3904502     | 13.5438   | 16.184    | 0.256939 | 0.630883 |
| XLOC_018175 | ATAT1        | chr6:30594612-30614598    | 1.50128   | 1.79402   | 0.256996 | 0.832978 |
| XLOC_000498 | LRRC8B       | chr1:89990396-90063420    | 1.43874   | 1.71941   | 0.257102 | 0.684767 |
| XLOC_011255 | WASH5P       | chr19:60950-70966         | 2.8141    | 3.36316   | 0.257144 | 0.821611 |
| XLOC_013468 | DTYMK        | chr2:242615156-242626383  | 64.8688   | 77.532    | 0.257267 | 0.605249 |
| XLOC_001876 | PMVK         | chr1:154897207-154909484  | 25.0646   | 29.9647   | 0.25761  | 0.629636 |
| XLOC_018241 | PFDN6        | chr6:33257373-33258711    | 108.517   | 129.748   | 0.257796 | 0.608991 |
| XLOC_007885 | AMDHD2       | chr16:2570362-2581409     | 25.2858   | 30.2356   | 0.257919 | 0.722516 |
| XLOC_005739 | MSI1         | chr12:120779132-120806983 | 16.8807   | 20.1856   | 0.257949 | 0.620049 |
| XLOC_009979 | MRPL38       | chr17:73894723-73901181   | 97.8398   | 117       | 0.258018 | 0.59116  |
| XLOC_003863 | NLRX1        | chr11:119039439-119054725 | 7.30137   | 8.73133   | 0.258035 | 0.648214 |
| XLOC_016744 | RPL21P44     | chr4:54851665-54853449    | 0.0656182 | 0.078479  | 0.258211 | 1        |
| XLOC_013647 | SNHG11       | chr20:37075296-37079564   | 12.2624   | 14.6665   | 0.258285 | 0.706362 |
| XLOC_007691 | SCAMP2       | chr15:75137196-75165670   | 33.4784   | 40.044    | 0.258355 | 0.624571 |
| XLOC_011972 | ISOC2        | chr19:55964345-55973049   | 85.8811   | 102.732   | 0.258476 | 0.599775 |
| XLOC_015340 | NUDT16       | chr3:131100514-131107674  | 6.89385   | 8.2466    | 0.258491 | 0.874294 |
| XLOC_018324 | SLC29A1      | chr6:44187241-44201888    | 61.2927   | 73.3206   | 0.258504 | 0.592657 |
| XLOC_003940 | HRAS         | chr11:532241-535550       | 37.8739   | 45.3063   | 0.258507 | 0.617011 |
| XLOC_009881 | PTRH2        | chr17:57774666-57784856   | 44.7661   | 53.57     | 0.259016 | 0.60666  |
| XLOC_022161 | ATAD2        | chr8:124332090-124408705  | 10.2046   | 12.213    | 0.259201 | 0.586149 |
| XLOC_008073 | ITGAM        | chr16:31271287-31344213   | 0.0198653 | 0.0237758 | 0.259246 | 1        |
| XLOC_023586 | LONRF3       | chrX:118108712-118151949  | 2.43074   | 2.90936   | 0.259303 | 0.752397 |
| XLOC_021139 | HGF          | chr7:81331443-81399452    | 3.21025   | 3.84244   | 0.259337 | 0.779476 |
| XLOC_004647 | ADIPOR2      | chr12:1800246-1897845     | 9.84215   | 11.7813   | 0.259457 | 0.59463  |
| XLOC_018522 | FLJ46906     | chr6:139012804-139018425  | 4.67508   | 5.59647   | 0.259525 | 0.772699 |
| XLOC_005091 | FAM222A      | chr12:110152186-110211292 | 1.22053   | 1.46116   | 0.259604 | 0.89536  |
| XLOC_015461 | TTC14        | chr3:180319917-180328918  | 1.41743   | 1.69694   | 0.259657 | 0.757598 |
| XLOC_004718 | LOC374443    | chr12:9769879-9811010     | 0.987177  | 1.1819    | 0.259728 | 0.810757 |
| XLOC_008099 | NKD1         | chr16:50582240-50674771   | 1.11769   | 1.3382    | 0.259775 | 0.70639  |
| XLOC_014969 | SH3BP5-AS1   | chr3:15295690-15382901    | 0.780083  | 0.934092  | 0.259937 | 0.920464 |
| XLOC_007919 | DNAJA3       | chr16:4475805-4506775     | 36.0249   | 43.1376   | 0.259949 | 0.597006 |
| XLOC_003076 | MORN4        | chr10:99374309-99393913   | 4.41082   | 5.28197   | 0.260028 | 0.693574 |

|             |                 |                           |           |           |          |          |
|-------------|-----------------|---------------------------|-----------|-----------|----------|----------|
| XLOC_005730 | TAOK3           | chr12:118587605-118810750 | 1.17887   | 1.41175   | 0.260078 | 0.746171 |
| XLOC_018309 | SRF             | chr6:43138919-43149244    | 22.8294   | 27.3411   | 0.260174 | 0.584417 |
| XLOC_004527 | PIH1D2          | chr11:111895537-111944895 | 1.20735   | 1.44598   | 0.260206 | 0.952184 |
| XLOC_002065 | RGS16           | chr1:182567757-182573548  | 4.09878   | 4.9093    | 0.26032  | 0.704317 |
| XLOC_012226 | MXD1            | chr2:70142172-70170076    | 6.23764   | 7.4724    | 0.260572 | 0.612247 |
| XLOC_024196 | G6PD            | chrX:153759605-153793261  | 22.6223   | 27.1017   | 0.260639 | 0.685792 |
| XLOC_010809 | TBCB            | chr19:36602104-36616849   | 77.2557   | 92.564    | 0.260809 | 0.718059 |
| XLOC_006818 | CNIH            | chr14:54893646-54908148   | 64.0534   | 76.7504   | 0.260898 | 0.59512  |
| XLOC_008414 | TEKT5           | chr16:10721360-10788802   | 0.0793833 | 0.0951406 | 0.261225 | 1        |
| XLOC_012105 | GCKR            | chr2:27719705-27746550    | 0.0991393 | 0.118823  | 0.261281 | 1        |
| XLOC_009528 | COPS3           | chr17:17149937-17184617   | 36.7453   | 44.0421   | 0.261322 | 0.575745 |
| XLOC_009166 | RSAD1           | chr17:48556189-48563336   | 29.9759   | 35.9289   | 0.261342 | 0.59116  |
| XLOC_007142 | DISP2           | chr15:40650433-40663256   | 0.882903  | 1.0583    | 0.261417 | 0.806275 |
| XLOC_011956 | PPP1R12C        | chr19:55602280-55628968   | 18.4504   | 22.1161   | 0.261448 | 0.621022 |
| XLOC_002763 | PPP2R2D         | chr10:133747959-133770053 | 12.3263   | 14.7764   | 0.261555 | 0.630399 |
| XLOC_015808 | EOGT            | chr3:69024367-69062774    | 4.52485   | 5.42505   | 0.261764 | 0.630699 |
| XLOC_022230 | PLEC            | chr8:144989320-145050913  | 16.3874   | 19.6478   | 0.26178  | 0.578553 |
| XLOC_015312 | PLXNA1          | chr3:126707436-126756235  | 6.36685   | 7.63378   | 0.26182  | 0.590733 |
| XLOC_015993 | PLSCR1          | chr3:146232966-146262628  | 5.21737   | 6.25616   | 0.261954 | 0.678167 |
| XLOC_001596 | GNG12           | chr1:68167148-68698284    | 25.0287   | 30.0142   | 0.262059 | 0.756208 |
| XLOC_006264 | METT17          | chr14:21457964-21465194   | 36.1023   | 43.2941   | 0.26208  | 0.57574  |
| XLOC_023714 | IKBKKG          | chrX:153759605-153793261  | 11.7357   | 14.0736   | 0.262094 | 0.839471 |
| XLOC_020649 | MEPCE           | chr7:99998494-100031749   | 54.4156   | 65.2579   | 0.262131 | 0.609125 |
| XLOC_013926 | CDK5RAP1        | chr20:31946644-31989337   | 15.7159   | 18.8483   | 0.262207 | 0.604499 |
| XLOC_023661 | CXorf40A        | chrX:148622518-148632086  | 6.15046   | 7.37722   | 0.262382 | 0.688291 |
| XLOC_006634 | TECPR2          | chr14:102829299-102968818 | 0.740761  | 0.888529  | 0.26241  | 0.764528 |
| XLOC_011672 | ZNF780B         | chr19:40534166-40562115   | 0.658946  | 0.790416  | 0.262452 | 0.724492 |
| XLOC_015277 | TIMMDC1         | chr3:119217367-119243125  | 37.0862   | 44.4909   | 0.262629 | 0.581421 |
| XLOC_004500 | CASP4           | chr11:104813593-104839325 | 156.091   | 187.258   | 0.262642 | 0.592652 |
| XLOC_009088 | IFI35           | chr17:41158741-41166476   | 4.76999   | 5.72297   | 0.262777 | 0.765267 |
| XLOC_002248 | SIPA1L2         | chr1:232533711-232651243  | 0.287044  | 0.344436  | 0.262961 | 1        |
| XLOC_010198 | SKA1            | chr18:47901391-47920538   | 7.80247   | 9.36268   | 0.262991 | 0.62793  |
| XLOC_008517 | DCTPP1          | chr16:30435018-30441373   | 92.9095   | 111.505   | 0.263215 | 0.580893 |
| XLOC_018097 | HIST1H2AC       | chr6:26124372-26124918    | 3.70991   | 4.45264   | 0.263276 | 0.884031 |
| XLOC_011412 | DNMT1           | chr19:10244021-10305755   | 17.9699   | 21.5679   | 0.263308 | 0.566752 |
| XLOC_013784 | RTEL1, TNFRSF6l | chr20:62289162-62367494   | 6.10664   | 7.32984   | 0.263402 | 0.900642 |
| XLOC_021695 | POLR2K          | chr8:101162838-101166230  | 56.9711   | 68.3877   | 0.263507 | 0.574558 |
| XLOC_010963 | NPAS1           | chr19:47524142-47549017   | 2.67033   | 3.20553   | 0.263546 | 0.811033 |
| XLOC_009547 | B9D1            | chr17:19240866-19290532   | 34.3552   | 41.2413   | 0.263563 | 0.754905 |
| XLOC_018875 | MRPS10          | chr6:42174538-42185633    | 20.0029   | 24.0139   | 0.263661 | 0.586149 |
| XLOC_018271 | C6orf89         | chr6:36853639-36896740    | 4.56727   | 5.48326   | 0.263704 | 0.608336 |
| XLOC_015054 | ABHD5           | chr3:43732374-43764217    | 2.57755   | 3.0945    | 0.263707 | 0.642729 |
| XLOC_020540 | WBSCR22         | chr7:73097897-73112551    | 108.433   | 130.183   | 0.263734 | 0.568684 |
| XLOC_023274 | CA5BP1          | chrX:15693038-15721474    | 11.6761   | 14.0184   | 0.263767 | 0.704477 |
| XLOC_002739 | LOC399815       | chr10:124591670-124658230 | 0.497207  | 0.596973  | 0.26382  | 0.934861 |
| XLOC_011309 | MFSD12          | chr19:3538262-3557571     | 75.3164   | 90.4301   | 0.263839 | 0.589092 |
| XLOC_018745 | FLOT1           | chr6:30695510-30710453    | 106.618   | 128.02    | 0.263924 | 0.580893 |
| XLOC_012966 | TGFA            | chr2:70674411-70781147    | 1.84637   | 2.21759   | 0.264302 | 0.705194 |
| XLOC_000841 | C1orf226        | chr1:162348695-162356608  | 1.38372   | 1.66195   | 0.264321 | 0.739517 |

|             |            |                           |           |           |          |          |
|-------------|------------|---------------------------|-----------|-----------|----------|----------|
| XLOC_015767 | RFT1       | chr3:53122500-53164470    | 8.81533   | 10.5892   | 0.264502 | 0.581794 |
| XLOC_019149 | RGS17      | chr6:153332031-153452389  | 0.0323855 | 0.0389027 | 0.264522 | 1        |
| XLOC_011368 | INSR       | chr19:7112265-7294011     | 2.6499    | 3.1834    | 0.264631 | 0.608864 |
| XLOC_002498 | C10orf35   | chr10:71390002-71393355   | 23.0089   | 27.6418   | 0.264658 | 0.623939 |
| XLOC_001540 | DMRTA2     | chr1:50883222-50889119    | 6.33797   | 7.61417   | 0.264665 | 0.699464 |
| XLOC_000674 | MRPS21     | chr1:150266268-150280819  | 362.952   | 436.065   | 0.264767 | 0.592939 |
| XLOC_004333 | FOSL1      | chr11:65659691-65667997   | 329.585   | 395.99    | 0.264812 | 0.592157 |
| XLOC_010573 | MRPL4      | chr19:10362639-10370736   | 153.844   | 184.853   | 0.264911 | 0.581347 |
| XLOC_008642 | COG8,PDF   | chr16:69362523-69377013   | 28.2487   | 33.943    | 0.264927 | 0.850179 |
| XLOC_023780 | MAP3K15    | chrX:19362010-19533379    | 0.66184   | 0.795277  | 0.264974 | 0.967458 |
| XLOC_007413 | SLCO3A1    | chr15:92396937-92715665   | 2.27852   | 2.73791   | 0.264978 | 0.757708 |
| XLOC_023426 | APEX2      | chrX:55026755-55034306    | 21.6272   | 25.9927   | 0.265261 | 0.599775 |
| XLOC_005113 | OAS3       | chr12:113376248-113411054 | 1.59685   | 1.91927   | 0.265326 | 0.687395 |
| XLOC_015179 | KBTBD8     | chr3:67048726-67061632    | 0.904595  | 1.08729   | 0.265388 | 0.743519 |
| XLOC_010958 | PPP5C      | chr19:46850250-46894232   | 30.5845   | 36.762    | 0.265412 | 0.582753 |
| XLOC_008307 | DEF8       | chr16:90015138-90034468   | 41.3859   | 49.7522   | 0.265621 | 0.72141  |
| XLOC_019184 | MPC1       | chr6:166778407-166796501  | 16.2465   | 19.5311   | 0.265646 | 0.663013 |
| XLOC_015923 | SLC41A3    | chr3:125725199-125820391  | 19.0839   | 22.9428   | 0.265686 | 0.599775 |
| XLOC_014097 | ANKRD30BP2 | chr21:14410486-14490571   | 0.0497542 | 0.0598195 | 0.265797 | 1        |
| XLOC_007433 | ASB7       | chr15:101142754-101191904 | 2.24509   | 2.69951   | 0.265926 | 0.745392 |
| XLOC_021961 | LSM1       | chr8:38020838-38070819    | 33.9493   | 40.8221   | 0.265971 | 0.711178 |
| XLOC_011685 | ADCK4      | chr19:41197433-41222790   | 21.2981   | 25.6109   | 0.266029 | 0.59484  |
| XLOC_017973 | LMAN2      | chr5:176758562-176778885  | 104.634   | 125.824   | 0.266055 | 0.567668 |
| XLOC_001110 | KCNK1      | chr1:233749749-233808258  | 13.3673   | 16.0789   | 0.266459 | 0.601696 |
| XLOC_008807 | ELP5       | chr17:7155371-7166512     | 47.9434   | 57.6713   | 0.266521 | 0.582537 |
| XLOC_007172 | TMEM62     | chr15:43425721-43477341   | 8.39781   | 10.1022   | 0.26658  | 0.625461 |
| XLOC_008325 | RPUSD1     | chr16:834973-838383       | 74.8912   | 90.0944   | 0.266642 | 0.571233 |
| XLOC_005501 | ZNF385A    | chr12:54762919-54785083   | 14.7774   | 17.7773   | 0.266645 | 0.612746 |
| XLOC_003868 | OAF        | chr11:120081746-120100650 | 46.8362   | 56.3449   | 0.266663 | 0.577729 |
| XLOC_022902 | C9orf64    | chr9:86553226-86571663    | 9.73021   | 11.7057   | 0.26667  | 0.614163 |
| XLOC_000823 | PPOX       | chr1:161136180-161141010  | 15.5163   | 18.6671   | 0.266707 | 0.623939 |
| XLOC_017710 | LHFPL2     | chr5:77781037-77944648    | 2.42557   | 2.91842   | 0.266865 | 0.65944  |
| XLOC_013767 | OGFR       | chr20:61436176-61445352   | 39.2519   | 47.23     | 0.266941 | 0.570328 |
| XLOC_008524 | ZNF689     | chr16:30613878-30622096   | 3.65122   | 4.39347   | 0.266982 | 0.696511 |
| XLOC_009973 | H3F3B      | chr17:73772514-73775860   | 204.538   | 246.143   | 0.267128 | 0.587374 |
| XLOC_021792 | MAF1       | chr8:145159304-145162515  | 192.655   | 231.859   | 0.267228 | 0.578405 |
| XLOC_015677 | KIF9       | chr3:47205859-47388306    | 1.2783    | 1.53847   | 0.267268 | 0.906423 |
| XLOC_006320 | SRP54      | chr14:35452103-35498773   | 8.77608   | 10.5627   | 0.267334 | 0.60714  |
| XLOC_021263 | PNPLA8     | chr7:108110865-108168605  | 1.76402   | 2.12346   | 0.267552 | 0.684216 |
| XLOC_003384 | RCN1       | chr11:32112476-32127272   | 62.3261   | 75.0292   | 0.267616 | 0.576342 |
| XLOC_010089 | USP14      | chr18:158482-213739       | 10.7348   | 12.9235   | 0.267699 | 0.573142 |
| XLOC_022597 | LRRC8A     | chr9:131644390-131680317  | 12.8854   | 15.5126   | 0.267705 | 0.588874 |
| XLOC_022258 | DOCK8      | chr9:213107-465259        | 0.365533  | 0.440063  | 0.267708 | 0.812322 |
| XLOC_010012 | RBFOX3     | chr17:77085426-77478563   | 0.0331728 | 0.0399369 | 0.267721 | 1        |
| XLOC_003789 | BIRC2      | chr11:102217912-102249401 | 16.6149   | 20.0041   | 0.267817 | 0.585353 |
| XLOC_020901 | PSMG3      | chr7:1606969-1609668      | 58.5187   | 70.456    | 0.267824 | 0.59484  |
| XLOC_022128 | KLF10      | chr8:103661004-103667983  | 12.2468   | 14.7467   | 0.267993 | 0.59301  |
| XLOC_018009 | MGAT1      | chr5:180217540-180237137  | 32.1125   | 38.6728   | 0.268185 | 0.573798 |
| XLOC_002833 | C1QL3      | chr10:16478941-16564004   | 0.327436  | 0.394337  | 0.268216 | 0.978818 |

|             |             |                           |          |          |          |          |
|-------------|-------------|---------------------------|----------|----------|----------|----------|
| XLOC_016816 | HNRNPD      | chr4:83274466-83295149    | 118.222  | 142.379  | 0.26823  | 0.566136 |
| XLOC_014531 | MCM5        | chr22:35796115-35820495   | 33.4286  | 40.264   | 0.268409 | 0.580093 |
| XLOC_002208 | LBR         | chr1:225589203-225616557  | 10.1923  | 12.2769  | 0.268456 | 0.580746 |
| XLOC_008063 | FBXL19      | chr16:30930639-30960104   | 10.9898  | 13.2375  | 0.268462 | 0.61469  |
| XLOC_003136 | BBIP1       | chr10:112631552-112679124 | 7.72135  | 9.30133  | 0.268584 | 0.874789 |
| XLOC_012143 | RMDN2       | chr2:38152461-38294285    | 0.341123 | 0.410929 | 0.268597 | 0.88197  |
| XLOC_008526 | C16orf93    | chr16:30759619-30787628   | 2.74999  | 3.31282  | 0.268635 | 0.964442 |
| XLOC_009799 | WNT3        | chr17:44841686-44896082   | 1.08287  | 1.30452  | 0.268652 | 0.86364  |
| XLOC_002937 | FLJ31813    | chr10:51780941-51827563   | 0.33223  | 0.400278 | 0.268818 | 0.88321  |
| XLOC_005568 | LLPH        | chr12:66516848-66524533   | 47.9609  | 57.7844  | 0.268821 | 0.56885  |
| XLOC_009432 | DHX33       | chr17:5344231-5372380     | 9.22096  | 11.1099  | 0.268855 | 0.564651 |
| XLOC_016213 | SH3TC1      | chr4:8201059-8242830      | 3.70388  | 4.46278  | 0.268905 | 0.683816 |
| XLOC_022578 | SLC25A25    | chr9:130830478-130871537  | 16.216   | 19.5396  | 0.268982 | 0.574243 |
| XLOC_018872 | CCND3       | chr6:41902670-42016610    | 27.4714  | 33.1023  | 0.269004 | 0.592013 |
| XLOC_004867 | MFSD5       | chr12:53645369-53648190   | 22.5385  | 27.1584  | 0.26901  | 0.593927 |
| XLOC_022221 | PYCRL       | chr8:144686082-144691784  | 23.503   | 28.3231  | 0.269134 | 0.578405 |
| XLOC_011534 | LSM4        | chr19:18417039-18434001   | 140.03   | 168.754  | 0.26919  | 0.565559 |
| XLOC_018546 | UST         | chr6:149068270-149398126  | 2.52665  | 3.04497  | 0.269202 | 0.663419 |
| XLOC_001498 | EBNA1BP2    | chr1:43629844-43720029    | 81.6412  | 98.3942  | 0.269276 | 0.566297 |
| XLOC_011312 | PIP5K1C     | chr19:3630178-3700477     | 8.01851  | 9.66556  | 0.26952  | 0.601217 |
| XLOC_007659 | ANP32A      | chr15:69070874-69113261   | 47.7585  | 57.5696  | 0.269548 | 0.555083 |
| XLOC_008205 | WWP2        | chr16:69796186-69975644   | 10.4668  | 12.6185  | 0.269712 | 0.59463  |
| XLOC_015394 | RNF13       | chr3:149530474-149679925  | 6.10683  | 7.36235  | 0.269741 | 0.629512 |
| XLOC_008791 | MIS12       | chr17:5389693-5394130     | 8.4748   | 10.2189  | 0.269992 | 0.622503 |
| XLOC_018488 | CENPW       | chr6:126661252-126669754  | 56.9927  | 68.7232  | 0.27002  | 0.623939 |
| XLOC_010462 | CSNK1G2     | chr19:1941160-1981336     | 33.913   | 40.8936  | 0.270038 | 0.564045 |
| XLOC_000121 | DDI2,RSC1A1 | chr1:15943952-15988217    | 2.19116  | 2.64225  | 0.270077 | 0.748337 |
| XLOC_014839 | RPS19BP1    | chr22:39925097-39928860   | 118.194  | 142.532  | 0.27013  | 0.563587 |
| XLOC_011983 | ZSCAN5A     | chr19:56732678-56739659   | 0.550347 | 0.66368  | 0.270146 | 0.861051 |
| XLOC_006909 | POMT2       | chr14:77741298-77787225   | 3.08121  | 3.71579  | 0.270172 | 0.64317  |
| XLOC_017168 | OCLN        | chr5:68788118-68853931    | 4.60707  | 5.55647  | 0.27032  | 0.597911 |
| XLOC_007334 | CHRNA5      | chr15:78857861-78913637   | 1.69349  | 2.04298  | 0.270674 | 0.722151 |
| XLOC_003155 | RAB11FIP2   | chr10:119764426-119806114 | 1.34492  | 1.62265  | 0.270827 | 0.67467  |
| XLOC_021777 | GLI4        | chr8:144349606-144359101  | 28.3561  | 34.2151  | 0.270976 | 0.650967 |
| XLOC_011419 | CDC37       | chr19:10501808-10514271   | 253.414  | 305.857  | 0.271359 | 0.687986 |
| XLOC_002998 | USP54       | chr10:75257295-75335433   | 0.930316 | 1.12298  | 0.271545 | 0.718059 |
| XLOC_022666 | FAM69B      | chr9:139607023-139622636  | 3.19774  | 3.86047  | 0.271724 | 0.977897 |
| XLOC_018892 | MRPS18A     | chr6:43638933-43655549    | 66.2248  | 79.95    | 0.271727 | 0.558518 |
| XLOC_009569 | SLC46A1     | chr17:26698986-26733230   | 5.47431  | 6.60898  | 0.27175  | 0.604911 |
| XLOC_015949 | PIK3R4      | chr3:130397777-130465696  | 2.68342  | 3.23969  | 0.271781 | 0.633194 |
| XLOC_003086 | SLC25A28    | chr10:101370274-101380221 | 18.6695  | 22.5405  | 0.271841 | 0.603622 |
| XLOC_011341 | LONP1       | chr19:5691844-5720463     | 96.0171  | 115.941  | 0.272026 | 0.568192 |
| XLOC_020359 | AIMP2       | chr7:6048881-6098860      | 11.7879  | 14.235   | 0.272135 | 0.934331 |
| XLOC_011769 | MYPOP       | chr19:46393280-46405862   | 9.84064  | 11.8847  | 0.272278 | 0.679486 |
| XLOC_015422 | MFSD1       | chr3:158519714-158547508  | 11.4292  | 13.8069  | 0.272662 | 0.596867 |
| XLOC_021073 | CHCHD2      | chr7:56169265-56174187    | 769.931  | 930.192  | 0.272799 | 0.578092 |
| XLOC_016316 | FIP1L1      | chr4:54243819-54326103    | 9.67817  | 11.6937  | 0.272919 | 0.600393 |
| XLOC_010744 | CCNE1       | chr19:30302900-30315215   | 14.8188  | 17.9058  | 0.273001 | 0.591942 |
| XLOC_000213 | SFN         | chr1:27189632-27190947    | 61.6759  | 74.5244  | 0.273007 | 0.559351 |



|             |           |                           |          |           |          |          |
|-------------|-----------|---------------------------|----------|-----------|----------|----------|
| XLOC_011354 | KHSRP     | chr19:6413118-6424822     | 58.6676  | 70.8984   | 0.27319  | 0.543076 |
| XLOC_001425 | ZBTB8OS   | chr1:33087306-33116185    | 13.4719  | 16.2825   | 0.273364 | 0.67701  |
| XLOC_016285 | LIAS      | chr4:39460664-39479271    | 9.37587  | 11.3323   | 0.273422 | 0.61138  |
| XLOC_010043 | ARHGDI1A  | chr17:79825596-79829282   | 252.321  | 305.03    | 0.273694 | 0.562668 |
| XLOC_009996 | SRSF2     | chr17:74730196-74775336   | 85.7567  | 103.702   | 0.274122 | 0.594419 |
| XLOC_006893 | LTBP2     | chr14:74964885-75079034   | 0.644858 | 0.780072  | 0.274626 | 0.752311 |
| XLOC_007677 | NPTN      | chr15:73735498-73925753   | 19.7338  | 23.875    | 0.274832 | 0.56885  |
| XLOC_001800 | MCL1      | chr1:150547026-150552214  | 74.2235  | 89.8036   | 0.274898 | 0.551866 |
| XLOC_005793 | ANKLE2    | chr12:133302253-133338451 | 12.9248  | 15.6416   | 0.275245 | 0.566913 |
| XLOC_010247 | CNDP2     | chr18:72163499-72190689   | 17.016   | 20.5927   | 0.275246 | 0.552625 |
| XLOC_011981 | ZNF787    | chr19:56598731-56632649   | 72.8726  | 88.1987   | 0.275382 | 0.559351 |
| XLOC_006098 | CCDC122   | chr13:44410488-44468068   | 1.16346  | 1.40843   | 0.275665 | 0.871053 |
| XLOC_002506 | SLC29A3   | chr10:73079009-73123147   | 6.89656  | 8.34876   | 0.275684 | 0.652628 |
| XLOC_013937 | GSS       | chr20:33516235-33543601   | 67.4564  | 81.6737   | 0.275916 | 0.546288 |
| XLOC_005646 | ANKS1B    | chr12:99039077-100378432  | 2.4936   | 3.0192    | 0.275934 | 0.813397 |
| XLOC_001465 | SF3A3     | chr1:38422651-38455761    | 35.9982  | 43.5858   | 0.275936 | 0.547706 |
| XLOC_001718 | RHOC      | chr1:113243748-113250025  | 266.933  | 323.287   | 0.276338 | 0.559079 |
| XLOC_002970 | AIFM2     | chr10:71812356-71892690   | 19.8895  | 24.0897   | 0.276407 | 0.704317 |
| XLOC_010401 | TMX3      | chr18:66340924-66382353   | 5.74299  | 6.9559    | 0.276434 | 0.581794 |
| XLOC_018620 | HTATSF1P2 | chr6:3020389-3025005      | 2.35669  | 2.85459   | 0.276521 | 0.658831 |
| XLOC_015737 | TMEM115   | chr3:50392179-50396939    | 36.0642  | 43.6874   | 0.27665  | 0.55829  |
| XLOC_001442 | PSMB2     | chr1:36065142-36107445    | 31.318   | 37.9477   | 0.277022 | 0.532407 |
| XLOC_005598 | E2F7      | chr12:77415025-77459360   | 2.99668  | 3.63109   | 0.277039 | 0.608864 |
| XLOC_014502 | CCDC157   | chr22:30727976-30773894   | 0.514186 | 0.623082  | 0.277133 | 0.977096 |
| XLOC_021242 | DNAJC2    | chr7:102937872-102985320  | 22.8005  | 27.6294   | 0.277143 | 0.818631 |
| XLOC_007823 | SOLH      | chr16:577855-604636       | 28.9884  | 35.1282   | 0.277154 | 0.539043 |
| XLOC_009331 | CHMP6     | chr17:78965640-78973933   | 13.2614  | 16.0706   | 0.277193 | 0.635374 |
| XLOC_020466 | DBNL      | chr7:44084238-44101315    | 37.9693  | 46.0128   | 0.277201 | 0.551968 |
| XLOC_016700 | SEPSECS   | chr4:25121626-25162204    | 0.895322 | 1.08517   | 0.277444 | 0.715755 |
| XLOC_010197 | SCARNA17  | chr18:47340392-47340813   | 6.61237  | 8.01455   | 0.277455 | 0.842989 |
| XLOC_010447 | ATP5D     | chr19:1241748-1244824     | 365.672  | 443.231   | 0.277508 | 0.549186 |
| XLOC_001390 | RPA2      | chr1:28218048-28241236    | 27.9906  | 33.9276   | 0.277519 | 0.540163 |
| XLOC_010456 | APC2      | chr19:1450147-1479228     | 0.920247 | 1.11546   | 0.277544 | 0.93113  |
| XLOC_018234 | SLC39A7   | chr6:33168602-33172214    | 42.2665  | 51.2409   | 0.27778  | 0.536705 |
| XLOC_018763 | GPANK1    | chr6:31629005-31637843    | 19.3105  | 23.4119   | 0.277855 | 0.879055 |
| XLOC_002964 | PBLD      | chr10:70042416-70102953   | 0.49115  | 0.595469  | 0.277862 | 0.98206  |
| XLOC_000361 | TOE1      | chr1:45794913-45956840    | 10.475   | 12.7045   | 0.278391 | 0.757708 |
| XLOC_016026 | SSR3      | chr3:156257928-156272973  | 240.613  | 291.85    | 0.27851  | 0.582318 |
| XLOC_018802 | TAP1      | chr6:32808493-32821748    | 24.6766  | 29.9316   | 0.278526 | 0.8146   |
| XLOC_015905 | PARP9     | chr3:122246759-122294049  | 1.76184  | 2.13719   | 0.278635 | 0.81677  |
| XLOC_017843 | SIL1      | chr5:138282409-138534065  | 39.5601  | 47.9892   | 0.278663 | 0.540664 |
| XLOC_017900 | ZNF300    | chr5:150273953-150284545  | 5.5892   | 6.78059   | 0.27877  | 0.581347 |
| XLOC_015931 | MGLL      | chr3:127407904-127542093  | 28.9813  | 35.1652   | 0.279026 | 0.532783 |
| XLOC_021862 | XKR6      | chr8:10753656-11058875    | 0.162156 | 0.196761  | 0.279062 | 1        |
| XLOC_015421 | GFM1      | chr3:158362316-158410360  | 7.34362  | 8.91117   | 0.279124 | 0.647731 |
| XLOC_002536 | PPIF      | chr10:81107219-81115089   | 60.5611  | 73.49     | 0.279158 | 0.53682  |
| XLOC_008015 | KIAA0556  | chr16:27561467-27791692   | 1.57744  | 1.91425   | 0.279199 | 0.666852 |
| XLOC_010348 | ST8SIA5   | chr18:44259080-44337039   | 0.017333 | 0.0210366 | 0.279373 | 1        |
| XLOC_023025 | POLE3     | chr9:116169517-116191879  | 39.005   | 47.3404   | 0.279413 | 0.542814 |

|             |            |                           |           |           |          |          |
|-------------|------------|---------------------------|-----------|-----------|----------|----------|
| XLOC_004931 | SPRYD4     | chr12:56862300-56882181   | 8.57934   | 10.4157   | 0.279821 | 0.801574 |
| XLOC_015566 | LOC401052  | chr3:10048101-10052779    | 1.76101   | 2.13811   | 0.279934 | 0.791672 |
| XLOC_002633 | R3HCC1L    | chr10:99894380-100004654  | 6.06975   | 7.37049   | 0.280124 | 0.653218 |
| XLOC_022598 | PHYHD1     | chr9:131683173-131704320  | 0.0642551 | 0.0780289 | 0.280199 | 1        |
| XLOC_000120 | DNAJC16    | chr1:15853351-15911605    | 2.13571   | 2.59398   | 0.280453 | 0.803226 |
| XLOC_019137 | NUP43      | chr6:150045456-150067688  | 9.37248   | 11.3843   | 0.280541 | 0.554974 |
| XLOC_014630 | TRMU       | chr22:46731297-46753237   | 18.207    | 22.1159   | 0.280592 | 0.566136 |
| XLOC_015141 | SMIM4      | chr3:52570620-52574586    | 65.1623   | 79.1523   | 0.280593 | 0.629991 |
| XLOC_006082 | PROSER1    | chr13:39584001-39612213   | 5.99344   | 7.28039   | 0.280632 | 0.579868 |
| XLOC_002493 | VPS26A     | chr10:70883907-70932616   | 21.5542   | 26.1856   | 0.280804 | 0.539268 |
| XLOC_001378 | GPATCH3    | chr1:27216978-27226962    | 7.54165   | 9.16339   | 0.281001 | 0.625266 |
| XLOC_022141 | SYBU       | chr8:110586404-110704020  | 6.76276   | 8.21756   | 0.281097 | 0.604499 |
| XLOC_013431 | MSL3P1     | chr2:234774089-234777055  | 4.20267   | 5.10718   | 0.28122  | 0.668024 |
| XLOC_014753 | THOC5      | chr22:29904155-29949736   | 26.7411   | 32.4997   | 0.28137  | 0.546288 |
| XLOC_009878 | SKA2       | chr17:57187307-57232800   | 15.899    | 19.3253   | 0.281557 | 0.544405 |
| XLOC_008013 | IL4R       | chr16:27325229-27376099   | 6.42401   | 7.80874   | 0.281617 | 0.584407 |
| XLOC_003362 | ZDHHC13    | chr11:19138691-19197967   | 6.68617   | 8.12845   | 0.281801 | 0.6086   |
| XLOC_001482 | PPT1       | chr1:40538381-40563142    | 43.6834   | 53.1089   | 0.281867 | 0.522524 |
| XLOC_012527 | HOXD9      | chr2:176987412-176989645  | 10.2032   | 12.4058   | 0.281997 | 0.653588 |
| XLOC_000506 | KIAA1107   | chr1:92632608-92650280    | 0.234302  | 0.284962  | 0.282402 | 1        |
| XLOC_020594 | STEAP1     | chr7:89783688-89794141    | 9.89621   | 12.0368   | 0.282506 | 0.608864 |
| XLOC_011404 | ZNF562     | chr19:9759337-9785776     | 3.54672   | 4.3139    | 0.282507 | 0.581794 |
| XLOC_001647 | GEMIN8P4   | chr1:90458823-90460525    | 0.921494  | 1.12101   | 0.282754 | 0.838228 |
| XLOC_021230 | RABL5      | chr7:100956647-100965093  | 8.81764   | 10.7271   | 0.282796 | 0.581797 |
| XLOC_021690 | C8orf47    | chr8:99076749-99105838    | 7.45173   | 9.06566   | 0.282836 | 0.759934 |
| XLOC_010313 | KCTD1      | chr18:24034873-24237365   | 2.41428   | 2.93726   | 0.282875 | 0.730157 |
| XLOC_016089 | CLCN2      | chr3:184053716-184079439  | 5.8669    | 7.13842   | 0.283006 | 0.81334  |
| XLOC_000364 | NASP       | chr1:46049659-46084578    | 40.9934   | 49.8782   | 0.283017 | 0.533447 |
| XLOC_014466 | SPECC1L    | chr22:24666789-24813708   | 6.31308   | 7.68147   | 0.283037 | 0.566906 |
| XLOC_013760 | ADRM1      | chr20:60878026-60883918   | 143.652   | 174.795   | 0.283089 | 0.524638 |
| XLOC_013065 | MITD1      | chr2:99785725-99797492    | 16.6934   | 20.3129   | 0.283115 | 0.614106 |
| XLOC_001311 | RCC2       | chr1:17733250-17766250    | 20.6511   | 25.1292   | 0.283146 | 0.523539 |
| XLOC_022239 | FBXL6      | chr8:145579087-145582183  | 52.5611   | 63.9603   | 0.283182 | 0.524638 |
| XLOC_006002 | LAMP1      | chr13:113951468-113977741 | 64.2307   | 78.1827   | 0.283587 | 0.533447 |
| XLOC_014060 | PSMA7      | chr20:60711782-60718514   | 261.197   | 317.941   | 0.28362  | 0.527683 |
| XLOC_008530 | FBXL19-AS1 | chr16:30930639-30960104   | 0.28942   | 0.352312  | 0.283689 | 1        |
| XLOC_009335 | C17orf89   | chr17:79213110-79215098   | 76.8367   | 93.5391   | 0.283774 | 0.587082 |
| XLOC_003965 | CTSD       | chr11:1490684-1785501     | 161.03    | 196.034   | 0.283777 | 0.590233 |
| XLOC_014888 | C22orf26   | chr22:46446338-46454402   | 0.38286   | 0.466135  | 0.283931 | 0.952184 |
| XLOC_002843 | C10orf114  | chr10:21783420-21786213   | 7.8856    | 9.60086   | 0.283943 | 0.688371 |
| XLOC_022803 | ARID3C     | chr9:34621454-34628011    | 0.0840451 | 0.102335  | 0.284064 | 1        |
| XLOC_012306 | FAHD2A     | chr2:96068447-96078879    | 23.1306   | 28.1656   | 0.284132 | 0.566136 |
| XLOC_023331 | MID1IP1    | chrX:38660684-38665783    | 30.2161   | 36.7949   | 0.284189 | 0.552625 |
| XLOC_010595 | SWSAP1     | chr19:11485382-11487627   | 2.40337   | 2.92681   | 0.284266 | 0.764909 |
| XLOC_007640 | DPP8       | chr15:65737997-65810035   | 0.800595  | 0.974998  | 0.284326 | 0.73942  |
| XLOC_010611 | WDR83      | chr19:12777617-12792701   | 14.4296   | 17.5757   | 0.284557 | 0.933523 |
| XLOC_003169 | NSMCE4A    | chr10:123716602-123734743 | 18.475    | 22.5033   | 0.284567 | 0.569671 |
| XLOC_002071 | ARPC5      | chr1:183595327-183605076  | 22.4701   | 27.3724   | 0.284711 | 0.530943 |
| XLOC_020627 | ARPC1B     | chr7:98972297-99006305    | 152.192   | 185.396   | 0.28472  | 0.783706 |

|             |           |                           |            |           |          |          |
|-------------|-----------|---------------------------|------------|-----------|----------|----------|
| XLOC_002745 | BUB3      | chr10:124913759-124924886 | 119.193    | 145.224   | 0.284981 | 0.581949 |
| XLOC_018181 | VAR52     | chr6:30881981-30894235    | 18.106     | 22.0637   | 0.285202 | 0.534323 |
| XLOC_005605 | CCDC59    | chr12:82746082-82873016   | 19.4448    | 23.6954   | 0.285225 | 0.536904 |
| XLOC_011261 | C2CD4C    | chr19:405442-409170       | 9.4378     | 11.501    | 0.285238 | 0.606401 |
| XLOC_021568 | GINS4     | chr8:41386724-41402565    | 5.15664    | 6.28415   | 0.285286 | 0.58701  |
| XLOC_016165 | TMEM175   | chr4:926261-952443        | 7.58361    | 9.24183   | 0.285293 | 0.671261 |
| XLOC_021912 | TNFRSF10A | chr8:23048969-23082680    | 5.75054    | 7.00857   | 0.285423 | 0.648844 |
| XLOC_021103 | BAZ1B     | chr7:72854727-72936615    | 8.96574    | 10.9319   | 0.286047 | 0.522524 |
| XLOC_017641 | C5orf34   | chr5:43486802-43515273    | 2.57517    | 3.13997   | 0.286084 | 0.669767 |
| XLOC_023513 | CSTF2     | chrX:100075347-100095923  | 9.64299    | 11.7598   | 0.286312 | 0.589877 |
| XLOC_023479 | TSIX      | chrX:73012039-73072588    | 0.00827232 | 0.0100891 | 0.286438 | 1        |
| XLOC_001996 | ILDR2     | chr1:166882440-166944561  | 0.601355   | 0.733477  | 0.286535 | 0.708142 |
| XLOC_009162 | TMEM92    | chr17:48348766-48358846   | 0.0892004  | 0.108802  | 0.286583 | 1        |
| XLOC_013916 | BCL2L1    | chr20:30252260-30310656   | 129.424    | 157.876   | 0.28668  | 0.514169 |
| XLOC_015945 | MBD4      | chr3:129149786-129239191  | 7.9303     | 9.6751    | 0.286901 | 0.746692 |
| XLOC_022804 | SIGMAR1   | chr9:34634718-34637768    | 145.303    | 177.282   | 0.286974 | 0.521655 |
| XLOC_012824 | DNMT3A    | chr2:25455829-25565459    | 1.06734    | 1.3025    | 0.287262 | 0.797588 |
| XLOC_016146 | WDR53     | chr3:196281058-196295413  | 2.74752    | 3.35297   | 0.287311 | 0.732699 |
| XLOC_009975 | UNC13D    | chr17:73823307-73840798   | 0.713237   | 0.870508  | 0.287477 | 0.799656 |
| XLOC_010678 | MVB12A    | chr19:17530911-17536140   | 64.3276    | 78.5151   | 0.287533 | 0.530062 |
| XLOC_006368 | PELI2     | chr14:56585092-56768031   | 0.630607   | 0.76973   | 0.287609 | 0.74277  |
| XLOC_007726 | BCL2A1    | chr15:80253231-80263643   | 44.0347    | 53.7547   | 0.287751 | 0.532767 |
| XLOC_006140 | NEK3      | chr13:52706778-52733996   | 7.85251    | 9.58613   | 0.287794 | 0.57055  |
| XLOC_008413 | EMP2      | chr16:10622278-10674539   | 3.15081    | 3.84733   | 0.288132 | 0.60307  |
| XLOC_010454 | DAZAP1    | chr19:1407583-1435682     | 105.293    | 128.572   | 0.288172 | 0.51789  |
| XLOC_001827 | S100A11   | chr1:152004981-152009511  | 899.201    | 1098.13   | 0.28833  | 0.535354 |
| XLOC_008398 | UBALD1    | chr16:4658883-4664927     | 42.1317    | 51.4537   | 0.28837  | 0.54424  |
| XLOC_016302 | ATP10D    | chr4:47487409-47595503    | 0.789538   | 0.964241  | 0.288384 | 0.699944 |
| XLOC_022189 | ST3GAL1   | chr8:134467090-134584183  | 5.04954    | 6.16816   | 0.28869  | 0.539675 |
| XLOC_001992 | TMCO1     | chr1:165693527-165738159  | 12.9168    | 15.7799   | 0.288842 | 0.521655 |
| XLOC_012695 | PSMD1     | chr2:231921577-232037540  | 20.2273    | 24.7114   | 0.288868 | 0.500861 |
| XLOC_014416 | RANBP1    | chr22:20105023-20114704   | 146.112    | 178.509   | 0.288923 | 0.524638 |
| XLOC_015565 | EMC3      | chr3:10005635-10028522    | 26.578     | 32.4715   | 0.288944 | 0.570316 |
| XLOC_003592 | PRDX5     | chr11:64085559-64089295   | 368.078    | 449.716   | 0.289002 | 0.540414 |
| XLOC_023083 | TOR2A     | chr9:130478357-130497628  | 39.2934    | 48.0132   | 0.289145 | 0.559351 |
| XLOC_021618 | RRS1      | chr8:67341262-67342968    | 39.1676    | 47.8604   | 0.289172 | 0.525673 |
| XLOC_005497 | SMUG1     | chr12:54574141-54582778   | 33.6449    | 41.1133   | 0.289217 | 0.665505 |
| XLOC_007485 | EMC7      | chr15:34376223-34394053   | 85.2008    | 104.116   | 0.289247 | 0.517848 |
| XLOC_018617 | MGC39372  | chr6:2854890-2876744      | 1.95302    | 2.38661   | 0.28926  | 0.795819 |
| XLOC_010676 | DDA1      | chr19:17420336-17445638   | 10.9296    | 13.3563   | 0.289276 | 0.565953 |
| XLOC_022452 | C9orf3    | chr9:97488950-97849500    | 1.90562    | 2.32884   | 0.289355 | 0.689772 |
| XLOC_002258 | B3GALNT2  | chr1:235530727-235667781  | 6.02295    | 7.36145   | 0.28952  | 0.619359 |
| XLOC_005459 | KRT81     | chr12:52679696-52685299   | 0.69937    | 0.854972  | 0.289821 | 0.864909 |
| XLOC_003845 | UBE4A     | chr11:118230295-118289530 | 5.92112    | 7.23897   | 0.289915 | 0.877654 |
| XLOC_010250 | TSHZ1     | chr18:72922709-73001905   | 1.37105    | 1.67622   | 0.289923 | 0.692252 |
| XLOC_016701 | SEL1L3    | chr4:25749048-25864610    | 9.58236    | 11.7154   | 0.289957 | 0.52407  |
| XLOC_022263 | SMARCA2   | chr9:2015341-2193623      | 4.63839    | 5.67122   | 0.290036 | 0.54457  |
| XLOC_009565 | IFT20     | chr17:26646120-26662515   | 25.8515    | 31.6117   | 0.290212 | 0.847391 |
| XLOC_017500 | SIMC1     | chr5:175665369-175772990  | 8.90796    | 10.8933   | 0.290276 | 0.592657 |

|             |               |                           |           |           |          |          |
|-------------|---------------|---------------------------|-----------|-----------|----------|----------|
| XLOC_004699 | PEX5          | chr12:7341758-7371169     | 34.1904   | 41.8128   | 0.290351 | 0.516033 |
| XLOC_018738 | HCG18         | chr6:30201815-30314635    | 1.38435   | 1.69323   | 0.290569 | 0.884911 |
| XLOC_023091 | DPM2          | chr9:130697373-130700763  | 141.444   | 173.015   | 0.290665 | 0.517103 |
| XLOC_004971 | HMG2A2        | chr12:66151799-66360071   | 21.488    | 26.2858   | 0.290757 | 0.683647 |
| XLOC_003320 | AKIP1         | chr11:8932700-8954553     | 22.6778   | 27.7471   | 0.291054 | 0.552614 |
| XLOC_012770 | ADI1          | chr2:3501689-3523350      | 20.2136   | 24.7383   | 0.29142  | 0.54556  |
| XLOC_018438 | ARMC2         | chr6:109169618-109295352  | 0.0692598 | 0.0847659 | 0.291466 | 1        |
| XLOC_001500 | ELOVL1        | chr1:43829067-43833745    | 91.0517   | 111.443   | 0.291553 | 0.52274  |
| XLOC_023967 | CHM           | chrX:85116184-85302566    | 1.95409   | 2.39241   | 0.29197  | 0.670352 |
| XLOC_018464 | KPNA5         | chr6:117002366-117063030  | 0.626001  | 0.7665    | 0.292121 | 0.802444 |
| XLOC_022262 | DMRT2         | chr9:1050345-1057554      | 2.59134   | 3.17331   | 0.292293 | 0.733299 |
| XLOC_020518 | VKORC1L1      | chr7:65338256-65419800    | 9.20878   | 11.2776   | 0.292377 | 0.664657 |
| XLOC_022052 | IL7           | chr8:79645006-79717758    | 0.568912  | 0.696765  | 0.292467 | 0.825017 |
| XLOC_006187 | UGGT2         | chr13:96453835-96705736   | 2.28492   | 2.79851   | 0.292516 | 0.608336 |
| XLOC_009372 | CRK           | chr17:1324646-1359561     | 8.07551   | 9.89373   | 0.292961 | 0.540678 |
| XLOC_003496 | ZDHHC5        | chr11:57435473-57468659   | 16.6178   | 20.3612   | 0.293088 | 0.515101 |
| XLOC_006371 | AP5M1         | chr14:57669193-57756797   | 3.90856   | 4.78984   | 0.293343 | 0.843686 |
| XLOC_021008 | DPY19L1       | chr7:34968492-35077653    | 2.86171   | 3.50697   | 0.293348 | 0.592157 |
| XLOC_001953 | PIGM          | chr1:159997461-160001783  | 2.11855   | 2.59696   | 0.29375  | 0.642802 |
| XLOC_012126 | SPAST         | chr2:32288679-32382706    | 1.71757   | 2.10544   | 0.293753 | 0.631505 |
| XLOC_017683 | TAF9          | chr5:68647552-68710630    | 96.0343   | 117.723   | 0.293772 | 0.569295 |
| XLOC_018278 | ZFAND3        | chr6:37787306-38122399    | 21.1053   | 25.8726   | 0.293814 | 0.506829 |
| XLOC_010703 | C19orf60      | chr19:18699494-18703147   | 54.9663   | 67.3864   | 0.293909 | 0.555004 |
| XLOC_017298 | SLC12A2       | chr5:127419482-127525380  | 1.5692    | 1.92418   | 0.294211 | 0.611005 |
| XLOC_017039 | FAT1          | chr4:187508936-187644987  | 1.12824   | 1.38356   | 0.294309 | 0.566107 |
| XLOC_001617 | FUBP1         | chr1:78413590-78444777    | 20.0486   | 24.586    | 0.294333 | 0.514736 |
| XLOC_018832 | FKBP5         | chr6:35541361-35704724    | 6.67553   | 8.18758   | 0.294554 | 0.528761 |
| XLOC_021172 | PON2          | chr7:95034173-95064384    | 33.7015   | 41.3476   | 0.294991 | 0.490568 |
| XLOC_015108 | RNF123        | chr3:49726949-49761384    | 8.78673   | 10.7807   | 0.295047 | 0.639634 |
| XLOC_001659 | DNTTIP2       | chr1:94335013-94344762    | 18.4052   | 22.5819   | 0.295053 | 0.500835 |
| XLOC_017833 | FAM13B        | chr5:137225124-137368802  | 2.48428   | 3.04816   | 0.295113 | 0.587086 |
| XLOC_003168 | ATE1          | chr10:123502624-123687546 | 1.17733   | 1.44473   | 0.295285 | 0.754498 |
| XLOC_020619 | LMTK2         | chr7:97736196-97838944    | 3.21152   | 3.94104   | 0.295323 | 0.547145 |
| XLOC_002805 | PRKCQ         | chr10:6469104-6622254     | 1.26115   | 1.54775   | 0.295435 | 0.719384 |
| XLOC_005151 | SETD1B        | chr12:122242637-122270562 | 2.39343   | 2.93735   | 0.295437 | 0.597425 |
| XLOC_004884 | HOXC4,HOXC5,H | chr12:54410641-54449814   | 12.2604   | 15.0472   | 0.29548  | 0.628907 |
| XLOC_006819 | GMFB          | chr14:54941208-54955744   | 7.19677   | 8.83352   | 0.295639 | 0.525673 |
| XLOC_013163 | TMEM163       | chr2:135213329-135476571  | 0.035005  | 0.0429706 | 0.295789 | 1        |
| XLOC_002113 | PTPN7         | chr1:202116140-202130716  | 25.1585   | 30.8882   | 0.296008 | 0.497598 |
| XLOC_014412 | COMT          | chr22:19863039-20004309   | 49.8563   | 61.216    | 0.296133 | 0.703945 |
| XLOC_004752 | STRAP         | chr12:16035287-16056410   | 78.0624   | 95.8543   | 0.296216 | 0.50844  |
| XLOC_002825 | DCLRE1C       | chr10:14948870-14996094   | 2.95854   | 3.63314   | 0.296332 | 0.592157 |
| XLOC_002147 | SLC45A3       | chr1:205626980-205649630  | 6.30969   | 7.74857   | 0.29636  | 0.574853 |
| XLOC_012997 | LOXL3         | chr2:74753774-74784678    | 5.43889   | 6.67929   | 0.296383 | 0.940297 |
| XLOC_022600 | FAM73B        | chr9:131799252-131834351  | 17.3658   | 21.3267   | 0.296414 | 0.509882 |
| XLOC_008613 | RRAD          | chr16:66955581-66959439   | 0.123072  | 0.151156  | 0.296535 | 1        |
| XLOC_002936 | TIMM23        | chr10:51592080-51623386   | 114.184   | 140.282   | 0.296967 | 0.495945 |
| XLOC_015136 | GLYCTK        | chr3:52321835-52329272    | 8.97724   | 11.0293   | 0.297001 | 0.657199 |
| XLOC_003690 | FAM86C1       | chr11:71498556-71524905   | 2.86528   | 3.5206    | 0.297147 | 0.699308 |

|             |           |                           |           |           |          |          |
|-------------|-----------|---------------------------|-----------|-----------|----------|----------|
| XLOC_002135 | PPP1R15B  | chr1:204372491-204380944  | 7.45448   | 9.15944   | 0.297151 | 0.505536 |
| XLOC_021459 | MSRA      | chr8:9911829-10286401     | 9.7592    | 11.9919   | 0.29722  | 0.60754  |
| XLOC_006184 | ABCC4     | chr13:95672082-95953687   | 3.40538   | 4.18489   | 0.297373 | 0.538044 |
| XLOC_012029 | TRAPPC12  | chr2:3383445-3483342      | 16.201    | 19.9097   | 0.297384 | 0.539675 |
| XLOC_005143 | UNC119B   | chr12:121148237-121161443 | 11.3969   | 14.0065   | 0.297451 | 0.517465 |
| XLOC_000879 | FMO4      | chr1:171283485-171311223  | 0.36619   | 0.450067  | 0.297549 | 0.865106 |
| XLOC_009083 | AOC3      | chr17:41003200-41010140   | 0.789611  | 0.970504  | 0.297591 | 0.7646   |
| XLOC_003237 | TSPAN4    | chr11:842823-867116       | 51.851    | 63.7323   | 0.297651 | 0.518305 |
| XLOC_004341 | BRMS1     | chr11:66104803-66112582   | 44.0473   | 54.1487   | 0.297873 | 0.495945 |
| XLOC_001382 | SLC9A1    | chr1:27425299-27481621    | 8.71261   | 10.711    | 0.297914 | 0.535571 |
| XLOC_003506 | FAM111A   | chr11:58910317-58922511   | 4.27911   | 5.26228   | 0.298376 | 0.563431 |
| XLOC_016087 | ALG3      | chr3:183948316-183967313  | 64.2054   | 78.9688   | 0.298589 | 0.53682  |
| XLOC_023102 | WDR34     | chr9:131314836-131419129  | 131.945   | 162.288   | 0.298625 | 0.774988 |
| XLOC_010634 | IL27RA    | chr19:14142551-14163717   | 9.82891   | 12.0897   | 0.298681 | 0.546263 |
| XLOC_000959 | NR5A2     | chr1:199996729-200146550  | 0.0262648 | 0.0323139 | 0.29902  | 1        |
| XLOC_007248 | SNX22     | chr15:64443915-64455354   | 0.45847   | 0.564075  | 0.299059 | 0.976381 |
| XLOC_009672 | GJD3      | chr17:38516904-38520945   | 3.02224   | 3.71869   | 0.299176 | 0.647903 |
| XLOC_020473 | CCM2      | chr7:45039344-45116069    | 17.2816   | 21.2667   | 0.299363 | 0.558053 |
| XLOC_020420 | DPY19L2P3 | chr7:29685537-29727859    | 0.226484  | 0.278735  | 0.299485 | 1        |
| XLOC_008020 | ATXN2L    | chr16:28834368-28848558   | 50.2474   | 61.8431   | 0.299565 | 0.511483 |
| XLOC_012442 | C2orf27A  | chr2:132480063-132524977  | 0.362939  | 0.446699  | 0.299577 | 0.89301  |
| XLOC_011729 | ZNF428    | chr19:44111375-44124014   | 11.4653   | 14.1133   | 0.299783 | 0.641994 |
| XLOC_008500 | CDIPT     | chr16:29869677-29874578   | 51.2311   | 63.0664   | 0.299852 | 0.513755 |
| XLOC_014572 | ATF4      | chr22:39916568-39918691   | 498.645   | 613.949   | 0.300104 | 0.523431 |
| XLOC_013823 | IDH3B     | chr20:2639040-2644865     | 46.6743   | 57.4728   | 0.300252 | 0.496696 |
| XLOC_019020 | RTN4IP1   | chr6:107018902-107077373  | 2.99554   | 3.68952   | 0.300618 | 0.638542 |
| XLOC_016295 | TMEM33    | chr4:41937136-41962824    | 7.87698   | 9.70654   | 0.301313 | 0.500058 |
| XLOC_015745 | RRP9      | chr3:51967441-51975957    | 71.8271   | 88.513    | 0.301361 | 0.492699 |
| XLOC_013521 | MCM8      | chr20:5931297-5975831     | 1.86607   | 2.29996   | 0.301602 | 0.632134 |
| XLOC_007452 | NIPA2     | chr15:23004683-23034427   | 18.8124   | 23.1882   | 0.301707 | 0.491072 |
| XLOC_020431 | ADCYAP1R1 | chr7:31092075-31151093    | 0.0358439 | 0.0441839 | 0.301792 | 1        |
| XLOC_007213 | AP4E1     | chr15:51200868-51298097   | 1.29012   | 1.59054   | 0.302005 | 0.606595 |
| XLOC_011414 | ZGLP1     | chr19:10415478-10420233   | 1.74724   | 2.15411   | 0.302013 | 0.755918 |
| XLOC_012914 | RTN4      | chr2:55199326-55277734    | 104.329   | 128.626   | 0.302037 | 0.494479 |
| XLOC_001513 | MUTYH     | chr1:45794913-45956840    | 11.7848   | 14.532    | 0.302302 | 0.774876 |
| XLOC_022468 | NCBP1     | chr9:100263461-100436029  | 10.9564   | 13.5117   | 0.302442 | 0.597911 |
| XLOC_011339 | SAFB2     | chr19:5587009-5622938     | 11.5375   | 14.2296   | 0.302567 | 0.514736 |
| XLOC_012616 | CCNYL1    | chr2:208576263-208620896  | 3.33275   | 4.11047   | 0.302589 | 0.650967 |
| XLOC_002736 | HTRA1     | chr10:124221040-124274424 | 0.308743  | 0.380793  | 0.3026   | 0.881593 |
| XLOC_014585 | L3MBTL2   | chr22:41601312-41636935   | 9.30733   | 11.4794   | 0.302608 | 0.506451 |
| XLOC_021578 | SGK196    | chr8:42948656-42978323    | 0.396661  | 0.489241  | 0.302638 | 0.868098 |
| XLOC_022332 | RUSC2     | chr9:35490006-35563896    | 8.83832   | 10.9014   | 0.302665 | 0.514418 |
| XLOC_004217 | MED19     | chr11:57471186-57479673   | 5.95461   | 7.34475   | 0.302706 | 0.630699 |
| XLOC_023137 | REXO4     | chr9:136243283-136324508  | 69.7107   | 85.9949   | 0.30287  | 0.527333 |
| XLOC_000436 | CACHD1    | chr1:64936475-65158741    | 0.998527  | 1.23179   | 0.302884 | 0.673917 |
| XLOC_011788 | AP2S1     | chr19:47341422-47354203   | 163.542   | 201.757   | 0.302958 | 0.482379 |
| XLOC_009956 | NAT9      | chr17:72766685-72772470   | 28.1974   | 34.7894   | 0.303083 | 0.502644 |
| XLOC_006299 | REC8      | chr14:24641233-24658124   | 0.484267  | 0.597694  | 0.303605 | 0.981428 |
| XLOC_012547 | NUP35     | chr2:183989082-184026408  | 6.16102   | 7.60513   | 0.303805 | 0.598605 |

|             |              |                           |           |           |          |          |
|-------------|--------------|---------------------------|-----------|-----------|----------|----------|
| XLOC_003335 | MICAL2       | chr11:12132137-12285331   | 3.59459   | 4.43802   | 0.304088 | 0.582096 |
| XLOC_015803 | ADAMTS9      | chr3:64501330-64997143    | 0.160193  | 0.197781  | 0.304091 | 1        |
| XLOC_014382 | SLC19A1      | chr21:46934628-46962385   | 20.6979   | 25.5547   | 0.304106 | 0.519884 |
| XLOC_013652 | ARHGAP40     | chr20:37230576-37279295   | 1.50271   | 1.85534   | 0.304113 | 0.718986 |
| XLOC_014031 | ATP9A        | chr20:50213313-50384908   | 2.59158   | 3.20026   | 0.304359 | 0.552818 |
| XLOC_000973 | ELF3         | chr1:201979689-201986315  | 0.0492862 | 0.0608654 | 0.304437 | 1        |
| XLOC_006911 | NOXRED1      | chr14:77860364-77889399   | 0.133373  | 0.164713  | 0.304483 | 1        |
| XLOC_010684 | FCHO1        | chr19:17858526-17899377   | 8.64344   | 10.6777   | 0.304918 | 0.548709 |
| XLOC_017524 | ZFP2         | chr5:178322915-178360210  | 0.288384  | 0.356277  | 0.305008 | 1        |
| XLOC_014482 | ASPHD2       | chr22:26825279-26840978   | 3.73397   | 4.61331   | 0.305095 | 0.617265 |
| XLOC_019042 | FYN          | chr6:111981534-112194655  | 6.72164   | 8.30627   | 0.305388 | 0.5266   |
| XLOC_005525 | TIMELESS     | chr12:56810156-56843200   | 6.00284   | 7.41807   | 0.305398 | 0.505323 |
| XLOC_005769 | MPHOSPH9     | chr12:123640945-123706441 | 1.29738   | 1.60342   | 0.305555 | 0.663013 |
| XLOC_009422 | PFN1         | chr17:4848944-4852381     | 1160.66   | 1434.51   | 0.305608 | 0.51789  |
| XLOC_009752 | RAMP2-AS1    | chr17:40905946-40915060   | 0.0541337 | 0.0669087 | 0.305667 | 1        |
| XLOC_020332 | GET4         | chr7:916190-936071        | 39.1783   | 48.4258   | 0.30572  | 0.488743 |
| XLOC_008268 | LINC00311    | chr16:85316563-85321685   | 0.0508053 | 0.0627986 | 0.305753 | 1        |
| XLOC_018816 | LINC00336    | chr6:33551475-33561115    | 0.0479068 | 0.0592214 | 0.30589  | 1        |
| XLOC_007970 | TMC5         | chr16:19422056-19510434   | 1.44418   | 1.78528   | 0.305898 | 0.669555 |
| XLOC_008355 | PKD1         | chr16:2097989-2185899     | 4.54859   | 5.623     | 0.305921 | 0.722089 |
| XLOC_014394 | IL17RA       | chr22:17565848-17596584   | 3.39497   | 4.19723   | 0.30604  | 0.52085  |
| XLOC_000746 | FLAD1        | chr1:154955769-154965587  | 30.306    | 37.4684   | 0.306068 | 0.489113 |
| XLOC_014676 | HIRA         | chr22:19318223-19419219   | 6.43219   | 7.95332   | 0.306248 | 0.5266   |
| XLOC_009021 | PSMB3        | chr17:36909001-36920478   | 283.349   | 350.443   | 0.306598 | 0.474512 |
| XLOC_001071 | DEGS1        | chr1:224370909-224381142  | 28.3849   | 35.1075   | 0.306656 | 0.480434 |
| XLOC_002335 | PRKCQ-AS1    | chr10:6622386-6627323     | 2.35487   | 2.91284   | 0.30678  | 0.67266  |
| XLOC_014818 | BAIAP2L2     | chr22:38480895-38506676   | 0.153499  | 0.189888  | 0.306922 | 1        |
| XLOC_008778 | PSMB6        | chr17:4699438-4701798     | 230.593   | 285.268   | 0.306974 | 0.475379 |
| XLOC_012658 | ZFAND2B      | chr2:220071505-220074373  | 24.0918   | 29.8047   | 0.306997 | 0.519974 |
| XLOC_002670 | SFXN2        | chr10:104474297-104498946 | 6.62719   | 8.19907   | 0.307063 | 0.572663 |
| XLOC_003676 | MYEOV        | chr11:69061621-69064754   | 9.10725   | 11.2682   | 0.307174 | 0.564644 |
| XLOC_002484 | HNRNPH3      | chr10:70042416-70102953   | 37.2135   | 46.0446   | 0.307206 | 0.473045 |
| XLOC_020768 | AGBL3        | chr7:134671258-134820530  | 0.0719368 | 0.0890137 | 0.307296 | 1        |
| XLOC_022675 | TRAF2        | chr9:139780964-139821067  | 32.4718   | 40.1818   | 0.307355 | 0.480199 |
| XLOC_012346 | SLC9A2       | chr2:103236165-103327809  | 0.177235  | 0.219339  | 0.307503 | 1        |
| XLOC_012014 | UBE2M        | chr19:59067078-59070343   | 129.324   | 160.058   | 0.307598 | 0.462169 |
| XLOC_000617 | TTF2         | chr1:117602948-117645491  | 4.253     | 5.26399   | 0.307676 | 0.513296 |
| XLOC_018071 | KDM1B        | chr6:18155618-18224084    | 2.00008   | 2.47565   | 0.307746 | 0.608931 |
| XLOC_004461 | C11orf75     | chr11:93211638-93276546   | 13.5861   | 16.8173   | 0.307814 | 0.601696 |
| XLOC_017013 | MGC45800     | chr4:183060158-183065668  | 0.683012  | 0.84552   | 0.307928 | 0.738263 |
| XLOC_007487 | SLC12A6      | chr15:34517244-34630265   | 1.17954   | 1.46023   | 0.307969 | 0.905257 |
| XLOC_010418 | TXNL4A       | chr18:77732866-77748532   | 67.8573   | 84.0065   | 0.307997 | 0.46938  |
| XLOC_002281 | HNRNPU       | chr1:245013601-245027827  | 44.4659   | 55.0526   | 0.308113 | 0.48407  |
| XLOC_020980 | HOXA7        | chr7:27179982-27196296    | 13.8963   | 17.2052   | 0.308138 | 0.645616 |
| XLOC_000843 | UAP1         | chr1:162531295-162569633  | 200.239   | 247.918   | 0.30814  | 0.500234 |
| XLOC_000574 | CSF1         | chr1:110453232-110473616  | 2.32483   | 2.87853   | 0.308207 | 0.659482 |
| XLOC_022205 | LOC100288181 | chr8:143781528-143808391  | 0.361843  | 0.448051  | 0.3083   | 0.775619 |
| XLOC_011627 | ZNF850       | chr19:37234379-37263716   | 1.52868   | 1.89296   | 0.308351 | 0.57283  |
| XLOC_022256 | ZNF252P      | chr8:146198974-146231432  | 3.73684   | 4.62781   | 0.308512 | 0.521695 |

|             |             |                          |           |           |          |          |
|-------------|-------------|--------------------------|-----------|-----------|----------|----------|
| XLOC_006411 | ARG2        | chr14:68086578-68141602  | 18.725    | 23.1927   | 0.308704 | 0.749679 |
| XLOC_018715 | SCAND3      | chr6:28539406-28555112   | 0.503133  | 0.623189  | 0.308729 | 0.730056 |
| XLOC_014139 | C21orf119   | chr21:33765441-33766266  | 7.55461   | 9.35806   | 0.308853 | 0.71402  |
| XLOC_004135 | C11orf91    | chr11:33719653-33722286  | 1.82937   | 2.26617   | 0.308907 | 0.845981 |
| XLOC_017465 | WWC1        | chr5:167719064-167899308 | 7.50621   | 9.29877   | 0.308956 | 0.470965 |
| XLOC_009654 | C17orf98    | chr17:36991340-36997642  | 0.371904  | 0.460727  | 0.308983 | 0.937886 |
| XLOC_003336 | MICALCL     | chr11:12308446-12380691  | 0.209912  | 0.260066  | 0.309093 | 1        |
| XLOC_009864 | SRSF1       | chr17:56078279-56084707  | 20.5199   | 25.4228   | 0.309102 | 0.490598 |
| XLOC_013068 | TXNDC9      | chr2:99935486-99952860   | 3.61642   | 4.48132   | 0.309361 | 0.650967 |
| XLOC_000599 | FAM19A3     | chr1:113263188-113269856 | 0.871682  | 1.08021   | 0.309438 | 0.835405 |
| XLOC_017972 | MXD3        | chr5:176730762-176739292 | 29.7856   | 36.9113   | 0.309447 | 0.794976 |
| XLOC_021326 | SLC35B4     | chr7:133974089-134001827 | 3.19162   | 3.95533   | 0.309508 | 0.50443  |
| XLOC_014797 | FOXRED2     | chr22:36883232-36903148  | 8.25841   | 10.2347   | 0.309532 | 0.491486 |
| XLOC_012045 | GRHL1       | chr2:10091791-10142412   | 0.877233  | 1.08725   | 0.309658 | 0.722814 |
| XLOC_013299 | SATB2       | chr2:200134222-200337481 | 1.37487   | 1.70426   | 0.309848 | 0.642802 |
| XLOC_022907 | GOLM1       | chr9:88641057-88715116   | 49.9018   | 61.8596   | 0.309906 | 0.457462 |
| XLOC_016844 | NAP1L5      | chr4:89513573-89629693   | 1.04046   | 1.28981   | 0.309931 | 0.88321  |
| XLOC_015377 | ATP1B3      | chr3:141595469-141645382 | 69.2292   | 85.8342   | 0.310172 | 0.47107  |
| XLOC_017782 | PPIC        | chr5:122359077-122372425 | 12.3831   | 15.3533   | 0.310177 | 0.553492 |
| XLOC_010639 | TECR        | chr19:14640354-14676792  | 99.6259   | 123.534   | 0.310317 | 0.463403 |
| XLOC_011402 | ZNF121      | chr19:9676291-9695209    | 1.36305   | 1.69027   | 0.310414 | 0.730925 |
| XLOC_003497 | CTNND1,TMX2 | chr11:57479994-57586652  | 60.9344   | 75.5676   | 0.310509 | 0.810183 |
| XLOC_021864 | FAM167A     | chr8:11197145-11324276   | 1.0625    | 1.31769   | 0.310549 | 0.70088  |
| XLOC_010006 | USP36       | chr17:76792964-76836969  | 8.52792   | 10.5769   | 0.310644 | 0.467566 |
| XLOC_012975 | EXOC6B      | chr2:72406443-73053177   | 0.340704  | 0.422563  | 0.310647 | 0.82694  |
| XLOC_020651 | AGFG2       | chr7:100136833-100165843 | 1.70409   | 2.11378   | 0.310821 | 0.653569 |
| XLOC_007328 | IDH3A       | chr15:78441718-78462884  | 14.3764   | 17.8409   | 0.311489 | 0.476106 |
| XLOC_011385 | RAB11B-AS1  | chr19:8439259-8469317    | 3.78499   | 4.69722   | 0.311514 | 0.962865 |
| XLOC_017507 | UNC5A       | chr5:176237559-176326333 | 1.35422   | 1.68092   | 0.311792 | 0.724796 |
| XLOC_013820 | SNRPB       | chr20:2442280-2451499    | 436.925   | 542.358   | 0.311862 | 0.471249 |
| XLOC_004766 | SLCO1B1     | chr12:21284127-21392730  | 0.0549905 | 0.0682614 | 0.311888 | 1        |
| XLOC_000616 | CD101       | chr1:117544371-117579173 | 0.356699  | 0.442796  | 0.311935 | 0.801516 |
| XLOC_016817 | HNRPDL      | chr4:83343716-83351378   | 45.2797   | 56.2109   | 0.311985 | 0.464856 |
| XLOC_024096 | PLAC1       | chrX:133699872-133792513 | 0.293214  | 0.364021  | 0.312069 | 1        |
| XLOC_020343 | CHST12      | chr7:2443194-2474216     | 9.61926   | 11.9437   | 0.31225  | 0.584417 |
| XLOC_010714 | GATAD2A     | chr19:19496641-19619741  | 16.9827   | 21.0874   | 0.31232  | 0.458976 |
| XLOC_024027 | IL13RA2     | chrX:114238537-114252207 | 22.765    | 28.2705   | 0.312481 | 0.492924 |
| XLOC_022769 | PLAA        | chr9:26903367-27062931   | 7.91777   | 9.83315   | 0.312559 | 0.550522 |
| XLOC_017702 | POC5        | chr5:74970023-75013313   | 3.51108   | 4.36152   | 0.312916 | 0.62076  |
| XLOC_006012 | ANKRD20A9P  | chr13:19408542-19446109  | 0.0718745 | 0.0892892 | 0.313006 | 1        |
| XLOC_001337 | ECE1        | chr1:21543739-21672034   | 13.5389   | 16.8196   | 0.313031 | 0.46587  |
| XLOC_013015 | GGCX        | chr2:85766100-85788657   | 5.98145   | 7.43193   | 0.313243 | 0.764456 |
| XLOC_006332 | PNN         | chr14:39644386-39652422  | 16.572    | 20.5925   | 0.313373 | 0.459975 |
| XLOC_000646 | PDZK1       | chr1:145727665-145764206 | 0.063629  | 0.0790684 | 0.313416 | 1        |
| XLOC_017964 | CLTB        | chr5:175819455-175843570 | 120.432   | 149.664   | 0.313505 | 0.450304 |
| XLOC_001463 | MTF1        | chr1:38275238-38325292   | 1.04748   | 1.30175   | 0.313533 | 0.599713 |
| XLOC_000501 | ZNF326      | chr1:90460677-90494094   | 5.28332   | 6.56656   | 0.313694 | 0.525673 |
| XLOC_001558 | TMEM48      | chr1:54231133-54304225   | 5.19611   | 6.45844   | 0.313755 | 0.50153  |
| XLOC_012919 | PNPT1       | chr2:55861197-55921045   | 8.45955   | 10.5158   | 0.313909 | 0.468062 |

|             |                |                           |            |           |          |          |
|-------------|----------------|---------------------------|------------|-----------|----------|----------|
| XLOC_007828 | PIGQ           | chr16:619967-634136       | 34.8356    | 43.3071   | 0.314043 | 0.452786 |
| XLOC_004330 | CFL1           | chr11:65622284-65625804   | 627.808    | 780.613   | 0.314284 | 0.473185 |
| XLOC_008150 | USB1           | chr16:58035276-58055527   | 29.6695    | 36.895    | 0.314447 | 0.461367 |
| XLOC_010690 | KCNN1          | chr19:18062110-18109930   | 0.120793   | 0.150215  | 0.314493 | 1        |
| XLOC_002802 | IL15RA         | chr10:5994333-6020150     | 13.966     | 17.3695   | 0.314634 | 0.548453 |
| XLOC_016411 | CDS1           | chr4:85504056-85572493    | 1.5686     | 1.95089   | 0.314654 | 0.618639 |
| XLOC_005985 | ABHD13         | chr13:108870762-108886603 | 1.52334    | 1.89481   | 0.314811 | 0.582464 |
| XLOC_024025 | AMOT           | chrX:112018104-112084043  | 0.200181   | 0.249023  | 0.314969 | 1        |
| XLOC_004103 | UEVLD          | chr11:18552949-18610293   | 1.04685    | 1.3023    | 0.314998 | 0.729672 |
| XLOC_011643 | YIF1B          | chr19:38794199-38806606   | 21.2704    | 26.4611   | 0.315022 | 0.795382 |
| XLOC_002945 | ZWINT          | chr10:58117198-58121034   | 26.8785    | 33.4424   | 0.315229 | 0.472657 |
| XLOC_022338 | RGP1           | chr9:35749276-35754274    | 1.17711    | 1.46479   | 0.315443 | 0.809988 |
| XLOC_017563 | IRX2           | chr5:2746278-2751769      | 7.17649    | 8.93102   | 0.315546 | 0.613246 |
| XLOC_004673 | TAPBPL         | chr12:6561176-6579843     | 1.4172     | 1.7637    | 0.31556  | 0.882649 |
| XLOC_017469 | SPDL1          | chr5:169010637-169031781  | 2.70309    | 3.3641    | 0.315612 | 0.61305  |
| XLOC_012367 | SOWAHC         | chr2:110371910-110376564  | 7.35652    | 9.15645   | 0.315765 | 0.492502 |
| XLOC_001689 | TAF13          | chr1:109606997-109618624  | 11.8666    | 14.771    | 0.315857 | 0.648271 |
| XLOC_001361 | STPG1          | chr1:24645811-24741587    | 5.40713    | 6.73128   | 0.316018 | 0.569689 |
| XLOC_015525 | TMEM44-AS1     | chr3:194304996-194354150  | 2.00923    | 2.50142   | 0.316102 | 0.904108 |
| XLOC_009105 | GRN            | chr17:42422490-42430470   | 130.653    | 162.666   | 0.31617  | 0.461842 |
| XLOC_007939 | CLEC16A        | chr16:11038344-11276046   | 2.35912    | 2.93718   | 0.316182 | 0.550522 |
| XLOC_006265 | SLC39A2        | chr14:21467413-21470034   | 0.0371951  | 0.0463107 | 0.316233 | 1        |
| XLOC_014743 | TTC28          | chr22:28315363-29075853   | 0.442847   | 0.551414  | 0.316329 | 0.840893 |
| XLOC_006695 | LINC00641      | chr14:21668237-21675059   | 0.704455   | 0.877176  | 0.316359 | 0.786254 |
| XLOC_016176 | C4orf48        | chr4:2043719-2045697      | 53.5469    | 66.6926   | 0.316724 | 0.663286 |
| XLOC_009847 | CACNA1G-AS1    | chr17:48633567-48704832   | 0.0545087  | 0.0679011 | 0.316948 | 1        |
| XLOC_012586 | CASP10         | chr2:202047620-202094129  | 1.0057     | 1.25307   | 0.317272 | 0.629512 |
| XLOC_014306 | GART           | chr21:34876237-34915198   | 32.8001    | 40.8745   | 0.317498 | 0.479208 |
| XLOC_005439 | NCKAP5L        | chr12:50184928-50222208   | 5.58237    | 6.957     | 0.317587 | 0.509766 |
| XLOC_014547 | NOL12          | chr22:38082343-38089485   | 6.10809    | 7.61247   | 0.317643 | 0.545547 |
| XLOC_013570 | PYGB           | chr20:25228705-25371618   | 21.4198    | 26.6977   | 0.317769 | 0.664657 |
| XLOC_018658 | TPMT           | chr6:18128544-18155374    | 4.60496    | 5.73971   | 0.317789 | 0.521714 |
| XLOC_015160 | ABHD6          | chr3:58223258-58280461    | 5.03416    | 6.27592   | 0.318078 | 0.5622   |
| XLOC_006987 | PPP1R13B       | chr14:104200087-104313927 | 2.20017    | 2.74309   | 0.318191 | 0.592157 |
| XLOC_002810 | SFTA1P         | chr10:10826401-10836877   | 353.05     | 440.344   | 0.318758 | 0.457572 |
| XLOC_021346 | PARP12         | chr7:139723548-139763521  | 9.50593    | 11.8568   | 0.318812 | 0.48457  |
| XLOC_016259 | PACRGL         | chr4:20702035-20729980    | 3.01222    | 3.75729   | 0.318866 | 0.649667 |
| XLOC_010480 | NCLN           | chr19:3185874-3209573     | 48.1944    | 60.1201   | 0.318982 | 0.444145 |
| XLOC_018306 | RRP36          | chr6:42989384-42997337    | 26.0719    | 32.5239   | 0.319003 | 0.480807 |
| XLOC_016284 | KLB            | chr4:39408472-39453153    | 0.0383348  | 0.0478219 | 0.319018 | 1        |
| XLOC_010870 | EGLN2,MIA,RAB4 | chr19:41281081-41314346   | 45.6582    | 56.9581   | 0.319028 | 0.469232 |
| XLOC_007488 | NOP10          | chr15:34633916-34635362   | 474.52     | 591.996   | 0.31912  | 0.441656 |
| XLOC_001228 | WRAP73         | chr1:3547330-3566671      | 24.848     | 31.0027   | 0.319263 | 0.489185 |
| XLOC_003426 | SLC35C1        | chr11:45825622-45834567   | 9.84052    | 12.2785   | 0.319333 | 0.49034  |
| XLOC_004988 | KCNMB4         | chr12:70760061-70828072   | 0.00838348 | 0.0104621 | 0.319552 | 1        |
| XLOC_016161 | PIGG           | chr4:419223-533320        | 5.51812    | 6.88632   | 0.319556 | 0.681951 |
| XLOC_011836 | TEAD2          | chr19:49838676-49865714   | 9.15552    | 11.4262   | 0.319634 | 0.524638 |
| XLOC_019113 | LOC100507462   | chr6:139046347-139114456  | 0.0920183  | 0.114846  | 0.319703 | 1        |
| XLOC_018027 | NQO2           | chr6:3000066-3019994      | 98.2015    | 122.576   | 0.31986  | 0.442213 |



|             |                |                           |            |            |          |          |
|-------------|----------------|---------------------------|------------|------------|----------|----------|
| XLOC_007894 | FLYWCH2        | chr16:2933195-2949383     | 38.4907    | 48.0445    | 0.319861 | 0.476694 |
| XLOC_009898 | CYB561         | chr17:61509664-61523722   | 13.0605    | 16.3031    | 0.319941 | 0.458976 |
| XLOC_018485 | NCOA7          | chr6:126102306-126253176  | 3.32276    | 4.14818    | 0.320095 | 0.554074 |
| XLOC_019006 | FAXC           | chr6:99720792-99797531    | 0.442594   | 0.552553   | 0.320129 | 0.659717 |
| XLOC_008641 | CHTF8          | chr16:69139466-69166493   | 35.0588    | 43.7741    | 0.320299 | 0.473464 |
| XLOC_015362 | MRAS           | chr3:138066489-138124377  | 1.5472     | 1.93259    | 0.320875 | 0.633194 |
| XLOC_002852 | PRTFDC1        | chr10:25137553-25241533   | 5.94212    | 7.42289    | 0.321004 | 0.552737 |
| XLOC_002392 | PDSS1          | chr10:26986594-27150016   | 6.80627    | 8.50322    | 0.321144 | 0.864982 |
| XLOC_020680 | LRRC17         | chr7:102453307-102715288  | 0.0467705  | 0.0584332  | 0.321189 | 1        |
| XLOC_007958 | NDE1           | chr16:15737123-15950887   | 5.34341    | 6.67643    | 0.321316 | 0.568199 |
| XLOC_000662 | FAM91A2,LINC00 | chr1:149576261-149672733  | 4.27832    | 5.34619    | 0.321468 | 0.709143 |
| XLOC_023195 | FAM166A        | chr9:140135710-140142222  | 8.04219    | 10.0498    | 0.321512 | 0.978818 |
| XLOC_003030 | LOC728190      | chr10:88998423-89103331   | 19.3056    | 24.1265    | 0.3216   | 0.622994 |
| XLOC_023880 | HSD17B10       | chrX:53458205-53461323    | 117.24     | 146.522    | 0.321649 | 0.427664 |
| XLOC_013919 | PDRG1          | chr20:30532757-30539883   | 26.9745    | 33.7169    | 0.321875 | 0.469274 |
| XLOC_020642 | MBLAC1         | chr7:99724319-99726121    | 3.2504     | 4.06313    | 0.321972 | 0.739517 |
| XLOC_011475 | C19orf57       | chr19:13993167-14016909   | 0.589457   | 0.736961   | 0.322201 | 0.809839 |
| XLOC_014849 | PHF5A          | chr22:41855720-41864708   | 62.9554    | 78.7111    | 0.322237 | 0.438793 |
| XLOC_005037 | AMDHD1         | chr12:96337070-96362370   | 0.438841   | 0.548814   | 0.322619 | 0.817046 |
| XLOC_001268 | MTHFR          | chr1:11845786-11907840    | 0.912708   | 1.14148    | 0.322677 | 0.828851 |
| XLOC_013540 | MGME1          | chr20:17949761-17971762   | 11.0604    | 13.8341    | 0.322824 | 0.47931  |
| XLOC_000316 | CTPS1          | chr1:41445006-41478235    | 20.4141    | 25.5338    | 0.322843 | 0.447828 |
| XLOC_002537 | EIF5AL1        | chr10:81272356-81276192   | 3.26877    | 4.08864    | 0.322872 | 0.530459 |
| XLOC_011046 | SIGLEC16       | chr19:50472911-50479076   | 0.23195    | 0.290131   | 0.322887 | 1        |
| XLOC_002044 | KIAA0040       | chr1:175126122-175162229  | 1.619      | 2.02537    | 0.323084 | 0.604499 |
| XLOC_015886 | B4GALT4        | chr3:118930588-118959752  | 4.83472    | 6.0497     | 0.323343 | 0.539141 |
| XLOC_003673 | GAL            | chr11:68451982-68458643   | 133.132    | 166.612    | 0.323635 | 0.444145 |
| XLOC_007798 | PRKXP1         | chr15:101087956-101099488 | 0.122356   | 0.153144   | 0.323805 | 1        |
| XLOC_004161 | HARBI1         | chr11:46624855-46638777   | 1.45457    | 1.82062    | 0.323839 | 0.748812 |
| XLOC_000016 | B3GALT6        | chr1:1167628-1170420      | 12.9876    | 16.2578    | 0.323996 | 0.498357 |
| XLOC_001676 | EXTL2          | chr1:101337927-101360735  | 5.91025    | 7.39912    | 0.324135 | 0.486248 |
| XLOC_006303 | LTB4R,LTB4R2   | chr14:24774392-24787242   | 3.94776    | 4.94283    | 0.324303 | 0.756508 |
| XLOC_015510 | FLJ42393       | chr3:187868993-188608460  | 0.0440771  | 0.0551932  | 0.324461 | 1        |
| XLOC_022451 | HIATL1         | chr9:97136832-97223202    | 16.6052    | 20.795     | 0.324603 | 0.442213 |
| XLOC_009225 | TACO1          | chr17:61678230-61685725   | 16.0311    | 20.0782    | 0.324755 | 0.478726 |
| XLOC_006491 | SNORA11B       | chr14:91580356-91691703   | 5.94076    | 7.44054    | 0.32476  | 0.961459 |
| XLOC_018660 | MBOAT1         | chr6:20099915-20212695    | 1.22807    | 1.53823    | 0.324886 | 0.654907 |
| XLOC_012498 | BBS5           | chr2:170336005-170363165  | 0.645421   | 0.808451   | 0.32492  | 0.77663  |
| XLOC_017977 | DBN1           | chr5:176883613-176900694  | 112.035    | 140.34     | 0.32498  | 0.424325 |
| XLOC_010453 | NDUFS7         | chr19:1383882-1395588     | 157.029    | 196.727    | 0.325163 | 0.42844  |
| XLOC_014917 | CNTN4          | chr3:2140549-3099645      | 0.00639573 | 0.00801299 | 0.325232 | 1        |
| XLOC_000565 | CYB561D1       | chr1:110036657-110043063  | 3.55103    | 4.44961    | 0.325441 | 0.527665 |
| XLOC_008766 | CTNS           | chr17:3539761-3599698     | 4.78889    | 6.00221    | 0.325803 | 0.897319 |
| XLOC_007851 | TELO2          | chr16:1543351-1662109     | 25.2248    | 31.6177    | 0.325888 | 0.600595 |
| XLOC_016473 | ANK2           | chr4:113739238-114304896  | 0.356923   | 0.447413   | 0.325992 | 0.698259 |
| XLOC_012950 | WDR92          | chr2:68357280-68384692    | 2.779      | 3.48399    | 0.326173 | 0.616881 |
| XLOC_003235 | EFCAB4A        | chr11:827584-831991       | 6.02079    | 7.54872    | 0.326281 | 0.629512 |
| XLOC_008368 | PRSS27         | chr16:2762422-2770552     | 1.32491    | 1.66114    | 0.326282 | 0.813283 |
| XLOC_018496 | AKAP7          | chr6:131456825-131604675  | 0.697161   | 0.874189   | 0.326453 | 0.748812 |

|             |               |                           |            |            |          |          |
|-------------|---------------|---------------------------|------------|------------|----------|----------|
| XLOC_002894 | ZNF239        | chr10:44051792-44070066   | 2.42182    | 3.03737    | 0.326731 | 0.641512 |
| XLOC_006432 | PAPLN         | chr14:73704204-73741347   | 0.130122   | 0.163202   | 0.326798 | 1        |
| XLOC_020713 | NAA38         | chr7:117824085-117844093  | 3.91801    | 4.91463    | 0.32696  | 0.423172 |
| XLOC_015887 | TMEM39A       | chr3:119147806-119182529  | 3.55795    | 4.46311    | 0.327001 | 0.490815 |
| XLOC_018756 | ATP6V1G2,DDX3 | chr6:31496738-31514625    | 156.551    | 196.415    | 0.327275 | 0.442187 |
| XLOC_000406 | TCEANC2       | chr1:54519273-54565416    | 0.743851   | 0.933372   | 0.327439 | 0.688656 |
| XLOC_006016 | PSPC1         | chr13:20248891-20357159   | 18.8721    | 23.6819    | 0.327534 | 0.450707 |
| XLOC_013123 | C2orf76       | chr2:120060019-120124258  | 1.20144    | 1.50765    | 0.327538 | 0.802416 |
| XLOC_003055 | FRA10AC1      | chr10:95427639-95462329   | 5.4961     | 6.89752    | 0.327669 | 0.473081 |
| XLOC_022584 | COQ4          | chr9:131084790-131096351  | 78.0857    | 98.0018    | 0.327749 | 0.429845 |
| XLOC_007473 | TJP1          | chr15:29992356-30114706   | 4.76563    | 5.98116    | 0.327759 | 0.437419 |
| XLOC_002490 | DDX21         | chr10:70715878-70744825   | 22.9714    | 28.8306    | 0.327762 | 0.423117 |
| XLOC_011614 | ALKBH6        | chr19:36500021-36505141   | 16.3638    | 20.539     | 0.327865 | 0.573142 |
| XLOC_014885 | SMC1B         | chr22:45739944-45809500   | 0.00776831 | 0.00975274 | 0.328207 | 1        |
| XLOC_020708 | MET           | chr7:116312458-116438440  | 7.02557    | 8.8214     | 0.328391 | 0.419676 |
| XLOC_003121 | CALHM2        | chr10:105206542-105212162 | 0.379732   | 0.476799   | 0.3284   | 0.844936 |
| XLOC_008684 | CHST5         | chr16:75562427-75569068   | 0.371634   | 0.466653   | 0.328468 | 0.831535 |
| XLOC_022197 | AGO2          | chr8:141541263-141645646  | 17.1822    | 21.5765    | 0.328551 | 0.42844  |
| XLOC_010700 | SSBP4         | chr19:18530145-18549111   | 63.3318    | 79.529     | 0.328551 | 0.477247 |
| XLOC_024070 | AIFM1         | chrX:129263337-129299861  | 33.7114    | 42.3344    | 0.328596 | 0.454341 |
| XLOC_016307 | OCIAD1        | chr4:48833059-48863834    | 41.4292    | 52.0346    | 0.328821 | 0.432271 |
| XLOC_012647 | PLCD4         | chr2:219472487-219501909  | 0.386454   | 0.485393   | 0.328855 | 0.790595 |
| XLOC_015153 | CCDC66        | chr3:56591183-56717135    | 1.52359    | 1.91376    | 0.328934 | 0.882208 |
| XLOC_002210 | TMEM63A       | chr1:225997796-226070420  | 4.97313    | 6.24782    | 0.329197 | 0.69939  |
| XLOC_000300 | BMP8A         | chr1:39957317-40025370    | 0.252022   | 0.316628   | 0.329243 | 1        |
| XLOC_001739 | CD58          | chr1:117057155-117113715  | 7.85369    | 9.86709    | 0.329253 | 0.555003 |
| XLOC_017633 | OXCT1         | chr5:41730166-41870791    | 19.3649    | 24.3297    | 0.329275 | 0.421289 |
| XLOC_004321 | SYVN1         | chr11:64888098-64902003   | 15.0325    | 18.8865    | 0.329277 | 0.963969 |
| XLOC_005440 | BCDIN3D       | chr12:50222325-50236912   | 2.19325    | 2.75558    | 0.329286 | 0.625524 |
| XLOC_016409 | MRPS18C       | chr4:84377117-84406290    | 17.4663    | 21.9448    | 0.329302 | 0.654938 |
| XLOC_002380 | MSRB2         | chr10:23384426-23410942   | 9.57194    | 12.0275    | 0.329447 | 0.500835 |
| XLOC_006709 | PRMT5         | chr14:23389732-23398661   | 71.2195    | 89.4949    | 0.329534 | 0.419078 |
| XLOC_015659 | TMEM158       | chr3:45265955-45267814    | 28.6712    | 36.0352    | 0.329803 | 0.498357 |
| XLOC_002762 | GLRX3         | chr10:131934638-131978646 | 115.351    | 144.997    | 0.32999  | 0.420092 |
| XLOC_021784 | BREA2         | chr8:144779284-144780583  | 0.532683   | 0.669659   | 0.330151 | 0.881218 |
| XLOC_007610 | BNIP2         | chr15:59955061-59981642   | 11.5963    | 14.5796    | 0.330293 | 0.438842 |
| XLOC_010325 | GAREM         | chr18:29843483-30050447   | 0.343091   | 0.431419   | 0.330496 | 0.722814 |
| XLOC_005850 | RFC3          | chr13:34392205-34540695   | 6.20196    | 7.80193    | 0.331107 | 0.516033 |
| XLOC_023621 | LINC00629     | chrX:133684053-133694428  | 0.0607643  | 0.0764566  | 0.331418 | 1        |
| XLOC_020556 | GTF2IRD2B     | chr7:74508346-74565623    | 0.0921486  | 0.115947   | 0.331433 | 1        |
| XLOC_004178 | AGBL2         | chr11:47681142-47736928   | 0.0553404  | 0.0696337  | 0.331454 | 1        |
| XLOC_004403 | C2CD3         | chr11:73745479-73882064   | 0.270335   | 0.340182   | 0.331559 | 1        |
| XLOC_011303 | SGTA          | chr19:2754711-2783354     | 66.4772    | 83.6612    | 0.331699 | 0.412911 |
| XLOC_014856 | CENPM         | chr22:42334740-42343148   | 29.3944    | 36.9946    | 0.331773 | 0.489843 |
| XLOC_006733 | TM9SF1        | chr14:24658352-24664882   | 17.8821    | 22.5059    | 0.331787 | 0.444145 |
| XLOC_006507 | PPP4R4        | chr14:94640648-94746072   | 0.684008   | 0.860974   | 0.331957 | 0.87763  |
| XLOC_000294 | UTP11L        | chr1:38478383-38490497    | 21.6383    | 27.2374    | 0.332001 | 0.426592 |
| XLOC_005430 | RHEBL1        | chr12:49458467-49463775   | 9.99846    | 12.5864    | 0.332094 | 0.54523  |
| XLOC_002477 | NRBF2         | chr10:64893006-64914786   | 6.73999    | 8.48533    | 0.332225 | 0.513296 |

|             |               |                           |            |            |          |          |
|-------------|---------------|---------------------------|------------|------------|----------|----------|
| XLOC_019004 | MMS22L        | chr6:97372495-97862283    | 1.00343    | 1.26361    | 0.332616 | 0.550522 |
| XLOC_015140 | STAB1         | chr3:52529355-52569093    | 0.00986274 | 0.0124202  | 0.332625 | 1        |
| XLOC_005759 | CLIP1         | chr12:122755980-122907116 | 5.04793    | 6.35702    | 0.332659 | 0.432152 |
| XLOC_012665 | GMPPA         | chr2:220363586-220371718  | 27.5264    | 34.6665    | 0.332726 | 0.434459 |
| XLOC_009529 | RASD1         | chr17:17397752-17399709   | 0.120695   | 0.152033   | 0.333024 | 1        |
| XLOC_016198 | EVC           | chr4:5712923-5816031      | 5.91617    | 7.45241    | 0.333043 | 0.438793 |
| XLOC_008993 | SLFN5         | chr17:33570085-33594761   | 1.15995    | 1.46168    | 0.333568 | 0.61081  |
| XLOC_003343 | PDE3B         | chr11:14665268-14893604   | 0.98271    | 1.23834    | 0.33357  | 0.608336 |
| XLOC_016410 | AGPAT9        | chr4:84457066-84527027    | 5.49828    | 6.92895    | 0.333656 | 0.494703 |
| XLOC_006731 | PSME2         | chr14:24612573-24615855   | 102.59     | 129.284    | 0.333659 | 0.407872 |
| XLOC_018853 | KCNK5         | chr6:39156746-39197251    | 4.5046     | 5.67758    | 0.333879 | 0.512407 |
| XLOC_000034 | RER1          | chr1:2323213-2344010      | 36.2188    | 45.6519    | 0.333936 | 0.496751 |
| XLOC_007889 | KCTD5         | chr16:2732494-2759031     | 28.0822    | 35.3967    | 0.333956 | 0.413848 |
| XLOC_014327 | PSMG1         | chr21:40547371-40555440   | 67.6164    | 85.2296    | 0.333981 | 0.418773 |
| XLOC_009079 | WNK4          | chr17:40932648-40949084   | 1.09925    | 1.38571    | 0.3341   | 0.693079 |
| XLOC_011546 | MEF2B,MEF2BNE | chr19:19256375-19314238   | 12.66      | 15.9604    | 0.334223 | 0.904022 |
| XLOC_010523 | CRB3          | chr19:6464259-6481798     | 1.11861    | 1.41041    | 0.334412 | 0.897441 |
| XLOC_013829 | DDRGK1        | chr20:3171011-3185295     | 83.1352    | 104.828    | 0.334498 | 0.409021 |
| XLOC_011258 | PPAP2C        | chr19:281043-291435       | 77.6746    | 97.9442    | 0.334517 | 0.414159 |
| XLOC_009072 | COASY         | chr17:40714091-40718299   | 47.1932    | 59.5123    | 0.334609 | 0.41867  |
| XLOC_019197 | THBS2         | chr6:169615874-169654137  | 0.420328   | 0.530063   | 0.334649 | 0.732699 |
| XLOC_000425 | L1TD1         | chr1:62660473-62678001    | 0.0144453  | 0.0182169  | 0.334676 | 1        |
| XLOC_015823 | ZNF717        | chr3:75786028-75834255    | 0.14079    | 0.177566   | 0.334811 | 1        |
| XLOC_010537 | PET100        | chr19:7694670-7698634     | 139.734    | 176.242    | 0.334875 | 0.452338 |
| XLOC_000610 | SLC22A15      | chr1:116519118-116612675  | 1.09452    | 1.38064    | 0.335036 | 0.626866 |
| XLOC_003234 | PNPLA2        | chr11:818900-825571       | 68.17      | 86.0036    | 0.335259 | 0.393192 |
| XLOC_005638 | HAL           | chr12:96366439-96390143   | 0.0658425  | 0.083071   | 0.335326 | 1        |
| XLOC_010929 | TOMM40        | chr19:45394476-45406946   | 108.368    | 136.739    | 0.33548  | 0.408062 |
| XLOC_002550 | GHITM         | chr10:85899184-85913311   | 84.3844    | 106.49     | 0.335668 | 0.426107 |
| XLOC_016695 | PPARGC1A      | chr4:23793643-23891700    | 0.00593695 | 0.00749337 | 0.335892 | 1        |
| XLOC_014003 | PLTP          | chr20:44517110-44541003   | 8.46749    | 10.6883    | 0.336024 | 0.897332 |
| XLOC_004768 | PYROXD1       | chr12:21590537-21654603   | 3.00195    | 3.78952    | 0.336114 | 0.757598 |
| XLOC_003590 | TEX40         | chr11:64067862-64072239   | 0.069413   | 0.087625   | 0.336137 | 1        |
| XLOC_020792 | SSBP1         | chr7:141438120-141450288  | 248.058    | 313.176    | 0.336298 | 0.408001 |
| XLOC_013227 | LOC440925     | chr2:171568948-171571077  | 0.103247   | 0.130393   | 0.336769 | 1        |
| XLOC_011192 | ZNF580        | chr19:56152391-56154836   | 82.3649    | 104.051    | 0.337188 | 0.434104 |
| XLOC_013676 | YWHAB         | chr20:43514343-43537161   | 48.8928    | 61.7716    | 0.337322 | 0.399313 |
| XLOC_011874 | C19orf48      | chr19:51300960-51307974   | 348.322    | 440.119    | 0.337474 | 0.421947 |
| XLOC_015699 | SLC25A20      | chr3:48894355-48936426    | 3.59529    | 4.54335    | 0.337649 | 0.585208 |
| XLOC_023339 | MAOA          | chrX:43514154-43606071    | 0.0152389  | 0.0192576  | 0.337674 | 1        |
| XLOC_005355 | CASC1         | chr12:25205180-25348094   | 0.0128617  | 0.0162547  | 0.337771 | 1        |
| XLOC_018923 | TRAM2         | chr6:52362199-52441862    | 2.65147    | 3.35149    | 0.33801  | 0.49037  |
| XLOC_004144 | COMMD9        | chr11:36293841-36310999   | 5.6601     | 7.15451    | 0.338025 | 0.468062 |
| XLOC_021651 | CHMP4C        | chr8:82644687-82671748    | 45.3146    | 57.2837    | 0.338149 | 0.415024 |
| XLOC_000909 | TDRD5         | chr1:179560747-179660407  | 0.400889   | 0.506849   | 0.338352 | 0.774876 |
| XLOC_011603 | LOC100506469  | chr19:36024313-36038429   | 6.53096    | 8.25769    | 0.338443 | 0.937886 |
| XLOC_013074 | SNORD89       | chr2:101889397-101889511  | 12.7871    | 16.1704    | 0.338665 | 0.961132 |
| XLOC_003894 | NRGN          | chr11:124609828-124617102 | 13.3313    | 16.8593    | 0.338731 | 0.591586 |
| XLOC_001374 | UBXN11        | chr1:26608772-26647014    | 12.0514    | 15.2432    | 0.338967 | 0.524958 |

|             |            |                           |            |            |          |          |
|-------------|------------|---------------------------|------------|------------|----------|----------|
| XLOC_010271 | METTL4     | chr18:2537523-2571489     | 1.68646    | 2.13339    | 0.339146 | 0.579868 |
| XLOC_005516 | WIBG       | chr12:56295196-56321697   | 17.2889    | 21.8731    | 0.339311 | 0.489185 |
| XLOC_015729 | IFRD2      | chr3:50316517-50330026    | 77.4101    | 97.944     | 0.339435 | 0.384626 |
| XLOC_013318 | RAPH1      | chr2:204298538-204400058  | 0.692      | 0.875632   | 0.339553 | 0.569918 |
| XLOC_008115 | OGFOD1     | chr16:56485423-56511407   | 14.4917    | 18.3395    | 0.339725 | 0.415082 |
| XLOC_009296 | UBALD2     | chr17:74261285-74267379   | 82.7071    | 104.671    | 0.339773 | 0.392176 |
| XLOC_002838 | PTPLA      | chr10:17631957-17659373   | 3.96825    | 5.02279    | 0.339984 | 0.639952 |
| XLOC_005232 | C12orf4    | chr12:4596900-4647637     | 1.80244    | 2.28147    | 0.340011 | 0.560049 |
| XLOC_022912 | LOC440173  | chr9:89623365-89657041    | 0.0349997  | 0.0443016  | 0.340014 | 1        |
| XLOC_008520 | ZNF747     | chr16:30542778-30546194   | 6.10901    | 7.73578    | 0.340608 | 0.570328 |
| XLOC_017515 | PRR7       | chr5:176853686-176883287  | 38.5254    | 48.7887    | 0.340736 | 0.800869 |
| XLOC_007984 | OTOA       | chr16:21689834-21772050   | 0.0529171  | 0.0670157  | 0.340765 | 1        |
| XLOC_000358 | UROD       | chr1:45477804-45481341    | 135.047    | 171.048    | 0.340934 | 0.403093 |
| XLOC_016212 | AFAP1-AS1  | chr4:7755816-7941653      | 0.00576045 | 0.00729641 | 0.341004 | 1        |
| XLOC_004792 | DDX11      | chr12:31173696-31257725   | 10.6218    | 13.4542    | 0.341028 | 0.436516 |
| XLOC_012534 | HNRNPA3    | chr2:178077421-178088685  | 42.2843    | 53.5688    | 0.341269 | 0.390067 |
| XLOC_013793 | UCKL1-AS1  | chr20:62571181-62601223   | 0.161092   | 0.204086   | 0.341294 | 1        |
| XLOC_006127 | DLEU2      | chr13:50556687-50699677   | 0.133641   | 0.169319   | 0.341376 | 1        |
| XLOC_013020 | LOC90784   | chr2:86247338-86250991    | 2.80909    | 3.55939    | 0.34153  | 0.518305 |
| XLOC_015035 | EIF1B      | chr3:39851302-40353915    | 55.8817    | 70.8153    | 0.341685 | 0.404058 |
| XLOC_002175 | TMEM206    | chr1:212537815-212588267  | 10.4976    | 13.3031    | 0.341704 | 0.454452 |
| XLOC_006210 | KDELC1     | chr13:103436630-103528351 | 4.45268    | 5.64409    | 0.342065 | 0.877848 |
| XLOC_011439 | ELOF1      | chr19:11663857-11670051   | 101.387    | 128.552    | 0.342484 | 0.387199 |
| XLOC_015944 | EFCAB12    | chr3:129120163-129147494  | 0.109622   | 0.138996   | 0.342508 | 1        |
| XLOC_009808 | COPZ2      | chr17:46103532-46115152   | 6.15771    | 7.808      | 0.342558 | 0.638482 |
| XLOC_009916 | DDX5       | chr17:62494373-62502484   | 72.8765    | 92.4305    | 0.342916 | 0.3917   |
| XLOC_005455 | GALNT6     | chr12:51745832-51909547   | 14.284     | 18.121     | 0.343271 | 0.482379 |
| XLOC_009196 | BZRAP1-AS1 | chr17:56378587-56494931   | 0.0561387  | 0.0712225  | 0.343339 | 1        |
| XLOC_021960 | STAR       | chr8:38000217-38008600    | 0.0709423  | 0.0900141  | 0.343504 | 1        |
| XLOC_009136 | KPNB1      | chr17:45727203-45761004   | 38.7121    | 49.1249    | 0.343671 | 0.390338 |
| XLOC_006896 | RPS6KL1    | chr14:75370656-75389145   | 1.37249    | 1.74176    | 0.343755 | 0.582464 |
| XLOC_004429 | ALG8       | chr11:77726760-77850699   | 23.6029    | 29.9569    | 0.34392  | 0.694097 |
| XLOC_013486 | SIRPA      | chr20:1874812-1920540     | 4.03458    | 5.12077    | 0.343943 | 0.490815 |
| XLOC_020675 | LRWD1      | chr7:102105389-102119381  | 31.597     | 40.1106    | 0.344198 | 0.724534 |
| XLOC_022348 | MELK       | chr9:36572858-36677680    | 9.5765     | 12.1586    | 0.344405 | 0.436615 |
| XLOC_012199 | COMMD1     | chr2:62132802-62363205    | 20.4636    | 25.9813    | 0.344413 | 0.499306 |
| XLOC_018138 | ZSCAN16    | chr6:28092386-28097856    | 4.15472    | 5.27548    | 0.344552 | 0.592657 |
| XLOC_023089 | ST6GALNAC4 | chr9:130670164-130679305  | 257.184    | 326.564    | 0.344563 | 0.386855 |
| XLOC_014825 | DMC1       | chr22:38914953-38966189   | 0.0372983  | 0.0473651  | 0.344716 | 1        |
| XLOC_014510 | TUG1       | chr22:31365633-31375380   | 7.90298    | 10.0374    | 0.344912 | 0.403093 |
| XLOC_022103 | C8orf37    | chr8:96257140-96822371    | 0.576364   | 0.732152   | 0.345163 | 0.720235 |
| XLOC_013313 | MPP4       | chr2:202509596-202563417  | 0.0137368  | 0.0174549  | 0.345587 | 1        |
| XLOC_022354 | TRMT10B    | chr9:37753801-37778969    | 2.45939    | 3.12553    | 0.345799 | 0.599775 |
| XLOC_014940 | PRRT3-AS1  | chr3:9987225-9996471      | 4.95636    | 6.29912    | 0.345869 | 0.820487 |
| XLOC_006854 | SPTB       | chr14:65213000-65289866   | 0.5366     | 0.682019   | 0.345967 | 0.646705 |
| XLOC_023372 | SUV39H1    | chrX:48555130-48567406    | 8.80396    | 11.1904    | 0.346035 | 0.455231 |
| XLOC_019099 | MTFR2      | chr6:136552167-136571449  | 9.41909    | 11.9733    | 0.346156 | 0.477384 |
| XLOC_022696 | MRPL41     | chr9:140446308-140447007  | 530.325    | 674.141    | 0.346173 | 0.373268 |
| XLOC_016813 | ANTXR2     | chr4:80822770-80994477    | 12.9851    | 16.5065    | 0.346183 | 0.372106 |

|             |              |                           |           |           |          |          |
|-------------|--------------|---------------------------|-----------|-----------|----------|----------|
| XLOC_014850 | POLR3H       | chr22:41865128-41940479   | 19.5172   | 24.8106   | 0.346209 | 0.593645 |
| XLOC_002194 | AURKAPS1     | chr1:220321609-220445843  | 0.653077  | 0.830438  | 0.34662  | 0.953159 |
| XLOC_008625 | ATP6V0D1     | chr16:67471916-67515089   | 59.7838   | 76.0259   | 0.346735 | 0.377663 |
| XLOC_018091 | TRIM38       | chr6:25962916-25987557    | 1.72533   | 2.19434   | 0.346916 | 0.502187 |
| XLOC_012536 | RBM45        | chr2:178977181-178994382  | 4.7927    | 6.09694   | 0.347246 | 0.539268 |
| XLOC_022630 | GTF3C5       | chr9:135906061-135933890  | 88.0271   | 111.991   | 0.34736  | 0.3699   |
| XLOC_007900 | TNFRSF12A    | chr16:3070312-3072383     | 502.97    | 639.916   | 0.347409 | 0.394733 |
| XLOC_023794 | APOO         | chrX:23851464-23926057    | 11.8773   | 15.1125   | 0.347528 | 0.499306 |
| XLOC_001296 | EPHA2        | chr1:16450831-16482582    | 75.9558   | 96.6569   | 0.347713 | 0.38271  |
| XLOC_013407 | SLC16A14     | chr2:230899689-230933715  | 2.47211   | 3.14587   | 0.347719 | 0.50443  |
| XLOC_000658 | LOC645166    | chr1:148928285-148953054  | 4.38421   | 5.57998   | 0.347942 | 0.732699 |
| XLOC_016394 | MRPL1        | chr4:78783804-78873944    | 8.91597   | 11.3482   | 0.348    | 0.482717 |
| XLOC_017484 | RPL26L1      | chr5:172386438-172396774  | 76.8073   | 97.7649   | 0.348072 | 0.389453 |
| XLOC_003901 | STT3A        | chr11:125462738-125491280 | 36.8491   | 46.9053   | 0.348123 | 0.372956 |
| XLOC_016077 | DNAJC19      | chr3:180701497-180707562  | 14.1837   | 18.0548   | 0.348146 | 0.433511 |
| XLOC_010015 | CBX4         | chr17:77806954-77813213   | 19.9035   | 25.3358   | 0.348153 | 0.408062 |
| XLOC_018379 | DDX43        | chr6:74104284-74127289    | 0.0247194 | 0.0314666 | 0.348178 | 1        |
| XLOC_005612 | C12orf50     | chr12:88373815-88423176   | 0.016645  | 0.0211892 | 0.348239 | 1        |
| XLOC_010044 | ALYREF       | chr17:79845710-79849462   | 116.08    | 147.773   | 0.348265 | 0.383618 |
| XLOC_006850 | SGPP1        | chr14:64150934-64194756   | 3.58494   | 4.56379   | 0.348281 | 0.504142 |
| XLOC_011970 | UBE2S        | chr19:55912649-55919325   | 519.188   | 661.013   | 0.348421 | 0.393462 |
| XLOC_018585 | IGF2R        | chr6:160390130-160527583  | 4.28644   | 5.45784   | 0.348549 | 0.392176 |
| XLOC_003675 | TPCN2        | chr11:68816349-68858072   | 3.18535   | 4.05748   | 0.349135 | 0.495723 |
| XLOC_006513 | GLRX5        | chr14:96001322-96011055   | 46.3952   | 59.1103   | 0.349433 | 0.392448 |
| XLOC_013417 | LINC00471    | chr2:232373136-232379050  | 0.159728  | 0.203516  | 0.349528 | 1        |
| XLOC_000675 | PRPF3        | chr1:150293927-150325704  | 8.4224    | 10.734    | 0.349879 | 0.438502 |
| XLOC_006472 | ADCK1        | chr14:78266425-78400297   | 3.78077   | 4.81853   | 0.349911 | 0.586149 |
| XLOC_007802 | SNRPA1       | chr15:101821714-101835460 | 43.0126   | 54.8224   | 0.350006 | 0.384173 |
| XLOC_023922 | BCYRN1       | chrX:70430034-70948962    | 22.534    | 28.7239   | 0.350149 | 0.970931 |
| XLOC_004512 | SLC35F2      | chr11:107661716-107729914 | 21.32     | 27.1795   | 0.350307 | 0.394465 |
| XLOC_010711 | RFXANK       | chr19:19256375-19314238   | 40.2141   | 51.2679   | 0.350354 | 0.654164 |
| XLOC_015023 | XYLB         | chr3:38388250-38456467    | 1.67797   | 2.13926   | 0.350397 | 0.569689 |
| XLOC_008301 | LOC100128881 | chr16:89773540-89883065   | 18.9655   | 24.1808   | 0.350483 | 0.762566 |
| XLOC_002098 | ZNF281       | chr1:200375419-200379166  | 1.7907    | 2.28325   | 0.350568 | 0.572991 |
| XLOC_000983 | ADORA1       | chr1:203096835-203136533  | 1.88734   | 2.40667   | 0.350685 | 0.652583 |
| XLOC_000539 | SLC30A7      | chr1:101361631-101447311  | 2.14758   | 2.73873   | 0.350792 | 0.451089 |
| XLOC_007881 | C16orf59     | chr16:2510114-2514964     | 7.79493   | 9.94984   | 0.352137 | 0.547473 |
| XLOC_022510 | FAM225A      | chr9:115875175-115882126  | 0.773406  | 0.987225  | 0.352154 | 0.637294 |
| XLOC_021790 | GPAA1        | chr8:145137523-145141119  | 126.29    | 161.207   | 0.352169 | 0.369226 |
| XLOC_005468 | KRT5         | chr12:52908358-52914243   | 0.0502227 | 0.0641162 | 0.352349 | 1        |
| XLOC_010998 | SPACA4       | chr19:49103856-49116694   | 0.0831466 | 0.106154  | 0.352425 | 1        |
| XLOC_002074 | EDEM3        | chr1:184659624-184724041  | 0.755335  | 0.964387  | 0.352496 | 0.594349 |
| XLOC_016423 | PKD2         | chr4:88928798-88998931    | 1.99369   | 2.54567   | 0.352604 | 0.502308 |
| XLOC_015104 | TCTA         | chr3:49449638-49453909    | 8.36605   | 10.6827   | 0.352661 | 0.458372 |
| XLOC_016892 | ELOVL6       | chr4:110970228-111119820  | 7.8664    | 10.0454   | 0.352755 | 0.384312 |
| XLOC_015963 | ANAPC13      | chr3:134196545-134293855  | 32.2847   | 41.2325   | 0.352933 | 0.447327 |
| XLOC_021536 | LEPROTL1     | chr8:29920257-30108213    | 10.2796   | 13.1296   | 0.353044 | 0.824372 |
| XLOC_003668 | NDUFS8       | chr11:67798083-67804114   | 169.908   | 217.11    | 0.353673 | 0.357424 |
| XLOC_010308 | NPC1         | chr18:21083433-21166581   | 9.74831   | 12.4596   | 0.354036 | 0.513296 |

|             |                 |                           |           |           |          |          |
|-------------|-----------------|---------------------------|-----------|-----------|----------|----------|
| XLOC_003621 | PCNXL3          | chr11:65383782-65404910   | 7.32479   | 9.36295   | 0.354176 | 0.392721 |
| XLOC_012077 | CENPO           | chr2:25013135-25142055    | 3.12996   | 4.00099   | 0.354214 | 0.840418 |
| XLOC_008238 | MON1B,SYCE1L    | chr16:77224835-77246976   | 8.71528   | 11.1407   | 0.354223 | 0.424569 |
| XLOC_015071 | SACM1L          | chr3:45730753-45786900    | 4.88504   | 6.24701   | 0.354796 | 0.435859 |
| XLOC_018699 | HIST1H2BL       | chr6:27775256-27775709    | 1.45677   | 1.86369   | 0.35539  | 0.883608 |
| XLOC_009890 | SCARNA20        | chr17:58254690-58469586   | 3.0634    | 3.91922   | 0.355435 | 0.943024 |
| XLOC_017321 | TCF7            | chr5:133450401-133483920  | 5.35864   | 6.85598   | 0.355498 | 0.464963 |
| XLOC_014553 | MICALL1         | chr22:38302154-38338465   | 21.091    | 26.9877   | 0.355679 | 0.360949 |
| XLOC_007801 | VIMP            | chr15:101811213-101817700 | 39.3454   | 50.3459   | 0.35568  | 0.369226 |
| XLOC_008734 | VPS9D1          | chr16:89773540-89883065   | 1.87135   | 2.39496   | 0.355922 | 0.937188 |
| XLOC_007925 | LOC440335       | chr16:4827614-4846492     | 0.101005  | 0.129334  | 0.356678 | 1        |
| XLOC_015766 | SFMBT1          | chr3:52937582-53080089    | 2.64763   | 3.39031   | 0.356711 | 0.473572 |
| XLOC_015255 | C3orf52         | chr3:111805181-111837073  | 5.85746   | 7.50126   | 0.356859 | 0.497625 |
| XLOC_006802 | CDKL1           | chr14:50796719-50862617   | 0.840441  | 1.07634   | 0.35692  | 0.783706 |
| XLOC_023382 | PPP1R3F         | chrX:49126305-49144555    | 0.547211  | 0.700925  | 0.357163 | 0.756508 |
| XLOC_012215 | PNO1            | chr2:68385004-68403094    | 13.9001   | 17.8079   | 0.357422 | 0.409459 |
| XLOC_009339 | CCDC137         | chr17:79633760-79640936   | 24.8889   | 31.8879   | 0.357505 | 0.370689 |
| XLOC_012974 | CYP26B1         | chr2:72356366-72374963    | 0.935433  | 1.19854   | 0.357574 | 0.664657 |
| XLOC_024039 | UPF3B           | chrX:118967988-118986991  | 4.63884   | 5.94369   | 0.357595 | 0.476106 |
| XLOC_021245 | ORC5            | chr7:103766787-103848495  | 19.3851   | 24.8393   | 0.357678 | 0.363734 |
| XLOC_013665 | MYBL2           | chr20:42295708-42345122   | 14.0292   | 17.9795   | 0.357919 | 0.386372 |
| XLOC_022991 | ABCA1           | chr9:107543283-107690527  | 0.0154249 | 0.0197682 | 0.357919 | 1        |
| XLOC_009082 | AOC2            | chr17:40996608-41002724   | 1.93912   | 2.48557   | 0.358172 | 0.62768  |
| XLOC_003804 | ZC3H12C         | chr11:109964086-110042566 | 0.774748  | 0.993463  | 0.358738 | 0.525673 |
| XLOC_002032 | SNORD47         | chr1:173832385-173837125  | 431.035   | 552.791   | 0.358931 | 0.967226 |
| XLOC_018446 | GTF3C6          | chr6:111279762-111289091  | 56.5786   | 72.5615   | 0.358947 | 0.361239 |
| XLOC_009430 | NUP88           | chr17:5289345-5342471     | 23.5855   | 30.2502   | 0.35904  | 0.858377 |
| XLOC_003047 | NUDT9P1         | chr10:92911760-92912837   | 0.19944   | 0.255834  | 0.359258 | 1        |
| XLOC_001592 | WDR78           | chr1:67278571-67390570    | 0.227516  | 0.291882  | 0.359418 | 1        |
| XLOC_006685 | OSGEP           | chr14:20915206-20923267   | 28.0153   | 35.9431   | 0.3595   | 0.362399 |
| XLOC_017742 | KIAA0825        | chr5:93486555-93954309    | 0.024523  | 0.0314659 | 0.359654 | 1        |
| XLOC_010041 | PPP1R27         | chr17:79791367-79792926   | 0.169855  | 0.217997  | 0.360003 | 1        |
| XLOC_017586 | ZNF622          | chr5:16451627-16465894    | 30.956    | 39.7313   | 0.360055 | 0.361239 |
| XLOC_023485 | PBDC1           | chrX:75392770-75398033    | 23.5385   | 30.2122   | 0.360109 | 0.375413 |
| XLOC_004808 | TMEM117         | chr12:44229961-44783541   | 0.895476  | 1.14938   | 0.360128 | 0.673586 |
| XLOC_010148 | C18orf8         | chr18:21083433-21166581   | 8.94578   | 11.4833   | 0.360263 | 0.760118 |
| XLOC_013085 | UXS1            | chr2:106709758-106810795  | 10.2849   | 13.2031   | 0.360348 | 0.416627 |
| XLOC_023556 | ATG4A           | chrX:107334898-107397901  | 1.7932    | 2.30243   | 0.36062  | 0.599775 |
| XLOC_006523 | VRK1            | chr14:97263683-97347951   | 11.7884   | 15.1361   | 0.360634 | 0.419968 |
| XLOC_018512 | TBPL1           | chr6:134273307-134308638  | 7.83505   | 10.0626   | 0.360988 | 0.494451 |
| XLOC_004855 | GRASP           | chr12:52400728-52409673   | 0.471638  | 0.605761  | 0.361068 | 0.83793  |
| XLOC_001790 | HIST2H2BC       | chr1:149821758-149822340  | 5.46852   | 7.02389   | 0.361118 | 0.765908 |
| XLOC_023044 | TRAF1           | chr9:123664670-123691451  | 0.81281   | 1.04413   | 0.361307 | 0.662604 |
| XLOC_000077 | APITD1,APITD1-C | chr1:10490158-10512060    | 8.88129   | 11.4092   | 0.361358 | 0.513388 |
| XLOC_022450 | LOC100132077    | chr9:97094757-97123230    | 0.148028  | 0.190178  | 0.361474 | 1        |
| XLOC_010970 | DHX34           | chr19:47852537-47885961   | 10.8661   | 13.9605   | 0.361515 | 0.387199 |
| XLOC_021740 | NDUFB9          | chr8:125551342-125562227  | 574.334   | 737.894   | 0.361524 | 0.356885 |
| XLOC_007124 | CHRM5           | chr15:34158427-34357287   | 0.025171  | 0.03234   | 0.36156  | 1        |
| XLOC_021556 | TACC1           | chr8:38585703-38710546    | 3.28808   | 4.2255    | 0.361877 | 0.389453 |

|             |              |                           |           |           |          |          |
|-------------|--------------|---------------------------|-----------|-----------|----------|----------|
| XLOC_010774 | SCN1B        | chr19:35521591-35531353   | 4.27588   | 5.49599   | 0.362158 | 0.633194 |
| XLOC_006664 | TEX22        | chr14:105864919-105880196 | 0.235692  | 0.302953  | 0.362191 | 1        |
| XLOC_016469 | C4orf32      | chr4:113066552-113110237  | 4.17115   | 5.36193   | 0.362306 | 0.482379 |
| XLOC_023421 | TSR2         | chrX:54466852-54471731    | 25.3288   | 32.5683   | 0.362692 | 0.365953 |
| XLOC_018695 | HIST1H2BK    | chr6:27106071-27114637    | 34.9117   | 44.8921   | 0.362751 | 0.417242 |
| XLOC_008876 | UBB          | chr17:16284366-16286054   | 1030.57   | 1325.51   | 0.363107 | 0.384397 |
| XLOC_017020 | ENPP6        | chr4:185009858-185139114  | 0.0247181 | 0.0317951 | 0.363235 | 1        |
| XLOC_014227 | PCNT         | chr21:47744035-47865682   | 1.97941   | 2.54635   | 0.363355 | 0.412216 |
| XLOC_009214 | C17orf82     | chr17:59489111-59490641   | 0.333484  | 0.429033  | 0.363472 | 0.907121 |
| XLOC_013097 | NPHP1        | chr2:110880913-110962639  | 0.989157  | 1.27265   | 0.363561 | 0.66119  |
| XLOC_001095 | RNF187       | chr1:228675067-228683889  | 58.1389   | 74.8023   | 0.363579 | 0.347988 |
| XLOC_022497 | ZNF462       | chr9:109625377-109848716  | 0.895232  | 1.15183   | 0.363598 | 0.514736 |
| XLOC_016050 | GOLIM4       | chr3:167727653-167813417  | 0.657553  | 0.846129  | 0.363771 | 0.70639  |
| XLOC_018525 | ABRACL       | chr6:139349818-139364439  | 82.0651   | 105.639   | 0.364307 | 0.347688 |
| XLOC_023067 | PSMB7        | chr9:127115743-127177752  | 257.553   | 331.543   | 0.364329 | 0.480741 |
| XLOC_004255 | FADS3        | chr11:61640997-61659006   | 65.4299   | 84.2444   | 0.364631 | 0.354806 |
| XLOC_009336 | BAHCC1       | chr17:79373539-79433358   | 1.16779   | 1.50422   | 0.365232 | 0.532305 |
| XLOC_013897 | APMAP        | chr20:24943579-24973425   | 50.0266   | 64.4522   | 0.365534 | 0.343733 |
| XLOC_020600 | FZD1         | chr7:90893782-90898132    | 1.60309   | 2.06552   | 0.365654 | 0.604499 |
| XLOC_016103 | RFC4         | chr3:186501360-186524484  | 25.5145   | 32.8795   | 0.365871 | 0.884031 |
| XLOC_003607 | SLC22A20     | chr11:64981310-65010228   | 0.145554  | 0.187579  | 0.36594  | 1        |
| XLOC_010461 | ADAT3_SCAMP4 | chr19:1905370-1926012     | 39.1687   | 50.4829   | 0.366093 | 0.409587 |
| XLOC_016141 | PCYT1A       | chr3:195965252-196014584  | 5.8891    | 7.59037   | 0.366122 | 0.495709 |
| XLOC_001203 | MRPL20       | chr1:1334909-1342693      | 139.775   | 180.155   | 0.366131 | 0.390341 |
| XLOC_020755 | CPA4         | chr7:129932973-129964020  | 0.0145985 | 0.018816  | 0.366141 | 1        |
| XLOC_014294 | MIS18A       | chr21:33640529-33651376   | 14.3325   | 18.4793   | 0.366621 | 0.396999 |
| XLOC_009931 | SLC16A6      | chr17:66255322-66417000   | 0.513347  | 0.661973  | 0.366838 | 0.774294 |
| XLOC_001825 | THEM4        | chr1:151843342-151882361  | 3.71401   | 4.78963   | 0.366936 | 0.392176 |
| XLOC_014393 | CECR7        | chr22:17517459-17539682   | 0.985602  | 1.27116   | 0.367065 | 0.693923 |
| XLOC_002221 | JMJD4        | chr1:227916239-227968932  | 17.2245   | 22.2199   | 0.367389 | 0.619728 |
| XLOC_012958 | AAK1         | chr2:69685126-69870977    | 0.898072  | 1.15853   | 0.367392 | 0.399575 |
| XLOC_015408 | RAP2B        | chr3:152880028-152886263  | 13.5277   | 17.4588   | 0.368037 | 0.392586 |
| XLOC_008727 | GALNS        | chr16:88880141-88923374   | 8.51237   | 10.9876   | 0.368247 | 0.426107 |
| XLOC_004066 | TMEM41B      | chr11:9302200-9336315     | 26.7634   | 34.5469   | 0.368292 | 0.423783 |
| XLOC_016251 | TAPT1-AS1    | chr4:16228285-16259810    | 0.262251  | 0.338534  | 0.368355 | 1        |
| XLOC_002542 | TMEM254      | chr10:81805988-81852307   | 1.87969   | 2.42664   | 0.368465 | 0.622746 |
| XLOC_008998 | TAF15        | chr17:34136458-34174246   | 70.0991   | 90.5099   | 0.36868  | 0.330706 |
| XLOC_018815 | BAK1         | chr6:33540322-33548070    | 50.5926   | 65.3326   | 0.368875 | 0.339765 |
| XLOC_012512 | HAT1         | chr2:172778934-172848600  | 23.0489   | 29.7674   | 0.369033 | 0.335344 |
| XLOC_017862 | DIAPH1       | chr5:140894587-140998622  | 10.2139   | 13.1949   | 0.369441 | 0.352882 |
| XLOC_008407 | FAM86A       | chr16:5121809-5147789     | 11.0847   | 14.3232   | 0.369778 | 0.59519  |
| XLOC_019133 | ZC3H12D      | chr6:149768765-149806148  | 0.0229807 | 0.029695  | 0.369794 | 1        |
| XLOC_001265 | MTOR         | chr1:11166587-11322608    | 2.71819   | 3.51242   | 0.36982  | 0.377304 |
| XLOC_000440 | DNAJC6       | chr1:65730376-65881552    | 1.5881    | 2.05217   | 0.369849 | 0.47659  |
| XLOC_009835 | SLC35B1      | chr17:47778689-47785282   | 40.9122   | 52.8682   | 0.369867 | 0.345838 |
| XLOC_005152 | PSMD9        | chr12:122326636-122355771 | 33.7013   | 43.5503   | 0.369877 | 0.330706 |
| XLOC_005629 | SOCS2-AS1    | chr12:93959403-93970521   | 0.559059  | 0.722526  | 0.370049 | 0.967343 |
| XLOC_005713 | SLC24A6      | chr12:113736570-113772925 | 9.81212   | 12.6814   | 0.370079 | 0.390817 |
| XLOC_011054 | EMC10        | chr19:50970044-50986608   | 32.3304   | 41.7919   | 0.370333 | 0.367402 |

|             |               |                           |           |           |          |          |
|-------------|---------------|---------------------------|-----------|-----------|----------|----------|
| XLOC_023330 | TSPAN7        | chrX:38420730-38548172    | 0.823353  | 1.06454   | 0.370648 | 0.730925 |
| XLOC_013850 | TRMT6         | chr20:5918485-5931173     | 9.84077   | 12.7238   | 0.370691 | 0.363569 |
| XLOC_011289 | MKNK2         | chr19:2037469-2051243     | 49.1649   | 63.5713   | 0.370746 | 0.384626 |
| XLOC_021060 | FIGNL1        | chr7:50511831-50518088    | 2.45127   | 3.16969   | 0.370815 | 0.465794 |
| XLOC_002111 | LMOD1         | chr1:201865583-201915716  | 0.142969  | 0.184887  | 0.370943 | 1        |
| XLOC_017061 | NDUFS6        | chr5:1801495-1816167      | 121.919   | 157.67    | 0.370992 | 0.338996 |
| XLOC_007929 | ALG1          | chr16:5121809-5147789     | 5.17419   | 6.69257   | 0.371226 | 0.633194 |
| XLOC_009957 | GRIN2C        | chr17:72838167-72856007   | 0.119603  | 0.15471   | 0.371304 | 1        |
| XLOC_015805 | LRIG1         | chr3:66119284-66550845    | 2.18253   | 2.82319   | 0.371322 | 0.838902 |
| XLOC_016033 | SHOX2         | chr3:157813799-157823952  | 0.14443   | 0.18683   | 0.371359 | 1        |
| XLOC_022815 | FAM166B       | chr9:35490006-35563896    | 0.946706  | 1.22465   | 0.371379 | 0.969901 |
| XLOC_005712 | IQCD          | chr12:113633245-113658880 | 0.169368  | 0.219141  | 0.371696 | 1        |
| XLOC_011276 | C19orf25      | chr19:1450147-1479228     | 31.0551   | 40.185    | 0.371824 | 0.363587 |
| XLOC_015869 | ATG3          | chr3:112251358-112280485  | 30.3854   | 39.3189   | 0.371843 | 0.334695 |
| XLOC_023371 | WAS           | chrX:48542185-48549817    | 0.170991  | 0.221273  | 0.371903 | 1        |
| XLOC_024017 | AMMECR1       | chrX:109437413-109699562  | 1.22084   | 1.58001   | 0.372061 | 0.514736 |
| XLOC_001554 | MAGOH         | chr1:53692563-53793821    | 68.4977   | 88.6609   | 0.372243 | 0.469269 |
| XLOC_021992 | ATP6V1H       | chr8:54628102-54755871    | 33.9734   | 43.9851   | 0.372611 | 0.325655 |
| XLOC_023162 | DKFZP434A062  | chr9:139216997-139221779  | 0.0141525 | 0.0183255 | 0.372793 | 1        |
| XLOC_006652 | KIF26A        | chr14:104605059-104647235 | 2.40022   | 3.10813   | 0.372884 | 0.504902 |
| XLOC_018586 | LOC729603     | chr6:160390130-160527583  | 0.240248  | 0.311128  | 0.372983 | 1        |
| XLOC_021650 | FABP5         | chr8:82192717-82197012    | 251.132   | 325.264   | 0.373165 | 0.327486 |
| XLOC_020861 | ABCB8         | chr7:150725509-150744869  | 5.3948    | 6.98774   | 0.373256 | 0.390817 |
| XLOC_011351 | ACER1         | chr19:6306509-6333640     | 0.976051  | 1.26426   | 0.373267 | 0.805817 |
| XLOC_011485 | GIPC1         | chr19:14588570-14606961   | 132.531   | 171.671   | 0.373313 | 0.341841 |
| XLOC_023695 | ABCD1         | chrX:152990322-153010216  | 11.6769   | 15.1257   | 0.373352 | 0.374271 |
| XLOC_015948 | FAM86HP       | chr3:129800673-129830276  | 1.20395   | 1.55957   | 0.373369 | 0.688705 |
| XLOC_004800 | ALG10         | chr12:34175215-34181236   | 1.13571   | 1.47136   | 0.373559 | 0.618375 |
| XLOC_011323 | SIRT6         | chr19:4174105-4182596     | 26.9445   | 34.9156   | 0.37388  | 0.35044  |
| XLOC_008502 | KCTD13        | chr16:29917656-29937545   | 10.2726   | 13.3148   | 0.37423  | 0.461842 |
| XLOC_004769 | GOLT1B        | chr12:21654698-21671337   | 8.82488   | 11.4386   | 0.374261 | 0.36667  |
| XLOC_001889 | SCAMP3        | chr1:155225769-155232176  | 45.1981   | 58.6057   | 0.374778 | 0.317579 |
| XLOC_011020 | ALDH16A1      | chr19:49956472-49974305   | 11.1239   | 14.4244   | 0.374855 | 0.382564 |
| XLOC_014490 | ZNRF3         | chr22:29279754-29453476   | 1.36563   | 1.7709    | 0.374916 | 0.512407 |
| XLOC_008247 | GAN           | chr16:81348570-81413803   | 0.210879  | 0.27356   | 0.37544  | 1        |
| XLOC_006255 | PNP           | chr14:20937537-20946165   | 76.0401   | 98.6508   | 0.375571 | 0.319848 |
| XLOC_010993 | GRIN2D        | chr19:48898131-48948188   | 17.9984   | 23.3506   | 0.37559  | 0.332523 |
| XLOC_014701 | YDJC          | chr22:21982377-21984340   | 111.821   | 145.137   | 0.376221 | 0.319804 |
| XLOC_023973 | SYTL4         | chrX:99929488-99987135    | 0.805224  | 1.04535   | 0.37652  | 0.614106 |
| XLOC_000308 | ZFP69B        | chr1:40916336-40929390    | 1.0404    | 1.3509    | 0.376782 | 0.673957 |
| XLOC_001924 | ETV3          | chr1:157094458-157108383  | 0.371318  | 0.482146  | 0.376818 | 0.806275 |
| XLOC_009884 | TBC1D3P1-DHX4 | chr17:58053384-58096336   | 0.323416  | 0.419972  | 0.376899 | 0.85718  |
| XLOC_009047 | CDC6          | chr17:38444145-38459413   | 7.93685   | 10.3101   | 0.377415 | 0.358261 |
| XLOC_002346 | CDC123        | chr10:12171639-12292589   | 138.185   | 179.511   | 0.377463 | 0.503119 |
| XLOC_008316 | MRPL28        | chr16:417383-420569       | 101.891   | 132.366   | 0.377511 | 0.311408 |
| XLOC_017558 | SDHAP3        | chr5:1572072-1594646      | 3.31479   | 4.30666   | 0.377652 | 0.633137 |
| XLOC_002565 | LOC439994     | chr10:88998423-89103331   | 3.15707   | 4.10204   | 0.377758 | 0.881798 |
| XLOC_011701 | POU2F2        | chr19:42590261-42636625   | 0.0801676 | 0.104174  | 0.3779   | 1        |
| XLOC_008098 | ADCY7         | chr16:50321822-50352043   | 6.4292    | 8.35471   | 0.377951 | 0.333549 |



|             |               |                           |           |           |          |          |
|-------------|---------------|---------------------------|-----------|-----------|----------|----------|
| XLOC_010010 | CANT1         | chr17:76987797-77005899   | 22.5681   | 29.329    | 0.378041 | 0.324591 |
| XLOC_015932 | RUVBL1        | chr3:127799799-127842671  | 48.9013   | 63.558    | 0.378201 | 0.318076 |
| XLOC_008353 | ZNF598        | chr16:2047652-2059822     | 39.8664   | 51.8221   | 0.378392 | 0.319187 |
| XLOC_017450 | UBLCP1        | chr5:158690088-158713048  | 8.87257   | 11.5348   | 0.378564 | 0.355674 |
| XLOC_005319 | MANSC1        | chr12:12482217-12503169   | 3.29375   | 4.2823    | 0.378655 | 0.513296 |
| XLOC_009919 | SMURF2        | chr17:62540734-62658386   | 77.2859   | 100.504   | 0.378982 | 0.337256 |
| XLOC_011638 | ZNF573        | chr19:38229202-38270230   | 0.151489  | 0.197011  | 0.379065 | 1        |
| XLOC_015941 | H1FX          | chr3:129033613-129043412  | 205.852   | 267.771   | 0.379394 | 0.312144 |
| XLOC_000763 | MSTO1         | chr1:155579960-155584758  | 7.66066   | 9.96631   | 0.379591 | 0.392178 |
| XLOC_009100 | G6PC3         | chr17:42148097-42153712   | 67.4841   | 87.8029   | 0.379719 | 0.30134  |
| XLOC_012124 | LCLAT1        | chr2:30670122-30867091    | 2.56807   | 3.34144   | 0.379787 | 0.413223 |
| XLOC_015467 | LOC100505687  | chr3:183165395-183173800  | 3.31614   | 4.31513   | 0.379899 | 0.555392 |
| XLOC_022033 | SLCO5A1       | chr8:70584567-70747299    | 2.16025   | 2.81106   | 0.379918 | 0.52274  |
| XLOC_020697 | DNAJB9        | chr7:108210188-108215294  | 8.67339   | 11.2871   | 0.380001 | 0.376508 |
| XLOC_020525 | TYW1          | chr7:66461791-66704507    | 3.89595   | 5.07003   | 0.380021 | 0.413789 |
| XLOC_006820 | GCH1          | chr14:55308723-55369542   | 6.3827    | 8.30667   | 0.380103 | 0.474163 |
| XLOC_021253 | ATXN7L1       | chr7:105245220-105517031  | 1.17552   | 1.52991   | 0.380153 | 0.705123 |
| XLOC_011789 | TMEM160       | chr19:47549166-47551882   | 53.7075   | 69.9154   | 0.380486 | 0.450976 |
| XLOC_005066 | TXNRD1        | chr12:104609556-104744085 | 23.5031   | 30.5979   | 0.38058  | 0.312491 |
| XLOC_015857 | MYH15         | chr3:108099215-108248169  | 0.151836  | 0.197742  | 0.381098 | 1        |
| XLOC_009374 | INPP5K        | chr17:1397870-1420182     | 13.4848   | 17.5671   | 0.38154  | 0.331994 |
| XLOC_010682 | GLT25D1       | chr19:17666510-17693965   | 52.3763   | 68.2605   | 0.382135 | 0.317407 |
| XLOC_007945 | SHISA9        | chr16:12995476-13334273   | 0.917905  | 1.19631   | 0.38218  | 0.536934 |
| XLOC_000025 | ATAD3B        | chr1:1407163-1431582      | 44.2116   | 57.6216   | 0.382183 | 0.304538 |
| XLOC_014191 | SLC37A1       | chr21:43919741-44001550   | 6.05689   | 7.89757   | 0.382832 | 0.393394 |
| XLOC_007209 | SLC27A2       | chr15:50474392-50528589   | 12.7094   | 16.5773   | 0.383321 | 0.333549 |
| XLOC_012630 | TMEM169       | chr2:216946588-216967506  | 0.0253713 | 0.0330952 | 0.383425 | 1        |
| XLOC_009828 | SNF8          | chr17:47007458-47022154   | 78.9624   | 103.021   | 0.383704 | 0.28912  |
| XLOC_002212 | PYCR2         | chr1:226107576-226112040  | 61.8655   | 80.7204   | 0.3838   | 0.302361 |
| XLOC_014562 | APOBEC3A,APOE | chr22:39353526-39388784   | 16.7375   | 21.8445   | 0.384183 | 0.358175 |
| XLOC_005522 | CNPY2,PAN2    | chr12:56704212-56727837   | 102.702   | 134.047   | 0.384278 | 0.366523 |
| XLOC_000293 | C1orf122      | chr1:38268613-38275126    | 63.5793   | 83.0044   | 0.38463  | 0.614359 |
| XLOC_008710 | EMC8          | chr16:85812230-85833148   | 27.629    | 36.0731   | 0.38474  | 0.318231 |
| XLOC_010869 | SNRPA         | chr19:41256758-41271297   | 137.532   | 179.657   | 0.38548  | 0.30074  |
| XLOC_001444 | CLSPN         | chr1:36197712-36235551    | 0.858202  | 1.12121   | 0.38567  | 0.466414 |
| XLOC_021910 | TNFRSF10B     | chr8:22844929-22941132    | 34.5565   | 45.148    | 0.385703 | 0.342693 |
| XLOC_017840 | HSPA9         | chr5:137890570-137911318  | 174.972   | 228.639   | 0.385945 | 0.312888 |
| XLOC_003618 | SSSCA1        | chr11:65337942-65339239   | 64.5944   | 84.4278   | 0.386309 | 0.358432 |
| XLOC_000819 | KLHDC9        | chr1:161068150-161070138  | 0.187026  | 0.244498  | 0.386585 | 1        |
| XLOC_001253 | GPR157        | chr1:9164475-9189229      | 0.202549  | 0.264869  | 0.387008 | 1        |
| XLOC_006686 | TMEM55B       | chr14:20926011-20929637   | 27.3252   | 35.7437   | 0.387456 | 0.310597 |
| XLOC_004309 | EHD1          | chr11:64620207-64646191   | 29.9582   | 39.1927   | 0.387632 | 0.297228 |
| XLOC_015494 | DNAJB11       | chr3:186288466-186303589  | 21.9432   | 28.711    | 0.38783  | 0.310885 |
| XLOC_012786 | ODC1          | chr2:10580507-10588453    | 207.341   | 271.309   | 0.387932 | 0.301521 |
| XLOC_004345 | ZDHC24        | chr11:66306734-66313671   | 35.8329   | 46.8891   | 0.387968 | 0.351761 |
| XLOC_017024 | MLF1IP        | chr4:185570766-185655286  | 9.55188   | 12.5007   | 0.388149 | 0.361239 |
| XLOC_022218 | MROH6         | chr8:144648362-144654928  | 4.08636   | 5.34795   | 0.388169 | 0.515374 |
| XLOC_011712 | PSG3          | chr19:43225793-43244668   | 0.0291331 | 0.0381281 | 0.388195 | 1        |
| XLOC_008144 | GPR114        | chr16:57576600-57611100   | 2.06495   | 2.70277   | 0.388335 | 0.514396 |

|             |              |                           |            |            |          |          |
|-------------|--------------|---------------------------|------------|------------|----------|----------|
| XLOC_013712 | SLC9A8       | chr20:48429249-48508779   | 3.10495    | 4.06403    | 0.388341 | 0.384397 |
| XLOC_003056 | PIPSL        | chr10:95717896-95721672   | 0.0101349  | 0.0132661  | 0.388423 | 1        |
| XLOC_018137 | ZSCAN12P1    | chr6:28058584-28063493    | 0.7305     | 0.956208   | 0.38844  | 0.628025 |
| XLOC_010392 | BCL2         | chr18:60790578-60986613   | 1.69813    | 2.22297    | 0.388542 | 0.800138 |
| XLOC_018250 | SNRPC        | chr6:34724870-34741634    | 106.646    | 139.636    | 0.388842 | 0.284835 |
| XLOC_007394 | TICRR        | chr15:90118817-90198682   | 3.73705    | 4.89328    | 0.388902 | 0.552646 |
| XLOC_003048 | LOC100188947 | chr10:93066718-93371217   | 0.11843    | 0.155093   | 0.3891   | 1        |
| XLOC_011848 | AKT1S1       | chr19:50372296-50380644   | 49.3006    | 64.566     | 0.38917  | 0.284028 |
| XLOC_012680 | RHBDD1       | chr2:227700670-227863923  | 3.01376    | 3.94724    | 0.389279 | 0.387821 |
| XLOC_001493 | ZMYND12      | chr1:42896000-42921938    | 0.240519   | 0.315036   | 0.389369 | 1        |
| XLOC_005587 | MRS2P2       | chr12:72233486-72320629   | 0.0185977  | 0.0243597  | 0.389372 | 1        |
| XLOC_005093 | TCHP         | chr12:110338078-110355874 | 4.27622    | 5.60119    | 0.389396 | 0.403799 |
| XLOC_008809 | EIF5A        | chr17:7210317-7215782     | 885.881    | 1160.51    | 0.389576 | 0.332923 |
| XLOC_024078 | MBNL3        | chrX:131503342-131623996  | 0.30682    | 0.40197    | 0.389693 | 0.532321 |
| XLOC_023420 | RIBC1        | chrX:53449804-53458063    | 0.595017   | 0.779894   | 0.390347 | 0.780762 |
| XLOC_016738 | LRRC66       | chr4:52859865-52883786    | 0.0545711  | 0.0715295  | 0.390401 | 1        |
| XLOC_015364 | FAIM         | chr3:138327541-138352213  | 7.43247    | 9.74239    | 0.390434 | 0.474234 |
| XLOC_006922 | SEL1L        | chr14:81937890-82000205   | 3.63841    | 4.7692     | 0.390439 | 0.315311 |
| XLOC_010145 | RBBP8        | chr18:20513294-20606449   | 4.20628    | 5.51434    | 0.390644 | 0.401334 |
| XLOC_000580 | RBM15        | chr1:110881944-110889303  | 4.11306    | 5.39225    | 0.390674 | 0.424204 |
| XLOC_018013 | TRIM7        | chr5:180620923-180632177  | 11.9654    | 15.6884    | 0.390828 | 0.52085  |
| XLOC_011763 | SIX5         | chr19:46268042-46272497   | 11.3387    | 14.8671    | 0.390869 | 0.358261 |
| XLOC_007270 | CORO2B       | chr15:68871307-69020144   | 2.57947    | 3.38241    | 0.39098  | 0.466843 |
| XLOC_017788 | FLJ33630     | chr5:127357243-127418766  | 0.98646    | 1.29353    | 0.390981 | 0.587084 |
| XLOC_019151 | CNKSR3       | chr6:154726432-154831753  | 1.44717    | 1.89792    | 0.391186 | 0.547473 |
| XLOC_001884 | MUC1         | chr1:155158299-155162706  | 3.73359    | 4.89726    | 0.391412 | 0.553823 |
| XLOC_014396 | CECR2        | chr22:17956627-18033845   | 0.036601   | 0.0480122  | 0.39152  | 1        |
| XLOC_008918 | DHRS7B       | chr17:21030240-21095285   | 10.3847    | 13.6224    | 0.39153  | 0.353588 |
| XLOC_016412 | WDFY3-AS2    | chr4:85887970-85928168    | 0.225844   | 0.29629    | 0.391683 | 1        |
| XLOC_018433 | SOBP         | chr6:107811316-107982513  | 0.559058   | 0.733661   | 0.392115 | 0.628907 |
| XLOC_010631 | CC2D1A       | chr19:14016955-14041693   | 17.5257    | 23.0103    | 0.392809 | 0.302181 |
| XLOC_009246 | KPNA2        | chr17:66031847-66042970   | 91.1247    | 119.653    | 0.392943 | 0.293112 |
| XLOC_008652 | LOC100506083 | chr16:70323669-70380650   | 0.270381   | 0.355037   | 0.392977 | 1        |
| XLOC_015930 | TPRA1        | chr3:127291906-127309602  | 45.2872    | 59.4719    | 0.393104 | 0.289821 |
| XLOC_016623 | CPLX1        | chr4:778744-819945        | 5.23756    | 6.87911    | 0.393326 | 0.546604 |
| XLOC_010798 | PSENE1       | chr19:36236493-36237903   | 84.6314    | 111.195    | 0.393823 | 0.297593 |
| XLOC_023090 | PIP5K1       | chr9:130683807-130693076  | 23.398     | 30.7502    | 0.394213 | 0.418954 |
| XLOC_000798 | IFI16        | chr1:158979681-159024945  | 39.7732    | 52.2768    | 0.394375 | 0.28912  |
| XLOC_011606 | IGFLR1       | chr19:36230150-36233351   | 2.71746    | 3.57178    | 0.394386 | 0.688092 |
| XLOC_000087 | AGTRAP       | chr1:11796141-11810828    | 72.0671    | 94.7712    | 0.395108 | 0.282119 |
| XLOC_003256 | TSSC4        | chr11:2423522-2425106     | 35.4965    | 46.6818    | 0.395185 | 0.312715 |
| XLOC_014430 | THAP7-AS1    | chr22:21354060-21368576   | 2.88822    | 3.79844    | 0.395229 | 0.878705 |
| XLOC_014810 | MFNG         | chr22:37865100-37882478   | 0.0953755  | 0.125437   | 0.395279 | 1        |
| XLOC_004833 | TMBIM6       | chr12:50135292-50158717   | 277.4      | 364.922    | 0.395619 | 0.308679 |
| XLOC_006483 | FOXN3-AS1    | chr14:89622515-90085494   | 1.96236    | 2.58152    | 0.395629 | 0.913056 |
| XLOC_010637 | CD97         | chr19:14491955-14519537   | 24.3075    | 31.9776    | 0.395656 | 0.285666 |
| XLOC_022112 | NIPAL2       | chr8:99204386-99306621    | 0.238057   | 0.313204   | 0.395797 | 1        |
| XLOC_022648 | COL5A1       | chr9:137533651-137736688  | 0.00633606 | 0.00833671 | 0.395891 | 1        |
| XLOC_007259 | DIS3L        | chr15:66585632-66626236   | 3.92601    | 5.17104    | 0.39739  | 0.357338 |

|             |           |                           |            |            |          |          |
|-------------|-----------|---------------------------|------------|------------|----------|----------|
| XLOC_008877 | TRPV2     | chr17:16318855-16340317   | 0.79644    | 1.0493     | 0.397791 | 0.693623 |
| XLOC_008051 | ZNF771    | chr16:30418734-30429916   | 11.0596    | 14.5716    | 0.397857 | 0.549965 |
| XLOC_008133 | HERPUD1   | chr16:56965747-56977793   | 48.8913    | 64.4168    | 0.397858 | 0.299775 |
| XLOC_004857 | C12orf44  | chr12:52463757-52471279   | 60.3477    | 79.5187    | 0.397996 | 0.284182 |
| XLOC_011731 | PLAUR     | chr19:44150246-44174498   | 108.577    | 143.164    | 0.398955 | 0.259419 |
| XLOC_011796 | NAPA      | chr19:47987538-48018515   | 40.0893    | 52.8674    | 0.399159 | 0.294591 |
| XLOC_004577 | PVRL1     | chr11:119508807-119599435 | 8.74418    | 11.5349    | 0.399611 | 0.506451 |
| XLOC_016645 | FAM86EP   | chr4:3943668-3957148      | 0.754552   | 0.99539    | 0.39964  | 0.647903 |
| XLOC_004939 | SHMT2     | chr12:57623355-57634475   | 288.502    | 380.631    | 0.399812 | 0.333549 |
| XLOC_004302 | NRXN2     | chr11:64373645-64490660   | 0.114481   | 0.151091   | 0.400304 | 1        |
| XLOC_015580 | TMEM40    | chr3:12775391-12800808    | 0.111813   | 0.147575   | 0.40036  | 1        |
| XLOC_015234 | CEP97     | chr3:101443493-101486181  | 0.480924   | 0.634743   | 0.400361 | 0.61923  |
| XLOC_003874 | TECTA     | chr11:120973374-121061515 | 0.0450418  | 0.0594511  | 0.40044  | 1        |
| XLOC_017839 | ETF1      | chr5:137841781-137878989  | 31.5847    | 41.6902    | 0.400482 | 0.287405 |
| XLOC_007123 | RYR3      | chr15:33603176-34158303   | 0.00534307 | 0.00705282 | 0.400531 | 1        |
| XLOC_014221 | COL18A1   | chr21:46825096-46933634   | 2.65614    | 3.50626    | 0.400605 | 0.435778 |
| XLOC_016023 | SLC33A1   | chr3:155544300-155572248  | 3.89227    | 5.13917    | 0.400923 | 0.415024 |
| XLOC_002408 | ZNF37A    | chr10:38383263-38412278   | 1.85154    | 2.44492    | 0.401063 | 0.371307 |
| XLOC_007888 | FLJ42627  | chr16:2688982-2696130     | 2.27602    | 3.00547    | 0.40108  | 0.386372 |
| XLOC_013167 | LCT       | chr2:136545414-136594750  | 0.0127459  | 0.0168322  | 0.401185 | 1        |
| XLOC_015296 | DIRC2     | chr3:122513900-122599986  | 9.66833    | 12.7706    | 0.401483 | 0.303246 |
| XLOC_011265 | RNF126    | chr19:647525-663233       | 74.7273    | 98.7136    | 0.401613 | 0.278484 |
| XLOC_023787 | SCARNA9L  | chrX:20142635-20159966    | 1.22872    | 1.62325    | 0.401728 | 0.970994 |
| XLOC_016542 | KIAA0922  | chr4:154387497-154557862  | 2.14903    | 2.8397     | 0.402052 | 0.389795 |
| XLOC_018845 | TMEM217   | chr6:37179953-37300746    | 0.160817   | 0.21253    | 0.402245 | 1        |
| XLOC_010755 | C19orf40  | chr19:33463147-33467960   | 2.10872    | 2.78852    | 0.403134 | 0.644644 |
| XLOC_017522 | HNRNPAB   | chr5:177631507-177659803  | 138.663    | 183.424    | 0.403592 | 0.302001 |
| XLOC_002636 | ENTPD7    | chr10:101419262-101515894 | 3.04149    | 4.02368    | 0.403739 | 0.797341 |
| XLOC_023857 | FOXP3     | chrX:49091926-49121288    | 0.298217   | 0.394527   | 0.403763 | 0.957728 |
| XLOC_010047 | MAFG      | chr17:79876144-79885587   | 9.00275    | 11.9127    | 0.404067 | 0.285406 |
| XLOC_011496 | NOTCH3    | chr19:15270443-15311792   | 0.154044   | 0.203854   | 0.404193 | 1        |
| XLOC_012771 | RNASEH1   | chr2:3592690-3605940      | 9.40198    | 12.4426    | 0.404252 | 0.347688 |
| XLOC_009060 | EIF1      | chr17:39845126-39847898   | 759.08     | 1004.74    | 0.404492 | 0.329474 |
| XLOC_014238 | HSPA13    | chr21:15743436-15755509   | 5.93205    | 7.85384    | 0.404868 | 0.298867 |
| XLOC_017994 | HNRNPH1   | chr5:179041178-179050722  | 70.4303    | 93.3133    | 0.405887 | 0.254335 |
| XLOC_001291 | UQCRHL    | chr1:16133656-16134194    | 1.72475    | 2.28524    | 0.405963 | 0.767689 |
| XLOC_009004 | PIGW      | chr17:34891402-34895150   | 4.71601    | 6.24985    | 0.406254 | 0.392037 |
| XLOC_018062 | CD83      | chr6:14117486-14137148    | 3.62518    | 4.80471    | 0.406396 | 0.419912 |
| XLOC_003588 | GPR137    | chr11:64037299-64056972   | 13.3264    | 17.664     | 0.406525 | 0.722665 |
| XLOC_017859 | HARS      | chr5:140053489-140078890  | 35.1596    | 46.607     | 0.406629 | 0.387195 |
| XLOC_009559 | C17orf103 | chr17:21142183-21156578   | 4.08518    | 5.41537    | 0.40666  | 0.35293  |
| XLOC_000092 | TNFRSF8   | chr1:12123433-12204264    | 0.225226   | 0.298605   | 0.40686  | 1        |
| XLOC_001189 | HES4      | chr1:934341-935552        | 74.3255    | 98.5411    | 0.406869 | 0.333549 |
| XLOC_010249 | ZNF407    | chr18:72342918-72777628   | 0.761139   | 1.00918    | 0.406954 | 0.465786 |
| XLOC_004173 | RAPSN     | chr11:47459307-47470730   | 0.093105   | 0.123448   | 0.406977 | 1        |
| XLOC_013221 | SPC25     | chr2:169727400-169746944  | 13.302     | 17.6395    | 0.407169 | 0.344988 |
| XLOC_004562 | IFT46     | chr11:118401802-118436791 | 7.07072    | 9.37666    | 0.407217 | 0.372669 |
| XLOC_009471 | ALOX12B   | chr17:7975953-7991021     | 3.10328    | 4.1154     | 0.407239 | 0.498357 |
| XLOC_004277 | SNORD22   | chr11:62619459-62623360   | 64.2062    | 85.1951    | 0.408058 | 0.970185 |

|             |               |                           |            |           |          |          |
|-------------|---------------|---------------------------|------------|-----------|----------|----------|
| XLOC_007625 | KIAA0101      | chr15:64657210-64673702   | 21.391     | 28.3849   | 0.408123 | 0.290507 |
| XLOC_017054 | AHRR,PCDC6    | chr5:271735-438405        | 91.4849    | 121.4     | 0.408165 | 0.28166  |
| XLOC_012900 | ATP6V1E2      | chr2:46738985-46747096    | 2.17787    | 2.89107   | 0.408688 | 0.521655 |
| XLOC_010470 | GADD45B       | chr19:2476122-2478257     | 60.9898    | 80.9688   | 0.408797 | 0.262704 |
| XLOC_022054 | MRPS28        | chr8:80831094-80942506    | 39.0513    | 51.8466   | 0.408881 | 0.31071  |
| XLOC_009574 | SGK494        | chr17:26926150-26972177   | 0.543602   | 0.721775  | 0.408999 | 0.898731 |
| XLOC_009463 | SOX15         | chr17:7486964-7493488     | 0.287      | 0.38107   | 0.409007 | 0.974767 |
| XLOC_018291 | MDF1          | chr6:41606194-41621982    | 28.279     | 37.5497   | 0.409074 | 0.288038 |
| XLOC_002174 | INTS7         | chr1:212113740-212278187  | 3.16644    | 4.20459   | 0.409102 | 0.738519 |
| XLOC_020345 | IQCE          | chr7:2598631-2654368      | 1.07193    | 1.42339   | 0.409121 | 0.473009 |
| XLOC_012746 | GPR35         | chr2:241544824-241570676  | 0.357218   | 0.474385  | 0.409256 | 0.824372 |
| XLOC_004856 | NR4A1         | chr12:52416615-52453291   | 12.2538    | 16.2773   | 0.409629 | 0.3056   |
| XLOC_002938 | ASAH2         | chr10:51946999-52008370   | 0.0633661  | 0.0841805 | 0.409776 | 1        |
| XLOC_013392 | SERPINE2      | chr2:224839764-224904036  | 1.11121    | 1.47636   | 0.409911 | 0.612247 |
| XLOC_007653 | LCTL          | chr15:66797430-66857835   | 0.491849   | 0.653574  | 0.410136 | 0.919076 |
| XLOC_002677 | PDCD11        | chr10:105156411-105206019 | 9.73384    | 12.9355   | 0.410256 | 0.266373 |
| XLOC_022523 | C9orf91       | chr9:117373705-117408703  | 8.26708    | 10.9899   | 0.410725 | 0.291131 |
| XLOC_001564 | CYB5RL        | chr1:54638026-54665746    | 0.407458   | 0.541713  | 0.410879 | 0.680305 |
| XLOC_000868 | BLZF1         | chr1:169337193-169396670  | 1.04436    | 1.38891   | 0.411332 | 0.590377 |
| XLOC_004213 | SLC43A1       | chr11:57252003-57283192   | 25.1541    | 33.4593   | 0.411614 | 0.271045 |
| XLOC_001717 | ST7L          | chr1:113066140-113162040  | 3.36634    | 4.47784   | 0.411622 | 0.466805 |
| XLOC_010793 | ETV2          | chr19:36132646-36135773   | 0.357755   | 0.475889  | 0.411653 | 0.860285 |
| XLOC_013179 | NMI           | chr2:152126981-152146430  | 9.00595    | 11.9802   | 0.411707 | 0.338675 |
| XLOC_014405 | DGCR9         | chr22:19005346-19007761   | 0.0505417  | 0.0672414 | 0.411875 | 1        |
| XLOC_014352 | U2AF1         | chr21:44513065-44527688   | 175.002    | 232.849   | 0.412019 | 0.261879 |
| XLOC_008182 | C16orf86      | chr16:67700716-67702661   | 0.176797   | 0.235315  | 0.412495 | 1        |
| XLOC_009435 | NLRP1         | chr17:5404718-5487832     | 0.390742   | 0.520135  | 0.412668 | 0.639446 |
| XLOC_003046 | ANKRD1        | chr10:92671856-92681032   | 0.225849   | 0.300644  | 0.412699 | 1        |
| XLOC_017372 | PCDHB5        | chr5:140514799-140517704  | 0.0287178  | 0.0382289 | 0.412721 | 1        |
| XLOC_016970 | PLRG1         | chr4:155456148-155471585  | 11.8603    | 15.7928   | 0.413133 | 0.243499 |
| XLOC_003714 | NEU3          | chr11:74699949-74718743   | 0.355234   | 0.473032  | 0.413171 | 0.737677 |
| XLOC_001225 | FLJ42875      | chr1:2976180-2984289      | 6.36827    | 8.48099   | 0.413332 | 0.66836  |
| XLOC_013336 | IDH1          | chr2:209100952-209119806  | 12.2014    | 16.2505   | 0.413439 | 0.282505 |
| XLOC_015727 | MON1A         | chr3:49946301-49967445    | 10.5062    | 13.9935   | 0.413523 | 0.389795 |
| XLOC_010500 | CHAF1A        | chr19:4402659-4443394     | 11.4474    | 15.2472   | 0.413527 | 0.266689 |
| XLOC_019146 | SYNE1         | chr6:152442818-152958534  | 0.00914231 | 0.0121779 | 0.413639 | 1        |
| XLOC_001508 | TCTEX1D4      | chr1:45266035-45272957    | 0.0709061  | 0.0944711 | 0.413963 | 1        |
| XLOC_003431 | DGKZ          | chr11:46354454-46402104   | 23.5725    | 31.4072   | 0.41399  | 0.255196 |
| XLOC_014748 | RHBDD3        | chr22:29655843-29663914   | 20.4059    | 27.1982   | 0.414523 | 0.30787  |
| XLOC_011310 | TBXA2R        | chr19:3594503-3606831     | 3.04549    | 4.05929   | 0.414556 | 0.544735 |
| XLOC_012326 | UNC50         | chr2:99225041-99234977    | 25.5448    | 34.0485   | 0.414561 | 0.299594 |
| XLOC_009081 | PSME3         | chr17:40985158-40995777   | 34.0537    | 45.3949   | 0.414718 | 0.239825 |
| XLOC_013125 | TMEM185B      | chr2:120975046-120980984  | 10.8104    | 14.415    | 0.415155 | 0.252509 |
| XLOC_023173 | SNHG7,SNORA17 | chr9:139607023-139622636  | 467.188    | 622.979   | 0.41518  | 0.569689 |
| XLOC_022203 | ARC           | chr8:143692404-143695833  | 6.03184    | 8.04452   | 0.415408 | 0.397595 |
| XLOC_010922 | PVR           | chr19:45147097-45169428   | 15.4488    | 20.608    | 0.415702 | 0.24507  |
| XLOC_015719 | AMIGO3        | chr3:49726949-49761384    | 2.85311    | 3.80593   | 0.415715 | 0.871053 |
| XLOC_006194 | UBAC2-AS1     | chr13:99848627-100058554  | 0.350321   | 0.467393  | 0.415958 | 0.975928 |
| XLOC_005674 | CRY1          | chr12:107385142-107487635 | 8.75528    | 11.6831   | 0.416196 | 0.297533 |

|             |                 |                           |           |           |          |          |
|-------------|-----------------|---------------------------|-----------|-----------|----------|----------|
| XLOC_007399 | GDPGP1          | chr15:90777486-90785312   | 0.965437  | 1.28833   | 0.416253 | 0.726595 |
| XLOC_009197 | RAD51C          | chr17:56769962-56811692   | 18.7824   | 25.0648   | 0.416279 | 0.343481 |
| XLOC_014794 | APOL2           | chr22:36622254-36636000   | 4.2795    | 5.7161    | 0.417587 | 0.373268 |
| XLOC_020710 | ST7             | chr7:116592500-116870075  | 9.26739   | 12.3795   | 0.417714 | 0.42207  |
| XLOC_014201 | TRAPPC10        | chr21:45432205-45526432   | 2.43681   | 3.25522   | 0.417762 | 0.319187 |
| XLOC_001191 | C1orf159        | chr1:1017197-1051736      | 12.8254   | 17.1365   | 0.41807  | 0.34618  |
| XLOC_018557 | MTHFD1L         | chr6:151186814-151423023  | 32.3317   | 43.2165   | 0.418634 | 0.43363  |
| XLOC_007602 | LOC145783       | chr15:57178367-57210697   | 0.16635   | 0.22247   | 0.419391 | 1        |
| XLOC_009791 | ARHGAP27        | chr17:43506717-43510282   | 3.51239   | 4.69855   | 0.419763 | 0.708756 |
| XLOC_004747 | ATF7IP          | chr12:14518610-14651697   | 2.16371   | 2.89569   | 0.420395 | 0.339765 |
| XLOC_005345 | GYS2            | chr12:21689122-21757781   | 0.0133694 | 0.0178951 | 0.420628 | 1        |
| XLOC_009980 | FBF1            | chr17:73906617-73937119   | 1.26737   | 1.69655   | 0.420773 | 0.547072 |
| XLOC_008011 | KDM8            | chr16:27214806-27233089   | 0.463659  | 0.620675  | 0.420774 | 0.722814 |
| XLOC_005758 | VPS33A          | chr12:122716093-122751068 | 7.39223   | 9.8958    | 0.420807 | 0.293112 |
| XLOC_009999 | LOC100131096    | chr17:76000317-76107880   | 1.01373   | 1.35737   | 0.421137 | 0.73849  |
| XLOC_017866 | PCDH1           | chr5:141232672-141257944  | 4.88482   | 6.54269   | 0.421579 | 0.324946 |
| XLOC_001886 | GBAP1           | chr1:155178489-155197325  | 1.53073   | 2.05031   | 0.421625 | 0.923276 |
| XLOC_014639 | PIM3            | chr22:50354142-50357720   | 42.1619   | 56.4829   | 0.421874 | 0.265533 |
| XLOC_008750 | WDR81           | chr17:1619816-1641893     | 10.9208   | 14.6304   | 0.421889 | 0.296679 |
| XLOC_014464 | SUSD2           | chr22:24577443-24585074   | 0.083401  | 0.111741  | 0.422023 | 1        |
| XLOC_001481 | MYCL1           | chr1:40361095-40367687    | 3.66656   | 4.91276   | 0.422106 | 0.415208 |
| XLOC_011476 | PODNL1          | chr19:14041999-14072256   | 0.15175   | 0.203439  | 0.422901 | 1        |
| XLOC_024200 | GAB3            | chrX:153903526-153979348  | 0.0105601 | 0.0141585 | 0.423051 | 1        |
| XLOC_007814 | HBA1            | chr16:226678-227520       | 0.340314  | 0.456325  | 0.423196 | 0.915223 |
| XLOC_008072 | TRIM72          | chr16:31225341-31236510   | 4.55077   | 6.10358   | 0.423544 | 0.487261 |
| XLOC_006986 | XRCC3           | chr14:104095524-104181823 | 10.4686   | 14.0465   | 0.424141 | 0.663122 |
| XLOC_013438 | ILKAP           | chr2:239079042-239112324  | 29.8884   | 40.1083   | 0.424316 | 0.247848 |
| XLOC_017852 | PFDN1           | chr5:139624634-139682689  | 100.972   | 135.509   | 0.424435 | 0.230069 |
| XLOC_016142 | TCTEX1D2, TM4S  | chr3:196018089-196065291  | 88.6903   | 119.036   | 0.424544 | 0.244917 |
| XLOC_002254 | SNORA14B        | chr1:235272657-235292256  | 9.57442   | 12.8508   | 0.424602 | 0.965252 |
| XLOC_021056 | PKD1L1          | chr7:47814249-47988071    | 0.0855505 | 0.114832  | 0.424678 | 1        |
| XLOC_020989 | LOC646762, ZNRF | chr7:29685537-29727859    | 1.95466   | 2.62396   | 0.424825 | 0.378746 |
| XLOC_007986 | C16orf52        | chr16:22019455-22095972   | 1.28409   | 1.72396   | 0.42498  | 0.448055 |
| XLOC_007884 | ATP6V0C         | chr16:2563726-2570224     | 238.896   | 320.772   | 0.425168 | 0.22341  |
| XLOC_000191 | TMEM57          | chr1:25757387-25826698    | 4.72907   | 6.35065   | 0.425346 | 0.283754 |
| XLOC_022713 | SPATA6L         | chr9:4598315-4666674      | 0.5805    | 0.779568  | 0.42538  | 0.827135 |
| XLOC_007895 | FLYWCH1         | chr16:2961979-3001209     | 16.2229   | 21.7885   | 0.425534 | 0.220227 |
| XLOC_008945 | NEK8            | chr17:27055831-27069784   | 0.834693  | 1.12106   | 0.425541 | 0.633246 |
| XLOC_004606 | ESAM            | chr11:124623018-124632223 | 8.20112   | 11.0168   | 0.425813 | 0.342126 |
| XLOC_011031 | PRRG2           | chr19:50084586-50094265   | 0.949136  | 1.27536   | 0.426215 | 0.73942  |
| XLOC_023304 | POLA1           | chrX:24712063-25015102    | 2.12924   | 2.86183   | 0.426602 | 0.310422 |
| XLOC_003159 | EIF3A           | chr10:120794540-120840334 | 28.9125   | 38.8631   | 0.426708 | 0.23816  |
| XLOC_018791 | GPSM3, NOTCH4   | chr6:32158542-32191844    | 0.219707  | 0.295371  | 0.426948 | 1        |
| XLOC_017327 | DDX46           | chr5:134094460-134166812  | 5.19456   | 6.98585   | 0.427435 | 0.247052 |
| XLOC_003648 | RBM14, RBM14-RI | chr11:66384052-66445275   | 94.2526   | 126.756   | 0.427445 | 0.402378 |
| XLOC_001501 | MED8            | chr1:43849578-43855483    | 17.8188   | 23.9702   | 0.427837 | 0.235458 |
| XLOC_010223 | CDH20           | chr18:59157774-59222365   | 0.231264  | 0.311144  | 0.428044 | 1        |
| XLOC_014936 | JAGN1           | chr3:9932270-9936031      | 28.927    | 38.9242   | 0.42825  | 0.234147 |
| XLOC_015162 | PXK             | chr3:58318616-58410878    | 1.83199   | 2.46546   | 0.428449 | 0.525673 |

|             |               |                           |           |           |          |          |
|-------------|---------------|---------------------------|-----------|-----------|----------|----------|
| XLOC_007943 | SNX29         | chr16:12070601-12668146   | 0.562695  | 0.757402  | 0.428706 | 0.484507 |
| XLOC_024073 | ENOX2         | chrX:129757356-130037208  | 1.17102   | 1.5766    | 0.429059 | 0.480199 |
| XLOC_004139 | ABTB2         | chr11:34172533-34379555   | 2.32028   | 3.12594   | 0.42999  | 0.391565 |
| XLOC_004462 | SNORA25       | chr11:93463680-93463812   | 2.49066   | 3.35648   | 0.430421 | 0.883053 |
| XLOC_020360 | ANKRD61       | chr7:6048881-6098860      | 0.107768  | 0.145232  | 0.430428 | 1        |
| XLOC_012869 | EIF2AK2       | chr2:37332283-37384190    | 2.12021   | 2.85853   | 0.431065 | 0.352576 |
| XLOC_010028 | SLC38A10      | chr17:79218798-79269096   | 22.25     | 30.0037   | 0.431338 | 0.21812  |
| XLOC_009433 | DERL2         | chr17:5377612-5389494     | 25.9917   | 35.0534   | 0.431505 | 0.254028 |
| XLOC_011613 | SYNE4         | chr19:36494001-36499672   | 0.164371  | 0.221728  | 0.431835 | 1        |
| XLOC_022881 | TMEM2         | chr9:74298281-74383800    | 0.474095  | 0.639599  | 0.431992 | 0.54836  |
| XLOC_003195 | LOC387723     | chr10:131862161-131909081 | 0.869584  | 1.17333   | 0.432209 | 0.611715 |
| XLOC_011379 | TIMM44        | chr19:7991602-8008708     | 26.4672   | 35.7287   | 0.432877 | 0.235458 |
| XLOC_007561 | GATM          | chr15:45653321-45672321   | 0.391829  | 0.528992  | 0.433022 | 0.739297 |
| XLOC_015350 | SRPRB         | chr3:133502876-133540336  | 22.0866   | 29.8186   | 0.433043 | 0.220075 |
| XLOC_000669 | VPS45         | chr1:150039341-150117505  | 5.22405   | 7.05385   | 0.433241 | 0.318122 |
| XLOC_017704 | ZBED3         | chr5:76372531-76444176    | 0.847724  | 1.14513   | 0.433841 | 0.840937 |
| XLOC_023290 | MBTPS2        | chrX:21857655-21903541    | 2.6171    | 3.53589   | 0.434104 | 0.339765 |
| XLOC_000596 | WNT2B         | chr1:113010039-113063910  | 0.885901  | 1.19693   | 0.434119 | 0.63407  |
| XLOC_001913 | GPATCH4       | chr1:156564099-156571279  | 20.3616   | 27.5159   | 0.434414 | 0.21812  |
| XLOC_005947 | RBM26-AS1     | chr13:79980443-79998468   | 0.266188  | 0.359732  | 0.434448 | 1        |
| XLOC_011964 | HSPBP1        | chr19:55773590-55791751   | 37.9781   | 51.3326   | 0.434709 | 0.220993 |
| XLOC_022631 | CEL           | chr9:135937364-135947250  | 0.702538  | 0.949596  | 0.434738 | 0.697338 |
| XLOC_017853 | HBEGF         | chr5:139712427-139726188  | 26.9451   | 36.4224   | 0.434806 | 0.248913 |
| XLOC_010048 | PYCR1         | chr17:79890266-79894968   | 197.254   | 266.716   | 0.435247 | 0.224006 |
| XLOC_010694 | IFI30         | chr19:18284578-18288927   | 50.2838   | 68.0136   | 0.435728 | 0.224366 |
| XLOC_000907 | SOAT1         | chr1:179262848-179327814  | 3.62      | 4.89651   | 0.435766 | 0.273588 |
| XLOC_003183 | FLJ37035      | chr10:127371811-127408062 | 0.093341  | 0.126283  | 0.436083 | 1        |
| XLOC_003932 | LOC100133161  | chr11:126986-131920       | 0.105575  | 0.142853  | 0.436267 | 1        |
| XLOC_005174 | ATP6V0A2      | chr12:124196864-124246301 | 1.05565   | 1.42847   | 0.436335 | 0.403413 |
| XLOC_011578 | LINC00662     | chr19:28281400-28284848   | 0.644658  | 0.87243   | 0.436504 | 0.681223 |
| XLOC_007310 | PPCDC         | chr15:75315926-75343067   | 5.78437   | 7.8312    | 0.437073 | 0.347606 |
| XLOC_020966 | CYCS          | chr7:25158269-25164980    | 21.6091   | 29.2558   | 0.437087 | 0.213147 |
| XLOC_020628 | BUD31         | chr7:99006600-99063824    | 61.4558   | 83.2057   | 0.437134 | 0.810443 |
| XLOC_020559 | STAG3L1       | chr7:74988428-74996914    | 0.0380019 | 0.0514534 | 0.437194 | 1        |
| XLOC_020574 | DTX2P1-UPK3BP | chr7:76610138-76653076    | 0.349446  | 0.4732    | 0.437381 | 0.80614  |
| XLOC_016098 | ETV5          | chr3:185764105-185826901  | 11.8721   | 16.0772   | 0.437444 | 0.208798 |
| XLOC_021803 | PPP1R16A      | chr8:145722108-145727504  | 36.4794   | 49.4022   | 0.437495 | 0.211893 |
| XLOC_012068 | RHOB          | chr2:20646834-20649201    | 28.6564   | 38.8098   | 0.437564 | 0.217433 |
| XLOC_003718 | SNORD15A      | chr11:75110534-75133345   | 5.59126   | 7.57294   | 0.43768  | 0.965534 |
| XLOC_011588 | SLC7A10       | chr19:33685598-33716756   | 0.159836  | 0.216536  | 0.438017 | 1        |
| XLOC_017686 | SMA4          | chr5:69423288-69586004    | 0.442125  | 0.599109  | 0.438362 | 0.718899 |
| XLOC_012255 | LBX2-AS1      | chr2:74724643-74734821    | 8.098     | 10.9736   | 0.438404 | 0.60545  |
| XLOC_012696 | ARMC9         | chr2:232063293-232238606  | 2.8196    | 3.82154   | 0.438665 | 0.452259 |
| XLOC_005540 | TMEM194A      | chr12:57449425-57472574   | 5.83209   | 7.90529   | 0.438807 | 0.223482 |
| XLOC_017854 | SRA1          | chr5:139929651-139937678  | 30.9954   | 42.017    | 0.438916 | 0.235798 |
| XLOC_023082 | PTRH1         | chr9:130469270-130477936  | 72.6107   | 98.4459   | 0.43915  | 0.241921 |
| XLOC_022559 | ARPC5L        | chr9:127631483-127639696  | 101.697   | 137.934   | 0.439701 | 0.20933  |
| XLOC_002992 | DNAJC9        | chr10:75002581-75007025   | 35.5128   | 48.1669   | 0.439702 | 0.206179 |
| XLOC_002984 | SPOCK2        | chr10:73818791-73848790   | 0.0231089 | 0.0313495 | 0.439989 | 1        |

|             |           |                           |           |           |          |          |
|-------------|-----------|---------------------------|-----------|-----------|----------|----------|
| XLOC_021402 | ABCF2     | chr7:150904922-150924317  | 51.3502   | 69.6819   | 0.440415 | 0.196771 |
| XLOC_013382 | CHPF      | chr2:220403668-220408487  | 43.8831   | 59.5534   | 0.440518 | 0.18775  |
| XLOC_002355 | SUV39H2   | chr10:14920781-14946304   | 5.56628   | 7.55479   | 0.440679 | 0.282517 |
| XLOC_023895 | UQCRBP1   | chrX:56755717-56844004    | 0.0253274 | 0.0343785 | 0.440809 | 1        |
| XLOC_015229 | FAM172BP  | chr3:101237710-101242731  | 0.239123  | 0.324818  | 0.441878 | 1        |
| XLOC_005053 | GAS2L3    | chr12:100967488-101018685 | 0.369041  | 0.501365  | 0.442078 | 0.699755 |
| XLOC_001856 | S100A2    | chr1:153533584-153538306  | 1027.86   | 1397.19   | 0.442884 | 0.253875 |
| XLOC_021201 | MCM7      | chr7:99690403-99723128    | 144.274   | 196.13    | 0.443    | 0.310422 |
| XLOC_006707 | SLC7A7    | chr14:23242431-23289020   | 0.184464  | 0.250802  | 0.443204 | 1        |
| XLOC_008518 | SEPHS2    | chr16:30454951-30457224   | 50.6279   | 68.8438   | 0.443394 | 0.211369 |
| XLOC_006926 | EML5      | chr14:89081173-89259096   | 0.159148  | 0.216479  | 0.443857 | 1        |
| XLOC_002697 | VTI1A     | chr10:114206755-114578504 | 3.85107   | 5.23914   | 0.444073 | 0.265737 |
| XLOC_011433 | TMEM205   | chr19:11453451-11456981   | 96.0381   | 130.663   | 0.444174 | 0.221615 |
| XLOC_005074 | POLR3B    | chr12:106751435-107283094 | 1.00274   | 1.36473   | 0.444661 | 0.643713 |
| XLOC_002667 | TMEM180   | chr10:104221169-104236802 | 5.07031   | 6.90071   | 0.444672 | 0.349952 |
| XLOC_022849 | MGC21881  | chr9:41952398-41955076    | 1.03002   | 1.40212   | 0.444936 | 0.553492 |
| XLOC_019026 | OSTM1     | chr6:108362612-108395941  | 3.35079   | 4.562     | 0.445163 | 0.307111 |
| XLOC_005012 | TMTC2     | chr12:83080933-83528067   | 0.159831  | 0.217617  | 0.445246 | 1        |
| XLOC_010708 | DDX49     | chr19:19030483-19039442   | 34.8341   | 47.4318   | 0.445355 | 0.203382 |
| XLOC_009116 | FMNL1     | chr17:43299291-43324683   | 0.0269512 | 0.0367059 | 0.445663 | 1        |
| XLOC_013199 | RBMS1     | chr2:161128661-161350318  | 0.12553   | 0.170996  | 0.445924 | 1        |
| XLOC_011869 | JOSD2     | chr19:51009253-51014612   | 50.5762   | 68.8958   | 0.445958 | 0.255101 |
| XLOC_013999 | TNNC2     | chr20:44451854-44455953   | 0.258296  | 0.351878  | 0.446052 | 1        |
| XLOC_002073 | GLT25D2   | chr1:183904965-184006863  | 0.606788  | 0.826927  | 0.446568 | 0.530079 |
| XLOC_009063 | KLHL10    | chr17:39994042-40004599   | 0.0601598 | 0.0820014 | 0.446849 | 1        |
| XLOC_014137 | HUNK      | chr21:33245627-33376377   | 0.422369  | 0.575719  | 0.446859 | 0.5159   |
| XLOC_006870 | ERH       | chr14:69846839-69865021   | 236.717   | 322.7     | 0.447025 | 0.201968 |
| XLOC_002356 | MEIG1     | chr10:15001437-15014850   | 0.226327  | 0.308553  | 0.447108 | 1        |
| XLOC_012233 | NAGK      | chr2:71295407-71305998    | 13.098    | 17.8579   | 0.447214 | 0.264981 |
| XLOC_012242 | ALMS1     | chr2:73612885-73837046    | 0.560742  | 0.764926  | 0.447984 | 0.347688 |
| XLOC_005724 | TESC      | chr12:117476727-117537251 | 47.0481   | 64.1801   | 0.44799  | 0.221358 |
| XLOC_023138 | SLC2A6    | chr9:136336215-136344276  | 17.1283   | 23.3792   | 0.448847 | 0.232659 |
| XLOC_010778 | FXYP7     | chr19:35634153-35645205   | 0.209879  | 0.286499  | 0.448971 | 1        |
| XLOC_003881 | GRAMD1B   | chr11:123396527-123493518 | 0.0705072 | 0.0962583 | 0.449141 | 1        |
| XLOC_009111 | CCDC103   | chr17:42977079-42981047   | 1.63955   | 2.23841   | 0.449172 | 0.54836  |
| XLOC_017578 | FAM173B   | chr5:10225619-10250021    | 1.50342   | 2.05269   | 0.449262 | 0.44926  |
| XLOC_010131 | LDLRAD4   | chr18:13218728-13652753   | 0.0417231 | 0.057026  | 0.450773 | 1        |
| XLOC_014375 | C21orf67  | chr21:46353198-46359828   | 1.3137    | 1.79583   | 0.451008 | 0.684216 |
| XLOC_004317 | CDCA5     | chr11:64844926-64851615   | 29.9833   | 40.9905   | 0.451128 | 0.19024  |
| XLOC_006291 | LRRRC16B  | chr14:24521205-24538937   | 0.349949  | 0.478441  | 0.451193 | 0.653588 |
| XLOC_023114 | TOR1A     | chr9:132575220-132586441  | 38.1771   | 52.1962   | 0.451238 | 0.184817 |
| XLOC_006341 | LRR1      | chr14:50065414-50081390   | 14.4824   | 19.8045   | 0.451522 | 0.326259 |
| XLOC_017087 | GUSBP1    | chr5:21459588-21589481    | 2.54839   | 3.48567   | 0.45185  | 0.527665 |
| XLOC_012614 | CPO       | chr2:207804277-207834198  | 0.0165914 | 0.0227032 | 0.452465 | 1        |
| XLOC_009424 | CAMTA2    | chr17:4871286-4890960     | 18.8482   | 25.794    | 0.452606 | 0.174582 |
| XLOC_020542 | LINC00035 | chr7:73149398-73150330    | 0.323447  | 0.442669  | 0.452696 | 0.914837 |
| XLOC_003638 | KLC2      | chr11:66024764-66035332   | 32.5333   | 44.5271   | 0.452765 | 0.183133 |
| XLOC_023298 | SAT1      | chrX:23801274-23804327    | 120.731   | 165.263   | 0.452966 | 0.200495 |
| XLOC_011519 | ABHD8     | chr19:17402939-17414282   | 9.16493   | 12.5471   | 0.453158 | 0.345931 |

|             |              |                           |            |            |          |          |
|-------------|--------------|---------------------------|------------|------------|----------|----------|
| XLOC_010665 | C19orf44     | chr19:16607204-16653263   | 1.83957    | 2.51891    | 0.453432 | 0.85617  |
| XLOC_012993 | LBX2         | chr2:74724643-74734821    | 5.9147     | 8.10354    | 0.454248 | 0.811883 |
| XLOC_017246 | LNPEP        | chr5:96271345-96365115    | 0.504584   | 0.691321   | 0.45426  | 0.532767 |
| XLOC_020929 | CCZ1B        | chr7:6838565-6865926      | 6.53138    | 8.95258    | 0.454917 | 0.292741 |
| XLOC_016311 | DANCR        | chr4:53578620-53580305    | 93.1867    | 127.75     | 0.455125 | 0.184545 |
| XLOC_021288 | SLC13A1      | chr7:122753587-122840025  | 0.0354406  | 0.0485951  | 0.455408 | 1        |
| XLOC_011253 | LOC100131691 | chr19:59070552-59086164   | 0.292778   | 0.401567   | 0.45583  | 0.954421 |
| XLOC_012120 | FAM179A      | chr2:29204163-29275096    | 0.0150909  | 0.0207108  | 0.456703 | 1        |
| XLOC_013809 | ANGPT4       | chr20:853296-896960       | 0.0154664  | 0.0212305  | 0.456998 | 1        |
| XLOC_004850 | SLC4A8       | chr12:51745832-51909547   | 1.32061    | 1.81313    | 0.457274 | 0.744399 |
| XLOC_012530 | HOXD4        | chr2:177016112-177017949  | 0.775562   | 1.06496    | 0.457479 | 0.757021 |
| XLOC_004570 | H2AFX        | chr11:118964584-118966177 | 155.996    | 214.219    | 0.457571 | 0.171625 |
| XLOC_022877 | LOC100507299 | chr9:72658496-72873790    | 0.0274478  | 0.0376959  | 0.457716 | 1        |
| XLOC_012083 | EPT1         | chr2:26531040-26618759    | 3.75028    | 5.15071    | 0.457776 | 0.204123 |
| XLOC_004372 | CPT1A        | chr11:68522087-68609399   | 9.24182    | 12.6934    | 0.457827 | 0.190837 |
| XLOC_021095 | TYW1B        | chr7:72023728-72298813    | 0.99896    | 1.37214    | 0.457926 | 0.492049 |
| XLOC_008657 | HYDIN        | chr16:70841286-71264625   | 0.0953479  | 0.131041   | 0.458741 | 1        |
| XLOC_013984 | STK4-AS1     | chr20:43592439-43595099   | 0.053133   | 0.0730235  | 0.458754 | 1        |
| XLOC_003852 | CXCR5        | chr11:118754474-118781613 | 0.0103692  | 0.0142517  | 0.458823 | 1        |
| XLOC_000480 | SAMD13       | chr1:84764048-84816481    | 0.196826   | 0.270531   | 0.458875 | 1        |
| XLOC_009912 | ERN1         | chr17:62120389-62207502   | 0.153564   | 0.211113   | 0.45917  | 1        |
| XLOC_011034 | BCL2L12      | chr19:50162825-50177173   | 39.3555    | 54.1121    | 0.459384 | 0.516809 |
| XLOC_003722 | DGAT2        | chr11:75479777-75512581   | 5.24671    | 7.21597    | 0.459779 | 0.296434 |
| XLOC_006810 | NID2         | chr14:52471519-52535946   | 0.0488811  | 0.0672307  | 0.459844 | 1        |
| XLOC_006953 | SERPINA1     | chr14:94843083-94857029   | 0.0331359  | 0.0455837  | 0.460123 | 1        |
| XLOC_022931 | IARS         | chr9:94972489-95056038    | 71.3824    | 98.1999    | 0.460154 | 0.188839 |
| XLOC_018532 | AIG1         | chr6:143382022-143661441  | 29.457     | 40.5476    | 0.461005 | 0.190837 |
| XLOC_011707 | CNFN         | chr19:42891170-42894444   | 4.44144    | 6.11502    | 0.461328 | 0.701834 |
| XLOC_007657 | CLN6         | chr15:68499329-68522080   | 47.8525    | 65.8863    | 0.461384 | 0.177708 |
| XLOC_022185 | LRRC6        | chr8:133584200-133687863  | 0.730789   | 1.00648    | 0.461787 | 0.601765 |
| XLOC_021633 | RDH10        | chr8:74206836-74237520    | 4.23756    | 5.83625    | 0.461808 | 0.244917 |
| XLOC_009447 | SLC16A11     | chr17:6944948-6947242     | 0.279495   | 0.384944   | 0.461825 | 0.864689 |
| XLOC_018562 | MYCT1        | chr6:153019029-153045715  | 0.0293817  | 0.0404675  | 0.461846 | 1        |
| XLOC_007314 | COMMD4       | chr15:75628373-75632614   | 114.323    | 157.5      | 0.462233 | 0.172992 |
| XLOC_002792 | KLF6         | chr10:3818187-3827473     | 7.67627    | 10.5783    | 0.462633 | 0.199834 |
| XLOC_018764 | LY6G5C       | chr6:31644460-31648150    | 2.17421    | 2.99639    | 0.462736 | 0.642563 |
| XLOC_006367 | RPL13AP3     | chr14:56232962-56234435   | 0.0155943  | 0.0214957  | 0.463028 | 1        |
| XLOC_004746 | EMP1         | chr12:13349601-13369708   | 52.6789    | 72.6454    | 0.463647 | 0.170772 |
| XLOC_007407 | FES          | chr15:91427664-91439006   | 0.496728   | 0.685038   | 0.463729 | 0.67336  |
| XLOC_011971 | SHISA7       | chr19:55940104-55954230   | 0.00472938 | 0.00652257 | 0.463789 | 1        |
| XLOC_022410 | IDNK         | chr9:86237963-86259045    | 2.95067    | 4.07077    | 0.464259 | 0.515283 |
| XLOC_000024 | ATAD3C       | chr1:1385068-1405538      | 0.138928   | 0.191733   | 0.464764 | 1        |
| XLOC_018056 | HIVEP1       | chr6:12012723-12165232    | 0.213418   | 0.294553   | 0.464846 | 1        |
| XLOC_008815 | SPEM1        | chr17:7323678-7324951     | 0.47116    | 0.650288   | 0.464862 | 0.810757 |
| XLOC_004571 | DPAGT1       | chr11:118967212-118972785 | 22.1973    | 30.6378    | 0.46493  | 0.175696 |
| XLOC_018870 | USP49        | chr6:41765382-41863099    | 0.0933221  | 0.128811   | 0.464965 | 1        |
| XLOC_007261 | ZWILCH       | chr15:66797430-66857835   | 4.20049    | 5.80026    | 0.46556  | 0.248596 |
| XLOC_013931 | EIF2S2       | chr20:32676114-32700085   | 89.3594    | 123.408    | 0.465746 | 0.185703 |
| XLOC_014757 | LIF          | chr22:30636435-30642840   | 23.6235    | 32.6259    | 0.465794 | 0.171625 |



|             |              |                           |            |            |          |          |
|-------------|--------------|---------------------------|------------|------------|----------|----------|
| XLOC_010381 | NARS         | chr18:55267893-55289177   | 42.9541    | 59.3331    | 0.466042 | 0.190837 |
| XLOC_022346 | CCIN         | chr9:36169388-36171331    | 0.013487   | 0.0186305  | 0.466098 | 1        |
| XLOC_010422 | TPGS1        | chr19:507496-519654       | 21.5814    | 29.8138    | 0.466189 | 0.385184 |
| XLOC_018519 | TNFAIP3      | chr6:138144806-138204451  | 0.531505   | 0.734918   | 0.467501 | 0.553492 |
| XLOC_002188 | EPRS         | chr1:220046618-220321383  | 21.5802    | 29.8418    | 0.467626 | 0.459894 |
| XLOC_021800 | SLC52A2      | chr8:145582216-145584948  | 99.6701    | 137.85     | 0.467863 | 0.181992 |
| XLOC_007747 | HOMER2       | chr15:83517728-83621476   | 0.186595   | 0.258105   | 0.468046 | 1        |
| XLOC_005452 | SMAGP        | chr12:51632507-51664202   | 157.842    | 218.353    | 0.468183 | 0.359202 |
| XLOC_017767 | EPB41L4A     | chr5:111498314-111755010  | 0.896586   | 1.24036    | 0.468243 | 0.428853 |
| XLOC_001103 | TRIM67       | chr1:231298673-231357314  | 0.00306608 | 0.00424246 | 0.468509 | 1        |
| XLOC_003706 | PLEKHB1      | chr11:73357222-73373864   | 0.0137822  | 0.0190746  | 0.468842 | 1        |
| XLOC_003663 | CABP4        | chr11:67222817-67229245   | 0.0117987  | 0.0163324  | 0.46911  | 1        |
| XLOC_003597 | SLC22A11     | chr11:64323097-64338999   | 0.0140462  | 0.0194491  | 0.469517 | 1        |
| XLOC_017640 | C5orf28      | chr5:43444353-43483992    | 2.97586    | 4.12196    | 0.470027 | 0.315828 |
| XLOC_017711 | ARSB         | chr5:78073036-78282357    | 0.778874   | 1.07937    | 0.470723 | 0.588872 |
| XLOC_008207 | CLEC18A      | chr16:69984607-69998250   | 0.157603   | 0.218416   | 0.470784 | 1        |
| XLOC_004834 | BCDIN3D-AS1  | chr12:50222325-50236912   | 0.103508   | 0.143482   | 0.471128 | 1        |
| XLOC_011483 | DDX39A       | chr19:14519609-14530195   | 58.9236    | 81.6827    | 0.471187 | 0.14872  |
| XLOC_005134 | CCDC64       | chr12:120427647-120532299 | 1.23182    | 1.70775    | 0.471306 | 0.512522 |
| XLOC_015795 | PTPRG-AS1    | chr3:61547242-62304622    | 0.00797325 | 0.0110564  | 0.471642 | 1        |
| XLOC_021062 | GRB10        | chr7:50657759-50861159    | 7.58617    | 10.522     | 0.471963 | 0.197402 |
| XLOC_002359 | PTER         | chr10:16478941-16564004   | 5.46409    | 7.57872    | 0.471972 | 0.225099 |
| XLOC_007312 | GOLGA6C      | chr15:75550898-75565796   | 0.00349052 | 0.00484447 | 0.472896 | 1        |
| XLOC_016451 | ARHGEF38     | chr4:106473776-106602070  | 0.00620221 | 0.00861064 | 0.473338 | 1        |
| XLOC_013786 | LIME1        | chr20:62367977-62370460   | 5.92251    | 8.2251     | 0.473824 | 0.469274 |
| XLOC_014604 | SERHL2       | chr22:42949924-42978017   | 0.0400369  | 0.055609   | 0.47399  | 1        |
| XLOC_008668 | TXNL4B       | chr16:72118755-72146811   | 6.06219    | 8.42389    | 0.474648 | 0.765267 |
| XLOC_005254 | SCARNA12     | chr12:7074514-7079916     | 9.1755     | 12.7508    | 0.474726 | 0.958876 |
| XLOC_016864 | H2AFZ        | chr4:100869243-100871512  | 402.619    | 559.732    | 0.47532  | 0.162857 |
| XLOC_007711 | LINC00597    | chr15:77400497-77712446   | 0.0118167  | 0.0164297  | 0.475477 | 1        |
| XLOC_022495 | TAL2         | chr9:108424737-108425385  | 0.284645   | 0.395843   | 0.475766 | 0.877848 |
| XLOC_008405 | NAGPA        | chr16:5074844-5092972     | 8.35008    | 11.6149    | 0.476114 | 0.267401 |
| XLOC_002827 | C10orf111    | chr10:15137383-15146256   | 0.117712   | 0.163776   | 0.476465 | 1        |
| XLOC_010667 | NWD1         | chr19:16830786-16928774   | 0.00309006 | 0.00430026 | 0.476788 | 1        |
| XLOC_016719 | APBB2        | chr4:40812043-41216635    | 0.887331   | 1.23536    | 0.477384 | 0.315483 |
| XLOC_003051 | CPEB3        | chr10:93808396-94050875   | 0.147962   | 0.206006   | 0.477459 | 1        |
| XLOC_011463 | DNASE2       | chr19:12986024-12992335   | 38.4491    | 53.5405    | 0.477679 | 0.147598 |
| XLOC_008088 | ORC6         | chr16:46723557-46732306   | 12.8457    | 17.8886    | 0.477756 | 0.199011 |
| XLOC_021525 | PTK2B        | chr8:27168998-27316908    | 0.432016   | 0.601952   | 0.478564 | 0.570316 |
| XLOC_009816 | HOXB4        | chr17:46652868-46655743   | 5.40786    | 7.53544    | 0.478634 | 0.334498 |
| XLOC_016545 | LRAT         | chr4:155665162-155674270  | 0.00380973 | 0.00530904 | 0.478764 | 1        |
| XLOC_003736 | LOC100506233 | chr11:82783107-82784754   | 3.18831    | 4.44342    | 0.478878 | 0.536281 |
| XLOC_021993 | TCEA1        | chr8:54879115-54935008    | 49.2464    | 68.6355    | 0.478938 | 0.14961  |
| XLOC_013400 | TM4SF20      | chr2:228226873-228244022  | 0.00664061 | 0.00925555 | 0.479003 | 1        |
| XLOC_000367 | TSPAN1       | chr1:46640748-46651634    | 0.307884   | 0.429148   | 0.479088 | 0.760439 |
| XLOC_023754 | GPR143       | chrX:9693452-9734005      | 0.0183164  | 0.0255341  | 0.479289 | 1        |
| XLOC_006888 | ENTPD5       | chr14:74433180-74486026   | 0.356884   | 0.497537   | 0.479349 | 0.687986 |
| XLOC_012070 | KLHL29       | chr2:23608297-23931483    | 3.21894    | 4.48868    | 0.479707 | 0.276165 |
| XLOC_009434 | LOC728392    | chr17:5402746-5404319     | 0.580007   | 0.808884   | 0.479863 | 0.745341 |

|             |           |                          |           |           |          |          |
|-------------|-----------|--------------------------|-----------|-----------|----------|----------|
| XLOC_003694 | IL18BP    | chr11:71709957-71823822  | 1.0773    | 1.50265   | 0.48008  | 0.931457 |
| XLOC_012837 | SLC5A6    | chr2:27422454-27440046   | 17.5831   | 24.5318   | 0.48046  | 0.587086 |
| XLOC_000504 | EPHX4     | chr1:92495532-92529093   | 5.68497   | 7.9317    | 0.480477 | 0.330262 |
| XLOC_024007 | RBM41     | chrX:106305117-106362057 | 0.856157  | 1.19451   | 0.480477 | 0.489942 |
| XLOC_006286 | THTPA     | chr14:23980968-24048009  | 10.1893   | 14.2246   | 0.481324 | 0.705202 |
| XLOC_015171 | PSMD6-AS2 | chr3:63989697-64009686   | 0.158618  | 0.221437  | 0.48134  | 1        |
| XLOC_009364 | FAM101B   | chr17:289770-295731      | 0.14846   | 0.207262  | 0.481381 | 1        |
| XLOC_006944 | C14orf142 | chr14:93669236-93695561  | 5.98675   | 8.35996   | 0.481722 | 0.815686 |
| XLOC_005582 | BEST3     | chr12:70047388-70093196  | 0.552485  | 0.771513  | 0.481754 | 0.589377 |
| XLOC_014890 | PKDREJ    | chr22:46651559-46659219  | 0.0135542 | 0.0189306 | 0.481973 | 1        |
| XLOC_020914 | TNRC18    | chr7:5346422-5463177     | 6.42859   | 8.98047   | 0.482289 | 0.153539 |
| XLOC_018560 | CCDC170   | chr6:151815174-151942328 | 0.0243922 | 0.0340758 | 0.482324 | 1        |
| XLOC_023316 | GK        | chrX:30671475-30749577   | 1.1282    | 1.57609   | 0.482326 | 0.358175 |
| XLOC_008889 | LRRC48    | chr17:17876126-17920189  | 0.235512  | 0.329045  | 0.482487 | 1        |
| XLOC_010995 | KCNJ14    | chr19:48958963-48969367  | 0.561112  | 0.784238  | 0.483003 | 0.59805  |
| XLOC_009592 | CORO6     | chr17:27920526-27948441  | 0.0138212 | 0.0193178 | 0.483046 | 1        |
| XLOC_002823 | FAM107B   | chr10:14560558-14816896  | 6.94309   | 9.70867   | 0.483696 | 0.176195 |
| XLOC_006932 | GPR68     | chr14:91698875-91720224  | 0.312061  | 0.436421  | 0.483889 | 0.695113 |
| XLOC_018269 | CDKN1A    | chr6:36644236-36655116   | 71.8797   | 100.557   | 0.484355 | 0.129711 |
| XLOC_014329 | BRWD1-IT2 | chr21:40685860-40686888  | 0.587101  | 0.82138   | 0.484439 | 0.783706 |
| XLOC_021033 | PGAM2     | chr7:44102325-44105186   | 0.975708  | 1.3651    | 0.484487 | 0.747083 |
| XLOC_006455 | JDP2      | chr14:75894508-75939404  | 6.28199   | 8.79144   | 0.484877 | 0.187362 |
| XLOC_018251 | UHRF1BP1  | chr6:34759793-34845291   | 2.87821   | 4.02935   | 0.485375 | 0.163304 |
| XLOC_017762 | HP07349   | chr5:108063525-108063962 | 2.53719   | 3.55231   | 0.485523 | 0.776116 |
| XLOC_008324 | NARFL     | chr16:779768-790997      | 11.149    | 15.6103   | 0.485574 | 0.201968 |
| XLOC_021211 | ZCWPW1    | chr7:99998494-100031749  | 1.53611   | 2.15108   | 0.485778 | 0.916584 |
| XLOC_000183 | GRHL3     | chr1:24645811-24741587   | 0.0218247 | 0.0305871 | 0.486959 | 1        |
| XLOC_024173 | TREX2     | chrX:152710177-152711945 | 0.440306  | 0.617099  | 0.486995 | 0.810183 |
| XLOC_022284 | LURAP1L   | chr9:12775011-12823059   | 2.74783   | 3.85176   | 0.487227 | 0.371058 |
| XLOC_011037 | ADM5      | chr19:50191941-50194247  | 2.53175   | 3.54929   | 0.487397 | 0.480199 |
| XLOC_007606 | SLTM      | chr15:59171243-59225852  | 7.73116   | 10.8387   | 0.487431 | 0.161211 |
| XLOC_011992 | ZNF550    | chr19:58058342-58067725  | 0.275719  | 0.386624  | 0.487733 | 0.800869 |
| XLOC_014470 | GGT1      | chr22:24979717-25024972  | 5.99678   | 8.41021   | 0.487953 | 0.524977 |
| XLOC_021540 | UBXN8     | chr8:30601689-30624520   | 6.23177   | 8.74104   | 0.488163 | 0.254335 |
| XLOC_001487 | SLFNL1    | chr1:41480261-41707815   | 0.0679205 | 0.0952823 | 0.488361 | 1        |
| XLOC_021355 | FLJ40852  | chr7:141404137-141438030 | 0.0852394 | 0.119588  | 0.488486 | 1        |
| XLOC_010232 | SERPINB7  | chr18:61420280-61472610  | 0.0285946 | 0.0401181 | 0.48851  | 1        |
| XLOC_015906 | HSPBAP1   | chr3:122458843-122512666 | 5.63425   | 7.90644   | 0.488805 | 0.256339 |
| XLOC_009473 | HES7      | chr17:8023907-8027410    | 11.3362   | 15.9094   | 0.48894  | 0.255234 |
| XLOC_017125 | ISL1      | chr5:50668570-50690563   | 0.172068  | 0.241544  | 0.489305 | 1        |
| XLOC_021879 | LOC729732 | chr8:12294521-12523120   | 1.11665   | 1.56759   | 0.489368 | 0.611201 |
| XLOC_017539 | TRIM41    | chr5:180650262-180662808 | 9.81728   | 13.7832   | 0.489519 | 0.171388 |
| XLOC_003061 | SORBS1    | chr10:97071529-97321171  | 0.167119  | 0.234654  | 0.489654 | 1        |
| XLOC_014669 | GGT3P     | chr22:18761201-18779474  | 0.188567  | 0.264864  | 0.490176 | 1        |
| XLOC_013440 | HES6      | chr2:239146907-239148681 | 131.009   | 184.084   | 0.490697 | 0.12245  |
| XLOC_017587 | FAM134B   | chr5:16473146-16617167   | 0.434522  | 0.610924  | 0.491562 | 0.568843 |
| XLOC_023852 | WDR45     | chrX:48932091-48958059   | 38.1579   | 53.6501   | 0.491601 | 0.127354 |
| XLOC_014175 | SH3BGR    | chr21:40817796-40887433  | 3.68931   | 5.18886   | 0.492066 | 0.421781 |
| XLOC_010534 | MCOLN1    | chr19:7587495-7598895    | 9.33938   | 13.141    | 0.492681 | 0.235798 |

|             |              |                           |            |           |          |          |
|-------------|--------------|---------------------------|------------|-----------|----------|----------|
| XLOC_001190 | RNF223       | chr1:1007125-1009687      | 0.17746    | 0.249706  | 0.492738 | 1        |
| XLOC_016877 | CXXC4        | chr4:105389462-105416058  | 0.00962548 | 0.0135448 | 0.492806 | 1        |
| XLOC_010285 | LAMA1        | chr18:6941742-7117813     | 12.897     | 18.1499   | 0.492933 | 0.162455 |
| XLOC_005301 | TAS2R10      | chr12:10977944-10978868   | 0.0259896  | 0.0365852 | 0.493328 | 1        |
| XLOC_003231 | NS3BP        | chr11:779453-780755       | 1.55678    | 2.19179   | 0.493542 | 0.574857 |
| XLOC_016955 | SLC10A7      | chr4:147175136-147443123  | 0.467488   | 0.658388  | 0.494008 | 0.523716 |
| XLOC_008578 | CRNDE        | chr16:54952776-54963101   | 17.3144    | 24.3867   | 0.494121 | 0.233577 |
| XLOC_004466 | SNORA8       | chr11:93465526-93465665   | 36.1784    | 50.9645   | 0.494363 | 0.773332 |
| XLOC_006452 | ZC2HC1C      | chr14:75536298-75544799   | 0.145645   | 0.205175  | 0.494394 | 1        |
| XLOC_007933 | PMM2         | chr16:8891669-8943194     | 18.3489    | 25.8499   | 0.494464 | 0.133573 |
| XLOC_017098 | TARS         | chr5:33440801-33468196    | 49.7253    | 70.0685   | 0.494786 | 0.145411 |
| XLOC_020915 | FBXL18       | chr7:5515427-5553399      | 1.56629    | 2.20873   | 0.495863 | 0.249717 |
| XLOC_006658 | LINC00638    | chr14:105287537-105290055 | 0.251224   | 0.354333  | 0.496129 | 1        |
| XLOC_011541 | CERS1        | chr19:18979360-19006953   | 0.0912189  | 0.128667  | 0.496233 | 1        |
| XLOC_000310 | EXO5         | chr1:40974432-40982214    | 3.21527    | 4.53617   | 0.496534 | 0.281527 |
| XLOC_013867 | BFSP1        | chr20:17474549-17539605   | 0.388923   | 0.548765  | 0.496701 | 0.655692 |
| XLOC_007645 | TIPIN        | chr15:66629007-66649054   | 6.63644    | 9.36523   | 0.496905 | 0.267401 |
| XLOC_001747 | LINC00622    | chr1:120140324-120141914  | 0.150505   | 0.212466  | 0.49742  | 1        |
| XLOC_004169 | ACP2         | chr11:47260852-47290584   | 8.92803    | 12.6046   | 0.497541 | 0.266662 |
| XLOC_011330 | LRG1         | chr19:4537226-4540036     | 0.053071   | 0.0749355 | 0.497726 | 1        |
| XLOC_004414 | KLHL35       | chr11:75133437-75141674   | 13.7413    | 19.4089   | 0.4982   | 0.241597 |
| XLOC_005832 | ATP5EP2      | chr13:28519342-28519710   | 1.47528    | 2.08413   | 0.498454 | 0.804694 |
| XLOC_008689 | MAF          | chr16:79627744-79634622   | 0.00886088 | 0.0125189 | 0.498592 | 1        |
| XLOC_020971 | HNRNPA2B1    | chr7:26229555-26240413    | 145.078    | 205.026   | 0.498982 | 0.147372 |
| XLOC_023084 | SH2D3C       | chr9:130500595-130541048  | 0.238315   | 0.336817  | 0.499095 | 1        |
| XLOC_009026 | LOC100131347 | chr17:37213271-37307902   | 0.0590411  | 0.0834629 | 0.499414 | 1        |
| XLOC_005067 | EID3         | chr12:104609556-104744085 | 0.225852   | 0.319289  | 0.499485 | 1        |
| XLOC_003860 | C2CD2L       | chr11:118978092-118987827 | 6.31695    | 8.93365   | 0.500021 | 0.212084 |
| XLOC_024009 | TSC22D3      | chrX:106956451-107019017  | 11.7268    | 16.5857   | 0.500134 | 0.215636 |
| XLOC_002310 | SH3BP5L      | chr1:249104650-249120154  | 88.269     | 124.893   | 0.500712 | 0.132239 |
| XLOC_003446 | FAM180B      | chr11:47608229-47610746   | 0.0335223  | 0.047465  | 0.501744 | 1        |
| XLOC_010488 | TJP3         | chr19:3708334-3761673     | 0.507789   | 0.718999  | 0.501761 | 0.883608 |
| XLOC_006217 | LIG4         | chr13:108859791-108870716 | 0.984657   | 1.39425   | 0.501792 | 0.361509 |
| XLOC_022053 | HEY1         | chr8:80676244-80680098    | 2.85651    | 4.04535   | 0.502009 | 0.342126 |
| XLOC_009201 | GDPD1        | chr17:57297827-57353330   | 3.49475    | 4.94965   | 0.502138 | 0.274812 |
| XLOC_017565 | FLJ33360     | chr5:6310553-6337405      | 0.040019   | 0.0566921 | 0.50246  | 1        |
| XLOC_015039 | ZNF620       | chr3:40547529-40559712    | 0.504598   | 0.71483   | 0.502465 | 0.557876 |
| XLOC_006317 | AKAP6        | chr14:32798478-33302268   | 0.0102508  | 0.0145225 | 0.50255  | 1        |
| XLOC_021589 | RGS20        | chr8:54764367-54871863    | 0.0964266  | 0.13661   | 0.502556 | 1        |
| XLOC_022573 | C9orf117     | chr9:130469270-130477936  | 0.479071   | 0.678938  | 0.503041 | 0.967295 |
| XLOC_006026 | SKA3         | chr13:21727733-21753220   | 10.1046    | 14.3354   | 0.504569 | 0.512614 |
| XLOC_013477 | NRSN2        | chr20:327369-335512       | 0.249847   | 0.354474  | 0.504635 | 1        |
| XLOC_010968 | C5AR1        | chr19:47813103-47825327   | 0.383319   | 0.543874  | 0.504727 | 0.676958 |
| XLOC_018448 | SLC16A10     | chr6:111408780-111544606  | 1.20474    | 1.70966   | 0.504984 | 0.422315 |
| XLOC_023048 | GGTA1P       | chr9:124217318-124262306  | 0.143262   | 0.203306  | 0.504997 | 1        |
| XLOC_011790 | ZC3H4        | chr19:47567446-47617009   | 6.01446    | 8.53887   | 0.505611 | 0.152767 |
| XLOC_014831 | CBX6         | chr22:39260247-39268258   | 5.72607    | 8.1316    | 0.505994 | 0.215259 |
| XLOC_022908 | C9orf153     | chr9:88835179-88874572    | 0.0335652  | 0.047672  | 0.506176 | 1        |
| XLOC_013851 | LRRN4        | chr20:6021191-6034726     | 1.28931    | 1.83278   | 0.507433 | 0.491102 |

|             |               |                           |            |            |          |           |
|-------------|---------------|---------------------------|------------|------------|----------|-----------|
| XLOC_008933 | TMEM199       | chr17:26684686-26689089   | 7.15526    | 10.1748    | 0.507926 | 0.238551  |
| XLOC_011991 | ZNF772        | chr19:57980953-57988938   | 0.00292247 | 0.00415634 | 0.508126 | 1         |
| XLOC_017062 | C5orf38       | chr5:2752261-2755511      | 5.88678    | 8.3743     | 0.50849  | 0.495123  |
| XLOC_004790 | LOC100287314  | chr12:30948614-30955645   | 5.40933    | 7.69561    | 0.508586 | 0.243499  |
| XLOC_018867 | TFEB          | chr6:41651715-41703997    | 1.51753    | 2.15914    | 0.508734 | 0.473572  |
| XLOC_021691 | POP1          | chr8:99129520-99172069    | 4.89227    | 6.96109    | 0.50881  | 0.156646  |
| XLOC_016743 | LNX1          | chr4:54326436-54457753    | 0.121836   | 0.173373   | 0.508936 | 1         |
| XLOC_010695 | MPV17L2       | chr19:18304039-18307550   | 14.1173    | 20.1019    | 0.509862 | 0.200193  |
| XLOC_014762 | KIAA1656      | chr22:30727976-30773894   | 0.455004   | 0.647893   | 0.509876 | 0.922965  |
| XLOC_008415 | TVP23A        | chr16:10837697-10912621   | 0.091793   | 0.130737   | 0.51021  | 1         |
| XLOC_013765 | NTSR1         | chr20:61340188-61394123   | 7.63981    | 10.8811    | 0.510215 | 0.165955  |
| XLOC_013768 | COL9A3        | chr20:61448413-61493115   | 19.7444    | 28.1235    | 0.510334 | 0.248957  |
| XLOC_012717 | SCARNA6       | chr2:234160216-234204320  | 0.238421   | 0.339609   | 0.510362 | 1         |
| XLOC_022375 | PTGER4P2-CDK2 | chr9:66494268-66503030    | 0.0544266  | 0.0775374  | 0.510581 | 1         |
| XLOC_004242 | PTGDR2        | chr11:60609428-60623444   | 0.906672   | 1.29193    | 0.510874 | 0.921553  |
| XLOC_018641 | C6orf52       | chr6:10671650-10695030    | 1.66692    | 2.37585    | 0.511261 | 0.654639  |
| XLOC_008919 | MAP2K3        | chr17:21187967-21218551   | 55.893     | 79.6653    | 0.511283 | 0.117237  |
| XLOC_022795 | KIF24         | chr9:34179002-34329198    | 0.604069   | 0.861025   | 0.511343 | 0.821611  |
| XLOC_000898 | PAPPA2        | chr1:176432306-176811970  | 0.0257215  | 0.0366821  | 0.512103 | 1         |
| XLOC_008027 | LAT           | chr16:28996146-29002104   | 0.854918   | 1.22005    | 0.513087 | 0.617863  |
| XLOC_000342 | ATP6V0B       | chr1:44440601-44443972    | 160.991    | 229.755    | 0.513115 | 0.0956889 |
| XLOC_003702 | P2RY2         | chr11:72929343-72947395   | 0.554832   | 0.792207   | 0.513827 | 0.592155  |
| XLOC_022418 | CTSL1         | chr9:90340973-90346384    | 115.309    | 164.664    | 0.514024 | 0.126915  |
| XLOC_016745 | CHIC2         | chr4:54875957-54930815    | 18.9659    | 27.0949    | 0.514619 | 0.17963   |
| XLOC_014311 | RCAN1         | chr21:35888783-35987382   | 10.8212    | 15.4653    | 0.515173 | 0.15329   |
| XLOC_015683 | CDC25A        | chr3:48198667-48229801    | 5.09371    | 7.2808     | 0.515382 | 0.147372  |
| XLOC_011003 | PPP1R15A      | chr19:49375648-49379319   | 186.023    | 265.915    | 0.515478 | 0.137267  |
| XLOC_003895 | ROBO3         | chr11:124735304-124751370 | 2.59673    | 3.71217    | 0.515566 | 0.234378  |
| XLOC_010532 | C19orf45      | chr19:7562444-7573336     | 0.639296   | 0.914196   | 0.516018 | 0.690706  |
| XLOC_018201 | APOM          | chr6:31606804-31625987    | 3.63587    | 5.19953    | 0.516082 | 0.960217  |
| XLOC_005490 | NPFF          | chr12:53900473-53901422   | 1.24319    | 1.77881    | 0.516868 | 0.727839  |
| XLOC_005243 | CHD4          | chr12:6679247-6716551     | 16.5634    | 23.7034    | 0.517101 | 0.107565  |
| XLOC_001887 | GBA           | chr1:155204238-155214653  | 14.2223    | 20.3606    | 0.517623 | 0.112663  |
| XLOC_008601 | SLC38A7       | chr16:58700297-58718674   | 1.92317    | 2.75321    | 0.517626 | 0.355674  |
| XLOC_023930 | CITED1        | chrX:71521487-71527037    | 11.8551    | 16.9737    | 0.517786 | 0.274969  |
| XLOC_009090 | NBR2          | chr17:41277599-41297125   | 1.85153    | 2.65128    | 0.517975 | 0.500835  |
| XLOC_014891 | CN5H6.4       | chr22:46691039-46692557   | 0.115837   | 0.16588    | 0.518038 | 1         |
| XLOC_009788 | SPATA32       | chr17:43325302-43394414   | 0.0457762  | 0.0655618  | 0.518259 | 1         |
| XLOC_018213 | C2            | chr6:31865561-31913449    | 0.113282   | 0.162257   | 0.518364 | 1         |
| XLOC_020424 | ZNRF2         | chr7:30323922-30407308    | 1.11358    | 1.59554    | 0.518847 | 0.416068  |
| XLOC_005295 | MAGOHB        | chr12:10756363-10766208   | 3.29135    | 4.71595    | 0.518869 | 0.203478  |
| XLOC_014770 | DUSP18        | chr22:31058038-31063872   | 0.379916   | 0.544358   | 0.518875 | 0.638761  |
| XLOC_008708 | C16orf74      | chr16:85741123-85784689   | 56.1511    | 80.4666    | 0.519076 | 0.126213  |
| XLOC_022525 | PAPPA         | chr9:118916070-119164600  | 0.00324346 | 0.00464882 | 0.519333 | 1         |
| XLOC_013586 | MYLK2         | chr20:30407177-30422500   | 0.388075   | 0.556227   | 0.519339 | 0.637294  |
| XLOC_000306 | ZMPSTE24      | chr1:40723721-40759856    | 7.04542    | 10.0998    | 0.519571 | 0.138406  |
| XLOC_022601 | DOLPP1        | chr9:131843382-131852717  | 15.8677    | 22.7535    | 0.519996 | 0.128985  |
| XLOC_018111 | BTN2A3P       | chr6:26421618-26430816    | 0.252597   | 0.362355   | 0.520564 | 1         |
| XLOC_023845 | SLC35A2       | chrX:48760458-48769235    | 15.4393    | 22.1567    | 0.521139 | 0.161367  |

|             |              |                           |            |            |          |           |
|-------------|--------------|---------------------------|------------|------------|----------|-----------|
| XLOC_010849 | ZFP36        | chr19:39897486-39900052   | 12.6911    | 18.2239    | 0.522014 | 0.189056  |
| XLOC_022063 | SLC10A5      | chr8:82605890-82607207    | 0.962961   | 1.38293    | 0.522179 | 0.570626  |
| XLOC_004097 | TPH1         | chr11:18042083-18062335   | 0.0082667  | 0.0118739  | 0.522413 | 1         |
| XLOC_001762 | PFN1P2       | chr1:144610814-144612727  | 0.317326   | 0.45606    | 0.523258 | 0.680305  |
| XLOC_001362 | RCAN3AS      | chr1:24822822-24863510    | 0.179673   | 0.258277   | 0.523543 | 1         |
| XLOC_013514 | PRNP         | chr20:4666796-4682234     | 29.9232    | 43.0325    | 0.524163 | 0.0952042 |
| XLOC_006851 | ESR2         | chr14:64693750-64805268   | 0.0470583  | 0.0676956  | 0.524611 | 1         |
| XLOC_022035 | NCOA2        | chr8:71024266-71316020    | 0.252271   | 0.3631     | 0.525394 | 1         |
| XLOC_001838 | LCE1C        | chr1:152777310-152779107  | 0.128561   | 0.185121   | 0.526012 | 1         |
| XLOC_007388 | ISG20        | chr15:89182038-89198879   | 51.6603    | 74.4154    | 0.526546 | 0.103973  |
| XLOC_003612 | FRMD8        | chr11:65154040-65180995   | 10.6242    | 15.3118    | 0.527295 | 0.125565  |
| XLOC_011795 | KPTN         | chr19:47978399-47987521   | 3.5452     | 5.11007    | 0.527476 | 0.359736  |
| XLOC_004549 | PCSK7        | chr11:117075787-117102811 | 7.71016    | 11.1166    | 0.527888 | 0.120157  |
| XLOC_000892 | GAS5-AS1     | chr1:173832385-173837125  | 0.698763   | 1.00767    | 0.52815  | 0.948523  |
| XLOC_008294 | LOC100287036 | chr16:89334028-89556969   | 0.155918   | 0.224853   | 0.528191 | 1         |
| XLOC_022886 | TRPM6        | chr9:77337410-77503010    | 0.0454577  | 0.0655814  | 0.528761 | 1         |
| XLOC_016110 | LPP-AS2      | chr3:187868993-188608460  | 0.362682   | 0.523246   | 0.528784 | 0.930048  |
| XLOC_007940 | RMI2         | chr16:11439310-11445617   | 5.86235    | 8.45874    | 0.528963 | 0.270059  |
| XLOC_020521 | TPST1        | chr7:65670258-65825438    | 2.39593    | 3.46092    | 0.530567 | 0.303947  |
| XLOC_001448 | STK40        | chr1:36805224-36851485    | 13.1466    | 18.9988    | 0.531224 | 0.116756  |
| XLOC_002743 | HMX3         | chr10:124895566-124897247 | 0.559686   | 0.80889    | 0.531326 | 0.826624  |
| XLOC_020630 | ZNF789       | chr7:99070514-99085217    | 3.35537    | 4.84951    | 0.531367 | 0.433748  |
| XLOC_014977 | KCNH8        | chr3:19190016-19577135    | 0.0642631  | 0.0929156  | 0.53193  | 1         |
| XLOC_011436 | CCDC151      | chr19:11531271-11545980   | 0.573026   | 0.828656   | 0.532173 | 0.628907  |
| XLOC_013589 | CCM2L        | chr20:30598244-30619984   | 0.0920542  | 0.133128   | 0.53226  | 1         |
| XLOC_003550 | FEN1         | chr11:61560108-61564714   | 18.0994    | 26.1885    | 0.532991 | 0.100178  |
| XLOC_018030 | PSMG4        | chr6:3259161-3268300      | 30.9711    | 44.8265    | 0.533432 | 0.204323  |
| XLOC_001971 | PFDN2        | chr1:161070345-161102478  | 259.141    | 375.13     | 0.533653 | 0.249717  |
| XLOC_003794 | GRIA4        | chr11:105480799-105852819 | 0.00258041 | 0.00373689 | 0.53424  | 1         |
| XLOC_006033 | C1QTNF9B     | chr13:24304327-24471125   | 0.285715   | 0.413795   | 0.53434  | 0.948523  |
| XLOC_003140 | ZDHC6        | chr10:114190057-114206672 | 13.3611    | 19.352     | 0.534447 | 0.107265  |
| XLOC_008076 | ARMC5        | chr16:31470316-31478488   | 6.90715    | 10.0064    | 0.534767 | 0.179452  |
| XLOC_015593 | METTL6       | chr3:15451376-15469042    | 3.63688    | 5.26897    | 0.534819 | 0.207155  |
| XLOC_009143 | NFE2L1       | chr17:46125685-46138907   | 19.7699    | 28.6511    | 0.535285 | 0.100423  |
| XLOC_017011 | AGA          | chr4:178351928-178363657  | 2.65711    | 3.85261    | 0.535981 | 0.25966   |
| XLOC_016086 | ABCC5        | chr3:183637723-183735727  | 5.23832    | 7.59568    | 0.536075 | 0.24507   |
| XLOC_013071 | LONRF2       | chr2:100889752-100939195  | 0.00116253 | 0.00168577 | 0.536136 | 1         |
| XLOC_002504 | SGPL1        | chr10:72575703-72640932   | 6.31828    | 9.16824    | 0.537113 | 0.0991523 |
| XLOC_015327 | H1FX-AS1     | chr3:129033613-129043412  | 0.342787   | 0.497689   | 0.537932 | 0.964843  |
| XLOC_009667 | IKZF3        | chr17:37913967-38020441   | 0.0130824  | 0.0189996  | 0.538342 | 1         |
| XLOC_011308 | DOHH         | chr19:3490818-3500938     | 16.5145    | 23.9879    | 0.538569 | 0.153539  |
| XLOC_022722 | GLDC         | chr9:6532463-6645692      | 0.0156856  | 0.0227875  | 0.538807 | 1         |
| XLOC_013146 | CCDC74B      | chr2:130887195-130902707  | 1.06355    | 1.54524    | 0.53894  | 0.600595  |
| XLOC_001334 | SH2D5        | chr1:21046224-21059133    | 0.55196    | 0.802366   | 0.539696 | 0.516809  |
| XLOC_014598 | WBP2NL       | chr22:42394728-42424477   | 0.00647393 | 0.00941275 | 0.539974 | 1         |
| XLOC_008373 | PRSS22       | chr16:2902727-2908171     | 10.3567    | 15.0582    | 0.539991 | 0.230528  |
| XLOC_000299 | KIAA0754     | chr1:39547088-39952810    | 0.251932   | 0.366519   | 0.540852 | 1         |
| XLOC_003415 | SEC14L1P1    | chr11:43902356-43942494   | 0.222718   | 0.324048   | 0.540988 | 1         |
| XLOC_022706 | FOXO4        | chr9:116230-118417        | 0.876968   | 1.27602    | 0.541059 | 0.585281  |

|             |              |                          |            |           |          |           |
|-------------|--------------|--------------------------|------------|-----------|----------|-----------|
| XLOC_022895 | GNAQ         | chr9:80335190-80646219   | 0.659931   | 0.960395  | 0.541313 | 0.504688  |
| XLOC_012817 | TP53I3       | chr2:24300302-24308085   | 12.8375    | 18.6974   | 0.54247  | 0.155397  |
| XLOC_013715 | CEBPB        | chr20:48807119-48809227  | 94.6599    | 137.924   | 0.543045 | 0.109797  |
| XLOC_001200 | MXRA8        | chr1:1288070-1293915     | 0.449813   | 0.655681  | 0.543668 | 0.701787  |
| XLOC_001423 | FAM229A      | chr1:32826870-32827844   | 2.15748    | 3.14569   | 0.544032 | 0.703707  |
| XLOC_023708 | SNORA70      | chrX:153626570-153650063 | 65.2979    | 95.2094   | 0.544067 | 0.944374  |
| XLOC_016337 | STAP1        | chr4:68424445-68472616   | 0.00884467 | 0.0129002 | 0.544517 | 1         |
| XLOC_022110 | SNORA72      | chr8:99053937-99057818   | 15.8514    | 23.1392   | 0.545729 | 0.955641  |
| XLOC_022773 | MOB3B        | chr9:27325206-27529850   | 0.414279   | 0.604873  | 0.546029 | 0.376879  |
| XLOC_017390 | RELL2        | chr5:141016516-141030986 | 6.15733    | 8.99259   | 0.546433 | 0.644084  |
| XLOC_005399 | SLC38A1      | chr12:46576840-46663208  | 27.7603    | 40.5764   | 0.547618 | 0.0981523 |
| XLOC_006295 | FITM1        | chr14:24600674-24602058  | 0.862991   | 1.26166   | 0.547902 | 0.716687  |
| XLOC_007928 | NAGPA-AS1    | chr16:5074844-5092972    | 0.0366658  | 0.053609  | 0.548042 | 1         |
| XLOC_018569 | ZDHHC14      | chr6:157802556-158094977 | 1.459      | 2.13333   | 0.548127 | 0.398652  |
| XLOC_008586 | MT1G         | chr16:56700652-56701977  | 0.547853   | 0.801085  | 0.548168 | 0.883324  |
| XLOC_017721 | LOC100131067 | chr5:80256507-81047072   | 1.18373    | 1.73178   | 0.548909 | 0.869473  |
| XLOC_022445 | PTPDC1       | chr9:96793075-96872138   | 1.40995    | 2.06275   | 0.548919 | 0.239825  |
| XLOC_021551 | EIF4EBP1     | chr8:37888019-37917883   | 312.476    | 457.24    | 0.549206 | 0.0836901 |
| XLOC_018054 | SMIM13       | chr6:11094265-11138969   | 2.50353    | 3.66429   | 0.549571 | 0.141482  |
| XLOC_011408 | OLFM2        | chr19:9964393-10047070   | 0.0531437  | 0.0777873 | 0.549637 | 1         |
| XLOC_022863 | LOC440896    | chr9:69174213-69181041   | 0.138475   | 0.202719  | 0.549855 | 1         |
| XLOC_020459 | HECW1        | chr7:43152197-43602938   | 0.060919   | 0.0891877 | 0.549951 | 1         |
| XLOC_011845 | FUZ          | chr19:50270179-50316567  | 2.05035    | 3.00204   | 0.550072 | 0.902819  |
| XLOC_019043 | TUBE1        | chr6:112391859-112423993 | 7.32614    | 10.7275   | 0.550192 | 0.441956  |
| XLOC_016652 | CRMP1        | chr4:5822490-5894785     | 2.46234    | 3.60614   | 0.550425 | 0.246893  |
| XLOC_014409 | CDC45        | chr22:19467413-19508135  | 14.2591    | 20.8981   | 0.551481 | 0.106011  |
| XLOC_009922 | LRRRC37A3    | chr17:62850487-62914903  | 0.054253   | 0.0795551 | 0.552251 | 1         |
| XLOC_001974 | ADAMTS4      | chr1:161159537-161168845 | 0.0144926  | 0.021252  | 0.552285 | 1         |
| XLOC_001854 | S100A4       | chr1:153516094-153518282 | 0.419204   | 0.61476   | 0.55237  | 0.82411   |
| XLOC_016305 | SLC10A4      | chr4:48485359-48491541   | 0.0104507  | 0.0153267 | 0.552454 | 1         |
| XLOC_023299 | CXorf58      | chrX:23926122-23957624   | 0.0220429  | 0.0323484 | 0.553379 | 1         |
| XLOC_011671 | FCGBP        | chr19:40353962-40440533  | 0.0401431  | 0.0589119 | 0.553406 | 1         |
| XLOC_023833 | CFP          | chrX:47483611-47489704   | 0.282221   | 0.414223  | 0.55358  | 0.727839  |
| XLOC_012953 | FBXO48       | chr2:68689504-68694390   | 0.124241   | 0.182505  | 0.55479  | 1         |
| XLOC_015653 | SNRK-AS1     | chr3:43328003-43393454   | 0.227378   | 0.334183  | 0.555549 | 1         |
| XLOC_008469 | RRN3P3       | chr16:22430866-22503541  | 0.661328   | 0.971983  | 0.555566 | 0.565559  |
| XLOC_010179 | FHOD3        | chr18:33877701-34805288  | 0.0288911  | 0.0424789 | 0.556117 | 1         |
| XLOC_021769 | PSCA         | chr8:143751725-143764145 | 0.62373    | 0.917082  | 0.556128 | 0.712857  |
| XLOC_017204 | ZBED3-AS1    | chr5:76372531-76444176   | 0.187663   | 0.276108  | 0.55709  | 1         |
| XLOC_014846 | CHADL        | chr22:41601312-41636935  | 0.0929623  | 0.136787  | 0.55721  | 1         |
| XLOC_000837 | ATF6         | chr1:161736033-161933860 | 7.43298    | 10.9442   | 0.558153 | 0.0741309 |
| XLOC_010815 | ZNF382       | chr19:37096206-37119499  | 0.0782454  | 0.115238  | 0.558543 | 1         |
| XLOC_014542 | CDC42EP1     | chr22:37956470-37965410  | 103.132    | 151.898   | 0.558614 | 0.0775493 |
| XLOC_008089 | GPT2         | chr16:46918307-46965201  | 20.2862    | 29.8815   | 0.558754 | 0.0650492 |
| XLOC_011274 | CIRBP-AS1    | chr19:1267469-1274809    | 1.1491     | 1.69268   | 0.558807 | 0.961459  |
| XLOC_001381 | FAM46B       | chr1:27331510-27339333   | 0.632638   | 0.932324  | 0.559451 | 0.551877  |
| XLOC_016603 | CYP4V2       | chr4:187112673-187134617 | 1.00617    | 1.48319   | 0.559837 | 0.281986  |
| XLOC_000820 | NIT1         | chr1:161070345-161102478 | 30.2828    | 44.6496   | 0.560148 | 0.6565    |
| XLOC_015658 | CDCP1        | chr3:45123768-45187914   | 23.4065    | 34.5166   | 0.560383 | 0.0729664 |

|             |                 |                           |            |           |          |           |
|-------------|-----------------|---------------------------|------------|-----------|----------|-----------|
| XLOC_021935 | FBXO16          | chr8:28285925-28347835    | 0.672999   | 0.992962  | 0.561134 | 0.559245  |
| XLOC_006875 | ADAM21P1        | chr14:70712469-70714518   | 0.00686953 | 0.0101362 | 0.561227 | 1         |
| XLOC_014745 | XBP1            | chr22:29190547-29196560   | 55.0865    | 81.2988   | 0.561534 | 0.0897828 |
| XLOC_002351 | MCM10           | chr10:13203553-13253104   | 3.31158    | 4.8878    | 0.561665 | 0.115592  |
| XLOC_003821 | BCO2            | chr11:112046207-112089649 | 0.0164116  | 0.0242307 | 0.562122 | 1         |
| XLOC_010829 | SPINT2          | chr19:38755097-38783254   | 2.07706    | 3.06767   | 0.562598 | 0.377162  |
| XLOC_018645 | ERVFRD-1        | chr6:11094265-11138969    | 0.0216871  | 0.0320341 | 0.562773 | 1         |
| XLOC_002085 | GLRX2           | chr1:193065594-193075244  | 17.9099    | 26.4625   | 0.563189 | 0.155609  |
| XLOC_016159 | ZNF876P         | chr4:206388-249773        | 0.073524   | 0.108651  | 0.56342  | 1         |
| XLOC_000642 | ITGA10          | chr1:145524989-145543868  | 0.0877083  | 0.129639  | 0.563713 | 1         |
| XLOC_000494 | LMO4            | chr1:87794150-87814607    | 4.42098    | 6.53716   | 0.564299 | 0.104553  |
| XLOC_007525 | SPTBN5          | chr15:42120282-42186275   | 0.0205837  | 0.0304798 | 0.566347 | 1         |
| XLOC_000188 | CLIC4           | chr1:25071759-25170815    | 21.057     | 31.1906   | 0.566816 | 0.0660778 |
| XLOC_022394 | ANXA1           | chr9:75766780-75785307    | 243.648    | 360.937   | 0.566947 | 0.0732377 |
| XLOC_014717 | VPREB3          | chr22:24094929-24096630   | 0.499455   | 0.74045   | 0.568048 | 0.83199   |
| XLOC_009758 | BRCA1           | chr17:41196311-41277500   | 3.36791    | 4.99454   | 0.568498 | 0.112565  |
| XLOC_008522 | ZNF688          | chr16:30581018-30583728   | 5.26147    | 7.80311   | 0.568583 | 0.314288  |
| XLOC_017699 | GCNT4           | chr5:74323288-74326724    | 0.0215706  | 0.0319927 | 0.568677 | 1         |
| XLOC_023851 | PRAF2           | chrX:48928817-48931662    | 2.55257    | 3.7867    | 0.568987 | 0.414529  |
| XLOC_004171 | SPI1            | chr11:47376408-47400127   | 0.0750841  | 0.111437  | 0.569648 | 1         |
| XLOC_011583 | LOC400684       | chr19:32880955-32896445   | 1.37358    | 2.04027   | 0.57082  | 0.61844   |
| XLOC_001176 | ZNF672          | chr1:249132529-249143714  | 146.299    | 217.326   | 0.570943 | 0.0603207 |
| XLOC_014727 | ADORA2A-AS1     | chr22:24823529-24890783   | 0.0327289  | 0.0486416 | 0.571627 | 1         |
| XLOC_024207 | CLIC2           | chrX:154505499-154563986  | 0.0880687  | 0.130911  | 0.57189  | 1         |
| XLOC_010494 | ANKRD24         | chr19:4183350-4224811     | 0.203171   | 0.302189  | 0.572754 | 1         |
| XLOC_021453 | CLDN23          | chr8:8559665-8561617      | 0.632852   | 0.942017  | 0.573884 | 0.59244   |
| XLOC_004480 | CCDC82          | chr11:96085928-96123083   | 1.86078    | 2.7715    | 0.574758 | 0.20647   |
| XLOC_003986 | OR7E12P         | chr11:3402190-3430378     | 0.0327213  | 0.0487422 | 0.574941 | 1         |
| XLOC_020862 | ASIC3           | chr7:150745378-150749843  | 1.05351    | 1.56935   | 0.574968 | 0.492403  |
| XLOC_001655 | FAM69A          | chr1:93297593-93427079    | 1.64813    | 2.45699   | 0.576063 | 0.894866  |
| XLOC_000486 | CYR61           | chr1:86046443-86049648    | 186.467    | 278.024   | 0.576286 | 0.0712966 |
| XLOC_005059 | DRAM1           | chr12:102271104-102317401 | 6.38385    | 9.52013   | 0.576555 | 0.0916618 |
| XLOC_004569 | HYOU1           | chr11:118914895-118927925 | 20.5498    | 30.6519   | 0.576851 | 0.0592362 |
| XLOC_004402 | UCP3            | chr11:73711325-73720282   | 0.16884    | 0.251974  | 0.577623 | 1         |
| XLOC_001759 | LINC00623,LOC7: | chr1:144300511-144341755  | 0.606338   | 0.905287  | 0.578252 | 0.613115  |
| XLOC_016574 | CLCN3           | chr4:170541671-170644338  | 5.9679     | 8.91536   | 0.57907  | 0.0676413 |
| XLOC_020358 | CCZ1            | chr7:5938340-5965603      | 8.61971    | 12.8787   | 0.579276 | 0.109797  |
| XLOC_020632 | ZNF655          | chr7:99156044-99174076    | 20.5737    | 30.7545   | 0.580001 | 0.232659  |
| XLOC_016588 | TENM3           | chr4:183245136-183724177  | 0.145553   | 0.217639  | 0.580395 | 1         |
| XLOC_005584 | PTPRR           | chr12:71031852-71314584   | 0.262986   | 0.393417  | 0.58107  | 0.518305  |
| XLOC_010760 | CEBPG           | chr19:33864574-33873592   | 18.3624    | 27.4713   | 0.581174 | 0.0644552 |
| XLOC_017310 | SLC22A4         | chr5:131630144-131731306  | 0.303051   | 0.453522  | 0.581614 | 0.890489  |
| XLOC_021410 | XRCC2           | chr7:152343586-152373250  | 0.741597   | 1.11      | 0.58185  | 0.359202  |
| XLOC_003321 | TMEM9B-AS1      | chr11:8986221-8997830     | 0.330602   | 0.494893  | 0.582021 | 0.742651  |
| XLOC_008026 | SPNS1           | chr16:28986095-28995869   | 23.9896    | 35.9196   | 0.582361 | 0.0741309 |
| XLOC_016965 | TIGD4           | chr4:153690505-153700916  | 0.0988153  | 0.147981  | 0.582608 | 1         |
| XLOC_019131 | STXBP5-AS1      | chr6:147162524-147711612  | 0.0173174  | 0.0259361 | 0.582737 | 1         |
| XLOC_007267 | SKOR1           | chr15:68112041-68126174   | 0.373363   | 0.559241  | 0.582892 | 0.648569  |
| XLOC_000256 | FAM167B         | chr1:32712817-32714461    | 0.695147   | 1.04164   | 0.583463 | 0.692701  |

|             |                 |                          |            |            |          |           |
|-------------|-----------------|--------------------------|------------|------------|----------|-----------|
| XLOC_023507 | PCDH11X         | chrX:91034259-91878228   | 0.00304189 | 0.00455904 | 0.583762 | 1         |
| XLOC_012605 | NRP2            | chr2:206547223-206662857 | 0.83832    | 1.25657    | 0.583922 | 0.221487  |
| XLOC_010716 | YJEFN3          | chr19:19639669-19648393  | 3.65041    | 5.47503    | 0.584808 | 0.463992  |
| XLOC_010504 | LOC100131094    | chr19:4675243-4723855    | 0.263656   | 0.395447   | 0.584826 | 0.907138  |
| XLOC_000626 | PHGDH           | chr1:120254418-120286849 | 113.191    | 169.93     | 0.586179 | 0.0647668 |
| XLOC_014068 | LINC00659       | chr20:61405472-61408208  | 0.39942    | 0.599739   | 0.586427 | 0.798947  |
| XLOC_016313 | SNORA26         | chr4:53578620-53580305   | 14.7129    | 22.0987    | 0.586878 | 0.953219  |
| XLOC_005267 | POU5F1P3        | chr12:8276227-8291203    | 0.0469047  | 0.070476   | 0.587399 | 1         |
| XLOC_010961 | FKRP            | chr19:47222767-47261832  | 3.13277    | 4.70747    | 0.587514 | 0.835405  |
| XLOC_017884 | SPINK1          | chr5:147204142-147211260 | 0.105757   | 0.159055   | 0.588777 | 1         |
| XLOC_017662 | SLC38A9         | chr5:54921672-55008163   | 4.12848    | 6.21008    | 0.589001 | 0.124445  |
| XLOC_014525 | LOC100506195    | chr22:33669061-34316416  | 0.0144387  | 0.0217313  | 0.589837 | 1         |
| XLOC_001792 | HIST2H2BE       | chr1:149856009-149858232 | 2.30375    | 3.46779    | 0.590031 | 0.281527  |
| XLOC_000561 | SARS            | chr1:109756514-109780804 | 160.928    | 242.279    | 0.590258 | 0.0647668 |
| XLOC_006314 | AP4S1           | chr14:31363004-31565656  | 0.617596   | 0.929933   | 0.590463 | 0.73942   |
| XLOC_017289 | PRDM6           | chr5:122424840-122523745 | 0.046737   | 0.0704669  | 0.592382 | 1         |
| XLOC_011937 | OSCAR           | chr19:54597932-54604148  | 2.05413    | 3.1007     | 0.594064 | 0.347606  |
| XLOC_009376 | SLC43A2         | chr17:1477695-1532130    | 4.66496    | 7.04311    | 0.594348 | 0.147009  |
| XLOC_017451 | LOC285626       | chr5:158758525-158789842 | 0.0106593  | 0.0160958  | 0.594567 | 1         |
| XLOC_017887 | SH3TC2          | chr5:148361712-148442737 | 0.122086   | 0.184373   | 0.594726 | 1         |
| XLOC_000783 | NTRK1           | chr1:156776034-156851642 | 0.0420964  | 0.0635752  | 0.594766 | 1         |
| XLOC_007149 | RAD51           | chr15:40987326-41024356  | 6.64942    | 10.0473    | 0.595507 | 0.0904689 |
| XLOC_003541 | TMEM138         | chr11:61066918-61136975  | 15.5339    | 23.4852    | 0.59633  | 0.819558  |
| XLOC_014878 | KIAA1644        | chr22:44639556-44708731  | 0.0368517  | 0.0558117  | 0.598838 | 1         |
| XLOC_005856 | EXOSC8          | chr13:37574677-37633850  | 31.9213    | 48.3683    | 0.599545 | 0.205834  |
| XLOC_016270 | STIM2           | chr4:26862312-27027003   | 0.887883   | 1.34613    | 0.600378 | 0.207155  |
| XLOC_016834 | C4orf36         | chr4:87797357-87813575   | 0.385651   | 0.584733   | 0.600482 | 0.74277   |
| XLOC_013978 | FITM2           | chr20:42935196-42939889  | 0.825725   | 1.25476    | 0.603673 | 0.637294  |
| XLOC_008153 | GINS3           | chr16:58426297-58440048  | 5.05072    | 7.67556    | 0.603785 | 0.123068  |
| XLOC_000992 | ZBED6           | chr1:203764750-203823256 | 0.141979   | 0.215794   | 0.603978 | 1         |
| XLOC_023859 | LOC158572       | chrX:49641326-49643959   | 0.0292566  | 0.0444862  | 0.604598 | 1         |
| XLOC_013292 | C2orf66         | chr2:197669138-197675000 | 0.186519   | 0.283681   | 0.604946 | 1         |
| XLOC_013746 | TUBB1           | chr20:57594308-57601709  | 0.0788151  | 0.119923   | 0.605568 | 1         |
| XLOC_019170 | LPAL2           | chr6:160887586-160932156 | 0.203509   | 0.309706   | 0.605809 | 1         |
| XLOC_023049 | TTLL11          | chr9:124584203-124855885 | 2.03857    | 3.10252    | 0.605883 | 0.33256   |
| XLOC_023357 | LOC100133957    | chrX:47511190-47519776   | 1.83567    | 2.79654    | 0.60734  | 0.960032  |
| XLOC_005954 | MIR17,MIR17HG,l | chr13:92000073-92006829  | 4.41084    | 6.72018    | 0.607448 | 0.339765  |
| XLOC_009501 | MYH3            | chr17:10531842-10560626  | 0.177887   | 0.271039   | 0.607536 | 1         |
| XLOC_009772 | ASB16-AS1       | chr17:42248073-42264085  | 4.08727    | 6.23186    | 0.608525 | 0.294467  |
| XLOC_012667 | TMEM198         | chr2:220408744-220415317 | 1.9953     | 3.04424    | 0.609476 | 0.334695  |
| XLOC_021241 | DPY19L2P2       | chr7:102815461-102920913 | 0.0240729  | 0.0367448  | 0.610133 | 1         |
| XLOC_011591 | SCGB1B2P        | chr19:35067637-35068596  | 0.267574   | 0.408428   | 0.610145 | 0.844936  |
| XLOC_002165 | LAMB3           | chr1:209788217-209825820 | 84.1564    | 128.511    | 0.610742 | 0.0504359 |
| XLOC_022825 | HINT2           | chr9:35812956-35815042   | 25.7514    | 39.3709    | 0.612475 | 0.0985099 |
| XLOC_001715 | KCND3           | chr1:112318453-112531777 | 0.0832285  | 0.12725    | 0.612519 | 1         |
| XLOC_009293 | GALR2           | chr17:74070891-74073573  | 0.334041   | 0.511094   | 0.613563 | 0.814411  |
| XLOC_013677 | PABPC1L         | chr20:43538702-43567962  | 5.57172    | 8.52973    | 0.614378 | 0.125909  |
| XLOC_010586 | C19orf38        | chr19:10959105-10980360  | 0.397736   | 0.609267   | 0.615263 | 0.703434  |
| XLOC_001389 | IFI6            | chr1:27992571-27998724   | 2.96257    | 4.53923    | 0.615596 | 0.452059  |



|             |              |                           |            |            |          |           |
|-------------|--------------|---------------------------|------------|------------|----------|-----------|
| XLOC_004393 | PDE2A        | chr11:72287183-72385497   | 0.0777029  | 0.119092   | 0.616034 | 1         |
| XLOC_010146 | CABLES1      | chr18:20714527-20840434   | 1.42446    | 2.184      | 0.616556 | 0.172992  |
| XLOC_013095 | MALL         | chr2:110841446-110874143  | 0.0448057  | 0.0687198  | 0.617044 | 1         |
| XLOC_004315 | BATF2        | chr11:64755416-64764517   | 0.519079   | 0.796506   | 0.617732 | 0.5266    |
| XLOC_012148 | ARHGEF33     | chr2:39146503-39202590    | 0.00999996 | 0.0153448  | 0.617752 | 1         |
| XLOC_001462 | YRDC         | chr1:38268613-38275126    | 26.3519    | 40.4667    | 0.618829 | 0.14587   |
| XLOC_001900 | ARHGEF2      | chr1:155916629-155948336  | 41.8509    | 64.2904    | 0.619347 | 0.0726643 |
| XLOC_006468 | SAMD15       | chr14:77843761-77857587   | 0.0845561  | 0.129902   | 0.619444 | 1         |
| XLOC_016131 | XXYL1        | chr3:194789012-194991895  | 3.15742    | 4.85338    | 0.620243 | 0.151906  |
| XLOC_007346 | KIAA1199     | chr15:81071711-81243999   | 0.0479554  | 0.0737548  | 0.621042 | 1         |
| XLOC_000858 | RCSD1        | chr1:167599473-167675486  | 0.0054563  | 0.00839385 | 0.621409 | 1         |
| XLOC_000500 | LRRRC8D      | chr1:90286572-90401989    | 5.49986    | 8.46144    | 0.621507 | 0.0617671 |
| XLOC_014471 | BCRP3        | chr22:25028881-25055114   | 0.210483   | 0.323951   | 0.622068 | 1         |
| XLOC_005423 | RND1         | chr12:49250915-49259653   | 1.17453    | 1.80797    | 0.622291 | 0.41247   |
| XLOC_003879 | C11orf63     | chr11:122753472-122830430 | 0.420256   | 0.647008   | 0.622516 | 0.499306  |
| XLOC_005141 | CABP1        | chr12:121078421-121105127 | 1.35314    | 2.08481    | 0.62361  | 0.447714  |
| XLOC_008649 | LOC100506060 | chr16:70253483-70259936   | 1.01452    | 1.56333    | 0.623822 | 0.388367  |
| XLOC_020722 | LMOD2        | chr7:123295860-123304147  | 0.00677456 | 0.0104418  | 0.624174 | 1         |
| XLOC_000137 | PADI3        | chr1:17575592-17610727    | 0.0109786  | 0.0169359  | 0.625398 | 1         |
| XLOC_021071 | PSPH         | chr7:56078743-56119268    | 13.6637    | 21.0898    | 0.626196 | 0.0614148 |
| XLOC_019048 | FRK          | chr6:116262692-116381921  | 0.0168287  | 0.0259757  | 0.626236 | 1         |
| XLOC_016303 | NIPAL1       | chr4:48018790-48039080    | 0.106353   | 0.164183   | 0.626436 | 1         |
| XLOC_019142 | RAET1L       | chr6:150341265-150346668  | 0.0224766  | 0.0347008  | 0.626546 | 1         |
| XLOC_000930 | TSEN15       | chr1:184020810-184043344  | 11.6874    | 18.0446    | 0.626605 | 0.0603207 |
| XLOC_012243 | ALMS1P       | chr2:73872045-73912694    | 0.0255604  | 0.0394686  | 0.626795 | 1         |
| XLOC_008543 | HERC2P4      | chr16:32162608-32163874   | 0.891945   | 1.3781     | 0.627656 | 0.489185  |
| XLOC_006414 | ACTN1-AS1    | chr14:69446398-69454180   | 0.0567545  | 0.0877097  | 0.628001 | 1         |
| XLOC_013275 | COL5A2       | chr2:189896640-190044605  | 0.0303115  | 0.0468755  | 0.628971 | 1         |
| XLOC_005233 | AKAP3        | chr12:4724675-4754343     | 0.208368   | 0.322285   | 0.629203 | 1         |
| XLOC_018700 | HIST1H2AJ    | chr6:27782079-27782518    | 1.29913    | 2.00965    | 0.629401 | 0.765302  |
| XLOC_016626 | SLC26A1      | chr4:972862-998317        | 0.384257   | 0.594512   | 0.629635 | 0.838861  |
| XLOC_020959 | FAM126A      | chr7:22980877-23053770    | 0.0224853  | 0.0348009  | 0.630141 | 1         |
| XLOC_021555 | LETM2        | chr8:38243958-38266062    | 2.78288    | 4.3091     | 0.630806 | 0.193396  |
| XLOC_015958 | RAB6B        | chr3:133543079-133614691  | 0.346388   | 0.536396   | 0.630912 | 0.349708  |
| XLOC_000200 | CNKSR1       | chr1:26503980-26516375    | 0.406631   | 0.629786   | 0.631141 | 0.525673  |
| XLOC_021747 | POU5F1B      | chr8:128427856-128429441  | 0.962954   | 1.49205    | 0.631759 | 0.467025  |
| XLOC_006052 | SLC46A3      | chr13:29274217-29293150   | 3.30384    | 5.11983    | 0.631954 | 0.111734  |
| XLOC_008651 | AARS         | chr16:70286296-70323412   | 36.1117    | 55.9646    | 0.632049 | 0.0519269 |
| XLOC_017432 | SLC36A1      | chr5:150827162-150871940  | 1.03028    | 1.59806    | 0.633291 | 0.162857  |
| XLOC_015892 | GPR156       | chr3:119884327-119963142  | 0.00376403 | 0.0058464  | 0.635273 | 1         |
| XLOC_021099 | SPDYE8P      | chr7:72476588-72519691    | 0.0156195  | 0.024267   | 0.635645 | 1         |
| XLOC_005269 | FAM86FP      | chr12:8383644-8395542     | 1.90934    | 2.96649    | 0.635682 | 0.220227  |
| XLOC_011373 | FCER2        | chr19:7753642-7767032     | 0.243141   | 0.377822   | 0.635915 | 0.676682  |
| XLOC_021315 | CEP41        | chr7:130033611-130081051  | 1.25185    | 1.94683    | 0.637067 | 0.119294  |
| XLOC_000560 | KIAA1324     | chr1:109656584-109749403  | 0.15838    | 0.246354   | 0.637347 | 1         |
| XLOC_001870 | C1orf189     | chr1:154171561-154178841  | 0.135592   | 0.211133   | 0.638878 | 1         |
| XLOC_004354 | PTPRCAP      | chr11:67202980-67205153   | 2.10224    | 3.27419    | 0.639212 | 0.490627  |
| XLOC_022153 | DSCC1        | chr8:120846180-120868170  | 5.17007    | 8.05518    | 0.639731 | 0.0621442 |
| XLOC_000835 | FCRLB        | chr1:161692456-161697933  | 0.418259   | 0.652203   | 0.640924 | 0.647696  |

|             |               |                           |            |            |          |          |
|-------------|---------------|---------------------------|------------|------------|----------|----------|
| XLOC_014044 | MTRNR2L3      | chr20:55904830-55998278   | 0.0771933  | 0.120439   | 0.641754 | 1        |
| XLOC_009098 | FAM215A       | chr17:41994575-41995355   | 0.108695   | 0.170014   | 0.64537  | 1        |
| XLOC_023164 | CARD9         | chr9:139258407-139268133  | 1.21451    | 1.90026    | 0.645816 | 0.378821 |
| XLOC_000817 | SLAMF7        | chr1:160709076-160724601  | 0.311155   | 0.487112   | 0.646621 | 0.472023 |
| XLOC_004269 | LRRN4CL       | chr11:62453873-62457371   | 0.113808   | 0.178398   | 0.648499 | 1        |
| XLOC_000649 | PDIA3P        | chr1:146649429-146651528  | 1.16752    | 1.83033    | 0.648661 | 0.264777 |
| XLOC_011437 | ELAVL3        | chr19:11562142-11591803   | 0.00467561 | 0.00733213 | 0.649077 | 1        |
| XLOC_004304 | PYGM          | chr11:64513860-64528187   | 0.0556886  | 0.0873457  | 0.649354 | 1        |
| XLOC_016081 | LAMP3         | chr3:182840002-182880667  | 0.751005   | 1.17817    | 0.649656 | 0.248913 |
| XLOC_008731 | ANKRD11       | chr16:89334028-89556969   | 11.5578    | 18.1328    | 0.649732 | 0.156107 |
| XLOC_007504 | FSIP1         | chr15:39892231-40075039   | 0.0257548  | 0.0404362  | 0.650808 | 1        |
| XLOC_011370 | PEX11G        | chr19:7541755-7553924     | 2.81492    | 4.42019    | 0.651012 | 0.343575 |
| XLOC_003267 | LOC100506082  | chr11:4208381-4223883     | 0.188514   | 0.296331   | 0.652534 | 1        |
| XLOC_006267 | RNASE7        | chr14:21510384-21512392   | 0.0795821  | 0.125133   | 0.652941 | 1        |
| XLOC_012862 | NLRC4         | chr2:32449517-32490812    | 0.226664   | 0.35657    | 0.653629 | 1        |
| XLOC_004124 | BDNF          | chr11:27528398-27743605   | 0.0635628  | 0.100079   | 0.654885 | 1        |
| XLOC_018578 | C6orf99       | chr6:159309618-159331385  | 0.462359   | 0.728153   | 0.655228 | 0.720426 |
| XLOC_007680 | STOML1        | chr15:74275558-74286963   | 3.85346    | 6.07269    | 0.656181 | 0.139691 |
| XLOC_006000 | PROZ          | chr13:113812967-113826698 | 0.121967   | 0.192215   | 0.656234 | 1        |
| XLOC_009734 | KLHL11        | chr17:40009798-40021629   | 0.328483   | 0.518212   | 0.657724 | 0.492895 |
| XLOC_014141 | PAXBP1-AS1    | chr21:34100424-34144169   | 0.0874325  | 0.137979   | 0.658205 | 1        |
| XLOC_016999 | MFAP3L        | chr4:170907747-170947429  | 0.213206   | 0.336901   | 0.660076 | 1        |
| XLOC_005116 | CCDC42B       | chr12:113587662-113623284 | 0.29636    | 0.468672   | 0.661229 | 0.945887 |
| XLOC_011090 | ZNF137P       | chr19:53099936-53103405   | 0.228465   | 0.361381   | 0.661551 | 1        |
| XLOC_018099 | HIST1H2BD     | chr6:26158348-26171576    | 8.04944    | 12.7362    | 0.661972 | 0.339092 |
| XLOC_011832 | C19orf73      | chr19:49617617-49622397   | 1.81833    | 2.87717    | 0.662037 | 0.736823 |
| XLOC_009157 | FLJ45513      | chr17:47915670-47926199   | 0.0665283  | 0.10527    | 0.662058 | 1        |
| XLOC_013213 | GALNT3        | chr2:166604312-166650803  | 0.018023   | 0.0285328  | 0.662786 | 1        |
| XLOC_011741 | ZNF285        | chr19:44889807-44905777   | 0.0114362  | 0.0181156  | 0.663629 | 1        |
| XLOC_006968 | BCL11B        | chr14:99635624-99737822   | 0.121823   | 0.19302    | 0.663965 | 1        |
| XLOC_008379 | ZNF205-AS1    | chr16:3160460-3170518     | 0.188391   | 0.298619   | 0.664579 | 1        |
| XLOC_018058 | PHACTR1       | chr6:12717036-13295818    | 0.00648686 | 0.0103016  | 0.667276 | 1        |
| XLOC_005666 | SLC41A2       | chr12:105197274-105322472 | 0.566338   | 0.89992    | 0.668133 | 0.258796 |
| XLOC_021550 | GPR124        | chr8:37654400-37707431    | 0.0505228  | 0.0803166  | 0.668765 | 1        |
| XLOC_008818 | FGF11         | chr17:7342688-7348251     | 1.69914    | 2.70198    | 0.669215 | 0.19024  |
| XLOC_000629 | SRGAP2D       | chr1:121107151-121129827  | 0.197127   | 0.313729   | 0.670396 | 1        |
| XLOC_008744 | DBIL5P        | chr17:655572-658576       | 0.204114   | 0.324895   | 0.670597 | 1        |
| XLOC_021024 | INHBA         | chr7:41728600-41818976    | 0.0073396  | 0.011691   | 0.671163 | 1        |
| XLOC_011328 | PLIN4         | chr19:4472254-4517716     | 0.189497   | 0.301873   | 0.671772 | 1        |
| XLOC_020562 | SPDYE5        | chr7:75124298-75133628    | 0.107026   | 0.170538   | 0.67213  | 1        |
| XLOC_010997 | SULT2B1       | chr19:49055428-49102684   | 0.0436392  | 0.0695374  | 0.672165 | 1        |
| XLOC_018583 | PNLDC1        | chr6:160221300-160241735  | 0.0371623  | 0.0592761  | 0.673613 | 1        |
| XLOC_012641 | C2orf62       | chr2:219221578-219232817  | 0.0584172  | 0.0931903  | 0.673787 | 1        |
| XLOC_009987 | QRICH2        | chr17:74270129-74303761   | 0.84258    | 1.34548    | 0.675238 | 0.153369 |
| XLOC_005979 | METTL21EP     | chr13:103532448-103548383 | 0.0134287  | 0.0214521  | 0.6758   | 1        |
| XLOC_011602 | SBSN          | chr19:36014268-36019253   | 0.0471622  | 0.075369   | 0.676342 | 1        |
| XLOC_008796 | C17orf100     | chr17:6555058-6556617     | 0.343763   | 0.54937    | 0.676366 | 0.59554  |
| XLOC_004015 | OR51B5        | chr11:5362112-5526882     | 0.348749   | 0.557548   | 0.676905 | 0.686715 |
| XLOC_009381 | MIR22,MIR22HG | chr17:1614797-1619566     | 4.09903    | 6.56506    | 0.679525 | 0.139083 |

|             |                |                           |            |            |          |           |
|-------------|----------------|---------------------------|------------|------------|----------|-----------|
| XLOC_013352 | MARCH4         | chr2:217122584-217236750  | 0.0109165  | 0.0174842  | 0.679535 | 1         |
| XLOC_014949 | HRH1           | chr3:11178778-11304939    | 1.79451    | 2.87842    | 0.681688 | 0.0952042 |
| XLOC_003867 | LOC100499227   | chr11:119252487-119369944 | 1.00682    | 1.61506    | 0.681781 | 0.390748  |
| XLOC_012073 | FKBP1B         | chr2:24272583-24286550    | 0.0713634  | 0.114498   | 0.682071 | 1         |
| XLOC_000123 | SLC25A34       | chr1:16062808-16067884    | 0.138357   | 0.222108   | 0.682865 | 1         |
| XLOC_009051 | KRTAP4-7       | chr17:39240458-39241396   | 0.329971   | 0.530114   | 0.683963 | 0.72151   |
| XLOC_010840 | NFKBIB         | chr19:39369194-39399534   | 21.2893    | 34.2109    | 0.684326 | 0.539268  |
| XLOC_007421 | LOC440311      | chr15:95398591-95400293   | 0.251128   | 0.403674   | 0.684763 | 0.698819  |
| XLOC_009124 | KANSL1-AS1     | chr17:44107281-44302740   | 0.629511   | 1.01389    | 0.687598 | 0.953159  |
| XLOC_015501 | MIR1248,SNORA1 | chr3:186501360-186524484  | 5.09912    | 8.21279    | 0.687624 | 0.947261  |
| XLOC_023291 | YY2            | chrX:21857655-21903541    | 0.7009     | 1.12893    | 0.687682 | 0.672486  |
| XLOC_001052 | SPATA17        | chr1:217804694-218040484  | 0.246925   | 0.39798    | 0.688626 | 0.640604  |
| XLOC_021463 | SLC35G5        | chr8:11188494-11189695    | 0.0198242  | 0.0319782  | 0.689822 | 1         |
| XLOC_001478 | BMP8B          | chr1:40204516-40254533    | 0.648988   | 1.04707    | 0.690092 | 0.870963  |
| XLOC_023359 | ZNF81          | chrX:47696300-47781655    | 0.107188   | 0.173188   | 0.692194 | 1         |
| XLOC_003807 | C11orf93       | chr11:111164113-111179460 | 0.811771   | 1.31178    | 0.692376 | 0.511042  |
| XLOC_007646 | SCARNA14       | chr15:66629007-66649054   | 27.981     | 45.2617    | 0.693841 | 0.957857  |
| XLOC_021637 | GDAP1          | chr8:75262617-75279335    | 1.75641    | 2.85198    | 0.699338 | 0.0685533 |
| XLOC_009677 | KRT222         | chr17:38811871-38821416   | 0.280113   | 0.454846   | 0.69937  | 0.513296  |
| XLOC_014926 | LMCD1          | chr3:8543510-8609806      | 0.0432004  | 0.0701987  | 0.700398 | 1         |
| XLOC_022380 | CBWD3          | chr9:70856838-70914932    | 0.291876   | 0.474487   | 0.701016 | 0.4913    |
| XLOC_017979 | DOK3           | chr5:176928905-176937427  | 2.72868    | 4.43626    | 0.701144 | 0.153369  |
| XLOC_023144 | RNU6ATAC       | chr9:137029561-137029686  | 37.7743    | 61.4133    | 0.701146 | 0.679486  |
| XLOC_009797 | ARL17A,ARL17B  | chr17:44372496-44439163   | 0.143611   | 0.233492   | 0.701206 | 1         |
| XLOC_022199 | SLC45A4        | chr8:142220869-142238673  | 4.17077    | 6.78927    | 0.702942 | 0.0637721 |
| XLOC_008965 | ADAP2          | chr17:29248753-29286211   | 0.0528241  | 0.0860299  | 0.703641 | 1         |
| XLOC_007655 | IQCH-AS1       | chr15:67493012-67819641   | 3.47835    | 5.6691     | 0.704715 | 0.905903  |
| XLOC_013411 | LOC348761      | chr2:231849082-231860747  | 0.0714521  | 0.116477   | 0.70499  | 1         |
| XLOC_004942 | GLI1           | chr12:57853917-57873633   | 0.271979   | 0.4435     | 0.705437 | 0.485845  |
| XLOC_022515 | C9orf43        | chr9:116169517-116191879  | 0.398838   | 0.650928   | 0.706694 | 0.946416  |
| XLOC_007797 | CERS3          | chr15:100940599-101084925 | 0.0263465  | 0.0430206  | 0.707419 | 1         |
| XLOC_007600 | MNS1           | chr15:56657643-56757335   | 0.333772   | 0.545265   | 0.708093 | 0.538509  |
| XLOC_007666 | THAP10         | chr15:71173680-71184772   | 0.84727    | 1.38428    | 0.708242 | 0.283034  |
| XLOC_008383 | MTRNR2L4       | chr16:3421052-3422283     | 0.112601   | 0.184014   | 0.708602 | 1         |
| XLOC_010717 | CILP2          | chr19:19649073-19657468   | 0.0608489  | 0.0994405  | 0.708603 | 1         |
| XLOC_020347 | AMZ1           | chr7:2719162-2755069      | 0.00664331 | 0.0108575  | 0.70872  | 1         |
| XLOC_000775 | TSACC          | chr1:156278751-156316785  | 0.52528    | 0.858623   | 0.708938 | 0.919777  |
| XLOC_022536 | PTGS1          | chr9:125132808-125157982  | 0.00791973 | 0.0129478  | 0.709189 | 1         |
| XLOC_010865 | SPTBN4         | chr19:40973125-41082365   | 0.109301   | 0.178705   | 0.709277 | 1         |
| XLOC_007563 | MYEF2          | chr15:48413168-48470558   | 0.00342587 | 0.0056029  | 0.709704 | 1         |
| XLOC_021182 | MGC72080       | chr7:97595907-97601638    | 15.0384    | 24.5958    | 0.70976  | 0.0844706 |
| XLOC_017610 | LMBRD2         | chr5:36103413-36152015    | 0.285776   | 0.467471   | 0.70999  | 0.35231   |
| XLOC_008643 | TMED6          | chr16:69377148-69385712   | 0.814097   | 1.33248    | 0.710836 | 0.47697   |
| XLOC_003921 | ST14           | chr11:130029681-130080257 | 0.0108248  | 0.0177217  | 0.71118  | 1         |
| XLOC_016690 | KCNIP4         | chr4:20730238-21950374    | 0.188268   | 0.308327   | 0.711672 | 1         |
| XLOC_018794 | HLA-DRB5       | chr6:32485153-32498006    | 0.0233401  | 0.0382757  | 0.713615 | 1         |
| XLOC_008221 | MARVELD3       | chr16:71660055-71675868   | 0.974598   | 1.59839    | 0.713739 | 0.241597  |
| XLOC_002164 | PLXNA2         | chr1:208195587-208417665  | 0.358511   | 0.588053   | 0.713928 | 0.141952  |
| XLOC_013037 | ANKRD20A8P,LO  | chr2:95421070-95522820    | 0.00448449 | 0.00735735 | 0.714241 | 1         |

|             |              |                           |            |            |          |           |
|-------------|--------------|---------------------------|------------|------------|----------|-----------|
| XLOC_003198 | FLJ46300     | chr10:133604733-133622535 | 0.0078058  | 0.0128119  | 0.714864 | 1         |
| XLOC_008740 | PRDM7        | chr16:90122973-90142338   | 0.0126029  | 0.0207169  | 0.717053 | 1         |
| XLOC_006669 | TMEM121      | chr14:105992952-105996539 | 0.931912   | 1.53386    | 0.718902 | 0.562434  |
| XLOC_023551 | CLDN2        | chrX:106143292-106174091  | 0.0194513  | 0.0320208  | 0.719143 | 1         |
| XLOC_018402 | C6orf163     | chr6:88054570-88075181    | 0.181049   | 0.298271   | 0.720245 | 1         |
| XLOC_015132 | GPR62        | chr3:51989329-52001482    | 0.0257744  | 0.04249    | 0.721184 | 1         |
| XLOC_021501 | PIWIL2       | chr8:22132809-22213584    | 0.00593844 | 0.0097906  | 0.721313 | 1         |
| XLOC_016707 | TLR10        | chr4:38773859-38784611    | 0.00506208 | 0.00834784 | 0.721674 | 1         |
| XLOC_021362 | TRPV6        | chr7:142568959-142583490  | 0.00681264 | 0.0112348  | 0.721685 | 1         |
| XLOC_001217 | LOC100129534 | chr1:2252695-2322993      | 0.632122   | 1.04324    | 0.722793 | 0.424204  |
| XLOC_008374 | PKMYT1       | chr16:3019341-3030540     | 49.7659    | 82.1847    | 0.723712 | 0.0805827 |
| XLOC_008600 | SNORA50      | chr16:58549382-58663790   | 6.43013    | 10.6227    | 0.724231 | 0.939948  |
| XLOC_014649 | LOC100144603 | chr22:51021454-51022355   | 1.72436    | 2.85174    | 0.725779 | 0.559351  |
| XLOC_000448 | IL12RB2      | chr1:67773046-67862583    | 0.0290778  | 0.0481238  | 0.726829 | 1         |
| XLOC_017205 | PDE8B        | chr5:76506705-76724080    | 0.119998   | 0.19901    | 0.729832 | 1         |
| XLOC_020784 | TBXAS1       | chr7:139478046-139720125  | 0.192362   | 0.319083   | 0.730102 | 1         |
| XLOC_012052 | C2orf50      | chr2:11273178-11286916    | 0.0209248  | 0.0347301  | 0.730976 | 1         |
| XLOC_002028 | ANKRD45      | chr1:173577474-173639001  | 0.00786653 | 0.0130601  | 0.731365 | 1         |
| XLOC_015629 | TRANK1       | chr3:36868307-36986548    | 0.0294546  | 0.048948   | 0.732755 | 1         |
| XLOC_013261 | ZNF385B      | chr2:180306710-180726232  | 0.0154433  | 0.0256817  | 0.733763 | 1         |
| XLOC_022993 | KLF4         | chr9:110247132-110252047  | 4.10039    | 6.82461    | 0.734986 | 0.0508243 |
| XLOC_006996 | GPR132       | chr14:105515736-105531754 | 0.00605242 | 0.0100844  | 0.736538 | 1         |
| XLOC_000141 | ACTL8        | chr1:18081807-18153558    | 2.47678    | 4.13247    | 0.73854  | 0.154835  |
| XLOC_012830 | GPR113       | chr2:26531040-26618759    | 0.0260517  | 0.0435362  | 0.740837 | 1         |
| XLOC_015889 | POPCD2       | chr3:119360907-119379404  | 0.14448    | 0.241476   | 0.741011 | 1         |
| XLOC_016413 | ARHGAP24     | chr4:86396283-86923823    | 0.0829722  | 0.138703   | 0.741295 | 1         |
| XLOC_009052 | KRTAP4-9     | chr17:39261640-39262740   | 1.264      | 2.1135     | 0.741635 | 0.381661  |
| XLOC_003988 | CHRNA10      | chr11:3686816-3692614     | 0.881956   | 1.47517    | 0.742103 | 0.361509  |
| XLOC_012672 | SGPP2        | chr2:223289321-223423617  | 0.728817   | 1.21917    | 0.742267 | 0.459935  |
| XLOC_005336 | ARHGDI1      | chr12:15094949-15114562   | 0.0270699  | 0.0452909  | 0.742533 | 1         |
| XLOC_010687 | SNORA68      | chr19:17970686-17974133   | 22.9232    | 38.3751    | 0.743361 | 0.916694  |
| XLOC_015125 | RAD54L2      | chr3:51575595-51697612    | 0.223514   | 0.374483   | 0.744532 | 0.351761  |
| XLOC_001855 | S100A3       | chr1:153519808-153521734  | 6.28427    | 10.5324    | 0.745015 | 0.155867  |
| XLOC_008352 | NOXO1        | chr16:2028917-2031550     | 0.389341   | 0.652566   | 0.745092 | 0.570298  |
| XLOC_005235 | VWF          | chr12:6058039-6233836     | 0.00594387 | 0.00996981 | 0.746164 | 1         |
| XLOC_008012 | FLJ21408     | chr16:27236314-27301789   | 0.0442223  | 0.0741895  | 0.74644  | 1         |
| XLOC_006831 | SLC35F4      | chr14:58030639-58332592   | 0.0264373  | 0.0443575  | 0.746605 | 1         |
| XLOC_011794 | SLC8A2       | chr19:47931278-47975307   | 0.0129616  | 0.0217535  | 0.747003 | 1         |
| XLOC_018118 | LINC00240    | chr6:26924771-26991753    | 0.485595   | 0.815406   | 0.747765 | 0.691843  |
| XLOC_014932 | CPNE9        | chr3:9745509-9771592      | 0.0681351  | 0.11442    | 0.747875 | 1         |
| XLOC_005884 | CPB2-AS1     | chr13:46626982-46679211   | 0.00516056 | 0.00866728 | 0.748052 | 1         |
| XLOC_005553 | AVIL         | chr12:58176527-58209852   | 0.195436   | 0.328361   | 0.748586 | 1         |
| XLOC_022708 | C9orf66      | chr9:213107-465259        | 0.276194   | 0.464219   | 0.749126 | 0.713126  |
| XLOC_023189 | LRRC26       | chr9:140033608-140064491  | 4.37919    | 7.36057    | 0.749153 | 0.358967  |
| XLOC_018259 | ARMC12       | chr6:35704858-35716685    | 0.331247   | 0.556922   | 0.749567 | 0.599775  |
| XLOC_004940 | INHBC        | chr12:57828542-57844609   | 0.0623743  | 0.104955   | 0.750746 | 1         |
| XLOC_001990 | LOC400794    | chr1:165446078-165551341  | 0.021369   | 0.0359814  | 0.75173  | 1         |
| XLOC_010731 | LOC641367    | chr19:21906842-21950430   | 0.0363681  | 0.061332   | 0.753966 | 1         |
| XLOC_022436 | LOC100128361 | chr9:95059639-95432547    | 0.390242   | 0.658178   | 0.754107 | 0.901295  |

|             |                |                           |            |           |          |           |
|-------------|----------------|---------------------------|------------|-----------|----------|-----------|
| XLOC_021774 | C8orf31        | chr8:144120678-144135720  | 0.959971   | 1.61974   | 0.754696 | 0.254546  |
| XLOC_001535 | TRABD2B        | chr1:48226199-48462562    | 0.0423903  | 0.0715546 | 0.755311 | 1         |
| XLOC_001205 | TMEM240        | chr1:1470157-1475740      | 0.0403745  | 0.0681537 | 0.755348 | 1         |
| XLOC_011185 | TMEM190        | chr19:55888203-55889612   | 0.103968   | 0.175915  | 0.758745 | 1         |
| XLOC_017371 | PCDHB4         | chr5:140501580-140505201  | 0.0406107  | 0.0687626 | 0.759764 | 1         |
| XLOC_018141 | NKAPL          | chr6:28227074-28228736    | 0.0126623  | 0.0214612 | 0.761194 | 1         |
| XLOC_016466 | LRIT3          | chr4:110769357-110793471  | 0.0656748  | 0.111322  | 0.761329 | 1         |
| XLOC_005545 | ARHGAP9        | chr12:57853917-57873633   | 0.103471   | 0.175454  | 0.761865 | 1         |
| XLOC_010804 | HCST           | chr19:36393381-36395173   | 2.26105    | 3.83903   | 0.763754 | 0.455538  |
| XLOC_020575 | LOC100132832   | chr7:76668796-76682355    | 0.620805   | 1.05429   | 0.764054 | 0.26052   |
| XLOC_009338 | TSPAN10        | chr17:79609348-79615779   | 0.946382   | 1.60931   | 0.765952 | 0.406256  |
| XLOC_005578 | CPM            | chr12:69244955-69357020   | 0.00813667 | 0.0138491 | 0.76728  | 1         |
| XLOC_005542 | NDUFA4L2       | chr12:57623355-57634475   | 1.81581    | 3.09424   | 0.768972 | 0.927404  |
| XLOC_008816 | C17orf74       | chr17:7328934-7330886     | 0.413572   | 0.705319  | 0.770137 | 0.522543  |
| XLOC_003947 | SCT            | chr11:626312-627173       | 0.154319   | 0.263195  | 0.770222 | 1         |
| XLOC_018096 | HIST1H4C       | chr6:26104175-26104565    | 2.06862    | 3.52822   | 0.770272 | 0.574478  |
| XLOC_003974 | TRPM5          | chr11:2425745-2444275     | 0.0063564  | 0.0108462 | 0.770912 | 1         |
| XLOC_004981 | LYZ            | chr12:69742133-69748013   | 0.0328054  | 0.0561338 | 0.774935 | 1         |
| XLOC_000975 | PTPRVP         | chr1:202137178-202158577  | 0.0222402  | 0.0380845 | 0.776031 | 1         |
| XLOC_003931 | LOC283177      | chr11:134306375-134375555 | 0.0237286  | 0.0406706 | 0.777361 | 1         |
| XLOC_001858 | S100A14        | chr1:153586731-153588808  | 0.300098   | 0.514521  | 0.777795 | 0.582102  |
| XLOC_014015 | SULF2          | chr20:46286149-46415360   | 0.00647577 | 0.0111043 | 0.777998 | 1         |
| XLOC_014296 | SNORA80        | chr21:33664123-33765312   | 10.5794    | 18.1504   | 0.778743 | 0.946606  |
| XLOC_003763 | SCARNA9        | chr11:93394815-93463522   | 4.43738    | 7.61339   | 0.778832 | 0.698669  |
| XLOC_001517 | CCDC17         | chr1:46085715-46089731    | 0.248904   | 0.427436  | 0.780119 | 0.515718  |
| XLOC_016389 | SHROOM3        | chr4:77356252-77704405    | 0.00667085 | 0.0114598 | 0.780638 | 1         |
| XLOC_022797 | C9orf24        | chr9:34379016-34397849    | 0.0979243  | 0.16834   | 0.781635 | 1         |
| XLOC_002315 | IDI2-AS1       | chr10:1064846-1095061     | 1.31825    | 2.26679   | 0.782021 | 0.897332  |
| XLOC_005999 | F10            | chr13:113777112-113803843 | 0.164503   | 0.283007  | 0.782721 | 1         |
| XLOC_005699 | HVCN1          | chr12:111051831-111127617 | 0.0539615  | 0.0928897 | 0.783589 | 1         |
| XLOC_019071 | KIAA0408,SOGA3 | chr6:127759550-127840500  | 0.00618904 | 0.0106645 | 0.785024 | 1         |
| XLOC_021731 | HAS2-AS1       | chr8:122625270-122657564  | 0.0197806  | 0.0341141 | 0.786279 | 1         |
| XLOC_023510 | RPA4           | chrX:95939661-96855597    | 0.21667    | 0.373984  | 0.787481 | 0.901719  |
| XLOC_020644 | STAG3          | chr7:99775537-99869855    | 0.146865   | 0.2537    | 0.788636 | 1         |
| XLOC_009025 | LRRRC37A11P    | chr17:37186158-37209458   | 0.0146129  | 0.0252563 | 0.789401 | 1         |
| XLOC_003558 | ASRGL1         | chr11:62104773-62160887   | 1.10195    | 1.90631   | 0.790719 | 0.14651   |
| XLOC_002448 | GLUD1P7        | chr10:48954404-48958083   | 0.0263688  | 0.0456269 | 0.791055 | 1         |
| XLOC_006837 | CCDC175        | chr14:59951160-60043549   | 0.316135   | 0.547071  | 0.791187 | 0.817355  |
| XLOC_015864 | PVRL3-AS1      | chr3:110764162-110788806  | 0.0345872  | 0.0598731 | 0.791671 | 1         |
| XLOC_012661 | TUBA4B         | chr2:220110191-220136910  | 0.0184676  | 0.0319724 | 0.791829 | 1         |
| XLOC_009391 | LOC284009      | chr17:2310274-2318730     | 0.125728   | 0.217763  | 0.792446 | 1         |
| XLOC_008305 | MC1R           | chr16:89984286-89987385   | 1.89669    | 3.28525   | 0.792522 | 0.0738934 |
| XLOC_004033 | HPX            | chr11:6452267-6462254     | 0.21966    | 0.380494  | 0.792602 | 0.554994  |
| XLOC_013630 | CNBD2          | chr20:34556528-34618622   | 0.0555069  | 0.0962649 | 0.794343 | 1         |
| XLOC_013356 | TNS1           | chr2:218664511-218808796  | 0.131193   | 0.227621  | 0.794936 | 1         |
| XLOC_000485 | LOC646626      | chr1:85731459-85743771    | 2.35172    | 4.08284   | 0.795855 | 0.922274  |
| XLOC_007369 | LOC100505679   | chr15:84841241-84850985   | 0.316322   | 0.549221  | 0.795994 | 0.765908  |
| XLOC_004877 | HOXC13         | chr12:54329111-54340328   | 0.301719   | 0.523962  | 0.796255 | 0.474059  |
| XLOC_012398 | LOC440900      | chr2:114735245-114764887  | 0.0538165  | 0.0934678 | 0.79642  | 1         |

|             |               |                           |            |            |          |           |
|-------------|---------------|---------------------------|------------|------------|----------|-----------|
| XLOC_016072 | KCNMB3        | chr3:178957536-178984838  | 0.44778    | 0.777784   | 0.796578 | 0.420709  |
| XLOC_009271 | TMEM104       | chr17:72772621-72835922   | 1.61228    | 2.8047     | 0.79874  | 0.0525851 |
| XLOC_008162 | CA7           | chr16:66878281-66888049   | 0.0487403  | 0.0848518  | 0.79983  | 1         |
| XLOC_001661 | ABCA4         | chr1:94458393-94586705    | 0.0122377  | 0.0213314  | 0.801641 | 1         |
| XLOC_007109 | APBA2         | chr15:29213839-29410516   | 0.00793842 | 0.0138383  | 0.801747 | 1         |
| XLOC_002639 | DNMBP-AS1     | chr10:101635333-101769676 | 0.0132198  | 0.0230602  | 0.802703 | 1         |
| XLOC_008350 | SNORA10       | chr16:2012061-2014827     | 47.7041    | 83.2474    | 0.803294 | 0.902666  |
| XLOC_002719 | CASC2         | chr10:119806331-119969665 | 0.196936   | 0.343893   | 0.80423  | 1         |
| XLOC_016465 | RRH           | chr4:110749149-110765861  | 0.0400956  | 0.0700476  | 0.804892 | 1         |
| XLOC_015578 | LOC100129480  | chr3:12581279-12586963    | 0.0380162  | 0.066439   | 0.805417 | 1         |
| XLOC_018128 | HIST1H2AI     | chr6:27775976-27776445    | 0.889957   | 1.55633    | 0.806336 | 0.711397  |
| XLOC_003233 | SNORA52       | chr11:809935-812876       | 31.152     | 54.5818    | 0.809096 | 0.907121  |
| XLOC_001812 | TMOD4         | chr1:151129104-151148547  | 0.0891537  | 0.156221   | 0.809221 | 1         |
| XLOC_008929 | PYY2          | chr17:26553588-26555085   | 0.609463   | 1.06811    | 0.809449 | 0.550766  |
| XLOC_011443 | ZNF878        | chr19:12154619-12163782   | 0.194752   | 0.341407   | 0.809857 | 1         |
| XLOC_017850 | TMEM173       | chr5:138855112-138862343  | 0.12182    | 0.213615   | 0.810267 | 1         |
| XLOC_008599 | SNORA46       | chr16:58549382-58663790   | 1.79061    | 3.14039    | 0.81049  | 0.930021  |
| XLOC_000976 | LGR6          | chr1:202163117-202288889  | 0.0427267  | 0.07498    | 0.811368 | 1         |
| XLOC_009145 | HOXB-AS3      | chr17:46667822-46683774   | 0.505049   | 0.887438   | 0.813224 | 0.902216  |
| XLOC_006700 | SNORD8        | chr14:21853352-21905457   | 13.5518    | 23.8414    | 0.814983 | 0.940466  |
| XLOC_007902 | LOC100128770  | chr16:3077867-3089133     | 0.0420774  | 0.0740397  | 0.815255 | 1         |
| XLOC_023464 | ITGB1BP2      | chrX:70430034-70948962    | 0.430624   | 0.758262   | 0.816266 | 0.910997  |
| XLOC_012961 | LOC100133985  | chr2:70351167-70352448    | 1.91785    | 3.379      | 0.817104 | 0.421781  |
| XLOC_018774 | HSPA1L        | chr6:31777395-31782835    | 0.188514   | 0.333024   | 0.82096  | 1         |
| XLOC_015232 | LOC100009676  | chr3:101368282-101398057  | 1.96873    | 3.47797    | 0.820981 | 0.303067  |
| XLOC_014354 | LINC00313     | chr21:44881973-44898103   | 0.107961   | 0.19091    | 0.822384 | 1         |
| XLOC_015434 | SERPINI1      | chr3:167453431-167543357  | 0.152666   | 0.270845   | 0.82709  | 1         |
| XLOC_000653 | GPR89B,GPR89C | chr1:147400505-147465755  | 0.0737147  | 0.130796   | 0.827298 | 1         |
| XLOC_004558 | MPZL3         | chr11:118100335-118123011 | 0.136439   | 0.242413   | 0.829213 | 1         |
| XLOC_007395 | WDR93         | chr15:90234027-90286869   | 0.053362   | 0.0948676  | 0.830103 | 1         |
| XLOC_006120 | RCBTB2        | chr13:49063098-49107316   | 0.245663   | 0.437384   | 0.832221 | 0.292125  |
| XLOC_009545 | GRAP          | chr17:18853988-18950336   | 0.0846868  | 0.150845   | 0.832857 | 1         |
| XLOC_005308 | TAS2R31       | chr12:10998447-11328619   | 0.0180156  | 0.0320992  | 0.833289 | 1         |
| XLOC_008160 | CMTM2         | chr16:66613350-66622177   | 0.151472   | 0.269991   | 0.833857 | 1         |
| XLOC_013399 | COL4A4        | chr2:227867426-228029275  | 0.0165427  | 0.0294907  | 0.834066 | 1         |
| XLOC_014016 | PREX1         | chr20:47240792-47444420   | 0.0350825  | 0.0626164  | 0.835789 | 1         |
| XLOC_010661 | HSH2D         | chr19:16244837-16269377   | 0.290761   | 0.518982   | 0.835854 | 0.381661  |
| XLOC_007224 | TEX9          | chr15:56657643-56757335   | 0.337594   | 0.602709   | 0.836171 | 0.529976  |
| XLOC_007429 | SYNM          | chr15:99645285-99675800   | 0.00268882 | 0.00480037 | 0.836172 | 1         |
| XLOC_012393 | FOXD4L1       | chr2:114256660-114258727  | 0.422189   | 0.754312   | 0.837271 | 0.452276  |
| XLOC_020729 | SND1-IT1      | chr7:127292201-127732659  | 0.0239186  | 0.0427394  | 0.837435 | 1         |
| XLOC_016296 | DCAF4L1       | chr4:41983712-41988484    | 0.119569   | 0.213656   | 0.837446 | 1         |
| XLOC_000028 | MMP23B        | chr1:1567559-1570030      | 0.1154     | 0.206654   | 0.840568 | 1         |
| XLOC_013730 | FAM209A       | chr20:55043646-55101208   | 0.173632   | 0.311069   | 0.841201 | 1         |
| XLOC_007830 | WFIKKN1       | chr16:681011-684116       | 0.212819   | 0.381396   | 0.841664 | 0.666905  |
| XLOC_021232 | SPDYE6        | chr7:101986191-101996889  | 0.262364   | 0.471122   | 0.844534 | 0.301882  |
| XLOC_014505 | TCN2          | chr22:31003069-31023047   | 0.0280766  | 0.0504723  | 0.846124 | 1         |
| XLOC_008927 | LGALS9        | chr17:25958173-25976586   | 0.110994   | 0.199596   | 0.846603 | 1         |
| XLOC_010484 | C19orf71      | chr19:3538262-3557571     | 0.515024   | 0.928062   | 0.849581 | 0.926428  |

|             |              |                           |            |            |          |           |
|-------------|--------------|---------------------------|------------|------------|----------|-----------|
| XLOC_000020 | TAS1R3       | chr1:1266725-1269844      | 0.0840563  | 0.151598   | 0.850819 | 1         |
| XLOC_022963 | HIATL2       | chr9:99708326-99775862    | 0.562487   | 1.01524    | 0.851924 | 0.568684  |
| XLOC_024115 | FGF13        | chrX:137713733-138287185  | 0.00743944 | 0.0134321  | 0.852422 | 1         |
| XLOC_014892 | CELSR1       | chr22:46756730-46933067   | 0.0413524  | 0.0749444  | 0.857848 | 1         |
| XLOC_014955 | CAND2        | chr3:12838170-12876313    | 0.0744546  | 0.134978   | 0.858288 | 1         |
| XLOC_006852 | TEX21P       | chr14:64812190-64814329   | 0.0532941  | 0.0967521  | 0.860318 | 1         |
| XLOC_004784 | REP15        | chr12:27849427-27850566   | 0.760758   | 1.38154    | 0.860771 | 0.25951   |
| XLOC_014453 | FBXW4P1      | chr22:23522551-23660224   | 0.269221   | 0.489337   | 0.862038 | 0.938335  |
| XLOC_012299 | GGT8P        | chr2:91963367-91970153    | 0.0175429  | 0.0320275  | 0.86842  | 1         |
| XLOC_012093 | EMILIN1      | chr2:27301434-27309265    | 0.194786   | 0.35638    | 0.871526 | 1         |
| XLOC_012288 | ANAPC1P1     | chr2:87042459-87122165    | 0.00862653 | 0.0157839  | 0.871598 | 1         |
| XLOC_021286 | RNF148       | chr7:121958477-122526813  | 0.107645   | 0.197008   | 0.871978 | 1         |
| XLOC_020930 | LOC100131257 | chr7:7115400-7136417      | 0.00327465 | 0.00599488 | 0.87239  | 1         |
| XLOC_005322 | GPR19        | chr12:12813994-12849121   | 0.205361   | 0.376063   | 0.872812 | 0.454495  |
| XLOC_023939 | MAP2K4P1     | chrX:72744110-72782921    | 0.00587712 | 0.0107748  | 0.874486 | 1         |
| XLOC_015989 | SLC9A9       | chr3:142984063-143567373  | 0.00852477 | 0.0156466  | 0.876118 | 1         |
| XLOC_022085 | LOC100127983 | chr8:91803920-91997485    | 0.145599   | 0.268088   | 0.880705 | 1         |
| XLOC_001975 | APOA2        | chr1:161192082-161193418  | 1.01915    | 1.87662    | 0.880762 | 0.512222  |
| XLOC_015006 | FBXL2        | chr3:33318933-33428757    | 0.0283174  | 0.0521953  | 0.88223  | 1         |
| XLOC_004928 | SLC39A5      | chr12:56623819-56652143   | 0.094105   | 0.173528   | 0.882826 | 1         |
| XLOC_000457 | ZRANB2-AS2   | chr1:71547006-71703406    | 0.153662   | 0.284161   | 0.886948 | 1         |
| XLOC_005992 | TEX29        | chr13:111973014-111996594 | 0.228047   | 0.421846   | 0.887387 | 0.703707  |
| XLOC_011649 | LGALS4       | chr19:39292310-39303740   | 0.122572   | 0.226879   | 0.888296 | 1         |
| XLOC_020957 | STEAP1B      | chr7:22459062-22539901    | 0.0125104  | 0.0232529  | 0.894279 | 1         |
| XLOC_009139 | LRRRC46      | chr17:45908992-45918699   | 0.329851   | 0.613399   | 0.895012 | 0.940466  |
| XLOC_018200 | SNORA38      | chr6:31588449-31605554    | 9.39912    | 17.4922    | 0.896113 | 0.938622  |
| XLOC_004714 | KLRG1        | chr12:9142220-9163340     | 0.127708   | 0.23808    | 0.898597 | 1         |
| XLOC_023005 | SVEP1        | chr9:113127528-113342160  | 0.00115311 | 0.00214969 | 0.8986   | 1         |
| XLOC_009634 | CCL3L1       | chr17:34522267-34524156   | 0.245004   | 0.456955   | 0.899244 | 0.612247  |
| XLOC_016175 | SCARNA22     | chr4:1873122-1983934      | 53.8311    | 100.404    | 0.899298 | 0.936432  |
| XLOC_005296 | STYK1        | chr12:10771537-10826891   | 0.100211   | 0.18691    | 0.89931  | 1         |
| XLOC_014357 | LOC284837    | chr21:45225638-45232448   | 0.0221539  | 0.0413369  | 0.899866 | 1         |
| XLOC_021028 | LOC100506895 | chr7:43152197-43602938    | 0.00527269 | 0.00985074 | 0.901693 | 1         |
| XLOC_006817 | BMP4         | chr14:54416454-54423554   | 0.620345   | 1.15963    | 0.902521 | 0.200193  |
| XLOC_004080 | DKK3         | chr11:11984542-12030917   | 0.0954861  | 0.178557   | 0.903023 | 1         |
| XLOC_021945 | LOC100128750 | chr8:30239634-30429734    | 0.354845   | 0.66423    | 0.904492 | 0.922274  |
| XLOC_023455 | RAB41        | chrX:69502021-69504852    | 0.0173905  | 0.0326003  | 0.906585 | 1         |
| XLOC_022980 | BAAT         | chr9:104122698-104147287  | 0.111009   | 0.208205   | 0.907331 | 1         |
| XLOC_023132 | ABO          | chr9:136130562-136150630  | 0.167294   | 0.313793   | 0.907431 | 1         |
| XLOC_015410 | ARHGEF26     | chr3:153742189-153975616  | 0.108307   | 0.20349    | 0.909838 | 1         |
| XLOC_018190 | HCP5         | chr6:31430956-31433586    | 0.00582741 | 0.0109544  | 0.910581 | 1         |
| XLOC_013907 | LOC284801    | chr20:26167654-26189869   | 0.0361952  | 0.0681004  | 0.911863 | 1         |
| XLOC_011069 | LOC100129083 | chr19:51913274-51921057   | 0.177162   | 0.333649   | 0.913266 | 1         |
| XLOC_015183 | MITF         | chr3:69788585-70017488    | 0.383686   | 0.722686   | 0.913443 | 0.0689012 |
| XLOC_010248 | CNDP1        | chr18:72201691-72252261   | 0.00777421 | 0.0146627  | 0.915385 | 1         |
| XLOC_022237 | SCRT1        | chr8:145554453-145559943  | 0.0544552  | 0.102778   | 0.916392 | 1         |
| XLOC_023403 | CCNB3        | chrX:50027539-50094911    | 0.387626   | 0.733443   | 0.92002  | 0.368906  |
| XLOC_021339 | ATP6V0A4     | chr7:138391038-138490769  | 0.0108188  | 0.0204818  | 0.92081  | 1         |
| XLOC_023313 | MAGEB2       | chrX:30233674-30238206    | 0.369835   | 0.700239   | 0.920967 | 0.312318  |

|             |              |                           |            |            |          |           |
|-------------|--------------|---------------------------|------------|------------|----------|-----------|
| XLOC_013970 | MAFB         | chr20:39314516-39317876   | 0.00775905 | 0.0147081  | 0.922662 | 1         |
| XLOC_021377 | CTAGE4       | chr7:143955788-143983096  | 0.050439   | 0.0957904  | 0.925342 | 1         |
| XLOC_016621 | MFSD7        | chr4:671710-682973        | 0.224103   | 0.42563    | 0.925436 | 0.879418  |
| XLOC_002041 | SERPINC1     | chr1:173872941-173886516  | 0.0258156  | 0.049048   | 0.92595  | 1         |
| XLOC_007554 | PIN4P1       | chr15:44165729-44487429   | 0.0215025  | 0.0408548  | 0.926002 | 1         |
| XLOC_009840 | SAMD14       | chr17:48172100-48207246   | 0.050186   | 0.0955416  | 0.928845 | 1         |
| XLOC_020515 | INTS4L2      | chr7:65111923-65235797    | 0.0331356  | 0.0631341  | 0.930038 | 1         |
| XLOC_018707 | HIST1H2AM    | chr6:27860476-27860963    | 2.69868    | 5.14455    | 0.930793 | 0.332523  |
| XLOC_001509 | PTCH2        | chr1:45285515-45308616    | 0.17192    | 0.328244   | 0.93303  | 1         |
| XLOC_018326 | TMEM151B     | chr6:44238479-44247182    | 0.0392471  | 0.0749894  | 0.934101 | 1         |
| XLOC_018119 | HIST1H2AG    | chr6:27100816-27101314    | 1.88279    | 3.60048    | 0.93532  | 0.413789  |
| XLOC_015358 | IL20RB       | chr3:136676706-136729926  | 0.142546   | 0.272678   | 0.935766 | 1         |
| XLOC_014349 | RSPH1        | chr21:43892596-43916401   | 0.416673   | 0.798254   | 0.937933 | 0.292741  |
| XLOC_007278 | LOC145837    | chr15:69854058-69863779   | 0.0326326  | 0.0625384  | 0.938427 | 1         |
| XLOC_021683 | LOC100616530 | chr8:96257140-96822371    | 0.147022   | 0.281977   | 0.939544 | 1         |
| XLOC_001396 | SNORA61      | chr1:28879528-28908366    | 30.8068    | 59.1541    | 0.94123  | 0.939922  |
| XLOC_008276 | FOXL1        | chr16:86612114-86615304   | 0.0255193  | 0.0490118  | 0.941543 | 1         |
| XLOC_017992 | GRM6         | chr5:178405329-178422124  | 0.011259   | 0.0216321  | 0.942093 | 1         |
| XLOC_008498 | SLC7A5P1     | chr16:29624423-29625038   | 0.326369   | 0.627768   | 0.943729 | 0.804081  |
| XLOC_000606 | OLFML3       | chr1:114522029-114524875  | 0.00955567 | 0.0184436  | 0.948693 | 1         |
| XLOC_011815 | RASIP1       | chr19:49223841-49243970   | 0.302233   | 0.58515    | 0.953143 | 0.355674  |
| XLOC_017180 | MAP1B        | chr5:71403117-71505397    | 0.0043578  | 0.00844322 | 0.954194 | 1         |
| XLOC_022186 | TMEM71       | chr8:133722191-133772914  | 0.530195   | 1.02784    | 0.955022 | 0.163304  |
| XLOC_020482 | ABCA13       | chr7:48211056-48687091    | 0.00110796 | 0.00215095 | 0.957071 | 1         |
| XLOC_007924 | C16orf71     | chr16:4746510-4799397     | 0.0748509  | 0.145435   | 0.958282 | 1         |
| XLOC_018120 | HIST1H4I     | chr6:27106071-27114637    | 0.710474   | 1.38094    | 0.958799 | 0.944295  |
| XLOC_004893 | PDE1B        | chr12:54943176-54973023   | 0.00570625 | 0.0111183  | 0.962316 | 1         |
| XLOC_017272 | AQPEP        | chr5:115298150-115363299  | 0.00402796 | 0.00785651 | 0.963837 | 1         |
| XLOC_020543 | CLDN4        | chr7:73245192-73247015    | 0.122589   | 0.239109   | 0.963839 | 1         |
| XLOC_010817 | ZNF790-AS1   | chr19:37288451-37407193   | 0.0277163  | 0.0540735  | 0.964185 | 1         |
| XLOC_017486 | SNORA74B     | chr5:172410762-172461900  | 1.55774    | 3.0393     | 0.964284 | 0.934861  |
| XLOC_002814 | PROSER2-AS1  | chr10:11865396-11936709   | 0.00720021 | 0.014066   | 0.966107 | 1         |
| XLOC_008770 | SPNS3        | chr17:4337218-4391499     | 0.364139   | 0.712871   | 0.969149 | 0.377663  |
| XLOC_022946 | MIRLET7DHG   | chr9:96938851-96966848    | 0.48828    | 0.955911   | 0.969167 | 0.208603  |
| XLOC_014177 | IGSF5        | chr21:41117333-41174023   | 0.020774   | 0.0407141  | 0.97075  | 1         |
| XLOC_003349 | NCR3LG1      | chr11:17373308-17398868   | 0.218123   | 0.427759   | 0.97166  | 0.0831301 |
| XLOC_000769 | RAB25        | chr1:156030965-156040295  | 0.0398918  | 0.078406   | 0.974871 | 1         |
| XLOC_015147 | ITIH1        | chr3:52811601-52826084    | 0.00729021 | 0.0143288  | 0.974886 | 1         |
| XLOC_008377 | CCDC64B      | chr16:3077867-3089133     | 0.155622   | 0.306552   | 0.978089 | 1         |
| XLOC_006350 | LINC00640    | chr14:51800110-51832275   | 0.0794895  | 0.157041   | 0.98231  | 1         |
| XLOC_015924 | ALDH1L1      | chr3:125822403-125929011  | 0.00700496 | 0.0138569  | 0.984151 | 1         |
| XLOC_015520 | HRASLS       | chr3:192958916-192988644  | 0.171105   | 0.33852    | 0.98436  | 1         |
| XLOC_018896 | TCTE1        | chr6:44247896-44265458    | 0.111787   | 0.22158    | 0.987078 | 1         |
| XLOC_006528 | CYP46A1      | chr14:100150754-100193638 | 0.0390689  | 0.0775041  | 0.988254 | 1         |
| XLOC_009568 | VTN          | chr17:26694298-26697373   | 0.012749   | 0.025307   | 0.989155 | 1         |
| XLOC_011345 | FUT3         | chr19:5842898-5851485     | 0.0112644  | 0.0223814  | 0.990534 | 1         |
| XLOC_007121 | SCG5         | chr15:32933869-32989298   | 0.198994   | 0.395809   | 0.992075 | 0.431488  |
| XLOC_005325 | GSG1         | chr12:13236470-13256630   | 0.038206   | 0.0761228  | 0.994529 | 1         |
| XLOC_014484 | CRYBA4       | chr22:27017927-27026636   | 0.0327297  | 0.0653925  | 0.998524 | 1         |



|             |                  |                           |            |            |          |           |
|-------------|------------------|---------------------------|------------|------------|----------|-----------|
| XLOC_011045 | ATF5             | chr19:50392912-50437193   | 51.3277    | 102.578    | 0.998918 | 0.270647  |
| XLOC_002599 | CYP26A1          | chr10:94833231-94837641   | 0.0315962  | 0.0632085  | 1.00037  | 1         |
| XLOC_020742 | LOC100130705     | chr7:128506463-128512101  | 0.755771   | 1.51327    | 1.00165  | 0.0699076 |
| XLOC_013870 | SNORD17          | chr20:17922243-17949490   | 4.74934    | 9.51734    | 1.00283  | 0.930948  |
| XLOC_005161 | CCDC62           | chr12:123259055-123311927 | 0.122055   | 0.24491    | 1.00471  | 1         |
| XLOC_001872 | SHE              | chr1:154451953-154474526  | 0.00523288 | 0.0105197  | 1.00741  | 1         |
| XLOC_000668 | BOLA1            | chr1:149871154-149872348  | 0.0926644  | 0.186335   | 1.00781  | 1         |
| XLOC_022557 | OLFML2A          | chr9:127539436-127577159  | 0.0141758  | 0.0285807  | 1.01161  | 1         |
| XLOC_021116 | NCF1C            | chr7:74572383-74587816    | 0.0189458  | 0.0382827  | 1.01481  | 1         |
| XLOC_014746 | ZNRF3-AS1        | chr22:29279754-29453476   | 0.0269056  | 0.0543975  | 1.01563  | 1         |
| XLOC_018676 | HIST1H3B         | chr6:26031816-26032288    | 1.69024    | 3.42996    | 1.02096  | 0.421836  |
| XLOC_018103 | HIST1H2AE        | chr6:26217147-26217711    | 7.41384    | 15.0484    | 1.02132  | 0.0625465 |
| XLOC_007702 | DNM1P35          | chr15:76016318-76032418   | 0.118855   | 0.2414     | 1.02223  | 1         |
| XLOC_014407 | TSSK2            | chr22:19117791-19132190   | 0.423365   | 0.859896   | 1.02226  | 0.85718   |
| XLOC_012799 | FAM49A           | chr2:16730729-16847134    | 0.0152588  | 0.031045   | 1.02472  | 1         |
| XLOC_011188 | NAT14            | chr19:55996556-55998935   | 1.67004    | 3.40054    | 1.02588  | 0.110718  |
| XLOC_001483 | COL9A2           | chr1:40766162-40782939    | 0.00807294 | 0.0164728  | 1.02892  | 1         |
| XLOC_004063 | SCUBE2           | chr11:9041046-9113150     | 0.00908841 | 0.0185549  | 1.0297   | 1         |
| XLOC_005082 | FICD             | chr12:108909050-108913380 | 0.609543   | 1.24534    | 1.03074  | 0.189591  |
| XLOC_007520 | EXD1             | chr15:41474930-41522895   | 0.0121902  | 0.024927   | 1.03199  | 1         |
| XLOC_008865 | HS3ST3B1         | chr17:14204505-14249492   | 0.144593   | 0.29662    | 1.03662  | 1         |
| XLOC_005845 | FRY              | chr13:32605436-32870776   | 0.00340833 | 0.00702145 | 1.0427   | 1         |
| XLOC_001780 | NBPF11,NBPF24    | chr1:147574322-147624601  | 0.00352018 | 0.00725601 | 1.04353  | 1         |
| XLOC_016286 | LOC401127        | chr4:39481874-39483523    | 0.0951327  | 0.197026   | 1.05037  | 1         |
| XLOC_003969 | IGF2,INS,INS-IGF | chr11:2150341-2182439     | 0.00915311 | 0.0189604  | 1.05066  | 1         |
| XLOC_023181 | CLIC3            | chr9:139889059-139891024  | 0.114855   | 0.238615   | 1.05487  | 1         |
| XLOC_013908 | MIR663A          | chr20:26167654-26189869   | 1704.87    | 3544.5     | 1.05592  | 0.267401  |
| XLOC_005437 | FAM186B          | chr12:49976657-49999433   | 0.104752   | 0.218408   | 1.06005  | 1         |
| XLOC_015393 | WWTR1-AS1        | chr3:149235021-149421060  | 0.0547669  | 0.11419    | 1.06006  | 1         |
| XLOC_005869 | VWA8-AS1         | chr13:42535304-42555701   | 0.0185516  | 0.0386918  | 1.06048  | 1         |
| XLOC_003950 | CEND1            | chr11:787109-790126       | 0.127615   | 0.266402   | 1.0618   | 1         |
| XLOC_010345 | PSTPIP2          | chr18:43563501-43652250   | 0.0161333  | 0.0337297  | 1.06397  | 1         |
| XLOC_013442 | LOC151171        | chr2:239419330-239464140  | 0.0202583  | 0.0424068  | 1.06578  | 1         |
| XLOC_017837 | GFRA3            | chr5:137588068-137610253  | 0.0699687  | 0.146586   | 1.06696  | 1         |
| XLOC_001471 | RHBDL2           | chr1:39351478-39407456    | 0.0466857  | 0.0978294  | 1.06729  | 1         |
| XLOC_011365 | FLJ25758         | chr19:7004963-7006426     | 0.0301096  | 0.0631261  | 1.06801  | 1         |
| XLOC_007307 | CPLX3            | chr15:75118950-75124136   | 0.0402747  | 0.0846415  | 1.07149  | 1         |
| XLOC_003297 | CNGA4            | chr11:6260321-6265707     | 0.0349928  | 0.0737267  | 1.07513  | 1         |
| XLOC_023761 | GPM6B            | chrX:13789061-13956831    | 0.0192715  | 0.0406224  | 1.0758   | 1         |
| XLOC_005938 | C13orf45         | chr13:76445173-76457948   | 0.0154322  | 0.0325633  | 1.0773   | 1         |
| XLOC_008828 | SHBG             | chr17:7494547-7536700     | 0.3945     | 0.834862   | 1.08151  | 0.730925  |
| XLOC_012687 | SP140            | chr2:231090444-231177930  | 0.136925   | 0.290367   | 1.08449  | 1         |
| XLOC_022020 | LOC100505676     | chr8:67331821-67341212    | 0.0159684  | 0.0339671  | 1.08892  | 1         |
| XLOC_022619 | PPAPDC3          | chr9:134165080-134184649  | 0.170717   | 0.363612   | 1.09079  | 1         |
| XLOC_018688 | HIST1H3G         | chr6:26271145-26271612    | 1.00999    | 2.15226    | 1.09152  | 0.472023  |
| XLOC_011879 | KLK15            | chr19:51328544-51334779   | 0.0419579  | 0.0894392  | 1.09197  | 1         |
| XLOC_000450 | GNG12-AS1        | chr1:68167148-68698284    | 0.030535   | 0.0651286  | 1.09283  | 1         |
| XLOC_012183 | C2orf73          | chr2:54558070-54588714    | 0.00730119 | 0.0155779  | 1.0933   | 1         |
| XLOC_005559 | C12orf61         | chr12:62995530-62997214   | 0.331893   | 0.708165   | 1.09337  | 0.303364  |

|             |           |                           |            |            |         |           |
|-------------|-----------|---------------------------|------------|------------|---------|-----------|
| XLOC_004325 | KCNK7     | chr11:65360325-65363467   | 0.328011   | 0.700588   | 1.09482 | 0.285746  |
| XLOC_008489 | NUPR1     | chr16:28548661-28550495   | 2.47773    | 5.29395    | 1.09533 | 0.064033  |
| XLOC_018195 | LTA       | chr6:31539875-31542100    | 0.0763534  | 0.163292   | 1.09669 | 1         |
| XLOC_008439 | XYLT1     | chr16:17196180-17564738   | 0.00710283 | 0.0152053  | 1.09811 | 1         |
| XLOC_001970 | PVRL4     | chr1:161040780-161059385  | 0.029976   | 0.064233   | 1.09951 | 1         |
| XLOC_015534 | LRRC33    | chr3:196366655-196388874  | 0.0830836  | 0.17819    | 1.10078 | 1         |
| XLOC_012708 | CHRNA3    | chr2:233404436-233411038  | 0.0196804  | 0.0423523  | 1.10568 | 1         |
| XLOC_015569 | GHRL      | chr3:10290176-10335133    | 0.187894   | 0.405593   | 1.11012 | 0.600595  |
| XLOC_009674 | TNS4      | chr17:38632079-38657854   | 0.0107783  | 0.0232772  | 1.11079 | 1         |
| XLOC_002336 | LINC00707 | chr10:6821559-6884868     | 0.00471609 | 0.0102033  | 1.11337 | 1         |
| XLOC_005241 | IFFO1     | chr12:6648693-6665249     | 0.0445725  | 0.0965249  | 1.11475 | 1         |
| XLOC_021804 | GPT       | chr8:145729464-145732555  | 0.112641   | 0.244136   | 1.11595 | 1         |
| XLOC_013668 | GDAP1L1   | chr20:42875738-42909557   | 0.0214202  | 0.0464772  | 1.11755 | 1         |
| XLOC_005216 | NINJ2     | chr12:673461-772755       | 0.885993   | 1.92519    | 1.11963 | 0.126915  |
| XLOC_010575 | ICAM4     | chr19:10397642-10399260   | 0.156128   | 0.339284   | 1.11977 | 1         |
| XLOC_023994 | RAB40A    | chrX:102754680-102774417  | 0.372163   | 0.80882    | 1.11988 | 0.245554  |
| XLOC_017386 | PCDHB15   | chr5:140625146-140627801  | 0.0656467  | 0.142756   | 1.12076 | 1         |
| XLOC_010754 | TDRD12    | chr19:33210678-33281714   | 0.00918279 | 0.0199748  | 1.12117 | 1         |
| XLOC_005826 | SNORA27   | chr13:27825691-27830702   | 29.2329    | 63.7132    | 1.124   | 0.876392  |
| XLOC_020953 | MACC1     | chr7:20174278-20257013    | 0.00342825 | 0.00747363 | 1.12433 | 1         |
| XLOC_015616 | NEK10     | chr3:27257096-27410912    | 0.00545483 | 0.0119013  | 1.12551 | 1         |
| XLOC_020791 | WEE2      | chr7:141404137-141438030  | 0.00491894 | 0.0107696  | 1.13054 | 1         |
| XLOC_014592 | MEI1      | chr22:42095517-42195459   | 0.0222294  | 0.0486882  | 1.1311  | 1         |
| XLOC_003318 | SNORA3    | chr11:8703994-8711419     | 8.79887    | 19.2856    | 1.13213 | 0.87748   |
| XLOC_010721 | ZNF90     | chr19:20188802-20231977   | 0.00451954 | 0.00991396 | 1.13329 | 1         |
| XLOC_020802 | EPHB6     | chr7:142552791-142568847  | 0.112096   | 0.245995   | 1.1339  | 1         |
| XLOC_021615 | DNAJC5B   | chr8:66933790-67012755    | 0.0160586  | 0.0352434  | 1.13401 | 1         |
| XLOC_020593 | DPY19L2P4 | chr7:89748713-89754914    | 0.0310357  | 0.0682008  | 1.13586 | 1         |
| XLOC_020376 | SCIN      | chr7:12610202-12693228    | 0.00557251 | 0.0122618  | 1.13777 | 1         |
| XLOC_010326 | KLHL14    | chr18:30252633-30352974   | 0.00755545 | 0.0166434  | 1.13936 | 1         |
| XLOC_020789 | TMEM178B  | chr7:140774031-141180179  | 0.00142888 | 0.003148   | 1.13955 | 1         |
| XLOC_010185 | SETBP1    | chr18:42260137-42648475   | 0.00156743 | 0.00345995 | 1.14235 | 1         |
| XLOC_018796 | HLA-DRB1  | chr6:32546546-32557613    | 0.0235869  | 0.0520839  | 1.14285 | 1         |
| XLOC_018668 | FAM65B    | chr6:24804512-24911195    | 0.00270612 | 0.00598338 | 1.14474 | 1         |
| XLOC_011960 | SYT5      | chr19:55684468-55691720   | 0.0353488  | 0.0782257  | 1.14598 | 1         |
| XLOC_018107 | HIST1H2BI | chr6:26273203-26273640    | 0.64939    | 1.44075    | 1.14966 | 0.506593  |
| XLOC_017888 | IL17B     | chr5:148753829-148758838  | 0.0515287  | 0.114344   | 1.14993 | 1         |
| XLOC_002888 | SEPT7L    | chr10:38671997-38691780   | 0.0557795  | 0.123843   | 1.1507  | 1         |
| XLOC_004737 | APOLD1    | chr12:12878850-12944399   | 0.198408   | 0.441432   | 1.15372 | 0.0831301 |
| XLOC_005631 | TMCC3     | chr12:94960899-95044324   | 0.00339995 | 0.00756856 | 1.1545  | 1         |
| XLOC_022937 | ECM2      | chr9:95059639-95432547    | 0.00744599 | 0.0165903  | 1.15581 | 1         |
| XLOC_007434 | ALDH1A3   | chr15:101420008-101456830 | 0.0181656  | 0.0406481  | 1.16198 | 1         |
| XLOC_001204 | ANKRD65   | chr1:1353799-1356824      | 0.0129297  | 0.0290198  | 1.16635 | 1         |
| XLOC_013271 | CALCRL    | chr2:188206689-188313021  | 0.0028922  | 0.00650612 | 1.16963 | 1         |
| XLOC_000224 | SCARNA1   | chr1:28157251-28178183    | 1.67558    | 3.76969    | 1.16978 | 0.906152  |
| XLOC_007956 | MPV17L    | chr16:15489610-15503543   | 0.0118518  | 0.0266696  | 1.17008 | 1         |
| XLOC_011198 | NLRP4     | chr19:56296762-56393220   | 0.00455281 | 0.010294   | 1.17698 | 1         |
| XLOC_017242 | C5orf27   | chr5:95187935-95195836    | 0.00880894 | 0.0199795  | 1.18148 | 1         |
| XLOC_006920 | SNORA79   | chr14:81641795-81687575   | 17.4635    | 39.6549    | 1.18316 | 0.907121  |

|             |              |                          |            |            |         |           |
|-------------|--------------|--------------------------|------------|------------|---------|-----------|
| XLOC_008005 | SLC5A11      | chr16:24857183-24922949  | 0.0259692  | 0.0589844  | 1.18353 | 1         |
| XLOC_014122 | C21orf7      | chr21:30452872-30548202  | 0.295196   | 0.672089   | 1.18698 | 0.118625  |
| XLOC_023285 | CDKL5        | chrX:18443724-18690223   | 0.0131639  | 0.0299875  | 1.18777 | 1         |
| XLOC_013523 | BMP2         | chr20:6748744-6760910    | 0.00759543 | 0.0173158  | 1.18889 | 1         |
| XLOC_000715 | LCE1B        | chr1:152784446-152785585 | 0.113651   | 0.260608   | 1.19727 | 1         |
| XLOC_004892 | NCKAP1L      | chr12:54891494-54936899  | 0.0248065  | 0.0569216  | 1.19826 | 1         |
| XLOC_021350 | DENND2A      | chr7:140218219-140302342 | 0.00528216 | 0.0121318  | 1.19959 | 1         |
| XLOC_009952 | CD300C       | chr17:72537204-72542310  | 0.0185846  | 0.0427634  | 1.20227 | 1         |
| XLOC_014602 | LOC388906    | chr22:42665758-42670868  | 0.192064   | 0.442213   | 1.20316 | 0.421289  |
| XLOC_018842 | CPNE5        | chr6:36708554-36807220   | 0.079407   | 0.183261   | 1.20656 | 1         |
| XLOC_009231 | C17orf72     | chr17:62075710-62097994  | 0.0168628  | 0.0389479  | 1.2077  | 1         |
| XLOC_013181 | NEB          | chr2:152341852-152591001 | 0.00332474 | 0.00771265 | 1.21398 | 1         |
| XLOC_016376 | CXCL1        | chr4:74735108-74737019   | 0.1789     | 0.415159   | 1.21451 | 0.351736  |
| XLOC_020480 | C7orf57      | chr7:48075107-48100894   | 0.0177694  | 0.0412407  | 1.21467 | 1         |
| XLOC_010875 | CYP2F1       | chr19:41620352-41634281  | 0.0144624  | 0.0335707  | 1.2149  | 1         |
| XLOC_018689 | HIST1H4H     | chr6:26285353-26285727   | 3.14664    | 7.31221    | 1.2165  | 0.109206  |
| XLOC_009121 | MAPT         | chr17:43920721-44105699  | 0.00684516 | 0.0159562  | 1.22096 | 1         |
| XLOC_020718 | WNT16        | chr7:120965420-120981158 | 0.0299653  | 0.069982   | 1.22369 | 1         |
| XLOC_017348 | SNORA74A     | chr5:138609440-138667366 | 1.31212    | 3.07215    | 1.22735 | 0.907121  |
| XLOC_009198 | PPM1E        | chr17:56833229-57184266  | 0.00534146 | 0.0125197  | 1.2289  | 1         |
| XLOC_004805 | PDZRN4       | chr12:41582249-41968392  | 0.0150715  | 0.0354258  | 1.23298 | 1         |
| XLOC_010064 | ZNF750       | chr17:80709939-80901062  | 0.00632134 | 0.0148781  | 1.23489 | 1         |
| XLOC_011497 | EPHX3        | chr19:15337729-15343858  | 0.0613551  | 0.144467   | 1.23549 | 1         |
| XLOC_022655 | LCN1         | chr9:138413283-138418386 | 0.0707409  | 0.166713   | 1.23675 | 1         |
| XLOC_018420 | KLHL32       | chr6:97372495-97862283   | 0.00944707 | 0.0222745  | 1.23746 | 1         |
| XLOC_005246 | ACRBP        | chr12:6747241-6756580    | 0.150248   | 0.355168   | 1.24115 | 1         |
| XLOC_008454 | ACSM1        | chr16:20634558-20702578  | 0.00744177 | 0.0175914  | 1.24115 | 1         |
| XLOC_018093 | HIST1H4A     | chr6:26021906-26022278   | 0.509879   | 1.20752    | 1.24382 | 0.591799  |
| XLOC_016032 | VEPH1        | chr3:156977531-157221415 | 1.11618    | 2.64449    | 1.24442 | 0.0541611 |
| XLOC_015922 | ALG1L        | chr3:125635443-125655887 | 0.330248   | 0.783522   | 1.24642 | 0.576328  |
| XLOC_016950 | HHIP-AS1     | chr4:145564067-145659881 | 0.0401525  | 0.0954768  | 1.24966 | 1         |
| XLOC_012078 | DNAJC27-AS1  | chr2:25194980-25262563   | 0.00824334 | 0.0196595  | 1.25392 | 1         |
| XLOC_009035 | GRB7         | chr17:37894161-37903538  | 0.164621   | 0.393606   | 1.2576  | 0.208514  |
| XLOC_011748 | NKPD1        | chr19:45653007-45663408  | 0.0128666  | 0.0308655  | 1.26237 | 1         |
| XLOC_019067 | STL          | chr6:125229391-125284173 | 0.0133051  | 0.0319419  | 1.26348 | 1         |
| XLOC_008157 | LOC100505865 | chr16:66442426-66444803  | 0.117976   | 0.283272   | 1.2637  | 1         |
| XLOC_017827 | LOC389332    | chr5:135527155-135528851 | 0.0234391  | 0.0564733  | 1.26865 | 1         |
| XLOC_019166 | SNORA20      | chr6:160181290-160210735 | 2.94782    | 7.10605    | 1.2694  | 0.886622  |
| XLOC_002957 | EGR2         | chr10:64571755-64578927  | 0.152103   | 0.367001   | 1.27074 | 1         |
| XLOC_009482 | LOC100128288 | chr17:8261730-8263859    | 0.0234416  | 0.0566864  | 1.27393 | 1         |
| XLOC_015445 | CLDN11       | chr3:170136652-170152479 | 0.00711978 | 0.017241   | 1.27594 | 1         |
| XLOC_008490 | SULT1A2      | chr16:28603263-28608391  | 0.0253743  | 0.0614532  | 1.27612 | 1         |
| XLOC_006895 | PROX2        | chr14:75319735-75330537  | 0.00949779 | 0.0230309  | 1.2779  | 1         |
| XLOC_021886 | MSR1         | chr8:15965386-16050300   | 0.00527807 | 0.0128011  | 1.27818 | 1         |
| XLOC_014958 | LINC00620    | chr3:13692220-13788132   | 0.024464   | 0.0593384  | 1.27831 | 1         |
| XLOC_018737 | HCG17        | chr6:30201815-30314635   | 0.153507   | 0.372689   | 1.27967 | 1         |
| XLOC_009308 | SCARNA16     | chr17:75084724-75213181  | 9.50171    | 23.1479    | 1.28462 | 0.911075  |
| XLOC_011883 | KLK6         | chr19:51461886-51472929  | 0.0131028  | 0.0319809  | 1.28734 | 1         |
| XLOC_024015 | KCNE1L       | chrX:108866928-108868393 | 0.281019   | 0.687178   | 1.29002 | 0.262615  |

|             |              |                           |            |            |         |           |
|-------------|--------------|---------------------------|------------|------------|---------|-----------|
| XLOC_004218 | BTBD18       | chr11:57479994-57586652   | 0.00938101 | 0.0230559  | 1.29732 | 1         |
| XLOC_010311 | ZNF521       | chr18:22641887-22932214   | 0.04185    | 0.102948   | 1.29862 | 1         |
| XLOC_011978 | NLRP9        | chr19:56219797-56249768   | 0.0421215  | 0.103657   | 1.29918 | 1         |
| XLOC_003243 | LOC338651    | chr11:1490684-1785501     | 0.00806933 | 0.0198697  | 1.30005 | 1         |
| XLOC_017112 | PTGER4       | chr5:40680031-40693837    | 0.0744676  | 0.183596   | 1.30185 | 1         |
| XLOC_009714 | KRT34        | chr17:39533920-39538636   | 0.0112865  | 0.0279374  | 1.3076  | 1         |
| XLOC_010520 | ACSBG2       | chr19:6135709-6193112     | 0.010474   | 0.0259782  | 1.31049 | 1         |
| XLOC_018102 | HIST1H4E     | chr6:26204872-26205249    | 4.37283    | 10.865     | 1.31305 | 0.0637721 |
| XLOC_017764 | TMEM232      | chr5:109755197-110062450  | 0.0180792  | 0.0449367  | 1.31356 | 1         |
| XLOC_013297 | RFTN2        | chr2:198435526-198540584  | 0.017308   | 0.0430695  | 1.31523 | 1         |
| XLOC_001621 | UOX          | chr1:84830640-84863576    | 0.0121492  | 0.0302383  | 1.31552 | 1         |
| XLOC_009541 | CCDC144B     | chr17:18441114-18528930   | 0.00190021 | 0.00473901 | 1.31843 | 1         |
| XLOC_010969 | C5AR2        | chr19:47835403-47845272   | 0.0300138  | 0.0749063  | 1.31946 | 1         |
| XLOC_005658 | LINC00485    | chr12:103203060-103218177 | 0.00544781 | 0.0136315  | 1.3232  | 1         |
| XLOC_013957 | MROH8        | chr20:35729628-35870025   | 0.0438133  | 0.109847   | 1.32605 | 1         |
| XLOC_009910 | SCN4A        | chr17:62015913-62050278   | 0.0161477  | 0.0405029  | 1.3267  | 1         |
| XLOC_023591 | SOWAHD       | chrX:118892575-118894165  | 0.0212301  | 0.0532564  | 1.32684 | 1         |
| XLOC_007795 | ADAMTS17     | chr15:100511642-100882183 | 0.0466869  | 0.117573   | 1.33247 | 1         |
| XLOC_011009 | CGB2         | chr19:49535129-49536495   | 0.0440731  | 0.111384   | 1.33757 | 1         |
| XLOC_008100 | NOD2         | chr16:50731049-50766987   | 0.0060033  | 0.0151885  | 1.33915 | 1         |
| XLOC_018733 | RNF39        | chr6:30034931-30043628    | 0.0387279  | 0.0981444  | 1.34153 | 1         |
| XLOC_004840 | GPD1         | chr12:50497601-50505103   | 0.100693   | 0.255508   | 1.34341 | 1         |
| XLOC_001445 | COL8A2       | chr1:36560843-36565850    | 0.00635788 | 0.0161844  | 1.34799 | 1         |
| XLOC_004442 | DLG2         | chr11:83166055-85338314   | 0.00366    | 0.00933539 | 1.35086 | 1         |
| XLOC_011985 | ZNF667       | chr19:56950692-56988770   | 0.00358468 | 0.00918331 | 1.35717 | 1         |
| XLOC_003562 | SNORA57      | chr11:62430288-62441162   | 12.6603    | 32.4343    | 1.3572  | 0.861796  |
| XLOC_001696 | GNAT2        | chr1:110145888-110155705  | 0.0538733  | 0.138147   | 1.35856 | 1         |
| XLOC_014475 | CRYBB3       | chr22:25595816-25603326   | 0.10241    | 0.263507   | 1.36348 | 1         |
| XLOC_022994 | ACTL7B       | chr9:111616868-111618275  | 0.042842   | 0.110359   | 1.3651  | 1         |
| XLOC_007253 | SLC51B       | chr15:65337707-65360388   | 0.0391701  | 0.100969   | 1.36608 | 1         |
| XLOC_015847 | IMPG2        | chr3:100941389-101039419  | 0.0064511  | 0.0166356  | 1.36665 | 1         |
| XLOC_003081 | PYROXD2      | chr10:100143321-100174978 | 0.0475474  | 0.122707   | 1.36778 | 1         |
| XLOC_021720 | RAD21-AS1    | chr8:117858172-117889107  | 0.0465314  | 0.12035    | 1.37096 | 1         |
| XLOC_020691 | GPR22        | chr7:106809405-107218968  | 0.0116827  | 0.0304527  | 1.38219 | 1         |
| XLOC_007972 | C16orf62     | chr16:19566736-19712485   | 0.0197562  | 0.0515474  | 1.38359 | 1         |
| XLOC_018129 | HIST1H3H     | chr6:27777841-27778314    | 1.44979    | 3.7876     | 1.38544 | 0.210545  |
| XLOC_018677 | HIST1H2AB    | chr6:26033319-26033796    | 0.691379   | 1.80642    | 1.38559 | 0.416068  |
| XLOC_018964 | FILIP1       | chr6:76017799-76203496    | 0.00283388 | 0.00743543 | 1.39164 | 1         |
| XLOC_021393 | GIMAP6       | chr7:150322463-150329736  | 0.00460359 | 0.0121346  | 1.3983  | 1         |
| XLOC_015365 | C3orf72      | chr3:138666075-138672830  | 0.0120801  | 0.0318452  | 1.39844 | 1         |
| XLOC_008835 | TMEM88       | chr17:7758383-7759417     | 0.942853   | 2.49298    | 1.40276 | 0.1252    |
| XLOC_003025 | GRID1        | chr10:87337487-88126250   | 0.00824634 | 0.0218923  | 1.4086  | 1         |
| XLOC_002197 | HHIPL2       | chr1:222695601-222721444  | 0.0388433  | 0.103212   | 1.40987 | 1         |
| XLOC_001787 | HIST2H3D     | chr1:149784779-149785236  | 0.387025   | 1.02855    | 1.41011 | 0.586149  |
| XLOC_011745 | CEACAM22P    | chr19:45041044-45060150   | 0.00531766 | 0.014135   | 1.41041 | 1         |
| XLOC_022457 | LOC100507346 | chr9:98205263-98279247    | 0.0161648  | 0.0430098  | 1.41181 | 1         |
| XLOC_009213 | TBX2         | chr17:59477256-59486827   | 0.0609308  | 0.162195   | 1.41248 | 1         |
| XLOC_020698 | LRRN3        | chr7:110303105-111202573  | 0.00900866 | 0.0239937  | 1.41327 | 1         |
| XLOC_013918 | DUSP15       | chr20:30448869-30458479   | 0.124145   | 0.331149   | 1.41546 | 1         |

|             |             |                           |            |            |         |           |
|-------------|-------------|---------------------------|------------|------------|---------|-----------|
| XLOC_001269 | NPPA        | chr1:11845786-11907840    | 0.160492   | 0.4299     | 1.4215  | 0.895887  |
| XLOC_006497 | ITPK1-AS1   | chr14:93403258-93582263   | 0.0121109  | 0.0324415  | 1.42153 | 1         |
| XLOC_018681 | HIST1H2BC   | chr6:26123694-26124132    | 1.31468    | 3.52484    | 1.42285 | 0.198908  |
| XLOC_007128 | ANP32AP1    | chr15:35529526-35530264   | 0.0237382  | 0.0637155  | 1.42443 | 1         |
| XLOC_005323 | GPRC5D      | chr12:13093708-13103318   | 0.243912   | 0.655704   | 1.42668 | 0.270224  |
| XLOC_002259 | GNG4        | chr1:235710984-235814054  | 0.00815211 | 0.022181   | 1.44408 | 1         |
| XLOC_022353 | FRMPD1      | chr9:37651051-37746901    | 0.00339146 | 0.00925055 | 1.44763 | 1         |
| XLOC_023832 | SYN1        | chrX:47420498-47479256    | 0.0150883  | 0.0411745  | 1.44832 | 1         |
| XLOC_020517 | SNORA22     | chr7:65111923-65235797    | 2.35522    | 6.44359    | 1.452   | 0.888673  |
| XLOC_001754 | FCGR1B      | chr1:120926127-120935944  | 0.00955418 | 0.0261595  | 1.45313 | 1         |
| XLOC_007992 | LOC653786   | chr16:22557018-22588186   | 0.0328767  | 0.0907915  | 1.46549 | 1         |
| XLOC_014029 | NFATC2      | chr20:50003493-50179370   | 0.00342818 | 0.00948694 | 1.4685  | 1         |
| XLOC_023530 | BEX4        | chrX:102470019-102472128  | 0.0200453  | 0.0554757  | 1.4686  | 1         |
| XLOC_009690 | KRTAP3-2    | chr17:39155444-39156138   | 0.210788   | 0.583694   | 1.46942 | 0.425029  |
| XLOC_011241 | ZNF274      | chr19:58694395-58724927   | 0.0234608  | 0.0650361  | 1.47099 | 1         |
| XLOC_017890 | PDE6A       | chr5:149237518-149324356  | 0.00365469 | 0.0101516  | 1.47389 | 1         |
| XLOC_004605 | VSIG2       | chr11:124617369-124622109 | 0.0180403  | 0.0501225  | 1.47423 | 1         |
| XLOC_023255 | WWC3        | chrX:9983794-10112518     | 0.00408481 | 0.0113504  | 1.47441 | 1         |
| XLOC_005499 | NFE2        | chr12:54685890-54694821   | 0.012113   | 0.033926   | 1.48583 | 1         |
| XLOC_017501 | ARL10       | chr5:175792501-175800503  | 0.0105218  | 0.0297423  | 1.49914 | 1         |
| XLOC_006639 | EXOC3L4     | chr14:103566480-103576894 | 0.0193889  | 0.0548622  | 1.50058 | 1         |
| XLOC_015503 | SNORA4      | chr3:186501360-186524484  | 2.3001     | 6.5452     | 1.50874 | 0.876998  |
| XLOC_017969 | HK3         | chr5:176237559-176326333  | 0.00722419 | 0.0205764  | 1.51008 | 1         |
| XLOC_011816 | IZUMO1      | chr19:49244144-49250166   | 0.0171609  | 0.0489589  | 1.51244 | 1         |
| XLOC_013968 | SNORA71D    | chr20:37049238-37064018   | 9.46709    | 27.0256    | 1.51334 | 0.889702  |
| XLOC_021636 | LY96        | chr8:74903563-74941307    | 1.11669    | 3.19746    | 1.51769 | 0.0508243 |
| XLOC_002038 | SNORD76     | chr1:173832385-173837125  | 117.407    | 337.929    | 1.52521 | 0.877654  |
| XLOC_002232 | ACTA1       | chr1:229566992-229569843  | 0.342342   | 0.986977   | 1.52758 | 0.11953   |
| XLOC_018470 | BRD7P3      | chr6:118781934-119031238  | 0.00489549 | 0.0141211  | 1.52833 | 1         |
| XLOC_016507 | SLC7A11-AS1 | chr4:138948576-139163503  | 0.00849107 | 0.0246307  | 1.53644 | 1         |
| XLOC_009778 | ITGA2B      | chr17:42449549-42466873   | 0.00947594 | 0.0275003  | 1.53711 | 1         |
| XLOC_005835 | MTUS2       | chr13:29598747-30080084   | 0.0220502  | 0.0640257  | 1.53786 | 1         |
| XLOC_018684 | HIST1H2BG   | chr6:26216427-26216872    | 1.58559    | 4.62682    | 1.545   | 0.0729664 |
| XLOC_016052 | TERC        | chr3:169482397-169482848  | 3.75805    | 11.005     | 1.55011 | 0.0609817 |
| XLOC_014998 | ZNF860      | chr3:31702316-32033228    | 0.0254932  | 0.0748297  | 1.5535  | 1         |
| XLOC_003646 | ACTN3       | chr11:66313865-66330799   | 0.0168526  | 0.0497345  | 1.56128 | 1         |
| XLOC_017207 | BHMT2       | chr5:78365546-78385897    | 0.00641673 | 0.0190536  | 1.57016 | 1         |
| XLOC_022864 | FOXD4L6     | chr9:69199479-69202204    | 0.0253664  | 0.0754465  | 1.57254 | 1         |
| XLOC_018130 | HIST1H2BM   | chr6:27782821-27783267    | 0.103239   | 0.30821    | 1.57793 | 1         |
| XLOC_016618 | ZNF732      | chr4:264463-289944        | 0.00742212 | 0.0222399  | 1.58324 | 1         |
| XLOC_012084 | CCDC164     | chr2:26624783-26679579    | 0.00826559 | 0.0248088  | 1.58566 | 1         |
| XLOC_013089 | EDAR        | chr2:109510926-109605828  | 0.00373815 | 0.0112221  | 1.58595 | 1         |
| XLOC_011809 | FAM83E      | chr19:49103856-49116694   | 0.195212   | 0.586921   | 1.58812 | 0.176195  |
| XLOC_018701 | HIST1H4K    | chr6:27798951-27799305    | 0.303322   | 0.913683   | 1.59084 | 0.621662  |
| XLOC_009031 | TCAP        | chr17:37821598-37822807   | 0.104517   | 0.315936   | 1.5959  | 1         |
| XLOC_004998 | GLIPR1L2    | chr12:75784849-75826177   | 0.040891   | 0.123692   | 1.5969  | 1         |
| XLOC_001343 | LOC729059   | chr1:23337326-23342343    | 0.115092   | 0.348379   | 1.59786 | 1         |
| XLOC_004253 | FADS1       | chr11:61567096-61584529   | 0.0035958  | 0.0108872  | 1.59825 | 1         |
| XLOC_016749 | PDCL2       | chr4:56422691-56458379    | 0.0242765  | 0.07359    | 1.59995 | 1         |

|             |                 |                           |            |            |         |           |
|-------------|-----------------|---------------------------|------------|------------|---------|-----------|
| XLOC_008032 | SPN             | chr16:29674270-29681823   | 0.0024751  | 0.00752052 | 1.60335 | 1         |
| XLOC_022283 | TYRP1           | chr9:12693385-12710266    | 0.0199838  | 0.0607603  | 1.6043  | 1         |
| XLOC_023522 | TCEAL2          | chrX:101380659-101382684  | 0.0128268  | 0.0390009  | 1.60434 | 1         |
| XLOC_016373 | IL8             | chr4:74606222-74609433    | 0.0722373  | 0.219871   | 1.60584 | 1         |
| XLOC_014183 | MX2             | chr21:42733949-42780869   | 0.0081019  | 0.0246697  | 1.60641 | 1         |
| XLOC_015604 | EFHB            | chr3:19920965-19975706    | 0.0123917  | 0.0378226  | 1.60988 | 1         |
| XLOC_009807 | PRR15L          | chr17:46029333-46035243   | 0.027583   | 0.0842051  | 1.61013 | 1         |
| XLOC_009234 | MILR1           | chr17:62461568-62464760   | 0.126399   | 0.386073   | 1.61089 | 0.468876  |
| XLOC_015502 | SNORA63         | chr3:186501360-186524484  | 70.6922    | 216.239    | 1.61301 | 0.848653  |
| XLOC_003019 | TMEM254-AS1     | chr10:81805988-81852307   | 0.0173873  | 0.053275   | 1.61543 | 1         |
| XLOC_015022 | SLC22A14        | chr3:38347444-38359859    | 0.00976222 | 0.0299311  | 1.61636 | 1         |
| XLOC_002169 | KCNH1           | chr1:210851656-211307457  | 0.00198279 | 0.0060793  | 1.61637 | 1         |
| XLOC_008549 | LINC00273       | chr16:33961051-33962503   | 0.0470029  | 0.144278   | 1.61803 | 1         |
| XLOC_013975 | GTSF1L          | chr20:42354800-42355642   | 0.0236879  | 0.073043   | 1.62459 | 1         |
| XLOC_023116 | FNBP1           | chr9:132649465-132805473  | 0.00444209 | 0.0137257  | 1.62757 | 1         |
| XLOC_021240 | RPL19P12        | chr7:102715327-102789569  | 0.040041   | 0.123765   | 1.62806 | 1         |
| XLOC_015032 | SNORA62         | chr3:39448203-39454032    | 3.90053    | 12.0566    | 1.62808 | 0.840828  |
| XLOC_007796 | FLJ42289        | chr15:100884661-100890923 | 0.0300149  | 0.0937744  | 1.64352 | 1         |
| XLOC_022699 | FLJ40292        | chr9:140513443-140730578  | 0.013129   | 0.041043   | 1.64438 | 1         |
| XLOC_022932 | MIR3651,SNORA63 | chr9:94972489-95056038    | 13.9246    | 43.6888    | 1.64963 | 0.838927  |
| XLOC_012413 | RNU4ATAC        | chr2:122095351-122407052  | 4.71672    | 14.8311    | 1.65277 | 0.875256  |
| XLOC_020467 | AEBP1           | chr7:44143959-44154159    | 0.00729095 | 0.0229988  | 1.65738 | 1         |
| XLOC_015785 | DNAH12          | chr3:57327726-57530071    | 0.00686673 | 0.0216808  | 1.65872 | 1         |
| XLOC_023975 | XKRX            | chrX:100168430-100183898  | 0.0119087  | 0.0376379  | 1.66017 | 1         |
| XLOC_004793 | FLJ13224        | chr12:31433519-31479159   | 0.0908221  | 0.288288   | 1.6664  | 1         |
| XLOC_018694 | HIST1H2BJ       | chr6:27100094-27100575    | 0.872172   | 2.77093    | 1.66769 | 0.170392  |
| XLOC_003980 | SNORA54         | chr11:2965659-3013607     | 9.32636    | 29.6726    | 1.66975 | 0.866944  |
| XLOC_003249 | LSP1            | chr11:1874199-1913493     | 0.0207994  | 0.066304   | 1.67255 | 1         |
| XLOC_018685 | HIST1H1D        | chr6:26234439-26235216    | 0.68831    | 2.1964     | 1.67401 | 0.0617671 |
| XLOC_000412 | TMEM61          | chr1:55446464-55457966    | 0.0272773  | 0.0870707  | 1.67448 | 1         |
| XLOC_007127 | C15orf55        | chr15:34638065-34649931   | 0.00442833 | 0.014144   | 1.67535 | 1         |
| XLOC_022549 | CRB2            | chr9:126118447-126141032  | 0.0257816  | 0.0825099  | 1.67823 | 1         |
| XLOC_023118 | QRFP            | chr9:133768814-133769225  | 0.769086   | 2.46297    | 1.67918 | 0.239661  |
| XLOC_018687 | HIST1H3F        | chr6:26250369-26250835    | 1.66297    | 5.33682    | 1.68222 | 0.0962745 |
| XLOC_000376 | TEX38           | chr1:47137496-47139256    | 0.0234154  | 0.0751776  | 1.68284 | 1         |
| XLOC_012456 | YY1P2           | chr2:139654893-139656744  | 0.0158981  | 0.0511176  | 1.68497 | 1         |
| XLOC_016480 | SNORA24         | chr4:119199916-119200978  | 27.5909    | 88.8085    | 1.6865  | 0.85253   |
| XLOC_001504 | SLC6A9          | chr1:44457279-44497164    | 2.16506    | 7.04346    | 1.70188 | 0.419912  |
| XLOC_008378 | ZSCAN10         | chr16:3138894-3142861     | 0.0371997  | 0.122309   | 1.71716 | 1         |
| XLOC_003596 | LOC100996455    | chr11:64216528-64219128   | 0.0284484  | 0.093735   | 1.72024 | 1         |
| XLOC_000713 | LCE1E           | chr1:152758752-152760901  | 0.0731428  | 0.241468   | 1.72304 | 1         |
| XLOC_006196 | GPR18           | chr13:99848627-100058554  | 0.0123723  | 0.0409135  | 1.72546 | 1         |
| XLOC_000679 | LINC00568       | chr1:150488232-150490508  | 0.0855778  | 0.283251   | 1.72677 | 1         |
| XLOC_011301 | DIRAS1          | chr19:2714564-2721390     | 0.0254214  | 0.0844664  | 1.73233 | 1         |
| XLOC_021564 | IDO1            | chr8:39771327-39786309    | 0.011017   | 0.0366088  | 1.73245 | 1         |
| XLOC_013834 | SIGLEC1         | chr20:3667616-3687775     | 0.00297564 | 0.0098955  | 1.73357 | 1         |
| XLOC_020736 | FAM71F2         | chr7:128312345-128323379  | 0.0538737  | 0.179307   | 1.73478 | 1         |
| XLOC_013393 | FAM124B         | chr2:225243414-225266711  | 0.00966868 | 0.0322773  | 1.73913 | 1         |
| XLOC_011850 | SIGLEC11        | chr19:50452249-50464429   | 0.0093902  | 0.0314184  | 1.74238 | 1         |

|             |              |                           |            |            |         |          |
|-------------|--------------|---------------------------|------------|------------|---------|----------|
| XLOC_000328 | SLC2A1-AS1   | chr1:43391045-43449029    | 0.0172766  | 0.0581571  | 1.75114 | 1        |
| XLOC_004851 | SCN8A        | chr12:51985019-52206648   | 0.00132659 | 0.00446562 | 1.75114 | 1        |
| XLOC_008109 | CAPNS2       | chr16:55542912-55620582   | 0.0174939  | 0.0589876  | 1.75356 | 1        |
| XLOC_014749 | RASL10A      | chr22:29708921-29711745   | 0.193616   | 0.656336   | 1.76124 | 0.323795 |
| XLOC_011360 | TNFSF14      | chr19:6663147-6670599     | 0.00542802 | 0.018402   | 1.76136 | 1        |
| XLOC_017826 | SMAD5-AS1    | chr5:135465202-135518422  | 0.0340501  | 0.115456   | 1.76161 | 1        |
| XLOC_018675 | HIST1H4B     | chr6:26027123-26027480    | 0.852744   | 2.89846    | 1.7651  | 0.218096 |
| XLOC_008351 | SNORA64      | chr16:2012061-2014827     | 8.58633    | 29.2734    | 1.76948 | 0.783261 |
| XLOC_006287 | DHRS2        | chr14:24105572-24114848   | 0.126278   | 0.431493   | 1.77274 | 0.140686 |
| XLOC_022383 | PIP5K1B      | chr9:71320615-71624091    | 0.038156   | 0.130671   | 1.77595 | 1        |
| XLOC_011679 | HIPK4        | chr19:40885177-40896094   | 0.0546087  | 0.187036   | 1.77611 | 1        |
| XLOC_010274 | LOC727896    | chr18:2916991-3011945     | 0.0093346  | 0.0321093  | 1.78233 | 1        |
| XLOC_011024 | SNORD33      | chr19:49990810-49995564   | 65.5687    | 226.449    | 1.78811 | 0.872122 |
| XLOC_013034 | FOXI3        | chr2:88747725-88752053    | 0.128466   | 0.444473   | 1.79071 | 0.405553 |
| XLOC_017366 | VTRNA1-3     | chr5:140105743-140105831  | 74.139     | 256.955    | 1.79321 | 0.772937 |
| XLOC_012851 | LOC100505716 | chr2:28004265-28561767    | 0.0164947  | 0.0572442  | 1.79512 | 1        |
| XLOC_008824 | SNORA48      | chr17:7465308-7482324     | 28.0961    | 97.8323    | 1.79994 | 0.817355 |
| XLOC_018132 | HIST1H2BN    | chr6:27806439-27806888    | 0.527266   | 1.84274    | 1.80525 | 0.298867 |
| XLOC_005114 | OAS2         | chr12:113416273-113449528 | 0.00412236 | 0.0144186  | 1.80639 | 1        |
| XLOC_011052 | SPIB         | chr19:50922194-50934309   | 0.0310026  | 0.108561   | 1.80805 | 1        |
| XLOC_014874 | SCUBE1       | chr22:43599228-43739394   | 0.00590508 | 0.0208108  | 1.8173  | 1        |
| XLOC_018702 | HIST1H2AK    | chr6:27805657-27806117    | 0.201149   | 0.711975   | 1.82356 | 0.559245 |
| XLOC_005102 | CUX2         | chr12:111471827-111788358 | 0.00286314 | 0.0101729  | 1.82906 | 1        |
| XLOC_011821 | TULP2        | chr19:49384221-49401996   | 0.0108743  | 0.0388295  | 1.83624 | 1        |
| XLOC_002614 | CC2D2B       | chr10:97471535-97849992   | 0.00812755 | 0.0291152  | 1.84088 | 1        |
| XLOC_002545 | DYDC2        | chr10:82095860-82127829   | 0.00803727 | 0.0289755  | 1.85006 | 1        |
| XLOC_011535 | LRRC25       | chr19:18501953-18508415   | 0.00962214 | 0.0346968  | 1.85037 | 1        |
| XLOC_016794 | BTC          | chr4:75671447-75719882    | 0.0186001  | 0.0671993  | 1.85313 | 1        |
| XLOC_010992 | SYNGR4       | chr19:48867650-48879634   | 0.0684379  | 0.247476   | 1.85442 | 1        |
| XLOC_004675 | SCARNA10     | chr12:6603297-6641132     | 0.958709   | 3.46825    | 1.85504 | 0.818092 |
| XLOC_005198 | SNORA49      | chr12:132434464-132565011 | 4.73038    | 17.1182    | 1.8555  | 0.852016 |
| XLOC_014965 | C3orf20      | chr3:14716605-14814543    | 0.0059208  | 0.0214669  | 1.85825 | 1        |
| XLOC_012341 | IL1RL1       | chr2:102927961-102968497  | 0.00578975 | 0.0211145  | 1.86666 | 1        |
| XLOC_001786 | HIST2H2BF    | chr1:149754244-149783928  | 0.981433   | 3.5796     | 1.86684 | 0.678647 |
| XLOC_011997 | FKBP1AP1     | chr19:58336666-58338830   | 0.0115556  | 0.0424598  | 1.8775  | 1        |
| XLOC_002953 | ANK3         | chr10:61786055-62493284   | 0.00155152 | 0.00571432 | 1.8809  | 1        |
| XLOC_006770 | PTCSC3       | chr14:36539632-36645857   | 0.0138127  | 0.0509436  | 1.8829  | 1        |
| XLOC_011189 | SSC5D        | chr19:55999869-56030466   | 0.00647497 | 0.0241938  | 1.90169 | 1        |
| XLOC_015291 | CSTA         | chr3:122044010-122060815  | 0.192123   | 0.718475   | 1.90291 | 0.154835 |
| XLOC_014817 | SLC16A8      | chr22:38474143-38479170   | 0.022586   | 0.0849706  | 1.91154 | 1        |
| XLOC_003552 | BEST1        | chr11:61717355-61735132   | 0.11136    | 0.418961   | 1.91158 | 0.726353 |
| XLOC_006038 | TPTE2P1      | chr13:25502892-25542607   | 0.00494196 | 0.0186564  | 1.91652 | 1        |
| XLOC_018957 | OOEP         | chr6:74078279-74079515    | 0.0450236  | 0.170134   | 1.91792 | 1        |
| XLOC_004385 | ALG1L9P      | chr11:71498556-71524905   | 0.0468725  | 0.177614   | 1.92193 | 1        |
| XLOC_003719 | SNORD15B     | chr11:75110534-75133345   | 14.6772    | 55.9414    | 1.93034 | 0.729672 |
| XLOC_001138 | C1orf101     | chr1:244624672-244803662  | 0.0109562  | 0.0418274  | 1.9327  | 1        |
| XLOC_013018 | SFTPFB       | chr2:85884439-85895864    | 0.00673032 | 0.0259028  | 1.94436 | 1        |
| XLOC_016075 | PEX5L        | chr3:179512746-179754841  | 0.00210862 | 0.00821029 | 1.96113 | 1        |
| XLOC_018246 | GGNBP1       | chr6:33551475-33561115    | 0.0271571  | 0.105938   | 1.96382 | 1        |

|             |               |                           |            |            |         |          |
|-------------|---------------|---------------------------|------------|------------|---------|----------|
| XLOC_012639 | GPBAR1        | chr2:219125737-219128582  | 0.122969   | 0.483322   | 1.97469 | 0.14504  |
| XLOC_018270 | RAB44         | chr6:36665627-36700960    | 0.00905135 | 0.0357532  | 1.98187 | 1        |
| XLOC_016733 | CNGA1         | chr4:47937993-48014961    | 0.0110155  | 0.0435154  | 1.98199 | 1        |
| XLOC_018101 | HIST1H2BF     | chr6:26199786-26200216    | 0.545971   | 2.15975    | 1.98397 | 0.249574 |
| XLOC_004692 | PTPN6         | chr12:7055739-7070479     | 0.0090423  | 0.0361136  | 1.99778 | 1        |
| XLOC_005652 | SYCP3         | chr12:102091416-102133250 | 0.0248147  | 0.0991282  | 1.9981  | 1        |
| XLOC_001398 | SNORA16A      | chr1:28879528-28908366    | 7.25833    | 29.1454    | 2.00556 | 0.874294 |
| XLOC_010466 | AMH           | chr19:2249112-2252072     | 0.160017   | 0.643972   | 2.00877 | 0.637072 |
| XLOC_016240 | DEFB131       | chr4:9446259-9452240      | 0.344138   | 1.39833    | 2.02264 | 0.71079  |
| XLOC_008802 | ALOX12        | chr17:6888441-6915653     | 0.00810072 | 0.0331677  | 2.03366 | 1        |
| XLOC_008290 | LINC00304     | chr16:89225627-89230083   | 0.0257948  | 0.107412   | 2.05801 | 1        |
| XLOC_017895 | ARSI          | chr5:149675908-149682525  | 0.0327179  | 0.136339   | 2.05904 | 1        |
| XLOC_000648 | HYDIN2        | chr1:146310551-146334210  | 0.00195926 | 0.00817941 | 2.06169 | 1        |
| XLOC_022574 | TTC16         | chr9:130478357-130497628  | 0.00693303 | 0.0290467  | 2.06682 | 1        |
| XLOC_003344 | CALCB         | chr11:15095145-15100177   | 0.0519714  | 0.218097   | 2.06918 | 1        |
| XLOC_003319 | SNORA45       | chr11:8703994-8711419     | 2.63096    | 11.0548    | 2.07101 | 0.799687 |
| XLOC_006105 | SNORA31       | chr13:45911303-45915297   | 9.78255    | 41.1055    | 2.07105 | 0.779038 |
| XLOC_008831 | EFNB3         | chr17:7608519-7614693     | 0.00658561 | 0.0277141  | 2.07323 | 1        |
| XLOC_010400 | DSEL          | chr18:65173818-65566856   | 0.00197083 | 0.00829673 | 2.07374 | 1        |
| XLOC_002613 | C10orf131     | chr10:97471535-97849992   | 0.0130631  | 0.0551748  | 2.07851 | 1        |
| XLOC_016747 | SRD5A3-AS1    | chr4:56212387-56251747    | 0.0172897  | 0.073392   | 2.08571 | 1        |
| XLOC_014648 | KLHDC7B       | chr22:50986461-50989452   | 0.074253   | 0.318114   | 2.09902 | 1        |
| XLOC_005416 | MIR1291,SNORA | chr12:49046994-49076035   | 2.07       | 8.90854    | 2.10555 | 0.818403 |
| XLOC_000357 | BTBD19        | chr1:45274153-45279801    | 0.0502058  | 0.217144   | 2.11273 | 1        |
| XLOC_004646 | WNT5B         | chr12:1726221-1756378     | 0.0102189  | 0.0444484  | 2.1209  | 1        |
| XLOC_003122 | CALHM1        | chr10:105213143-105218648 | 0.00606074 | 0.026395   | 2.1227  | 1        |
| XLOC_012121 | CLIP4         | chr2:29338307-29406679    | 0.00933934 | 0.0410182  | 2.13487 | 1        |
| XLOC_021163 | HEPACAM2      | chr7:92817898-92855782    | 0.00695139 | 0.0307662  | 2.14597 | 1        |
| XLOC_013776 | BIRC7         | chr20:61867275-61871854   | 0.021601   | 0.0961516  | 2.15421 | 1        |
| XLOC_000421 | HOOK1         | chr1:60280532-60342050    | 0.00234909 | 0.0106264  | 2.17748 | 1        |
| XLOC_005838 | ALOX5AP       | chr13:31287614-31338565   | 0.0229985  | 0.104669   | 2.18623 | 1        |
| XLOC_008825 | SNORD10       | chr17:7465308-7482324     | 8.38677    | 38.4468    | 2.19668 | 0.739517 |
| XLOC_022329 | C9orf131      | chr9:35041101-35045988    | 0.0100801  | 0.0466827  | 2.21137 | 1        |
| XLOC_003324 | SNORA23       | chr11:9406168-9469674     | 3.80633    | 17.703     | 2.21752 | 0.853094 |
| XLOC_012136 | RASGRP3       | chr2:33661415-33789798    | 0.0241687  | 0.112412   | 2.21759 | 1        |
| XLOC_013369 | IHH           | chr2:219919141-219925238  | 0.0311535  | 0.145704   | 2.22557 | 1        |
| XLOC_022183 | KCNQ3         | chr8:133133104-133493004  | 0.00173134 | 0.00816435 | 2.23745 | 1        |
| XLOC_020625 | MYH16         | chr7:98870923-98895594    | 0.00712091 | 0.03444    | 2.27395 | 1        |
| XLOC_012666 | ASIC4         | chr2:220378891-220403494  | 0.00843276 | 0.0408371  | 2.2758  | 1        |
| XLOC_004285 | CHRM1         | chr11:62676150-62689012   | 0.00812321 | 0.0393988  | 2.27803 | 1        |
| XLOC_002131 | KISS1         | chr1:204159468-204165619  | 0.0645304  | 0.315163   | 2.28805 | 1        |
| XLOC_010950 | LOC388553     | chr19:46242887-46262748   | 0.0230456  | 0.112579   | 2.28837 | 1        |
| XLOC_009233 | SNORA76       | chr17:62223698-62223831   | 3.57456    | 17.5427    | 2.29503 | 0.692349 |
| XLOC_018320 | LOC100132354  | chr6:43858764-43905944    | 0.0111847  | 0.0554389  | 2.30937 | 1        |
| XLOC_004608 | ROBO4         | chr11:124754113-124767831 | 0.0523717  | 0.261978   | 2.32259 | 1        |
| XLOC_011227 | ZNF549        | chr19:58038692-58052244   | 0.0047479  | 0.0237859  | 2.32474 | 1        |
| XLOC_009244 | SNORA38B      | chr17:65714060-65740266   | 2.37572    | 11.9044    | 2.32506 | 0.828523 |
| XLOC_021464 | C8orf12,TDH   | chr8:11197145-11324276    | 0.0141831  | 0.0716979  | 2.33776 | 1        |
| XLOC_023440 | MSN           | chrX:64887510-64961793    | 0.00407569 | 0.0206173  | 2.33874 | 1        |



|             |              |                           |            |             |         |          |
|-------------|--------------|---------------------------|------------|-------------|---------|----------|
| XLOC_018134 | HIST1H2BO    | chr6:27861202-27861669    | 0.38603    | 1.98639     | 2.36337 | 0.218807 |
| XLOC_014446 | LOC648691    | chr22:22901755-22909007   | 0.00504487 | 0.0261754   | 2.37532 | 1        |
| XLOC_020717 | CPED1        | chr7:120628750-120937498  | 0.00327932 | 0.0170419   | 2.37762 | 1        |
| XLOC_008250 | LOC100129617 | chr16:81478774-81745367   | 0.012445   | 0.0651559   | 2.38834 | 1        |
| XLOC_013966 | SNORA71A     | chr20:37049238-37064018   | 8.77254    | 46.0211     | 2.39123 | 0.810183 |
| XLOC_018121 | HIST1H2AH    | chr6:27114860-27115341    | 0.494589   | 2.60924     | 2.39932 | 0.150629 |
| XLOC_016604 | KLKB1        | chr4:187148671-187179625  | 0.0084404  | 0.0448769   | 2.41059 | 1        |
| XLOC_007179 | CKMT1A       | chr15:43985083-43991420   | 0.023738   | 0.127153    | 2.4213  | 1        |
| XLOC_008908 | EPN2-IT1     | chr17:19140689-19240028   | 0.0222209  | 0.119156    | 2.42286 | 1        |
| XLOC_022381 | FOXD4L3      | chr9:70917782-70920000    | 0.012311   | 0.0669525   | 2.44319 | 1        |
| XLOC_021620 | C8orf46      | chr8:67405490-67430759    | 0.00446192 | 0.0243734   | 2.44958 | 1        |
| XLOC_023277 | GRPR         | chrX:16141423-16171641    | 0.00623208 | 0.0344421   | 2.46639 | 1        |
| XLOC_007196 | HMG2P46      | chr15:45774679-45848928   | 0.00797492 | 0.0442301   | 2.47149 | 1        |
| XLOC_018220 | C4A,C4B_2    | chr6:31982571-32003195    | 0.00365937 | 0.0203979   | 2.47875 | 1        |
| XLOC_011220 | ZNF304       | chr19:57862644-57871265   | 0.00416076 | 0.0240842   | 2.53317 | 1        |
| XLOC_002433 | ALOX5        | chr10:45869623-45941567   | 0.0117587  | 0.0681148   | 2.53425 | 1        |
| XLOC_013268 | FRZB         | chr2:183698004-183731498  | 0.00639011 | 0.0370793   | 2.5367  | 1        |
| XLOC_021890 | MTUS1        | chr8:17501302-17658426    | 0.00534721 | 0.0312356   | 2.54634 | 1        |
| XLOC_005558 | FAM19A2      | chr12:62102028-62586620   | 0.00547772 | 0.032107    | 2.55124 | 1        |
| XLOC_017285 | LOC100505841 | chr5:121495870-121518358  | 0.10565    | 0.622325    | 2.55838 | 0.495723 |
| XLOC_008537 | PYCARD       | chr16:31212806-31214097   | 0.0982681  | 0.594143    | 2.59601 | 0.643053 |
| XLOC_002357 | OLAH         | chr10:15085894-15115851   | 0.0324025  | 0.201814    | 2.63885 | 1        |
| XLOC_013436 | COL6A3       | chr2:238232654-238322850  | 0.00269859 | 0.0168773   | 2.64481 | 1        |
| XLOC_021944 | MBOAT4       | chr8:29920257-30108213    | 0.0160956  | 0.101694    | 2.6595  | 1        |
| XLOC_012787 | SNORA80B     | chr2:10580507-10588453    | 4.79158    | 30.5646     | 2.67329 | 0.726747 |
| XLOC_007862 | SNORA78      | chr16:2014996-2015505     | 5.72788    | 36.6498     | 2.67773 | 0.814274 |
| XLOC_001262 | MASP2        | chr1:11086579-11107296    | 0.0369953  | 0.238164    | 2.68654 | 1        |
| XLOC_013967 | SNORA71C     | chr20:37049238-37064018   | 2.5869     | 18.2337     | 2.81732 | 0.77849  |
| XLOC_015284 | STXBPL5      | chr3:120627049-121143608  | 0.00145279 | 0.0103921   | 2.83859 | 1        |
| XLOC_003823 | NCAM1        | chr11:112831968-113149158 | 0.00262938 | 0.0197658   | 2.91022 | 1        |
| XLOC_015943 | SNORA7B      | chr3:129101676-129118282  | 1.81894    | 13.8575     | 2.9295  | 0.809839 |
| XLOC_021177 | LOC100506136 | chr7:96250968-96293650    | 0.0123636  | 0.0947868   | 2.93859 | 1        |
| XLOC_015250 | CD96         | chr3:111260925-111371206  | 0.00317937 | 0.0244285   | 2.94175 | 1        |
| XLOC_021677 | ESRP1        | chr8:95653363-95719694    | 0.00562988 | 0.0440175   | 2.9669  | 1        |
| XLOC_014605 | RNU12        | chr22:43011250-43011399   | 1.08878    | 8.82569     | 3.019   | 0.643686 |
| XLOC_018162 | HCG9         | chr6:29942891-29946177    | 0.0380793  | 0.313335    | 3.04063 | 1        |
| XLOC_024198 | FAM223B      | chrX:153860738-153861448  | 0.0302911  | 0.249394    | 3.04146 | 1        |
| XLOC_001307 | MFAP2        | chr1:17300998-17308081    | 0.290675   | 2.41715     | 3.05583 | 0.586149 |
| XLOC_004625 | TP53AIP1     | chr11:128804626-128813294 | 0.0252771  | 0.222523    | 3.13805 | 1        |
| XLOC_005526 | MIP          | chr12:56843285-56848435   | 0.00633319 | 0.0564802   | 3.15674 | 1        |
| XLOC_003849 | TMEM25       | chr11:118401802-118436791 | 0.0100747  | 0.0898604   | 3.15695 | 1        |
| XLOC_022331 | ATP8B5P      | chr9:35406751-35483026    | 0.00537259 | 0.0491527   | 3.19358 | 1        |
| XLOC_001093 | HIST3H2BB    | chr1:228645807-228646259  | 0.0755136  | 0.699731    | 3.21199 | 0.642563 |
| XLOC_004075 | SNORD97      | chr11:10818592-10830582   | 2.50001    | 25.8651     | 3.371   | 0.838902 |
| XLOC_012284 | SNORD94      | chr2:86333304-86369280    | 1.80731    | 19.1607     | 3.40624 | 0.759419 |
| XLOC_015031 | SNORA6       | chr3:39448203-39454032    | 1.07301    | 13.5362     | 3.65708 | 0.730966 |
| XLOC_013159 | ANKRD30BL    | chr2:132905163-133015542  | 0.0135457  | 0.174773    | 3.68957 | 1        |
| XLOC_017364 | VTRNA1-1     | chr5:140090860-140090958  | 0          | 64.7828 inf |         | 0.284835 |
| XLOC_011010 | SNAR-G1      | chr19:49540276-49540404   | 0          | 7.25033 inf |         | 0.284835 |

|             |              |                          |   |            |     |          |
|-------------|--------------|--------------------------|---|------------|-----|----------|
| XLOC_000353 | SNORD46      | chr1:45241245-45244412   | 0 | 45.0279    | inf | 0.334498 |
| XLOC_014836 | SNORD83A     | chr22:39708886-39715670  | 0 | 73.5686    | inf | 0.35293  |
| XLOC_011026 | SNORD35A     | chr19:49990810-49995564  | 0 | 216.72     | inf | 0.371058 |
| XLOC_012608 | SNORA41      | chr2:207024317-207027653 | 0 | 6.90113    | inf | 0.384403 |
| XLOC_011023 | SNORD32A     | chr19:49990810-49995564  | 0 | 263.188    | inf | 0.438784 |
| XLOC_022636 | SNORD36A     | chr9:136215068-136218280 | 0 | 166.462    | inf | 0.444192 |
| XLOC_008942 | SNORD4A      | chr17:27046999-27053949  | 0 | 316.469    | inf | 0.451834 |
| XLOC_018506 | SNORD100     | chr6:133135707-133138703 | 0 | 195.994    | inf | 0.452338 |
| XLOC_017494 | MIR4634      | chr5:174178736-174178790 | 0 | 4568.78    | inf | 0.45742  |
| XLOC_020392 | SNORD93      | chr7:22896231-22896305   | 0 | 237.212    | inf | 0.45742  |
| XLOC_007651 | SNORD16      | chr15:66791652-66797193  | 0 | 46.8943    | inf | 0.472023 |
| XLOC_010975 | SNORD23      | chr19:48248792-48260323  | 0 | 13.6296    | inf | 0.472269 |
| XLOC_002033 | SNORD80      | chr1:173832385-173837125 | 0 | 1184.91    | inf | 0.477384 |
| XLOC_000464 | SNORD45A     | chr1:76251878-76260775   | 0 | 246.46     | inf | 0.581347 |
| XLOC_021047 | SNORA9       | chr7:45022626-45026259   | 0 | 9.39267    | inf | 0.585998 |
| XLOC_010571 | SNORD105B    | chr19:10216898-10230599  | 0 | 47.6524    | inf | 0.587084 |
| XLOC_001397 | SNORA44      | chr1:28879528-28908366   | 0 | 7.09215    | inf | 0.59519  |
| XLOC_004281 | SNORD28      | chr11:62619459-62623360  | 0 | 255.029    | inf | 0.600393 |
| XLOC_013965 | SNORA71B     | chr20:37049238-37064018  | 0 | 3.82051    | inf | 0.605249 |
| XLOC_004282 | SNORD27      | chr11:62619459-62623360  | 0 | 589.746    | inf | 0.607271 |
| XLOC_010373 | SNORA37      | chr18:51677970-51751158  | 0 | 18.927     | inf | 0.607733 |
| XLOC_002047 | SCARNA3      | chr1:175913966-176176370 | 0 | 2.62792    | inf | 0.621348 |
| XLOC_021050 | SNORA5A      | chr7:45139698-45151346   | 0 | 4.21818    | inf | 0.622746 |
| XLOC_023305 | SCARNA23     | chrX:24712063-25015102   | 0 | 5.71138    | inf | 0.629512 |
| XLOC_007714 | LOC91450     | chr15:78285574-78286567  | 0 | 0.0408273  | inf | 1        |
| XLOC_004463 | SNORA32      | chr11:93464144-93464265  | 0 | 5.41223    | inf | 1        |
| XLOC_009885 | MIR4737      | chr17:58120385-58120466  | 0 | 84.566     | inf | 1        |
| XLOC_008538 | PYDC1        | chr16:31225341-31236510  | 0 | 0.226971   | inf | 1        |
| XLOC_000055 | ESPN         | chr1:6484847-6521004     | 0 | 0.0346764  | inf | 1        |
| XLOC_000066 | CA6          | chr1:9005892-9035148     | 0 | 0.0123305  | inf | 1        |
| XLOC_000117 | CTRC         | chr1:15764937-15773153   | 0 | 0.0293885  | inf | 1        |
| XLOC_000127 | C1orf64      | chr1:16330730-16333184   | 0 | 0.0198972  | inf | 1        |
| XLOC_000225 | THEMIS2      | chr1:28199054-28213193   | 0 | 0.024563   | inf | 1        |
| XLOC_000234 | RAB42        | chr1:28918711-28921088   | 0 | 0.0367801  | inf | 1        |
| XLOC_000246 | TINAGL1      | chr1:32042085-32053287   | 0 | 0.0214413  | inf | 1        |
| XLOC_000257 | LCK          | chr1:32716839-32751766   | 0 | 0.0105531  | inf | 1        |
| XLOC_000260 | ZBTB8B       | chr1:32930657-32953459   | 0 | 0.00298985 | inf | 1        |
| XLOC_000325 | LOC100129924 | chr1:43253660-43263901   | 0 | 0.0473277  | inf | 1        |
| XLOC_000329 | FAM183A      | chr1:43613593-43622067   | 0 | 0.0300573  | inf | 1        |
| XLOC_000384 | FOXE3        | chr1:47881743-47883724   | 0 | 0.0387979  | inf | 1        |
| XLOC_000423 | MGC34796     | chr1:62119913-62121800   | 0 | 0.00694343 | inf | 1        |
| XLOC_000476 | IFI44L       | chr1:79086087-79111830   | 0 | 0.00241978 | inf | 1        |
| XLOC_000477 | IFI44        | chr1:79115476-79129763   | 0 | 0.0148843  | inf | 1        |
| XLOC_000479 | PRKACB       | chr1:84543744-84704181   | 0 | 0.00608478 | inf | 1        |
| XLOC_000490 | CLCA3P       | chr1:87099958-87121059   | 0 | 0.0057119  | inf | 1        |
| XLOC_000496 | GBP6         | chr1:89829435-89853719   | 0 | 0.00207468 | inf | 1        |
| XLOC_000503 | BRDT         | chr1:92414927-92479985   | 0 | 0.0066294  | inf | 1        |
| XLOC_000586 | CHIAP2       | chr1:111823145-111828730 | 0 | 0.0075232  | inf | 1        |
| XLOC_000622 | HAO2         | chr1:119911401-119936751 | 0 | 0.0100332  | inf | 1        |

|             |              |                          |   |            |     |   |
|-------------|--------------|--------------------------|---|------------|-----|---|
| XLOC_000671 | CA14         | chr1:150230217-150237480 | 0 | 0.00736879 | inf | 1 |
| XLOC_000776 | RHBG         | chr1:156338979-156355013 | 0 | 0.0686654  | inf | 1 |
| XLOC_000788 | CD1D         | chr1:158149736-158156216 | 0 | 0.00316362 | inf | 1 |
| XLOC_000809 | ATP1A2       | chr1:160085519-160113374 | 0 | 0.00334225 | inf | 1 |
| XLOC_000818 | LY9          | chr1:160765863-160798045 | 0 | 0.00573682 | inf | 1 |
| XLOC_000827 | PCP4L1       | chr1:161228516-161255240 | 0 | 0.0135667  | inf | 1 |
| XLOC_000834 | FCRLA        | chr1:161676761-161684142 | 0 | 0.0210896  | inf | 1 |
| XLOC_000855 | MAEL         | chr1:166958518-166991447 | 0 | 0.0423953  | inf | 1 |
| XLOC_000953 | CFHR5        | chr1:196946666-196978803 | 0 | 0.00325721 | inf | 1 |
| XLOC_000986 | OPTC         | chr1:203463270-203478077 | 0 | 0.0129057  | inf | 1 |
| XLOC_000997 | CNTN2        | chr1:205012339-205047171 | 0 | 0.00370263 | inf | 1 |
| XLOC_001004 | AVPR1B       | chr1:206224282-206231482 | 0 | 0.0157339  | inf | 1 |
| XLOC_001013 | IL24         | chr1:207070787-207095378 | 0 | 0.00867236 | inf | 1 |
| XLOC_001015 | C4BPB        | chr1:207262211-207273337 | 0 | 0.0146889  | inf | 1 |
| XLOC_001022 | LOC148696    | chr1:207991723-207995941 | 0 | 0.00306003 | inf | 1 |
| XLOC_001024 | CAMK1G       | chr1:209757044-209787284 | 0 | 0.0057     | inf | 1 |
| XLOC_001066 | FAM177B      | chr1:222910557-222924002 | 0 | 0.0115729  | inf | 1 |
| XLOC_001116 | LOC100506810 | chr1:234859788-234867390 | 0 | 0.00768584 | inf | 1 |
| XLOC_001133 | SDCCAG8      | chr1:243419306-244006886 | 0 | 0.00400989 | inf | 1 |
| XLOC_001261 | C1orf127     | chr1:11006529-11042094   | 0 | 0.0060232  | inf | 1 |
| XLOC_001270 | NPPB         | chr1:11917520-11918992   | 0 | 0.047988   | inf | 1 |
| XLOC_001356 | CNR2         | chr1:24200459-24239817   | 0 | 0.00856937 | inf | 1 |
| XLOC_001358 | MYOM3        | chr1:24382530-24438665   | 0 | 0.00247551 | inf | 1 |
| XLOC_001375 | AIM1L        | chr1:26648349-26680621   | 0 | 0.00432945 | inf | 1 |
| XLOC_001395 | SNORD99      | chr1:28879528-28908366   | 0 | 75.8489    | inf | 1 |
| XLOC_001467 | POU3F1       | chr1:38509522-38512450   | 0 | 0.0410058  | inf | 1 |
| XLOC_001489 | EDN2         | chr1:41944445-41950344   | 0 | 0.0234275  | inf | 1 |
| XLOC_001491 | GUCA2A       | chr1:42628361-42630395   | 0 | 0.0361498  | inf | 1 |
| XLOC_001499 | C1orf210     | chr1:43747556-43751288   | 0 | 0.0169766  | inf | 1 |
| XLOC_001529 | CYP4Z2P      | chr1:47308766-47366147   | 0 | 0.00824694 | inf | 1 |
| XLOC_001586 | LINC00466    | chr1:63624753-63782901   | 0 | 0.0134364  | inf | 1 |
| XLOC_001641 | GBP1         | chr1:89517986-89531043   | 0 | 0.0164501  | inf | 1 |
| XLOC_001690 | C1orf194     | chr1:109648572-109656479 | 0 | 0.0188768  | inf | 1 |
| XLOC_001736 | CASQ2        | chr1:116242625-116311426 | 0 | 0.00402217 | inf | 1 |
| XLOC_001789 | HIST2H2AA3   | chr1:149813784-149814318 | 0 | 0.0894848  | inf | 1 |
| XLOC_001853 | S100A5       | chr1:153509622-153514241 | 0 | 0.0603153  | inf | 1 |
| XLOC_001875 | KCNN3        | chr1:154669941-154842754 | 0 | 0.00169125 | inf | 1 |
| XLOC_001907 | VHLL         | chr1:156268414-156269428 | 0 | 0.0163423  | inf | 1 |
| XLOC_001962 | CD48         | chr1:160648535-160681641 | 0 | 0.0104468  | inf | 1 |
| XLOC_001984 | SH2D1B       | chr1:162365055-162381928 | 0 | 0.00431908 | inf | 1 |
| XLOC_002050 | SEC16B       | chr1:177898241-177939050 | 0 | 0.00785134 | inf | 1 |
| XLOC_002055 | NPHS2        | chr1:179334854-179545084 | 0 | 0.00814995 | inf | 1 |
| XLOC_002063 | TEDDM1       | chr1:182367251-182369751 | 0 | 0.0130043  | inf | 1 |
| XLOC_002070 | NCF2         | chr1:183524696-183560056 | 0 | 0.00594625 | inf | 1 |
| XLOC_002086 | B3GALT2      | chr1:193091087-193223942 | 0 | 0.00268012 | inf | 1 |
| XLOC_002107 | TNNI1        | chr1:201372894-201390874 | 0 | 0.00210942 | inf | 1 |
| XLOC_002121 | LOC401980    | chr1:202955579-202976393 | 0 | 0.00982197 | inf | 1 |
| XLOC_002130 | REN          | chr1:204123943-204135465 | 0 | 0.0249927  | inf | 1 |
| XLOC_002132 | GOLT1A       | chr1:204167287-204183220 | 0 | 0.0758153  | inf | 1 |

|             |                |                           |   |            |     |   |
|-------------|----------------|---------------------------|---|------------|-----|---|
| XLOC_002157 | PIGR           | chr1:207101866-207119811  | 0 | 0.016117   | inf | 1 |
| XLOC_002159 | C1orf116       | chr1:207191865-207206101  | 0 | 0.00228666 | inf | 1 |
| XLOC_002213 | LEFTY2         | chr1:226124297-226129083  | 0 | 0.00857513 | inf | 1 |
| XLOC_002245 | SNRPD2P2       | chr1:231611509-231612271  | 0 | 0.0253793  | inf | 1 |
| XLOC_002341 | CELF2          | chr10:11047258-11378672   | 0 | 0.00227606 | inf | 1 |
| XLOC_002442 | CTSL1P2        | chr10:48155942-48158691   | 0 | 0.0342414  | inf | 1 |
| XLOC_002450 | WDFY4          | chr10:49893517-50191001   | 0 | 0.00141464 | inf | 1 |
| XLOC_002562 | FAM25A         | chr10:88780045-88784487   | 0 | 0.0626594  | inf | 1 |
| XLOC_002625 | ANKRD2         | chr10:99332255-99343641   | 0 | 0.0192262  | inf | 1 |
| XLOC_002652 | TLX1           | chr10:102891060-102897546 | 0 | 0.00986966 | inf | 1 |
| XLOC_002694 | ADRA2A         | chr10:112836789-112840662 | 0 | 0.012142   | inf | 1 |
| XLOC_002744 | HMX2           | chr10:124907637-124910188 | 0 | 0.0164035  | inf | 1 |
| XLOC_002782 | TUBB8          | chr10:92827-95178         | 0 | 0.0151633  | inf | 1 |
| XLOC_002817 | CCDC3          | chr10:12938624-13043704   | 0 | 0.00585397 | inf | 1 |
| XLOC_002841 | NEBL           | chr10:21068902-21463852   | 0 | 0.00440104 | inf | 1 |
| XLOC_002886 | ZNF33BP1       | chr10:38065453-38147012   | 0 | 0.0207703  | inf | 1 |
| XLOC_002898 | TMEM72-AS1     | chr10:45306471-45455137   | 0 | 0.0212374  | inf | 1 |
| XLOC_002910 | HNRNPA1P33     | chr10:47096453-47151400   | 0 | 0.0655368  | inf | 1 |
| XLOC_002916 | GDF2           | chr10:48413091-48416853   | 0 | 0.0108981  | inf | 1 |
| XLOC_002927 | VSTM4          | chr10:50222332-50323559   | 0 | 0.0141847  | inf | 1 |
| XLOC_002968 | TACR2          | chr10:71163957-71176674   | 0 | 0.0372633  | inf | 1 |
| XLOC_002977 | PRF1           | chr10:72357103-72362531   | 0 | 0.0477399  | inf | 1 |
| XLOC_002981 | C10orf105      | chr10:73156690-73575704   | 0 | 0.00463691 | inf | 1 |
| XLOC_003009 | DUSP13         | chr10:76854189-76868970   | 0 | 0.0533402  | inf | 1 |
| XLOC_003012 | KCNMA1         | chr10:78629358-79397577   | 0 | 0.00601305 | inf | 1 |
| XLOC_003037 | FAS-AS1        | chr10:90694830-90775542   | 0 | 0.0334203  | inf | 1 |
| XLOC_003154 | EMX2OS         | chr10:119243803-119309057 | 0 | 0.00162328 | inf | 1 |
| XLOC_003187 | ADAM12         | chr10:127702901-128077127 | 0 | 0.00196137 | inf | 1 |
| XLOC_003303 | OR2AG1         | chr11:6806247-6807245     | 0 | 0.0148511  | inf | 1 |
| XLOC_003307 | OR2D3          | chr11:6942232-6943225     | 0 | 0.0150238  | inf | 1 |
| XLOC_003355 | SAA1           | chr11:18287807-18291523   | 0 | 0.0563441  | inf | 1 |
| XLOC_003375 | BBOX1          | chr11:27062508-27149354   | 0 | 0.00568389 | inf | 1 |
| XLOC_003417 | ACCSL          | chr11:44069530-44081527   | 0 | 0.0100781  | inf | 1 |
| XLOC_003437 | F2             | chr11:46740742-46761056   | 0 | 0.0166326  | inf | 1 |
| XLOC_003514 | OR10V2P        | chr11:59516284-59517054   | 0 | 0.058949   | inf | 1 |
| XLOC_003522 | MS4A14         | chr11:60163486-60185228   | 0 | 0.00445733 | inf | 1 |
| XLOC_003532 | ZP1            | chr11:60635014-60643164   | 0 | 0.0119538  | inf | 1 |
| XLOC_003535 | CD6            | chr11:60739112-60787848   | 0 | 0.00865215 | inf | 1 |
| XLOC_003589 | KCNK4          | chr11:64058792-64067503   | 0 | 0.0167595  | inf | 1 |
| XLOC_003627 | SNX32          | chr11:65601409-65621172   | 0 | 0.0106629  | inf | 1 |
| XLOC_003641 | TMEM151A       | chr11:66059372-66064135   | 0 | 0.0308099  | inf | 1 |
| XLOC_003686 | KRTAP5-7       | chr11:71238312-71239210   | 0 | 0.0299199  | inf | 1 |
| XLOC_003703 | P2RY6          | chr11:72975569-73009664   | 0 | 0.0574837  | inf | 1 |
| XLOC_003729 | OMP            | chr11:76777991-76837198   | 0 | 0.0535851  | inf | 1 |
| XLOC_003786 | C11orf70       | chr11:101918168-101955291 | 0 | 0.00561034 | inf | 1 |
| XLOC_003796 | ELMOD1         | chr11:107461816-107537505 | 0 | 0.00411799 | inf | 1 |
| XLOC_003811 | C11orf88       | chr11:111385509-111407756 | 0 | 0.0206134  | inf | 1 |
| XLOC_003815 | C11orf52,HSPB2 | chr11:111783459-111797595 | 0 | 0.0240542  | inf | 1 |
| XLOC_003830 | NNMT           | chr11:114166534-114183238 | 0 | 0.00943794 | inf | 1 |

|             |                |                           |   |            |     |   |
|-------------|----------------|---------------------------|---|------------|-----|---|
| XLOC_003848 | TTC36          | chr11:118398209-118401740 | 0 | 0.0896546  | inf | 1 |
| XLOC_003854 | UPK2           | chr11:118827007-118829269 | 0 | 0.0310428  | inf | 1 |
| XLOC_003905 | PATE4          | chr11:125703210-125709967 | 0 | 0.00517466 | inf | 1 |
| XLOC_003907 | DDX25          | chr11:125774260-125793006 | 0 | 0.026172   | inf | 1 |
| XLOC_003929 | GLB1L3         | chr11:134146274-134189458 | 0 | 0.012107   | inf | 1 |
| XLOC_003943 | MIR210         | chr11:565656-568457       | 0 | 7.12532    | inf | 1 |
| XLOC_003960 | KRTAP5-2       | chr11:1490684-1785501     | 0 | 0.0177485  | inf | 1 |
| XLOC_004095 | USH1C          | chr11:17515441-17565963   | 0 | 0.0284979  | inf | 1 |
| XLOC_004127 | MPPED2         | chr11:30406039-30607930   | 0 | 0.0130004  | inf | 1 |
| XLOC_004153 | SYT13          | chr11:45261852-45307884   | 0 | 0.0128937  | inf | 1 |
| XLOC_004154 | CHST1          | chr11:45669238-45687206   | 0 | 0.011651   | inf | 1 |
| XLOC_004165 | SNORD67        | chr11:46765083-46867859   | 0 | 6.81531    | inf | 1 |
| XLOC_004365 | ALDH3B2        | chr11:67429632-67448685   | 0 | 0.00967915 | inf | 1 |
| XLOC_004444 | CCDC89         | chr11:85394892-85397320   | 0 | 0.0149383  | inf | 1 |
| XLOC_004472 | VSTM5          | chr11:93553734-93583668   | 0 | 0.0437359  | inf | 1 |
| XLOC_004499 | LOC643733      | chr11:104772275-104788902 | 0 | 0.182955   | inf | 1 |
| XLOC_004501 | CASP5          | chr11:104864966-104893895 | 0 | 0.0972967  | inf | 1 |
| XLOC_004530 | C11orf34       | chr11:112118875-112131583 | 0 | 0.00815253 | inf | 1 |
| XLOC_004545 | APOA4          | chr11:116691417-116694011 | 0 | 0.0254954  | inf | 1 |
| XLOC_004552 | FXVD2,FXVD6,FX | chr11:117690789-117748201 | 0 | 0.00881018 | inf | 1 |
| XLOC_004587 | CLMP           | chr11:122943032-123066007 | 0 | 0.00941839 | inf | 1 |
| XLOC_004619 | KIRREL3        | chr11:126293395-126870766 | 0 | 0.0097848  | inf | 1 |
| XLOC_004630 | ADAMTS8        | chr11:130274817-130298539 | 0 | 0.0146456  | inf | 1 |
| XLOC_004640 | IQSEC3         | chr12:176048-287625       | 0 | 0.00283035 | inf | 1 |
| XLOC_004645 | LOC100292680   | chr12:1609656-1613590     | 0 | 0.0486701  | inf | 1 |
| XLOC_004712 | A2ML1          | chr12:8975149-9029381     | 0 | 0.00311529 | inf | 1 |
| XLOC_004727 | KLRD1          | chr12:10457049-10469850   | 0 | 0.0108538  | inf | 1 |
| XLOC_004748 | H2AFJ          | chr12:14927269-14930936   | 0 | 0.0133869  | inf | 1 |
| XLOC_004770 | C12orf39       | chr12:21679255-21684210   | 0 | 0.191914   | inf | 1 |
| XLOC_004819 | C12orf54       | chr12:48876285-48890297   | 0 | 0.0139707  | inf | 1 |
| XLOC_004853 | ACVRL1         | chr12:52301201-52317145   | 0 | 0.00376168 | inf | 1 |
| XLOC_005047 | FAM71C         | chr12:99039077-100378432  | 0 | 0.00646951 | inf | 1 |
| XLOC_005054 | ANO4           | chr12:101188373-101522419 | 0 | 0.00417165 | inf | 1 |
| XLOC_005061 | ASCL1          | chr12:103351451-103354294 | 0 | 0.00791247 | inf | 1 |
| XLOC_005111 | RPH3A          | chr12:113229548-113336684 | 0 | 0.00871831 | inf | 1 |
| XLOC_005130 | HSPB8          | chr12:119616594-119632551 | 0 | 0.0103369  | inf | 1 |
| XLOC_005146 | P2RX7          | chr12:121570621-121624354 | 0 | 0.0049558  | inf | 1 |
| XLOC_005182 | LOC100507206   | chr12:127215246-127256808 | 0 | 0.0142482  | inf | 1 |
| XLOC_005194 | MMP17          | chr12:132312940-132336316 | 0 | 0.0154342  | inf | 1 |
| XLOC_005282 | CLECL1         | chr12:9868455-9885895     | 0 | 0.00719013 | inf | 1 |
| XLOC_005288 | CLEC7A         | chr12:10269375-10282868   | 0 | 0.00766012 | inf | 1 |
| XLOC_005311 | TAS2R30        | chr12:10998447-11328619   | 0 | 0.0132035  | inf | 1 |
| XLOC_005353 | BCAT1          | chr12:24962957-25102393   | 0 | 0.00262562 | inf | 1 |
| XLOC_005392 | NELL2          | chr12:44902057-45307711   | 0 | 0.0280971  | inf | 1 |
| XLOC_005417 | SNORA2A        | chr12:49046994-49076035   | 0 | 2.11758    | inf | 1 |
| XLOC_005426 | WNT10B         | chr12:49359122-49365641   | 0 | 0.00789248 | inf | 1 |
| XLOC_005435 | C1QL4          | chr12:49726199-49730971   | 0 | 0.0135353  | inf | 1 |
| XLOC_005441 | FAIM2          | chr12:50260678-50297760   | 0 | 0.00348963 | inf | 1 |
| XLOC_005453 | BIN2           | chr12:51674821-51717938   | 0 | 0.0149896  | inf | 1 |

|             |               |                           |   |             |     |   |
|-------------|---------------|---------------------------|---|-------------|-----|---|
| XLOC_005460 | KRT83         | chr12:52708084-52715182   | 0 | 0.0142174   | inf | 1 |
| XLOC_005464 | KRT75         | chr12:52817853-52828110   | 0 | 0.00734829  | inf | 1 |
| XLOC_005480 | KRT78         | chr12:53232745-53242778   | 0 | 0.00906256  | inf | 1 |
| XLOC_005500 | GPR84         | chr12:54756228-54758270   | 0 | 0.0105213   | inf | 1 |
| XLOC_005562 | DPY19L2       | chr12:63952692-64062354   | 0 | 0.00403551  | inf | 1 |
| XLOC_005566 | WIF1          | chr12:65444403-65515346   | 0 | 0.00589247  | inf | 1 |
| XLOC_005585 | TSPAN8        | chr12:71518876-71551779   | 0 | 0.0235722   | inf | 1 |
| XLOC_005607 | TSPAN19       | chr12:85408093-85430055   | 0 | 0.011394    | inf | 1 |
| XLOC_005622 | LUM           | chr12:91497231-91505542   | 0 | 0.00504737  | inf | 1 |
| XLOC_005684 | USP30-AS1     | chr12:109489845-109525831 | 0 | 0.154438    | inf | 1 |
| XLOC_005701 | MYL2          | chr12:111348623-111358404 | 0 | 0.0779445   | inf | 1 |
| XLOC_005714 | SDS           | chr12:113830250-113841692 | 0 | 0.0220092   | inf | 1 |
| XLOC_005746 | HNF1A-AS1     | chr12:121407640-121410095 | 0 | 0.00770205  | inf | 1 |
| XLOC_005762 | HCAR2         | chr12:123185839-123187904 | 0 | 0.0144142   | inf | 1 |
| XLOC_005764 | HCAR1         | chr12:123212152-123215129 | 0 | 0.00475876  | inf | 1 |
| XLOC_005786 | FLJ31485      | chr12:130636137-130646223 | 0 | 0.00651954  | inf | 1 |
| XLOC_005790 | GALNT9        | chr12:132680916-132905905 | 0 | 0.0266669   | inf | 1 |
| XLOC_005823 | WASF3         | chr13:27131839-27263082   | 0 | 0.00530706  | inf | 1 |
| XLOC_005874 | DNAJC15       | chr13:43597361-43683306   | 0 | 0.00624925  | inf | 1 |
| XLOC_005974 | NALCN-AS1     | chr13:101360578-102068813 | 0 | 0.00612729  | inf | 1 |
| XLOC_005998 | F7            | chr13:113760101-113774995 | 0 | 0.0296622   | inf | 1 |
| XLOC_006005 | GRK1          | chr13:114321596-114438637 | 0 | 0.00824843  | inf | 1 |
| XLOC_006015 | TPTE2         | chr13:19997018-20135714   | 0 | 0.00857971  | inf | 1 |
| XLOC_006034 | ANKRD20A19P   | chr13:24481422-24523454   | 0 | 0.0167767   | inf | 1 |
| XLOC_006081 | STOML3        | chr13:39540061-39564996   | 0 | 0.00627892  | inf | 1 |
| XLOC_006096 | EPST11        | chr13:43460523-43566407   | 0 | 0.0136422   | inf | 1 |
| XLOC_006110 | CPB2          | chr13:46626982-46679211   | 0 | 0.0164782   | inf | 1 |
| XLOC_006121 | LINC00462     | chr13:49151109-49155037   | 0 | 0.0128255   | inf | 1 |
| XLOC_006132 | RNASEH2B-AS1  | chr13:51456514-51544596   | 0 | 0.0589771   | inf | 1 |
| XLOC_006157 | CTAGE11P      | chr13:75811888-75814517   | 0 | 0.00780677  | inf | 1 |
| XLOC_006173 | MIR4500HG     | chr13:88096241-88323218   | 0 | 0.0063441   | inf | 1 |
| XLOC_006190 | RNF113B       | chr13:98795433-99102023   | 0 | 0.0188892   | inf | 1 |
| XLOC_006208 | CCDC168       | chr13:103381716-103411422 | 0 | 0.000391036 | inf | 1 |
| XLOC_006268 | RNASE8        | chr14:21526051-21526516   | 0 | 0.056301    | inf | 1 |
| XLOC_006313 | COCH          | chr14:31343740-31359822   | 0 | 0.00413363  | inf | 1 |
| XLOC_006378 | DACT1         | chr14:59100785-59115038   | 0 | 0.00841228  | inf | 1 |
| XLOC_006412 | RDH12         | chr14:68168602-68201168   | 0 | 0.00833849  | inf | 1 |
| XLOC_006475 | TSHR          | chr14:81421868-81612646   | 0 | 0.0323344   | inf | 1 |
| XLOC_006496 | CHGA          | chr14:93389444-93401638   | 0 | 0.00954971  | inf | 1 |
| XLOC_006510 | SERPINA3      | chr14:95078713-95090390   | 0 | 0.00830208  | inf | 1 |
| XLOC_006517 | C14orf132     | chr14:96505660-96560226   | 0 | 0.00171561  | inf | 1 |
| XLOC_006628 | DIO3          | chr14:102027687-102029789 | 0 | 0.010515    | inf | 1 |
| XLOC_006642 | SNORA28       | chr14:103800338-103811361 | 0 | 3.00352     | inf | 1 |
| XLOC_006648 | LINC00637     | chr14:104314057-104324386 | 0 | 0.0102523   | inf | 1 |
| XLOC_006650 | ASPG          | chr14:104552022-104579046 | 0 | 0.0118979   | inf | 1 |
| XLOC_006688 | RNASE11,RNASE | chr14:21051051-21058982   | 0 | 0.00598168  | inf | 1 |
| XLOC_006724 | MYH7          | chr14:23881946-23904870   | 0 | 0.00342856  | inf | 1 |
| XLOC_006741 | ADCY4         | chr14:24787554-24804277   | 0 | 0.00532081  | inf | 1 |
| XLOC_006753 | LOC100506071  | chr14:31343740-31359822   | 0 | 0.00530861  | inf | 1 |

|             |                |                         |   |            |     |   |
|-------------|----------------|-------------------------|---|------------|-----|---|
| XLOC_006807 | TRIM9          | chr14:51441980-51562422 | 0 | 0.00403447 | inf | 1 |
| XLOC_006808 | FRMD6-AS2      | chr14:51921229-52197444 | 0 | 0.025487   | inf | 1 |
| XLOC_006873 | SLC10A1        | chr14:70242551-70264006 | 0 | 0.0399066  | inf | 1 |
| XLOC_006930 | TTC7B          | chr14:91006931-91282761 | 0 | 0.00616006 | inf | 1 |
| XLOC_006952 | SERPINA6       | chr14:94770584-94789688 | 0 | 0.0088253  | inf | 1 |
| XLOC_007007 | OR4N3P         | chr15:22413461-22414395 | 0 | 0.0168781  | inf | 1 |
| XLOC_007018 | NPAP1          | chr15:24920540-24928593 | 0 | 0.00213095 | inf | 1 |
| XLOC_007112 | DKFZP434L187   | chr15:30488238-30506743 | 0 | 0.00250614 | inf | 1 |
| XLOC_007116 | HERC2P10       | chr15:31110238-31119986 | 0 | 0.0334616  | inf | 1 |
| XLOC_007174 | ADAL           | chr15:43622871-43646096 | 0 | 0.00419657 | inf | 1 |
| XLOC_007214 | DCAF13P3       | chr15:51200868-51298097 | 0 | 0.0312802  | inf | 1 |
| XLOC_007234 | LDHAL6B        | chr15:59428167-59665071 | 0 | 0.0162561  | inf | 1 |
| XLOC_007238 | C2CD4A         | chr15:62359175-62363116 | 0 | 0.0116383  | inf | 1 |
| XLOC_007282 | NR2E3          | chr15:72102893-72110597 | 0 | 0.0446589  | inf | 1 |
| XLOC_007317 | ODF3L1         | chr15:76016318-76032418 | 0 | 0.0316678  | inf | 1 |
| XLOC_007323 | PSTPIP1        | chr15:77287464-77329671 | 0 | 0.0153908  | inf | 1 |
| XLOC_007357 | UBE2Q2P2,UBE2  | chr15:83023772-83084729 | 0 | 0.0154501  | inf | 1 |
| XLOC_007373 | LOC100506874   | chr15:85070426-85123412 | 0 | 0.00437093 | inf | 1 |
| XLOC_007412 | SV2B           | chr15:91643181-91844539 | 0 | 0.00104056 | inf | 1 |
| XLOC_007416 | ASB9P1         | chr15:93338713-93340338 | 0 | 0.00755689 | inf | 1 |
| XLOC_007451 | GOLGA8DP       | chr15:22702284-22715728 | 0 | 0.00196978 | inf | 1 |
| XLOC_007495 | ACTC1          | chr15:35080296-35087927 | 0 | 0.00465687 | inf | 1 |
| XLOC_007529 | PLA2G4D        | chr15:42359880-42386752 | 0 | 0.00644061 | inf | 1 |
| XLOC_007559 | DUOXA1         | chr15:45406522-45422075 | 0 | 0.0444445  | inf | 1 |
| XLOC_007632 | RASL12         | chr15:65337707-65360388 | 0 | 0.00617611 | inf | 1 |
| XLOC_007638 | IGDCC3         | chr15:65619464-65670378 | 0 | 0.00527521 | inf | 1 |
| XLOC_007658 | ITGA11         | chr15:68594041-68724492 | 0 | 0.00819575 | inf | 1 |
| XLOC_007721 | ADAMTS7        | chr15:79051544-79103773 | 0 | 0.00571074 | inf | 1 |
| XLOC_007723 | RASGRF1        | chr15:79252288-79383215 | 0 | 0.00543845 | inf | 1 |
| XLOC_007738 | LOC440297      | chr15:82944792-82986427 | 0 | 0.00233538 | inf | 1 |
| XLOC_007743 | AP3B2          | chr15:83211950-83378635 | 0 | 0.0112403  | inf | 1 |
| XLOC_007762 | NTRK3          | chr15:88419987-88814297 | 0 | 0.00796325 | inf | 1 |
| XLOC_007785 | LOC100144604   | chr15:93111047-93115493 | 0 | 0.00657588 | inf | 1 |
| XLOC_007789 | LOC91948       | chr15:98285845-98417659 | 0 | 0.0176917  | inf | 1 |
| XLOC_007826 | C16orf11       | chr16:610421-615529     | 0 | 0.0268669  | inf | 1 |
| XLOC_007827 | NHLRC4         | chr16:617031-619495     | 0 | 0.0359699  | inf | 1 |
| XLOC_007845 | CACNA1H        | chr16:1203240-1275254   | 0 | 0.0105     | inf | 1 |
| XLOC_007852 | TMEM204        | chr16:1543351-1662109   | 0 | 0.0149855  | inf | 1 |
| XLOC_008014 | IL21R          | chr16:27413482-27464714 | 0 | 0.00315217 | inf | 1 |
| XLOC_008031 | SLX1A,SLX1B,SU | chr16:29464913-29478899 | 0 | 0.0150509  | inf | 1 |
| XLOC_008052 | ITGAL          | chr16:30483982-30534506 | 0 | 0.00282314 | inf | 1 |
| XLOC_008061 | MIR762         | chr16:30899115-30905399 | 0 | 78.3877    | inf | 1 |
| XLOC_008113 | GNAO1          | chr16:56225250-56391356 | 0 | 0.0237669  | inf | 1 |
| XLOC_008132 | SLC12A3        | chr16:56899118-56949762 | 0 | 0.00361428 | inf | 1 |
| XLOC_008329 | C1QTNF8        | chr16:1138225-1146244   | 0 | 0.00684443 | inf | 1 |
| XLOC_008372 | PRSS30P        | chr16:2889573-2892752   | 0 | 0.00801674 | inf | 1 |
| XLOC_008401 | SEPT12         | chr16:4827614-4846492   | 0 | 0.0120732  | inf | 1 |
| XLOC_008453 | ACSM2B         | chr16:20548082-20587695 | 0 | 0.00456199 | inf | 1 |
| XLOC_008667 | PKD1L3         | chr16:71928310-72033877 | 0 | 0.00222393 | inf | 1 |

|             |              |                         |   |            |     |   |
|-------------|--------------|-------------------------|---|------------|-----|---|
| XLOC_008741 | LOC100506388 | chr17:62179-202633      | 0 | 0.0242096  | inf | 1 |
| XLOC_008798 | ALOX15P1     | chr17:6561037-6564701   | 0 | 0.0264293  | inf | 1 |
| XLOC_008950 | CRYBA1       | chr17:27573874-27581502 | 0 | 0.0177046  | inf | 1 |
| XLOC_008992 | UNC45B       | chr17:33474835-33516364 | 0 | 0.0071556  | inf | 1 |
| XLOC_009132 | MYL4         | chr17:45286427-45301045 | 0 | 0.0284454  | inf | 1 |
| XLOC_009155 | NXPH3        | chr17:47653297-47661171 | 0 | 0.0027845  | inf | 1 |
| XLOC_009195 | LPO          | chr17:56315786-56345879 | 0 | 0.0078151  | inf | 1 |
| XLOC_009215 | TBX4         | chr17:59533806-59561664 | 0 | 0.00848772 | inf | 1 |
| XLOC_009219 | MRC2         | chr17:60704761-60770962 | 0 | 0.00472766 | inf | 1 |
| XLOC_009267 | CD300A       | chr17:72462521-72480937 | 0 | 0.00733779 | inf | 1 |
| XLOC_009290 | ITGB4        | chr17:73717515-73753899 | 0 | 0.00675539 | inf | 1 |
| XLOC_009402 | SPATA22      | chr17:3343305-3375142   | 0 | 0.0265045  | inf | 1 |
| XLOC_009410 | ATP2A3       | chr17:3827162-3867758   | 0 | 0.00702139 | inf | 1 |
| XLOC_009415 | GGT6         | chr17:4460221-4463876   | 0 | 0.00638324 | inf | 1 |
| XLOC_009416 | ALOX15       | chr17:4534213-4544960   | 0 | 0.00851793 | inf | 1 |
| XLOC_009441 | SLC13A5      | chr17:6588038-6616740   | 0 | 0.00680453 | inf | 1 |
| XLOC_009495 | GAS7         | chr17:9813925-10101868  | 0 | 0.00167716 | inf | 1 |
| XLOC_009504 | MAGOH2       | chr17:10616638-10718481 | 0 | 0.0329125  | inf | 1 |
| XLOC_009524 | KRT16P2      | chr17:16733796-16736147 | 0 | 0.0101989  | inf | 1 |
| XLOC_009531 | SMCR5        | chr17:17584786-17740325 | 0 | 0.0138805  | inf | 1 |
| XLOC_009601 | OMG          | chr17:29421944-29704695 | 0 | 0.0128136  | inf | 1 |
| XLOC_009603 | EVI2A        | chr17:29421944-29704695 | 0 | 0.0170028  | inf | 1 |
| XLOC_009616 | SLC35G3      | chr17:33519538-33521412 | 0 | 0.0115337  | inf | 1 |
| XLOC_009635 | TBC1D3C      | chr17:34581084-34592032 | 0 | 0.0112889  | inf | 1 |
| XLOC_009675 | CCR7         | chr17:38710021-38721736 | 0 | 0.0106122  | inf | 1 |
| XLOC_009689 | KRTAP3-3     | chr17:39149681-39150385 | 0 | 0.136073   | inf | 1 |
| XLOC_009696 | KRTAP2-1     | chr17:39202795-39203568 | 0 | 0.0408858  | inf | 1 |
| XLOC_009697 | KRTAP2-2     | chr17:39210750-39211463 | 0 | 0.134199   | inf | 1 |
| XLOC_009701 | KRTAP4-11    | chr17:39273433-39274606 | 0 | 0.0502     | inf | 1 |
| XLOC_009702 | KRTAP4-12    | chr17:39279344-39280419 | 0 | 0.0535441  | inf | 1 |
| XLOC_009763 | SOST         | chr17:41831098-41836156 | 0 | 0.00715652 | inf | 1 |
| XLOC_009768 | PYY          | chr17:42030106-42081837 | 0 | 0.0196499  | inf | 1 |
| XLOC_009817 | MIR10A       | chr17:46657199-46657309 | 0 | 5.1502     | inf | 1 |
| XLOC_009838 | DLX3         | chr17:48067368-48072588 | 0 | 0.0064246  | inf | 1 |
| XLOC_009849 | LINC00483    | chr17:48838394-48844876 | 0 | 0.0146126  | inf | 1 |
| XLOC_009858 | MTVR2        | chr17:54961462-54962274 | 0 | 0.0237043  | inf | 1 |
| XLOC_009866 | MPO          | chr17:56347216-56358296 | 0 | 0.00525941 | inf | 1 |
| XLOC_009872 | HSF5         | chr17:56497528-56565759 | 0 | 0.00285261 | inf | 1 |
| XLOC_009918 | MIR5047      | chr17:62494373-62502484 | 0 | 12.7523    | inf | 1 |
| XLOC_010158 | AQP4-AS1     | chr18:24432007-24765302 | 0 | 0.00502478 | inf | 1 |
| XLOC_010186 | SLC14A2      | chr18:42792946-43263060 | 0 | 0.00389269 | inf | 1 |
| XLOC_010187 | SLC14A1      | chr18:43304091-43332485 | 0 | 0.00406857 | inf | 1 |
| XLOC_010233 | SERPINB2     | chr18:61554938-61571124 | 0 | 0.0118286  | inf | 1 |
| XLOC_010246 | C18orf63     | chr18:71983109-72026422 | 0 | 0.00189295 | inf | 1 |
| XLOC_010270 | LINC00470    | chr18:1268311-1359630   | 0 | 0.00920669 | inf | 1 |
| XLOC_010276 | DLGAP1       | chr18:3496029-4455266   | 0 | 0.00235468 | inf | 1 |
| XLOC_010277 | C18orf42     | chr18:5143671-5197255   | 0 | 0.00474703 | inf | 1 |
| XLOC_010357 | ZBTB7C       | chr18:45553638-45663680 | 0 | 0.00417878 | inf | 1 |
| XLOC_010402 | CD226        | chr18:67530192-67624232 | 0 | 0.013875   | inf | 1 |



|             |              |                         |   |             |     |   |
|-------------|--------------|-------------------------|---|-------------|-----|---|
| XLOC_010407 | LOC400655    | chr18:70821292-70931733 | 0 | 0.00648588  | inf | 1 |
| XLOC_010434 | AZU1         | chr19:827830-832017     | 0 | 0.045374    | inf | 1 |
| XLOC_010486 | GIPC3        | chr19:3585568-3593539   | 0 | 0.0070422   | inf | 1 |
| XLOC_010550 | CERS4        | chr19:8274216-8327304   | 0 | 0.0104588   | inf | 1 |
| XLOC_010566 | RDH8         | chr19:10123924-10132954 | 0 | 0.0131136   | inf | 1 |
| XLOC_010646 | SYDE1        | chr19:15218213-15236577 | 0 | 0.0192384   | inf | 1 |
| XLOC_010688 | SLC5A5       | chr19:17982781-18005983 | 0 | 0.00516609  | inf | 1 |
| XLOC_010696 | MIR3188      | chr19:18392886-18392971 | 0 | 63.7142     | inf | 1 |
| XLOC_010782 | HAMP         | chr19:35773409-35776045 | 0 | 0.191678    | inf | 1 |
| XLOC_010784 | CD22         | chr19:35820071-35838264 | 0 | 0.0252371   | inf | 1 |
| XLOC_010795 | UPK1A        | chr19:36157714-36169367 | 0 | 0.140355    | inf | 1 |
| XLOC_010808 | OVOL3        | chr19:36602104-36616849 | 0 | 0.0999575   | inf | 1 |
| XLOC_010885 | CEACAM6      | chr19:42259397-42276113 | 0 | 0.0042614   | inf | 1 |
| XLOC_010902 | TEX101       | chr19:43892762-43922767 | 0 | 0.0121318   | inf | 1 |
| XLOC_010957 | HIF3A        | chr19:46720994-46846690 | 0 | 0.00850691  | inf | 1 |
| XLOC_011019 | LOC100507003 | chr19:49929687-49932075 | 0 | 0.0337671   | inf | 1 |
| XLOC_011028 | SNORD35B     | chr19:49999621-50002969 | 0 | 30.7989     | inf | 1 |
| XLOC_011062 | KLK2         | chr19:51376688-51383823 | 0 | 0.00393284  | inf | 1 |
| XLOC_011156 | CACNG6       | chr19:54495541-54515920 | 0 | 0.0509844   | inf | 1 |
| XLOC_011199 | NLRP8        | chr19:56459197-56499995 | 0 | 0.00450307  | inf | 1 |
| XLOC_011307 | C19orf77     | chr19:3474404-3480540   | 0 | 0.0352012   | inf | 1 |
| XLOC_011344 | FUT6         | chr19:5830636-5839742   | 0 | 0.0142692   | inf | 1 |
| XLOC_011364 | EMR4P        | chr19:6952510-6990857   | 0 | 0.0130766   | inf | 1 |
| XLOC_011375 | CD209        | chr19:7804880-7812464   | 0 | 0.00396967  | inf | 1 |
| XLOC_011377 | LOC388499    | chr19:7943516-7945117   | 0 | 0.0272172   | inf | 1 |
| XLOC_011400 | ZNF560       | chr19:9577030-9609279   | 0 | 0.0036382   | inf | 1 |
| XLOC_011421 | S1PR5        | chr19:10623417-10628668 | 0 | 0.0125159   | inf | 1 |
| XLOC_011468 | LYL1         | chr19:13209841-13213974 | 0 | 0.0166273   | inf | 1 |
| XLOC_011524 | NXNL1        | chr19:17566233-17571725 | 0 | 0.103419    | inf | 1 |
| XLOC_011526 | INSL3        | chr19:17927321-17932383 | 0 | 0.0702916   | inf | 1 |
| XLOC_011567 | ZNF43        | chr19:21987750-22034870 | 0 | 0.00644177  | inf | 1 |
| XLOC_011568 | ZNF208       | chr19:22148896-22193745 | 0 | 0.000968668 | inf | 1 |
| XLOC_011592 | SCGB2B2      | chr19:35084345-35085490 | 0 | 0.0520671   | inf | 1 |
| XLOC_011605 | UPK1A-AS1    | chr19:36157714-36169367 | 0 | 0.030246    | inf | 1 |
| XLOC_011656 | FBXO17       | chr19:39432041-39466380 | 0 | 0.0578072   | inf | 1 |
| XLOC_011694 | LOC100505495 | chr19:41960073-42006554 | 0 | 0.00453875  | inf | 1 |
| XLOC_011697 | LYPD4        | chr19:42341149-42348508 | 0 | 0.00926743  | inf | 1 |
| XLOC_011713 | PSG8         | chr19:43256838-43269831 | 0 | 0.0171331   | inf | 1 |
| XLOC_011715 | PSG1         | chr19:43370612-43383871 | 0 | 0.00544695  | inf | 1 |
| XLOC_011718 | PSG11        | chr19:43511808-43530631 | 0 | 0.0097173   | inf | 1 |
| XLOC_011720 | PSG5         | chr19:43671894-43690688 | 0 | 0.0183724   | inf | 1 |
| XLOC_011751 | CKM          | chr19:45809670-45826235 | 0 | 0.00988918  | inf | 1 |
| XLOC_011766 | RSPH6A       | chr19:46298967-46318605 | 0 | 0.00758424  | inf | 1 |
| XLOC_011827 | CGB1         | chr19:49538825-49540191 | 0 | 0.0508382   | inf | 1 |
| XLOC_011831 | KCNA7        | chr19:49570674-49576198 | 0 | 0.00824896  | inf | 1 |
| XLOC_011876 | SNORD88A     | chr19:51300960-51307974 | 0 | 13.4121     | inf | 1 |
| XLOC_011887 | KLK10        | chr19:51515999-51523431 | 0 | 0.00459147  | inf | 1 |
| XLOC_011888 | KLK11        | chr19:51525486-51531290 | 0 | 0.0419887   | inf | 1 |
| XLOC_011899 | SIGLEC10     | chr19:51913274-51921057 | 0 | 0.0227961   | inf | 1 |

|             |              |                          |   |            |     |   |
|-------------|--------------|--------------------------|---|------------|-----|---|
| XLOC_011901 | SIGLEC12     | chr19:51994612-52005043  | 0 | 0.00877262 | inf | 1 |
| XLOC_011989 | DUXA         | chr19:57663093-57678856  | 0 | 0.0156731  | inf | 1 |
| XLOC_012026 | SNTG2        | chr2:946553-1371384      | 0 | 0.00833996 | inf | 1 |
| XLOC_012034 | SOX11        | chr2:5832798-5841517     | 0 | 0.00159614 | inf | 1 |
| XLOC_012095 | ABHD1        | chr2:27346656-27357542   | 0 | 0.0339124  | inf | 1 |
| XLOC_012144 | CYP1B1-AS1   | chr2:38358246-38408993   | 0 | 0.00968201 | inf | 1 |
| XLOC_012151 | SLC8A1-AS1   | chr2:40144773-40739575   | 0 | 0.0198625  | inf | 1 |
| XLOC_012173 | EPCAM        | chr2:47596286-47614167   | 0 | 0.0108169  | inf | 1 |
| XLOC_012185 | RPL23AP32    | chr2:54683453-54898583   | 0 | 0.0341653  | inf | 1 |
| XLOC_012213 | MEIS1        | chr2:66662531-66799891   | 0 | 0.0054416  | inf | 1 |
| XLOC_012231 | ANKRD53      | chr2:71205574-71212629   | 0 | 0.0368655  | inf | 1 |
| XLOC_012251 | DCTN1-AS1    | chr2:74588280-74621008   | 0 | 0.00590158 | inf | 1 |
| XLOC_012266 | CTNNA2       | chr2:79740059-80875988   | 0 | 0.00928229 | inf | 1 |
| XLOC_012280 | GNLY         | chr2:85921413-85925875   | 0 | 0.0334188  | inf | 1 |
| XLOC_012295 | TEX37        | chr2:88824168-88829103   | 0 | 0.0301256  | inf | 1 |
| XLOC_012297 | ANKRD36BP2   | chr2:89065418-89106109   | 0 | 0.0147954  | inf | 1 |
| XLOC_012339 | IL1R1        | chr2:102770401-102796334 | 0 | 0.00535891 | inf | 1 |
| XLOC_012359 | SULT1C2      | chr2:108905094-108926371 | 0 | 0.00377235 | inf | 1 |
| XLOC_012411 | INHBB        | chr2:121103718-121109383 | 0 | 0.00559114 | inf | 1 |
| XLOC_012432 | AMER3        | chr2:131513076-131525707 | 0 | 0.00341252 | inf | 1 |
| XLOC_012436 | LOC440910    | chr2:132036862-132057392 | 0 | 0.014412   | inf | 1 |
| XLOC_012461 | PABPC1P2     | chr2:147344624-147348558 | 0 | 0.00294454 | inf | 1 |
| XLOC_012485 | TBR1         | chr2:162272619-162281573 | 0 | 0.0196159  | inf | 1 |
| XLOC_012495 | NOSTRIN      | chr2:169643048-169721849 | 0 | 0.00704827 | inf | 1 |
| XLOC_012525 | HOXD11       | chr2:176972083-176974316 | 0 | 0.0607547  | inf | 1 |
| XLOC_012549 | FSIP2        | chr2:186603354-186698016 | 0 | 0.00126751 | inf | 1 |
| XLOC_012675 | KCNE4        | chr2:223916647-223920357 | 0 | 0.00433212 | inf | 1 |
| XLOC_012758 | GAL3ST2      | chr2:242716239-242743702 | 0 | 0.0323753  | inf | 1 |
| XLOC_012764 | FAM150B      | chr2:279560-288308       | 0 | 0.0133106  | inf | 1 |
| XLOC_012813 | LOC645949    | chr2:21910305-21933524   | 0 | 0.00739089 | inf | 1 |
| XLOC_012831 | OTOF         | chr2:26680070-26781566   | 0 | 0.00365005 | inf | 1 |
| XLOC_012874 | CYP1B1       | chr2:38294745-38303323   | 0 | 0.00359145 | inf | 1 |
| XLOC_012879 | LOC375196    | chr2:39146503-39202590   | 0 | 0.0268742  | inf | 1 |
| XLOC_012909 | NRXN1        | chr2:50145642-51259674   | 0 | 0.0031611  | inf | 1 |
| XLOC_012920 | EFEMP1       | chr2:56093096-56151298   | 0 | 0.00367221 | inf | 1 |
| XLOC_012929 | LOC339803    | chr2:61368726-61372110   | 0 | 0.00491415 | inf | 1 |
| XLOC_012943 | LOC400958    | chr2:65128973-65159581   | 0 | 0.00378222 | inf | 1 |
| XLOC_012967 | ADD2         | chr2:70889215-70995375   | 0 | 0.00355701 | inf | 1 |
| XLOC_012999 | TACR1        | chr2:75273589-75426645   | 0 | 0.00256296 | inf | 1 |
| XLOC_013028 | PLGLB2       | chr2:87140934-87248973   | 0 | 0.00349544 | inf | 1 |
| XLOC_013055 | FAM178B      | chr2:97541618-97652301   | 0 | 0.0318187  | inf | 1 |
| XLOC_013066 | LYG2         | chr2:99858710-99871570   | 0 | 0.0673489  | inf | 1 |
| XLOC_013087 | ST6GAL2      | chr2:107418055-107503563 | 0 | 0.00512554 | inf | 1 |
| XLOC_013110 | IL1A         | chr2:113531491-113542971 | 0 | 0.0216446  | inf | 1 |
| XLOC_013118 | LOC100499194 | chr2:114735245-114764887 | 0 | 0.00762923 | inf | 1 |
| XLOC_013121 | EN1          | chr2:119599746-119605759 | 0 | 0.00926401 | inf | 1 |
| XLOC_013154 | WTH3DI       | chr2:132118064-132121731 | 0 | 0.00316826 | inf | 1 |
| XLOC_013160 | MIR663B      | chr2:132905163-133015542 | 0 | 8.78578    | inf | 1 |
| XLOC_013161 | LYPD1        | chr2:133174146-133429070 | 0 | 0.0203177  | inf | 1 |

|             |                |                          |   |             |     |   |
|-------------|----------------|--------------------------|---|-------------|-----|---|
| XLOC_013187 | LOC100144595   | chr2:154728425-155313950 | 0 | 0.00719223  | inf | 1 |
| XLOC_013204 | FAP            | chr2:163027199-163100045 | 0 | 0.00374083  | inf | 1 |
| XLOC_013238 | WIPF1          | chr2:175424301-175547627 | 0 | 0.0106355   | inf | 1 |
| XLOC_013287 | DNAH7          | chr2:196602426-196933536 | 0 | 0.00314899  | inf | 1 |
| XLOC_013298 | BOLL           | chr2:198591602-198650938 | 0 | 0.00389075  | inf | 1 |
| XLOC_013349 | LINC00607      | chr2:216476285-216708259 | 0 | 0.00308186  | inf | 1 |
| XLOC_013368 | CCDC108        | chr2:219866936-219906245 | 0 | 0.0102451   | inf | 1 |
| XLOC_013409 | LOC151475      | chr2:231555635-231565244 | 0 | 0.00968156  | inf | 1 |
| XLOC_013414 | SNORA75        | chr2:232319458-232329205 | 0 | 1.58364     | inf | 1 |
| XLOC_013434 | ASB18          | chr2:237103514-237172988 | 0 | 0.0356519   | inf | 1 |
| XLOC_013447 | MGC16025       | chr2:239969863-240322643 | 0 | 0.00782259  | inf | 1 |
| XLOC_013466 | BOK-AS1        | chr2:242483800-242513553 | 0 | 0.0263796   | inf | 1 |
| XLOC_013482 | C20orf202      | chr20:1184097-1188918    | 0 | 0.0156435   | inf | 1 |
| XLOC_013488 | TGM3           | chr20:2276612-2321725    | 0 | 0.00765473  | inf | 1 |
| XLOC_013503 | UBOX5-AS1      | chr20:3087556-3140556    | 0 | 0.0104856   | inf | 1 |
| XLOC_013551 | SLC24A3        | chr20:19193289-19703541  | 0 | 0.0141572   | inf | 1 |
| XLOC_013558 | PAX1           | chr20:21686296-21699124  | 0 | 0.00414559  | inf | 1 |
| XLOC_013587 | TTLL9          | chr20:30458504-30530858  | 0 | 0.0220919   | inf | 1 |
| XLOC_013651 | ADIG           | chr20:37209837-37217104  | 0 | 0.0229498   | inf | 1 |
| XLOC_013679 | PI3            | chr20:43803539-43805185  | 0 | 0.0343429   | inf | 1 |
| XLOC_013704 | LINC00494      | chr20:46988653-46999381  | 0 | 0.00333652  | inf | 1 |
| XLOC_013722 | TSHZ2          | chr20:51588945-52111869  | 0 | 0.000933691 | inf | 1 |
| XLOC_013728 | CASS4          | chr20:54987167-55034396  | 0 | 0.0091566   | inf | 1 |
| XLOC_013751 | CDH26          | chr20:58533470-58588168  | 0 | 0.0181462   | inf | 1 |
| XLOC_013753 | LOC284757      | chr20:58713547-58897314  | 0 | 0.00900993  | inf | 1 |
| XLOC_013783 | C20orf195      | chr20:62184372-62188035  | 0 | 0.0507901   | inf | 1 |
| XLOC_013798 | MYT1           | chr20:62795826-62873606  | 0 | 0.00373469  | inf | 1 |
| XLOC_013805 | TCF15          | chr20:584636-590910      | 0 | 0.026286    | inf | 1 |
| XLOC_013930 | PXMP4          | chr20:32290549-32308136  | 0 | 0.01345     | inf | 1 |
| XLOC_013942 | FAM83C         | chr20:33873533-33880225  | 0 | 0.0163781   | inf | 1 |
| XLOC_013944 | GDF5           | chr20:34021148-34026027  | 0 | 0.0102669   | inf | 1 |
| XLOC_013976 | JPH2           | chr20:42740336-42816218  | 0 | 0.00593228  | inf | 1 |
| XLOC_013993 | EPPIN,EPPIN-WF | chr20:44162835-44176065  | 0 | 0.00877266  | inf | 1 |
| XLOC_014020 | PTGIS          | chr20:48120410-48184707  | 0 | 0.00249611  | inf | 1 |
| XLOC_014025 | FAM65C         | chr20:49202646-49253426  | 0 | 0.0054674   | inf | 1 |
| XLOC_014028 | KCNG1          | chr20:49620192-49639675  | 0 | 0.0142397   | inf | 1 |
| XLOC_014032 | SALL4          | chr20:50400582-50419048  | 0 | 0.0090889   | inf | 1 |
| XLOC_014038 | CYP24A1        | chr20:52769987-52790516  | 0 | 0.00412318  | inf | 1 |
| XLOC_014041 | GCNT7          | chr20:55043646-55101208  | 0 | 0.0178865   | inf | 1 |
| XLOC_014061 | HRH3           | chr20:60790016-60795323  | 0 | 0.0136106   | inf | 1 |
| XLOC_014065 | GATA5          | chr20:61038552-61051026  | 0 | 0.0083362   | inf | 1 |
| XLOC_014095 | MIR3648        | chr21:9825831-9826011    | 0 | 0.880056    | inf | 1 |
| XLOC_014123 | LINC00189      | chr21:30565814-30660526  | 0 | 0.0158773   | inf | 1 |
| XLOC_014138 | MRAP           | chr21:33664123-33765312  | 0 | 0.028771    | inf | 1 |
| XLOC_014153 | LINC00310      | chr21:35552977-35562220  | 0 | 0.0300789   | inf | 1 |
| XLOC_014178 | PCP4           | chr21:41239346-41301322  | 0 | 0.0252884   | inf | 1 |
| XLOC_014310 | KCNE1          | chr21:35818985-35884573  | 0 | 0.00391149  | inf | 1 |
| XLOC_014317 | LOC100133286   | chr21:37441939-37498938  | 0 | 0.127949    | inf | 1 |
| XLOC_014376 | LINC00163      | chr21:46409778-46414001  | 0 | 0.0418572   | inf | 1 |

|             |              |                          |   |            |     |   |
|-------------|--------------|--------------------------|---|------------|-----|---|
| XLOC_014447 | GGTLC2       | chr22:22988781-22990368  | 0 | 0.0259198  | inf | 1 |
| XLOC_014472 | TOP1P2       | chr22:25115000-25170687  | 0 | 0.00773631 | inf | 1 |
| XLOC_014477 | IGLL3P       | chr22:25714223-25716193  | 0 | 0.027628   | inf | 1 |
| XLOC_014526 | ISX          | chr22:35462129-35483380  | 0 | 0.00379124 | inf | 1 |
| XLOC_014537 | CSF2RB       | chr22:37309674-37336479  | 0 | 0.00616358 | inf | 1 |
| XLOC_014573 | CACNA1I      | chr22:39966757-40085740  | 0 | 0.00530062 | inf | 1 |
| XLOC_014603 | SERHL        | chr22:42896584-42915829  | 0 | 0.0242295  | inf | 1 |
| XLOC_014640 | MOV10L1      | chr22:50528434-50600116  | 0 | 0.0139374  | inf | 1 |
| XLOC_014685 | LOC388849    | chr22:20136108-20137431  | 0 | 0.0451677  | inf | 1 |
| XLOC_014740 | MN1          | chr22:28144264-28197486  | 0 | 0.00702363 | inf | 1 |
| XLOC_014780 | C22orf24     | chr22:32329506-32353590  | 0 | 0.0122103  | inf | 1 |
| XLOC_014886 | WNT7B        | chr22:46316247-46373008  | 0 | 0.00737782 | inf | 1 |
| XLOC_014994 | RBMS3        | chr3:29322802-30051886   | 0 | 0.00190257 | inf | 1 |
| XLOC_015066 | TGM4         | chr3:44916097-44956088   | 0 | 0.00569821 | inf | 1 |
| XLOC_015117 | C3orf45      | chr3:50316517-50330026   | 0 | 0.0263487  | inf | 1 |
| XLOC_015128 | IQCF4        | chr3:51851618-51853651   | 0 | 0.027233   | inf | 1 |
| XLOC_015181 | FAM19A1      | chr3:68040733-68594771   | 0 | 0.020212   | inf | 1 |
| XLOC_015191 | FRG2C        | chr3:75713480-75716368   | 0 | 0.00578861 | inf | 1 |
| XLOC_015194 | ROBO2        | chr3:77089293-77699114   | 0 | 0.0011631  | inf | 1 |
| XLOC_015201 | EPHA3        | chr3:89156673-89531284   | 0 | 0.00589387 | inf | 1 |
| XLOC_015227 | GPR128       | chr3:100328432-100414323 | 0 | 0.00524148 | inf | 1 |
| XLOC_015262 | SIDT1        | chr3:113251217-113348422 | 0 | 0.00399804 | inf | 1 |
| XLOC_015268 | TIGIT        | chr3:114012832-114029135 | 0 | 0.0110589  | inf | 1 |
| XLOC_015279 | PLA1A        | chr3:119316694-119348658 | 0 | 0.0084365  | inf | 1 |
| XLOC_015308 | CCDC37       | chr3:126113781-126155398 | 0 | 0.00748488 | inf | 1 |
| XLOC_015353 | EPHB1        | chr3:134514098-134979307 | 0 | 0.00710128 | inf | 1 |
| XLOC_015404 | AADAC        | chr3:151347319-151546276 | 0 | 0.0127281  | inf | 1 |
| XLOC_015417 | PTX3         | chr3:156977531-157221415 | 0 | 0.0266651  | inf | 1 |
| XLOC_015495 | AHSG         | chr3:186330849-186339107 | 0 | 0.0132903  | inf | 1 |
| XLOC_015514 | CLDN16       | chr3:190105660-190129932 | 0 | 0.00358256 | inf | 1 |
| XLOC_015630 | EPM2AIP1     | chr3:37027356-37034795   | 0 | 0.002264   | inf | 1 |
| XLOC_015635 | SCN5A        | chr3:38589552-38691164   | 0 | 0.00194113 | inf | 1 |
| XLOC_015641 | CX3CR1       | chr3:39304984-39323226   | 0 | 0.00774319 | inf | 1 |
| XLOC_015651 | CYP8B1       | chr3:42913683-42917633   | 0 | 0.00730446 | inf | 1 |
| XLOC_015662 | SLC6A20      | chr3:45796940-45838035   | 0 | 0.0108757  | inf | 1 |
| XLOC_015744 | IQCF1        | chr3:51928891-51937386   | 0 | 0.0990648  | inf | 1 |
| XLOC_015797 | CADPS        | chr3:62384020-62861064   | 0 | 0.00245749 | inf | 1 |
| XLOC_015812 | LMOD3        | chr3:69156038-69171746   | 0 | 0.0100534  | inf | 1 |
| XLOC_015834 | STX19        | chr3:93698982-93774522   | 0 | 0.012761   | inf | 1 |
| XLOC_015974 | PRR23A       | chr3:138722803-138725110 | 0 | 0.0199934  | inf | 1 |
| XLOC_015990 | PLOD2        | chr3:145787227-145879282 | 0 | 0.0040598  | inf | 1 |
| XLOC_015998 | TM4SF18      | chr3:149036284-149051548 | 0 | 0.00419517 | inf | 1 |
| XLOC_016005 | FAM194A      | chr3:150377674-150421742 | 0 | 0.0226385  | inf | 1 |
| XLOC_016017 | ARHGFE26-AS1 | chr3:153742189-153975616 | 0 | 0.0458533  | inf | 1 |
| XLOC_016043 | SI           | chr3:164696685-164796283 | 0 | 0.00149892 | inf | 1 |
| XLOC_016048 | WDR49        | chr3:167196472-167371289 | 0 | 0.00385568 | inf | 1 |
| XLOC_016058 | SLC7A14      | chr3:170177341-170303863 | 0 | 0.00254749 | inf | 1 |
| XLOC_016066 | TNFSF10      | chr3:172223297-172241297 | 0 | 0.0079167  | inf | 1 |
| XLOC_016106 | MASP1        | chr3:186933872-187009810 | 0 | 0.00661275 | inf | 1 |

|             |              |                          |   |            |     |   |
|-------------|--------------|--------------------------|---|------------|-----|---|
| XLOC_016111 | TPRG1-AS2    | chr3:188889762-189041271 | 0 | 0.0511421  | inf | 1 |
| XLOC_016162 | PDE6B        | chr4:619362-664681       | 0 | 0.00743094 | inf | 1 |
| XLOC_016193 | NSG1         | chr4:4387982-4543775     | 0 | 0.0138768  | inf | 1 |
| XLOC_016197 | C4orf6       | chr4:5526882-5529527     | 0 | 0.0303545  | inf | 1 |
| XLOC_016214 | HTRA3        | chr4:8271488-8308838     | 0 | 0.0125973  | inf | 1 |
| XLOC_016241 | DRD5         | chr4:9783257-9785633     | 0 | 0.0128184  | inf | 1 |
| XLOC_016246 | C1QTNF7      | chr4:15341559-15447791   | 0 | 0.00704697 | inf | 1 |
| XLOC_016306 | ZAR1         | chr4:48492308-48496422   | 0 | 0.0307625  | inf | 1 |
| XLOC_016367 | SLC4A4       | chr4:72053002-72437804   | 0 | 0.00203259 | inf | 1 |
| XLOC_016379 | EREG         | chr4:75230859-75254477   | 0 | 0.00666317 | inf | 1 |
| XLOC_016397 | LOC100505702 | chr4:79567147-79605655   | 0 | 0.00389649 | inf | 1 |
| XLOC_016422 | SPP1         | chr4:88896801-88904563   | 0 | 0.0144148  | inf | 1 |
| XLOC_016454 | NPNT         | chr4:106816596-106892828 | 0 | 0.00601844 | inf | 1 |
| XLOC_016550 | TDO2         | chr4:156824844-156841558 | 0 | 0.00622484 | inf | 1 |
| XLOC_016594 | STOX2        | chr4:184826508-184938875 | 0 | 0.00353652 | inf | 1 |
| XLOC_016717 | RBM47        | chr4:40425271-40631883   | 0 | 0.0515978  | inf | 1 |
| XLOC_016726 | GABRG1       | chr4:46037786-46126082   | 0 | 0.00137849 | inf | 1 |
| XLOC_016746 | KDR          | chr4:55944425-55991762   | 0 | 0.00183414 | inf | 1 |
| XLOC_016756 | IGFBP7       | chr4:57845108-58071465   | 0 | 0.0577976  | inf | 1 |
| XLOC_016762 | GNRHR        | chr4:68603098-68621804   | 0 | 0.0042475  | inf | 1 |
| XLOC_016771 | UGT2B17      | chr4:69402902-69434245   | 0 | 0.00509732 | inf | 1 |
| XLOC_016779 | SULT1E1      | chr4:70706929-70725870   | 0 | 0.0147482  | inf | 1 |
| XLOC_016781 | IGJ          | chr4:71521257-71532348   | 0 | 0.0236956  | inf | 1 |
| XLOC_016977 | FAM198B      | chr4:159045731-159094202 | 0 | 0.00865211 | inf | 1 |
| XLOC_017007 | GPM6A        | chr4:176554087-176923842 | 0 | 0.0150975  | inf | 1 |
| XLOC_017078 | ROPN1L       | chr5:10441973-10465138   | 0 | 0.0211282  | inf | 1 |
| XLOC_017111 | OSMR         | chr5:38845959-38935743   | 0 | 0.0086784  | inf | 1 |
| XLOC_017121 | NIM1         | chr5:43192169-43280952   | 0 | 0.00468113 | inf | 1 |
| XLOC_017129 | FST          | chr5:52776263-52782304   | 0 | 0.0120197  | inf | 1 |
| XLOC_017176 | PMCHL2       | chr5:70671611-70681820   | 0 | 0.00583795 | inf | 1 |
| XLOC_017186 | TMEM171      | chr5:72416387-72427644   | 0 | 0.0140053  | inf | 1 |
| XLOC_017208 | BHMT         | chr5:78407603-78428113   | 0 | 0.0134737  | inf | 1 |
| XLOC_017219 | CKMT2        | chr5:80256507-81047072   | 0 | 0.0125137  | inf | 1 |
| XLOC_017317 | SOWAHA       | chr5:132149032-132152489 | 0 | 0.0112518  | inf | 1 |
| XLOC_017322 | MIR3661      | chr5:133532147-133561950 | 0 | 19.3829    | inf | 1 |
| XLOC_017338 | MYOT         | chr5:137203544-137223540 | 0 | 0.00813255 | inf | 1 |
| XLOC_017339 | PKD2L2       | chr5:137225124-137368802 | 0 | 0.00968351 | inf | 1 |
| XLOC_017388 | PCDHGB8P     | chr5:140710251-140892548 | 0 | 0.0463384  | inf | 1 |
| XLOC_017400 | POU4F3       | chr5:145718586-145720083 | 0 | 0.0255755  | inf | 1 |
| XLOC_017412 | ADRB2        | chr5:148206155-148208197 | 0 | 0.00700471 | inf | 1 |
| XLOC_017414 | AFAP1L1      | chr5:148651400-148721367 | 0 | 0.00448103 | inf | 1 |
| XLOC_017423 | SLC6A7       | chr5:149569519-149590635 | 0 | 0.00652961 | inf | 1 |
| XLOC_017429 | IRGM         | chr5:150226084-150228231 | 0 | 0.0119465  | inf | 1 |
| XLOC_017441 | KIF4B        | chr5:154393259-154397685 | 0 | 0.00235888 | inf | 1 |
| XLOC_017443 | PPP1R2P3     | chr5:156277548-156279539 | 0 | 0.00525738 | inf | 1 |
| XLOC_017481 | EFCAB9       | chr5:171621175-171630458 | 0 | 0.0605016  | inf | 1 |
| XLOC_017513 | SLC34A1      | chr5:176811431-176825849 | 0 | 0.00918399 | inf | 1 |
| XLOC_017535 | BTNL8        | chr5:180326076-180377906 | 0 | 0.0108913  | inf | 1 |
| XLOC_017602 | SLC45A2      | chr5:33944720-33984780   | 0 | 0.00621863 | inf | 1 |

|             |           |                          |   |            |     |   |
|-------------|-----------|--------------------------|---|------------|-----|---|
| XLOC_017613 | RANBP3L   | chr5:36249103-36302011   | 0 | 0.00575309 | inf | 1 |
| XLOC_017617 | GDNF      | chr5:37812778-37839782   | 0 | 0.00328451 | inf | 1 |
| XLOC_017634 | SEPP1     | chr5:42756919-42812024   | 0 | 0.00751447 | inf | 1 |
| XLOC_017690 | LOC647859 | chr5:70370029-70388897   | 0 | 0.0213927  | inf | 1 |
| XLOC_017703 | F2RL2     | chr5:75699148-76003957   | 0 | 0.00372681 | inf | 1 |
| XLOC_017705 | SNORA47   | chr5:76372531-76444176   | 0 | 2.25814    | inf | 1 |
| XLOC_017741 | POU5F2    | chr5:92919042-93447404   | 0 | 0.0793481  | inf | 1 |
| XLOC_017787 | C5orf63   | chr5:126378249-126409184 | 0 | 0.0024364  | inf | 1 |
| XLOC_017799 | IL5       | chr5:131877135-131879214 | 0 | 0.0141183  | inf | 1 |
| XLOC_017806 | FSTL4     | chr5:132532151-132948223 | 0 | 0.00509337 | inf | 1 |
| XLOC_017829 | SPOCK1    | chr5:136310986-136835018 | 0 | 0.00590237 | inf | 1 |
| XLOC_017834 | NME5      | chr5:137450860-137475132 | 0 | 0.00885919 | inf | 1 |
| XLOC_017845 | MZB1      | chr5:138723256-138725605 | 0 | 0.0398181  | inf | 1 |
| XLOC_017856 | CD14      | chr5:140011312-140013286 | 0 | 0.132971   | inf | 1 |
| XLOC_017924 | ADAM19    | chr5:156904311-157002783 | 0 | 0.00609365 | inf | 1 |
| XLOC_017925 | SOX30     | chr5:157052686-157079428 | 0 | 0.00498036 | inf | 1 |
| XLOC_017984 | PROP1     | chr5:177419235-177423243 | 0 | 0.0108382  | inf | 1 |
| XLOC_018042 | BMP6      | chr6:7727010-8102828     | 0 | 0.0044641  | inf | 1 |
| XLOC_018080 | NRSN1     | chr6:24126413-24147757   | 0 | 0.00487748 | inf | 1 |
| XLOC_018092 | HIST1H3A  | chr6:26020717-26021186   | 0 | 0.265744   | inf | 1 |
| XLOC_018124 | VN1R10P   | chr6:27292539-27293741   | 0 | 0.00904422 | inf | 1 |
| XLOC_018311 | TTBK1     | chr6:43211221-43255997   | 0 | 0.00536377 | inf | 1 |
| XLOC_018323 | CAPN11    | chr6:44126547-44152139   | 0 | 0.00508547 | inf | 1 |
| XLOC_018338 | GPR115    | chr6:47666288-47689757   | 0 | 0.00874704 | inf | 1 |
| XLOC_018356 | MLIP      | chr6:53883713-54131078   | 0 | 0.00690842 | inf | 1 |
| XLOC_018360 | GFRAL     | chr6:55192266-55267291   | 0 | 0.0155199  | inf | 1 |
| XLOC_018415 | TSG1      | chr6:94416800-94486199   | 0 | 0.00197109 | inf | 1 |
| XLOC_018426 | GRIK2     | chr6:101846860-102517958 | 0 | 0.00238759 | inf | 1 |
| XLOC_018434 | NR2E1     | chr6:108487214-108510013 | 0 | 0.00438624 | inf | 1 |
| XLOC_018437 | LINC00222 | chr6:109072856-109091145 | 0 | 0.0165451  | inf | 1 |
| XLOC_018495 | SMLR1     | chr6:131148544-131158276 | 0 | 0.00629727 | inf | 1 |
| XLOC_018518 | SLC35D3   | chr6:137243401-137246776 | 0 | 0.0278624  | inf | 1 |
| XLOC_018540 | GRM1      | chr6:146348781-146758731 | 0 | 0.00189262 | inf | 1 |
| XLOC_018563 | VIP       | chr6:153071931-153080902 | 0 | 0.00653178 | inf | 1 |
| XLOC_018566 | TIAM2     | chr6:155411422-155635617 | 0 | 0.00900336 | inf | 1 |
| XLOC_018588 | SLC22A3   | chr6:160769404-160873611 | 0 | 0.00397157 | inf | 1 |
| XLOC_018614 | MYLK4     | chr6:2663862-2751154     | 0 | 0.00819311 | inf | 1 |
| XLOC_018644 | ELOVL2    | chr6:10980992-11079377   | 0 | 0.00420368 | inf | 1 |
| XLOC_018706 | HIST1H3J  | chr6:27858092-27858570   | 0 | 0.0673109  | inf | 1 |
| XLOC_018725 | UBD       | chr6:29523388-29527702   | 0 | 0.019306   | inf | 1 |
| XLOC_018729 | IFITM4P   | chr6:29718583-29718925   | 0 | 0.0832126  | inf | 1 |
| XLOC_018748 | C6orf15   | chr6:31078999-31080332   | 0 | 0.0150869  | inf | 1 |
| XLOC_018877 | PRPH2     | chr6:42664332-42690358   | 0 | 0.00885274 | inf | 1 |
| XLOC_018885 | CRIP3     | chr6:43265997-43276530   | 0 | 0.0177797  | inf | 1 |
| XLOC_018931 | GCM1      | chr6:52991759-53013624   | 0 | 0.0132577  | inf | 1 |
| XLOC_018986 | GJB7      | chr6:87992696-88052043   | 0 | 0.0148702  | inf | 1 |
| XLOC_019012 | SIM1      | chr6:100836749-100911551 | 0 | 0.0029464  | inf | 1 |
| XLOC_019045 | LOC285758 | chr6:114189178-114194512 | 0 | 0.00355113 | inf | 1 |
| XLOC_019093 | HMGAI1P7  | chr6:134435110-134438818 | 0 | 0.0199684  | inf | 1 |

|             |               |                          |   |             |     |   |
|-------------|---------------|--------------------------|---|-------------|-----|---|
| XLOC_019108 | LOC100130476  | chr6:138144806-138204451 | 0 | 0.0107568   | inf | 1 |
| XLOC_019115 | TXLNB         | chr6:139561198-139613208 | 0 | 0.00233648  | inf | 1 |
| XLOC_019160 | OSTCP1        | chr6:159262157-159278664 | 0 | 0.0831842   | inf | 1 |
| XLOC_019167 | SNORA29       | chr6:160181290-160210735 | 0 | 1.20387     | inf | 1 |
| XLOC_019192 | C6orf123      | chr6:168185218-168197539 | 0 | 0.00888635  | inf | 1 |
| XLOC_020439 | BMPER         | chr7:33944522-34195484   | 0 | 0.00228309  | inf | 1 |
| XLOC_020475 | ADCY1         | chr7:45614124-45762714   | 0 | 0.00161671  | inf | 1 |
| XLOC_020544 | WBSCR28       | chr7:73275488-73280223   | 0 | 0.0580057   | inf | 1 |
| XLOC_020545 | ELN           | chr7:73442426-73484236   | 0 | 0.00851836  | inf | 1 |
| XLOC_020582 | MAGI2-AS3     | chr7:77646373-79100524   | 0 | 0.00116522  | inf | 1 |
| XLOC_020645 | PVRIG         | chr7:99775537-99869855   | 0 | 0.106377    | inf | 1 |
| XLOC_020669 | COL26A1       | chr7:101006121-101202304 | 0 | 0.00898974  | inf | 1 |
| XLOC_020712 | CFTR          | chr7:117120016-117308718 | 0 | 0.00248114  | inf | 1 |
| XLOC_020737 | FAM71F1       | chr7:128355442-128371797 | 0 | 0.00738059  | inf | 1 |
| XLOC_020753 | C7orf45       | chr7:129847703-129856684 | 0 | 0.0464179   | inf | 1 |
| XLOC_020765 | AKR1B15       | chr7:134233848-134264592 | 0 | 0.0106616   | inf | 1 |
| XLOC_020775 | LOC100130880  | chr7:137559724-137686847 | 0 | 0.0424002   | inf | 1 |
| XLOC_020793 | TAS2R3        | chr7:141463896-141464997 | 0 | 0.011816    | inf | 1 |
| XLOC_020800 | PRSS1         | chr7:142457318-142460927 | 0 | 0.0276563   | inf | 1 |
| XLOC_020853 | GIMAP8        | chr7:150147961-150176483 | 0 | 0.0029223   | inf | 1 |
| XLOC_020856 | GIMAP2        | chr7:150382793-150390728 | 0 | 0.0103879   | inf | 1 |
| XLOC_020871 | FABP5P3       | chr7:152133979-152140100 | 0 | 0.032241    | inf | 1 |
| XLOC_020874 | DPP6          | chr7:153584418-154685995 | 0 | 0.00316343  | inf | 1 |
| XLOC_020913 | ZNF890P       | chr7:5160940-5184177     | 0 | 0.00934348  | inf | 1 |
| XLOC_020996 | CRHR2         | chr7:30691558-30739719   | 0 | 0.0120412   | inf | 1 |
| XLOC_021045 | MYO1G         | chr7:45002259-45018704   | 0 | 0.0189522   | inf | 1 |
| XLOC_021051 | SNORA5C       | chr7:45139698-45151346   | 0 | 1.04995     | inf | 1 |
| XLOC_021067 | EGFR-AS1      | chr7:55086724-55275031   | 0 | 0.00672683  | inf | 1 |
| XLOC_021070 | SEPT14        | chr7:55861236-55930482   | 0 | 0.00940844  | inf | 1 |
| XLOC_021078 | ZNF479        | chr7:57187325-57207571   | 0 | 0.00472898  | inf | 1 |
| XLOC_021100 | GTF2IRD2P1    | chr7:72656901-72685658   | 0 | 0.00413344  | inf | 1 |
| XLOC_021148 | ABCB4         | chr7:87031360-87105019   | 0 | 0.00290497  | inf | 1 |
| XLOC_021152 | STEAP4        | chr7:87905743-87936228   | 0 | 0.00264054  | inf | 1 |
| XLOC_021186 | TMEM130       | chr7:98444110-98467673   | 0 | 0.00822465  | inf | 1 |
| XLOC_021194 | CYP3A7,CYP3A7 | chr7:99282301-99332819   | 0 | 0.00534171  | inf | 1 |
| XLOC_021195 | CYP3A4        | chr7:99354582-99381811   | 0 | 0.00546264  | inf | 1 |
| XLOC_021226 | MOGAT3        | chr7:100839012-100844302 | 0 | 0.0311562   | inf | 1 |
| XLOC_021271 | GPR85         | chr7:112720467-112727833 | 0 | 0.00337655  | inf | 1 |
| XLOC_021307 | KCP           | chr7:128516918-128550773 | 0 | 0.00977428  | inf | 1 |
| XLOC_021324 | PLXNA4        | chr7:131808090-132333447 | 0 | 0.000998152 | inf | 1 |
| XLOC_021363 | TRPV5         | chr7:142605647-142630820 | 0 | 0.00853757  | inf | 1 |
| XLOC_021366 | OR6W1P        | chr7:142759380-142760882 | 0 | 0.0100374   | inf | 1 |
| XLOC_021374 | OR2A1         | chr7:143929003-143929936 | 0 | 0.0526235   | inf | 1 |
| XLOC_021444 | FAM90A10P     | chr8:7627105-7628835     | 0 | 0.0365905   | inf | 1 |
| XLOC_021465 | BLK           | chr8:11351520-11422108   | 0 | 0.00954722  | inf | 1 |
| XLOC_021471 | ZNF705D       | chr8:11946846-11973025   | 0 | 0.00413495  | inf | 1 |
| XLOC_021561 | ADAM5         | chr8:39172181-39260375   | 0 | 0.00581595  | inf | 1 |
| XLOC_021600 | FAM110B       | chr8:58907112-59062277   | 0 | 0.00471771  | inf | 1 |
| XLOC_021624 | PREX2         | chr8:68864602-69143897   | 0 | 0.00289691  | inf | 1 |

|             |               |                          |   |            |     |   |
|-------------|---------------|--------------------------|---|------------|-----|---|
| XLOC_021641 | PI15          | chr8:75736771-75767264   | 0 | 0.0014336  | inf | 1 |
| XLOC_021692 | KCNS2         | chr8:99439249-99443023   | 0 | 0.00461478 | inf | 1 |
| XLOC_021698 | FLJ42969      | chr8:102064281-102088479 | 0 | 0.00655454 | inf | 1 |
| XLOC_021704 | BAALC         | chr8:104145190-104242533 | 0 | 0.0111028  | inf | 1 |
| XLOC_021707 | CTHRC1        | chr8:104383742-104395232 | 0 | 0.0215508  | inf | 1 |
| XLOC_021757 | TG            | chr8:133879204-134147143 | 0 | 0.00329177 | inf | 1 |
| XLOC_021973 | ANK1          | chr8:41510743-41754280   | 0 | 0.0266415  | inf | 1 |
| XLOC_021977 | DKK4          | chr8:42231585-42234674   | 0 | 0.017857   | inf | 1 |
| XLOC_022009 | LOC100130298  | chr8:61878679-61880307   | 0 | 0.0356976  | inf | 1 |
| XLOC_022016 | LOC286186     | chr8:66439242-66474901   | 0 | 0.00452659 | inf | 1 |
| XLOC_022087 | RUNX1T1       | chr8:92967194-93115454   | 0 | 0.0110412  | inf | 1 |
| XLOC_022098 | LOC100288748  | chr8:95649512-95651695   | 0 | 0.0099602  | inf | 1 |
| XLOC_022131 | LOC100499183  | chr8:104145190-104242533 | 0 | 0.0172419  | inf | 1 |
| XLOC_022133 | DPYS          | chr8:105391651-105479277 | 0 | 0.00911249 | inf | 1 |
| XLOC_022139 | TMEM74        | chr8:109795345-109799770 | 0 | 0.00908591 | inf | 1 |
| XLOC_022145 | LINC00536     | chr8:116962735-117337297 | 0 | 0.00366917 | inf | 1 |
| XLOC_022155 | SNTB1         | chr8:121547984-121824309 | 0 | 0.00232842 | inf | 1 |
| XLOC_022182 | HHLA1         | chr8:133073732-133117512 | 0 | 0.00395573 | inf | 1 |
| XLOC_022265 | KCNV2         | chr9:2717525-2730037     | 0 | 0.0139064  | inf | 1 |
| XLOC_022299 | IFNA1         | chr9:21440452-21441315   | 0 | 0.016335   | inf | 1 |
| XLOC_022305 | LOC100506422  | chr9:26066672-26118406   | 0 | 0.0088389  | inf | 1 |
| XLOC_022327 | KIAA1045      | chr9:34958191-34982541   | 0 | 0.0023449  | inf | 1 |
| XLOC_022371 | FAM27C        | chr9:44990235-44991492   | 0 | 0.0276447  | inf | 1 |
| XLOC_022378 | ANKRD20A4     | chr9:69381980-69425109   | 0 | 0.00397841 | inf | 1 |
| XLOC_022382 | PGM5          | chr9:70970108-71145977   | 0 | 0.00569833 | inf | 1 |
| XLOC_022392 | GDA           | chr9:74729510-74867140   | 0 | 0.00819605 | inf | 1 |
| XLOC_022412 | NTRK2         | chr9:87283465-87638505   | 0 | 0.00133886 | inf | 1 |
| XLOC_022425 | C9orf47,S1PR3 | chr9:91605777-91620069   | 0 | 0.00458321 | inf | 1 |
| XLOC_022626 | BARHL1        | chr9:135457992-135465640 | 0 | 0.0252618  | inf | 1 |
| XLOC_022689 | RNF224        | chr9:140122017-140124090 | 0 | 0.0385745  | inf | 1 |
| XLOC_022702 | TUBBP5        | chr9:141044564-141071885 | 0 | 0.0236311  | inf | 1 |
| XLOC_022726 | FLJ41200      | chr9:13406378-13431328   | 0 | 0.00459448 | inf | 1 |
| XLOC_022735 | FAM154A       | chr9:18927890-19033256   | 0 | 0.0106415  | inf | 1 |
| XLOC_022740 | SLC24A2       | chr9:19507449-19787017   | 0 | 0.00141782 | inf | 1 |
| XLOC_022791 | PTENP1        | chr9:33673501-33677418   | 0 | 0.00811424 | inf | 1 |
| XLOC_022885 | ALDH1A1       | chr9:75515577-75568233   | 0 | 0.0072215  | inf | 1 |
| XLOC_022894 | GNA14         | chr9:80037994-80263232   | 0 | 0.0157579  | inf | 1 |
| XLOC_022925 | LOC100129316  | chr9:93825575-93837414   | 0 | 0.00219602 | inf | 1 |
| XLOC_022948 | FBP2          | chr9:97321002-97356075   | 0 | 0.0411747  | inf | 1 |
| XLOC_022954 | LINC00092     | chr9:98782013-98784037   | 0 | 0.0255129  | inf | 1 |
| XLOC_022965 | LOC340508     | chr9:99837952-99844227   | 0 | 0.0187708  | inf | 1 |
| XLOC_023031 | TNFSF15       | chr9:117546914-117568408 | 0 | 0.00163456 | inf | 1 |
| XLOC_023033 | TNC           | chr9:117781853-117880536 | 0 | 0.010247   | inf | 1 |
| XLOC_023077 | ANGPTL2       | chr9:129677052-129985445 | 0 | 0.0100342  | inf | 1 |
| XLOC_023155 | SOHLH1        | chr9:138585254-138591374 | 0 | 0.0165708  | inf | 1 |
| XLOC_023174 | LCN10         | chr9:139632618-139637411 | 0 | 0.0111467  | inf | 1 |
| XLOC_023232 | PLCXD1        | chrX:192990-220022       | 0 | 0.00425472 | inf | 1 |
| XLOC_023329 | OTC           | chrX:38211735-38280703   | 0 | 0.0107882  | inf | 1 |
| XLOC_023454 | ARR3          | chrX:69488184-69501690   | 0 | 0.0102819  | inf | 1 |



|             |             |                           |         |            |        |          |
|-------------|-------------|---------------------------|---------|------------|--------|----------|
| XLOC_023457 | GDPD2       | chrX:69642880-69653241    | 0       | 0.00713048 | inf    | 1        |
| XLOC_023524 | NXF4        | chrX:101804892-101826621  | 0       | 0.00647253 | inf    | 1        |
| XLOC_023529 | RAB40AL     | chrX:102192199-102193228  | 0       | 0.134185   | inf    | 1        |
| XLOC_023538 | TMEM31      | chrX:102962271-102983552  | 0       | 0.0267954  | inf    | 1        |
| XLOC_023555 | VSIG1       | chrX:107288199-107322414  | 0       | 0.0107612  | inf    | 1        |
| XLOC_023561 | RGAG1       | chrX:109437413-109699562  | 0       | 0.00294777 | inf    | 1        |
| XLOC_023593 | AKAP14      | chrX:119029935-119054679  | 0       | 0.0209754  | inf    | 1        |
| XLOC_023648 | SPANXA2-OT1 | chrX:140590842-140738069  | 0       | 0.00695419 | inf    | 1        |
| XLOC_023679 | MAGEA4      | chrX:151081360-151093642  | 0       | 0.00800148 | inf    | 1        |
| XLOC_023681 | MAGEA6      | chrX:151867244-151870814  | 0       | 0.0119906  | inf    | 1        |
| XLOC_023683 | CSAG1       | chrX:151903227-151909518  | 0       | 0.0226479  | inf    | 1        |
| XLOC_023691 | BGN         | chrX:152713122-152775004  | 0       | 0.00799551 | inf    | 1        |
| XLOC_023693 | DUSP9       | chrX:152907896-152916781  | 0       | 0.021541   | inf    | 1        |
| XLOC_023739 | LINC00102   | chrX:2527305-2575270      | 0       | 0.00819605 | inf    | 1        |
| XLOC_023768 | ACE2        | chrX:15579155-15620192    | 0       | 0.00552084 | inf    | 1        |
| XLOC_023775 | BEND2       | chrX:18181050-18239024    | 0       | 0.00242682 | inf    | 1        |
| XLOC_023779 | GPR64       | chrX:19007424-19140755    | 0       | 0.00231272 | inf    | 1        |
| XLOC_023809 | FTH1P18     | chrX:37060954-37061867    | 0       | 0.0267722  | inf    | 1        |
| XLOC_023824 | CXorf36     | chrX:45007617-45060146    | 0       | 0.00290889 | inf    | 1        |
| XLOC_023886 | WNK3        | chrX:54219255-54384438    | 0       | 0.00218923 | inf    | 1        |
| XLOC_023921 | IL2RG       | chrX:70327253-70331481    | 0       | 0.0120894  | inf    | 1        |
| XLOC_023925 | CXCR3       | chrX:70430034-70948962    | 0       | 0.0155027  | inf    | 1        |
| XLOC_023949 | ZDHHC15     | chrX:74588261-74743337    | 0       | 0.00263115 | inf    | 1        |
| XLOC_023985 | TCEAL6      | chrX:101394932-101397388  | 0       | 0.0119288  | inf    | 1        |
| XLOC_024031 | KIAA1210    | chrX:118212597-118284542  | 0       | 0.00145918 | inf    | 1        |
| XLOC_024065 | ACTRT1      | chrX:127184940-127186382  | 0       | 0.0165778  | inf    | 1        |
| XLOC_024066 | SMARCA1     | chrX:128580477-128657460  | 0       | 0.00378756 | inf    | 1        |
| XLOC_024125 | SPANXC      | chrX:140335595-140336646  | 0       | 0.0524389  | inf    | 1        |
| XLOC_024150 | FMR1-AS1    | chrX:146990948-147032647  | 0       | 0.0134779  | inf    | 1        |
| XLOC_024170 | PNMA5       | chrX:152157367-152162671  | 0       | 0.00826821 | inf    | 1        |
| XLOC_024208 | TMLHE-AS1   | chrX:154576449-154603823  | 0       | 0.00625313 | inf    | 1        |
| XLOC_024304 | GYG2P1      | chrY:14517914-14533389    | 0       | 0.0230603  | inf    | 1        |
| XLOC_023825 | MIR221      | chrX:45605584-45605694    | 16.9086 | 0          | #NAME? | 0.322071 |
| XLOC_004464 | SNORD6      | chr11:93464668-93464739   | 487.812 | 0          | #NAME? | 0.42844  |
| XLOC_008951 | MIR4523     | chr17:27717679-27717748   | 418.685 | 0          | #NAME? | 0.44926  |
| XLOC_009232 | SNORD104    | chr17:62223437-62223517   | 115.097 | 0          | #NAME? | 0.44926  |
| XLOC_010362 | SNORD58C    | chr18:47007547-47018935   | 49.7513 | 0          | #NAME? | 0.449418 |
| XLOC_018017 | SNORD95     | chr5:180663927-180670906  | 1001.91 | 0          | #NAME? | 0.451834 |
| XLOC_010363 | SNORD58A    | chr18:47007547-47018935   | 724.526 | 0          | #NAME? | 0.45301  |
| XLOC_008944 | SNORD4B     | chr17:27046999-27053949   | 376.22  | 0          | #NAME? | 0.45332  |
| XLOC_009917 | MIR3064     | chr17:62494373-62502484   | 944.449 | 0          | #NAME? | 0.510254 |
| XLOC_007550 | MIR1282     | chr15:44038589-44094769   | 49.8854 | 0          | #NAME? | 0.529439 |
| XLOC_018757 | SNORD117    | chr6:31496738-31514625    | 233.028 | 0          | #NAME? | 0.54523  |
| XLOC_004278 | SNORD31     | chr11:62619459-62623360   | 437.393 | 0          | #NAME? | 0.575157 |
| XLOC_011318 | MIR637      | chr19:3958451-3969826     | 65.1108 | 0          | #NAME? | 0.614625 |
| XLOC_023081 | MIR3911     | chr9:130374485-130454995  | 13.7581 | 0          | #NAME? | 0.617599 |
| XLOC_022241 | MIR1234     | chr8:145597730-145634733  | 82.2439 | 0          | #NAME? | 0.631075 |
| XLOC_002753 | MIR4484     | chr10:127477146-127511837 | 124.545 | 0          | #NAME? | 0.637072 |
| XLOC_022448 | MIRLET7D    | chr9:96938851-96966848    | 87.1596 | 0          | #NAME? | 0.642802 |

|             |                 |                          |            |   |        |   |
|-------------|-----------------|--------------------------|------------|---|--------|---|
| XLOC_000001 | DDX11L1         | chr1:11873-29370         | 0.0114857  | 0 | #NAME? | 1 |
| XLOC_000003 | LOC100132062.L1 | chr1:323891-328581       | 0.0157779  | 0 | #NAME? | 1 |
| XLOC_000128 | CLCNKA          | chr1:16348485-16360545   | 0.00910098 | 0 | #NAME? | 1 |
| XLOC_000155 | CDA             | chr1:20915443-20945400   | 0.0227857  | 0 | #NAME? | 1 |
| XLOC_000175 | MDS2            | chr1:23953823-23967056   | 0.0209926  | 0 | #NAME? | 1 |
| XLOC_000205 | LIN28A          | chr1:26737268-26756219   | 0.0174272  | 0 | #NAME? | 1 |
| XLOC_000247 | HCRTR1          | chr1:32083300-32092919   | 0.0121561  | 0 | #NAME? | 1 |
| XLOC_000274 | GJB3            | chr1:35246789-35251967   | 0.0115775  | 0 | #NAME? | 1 |
| XLOC_000305 | TMCO2           | chr1:40713572-40717365   | 0.0364069  | 0 | #NAME? | 1 |
| XLOC_000375 | MKNK1-AS1       | chr1:47004367-47069966   | 0.00729752 | 0 | #NAME? | 1 |
| XLOC_000396 | FAM159A         | chr1:53099065-53122737   | 0.0662603  | 0 | #NAME? | 1 |
| XLOC_000398 | ZYG11A          | chr1:53308182-53360247   | 0.00390931 | 0 | #NAME? | 1 |
| XLOC_000417 | PRKAA2          | chr1:57110989-57181008   | 0.00190329 | 0 | #NAME? | 1 |
| XLOC_000427 | ANGPTL3         | chr1:62920396-63154039   | 0.00614961 | 0 | #NAME? | 1 |
| XLOC_000429 | FOXD3           | chr1:63788729-63790797   | 0.0461299  | 0 | #NAME? | 1 |
| XLOC_000447 | IL23R           | chr1:67632168-67725650   | 0.00477917 | 0 | #NAME? | 1 |
| XLOC_000451 | LRRC7           | chr1:70225857-70589171   | 0.00301816 | 0 | #NAME? | 1 |
| XLOC_000467 | ST6GALNAC3      | chr1:76540388-77096669   | 0.0145099  | 0 | #NAME? | 1 |
| XLOC_000481 | DNASE2B         | chr1:84864214-84880691   | 0.0171552  | 0 | #NAME? | 1 |
| XLOC_000522 | FLJ31662        | chr1:95940292-95944912   | 0.00648915 | 0 | #NAME? | 1 |
| XLOC_000563 | SYPL2           | chr1:110009099-110024764 | 0.012795   | 0 | #NAME? | 1 |
| XLOC_000566 | GPR61           | chr1:110082493-110088455 | 0.0187339  | 0 | #NAME? | 1 |
| XLOC_000625 | HSD3BP4         | chr1:120106502-120115199 | 0.00339396 | 0 | #NAME? | 1 |
| XLOC_000742 | TDRD10          | chr1:154474694-154520623 | 0.0138921  | 0 | #NAME? | 1 |
| XLOC_000808 | KCNJ9           | chr1:160051359-160059212 | 0.00600484 | 0 | #NAME? | 1 |
| XLOC_000816 | VANGL2          | chr1:160370363-160398468 | 0.00526402 | 0 | #NAME? | 1 |
| XLOC_000829 | FCGR2A          | chr1:161475204-161489360 | 0.00870554 | 0 | #NAME? | 1 |
| XLOC_000832 | HSPA7           | chr1:161575848-161578341 | 0.00865198 | 0 | #NAME? | 1 |
| XLOC_000895 | GPR52           | chr1:174128551-174964445 | 0.0118842  | 0 | #NAME? | 1 |
| XLOC_000954 | CRB1            | chr1:197170591-197447585 | 0.0122386  | 0 | #NAME? | 1 |
| XLOC_000985 | PRELP           | chr1:203444882-203460479 | 0.00888832 | 0 | #NAME? | 1 |
| XLOC_000989 | LINC00260       | chr1:203595914-203713209 | 0.0322005  | 0 | #NAME? | 1 |
| XLOC_000999 | LEMD1-AS1       | chr1:205342379-205391214 | 0.0084081  | 0 | #NAME? | 1 |
| XLOC_001002 | LOC284581       | chr1:205831206-205865215 | 0.0184684  | 0 | #NAME? | 1 |
| XLOC_001019 | CR1             | chr1:207669472-207815110 | 0.00420424 | 0 | #NAME? | 1 |
| XLOC_001026 | HSD11B1         | chr1:209859524-209908295 | 0.0267528  | 0 | #NAME? | 1 |
| XLOC_001073 | CNIH3           | chr1:224804178-224928249 | 0.0379469  | 0 | #NAME? | 1 |
| XLOC_001115 | LINC00184       | chr1:234765056-234770526 | 0.00839509 | 0 | #NAME? | 1 |
| XLOC_001130 | KMO             | chr1:241695433-241803701 | 0.00541183 | 0 | #NAME? | 1 |
| XLOC_001193 | TNFRSF4         | chr1:1146705-1149548     | 0.127781   | 0 | #NAME? | 1 |
| XLOC_001207 | C1orf233        | chr1:1533387-1535476     | 0.0371248  | 0 | #NAME? | 1 |
| XLOC_001224 | TTC34           | chr1:2572806-2706230     | 0.0166038  | 0 | #NAME? | 1 |
| XLOC_001240 | HES2            | chr1:6475293-6479979     | 0.00907841 | 0 | #NAME? | 1 |
| XLOC_001251 | SLC2A7          | chr1:9063358-9086404     | 0.0183237  | 0 | #NAME? | 1 |
| XLOC_001300 | SPATA21         | chr1:16725137-16763919   | 0.0134776  | 0 | #NAME? | 1 |
| XLOC_001327 | PLA2G2D         | chr1:20439142-20446059   | 0.0100823  | 0 | #NAME? | 1 |
| XLOC_001436 | DLGAP3          | chr1:35331036-35370984   | 0.0121873  | 0 | #NAME? | 1 |
| XLOC_001530 | CYP4A11         | chr1:47394845-47407156   | 0.0145192  | 0 | #NAME? | 1 |
| XLOC_001557 | GLIS1           | chr1:53971905-54199877   | 0.00972781 | 0 | #NAME? | 1 |

|             |              |                           |            |   |        |   |
|-------------|--------------|---------------------------|------------|---|--------|---|
| XLOC_001576 | TACSTD2      | chr1:59041094-59043166    | 0.0330328  | 0 | #NAME? | 1 |
| XLOC_001626 | LPAR3        | chr1:85279085-85358896    | 0.0489722  | 0 | #NAME? | 1 |
| XLOC_001666 | DPYD         | chr1:97543299-98386615    | 0.00327766 | 0 | #NAME? | 1 |
| XLOC_001724 | PTPN22       | chr1:114356432-114447741  | 0.00913429 | 0 | #NAME? | 1 |
| XLOC_001731 | AMPD1        | chr1:115215719-115238239  | 0.00650032 | 0 | #NAME? | 1 |
| XLOC_001750 | REG4         | chr1:120336640-120354203  | 0.0125679  | 0 | #NAME? | 1 |
| XLOC_001818 | CELF3        | chr1:151672533-151689290  | 0.0233674  | 0 | #NAME? | 1 |
| XLOC_001822 | RORC         | chr1:151778546-151804348  | 0.00874211 | 0 | #NAME? | 1 |
| XLOC_001832 | FLG          | chr1:152274650-152297679  | 0.00313737 | 0 | #NAME? | 1 |
| XLOC_001981 | RPL31P11     | chr1:161653494-161655042  | 0.0284154  | 0 | #NAME? | 1 |
| XLOC_002004 | LOC100505918 | chr1:168369426-168391894  | 0.0059214  | 0 | #NAME? | 1 |
| XLOC_002010 | F5           | chr1:169481191-169555769  | 0.00290113 | 0 | #NAME? | 1 |
| XLOC_002012 | SELL         | chr1:169659805-169680843  | 0.00665564 | 0 | #NAME? | 1 |
| XLOC_002048 | ASTN1        | chr1:176830202-177134024  | 0.00222787 | 0 | #NAME? | 1 |
| XLOC_002068 | NMNAT2       | chr1:183217371-183387634  | 0.00284867 | 0 | #NAME? | 1 |
| XLOC_002072 | APOBEC4      | chr1:183605207-183897666  | 0.0128376  | 0 | #NAME? | 1 |
| XLOC_002089 | F13B         | chr1:197008320-197036397  | 0.0129597  | 0 | #NAME? | 1 |
| XLOC_002094 | LOC100131234 | chr1:198777131-198906558  | 0.0305184  | 0 | #NAME? | 1 |
| XLOC_002122 | MYOG         | chr1:203052256-203055166  | 0.0145209  | 0 | #NAME? | 1 |
| XLOC_002155 | IL10         | chr1:206940947-206945839  | 0.0142266  | 0 | #NAME? | 1 |
| XLOC_002182 | USH2A        | chr1:215796235-216596738  | 0.00291118 | 0 | #NAME? | 1 |
| XLOC_002237 | AGT          | chr1:230838271-230850336  | 0.010577   | 0 | #NAME? | 1 |
| XLOC_002247 | DISC2        | chr1:231664398-232177019  | 0.00415797 | 0 | #NAME? | 1 |
| XLOC_002313 | PRR26        | chr10:320129-735608       | 0.0772987  | 0 | #NAME? | 1 |
| XLOC_002324 | AKR1C3       | chr10:5090957-5149878     | 0.0130812  | 0 | #NAME? | 1 |
| XLOC_002421 | ZNF32-AS3    | chr10:44124264-44170147   | 0.0158385  | 0 | #NAME? | 1 |
| XLOC_002437 | GPRIN2       | chr10:46993545-47000568   | 0.0126359  | 0 | #NAME? | 1 |
| XLOC_002464 | MTRNR2L5     | chr10:57358749-57360487   | 0.0107902  | 0 | #NAME? | 1 |
| XLOC_002475 | ZNF365       | chr10:64133915-64431771   | 0.00882354 | 0 | #NAME? | 1 |
| XLOC_002503 | ADAMTS14     | chr10:72432558-72522195   | 0.00559348 | 0 | #NAME? | 1 |
| XLOC_002601 | FFAR4        | chr10:95326421-95349829   | 0.0127437  | 0 | #NAME? | 1 |
| XLOC_002610 | CYP2C9       | chr10:96698414-96749148   | 0.0227851  | 0 | #NAME? | 1 |
| XLOC_002627 | C10orf62     | chr10:99344101-99372555   | 0.0702301  | 0 | #NAME? | 1 |
| XLOC_002634 | CNNM1        | chr10:101088855-101154087 | 0.00314545 | 0 | #NAME? | 1 |
| XLOC_002642 | WNT8B        | chr10:102222811-102243399 | 0.016071   | 0 | #NAME? | 1 |
| XLOC_002702 | PLEKHS1      | chr10:115511212-115542192 | 0.0119316  | 0 | #NAME? | 1 |
| XLOC_002732 | BTBD16       | chr10:124030820-124097676 | 0.00981929 | 0 | #NAME? | 1 |
| XLOC_002735 | ARMS2        | chr10:124214178-124216868 | 0.0338871  | 0 | #NAME? | 1 |
| XLOC_002738 | FLJ46361     | chr10:124516209-124557161 | 0.0109411  | 0 | #NAME? | 1 |
| XLOC_002837 | ST8SIA6      | chr10:17362675-17496254   | 0.0151846  | 0 | #NAME? | 1 |
| XLOC_002860 | LRRRC37A6P   | chr10:27534781-27541235   | 0.00455445 | 0 | #NAME? | 1 |
| XLOC_002889 | LOC441666    | chr10:42827313-42863493   | 0.00197568 | 0 | #NAME? | 1 |
| XLOC_002902 | OR13A1       | chr10:45798101-45811056   | 0.00886077 | 0 | #NAME? | 1 |
| XLOC_002909 | LINC00842    | chr10:47096453-47151400   | 0.00557064 | 0 | #NAME? | 1 |
| XLOC_002914 | BMS1P6       | chr10:47225570-47243511   | 0.00407454 | 0 | #NAME? | 1 |
| XLOC_002915 | RBP3         | chr10:48381486-48390991   | 0.00712402 | 0 | #NAME? | 1 |
| XLOC_002940 | A1CF         | chr10:52559168-52645435   | 0.0142889  | 0 | #NAME? | 1 |
| XLOC_002976 | NODAL        | chr10:72191691-72201465   | 0.0336343  | 0 | #NAME? | 1 |
| XLOC_002999 | MYOZ1        | chr10:75391369-75401515   | 0.0113002  | 0 | #NAME? | 1 |

|             |              |                           |            |   |        |   |
|-------------|--------------|---------------------------|------------|---|--------|---|
| XLOC_003079 | CRTAC1       | chr10:99609994-99790585   | 0.00761503 | 0 | #NAME? | 1 |
| XLOC_003117 | CYP17A1      | chr10:104590287-104597290 | 0.0257826  | 0 | #NAME? | 1 |
| XLOC_003197 | TCERG1L      | chr10:132890654-133109984 | 0.0119677  | 0 | #NAME? | 1 |
| XLOC_003211 | SYCE1        | chr10:135367403-135383462 | 0.0285326  | 0 | #NAME? | 1 |
| XLOC_003284 | OR51I2       | chr11:5362112-5526882     | 0.0267106  | 0 | #NAME? | 1 |
| XLOC_003285 | OR52D1       | chr11:5362112-5526882     | 0.0185676  | 0 | #NAME? | 1 |
| XLOC_003305 | OR10A2       | chr11:6890985-6891897     | 0.054471   | 0 | #NAME? | 1 |
| XLOC_003331 | MRV11-AS1    | chr11:10562782-10715535   | 0.115045   | 0 | #NAME? | 1 |
| XLOC_003347 | OR7E14P      | chr11:17073432-17074591   | 0.0410275  | 0 | #NAME? | 1 |
| XLOC_003359 | LDHAL6A      | chr11:18477373-18501147   | 0.0106468  | 0 | #NAME? | 1 |
| XLOC_003379 | FSHB         | chr11:30252562-30256824   | 0.00843204 | 0 | #NAME? | 1 |
| XLOC_003416 | C11orf96     | chr11:43964105-43965433   | 0.0846609  | 0 | #NAME? | 1 |
| XLOC_003430 | CREB3L1      | chr11:46299227-46342972   | 0.0080952  | 0 | #NAME? | 1 |
| XLOC_003492 | SMTNL1       | chr11:57310113-57317747   | 0.0287024  | 0 | #NAME? | 1 |
| XLOC_003521 | MS4A7        | chr11:60145957-60163426   | 0.00572508 | 0 | #NAME? | 1 |
| XLOC_003570 | SLC22A10     | chr11:63014620-63330855   | 0.005868   | 0 | #NAME? | 1 |
| XLOC_003573 | RARRES3      | chr11:63014620-63330855   | 0.0255635  | 0 | #NAME? | 1 |
| XLOC_003614 | MIR612       | chr11:65211928-65212028   | 21.6283    | 0 | #NAME? | 1 |
| XLOC_003626 | OVOL1        | chr11:65554504-65564690   | 0.00708015 | 0 | #NAME? | 1 |
| XLOC_003652 | SYT12        | chr11:66790189-66818334   | 0.00850091 | 0 | #NAME? | 1 |
| XLOC_003683 | SHANK2-AS1   | chr11:70313960-70935808   | 0.0165473  | 0 | #NAME? | 1 |
| XLOC_003727 | B3GNT6       | chr11:76745434-76753005   | 0.0115759  | 0 | #NAME? | 1 |
| XLOC_003768 | FOLR4        | chr11:94038802-94040858   | 0.0406429  | 0 | #NAME? | 1 |
| XLOC_003806 | C11orf53     | chr11:111126706-111156972 | 0.0247044  | 0 | #NAME? | 1 |
| XLOC_003864 | PDZD3        | chr11:119056165-119060932 | 0.0182707  | 0 | #NAME? | 1 |
| XLOC_003869 | POU2F3       | chr11:120107348-120190653 | 0.0149121  | 0 | #NAME? | 1 |
| XLOC_003915 | FLI1         | chr11:128556429-128683162 | 0.00632702 | 0 | #NAME? | 1 |
| XLOC_003917 | BARX2        | chr11:129245880-129322174 | 0.011439   | 0 | #NAME? | 1 |
| XLOC_003922 | ADAMTS15     | chr11:130318868-130346539 | 0.00724384 | 0 | #NAME? | 1 |
| XLOC_004044 | OR2D2        | chr11:6912804-6913731     | 0.0219528  | 0 | #NAME? | 1 |
| XLOC_004090 | PLEKHA7      | chr11:16809206-17035963   | 0.00542138 | 0 | #NAME? | 1 |
| XLOC_004119 | MUC15        | chr11:26353677-26684836   | 0.0111767  | 0 | #NAME? | 1 |
| XLOC_004120 | SLC5A12      | chr11:26688565-26743574   | 0.00430089 | 0 | #NAME? | 1 |
| XLOC_004143 | PAMR1        | chr11:35453375-35547176   | 0.00635101 | 0 | #NAME? | 1 |
| XLOC_004150 | LOC100507300 | chr11:43902356-43942494   | 0.00903622 | 0 | #NAME? | 1 |
| XLOC_004211 | PRG2         | chr11:57154833-57158130   | 0.0469611  | 0 | #NAME? | 1 |
| XLOC_004251 | DKFZP434K028 | chr11:61520120-61555989   | 0.0205887  | 0 | #NAME? | 1 |
| XLOC_004382 | FLJ42102     | chr11:71116791-71134400   | 0.00830857 | 0 | #NAME? | 1 |
| XLOC_004391 | PHOX2A       | chr11:71935881-71955220   | 0.0355153  | 0 | #NAME? | 1 |
| XLOC_004404 | P4HA3        | chr11:73977701-74022699   | 0.00727584 | 0 | #NAME? | 1 |
| XLOC_004416 | MAP6         | chr11:75297962-75379479   | 0.00841012 | 0 | #NAME? | 1 |
| XLOC_004433 | TENM4        | chr11:78364327-79151695   | 0.00173024 | 0 | #NAME? | 1 |
| XLOC_004453 | NOX4         | chr11:89057521-89322779   | 0.0125631  | 0 | #NAME? | 1 |
| XLOC_004465 | SNORA1       | chr11:93465169-93465299   | 3.10648    | 0 | #NAME? | 1 |
| XLOC_004487 | MMP7         | chr11:102391238-102401478 | 0.0150686  | 0 | #NAME? | 1 |
| XLOC_004503 | CARD16       | chr11:104912052-104916051 | 0.0329194  | 0 | #NAME? | 1 |
| XLOC_004517 | RDX          | chr11:110045604-110167437 | 0.0137928  | 0 | #NAME? | 1 |
| XLOC_004520 | POU2AF1      | chr11:111222980-111250157 | 0.00677127 | 0 | #NAME? | 1 |
| XLOC_004546 | APOA1        | chr11:116706468-116708338 | 0.0331967  | 0 | #NAME? | 1 |

|             |              |                           |            |   |        |   |
|-------------|--------------|---------------------------|------------|---|--------|---|
| XLOC_004560 | CD3D         | chr11:118209788-118213459 | 0.0581881  | 0 | #NAME? | 1 |
| XLOC_004589 | SCN3B        | chr11:123499894-123525315 | 0.00296739 | 0 | #NAME? | 1 |
| XLOC_004664 | GALNT8       | chr12:4829751-4881892     | 0.01035    | 0 | #NAME? | 1 |
| XLOC_004703 | NANOG        | chr12:7941994-7948655     | 0.0203444  | 0 | #NAME? | 1 |
| XLOC_004711 | RIMKLB       | chr12:8850517-8929787     | 0.00252424 | 0 | #NAME? | 1 |
| XLOC_004716 | LOC100499405 | chr12:9392598-9395645     | 0.0162092  | 0 | #NAME? | 1 |
| XLOC_004730 | LOC338817    | chr12:11700963-11717335   | 0.00608485 | 0 | #NAME? | 1 |
| XLOC_004732 | BCL2L14      | chr12:12223877-12252627   | 0.00788463 | 0 | #NAME? | 1 |
| XLOC_004763 | SLCO1C1      | chr12:20848288-20906320   | 0.00471675 | 0 | #NAME? | 1 |
| XLOC_004767 | IAPP         | chr12:21417533-21548371   | 0.00813961 | 0 | #NAME? | 1 |
| XLOC_004794 | DENND5B-AS1  | chr12:31535156-31768285   | 0.112153   | 0 | #NAME? | 1 |
| XLOC_004872 | AMHR2        | chr12:53817638-53825318   | 0.0134398  | 0 | #NAME? | 1 |
| XLOC_005005 | OTOGL        | chr12:80603232-80772870   | 0.00204248 | 0 | #NAME? | 1 |
| XLOC_005115 | DTX1         | chr12:113495661-113535833 | 0.0111001  | 0 | #NAME? | 1 |
| XLOC_005129 | SRRM4        | chr12:119419299-119600856 | 0.00206843 | 0 | #NAME? | 1 |
| XLOC_005156 | LRRRC43      | chr12:122652265-122688018 | 0.0417019  | 0 | #NAME? | 1 |
| XLOC_005165 | LOC100507091 | chr12:123468026-123594975 | 0.00776884 | 0 | #NAME? | 1 |
| XLOC_005169 | MIR3908      | chr12:124020955-124021081 | 3.09023    | 0 | #NAME? | 1 |
| XLOC_005187 | GLT1D1       | chr12:129338080-129469509 | 0.0186685  | 0 | #NAME? | 1 |
| XLOC_005191 | GPR133       | chr12:131438451-131626008 | 0.00992455 | 0 | #NAME? | 1 |
| XLOC_005192 | LOC116437    | chr12:131649555-131697476 | 0.00685918 | 0 | #NAME? | 1 |
| XLOC_005221 | LOC100271702 | chr12:2038367-2045742     | 0.0227049  | 0 | #NAME? | 1 |
| XLOC_005276 | A2M          | chr12:9217772-9268558     | 0.00318134 | 0 | #NAME? | 1 |
| XLOC_005305 | TAS2R50      | chr12:10998447-11328619   | 0.0233733  | 0 | #NAME? | 1 |
| XLOC_005310 | TAS2R43      | chr12:10998447-11328619   | 0.0212633  | 0 | #NAME? | 1 |
| XLOC_005313 | PRB3         | chr12:11418856-11422641   | 0.0181704  | 0 | #NAME? | 1 |
| XLOC_005343 | SLCO1A2      | chr12:21417533-21548371   | 0.00237185 | 0 | #NAME? | 1 |
| XLOC_005366 | PTHLH        | chr12:28111016-28124916   | 0.0320242  | 0 | #NAME? | 1 |
| XLOC_005376 | H3F3C        | chr12:31944118-31945175   | 0.0251672  | 0 | #NAME? | 1 |
| XLOC_005388 | PRICKLE1     | chr12:42852139-42983572   | 0.00368879 | 0 | #NAME? | 1 |
| XLOC_005405 | ENDOU        | chr12:48103517-48119355   | 0.0227091  | 0 | #NAME? | 1 |
| XLOC_005474 | KRT1         | chr12:53068519-53074191   | 0.00665802 | 0 | #NAME? | 1 |
| XLOC_005507 | DCD          | chr12:55038374-55042149   | 0.0887001  | 0 | #NAME? | 1 |
| XLOC_005535 | SDR9C7       | chr12:57316937-57328189   | 0.0435684  | 0 | #NAME? | 1 |
| XLOC_005577 | LOC100130075 | chr12:69198216-69199274   | 0.0194348  | 0 | #NAME? | 1 |
| XLOC_005581 | LRRRC10      | chr12:70002344-70004942   | 0.0295734  | 0 | #NAME? | 1 |
| XLOC_005615 | LOC728084    | chr12:89404902-89413469   | 0.00582948 | 0 | #NAME? | 1 |
| XLOC_005690 | TRPV4        | chr12:110220891-110271241 | 0.00795315 | 0 | #NAME? | 1 |
| XLOC_005726 | NOS1         | chr12:117645946-117799607 | 0.00208951 | 0 | #NAME? | 1 |
| XLOC_005738 | PLA2G1B      | chr12:120759913-120765592 | 0.0620833  | 0 | #NAME? | 1 |
| XLOC_005748 | OASL         | chr12:121458094-121477045 | 0.0114036  | 0 | #NAME? | 1 |
| XLOC_005755 | HPD          | chr12:122277432-122326517 | 0.0407195  | 0 | #NAME? | 1 |
| XLOC_005817 | ATP12A       | chr13:25254548-25285923   | 0.0063282  | 0 | #NAME? | 1 |
| XLOC_005851 | NBEA         | chr13:35516423-36705514   | 0.00291807 | 0 | #NAME? | 1 |
| XLOC_005883 | SPERT        | chr13:46276445-46288693   | 0.0400736  | 0 | #NAME? | 1 |
| XLOC_005892 | MLNR         | chr13:49794473-49796513   | 0.0555244  | 0 | #NAME? | 1 |
| XLOC_005904 | SERPINE3     | chr13:51915167-52027275   | 0.0321511  | 0 | #NAME? | 1 |
| XLOC_005907 | CCDC70       | chr13:52436116-52440372   | 0.0171913  | 0 | #NAME? | 1 |
| XLOC_006007 | GAS6-AS1     | chr13:114518582-114567046 | 0.0562955  | 0 | #NAME? | 1 |

|             |                |                           |            |   |        |   |
|-------------|----------------|---------------------------|------------|---|--------|---|
| XLOC_006043 | GPR12          | chr13:27329338-27334922   | 0.00441299 | 0 | #NAME? | 1 |
| XLOC_006086 | LINC00598      | chr13:40921270-41055143   | 0.0150782  | 0 | #NAME? | 1 |
| XLOC_006103 | KCTD4          | chr13:45694630-45858239   | 0.00744228 | 0 | #NAME? | 1 |
| XLOC_006112 | LINC00563      | chr13:46870579-46871979   | 0.0113544  | 0 | #NAME? | 1 |
| XLOC_006119 | LPAR6          | chr13:48877882-49056026   | 0.00671859 | 0 | #NAME? | 1 |
| XLOC_006131 | DLEU7          | chr13:51286758-51424041   | 0.0478854  | 0 | #NAME? | 1 |
| XLOC_006165 | POU4F1         | chr13:78628989-79233314   | 0.00554418 | 0 | #NAME? | 1 |
| XLOC_006181 | DCT            | chr13:95091840-95131936   | 0.00702782 | 0 | #NAME? | 1 |
| XLOC_006192 | SLC15A1        | chr13:99336054-99404929   | 0.0122258  | 0 | #NAME? | 1 |
| XLOC_006263 | RNASE2         | chr14:21423629-21424594   | 0.0245122  | 0 | #NAME? | 1 |
| XLOC_006305 | NYNRIN         | chr14:24867991-24888494   | 0.00341594 | 0 | #NAME? | 1 |
| XLOC_006330 | SSTR1          | chr14:38677203-38682268   | 0.00550369 | 0 | #NAME? | 1 |
| XLOC_006418 | PLEKHD1        | chr14:69951470-69995215   | 0.0111802  | 0 | #NAME? | 1 |
| XLOC_006500 | UNC79          | chr14:93799564-94173689   | 0.00700614 | 0 | #NAME? | 1 |
| XLOC_006691 | NDRG2          | chr14:21484921-21493935   | 0.00855201 | 0 | #NAME? | 1 |
| XLOC_006722 | MYH6           | chr14:23851198-23877486   | 0.00432123 | 0 | #NAME? | 1 |
| XLOC_006752 | PRKD1          | chr14:29896116-30396899   | 0.00574334 | 0 | #NAME? | 1 |
| XLOC_006761 | EGLN3          | chr14:34393420-34420284   | 0.00669703 | 0 | #NAME? | 1 |
| XLOC_006798 | C14orf183      | chr14:50550368-50559361   | 0.0250739  | 0 | #NAME? | 1 |
| XLOC_006828 | OTX2           | chr14:57267424-57277194   | 0.0103461  | 0 | #NAME? | 1 |
| XLOC_006913 | ISM2           | chr14:77940737-77965210   | 0.00647185 | 0 | #NAME? | 1 |
| XLOC_006971 | DEGS2          | chr14:100612752-100626012 | 0.0688622  | 0 | #NAME? | 1 |
| XLOC_007019 | SNRPN,SNURF    | chr15:25068793-25223729   | 0.0200948  | 0 | #NAME? | 1 |
| XLOC_007020 | PAR-SN         | chr15:25227140-25228937   | 0.00938048 | 0 | #NAME? | 1 |
| XLOC_007021 | PAR5           | chr15:25230006-25233379   | 0.00517697 | 0 | #NAME? | 1 |
| XLOC_007192 | SLC28A2        | chr15:45544427-45568132   | 0.0459993  | 0 | #NAME? | 1 |
| XLOC_007217 | SCG3           | chr15:51973549-52013223   | 0.00435756 | 0 | #NAME? | 1 |
| XLOC_007227 | CGNL1          | chr15:57668702-57842925   | 0.00485774 | 0 | #NAME? | 1 |
| XLOC_007304 | CYP1A2         | chr15:75041183-75048941   | 0.0148237  | 0 | #NAME? | 1 |
| XLOC_007335 | LOC646938      | chr15:79044378-79045734   | 0.0623146  | 0 | #NAME? | 1 |
| XLOC_007366 | SH3GL3         | chr15:84116090-84287493   | 0.0123014  | 0 | #NAME? | 1 |
| XLOC_007396 | MESP2          | chr15:90319588-90321982   | 0.0204424  | 0 | #NAME? | 1 |
| XLOC_007480 | ULK4P1,ULK4P3  | chr15:32698800-32727250   | 0.0148101  | 0 | #NAME? | 1 |
| XLOC_007500 | CSNK1A1P1      | chr15:36871811-37110707   | 0.00939671 | 0 | #NAME? | 1 |
| XLOC_007572 | HDC            | chr15:50534145-50558162   | 0.0285     | 0 | #NAME? | 1 |
| XLOC_007636 | CILP           | chr15:65488336-65503840   | 0.00855654 | 0 | #NAME? | 1 |
| XLOC_007740 | AGSK1,LOC7278  | chr15:83130032-83182930   | 0.00811552 | 0 | #NAME? | 1 |
| XLOC_007744 | LOC338963      | chr15:83379222-83382745   | 0.0205358  | 0 | #NAME? | 1 |
| XLOC_007746 | FSD2           | chr15:83428023-83474806   | 0.00560586 | 0 | #NAME? | 1 |
| XLOC_007968 | SYT17          | chr16:19179637-19278554   | 0.0113531  | 0 | #NAME? | 1 |
| XLOC_007974 | ACSM5          | chr16:20420855-20452281   | 0.0101581  | 0 | #NAME? | 1 |
| XLOC_007987 | VWA3A          | chr16:22103862-22168287   | 0.00352215 | 0 | #NAME? | 1 |
| XLOC_008029 | SNX29P2        | chr16:29313607-29376380   | 0.0331531  | 0 | #NAME? | 1 |
| XLOC_008057 | SNORA30        | chr16:30710461-30751450   | 3.38411    | 0 | #NAME? | 1 |
| XLOC_008087 | FLJ26245,RNA5S | chr16:34980893-34990995   | 0.010777   | 0 | #NAME? | 1 |
| XLOC_008123 | MT1A           | chr16:56672577-56673999   | 0.188507   | 0 | #NAME? | 1 |
| XLOC_008125 | MT1B           | chr16:56685810-56687116   | 0.225491   | 0 | #NAME? | 1 |
| XLOC_008127 | MT1H           | chr16:56703725-56705041   | 0.134997   | 0 | #NAME? | 1 |
| XLOC_008146 | GPR97          | chr16:57702156-57723290   | 0.00728204 | 0 | #NAME? | 1 |

|             |               |                         |            |   |        |   |
|-------------|---------------|-------------------------|------------|---|--------|---|
| XLOC_008156 | CDH5          | chr16:66400524-66438689 | 0.00596489 | 0 | #NAME? | 1 |
| XLOC_008166 | CES4A         | chr16:67022491-67043659 | 0.00891595 | 0 | #NAME? | 1 |
| XLOC_008225 | HP            | chr16:72088507-72094955 | 0.0128182  | 0 | #NAME? | 1 |
| XLOC_008253 | CDH13         | chr16:82660398-83830215 | 0.00564583 | 0 | #NAME? | 1 |
| XLOC_008275 | FOXC2         | chr16:86600856-86602537 | 0.0272028  | 0 | #NAME? | 1 |
| XLOC_008284 | IL17C         | chr16:88705000-88706882 | 0.0656167  | 0 | #NAME? | 1 |
| XLOC_008318 | LINC00235     | chr16:576846-577407     | 0.135791   | 0 | #NAME? | 1 |
| XLOC_008328 | SSTR5-AS1     | chr16:1114081-1131454   | 0.00852088 | 0 | #NAME? | 1 |
| XLOC_008479 | LOC100506655  | chr16:25123046-25189551 | 0.00824098 | 0 | #NAME? | 1 |
| XLOC_008511 | LOC388242     | chr16:30204255-30218248 | 0.0174316  | 0 | #NAME? | 1 |
| XLOC_008553 | ANKRD26P1     | chr16:46503248-46603009 | 0.00299317 | 0 | #NAME? | 1 |
| XLOC_008605 | CDH11         | chr16:64980682-65155919 | 0.00543168 | 0 | #NAME? | 1 |
| XLOC_008636 | DPEP2         | chr16:68021292-68033421 | 0.0117778  | 0 | #NAME? | 1 |
| XLOC_008712 | FENDRR        | chr16:86508130-86542466 | 0.00504543 | 0 | #NAME? | 1 |
| XLOC_008730 | SLC22A31      | chr16:89262168-89266529 | 0.0760822  | 0 | #NAME? | 1 |
| XLOC_008748 | TUSC5         | chr17:1182956-1204281   | 0.00631362 | 0 | #NAME? | 1 |
| XLOC_008772 | SMTNL2        | chr17:4487275-4511614   | 0.0118674  | 0 | #NAME? | 1 |
| XLOC_008792 | LOC339166     | chr17:5675553-5834016   | 0.0159272  | 0 | #NAME? | 1 |
| XLOC_008881 | CCDC144A      | chr17:16593638-16678311 | 0.00210944 | 0 | #NAME? | 1 |
| XLOC_008906 | GRAPL         | chr17:19030781-19062148 | 0.0241287  | 0 | #NAME? | 1 |
| XLOC_008920 | KCNJ12,KCNJ18 | chr17:21279698-21323179 | 0.00624927 | 0 | #NAME? | 1 |
| XLOC_009008 | LHX1          | chr17:35294771-35301915 | 0.0100412  | 0 | #NAME? | 1 |
| XLOC_009011 | C17orf78      | chr17:35441926-35766902 | 0.0103366  | 0 | #NAME? | 1 |
| XLOC_009097 | CD300LG       | chr17:41924515-41940997 | 0.00740411 | 0 | #NAME? | 1 |
| XLOC_009150 | IGF2BP1       | chr17:47074773-47133507 | 0.00203969 | 0 | #NAME? | 1 |
| XLOC_009167 | MYCBPAP       | chr17:48585744-48608862 | 0.00523173 | 0 | #NAME? | 1 |
| XLOC_009170 | CACNA1G       | chr17:48633567-48704832 | 0.00434235 | 0 | #NAME? | 1 |
| XLOC_009194 | EPX           | chr17:56270088-56282535 | 0.0161017  | 0 | #NAME? | 1 |
| XLOC_009272 | OTOP2         | chr17:72920369-72930006 | 0.0154862  | 0 | #NAME? | 1 |
| XLOC_009409 | P2RX1         | chr17:3799884-3819960   | 0.00667171 | 0 | #NAME? | 1 |
| XLOC_009491 | PIK3R5        | chr17:8782232-8869029   | 0.00443294 | 0 | #NAME? | 1 |
| XLOC_009546 | EPN2-AS1      | chr17:19140689-19240028 | 0.0142597  | 0 | #NAME? | 1 |
| XLOC_009550 | SLC47A2       | chr17:19581627-19620043 | 0.00887227 | 0 | #NAME? | 1 |
| XLOC_009562 | NOS2          | chr17:26083791-26127555 | 0.0102762  | 0 | #NAME? | 1 |
| XLOC_009621 | SLFN14        | chr17:33875143-33885110 | 0.004604   | 0 | #NAME? | 1 |
| XLOC_009623 | GAS2L2        | chr17:34071529-34079897 | 0.00630977 | 0 | #NAME? | 1 |
| XLOC_009632 | CCL3          | chr17:34415602-34417506 | 0.0326685  | 0 | #NAME? | 1 |
| XLOC_009637 | TBC1D3H       | chr17:34745935-34757050 | 0.00865094 | 0 | #NAME? | 1 |
| XLOC_009643 | HNF1B         | chr17:36046433-36105096 | 0.00979177 | 0 | #NAME? | 1 |
| XLOC_009661 | STAC2         | chr17:37366788-37382040 | 0.0176335  | 0 | #NAME? | 1 |
| XLOC_009664 | NEUROD2       | chr17:37760020-37764175 | 0.0151589  | 0 | #NAME? | 1 |
| XLOC_009723 | KRT19         | chr17:39679868-39684641 | 0.0271339  | 0 | #NAME? | 1 |
| XLOC_009727 | KRT16         | chr17:39766030-39769079 | 0.0190532  | 0 | #NAME? | 1 |
| XLOC_009800 | RPRML         | chr17:45055521-45056614 | 0.062195   | 0 | #NAME? | 1 |
| XLOC_009837 | TAC4          | chr17:47915670-47926199 | 0.0604745  | 0 | #NAME? | 1 |
| XLOC_009846 | CHAD          | chr17:48503518-48552200 | 0.0139355  | 0 | #NAME? | 1 |
| XLOC_009875 | C17orf47      | chr17:56618947-56621733 | 0.0304503  | 0 | #NAME? | 1 |
| XLOC_009896 | TBC1D3P2      | chr17:60342066-60353016 | 0.0139036  | 0 | #NAME? | 1 |
| XLOC_009950 | BTBD17        | chr17:72352554-72357958 | 0.0253595  | 0 | #NAME? | 1 |

|             |              |                         |            |   |        |   |
|-------------|--------------|-------------------------|------------|---|--------|---|
| XLOC_009985 | FOXJ1        | chr17:74132414-74236390 | 0.0145112  | 0 | #NAME? | 1 |
| XLOC_010002 | LOC100996291 | chr17:76257429-76274573 | 0.0162005  | 0 | #NAME? | 1 |
| XLOC_010031 | LOC100130370 | chr17:79349698-79359160 | 0.0270332  | 0 | #NAME? | 1 |
| XLOC_010096 | EMILIN2      | chr18:2847027-2914090   | 0.00434463 | 0 | #NAME? | 1 |
| XLOC_010212 | ST8SIA3      | chr18:55019720-55036161 | 0.00182645 | 0 | #NAME? | 1 |
| XLOC_010296 | MC2R         | chr18:13882042-13915535 | 0.0128527  | 0 | #NAME? | 1 |
| XLOC_010323 | SLC25A52     | chr18:29339658-29340843 | 0.0148865  | 0 | #NAME? | 1 |
| XLOC_010370 | MRO          | chr18:48321489-48351754 | 0.00626979 | 0 | #NAME? | 1 |
| XLOC_010421 | MADCAM1      | chr19:496489-505343     | 0.0238277  | 0 | #NAME? | 1 |
| XLOC_010426 | HCN2         | chr19:589892-617159     | 0.0698825  | 0 | #NAME? | 1 |
| XLOC_010436 | ELANE        | chr19:852290-856246     | 0.0442792  | 0 | #NAME? | 1 |
| XLOC_010441 | GRIN3B       | chr19:1000436-1021141   | 0.0256561  | 0 | #NAME? | 1 |
| XLOC_010458 | PLK5         | chr19:1524072-1535455   | 0.021212   | 0 | #NAME? | 1 |
| XLOC_010479 | S1PR4        | chr19:3178735-3180330   | 0.0331177  | 0 | #NAME? | 1 |
| XLOC_010490 | ATCAY        | chr19:3880617-3928080   | 0.00366992 | 0 | #NAME? | 1 |
| XLOC_010493 | CREB3L3      | chr19:4153597-4173051   | 0.0067427  | 0 | #NAME? | 1 |
| XLOC_010505 | MIR7-3HG     | chr19:4769116-4772568   | 0.0302896  | 0 | #NAME? | 1 |
| XLOC_010519 | LOC100128568 | chr19:5978413-6110664   | 0.0805082  | 0 | #NAME? | 1 |
| XLOC_010591 | C19orf80     | chr19:11309968-11373168 | 0.0383338  | 0 | #NAME? | 1 |
| XLOC_010644 | CASP14       | chr19:15160290-15169103 | 0.00708276 | 0 | #NAME? | 1 |
| XLOC_010824 | ZNF570       | chr19:37959981-37976242 | 0.0155088  | 0 | #NAME? | 1 |
| XLOC_010827 | LOC6444554   | chr19:38308050-38345836 | 0.0226582  | 0 | #NAME? | 1 |
| XLOC_010836 | RYR1         | chr19:38924339-39078204 | 0.00198332 | 0 | #NAME? | 1 |
| XLOC_010871 | CYP2G1P      | chr19:41396730-41406413 | 0.00658766 | 0 | #NAME? | 1 |
| XLOC_010892 | LOC100505622 | chr19:42636780-42641251 | 0.0348753  | 0 | #NAME? | 1 |
| XLOC_010907 | IRGC         | chr19:44220213-44224169 | 0.0288753  | 0 | #NAME? | 1 |
| XLOC_010932 | APOC1P1      | chr19:45430059-45434643 | 0.133826   | 0 | #NAME? | 1 |
| XLOC_010954 | IGFL2        | chr19:46651038-46664561 | 0.0526806  | 0 | #NAME? | 1 |
| XLOC_010960 | DACT3-AS1    | chr19:47150868-47220384 | 0.0495698  | 0 | #NAME? | 1 |
| XLOC_011016 | CD37         | chr19:49838676-49865714 | 0.0241256  | 0 | #NAME? | 1 |
| XLOC_011058 | GPR32        | chr19:51273720-51274989 | 0.0204661  | 0 | #NAME? | 1 |
| XLOC_011091 | ERVV-1       | chr19:53517343-53519833 | 0.0177663  | 0 | #NAME? | 1 |
| XLOC_011093 | ZNF818P      | chr19:53716200-53719355 | 0.00624686 | 0 | #NAME? | 1 |
| XLOC_011163 | TTYH1        | chr19:54926604-54947899 | 0.0437852  | 0 | #NAME? | 1 |
| XLOC_011169 | LILRB1       | chr19:55128628-55149004 | 0.0354098  | 0 | #NAME? | 1 |
| XLOC_011203 | ZNF542       | chr19:56879467-56891196 | 0.00436458 | 0 | #NAME? | 1 |
| XLOC_011208 | ZFP28        | chr19:57050316-57068170 | 0.00699902 | 0 | #NAME? | 1 |
| XLOC_011287 | CSNK1G2-AS1  | chr19:1941160-1981336   | 0.0190619  | 0 | #NAME? | 1 |
| XLOC_011296 | LINGO3       | chr19:2289773-2308156   | 0.0231958  | 0 | #NAME? | 1 |
| XLOC_011346 | FUT5         | chr19:5865836-5870551   | 0.0245758  | 0 | #NAME? | 1 |
| XLOC_011358 | TUBB4A       | chr19:6494329-6502330   | 0.0156456  | 0 | #NAME? | 1 |
| XLOC_011464 | KLF1         | chr19:12995236-12998017 | 0.0201396  | 0 | #NAME? | 1 |
| XLOC_011510 | CALR3        | chr19:16589867-16607003 | 0.0175973  | 0 | #NAME? | 1 |
| XLOC_011571 | ZNF99        | chr19:22934984-22966973 | 0.00214209 | 0 | #NAME? | 1 |
| XLOC_011599 | FAM187B      | chr19:35715703-35719628 | 0.0267825  | 0 | #NAME? | 1 |
| XLOC_011618 | COX7A1       | chr19:36641823-36643771 | 0.0450129  | 0 | #NAME? | 1 |
| XLOC_011622 | ZFP82        | chr19:36882860-36909550 | 0.0242768  | 0 | #NAME? | 1 |
| XLOC_011640 | WDR87        | chr19:38375471-38397317 | 0.00138909 | 0 | #NAME? | 1 |
| XLOC_011687 | CYP2A6       | chr19:41349442-41356352 | 0.0242071  | 0 | #NAME? | 1 |



|             |              |                          |            |   |        |   |
|-------------|--------------|--------------------------|------------|---|--------|---|
| XLOC_011723 | PSG9         | chr19:43757434-43773682  | 0.0121066  | 0 | #NAME? | 1 |
| XLOC_011742 | ZNF229       | chr19:44930425-44952665  | 0.00296077 | 0 | #NAME? | 1 |
| XLOC_011750 | EXOC3L2      | chr19:45715878-45737469  | 0.0494245  | 0 | #NAME? | 1 |
| XLOC_011772 | PGLYRP1      | chr19:46522411-46526556  | 0.0288554  | 0 | #NAME? | 1 |
| XLOC_011781 | GNG8         | chr19:47137332-47137939  | 0.38448    | 0 | #NAME? | 1 |
| XLOC_011801 | CABP5        | chr19:48532639-48547311  | 0.013624   | 0 | #NAME? | 1 |
| XLOC_011880 | KLKP1        | chr19:51385351-51399654  | 0.0162482  | 0 | #NAME? | 1 |
| XLOC_011881 | KLK4         | chr19:51409607-51413994  | 0.017607   | 0 | #NAME? | 1 |
| XLOC_011898 | LOC147646    | chr19:51891542-51893828  | 0.0233374  | 0 | #NAME? | 1 |
| XLOC_011906 | HAS1         | chr19:52216364-52227221  | 0.0407172  | 0 | #NAME? | 1 |
| XLOC_011929 | ZNF677       | chr19:53738637-53758111  | 0.00740391 | 0 | #NAME? | 1 |
| XLOC_011942 | LILRB3       | chr19:54720146-54726959  | 0.0335986  | 0 | #NAME? | 1 |
| XLOC_011965 | TMEM150B     | chr19:55824226-55836708  | 0.0769646  | 0 | #NAME? | 1 |
| XLOC_011982 | ZSCAN5B      | chr19:56701057-56704421  | 0.0545921  | 0 | #NAME? | 1 |
| XLOC_012039 | LOC100506274 | chr2:7561391-7590381     | 0.0172453  | 0 | #NAME? | 1 |
| XLOC_012054 | LINC00570    | chr2:11534106-11543203   | 0.0126413  | 0 | #NAME? | 1 |
| XLOC_012062 | VSNL1        | chr2:17721806-17837706   | 0.0185239  | 0 | #NAME? | 1 |
| XLOC_012086 | KCNK3        | chr2:26915580-26954066   | 0.00565964 | 0 | #NAME? | 1 |
| XLOC_012089 | DPYSL5       | chr2:27070968-27173219   | 0.00523854 | 0 | #NAME? | 1 |
| XLOC_012123 | LBH          | chr2:30454396-30482899   | 0.00889172 | 0 | #NAME? | 1 |
| XLOC_012142 | QPCT         | chr2:37571752-37600465   | 0.0102565  | 0 | #NAME? | 1 |
| XLOC_012163 | SIX3         | chr2:45169036-45173216   | 0.0147779  | 0 | #NAME? | 1 |
| XLOC_012166 | TMEM247      | chr2:46706703-46711564   | 0.0602711  | 0 | #NAME? | 1 |
| XLOC_012219 | ARHGAP25     | chr2:68961912-69053957   | 0.00771001 | 0 | #NAME? | 1 |
| XLOC_012229 | VAX2         | chr2:71127719-71160575   | 0.0280533  | 0 | #NAME? | 1 |
| XLOC_012230 | ATP6V1B1     | chr2:71162997-71192561   | 0.0280188  | 0 | #NAME? | 1 |
| XLOC_012246 | ACTG2        | chr2:74120092-74146780   | 0.0690393  | 0 | #NAME? | 1 |
| XLOC_012282 | LOC284950    | chr2:86042252-86053911   | 0.00520252 | 0 | #NAME? | 1 |
| XLOC_012354 | C2orf40      | chr2:106682112-106694609 | 0.034266   | 0 | #NAME? | 1 |
| XLOC_012377 | FBLN7        | chr2:112895961-112945791 | 0.0279847  | 0 | #NAME? | 1 |
| XLOC_012418 | PROC         | chr2:128175995-128186822 | 0.0133859  | 0 | #NAME? | 1 |
| XLOC_012419 | MYO7B        | chr2:128293377-128395303 | 0.00308244 | 0 | #NAME? | 1 |
| XLOC_012424 | CCDC74B-AS1  | chr2:130887195-130902707 | 0.0237416  | 0 | #NAME? | 1 |
| XLOC_012433 | ARHGEF4      | chr2:131674223-131804836 | 0.00847905 | 0 | #NAME? | 1 |
| XLOC_012439 | TUBA3D       | chr2:132202795-132360468 | 0.037616   | 0 | #NAME? | 1 |
| XLOC_012492 | B3GALT1      | chr2:168675181-168727366 | 0.00658069 | 0 | #NAME? | 1 |
| XLOC_012734 | KLHL30       | chr2:239047362-239061547 | 0.00677704 | 0 | #NAME? | 1 |
| XLOC_013006 | REG3A        | chr2:79384131-79386880   | 0.0339929  | 0 | #NAME? | 1 |
| XLOC_013033 | FABP1        | chr2:88422507-88427650   | 0.0461285  | 0 | #NAME? | 1 |
| XLOC_013038 | LOC442028    | chr2:95534429-95613087   | 0.00748331 | 0 | #NAME? | 1 |
| XLOC_013043 | ADRA2B       | chr2:96778622-96781888   | 0.00957567 | 0 | #NAME? | 1 |
| XLOC_013122 | C1QL2        | chr2:119913818-119916471 | 0.020634   | 0 | #NAME? | 1 |
| XLOC_013148 | TUBA3E       | chr2:130949317-130956034 | 0.0326768  | 0 | #NAME? | 1 |
| XLOC_013232 | RAPGEF4-AS1  | chr2:173587917-173917620 | 0.00317458 | 0 | #NAME? | 1 |
| XLOC_013259 | CCDC141      | chr2:179694483-179914786 | 0.00359844 | 0 | #NAME? | 1 |
| XLOC_013290 | LOC100130452 | chr2:197504355-197597530 | 0.0697224  | 0 | #NAME? | 1 |
| XLOC_013345 | LOC100130451 | chr2:214141276-214148929 | 0.035834   | 0 | #NAME? | 1 |
| XLOC_013386 | EPHA4        | chr2:222282746-222437010 | 0.00306092 | 0 | #NAME? | 1 |
| XLOC_013410 | GPR55        | chr2:231772042-231789941 | 0.00858616 | 0 | #NAME? | 1 |

|             |              |                          |            |   |        |   |
|-------------|--------------|--------------------------|------------|---|--------|---|
| XLOC_013460 | C2orf54      | chr2:241825464-241835573 | 0.0344157  | 0 | #NAME? | 1 |
| XLOC_013483 | RAD21L1      | chr20:1206763-1235145    | 0.023067   | 0 | #NAME? | 1 |
| XLOC_013490 | TMC2         | chr20:2517252-2622430    | 0.00537157 | 0 | #NAME? | 1 |
| XLOC_013502 | OXT          | chr20:3052265-3053162    | 0.105812   | 0 | #NAME? | 1 |
| XLOC_013568 | CST7         | chr20:24929865-24940564  | 0.022544   | 0 | #NAME? | 1 |
| XLOC_013590 | HCK          | chr20:30639990-30689657  | 0.00914175 | 0 | #NAME? | 1 |
| XLOC_013614 | ASIP         | chr20:32848170-32857148  | 0.0985991  | 0 | #NAME? | 1 |
| XLOC_013641 | LOC100287792 | chr20:36305311-36311636  | 0.00838463 | 0 | #NAME? | 1 |
| XLOC_013670 | HNF4A        | chr20:42984440-43061485  | 0.005333   | 0 | #NAME? | 1 |
| XLOC_013796 | TCEA2        | chr20:62688438-62703700  | 0.0978322  | 0 | #NAME? | 1 |
| XLOC_013832 | GFRA4        | chr20:3639938-3644046    | 0.0219804  | 0 | #NAME? | 1 |
| XLOC_013847 | LINC00658    | chr20:5412602-5426394    | 0.0113356  | 0 | #NAME? | 1 |
| XLOC_013848 | LINC00654    | chr20:5479217-5485242    | 0.0106957  | 0 | #NAME? | 1 |
| XLOC_013885 | CD93         | chr20:23059992-23066977  | 0.00243511 | 0 | #NAME? | 1 |
| XLOC_013906 | NCOR1P1      | chr20:26084051-26094677  | 0.0604525  | 0 | #NAME? | 1 |
| XLOC_013920 | TSPY26P      | chr20:30776948-30778163  | 0.0239385  | 0 | #NAME? | 1 |
| XLOC_014077 | KCNQ2        | chr20:62037541-62103993  | 0.0141208  | 0 | #NAME? | 1 |
| XLOC_014080 | SRMS         | chr20:62172162-62178857  | 0.0394902  | 0 | #NAME? | 1 |
| XLOC_014109 | CHODL        | chr21:19289656-19639687  | 0.00702081 | 0 | #NAME? | 1 |
| XLOC_014165 | DSCR6        | chr21:38378862-38391958  | 0.0190272  | 0 | #NAME? | 1 |
| XLOC_014176 | B3GALT5      | chr21:41029253-41034815  | 0.00867872 | 0 | #NAME? | 1 |
| XLOC_014189 | ABCG1        | chr21:43619798-43717354  | 0.00670843 | 0 | #NAME? | 1 |
| XLOC_014222 | PCBP3        | chr21:47269874-47362368  | 0.0611738  | 0 | #NAME? | 1 |
| XLOC_014224 | COL6A2       | chr21:47518032-47552763  | 0.00816275 | 0 | #NAME? | 1 |
| XLOC_014256 | ADAMTS5      | chr21:28290230-28339439  | 0.00161603 | 0 | #NAME? | 1 |
| XLOC_014359 | DNMT3L       | chr21:45666221-45682099  | 0.0193464  | 0 | #NAME? | 1 |
| XLOC_014381 | COL18A1-AS1  | chr21:46825096-46933634  | 0.0191338  | 0 | #NAME? | 1 |
| XLOC_014385 | SPATC1L      | chr21:47581061-47604373  | 0.0731886  | 0 | #NAME? | 1 |
| XLOC_014431 | P2RX6        | chr22:21369441-21382302  | 0.0170944  | 0 | #NAME? | 1 |
| XLOC_014468 | UPB1         | chr22:24891250-24922553  | 0.00804457 | 0 | #NAME? | 1 |
| XLOC_014570 | MGAT3        | chr22:39853324-39888199  | 0.00433302 | 0 | #NAME? | 1 |
| XLOC_014700 | RIMBP3C      | chr22:21899957-21978323  | 0.0147492  | 0 | #NAME? | 1 |
| XLOC_014723 | GSTTP1       | chr22:24340594-24347258  | 0.0258355  | 0 | #NAME? | 1 |
| XLOC_014733 | LOC100128531 | chr22:25423940-25593415  | 0.0544152  | 0 | #NAME? | 1 |
| XLOC_014833 | PDGFB        | chr22:39619684-39640957  | 0.0171729  | 0 | #NAME? | 1 |
| XLOC_014868 | A4GALT       | chr22:43088126-43116876  | 0.0123098  | 0 | #NAME? | 1 |
| XLOC_014900 | MLC1         | chr22:50497819-50524358  | 0.00589952 | 0 | #NAME? | 1 |
| XLOC_014957 | FBLN2        | chr3:13590624-13679922   | 0.0132374  | 0 | #NAME? | 1 |
| XLOC_014973 | GALNT15      | chr3:16216183-16271253   | 0.00461401 | 0 | #NAME? | 1 |
| XLOC_015014 | ITGA9        | chr3:37493812-37861281   | 0.00423066 | 0 | #NAME? | 1 |
| XLOC_015033 | MOBP         | chr3:39509069-39567857   | 0.00468594 | 0 | #NAME? | 1 |
| XLOC_015034 | MYRIP        | chr3:39851302-40353915   | 0.00626576 | 0 | #NAME? | 1 |
| XLOC_015052 | FAM198A      | chr3:43020758-43099207   | 0.00552413 | 0 | #NAME? | 1 |
| XLOC_015073 | CXCR6        | chr3:45959390-46037316   | 0.00837058 | 0 | #NAME? | 1 |
| XLOC_015102 | CCDC36       | chr3:49235860-49295537   | 0.00544838 | 0 | #NAME? | 1 |
| XLOC_015113 | GNAT1        | chr3:50229042-50235129   | 0.0073207  | 0 | #NAME? | 1 |
| XLOC_015165 | C3orf14      | chr3:62305395-62319320   | 0.0914526  | 0 | #NAME? | 1 |
| XLOC_015217 | OR5K2        | chr3:98216524-98217475   | 0.0448442  | 0 | #NAME? | 1 |
| XLOC_015219 | ST3GAL6      | chr3:98433176-98514689   | 0.00459169 | 0 | #NAME? | 1 |

|             |              |                          |            |   |        |   |
|-------------|--------------|--------------------------|------------|---|--------|---|
| XLOC_015257 | CD200        | chr3:112051915-112081658 | 0.00949194 | 0 | #NAME? | 1 |
| XLOC_015281 | NR1I2        | chr3:119499330-119537332 | 0.00664878 | 0 | #NAME? | 1 |
| XLOC_015286 | FBXO40       | chr3:121312169-121349139 | 0.0026085  | 0 | #NAME? | 1 |
| XLOC_015316 | KBTBD12      | chr3:127641901-127706514 | 0.0195868  | 0 | #NAME? | 1 |
| XLOC_015333 | ALG1L2       | chr3:129800673-129830276 | 0.0986976  | 0 | #NAME? | 1 |
| XLOC_015334 | COL6A4P2     | chr3:129931662-129992649 | 0.00213478 | 0 | #NAME? | 1 |
| XLOC_015349 | TF           | chr3:133464976-133497850 | 0.0116608  | 0 | #NAME? | 1 |
| XLOC_015409 | C3orf79      | chr3:153202283-153220486 | 0.0444332  | 0 | #NAME? | 1 |
| XLOC_015426 | C3orf80      | chr3:159943422-159946000 | 0.0085906  | 0 | #NAME? | 1 |
| XLOC_015430 | ARL14        | chr3:160394947-160396235 | 0.0145672  | 0 | #NAME? | 1 |
| XLOC_015454 | KCNMB2       | chr3:178254223-178562217 | 0.0177873  | 0 | #NAME? | 1 |
| XLOC_015496 | FETUB        | chr3:186358148-186370797 | 0.0113252  | 0 | #NAME? | 1 |
| XLOC_015511 | TPRG1        | chr3:188889762-189041271 | 0.00848045 | 0 | #NAME? | 1 |
| XLOC_015527 | LOC100507391 | chr3:194429149-194502897 | 0.00437478 | 0 | #NAME? | 1 |
| XLOC_015571 | ATP2B2       | chr3:10365706-10547268   | 0.00209094 | 0 | #NAME? | 1 |
| XLOC_015640 | XIRP1        | chr3:39224705-39234085   | 0.00289727 | 0 | #NAME? | 1 |
| XLOC_015670 | PRSS50       | chr3:46753605-46759373   | 0.0246586  | 0 | #NAME? | 1 |
| XLOC_015693 | TMEM89       | chr3:48658274-48659189   | 0.314871   | 0 | #NAME? | 1 |
| XLOC_015752 | TLR9         | chr3:52255095-52260179   | 0.00891006 | 0 | #NAME? | 1 |
| XLOC_015813 | FRMD4B       | chr3:69219145-69435430   | 0.00376619 | 0 | #NAME? | 1 |
| XLOC_015867 | SLC9C1       | chr3:111859751-112013074 | 0.00413328 | 0 | #NAME? | 1 |
| XLOC_015868 | BTLA         | chr3:112182812-112218408 | 0.00529806 | 0 | #NAME? | 1 |
| XLOC_015880 | ZNF80        | chr3:113953479-113956425 | 0.00528234 | 0 | #NAME? | 1 |
| XLOC_015895 | HGD          | chr3:120347014-120401418 | 0.0295774  | 0 | #NAME? | 1 |
| XLOC_015914 | MUC13        | chr3:124624288-124653595 | 0.00534386 | 0 | #NAME? | 1 |
| XLOC_015927 | UROC1        | chr3:126200007-126236616 | 0.00598312 | 0 | #NAME? | 1 |
| XLOC_015933 | DNAJB8       | chr3:128181274-128191160 | 0.0203237  | 0 | #NAME? | 1 |
| XLOC_015934 | GATA2        | chr3:128198264-128212030 | 0.00709051 | 0 | #NAME? | 1 |
| XLOC_015953 | SNORA58      | chr3:131181044-131221860 | 0.297528   | 0 | #NAME? | 1 |
| XLOC_016016 | TMEM14E      | chr3:151980404-152183569 | 0.042196   | 0 | #NAME? | 1 |
| XLOC_016020 | LOC100507537 | chr3:155008020-155011489 | 0.0297047  | 0 | #NAME? | 1 |
| XLOC_016047 | SERPINI2     | chr3:167159576-167191920 | 0.00851703 | 0 | #NAME? | 1 |
| XLOC_016056 | LOC100128164 | chr3:169661771-169684522 | 0.0188046  | 0 | #NAME? | 1 |
| XLOC_016083 | KLHL6        | chr3:183205318-183273499 | 0.00330779 | 0 | #NAME? | 1 |
| XLOC_016112 | LEPREL1      | chr3:189674516-189840226 | 0.0067731  | 0 | #NAME? | 1 |
| XLOC_016119 | ATP13A5      | chr3:192992830-193096514 | 0.0040157  | 0 | #NAME? | 1 |
| XLOC_016136 | MUC4         | chr3:195473637-195538844 | 0.0163298  | 0 | #NAME? | 1 |
| XLOC_016140 | ZDHHC19      | chr3:195924322-195938300 | 0.0273167  | 0 | #NAME? | 1 |
| XLOC_016204 | S100P        | chr4:6695565-6698897     | 0.165845   | 0 | #NAME? | 1 |
| XLOC_016275 | C4orf19      | chr4:37455551-37687999   | 0.00531953 | 0 | #NAME? | 1 |
| XLOC_016290 | RHOH         | chr4:40198526-40246281   | 0.0237697  | 0 | #NAME? | 1 |
| XLOC_016362 | ENAM         | chr4:71494460-71512536   | 0.00247848 | 0 | #NAME? | 1 |
| XLOC_016393 | CXCL13       | chr4:78432906-78532988   | 0.0170014  | 0 | #NAME? | 1 |
| XLOC_016467 | EGF          | chr4:110834039-110934118 | 0.00271462 | 0 | #NAME? | 1 |
| XLOC_016483 | SYNPO2       | chr4:119809995-119982402 | 0.00533957 | 0 | #NAME? | 1 |
| XLOC_016490 | ADAD1        | chr4:123300120-123350947 | 0.0076251  | 0 | #NAME? | 1 |
| XLOC_016516 | IL15         | chr4:142557748-142655140 | 0.0136514  | 0 | #NAME? | 1 |
| XLOC_016527 | POUF2        | chr4:147560044-147563623 | 0.00710913 | 0 | #NAME? | 1 |
| XLOC_016533 | MAB21L2      | chr4:151185810-151936649 | 0.0148085  | 0 | #NAME? | 1 |

|             |               |                          |            |   |        |   |
|-------------|---------------|--------------------------|------------|---|--------|---|
| XLOC_016607 | TRIML1        | chr4:189060597-189068649 | 0.0139701  | 0 | #NAME? | 1 |
| XLOC_016646 | OTOP1         | chr4:4190529-4228621     | 0.011501   | 0 | #NAME? | 1 |
| XLOC_016670 | ZNF518B       | chr4:10441503-10459032   | 0.0026471  | 0 | #NAME? | 1 |
| XLOC_016682 | PROM1         | chr4:15969848-16085623   | 0.0243128  | 0 | #NAME? | 1 |
| XLOC_016777 | UGT2A1,UGT2A2 | chr4:70454134-70518967   | 0.00571354 | 0 | #NAME? | 1 |
| XLOC_016806 | CCDC158       | chr4:77234191-77328458   | 0.0232634  | 0 | #NAME? | 1 |
| XLOC_016887 | COL25A1       | chr4:109731876-110223799 | 0.00708959 | 0 | #NAME? | 1 |
| XLOC_016914 | NDNF          | chr4:121956781-121993673 | 0.0169537  | 0 | #NAME? | 1 |
| XLOC_016990 | GK3P          | chr4:166128769-166244308 | 0.0258296  | 0 | #NAME? | 1 |
| XLOC_016991 | SPOCK3        | chr4:167654535-168155741 | 0.00644213 | 0 | #NAME? | 1 |
| XLOC_017008 | SPATA4        | chr4:177105724-177116822 | 0.068953   | 0 | #NAME? | 1 |
| XLOC_017017 | CLDN24        | chr4:184242916-184243579 | 0.062133   | 0 | #NAME? | 1 |
| XLOC_017026 | SLED1         | chr4:185676748-185747215 | 0.139716   | 0 | #NAME? | 1 |
| XLOC_017052 | LRRC14B       | chr5:191625-195468       | 0.0210975  | 0 | #NAME? | 1 |
| XLOC_017092 | CDH6          | chr5:31193761-31329253   | 0.00212809 | 0 | #NAME? | 1 |
| XLOC_017101 | TTC23L        | chr5:34839268-34899564   | 0.0109206  | 0 | #NAME? | 1 |
| XLOC_017117 | GHR           | chr5:42423876-42721980   | 0.00330067 | 0 | #NAME? | 1 |
| XLOC_017137 | DDX4          | chr5:55033844-55112974   | 0.0137274  | 0 | #NAME? | 1 |
| XLOC_017237 | FAM81B        | chr5:94727047-94786144   | 0.00955109 | 0 | #NAME? | 1 |
| XLOC_017275 | LOC728342     | chr5:116751207-116915439 | 0.00485644 | 0 | #NAME? | 1 |
| XLOC_017280 | FAM170A       | chr5:118965253-118971517 | 0.0170903  | 0 | #NAME? | 1 |
| XLOC_017293 | C5orf48       | chr5:125967413-125971974 | 0.0515693  | 0 | #NAME? | 1 |
| XLOC_017333 | SLC25A48      | chr5:135170364-135224326 | 0.0551786  | 0 | #NAME? | 1 |
| XLOC_017335 | TGFB1         | chr5:135364583-135399507 | 0.0125592  | 0 | #NAME? | 1 |
| XLOC_017389 | LOC100505658  | chr5:140894587-140998622 | 0.00554226 | 0 | #NAME? | 1 |
| XLOC_017397 | KCTD16        | chr5:143550436-143856944 | 0.00978605 | 0 | #NAME? | 1 |
| XLOC_017464 | TENM2         | chr5:166711842-167691162 | 0.00237798 | 0 | #NAME? | 1 |
| XLOC_017489 | LOC285593     | chr5:173006645-173012075 | 0.0122484  | 0 | #NAME? | 1 |
| XLOC_017504 | CDHR2         | chr5:175969511-176022769 | 0.00650678 | 0 | #NAME? | 1 |
| XLOC_017519 | FAM153C       | chr5:177433966-177476088 | 0.0812205  | 0 | #NAME? | 1 |
| XLOC_017570 | LOC442132     | chr5:7299486-7306827     | 0.0108583  | 0 | #NAME? | 1 |
| XLOC_017574 | SEMA5A        | chr5:9035137-9546233     | 0.00271523 | 0 | #NAME? | 1 |
| XLOC_017605 | AGXT2         | chr5:34998205-35048240   | 0.00675781 | 0 | #NAME? | 1 |
| XLOC_017667 | PLK2          | chr5:57749809-57755966   | 0.012971   | 0 | #NAME? | 1 |
| XLOC_017680 | LOC100303749  | chr5:65222381-65376851   | 0.0211019  | 0 | #NAME? | 1 |
| XLOC_017691 | GUSBP9        | chr5:70516052-70555122   | 0.0517867  | 0 | #NAME? | 1 |
| XLOC_017748 | PCSK1         | chr5:95726039-95768985   | 0.00295108 | 0 | #NAME? | 1 |
| XLOC_017844 | SLC23A1       | chr5:138677518-138719039 | 0.0206397  | 0 | #NAME? | 1 |
| XLOC_017896 | CD74          | chr5:149781199-149792499 | 0.020255   | 0 | #NAME? | 1 |
| XLOC_017927 | EBF1          | chr5:158122922-158526788 | 0.00423725 | 0 | #NAME? | 1 |
| XLOC_017986 | GMCL1P1       | chr5:177611510-177614433 | 0.00671453 | 0 | #NAME? | 1 |
| XLOC_017996 | CBY3          | chr5:179105558-179107975 | 0.0470585  | 0 | #NAME? | 1 |
| XLOC_018007 | FLT4          | chr5:180028505-180076624 | 0.0147179  | 0 | #NAME? | 1 |
| XLOC_018045 | HULC          | chr6:8435855-8785678     | 0.118171   | 0 | #NAME? | 1 |
| XLOC_018057 | EDN1          | chr6:12290528-12297427   | 0.0168473  | 0 | #NAME? | 1 |
| XLOC_018193 | MCCD1         | chr6:31496738-31514625   | 0.0348983  | 0 | #NAME? | 1 |
| XLOC_018266 | PNPLA1        | chr6:36210944-36276372   | 0.0069455  | 0 | #NAME? | 1 |
| XLOC_018296 | GUCA1A        | chr6:42123143-42147794   | 0.0103182  | 0 | #NAME? | 1 |
| XLOC_018451 | WISP3         | chr6:112375277-112390887 | 0.0450933  | 0 | #NAME? | 1 |

|             |              |                          |            |   |        |   |
|-------------|--------------|--------------------------|------------|---|--------|---|
| XLOC_018471 | PLN          | chr6:118781934-119031238 | 0.00914001 | 0 | #NAME? | 1 |
| XLOC_018492 | LAMA2        | chr6:129204285-129837710 | 0.00288528 | 0 | #NAME? | 1 |
| XLOC_018548 | SUMO4        | chr6:149639435-149732747 | 0.104428   | 0 | #NAME? | 1 |
| XLOC_018592 | QKI          | chr6:163835674-163999628 | 0.00610305 | 0 | #NAME? | 1 |
| XLOC_018602 | SMOC2        | chr6:168841830-169068674 | 0.00613217 | 0 | #NAME? | 1 |
| XLOC_018640 | LINC00518    | chr6:10428017-10435055   | 0.00498411 | 0 | #NAME? | 1 |
| XLOC_018646 | NEDD9        | chr6:11183530-11382581   | 0.0352431  | 0 | #NAME? | 1 |
| XLOC_018704 | HIST1H3I     | chr6:27839622-27840099   | 0.0930951  | 0 | #NAME? | 1 |
| XLOC_018806 | HLA-DPA1     | chr6:33032345-33057473   | 0.0130073  | 0 | #NAME? | 1 |
| XLOC_018887 | DLK2         | chr6:43395291-43423786   | 0.0167582  | 0 | #NAME? | 1 |
| XLOC_018921 | IL17F        | chr6:52101483-52109298   | 0.0360171  | 0 | #NAME? | 1 |
| XLOC_018951 | LINC00472    | chr6:72124148-72130448   | 0.00801616 | 0 | #NAME? | 1 |
| XLOC_018991 | SRSF12       | chr6:89805677-89827800   | 0.00973185 | 0 | #NAME? | 1 |
| XLOC_018998 | BACH2        | chr6:90636246-91006627   | 0.00239834 | 0 | #NAME? | 1 |
| XLOC_019039 | GSTM2P1      | chr6:111367621-111368757 | 0.0422787  | 0 | #NAME? | 1 |
| XLOC_019079 | OR2A4        | chr6:131958441-132068550 | 0.023586   | 0 | #NAME? | 1 |
| XLOC_019103 | NHEG1        | chr6:137303295-137314368 | 0.0218936  | 0 | #NAME? | 1 |
| XLOC_019139 | RAET1E       | chr6:150139893-150244214 | 0.0102596  | 0 | #NAME? | 1 |
| XLOC_020339 | TFAMP1       | chr7:1654105-1656328     | 0.00735735 | 0 | #NAME? | 1 |
| XLOC_020385 | ITGB8        | chr7:20370724-20455382   | 0.00588899 | 0 | #NAME? | 1 |
| XLOC_020415 | JAZF1-AS1    | chr7:27870192-28280996   | 0.0645662  | 0 | #NAME? | 1 |
| XLOC_020537 | FKBP6        | chr7:72742154-72772641   | 0.0125892  | 0 | #NAME? | 1 |
| XLOC_020586 | GRM3         | chr7:86273229-86494192   | 0.00411236 | 0 | #NAME? | 1 |
| XLOC_020635 | CYP3A43      | chr7:99425635-99464173   | 0.0419907  | 0 | #NAME? | 1 |
| XLOC_020754 | CPA2         | chr7:129906702-129929637 | 0.0162347  | 0 | #NAME? | 1 |
| XLOC_020794 | TAS2R4       | chr7:141478288-141479188 | 0.052806   | 0 | #NAME? | 1 |
| XLOC_020813 | EPHA1-AS1    | chr7:143078359-143220540 | 0.00272789 | 0 | #NAME? | 1 |
| XLOC_020831 | CNTNAP2      | chr7:145813452-148118088 | 0.00202554 | 0 | #NAME? | 1 |
| XLOC_020879 | EN2          | chr7:155250823-155257526 | 0.0282234  | 0 | #NAME? | 1 |
| XLOC_020927 | GRID2IP      | chr7:6536408-6591067     | 0.0136539  | 0 | #NAME? | 1 |
| XLOC_021040 | NPC1L1       | chr7:44552134-44580914   | 0.00621429 | 0 | #NAME? | 1 |
| XLOC_021080 | ZNF733P      | chr7:62751669-62764434   | 0.0101882  | 0 | #NAME? | 1 |
| XLOC_021102 | TRIM50       | chr7:72726534-72742085   | 0.0190175  | 0 | #NAME? | 1 |
| XLOC_021123 | CCL26        | chr7:75398841-75419064   | 0.0992913  | 0 | #NAME? | 1 |
| XLOC_021164 | CALCR        | chr7:93053798-93204042   | 0.00584958 | 0 | #NAME? | 1 |
| XLOC_021244 | RELN         | chr7:103112230-103629963 | 0.00166625 | 0 | #NAME? | 1 |
| XLOC_021394 | TMEM176B     | chr7:150488375-150502208 | 0.051646   | 0 | #NAME? | 1 |
| XLOC_021456 | LOC157273    | chr8:9182560-9192590     | 0.0143046  | 0 | #NAME? | 1 |
| XLOC_021498 | SFTPC        | chr8:22019183-22021991   | 0.0215873  | 0 | #NAME? | 1 |
| XLOC_021582 | LOC100287846 | chr8:48100929-48104439   | 0.0048457  | 0 | #NAME? | 1 |
| XLOC_021591 | SOX17        | chr8:55370494-55373456   | 0.0117531  | 0 | #NAME? | 1 |
| XLOC_021616 | TRIM55       | chr8:67039277-67087718   | 0.00860586 | 0 | #NAME? | 1 |
| XLOC_021660 | ATP6V0D2     | chr8:87111138-87166454   | 0.013462   | 0 | #NAME? | 1 |
| XLOC_021685 | SDC2         | chr8:97505881-97624037   | 0.00625219 | 0 | #NAME? | 1 |
| XLOC_021714 | TRHR         | chr8:110099652-110131812 | 0.0118175  | 0 | #NAME? | 1 |
| XLOC_021724 | SAMD12-AS1   | chr8:119201694-119738306 | 0.0846397  | 0 | #NAME? | 1 |
| XLOC_021819 | ANGPT2       | chr8:6264112-6501140     | 0.00628082 | 0 | #NAME? | 1 |
| XLOC_021884 | SGCZ         | chr8:13947372-15095792   | 0.0265766  | 0 | #NAME? | 1 |
| XLOC_021922 | PNMA2        | chr8:26362195-26371483   | 0.0361413  | 0 | #NAME? | 1 |

|             |                |                          |            |   |        |   |
|-------------|----------------|--------------------------|------------|---|--------|---|
| XLOC_021923 | ADRA1A         | chr8:26605666-26722922   | 0.0115234  | 0 | #NAME? | 1 |
| XLOC_021955 | LOC728024      | chr8:37594096-37615319   | 0.0107865  | 0 | #NAME? | 1 |
| XLOC_021989 | FAM150A        | chr8:53446596-53478021   | 0.0243789  | 0 | #NAME? | 1 |
| XLOC_022061 | FABP12         | chr8:82437280-82443550   | 0.1203     | 0 | #NAME? | 1 |
| XLOC_022094 | CDH17          | chr8:95139393-95229531   | 0.00508802 | 0 | #NAME? | 1 |
| XLOC_022121 | SNX31          | chr8:101585111-101661893 | 0.00656616 | 0 | #NAME? | 1 |
| XLOC_022125 | NCALD          | chr8:102698769-103137135 | 0.00579855 | 0 | #NAME? | 1 |
| XLOC_022143 | CSMD3          | chr8:113235158-114449242 | 0.0032147  | 0 | #NAME? | 1 |
| XLOC_022179 | ASAP1-IT1      | chr8:131064350-131455906 | 0.0145157  | 0 | #NAME? | 1 |
| XLOC_022184 | HPYR1          | chr8:133572744-133573726 | 0.0409026  | 0 | #NAME? | 1 |
| XLOC_022223 | CCDC166        | chr8:144788863-144790279 | 0.0998295  | 0 | #NAME? | 1 |
| XLOC_022229 | EPPK1          | chr8:144939911-144947434 | 0.00628916 | 0 | #NAME? | 1 |
| XLOC_022260 | DMRT1          | chr9:841689-969090       | 0.0124688  | 0 | #NAME? | 1 |
| XLOC_022307 | TEK            | chr9:27109146-27230172   | 0.00294932 | 0 | #NAME? | 1 |
| XLOC_022387 | FAM189A2       | chr9:71939487-72007370   | 0.00914049 | 0 | #NAME? | 1 |
| XLOC_022389 | MAMDC2         | chr9:72658496-72873790   | 0.00444732 | 0 | #NAME? | 1 |
| XLOC_022424 | NXNL2          | chr9:91150015-91190704   | 0.0191664  | 0 | #NAME? | 1 |
| XLOC_022459 | LOC158435      | chr9:98828120-98864194   | 0.0197106  | 0 | #NAME? | 1 |
| XLOC_022540 | OR1Q1          | chr9:125377016-125377961 | 0.0207839  | 0 | #NAME? | 1 |
| XLOC_022564 | LMX1B          | chr9:129376721-129463311 | 0.00703528 | 0 | #NAME? | 1 |
| XLOC_022625 | C9orf171       | chr9:135285610-135448675 | 0.0243089  | 0 | #NAME? | 1 |
| XLOC_022642 | ADAMTSL2       | chr9:136397285-136440641 | 0.00606571 | 0 | #NAME? | 1 |
| XLOC_022667 | LOC100128593   | chr9:139638468-139644363 | 0.0182901  | 0 | #NAME? | 1 |
| XLOC_022678 | LCN12          | chr9:139846767-139849949 | 0.143127   | 0 | #NAME? | 1 |
| XLOC_022703 | FAM157B        | chr9:141106636-141134172 | 0.0230232  | 0 | #NAME? | 1 |
| XLOC_022709 | FLJ35024       | chr9:2535654-2654485     | 0.0321557  | 0 | #NAME? | 1 |
| XLOC_022737 | SCARNA8        | chr9:19053134-19102940   | 2.11506    | 0 | #NAME? | 1 |
| XLOC_022827 | OR13J1         | chr9:35869459-35870398   | 0.0267725  | 0 | #NAME? | 1 |
| XLOC_022845 | LOC653501_ZNF6 | chr9:39443813-39464526   | 0.00296468 | 0 | #NAME? | 1 |
| XLOC_022870 | TMEM252        | chr9:71151497-71155783   | 0.0145339  | 0 | #NAME? | 1 |
| XLOC_022879 | TRPM3          | chr9:73149965-73736514   | 0.00366311 | 0 | #NAME? | 1 |
| XLOC_022892 | PRUNE2         | chr9:79226291-79521003   | 0.00144955 | 0 | #NAME? | 1 |
| XLOC_022897 | RASEF          | chr9:85594499-85678043   | 0.00272522 | 0 | #NAME? | 1 |
| XLOC_022935 | OMD            | chr9:95059639-95432547   | 0.00541479 | 0 | #NAME? | 1 |
| XLOC_022936 | ASPN           | chr9:95059639-95432547   | 0.00622282 | 0 | #NAME? | 1 |
| XLOC_022947 | FAM22F         | chr9:97080477-97090926   | 0.00848326 | 0 | #NAME? | 1 |
| XLOC_022974 | GABBR2         | chr9:101050363-101471479 | 0.00960367 | 0 | #NAME? | 1 |
| XLOC_023047 | STOM           | chr9:124101265-124132582 | 0.00821006 | 0 | #NAME? | 1 |
| XLOC_023076 | NRON           | chr9:129089122-129269320 | 0.0113945  | 0 | #NAME? | 1 |
| XLOC_023242 | XG             | chrX:2670092-2734541     | 0.0132254  | 0 | #NAME? | 1 |
| XLOC_023254 | LOC100288814   | chrX:9935397-9936042     | 0.0731117  | 0 | #NAME? | 1 |
| XLOC_023262 | TLR7           | chrX:12885201-12908480   | 0.00671788 | 0 | #NAME? | 1 |
| XLOC_023321 | CXorf30        | chrX:36246895-36403434   | 0.00603623 | 0 | #NAME? | 1 |
| XLOC_023324 | LANCL3         | chrX:37430821-37536750   | 0.00559571 | 0 | #NAME? | 1 |
| XLOC_023336 | NYX            | chrX:41306712-41334905   | 0.015815   | 0 | #NAME? | 1 |
| XLOC_023338 | GPR82          | chrX:41374188-41782287   | 0.013379   | 0 | #NAME? | 1 |
| XLOC_023425 | TRO            | chrX:54946995-54957866   | 0.00667447 | 0 | #NAME? | 1 |
| XLOC_023427 | PAGE2B         | chrX:55101488-55105336   | 0.0767475  | 0 | #NAME? | 1 |
| XLOC_023508 | FAM133A        | chrX:92929011-92967273   | 0.00441826 | 0 | #NAME? | 1 |

|             |              |                          |            |   |        |   |
|-------------|--------------|--------------------------|------------|---|--------|---|
| XLOC_023552 | PIH1D3       | chrX:106449861-106487473 | 0.00901642 | 0 | #NAME? | 1 |
| XLOC_023577 | LUZP4        | chrX:114524291-114542121 | 0.00828643 | 0 | #NAME? | 1 |
| XLOC_023602 | SH2D1A       | chrX:123480131-123507010 | 0.00780644 | 0 | #NAME? | 1 |
| XLOC_023639 | CD40LG       | chrX:135730335-135742549 | 0.00890433 | 0 | #NAME? | 1 |
| XLOC_023655 | SLITRK2      | chrX:144899346-144907360 | 0.00558933 | 0 | #NAME? | 1 |
| XLOC_023665 | MAGEA8       | chrX:149009940-149014609 | 0.00963806 | 0 | #NAME? | 1 |
| XLOC_023702 | OPN1LW       | chrX:153409724-153424507 | 0.0271945  | 0 | #NAME? | 1 |
| XLOC_023705 | TKTL1        | chrX:153524026-153558713 | 0.00673386 | 0 | #NAME? | 1 |
| XLOC_023747 | VCX3A        | chrX:6451658-6453159     | 0.0204824  | 0 | #NAME? | 1 |
| XLOC_023862 | SHROOM4      | chrX:50334642-50557044   | 0.00270372 | 0 | #NAME? | 1 |
| XLOC_023927 | RGAG4        | chrX:71130937-71363424   | 0.00822237 | 0 | #NAME? | 1 |
| XLOC_023998 | SLC25A53     | chrX:103139054-103401708 | 0.00923501 | 0 | #NAME? | 1 |
| XLOC_024012 | COL4A6       | chrX:107398836-107682704 | 0.00247046 | 0 | #NAME? | 1 |
| XLOC_024038 | SNORA69      | chrX:118920468-118925606 | 2.89041    | 0 | #NAME? | 1 |
| XLOC_024074 | IGSF1        | chrX:130407482-130423403 | 0.00478086 | 0 | #NAME? | 1 |
| XLOC_024127 | SPANXE       | chrX:140785567-140786655 | 0.102266   | 0 | #NAME? | 1 |
| XLOC_024160 | MAGEA10,MAGE | chrX:151282520-151307050 | 0.00589575 | 0 | #NAME? | 1 |
| XLOC_024180 | L1CAM        | chrX:153126970-153141399 | 0.00396071 | 0 | #NAME? | 1 |
| XLOC_024201 | MPP1         | chrX:154006958-154033802 | 0.0172938  | 0 | #NAME? | 1 |
| XLOC_024206 | RAB39B       | chrX:154487525-154493852 | 0.0135847  | 0 | #NAME? | 1 |

7hrs - 1/2hr

| gene           | t5       | t7       | log2(fold_change) | q_value    |
|----------------|----------|----------|-------------------|------------|
| SYTL2          | 0.118199 | 0.140421 | 0.248531          | 1          |
| HSPA6          | 0.177302 | 0.852871 | 2.26612           | 0.00820276 |
| CA9            | 46.6043  | 73.2848  | 0.65305           | 0.0355697  |
| TRIML2         | 0.251401 | 0.500857 | 0.99441           | 0.342315   |
| B3GNT4         | 0.38769  | 0.292792 | -0.405028         | 0.840058   |
| MGAT5B         | 0.925096 | 0.999944 | 0.112244          | 0.942533   |
| PLXNB3         | 0.344001 | 0.359953 | 0.0653969         | 1          |
| LDHD           | 1.37858  | 1.9527   | 0.502287          | 0.517284   |
| C6orf141       | 0.556654 | 0.879221 | 0.659444          | 0.477591   |
| SOX2-OT        | 0.44057  | 0.358004 | -0.299392         | 0.785473   |
| AMT,NICN1      | 0.818604 | 0.876441 | 0.0984897         | 0.939929   |
| PLA2G4A        | 0.526043 | 0.528115 | 0.00567351        | 0.997552   |
| NDRG1          | 125.74   | 79.9001  | -0.654178         | 0.024868   |
| MIR210HG       | 4.65413  | 4.9969   | 0.102521          | 0.927665   |
| BHLHE40        | 14.1303  | 43.2669  | 1.61447           | 0.00153868 |
| ITPR1          | 0.949392 | 0.566594 | -0.74469          | 0.0338188  |
| NEAT1          | 24.3803  | 50.5205  | 1.05115           | 0.00153868 |
| PFKFB4         | 20.3135  | 14.9278  | -0.444434         | 0.198908   |
| CAV1           | 3.86948  | 3.97629  | 0.0392841         | 0.975492   |
| GEM            | 0.719639 | 0.624998 | -0.203422         | 0.879418   |
| CALD1          | 8.50306  | 22.6287  | 1.4121            | 0.00153868 |
| DDIT4          | 55.2343  | 71.0746  | 0.36377           | 0.289307   |
| SH3D21         | 2.20856  | 1.60518  | -0.460373         | 0.452338   |
| ALDOC          | 70.9923  | 98.2654  | 0.46902           | 0.166442   |
| CCDC80         | 0.473676 | 0.415883 | -0.187721         | 0.887695   |
| RORA           | 0.58215  | 0.338495 | -0.782256         | 0.0403493  |
| FUT11          | 1.52388  | 2.76354  | 0.858768          | 0.0719976  |
| AKAP9          | 0.357232 | 0.547086 | 0.614908          | 0.117359   |
| FOSL2          | 2.21642  | 2.98815  | 0.43102           | 0.368906   |
| ARRDC3         | 2.30497  | 5.09562  | 1.14451           | 0.00153868 |
| DHRS1          | 1.07174  | 2.64862  | 1.30528           | 0.00970147 |
| SEC31B         | 0.266773 | 0.381948 | 0.517766          | 0.525673   |
| RNF157         | 0.233405 | 0.287932 | 0.302896          | 1          |
| SPRY1          | 0.839812 | 3.00126  | 1.83743           | 0.00153868 |
| IL1RAP         | 1.18933  | 0.696321 | -0.77233          | 0.0955341  |
| NRN1           | 14.7303  | 7.90899  | -0.897222         | 0.00274688 |
| FAM115C        | 0.786961 | 0.559666 | -0.491726         | 0.451834   |
| MIR155,MIR155H | 1.86017  | 4.59623  | 1.30502           | 0.00659556 |
| PIM1           | 8.30418  | 14.8004  | 0.833728          | 0.00380811 |
| RIMKLA         | 1.10819  | 0.859729 | -0.366247         | 0.456287   |
| KDM3A          | 8.65549  | 7.75107  | -0.15922          | 0.783527   |
| CLK1           | 11.8676  | 22.9459  | 0.951215          | 0.00153868 |
| BCL6           | 1.7961   | 4.30899  | 1.26248           | 0.00153868 |
| SEMA3A         | 0.717346 | 0.404709 | -0.825785         | 0.0515699  |
| LOC283174      | 0.458893 | 1.93823  | 2.07851           | 0.00153868 |
| FIBCD1         | 3.21252  | 4.17484  | 0.378017          | 0.484634   |



|                |          |          |            |            |
|----------------|----------|----------|------------|------------|
| ENO2           | 122.824  | 69.1289  | -0.829236  | 0.00153868 |
| NAT16          | 1.22655  | 1.20445  | -0.0262311 | 0.990421   |
| ADAMTSL4       | 1.81868  | 1.37411  | -0.404391  | 0.514736   |
| CDKN2C         | 6.74836  | 3.78204  | -0.835371  | 0.0304296  |
| CA12           | 4.46176  | 4.80908  | 0.108151   | 0.89536    |
| RGS2           | 2.48287  | 3.82175  | 0.622221   | 0.170153   |
| OTX1           | 1.14391  | 1.58002  | 0.465973   | 0.499953   |
| F3             | 1.27839  | 2.09592  | 0.713255   | 0.106011   |
| PLAG1          | 0.580172 | 0.32274  | -0.846107  | 0.0568637  |
| GBE1           | 14.6614  | 14.1346  | -0.0527828 | 0.957014   |
| STARD9         | 0.222738 | 0.427545 | 0.940727   | 0.0103919  |
| ARHGAP33       | 1.06866  | 0.925664 | -0.207242  | 0.856707   |
| LOC284454,MIR2 | 5.40596  | 13.3185  | 1.30081    | 0.00153868 |
| MAPK15         | 2.79814  | 3.56455  | 0.34925    | 0.642337   |
| ZNF669         | 1.73362  | 1.57661  | -0.136962  | 0.914269   |
| INSIG2         | 6.56941  | 3.94883  | -0.734336  | 0.0117316  |
| SRD5A3         | 2.75642  | 2.20954  | -0.319044  | 0.525065   |
| PRDM10         | 0.595368 | 1.32877  | 1.15824    | 0.00274688 |
| PDE4B          | 0.628121 | 0.466747 | -0.428401  | 0.531358   |
| MEGF6          | 0.557907 | 0.362608 | -0.621615  | 0.320187   |
| SCD            | 47.6542  | 94.7     | 0.99076    | 0.00153868 |
| HERC3          | 1.54226  | 1.02776  | -0.585544  | 0.255234   |
| EGLN1          | 9.89369  | 10.5486  | 0.0924714  | 0.900927   |
| ZNF292         | 0.886776 | 1.00297  | 0.177641   | 0.79507    |
| P4HA1          | 16.6787  | 11.9802  | -0.477352  | 0.121719   |
| C8orf58        | 15.2613  | 17.996   | 0.237799   | 0.643266   |
| DNAJB4         | 1.63453  | 3.11304  | 0.92945    | 0.0117316  |
| CAV2           | 1.66666  | 1.69871  | 0.0274851  | 0.983738   |
| RAB20          | 12.3884  | 16.0607  | 0.374548   | 0.36961    |
| PDK1           | 12.38    | 8.70666  | -0.507821  | 0.0999674  |
| BNIP3L         | 25.5647  | 16.251   | -0.653623  | 0.0130226  |
| KIAA1244       | 1.52846  | 1.14634  | -0.41504   | 0.225511   |
| FAM162A        | 181.047  | 219.379  | 0.277058   | 0.519005   |
| HSPH1          | 2.33036  | 9.15751  | 1.9744     | 0.00153868 |
| ZNF627         | 2.15935  | 2.29341  | 0.0868975  | 0.939068   |
| KDM5B-AS1      | 13.4854  | 8.32945  | -0.69511   | 0.178671   |
| C4orf3         | 52.9174  | 63.2741  | 0.257873   | 0.54836    |
| PLXNA3         | 3.55375  | 4.93865  | 0.474777   | 0.185361   |
| ZNF572         | 0.91219  | 1.13438  | 0.314501   | 0.660186   |
| S100A10        | 128.897  | 207.873  | 0.68949    | 0.0123712  |
| NRBP2          | 6.72679  | 8.2769   | 0.299172   | 0.514213   |
| APLN           | 2.92814  | 3.44445  | 0.234292   | 0.729672   |
| GOLGA8A        | 9.16876  | 11.1563  | 0.283058   | 0.489185   |
| KIAA1715       | 2.38359  | 1.71211  | -0.477358  | 0.198233   |
| SPAG4          | 12.8066  | 7.99967  | -0.678875  | 0.076039   |
| SMAP1          | 1.96318  | 1.63581  | -0.263188  | 0.712857   |
| PNRC1          | 16.476   | 17.3718  | 0.0763825  | 0.931668   |
| DPYSL2         | 4.43104  | 5.51266  | 0.315104   | 0.454341   |
| CLK4           | 2.53274  | 4.2047   | 0.731305   | 0.024868   |

|           |         |         |            |            |
|-----------|---------|---------|------------|------------|
| TPM2      | 52.9663 | 84.2483 | 0.669572   | 0.0103919  |
| HK2       | 23.442  | 22.8984 | -0.0338437 | 0.974073   |
| LRP1      | 4.01137 | 2.8124  | -0.512292  | 0.0854415  |
| PGK1      | 443.307 | 578.316 | 0.38355    | 0.325989   |
| P4HA2     | 17.1556 | 16.9088 | -0.020899  | 0.983243   |
| ERO1L     | 21.8064 | 18.1865 | -0.261884  | 0.529976   |
| NUDT14    | 24.0044 | 35.9492 | 0.582662   | 0.0881203  |
| SNX33     | 14.6189 | 14.4347 | -0.0182881 | 0.985768   |
| MYLIP     | 2.78785 | 3.09235 | 0.149548   | 0.858227   |
| HILPDA    | 15.7109 | 29.3955 | 0.903826   | 0.00153868 |
| PIAS2     | 6.00436 | 5.92801 | -0.0184628 | 0.985492   |
| LDHA      | 596.318 | 812.827 | 0.446866   | 0.234776   |
| ATHL1     | 16.1546 | 20.1261 | 0.317124   | 0.398652   |
| CCBL1     | 6.39723 | 6.78326 | 0.0845328  | 0.939529   |
| WSB1      | 26.1378 | 16.8759 | -0.631172  | 0.0137404  |
| HSPA1B    | 27.9919 | 269.569 | 3.26758    | 0.00153868 |
| CDK18     | 5.1906  | 2.67825 | -0.95461   | 0.00274688 |
| GSTM1     | 17.6396 | 24.7651 | 0.489494   | 0.154363   |
| PGM1      | 26.3548 | 22.7414 | -0.212749  | 0.674951   |
| ZNRF1     | 8.74859 | 7.54989 | -0.212594  | 0.678818   |
| PROSAPIP1 | 2.66001 | 3.61655 | 0.443184   | 0.28912    |
| TUBGCP5   | 3.13961 | 2.93161 | -0.0988902 | 0.91207    |
| ALDOA     | 2585.32 | 3344.09 | 0.371272   | 0.376279   |
| COG6      | 2.03136 | 1.78112 | -0.189659  | 0.800138   |
| RLF       | 2.48019 | 2.96448 | 0.25733    | 0.579643   |
| TNFRSF14  | 11.4007 | 9.17396 | -0.31351   | 0.535571   |
| DPCD      | 51.5637 | 63.2276 | 0.294198   | 0.489743   |
| CCNG2     | 4.17922 | 1.68766 | -1.30821   | 0.00153868 |
| TSC22D2   | 5.25252 | 5.91645 | 0.171721   | 0.797218   |
| RUNDC1    | 3.72445 | 7.51645 | 1.01302    | 0.00153868 |
| ZNF395    | 8.79494 | 6.21582 | -0.500729  | 0.110718   |
| XIST      | 3.78778 | 4.94603 | 0.38492    | 0.251505   |
| KCTD11    | 9.25287 | 12.0349 | 0.379248   | 0.306426   |
| CLK3      | 11.36   | 18.1734 | 0.677872   | 0.0192959  |
| ELL2      | 2.87928 | 2.57139 | -0.16316   | 0.802177   |
| SMAD9     | 2.51206 | 1.2841  | -0.96812   | 0.00153868 |
| CRABP2    | 114.302 | 123.966 | 0.117092   | 0.873654   |
| ID3       | 210.504 | 386.295 | 0.875853   | 0.00153868 |
| IVNS1ABP  | 10.355  | 19.1598 | 0.887757   | 0.00153868 |
| PHF1      | 17.9766 | 16.9167 | -0.0876681 | 0.916584   |
| DDX17     | 41.2618 | 66.181  | 0.681609   | 0.00970147 |
| CCNG1     | 35.951  | 35.4441 | -0.0204867 | 0.983529   |
| ERP29     | 145.966 | 86.1846 | -0.760133  | 0.00274688 |
| SLC7A1    | 22.4756 | 13.7288 | -0.711158  | 0.00380811 |
| HAX1      | 108.026 | 50.5222 | -1.09639   | 0.00153868 |
| SLC39A14  | 34.4442 | 34.8952 | 0.0187658  | 0.985692   |
| CLCN7     | 58.9431 | 44.5938 | -0.402478  | 0.200395   |
| HNRNPM    | 116.97  | 136.542 | 0.223208   | 0.633194   |
| XPOT      | 25.2861 | 13.3151 | -0.925275  | 0.00153868 |

|          |         |         |            |            |
|----------|---------|---------|------------|------------|
| EDF1     | 1358.43 | 960.856 | -0.499547  | 0.0748376  |
| REEP4    | 71.2185 | 52.1531 | -0.449498  | 0.14587    |
| FUS      | 70.6345 | 74.4133 | 0.0751874  | 0.933369   |
| FAM208B  | 4.04926 | 7.40398 | 0.870642   | 0.00153868 |
| NDOR1    | 17.5901 | 22.4044 | 0.349013   | 0.333549   |
| SDSL     | 52.915  | 22.2953 | -1.24694   | 0.00153868 |
| NFKBIA   | 47.8314 | 34.0241 | -0.491399  | 0.089127   |
| TAP2     | 30.5557 | 28.9115 | -0.0797979 | 0.934251   |
| EZH2     | 21.7624 | 14.0719 | -0.629018  | 0.0156935  |
| RBCK1    | 59.312  | 28.2732 | -1.06889   | 0.00153868 |
| SFPQ     | 95.694  | 92.0968 | -0.0552783 | 0.952184   |
| C14orf80 | 23.2166 | 21.9954 | -0.0779598 | 0.935067   |
| G0S2     | 426.871 | 372.339 | -0.197183  | 0.689784   |
| SLC27A4  | 74.0319 | 106.826 | 0.529049   | 0.0533774  |
| EIF6     | 417.412 | 378.889 | -0.139698  | 0.828851   |
| YARS     | 101.265 | 61.1446 | -0.727845  | 0.00478151 |
| SLC35F6  | 27.9226 | 19.1187 | -0.546447  | 0.0442243  |
| GFPT1    | 12.3956 | 5.32765 | -1.21826   | 0.00153868 |
| CHAC1    | 43.2353 | 2.0968  | -4.36594   | 0.00153868 |
| WIP1     | 15.8588 | 4.29066 | -1.88601   | 0.00153868 |
| PAPL     | 20.9338 | 8.12631 | -1.36516   | 0.00153868 |
| MT1E     | 2431.94 | 1543.48 | -0.655917  | 0.0163491  |
| SUN3     | 44.4948 | 13.2323 | -1.74958   | 0.00153868 |
| SEC11C   | 42.2732 | 48.8679 | 0.209142   | 0.674951   |
| MTHFD2   | 126.134 | 63.6815 | -0.986012  | 0.00153868 |
| SLC31A1  | 21.663  | 12.7147 | -0.76874   | 0.00153868 |
| CTAGE5   | 7.68407 | 3.59365 | -1.09642   | 0.00153868 |
| TRIM25   | 28.3415 | 11.7137 | -1.27471   | 0.00153868 |
| GTPBP2   | 55.7364 | 13.097  | -2.08938   | 0.00153868 |
| KLF2     | 78.2112 | 26.8966 | -1.53995   | 0.00153868 |
| MOCOS    | 22.8254 | 6.31251 | -1.85435   | 0.00153868 |
| MFSD2A   | 17.1558 | 28.6557 | 0.740127   | 0.00739414 |
| TMEM51   | 7.16695 | 12.9368 | 0.852046   | 0.00380811 |
| MAP1LC3B | 115.271 | 53.7057 | -1.10189   | 0.00153868 |
| SLC4A5   | 7.46629 | 5.01232 | -0.574911  | 0.0420136  |
| CTH      | 22.3215 | 1.39405 | -4.00108   | 0.00153868 |
| IER2     | 211.688 | 169.23  | -0.322957  | 0.373268   |
| SESN2    | 82.7034 | 10.4133 | -2.98952   | 0.00153868 |
| GFPT2    | 49.6948 | 58.0295 | 0.223693   | 0.630091   |
| PHLDA2   | 173.092 | 304.609 | 0.815418   | 0.00153868 |
| PCK2     | 117.678 | 35.1022 | -1.74521   | 0.00153868 |
| PRR22    | 15.0293 | 11.0823 | -0.439515  | 0.306657   |
| SERPIN8  | 12.3823 | 6.84866 | -0.854382  | 0.00153868 |
| DUSP2    | 39.839  | 31.3681 | -0.344885  | 0.355674   |
| CARS     | 50.4273 | 14.9879 | -1.75041   | 0.00153868 |
| SPPL2A   | 5.36886 | 5.1186  | -0.068866  | 0.951036   |
| ALOXE3   | 11.8561 | 2.34127 | -2.34027   | 0.00153868 |
| SLC3A2   | 330.119 | 149.818 | -1.13978   | 0.00153868 |
| GARS     | 159.157 | 66.2753 | -1.2639    | 0.00153868 |

|                |            |           |                   |            |
|----------------|------------|-----------|-------------------|------------|
| SLC30A1        | 6.1094     | 2.87203   | -1.08896          | 0.00153868 |
| FOSB           | 7.23078    | 4.97807   | -0.538566         | 0.112663   |
| SLC1A5         | 362.555    | 196.395   | -0.88444          | 0.00153868 |
| NHSL1          | 1.15104    | 0.961349  | -0.259811         | 0.697953   |
| AKNA           | 7.50302    | 1.63562   | -2.19763          | 0.00153868 |
| IER3           | 97.7447    | 65.256    | -0.582907         | 0.0226901  |
| SLC39A3        | 57.3423    | 44.9706   | -0.350618         | 0.426107   |
| HIST1H2BH      | 32.8385    | 19.2441   | -0.770973         | 0.0907094  |
| SLC16A13       | 18.0716    | 5.65907   | -1.67509          | 0.00153868 |
| ITPRIP         | 11.0571    | 4.97922   | -1.15099          | 0.00153868 |
| ARRDC4         | 2.86896    | 4.3056    | 0.585689          | 0.0732377  |
| EGR3           | 2.89847    | 2.9877    | 0.0437428         | 0.972494   |
| PSAT1          | 135.74     | 37.6823   | -1.84889          | 0.00153868 |
| RPLP0P2        | 3.29478    | 0.990365  | -1.73415          | 0.00153868 |
| CCRL2          | 4.45019    | 1.28435   | -1.79283          | 0.00153868 |
| TSLP           | 6.48329    | 0.405985  | -3.99723          | 0.00153868 |
| ULBP1          | 1.76881    | 0.507242  | -1.80203          | 0.00153868 |
| JUNB           | 64.4527    | 56.1112   | -0.199953         | 0.698259   |
| MARS           | 69.9251    | 33.4263   | -1.06482          | 0.00153868 |
| MAP1LC3B2      | 7.20884    | 3.67745   | -0.971061         | 0.0130226  |
| TRIB3          | 196.131    | 25.7736   | -2.92785          | 0.00153868 |
| TXNIP          | 55.1876    | 53.9053   | -0.033916         | 0.975231   |
| SLC1A4         | 15.1473    | 4.58358   | -1.72452          | 0.00153868 |
| GOT1           | 65.0037    | 19.7278   | -1.7203           | 0.00153868 |
| ASNS           | 279.956    | 62.6233   | -2.16043          | 0.00153868 |
| HKDC1          | 1.90201    | 0.0937073 | -4.34322          | 0.00153868 |
| SLC7A5         | 172.618    | 112.307   | -0.620134         | 0.0238313  |
| INHBE          | 1.78933    | 0.185455  | -3.27028          | 0.00153868 |
| LAT2           | 1.2277     | 1.059     | -0.213248         | 0.856226   |
| WARS           | 125.762    | 44.0197   | -1.51447          | 0.00153868 |
| FOS            | 9.94934    | 5.9906    | -0.731901         | 0.0220668  |
| LINC00565      | 1.00899    | 0.192616  | -2.38911          | 0.00380811 |
| GDF15          | 379.777    | 61.2309   | -2.63282          | 0.00153868 |
| KRTAP2-3       | 4.61657    | 1.41063   | -1.71048          | 0.00572929 |
| SLC7A11        | 4.03336    | 0.200732  | -4.32864          | 0.00153868 |
| TMEM42         | 31.8366    | 5.78436   | -2.46046          | 0.00153868 |
| HIST2H2AC      | 13.3543    | 9.07122   | -0.557931         | 0.451834   |
| HIST1H2AD,HIST | 4.79837    | 2.94324   | -0.70514          | 0.378746   |
| SCARNA2        | 9.25931    | 3.28275   | -1.496            | 0.0379922  |
| RPPH1          | 163.768    | 46.7725   | -1.80792          | 0.00153868 |
| CTGF           | 47.2122    | 4.76584   | -3.30836          | 0.00153868 |
| EGR1           | 55.2164    | 15.5784   | -1.82555          | 0.00153868 |
| RMRP           | 433.034    | 113.434   | -1.93263          | 0.00153868 |
| HIST1H1E       | 7.53524    | 1.92609   | -1.96798          | 0.00153868 |
| CXCL2          | 1.13081    | 0.277032  | -2.02922          | 0.0215444  |
| RPS17          | 1.91314    | 0         | #NAME?            | 0.00153868 |
| HIST1H4D       | 2.4889     | 0.544538  | -2.1924           | 0.182216   |
| gene           | t5         | t7        | log2(fold_change) | q_value    |
| LOC284260      | 0.00673286 | 0.0540573 | 3.0052            | 1          |

|              |             |            |            |   |
|--------------|-------------|------------|------------|---|
| STARD8       | 0.00320027  | 0.0296578  | 3.21215    | 1 |
| LOC100507173 | 0.00603575  | 0.00578892 | -0.0602397 | 1 |
| TMEM178A     | 0.026225    | 0.0302934  | 0.20806    | 1 |
| MUC5B        | 0.00392563  | 0.0194578  | 2.30936    | 1 |
| MYLK         | 0.002449    | 0.0147225  | 2.58776    | 1 |
| ZFR2         | 0.0062955   | 0.00415604 | -0.599113  | 1 |
| PP14571      | 0.00763361  | 0.0313186  | 2.03658    | 1 |
| SEMA4A       | 0.00712832  | 0.00469491 | -0.602464  | 1 |
| MMP10        | 0.00624064  | 0.00593431 | -0.072613  | 1 |
| LSAMP        | 0.00104311  | 0.00362173 | 1.79579    | 1 |
| LOC100272216 | 0.0152663   | 0.0532395  | 1.80215    | 1 |
| SLC22A13     | 0.0059726   | 0.0111882  | 0.905548   | 1 |
| ZNF660       | 0.00443253  | 0          | #NAME?     | 1 |
| PTTG2        | 0.0272569   | 0.310888   | 3.51171    | 1 |
| FNDC7        | 0.00376831  | 0.00620465 | 0.719431   | 1 |
| WDR11-AS1    | 0.0043327   | 0.0109594  | 1.33884    | 1 |
| LOC100128076 | 0.0118846   | 0.0315517  | 1.40862    | 1 |
| PPP3CC       | 0.011426    | 0.103065   | 3.17317    | 1 |
| DENND2D      | 0.00369731  | 0.0148002  | 2.00107    | 1 |
| HEPHL1       | 0.00170231  | 0.00767366 | 2.17242    | 1 |
| LOC100506343 | 0.00663006  | 0.0154151  | 1.21725    | 1 |
| TET1         | 0.00164193  | 0.00375854 | 1.19478    | 1 |
| GSTM5        | 0.0225012   | 0.0488971  | 1.11975    | 1 |
| SLC4A1       | 0.00416309  | 0.0213757  | 2.36024    | 1 |
| ANPEP        | 0.0062242   | 0.0225784  | 1.85898    | 1 |
| SUMO1P3      | 0.00897685  | 0.00855228 | -0.0698991 | 1 |
| TRIM58       | 0.00260503  | 0.0207098  | 2.99095    | 1 |
| POM121L9P    | 0.0027818   | 0.036313   | 3.70639    | 1 |
| CDHR5        | 0.0058208   | 0.0335224  | 2.52584    | 1 |
| TSC22D1-AS1  | 0.0259993   | 0.196432   | 2.91748    | 1 |
| CD200R1      | 0.00449733  | 0.019628   | 2.12577    | 1 |
| RNF43        | 0.0059604   | 0.0155577  | 1.38414    | 1 |
| DNAH2        | 0.000988949 | 0.0016214  | 0.713275   | 1 |
| RIMS1        | 0.00987098  | 0.0256247  | 1.37627    | 1 |
| CACNA1D      | 0.00237416  | 0.015518   | 2.70846    | 1 |
| STC1         | 0.00596632  | 0.0245964  | 2.04353    | 1 |
| LOC100652739 | 0.0357354   | 0.157414   | 2.13913    | 1 |
| C21orf62     | 0.00417754  | 0.00511492 | 0.292057   | 1 |
| CLUL1        | 0.0053771   | 0.01021    | 0.925079   | 1 |
| C9orf152     | 0.0103856   | 0.0371448  | 1.83857    | 1 |
| C20orf118    | 0.00688095  | 0.0666138  | 3.27514    | 1 |
| ACR          | 0.0129466   | 0.033593   | 1.37558    | 1 |
| MATN2        | 0.00282659  | 0.0021383  | -0.402598  | 1 |
| PDIA2        | 0.0294623   | 0.119653   | 2.02191    | 1 |
| ANO9         | 0.0295895   | 0.0791859  | 1.42016    | 1 |
| NFAM1        | 0.00274273  | 0.00255547 | -0.102027  | 1 |
| FNDC5        | 0.00667391  | 0.0334674  | 2.32615    | 1 |
| PTGES        | 0.0266061   | 0.0473938  | 0.83294    | 1 |
| PRICKLE2-AS3 | 0.00373504  | 0.00937981 | 1.32843    | 1 |

|              |            |             |            |          |
|--------------|------------|-------------|------------|----------|
| SCN2A        | 0.00115724 | 0.00220929  | 0.932893   | 1        |
| LOC101101776 | 0.0478019  | 0.113921    | 1.25289    | 1        |
| KALRN        | 0.00294084 | 0.0186173   | 2.66234    | 1        |
| NFASC        | 0.00193242 | 0.00121368  | -0.671025  | 1        |
| ZNF880       | 0.00878033 | 0.0357523   | 2.02569    | 1        |
| AFF3         | 0.00305935 | 0.00116362  | -1.39461   | 1        |
| PPP2R2C      | 0.00312605 | 0           | #NAME?     | 1        |
| APOL4        | 0.00350522 | 0.0206071   | 2.55557    | 1        |
| UNC5B-AS1    | 0.287453   | 0.38205     | 0.410434   | 1        |
| LOC100505875 | 0.0758055  | 0.0758747   | 0.00131619 | 1        |
| LINC00264    | 0.0204601  | 0.063563    | 1.63537    | 1        |
| LINC00652    | 0.0121293  | 0.0191757   | 0.660778   | 1        |
| CRYAB        | 0.0847718  | 0.540982    | 2.67392    | 0.310083 |
| GRIK1-AS2    | 0.011285   | 0.109835    | 3.28285    | 1        |
| ZAP70        | 0.0498443  | 0.0690911   | 0.471071   | 1        |
| STARD4-AS1   | 0.00190701 | 0.00327295  | 0.779279   | 1        |
| KCNJ10       | 0.00213992 | 0.00782529  | 1.87059    | 1        |
| GPIHBP1      | 0.00749925 | 0.012371    | 0.722148   | 1        |
| IGFN1        | 0.00095955 | 0.000723121 | -0.408121  | 1        |
| PROK1        | 0.0115284  | 0           | #NAME?     | 1        |
| CASP1        | 0.027447   | 0.0677822   | 1.30426    | 1        |
| PTPRN        | 0.0268726  | 0.0323592   | 0.268038   | 1        |
| C10orf10     | 0.0175796  | 0.0840112   | 2.25668    | 1        |
| LRRIQ4       | 0.0143803  | 0.00635734  | -1.17759   | 1        |
| LOC643723    | 0.0206518  | 0.0114051   | -0.856595  | 1        |
| MFAP4        | 0.00900536 | 0.0647959   | 2.84705    | 1        |
| ABCA12       | 0.00127222 | 0.000980522 | -0.375722  | 1        |
| RAPGEF4      | 0.0192611  | 0.0110874   | -0.796766  | 1        |
| OPCML        | 0.0017014  | 0.00150023  | -0.181538  | 1        |
| PA2G4P4      | 0.00393348 | 0.010635    | 1.43494    | 1        |
| DCDC5        | 0.00318105 | 0.00164842  | -0.948422  | 1        |
| SLC43A3      | 0.0453218  | 0.238498    | 2.3957     | 1        |
| SLA2         | 0.0136594  | 0.0907183   | 2.7315     | 1        |
| WDR88        | 0.00843239 | 0.0298134   | 1.82195    | 1        |
| PSORS1C2     | 0.0235634  | 0.0157748   | -0.578927  | 1        |
| C1orf228     | 0.0408224  | 0.00859173  | -2.24834   | 1        |
| ADCY5        | 0.00881844 | 0.0183827   | 1.05975    | 1        |
| TMEM139      | 0.0107641  | 0.0448175   | 2.05783    | 1        |
| NARR,RAB34   | 0.0531019  | 0.0664696   | 0.323932   | 1        |
| AHCTF1P1     | 0.00162076 | 0.00777349  | 2.26189    | 1        |
| BNIP3        | 0.015615   | 0.0320503   | 1.0374     | 1        |
| PCDH18       | 0.0101113  | 0.0179774   | 0.830215   | 1        |
| SLC5A4       | 0.0343225  | 0.0339808   | -0.0144378 | 1        |
| CD79B        | 0.018194   | 0.0301527   | 0.728825   | 1        |
| L3MBTL1      | 0.0773431  | 0.265049    | 1.77691    | 1        |
| GAL3ST1      | 0.0231776  | 0           | #NAME?     | 1        |
| TBC1D26      | 0.0423029  | 0.0636034   | 0.588348   | 1        |
| SLC19A3      | 0.00300719 | 0.0209133   | 2.79793    | 1        |
| RGS9         | 0.0240966  | 0           | #NAME?     | 1        |

|               |            |            |            |          |
|---------------|------------|------------|------------|----------|
| STK33         | 0.00360566 | 0.0027708  | -0.379959  | 1        |
| AGSK1,LOC7278 | 0.00992845 | 0.0124939  | 0.331588   | 1        |
| C1orf114      | 0.0052184  | 0.0138401  | 1.40717    | 1        |
| HRH4          | 0.00374962 | 0.00961744 | 1.35891    | 1        |
| RBP5          | 0.0345412  | 0.0921872  | 1.41625    | 1        |
| FAM228A       | 0.0112283  | 0.02116    | 0.914207   | 1        |
| ENG           | 0.0809132  | 0.119853   | 0.566823   | 1        |
| OR2B6         | 0.0223986  | 0.037306   | 0.735996   | 1        |
| LOC100131655  | 0.0122974  | 0.0323742  | 1.39649    | 1        |
| LIPH          | 0.00453229 | 0.00343129 | -0.401489  | 1        |
| KCNE2         | 0.0526812  | 0.157167   | 1.57694    | 1        |
| LRRC15        | 0.0023298  | 0.00220083 | -0.0821555 | 1        |
| LRTM2         | 0.00684633 | 0.0220546  | 1.68768    | 1        |
| SH2D6         | 0.0329651  | 0          | #NAME?     | 1        |
| CHST11        | 0.00309838 | 0.00349906 | 0.175456   | 1        |
| TSPAN18       | 0.0035196  | 0.00646829 | 0.877975   | 1        |
| ENO1-AS1      | 0.0649512  | 0.243085   | 1.90403    | 1        |
| NRAP          | 0.00219374 | 0.00327115 | 0.576405   | 1        |
| SLC5A1        | 0.00350294 | 0          | #NAME?     | 1        |
| PLB1          | 0.00371858 | 0          | #NAME?     | 1        |
| GALR3         | 0.31638    | 0.371319   | 0.230998   | 1        |
| TMEM119       | 0.00822248 | 0.0106177  | 0.368832   | 1        |
| SLC13A4       | 0.00515545 | 0.0142148  | 1.46322    | 1        |
| DLEU7-AS1     | 0.00635232 | 0          | #NAME?     | 1        |
| TAS1R1        | 0.00855673 | 0.00801205 | -0.0948888 | 1        |
| SEMA3G        | 0.0046331  | 0.0199476  | 2.10617    | 1        |
| TMIGD2        | 0.020568   | 0.0134756  | -0.610049  | 1        |
| HLA-DOB       | 0.0446665  | 0.182246   | 2.02862    | 1        |
| SPON1         | 0.0105184  | 0.0252856  | 1.2654     | 1        |
| COL6A4P1      | 0.0110746  | 0.00492869 | -1.16798   | 1        |
| IL16          | 0.00992405 | 0.0364327  | 1.87623    | 1        |
| RNF183        | 0.028979   | 0.104499   | 1.85041    | 1        |
| SPATA25       | 0.071054   | 0.216631   | 1.60825    | 1        |
| TRIM69        | 0.066971   | 0.150485   | 1.16801    | 1        |
| ZNF582-AS1    | 0.0247019  | 0.0826948  | 1.74318    | 1        |
| ACSM3         | 0.0820885  | 0.0984714  | 0.262525   | 1        |
| DHH           | 0.0142286  | 0.0630199  | 2.14701    | 1        |
| C3orf65       | 0.0237623  | 0.0111841  | -1.08722   | 1        |
| C9orf139      | 0.00487821 | 0.00447687 | -0.123863  | 1        |
| LOC283038     | 0.0126002  | 0.0117805  | -0.097036  | 1        |
| HLA-DRB6      | 0.0288729  | 0.0177818  | -0.699318  | 1        |
| GUCY2C        | 0.00270309 | 0.00414372 | 0.616319   | 1        |
| KRTDAP        | 0.146233   | 1.02672    | 2.8117     | 0.646217 |
| EXOC3L1       | 0.0358744  | 0.044034   | 0.295663   | 1        |
| FEZF1         | 0.0525612  | 0.0873615  | 0.733001   | 1        |
| TBX15         | 0.00690078 | 0.00632762 | -0.125097  | 1        |
| RPGRIP1       | 0.00395693 | 0.00469986 | 0.248237   | 1        |
| C9orf173      | 0.0723641  | 0.0447123  | -0.694603  | 1        |
| LOC643201     | 0.0157258  | 0.0179569  | 0.191403   | 1        |

|              |            |             |            |   |
|--------------|------------|-------------|------------|---|
| ENOX1        | 0.00479237 | 0           | #NAME?     | 1 |
| ZFHx4        | 0.00282604 | 0.000623201 | -2.18101   | 1 |
| RNF222       | 0.00765092 | 0.0179454   | 1.22991    | 1 |
| ACOT4        | 0.0112411  | 0.0520629   | 2.21148    | 1 |
| AQP7P1       | 0.0039262  | 0.0182875   | 2.21966    | 1 |
| IQUB         | 0.00940583 | 0.0141663   | 0.59084    | 1 |
| MATN1        | 0.0265733  | 0.110184    | 2.05186    | 1 |
| IRF4         | 0.0178006  | 0.029429    | 0.725315   | 1 |
| TRAF3IP3     | 0.00550852 | 0.00900734  | 0.709436   | 1 |
| LAG3         | 0.0263551  | 0.0386371   | 0.551908   | 1 |
| ANO2         | 0.00510687 | 0.00267338  | -0.933771  | 1 |
| OR7D2        | 0.0191825  | 0.0168791   | -0.184554  | 1 |
| LOC100134259 | 0.0163488  | 0.0676828   | 2.0496     | 1 |
| GPR182       | 0.0118157  | 0.00872162  | -0.438037  | 1 |
| USP32P2      | 0.032777   | 0.0721506   | 1.13833    | 1 |
| MSTN         | 0.00351201 | 0.00614215  | 0.806445   | 1 |
| COL16A1      | 0.00294425 | 0.0102978   | 1.80636    | 1 |
| SMIM16       | 0.0083919  | 0.0213355   | 1.34619    | 1 |
| HHLA2        | 0.00401388 | 0           | #NAME?     | 1 |
| CLDN5        | 0.0139309  | 0.0662723   | 2.25012    | 1 |
| VCX3B        | 0.0127806  | 0.00940113  | -0.443045  | 1 |
| GNRH2        | 0.0636379  | 0.227268    | 1.83643    | 1 |
| COL6A6       | 0.00123679 | 0.00545325  | 2.14051    | 1 |
| LOC100131060 | 0.0159299  | 0           | #NAME?     | 1 |
| LOC645638    | 0.0290963  | 0           | #NAME?     | 1 |
| PPP1R36      | 0.00869128 | 0.0470553   | 2.43672    | 1 |
| SSTR2        | 0.00402684 | 0.0165519   | 2.03928    | 1 |
| LINC00282    | 0.00583601 | 0.00260277  | -1.16493   | 1 |
| TSPAN11      | 0.00365562 | 0.00238657  | -0.615179  | 1 |
| ANXA2P1      | 0.00843184 | 0.00793187  | -0.0881868 | 1 |
| SP7          | 0.00505036 | 0.00852023  | 0.754505   | 1 |
| RPL23P8      | 0.0299349  | 0.100552    | 1.74805    | 1 |
| SYCP2        | 0.0117548  | 0.0207341   | 0.818756   | 1 |
| FBXW12       | 0.0165484  | 0.0642064   | 1.95603    | 1 |
| PAEP         | 0.0191763  | 0           | #NAME?     | 1 |
| C14orf23     | 0.00878371 | 0.0242193   | 1.46325    | 1 |
| OR2H2        | 0.0701101  | 0.204113    | 1.54167    | 1 |
| LINC00266-1  | 0.0227055  | 0.0370837   | 0.707743   | 1 |
| CYP3A5       | 0.0112375  | 0.061995    | 2.46383    | 1 |
| UBA7         | 0.0439025  | 0.171901    | 1.96921    | 1 |
| EEF1A2       | 0.0131857  | 0.0217844   | 0.72433    | 1 |
| SLC22A9      | 0.0107501  | 0.0149783   | 0.478526   | 1 |
| TM6SF2       | 0.0130465  | 0.0122283   | -0.0934385 | 1 |
| CNTD2        | 0.0140626  | 0.0753181   | 2.42113    | 1 |
| KLK1         | 0.0274575  | 0           | #NAME?     | 1 |
| INGX         | 0.0160415  | 0.0269663   | 0.74935    | 1 |
| CCDC153      | 0.0710521  | 0.087338    | 0.297732   | 1 |
| SMO          | 0.0226435  | 0.0648917   | 1.51893    | 1 |
| C4orf26      | 0.0160388  | 0.0341433   | 1.09004    | 1 |



|              |            |            |            |         |
|--------------|------------|------------|------------|---------|
| FLJ45445     | 0.0107809  | 0.0127504  | 0.242066   | 1       |
| SMIM5        | 0.0317324  | 0.0465969  | 0.554278   | 1       |
| CDH4         | 0.0132503  | 0.0446892  | 1.7539     | 1       |
| MAP7D2       | 0.00893963 | 0.0315517  | 1.81943    | 1       |
| FUT8-AS1     | 0.0646293  | 0.108339   | 0.74529    | 1       |
| NLRP14       | 0.00531807 | 0.0129864  | 1.28803    | 1       |
| TYRO3P       | 0.0263755  | 0.0307204  | 0.22       | 1       |
| STAT4        | 0.0113631  | 0.00734085 | -0.630333  | 1       |
| C21orf49     | 0.0212315  | 0.0100749  | -1.07543   | 1       |
| PDGFRB       | 0.00376237 | 0.00240636 | -0.644792  | 1       |
| LGI4         | 0.00973488 | 0          | #NAME?     | 1       |
| LOC100129055 | 0.0247478  | 0.0397964  | 0.685336   | 1       |
| FGF7         | 0.00240461 | 0.00230624 | -0.0602595 | 1       |
| ACSL6        | 0.00261304 | 0.00161997 | -0.689758  | 1       |
| DCDC2B       | 0.0268931  | 0.0311515  | 0.212067   | 1       |
| CLVS1        | 0.0100185  | 0.0166603  | 0.733755   | 1       |
| LOC100505624 | 0.0422389  | 0.110264   | 1.38431    | 1       |
| LOC100507557 | 0.010424   | 0.00252699 | -2.04442   | 1       |
| CNN1         | 0.0502498  | 0.0610128  | 0.279995   | 1       |
| GSTM2        | 0.098105   | 0.128242   | 0.386474   | 1       |
| YPEL4        | 0.160945   | 0.0289027  | -2.47729   | 1       |
| SCUBE3       | 0.00634795 | 0.0334647  | 2.39828    | 1       |
| TLR1         | 0.0111558  | 0.0190842  | 0.774575   | 1       |
| SOX6         | 0.00247366 | 0          | #NAME?     | 1       |
| SNAI2        | 0.00602384 | 0.00571671 | -0.0754998 | 1       |
| HOXA6        | 0.144458   | 0.229353   | 0.666912   | 1       |
| ALDH1L2      | 0.00135    | 0.0074022  | 2.45499    | 1       |
| FERMT2       | 0.00906385 | 0.0193382  | 1.09326    | 1       |
| ANKRD37      | 3.08593    | 8.56044    | 1.47198    | 0.20701 |
| LOC100272228 | 0.0411053  | 0.0653611  | 0.669107   | 1       |
| ZNF347       | 0.00223241 | 0.0185504  | 3.05478    | 1       |
| LRRC2        | 0.00205602 | 0          | #NAME?     | 1       |
| MIR31HG      | 0.178629   | 0.252459   | 0.499086   | 1       |
| LOC100507117 | 0.00551239 | 0.038806   | 2.81553    | 1       |
| SYCP2L       | 0.0633629  | 0.0724175  | 0.192701   | 1       |
| ALLC         | 0.0552587  | 0.291144   | 2.39746    | 1       |
| PCDH19       | 0.00145898 | 0.00276842 | 0.924104   | 1       |
| CPEB1        | 0.00438059 | 0.00677367 | 0.628812   | 1       |
| RACGAP1P     | 0.00377525 | 0          | #NAME?     | 1       |
| ZBTB20       | 0.0215733  | 0.00767776 | -1.49049   | 1       |
| LGR5         | 0.00446569 | 0          | #NAME?     | 1       |
| ARGFXP2      | 0.0103091  | 0.0248597  | 1.26989    | 1       |
| BCL2L15      | 0.0188906  | 0.0609402  | 1.68973    | 1       |
| ZNF426       | 0.0149405  | 0.0192457  | 0.365314   | 1       |
| CLDN18       | 0.00856227 | 0.0678602  | 2.9865     | 1       |
| HCG11        | 0.00276971 | 0.00174576 | -0.665876  | 1       |
| GPX7         | 0.0117534  | 0          | #NAME?     | 1       |
| PRR23C       | 0.0144791  | 0.0440986  | 1.60676    | 1       |
| SRL          | 0.00323341 | 0.00245163 | -0.399314  | 1       |

|              |            |            |           |          |
|--------------|------------|------------|-----------|----------|
| LOC339894    | 0.00639515 | 0.0108727  | 0.765659  | 1        |
| C14orf178    | 0.0294299  | 0.0752889  | 1.35516   | 1        |
| CRISPLD2     | 0.0117764  | 0.0412318  | 1.80786   | 1        |
| NUGGC        | 0.00329128 | 0.0161162  | 2.29179   | 1        |
| COL10A1      | 0.00856944 | 0.0123937  | 0.532338  | 1        |
| HSD52        | 0.0724348  | 0.101278   | 0.483568  | 1        |
| IL37         | 0.0428586  | 0          | #NAME?    | 1        |
| ACTG1P4      | 0.0159545  | 0.037061   | 1.21594   | 1        |
| ZNF295-AS1   | 0.0186007  | 0.168954   | 3.1832    | 1        |
| ADAMTS16     | 0.00562304 | 0          | #NAME?    | 1        |
| GNN          | 0.0142892  | 0.0214272  | 0.584512  | 1        |
| ANKS4B       | 0.00587602 | 0.00352022 | -0.739172 | 1        |
| FAM13A-AS1   | 0.0861027  | 0.17642    | 1.03488   | 1        |
| LOC100505817 | 0.0141059  | 0          | #NAME?    | 1        |
| KPNA7        | 0.00885971 | 0.00797755 | -0.151314 | 1        |
| HEIH         | 0.0123047  | 0          | #NAME?    | 1        |
| SLC2A14      | 0.0097358  | 0.0167154  | 0.779802  | 1        |
| RUFY4        | 0.00772078 | 0          | #NAME?    | 1        |
| KRT42P       | 0.00527134 | 0          | #NAME?    | 1        |
| SLC2A9       | 0.0213754  | 0.00778741 | -1.45674  | 1        |
| CCDC81       | 0.0360309  | 0.0710699  | 0.980003  | 1        |
| PHEX         | 0.0140095  | 0.0197076  | 0.492353  | 1        |
| GJD4         | 0.0162253  | 0.0150473  | -0.108738 | 1        |
| SPTY2D1-AS1  | 0.0201146  | 0.0440219  | 1.12998   | 1        |
| ANKK1        | 0.0586147  | 0.160246   | 1.45095   | 1        |
| BSN          | 0.0169338  | 0.023685   | 0.484066  | 1        |
| ZNF671       | 0.0135601  | 0.0173961  | 0.359398  | 1        |
| CGB          | 0.0399664  | 0.0209875  | -0.929253 | 1        |
| LOC400558    | 0.0158059  | 0.0261657  | 0.727207  | 1        |
| DPYSL4       | 0.0150289  | 0.0249483  | 0.731206  | 1        |
| CYBRD1       | 0.0025288  | 0.0185518  | 2.87503   | 1        |
| PDK4         | 0.10082    | 0.020798   | -2.27727  | 1        |
| FAM182B      | 0.0393498  | 0.0559337  | 0.507359  | 1        |
| RNF165       | 0.115891   | 0.196854   | 0.764356  | 1        |
| ANP32A-IT1   | 0.00865796 | 0.0272579  | 1.65458   | 1        |
| MEP1B        | 0.0108827  | 0.0146717  | 0.430989  | 1        |
| PADI1        | 0.0209815  | 0.0125185  | -0.745057 | 1        |
| DOK7         | 0.0109784  | 0          | #NAME?    | 1        |
| RBM44        | 0.0381503  | 0.0468643  | 0.296795  | 1        |
| CCBP2        | 0.0107206  | 0.00407333 | -1.39611  | 1        |
| C1orf227     | 0.0681444  | 0.0511793  | -0.413035 | 1        |
| LOC100129722 | 0.160494   | 0.0881581  | -0.864354 | 1        |
| HAPLN3       | 0.160618   | 0.327639   | 1.02848   | 1        |
| NLRP3        | 0.0346078  | 0.0285327  | -0.278482 | 1        |
| PTGER1       | 0.0372272  | 0.0336298  | -0.146616 | 1        |
| PRSS8        | 0.114238   | 0.158552   | 0.472909  | 1        |
| PDZD9        | 0.0104022  | 0.0345164  | 1.7304    | 1        |
| C1orf213     | 0.486506   | 0.704982   | 0.535127  | 0.880513 |
| FAM92A1P2    | 0.00449338 | 0.00699665 | 0.638862  | 1        |

|              |            |            |           |          |
|--------------|------------|------------|-----------|----------|
| RGPD4        | 0.00138083 | 0.00107207 | -0.365132 | 1        |
| AIRN         | 0.00979339 | 0.0151965  | 0.633857  | 1        |
| FRMD6-AS1    | 0.108817   | 0.250747   | 1.20433   | 1        |
| STARD13-AS   | 0.0300648  | 0.0533128  | 0.826405  | 1        |
| CSPG4        | 0.00764365 | 0.0262807  | 1.78167   | 1        |
| ATOH8        | 0.00530712 | 0.00248655 | -1.09378  | 1        |
| ST6GALNAC2   | 0.0520946  | 0.123556   | 1.24596   | 1        |
| ZNF705A      | 0.00295478 | 0.0221105  | 2.9036    | 1        |
| PTN          | 0.205584   | 0.0984608  | -1.06211  | 1        |
| DOCK3        | 0.0138372  | 0.037511   | 1.43876   | 1        |
| GOLGA8I      | 0.0258223  | 0.0451364  | 0.805674  | 1        |
| LOC643669    | 0.210859   | 0.156533   | -0.429813 | 1        |
| CARD14       | 0.0628299  | 0.0811351  | 0.368876  | 1        |
| RPS15AP10    | 0.0517812  | 0.0672272  | 0.376617  | 1        |
| CSMD2        | 0.00585621 | 0.0116882  | 0.997017  | 1        |
| CTSS         | 0.00902565 | 0.0154969  | 0.779873  | 1        |
| EPN3         | 0.01198    | 0.0339206  | 1.50153   | 1        |
| IGSF11       | 0.00336442 | 0          | #NAME?    | 1        |
| PCDHB18      | 0.0093386  | 0.0325818  | 1.80279   | 1        |
| PGAM4        | 0.0537443  | 0.0916577  | 0.770145  | 1        |
| HPCA         | 0.0616592  | 0.173049   | 1.48879   | 1        |
| CCDC144C     | 0.00208837 | 0          | #NAME?    | 1        |
| GPR87        | 0.0156141  | 0.00747215 | -1.06325  | 1        |
| SULF1        | 0.00484099 | 0.00342489 | -0.499244 | 1        |
| RASSF2       | 0.00534231 | 0.00792994 | 0.569848  | 1        |
| PABPC3       | 0.00518945 | 0.00458877 | -0.177472 | 1        |
| LOC284080    | 0.0704798  | 0.0625119  | -0.173078 | 1        |
| GLUD2        | 0.00812412 | 0.00495008 | -0.71476  | 1        |
| ARMCX2       | 0.048024   | 0.0585205  | 0.285188  | 1        |
| COX8C        | 0.0438162  | 0.082581   | 0.914345  | 1        |
| ARG1         | 0.00749063 | 0          | #NAME?    | 1        |
| LOC100129046 | 0.0129924  | 0.0068765  | -0.917923 | 1        |
| LOC391322    | 1.18771    | 1.6869     | 0.50619   | 0.752072 |
| LOC650368    | 0.0281601  | 0.0213612  | -0.398662 | 1        |
| THBS4        | 0.119383   | 0.0487127  | -1.29323  | 1        |
| MYO15A       | 0.00973559 | 0.00699166 | -0.477634 | 1        |
| SMIM17       | 0.103354   | 0.085874   | -0.267305 | 1        |
| MORF4L2-AS1  | 0.0373594  | 0.089954   | 1.26772   | 1        |
| OR2H1        | 0.00385427 | 0          | #NAME?    | 1        |
| C1orf192     | 0.027896   | 0.101218   | 1.85933   | 1        |
| LOC387895    | 0.103339   | 0.317503   | 1.61939   | 1        |
| PDE4C        | 0.0551331  | 0.0200875  | -1.45662  | 1        |
| ACY3         | 0.0482011  | 0.0967758  | 1.00558   | 1        |
| LOC643401    | 0.0124896  | 0.0905896  | 2.85862   | 1        |
| GBP2         | 0.00410114 | 0.013702   | 1.74029   | 1        |
| FBXO27       | 0.0445034  | 0.0305359  | -0.543411 | 1        |
| C6orf25      | 0.00731593 | 0.0255863  | 1.80626   | 1        |
| ADAM20P1     | 0.0558565  | 0.0942322  | 0.754495  | 1        |
| RFPL1        | 0.00924482 | 0.040323   | 2.12488   | 1        |

|                |            |            |            |          |
|----------------|------------|------------|------------|----------|
| SH3RF3-AS1     | 0.0280842  | 0.0997466  | 1.82851    | 1        |
| KCNT1          | 0.00867598 | 0.0119752  | 0.464946   | 1        |
| NNAT           | 0.0229449  | 0.0903111  | 1.97673    | 1        |
| SUSD5          | 0.0175986  | 0.0125556  | -0.487133  | 1        |
| RSPH9          | 0.0874575  | 0.0568351  | -0.621799  | 1        |
| SLC15A2        | 0.00566468 | 0.0289754  | 2.35476    | 1        |
| LOC158376      | 0.0101523  | 0          | #NAME?     | 1        |
| C3orf43        | 0.0424389  | 0.069738   | 0.716558   | 1        |
| ERN2           | 0.00959625 | 0.0123937  | 0.369064   | 1        |
| MIR143,MIR143H | 0.00133128 | 0.00495177 | 1.89513    | 1        |
| MTUS2-AS1      | 0.0663366  | 0.111864   | 0.753871   | 1        |
| TIPARP-AS1     | 0.126784   | 0.109857   | -0.206748  | 1        |
| EFHD1          | 0.00938789 | 0.0260948  | 1.47489    | 1        |
| ADPGK-AS1      | 0.0424532  | 0.057104   | 0.427721   | 1        |
| PARVG          | 0.0461663  | 0.148308   | 1.68369    | 1        |
| CASQ1          | 0.0062762  | 0.00470964 | -0.414273  | 1        |
| HAPLN2         | 0.0219203  | 0          | #NAME?     | 1        |
| LST1           | 0.0336539  | 0.0222254  | -0.598561  | 1        |
| BCL2L10        | 0.0466585  | 0.0294734  | -0.662726  | 1        |
| SPDEF          | 0.0162016  | 0.0195022  | 0.267495   | 1        |
| M1AP           | 0.00511102 | 0.00457933 | -0.158477  | 1        |
| KCNH6          | 0.110315   | 0.129528   | 0.23164    | 1        |
| MORN5          | 0.020128   | 0          | #NAME?     | 1        |
| UNC5CL         | 0.243707   | 0.292232   | 0.261968   | 1        |
| MT1DP          | 2.71438    | 2.59882    | -0.062767  | 0.981735 |
| CCRL1          | 0.0139054  | 0.0304601  | 1.13127    | 1        |
| MYO1H          | 0.00799455 | 0.00677328 | -0.239163  | 1        |
| HSP90AB4P      | 0.0205007  | 0.0485024  | 1.24239    | 1        |
| DENND1C        | 0.163216   | 0.0980902  | -0.734605  | 1        |
| CCNI2          | 0.0166196  | 0.0115835  | -0.520815  | 1        |
| TGFB2          | 0.00589471 | 0.00155247 | -1.92485   | 1        |
| FLJ34208       | 0.0218786  | 0.0204586  | -0.0968108 | 1        |
| DFNA5          | 0.00581769 | 0.0260676  | 2.16374    | 1        |
| INPP5D         | 0.0877786  | 0.142964   | 0.703707   | 1        |
| PRTN3          | 0.0382194  | 0          | #NAME?     | 1        |
| ZNF483         | 0.108085   | 0.169789   | 0.651574   | 1        |
| NLRP12         | 0.0128716  | 0.024006   | 0.8992     | 1        |
| GSDMA          | 0.0068376  | 0          | #NAME?     | 1        |
| SYNPO2L        | 0.00914577 | 0.00959312 | 0.0688951  | 1        |
| MYOM2          | 0.0171658  | 0.0348412  | 1.02126    | 1        |
| PNLIPRP1       | 0.0124287  | 0.0148047  | 0.252376   | 1        |
| HGFAC          | 0.0185422  | 0.0121557  | -0.609182  | 1        |
| ATP8A1         | 0.136608   | 0.0957448  | -0.512779  | 1        |
| TMEM212        | 0.0328461  | 0.0540557  | 0.718726   | 1        |
| C14orf182      | 0.022149   | 0.0356551  | 0.686868   | 1        |
| FLJ44511       | 0.0480676  | 0.0520267  | 0.114188   | 1        |
| LOC100507066   | 0.0218713  | 0.0230207  | 0.0738944  | 1        |
| C4A,C4B        | 0.00718608 | 0.00220959 | -1.70142   | 1        |
| CHRNA3         | 0.0773728  | 0.307186   | 1.98921    | 1        |

|              |            |            |           |          |
|--------------|------------|------------|-----------|----------|
| KRT18P55     | 0.00760023 | 0.00562719 | -0.433629 | 1        |
| NCF4         | 0.018104   | 0.00951524 | -0.927994 | 1        |
| KRT15        | 0.0194569  | 0.0426425  | 1.13201   | 1        |
| ALS2CR8      | 0.0837204  | 0.0591647  | -0.500843 | 1        |
| CELA1        | 0.0257773  | 0.0163957  | -0.652777 | 1        |
| ACPT         | 0.0273331  | 0.0322308  | 0.237792  | 1        |
| ZNF454       | 0.0180967  | 0.0261731  | 0.532357  | 1        |
| TEX30        | 0.0934711  | 0.429697   | 2.20073   | 0.103353 |
| C3orf35      | 0.116661   | 0.200574   | 0.781816  | 1        |
| FAM71A       | 0.00604098 | 0.00562873 | -0.101972 | 1        |
| PTPN13       | 0.0018325  | 0.00203539 | 0.15149   | 1        |
| ZNF835       | 0.00873821 | 0          | #NAME?    | 1        |
| LOC399753    | 0.103191   | 0.138895   | 0.428674  | 1        |
| GUSBP4       | 0.261404   | 0.186024   | -0.490794 | 1        |
| GFAP         | 0.015274   | 0.0125645  | -0.281731 | 1        |
| DNAH11       | 0.00107927 | 0.00576276 | 2.41671   | 1        |
| ZNF724P      | 0.134283   | 0.167576   | 0.319547  | 1        |
| SNORA36A     | 2.68905    | 5.57836    | 1.05275   | 0.919777 |
| PBOV1        | 0.00659972 | 0.0228408  | 1.79114   | 1        |
| EFEMP2       | 1.09215    | 0.43575    | -1.32559  | 0.865543 |
| IQGAP2       | 0.00245018 | 0.00143603 | -0.770804 | 1        |
| PNCK         | 0.0514154  | 0.0366946  | -0.486634 | 1        |
| RNASE3       | 0.0302119  | 0          | #NAME?    | 1        |
| WDR63        | 0.0518327  | 0.0269419  | -0.944009 | 1        |
| PKD1L2       | 0.0379765  | 0.00180794 | -4.39269  | 1        |
| UTS2D        | 0.0119963  | 0          | #NAME?    | 1        |
| NTF4         | 0.721739   | 0.862814   | 0.257572  | 0.902428 |
| SIGLEC9      | 0.0562772  | 0.0161285  | -1.80293  | 1        |
| LOC100133445 | 0.806124   | 0.476958   | -0.757139 | 0.884031 |
| TMPRSS5      | 0.189853   | 0.359299   | 0.9203    | 1        |
| SPDYE2L      | 0.0146747  | 0.042584   | 1.53698   | 1        |
| LEP          | 0.0100785  | 0.0133801  | 0.408805  | 1        |
| PLEKHG6      | 0.0121525  | 0.00560322 | -1.11693  | 1        |
| ASTL         | 0.060245   | 0.0411708  | -0.549219 | 1        |
| TPPP3        | 0.0775744  | 0.0440979  | -0.814869 | 1        |
| ANKRD20A12P  | 0.302865   | 0.441088   | 0.542393  | 0.600595 |
| SEC24B-AS1   | 0.26257    | 0.381806   | 0.540141  | 0.967343 |
| LOC100289511 | 0.056091   | 0.0691997  | 0.302995  | 1        |
| AMN          | 0.0659866  | 0.0204366  | -1.69102  | 1        |
| GAS2         | 0.0287562  | 0.0679943  | 1.24154   | 1        |
| MYADML2      | 0.0320813  | 0.0667227  | 1.05645   | 1        |
| DCST2        | 0.0564836  | 0.0661746  | 0.228445  | 1        |
| PDCL3P4      | 0.0839678  | 0.0481312  | -0.802864 | 1        |
| RRN3P2       | 0.0439114  | 0.0829806  | 0.918179  | 1        |
| PLG          | 0.0126314  | 0.0102067  | -0.307505 | 1        |
| EFCAB3       | 0.207779   | 0.332253   | 0.677231  | 1        |
| MAK          | 0.0533983  | 0.0582465  | 0.125377  | 1        |
| RGPD8        | 0.0474976  | 0.0398247  | -0.25419  | 1        |
| ENTPD8       | 0.120816   | 0.0753912  | -0.680346 | 1        |

|              |            |            |           |           |
|--------------|------------|------------|-----------|-----------|
| SYN3         | 0.00754512 | 0          | #NAME?    | 1         |
| SNORD55      | 278.732    | 314.796    | 0.175537  | 0.947962  |
| SNORD83B     | 59.6111    | 22.1757    | -1.4266   | 0.860592  |
| AGAP7        | 0.183782   | 0.276828   | 0.590995  | 1         |
| CTAGE10P     | 0.0074091  | 0.010529   | 0.507     | 1         |
| MYO7A        | 0.065327   | 0.0569647  | -0.19761  | 1         |
| TAS2R5       | 0.202041   | 0.25968    | 0.362084  | 1         |
| ATP2C2       | 0.0321344  | 0.0448103  | 0.479715  | 1         |
| LINC00665    | 0.0275644  | 0.0163451  | -0.753953 | 1         |
| FP588        | 0.0663484  | 0.0297364  | -1.15783  | 1         |
| LOC256880    | 0.0693717  | 0.057555   | -0.269405 | 1         |
| LINC00202-1  | 0.0684791  | 0.174916   | 1.35293   | 1         |
| LOC100270804 | 0.175192   | 0.237336   | 0.437994  | 1         |
| GPR146       | 2.10705    | 1.26968    | -0.730761 | 0.800869  |
| PCDHB11      | 0.190424   | 0.157388   | -0.274884 | 1         |
| PARK2        | 0.0211583  | 0.0427685  | 1.01532   | 1         |
| MYO15B       | 0.213708   | 0.0651236  | -1.71439  | 1         |
| ATP6AP1L     | 0.611707   | 0.401017   | -0.609179 | 0.737273  |
| B3GALT4      | 0.149778   | 0.316968   | 1.08151   | 1         |
| CDH3         | 0.0880574  | 0.0493989  | -0.833966 | 1         |
| FLJ12825     | 0.078967   | 0.116188   | 0.557138  | 1         |
| GPR137C      | 0.0574176  | 0.0619651  | 0.109962  | 1         |
| LOC100288123 | 0.0706539  | 0.115659   | 0.711032  | 1         |
| PLCB2        | 0.0836172  | 0.182912   | 1.12928   | 1         |
| MST1         | 0.750837   | 0.451862   | -0.732617 | 0.425947  |
| FAM182A      | 0.0159473  | 0.0168916  | 0.0829862 | 1         |
| HOXA13       | 0.384503   | 0.633897   | 0.721252  | 0.396333  |
| BEST4        | 0.0294495  | 0.0583679  | 0.986934  | 1         |
| C1S          | 0.178005   | 0.275021   | 0.627622  | 1         |
| JAM2         | 0.029916   | 0.0258077  | -0.213117 | 1         |
| SCN4B        | 0.0449976  | 0.0294067  | -0.613706 | 1         |
| AATK         | 0.225734   | 0.482564   | 1.0961    | 0.8041    |
| LINC00612    | 0.0161698  | 0.00501081 | -1.69018  | 1         |
| SYT3         | 0.0289407  | 0.0470119  | 0.699925  | 1         |
| TULP1        | 0.0316029  | 0.0817008  | 1.3703    | 1         |
| TMEM132B     | 0.00770812 | 0.00872148 | 0.178193  | 1         |
| CTSO         | 0.15006    | 0.240393   | 0.679852  | 1         |
| LRRTM2       | 0.00709609 | 0.00661956 | -0.100289 | 1         |
| MGAM         | 0.0148845  | 0.00789418 | -0.914948 | 1         |
| CLDN20       | 0.0201759  | 0.0180284  | -0.162362 | 1         |
| ZNF154       | 0.0174179  | 0.0634074  | 1.86408   | 1         |
| ADTRP        | 0.197011   | 0.318756   | 0.69418   | 1         |
| FUT2         | 0.0878463  | 0.300545   | 1.77453   | 1         |
| PPEF2        | 0.0220568  | 0.0332938  | 0.594031  | 1         |
| GCSAM        | 0.122874   | 0.266925   | 1.11926   | 1         |
| CLEC4A       | 0.334964   | 0.625067   | 0.900005  | 0.30248   |
| CCDC102B     | 0.0304811  | 0.0198636  | -0.617788 | 1         |
| LINC00085    | 0.28448    | 0.679579   | 1.25631   | 0.0888478 |
| FAM3B        | 0.0996001  | 0.0628581  | -0.664049 | 1         |

|               |            |             |              |          |
|---------------|------------|-------------|--------------|----------|
| EPO           | 0.0623487  | 0.221615    | 1.82963      | 1        |
| FLJ14107      | 0.0199269  | 0.0501545   | 1.33166      | 1        |
| LOC401074     | 0.0910374  | 0.10279     | 0.175169     | 1        |
| DMGDH         | 0.0082906  | 0.00315802  | -1.39246     | 1        |
| TCF7L1        | 0.0347397  | 0.0865714   | 1.3173       | 1        |
| TNXB          | 0.0136053  | 0.00848973  | -0.680384    | 1        |
| PDE6G         | 0.0310058  | 0.0211728   | -0.550326    | 1        |
| USHBP1        | 0.0102346  | 0           | #NAME?       | 1        |
| CALML6        | 0.0864827  | 0.104479    | 0.272729     | 1        |
| FOXN4         | 0.0238513  | 0.00891943  | -1.41905     | 1        |
| MYOZ3         | 0.012856   | 0.0217559   | 0.75897      | 1        |
| ABLIM3        | 0.0121464  | 0.00512013  | -1.24628     | 1        |
| ARL9          | 0.0625501  | 0.25728     | 2.04025      | 1        |
| LOC728228     | 0.0571716  | 0.178177    | 1.63994      | 1        |
| HOXD1         | 0.0475859  | 0.0294778   | -0.690907    | 1        |
| RFTN1         | 0.00916531 | 0.0236828   | 1.36958      | 1        |
| EIF1B-AS1     | 0.0465465  | 0.0426053   | -0.127638    | 1        |
| TP53TG5       | 0.403051   | 0.416564    | 0.0475743    | 0.99611  |
| CLEC2B        | 0.113257   | 0.049277    | -1.20062     | 1        |
| ZNF813        | 0.00350736 | 0.00635219  | 0.856868     | 1        |
| ACVR1C        | 0.00473293 | 0.00208831  | -1.1804      | 1        |
| CD84          | 0.00195724 | 0.0012542   | -0.642047    | 1        |
| TMC8          | 0.0833076  | 0.0623873   | -0.417195    | 1        |
| CALN1         | 0.00186151 | 0.00194174  | 0.0608728    | 1        |
| ANXA8         | 0.0147659  | 0           | #NAME?       | 1        |
| PACRG         | 0.013482   | 0.0140614   | 0.0606974    | 1        |
| PLAC4         | 0.0464309  | 0.136058    | 1.55106      | 1        |
| LOC100506776  | 0.00477235 | 0.00245802  | -0.957206    | 1        |
| LOC100131434  | 0.0223629  | 0.0288257   | 0.366251     | 1        |
| CHN1          | 0.0334806  | 0.0176328   | -0.925059    | 1        |
| RPS6KA6       | 0.00178674 | 0.000906589 | -0.97881     | 1        |
| CA5B          | 0.379388   | 0.379285    | -0.000391423 | 0.999234 |
| TBX19         | 0.26686    | 0.292309    | 0.131414     | 1        |
| LOC730668     | 0.0182978  | 0.0216768   | 0.244485     | 1        |
| PSD2          | 0.00467732 | 0           | #NAME?       | 1        |
| LINC00242     | 0.268359   | 0.455744    | 0.764061     | 0.458976 |
| MEIOB         | 0.00914512 | 0.044149    | 2.27131      | 1        |
| FGD4          | 0.0427313  | 0.0170806   | -1.32294     | 1        |
| AQP7P3        | 0.363266   | 0.444585    | 0.291434     | 0.952184 |
| LOC145474     | 0.00891536 | 0.0159154   | 0.836056     | 1        |
| LOC100507156  | 0.00433269 | 0.00711023  | 0.714634     | 1        |
| DDX60         | 0.121704   | 0.0813795   | -0.580638    | 1        |
| LOC100130691  | 0.0572269  | 0.0284505   | -1.00824     | 1        |
| KIAA0319      | 0.0393067  | 0.0265263   | -0.567353    | 1        |
| NBPF11,NBPF24 | 0.00914573 | 0.00804571  | -0.184879    | 1        |
| AKNAD1        | 0.0276001  | 0.0123156   | -1.16419     | 1        |
| MPZL2         | 0.00615826 | 0.013834    | 1.16762      | 1        |
| SRPX2         | 0.00845448 | 0.02587     | 1.61349      | 1        |
| LOC154761     | 0.909141   | 0.488525    | -0.896073    | 0.140686 |

|              |            |            |            |           |
|--------------|------------|------------|------------|-----------|
| RBPM2        | 0.0284776  | 0.0489893  | 0.782639   | 1         |
| RNU11        | 24.3935    | 24.0997    | -0.0174851 | 0.996035  |
| COL23A1      | 0.00918764 | 0.0121091  | 0.398324   | 1         |
| PPP1R14D     | 0.034862   | 0          | #NAME?     | 1         |
| LOC100240735 | 0.0260467  | 0          | #NAME?     | 1         |
| EBLN2        | 0.0587916  | 0.0231929  | -1.34193   | 1         |
| LIPG         | 0.0351801  | 0.0505176  | 0.522027   | 1         |
| ADAMTS2      | 0.0402393  | 0.0751083  | 0.900368   | 1         |
| MAML2        | 0.00828415 | 0.00379881 | -1.12481   | 1         |
| LOC100505933 | 0.0430785  | 0.0525519  | 0.286776   | 1         |
| GPR39        | 0.0293367  | 0          | #NAME?     | 1         |
| DDIT3        | 53.4514    | 18.3134    | -1.54533   | 0.0308509 |
| CACNG7       | 0.425139   | 0.18224    | -1.22209   | 0.248957  |
| ECT2L        | 0.0483758  | 0.0741593  | 0.616343   | 1         |
| DRD4         | 0.91546    | 1.88381    | 1.04108    | 0.301221  |
| SLC4A9       | 0.0469693  | 0.0178986  | -1.39187   | 1         |
| HEXA-AS1     | 0.0283662  | 0.08328    | 1.5538     | 1         |
| PRDM11       | 0.162829   | 0.175982   | 0.112066   | 1         |
| LOC100128573 | 0.0581834  | 0.0937047  | 0.687515   | 1         |
| SHC4         | 0.010886   | 0          | #NAME?     | 1         |
| CYP4F35P     | 0.1714     | 0.154229   | -0.15229   | 1         |
| TSPEAR       | 0.0156297  | 0          | #NAME?     | 1         |
| IRF7         | 0.018165   | 0.0241228  | 0.409235   | 1         |
| HAVCR2       | 0.0264418  | 0.0464169  | 0.81183    | 1         |
| MYBPC2       | 0.0390171  | 0.0427279  | 0.131071   | 1         |
| CYP2E1       | 1.07601    | 1.87655    | 0.802386   | 0.149166  |
| ANGPTL1      | 0.00780901 | 0.00248709 | -1.65068   | 1         |
| ANKRD18A     | 0.240601   | 0.306453   | 0.349022   | 1         |
| TOB1-AS1     | 0.444469   | 0.403132   | -0.140829  | 0.955281  |
| LOC100129269 | 0.0520429  | 0.116478   | 1.16229    | 1         |
| KIAA1024     | 0.106527   | 0.265718   | 1.31868    | 1         |
| BMP3         | 0.0391645  | 0.0302296  | -0.373584  | 1         |
| LUST         | 0.0477956  | 0.126201   | 1.40077    | 1         |
| LRRC19       | 0.00682369 | 0.00973992 | 0.513358   | 1         |
| MMP3         | 0.0118956  | 0.00977254 | -0.283626  | 1         |
| SYT11        | 0.00447445 | 0.0332477  | 2.89347    | 1         |
| PROCA1       | 0.474704   | 0.242678   | -0.967983  | 0.424569  |
| PRG4         | 0.0246195  | 0.0557357  | 1.1788     | 1         |
| CCDC121      | 0.1213     | 0.172661   | 0.509367   | 1         |
| LOC153684    | 0.0572381  | 0.313332   | 2.45265    | 1         |
| TEX12        | 0.0913846  | 0.136656   | 0.580521   | 1         |
| ZMIZ1-AS1    | 0.0241167  | 0          | #NAME?     | 1         |
| DIRAS3       | 0.119848   | 0.134477   | 0.166152   | 1         |
| LDHC         | 0.0421125  | 0.122398   | 1.53926    | 1         |
| LOC286367    | 0.30139    | 0.445491   | 0.563765   | 0.486248  |
| CXorf48      | 0.0137496  | 0.0813419  | 2.56461    | 1         |
| MST1L        | 0.220291   | 0.104491   | -1.07603   | 1         |
| LEMD1        | 0.0197699  | 0.0420772  | 1.08973    | 1         |
| LOC100287072 | 0.0121116  | 0          | #NAME?     | 1         |



|              |            |            |            |          |
|--------------|------------|------------|------------|----------|
| PRH1,PRR4    | 1.32413    | 1.63681    | 0.305837   | 0.957728 |
| SNX29P1      | 0.0914122  | 0.101229   | 0.147158   | 1        |
| KLHL7-AS1    | 0.032959   | 0.0145055  | -1.18407   | 1        |
| CDC20B       | 0.0112905  | 0.00347748 | -1.69899   | 1        |
| PCP2         | 0.36642    | 0.14232    | -1.36436   | 1        |
| THSD4        | 0.0725972  | 0.0657308  | -0.143345  | 1        |
| CRSP8P       | 0.0260737  | 0.00805381 | -1.69485   | 1        |
| EFCAB13      | 0.00939941 | 0.0167717  | 0.835386   | 1        |
| DEPDC4       | 0.149146   | 0.174472   | 0.226271   | 1        |
| SCNN1A       | 0.575549   | 0.32176    | -0.838955  | 0.920464 |
| TBC1D30      | 0.0435723  | 0.0249787  | -0.802716  | 1        |
| DNM3         | 0.00871264 | 0.0129845  | 0.575608   | 1        |
| FDP2L2A      | 0.0165731  | 0.0330292  | 0.994899   | 1        |
| LOC100505978 | 0.0406042  | 0.09901    | 1.28594    | 1        |
| FAM209B      | 0.580011   | 1.03147    | 0.830552   | 0.467453 |
| LOC100652770 | 0.041605   | 0.112291   | 1.43241    | 1        |
| SOAT2        | 0.0390808  | 0.0333685  | -0.227973  | 1        |
| SARDH        | 0.253628   | 0.111973   | -1.17956   | 1        |
| KCNJ4        | 0.0301035  | 0.15586    | 2.37225    | 1        |
| GPR155       | 0.17893    | 0.311104   | 0.798      | 1        |
| NRIP2        | 0.0810718  | 0.119173   | 0.55578    | 1        |
| TMEM191A     | 0.529449   | 0.705794   | 0.414755   | 0.747742 |
| EXD3         | 1.47278    | 1.38477    | -0.0889039 | 0.958285 |
| CGB7         | 0.375283   | 0.217122   | -0.789472  | 0.733299 |
| ZNF785       | 1.04312    | 1.71963    | 0.721184   | 0.138646 |
| C1orf229     | 0.30373    | 0.260436   | -0.221861  | 1        |
| KIAA1984     | 0.113098   | 0.1345     | 0.250036   | 1        |
| SLFNL1-AS1   | 0.0863773  | 0.194762   | 1.17299    | 1        |
| C6orf58      | 0.0473509  | 0.0239411  | -0.983903  | 1        |
| MUC20        | 0.0228931  | 0.0320187  | 0.484006   | 1        |
| TSNAXIP1     | 0.0708687  | 0.0605279  | -0.227548  | 1        |
| KIF17        | 0.325396   | 0.194121   | -0.745238  | 1        |
| VSTM2L       | 0.0528705  | 0.0321758  | -0.716488  | 1        |
| CCBE1        | 0.00643162 | 0.00479151 | -0.424702  | 1        |
| NAPA-AS1     | 2.15542    | 2.18108    | 0.017076   | 0.98338  |
| TRIM74       | 0.40156    | 0.694201   | 0.789737   | 0.475587 |
| MRGPRX3      | 0.0615575  | 0.156671   | 1.34773    | 1        |
| TINCR        | 0.133028   | 0.229276   | 0.785353   | 1        |
| SPNS2        | 0.475589   | 0.483086   | 0.022565   | 0.980184 |
| IFIT1        | 0.0662164  | 0.172809   | 1.38392    | 1        |
| PIANP        | 0.0644991  | 0.10167    | 0.656537   | 1        |
| FBXO43       | 0.0707274  | 0.0390971  | -0.855207  | 1        |
| LOC646471    | 0.147091   | 0.168281   | 0.194164   | 1        |
| IL21R-AS1    | 0.0226331  | 0.0410654  | 0.85949    | 1        |
| HLA-J        | 0.838806   | 0.945357   | 0.172522   | 0.957822 |
| CXCR2        | 0.0139493  | 0          | #NAME?     | 1        |
| LOC400043    | 0.0830359  | 0.171696   | 1.04805    | 1        |
| GRAP2        | 0.0311981  | 0.00850749 | -1.87465   | 1        |
| TSSK3        | 0.842336   | 1.13582    | 0.431266   | 0.687264 |

|               |            |            |           |            |
|---------------|------------|------------|-----------|------------|
| DQX1          | 0.0175823  | 0.0255198  | 0.537492  | 1          |
| HSD17B13      | 0.0276487  | 0.067199   | 1.28123   | 1          |
| PLXDC1        | 0.0529468  | 0.0318595  | -0.73282  | 1          |
| C1orf106      | 0.106985   | 0.115742   | 0.113513  | 1          |
| LOC100132707  | 0.402749   | 0.697309   | 0.791916  | 0.878806   |
| KIAA1456      | 0.0064664  | 0.0134736  | 1.0591    | 1          |
| NECAB2        | 0.186059   | 0.0621919  | -1.58096  | 1          |
| FLJ30679      | 0.088259   | 0.106418   | 0.269921  | 1          |
| SRPK3         | 0.0366909  | 0.0194093  | -0.918671 | 1          |
| TRPC1         | 0.091395   | 0.0236047  | -1.95304  | 1          |
| SLC9B1        | 0.159673   | 0.145939   | -0.129753 | 1          |
| SLC46A2       | 0.0132974  | 0.0187501  | 0.495756  | 1          |
| ZNF252P-AS1   | 0.0810738  | 0.183383   | 1.17755   | 1          |
| LINC00669     | 0.203545   | 0.114078   | -0.835323 | 1          |
| CDSN          | 0.0663402  | 0.0571235  | -0.215799 | 1          |
| DEFB134       | 0.281739   | 0.229347   | -0.296825 | 1          |
| TP53TG1       | 3.24065    | 4.00343    | 0.304953  | 0.774988   |
| CCDC110       | 0.0556556  | 0.0349137  | -0.672732 | 1          |
| CSDC2         | 0.0314343  | 0.00723972 | -2.11833  | 1          |
| B3GNT7        | 0.0853039  | 0.123475   | 0.533537  | 1          |
| CTAGE7P       | 0.0384902  | 0.0822059  | 1.09475   | 1          |
| ZFP3          | 0.0205132  | 0.0497288  | 1.27753   | 1          |
| LOC728989     | 0.0295404  | 0.0109457  | -1.43232  | 1          |
| SEMA7A        | 0.109607   | 0.244439   | 1.15714   | 1          |
| SOX2          | 0.0408361  | 0.00639611 | -2.67458  | 1          |
| DUOX2         | 0.00485415 | 0.010257   | 1.07932   | 1          |
| KEL           | 0.0120813  | 0.0108669  | -0.152828 | 1          |
| C1orf141      | 0.011628   | 0          | #NAME?    | 1          |
| TTC30B        | 0.120717   | 0.112963   | -0.095775 | 1          |
| TMC4          | 0.492405   | 0.601808   | 0.289458  | 0.845932   |
| LOC100130855  | 0.235345   | 0.353541   | 0.587098  | 1          |
| HSPA1A        | 1.45208    | 14.1236    | 3.28191   | 0.00153868 |
| VMO1          | 0.62842    | 0.387707   | -0.696763 | 0.696915   |
| GOLGA8T       | 0.118562   | 0.108731   | -0.124877 | 1          |
| PLL           | 0.766404   | 0.175737   | -2.12469  | 0.0621442  |
| KIAA1875      | 0.080678   | 0.122389   | 0.601232  | 1          |
| ARHGAP4       | 0.192494   | 0.355214   | 0.883874  | 1          |
| FAM84A        | 0.00301751 | 0          | #NAME?    | 1          |
| TMEM30C       | 0.0514987  | 0.0462065  | -0.156441 | 1          |
| C2orf15       | 0.649128   | 0.574766   | -0.17553  | 0.934279   |
| CTF1          | 0.427104   | 0.345625   | -0.30538  | 0.897319   |
| GUCY1A2       | 0.00060839 | 0          | #NAME?    | 1          |
| IGIP          | 0.502098   | 0.687436   | 0.453256  | 0.541081   |
| MAP3K9        | 0.26478    | 0.501776   | 0.922251  | 0.0916618  |
| FAM35BP       | 0.00455992 | 0.0130452  | 1.51644   | 1          |
| ALDOB         | 0.0531836  | 0.106873   | 1.00685   | 1          |
| ANKRD20A1,ANK | 0.00672393 | 0.00208933 | -1.68626  | 1          |
| PRMT8         | 0.499653   | 0.835345   | 0.741445  | 0.285746   |
| RLN2          | 0.0429027  | 0.0139479  | -1.62102  | 1          |

|              |            |            |            |           |
|--------------|------------|------------|------------|-----------|
| GP1BA        | 0.13734    | 0.172964   | 0.332713   | 1         |
| C12orf69     | 0.017578   | 0.0336675  | 0.937587   | 1         |
| RAB30        | 0.174111   | 0.226809   | 0.381476   | 1         |
| SMAD7        | 1.8615     | 1.03464    | -0.847341  | 0.0799092 |
| MYLPF        | 0.105127   | 0.168516   | 0.680755   | 1         |
| NBEAL1       | 0.0316516  | 0.0379898  | 0.263332   | 1         |
| ZNF221       | 0.0682133  | 0.0952301  | 0.481365   | 1         |
| GLUD1P7      | 0.00278611 | 0.00267609 | -0.0581229 | 1         |
| ZNF614       | 0.130654   | 0.125331   | -0.0600065 | 1         |
| OCLM         | 0.106949   | 0.108159   | 0.0162333  | 1         |
| EYS          | 0.00707384 | 0.0131451  | 0.893961   | 1         |
| ZNF555       | 0.297138   | 0.393022   | 0.403474   | 0.527665  |
| SSPN         | 0.00250686 | 0.00677911 | 1.43521    | 1         |
| ZNF829       | 0.00457442 | 0.00788862 | 0.786185   | 1         |
| ZNF469       | 0.00680272 | 0          | #NAME?     | 1         |
| OGN          | 0.00352572 | 0          | #NAME?     | 1         |
| DSG3         | 0.0124439  | 0.024165   | 0.957482   | 1         |
| GPR98        | 0.00075758 | 0.00131662 | 0.797364   | 1         |
| RNF133       | 0.00778077 | 0.0618945  | 2.99183    | 1         |
| MYOZ2        | 0.00367563 | 0          | #NAME?     | 1         |
| HOXB13       | 0.574452   | 0.488129   | -0.234925  | 0.866022  |
| SPEG         | 0.00923858 | 0.0123234  | 0.415658   | 1         |
| BEAN1        | 0.110752   | 0.0932252  | -0.248543  | 1         |
| H19,MIR675   | 1.34845    | 1.58147    | 0.229963   | 0.882208  |
| LRRC71       | 0.301097   | 0.143811   | -1.06605   | 1         |
| LOC100506035 | 0.00537398 | 0          | #NAME?     | 1         |
| ALS2CR11     | 0.00609832 | 0.0069004  | 0.178268   | 1         |
| ZNF582       | 0.0151753  | 0.0292579  | 0.947098   | 1         |
| TEC          | 0.55473    | 0.494569   | -0.165614  | 0.89536   |
| PLGLB2       | 0.00349773 | 0.00273057 | -0.357221  | 1         |
| DCDC2        | 0.522925   | 0.378093   | -0.467863  | 0.520223  |
| PXT1         | 0.00889619 | 0.0148244  | 0.736714   | 1         |
| MCF2         | 0.00271331 | 0.00450004 | 0.729882   | 1         |
| FANK1        | 0.517224   | 0.267519   | -0.951149  | 0.343481  |
| FLJ36777     | 0.0252936  | 0.00476613 | -2.40788   | 1         |
| LOC100506368 | 0.156654   | 0.0278677  | -2.49092   | 1         |
| LOC100133612 | 0.0670486  | 0.16277    | 1.27956    | 1         |
| MFAP5        | 0.00385276 | 0.00636366 | 0.723963   | 1         |
| EDA2R        | 0.0033816  | 0          | #NAME?     | 1         |
| ZNF467       | 1.10558    | 0.832341   | -0.409557  | 0.735312  |
| RPL23AP64    | 0.163941   | 0.290201   | 0.823873   | 1         |
| ITGAX        | 0.892515   | 0.427765   | -1.06106   | 0.0253664 |
| RAB37        | 0.0785239  | 0.0636483  | -0.303011  | 1         |
| LOC285540    | 0.010725   | 0.00944303 | -0.183659  | 1         |
| KCNU1        | 0.00421998 | 0.00369096 | -0.19324   | 1         |
| RFPL1-AS1    | 0.00554436 | 0.00369523 | -0.585359  | 1         |
| TNFRSF9      | 0.00189744 | 0.0594378  | 4.96926    | 1         |
| ALS2CR12     | 0.0130126  | 0.00960295 | -0.438363  | 1         |
| METTL7A      | 0.00390608 | 0.00718787 | 0.879843   | 1         |

|              |            |            |            |          |
|--------------|------------|------------|------------|----------|
| SNORA65      | 4.19533    | 8.93023    | 1.08991    | 0.904905 |
| LOC150197    | 0.166508   | 0.357318   | 1.10161    | 1        |
| PMFBP1       | 0.0424238  | 0.037461   | -0.179485  | 1        |
| SLC6A12      | 0.068739   | 0.0155043  | -2.14846   | 1        |
| C1orf180     | 0.00399555 | 0          | #NAME?     | 1        |
| FAM186A      | 0.00222414 | 0          | #NAME?     | 1        |
| IL18RAP      | 0.00397592 | 0          | #NAME?     | 1        |
| MYLK3        | 0.00282338 | 0.0189234  | 2.74467    | 1        |
| COL12A1      | 0.00203952 | 0          | #NAME?     | 1        |
| SNAP25       | 0.00557396 | 0          | #NAME?     | 1        |
| ARHGAP11B    | 0.651604   | 1.25578    | 0.946517   | 0.207194 |
| EP400NL      | 0.250649   | 0.490964   | 0.969951   | 0.344644 |
| ZFPM2        | 0.0024273  | 0.00185645 | -0.38681   | 1        |
| DGAT2L6      | 0.00756462 | 0.0116493  | 0.62291    | 1        |
| FAM129A      | 0.00161659 | 0          | #NAME?     | 1        |
| LINC00244    | 0.0287734  | 0          | #NAME?     | 1        |
| PCDHB6       | 0.00503861 | 0.0039002  | -0.369479  | 1        |
| LOC285740    | 0.00587723 | 0.0291215  | 2.30888    | 1        |
| HBA2         | 0.202608   | 0.353191   | 0.801759   | 1        |
| C5orf56      | 0.620542   | 0.966066   | 0.638594   | 0.66108  |
| HAVCR1P1     | 0.0325214  | 0.0393381  | 0.274538   | 1        |
| SLN          | 0.0474555  | 0.0638233  | 0.427507   | 1        |
| RASA4CP      | 0.106093   | 0.074778   | -0.504641  | 1        |
| HECW2        | 0.00160717 | 0          | #NAME?     | 1        |
| LCN15        | 0.335848   | 0.214364   | -0.647746  | 1        |
| GLUD1P3      | 0.211831   | 0.405242   | 0.935872   | 0.236701 |
| C12orf70     | 0.0726764  | 0.089967   | 0.30791    | 1        |
| CYP4F3       | 0.00428449 | 0.00325715 | -0.395511  | 1        |
| QPRT         | 0.0711393  | 0.00847919 | -3.06865   | 1        |
| C3orf49      | 0.00863406 | 0.021719   | 1.33084    | 1        |
| LINC00595    | 0.0391064  | 0          | #NAME?     | 1        |
| ALB          | 0.00535172 | 0          | #NAME?     | 1        |
| DDC          | 0.0117243  | 0.00613714 | -0.93386   | 1        |
| CDKL2        | 0.0889846  | 0.0413173  | -1.10681   | 1        |
| RP1L1        | 0.0104268  | 0.0285118  | 1.45126    | 1        |
| RPS26P11     | 0.977525   | 1.29825    | 0.409359   | 0.810299 |
| TMEM150C     | 0.00650781 | 0.0462089  | 2.82793    | 1        |
| ASCL3        | 0.0321238  | 0          | #NAME?     | 1        |
| GREB1L       | 0.00191932 | 0.00659191 | 1.7801     | 1        |
| MLLT4-AS1    | 0.0775742  | 0.0500305  | -0.63277   | 1        |
| HLA-G        | 0.0363019  | 0.0688548  | 0.923513   | 1        |
| DHDH         | 4.1617     | 3.30353    | -0.333165  | 0.70174  |
| NEU4         | 0.0265306  | 0.0123233  | -1.10627   | 1        |
| GAL3ST3      | 0.00551474 | 0.00517281 | -0.0923446 | 1        |
| HBBP1        | 0.0640469  | 0.115139   | 0.846175   | 1        |
| EMR1         | 0.00486943 | 0          | #NAME?     | 1        |
| FAM46C       | 0.177562   | 0.119685   | -0.569082  | 1        |
| LOC100129726 | 0.0142622  | 0.0276743  | 0.95635    | 1        |
| GNRH1        | 0.426577   | 0.729429   | 0.773961   | 0.267178 |

|              |            |            |            |           |
|--------------|------------|------------|------------|-----------|
| CD247        | 0.0216014  | 0.00671888 | -1.68483   | 1         |
| FER1L5       | 0.0184009  | 0.0123084  | -0.58014   | 1         |
| HIGD2B       | 0.0310538  | 0.0139362  | -1.15593   | 1         |
| SEC14L3      | 0.00600012 | 0.00564299 | -0.0885316 | 1         |
| INTU         | 0.548076   | 0.247645   | -1.1461    | 0.048028  |
| DHX58        | 0.0258614  | 0.0334478  | 0.371114   | 1         |
| NAP1L6       | 0.00623701 | 0.0103148  | 0.725786   | 1         |
| RAB3A        | 1.05195    | 2.37394    | 1.17421    | 0.0529824 |
| DNAJC27      | 0.495688   | 0.643732   | 0.377026   | 0.606134  |
| SMIM6        | 0.0205898  | 0.0194115  | -0.0850192 | 1         |
| HRASLS2      | 0.0226601  | 0.0983209  | 2.11734    | 1         |
| TPI1P3       | 0.0164286  | 0.0756295  | 2.20274    | 1         |
| CORIN        | 0.0840114  | 0.0658182  | -0.352099  | 1         |
| TNFRSF10C    | 0.946828   | 0.501574   | -0.91664   | 0.331994  |
| LOC653160    | 0.55694    | 0.520213   | -0.0984186 | 0.968712  |
| NOMO3        | 0.0151008  | 0.053474   | 1.82422    | 1         |
| XDH          | 0.00204238 | 0.00498468 | 1.28725    | 1         |
| APOBEC3D     | 0.0918348  | 0.0780064  | -0.23545   | 1         |
| NEFH         | 0.0076993  | 0.0254301  | 1.72374    | 1         |
| ANKDD1B      | 0.00879397 | 0          | #NAME?     | 1         |
| ANXA9        | 0.21633    | 0.203373   | -0.0891047 | 1         |
| BCAS1        | 0.00337404 | 0.00314826 | -0.0999242 | 1         |
| BMS1P5       | 0.112417   | 0.12653    | 0.170618   | 1         |
| LOC399715    | 0.157404   | 0.0771505  | -1.02873   | 1         |
| AIPL1        | 0.00778248 | 0.0146866  | 0.916195   | 1         |
| LOC100506023 | 0.0186417  | 0.029458   | 0.660128   | 1         |
| GIPR         | 0.329874   | 0.19499    | -0.758518  | 1         |
| CECR5-AS1    | 0.291168   | 0.431952   | 0.569019   | 1         |
| SGSM1        | 0.588192   | 0.253525   | -1.21416   | 0.0117316 |
| LOC100506123 | 0.662477   | 0.749304   | 0.17768    | 0.881798  |
| LINC00672    | 0.0602035  | 0.0512747  | -0.231599  | 1         |
| LOC100289230 | 0.29042    | 0.387099   | 0.414563   | 0.792083  |
| SGK2         | 0.112677   | 0.158035   | 0.488054   | 1         |
| PLA2G4E      | 0.00286876 | 0.00256972 | -0.158815  | 1         |
| WWC2-AS2     | 0.562475   | 0.477521   | -0.236226  | 0.902666  |
| ZNF737       | 0.443354   | 0.343137   | -0.369675  | 0.558921  |
| SH3GL1P2     | 0.0285882  | 0.0578841  | 1.01775    | 1         |
| DCHS1        | 0.0292219  | 0.0585245  | 1.00199    | 1         |
| TCEAL5       | 0.0103156  | 0          | #NAME?     | 1         |
| RHD          | 0.0517941  | 0.0630414  | 0.283514   | 1         |
| RASGRP4      | 0.00660313 | 0.0172792  | 1.38781    | 1         |
| COL17A1      | 0.00870891 | 0.0187643  | 1.10743    | 1         |
| AOC4         | 0.00787522 | 0.0190801  | 1.27668    | 1         |
| ZNF254       | 0.531893   | 0.594038   | 0.159419   | 0.893674  |
| ALX4         | 0.00306369 | 0.00285527 | -0.101641  | 1         |
| CNGB1        | 0.00256193 | 0          | #NAME?     | 1         |
| HR           | 0.757837   | 0.295164   | -1.36037   | 0.0163491 |
| CD5          | 0.00744941 | 0.00393251 | -0.921676  | 1         |
| LRRD1        | 0.0232365  | 0.04207    | 0.856402   | 1         |

|                |            |            |           |           |
|----------------|------------|------------|-----------|-----------|
| KIF5A          | 0.00339282 | 0          | #NAME?    | 1         |
| ZNF543         | 0.395736   | 0.427988   | 0.113034  | 0.944934  |
| HIST1H2BE      | 0.0690518  | 0.11612    | 0.749862  | 1         |
| FOLR3          | 0.031306   | 0.0167061  | -0.906064 | 1         |
| TPT1-AS1       | 3.49497    | 3.15315    | -0.148487 | 0.89836   |
| ANKRD12        | 0.368729   | 0.444452   | 0.269467  | 0.705198  |
| PDC            | 0.00862771 | 0.0133522  | 0.630029  | 1         |
| LINC00167      | 0.0526812  | 0.0244449  | -1.10775  | 1         |
| GP6            | 0.0873321  | 0.138386   | 0.664118  | 1         |
| ZNF709         | 0.560788   | 0.7957     | 0.504769  | 0.346798  |
| VAMP5          | 0.0298121  | 0          | #NAME?    | 1         |
| SNORD21        | 30.0037    | 13.4683    | -1.15557  | 0.878182  |
| TMPRSS9        | 0.0143622  | 0.017079   | 0.249945  | 1         |
| LOC100130238   | 0.0110208  | 0.00420157 | -1.39122  | 1         |
| LOC100506801   | 0.053758   | 0.0344644  | -0.641372 | 1         |
| ZBTB32         | 0.0560948  | 0.0996171  | 0.828525  | 1         |
| BRWD3          | 0.335501   | 0.366716   | 0.128347  | 1         |
| CCDC146        | 0.286719   | 0.35541    | 0.309844  | 1         |
| RGPD3          | 0.026748   | 0.0375852  | 0.490731  | 1         |
| KIAA1751       | 0.00494693 | 0.00257853 | -0.939985 | 1         |
| PGM5P2         | 0.0664884  | 0.0617582  | -0.106471 | 1         |
| RAB26          | 6.22803    | 6.28939    | 0.0141442 | 0.992563  |
| YBX2           | 0.0125859  | 0.0397915  | 1.66066   | 1         |
| MIR4763,MIRLET | 0.406334   | 1.38744    | 1.77168   | 0.162206  |
| SORCS2         | 0.00293416 | 0          | #NAME?    | 1         |
| CCDC116        | 0.0739043  | 0.0664532  | -0.15332  | 1         |
| CYBB           | 0.0243137  | 0.0356098  | 0.550507  | 1         |
| DRP2           | 0.0160257  | 0.0202786  | 0.339573  | 1         |
| ZNF699         | 0.0496454  | 0.0360534  | -0.461524 | 1         |
| TNNI2          | 0.0255148  | 0.0234766  | -0.120116 | 1         |
| FUT7           | 0.00875677 | 0.00810214 | -0.112096 | 1         |
| OPN4           | 0.00829343 | 0          | #NAME?    | 1         |
| COL13A1        | 1.83664    | 0.801607   | -1.1961   | 0.0103919 |
| LRRN2          | 0.00570108 | 0.00521783 | -0.127786 | 1         |
| PDCD1          | 0.0832782  | 0.125072   | 0.586748  | 1         |
| IGFALS         | 0.0954704  | 0.0973055  | 0.0274671 | 1         |
| JPH3           | 0.0115835  | 0.0689926  | 2.57437   | 1         |
| GUSBP3         | 0.0460576  | 0.0842078  | 0.870515  | 1         |
| NAALADL1       | 0.00922939 | 0.0121606  | 0.397906  | 1         |
| RHPN1-AS1      | 1.5396     | 2.88367    | 0.905356  | 0.0609817 |
| ABI3BP         | 0.010378   | 0.0286166  | 1.46332   | 1         |
| COL2A1         | 0.00925039 | 0.0103852  | 0.166943  | 1         |
| HCG27          | 0.240884   | 0.214949   | -0.164345 | 1         |
| NFATC4         | 0.203023   | 0.0742342  | -1.45148  | 1         |
| ARHGAP5-AS1    | 1.64637    | 2.19252    | 0.413303  | 0.6084    |
| CD7            | 0.0443767  | 0.0310468  | -0.515361 | 1         |
| PAQR6          | 2.07782    | 1.12049    | -0.890939 | 0.703945  |
| ALPL           | 0.0107938  | 0.0816603  | 2.91943   | 1         |
| C19orf35       | 0.0154042  | 0.0204256  | 0.407056  | 1         |

|                 |            |            |           |            |
|-----------------|------------|------------|-----------|------------|
| CLCA2           | 0.00852277 | 0          | #NAME?    | 1          |
| CENPE           | 0.276115   | 0.70395    | 1.3502    | 0.00153868 |
| LOC257358       | 0.0237491  | 0.0154311  | -0.622027 | 1          |
| LOC100505648    | 0.201111   | 0.300246   | 0.578153  | 1          |
| FAM151B         | 0.172073   | 0.0949761  | -0.857386 | 1          |
| NEURL1B         | 0.207172   | 0.225635   | 0.123159  | 1          |
| P2RX2           | 0.0119779  | 0.053887   | 2.16957   | 1          |
| VAMP8           | 0.78274    | 0.838309   | 0.0989487 | 0.969535   |
| TLE6            | 4.49205    | 1.8424     | -1.28579  | 0.00274688 |
| SLC34A3         | 0.0122267  | 0.0203521  | 0.735137  | 1          |
| OBSCN           | 0.437079   | 0.333068   | -0.392075 | 0.497625   |
| ANKRD26         | 0.16826    | 0.212255   | 0.335103  | 1          |
| GSG1L           | 0.00828645 | 0.0191539  | 1.20881   | 1          |
| ZNF841          | 0.99277    | 1.02436    | 0.0451989 | 0.975492   |
| ZKSCAN4         | 0.82637    | 1.9353     | 1.2277    | 0.00380811 |
| LOC643355       | 0.0134384  | 0.00664813 | -1.01534  | 1          |
| XAF1            | 0.0084847  | 0          | #NAME?    | 1          |
| TAF7L           | 0.0371276  | 0.128266   | 1.78857   | 1          |
| ANKRD6          | 0.0321295  | 0.0481177  | 0.582671  | 1          |
| CEP290          | 0.366761   | 0.573882   | 0.645912  | 0.573873   |
| C6orf57         | 9.82547    | 4.32419    | -1.18409  | 0.00970147 |
| ASB14           | 0.160478   | 0.266529   | 0.731917  | 1          |
| ESPNL           | 0.0411622  | 0.0582384  | 0.500649  | 1          |
| ZNF843          | 0.0183066  | 0          | #NAME?    | 1          |
| ZNF540          | 0.137744   | 0.360533   | 1.38815   | 1          |
| COLEC10         | 0.0259     | 0.0107119  | -1.27374  | 1          |
| HSF2BP          | 0.862876   | 0.687602   | -0.327579 | 0.76721    |
| KCTD7           | 0.787078   | 1.16014    | 0.559715  | 0.260643   |
| CD302.LY75.LY75 | 0.227208   | 0.426623   | 0.908945  | 0.0987604  |
| EPS8L2          | 0.792814   | 0.529743   | -0.581689 | 0.503126   |
| AXIN2           | 0.443204   | 0.683573   | 0.625123  | 0.306657   |
| NRG4            | 0.298437   | 0.691887   | 1.21311   | 0.0500215  |
| ZNF93           | 0.0441293  | 0.00886599 | -2.31538  | 1          |
| WNT10A          | 0.767625   | 1.18123    | 0.62182   | 0.426107   |
| GTF2IRD2        | 0.117468   | 0.0841073  | -0.481966 | 1          |
| HSP90B2P        | 0.0121755  | 0.0500199  | 2.03852   | 1          |
| C21orf15        | 0.243994   | 0.195036   | -0.323105 | 1          |
| ST3GAL5         | 1.17791    | 0.676127   | -0.800861 | 0.127913   |
| TPTE2P6         | 0.0124231  | 0.00363527 | -1.77289  | 1          |
| PSORS1C1        | 0.490302   | 0.330196   | -0.570351 | 0.817355   |
| USP44           | 0.00763043 | 0.0138353  | 0.85852   | 1          |
| TXNDC16         | 0.310162   | 0.221079   | -0.488465 | 1          |
| SEMA3C          | 0.182574   | 0.310444   | 0.765852  | 1          |
| TBX6            | 0.687207   | 0.317808   | -1.11259  | 0.24507    |
| KATNAL2         | 0.0780826  | 0.0432905  | -0.850951 | 1          |
| PLA2G4C         | 0.0957969  | 0.0865045  | -0.147202 | 1          |
| FRMD5           | 1.20962    | 0.669893   | -0.852556 | 0.14863    |
| DGCR5           | 0.068108   | 0.18825    | 1.46676   | 1          |
| ABHD12B         | 0.0283585  | 0.065141   | 1.19978   | 1          |

|          |            |            |            |            |
|----------|------------|------------|------------|------------|
| IL13     | 0.0701352  | 0.0303638  | -1.20779   | 1          |
| PBX4     | 0.939518   | 0.791211   | -0.247857  | 0.874107   |
| PDK3     | 4.07442    | 3.40196    | -0.260227  | 0.79416    |
| LILRA6   | 0.0338842  | 0.0855593  | 1.33631    | 1          |
| HLA-DMB  | 0.0275057  | 0          | #NAME?     | 1          |
| CCDC15   | 0.0451241  | 0.0315882  | -0.514513  | 1          |
| CDH23    | 0.0202317  | 0          | #NAME?     | 1          |
| GSTT2    | 0.702315   | 1.62753    | 1.2125     | 0.0927091  |
| NEURL3   | 0.0353345  | 0.019711   | -0.842074  | 1          |
| DHRS3    | 0.193431   | 0.0499317  | -1.95379   | 1          |
| ZNF586   | 0.28115    | 0.432607   | 0.621715   | 0.465679   |
| WHAMMP1  | 0.551827   | 0.617879   | 0.163108   | 0.924931   |
| UNC13A   | 0.00807469 | 0.0063827  | -0.339241  | 1          |
| TIAM1    | 0.00554993 | 0          | #NAME?     | 1          |
| CXorf31  | 0.15373    | 0.0232188  | -2.72703   | 1          |
| IFI27    | 15.8699    | 20.6235    | 0.377993   | 0.489185   |
| TAS2R19  | 0.0457047  | 0          | #NAME?     | 1          |
| DPH3P1   | 0.719618   | 0.552082   | -0.382349  | 0.961132   |
| KCNJ13   | 0.0115657  | 0.0285798  | 1.30514    | 1          |
| ITGA7    | 2.32754    | 1.81719    | -0.357094  | 0.640496   |
| FIGF_PIR | 0.367878   | 0.461318   | 0.326536   | 0.824372   |
| LMAN1    | 1.36447    | 1.60536    | 0.234553   | 0.725441   |
| NTNG2    | 1.14913    | 0.713449   | -0.687662  | 0.319357   |
| MGC12916 | 1.80213    | 5.21802    | 1.5338     | 0.00153868 |
| EBF4     | 0.649084   | 0.581759   | -0.157983  | 0.934043   |
| CCDC148  | 0.0611488  | 0.0251051  | -1.28434   | 1          |
| FAM212A  | 5.2892     | 6.9873     | 0.401687   | 0.522524   |
| PARD3B   | 0.223577   | 0.153312   | -0.5443    | 1          |
| DNAJB5   | 2.48519    | 2.59136    | 0.0603542  | 0.963969   |
| LY6G5B   | 2.66015    | 4.97029    | 0.901824   | 0.105743   |
| DIO1     | 0.0240704  | 0.0188662  | -0.351454  | 1          |
| C4orf47  | 0.865037   | 0.430373   | -1.00718   | 0.35997    |
| TRIM31   | 0.029197   | 0.00494599 | -2.56149   | 1          |
| PRRT2    | 0.0965428  | 0.0617083  | -0.645703  | 1          |
| LTC4S    | 0.972688   | 0.384788   | -1.33791   | 0.541095   |
| APOBR    | 0.0316928  | 0.0133682  | -1.24535   | 1          |
| OSBPL1A  | 1.70806    | 1.86751    | 0.128755   | 0.895397   |
| USH1G    | 0.418699   | 0.42647    | 0.0265298  | 0.991167   |
| GPR162   | 2.39163    | 2.37281    | -0.0113962 | 0.994734   |
| ZNF844   | 0.678605   | 0.591376   | -0.198495  | 0.864177   |
| NPTXR    | 0.291844   | 0.367459   | 0.332389   | 1          |
| GOLGA6L5 | 0.160991   | 0.224911   | 0.48238    | 1          |
| DNM1     | 6.1609     | 6.4601     | 0.0684157  | 0.988974   |
| FAM160A1 | 0.916905   | 0.475783   | -0.946468  | 0.0351856  |
| A1BG     | 0.256551   | 0.117802   | -1.12288   | 1          |
| HCG25    | 0.165811   | 0.0671879  | -1.30326   | 1          |
| SLC25A27 | 0.822081   | 0.710396   | -0.210656  | 0.852179   |
| C1orf145 | 0.387822   | 0.273433   | -0.504208  | 0.933684   |
| IGF1     | 0.00289225 | 0.00391932 | 0.438412   | 1          |



|           |            |            |            |           |
|-----------|------------|------------|------------|-----------|
| FLJ43663  | 3.40612    | 3.1825     | -0.0979686 | 0.930048  |
| PROM2     | 0.155625   | 0.239081   | 0.619426   | 1         |
| ANKAR     | 0.1153     | 0.0793725  | -0.538684  | 1         |
| NOS1AP    | 0.114222   | 0.196153   | 0.78014    | 1         |
| CNIH2     | 0.349274   | 0.537612   | 0.622208   | 0.684216  |
| PIK3IP1   | 1.96706    | 1.04937    | -0.906521  | 0.0500215 |
| ATRX      | 0.898378   | 1.51937    | 0.758083   | 0.0123712 |
| MFSD4     | 0.0485333  | 0.0412289  | -0.23532   | 1         |
| HRK       | 1.41321    | 1.11818    | -0.337815  | 0.756518  |
| NME9      | 0.106118   | 0.119049   | 0.165891   | 1         |
| OVGP1     | 0.683379   | 1.24408    | 0.864322   | 0.100423  |
| MMRN2     | 0.19557    | 0.335661   | 0.779323   | 1         |
| ZNF449    | 0.319934   | 0.31397    | -0.0271488 | 1         |
| RCN3      | 2.6972     | 3.44142    | 0.351543   | 0.628664  |
| CHFR      | 0.204675   | 0.132491   | -0.627444  | 1         |
| PCDHB12   | 0.0884567  | 0.0511027  | -0.791572  | 1         |
| OTUD1     | 2.3618     | 1.83477    | -0.364284  | 0.539297  |
| ZNF792    | 0.731283   | 1.07473    | 0.555468   | 0.285026  |
| LYPD5     | 0.249158   | 0.162728   | -0.614601  | 1         |
| PPP1R3E   | 0.919505   | 1.17786    | 0.357238   | 0.593715  |
| ENPP5     | 0.230486   | 0.113719   | -1.01921   | 1         |
| AGAP9     | 0.0676717  | 0.0709357  | 0.0679604  | 1         |
| ALDH6A1   | 1.63867    | 1.41317    | -0.213582  | 0.852179  |
| HBG1      | 0.161716   | 0.13035    | -0.31107   | 1         |
| A2M-AS1   | 0.0461482  | 0.0474533  | 0.0402318  | 1         |
| FLJ30403  | 0.540152   | 0.708107   | 0.390601   | 0.742598  |
| PITPNM3   | 0.131844   | 0.20374    | 0.6279     | 1         |
| SCAPER    | 1.40559    | 0.796838   | -0.818816  | 0.034328  |
| PILRA     | 0.366428   | 0.238152   | -0.621643  | 1         |
| LOC728730 | 0.335758   | 0.138635   | -1.27613   | 1         |
| TSSK4     | 0.0556103  | 0.0803529  | 0.530997   | 1         |
| BVES      | 0.00383583 | 0.00150121 | -1.35341   | 1         |
| KLF5      | 1.03046    | 1.03149    | 0.00143974 | 0.999234  |
| BCOR      | 0.981039   | 1.54857    | 0.658556   | 0.0775493 |
| ING2      | 5.34861    | 7.63693    | 0.513829   | 0.239607  |
| LRRC37A   | 0.0421789  | 0.0503513  | 0.255507   | 1         |
| LY6K      | 0.148659   | 0.182643   | 0.297025   | 1         |
| ZNF397    | 1.72624    | 1.14484    | -0.592491  | 0.544748  |
| ZNF354B   | 0.951748   | 1.22645    | 0.365839   | 0.629991  |
| SLC15A3   | 1.66071    | 1.99542    | 0.264893   | 0.968079  |
| C12orf76  | 1.16826    | 1.35591    | 0.214907   | 0.836427  |
| C7orf10   | 0.224755   | 0.305573   | 0.443164   | 1         |
| RNF122    | 2.05128    | 2.55275    | 0.315522   | 0.691843  |
| KLHL28    | 0.485443   | 0.475095   | -0.031085  | 0.983243  |
| OSBPL7    | 2.21499    | 2.56641    | 0.212451   | 0.788779  |
| INE2      | 1.2555     | 1.19942    | -0.0659251 | 0.975776  |
| TMEM220   | 0.0560882  | 0.0344095  | -0.704892  | 1         |
| ARHGEF6   | 0.230964   | 0.174988   | -0.400411  | 1         |
| ATAD5     | 0.400357   | 0.458405   | 0.195335   | 0.841494  |

|                |            |            |             |            |
|----------------|------------|------------|-------------|------------|
| ZNF441         | 0.394385   | 0.351205   | -0.16729    | 0.891142   |
| SOX7           | 0.0902968  | 0.215431   | 1.25448     | 1          |
| LOC554206      | 0.588757   | 0.703213   | 0.256289    | 0.891828   |
| KRTCAP3        | 0.740357   | 0.741018   | 0.00128749  | 0.999234   |
| PBX1           | 0.108671   | 0.0365041  | -1.57384    | 1          |
| BTK            | 0.0107685  | 0.00412825 | -1.38322    | 1          |
| SKIDA1         | 0.145178   | 0.266495   | 0.876284    | 1          |
| IL12A          | 0.987062   | 1.6943     | 0.779478    | 0.172569   |
| NBPF7          | 0.0818333  | 0.138631   | 0.760492    | 1          |
| ANXA2R         | 1.96708    | 1.69241    | -0.216976   | 0.87521    |
| SLC26A4        | 0.0379793  | 0.0611196  | 0.686422    | 1          |
| LOC643770      | 0.185521   | 0.0581261  | -1.67432    | 1          |
| LAIR2          | 1.51116    | 1.15181    | -0.391752   | 0.790372   |
| SELPLG         | 0.148159   | 0.131131   | -0.176144   | 1          |
| GTF2A1L,STON1, | 0.00740115 | 0.00822836 | 0.152855    | 1          |
| SHD            | 0.297052   | 0.201666   | -0.558749   | 1          |
| MACROD2        | 0.0131873  | 0.00626777 | -1.07313    | 1          |
| HEATR3         | 1.46821    | 3.42472    | 1.22192     | 0.00153868 |
| TMEM45A        | 9.65862    | 4.6329     | -1.0599     | 0.00153868 |
| LOC202781      | 5.516      | 5.53221    | 0.00423341  | 0.997552   |
| CHRM4          | 0.118588   | 0.132977   | 0.165213    | 1          |
| ZNF385C        | 0.018605   | 0.0172015  | -0.113161   | 1          |
| VPS37D         | 12.6831    | 11.3161    | -0.164532   | 0.836427   |
| LOC642236      | 0.143697   | 0.0510525  | -1.49298    | 1          |
| NBPF10         | 0.147665   | 0.184745   | 0.32321     | 1          |
| ZDBF2          | 0.364078   | 0.41468    | 0.187752    | 0.832407   |
| MAP3K14-AS1    | 0.665795   | 0.21968    | -1.59967    | 0.781034   |
| FLJ20021       | 1.82832    | 1.87684    | 0.0377878   | 0.989715   |
| FMN1           | 0.0775221  | 0.0743768  | -0.0597552  | 1          |
| COMMD10        | 4.31125    | 6.92002    | 0.682671    | 0.057213   |
| TMEM91         | 3.769      | 4.30571    | 0.192069    | 0.935829   |
| LAMB2P1        | 0.460144   | 0.262819   | -0.808013   | 0.433273   |
| ANG,RNASE4     | 15.6569    | 6.11339    | -1.35675    | 0.00153868 |
| KCNC1          | 0.0106635  | 0          | #NAME?      | 1          |
| C5orf4         | 0.0166676  | 0.0304246  | 0.868192    | 1          |
| FAM66C         | 0.0298943  | 0.0133218  | -1.16608    | 1          |
| LOC100506124   | 0.30263    | 0.331923   | 0.133295    | 1          |
| CEP112         | 1.05473    | 0.55033    | -0.938507   | 0.137794   |
| ACP5           | 0.112685   | 0.140735   | 0.320683    | 1          |
| PRPH           | 0.0756771  | 0.0585064  | -0.371261   | 1          |
| JAKMIP3        | 0.047875   | 0.0531283  | 0.15021     | 1          |
| LOC100132215   | 0.122228   | 0.183853   | 0.588972    | 1          |
| SNORA12        | 25.1219    | 1.61747    | -3.95714    | 0.766151   |
| LOC653653      | 0.0468202  | 0.0465942  | -0.00697974 | 1          |
| UBAP1L         | 0.692427   | 2.07739    | 1.58504     | 0.0232503  |
| RAET1G         | 0.341497   | 0.583641   | 0.773208    | 0.890882   |
| PLCH2          | 0.0545522  | 0.0233441  | -1.22458    | 1          |
| PARD6B         | 1.25077    | 1.45785    | 0.221026    | 0.764456   |
| GRIK1          | 0.0198903  | 0.0110012  | -0.854404   | 1          |

|              |           |            |             |            |
|--------------|-----------|------------|-------------|------------|
| LOC284412    | 0.271981  | 0.457258   | 0.749502    | 0.380319   |
| IFIT2        | 0.0668136 | 0.110396   | 0.724472    | 1          |
| AMPD3        | 2.55151   | 1.7453     | -0.547874   | 0.177937   |
| LOC100499489 | 1.35198   | 1.65524    | 0.291969    | 0.757347   |
| RNF112       | 0.153363  | 0.197584   | 0.365519    | 1          |
| CYP27A1      | 0.029516  | 0.155306   | 2.39554     | 1          |
| FHIT         | 10.1182   | 9.7592     | -0.0521179  | 0.96513    |
| OPN1SW       | 0.0793969 | 0.241129   | 1.60265     | 1          |
| BTN3A1       | 0.85615   | 0.842053   | -0.0239532  | 0.990104   |
| SESN1        | 2.44342   | 2.85478    | 0.224475    | 0.758662   |
| SEMA3E       | 0.0131933 | 0.0215719  | 0.709351    | 1          |
| REM2         | 0.271482  | 0.380831   | 0.488297    | 0.776769   |
| FEM1C        | 2.06762   | 2.32269    | 0.167832    | 0.802621   |
| CACNB4       | 0.383118  | 0.296391   | -0.370287   | 0.591586   |
| LOC100130093 | 0.455252  | 0.852624   | 0.905243    | 0.939543   |
| LOC100130301 | 0.0520433 | 0          | #NAME?      | 1          |
| ID1          | 35.7846   | 78.1851    | 1.12756     | 0.00153868 |
| CELF5        | 0.296931  | 0.394982   | 0.411656    | 0.785865   |
| UPK3B        | 1.1766    | 2.50023    | 1.08744     | 0.0580068  |
| LOC100506713 | 1.2646    | 1.40199    | 0.148801    | 0.951036   |
| C1orf74      | 1.21224   | 1.71667    | 0.501932    | 0.467453   |
| KRTAP4-6     | 0.116738  | 0.096888   | -0.268889   | 1          |
| ZNF484       | 0.636065  | 0.570444   | -0.157088   | 0.890882   |
| STAR4        | 0.853748  | 1.16656    | 0.450373    | 0.50443    |
| SPDYA        | 0.0996413 | 0.207848   | 1.06071     | 1          |
| LOC649395    | 0.0126373 | 0.0256303  | 1.02016     | 1          |
| LOC100190986 | 0.553039  | 0.912496   | 0.722438    | 0.218807   |
| C1orf54      | 0.30131   | 0.339701   | 0.173016    | 1          |
| TMEM191C     | 0.258795  | 0.469569   | 0.859529    | 0.646217   |
| MRPL23-AS1   | 0.054167  | 0          | #NAME?      | 1          |
| LOX          | 0.719371  | 0.886043   | 0.300639    | 0.677269   |
| CELSR3       | 0.613571  | 0.825784   | 0.428534    | 0.776558   |
| SAP30        | 26.4035   | 28.8494    | 0.127812    | 0.863087   |
| ZMYM2        | 1.371     | 1.23664    | -0.148807   | 0.825475   |
| TAS2R20      | 0.19141   | 0.26077    | 0.446113    | 1          |
| RNF144A-AS1  | 0.0102101 | 0.0258924  | 1.34253     | 1          |
| KIAA1328     | 0.228501  | 0.228173   | -0.0020761  | 1          |
| LURAP1       | 0.0275615 | 0          | #NAME?      | 1          |
| SWT1         | 0.625308  | 0.458814   | -0.446658   | 0.845567   |
| NHS          | 0.0170519 | 0.00916173 | -0.89624    | 1          |
| ZNF575       | 0.627853  | 0.581351   | -0.111018   | 0.96676    |
| SLC7A9       | 0.139748  | 0.262612   | 0.910103    | 1          |
| SERTAD4-AS1  | 2.24395   | 1.07301    | -1.06438    | 0.180016   |
| ZFP14        | 0.154059  | 0.260419   | 0.757351    | 1          |
| PPEF1        | 0.110813  | 0.0173086  | -2.67856    | 1          |
| HMHA1        | 15.8838   | 15.8882    | 0.000403917 | 0.99971    |
| LOC100506305 | 0.0167434 | 0.0142959  | -0.227991   | 1          |
| SLX4IP       | 0.17279   | 0.162936   | -0.0847126  | 1          |
| PARP10       | 2.83298   | 3.22058    | 0.185       | 0.824472   |

|              |            |            |            |           |
|--------------|------------|------------|------------|-----------|
| CDKN2B-AS1   | 0.120576   | 0.111679   | -0.110592  | 1         |
| C2orf48      | 1.15839    | 0.489124   | -1.24385   | 0.227385  |
| GGN          | 0.480278   | 0.622539   | 0.374295   | 0.837065  |
| ZNF250       | 0.925955   | 1.40159    | 0.598052   | 0.112989  |
| ZBTB3        | 0.879923   | 0.636389   | -0.467468  | 0.54298   |
| LOC286437    | 0.162442   | 0.282356   | 0.797593   | 1         |
| C17orf107    | 0.124738   | 0.360385   | 1.53063    | 1         |
| C16orf45     | 0.0734326  | 0.0662801  | -0.147845  | 1         |
| ZNF654       | 1.07108    | 1.04807    | -0.0313309 | 0.993173  |
| ASIC1        | 4.60866    | 6.50798    | 0.497862   | 0.162455  |
| GARNL3       | 1.06622    | 1.43122    | 0.424737   | 0.456287  |
| FLJ35390     | 0.71854    | 0.595937   | -0.269909  | 0.889908  |
| LOC143666    | 0.674619   | 1.52391    | 1.17563    | 0.0447624 |
| ZFP37        | 1.53677    | 1.75197    | 0.18908    | 0.819675  |
| CD82         | 1.42884    | 1.89429    | 0.406807   | 0.629512  |
| LOC389247    | 0.389419   | 0.415617   | 0.0939298  | 0.981441  |
| CRYM-AS1     | 0.127283   | 0.1751     | 0.460139   | 1         |
| DNALI1       | 0.00916091 | 0.048149   | 2.39394    | 1         |
| RPL32P3      | 1.39301    | 2.29141    | 0.71803    | 0.141805  |
| EFCAB5       | 0.014366   | 0.0318079  | 1.14672    | 1         |
| THAP3        | 16.4288    | 22.2901    | 0.440173   | 0.717284  |
| SEMA3D       | 2.31768    | 2.32943    | 0.00729344 | 0.994734  |
| RAB17        | 0.0359866  | 0.0123965  | -1.53753   | 1         |
| BMS1P1       | 0.0588083  | 0.0783722  | 0.414322   | 1         |
| GPR4         | 0.0252296  | 0.0199888  | -0.335922  | 1         |
| MFI2-AS1     | 1.92667    | 3.13492    | 0.702321   | 0.920543  |
| MPP2         | 3.36264    | 2.47953    | -0.439531  | 0.290007  |
| LINC00514    | 0.188237   | 0.22865    | 0.280587   | 1         |
| C9orf96      | 0.0806236  | 0.131524   | 0.706049   | 1         |
| WFDC3        | 0.0992161  | 0.0491771  | -1.01259   | 1         |
| SYT2         | 0.0135919  | 0.0141098  | 0.0539492  | 1         |
| ZNF57        | 2.1958     | 3.35889    | 0.613237   | 0.143385  |
| WDR27        | 1.00559    | 1.01096    | 0.00767088 | 0.996454  |
| DCBLD1       | 0.416435   | 0.569372   | 0.451279   | 0.930948  |
| LOC100130417 | 0.178561   | 0.105402   | -0.760515  | 1         |
| HFE          | 1.26645    | 0.659486   | -0.941377  | 0.108871  |
| ANKDD1A      | 0.809941   | 0.842055   | 0.0560979  | 0.975211  |
| LRIG2        | 1.19692    | 0.95668    | -0.323217  | 0.620504  |
| TNFAIP8      | 1.9169     | 1.78223    | -0.105092  | 0.934331  |
| DNAJC9-AS1   | 0.0364511  | 0.0242934  | -0.585398  | 1         |
| GPR179       | 0.00394023 | 0.00591834 | 0.586913   | 1         |
| LOC642366    | 0.0408588  | 0.0480221  | 0.23305    | 1         |
| UBL4B        | 0.104931   | 0.0713067  | -0.557339  | 1         |
| FLJ26850     | 1.08366    | 1.38796    | 0.357056   | 0.73946   |
| AZGP1        | 0.0942199  | 0.0165372  | -2.51032   | 1         |
| NMNAT3       | 1.71348    | 1.00711    | -0.766704  | 0.167611  |
| DDAH2        | 25.1118    | 23.6957    | -0.0837399 | 0.929645  |
| ZNF487P      | 0.227968   | 0.214267   | -0.089417  | 1         |
| MATN1-AS1    | 0.710695   | 0.497283   | -0.515165  | 0.697434  |

|              |            |            |             |            |
|--------------|------------|------------|-------------|------------|
| G2E3         | 0.689197   | 0.90617    | 0.394865    | 0.479652   |
| BMF          | 0.239922   | 0.290025   | 0.273613    | 1          |
| BACE1-AS     | 0.527905   | 0.524039   | -0.0106039  | 0.981963   |
| ZNF217       | 1.28554    | 1.62387    | 0.337068    | 0.503126   |
| ZNF2         | 0.828199   | 1.55671    | 0.910447    | 0.0243026  |
| ZNF823       | 1.23151    | 1.96511    | 0.674184    | 0.12218    |
| TXK          | 0.0655035  | 0.0655714  | 0.00149564  | 1          |
| MPI          | 33.8672    | 20.6863    | -0.711212   | 0.00820276 |
| TAGLN        | 33.6626    | 108.998    | 1.69509     | 0.00153868 |
| PLEKHA2      | 7.09721    | 4.91012    | -0.531494   | 0.0685533  |
| RASD2        | 0.757392   | 0.587056   | -0.367543   | 0.713126   |
| ZNF14        | 1.48653    | 1.72055    | 0.210924    | 0.790054   |
| C1QTNF6      | 0.768744   | 0.164338   | -2.22583    | 0.00897284 |
| FBXL8,HSF4   | 6.31901    | 6.31166    | -0.00167904 | 0.999234   |
| LOC100506385 | 0.0202483  | 0.0332725  | 0.716531    | 1          |
| ABCA2        | 15.2971    | 17.9855    | 0.23357     | 0.607733   |
| SLC52A3      | 0.0161786  | 0.0113039  | -0.517266   | 1          |
| C1orf220     | 0.0648192  | 0.0728802  | 0.169107    | 1          |
| SNED1        | 0.308491   | 0.240874   | -0.356954   | 1          |
| RINL         | 0.727492   | 0.307551   | -1.24211    | 0.0410754  |
| NAGS         | 4.48462    | 4.75918    | 0.0857289   | 0.945857   |
| COLEC11      | 0.308027   | 0.537405   | 0.802952    | 0.327652   |
| ZNF615       | 0.500576   | 0.594594   | 0.248316    | 0.796442   |
| GAD1         | 6.17928    | 6.11547    | -0.0149738  | 0.994068   |
| CRYL1        | 19.941     | 12.1361    | -0.716439   | 0.0143403  |
| MLLT3        | 2.33677    | 1.31426    | -0.830263   | 0.0192959  |
| FGF2         | 0.00481314 | 0.00364455 | -0.401238   | 1          |
| KRBA2        | 0.0274155  | 0.00520954 | -2.39576    | 1          |
| STXBP6       | 0.658878   | 0.283273   | -1.21782    | 0.104245   |
| CRLF1        | 0.69055    | 0.860338   | 0.317157    | 0.836708   |
| CSRP2        | 20.1423    | 25.1528    | 0.320491    | 0.470928   |
| PTX4         | 0.0528178  | 0.0323371  | -0.707831   | 1          |
| GPX2         | 0.0547241  | 0.0504915  | -0.116134   | 1          |
| IFFO2        | 4.52667    | 7.1448     | 0.658445    | 0.0143403  |
| CHRM3        | 0.0876537  | 0.0645852  | -0.440612   | 1          |
| BAI1         | 0.387984   | 0.145443   | -1.41554    | 0.068345   |
| ADAM20       | 0.0103966  | 0.0178892  | 0.782984    | 1          |
| LOC100132356 | 0.142093   | 0.152885   | 0.105608    | 1          |
| C1orf21      | 1.779      | 1.04674    | -0.765161   | 0.00659556 |
| ZNF160       | 3.26664    | 2.54195    | -0.361868   | 0.389383   |
| HLTF         | 0.0361209  | 0.042318   | 0.228439    | 1          |
| TTLL7        | 0.107244   | 0.0832925  | -0.364636   | 1          |
| SLC9A4       | 0.0528215  | 0.0684527  | 0.373981    | 1          |
| GOLGA6L4     | 0.119218   | 0.100168   | -0.251183   | 1          |
| SMYD3        | 15.1127    | 10.412     | -0.537524   | 0.094542   |
| RALGAPA2     | 0.761754   | 0.807641   | 0.0843888   | 0.939929   |
| LCA5L        | 0.15273    | 0.167426   | 0.132537    | 1          |
| GPI          | 206.293    | 237.155    | 0.201137    | 0.707165   |
| MAST4        | 0.468213   | 0.166756   | -1.48943    | 0.0943483  |

|               |           |            |            |            |
|---------------|-----------|------------|------------|------------|
| TAS2R14       | 0.178847  | 0.0963906  | -0.89176   | 1          |
| KAAG1         | 0.473551  | 0.369858   | -0.356548  | 0.928548   |
| HERC2P7       | 2.27031   | 3.9429     | 0.796367   | 0.0460785  |
| NYAP1         | 1.56547   | 1.07008    | -0.548878  | 0.352552   |
| SHC3          | 0.0342704 | 0.0190474  | -0.847367  | 1          |
| MBD5          | 0.10278   | 0.0271103  | -1.92265   | 1          |
| DFNB31        | 8.62337   | 10.1416    | 0.233963   | 0.65387    |
| VWA7          | 0.0638464 | 0.077023   | 0.270686   | 1          |
| PMS2CL        | 1.60897   | 1.66146    | 0.0463161  | 0.977897   |
| AP1S3         | 0.0143072 | 0.00252436 | -2.50276   | 1          |
| AANAT         | 0.159371  | 0.29011    | 0.864212   | 1          |
| ZNF786        | 2.3784    | 3.77985    | 0.668338   | 0.073625   |
| C19orf59      | 0.047292  | 0.0145422  | -1.70135   | 1          |
| MAP1LC3C      | 0.457709  | 0.960356   | 1.06914    | 0.186315   |
| LOC283683     | 0.122539  | 0.0363504  | -1.75319   | 1          |
| ZNF133        | 4.07635   | 5.0466     | 0.308032   | 0.564651   |
| ZNF32-AS2     | 0.433432  | 0.379958   | -0.189966  | 0.980228   |
| MGC2889       | 0.0227971 | 0.0183478  | -0.313244  | 1          |
| CCDC92        | 1.64411   | 2.10555    | 0.356889   | 0.668321   |
| DTWD2         | 0.406464  | 0.482363   | 0.246992   | 0.808777   |
| ZNF566        | 1.37767   | 1.80887    | 0.392865   | 0.376498   |
| SLC39A10      | 2.23015   | 4.22134    | 0.920557   | 0.00153868 |
| PRDM5         | 0.902825  | 0.572055   | -0.658294  | 0.255443   |
| IDUA          | 2.96706   | 2.92288    | -0.0216425 | 0.991637   |
| PGAP1         | 0.60141   | 0.724758   | 0.26915    | 0.642611   |
| CTAGE6P       | 0.027408  | 0.0466739  | 0.768019   | 1          |
| FSCN3         | 0.0161216 | 0.0280105  | 0.796974   | 1          |
| SH3RF2        | 0.288821  | 0.0768918  | -1.90928   | 1          |
| CYP27B1       | 1.49116   | 2.66101    | 0.835545   | 0.077173   |
| AQP6          | 0.0118664 | 0.0205182  | 0.790023   | 1          |
| IQCC          | 0.979716  | 1.64475    | 0.747437   | 0.1252     |
| ZC3H6         | 0.120496  | 0.00885273 | -3.76671   | 1          |
| ZNF526        | 2.70211   | 4.30367    | 0.671479   | 0.0487873  |
| RRAS          | 21.8848   | 13.9997    | -0.644533  | 0.0748376  |
| MEX3B         | 0.65614   | 0.811738   | 0.307011   | 0.759124   |
| SENP7         | 0.738031  | 0.512132   | -0.527165  | 0.296862   |
| C1orf162      | 0.579314  | 0.427982   | -0.436796  | 0.800869   |
| MCTP2         | 0.509865  | 0.435937   | -0.225994  | 0.861724   |
| CACNB3        | 14.7412   | 13.8073    | -0.0944219 | 0.905839   |
| AMZ2P1        | 1.37841   | 0.862877   | -0.675784  | 0.131273   |
| RASAL2-AS1    | 0.040165  | 0.0942237  | 1.23015    | 1          |
| CCDC41        | 1.32396   | 2.52221    | 0.929824   | 0.00572929 |
| SYDE2         | 1.10864   | 0.628616   | -0.818543  | 0.042563   |
| GPX3          | 0.015832  | 0.0364205  | 1.20191    | 1          |
| NFAT5         | 2.26114   | 3.02737    | 0.421018   | 0.191267   |
| PACSIN1       | 0.0282408 | 0.00579974 | -2.28372   | 1          |
| GPR160        | 12.6741   | 9.61852    | -0.398003  | 0.28861    |
| CD4           | 0.0452145 | 0.0783254  | 0.792694   | 1          |
| FAM47E,FAM47E | 5.09456   | 6.95854    | 0.449829   | 0.194881   |

|              |            |           |            |            |
|--------------|------------|-----------|------------|------------|
| ZBTB25       | 1.95746    | 1.52634   | -0.358904  | 0.641758   |
| CCR6         | 0.0540309  | 0.0673408 | 0.317697   | 1          |
| SYNPO        | 0.406942   | 0.36585   | -0.153571  | 0.9183     |
| GXYLT2       | 0.409594   | 0.322258  | -0.345979  | 0.850951   |
| ERMP1        | 2.7537     | 2.2133    | -0.315171  | 0.500006   |
| MORC3        | 2.36059    | 2.48704   | 0.0752779  | 0.939948   |
| DYSF         | 0.105798   | 0.0558336 | -0.922107  | 1          |
| C2orf74      | 0.0658735  | 0.0299372 | -1.13776   | 1          |
| LOC100134368 | 0.172597   | 0.149546  | -0.206819  | 1          |
| ZCWPW2       | 0.0594172  | 0.0142019 | -2.06479   | 1          |
| MAPK8IP2     | 0.761564   | 0.672544  | -0.179338  | 0.914505   |
| MYH7B        | 0.0320701  | 0.0146827 | -1.12711   | 1          |
| DLG4         | 13.6231    | 9.41189   | -0.533504  | 0.749866   |
| LRRC39       | 0.344679   | 0.406457  | 0.237852   | 0.951272   |
| STRC         | 0.0866611  | 0.0753627 | -0.201536  | 1          |
| POU5F1P4     | 0.0306407  | 0         | #NAME?     | 1          |
| DNAH1        | 0.120718   | 0.159223  | 0.399401   | 1          |
| BAIAP3       | 1.39       | 1.28284   | -0.115743  | 0.982866   |
| PJA2         | 2.26579    | 1.31168   | -0.788596  | 0.0150346  |
| TEKT3        | 0.140036   | 0.127449  | -0.135883  | 1          |
| TGIF1        | 26.5555    | 47.3515   | 0.834399   | 0.00153868 |
| STAG3L3      | 0.281208   | 0.421552  | 0.584076   | 0.628907   |
| ESRRB        | 0.126707   | 0.114278  | -0.148952  | 1          |
| LOC730101    | 0.993245   | 1.79119   | 0.850695   | 0.020985   |
| COX6B2       | 0.418324   | 0.363294  | -0.203483  | 0.93285    |
| RSBN1        | 1.64686    | 1.98228   | 0.267442   | 0.619482   |
| ALPK3        | 0.0162846  | 0.0255612 | 0.650445   | 1          |
| MUC6         | 0.0392728  | 0.0793102 | 1.01397    | 1          |
| CNTD1        | 0.153145   | 0.192152  | 0.327343   | 1          |
| C6orf223     | 0.0523342  | 0.0238545 | -1.13349   | 1          |
| CYP1A1       | 0.219378   | 0.225934  | 0.0424793  | 1          |
| ZNF610       | 0.0343656  | 0.0422156 | 0.29681    | 1          |
| N4BP2L2-IT2  | 0.281024   | 0.339828  | 0.274112   | 1          |
| SEMA6A       | 0.0289475  | 0.034517  | 0.25387    | 1          |
| LOC400927    | 0.818107   | 1.03285   | 0.336264   | 0.891309   |
| ANO6         | 7.85652    | 7.66649   | -0.0353243 | 0.974573   |
| PON3         | 0.523179   | 0.42812   | -0.289289  | 0.870767   |
| MPL          | 0.0377638  | 0.0444703 | 0.235839   | 1          |
| LOC100506730 | 1.6114     | 1.7312    | 0.103454   | 0.93305    |
| MATK         | 1.09637    | 0.317956  | -1.78584   | 0.0204286  |
| C5orf54      | 0.797673   | 0.979767  | 0.296642   | 0.74248    |
| TBC1D8B      | 0.494337   | 0.268964  | -0.878083  | 0.133324   |
| INSIG1       | 8.18784    | 15.7843   | 0.946936   | 0.00153868 |
| PER1         | 3.46086    | 6.7716    | 0.968365   | 0.00153868 |
| TMEM133      | 0.340715   | 0.473947  | 0.476161   | 0.643266   |
| PLOD1        | 69.9141    | 72.0495   | 0.0434051  | 0.964843   |
| ZNF793       | 0.00683997 | 0.0164202 | 1.26341    | 1          |
| FABP2        | 0.00440392 | 0.0035071 | -0.32851   | 1          |
| LRRC37A2     | 0.143041   | 0.158769  | 0.150496   | 1          |

|              |            |            |            |            |
|--------------|------------|------------|------------|------------|
| CRYZ         | 12.3858    | 18.1002    | 0.547323   | 0.399838   |
| CALB2        | 11.3217    | 12.1097    | 0.0970689  | 0.913931   |
| CD72         | 0.41451    | 0.248013   | -0.740992  | 0.93855    |
| GOLGA4       | 1.62454    | 3.46231    | 1.0917     | 0.00153868 |
| ZNF10        | 1.67978    | 2.28315    | 0.442758   | 0.26052    |
| TMEM8B       | 3.03383    | 1.83505    | -0.725324  | 0.167611   |
| CRY2         | 3.11061    | 4.60151    | 0.564909   | 0.104824   |
| CAPN8        | 0.0200373  | 0.0129443  | -0.630365  | 1          |
| SLC1A1       | 1.37085    | 1.11908    | -0.292759  | 0.678046   |
| AASDH        | 1.51274    | 1.0407     | -0.539615  | 0.2504     |
| ABCA9        | 0.00796977 | 0.00569414 | -0.485059  | 1          |
| CGN          | 1.224      | 1.52387    | 0.316139   | 0.609058   |
| ZNF17        | 0.91805    | 1.33904    | 0.544558   | 0.28265    |
| ZNF235       | 0.269154   | 0.265379   | -0.0203775 | 1          |
| AXDND1       | 0.446391   | 0.453355   | 0.0223339  | 0.991515   |
| LOC100288842 | 0.663194   | 0.301573   | -1.13692   | 0.495318   |
| RBM43        | 1.08887    | 0.502241   | -1.11639   | 0.0117316  |
| LOC729970    | 1.28287    | 0.944988   | -0.441012  | 0.665303   |
| MYO1F        | 0.077081   | 0.0617648  | -0.319591  | 1          |
| PNPLA7       | 1.23386    | 0.866099   | -0.51058   | 0.376508   |
| NXN          | 7.39795    | 4.15098    | -0.833674  | 0.00659556 |
| ROCK1P1      | 0.249238   | 0.16515    | -0.59375   | 1          |
| LOC440461    | 0.0921392  | 0.0129294  | -2.83316   | 1          |
| CD79A        | 0.637319   | 0.753994   | 0.242539   | 0.889851   |
| HCFC2        | 0.487282   | 0.561374   | 0.204207   | 0.825602   |
| KIF20B       | 0.703329   | 1.3172     | 0.9052     | 0.00970147 |
| C10orf12     | 0.375173   | 0.586594   | 0.644806   | 0.243499   |
| C3           | 0.00573274 | 0.0394861  | 2.78405    | 1          |
| CLIP2        | 11.9921    | 8.54724    | -0.488555  | 0.106278   |
| IL17RE       | 0.534694   | 0.795885   | 0.573846   | 0.472341   |
| MAN2C1       | 7.92213    | 9.49124    | 0.260709   | 0.61138    |
| NR3C2        | 0.166025   | 0.0680722  | -1.28626   | 1          |
| SERPING1     | 0.026868   | 0.0117349  | -1.19508   | 1          |
| C12orf23     | 7.89517    | 8.90226    | 0.1732     | 0.756518   |
| SH3GL2       | 0.0250605  | 0.0312895  | 0.320258   | 1          |
| FONG         | 1.08298    | 0.969165   | -0.160191  | 0.945399   |
| PLCD1        | 2.79155    | 2.00358    | -0.478487  | 0.371596   |
| CABP7        | 0.0526157  | 0.036999   | -0.508007  | 1          |
| CRIP2        | 21.6324    | 20.1145    | -0.104961  | 0.913039   |
| ZSCAN12      | 0.411961   | 0.395449   | -0.0590132 | 0.974108   |
| ZNF30        | 0.402055   | 0.887068   | 1.14165    | 0.0347593  |
| PHC3         | 1.15643    | 1.1233     | -0.0419351 | 0.969901   |
| GOLGA6L10    | 0.0245     | 0.0127069  | -0.947172  | 1          |
| FAM102B      | 1.26254    | 1.31346    | 0.0570399  | 0.962865   |
| MT1JP        | 0.839802   | 1.80589    | 1.10459    | 0.450707   |
| LOC100289137 | 2.04129    | 3.02355    | 0.56676    | 0.197192   |
| STX1B        | 0.434758   | 0.275175   | -0.65986   | 0.349063   |
| LOC100996307 | 0.16647    | 0.0323445  | -2.36367   | 1          |
| TMEM135      | 1.65238    | 1.30772    | -0.337484  | 0.418557   |



|              |            |            |            |            |
|--------------|------------|------------|------------|------------|
| DDX26B       | 0.826375   | 0.764969   | -0.111396  | 0.93285    |
| ALKBH5       | 35.6968    | 55.4808    | 0.636192   | 0.0117316  |
| HSPB9        | 0.0815189  | 0.136145   | 0.739934   | 1          |
| DDX41        | 33.3541    | 55.6696    | 0.739026   | 0.00739414 |
| HSPA4L       | 2.12128    | 4.11192    | 0.954876   | 0.00274688 |
| TMEM161B-AS1 | 1.49921    | 1.90282    | 0.343933   | 0.773721   |
| C5           | 0.227855   | 0.119848   | -0.926909  | 1          |
| LIMS2        | 0.0280118  | 0.0283128  | 0.0154217  | 1          |
| ATPBD4       | 2.59941    | 1.94796    | -0.41622   | 0.442213   |
| SLC51A       | 0.143903   | 0.173661   | 0.271117   | 1          |
| LOC255512    | 2.15054    | 2.96751    | 0.464557   | 0.640604   |
| KLF7         | 0.0158403  | 0          | #NAME?     | 1          |
| NAB2         | 27.1726    | 34.8318    | 0.358255   | 0.692701   |
| PTP4A3       | 8.72945    | 3.48068    | -1.32652   | 0.00153868 |
| ZNF500       | 2.88173    | 4.15434    | 0.527684   | 0.201817   |
| IL11RA       | 0.659101   | 0.991109   | 0.588545   | 0.474234   |
| LOC493754    | 3.56918    | 4.11085    | 0.203845   | 0.746432   |
| GAPDHS       | 0.153662   | 0.25547    | 0.733392   | 1          |
| CCT6P3       | 2.21551    | 3.40773    | 0.621173   | 0.111734   |
| MGC45922     | 0.283244   | 0          | #NAME?     | 1          |
| ZNF416       | 2.66899    | 3.09501    | 0.21365    | 0.765759   |
| ZNF440       | 1.97276    | 2.33811    | 0.245127   | 0.675573   |
| TIGD3        | 1.58037    | 1.79986    | 0.187617   | 0.879418   |
| RBPJ         | 6.45023    | 5.15191    | -0.324243  | 0.39733    |
| RIMBP2       | 0.00837253 | 0.00190047 | -2.13931   | 1          |
| RLTPR        | 0.0326419  | 0.0702609  | 1.106      | 1          |
| KDM4B        | 8.62931    | 5.25653    | -0.715134  | 0.0103919  |
| GLCC11       | 0.536942   | 0.573136   | 0.0941116  | 0.950837   |
| ZNF230       | 0.578658   | 0.82657    | 0.514426   | 0.333648   |
| LIN7B        | 1.9175     | 2.55234    | 0.412594   | 0.780762   |
| LOC441242    | 0.0379072  | 0.0638134  | 0.751389   | 1          |
| STAG3L2      | 1.09695    | 1.89427    | 0.788137   | 0.16409    |
| KIAA1958     | 0.451958   | 0.326088   | -0.470928  | 0.633472   |
| SNAI3        | 1.50698    | 1.81794    | 0.270645   | 0.883608   |
| PABPN1L      | 0.0300941  | 0.107494   | 1.83671    | 1          |
| ETNK2        | 0.830577   | 0.535383   | -0.633543  | 0.415024   |
| ZNF708       | 0.843225   | 0.968012   | 0.199107   | 0.824472   |
| SLCO1B7      | 0.233089   | 0.100594   | -1.21234   | 1          |
| PDLIM2       | 93.1757    | 75.1762    | -0.309677  | 0.409021   |
| DENND3       | 0.711985   | 0.619569   | -0.200581  | 0.852016   |
| ZNF436       | 1.09093    | 1.53879    | 0.496244   | 0.303477   |
| FLJ45340     | 3.17007    | 2.86646    | -0.145248  | 0.828523   |
| IRX6         | 0.0181288  | 0.0249206  | 0.459058   | 1          |
| FGL2         | 0.00224117 | 0.00410123 | 0.871809   | 1          |
| TMEM74B      | 10.5436    | 9.54062    | -0.144219  | 0.856147   |
| NLGN3        | 0.589355   | 0.590539   | 0.00289333 | 0.999138   |
| FGF9         | 0.36162    | 0.491769   | 0.443505   | 0.553492   |
| ACSBG1       | 0.0647439  | 0.257343   | 1.99088    | 1          |
| SLC2A13      | 0.3318     | 0.417538   | 0.331593   | 0.662946   |

|              |            |            |            |            |
|--------------|------------|------------|------------|------------|
| SEMA4G       | 3.00943    | 3.3955     | 0.174133   | 0.938232   |
| GUCA1B       | 0.979766   | 1.60164    | 0.709037   | 0.179176   |
| SPICE1       | 0.856014   | 0.776399   | -0.140836  | 0.886094   |
| MYL9         | 52.7259    | 96.1955    | 0.867458   | 0.00153868 |
| MST1P2       | 0.709514   | 0.45335    | -0.646208  | 0.483696   |
| AK4          | 11.7692    | 14.5297    | 0.30399    | 0.424921   |
| CKB          | 4.90053    | 4.18955    | -0.226142  | 0.817355   |
| CCDC40       | 0.328021   | 0.373674   | 0.18799    | 0.898731   |
| EVI2B        | 0.0124705  | 0.0311994  | 1.323      | 1          |
| DNAH17       | 0.132256   | 0.195772   | 0.565842   | 1          |
| PIPOX        | 0.0767391  | 0.0348617  | -1.13832   | 1          |
| C12orf71     | 0.0466583  | 0.0233504  | -0.998686  | 1          |
| NPB          | 0.730223   | 1.1336     | 0.634507   | 0.952539   |
| C8orf42      | 0.00688498 | 0.0194451  | 1.49789    | 1          |
| LOC441081    | 0.15428    | 0.126598   | -0.285297  | 1          |
| CACTIN-AS1   | 0.103061   | 0.125687   | 0.286334   | 1          |
| CYP39A1      | 0.290878   | 0.136404   | -1.09252   | 1          |
| ZNF41        | 0.207436   | 0.293315   | 0.499786   | 1          |
| ZMYM1        | 1.44505    | 1.66185    | 0.201676   | 0.780964   |
| PLEKHG7      | 0.00292129 | 0          | #NAME?     | 1          |
| KLHL31       | 0.0253574  | 0.0218353  | -0.215742  | 1          |
| NPR3         | 0.0111408  | 0.0080854  | -0.462461  | 1          |
| SYCE2        | 1.03445    | 0.923325   | -0.163951  | 0.978031   |
| SLCO1B3      | 6.37144    | 4.84188    | -0.396051  | 0.277374   |
| LOC100652999 | 0.116231   | 0.131905   | 0.182501   | 1          |
| KIAA1919     | 0.420742   | 0.511328   | 0.281315   | 0.784528   |
| UPRT         | 4.12729    | 3.12417    | -0.401723  | 0.357918   |
| NPAS2        | 5.97021    | 6.43622    | 0.108431   | 0.890882   |
| JAG1         | 1.07753    | 1.50387    | 0.480949   | 0.283957   |
| MIR100HG     | 0.00313034 | 0.00245627 | -0.349853  | 1          |
| ATP2B4       | 1.10841    | 1.26636    | 0.192192   | 0.775951   |
| KLF11        | 1.22506    | 1.23532    | 0.0120406  | 0.994204   |
| KCNIP2       | 0.177349   | 0.255858   | 0.528756   | 1          |
| KIF12        | 0.687932   | 0.34372    | -1.00103   | 0.210545   |
| MID1         | 0.0186383  | 0.00709919 | -1.39254   | 1          |
| F8           | 2.21615    | 1.27935    | -0.792643  | 0.20933    |
| BCL2L11      | 1.69596    | 2.45262    | 0.532228   | 0.180192   |
| LOC619207    | 0.111452   | 0.151206   | 0.440091   | 1          |
| ZNF20,ZNF625 | 1.36703    | 1.96501    | 0.523498   | 0.245393   |
| ARHGAP32     | 1.13542    | 0.780502   | -0.540753  | 0.15255    |
| EIF4A2       | 107.129    | 109.328    | 0.0293167  | 0.978818   |
| NKTR         | 1.0782     | 1.87201    | 0.79596    | 0.250087   |
| SP5          | 0.47457    | 0.292436   | -0.698501  | 0.65998    |
| SPATC1       | 0.0641381  | 0.32095    | 2.3231     | 1          |
| AMER1        | 0.440043   | 1.12519    | 1.35446    | 0.00153868 |
| ZNF776       | 0.972005   | 0.890099   | -0.126998  | 0.900016   |
| CPZ          | 17.9067    | 17.3297    | -0.0472489 | 0.964442   |
| ZNF517       | 4.97263    | 3.93292    | -0.338408  | 0.57221    |
| LOC100272217 | 0.581371   | 0.702642   | 0.27333    | 0.818403   |

|               |            |            |             |            |
|---------------|------------|------------|-------------|------------|
| PLIN2         | 27.1398    | 20.9407    | -0.3741     | 0.269977   |
| CMBL          | 12.838     | 9.63627    | -0.413877   | 0.194669   |
| PELI1         | 1.38317    | 1.20382    | -0.200352   | 0.818092   |
| MTMR9LP       | 2.25695    | 1.12674    | -1.00222    | 0.0491395  |
| SYNE2         | 1.86669    | 1.75246    | -0.0910967  | 0.952184   |
| PCDHGA1,PCDH1 | 5.45181    | 3.98221    | -0.453165   | 0.331994   |
| ZNF333        | 0.72599    | 0.487067   | -0.575831   | 0.317314   |
| CLEC2D        | 0.394565   | 0.341789   | -0.207159   | 0.845917   |
| C10orf11      | 9.50435    | 9.51007    | 0.000868311 | 0.999234   |
| GATM-AS1      | 0.061855   | 0.0736908  | 0.252595    | 1          |
| KIF9-AS1      | 0.2307     | 0.172939   | -0.415754   | 1          |
| PECR          | 2.38835    | 1.61088    | -0.568166   | 0.26617    |
| SIRT2         | 27.137     | 30.6788    | 0.176981    | 0.860285   |
| DMXL2         | 1.45987    | 1.34509    | -0.11814    | 0.884031   |
| AQP8          | 0.0868282  | 0.138136   | 0.669855    | 1          |
| GPRC5C        | 0.188909   | 0.0862779  | -1.13063    | 1          |
| MSL2          | 3.39457    | 4.01268    | 0.241336    | 0.643442   |
| SLC9A3        | 0.319307   | 0.172498   | -0.888363   | 1          |
| ARSJ          | 1.4116     | 1.8975     | 0.426773    | 0.334299   |
| ZNF439        | 0.978132   | 0.876534   | -0.158219   | 0.894866   |
| KNDC1         | 0.647383   | 0.454794   | -0.509408   | 0.470574   |
| DSC3          | 0.00142989 | 0.00902836 | 2.65856     | 1          |
| LINC00673     | 0.264236   | 0.397134   | 0.587801    | 0.590519   |
| LOC728537     | 0.733371   | 0.379664   | -0.949822   | 0.229358   |
| EFCAB10       | 0.486424   | 0.825257   | 0.76263     | 0.934861   |
| ZFAT          | 1.03489    | 1.89075    | 0.869474    | 0.0181648  |
| SNCG          | 0.0563348  | 0.0216204  | -1.38163    | 1          |
| TTC21A        | 0.203716   | 0.0987085  | -1.04532    | 1          |
| KBTBD7        | 0.174866   | 0.135216   | -0.37098    | 1          |
| SNAR-F        | 8.27402    | 8.14799    | -0.022145   | 0.880357   |
| FAM151A       | 0.217825   | 0.0956509  | -1.18732    | 1          |
| GMEB1         | 1.44588    | 1.07564    | -0.426757   | 0.47797    |
| SEC24A        | 1.58183    | 2.01209    | 0.347099    | 0.431488   |
| PLAGL1        | 8.21067    | 6.10114    | -0.42842    | 0.237038   |
| ZBTB4         | 5.42465    | 5.08191    | -0.0941605  | 0.906667   |
| B3GAT2        | 0.978404   | 1.11914    | 0.193886    | 0.95935    |
| UBE2O         | 6.84377    | 8.55022    | 0.321171    | 0.403223   |
| ZNF788        | 0.0550949  | 0.0369215  | -0.57746    | 1          |
| TMOD3         | 3.52307    | 3.82871    | 0.120023    | 0.874107   |
| DDX50         | 20.5195    | 15.7554    | -0.381147   | 0.24507    |
| METTL25       | 0.446005   | 0.760471   | 0.769833    | 0.859711   |
| LOC283731     | 0.0209735  | 0.0374821  | 0.837633    | 1          |
| FCAR          | 0.00906195 | 0.00957559 | 0.0795393   | 1          |
| ZNF442        | 0.318706   | 0.342854   | 0.105367    | 1          |
| USPL1         | 1.79757    | 3.11543    | 0.793388    | 0.00970147 |
| TMEM120A      | 22.9257    | 29.7732    | 0.377051    | 0.770773   |
| CFDP1         | 18.3237    | 21.6644    | 0.241619    | 0.614163   |
| PHF3          | 4.03831    | 3.55742    | -0.182921   | 0.736178   |
| LOC338799     | 1.69063    | 1.84124    | 0.123114    | 0.939948   |

|              |            |            |             |            |
|--------------|------------|------------|-------------|------------|
| AGAP2        | 0.354622   | 0.325532   | -0.123485   | 1          |
| BBS12        | 0.767918   | 1.28106    | 0.738315    | 0.106507   |
| C15orf48     | 0.109708   | 0.268562   | 1.29159     | 1          |
| INADL        | 1.23892    | 0.70525    | -0.81288    | 0.00897284 |
| LOC407835    | 0.0318357  | 0.0121243  | -1.39275    | 1          |
| FAM13A       | 1.07011    | 1.30828    | 0.289903    | 0.622249   |
| LOC729683    | 0.380478   | 0.660146   | 0.794973    | 0.386372   |
| POU5F1       | 0.0613215  | 0.0889748  | 0.537005    | 1          |
| TPD52        | 23.1265    | 24.4325    | 0.0792529   | 0.921691   |
| FAM8A1       | 1.0136     | 1.44952    | 0.516079    | 0.241211   |
| LOC100630918 | 1.47527    | 2.00365    | 0.44165     | 0.592157   |
| DNAJB1       | 50.1136    | 160.136    | 1.67602     | 0.00153868 |
| ATP7A        | 0.396706   | 0.295139   | -0.426674   | 0.496751   |
| SIRT4        | 1.30781    | 2.5357     | 0.955231    | 0.0827369  |
| CFL1P1       | 0.0445303  | 0.0210133  | -1.08348    | 1          |
| PRAM1        | 0.162865   | 0.0524754  | -1.63396    | 1          |
| ITGA3        | 29.8466    | 36.7885    | 0.30169     | 0.415334   |
| TEF          | 1.66853    | 3.81303    | 1.19236     | 0.00153868 |
| HM13-AS1     | 0.197039   | 0.338762   | 0.781791    | 1          |
| ITIH4        | 0.252474   | 0.149839   | -0.752718   | 1          |
| SUCLG2       | 19.382     | 18.0293    | -0.104371   | 0.884031   |
| MIPEPP3      | 0.298768   | 0.528424   | 0.82267     | 0.925563   |
| FAM22D       | 0.128561   | 0.187818   | 0.546879    | 1          |
| PCMTD1       | 1.92471    | 1.12453    | -0.775319   | 0.0290262  |
| CA3          | 0.485754   | 0.322301   | -0.591818   | 0.556775   |
| ZMAT3        | 2.28181    | 3.5102     | 0.621379    | 0.0264621  |
| NAPB         | 1.25612    | 2.23647    | 0.832252    | 0.0117316  |
| PLD1         | 0.155222   | 0.090439   | -0.779319   | 1          |
| ZNF438       | 0.957079   | 0.531224   | -0.849317   | 0.0913904  |
| ZPLD1        | 0.0130895  | 0.00723731 | -0.854885   | 1          |
| MSRB3        | 0.352376   | 0.309152   | -0.188802   | 1          |
| LHB          | 1.6952     | 1.26105    | -0.426833   | 0.822199   |
| ATAD2B       | 0.284918   | 0.331292   | 0.217553    | 1          |
| MTMR11       | 1.94458    | 0.891657   | -1.1249     | 0.0130226  |
| HLX          | 0.270439   | 0.312668   | 0.209329    | 1          |
| ZNF821       | 3.36029    | 2.55374    | -0.395976   | 0.498357   |
| LGSN         | 0.00186946 | 0.00145326 | -0.363327   | 1          |
| NGLY1        | 12.4361    | 11.7802    | -0.0781725  | 0.926243   |
| RAET1K       | 1.06092    | 2.4873     | 1.22926     | 0.00153868 |
| NUAK2        | 0.193182   | 0.289312   | 0.58267     | 1          |
| MYO1E        | 4.03019    | 3.56104    | -0.178551   | 0.767689   |
| PANK1        | 0.208633   | 0.3633     | 0.800197    | 1          |
| ZNF805       | 0.837693   | 0.744974   | -0.169232   | 0.831834   |
| KDELRL3      | 10.5501    | 7.0552     | -0.580498   | 0.842721   |
| CTDSPL2      | 2.00882    | 1.87816    | -0.0970255  | 0.919694   |
| TMEM253      | 0.377133   | 0.375928   | -0.00461564 | 0.998572   |
| COL7A1       | 0.425056   | 0.572075   | 0.428551    | 0.867514   |
| LOC148709    | 0.134481   | 0.29706    | 1.14335     | 1          |
| ANKRD18B     | 0.0025266  | 0.00238541 | -0.0829587  | 1          |

|              |            |           |            |            |
|--------------|------------|-----------|------------|------------|
| ZMYM3        | 5.1759     | 4.91806   | -0.0737201 | 0.988611   |
| ANKRD19P     | 0.573142   | 0.865912  | 0.595327   | 0.426872   |
| CCT6P1       | 2.34881    | 2.59876   | 0.145896   | 0.890207   |
| GPR56        | 0.0300372  | 0         | #NAME?     | 1          |
| PLEKHF2      | 4.71642    | 4.19683   | -0.168391  | 0.806478   |
| THUMPD2      | 6.7391     | 10.382    | 0.623455   | 0.0290262  |
| CCDC138      | 0.769434   | 0.933495  | 0.278844   | 0.777523   |
| C7orf60      | 2.52794    | 2.99151   | 0.242911   | 0.67663    |
| ATF2         | 2.91502    | 3.65527   | 0.326472   | 0.457337   |
| ST7-AS1      | 3.52074    | 1.4917    | -1.23892   | 0.455649   |
| ZNF658       | 0.167958   | 0.165812  | -0.0185523 | 1          |
| ZNF700       | 2.50152    | 3.40773   | 0.446005   | 0.277238   |
| SLC25A36     | 10.673     | 8.76834   | -0.283584  | 0.469274   |
| RGS11        | 9.42582    | 7.76796   | -0.279081  | 0.599368   |
| SNTA1        | 10.7495    | 10.8905   | 0.0187963  | 0.987173   |
| GPR183       | 0.00643091 | 0.0100351 | 0.641954   | 1          |
| LYRM9        | 2.16152    | 0.80097   | -1.43223   | 0.0123712  |
| DAPK2        | 0.527259   | 0.574884  | 0.124761   | 0.943181   |
| RGS4         | 7.48437    | 12.2902   | 0.715549   | 0.00380811 |
| GZMM         | 0.204788   | 0.476341  | 1.21786    | 0.438784   |
| ZNF510       | 1.1662     | 1.56768   | 0.426809   | 0.323795   |
| GALK2        | 6.93187    | 4.57184   | -0.600469  | 0.0512103  |
| RASA2        | 0.42393    | 0.528106  | 0.317003   | 0.767689   |
| SLC2A1       | 63.8804    | 62.0095   | -0.0428845 | 0.963782   |
| LOC100131626 | 0.0404115  | 0         | #NAME?     | 1          |
| RTBDN        | 0.566038   | 0.204638  | -1.46782   | 0.126516   |
| KLF9         | 0.900954   | 0.451084  | -0.998057  | 0.0187307  |
| ABCB6        | 7.1107     | 11.7263   | 0.721686   | 0.0137404  |
| FGF18        | 0.151134   | 0.371632  | 1.29805    | 0.243299   |
| ZNF284       | 0.527919   | 0.877868  | 0.733688   | 0.219415   |
| BST1         | 0.316496   | 0.478267  | 0.595629   | 0.629991   |
| MAP1A        | 0.0980761  | 0.0683353 | -0.52127   | 1          |
| GCAT         | 78.4663    | 72.2352   | -0.119373  | 0.865084   |
| ZNF417       | 0.347629   | 0.248932  | -0.481801  | 1          |
| ZNF225       | 0.42578    | 0.602951  | 0.501933   | 0.497376   |
| NT5M         | 7.14839    | 5.3688    | -0.413019  | 0.438288   |
| DNHD1        | 0.585758   | 0.796045  | 0.442546   | 0.642802   |
| CCDC79       | 0.00400599 | 0.0110861 | 1.46853    | 1          |
| EBI3         | 0.2926     | 0.191901  | -0.608564  | 1          |
| ZNF114       | 5.18054    | 4.4885    | -0.206868  | 0.744058   |
| GPATCH11     | 0.820561   | 1.0498    | 0.355438   | 0.720194   |
| BHLHE41      | 2.00386    | 2.34998   | 0.229867   | 0.739517   |
| MIPOL1       | 0.245433   | 0.226289  | -0.117165  | 1          |
| WFDC10B      | 0.137619   | 0.132958  | -0.0497017 | 1          |
| RAPGEF6      | 0.740295   | 0.937456  | 0.340651   | 0.512429   |
| RHBDL1       | 1.55833    | 2.58484   | 0.730068   | 0.26241    |
| C1QTNF4      | 0.5241     | 0.577825  | 0.14079    | 0.968157   |
| C14orf37     | 0.888035   | 0.50779   | -0.806383  | 0.114535   |
| RHOBTB1      | 0.34118    | 0.326581  | -0.0630938 | 1          |

|              |            |            |            |            |
|--------------|------------|------------|------------|------------|
| WEE1         | 18.2207    | 12.5158    | -0.54183   | 0.0519269  |
| SLC25A24     | 3.2131     | 2.74792    | -0.225623  | 0.700039   |
| ZNF599       | 0.269409   | 0.321952   | 0.257047   | 1          |
| BTG2         | 7.2971     | 8.98372    | 0.299989   | 0.496238   |
| HIC2         | 1.18471    | 1.49266    | 0.333355   | 0.557974   |
| LOC339874    | 0.157247   | 0.0333532  | -2.23714   | 1          |
| AHNAK2       | 1.15219    | 0.321713   | -1.84053   | 0.00153868 |
| VN1R2        | 0.0187161  | 0.10568    | 2.49735    | 1          |
| CREB5        | 1.91773    | 0.827602   | -1.21239   | 0.00153868 |
| THAP9-AS1    | 9.54031    | 8.99976    | -0.0841497 | 0.929057   |
| DAPP1        | 0.00367034 | 0.00348401 | -0.0751646 | 1          |
| CADPS2       | 0.471843   | 0.663434   | 0.491647   | 0.385322   |
| HSD17B14     | 19.0168    | 18.0785    | -0.0730033 | 0.942091   |
| SMAD3        | 2.90672    | 3.64221    | 0.325421   | 0.450619   |
| ZNF527       | 0.700045   | 0.752349   | 0.103954   | 0.932349   |
| LOC729852    | 1.92227    | 1.83027    | -0.070754  | 0.977857   |
| IQCH         | 0.6364     | 0.444902   | -0.516445  | 0.938755   |
| SIDT2        | 2.69451    | 2.18737    | -0.300823  | 0.902886   |
| LOC100505783 | 0.873635   | 0.261858   | -1.73825   | 0.0243026  |
| FRMD3        | 0.0222148  | 0.0369086  | 0.732439   | 1          |
| LOC283693    | 0.029106   | 0.0555337  | 0.932049   | 1          |
| C2orf88      | 0.715842   | 1.23264    | 0.784042   | 0.0464744  |
| IKZF5        | 2.66292    | 2.74134    | 0.0418719  | 0.971528   |
| SSH2         | 0.696379   | 0.823676   | 0.242203   | 0.707074   |
| MAP2K1       | 34.3431    | 39.8677    | 0.215198   | 0.665721   |
| FOXC1        | 0.0048784  | 0          | #NAME?     | 1          |
| DDB2         | 18.5799    | 12.0369    | -0.626276  | 0.0403493  |
| HOXA3        | 0.456621   | 0.441323   | -0.0491644 | 0.981659   |
| GOLGA8B      | 3.65842    | 3.67788    | 0.00765125 | 0.994734   |
| XKR9         | 0.106117   | 0.130988   | 0.303772   | 1          |
| SNAPC3       | 1.89747    | 2.16624    | 0.191115   | 0.809647   |
| SPAG6        | 0.00454425 | 0          | #NAME?     | 1          |
| CAPRIN2      | 16.0506    | 20.7435    | 0.370033   | 0.28912    |
| TRIM16L      | 3.97456    | 3.63962    | -0.127008  | 0.897319   |
| LOC100507547 | 1.94155    | 1.05868    | -0.874946  | 0.838902   |
| COBLL1       | 0.068519   | 0.0657175  | -0.0602255 | 1          |
| ELF5         | 0.00540347 | 0          | #NAME?     | 1          |
| FAM76B       | 1.25901    | 1.18801    | -0.0837442 | 0.945399   |
| FBXO42       | 5.71787    | 6.01529    | 0.0731568  | 0.939068   |
| ZNF25        | 1.24296    | 0.773808   | -0.683728  | 0.106278   |
| KRT86        | 0.0578216  | 0.113999   | 0.979348   | 1          |
| MLL5         | 3.72757    | 3.57305    | -0.0610816 | 0.946429   |
| ZNF273       | 0.828292   | 0.771374   | -0.102709  | 0.935301   |
| MYO9A        | 0.163687   | 0.155812   | -0.07114   | 1          |
| CBLN3        | 0.205407   | 0.127842   | -0.684122  | 1          |
| NREP         | 0.0313506  | 0.0290354  | -0.11068   | 1          |
| MANBA        | 7.50216    | 3.7877     | -0.985983  | 0.00153868 |
| DCUN1D2      | 2.57569    | 4.93022    | 0.936691   | 0.00380811 |
| SMIM1        | 4.04879    | 3.27149    | -0.307541  | 0.821796   |

|               |            |            |            |            |
|---------------|------------|------------|------------|------------|
| ARFGAP3       | 4.81498    | 7.5599     | 0.650838   | 0.0393841  |
| PDX1          | 1.67793    | 1.98244    | 0.240596   | 0.812379   |
| CAMK2D        | 2.86968    | 1.40723    | -1.02803   | 0.00153868 |
| CROCCP3       | 0.252925   | 0.430996   | 0.768962   | 0.224366   |
| SH3YL1        | 4.70697    | 4.15887    | -0.178607  | 0.82034    |
| DEPDC7        | 1.2241     | 2.09332    | 0.77407    | 0.0919662  |
| RAG1          | 0.0456538  | 0.0167992  | -1.44234   | 1          |
| LOC613037     | 3.39168    | 5.75216    | 0.762104   | 0.0270318  |
| FAM172A       | 1.61639    | 1.15326    | -0.487066  | 0.61081    |
| VAMP1         | 2.69388    | 5.18784    | 0.94545    | 0.070901   |
| TBX3          | 1.25864    | 2.39379    | 0.927426   | 0.00897284 |
| HOXC9         | 1.07193    | 1.30019    | 0.278513   | 0.834016   |
| PLEKHA1       | 2.77141    | 3.51144    | 0.341446   | 0.447372   |
| DUSP10        | 0.643867   | 0.307905   | -1.06428   | 0.107075   |
| ZC3H10        | 2.28096    | 3.06393    | 0.425742   | 0.456688   |
| GRIN3A        | 0.0386145  | 0.0485997  | 0.331807   | 1          |
| PAIP2B        | 1.48679    | 0.673312   | -1.14285   | 0.00153868 |
| FAM226A       | 0.34893    | 0.537531   | 0.623411   | 0.500835   |
| PALM3         | 10.0519    | 12.3811    | 0.300681   | 0.491486   |
| PHLDB2,PLCXD2 | 0.424853   | 0.395294   | -0.10404   | 0.940466   |
| METTL14       | 2.22666    | 2.37864    | 0.0952583  | 0.934861   |
| TIGD7         | 0.091636   | 0.119596   | 0.38418    | 1          |
| ACAP1         | 0.445035   | 0.418521   | -0.0886181 | 0.967343   |
| ZNF512B       | 0.0340425  | 0.0568758  | 0.740479   | 1          |
| KCNMB2-IT1    | 0.0257552  | 0          | #NAME?     | 1          |
| C22orf43      | 0.135414   | 0.154646   | 0.191584   | 1          |
| OSR2          | 7.27784    | 8.05027    | 0.145526   | 0.869966   |
| ATM           | 1.07773    | 0.896334   | -0.265889  | 0.6084     |
| LOC646329     | 16.979     | 17.5085    | 0.0443044  | 0.962687   |
| PTBP2         | 2.64326    | 2.81569    | 0.0911725  | 0.926279   |
| CUX1          | 19.092     | 18.9177    | -0.0132258 | 0.994068   |
| CEP170        | 0.00138513 | 0.00111603 | -0.311645  | 1          |
| ZNF91         | 0.76068    | 1.09347    | 0.523553   | 0.231051   |
| FABP3         | 0.0620233  | 0.146491   | 1.23993    | 1          |
| ZNF324B       | 1.94168    | 2.65446    | 0.451113   | 0.401008   |
| EFNA5         | 0.690351   | 0.789839   | 0.194228   | 0.840937   |
| DARS          | 44.9952    | 35.4558    | -0.343748  | 0.318494   |
| SLC6A10P      | 0.0271503  | 0.0320896  | 0.241135   | 1          |
| AMPD2         | 28.1837    | 40.955     | 0.539176   | 0.0525851  |
| C1orf110      | 0.122265   | 0.181465   | 0.569686   | 1          |
| HAS3          | 0.986223   | 2.30085    | 1.22218    | 0.527665   |
| FGF8          | 0.789473   | 1.13477    | 0.523438   | 0.679486   |
| PTPRF         | 17.6237    | 19.7177    | 0.161973   | 0.765759   |
| C5orf30       | 3.51875    | 5.0944     | 0.53385    | 0.120863   |
| LHPP          | 7.1185     | 7.70243    | 0.113739   | 0.908661   |
| NUDT12        | 2.39556    | 1.58974    | -0.591569  | 0.117237   |
| PPARA         | 0.803047   | 1.0609     | 0.401727   | 0.369226   |
| FLJ42709      | 0.315257   | 0.345578   | 0.132481   | 1          |
| AK8           | 0.794395   | 0.406936   | -0.965054  | 0.173509   |

|              |            |           |            |            |
|--------------|------------|-----------|------------|------------|
| ARHGDIG      | 0.409058   | 0.0397638 | -3.36278   | 0.645558   |
| FGFR4        | 9.9864     | 12.1207   | 0.279437   | 0.549024   |
| MAN2B1       | 20.3402    | 22.2567   | 0.129901   | 0.844936   |
| ZNF514       | 0.979651   | 1.17659   | 0.264271   | 0.739148   |
| OPRL1        | 1.64798    | 0.769128  | -1.0994    | 0.0137404  |
| BCKDHA       | 82.6133    | 68.8072   | -0.263814  | 0.542635   |
| JSRP1        | 24.355     | 20.0061   | -0.283778  | 0.613181   |
| SEMA4B       | 9.58803    | 13.7439   | 0.519481   | 0.0809491  |
| IDH2         | 41.9219    | 38.7505   | -0.113488  | 0.871917   |
| ZNF493       | 0.783031   | 0.973827  | 0.314596   | 0.784692   |
| LOC400752    | 0.564482   | 0.330886  | -0.77059   | 0.447942   |
| SLC25A30     | 0.506499   | 0.938517  | 0.889825   | 0.0504359  |
| TSPAN5       | 2.91712    | 2.013     | -0.535197  | 0.194509   |
| PLEKHH1      | 1.57682    | 1.11695   | -0.497451  | 0.665343   |
| ZNF563       | 0.676146   | 0.718915  | 0.0884863  | 0.954167   |
| EPOR         | 4.53492    | 4.31698   | -0.0710534 | 0.952184   |
| IFLTD1       | 0.00915721 | 0.0156227 | 0.770666   | 1          |
| ACCS         | 1.15149    | 0.628005  | -0.874651  | 0.161367   |
| LOC100294362 | 0.0979988  | 0.27289   | 1.47748    | 1          |
| ANKRD50      | 0.712241   | 0.718428  | 0.0124784  | 0.993604   |
| EID2B        | 1.73133    | 2.38731   | 0.463503   | 0.444145   |
| IPMK         | 1.36463    | 1.47493   | 0.112135   | 0.899998   |
| MLL          | 0.704973   | 0.780464  | 0.146764   | 0.848628   |
| MYOM1        | 0.094521   | 0.049628  | -0.929482  | 1          |
| LOC283335    | 0.353895   | 0.364953  | 0.0443869  | 1          |
| TOX2         | 8.52419    | 3.36868   | -1.33938   | 0.00153868 |
| ZNF226       | 3.62654    | 3.94418   | 0.121133   | 0.933717   |
| MYO1A        | 0.0420271  | 0.0110319 | -1.92964   | 1          |
| ABRA         | 0.00380706 | 0.0144522 | 1.92454    | 1          |
| REPS2        | 0.274726   | 0.122999  | -1.15935   | 1          |
| RALGDS       | 36.7076    | 40.9696   | 0.158473   | 0.779038   |
| CACNA2D2     | 0.134653   | 0.136352  | 0.0180893  | 1          |
| THBS3        | 1.54658    | 0.929543  | -0.734484  | 0.128429   |
| HAS2         | 0.263493   | 0.408987  | 0.634288   | 0.40127    |
| SLC25A41     | 0.910932   | 1.14119   | 0.325121   | 0.782409   |
| C17orf58     | 13.084     | 11.1005   | -0.237176  | 0.666852   |
| FGD6         | 0.0633564  | 0.0512741 | -0.30526   | 1          |
| FAM110A      | 7.55904    | 8.31855   | 0.138128   | 0.886331   |
| PDXDC2P      | 1.95924    | 2.63093   | 0.425277   | 0.347688   |
| ZNF554       | 0.976312   | 0.613695  | -0.669821  | 0.203478   |
| LOC645212    | 3.29451    | 3.15397   | -0.0628949 | 0.961248   |
| ZNF431       | 1.52908    | 0.891635  | -0.778141  | 0.0410754  |
| LGALS8-AS1   | 0.427797   | 0.210523  | -1.02295   | 0.880021   |
| MAP1LC3A     | 0.0850024  | 0.0829829 | -0.0346902 | 1          |
| WNT4         | 0.265531   | 0.14612   | -0.861726  | 1          |
| ROR1         | 0.0479701  | 0.0777374 | 0.696473   | 1          |
| CALML4       | 1.49211    | 2.93632   | 0.976657   | 0.00153868 |
| PRELID2      | 4.78849    | 2.55223   | -0.907814  | 0.00820276 |
| NAB1         | 3.54216    | 3.82495   | 0.11081    | 0.886468   |



|           |           |           |            |            |
|-----------|-----------|-----------|------------|------------|
| LOC284751 | 0.267078  | 0.0764678 | -1.80434   | 1          |
| THAP9     | 0.680288  | 0.292847  | -1.216     | 0.400688   |
| C10orf137 | 1.29788   | 3.15092   | 1.27962    | 0.00153868 |
| ZNF398    | 2.27799   | 3.60187   | 0.660986   | 0.0243026  |
| CHST13    | 0.476886  | 0.104593  | -2.18885   | 0.254182   |
| ZBTB6     | 2.22432   | 2.86113   | 0.363219   | 0.39733    |
| DMBT1     | 0.0479596 | 0.0186724 | -1.36091   | 1          |
| ANKZF1    | 29.449    | 22.6986   | -0.375616  | 0.267972   |
| ZNF184    | 1.46002   | 1.53801   | 0.0750774  | 0.952184   |
| DBP       | 10.8965   | 11.2459   | 0.0455363  | 0.971768   |
| DGKH      | 0.235419  | 0.253245  | 0.105299   | 1          |
| TOB1      | 8.21958   | 9.72007   | 0.241904   | 0.654907   |
| CLYBL     | 0.459975  | 0.365055  | -0.333442  | 0.716797   |
| CBR3-AS1  | 0.565303  | 0.339032  | -0.737603  | 0.872122   |
| MTMR3     | 3.25149   | 2.61949   | -0.311814  | 0.436615   |
| LINC00853 | 1.29512   | 0.23856   | -2.44067   | 0.0955341  |
| FAM63B    | 0.315904  | 0.145591  | -1.11756   | 1          |
| EFNA1     | 14.7488   | 24.0651   | 0.706342   | 0.0143403  |
| HCFC1R1   | 263.995   | 286.811   | 0.119586   | 0.922274   |
| GCHFR     | 52.8271   | 61.9649   | 0.230172   | 0.65944    |
| CPQ       | 5.84182   | 5.02371   | -0.217664  | 0.741015   |
| BTBD8     | 0.0581805 | 0.0572823 | -0.0224474 | 1          |
| TCP10L    | 0.486551  | 1.0861    | 1.1585     | 0.0259174  |
| EMID1     | 6.31088   | 6.20893   | -0.0234953 | 0.985712   |
| SMG1P1    | 0.0479615 | 0.0542034 | 0.176507   | 1          |
| PLCE1     | 0.0415487 | 0.0316897 | -0.390789  | 1          |
| ZNF767    | 1.6111    | 2.85952   | 0.827732   | 0.0403493  |
| ZBTB5     | 1.92678   | 2.00691   | 0.058785   | 0.960032   |
| AKAP5     | 0.0946776 | 0.153098  | 0.693358   | 1          |
| ZNF136    | 0.869073  | 0.703155  | -0.305635  | 0.709707   |
| MDH1B     | 0.209217  | 0.0600546 | -1.80065   | 1          |
| TMEM68    | 6.68425   | 6.33444   | -0.0775486 | 0.96692    |
| FAM117A   | 8.3075    | 7.10492   | -0.225596  | 0.700524   |
| ANKRD33B  | 1.23199   | 1.36278   | 0.145558   | 0.85718    |
| PAN3-AS1  | 0.573687  | 1.24627   | 1.11928    | 0.623292   |
| TEP1      | 0.839799  | 0.805886  | -0.0594694 | 0.960417   |
| STARD5    | 1.10895   | 1.18015   | 0.0897829  | 0.964843   |
| MARCH1    | 0.120287  | 0.161036  | 0.420896   | 1          |
| RHCE      | 0.323578  | 0.191967  | -0.753258  | 1          |
| PTGER2    | 0.017615  | 0.0051449 | -1.77559   | 1          |
| EPAS1     | 1.8899    | 1.21899   | -0.632621  | 0.114327   |
| OCM       | 0.131529  | 0.105147  | -0.322968  | 1          |
| MLK7-AS1  | 0.0317509 | 0.0345418 | 0.121545   | 1          |
| GABBR1    | 3.01275   | 2.93455   | -0.0379413 | 0.97562    |
| GSDMB     | 1.28856   | 1.68732   | 0.388971   | 0.628025   |
| MED23     | 1.53828   | 1.32948   | -0.210454  | 0.767606   |
| CYP2W1    | 0.0362385 | 0         | #NAME?     | 1          |
| GPR135    | 0.226315  | 0.569979  | 1.33258    | 0.319187   |
| ZNF764    | 2.55078   | 4.1966    | 0.718286   | 0.0657182  |

|               |            |            |            |            |
|---------------|------------|------------|------------|------------|
| ACBD7         | 1.19339    | 2.2987     | 0.94575    | 0.0117316  |
| GK5           | 0.531762   | 0.58212    | 0.130534   | 0.88987    |
| PRSS36        | 0.398688   | 0.270382   | -0.560261  | 0.642802   |
| CEACAM8       | 0.00526208 | 0.0128137  | 1.28399    | 1          |
| CDH15         | 0.578925   | 0.508413   | -0.187375  | 0.916191   |
| SPAG5-AS1     | 0.295398   | 0.078108   | -1.91912   | 1          |
| FNIP1         | 4.54506    | 2.74104    | -0.729575  | 0.00572929 |
| RAB13         | 77.2685    | 89.7709    | 0.216368   | 0.635064   |
| RNF2          | 7.18441    | 7.64922    | 0.0904437  | 0.91015    |
| SP6           | 1.80989    | 2.33179    | 0.365532   | 0.515101   |
| TARBP1        | 3.4129     | 2.83396    | -0.268179  | 0.597911   |
| PPP1R32       | 0.617177   | 0.45223    | -0.448629  | 0.737085   |
| NSUN5P2       | 5.09356    | 7.50142    | 0.558488   | 0.786286   |
| HPCAL4        | 0.749414   | 0.603921   | -0.311402  | 0.70639    |
| ACTR1B        | 64.257     | 54.7644    | -0.230615  | 0.622936   |
| BMPR2         | 0.583739   | 0.517101   | -0.174875  | 0.821453   |
| LOC100506394  | 0.0985948  | 0.103847   | 0.0748732  | 1          |
| RLN1          | 0.0143998  | 0.0128176  | -0.167928  | 1          |
| PUS10         | 0.349417   | 0.264725   | -0.400454  | 1          |
| AKR7L         | 1.55523    | 2.40274    | 0.627552   | 0.169723   |
| CBR3          | 12.9145    | 11.794     | -0.13094   | 0.883779   |
| FAM106A       | 0.00535245 | 0.0051038  | -0.0686258 | 1          |
| LOC283070     | 6.16816    | 5.39354    | -0.193607  | 0.769834   |
| EMILIN3       | 2.37339    | 2.30597    | -0.0415755 | 0.981441   |
| ZNF253        | 1.06046    | 1.10979    | 0.0655997  | 0.96692    |
| ZKSCAN7       | 0.470427   | 0.616752   | 0.390717   | 0.674634   |
| DIP2A-IT1     | 0.0373687  | 0.0890843  | 1.25334    | 1          |
| TJP2          | 3.55017    | 2.0456     | -0.795368  | 0.0111246  |
| SLX1B,SULT1A4 | 0.503829   | 0.534768   | 0.0859801  | 0.97717    |
| CEP70         | 2.24813    | 1.76561    | -0.348561  | 0.51814    |
| LAMA4         | 0.00145473 | 0          | #NAME?     | 1          |
| WHAMMP2       | 0.0271954  | 0.0222285  | -0.290954  | 1          |
| RNF169        | 0.991738   | 0.666396   | -0.573579  | 0.661616   |
| MEGF11        | 0.0159328  | 0.0215255  | 0.434049   | 1          |
| FAM110C       | 0.858215   | 0.971338   | 0.178636   | 0.864177   |
| CRKL          | 9.39536    | 12.6316    | 0.427017   | 0.166246   |
| LINC00161     | 0.0264986  | 0          | #NAME?     | 1          |
| VCL           | 9.37604    | 8.68883    | -0.109817  | 0.87748    |
| ADAMTS13      | 2.90644    | 1.6699     | -0.799492  | 0.815365   |
| NOMO2         | 0.649824   | 0.804974   | 0.308894   | 0.715755   |
| TUBB6         | 3.40422    | 2.8051     | -0.279272  | 0.730925   |
| PEX2          | 5.67908    | 5.04792    | -0.169967  | 0.780068   |
| LINC00115     | 1.21838    | 2.74685    | 1.17281    | 0.0285456  |
| FGF17         | 2.17755    | 3.50186    | 0.685416   | 0.298627   |
| SLC44A3       | 0.533535   | 0.392037   | -0.444594  | 0.628025   |
| GAPDH         | 6235.84    | 6585.6     | 0.0787318  | 0.947923   |
| SHANK3        | 4.79609    | 8.07682    | 0.75193    | 0.00380811 |
| LINC00511     | 0.0216616  | 0.00896615 | -1.27258   | 1          |
| SERPINF1      | 0.214903   | 0.395021   | 0.878244   | 0.473009   |

|              |            |           |            |            |
|--------------|------------|-----------|------------|------------|
| ZNF568       | 0.0632038  | 0.0211462 | -1.57961   | 1          |
| FPR3         | 0.0135052  | 0.0269433 | 0.996406   | 1          |
| LOC100507373 | 0.375369   | 0.535774  | 0.513317   | 0.950064   |
| NR4A2        | 0.332434   | 0.578038  | 0.798094   | 0.19932    |
| SKIL         | 0.956207   | 0.679127  | -0.493642  | 0.264777   |
| KIF27        | 0.278042   | 0.335095  | 0.26927    | 1          |
| CCDC38       | 0.00559734 | 0         | #NAME?     | 1          |
| MAPRE3       | 0.705564   | 0.864493  | 0.293076   | 0.818547   |
| TRAPPC9      | 6.45146    | 4.76051   | -0.43851   | 0.210405   |
| FAM219A      | 6.44834    | 6.94626   | 0.10731    | 0.894391   |
| MYO1B        | 7.73193    | 8.53456   | 0.142487   | 0.8146     |
| C4orf22      | 1.78863    | 0.902299  | -0.987176  | 0.147823   |
| DACT3        | 2.0439     | 2.14029   | 0.0664799  | 0.988327   |
| ARSK         | 0.762706   | 0.847115  | 0.151431   | 0.899607   |
| ARHGAP18     | 1.03646    | 0.328753  | -1.65659   | 0.00153868 |
| LINC00649    | 0.00456997 | 0.0185322 | 2.01977    | 1          |
| CCDC96       | 0.507188   | 0.88505   | 0.803239   | 0.943284   |
| RFESD        | 1.27465    | 0.836773  | -0.607196  | 0.32964    |
| C20orf196    | 1.4428     | 2.54894   | 0.821022   | 0.141482   |
| ZNF585A      | 0.666732   | 0.566946  | -0.233897  | 0.804859   |
| NFIL3        | 20.3645    | 16.7669   | -0.280444  | 0.495123   |
| LOC100506123 | 1.57029    | 1.50618   | -0.0601414 | 0.96513    |
| PTOV1        | 46.7956    | 65.1618   | 0.477655   | 0.118979   |
| MAML3        | 0.659819   | 0.358213  | -0.881252  | 0.614106   |
| FSTL1        | 0.0148617  | 0.0308365 | 1.05304    | 1          |
| ZNF391       | 0.458291   | 0.414218  | -0.145874  | 0.941934   |
| ZSWIM5       | 0.163975   | 0.0417089 | -1.97505   | 1          |
| WDR60        | 1.80363    | 1.70404   | -0.0819426 | 0.943051   |
| NBPF14       | 2.07487    | 2.63552   | 0.345065   | 0.473009   |
| ZNF337       | 3.02207    | 2.9596    | -0.0301347 | 0.978818   |
| HMGCS1       | 1.96079    | 4.33702   | 1.14527    | 0.00153868 |
| ABCA10,ABCA5 | 0.362437   | 0.384337  | 0.0846409  | 0.949      |
| B9D2         | 5.94883    | 7.41683   | 0.318197   | 0.756508   |
| AMN1         | 0.83188    | 0.625034  | -0.412441  | 0.638482   |
| RASA4        | 3.86437    | 2.65385   | -0.542144  | 0.1252     |
| PRPSAP1      | 18.6385    | 21.9184   | 0.233857   | 0.61305    |
| LRRC69       | 0.10204    | 0.196146  | 0.942795   | 1          |
| CCDC102A     | 4.06206    | 4.5401    | 0.160512   | 0.869513   |
| RRM2B        | 6.89383    | 8.38315   | 0.282188   | 0.50153    |
| SLC2A11      | 2.1975     | 2.67569   | 0.284043   | 0.707049   |
| TGFB111      | 42.9905    | 29.6122   | -0.537827  | 0.0663805  |
| PGAP3        | 1.26472    | 1.3964    | 0.14289    | 0.912937   |
| DDHD2        | 2.79256    | 2.76872   | -0.0123712 | 0.992529   |
| MLL3         | 1.04624    | 0.991927  | -0.0769121 | 0.933523   |
| PPCS         | 31.1459    | 28.7455   | -0.115707  | 0.8723     |
| SRRM1        | 14.2033    | 23.3612   | 0.717884   | 0.00380811 |
| ZNF799       | 1.30665    | 1.72429   | 0.400124   | 0.500058   |
| TP53INP1     | 1.54762    | 0.898511  | -0.78444   | 0.0308509  |
| C14orf28     | 0.879517   | 0.529574  | -0.731878  | 0.180946   |

|                 |            |           |             |           |
|-----------------|------------|-----------|-------------|-----------|
| C2orf72         | 4.97654    | 4.3153    | -0.205682   | 0.742994  |
| CDKN2A          | 1.95806    | 1.49536   | -0.388934   | 0.72151   |
| GOLGB1          | 2.02714    | 2.32281   | 0.196425    | 0.73115   |
| SLC44A1         | 8.33533    | 7.75222   | -0.10463    | 0.885904  |
| LMO7            | 1.91528    | 1.27056   | -0.592087   | 0.0695357 |
| RUFY2           | 1.46906    | 1.4188    | -0.0502217  | 0.968712  |
| CCDC19          | 0.0965413  | 0.200769  | 1.05632     | 1         |
| TBC1D9B         | 22.3239    | 25.7288   | 0.204797    | 0.673957  |
| KBTBD3          | 0.472115   | 0.325039  | -0.538525   | 0.896541  |
| LOC100216546    | 0.158553   | 0.179386  | 0.178099    | 1         |
| TMOD1           | 0.792451   | 0.569779  | -0.475918   | 0.974348  |
| BTBD11          | 0.310884   | 0.362045  | 0.219792    | 1         |
| IRF6            | 0.00267588 | 0.0025396 | -0.0754121  | 1         |
| ZNF564          | 1.4375     | 1.75627   | 0.288952    | 0.663419  |
| LOC541473       | 0.475439   | 1.07549   | 1.17766     | 0.219177  |
| PRKCG           | 3.94276    | 2.69536   | -0.548728   | 0.1987    |
| BCAM            | 27.1731    | 29.2157   | 0.104563    | 0.890583  |
| LINC00636       | 0.012742   | 0         | #NAME?      | 1         |
| TIE1            | 0.0515823  | 0.0746633 | 0.533522    | 1         |
| GKAP1           | 1.62868    | 1.66714   | 0.0336701   | 0.982229  |
| ZIC2            | 3.96804    | 5.3374    | 0.427711    | 0.350684  |
| HCN3            | 0.489352   | 0.904627  | 0.886452    | 0.194085  |
| KIAA1324L       | 0.216896   | 0.128746  | -0.752478   | 1         |
| HTR2B           | 0.0430045  | 0.136038  | 1.66145     | 1         |
| SHC1            | 122.051    | 149.932   | 0.296822    | 0.445041  |
| FLJ39639        | 0.173084   | 0.207683  | 0.262908    | 1         |
| RUNDC3A         | 0.61767    | 0.825696  | 0.418775    | 0.718147  |
| NIPSNAP1        | 57.83      | 45.6875   | -0.34002    | 0.344644  |
| ENPEP           | 0.0207004  | 0.0105381 | -0.974044   | 1         |
| TFAP2A          | 2.46412    | 3.79831   | 0.624285    | 0.104245  |
| PYGL            | 44.6607    | 44.4471   | -0.00691638 | 0.994734  |
| MXI1            | 9.78635    | 8.80823   | -0.151919   | 0.81114   |
| TIA1            | 5.57727    | 6.36264   | 0.190068    | 0.726456  |
| SPAG16          | 5.46082    | 5.06564   | -0.108375   | 0.917701  |
| RAB33A          | 0.143284   | 0.0369924 | -1.95357    | 1         |
| LOC339666       | 0.0928807  | 0.122528  | 0.399662    | 1         |
| LOC400680       | 0.392145   | 0.561227  | 0.517198    | 0.432985  |
| VMAC            | 1.02103    | 0.481586  | -1.08416    | 0.156345  |
| ANKRD9          | 13.1552    | 12.3322   | -0.0932046  | 0.937886  |
| PRKRA           | 16.1015    | 22.019    | 0.451554    | 0.349617  |
| PGAM1           | 360.284    | 490.034   | 0.443749    | 0.167459  |
| ZNF816,ZNF816-2 | 2.41844    | 3.10878   | 0.36227     | 0.490657  |
| EXOC4           | 13.3326    | 9.70416   | -0.458279   | 0.123524  |
| ZNF552          | 1.49081    | 1.94811   | 0.385976    | 0.513296  |
| ZNF107          | 0.550012   | 0.842379  | 0.615005    | 0.18082   |
| ZNF143          | 3.03198    | 3.93988   | 0.37789     | 0.373973  |
| LGALS1          | 1567.8     | 1735.74   | 0.146807    | 0.813368  |
| SOX4            | 6.28962    | 7.54528   | 0.262602    | 0.566752  |
| GRM8            | 0.00314096 | 0         | #NAME?      | 1         |

|              |           |           |            |            |
|--------------|-----------|-----------|------------|------------|
| CUL7         | 4.50101   | 4.21731   | -0.0939243 | 0.913875   |
| ING4         | 4.85606   | 4.02197   | -0.271883  | 0.711466   |
| GLB1L        | 0.625707  | 0.544222  | -0.201291  | 0.880552   |
| RRAGA        | 50.1067   | 63.8575   | 0.349854   | 0.308398   |
| TMEM27       | 0.337406  | 0.0930765 | -1.858     | 1          |
| ANGPTL4      | 86.0816   | 102.195   | 0.247542   | 0.554964   |
| ARL4C        | 0.100464  | 0.0908274 | -0.145479  | 1          |
| SLC25A4      | 12.0435   | 17.7554   | 0.559999   | 0.0438785  |
| PPP1R21      | 2.84984   | 3.30685   | 0.214577   | 0.73154    |
| SMAD4        | 3.23009   | 3.20598   | -0.0108088 | 0.994058   |
| ZNF512       | 3.1005    | 6.19071   | 0.997602   | 0.00153868 |
| ZNF350       | 2.1529    | 2.00847   | -0.100188  | 0.928193   |
| HBE1         | 97.9346   | 130.857   | 0.418102   | 0.171813   |
| SLC37A2      | 0.244185  | 0.155682  | -0.649368  | 1          |
| PARP11       | 0.8648    | 0.399562  | -1.11394   | 0.0181648  |
| TGM2         | 113.922   | 133.405   | 0.227769   | 0.630091   |
| RAB2B        | 2.8938    | 3.38663   | 0.226886   | 0.726353   |
| C16orf3      | 0.0966758 | 0.0164415 | -2.55581   | 1          |
| RICTOR       | 1.1903    | 0.922801  | -0.36724   | 0.405098   |
| NPIPL3       | 2.87134   | 3.57669   | 0.316898   | 0.584562   |
| RASL11A      | 2.34897   | 7.79277   | 1.73011    | 0.00153868 |
| PPFIA4       | 0.0805366 | 0.111945  | 0.475075   | 1          |
| SDC4         | 44.4361   | 44.7717   | 0.0108546  | 0.992823   |
| SLC25A5-AS1  | 0.256782  | 0.192888  | -0.41278   | 1          |
| DAW1         | 0.0210329 | 0.0062894 | -1.74166   | 1          |
| ZNF680       | 1.1723    | 1.22038   | 0.0579939  | 0.96734    |
| HCG4B        | 0.327851  | 0.25905   | -0.339809  | 1          |
| TTC3         | 2.12023   | 2.96358   | 0.483119   | 0.136653   |
| METTL21B     | 2.55689   | 3.06447   | 0.261249   | 0.694591   |
| ASS1         | 102.504   | 97.392    | -0.0738025 | 0.93064    |
| MTTP         | 0.019471  | 0         | #NAME?     | 1          |
| PATL2        | 0.179952  | 0.0754425 | -1.25417   | 1          |
| KGFLP2       | 0.123909  | 0.111595  | -0.151006  | 1          |
| LRRC73       | 2.25555   | 1.84708   | -0.288231  | 0.783261   |
| MTMR7        | 0.81521   | 1.05396   | 0.37058    | 0.774294   |
| EHD2         | 6.03273   | 5.10022   | -0.24225   | 0.681816   |
| MCF2L2       | 0.105346  | 0.0513158 | -1.03766   | 1          |
| ADH6         | 0.0155682 | 0         | #NAME?     | 1          |
| ACSF2        | 5.05222   | 5.09094   | 0.0110149  | 0.994068   |
| FGFR1OP2     | 6.33011   | 7.7947    | 0.300263   | 0.698989   |
| LOC253039    | 1.87031   | 1.09891   | -0.767205  | 0.0451232  |
| GNG3         | 0.137672  | 0.0984235 | -0.48416   | 1          |
| TBC1D3       | 0.152221  | 0.154828  | 0.024492   | 1          |
| LOC100506714 | 1.13237   | 1.22846   | 0.117501   | 0.945887   |
| ERCC2        | 19.1369   | 19.543    | 0.0302974  | 0.982723   |
| UBR3         | 1.44552   | 2.4997    | 0.790171   | 0.00478151 |
| LOC100506599 | 0.571578  | 0.693658  | 0.279275   | 0.785826   |
| PCCA         | 1.09306   | 0.882726  | -0.30833   | 0.787214   |
| FAM228B      | 0.962242  | 0.277359  | -1.79465   | 0.0111246  |

|              |            |           |            |            |
|--------------|------------|-----------|------------|------------|
| POM121L10P   | 0.0130689  | 0.0475871 | 1.86444    | 1          |
| SGSM2        | 7.27235    | 8.32957   | 0.195821   | 0.720882   |
| KANSL2       | 8.86706    | 9.91977   | 0.161852   | 0.795289   |
| SERGEF       | 15.469     | 16.0257   | 0.0510074  | 0.961236   |
| TNFRSF13C    | 1.14042    | 0.621634  | -0.875431  | 0.438793   |
| ZNF404       | 1.7567     | 1.58962   | -0.144185  | 0.905545   |
| JAK3         | 1.03536    | 0.659375  | -0.650965  | 0.200395   |
| LOC220729    | 0.869862   | 2.0805    | 1.25807    | 0.00820276 |
| OXCT2        | 1.09647    | 2.36306   | 1.10779    | 0.838902   |
| ZYG11B       | 1.35291    | 1.4804    | 0.129923   | 0.876392   |
| HLA-F-AS1    | 0.901416   | 2.20403   | 1.28988    | 0.688049   |
| CYP4F11      | 0.101149   | 0.0336443 | -1.58804   | 1          |
| JMJD1C-AS1   | 0.4074     | 0.304216  | -0.421351  | 0.971282   |
| CAT          | 5.68631    | 4.72402   | -0.267477  | 0.621348   |
| ZNF529       | 1.32667    | 1.49436   | 0.171724   | 0.84703    |
| SUV420H2     | 6.26679    | 6.92994   | 0.145116   | 0.873059   |
| TRAF5        | 3.2561     | 3.62989   | 0.156783   | 0.820487   |
| KLRAP1       | 0.149235   | 0.162336  | 0.121403   | 1          |
| S100A13      | 396.969    | 578.774   | 0.543974   | 0.226046   |
| PI4KAP1      | 9.39831    | 11.6852   | 0.314216   | 0.485006   |
| SERPINA10    | 0.00542199 | 0.0125719 | 1.21331    | 1          |
| ARHGEF17     | 2.51297    | 1.69368   | -0.569237  | 0.106773   |
| WFDC13       | 0.00881938 | 0         | #NAME?     | 1          |
| FAM201A      | 3.10284    | 1.93859   | -0.678582  | 0.20739    |
| YEATS2       | 8.91995    | 7.3273    | -0.283754  | 0.472128   |
| APLF         | 0.235036   | 0.178585  | -0.39627   | 1          |
| GM2A         | 8.7238     | 6.23843   | -0.483774  | 0.127176   |
| PFKL         | 49.2327    | 45.3035   | -0.119993  | 0.864177   |
| AK3          | 6.29563    | 6.55779   | 0.0588602  | 0.950862   |
| GYS1         | 43.7584    | 33.5088   | -0.38502   | 0.271583   |
| MBIP         | 3.98341    | 3.92012   | -0.0231059 | 0.985492   |
| NECAB1       | 0.0358954  | 0.0421492 | 0.231708   | 1          |
| LRRC28       | 3.87419    | 3.02307   | -0.357882  | 0.59463    |
| NF1          | 0.781981   | 0.735638  | -0.0881373 | 0.945399   |
| RASL11B      | 0.00719368 | 0.0196648 | 1.45081    | 1          |
| SAV1         | 10.4247    | 7.72738   | -0.431961  | 0.178671   |
| TGFBR2       | 0.776532   | 0.758457  | -0.0339773 | 0.981543   |
| C4orf29      | 0.646427   | 0.589506  | -0.13298   | 0.967978   |
| ADIRF,AGAP11 | 39.8153    | 48.1142   | 0.27314    | 0.592657   |
| TBC1D12      | 1.16123    | 1.02053   | -0.186344  | 0.821878   |
| DST          | 0.864391   | 0.626491  | -0.464391  | 0.200495   |
| GULP1        | 1.65988    | 1.27362   | -0.382137  | 0.495681   |
| ZFP1         | 1.63394    | 2.29894   | 0.492618   | 0.237263   |
| IRX5         | 0.357751   | 0.295094  | -0.277785  | 1          |
| CCNI         | 48.349     | 31.5629   | -0.615256  | 0.0198871  |
| SSFA2        | 5.11377    | 5.87544   | 0.200309   | 0.704317   |
| LOC100289341 | 1.4887     | 1.87321   | 0.331454   | 0.726456   |
| KIAA1217     | 1.90515    | 1.03808   | -0.875979  | 0.0111246  |
| GP5          | 0.00539846 | 0         | #NAME?     | 1          |

|              |            |           |            |            |
|--------------|------------|-----------|------------|------------|
| AMOTL1       | 0.0511707  | 0.0194888 | -1.39267   | 1          |
| ENO1         | 1755.56    | 2271.92   | 0.371981   | 0.357575   |
| WDR96        | 0.0489973  | 0.0172434 | -1.50666   | 1          |
| F2R          | 0.626187   | 0.289767  | -1.1117    | 0.0496513  |
| TANC2        | 1.31612    | 0.904111  | -0.541724  | 0.132824   |
| ABCB7        | 11.4676    | 8.4787    | -0.435646  | 0.192807   |
| S100A1       | 0.423419   | 0.299061  | -0.501644  | 0.952429   |
| LOC440354    | 0.206125   | 0.292324  | 0.504045   | 1          |
| BOD1         | 27.9872    | 28.2423   | 0.0130902  | 0.991167   |
| AGPHD1       | 2.11939    | 1.6541    | -0.357606  | 0.734343   |
| FAM126B      | 0.904443   | 0.997667  | 0.14153    | 0.861774   |
| CCDC112      | 1.91052    | 1.58415   | -0.270249  | 0.702417   |
| SCARF2       | 1.22858    | 1.00893   | -0.28416   | 0.823091   |
| PLEKHG4B     | 0.00354093 | 0.0097194 | 1.45674    | 1          |
| CLEC18B      | 0.154852   | 0.142748  | -0.117422  | 1          |
| NEK2         | 8.41667    | 6.61377   | -0.347776  | 0.406256   |
| GAS6         | 18.9071    | 23.5482   | 0.316694   | 0.434883   |
| LRRCC1       | 1.2646     | 1.20607   | -0.0683749 | 0.956369   |
| MGAT4A       | 0.717046   | 0.842022  | 0.231792   | 0.79728    |
| FEM1B        | 1.16555    | 0.883789  | -0.399232  | 0.599713   |
| FAM154B      | 0.0679806  | 0.0775204 | 0.189452   | 1          |
| SCAI         | 0.884792   | 0.768776  | -0.202774  | 0.760753   |
| CMC4,MTCP1   | 11.6613    | 11.3585   | -0.0379468 | 0.978763   |
| SEPT4        | 0.273405   | 0.162662  | -0.749161  | 1          |
| PPP1R3D      | 1.46276    | 1.82105   | 0.316085   | 0.800869   |
| TMEM221      | 0.162043   | 0.250864  | 0.630525   | 1          |
| PQLC3        | 7.04807    | 4.71955   | -0.578579  | 0.112663   |
| FBN1         | 0.0136626  | 0.0131021 | -0.0604303 | 1          |
| LOC100288198 | 0.396967   | 0.334198  | -0.248314  | 0.967343   |
| PWWP2A       | 4.40681    | 5.15032   | 0.224928   | 0.678939   |
| DLGAP1-AS1   | 1.75974    | 0.960486  | -0.873529  | 0.197245   |
| FAM227B      | 0.42584    | 0.261835  | -0.701655  | 0.883229   |
| SDHAP1       | 0.819869   | 1.06785   | 0.381246   | 0.642802   |
| ANXA4        | 15.9848    | 12.8046   | -0.320042  | 0.416068   |
| LOC100302640 | 0.310035   | 0.0672524 | -2.20477   | 1          |
| GBAS         | 23.6776    | 22.332    | -0.0844093 | 0.915911   |
| SV2A         | 0.0342516  | 0.0555469 | 0.697534   | 1          |
| DNAAF1       | 0.015374   | 0.0175669 | 0.192366   | 1          |
| DHPS         | 36.8471    | 31.7975   | -0.212639  | 0.910254   |
| GNAI1        | 2.78182    | 2.86884   | 0.0444386  | 0.970533   |
| TTC38        | 13.7101    | 23.7757   | 0.79425    | 0.00153868 |
| CPNE7        | 34.2766    | 48.1356   | 0.489878   | 0.0897828  |
| CLIP3        | 0.263734   | 0.166248  | -0.665744  | 1          |
| STAP2        | 13.948     | 11.3554   | -0.296684  | 0.557638   |
| LINC00263    | 10.7805    | 4.96596   | -1.11827   | 0.00380811 |
| TGFB3        | 1.43458    | 1.23654   | -0.214321  | 0.818547   |
| HOXB5        | 1.68429    | 2.89962   | 0.783721   | 0.460591   |
| MNF1         | 22.8307    | 33.5104   | 0.553631   | 0.0653297  |
| SBF2         | 1.68902    | 0.998741  | -0.758002  | 0.0824065  |

|              |            |          |            |            |
|--------------|------------|----------|------------|------------|
| ZC4H2        | 3.92698    | 3.06343  | -0.358271  | 0.435859   |
| EDARADD      | 0.461156   | 0.591276 | 0.358579   | 0.709571   |
| TPPP         | 1.0677     | 0.817948 | -0.38443   | 0.5266     |
| PARD6G-AS1   | 0.190886   | 0.713099 | 1.90139    | 0.628907   |
| KDM2A        | 8.42151    | 11.1792  | 0.408672   | 0.199011   |
| LOC100505839 | 0.012412   | 0.016127 | 0.377742   | 1          |
| MED15        | 16.0455    | 12.5386  | -0.3558    | 0.336899   |
| RAG2         | 0.0108363  | 0        | #NAME?     | 1          |
| GNAZ         | 3.12952    | 3.65275  | 0.22304    | 0.755955   |
| LOC731424    | 0.00360664 | 0        | #NAME?     | 1          |
| QPCTL        | 13.3574    | 13.0064  | -0.0384143 | 0.970994   |
| ZNF556       | 1.20361    | 1.99456  | 0.728705   | 0.161007   |
| MECP2        | 21.632     | 21.1846  | -0.0301475 | 0.978818   |
| BEGAIN       | 3.22241    | 4.96511  | 0.623685   | 0.159688   |
| CLK2         | 12.482     | 15.1154  | 0.276162   | 0.529352   |
| FDXACB1      | 1.25547    | 2.16879  | 0.78866    | 0.301221   |
| CAP2         | 3.59876    | 4.60482  | 0.355644   | 0.413603   |
| KANSL1L      | 2.49773    | 3.59088  | 0.523716   | 0.247212   |
| FRG1B        | 6.26209    | 3.5329   | -0.82579   | 0.0388971  |
| PDIK1L       | 1.79371    | 1.83392  | 0.0319825  | 0.978818   |
| SLC23A2      | 0.862939   | 1.02322  | 0.24578    | 0.727387   |
| IAH1         | 33.8725    | 27.6307  | -0.293842  | 0.50556    |
| MAPKAPK5-AS1 | 7.48267    | 8.32466  | 0.153839   | 0.915911   |
| FAM168A      | 1.125      | 0.831736 | -0.435722  | 0.630399   |
| VASN         | 1.81777    | 2.58176  | 0.50619    | 0.907039   |
| FOXN3        | 2.06592    | 0.798412 | -1.37158   | 0.00153868 |
| SLC25A26     | 15.3349    | 16.2654  | 0.0849929  | 0.935766   |
| WTIP         | 1.15061    | 1.34207  | 0.222066   | 0.879396   |
| DHRS13       | 24.6824    | 18.0759  | -0.449413  | 0.167611   |
| FOXD1        | 69.7258    | 40.0495  | -0.799907  | 0.00153868 |
| RABL2A       | 1.27694    | 1.967    | 0.623307   | 0.250087   |
| KIAA1109     | 0.661273   | 0.553011 | -0.257937  | 0.639922   |
| BCL6B        | 0.00410456 | 0        | #NAME?     | 1          |
| CCNJL        | 5.02409    | 6.277    | 0.321213   | 0.465287   |
| ANO8         | 1.75294    | 1.94629  | 0.150947   | 0.968709   |
| ZNF711       | 0.959823   | 0.671558 | -0.515256  | 0.306888   |
| RND2         | 0.423683   | 0.413271 | -0.0358957 | 0.983243   |
| FAM114A1     | 3.70758    | 2.7207   | -0.446501  | 0.2463     |
| ANXA6        | 37.8891    | 33.4203  | -0.181056  | 0.722151   |
| LOC284023    | 5.06919    | 6.5082   | 0.360504   | 0.425447   |
| CHKA         | 17.976     | 21.7635  | 0.275839   | 0.513296   |
| POLI         | 2.13609    | 1.33234  | -0.681011  | 0.0290262  |
| PLXNB1       | 3.61246    | 4.62818  | 0.357462   | 0.359202   |
| KANK3        | 3.38446    | 2.76157  | -0.293434  | 0.713886   |
| AGPAT4-IT1   | 0.0084575  | 0        | #NAME?     | 1          |
| KLHL24       | 1.9645     | 0.757573 | -1.3747    | 0.00153868 |
| ATP1A1OS     | 2.84994    | 2.21217  | -0.365465  | 0.944779   |
| MMP1         | 0.140158   | 0.126446 | -0.148527  | 1          |
| ASAP1        | 10.261     | 10.0199  | -0.0343019 | 0.971919   |



|               |            |            |            |            |
|---------------|------------|------------|------------|------------|
| ITGB7         | 0.07275    | 0.0638906  | -0.187345  | 1          |
| ITIH5         | 0.00562498 | 0.00194927 | -1.52892   | 1          |
| STT3B         | 6.41101    | 6.341      | -0.0158417 | 0.991167   |
| LPP           | 1.45447    | 1.17417    | -0.308854  | 0.452276   |
| MYNN          | 1.83548    | 2.18348    | 0.250467   | 0.644608   |
| SLC9A5        | 3.73932    | 5.06726    | 0.438432   | 0.270224   |
| PDZD7         | 1.74507    | 1.1855     | -0.557788  | 0.897319   |
| DNAI1         | 0.018579   | 0.00361691 | -2.36084   | 1          |
| ZFP36L1       | 98.9802    | 84.3811    | -0.23022   | 0.61923    |
| SDC4P         | 0.0349211  | 0          | #NAME?     | 1          |
| AVP1          | 13.0647    | 19.4188    | 0.571776   | 0.0784883  |
| ZNF432        | 0.944715   | 0.834147   | -0.179577  | 0.872122   |
| SLC11A1       | 0.122354   | 0.128246   | 0.067861   | 1          |
| PEAR1         | 1.1039     | 0.624638   | -0.821518  | 0.077173   |
| CLMN          | 0.990311   | 0.399578   | -1.30941   | 0.00153868 |
| AMACR,C1QTNF: | 1.83256    | 1.2532     | -0.54825   | 0.215771   |
| NUMBL         | 8.82984    | 14.3036    | 0.695918   | 0.0123712  |
| ST6GALNAC6    | 76.7534    | 124.835    | 0.701716   | 0.00739414 |
| CCSAP         | 1.33932    | 1.91809    | 0.518174   | 0.188018   |
| RNF168        | 4.44558    | 5.20353    | 0.227118   | 0.640831   |
| FBXO15        | 0.452358   | 0.110953   | -2.02752   | 0.0429833  |
| KCNA6         | 0.00257391 | 0.00229309 | -0.166667  | 1          |
| VSIG10L       | 1.08439    | 1.0021     | -0.113863  | 0.936418   |
| ENDOG         | 28.3499    | 50.0175    | 0.819092   | 0.47659    |
| NEK5          | 0.197173   | 0.173151   | -0.187424  | 1          |
| KIAA1549L     | 0.943128   | 0.738141   | -0.353557  | 0.443822   |
| MTL5          | 1.39551    | 0.63859    | -1.12783   | 0.0143403  |
| KRT17         | 0.120163   | 0.35422    | 1.55965    | 1          |
| USP30         | 1.84377    | 1.4747     | -0.322245  | 0.586073   |
| HOXA4         | 3.42433    | 3.01144    | -0.18537   | 0.860285   |
| PHYH          | 28.6588    | 24.7676    | -0.210528  | 0.676146   |
| SS18L1        | 2.29851    | 3.30303    | 0.52309    | 0.144765   |
| CCDC65        | 0.0126697  | 0.0465688  | 1.87798    | 1          |
| PRH2          | 0.0112315  | 0.0132027  | 0.233274   | 1          |
| SERTAD3       | 12.0447    | 26.986     | 1.16381    | 0.00153868 |
| HPS3          | 2.49339    | 1.5212     | -0.7129    | 0.0738934  |
| CCDC154       | 0.257754   | 0.138604   | -0.895022  | 1          |
| COL24A1       | 0.00678191 | 0.00819243 | 0.272599   | 1          |
| CDK19         | 1.32993    | 0.701995   | -0.92182   | 0.00739414 |
| LOC100652768  | 1.02125    | 1.28017    | 0.325991   | 0.964616   |
| RPL13AP20     | 1.83706    | 2.81237    | 0.614389   | 0.492305   |
| AHSA2         | 3.75806    | 4.89213    | 0.380475   | 0.756518   |
| CDCA7L        | 29.4485    | 22.2453    | -0.404691  | 0.208318   |
| DIAPH2        | 4.05476    | 2.40109    | -0.755928  | 0.0117316  |
| LOC100289509  | 0.373074   | 0.226606   | -0.719276  | 0.795289   |
| CNOT8         | 22.7091    | 20.8932    | -0.120235  | 0.859038   |
| ACADS         | 39.6615    | 36.319     | -0.127015  | 0.855973   |
| ZNF546        | 0.20413    | 0.258329   | 0.339718   | 1          |
| JAM3          | 0.249572   | 0.567468   | 1.18508    | 0.0324264  |

|              |            |            |            |            |
|--------------|------------|------------|------------|------------|
| TRIO         | 1.90961    | 2.14333    | 0.166575   | 0.797588   |
| MBNL2        | 2.62921    | 1.70403    | -0.625678  | 0.0605998  |
| ZNF211       | 1.11073    | 1.08044    | -0.0398871 | 0.978996   |
| CHN2         | 0.337798   | 0.182188   | -0.890734  | 1          |
| SATB1        | 2.8002     | 2.95955    | 0.0798496  | 0.936311   |
| ZNF79        | 3.09577    | 4.12258    | 0.41325    | 0.426631   |
| ZNF236       | 0.588206   | 0.579793   | -0.0207833 | 0.990201   |
| NAPSA        | 0.0360931  | 0.0211016  | -0.774369  | 1          |
| ZBTB18       | 1.75359    | 2.11584    | 0.270917   | 0.65387    |
| HLA-L        | 0.0103708  | 0.0182343  | 0.814133   | 1          |
| PKM          | 1023.29    | 1244.96    | 0.282875   | 0.555472   |
| SLC6A6       | 3.12104    | 6.88292    | 1.141      | 0.00153868 |
| PPP5D1       | 0.11008    | 0.0763977  | -0.52695   | 1          |
| UAP1L1       | 27.7557    | 25.7996    | -0.105433  | 0.879418   |
| NOL3         | 15.4277    | 16.8081    | 0.123632   | 0.912532   |
| MLH3         | 0.922537   | 1.38356    | 0.584708   | 0.111341   |
| AGBL5        | 9.76781    | 9.05878    | -0.108719  | 0.968157   |
| CYP21A2      | 0.0661156  | 0.0984769  | 0.574795   | 1          |
| LOC101059948 | 0.333922   | 0.12531    | -1.41401   | 1          |
| VEGFB        | 56.9074    | 52.4027    | -0.118975  | 0.858752   |
| RAPGEF5      | 0.710072   | 0.61396    | -0.209821  | 0.802799   |
| MYOF         | 12.433     | 9.09514    | -0.45101   | 0.120157   |
| DEDD2        | 30.2782    | 64.1679    | 1.08357    | 0.00153868 |
| GRM2         | 0.0792627  | 0.025796   | -1.61949   | 1          |
| CDKN1B       | 7.04785    | 5.93572    | -0.247761  | 0.64913    |
| C16orf95     | 3.72924    | 2.95889    | -0.333823  | 0.722089   |
| BDH2         | 4.93896    | 3.06284    | -0.689335  | 0.024868   |
| CBX8         | 11.61      | 14.1879    | 0.289296   | 0.566374   |
| ZP3          | 9.94299    | 7.53519    | -0.400035  | 0.403413   |
| ACER2        | 0.0704046  | 0.122158   | 0.795007   | 1          |
| HELZ         | 1.56728    | 1.2301     | -0.349487  | 0.369755   |
| SRPX         | 9.56206    | 7.73473    | -0.305971  | 0.535338   |
| FAM129B      | 94.3679    | 158.284    | 0.746148   | 0.00380811 |
| ECSCR        | 0.0199485  | 0.0149772  | -0.41351   | 1          |
| LYST         | 0.220179   | 0.13943    | -0.659135  | 1          |
| ELMO3        | 1.81986    | 3.64833    | 1.00341    | 0.0181648  |
| NCKIPSD      | 17.0528    | 14.1671    | -0.26746   | 0.547145   |
| UGP2         | 11.7121    | 10.8092    | -0.115745  | 0.872122   |
| ZDHHHC8P1    | 0.545146   | 0.521708   | -0.0634    | 0.977897   |
| CEP85L       | 0.412772   | 0.409106   | -0.0128698 | 0.994593   |
| TRAPPC6A     | 24.4015    | 21.2693    | -0.198197  | 0.791197   |
| ELMSAN1      | 2.45139    | 2.78626    | 0.184725   | 0.767329   |
| PACS1        | 15.3423    | 16.1256    | 0.0718324  | 0.933451   |
| ZNF597       | 0.890618   | 1.08145    | 0.280089   | 0.783531   |
| CACNB2       | 0.0712899  | 0.0639083  | -0.157694  | 1          |
| WDR54        | 70.3724    | 53.9253    | -0.384048  | 0.254182   |
| LOC284276    | 0.00661269 | 0.00625033 | -0.0813058 | 1          |
| LRRC37BP1    | 3.4327     | 3.58757    | 0.063663   | 0.948523   |
| NOXA1        | 6.89483    | 2.48591    | -1.47174   | 0.00153868 |

|              |            |            |             |            |
|--------------|------------|------------|-------------|------------|
| AQP11        | 0.819796   | 0.590431   | -0.473497   | 0.599091   |
| MAP3K8       | 0.856537   | 0.842784   | -0.0233516  | 0.990377   |
| ZNF665       | 0.0186828  | 0.0242456  | 0.376011    | 1          |
| ACAD11,NPHP3 | 8.18116    | 5.04545    | -0.697323   | 0.240047   |
| LOC728743    | 0.566773   | 0.536899   | -0.0781211  | 0.969826   |
| ADAMTS6      | 0.0323895  | 0.00576658 | -2.48974    | 1          |
| PAN3         | 2.76645    | 3.35922    | 0.280091    | 0.571471   |
| THAP2        | 0.439387   | 0.37911    | -0.212876   | 0.943284   |
| TMLHE        | 5.54175    | 3.81386    | -0.539089   | 0.271127   |
| SMG7-AS1     | 0.0358492  | 0.0758684  | 1.08156     | 1          |
| XRR1         | 8.08816    | 6.18283    | -0.387545   | 0.332523   |
| RERE         | 2.95739    | 3.56175    | 0.268263    | 0.599981   |
| ARNT         | 4.18065    | 2.81126    | -0.572507   | 0.0685533  |
| EPB41L5      | 1.25498    | 1.36228    | 0.118363    | 0.901751   |
| MYADML       | 0.00937511 | 0          | #NAME?      | 1          |
| MYSM1        | 1.23305    | 1.40867    | 0.192105    | 0.769085   |
| MSH5,SAPCD1  | 7.02489    | 5.26795    | -0.415234   | 0.521457   |
| GJC2         | 0.0467671  | 0.548682   | 3.5524      | 0.244431   |
| TCTN2        | 1.60649    | 1.46442    | -0.133585   | 0.905839   |
| TNIP1        | 52.7362    | 42.7358    | -0.303347   | 0.423117   |
| ZNF519       | 0.274469   | 0.368985   | 0.426921    | 1          |
| SLC27A3      | 5.42938    | 4.82741    | -0.16954    | 0.840937   |
| FN3K         | 27.8511    | 20.9359    | -0.411758   | 0.267888   |
| LATS1        | 1.68193    | 1.46638    | -0.197857   | 0.831834   |
| ENKUR        | 0.150202   | 0.313122   | 1.05982     | 1          |
| LOC100132273 | 1.07614    | 0.905698   | -0.248757   | 0.858227   |
| CREBZF       | 4.16284    | 6.42582    | 0.626313    | 0.0285456  |
| CBFA2T2      | 1.88757    | 1.68397    | -0.164667   | 0.82034    |
| ZBTB34       | 1.87438    | 1.98024    | 0.0792615   | 0.936242   |
| CUL4B        | 5.66321    | 3.52955    | -0.682136   | 0.0117316  |
| LOC155060    | 3.07572    | 2.5139     | -0.290995   | 0.642802   |
| HNRNPU-AS1   | 4.4691     | 5.95124    | 0.413204    | 0.299594   |
| LRP2BP       | 0.296092   | 0.315096   | 0.0897489   | 1          |
| ZNF587       | 1.25029    | 1.28458    | 0.0390362   | 0.97562    |
| ZNF607       | 1.23605    | 1.75141    | 0.502783    | 0.243499   |
| DNAH3        | 0.00190009 | 0.00142967 | -0.410381   | 1          |
| OTUD3        | 1.25812    | 1.33939    | 0.0903098   | 0.933093   |
| LY6G6C       | 0.067593   | 0.0212438  | -1.66983    | 1          |
| CATSPER2     | 0.57464    | 0.377349   | -0.606758   | 0.489743   |
| FOXO3        | 4.2042     | 2.55972    | -0.715849   | 0.00897284 |
| MST1R        | 3.77423    | 2.37186    | -0.670162   | 0.0550104  |
| LTA4H        | 79.373     | 71.2241    | -0.156283   | 0.783261   |
| PATL1        | 10.8951    | 11.6765    | 0.0999267   | 0.891828   |
| FAM175A      | 5.50845    | 2.81202    | -0.970039   | 0.111734   |
| AKAP8L       | 21.0997    | 21.0643    | -0.00242261 | 0.998382   |
| ZNF77        | 2.10822    | 2.52065    | 0.257767    | 0.727856   |
| DNM1P41      | 0.185408   | 0.250431   | 0.433713    | 1          |
| DPF3         | 0.0948658  | 0.0737875  | -0.362511   | 1          |
| SPATA9       | 0.02272    | 0.0281576  | 0.309562    | 1          |

|              |            |            |              |            |
|--------------|------------|------------|--------------|------------|
| CDK14        | 0.00522901 | 0.00359774 | -0.539445    | 1          |
| TUBAL3       | 0.739151   | 1.13013    | 0.61255      | 0.385955   |
| CARHSP1      | 20.253     | 17.1133    | -0.243018    | 0.587518   |
| ZNF648       | 0.018645   | 0.0164595  | -0.179867    | 1          |
| IRF2BP2      | 16.5071    | 10.7675    | -0.616412    | 0.0204286  |
| ATL1         | 0.429948   | 0.400563   | -0.102132    | 0.953219   |
| FLJ37453     | 2.3227     | 2.27801    | -0.028028    | 0.994734   |
| BTN3A3       | 0.742637   | 0.903044   | 0.282139     | 0.775623   |
| ELF2         | 3.14137    | 2.8952     | -0.117727    | 0.896977   |
| STXBP3       | 5.39489    | 5.39314    | -0.000467797 | 0.999234   |
| STON2        | 0.00756056 | 0.00142058 | -2.41202     | 1          |
| HS3ST2       | 0.00925732 | 0          | #NAME?       | 1          |
| SLC35E1      | 12.2557    | 14.5948    | 0.252        | 0.550777   |
| RFX3         | 0.47539    | 0.121946   | -1.96286     | 0.00820276 |
| TROVE2       | 4.88147    | 4.82922    | -0.0155276   | 0.995521   |
| NPTX1        | 0.00291928 | 0          | #NAME?       | 1          |
| C6orf201     | 0.00825497 | 0          | #NAME?       | 1          |
| ZFAT-AS1     | 0.0459494  | 0.147974   | 1.68723      | 1          |
| DDR2         | 0.0687975  | 0.0809859  | 0.235316     | 1          |
| CD109        | 0.977971   | 0.695207   | -0.492349    | 0.207927   |
| RGMB         | 5.74479    | 6.12032    | 0.0913535    | 0.911412   |
| MRPS31P5     | 1.62136    | 1.30941    | -0.308294    | 0.686415   |
| PVRL3        | 0.997981   | 1.16592    | 0.224383     | 0.757708   |
| ABHD10       | 10.4957    | 8.1629     | -0.362649    | 0.318863   |
| HDHD2        | 4.70116    | 4.6633     | -0.0116658   | 0.993578   |
| SLC6A4       | 0.0484957  | 0.100066   | 1.04502      | 1          |
| MIR4461      | 4971.71    | 2664.04    | -0.900128    | 0.890489   |
| LINC00460    | 0.530826   | 0.187079   | -1.5046      | 0.201718   |
| LOC100131289 | 0.626716   | 0.670819   | 0.0981111    | 0.975484   |
| ZNF12        | 3.2967     | 4.02044    | 0.286332     | 0.515991   |
| SAMD10       | 2.84224    | 3.68734    | 0.375552     | 0.552211   |
| CXADR        | 0.0353393  | 0.0599796  | 0.763199     | 1          |
| PM20D2       | 8.56288    | 10.771     | 0.330989     | 0.356128   |
| TUBGCP4      | 5.55353    | 5.35496    | -0.0525303   | 0.981441   |
| CAB39L       | 2.4681     | 2.04099    | -0.27413     | 0.642898   |
| NIPSNAP3A    | 4.54689    | 4.68905    | 0.0444166    | 0.972385   |
| FBXO38       | 5.0971     | 4.71831    | -0.111408    | 0.887978   |
| PPP1R2       | 7.7702     | 8.24526    | 0.0856135    | 0.916694   |
| NLGN2        | 18.0706    | 17.8425    | -0.0183207   | 0.985768   |
| GAB2         | 2.01898    | 1.23112    | -0.713661    | 0.0370145  |
| CBX2         | 5.7527     | 10.6845    | 0.893208     | 0.00153868 |
| PLCG1        | 10.5438    | 11.8476    | 0.1682       | 0.762698   |
| UQCRC2       | 71.7303    | 67.768     | -0.0819785   | 0.917701   |
| PRSS56       | 0.299098   | 0.0254576  | -3.55445     | 1          |
| RPL9         | 4188.29    | 4291.26    | 0.0350406    | 0.975484   |
| FAM63A       | 4.05535    | 1.64914    | -1.29811     | 0.00153868 |
| DENND5B      | 0.436385   | 0.360134   | -0.27707     | 0.707003   |
| DNAJC28      | 0.229733   | 0.219525   | -0.0655706   | 1          |
| SPIN2B       | 1.9342     | 3.04053    | 0.652584     | 0.249215   |

|           |            |            |             |            |
|-----------|------------|------------|-------------|------------|
| RPS3A     | 3113.85    | 3275.56    | 0.0730437   | 0.937886   |
| SLC9A7    | 4.26855    | 3.41452    | -0.322061   | 0.376584   |
| TINF2     | 13.1822    | 15.136     | 0.199394    | 0.724344   |
| GCNT2     | 0.0059417  | 0.00183225 | -1.69726    | 1          |
| WDR45B    | 36.7085    | 45.0284    | 0.294722    | 0.431845   |
| C9orf123  | 22.728     | 23.061     | 0.0209866   | 0.98206    |
| KIAA1586  | 2.40614    | 2.60431    | 0.114177    | 0.902666   |
| RSAD2     | 0.00750838 | 0.00805085 | 0.10064     | 1          |
| SH3BGRL   | 14.4024    | 13.9667    | -0.0443241  | 0.968709   |
| ST13P4    | 0.122145   | 0.104942   | -0.218995   | 1          |
| IRF2BPL   | 7.42665    | 13.1123    | 0.820133    | 0.00478151 |
| TMEM191B  | 1.34224    | 2.07141    | 0.625964    | 0.506735   |
| OCEL1     | 21.883     | 16.4355    | -0.412994   | 0.318494   |
| ZNF430    | 1.00009    | 0.913616   | -0.130478   | 0.900642   |
| POM121L8P | 0.253415   | 0.542603   | 1.09839     | 0.0204286  |
| OLFML1    | 0.00986642 | 0.0139239  | 0.496965    | 1          |
| NLRP6     | 0.0623259  | 0.0601979  | -0.0501199  | 1          |
| COMMD6    | 54.3832    | 56.5573    | 0.0565519   | 0.949526   |
| GSTM3     | 12.7047    | 15.4999    | 0.286898    | 0.455231   |
| SLC2A3    | 11.9204    | 6.35752    | -0.906901   | 0.00153868 |
| TPT1      | 3749.87    | 4223.12    | 0.171468    | 0.783531   |
| MYC       | 218.727    | 255.001    | 0.22137     | 0.645315   |
| ZNF766    | 3.65477    | 1.98432    | -0.881135   | 0.00478151 |
| RFX2      | 2.03672    | 1.97562    | -0.0439459  | 0.975484   |
| C7orf61   | 0.265277   | 0.455772   | 0.780814    | 0.62076    |
| MLLT11    | 0.596254   | 0.523278   | -0.188351   | 0.898747   |
| PDDC1     | 12.5604    | 18.8958    | 0.589183    | 0.0280907  |
| SUPT3H    | 3.18504    | 1.51932    | -1.06788    | 0.00478151 |
| RFPL2     | 0.23041    | 0.394336   | 0.775222    | 0.409204   |
| ZDHC17    | 1.94097    | 1.93599    | -0.00370505 | 0.997552   |
| GPR173    | 0.003227   | 0          | #NAME?      | 1          |
| BAG3      | 22.1205    | 67.4703    | 1.60887     | 0.00153868 |
| ARL15     | 1.06235    | 1.10339    | 0.0546845   | 0.971528   |
| ABI2      | 6.28383    | 5.74009    | -0.13057    | 0.840937   |
| DLEU2L    | 0.0998088  | 0.368238   | 1.8834      | 1          |
| ATOH7     | 0.141222   | 0.216653   | 0.617418    | 1          |
| TMF1      | 2.55221    | 2.87756    | 0.173101    | 0.764456   |
| PRDM8     | 15.953     | 35.7841    | 1.16549     | 0.00153868 |
| BCL3      | 5.9627     | 5.39143    | -0.145298   | 0.887789   |
| PPP2R5B   | 13.923     | 12.3253    | -0.175843   | 0.757708   |
| FMNL2     | 6.39957    | 7.20948    | 0.171921    | 0.756068   |
| PIAS3     | 5.42041    | 7.33069    | 0.435547    | 0.258195   |
| AOX1      | 0.137143   | 0.0490997  | -1.4819     | 1          |
| SMS       | 165.064    | 149.493    | -0.142952   | 0.818403   |
| TGFBR1    | 5.25788    | 5.79579    | 0.140524    | 0.82034    |
| TIGD1     | 1.44043    | 1.61759    | 0.167348    | 0.900642   |
| TMEM106A  | 0.580043   | 0.556376   | -0.0600988  | 0.97562    |
| ZNF778    | 0.313251   | 0.491965   | 0.651235    | 0.327383   |
| PRCD      | 0.0759028  | 0.0421625  | -0.848193   | 1          |

|              |            |           |             |            |
|--------------|------------|-----------|-------------|------------|
| MAP6D1       | 6.47891    | 13.1125   | 1.01712     | 0.00153868 |
| CSRNP2       | 4.12261    | 6.09917   | 0.565056    | 0.0568637  |
| CRTAP        | 29.2533    | 25.4856   | -0.198913   | 0.688983   |
| AURKC        | 0.859738   | 0.615159  | -0.482937   | 0.672486   |
| AKR1B1       | 0.00959353 | 0.0157361 | 0.713947    | 1          |
| HBP1         | 4.23764    | 2.59926   | -0.705161   | 0.58104    |
| RAB33B       | 1.0875     | 0.81473   | -0.416627   | 0.48699    |
| FBXL3        | 4.72948    | 4.04216   | -0.226554   | 0.677324   |
| SNORA18      | 23.9555    | 46.1825   | 0.946986    | 0.538524   |
| PCAT1        | 0.0569234  | 0.0161641 | -1.81622    | 1          |
| HOOK3        | 0.832912   | 1.08915   | 0.386969    | 0.317407   |
| GCFC2        | 10.2462    | 11.6584   | 0.186283    | 0.836244   |
| PFKFB3       | 14.6668    | 20.364    | 0.47347     | 0.110718   |
| TTC9C        | 17.7119    | 17.6909   | -0.00171343 | 0.999215   |
| GAS1         | 0.424361   | 0.599973  | 0.499608    | 0.643053   |
| DZIP1L       | 1.76246    | 2.29326   | 0.379804    | 0.47621    |
| LOC100132247 | 1.74073    | 2.16392   | 0.313953    | 0.639952   |
| OR2A1        | 0.0214092  | 0.0202187 | -0.0825437  | 1          |
| KCNRG,TRIM13 | 3.15857    | 2.96339   | -0.0920223  | 0.925922   |
| ZNF131       | 2.9116     | 3.35378   | 0.203977    | 0.758847   |
| TMEM59L      | 0.072456   | 0.165767  | 1.19398     | 1          |
| RPS18        | 11235.9    | 12473     | 0.150693    | 0.845932   |
| FRMD4A       | 10.4679    | 8.20327   | -0.351701   | 0.311521   |
| AUH          | 6.31489    | 6.79731   | 0.106206    | 0.910891   |
| XRN1         | 1.09537    | 0.778732  | -0.492224   | 0.180418   |
| ZNF619       | 0.539899   | 0.415906  | -0.376433   | 0.633194   |
| ZFYVE28      | 4.31974    | 3.6547    | -0.241192   | 0.74725    |
| ACOT6        | 0.0341984  | 0         | #NAME?      | 1          |
| RARRES1      | 1.21281    | 0.820702  | -0.563428   | 0.525761   |
| HLA-DMA      | 0.569184   | 0.241167  | -1.23886    | 0.226046   |
| RYBP         | 5.00259    | 4.52713   | -0.144077   | 0.831834   |
| CENPP        | 1.42756    | 2.03395   | 0.510729    | 0.857469   |
| GRAMD1C      | 0.578313   | 0.252504  | -1.19555    | 0.0198871  |
| LINC00526    | 1.40422    | 1.34765   | -0.0593219  | 0.975492   |
| CIB2         | 18.5065    | 17.4285   | -0.0865818  | 0.922586   |
| IL17RD       | 1.11558    | 0.788964  | -0.499756   | 0.204028   |
| LCOR         | 1.21865    | 0.849051  | -0.521366   | 0.175696   |
| PPP1R13L     | 2.27108    | 1.31193   | -0.79169    | 0.943168   |
| ARHGAP12     | 4.45332    | 3.78782   | -0.233515   | 0.637594   |
| TLN1         | 12.1968    | 12.159    | -0.00448213 | 0.997773   |
| CROCCP2      | 15.4873    | 26.2403   | 0.760697    | 0.00659556 |
| OR51B4       | 0.0758016  | 0.0233055 | -1.70156    | 1          |
| HKR1         | 5.89985    | 7.52126   | 0.350296    | 0.365235   |
| TRAPPC8      | 1.65557    | 1.71069   | 0.0472456   | 0.967226   |
| PROS1        | 9.83354    | 7.47933   | -0.394801   | 0.235628   |
| MRPL17       | 38.3877    | 44.7538   | 0.221363    | 0.629991   |
| TCERG1       | 9.31352    | 11.1082   | 0.254224    | 0.548266   |
| MT1IP        | 0.00871717 | 0         | #NAME?      | 1          |
| EFNA3        | 29.2604    | 48.4625   | 0.727918    | 0.00659556 |

|                |            |            |            |            |
|----------------|------------|------------|------------|------------|
| IFITM10        | 0.547842   | 0.463122   | -0.242368  | 0.98206    |
| GNA11          | 6.13145    | 10.2079    | 0.735383   | 0.0471668  |
| EEPD1          | 1.44158    | 1.50407    | 0.0612219  | 0.964843   |
| NIPBL          | 1.26575    | 1.24071    | -0.0288327 | 0.97918    |
| HSD17B8        | 4.96594    | 3.68078    | -0.432054  | 0.497279   |
| FGFR3          | 3.88862    | 6.4761     | 0.735866   | 0.0192959  |
| ATP1B1         | 7.10769    | 6.06546    | -0.228763  | 0.787792   |
| KIAA0895L      | 4.35241    | 3.81626    | -0.189655  | 0.880754   |
| RNF208         | 42.27      | 53.3133    | 0.334862   | 0.389383   |
| DDX60L         | 0.241762   | 0.23765    | -0.0247512 | 1          |
| MLX            | 23.8335    | 24.0533    | 0.0132421  | 0.993923   |
| CSTF3-AS1      | 0.0173554  | 0.00621386 | -1.48182   | 1          |
| ZNF35          | 1.82893    | 3.56279    | 0.962012   | 0.00274688 |
| PAPD4          | 4.83756    | 4.38804    | -0.140704  | 0.844936   |
| RAB3D          | 9.39758    | 8.81048    | -0.0930687 | 0.905839   |
| ZNF83          | 2.62065    | 1.85707    | -0.496891  | 0.237712   |
| RAP1GAP        | 2.99413    | 2.84385    | -0.0742898 | 0.948774   |
| FLJ10038       | 0.723833   | 0.823702   | 0.186466   | 0.939948   |
| C10orf55       | 0.161132   | 0.161833   | 0.00625935 | 1          |
| TEKT4          | 0.388346   | 0.482953   | 0.314541   | 0.880754   |
| LOC100129250   | 12.855     | 12.1249    | -0.0843613 | 0.981441   |
| SATL1          | 0.400027   | 0.410909   | 0.0387182  | 0.994734   |
| VSTM1          | 0.0219667  | 0.0259638  | 0.241181   | 1          |
| MAG1           | 0.696711   | 0.341146   | -1.03017   | 0.0192959  |
| ENDOD1         | 0.233215   | 0.440204   | 0.916511   | 0.107265   |
| CECR1          | 0.0120305  | 0          | #NAME?     | 1          |
| GPER           | 0.150243   | 0.145097   | -0.0502749 | 1          |
| ACTA2          | 2.07524    | 2.2765     | 0.133535   | 0.960032   |
| ZNF354A        | 5.04052    | 4.77392    | -0.0783972 | 0.936256   |
| PTPRK          | 1.06549    | 0.76575    | -0.476568  | 0.289501   |
| GGA3           | 9.01596    | 10.8086    | 0.261633   | 0.824472   |
| SEPT3          | 6.32192    | 4.93025    | -0.358701  | 0.417492   |
| SLC25A42       | 2.94779    | 2.08563    | -0.499151  | 0.291935   |
| ZMYM5          | 3.66928    | 3.04705    | -0.268083  | 0.737368   |
| C2orf16        | 0.0961779  | 0.0659028  | -0.545364  | 1          |
| NR0B2          | 0.0209544  | 0          | #NAME?     | 1          |
| HSP90AA1       | 263.503    | 675.37     | 1.35786    | 0.00153868 |
| LOC100131726   | 0.0377726  | 0.0557885  | 0.562628   | 1          |
| TRIM45         | 0.341813   | 0.310288   | -0.1396    | 1          |
| STK31          | 0.0465474  | 0.0276321  | -0.752354  | 1          |
| ZNF845         | 0.957008   | 0.940831   | -0.0245954 | 0.986181   |
| LOC100130357   | 0.169171   | 0.276675   | 0.70971    | 1          |
| GPSM2          | 1.14858    | 0.819392   | -0.487225  | 0.818547   |
| MAT1A          | 0.00411687 | 0.00307333 | -0.421748  | 1          |
| LOC388152,LOC6 | 10.6179    | 9.14787    | -0.214997  | 0.691843   |
| LOC401320      | 0.48592    | 0.327636   | -0.568626  | 0.411581   |
| HMBX1          | 0.679244   | 0.379168   | -0.841091  | 0.133573   |
| CIC            | 7.89125    | 11.3192    | 0.520445   | 0.0792007  |
| NHEJ1          | 6.76175    | 8.48609    | 0.327704   | 0.471107   |

|                   |           |           |            |            |
|-------------------|-----------|-----------|------------|------------|
| FRMD6             | 14.7634   | 18.3121   | 0.310773   | 0.39786    |
| AP3M2             | 3.96488   | 6.17026   | 0.638054   | 0.0374759  |
| RTN1              | 0.0218175 | 0.020221  | -0.109631  | 1          |
| MIR4315-1,PLEKHA7 | 1.58892   | 1.17747   | -0.432349  | 0.702993   |
| DLGAP4            | 19.0483   | 17.98     | -0.0832702 | 0.913875   |
| NDRG3             | 4.73518   | 5.8422    | 0.303093   | 0.500059   |
| SGK1              | 2.153     | 3.20972   | 0.576094   | 0.166833   |
| LINC00630         | 0.190277  | 0.189494  | -0.0059488 | 1          |
| HIST1H4J          | 1.15999   | 0.892136  | -0.378771  | 0.921904   |
| PCDHB19P          | 0.0276725 | 0.0293216 | 0.083511   | 1          |
| NUDT16L1          | 23.5108   | 33.6689   | 0.518095   | 0.0937156  |
| PANK4             | 8.36529   | 13.1008   | 0.647172   | 0.0308509  |
| BAIAP2-AS1        | 2.41098   | 2.65641   | 0.139857   | 0.8709     |
| CACNA2D1          | 0.119603  | 0.0640744 | -0.900428  | 1          |
| DOPEY1            | 0.273045  | 0.203436  | -0.424561  | 1          |
| CRIP1             | 0.630567  | 0.414015  | -0.606965  | 0.813026   |
| SAMD9L            | 0.0559873 | 0.0118536 | -2.23978   | 1          |
| AP4M1             | 19.1409   | 23.1121   | 0.271989   | 0.951421   |
| PHF13             | 4.54126   | 6.24199   | 0.458912   | 0.20647    |
| JHDM1D            | 1.30361   | 0.519816  | -1.32644   | 0.00153868 |
| SPATS2            | 7.64653   | 7.903     | 0.0475945  | 0.961459   |
| STK3              | 4.79092   | 5.20876   | 0.120637   | 0.878705   |
| DENND4C           | 2.0139    | 1.83994   | -0.130337  | 0.863898   |
| DDTL              | 1.61408   | 3.09313   | 0.938354   | 0.755384   |
| MYB               | 0.730672  | 1.62679   | 1.15473    | 0.00274688 |
| NES               | 4.7112    | 5.77895   | 0.294713   | 0.495723   |
| GNMT              | 0.189405  | 0.693145  | 1.87168    | 0.839406   |
| LACTB             | 5.95557   | 5.85358   | -0.0249217 | 0.981659   |
| TRMT11            | 6.21607   | 8.0212    | 0.367815   | 0.379552   |
| RPSAP52           | 1.5809    | 0.593528  | -1.41336   | 0.905903   |
| CREB1             | 1.43406   | 1.45157   | 0.0175102  | 0.987173   |
| PCIF1             | 8.63867   | 8.56013   | -0.0131764 | 0.992304   |
| USP45             | 0.989091  | 1.36924   | 0.469205   | 0.24679    |
| TM2D3             | 15.9143   | 19.2353   | 0.273431   | 0.553492   |
| ZNF280D           | 2.38967   | 1.73352   | -0.46311   | 0.385393   |
| ZNF223            | 0.842603  | 0.667806  | -0.335425  | 0.700551   |
| CST6              | 0.0424983 | 0.120752  | 1.50657    | 1          |
| SMC2              | 3.88261   | 3.80094   | -0.030669  | 0.9771     |
| PRPF39            | 5.28068   | 7.66796   | 0.538119   | 0.602107   |
| ZBTB41            | 0.370316  | 0.366993  | -0.0130034 | 0.994116   |
| STRADB            | 14.922    | 15.2811   | 0.0343036  | 0.974348   |
| MUC12             | 0.247625  | 0.4409    | 0.832298   | 0.0351856  |
| PLK1S1            | 4.74405   | 1.87355   | -1.34035   | 0.00153868 |
| TMEM44            | 12.3171   | 8.43401   | -0.546367  | 0.116756   |
| GPRC5A            | 7.113     | 3.00057   | -1.24522   | 0.00153868 |
| LOC100129550      | 0.901947  | 0.608687  | -0.567342  | 0.217777   |
| LRRC27            | 2.93263   | 2.26101   | -0.375225  | 0.619359   |
| C1QTNF9           | 0.0156628 | 0.0328198 | 1.06722    | 1          |
| TBCK              | 1.23881   | 0.658607  | -0.911469  | 0.66669    |



|                |            |            |            |            |
|----------------|------------|------------|------------|------------|
| NCOR1          | 1.23577    | 1.36931    | 0.148038   | 0.862984   |
| ARHGAP19,SLIT1 | 1.67874    | 1.84658    | 0.137483   | 0.867118   |
| PNPLA3         | 0.732866   | 0.520975   | -0.492335  | 0.538495   |
| C15orf52       | 0.0497745  | 0.117992   | 1.24521    | 1          |
| VMP1           | 50.1739    | 60.3182    | 0.265654   | 0.52531    |
| FRS3           | 3.24828    | 2.99018    | -0.119444  | 0.917149   |
| ZNF774         | 0.461477   | 0.387313   | -0.252759  | 0.878705   |
| ASB8           | 4.30726    | 4.49212    | 0.0606237  | 0.955413   |
| ACAP3          | 5.4016     | 6.64926    | 0.299806   | 0.553492   |
| UBL3           | 3.74843    | 3.14156    | -0.254805  | 0.626866   |
| ABI3           | 0.0118894  | 0          | #NAME?     | 1          |
| KDM4C          | 2.79571    | 2.00871    | -0.476946  | 0.215259   |
| MARCH3         | 0.292219   | 0.421375   | 0.528055   | 0.517827   |
| PIM2           | 14.4006    | 26.8143    | 0.896873   | 0.00153868 |
| HEATR4         | 0.024791   | 0.037994   | 0.615954   | 1          |
| MAPK7          | 6.61192    | 10.3148    | 0.64158    | 0.361033   |
| IFT74          | 2.87494    | 2.19041    | -0.392333  | 0.836759   |
| MIB2           | 7.83861    | 9.07004    | 0.210512   | 0.740167   |
| FANCL          | 6.56283    | 8.50058    | 0.373243   | 0.484602   |
| CITED2         | 6.02698    | 6.25319    | 0.0531568  | 0.966197   |
| C18orf25       | 1.52963    | 1.70625    | 0.157644   | 0.848653   |
| FBXO21         | 3.59394    | 4.0645     | 0.177513   | 0.780395   |
| ZBTB12         | 4.41944    | 3.30357    | -0.419838  | 0.502454   |
| ANKMY2         | 4.9601     | 5.25076    | 0.0821586  | 0.93402    |
| EEF1A1         | 5465.43    | 5246.9     | -0.0588704 | 0.954252   |
| CABIN1         | 7.52008    | 8.22992    | 0.130131   | 0.843536   |
| MB21D2         | 1.5796     | 1.92708    | 0.286859   | 0.671663   |
| MYH9           | 50.5748    | 55.4133    | 0.131813   | 0.842721   |
| RAB8B          | 4.23945    | 3.78188    | -0.164773  | 0.786155   |
| BAMBI          | 5.03979    | 6.67464    | 0.405328   | 0.384554   |
| SHANK2         | 0.515294   | 0.284192   | -0.858531  | 0.0667647  |
| SLC26A8        | 0.00945381 | 0.00692292 | -0.449515  | 1          |
| FUT1           | 2.26775    | 4.16332    | 0.876468   | 0.00478151 |
| ATP8B2         | 0.697939   | 0.421218   | -0.728533  | 0.141333   |
| PPP2R3A        | 0.867193   | 0.934222   | 0.107412   | 0.93144    |
| UBE2H          | 9.11732    | 8.69734    | -0.0680356 | 0.935829   |
| NAP1L1         | 137.515    | 140.913    | 0.0352078  | 0.972375   |
| ZNF16          | 10.0312    | 5.36475    | -0.902909  | 0.00153868 |
| POM121C        | 8.52145    | 9.99839    | 0.230597   | 0.686765   |
| BTBD2          | 65.3841    | 43.015     | -0.6041    | 0.0259174  |
| SNX25          | 3.95204    | 3.54516    | -0.156747  | 0.83928    |
| TMEM55A        | 6.34981    | 4.60942    | -0.462127  | 0.208122   |
| FAM35DP        | 0.173999   | 0.156051   | -0.157062  | 1          |
| SNX30          | 2.08156    | 1.8961     | -0.134628  | 0.862353   |
| MAP4K5         | 7.48606    | 6.87541    | -0.122759  | 0.854216   |
| ZNF567         | 2.29726    | 2.56994    | 0.161825   | 0.844936   |
| TAGLN3         | 0.0146971  | 0          | #NAME?     | 1          |
| GIT2           | 5.96429    | 5.98795    | 0.0057105  | 0.995521   |
| ID2            | 2.00821    | 2.04865    | 0.0287614  | 0.986782   |

|                |            |            |            |            |
|----------------|------------|------------|------------|------------|
| TMEM65         | 3.96297    | 3.23192    | -0.294192  | 0.524977   |
| SLC27A1        | 4.75912    | 3.27119    | -0.540882  | 0.175512   |
| CUL5           | 1.81613    | 2.25553    | 0.312604   | 0.494451   |
| NBPF15,NBPF16  | 4.92635    | 6.28416    | 0.351201   | 0.360567   |
| GUSBP9,SMA5    | 0.500293   | 0.446574   | -0.163873  | 0.945416   |
| KDM5C          | 17.083     | 14.4833    | -0.238176  | 0.581347   |
| ALS2CL         | 5.12281    | 3.23621    | -0.662629  | 0.0434002  |
| ST3GAL3        | 2.89622    | 1.62542    | -0.833363  | 0.0434002  |
| RFPL4A         | 0.218281   | 0.0273795  | -2.99502   | 1          |
| GORAB          | 1.63084    | 1.61276    | -0.0160813 | 0.992304   |
| ASH1L-AS1      | 1.56579    | 2.62757    | 0.746843   | 0.66768    |
| TAGLN2         | 58.7535    | 89.2321    | 0.602888   | 0.0259174  |
| DTX4           | 1.17259    | 2.01633    | 0.782039   | 0.0259174  |
| TBC1D5         | 2.89048    | 1.2409     | -1.21992   | 0.00153868 |
| LOC100506668   | 3.64802    | 6.01813    | 0.7222     | 0.839812   |
| JMJD7,JMJD7-PL | 15.0293    | 13.9892    | -0.103459  | 0.91207    |
| PLA2G3         | 0.00838984 | 0.0110005  | 0.390851   | 1          |
| FAM220A        | 5.4147     | 4.15212    | -0.383031  | 0.40471    |
| CCDC135        | 0.0790107  | 0.0360932  | -1.13032   | 1          |
| ZNF138         | 2.64834    | 1.76469    | -0.585675  | 0.127354   |
| UNC119         | 59.8202    | 56.4573    | -0.0834728 | 0.915223   |
| PDIA4          | 50.7308    | 75.6036    | 0.575593   | 0.0285456  |
| PARP16         | 6.20974    | 4.3867     | -0.5014    | 0.19024    |
| TBX10          | 0.0152279  | 0          | #NAME?     | 1          |
| RAB11FIP5      | 16.1326    | 15.6561    | -0.0432511 | 0.964628   |
| TMPRSS13       | 0.0044451  | 0.0120846  | 1.44288    | 1          |
| UHRF2          | 4.47492    | 4.91565    | 0.135522   | 0.854102   |
| CDC42BPG       | 0.0682616  | 0.073748   | 0.11153    | 1          |
| PRSS16         | 1.56461    | 0.975631   | -0.681395  | 0.207889   |
| CDIP1          | 0.00619395 | 0.0354168  | 2.5155     | 1          |
| GOLGA6L10      | 0.0442141  | 0.045936   | 0.0551184  | 1          |
| MID2           | 1.08717    | 0.935149   | -0.217309  | 0.757708   |
| CCDC176        | 0.428852   | 0.306325   | -0.485417  | 0.733012   |
| FAH            | 24.2743    | 24.7922    | 0.0304568  | 0.977229   |
| ZNF28          | 1.20181    | 1.24956    | 0.05622    | 0.964843   |
| CRYBG3         | 0.221034   | 0.225447   | 0.028519   | 1          |
| HLA-A          | 954.146    | 1084.27    | 0.184441   | 0.740566   |
| FAM219B        | 7.43969    | 9.23162    | 0.311342   | 0.448806   |
| LOC150381      | 2.8225     | 4.13741    | 0.551755   | 0.243937   |
| LOC100506990   | 3.37215    | 2.42507    | -0.47564   | 0.437468   |
| C7orf29        | 13.7422    | 20.1187    | 0.549921   | 0.303477   |
| CP             | 1.33075    | 0.668156   | -0.993985  | 0.0763878  |
| PPIP5K2        | 2.05171    | 1.69267    | -0.277522  | 0.582102   |
| ARHGAP22       | 29.8906    | 28.0036    | -0.0940817 | 0.904056   |
| KCNJ5          | 0.00996762 | 0.00370032 | -1.4296    | 1          |
| KLHL7          | 9.61421    | 8.97866    | -0.0986681 | 0.94326    |
| TMOD2          | 0.666092   | 0.709946   | 0.0919869  | 0.933523   |
| TTC9           | 0.530624   | 0.29133    | -0.865033  | 0.100423   |
| HACE1          | 0.714206   | 0.595697   | -0.261762  | 0.76269    |

|                |            |            |            |            |
|----------------|------------|------------|------------|------------|
| C3orf38        | 3.91718    | 4.41154    | 0.171466   | 0.916725   |
| SOCS1          | 2.19792    | 4.51588    | 1.03887    | 0.092709   |
| SEC1P          | 0.0655844  | 0.0223625  | -1.55227   | 1          |
| BAZ2B          | 0.79778    | 0.360036   | -1.14785   | 0.00153868 |
| SAG            | 0.0199815  | 0.00738542 | -1.43591   | 1          |
| GDF9           | 0.103132   | 0.0381331  | -1.43538   | 1          |
| LCORL          | 2.60856    | 2.45717    | -0.0862565 | 0.966307   |
| PIP5K1P1       | 0.0117787  | 0          | #NAME?     | 1          |
| FBXL20         | 1.8976     | 1.01462    | -0.903232  | 0.00153868 |
| LENG8          | 7.87959    | 11.9746    | 0.603789   | 0.135473   |
| EIF4E3         | 2.58451    | 1.84614    | -0.485383  | 0.154835   |
| BTG1,LOC256021 | 13.0416    | 7.15161    | -0.866785  | 0.00153868 |
| BACE2          | 15.509     | 16.6923    | 0.106081   | 0.890489   |
| HSF2           | 5.27733    | 5.17705    | -0.0276781 | 0.979931   |
| DENND6B        | 3.00494    | 2.1472     | -0.484879  | 0.435859   |
| RPL13          | 784.917    | 924.886    | 0.236735   | 0.676198   |
| BRSK2          | 8.24539    | 15.6057    | 0.920414   | 0.00153868 |
| ECI2           | 26.5915    | 24.6976    | -0.106591  | 0.884488   |
| KCNH3          | 0.631126   | 0.35486    | -0.830677  | 0.272576   |
| GYLTL1B        | 0.0118225  | 0.0125772  | 0.0892668  | 1          |
| FXR1           | 4.79785    | 5.01082    | 0.0626573  | 0.943284   |
| TMSB10         | 4339       | 5330.31    | 0.296857   | 0.500006   |
| CCDC104        | 45.9092    | 39.2344    | -0.226666  | 0.619728   |
| HYI            | 17.8908    | 18.1263    | 0.0188725  | 0.992304   |
| ZNF331         | 0.315494   | 0.190291   | -0.729406  | 1          |
| CSF2           | 0.0634804  | 0.171494   | 1.43377    | 1          |
| NBPF9          | 0.859773   | 1.30058    | 0.597129   | 0.224366   |
| SYNDIG1L       | 0.0147808  | 0.0114831  | -0.364208  | 1          |
| SLC12A5        | 0.00281627 | 0.00420264 | 0.577511   | 1          |
| LOC100505718   | 3.36362    | 1.70801    | -0.977699  | 0.00478151 |
| LOC728431      | 0.705622   | 0.242156   | -1.54296   | 0.0966711  |
| FOXA1          | 1.06798    | 1.35939    | 0.34807    | 0.63388    |
| EQTN           | 0.0561665  | 0.0644249  | 0.197907   | 1          |
| TWSG1          | 6.84099    | 6.70854    | -0.0282069 | 0.977962   |
| MSTO2P         | 0.235789   | 0.346275   | 0.554423   | 1          |
| HOXD3          | 0.807238   | 1.14306    | 0.501838   | 0.529855   |
| TRIM17         | 0.0130907  | 0.0174654  | 0.415951   | 1          |
| LOC731223      | 0.400975   | 0.135328   | -1.56706   | 0.379394   |
| BBX            | 1.88054    | 1.44874    | -0.376347  | 0.35231    |
| C9orf41        | 0.76234    | 1.28863    | 0.757335   | 0.150849   |
| NPEPPS         | 13.3999    | 15.9168    | 0.248329   | 0.559735   |
| FZD5           | 2.05388    | 2.47447    | 0.268763   | 0.61305    |
| CHRNA2         | 0.00541799 | 0.00487288 | -0.152982  | 1          |
| C15orf39       | 5.58882    | 10.1443    | 0.860059   | 0.00153868 |
| NARF           | 61.1011    | 54.3436    | -0.169087  | 0.764196   |
| BLVRA          | 38.303     | 54.5332    | 0.509678   | 0.0854415  |
| ARMCX3         | 7.00116    | 6.71369    | -0.0604875 | 0.951891   |
| CEP89          | 2.2264     | 2.14858    | -0.0513264 | 0.969635   |
| KRT79          | 0.567031   | 0.7918     | 0.481708   | 0.622185   |

|                |            |            |            |            |
|----------------|------------|------------|------------|------------|
| RHOT1          | 4.83013    | 4.56749    | -0.0806611 | 0.93285    |
| TUBG2          | 11.5334    | 14.7024    | 0.35023    | 0.408508   |
| PRKAR1A        | 18.7789    | 20.2646    | 0.109849   | 0.880754   |
| ZNF624         | 0.2741     | 0.241654   | -0.181761  | 1          |
| SAMD11         | 1.6121     | 0.441501   | -1.86846   | 0.824756   |
| NEK6           | 26.0646    | 20.1284    | -0.372861  | 0.271127   |
| ACTG1          | 2579.26    | 2899.42    | 0.168809   | 0.796068   |
| JRKL           | 1.27882    | 1.43806    | 0.169307   | 0.850357   |
| RAPGEFL1       | 2.4413     | 2.9115     | 0.254111   | 0.684382   |
| USP53          | 0.789501   | 0.717281   | -0.138402  | 0.88839    |
| CENPI          | 0.4918     | 0.411062   | -0.258716  | 0.840937   |
| UROS           | 19.2122    | 27.4618    | 0.515402   | 0.101019   |
| MRPL42         | 10.6417    | 13.4348    | 0.336247   | 0.346023   |
| EEF1G          | 3634.86    | 3977.48    | 0.129958   | 0.869972   |
| SIAH1          | 8.92473    | 7.22335    | -0.305141  | 0.824372   |
| MLXIP          | 4.12491    | 6.06202    | 0.555435   | 0.0745439  |
| NUDT3,RPS10,RF | 4996.89    | 5710.11    | 0.192489   | 0.754536   |
| KCTD19         | 0.00458652 | 0          | #NAME?     | 1          |
| PMEL           | 0.729905   | 0.37378    | -0.965521  | 0.154363   |
| APOOL          | 1.86464    | 2.01108    | 0.109067   | 0.898731   |
| MTR            | 1.48982    | 1.26685    | -0.233893  | 0.66836    |
| PLIN1          | 0.0848949  | 0.0733515  | -0.210852  | 1          |
| IGSF22         | 0.0115934  | 0.0151357  | 0.384654   | 1          |
| CARD8          | 2.52185    | 2.1794     | -0.210551  | 0.922304   |
| GGA2           | 7.86749    | 8.95028    | 0.18603    | 0.720426   |
| ST7-OT4        | 0.0775359  | 0.00677455 | -3.51667   | 1          |
| TCFL5          | 6.48971    | 5.75582    | -0.173133  | 0.906423   |
| HADH           | 34.3098    | 31.8053    | -0.10935   | 0.87752    |
| HSD17B7P2      | 0.521977   | 0.60392    | 0.210372   | 0.908615   |
| IMPDH2         | 260.466    | 231.362    | -0.170943  | 0.756358   |
| ZNF502         | 1.28961    | 1.18148    | -0.126333  | 0.907653   |
| FKBP14         | 2.02297    | 3.19597    | 0.659779   | 0.0294837  |
| IER5L          | 21.6005    | 73.4316    | 1.76533    | 0.00153868 |
| ORAI3          | 13.6085    | 4.98571    | -1.44864   | 0.00153868 |
| HUS1           | 4.25399    | 4.58682    | 0.108678   | 0.907121   |
| CPPED1         | 1.16936    | 1.60291    | 0.454966   | 0.274969   |
| CTAGE4         | 0.193479   | 0.173013   | -0.161296  | 1          |
| MSANTD3,MSAN'  | 67.3598    | 50.5296    | -0.41476   | 0.178116   |
| EPHX2          | 4.53198    | 3.08646    | -0.554187  | 0.175976   |
| CCDC106        | 0.658256   | 0.801868   | 0.284716   | 0.866944   |
| MEAF6          | 9.99036    | 11.6576    | 0.222661   | 0.635374   |
| CRIM1          | 7.41238    | 7.05504    | -0.0712815 | 0.934505   |
| GALNT4,POC1B,f | 4.70613    | 3.26796    | -0.526148  | 0.125383   |
| TMEM79         | 2.69395    | 3.50691    | 0.380479   | 0.525574   |
| SLC17A7        | 0.339495   | 0.137617   | -1.30273   | 1          |
| ZNF616         | 0.996311   | 0.928029   | -0.102427  | 0.940466   |
| TBC1D17        | 9.48607    | 8.80886    | -0.106855  | 0.904905   |
| VAV1           | 0.0803953  | 0.0504542  | -0.672138  | 1          |
| RNF213         | 0.938123   | 0.708246   | -0.405527  | 0.51683    |

|            |            |            |             |            |
|------------|------------|------------|-------------|------------|
| AKD1       | 0.539359   | 0.449465   | -0.263039   | 0.826133   |
| RNF24      | 2.50442    | 2.20249    | -0.185347   | 0.810769   |
| CTIF       | 8.78743    | 6.91639    | -0.345422   | 0.357812   |
| TARSL2     | 2.5053     | 3.26442    | 0.381843    | 0.381587   |
| LTN1       | 0.931259   | 0.87574    | -0.0886786  | 0.934251   |
| HSD17B3    | 0.362538   | 0.143276   | -1.33933    | 1          |
| TRERF1     | 2.24026    | 2.11298    | -0.0843897  | 0.929491   |
| SHB        | 8.34534    | 9.96802    | 0.256336    | 0.554874   |
| SECISBP2L  | 1.71624    | 1.7358     | 0.0163507   | 0.990104   |
| ZNF26      | 3.88891    | 3.79544    | -0.0350996  | 0.975492   |
| CSGALNACT1 | 0.0808673  | 0.206711   | 1.35399     | 1          |
| DHX32      | 11.2916    | 11.033     | -0.033433   | 0.987173   |
| TBC1D4     | 4.01189    | 5.86745    | 0.548451    | 0.0650492  |
| SOGA2      | 3.14969    | 3.58264    | 0.185814    | 0.77012    |
| GATSL3     | 2.94252    | 4.55237    | 0.629566    | 0.234947   |
| PRKCDBP    | 20.7393    | 11.258     | -0.881415   | 0.0156935  |
| ALOX15B    | 0.00663039 | 0.00493107 | -0.427192   | 1          |
| HOGA1      | 0.0761578  | 0.0314402  | -1.27638    | 1          |
| HDAC10     | 10.2348    | 10.2113    | -0.00332083 | 0.997773   |
| CCDC163P   | 0.808235   | 0.813765   | 0.00983716  | 0.996035   |
| UBA2       | 19.7367    | 16.5658    | -0.25267    | 0.551877   |
| SLC6A3     | 0.00634446 | 0.00418053 | -0.601811   | 1          |
| MXRA7      | 41.4361    | 46.9797    | 0.181151    | 0.727623   |
| RGS3       | 7.28961    | 8.88098    | 0.284877    | 0.626866   |
| SSBP2      | 1.3452     | 0.885726   | -0.602888   | 0.727839   |
| TBCE       | 4.1111     | 3.87003    | -0.0871801  | 0.975454   |
| SCLT1      | 1.68533    | 1.64998    | -0.0305855  | 0.981441   |
| IL31RA     | 0.0219632  | 0.00392119 | -2.48572    | 1          |
| C3AR1      | 0.246778   | 0.0700617  | -1.81652    | 1          |
| FBN3       | 0.00283261 | 0          | #NAME?      | 1          |
| PAM        | 9.15392    | 7.00173    | -0.386679   | 0.265533   |
| SMYD2      | 17.5634    | 20.6375    | 0.232692    | 0.625139   |
| ZNF584     | 5.08022    | 10.2912    | 1.01844     | 0.00153868 |
| SSTR5      | 0.0143731  | 0          | #NAME?      | 1          |
| RPS6       | 4185.1     | 4596.09    | 0.135143    | 0.856147   |
| RPS11      | 5250.45    | 5710.46    | 0.121165    | 0.87748    |
| PKLR       | 0.304818   | 0.756727   | 1.31183     | 0.12245    |
| PRICKLE4   | 1.58929    | 1.24277    | -0.354824   | 0.720534   |
| ASXL1      | 9.74409    | 10.728     | 0.138787    | 0.908098   |
| RUFY1      | 9.13462    | 12.8733    | 0.494962    | 0.12245    |
| ADD3       | 2.48559    | 1.25346    | -0.987668   | 0.00153868 |
| ZMYM6      | 1.46983    | 1.45147    | -0.0181353  | 0.989716   |
| HLA-H      | 11.3778    | 22.1111    | 0.958551    | 0.00153868 |
| WFDC2      | 0.0412122  | 0          | #NAME?      | 1          |
| GATSL2     | 0.0281809  | 0.0735349  | 1.38371     | 1          |
| PCYT2      | 11.2564    | 11.7806    | 0.0656732   | 0.945399   |
| ZNF681     | 0.363533   | 0.351241   | -0.0496213  | 1          |
| HRNR       | 0.00218051 | 0.00143428 | -0.604345   | 1          |
| YAF2       | 2.17656    | 2.8129     | 0.370007    | 0.382564   |

|              |           |            |            |            |
|--------------|-----------|------------|------------|------------|
| INPP5J       | 2.32049   | 1.58458    | -0.550331  | 0.328047   |
| COG7         | 4.87486   | 4.96614    | 0.0267646  | 0.981441   |
| EBPL         | 109.516   | 114.522    | 0.0644841  | 0.93855    |
| SEC31A       | 5.25412   | 6.58756    | 0.326295   | 0.409021   |
| SNX14        | 9.37051   | 9.267      | -0.0160261 | 0.988088   |
| ZNF675       | 1.62173   | 1.32756    | -0.288758  | 0.698259   |
| NMRK1        | 8.31186   | 3.59328    | -1.20987   | 0.00153868 |
| SEC61G       | 295.675   | 370.28     | 0.324603   | 0.362399   |
| ASTE1        | 1.66746   | 2.12137    | 0.34734    | 0.905839   |
| FANCF        | 3.48926   | 4.31364    | 0.305986   | 0.525673   |
| HDAC3        | 56.4471   | 63.5503    | 0.171001   | 0.751293   |
| DOC2GP       | 0.108209  | 0          | #NAME?     | 1          |
| RPGRIP1L     | 0.284995  | 0.411981   | 0.531642   | 0.370768   |
| LFNG         | 2.44886   | 6.15048    | 1.32859    | 0.00153868 |
| FAM149B1     | 1.62693   | 1.08135    | -0.589324  | 0.214637   |
| SPG7         | 18.1986   | 22.4504    | 0.302911   | 0.455427   |
| OSM          | 0.0101292 | 0          | #NAME?     | 1          |
| CD163L1      | 0.14316   | 0.0813752  | -0.814969  | 1          |
| NPC2         | 208.136   | 203.424    | -0.0330369 | 0.982866   |
| BLCAP        | 29.3913   | 39.0274    | 0.409102   | 0.196981   |
| EAF2         | 1.24176   | 1.04001    | -0.255793  | 0.839812   |
| FAM214A      | 1.3604    | 0.61917    | -1.13562   | 0.00572929 |
| CPXM2        | 0.0114972 | 0.00374965 | -1.61645   | 1          |
| FTX          | 0.493962  | 0.509833   | 0.0456244  | 0.990183   |
| ENGASE       | 3.64403   | 6.36577    | 0.804798   | 0.00380811 |
| GPN1         | 23.4119   | 35.1778    | 0.587425   | 0.299594   |
| DUOX1        | 0.0213401 | 0.039736   | 0.896881   | 1          |
| BBS2         | 10.5623   | 6.41138    | -0.720214  | 0.00897284 |
| KLLN         | 0.22492   | 0.15831    | -0.506665  | 1          |
| TP53INP2     | 5.48747   | 4.36346    | -0.330669  | 0.450976   |
| KIAA1432     | 1.175     | 1.3134     | 0.160639   | 0.842721   |
| CCDC107      | 11.5027   | 10.3495    | -0.152412  | 0.923193   |
| LOC400027    | 5.50634   | 5.28222    | -0.0599494 | 0.957719   |
| SEPT9        | 34.605    | 43.2031    | 0.320152   | 0.385735   |
| LRRC56       | 1.95551   | 1.66644    | -0.230775  | 0.824372   |
| DCLK2        | 0.509333  | 0.56526    | 0.150306   | 0.917701   |
| TREM2        | 0.0288184 | 0.0538364  | 0.901589   | 1          |
| LRRC58       | 3.70408   | 4.46095    | 0.268236   | 0.518305   |
| LOC441454    | 0.262089  | 0.379596   | 0.534406   | 0.694097   |
| ELP4         | 10.288    | 6.75625    | -0.606669  | 0.0719976  |
| OSBPL10      | 5.63529   | 3.76082    | -0.583443  | 0.0588451  |
| ZNF474       | 7.13428   | 3.97082    | -0.845331  | 0.00820276 |
| ZNF367       | 2.79864   | 3.4421     | 0.298563   | 0.553492   |
| RPS25        | 4071.3    | 4363.22    | 0.0999035  | 0.900267   |
| KIF15        | 1.75022   | 1.38904    | -0.333447  | 0.513663   |
| ZNF101       | 2.6506    | 3.05142    | 0.203162   | 0.81727    |
| ZBTB14       | 1.39816   | 1.40391    | 0.00592127 | 0.996244   |
| EARS2        | 8.30985   | 11.905     | 0.518675   | 0.0699076  |
| LOC100128822 | 6.1808    | 5.46816    | -0.176737  | 0.859937   |

|           |            |            |            |            |
|-----------|------------|------------|------------|------------|
| IFT88     | 0.991612   | 0.690131   | -0.522906  | 0.36998    |
| MTHFD2L   | 0.748464   | 0.850546   | 0.184455   | 0.883608   |
| DIRC3     | 0.00390216 | 0          | #NAME?     | 1          |
| RDH16     | 0.131011   | 0.0949569  | -0.464342  | 1          |
| CCDC109B  | 30.8285    | 25.1067    | -0.296194  | 0.471107   |
| CHD2      | 5.97818    | 4.4455     | -0.42736   | 0.298627   |
| NLRC3     | 0.149327   | 0.201095   | 0.429401   | 1          |
| CCDC88A   | 1.05769    | 1.08365    | 0.0349713  | 0.976134   |
| KCNQ1     | 9.28288    | 5.12786    | -0.856215  | 0.0705331  |
| RXFP4     | 0.0394507  | 0.0364035  | -0.115974  | 1          |
| INHA      | 0.459809   | 0.153347   | -1.58424   | 0.229368   |
| HECTD4    | 0.653925   | 0.713467   | 0.125722   | 0.88493    |
| C16orf46  | 0.33488    | 0.55057    | 0.717281   | 0.407744   |
| CDK5R1    | 2.06554    | 3.30717    | 0.679079   | 0.0529824  |
| TPI1      | 875.422    | 1165.03    | 0.412322   | 0.258496   |
| NAV2      | 4.79162    | 2.15454    | -1.15314   | 0.00153868 |
| ORC1      | 3.079      | 3.7595     | 0.28808    | 0.591871   |
| IFT81     | 0.951721   | 1.03217    | 0.117068   | 0.930021   |
| HOXD-AS1  | 1.77762    | 1.13484    | -0.647457  | 0.122719   |
| AGAP6     | 3.29718    | 5.01909    | 0.606195   | 0.086788   |
| LDLRAD2   | 0.0162982  | 0.00881872 | -0.886073  | 1          |
| CDC5L     | 4.60379    | 4.79639    | 0.0591243  | 0.948368   |
| NFS1      | 9.98036    | 11.4037    | 0.192344   | 0.905305   |
| CDCA3     | 19.8568    | 29.0295    | 0.547888   | 0.0741309  |
| CNN3      | 58.839     | 73.8513    | 0.327851   | 0.362925   |
| CHRFAM7A  | 0.0313262  | 0.0495155  | 0.660512   | 1          |
| RALGAPA1  | 0.962605   | 0.817376   | -0.235944  | 0.72151    |
| OSGIN1    | 15.7367    | 13.8906    | -0.18003   | 0.774876   |
| CLSTN3    | 6.94201    | 5.26347    | -0.39934   | 0.284835   |
| ITGB2-AS1 | 0.013947   | 0          | #NAME?     | 1          |
| DBNDD1    | 30.5036    | 36.6082    | 0.263189   | 0.525673   |
| COX18     | 3.55923    | 3.07996    | -0.208656  | 0.72151    |
| ZNF674    | 0.428175   | 0.230998   | -0.890318  | 0.111341   |
| ZNF691    | 6.98621    | 8.87083    | 0.344559   | 0.459126   |
| CEP95     | 5.80281    | 5.08189    | -0.191386  | 0.751881   |
| ZNF701    | 0.134852   | 0.127737   | -0.078203  | 1          |
| DIP2A     | 3.11861    | 3.32114    | 0.0907744  | 0.938232   |
| ZNF322    | 2.79085    | 3.373      | 0.273328   | 0.564876   |
| HK1       | 62.3879    | 45.1142    | -0.467685  | 0.100739   |
| SRSF4     | 36.9303    | 63.431     | 0.78038    | 0.00153868 |
| PSD4      | 1.54973    | 1.41855    | -0.127604  | 0.902251   |
| ZNF433    | 1.24878    | 0.837268   | -0.576752  | 0.307111   |
| ZNF248    | 1.13059    | 2.26918    | 1.0051     | 0.00153868 |
| C16orf87  | 2.58926    | 2.43761    | -0.0870768 | 0.948523   |
| ARHGAP42  | 0.202699   | 0.214829   | 0.0838513  | 1          |
| VEZF1     | 5.83315    | 5.47397    | -0.091688  | 0.910813   |
| FAM210B   | 18.8717    | 16.6935    | -0.176936  | 0.741465   |
| PDE4DIP   | 0.509011   | 0.721338   | 0.502979   | 0.343885   |
| C19orf33  | 265.384    | 250.802    | -0.0815322 | 0.950837   |

|              |            |           |             |            |
|--------------|------------|-----------|-------------|------------|
| CDC42EP5     | 22.2311    | 17.4913   | -0.345942   | 0.600187   |
| SPIN1        | 7.5984     | 8.39532   | 0.143891    | 0.814685   |
| C15orf27     | 0.0210381  | 0         | #NAME?      | 1          |
| B3GNT8       | 0.0325684  | 0.0456366 | 0.48672     | 1          |
| MKL2         | 0.822015   | 0.948883  | 0.207066    | 0.76719    |
| OTUD7B       | 1.9661     | 2.65089   | 0.431142    | 0.235343   |
| HMGCL        | 34.6158    | 15.4817   | -1.16087    | 0.00153868 |
| TLE2         | 28.7138    | 24.3421   | -0.238291   | 0.603415   |
| IL11         | 9.98458    | 16.0439   | 0.68425     | 0.0123712  |
| UACA         | 0.85845    | 0.370464  | -1.2124     | 0.00153868 |
| IFT172       | 1.93933    | 0.944665  | -1.03768    | 0.00153868 |
| BARD1        | 0.186312   | 0.176703  | -0.0763911  | 1          |
| DLGAP5       | 5.96728    | 6.23886   | 0.0642086   | 0.947681   |
| IMMP2L       | 10.235     | 6.23704   | -0.714579   | 0.0294837  |
| APOBEC3H     | 0.04495    | 0.0928065 | 1.04591     | 1          |
| SEC14L2      | 7.35857    | 6.54628   | -0.168751   | 0.80005    |
| CCDC9        | 5.45559    | 6.92444   | 0.343962    | 0.502136   |
| TSSK6        | 1.11842    | 0.923957  | -0.275566   | 0.879418   |
| DHRS11       | 10.0197    | 7.05829   | -0.505447   | 0.190507   |
| ZNF652       | 0.801145   | 0.903829  | 0.173987    | 0.809647   |
| ZBTB24       | 3.06811    | 3.05612   | -0.00565001 | 0.996765   |
| HBG2         | 0.712801   | 1.23848   | 0.796993    | 0.462969   |
| ARID4A       | 0.500637   | 0.419387  | -0.255484   | 0.758625   |
| CMIP         | 7.63113    | 7.0516    | -0.113946   | 0.881238   |
| FAM134A      | 23.2389    | 23.2791   | 0.00249278  | 0.998382   |
| TP53BP2      | 9.02636    | 8.75118   | -0.044667   | 0.963619   |
| HTRA4        | 0.00925715 | 0.0155848 | 0.7515      | 1          |
| FAM212B      | 0.857728   | 0.990974  | 0.208327    | 0.92085    |
| FAM210A      | 5.75174    | 7.12709   | 0.309315    | 0.426631   |
| BICD1        | 0.2881     | 0.273297  | -0.0760981  | 1          |
| GSTA4        | 10.681     | 7.69046   | -0.473901   | 0.216201   |
| TRIM32       | 7.08787    | 7.88869   | 0.154433    | 0.824372   |
| LRRC3-AS1    | 0.0309566  | 0.038505  | 0.314796    | 1          |
| MDM1         | 2.10135    | 2.37655   | 0.177551    | 0.83199    |
| C6orf170     | 0.24604    | 0.170471  | -0.529369   | 1          |
| RUNX2        | 1.52619    | 1.21989   | -0.32318    | 0.739297   |
| RIN1         | 43.0874    | 35.2527   | -0.289534   | 0.465071   |
| ZNF414       | 9.40379    | 6.85398   | -0.4563     | 0.418727   |
| LOC100130899 | 4.17149    | 5.23984   | 0.32896     | 0.452276   |
| CLDN7        | 0.14835    | 0.162631  | 0.132595    | 1          |
| FASN         | 31.1659    | 59.5506   | 0.934148    | 0.00153868 |
| KAT5         | 9.41024    | 8.16669   | -0.20448    | 0.907121   |
| CALHM3       | 0.0140452  | 0         | #NAME?      | 1          |
| FAM110D      | 0.68451    | 1.08386   | 0.663042    | 0.56396    |
| UNG          | 25.8941    | 43.5501   | 0.750052    | 0.00478151 |
| MMAB         | 5.11846    | 5.31083   | 0.0532264   | 0.958829   |
| FBXO3        | 5.66886    | 3.97709   | -0.511345   | 0.160303   |
| PER3         | 0.184888   | 0.228548  | 0.305843    | 1          |
| SLCO4A1      | 26.0161    | 38.3813   | 0.560998    | 0.0464744  |



|              |            |            |            |            |
|--------------|------------|------------|------------|------------|
| BPHL         | 16.1677    | 14.1557    | -0.191727  | 0.745392   |
| PIK3C2A      | 2.39104    | 2.84349    | 0.250027   | 0.586001   |
| SNX21        | 8.51485    | 8.24697    | -0.046117  | 0.970533   |
| ZSWIM6       | 1.89302    | 1.09331    | -0.791993  | 0.0304296  |
| ARHGAP5      | 2.09706    | 1.88439    | -0.154276  | 0.806525   |
| N6AMT1       | 2.55741    | 3.59359    | 0.490742   | 0.41883    |
| B3GALTL      | 1.20571    | 1.5717     | 0.382451   | 0.452338   |
| LOC389765    | 0.539472   | 0.513327   | -0.0716693 | 0.974777   |
| LOC646278    | 0.280939   | 0.253557   | -0.147946  | 1          |
| CLEC4GP1     | 0.0239085  | 0          | #NAME?     | 1          |
| RCCD1        | 8.27637    | 8.97151    | 0.116353   | 0.880754   |
| FCGRT        | 33.3316    | 27.4476    | -0.280209  | 0.511853   |
| NPEPL1,STX16 | 28.9364    | 26.5962    | -0.121664  | 0.891476   |
| PRRC1        | 5.87087    | 6.60509    | 0.170005   | 0.768903   |
| SNX3         | 112.464    | 154.59     | 0.458986   | 0.12463    |
| MCM9         | 0.917762   | 1.09641    | 0.256599   | 0.873742   |
| MIAT         | 0.0355482  | 0.0368934  | 0.0535871  | 1          |
| ZNF503       | 7.41928    | 11.1023    | 0.581505   | 0.111557   |
| RAB40C       | 13.8358    | 15.897     | 0.200346   | 0.722665   |
| CHRNB1       | 27.7249    | 14.7329    | -0.912144  | 0.00153868 |
| SDK2         | 0.00151055 | 0          | #NAME?     | 1          |
| CSF1R        | 0.00380683 | 0.00626036 | 0.717658   | 1          |
| RPL26        | 5087.15    | 5738.33    | 0.173774   | 0.781103   |
| XK           | 0.467378   | 0.508554   | 0.121812   | 0.929645   |
| SPAG5        | 13.5049    | 14.9081    | 0.142614   | 0.815365   |
| FOXH1        | 8.55701    | 11.3891    | 0.41247    | 0.628907   |
| RAD52        | 2.72005    | 2.02064    | -0.428818  | 0.390823   |
| STK39        | 4.95907    | 4.41842    | -0.166538  | 0.806525   |
| RPS3         | 2713.97    | 2805.51    | 0.0478585  | 0.967343   |
| H1FNT        | 0.0326557  | 0          | #NAME?     | 1          |
| SIGLEC15     | 0.0219183  | 0          | #NAME?     | 1          |
| PXN-AS1      | 2.32462    | 2.34398    | 0.0119684  | 0.999234   |
| CINP         | 22.7064    | 27.2387    | 0.262557   | 0.589092   |
| HPS4         | 5.28408    | 3.38276    | -0.643449  | 0.0318822  |
| WIPF2        | 3.83291    | 3.19716    | -0.261647  | 0.59009    |
| C7orf63      | 0.668592   | 0.936942   | 0.486834   | 0.396533   |
| ST13         | 81.3055    | 94.5809    | 0.218196   | 0.64889    |
| RBBP6        | 6.26319    | 6.9604     | 0.152272   | 0.906934   |
| TUBD1        | 1.3883     | 2.26849    | 0.708416   | 0.117075   |
| RCOR3        | 3.23622    | 3.0882     | -0.0675466 | 0.954981   |
| KCTD12       | 1.62278    | 2.22318    | 0.454163   | 0.233177   |
| GAS5         | 1266.01    | 1102.4     | -0.199638  | 0.698819   |
| ATF7IP2      | 1.28876    | 1.45006    | 0.17012    | 0.851768   |
| C14orf180    | 0.0256677  | 0.0177393  | -0.533005  | 1          |
| HPRT1        | 63.3886    | 66.4621    | 0.0683084  | 0.937886   |
| TFDP2        | 2.85792    | 1.7672     | -0.693502  | 0.00970147 |
| HIBADH       | 11.8299    | 8.35546    | -0.501652  | 0.140298   |
| PSTK         | 2.57456    | 1.88702    | -0.448219  | 0.489743   |
| SCP2         | 29.5488    | 27.6374    | -0.0964773 | 0.899607   |

|              |            |            |            |            |
|--------------|------------|------------|------------|------------|
| INTS8        | 12.7125    | 10.8488    | -0.228718  | 0.709707   |
| RNF19A       | 6.07896    | 4.76945    | -0.350003  | 0.345838   |
| HAUS4        | 34.7777    | 23.6343    | -0.557277  | 0.0451232  |
| CHEK2        | 10.1441    | 8.37751    | -0.276046  | 0.5818     |
| POLG         | 12.2911    | 21.6944    | 0.819714   | 0.0198871  |
| SPATA7       | 3.64044    | 1.83517    | -0.9882    | 0.00739414 |
| COA3         | 45.5634    | 79.9245    | 0.810761   | 0.00153868 |
| PRPF40B      | 0.635329   | 0.332144   | -0.935693  | 0.875956   |
| ARL4D        | 0.0150776  | 0.0381676  | 1.33994    | 1          |
| EML6         | 0.405849   | 0.355815   | -0.189815  | 0.858729   |
| BRK1         | 74.278     | 76.3154    | 0.0390397  | 0.968703   |
| GPX4         | 320.743    | 329.811    | 0.0402209  | 0.967343   |
| CTNNA1       | 24.6673    | 27.8972    | 0.177522   | 0.73707    |
| NUCKS1       | 14.8024    | 11.9167    | -0.312843  | 0.392178   |
| BCKDK        | 105.673    | 108.21     | 0.0342262  | 0.974073   |
| ZNF420       | 0.895963   | 1.47513    | 0.719328   | 0.105057   |
| LOC100506548 | 22.8514    | 19.9802    | -0.193715  | 0.704317   |
| MYLK-AS1     | 0.152029   | 0.29871    | 0.974401   | 1          |
| LOC100507489 | 0.0929722  | 0.0211559  | -2.13574   | 1          |
| FLCN         | 14.2726    | 7.21956    | -0.98326   | 0.00153868 |
| FAM108B1     | 3.85819    | 5.30985    | 0.460746   | 0.207927   |
| ALDH8A1      | 0.125372   | 0.152244   | 0.280168   | 1          |
| LOC100130275 | 1.80539    | 1.34161    | -0.428344  | 0.869722   |
| PUS7         | 7.53012    | 12.4857    | 0.729538   | 0.00153868 |
| CHCHD6       | 58.3562    | 76.8937    | 0.397978   | 0.227684   |
| ZNF833P      | 0.459644   | 0.464501   | 0.0151651  | 0.994279   |
| SYT1         | 0.00654883 | 0.00338522 | -0.951986  | 1          |
| IL34         | 0.0107813  | 0          | #NAME?     | 1          |
| FHL2         | 326.635    | 211.489    | -0.627097  | 0.0169799  |
| TLX2         | 0.0142171  | 0.013057   | -0.1228    | 1          |
| WDR26        | 6.57195    | 7.21892    | 0.135461   | 0.831535   |
| EIF1AD       | 9.40461    | 19.2153    | 1.03081    | 0.384547   |
| LOC730227    | 0.0341047  | 0.023325   | -0.548093  | 1          |
| CLDND2       | 0.280683   | 0.414529   | 0.562534   | 0.809131   |
| ZNF175       | 1.31348    | 1.18977    | -0.142703  | 0.883608   |
| RAB11FIP4    | 3.30823    | 2.31293    | -0.516341  | 0.210317   |
| RNF146       | 5.35702    | 3.68452    | -0.539951  | 0.135269   |
| RGS12        | 1.62153    | 2.13648    | 0.397878   | 0.448169   |
| SMCR7        | 19.7202    | 8.81704    | -1.16131   | 0.00153868 |
| MSLN         | 0.0274721  | 0          | #NAME?     | 1          |
| ZNF18        | 1.68664    | 1.06011    | -0.66993   | 0.146193   |
| OXR1         | 8.05788    | 4.91038    | -0.714565  | 0.0187307  |
| JARID2       | 1.78992    | 1.68911    | -0.0836283 | 0.939068   |
| FGFR10P      | 5.83209    | 5.5495     | -0.0716556 | 0.945399   |
| C21orf2      | 3.98012    | 5.09165    | 0.355319   | 0.547145   |
| CD27-AS1     | 3.58       | 1.72574    | -1.05274   | 0.00572929 |
| LINC00324    | 0.692194   | 0.36443    | -0.925533  | 0.239441   |
| PTCHD4       | 0.129734   | 0.121907   | -0.0897737 | 1          |
| FAM131C      | 21.8659    | 15.9115    | -0.458614  | 0.197402   |

|                |            |            |            |            |
|----------------|------------|------------|------------|------------|
| AGSK1,LOC7278- | 0.20678    | 0.176811   | -0.225884  | 1          |
| C22orf39       | 11.0377    | 11.6282    | 0.0751948  | 0.938622   |
| CEP78          | 3.2747     | 5.8561     | 0.838578   | 0.00572929 |
| FAM178A        | 2.98469    | 3.21759    | 0.108399   | 0.963794   |
| NANP           | 2.23669    | 2.75188    | 0.299051   | 0.559324   |
| MMP11          | 7.01028    | 4.90146    | -0.516262  | 0.196665   |
| DENND1A        | 11.6423    | 9.15125    | -0.347331  | 0.415392   |
| ZNF836         | 1.23575    | 0.538313   | -1.19887   | 0.00478151 |
| SRRM2          | 33.053     | 44.4992    | 0.428998   | 0.166442   |
| EPB41L1        | 3.89385    | 3.32492    | -0.227876  | 0.66979    |
| METTL20        | 0.379361   | 0.0969632  | -1.96806   | 0.0243026  |
| KTN1-AS1       | 1.17842    | 0.713397   | -0.72408   | 0.255196   |
| CHID1          | 20.1253    | 27.0258    | 0.425328   | 0.163844   |
| RANBP17        | 0.429652   | 0.283476   | -0.599942  | 0.368309   |
| MIR600HG       | 0.747108   | 1.15211    | 0.624893   | 0.147146   |
| DZIP1          | 0.00443296 | 0.00114291 | -1.95556   | 1          |
| MMP24          | 4.38643    | 5.51602    | 0.330581   | 0.463667   |
| LENG9          | 13.3543    | 11.0881    | -0.26829   | 0.814132   |
| AKR7A2P1       | 0.0637938  | 0.0109716  | -2.53964   | 1          |
| MARCH8         | 0.682718   | 0.441268   | -0.629634  | 0.393864   |
| ARHGAP23       | 1.92731    | 0.770357   | -1.32299   | 0.00153868 |
| KATNAL1        | 0.281272   | 0.257698   | -0.126286  | 1          |
| MAP2K5         | 10.9563    | 3.82554    | -1.51803   | 0.00153868 |
| CRYBB2P1       | 17.3877    | 21.2689    | 0.290681   | 0.480434   |
| TRAF3IP2       | 3.76301    | 2.78384    | -0.434811  | 0.266518   |
| RPS8           | 5033.28    | 5485.58    | 0.124146   | 0.869513   |
| ZNF181         | 1.73645    | 1.44164    | -0.268427  | 0.691381   |
| MIF            | 2967.83    | 3887.81    | 0.389551   | 0.266833   |
| MTFR1L         | 19.3732    | 21.4696    | 0.148236   | 0.814274   |
| LGALS8         | 6.39964    | 4.10469    | -0.640719  | 0.258646   |
| AHCYL2         | 2.04053    | 2.13334    | 0.0641714  | 0.952184   |
| TNNT1          | 130.498    | 128.579    | -0.0213718 | 0.98206    |
| BTA1F1         | 2.85762    | 2.64595    | -0.111027  | 0.882065   |
| VPS53          | 2.70523    | 3.91602    | 0.533638   | 0.0621442  |
| CEBPA-AS1      | 2.71291    | 3.83426    | 0.499105   | 0.338257   |
| KAT6B          | 1.00739    | 1.06469    | 0.0798134  | 0.940466   |
| PLD2           | 9.19453    | 7.48432    | -0.296905  | 0.494801   |
| DLL3           | 0.0179594  | 0.0165328  | -0.119407  | 1          |
| SRGAP3         | 0.0177446  | 0.00217314 | -3.02953   | 1          |
| PEX3           | 7.24671    | 6.53049    | -0.150133  | 0.821083   |
| FRAS1          | 0.758415   | 0.432219   | -0.811225  | 0.0163491  |
| CPOX           | 11.0292    | 16.16      | 0.551101   | 0.0504359  |
| LOC100130231   | 0.0029714  | 0.00152662 | -0.960802  | 1          |
| SEMA6C         | 2.07142    | 1.45319    | -0.511398  | 0.347688   |
| KLHL17         | 14.3588    | 23.8496    | 0.732023   | 0.00820276 |
| C20orf112      | 1.10151    | 1.23159    | 0.161035   | 0.861141   |
| TRIM54         | 0.00956731 | 0          | #NAME?     | 1          |
| OBFC1          | 2.07161    | 1.42709    | -0.537671  | 0.139083   |
| PRDM1          | 0.167803   | 0.120271   | -0.480471  | 1          |

|               |            |           |            |            |
|---------------|------------|-----------|------------|------------|
| H6PD          | 2.99408    | 1.62756   | -0.879402  | 0.00380811 |
| PKIB          | 0.0697528  | 0.0287595 | -1.27822   | 1          |
| SP100         | 14.4752    | 13.7722   | -0.071823  | 0.945673   |
| MTERFD3       | 2.84857    | 4.25122   | 0.577641   | 0.148853   |
| KCNAB2        | 29.899     | 27.2412   | -0.134307  | 0.845153   |
| PRKD3         | 1.86789    | 2.15886   | 0.20886    | 0.729504   |
| PARP6         | 5.84626    | 5.63484   | -0.0531403 | 0.960032   |
| FBXL5         | 7.14211    | 6.32213   | -0.175941  | 0.758199   |
| DEAF1         | 33.5971    | 37.6285   | 0.163489   | 0.824372   |
| ZNF589        | 3.87575    | 6.08352   | 0.650429   | 0.0374759  |
| ANKRD13A      | 24.7306    | 20.6899   | -0.257367  | 0.536266   |
| ATF1          | 5.37065    | 6.5529    | 0.287039   | 0.540497   |
| HAGHL         | 73.5998    | 76.376    | 0.0534173  | 0.954143   |
| ZSCAN30       | 1.30172    | 0.927923  | -0.488342  | 0.542067   |
| ZNF277        | 9.82375    | 4.79769   | -1.03393   | 0.00153868 |
| LOC100271836  | 0.0628446  | 0.0635006 | 0.0149815  | 1          |
| LOC100287177  | 21.0735    | 11.737    | -0.844369  | 0.32346    |
| SIX4          | 1.64378    | 2.77056   | 0.753157   | 0.0117316  |
| PLSCR3,TMEM25 | 224.906    | 217.019   | -0.0514982 | 0.970421   |
| MLL4          | 4.96056    | 6.88746   | 0.47347    | 0.117237   |
| C15orf62      | 0.237981   | 0.252197  | 0.0837026  | 1          |
| NAA16         | 2.21251    | 4.47464   | 1.01608    | 0.00153868 |
| MON2          | 0.903133   | 1.05621   | 0.225887   | 0.698989   |
| ARL17A        | 0.237548   | 0.260555  | 0.133367   | 1          |
| POLH          | 1.70341    | 2.03285   | 0.255082   | 0.883799   |
| EFNA4         | 24.8141    | 29.4049   | 0.244898   | 0.940466   |
| GCC2          | 0.632472   | 0.600854  | -0.0739879 | 0.953219   |
| KIF20A        | 5.18496    | 6.60254   | 0.348687   | 0.736305   |
| RGPD5,RGPD6   | 0.00209682 | 0         | #NAME?     | 1          |
| RPL39         | 7785.42    | 8145.62   | 0.0652497  | 0.945208   |
| ZFYVE1        | 5.94278    | 4.51515   | -0.396365  | 0.369051   |
| TPI1P2        | 0.148814   | 0.197358  | 0.407307   | 1          |
| GPLD1         | 0.291586   | 0.406054  | 0.47775    | 0.494507   |
| LGALS3        | 45.9799    | 49.05     | 0.0932513  | 0.906423   |
| EHBP1         | 2.1106     | 2.18612   | 0.0507202  | 0.964843   |
| USP6          | 0.157943   | 0.145213  | -0.121227  | 1          |
| ENPP1         | 0.621545   | 0.590948  | -0.0728272 | 0.954469   |
| ERGIC1        | 73.2438    | 77.0231   | 0.0725842  | 0.93102    |
| RNF166        | 14.128     | 12.6609   | -0.158176  | 0.836427   |
| ZC3H12B       | 0.221652   | 0.308738  | 0.478088   | 1          |
| PHLDA3        | 80.5437    | 75.3902   | -0.0953936 | 0.901063   |
| FCHO2         | 1.53467    | 1.30644   | -0.23229   | 0.722833   |
| NOP9          | 2.02171    | 4.94734   | 1.29107    | 0.00153868 |
| TSC22D1       | 13.2922    | 10.9761   | -0.276209  | 0.503643   |
| SMC5          | 2.74841    | 3.48352   | 0.341949   | 0.372956   |
| PDCD6IP       | 14.4443    | 12.9348   | -0.159247  | 0.781034   |
| NUAK1         | 0.9649     | 0.580741  | -0.732484  | 0.0933464  |
| TMEM219       | 91.8527    | 75.5871   | -0.281183  | 0.478004   |
| WDR59         | 11.1452    | 10.317    | -0.111393  | 0.876392   |

|               |            |            |            |            |
|---------------|------------|------------|------------|------------|
| HFE2          | 0.0126577  | 0.00648562 | -0.964703  | 1          |
| CEP44         | 1.53526    | 0.951475   | -0.690243  | 0.253241   |
| GNB4          | 0.0679471  | 0.0985972  | 0.537133   | 1          |
| CCDC61        | 6.45694    | 7.16363    | 0.14984    | 0.876338   |
| GAA           | 49.9549    | 39.9477    | -0.322511  | 0.378455   |
| SUDS3         | 5.37758    | 6.63364    | 0.302842   | 0.447327   |
| LINC00520     | 0.210589   | 0.152811   | -0.462688  | 1          |
| TULP3         | 7.5897     | 6.52441    | -0.218195  | 0.689582   |
| FRYL          | 0.985907   | 0.963102   | -0.0337632 | 0.975928   |
| TET2          | 0.480731   | 0.402213   | -0.257271  | 0.724492   |
| LAMC1         | 8.56618    | 6.8227     | -0.328309  | 0.350838   |
| TRIM5         | 1.56636    | 1.10285    | -0.506181  | 0.338578   |
| PRKCA         | 0.793415   | 0.913123   | 0.202734   | 0.783706   |
| SNORA21       | 34.1261    | 34.8235    | 0.0291858  | 0.997552   |
| SEC23A        | 3.4983     | 3.98325    | 0.187294   | 0.764196   |
| ESCO1         | 1.67185    | 1.81687    | 0.120007   | 0.89301    |
| PREP          | 12.3224    | 14.0844    | 0.192813   | 0.714933   |
| ZKSCAN3       | 0.888574   | 1.00271    | 0.174346   | 0.860412   |
| SLFN13        | 0.00184224 | 0          | #NAME?     | 1          |
| GALT          | 10.9454    | 10.9871    | 0.00549527 | 0.996765   |
| CTBS          | 3.33587    | 1.51832    | -1.13559   | 0.00153868 |
| EIF3E         | 659.56     | 630.689    | -0.0645741 | 0.944295   |
| SUGP2         | 6.12275    | 9.60087    | 0.648985   | 0.0215444  |
| RPL27         | 4474.08    | 4949.57    | 0.145712   | 0.825017   |
| HNRNPH2,RPL36 | 1479.01    | 1645.4     | 0.153812   | 0.813026   |
| ZNF461        | 0.304918   | 0.365084   | 0.259806   | 1          |
| PHF7          | 1.23072    | 0.673984   | -0.868715  | 0.111049   |
| MGC16142      | 0.957427   | 1.6192     | 0.758047   | 0.217192   |
| MYO6          | 1.69364    | 1.26205    | -0.424357  | 0.249215   |
| KATNBL1       | 6.10703    | 5.93379    | -0.0415177 | 0.969826   |
| INPP4A        | 1.9224     | 2.04983    | 0.092592   | 0.920178   |
| NOX1          | 0.0326499  | 0.107365   | 1.71737    | 1          |
| ZNF506        | 1.79349    | 1.37729    | -0.38094   | 0.464031   |
| SERTAD2       | 4.95575    | 4.16173    | -0.251922  | 0.600595   |
| IL17RB        | 2.29421    | 2.62189    | 0.192607   | 0.825017   |
| JUN           | 127.881    | 173.805    | 0.442672   | 0.15255    |
| CLPX          | 9.75601    | 9.78893    | 0.0048606  | 0.996094   |
| RPL30         | 5939.11    | 6341.43    | 0.0945618  | 0.911326   |
| COPS2         | 14.9202    | 15.2977    | 0.0360442  | 0.971663   |
| MGC16275      | 2.17998    | 2.04392    | -0.0929796 | 0.940689   |
| LOC100506100  | 5.41133    | 7.32013    | 0.435886   | 0.938622   |
| LOC100506844  | 13.3957    | 7.12467    | -0.910873  | 0.0130226  |
| MCOLN2        | 5.3975     | 7.2628     | 0.428236   | 0.239661   |
| GSTT1         | 44.0688    | 39.0347    | -0.175003  | 0.764196   |
| ADARB1        | 3.1851     | 4.89769    | 0.620761   | 0.0663805  |
| ESYT2         | 6.2987     | 5.83961    | -0.109181  | 0.880533   |
| LOC440600     | 0.078323   | 0.0699748  | -0.1626    | 1          |
| ATXN1         | 0.244294   | 0.0570562  | -2.09817   | 1          |
| MCPH1         | 2.64406    | 3.27036    | 0.306694   | 0.558912   |

|              |            |            |             |            |
|--------------|------------|------------|-------------|------------|
| SSPO         | 0.0173165  | 0.00879881 | -0.976768   | 1          |
| PHIP         | 1.74083    | 1.61113    | -0.111698   | 0.880754   |
| TRPC6        | 0.00364291 | 0          | #NAME?      | 1          |
| ATP8B4       | 0.0237447  | 0.0176735  | -0.426021   | 1          |
| APPL2        | 4.12259    | 3.31919    | -0.31272    | 0.525673   |
| MAP7         | 4.70263    | 3.12625    | -0.589036   | 0.0588451  |
| CLEC18C      | 0.00937671 | 0          | #NAME?      | 1          |
| RPL15        | 1090.62    | 1204.36    | 0.143116    | 0.835405   |
| TMEM198B     | 1.97888    | 0.670887   | -1.56054    | 0.524814   |
| RIT1         | 4.64779    | 3.60906    | -0.36492    | 0.356885   |
| TADA1        | 6.03465    | 6.55591    | 0.119525    | 0.881798   |
| MAB21L3      | 0.0940276  | 0.100712   | 0.0990864   | 1          |
| FOXJ3        | 7.17214    | 7.38038    | 0.0412929   | 0.96645    |
| KIAA2026     | 0.492404   | 0.527129   | 0.0983117   | 0.939651   |
| FAM83B       | 0.0023547  | 0.00267657 | 0.184842    | 1          |
| ENC1         | 12.5112    | 15.5765    | 0.316154    | 0.397264   |
| NRF1         | 2.94461    | 3.62336    | 0.299252    | 0.670177   |
| WDR37        | 5.052      | 4.82697    | -0.0657372  | 0.945857   |
| TNFSF4       | 0.0476358  | 0.030218   | -0.65664    | 1          |
| PSD          | 0.893764   | 0.541803   | -0.722125   | 0.849035   |
| ZNF180       | 2.08137    | 2.25531    | 0.115791    | 0.904905   |
| EIF3L        | 238.312    | 242.267    | 0.0237468   | 0.981179   |
| LPCAT4       | 25.1933    | 25.2735    | 0.00458344  | 0.997314   |
| NBAS         | 6.13314    | 2.85381    | -1.10374    | 0.00153868 |
| ASB4         | 0.0039663  | 0          | #NAME?      | 1          |
| C1orf52      | 14.6557    | 13.2594    | -0.144449   | 0.806275   |
| NPRL2        | 15.8523    | 21.2494    | 0.422729    | 0.633758   |
| TUBA4A       | 67.6744    | 174.542    | 1.36689     | 0.00153868 |
| TMEM81       | 2.03654    | 4.23542    | 1.05638     | 0.0123712  |
| NAMPT        | 17.306     | 20.5728    | 0.249466    | 0.557974   |
| FBXL13       | 0.0995381  | 0.0641473  | -0.633862   | 1          |
| LOC100133669 | 0.029874   | 0.0495613  | 0.730326    | 1          |
| LOC100505666 | 0.765529   | 0.870306   | 0.185066    | 0.978818   |
| CCDC71       | 13.6177    | 13.8424    | 0.0236017   | 0.98218    |
| GTF2H5       | 3.30264    | 3.83367    | 0.215105    | 0.670405   |
| DTD2         | 4.32627    | 5.40023    | 0.319896    | 0.480434   |
| GGTLC1       | 0.152843   | 0.0615859  | -1.31138    | 1          |
| FGD3         | 3.28464    | 1.80639    | -0.862625   | 0.0238313  |
| LENG1        | 10.1465    | 8.54118    | -0.248476   | 0.89785    |
| REV3L        | 0.511515   | 0.590734   | 0.207732    | 0.780964   |
| ITFG2        | 3.13802    | 3.79515    | 0.274304    | 0.655692   |
| CPNE1,RBM12  | 77.8321    | 77.4427    | -0.00723557 | 0.995209   |
| OSBPL9       | 12.397     | 10.5844    | -0.228049   | 0.847391   |
| ZNF124       | 2.16384    | 2.31643    | 0.0983091   | 0.937188   |
| SLC38A6      | 3.42913    | 2.96701    | -0.208836   | 0.810757   |
| HP1BP3       | 22.73      | 21.2001    | -0.10053    | 0.885805   |
| PPL          | 0.0151471  | 0.00955437 | -0.664805   | 1          |
| TYW3         | 8.92258    | 15.2566    | 0.773903    | 0.0176564  |
| SYNGAP1      | 2.97084    | 2.68214    | -0.147485   | 0.869722   |

|           |           |           |            |            |
|-----------|-----------|-----------|------------|------------|
| AGO4      | 1.51079   | 0.929023  | -0.701515  | 0.0355697  |
| LINS      | 1.792     | 2.10871   | 0.234794   | 0.759742   |
| DIP2C     | 1.86779   | 1.46531   | -0.350131  | 0.436831   |
| ANKRA2    | 2.39626   | 1.08957   | -1.13702   | 0.00572929 |
| MINK1     | 16.4497   | 16.8861   | 0.0377773  | 0.970681   |
| TLL1      | 2.71686   | 1.22351   | -1.15092   | 0.00739414 |
| ACADVL    | 121.918   | 133.922   | 0.135476   | 0.852271   |
| CRBN      | 5.62107   | 3.8284    | -0.554104  | 0.0919662  |
| ITIH2     | 0.0206101 | 0.0121736 | -0.759595  | 1          |
| MAGI3     | 0.30466   | 0.357167  | 0.229398   | 1          |
| D2HGDH    | 8.13388   | 6.25022   | -0.380037  | 0.405874   |
| WDR52     | 0.187979  | 0.162814  | -0.207353  | 1          |
| ATP5S     | 5.12867   | 4.40018   | -0.221022  | 0.772699   |
| IGLON5    | 0.0293407 | 0.035917  | 0.29176    | 1          |
| TRIM65    | 13.8527   | 15.7572   | 0.185848   | 0.722814   |
| PPIAL4G   | 0.164681  | 0.186266  | 0.177688   | 1          |
| LPIN2     | 3.86565   | 2.32927   | -0.730832  | 0.00897284 |
| EMB       | 1.79747   | 2.22445   | 0.307482   | 0.559429   |
| YPEL2     | 0.993347  | 0.633536  | -0.648871  | 0.15255    |
| C11orf65  | 0.463896  | 0.181274  | -1.35563   | 0.202477   |
| FBXO2     | 1.84045   | 1.56168   | -0.236962  | 0.972504   |
| ADHFE1    | 0.311886  | 0.331372  | 0.0874316  | 1          |
| ALDH5A1   | 3.24327   | 2.87482   | -0.173977  | 0.796502   |
| LOC646999 | 0.0299299 | 0.0478905 | 0.678149   | 1          |
| ZNF329    | 2.70435   | 3.22802   | 0.25537    | 0.648214   |
| ZNF84     | 3.30136   | 3.36868   | 0.0291201  | 0.97664    |
| TESK2     | 1.94454   | 1.17195   | -0.730518  | 0.653588   |
| SLC25A23  | 29.0969   | 29.3123   | 0.0106367  | 0.992917   |
| ZNF853    | 0.0985784 | 0.141563  | 0.522104   | 1          |
| UTRN      | 0.832587  | 0.42808   | -0.95972   | 0.00153868 |
| CISH      | 2.11349   | 4.37411   | 1.04936    | 0.00274688 |
| NBPF16    | 3.96374   | 5.58349   | 0.494306   | 0.136653   |
| METTL21D  | 4.08285   | 4.69004   | 0.200021   | 0.789544   |
| NUBPL     | 1.49164   | 1.11803   | -0.415937  | 0.474408   |
| APOC1     | 9.89742   | 9.22484   | -0.101529  | 0.946021   |
| ARHGEF39  | 5.94451   | 5.79011   | -0.0379673 | 0.97562    |
| FHDC1     | 0.31419   | 0.419513  | 0.417081   | 0.571471   |
| GPATCH2L  | 1.18966   | 1.23923   | 0.058895   | 0.970185   |
| DSTN      | 53.7198   | 72.0394   | 0.423332   | 0.167611   |
| PTGR2     | 2.06942   | 1.19852   | -0.787968  | 0.0533774  |
| TAF9B     | 7.12562   | 5.30811   | -0.424818  | 0.224437   |
| NFRKB     | 4.30494   | 5.61794   | 0.384049   | 0.30896    |
| KIF13A    | 1.24563   | 0.900193  | -0.46857   | 0.474825   |
| STX11     | 0.166699  | 0.175031  | 0.0703723  | 1          |
| RWDD2A    | 3.15876   | 2.90686   | -0.119896  | 0.971789   |
| RCOR2     | 10.8147   | 7.89055   | -0.454802  | 0.211615   |
| RABEP2    | 19.2458   | 36.7983   | 0.935101   | 0.00153868 |
| FAM45B    | 0.0446871 | 0.0111719 | -1.99998   | 1          |
| ERRFI1    | 54.494    | 28.3856   | -0.940938  | 0.00153868 |

|              |           |           |             |            |
|--------------|-----------|-----------|-------------|------------|
| SCARB2       | 19.0466   | 13.1668   | -0.53263    | 0.0603207  |
| PMS2P1       | 9.60517   | 7.89852   | -0.282229   | 0.917022   |
| ANKLE1       | 0.52345   | 0.798503  | 0.609246    | 0.38334    |
| RPL13A       | 8854.39   | 9565.31   | 0.111418    | 0.913239   |
| SIK1         | 10.6743   | 9.81364   | -0.121281   | 0.864982   |
| PTPRJ        | 3.29422   | 2.92253   | -0.172721   | 0.81727    |
| TSKU         | 13.5843   | 19.0973   | 0.491427    | 0.103353   |
| USP24        | 2.7611    | 3.65574   | 0.404922    | 0.21252    |
| LOC100130581 | 0.549181  | 0.179538  | -1.61299    | 0.0308509  |
| ZNF784       | 7.1962    | 6.15636   | -0.225159   | 0.755093   |
| LRGUK        | 0.159942  | 0.065554  | -1.2868     | 1          |
| SPDYE1       | 0.0817123 | 0.104178  | 0.350422    | 1          |
| FTO          | 1.71955   | 1.65953   | -0.0512583  | 0.967859   |
| DLL1         | 5.28923   | 6.21186   | 0.231969    | 0.691332   |
| RPS6KB1      | 2.48795   | 5.28791   | 1.08774     | 0.00153868 |
| GANC         | 0.447634  | 0.590904  | 0.400603    | 0.593645   |
| LAMB2        | 11.7034   | 7.89376   | -0.56814    | 0.0429833  |
| PUM2         | 10.6639   | 11.9765   | 0.167476    | 0.761614   |
| ZNF780A      | 1.32505   | 1.55642   | 0.232178    | 0.808452   |
| SYNRG        | 2.67615   | 2.3095    | -0.21258    | 0.703087   |
| HUS1B        | 0.658605  | 0.648304  | -0.0227414  | 0.934331   |
| ACOT8        | 15.9031   | 14.2569   | -0.157647   | 0.913342   |
| MAPK14       | 8.29651   | 9.76811   | 0.235575    | 0.604499   |
| LYSMD3       | 1.59281   | 1.66896   | 0.0673679   | 0.952184   |
| TMEM64       | 5.27078   | 8.34592   | 0.663054    | 0.0143403  |
| STYX         | 2.91215   | 3.07785   | 0.0798383   | 0.93305    |
| BAIAP2L1     | 20.3874   | 12.3462   | -0.723617   | 0.188839   |
| PIDD         | 11.2772   | 12.2022   | 0.113739    | 0.887789   |
| FAAH2        | 0.630484  | 0.261976  | -1.26702    | 0.0663805  |
| DDX11L2      | 0.53216   | 0.375733  | -0.502154   | 0.914693   |
| HSPB6        | 0.0608122 | 0         | #NAME?      | 1          |
| ORM1         | 0.0282401 | 0         | #NAME?      | 1          |
| SLC29A4      | 11.1621   | 11.6069   | 0.0563729   | 0.956177   |
| PAK4         | 28.2185   | 31.5894   | 0.162798    | 0.787471   |
| PFKM         | 45.5131   | 36.5551   | -0.316209   | 0.452259   |
| SMARCD3      | 53.6224   | 64.211    | 0.259985    | 0.531494   |
| MYO1D        | 2.69828   | 2.30184   | -0.229254   | 0.704729   |
| DCAF8        | 12.0856   | 12.869    | 0.0906097   | 0.914693   |
| BZW1         | 60.9486   | 72.5041   | 0.250468    | 0.559351   |
| CPNE3        | 19.3472   | 22.0402   | 0.188013    | 0.707936   |
| SNX10        | 9.80139   | 6.67439   | -0.55435    | 0.0756592  |
| KIAA0907     | 6.52805   | 10.864    | 0.734835    | 0.0123712  |
| CD46         | 7.91      | 7.92921   | 0.00349828  | 0.997552   |
| ARID5A       | 8.31235   | 8.31418   | 0.000316218 | 0.999404   |
| GNG13        | 0.0217292 | 0.0199235 | -0.125166   | 1          |
| SEZ6L2       | 22.9904   | 16.3159   | -0.494754   | 0.108015   |
| AFF4         | 2.75617   | 2.45594   | -0.166387   | 0.783527   |
| TMEM167B     | 6.66314   | 6.5976    | -0.0142611  | 0.991167   |
| CAMKMT       | 2.64534   | 2.46729   | -0.100527   | 0.937188   |



|           |            |            |            |            |
|-----------|------------|------------|------------|------------|
| SPTSSA    | 10.528     | 14.0915    | 0.420597   | 0.202575   |
| PIP4K2B   | 5.88444    | 8.99092    | 0.611563   | 0.0181648  |
| ZER1      | 27.2486    | 17.7816    | -0.615798  | 0.0243026  |
| PRCP      | 30.0506    | 24.1637    | -0.314549  | 0.385878   |
| TNFRSF10D | 27.7764    | 37.9599    | 0.450617   | 0.13436    |
| LRP5L     | 4.3765     | 5.12284    | 0.227168   | 0.767294   |
| WDPCP     | 0.388976   | 0.305673   | -0.347691  | 0.978016   |
| DEPDC1B   | 5.825      | 7.14323    | 0.294318   | 0.522918   |
| ZNF692    | 17.2561    | 24.3148    | 0.494722   | 0.121447   |
| PIK3CD    | 2.07902    | 1.21891    | -0.770315  | 0.751767   |
| PIAS1     | 3.21889    | 3.50791    | 0.124048   | 0.891476   |
| ZFYVE16   | 1.24888    | 1.3552     | 0.117879   | 0.886468   |
| KLHL26    | 4.89337    | 4.66037    | -0.0703852 | 0.952184   |
| VPS36     | 3.94494    | 4.46881    | 0.17989    | 0.762574   |
| ABCB10    | 2.89222    | 4.36353    | 0.593318   | 0.0691625  |
| TMEM144   | 6.47547    | 1.62619    | -1.99349   | 0.00153868 |
| AKR7A2    | 32.3945    | 28.5679    | -0.181354  | 0.730307   |
| RASGRP2   | 0.579675   | 0.447447   | -0.373528  | 0.762566   |
| LOC494141 | 0.00861564 | 0.00496535 | -0.795063  | 1          |
| DFFA      | 15.4351    | 20.2791    | 0.39378    | 0.284182   |
| ACPL2     | 3.24706    | 4.30606    | 0.407235   | 0.318863   |
| SRP72     | 16.9761    | 15.6369    | -0.118555  | 0.858729   |
| PARVA     | 3.40901    | 4.594      | 0.430399   | 0.175048   |
| SCNN1D    | 1.28906    | 0.626757   | -1.04034   | 0.0756592  |
| DCAF17    | 1.66336    | 1.68456    | 0.0182677  | 0.994068   |
| ARHGAP30  | 0.0654399  | 0.0532471  | -0.297466  | 1          |
| ZNF773    | 0.877351   | 0.70901    | -0.307348  | 0.751958   |
| ORC4      | 3.80543    | 4.2033     | 0.14346    | 0.839471   |
| YOD1      | 1.6019     | 1.28409    | -0.319033  | 0.524958   |
| MSH4      | 0.479088   | 0.242857   | -0.980185  | 0.0884345  |
| CCDC22    | 16.3401    | 14.6191    | -0.160558  | 0.80614    |
| BDH1      | 18.7904    | 20.8582    | 0.150618   | 0.798514   |
| ZNF518A   | 1.09076    | 0.894234   | -0.286613  | 0.586866   |
| KANK2     | 1.9172     | 2.55555    | 0.414637   | 0.363569   |
| SLC37A4   | 21.1184    | 19.3991    | -0.122507  | 0.867492   |
| COX20     | 3.7379     | 3.98823    | 0.0935205  | 0.963969   |
| ACBD4     | 8.02771    | 4.50691    | -0.832849  | 0.0143403  |
| MDM4      | 3.42384    | 3.52765    | 0.0430892  | 0.966307   |
| C11orf35  | 1.62661    | 0.658095   | -1.3055    | 0.255101   |
| BRPF3     | 3.65446    | 3.78604    | 0.0510286  | 0.962865   |
| AIF1L     | 34.828     | 50.7797    | 0.544004   | 0.0434002  |
| KIF3A     | 1.60885    | 2.45999    | 0.612618   | 0.0529824  |
| SAT2      | 91.6806    | 91.9744    | 0.00461589 | 0.997814   |
| CMPK2     | 0.277411   | 0.333593   | 0.266061   | 1          |
| ZNF581    | 131.38     | 78.3559    | -0.745634  | 0.00380811 |
| ASCC3     | 3.2598     | 4.57097    | 0.487715   | 0.136495   |
| CHORDC1   | 7.75532    | 34.7437    | 2.16349    | 0.00153868 |
| GRK5      | 5.111      | 6.90693    | 0.434439   | 0.271981   |
| PPP1R12B  | 0.327235   | 0.46696    | 0.512974   | 0.454341   |

|              |            |           |            |            |
|--------------|------------|-----------|------------|------------|
| SH3GL1P1     | 0.288237   | 0.62055   | 1.10629    | 0.635435   |
| HERC2P9      | 2.98418    | 4.62054   | 0.630728   | 0.070307   |
| SLC36A4      | 3.14791    | 3.71257   | 0.238022   | 0.708212   |
| SNHG6        | 887.558    | 1005.88   | 0.180549   | 0.733086   |
| ZNF75A       | 1.05965    | 1.2939    | 0.28814    | 0.765218   |
| DICER1-AS1   | 2.48339    | 0.983522  | -1.33628   | 0.0399087  |
| METTL15      | 3.01095    | 2.07905   | -0.534294  | 0.130936   |
| ZNF558       | 3.94323    | 3.28554   | -0.263249  | 0.628907   |
| NANOS3       | 2.42686    | 3.5422    | 0.545557   | 0.498357   |
| LANCL1       | 4.18337    | 3.3985    | -0.299767  | 0.49848    |
| ZNF330       | 22.3809    | 24.2775   | 0.117352   | 0.864177   |
| MTMR4        | 5.92018    | 4.96199   | -0.254725  | 0.569842   |
| SETD4        | 7.48521    | 9.1931    | 0.296507   | 0.632632   |
| E2F5         | 7.30444    | 6.95434   | -0.0708601 | 0.984517   |
| LINC00094    | 2.42498    | 2.63999   | 0.122563   | 0.948523   |
| PARM1        | 1.19772    | 1.02627   | -0.22288   | 0.773016   |
| HTT          | 3.54694    | 3.62145   | 0.0299923  | 0.976725   |
| LDLRAD3      | 2.75153    | 2.69125   | -0.0319581 | 0.980228   |
| PRR25        | 0.0233099  | 0.0814376 | 1.80475    | 1          |
| SFXN3        | 30.8874    | 18.5238   | -0.737638  | 0.00572929 |
| MFGE8        | 10.8772    | 10.9111   | 0.00449261 | 0.997552   |
| NT5DC1       | 9.11994    | 5.24671   | -0.797612  | 0.00274688 |
| RTKN2        | 0.155033   | 0.0677611 | -1.19405   | 1          |
| CAPZA2       | 39.2886    | 49.3744   | 0.329653   | 0.343762   |
| SIRT1        | 3.27315    | 3.19322   | -0.0356691 | 0.975492   |
| ZNF528       | 0.0349089  | 0.0192797 | -0.856511  | 1          |
| RPL7L1       | 16.3689    | 19.2867   | 0.236647   | 0.644644   |
| ZZZ3         | 2.5569     | 2.05591   | -0.314617  | 0.505982   |
| WDR33        | 10.0725    | 9.68794   | -0.0561594 | 0.952967   |
| TMEM107      | 8.84802    | 4.85726   | -0.865212  | 0.00820276 |
| PEX11A       | 2.5326     | 2.57259   | 0.0226022  | 0.985373   |
| C12orf65     | 8.05286    | 10.5718   | 0.39265    | 0.325614   |
| ZNF85        | 1.28298    | 0.603602  | -1.08784   | 0.0338188  |
| LPIN3        | 2.84956    | 2.41872   | -0.236493  | 0.782739   |
| SOX9         | 0.00651664 | 0.0151003 | 1.21238    | 1          |
| FAM115A      | 7.52477    | 3.41261   | -1.14077   | 0.00153868 |
| BAD          | 66.5845    | 72.8032   | 0.128814   | 0.896288   |
| NAAA         | 8.74912    | 9.13669   | 0.0625332  | 0.953159   |
| EEF1B2       | 2024.09    | 2307.05   | 0.188774   | 0.739148   |
| MR1          | 10.9021    | 13.1521   | 0.270692   | 0.538495   |
| ZCCHC11      | 1.75906    | 1.51655   | -0.214009  | 0.732699   |
| BRD9         | 11.4912    | 18.8438   | 0.713561   | 0.00380811 |
| LOC100862671 | 3.97419    | 5.29448   | 0.413829   | 0.35293    |
| ASPDH        | 0.0563237  | 0.0643635 | 0.1925     | 1          |
| RPL32        | 1251.33    | 1310      | 0.0661144  | 0.944204   |
| MED26        | 5.03944    | 6.14271   | 0.285612   | 0.592657   |
| TSPYL1       | 18.9505    | 23.3261   | 0.299707   | 0.41602    |
| TRPT1        | 58.4935    | 28.3252   | -1.04619   | 0.00153868 |
| CASC5        | 0.361507   | 0.492938  | 0.447383   | 0.421146   |

|              |           |            |            |            |
|--------------|-----------|------------|------------|------------|
| TMPRSS6      | 0.0584493 | 0.102007   | 0.803406   | 1          |
| ZBTB11       | 1.5626    | 2.81047    | 0.846862   | 0.0198871  |
| ZHX3         | 1.84428   | 1.53643    | -0.263482  | 0.592657   |
| ASAP2        | 3.11174   | 1.95467    | -0.670799  | 0.0355697  |
| TUBGCP6      | 4.842     | 5.87398    | 0.278737   | 0.540664   |
| MAP3K6       | 2.06176   | 2.34407    | 0.185144   | 0.835405   |
| FCHSD2       | 3.55543   | 3.39344    | -0.0672756 | 0.945887   |
| MIB1         | 1.81581   | 1.17851    | -0.623653  | 0.0407657  |
| CYP21A2      | 0.0494976 | 0.0271714  | -0.865271  | 1          |
| SLC16A2      | 3.90411   | 4.37379    | 0.163892   | 0.808631   |
| PION         | 0.846547  | 0.556903   | -0.604163  | 0.298809   |
| ZBTB49       | 1.41327   | 1.92071    | 0.442605   | 0.414655   |
| MXD4         | 25.5557   | 25.6778    | 0.00687326 | 0.994593   |
| RPLP1        | 9857.99   | 11248.2    | 0.19033    | 0.748812   |
| GRTP1        | 9.22017   | 6.57385    | -0.488053  | 0.256757   |
| DLL4         | 0.910354  | 1.32286    | 0.539166   | 0.38334    |
| USP48        | 7.17001   | 7.50469    | 0.0658171  | 0.945399   |
| GLTSCR2      | 666.09    | 629.284    | -0.0820053 | 0.916694   |
| ZNF260       | 2.3031    | 2.4812     | 0.107465   | 0.89785    |
| PBX3         | 18.5498   | 14.8216    | -0.323704  | 0.38144    |
| SFXN5        | 0.66575   | 1.50727    | 1.17889    | 0.00478151 |
| SLK          | 3.66476   | 3.44217    | -0.0904037 | 0.912629   |
| CLEC11A      | 200.203   | 215.744    | 0.107859   | 0.879418   |
| MKLN1        | 5.1637    | 4.26572    | -0.275616  | 0.476106   |
| IDS          | 10.5479   | 11.1947    | 0.0858601  | 0.952163   |
| ICOSLG       | 2.36785   | 5.66568    | 1.25867    | 0.00153868 |
| LOC100130894 | 0.119537  | 0.160746   | 0.427328   | 1          |
| SELM         | 341.495   | 473.136    | 0.470391   | 0.112565   |
| EFTUD1       | 13.3116   | 9.33963    | -0.511251  | 0.0695357  |
| EPC1         | 4.78433   | 3.36688    | -0.506901  | 0.136653   |
| KIFC2        | 13.1053   | 15.2549    | 0.219124   | 0.765759   |
| CDK10        | 29.9905   | 36.2391    | 0.273044   | 0.66669    |
| DUSP1        | 68.2364   | 45.3746    | -0.588659  | 0.0318822  |
| HERC2P2      | 1.38798   | 2.33126    | 0.748126   | 0.0163491  |
| NDRG4        | 4.09027   | 2.6186     | -0.643399  | 0.0657182  |
| RPL34        | 989.121   | 1054.57    | 0.0924355  | 0.905545   |
| THNSL1       | 10.4721   | 9.92033    | -0.0780871 | 0.926868   |
| C19orf81     | 1.24244   | 1.01389    | -0.293272  | 0.894574   |
| MAP4K3       | 2.48967   | 2.50619    | 0.00954109 | 0.994116   |
| CD27         | 0.190195  | 0.129787   | -0.551333  | 1          |
| YPEL1        | 2.49231   | 2.04043    | -0.288609  | 0.8146     |
| LDB3         | 0.0316759 | 0.00866384 | -1.87031   | 1          |
| TAF4B        | 1.55205   | 1.22845    | -0.337326  | 0.521734   |
| FAM211B      | 8.8646    | 6.12079    | -0.534339  | 0.675661   |
| B4GALNT4     | 10.9561   | 14.0651    | 0.36039    | 0.359885   |
| KRBOX4       | 3.69184   | 2.35054    | -0.651347  | 0.0827369  |
| ZC3H11A      | 13.9682   | 15.4705    | 0.147372   | 0.798886   |
| LOC100129794 | 1.22463   | 0.399934   | -1.61451   | 0.200495   |
| MBTD1        | 2.18734   | 1.43798    | -0.605133  | 0.0799092  |

|              |            |            |             |            |
|--------------|------------|------------|-------------|------------|
| ZNF740       | 5.58428    | 7.22914    | 0.372454    | 0.327486   |
| KLF3         | 2.75825    | 2.29874    | -0.262906   | 0.604499   |
| PTH2         | 0.187397   | 0.0877067  | -1.09534    | 1          |
| ZNF335       | 5.20443    | 7.05876    | 0.439676    | 0.205132   |
| RPS27        | 10216.1    | 10920.9    | 0.0962412   | 0.905839   |
| IQSEC1       | 5.41645    | 7.31752    | 0.434007    | 0.199218   |
| RPL34-AS1    | 0.00433682 | 0          | #NAME?      | 1          |
| LASP1        | 47.5073    | 47.2559    | -0.00765567 | 0.994279   |
| KIAA1755     | 1.85285    | 0.877933   | -1.07757    | 0.00153868 |
| GJC3         | 0.0792596  | 0          | #NAME?      | 1          |
| TFAP2C       | 0.360439   | 0.375419   | 0.0587499   | 0.978818   |
| ECH1         | 106.692    | 99.1498    | -0.105771   | 0.879055   |
| POLK         | 1.30315    | 1.1537     | -0.175725   | 0.927002   |
| SNX13        | 2.38734    | 1.97042    | -0.276902   | 0.569518   |
| MRPS9        | 26.0956    | 24.2255    | -0.107276   | 0.880754   |
| DSCR3        | 12.8234    | 10.2014    | -0.33001    | 0.36961    |
| IGBP1        | 58.9759    | 39.9724    | -0.561121   | 0.0464744  |
| ATG14        | 2.762      | 2.39908    | -0.203232   | 0.745431   |
| TRIM46       | 0.0637061  | 0.0384333  | -0.729074   | 1          |
| KCTD6        | 4.93735    | 6.4021     | 0.374809    | 0.431385   |
| PTPRM        | 0.022459   | 0.00756731 | -1.56944    | 1          |
| LSM14B       | 19.2509    | 15.6791    | -0.296079   | 0.454033   |
| TOMM7        | 289.805    | 315.863    | 0.124216    | 0.849965   |
| EPM2A        | 0.447621   | 0.454699   | 0.0226333   | 0.996522   |
| MANEA        | 1.23094    | 1.35129    | 0.134578    | 0.884031   |
| KIAA0195     | 9.63766    | 7.33519    | -0.393848   | 0.371307   |
| CLPB         | 5.84068    | 6.9433     | 0.249485    | 0.636892   |
| SRCIN1       | 0.482387   | 0.390289   | -0.305648   | 0.747742   |
| ZNF264       | 1.19506    | 0.973505   | -0.295821   | 0.535369   |
| ZNF713       | 0.172972   | 0.118235   | -0.548883   | 1          |
| LMNA         | 71.9959    | 83.0578    | 0.2062      | 0.688092   |
| FAM160B1     | 1.80022    | 1.68937    | -0.0916844  | 0.92539    |
| RAD50        | 2.72287    | 1.84838    | -0.558867   | 0.0788604  |
| GSK3B        | 4.45981    | 4.43092    | -0.00937655 | 0.994068   |
| ZNF600       | 4.07816    | 4.39645    | 0.108423    | 0.902527   |
| ZNF791       | 1.00635    | 1.05827    | 0.0725769   | 0.961459   |
| ETAA1        | 2.44991    | 2.37297    | -0.0460366  | 0.968709   |
| SLC27A5      | 15.0348    | 17.6507    | 0.231423    | 0.647373   |
| MGARP        | 0.208354   | 0.214189   | 0.039846    | 1          |
| GNG7         | 1.30518    | 0.922637   | -0.500418   | 0.390823   |
| RNMT         | 7.57207    | 5.56011    | -0.445574   | 0.135473   |
| LOC654433    | 2.83392    | 2.97317    | 0.0691995   | 0.974348   |
| MRPS6,SLC5A3 | 51.0457    | 88.3801    | 0.791932    | 0.00739414 |
| CRYZL1       | 4.76532    | 4.34037    | -0.134754   | 0.879418   |
| BTD          | 1.0097     | 1.20966    | 0.260667    | 0.800413   |
| RSPH3        | 1.75079    | 1.13211    | -0.628987   | 0.248596   |
| DENND5A      | 8.08144    | 6.0714     | -0.412582   | 0.207155   |
| MAPK8IP1     | 0.716066   | 0.397358   | -0.849654   | 0.260643   |
| USP4         | 3.02252    | 3.42494    | 0.18033     | 0.787473   |

|                |          |          |            |            |
|----------------|----------|----------|------------|------------|
| PPME1          | 37.1895  | 41.0871  | 0.14379    | 0.807648   |
| PMS2           | 1.20566  | 0.780908 | -0.626595  | 0.239387   |
| XAB2           | 27.0948  | 24.9226  | -0.120558  | 0.862353   |
| GPBP1          | 11.8175  | 13.0336  | 0.141318   | 0.818547   |
| ZNF883         | 6.9738   | 6.74093  | -0.0489968 | 0.962526   |
| TUBA1A         | 37.1129  | 55.7837  | 0.587924   | 0.0318822  |
| FAM156A,FAM151 | 0.451995 | 0.636763 | 0.494448   | 0.575745   |
| TRIM4          | 7.90512  | 6.88756  | -0.198795  | 0.709934   |
| LGALS3BP       | 33.5853  | 29.7368  | -0.17558   | 0.751996   |
| MAN1B1         | 34.1166  | 29.3158  | -0.218797  | 0.639138   |
| FAM199X        | 2.83006  | 3.71327  | 0.391858   | 0.267205   |
| STARD13        | 1.27658  | 1.21085  | -0.0762714 | 0.946416   |
| DAZAP2         | 24.5132  | 19.9435  | -0.297638  | 0.852179   |
| TSPAN6         | 15.1225  | 14.1937  | -0.0914433 | 0.907256   |
| GTF3C3         | 9.82145  | 7.50638  | -0.387819  | 0.236362   |
| PLK3           | 14.0513  | 15.895   | 0.177871   | 0.764456   |
| PAPSS1         | 13.7684  | 12.1305  | -0.182725  | 0.739517   |
| ITGA1,PELO     | 12.4214  | 19.9747  | 0.685346   | 0.0111246  |
| GNPAT          | 15.0378  | 15.2401  | 0.019281   | 0.985692   |
| TM9SF4         | 12.8123  | 13.8551  | 0.112888   | 0.872818   |
| SEC24D         | 2.6422   | 4.06354  | 0.620998   | 0.0541611  |
| LOC729041      | 1.69317  | 1.0164   | -0.736267  | 0.253875   |
| CTDSPL         | 4.94228  | 5.37426  | 0.120892   | 0.874393   |
| LZTS2          | 47.0976  | 52.5716  | 0.15863    | 0.779105   |
| FYTTD1         | 7.66162  | 11.6508  | 0.604708   | 0.0832671  |
| CGRRF1         | 5.61514  | 4.85199  | -0.210744  | 0.777898   |
| TTC33          | 1.33952  | 1.27012  | -0.0767464 | 0.944774   |
| STK17B         | 2.42584  | 2.01179  | -0.270007  | 0.602107   |
| RILP           | 17.0984  | 12.4815  | -0.454062  | 0.260223   |
| TFRC           | 6.87632  | 19.3638  | 1.49365    | 0.00153868 |
| THAP5          | 4.84328  | 5.59998  | 0.209438   | 0.699335   |
| FAM83G         | 10.4203  | 6.78798  | -0.618337  | 0.0625465  |
| ANKRD16        | 11.0133  | 10.6755  | -0.0449482 | 0.989857   |
| PDE4A          | 1.12798  | 0.66427  | -0.763899  | 0.13407    |
| KAT2A          | 32.1061  | 45.0739  | 0.489443   | 0.0956889  |
| PHPT1          | 99.9695  | 136.876  | 0.453305   | 0.133159   |
| C11orf68       | 43.9161  | 70.8679  | 0.690382   | 0.00659556 |
| PCNX           | 2.34247  | 2.1018   | -0.156404  | 0.80005    |
| TBL1XR1        | 14.7478  | 13.2223  | -0.157527  | 0.779141   |
| CCDC117        | 4.2817   | 6.15071  | 0.522568   | 0.0949082  |
| MAP3K14        | 2.59536  | 2.85343  | 0.13676    | 0.876679   |
| DTWD1          | 7.24782  | 6.63074  | -0.128378  | 0.860087   |
| RPL36          | 5095.07  | 5727.15  | 0.168715   | 0.774988   |
| JMJD6          | 18.6031  | 47.5907  | 1.35514    | 0.00153868 |
| TNK2           | 7.40161  | 8.40271  | 0.183014   | 0.765218   |
| IMPA1          | 7.99763  | 8.35267  | 0.0626658  | 0.945399   |
| ZNF749         | 0.661463 | 0.827323 | 0.32279    | 0.695963   |
| VPS26B         | 13.6546  | 17.1763  | 0.331033   | 0.369131   |
| FAM20B         | 6.86732  | 8.3725   | 0.28591    | 0.460632   |

|                |          |          |            |            |
|----------------|----------|----------|------------|------------|
| RPL31          | 4315.95  | 4649.48  | 0.107389   | 0.890882   |
| MARCH2         | 12.2463  | 12.0019  | -0.0290808 | 0.981354   |
| IDI1           | 14.6605  | 28.9956  | 0.983895   | 0.00153868 |
| TSPYL2         | 11.7774  | 11.2056  | -0.0717947 | 0.936242   |
| KRT8           | 18.6995  | 13.7743  | -0.441022  | 0.87935    |
| FAM133B        | 11.129   | 15.5573  | 0.483261   | 0.12218    |
| PLEKHO1        | 19.6212  | 23.2844  | 0.24695    | 0.619482   |
| RBL2           | 3.06883  | 2.14741  | -0.515092  | 0.361388   |
| MOSPD2         | 0.681425 | 0.501061 | -0.443569  | 0.529248   |
| ZNF189         | 5.10073  | 5.40311  | 0.0830864  | 0.926199   |
| RAB11FIP1      | 4.11011  | 4.14459  | 0.0120522  | 0.992304   |
| SH2B1          | 11.5261  | 20.6855  | 0.843718   | 0.00153868 |
| ARAF           | 15.5823  | 20.2623  | 0.378893   | 0.901684   |
| DOCK1          | 5.10539  | 4.17958  | -0.288664  | 0.476106   |
| MAPK3          | 61.8785  | 49.728   | -0.31538   | 0.392582   |
| TMCO6          | 8.3663   | 8.41268  | 0.00797626 | 0.997552   |
| BCKDHB         | 6.56035  | 5.86266  | -0.162218  | 0.846945   |
| ULK2           | 1.34126  | 0.93684  | -0.517719  | 0.319848   |
| OSGEPL1        | 1.74066  | 1.0663   | -0.707018  | 0.136981   |
| TMEM134        | 38.2375  | 38.6636  | 0.0159868  | 0.989716   |
| ZNF182         | 1.00927  | 1.2969   | 0.361751   | 0.54556    |
| MPND           | 19.9752  | 23.6664  | 0.244628   | 0.632632   |
| SIAH2          | 13.6204  | 20.331   | 0.577913   | 0.0475987  |
| ABCG2          | 0.458058 | 0.389332 | -0.234528  | 0.823376   |
| LTBP4          | 13.7493  | 9.14831  | -0.587783  | 0.0484091  |
| LOC100288778   | 11.4336  | 9.45604  | -0.273968  | 0.633194   |
| DUSP3          | 19.2188  | 19.311   | 0.00690528 | 0.994734   |
| SMAD1          | 3.35997  | 2.99283  | -0.166939  | 0.826651   |
| REV1           | 2.50063  | 2.92953  | 0.228377   | 0.688371   |
| TMEM159        | 41.3657  | 29.8707  | -0.469705  | 0.115387   |
| HSP90B1        | 78.5602  | 108.548  | 0.466462   | 0.12195    |
| ADAM22         | 0.44729  | 0.442061 | -0.0169664 | 0.992304   |
| SPIN4          | 1.23965  | 1.22365  | -0.0187431 | 0.991175   |
| ZNF319         | 2.70705  | 2.62266  | -0.0456874 | 0.971768   |
| CHD9           | 1.51769  | 1.46573  | -0.050255  | 0.959846   |
| GDI1           | 43.6479  | 50.2693  | 0.203763   | 0.672486   |
| LNX2           | 1.40963  | 1.48665  | 0.0767393  | 0.945208   |
| RPL37          | 955.051  | 961.228  | 0.00930023 | 0.994116   |
| ATMIN          | 3.54194  | 4.3506   | 0.296675   | 0.483696   |
| USP37          | 1.04728  | 1.00587  | -0.0582081 | 0.960032   |
| ARHGEF10       | 5.32195  | 5.74192  | 0.109578   | 0.881554   |
| LOC100289561,P | 27.2339  | 27.3884  | 0.00815723 | 0.994582   |
| MST4           | 9.71117  | 11.1733  | 0.202332   | 0.690313   |
| ROBO1          | 0.894042 | 0.645244 | -0.470498  | 0.33256    |
| LIN37          | 8.07833  | 7.91395  | -0.0296588 | 0.981543   |
| SCAF11         | 3.68613  | 4.52985  | 0.297355   | 0.446894   |
| TOM1           | 14.7182  | 10.09    | -0.544673  | 0.0802776  |
| FAM229B        | 2.20061  | 1.40586  | -0.646457  | 0.544322   |
| ZDHC11         | 2.90725  | 2.9318   | 0.0121352  | 0.994116   |

|                   |           |           |            |            |
|-------------------|-----------|-----------|------------|------------|
| FTCD              | 0.0130476 | 0         | #NAME?     | 1          |
| MLLT10P1          | 0.113097  | 0.0795526 | -0.507576  | 1          |
| CEP192            | 0.842087  | 0.720526  | -0.224918  | 0.747122   |
| DRAM2             | 18.6775   | 12.5611   | -0.572339  | 0.180016   |
| ZXDB              | 3.80861   | 3.02167   | -0.333917  | 0.428853   |
| IPP               | 1.14402   | 0.893034  | -0.357321  | 0.940847   |
| TPGS2             | 30.2166   | 27.5565   | -0.132946  | 0.881554   |
| MRGBP             | 35.1144   | 41.7418   | 0.249429   | 0.551785   |
| CSAD              | 1.82058   | 2.16057   | 0.247014   | 0.933845   |
| ANKRD36           | 0.267633  | 0.229637  | -0.220905  | 1          |
| OXR1              | 7.57763   | 9.81143   | 0.372716   | 0.276302   |
| PAQR5             | 2.42247   | 2.72297   | 0.168705   | 0.810769   |
| LRRC42            | 23.5054   | 29.9436   | 0.349254   | 0.331199   |
| SARNP             | 37.3002   | 49.4974   | 0.408171   | 0.352954   |
| ZNF19             | 0.651091  | 0.345509  | -0.914138  | 0.115592   |
| ZNF490            | 1.52861   | 1.18352   | -0.369133  | 0.450707   |
| RPAP2             | 4.14095   | 3.70136   | -0.161906  | 0.879498   |
| PKP3              | 36.4259   | 29.5221   | -0.303169  | 0.436281   |
| PRKD2             | 13.9262   | 22.2243   | 0.674336   | 0.0169799  |
| ADAMTSL1          | 0.436047  | 0.600889  | 0.462616   | 0.667733   |
| IFT122            | 2.61437   | 1.90262   | -0.458479  | 0.714933   |
| UBA3              | 13.3882   | 14.6405   | 0.128998   | 0.84703    |
| CDON              | 0.218407  | 0.293302  | 0.425369   | 1          |
| HSPG2             | 1.41836   | 1.74025   | 0.295076   | 0.538495   |
| EXPH5             | 0.25416   | 0.151893  | -0.742682  | 1          |
| ABCA7             | 1.98368   | 1.77995   | -0.15634   | 0.864689   |
| TOP1MT            | 98.3504   | 122.692   | 0.319044   | 0.361239   |
| TREM1             | 0.084305  | 0.0226241 | -1.89775   | 1          |
| UBXN4             | 14.237    | 12.6537   | -0.170082  | 0.753321   |
| MCF2L             | 1.37491   | 1.02918   | -0.417844  | 0.407487   |
| TMEM123           | 38.1386   | 32.3459   | -0.23767   | 0.59533    |
| PCNP              | 38.429    | 38.5052   | 0.0028571  | 0.998272   |
| APP               | 64.0444   | 59.4039   | -0.108514  | 0.876679   |
| CORO2A            | 4.80195   | 3.60256   | -0.4146    | 0.235173   |
| ZNF383            | 1.71858   | 1.33071   | -0.369021  | 0.606595   |
| IMPAD1            | 8.9247    | 13.9805   | 0.647539   | 0.0117316  |
| REEP2             | 42.3765   | 32.5658   | -0.379907  | 0.266689   |
| ICAM1             | 24.6284   | 33.4657   | 0.442357   | 0.145411   |
| VAMP4             | 2.4272    | 1.89011   | -0.360822  | 0.508812   |
| EIF4B             | 146.283   | 125.977   | -0.215603  | 0.654907   |
| C8orf44,C8orf44-ε | 2.01118   | 1.96565   | -0.0330314 | 0.981441   |
| WDR91             | 2.10305   | 2.11578   | 0.00870354 | 0.994661   |
| CCRN4L            | 10.5146   | 11.102    | 0.0784228  | 0.934861   |
| PHLDA1            | 60.6187   | 51.4699   | -0.236032  | 0.604499   |
| CRELD1            | 10.087    | 5.82022   | -0.793346  | 0.00970147 |
| ZBTB33            | 3.39164   | 4.32921   | 0.352123   | 0.367921   |
| MSMO1             | 16.4457   | 27.0727   | 0.719124   | 0.00380811 |
| LGALS1            | 4.89927   | 5.88038   | 0.263341   | 0.566107   |
| PLXNB2            | 19.6692   | 19.8297   | 0.0117235  | 0.992304   |

|                |           |           |            |           |
|----------------|-----------|-----------|------------|-----------|
| MAGI2          | 0.208365  | 0.117249  | -0.82954   | 1         |
| ZBTB17         | 10.5255   | 10.7915   | 0.0360027  | 0.974593  |
| THOC2          | 3.05179   | 3.59235   | 0.235272   | 0.633194  |
| RPS17L         | 0.830965  | 0.149426  | -2.47536   | 0.348481  |
| BRIP1          | 1.23526   | 0.731084  | -0.756702  | 0.0220668 |
| FBXO10         | 2.10346   | 2.67967   | 0.349289   | 0.473572  |
| CCDC71L        | 2.58979   | 2.13591   | -0.277984  | 0.614872  |
| SMAP2          | 13.6453   | 16.0443   | 0.23366    | 0.620113  |
| SLC22A18AS     | 0.85129   | 0.316519  | -1.42736   | 0.465794  |
| RBM5           | 20.7039   | 17.1154   | -0.274606  | 0.489743  |
| VWTR1          | 1.92341   | 1.8946    | -0.0217756 | 0.986782  |
| HIBCH          | 2.1297    | 3.35667   | 0.656378   | 0.124219  |
| RABGAP1L       | 2.35012   | 1.6837    | -0.481102  | 0.627993  |
| TBC1D25        | 5.32692   | 6.23143   | 0.226262   | 0.669327  |
| TNRC6A         | 1.20839   | 1.50248   | 0.314257   | 0.506475  |
| LRRC20         | 5.28371   | 4.01647   | -0.395624  | 0.338224  |
| CCDC136        | 5.38314   | 5.56177   | 0.0470966  | 0.974348  |
| PDS5B          | 1.63996   | 2.00869   | 0.2926     | 0.521714  |
| EDEM1          | 8.63341   | 6.78827   | -0.346888  | 0.318231  |
| IDH3G          | 58.1966   | 61.2095   | 0.0728218  | 0.975492  |
| FBXO8          | 3.22205   | 1.53108   | -1.07343   | 0.064033  |
| RPL12          | 8754.06   | 8107.21   | -0.110748  | 0.891828  |
| SPIN3          | 1.80617   | 2.20387   | 0.287109   | 0.754724  |
| LYPD3          | 0.387716  | 0.277185  | -0.484152  | 0.775657  |
| PPP1CB         | 19.5611   | 16.4211   | -0.252436  | 0.531891  |
| PDE5A          | 0.292437  | 0.180003  | -0.700105  | 1         |
| CGB8           | 0.714679  | 0.410468  | -0.800023  | 0.62495   |
| LLGL1          | 15.3978   | 14.8176   | -0.0554104 | 0.98206   |
| DYM            | 8.14463   | 4.89329   | -0.735043  | 0.0111246 |
| PBX2           | 25.5348   | 21.5205   | -0.246757  | 0.554884  |
| RPS19          | 5346.91   | 5940.58   | 0.151899   | 0.821425  |
| SMIM14         | 1.16906   | 0.401308  | -1.54257   | 0.321459  |
| DCLRE1B        | 2.42508   | 2.93072   | 0.273221   | 0.628664  |
| RAVER2         | 4.52747   | 5.22046   | 0.205471   | 0.887978  |
| TTL13          | 0.109315  | 0.0738229 | -0.566347  | 1         |
| FAM193B        | 7.83207   | 8.65258   | 0.143736   | 0.846005  |
| KDELC2         | 3.55043   | 2.70689   | -0.391354  | 0.320294  |
| EFCAB7         | 0.77361   | 1.02002   | 0.398919   | 0.594419  |
| RAB38          | 19.6319   | 18.4174   | -0.0921326 | 0.908707  |
| CAMK2B         | 0.0545305 | 0.0230171 | -1.24436   | 1         |
| MEX3D          | 21.8162   | 26.2409   | 0.266416   | 0.570328  |
| RAC3           | 202.582   | 270.761   | 0.418519   | 0.177708  |
| LOC100505738,M | 2.21269   | 2.74903   | 0.313126   | 0.66669   |
| CATSPER1       | 1.859     | 0.796122  | -1.22346   | 0.0123712 |
| SEPT11         | 11.9326   | 16.6364   | 0.479431   | 0.0999674 |
| RPS21          | 6583.18   | 7013.04   | 0.0912544  | 0.90933   |
| ALDH7A1        | 12.8019   | 11.345    | -0.174303  | 0.745392  |
| BAG4           | 3.33938   | 4.67445   | 0.485215   | 0.542635  |
| HOXB9          | 20.2294   | 17.6455   | -0.197152  | 0.703707  |



|           |            |            |            |            |
|-----------|------------|------------|------------|------------|
| ZNF782    | 0.531978   | 0.519202   | -0.03507   | 0.98206    |
| FLJ38109  | 0.0526369  | 0.0583034  | 0.147505   | 1          |
| B3GNL1    | 5.22433    | 3.62118    | -0.528787  | 0.318494   |
| CPT1C     | 4.2887     | 2.69191    | -0.671907  | 0.110718   |
| KLHL15    | 1.30435    | 1.22428    | -0.0914    | 0.931711   |
| MED4-AS1  | 3.15822    | 3.31488    | 0.0698454  | 0.993157   |
| ZNF195    | 6.10165    | 5.36434    | -0.185797  | 0.756518   |
| PPM1J     | 19.2522    | 21.3907    | 0.151958   | 0.817908   |
| STXBP1    | 17.4488    | 15.1654    | -0.202347  | 0.678939   |
| IL6ST     | 2.52494    | 3.19204    | 0.33823    | 0.385184   |
| TIGD5     | 23.7988    | 40.2487    | 0.758051   | 0.00153868 |
| NUDT16P1  | 3.32006    | 3.52467    | 0.0862807  | 0.945887   |
| RBM48     | 6.55948    | 6.9596     | 0.085422   | 0.932687   |
| PAPOLG    | 1.43021    | 1.34602    | -0.0875214 | 0.929461   |
| AHDC1     | 1.27735    | 2.35323    | 0.881487   | 0.0111246  |
| PHC1      | 3.71463    | 3.08279    | -0.268982  | 0.930356   |
| ZNF639    | 8.24117    | 9.17822    | 0.155365   | 0.804859   |
| FEZF1-AS1 | 2.18181    | 1.0407     | -1.06798   | 0.0355697  |
| TNNC1     | 0.37983    | 0.185626   | -1.03296   | 0.57283    |
| COX10-AS1 | 1.2507     | 1.23913    | -0.0134047 | 0.996973   |
| FAM117B   | 1.25581    | 1.29053    | 0.0393479  | 0.975492   |
| DAND5     | 0.0888408  | 0.0823538  | -0.109387  | 1          |
| ARHGAP29  | 28.7567    | 35.5249    | 0.304932   | 0.414529   |
| PRKCZ     | 16.4167    | 14.4262    | -0.18647   | 0.898747   |
| ZNF286A   | 2.00437    | 2.76462    | 0.463934   | 0.196981   |
| ZNF275    | 2.57708    | 2.85264    | 0.146559   | 0.843686   |
| ZNF197    | 2.69178    | 2.10391    | -0.355486  | 0.46089    |
| ST8SIA1   | 0.00408395 | 0.00157722 | -1.37258   | 1          |
| MAN2A2    | 6.46371    | 7.35546    | 0.186452   | 0.72743    |
| LSM11     | 1.31146    | 0.90385    | -0.537023  | 0.376279   |
| NRIP3     | 0.0168419  | 0.0100427  | -0.745907  | 1          |
| MAPK8IP3  | 8.03135    | 9.22956    | 0.20062    | 0.704283   |
| ELP2      | 24.4341    | 13.7883    | -0.825457  | 0.00153868 |
| SRPK2     | 7.86224    | 7.33807    | -0.0995391 | 0.895596   |
| LOC339524 | 0.0183968  | 0.00720308 | -1.35277   | 1          |
| ZFYVE21   | 23.9666    | 29.9831    | 0.323122   | 0.411641   |
| SIRT3     | 10.489     | 6.67576    | -0.651872  | 0.69054    |
| FMO5      | 0.120738   | 0.0417446  | -1.53222   | 1          |
| RPL35     | 9015.47    | 10102.2    | 0.164195   | 0.798422   |
| CNN2      | 102.534    | 112.502    | 0.133845   | 0.828968   |
| RPS12     | 8021.01    | 8101.38    | 0.0143841  | 0.991167   |
| GPATCH8   | 4.15211    | 4.54364    | 0.130002   | 0.847896   |
| CDK9      | 42.7097    | 67.0807    | 0.651336   | 0.0117316  |
| NDUFB5    | 66.5242    | 55.1533    | -0.270432  | 0.503119   |
| CASD1     | 3.30439    | 4.28498    | 0.374901   | 0.346208   |
| COQ10A    | 11.1051    | 10.6684    | -0.0578894 | 0.958143   |
| NUMB      | 9.1602     | 8.14418    | -0.169609  | 0.773721   |
| RASSF3    | 5.31278    | 11.067     | 1.05872    | 0.00153868 |
| GTPBP1    | 11.9608    | 11.9846    | 0.00286847 | 0.998382   |

|              |            |            |             |            |
|--------------|------------|------------|-------------|------------|
| GCA          | 2.09506    | 1.28256    | -0.707963   | 0.0550104  |
| LOC100132781 | 0.0201107  | 0          | #NAME?      | 1          |
| TBC1D23      | 8.86461    | 6.93002    | -0.355197   | 0.314558   |
| KRTAP5-1     | 0.0956936  | 0.0880824  | -0.11957    | 1          |
| IGSF9B       | 0.116694   | 0.166439   | 0.512255    | 1          |
| VPS39        | 7.25948    | 6.14841    | -0.239652   | 0.604705   |
| LRRC37B      | 1.5836     | 1.01599    | -0.640312   | 0.270565   |
| NINL         | 1.80854    | 1.74828    | -0.0488915  | 0.970185   |
| ZNF318       | 2.08823    | 1.97793    | -0.078287   | 0.934312   |
| DALRD3       | 31.5188    | 28.4435    | -0.148113   | 0.946021   |
| AEBP2        | 1.55584    | 1.71888    | 0.143772    | 0.864624   |
| SLC12A7      | 11.1202    | 13.7438    | 0.305601    | 0.417991   |
| DYNC1I2      | 11.796     | 11.7928    | -0.00039415 | 0.999234   |
| TSGA10IP     | 0.560116   | 0.147996   | -1.92017    | 0.0937156  |
| DHRS12       | 2.17076    | 1.5145     | -0.519353   | 0.480434   |
| PHKB         | 3.25877    | 2.27333    | -0.519523   | 0.107265   |
| CNTNAP1      | 5.71404    | 4.95807    | -0.204734   | 0.705194   |
| NUDT18       | 10.23      | 4.40313    | -1.2162     | 0.00153868 |
| NME3         | 61.3511    | 64.5582    | 0.0735121   | 0.938489   |
| SNIP1        | 3.44019    | 3.41797    | -0.00934946 | 0.994475   |
| ATP6V0E2     | 0.00865616 | 0.00793459 | -0.125572   | 1          |
| GIGYF1       | 18.502     | 21.4523    | 0.21345     | 0.644644   |
| CCDC23       | 9.86604    | 7.98815    | -0.304608   | 0.733299   |
| TMEM132A     | 27.4155    | 42.3632    | 0.627821    | 0.0198871  |
| GNA13        | 5.07837    | 4.55953    | -0.155481   | 0.796502   |
| SHISA4       | 10.2294    | 8.40662    | -0.283124   | 0.61305    |
| DTNB         | 12.5612    | 6.4836     | -0.954107   | 0.00153868 |
| RNASL        | 0.392663   | 0.247527   | -0.665707   | 0.328749   |
| HYAL1        | 0.027583   | 0.0554971  | 1.00863     | 1          |
| PARS2        | 5.1454     | 5.95843    | 0.211648    | 0.733299   |
| RHPN2        | 4.50778    | 5.46675    | 0.278265    | 0.563587   |
| FUNDC2       | 17.6461    | 20.4184    | 0.210519    | 0.65647    |
| VIPAS39      | 5.12325    | 3.31466    | -0.628197   | 0.0653297  |
| TTC28-AS1    | 11.5529    | 10.3652    | -0.156497   | 0.876392   |
| DDX59        | 4.18749    | 2.52851    | -0.727797   | 0.0464744  |
| SLC35E2      | 2.9874     | 1.95169    | -0.614169   | 0.26191    |
| LRSAM1       | 14.5864    | 10.6783    | -0.449941   | 0.161367   |
| GAMT         | 0.222661   | 0.0547786  | -2.02316    | 1          |
| DYRK1B       | 0.931374   | 1.7485     | 0.908688    | 0.101333   |
| THOC1        | 7.17556    | 11.0228    | 0.619323    | 0.0338188  |
| SRSF11       | 29.8405    | 34.7274    | 0.218801    | 0.639446   |
| C20orf111    | 24.4888    | 13.4972    | -0.85946    | 0.00153868 |
| ZNF445       | 0.959583   | 1.16017    | 0.273859    | 0.61305    |
| PIGA         | 2.25011    | 2.2703     | 0.0128884   | 0.993157   |
| HPS1         | 27.6747    | 25.1864    | -0.135922   | 0.854286   |
| SMYD4        | 1.84242    | 1.75323    | -0.0715895  | 0.950252   |
| DUSP8        | 4.14716    | 4.36872    | 0.075087    | 0.99079    |
| LOC389906    | 15.4084    | 21.0639    | 0.451058    | 0.190723   |
| OR7E37P      | 0.197978   | 0.265075   | 0.421059    | 1          |

|              |           |           |            |            |
|--------------|-----------|-----------|------------|------------|
| CDC73        | 4.55823   | 5.18985   | 0.18722    | 0.725976   |
| NCAPD2       | 25.4874   | 16.5776   | -0.620548  | 0.0181648  |
| H1F0         | 167.993   | 67.4208   | -1.31713   | 0.00153868 |
| CAMKK1       | 5.09138   | 4.73266   | -0.105405  | 0.906254   |
| MNT          | 6.0759    | 4.57751   | -0.408536  | 0.276711   |
| SREBF2       | 23.0071   | 23.5049   | 0.030884   | 0.976134   |
| OST4         | 448.325   | 559.276   | 0.319016   | 0.426872   |
| FAM131B      | 4.80121   | 3.19357   | -0.588228  | 0.0660778  |
| BRAF         | 1.76124   | 1.05584   | -0.738195  | 0.0788604  |
| PFDN5        | 445.999   | 500.832   | 0.167286   | 0.765759   |
| C3orf58      | 2.82196   | 4.13025   | 0.549533   | 0.0997561  |
| NEIL3        | 1.35082   | 1.57513   | 0.221634   | 0.806525   |
| LOC100506710 | 6.42372   | 7.34012   | 0.192394   | 0.711466   |
| ZNF613       | 1.34158   | 1.64811   | 0.296873   | 0.695113   |
| ZNF276       | 4.9304    | 5.58793   | 0.180611   | 0.921683   |
| EP300        | 1.16357   | 1.09601   | -0.0863005 | 0.933712   |
| THUMPD3      | 10.2738   | 8.88159   | -0.210073  | 0.660186   |
| FBXO41       | 5.64245   | 5.40796   | -0.0612353 | 0.948368   |
| RPL24        | 4026.03   | 4438.35   | 0.140665   | 0.831614   |
| C9orf174     | 0.358169  | 0.343517  | -0.0602566 | 1          |
| AGRN         | 12.0866   | 17.1894   | 0.508109   | 0.0748376  |
| TTC30A       | 0.107519  | 0.0816714 | -0.396684  | 1          |
| FBXO44       | 18.4014   | 22.3032   | 0.277434   | 0.513296   |
| RSRC2        | 19.2458   | 23.6852   | 0.299444   | 0.439308   |
| CIDEB        | 1.47982   | 3.72808   | 1.33302    | 0.147146   |
| YY1AP1       | 16.9833   | 17.0542   | 0.00600632 | 0.995202   |
| ISCA1        | 23.3417   | 32.2099   | 0.464591   | 0.116553   |
| ANKRD36B     | 0.26075   | 0.211839  | -0.299703  | 1          |
| TAF2         | 4.81809   | 6.60661   | 0.455447   | 0.14417    |
| ZNF266       | 7.85395   | 8.02106   | 0.0303739  | 0.97562    |
| LUC7L        | 20.0485   | 48.2745   | 1.26776    | 0.00153868 |
| DYRK2        | 2.86136   | 4.0744    | 0.509887   | 0.108351   |
| ING5         | 3.00637   | 5.03416   | 0.74373    | 0.0143403  |
| GDAP2        | 1.16969   | 1.62334   | 0.472839   | 0.397131   |
| MTRNR2L1     | 0.519442  | 0.383127  | -0.43914   | 0.718411   |
| PARVB        | 34.5417   | 35.4014   | 0.0354696  | 0.974073   |
| KLHDC2       | 15.6042   | 9.88779   | -0.658214  | 0.020985   |
| SNN          | 6.7499    | 8.22403   | 0.284979   | 0.722151   |
| RAD9A        | 4.74774   | 7.29186   | 0.619046   | 0.879055   |
| SAMD1        | 43.2804   | 56.7832   | 0.39175    | 0.280545   |
| HECTD2       | 0.692544  | 0.667777  | -0.0525395 | 0.97664    |
| ZNF704       | 0.321724  | 0.219183  | -0.553685  | 1          |
| SLC25A43     | 6.92871   | 7.62434   | 0.138026   | 0.85253    |
| TSEN34       | 48.8746   | 61.3138   | 0.327128   | 0.347606   |
| RNF135       | 5.75143   | 4.32734   | -0.41044   | 0.368389   |
| ALKBH1       | 4.02384   | 5.10995   | 0.344738   | 0.436281   |
| GSN          | 27.9289   | 20.3575   | -0.456201  | 0.139083   |
| CCDC28B      | 7.09111   | 6.61305   | -0.100696  | 0.936242   |
| PP2D1        | 0.0455644 | 0.0318839 | -0.515077  | 1          |

|              |           |           |             |            |
|--------------|-----------|-----------|-------------|------------|
| MT1F         | 79.312    | 64.7884   | -0.291805   | 0.569765   |
| TM7SF2,VPS51 | 59.3396   | 49.6643   | -0.256784   | 0.649244   |
| ZFC3H1       | 1.37717   | 2.87701   | 1.06286     | 0.00153868 |
| RHOV         | 5.40627   | 9.25701   | 0.775911    | 0.0270318  |
| FBNP1L       | 4.13584   | 3.02014   | -0.453565   | 0.201817   |
| VEZT         | 5.28537   | 4.27253   | -0.306912   | 0.439075   |
| ANKRD10      | 7.11106   | 9.87146   | 0.473199    | 0.193396   |
| STRN3        | 3.89171   | 4.75592   | 0.289318    | 0.565953   |
| ARL1         | 13.4094   | 17.4035   | 0.376135    | 0.25951    |
| DNASE1L1     | 13.9458   | 9.86375   | -0.499627   | 0.894042   |
| ZNF146       | 14.3045   | 17.6343   | 0.301918    | 0.414529   |
| LGR4         | 1.03547   | 1.38039   | 0.414786    | 0.401334   |
| FBXO5        | 7.40133   | 8.46818   | 0.194267    | 0.743414   |
| RPS14        | 4113.32   | 4391.76   | 0.0944961   | 0.908098   |
| GOLGA6L9     | 0.169365  | 0.138055  | -0.294897   | 1          |
| ACADSB       | 2.14676   | 2.15976   | 0.00870884  | 0.994279   |
| SLC38A4      | 0.0334967 | 0.0444146 | 0.407015    | 1          |
| AKT3         | 1.24324   | 0.81892   | -0.602315   | 0.112663   |
| ZNF770       | 7.19685   | 8.00079   | 0.152777    | 0.795757   |
| WHAMMP3      | 0.157059  | 0.153661  | -0.0315558  | 1          |
| HECA         | 3.92596   | 2.41833   | -0.699037   | 0.0117316  |
| TPP1         | 28.5383   | 24.6494   | -0.211348   | 0.650386   |
| RNF111       | 1.98701   | 2.16887   | 0.126348    | 0.876699   |
| USP2         | 0.484515  | 0.684445  | 0.498394    | 0.559735   |
| RPS29        | 9233.25   | 9725.58   | 0.0749454   | 0.933369   |
| NUDT2        | 45.0246   | 32.7503   | -0.459204   | 0.162857   |
| KIAA1407     | 0.332504  | 0.141507  | -1.2325     | 1          |
| RB1CC1       | 5.23872   | 3.07791   | -0.767263   | 0.00380811 |
| PDSS2        | 2.09964   | 1.63423   | -0.361532   | 0.495723   |
| ZNF808       | 0.497354  | 0.307873  | -0.69194    | 0.261879   |
| ZNF507       | 1.29867   | 1.29931   | 0.000714414 | 0.999234   |
| TMEM37       | 0.212806  | 0.0306185 | -2.79706    | 1          |
| MYO5B        | 0.898632  | 0.365013  | -1.29978    | 0.00153868 |
| VAPA         | 15.2779   | 16.552    | 0.115559    | 0.86364    |
| SAMD9        | 0.188076  | 0.148554  | -0.34033    | 1          |
| NRL          | 0.537516  | 0.258914  | -1.05384    | 0.244537   |
| OPTN         | 24.7409   | 12.8322   | -0.947124   | 0.00153868 |
| C9orf114     | 28.7876   | 47.794    | 0.731381    | 0.00820276 |
| FZD3         | 1.22553   | 1.20933   | -0.0191993  | 0.986871   |
| ART5         | 0.429065  | 0.30123   | -0.51033    | 0.76395    |
| CASC4        | 8.60084   | 8.30535   | -0.0504371  | 0.956285   |
| CYP2R1       | 9.44166   | 8.30738   | -0.184647   | 0.775896   |
| FBLN5        | 2.27008   | 1.0227    | -1.15036    | 0.00572929 |
| ZBTB42       | 4.00913   | 5.72401   | 0.513739    | 0.155397   |
| STX7         | 4.23001   | 4.25566   | 0.00872168  | 0.994582   |
| AFF1         | 1.8821    | 2.35083   | 0.320828    | 0.439404   |
| LARP1B       | 4.48715   | 5.79374   | 0.368698    | 0.346329   |
| SCARF1       | 0.654404  | 0.365283  | -0.841165   | 0.221615   |
| C2orf43      | 2.62601   | 2.36601   | -0.150418   | 0.859038   |

|              |            |           |             |            |
|--------------|------------|-----------|-------------|------------|
| IMP3         | 112.139    | 187.922   | 0.744854    | 0.00380811 |
| UFSP2        | 8.92089    | 6.71093   | -0.410676   | 0.303947   |
| HBS1L        | 5.18271    | 6.09862   | 0.234775    | 0.662083   |
| CD59         | 14.105     | 18.8852   | 0.42105     | 0.169436   |
| PCSK4        | 0.930897   | 0.305458  | -1.60765    | 0.0285456  |
| ANKH         | 3.64969    | 3.27274   | -0.157276   | 0.802444   |
| SETD5        | 6.14798    | 6.90884   | 0.168331    | 0.759971   |
| PLEKHH2      | 0.00569461 | 0.0012547 | -2.18225    | 1          |
| ACBD3        | 7.35008    | 8.13755   | 0.146834    | 0.814388   |
| TTC37        | 1.17406    | 1.19681   | 0.0276942   | 0.981963   |
| SDCBP2-AS1   | 0.25937    | 0.108211  | -1.26117    | 1          |
| KIAA0430     | 1.50636    | 0.794457  | -0.923025   | 0.00478151 |
| RPS15A       | 4233.59    | 4378.34   | 0.0485027   | 0.960263   |
| SLC4A3       | 3.29606    | 3.21012   | -0.0381169  | 0.975928   |
| SWAP70       | 5.1574     | 4.37341   | -0.237885   | 0.628345   |
| LOC100270746 | 2.18465    | 1.96595   | -0.152177   | 0.937886   |
| GGPS1        | 8.12716    | 5.40177   | -0.589318   | 0.0617671  |
| OSBPL8       | 3.44369    | 4.26506   | 0.308608    | 0.423417   |
| ADC          | 3.12197    | 2.57049   | -0.280417   | 0.708142   |
| FILIP1L      | 2.59933    | 1.11483   | -1.22132    | 0.336576   |
| PSMG3-AS1    | 0.294312   | 0.210963  | -0.480354   | 1          |
| SUCO         | 2.48068    | 1.85437   | -0.419809   | 0.280619   |
| FBXW10       | 0.0425739  | 0.0466045 | 0.130502    | 1          |
| PRPS2        | 25.1152    | 26.2254   | 0.0624046   | 0.942184   |
| HIF1A        | 1.85157    | 2.06716   | 0.158901    | 0.934861   |
| SLC9A3R2     | 35.0012    | 46.4436   | 0.408075    | 0.215771   |
| RPS13        | 3295.57    | 3616.23   | 0.133959    | 0.842721   |
| PRRC2B       | 17.4451    | 18.4788   | 0.0830474   | 0.912357   |
| DYNC2LI1     | 11.1479    | 6.14531   | -0.859218   | 0.00739414 |
| PRMT2        | 17.0952    | 21.4673   | 0.32855     | 0.40075    |
| MARCKSL1     | 222.648    | 355.682   | 0.675822    | 0.00659556 |
| COG2         | 5.43912    | 6.3831    | 0.230883    | 0.664657   |
| MAP3K2       | 1.32759    | 1.0934    | -0.279994   | 0.560973   |
| KCTD21       | 0.828832   | 1.07564   | 0.376042    | 0.59798    |
| THOC6        | 123.022    | 141.208   | 0.198907    | 0.828968   |
| DPF2         | 24.9441    | 20.8152   | -0.261064   | 0.539675   |
| KDM6A        | 1.96594    | 1.49537   | -0.394717   | 0.351429   |
| PCED1A       | 13.565     | 12.8292   | -0.0804618  | 0.975928   |
| SP4          | 0.499601   | 0.358108  | -0.480381   | 0.42515    |
| FGGY         | 7.67904    | 4.76526   | -0.68837    | 0.0388971  |
| PHKA2-AS1    | 0.0933257  | 0.0562177 | -0.731249   | 1          |
| MCC          | 0.0211855  | 0.026905  | 0.344793    | 1          |
| METAP1       | 26.0681    | 27.714    | 0.0883271   | 0.905839   |
| NUCB1        | 93.9042    | 87.2689   | -0.105722   | 0.87935    |
| LOC100507634 | 0.521008   | 0.648236  | 0.315213    | 0.810501   |
| IL20RA       | 0.702292   | 0.351241  | -0.999609   | 0.0529824  |
| NMT2         | 3.31188    | 3.30572   | -0.00268407 | 0.998491   |
| CASZ1        | 1.91458    | 2.54706   | 0.411809    | 0.430256   |
| RRAGB        | 2.63784    | 2.74546   | 0.0576913   | 0.967226   |

|           |          |           |            |            |
|-----------|----------|-----------|------------|------------|
| SSR4P1    | 0.502565 | 0.328839  | -0.611931  | 0.55344    |
| RWDD1     | 32.8738  | 47.2373   | 0.522987   | 0.0685533  |
| AGL       | 1.50444  | 1.55112   | 0.0440903  | 0.968709   |
| GSG2      | 3.00663  | 2.9593    | -0.022891  | 0.992304   |
| PDP1      | 4.97662  | 2.60412   | -0.934367  | 0.00153868 |
| PARPBP    | 1.39131  | 1.89181   | 0.443321   | 0.393864   |
| FBXO6     | 13.3059  | 12.789    | -0.0571598 | 0.956177   |
| TWF1      | 24.9631  | 28.6861   | 0.200557   | 0.683037   |
| SORD      | 38.5555  | 32.0783   | -0.26534   | 0.502136   |
| LOC150776 | 7.85621  | 9.35136   | 0.251343   | 0.902666   |
| APBB3     | 6.9059   | 3.02086   | -1.19287   | 0.00153868 |
| R3HCC1    | 40.4829  | 35.3406   | -0.195986  | 0.69847    |
| PRPF4B    | 2.61207  | 5.01836   | 0.94202    | 0.00153868 |
| CHD6      | 1.13678  | 0.693346  | -0.713303  | 0.0334318  |
| HOXA1     | 1.10724  | 0.954828  | -0.213652  | 0.858729   |
| AXL       | 188.453  | 133.651   | -0.495733  | 0.0894386  |
| GINM1     | 12.5567  | 9.6372    | -0.381771  | 0.354109   |
| ZBTB1     | 3.82352  | 3.48541   | -0.133571  | 0.861774   |
| WBP5      | 40.9551  | 42.517    | 0.0539954  | 0.952795   |
| FAM193A   | 3.77659  | 3.53604   | -0.0949477 | 0.91609    |
| PRR15     | 1.80192  | 2.24798   | 0.319095   | 0.740088   |
| ZNF212    | 7.32628  | 6.59782   | -0.151092  | 0.831834   |
| RHPN1     | 23.4963  | 20.1882   | -0.218921  | 0.647731   |
| ZNF44     | 1.72688  | 1.44894   | -0.253173  | 0.73849    |
| SAMD12    | 1.49727  | 1.02249   | -0.550247  | 0.155896   |
| RELT      | 10.2219  | 14.1903   | 0.473239   | 0.12218    |
| SEPW1     | 165.28   | 280.477   | 0.762964   | 0.00274688 |
| EZH1      | 3.62926  | 2.88297   | -0.332118  | 0.452338   |
| ZNF830    | 10.7505  | 13.7862   | 0.358821   | 0.358432   |
| NDUFS4    | 61.1914  | 67.6107   | 0.143923   | 0.813871   |
| ZNF33A    | 2.32761  | 1.98187   | -0.231983  | 0.662138   |
| UHMK1     | 9.39808  | 9.50154   | 0.0157953  | 0.988513   |
| ACAP2     | 3.37224  | 2.98198   | -0.177436  | 0.764456   |
| CRLS1     | 14.9351  | 19.7767   | 0.405095   | 0.199784   |
| RTTN      | 0.739098 | 0.550749  | -0.424371  | 0.424149   |
| PPP2R2A   | 17.0823  | 20.7681   | 0.281865   | 0.465179   |
| TOB2      | 13.9343  | 17.9907   | 0.36861    | 0.275833   |
| SLC17A5   | 7.68348  | 6.45232   | -0.251943  | 0.596937   |
| EML3      | 16.8899  | 15.8575   | -0.0910021 | 0.912646   |
| KIAA1033  | 2.25211  | 1.76827   | -0.348942  | 0.418773   |
| IFT140    | 4.37151  | 2.23821   | -0.965786  | 0.379394   |
| TKT       | 257.666  | 229.45    | -0.167326  | 0.764196   |
| ZBTB37    | 0.195061 | 0.0809559 | -1.26872   | 1          |
| TIGD6     | 0.940389 | 0.566445  | -0.731322  | 0.869473   |
| TRABD2A   | 15.9229  | 18.7033   | 0.232195   | 0.645373   |
| DPY19L1P1 | 0.543717 | 0.366967  | -0.567207  | 0.817355   |
| APAF1     | 1.28228  | 1.01938   | -0.331025  | 0.69402    |
| CD3EAP    | 1.86139  | 4.16971   | 1.16356    | 0.736853   |
| AMZ2      | 43.1915  | 30.8687   | -0.484602  | 0.103353   |

|                |          |          |             |            |
|----------------|----------|----------|-------------|------------|
| CRLF3          | 5.53426  | 6.09507  | 0.139253    | 0.845932   |
| KIFC3          | 39.556   | 35.3099  | -0.163824   | 0.768598   |
| CERK           | 10.7042  | 13.5389  | 0.33893     | 0.338675   |
| BACH1          | 2.48521  | 1.67178  | -0.571983   | 0.0907094  |
| ZBTB47         | 1.61883  | 1.59805  | -0.0186397  | 0.991167   |
| CHMP7          | 16.2918  | 21.8039  | 0.42044     | 0.166637   |
| RNASEH2C       | 18.5493  | 30.5596  | 0.720258    | 0.0226901  |
| C22orf29,GNB1L | 12.4984  | 20.7991  | 0.734777    | 0.168476   |
| OLA1           | 43.2942  | 34.5928  | -0.323703   | 0.362943   |
| POLL           | 19.4689  | 10.8213  | -0.847298   | 0.00274688 |
| EML2           | 14.0361  | 8.60945  | -0.705153   | 0.0741309  |
| ARSG           | 0.742439 | 0.425177 | -0.80421    | 0.458976   |
| ACBD6          | 29.9843  | 33.9316  | 0.178424    | 0.752718   |
| C5orf24        | 5.23052  | 6.12134  | 0.226894    | 0.633194   |
| STAT5A         | 7.7777   | 6.07266  | -0.357016   | 0.357812   |
| JRK            | 6.32496  | 12.1944  | 0.947089    | 0.00153868 |
| KIAA1551       | 0.687138 | 0.798683 | 0.217023    | 0.772734   |
| MAP3K7         | 5.21617  | 6.59232  | 0.337795    | 0.358517   |
| POU6F1         | 1.48522  | 1.43649  | -0.0481276  | 0.970311   |
| ZMIZ1          | 1.88006  | 1.17384  | -0.679548   | 0.0580068  |
| PEBP1          | 152.817  | 202.787  | 0.408163    | 0.204028   |
| PNPLA4         | 8.16119  | 5.88443  | -0.471878   | 0.15618    |
| POLR2H         | 206.171  | 258.396  | 0.325743    | 0.36961    |
| TMEM39B        | 15.445   | 15.8378  | 0.0362299   | 0.974777   |
| ZNF419         | 2.29385  | 2.06733  | -0.150008   | 0.8783     |
| VASH2          | 0.428076 | 0.345892 | -0.307546   | 0.756508   |
| SCRN2          | 38.6426  | 28.273   | -0.450765   | 0.180016   |
| SUN1           | 14.2791  | 13.4135  | -0.0902223  | 0.905545   |
| KRT80          | 0.47206  | 0.32011  | -0.560402   | 0.510068   |
| RPL21          | 3605.86  | 3750.1   | 0.0565843   | 0.954501   |
| VDAC3          | 96.5702  | 122.31   | 0.340892    | 0.332158   |
| YPEL5          | 14.9561  | 8.21187  | -0.864949   | 0.00153868 |
| GLS            | 9.68528  | 13.8856  | 0.519719    | 0.0685533  |
| MAPKBP1        | 2.28853  | 2.94028  | 0.361533    | 0.381086   |
| BTBD6          | 40.6468  | 45.7687  | 0.17122     | 0.868343   |
| USP47          | 5.27442  | 5.27742  | 0.000819663 | 0.999234   |
| KRIT1          | 3.82304  | 4.15097  | 0.118729    | 0.871748   |
| SDCCAG3        | 97.9515  | 86.0202  | -0.187393   | 0.713997   |
| BMI1,COMMD3,C  | 71.4349  | 56.2956  | -0.343606   | 0.517082   |
| CDH24          | 8.29449  | 11.365   | 0.454367    | 0.194509   |
| PCSK5          | 1.34216  | 0.847779 | -0.662794   | 0.200395   |
| CCT6B          | 1.54094  | 0.811812 | -0.924595   | 0.0617671  |
| STK17A         | 5.99595  | 9.88156  | 0.720749    | 0.00572929 |
| RAP1A          | 18.703   | 18.6684  | -0.00267206 | 0.998382   |
| SNX6           | 22.4869  | 21.1547  | -0.0881107  | 0.905305   |
| GNB5           | 7.24295  | 5.63014  | -0.363408   | 0.355674   |
| ACTN1          | 63.1889  | 72.6978  | 0.20224     | 0.683545   |
| PANK3          | 3.30508  | 3.71231  | 0.167632    | 0.808394   |
| FNTA           | 52.0099  | 29.8587  | -0.800634   | 0.00153868 |

|            |           |            |             |            |
|------------|-----------|------------|-------------|------------|
| HERC4      | 5.19035   | 5.04586    | -0.0407316  | 0.970185   |
| STK16      | 10.179    | 8.23807    | -0.305217   | 0.861141   |
| SHC2       | 15.6177   | 9.7312     | -0.682491   | 0.0220668  |
| GMPR2      | 37.0572   | 31.8067    | -0.220425   | 0.642161   |
| TSPAN31    | 6.67772   | 4.04432    | -0.723458   | 0.906934   |
| DCXR       | 207.536   | 237.506    | 0.194598    | 0.70251    |
| ENPP4      | 1.39829   | 1.13676    | -0.298741   | 0.618375   |
| TNFAIP8L1  | 5.64641   | 5.64226    | -0.00106039 | 0.999234   |
| EHHADH     | 0.554918  | 0.324624   | -0.773504   | 0.173978   |
| APOBEC3C   | 13.3503   | 7.01338    | -0.928695   | 0.00380811 |
| ZNF302     | 3.81312   | 3.4587     | -0.140741   | 0.860871   |
| DGKA       | 9.0872    | 6.94447    | -0.387971   | 0.306426   |
| ADH5       | 41.7351   | 31.6407    | -0.399478   | 0.214827   |
| PAX2       | 1.63774   | 1.67099    | 0.0289972   | 0.985265   |
| DYNLL1     | 261.045   | 555.787    | 1.09023     | 0.00153868 |
| LSS        | 12.8212   | 21.1881    | 0.724724    | 0.00274688 |
| OXSM       | 16.1491   | 12.8382    | -0.331014   | 0.45301    |
| C19orf52   | 15.7276   | 16.4969    | 0.0689006   | 0.947962   |
| C5orf42    | 0.154011  | 0.193803   | 0.331556    | 1          |
| GMIP       | 13.8911   | 11.9488    | -0.217302   | 0.662987   |
| EMP3       | 147.502   | 165.21     | 0.163569    | 0.76719    |
| TEAD1      | 4.02528   | 3.51947    | -0.19373    | 0.705123   |
| EXT1       | 11.147    | 8.10252    | -0.460215   | 0.139083   |
| ZBTB44     | 2.42603   | 2.10826    | -0.202541   | 0.703975   |
| RAB14      | 19.4355   | 24.929     | 0.35913     | 0.289821   |
| NEXN       | 0.0118315 | 0.0202207  | 0.773204    | 1          |
| RPL7A      | 10221.6   | 10761.8    | 0.0742985   | 0.947681   |
| MMS19      | 19.9038   | 16.3136    | -0.286974   | 0.463077   |
| PERP       | 27.0378   | 21.2957    | -0.34442    | 0.321903   |
| VGFB       | 26.1526   | 27.9877    | 0.0978343   | 0.906934   |
| GOLGA8S    | 0.268547  | 0.282029   | 0.07067     | 1          |
| FNDC4      | 10.2808   | 10.1141    | -0.0235879  | 0.983243   |
| RNF44      | 8.59127   | 6.96547    | -0.302652   | 0.483696   |
| SPRED1     | 3.14276   | 2.87662    | -0.127659   | 0.860592   |
| GPATCH1    | 1.6553    | 1.73623    | 0.0688661   | 0.957719   |
| DPY19L4    | 4.04204   | 3.12649    | -0.370538   | 0.317407   |
| FAM217B    | 1.80121   | 2.29708    | 0.350834    | 0.553733   |
| ARIH1      | 8.39021   | 8.99989    | 0.1012      | 0.887356   |
| PHF8       | 6.86627   | 8.17134    | 0.251046    | 0.574633   |
| RAP2A      | 2.81331   | 3.09437    | 0.137381    | 0.861774   |
| EPS15L1    | 11.8401   | 13.1631    | 0.152816    | 0.80416    |
| ZNF324     | 4.07509   | 5.54755    | 0.445019    | 0.278619   |
| ZSWIM8-AS1 | 3.05608   | 2.29226    | -0.414913   | 0.854032   |
| NT5DC3     | 2.48918   | 3.37695    | 0.440051    | 0.199011   |
| RPL4       | 3171.8    | 3112.34    | -0.027305   | 0.980228   |
| WDR31      | 0.342672  | 0.136972   | -1.32294    | 1          |
| TLR5       | 0.0213482 | 0.00646533 | -1.72332    | 1          |
| KIAA0146   | 7.53816   | 6.80299    | -0.148042   | 0.824372   |
| ZNF174     | 3.56016   | 5.5804     | 0.648426    | 0.0959472  |



|           |            |            |            |            |
|-----------|------------|------------|------------|------------|
| BIK       | 5.7012     | 6.95918    | 0.287652   | 0.704985   |
| KIF1B     | 3.44921    | 2.69854    | -0.354086  | 0.346954   |
| MINA      | 7.09029    | 8.79904    | 0.311503   | 0.426631   |
| MTERFD1   | 29.8545    | 38.0239    | 0.348957   | 0.318494   |
| COL4A3BP  | 4.3491     | 3.68773    | -0.237986  | 0.687762   |
| MGEA5     | 19.1228    | 10.3752    | -0.882158  | 0.00153868 |
| RNF113A   | 29.7049    | 26.3467    | -0.173076  | 0.9194     |
| SERINC4   | 1.32117    | 1.88503    | 0.512779   | 0.945689   |
| MDM2      | 12.9097    | 12.9908    | 0.00903482 | 0.994116   |
| ADD1      | 17.6728    | 18.9596    | 0.101391   | 0.886468   |
| CXorf23   | 0.398204   | 0.394004   | -0.015298  | 0.994058   |
| CTTNBP2   | 0.546984   | 0.497766   | -0.136032  | 0.907653   |
| LOC440434 | 8.53708    | 7.72861    | -0.143533  | 0.852788   |
| ACAT1     | 46.7956    | 41.2884    | -0.180638  | 0.726122   |
| KIAA1191  | 28.3212    | 34.4199    | 0.28136    | 0.472023   |
| NECAP2    | 21.0875    | 25.1719    | 0.255427   | 0.553653   |
| RPL37A    | 9875.39    | 10771.5    | 0.125314   | 0.868825   |
| COPB1     | 19.7845    | 15.4146    | -0.360069  | 0.274062   |
| CEP57L1   | 1.48048    | 1.3033     | -0.183893  | 0.843293   |
| USP3      | 8.52024    | 8.11656    | -0.0700258 | 0.936071   |
| MACROD1   | 86.5517    | 76.4954    | -0.178189  | 0.749866   |
| VPS8      | 3.04103    | 2.49381    | -0.286205  | 0.539675   |
| FAM216A   | 31.0436    | 21.6354    | -0.520901  | 0.343199   |
| ZNF492    | 0.00577841 | 0.00376066 | -0.619686  | 1          |
| CEP350    | 1.0709     | 0.901002   | -0.249222  | 0.635374   |
| LOC146880 | 9.8118     | 10.6757    | 0.121743   | 0.885904   |
| CNTLN     | 0.944282   | 1.09358    | 0.211773   | 0.783706   |
| KIAA1430  | 8.58156    | 7.35287    | -0.222932  | 0.637815   |
| TBC1D14   | 0.886071   | 1.37228    | 0.63108    | 0.854102   |
| CCDC115   | 14.1528    | 18.3233    | 0.372593   | 0.318863   |
| HSDL2     | 17.0315    | 9.96206    | -0.773686  | 0.00153868 |
| PHF20     | 2.69305    | 2.18509    | -0.301542  | 0.50844    |
| GPRASP1   | 0.105382   | 0.0652221  | -0.6922    | 1          |
| NR6A1     | 0.638208   | 0.832656   | 0.383694   | 0.708142   |
| DDHD1     | 1.2161     | 1.80667    | 0.571079   | 0.0491395  |
| AJUBA     | 10.9129    | 9.09793    | -0.262422  | 0.536705   |
| FARP1     | 11.5574    | 9.19945    | -0.329198  | 0.379103   |
| HEXDC     | 2.70977    | 2.23955    | -0.274961  | 0.953159   |
| DNAJA4    | 4.91455    | 17.5174    | 1.83366    | 0.00153868 |
| SBSPON    | 0.220975   | 0.406158   | 0.878161   | 0.173275   |
| VPS41     | 2.49006    | 1.8087     | -0.461226  | 0.226511   |
| ZNF561    | 4.11889    | 4.8833     | 0.2456     | 0.602107   |
| DCP1B     | 8.53851    | 5.51861    | -0.629681  | 0.0471668  |
| CCDC120   | 0.279962   | 0.182569   | -0.616785  | 1          |
| RBBP4     | 6.80275    | 7.98756    | 0.231638   | 0.787278   |
| C1orf198  | 8.09192    | 13.7149    | 0.761187   | 0.00274688 |
| ZNF8      | 2.03314    | 2.46936    | 0.280427   | 0.712319   |
| USP28     | 4.11966    | 3.73712    | -0.140597  | 0.840593   |
| ENOPH1    | 16.6411    | 22.8586    | 0.457985   | 0.125383   |

|                |            |            |            |            |
|----------------|------------|------------|------------|------------|
| TNKS           | 3.1628     | 1.46434    | -1.11095   | 0.00153868 |
| ANXA11         | 59.809     | 50.0174    | -0.257931  | 0.544735   |
| RUNDC3B        | 0.00698456 | 0.00239959 | -1.54138   | 1          |
| RPL18A         | 5288.31    | 5698.44    | 0.107761   | 0.890882   |
| SLC45A1        | 3.01981    | 0.9125     | -1.72656   | 0.00153868 |
| MMP19          | 1.86649    | 0.790948   | -1.23867   | 0.524563   |
| ETV6           | 1.6513     | 1.58352    | -0.060469  | 0.958841   |
| CRAT           | 74.3804    | 57.8359    | -0.362958  | 0.27751    |
| SCAMP1         | 5.71177    | 4.66783    | -0.291184  | 0.458261   |
| CACNB1         | 4.30911    | 5.75275    | 0.416862   | 0.297593   |
| ERGIC2         | 15.5912    | 14.3153    | -0.123175  | 0.861472   |
| LOC100131564   | 0.378848   | 0.0938284  | -2.01352   | 0.00659556 |
| KIAA1147       | 3.86961    | 3.57129    | -0.115741  | 0.87419    |
| TCP11L1        | 3.20777    | 2.15222    | -0.575743  | 0.152079   |
| ZNF451         | 3.17308    | 3.14205    | -0.0141783 | 0.991167   |
| SAP30L         | 2.34551    | 3.00106    | 0.355574   | 0.386372   |
| TICAM2,TMED7,T | 12.8199    | 15.4567    | 0.269846   | 0.516033   |
| AP4B1-AS1      | 0.0824233  | 0.0655767  | -0.329867  | 1          |
| TAB2           | 7.55862    | 6.73924    | -0.165537  | 0.769869   |
| VPS13A         | 1.21303    | 1.2164     | 0.00400278 | 0.997552   |
| ZBED5          | 9.36297    | 8.63326    | -0.11706   | 0.870725   |
| GTSE1          | 8.72586    | 11.7454    | 0.428731   | 0.22323    |
| SUZ12P1        | 3.84272    | 5.88523    | 0.614973   | 0.266976   |
| STAT5B         | 7.77052    | 5.24606    | -0.566776  | 0.0442243  |
| ZNF22          | 8.06404    | 8.65694    | 0.102355   | 0.901786   |
| ANXA2          | 590.73     | 666.969    | 0.17512    | 0.755384   |
| RILPL1         | 8.51406    | 10.701     | 0.329828   | 0.419912   |
| YTHDC2         | 1.83538    | 1.63604    | -0.165876  | 0.818547   |
| PROSC          | 26.3296    | 29.6808    | 0.172845   | 0.747742   |
| APC            | 0.830488   | 0.957421   | 0.205194   | 0.749866   |
| PLCB3          | 19.8822    | 17.4147    | -0.191173  | 0.704317   |
| DACH1          | 0.176664   | 0.0246991  | -2.83848   | 1          |
| MARVELD2       | 0.444138   | 0.449959   | 0.018788   | 0.994116   |
| APOL1          | 0.0770359  | 0.117559   | 0.609784   | 1          |
| ZC3H7A         | 4.56524    | 4.12179    | -0.147418  | 0.825017   |
| RPS28          | 6539.26    | 7023.44    | 0.103051   | 0.89536    |
| SECISBP2       | 6.85373    | 7.48331    | 0.126788   | 0.858806   |
| GPNMB          | 0.10711    | 0.0640026  | -0.742897  | 1          |
| CLDND1         | 19.9568    | 16.334     | -0.288996  | 0.490815   |
| KDM2B          | 7.74138    | 11.498     | 0.570722   | 0.0407657  |
| ACACB          | 0.326289   | 0.262058   | -0.316262  | 1          |
| SPG11          | 3.43551    | 1.632      | -1.07388   | 0.154835   |
| SLC2A4RG       | 49.3328    | 40.5828    | -0.281679  | 0.527665   |
| SEMA4D         | 6.88967    | 7.62308    | 0.145939   | 0.823349   |
| PCYOX1         | 4.76234    | 5.15116    | 0.113227   | 0.8775     |
| LIPT1          | 6.98767    | 4.647      | -0.58851   | 0.115142   |
| HLA-B          | 408.705    | 448.046    | 0.132586   | 0.836801   |
| PHF20L1        | 2.9849     | 3.31882    | 0.152985   | 0.840568   |
| RNPEPL1        | 40.7345    | 37.9466    | -0.102279  | 0.886445   |

|            |           |           |            |            |
|------------|-----------|-----------|------------|------------|
| USP25      | 3.39691   | 2.60984   | -0.380261  | 0.319526   |
| CIB1       | 172.621   | 199.264   | 0.207075   | 0.663419   |
| IPO9       | 4.68234   | 5.42955   | 0.213602   | 0.647649   |
| FASTKD1    | 8.93277   | 11.3998   | 0.351834   | 0.335507   |
| JAZF1      | 1.82828   | 2.24072   | 0.293471   | 0.640772   |
| LOXL1-AS1  | 1.16006   | 1.48559   | 0.35683    | 0.848939   |
| GRIP1      | 0.310165  | 0.356101  | 0.199247   | 1          |
| METTL9     | 23.1788   | 26.4988   | 0.193118   | 0.700208   |
| KBTBD4     | 6.52639   | 8.62624   | 0.402446   | 0.836427   |
| ILVBL      | 36.1271   | 33.1193   | -0.125407  | 0.848603   |
| KGFLP1     | 0.243492  | 0.0738667 | -1.72088   | 1          |
| MTX3       | 1.22029   | 1.15025   | -0.0852784 | 0.934861   |
| XPC        | 10.732    | 8.51836   | -0.333275  | 0.37405    |
| UBE2E3     | 43.258    | 50.1688   | 0.213822   | 0.64638    |
| BPTF       | 1.42391   | 1.43386   | 0.0100486  | 0.994077   |
| REL        | 0.174388  | 0.119808  | -0.541569  | 1          |
| METTL16    | 4.55419   | 7.39505   | 0.699365   | 0.00897284 |
| STAMPB     | 5.52082   | 3.87798   | -0.50958   | 0.0916618  |
| ZNF3       | 17.5451   | 16.8095   | -0.0617906 | 0.952184   |
| DICER1     | 1.53737   | 2.08936   | 0.442591   | 0.194509   |
| INSM1      | 0.208076  | 0.145171  | -0.519359  | 1          |
| CTSH       | 16.7131   | 17.1635   | 0.0383567  | 0.971057   |
| WDR6       | 25.0206   | 33.4815   | 0.420244   | 0.464817   |
| CACFD1     | 4.53651   | 3.12907   | -0.535851  | 0.21252    |
| FLJ22184   | 11.3047   | 5.73834   | -0.978212  | 0.00153868 |
| FRRS1      | 0.411706  | 0.153649  | -1.42198   | 0.0603207  |
| KCNQ1OT1   | 0.0587201 | 0.0649479 | 0.14543    | 1          |
| CBX1       | 42.2357   | 47.2508   | 0.161876   | 0.764196   |
| RNF125     | 1.91827   | 1.15519   | -0.731682  | 0.0294837  |
| RIMBP3     | 0.0373376 | 0.047734  | 0.354388   | 1          |
| CD99L2     | 5.63615   | 4.10192   | -0.458411  | 0.223482   |
| POGZ       | 4.32876   | 3.55887   | -0.282533  | 0.503719   |
| SREK1      | 3.54633   | 4.18422   | 0.238633   | 0.609462   |
| UBA6       | 5.90284   | 5.12772   | -0.203093  | 0.684216   |
| BOLA3-AS1  | 2.96654   | 4.0419    | 0.446252   | 0.821611   |
| NSUN5P1    | 7.27557   | 11.0746   | 0.606123   | 0.649301   |
| ALDH3A2    | 7.33149   | 7.59447   | 0.0508433  | 0.958829   |
| GSTM4      | 12.3709   | 9.22207   | -0.423786  | 0.277374   |
| ENAH       | 3.4208    | 3.31872   | -0.0437046 | 0.965252   |
| ATRAID     | 97.8259   | 80.335    | -0.284188  | 0.754724   |
| CHKB,CPT1B | 15.3445   | 13.4308   | -0.192179  | 0.769904   |
| RGL2       | 22.8995   | 15.3295   | -0.579003  | 0.0308509  |
| TDRD6      | 0.0325154 | 0.0263191 | -0.305013  | 1          |
| PIK3CA     | 1.14586   | 1.00239   | -0.192981  | 0.825582   |
| EPN2       | 8.50617   | 8.95517   | 0.0742109  | 0.933651   |
| TSC1       | 3.57201   | 3.49914   | -0.0297341 | 0.9772     |
| PEX6       | 6.25306   | 4.46308   | -0.486523  | 0.193924   |
| GDF11      | 4.08403   | 5.50538   | 0.430847   | 0.607271   |
| SGSH       | 15.006    | 12.1695   | -0.302261  | 0.479105   |

|                  |           |           |            |            |
|------------------|-----------|-----------|------------|------------|
| RIPK4            | 0.0222318 | 0.0202855 | -0.132173  | 1          |
| PIAS4            | 9.13504   | 10.0301   | 0.134853   | 0.875956   |
| STARD10          | 26.1373   | 25.9561   | -0.010034  | 0.993923   |
| TM4SF1           | 60.8276   | 104.766   | 0.784366   | 0.00153868 |
| KIAA2018         | 0.479866  | 0.463389  | -0.0504061 | 0.967343   |
| FOCAD            | 1.90487   | 1.34076   | -0.506644  | 0.177674   |
| WDFY1            | 4.30125   | 3.07072   | -0.486179  | 0.15255    |
| C21orf58         | 1.3888    | 1.59124   | 0.196315   | 0.852271   |
| MPG              | 175.732   | 139.417   | -0.333969  | 0.614163   |
| SAYSD1           | 3.66413   | 4.90092   | 0.419584   | 0.371307   |
| EVPL             | 4.62296   | 5.04251   | 0.125325   | 0.869513   |
| HDAC6            | 1.76076   | 1.13463   | -0.633973  | 0.158977   |
| PRKCI            | 7.16271   | 7.07899   | -0.0169608 | 0.986916   |
| RPE              | 5.34377   | 6.0953    | 0.189839   | 0.864982   |
| RPL29            | 5118.29   | 5252.95   | 0.0374658  | 0.974073   |
| NUDCC3           | 11.1447   | 12.6581   | 0.183709   | 0.722833   |
| LHFPL4           | 1.08351   | 0.91889   | -0.237745  | 0.792839   |
| HINFP            | 9.27616   | 10.045    | 0.114874   | 0.885883   |
| SOX8             | 15.7238   | 32.7276   | 1.05756    | 0.00153868 |
| NDUFB4           | 234.455   | 273.623   | 0.222879   | 0.629991   |
| HS1BP3           | 18.0439   | 7.31518   | -1.30255   | 0.00153868 |
| ADPRHL2          | 32.4769   | 41.0131   | 0.336669   | 0.349952   |
| OGT              | 15.5697   | 13.577    | -0.197572  | 0.93571    |
| FAM160A2         | 8.43557   | 8.07954   | -0.0622113 | 0.948523   |
| L2HGDH           | 2.66405   | 2.74403   | 0.0426734  | 0.967978   |
| PCGF1            | 16.2578   | 17.0814   | 0.0712959  | 0.962161   |
| AGO3             | 1.16108   | 1.20246   | 0.0505174  | 0.971919   |
| PFKP             | 76.5748   | 66.5749   | -0.201891  | 0.680918   |
| DNAJC4           | 18.8504   | 14.1888   | -0.409845  | 0.321566   |
| RPSAP9           | 8.56562   | 9.82809   | 0.198354   | 0.756321   |
| NTPCR            | 37.3566   | 30.6005   | -0.287806  | 0.516809   |
| CELF6            | 0.797922  | 0.547182  | -0.544227  | 0.490141   |
| EAPP             | 21.2869   | 17.5463   | -0.2788    | 0.502403   |
| ITGB5            | 21.8378   | 16.3686   | -0.415893  | 0.177708   |
| PAK1             | 18.1919   | 12.5857   | -0.531507  | 0.0475987  |
| HOTTIP           | 0.0716282 | 0.0518026 | -0.467502  | 1          |
| USP32            | 3.30961   | 2.44297   | -0.438026  | 0.188237   |
| VPS11            | 9.977     | 7.94846   | -0.327931  | 0.403413   |
| EIF2AK1          | 26.5889   | 24.933    | -0.0927677 | 0.911712   |
| WBP11            | 23.7034   | 28.4806   | 0.264889   | 0.511505   |
| C18orf32,RPL17,F | 3722.41   | 3794.35   | 0.0276128  | 0.980228   |
| RNASET2          | 49.8196   | 37.8721   | -0.395578  | 0.243718   |
| CDKN1C           | 10.4142   | 4.58739   | -1.18281   | 0.00153868 |
| TAOK1            | 3.07898   | 2.87955   | -0.0966063 | 0.89836    |
| RAB4A,SPHAR      | 8.68399   | 12.0162   | 0.468554   | 0.132574   |
| AIP              | 52.9136   | 50.4611   | -0.0684661 | 0.937886   |
| RANBP6           | 4.37831   | 5.7929    | 0.403911   | 0.26191    |
| GOLGA2P5         | 1.21152   | 0.951376  | -0.348732  | 0.674722   |
| ASPHD1           | 29.9405   | 44.9863   | 0.587387   | 0.0360613  |

|                 |           |           |            |            |
|-----------------|-----------|-----------|------------|------------|
| PLCG2           | 2.71678   | 1.4856    | -0.870852  | 0.0123712  |
| DHX35           | 3.22751   | 4.02158   | 0.317342   | 0.512222   |
| TMEM41A         | 7.8109    | 9.89545   | 0.341278   | 0.379543   |
| TAF1D           | 32.5562   | 23.189    | -0.489488  | 0.106011   |
| PCSK6           | 5.28917   | 5.42708   | 0.0371336  | 0.97713    |
| RIMS3           | 0.678882  | 0.722151  | 0.0891395  | 0.945857   |
| WWC2            | 0.750475  | 0.950598  | 0.341031   | 0.610939   |
| ZMIZ2           | 12.0084   | 13.5065   | 0.169616   | 0.760476   |
| NAA25           | 4.32725   | 6.27788   | 0.536826   | 0.0603207  |
| POLM            | 5.98162   | 5.70756   | -0.0676625 | 0.952163   |
| CXorf57         | 1.27407   | 0.669359  | -0.928589  | 0.0243026  |
| HELB            | 0.362328  | 0.30872   | -0.231     | 1          |
| AVL9            | 3.92935   | 2.29597   | -0.775185  | 0.0379922  |
| USP19           | 7.58039   | 7.82105   | 0.0450903  | 0.964442   |
| STX2            | 3.26991   | 5.09029   | 0.638496   | 0.0460785  |
| CAND1           | 14.9128   | 21.8749   | 0.552728   | 0.0471668  |
| BOD1L1          | 0.65361   | 0.863756  | 0.402193   | 0.354501   |
| SUN2            | 15.7477   | 12.7203   | -0.308013  | 0.426068   |
| DMXL1           | 0.647585  | 0.409595  | -0.66087   | 0.0784883  |
| EEF2            | 2272.27   | 1810.57   | -0.32769   | 0.46286    |
| TCP11L2         | 0.500441  | 0.149201  | -1.74594   | 0.0294837  |
| RNF144A         | 1.6628    | 1.01902   | -0.706429  | 0.0541611  |
| NELFA           | 33.3812   | 32.9313   | -0.0195744 | 0.983334   |
| RPS27A          | 1775.6    | 1957.35   | 0.140593   | 0.836734   |
| SARM1           | 0.645217  | 1.00688   | 0.642035   | 0.732319   |
| ARHGEF40        | 2.21169   | 3.00481   | 0.442126   | 0.284028   |
| THAP8           | 2.60347   | 1.62015   | -0.684308  | 0.224366   |
| PDGFA           | 5.73846   | 6.77537   | 0.239636   | 0.697857   |
| CHRNE           | 3.40167   | 3.44412   | 0.0178952  | 0.996773   |
| METTL23         | 22.5584   | 11.9976   | -0.910921  | 0.00572929 |
| ZNF763          | 0.721392  | 0.389798  | -0.888057  | 0.108871   |
| LOC100288911    | 9.09897   | 5.47735   | -0.732225  | 0.147146   |
| ZC3HAV1         | 5.35881   | 10.0278   | 0.904025   | 0.00153868 |
| PKN2            | 3.63416   | 3.37697   | -0.105892  | 0.891309   |
| CLCF1           | 5.73361   | 6.82584   | 0.251564   | 0.856217   |
| EIF2A           | 18.0766   | 15.7022   | -0.203162  | 0.667588   |
| RASGEF1B        | 0.0307864 | 0.0275255 | -0.161525  | 1          |
| SGK223          | 2.3174    | 3.52114   | 0.60354    | 0.114535   |
| CENPF           | 4.12418   | 4.7321    | 0.198373   | 0.693923   |
| MIER1           | 5.54875   | 5.57616   | 0.00710834 | 0.994593   |
| C17orf76-AS1,SN | 1338.19   | 1172.4    | -0.190825  | 0.739268   |
| ZNHIT3          | 71.1993   | 66.1957   | -0.105125  | 0.922388   |
| GPAT2           | 0.0902759 | 0.0561458 | -0.685162  | 1          |
| SPDYE3          | 0.26863   | 0.290183  | 0.111341   | 1          |
| METTL10         | 2.8702    | 2.76872   | -0.0519335 | 0.96692    |
| CFL2            | 12.5732   | 9.83703   | -0.354059  | 0.308846   |
| DSG2            | 9.30706   | 5.7165    | -0.703194  | 0.00478151 |
| PCGF3           | 4.33357   | 4.43342   | 0.0328644  | 0.97562    |
| KREMEN1         | 2.29238   | 1.66478   | -0.461516  | 0.249115   |

|              |           |          |             |            |
|--------------|-----------|----------|-------------|------------|
| ZCCHC6       | 2.4753    | 2.49524  | 0.0115758   | 0.993157   |
| ZNF696       | 5.77202   | 9.27408  | 0.684128    | 0.0143403  |
| RASSF4       | 3.45989   | 2.44464  | -0.501103   | 0.263581   |
| LAMB1        | 15.4027   | 9.55461  | -0.688917   | 0.0103919  |
| NSMCE2       | 20.2805   | 13.4217  | -0.595531   | 0.0403493  |
| IFIT5        | 2.74957   | 5.19162  | 0.91698     | 0.00274688 |
| RBM27        | 2.54005   | 3.08923  | 0.28239     | 0.529976   |
| SLC38A5      | 164.005   | 192.313  | 0.22972     | 0.606334   |
| LOC100128338 | 10.2475   | 7.36111  | -0.477275   | 0.149433   |
| NLN          | 3.20781   | 3.70908  | 0.209471    | 0.679281   |
| ETS1         | 22.5435   | 17.1013  | -0.398604   | 0.220205   |
| NUF2         | 10.0866   | 7.90302  | -0.351958   | 0.379534   |
| GIN1         | 1.01562   | 0.897107 | -0.179007   | 0.853105   |
| METAP1D      | 0.918325  | 0.930828 | 0.0195089   | 0.994068   |
| NEURL2       | 1.89301   | 1.20484  | -0.651843   | 0.923594   |
| ABHD15       | 5.38608   | 6.7488   | 0.325396    | 0.454341   |
| GID8         | 14.0545   | 12.54    | -0.164494   | 0.76946    |
| LTK          | 37.8278   | 29.6292  | -0.352424   | 0.315656   |
| PTAFR        | 0.0342147 | 0.115048 | 1.74955     | 1          |
| DGCR6        | 21.0125   | 18.0633  | -0.218191   | 0.722516   |
| LEPR,LEPROT  | 6.37974   | 5.45211  | -0.226683   | 0.881709   |
| COA5         | 8.37386   | 6.82406  | -0.295262   | 0.545218   |
| FLJ27354     | 0.672782  | 0.30896  | -1.12272    | 0.384403   |
| SMEK1        | 9.80455   | 12.875   | 0.393045    | 0.224437   |
| ARID4B       | 1.15126   | 1.31187  | 0.18841     | 0.786222   |
| ZNF577       | 0.330619  | 0.355971 | 0.106592    | 1          |
| ZNF148       | 1.65218   | 1.74494  | 0.0788022   | 0.931292   |
| IRF1         | 2.67392   | 5.27429  | 0.980019    | 0.00153868 |
| DSE          | 2.67984   | 2.73991  | 0.0319817   | 0.978818   |
| RPLP0        | 6837.98   | 6558.34  | -0.0602401  | 0.95448    |
| TAF1         | 1.8617    | 1.80852  | -0.0418088  | 0.994116   |
| RPL27A       | 382.022   | 402.616  | 0.0757481   | 0.934265   |
| DLX4         | 0.710794  | 0.261815 | -1.44089    | 0.0525851  |
| SH3BP1       | 19.3341   | 23.1926  | 0.262516    | 0.551968   |
| PTH1R        | 5.60176   | 1.34973  | -2.0532     | 0.00153868 |
| SPR          | 64.3123   | 116.074  | 0.851874    | 0.00153868 |
| AP3S1        | 40.7417   | 40.6421  | -0.00353024 | 0.997552   |
| TUFT1        | 10.7864   | 4.51048  | -1.25786    | 0.00153868 |
| RPL18        | 3287.65   | 3577.36  | 0.121839    | 0.872122   |
| LONP2        | 12.6411   | 10.0178  | -0.335559   | 0.447327   |
| KLHL12       | 8.99058   | 5.62153  | -0.677452   | 0.0130226  |
| MARK4        | 10.8272   | 8.10195  | -0.418314   | 0.197192   |
| BST2         | 321.307   | 494.87   | 0.623096    | 0.0143403  |
| FBLIM1       | 0.453056  | 0.23272  | -0.961097   | 0.274812   |
| RALBP1       | 13.9407   | 12.1277  | -0.200989   | 0.680526   |
| CHD1         | 2.77305   | 4.11812  | 0.57051     | 0.0533774  |
| LINC00628    | 0.0385089 | 0.112773 | 1.55016     | 1          |
| CAST         | 30.6674   | 20.7016  | -0.566967   | 0.0782684  |
| ARID2        | 1.56858   | 1.79233  | 0.19237     | 0.757708   |

|          |           |            |            |            |
|----------|-----------|------------|------------|------------|
| HPS6     | 15.9113   | 26.775     | 0.750833   | 0.00274688 |
| SMN2     | 2.19521   | 2.93724    | 0.420106   | 0.456161   |
| CDC16    | 24.1221   | 23.8164    | -0.0183984 | 0.985692   |
| PRX      | 1.3206    | 1.00287    | -0.397065  | 0.524638   |
| MED9     | 8.24418   | 11.0482    | 0.422365   | 0.260553   |
| BLOC1S4  | 22.1488   | 30.6539    | 0.468843   | 0.148853   |
| BET1L    | 19.629    | 21.3755    | 0.122974   | 0.852271   |
| DCAF10   | 2.49267   | 1.20992    | -1.04278   | 0.00153868 |
| ZNF592   | 2.95524   | 2.80674    | -0.0743795 | 0.935507   |
| KLHL42   | 2.95387   | 3.40638    | 0.205632   | 0.703945   |
| ADM      | 49.3613   | 52.5584    | 0.0905411  | 0.907653   |
| RACGAP1  | 13.5659   | 12.1046    | -0.164431  | 0.772699   |
| ARL5A    | 11.216    | 14.371     | 0.357593   | 0.312032   |
| PTAR1    | 1.36711   | 1.18239    | -0.209421  | 0.721553   |
| NTAN1    | 22.0048   | 20.8368    | -0.0786793 | 0.930048   |
| GLTPD1   | 19.3449   | 28.7145    | 0.569821   | 0.0537703  |
| ANKRD23  | 1.43432   | 2.21602    | 0.627598   | 0.216201   |
| TGDS     | 5.20766   | 5.62709    | 0.111752   | 0.89785    |
| EPS15    | 5.49073   | 4.13094    | -0.410526  | 0.241813   |
| MARCH6   | 8.52036   | 7.47177    | -0.189465  | 0.704317   |
| TP53BP1  | 2.73918   | 2.67081    | -0.036468  | 0.98652    |
| MED11    | 20.9563   | 23.9407    | 0.192078   | 0.930948   |
| GUCD1    | 19.0645   | 25.6691    | 0.429147   | 0.15801    |
| AFMID    | 17.065    | 17.8181    | 0.0623039  | 0.954981   |
| PLA2G12A | 3.51203   | 4.44862    | 0.341055   | 0.37853    |
| C1orf115 | 2.76481   | 2.1611     | -0.355412  | 0.512798   |
| ADAM11   | 2.02732   | 1.95104    | -0.0553302 | 0.966307   |
| PLA2G6   | 2.26729   | 0.905825   | -1.32366   | 0.00380811 |
| FER      | 0.798684  | 0.659421   | -0.276425  | 0.765218   |
| PUSL1    | 37.0785   | 63.5392    | 0.777063   | 0.365594   |
| ANKIB1   | 2.39524   | 1.99375    | -0.264689  | 0.601833   |
| VWA1     | 4.55429   | 5.0273     | 0.142558   | 0.862406   |
| PSRC1    | 24.2864   | 33.6649    | 0.471099   | 0.136049   |
| METTL18  | 4.28521   | 4.09921    | -0.064019  | 0.956393   |
| RPS5     | 4693.16   | 5087.35    | 0.116355   | 0.880021   |
| NUPL1    | 8.96083   | 9.98544    | 0.156195   | 0.785865   |
| RPL23A   | 2272.66   | 2374.48    | 0.0632292  | 0.948304   |
| RFX1     | 2.64535   | 2.55996    | -0.0473331 | 0.973295   |
| C9orf37  | 5.08031   | 6.59714    | 0.376924   | 0.907892   |
| CERKL    | 0.0264148 | 0.00650025 | -2.02278   | 1          |
| GALM     | 4.65587   | 2.82764    | -0.719451  | 0.0442243  |
| IGFBP6   | 223.261   | 225.493    | 0.0143503  | 0.990368   |
| C11orf1  | 16.2536   | 11.6297    | -0.482945  | 0.279083   |
| ESD      | 55.9949   | 46.9604    | -0.25385   | 0.548453   |
| STX6     | 5.10084   | 8.02006    | 0.652878   | 0.0169799  |
| CNOT7    | 25.1925   | 27.2169    | 0.111507   | 0.872122   |
| IL6R     | 2.26846   | 3.12955    | 0.46424    | 0.21791    |
| PACS2    | 8.64084   | 8.31583    | -0.0553109 | 0.975928   |
| SCARNA5  | 1.90434   | 1.09509    | -0.798244  | 0.935543   |

|              |          |           |            |           |
|--------------|----------|-----------|------------|-----------|
| PLEKHO2      | 4.53312  | 5.85658   | 0.369554   | 0.368148  |
| MAP3K3       | 3.74178  | 5.24292   | 0.486644   | 0.45742   |
| TLL2         | 0.018348 | 0.0311063 | 0.761582   | 1         |
| ZNF630       | 0.411509 | 0.224162  | -0.876384  | 0.196141  |
| ATG9B        | 1.18488  | 0.929954  | -0.349515  | 0.865084  |
| BAZ2A        | 8.74172  | 9.64099   | 0.141264   | 0.869345  |
| DOCK6        | 10.7498  | 7.79381   | -0.463907  | 0.124445  |
| RUFY3        | 1.89751  | 2.36479   | 0.317606   | 0.517284  |
| CEPT1        | 9.96915  | 11.1885   | 0.166475   | 0.881798  |
| NDUFA10      | 18.8777  | 18.6643   | -0.0164044 | 0.987173  |
| MTMR10       | 2.06026  | 1.88403   | -0.129008  | 0.926184  |
| LOC440300    | 0.13837  | 0.123214  | -0.167366  | 1         |
| RCOR1        | 4.86042  | 6.26962   | 0.367297   | 0.303477  |
| PCCB         | 75.6025  | 60.0254   | -0.332861  | 0.345145  |
| ATPAF2       | 10.6947  | 10.9573   | 0.0349928  | 0.975928  |
| INO80D       | 0.488043 | 0.453531  | -0.105809  | 0.917228  |
| MTMR1        | 3.09464  | 4.10994   | 0.409348   | 0.343575  |
| DDX12P       | 2.92291  | 3.72872   | 0.351275   | 0.46089   |
| ZEB1-AS1     | 3.13914  | 1.69753   | -0.886932  | 0.0176564 |
| ELK3         | 9.8792   | 8.99103   | -0.135909  | 0.857249  |
| UBE2R2       | 14.8342  | 13.796    | -0.104678  | 0.884031  |
| ASTN2        | 2.77685  | 0.893131  | -1.63651   | 0.317796  |
| NADSYN1      | 27.9683  | 26.8299   | -0.0599528 | 0.946021  |
| FAM179B      | 0.639769 | 0.725382  | 0.18119    | 0.840853  |
| ZFP62        | 2.22322  | 2.02438   | -0.135171  | 0.872122  |
| DENND4A      | 1.04535  | 0.967223  | -0.112066  | 0.907121  |
| C2CD5        | 3.62421  | 3.31418   | -0.129016  | 0.865047  |
| CACNG8       | 0.140471 | 0.119749  | -0.230258  | 1         |
| RBFA         | 4.91885  | 6.39847   | 0.379404   | 0.282517  |
| LSMD1        | 44.5641  | 67.9009   | 0.60755    | 0.289501  |
| PLEKHG3      | 9.9313   | 11.3053   | 0.186941   | 0.731905  |
| PVT1         | 28.6977  | 29.5845   | 0.0439065  | 0.964913  |
| GALNT12      | 8.05264  | 4.77978   | -0.752517  | 0.0123712 |
| ZNF684       | 0.89504  | 1.2789    | 0.514876   | 0.400688  |
| ATXN7        | 1.50269  | 1.29862   | -0.210566  | 0.757708  |
| KIAA1522     | 11.8121  | 9.13704   | -0.370463  | 0.320464  |
| SLC30A9      | 14.5833  | 10.6846   | -0.448782  | 0.148406  |
| ATG12        | 8.37347  | 7.12699   | -0.232532  | 0.611201  |
| CCDC149      | 1.13549  | 0.56463   | -1.00793   | 0.020985  |
| LPPR2        | 16.197   | 23.6587   | 0.54664    | 0.0685533 |
| FBXO34       | 4.28186  | 3.56326   | -0.265038  | 0.611201  |
| C3orf33      | 3.49216  | 3.19357   | -0.12895   | 0.890133  |
| FCER1G       | 0.662427 | 0.43438   | -0.608805  | 0.749043  |
| SOCS5        | 1.66806  | 1.94205   | 0.219408   | 0.736853  |
| LOC100271722 | 2.09291  | 0.968279  | -1.11201   | 0.0253664 |
| MAST2        | 17.4084  | 20.483    | 0.234643   | 0.582102  |
| PHKA2        | 3.55989  | 2.88175   | -0.304888  | 0.502454  |
| ASPH         | 43.4994  | 40.4111   | -0.106243  | 0.885805  |
| MEFV         | 0.041707 | 0         | #NAME?     | 1         |



|              |           |           |            |            |
|--------------|-----------|-----------|------------|------------|
| MSI2         | 4.78187   | 3.11313   | -0.61921   | 0.173695   |
| HMGXB4       | 4.11016   | 2.94693   | -0.479982  | 0.171388   |
| PPIP5K1      | 4.14694   | 3.50114   | -0.244221  | 0.848653   |
| PRSS12       | 1.29606   | 0.875382  | -0.566146  | 0.210405   |
| SMAD2        | 4.82884   | 4.09422   | -0.238088  | 0.592657   |
| TMEM255A     | 0.0184035 | 0.0168551 | -0.126795  | 1          |
| PFDN4        | 25.5501   | 22.359    | -0.192473  | 0.722665   |
| C6orf195     | 0.109019  | 0.17075   | 0.647308   | 1          |
| ZNRD1        | 85.8434   | 108.364   | 0.336108   | 0.352576   |
| MTF2         | 5.23818   | 6.14718   | 0.230858   | 0.638482   |
| FBXL16       | 21.5146   | 23.8466   | 0.148467   | 0.809647   |
| NPHP4        | 2.43918   | 2.40619   | -0.0196452 | 0.995202   |
| OPN3         | 0.214224  | 0.104767  | -1.03194   | 1          |
| DGCR8        | 5.09446   | 16.0411   | 1.65478    | 0.00153868 |
| PTPN23       | 6.44918   | 6.49283   | 0.0097326  | 0.994068   |
| LOC100506963 | 2.86542   | 2.45609   | -0.222381  | 0.925922   |
| MED13L       | 1.36349   | 1.0705    | -0.349013  | 0.44073    |
| ADSSL1       | 1.98378   | 1.14455   | -0.793475  | 0.14417    |
| HEATR5B      | 1.69584   | 1.3297    | -0.350902  | 0.446551   |
| CLHC1        | 0.386157  | 0.277145  | -0.478544  | 0.939583   |
| CD44         | 74.5326   | 63.151    | -0.239066  | 0.590304   |
| CRIPAK       | 1.1204    | 1.01305   | -0.1453    | 0.890806   |
| RC3H2        | 2.74553   | 2.97629   | 0.116429   | 0.897319   |
| MED13        | 2.27892   | 2.03475   | -0.163497  | 0.790213   |
| BDNF-AS      | 0.315263  | 0.112357  | -1.48846   | 1          |
| ERMAP        | 1.77709   | 1.11006   | -0.678877  | 0.303067   |
| DIP2B        | 2.64816   | 2.55592   | -0.0511507 | 0.958829   |
| APPBP2       | 2.7616    | 2.35771   | -0.22812   | 0.6565     |
| GNAI2        | 51.7181   | 56.8394   | 0.136222   | 0.819558   |
| ALG9         | 3.40382   | 2.86809   | -0.247067  | 0.6172     |
| C1R          | 0.41261   | 0.278829  | -0.565399  | 0.597911   |
| ARHGGEF12    | 4.62588   | 4.48988   | -0.0430507 | 0.964628   |
| MTM1         | 0.729755  | 0.642905  | -0.182806  | 0.870063   |
| HIAT1        | 11.226    | 14.2632   | 0.345453   | 0.332923   |
| ZNF583       | 0.854317  | 1.07631   | 0.333247   | 0.66669    |
| RCAN2        | 0.029249  | 0.0147061 | -0.991974  | 1          |
| INPPL1       | 14.7408   | 14.3251   | -0.0412689 | 0.967296   |
| TTC9B        | 1.32127   | 0.453412  | -1.54303   | 0.208122   |
| GPSM1        | 46.4725   | 53.9089   | 0.214148   | 0.676734   |
| TTC25        | 0.0691908 | 0.0186707 | -1.88981   | 1          |
| RPS6KA1      | 18.1542   | 28.2794   | 0.63945    | 0.0137404  |
| CTAGE9       | 0.044599  | 0.0538948 | 0.273136   | 1          |
| CCNB1IP1     | 142.276   | 105.019   | -0.438044  | 0.160804   |
| PSME1        | 154.669   | 183.15    | 0.243838   | 0.612746   |
| HSD11B2      | 8.37465   | 11.7871   | 0.493112   | 0.211701   |
| ACO1         | 13.3708   | 12.8107   | -0.0617459 | 0.943388   |
| KCMF1        | 9.16414   | 8.19582   | -0.161112  | 0.771216   |
| VN1R1        | 0.277642  | 0.509464  | 0.875756   | 0.352132   |
| EXOC1        | 5.39763   | 3.03184   | -0.832132  | 0.00572929 |

|                |           |           |             |            |
|----------------|-----------|-----------|-------------|------------|
| RRAS2          | 16.7742   | 16.776    | 0.000152284 | 0.99971    |
| ALG13          | 3.92508   | 4.19521   | 0.0960223   | 0.915693   |
| KIAA1598       | 3.13896   | 2.68577   | -0.224949   | 0.688049   |
| SZRD1          | 37.9642   | 58.592    | 0.626064    | 0.0187307  |
| EHD4           | 12.9466   | 16.6213   | 0.36046     | 0.317796   |
| SETDB1         | 3.92222   | 3.28767   | -0.254605   | 0.690264   |
| SF3A1          | 19.261    | 19.2832   | 0.00166306  | 0.999201   |
| GPBP1L1        | 12.5452   | 11.9921   | -0.065052   | 0.940466   |
| FAM81A         | 0.500723  | 0.847599  | 0.759371    | 0.13182    |
| ZNF765         | 0.929989  | 1.15058   | 0.307074    | 0.625783   |
| ALKBH7         | 61.5239   | 58.6612   | -0.0687402  | 0.93855    |
| PPIL3          | 12.4665   | 8.97356   | -0.474308   | 0.200395   |
| RRAGC          | 11.3395   | 7.997     | -0.503823   | 0.0933464  |
| STK32C         | 9.16053   | 6.54268   | -0.48555    | 0.241705   |
| DUSP19         | 0.424902  | 0.254695  | -0.738357   | 0.201718   |
| RAB9A          | 11.3911   | 12.2427   | 0.10401     | 0.903614   |
| AZIN1          | 25.8699   | 30.53     | 0.238954    | 0.57283    |
| OPA1           | 7.97427   | 8.66728   | 0.120228    | 0.861774   |
| SLC20A1        | 8.26607   | 12.4028   | 0.585387    | 0.0374759  |
| CD68           | 382.966   | 323.979   | -0.241317   | 0.592657   |
| NR1D2          | 3.09272   | 1.75241   | -0.819532   | 0.00572929 |
| INTS1          | 18.6915   | 22.2899   | 0.254006    | 0.551958   |
| LCA5           | 0.245241  | 0.156484  | -0.648187   | 1          |
| RPL10          | 1705.25   | 1629.42   | -0.0656247  | 0.950999   |
| FAM160B2       | 17.2166   | 18.2376   | 0.0831199   | 0.916473   |
| ZCCHC7         | 9.09661   | 6.2187    | -0.548716   | 0.0625465  |
| LOC100507577   | 0.383285  | 0.468933  | 0.290964    | 0.964843   |
| IFITM2         | 522.971   | 615.455   | 0.234921    | 0.614163   |
| RBMS2          | 7.03908   | 4.35025   | -0.69429    | 0.179887   |
| NEIL2          | 20.8028   | 22.4983   | 0.113038    | 0.873701   |
| PPTC7          | 1.10411   | 1.34294   | 0.28251     | 0.687955   |
| SRSF5          | 71.0551   | 70.859    | -0.0039871  | 0.997191   |
| LIMA1          | 3.70221   | 4.58545   | 0.308676    | 0.497888   |
| ARFIP2         | 9.22501   | 18.0843   | 0.97112     | 0.0103919  |
| MGST2          | 60.2553   | 44.6273   | -0.433161   | 0.220227   |
| IFNE           | 0.0833302 | 0.063577  | -0.390335   | 1          |
| CDADC1         | 1.46576   | 1.51385   | 0.0465788   | 0.975492   |
| SUGT1P3,TPTE2I | 0.276537  | 0.277926  | 0.00722609  | 1          |
| TRIM23         | 1.57859   | 1.66763   | 0.0791688   | 0.961236   |
| CIT            | 3.39045   | 1.84567   | -0.877332   | 0.0215444  |
| CKAP2          | 12.3522   | 11.9798   | -0.0441529  | 0.96385    |
| HEBP1          | 57.8401   | 44.9612   | -0.363391   | 0.290633   |
| RASAL2         | 0.747822  | 0.762668  | 0.0283613   | 0.981441   |
| FLNC           | 0.0149944 | 0.0404881 | 1.43307     | 1          |
| LRRC23         | 6.31326   | 3.70685   | -0.768192   | 0.0420136  |
| TRAPPC11       | 5.05971   | 3.43555   | -0.558514   | 0.0561838  |
| ZNF69          | 2.36422   | 2.4567    | 0.0553615   | 0.970185   |
| RPL5           | 2186.82   | 2264.97   | 0.0506591   | 0.961132   |
| UBTD2          | 6.26195   | 6.7779    | 0.114228    | 0.879418   |

|              |           |           |            |            |
|--------------|-----------|-----------|------------|------------|
| BTN3A2       | 6.54742   | 5.77937   | -0.180014  | 0.772699   |
| GLG1         | 15.7189   | 12.0654   | -0.381627  | 0.228324   |
| AKT2         | 14.4969   | 20.9748   | 0.532914   | 0.0564873  |
| TBC1D1       | 14.6319   | 12.0707   | -0.277604  | 0.521259   |
| HEXIM1       | 11.6974   | 20.3053   | 0.795665   | 0.00153868 |
| SPOPL        | 1.26343   | 1.25005   | -0.0153573 | 0.991515   |
| NLK          | 2.4588    | 3.7569    | 0.611592   | 0.0732377  |
| RFC1         | 6.56734   | 5.26175   | -0.319766  | 0.402378   |
| NFYA         | 3.37081   | 4.96492   | 0.558677   | 0.0519269  |
| PHYHIP       | 0.159262  | 0.04216   | -1.91745   | 1          |
| FUT4         | 2.95061   | 5.89824   | 0.999274   | 0.00153868 |
| GNE          | 2.1465    | 2.05454   | -0.0631754 | 0.95238    |
| TAF1A        | 2.96421   | 4.54664   | 0.617153   | 0.114535   |
| IDH1-AS1     | 0.816439  | 0.539799  | -0.596925  | 0.774294   |
| GSE1         | 4.84333   | 3.35635   | -0.529107  | 0.0832671  |
| LOC100288432 | 0.245531  | 0.882599  | 1.84586    | 0.339765   |
| TOB2P1       | 0.774983  | 0.639438  | -0.277361  | 0.778819   |
| SEPT7        | 17.3974   | 18.6023   | 0.09661    | 0.895686   |
| ARMCX1       | 0.0936266 | 0.0621686 | -0.590731  | 1          |
| IRAK2        | 0.825171  | 1.05012   | 0.347785   | 0.653218   |
| LOC100130987 | 0.896294  | 0.813885  | -0.139147  | 0.979338   |
| FAM57A       | 24.129    | 27.7614   | 0.202312   | 0.691637   |
| RUNX1        | 7.10512   | 5.2223    | -0.444173  | 0.241921   |
| HSD11B1L     | 1.09121   | 1.05451   | -0.049358  | 0.995202   |
| C21orf90     | 0.619366  | 0.626104  | 0.0156091  | 0.995209   |
| RPSAP58      | 48.5837   | 46.2038   | -0.0724601 | 0.929057   |
| VPS13C       | 1.21109   | 0.772207  | -0.649244  | 0.0370145  |
| DIDO1        | 5.07795   | 5.90708   | 0.218199   | 0.756508   |
| COTL1        | 220.836   | 275.569   | 0.319439   | 0.389111   |
| CLCN5        | 0.592107  | 0.646088  | 0.125873   | 0.916694   |
| CNOT3        | 15.4758   | 14.1699   | -0.127177  | 0.869473   |
| WDR90        | 5.95103   | 6.68957   | 0.168775   | 0.801756   |
| ACTR8        | 3.28817   | 3.20487   | -0.0370199 | 0.974348   |
| MSL1         | 5.30294   | 8.62364   | 0.701503   | 0.0117316  |
| MRPL43       | 78.7196   | 87.3843   | 0.15065    | 0.839406   |
| NPHS1        | 0.0361775 | 0.0246492 | -0.553549  | 1          |
| RPSA         | 3901.26   | 3905.99   | 0.00174806 | 0.999122   |
| RPLP2        | 6551.2    | 7295.87   | 0.15532    | 0.809839   |
| PAK2         | 10.609    | 12.1156   | 0.19158    | 0.701714   |
| ZNF204P      | 1.17581   | 1.15753   | -0.0226003 | 0.989044   |
| REST         | 3.77994   | 3.53396   | -0.0970788 | 0.901751   |
| ARAP3        | 5.74801   | 6.6856    | 0.217993   | 0.669949   |
| NSUN4        | 6.33362   | 6.15655   | -0.040907  | 0.969418   |
| FARS2        | 7.48034   | 7.12858   | -0.0694889 | 0.948304   |
| DYNC111      | 0.0929171 | 0.111857  | 0.267633   | 1          |
| FN3KRP       | 16.4042   | 15.1714   | -0.112706  | 0.879418   |
| SEC24C       | 9.71509   | 12.2655   | 0.336311   | 0.353107   |
| PEX11B       | 11.3085   | 10.8585   | -0.0585912 | 0.954143   |
| GUK1         | 248.849   | 309.081   | 0.312713   | 0.419248   |

|              |           |          |             |            |
|--------------|-----------|----------|-------------|------------|
| ASAP3        | 5.16498   | 5.14539  | -0.0054831  | 0.996522   |
| SUCLA2       | 6.88096   | 8.86696  | 0.365829    | 0.348144   |
| FAM86JP      | 1.18082   | 0.382212 | -1.62735    | 0.0192959  |
| ARPP19       | 15.3506   | 20.766   | 0.435931    | 0.15329    |
| ABCA17P      | 0.0802937 | 0.111231 | 0.470204    | 1          |
| NEDD4L       | 7.59112   | 5.33712  | -0.508251   | 0.0784883  |
| PTK2         | 24.381    | 24.4558  | 0.00441605  | 0.996948   |
| LOXL1        | 5.8801    | 5.34296  | -0.138201   | 0.926279   |
| ATG10        | 1.88705   | 1.03065  | -0.872577   | 0.0338188  |
| PHKA1        | 5.52781   | 5.14988  | -0.102171   | 0.894373   |
| CCDC150      | 0.933066  | 1.36769  | 0.551692    | 0.220227   |
| NBPF3        | 4.37787   | 4.92247  | 0.169153    | 0.794882   |
| FTL          | 9119.95   | 9649.74  | 0.0814643   | 0.934861   |
| SPATA5L1     | 9.8112    | 11.2993  | 0.203734    | 0.720363   |
| PEX13        | 3.25577   | 2.81835  | -0.208148   | 0.739662   |
| PRPF18       | 9.4377    | 10.969   | 0.216931    | 0.689533   |
| WWOX         | 4.89018   | 6.18048  | 0.337831    | 0.682291   |
| MED12        | 2.99476   | 1.9914   | -0.588656   | 0.0660778  |
| LRP4         | 1.21275   | 1.49005  | 0.297083    | 0.578405   |
| FSBP,RAD54B  | 3.41214   | 4.23191  | 0.310631    | 0.513296   |
| TTL5         | 2.36077   | 1.96135  | -0.267411   | 0.637192   |
| LOC646719    | 2.07883   | 2.07618  | -0.00183881 | 0.999048   |
| ARRB2        | 84.8766   | 80.4825  | -0.0766906  | 0.922996   |
| STK25        | 69.5947   | 92.4667  | 0.409955    | 0.202575   |
| SOS1         | 1.62903   | 2.07124  | 0.346486    | 0.382784   |
| NOTCH2NL     | 5.33577   | 4.47424  | -0.254055   | 0.581347   |
| TNIK         | 5.67144   | 5.26638  | -0.106904   | 0.957014   |
| AHNAK        | 15.5709   | 13.565   | -0.198958   | 0.871443   |
| CCDC126      | 1.06954   | 0.883076 | -0.276375   | 0.754905   |
| LCAT,SLC12A4 | 20.4605   | 17.7392  | -0.205901   | 0.773721   |
| PRDM2        | 2.00878   | 2.2469   | 0.16162     | 0.87667    |
| B3GNT1       | 10.3938   | 16.5454  | 0.670702    | 0.0280907  |
| TIFA         | 5.58256   | 6.17402  | 0.145283    | 0.826967   |
| SND1         | 82.8155   | 65.7475  | -0.332965   | 0.349063   |
| DCTN3        | 87.1222   | 89.7121  | 0.0422632   | 0.964843   |
| C7orf53      | 0.475202  | 0.918804 | 0.951216    | 0.158977   |
| ARHGEF37     | 0.485419  | 0.198933 | -1.28695    | 0.0150346  |
| MIR497HG     | 1.08809   | 1.03493  | -0.0722663  | 0.994593   |
| PRKX         | 4.98487   | 5.79814  | 0.218035    | 0.665451   |
| GNPTG        | 18.8071   | 24.9979  | 0.410528    | 0.419968   |
| MYRF         | 3.60395   | 3.25015  | -0.149074   | 0.837596   |
| ARL2BP       | 32.8278   | 43.4863  | 0.405642    | 0.194348   |
| LIMCH1       | 1.55612   | 1.32082  | -0.23652    | 0.700208   |
| SPRY2        | 5.58697   | 6.19613  | 0.149301    | 0.847872   |
| GEMIN8       | 6.86475   | 4.46954  | -0.619082   | 0.0568637  |
| NARG2        | 2.09193   | 1.96301  | -0.0917671  | 0.918453   |
| RPL8         | 10962.4   | 11850.9  | 0.112435    | 0.900608   |
| PIGV         | 4.62647   | 2.157    | -1.10088    | 0.00153868 |
| PRUNE        | 4.7871    | 5.43354  | 0.182739    | 0.77615    |

|           |           |           |            |            |
|-----------|-----------|-----------|------------|------------|
| TUBB3     | 78.8847   | 109.3     | 0.470478   | 0.129159   |
| TRAF6     | 1.4545    | 1.40827   | -0.0466014 | 0.967296   |
| NAT10     | 28.4161   | 35.9556   | 0.339509   | 0.334695   |
| MORC2-AS1 | 0.954596  | 1.58236   | 0.729116   | 0.623184   |
| NDUFV3    | 27.3238   | 27.5896   | 0.0139625  | 0.991446   |
| FAM46A    | 0.32776   | 0.5249    | 0.679404   | 0.205688   |
| RAB3B     | 2.74534   | 2.40809   | -0.189095  | 0.72175    |
| CYFIP2    | 8.78567   | 6.82955   | -0.363362  | 0.285216   |
| HOMER1    | 0.853534  | 1.22482   | 0.521045   | 0.273369   |
| RC3H1     | 1.14644   | 1.42194   | 0.310702   | 0.498082   |
| TBKBP1    | 5.50144   | 6.60904   | 0.264632   | 0.61138    |
| NOC3L     | 7.59768   | 8.97696   | 0.240668   | 0.607406   |
| AACS      | 9.30939   | 11.6002   | 0.317392   | 0.424027   |
| LOC254128 | 1.55791   | 1.40457   | -0.149482  | 0.983243   |
| SASH1     | 0.990157  | 0.546204  | -0.858216  | 0.0313688  |
| CUL9      | 2.01716   | 1.33373   | -0.596857  | 0.093011   |
| TAB3      | 1.60409   | 1.41233   | -0.183673  | 0.785209   |
| RARB      | 0.0730591 | 0.0631231 | -0.210896  | 1          |
| RPL14     | 2888.54   | 2984.03   | 0.0469178  | 0.964628   |
| ZRANB1    | 3.75897   | 3.42862   | -0.132709  | 0.854474   |
| PAPD7     | 9.14892   | 12.7746   | 0.481604   | 0.12051    |
| ZNF286B   | 2.29436   | 2.91783   | 0.346805   | 0.413848   |
| THAP1     | 5.7426    | 6.36475   | 0.148399   | 0.848628   |
| CTR9      | 7.86316   | 10.2833   | 0.387118   | 0.238719   |
| LOC285033 | 1.36614   | 1.60436   | 0.231892   | 0.967343   |
| LOC149134 | 1.33307   | 0.853582  | -0.643153  | 0.452674   |
| DBT       | 1.19128   | 1.10647   | -0.106552  | 0.895345   |
| MOCS3     | 4.75246   | 4.95029   | 0.0588381  | 0.954535   |
| LOC729013 | 7.00126   | 3.6113    | -0.955094  | 0.0123712  |
| TIMP2     | 6.49373   | 4.69822   | -0.466934  | 0.191747   |
| AHCTF1    | 2.02704   | 3.10253   | 0.614071   | 0.0215444  |
| EHMT2     | 20.4506   | 21.9631   | 0.102938   | 0.886208   |
| TRPM4     | 7.58479   | 4.89774   | -0.630994  | 0.0508243  |
| CAPZB     | 81.6323   | 104.741   | 0.359612   | 0.282517   |
| DENND4B   | 9.94914   | 8.75845   | -0.183895  | 0.732699   |
| CISD3     | 13.294    | 18.0663   | 0.442526   | 0.612746   |
| TIMM21    | 14.3      | 22.7431   | 0.669412   | 0.0130226  |
| PARD6A    | 13.183    | 12.052    | -0.129413  | 0.886331   |
| PITPNC1   | 5.99211   | 4.5812    | -0.38734   | 0.242418   |
| AGTPBP1   | 4.41884   | 2.53998   | -0.798847  | 0.00478151 |
| ABI1      | 15.1307   | 12.7367   | -0.248493  | 0.638064   |
| PPM1D     | 1.83993   | 1.9274    | 0.067003   | 0.952184   |
| ESRP2     | 9.51288   | 19.9279   | 1.06683    | 0.00153868 |
| POFUT2    | 7.99599   | 8.73316   | 0.127227   | 0.864982   |
| XIAP      | 2.17988   | 1.88223   | -0.211804  | 0.716687   |
| KCTD2     | 6.84723   | 10.6932   | 0.643101   | 0.0215444  |
| CPSF1     | 29.0238   | 33.1335   | 0.191056   | 0.759631   |
| FBXL4     | 3.07527   | 2.25013   | -0.450709  | 0.306194   |
| C6orf211  | 4.86134   | 4.96504   | 0.0304513  | 0.978818   |

|           |           |           |            |            |
|-----------|-----------|-----------|------------|------------|
| KDM5B     | 5.94742   | 5.83526   | -0.0274667 | 0.978818   |
| PRR24     | 20.4144   | 21.6275   | 0.0832787  | 0.948523   |
| LAMA5     | 2.90765   | 4.0879    | 0.491507   | 0.2463     |
| MPC2      | 13.6975   | 14.2421   | 0.05625    | 0.9636     |
| ZFP106    | 3.43472   | 3.78005   | 0.138213   | 0.824446   |
| ATG16L1   | 4.45323   | 7.23465   | 0.70007    | 0.0280907  |
| MVD       | 27.6258   | 41.7908   | 0.597171   | 0.0355697  |
| CDCA7     | 17.7601   | 24.1365   | 0.442579   | 0.151906   |
| PCID2     | 26.5664   | 26.0288   | -0.0294943 | 0.97664    |
| MEX3A     | 4.82714   | 5.95619   | 0.30322    | 0.457862   |
| OAT       | 45.0358   | 55.1166   | 0.291415   | 0.447327   |
| P4HB      | 363.391   | 353.907   | -0.0381525 | 0.969699   |
| CYTH2     | 17.7795   | 10.6618   | -0.737762  | 0.00153868 |
| CDKN2B    | 3.03301   | 7.35838   | 1.27864    | 0.00153868 |
| LOC344595 | 0.758586  | 0.959538  | 0.339027   | 0.646322   |
| ATP2C1    | 13.821    | 13.6696   | -0.015895  | 0.989688   |
| SRP68     | 37.236    | 45.854    | 0.300349   | 0.45245    |
| FANCG     | 14.285    | 13.1101   | -0.123818  | 0.864624   |
| VCIPI1    | 2.22173   | 2.11094   | -0.0738011 | 0.935437   |
| PCNXL4    | 10.902    | 5.33218   | -1.03179   | 0.00153868 |
| NKAP      | 17.7298   | 12.1963   | -0.539737  | 0.0864363  |
| ARSA      | 7.25713   | 6.2046    | -0.22606   | 0.673957   |
| PSMD5     | 16.7582   | 22.1182   | 0.400366   | 0.197192   |
| PHF11     | 8.23562   | 4.70903   | -0.806447  | 0.0103919  |
| NET1      | 6.87253   | 9.55215   | 0.474984   | 0.104824   |
| FHL1      | 0.073376  | 0.142784  | 0.960454   | 1          |
| PLEKHG4   | 4.31966   | 2.56884   | -0.749799  | 0.024868   |
| ZBTB43    | 3.94751   | 2.9032    | -0.443297  | 0.19932    |
| METTL8    | 2.37749   | 3.00643   | 0.338615   | 0.509882   |
| MAGED2    | 32.4795   | 30.0936   | -0.110073  | 0.875961   |
| PRKAR2A   | 1.08274   | 1.33145   | 0.29831    | 0.73105    |
| ZNF233    | 0.332908  | 0.19861   | -0.745186  | 1          |
| EXD2      | 3.91527   | 3.47558   | -0.17186   | 0.790722   |
| AP1G1     | 5.42797   | 6.48814   | 0.25739    | 0.541415   |
| BRE       | 31.9086   | 17.9969   | -0.8262    | 0.00153868 |
| CGREF1    | 18.9931   | 16.7372   | -0.182415  | 0.836427   |
| TOMM20    | 55.924    | 57.9956   | 0.0524745  | 0.952355   |
| DNAAF2    | 6.75867   | 9.55454   | 0.499447   | 0.152514   |
| PRPF40A   | 10.17     | 11.6941   | 0.201465   | 0.66973    |
| VN1R5     | 0.0334096 | 0.0596133 | 0.835371   | 1          |
| FKBP10    | 122.756   | 106.743   | -0.201652  | 0.681951   |
| PTGES3    | 164.259   | 294.577   | 0.842677   | 0.00153868 |
| RPS7      | 4150.07   | 4352.59   | 0.0687376  | 0.941835   |
| WHSC1     | 9.14852   | 8.88425   | -0.0422882 | 0.966727   |
| SH2D3A    | 5.61853   | 4.5208    | -0.313617  | 0.59533    |
| RPUSD3    | 61.7221   | 31.1677   | -0.985737  | 0.00153868 |
| RBM7      | 10.087    | 9.74526   | -0.0497248 | 0.961082   |
| SLC35F1   | 0.0109478 | 0.0104943 | -0.0610422 | 1          |
| FAM45A    | 6.85874   | 5.61976   | -0.287434  | 0.530442   |

|              |           |          |            |            |
|--------------|-----------|----------|------------|------------|
| PPAT         | 7.0625    | 12.0713  | 0.773333   | 0.00153868 |
| RPS2         | 11566     | 11766.1  | 0.0247393  | 0.983243   |
| CGGBP1       | 7.10972   | 6.1827   | -0.201554  | 0.774988   |
| PTRF         | 56.7181   | 93.7034  | 0.724294   | 0.00659556 |
| CALR         | 396.836   | 696.551  | 0.811687   | 0.00274688 |
| ZFAND5       | 12.094    | 12.8484  | 0.08729    | 0.906633   |
| KXD1         | 122.972   | 122.062  | -0.0107189 | 0.992831   |
| LOC100506207 | 0.17595   | 0.109179 | -0.688472  | 1          |
| WDR5B        | 1.01312   | 1.09295  | 0.109422   | 0.92475    |
| KIAA0930     | 10.5793   | 17.0276  | 0.686626   | 0.00380811 |
| RARA         | 8.74574   | 10.6832  | 0.288693   | 0.533447   |
| UNC5B        | 1.97134   | 2.19033  | 0.151971   | 0.849881   |
| FZD4         | 0.834748  | 1.10665  | 0.40679    | 0.40075    |
| AES          | 174.937   | 189.933  | 0.118651   | 0.8626     |
| PFN2         | 44.3831   | 44.9247  | 0.0174986  | 0.985712   |
| UBAP1        | 17.386    | 16.6726  | -0.0604498 | 0.951036   |
| DMTF1        | 3.30347   | 2.19599  | -0.589109  | 0.360949   |
| CAPG         | 123.84    | 105.375  | -0.232938  | 0.606595   |
| N6AMT2       | 7.99047   | 11.507   | 0.526159   | 0.207194   |
| PBK          | 23.1154   | 21.7036  | -0.0909191 | 0.907121   |
| SHPK,TRPV1   | 4.3163    | 7.32372  | 0.762782   | 0.0137404  |
| MADD         | 5.44031   | 5.57295  | 0.0347503  | 0.974348   |
| NKAIN1       | 1.90457   | 2.92475  | 0.618846   | 0.169436   |
| PHF19        | 64.8113   | 116.737  | 0.848944   | 0.0156935  |
| SEMA3F       | 5.43214   | 5.95024  | 0.131429   | 0.865674   |
| SKP2         | 7.74064   | 12.9381  | 0.741103   | 0.0515699  |
| RAD21        | 52.6474   | 47.9973  | -0.13341   | 0.828851   |
| PP7080       | 12.1666   | 13.9987  | 0.202367   | 0.730432   |
| CXorf40B     | 14.7628   | 18.632   | 0.335813   | 0.416867   |
| TBK1         | 6.43622   | 6.95365  | 0.111557   | 0.880357   |
| RAB40B       | 12.1027   | 16.5427  | 0.450869   | 0.203128   |
| YTHDC1       | 4.8985    | 4.90531  | 0.00200571 | 0.998593   |
| ODF3B        | 10.7829   | 4.39118  | -1.29606   | 0.00970147 |
| PHF17        | 5.92118   | 6.89581  | 0.219836   | 0.665087   |
| TYSND1       | 14.3339   | 9.2344   | -0.634341  | 0.0259174  |
| ZSCAN9       | 6.00031   | 5.37924  | -0.157635  | 0.845519   |
| CYP51A1      | 25.7066   | 28.147   | 0.13084    | 0.835372   |
| IARS2        | 26.5641   | 21.3981  | -0.311996  | 0.715689   |
| DNAH6        | 0.0292098 | 0.013777 | -1.0842    | 1          |
| ZNF491       | 0.252239  | 0.182357 | -0.468027  | 1          |
| SON          | 11.8757   | 16.9875  | 0.516465   | 0.0647668  |
| ELAVL1       | 15.5302   | 21.0482  | 0.438619   | 0.145411   |
| CRTC1        | 3.50604   | 2.82087  | -0.313701  | 0.500234   |
| HNF4G        | 0.495763  | 0.354045 | -0.485718  | 0.489185   |
| PURA         | 3.65082   | 7.85152  | 1.10475    | 0.00153868 |
| POM121       | 10.3388   | 13.302   | 0.363576   | 0.428973   |
| WDR55        | 16.8585   | 25.2419  | 0.582347   | 0.0584523  |
| USP38        | 2.8124    | 3.39128  | 0.270026   | 0.578405   |
| TDRKH        | 1.91076   | 1.16547  | -0.713234  | 0.0923379  |

|              |           |           |            |            |
|--------------|-----------|-----------|------------|------------|
| ZNF283       | 1.68273   | 1.63313   | -0.0431632 | 0.975492   |
| RYK          | 17.0182   | 18.9228   | 0.153047   | 0.794475   |
| RPL35A       | 3993.9    | 3957.15   | -0.0133354 | 0.991515   |
| PPP2R5C      | 33.6728   | 25.1681   | -0.41999   | 0.260223   |
| KRTAP5-9     | 0.182654  | 0.0885466 | -1.04461   | 1          |
| ESRG         | 0.0937588 | 0.103342  | 0.140404   | 1          |
| ANKFY1       | 3.59964   | 5.35453   | 0.572909   | 0.0420136  |
| ANGEL1       | 6.07636   | 5.09545   | -0.253997  | 0.608864   |
| RNF130       | 47.6634   | 39.9852   | -0.253417  | 0.547227   |
| KLHL9        | 7.14443   | 8.65674   | 0.277004   | 0.503694   |
| PUS7L        | 2.15952   | 2.08795   | -0.0486253 | 0.96875    |
| NCOA4        | 49.5677   | 37.047    | -0.420045  | 0.172285   |
| TBCD         | 11.6781   | 12.8824   | 0.141588   | 0.818547   |
| NUP210L      | 0.0109761 | 0.0173981 | 0.664567   | 1          |
| HRC          | 0.0177026 | 0.0119749 | -0.563947  | 1          |
| FAHD2B       | 18.0428   | 11.6641   | -0.62935   | 0.0442243  |
| PBXIP1       | 6.92648   | 2.59772   | -1.41487   | 0.00153868 |
| GATAD1       | 13.3575   | 9.06075   | -0.559951  | 0.0388971  |
| SEC62        | 8.39892   | 9.49418   | 0.176839   | 0.736853   |
| LOC100505876 | 9.94894   | 8.338     | -0.254842  | 0.765218   |
| YAP1         | 10.8442   | 10.647    | -0.026474  | 0.978818   |
| ANKRD28      | 3.66244   | 3.16386   | -0.211116  | 0.677165   |
| ANKRD49      | 4.86608   | 4.06429   | -0.259756  | 0.659814   |
| MORF4L2      | 65.7202   | 93.749    | 0.512468   | 0.0685533  |
| SMAD5        | 3.43546   | 4.11234   | 0.259458   | 0.560895   |
| FAM122A      | 2.48512   | 2.96693   | 0.255658   | 0.670859   |
| ZNF155       | 1.52337   | 1.3856    | -0.136753  | 0.896324   |
| GORASP1      | 8.48596   | 10.1421   | 0.257205   | 0.575157   |
| DAB2         | 0.0172855 | 0.0164549 | -0.0710475 | 1          |
| PSME4        | 8.57851   | 9.98488   | 0.219019   | 0.633194   |
| CLU          | 37.2105   | 37.4503   | 0.00926805 | 0.994068   |
| IFNGR1       | 6.62471   | 5.27761   | -0.327971  | 0.467566   |
| LACC1        | 0.954482  | 0.712119  | -0.422598  | 0.52407    |
| LRRC4B       | 0.862283  | 0.273564  | -1.65629   | 0.0304296  |
| TOP2A        | 9.61848   | 8.23291   | -0.224406  | 0.629512   |
| PUS3         | 9.1531    | 11.4168   | 0.318827   | 0.561575   |
| KIAA0391     | 14.1863   | 13.5908   | -0.0618754 | 0.952184   |
| PPAP2B       | 0.485506  | 0.500173  | 0.0429389  | 0.981543   |
| SPAG7        | 35.8301   | 37.7439   | 0.0750716  | 0.934204   |
| ZBTB46       | 2.04159   | 2.03673   | -0.0034409 | 0.999234   |
| ICAM2        | 4.00934   | 3.97123   | -0.01378   | 0.994204   |
| TADA2B       | 5.08095   | 5.53637   | 0.123844   | 0.94805    |
| DCP1A        | 2.86942   | 2.87341   | 0.00200227 | 0.998858   |
| MICU1        | 27.0443   | 18.8358   | -0.521847  | 0.070901   |
| B2M          | 700.261   | 707.15    | 0.0141238  | 0.990368   |
| HEXIM2       | 5.33848   | 3.80764   | -0.487532  | 0.379394   |
| NUFIP2       | 4.25076   | 5.35567   | 0.333345   | 0.339765   |
| GUSBP11      | 3.82505   | 3.98405   | 0.0587574  | 0.960786   |
| ZNF837       | 2.29461   | 1.56651   | -0.550693  | 0.524921   |



|                |           |           |            |            |
|----------------|-----------|-----------|------------|------------|
| LIN7C          | 5.28606   | 7.1627    | 0.43831    | 0.167611   |
| OAZ2           | 32.4191   | 36.9734   | 0.189642   | 0.711442   |
| CATSPER3       | 0.577361  | 0.701304  | 0.280566   | 0.86364    |
| GON4L          | 1.89281   | 2.11959   | 0.163261   | 0.813026   |
| FBXW8          | 1.61128   | 0.871132  | -0.887245  | 0.0215444  |
| KIAA1804       | 2.38795   | 3.41458   | 0.515938   | 0.12218    |
| PLEKHA4        | 8.63354   | 4.5418    | -0.926687  | 0.00274688 |
| LGI2           | 0.0636561 | 0.069574  | 0.12825    | 1          |
| GPR161         | 2.0921    | 2.49551   | 0.254384   | 0.60545    |
| UHRF1BP1L      | 1.32707   | 1.04142   | -0.349687  | 0.61138    |
| TAF7           | 30.1395   | 38.019    | 0.335066   | 0.337839   |
| FZD7           | 3.53148   | 2.62604   | -0.427386  | 0.332823   |
| POGK           | 12.4119   | 15.4876   | 0.319386   | 0.387336   |
| AZI1           | 9.1106    | 7.39576   | -0.300847  | 0.508463   |
| FOXD2-AS1      | 2.62052   | 4.44616   | 0.762703   | 0.0584523  |
| IRAK4          | 3.63375   | 2.33946   | -0.635282  | 0.0467998  |
| GATAD2B        | 5.22439   | 4.22062   | -0.307808  | 0.426282   |
| RSPRY1         | 2.26152   | 1.77521   | -0.349302  | 0.597911   |
| PRKCE          | 1.22877   | 0.889236  | -0.466578  | 0.332486   |
| ZADH2          | 6.34425   | 5.56927   | -0.18796   | 0.725228   |
| TBC1D22B       | 3.42067   | 2.93001   | -0.223371  | 0.728284   |
| VAT1           | 163.123   | 130.566   | -0.321186  | 0.367402   |
| PORCN          | 15.9735   | 14.4037   | -0.149248  | 0.831614   |
| RALGPS2        | 1.97073   | 1.09884   | -0.842752  | 0.0111246  |
| ADAT2          | 2.30791   | 3.05352   | 0.403884   | 0.271981   |
| UNC45A         | 29.6729   | 33.3632   | 0.169112   | 0.785473   |
| TMEM14A        | 21.3624   | 19.7086   | -0.11625   | 0.880121   |
| DPP7           | 320.915   | 361.998   | 0.17379    | 0.756508   |
| FNIP2          | 0.288079  | 0.274424  | -0.0700578 | 1          |
| LOC151009,LOC4 | 3.48727   | 3.86012   | 0.14655    | 0.8709     |
| CLNS1A         | 100.009   | 95.0229   | -0.073781  | 0.931725   |
| LPXN           | 1.49772   | 0.580598  | -1.36716   | 0.00970147 |
| ADAM15         | 95.4497   | 113.406   | 0.248683   | 0.608336   |
| ZNF267         | 2.31259   | 2.11918   | -0.126002  | 0.884031   |
| ANO7           | 2.39046   | 3.12493   | 0.386537   | 0.454495   |
| IPO5           | 26.2392   | 23.8411   | -0.138277  | 0.817992   |
| BLOC1S6        | 9.68328   | 8.61456   | -0.16872   | 0.764196   |
| SCARA3         | 9.57964   | 8.66628   | -0.144558  | 0.824372   |
| ENTPD3-AS1     | 0.129231  | 0.0844508 | -0.613773  | 1          |
| FAM111B        | 1.22825   | 2.7672    | 1.17182    | 0.00153868 |
| C22orf32       | 23.7598   | 22.1864   | -0.0988435 | 0.900997   |
| DISC1,TSNAX    | 9.30805   | 9.01615   | -0.0459672 | 0.964843   |
| KIAA1737       | 3.05415   | 5.58633   | 0.871131   | 0.00153868 |
| CAMK2N1        | 23.1094   | 16.8274   | -0.457668  | 0.145411   |
| NFATC3         | 3.55939   | 5.9823    | 0.74907    | 0.124445   |
| FBXW9          | 10.0125   | 9.83193   | -0.0262528 | 0.982623   |
| GSTK1          | 122.259   | 108.693   | -0.169678  | 0.752756   |
| FBXW7          | 2.60255   | 3.01184   | 0.210721   | 0.736305   |
| SGCB           | 3.08139   | 3.24237   | 0.0734657  | 0.93855    |

|           |           |           |            |            |
|-----------|-----------|-----------|------------|------------|
| PLS3      | 10.5594   | 8.50316   | -0.312461  | 0.421202   |
| PNISR     | 5.84795   | 6.17743   | 0.0790763  | 0.930948   |
| SHPRH     | 0.643701  | 0.839653  | 0.383402   | 0.769079   |
| FAM22A    | 0.864029  | 0.673506  | -0.359388  | 0.688922   |
| C4orf52   | 26.9952   | 15.5934   | -0.79177   | 0.00572929 |
| CCDC39    | 0.0255261 | 0.0339064 | 0.409582   | 1          |
| ESF1      | 2.55758   | 4.08825   | 0.676706   | 0.0304296  |
| PLEKHA8P1 | 1.87875   | 1.92963   | 0.0385539  | 0.993157   |
| CMTM3     | 53.6063   | 59.7605   | 0.156789   | 0.781269   |
| VPS72     | 36.5822   | 38.231    | 0.0636021  | 0.944934   |
| RPL13P5   | 0.735557  | 0.641499  | -0.197389  | 0.939948   |
| USE1      | 37.6478   | 32.0718   | -0.23126   | 0.675228   |
| WNK2      | 5.29961   | 7.09676   | 0.421274   | 0.237712   |
| RASSF7    | 30.2097   | 44.3197   | 0.552933   | 0.064033   |
| GNL3      | 62.5899   | 92.7983   | 0.568168   | 0.196771   |
| MYL5      | 7.17678   | 7.32987   | 0.0304495  | 0.983462   |
| TSTD2     | 4.62575   | 4.65922   | 0.0104026  | 0.996765   |
| HMMR      | 1.57121   | 1.02287   | -0.619254  | 0.161211   |
| PHF15     | 3.22275   | 5.09876   | 0.661854   | 0.0192959  |
| NABP1     | 19.9959   | 26.4476   | 0.403431   | 0.213961   |
| LOC148413 | 8.63227   | 10.3131   | 0.256661   | 0.913887   |
| ZNF268    | 1.50867   | 1.94471   | 0.366278   | 0.403473   |
| FAM208A   | 4.36534   | 4.49797   | 0.043181   | 0.968459   |
| LOC553103 | 0.222577  | 0.185678  | -0.261506  | 1          |
| ANKRD13C  | 1.77084   | 1.57079   | -0.172945  | 0.808777   |
| ZNF547    | 9.3185    | 8.26821   | -0.172524  | 0.865645   |
| PILRB     | 38.9576   | 43.8663   | 0.171206   | 0.829536   |
| ZNF702P   | 1.58103   | 2.02075   | 0.354026   | 0.513296   |
| CWC15     | 23.7111   | 22.4833   | -0.0767073 | 0.92475    |
| TMEM38B   | 10.9182   | 10.6828   | -0.031435  | 0.97562    |
| SNX27     | 3.03903   | 4.31782   | 0.506691   | 0.107753   |
| ZNF646    | 2.18128   | 1.88738   | -0.208787  | 0.838861   |
| ABAT      | 1.48148   | 1.49599   | 0.0140676  | 0.992814   |
| BTBD1     | 21.1534   | 23.2716   | 0.137684   | 0.824372   |
| FLII      | 67.5726   | 60.5975   | -0.157178  | 0.817763   |
| SLC17A9   | 20.5734   | 32.4868   | 0.659075   | 0.0181648  |
| MYO10     | 5.71299   | 7.32233   | 0.358057   | 0.296127   |
| TMEM131   | 3.93166   | 3.87985   | -0.0191384 | 0.985712   |
| CWF19L2   | 1.60576   | 1.68605   | 0.0703936  | 0.952184   |
| TTC21B    | 1.49795   | 1.24318   | -0.268964  | 0.647419   |
| OXA1L     | 160.51    | 144.117   | -0.155424  | 0.783527   |
| PTTG1     | 173.113   | 189.842   | 0.133084   | 0.838902   |
| TRAK2     | 1.15137   | 1.8555    | 0.68845    | 0.0313688  |
| ARHGEF9   | 1.91675   | 1.35405   | -0.501385  | 0.230528   |
| PAPD5     | 1.39316   | 2.38574   | 0.776076   | 0.00739414 |
| RAB11FIP3 | 14.2027   | 20.6275   | 0.538408   | 0.0500215  |
| CDT1      | 62.8454   | 31.408    | -1.00067   | 0.00153868 |
| SKP1      | 103.776   | 139.417   | 0.425935   | 0.16409    |
| NSMAF     | 16.8135   | 19.9202   | 0.244611   | 0.557974   |

|            |           |           |             |           |
|------------|-----------|-----------|-------------|-----------|
| ZNF92      | 1.71457   | 1.36749   | -0.326322   | 0.58104   |
| MOB3C      | 4.6034    | 4.86665   | 0.0802302   | 0.934861  |
| ZCCHC24    | 1.31831   | 0.934981  | -0.495683   | 0.330706  |
| PTGR1      | 72.4948   | 59.5332   | -0.284181   | 0.460482  |
| C6orf106   | 13.4043   | 17.1148   | 0.352556    | 0.297593  |
| FAM213A    | 15.9604   | 14.4825   | -0.140192   | 0.8361    |
| BACE1      | 2.0742    | 1.85623   | -0.160185   | 0.880754  |
| WDR20      | 8.64536   | 10.1087   | 0.225594    | 0.667022  |
| PPIL4      | 7.4391    | 7.69116   | 0.0480725   | 0.9634    |
| AKAP13     | 1.46728   | 1.34122   | -0.129593   | 0.871443  |
| EPS8       | 2.09619   | 1.46992   | -0.512031   | 0.211893  |
| SSH3       | 18.0336   | 17.4322   | -0.0489335  | 0.96009   |
| FAM120AOS  | 16.9901   | 15.453    | -0.1368     | 0.950787  |
| ICAM3      | 9.09037   | 12.4593   | 0.454815    | 0.249373  |
| GCC1       | 6.01366   | 5.98498   | -0.00689798 | 0.994734  |
| RPS16      | 5266.35   | 5216.98   | -0.0135867  | 0.991446  |
| DIS3L2     | 4.59535   | 4.64288   | 0.0148435   | 0.991167  |
| SEPT1      | 0.827288  | 0.670469  | -0.303219   | 0.973233  |
| GMFG       | 0.300506  | 0.112905  | -1.41228    | 1         |
| ATXN7L3B   | 13.6649   | 17.4624   | 0.35378     | 0.310422  |
| TBCCD1     | 1.84894   | 3.26826   | 0.821829    | 0.0280907 |
| MAP3K5     | 0.664724  | 1.02762   | 0.628479    | 0.15801   |
| ZCRB1      | 20.5868   | 15.9101   | -0.371775   | 0.268716  |
| CCS        | 34.2933   | 34.5044   | 0.00885337  | 0.994204  |
| RNF138P1   | 0.0364038 | 0.0200288 | -0.862015   | 1         |
| TLK1       | 5.90117   | 5.62884   | -0.0681649  | 0.937886  |
| ZNF790     | 0.453408  | 0.621029  | 0.453849    | 0.674951  |
| STX12      | 9.45967   | 8.54615   | -0.146514   | 0.816068  |
| SF3B14     | 251.979   | 321.868   | 0.353168    | 0.311296  |
| DPY30      | 50.5867   | 49.4288   | -0.0334063  | 0.974348  |
| LPAR2      | 12.1121   | 11.1083   | -0.124816   | 0.884203  |
| TOM1L2     | 3.85137   | 2.30206   | -0.742444   | 0.0181648 |
| ST6GAL1    | 4.81073   | 6.37638   | 0.406481    | 0.251081  |
| RPL38      | 4451.51   | 4495.06   | 0.0140441   | 0.991167  |
| VAMP3      | 20.6047   | 22.8406   | 0.148626    | 0.800869  |
| LPAR5      | 0.0331469 | 0         | #NAME?      | 1         |
| C11orf49   | 19.0356   | 13.4227   | -0.504025   | 0.619985  |
| CLEC3B     | 1.27851   | 1.10295   | -0.213093   | 0.913875  |
| DNAJC22    | 4.90433   | 2.63905   | -0.894039   | 0.0192959 |
| TAB1       | 10.9573   | 12.1395   | 0.147819    | 0.817355  |
| APPL1      | 3.66719   | 3.59287   | -0.0295358  | 0.978016  |
| ABCE1      | 19.001    | 24.6333   | 0.374534    | 0.285815  |
| SBF1       | 8.11682   | 12.4776   | 0.620354    | 0.128429  |
| ZFYVE20    | 3.15813   | 3.49112   | 0.14462     | 0.825017  |
| RPL7       | 6597.11   | 6692.51   | 0.0207143   | 0.985692  |
| VAV2       | 13.4849   | 18.6979   | 0.471536    | 0.109797  |
| FBXO22-AS1 | 45.5747   | 53.4107   | 0.228897    | 0.845932  |
| UQCRB      | 50.7271   | 53.9335   | 0.0884243   | 0.908707  |
| UNK        | 7.76106   | 6.49789   | -0.256282   | 0.671208  |

|              |           |           |             |            |
|--------------|-----------|-----------|-------------|------------|
| TTC18        | 0.45521   | 0.203447  | -1.16188    | 0.91015    |
| RAD51AP1     | 4.89479   | 4.86102   | -0.00998616 | 0.994204   |
| ME3          | 9.3979    | 8.08039   | -0.217913   | 0.711465   |
| TTPAL        | 3.96448   | 4.22601   | 0.0921629   | 0.910891   |
| MAVS         | 3.40475   | 3.11935   | -0.126304   | 0.848579   |
| AACSP1       | 0.865012  | 0.796595  | -0.118874   | 0.940466   |
| TMTC4        | 3.6763    | 2.11342   | -0.798676   | 0.0103919  |
| DNAL1        | 0.526091  | 0.824907  | 0.648918    | 0.106011   |
| RAVER1       | 24.8057   | 35.9663   | 0.535974    | 0.0576107  |
| HINT3        | 5.49052   | 3.58416   | -0.615308   | 0.0467998  |
| HMG20B       | 97.1109   | 91.3676   | -0.087951   | 0.907256   |
| CCDC93       | 4.10727   | 3.74058   | -0.134917   | 0.839607   |
| KIF4A        | 5.30873   | 6.90855   | 0.380017    | 0.288227   |
| SDHAP2       | 0.86994   | 1.34017   | 0.623431    | 0.293421   |
| HOXB8        | 3.08992   | 6.11943   | 0.985828    | 0.0220668  |
| CNEP1R1      | 5.00622   | 5.02337   | 0.00493188  | 0.996781   |
| FGFR1        | 19.5883   | 16.708    | -0.22945    | 0.614559   |
| KCTD9        | 5.58898   | 5.67332   | 0.0216084   | 0.984084   |
| NME4         | 68.4234   | 74.7887   | 0.128331    | 0.848219   |
| MARCKS       | 10.3268   | 5.64403   | -0.871599   | 0.00153868 |
| KCNQ4        | 5.20079   | 6.01421   | 0.209644    | 0.73154    |
| FBXL17       | 1.17868   | 0.825934  | -0.513078   | 0.294591   |
| EXOC6        | 2.87097   | 3.10759   | 0.114261    | 0.891086   |
| TRIM8        | 31.079    | 26.0129   | -0.256716   | 0.543063   |
| VWA9         | 27.5387   | 36.0442   | 0.388309    | 0.232888   |
| FBXO36       | 0.534056  | 0.368047  | -0.537098   | 0.502283   |
| TIPARP       | 11.8573   | 10.6194   | -0.159079   | 0.783261   |
| PTPN14       | 1.58427   | 1.59727   | 0.0117932   | 0.993157   |
| PLEKHH3      | 9.62926   | 10.5498   | 0.131721    | 0.871443   |
| SRRM3        | 11.8034   | 10.9806   | -0.104246   | 0.896541   |
| UBR5         | 5.64741   | 4.88906   | -0.20803    | 0.66868    |
| DOCK7        | 2.94189   | 1.91124   | -0.622239   | 0.0442243  |
| BTBD3        | 2.20387   | 2.34686   | 0.0906882   | 0.925922   |
| ZNF621       | 2.25863   | 2.02771   | -0.155596   | 0.817046   |
| UQCRQ        | 91.3893   | 125.175   | 0.453853    | 0.137794   |
| SPRY4        | 47.1876   | 55.7682   | 0.241037    | 0.582022   |
| AKAP10       | 3.74748   | 3.12478   | -0.262163   | 0.61305    |
| LOC100130000 | 0.0873645 | 0.0329751 | -1.40567    | 1          |
| KBTD2        | 7.5846    | 7.31936   | -0.051357   | 0.956644   |
| SEPT10       | 15.6364   | 11.6938   | -0.419163   | 0.180016   |
| SPG21        | 75.9855   | 65.9924   | -0.203425   | 0.673323   |
| LAMTOR5      | 131.681   | 143.45    | 0.123502    | 0.853129   |
| A1BG-AS1     | 0.163544  | 0.133404  | -0.293871   | 1          |
| FBXW2        | 7.97267   | 12.7946   | 0.682402    | 0.00970147 |
| ZNF443       | 1.40922   | 1.90652   | 0.436045    | 0.408637   |
| CEP152       | 0.976114  | 0.816028  | -0.258431   | 0.704283   |
| ALAD         | 7.20327   | 5.40602   | -0.414086   | 0.248596   |
| PPIE         | 37.4543   | 30.4931   | -0.296651   | 0.611201   |
| LYSMD1       | 1.45186   | 1.90127   | 0.389058    | 0.839114   |

|               |           |           |            |            |
|---------------|-----------|-----------|------------|------------|
| MSH3          | 0.414938  | 0.361918  | -0.197233  | 0.903133   |
| CHAMP1        | 4.97036   | 4.73609   | -0.0696531 | 0.941566   |
| ADCK3         | 21.955    | 15.9121   | -0.464425  | 0.137267   |
| RPS23         | 450.228   | 441.883   | -0.0269922 | 0.978996   |
| CC2D1B        | 4.36755   | 5.40185   | 0.30663    | 0.450505   |
| E2F2          | 2.21168   | 3.1785    | 0.523203   | 0.164978   |
| DDX11-AS1     | 0.799716  | 0.660726  | -0.275436  | 0.956716   |
| FAM105B       | 2.05513   | 2.82762   | 0.46036    | 0.160303   |
| MRPS27        | 37.1983   | 38.614    | 0.0538874  | 0.951854   |
| RPL41         | 12602.8   | 12695.9   | 0.0106178  | 0.994058   |
| BUB1          | 13.5503   | 15.6767   | 0.210301   | 0.670807   |
| AGAP1         | 3.28566   | 2.58943   | -0.343546  | 0.378436   |
| ZNF578        | 1.32312   | 1.86705   | 0.496819   | 0.194085   |
| GAB1          | 0.244677  | 0.200986  | -0.283781  | 1          |
| B4GALNT3      | 2.00048   | 4.13311   | 1.04688    | 0.00153868 |
| LRRC4         | 0.0358432 | 0.0432062 | 0.269542   | 1          |
| MOSPD3        | 43.5027   | 41.5374   | -0.0666931 | 0.944295   |
| AP2M1         | 196.483   | 197.72    | 0.0090586  | 0.994116   |
| AP1S2         | 11.8129   | 12.1817   | 0.044346   | 0.964843   |
| TRIM47        | 14.4092   | 27.0054   | 0.906258   | 0.00153868 |
| RNF10         | 27.0688   | 21.8626   | -0.308163  | 0.398588   |
| CCDC50        | 6.44956   | 3.32835   | -0.954395  | 0.00153868 |
| DZANK1        | 0.207027  | 0.353056  | 0.770078   | 1          |
| CBX3P2        | 0.337595  | 0.0897503 | -1.91131   | 1          |
| NBEAL2        | 5.03259   | 4.76103   | -0.080029  | 0.949676   |
| MCEE          | 3.99226   | 3.04077   | -0.392767  | 0.57283    |
| PEX19         | 14.3898   | 11.5224   | -0.320608  | 0.384101   |
| MNAT1         | 20.8382   | 18.3752   | -0.18147   | 0.737596   |
| CNOT11        | 22.5975   | 21.3724   | -0.0804104 | 0.922274   |
| RAP1GDS1      | 9.8483    | 8.43514   | -0.223462  | 0.648214   |
| DYNC1LI2      | 7.43964   | 12.1057   | 0.70238    | 0.00659556 |
| L3HYPDH       | 2.81255   | 2.15531   | -0.383982  | 0.608804   |
| TSC2          | 10.1144   | 9.9309    | -0.0264085 | 0.985501   |
| CDC42EP3      | 1.78281   | 2.11003   | 0.243104   | 0.672486   |
| SORT1         | 5.18963   | 5.24313   | 0.0147953  | 0.990104   |
| TTC13         | 1.05888   | 1.40647   | 0.409537   | 0.489185   |
| MTIF3         | 28.7311   | 20.2843   | -0.50225   | 0.712162   |
| FLJ13197      | 0.0144033 | 0.0459529 | 1.67376    | 1          |
| AP1M2         | 2.6456    | 2.82803   | 0.0962032  | 0.94188    |
| PTEN          | 7.30642   | 4.61657   | -0.662344  | 0.0176564  |
| ONECUT2       | 0.319899  | 0.367285  | 0.199283   | 1          |
| RSBN1L-AS1    | 3.87987   | 5.29385   | 0.448308   | 0.663013   |
| C2orf49       | 7.83801   | 8.26695   | 0.0768675  | 0.945399   |
| C19orf70      | 98.4599   | 126.706   | 0.363875   | 0.283227   |
| APOL6         | 0.0955623 | 0.0339203 | -1.49429   | 1          |
| LOC388692     | 0.279746  | 0.256975  | -0.122493  | 1          |
| RWDD3, TMEM56 | 10.5053   | 8.51374   | -0.303257  | 0.630153   |
| PHLDB1        | 2.9237    | 3.65779   | 0.323176   | 0.483397   |
| LOC100505715  | 0.253428  | 0.223889  | -0.178789  | 1          |

|               |           |           |            |           |
|---------------|-----------|-----------|------------|-----------|
| DCPS          | 30.1638   | 26.1146   | -0.20796   | 0.702001  |
| TYMS          | 18.5009   | 24.9875   | 0.433607   | 0.681325  |
| MED28         | 37.6674   | 34.6901   | -0.118792  | 0.864901  |
| RPL22         | 325.437   | 330.942   | 0.0242016  | 0.981441  |
| PLEKHF1       | 6.70888   | 5.62919   | -0.253143  | 0.739517  |
| SETD1A        | 7.52902   | 10.7996   | 0.520446   | 0.070901  |
| ANAPC10       | 6.16972   | 6.20775   | 0.0088665  | 0.998382  |
| TCIRG1        | 35.131    | 28.659    | -0.293759  | 0.472728  |
| RRP8          | 10.8357   | 14.4092   | 0.411197   | 0.267972  |
| RASGRF2       | 0.0524121 | 0.0539823 | 0.0425871  | 1         |
| GCOM1_MYZAP,F | 8.75485   | 6.89247   | -0.345061  | 0.340244  |
| UNC13B        | 1.12615   | 1.30097   | 0.208186   | 0.776769  |
| C19orf26      | 2.72575   | 2.94084   | 0.109574   | 0.934331  |
| PGBD1         | 1.82986   | 2.52262   | 0.463189   | 0.28785   |
| SSH1          | 5.54014   | 6.00573   | 0.116417   | 0.874024  |
| IRF5          | 22.4451   | 16.8444   | -0.414128  | 0.202725  |
| LLGL2         | 26.7765   | 32.386    | 0.274406   | 0.594489  |
| TRIM2         | 1.63841   | 1.55938   | -0.0713186 | 0.944204  |
| GNPDA2        | 3.86559   | 3.15784   | -0.291751  | 0.623685  |
| ZMAT1         | 0.131511  | 0.0391507 | -1.74808   | 1         |
| CDYL2         | 0.193154  | 0.154932  | -0.318121  | 1         |
| LNP1          | 1.79494   | 1.29179   | -0.474566  | 0.910891  |
| BPNT1         | 9.02501   | 7.66896   | -0.234897  | 0.938622  |
| RABL3         | 4.06428   | 5.49026   | 0.433877   | 0.208603  |
| RGS14         | 4.85415   | 5.5017    | 0.180659   | 0.820484  |
| KAT8          | 19.8313   | 20.5917   | 0.0542806  | 0.955413  |
| SPC24         | 7.86283   | 5.36892   | -0.550416  | 0.376879  |
| ATP13A3       | 6.70447   | 6.99978   | 0.0621864  | 0.944934  |
| TSPYL4        | 3.1504    | 4.47216   | 0.505438   | 0.147372  |
| RPAP1         | 7.00327   | 6.29876   | -0.15296   | 0.811033  |
| SYP           | 0.238618  | 0.274248  | 0.200783   | 1         |
| ELFN1         | 2.20481   | 1.37288   | -0.68345   | 0.177708  |
| KIAA2013      | 46.9131   | 60.0109   | 0.355236   | 0.288415  |
| DNMT3B        | 1.36441   | 1.72459   | 0.337975   | 0.581347  |
| ZSWIM1        | 4.10088   | 4.34038   | 0.0818876  | 0.938622  |
| SLC25A40      | 2.07404   | 1.27884   | -0.69761   | 0.54033   |
| LOC389641     | 4.93362   | 3.20772   | -0.621098  | 0.135269  |
| UBE2Q2        | 12.1546   | 11.5802   | -0.069847  | 0.936242  |
| COL6A1        | 19.0985   | 22.5201   | 0.237755   | 0.606266  |
| GLO1          | 100.374   | 97.7431   | -0.0383164 | 0.968279  |
| ERBB2IP       | 5.62504   | 3.60559   | -0.641627  | 0.0198871 |
| ELL3          | 1.46397   | 1.55503   | 0.0870525  | 0.994068  |
| GATA6         | 2.75911   | 2.81478   | 0.0288186  | 0.98206   |
| PPM1N         | 4.62829   | 3.42228   | -0.435519  | 0.464817  |
| PAXBP1        | 10.2695   | 11.2621   | 0.133103   | 0.840956  |
| TYRO3         | 15.4689   | 14.2397   | -0.119448  | 0.864177  |
| PIGZ          | 0.814416  | 0.281528  | -1.53248   | 0.0285456 |
| ARL6IP5       | 18.0946   | 13.507    | -0.421851  | 0.192594  |
| KLHDC8B       | 7.95257   | 7.61006   | -0.0635137 | 0.954501  |

|              |           |            |             |            |
|--------------|-----------|------------|-------------|------------|
| MGST3        | 73.4097   | 69.4206    | -0.0806069  | 0.917701   |
| KHNYN        | 11.5592   | 7.87176    | -0.554286   | 0.17963    |
| PEX1         | 4.09266   | 2.54687    | -0.684314   | 0.0187307  |
| RPL23        | 4514.1    | 4604.93    | 0.0287401   | 0.978555   |
| AHCY         | 177.837   | 177.403    | -0.00352613 | 0.997552   |
| ALDH1B1      | 19.3979   | 35.3423    | 0.865497    | 0.00153868 |
| TRIQK        | 2.01695   | 0.742083   | -1.44252    | 0.00153868 |
| KIAA1468     | 1.9885    | 1.96225    | -0.0191748  | 0.987173   |
| DOK4         | 12.5287   | 12.6507    | 0.0139792   | 0.99481    |
| ATP5G2       | 764.585   | 694.491    | -0.138721   | 0.811969   |
| FAF1         | 24.6973   | 16.3427    | -0.595709   | 0.0259174  |
| CLOCK        | 0.678373  | 0.885863   | 0.385006    | 0.391295   |
| STX17        | 2.64884   | 2.09355    | -0.339414   | 0.400165   |
| GBA2         | 8.37833   | 14.2259    | 0.763788    | 0.42868    |
| CCBL2,RBMXL1 | 14.8697   | 13.8585    | -0.101606   | 0.914204   |
| TMEM237      | 3.54818   | 3.99241    | 0.170181    | 0.780958   |
| PPARGC1B     | 0.452447  | 0.785713   | 0.796255    | 0.0355697  |
| OGFOD3       | 5.57678   | 7.11443    | 0.351316    | 0.730925   |
| SLC25A1      | 141.967   | 159.703    | 0.169841    | 0.762618   |
| STAM2        | 1.48813   | 1.24632    | -0.255829   | 0.674951   |
| RPS24        | 3334.74   | 3593.54    | 0.107834    | 0.886331   |
| DSN1         | 8.22648   | 8.61291    | 0.0662253   | 0.949638   |
| DND1         | 8.92445   | 13.5114    | 0.598339    | 0.557163   |
| RPS20        | 3618.62   | 3590.96    | -0.011073   | 0.993578   |
| KRTAP5-8     | 0.0562478 | 0.0311811  | -0.851126   | 1          |
| PIH1D1       | 88.4165   | 89.1448    | 0.0118353   | 0.992304   |
| AKAP11       | 2.00941   | 1.78314    | -0.172352   | 0.774227   |
| TTN          | 0.0153035 | 0.0117468  | -0.381597   | 1          |
| ARHGFE7      | 7.85849   | 8.89748    | 0.179143    | 0.733299   |
| ETNK1        | 5.17493   | 5.99999    | 0.213421    | 0.836427   |
| WDR1         | 117.077   | 126.119    | 0.107335    | 0.882208   |
| C12orf52     | 21.2259   | 35.1556    | 0.727929    | 0.00572929 |
| RPL13AP6     | 0.162675  | 0.300208   | 0.883965    | 1          |
| NHLH2        | 0.470391  | 0.561336   | 0.255004    | 0.84547    |
| B3GNT5       | 2.38537   | 2.97551    | 0.318922    | 0.50443    |
| FAM175B      | 4.53091   | 5.28182    | 0.221234    | 0.692701   |
| LOC648987    | 1.28897   | 1.39714    | 0.116255    | 0.934604   |
| FAM90A2P     | 0.158434  | 0.110812   | -0.515762   | 1          |
| PLGRKT       | 13.3735   | 10.6443    | -0.329301   | 0.509882   |
| PLEK2        | 44.6042   | 40.5395    | -0.13785    | 0.827565   |
| C1orf50      | 10.7456   | 8.95361    | -0.263211   | 0.665667   |
| FLJ43681     | 0.542245  | 0.689661   | 0.346943    | 0.744778   |
| CLSTN1       | 26.0059   | 26.9077    | 0.0491774   | 0.960032   |
| LOC100506190 | 11.9131   | 3.79188    | -1.65157    | 0.00153868 |
| TMEM230      | 57.4965   | 52.861     | -0.121269   | 0.858829   |
| LAPTM5       | 0.017841  | 0.00590696 | -1.59471    | 1          |
| PACSIN2      | 14.9971   | 20.067     | 0.420138    | 0.19932    |
| ACTN4        | 52.0415   | 66.8528    | 0.361325    | 0.343293   |
| HELQ         | 1.92781   | 1.48832    | -0.373281   | 0.471212   |

|                |           |           |            |            |
|----------------|-----------|-----------|------------|------------|
| MEA1           | 125.281   | 147.223   | 0.23283    | 0.713125   |
| BBS9           | 1.02007   | 0.596614  | -0.773802  | 0.100423   |
| ZBTB40         | 2.07617   | 2.90071   | 0.48248    | 0.14961    |
| UBQLN2         | 10.799    | 11.4447   | 0.0837819  | 0.917701   |
| VDAC1          | 149.962   | 181.025   | 0.271593   | 0.499926   |
| TMEM106B       | 3.36395   | 2.22377   | -0.59715   | 0.0374759  |
| RHOBTB3        | 7.05137   | 3.93846   | -0.840271  | 0.00153868 |
| FBXO30         | 4.4072    | 4.81626   | 0.128049   | 0.879055   |
| STAG2          | 7.98653   | 5.22059   | -0.613354  | 0.0238313  |
| SNAPIN         | 37.0101   | 28.8534   | -0.359175  | 0.89785    |
| LMF1           | 25.6061   | 20.5768   | -0.315473  | 0.470892   |
| SIN3B          | 8.32051   | 10.0246   | 0.268794   | 0.530459   |
| ATP5O          | 303.822   | 316.314   | 0.0581285  | 0.947376   |
| SGOL2          | 2.08424   | 3.29324   | 0.659986   | 0.0280907  |
| ETFA           | 92.1814   | 97.6075   | 0.0825158  | 0.91534    |
| GALNT11        | 11.8144   | 13.2181   | 0.161962   | 0.787473   |
| KIF1C          | 19.2789   | 30.5682   | 0.66501    | 0.00970147 |
| IGF2BP2        | 28.6117   | 21.2032   | -0.432323  | 0.163151   |
| AGPAT4         | 0.349238  | 0.151516  | -1.20474   | 1          |
| PRKAB1         | 8.7809    | 9.864     | 0.167804   | 0.80005    |
| RPS4X          | 3248.82   | 3394.91   | 0.0634568  | 0.949726   |
| SPATA12        | 0.0751711 | 0.0298168 | -1.33405   | 1          |
| SLC26A6        | 7.67799   | 9.34973   | 0.284196   | 0.557876   |
| CAAP1          | 4.06679   | 3.75788   | -0.113969  | 0.895686   |
| FEZ2           | 126.049   | 94.0722   | -0.422147  | 0.167611   |
| RPS27L         | 70.5563   | 97.7383   | 0.470148   | 0.116272   |
| MSX2           | 2.22637   | 1.94267   | -0.196655  | 0.84258    |
| LOC440354,LOC5 | 1.83412   | 2.31606   | 0.336588   | 0.503719   |
| CCDC18         | 0.413489  | 0.516349  | 0.320497   | 0.703975   |
| CERS6-AS1      | 5.74643   | 6.36279   | 0.146993   | 0.89785    |
| PAFAH1B1       | 12.7121   | 12.5924   | -0.0136485 | 0.991079   |
| NSA2           | 138.982   | 133.288   | -0.0603448 | 0.964843   |
| FOPNL          | 12.3505   | 12.0275   | -0.0382346 | 0.969535   |
| ZC2HC1A        | 1.64898   | 0.949181  | -0.796816  | 0.0410754  |
| LZIC           | 10.1115   | 7.80197   | -0.37408   | 0.367402   |
| HARS2          | 8.45002   | 8.25552   | -0.0335966 | 0.991167   |
| CENPC1         | 2.05595   | 1.29986   | -0.661447  | 0.0900926  |
| CCDC34         | 9.3906    | 11.3492   | 0.273297   | 0.5818     |
| MARC2          | 4.31603   | 4.22661   | -0.0302037 | 0.98206    |
| DOCK5          | 0.596936  | 0.607842  | 0.026121   | 0.985857   |
| S100PBP        | 3.38754   | 3.49743   | 0.0460537  | 0.992304   |
| CDKAL1         | 2.6527    | 2.38877   | -0.151193  | 0.858729   |
| XRCC1          | 16.2869   | 9.46694   | -0.782739  | 0.00380811 |
| BCAR4          | 0.269657  | 0.222459  | -0.277585  | 1          |
| KIAA1009       | 0.251986  | 0.353915  | 0.490063   | 1          |
| ATXN3          | 1.62506   | 0.966288  | -0.749972  | 0.0137404  |
| FAM104B        | 6.09716   | 7.85126   | 0.364788   | 0.46877    |
| TMEM86A        | 1.17051   | 0.53263   | -1.13593   | 0.0143403  |
| SLC35A3        | 2.31244   | 1.74564   | -0.405656  | 0.291005   |



|                |           |            |            |            |
|----------------|-----------|------------|------------|------------|
| SUV420H1       | 5.59967   | 4.46758    | -0.32585   | 0.470574   |
| TMEM30A        | 11.4418   | 13.7592    | 0.266088   | 0.518985   |
| CHMP1B         | 16.8817   | 12.5392    | -0.429011  | 0.392586   |
| LPCAT3         | 9.099     | 19.0684    | 1.0674     | 0.00153868 |
| GPR65          | 0.0120153 | 0.00185475 | -2.69558   | 1          |
| TCEAL1         | 10.4588   | 10.977     | 0.0697655  | 0.948523   |
| FBXO28         | 6.0511    | 6.70117    | 0.147215   | 0.81334    |
| CBWD2          | 1.26805   | 2.63526    | 1.05534    | 0.00897284 |
| DERL3          | 1.2465    | 1.02823    | -0.277719  | 0.971173   |
| WDR65          | 0.0244036 | 0.0272014  | 0.156586   | 1          |
| ELF1           | 7.0592    | 4.87684    | -0.533559  | 0.077894   |
| SIAE           | 7.68332   | 5.81798    | -0.40121   | 0.614106   |
| ABCC9          | 0.507853  | 0.49631    | -0.0331711 | 0.981022   |
| FAM149A        | 1.10455   | 0.745361   | -0.567454  | 0.353347   |
| NARS2          | 6.96078   | 7.93296    | 0.188609   | 0.754905   |
| MZT1           | 14.8007   | 14.672     | -0.0126015 | 0.991446   |
| MCM3AP-AS1     | 0.136303  | 0.127293   | -0.0986695 | 1          |
| PRKDC          | 9.41207   | 8.47367    | -0.151525  | 0.797341   |
| LIX1L          | 8.43415   | 5.84214    | -0.529745  | 0.216013   |
| PRMT6          | 6.49933   | 11.308     | 0.798978   | 0.00274688 |
| FUNDC1         | 13.1286   | 12.6452    | -0.0541216 | 0.960032   |
| ATP9B          | 2.25184   | 1.54954    | -0.539262  | 0.204576   |
| C3orf18        | 5.83663   | 4.18611    | -0.479525  | 0.592657   |
| LOC728752      | 1.16572   | 1.43808    | 0.302922   | 0.791482   |
| DKFZP686115217 | 1.07707   | 0.488359   | -1.1411    | 0.0564873  |
| PEAK1          | 1.10573   | 0.91075    | -0.279873  | 0.579868   |
| KIF21B         | 0.103808  | 0.0723336  | -0.521176  | 1          |
| SMG1           | 2.20564   | 2.72147    | 0.303188   | 0.427905   |
| SIPA1          | 12.2843   | 11.6022    | -0.0824105 | 0.927701   |
| DGKG           | 1.86697   | 2.15515    | 0.207089   | 0.741465   |
| CDC14A         | 0.899703  | 0.713609   | -0.334316  | 0.629512   |
| GTF2H2C,GTF2H  | 1.48083   | 1.77968    | 0.265213   | 0.751625   |
| HSPB1          | 764.412   | 1634.53    | 1.09645    | 0.00153868 |
| TRPC4AP        | 36.4943   | 38.4767    | 0.0763134  | 0.928178   |
| ROGDI          | 8.72876   | 9.19463    | 0.0750143  | 0.947261   |
| TMEM246        | 25.1219   | 27.8376    | 0.14809    | 0.803349   |
| FMNL3          | 3.16677   | 3.59812    | 0.18423    | 0.740566   |
| TMEM231        | 11.6123   | 7.10635    | -0.708478  | 0.0137404  |
| TMEM45B        | 0.0293529 | 0.117437   | 2.00031    | 1          |
| BRF2           | 10.039    | 10.8021    | 0.105696   | 0.897332   |
| USP13          | 1.47629   | 1.65886    | 0.168214   | 0.801665   |
| CYTH3          | 4.11727   | 4.75595    | 0.208046   | 0.720882   |
| VDAC2          | 173.097   | 154.659    | -0.162486  | 0.773332   |
| KIAA0319L      | 7.11585   | 4.42801    | -0.684376  | 0.0137404  |
| ZNF501         | 0.592975  | 0.526322   | -0.172024  | 0.886331   |
| BDP1           | 0.895986  | 1.29305    | 0.529229   | 0.12463    |
| LOC285819      | 0.273457  | 0.189657   | -0.527923  | 1          |
| UBXN6          | 138.538   | 112.432    | -0.301228  | 0.438784   |
| GPC2           | 1.73491   | 2.24964    | 0.374836   | 0.610071   |

|            |          |          |            |            |
|------------|----------|----------|------------|------------|
| DHX57      | 3.13387  | 4.33463  | 0.467961   | 0.167611   |
| LYPLAL1    | 12.0074  | 5.34651  | -1.16726   | 0.00153868 |
| CDC37L1    | 6.19698  | 5.50548  | -0.170697  | 0.809839   |
| SOX13      | 4.12899  | 4.71493  | 0.191447   | 0.773721   |
| TCTN1      | 7.67903  | 5.47729  | -0.487464  | 0.213634   |
| GAS2L1     | 14.0542  | 21.3353  | 0.602238   | 0.0434002  |
| C21orf33   | 71.5676  | 46.1331  | -0.633505  | 0.0150346  |
| TASP1      | 3.07037  | 3.21747  | 0.0675163  | 0.953962   |
| CCNJ       | 3.65733  | 5.50784  | 0.590697   | 0.228555   |
| SKI        | 8.49431  | 10.1355  | 0.25485    | 0.565031   |
| SERPINB6   | 101.983  | 80.7621  | -0.336573  | 0.337839   |
| CNNM2      | 2.99392  | 1.0037   | -1.5767    | 0.00153868 |
| GABPB1-AS1 | 1.27191  | 1.20691  | -0.075678  | 0.978031   |
| MIER3      | 1.71675  | 2.03037  | 0.242058   | 0.731357   |
| FBXO24     | 0.358371 | 0.140774 | -1.34807   | 1          |
| SH3BP5     | 6.11622  | 6.51356  | 0.0908059  | 0.927002   |
| TMEM229B   | 0.458942 | 0.322231 | -0.510216  | 0.546288   |
| VWA5A      | 3.94575  | 2.207    | -0.838216  | 0.0150346  |
| PHF23      | 15.9651  | 39.9209  | 1.32223    | 0.00153868 |
| PML        | 12.7166  | 11.3309  | -0.166451  | 0.806275   |
| COPS7B     | 18.1388  | 31.9355  | 0.816078   | 0.00274688 |
| DENND6A    | 2.94006  | 2.56328  | -0.197858  | 0.745547   |
| PPP4R2     | 4.01649  | 4.96527  | 0.305935   | 0.580385   |
| STAU1      | 29.0045  | 32.9749  | 0.185089   | 0.722089   |
| FLJ39051   | 1.96411  | 1.70008  | -0.208274  | 0.969667   |
| PDCD4      | 14.1568  | 6.61011  | -1.09875   | 0.00153868 |
| ABL2       | 17.935   | 8.40837  | -1.09288   | 0.00153868 |
| CD2AP      | 5.41443  | 5.99594  | 0.147177   | 0.808394   |
| SNX9       | 11.5269  | 9.62206  | -0.260582  | 0.527245   |
| MDH1       | 87.9508  | 91.5804  | 0.058342   | 0.948304   |
| C15orf40   | 15.8646  | 13.4249  | -0.240896  | 0.886227   |
| BRWD1      | 1.99804  | 1.74238  | -0.19753   | 0.883608   |
| LTBP1      | 1.51574  | 0.868306 | -0.803743  | 0.024868   |
| ZNF100     | 1.52813  | 1.32059  | -0.21059   | 0.767184   |
| NEIL1      | 9.40712  | 8.08133  | -0.219161  | 0.751293   |
| C7orf31    | 1.40458  | 0.711019 | -0.982175  | 0.0156935  |
| ZMYND15    | 1.66906  | 1.13712  | -0.553648  | 0.358175   |
| ZNF202     | 3.23325  | 4.11574  | 0.348164   | 0.408191   |
| POLR1B     | 8.46457  | 12.112   | 0.516934   | 0.064033   |
| C8orf40    | 48.2793  | 22.3445  | -1.11148   | 0.0290262  |
| MED14      | 4.50572  | 3.71617  | -0.277941  | 0.503126   |
| DNAJA1     | 80.7806  | 294.044  | 1.86395    | 0.00153868 |
| B3GAT1     | 6.8711   | 6.79837  | -0.0153514 | 0.990711   |
| NUSAP1     | 31.9118  | 29.3642  | -0.120034  | 0.861774   |
| CAPN2      | 143.93   | 139.937  | -0.0405903 | 0.967343   |
| NSUN6      | 3.70447  | 3.41652  | -0.116742  | 0.896977   |
| ACSL4      | 9.10726  | 8.96272  | -0.0230807 | 0.981441   |
| TMEM86B    | 1.69696  | 2.88106  | 0.763644   | 0.160554   |
| CMTM4      | 11.1836  | 12.5642  | 0.167937   | 0.773987   |

|               |            |             |            |            |
|---------------|------------|-------------|------------|------------|
| QTRTD1        | 5.19069    | 7.42017     | 0.515527   | 0.096962   |
| TBC1D22A      | 13.4376    | 8.81491     | -0.608259  | 0.0308509  |
| FOXN2         | 2.47661    | 2.18475     | -0.180901  | 0.773721   |
| CNST          | 3.15462    | 2.41672     | -0.384417  | 0.342      |
| SERPINB9      | 11.852     | 18.44       | 0.637708   | 0.0150346  |
| CASP7         | 3.78801    | 5.96484     | 0.655042   | 0.048028   |
| CSDE1,NRAS    | 35.5052    | 31.0978     | -0.191218  | 0.736949   |
| NRARP         | 41.1472    | 72.9211     | 0.825543   | 0.00153868 |
| UGDH-AS1      | 2.36814    | 2.06148     | -0.200076  | 0.809839   |
| NISCH         | 15.5078    | 15.3944     | -0.0105898 | 0.992917   |
| CBR1          | 45.1489    | 93.7284     | 1.0538     | 0.00153868 |
| HLA-F         | 58.8436    | 48.4488     | -0.280423  | 0.507179   |
| SMARCD2       | 41.1494    | 46.7334     | 0.183583   | 0.727839   |
| PSD3          | 0.00525411 | 0.000809589 | -2.69818   | 1          |
| DECR1         | 113.405    | 89.3714     | -0.343599  | 0.314115   |
| CRTC2         | 14.608     | 17.2695     | 0.241476   | 0.606595   |
| CTSK          | 0.888713   | 0.589254    | -0.592828  | 0.419248   |
| RNF181        | 159.773    | 113.005     | -0.499637  | 0.0809491  |
| PPP2R5D       | 19.1063    | 20.0915     | 0.0725434  | 0.96623    |
| PPM1A         | 3.6383     | 3.81453     | 0.0682395  | 0.944348   |
| BBS4          | 5.23393    | 3.41389     | -0.616477  | 0.0741309  |
| MTHFSD        | 4.55574    | 4.2319      | -0.10638   | 0.915911   |
| P2RX4         | 13.4502    | 6.41676     | -1.06771   | 0.00153868 |
| KLHL20        | 1.64198    | 1.83709     | 0.161984   | 0.857226   |
| ALKBH4        | 10.2373    | 17.7349     | 0.792757   | 0.150849   |
| ADK           | 16.1509    | 15.8372     | -0.0282972 | 0.977897   |
| PRDM12        | 1.35297    | 1.71206     | 0.339601   | 0.709934   |
| B4GALT7       | 30.5597    | 23.2825     | -0.392385  | 0.248811   |
| RNF38         | 2.67434    | 2.40418     | -0.153641  | 0.832511   |
| BTF3          | 812.727    | 873.77      | 0.104483   | 0.886622   |
| ZNF234        | 0.921051   | 1.24348     | 0.433027   | 0.390823   |
| SNX5          | 44.8911    | 35.7627     | -0.327972  | 0.349952   |
| SCCPDH        | 27.6342    | 21.6227     | -0.353903  | 0.307003   |
| PPHLN1        | 19.2332    | 19.8628     | 0.0464724  | 0.967296   |
| KIAA0895      | 0.544653   | 0.917502    | 0.752374   | 0.762734   |
| PTPN12        | 7.49307    | 6.81012     | -0.137876  | 0.834542   |
| ATP6V1A       | 6.04964    | 5.76138     | -0.0704351 | 0.937886   |
| COQ6          | 16.2728    | 12.9688     | -0.327417  | 0.461327   |
| C11orf71      | 6.22205    | 4.36229     | -0.512304  | 0.544488   |
| CADM1         | 5.33417    | 4.55168     | -0.228865  | 0.644703   |
| ICAM5         | 1.85277    | 1.23924     | -0.580223  | 0.405811   |
| POT1          | 2.67379    | 1.67659     | -0.673356  | 0.0504359  |
| IST1          | 24.2464    | 25.4854     | 0.0719006  | 0.933369   |
| ANLN          | 9.0194     | 14.0188     | 0.636264   | 0.0176564  |
| LOC644961     | 0.153395   | 0.226778    | 0.564031   | 1          |
| PLEKHG5,TNFRS | 16.0106    | 15.2739     | -0.0679648 | 0.964843   |
| NBR1          | 20.3828    | 6.64088     | -1.61791   | 0.00153868 |
| XPO7          | 13.2355    | 10.8718     | -0.283821  | 0.473572   |
| ARHGAP31      | 1.35583    | 2.01262     | 0.569897   | 0.0884345  |

|              |           |           |             |            |
|--------------|-----------|-----------|-------------|------------|
| PHKG2        | 6.95515   | 9.67608   | 0.476341    | 0.642802   |
| CD24         | 4.87423   | 3.56491   | -0.451307   | 0.284182   |
| RHOU         | 0.251346  | 0.275707  | 0.133462    | 1          |
| FAU          | 1955.24   | 2280.35   | 0.221914    | 0.687015   |
| EEFSEC       | 13.4441   | 9.16689   | -0.552469   | 0.0910503  |
| VAMP2        | 27.6093   | 15.3802   | -0.844076   | 0.00153868 |
| GPD1L        | 2.97046   | 5.67194   | 0.933157    | 0.00153868 |
| RELA         | 55.0105   | 56.2175   | 0.0313135   | 0.975492   |
| MYL12A       | 356.353   | 274.162   | -0.378275   | 0.256851   |
| ANKS1A       | 3.83157   | 5.09804   | 0.412007    | 0.249215   |
| KLC3         | 32.0144   | 21.2901   | -0.588538   | 0.28861    |
| IFT57        | 8.15363   | 9.6811    | 0.247729    | 0.592869   |
| LINC00535    | 0.0870252 | 0.0788409 | -0.14249    | 1          |
| RAB22A       | 3.58155   | 3.53783   | -0.0177207  | 0.98643    |
| C9orf84      | 0.0080349 | 0.0104759 | 0.382716    | 1          |
| SERPINB1     | 70.7898   | 36.3463   | -0.961733   | 0.00153868 |
| LTBP3        | 7.97021   | 11.6954   | 0.553252    | 0.6172     |
| CLUHP3       | 0.254615  | 0.290619  | 0.190808    | 1          |
| LINC00265    | 3.05525   | 2.4608    | -0.31216    | 0.574468   |
| EIF3C,EIF3CL | 0.0272703 | 0.0107882 | -1.33787    | 1          |
| TOP3B        | 7.75511   | 8.09755   | 0.0623389   | 0.952184   |
| TTC39C       | 21.9983   | 17.0016   | -0.371717   | 0.620242   |
| PIF1         | 5.01972   | 7.36465   | 0.553009    | 0.127913   |
| RXRB         | 22.1635   | 13.764    | -0.687289   | 0.00897284 |
| VTA1         | 7.2268    | 7.79103   | 0.108458    | 0.881554   |
| DHX40        | 5.83875   | 3.90668   | -0.579716   | 0.0537703  |
| AFAP1        | 1.07217   | 1.36981   | 0.353448    | 0.490627   |
| TK2          | 4.47951   | 2.5933    | -0.788551   | 0.00897284 |
| EIF2D        | 29.2074   | 20.1294   | -0.537027   | 0.048028   |
| FOXJ2        | 1.9266    | 1.66219   | -0.212974   | 0.748287   |
| EXOC7        | 26.6971   | 38.5163   | 0.528787    | 0.0653297  |
| LOC285074    | 10.4      | 10.3145   | -0.0119036  | 0.993578   |
| AP1G2,JPH4   | 12.7133   | 12.8411   | 0.0144286   | 0.992891   |
| KBTBD6       | 1.25382   | 1.81517   | 0.533773    | 0.187362   |
| CEP76        | 1.39018   | 1.2642    | -0.137044   | 0.974573   |
| LINC00663    | 1.25192   | 0.918292  | -0.447116   | 0.525575   |
| COPG2,TSGA13 | 12.8147   | 7.86639   | -0.704025   | 0.243499   |
| PAX6         | 0.0632005 | 0.101973  | 0.690175    | 1          |
| MTSS1L       | 12.629    | 16.7348   | 0.406109    | 0.212956   |
| WNT11        | 7.00078   | 6.95979   | -0.00847273 | 0.994734   |
| HSD17B11     | 28.6957   | 14.3502   | -0.999762   | 0.00153868 |
| MKRN1        | 41.7279   | 31.3639   | -0.411907   | 0.207194   |
| ATP1A3       | 8.37207   | 7.59153   | -0.141194   | 0.842746   |
| STAU2        | 6.17545   | 4.60653   | -0.422862   | 0.217777   |
| ZNF185       | 0.14793   | 0.092381  | -0.679244   | 1          |
| CUTC         | 16.8502   | 16.7055   | -0.0124375  | 0.995799   |
| QRICH1       | 16.7438   | 20.0865   | 0.262602    | 0.525673   |
| RNF8         | 5.69855   | 8.66905   | 0.605278    | 0.0220668  |
| SEPT6        | 7.10844   | 6.20705   | -0.195627   | 0.731905   |

|            |           |           |            |            |
|------------|-----------|-----------|------------|------------|
| GNPNAT1    | 19.1856   | 28.5402   | 0.572974   | 0.0308509  |
| CIR1       | 11.7141   | 7.53405   | -0.636748  | 0.0304296  |
| ADAM10     | 2.56991   | 2.18942   | -0.231171  | 0.707074   |
| TCF3       | 26.9245   | 34.8624   | 0.372751   | 0.255101   |
| POLR1C     | 54.8873   | 73.4614   | 0.420516   | 0.179759   |
| C5orf22    | 3.86503   | 4.39119   | 0.184131   | 0.765759   |
| CKAP2L     | 2.13301   | 1.27406   | -0.743458  | 0.0407657  |
| ARFIP1     | 5.76099   | 5.48867   | -0.0698606 | 0.940421   |
| ZNF611     | 0.477214  | 0.364982  | -0.38681   | 0.618057   |
| SZT2       | 1.26957   | 1.24654   | -0.0264056 | 0.986916   |
| ASAH1      | 25.3385   | 15.0958   | -0.747181  | 0.00274688 |
| CTAGE15P   | 0.0909543 | 0.146039  | 0.683145   | 1          |
| OSTC       | 65.9466   | 72.2265   | 0.131229   | 0.835783   |
| NAT2       | 0.0259962 | 0         | #NAME?     | 1          |
| LOC441204  | 0.0437429 | 0.0196382 | -1.15538   | 1          |
| TLL4       | 5.75233   | 7.5228    | 0.387123   | 0.266689   |
| TCEAL3     | 14.7177   | 9.62054   | -0.613359  | 0.0705331  |
| DNAH5      | 0.014702  | 0.0138528 | -0.0858436 | 1          |
| SPSB1      | 14.5886   | 10.7704   | -0.437765  | 0.176657   |
| COMMD2     | 3.62984   | 3.27187   | -0.149788  | 0.841788   |
| TFB1M      | 6.1857    | 4.75011   | -0.380976  | 0.352576   |
| TCEB3      | 1.75154   | 2.57253   | 0.554561   | 0.17063    |
| IL23A      | 0.862699  | 0.617936  | -0.4814    | 0.7154     |
| SLC4A7     | 1.40763   | 1.3607    | -0.0489217 | 0.965831   |
| RAP2C      | 6.27027   | 7.58582   | 0.274778   | 0.538465   |
| TTC3P1     | 0.147648  | 0.0869902 | -0.763241  | 1          |
| OCRL       | 7.99493   | 5.2201    | -0.615008  | 0.0304296  |
| GPHN       | 5.30926   | 5.1252    | -0.0509025 | 0.959927   |
| SERF1A     | 0.0938674 | 0.17518   | 0.900144   | 1          |
| MFF        | 26.0287   | 19.2242   | -0.437179  | 0.150319   |
| HEBP2      | 49.1266   | 51.7705   | 0.0756269  | 0.926279   |
| ZNF628     | 4.91103   | 4.47563   | -0.133935  | 0.889403   |
| HYAL3.NAT6 | 24.4512   | 18.9747   | -0.365826  | 0.374557   |
| KCNK15     | 0.0829438 | 0.0838623 | 0.015888   | 1          |
| MAP2K7     | 18.6408   | 21.9892   | 0.238328   | 0.604311   |
| ZNF23      | 7.12329   | 4.28913   | -0.73186   | 0.00820276 |
| YPEL3      | 19.6315   | 6.5727    | -1.57861   | 0.00153868 |
| TMIE       | 0.339121  | 0.0329319 | -3.36424   | 1          |
| TMEM101    | 39.3259   | 23.6862   | -0.731432  | 0.00274688 |
| DFFB       | 3.61836   | 8.60013   | 1.24902    | 0.00153868 |
| DHCR7      | 32.399    | 69.7286   | 1.1058     | 0.00153868 |
| NDUFAF4P1  | 0.017087  | 0.0498984 | 1.5461     | 1          |
| MORC2      | 4.04021   | 5.23568   | 0.373946   | 0.359372   |
| ZNF446     | 7.14092   | 2.56601   | -1.47658   | 0.00153868 |
| ZNF70      | 0.66972   | 0.606198  | -0.143768  | 0.915911   |
| PRSS3      | 50.7504   | 42.9658   | -0.24023   | 0.615477   |
| ASCC1      | 8.36631   | 5.61298   | -0.575824  | 0.480807   |
| ZDHHC4     | 36.5057   | 27.3753   | -0.415247  | 0.207927   |
| C1orf109   | 6.66684   | 11.4089   | 0.775084   | 0.00820276 |

|                |           |            |             |            |
|----------------|-----------|------------|-------------|------------|
| ASB3,GPR75,GPI | 3.91982   | 3.06164    | -0.356483   | 0.831832   |
| LAGE3          | 17.4718   | 20.2225    | 0.210934    | 0.688983   |
| LRIG3          | 0.855701  | 1.12124    | 0.389912    | 0.522408   |
| MBLAC2         | 1.49401   | 1.58979    | 0.0896508   | 0.937886   |
| ZNF557         | 1.74482   | 1.62107    | -0.106135   | 0.907499   |
| CASK           | 1.3155    | 0.991905   | -0.407334   | 0.343885   |
| QSER1          | 2.28855   | 2.88576    | 0.334513    | 0.362925   |
| LAIR1          | 0.0483846 | 0.0923197  | 0.93209     | 1          |
| N4BP3          | 3.9461    | 4.31462    | 0.128806    | 0.865746   |
| BCRP2          | 2.79624   | 3.23927    | 0.212182    | 0.797188   |
| MTRF1          | 2.5032    | 3.1006     | 0.308774    | 0.590662   |
| CXCL3          | 0.367163  | 0.379405   | 0.04732     | 0.987457   |
| ELK4           | 3.87405   | 3.61058    | -0.101613   | 0.931457   |
| UBTF           | 17.0236   | 25.3402    | 0.573894    | 0.0253664  |
| PDE11A         | 0.0758978 | 0.0244966  | -1.63148    | 1          |
| COPS4          | 23.3371   | 23.1829    | -0.0095622  | 0.994058   |
| C16orf58       | 41.1674   | 26.2299    | -0.650291   | 0.0111246  |
| RAB6A          | 24.8648   | 24.0205    | -0.0498358  | 0.955113   |
| YTHDF3         | 7.51014   | 7.20396    | -0.0600504  | 0.9473     |
| PHF10          | 18.6584   | 16.5932    | -0.169239   | 0.855739   |
| HADHB          | 67.5883   | 59.6024    | -0.181404   | 0.726122   |
| PRRC2A         | 31.1873   | 35.0923    | 0.170195    | 0.749043   |
| SKIV2L         | 7.19387   | 6.89322    | -0.0615889  | 0.977897   |
| ZFPM1          | 2.22044   | 2.02903    | -0.130054   | 0.925593   |
| MOB1B          | 1.43443   | 1.41872    | -0.0158823  | 0.990368   |
| UBN2           | 1.07532   | 0.868876   | -0.30754    | 0.491072   |
| CDX2           | 12.4543   | 16.6016    | 0.414678    | 0.252509   |
| ME2            | 17.1431   | 17.0314    | -0.00943192 | 0.994068   |
| SEC24B         | 5.54298   | 4.5591     | -0.281912   | 0.518305   |
| MCCC1          | 13.9528   | 8.458      | -0.722171   | 0.00572929 |
| MLLT4          | 4.51918   | 3.85972    | -0.227565   | 0.632579   |
| SMIM3          | 8.30111   | 8.67649    | 0.0638074   | 0.948523   |
| GAREML         | 6.65423   | 8.54208    | 0.360314    | 0.361239   |
| GLS2           | 9.89418   | 6.51475    | -0.602869   | 0.308793   |
| SMIM15         | 13.1712   | 15.6787    | 0.251416    | 0.560206   |
| RHBDF1         | 17.3674   | 11.1155    | -0.643803   | 0.0304296  |
| LCP1           | 68.945    | 57.1684    | -0.270227   | 0.510161   |
| RNF34          | 7.6511    | 11.4628    | 0.583221    | 0.0763878  |
| OSBP2          | 5.25688   | 3.35712    | -0.646985   | 0.0512103  |
| GLOD4          | 32.5648   | 30.4954    | -0.0947204  | 0.938543   |
| STRADA         | 12.7039   | 10.1681    | -0.321213   | 0.432985   |
| PHLPP1         | 2.63719   | 1.91466    | -0.461914   | 0.247848   |
| ANAPC16        | 20.5318   | 15.2211    | -0.431786   | 0.26469    |
| APEX1          | 186.726   | 193.884    | 0.05427     | 0.952978   |
| NR1D1          | 9.02988   | 12.5722    | 0.477462    | 0.352882   |
| MATN3          | 0.0129626 | 0.00411882 | -1.65406    | 1          |
| RPL3           | 4035.7    | 3705.98    | -0.122963   | 0.877776   |
| ZNF214         | 0.352463  | 0.295243   | -0.255571   | 1          |
| DMAP1          | 13.3861   | 20.103     | 0.586677    | 0.068345   |

|             |           |           |            |            |
|-------------|-----------|-----------|------------|------------|
| NDEL1       | 5.41802   | 7.42993   | 0.455583   | 0.217674   |
| ZNF761      | 2.81387   | 4.09878   | 0.542636   | 0.12195    |
| ZDHHHC9     | 13.8218   | 10.2916   | -0.425484  | 0.163844   |
| WNK1        | 3.44013   | 4.23414   | 0.299605   | 0.441241   |
| ZNF781      | 0.0527638 | 0.0435549 | -0.276712  | 1          |
| OSGIN2      | 8.98212   | 7.19503   | -0.320056  | 0.392586   |
| ADRA2C      | 16.1262   | 12.0271   | -0.423114  | 0.338257   |
| LRP4-AS1    | 0.317164  | 0.180527  | -0.813014  | 1          |
| ECHDC2      | 8.93404   | 7.17104   | -0.317132  | 0.542897   |
| MRPS14      | 10.1762   | 10.9409   | 0.104533   | 0.889851   |
| RPL10A      | 3142.77   | 2939.99   | -0.0962267 | 0.905839   |
| PLEKHA6     | 1.36391   | 1.28462   | -0.0864082 | 0.93511    |
| CTDSP2      | 21.0496   | 14.7003   | -0.517943  | 0.057213   |
| CREG1       | 36.1445   | 28.8726   | -0.324073  | 0.371596   |
| TMEM60      | 23.2126   | 17.5531   | -0.403178  | 0.317314   |
| UBE2Z       | 41.755    | 50.1219   | 0.263492   | 0.51683    |
| CAMLG       | 50.8094   | 24.6659   | -1.04258   | 0.00153868 |
| NXF1        | 24.7698   | 50.715    | 1.03383    | 0.00153868 |
| GTDC2       | 8.63799   | 11.9999   | 0.474254   | 0.159482   |
| FRAT1       | 3.87625   | 2.30492   | -0.749947  | 0.0874559  |
| CDKN2AIP    | 4.94344   | 5.55993   | 0.16955    | 0.813026   |
| ADRB1       | 0.316423  | 0.20315   | -0.639313  | 1          |
| FTSJD1      | 6.05288   | 5.94275   | -0.0264909 | 0.979451   |
| CECR5       | 101.974   | 106.092   | 0.0571158  | 0.950064   |
| COX7C       | 1184.81   | 1176.27   | -0.0104429 | 0.993157   |
| RASA1       | 2.85142   | 2.19723   | -0.375994  | 0.374985   |
| LOC646903   | 0.127991  | 0.272765  | 1.09162    | 1          |
| CCDC88C     | 3.05378   | 3.5556    | 0.219496   | 0.689613   |
| PDIA6       | 114.743   | 147.227   | 0.359628   | 0.303595   |
| MAMDC4      | 2.38366   | 1.37114   | -0.797801  | 0.0775493  |
| ZFP112      | 0.7319    | 0.818525  | 0.16138    | 0.879055   |
| ZNF169      | 0.630843  | 0.673782  | 0.0950002  | 0.950837   |
| PPM1M       | 8.31386   | 4.40297   | -0.91704   | 0.00274688 |
| BMP1        | 7.62369   | 7.38898   | -0.0451138 | 0.967296   |
| DHRS4       | 14.8625   | 13.9992   | -0.0863327 | 0.945429   |
| ZNF574      | 10.2355   | 13.4316   | 0.392046   | 0.276498   |
| PLD3        | 46.3158   | 32.6185   | -0.505817  | 0.14449    |
| CEP63       | 1.98005   | 1.52616   | -0.375631  | 0.869183   |
| ASCL5       | 0.368722  | 0.449873  | 0.286981   | 0.92085    |
| NTN5        | 0.642263  | 0.557428  | -0.20438   | 0.978818   |
| PTPRA,VPS16 | 28.2346   | 23.4649   | -0.26696   | 0.633194   |
| FAM90A1     | 0.558911  | 0.495691  | -0.173176  | 0.919777   |
| TMEM223     | 14.5704   | 12.8768   | -0.178263  | 0.941368   |
| KTN1        | 13.4399   | 16.7472   | 0.317393   | 0.402378   |
| INCENP      | 6.48701   | 7.71588   | 0.250277   | 0.622503   |
| PPIEL       | 0.11532   | 0.233525  | 1.01794    | 1          |
| C6orf70     | 7.25229   | 4.52408   | -0.680812  | 0.0410754  |
| BBS10       | 2.27117   | 1.74742   | -0.378214  | 0.435374   |
| JUP         | 0.0386436 | 0.0407347 | 0.0760296  | 1          |

|            |          |          |             |            |
|------------|----------|----------|-------------|------------|
| RNF207     | 1.76884  | 2.77197  | 0.648103    | 0.765759   |
| TOMM6      | 124.575  | 196.161  | 0.655028    | 0.0117316  |
| ITPKC      | 5.77438  | 11.8766  | 1.04038     | 0.00380811 |
| MROH1      | 22.4506  | 18.3249  | -0.292946   | 0.538721   |
| SCYL2      | 4.45768  | 4.26356  | -0.0642362  | 0.949814   |
| AQP3       | 0.1844   | 0.30659  | 0.733476    | 1          |
| VPS37A     | 3.24849  | 3.43298  | 0.0796959   | 0.941566   |
| ZBTB38     | 2.51063  | 1.76978  | -0.504476   | 0.111557   |
| RPL28      | 1978.5   | 2014.44  | 0.025975    | 0.985373   |
| MGA        | 1.09164  | 1.58957  | 0.542132    | 0.0824065  |
| YLPM1      | 2.71335  | 3.24473  | 0.258024    | 0.566297   |
| RHOD       | 67.3856  | 64.9587  | -0.0529178  | 0.954143   |
| MIDN       | 12.8038  | 17.4604  | 0.447522    | 0.17528    |
| DCAF5      | 4.43004  | 4.62332  | 0.0616111   | 0.946021   |
| XPA        | 7.25813  | 9.92952  | 0.452126    | 0.224562   |
| TRIM52     | 1.48104  | 1.61023  | 0.120654    | 0.924931   |
| CLDN9      | 0.36919  | 0.368671 | -0.00202964 | 1          |
| NECAB3     | 31.0815  | 28.738   | -0.113097   | 0.883608   |
| COPS7A     | 48.3816  | 49.1499  | 0.0227319   | 0.98206    |
| PTPRH      | 0.804994 | 0.128815 | -2.64368    | 0.00153868 |
| ZNF496     | 6.21603  | 4.91923  | -0.337562   | 0.518305   |
| TMCC2      | 1.57724  | 1.85155  | 0.231328    | 0.784853   |
| IMPACT     | 4.37848  | 2.54531  | -0.782591   | 0.00820276 |
| FAM171A2   | 7.94701  | 5.42641  | -0.550415   | 0.206324   |
| PCDHB9     | 0.395919 | 0.193372 | -1.03382    | 0.112663   |
| LDOC1L     | 6.20777  | 6.81089  | 0.133768    | 0.844936   |
| OTUD4      | 3.78603  | 5.1195   | 0.435316    | 0.231454   |
| MLEC       | 20.7782  | 32.5214  | 0.646322    | 0.0176564  |
| CHDH       | 4.09783  | 5.53825  | 0.43457     | 0.270224   |
| ALX3       | 1.38804  | 1.52944  | 0.139959    | 0.936418   |
| CNOT6L     | 2.33241  | 2.41401  | 0.0496119   | 0.960032   |
| RPL19      | 5729.84  | 5680.09  | -0.0125815  | 0.992159   |
| AHI1       | 1.5023   | 1.61393  | 0.103406    | 0.915911   |
| PARP3      | 11.416   | 7.04482  | -0.69642    | 0.0123712  |
| VBP1       | 27.6947  | 32.3946  | 0.226144    | 0.6214     |
| LITAF      | 26.0652  | 31.2789  | 0.263065    | 0.51789    |
| ACIN1      | 56.756   | 72.797   | 0.359105    | 0.49582    |
| PRAME      | 14.3625  | 30.3034  | 1.07717     | 0.00153868 |
| PRKAG2-AS1 | 15.4807  | 11.6756  | -0.406967   | 0.798113   |
| NMD3       | 13.525   | 12.4817  | -0.115808   | 0.870275   |
| NUP210     | 13.4487  | 13.082   | -0.039885   | 0.967048   |
| NDUFA2     | 108.586  | 133.078  | 0.293442    | 0.529161   |
| THG1L      | 21.9186  | 14.9417  | -0.552812   | 0.0691625  |
| WRNIP1     | 33.1979  | 48.2675  | 0.53996     | 0.0442243  |
| PDHX       | 9.98335  | 9.01663  | -0.146935   | 0.87763    |
| C12orf49   | 6.53497  | 8.04154  | 0.299291    | 0.499953   |
| SLC39A4    | 36.2937  | 39.097   | 0.107339    | 0.884949   |
| ST3GAL4    | 17.7554  | 22.3893  | 0.334548    | 0.385955   |
| PNKD       | 43.4599  | 42.4235  | -0.0348231  | 0.994017   |



|           |          |           |            |            |
|-----------|----------|-----------|------------|------------|
| PMS2P4    | 1.12529  | 0.90535   | -0.313756  | 0.85253    |
| ZSCAN25   | 2.99965  | 3.26641   | 0.122911   | 0.880081   |
| ARVCF     | 12.772   | 8.2944    | -0.622778  | 0.624761   |
| TPM4      | 235.439  | 232.977   | -0.0151689 | 0.989777   |
| SLC2A10   | 2.28582  | 1.27727   | -0.839648  | 0.0187307  |
| SP3       | 5.06769  | 4.38206   | -0.20972   | 0.668024   |
| CPNE2     | 27.8971  | 25.5004   | -0.129595  | 0.847872   |
| NANOS1    | 2.66061  | 3.64558   | 0.454391   | 0.235628   |
| SFI1      | 6.71219  | 3.92861   | -0.772766  | 0.370545   |
| THPO      | 0.234058 | 0.0415007 | -2.49566   | 1          |
| MCU       | 6.11497  | 6.16889   | 0.0126639  | 0.992298   |
| IFNLR1    | 1.4203   | 1.43102   | 0.0108428  | 0.994279   |
| AGXT2L2   | 9.53846  | 5.56193   | -0.778171  | 0.870524   |
| SNAI3-AS1 | 1.32703  | 1.40896   | 0.0864299  | 0.978016   |
| BORA      | 4.03431  | 3.28684   | -0.29562   | 0.882208   |
| HS6ST1    | 10.7196  | 18.7671   | 0.807949   | 0.00153868 |
| AHR       | 0.288307 | 0.368251  | 0.353085   | 1          |
| GLYR1     | 10.624   | 17.215    | 0.696342   | 0.00897284 |
| PPFIA1    | 5.28505  | 5.55711   | 0.0724174  | 0.934331   |
| EIF3H     | 537      | 447.757   | -0.262205  | 0.538509   |
| TMEM258   | 467.048  | 441.166   | -0.0822474 | 0.917228   |
| MYL6      | 770.914  | 905.945   | 0.232854   | 0.612746   |
| FUT10     | 2.6948   | 2.72169   | 0.0143215  | 0.992098   |
| HIST1H1C  | 42.5385  | 46.7969   | 0.137644   | 0.859937   |
| ANXA2P2   | 4.0727   | 4.04363   | -0.0103346 | 0.994507   |
| RNF217    | 0.473887 | 0.298963  | -0.664577  | 0.462426   |
| DSTYK     | 1.75722  | 1.87733   | 0.095389   | 0.913947   |
| SCAND2P   | 2.48571  | 3.40719   | 0.454926   | 0.239715   |
| CUTA      | 282.886  | 242.108   | -0.224567  | 0.639446   |
| SF3B3     | 22.977   | 22.7425   | -0.0147993 | 0.990042   |
| FAN1      | 3.02359  | 3.93765   | 0.381071   | 0.463884   |
| PLXNC1    | 0.521469 | 0.401506  | -0.377159  | 0.648133   |
| SQRDL     | 10.3967  | 6.81394   | -0.609558  | 0.0491395  |
| GTF2B     | 16.1252  | 14.6997   | -0.133532  | 0.850452   |
| SBF2-AS1  | 2.46634  | 0.994634  | -1.31013   | 0.0460785  |
| PIKFYVE   | 1.34358  | 1.21535   | -0.144704  | 0.855564   |
| PRDX4     | 209.039  | 281.495   | 0.429339   | 0.157502   |
| CISD1     | 11.0415  | 13.9231   | 0.334545   | 0.373268   |
| LRRC41    | 29.28    | 37.4821   | 0.356288   | 0.400688   |
| COQ7      | 3.40499  | 2.55902   | -0.412057  | 0.370768   |
| SRC       | 18.2324  | 19.2378   | 0.0774451  | 0.924901   |
| AKR7A3    | 10.2782  | 8.52407   | -0.269968  | 0.675765   |
| DNTTIP1   | 76.8755  | 44.4127   | -0.791552  | 0.00153868 |
| POLDIP3   | 26.0107  | 30.4879   | 0.229127   | 0.61305    |
| CUL4A     | 16.8325  | 22.2937   | 0.405385   | 0.199526   |
| BHLHA15   | 1.99026  | 2.55587   | 0.360859   | 0.806525   |
| ABHD4     | 7.07477  | 4.80326   | -0.558668  | 0.104553   |
| PHACTR4   | 3.79091  | 4.14927   | 0.130316   | 0.851662   |
| AP3B1     | 5.49528  | 3.84085   | -0.516768  | 0.0959472  |

|               |          |           |             |            |
|---------------|----------|-----------|-------------|------------|
| PCOLCE        | 14.7253  | 7.67248   | -0.940533   | 0.00153868 |
| FAM21A,FAM21B | 1.69487  | 1.34332   | -0.335363   | 0.536705   |
| MYCBP2        | 1.38254  | 1.79372   | 0.37563     | 0.274988   |
| SPRED3        | 1.63789  | 2.03572   | 0.313701    | 0.587158   |
| GOLGA1        | 4.91108  | 3.21086   | -0.613078   | 0.048028   |
| TFCP2L1       | 0.819911 | 0.726477  | -0.17455    | 0.831834   |
| RPL11         | 4107.03  | 4368.06   | 0.0888982   | 0.917701   |
| GID4          | 3.9348   | 3.58147   | -0.135741   | 0.861774   |
| CHD8          | 3.32328  | 4.15602   | 0.322593    | 0.396      |
| DVL3          | 16.0028  | 18.1646   | 0.182808    | 0.720426   |
| USP9X         | 6.01131  | 4.08152   | -0.558573   | 0.0393841  |
| EIF3F         | 398.942  | 383.614   | -0.0565259  | 0.950837   |
| CYB5D1        | 5.18605  | 9.90005   | 0.9328      | 0.0403493  |
| ROCK2         | 1.08662  | 1.14991   | 0.0816755   | 0.939356   |
| SH3GLB1       | 8.30421  | 7.46981   | -0.152771   | 0.793248   |
| CXXC5         | 4.38285  | 6.59733   | 0.590011    | 0.233577   |
| CASC3         | 23.5754  | 17.4842   | -0.431226   | 0.155896   |
| PKIG          | 23.5747  | 16.1997   | -0.541269   | 0.111734   |
| PPP1R12A      | 3.85408  | 3.77667   | -0.0292709  | 0.978659   |
| RENBP         | 0.393909 | 0.146741  | -1.42459    | 0.267401   |
| CAMKK2        | 9.77969  | 13.7507   | 0.49164     | 0.105364   |
| ANKRD36BP1    | 0.107838 | 0.0862893 | -0.321618   | 1          |
| LOC100379224  | 1.80955  | 1.96981   | 0.122429    | 0.898731   |
| RCL1          | 12.3984  | 15.0911   | 0.283535    | 0.501964   |
| TRIAP1        | 21.8243  | 31.4369   | 0.526528    | 0.0672313  |
| RNF141        | 3.68353  | 3.06329   | -0.266008   | 0.598397   |
| MMD           | 2.22473  | 2.33878   | 0.0721257   | 0.953159   |
| ARL6IP1       | 65.3886  | 65.9204   | 0.0116851   | 0.992304   |
| UBA5          | 9.72178  | 9.94932   | 0.0333772   | 0.980228   |
| TEKT4P2       | 8.83259  | 9.80468   | 0.150635    | 0.905579   |
| CPSF2         | 6.34069  | 6.31371   | -0.00615142 | 0.994734   |
| MTCH1         | 26.6705  | 26.3069   | -0.0198047  | 0.984602   |
| RFK           | 9.95001  | 16.887    | 0.763145    | 0.00380811 |
| CHD1L         | 31.4297  | 29.6848   | -0.0824028  | 0.91609    |
| MBOAT2        | 4.46488  | 4.00461   | -0.156962   | 0.81323    |
| SNHG5         | 1342.92  | 1244.72   | -0.109555   | 0.877394   |
| CSTF1         | 12.0149  | 12.5732   | 0.0655197   | 0.945399   |
| ERGIC3        | 142.413  | 143.6     | 0.0119763   | 0.992304   |
| DIEXF         | 3.96329  | 3.934     | -0.0107022  | 0.993578   |
| ZRANB3        | 0.459113 | 0.201648  | -1.18701    | 0.042563   |
| CDPF1         | 5.03937  | 3.23284   | -0.64044    | 0.156345   |
| GOPC          | 4.8359   | 4.88575   | 0.0147947   | 0.990746   |
| EXOC8         | 2.06062  | 2.09723   | 0.0254102   | 0.981975   |
| CSPG5         | 1.21095  | 1.54234   | 0.348983    | 0.673007   |
| PHLDB3        | 8.40822  | 8.38154   | -0.00458477 | 0.997552   |
| ILK           | 60.9955  | 58.9719   | -0.0486752  | 0.970533   |
| PER2          | 1.81805  | 2.66368   | 0.551026    | 0.115142   |
| NUDT15        | 8.93453  | 16.1196   | 0.85135     | 0.00153868 |
| CERCAM        | 72.8415  | 63.9466   | -0.187892   | 0.711825   |

|                |           |           |             |            |
|----------------|-----------|-----------|-------------|------------|
| BIVM,BIVM-ERCC | 16.6332   | 14.2538   | -0.222717   | 0.673957   |
| TMED10         | 24.5535   | 23.5925   | -0.0575973  | 0.947795   |
| PCNA-AS1       | 44.9199   | 77.2526   | 0.782228    | 0.677324   |
| HOXA11-AS      | 1.86476   | 1.68526   | -0.146014   | 0.926279   |
| FAM21B         | 1.04068   | 0.897698  | -0.213218   | 0.79557    |
| SDHC           | 34.516    | 31.7685   | -0.119671   | 0.859038   |
| RBM33          | 3.57854   | 2.42076   | -0.563913   | 0.055778   |
| CCDC171        | 0.343329  | 0.170002  | -1.01404    | 1          |
| C12orf43       | 5.98297   | 10.9161   | 0.867523    | 0.00380811 |
| KIAA1143       | 8.23495   | 7.15224   | -0.203366   | 0.677324   |
| RFC5           | 11.9638   | 15.4033   | 0.364567    | 0.321566   |
| TMEM14C        | 156.939   | 122.119   | -0.36192    | 0.276711   |
| WDR36          | 6.24128   | 8.63284   | 0.467992    | 0.114535   |
| TRAPPC2        | 10.6441   | 10.8608   | 0.0290791   | 0.977897   |
| RSPH4A         | 0.198309  | 0.271409  | 0.452717    | 1          |
| SARS2          | 15.5086   | 16.3387   | 0.0752252   | 0.975484   |
| MAP3K1         | 0.758614  | 0.549299  | -0.465776   | 0.355977   |
| NLRP11         | 0.375015  | 0.194149  | -0.949781   | 0.143894   |
| RPAP3          | 4.86496   | 6.31307   | 0.375914    | 0.302656   |
| HOXB6          | 5.57171   | 7.73199   | 0.47272     | 0.438793   |
| PIK3C2B        | 1.36623   | 0.789553  | -0.791097   | 0.0280907  |
| COPRS          | 107.076   | 157.767   | 0.559164    | 0.0410754  |
| ARL8A          | 23.3373   | 24.2926   | 0.0578787   | 0.952184   |
| ESYT1          | 35.2633   | 27.5749   | -0.35481    | 0.286272   |
| ZNF548         | 1.29602   | 0.887604  | -0.546097   | 0.210405   |
| ADNP           | 10.3783   | 8.80675   | -0.23689    | 0.591514   |
| LOC100527964   | 1.51966   | 1.8404    | 0.276271    | 0.794035   |
| SLC16A3        | 200.918   | 187.384   | -0.10061    | 0.890489   |
| POLR1E         | 37.1265   | 35.8075   | -0.0521868  | 0.954971   |
| RAD23B         | 47.797    | 59.0499   | 0.305015    | 0.415024   |
| RIMBP3C        | 0.0322321 | 0.0352255 | 0.128122    | 1          |
| BNC2           | 0.772441  | 0.32782   | -1.23652    | 0.00153868 |
| TNFSF12,TNFSF1 | 15.5121   | 10.4803   | -0.565713   | 0.129497   |
| CETN2          | 28.146    | 31.3004   | 0.153249    | 0.800413   |
| TMEM203        | 62.8356   | 97.8642   | 0.6392      | 0.0117316  |
| STX8           | 38.4792   | 31.4203   | -0.29238    | 0.485278   |
| ZDHHC23        | 3.24496   | 4.02673   | 0.311407    | 0.505536   |
| PRR3           | 5.43245   | 9.03628   | 0.734126    | 0.454898   |
| MSH6           | 6.38125   | 10.6169   | 0.734449    | 0.115387   |
| TP73           | 3.18242   | 4.18656   | 0.395643    | 0.342599   |
| TMEM243        | 13.7928   | 19.3359   | 0.487369    | 0.361239   |
| DAPK3          | 119.148   | 102.469   | -0.217576   | 0.633281   |
| NCOA1          | 1.88326   | 1.87054   | -0.00977475 | 0.994204   |
| SOX12          | 18.2899   | 18.1406   | -0.0118199  | 0.992304   |
| C5orf15        | 10.2657   | 10.7623   | 0.06815     | 0.940466   |
| EBF3           | 0.0445116 | 0.0765941 | 0.783052    | 1          |
| GRHPR          | 112.209   | 97.4537   | -0.203395   | 0.677324   |
| DOPEY2         | 1.44627   | 0.893127  | -0.695405   | 0.0653297  |
| SEPT8          | 8.58328   | 10.0754   | 0.231235    | 0.630883   |

|           |            |            |            |            |
|-----------|------------|------------|------------|------------|
| USP31     | 1.52204    | 2.18511    | 0.521701   | 0.111734   |
| NCK1      | 6.19286    | 6.00213    | -0.0451333 | 0.969625   |
| ADAM32    | 0.0235884  | 0          | #NAME?     | 1          |
| ALCAM     | 6.01053    | 6.35882    | 0.0812662  | 0.92475    |
| PPIG      | 6.97097    | 8.30658    | 0.252896   | 0.59512    |
| TRIM3     | 3.36718    | 5.90374    | 0.810087   | 0.0130226  |
| CDKN3     | 33.8737    | 24.9894    | -0.438846  | 0.200395   |
| MMACHC    | 3.81589    | 4.03761    | 0.0814811  | 0.986681   |
| ZDHHC2    | 6.24414    | 4.31779    | -0.532211  | 0.0874559  |
| PDZD2     | 0.00259836 | 0.0019531  | -0.411837  | 1          |
| IRGQ      | 2.07473    | 4.35275    | 1.069      | 0.00153868 |
| SETMAR    | 4.9066     | 5.68595    | 0.212678   | 0.784885   |
| MYL6B     | 113.758    | 99.7582    | -0.189457  | 0.710227   |
| GMDS      | 17.3938    | 16.7756    | -0.0522088 | 0.958462   |
| CROCC     | 5.2989     | 3.53353    | -0.584583  | 0.0667647  |
| RHOQ      | 15.0635    | 10.9313    | -0.462591  | 0.194669   |
| LAMTOR4   | 268.594    | 314.516    | 0.227704   | 0.612746   |
| TRAF7     | 32.1295    | 30.7169    | -0.0648678 | 0.952355   |
| RAB5B     | 9.99084    | 11.8611    | 0.247562   | 0.572669   |
| IFT52     | 12.1778    | 9.4595     | -0.364417  | 0.347606   |
| C17orf104 | 0.0847626  | 0.131334   | 0.631744   | 1          |
| MTFP1     | 125.917    | 113.075    | -0.155193  | 0.782868   |
| RLIM      | 4.28482    | 3.44373    | -0.315264  | 0.388363   |
| PRSS53    | 3.96462    | 3.57983    | -0.147292  | 0.943183   |
| DLX1      | 4.77343    | 8.50298    | 0.832943   | 0.00820276 |
| CD160     | 0.118899   | 0.0972854  | -0.289436  | 1          |
| SFSWAP    | 8.52114    | 12.3031    | 0.529904   | 0.0795709  |
| PRPSAP2   | 20.9429    | 15.8016    | -0.406394  | 0.211369   |
| MAML1     | 5.09276    | 5.99996    | 0.236505   | 0.628907   |
| C17orf85  | 2.57394    | 2.86561    | 0.15486    | 0.8146     |
| ACTR3B    | 12.2601    | 15.56      | 0.343872   | 0.380319   |
| RFNG      | 65.8783    | 64.5363    | -0.0296914 | 0.975928   |
| TRIM66    | 0.561978   | 0.304894   | -0.882206  | 0.0259174  |
| ATG2B     | 1.12455    | 0.939706   | -0.259071  | 0.639952   |
| KAT6A     | 3.16501    | 3.38387    | 0.0964664  | 0.900642   |
| FDXR      | 42.2325    | 39.137     | -0.109821  | 0.878745   |
| SERINC1   | 16.764     | 8.99553    | -0.898088  | 0.00153868 |
| GOLGA5    | 6.78476    | 6.03749    | -0.16835   | 0.780362   |
| LYRM4     | 21.2795    | 28.5957    | 0.426333   | 0.18775    |
| LINC00173 | 0.21314    | 0.00914881 | -4.54208   | 1          |
| SLC25A18  | 0.101143   | 0.0941536  | -0.103314  | 1          |
| GOLPH3L   | 5.1605     | 3.38622    | -0.607838  | 0.0580068  |
| ADRBK2    | 0.418169   | 0.504881   | 0.271858   | 0.715689   |
| FLJ37201  | 0.0378561  | 0.0605156  | 0.676781   | 1          |
| CEP57     | 9.05325    | 3.72313    | -1.28192   | 0.00153868 |
| FAM122B   | 4.94937    | 6.85659    | 0.470247   | 0.186334   |
| PFKFB2    | 1.58533    | 0.902033   | -0.813533  | 0.0220668  |
| SNRNP70   | 103.113    | 197.68     | 0.938939   | 0.00153868 |
| WDR82     | 15.2797    | 23.3675    | 0.612886   | 0.0204286  |

|                |           |           |             |            |
|----------------|-----------|-----------|-------------|------------|
| HERC1          | 0.585445  | 0.562511  | -0.0576531  | 0.960067   |
| PLA2G15        | 10.2746   | 12.1117   | 0.237321    | 0.631137   |
| IBTK           | 4.45869   | 3.32409   | -0.423661   | 0.204123   |
| AFTPH          | 5.84119   | 5.23971   | -0.156774   | 0.800413   |
| U2AF1L4        | 2.75194   | 2.65549   | -0.0514738  | 0.978818   |
| TCP11          | 0.0184777 | 0         | #NAME?      | 1          |
| DZIP3          | 1.02326   | 0.391465  | -1.38622    | 0.102273   |
| C9orf9         | 10.0412   | 4.32938   | -1.2137     | 0.00739414 |
| ATP5L          | 140.98    | 150.787   | 0.0970216   | 0.912694   |
| ITGB1BP1       | 26.8574   | 43.5265   | 0.696572    | 0.00274688 |
| OPHN1          | 1.84169   | 1.61602   | -0.188588   | 0.7646     |
| ANXA5          | 252.785   | 272.888   | 0.110401    | 0.878536   |
| FKBP7          | 1.53258   | 1.2669    | -0.274661   | 0.931711   |
| ADAM21         | 0.0813685 | 0.0752991 | -0.111838   | 1          |
| WHAMM          | 4.70125   | 3.86293   | -0.283347   | 0.56059    |
| MKL1           | 3.83189   | 5.05814   | 0.400552    | 0.668733   |
| SNRNP27        | 19.5414   | 21.482    | 0.136596    | 0.838532   |
| MT1X           | 1978.12   | 2328.67   | 0.235378    | 0.619728   |
| WASF2          | 17.1479   | 9.33128   | -0.877887   | 0.00153868 |
| TMEM11         | 22.7354   | 35.5264   | 0.643953    | 0.0285456  |
| SPAG8          | 0.0764899 | 0.0409518 | -0.901343   | 1          |
| CKMT1B         | 12.6054   | 11.5596   | -0.124951   | 0.948368   |
| GOSR1          | 5.25928   | 6.21852   | 0.241706    | 0.607473   |
| C10orf68,CCDC7 | 0.571965  | 0.216155  | -1.40386    | 0.0329313  |
| PI4KAP2        | 11.4621   | 12.0085   | 0.067189    | 0.946021   |
| C11orf54       | 4.11632   | 2.4345    | -0.757732   | 0.0290262  |
| GMCL1          | 1.99706   | 2.25574   | 0.175721    | 0.844875   |
| HSDL1          | 5.97324   | 5.95302   | -0.00489186 | 0.996244   |
| ZFX            | 2.01246   | 2.10273   | 0.0633035   | 0.951272   |
| LYG1           | 2.55398   | 4.10159   | 0.683436    | 0.193924   |
| PGD            | 108.618   | 109.209   | 0.00783336  | 0.994483   |
| USP32P1        | 0.123785  | 0.141951  | 0.197561    | 1          |
| TRIM16         | 3.44222   | 3.90594   | 0.182332    | 0.804694   |
| PGRMC1         | 92.6908   | 91.225    | -0.0229962  | 0.981441   |
| ZFAS1          | 684.474   | 618.138   | -0.147068   | 0.824392   |
| PRICKLE3       | 13.2859   | 14.9588   | 0.171107    | 0.802089   |
| USP34          | 2.76535   | 2.91252   | 0.0748082   | 0.939448   |
| MTPN           | 34.245    | 41.2639   | 0.268987    | 0.500329   |
| TTC17          | 7.51403   | 5.20699   | -0.529136   | 0.0663805  |
| CHIC1          | 0.938504  | 0.813536  | -0.206158   | 0.779071   |
| LHFPL5         | 0.0505474 | 0.0334136 | -0.597201   | 1          |
| RBM26          | 6.47016   | 9.80706   | 0.600018    | 0.0360613  |
| RASL10B        | 9.46175   | 7.73644   | -0.290438   | 0.527962   |
| CPD            | 4.12674   | 3.51887   | -0.229888   | 0.622746   |
| TOMM34         | 84.3092   | 100.619   | 0.255146    | 0.547145   |
| PI4K2B         | 2.68904   | 2.9722    | 0.144438    | 0.852189   |
| LCE1F          | 0.411185  | 0.268749  | -0.61353    | 0.837545   |
| GPR83          | 0.180691  | 0.15586   | -0.213268   | 1          |
| U2SURP         | 7.82898   | 9.03878   | 0.207304    | 0.666959   |

|                |           |           |             |            |
|----------------|-----------|-----------|-------------|------------|
| PSMB10         | 40.6516   | 64.0267   | 0.655362    | 0.0204286  |
| SGIP1          | 0.926431  | 0.582372  | -0.669742   | 0.153539   |
| RASSF5         | 0.650567  | 0.493657  | -0.398188   | 0.646217   |
| FBXO45         | 3.45383   | 4.01957   | 0.218845    | 0.671837   |
| HID1           | 16.9229   | 9.63898   | -0.812026   | 0.00153868 |
| LONRF1         | 2.99287   | 2.9905    | -0.00114366 | 0.999234   |
| BHLHB9         | 0.106567  | 0.209317  | 0.973926    | 1          |
| NACA           | 1150.27   | 1184.36   | 0.0421413   | 0.967296   |
| TTLL12         | 52.2157   | 63.4557   | 0.281266    | 0.473009   |
| DLG1           | 3.3988    | 3.61964   | 0.0908195   | 0.917306   |
| KIAA0226       | 2.70995   | 3.75436   | 0.470304    | 0.574478   |
| RAD51B         | 5.08364   | 2.28174   | -1.15573    | 0.00274688 |
| ARMC1          | 10.5853   | 11.0575   | 0.0629684   | 0.944479   |
| ZNF827         | 0.247518  | 0.141251  | -0.809269   | 1          |
| ZFP64          | 5.60152   | 5.33024   | -0.0716165  | 0.945208   |
| C12orf73       | 2.62259   | 3.19144   | 0.283215    | 0.700356   |
| BAG2           | 21.0475   | 40.1543   | 0.931908    | 0.00153868 |
| GNAL           | 3.35504   | 3.00329   | -0.159784   | 0.923624   |
| PEMT           | 67.6583   | 75.9925   | 0.167589    | 0.774294   |
| PNPLA6         | 27.9698   | 33.8586   | 0.275653    | 0.491072   |
| MPHOSPH10      | 8.5103    | 11.7012   | 0.459368    | 0.150143   |
| FN1            | 0.0235344 | 0.0250672 | 0.0910313   | 1          |
| PAAF1          | 15.3272   | 7.51631   | -1.028      | 0.375852   |
| YWHAQ          | 147.898   | 173.053   | 0.226611    | 0.623292   |
| CHAF1B         | 8.22395   | 5.7546    | -0.515117   | 0.14872    |
| AK7            | 0.177546  | 0.0718686 | -1.30476    | 1          |
| NCOA6          | 3.05622   | 3.96343   | 0.375001    | 0.343199   |
| C6orf164       | 0.110904  | 0.0492714 | -1.17049    | 1          |
| PRMT7          | 11.7744   | 14.0585   | 0.25579     | 0.601631   |
| JAK1           | 13.9642   | 12.3233   | -0.180347   | 0.77453    |
| C4orf33        | 4.78249   | 2.03727   | -1.23112    | 0.00153868 |
| CEP164         | 2.40748   | 2.4411    | 0.0200026   | 0.987448   |
| NOB1           | 137.685   | 93.6228   | -0.556441   | 0.0388971  |
| PRMT10         | 2.11331   | 1.84936   | -0.192475   | 0.806525   |
| CHMP2B         | 16.0007   | 12.5875   | -0.346143   | 0.330706   |
| PIK3R1         | 0.94582   | 1.0653    | 0.171625    | 0.839812   |
| LAMP2          | 12.382    | 9.65575   | -0.358779   | 0.292      |
| TRIB2          | 0.826269  | 0.979963  | 0.246115    | 0.806525   |
| ETFB           | 91.5325   | 79.3578   | -0.205912   | 0.667013   |
| CCNK           | 15.9341   | 14.5985   | -0.1263     | 0.935543   |
| ROCK1          | 2.47894   | 2.80418   | 0.177852    | 0.773367   |
| DHRS4L2        | 12.6949   | 11.1693   | -0.184705   | 0.780101   |
| CEP68          | 2.56732   | 2.50446   | -0.0357603  | 0.992304   |
| LOC654433      | 2.34864   | 1.8937    | -0.310618   | 0.765759   |
| SUOX           | 5.25562   | 6.43392   | 0.291839    | 0.574558   |
| MBD6           | 11.6674   | 8.78759   | -0.408941   | 0.759263   |
| POLR2J2,UPK3BI | 44.4332   | 37.1099   | -0.259835   | 0.541525   |
| CAMK1D         | 3.51953   | 2.59429   | -0.440043   | 0.417991   |
| SELO           | 23.07     | 29.4241   | 0.350982    | 0.35231    |

|           |          |           |            |            |
|-----------|----------|-----------|------------|------------|
| SPATA20   | 34.8461  | 27.3854   | -0.347593  | 0.330706   |
| CDC25C    | 5.06043  | 2.43765   | -1.05377   | 0.00274688 |
| ANKRD46   | 3.43064  | 3.52503   | 0.0391582  | 0.975484   |
| CPSF7     | 14.4504  | 18.4208   | 0.350226   | 0.313      |
| FUBP3     | 20.3023  | 28.2954   | 0.478924   | 0.0973224  |
| SKAP2     | 3.88711  | 1.98338   | -0.970736  | 0.00153868 |
| MYH14     | 4.78036  | 3.8395    | -0.3162    | 0.466918   |
| LOC286467 | 0.855224 | 0.685164  | -0.319852  | 0.72151    |
| RALGPS1   | 0.854444 | 0.613944  | -0.476878  | 0.538465   |
| B3GAT3    | 33.4335  | 48.3779   | 0.533053   | 0.0525851  |
| DUSP14    | 36.0343  | 45.5713   | 0.338755   | 0.347897   |
| EPB49     | 18.6126  | 14.26     | -0.384301  | 0.284754   |
| ADCK5     | 19.2432  | 21.2293   | 0.141709   | 0.949401   |
| CPVL      | 12.0138  | 9.54219   | -0.3323    | 0.41867    |
| ACAD10    | 2.0387   | 1.33432   | -0.611542  | 0.151114   |
| MMP15     | 6.35202  | 8.20046   | 0.368489   | 0.357726   |
| RAPGEF3   | 0.539109 | 0.219188  | -1.29841   | 0.0111246  |
| DR1       | 15.0554  | 17.8842   | 0.24841    | 0.562208   |
| TMCC1     | 1.06064  | 1.16749   | 0.138481   | 0.883608   |
| MFSD10    | 158.58   | 154.95    | -0.0334149 | 0.974093   |
| ASAH2B    | 0.192766 | 0.0175346 | -3.45857   | 1          |
| ZNF282    | 22.3083  | 24.2246   | 0.118895   | 0.86364    |
| GJA3      | 0.707484 | 0.816523  | 0.206796   | 0.831614   |
| RNF138    | 7.97292  | 9.06061   | 0.184501   | 0.740538   |
| SDE2      | 3.97713  | 4.52153   | 0.185083   | 0.76719    |
| IKBIP     | 12.5879  | 13.2921   | 0.0785238  | 0.937886   |
| PDCL3     | 14.9649  | 30.9322   | 1.04753    | 0.00153868 |
| C1orf56   | 4.42919  | 2.38989   | -0.890096  | 0.761305   |
| GTDC1     | 1.41361  | 1.09252   | -0.371728  | 0.588875   |
| HNRPLL    | 7.59694  | 6.70573   | -0.180025  | 0.757021   |
| C14orf159 | 6.27798  | 5.0026    | -0.327622  | 0.479652   |
| SYAP1     | 23.0576  | 24.8768   | 0.109556   | 0.873722   |
| ANO10     | 7.26618  | 5.07202   | -0.518636  | 0.145411   |
| GTF2IRD1  | 18.9684  | 9.51693   | -0.995031  | 0.00153868 |
| CCDC101   | 11.8979  | 11.0647   | -0.104739  | 0.917038   |
| TRUB1     | 4.07109  | 4.94959   | 0.281893   | 0.547145   |
| QARS      | 89.1978  | 80.2725   | -0.152103  | 0.789671   |
| C15orf61  | 12.3516  | 11.5909   | -0.0917027 | 0.968154   |
| PMS2P3    | 0.929431 | 0.917472  | -0.0186834 | 0.994068   |
| ZNF480    | 1.44368  | 1.4872    | 0.0428485  | 0.971779   |
| GGNBP2    | 13.1633  | 10.3107   | -0.352377  | 0.33256    |
| TCEANC    | 0.306827 | 0.217693  | -0.495132  | 1          |
| CD320     | 261.798  | 359.276   | 0.456636   | 0.124935   |
| IFT80     | 2.05617  | 1.41007   | -0.544188  | 0.15329    |
| CHP1      | 45.8192  | 38.6249   | -0.246421  | 0.559      |
| PCMTD2    | 5.19554  | 3.37026   | -0.624412  | 0.0451232  |
| PRDM15    | 0.609884 | 1.49994   | 1.2983     | 0.00153868 |
| PPA2      | 40.5386  | 31.5509   | -0.361616  | 0.27751    |
| POLG2     | 5.41765  | 7.02397   | 0.37462    | 0.416867   |

|            |           |            |            |            |
|------------|-----------|------------|------------|------------|
| PRPF8      | 35.6979   | 34.2769    | -0.0586026 | 0.948523   |
| CYP2D6     | 1.32749   | 1.21209    | -0.131205  | 0.942801   |
| ZNF579     | 29.5329   | 26.6106    | -0.150321  | 0.823458   |
| ZNF486     | 1.58755   | 1.18755    | -0.41882   | 0.402903   |
| GLB1,TMPPE | 26.9306   | 21.3375    | -0.335856  | 0.337742   |
| DOCK9      | 0.879502  | 1.02018    | 0.214069   | 0.771286   |
| ZNF251     | 7.38154   | 7.91625    | 0.100895   | 0.897332   |
| PAF1       | 13.5546   | 19.0771    | 0.493058   | 0.105364   |
| PHF21A     | 2.99878   | 1.4123     | -1.08634   | 0.00153868 |
| RNF214     | 3.35271   | 1.68296    | -0.994327  | 0.112314   |
| SLC6A16    | 0.160208  | 0.204739   | 0.353846   | 1          |
| ARRB1      | 4.90029   | 6.85794    | 0.484908   | 0.100739   |
| RALB       | 18.7348   | 19.2263    | 0.0373629  | 0.969439   |
| AGAP8      | 0.70376   | 1.12152    | 0.672296   | 0.757635   |
| ULK1       | 6.40004   | 3.34846    | -0.934584  | 0.00153868 |
| ZNF649     | 0.131348  | 0.194947   | 0.569692   | 1          |
| ABTB1      | 16.957    | 6.36974    | -1.41257   | 0.00153868 |
| MRPL22     | 11.8568   | 12.2395    | 0.0458297  | 0.961424   |
| CCT4       | 101.745   | 117.757    | 0.210852   | 0.653588   |
| NCS1       | 46.4436   | 61.4924    | 0.404928   | 0.201515   |
| PCTP       | 8.4504    | 8.09063    | -0.0627667 | 0.952184   |
| DDX55      | 9.19523   | 11.6629    | 0.342975   | 0.361509   |
| FAM105A    | 0.810362  | 0.829672   | 0.0339753  | 0.978678   |
| DCTN4      | 11.763    | 7.66079    | -0.618695  | 0.0187307  |
| MTMR12     | 3.65574   | 4.17424    | 0.19135    | 0.740088   |
| AASDHPPT   | 13.0394   | 17.8283    | 0.451297   | 0.141482   |
| BRICD5     | 4.50039   | 5.25651    | 0.224055   | 0.969678   |
| ACN9       | 11.3832   | 15.6396    | 0.458302   | 0.166833   |
| AMFR       | 30.9322   | 27.1155    | -0.189994  | 0.704283   |
| LRP12      | 3.11179   | 2.69514    | -0.207383  | 0.735532   |
| PTPN3      | 5.42542   | 5.195      | -0.0626104 | 0.945208   |
| ZNF783     | 2.0522    | 1.7902     | -0.197055  | 0.804859   |
| SHROOM2    | 0.486398  | 0.474221   | -0.0365773 | 0.981441   |
| RNF145     | 28.7885   | 32.7889    | 0.187716   | 0.720751   |
| SLC26A7    | 0.0163248 | 0.00651076 | -1.32617   | 1          |
| AASS       | 5.05378   | 4.73311    | -0.0945741 | 0.904905   |
| PRRG4      | 2.2817    | 3.7305     | 0.709258   | 0.020985   |
| WASH1      | 5.61956   | 4.03626    | -0.477437  | 0.312715   |
| PPP2R1A    | 191.255   | 189.262    | -0.0151095 | 0.989036   |
| IFNAR1     | 5.28723   | 4.89939    | -0.109912  | 0.879478   |
| SDR39U1    | 46.3476   | 44.7603    | -0.0502755 | 0.976285   |
| PRORS1P    | 0.462777  | 0.30704    | -0.591891  | 0.527577   |
| ZSCAN29    | 3.16252   | 3.5168     | 0.153187   | 0.816962   |
| FA2H       | 2.32193   | 1.14519    | -1.01974   | 0.0360613  |
| SPATA24    | 1.79317   | 1.05453    | -0.765914  | 0.342315   |
| CDC42BPB   | 9.39584   | 10.244     | 0.124691   | 0.852189   |
| EFNB2      | 1.12517   | 1.42407    | 0.339877   | 0.562754   |
| TMEM18     | 17.1903   | 17.3278    | 0.0114969  | 0.992304   |
| SFXN1      | 12.9106   | 14.1494    | 0.132186   | 0.841165   |



|              |           |           |             |            |
|--------------|-----------|-----------|-------------|------------|
| NR1H2        | 33.0414   | 37.4284   | 0.17986     | 0.734343   |
| HIST4H4      | 0.778593  | 0.407198  | -0.935139   | 0.703707   |
| HOXA11       | 5.18293   | 10.9892   | 1.08425     | 0.00153868 |
| NETO2        | 11.8039   | 22.5457   | 0.933583    | 0.00153868 |
| ATP6V1D      | 27.1092   | 30.728    | 0.180768    | 0.726019   |
| PDCL         | 4.31566   | 4.83719   | 0.164588    | 0.810757   |
| TTC32        | 3.54618   | 2.5314    | -0.486326   | 0.472305   |
| RNF216P1     | 10.1497   | 13.8611   | 0.449607    | 0.197245   |
| PPM1L        | 0.361871  | 0.256447  | -0.496814   | 1          |
| KIAA1683     | 0.0181352 | 0.035697  | 0.977006    | 1          |
| PKP4         | 8.0353    | 7.71559   | -0.0585749  | 0.948523   |
| HSP90AB1     | 814.082   | 1037.9    | 0.350422    | 0.399313   |
| B3GNT9       | 8.59988   | 9.10282   | 0.0819971   | 0.954143   |
| RPUSD4       | 21.4455   | 23.2312   | 0.115385    | 0.863994   |
| NSUN3        | 1.37038   | 1.03559   | -0.40412    | 0.806525   |
| TAF1B        | 4.03267   | 3.69538   | -0.126012   | 0.879418   |
| TTL6         | 0.0512214 | 0         | #NAME?      | 1          |
| PET112       | 13.3465   | 11.4639   | -0.219371   | 0.669502   |
| ADNP2        | 9.60242   | 7.84923   | -0.290847   | 0.461803   |
| PPP1R8       | 20.0665   | 25.81     | 0.363141    | 0.284835   |
| EXOSC10      | 20.3265   | 21.6846   | 0.093304    | 0.900642   |
| NGEF         | 12.0404   | 4.61932   | -1.38213    | 0.00153868 |
| NUP54        | 12.1143   | 14.1016   | 0.219149    | 0.653456   |
| CEP250       | 9.48681   | 8.3635    | -0.181817   | 0.722089   |
| TAMM41       | 7.44938   | 8.5892    | 0.205402    | 0.765267   |
| LETMD1       | 42.2517   | 18.8028   | -1.16806    | 0.00153868 |
| SLC35G6      | 0.0486551 | 0.0753936 | 0.631852    | 1          |
| RAB12        | 10.9941   | 14.718    | 0.420847    | 0.224796   |
| WDR47        | 1.60955   | 1.71709   | 0.0933085   | 0.931145   |
| BID          | 30.1197   | 40.472    | 0.426215    | 0.169914   |
| CCND2        | 22.4067   | 28.5964   | 0.351905    | 0.296617   |
| CYFIP1       | 44.1186   | 38.5999   | -0.192788   | 0.698989   |
| NUP133       | 9.27386   | 8.33892   | -0.153309   | 0.795943   |
| ZFYVE19      | 20.2118   | 16.3588   | -0.305132   | 0.620568   |
| NT5E         | 0.721458  | 0.569836  | -0.340368   | 0.680951   |
| SRSF9        | 275.557   | 295.788   | 0.102211    | 0.897332   |
| RASGRP1      | 0.720879  | 0.475439  | -0.600497   | 0.25951    |
| NENF         | 128.233   | 131.753   | 0.0390685   | 0.967458   |
| RRN3         | 13.2312   | 16.1025   | 0.283339    | 0.468168   |
| NUDT17       | 1.55563   | 1.07999   | -0.526488   | 0.892475   |
| GLE1         | 32.5828   | 24.2961   | -0.423386   | 0.15618    |
| LOC100127888 | 1.01468   | 1.21666   | 0.261898    | 0.969535   |
| RPL36AL      | 553.575   | 816.314   | 0.560345    | 0.0451232  |
| FZR1         | 22.6129   | 19.376    | -0.222874   | 0.643442   |
| SLC2A4       | 0.657365  | 1.18034   | 0.844437    | 0.125383   |
| RFX7         | 1.86371   | 1.86311   | -0.00046381 | 0.999404   |
| RGS5         | 0.368651  | 0.213386  | -0.788791   | 1          |
| ACTR6        | 12.236    | 8.92599   | -0.45505    | 0.177395   |
| KDM1A        | 50.7848   | 59.9104   | 0.238411    | 0.588302   |

|              |           |           |            |            |
|--------------|-----------|-----------|------------|------------|
| AP1S1        | 160.217   | 199.169   | 0.313971   | 0.386092   |
| SLC9B2       | 7.28364   | 5.83128   | -0.320847  | 0.430137   |
| TSTD3        | 0.879142  | 0.500794  | -0.811878  | 0.180946   |
| PITRM1       | 22.0585   | 20.9509   | -0.0743194 | 0.92921    |
| HEXB         | 64.1435   | 45.7276   | -0.488238  | 0.553903   |
| LOC100126784 | 3.75809   | 1.54259   | -1.28465   | 0.126915   |
| CYP4F2       | 0.0148392 | 0.0203626 | 0.45651    | 1          |
| CENPV        | 63.1012   | 90.9906   | 0.52805    | 0.0650492  |
| SMARCD1      | 22.3962   | 29.3474   | 0.389976   | 0.221358   |
| UBXN2B       | 5.34084   | 5.07056   | -0.0749229 | 0.933736   |
| C19orf12     | 4.58177   | 4.91456   | 0.101159   | 0.899998   |
| ARMC8        | 3.69969   | 4.87169   | 0.397018   | 0.298867   |
| ELL          | 10.4754   | 10.6505   | 0.0239119  | 0.980228   |
| ACAD9        | 12.9264   | 15.2802   | 0.241337   | 0.609802   |
| IL17D        | 2.38174   | 3.11406   | 0.38678    | 0.590376   |
| PPA1         | 191.012   | 215.332   | 0.172899   | 0.751293   |
| SRCAP        | 5.25217   | 8.31967   | 0.663611   | 0.00897284 |
| PELP1        | 19.4173   | 24.3293   | 0.325349   | 0.355826   |
| PQLC1        | 38.6356   | 48.9733   | 0.342062   | 0.331035   |
| ERVK13-1     | 1.0012    | 1.44556   | 0.529895   | 0.162206   |
| BNIP1        | 14.3616   | 14.1557   | -0.0208356 | 0.984547   |
| RNF215       | 17.6498   | 9.38377   | -0.91141   | 0.00153868 |
| HSBP1        | 52.9868   | 77.2721   | 0.544313   | 0.0523053  |
| BCAR3        | 5.62852   | 3.59066   | -0.648507  | 0.0541611  |
| DYRK4        | 11.732    | 9.13457   | -0.361038  | 0.371609   |
| SLC2A12      | 0.508008  | 0.328713  | -0.628019  | 0.237712   |
| NFKB1        | 6.87375   | 10.9466   | 0.671315   | 0.0103919  |
| PHTF1        | 1.97751   | 2.81146   | 0.507635   | 0.200956   |
| COG5         | 11.9386   | 7.07059   | -0.755731  | 0.0143403  |
| LOC731275    | 0.386007  | 0.214561  | -0.84724   | 0.229949   |
| COX6C        | 326.244   | 384.963   | 0.238768   | 0.596588   |
| NRDE2        | 1.88219   | 2.17174   | 0.206443   | 0.767724   |
| G3BP2        | 15.1396   | 18.5764   | 0.295142   | 0.437985   |
| POMZP3       | 8.09979   | 12.0508   | 0.573172   | 0.363274   |
| CCNC         | 22.064    | 25.8381   | 0.227807   | 0.607271   |
| RPL23AP82    | 5.08454   | 6.0391    | 0.248216   | 0.843427   |
| SLC25A38     | 44.1828   | 52.2911   | 0.24308    | 0.571227   |
| KLF15        | 4.4504    | 2.39828   | -0.891935  | 0.0232503  |
| C1GALT1C1    | 8.4722    | 10.8808   | 0.360976   | 0.355674   |
| ACBD5        | 5.81023   | 5.18172   | -0.165165  | 0.783531   |
| HABP4        | 14.7749   | 15.8938   | 0.105314   | 0.886094   |
| CCDC85C      | 17.0445   | 26.9052   | 0.658576   | 0.0484091  |
| SF3B1        | 31.3381   | 30.0676   | -0.0597096 | 0.945416   |
| FRAT2        | 14.2809   | 18.9153   | 0.405465   | 0.269836   |
| SLC31A2      | 8.1191    | 12.7741   | 0.65383    | 0.0403493  |
| ANGPTL6      | 3.27459   | 5.17206   | 0.659424   | 0.513296   |
| TCEAL8       | 43.0163   | 31.5868   | -0.445559  | 0.14872    |
| USP12        | 6.50211   | 7.17874   | 0.142824   | 0.818403   |
| NOM1         | 7.54411   | 11.1417   | 0.562551   | 0.0365493  |

|                |           |           |             |            |
|----------------|-----------|-----------|-------------|------------|
| RAB1A          | 40.571    | 45.5241   | 0.16618     | 0.782703   |
| PURB           | 3.81566   | 4.86607   | 0.350825    | 0.317407   |
| UFL1           | 4.20266   | 2.91525   | -0.527686   | 0.103973   |
| CTNNBIP1       | 7.04292   | 7.45036   | 0.0811364   | 0.93305    |
| ATAD1          | 10.0608   | 8.93526   | -0.171159   | 0.761614   |
| COX17          | 85.7443   | 121.929   | 0.507928    | 0.106507   |
| KLC4           | 4.82496   | 2.92163   | -0.723744   | 0.0467998  |
| KANSL3         | 7.07277   | 8.17388   | 0.208747    | 0.684817   |
| CREBRF         | 1.73575   | 0.478013  | -1.86044    | 0.00153868 |
| SF3B2          | 80.1677   | 89.702    | 0.162119    | 0.775951   |
| MBNL1-AS1      | 0.102783  | 0.147539  | 0.521493    | 1          |
| TMED4          | 35.3133   | 35.9708   | 0.0266145   | 0.978996   |
| TNRC6C         | 0.418181  | 0.37474   | -0.158239   | 0.917927   |
| CNOT2          | 16.9079   | 14.9388   | -0.17864    | 0.732286   |
| ODF2L          | 2.95035   | 2.33854   | -0.335279   | 0.458976   |
| ATP5C1         | 224.047   | 232.362   | 0.0525773   | 0.953159   |
| INCA1          | 0.495502  | 0.531051  | 0.099958    | 0.967296   |
| HMG20A         | 6.58034   | 5.39883   | -0.285516   | 0.502644   |
| STMN3          | 18.0428   | 25.1832   | 0.481041    | 0.124935   |
| DHRS7          | 53.4784   | 38.2784   | -0.482425   | 0.0952042  |
| ZNF24          | 5.32938   | 5.60342   | 0.0723401   | 0.933712   |
| ARMCX6         | 31.4166   | 26.9557   | -0.220936   | 0.690755   |
| PHF14          | 4.038     | 5.54678   | 0.458008    | 0.215771   |
| CAPN12         | 14.3874   | 17.7715   | 0.304756    | 0.859038   |
| OTUB2          | 1.0128    | 0.62347   | -0.699953   | 0.161616   |
| SLC41A1        | 11.7007   | 16.6751   | 0.511106    | 0.068345   |
| C1GALT1        | 3.29101   | 2.64625   | -0.314581   | 0.447486   |
| MPP5           | 4.4071    | 5.48014   | 0.314382    | 0.411326   |
| TICAM1         | 14.1277   | 20.7861   | 0.557086    | 0.0588451  |
| MSX1           | 19.7808   | 37.9653   | 0.940581    | 0.00153868 |
| ATP6V1C2       | 0.212251  | 0.309629  | 0.54477     | 1          |
| CCNT2          | 2.41402   | 2.42784   | 0.00823474  | 0.994593   |
| MFSD3          | 45.9526   | 46.2565   | 0.00950895  | 0.994068   |
| SNX16          | 2.59079   | 2.14809   | -0.270334   | 0.643053   |
| KIAA1211       | 2.31892   | 1.1135    | -1.05836    | 0.00274688 |
| NFX1           | 6.30681   | 5.25498   | -0.263225   | 0.557974   |
| COQ2           | 14.4394   | 12.7748   | -0.176711   | 0.775691   |
| RPS26          | 2182.35   | 2171.3    | -0.00732333 | 0.994734   |
| IQCK           | 2.61693   | 2.09728   | -0.319354   | 0.811287   |
| GPN3           | 22.0096   | 20.9215   | -0.0731496  | 0.956177   |
| RPS6KB2        | 48.3823   | 70.126    | 0.535471    | 0.0487873  |
| CLCN6          | 2.40565   | 2.04914   | -0.231408   | 0.857492   |
| PRKAA1         | 5.02201   | 5.22091   | 0.0560385   | 0.952978   |
| WDR16          | 0.105574  | 0.0279662 | -1.9165     | 1          |
| CAMK2G         | 5.52084   | 6.11824   | 0.148227    | 0.835568   |
| DDAH1          | 19.833    | 19.1231   | -0.0525861  | 0.953524   |
| EPS8L1         | 8.61347   | 9.13878   | 0.085407    | 0.938335   |
| ITGAV          | 2.13728   | 2.04377   | -0.0645443  | 0.950251   |
| C1orf204,VSIG8 | 0.0288769 | 0.0227567 | -0.343624   | 1          |

|           |           |           |            |            |
|-----------|-----------|-----------|------------|------------|
| ITM2B     | 46.8343   | 36.0062   | -0.379319  | 0.238328   |
| SMYD5     | 21.3913   | 28.43     | 0.410387   | 0.202725   |
| LINC00482 | 0.0611507 | 0.0176713 | -1.79096   | 1          |
| LHX3      | 0.40132   | 0.204124  | -0.975308  | 0.392586   |
| ASGR1     | 14.8839   | 7.1127    | -1.06528   | 0.00153868 |
| USP40     | 3.48991   | 2.62412   | -0.411354  | 0.287782   |
| PGM5-AS1  | 0.174365  | 0.123375  | -0.499058  | 1          |
| CHCHD7    | 18.7185   | 27.0565   | 0.53151    | 0.0605998  |
| ZFAND6    | 26.3743   | 21.9801   | -0.262938  | 0.532767   |
| F11R      | 4.76745   | 3.85344   | -0.307071  | 0.468557   |
| STOX1     | 2.54699   | 1.76862   | -0.526173  | 0.558755   |
| MAP2      | 0.0743405 | 0.030734  | -1.27431   | 1          |
| C6orf120  | 5.97315   | 5.79521   | -0.0436319 | 0.977897   |
| GLT8D1    | 14.6429   | 13.5612   | -0.110719  | 0.975928   |
| HOXC10    | 6.80166   | 5.53237   | -0.297989  | 0.604499   |
| BIRC5     | 36.8897   | 59.2687   | 0.684051   | 0.0111246  |
| SLC39A9   | 12.3449   | 12.5514   | 0.023943   | 0.983971   |
| ETFDH     | 2.82276   | 3.14092   | 0.154081   | 0.862733   |
| FBXW5     | 136.83    | 163.496   | 0.256869   | 0.535826   |
| ZNF644    | 6.60303   | 6.43812   | -0.0364875 | 0.975492   |
| S100A6    | 2406.39   | 2922.56   | 0.28036    | 0.510787   |
| NDC80     | 9.43282   | 6.78575   | -0.475181  | 0.15329    |
| POLQ      | 0.591366  | 0.743993  | 0.331237   | 0.552635   |
| NHLRC3    | 2.82188   | 1.74381   | -0.694413  | 0.0442243  |
| ACVR2B    | 1.22011   | 0.964266  | -0.339511  | 0.465909   |
| ARV1      | 6.40895   | 5.95167   | -0.106793  | 0.911712   |
| ZBTB39    | 1.64044   | 1.49635   | -0.132633  | 0.878705   |
| ECT2      | 9.54774   | 10.6822   | 0.161972   | 0.774294   |
| TNKS1BP1  | 11.0307   | 10.1497   | -0.120099  | 0.860719   |
| KAT7      | 8.76782   | 5.97044   | -0.554381  | 0.0605998  |
| PGPEP1    | 6.89173   | 3.84481   | -0.841955  | 0.00153868 |
| FAM104A   | 12.9544   | 12.8135   | -0.0157875 | 0.991167   |
| MURC      | 0.167254  | 0.249952  | 0.579608   | 1          |
| RIOK3     | 10.2105   | 4.43343   | -1.20356   | 0.00153868 |
| TATDN2    | 7.40639   | 12.3185   | 0.733987   | 0.00478151 |
| NIF3L1    | 18.1326   | 19.5097   | 0.105605   | 0.894373   |
| SOCS6     | 2.12053   | 1.92256   | -0.141401  | 0.853105   |
| MED21     | 5.09325   | 4.66226   | -0.127559  | 0.872321   |
| LOC550112 | 6.03469   | 3.0068    | -1.00505   | 0.00153868 |
| PRKRIR    | 10.9749   | 14.1865   | 0.370315   | 0.274831   |
| METTL2B   | 6.20773   | 7.62811   | 0.297258   | 0.527001   |
| CASP8AP2  | 0.483715  | 0.667546  | 0.464708   | 0.346798   |
| POLR2A    | 10.8425   | 15.6703   | 0.531341   | 0.0515699  |
| COX7A2    | 256.904   | 285.501   | 0.152266   | 0.789353   |
| CCNT1     | 3.94909   | 4.44246   | 0.169839   | 0.773721   |
| GRK4      | 0.537843  | 0.333178  | -0.690892  | 0.408319   |
| TPR       | 4.81704   | 4.8429    | 0.00772396 | 0.995209   |
| WDR3      | 11.9695   | 18.603    | 0.636176   | 0.0123712  |
| FBXW4     | 22.8759   | 13.894    | -0.71937   | 0.00739414 |

|               |           |           |            |            |
|---------------|-----------|-----------|------------|------------|
| HEATR1        | 5.88684   | 7.44167   | 0.338133   | 0.501582   |
| BGLAP,PMF1,PM | 41.9779   | 43.4236   | 0.0488487  | 0.959716   |
| NDUFA5        | 31.8265   | 29.3972   | -0.114548  | 0.864901   |
| FAM122C       | 0.646282  | 0.181333  | -1.83352   | 0.244537   |
| EDC4          | 14.4275   | 17.6191   | 0.288324   | 0.46089    |
| TERF2         | 10.7918   | 9.6984    | -0.154111  | 0.804526   |
| PMS2P5        | 3.08047   | 2.2991    | -0.422079  | 0.538451   |
| COPS6         | 156.834   | 184.074   | 0.231047   | 0.607733   |
| LRRC8E        | 15.5422   | 15.8466   | 0.027986   | 0.977897   |
| KIF14         | 1.20912   | 1.35829   | 0.167834   | 0.818403   |
| CCDC25        | 11.8186   | 10.0415   | -0.235078  | 0.60666    |
| SACS          | 0.767828  | 1.27947   | 0.73669    | 0.00739414 |
| SLC22A1       | 0.0700618 | 0.116507  | 0.733718   | 1          |
| MEIS3         | 57.4272   | 41.3603   | -0.473486  | 0.0999674  |
| FKBP8         | 266.138   | 241.44    | -0.140514  | 0.818547   |
| PCBP1         | 188.682   | 257.795   | 0.450266   | 0.136495   |
| RABGAP1       | 4.41453   | 4.28784   | -0.0420085 | 0.968157   |
| LDHB          | 817.287   | 898.684   | 0.136972   | 0.83928    |
| BEND3P3       | 0.0186678 | 0.0157352 | -0.246552  | 1          |
| NONO          | 157.52    | 141.244   | -0.157344  | 0.838861   |
| TRMT5         | 4.67511   | 5.02271   | 0.103466   | 0.893895   |
| TRIM28        | 181.277   | 311.825   | 0.78254    | 0.00380811 |
| RPS15         | 4962.9    | 5333.08   | 0.103787   | 0.890133   |
| FAM131A       | 17.0202   | 9.22041   | -0.884349  | 0.0259174  |
| HOXC11        | 5.9764    | 6.94587   | 0.216878   | 0.773159   |
| TMEM50B       | 7.50701   | 9.56265   | 0.349173   | 0.754065   |
| SLC16A4       | 0.0765087 | 0.0962992 | 0.3319     | 1          |
| ZMYND10       | 0.743778  | 1.42725   | 0.9403     | 0.109539   |
| CSNK1E        | 68.6295   | 63.0084   | -0.123286  | 0.847739   |
| INTS2         | 1.77253   | 1.52299   | -0.2189    | 0.726104   |
| CBL           | 3.07525   | 2.89442   | -0.0874306 | 0.91609    |
| ZNF511        | 31.0677   | 35.9002   | 0.208578   | 0.883974   |
| GABARAP       | 342.27    | 250.099   | -0.452634  | 0.130345   |
| NRIP1         | 0.502831  | 0.419583  | -0.261118  | 0.739517   |
| DDT           | 254.256   | 267.54    | 0.0734751  | 0.933523   |
| CBX7          | 10.3509   | 6.55698   | -0.658654  | 0.0192959  |
| FPGT,FPGT-TNN | 1.46371   | 1.1756    | -0.316226  | 0.572361   |
| FAM49B        | 21.0776   | 26.7889   | 0.345929   | 0.303774   |
| TRIM36        | 2.16133   | 1.74275   | -0.310558  | 0.532767   |
| PITPNM1       | 15.0516   | 23.2877   | 0.629653   | 0.0181648  |
| RBM23         | 24.1674   | 35.8928   | 0.570633   | 0.0434002  |
| ABCC10        | 2.18992   | 4.34503   | 0.988485   | 0.00153868 |
| SNAPC1        | 5.75099   | 5.19168   | -0.147608  | 0.835886   |
| ASH1L         | 0.96275   | 1.1007    | 0.193185   | 0.900639   |
| C1orf123      | 27.6214   | 19.5379   | -0.499512  | 0.296679   |
| ITCH          | 4.25241   | 3.77927   | -0.170173  | 0.769834   |
| SLC25A29      | 41.0052   | 36.5786   | -0.164809  | 0.76721    |
| C17orf67      | 1.25656   | 1.74708   | 0.475461   | 0.459236   |
| PAIP1         | 34.2547   | 32.6747   | -0.068126  | 0.936655   |

|               |            |           |            |            |
|---------------|------------|-----------|------------|------------|
| DKFZp779M0652 | 1.10922    | 0.661797  | -0.745085  | 0.611333   |
| FAM203A       | 1.83113    | 3.70489   | 1.0167     | 0.0117316  |
| RAB10         | 26.2713    | 27.8063   | 0.0819241  | 0.91609    |
| PTCD3         | 10.7112    | 10.0876   | -0.0865435 | 0.908661   |
| IL17RC        | 15.2922    | 8.90223   | -0.780556  | 0.0103919  |
| ECSIT,ZNF653  | 40.0702    | 42.8355   | 0.0962766  | 0.908098   |
| CCT8          | 179.208    | 191.156   | 0.0931124  | 0.901751   |
| GPR125        | 4.96648    | 8.74521   | 0.816269   | 0.00153868 |
| ARID1A        | 4.06305    | 3.84967   | -0.0778281 | 0.930048   |
| POLR1D        | 229.985    | 172.256   | -0.416987  | 0.20933    |
| CEP72         | 7.95501    | 5.82271   | -0.450173  | 0.241813   |
| SEC22C        | 7.82964    | 7.18999   | -0.122956  | 0.951036   |
| NSFL1C        | 19.607     | 26.6556   | 0.443072   | 0.141952   |
| TENC1         | 0.712063   | 0.372927  | -0.933112  | 0.902527   |
| TMEM63C       | 1.28425    | 1.0799    | -0.250036  | 0.737556   |
| CASP6         | 10.2128    | 8.96925   | -0.187316  | 0.775951   |
| MSMP          | 1.76346    | 1.33616   | -0.400315  | 0.845932   |
| ADA           | 21.1869    | 16.3974   | -0.369709  | 0.331994   |
| CETN4P        | 0.171686   | 0.0723374 | -1.24696   | 1          |
| ITPR2         | 0.352187   | 0.294214  | -0.259478  | 1          |
| THOC3         | 17.2732    | 16.2044   | -0.0921455 | 0.913358   |
| FBNP4         | 7.96226    | 9.92247   | 0.317521   | 0.392176   |
| LOC100129138  | 0.0834065  | 0.112056  | 0.425986   | 1          |
| MEGF8         | 1.42687    | 1.82103   | 0.351904   | 0.435678   |
| MANF          | 71.6524    | 135.674   | 0.921062   | 0.00153868 |
| PPP1R11       | 38.8331    | 36.6875   | -0.081998  | 0.91634    |
| DERA          | 16.41      | 9.9541    | -0.721209  | 0.0103919  |
| TAF4          | 4.15077    | 4.48299   | 0.111079   | 0.900642   |
| SUZ12         | 9.49719    | 10.904    | 0.199291   | 0.693923   |
| CDC27         | 6.76135    | 7.53708   | 0.156695   | 0.782703   |
| DNPEP         | 44.7107    | 39.5175   | -0.178128  | 0.736595   |
| RABL2B        | 6.92544    | 8.18629   | 0.241303   | 0.724216   |
| MPPE1         | 8.2043     | 6.02744   | -0.444835  | 0.691588   |
| PLA2G10       | 0.0743991  | 0         | #NAME?     | 1          |
| HAUS3,POLN    | 1.73618    | 1.81359   | 0.0629352  | 0.953159   |
| TANC1         | 1.74715    | 2.14771   | 0.297794   | 0.53682    |
| TRIOBP        | 9.8951     | 9.14881   | -0.113129  | 0.91207    |
| CCDC74A       | 12.4986    | 10.0893   | -0.308935  | 0.924033   |
| C2orf69       | 3.78511    | 4.84649   | 0.356604   | 0.374271   |
| TNKS2         | 3.38933    | 3.07248   | -0.141595  | 0.836427   |
| MKRN2         | 10.2449    | 8.08744   | -0.341146  | 0.744176   |
| C1orf216      | 7.96423    | 16.5205   | 1.05265    | 0.00153868 |
| GVINP1        | 0.00774115 | 0.0101671 | 0.393283   | 1          |
| FPGS          | 124.687    | 136.09    | 0.126251   | 0.843686   |
| PDGFRL        | 4.36716    | 3.45889   | -0.336386  | 0.55213    |
| HADHA         | 90.3589    | 78.7262   | -0.198823  | 0.692701   |
| CTU2          | 18.0012    | 47.5557   | 1.40152    | 0.0181648  |
| ZNF525        | 0.959396   | 1.16241   | 0.276922   | 0.648626   |
| KDM3B         | 7.07688    | 6.73536   | -0.0713592 | 0.934861   |

|          |          |           |            |            |
|----------|----------|-----------|------------|------------|
| SLC16A5  | 6.11899  | 2.41362   | -1.34209   | 0.00153868 |
| MED31    | 8.03052  | 12.1134   | 0.593041   | 0.62768    |
| FAM171A1 | 14.5726  | 16.116    | 0.145232   | 0.8146     |
| MSANTD4  | 3.73108  | 4.10126   | 0.136474   | 0.851768   |
| FAM174B  | 8.0327   | 9.55396   | 0.250214   | 0.628088   |
| MIEN1    | 88.5298  | 110.314   | 0.317377   | 0.398652   |
| PPP6C    | 16.2493  | 17.1559   | 0.078332   | 0.922274   |
| LRRC40   | 3.89998  | 3.61537   | -0.109324  | 0.897319   |
| ASNSD1   | 17.4355  | 22.6987   | 0.38058    | 0.243499   |
| CHSY1    | 3.60121  | 5.47901   | 0.605434   | 0.0475987  |
| ACTB     | 1710.49  | 2593.18   | 0.600313   | 0.0523053  |
| FAM189B  | 60.0117  | 52.0441   | -0.205508  | 0.670511   |
| APOA1BP  | 137.198  | 139.583   | 0.0248571  | 0.979451   |
| DPEP1    | 0.183912 | 0.136761  | -0.427362  | 1          |
| PTCD2    | 2.6487   | 2.00855   | -0.399128  | 0.469232   |
| MRPL19   | 7.51776  | 8.75728   | 0.22018    | 0.637815   |
| LRP5     | 11.3613  | 14.758    | 0.377367   | 0.267401   |
| DNPH1    | 187.778  | 173.062   | -0.117739  | 0.863898   |
| MED30    | 32.24    | 22.3543   | -0.528302  | 0.0995082  |
| TSGA10   | 0.152224 | 0.0788138 | -0.949674  | 1          |
| STAT2    | 5.79824  | 4.35771   | -0.412044  | 0.226511   |
| MYD88    | 13.0324  | 20.5421   | 0.656482   | 0.0123712  |
| DYNLRB1  | 164.722  | 179.355   | 0.122783   | 0.854032   |
| BAI2     | 3.10605  | 3.26743   | 0.0730751  | 0.946883   |
| ETHE1    | 134.585  | 115.021   | -0.226615  | 0.612808   |
| SLC5A10  | 0.669153 | 0.433347  | -0.626812  | 0.890207   |
| PICK1    | 15.4842  | 14.4302   | -0.101704  | 0.898731   |
| C2CD2    | 27.2603  | 31.9552   | 0.229246   | 0.605249   |
| EFNB1    | 8.05755  | 10.3895   | 0.366712   | 0.355674   |
| CABLES2  | 1.51206  | 2.98336   | 0.980423   | 0.00659556 |
| TRMT61B  | 9.2167   | 9.66226   | 0.0681105  | 0.944099   |
| PAPOLA   | 22.5925  | 30.6883   | 0.441843   | 0.15861    |
| MAD2L1   | 46.7952  | 56.4341   | 0.270205   | 0.506593   |
| RAF1     | 18.376   | 24.5749   | 0.419362   | 0.282517   |
| ALS2     | 3.80578  | 3.83705   | 0.011805   | 0.994068   |
| P DPR    | 1.83781  | 1.78356   | -0.0432292 | 0.969087   |
| MAST1    | 5.02141  | 3.16545   | -0.66568   | 0.0515699  |
| SETX     | 4.05808  | 5.41682   | 0.416648   | 0.183406   |
| DGCR6L   | 75.0854  | 81.866    | 0.124732   | 0.848653   |
| PLEKHM3  | 0.355996 | 0.18774   | -0.923129  | 1          |
| CSTB     | 258.918  | 305.18    | 0.237163   | 0.593786   |
| SUSD1    | 4.94982  | 4.97985   | 0.0087252  | 0.997552   |
| METTL2A  | 9.58542  | 10.961    | 0.193462   | 0.725976   |
| FBL      | 529.786  | 623.066   | 0.233976   | 0.608211   |
| FNDC3A   | 4.68486  | 3.46571   | -0.434858  | 0.176195   |
| CCHCR1   | 9.56757  | 6.15448   | -0.636517  | 0.0500215  |
| KIAA0100 | 14.6692  | 20.1993   | 0.461512   | 0.118625   |
| NANS     | 114.801  | 152.573   | 0.41037    | 0.32908    |
| FLRT1    | 0.114463 | 0.300266  | 1.39137    | 1          |

|              |            |            |              |            |
|--------------|------------|------------|--------------|------------|
| SNORA40      | 26.6958    | 16.9478    | -0.655518    | 0.7935     |
| TACC3        | 36.5978    | 49.582     | 0.438059     | 0.155609   |
| TRAK1        | 3.63167    | 2.86739    | -0.340894    | 0.435778   |
| STRN         | 0.915459   | 0.776946   | -0.23668     | 0.673759   |
| PABPC4       | 114.921    | 114.878    | -0.000546641 | 0.999234   |
| C5orf55      | 3.1842     | 2.82426    | -0.173055    | 0.872122   |
| TRIM22       | 0.105366   | 0.106019   | 0.00892017   | 1          |
| ARHGAP44     | 2.68542    | 2.55806    | -0.0700972   | 0.987078   |
| PRC1         | 17.0237    | 17.8009    | 0.0644028    | 0.946416   |
| GNB1         | 97.2305    | 98.7868    | 0.0229091    | 0.981441   |
| C11orf95     | 5.07702    | 5.98896    | 0.238324     | 0.648087   |
| ACAD8        | 14.1314    | 18.8143    | 0.412929     | 0.21812    |
| DNAH14       | 4.09916    | 4.36656    | 0.0911704    | 0.951036   |
| CCDC132      | 2.23826    | 2.40466    | 0.103452     | 0.905305   |
| MRAP2        | 1.2872     | 0.816474   | -0.656753    | 0.23128    |
| TMEM59       | 67.0011    | 47.4425    | -0.498006    | 0.077894   |
| EIF2B4       | 28.4046    | 41.404     | 0.543649     | 0.0500215  |
| HLF          | 0.0434389  | 0.0815624  | 0.908915     | 1          |
| COX5B        | 463.348    | 435.96     | -0.0878998   | 0.907121   |
| SRP9         | 117.198    | 122.99     | 0.0695911    | 0.935829   |
| MAST3        | 3.30642    | 4.81475    | 0.542189     | 0.112565   |
| ABL1         | 40.0107    | 40.0398    | 0.0010482    | 0.999234   |
| ERICH1       | 9.61827    | 12.9688    | 0.431191     | 0.233004   |
| UTP20        | 1.60019    | 4.10909    | 1.36057      | 0.00153868 |
| ARHGAP17     | 9.37006    | 11.4402    | 0.28798      | 0.490815   |
| SEC23IP      | 2.80939    | 4.39751    | 0.646429     | 0.0215444  |
| CASP2        | 11.2339    | 15.936     | 0.504433     | 0.0705331  |
| SLC25A16     | 2.552      | 3.01629    | 0.241145     | 0.735312   |
| SIRT7        | 20.4425    | 24.7606    | 0.276475     | 0.54424    |
| UBL4A        | 24.6642    | 37.2383    | 0.594367     | 0.0290262  |
| TMED8        | 0.243823   | 0.156264   | -0.641843    | 1          |
| CAMK1        | 31.8679    | 28.017     | -0.1858      | 0.802771   |
| AGGF1        | 4.07037    | 3.97701    | -0.0334742   | 0.975484   |
| LOC100129961 | 0.219922   | 0.224778   | 0.0315105    | 1          |
| RSF1         | 2.01945    | 1.51416    | -0.415445    | 0.316689   |
| LMBR1L       | 9.68574    | 6.24904    | -0.632228    | 0.0515699  |
| RNF185       | 19.2162    | 11.9864    | -0.680918    | 0.00970147 |
| LOC144486    | 0.140751   | 0.167851   | 0.254036     | 1          |
| DMBX1        | 1.37481    | 0.859769   | -0.67721     | 0.249373   |
| EXOC3        | 13.1304    | 12.0938    | -0.118633    | 0.868975   |
| PALLD        | 5.29631    | 3.86975    | -0.452749    | 0.177395   |
| DLEC1        | 0.00616383 | 0.00380822 | -0.69471     | 1          |
| ZUFSP        | 5.31046    | 5.55029    | 0.0637272    | 0.952184   |
| ADPRM        | 6.68702    | 3.56862    | -0.905998    | 0.00478151 |
| SLC7A6OS     | 11.5062    | 17.0784    | 0.569761     | 0.430137   |
| CALM2        | 265.147    | 314.459    | 0.24608      | 0.570316   |
| TMSB4X       | 227.71     | 254.587    | 0.160963     | 0.773016   |
| PICALM       | 22.0338    | 19.1823    | -0.199945    | 0.688092   |
| RSL1D1       | 69.4474    | 72.3203    | 0.0584801    | 0.948152   |



|                 |           |           |            |            |
|-----------------|-----------|-----------|------------|------------|
| MESP1           | 31.664    | 46.9379   | 0.567911   | 0.0976116  |
| SLBP            | 45.0912   | 62.6933   | 0.475466   | 0.0981523  |
| C1orf151-NBL1,M | 95.8039   | 119.159   | 0.314734   | 0.436665   |
| DHDDS           | 6.71594   | 8.04496   | 0.260496   | 0.578315   |
| USO1            | 9.37803   | 7.88599   | -0.249993  | 0.559892   |
| MAPK9           | 10.0417   | 15.8461   | 0.658123   | 0.0111246  |
| EIF2AK4         | 7.90091   | 7.22752   | -0.128518  | 0.846427   |
| ACSL3           | 9.90212   | 11.4664   | 0.211603   | 0.663013   |
| AKAP8           | 10.8344   | 14.1343   | 0.383589   | 0.26241    |
| ZDHHC1          | 4.13007   | 1.75414   | -1.2354    | 0.00380811 |
| TUBGCP2         | 21.2654   | 19.7115   | -0.109466  | 0.905172   |
| LOC541471       | 395.42    | 346.542   | -0.190355  | 0.703945   |
| PLK4            | 4.08675   | 4.02675   | -0.0213358 | 0.984327   |
| ARHGAP10        | 4.46345   | 4.85031   | 0.119919   | 0.879055   |
| UQCRH           | 880.852   | 931.039   | 0.0799416  | 0.921636   |
| BRD1            | 5.50105   | 5.81752   | 0.0806954  | 0.930466   |
| TCEA3           | 0.0529271 | 0.0376938 | -0.489679  | 1          |
| POLR2J3         | 2.59867   | 2.22868   | -0.221585  | 0.831535   |
| RARG            | 10.2648   | 14.6638   | 0.514556   | 0.114327   |
| GSTO2           | 37.4069   | 21.3764   | -0.807282  | 0.00572929 |
| NEU1            | 77.5386   | 54.9142   | -0.497734  | 0.0795709  |
| ZRANB2          | 13.893    | 19.9255   | 0.520258   | 0.0691625  |
| KNTC1           | 1.66228   | 0.865445  | -0.941648  | 0.00380811 |
| NFKBIL1         | 37.5572   | 14.7181   | -1.3515    | 0.00153868 |
| RDM1            | 1.79394   | 0.719263  | -1.31854   | 0.0187307  |
| SNX17           | 41.6928   | 48.2839   | 0.211746   | 0.726583   |
| VASH1           | 2.23503   | 2.59665   | 0.216356   | 0.731091   |
| BRCA2           | 0.147025  | 0.133776  | -0.136248  | 1          |
| MYO5C           | 0.602662  | 0.362012  | -0.735311  | 0.115592   |
| NUP205          | 15.6459   | 13.7638   | -0.184911  | 0.716797   |
| COQ9            | 28.934    | 23.4728   | -0.301776  | 0.736178   |
| RDH11           | 16.0801   | 15.6914   | -0.0353024 | 0.972748   |
| RBFOX2          | 16.2498   | 9.81641   | -0.727157  | 0.00572929 |
| TMEM143         | 3.58643   | 2.04495   | -0.810484  | 0.0637721  |
| ZNF140          | 6.89093   | 7.29783   | 0.0827687  | 0.92475    |
| EVI5            | 1.60658   | 1.74885   | 0.122417   | 0.875961   |
| ACO2            | 21.4994   | 18.8332   | -0.191021  | 0.883876   |
| SETD7           | 6.3526    | 7.56316   | 0.251641   | 0.549349   |
| AGO1            | 3.1472    | 4.12766   | 0.391255   | 0.264777   |
| SP2             | 4.42924   | 3.67056   | -0.27106   | 0.635064   |
| ATP2A1          | 1.09985   | 0.821912  | -0.420255  | 0.920464   |
| SH3GLB2         | 135.196   | 98.5761   | -0.455744  | 0.136495   |
| LIG3            | 5.4222    | 5.92936   | 0.128999   | 0.860871   |
| RNF216          | 9.07157   | 11.1285   | 0.294829   | 0.44013    |
| SSR4            | 435.461   | 464.355   | 0.0926832  | 0.923579   |
| DKKL1           | 0.605684  | 0.490374  | -0.304682  | 0.872122   |
| UBR7            | 9.26233   | 10.4792   | 0.178079   | 0.804859   |
| AP2B1           | 42.8665   | 35.305    | -0.27998   | 0.472446   |
| SLC35E3         | 5.43678   | 3.1941    | -0.76734   | 0.0232503  |

|                |           |           |            |            |
|----------------|-----------|-----------|------------|------------|
| BIRC3          | 0.457992  | 1.31818   | 1.52515    | 0.00153868 |
| RMND1          | 30.2153   | 18.4153   | -0.714375  | 0.00572929 |
| SUFU           | 3.88436   | 4.64262   | 0.25726    | 0.659662   |
| PIK3R3         | 0.93037   | 1.49629   | 0.685511   | 0.068345   |
| CKLF,CKLF-CMT1 | 55.4742   | 49.5647   | -0.162503  | 0.787439   |
| FSCN1          | 157.385   | 169.38    | 0.105969   | 0.879418   |
| SEC22A         | 4.07197   | 3.45952   | -0.235154  | 0.678596   |
| CCNE2          | 3.44785   | 5.39383   | 0.645614   | 0.473572   |
| FAT2           | 0.0121033 | 0.0159458 | 0.397772   | 1          |
| FHOD1          | 8.9944    | 17.0047   | 0.918831   | 0.00153868 |
| CABYR          | 0.584956  | 0.725488  | 0.310624   | 0.82411    |
| MED7           | 8.16292   | 6.96685   | -0.228579  | 0.737085   |
| ADSS           | 10.1303   | 12.5246   | 0.306087   | 0.437301   |
| RGS10          | 157.188   | 123.453   | -0.348526  | 0.297533   |
| RANBP3         | 22.1172   | 34.9758   | 0.66119    | 0.0150346  |
| IGF1R          | 2.06777   | 1.67265   | -0.30594   | 0.481869   |
| TFAP2E         | 3.67493   | 6.61823   | 0.848727   | 0.0204286  |
| ZNF746         | 11.9331   | 12.5491   | 0.0726056  | 0.934331   |
| SCD5           | 13.1942   | 13.274    | 0.00869537 | 0.994204   |
| HPDL           | 12.6346   | 29.7219   | 1.23414    | 0.00153868 |
| DNAJC17        | 17.002    | 19.3129   | 0.183861   | 0.890882   |
| NIT2           | 64.4891   | 47.8323   | -0.431069  | 0.161007   |
| SLC22A18       | 13.7929   | 6.79304   | -1.0218    | 0.00274688 |
| ACAA2          | 32.1019   | 17.8681   | -0.845271  | 0.00153868 |
| SENP8          | 1.55786   | 0.717803  | -1.1179    | 0.194085   |
| LEO1           | 7.42783   | 10.429    | 0.489587   | 0.114327   |
| SPA17          | 7.35146   | 5.85128   | -0.329279  | 0.898747   |
| RAB5A          | 13.6199   | 10.8536   | -0.327545  | 0.373268   |
| GCNT1          | 0.975159  | 1.01749   | 0.0613078  | 0.960032   |
| MEX3C          | 6.08708   | 4.52236   | -0.428674  | 0.221797   |
| MYO18A,TIAF1   | 9.63455   | 8.77386   | -0.135006  | 0.872797   |
| ARHGEF3        | 1.28761   | 1.21774   | -0.0804964 | 0.948999   |
| CAPN3          | 1.96736   | 1.19708   | -0.71674   | 0.221358   |
| RNF11          | 16.442    | 14.1841   | -0.213109  | 0.656753   |
| LOC100288069   | 0.923286  | 0.60677   | -0.605629  | 0.518305   |
| NEK7           | 2.99051   | 2.4923    | -0.262917  | 0.628907   |
| PLCB4          | 0.578274  | 0.425722  | -0.441842  | 0.455427   |
| PABPC1         | 918.762   | 731.852   | -0.328139  | 0.420597   |
| SCMH1          | 12.4251   | 11.5727   | -0.102534  | 0.898731   |
| B4GALT6        | 3.46505   | 2.17498   | -0.671877  | 0.0304296  |
| HYAL2          | 19.0354   | 38.3852   | 1.01186    | 0.00153868 |
| TMEM177        | 33.8257   | 48.3397   | 0.515087   | 0.0705331  |
| C22orf23       | 4.41193   | 4.3658    | -0.0151647 | 0.997552   |
| WDR19          | 2.67336   | 1.47906   | -0.853972  | 0.00970147 |
| LSM14A         | 25.9687   | 25.1434   | -0.0465958 | 0.960032   |
| NUDT8          | 42.5982   | 43.4329   | 0.0279943  | 0.98003    |
| FAM109B        | 2.98108   | 3.87739   | 0.379254   | 0.49983    |
| SLC25A37       | 25.8181   | 25.2831   | -0.0302104 | 0.976572   |
| LAP3           | 26.2114   | 32.5715   | 0.313416   | 0.384397   |

|               |            |            |            |            |
|---------------|------------|------------|------------|------------|
| GNPTAB        | 2.53204    | 2.90261    | 0.197049   | 0.7419     |
| PTPRN2        | 2.26896    | 2.69537    | 0.248455   | 0.704283   |
| RIOK1         | 12.7965    | 21.0291    | 0.716638   | 0.00739414 |
| PDP2          | 2.19217    | 4.04197    | 0.882696   | 0.00380811 |
| CAPN1         | 88.4186    | 77.0027    | -0.19944   | 0.691166   |
| PPP4R1        | 8.47085    | 11.5584    | 0.448361   | 0.152079   |
| RIC8B         | 1.51858    | 2.23222    | 0.55576    | 0.250244   |
| SLC24A4       | 0.00462845 | 0.00244107 | -0.923017  | 1          |
| CALCOCO1      | 9.08043    | 4.10785    | -1.14438   | 0.00153868 |
| RBM34         | 25.5755    | 24.6255    | -0.0546098 | 0.952184   |
| LOC440028     | 1.78046    | 0.263121   | -2.75845   | 0.142786   |
| TSNARE1       | 5.32908    | 2.86355    | -0.896079  | 0.0285456  |
| RPRD1B        | 6.23608    | 6.66903    | 0.0968383  | 0.900639   |
| GNPDA1        | 98.8835    | 64.6336    | -0.613446  | 0.020985   |
| RCHY1         | 5.64856    | 4.65437    | -0.279295  | 0.506239   |
| COX16,SYNJ2BP | 30.7923    | 41.9244    | 0.445223   | 0.167611   |
| ZYX           | 326.766    | 312.972    | -0.0622272 | 0.945208   |
| C11orf84      | 42.6918    | 76.207     | 0.835963   | 0.00153868 |
| CHMP5         | 33.2089    | 22.1642    | -0.583338  | 0.0259174  |
| CREBBP        | 3.14545    | 2.87999    | -0.127199  | 0.861472   |
| RAD17         | 7.49289    | 6.90483    | -0.117918  | 0.967343   |
| TTF1          | 8.51046    | 9.67264    | 0.184672   | 0.765267   |
| MUSTN1,TMEM1  | 5.34552    | 8.34512    | 0.642602   | 0.118625   |
| PLXND1        | 8.13394    | 9.05581    | 0.15489    | 0.78932    |
| ARHGAP27      | 6.49406    | 6.01885    | -0.109632  | 0.895596   |
| PTPRB         | 0.00737294 | 0.00314154 | -1.23077   | 1          |
| CDK20         | 8.11326    | 9.62127    | 0.245947   | 0.648569   |
| TMEM5         | 9.79524    | 13.8221    | 0.496826   | 0.150143   |
| C11orf57      | 9.4431     | 9.12129    | -0.0500221 | 0.975043   |
| JPX           | 3.11334    | 3.28093    | 0.0756427  | 0.955413   |
| XPNPEP1       | 30.4334    | 25.8445    | -0.235794  | 0.608336   |
| BRI3BP        | 13.5471    | 27.7332    | 1.03363    | 0.00153868 |
| SHANK1        | 5.1563     | 4.92934    | -0.0649414 | 0.949726   |
| IL22RA1       | 0.408023   | 0.144585   | -1.49673   | 0.0689012  |
| RHOG          | 53.4732    | 71.3399    | 0.415892   | 0.185432   |
| RAB11A        | 22.7687    | 20.0571    | -0.182938  | 0.722833   |
| CRYM          | 0.837455   | 0.899938   | 0.103815   | 0.96692    |
| NUDT7         | 4.07306    | 1.79345    | -1.18337   | 0.0111246  |
| NAV1          | 1.4498     | 1.37677    | -0.074566  | 0.939068   |
| CISD2         | 6.39311    | 6.41386    | 0.00467345 | 0.997314   |
| CLASRP        | 18.3782    | 18.1856    | -0.0151966 | 0.990667   |
| RPP14         | 5.76204    | 7.04865    | 0.290767   | 0.505417   |
| DHODH         | 6.8712     | 7.41841    | 0.110547   | 0.89536    |
| HOXA5         | 8.68633    | 9.66281    | 0.153695   | 0.926279   |
| MRPL30        | 16.8533    | 16.2683    | -0.0509658 | 0.955832   |
| TBC1D15       | 5.46005    | 3.30517    | -0.72419   | 0.00572929 |
| NDUFS5        | 357.849    | 459.978    | 0.362212   | 0.28349    |
| SORBS3        | 101.084    | 85.7972    | -0.236556  | 0.593786   |
| DGCR2         | 16.5667    | 18.4248    | 0.153362   | 0.795289   |

|               |           |            |            |            |
|---------------|-----------|------------|------------|------------|
| UPF3A         | 14.2556   | 13.7126    | -0.0560274 | 0.952978   |
| INO80B,WBP1   | 70.4624   | 54.2142    | -0.378182  | 0.28912    |
| ARID5B        | 0.212372  | 0.0518296  | -2.03474   | 1          |
| LOC100505912  | 0.216669  | 0.228932   | 0.0794298  | 1          |
| PPP1R3B       | 15.5367   | 6.16069    | -1.33451   | 0.00153868 |
| RBKS          | 2.5968    | 1.41614    | -0.874765  | 0.729421   |
| TBL2          | 19.2427   | 21.2778    | 0.145042   | 0.809368   |
| MOCS2         | 16.3396   | 24.2368    | 0.568828   | 0.0420136  |
| HEMK1         | 5.05774   | 3.03194    | -0.738252  | 0.0370145  |
| DCTN1         | 31.1861   | 30.8455    | -0.015845  | 0.988114   |
| GPCPD1        | 3.00591   | 1.66533    | -0.851991  | 0.00572929 |
| MPP3          | 5.51766   | 6.61643    | 0.261997   | 0.612247   |
| NOL8          | 6.54226   | 6.98473    | 0.0944164  | 0.951036   |
| FEZ1          | 0.0713456 | 0.0277565  | -1.362     | 1          |
| TTC23         | 3.14039   | 2.49843    | -0.329921  | 0.509743   |
| TXNRD3,TXNRD3 | 3.60515   | 3.47517    | -0.0529765 | 0.963969   |
| LOC100507564  | 0.176895  | 0.00975906 | -4.18001   | 1          |
| HOXB3         | 3.52512   | 3.90844    | 0.14892    | 0.854216   |
| COLQ          | 0.487202  | 0.706007   | 0.535164   | 0.460263   |
| PPP3R1        | 12.2137   | 14.7744    | 0.274601   | 0.491398   |
| PCDHB14       | 2.87959   | 2.05226    | -0.488646  | 0.31071    |
| EEA1          | 1.04766   | 1.28314    | 0.292504   | 0.568282   |
| GMPS          | 42.0699   | 36.7034    | -0.196872  | 0.691843   |
| SLC25A3       | 472.491   | 503.869    | 0.0927622  | 0.906633   |
| SCML1         | 2.96433   | 3.17239    | 0.0978644  | 0.924931   |
| GABPA         | 2.93875   | 2.74054    | -0.100742  | 0.971088   |
| NPW           | 0.402899  | 0.394495   | -0.0304115 | 0.994204   |
| CTPS2         | 3.8476    | 2.21391    | -0.79736   | 0.0111246  |
| PTMA          | 1047.71   | 1488.54    | 0.506665   | 0.0894386  |
| H3F3A         | 393.825   | 482.96     | 0.294349   | 0.453612   |
| NRADDP        | 0.094491  | 0.128794   | 0.446819   | 1          |
| ZNF687        | 7.17161   | 4.96155    | -0.531504  | 0.508906   |
| FGFR2         | 0.972541  | 0.655155   | -0.569924  | 0.259419   |
| MED18         | 11.2105   | 12.4786    | 0.154606   | 0.820912   |
| PDIA3         | 102.837   | 126.888    | 0.303198   | 0.689613   |
| FADD          | 29.6914   | 40.7475    | 0.456665   | 0.133324   |
| RNF4          | 16.8857   | 24.7985    | 0.554451   | 0.0434002  |
| MT1L          | 1057.12   | 1211.49    | 0.196645   | 0.700133   |
| CTTN          | 72.1088   | 89.9391    | 0.318773   | 0.380319   |
| FAM177A1      | 4.5651    | 5.50343    | 0.269684   | 0.572361   |
| NTMT1         | 131.543   | 159.642    | 0.279305   | 0.775384   |
| UBE2L6        | 27.3956   | 25.0209    | -0.130812  | 0.852718   |
| AHCYL1        | 22.8077   | 20.0933    | -0.182804  | 0.727839   |
| CRHR1         | 7.31541   | 7.52035    | 0.0398609  | 0.975928   |
| HOTAIR        | 0.611293  | 0.294928   | -1.0515    | 0.511505   |
| FAM35A        | 4.15978   | 5.71948    | 0.459376   | 0.19024    |
| ZBED4         | 3.85733   | 3.75006    | -0.0406873 | 0.968919   |
| CALM1         | 39.2367   | 68.7817    | 0.809823   | 0.00153868 |
| KIAA1211L     | 0.238568  | 0.186421   | -0.355837  | 1          |

|                |           |           |            |            |
|----------------|-----------|-----------|------------|------------|
| ZMAT2          | 33.8389   | 43.5887   | 0.36527    | 0.274733   |
| AQR            | 4.30815   | 4.34486   | 0.0122392  | 0.992298   |
| TTC19          | 22.7429   | 19.6918   | -0.207819  | 0.708212   |
| CECR6          | 0.43986   | 0.477138  | 0.11736    | 0.943284   |
| ENHO           | 15.3336   | 15.0281   | -0.0290359 | 0.981441   |
| JUND           | 112.107   | 104.599   | -0.100006  | 0.886331   |
| ATP5G3         | 63.1801   | 90.1003   | 0.512062   | 0.0748376  |
| ARRDC3-AS1     | 0.103323  | 0.0754464 | -0.453643  | 1          |
| TRIT1          | 15.1883   | 14.5797   | -0.0589994 | 0.948536   |
| BLVRB          | 160.265   | 129.668   | -0.305634  | 0.416627   |
| NUMA1          | 17.6624   | 11.7666   | -0.585989  | 0.28912    |
| CAPS           | 2.1969    | 0.760665  | -1.53014   | 0.721923   |
| SDHD           | 53.8461   | 47.7055   | -0.174687  | 0.742045   |
| PTPN21         | 1.32815   | 1.1722    | -0.180208  | 0.821693   |
| HELLS          | 3.30637   | 6.0643    | 0.875091   | 0.00153868 |
| YY1            | 16.9654   | 23.4219   | 0.465263   | 0.128687   |
| DNAAF3         | 26.7192   | 35.804    | 0.422242   | 0.186334   |
| ZNF468         | 2.10941   | 2.03697   | -0.0504157 | 0.964843   |
| TBC1D10A       | 13.6022   | 13.1808   | -0.0454008 | 0.967226   |
| DLG5           | 4.28812   | 5.70995   | 0.413134   | 0.223482   |
| C9orf172       | 0.906926  | 1.40397   | 0.63046    | 0.522524   |
| BUB1B,PAK6     | 15.8789   | 20.6173   | 0.376743   | 0.294282   |
| ZNF516         | 2.39465   | 1.54667   | -0.630651  | 0.0541611  |
| MRPL39         | 47.6171   | 43.9452   | -0.115776  | 0.868076   |
| NUDCD2         | 38.2412   | 36.5819   | -0.0639961 | 0.945416   |
| ACTRT3         | 1.08895   | 1.60048   | 0.555569   | 0.352954   |
| CLDN14         | 0.0411154 | 0         | #NAME?     | 1          |
| WDR89          | 3.15892   | 4.07624   | 0.36781    | 0.376726   |
| COMMD8         | 9.92126   | 9.77159   | -0.0219294 | 0.983664   |
| RNF5           | 66.4681   | 44.1473   | -0.590337  | 0.0308509  |
| RNF114         | 31.1191   | 22.9645   | -0.438394  | 0.164978   |
| ISCA2          | 28.4612   | 22.8358   | -0.317701  | 0.430137   |
| FASTKD2        | 5.40152   | 6.76997   | 0.325784   | 0.376356   |
| KPNA1          | 5.65218   | 8.85973   | 0.648454   | 0.0103919  |
| ABCG4          | 1.35777   | 2.46564   | 0.860726   | 0.0232503  |
| SLC6A8         | 60.59     | 61.2712   | 0.01613    | 0.987759   |
| LINC00476      | 4.17277   | 3.24979   | -0.360655  | 0.770254   |
| PRR11          | 6.0102    | 4.10004   | -0.551776  | 0.0588451  |
| ODF2           | 20.3511   | 18.8562   | -0.110065  | 0.878806   |
| HSD3B7         | 32.2737   | 35.6526   | 0.143648   | 0.821371   |
| KARS           | 75.0427   | 70.7928   | -0.0841082 | 0.912308   |
| CORO1A         | 18.7247   | 19.4997   | 0.0585075  | 0.953159   |
| TTYH3          | 20.3216   | 19.7912   | -0.0381537 | 0.968712   |
| CSRP2BP,PET11' | 17.0156   | 21.2292   | 0.319196   | 0.502162   |
| PDE8A          | 4.95012   | 4.7984    | -0.0449093 | 0.967296   |
| CCDC125        | 2.09886   | 1.01043   | -1.05464   | 0.00153868 |
| C12orf66       | 1.06303   | 0.848953  | -0.324418  | 0.700039   |
| CAMTA1         | 56.5553   | 54.8777   | -0.0434415 | 0.96715    |
| HSD17B1        | 29.4306   | 31.6197   | 0.103508   | 0.884911   |

|            |           |           |             |            |
|------------|-----------|-----------|-------------|------------|
| TWF2       | 111.076   | 95.1688   | -0.222991   | 0.628907   |
| LYRM5      | 7.78732   | 5.97568   | -0.382025   | 0.421289   |
| VWCE       | 0.423073  | 0.552651  | 0.385463    | 0.718411   |
| TMEM182    | 0.68538   | 0.495312  | -0.468567   | 0.495709   |
| SEMA4C     | 11.7987   | 13.6666   | 0.212025    | 0.671663   |
| FAM114A2   | 3.81487   | 3.05295   | -0.321427   | 0.499306   |
| ZBTB8A     | 1.58329   | 1.24477   | -0.347037   | 0.459016   |
| RING1      | 36.9934   | 28.9886   | -0.351783   | 0.322408   |
| NBN        | 9.98687   | 12.4123   | 0.313661    | 0.386855   |
| ZNF222     | 3.12809   | 2.31805   | -0.432373   | 0.416627   |
| GIGYF2     | 5.7161    | 5.88999   | 0.0432323   | 0.964843   |
| MAP4K1     | 0.268483  | 0.0933272 | -1.52446    | 1          |
| MARCH5     | 10.1388   | 9.4174    | -0.106482   | 0.879418   |
| MAPK11     | 13.6091   | 14.1097   | 0.0521115   | 0.95717    |
| MAN1C1     | 0.0820147 | 0.0654666 | -0.325123   | 1          |
| CLIC1      | 547.21    | 604.053   | 0.142581    | 0.822798   |
| DCUN1D1    | 3.79471   | 3.66088   | -0.0517987  | 0.962865   |
| BCAP29     | 9.67983   | 10.9777   | 0.18152     | 0.729162   |
| FBXO7      | 62.3673   | 59.9783   | -0.0563506  | 0.949013   |
| YEATS4     | 26.8913   | 19.4105   | -0.470305   | 0.134981   |
| PPM1F      | 11.9449   | 18.5458   | 0.634698    | 0.0137404  |
| PTK6       | 4.20296   | 2.08918   | -1.00847    | 0.00659556 |
| SMCHD1     | 2.81122   | 2.74607   | -0.0338263  | 0.975191   |
| AKR1A1     | 125.893   | 107.376   | -0.229534   | 0.621464   |
| RFX5       | 15.1228   | 15.1062   | -0.00158222 | 0.999048   |
| OFD1       | 4.85594   | 3.53439   | -0.458289   | 0.196141   |
| BRD3       | 8.11294   | 8.22293   | 0.0194277   | 0.987759   |
| NUFIP1     | 2.52064   | 3.31528   | 0.395342    | 0.347688   |
| WDR11      | 3.83371   | 3.22409   | -0.249852   | 0.622746   |
| CDC14B     | 3.87354   | 2.90429   | -0.41547    | 0.248957   |
| DLAT       | 4.79434   | 6.16089   | 0.361807    | 0.346329   |
| ARNTL2     | 3.04223   | 3.49699   | 0.200984    | 0.703507   |
| ACOX1      | 4.16142   | 4.35292   | 0.06491     | 0.960032   |
| GATS       | 1.62139   | 2.38569   | 0.557178    | 0.243349   |
| PEX12      | 1.18414   | 0.801828  | -0.562481   | 0.333549   |
| TMEM9      | 70.741    | 63.4601   | -0.156698   | 0.783426   |
| KRTAP5-10  | 0.0497013 | 0.0536837 | 0.111201    | 1          |
| CROT       | 0.632944  | 0.602993  | -0.0699358  | 0.974777   |
| RILPL2     | 27.6696   | 28.2262   | 0.0287347   | 0.978016   |
| CNNM3      | 7.41001   | 10.4142   | 0.491004    | 0.108015   |
| C11orf31   | 160.367   | 157.932   | -0.0220742  | 0.991167   |
| ANKRD20A5P | 0.0582512 | 0.0557715 | -0.0627596  | 1          |
| CCDC90A    | 4.87      | 6.34259   | 0.381151    | 0.286272   |
| PRRT1      | 2.60758   | 1.08938   | -1.25921    | 0.0304296  |
| NAT1       | 1.86233   | 1.65948   | -0.166375   | 0.877848   |
| RBM25      | 11.8713   | 16.7593   | 0.497488    | 0.0847952  |
| THUMPD1    | 4.08135   | 5.73051   | 0.489618    | 0.118625   |
| ANAPC1     | 6.16272   | 6.54607   | 0.0870631   | 0.9117     |
| PCM1       | 4.9759    | 3.49374   | -0.510186   | 0.0799092  |

|          |           |            |            |            |
|----------|-----------|------------|------------|------------|
| TCAIM    | 6.14201   | 3.40509    | -0.851019  | 0.00478151 |
| STOML2   | 304.804   | 346.427    | 0.184667   | 0.72546    |
| GMPPB    | 6.73718   | 11.4377    | 0.763577   | 0.416068   |
| RIF1     | 1.98525   | 2.50947    | 0.33806    | 0.378445   |
| CDAN1    | 4.89286   | 5.47529    | 0.162255   | 0.809647   |
| ASUN     | 10.2481   | 7.02254    | -0.545294  | 0.0663805  |
| SCARNA18 | 11.5659   | 2.62947    | -2.13704   | 0.802391   |
| CHMP2A   | 99.3064   | 91.4953    | -0.118188  | 0.861774   |
| CRADD    | 9.6932    | 7.26379    | -0.416251  | 0.362843   |
| ERAP1    | 2.42945   | 2.38861    | -0.0244579 | 0.994204   |
| PDXK     | 16.5154   | 18.4786    | 0.162041   | 0.76757    |
| GNAI3    | 15.1462   | 14.5089    | -0.0620163 | 0.943284   |
| FAM169A  | 2.37917   | 2.77903    | 0.22412    | 0.677271   |
| DNAJB2   | 33.615    | 27.9978    | -0.263794  | 0.547788   |
| LYN      | 10.9691   | 13.5526    | 0.305131   | 0.413789   |
| PLEKHG2  | 5.56358   | 5.24193    | -0.085916  | 0.917149   |
| MCM3AP   | 8.08236   | 9.50696    | 0.234207   | 0.599091   |
| PDXP     | 45.2455   | 81.5427    | 0.849781   | 0.00153868 |
| PPP1R14B | 426.804   | 582.72     | 0.449229   | 0.14863    |
| ZNF341   | 1.58754   | 2.75026    | 0.792773   | 0.0467998  |
| NUDT21   | 22.9692   | 20.2551    | -0.181415  | 0.72342    |
| CDK4     | 186.911   | 164.949    | -0.180336  | 0.736417   |
| POLR3E   | 9.45029   | 12.3546    | 0.386613   | 0.267205   |
| ANKS3    | 7.33684   | 9.97555    | 0.443237   | 0.268173   |
| DGKQ     | 5.80516   | 6.91614    | 0.252633   | 0.626914   |
| NADKD1   | 3.74524   | 3.61469    | -0.0511869 | 0.961459   |
| KIAA1841 | 0.325986  | 0.400394   | 0.296611   | 0.757708   |
| S1PR2    | 5.7594    | 6.47576    | 0.169131   | 0.802771   |
| DOC2A    | 12.9935   | 15.2748    | 0.233362   | 0.854706   |
| WDR35    | 2.44389   | 2.17386    | -0.16892   | 0.786511   |
| SNAP29   | 6.69777   | 6.0042     | -0.157708  | 0.794882   |
| RAB3GAP1 | 8.68991   | 7.06529    | -0.298592  | 0.439781   |
| MCAM     | 0.0107625 | 0.00833842 | -0.368167  | 1          |
| LSM12    | 59.9186   | 66.5767    | 0.152015   | 0.793752   |
| SRI      | 65.7128   | 68.492     | 0.0597611  | 0.952184   |
| PDCD7    | 16.3045   | 17.0294    | 0.0627642  | 0.943735   |
| UBE2D1   | 10.4908   | 9.54478    | -0.136342  | 0.836427   |
| SRD5A1   | 3.34335   | 2.72408    | -0.295524  | 0.656358   |
| PHTF2    | 2.39048   | 2.64322    | 0.144996   | 0.854567   |
| TMEM183A | 33.53     | 39.4027    | 0.232842   | 0.614872   |
| MED4     | 14.8557   | 15.6771    | 0.0776388  | 0.929057   |
| STRA13   | 74.008    | 136.647    | 0.884698   | 0.00153868 |
| SMPDL3B  | 1.51431   | 0.781022   | -0.955227  | 0.0962745  |
| CCNL2    | 29.6533   | 35.5842    | 0.263047   | 0.539479   |
| ACOT13   | 6.73855   | 4.68169    | -0.52541   | 0.570298   |
| SOCS3    | 22.1135   | 35.12      | 0.667365   | 0.0204286  |
| SMU1     | 9.59838   | 11.0886    | 0.208219   | 0.66042    |
| UBFD1    | 7.3555    | 11.6064    | 0.658019   | 0.0103919  |
| C11orf45 | 0.0249908 | 0.0134517  | -0.893606  | 1          |

|                |           |           |             |            |
|----------------|-----------|-----------|-------------|------------|
| SMARCC1        | 17.9444   | 18.8492   | 0.0709712   | 0.93053    |
| NCAPG2         | 8.57104   | 8.75104   | 0.0299842   | 0.975928   |
| TM2D1          | 25.5224   | 19.01     | -0.425009   | 0.224562   |
| LOC100288637   | 1.12189   | 1.1447    | 0.0290387   | 0.981441   |
| FUK            | 4.08999   | 3.80022   | -0.106012   | 0.910622   |
| ACTR2          | 34.8253   | 33.1553   | -0.0708948  | 0.934861   |
| BLOC1S3        | 10.757    | 10.8711   | 0.0152262   | 0.990737   |
| AQP1           | 0.188834  | 0.155305  | -0.282018   | 1          |
| CYHR1          | 67.2192   | 58.1387   | -0.209374   | 0.699003   |
| TMEM106C       | 95.0361   | 89.4333   | -0.0876638  | 0.908098   |
| GLIS2          | 11.9352   | 9.45734   | -0.335715   | 0.39733    |
| ZMYM6NB        | 32.9452   | 18.8413   | -0.806174   | 0.00274688 |
| ADIPOR1        | 49.3859   | 50.472    | 0.0313851   | 0.975454   |
| RPRD1A         | 9.90679   | 11.5919   | 0.22663     | 0.619985   |
| MRPL37         | 177.197   | 167.498   | -0.0812134  | 0.917701   |
| EFCAB14        | 6.30538   | 7.62113   | 0.273422    | 0.496751   |
| CBX5           | 4.07404   | 4.14928   | 0.0263991   | 0.98206    |
| GSPT2          | 4.39176   | 4.79633   | 0.127131    | 0.876059   |
| CAPN5          | 4.98764   | 4.02647   | -0.308841   | 0.49848    |
| HDAC2          | 6.27062   | 9.90807   | 0.659997    | 0.0111246  |
| LMBRD1         | 7.97835   | 3.77783   | -1.07853    | 0.00153868 |
| BCLAF1         | 10.1903   | 14.5381   | 0.512645    | 0.0564873  |
| AP2A2          | 13.1793   | 14.2697   | 0.114685    | 0.867824   |
| THRAP3         | 24.9054   | 24.0063   | -0.0530408  | 0.953159   |
| MARCH7         | 12.5113   | 9.93339   | -0.33287    | 0.347606   |
| ZNF224         | 0.0286181 | 0.0595636 | 1.0575      | 1          |
| ZNF200         | 3.09284   | 3.76601   | 0.284108    | 0.578405   |
| ACSS2          | 6.34134   | 4.40557   | -0.525459   | 0.117359   |
| ING1           | 5.78831   | 6.66792   | 0.204096    | 0.752718   |
| CGB5           | 0.390869  | 0.292287  | -0.4193     | 0.879418   |
| CHML           | 1.59339   | 1.91485   | 0.265135    | 0.606595   |
| C8orf33        | 37.8274   | 61.5538   | 0.702416    | 0.00739414 |
| AGPAT1         | 31.9307   | 31.7512   | -0.00813227 | 0.995546   |
| FAM98C         | 44.5694   | 28.5833   | -0.640881   | 0.0243026  |
| RAB24          | 25.5955   | 31.7453   | 0.310649    | 0.421412   |
| NUTF2          | 251.724   | 301.48    | 0.260224    | 0.646322   |
| HERC2P3        | 0.467243  | 0.667288  | 0.514137    | 0.42868    |
| TPM1           | 46.2733   | 56.2061   | 0.280547    | 0.473572   |
| MTA3           | 12.5012   | 8.24542   | -0.600401   | 0.0475987  |
| CCDC130        | 19.1598   | 18.798    | -0.0275005  | 0.97919    |
| TMC6           | 30.3113   | 21.9426   | -0.46612    | 0.128985   |
| THEM6          | 70.68     | 95.1826   | 0.429395    | 0.161367   |
| SLC48A1        | 8.347     | 7.17543   | -0.218194   | 0.883439   |
| GIT1           | 35.6391   | 37.6006   | 0.0772943   | 0.921553   |
| CWC22          | 4.01701   | 4.52518   | 0.171852    | 0.786222   |
| SLC13A3,TP53RK | 6.53901   | 10.9874   | 0.748702    | 0.00478151 |
| CDK5RAP2       | 4.49943   | 3.41557   | -0.397614   | 0.263932   |
| LINC00674      | 2.50131   | 2.06336   | -0.277687   | 0.525936   |
| EGFR           | 1.02415   | 0.443429  | -1.20766    | 0.00153868 |



|              |           |           |            |            |
|--------------|-----------|-----------|------------|------------|
| AIMP1        | 19.6513   | 15.406    | -0.351132  | 0.322788   |
| ZSCAN18      | 0.055667  | 0.0272153 | -1.03241   | 1          |
| USP33        | 6.39205   | 4.45463   | -0.520975  | 0.0821701  |
| NOTCH2       | 4.08803   | 4.29827   | 0.0723485  | 0.933523   |
| STAT3        | 8.56726   | 10.3328   | 0.270322   | 0.503126   |
| GNL3L        | 3.62218   | 5.35788   | 0.564806   | 0.0338188  |
| GFM2         | 11.2657   | 10.5819   | -0.0903392 | 0.97664    |
| CYB5D2       | 15.1844   | 8.22023   | -0.885342  | 0.00478151 |
| NFKBIZ,NXPE3 | 17.9406   | 15.0207   | -0.256278  | 0.590233   |
| WDR24        | 6.71627   | 7.4702    | 0.153488   | 0.838244   |
| ZNF775       | 8.33555   | 7.0358    | -0.244564  | 0.723759   |
| SNRNP35      | 11.143    | 14.0874   | 0.338264   | 0.489185   |
| EIF4A3       | 74.078    | 132.484   | 0.838705   | 0.00153868 |
| SBK1         | 3.79203   | 5.11106   | 0.430653   | 0.264399   |
| HINT1        | 690.871   | 798.783   | 0.209387   | 0.658043   |
| NUDT4        | 16.4291   | 20.3336   | 0.307609   | 0.410682   |
| CDC26        | 56.4795   | 78.3959   | 0.473051   | 0.105057   |
| HDLBP        | 30.5101   | 28.2865   | -0.109174  | 0.930385   |
| HOXA-AS3     | 0.0279881 | 0.0293998 | 0.0709907  | 1          |
| BRI3         | 329.291   | 180.199   | -0.869777  | 0.00380811 |
| GLMN         | 5.05273   | 7.60008   | 0.588953   | 0.247848   |
| CENPT        | 17.5636   | 23.0811   | 0.394119   | 0.824783   |
| HIPK2        | 1.68819   | 2.06747   | 0.29239    | 0.491486   |
| PUM1         | 7.96118   | 8.16817   | 0.0370319  | 0.971663   |
| SETD9        | 3.33412   | 2.91779   | -0.19243   | 0.921254   |
| IFRD1        | 16.4637   | 9.78804   | -0.750193  | 0.00153868 |
| DNASE1       | 0.5136    | 0.626293  | 0.286193   | 0.978649   |
| GPC4         | 5.60295   | 4.40782   | -0.34612   | 0.383267   |
| ERBB3        | 4.15958   | 4.41164   | 0.0848756  | 0.959525   |
| CXorf38      | 2.34867   | 2.1384    | -0.135316  | 0.875961   |
| FKBPL        | 5.21139   | 9.9191    | 0.92854    | 0.00659556 |
| MAGED1       | 21.4879   | 18.7817   | -0.194193  | 0.70639    |
| STK38L       | 2.7998    | 2.73223   | -0.0352443 | 0.97515    |
| ELF4         | 7.71282   | 6.70367   | -0.202308  | 0.702001   |
| RPUSD2       | 17.512    | 25.4441   | 0.538989   | 0.0712966  |
| ZSCAN21      | 1.39224   | 1.27743   | -0.124159  | 0.977897   |
| VCP          | 59.1229   | 96.718    | 0.710068   | 0.00478151 |
| FKBP4        | 66.5777   | 115.379   | 0.793267   | 0.00153868 |
| NEK9         | 5.86832   | 4.63654   | -0.3399    | 0.357833   |
| TMED3        | 105.061   | 138.69    | 0.400636   | 0.206179   |
| CES3         | 5.83441   | 3.86909   | -0.592591  | 0.0792007  |
| ACTR5        | 5.17678   | 8.08878   | 0.643866   | 0.0351856  |
| TAX1BP1      | 15.0263   | 11.318    | -0.408867  | 0.185432   |
| TRIM37       | 4.19242   | 5.48762   | 0.388397   | 0.289501   |
| C6orf203     | 14.6682   | 13.5834   | -0.110848  | 0.89301    |
| PPP1R18      | 54.1936   | 51.0212   | -0.0870246 | 0.906934   |
| TMEM63B      | 10.4945   | 9.8629    | -0.0895553 | 0.913903   |
| LAMTOR3      | 5.0471    | 4.50769   | -0.163066  | 0.788779   |
| COL11A2      | 0.281565  | 0.337984  | 0.263483   | 1          |

|           |           |           |            |            |
|-----------|-----------|-----------|------------|------------|
| ZNF488    | 0.219522  | 0.338573  | 0.625102   | 1          |
| EXOC5     | 3.06742   | 3.81012   | 0.31281    | 0.52085    |
| GLRX      | 627.015   | 291.992   | -1.10257   | 0.00153868 |
| DNAH10    | 0.0801144 | 0.0924103 | 0.205993   | 1          |
| RPS10P7   | 1.8948    | 0.800487  | -1.2431    | 0.109206   |
| GDE1      | 22.4409   | 22.798    | 0.0227806  | 0.981441   |
| MAPK1IP1L | 10.1669   | 10.2079   | 0.00580519 | 0.995202   |
| SUMO2     | 288.859   | 296.802   | 0.0391325  | 0.967343   |
| GOLGA7    | 34.1438   | 30.8551   | -0.146111  | 0.808953   |
| KIDINS220 | 2.17502   | 1.90792   | -0.189028  | 0.759419   |
| PIK3R2    | 26.8103   | 36.5029   | 0.445223   | 0.132824   |
| DHFR1L1   | 0.923541  | 0.470395  | -0.973304  | 0.0981523  |
| TATDN1    | 59.8182   | 39.9978   | -0.580665  | 0.212084   |
| CTSB      | 45.6257   | 42.0532   | -0.11763   | 0.86224    |
| PPP2CB    | 37.6248   | 53.8005   | 0.515937   | 0.0691625  |
| PRKAG1    | 45.0224   | 29.1051   | -0.629373  | 0.0192959  |
| SNHG12    | 30.171    | 56.0961   | 0.894738   | 0.318863   |
| CCP110    | 1.73189   | 2.33781   | 0.432806   | 0.248223   |
| BMP2K     | 2.16798   | 3.31028   | 0.610604   | 0.104553   |
| KIAA0947  | 2.86734   | 3.71854   | 0.375021   | 0.29533    |
| C5orf51   | 4.41547   | 3.75838   | -0.232457  | 0.64286    |
| WDSUB1    | 5.41584   | 4.1163    | -0.395839  | 0.378455   |
| FLJ38576  | 0.0644566 | 0.120626  | 0.904144   | 1          |
| GPR153    | 5.20006   | 6.19252   | 0.251999   | 0.6565     |
| NFKB2     | 41.2312   | 33.2926   | -0.308532  | 0.403093   |
| GORASP2   | 33.2696   | 41.3341   | 0.313129   | 0.378361   |
| ABCC1     | 10.4773   | 10.5463   | 0.00947611 | 0.994068   |
| SNX4      | 4.81354   | 5.98888   | 0.315189   | 0.474408   |
| WDR85     | 34.4819   | 53.0143   | 0.620542   | 0.0198871  |
| PPIL2     | 7.64948   | 8.92929   | 0.223184   | 0.745079   |
| NAIF1     | 3.35719   | 2.36524   | -0.505268  | 0.239276   |
| NR113     | 1.37112   | 2.8126    | 1.03656    | 0.656556   |
| SIRT5     | 4.64098   | 2.63012   | -0.819298  | 0.0181648  |
| TOP2B     | 13.2608   | 10.9341   | -0.278325  | 0.466307   |
| TMBIM4    | 30.2768   | 21.2367   | -0.511655  | 0.0824065  |
| HIPK1     | 2.32806   | 2.86878   | 0.301306   | 0.489185   |
| AGAP4     | 0.810422  | 1.22706   | 0.598461   | 0.307226   |
| BIN3      | 16.1305   | 18.8107   | 0.221763   | 0.910997   |
| EIF3K     | 290.789   | 320.213   | 0.13906    | 0.817355   |
| TXNDC17   | 32.3101   | 40.5998   | 0.329485   | 0.506333   |
| NTN4      | 0.431698  | 0.140541  | -1.61903   | 0.0150346  |
| PHF2      | 4.20111   | 4.07948   | -0.042386  | 0.969826   |
| CD33      | 0.0757701 | 0         | #NAME?     | 1          |
| WDR44     | 1.42764   | 1.21423   | -0.233586  | 0.749756   |
| VILL      | 0.353517  | 0.243425  | -0.538302  | 1          |
| BIN1      | 32.9142   | 22.4152   | -0.554232  | 0.0519269  |
| RASA3     | 16.8122   | 12.9114   | -0.380862  | 0.260223   |
| RNF115    | 7.1194    | 5.72229   | -0.315163  | 0.531391   |
| ATXN1L    | 2.01944   | 2.26808   | 0.167516   | 0.799656   |

|              |          |          |             |            |
|--------------|----------|----------|-------------|------------|
| OTUB1        | 62.4703  | 88.8131  | 0.507603    | 0.068345   |
| LEMD3        | 3.14811  | 3.37316  | 0.099618    | 0.907121   |
| ZNF618       | 2.10429  | 2.03044  | -0.0515362  | 0.963259   |
| CTNNB1       | 55.2555  | 57.0668  | 0.0465325   | 0.96074    |
| CDR2         | 7.61963  | 11.3902  | 0.580003    | 0.0471668  |
| CHURC1,CHURC | 23.7084  | 17.0023  | -0.479667   | 0.493653   |
| ZC3H14       | 9.15034  | 10.2917  | 0.169582    | 0.764456   |
| SEPT7P2      | 1.45235  | 1.81339  | 0.320306    | 0.654938   |
| FBXO11       | 8.42624  | 6.71908  | -0.326625   | 0.647073   |
| SNUPN        | 17.6467  | 17.3469  | -0.0247155  | 0.981441   |
| CEP19        | 0.576274 | 0.826518 | 0.520292    | 0.485845   |
| TBCC         | 17.837   | 19.5203  | 0.130101    | 0.859815   |
| IER5         | 21.2334  | 22.7706  | 0.100836    | 0.898718   |
| NAGLU        | 19.2511  | 12.1604  | -0.662754   | 0.020985   |
| TERF2IP      | 24.3992  | 20.2106  | -0.271721   | 0.499226   |
| ULK3         | 24.7251  | 28.1191  | 0.185578    | 0.727874   |
| SELT         | 26.526   | 43.0652  | 0.699118    | 0.00820276 |
| RALA         | 13.0731  | 15.1836  | 0.21591     | 0.647696   |
| FAM120A      | 43.0799  | 43.9436  | 0.0286367   | 0.978818   |
| ARMCX5,ARMCX | 3.00533  | 2.07365  | -0.535351   | 0.187632   |
| ADAM9        | 13.2272  | 9.13099  | -0.534667   | 0.0592362  |
| CDC42EP2     | 21.3778  | 40.5566  | 0.923826    | 0.00153868 |
| GABARAPL2    | 101.102  | 87.5816  | -0.207111   | 0.662604   |
| LRBA         | 4.09632  | 2.07892  | -0.978493   | 0.00153868 |
| C1orf63      | 10.4073  | 13.446   | 0.369571    | 0.398588   |
| ORC2         | 3.18856  | 3.7179   | 0.221583    | 0.70878    |
| PCYOX1L      | 5.40549  | 3.37114  | -0.681189   | 0.0519269  |
| UTS2         | 4.72884  | 3.66241  | -0.368695   | 0.655592   |
| DOK1         | 19.801   | 26.0839  | 0.397587    | 0.870788   |
| NDUFAF7      | 7.64594  | 7.109    | -0.105047   | 0.897786   |
| PLBD1        | 15.2454  | 12.3987  | -0.298183   | 0.469274   |
| TRAM1        | 41.252   | 41.4482  | 0.00684592  | 0.994734   |
| LRRC37A4P    | 1.11585  | 0.963576 | -0.211672   | 0.762973   |
| LEPREL2      | 18.4441  | 23.9298  | 0.37565     | 0.274988   |
| PTRHD1       | 51.233   | 63.4665  | 0.308923    | 0.85459    |
| APLP1        | 14.7467  | 14.0341  | -0.0714582  | 0.937886   |
| PAQR7        | 16.5296  | 16.4535  | -0.00665811 | 0.994734   |
| COPS8        | 31.0786  | 35.6275  | 0.197066    | 0.689833   |
| MDH2         | 333.83   | 343.466  | 0.0410573   | 0.967343   |
| GNB2L1       | 3313.34  | 2904.75  | -0.189868   | 0.744765   |
| ABR          | 18.6299  | 24.5103  | 0.395771    | 0.234147   |
| HSD17B6      | 0.563691 | 0.555984 | -0.0198617  | 0.994204   |
| MAGIX        | 1.07298  | 0.880984 | -0.28444    | 0.836427   |
| C12orf29     | 4.38022  | 5.66869  | 0.372013    | 0.439733   |
| C8orf59      | 150.342  | 139.542  | -0.107549   | 0.880754   |
| PARP14       | 2.83214  | 2.39865  | -0.239667   | 0.628907   |
| DNAL4        | 11.5845  | 4.78802  | -1.27469    | 0.00153868 |
| PITX2        | 8.18807  | 14.2196  | 0.79629     | 0.00380811 |
| RAB7L1       | 8.43687  | 9.49879  | 0.171035    | 0.774294   |

|                |           |          |            |            |
|----------------|-----------|----------|------------|------------|
| SNX12          | 15.7993   | 17.1966  | 0.122258   | 0.861253   |
| CMC1           | 46.4924   | 43.2967  | -0.102736  | 0.898731   |
| ARNT2          | 1.82117   | 1.44154  | -0.337258  | 0.502085   |
| AKAP2,PALM2,Pf | 6.18309   | 5.57019  | -0.150602  | 0.80614    |
| CCNB2          | 42.4856   | 32.8677  | -0.370301  | 0.28349    |
| LYSMD4         | 2.84622   | 2.53183  | -0.168868  | 0.845809   |
| WASH2P         | 8.63441   | 6.26055  | -0.463808  | 0.263172   |
| RB1            | 5.05718   | 3.47602  | -0.540898  | 0.0824065  |
| CTBP1-AS1      | 3.42003   | 3.49356  | 0.0306902  | 0.980228   |
| ENKD1          | 2.07506   | 2.15029  | 0.0513762  | 0.977972   |
| ATP11B         | 3.7691    | 2.46407  | -0.613179  | 0.024868   |
| LOC441461      | 2.06533   | 0.547515 | -1.9154    | 0.0420136  |
| LIPT2          | 1.26347   | 0.723581 | -0.804161  | 0.451947   |
| FAM188A        | 11.0678   | 10.1355  | -0.126947  | 0.85718    |
| CCDC78         | 4.15849   | 2.25211  | -0.884782  | 0.525673   |
| SS18           | 13.8062   | 14.9918  | 0.118858   | 0.860434   |
| PIK3CB         | 2.57728   | 3.19441  | 0.309703   | 0.491486   |
| EPN1           | 90.6068   | 95.014   | 0.0685212  | 0.93571    |
| VDR            | 1.44999   | 1.32252  | -0.132747  | 0.897332   |
| RPP25L         | 84.5157   | 48.9327  | -0.788419  | 0.00153868 |
| ZSCAN32        | 4.90216   | 6.47672  | 0.401844   | 0.281393   |
| LOC100286793   | 0.651632  | 0.545978 | -0.255214  | 0.879418   |
| EFHA1          | 12.8368   | 12.3633  | -0.0542179 | 0.954981   |
| RNASEH2A       | 58.4322   | 50.7825  | -0.202433  | 0.698593   |
| C17orf59       | 13.6208   | 12.848   | -0.0842668 | 0.93285    |
| HNRNPA1L2      | 9.05464   | 8.28854  | -0.127539  | 0.859143   |
| CAD            | 13.1931   | 15.7716  | 0.257544   | 0.533195   |
| ATG4D          | 19.0119   | 22.3267  | 0.231874   | 0.864177   |
| SHARPIN        | 87.098    | 71.9268  | -0.27611   | 0.485845   |
| PDE12          | 9.13185   | 13.7898  | 0.594625   | 0.0338188  |
| CCR10          | 24.3562   | 16.6007  | -0.553047  | 0.17963    |
| PIGB           | 3.1696    | 2.2364   | -0.503121  | 0.654938   |
| LOC644656      | 1.70668   | 1.9269   | 0.175089   | 0.902666   |
| FOXP1          | 8.48816   | 7.02892  | -0.272149  | 0.506642   |
| ANKS6          | 9.16297   | 10.2119  | 0.156368   | 0.783706   |
| TMEM238        | 21.8035   | 22.9114  | 0.0715054  | 0.967343   |
| ATN1           | 37.5039   | 33.3643  | -0.168737  | 0.750823   |
| MND1           | 32.5799   | 20.794   | -0.647815  | 0.0243026  |
| CDH12          | 0.0419104 | 0.026077 | -0.684528  | 1          |
| MGC27345       | 1.91034   | 3.34439  | 0.807916   | 0.00153868 |
| RNF149         | 16.9621   | 13.9624  | -0.280766  | 0.489185   |
| RAD54L         | 7.64641   | 9.5835   | 0.325771   | 0.818403   |
| CEBPZ          | 7.96537   | 11.0326  | 0.469957   | 0.308679   |
| HSD17B4        | 11.2652   | 9.76577  | -0.206065  | 0.687681   |
| SRCRB4D        | 0.746841  | 0.861226 | 0.205591   | 0.947351   |
| POGLUT1        | 3.22621   | 4.06639  | 0.333909   | 0.442926   |
| LARP7          | 8.2461    | 8.83679  | 0.0998119  | 0.910997   |
| KLHL23,PHOSPH  | 6.31163   | 8.30289  | 0.3956     | 0.37549    |
| LOC115110      | 0.914941  | 0.274775 | -1.73543   | 0.0143403  |

|               |           |           |            |            |
|---------------|-----------|-----------|------------|------------|
| PAQR8         | 1.85814   | 0.973136  | -0.933143  | 0.00739414 |
| ARNTL         | 3.68983   | 2.70561   | -0.4476    | 0.285745   |
| KIAA1609      | 5.64109   | 3.11825   | -0.855236  | 0.00153868 |
| INPP5E        | 21.8091   | 18.9047   | -0.206187  | 0.681478   |
| NUDCD1        | 20.782    | 24.964    | 0.264519   | 0.51146    |
| RNF40         | 15.4469   | 20.6837   | 0.421178   | 0.306773   |
| P2RY1         | 0.0780817 | 0.165717  | 1.08567    | 1          |
| MPHOSPH6      | 21.1459   | 29.9334   | 0.501377   | 0.100178   |
| NXT2          | 1.93655   | 1.99461   | 0.0426134  | 0.975484   |
| ZSCAN20       | 0.357827  | 0.365225  | 0.0295199  | 1          |
| B4GALT2       | 43.1976   | 52.5501   | 0.282743   | 0.474234   |
| SSX2IP        | 3.10776   | 3.26924   | 0.073079   | 0.935829   |
| GSKIP         | 5.03567   | 6.02064   | 0.257733   | 0.642802   |
| UVSSA         | 1.17438   | 0.496435  | -1.24222   | 0.00659556 |
| MRM1          | 9.09788   | 8.38897   | -0.117037  | 0.89785    |
| BSCL2,HNRNPUL | 28.5063   | 26.0499   | -0.130004  | 0.8909     |
| NME1,NME1-NME | 1779.2    | 2097.92   | 0.237736   | 0.624571   |
| SCRN1         | 0.0193561 | 0.0334009 | 0.787098   | 1          |
| GALK1         | 49.5581   | 41.879    | -0.242894  | 0.612746   |
| YWHAZ         | 235.4     | 271.176   | 0.20412    | 0.696867   |
| OPLAH         | 43.1087   | 54.1237   | 0.328282   | 0.367775   |
| NF2           | 7.60217   | 11.7414   | 0.62712    | 0.0243026  |
| PTK7          | 27.599    | 23.1647   | -0.252691  | 0.552979   |
| SP8           | 0.320496  | 0.378664  | 0.240611   | 0.880357   |
| CHERP         | 19.7527   | 25.5267   | 0.369956   | 0.308679   |
| CLINT1        | 8.37149   | 12.141    | 0.536336   | 0.0617671  |
| ZNF45         | 1.82924   | 2.07835   | 0.184193   | 0.801516   |
| KNSTRN        | 21.3331   | 29.5701   | 0.471042   | 0.120157   |
| YWHAE         | 365.256   | 410.81    | 0.169563   | 0.767689   |
| DEXI          | 30.0318   | 44.063    | 0.553078   | 0.064033   |
| ANKMY1        | 1.48754   | 0.786821  | -0.918825  | 0.070901   |
| CSNK1D        | 41.137    | 44.5136   | 0.113812   | 0.867427   |
| STIP1         | 135.971   | 289.507   | 1.0903     | 0.00153868 |
| INVS          | 4.68644   | 3.20936   | -0.546208  | 0.0916618  |
| POU2F1        | 0.874904  | 0.618721  | -0.499835  | 0.179887   |
| HIP1          | 3.68153   | 3.58148   | -0.0397489 | 0.96875    |
| SLC39A8       | 10.0185   | 8.78831   | -0.189009  | 0.731399   |
| PRPF6         | 30.8564   | 31.7182   | 0.0397398  | 0.967329   |
| PAXIP1        | 5.24815   | 6.38658   | 0.283233   | 0.530096   |
| KIF18B        | 8.84456   | 11.1165   | 0.329839   | 0.390338   |
| VSIG10        | 3.77118   | 2.77912   | -0.440389  | 0.222759   |
| TSPAN15       | 5.54349   | 4.74036   | -0.225798  | 0.760301   |
| ARHGEF11      | 2.82192   | 2.83735   | 0.0078632  | 0.994734   |
| MARVELD1      | 16.0826   | 18.5202   | 0.203596   | 0.688983   |
| C9orf129      | 2.02309   | 2.74591   | 0.440723   | 0.904905   |
| RBMX2         | 19.0826   | 17.7045   | -0.108142  | 0.881526   |
| DYNC2H1       | 1.02901   | 0.502166  | -1.03503   | 0.00153868 |
| LOC100508120  | 0.496689  | 0.20811   | -1.255     | 0.161211   |
| ZFP90         | 3.13146   | 2.03688   | -0.620474  | 0.0451232  |

|              |          |          |             |            |
|--------------|----------|----------|-------------|------------|
| BEX5         | 11.5537  | 7.1016   | -0.702138   | 0.0568637  |
| WDYHV1       | 12.1476  | 7.90498  | -0.619841   | 0.064033   |
| CBY1         | 31.1756  | 33.6227  | 0.10902     | 0.880754   |
| SNAP47       | 17.7581  | 19.8041  | 0.157325    | 0.891105   |
| ATP6V1E1     | 52.7313  | 53.552   | 0.022279    | 0.981543   |
| REEP3        | 3.55692  | 3.3137   | -0.102184   | 0.899621   |
| ADAM1A       | 0.5872   | 0.720591 | 0.295329    | 0.756508   |
| CCDC85B      | 279.737  | 288.311  | 0.0435549   | 0.963969   |
| LRP8         | 2.57532  | 5.23651  | 1.02385     | 0.0429833  |
| AAED1        | 28.4739  | 28.4499  | -0.00121776 | 0.999234   |
| NKRF         | 4.81859  | 5.23807  | 0.120424    | 0.874128   |
| SUPT5H       | 33.0712  | 31.2079  | -0.0836626  | 0.91609    |
| SUMF2        | 69.3037  | 42.7863  | -0.695785   | 0.0270318  |
| COPB2        | 22.7048  | 23.8824  | 0.0729509   | 0.931567   |
| DNAJC8       | 84.0844  | 101.81   | 0.275963    | 0.486217   |
| ARL6IP6      | 4.81621  | 2.82949  | -0.767358   | 0.0220668  |
| RPL23AP53    | 1.64088  | 2.12216  | 0.371063    | 0.413223   |
| STXBP4       | 0.245184 | 0.446652 | 0.865288    | 0.0878381  |
| FAM78B       | 3.27037  | 4.69907  | 0.522922    | 0.317407   |
| PLIN3        | 69.7125  | 64.5129  | -0.11183    | 0.870063   |
| PRR12        | 4.96872  | 5.96873  | 0.264549    | 0.579868   |
| NUP214       | 7.74968  | 7.4799   | -0.0511179  | 0.955413   |
| RNF7         | 53.7721  | 48.1989  | -0.157859   | 0.783706   |
| SPEN         | 3.07898  | 4.19184  | 0.445129    | 0.167611   |
| METTL21A     | 8.34092  | 10.4149  | 0.320375    | 0.400559   |
| HMGNI        | 206.947  | 244.999  | 0.24352     | 0.581794   |
| LOC100130776 | 69.04    | 60.8969  | -0.181064   | 0.737085   |
| MRPL33       | 119.02   | 152.825  | 0.360681    | 0.302656   |
| LRRC14       | 9.38625  | 14.17    | 0.594215    | 0.302537   |
| ATL2         | 11.0134  | 12.2284  | 0.150983    | 0.8041     |
| PDHB         | 28.4159  | 26.2825  | -0.112595   | 0.874294   |
| ZNF800       | 2.84308  | 3.0653   | 0.108573    | 0.902834   |
| LOC646214    | 0.211361 | 0.204909 | -0.0447313  | 1          |
| SGSM3        | 15.4087  | 14.0924  | -0.128836   | 0.887337   |
| IQCB1        | 13.6312  | 10.4733  | -0.380196   | 0.283886   |
| EID1         | 25.2858  | 30.5773  | 0.274132    | 0.483429   |
| MGMT         | 76.1762  | 67.5958  | -0.172408   | 0.74647    |
| COA1         | 46.9975  | 50.736   | 0.110427    | 0.884758   |
| HSPA8        | 656.586  | 1266.45  | 0.947731    | 0.00153868 |
| FCHSD1       | 11.4295  | 8.48943  | -0.429022   | 0.272576   |
| DYRK1A       | 4.86287  | 4.00962  | -0.278342   | 0.518305   |
| FHL3         | 37.3529  | 31.7758  | -0.233291   | 0.623292   |
| UBA52        | 392.044  | 394.082  | 0.007481    | 0.994593   |
| PRR13        | 87.6305  | 103.018  | 0.233395    | 0.592657   |
| DHX8         | 6.26021  | 6.4296   | 0.038518    | 0.970994   |
| KDEL1        | 276.364  | 246.332  | -0.165968   | 0.766871   |
| THYN1        | 55.3739  | 39.7626  | -0.477793   | 0.115142   |
| TMEM80       | 12.4967  | 13.704   | 0.133058    | 0.956177   |
| TK1          | 93.9043  | 97.2944  | 0.051166    | 0.956908   |

|                |            |            |            |            |
|----------------|------------|------------|------------|------------|
| FAM60A         | 31.3647    | 32.7946    | 0.0643139  | 0.939583   |
| SMARCA4        | 34.0895    | 38.6246    | 0.180195   | 0.727043   |
| FLOT2          | 36.9566    | 27.2486    | -0.439649  | 0.154363   |
| ZSCAN2         | 5.7092     | 4.52352    | -0.335842  | 0.703707   |
| CHMP3,RNF103,F | 22.6009    | 19.7166    | -0.196969  | 0.782703   |
| EIF5           | 22.5852    | 33.9001    | 0.585909   | 0.0204286  |
| ZNF595,ZNF718  | 0.455624   | 0.467967   | 0.0385627  | 0.983243   |
| VPS28          | 332.599    | 289.49     | -0.20027   | 0.689784   |
| RNF139         | 17.7407    | 13.0434    | -0.443744  | 0.397131   |
| THAP11         | 23.7409    | 41.8024    | 0.816215   | 0.385955   |
| COX10          | 8.06442    | 7.6414     | -0.0777342 | 0.935829   |
| SYNC           | 26.183     | 23.3954    | -0.162405  | 0.852271   |
| WRB            | 17.8717    | 17.501     | -0.0302428 | 0.977857   |
| QTRT1          | 51.9095    | 60.7389    | 0.226622   | 0.633194   |
| KIAA1984-AS1   | 0.706899   | 0.548524   | -0.36595   | 0.969482   |
| KCNS1          | 0.00999371 | 0.00546504 | -0.870788  | 1          |
| GLTSCR1        | 2.23358    | 2.74684    | 0.298413   | 0.633646   |
| CFLAR          | 3.78393    | 3.21274    | -0.236081  | 0.875956   |
| PTPN2          | 19.3362    | 18.9545    | -0.0287645 | 0.978818   |
| RNF26          | 22.2624    | 22.6885    | 0.0273468  | 0.978818   |
| ICA1           | 3.50035    | 1.37084    | -1.35244   | 0.00153868 |
| PPWD1          | 9.17721    | 9.53413    | 0.0550462  | 0.955509   |
| AMY2B,RNPC3    | 3.24387    | 1.77527    | -0.86968   | 0.0238313  |
| ZBTB45         | 12.3397    | 14.4419    | 0.226947   | 0.700086   |
| ITPR1PL2       | 4.31659    | 5.75507    | 0.414941   | 0.202725   |
| CEP85          | 5.12971    | 6.42908    | 0.325734   | 0.42256    |
| CCDC47         | 20.4793    | 24.5234    | 0.259993   | 0.521457   |
| TEAD3          | 11.3635    | 15.1087    | 0.41097    | 0.222632   |
| TRMT2A         | 15.4647    | 24.0669    | 0.638076   | 0.157202   |
| EXOC2          | 3.52567    | 3.30065    | -0.0951478 | 0.913444   |
| SEPN1          | 72.0166    | 57.4691    | -0.325542  | 0.36961    |
| TBC1D2B        | 3.25633    | 4.56636    | 0.4878     | 0.131988   |
| PARP8          | 2.29535    | 1.78287    | -0.364515  | 0.347688   |
| TATDN3         | 4.75779    | 2.39777    | -0.988596  | 0.00153868 |
| DDX58          | 0.505069   | 0.412965   | -0.290463  | 0.733653   |
| C5orf45        | 45.6389    | 29.5218    | -0.628481  | 0.872122   |
| SNX7           | 11.1609    | 9.68278    | -0.204963  | 0.71903    |
| ICA1L          | 0.404765   | 0.369751   | -0.130534  | 0.92298    |
| B3GALNT1       | 6.06096    | 8.82782    | 0.54251    | 0.0605998  |
| EHMT1          | 10.832     | 13.7369    | 0.342755   | 0.324863   |
| ZNF721         | 3.72932    | 4.03755    | 0.114568   | 0.945887   |
| CSRNP1         | 8.34346    | 11.4622    | 0.458161   | 0.165129   |
| MTX1           | 46.9821    | 49.2638    | 0.0684185  | 0.94188    |
| TRIM33         | 2.8126     | 2.64315    | -0.0896435 | 0.913887   |
| RBAK,RBAK-LOC  | 32.4156    | 26.9615    | -0.265788  | 0.872122   |
| NOV            | 4.09457    | 2.35136    | -0.800217  | 0.020985   |
| POLR2D         | 12.019     | 14.9534    | 0.315157   | 0.424975   |
| CHTOP          | 57.3232    | 61.5963    | 0.103724   | 0.952184   |
| ZC3H13         | 0.979608   | 1.28256    | 0.388754   | 0.396999   |

|             |          |          |             |            |
|-------------|----------|----------|-------------|------------|
| ZEB1        | 3.96599  | 4.08865  | 0.0439406   | 0.965252   |
| HPCAL1      | 47.6364  | 67.7332  | 0.5078      | 0.0712966  |
| NUP153      | 6.11254  | 7.79199  | 0.350221    | 0.318772   |
| RNF170      | 5.42111  | 3.32495  | -0.705257   | 0.0388971  |
| CXCL16      | 42.4749  | 47.3809  | 0.157694    | 0.825017   |
| LRCH1       | 2.579    | 3.07645  | 0.254454    | 0.633194   |
| YBEY        | 20.6992  | 13.932   | -0.571175   | 0.094542   |
| ROM1        | 2.18354  | 1.58955  | -0.458053   | 0.879418   |
| UBE2W       | 4.72408  | 4.38086  | -0.108821   | 0.892475   |
| PPP1R26     | 16.5155  | 20.644   | 0.321904    | 0.363127   |
| DRAP1       | 466.702  | 642.438  | 0.461056    | 0.130345   |
| ZNF71       | 4.30133  | 5.8489   | 0.443384    | 0.253087   |
| GSTT2       | 1.00678  | 2.10325  | 1.06288     | 0.0805827  |
| PVRL2       | 41.1299  | 39.017   | -0.0760836  | 0.927113   |
| PRDX6       | 285.974  | 298.526  | 0.061968    | 0.945399   |
| WDR48       | 5.46715  | 4.78835  | -0.191259   | 0.736579   |
| DCAF7       | 27.5115  | 19.467   | -0.499001   | 0.28665    |
| PPP2R5E     | 4.17696  | 4.17374  | -0.00111301 | 0.999234   |
| ILF3-AS1    | 5.87381  | 6.14489  | 0.0650902   | 0.953159   |
| TTK         | 5.0762   | 3.51787  | -0.529045   | 0.106507   |
| ZNFX1       | 2.3747   | 4.20848  | 0.825559    | 0.739148   |
| PCDHB16     | 1.00785  | 0.683636 | -0.559975   | 0.27006    |
| SBNO1       | 3.25146  | 4.16666  | 0.357802    | 0.284028   |
| MCMDC2      | 0.195406 | 0.237951 | 0.284192    | 1          |
| TRNAU1AP    | 13.4757  | 11.0105  | -0.291487   | 0.765218   |
| APEH        | 98.6999  | 88.0437  | -0.16483    | 0.765218   |
| SLC25A17    | 12.5661  | 14.7664  | 0.232777    | 0.6214     |
| HDHD3       | 29.3643  | 29.7227  | 0.017501    | 0.986782   |
| STAT1       | 6.48038  | 10.6033  | 0.710361    | 0.00659556 |
| LTBR        | 37.0768  | 75.2077  | 1.02036     | 0.00153868 |
| ACTR3       | 39.7075  | 48.661   | 0.293356    | 0.442187   |
| COBL        | 3.97984  | 3.24629  | -0.293919   | 0.525673   |
| FLJ44313    | 0.526946 | 0.359844 | -0.550281   | 0.581347   |
| C19orf21    | 0.390347 | 0.173335 | -1.17119    | 0.171388   |
| ACAA1       | 36.8422  | 35.8328  | -0.0400807  | 0.967343   |
| TRMT1L      | 3.47279  | 2.6691   | -0.37974    | 0.406256   |
| NRTN        | 8.90397  | 10.7378  | 0.270171    | 0.764196   |
| ANKRD18DP   | 0.12643  | 0.063504 | -0.993415   | 1          |
| RPP25       | 61.1796  | 104.48   | 0.772106    | 0.00274688 |
| RAD51D,RFFL | 12.7171  | 10.2205  | -0.315307   | 0.483022   |
| RIN3        | 10.8611  | 13.2322  | 0.284889    | 0.503126   |
| DDX24       | 35.8516  | 45.0665  | 0.330017    | 0.344831   |
| NKIRAS1     | 4.24124  | 6.90483  | 0.703121    | 0.931457   |
| IQCG        | 10.4125  | 17.1209  | 0.71745     | 0.917228   |
| VRK2        | 3.07207  | 1.87133  | -0.715145   | 0.468275   |
| ABT1        | 24.0393  | 34.3099  | 0.51323     | 0.0685533  |
| RWDD4       | 9.66533  | 12.1685  | 0.332256    | 0.385184   |
| COX4I1      | 604.557  | 623.356  | 0.0441788   | 0.962969   |
| FASTKD3     | 9.39139  | 13.9241  | 0.568171    | 0.15255    |



|              |           |             |            |            |
|--------------|-----------|-------------|------------|------------|
| NFIA         | 1.21152   | 1.28559     | 0.0856117  | 0.933651   |
| GYG1         | 33.1342   | 27.9026     | -0.247921  | 0.569219   |
| ZSWIM4       | 5.97074   | 3.03497     | -0.976228  | 0.00153868 |
| INPP1        | 10.4638   | 10.6508     | 0.0255635  | 0.981441   |
| RPF2         | 50.2798   | 54.389      | 0.113337   | 0.868932   |
| LRRC34       | 1.68818   | 0.715449    | -1.23855   | 0.00478151 |
| HOXA10,HOXA9 | 29.2126   | 41.8424     | 0.518377   | 0.073625   |
| RRNAD1       | 14.4623   | 6.42384     | -1.17079   | 0.00153868 |
| DDB1         | 65.1531   | 67.2522     | 0.0457464  | 0.968712   |
| PTTG1IP      | 80.907    | 77.2177     | -0.0673317 | 0.936029   |
| DHX29        | 3.47853   | 4.8386      | 0.476111   | 0.138886   |
| TIMM9        | 44.1288   | 27.9897     | -0.656826  | 0.0220668  |
| API5         | 25.9889   | 35.7261     | 0.459079   | 0.113276   |
| UBAC1        | 38.7454   | 48.9805     | 0.338182   | 0.346208   |
| PTDSS2       | 48.1186   | 55.6014     | 0.208525   | 0.668626   |
| CMAS         | 17.7497   | 16.4659     | -0.108307  | 0.883857   |
| TPCN1        | 5.43453   | 7.19112     | 0.404062   | 0.239661   |
| CRTC3        | 6.06905   | 5.56356     | -0.125462  | 0.86364    |
| PROCR        | 165.746   | 171.24      | 0.0470454  | 0.960032   |
| MED1         | 4.67456   | 5.21893     | 0.158925   | 0.784296   |
| DCTD         | 63.0394   | 62.4203     | -0.014237  | 0.990623   |
| TCF12        | 8.13601   | 5.80352     | -0.487395  | 0.110538   |
| SPTAN1       | 32.1564   | 21.8791     | -0.555556  | 0.203128   |
| SVIL         | 1.49028   | 1.70723     | 0.196077   | 0.774237   |
| HDAC5        | 15.1406   | 7.03286     | -1.10624   | 0.00153868 |
| CCDC114      | 0.0673838 | 0.0236954   | -1.5078    | 1          |
| RANBP10      | 5.08939   | 3.77401     | -0.431395  | 0.221797   |
| GDPD5        | 7.72765   | 8.0098      | 0.0517374  | 0.961459   |
| ARL14EP      | 5.63021   | 6.00483     | 0.0929352  | 0.922274   |
| PPP3CA       | 2.09303   | 2.48848     | 0.249671   | 0.675661   |
| TCF25        | 94.4421   | 83.197      | -0.182898  | 0.732319   |
| GTF3C2       | 11.6494   | 15.4629     | 0.408549   | 0.203984   |
| ARF6         | 19.1222   | 20.7171     | 0.115574   | 0.862143   |
| CDC42        | 77.4477   | 88.5139     | 0.192682   | 0.698259   |
| SPSB2        | 9.10144   | 10.7794     | 0.244116   | 0.975492   |
| MRPL48       | 23.0905   | 25.7493     | 0.15723    | 0.800413   |
| PAIP2        | 47.8907   | 37.4076     | -0.356413  | 0.283419   |
| EXTL1        | 0.0381479 | 0.0662117   | 0.795483   | 1          |
| AKT1         | 67.4093   | 80.0445     | 0.247856   | 0.567291   |
| FNDC3B       | 1.69826   | 1.72954     | 0.0263301  | 0.981441   |
| NEO1         | 5.59893   | 3.45594     | -0.696073  | 0.00897284 |
| RBM22        | 21.3908   | 21.0193     | -0.0252762 | 0.980228   |
| USP5         | 30.4436   | 37.3988     | 0.296852   | 0.432815   |
| MIR4792      | 0         | 425.882 inf |            | 0.284182   |
| SNORD50A     | 0         | 373.653 inf |            | 0.33087    |
| SNORA15      | 0         | 4.29014 inf |            | 0.468024   |
| SNORD9       | 0         | 21.4904 inf |            | 0.499306   |
| HNRNPC       | 153.16    | 159.326     | 0.0569447  | 0.952184   |
| OR4F5        | 0         | 0           | 0          | 1          |

|               |   |            |     |   |
|---------------|---|------------|-----|---|
| OR4F3         | 0 | 0          | 0   | 1 |
| LOC254099     | 0 | 0          | 0   | 1 |
| MIR200B       | 0 | 0          | 0   | 1 |
| MIR200A       | 0 | 0          | 0   | 1 |
| MIR429        | 0 | 0          | 0   | 1 |
| TTL10         | 0 | 0          | 0   | 1 |
| TMEM88B       | 0 | 0          | 0   | 1 |
| MMP23A        | 0 | 0          | 0   | 1 |
| GABRD         | 0 | 0          | 0   | 1 |
| ACTRT2        | 0 | 0          | 0   | 1 |
| MIR4251       | 0 | 0          | 0   | 1 |
| CCDC27        | 0 | 0          | 0   | 1 |
| LOC728716     | 0 | 0          | 0   | 1 |
| LOC284661     | 0 | 0          | 0   | 1 |
| AJAP1         | 0 | 0          | 0   | 1 |
| MIR4417       | 0 | 0          | 0   | 1 |
| HES3          | 0 | 0          | 0   | 1 |
| RBP7          | 0 | 0.0364937  | inf | 1 |
| MTOR-AS1      | 0 | 0.0350204  | inf | 1 |
| ANGPTL7       | 0 | 0          | 0   | 1 |
| PTCHD2        | 0 | 0          | 0   | 1 |
| DRAXIN        | 0 | 0          | 0   | 1 |
| SNORA59A      | 0 | 0          | 0   | 1 |
| AADA4L4       | 0 | 0          | 0   | 1 |
| AADA4L3       | 0 | 0          | 0   | 1 |
| C1orf158      | 0 | 0          | 0   | 1 |
| PRAMEF12      | 0 | 0          | 0   | 1 |
| PRAMEF1       | 0 | 0          | 0   | 1 |
| PRAMEF2       | 0 | 0          | 0   | 1 |
| PRAMEF7,PRAMI | 0 | 0          | 0   | 1 |
| PRAMEF22      | 0 | 0          | 0   | 1 |
| PRAMEF5       | 0 | 0          | 0   | 1 |
| PRAMEF9       | 0 | 0          | 0   | 1 |
| PRAMEF16      | 0 | 0          | 0   | 1 |
| PRAMEF20,PRAM | 0 | 0          | 0   | 1 |
| PRAMEF9       | 0 | 0          | 0   | 1 |
| PRAMEF17      | 0 | 0          | 0   | 1 |
| PRAMEF20,PRAM | 0 | 0          | 0   | 1 |
| PDPN          | 0 | 0          | 0   | 1 |
| CELA2A        | 0 | 0          | 0   | 1 |
| CELA2B        | 0 | 0          | 0   | 1 |
| TMEM82        | 0 | 0          | 0   | 1 |
| CLCNKB        | 0 | 0          | 0   | 1 |
| MIR3675       | 0 | 0          | 0   | 1 |
| MIR3675       | 0 | 0          | 0   | 1 |
| PADI4         | 0 | 0          | 0   | 1 |
| PADI6         | 0 | 0          | 0   | 1 |
| IGSF21        | 0 | 0          | 0   | 1 |
| KLHDC7A       | 0 | 0.00834716 | inf | 1 |

|             |   |            |     |   |
|-------------|---|------------|-----|---|
| PAX7        | 0 | 0          | 0   | 1 |
| HTR6        | 0 | 0.0156181  | inf | 1 |
| PLA2G5      | 0 | 0          | 0   | 1 |
| PLA2G2F     | 0 | 0          | 0   | 1 |
| UBXN10      | 0 | 0          | 0   | 1 |
| VWA5B1      | 0 | 0          | 0   | 1 |
| FAM43B      | 0 | 0          | 0   | 1 |
| CELA3B      | 0 | 0          | 0   | 1 |
| CELA3A      | 0 | 0          | 0   | 1 |
| EPHA8       | 0 | 0.00384827 | inf | 1 |
| C1QA        | 0 | 0          | 0   | 1 |
| C1QC        | 0 | 0          | 0   | 1 |
| C1QB        | 0 | 0          | 0   | 1 |
| MIR4684     | 0 | 0          | 0   | 1 |
| MIR3115     | 0 | 0          | 0   | 1 |
| MIR378F     | 0 | 0          | 0   | 1 |
| LOC284632   | 0 | 0          | 0   | 1 |
| NCMAP       | 0 | 0.00282094 | inf | 1 |
| CATSPER4    | 0 | 0          | 0   | 1 |
| CD52        | 0 | 0.0353109  | inf | 1 |
| MIR1976     | 0 | 0          | 0   | 1 |
| OPRD1       | 0 | 0.0343948  | inf | 1 |
| LOC149086   | 0 | 0          | 0   | 1 |
| LOC284551   | 0 | 0          | 0   | 1 |
| HMGB4       | 0 | 0          | 0   | 1 |
| LOC402779   | 0 | 0          | 0   | 1 |
| C1orf94     | 0 | 0          | 0   | 1 |
| GJB5        | 0 | 0.00933718 | inf | 1 |
| GJB4        | 0 | 0          | 0   | 1 |
| GJA4        | 0 | 0          | 0   | 1 |
| TEKT2       | 0 | 0          | 0   | 1 |
| MIR4255     | 0 | 0          | 0   | 1 |
| MIR3659     | 0 | 0          | 0   | 1 |
| MIR30E      | 0 | 0          | 0   | 1 |
| MIR30C1     | 0 | 0          | 0   | 1 |
| GUCA2B      | 0 | 0          | 0   | 1 |
| TMEM125     | 0 | 0          | 0   | 1 |
| KLF17       | 0 | 0.00577813 | inf | 1 |
| MIR5584     | 0 | 0          | 0   | 1 |
| SNORD38A    | 0 | 0          | 0   | 1 |
| SNORD38B    | 0 | 0          | 0   | 1 |
| EFCAB14-AS1 | 0 | 0          | 0   | 1 |
| CYP4B1      | 0 | 0          | 0   | 1 |
| CYP4X1      | 0 | 0          | 0   | 1 |
| CYP4Z1      | 0 | 0          | 0   | 1 |
| CYP4A22     | 0 | 0          | 0   | 1 |
| SLC5A9      | 0 | 0          | 0   | 1 |
| ELAVL4      | 0 | 0          | 0   | 1 |
| C1orf185    | 0 | 0          | 0   | 1 |

|              |   |            |     |   |
|--------------|---|------------|-----|---|
| PODN         | 0 | 0          | 0   | 1 |
| DMRTB1       | 0 | 0          | 0   | 1 |
| MIR4781      | 0 | 0          | 0   | 1 |
| C1orf177     | 0 | 0          | 0   | 1 |
| BSND         | 0 | 0          | 0   | 1 |
| PCSK9        | 0 | 0          | 0   | 1 |
| MIR4422      | 0 | 0          | 0   | 1 |
| C8A          | 0 | 0          | 0   | 1 |
| UBE2U        | 0 | 0          | 0   | 1 |
| MIR4794      | 0 | 0          | 0   | 1 |
| MIR3117      | 0 | 0          | 0   | 1 |
| TCTEX1D1     | 0 | 0.00379884 | inf | 1 |
| PIN1P1       | 0 | 0          | 0   | 1 |
| LHX8         | 0 | 0          | 0   | 1 |
| SNORD45C     | 0 | 0          | 0   | 1 |
| SNORD45B     | 0 | 0          | 0   | 1 |
| ST6GALNAC5   | 0 | 0          | 0   | 1 |
| AK5          | 0 | 0.00298046 | inf | 1 |
| GIPC2        | 0 | 0.00616717 | inf | 1 |
| MGC27382     | 0 | 0          | 0   | 1 |
| PTGFR        | 0 | 0          | 0   | 1 |
| LPHN2        | 0 | 0          | 0   | 1 |
| MIR4423      | 0 | 0          | 0   | 1 |
| CLCA1        | 0 | 0          | 0   | 1 |
| CLCA4        | 0 | 0          | 0   | 1 |
| GBP1P1       | 0 | 0          | 0   | 1 |
| C1orf146     | 0 | 0          | 0   | 1 |
| SNORA66      | 0 | 0          | 0   | 1 |
| MIR760       | 0 | 0          | 0   | 1 |
| DPYD-AS1     | 0 | 0          | 0   | 1 |
| LOC729987    | 0 | 0          | 0   | 1 |
| LOC100129620 | 0 | 0          | 0   | 1 |
| LPPR4        | 0 | 0          | 0   | 1 |
| PALMD        | 0 | 0          | 0   | 1 |
| MIR553       | 0 | 0          | 0   | 1 |
| GPR88        | 0 | 0          | 0   | 1 |
| VCAM1        | 0 | 0          | 0   | 1 |
| S1PR1        | 0 | 0.00437984 | inf | 1 |
| DNAJA1P5     | 0 | 0          | 0   | 1 |
| AMY2A        | 0 | 0          | 0   | 1 |
| AMY1A        | 0 | 0          | 0   | 1 |
| AMY1A        | 0 | 0          | 0   | 1 |
| NTNG1        | 0 | 0          | 0   | 1 |
| VAV3-AS1     | 0 | 0          | 0   | 1 |
| NBPF6        | 0 | 0          | 0   | 1 |
| SRG7         | 0 | 0          | 0   | 1 |
| MIR197       | 0 | 0          | 0   | 1 |
| SLC6A17      | 0 | 0          | 0   | 1 |
| CYMP         | 0 | 0          | 0   | 1 |

|              |   |               |   |   |
|--------------|---|---------------|---|---|
| CD53         | 0 | 0             | 0 | 1 |
| CHI3L2       | 0 | 0             | 0 | 1 |
| CHIA         | 0 | 0             | 0 | 1 |
| PIFO         | 0 | 0             | 0 | 1 |
| SYCP1        | 0 | 0             | 0 | 1 |
| TSHB         | 0 | 0             | 0 | 1 |
| MIR320B1     | 0 | 0             | 0 | 1 |
| CD2          | 0 | 0             | 0 | 1 |
| MIR942       | 0 | 0             | 0 | 1 |
| HSD3B2       | 0 | 0             | 0 | 1 |
| HSD3B1       | 0 | 0             | 0 | 1 |
| HIST2H2BA    | 0 | 0             | 0 | 1 |
| EMBP1        | 0 | 0             | 0 | 1 |
| GPR89C       | 0 | 0             | 0 | 1 |
| GJA8         | 0 | 0             | 0 | 1 |
| PPIAL4E      | 0 | 0             | 0 | 1 |
| PPIAL4D      | 0 | 0             | 0 | 1 |
| FCGR1C       | 0 | 0             | 0 | 1 |
| PPIAL4B      | 0 | 0             | 0 | 1 |
| FCGR1A       | 0 | 0             | 0 | 1 |
| HIST2H4B     | 0 | 0             | 0 | 1 |
| HIST2H2AA3   | 0 | 0.11208 inf   |   | 1 |
| HIST2H3C     | 0 | 0             | 0 | 1 |
| MIR4257      | 0 | 0             | 0 | 1 |
| MIR554       | 0 | 0             | 0 | 1 |
| RIAD1        | 0 | 0             | 0 | 1 |
| LOC100132111 | 0 | 0             | 0 | 1 |
| LCE5A        | 0 | 0.0401621 inf |   | 1 |
| CRCT1        | 0 | 0             | 0 | 1 |
| LCE3C        | 0 | 0             | 0 | 1 |
| LCE3B        | 0 | 0             | 0 | 1 |
| LCE2D        | 0 | 0             | 0 | 1 |
| LCE2C        | 0 | 0             | 0 | 1 |
| LCE2B        | 0 | 0             | 0 | 1 |
| LCE2A        | 0 | 0             | 0 | 1 |
| LCE4A        | 0 | 0             | 0 | 1 |
| C1orf68      | 0 | 0             | 0 | 1 |
| KPRP         | 0 | 0             | 0 | 1 |
| LCE1D        | 0 | 0             | 0 | 1 |
| LCE1A        | 0 | 0             | 0 | 1 |
| LCE6A        | 0 | 0             | 0 | 1 |
| SMCP         | 0 | 0             | 0 | 1 |
| IVL          | 0 | 0             | 0 | 1 |
| SPRR4        | 0 | 0             | 0 | 1 |
| SPRR1A       | 0 | 0             | 0 | 1 |
| SPRR3        | 0 | 0             | 0 | 1 |
| SPRR1B       | 0 | 0             | 0 | 1 |
| LELP1        | 0 | 0             | 0 | 1 |
| PRR9         | 0 | 0             | 0 | 1 |

|              |   |                |   |   |
|--------------|---|----------------|---|---|
| LOR          | 0 | 0              | 0 | 1 |
| S100A9       | 0 | 0.021699 inf   |   | 1 |
| S100A7A      | 0 | 0              | 0 | 1 |
| NPR1         | 0 | 0              | 0 | 1 |
| AQP10        | 0 | 0              | 0 | 1 |
| MIR4258      | 0 | 0              | 0 | 1 |
| LENEP        | 0 | 0              | 0 | 1 |
| DCST1        | 0 | 0              | 0 | 1 |
| MIR92B       | 0 | 0              | 0 | 1 |
| TTC24        | 0 | 0              | 0 | 1 |
| CYCSP52      | 0 | 0              | 0 | 1 |
| CD1A         | 0 | 0              | 0 | 1 |
| CD1C         | 0 | 0              | 0 | 1 |
| CD1E         | 0 | 0              | 0 | 1 |
| OR10K1       | 0 | 0              | 0 | 1 |
| OR10R2       | 0 | 0              | 0 | 1 |
| OR10Z1       | 0 | 0              | 0 | 1 |
| OR6K6        | 0 | 0              | 0 | 1 |
| MNDA         | 0 | 0              | 0 | 1 |
| PYHIN1       | 0 | 0              | 0 | 1 |
| CADM3        | 0 | 0              | 0 | 1 |
| DARC         | 0 | 0              | 0 | 1 |
| FCER1A       | 0 | 0              | 0 | 1 |
| OR10J1       | 0 | 0              | 0 | 1 |
| APCS         | 0 | 0              | 0 | 1 |
| FCRL6        | 0 | 0              | 0 | 1 |
| SLAMF8       | 0 | 0.00280526 inf |   | 1 |
| LOC100505633 | 0 | 0              | 0 | 1 |
| ATP1A4       | 0 | 0              | 0 | 1 |
| FCGR2C       | 0 | 0              | 0 | 1 |
| FCGR2B       | 0 | 0              | 0 | 1 |
| MIR4654      | 0 | 0              | 0 | 1 |
| MIR556       | 0 | 0              | 0 | 1 |
| LRRC52       | 0 | 0              | 0 | 1 |
| LOC440700    | 0 | 0              | 0 | 1 |
| FMO9P        | 0 | 0              | 0 | 1 |
| DUSP27       | 0 | 0              | 0 | 1 |
| MIR557       | 0 | 0              | 0 | 1 |
| XCL1         | 0 | 0.00827894 inf |   | 1 |
| LINC00626    | 0 | 0              | 0 | 1 |
| METTL11B     | 0 | 0              | 0 | 1 |
| PRRX1        | 0 | 0              | 0 | 1 |
| MROH9        | 0 | 0              | 0 | 1 |
| FMO3         | 0 | 0              | 0 | 1 |
| MIR1295B     | 0 | 0              | 0 | 1 |
| FMO6P        | 0 | 0              | 0 | 1 |
| FMO2         | 0 | 0              | 0 | 1 |
| FMO1         | 0 | 0              | 0 | 1 |
| MIR3120      | 0 | 0              | 0 | 1 |

|           |   |            |     |   |
|-----------|---|------------|-----|---|
| C1orf105  | 0 | 0          | 0   | 1 |
| FASLG     | 0 | 0          | 0   | 1 |
| LOC730159 | 0 | 0          | 0   | 1 |
| TNN       | 0 | 0          | 0   | 1 |
| FAM5B     | 0 | 0          | 0   | 1 |
| TEX35     | 0 | 0          | 0   | 1 |
| MIR4424   | 0 | 0          | 0   | 1 |
| FAM163A   | 0 | 0.00436175 | inf | 1 |
| GM140     | 0 | 0          | 0   | 1 |
| CACNA1E   | 0 | 0.00077528 | inf | 1 |
| LINC00272 | 0 | 0          | 0   | 1 |
| RGSL1     | 0 | 0          | 0   | 1 |
| LOC284648 | 0 | 0          | 0   | 1 |
| HMCN1     | 0 | 0          | 0   | 1 |
| LOC440704 | 0 | 0          | 0   | 1 |
| RGS18     | 0 | 0          | 0   | 1 |
| RGS21     | 0 | 0          | 0   | 1 |
| RGS1      | 0 | 0          | 0   | 1 |
| RGS13     | 0 | 0          | 0   | 1 |
| MIR1278   | 0 | 0          | 0   | 1 |
| CFH       | 0 | 0          | 0   | 1 |
| CFHR3     | 0 | 0          | 0   | 1 |
| CFHR1     | 0 | 0          | 0   | 1 |
| CFHR4     | 0 | 0          | 0   | 1 |
| CFHR2     | 0 | 0          | 0   | 1 |
| LHX9      | 0 | 0          | 0   | 1 |
| PTPRC     | 0 | 0          | 0   | 1 |
| GPR25     | 0 | 0          | 0   | 1 |
| PKP1      | 0 | 0          | 0   | 1 |
| MIR5191   | 0 | 0          | 0   | 1 |
| MIR1231   | 0 | 0          | 0   | 1 |
| GPR37L1   | 0 | 0          | 0   | 1 |
| LOC641515 | 0 | 0.0128188  | inf | 1 |
| SNORA77   | 0 | 0          | 0   | 1 |
| LAX1      | 0 | 0          | 0   | 1 |
| CTSE      | 0 | 0          | 0   | 1 |
| IL19      | 0 | 0.00621201 | inf | 1 |
| IL20      | 0 | 0          | 0   | 1 |
| C4BPA     | 0 | 0          | 0   | 1 |
| CR2       | 0 | 0          | 0   | 1 |
| CR1L      | 0 | 0          | 0   | 1 |
| MIR205HG  | 0 | 0          | 0   | 1 |
| SYT14     | 0 | 0          | 0   | 1 |
| SERTAD4   | 0 | 0          | 0   | 1 |
| MIR3122   | 0 | 0          | 0   | 1 |
| SNORA16B  | 0 | 1.29837    | inf | 1 |
| LINC00538 | 0 | 0          | 0   | 1 |
| KCNK2     | 0 | 0          | 0   | 1 |
| LINC00210 | 0 | 0          | 0   | 1 |

|              |   |           |     |   |
|--------------|---|-----------|-----|---|
| RNU5F-1      | 0 | 0         | 0   | 1 |
| MARK1        | 0 | 0         | 0   | 1 |
| C1orf65      | 0 | 0         | 0   | 1 |
| MIXL1        | 0 | 0         | 0   | 1 |
| C1orf95      | 0 | 0         | 0   | 1 |
| PRSS38       | 0 | 0         | 0   | 1 |
| WNT3A        | 0 | 0         | 0   | 1 |
| MIR3620      | 0 | 0         | 0   | 1 |
| MIR4666A     | 0 | 0         | 0   | 1 |
| CAPN9        | 0 | 0         | 0   | 1 |
| MAP10        | 0 | 0         | 0   | 1 |
| MIR4427      | 0 | 0         | 0   | 1 |
| SLC35F3      | 0 | 0         | 0   | 1 |
| MIR4671      | 0 | 0         | 0   | 1 |
| ACTN2        | 0 | 0         | 0   | 1 |
| LOC100130331 | 0 | 0         | 0   | 1 |
| RPS7P5       | 0 | 0         | 0   | 1 |
| FMN2         | 0 | 0         | 0   | 1 |
| MIR3123      | 0 | 0         | 0   | 1 |
| WDR64        | 0 | 0         | 0   | 1 |
| MIR4677      | 0 | 0         | 0   | 1 |
| LOC339529    | 0 | 0         | 0   | 1 |
| C1orf100     | 0 | 0.0453774 | inf | 1 |
| OR2W5        | 0 | 0         | 0   | 1 |
| GCSAML       | 0 | 0         | 0   | 1 |
| OR2G2        | 0 | 0         | 0   | 1 |
| OR2G3        | 0 | 0         | 0   | 1 |
| OR2W3        | 0 | 0         | 0   | 1 |
| OR2T8        | 0 | 0         | 0   | 1 |
| OR2L13       | 0 | 0         | 0   | 1 |
| OR2L8        | 0 | 0         | 0   | 1 |
| OR2AK2       | 0 | 0         | 0   | 1 |
| OR2L1P       | 0 | 0         | 0   | 1 |
| OR2L5        | 0 | 0         | 0   | 1 |
| OR2L2        | 0 | 0         | 0   | 1 |
| OR2L3        | 0 | 0         | 0   | 1 |
| OR2M1P       | 0 | 0         | 0   | 1 |
| OR2M5        | 0 | 0         | 0   | 1 |
| OR2M2        | 0 | 0         | 0   | 1 |
| OR2M3        | 0 | 0         | 0   | 1 |
| OR2M4        | 0 | 0         | 0   | 1 |
| OR14C36      | 0 | 0         | 0   | 1 |
| OR2T4        | 0 | 0         | 0   | 1 |
| OR2T6        | 0 | 0         | 0   | 1 |
| OR2T1        | 0 | 0         | 0   | 1 |
| OR2T2        | 0 | 0         | 0   | 1 |
| OR2T3        | 0 | 0         | 0   | 1 |
| OR2T5        | 0 | 0         | 0   | 1 |
| OR2G6        | 0 | 0         | 0   | 1 |



|               |   |            |     |   |
|---------------|---|------------|-----|---|
| MIR3124       | 0 | 0          | 0   | 1 |
| FAM138F       | 0 | 0          | 0   | 1 |
| OR4F3         | 0 | 0          | 0   | 1 |
| TNFRSF18      | 0 | 0.0227477  | inf | 1 |
| HES5          | 0 | 0          | 0   | 1 |
| MIR551A       | 0 | 0          | 0   | 1 |
| TP73-AS1      | 0 | 0          | 0   | 1 |
| MIR4689       | 0 | 0          | 0   | 1 |
| MIR4252       | 0 | 0          | 0   | 1 |
| MIR34A        | 0 | 0          | 0   | 1 |
| C1orf200      | 0 | 0          | 0   | 1 |
| PRAMEF11      | 0 | 0          | 0   | 1 |
| HNRNPCL1,LOC6 | 0 | 0          | 0   | 1 |
| PRAMEF4       | 0 | 0          | 0   | 1 |
| PRAMEF10      | 0 | 0          | 0   | 1 |
| PRAMEF6       | 0 | 0          | 0   | 1 |
| PRAMEF5       | 0 | 0          | 0   | 1 |
| LOC440563     | 0 | 0          | 0   | 1 |
| PRAMEF3       | 0 | 0          | 0   | 1 |
| PRAMEF8       | 0 | 0          | 0   | 1 |
| PRAMEF13,PRAM | 0 | 0          | 0   | 1 |
| PRAMEF18      | 0 | 0          | 0   | 1 |
| PRAMEF7,PRAMI | 0 | 0          | 0   | 1 |
| PRAMEF14      | 0 | 0          | 0   | 1 |
| PRAMEF18      | 0 | 0          | 0   | 1 |
| LRRC38        | 0 | 0          | 0   | 1 |
| HSPB7         | 0 | 0          | 0   | 1 |
| ESPNP         | 0 | 0          | 0   | 1 |
| MIR3675       | 0 | 0          | 0   | 1 |
| PADI2         | 0 | 0          | 0   | 1 |
| TAS1R2        | 0 | 0          | 0   | 1 |
| MIR4695       | 0 | 0          | 0   | 1 |
| RNF186        | 0 | 0          | 0   | 1 |
| PLA2G2E       | 0 | 0          | 0   | 1 |
| PLA2G2A       | 0 | 0          | 0   | 1 |
| PLA2G2C       | 0 | 0          | 0   | 1 |
| LOC339505     | 0 | 0          | 0   | 1 |
| MIR4253       | 0 | 0          | 0   | 1 |
| RUNX3         | 0 | 0          | 0   | 1 |
| SLC30A2       | 0 | 0          | 0   | 1 |
| TRIM63        | 0 | 0          | 0   | 1 |
| ZNF683        | 0 | 0          | 0   | 1 |
| C1orf172      | 0 | 0.00953244 | inf | 1 |
| FCN3          | 0 | 0.0166793  | inf | 1 |
| CD164L2       | 0 | 0          | 0   | 1 |
| FGR           | 0 | 0          | 0   | 1 |
| MIR4420       | 0 | 0          | 0   | 1 |
| SNORD103A     | 0 | 0          | 0   | 1 |
| SNORD103A     | 0 | 0          | 0   | 1 |

|                |   |                |   |   |
|----------------|---|----------------|---|---|
| SNORD85        | 0 | 0              | 0 | 1 |
| MIR4254        | 0 | 0              | 0 | 1 |
| CSF3R          | 0 | 0              | 0 | 1 |
| GRIK3          | 0 | 0              | 0 | 1 |
| MIR5581        | 0 | 0              | 0 | 1 |
| RSPO1          | 0 | 0              | 0 | 1 |
| LOC339442      | 0 | 0              | 0 | 1 |
| SNORA55        | 0 | 1.58496 inf    |   | 1 |
| HEYL           | 0 | 0              | 0 | 1 |
| NT5C1A         | 0 | 0              | 0 | 1 |
| CLDN19         | 0 | 0.00400474 inf |   | 1 |
| KNCN           | 0 | 0              | 0 | 1 |
| PDZK1IP1       | 0 | 0              | 0 | 1 |
| TAL1           | 0 | 0              | 0 | 1 |
| SKINTL         | 0 | 0              | 0 | 1 |
| AGBL4          | 0 | 0              | 0 | 1 |
| BEND5          | 0 | 0              | 0 | 1 |
| SLC1A7         | 0 | 0              | 0 | 1 |
| SLC25A3P1      | 0 | 0              | 0 | 1 |
| LDLRAD1        | 0 | 0              | 0 | 1 |
| CDCP2          | 0 | 0              | 0 | 1 |
| TTC22          | 0 | 0              | 0 | 1 |
| C1orf168       | 0 | 0              | 0 | 1 |
| C8B            | 0 | 0              | 0 | 1 |
| DAB1           | 0 | 0              | 0 | 1 |
| MIR4711        | 0 | 0              | 0 | 1 |
| CYP2J2         | 0 | 0              | 0 | 1 |
| C1orf87        | 0 | 0              | 0 | 1 |
| KANK4          | 0 | 0.0021709 inf  |   | 1 |
| MIR3671        | 0 | 0              | 0 | 1 |
| MIR101-1       | 0 | 0              | 0 | 1 |
| INSL5          | 0 | 0              | 0 | 1 |
| MIR1262        | 0 | 0              | 0 | 1 |
| RPE65          | 0 | 0              | 0 | 1 |
| PTGER3         | 0 | 0              | 0 | 1 |
| MIR186         | 0 | 0              | 0 | 1 |
| NEGR1          | 0 | 0              | 0 | 1 |
| NEGR1-IT1      | 0 | 0              | 0 | 1 |
| C1orf173       | 0 | 0              | 0 | 1 |
| SLC44A5        | 0 | 0              | 0 | 1 |
| ASB17          | 0 | 0              | 0 | 1 |
| ELTD1          | 0 | 0              | 0 | 1 |
| MIR548AP       | 0 | 0              | 0 | 1 |
| LOC100505768   | 0 | 0              | 0 | 1 |
| GBP7           | 0 | 0              | 0 | 1 |
| GBP5           | 0 | 0              | 0 | 1 |
| BARHL2         | 0 | 0              | 0 | 1 |
| HFM1           | 0 | 0              | 0 | 1 |
| MIR137,MIR137H | 0 | 0              | 0 | 1 |

|              |   |            |     |   |
|--------------|---|------------|-----|---|
| MIR2682      | 0 | 0          | 0   | 1 |
| LPPR5        | 0 | 0          | 0   | 1 |
| LOC100128787 | 0 | 0          | 0   | 1 |
| RNU6-6       | 0 | 0          | 0   | 1 |
| OLFM3        | 0 | 0          | 0   | 1 |
| COL11A1      | 0 | 0          | 0   | 1 |
| AMY1A        | 0 | 0          | 0   | 1 |
| VAV3         | 0 | 0          | 0   | 1 |
| NBPF4        | 0 | 0          | 0   | 1 |
| HENMT1       | 0 | 0.00517839 | inf | 1 |
| MYBPHL       | 0 | 0.00860239 | inf | 1 |
| EPS8L3       | 0 | 0          | 0   | 1 |
| KCNA10       | 0 | 0          | 0   | 1 |
| KCNA2        | 0 | 0          | 0   | 1 |
| KCNA3        | 0 | 0          | 0   | 1 |
| LRIF1        | 0 | 0.0130925  | inf | 1 |
| PGCP1        | 0 | 0.025539   | inf | 1 |
| ADORA3       | 0 | 0          | 0   | 1 |
| MIR4256      | 0 | 0          | 0   | 1 |
| LOC643441    | 0 | 0          | 0   | 1 |
| SYT6         | 0 | 0          | 0   | 1 |
| DENND2C      | 0 | 0          | 0   | 1 |
| TSPAN2       | 0 | 0          | 0   | 1 |
| NGF          | 0 | 0          | 0   | 1 |
| VTCN1        | 0 | 0          | 0   | 1 |
| SPAG17       | 0 | 0.00219305 | inf | 1 |
| HMGCS2       | 0 | 0          | 0   | 1 |
| ADAM30       | 0 | 0          | 0   | 1 |
| PPIAL4B      | 0 | 0          | 0   | 1 |
| LOC653513    | 0 | 0          | 0   | 1 |
| PDZK1P1      | 0 | 0          | 0   | 1 |
| LINC00624    | 0 | 0.002674   | inf | 1 |
| GJA5         | 0 | 0          | 0   | 1 |
| PDZK1P1      | 0 | 0          | 0   | 1 |
| MIR5087      | 0 | 0          | 0   | 1 |
| FLJ39739     | 0 | 0          | 0   | 1 |
| PPIAL4B      | 0 | 0          | 0   | 1 |
| PPIAL4D      | 0 | 0          | 0   | 1 |
| HIST2H3A     | 0 | 0          | 0   | 1 |
| HIST2H4A     | 0 | 0          | 0   | 1 |
| HORMAD1      | 0 | 0          | 0   | 1 |
| SELENBP1     | 0 | 0          | 0   | 1 |
| LINGO4       | 0 | 0.00508311 | inf | 1 |
| C2CD4D       | 0 | 0          | 0   | 1 |
| THEM5        | 0 | 0          | 0   | 1 |
| TCHHL1       | 0 | 0          | 0   | 1 |
| TCHH         | 0 | 0          | 0   | 1 |
| RPTN         | 0 | 0          | 0   | 1 |
| FLG2         | 0 | 0          | 0   | 1 |

|              |   |   |   |   |
|--------------|---|---|---|---|
| CRNN         | 0 | 0 | 0 | 1 |
| LCE3E        | 0 | 0 | 0 | 1 |
| LCE3D        | 0 | 0 | 0 | 1 |
| LCE3A        | 0 | 0 | 0 | 1 |
| SPRR2D       | 0 | 0 | 0 | 1 |
| SPRR2A       | 0 | 0 | 0 | 1 |
| SPRR2B       | 0 | 0 | 0 | 1 |
| SPRR2E       | 0 | 0 | 0 | 1 |
| SPRR2F       | 0 | 0 | 0 | 1 |
| SPRR2C       | 0 | 0 | 0 | 1 |
| SPRR2G       | 0 | 0 | 0 | 1 |
| PGLYRP3      | 0 | 0 | 0 | 1 |
| PGLYRP4      | 0 | 0 | 0 | 1 |
| S100A12      | 0 | 0 | 0 | 1 |
| S100A8       | 0 | 0 | 0 | 1 |
| S100A7L2     | 0 | 0 | 0 | 1 |
| S100A7       | 0 | 0 | 0 | 1 |
| MIR190B      | 0 | 0 | 0 | 1 |
| SNORA42      | 0 | 0 | 0 | 1 |
| C1orf61      | 0 | 0 | 0 | 1 |
| MIR9-1       | 0 | 0 | 0 | 1 |
| INSRR        | 0 | 0 | 0 | 1 |
| MIR765       | 0 | 0 | 0 | 1 |
| ETV3L        | 0 | 0 | 0 | 1 |
| FCRL5        | 0 | 0 | 0 | 1 |
| FCRL4        | 0 | 0 | 0 | 1 |
| FCRL3        | 0 | 0 | 0 | 1 |
| FCRL2        | 0 | 0 | 0 | 1 |
| FCRL1        | 0 | 0 | 0 | 1 |
| CD5L         | 0 | 0 | 0 | 1 |
| LOC646268    | 0 | 0 | 0 | 1 |
| CD1B         | 0 | 0 | 0 | 1 |
| OR10T2       | 0 | 0 | 0 | 1 |
| OR10K2       | 0 | 0 | 0 | 1 |
| OR6Y1        | 0 | 0 | 0 | 1 |
| OR6P1        | 0 | 0 | 0 | 1 |
| OR10X1       | 0 | 0 | 0 | 1 |
| SPTA1        | 0 | 0 | 0 | 1 |
| OR6K2        | 0 | 0 | 0 | 1 |
| OR6K3        | 0 | 0 | 0 | 1 |
| OR6N1        | 0 | 0 | 0 | 1 |
| OR6N2        | 0 | 0 | 0 | 1 |
| AIM2         | 0 | 0 | 0 | 1 |
| LOC100131825 | 0 | 0 | 0 | 1 |
| OR10J3       | 0 | 0 | 0 | 1 |
| OR10J5       | 0 | 0 | 0 | 1 |
| CRP          | 0 | 0 | 0 | 1 |
| IGSF9        | 0 | 0 | 0 | 1 |
| SLAMF9       | 0 | 0 | 0 | 1 |

|              |   |            |     |   |
|--------------|---|------------|-----|---|
| SLAMF6       | 0 | 0          | 0   | 1 |
| SLAMF1       | 0 | 0          | 0   | 1 |
| CD244        | 0 | 0          | 0   | 1 |
| ITLN1        | 0 | 0          | 0   | 1 |
| ITLN2        | 0 | 0          | 0   | 1 |
| MPZ          | 0 | 0.00621325 | inf | 1 |
| FCGR3A       | 0 | 0          | 0   | 1 |
| FCGR3B       | 0 | 0          | 0   | 1 |
| C1orf111     | 0 | 0          | 0   | 1 |
| LOC100505795 | 0 | 0          | 0   | 1 |
| LMX1A        | 0 | 0          | 0   | 1 |
| RXRG         | 0 | 0          | 0   | 1 |
| MIR921       | 0 | 0          | 0   | 1 |
| ADCY10       | 0 | 0          | 0   | 1 |
| XCL2         | 0 | 0          | 0   | 1 |
| DPT          | 0 | 0          | 0   | 1 |
| SELP         | 0 | 0          | 0   | 1 |
| SELE         | 0 | 0          | 0   | 1 |
| MIR3119-1    | 0 | 0          | 0   | 1 |
| LOC284688    | 0 | 0          | 0   | 1 |
| MIR1295A     | 0 | 0          | 0   | 1 |
| MYOC         | 0 | 0          | 0   | 1 |
| DNM3OS       | 0 | 0          | 0   | 1 |
| TNFSF18      | 0 | 0          | 0   | 1 |
| SLC9C2       | 0 | 0          | 0   | 1 |
| SNORD81      | 0 | 0          | 0   | 1 |
| SNORD79      | 0 | 76.8299    | inf | 1 |
| SNORD78      | 0 | 0          | 0   | 1 |
| SNORD44      | 0 | 801.784    | inf | 1 |
| SNORD77      | 0 | 0          | 0   | 1 |
| SNORD75      | 0 | 0          | 0   | 1 |
| SNORD74      | 0 | 0          | 0   | 1 |
| TNR          | 0 | 0          | 0   | 1 |
| MIR488       | 0 | 0          | 0   | 1 |
| LOC730102    | 0 | 0          | 0   | 1 |
| MIR3121      | 0 | 0          | 0   | 1 |
| RGS8         | 0 | 0          | 0   | 1 |
| SHCBP1L      | 0 | 0          | 0   | 1 |
| LOC100288079 | 0 | 0          | 0   | 1 |
| MIR548F1     | 0 | 0          | 0   | 1 |
| PTGS2        | 0 | 0          | 0   | 1 |
| FAM5C        | 0 | 0          | 0   | 1 |
| KCNT2        | 0 | 0          | 0   | 1 |
| MIR4735      | 0 | 0          | 0   | 1 |
| DENND1B      | 0 | 0          | 0   | 1 |
| ATP6V1G3     | 0 | 0          | 0   | 1 |
| MIR181B1     | 0 | 0          | 0   | 1 |
| MIR181A1     | 0 | 0          | 0   | 1 |
| CACNA1S      | 0 | 0          | 0   | 1 |

|                |   |            |     |   |
|----------------|---|------------|-----|---|
| TNNT2          | 0 | 0          | 0   | 1 |
| LAD1           | 0 | 0          | 0   | 1 |
| RNU6-79        | 0 | 0          | 0   | 1 |
| MYBPH          | 0 | 0          | 0   | 1 |
| CHI3L1         | 0 | 0.00626173 | inf | 1 |
| CHIT1          | 0 | 0          | 0   | 1 |
| FMOD           | 0 | 0          | 0   | 1 |
| LINC00303      | 0 | 0          | 0   | 1 |
| KLHDC8A        | 0 | 0          | 0   | 1 |
| MIR135B        | 0 | 0          | 0   | 1 |
| LOC284578      | 0 | 0          | 0   | 1 |
| PM20D1         | 0 | 0          | 0   | 1 |
| SLC26A9        | 0 | 0          | 0   | 1 |
| C1orf186       | 0 | 0          | 0   | 1 |
| FAIM3          | 0 | 0          | 0   | 1 |
| FCAMR          | 0 | 0          | 0   | 1 |
| MIR29C         | 0 | 0          | 0   | 1 |
| MIR29B2        | 0 | 0          | 0   | 1 |
| CD34           | 0 | 0          | 0   | 1 |
| RD3            | 0 | 0          | 0   | 1 |
| ESRRG          | 0 | 0          | 0   | 1 |
| LOC728463      | 0 | 0          | 0   | 1 |
| SLC30A10       | 0 | 0          | 0   | 1 |
| MIR215         | 0 | 0          | 0   | 1 |
| MIR194-1       | 0 | 0          | 0   | 1 |
| MIR664,SNORA3f | 0 | 0          | 0   | 1 |
| C1orf140       | 0 | 0          | 0   | 1 |
| MIR320B2       | 0 | 0          | 0   | 1 |
| MIR4742        | 0 | 0          | 0   | 1 |
| LEFTY1         | 0 | 0          | 0   | 1 |
| ZNF847P        | 0 | 0          | 0   | 1 |
| WNT9A          | 0 | 0          | 0   | 1 |
| MIR5008        | 0 | 0          | 0   | 1 |
| HIST3H3        | 0 | 0          | 0   | 1 |
| PGBD5          | 0 | 0          | 0   | 1 |
| LOC149373      | 0 | 0          | 0   | 1 |
| LINC00582      | 0 | 0          | 0   | 1 |
| LOC100506795   | 0 | 0.0031342  | inf | 1 |
| MIR4753        | 0 | 0          | 0   | 1 |
| MIR1537        | 0 | 0          | 0   | 1 |
| NID1           | 0 | 0          | 0   | 1 |
| MT1P2          | 0 | 0          | 0   | 1 |
| ZP4            | 0 | 0          | 0   | 1 |
| LOC339535      | 0 | 0          | 0   | 1 |
| GREM2          | 0 | 0          | 0   | 1 |
| RGS7           | 0 | 0          | 0   | 1 |
| PLD5           | 0 | 0          | 0   | 1 |
| LOC255654      | 0 | 0.0132121  | inf | 1 |
| MIR3916        | 0 | 0          | 0   | 1 |

|              |   |            |     |   |
|--------------|---|------------|-----|---|
| OR2B11       | 0 | 0          | 0   | 1 |
| OR2C3        | 0 | 0          | 0   | 1 |
| OR13G1       | 0 | 0          | 0   | 1 |
| OR6F1        | 0 | 0          | 0   | 1 |
| OR1C1        | 0 | 0          | 0   | 1 |
| OR14A16      | 0 | 0          | 0   | 1 |
| OR11L1       | 0 | 0          | 0   | 1 |
| OR2T33       | 0 | 0          | 0   | 1 |
| OR2T12       | 0 | 0          | 0   | 1 |
| OR2M7        | 0 | 0          | 0   | 1 |
| OR2T29       | 0 | 0          | 0   | 1 |
| OR2T34       | 0 | 0          | 0   | 1 |
| OR2T10       | 0 | 0          | 0   | 1 |
| OR2T11       | 0 | 0          | 0   | 1 |
| OR2T35       | 0 | 0          | 0   | 1 |
| OR2T27       | 0 | 0          | 0   | 1 |
| OR1411       | 0 | 0          | 0   | 1 |
| LYPD8        | 0 | 0          | 0   | 1 |
| LINC00200    | 0 | 0          | 0   | 1 |
| ADARB2-AS1   | 0 | 0          | 0   | 1 |
| LINC00705    | 0 | 0          | 0   | 1 |
| AKR1E2       | 0 | 0          | 0   | 1 |
| AKR1C1       | 0 | 0          | 0   | 1 |
| AKR1C4       | 0 | 0          | 0   | 1 |
| UCN3         | 0 | 0          | 0   | 1 |
| CALML3       | 0 | 0          | 0   | 1 |
| MIR3155A     | 0 | 0          | 0   | 1 |
| GATA3        | 0 | 0          | 0   | 1 |
| ECHDC3       | 0 | 0          | 0   | 1 |
| MIR4480      | 0 | 0          | 0   | 1 |
| MIR1265      | 0 | 0          | 0   | 1 |
| ST8SIA6-AS1  | 0 | 0          | 0   | 1 |
| MRC1         | 0 | 0          | 0   | 1 |
| MIR511-1     | 0 | 0          | 0   | 1 |
| MRC1         | 0 | 0          | 0   | 1 |
| MIR511-2     | 0 | 0          | 0   | 1 |
| SLC39A12     | 0 | 0.00706283 | inf | 1 |
| PLXDC2       | 0 | 0          | 0   | 1 |
| MIR4675      | 0 | 0          | 0   | 1 |
| NEBL-AS1     | 0 | 0          | 0   | 1 |
| LOC100130992 | 0 | 0          | 0   | 1 |
| ARMC3        | 0 | 0          | 0   | 1 |
| PTF1A        | 0 | 0          | 0   | 1 |
| MIR603       | 0 | 0          | 0   | 1 |
| MYO3A        | 0 | 0          | 0   | 1 |
| GAD2         | 0 | 0          | 0   | 1 |
| APBB1IP      | 0 | 0          | 0   | 1 |
| LINC00202-2  | 0 | 0          | 0   | 1 |
| MIR5586      | 0 | 0          | 0   | 1 |

|                |   |            |     |   |
|----------------|---|------------|-----|---|
| LYZL1          | 0 | 0          | 0   | 1 |
| ANKRD30A       | 0 | 0          | 0   | 1 |
| ACTR3BP5       | 0 | 0          | 0   | 1 |
| LINC00839      | 0 | 0          | 0   | 1 |
| MIR5100        | 0 | 0          | 0   | 1 |
| RET            | 0 | 0          | 0   | 1 |
| FXYD4          | 0 | 0          | 0   | 1 |
| LINC00619      | 0 | 0          | 0   | 1 |
| LINC00840      | 0 | 0          | 0   | 1 |
| LINC00841      | 0 | 0          | 0   | 1 |
| LOC100130539   | 0 | 0          | 0   | 1 |
| TMEM72         | 0 | 0          | 0   | 1 |
| ANKRD30BP3     | 0 | 0          | 0   | 1 |
| MIR3156-1      | 0 | 0          | 0   | 1 |
| PPYR1          | 0 | 0          | 0   | 1 |
| ANXA8L2        | 0 | 0          | 0   | 1 |
| BMS1P2         | 0 | 0          | 0   | 1 |
| FAM25C         | 0 | 0          | 0   | 1 |
| ANXA8          | 0 | 0          | 0   | 1 |
| FAM170B-AS1    | 0 | 0          | 0   | 1 |
| C10orf71       | 0 | 0          | 0   | 1 |
| CHAT           | 0 | 0          | 0   | 1 |
| SLC18A3        | 0 | 0          | 0   | 1 |
| C10orf53       | 0 | 0          | 0   | 1 |
| MSMB           | 0 | 0          | 0   | 1 |
| PRKG1          | 0 | 0          | 0   | 1 |
| MIR605         | 0 | 0          | 0   | 1 |
| DKK1           | 0 | 0          | 0   | 1 |
| BICC1          | 0 | 0          | 0   | 1 |
| FAM133CP       | 0 | 0.00382254 | inf | 1 |
| PHYHIPL        | 0 | 0          | 0   | 1 |
| C10orf107      | 0 | 0          | 0   | 1 |
| MIR548AV       | 0 | 0          | 0   | 1 |
| ANXA2P3        | 0 | 0          | 0   | 1 |
| LRRTM3         | 0 | 0.00181974 | inf | 1 |
| MYPN           | 0 | 0.00413302 | inf | 1 |
| SNORD98        | 0 | 0          | 0   | 1 |
| SRGN           | 0 | 0.00826593 | inf | 1 |
| CHST3          | 0 | 0          | 0   | 1 |
| MIR4676        | 0 | 0          | 0   | 1 |
| OIT3           | 0 | 0          | 0   | 1 |
| ZNF503-AS1     | 0 | 0          | 0   | 1 |
| LINC00856      | 0 | 0.00446234 | inf | 1 |
| SFTPA1         | 0 | 0          | 0   | 1 |
| LOC100288974,M | 0 | 0          | 0   | 1 |
| PLAC9          | 0 | 0.084617   | inf | 1 |
| SH2D4B         | 0 | 0.00335768 | inf | 1 |
| NRG3           | 0 | 0          | 0   | 1 |
| C10orf99       | 0 | 0          | 0   | 1 |



|              |   |                |   |   |
|--------------|---|----------------|---|---|
| CDHR1        | 0 | 0              | 0 | 1 |
| RGR          | 0 | 0              | 0 | 1 |
| LINC00858    | 0 | 0              | 0 | 1 |
| GRID1-AS1    | 0 | 0              | 0 | 1 |
| MIR4678      | 0 | 0              | 0 | 1 |
| LIPJ         | 0 | 0              | 0 | 1 |
| LIPF         | 0 | 0              | 0 | 1 |
| LIPK         | 0 | 0              | 0 | 1 |
| LIPN         | 0 | 0              | 0 | 1 |
| LIPM         | 0 | 0              | 0 | 1 |
| MIR4679-1    | 0 | 0              | 0 | 1 |
| IFIT1B       | 0 | 0              | 0 | 1 |
| LOC643529    | 0 | 0              | 0 | 1 |
| LINC00502    | 0 | 0              | 0 | 1 |
| MARK2P9      | 0 | 0.0331331 inf  |   | 1 |
| HHEX         | 0 | 0              | 0 | 1 |
| CYP26C1      | 0 | 0              | 0 | 1 |
| PDE6C        | 0 | 0              | 0 | 1 |
| LG1          | 0 | 0              | 0 | 1 |
| CYP2C18      | 0 | 0.0245561 inf  |   | 1 |
| CYP2C19      | 0 | 0              | 0 | 1 |
| C10orf129    | 0 | 0              | 0 | 1 |
| DNTT         | 0 | 0              | 0 | 1 |
| LOC100505540 | 0 | 0              | 0 | 1 |
| MIR5692C2    | 0 | 0              | 0 | 1 |
| NKX2-3       | 0 | 0              | 0 | 1 |
| MIR608       | 0 | 0              | 0 | 1 |
| FLJ41350     | 0 | 0              | 0 | 1 |
| ELOVL3       | 0 | 0              | 0 | 1 |
| MIR146B      | 0 | 0              | 0 | 1 |
| LOC729020    | 0 | 0              | 0 | 1 |
| INA          | 0 | 0              | 0 | 1 |
| SORCS3       | 0 | 0              | 0 | 1 |
| RNU6-53      | 0 | 0              | 0 | 1 |
| RBM20        | 0 | 0              | 0 | 1 |
| TECTB        | 0 | 0              | 0 | 1 |
| MIR4295      | 0 | 0              | 0 | 1 |
| HABP2        | 0 | 0              | 0 | 1 |
| TDRD1        | 0 | 0              | 0 | 1 |
| VWA2         | 0 | 0.00184401 inf |   | 1 |
| ATRNL1       | 0 | 0              | 0 | 1 |
| CCDC172      | 0 | 0              | 0 | 1 |
| PNLIPRP3     | 0 | 0              | 0 | 1 |
| PNLIP        | 0 | 0              | 0 | 1 |
| PNLIPRP2     | 0 | 0              | 0 | 1 |
| KCNK18       | 0 | 0              | 0 | 1 |
| EMX2         | 0 | 0              | 0 | 1 |
| MIR4681      | 0 | 0              | 0 | 1 |
| MIR4682      | 0 | 0              | 0 | 1 |

|                |   |            |     |   |
|----------------|---|------------|-----|---|
| PPAPDC1A       | 0 | 0          | 0   | 1 |
| MIR5694        | 0 | 0          | 0   | 1 |
| MIR3941        | 0 | 0          | 0   | 1 |
| FAM24A         | 0 | 0          | 0   | 1 |
| GPR26          | 0 | 0          | 0   | 1 |
| LOC100169752   | 0 | 0          | 0   | 1 |
| NPS            | 0 | 0          | 0   | 1 |
| FOXI2          | 0 | 0          | 0   | 1 |
| C10orf91       | 0 | 0.0300205  | inf | 1 |
| LOC399829      | 0 | 0          | 0   | 1 |
| GPR123         | 0 | 0          | 0   | 1 |
| UTF1           | 0 | 0          | 0   | 1 |
| PRAP1          | 0 | 0          | 0   | 1 |
| DUX2,DUX4,DUX- | 0 | 0          | 0   | 1 |
| MIR5699        | 0 | 0          | 0   | 1 |
| ADARB2         | 0 | 0          | 0   | 1 |
| LINC00700      | 0 | 0          | 0   | 1 |
| LINC00701      | 0 | 0          | 0   | 1 |
| LINC00704      | 0 | 0          | 0   | 1 |
| AKR1C6P        | 0 | 0          | 0   | 1 |
| AKR1C2         | 0 | 0          | 0   | 1 |
| AKR1CL1        | 0 | 0          | 0   | 1 |
| CALML5         | 0 | 0          | 0   | 1 |
| IL2RA          | 0 | 0          | 0   | 1 |
| MIR3155B       | 0 | 0          | 0   | 1 |
| SFMBT2         | 0 | 0          | 0   | 1 |
| GATA3-AS1      | 0 | 0          | 0   | 1 |
| LINC00710      | 0 | 0          | 0   | 1 |
| CELF2-AS2      | 0 | 0          | 0   | 1 |
| UCMA           | 0 | 0          | 0   | 1 |
| PPIAP30        | 0 | 0.0444638  | inf | 1 |
| ITGA8          | 0 | 0          | 0   | 1 |
| LOC100129213   | 0 | 0          | 0   | 1 |
| C10orf113      | 0 | 0          | 0   | 1 |
| MIR1915        | 0 | 0          | 0   | 1 |
| EBLN1          | 0 | 0          | 0   | 1 |
| C10orf67       | 0 | 0          | 0   | 1 |
| GPR158-AS1     | 0 | 0          | 0   | 1 |
| PTCHD3         | 0 | 0          | 0   | 1 |
| MKX            | 0 | 0          | 0   | 1 |
| ARMC4          | 0 | 0.00222777 | inf | 1 |
| LINC00837      | 0 | 0          | 0   | 1 |
| MIR604         | 0 | 0          | 0   | 1 |
| MIR938         | 0 | 0          | 0   | 1 |
| KIAA1462       | 0 | 0          | 0   | 1 |
| LYZL2          | 0 | 0          | 0   | 1 |
| LINC00838      | 0 | 0          | 0   | 1 |
| MTRNR2L7       | 0 | 0          | 0   | 1 |
| RASGEF1A       | 0 | 0.00408283 | inf | 1 |

|                |   |           |     |   |
|----------------|---|-----------|-----|---|
| HNRNPA3P1      | 0 | 0         | 0   | 1 |
| CXCL12         | 0 | 0         | 0   | 1 |
| RSU1P2         | 0 | 0         | 0   | 1 |
| ZFAND4         | 0 | 0         | 0   | 1 |
| PTPN20A,PTPN2I | 0 | 0         | 0   | 1 |
| FAM25C         | 0 | 0         | 0   | 1 |
| AGAP9          | 0 | 0         | 0   | 1 |
| GDF10          | 0 | 0         | 0   | 1 |
| PTPN20A,PTPN2I | 0 | 0         | 0   | 1 |
| FRMPD2P1       | 0 | 0         | 0   | 1 |
| FAM25C         | 0 | 0         | 0   | 1 |
| FRMPD2         | 0 | 0         | 0   | 1 |
| LRRC18         | 0 | 0         | 0   | 1 |
| MIR4294        | 0 | 0         | 0   | 1 |
| FAM170B        | 0 | 0         | 0   | 1 |
| C10orf128      | 0 | 0         | 0   | 1 |
| DRGX           | 0 | 0         | 0   | 1 |
| OGDHL          | 0 | 0         | 0   | 1 |
| PRKG1-AS1      | 0 | 0         | 0   | 1 |
| MBL2           | 0 | 0         | 0   | 1 |
| PCDH15         | 0 | 0         | 0   | 1 |
| MIR3924        | 0 | 0         | 0   | 1 |
| FAM13C         | 0 | 0         | 0   | 1 |
| M1             | 0 | 0.0921884 | inf | 1 |
| C10orf40       | 0 | 0         | 0   | 1 |
| TMEM26         | 0 | 0         | 0   | 1 |
| MIR1296        | 0 | 0         | 0   | 1 |
| CTNNA3         | 0 | 0         | 0   | 1 |
| NEUROG3        | 0 | 0         | 0   | 1 |
| NPFFR1         | 0 | 0         | 0   | 1 |
| TBATA          | 0 | 0         | 0   | 1 |
| C10orf54       | 0 | 0         | 0   | 1 |
| MIR1256        | 0 | 0         | 0   | 1 |
| PLA2G12B       | 0 | 0         | 0   | 1 |
| DUPD1          | 0 | 0         | 0   | 1 |
| SFTPA2         | 0 | 0         | 0   | 1 |
| SFTPD          | 0 | 0         | 0   | 1 |
| DYDC1          | 0 | 0         | 0   | 1 |
| LRIT2          | 0 | 0         | 0   | 1 |
| LRIT1          | 0 | 0         | 0   | 1 |
| MIR346         | 0 | 0         | 0   | 1 |
| LOC728218      | 0 | 0         | 0   | 1 |
| RNLS           | 0 | 0         | 0   | 1 |
| ANKRD22        | 0 | 0         | 0   | 1 |
| MIR4679-2      | 0 | 0         | 0   | 1 |
| CH25H          | 0 | 0         | 0   | 1 |
| SLC16A12       | 0 | 0         | 0   | 1 |
| MIR107         | 0 | 0         | 0   | 1 |
| HTR7           | 0 | 0         | 0   | 1 |

|              |   |                |   |   |
|--------------|---|----------------|---|---|
| PPP1R3C      | 0 | 0              | 0 | 1 |
| RBP4         | 0 | 0              | 0 | 1 |
| LOC100128054 | 0 | 0              | 0 | 1 |
| CYP2C8       | 0 | 0              | 0 | 1 |
| PDLIM1       | 0 | 0              | 0 | 1 |
| MIR3157      | 0 | 0              | 0 | 1 |
| BLNK         | 0 | 0              | 0 | 1 |
| OPALIN       | 0 | 0              | 0 | 1 |
| SFRP5        | 0 | 0              | 0 | 1 |
| MIR4685      | 0 | 0              | 0 | 1 |
| HPSE2        | 0 | 0              | 0 | 1 |
| CPN1         | 0 | 0              | 0 | 1 |
| PKD2L1       | 0 | 0              | 0 | 1 |
| TLX1NB       | 0 | 0              | 0 | 1 |
| LBX1         | 0 | 0              | 0 | 1 |
| MIR3158-2    | 0 | 0              | 0 | 1 |
| PITX3        | 0 | 0              | 0 | 1 |
| MIR609       | 0 | 0              | 0 | 1 |
| MIR4482-1    | 0 | 0              | 0 | 1 |
| SORCS1       | 0 | 0              | 0 | 1 |
| GUCY2GP      | 0 | 0              | 0 | 1 |
| MIR4483      | 0 | 0              | 0 | 1 |
| AFAP1L2      | 0 | 0              | 0 | 1 |
| GFRA1        | 0 | 0              | 0 | 1 |
| VAX1         | 0 | 0              | 0 | 1 |
| MIR3663      | 0 | 0              | 0 | 1 |
| PRLHR        | 0 | 0.00885197 inf |   | 1 |
| SNORA19      | 0 | 2.54433 inf    |   | 1 |
| C10orf120    | 0 | 0              | 0 | 1 |
| NKX1-2       | 0 | 0              | 0 | 1 |
| MIR4296      | 0 | 0              | 0 | 1 |
| TEX36        | 0 | 0              | 0 | 1 |
| MMP21        | 0 | 0.0221364 inf  |   | 1 |
| LINC00601    | 0 | 0              | 0 | 1 |
| C10orf90     | 0 | 0              | 0 | 1 |
| CLRN3        | 0 | 0              | 0 | 1 |
| MIR4297      | 0 | 0              | 0 | 1 |
| MIR378C      | 0 | 0              | 0 | 1 |
| NKX6-2       | 0 | 0              | 0 | 1 |
| TTC40        | 0 | 0              | 0 | 1 |
| MIR202       | 0 | 0              | 0 | 1 |
| CALY         | 0 | 0              | 0 | 1 |
| FUOM         | 0 | 0              | 0 | 1 |
| MIR3944      | 0 | 0              | 0 | 1 |
| FRG2B        | 0 | 0              | 0 | 1 |
| SCGB1C1      | 0 | 0              | 0 | 1 |
| ODF3         | 0 | 0              | 0 | 1 |
| MUC2         | 0 | 0              | 0 | 1 |
| KRTAP5-5     | 0 | 0              | 0 | 1 |

|            |   |            |     |   |
|------------|---|------------|-----|---|
| FAM99A     | 0 | 0          | 0   | 1 |
| KRTAP5-6   | 0 | 0          | 0   | 1 |
| SYT8       | 0 | 0          | 0   | 1 |
| TNNT3      | 0 | 0          | 0   | 1 |
| IGF2-AS    | 0 | 0          | 0   | 1 |
| MIR4686    | 0 | 0          | 0   | 1 |
| TSPAN32    | 0 | 0.0141751  | inf | 1 |
| KCNQ1DN    | 0 | 0          | 0   | 1 |
| MRGPRG-AS1 | 0 | 0          | 0   | 1 |
| TRPC2      | 0 | 0          | 0   | 1 |
| ART1       | 0 | 0          | 0   | 1 |
| OR52K2     | 0 | 0          | 0   | 1 |
| OR52K1     | 0 | 0          | 0   | 1 |
| OR52M1     | 0 | 0          | 0   | 1 |
| OR52I2     | 0 | 0          | 0   | 1 |
| OR52I1     | 0 | 0          | 0   | 1 |
| OR51D1     | 0 | 0          | 0   | 1 |
| OR51E1     | 0 | 0          | 0   | 1 |
| OR51F2     | 0 | 0          | 0   | 1 |
| OR51T1     | 0 | 0          | 0   | 1 |
| OR51A7     | 0 | 0          | 0   | 1 |
| MMP26      | 0 | 0          | 0   | 1 |
| OR51L1     | 0 | 0          | 0   | 1 |
| OR52J3     | 0 | 0          | 0   | 1 |
| OR51B6     | 0 | 0          | 0   | 1 |
| OR51M1     | 0 | 0.0142624  | inf | 1 |
| OR51Q1     | 0 | 0          | 0   | 1 |
| OR52B6     | 0 | 0.0169477  | inf | 1 |
| OR56B1     | 0 | 0          | 0   | 1 |
| OR52N4     | 0 | 0          | 0   | 1 |
| OR52N2     | 0 | 0          | 0   | 1 |
| OR52E4     | 0 | 0          | 0   | 1 |
| OR56A3     | 0 | 0          | 0   | 1 |
| OR56B4     | 0 | 0          | 0   | 1 |
| OR52W1     | 0 | 0          | 0   | 1 |
| C11orf42   | 0 | 0          | 0   | 1 |
| CCKBR      | 0 | 0          | 0   | 1 |
| OR10A5     | 0 | 0          | 0   | 1 |
| OR10A4     | 0 | 0          | 0   | 1 |
| SYT9       | 0 | 0          | 0   | 1 |
| OR5E1P     | 0 | 0          | 0   | 1 |
| TUB        | 0 | 0.00158667 | inf | 1 |
| KRT8P41    | 0 | 0          | 0   | 1 |
| RASSF10    | 0 | 0          | 0   | 1 |
| MYOD1      | 0 | 0          | 0   | 1 |
| MRGPRX4    | 0 | 0          | 0   | 1 |
| MIR4486    | 0 | 0          | 0   | 1 |
| SLC6A5     | 0 | 0          | 0   | 1 |
| NELL1      | 0 | 0          | 0   | 1 |

|               |   |            |     |   |
|---------------|---|------------|-----|---|
| ANO5          | 0 | 0          | 0   | 1 |
| SLC17A6       | 0 | 0          | 0   | 1 |
| LUZP2         | 0 | 0          | 0   | 1 |
| ANO3          | 0 | 0          | 0   | 1 |
| FIBIN         | 0 | 0          | 0   | 1 |
| MIR610        | 0 | 0          | 0   | 1 |
| DKFZp686K1684 | 0 | 0.00613885 | inf | 1 |
| WT1-AS        | 0 | 0          | 0   | 1 |
| EHF           | 0 | 0          | 0   | 1 |
| MIR1343       | 0 | 0          | 0   | 1 |
| MIR3973       | 0 | 0          | 0   | 1 |
| MIR670        | 0 | 0          | 0   | 1 |
| MIR129-2      | 0 | 0          | 0   | 1 |
| LOC221122     | 0 | 0          | 0   | 1 |
| LOC100507384  | 0 | 0          | 0   | 1 |
| MIR4688       | 0 | 0          | 0   | 1 |
| MIR3160-2     | 0 | 0          | 0   | 1 |
| OR4B1         | 0 | 0          | 0   | 1 |
| OR4X2         | 0 | 0          | 0   | 1 |
| OR4X1         | 0 | 0          | 0   | 1 |
| OR4S1         | 0 | 0          | 0   | 1 |
| OR4C3         | 0 | 0          | 0   | 1 |
| OR4A47        | 0 | 0          | 0   | 1 |
| TRIM49B       | 0 | 0          | 0   | 1 |
| LOC440040     | 0 | 0          | 0   | 1 |
| OR4C13        | 0 | 0          | 0   | 1 |
| LOC646813     | 0 | 0          | 0   | 1 |
| OR4C46        | 0 | 0          | 0   | 1 |
| TRIM48        | 0 | 0          | 0   | 1 |
| OR4A16        | 0 | 0          | 0   | 1 |
| OR4A15        | 0 | 0          | 0   | 1 |
| OR4C15        | 0 | 0          | 0   | 1 |
| OR4C16        | 0 | 0          | 0   | 1 |
| OR4P4         | 0 | 0          | 0   | 1 |
| OR4S2         | 0 | 0          | 0   | 1 |
| OR4C6         | 0 | 0          | 0   | 1 |
| OR5D13        | 0 | 0          | 0   | 1 |
| OR5D14        | 0 | 0          | 0   | 1 |
| OR5L1         | 0 | 0          | 0   | 1 |
| OR5D18        | 0 | 0          | 0   | 1 |
| OR5L2         | 0 | 0          | 0   | 1 |
| OR5D16        | 0 | 0          | 0   | 1 |
| TRIM51        | 0 | 0          | 0   | 1 |
| OR5AS1        | 0 | 0          | 0   | 1 |
| OR8I2         | 0 | 0          | 0   | 1 |
| OR8H2         | 0 | 0          | 0   | 1 |
| OR8H3         | 0 | 0          | 0   | 1 |
| OR5J2         | 0 | 0          | 0   | 1 |
| OR5T3         | 0 | 0          | 0   | 1 |

|             |   |           |     |   |
|-------------|---|-----------|-----|---|
| OR5T1       | 0 | 0         | 0   | 1 |
| OR8K3       | 0 | 0         | 0   | 1 |
| OR8K1       | 0 | 0         | 0   | 1 |
| OR8J1       | 0 | 0         | 0   | 1 |
| OR8U1,OR8U8 | 0 | 0         | 0   | 1 |
| OR5AR1      | 0 | 0         | 0   | 1 |
| OR9G9       | 0 | 0         | 0   | 1 |
| OR5AK2      | 0 | 0         | 0   | 1 |
| OR5AK4P     | 0 | 0         | 0   | 1 |
| LRRC55      | 0 | 0         | 0   | 1 |
| P2RX3       | 0 | 0         | 0   | 1 |
| MIR130A     | 0 | 0         | 0   | 1 |
| OR9Q1       | 0 | 0         | 0   | 1 |
| OR6Q1       | 0 | 0         | 0   | 1 |
| OR9Q2       | 0 | 0         | 0   | 1 |
| OR1S1       | 0 | 0         | 0   | 1 |
| GLYATL1     | 0 | 0         | 0   | 1 |
| OR5AN1      | 0 | 0         | 0   | 1 |
| OR5A1       | 0 | 0         | 0   | 1 |
| OR4D6       | 0 | 0         | 0   | 1 |
| OR4D10      | 0 | 0         | 0   | 1 |
| OR4D11      | 0 | 0         | 0   | 1 |
| OR4D9       | 0 | 0         | 0   | 1 |
| PLAC1L      | 0 | 0         | 0   | 1 |
| MS4A3       | 0 | 0         | 0   | 1 |
| MS4A2       | 0 | 0         | 0   | 1 |
| MS4A4A      | 0 | 0         | 0   | 1 |
| MS4A6E      | 0 | 0         | 0   | 1 |
| MS4A5       | 0 | 0         | 0   | 1 |
| MS4A1       | 0 | 0         | 0   | 1 |
| MS4A12      | 0 | 0         | 0   | 1 |
| MS4A13      | 0 | 0         | 0   | 1 |
| LINC00301   | 0 | 0         | 0   | 1 |
| MS4A8B      | 0 | 0         | 0   | 1 |
| MS4A15      | 0 | 0         | 0   | 1 |
| MS4A10      | 0 | 0         | 0   | 1 |
| PGA3        | 0 | 0         | 0   | 1 |
| PGA4        | 0 | 0         | 0   | 1 |
| PGA5        | 0 | 0         | 0   | 1 |
| MIR4488     | 0 | 0         | 0   | 1 |
| LRRC10B     | 0 | 0         | 0   | 1 |
| SCGB1D1     | 0 | 0         | 0   | 1 |
| SCGB2A1     | 0 | 0         | 0   | 1 |
| SCGB1D2     | 0 | 0.0695807 | inf | 1 |
| SCGB2A2     | 0 | 0         | 0   | 1 |
| SCGB1A1     | 0 | 0         | 0   | 1 |
| LGALS12     | 0 | 0         | 0   | 1 |
| MIR1237     | 0 | 0         | 0   | 1 |
| SLC22A12    | 0 | 0         | 0   | 1 |

|                |   |            |     |   |
|----------------|---|------------|-----|---|
| SPDYC          | 0 | 0          | 0   | 1 |
| MIR548AR       | 0 | 0          | 0   | 1 |
| MIR4690        | 0 | 0          | 0   | 1 |
| MIR4489        | 0 | 0          | 0   | 1 |
| CTSW           | 0 | 0.0114176  | inf | 1 |
| NPAS4          | 0 | 0.00470609 | inf | 1 |
| C11orf86       | 0 | 0.0153941  | inf | 1 |
| TBC1D10C       | 0 | 0          | 0   | 1 |
| MIR4691        | 0 | 0          | 0   | 1 |
| ANO1           | 0 | 0.00390602 | inf | 1 |
| MIR548K        | 0 | 0          | 0   | 1 |
| SHANK2-AS3     | 0 | 0          | 0   | 1 |
| DEFB108B       | 0 | 0          | 0   | 1 |
| LOC100129216   | 0 | 0          | 0   | 1 |
| FOLR1          | 0 | 0          | 0   | 1 |
| FOLR2          | 0 | 0          | 0   | 1 |
| MIR4692        | 0 | 0          | 0   | 1 |
| SLCO2B1        | 0 | 0          | 0   | 1 |
| TPBGL          | 0 | 0          | 0   | 1 |
| MOGAT2         | 0 | 0          | 0   | 1 |
| THRSP          | 0 | 0          | 0   | 1 |
| CCDC83         | 0 | 0          | 0   | 1 |
| GRM5-AS1       | 0 | 0          | 0   | 1 |
| TYR            | 0 | 0          | 0   | 1 |
| FOLH1B         | 0 | 0          | 0   | 1 |
| TRIM77         | 0 | 0          | 0   | 1 |
| MIR5692A1      | 0 | 0          | 0   | 1 |
| TRIM53AP       | 0 | 0          | 0   | 1 |
| TRIM49D1P,TRIM | 0 | 0          | 0   | 1 |
| TRIM64         | 0 | 0          | 0   | 1 |
| TRIM49C        | 0 | 0          | 0   | 1 |
| UBTFL1         | 0 | 0          | 0   | 1 |
| FAT3           | 0 | 0          | 0   | 1 |
| MTNR1B         | 0 | 0          | 0   | 1 |
| CCDC67         | 0 | 0.00329332 | inf | 1 |
| LOC643037      | 0 | 0          | 0   | 1 |
| KDM4E          | 0 | 0          | 0   | 1 |
| MIR1260B       | 0 | 0          | 0   | 1 |
| CNTN5          | 0 | 0          | 0   | 1 |
| LOC101054525   | 0 | 0          | 0   | 1 |
| WTAPP1         | 0 | 0          | 0   | 1 |
| MIR4693        | 0 | 0          | 0   | 1 |
| DDI1           | 0 | 0          | 0   | 1 |
| LOC643923      | 0 | 0          | 0   | 1 |
| RAB39A         | 0 | 0          | 0   | 1 |
| C11orf87       | 0 | 0          | 0   | 1 |
| MIR4491        | 0 | 0          | 0   | 1 |
| MIR34B         | 0 | 0          | 0   | 1 |
| MIR34C         | 0 | 0          | 0   | 1 |



|              |   |            |     |   |
|--------------|---|------------|-----|---|
| LAYN         | 0 | 0.00458987 | inf | 1 |
| CLDN25       | 0 | 0          | 0   | 1 |
| HTR3B        | 0 | 0          | 0   | 1 |
| HTR3A        | 0 | 0          | 0   | 1 |
| ZBTB16       | 0 | 0          | 0   | 1 |
| NXPE2        | 0 | 0.00492784 | inf | 1 |
| APOC3        | 0 | 0          | 0   | 1 |
| TMPRSS4      | 0 | 0          | 0   | 1 |
| CD3E         | 0 | 0          | 0   | 1 |
| CD3G         | 0 | 0          | 0   | 1 |
| MIR4492      | 0 | 0          | 0   | 1 |
| FOXR1        | 0 | 0          | 0   | 1 |
| GRIK4        | 0 | 0          | 0   | 1 |
| SORL1        | 0 | 0          | 0   | 1 |
| CRTAM        | 0 | 0.00774085 | inf | 1 |
| LOC341056    | 0 | 0          | 0   | 1 |
| OR8D4        | 0 | 0          | 0   | 1 |
| OR4D5        | 0 | 0          | 0   | 1 |
| OR10G4       | 0 | 0          | 0   | 1 |
| OR10G9       | 0 | 0          | 0   | 1 |
| OR10G8       | 0 | 0          | 0   | 1 |
| OR8G2        | 0 | 0          | 0   | 1 |
| OR8G1,OR8G5  | 0 | 0          | 0   | 1 |
| OR8A1        | 0 | 0          | 0   | 1 |
| PANX3        | 0 | 0.00661955 | inf | 1 |
| HEPN1        | 0 | 0          | 0   | 1 |
| PKNOX2       | 0 | 0          | 0   | 1 |
| PATE1        | 0 | 0          | 0   | 1 |
| PATE3        | 0 | 0          | 0   | 1 |
| KIRREL3-AS2  | 0 | 0          | 0   | 1 |
| KIRREL3-AS3  | 0 | 0          | 0   | 1 |
| C11orf44     | 0 | 0          | 0   | 1 |
| NTM          | 0 | 0          | 0   | 1 |
| LOC100128239 | 0 | 0          | 0   | 1 |
| IFITM5       | 0 | 0          | 0   | 1 |
| KRTAP5-3     | 0 | 0          | 0   | 1 |
| KRTAP5-4     | 0 | 0          | 0   | 1 |
| FAM99B       | 0 | 0          | 0   | 1 |
| MIR4298      | 0 | 0          | 0   | 1 |
| MIR483       | 0 | 0          | 0   | 1 |
| TH           | 0 | 0          | 0   | 1 |
| ASCL2        | 0 | 0          | 0   | 1 |
| C11orf21     | 0 | 0          | 0   | 1 |
| MRGPRG       | 0 | 0          | 0   | 1 |
| MRGPPE       | 0 | 0          | 0   | 1 |
| OR52B4       | 0 | 0          | 0   | 1 |
| C11orf40     | 0 | 0          | 0   | 1 |
| OR51E2       | 0 | 0.00747166 | inf | 1 |
| OR51F1       | 0 | 0          | 0   | 1 |

|                |   |            |     |   |
|----------------|---|------------|-----|---|
| OR52R1         | 0 | 0          | 0   | 1 |
| OR51S1         | 0 | 0          | 0   | 1 |
| OR51G2         | 0 | 0          | 0   | 1 |
| OR51G1         | 0 | 0          | 0   | 1 |
| OR51A4         | 0 | 0          | 0   | 1 |
| OR51A2         | 0 | 0          | 0   | 1 |
| OR52E2         | 0 | 0          | 0   | 1 |
| OR52A5         | 0 | 0          | 0   | 1 |
| OR52A1         | 0 | 0          | 0   | 1 |
| OR51V1         | 0 | 0          | 0   | 1 |
| HBB            | 0 | 0          | 0   | 1 |
| HBD            | 0 | 0.0651436  | inf | 1 |
| OR51B2         | 0 | 0.0106696  | inf | 1 |
| OR51I1         | 0 | 0          | 0   | 1 |
| UBQLN3         | 0 | 0          | 0   | 1 |
| UBQLNL         | 0 | 0.00506969 | inf | 1 |
| OR52H1         | 0 | 0          | 0   | 1 |
| OR52N5         | 0 | 0          | 0   | 1 |
| OR52N1         | 0 | 0          | 0   | 1 |
| OR52E6         | 0 | 0          | 0   | 1 |
| OR52E8         | 0 | 0          | 0   | 1 |
| OR56A5         | 0 | 0          | 0   | 1 |
| OR52L1         | 0 | 0          | 0   | 1 |
| OR56A4         | 0 | 0          | 0   | 1 |
| OR56A1         | 0 | 0          | 0   | 1 |
| OR52B2         | 0 | 0.0281405  | inf | 1 |
| OR2AG2         | 0 | 0          | 0   | 1 |
| OR6A2          | 0 | 0.00912898 | inf | 1 |
| CYB5R2         | 0 | 0          | 0   | 1 |
| OVCH2          | 0 | 0          | 0   | 1 |
| OR5P2          | 0 | 0          | 0   | 1 |
| OR5P3          | 0 | 0          | 0   | 1 |
| LOC283299      | 0 | 0          | 0   | 1 |
| OR10A6         | 0 | 0          | 0   | 1 |
| OR10A3         | 0 | 0          | 0   | 1 |
| NLRP10         | 0 | 0          | 0   | 1 |
| RIC3           | 0 | 0.00135488 | inf | 1 |
| LMO1           | 0 | 0          | 0   | 1 |
| MIR5691        | 0 | 0          | 0   | 1 |
| LYVE1          | 0 | 0          | 0   | 1 |
| MRVI1          | 0 | 0          | 0   | 1 |
| MIR4299        | 0 | 0          | 0   | 1 |
| PTH            | 0 | 0          | 0   | 1 |
| CALCA          | 0 | 0          | 0   | 1 |
| ABCC8          | 0 | 0.00310557 | inf | 1 |
| SAA3P          | 0 | 0.0220666  | inf | 1 |
| SAA2,SAA2-SAA4 | 0 | 0.0486105  | inf | 1 |
| PTPN5          | 0 | 0.00425256 | inf | 1 |
| MRGPRX1        | 0 | 0          | 0   | 1 |

|              |   |            |     |   |
|--------------|---|------------|-----|---|
| MRGPRX2      | 0 | 0          | 0   | 1 |
| CSRP3        | 0 | 0          | 0   | 1 |
| NAV2-AS5     | 0 | 0          | 0   | 1 |
| NAV2-AS4     | 0 | 0          | 0   | 1 |
| MIR4694      | 0 | 0          | 0   | 1 |
| DBX1         | 0 | 0          | 0   | 1 |
| CCDC179      | 0 | 0          | 0   | 1 |
| KCNA4        | 0 | 0          | 0   | 1 |
| DCDC1        | 0 | 0.0152575  | inf | 1 |
| WT1          | 0 | 0          | 0   | 1 |
| SLC1A2       | 0 | 0          | 0   | 1 |
| LRRC4C       | 0 | 0          | 0   | 1 |
| LOC100507205 | 0 | 0          | 0   | 1 |
| HNRNPKP3     | 0 | 0          | 0   | 1 |
| C11orf94     | 0 | 0.0667443  | inf | 1 |
| MIR3160-1    | 0 | 0          | 0   | 1 |
| MIR5582      | 0 | 0          | 0   | 1 |
| MYBPC3       | 0 | 0.00384074 | inf | 1 |
| OR4C45       | 0 | 0          | 0   | 1 |
| TRIM64C      | 0 | 0          | 0   | 1 |
| FOLH1        | 0 | 0          | 0   | 1 |
| OR4C12       | 0 | 0          | 0   | 1 |
| LOC441601    | 0 | 0          | 0   | 1 |
| OR4A5        | 0 | 0          | 0   | 1 |
| TRIM51HP     | 0 | 0          | 0   | 1 |
| OR4C11       | 0 | 0          | 0   | 1 |
| OR5W2        | 0 | 0          | 0   | 1 |
| OR5I1        | 0 | 0          | 0   | 1 |
| OR10AG1      | 0 | 0          | 0   | 1 |
| OR7E5P       | 0 | 0          | 0   | 1 |
| OR5F1        | 0 | 0          | 0   | 1 |
| OR8J3        | 0 | 0          | 0   | 1 |
| OR8K5        | 0 | 0          | 0   | 1 |
| OR5T2        | 0 | 0          | 0   | 1 |
| OR8H1        | 0 | 0          | 0   | 1 |
| OR5R1        | 0 | 0          | 0   | 1 |
| OR5M9        | 0 | 0          | 0   | 1 |
| OR5M3        | 0 | 0          | 0   | 1 |
| OR5M8        | 0 | 0          | 0   | 1 |
| OR5M11       | 0 | 0          | 0   | 1 |
| OR5M10       | 0 | 0          | 0   | 1 |
| OR5M1        | 0 | 0          | 0   | 1 |
| OR5AP2       | 0 | 0          | 0   | 1 |
| OR9G4        | 0 | 0          | 0   | 1 |
| APLNR        | 0 | 0.0035222  | inf | 1 |
| PRG3         | 0 | 0          | 0   | 1 |
| OR9I1        | 0 | 0          | 0   | 1 |
| OR1S2        | 0 | 0          | 0   | 1 |
| OR10Q1       | 0 | 0          | 0   | 1 |

|              |   |                |   |   |
|--------------|---|----------------|---|---|
| OR10W1       | 0 | 0              | 0 | 1 |
| OR5B17       | 0 | 0              | 0 | 1 |
| OR5B3        | 0 | 0              | 0 | 1 |
| OR5B2        | 0 | 0              | 0 | 1 |
| OR5B12       | 0 | 0.0108904 inf  |   | 1 |
| OR5B21       | 0 | 0              | 0 | 1 |
| GLYAT        | 0 | 0.00384216 inf |   | 1 |
| GLYATL2      | 0 | 0              | 0 | 1 |
| LOC283194    | 0 | 0              | 0 | 1 |
| MPEG1        | 0 | 0.00230249 inf |   | 1 |
| OR5A2        | 0 | 0              | 0 | 1 |
| MIR3162      | 0 | 0              | 0 | 1 |
| OR10V1       | 0 | 0              | 0 | 1 |
| GIF          | 0 | 0.0145143 inf  |   | 1 |
| TCN1         | 0 | 0              | 0 | 1 |
| MS4A6A       | 0 | 0              | 0 | 1 |
| MIR1908      | 0 | 0              | 0 | 1 |
| SCGB1D4      | 0 | 0              | 0 | 1 |
| SNORD30      | 0 | 0              | 0 | 1 |
| SNORD29      | 0 | 0              | 0 | 1 |
| SNORD26      | 0 | 0              | 0 | 1 |
| SNORD25      | 0 | 0              | 0 | 1 |
| SLC22A6      | 0 | 0              | 0 | 1 |
| SLC22A8      | 0 | 0              | 0 | 1 |
| SLC22A24     | 0 | 0              | 0 | 1 |
| SLC22A25     | 0 | 0              | 0 | 1 |
| MIR3680-2    | 0 | 0              | 0 | 1 |
| HRASLS5      | 0 | 0              | 0 | 1 |
| MIR192       | 0 | 0              | 0 | 1 |
| MIR194-2     | 0 | 0              | 0 | 1 |
| GPHA2        | 0 | 0              | 0 | 1 |
| C11orf85     | 0 | 0              | 0 | 1 |
| LOC100130348 | 0 | 0              | 0 | 1 |
| CD248        | 0 | 0              | 0 | 1 |
| CTSF         | 0 | 0              | 0 | 1 |
| GPR152       | 0 | 0              | 0 | 1 |
| CABP2        | 0 | 0              | 0 | 1 |
| MRGPRD       | 0 | 0              | 0 | 1 |
| MRGPRF       | 0 | 0              | 0 | 1 |
| FGF19        | 0 | 0              | 0 | 1 |
| FGF4         | 0 | 0              | 0 | 1 |
| FGF3         | 0 | 0              | 0 | 1 |
| MIR3664      | 0 | 0              | 0 | 1 |
| KRTAP5-11    | 0 | 0              | 0 | 1 |
| MIR3165      | 0 | 0              | 0 | 1 |
| MIR139       | 0 | 0              | 0 | 1 |
| KCNE3        | 0 | 0              | 0 | 1 |
| CHRD2        | 0 | 0              | 0 | 1 |
| MIR4696      | 0 | 0              | 0 | 1 |

|                |   |            |     |   |
|----------------|---|------------|-----|---|
| OR2AT4         | 0 | 0          | 0   | 1 |
| MIR326         | 0 | 0          | 0   | 1 |
| LOC283214      | 0 | 0          | 0   | 1 |
| LRRC32         | 0 | 0          | 0   | 1 |
| GUCY2EP        | 0 | 0          | 0   | 1 |
| GDPD4          | 0 | 0          | 0   | 1 |
| RNU6-83        | 0 | 0          | 0   | 1 |
| MIR708         | 0 | 0          | 0   | 1 |
| MIR5579        | 0 | 0          | 0   | 1 |
| MIR4300        | 0 | 0          | 0   | 1 |
| FAM181B        | 0 | 0          | 0   | 1 |
| SNORA70E       | 0 | 0          | 0   | 1 |
| OR7E2P         | 0 | 0          | 0   | 1 |
| GRM5           | 0 | 0          | 0   | 1 |
| TRIM49         | 0 | 0          | 0   | 1 |
| TRIM64B        | 0 | 0          | 0   | 1 |
| TRIM49D1P,TRIM | 0 | 0          | 0   | 1 |
| TRIM53AP       | 0 | 0          | 0   | 1 |
| MIR4490        | 0 | 0          | 0   | 1 |
| SNORD5         | 0 | 0          | 0   | 1 |
| MIR1304        | 0 | 0          | 0   | 1 |
| JRKL-AS1       | 0 | 0          | 0   | 1 |
| PGR            | 0 | 0          | 0   | 1 |
| MIR3920        | 0 | 0          | 0   | 1 |
| ANGPTL5        | 0 | 0.00372056 | inf | 1 |
| MMP20          | 0 | 0          | 0   | 1 |
| MMP27          | 0 | 0          | 0   | 1 |
| MMP8           | 0 | 0          | 0   | 1 |
| MMP12          | 0 | 0          | 0   | 1 |
| MMP13          | 0 | 0.00605919 | inf | 1 |
| PDGFD          | 0 | 0          | 0   | 1 |
| CASP12         | 0 | 0          | 0   | 1 |
| CARD17         | 0 | 0          | 0   | 1 |
| CARD18         | 0 | 0          | 0   | 1 |
| ARHGAP20       | 0 | 0          | 0   | 1 |
| LOC100132078   | 0 | 0          | 0   | 1 |
| BTG4           | 0 | 0          | 0   | 1 |
| IL18           | 0 | 0.0191875  | inf | 1 |
| LOC100288346   | 0 | 0          | 0   | 1 |
| DRD2           | 0 | 0          | 0   | 1 |
| MIR4301        | 0 | 0          | 0   | 1 |
| NXPE1          | 0 | 0          | 0   | 1 |
| NXPE4          | 0 | 0          | 0   | 1 |
| LOC283143      | 0 | 0          | 0   | 1 |
| APOA5          | 0 | 0          | 0   | 1 |
| DSCAML1        | 0 | 0          | 0   | 1 |
| TMPRSS4-AS1    | 0 | 0          | 0   | 1 |
| SCN2B          | 0 | 0.00507397 | inf | 1 |
| AMICA1         | 0 | 0.00516975 | inf | 1 |

|             |   |            |     |   |
|-------------|---|------------|-----|---|
| TREH        | 0 | 0.00619183 | inf | 1 |
| MFRP        | 0 | 0          | 0   | 1 |
| THY1        | 0 | 0          | 0   | 1 |
| TRIM29      | 0 | 0          | 0   | 1 |
| LOC649133   | 0 | 0          | 0   | 1 |
| MIR125B1    | 0 | 0          | 0   | 1 |
| BLID        | 0 | 0          | 0   | 1 |
| MIRLET7A2   | 0 | 0          | 0   | 1 |
| MIR100      | 0 | 0          | 0   | 1 |
| BSX         | 0 | 0          | 0   | 1 |
| MIR4493     | 0 | 0          | 0   | 1 |
| OR6X1       | 0 | 0          | 0   | 1 |
| OR6M1       | 0 | 0          | 0   | 1 |
| TMEM225     | 0 | 0          | 0   | 1 |
| OR6T1       | 0 | 0          | 0   | 1 |
| OR10S1      | 0 | 0          | 0   | 1 |
| OR10G7      | 0 | 0          | 0   | 1 |
| OR8D1       | 0 | 0          | 0   | 1 |
| OR8D2       | 0 | 0          | 0   | 1 |
| OR8B2       | 0 | 0          | 0   | 1 |
| OR8B3       | 0 | 0          | 0   | 1 |
| OR8B4       | 0 | 0          | 0   | 1 |
| OR8B8       | 0 | 0          | 0   | 1 |
| OR8B12      | 0 | 0          | 0   | 1 |
| HEPACAM     | 0 | 0.00398461 | inf | 1 |
| PATE2       | 0 | 0.00604116 | inf | 1 |
| MIR3167     | 0 | 0          | 0   | 1 |
| FLI1-AS1    | 0 | 0          | 0   | 1 |
| SPATA19     | 0 | 0          | 0   | 1 |
| CACNA1C     | 0 | 0          | 0   | 1 |
| CACNA1C-IT3 | 0 | 0          | 0   | 1 |
| KCNA1       | 0 | 0          | 0   | 1 |
| KCNA5       | 0 | 0          | 0   | 1 |
| NTF3        | 0 | 0          | 0   | 1 |
| MIR200C     | 0 | 0          | 0   | 1 |
| MIR141      | 0 | 0          | 0   | 1 |
| ACSM4       | 0 | 0          | 0   | 1 |
| DPPA3       | 0 | 0          | 0   | 1 |
| NANOGNB     | 0 | 0          | 0   | 1 |
| CLEC6A      | 0 | 0          | 0   | 1 |
| CLEC4D      | 0 | 0          | 0   | 1 |
| KLRF1       | 0 | 0          | 0   | 1 |
| KLRF2       | 0 | 0          | 0   | 1 |
| CLEC12A     | 0 | 0          | 0   | 1 |
| CLEC12B     | 0 | 0          | 0   | 1 |
| CLEC9A      | 0 | 0          | 0   | 1 |
| TMEM52B     | 0 | 0          | 0   | 1 |
| MIR1244-2   | 0 | 0          | 0   | 1 |
| MIR613      | 0 | 0          | 0   | 1 |

|              |   |            |     |   |
|--------------|---|------------|-----|---|
| MIR614       | 0 | 0          | 0   | 1 |
| PDE6H        | 0 | 0          | 0   | 1 |
| PTPRO        | 0 | 0          | 0   | 1 |
| SKP1P2       | 0 | 0.00579097 | inf | 1 |
| MIR3974      | 0 | 0          | 0   | 1 |
| PIK3C2G      | 0 | 0          | 0   | 1 |
| CAPZA3       | 0 | 0          | 0   | 1 |
| LOC100506393 | 0 | 0          | 0   | 1 |
| PDE3A        | 0 | 0.00383658 | inf | 1 |
| MIR920       | 0 | 0          | 0   | 1 |
| LRMP         | 0 | 0          | 0   | 1 |
| LOC101055625 | 0 | 0          | 0   | 1 |
| C12orf40     | 0 | 0          | 0   | 1 |
| LRRK2        | 0 | 0          | 0   | 1 |
| CNTN1        | 0 | 0.00172342 | inf | 1 |
| MIR4698      | 0 | 0          | 0   | 1 |
| PCED1B       | 0 | 0          | 0   | 1 |
| C12orf68     | 0 | 0          | 0   | 1 |
| ANP32D       | 0 | 0          | 0   | 1 |
| OR8S1        | 0 | 0          | 0   | 1 |
| LOC255411    | 0 | 0          | 0   | 1 |
| WNT1         | 0 | 0          | 0   | 1 |
| AQP2         | 0 | 0          | 0   | 1 |
| AQP5         | 0 | 0          | 0   | 1 |
| TMPRSS12     | 0 | 0          | 0   | 1 |
| HIGD1C       | 0 | 0          | 0   | 1 |
| ANKRD33      | 0 | 0          | 0   | 1 |
| HOXC12       | 0 | 0          | 0   | 1 |
| MIR196A2     | 0 | 0          | 0   | 1 |
| MIR615       | 0 | 0          | 0   | 1 |
| LOC100240734 | 0 | 0          | 0   | 1 |
| MIR148B      | 0 | 0          | 0   | 1 |
| MUCL1        | 0 | 0          | 0   | 1 |
| NEUROD4      | 0 | 0          | 0   | 1 |
| OR9K2        | 0 | 0          | 0   | 1 |
| OR10A7       | 0 | 0          | 0   | 1 |
| OR6C74       | 0 | 0          | 0   | 1 |
| OR6C1        | 0 | 0          | 0   | 1 |
| OR6C3        | 0 | 0          | 0   | 1 |
| OR6C75       | 0 | 0          | 0   | 1 |
| OR6C65       | 0 | 0          | 0   | 1 |
| OR6C76       | 0 | 0          | 0   | 1 |
| OR6C2        | 0 | 0          | 0   | 1 |
| OR6C68       | 0 | 0          | 0   | 1 |
| OR6C4        | 0 | 0          | 0   | 1 |
| OR2AP1       | 0 | 0          | 0   | 1 |
| OR10P1       | 0 | 0          | 0   | 1 |
| MIR1228      | 0 | 0          | 0   | 1 |
| DTX3         | 0 | 0          | 0   | 1 |

|                |   |            |     |   |
|----------------|---|------------|-----|---|
| ARHGEF25       | 0 | 0          | 0   | 1 |
| SLC26A10       | 0 | 0          | 0   | 1 |
| MIRLET7I       | 0 | 0          | 0   | 1 |
| MIR548C        | 0 | 0          | 0   | 1 |
| FLJ41278       | 0 | 0          | 0   | 1 |
| IRAK3          | 0 | 0.00122667 | inf | 1 |
| MIR3913-2      | 0 | 0          | 0   | 1 |
| TPH2           | 0 | 0          | 0   | 1 |
| TRHDE          | 0 | 0          | 0   | 1 |
| MIR1252        | 0 | 0          | 0   | 1 |
| MIR5692B       | 0 | 0          | 0   | 1 |
| PTPRQ          | 0 | 0          | 0   | 1 |
| MYF6           | 0 | 0          | 0   | 1 |
| MYF5           | 0 | 0          | 0   | 1 |
| ACSS3          | 0 | 0          | 0   | 1 |
| MIR4699        | 0 | 0          | 0   | 1 |
| LRRRIQ1        | 0 | 0          | 0   | 1 |
| ALX1           | 0 | 0          | 0   | 1 |
| NTS            | 0 | 0          | 0   | 1 |
| LINC00615      | 0 | 0          | 0   | 1 |
| CLLU1          | 0 | 0          | 0   | 1 |
| C12orf74       | 0 | 0          | 0   | 1 |
| MIR5700        | 0 | 0          | 0   | 1 |
| KRT19P2,MIR492 | 0 | 0          | 0   | 1 |
| MIR331         | 0 | 0          | 0   | 1 |
| MIR3685        | 0 | 0          | 0   | 1 |
| PGAM1P5        | 0 | 0          | 0   | 1 |
| RMST           | 0 | 0          | 0   | 1 |
| MIR1251        | 0 | 0          | 0   | 1 |
| MIR135A2       | 0 | 0          | 0   | 1 |
| MIR1827        | 0 | 0          | 0   | 1 |
| SLC17A8        | 0 | 0          | 0   | 1 |
| NR1H4          | 0 | 0          | 0   | 1 |
| SPIC           | 0 | 0          | 0   | 1 |
| MYBPC1         | 0 | 0          | 0   | 1 |
| STAB2          | 0 | 0.00387034 | inf | 1 |
| MIR3922        | 0 | 0          | 0   | 1 |
| RFX4           | 0 | 0          | 0   | 1 |
| ASCL4          | 0 | 0          | 0   | 1 |
| WSCD2          | 0 | 0          | 0   | 1 |
| DAO            | 0 | 0          | 0   | 1 |
| MIR4497        | 0 | 0          | 0   | 1 |
| CCDC63         | 0 | 0          | 0   | 1 |
| LOC100131138   | 0 | 0          | 0   | 1 |
| TBX5-AS1       | 0 | 0          | 0   | 1 |
| CCDC60         | 0 | 0          | 0   | 1 |
| TMEM233        | 0 | 0          | 0   | 1 |
| MIR5188        | 0 | 3.16172    | inf | 1 |
| LOC100128554   | 0 | 0          | 0   | 1 |



|                |   |            |     |   |
|----------------|---|------------|-----|---|
| TMEM132C       | 0 | 0          | 0   | 1 |
| MIR3612        | 0 | 0          | 0   | 1 |
| FZD10          | 0 | 0          | 0   | 1 |
| PIWIL1         | 0 | 0          | 0   | 1 |
| FAM138D        | 0 | 0          | 0   | 1 |
| LOC574538      | 0 | 0          | 0   | 1 |
| MIR3649        | 0 | 0          | 0   | 1 |
| CACNA2D4       | 0 | 0.00470076 | inf | 1 |
| CACNA1C-AS4    | 0 | 0          | 0   | 1 |
| CACNA1C-AS1    | 0 | 0          | 0   | 1 |
| LOC283440      | 0 | 0          | 0   | 1 |
| FGF23          | 0 | 0.00387478 | inf | 1 |
| FGF6           | 0 | 0          | 0   | 1 |
| SCARNA11       | 0 | 0          | 0   | 1 |
| CD163          | 0 | 0          | 0   | 1 |
| APOBEC1        | 0 | 0          | 0   | 1 |
| GDF3           | 0 | 0          | 0   | 1 |
| CLEC4C         | 0 | 0          | 0   | 1 |
| CLEC4E         | 0 | 0          | 0   | 1 |
| AICDA          | 0 | 0.0109236  | inf | 1 |
| PZP            | 0 | 0          | 0   | 1 |
| A2MP1          | 0 | 0          | 0   | 1 |
| MIR1244-1      | 0 | 0          | 0   | 1 |
| KLRB1          | 0 | 0          | 0   | 1 |
| CD69           | 0 | 0          | 0   | 1 |
| CLEC2A         | 0 | 0          | 0   | 1 |
| CLEC1B         | 0 | 0          | 0   | 1 |
| CLEC1A         | 0 | 0          | 0   | 1 |
| OLR1           | 0 | 0          | 0   | 1 |
| KLRC4,KLRC4-KL | 0 | 0          | 0   | 1 |
| KLRC3          | 0 | 0.00929536 | inf | 1 |
| KLRC2          | 0 | 0          | 0   | 1 |
| KLRC1          | 0 | 0          | 0   | 1 |
| TAS2R7         | 0 | 0          | 0   | 1 |
| TAS2R8         | 0 | 0          | 0   | 1 |
| TAS2R9         | 0 | 0          | 0   | 1 |
| TAS2R13        | 0 | 0          | 0   | 1 |
| TAS2R46        | 0 | 0          | 0   | 1 |
| TAS2R42        | 0 | 0          | 0   | 1 |
| PRB4           | 0 | 0          | 0   | 1 |
| PRB1           | 0 | 0          | 0   | 1 |
| PRB2           | 0 | 0          | 0   | 1 |
| RNU6-19        | 0 | 0          | 0   | 1 |
| C12orf36       | 0 | 0.00292618 | inf | 1 |
| GRIN2B         | 0 | 0.00165582 | inf | 1 |
| ART4           | 0 | 0          | 0   | 1 |
| MGP            | 0 | 0          | 0   | 1 |
| ERP27          | 0 | 0          | 0   | 1 |
| RERG           | 0 | 0          | 0   | 1 |

|              |   |                |   |   |
|--------------|---|----------------|---|---|
| SLC15A5      | 0 | 0              | 0 | 1 |
| LMO3         | 0 | 0              | 0 | 1 |
| RERGL        | 0 | 0              | 0 | 1 |
| PLCZ1        | 0 | 0              | 0 | 1 |
| KCNJ8        | 0 | 0              | 0 | 1 |
| SOX5         | 0 | 0              | 0 | 1 |
| LINC00477    | 0 | 0              | 0 | 1 |
| C12orf77     | 0 | 0              | 0 | 1 |
| MIR4302      | 0 | 0              | 0 | 1 |
| LOC100506451 | 0 | 0              | 0 | 1 |
| MANSC4       | 0 | 0.0202584 inf  |   | 1 |
| OVCH1        | 0 | 0              | 0 | 1 |
| TMTC1        | 0 | 0.00230919 inf |   | 1 |
| RNU6-78      | 0 | 0              | 0 | 1 |
| SYT10        | 0 | 0              | 0 | 1 |
| CPNE8        | 0 | 0              | 0 | 1 |
| ABCD2        | 0 | 0              | 0 | 1 |
| ADAMTS20     | 0 | 0              | 0 | 1 |
| DBX2         | 0 | 0              | 0 | 1 |
| RNY5         | 0 | 0              | 0 | 1 |
| AMIGO2       | 0 | 0              | 0 | 1 |
| PCED1B-AS1   | 0 | 0              | 0 | 1 |
| OR10AD1      | 0 | 0              | 0 | 1 |
| LALBA        | 0 | 0              | 0 | 1 |
| SNORA2B      | 0 | 0              | 0 | 1 |
| MIR4701      | 0 | 0              | 0 | 1 |
| LOC283332    | 0 | 0              | 0 | 1 |
| MIR1293      | 0 | 0              | 0 | 1 |
| FIGNL2       | 0 | 0              | 0 | 1 |
| LOC283403    | 0 | 0              | 0 | 1 |
| KRT85        | 0 | 0              | 0 | 1 |
| KRT84        | 0 | 0              | 0 | 1 |
| KRT82        | 0 | 0              | 0 | 1 |
| KRT6B        | 0 | 0              | 0 | 1 |
| KRT6C        | 0 | 0              | 0 | 1 |
| KRT6A        | 0 | 0              | 0 | 1 |
| KRT71        | 0 | 0              | 0 | 1 |
| KRT74        | 0 | 0              | 0 | 1 |
| KRT72        | 0 | 0              | 0 | 1 |
| KRT73        | 0 | 0.0064925 inf  |   | 1 |
| KRT2         | 0 | 0              | 0 | 1 |
| KRT77        | 0 | 0              | 0 | 1 |
| KRT76        | 0 | 0              | 0 | 1 |
| KRT3         | 0 | 0.014138 inf   |   | 1 |
| KRT4         | 0 | 0.00616394 inf |   | 1 |
| HOXC-AS5     | 0 | 0              | 0 | 1 |
| GTSF1        | 0 | 0              | 0 | 1 |
| PPP1R1A      | 0 | 0              | 0 | 1 |
| GLYCAM1      | 0 | 0              | 0 | 1 |

|              |   |                |   |   |
|--------------|---|----------------|---|---|
| LACRT        | 0 | 0              | 0 | 1 |
| TESPA1       | 0 | 0              | 0 | 1 |
| OR6C6        | 0 | 0              | 0 | 1 |
| OR6C70       | 0 | 0              | 0 | 1 |
| APOF         | 0 | 0.0063691 inf  |   | 1 |
| SNORD59B     | 0 | 0              | 0 | 1 |
| SNORD59A     | 0 | 0              | 0 | 1 |
| TAC3         | 0 | 0.0436053 inf  |   | 1 |
| B4GALNT1     | 0 | 0              | 0 | 1 |
| MIR26A2      | 0 | 0              | 0 | 1 |
| AVPR1A       | 0 | 0              | 0 | 1 |
| C12orf56     | 0 | 0              | 0 | 1 |
| IFNG         | 0 | 0              | 0 | 1 |
| IL26         | 0 | 0              | 0 | 1 |
| IL22         | 0 | 0              | 0 | 1 |
| SNORA70G     | 0 | 0              | 0 | 1 |
| MIR1279      | 0 | 0              | 0 | 1 |
| MIR3913-1    | 0 | 0              | 0 | 1 |
| TRHE-AS1     | 0 | 0              | 0 | 1 |
| LOC100507377 | 0 | 0              | 0 | 1 |
| KCNC2        | 0 | 0              | 0 | 1 |
| LIN7A        | 0 | 0              | 0 | 1 |
| MIR617       | 0 | 0              | 0 | 1 |
| MIR618       | 0 | 0              | 0 | 1 |
| PPFIA2       | 0 | 0              | 0 | 1 |
| SLC6A15      | 0 | 0              | 0 | 1 |
| RASSF9       | 0 | 0              | 0 | 1 |
| MGAT4C       | 0 | 0              | 0 | 1 |
| MIR548AL     | 0 | 0              | 0 | 1 |
| MKRN9P       | 0 | 0              | 0 | 1 |
| CCER1        | 0 | 0              | 0 | 1 |
| EPYC         | 0 | 0              | 0 | 1 |
| KERA         | 0 | 0              | 0 | 1 |
| DCN          | 0 | 0              | 0 | 1 |
| CLU10S       | 0 | 0              | 0 | 1 |
| LOC643339    | 0 | 0              | 0 | 1 |
| MIR4303      | 0 | 0              | 0 | 1 |
| SLC9A7P1     | 0 | 0              | 0 | 1 |
| SLC5A8       | 0 | 0              | 0 | 1 |
| PAH          | 0 | 0              | 0 | 1 |
| C12orf42     | 0 | 0              | 0 | 1 |
| LOC100287944 | 0 | 0              | 0 | 1 |
| LOC728739    | 0 | 0              | 0 | 1 |
| CMKLR1       | 0 | 0              | 0 | 1 |
| SVOP         | 0 | 0              | 0 | 1 |
| RASAL1       | 0 | 0.00331322 inf |   | 1 |
| LHX5         | 0 | 0              | 0 | 1 |
| TBX5         | 0 | 0              | 0 | 1 |
| MIR620       | 0 | 0              | 0 | 1 |

|              |   |            |     |   |
|--------------|---|------------|-----|---|
| MIR4472-2    | 0 | 0          | 0   | 1 |
| KSR2         | 0 | 0          | 0   | 1 |
| LOC144742    | 0 | 0          | 0   | 1 |
| MIR4498      | 0 | 0          | 0   | 1 |
| MORN3        | 0 | 0          | 0   | 1 |
| IL31         | 0 | 0          | 0   | 1 |
| MIR4304      | 0 | 0          | 0   | 1 |
| LOC400084    | 0 | 0          | 0   | 1 |
| LOC440117    | 0 | 0          | 0   | 1 |
| TMEM132D     | 0 | 0          | 0   | 1 |
| LOC100190940 | 0 | 0.00377402 | inf | 1 |
| LRCOL1       | 0 | 0          | 0   | 1 |
| ANHX         | 0 | 0          | 0   | 1 |
| LINC00442    | 0 | 0          | 0   | 1 |
| RNU6-52      | 0 | 0          | 0   | 1 |
| LINC00421    | 0 | 0          | 0   | 1 |
| SGCG         | 0 | 0          | 0   | 1 |
| LINC00327    | 0 | 0          | 0   | 1 |
| TNFRSF19     | 0 | 0          | 0   | 1 |
| MIR2276      | 0 | 0          | 0   | 1 |
| RNF17        | 0 | 0          | 0   | 1 |
| ATP8A2       | 0 | 0          | 0   | 1 |
| SNORD102     | 0 | 0          | 0   | 1 |
| GSX1         | 0 | 0          | 0   | 1 |
| LINC00544    | 0 | 0          | 0   | 1 |
| LINC00398    | 0 | 0          | 0   | 1 |
| MEDAG        | 0 | 0          | 0   | 1 |
| TEX26        | 0 | 0          | 0   | 1 |
| RXFP2        | 0 | 0          | 0   | 1 |
| EEF1DP3      | 0 | 0          | 0   | 1 |
| KL           | 0 | 0          | 0   | 1 |
| SPG20OS      | 0 | 0          | 0   | 1 |
| CCNA1        | 0 | 0          | 0   | 1 |
| SERTM1       | 0 | 0          | 0   | 1 |
| LINC00547    | 0 | 0          | 0   | 1 |
| LINC00366    | 0 | 0          | 0   | 1 |
| FREM2        | 0 | 0          | 0   | 1 |
| LINC00332    | 0 | 0          | 0   | 1 |
| RGCC         | 0 | 0          | 0   | 1 |
| TNFSF11      | 0 | 0          | 0   | 1 |
| FAM216B      | 0 | 0          | 0   | 1 |
| LINC00284    | 0 | 0          | 0   | 1 |
| SERP2        | 0 | 0          | 0   | 1 |
| CYSLTR2      | 0 | 0          | 0   | 1 |
| ARL11        | 0 | 0          | 0   | 1 |
| MIR4703      | 0 | 0          | 0   | 1 |
| MIR759       | 0 | 0          | 0   | 1 |
| OLFM4        | 0 | 0          | 0   | 1 |
| LINC00558    | 0 | 0          | 0   | 1 |

|            |   |            |     |   |
|------------|---|------------|-----|---|
| MIR5007    | 0 | 0          | 0   | 1 |
| PRR20B     | 0 | 0          | 0   | 1 |
| PRR20D     | 0 | 0          | 0   | 1 |
| PRR20E     | 0 | 0          | 0   | 1 |
| PRR20A     | 0 | 0          | 0   | 1 |
| PRR20A     | 0 | 0          | 0   | 1 |
| PCDH17     | 0 | 0          | 0   | 1 |
| DIAPH3-AS1 | 0 | 0          | 0   | 1 |
| DIAPH3-AS2 | 0 | 0          | 0   | 1 |
| OR7E156P   | 0 | 0.0159505  | inf | 1 |
| PCDH9-AS2  | 0 | 0          | 0   | 1 |
| PCDH9-AS3  | 0 | 0          | 0   | 1 |
| ATXN8OS    | 0 | 0          | 0   | 1 |
| LINC00348  | 0 | 0          | 0   | 1 |
| LINC00381  | 0 | 0.022536   | inf | 1 |
| LINC00347  | 0 | 0          | 0   | 1 |
| BTF3P11    | 0 | 0          | 0   | 1 |
| IRG1       | 0 | 0          | 0   | 1 |
| MYCBP2-AS1 | 0 | 0          | 0   | 1 |
| SCEL       | 0 | 0          | 0   | 1 |
| SLAIN1     | 0 | 0          | 0   | 1 |
| LINC00446  | 0 | 0          | 0   | 1 |
| POU4F1-AS1 | 0 | 0          | 0   | 1 |
| LINC00333  | 0 | 0          | 0   | 1 |
| LINC00351  | 0 | 0          | 0   | 1 |
| SLITRK5    | 0 | 0          | 0   | 1 |
| LINC00433  | 0 | 0          | 0   | 1 |
| MIR622     | 0 | 0          | 0   | 1 |
| GPC5       | 0 | 0          | 0   | 1 |
| GPC6       | 0 | 0          | 0   | 1 |
| CLDN10     | 0 | 0          | 0   | 1 |
| HS6ST3     | 0 | 0          | 0   | 1 |
| MIR3170    | 0 | 0          | 0   | 1 |
| FKSG29     | 0 | 0          | 0   | 1 |
| MIR623     | 0 | 0          | 0   | 1 |
| MIR4306    | 0 | 0          | 0   | 1 |
| ITGBL1     | 0 | 0.00352089 | inf | 1 |
| FGF14-AS2  | 0 | 0          | 0   | 1 |
| DAOA       | 0 | 0          | 0   | 1 |
| LINC00343  | 0 | 0          | 0   | 1 |
| LINC00551  | 0 | 0          | 0   | 1 |
| LINC00443  | 0 | 0          | 0   | 1 |
| MYO16      | 0 | 0          | 0   | 1 |
| COL4A2     | 0 | 0.00472594 | inf | 1 |
| SOX1       | 0 | 0          | 0   | 1 |
| SPACA7     | 0 | 0          | 0   | 1 |
| C13orf35   | 0 | 0          | 0   | 1 |
| TMEM255B   | 0 | 0          | 0   | 1 |
| TUBA3C     | 0 | 0          | 0   | 1 |

|               |   |            |     |   |
|---------------|---|------------|-----|---|
| ANKRD26P3     | 0 | 0          | 0   | 1 |
| GJB2          | 0 | 0          | 0   | 1 |
| GJB6          | 0 | 0          | 0   | 1 |
| MIR4499       | 0 | 0          | 0   | 1 |
| LINC00424     | 0 | 0          | 0   | 1 |
| BASP1P1       | 0 | 0          | 0   | 1 |
| SPATA13-AS1   | 0 | 0          | 0   | 1 |
| AMER2         | 0 | 0          | 0   | 1 |
| SHISA2        | 0 | 0          | 0   | 1 |
| PRHOXNB       | 0 | 0          | 0   | 1 |
| FLT3          | 0 | 0          | 0   | 1 |
| FLT1          | 0 | 0.00486436 | inf | 1 |
| LINC00297     | 0 | 0          | 0   | 1 |
| LINC00426     | 0 | 0          | 0   | 1 |
| TEX26-AS1     | 0 | 0.00519266 | inf | 1 |
| LINC00423     | 0 | 0          | 0   | 1 |
| LINC00457     | 0 | 0          | 0   | 1 |
| MAB21L1       | 0 | 0          | 0   | 1 |
| DCLK1         | 0 | 0          | 0   | 1 |
| CCDC169,CCDC1 | 0 | 0          | 0   | 1 |
| SPG20         | 0 | 0.00155801 | inf | 1 |
| CSNK1A1L      | 0 | 0          | 0   | 1 |
| POSTN         | 0 | 0          | 0   | 1 |
| TRPC4         | 0 | 0          | 0   | 1 |
| LINC00571     | 0 | 0          | 0   | 1 |
| LHFP          | 0 | 0          | 0   | 1 |
| MIR4305       | 0 | 0          | 0   | 1 |
| LINC00548     | 0 | 0          | 0   | 1 |
| MIR320D1      | 0 | 0          | 0   | 1 |
| SMIM2-IT1     | 0 | 0          | 0   | 1 |
| LINC00330     | 0 | 0          | 0   | 1 |
| FAM194B       | 0 | 0          | 0   | 1 |
| SIAH3         | 0 | 0          | 0   | 1 |
| KIAA0226L     | 0 | 0          | 0   | 1 |
| HTR2A         | 0 | 0          | 0   | 1 |
| MIR3613       | 0 | 0          | 0   | 1 |
| MIR16-1       | 0 | 0          | 0   | 1 |
| MIR15A        | 0 | 0          | 0   | 1 |
| GUCY1B2       | 0 | 0          | 0   | 1 |
| MIR5693       | 0 | 0          | 0   | 1 |
| LECT1         | 0 | 0          | 0   | 1 |
| PCDH8         | 0 | 0.00634185 | inf | 1 |
| MIR1297       | 0 | 0          | 0   | 1 |
| MIR3169       | 0 | 0          | 0   | 1 |
| PCDH20        | 0 | 0          | 0   | 1 |
| PCDH9         | 0 | 0          | 0   | 1 |
| LINC00550     | 0 | 0          | 0   | 1 |
| KLHL1         | 0 | 0          | 0   | 1 |
| MIR3665       | 0 | 0          | 0   | 1 |

|              |   |            |     |   |
|--------------|---|------------|-----|---|
| EDNRB        | 0 | 0          | 0   | 1 |
| LINC00331    | 0 | 0          | 0   | 1 |
| NDFIP2-AS1   | 0 | 0          | 0   | 1 |
| SLITRK1      | 0 | 0.00243956 | inf | 1 |
| SLITRK6      | 0 | 0          | 0   | 1 |
| MIR4500      | 0 | 0          | 0   | 1 |
| LINC00353    | 0 | 0          | 0   | 1 |
| LINC00559    | 0 | 0          | 0   | 1 |
| LINC00410    | 0 | 0          | 0   | 1 |
| LINC00379    | 0 | 0          | 0   | 1 |
| GPC5-AS1     | 0 | 0          | 0   | 1 |
| GPC6-AS2     | 0 | 0          | 0   | 1 |
| SOX21        | 0 | 0          | 0   | 1 |
| CLDN10-AS1   | 0 | 0          | 0   | 1 |
| LINC00359    | 0 | 0          | 0   | 1 |
| OXGR1        | 0 | 0          | 0   | 1 |
| MIR548AN     | 0 | 0          | 0   | 1 |
| PCCA-AS1     | 0 | 0          | 0   | 1 |
| NALCN        | 0 | 0          | 0   | 1 |
| FGF14        | 0 | 0          | 0   | 1 |
| MIR2681      | 0 | 0          | 0   | 1 |
| MIR4705      | 0 | 0          | 0   | 1 |
| FGF14-IT1    | 0 | 0          | 0   | 1 |
| METTL21C     | 0 | 0.00990095 | inf | 1 |
| SLC10A2      | 0 | 0          | 0   | 1 |
| MIR548AS     | 0 | 0          | 0   | 1 |
| DAOA-AS1     | 0 | 0          | 0   | 1 |
| FAM155A      | 0 | 0          | 0   | 1 |
| MYO16-AS1    | 0 | 0          | 0   | 1 |
| COL4A1       | 0 | 0          | 0   | 1 |
| COL4A2-AS1   | 0 | 0          | 0   | 1 |
| ATP4B        | 0 | 0          | 0   | 1 |
| LINC00552    | 0 | 0          | 0   | 1 |
| OR11H12      | 0 | 0          | 0   | 1 |
| POTEG        | 0 | 0          | 0   | 1 |
| LOC101101776 | 0 | 0          | 0   | 1 |
| OR4Q3        | 0 | 0          | 0   | 1 |
| OR4M1        | 0 | 0          | 0   | 1 |
| OR4N2        | 0 | 0          | 0   | 1 |
| OR4K2        | 0 | 0          | 0   | 1 |
| OR4K5        | 0 | 0          | 0   | 1 |
| OR4K1        | 0 | 0          | 0   | 1 |
| OR4K15       | 0 | 0          | 0   | 1 |
| OR4L1        | 0 | 0          | 0   | 1 |
| OR4K17       | 0 | 0          | 0   | 1 |
| OR4N5        | 0 | 0          | 0   | 1 |
| OR11G2       | 0 | 0          | 0   | 1 |
| OR11H6       | 0 | 0          | 0   | 1 |
| OR11H4       | 0 | 0          | 0   | 1 |

|            |   |            |     |   |
|------------|---|------------|-----|---|
| RNASE10    | 0 | 0          | 0   | 1 |
| EDDM3A     | 0 | 0          | 0   | 1 |
| EDDM3B     | 0 | 0          | 0   | 1 |
| RNASE6     | 0 | 0          | 0   | 1 |
| ECRP       | 0 | 0.0183598  | inf | 1 |
| TPPP2      | 0 | 0          | 0   | 1 |
| OR4E2      | 0 | 0          | 0   | 1 |
| PSMB11     | 0 | 0.00875198 | inf | 1 |
| IL25       | 0 | 0          | 0   | 1 |
| CMTM5      | 0 | 0.0378831  | inf | 1 |
| CPNE6      | 0 | 0          | 0   | 1 |
| MIR4307    | 0 | 0          | 0   | 1 |
| LINC00645  | 0 | 0          | 0   | 1 |
| FOXG1      | 0 | 0          | 0   | 1 |
| NPAS3      | 0 | 0.00181484 | inf | 1 |
| IGBP1P1    | 0 | 0          | 0   | 1 |
| INSM2      | 0 | 0.0101656  | inf | 1 |
| LINC00609  | 0 | 0          | 0   | 1 |
| MIA2       | 0 | 0          | 0   | 1 |
| LRFN5      | 0 | 0          | 0   | 1 |
| SNORD127   | 0 | 0          | 0   | 1 |
| GNG2       | 0 | 0          | 0   | 1 |
| PTGDR      | 0 | 0          | 0   | 1 |
| OTX2-AS1   | 0 | 0.00435152 | inf | 1 |
| LRRC9      | 0 | 0          | 0   | 1 |
| SIX6       | 0 | 0          | 0   | 1 |
| PRKCH      | 0 | 0          | 0   | 1 |
| FLJ22447   | 0 | 0          | 0   | 1 |
| SYT16      | 0 | 0          | 0   | 1 |
| LINC00643  | 0 | 0          | 0   | 1 |
| RHOJ       | 0 | 0          | 0   | 1 |
| HSPA2      | 0 | 0.0297857  | inf | 1 |
| MIR4706    | 0 | 0          | 0   | 1 |
| LINC00238  | 0 | 0          | 0   | 1 |
| FAM71D     | 0 | 0          | 0   | 1 |
| GALNT16    | 0 | 0          | 0   | 1 |
| SNORD56B   | 0 | 0          | 0   | 1 |
| RGS6       | 0 | 0          | 0   | 1 |
| MIR4505    | 0 | 0          | 0   | 1 |
| VSX2       | 0 | 0          | 0   | 1 |
| VRTN       | 0 | 0          | 0   | 1 |
| BATF       | 0 | 0          | 0   | 1 |
| C14orf166B | 0 | 0          | 0   | 1 |
| MIR1260A   | 0 | 0          | 0   | 1 |
| NRXN3      | 0 | 0          | 0   | 1 |
| DIO2-AS1   | 0 | 0          | 0   | 1 |
| FLRT2      | 0 | 0          | 0   | 1 |
| LOC283585  | 0 | 0          | 0   | 1 |
| LOC283587  | 0 | 0          | 0   | 1 |



|             |   |           |     |   |
|-------------|---|-----------|-----|---|
| FOXN3-AS2   | 0 | 0         | 0   | 1 |
| KCNK13      | 0 | 0         | 0   | 1 |
| LINC00642   | 0 | 0         | 0   | 1 |
| FAM181A     | 0 | 0         | 0   | 1 |
| LINC00521   | 0 | 0         | 0   | 1 |
| SERPINA4    | 0 | 0         | 0   | 1 |
| SERPINA5    | 0 | 0         | 0   | 1 |
| SERPINA13P  | 0 | 0         | 0   | 1 |
| TCL6        | 0 | 0         | 0   | 1 |
| TCL1B       | 0 | 0         | 0   | 1 |
| LINC00617   | 0 | 0         | 0   | 1 |
| BDKRB2      | 0 | 0         | 0   | 1 |
| BDKRB1      | 0 | 0         | 0   | 1 |
| C14orf177   | 0 | 0         | 0   | 1 |
| HHIPL1      | 0 | 0         | 0   | 1 |
| MIR5698     | 0 | 0         | 0   | 1 |
| EML1        | 0 | 0         | 0   | 1 |
| EVL         | 0 | 0         | 0   | 1 |
| MIR345      | 0 | 0         | 0   | 1 |
| SLC25A47    | 0 | 0.0138561 | inf | 1 |
| LINC00523   | 0 | 0         | 0   | 1 |
| DLK1        | 0 | 0         | 0   | 1 |
| MIR2392     | 0 | 0         | 0   | 1 |
| MEG3,MIR770 | 0 | 0         | 0   | 1 |
| MIR493      | 0 | 0         | 0   | 1 |
| MIR337      | 0 | 0         | 0   | 1 |
| MIR665      | 0 | 0         | 0   | 1 |
| MIR431      | 0 | 0         | 0   | 1 |
| MIR433      | 0 | 0         | 0   | 1 |
| MIR127      | 0 | 0         | 0   | 1 |
| MIR432      | 0 | 0         | 0   | 1 |
| MIR136      | 0 | 0         | 0   | 1 |
| MEG8        | 0 | 0         | 0   | 1 |
| SNORD113-1  | 0 | 0         | 0   | 1 |
| SNORD113-2  | 0 | 0         | 0   | 1 |
| SNORD113-4  | 0 | 0         | 0   | 1 |
| SNORD113-5  | 0 | 0         | 0   | 1 |
| SNORD113-6  | 0 | 0         | 0   | 1 |
| SNORD113-7  | 0 | 0         | 0   | 1 |
| SNORD113-9  | 0 | 0         | 0   | 1 |
| SNORD114-1  | 0 | 0         | 0   | 1 |
| SNORD114-2  | 0 | 0         | 0   | 1 |
| SNORD114-3  | 0 | 0         | 0   | 1 |
| SNORD114-4  | 0 | 0         | 0   | 1 |
| SNORD114-5  | 0 | 0         | 0   | 1 |
| SNORD114-6  | 0 | 0         | 0   | 1 |
| SNORD114-7  | 0 | 0         | 0   | 1 |
| SNORD114-8  | 0 | 0         | 0   | 1 |
| SNORD114-9  | 0 | 0         | 0   | 1 |

|             |   |   |   |   |
|-------------|---|---|---|---|
| SNORD114-10 | 0 | 0 | 0 | 1 |
| SNORD114-11 | 0 | 0 | 0 | 1 |
| SNORD114-12 | 0 | 0 | 0 | 1 |
| SNORD114-13 | 0 | 0 | 0 | 1 |
| SNORD114-14 | 0 | 0 | 0 | 1 |
| SNORD114-15 | 0 | 0 | 0 | 1 |
| SNORD114-16 | 0 | 0 | 0 | 1 |
| SNORD114-17 | 0 | 0 | 0 | 1 |
| SNORD114-18 | 0 | 0 | 0 | 1 |
| SNORD114-19 | 0 | 0 | 0 | 1 |
| SNORD114-20 | 0 | 0 | 0 | 1 |
| SNORD114-21 | 0 | 0 | 0 | 1 |
| SNORD114-22 | 0 | 0 | 0 | 1 |
| SNORD114-23 | 0 | 0 | 0 | 1 |
| SNORD114-24 | 0 | 0 | 0 | 1 |
| SNORD114-25 | 0 | 0 | 0 | 1 |
| SNORD114-26 | 0 | 0 | 0 | 1 |
| SNORD114-27 | 0 | 0 | 0 | 1 |
| SNORD114-28 | 0 | 0 | 0 | 1 |
| SNORD114-29 | 0 | 0 | 0 | 1 |
| SNORD114-30 | 0 | 0 | 0 | 1 |
| SNORD114-31 | 0 | 0 | 0 | 1 |
| MIR379      | 0 | 0 | 0 | 1 |
| MIR411      | 0 | 0 | 0 | 1 |
| MIR299      | 0 | 0 | 0 | 1 |
| MIR380      | 0 | 0 | 0 | 1 |
| MIR1197     | 0 | 0 | 0 | 1 |
| MIR323A     | 0 | 0 | 0 | 1 |
| MIR758      | 0 | 0 | 0 | 1 |
| MIR329-1    | 0 | 0 | 0 | 1 |
| MIR329-2    | 0 | 0 | 0 | 1 |
| MIR494      | 0 | 0 | 0 | 1 |
| MIR1193     | 0 | 0 | 0 | 1 |
| MIR543      | 0 | 0 | 0 | 1 |
| MIR495      | 0 | 0 | 0 | 1 |
| MIR376C     | 0 | 0 | 0 | 1 |
| MIR376A2    | 0 | 0 | 0 | 1 |
| MIR654      | 0 | 0 | 0 | 1 |
| MIR376B     | 0 | 0 | 0 | 1 |
| MIR376A1    | 0 | 0 | 0 | 1 |
| MIR300      | 0 | 0 | 0 | 1 |
| MIR1185-1   | 0 | 0 | 0 | 1 |
| MIR1185-2   | 0 | 0 | 0 | 1 |
| MIR381      | 0 | 0 | 0 | 1 |
| MIR487B     | 0 | 0 | 0 | 1 |
| MIR539      | 0 | 0 | 0 | 1 |
| MIR889      | 0 | 0 | 0 | 1 |
| MIR655      | 0 | 0 | 0 | 1 |
| MIR487A     | 0 | 0 | 0 | 1 |

|              |   |                |   |   |
|--------------|---|----------------|---|---|
| MIR382       | 0 | 0              | 0 | 1 |
| MIR134       | 0 | 0              | 0 | 1 |
| MIR668       | 0 | 0              | 0 | 1 |
| MIR485       | 0 | 0              | 0 | 1 |
| MIR323B      | 0 | 0              | 0 | 1 |
| MIR154       | 0 | 0              | 0 | 1 |
| MIR496       | 0 | 0              | 0 | 1 |
| MIR377       | 0 | 0              | 0 | 1 |
| MIR541       | 0 | 0              | 0 | 1 |
| MIR409       | 0 | 0              | 0 | 1 |
| MIR412       | 0 | 0              | 0 | 1 |
| MIR369       | 0 | 0              | 0 | 1 |
| MIR410       | 0 | 0              | 0 | 1 |
| MIR656       | 0 | 0              | 0 | 1 |
| MEG9         | 0 | 0              | 0 | 1 |
| MIR4309      | 0 | 0              | 0 | 1 |
| TDRD9        | 0 | 0              | 0 | 1 |
| MIR203       | 0 | 0              | 0 | 1 |
| PLD4         | 0 | 0.0112191 inf  |   | 1 |
| KIAA0125     | 0 | 0              | 0 | 1 |
| LINC00226    | 0 | 0              | 0 | 1 |
| LINC00221    | 0 | 0              | 0 | 1 |
| LOC642426    | 0 | 0              | 0 | 1 |
| LOC101101776 | 0 | 0              | 0 | 1 |
| POTEM        | 0 | 0              | 0 | 1 |
| OR11H2       | 0 | 0              | 0 | 1 |
| OR4K14       | 0 | 0              | 0 | 1 |
| OR4K13       | 0 | 0              | 0 | 1 |
| SNORD126     | 0 | 0              | 0 | 1 |
| KLHL33       | 0 | 0              | 0 | 1 |
| RNASE9       | 0 | 0              | 0 | 1 |
| OR6S1        | 0 | 0              | 0 | 1 |
| RNASE1       | 0 | 0              | 0 | 1 |
| RNASE13      | 0 | 0              | 0 | 1 |
| OR5AU1       | 0 | 0              | 0 | 1 |
| SALL2        | 0 | 0              | 0 | 1 |
| OR10G3       | 0 | 0              | 0 | 1 |
| OR10G2       | 0 | 0              | 0 | 1 |
| CEBPE        | 0 | 0              | 0 | 1 |
| SLC7A8       | 0 | 0.00477551 inf |   | 1 |
| SLC22A17     | 0 | 0              | 0 | 1 |
| EFS          | 0 | 0              | 0 | 1 |
| MIR208A      | 0 | 0              | 0 | 1 |
| MIR208B      | 0 | 0              | 0 | 1 |
| RIPK3        | 0 | 0              | 0 | 1 |
| CMA1         | 0 | 0              | 0 | 1 |
| CTSG         | 0 | 0              | 0 | 1 |
| GZMH         | 0 | 0              | 0 | 1 |
| GZMB         | 0 | 0              | 0 | 1 |

|              |   |   |   |   |
|--------------|---|---|---|---|
| NOVA1        | 0 | 0 | 0 | 1 |
| MIR548AI     | 0 | 0 | 0 | 1 |
| MIR624       | 0 | 0 | 0 | 1 |
| GPR33        | 0 | 0 | 0 | 1 |
| SFTA3        | 0 | 0 | 0 | 1 |
| NKX2-1       | 0 | 0 | 0 | 1 |
| NKX2-8       | 0 | 0 | 0 | 1 |
| MIR4503      | 0 | 0 | 0 | 1 |
| CLEC14A      | 0 | 0 | 0 | 1 |
| LINC00639    | 0 | 0 | 0 | 1 |
| FSCB         | 0 | 0 | 0 | 1 |
| RPL10L       | 0 | 0 | 0 | 1 |
| MDGA2        | 0 | 0 | 0 | 1 |
| MIR548Y      | 0 | 0 | 0 | 1 |
| LINC00648    | 0 | 0 | 0 | 1 |
| MIR5580      | 0 | 0 | 0 | 1 |
| MIR4308      | 0 | 0 | 0 | 1 |
| TBPL2        | 0 | 0 | 0 | 1 |
| C14orf39     | 0 | 0 | 0 | 1 |
| SIX1         | 0 | 0 | 0 | 1 |
| TMEM30B      | 0 | 0 | 0 | 1 |
| KCNH5        | 0 | 0 | 0 | 1 |
| GPHB5        | 0 | 0 | 0 | 1 |
| MIR4708      | 0 | 0 | 0 | 1 |
| CCDC177      | 0 | 0 | 0 | 1 |
| SLC8A3       | 0 | 0 | 0 | 1 |
| RNU6-6       | 0 | 0 | 0 | 1 |
| ZDHHC22      | 0 | 0 | 0 | 1 |
| NGB          | 0 | 0 | 0 | 1 |
| DIO2         | 0 | 0 | 0 | 1 |
| GALC         | 0 | 0 | 0 | 1 |
| KCNK10       | 0 | 0 | 0 | 1 |
| CATSPERB     | 0 | 0 | 0 | 1 |
| PRIMA1       | 0 | 0 | 0 | 1 |
| FAM181A-AS1  | 0 | 0 | 0 | 1 |
| ASB2         | 0 | 0 | 0 | 1 |
| SERPINA11    | 0 | 0 | 0 | 1 |
| SERPINA9     | 0 | 0 | 0 | 1 |
| SERPINA12    | 0 | 0 | 0 | 1 |
| GSC          | 0 | 0 | 0 | 1 |
| MIR3173      | 0 | 0 | 0 | 1 |
| LINC00341    | 0 | 0 | 0 | 1 |
| SYNE3        | 0 | 0 | 0 | 1 |
| TCL1A        | 0 | 0 | 0 | 1 |
| LOC100129345 | 0 | 0 | 0 | 1 |
| C14orf64     | 0 | 0 | 0 | 1 |
| RTL1         | 0 | 0 | 0 | 1 |
| DIO3OS       | 0 | 0 | 0 | 1 |
| MIR1247      | 0 | 0 | 0 | 1 |

|             |   |            |     |   |
|-------------|---|------------|-----|---|
| LINC00605   | 0 | 0          | 0   | 1 |
| RD3L        | 0 | 0          | 0   | 1 |
| MIR3545     | 0 | 0          | 0   | 1 |
| TMEM179     | 0 | 0          | 0   | 1 |
| MIR4710     | 0 | 0          | 0   | 1 |
| ELK2AP      | 0 | 0          | 0   | 1 |
| ADAM6       | 0 | 0          | 0   | 1 |
| CHEK2P2     | 0 | 0          | 0   | 1 |
| GOLGA8CP    | 0 | 0          | 0   | 1 |
| CT60        | 0 | 0          | 0   | 1 |
| OR4M2       | 0 | 0          | 0   | 1 |
| OR4N4       | 0 | 0          | 0   | 1 |
| RREP3       | 0 | 0          | 0   | 1 |
| GOLGA6L1    | 0 | 0          | 0   | 1 |
| GOLGA8EP    | 0 | 0.00153982 | inf | 1 |
| MKRN3       | 0 | 0          | 0   | 1 |
| PWRN1       | 0 | 0          | 0   | 1 |
| SNORD109A   | 0 | 0          | 0   | 1 |
| SNORD116-1  | 0 | 0          | 0   | 1 |
| SNORD116-2  | 0 | 0          | 0   | 1 |
| SNORD116-9  | 0 | 0          | 0   | 1 |
| SNORD116-4  | 0 | 0          | 0   | 1 |
| SNORD116-5  | 0 | 0          | 0   | 1 |
| SNORD116-6  | 0 | 0          | 0   | 1 |
| SNORD116-7  | 0 | 0          | 0   | 1 |
| SNORD116-8  | 0 | 0          | 0   | 1 |
| SNORD116-9  | 0 | 0          | 0   | 1 |
| SNORD116-10 | 0 | 0          | 0   | 1 |
| SNORD116-11 | 0 | 0          | 0   | 1 |
| SNORD116-12 | 0 | 0          | 0   | 1 |
| SNORD116-13 | 0 | 0          | 0   | 1 |
| SNORD116-14 | 0 | 0          | 0   | 1 |
| SNORD116-15 | 0 | 0          | 0   | 1 |
| SNORD116-16 | 0 | 0          | 0   | 1 |
| SNORD116-17 | 0 | 0          | 0   | 1 |
| SNORD116-18 | 0 | 0          | 0   | 1 |
| SNORD116-19 | 0 | 0          | 0   | 1 |
| SNORD116-20 | 0 | 0          | 0   | 1 |
| SNORD116-21 | 0 | 0          | 0   | 1 |
| SNORD116-22 | 0 | 0          | 0   | 1 |
| SNORD116-23 | 0 | 0          | 0   | 1 |
| SNORD116-24 | 0 | 0          | 0   | 1 |
| SNORD116-25 | 0 | 0          | 0   | 1 |
| SNORD116-26 | 0 | 0          | 0   | 1 |
| SNORD116-27 | 0 | 0          | 0   | 1 |
| SNORD116-28 | 0 | 0          | 0   | 1 |
| SNORD116-29 | 0 | 0          | 0   | 1 |
| IPW         | 0 | 0          | 0   | 1 |
| PAR1        | 0 | 0          | 0   | 1 |

|                |   |   |   |   |
|----------------|---|---|---|---|
| SNORD115-1     | 0 | 0 | 0 | 1 |
| SNORD115-2     | 0 | 0 | 0 | 1 |
| SNORD115-3     | 0 | 0 | 0 | 1 |
| SNORD115-4     | 0 | 0 | 0 | 1 |
| SNORD115-5     | 0 | 0 | 0 | 1 |
| SNORD115-6     | 0 | 0 | 0 | 1 |
| SNORD115-7     | 0 | 0 | 0 | 1 |
| SNORD115-8     | 0 | 0 | 0 | 1 |
| SNORD115-9     | 0 | 0 | 0 | 1 |
| SNORD115-10    | 0 | 0 | 0 | 1 |
| SNORD115-43    | 0 | 0 | 0 | 1 |
| SNORD115-10    | 0 | 0 | 0 | 1 |
| SNORD115-13    | 0 | 0 | 0 | 1 |
| SNORD115-14    | 0 | 0 | 0 | 1 |
| SNORD115-16    | 0 | 0 | 0 | 1 |
| SNORD115-18    | 0 | 0 | 0 | 1 |
| SNORD115-18    | 0 | 0 | 0 | 1 |
| SNORD115-17    | 0 | 0 | 0 | 1 |
| SNORD115-15,SN | 0 | 0 | 0 | 1 |
| SNORD115-22    | 0 | 0 | 0 | 1 |
| PAR4           | 0 | 0 | 0 | 1 |
| SNORD115-24    | 0 | 0 | 0 | 1 |
| SNORD115-25    | 0 | 0 | 0 | 1 |
| SNORD115-26    | 0 | 0 | 0 | 1 |
| SNORD115-27    | 0 | 0 | 0 | 1 |
| SNORD115-28    | 0 | 0 | 0 | 1 |
| SNORD115-11    | 0 | 0 | 0 | 1 |
| SNORD115-30    | 0 | 0 | 0 | 1 |
| SNORD115-31    | 0 | 0 | 0 | 1 |
| SNORD115-32    | 0 | 0 | 0 | 1 |
| SNORD115-33    | 0 | 0 | 0 | 1 |
| SNORD115-35    | 0 | 0 | 0 | 1 |
| SNORD115-11    | 0 | 0 | 0 | 1 |
| SNORD115-37    | 0 | 0 | 0 | 1 |
| SNORD115-38    | 0 | 0 | 0 | 1 |
| SNORD115-39    | 0 | 0 | 0 | 1 |
| SNORD115-40    | 0 | 0 | 0 | 1 |
| SNORD115-41    | 0 | 0 | 0 | 1 |
| SNORD115-10    | 0 | 0 | 0 | 1 |
| SNORD115-11    | 0 | 0 | 0 | 1 |
| SNORD115-44    | 0 | 0 | 0 | 1 |
| SNORD115-45    | 0 | 0 | 0 | 1 |
| SNORD115-47    | 0 | 0 | 0 | 1 |
| SNORD115-48    | 0 | 0 | 0 | 1 |
| SNORD109B      | 0 | 0 | 0 | 1 |
| LOC100128714   | 0 | 0 | 0 | 1 |
| LOC503519      | 0 | 0 | 0 | 1 |
| GABRA5         | 0 | 0 | 0 | 1 |
| GABRG3         | 0 | 0 | 0 | 1 |

|              |   |            |     |   |
|--------------|---|------------|-----|---|
| GOLGA8F,GOLG | 0 | 0          | 0   | 1 |
| MIR4509-1    | 0 | 0          | 0   | 1 |
| LOC100289656 | 0 | 0          | 0   | 1 |
| ULK4P3       | 0 | 0          | 0   | 1 |
| ULK4P2       | 0 | 0          | 0   | 1 |
| GREM1        | 0 | 0          | 0   | 1 |
| ATPBD4-AS1   | 0 | 0.00744139 | inf | 1 |
| MIR4510      | 0 | 0          | 0   | 1 |
| TMCO5A       | 0 | 0          | 0   | 1 |
| C15orf53     | 0 | 0          | 0   | 1 |
| C15orf54     | 0 | 0          | 0   | 1 |
| THBS1        | 0 | 0          | 0   | 1 |
| PHGR1        | 0 | 0          | 0   | 1 |
| MIR626       | 0 | 0          | 0   | 1 |
| RNU6-28      | 0 | 0          | 0   | 1 |
| C15orf43     | 0 | 0          | 0   | 1 |
| DUXA2        | 0 | 0          | 0   | 1 |
| SEMA6D       | 0 | 0          | 0   | 1 |
| SLC24A5      | 0 | 0          | 0   | 1 |
| CTXN2        | 0 | 0          | 0   | 1 |
| SLC12A1      | 0 | 0          | 0   | 1 |
| MIR4712      | 0 | 0          | 0   | 1 |
| MIR4713      | 0 | 0          | 0   | 1 |
| GLDN         | 0 | 0          | 0   | 1 |
| UNC13C       | 0 | 0          | 0   | 1 |
| AQP9         | 0 | 0          | 0   | 1 |
| LIPC         | 0 | 0          | 0   | 1 |
| GCNT3        | 0 | 0.00449481 | inf | 1 |
| FOXB1        | 0 | 0          | 0   | 1 |
| MIR190A      | 0 | 0          | 0   | 1 |
| KBTD13       | 0 | 0          | 0   | 1 |
| MIR4311      | 0 | 0          | 0   | 1 |
| MIR548H4     | 0 | 0          | 0   | 1 |
| NOX5,SPESP1  | 0 | 0          | 0   | 1 |
| LINC00277    | 0 | 0          | 0   | 1 |
| LINC00593    | 0 | 0          | 0   | 1 |
| TMEM202      | 0 | 0          | 0   | 1 |
| MIR630       | 0 | 0          | 0   | 1 |
| GOLGA6B      | 0 | 0          | 0   | 1 |
| C15orf60     | 0 | 0.0118504  | inf | 1 |
| TBC1D21      | 0 | 0          | 0   | 1 |
| ISLR2        | 0 | 0          | 0   | 1 |
| ISLR         | 0 | 0          | 0   | 1 |
| CCDC33       | 0 | 0          | 0   | 1 |
| LOC729739    | 0 | 0.0581383  | inf | 1 |
| LMAN1L       | 0 | 0.020928   | inf | 1 |
| GOLGA6D      | 0 | 0          | 0   | 1 |
| ISL2         | 0 | 0.014386   | inf | 1 |
| LOC253044    | 0 | 0          | 0   | 1 |

|               |   |            |     |   |
|---------------|---|------------|-----|---|
| MIR5003       | 0 | 0          | 0   | 1 |
| SH2D7         | 0 | 0.0335225  | inf | 1 |
| CRABP1        | 0 | 0          | 0   | 1 |
| MIR184        | 0 | 0          | 0   | 1 |
| ANKRD34C      | 0 | 0          | 0   | 1 |
| C15orf26      | 0 | 0          | 0   | 1 |
| LOC390660     | 0 | 0          | 0   | 1 |
| UBE2Q2P2.UBE2 | 0 | 0          | 0   | 1 |
| GOLGA6L9      | 0 | 0          | 0   | 1 |
| LOC440297     | 0 | 0          | 0   | 1 |
| LOC390660     | 0 | 0          | 0   | 1 |
| LOC440297     | 0 | 0          | 0   | 1 |
| LOC283692     | 0 | 0          | 0   | 1 |
| SCARNA15      | 0 | 0          | 0   | 1 |
| MIR4515       | 0 | 0          | 0   | 1 |
| TM6SF1        | 0 | 0          | 0   | 1 |
| ADAMTSL3      | 0 | 0          | 0   | 1 |
| EFTUD1P1      | 0 | 0.00981172 | inf | 1 |
| SLC28A1       | 0 | 0          | 0   | 1 |
| AGBL1         | 0 | 0          | 0   | 1 |
| LINC00052     | 0 | 0          | 0   | 1 |
| NTRK3-AS1     | 0 | 0          | 0   | 1 |
| MIR1179       | 0 | 0          | 0   | 1 |
| MIR7-2        | 0 | 0          | 0   | 1 |
| ACAN          | 0 | 0          | 0   | 1 |
| MIR9-3        | 0 | 0          | 0   | 1 |
| LOC254559     | 0 | 0          | 0   | 1 |
| ST8SIA2       | 0 | 0          | 0   | 1 |
| C15orf32      | 0 | 0          | 0   | 1 |
| MIR3175       | 0 | 0          | 0   | 1 |
| LOC145820     | 0 | 0.00445092 | inf | 1 |
| MIR1469       | 0 | 0          | 0   | 1 |
| SPATA8        | 0 | 0          | 0   | 1 |
| MIR4714       | 0 | 0          | 0   | 1 |
| OR4F6         | 0 | 0          | 0   | 1 |
| OR4F15        | 0 | 0          | 0   | 1 |
| OR4F13P       | 0 | 0          | 0   | 1 |
| FAM138E       | 0 | 0          | 0   | 1 |
| GOLGA6L6      | 0 | 0          | 0   | 1 |
| NBEAP1        | 0 | 0          | 0   | 1 |
| POTEB         | 0 | 0          | 0   | 1 |
| NF1P2         | 0 | 0          | 0   | 1 |
| CXADRP2       | 0 | 0          | 0   | 1 |
| POTEB         | 0 | 0          | 0   | 1 |
| NF1P2         | 0 | 0          | 0   | 1 |
| MIR4509-3     | 0 | 0          | 0   | 1 |
| LOC440243     | 0 | 0          | 0   | 1 |
| MIR4508       | 0 | 0          | 0   | 1 |
| MAGEL2        | 0 | 0          | 0   | 1 |



|              |   |            |     |   |
|--------------|---|------------|-----|---|
| NDN          | 0 | 0          | 0   | 1 |
| PWRN2        | 0 | 0          | 0   | 1 |
| ATP10A       | 0 | 0          | 0   | 1 |
| MIR4715      | 0 | 0          | 0   | 1 |
| OCA2         | 0 | 0          | 0   | 1 |
| MIR4509-1    | 0 | 0          | 0   | 1 |
| GOLGA8F,GOLG | 0 | 0          | 0   | 1 |
| GOLGA6L7P    | 0 | 0          | 0   | 1 |
| FAM189A1     | 0 | 0          | 0   | 1 |
| TRPM1        | 0 | 0          | 0   | 1 |
| MIR211       | 0 | 0          | 0   | 1 |
| LOC283710    | 0 | 0          | 0   | 1 |
| TMCO5B       | 0 | 0          | 0   | 1 |
| MIR1233-2    | 0 | 0          | 0   | 1 |
| MIR1233-1    | 0 | 0          | 0   | 1 |
| GJD2         | 0 | 0          | 0   | 1 |
| MIR3942      | 0 | 0          | 0   | 1 |
| LOC145845    | 0 | 0          | 0   | 1 |
| GPR176       | 0 | 0          | 0   | 1 |
| MIR4310      | 0 | 0          | 0   | 1 |
| PLA2G4F      | 0 | 0          | 0   | 1 |
| MIR627       | 0 | 0          | 0   | 1 |
| EPB42        | 0 | 0          | 0   | 1 |
| TGM5         | 0 | 0          | 0   | 1 |
| TGM7         | 0 | 0          | 0   | 1 |
| LCMT2        | 0 | 0          | 0   | 1 |
| MIR4716      | 0 | 0          | 0   | 1 |
| TNFAIP8L3    | 0 | 0.0052433  | inf | 1 |
| CYP19A1      | 0 | 0          | 0   | 1 |
| MIR1266      | 0 | 0          | 0   | 1 |
| ONECUT1      | 0 | 0          | 0   | 1 |
| WDR72        | 0 | 0          | 0   | 1 |
| MIR628       | 0 | 0          | 0   | 1 |
| PYGO1        | 0 | 0          | 0   | 1 |
| PRTG         | 0 | 0.0014742  | inf | 1 |
| ALDH1A2      | 0 | 0          | 0   | 1 |
| MIR2116      | 0 | 0          | 0   | 1 |
| C2CD4B       | 0 | 0          | 0   | 1 |
| MGC15885     | 0 | 0          | 0   | 1 |
| MIR1272      | 0 | 0          | 0   | 1 |
| MIR4511      | 0 | 0          | 0   | 1 |
| SNORD18C     | 0 | 0          | 0   | 1 |
| SNORD18B     | 0 | 0          | 0   | 1 |
| SNORD18A     | 0 | 0          | 0   | 1 |
| MIR4312      | 0 | 0          | 0   | 1 |
| MIR629       | 0 | 0          | 0   | 1 |
| LARP6        | 0 | 0          | 0   | 1 |
| CT62         | 0 | 0          | 0   | 1 |
| GRAMD2       | 0 | 0.00354627 | inf | 1 |

|           |   |                |   |   |
|-----------|---|----------------|---|---|
| HCN4      | 0 | 0              | 0 | 1 |
| C15orf59  | 0 | 0              | 0 | 1 |
| GOLGA6A   | 0 | 0              | 0 | 1 |
| STRA6     | 0 | 0.0112609 inf  |   | 1 |
| CYP11A1   | 0 | 0              | 0 | 1 |
| MIR4513   | 0 | 0              | 0 | 1 |
| MIR631    | 0 | 0              | 0 | 1 |
| MIR4313   | 0 | 0              | 0 | 1 |
| LINGO1    | 0 | 0              | 0 | 1 |
| LOC645752 | 0 | 0              | 0 | 1 |
| CHRNA4    | 0 | 0              | 0 | 1 |
| LOC729911 | 0 | 0              | 0 | 1 |
| LOC283688 | 0 | 0              | 0 | 1 |
| MIR549    | 0 | 0              | 0 | 1 |
| MIR4514   | 0 | 0              | 0 | 1 |
| TMC3      | 0 | 0.00353209 inf |   | 1 |
| HDGFRP3   | 0 | 0              | 0 | 1 |
| BNC1      | 0 | 0              | 0 | 1 |
| LOC642423 | 0 | 0              | 0 | 1 |
| MIR1276   | 0 | 0              | 0 | 1 |
| LOC727915 | 0 | 0              | 0 | 1 |
| MIR3529   | 0 | 0              | 0 | 1 |
| RLBP1     | 0 | 0              | 0 | 1 |
| RHCG      | 0 | 0              | 0 | 1 |
| LOC283761 | 0 | 0              | 0 | 1 |
| MIR5094   | 0 | 0              | 0 | 1 |
| GABARAPL3 | 0 | 0              | 0 | 1 |
| RGMA      | 0 | 0              | 0 | 1 |
| LOC400456 | 0 | 0              | 0 | 1 |
| FAM169B   | 0 | 0              | 0 | 1 |
| PGPEP1L   | 0 | 0              | 0 | 1 |
| DNM1P46   | 0 | 0              | 0 | 1 |
| OR4F4     | 0 | 0              | 0 | 1 |
| DDX11L9   | 0 | 0              | 0 | 1 |
| DDX11L10  | 0 | 0              | 0 | 1 |
| HBZ       | 0 | 0              | 0 | 1 |
| HBM       | 0 | 0              | 0 | 1 |
| HBQ1      | 0 | 0.112567 inf   |   | 1 |
| MIR5587   | 0 | 0              | 0 | 1 |
| MIR3176   | 0 | 0              | 0 | 1 |
| MIR662    | 0 | 0              | 0 | 1 |
| TPSAB1    | 0 | 0              | 0 | 1 |
| TPSD1     | 0 | 0              | 0 | 1 |
| MIR3177   | 0 | 0              | 0 | 1 |
| RNF151    | 0 | 0.057043 inf   |   | 1 |
| MIR4516   | 0 | 0              | 0 | 1 |
| MIR3677   | 0 | 0              | 0 | 1 |
| MIR940    | 0 | 0              | 0 | 1 |
| MIR4717   | 0 | 0              | 0 | 1 |

|                |   |            |     |   |
|----------------|---|------------|-----|---|
| NTN3           | 0 | 0.0351643  | inf | 1 |
| PRSS41         | 0 | 0          | 0   | 1 |
| PRSS21         | 0 | 0          | 0   | 1 |
| ZG16B          | 0 | 0.0557166  | inf | 1 |
| OR1F1          | 0 | 0          | 0   | 1 |
| OR1F2P         | 0 | 0          | 0   | 1 |
| OR2C1          | 0 | 0.0131697  | inf | 1 |
| C16orf96       | 0 | 0.0110366  | inf | 1 |
| SEC14L5        | 0 | 0          | 0   | 1 |
| RBFOX1         | 0 | 0          | 0   | 1 |
| MIR548X        | 0 | 0          | 0   | 1 |
| CIITA          | 0 | 0.00289654 | inf | 1 |
| TNFRSF17       | 0 | 0          | 0   | 1 |
| MIR4718        | 0 | 0          | 0   | 1 |
| MIR193B        | 0 | 0          | 0   | 1 |
| MIR365A        | 0 | 0          | 0   | 1 |
| MIR3179-3      | 0 | 0          | 0   | 1 |
| MIR3180-3      | 0 | 0          | 0   | 1 |
| MIR3179-1      | 0 | 0          | 0   | 1 |
| MIR3180-1      | 0 | 0          | 0   | 1 |
| ABCC6P1        | 0 | 0          | 0   | 1 |
| CLEC19A        | 0 | 0.00334614 | inf | 1 |
| ACSM2A         | 0 | 0          | 0   | 1 |
| MIR548D2       | 0 | 0          | 0   | 1 |
| SCNN1G         | 0 | 0          | 0   | 1 |
| SCNN1B         | 0 | 0          | 0   | 1 |
| CHP2           | 0 | 0          | 0   | 1 |
| PRKCB          | 0 | 0          | 0   | 1 |
| CACNG3         | 0 | 0          | 0   | 1 |
| HS3ST4         | 0 | 0          | 0   | 1 |
| C16orf82       | 0 | 0          | 0   | 1 |
| CD19           | 0 | 0          | 0   | 1 |
| MIR4517        | 0 | 0          | 0   | 1 |
| LOC606724      | 0 | 0          | 0   | 1 |
| ZG16           | 0 | 0.00527748 | inf | 1 |
| C16orf92       | 0 | 0          | 0   | 1 |
| MIR4518        | 0 | 0          | 0   | 1 |
| ITGAD          | 0 | 0.00331909 | inf | 1 |
| AHSP           | 0 | 0          | 0   | 1 |
| TP53TG3D       | 0 | 0          | 0   | 1 |
| TP53TG3,TP53TC | 0 | 0          | 0   | 1 |
| TP53TG3,TP53TC | 0 | 0          | 0   | 1 |
| LOC283914      | 0 | 0          | 0   | 1 |
| MIR548AE2      | 0 | 0          | 0   | 1 |
| C16orf78       | 0 | 0          | 0   | 1 |
| MMP2           | 0 | 0          | 0   | 1 |
| SLC6A2         | 0 | 0          | 0   | 1 |
| CES1P2         | 0 | 0          | 0   | 1 |
| CES1P1         | 0 | 0          | 0   | 1 |

|              |   |            |     |   |
|--------------|---|------------|-----|---|
| MIR3935      | 0 | 0          | 0   | 1 |
| MT4          | 0 | 0          | 0   | 1 |
| MT3          | 0 | 0          | 0   | 1 |
| MIR138-2     | 0 | 0          | 0   | 1 |
| CETP         | 0 | 0.0321758  | inf | 1 |
| CCL22        | 0 | 0          | 0   | 1 |
| CX3CL1       | 0 | 0          | 0   | 1 |
| CCL17        | 0 | 0.0468402  | inf | 1 |
| TEPP         | 0 | 0          | 0   | 1 |
| LRRC36       | 0 | 0          | 0   | 1 |
| CDH1         | 0 | 0.00447453 | inf | 1 |
| MIR140       | 0 | 0          | 0   | 1 |
| MIR1972-2    | 0 | 0          | 0   | 1 |
| SNORD111B    | 0 | 0          | 0   | 1 |
| SNORD111     | 0 | 0          | 0   | 1 |
| CHST4        | 0 | 0          | 0   | 1 |
| HPR          | 0 | 0          | 0   | 1 |
| HTA          | 0 | 0          | 0   | 1 |
| LOC100506172 | 0 | 0          | 0   | 1 |
| CTRB1        | 0 | 0.0232507  | inf | 1 |
| CNTNAP4      | 0 | 0          | 0   | 1 |
| MIR4719      | 0 | 0          | 0   | 1 |
| VAT1L        | 0 | 0          | 0   | 1 |
| CLEC3A       | 0 | 0          | 0   | 1 |
| DYNLRB2      | 0 | 0          | 0   | 1 |
| BCMO1        | 0 | 0          | 0   | 1 |
| MIR4720      | 0 | 0          | 0   | 1 |
| HSD17B2      | 0 | 0.0174878  | inf | 1 |
| MIR3182      | 0 | 0          | 0   | 1 |
| ADAD2        | 0 | 0.00941343 | inf | 1 |
| WFDC1        | 0 | 0          | 0   | 1 |
| LOC400548    | 0 | 0          | 0   | 1 |
| IRF8         | 0 | 0          | 0   | 1 |
| LOC146513    | 0 | 0          | 0   | 1 |
| MIR5189      | 0 | 0          | 0   | 1 |
| TPSG1        | 0 | 0          | 0   | 1 |
| TPSB2        | 0 | 0          | 0   | 1 |
| LINC00254    | 0 | 0          | 0   | 1 |
| HS3ST6       | 0 | 0          | 0   | 1 |
| RPL3L        | 0 | 0          | 0   | 1 |
| MIR1225      | 0 | 0          | 0   | 1 |
| MIR3180-5    | 0 | 0          | 0   | 1 |
| SNORD60      | 0 | 0          | 0   | 1 |
| MIR3178      | 0 | 0          | 0   | 1 |
| PRSS33       | 0 | 0          | 0   | 1 |
| C16orf90     | 0 | 0          | 0   | 1 |
| C16orf89     | 0 | 0          | 0   | 1 |
| TMEM114      | 0 | 0          | 0   | 1 |
| GRIN2A       | 0 | 0.00118265 | inf | 1 |

|              |   |                |   |   |
|--------------|---|----------------|---|---|
| TNP2         | 0 | 0              | 0 | 1 |
| PRM3         | 0 | 0              | 0 | 1 |
| PRM2         | 0 | 0              | 0 | 1 |
| PRM1         | 0 | 0              | 0 | 1 |
| ABCC6P2      | 0 | 0              | 0 | 1 |
| MIR3180-4    | 0 | 0              | 0 | 1 |
| MIR3180-1    | 0 | 0              | 0 | 1 |
| MIR3179-1    | 0 | 0              | 0 | 1 |
| GPRC5B       | 0 | 0              | 0 | 1 |
| GPR139       | 0 | 0              | 0 | 1 |
| GP2          | 0 | 0              | 0 | 1 |
| UMOD         | 0 | 0              | 0 | 1 |
| PDILT        | 0 | 0              | 0 | 1 |
| ZP2          | 0 | 0              | 0 | 1 |
| IGSF6        | 0 | 0.0122409 inf  |   | 1 |
| MIR548AA2    | 0 | 0              | 0 | 1 |
| IL27         | 0 | 0              | 0 | 1 |
| BOLA2B       | 0 | 0              | 0 | 1 |
| LOC388242    | 0 | 0.0132551 inf  |   | 1 |
| C16orf54     | 0 | 0.0100044 inf  |   | 1 |
| BOLA2B       | 0 | 0              | 0 | 1 |
| MIR4519      | 0 | 0              | 0 | 1 |
| COX6A2       | 0 | 0              | 0 | 1 |
| CSDAP1       | 0 | 0.00794275 inf |   | 1 |
| LOC390705    | 0 | 0              | 0 | 1 |
| TP53TG3      | 0 | 0              | 0 | 1 |
| LOC390705    | 0 | 0              | 0 | 1 |
| RNU6-76      | 0 | 0              | 0 | 1 |
| LOC146481    | 0 | 0              | 0 | 1 |
| LOC100130700 | 0 | 0              | 0 | 1 |
| ABCC12       | 0 | 0.00177151 inf |   | 1 |
| CBLN1        | 0 | 0              | 0 | 1 |
| ZNF423       | 0 | 0              | 0 | 1 |
| SNX20        | 0 | 0.0246248 inf  |   | 1 |
| SALL1        | 0 | 0              | 0 | 1 |
| C16orf97     | 0 | 0              | 0 | 1 |
| LOC100505619 | 0 | 0              | 0 | 1 |
| TOX3         | 0 | 0              | 0 | 1 |
| LOC643714    | 0 | 0              | 0 | 1 |
| LOC643802    | 0 | 0              | 0 | 1 |
| IRX3         | 0 | 0              | 0 | 1 |
| CES1         | 0 | 0              | 0 | 1 |
| CES5A        | 0 | 0              | 0 | 1 |
| LOC283856    | 0 | 0              | 0 | 1 |
| DKFZP434H168 | 0 | 0              | 0 | 1 |
| LOC644649    | 0 | 0              | 0 | 1 |
| CDH8         | 0 | 0              | 0 | 1 |
| LOC283867    | 0 | 0              | 0 | 1 |
| CDH16        | 0 | 0              | 0 | 1 |

|              |   |            |     |   |
|--------------|---|------------|-----|---|
| MIR328       | 0 | 0          | 0   | 1 |
| AGRP         | 0 | 0.0267098  | inf | 1 |
| DPEP3        | 0 | 0.00753152 | inf | 1 |
| MIR1538      | 0 | 0          | 0   | 1 |
| TAT          | 0 | 0.00782118 | inf | 1 |
| SNORA70D     | 0 | 0          | 0   | 1 |
| SNORD71      | 0 | 0          | 0   | 1 |
| CTRB2        | 0 | 0          | 0   | 1 |
| ADAMTS18     | 0 | 0          | 0   | 1 |
| SDR42E1      | 0 | 0          | 0   | 1 |
| KCNG4        | 0 | 0          | 0   | 1 |
| FAM92B       | 0 | 0          | 0   | 1 |
| MIR5093      | 0 | 0          | 0   | 1 |
| MIR1910      | 0 | 0          | 0   | 1 |
| LOC732275    | 0 | 0          | 0   | 1 |
| CA5A         | 0 | 0          | 0   | 1 |
| MIR4722      | 0 | 0          | 0   | 1 |
| BHLHA9       | 0 | 0          | 0   | 1 |
| OR1A2        | 0 | 0          | 0   | 1 |
| OR1A1        | 0 | 0          | 0   | 1 |
| OR1D4        | 0 | 0          | 0   | 1 |
| OR3A4P       | 0 | 0          | 0   | 1 |
| OR3A3        | 0 | 0          | 0   | 1 |
| ASPA         | 0 | 0          | 0   | 1 |
| TM4SF5       | 0 | 0          | 0   | 1 |
| LOC100130950 | 0 | 0          | 0   | 1 |
| WSCD1        | 0 | 0          | 0   | 1 |
| MIR4520B     | 0 | 0          | 0   | 1 |
| FBXO39       | 0 | 0          | 0   | 1 |
| ALOX12P2     | 0 | 0.00466423 | inf | 1 |
| TMEM95       | 0 | 0.01042    | inf | 1 |
| ATP1B2       | 0 | 0.0135711  | inf | 1 |
| RPL29P2      | 0 | 0          | 0   | 1 |
| SCARNA21     | 0 | 2.52433    | inf | 1 |
| GUCY2D       | 0 | 0          | 0   | 1 |
| MIR4314      | 0 | 0          | 0   | 1 |
| MIR4521      | 0 | 0          | 0   | 1 |
| MIR3676      | 0 | 0          | 0   | 1 |
| ARHGEF15     | 0 | 0          | 0   | 1 |
| ODF4         | 0 | 0          | 0   | 1 |
| GLP2R        | 0 | 0          | 0   | 1 |
| TMEM220-AS1  | 0 | 0          | 0   | 1 |
| SHISA6       | 0 | 0          | 0   | 1 |
| DNAH9        | 0 | 0          | 0   | 1 |
| MIR744       | 0 | 0          | 0   | 1 |
| LINC00670    | 0 | 0          | 0   | 1 |
| MYOCD        | 0 | 0          | 0   | 1 |
| CDRT7        | 0 | 0          | 0   | 1 |
| CDRT15P2     | 0 | 0          | 0   | 1 |

|           |   |            |     |   |
|-----------|---|------------|-----|---|
| MEIS3P1   | 0 | 0.00322874 | inf | 1 |
| MIR1288   | 0 | 0          | 0   | 1 |
| SNORD49A  | 0 | 0          | 0   | 1 |
| SNORD65   | 0 | 0          | 0   | 1 |
| FAM106CP  | 0 | 0          | 0   | 1 |
| SMCR9     | 0 | 0          | 0   | 1 |
| EVPLL     | 0 | 0          | 0   | 1 |
| LOC339240 | 0 | 0          | 0   | 1 |
| KRT16P1   | 0 | 0.00918932 | inf | 1 |
| LGALS9C   | 0 | 0          | 0   | 1 |
| SLC47A1   | 0 | 0.00323601 | inf | 1 |
| SNORA59B  | 0 | 0          | 0   | 1 |
| CDRT15L2  | 0 | 0          | 0   | 1 |
| FAM27L    | 0 | 0          | 0   | 1 |
| FLJ36000  | 0 | 0          | 0   | 1 |
| TBC1D3P5  | 0 | 0          | 0   | 1 |
| PPY2      | 0 | 0.0277353  | inf | 1 |
| MIR4723   | 0 | 0          | 0   | 1 |
| SLC13A2   | 0 | 0          | 0   | 1 |
| FOXN1     | 0 | 0          | 0   | 1 |
| SNORD42B  | 0 | 0          | 0   | 1 |
| SNORD42A  | 0 | 0          | 0   | 1 |
| MIR451B   | 0 | 0          | 0   | 1 |
| MIR423    | 0 | 0          | 0   | 1 |
| TBC1D29   | 0 | 0          | 0   | 1 |
| DPRXP4    | 0 | 0.0528006  | inf | 1 |
| MIR193A   | 0 | 0          | 0   | 1 |
| MIR4725   | 0 | 0          | 0   | 1 |
| MIR365B   | 0 | 0          | 0   | 1 |
| SPACA3    | 0 | 0          | 0   | 1 |
| CCL2      | 0 | 0          | 0   | 1 |
| CCL7      | 0 | 0          | 0   | 1 |
| CCL11     | 0 | 0.0124635  | inf | 1 |
| CCL8      | 0 | 0          | 0   | 1 |
| CCL13     | 0 | 0          | 0   | 1 |
| TMEM132E  | 0 | 0          | 0   | 1 |
| SNORD7    | 0 | 0          | 0   | 1 |
| C17orf50  | 0 | 0.0253391  | inf | 1 |
| CCL18     | 0 | 0          | 0   | 1 |
| CCL4      | 0 | 0.0482554  | inf | 1 |
| CCL4L1    | 0 | 0          | 0   | 1 |
| CCL4L2    | 0 | 0          | 0   | 1 |
| MIR2909   | 0 | 0          | 0   | 1 |
| MIR4726   | 0 | 0          | 0   | 1 |
| MIR4727   | 0 | 0          | 0   | 1 |
| PPP1R1B   | 0 | 0          | 0   | 1 |
| PNMT      | 0 | 0          | 0   | 1 |
| MIR4728   | 0 | 0          | 0   | 1 |
| ZPBP2     | 0 | 0          | 0   | 1 |

|              |   |           |     |   |
|--------------|---|-----------|-----|---|
| LRRC3C       | 0 | 0         | 0   | 1 |
| CSF3         | 0 | 0.0400456 | inf | 1 |
| SNORD124     | 0 | 0         | 0   | 1 |
| IGFBP4       | 0 | 0         | 0   | 1 |
| KRTAP9-1     | 0 | 0         | 0   | 1 |
| KRTAP9-2     | 0 | 0         | 0   | 1 |
| KRTAP9-3     | 0 | 0         | 0   | 1 |
| KRTAP9-8     | 0 | 0         | 0   | 1 |
| KRTAP9-4     | 0 | 0         | 0   | 1 |
| KRTAP9-9     | 0 | 0         | 0   | 1 |
| LOC100505782 | 0 | 0         | 0   | 1 |
| GAST         | 0 | 0         | 0   | 1 |
| RAMP2        | 0 | 0         | 0   | 1 |
| G6PC         | 0 | 0         | 0   | 1 |
| MIR2117      | 0 | 0         | 0   | 1 |
| C17orf105    | 0 | 0         | 0   | 1 |
| SPPL2C       | 0 | 0         | 0   | 1 |
| MAPT-IT1     | 0 | 0         | 0   | 1 |
| STH          | 0 | 0         | 0   | 1 |
| NSFP1        | 0 | 0         | 0   | 1 |
| WNT9B        | 0 | 0         | 0   | 1 |
| MIR5089      | 0 | 0         | 0   | 1 |
| ITGB3        | 0 | 0         | 0   | 1 |
| TBX21        | 0 | 0         | 0   | 1 |
| B4GALNT2     | 0 | 0         | 0   | 1 |
| FLJ40194     | 0 | 0         | 0   | 1 |
| NGFR         | 0 | 0         | 0   | 1 |
| SGCA         | 0 | 0         | 0   | 1 |
| ABCC3        | 0 | 0         | 0   | 1 |
| WFIKK2       | 0 | 0         | 0   | 1 |
| C17orf112    | 0 | 0         | 0   | 1 |
| KIF2B        | 0 | 0         | 0   | 1 |
| NOG          | 0 | 0.0100702 | inf | 1 |
| RNF126P1     | 0 | 0         | 0   | 1 |
| OR4D1        | 0 | 0         | 0   | 1 |
| MSX2P1       | 0 | 0.0123591 | inf | 1 |
| OR4D2        | 0 | 0         | 0   | 1 |
| MIR4729      | 0 | 0         | 0   | 1 |
| MIR21        | 0 | 0         | 0   | 1 |
| CA4          | 0 | 0         | 0   | 1 |
| MIR548W      | 0 | 0         | 0   | 1 |
| TCAM1P       | 0 | 0.0033407 | inf | 1 |
| MIR634       | 0 | 0         | 0   | 1 |
| CACNG5       | 0 | 0         | 0   | 1 |
| CACNG4       | 0 | 0         | 0   | 1 |
| CACNG1       | 0 | 0.0121964 | inf | 1 |
| MIR4524B     | 0 | 0         | 0   | 1 |
| MAP2K6       | 0 | 0         | 0   | 1 |
| KCNJ16       | 0 | 0         | 0   | 1 |



|              |   |            |     |   |
|--------------|---|------------|-----|---|
| KCNJ2        | 0 | 0          | 0   | 1 |
| LOC400620    | 0 | 0          | 0   | 1 |
| DNAI2        | 0 | 0          | 0   | 1 |
| KIF19        | 0 | 0          | 0   | 1 |
| GPR142       | 0 | 0          | 0   | 1 |
| C17orf77     | 0 | 0          | 0   | 1 |
| OTOP3        | 0 | 0          | 0   | 1 |
| MIR3678      | 0 | 0          | 0   | 1 |
| RNF157-AS1   | 0 | 0          | 0   | 1 |
| SNORD1C      | 0 | 0          | 0   | 1 |
| SNORD1B      | 0 | 0          | 0   | 1 |
| SNORD1A      | 0 | 0          | 0   | 1 |
| LOC100507351 | 0 | 0          | 0   | 1 |
| C17orf99     | 0 | 0          | 0   | 1 |
| TMEM235      | 0 | 0          | 0   | 1 |
| ENPP7        | 0 | 0          | 0   | 1 |
| MIR4730      | 0 | 0          | 0   | 1 |
| MIR3065      | 0 | 0          | 0   | 1 |
| AATK-AS1     | 0 | 0.00914302 | inf | 1 |
| GCGR         | 0 | 0.0101167  | inf | 1 |
| UTS2R        | 0 | 0          | 0   | 1 |
| MIR3183      | 0 | 0          | 0   | 1 |
| RTN4RL1      | 0 | 0          | 0   | 1 |
| MIR132       | 0 | 0          | 0   | 1 |
| MIR212       | 0 | 0          | 0   | 1 |
| SNORD91B     | 0 | 0          | 0   | 1 |
| SNORD91A     | 0 | 0          | 0   | 1 |
| MIR1253      | 0 | 0          | 0   | 1 |
| OR1D5        | 0 | 0          | 0   | 1 |
| OR1D2        | 0 | 0          | 0   | 1 |
| OR1G1        | 0 | 0          | 0   | 1 |
| OR3A2        | 0 | 0          | 0   | 1 |
| OR3A1        | 0 | 0          | 0   | 1 |
| OR1E1        | 0 | 0          | 0   | 1 |
| OR1E2        | 0 | 0          | 0   | 1 |
| TRPV3        | 0 | 0          | 0   | 1 |
| SLC52A1      | 0 | 0          | 0   | 1 |
| ZNF594       | 0 | 0          | 0   | 1 |
| SCIMP        | 0 | 0          | 0   | 1 |
| MIR4520A     | 0 | 0          | 0   | 1 |
| TEKT1        | 0 | 0          | 0   | 1 |
| MIR195       | 0 | 0          | 0   | 1 |
| MIR497       | 0 | 0          | 0   | 1 |
| CLEC10A      | 0 | 0          | 0   | 1 |
| ASGR2        | 0 | 0          | 0   | 1 |
| MIR324       | 0 | 0          | 0   | 1 |
| CCDC42       | 0 | 0          | 0   | 1 |
| SPDYE4       | 0 | 0          | 0   | 1 |
| MFSD6L       | 0 | 0          | 0   | 1 |

|             |   |            |     |   |
|-------------|---|------------|-----|---|
| PIK3R6      | 0 | 0          | 0   | 1 |
| DHRS7C      | 0 | 0          | 0   | 1 |
| RCVRN       | 0 | 0          | 0   | 1 |
| MYH13       | 0 | 0          | 0   | 1 |
| MYH8        | 0 | 0          | 0   | 1 |
| MYH4        | 0 | 0          | 0   | 1 |
| MYH1        | 0 | 0          | 0   | 1 |
| MYH2        | 0 | 0          | 0   | 1 |
| LINC00675   | 0 | 0.00829522 | inf | 1 |
| PIRT        | 0 | 0          | 0   | 1 |
| HS3ST3A1    | 0 | 0          | 0   | 1 |
| CDRT15      | 0 | 0.136668   | inf | 1 |
| MIR4731     | 0 | 0          | 0   | 1 |
| ZNF287      | 0 | 0          | 0   | 1 |
| TNFRSF13B   | 0 | 0          | 0   | 1 |
| MIR33B      | 0 | 0          | 0   | 1 |
| MIR1180     | 0 | 0          | 0   | 1 |
| ALDH3A1     | 0 | 0          | 0   | 1 |
| LGALS9B     | 0 | 0          | 0   | 1 |
| KRT16P3     | 0 | 0          | 0   | 1 |
| CCDC144NL   | 0 | 0          | 0   | 1 |
| MIR4522     | 0 | 0          | 0   | 1 |
| SEBOX       | 0 | 0.0560273  | inf | 1 |
| MIR451A     | 0 | 0          | 0   | 1 |
| MIR144      | 0 | 0          | 0   | 1 |
| MIR4732     | 0 | 0          | 0   | 1 |
| MIR3184     | 0 | 0          | 0   | 1 |
| TMIGD1      | 0 | 0          | 0   | 1 |
| MIR4733     | 0 | 0          | 0   | 1 |
| ASIC2       | 0 | 0          | 0   | 1 |
| AA06        | 0 | 0          | 0   | 1 |
| CCL1        | 0 | 0          | 0   | 1 |
| C17orf102   | 0 | 0          | 0   | 1 |
| SLFN11      | 0 | 0          | 0   | 1 |
| SLFN12      | 0 | 0          | 0   | 1 |
| SLFN12L     | 0 | 0          | 0   | 1 |
| MMP28       | 0 | 0          | 0   | 1 |
| C17orf66    | 0 | 0.005208   | inf | 1 |
| LYZL6       | 0 | 0          | 0   | 1 |
| CCL16       | 0 | 0.00781024 | inf | 1 |
| CCL14,CCL15 | 0 | 0          | 0   | 1 |
| CCL23       | 0 | 0          | 0   | 1 |
| TBC1D3B     | 0 | 0          | 0   | 1 |
| CCL3L1      | 0 | 0          | 0   | 1 |
| TBC1D3G     | 0 | 0          | 0   | 1 |
| LOC284100   | 0 | 0.00409969 | inf | 1 |
| TBC1D3      | 0 | 0          | 0   | 1 |
| MIR4734     | 0 | 0          | 0   | 1 |
| FBXO47      | 0 | 0          | 0   | 1 |

|           |   |            |     |   |
|-----------|---|------------|-----|---|
| ARL5C     | 0 | 0          | 0   | 1 |
| KRT24     | 0 | 0          | 0   | 1 |
| KRT25     | 0 | 0          | 0   | 1 |
| KRT26     | 0 | 0          | 0   | 1 |
| KRT27     | 0 | 0          | 0   | 1 |
| KRT28     | 0 | 0          | 0   | 1 |
| KRT12     | 0 | 0          | 0   | 1 |
| KRT20     | 0 | 0.00581507 | inf | 1 |
| KRT23     | 0 | 0.00419387 | inf | 1 |
| KRT39     | 0 | 0          | 0   | 1 |
| KRT40     | 0 | 0          | 0   | 1 |
| KRTAP3-1  | 0 | 0          | 0   | 1 |
| KRTAP1-5  | 0 | 0          | 0   | 1 |
| KRTAP1-4  | 0 | 0          | 0   | 1 |
| KRTAP1-3  | 0 | 0          | 0   | 1 |
| KRTAP1-1  | 0 | 0          | 0   | 1 |
| KRTAP2-4  | 0 | 0.0576906  | inf | 1 |
| KRTAP4-5  | 0 | 0          | 0   | 1 |
| KRTAP4-4  | 0 | 0          | 0   | 1 |
| KRTAP4-3  | 0 | 0          | 0   | 1 |
| KRTAP4-2  | 0 | 0          | 0   | 1 |
| KRTAP4-1  | 0 | 0          | 0   | 1 |
| KRTAP29-1 | 0 | 0          | 0   | 1 |
| KRTAP16-1 | 0 | 0          | 0   | 1 |
| KRTAP17-1 | 0 | 0          | 0   | 1 |
| KRT33A    | 0 | 0          | 0   | 1 |
| KRT33B    | 0 | 0          | 0   | 1 |
| KRT31     | 0 | 0          | 0   | 1 |
| KRT37     | 0 | 0          | 0   | 1 |
| KRT38     | 0 | 0          | 0   | 1 |
| KRT32     | 0 | 0          | 0   | 1 |
| KRT35     | 0 | 0          | 0   | 1 |
| KRT36     | 0 | 0          | 0   | 1 |
| KRT13     | 0 | 0          | 0   | 1 |
| LOC147093 | 0 | 0          | 0   | 1 |
| KRT9      | 0 | 0          | 0   | 1 |
| KRT14     | 0 | 0.0102119  | inf | 1 |
| HAP1      | 0 | 0          | 0   | 1 |
| KCNH4     | 0 | 0          | 0   | 1 |
| HCRT      | 0 | 0.0790126  | inf | 1 |
| LINC00671 | 0 | 0.022424   | inf | 1 |
| MEOX1     | 0 | 0          | 0   | 1 |
| PPY       | 0 | 0.090252   | inf | 1 |
| C1QL1     | 0 | 0          | 0   | 1 |
| LOC644172 | 0 | 0          | 0   | 1 |
| MAPT-AS1  | 0 | 0          | 0   | 1 |
| MIR152    | 0 | 0          | 0   | 1 |
| SKAP1     | 0 | 0          | 0   | 1 |
| MIR1203   | 0 | 0          | 0   | 1 |

|              |   |            |     |   |
|--------------|---|------------|-----|---|
| HOXB1        | 0 | 0          | 0   | 1 |
| MIR196A1     | 0 | 0          | 0   | 1 |
| PRAC         | 0 | 0          | 0   | 1 |
| MIR3185      | 0 | 0          | 0   | 1 |
| GIP          | 0 | 0          | 0   | 1 |
| GNGT2        | 0 | 0          | 0   | 1 |
| PHOSPHO1     | 0 | 0          | 0   | 1 |
| HILS1        | 0 | 0          | 0   | 1 |
| CA10         | 0 | 0          | 0   | 1 |
| TMEM100      | 0 | 0          | 0   | 1 |
| BZRAP1       | 0 | 0          | 0   | 1 |
| MIR142       | 0 | 0          | 0   | 1 |
| MIR4736      | 0 | 0          | 0   | 1 |
| MIR454       | 0 | 0          | 0   | 1 |
| MIR301A      | 0 | 0          | 0   | 1 |
| NACA2        | 0 | 0          | 0   | 1 |
| MARCH10      | 0 | 0          | 0   | 1 |
| CSH2         | 0 | 0          | 0   | 1 |
| GH2          | 0 | 0          | 0   | 1 |
| CSH1         | 0 | 0          | 0   | 1 |
| CSHL1        | 0 | 0          | 0   | 1 |
| GH1          | 0 | 0          | 0   | 1 |
| PECAM1       | 0 | 0.00226604 | inf | 1 |
| APOH         | 0 | 0          | 0   | 1 |
| MIR635       | 0 | 0          | 0   | 1 |
| ABCA8        | 0 | 0          | 0   | 1 |
| ABCA6        | 0 | 0.00145613 | inf | 1 |
| MIR4524A     | 0 | 0          | 0   | 1 |
| KCNJ2-AS1    | 0 | 0          | 0   | 1 |
| CPSF4L       | 0 | 0.0613221  | inf | 1 |
| LINC00469    | 0 | 0          | 0   | 1 |
| CD300LB      | 0 | 0          | 0   | 1 |
| CD300LD      | 0 | 0          | 0   | 1 |
| CD300E       | 0 | 0          | 0   | 1 |
| CD300LF      | 0 | 0          | 0   | 1 |
| FADS6        | 0 | 0          | 0   | 1 |
| MIR4738      | 0 | 0          | 0   | 1 |
| ST6GALNAC1   | 0 | 0.012292   | inf | 1 |
| MIR4316      | 0 | 0          | 0   | 1 |
| FLJ45079     | 0 | 0          | 0   | 1 |
| LOC100507410 | 0 | 0          | 0   | 1 |
| MIR4739      | 0 | 0          | 0   | 1 |
| MIR657       | 0 | 0          | 0   | 1 |
| MIR338       | 0 | 0          | 0   | 1 |
| MIR1250      | 0 | 0          | 0   | 1 |
| TMEM105      | 0 | 0          | 0   | 1 |
| MIR4740      | 0 | 0          | 0   | 1 |
| MIR3186      | 0 | 0          | 0   | 1 |
| CETN1        | 0 | 0          | 0   | 1 |

|              |   |   |   |   |
|--------------|---|---|---|---|
| ADCYAP1      | 0 | 0 | 0 | 1 |
| DLGAP1-AS3   | 0 | 0 | 0 | 1 |
| DLGAP1-AS5   | 0 | 0 | 0 | 1 |
| LOC645355    | 0 | 0 | 0 | 1 |
| MIR3976      | 0 | 0 | 0 | 1 |
| LOC100130480 | 0 | 0 | 0 | 1 |
| ARHGAP28     | 0 | 0 | 0 | 1 |
| LRRC30       | 0 | 0 | 0 | 1 |
| RAB31        | 0 | 0 | 0 | 1 |
| TXNDC2       | 0 | 0 | 0 | 1 |
| APCDD1       | 0 | 0 | 0 | 1 |
| C18orf61     | 0 | 0 | 0 | 1 |
| CIDEA        | 0 | 0 | 0 | 1 |
| MIR5190      | 0 | 0 | 0 | 1 |
| MIR4526      | 0 | 0 | 0 | 1 |
| MC5R         | 0 | 0 | 0 | 1 |
| ANKRD30B     | 0 | 0 | 0 | 1 |
| MIR3156-2    | 0 | 0 | 0 | 1 |
| MIR320C1     | 0 | 0 | 0 | 1 |
| LAMA3        | 0 | 0 | 0 | 1 |
| MIR320C2     | 0 | 0 | 0 | 1 |
| LOC729950    | 0 | 0 | 0 | 1 |
| PSMA8        | 0 | 0 | 0 | 1 |
| MIR302F      | 0 | 0 | 0 | 1 |
| DSG1         | 0 | 0 | 0 | 1 |
| DSG4         | 0 | 0 | 0 | 1 |
| TTR          | 0 | 0 | 0 | 1 |
| WBP11P1      | 0 | 0 | 0 | 1 |
| ASXL3        | 0 | 0 | 0 | 1 |
| DTNA         | 0 | 0 | 0 | 1 |
| MIR3975      | 0 | 0 | 0 | 1 |
| MIR4318      | 0 | 0 | 0 | 1 |
| MIR5583-1    | 0 | 0 | 0 | 1 |
| MIR4743      | 0 | 0 | 0 | 1 |
| MIR1539      | 0 | 0 | 0 | 1 |
| MAPK4        | 0 | 0 | 0 | 1 |
| LOC100287225 | 0 | 0 | 0 | 1 |
| DCC          | 0 | 0 | 0 | 1 |
| DYNAP        | 0 | 0 | 0 | 1 |
| RAB27B       | 0 | 0 | 0 | 1 |
| MIR4529      | 0 | 0 | 0 | 1 |
| BOD1L2       | 0 | 0 | 0 | 1 |
| MIR122       | 0 | 0 | 0 | 1 |
| ZNF532       | 0 | 0 | 0 | 1 |
| OACYLP       | 0 | 0 | 0 | 1 |
| GRP          | 0 | 0 | 0 | 1 |
| SERPIN5      | 0 | 0 | 0 | 1 |
| SERPIN12     | 0 | 0 | 0 | 1 |
| SERPIN13     | 0 | 0 | 0 | 1 |

|              |   |                |   |   |
|--------------|---|----------------|---|---|
| SERPINB11    | 0 | 0              | 0 | 1 |
| SERPINB10    | 0 | 0              | 0 | 1 |
| LOC284294    | 0 | 0              | 0 | 1 |
| CDH7         | 0 | 0              | 0 | 1 |
| MIR5011      | 0 | 0              | 0 | 1 |
| LOC643542    | 0 | 0              | 0 | 1 |
| DOK6         | 0 | 0              | 0 | 1 |
| LOC339298    | 0 | 0              | 0 | 1 |
| GALR1        | 0 | 0              | 0 | 1 |
| SALL3        | 0 | 0              | 0 | 1 |
| KCNG2        | 0 | 0.0394105 inf  |   | 1 |
| COLEC12      | 0 | 0              | 0 | 1 |
| EPB41L3      | 0 | 0              | 0 | 1 |
| TMEM200C     | 0 | 0              | 0 | 1 |
| L3MBTL4      | 0 | 0              | 0 | 1 |
| MIR4317      | 0 | 0              | 0 | 1 |
| LINC00668    | 0 | 0.00683076 inf |   | 1 |
| LOC100192426 | 0 | 0              | 0 | 1 |
| PIEZO2       | 0 | 0              | 0 | 1 |
| LOC100288122 | 0 | 0              | 0 | 1 |
| CXADRP3      | 0 | 0              | 0 | 1 |
| POTEC        | 0 | 0              | 0 | 1 |
| LOC644669    | 0 | 0              | 0 | 1 |
| MIR133A1     | 0 | 0              | 0 | 1 |
| MIR1-2       | 0 | 0              | 0 | 1 |
| CTAGE1       | 0 | 0              | 0 | 1 |
| ANKRD29      | 0 | 0              | 0 | 1 |
| LOC728606    | 0 | 0              | 0 | 1 |
| AQP4         | 0 | 0              | 0 | 1 |
| CHST9        | 0 | 0              | 0 | 1 |
| CDH2         | 0 | 0.00202038 inf |   | 1 |
| DSC2         | 0 | 0              | 0 | 1 |
| DSC1         | 0 | 0              | 0 | 1 |
| CCDC178      | 0 | 0              | 0 | 1 |
| NOL4         | 0 | 0              | 0 | 1 |
| ZNF396       | 0 | 0              | 0 | 1 |
| MIR187       | 0 | 0              | 0 | 1 |
| CELF4        | 0 | 0              | 0 | 1 |
| MIR5583-2    | 0 | 0              | 0 | 1 |
| KC6          | 0 | 0              | 0 | 1 |
| RIT2         | 0 | 0              | 0 | 1 |
| SYT4         | 0 | 0              | 0 | 1 |
| MIR4319      | 0 | 0              | 0 | 1 |
| LOXHD1       | 0 | 0              | 0 | 1 |
| TCEB3CL2     | 0 | 0              | 0 | 1 |
| TCEB3CL2     | 0 | 0              | 0 | 1 |
| TCEB3C       | 0 | 0              | 0 | 1 |
| TCEB3B       | 0 | 0              | 0 | 1 |
| MIR4744      | 0 | 0              | 0 | 1 |

|              |   |            |     |   |
|--------------|---|------------|-----|---|
| MIR4320      | 0 | 0          | 0   | 1 |
| STARD6       | 0 | 0          | 0   | 1 |
| CCDC68       | 0 | 0          | 0   | 1 |
| TCF4         | 0 | 0.00112083 | inf | 1 |
| LOC100505474 | 0 | 0          | 0   | 1 |
| LINC-ROR     | 0 | 0          | 0   | 1 |
| MIR3591      | 0 | 0          | 0   | 1 |
| ALPK2        | 0 | 0          | 0   | 1 |
| RAX          | 0 | 0          | 0   | 1 |
| CPLX4        | 0 | 0          | 0   | 1 |
| MC4R         | 0 | 0          | 0   | 1 |
| SERPINB4     | 0 | 0          | 0   | 1 |
| SERPINB3     | 0 | 0          | 0   | 1 |
| LINC00305    | 0 | 0          | 0   | 1 |
| LOC400654    | 0 | 0          | 0   | 1 |
| CDH19        | 0 | 0          | 0   | 1 |
| LOC100505776 | 0 | 0          | 0   | 1 |
| CBLN2        | 0 | 0          | 0   | 1 |
| NETO1        | 0 | 0          | 0   | 1 |
| FAM69C       | 0 | 0          | 0   | 1 |
| C18orf62     | 0 | 0          | 0   | 1 |
| OR4F17       | 0 | 0          | 0   | 1 |
| FGF22        | 0 | 0          | 0   | 1 |
| PALM         | 0 | 0.00756359 | inf | 1 |
| MIR4745      | 0 | 0          | 0   | 1 |
| MIR3187      | 0 | 0          | 0   | 1 |
| KISS1R       | 0 | 0          | 0   | 1 |
| ONECUT3      | 0 | 0          | 0   | 1 |
| NMRK2        | 0 | 0          | 0   | 1 |
| MIR4746      | 0 | 0          | 0   | 1 |
| MIR7-3       | 0 | 0          | 0   | 1 |
| MIR4747      | 0 | 0          | 0   | 1 |
| ZNRF4        | 0 | 0          | 0   | 1 |
| CATSPERD     | 0 | 0.00458401 | inf | 1 |
| MBD3L5       | 0 | 0          | 0   | 1 |
| MBD3L2       | 0 | 0          | 0   | 1 |
| RETN         | 0 | 0          | 0   | 1 |
| CLEC4M       | 0 | 0          | 0   | 1 |
| CCL25        | 0 | 0.0344952  | inf | 1 |
| OR2Z1        | 0 | 0          | 0   | 1 |
| MBD3L1       | 0 | 0          | 0   | 1 |
| OR1M1        | 0 | 0          | 0   | 1 |
| OR7E24       | 0 | 0          | 0   | 1 |
| C3P1         | 0 | 0          | 0   | 1 |
| SNORD105     | 0 | 0          | 0   | 1 |
| MIR4322      | 0 | 0          | 0   | 1 |
| MIR1238      | 0 | 0          | 0   | 1 |
| MIR638       | 0 | 0          | 0   | 1 |
| MIR4748      | 0 | 0          | 0   | 1 |

|               |   |            |     |   |
|---------------|---|------------|-----|---|
| TSPAN16       | 0 | 0          | 0   | 1 |
| BEST2         | 0 | 0.024569   | inf | 1 |
| MIR181C       | 0 | 0          | 0   | 1 |
| MIR181D       | 0 | 0          | 0   | 1 |
| RLN3          | 0 | 0          | 0   | 1 |
| CLEC17A       | 0 | 0          | 0   | 1 |
| OR7C2         | 0 | 0          | 0   | 1 |
| CCDC105       | 0 | 0          | 0   | 1 |
| OR111         | 0 | 0          | 0   | 1 |
| MIR1470       | 0 | 0          | 0   | 1 |
| CYP4F22       | 0 | 0          | 0   | 1 |
| CYP4F8        | 0 | 0.00824173 | inf | 1 |
| CYP4F12       | 0 | 0          | 0   | 1 |
| OR10H2        | 0 | 0          | 0   | 1 |
| OR10H3        | 0 | 0          | 0   | 1 |
| OR10H5        | 0 | 0          | 0   | 1 |
| OR10H4        | 0 | 0          | 0   | 1 |
| LINC00661     | 0 | 0          | 0   | 1 |
| FLJ25328      | 0 | 0          | 0   | 1 |
| F2RL3         | 0 | 0          | 0   | 1 |
| B3GNT3        | 0 | 0          | 0   | 1 |
| MIR3189       | 0 | 0          | 0   | 1 |
| NCAN          | 0 | 0          | 0   | 1 |
| ZNF257        | 0 | 0          | 0   | 1 |
| ZNF729        | 0 | 0          | 0   | 1 |
| LOC440518     | 0 | 0          | 0   | 1 |
| ZNF726        | 0 | 0          | 0   | 1 |
| LOC148145     | 0 | 0          | 0   | 1 |
| LOC100505835  | 0 | 0          | 0   | 1 |
| VSTM2B        | 0 | 0          | 0   | 1 |
| ZNF536        | 0 | 0          | 0   | 1 |
| DKFZp566F0947 | 0 | 0          | 0   | 1 |
| THEG5         | 0 | 0          | 0   | 1 |
| CHST8         | 0 | 0.012155   | inf | 1 |
| SCGB2B3P      | 0 | 0          | 0   | 1 |
| HPN           | 0 | 0.00948183 | inf | 1 |
| FXD3          | 0 | 0          | 0   | 1 |
| MAG           | 0 | 0          | 0   | 1 |
| FFAR1         | 0 | 0          | 0   | 1 |
| FFAR3         | 0 | 0.00872802 | inf | 1 |
| LOC100128682  | 0 | 0          | 0   | 1 |
| FFAR2         | 0 | 0.0133832  | inf | 1 |
| KIRREL2       | 0 | 0          | 0   | 1 |
| LOC100134317  | 0 | 0.0308941  | inf | 1 |
| LOC644189     | 0 | 0.00938216 | inf | 1 |
| LGALS7B       | 0 | 0          | 0   | 1 |
| NCCRP1        | 0 | 0          | 0   | 1 |
| IFNL2         | 0 | 0          | 0   | 1 |
| IFNL1         | 0 | 0          | 0   | 1 |



|               |   |                |   |   |
|---------------|---|----------------|---|---|
| SELV          | 0 | 0              | 0 | 1 |
| LGALS13       | 0 | 0              | 0 | 1 |
| LOC100129935  | 0 | 0              | 0 | 1 |
| LGALS16       | 0 | 0              | 0 | 1 |
| LGALS17A      | 0 | 0              | 0 | 1 |
| LGALS14       | 0 | 0              | 0 | 1 |
| LEUTX         | 0 | 0              | 0 | 1 |
| CYP2B7P1      | 0 | 0              | 0 | 1 |
| CYP2B6        | 0 | 0              | 0 | 1 |
| CYP2A13       | 0 | 0              | 0 | 1 |
| CYP2S1        | 0 | 0              | 0 | 1 |
| C19orf69      | 0 | 0              | 0 | 1 |
| CEACAM21      | 0 | 0.0094769 inf  |   | 1 |
| CEACAM5       | 0 | 0              | 0 | 1 |
| CEACAM3       | 0 | 0              | 0 | 1 |
| DMRTC2        | 0 | 0              | 0 | 1 |
| LOC100289650  | 0 | 0              | 0 | 1 |
| PRG1          | 0 | 0              | 0 | 1 |
| CD177         | 0 | 0              | 0 | 1 |
| CEACAM16      | 0 | 0              | 0 | 1 |
| CBLC          | 0 | 0              | 0 | 1 |
| APOC2,APOC4   | 0 | 0.0212478 inf  |   | 1 |
| MIR642A       | 0 | 0              | 0 | 1 |
| FOXA3         | 0 | 0.00779363 inf |   | 1 |
| MIR769        | 0 | 0              | 0 | 1 |
| DKFZp434J0226 | 0 | 0              | 0 | 1 |
| IGFL1         | 0 | 0              | 0 | 1 |
| MIR3190       | 0 | 0              | 0 | 1 |
| SNAR-A13      | 0 | 0              | 0 | 1 |
| SNAR-C2       | 0 | 0              | 0 | 1 |
| SNAR-A2       | 0 | 0              | 0 | 1 |
| SNAR-A8       | 0 | 0              | 0 | 1 |
| SNAR-C5       | 0 | 0              | 0 | 1 |
| SNAR-A2       | 0 | 0              | 0 | 1 |
| SNAR-C4       | 0 | 0              | 0 | 1 |
| SNAR-A13      | 0 | 0              | 0 | 1 |
| SNAR-C3       | 0 | 0              | 0 | 1 |
| SNAR-C5       | 0 | 0              | 0 | 1 |
| ELSPBP1       | 0 | 0              | 0 | 1 |
| FGF21         | 0 | 0.0217657 inf  |   | 1 |
| CCDC155       | 0 | 0              | 0 | 1 |
| SNORD34       | 0 | 0              | 0 | 1 |
| MIR5088       | 0 | 0              | 0 | 1 |
| MIR4749       | 0 | 0              | 0 | 1 |
| MIR4750       | 0 | 0              | 0 | 1 |
| KLK3          | 0 | 0              | 0 | 1 |
| SIGLEC7       | 0 | 0              | 0 | 1 |
| SIGLEC17P     | 0 | 0              | 0 | 1 |
| SIGLECL1      | 0 | 0              | 0 | 1 |

|           |   |   |   |   |
|-----------|---|---|---|---|
| CEACAM18  | 0 | 0 | 0 | 1 |
| MIR99B    | 0 | 0 | 0 | 1 |
| MIRLET7E  | 0 | 0 | 0 | 1 |
| MIR125A   | 0 | 0 | 0 | 1 |
| FPR2      | 0 | 0 | 0 | 1 |
| MIR643    | 0 | 0 | 0 | 1 |
| ZNF534    | 0 | 0 | 0 | 1 |
| ERVV-2    | 0 | 0 | 0 | 1 |
| FAM90A27P | 0 | 0 | 0 | 1 |
| DPRX      | 0 | 0 | 0 | 1 |
| MIR512-2  | 0 | 0 | 0 | 1 |
| MIR512-2  | 0 | 0 | 0 | 1 |
| MIR1323   | 0 | 0 | 0 | 1 |
| MIR498    | 0 | 0 | 0 | 1 |
| MIR520E   | 0 | 0 | 0 | 1 |
| MIR515-2  | 0 | 0 | 0 | 1 |
| MIR519E   | 0 | 0 | 0 | 1 |
| MIR520F   | 0 | 0 | 0 | 1 |
| MIR515-1  | 0 | 0 | 0 | 1 |
| MIR519C   | 0 | 0 | 0 | 1 |
| MIR1283-1 | 0 | 0 | 0 | 1 |
| MIR520A   | 0 | 0 | 0 | 1 |
| MIR526B   | 0 | 0 | 0 | 1 |
| MIR519B   | 0 | 0 | 0 | 1 |
| MIR525    | 0 | 0 | 0 | 1 |
| MIR523    | 0 | 0 | 0 | 1 |
| MIR518F   | 0 | 0 | 0 | 1 |
| MIR520B   | 0 | 0 | 0 | 1 |
| MIR518B   | 0 | 0 | 0 | 1 |
| MIR526A1  | 0 | 0 | 0 | 1 |
| MIR520C   | 0 | 0 | 0 | 1 |
| MIR518C   | 0 | 0 | 0 | 1 |
| MIR524    | 0 | 0 | 0 | 1 |
| MIR517A   | 0 | 0 | 0 | 1 |
| MIR519D   | 0 | 0 | 0 | 1 |
| MIR521-2  | 0 | 0 | 0 | 1 |
| MIR520D   | 0 | 0 | 0 | 1 |
| MIR517B   | 0 | 0 | 0 | 1 |
| MIR520G   | 0 | 0 | 0 | 1 |
| MIR516B2  | 0 | 0 | 0 | 1 |
| MIR526A2  | 0 | 0 | 0 | 1 |
| MIR518E   | 0 | 0 | 0 | 1 |
| MIR518A1  | 0 | 0 | 0 | 1 |
| MIR518D   | 0 | 0 | 0 | 1 |
| MIR516B1  | 0 | 0 | 0 | 1 |
| MIR518A2  | 0 | 0 | 0 | 1 |
| MIR517C   | 0 | 0 | 0 | 1 |
| MIR520H   | 0 | 0 | 0 | 1 |
| MIR521-1  | 0 | 0 | 0 | 1 |

|                |   |            |     |   |
|----------------|---|------------|-----|---|
| MIR522         | 0 | 0          | 0   | 1 |
| MIR519A1       | 0 | 0          | 0   | 1 |
| MIR527         | 0 | 0          | 0   | 1 |
| MIR516A1       | 0 | 0          | 0   | 1 |
| MIR1283-2      | 0 | 0          | 0   | 1 |
| MIR516A2       | 0 | 0          | 0   | 1 |
| MIR519A2       | 0 | 0          | 0   | 1 |
| MIR371A        | 0 | 0          | 0   | 1 |
| MIR372         | 0 | 0          | 0   | 1 |
| MIR373         | 0 | 0          | 0   | 1 |
| MIR4752        | 0 | 0          | 0   | 1 |
| KIR3DX1        | 0 | 0          | 0   | 1 |
| LILRA1         | 0 | 0          | 0   | 1 |
| LILRB4         | 0 | 0          | 0   | 1 |
| LILRP2         | 0 | 0          | 0   | 1 |
| KIR3DL3        | 0 | 0          | 0   | 1 |
| KIR2DL3        | 0 | 0          | 0   | 1 |
| KIR2DL1        | 0 | 0          | 0   | 1 |
| KIR2DL4,LOC100 | 0 | 0          | 0   | 1 |
| KIR3DL1        | 0 | 0          | 0   | 1 |
| KIR2DS4        | 0 | 0          | 0   | 1 |
| KIR3DL2        | 0 | 0          | 0   | 1 |
| NCR1           | 0 | 0          | 0   | 1 |
| NLRP2          | 0 | 0.0036672  | inf | 1 |
| NLRP5          | 0 | 0          | 0   | 1 |
| GALP           | 0 | 0          | 0   | 1 |
| LOC100128252   | 0 | 0          | 0   | 1 |
| ZNF471         | 0 | 0          | 0   | 1 |
| ZNF470         | 0 | 0          | 0   | 1 |
| PEG3-AS1       | 0 | 0          | 0   | 1 |
| MIMT1          | 0 | 0          | 0   | 1 |
| USP29          | 0 | 0          | 0   | 1 |
| ZNF530         | 0 | 0          | 0   | 1 |
| ZNF134         | 0 | 0          | 0   | 1 |
| ZSCAN4         | 0 | 0          | 0   | 1 |
| LOC100128398   | 0 | 0          | 0   | 1 |
| ZSCAN1         | 0 | 0          | 0   | 1 |
| ZNF135         | 0 | 0          | 0   | 1 |
| LOC646862      | 0 | 0          | 0   | 1 |
| FAM138A        | 0 | 0          | 0   | 1 |
| THEG           | 0 | 0.0127974  | inf | 1 |
| LPPR3          | 0 | 0.0157785  | inf | 1 |
| MIR1227        | 0 | 0          | 0   | 1 |
| RAX2           | 0 | 0.00997322 | inf | 1 |
| SNORD37        | 0 | 0          | 0   | 1 |
| ARRDC5         | 0 | 0          | 0   | 1 |
| PTPRS          | 0 | 0          | 0   | 1 |
| MBD3L4         | 0 | 0          | 0   | 1 |
| MBD3L3         | 0 | 0          | 0   | 1 |

|              |   |                 |   |   |
|--------------|---|-----------------|---|---|
| CLEC4G       | 0 | 0               | 0 | 1 |
| MIR4999      | 0 | 0               | 0 | 1 |
| ADAMTS10     | 0 | 0               | 0 | 1 |
| ACTL9        | 0 | 0               | 0 | 1 |
| MUC16        | 0 | 0.000368716 inf |   | 1 |
| OR7G2        | 0 | 0               | 0 | 1 |
| OR7G1        | 0 | 0               | 0 | 1 |
| OR7G3        | 0 | 0               | 0 | 1 |
| OR7D4        | 0 | 0               | 0 | 1 |
| ZNF812       | 0 | 0               | 0 | 1 |
| COL5A3       | 0 | 0.00509128 inf  |   | 1 |
| MIR199A1     | 0 | 0               | 0 | 1 |
| SNORD41      | 0 | 0               | 0 | 1 |
| CACNA1A      | 0 | 0               | 0 | 1 |
| MIR27A       | 0 | 0               | 0 | 1 |
| MIR23A       | 0 | 0               | 0 | 1 |
| EMR3         | 0 | 0               | 0 | 1 |
| OR7C1        | 0 | 0               | 0 | 1 |
| OR7A5        | 0 | 0               | 0 | 1 |
| OR7A10       | 0 | 0               | 0 | 1 |
| OR7A17       | 0 | 0               | 0 | 1 |
| SLC1A6       | 0 | 0.00386133 inf  |   | 1 |
| RASAL3       | 0 | 0               | 0 | 1 |
| PGLYRP2      | 0 | 0.0340896 inf   |   | 1 |
| CYP4F24P     | 0 | 0               | 0 | 1 |
| CIB3         | 0 | 0               | 0 | 1 |
| CPAMD8       | 0 | 0               | 0 | 1 |
| IL12RB1      | 0 | 0               | 0 | 1 |
| LOC729966    | 0 | 0               | 0 | 1 |
| COMP         | 0 | 0               | 0 | 1 |
| HAPLN4       | 0 | 0               | 0 | 1 |
| ZNF682       | 0 | 0               | 0 | 1 |
| MIR1270-2    | 0 | 0               | 0 | 1 |
| ZNF826P      | 0 | 0               | 0 | 1 |
| MIR1270-2    | 0 | 0               | 0 | 1 |
| ZNF626       | 0 | 0.00148049 inf  |   | 1 |
| ZNF676       | 0 | 0               | 0 | 1 |
| ZNF98        | 0 | 0               | 0 | 1 |
| ZNF728       | 0 | 0               | 0 | 1 |
| LOC284395    | 0 | 0               | 0 | 1 |
| TSHZ3        | 0 | 0               | 0 | 1 |
| LOC400685    | 0 | 0               | 0 | 1 |
| LOC100652909 | 0 | 0               | 0 | 1 |
| LOC100128675 | 0 | 0               | 0 | 1 |
| ATP4A        | 0 | 0               | 0 | 1 |
| PRODH2       | 0 | 0               | 0 | 1 |
| TYROBP       | 0 | 0               | 0 | 1 |
| LOC100631378 | 0 | 0               | 0 | 1 |
| PPP1R14A     | 0 | 0               | 0 | 1 |

|           |   |            |     |   |
|-----------|---|------------|-----|---|
| LGALS7    | 0 | 0          | 0   | 1 |
| SYCN      | 0 | 0          | 0   | 1 |
| IFNL3     | 0 | 0          | 0   | 1 |
| IFNL4     | 0 | 0          | 0   | 1 |
| LRFN1     | 0 | 0.0202559  | inf | 1 |
| MIR4530   | 0 | 0          | 0   | 1 |
| CLC       | 0 | 0          | 0   | 1 |
| MIR641    | 0 | 0          | 0   | 1 |
| CYP2A7    | 0 | 0          | 0   | 1 |
| CEACAM4   | 0 | 0          | 0   | 1 |
| CEACAM7   | 0 | 0          | 0   | 1 |
| MIR4323   | 0 | 0          | 0   | 1 |
| CXCL17    | 0 | 0          | 0   | 1 |
| PSG10P    | 0 | 0          | 0   | 1 |
| PSG6      | 0 | 0          | 0   | 1 |
| PSG7      | 0 | 0          | 0   | 1 |
| PSG2      | 0 | 0          | 0   | 1 |
| PSG4      | 0 | 0          | 0   | 1 |
| LOC284344 | 0 | 0          | 0   | 1 |
| CEACAM20  | 0 | 0          | 0   | 1 |
| MIR4531   | 0 | 0          | 0   | 1 |
| MIR330    | 0 | 0          | 0   | 1 |
| MIR642B   | 0 | 0          | 0   | 1 |
| NANOS2    | 0 | 0          | 0   | 1 |
| NOVA2     | 0 | 0          | 0   | 1 |
| IGFL4     | 0 | 0          | 0   | 1 |
| IGFL3     | 0 | 0          | 0   | 1 |
| RNU6-66   | 0 | 0          | 0   | 1 |
| CCDC8     | 0 | 0.00860045 | inf | 1 |
| PNMAL1    | 0 | 0          | 0   | 1 |
| PNMAL2    | 0 | 0          | 0   | 1 |
| PTGIR     | 0 | 0          | 0   | 1 |
| MIR320E   | 0 | 0          | 0   | 1 |
| SNAR-E    | 0 | 3.27805    | inf | 1 |
| MIR3191   | 0 | 0          | 0   | 1 |
| ZNF541    | 0 | 0          | 0   | 1 |
| TPRX1     | 0 | 0          | 0   | 1 |
| SULT2A1   | 0 | 0.00426634 | inf | 1 |
| BSPH1     | 0 | 0          | 0   | 1 |
| SNAR-G2   | 0 | 0          | 0   | 1 |
| MIR4324   | 0 | 0          | 0   | 1 |
| MIR150    | 0 | 0          | 0   | 1 |
| TSKS      | 0 | 0          | 0   | 1 |
| SNAR-A8   | 0 | 0          | 0   | 1 |
| SNAR-A4   | 0 | 0          | 0   | 1 |
| SNAR-A10  | 0 | 0          | 0   | 1 |
| SNAR-A7   | 0 | 0          | 0   | 1 |
| SNAR-A14  | 0 | 0          | 0   | 1 |
| SNAR-A3   | 0 | 0          | 0   | 1 |

|           |   |            |     |   |
|-----------|---|------------|-----|---|
| SNAR-A6   | 0 | 0          | 0   | 1 |
| SNAR-A10  | 0 | 0          | 0   | 1 |
| SNAR-A8   | 0 | 0          | 0   | 1 |
| SNAR-B1   | 0 | 0          | 0   | 1 |
| SNAR-B2   | 0 | 0          | 0   | 1 |
| SNAR-D    | 0 | 0          | 0   | 1 |
| IZUMO2    | 0 | 0          | 0   | 1 |
| KCNC3     | 0 | 0          | 0   | 1 |
| NAPSB     | 0 | 0          | 0   | 1 |
| SNORD88B  | 0 | 11.5706    | inf | 1 |
| SNORD88C  | 0 | 0          | 0   | 1 |
| KLK5      | 0 | 0          | 0   | 1 |
| KLK7      | 0 | 0          | 0   | 1 |
| KLK8      | 0 | 0          | 0   | 1 |
| KLK9      | 0 | 0          | 0   | 1 |
| KLK12     | 0 | 0          | 0   | 1 |
| KLK13     | 0 | 0          | 0   | 1 |
| NKG7      | 0 | 0          | 0   | 1 |
| LIM2      | 0 | 0          | 0   | 1 |
| SIGLEC8   | 0 | 0          | 0   | 1 |
| SIGLEC6   | 0 | 0          | 0   | 1 |
| SIGLEC5   | 0 | 0          | 0   | 1 |
| SIGLEC14  | 0 | 0          | 0   | 1 |
| FPR1      | 0 | 0          | 0   | 1 |
| ZNF415    | 0 | 0          | 0   | 1 |
| VN1R4     | 0 | 0          | 0   | 1 |
| BIRC8     | 0 | 0          | 0   | 1 |
| LOC284379 | 0 | 0.0109752  | inf | 1 |
| MIR371B   | 0 | 0          | 0   | 1 |
| TARM1     | 0 | 0          | 0   | 1 |
| LILRB5    | 0 | 0          | 0   | 1 |
| LILRB2    | 0 | 0          | 0   | 1 |
| LILRA3    | 0 | 0          | 0   | 1 |
| LILRA5    | 0 | 0.0108086  | inf | 1 |
| LILRA4    | 0 | 0          | 0   | 1 |
| NLRP7     | 0 | 0          | 0   | 1 |
| RNU6-64   | 0 | 0          | 0   | 1 |
| FAM71E2   | 0 | 0          | 0   | 1 |
| SBK2      | 0 | 0          | 0   | 1 |
| SGK110    | 0 | 0          | 0   | 1 |
| NLRP13    | 0 | 0          | 0   | 1 |
| PEG3,ZIM2 | 0 | 0          | 0   | 1 |
| ZIM3      | 0 | 0          | 0   | 1 |
| ZNF418    | 0 | 0          | 0   | 1 |
| ZNF256    | 0 | 0          | 0   | 1 |
| C19orf18  | 0 | 0          | 0   | 1 |
| ZNF606    | 0 | 0.00212755 | inf | 1 |
| MIR4754   | 0 | 0          | 0   | 1 |
| TPO       | 0 | 0.00486167 | inf | 1 |

|              |   |                |   |   |
|--------------|---|----------------|---|---|
| LOC730811    | 0 | 0              | 0 | 1 |
| LOC150622    | 0 | 0              | 0 | 1 |
| LOC400940    | 0 | 0              | 0 | 1 |
| KCNF1        | 0 | 0              | 0 | 1 |
| MIR3125      | 0 | 0              | 0 | 1 |
| MYCN         | 0 | 0              | 0 | 1 |
| MSGN1        | 0 | 0              | 0 | 1 |
| KCNS3        | 0 | 0              | 0 | 1 |
| MIR4757      | 0 | 0              | 0 | 1 |
| FLJ12334     | 0 | 0              | 0 | 1 |
| GDF7         | 0 | 0              | 0 | 1 |
| MFSD2B       | 0 | 0.0101108 inf  |   | 1 |
| C2orf70      | 0 | 0              | 0 | 1 |
| TCF23        | 0 | 0              | 0 | 1 |
| DNAJC5G      | 0 | 0.0120349 inf  |   | 1 |
| MIR4263      | 0 | 0              | 0 | 1 |
| SNORD92      | 0 | 0              | 0 | 1 |
| SNORD53      | 0 | 0              | 0 | 1 |
| EHD3         | 0 | 0              | 0 | 1 |
| MIR558       | 0 | 0              | 0 | 1 |
| MIR4765      | 0 | 0              | 0 | 1 |
| LINC00486    | 0 | 0              | 0 | 1 |
| LOC100271832 | 0 | 0              | 0 | 1 |
| VIT          | 0 | 0              | 0 | 1 |
| LOC388942    | 0 | 0              | 0 | 1 |
| ABCG8        | 0 | 0.00558702 inf |   | 1 |
| MIR559       | 0 | 0              | 0 | 1 |
| CCDC85A      | 0 | 0              | 0 | 1 |
| FLJ30838     | 0 | 0              | 0 | 1 |
| MIR5192      | 0 | 0              | 0 | 1 |
| MIR4434      | 0 | 0              | 0 | 1 |
| LOC339807    | 0 | 0              | 0 | 1 |
| PLEK         | 0 | 0              | 0 | 1 |
| PROKR1       | 0 | 0              | 0 | 1 |
| GKN1         | 0 | 0.0115529 inf  |   | 1 |
| ANTXR1       | 0 | 0              | 0 | 1 |
| MIR3126      | 0 | 0              | 0 | 1 |
| OR7E91P      | 0 | 0              | 0 | 1 |
| EMX1         | 0 | 0              | 0 | 1 |
| NOTO         | 0 | 0.015242 inf   |   | 1 |
| C2orf78      | 0 | 0              | 0 | 1 |
| MIR5000      | 0 | 0              | 0 | 1 |
| REG3G        | 0 | 0              | 0 | 1 |
| REG1A        | 0 | 0              | 0 | 1 |
| LOC1720      | 0 | 0              | 0 | 1 |
| FUNDC2P2     | 0 | 0              | 0 | 1 |
| RGPD1,RGPD2  | 0 | 0              | 0 | 1 |
| MIR4435-1    | 0 | 0              | 0 | 1 |
| SMYD1        | 0 | 0              | 0 | 1 |

|                 |   |            |     |   |
|-----------------|---|------------|-----|---|
| THNSL2          | 0 | 0          | 0   | 1 |
| MIR4436A        | 0 | 0          | 0   | 1 |
| ACTR3BP2        | 0 | 0          | 0   | 1 |
| MAL             | 0 | 0          | 0   | 1 |
| TRIM43          | 0 | 0          | 0   | 1 |
| ITPRIPL1        | 0 | 0          | 0   | 1 |
| MIR3127         | 0 | 0          | 0   | 1 |
| VWA3B           | 0 | 0          | 0   | 1 |
| CNGA3           | 0 | 0          | 0   | 1 |
| NMS             | 0 | 0          | 0   | 1 |
| MIR5696         | 0 | 0          | 0   | 1 |
| IL1R2           | 0 | 0          | 0   | 1 |
| IL1RL2          | 0 | 0          | 0   | 1 |
| MIR4772         | 0 | 0          | 0   | 1 |
| LOC150568       | 0 | 0          | 0   | 1 |
| POU3F3          | 0 | 0          | 0   | 1 |
| GPR45           | 0 | 0          | 0   | 1 |
| PLGLA           | 0 | 0          | 0   | 1 |
| SLC5A7          | 0 | 0          | 0   | 1 |
| SULT1C3         | 0 | 0          | 0   | 1 |
| SULT1C2P1       | 0 | 0          | 0   | 1 |
| SULT1C4         | 0 | 0.00622948 | inf | 1 |
| LIMS3L          | 0 | 0          | 0   | 1 |
| LOC100507334    | 0 | 0          | 0   | 1 |
| MIR4436B2       | 0 | 0          | 0   | 1 |
| ACOXL           | 0 | 0.0048494  | inf | 1 |
| IL36G           | 0 | 0          | 0   | 1 |
| IL36A           | 0 | 0          | 0   | 1 |
| IL36RN          | 0 | 0          | 0   | 1 |
| IL1F10          | 0 | 0          | 0   | 1 |
| IL1RN           | 0 | 0          | 0   | 1 |
| FAM138B         | 0 | 0          | 0   | 1 |
| DPP10           | 0 | 0          | 0   | 1 |
| MARCO           | 0 | 0          | 0   | 1 |
| PCDP1           | 0 | 0          | 0   | 1 |
| GLI2            | 0 | 0          | 0   | 1 |
| CNTNAP5         | 0 | 0          | 0   | 1 |
| GYPC            | 0 | 0.0137554  | inf | 1 |
| GPR17           | 0 | 0          | 0   | 1 |
| RAB6C           | 0 | 0.00310656 | inf | 1 |
| CFC1B           | 0 | 0          | 0   | 1 |
| LOC646743,TISP* | 0 | 0          | 0   | 1 |
| CYP4F30P        | 0 | 0          | 0   | 1 |
| GPR148          | 0 | 0          | 0   | 1 |
| POTEE           | 0 | 0          | 0   | 1 |
| LOC389043       | 0 | 0          | 0   | 1 |
| RNU6-81         | 0 | 0          | 0   | 1 |
| MIR3679         | 0 | 0          | 0   | 1 |
| ACMSD           | 0 | 0          | 0   | 1 |



|               |   |            |     |   |
|---------------|---|------------|-----|---|
| MIR128-1      | 0 | 0          | 0   | 1 |
| LOC100507600  | 0 | 0          | 0   | 1 |
| THSD7B        | 0 | 0          | 0   | 1 |
| HNMT          | 0 | 0.0694078  | inf | 1 |
| KYNU          | 0 | 0          | 0   | 1 |
| ARHGAP15      | 0 | 0          | 0   | 1 |
| ZEB2-AS1      | 0 | 0          | 0   | 1 |
| DKFZp686O1327 | 0 | 0          | 0   | 1 |
| KIF5C         | 0 | 0          | 0   | 1 |
| LYPD6B        | 0 | 0          | 0   | 1 |
| TNFAIP6       | 0 | 0          | 0   | 1 |
| MIR4773-1     | 0 | 0          | 0   | 1 |
| GALNT13       | 0 | 0          | 0   | 1 |
| KCNJ3         | 0 | 0          | 0   | 1 |
| GALNT5        | 0 | 0          | 0   | 1 |
| UPP2          | 0 | 0          | 0   | 1 |
| CCDC148-AS1   | 0 | 0          | 0   | 1 |
| DAPL1         | 0 | 0          | 0   | 1 |
| SLC4A10       | 0 | 0          | 0   | 1 |
| CSRNP3        | 0 | 0          | 0   | 1 |
| LOC100506134  | 0 | 0.0192952  | inf | 1 |
| XIRP2         | 0 | 0          | 0   | 1 |
| MIR4774       | 0 | 0          | 0   | 1 |
| G6PC2         | 0 | 0          | 0   | 1 |
| DHRS9         | 0 | 0          | 0   | 1 |
| KLHL41        | 0 | 0.0119253  | inf | 1 |
| MYO3B         | 0 | 0          | 0   | 1 |
| LOC285084     | 0 | 0          | 0   | 1 |
| SP9           | 0 | 0          | 0   | 1 |
| HOXD13        | 0 | 0.00601576 | inf | 1 |
| HOXD12        | 0 | 0          | 0   | 1 |
| HOXD10        | 0 | 0          | 0   | 1 |
| MIR10B        | 0 | 0          | 0   | 1 |
| OSBPL6        | 0 | 0          | 0   | 1 |
| ITGA4         | 0 | 0          | 0   | 1 |
| PPP1R1C       | 0 | 0.00261394 | inf | 1 |
| ZNF804A       | 0 | 0          | 0   | 1 |
| MIR561        | 0 | 0          | 0   | 1 |
| COL3A1        | 0 | 0          | 0   | 1 |
| MIR1245A      | 0 | 0          | 0   | 1 |
| PCGEM1        | 0 | 0          | 0   | 1 |
| PLCL1         | 0 | 0          | 0   | 1 |
| AOX2P         | 0 | 0          | 0   | 1 |
| CDK15         | 0 | 0          | 0   | 1 |
| SNORD70       | 0 | 0          | 0   | 1 |
| SNORD11B      | 0 | 0          | 0   | 1 |
| SNORD11       | 0 | 0          | 0   | 1 |
| CD28          | 0 | 0          | 0   | 1 |
| CTLA4         | 0 | 0          | 0   | 1 |

|               |   |            |     |   |
|---------------|---|------------|-----|---|
| ICOS          | 0 | 0          | 0   | 1 |
| SNORD51       | 0 | 0          | 0   | 1 |
| ADAM23        | 0 | 0          | 0   | 1 |
| LOC200726     | 0 | 0          | 0   | 1 |
| MIR3130-2     | 0 | 0          | 0   | 1 |
| LOC100507443  | 0 | 0          | 0   | 1 |
| PTH2R         | 0 | 0          | 0   | 1 |
| UNC80         | 0 | 0          | 0   | 1 |
| CPS1-IT1      | 0 | 0          | 0   | 1 |
| VWC2L         | 0 | 0          | 0   | 1 |
| VWC2L-IT1     | 0 | 0          | 0   | 1 |
| MIR26B        | 0 | 0          | 0   | 1 |
| VIL1          | 0 | 0          | 0   | 1 |
| WNT6          | 0 | 0          | 0   | 1 |
| CDK5R2        | 0 | 0          | 0   | 1 |
| LINC00608     | 0 | 0          | 0   | 1 |
| LOC100129175  | 0 | 0          | 0   | 1 |
| DES           | 0 | 0          | 0   | 1 |
| CCDC140       | 0 | 0          | 0   | 1 |
| MOGAT1        | 0 | 0          | 0   | 1 |
| NYAP2         | 0 | 0          | 0   | 1 |
| MIR548AR      | 0 | 0          | 0   | 1 |
| LOC646736     | 0 | 0          | 0   | 1 |
| COL4A3        | 0 | 0          | 0   | 1 |
| CCL20         | 0 | 0          | 0   | 1 |
| LOC151484     | 0 | 0          | 0   | 1 |
| SPATA3        | 0 | 0          | 0   | 1 |
| MIR4777       | 0 | 0          | 0   | 1 |
| C2orf57       | 0 | 0          | 0   | 1 |
| ALPP          | 0 | 0          | 0   | 1 |
| ALPPL2        | 0 | 0.00744973 | inf | 1 |
| ALPI          | 0 | 0          | 0   | 1 |
| CHRND         | 0 | 0          | 0   | 1 |
| NEU2          | 0 | 0          | 0   | 1 |
| UGT1A1,UGT1A1 | 0 | 0          | 0   | 1 |
| TRPM8         | 0 | 0          | 0   | 1 |
| SPP2          | 0 | 0          | 0   | 1 |
| CXCR7         | 0 | 0          | 0   | 1 |
| MLPH          | 0 | 0          | 0   | 1 |
| PRLH          | 0 | 0          | 0   | 1 |
| LOC643387     | 0 | 0          | 0   | 1 |
| TWIST2        | 0 | 0          | 0   | 1 |
| MIR4269       | 0 | 0          | 0   | 1 |
| LOC150935     | 0 | 0          | 0   | 1 |
| MIR149        | 0 | 0          | 0   | 1 |
| AQP12A        | 0 | 0          | 0   | 1 |
| AGXT          | 0 | 0          | 0   | 1 |
| CXXC11        | 0 | 0          | 0   | 1 |
| LOC339822     | 0 | 0          | 0   | 1 |

|              |   |             |     |   |
|--------------|---|-------------|-----|---|
| PXDN         | 0 | 0           | 0   | 1 |
| MYT1L        | 0 | 0           | 0   | 1 |
| LOC100505964 | 0 | 0           | 0   | 1 |
| LOC727982    | 0 | 0           | 0   | 1 |
| LINC00487    | 0 | 0           | 0   | 1 |
| LOC339788    | 0 | 0           | 0   | 1 |
| LINC00299    | 0 | 0           | 0   | 1 |
| CYS1         | 0 | 0           | 0   | 1 |
| MIR4261      | 0 | 0           | 0   | 1 |
| FLJ33534     | 0 | 0           | 0   | 1 |
| MIR4429      | 0 | 0           | 0   | 1 |
| NTSR2        | 0 | 0           | 0   | 1 |
| MIR4262      | 0 | 0           | 0   | 1 |
| LOC100506474 | 0 | 0           | 0   | 1 |
| MYCNOS       | 0 | 0           | 0   | 1 |
| RAD51AP2     | 0 | 0           | 0   | 1 |
| OSR1         | 0 | 0           | 0   | 1 |
| APOB         | 0 | 0.000685826 | inf | 1 |
| POMC         | 0 | 0           | 0   | 1 |
| MIR1301      | 0 | 0           | 0   | 1 |
| C2orf53      | 0 | 0           | 0   | 1 |
| SLC30A3      | 0 | 0.00904065  | inf | 1 |
| C2orf71      | 0 | 0           | 0   | 1 |
| ALK          | 0 | 0           | 0   | 1 |
| CAPN13       | 0 | 0           | 0   | 1 |
| GALNT14      | 0 | 0           | 0   | 1 |
| CAPN14       | 0 | 0           | 0   | 1 |
| SRD5A2       | 0 | 0           | 0   | 1 |
| SULT6B1      | 0 | 0           | 0   | 1 |
| CDKL4        | 0 | 0           | 0   | 1 |
| SLC8A1       | 0 | 0           | 0   | 1 |
| C2orf91      | 0 | 0           | 0   | 1 |
| KCNG3        | 0 | 0           | 0   | 1 |
| OXER1        | 0 | 0.00929951  | inf | 1 |
| HAAO         | 0 | 0           | 0   | 1 |
| LOC728819    | 0 | 0           | 0   | 1 |
| ABCG5        | 0 | 0           | 0   | 1 |
| MIR548AD     | 0 | 0           | 0   | 1 |
| SIX2         | 0 | 0           | 0   | 1 |
| UNQ6975      | 0 | 0           | 0   | 1 |
| C2orf61      | 0 | 0           | 0   | 1 |
| KCNK12       | 0 | 0           | 0   | 1 |
| LHCGR        | 0 | 0           | 0   | 1 |
| FSHR         | 0 | 0           | 0   | 1 |
| MIR3682      | 0 | 0           | 0   | 1 |
| TSPYL6       | 0 | 0           | 0   | 1 |
| MIR217       | 0 | 0           | 0   | 1 |
| MIR216A      | 0 | 0           | 0   | 1 |
| MIR216B      | 0 | 0           | 0   | 1 |

|              |   |            |     |   |
|--------------|---|------------|-----|---|
| MIR4432      | 0 | 0          | 0   | 1 |
| FLJ16341     | 0 | 0          | 0   | 1 |
| SNORA70B     | 0 | 0          | 0   | 1 |
| DBIL5P2      | 0 | 0.00478361 | inf | 1 |
| LINC00309    | 0 | 0          | 0   | 1 |
| MIR4778      | 0 | 0          | 0   | 1 |
| MEIS1-AS3    | 0 | 0          | 0   | 1 |
| LOC644838    | 0 | 0          | 0   | 1 |
| CNRIP1       | 0 | 0          | 0   | 1 |
| BMP10        | 0 | 0          | 0   | 1 |
| GKN2         | 0 | 0          | 0   | 1 |
| SNORA36C     | 0 | 0          | 0   | 1 |
| FIGLA        | 0 | 0          | 0   | 1 |
| CLEC4F       | 0 | 0          | 0   | 1 |
| CD207        | 0 | 0          | 0   | 1 |
| EGR4         | 0 | 0          | 0   | 1 |
| NAT8         | 0 | 0          | 0   | 1 |
| NAT8B        | 0 | 0          | 0   | 1 |
| EVA1A        | 0 | 0          | 0   | 1 |
| LRRTM4       | 0 | 0          | 0   | 1 |
| SNAR-H       | 0 | 0          | 0   | 1 |
| REG1B        | 0 | 0.0179186  | inf | 1 |
| REG1P        | 0 | 0          | 0   | 1 |
| MIR4264      | 0 | 0          | 0   | 1 |
| LRRTM1       | 0 | 0          | 0   | 1 |
| MIR4779      | 0 | 0          | 0   | 1 |
| CD8B         | 0 | 0          | 0   | 1 |
| MIR4780      | 0 | 0          | 0   | 1 |
| TRIM43B      | 0 | 0          | 0   | 1 |
| CHST10       | 0 | 0          | 0   | 1 |
| CREG2        | 0 | 0          | 0   | 1 |
| RFX8         | 0 | 0          | 0   | 1 |
| LOC100287010 | 0 | 0          | 0   | 1 |
| LOC284998    | 0 | 0          | 0   | 1 |
| LOC100506421 | 0 | 0          | 0   | 1 |
| LOC285000    | 0 | 0          | 0   | 1 |
| LOC729121    | 0 | 0          | 0   | 1 |
| MIR4265      | 0 | 0          | 0   | 1 |
| MIR4266      | 0 | 0          | 0   | 1 |
| MIR4267      | 0 | 0          | 0   | 1 |
| MIR4436B1    | 0 | 0          | 0   | 1 |
| LIMS3        | 0 | 0          | 0   | 1 |
| RGPD5,RGPD6  | 0 | 0          | 0   | 1 |
| MIR4435-1    | 0 | 0          | 0   | 1 |
| IL1B         | 0 | 0          | 0   | 1 |
| IL36B        | 0 | 0          | 0   | 1 |
| MIR4782      | 0 | 0          | 0   | 1 |
| LOC389023    | 0 | 0          | 0   | 1 |
| SCTR         | 0 | 0          | 0   | 1 |

|                 |   |             |     |   |
|-----------------|---|-------------|-----|---|
| LOC84931        | 0 | 0           | 0   | 1 |
| CYP27C1         | 0 | 0           | 0   | 1 |
| MIR4783         | 0 | 0           | 0   | 1 |
| LOC389033       | 0 | 0           | 0   | 1 |
| LOC100131320    | 0 | 0           | 0   | 1 |
| LOC440905       | 0 | 0.00217293  | inf | 1 |
| POTEF           | 0 | 0           | 0   | 1 |
| LOC100216479    | 0 | 0.01104     | inf | 1 |
| LOC646743,TISP- | 0 | 0           | 0   | 1 |
| CFC1,CFC1B      | 0 | 0           | 0   | 1 |
| LOC401010       | 0 | 0           | 0   | 1 |
| MIR4784         | 0 | 0           | 0   | 1 |
| C2orf27B        | 0 | 0           | 0   | 1 |
| NCKAP5          | 0 | 0           | 0   | 1 |
| MAP3K19         | 0 | 0           | 0   | 1 |
| CXCR4           | 0 | 0           | 0   | 1 |
| NXPH2           | 0 | 0           | 0   | 1 |
| LRP1B           | 0 | 0           | 0   | 1 |
| ZEB2            | 0 | 0           | 0   | 1 |
| RPRM            | 0 | 0           | 0   | 1 |
| ERMN            | 0 | 0           | 0   | 1 |
| CYTIP           | 0 | 0           | 0   | 1 |
| PLA2R1          | 0 | 0           | 0   | 1 |
| ITGB6           | 0 | 0           | 0   | 1 |
| MIR4785         | 0 | 0           | 0   | 1 |
| DPP4            | 0 | 0           | 0   | 1 |
| GCG             | 0 | 0           | 0   | 1 |
| KCNH7           | 0 | 0           | 0   | 1 |
| FIGN            | 0 | 0           | 0   | 1 |
| GRB14           | 0 | 0           | 0   | 1 |
| SNORA70F        | 0 | 0           | 0   | 1 |
| SLC38A11        | 0 | 0           | 0   | 1 |
| SCN3A           | 0 | 0           | 0   | 1 |
| SCN1A           | 0 | 0           | 0   | 1 |
| SCN9A           | 0 | 0           | 0   | 1 |
| SCN7A           | 0 | 0           | 0   | 1 |
| ABCB11          | 0 | 0           | 0   | 1 |
| LRP2            | 0 | 0.000598325 | inf | 1 |
| CHRNA1          | 0 | 0           | 0   | 1 |
| MIR933          | 0 | 0           | 0   | 1 |
| EVX2            | 0 | 0           | 0   | 1 |
| MIR1246         | 0 | 0           | 0   | 1 |
| MIR3128         | 0 | 0           | 0   | 1 |
| MIR1258         | 0 | 0           | 0   | 1 |
| MIR4437         | 0 | 0           | 0   | 1 |
| NEUROD1         | 0 | 0           | 0   | 1 |
| PDE1A           | 0 | 0.00771891  | inf | 1 |
| ZSWIM2          | 0 | 0           | 0   | 1 |
| DIRC1           | 0 | 0           | 0   | 1 |

|              |   |            |     |   |
|--------------|---|------------|-----|---|
| MIR1245B     | 0 | 0          | 0   | 1 |
| MIR3129      | 0 | 0          | 0   | 1 |
| SLC40A1      | 0 | 0          | 0   | 1 |
| SDPR         | 0 | 0          | 0   | 1 |
| TMEFF2       | 0 | 0          | 0   | 1 |
| CFLAR-AS1    | 0 | 0          | 0   | 1 |
| DYTN         | 0 | 0          | 0   | 1 |
| MIR2355      | 0 | 0          | 0   | 1 |
| CRYGD        | 0 | 0          | 0   | 1 |
| CRYGC        | 0 | 0          | 0   | 1 |
| CRYGB        | 0 | 0          | 0   | 1 |
| CRYGA        | 0 | 0          | 0   | 1 |
| C2orf80      | 0 | 0          | 0   | 1 |
| ACADL        | 0 | 0          | 0   | 1 |
| MYL1         | 0 | 0          | 0   | 1 |
| ERBB4        | 0 | 0          | 0   | 1 |
| MIR548F2     | 0 | 0          | 0   | 1 |
| MIR4776-2    | 0 | 0          | 0   | 1 |
| IGFBP5       | 0 | 0.00206183 | inf | 1 |
| TNP1         | 0 | 0          | 0   | 1 |
| CXCR2P1      | 0 | 0          | 0   | 1 |
| CXCR1        | 0 | 0          | 0   | 1 |
| PRKAG3       | 0 | 0          | 0   | 1 |
| FEV          | 0 | 0          | 0   | 1 |
| CRYBA2       | 0 | 0          | 0   | 1 |
| MIR375       | 0 | 0          | 0   | 1 |
| MIR3131      | 0 | 0          | 0   | 1 |
| MIR153-1     | 0 | 0          | 0   | 1 |
| RESP18       | 0 | 0          | 0   | 1 |
| MIR3132      | 0 | 0          | 0   | 1 |
| MIR4268      | 0 | 0          | 0   | 1 |
| PAX3         | 0 | 0          | 0   | 1 |
| SCG2         | 0 | 0          | 0   | 1 |
| DOCK10       | 0 | 0.00110077 | inf | 1 |
| MIR4439      | 0 | 0          | 0   | 1 |
| MIR5702      | 0 | 0          | 0   | 1 |
| C2orf83      | 0 | 0          | 0   | 1 |
| SPHKAP       | 0 | 0          | 0   | 1 |
| PID1         | 0 | 0          | 0   | 1 |
| DNER         | 0 | 0          | 0   | 1 |
| SNORD20      | 0 | 0          | 0   | 1 |
| SNORD82      | 0 | 0          | 0   | 1 |
| NMUR1        | 0 | 0          | 0   | 1 |
| MIR1471      | 0 | 0          | 0   | 1 |
| NPPC         | 0 | 0          | 0   | 1 |
| ECEL1P2      | 0 | 0          | 0   | 1 |
| ECEL1        | 0 | 0          | 0   | 1 |
| DNAJB3       | 0 | 0          | 0   | 1 |
| LOC100286922 | 0 | 0          | 0   | 1 |

|              |   |            |     |   |
|--------------|---|------------|-----|---|
| GBX2         | 0 | 0          | 0   | 1 |
| IQCA1        | 0 | 0          | 0   | 1 |
| LOC1511174   | 0 | 0          | 0   | 1 |
| FLJ43879     | 0 | 0          | 0   | 1 |
| MIR4440      | 0 | 0          | 0   | 1 |
| MIR4441      | 0 | 0          | 0   | 1 |
| MIR2467      | 0 | 0          | 0   | 1 |
| MIR4786      | 0 | 0          | 0   | 1 |
| OR6B2        | 0 | 0          | 0   | 1 |
| PRR21        | 0 | 0          | 0   | 1 |
| OR6B3        | 0 | 0          | 0   | 1 |
| OTOS         | 0 | 0.0385145  | inf | 1 |
| AQP12B       | 0 | 0          | 0   | 1 |
| KIF1A        | 0 | 0          | 0   | 1 |
| LOC200772    | 0 | 0          | 0   | 1 |
| DEFB125      | 0 | 0          | 0   | 1 |
| DEFB126      | 0 | 0          | 0   | 1 |
| DEFB127      | 0 | 0          | 0   | 1 |
| DEFB129      | 0 | 0          | 0   | 1 |
| DEFB132      | 0 | 0          | 0   | 1 |
| TGM6         | 0 | 0          | 0   | 1 |
| SNORD110     | 0 | 142.188    | inf | 1 |
| SNORA51      | 0 | 0          | 0   | 1 |
| SNORD56      | 0 | 0          | 0   | 1 |
| SNORD57      | 0 | 0          | 0   | 1 |
| C20orf141    | 0 | 0          | 0   | 1 |
| TMEM239      | 0 | 0          | 0   | 1 |
| MIR103A2     | 0 | 0          | 0   | 1 |
| PRND         | 0 | 0          | 0   | 1 |
| CHGB         | 0 | 0.00409046 | inf | 1 |
| PLCB1        | 0 | 0          | 0   | 1 |
| LAMP5        | 0 | 0          | 0   | 1 |
| ANKEF1       | 0 | 0          | 0   | 1 |
| SPTLC3       | 0 | 0          | 0   | 1 |
| ISM1         | 0 | 0          | 0   | 1 |
| OTOR         | 0 | 0          | 0   | 1 |
| PCSK2        | 0 | 0          | 0   | 1 |
| BANF2        | 0 | 0          | 0   | 1 |
| LINC00851    | 0 | 0          | 0   | 1 |
| MIR3192      | 0 | 0          | 0   | 1 |
| SCP2D1       | 0 | 0          | 0   | 1 |
| LOC100270679 | 0 | 0          | 0   | 1 |
| SSTR4        | 0 | 0          | 0   | 1 |
| CSTL1        | 0 | 0          | 0   | 1 |
| CST8         | 0 | 0          | 0   | 1 |
| CST13P       | 0 | 0          | 0   | 1 |
| FLJ33581     | 0 | 0          | 0   | 1 |
| SYNDIG1      | 0 | 0          | 0   | 1 |
| DEFB115      | 0 | 0          | 0   | 1 |

|              |   |            |     |   |
|--------------|---|------------|-----|---|
| DEFB118      | 0 | 0          | 0   | 1 |
| DEFB123      | 0 | 0          | 0   | 1 |
| REM1         | 0 | 0          | 0   | 1 |
| LINC00028    | 0 | 0          | 0   | 1 |
| MIR3193      | 0 | 0          | 0   | 1 |
| COX4I2       | 0 | 0          | 0   | 1 |
| XKR7         | 0 | 0          | 0   | 1 |
| LOC149950    | 0 | 0          | 0   | 1 |
| BPIFB2       | 0 | 0          | 0   | 1 |
| BPIFB6       | 0 | 0          | 0   | 1 |
| BPIFB3       | 0 | 0          | 0   | 1 |
| BPIFB4       | 0 | 0          | 0   | 1 |
| BPIFA2       | 0 | 0          | 0   | 1 |
| BPIFA4P      | 0 | 0          | 0   | 1 |
| BPIFA3       | 0 | 0          | 0   | 1 |
| BPIFA1       | 0 | 0          | 0   | 1 |
| BPIFB1       | 0 | 0          | 0   | 1 |
| MIR4755      | 0 | 0          | 0   | 1 |
| MIR644A      | 0 | 0          | 0   | 1 |
| MIR499A      | 0 | 0          | 0   | 1 |
| BPI          | 0 | 0          | 0   | 1 |
| LBP          | 0 | 0          | 0   | 1 |
| SNORA39      | 0 | 0          | 0   | 1 |
| SNORA60      | 0 | 1.20652    | inf | 1 |
| SLC32A1      | 0 | 0          | 0   | 1 |
| PPP1R16B     | 0 | 0.00163656 | inf | 1 |
| R3HDML       | 0 | 0          | 0   | 1 |
| MIR3646      | 0 | 0          | 0   | 1 |
| WISP2        | 0 | 0          | 0   | 1 |
| SEMG1        | 0 | 0          | 0   | 1 |
| SEMG2        | 0 | 0          | 0   | 1 |
| RBPJL        | 0 | 0          | 0   | 1 |
| WFDC10A      | 0 | 0          | 0   | 1 |
| SPINT4       | 0 | 0          | 0   | 1 |
| MMP9         | 0 | 0          | 0   | 1 |
| EYA2         | 0 | 0.00474297 | inf | 1 |
| MIR3616      | 0 | 0          | 0   | 1 |
| LOC100131496 | 0 | 0.0164954  | inf | 1 |
| SNORD12C     | 0 | 0          | 0   | 1 |
| SNORD12B     | 0 | 0          | 0   | 1 |
| SNORD12      | 0 | 0          | 0   | 1 |
| MIR645       | 0 | 0          | 0   | 1 |
| DOK5         | 0 | 0          | 0   | 1 |
| MC3R         | 0 | 0          | 0   | 1 |
| SPO11        | 0 | 0          | 0   | 1 |
| MIR5095      | 0 | 0          | 0   | 1 |
| PCK1         | 0 | 0          | 0   | 1 |
| MIR4532      | 0 | 0          | 0   | 1 |
| C20orf85     | 0 | 0          | 0   | 1 |



|                 |   |            |     |   |
|-----------------|---|------------|-----|---|
| APCDD1L-AS1     | 0 | 0.00557662 | inf | 1 |
| ZNF831          | 0 | 0          | 0   | 1 |
| EDN3            | 0 | 0          | 0   | 1 |
| PHACTR3         | 0 | 0.00490481 | inf | 1 |
| C20orf197       | 0 | 0          | 0   | 1 |
| MIR4533         | 0 | 0          | 0   | 1 |
| C20orf166       | 0 | 0          | 0   | 1 |
| MIR1-1          | 0 | 0          | 0   | 1 |
| LOC63930        | 0 | 0.00375035 | inf | 1 |
| LOC100144597    | 0 | 0          | 0   | 1 |
| HAR1A           | 0 | 0          | 0   | 1 |
| MIR124-3        | 0 | 0          | 0   | 1 |
| MIR3196         | 0 | 0          | 0   | 1 |
| FLJ16779        | 0 | 0          | 0   | 1 |
| MIR4326         | 0 | 0          | 0   | 1 |
| COL20A1         | 0 | 0.00842032 | inf | 1 |
| MIR941-1,MIR941 | 0 | 0          | 0   | 1 |
| MIR941-2,MIR941 | 0 | 0          | 0   | 1 |
| DEFB128         | 0 | 0          | 0   | 1 |
| SCRT2           | 0 | 0          | 0   | 1 |
| RSPO4           | 0 | 0          | 0   | 1 |
| SIRPB2          | 0 | 0          | 0   | 1 |
| SIRPD           | 0 | 0          | 0   | 1 |
| SIRPB1          | 0 | 0          | 0   | 1 |
| SIRPG           | 0 | 0          | 0   | 1 |
| LOC100289473    | 0 | 0          | 0   | 1 |
| PDYN            | 0 | 0          | 0   | 1 |
| SNORD119        | 0 | 0          | 0   | 1 |
| CPXM1           | 0 | 0.00741869 | inf | 1 |
| AVP             | 0 | 0          | 0   | 1 |
| C20orf194       | 0 | 0          | 0   | 1 |
| ADAM33          | 0 | 0          | 0   | 1 |
| MIR103B2        | 0 | 0          | 0   | 1 |
| ADRA1D          | 0 | 0          | 0   | 1 |
| PRNT            | 0 | 0          | 0   | 1 |
| PROKR2          | 0 | 0          | 0   | 1 |
| HAO1            | 0 | 0          | 0   | 1 |
| PAK7            | 0 | 0          | 0   | 1 |
| SNAP25-AS1      | 0 | 0          | 0   | 1 |
| LOC339593       | 0 | 0          | 0   | 1 |
| ISM1-AS1        | 0 | 0.0102338  | inf | 1 |
| SEL1L2          | 0 | 0          | 0   | 1 |
| FLRT3           | 0 | 0          | 0   | 1 |
| MACROD2-AS1     | 0 | 0          | 0   | 1 |
| C20orf78        | 0 | 0          | 0   | 1 |
| LOC100130264    | 0 | 0          | 0   | 1 |
| NKX2-4          | 0 | 0          | 0   | 1 |
| NKX2-2          | 0 | 0          | 0   | 1 |
| LOC284788       | 0 | 0          | 0   | 1 |

|           |   |            |     |   |
|-----------|---|------------|-----|---|
| LINC00261 | 0 | 0          | 0   | 1 |
| FOXA2     | 0 | 0          | 0   | 1 |
| THBD      | 0 | 0          | 0   | 1 |
| LINC00656 | 0 | 0          | 0   | 1 |
| CST11     | 0 | 0          | 0   | 1 |
| CST9L     | 0 | 0          | 0   | 1 |
| CST9      | 0 | 0          | 0   | 1 |
| CST4      | 0 | 0          | 0   | 1 |
| CST1      | 0 | 0          | 0   | 1 |
| CST2      | 0 | 0          | 0   | 1 |
| CST5      | 0 | 0          | 0   | 1 |
| VSX1      | 0 | 0          | 0   | 1 |
| LOC284798 | 0 | 0          | 0   | 1 |
| DEFB116   | 0 | 0          | 0   | 1 |
| DEFB119   | 0 | 0          | 0   | 1 |
| DEFB121   | 0 | 0          | 0   | 1 |
| DEFB122   | 0 | 0          | 0   | 1 |
| DEFB124   | 0 | 0          | 0   | 1 |
| FOXS1     | 0 | 0.0134007  | inf | 1 |
| C20orf203 | 0 | 0.0101058  | inf | 1 |
| SUN5      | 0 | 0          | 0   | 1 |
| HMGB3P1   | 0 | 0          | 0   | 1 |
| GGT7      | 0 | 0.0126903  | inf | 1 |
| MIR499B   | 0 | 0          | 0   | 1 |
| C20orf173 | 0 | 0.00574165 | inf | 1 |
| GHRH      | 0 | 0          | 0   | 1 |
| LINC00489 | 0 | 0          | 0   | 1 |
| LOC339568 | 0 | 0          | 0   | 1 |
| PTPRT     | 0 | 0          | 0   | 1 |
| LOC79015  | 0 | 0          | 0   | 1 |
| WFDC5     | 0 | 0          | 0   | 1 |
| WFDC12    | 0 | 0          | 0   | 1 |
| SLPI      | 0 | 0.0360995  | inf | 1 |
| SPINT3    | 0 | 0          | 0   | 1 |
| WFDC8     | 0 | 0          | 0   | 1 |
| WFDC9     | 0 | 0          | 0   | 1 |
| WFDC11    | 0 | 0.021124   | inf | 1 |
| CDH22     | 0 | 0          | 0   | 1 |
| ZNF663    | 0 | 0          | 0   | 1 |
| MKRN7P    | 0 | 0          | 0   | 1 |
| ZNF334    | 0 | 0          | 0   | 1 |
| OCSTAMP   | 0 | 0          | 0   | 1 |
| KCNB1     | 0 | 0          | 0   | 1 |
| LINC00651 | 0 | 0          | 0   | 1 |
| MIR3194   | 0 | 0          | 0   | 1 |
| SUMO1P1   | 0 | 0          | 0   | 1 |
| MIR4756   | 0 | 0          | 0   | 1 |
| CBLN4     | 0 | 0          | 0   | 1 |
| BMP7      | 0 | 0.0075977  | inf | 1 |

|               |   |            |     |   |
|---------------|---|------------|-----|---|
| MIR4325       | 0 | 0          | 0   | 1 |
| CTCFL         | 0 | 0.00662556 | inf | 1 |
| ZBP1          | 0 | 0          | 0   | 1 |
| APCDD1L       | 0 | 0          | 0   | 1 |
| MIR296        | 0 | 0          | 0   | 1 |
| MIR298        | 0 | 0          | 0   | 1 |
| GNAS-AS1      | 0 | 0.015645   | inf | 1 |
| LOC100506384  | 0 | 0          | 0   | 1 |
| MIR1257       | 0 | 0          | 0   | 1 |
| RBBP8NL       | 0 | 0          | 0   | 1 |
| C20orf166-AS1 | 0 | 0          | 0   | 1 |
| BHLHE23       | 0 | 0          | 0   | 1 |
| LINC00029     | 0 | 0          | 0   | 1 |
| HAR1B         | 0 | 0          | 0   | 1 |
| NKAIN4        | 0 | 0          | 0   | 1 |
| CHRNA4        | 0 | 0          | 0   | 1 |
| MIR1914       | 0 | 0          | 0   | 1 |
| MIR647        | 0 | 0          | 0   | 1 |
| SOX18         | 0 | 0          | 0   | 1 |
| C20orf201     | 0 | 0          | 0   | 1 |
| NPBWR2        | 0 | 0          | 0   | 1 |
| MIR3687       | 0 | 0          | 0   | 1 |
| POTED         | 0 | 0          | 0   | 1 |
| RBM11         | 0 | 0          | 0   | 1 |
| ABCC13        | 0 | 0          | 0   | 1 |
| SAMSN1-AS1    | 0 | 0          | 0   | 1 |
| LINC00478     | 0 | 0          | 0   | 1 |
| MIR99A        | 0 | 0          | 0   | 1 |
| MIRLET7C      | 0 | 0          | 0   | 1 |
| MIR125B2      | 0 | 0          | 0   | 1 |
| C21orf37      | 0 | 0          | 0   | 1 |
| NCAM2         | 0 | 0          | 0   | 1 |
| RNU6-67       | 0 | 0          | 0   | 1 |
| LINC00308     | 0 | 0          | 0   | 1 |
| LOC339622     | 0 | 0          | 0   | 1 |
| MIR4759       | 0 | 0          | 0   | 1 |
| LINC00113     | 0 | 0          | 0   | 1 |
| LINC00314     | 0 | 0          | 0   | 1 |
| GRIK1-AS1     | 0 | 0          | 0   | 1 |
| KRTAP13-1     | 0 | 0          | 0   | 1 |
| KRTAP13-4     | 0 | 0          | 0   | 1 |
| KRTAP15-1     | 0 | 0          | 0   | 1 |
| KRTAP6-3      | 0 | 0          | 0   | 1 |
| KRTAP22-1     | 0 | 0          | 0   | 1 |
| KRTAP20-1     | 0 | 0          | 0   | 1 |
| KRTAP20-4     | 0 | 0          | 0   | 1 |
| KRTAP20-2     | 0 | 0          | 0   | 1 |
| KRTAP20-3     | 0 | 0          | 0   | 1 |
| OLIG2         | 0 | 0          | 0   | 1 |

|               |   |            |     |   |
|---------------|---|------------|-----|---|
| OLIG1         | 0 | 0          | 0   | 1 |
| CLIC6         | 0 | 0          | 0   | 1 |
| MIR802        | 0 | 0          | 0   | 1 |
| DSCR8         | 0 | 0          | 0   | 1 |
| DSCR10        | 0 | 0          | 0   | 1 |
| KCNJ15        | 0 | 0          | 0   | 1 |
| BRWD1-AS1     | 0 | 0          | 0   | 1 |
| DSCAM-AS1     | 0 | 0.00687965 | inf | 1 |
| MIR3197       | 0 | 0          | 0   | 1 |
| LINC00111     | 0 | 0          | 0   | 1 |
| LINC00112     | 0 | 0          | 0   | 1 |
| UMODL1        | 0 | 0.0029881  | inf | 1 |
| UBASH3A       | 0 | 0          | 0   | 1 |
| PDE9A         | 0 | 0          | 0   | 1 |
| CRYAA         | 0 | 0          | 0   | 1 |
| AIRE          | 0 | 0.00719329 | inf | 1 |
| TRPM2         | 0 | 0.00571697 | inf | 1 |
| KRTAP10-4     | 0 | 0          | 0   | 1 |
| KRTAP10-7     | 0 | 0          | 0   | 1 |
| KRTAP10-8     | 0 | 0          | 0   | 1 |
| KRTAP10-9     | 0 | 0          | 0   | 1 |
| KRTAP10-10    | 0 | 0          | 0   | 1 |
| KRTAP10-11    | 0 | 0          | 0   | 1 |
| KRTAP12-3     | 0 | 0          | 0   | 1 |
| KRTAP10-12    | 0 | 0          | 0   | 1 |
| TPTE          | 0 | 0          | 0   | 1 |
| BAGE,BAGE3,BA | 0 | 0          | 0   | 1 |
| MIR3156-3     | 0 | 0          | 0   | 1 |
| ANKRD20A11P   | 0 | 0          | 0   | 1 |
| LIPI          | 0 | 0          | 0   | 1 |
| SAMSN1        | 0 | 0.00478467 | inf | 1 |
| LOC388813     | 0 | 0          | 0   | 1 |
| CHODL-AS1     | 0 | 0          | 0   | 1 |
| TMPRSS15      | 0 | 0          | 0   | 1 |
| LINC00320     | 0 | 0          | 0   | 1 |
| LINC00317     | 0 | 0          | 0   | 1 |
| D21S2088E     | 0 | 0          | 0   | 1 |
| LINC00158     | 0 | 0.0120477  | inf | 1 |
| CYYR1         | 0 | 0          | 0   | 1 |
| ADAMTS1       | 0 | 0          | 0   | 1 |
| MIR5009       | 0 | 0          | 0   | 1 |
| CLDN17        | 0 | 0          | 0   | 1 |
| LINC00307     | 0 | 0          | 0   | 1 |
| CLDN8         | 0 | 0          | 0   | 1 |
| KRTAP24-1     | 0 | 0          | 0   | 1 |
| KRTAP25-1     | 0 | 0          | 0   | 1 |
| KRTAP26-1     | 0 | 0          | 0   | 1 |
| KRTAP27-1     | 0 | 0          | 0   | 1 |
| KRTAP23-1     | 0 | 0          | 0   | 1 |

|              |   |            |     |   |
|--------------|---|------------|-----|---|
| KRTAP13-2    | 0 | 0          | 0   | 1 |
| MIR4327      | 0 | 0          | 0   | 1 |
| KRTAP13-3    | 0 | 0          | 0   | 1 |
| KRTAP19-1    | 0 | 0          | 0   | 1 |
| KRTAP19-2    | 0 | 0          | 0   | 1 |
| KRTAP19-3    | 0 | 0          | 0   | 1 |
| KRTAP19-4    | 0 | 0          | 0   | 1 |
| KRTAP19-5    | 0 | 0          | 0   | 1 |
| KRTAP19-6    | 0 | 0          | 0   | 1 |
| KRTAP19-7    | 0 | 0          | 0   | 1 |
| KRTAP22-2    | 0 | 0          | 0   | 1 |
| KRTAP6-2     | 0 | 0          | 0   | 1 |
| KRTAP6-1     | 0 | 0          | 0   | 1 |
| KRTAP21-3    | 0 | 0          | 0   | 1 |
| KRTAP21-2    | 0 | 0          | 0   | 1 |
| KRTAP21-1    | 0 | 0          | 0   | 1 |
| KRTAP8-1     | 0 | 0          | 0   | 1 |
| KRTAP7-1     | 0 | 0          | 0   | 1 |
| KRTAP11-1    | 0 | 0          | 0   | 1 |
| KRTAP19-8    | 0 | 0          | 0   | 1 |
| LINC00159    | 0 | 0          | 0   | 1 |
| C21orf54     | 0 | 0          | 0   | 1 |
| LINC00160    | 0 | 0          | 0   | 1 |
| RUNX1-IT1    | 0 | 0.0076149  | inf | 1 |
| LOC100506403 | 0 | 0          | 0   | 1 |
| KCNJ6        | 0 | 0          | 0   | 1 |
| DSCR4        | 0 | 0          | 0   | 1 |
| ERG          | 0 | 0          | 0   | 1 |
| LINC00114    | 0 | 0          | 0   | 1 |
| C21orf88     | 0 | 0.00774804 | inf | 1 |
| DSCAM        | 0 | 0          | 0   | 1 |
| MIR4760      | 0 | 0          | 0   | 1 |
| DSCAM-IT1    | 0 | 0          | 0   | 1 |
| LINC00323    | 0 | 0.00502694 | inf | 1 |
| TMPRSS2      | 0 | 0.00413231 | inf | 1 |
| LINC00479    | 0 | 0          | 0   | 1 |
| C21orf128    | 0 | 0.0089934  | inf | 1 |
| TFF3         | 0 | 0          | 0   | 1 |
| TFF2         | 0 | 0          | 0   | 1 |
| TFF1         | 0 | 0          | 0   | 1 |
| TMPRSS3      | 0 | 0          | 0   | 1 |
| CBS          | 0 | 0.0315179  | inf | 1 |
| KRTAP10-1    | 0 | 0          | 0   | 1 |
| KRTAP10-2    | 0 | 0          | 0   | 1 |
| KRTAP10-3    | 0 | 0          | 0   | 1 |
| KRTAP10-5    | 0 | 0          | 0   | 1 |
| KRTAP10-6    | 0 | 0          | 0   | 1 |
| KRTAP12-4    | 0 | 0          | 0   | 1 |
| KRTAP12-2    | 0 | 0          | 0   | 1 |

|              |   |                |   |   |
|--------------|---|----------------|---|---|
| KRTAP12-1    | 0 | 0              | 0 | 1 |
| ITGB2        | 0 | 0              | 0 | 1 |
| LINC00162    | 0 | 0              | 0 | 1 |
| COL18A1-AS2  | 0 | 0              | 0 | 1 |
| LOC100129027 | 0 | 0              | 0 | 1 |
| S100B        | 0 | 0              | 0 | 1 |
| TPTEP1       | 0 | 0.0088419 inf  |   | 1 |
| HSFY1P1      | 0 | 0              | 0 | 1 |
| FLJ41941     | 0 | 0.00499685 inf |   | 1 |
| MIR185       | 0 | 0              | 0 | 1 |
| POM121L4P    | 0 | 0              | 0 | 1 |
| SERPIND1     | 0 | 0              | 0 | 1 |
| LOC400891    | 0 | 0.00432779 inf |   | 1 |
| MIR301B      | 0 | 0              | 0 | 1 |
| MIR130B      | 0 | 0              | 0 | 1 |
| VPREB1       | 0 | 0              | 0 | 1 |
| MIR650       | 0 | 0              | 0 | 1 |
| IGLL5        | 0 | 0              | 0 | 1 |
| C22orf15     | 0 | 0              | 0 | 1 |
| MYO18B       | 0 | 0.00160488 inf |   | 1 |
| SEZ6L        | 0 | 0              | 0 | 1 |
| MIR3199-2    | 0 | 0              | 0 | 1 |
| HORMAD2      | 0 | 0              | 0 | 1 |
| MIR3200      | 0 | 0              | 0 | 1 |
| AP1B1P1      | 0 | 0              | 0 | 1 |
| RFPL3        | 0 | 0              | 0 | 1 |
| TIMP3        | 0 | 0.0021102 inf  |   | 1 |
| MIR3909      | 0 | 0              | 0 | 1 |
| APOL5        | 0 | 0              | 0 | 1 |
| LOC100506241 | 0 | 0              | 0 | 1 |
| CYTH4        | 0 | 0.0332787 inf  |   | 1 |
| MIR4534      | 0 | 0              | 0 | 1 |
| SYNGR1       | 0 | 0              | 0 | 1 |
| MCHR1        | 0 | 0.00627924 inf |   | 1 |
| MIR1281      | 0 | 0              | 0 | 1 |
| MIR33A       | 0 | 0              | 0 | 1 |
| MPPED1       | 0 | 0              | 0 | 1 |
| EFCAB6-AS1   | 0 | 0              | 0 | 1 |
| LINC00207    | 0 | 0              | 0 | 1 |
| UPK3A        | 0 | 0              | 0 | 1 |
| RIBC2        | 0 | 0              | 0 | 1 |
| FBLN1        | 0 | 0              | 0 | 1 |
| MIR4762      | 0 | 0              | 0 | 1 |
| MIR3619      | 0 | 0              | 0 | 1 |
| MIR3201      | 0 | 0              | 0 | 1 |
| FAM19A5      | 0 | 0              | 0 | 1 |
| MIR4535      | 0 | 0              | 0 | 1 |
| LOC100128946 | 0 | 0              | 0 | 1 |
| PANX2        | 0 | 0.00850512 inf |   | 1 |

|               |   |            |     |   |
|---------------|---|------------|-----|---|
| ADM2          | 0 | 0.00787439 | inf | 1 |
| MIOX          | 0 | 0          | 0   | 1 |
| POTEH         | 0 | 0          | 0   | 1 |
| OR11H1        | 0 | 0          | 0   | 1 |
| CCT8L2        | 0 | 0          | 0   | 1 |
| ANKRD62P1-PAR | 0 | 0          | 0   | 1 |
| XKR3          | 0 | 0          | 0   | 1 |
| GAB4          | 0 | 0          | 0   | 1 |
| CECR3         | 0 | 0          | 0   | 1 |
| MIR3198-1     | 0 | 0          | 0   | 1 |
| MIR648        | 0 | 0          | 0   | 1 |
| GSC2          | 0 | 0          | 0   | 1 |
| LOC150185     | 0 | 0          | 0   | 1 |
| LOC284865     | 0 | 0.00518389 | inf | 1 |
| MIR1286       | 0 | 0          | 0   | 1 |
| TUBA3FP       | 0 | 0.0202294  | inf | 1 |
| SLC7A4        | 0 | 0          | 0   | 1 |
| P2RX6P        | 0 | 0          | 0   | 1 |
| ZNF280B       | 0 | 0          | 0   | 1 |
| ZNF280A       | 0 | 0          | 0   | 1 |
| POM121L1P     | 0 | 0.0308415  | inf | 1 |
| CES5AP1       | 0 | 0          | 0   | 1 |
| IGLL1         | 0 | 0.0756707  | inf | 1 |
| GSTTP2        | 0 | 0          | 0   | 1 |
| GGT5          | 0 | 0          | 0   | 1 |
| PIWIL3        | 0 | 0.00534885 | inf | 1 |
| TMEM211       | 0 | 0          | 0   | 1 |
| MIR548J       | 0 | 0          | 0   | 1 |
| CRYBB1        | 0 | 0.0209351  | inf | 1 |
| MIR3199-1     | 0 | 0          | 0   | 1 |
| C22orf31      | 0 | 0          | 0   | 1 |
| MIR3653       | 0 | 19.3773    | inf | 1 |
| SEC14L6       | 0 | 0          | 0   | 1 |
| MIR3928       | 0 | 0          | 0   | 1 |
| C22orf42      | 0 | 0          | 0   | 1 |
| BPIFC         | 0 | 0          | 0   | 1 |
| MIR4764       | 0 | 0          | 0   | 1 |
| MB            | 0 | 0          | 0   | 1 |
| APOL3         | 0 | 0          | 0   | 1 |
| CACNG2        | 0 | 0          | 0   | 1 |
| PVALB         | 0 | 0          | 0   | 1 |
| TEX33         | 0 | 0          | 0   | 1 |
| IL2RB         | 0 | 0          | 0   | 1 |
| SSTR3         | 0 | 0          | 0   | 1 |
| ELFN2         | 0 | 0          | 0   | 1 |
| LGALS2        | 0 | 0          | 0   | 1 |
| MIR659        | 0 | 0          | 0   | 1 |
| SOX10         | 0 | 0.00639948 | inf | 1 |
| RNU86         | 0 | 0          | 0   | 1 |

|             |   |            |     |   |
|-------------|---|------------|-----|---|
| SNORD43     | 0 | 0          | 0   | 1 |
| ENTHD1      | 0 | 0          | 0   | 1 |
| MIR4766     | 0 | 0          | 0   | 1 |
| SHISA8      | 0 | 0          | 0   | 1 |
| ATP5L2      | 0 | 0.0167544  | inf | 1 |
| SULT4A1     | 0 | 0          | 0   | 1 |
| PNPLA5      | 0 | 0          | 0   | 1 |
| LINC00229   | 0 | 0          | 0   | 1 |
| PHF21B      | 0 | 0          | 0   | 1 |
| MIR1249     | 0 | 0          | 0   | 1 |
| FLJ46257    | 0 | 0          | 0   | 1 |
| LOC284933   | 0 | 0          | 0   | 1 |
| C22orf34    | 0 | 0          | 0   | 1 |
| IL17REL     | 0 | 0          | 0   | 1 |
| CHL1        | 0 | 0          | 0   | 1 |
| CNTN6       | 0 | 0          | 0   | 1 |
| LRRN1       | 0 | 0          | 0   | 1 |
| GRM7        | 0 | 0          | 0   | 1 |
| LINC00312   | 0 | 0.0056231  | inf | 1 |
| CAV3        | 0 | 0          | 0   | 1 |
| SLC6A11     | 0 | 0          | 0   | 1 |
| SLC6A1      | 0 | 0          | 0   | 1 |
| SYN2        | 0 | 0          | 0   | 1 |
| PPARG       | 0 | 0          | 0   | 1 |
| FGD5P1      | 0 | 0.00385656 | inf | 1 |
| TPRXL       | 0 | 0          | 0   | 1 |
| FGD5        | 0 | 0.0022169  | inf | 1 |
| MIR563      | 0 | 0          | 0   | 1 |
| LOC339862   | 0 | 0          | 0   | 1 |
| VENTXP7     | 0 | 0          | 0   | 1 |
| UBE2E2      | 0 | 0          | 0   | 1 |
| MIR548AC    | 0 | 0          | 0   | 1 |
| THRB-AS1    | 0 | 0          | 0   | 1 |
| LRRC3B      | 0 | 0          | 0   | 1 |
| LINC00693   | 0 | 0          | 0   | 1 |
| OSBPL10-AS1 | 0 | 0          | 0   | 1 |
| TRIM71      | 0 | 0.00650551 | inf | 1 |
| CCR4        | 0 | 0          | 0   | 1 |
| ARPP21      | 0 | 0          | 0   | 1 |
| MIR128-2    | 0 | 0          | 0   | 1 |
| STAC        | 0 | 0          | 0   | 1 |
| MLH1        | 0 | 0          | 0   | 1 |
| MIR26A1     | 0 | 0          | 0   | 1 |
| CCR8        | 0 | 0          | 0   | 1 |
| ENTPD3      | 0 | 0.00326394 | inf | 1 |
| KLHL40      | 0 | 0          | 0   | 1 |
| CCDC13-AS1  | 0 | 0          | 0   | 1 |
| KRBOX1      | 0 | 0          | 0   | 1 |
| MIR138-1    | 0 | 0          | 0   | 1 |



|              |   |            |     |   |
|--------------|---|------------|-----|---|
| TOPAZ1       | 0 | 0          | 0   | 1 |
| CCR3         | 0 | 0          | 0   | 1 |
| CCR2         | 0 | 0          | 0   | 1 |
| CCR5         | 0 | 0          | 0   | 1 |
| RTP3         | 0 | 0          | 0   | 1 |
| LRRC2-AS1    | 0 | 0          | 0   | 1 |
| TDGF1        | 0 | 0.00670232 | inf | 1 |
| LOC100132146 | 0 | 0          | 0   | 1 |
| MIR1226      | 0 | 123.928    | inf | 1 |
| MIR4443      | 0 | 0          | 0   | 1 |
| CAMP         | 0 | 0          | 0   | 1 |
| MIR4271      | 0 | 0          | 0   | 1 |
| SLC38A3      | 0 | 0.00498541 | inf | 1 |
| MIR4787      | 0 | 0          | 0   | 1 |
| IQCF3        | 0 | 0          | 0   | 1 |
| IQCF2        | 0 | 0          | 0   | 1 |
| SNORD19      | 0 | 0          | 0   | 1 |
| SNORD19B     | 0 | 0          | 0   | 1 |
| SNORD69      | 0 | 0          | 0   | 1 |
| ITIH3        | 0 | 0          | 0   | 1 |
| CACNA2D3     | 0 | 0          | 0   | 1 |
| ARHGEF3-AS1  | 0 | 0          | 0   | 1 |
| LINC00698    | 0 | 0          | 0   | 1 |
| SYNPR        | 0 | 0          | 0   | 1 |
| SNTN         | 0 | 0.00681996 | inf | 1 |
| PRICKLE2-AS1 | 0 | 0          | 0   | 1 |
| PRICKLE2-AS2 | 0 | 0          | 0   | 1 |
| ADAMTS9-AS2  | 0 | 0          | 0   | 1 |
| MIR548A2     | 0 | 0          | 0   | 1 |
| MAG11-AS1    | 0 | 0          | 0   | 1 |
| MIR4272      | 0 | 0          | 0   | 1 |
| GPR27        | 0 | 0          | 0   | 1 |
| LOC201617    | 0 | 0          | 0   | 1 |
| MIR4444-1    | 0 | 0          | 0   | 1 |
| MIR1324      | 0 | 0          | 0   | 1 |
| MIR4273      | 0 | 0          | 0   | 1 |
| CADM2        | 0 | 0          | 0   | 1 |
| MIR5688      | 0 | 0          | 0   | 1 |
| HTR1F        | 0 | 0          | 0   | 1 |
| LOC255025    | 0 | 0          | 0   | 1 |
| EPHA6        | 0 | 0          | 0   | 1 |
| OR5AC2       | 0 | 0          | 0   | 1 |
| OR5H1        | 0 | 0          | 0   | 1 |
| OR5H14       | 0 | 0          | 0   | 1 |
| OR5H15       | 0 | 0          | 0   | 1 |
| OR5H6        | 0 | 0          | 0   | 1 |
| OR5H2        | 0 | 0          | 0   | 1 |
| OR5K4        | 0 | 0          | 0   | 1 |
| OR5K3        | 0 | 0          | 0   | 1 |

|             |   |            |     |   |
|-------------|---|------------|-----|---|
| OR5K1       | 0 | 0          | 0   | 1 |
| GPR15       | 0 | 0          | 0   | 1 |
| COL8A1      | 0 | 0          | 0   | 1 |
| CCDC54      | 0 | 0          | 0   | 1 |
| TRAT1       | 0 | 0          | 0   | 1 |
| FLJ22763    | 0 | 0          | 0   | 1 |
| LINC00488   | 0 | 0.00306784 | inf | 1 |
| FLJ25363    | 0 | 0          | 0   | 1 |
| TMPRSS7     | 0 | 0          | 0   | 1 |
| MIR567      | 0 | 0          | 0   | 1 |
| BOC         | 0 | 0          | 0   | 1 |
| WDR52-AS1   | 0 | 0          | 0   | 1 |
| MIR4446     | 0 | 0          | 0   | 1 |
| ZBTB20-AS1  | 0 | 0          | 0   | 1 |
| GAP43       | 0 | 0.00548576 | inf | 1 |
| LSAMP-AS3   | 0 | 0          | 0   | 1 |
| IGSF11-AS1  | 0 | 0          | 0   | 1 |
| C3orf30     | 0 | 0          | 0   | 1 |
| UPK1B       | 0 | 0          | 0   | 1 |
| MAATS1      | 0 | 0          | 0   | 1 |
| CD86        | 0 | 0          | 0   | 1 |
| CASR        | 0 | 0          | 0   | 1 |
| PARP15      | 0 | 0.00309382 | inf | 1 |
| MIR5002     | 0 | 0          | 0   | 1 |
| ROPN1B      | 0 | 0          | 0   | 1 |
| ALDH1L1-AS1 | 0 | 0          | 0   | 1 |
| ALDH1L1-AS2 | 0 | 0          | 0   | 1 |
| NUP210P1    | 0 | 0          | 0   | 1 |
| DNAJB8-AS1  | 0 | 0          | 0   | 1 |
| LOC90246    | 0 | 0          | 0   | 1 |
| EFCC1       | 0 | 0          | 0   | 1 |
| GP9         | 0 | 0          | 0   | 1 |
| RHO         | 0 | 0          | 0   | 1 |
| H1FOO       | 0 | 0          | 0   | 1 |
| TRH         | 0 | 0.00736546 | inf | 1 |
| COL6A5      | 0 | 0          | 0   | 1 |
| ACPP        | 0 | 0          | 0   | 1 |
| NPHP3-AS1   | 0 | 0          | 0   | 1 |
| TMEM108     | 0 | 0          | 0   | 1 |
| BFSP2       | 0 | 0          | 0   | 1 |
| MIR4788     | 0 | 0          | 0   | 1 |
| SLC35G2     | 0 | 0          | 0   | 1 |
| SOX14       | 0 | 0          | 0   | 1 |
| ESYT3       | 0 | 0.00265011 | inf | 1 |
| BPESC1      | 0 | 0          | 0   | 1 |
| CLSTN2      | 0 | 0.00237898 | inf | 1 |
| TRIM42      | 0 | 0          | 0   | 1 |
| SPSB4       | 0 | 0          | 0   | 1 |
| GRK7        | 0 | 0          | 0   | 1 |

|              |   |            |     |   |
|--------------|---|------------|-----|---|
| LOC100507389 | 0 | 0          | 0   | 1 |
| CHST2        | 0 | 0          | 0   | 1 |
| SLC9A9-AS1   | 0 | 0          | 0   | 1 |
| ZIC1         | 0 | 0          | 0   | 1 |
| AGTR1        | 0 | 0          | 0   | 1 |
| CPB1         | 0 | 0          | 0   | 1 |
| CPA3         | 0 | 0          | 0   | 1 |
| HLTF-AS1     | 0 | 0          | 0   | 1 |
| TM4SF4       | 0 | 0          | 0   | 1 |
| CLRN1-AS1    | 0 | 0          | 0   | 1 |
| MED12L       | 0 | 0          | 0   | 1 |
| MIR548H2     | 0 | 0          | 0   | 1 |
| AADA2L2      | 0 | 0          | 0   | 1 |
| LOC201651    | 0 | 0          | 0   | 1 |
| SUCNR1       | 0 | 0          | 0   | 1 |
| MME          | 0 | 0          | 0   | 1 |
| LOC100498859 | 0 | 0          | 0   | 1 |
| C3orf55      | 0 | 0          | 0   | 1 |
| MLF1         | 0 | 0.00873466 | inf | 1 |
| MIR3919      | 0 | 0          | 0   | 1 |
| MIR15B       | 0 | 0          | 0   | 1 |
| MIR16-2      | 0 | 0          | 0   | 1 |
| OTOL1        | 0 | 0          | 0   | 1 |
| LOC646168    | 0 | 0          | 0   | 1 |
| EGFEM1P      | 0 | 0.00231822 | inf | 1 |
| MIR551B      | 0 | 0          | 0   | 1 |
| SAMD7        | 0 | 0          | 0   | 1 |
| NLGN1        | 0 | 0          | 0   | 1 |
| NAALADL2     | 0 | 0          | 0   | 1 |
| MIR4789      | 0 | 0          | 0   | 1 |
| LINC00578    | 0 | 0          | 0   | 1 |
| ABCC5-AS1    | 0 | 0          | 0   | 1 |
| HTR3D        | 0 | 0          | 0   | 1 |
| HTR3C        | 0 | 0          | 0   | 1 |
| HTR3E        | 0 | 0          | 0   | 1 |
| MIR1224      | 0 | 0          | 0   | 1 |
| SNORD66      | 0 | 0          | 0   | 1 |
| EPHB3        | 0 | 0          | 0   | 1 |
| EHHADH-AS1   | 0 | 0          | 0   | 1 |
| LOC344887    | 0 | 0          | 0   | 1 |
| HRG          | 0 | 0          | 0   | 1 |
| KNG1         | 0 | 0          | 0   | 1 |
| SNORD2       | 0 | 0          | 0   | 1 |
| ADIPOQ       | 0 | 0.00226974 | inf | 1 |
| RTP1         | 0 | 0          | 0   | 1 |
| RTP4         | 0 | 0          | 0   | 1 |
| LOC100131635 | 0 | 0          | 0   | 1 |
| TP63         | 0 | 0          | 0   | 1 |
| MIR944       | 0 | 0          | 0   | 1 |

|             |   |                |   |   |
|-------------|---|----------------|---|---|
| SNAR-1      | 0 | 0              | 0 | 1 |
| OSTN        | 0 | 0              | 0 | 1 |
| PYDC2       | 0 | 0              | 0 | 1 |
| MIR570      | 0 | 0              | 0 | 1 |
| LOC401109   | 0 | 0              | 0 | 1 |
| FAM157A     | 0 | 0              | 0 | 1 |
| CNTN4-AS2   | 0 | 0              | 0 | 1 |
| IL5RA       | 0 | 0.0018021 inf  |   | 1 |
| EGOT        | 0 | 0              | 0 | 1 |
| BHLHE40-AS1 | 0 | 0              | 0 | 1 |
| MIR4790     | 0 | 0              | 0 | 1 |
| LMCD1-AS1   | 0 | 0.00438977 inf |   | 1 |
| CIDEC       | 0 | 0              | 0 | 1 |
| FANCD2OS    | 0 | 0.0601737 inf  |   | 1 |
| MIR885      | 0 | 0              | 0 | 1 |
| LINC00606   | 0 | 0              | 0 | 1 |
| SLC6A1-AS1  | 0 | 0              | 0 | 1 |
| TIMP4       | 0 | 0              | 0 | 1 |
| WNT7A       | 0 | 0              | 0 | 1 |
| MIR4270     | 0 | 0              | 0 | 1 |
| DAZL        | 0 | 0              | 0 | 1 |
| MIR4791     | 0 | 0              | 0 | 1 |
| ZNF385D     | 0 | 0              | 0 | 1 |
| LINC00691   | 0 | 0              | 0 | 1 |
| THRB        | 0 | 0.00142031 inf |   | 1 |
| MIR4442     | 0 | 0              | 0 | 1 |
| LINC00692   | 0 | 0              | 0 | 1 |
| EOMES       | 0 | 0              | 0 | 1 |
| GADL1       | 0 | 0              | 0 | 1 |
| DCLK3       | 0 | 0              | 0 | 1 |
| SCN10A      | 0 | 0              | 0 | 1 |
| SCN11A      | 0 | 0.00293999 inf |   | 1 |
| CCK         | 0 | 0              | 0 | 1 |
| LYZL4       | 0 | 0              | 0 | 1 |
| HHATL       | 0 | 0              | 0 | 1 |
| LARS2-AS1   | 0 | 0.0105673 inf  |   | 1 |
| XCR1        | 0 | 0              | 0 | 1 |
| CCR1        | 0 | 0              | 0 | 1 |
| LTF         | 0 | 0              | 0 | 1 |
| PRSS46      | 0 | 0.0159898 inf  |   | 1 |
| PRSS45      | 0 | 0              | 0 | 1 |
| PRSS42      | 0 | 0              | 0 | 1 |
| MYL3        | 0 | 0              | 0 | 1 |
| SPINK8      | 0 | 0              | 0 | 1 |
| MIR425      | 0 | 0              | 0 | 1 |
| MIR191      | 0 | 0              | 0 | 1 |
| LOC646498   | 0 | 0              | 0 | 1 |
| BSN-AS2     | 0 | 0              | 0 | 1 |
| CDHR4       | 0 | 0              | 0 | 1 |

|              |   |            |     |   |
|--------------|---|------------|-----|---|
| CAMKV        | 0 | 0.00909954 | inf | 1 |
| IQCF6        | 0 | 0          | 0   | 1 |
| IQCF5        | 0 | 0          | 0   | 1 |
| LINC00696    | 0 | 0.00430294 | inf | 1 |
| MIRLET7G     | 0 | 0          | 0   | 1 |
| MIR135A1     | 0 | 0          | 0   | 1 |
| CACNA2D3-AS1 | 0 | 0          | 0   | 1 |
| LRTM1        | 0 | 0          | 0   | 1 |
| WNT5A        | 0 | 0          | 0   | 1 |
| ERC2         | 0 | 0          | 0   | 1 |
| ERC2-IT1     | 0 | 0          | 0   | 1 |
| MIR3938      | 0 | 0          | 0   | 1 |
| DNASE1L3     | 0 | 0          | 0   | 1 |
| FAM107A      | 0 | 0.00699056 | inf | 1 |
| FAM3D        | 0 | 0.00915459 | inf | 1 |
| C3orf67      | 0 | 0          | 0   | 1 |
| FEZF2        | 0 | 0          | 0   | 1 |
| SYNPR-AS1    | 0 | 0          | 0   | 1 |
| LOC100287879 | 0 | 0          | 0   | 1 |
| PRICKLE2     | 0 | 0          | 0   | 1 |
| FAM19A4      | 0 | 0          | 0   | 1 |
| MIR3136      | 0 | 0          | 0   | 1 |
| MIR1284      | 0 | 0          | 0   | 1 |
| PROK2        | 0 | 0          | 0   | 1 |
| PDZRN3       | 0 | 0.00360124 | inf | 1 |
| CNTN3        | 0 | 0          | 0   | 1 |
| LOC440970    | 0 | 0.00236325 | inf | 1 |
| CADM2-AS2    | 0 | 0          | 0   | 1 |
| RNU6-69      | 0 | 0          | 0   | 1 |
| VGLL3        | 0 | 0          | 0   | 1 |
| MIR4795      | 0 | 0          | 0   | 1 |
| POU1F1       | 0 | 0          | 0   | 1 |
| GABRR3       | 0 | 0          | 0   | 1 |
| ST3GAL6-AS1  | 0 | 0          | 0   | 1 |
| MIR548G      | 0 | 0          | 0   | 1 |
| MIR3921      | 0 | 0          | 0   | 1 |
| MIR548A3     | 0 | 0          | 0   | 1 |
| LINC00635    | 0 | 0          | 0   | 1 |
| RETNLB       | 0 | 0          | 0   | 1 |
| GUCA1C       | 0 | 0          | 0   | 1 |
| MORC1        | 0 | 0          | 0   | 1 |
| DPPA2        | 0 | 0          | 0   | 1 |
| DPPA4        | 0 | 0          | 0   | 1 |
| ZBED2        | 0 | 0          | 0   | 1 |
| CD200R1L     | 0 | 0          | 0   | 1 |
| DRD3         | 0 | 0          | 0   | 1 |
| MIR568       | 0 | 0          | 0   | 1 |
| MIR4796      | 0 | 0          | 0   | 1 |
| CD80         | 0 | 0.00351517 | inf | 1 |

|              |   |            |     |   |
|--------------|---|------------|-----|---|
| ILDR1        | 0 | 0          | 0   | 1 |
| SEMA5B       | 0 | 0          | 0   | 1 |
| ROPN1        | 0 | 0          | 0   | 1 |
| MIR5092      | 0 | 0          | 0   | 1 |
| MIR54811     | 0 | 0          | 0   | 1 |
| C3orf22      | 0 | 0          | 0   | 1 |
| C3orf27      | 0 | 0          | 0   | 1 |
| KIAA1257     | 0 | 0          | 0   | 1 |
| CPNE4        | 0 | 0          | 0   | 1 |
| MIR5704      | 0 | 0          | 0   | 1 |
| C3orf36      | 0 | 0          | 0   | 1 |
| SLCO2A1      | 0 | 0          | 0   | 1 |
| KY           | 0 | 0.00179518 | inf | 1 |
| A4GNT        | 0 | 0.00536414 | inf | 1 |
| FOXL2        | 0 | 0          | 0   | 1 |
| PRR23B       | 0 | 0          | 0   | 1 |
| PISRT1       | 0 | 0          | 0   | 1 |
| RBP2         | 0 | 0          | 0   | 1 |
| RBP1         | 0 | 0          | 0   | 1 |
| PCOLCE2      | 0 | 0          | 0   | 1 |
| PAQR9        | 0 | 0          | 0   | 1 |
| PLSCR4       | 0 | 0.00614921 | inf | 1 |
| PLSCR2       | 0 | 0          | 0   | 1 |
| PLSCR5       | 0 | 0          | 0   | 1 |
| ZIC4         | 0 | 0          | 0   | 1 |
| ANKUB1       | 0 | 0          | 0   | 1 |
| CLRN1        | 0 | 0          | 0   | 1 |
| GPR171       | 0 | 0          | 0   | 1 |
| P2RY14       | 0 | 0          | 0   | 1 |
| P2RY13       | 0 | 0          | 0   | 1 |
| P2RY12       | 0 | 0          | 0   | 1 |
| IGSF10       | 0 | 0          | 0   | 1 |
| MIR5186      | 0 | 0          | 0   | 1 |
| GPR149       | 0 | 0          | 0   | 1 |
| KCNAB1-AS2   | 0 | 0          | 0   | 1 |
| KCNAB1-AS1   | 0 | 0          | 0   | 1 |
| LOC730091    | 0 | 0          | 0   | 1 |
| SPTSSB       | 0 | 0          | 0   | 1 |
| CT64         | 0 | 0          | 0   | 1 |
| SLITRK3      | 0 | 0.00256895 | inf | 1 |
| BCHE         | 0 | 0          | 0   | 1 |
| ZBBX         | 0 | 0          | 0   | 1 |
| LRRC31       | 0 | 0          | 0   | 1 |
| SLC2A2       | 0 | 0          | 0   | 1 |
| MIR569       | 0 | 0          | 0   | 1 |
| GHSR         | 0 | 0          | 0   | 1 |
| SPATA16      | 0 | 0          | 0   | 1 |
| NAALADL2-AS3 | 0 | 0          | 0   | 1 |
| FLJ46066     | 0 | 0          | 0   | 1 |

|              |   |            |     |   |
|--------------|---|------------|-----|---|
| C3orf70      | 0 | 0.00488002 | inf | 1 |
| LOC253573    | 0 | 0          | 0   | 1 |
| ADIPOQ-AS1   | 0 | 0          | 0   | 1 |
| RPL39L       | 0 | 0          | 0   | 1 |
| SST          | 0 | 0          | 0   | 1 |
| RTP2         | 0 | 0          | 0   | 1 |
| CLDN1        | 0 | 0          | 0   | 1 |
| TMEM207      | 0 | 0          | 0   | 1 |
| GMNC         | 0 | 0          | 0   | 1 |
| FGF12        | 0 | 0          | 0   | 1 |
| ATP13A4      | 0 | 0          | 0   | 1 |
| OPA1-AS1     | 0 | 0          | 0   | 1 |
| LOC647323    | 0 | 0          | 0   | 1 |
| DPPA2P3      | 0 | 0          | 0   | 1 |
| LOC100131551 | 0 | 0.00687028 | inf | 1 |
| CPN2         | 0 | 0          | 0   | 1 |
| MIR5692C1    | 0 | 0          | 0   | 1 |
| APOD         | 0 | 0          | 0   | 1 |
| MIR4797      | 0 | 0          | 0   | 1 |
| ZNF141       | 0 | 0          | 0   | 1 |
| LOC402160    | 0 | 0.0164292  | inf | 1 |
| FLJ35424     | 0 | 0          | 0   | 1 |
| STK32B       | 0 | 0          | 0   | 1 |
| LOC285484    | 0 | 0          | 0   | 1 |
| MIR4798      | 0 | 0          | 0   | 1 |
| MIR4274      | 0 | 0          | 0   | 1 |
| GPR78        | 0 | 0.00329935 | inf | 1 |
| LOC650293    | 0 | 0          | 0   | 1 |
| USP17L10     | 0 | 0          | 0   | 1 |
| USP17L18     | 0 | 0          | 0   | 1 |
| USP17L21     | 0 | 0          | 0   | 1 |
| USP17L13     | 0 | 0          | 0   | 1 |
| USP17L15     | 0 | 0          | 0   | 1 |
| USP17L17     | 0 | 0          | 0   | 1 |
| USP17L18     | 0 | 0          | 0   | 1 |
| USP17L19     | 0 | 0          | 0   | 1 |
| USP17L22     | 0 | 0          | 0   | 1 |
| USP17L12     | 0 | 0          | 0   | 1 |
| USP17L22     | 0 | 0          | 0   | 1 |
| USP17L28     | 0 | 0          | 0   | 1 |
| USP17L26     | 0 | 0          | 0   | 1 |
| USP17L24     | 0 | 0          | 0   | 1 |
| USP17L28     | 0 | 0          | 0   | 1 |
| USP17L25     | 0 | 0          | 0   | 1 |
| USP17L30     | 0 | 0          | 0   | 1 |
| USP17L27     | 0 | 0          | 0   | 1 |
| USP17L9P     | 0 | 0          | 0   | 1 |
| USP17L27     | 0 | 0          | 0   | 1 |
| USP17L6P     | 0 | 0          | 0   | 1 |

|              |   |            |     |   |
|--------------|---|------------|-----|---|
| MIR572       | 0 | 0          | 0   | 1 |
| MIR5091      | 0 | 0          | 0   | 1 |
| LOC152742    | 0 | 0          | 0   | 1 |
| CD38         | 0 | 0          | 0   | 1 |
| CLRN2        | 0 | 0          | 0   | 1 |
| SLIT2        | 0 | 0          | 0   | 1 |
| SLIT2-IT1    | 0 | 0          | 0   | 1 |
| MIR218-1     | 0 | 0          | 0   | 1 |
| GBA3         | 0 | 0          | 0   | 1 |
| SOD3         | 0 | 0          | 0   | 1 |
| SLC34A2      | 0 | 0.00329913 | inf | 1 |
| MIR4275      | 0 | 0          | 0   | 1 |
| PCDH7        | 0 | 0.00276384 | inf | 1 |
| DTHD1        | 0 | 0          | 0   | 1 |
| KIAA1239     | 0 | 0          | 0   | 1 |
| MIR574       | 0 | 0          | 0   | 1 |
| CHRNA9       | 0 | 0          | 0   | 1 |
| NSUN7        | 0 | 0.00303537 | inf | 1 |
| UCLH1        | 0 | 0          | 0   | 1 |
| SHISA3       | 0 | 0          | 0   | 1 |
| GRXCR1       | 0 | 0          | 0   | 1 |
| GABRB1       | 0 | 0          | 0   | 1 |
| CWH43        | 0 | 0          | 0   | 1 |
| SPATA18      | 0 | 0          | 0   | 1 |
| MIR4449      | 0 | 0          | 0   | 1 |
| LOC152578    | 0 | 0          | 0   | 1 |
| LNX1-AS1     | 0 | 0          | 0   | 1 |
| LNX1-AS2     | 0 | 0          | 0   | 1 |
| GSX2         | 0 | 0          | 0   | 1 |
| PDGFRA       | 0 | 0          | 0   | 1 |
| KIT          | 0 | 0          | 0   | 1 |
| LOC644145    | 0 | 0          | 0   | 1 |
| THEGL        | 0 | 0          | 0   | 1 |
| LOC255130    | 0 | 0          | 0   | 1 |
| LPHN3        | 0 | 0          | 0   | 1 |
| LOC100144602 | 0 | 0          | 0   | 1 |
| LOC550113    | 0 | 0          | 0   | 1 |
| FTLP10       | 0 | 0          | 0   | 1 |
| TMPRSS11E    | 0 | 0          | 0   | 1 |
| UGT2B10      | 0 | 0          | 0   | 1 |
| UGT2B7       | 0 | 0          | 0   | 1 |
| UGT2B28      | 0 | 0          | 0   | 1 |
| CSN1S1       | 0 | 0          | 0   | 1 |
| STATH        | 0 | 0          | 0   | 1 |
| HTN3         | 0 | 0          | 0   | 1 |
| HTN1         | 0 | 0          | 0   | 1 |
| CSN1S2AP     | 0 | 0          | 0   | 1 |
| CSN1S2BP     | 0 | 0          | 0   | 1 |
| C4orf40      | 0 | 0.00209622 | inf | 1 |



|              |   |            |     |   |
|--------------|---|------------|-----|---|
| ODAM         | 0 | 0          | 0   | 1 |
| FDCSP        | 0 | 0          | 0   | 1 |
| CSN3         | 0 | 0          | 0   | 1 |
| CABS1        | 0 | 0          | 0   | 1 |
| SMR3A        | 0 | 0          | 0   | 1 |
| SMR3B        | 0 | 0          | 0   | 1 |
| PROL1        | 0 | 0          | 0   | 1 |
| MUC7         | 0 | 0          | 0   | 1 |
| AMTN         | 0 | 0          | 0   | 1 |
| AMBN         | 0 | 0          | 0   | 1 |
| NPFFR2       | 0 | 0          | 0   | 1 |
| AFP          | 0 | 0          | 0   | 1 |
| AFM          | 0 | 0          | 0   | 1 |
| LOC728040    | 0 | 0          | 0   | 1 |
| CXCL6        | 0 | 0          | 0   | 1 |
| PF4V1        | 0 | 0          | 0   | 1 |
| AREG         | 0 | 0          | 0   | 1 |
| AREG         | 0 | 0.0148248  | inf | 1 |
| LOC441025    | 0 | 0          | 0   | 1 |
| ART3         | 0 | 0          | 0   | 1 |
| MIR4450      | 0 | 0          | 0   | 1 |
| GDEP         | 0 | 0.00671072 | inf | 1 |
| MIR4451      | 0 | 0          | 0   | 1 |
| DSPP         | 0 | 0          | 0   | 1 |
| DMP1         | 0 | 0          | 0   | 1 |
| IBSP         | 0 | 0          | 0   | 1 |
| MEPE         | 0 | 0          | 0   | 1 |
| LOC644248    | 0 | 0          | 0   | 1 |
| MMRN1        | 0 | 0          | 0   | 1 |
| CCSER1       | 0 | 0          | 0   | 1 |
| GRID2        | 0 | 0          | 0   | 1 |
| ATOH1        | 0 | 0          | 0   | 1 |
| BMPR1B       | 0 | 0.00298805 | inf | 1 |
| PDHA2        | 0 | 0          | 0   | 1 |
| MIR3684      | 0 | 0          | 0   | 1 |
| C4orf17      | 0 | 0          | 0   | 1 |
| BANK1        | 0 | 0          | 0   | 1 |
| ARHGEF38-IT1 | 0 | 0          | 0   | 1 |
| MIR1243      | 0 | 0          | 0   | 1 |
| MIR577       | 0 | 0          | 0   | 1 |
| MIR1973      | 0 | 0          | 0   | 1 |
| NDST3        | 0 | 0.00310942 | inf | 1 |
| CEP170P1     | 0 | 0          | 0   | 1 |
| PP12613      | 0 | 0          | 0   | 1 |
| LOC285419    | 0 | 0          | 0   | 1 |
| FAT4         | 0 | 0          | 0   | 1 |
| MIR2054      | 0 | 0          | 0   | 1 |
| SLC25A31     | 0 | 0          | 0   | 1 |
| PCDH10       | 0 | 0          | 0   | 1 |

|              |   |            |     |   |
|--------------|---|------------|-----|---|
| LINC00499    | 0 | 0          | 0   | 1 |
| SCOC         | 0 | 0          | 0   | 1 |
| GUSBP5       | 0 | 0          | 0   | 1 |
| HHIP         | 0 | 0          | 0   | 1 |
| C4orf51      | 0 | 0          | 0   | 1 |
| EDNRA        | 0 | 0          | 0   | 1 |
| MIR4799      | 0 | 0          | 0   | 1 |
| PRSS48       | 0 | 0.0207698  | inf | 1 |
| TLR2         | 0 | 0          | 0   | 1 |
| FGB          | 0 | 0.00434438 | inf | 1 |
| RBM46        | 0 | 0          | 0   | 1 |
| NPY2R        | 0 | 0          | 0   | 1 |
| GUCY1A3      | 0 | 0          | 0   | 1 |
| GUCY1B3      | 0 | 0          | 0   | 1 |
| GLRB         | 0 | 0          | 0   | 1 |
| GRIA2        | 0 | 0          | 0   | 1 |
| LOC340017    | 0 | 0          | 0   | 1 |
| RXFP1        | 0 | 0          | 0   | 1 |
| MIR3688-2    | 0 | 0          | 0   | 1 |
| NPY5R        | 0 | 0          | 0   | 1 |
| MIR5684      | 0 | 0          | 0   | 1 |
| LOC100505989 | 0 | 0          | 0   | 1 |
| LOC100506013 | 0 | 0.00402974 | inf | 1 |
| FAM218A      | 0 | 0          | 0   | 1 |
| TRIM60       | 0 | 0.00409545 | inf | 1 |
| CPE          | 0 | 0          | 0   | 1 |
| MIR578       | 0 | 0          | 0   | 1 |
| TLL1         | 0 | 0          | 0   | 1 |
| ANXA10       | 0 | 0          | 0   | 1 |
| LOC100506122 | 0 | 0          | 0   | 1 |
| GALNTL6      | 0 | 0          | 0   | 1 |
| NBLA00301    | 0 | 0          | 0   | 1 |
| MIR4276      | 0 | 0          | 0   | 1 |
| ADAM29       | 0 | 0          | 0   | 1 |
| WDR17        | 0 | 0          | 0   | 1 |
| LOC285501    | 0 | 0          | 0   | 1 |
| MIR1305      | 0 | 0          | 0   | 1 |
| HELT         | 0 | 0          | 0   | 1 |
| F11          | 0 | 0          | 0   | 1 |
| ZFP42        | 0 | 0          | 0   | 1 |
| LOC401164    | 0 | 0          | 0   | 1 |
| DUX2         | 0 | 0          | 0   | 1 |
| DUX4L4       | 0 | 0          | 0   | 1 |
| DUX4L5       | 0 | 0          | 0   | 1 |
| DUX4L6       | 0 | 0          | 0   | 1 |
| DUX4L4       | 0 | 0          | 0   | 1 |
| DUX4         | 0 | 0          | 0   | 1 |
| DUX4L3       | 0 | 0          | 0   | 1 |
| DUX4         | 0 | 0          | 0   | 1 |

|              |   |              |   |   |
|--------------|---|--------------|---|---|
| RNF212       | 0 | 0            | 0 | 1 |
| TMED11P      | 0 | 0            | 0 | 1 |
| HTT-AS1      | 0 | 0            | 0 | 1 |
| LOC100133461 | 0 | 0            | 0 | 1 |
| CYTL1        | 0 | 0            | 0 | 1 |
| EVC2         | 0 | 0            | 0 | 1 |
| MIR378D1     | 0 | 0            | 0 | 1 |
| JAKMIP1      | 0 | 0            | 0 | 1 |
| PSAPL1       | 0 | 0            | 0 | 1 |
| HMX1         | 0 | 0            | 0 | 1 |
| MIR548I2     | 0 | 0.998387 inf |   | 1 |
| MIR3138      | 0 | 0            | 0 | 1 |
| CLNK         | 0 | 0            | 0 | 1 |
| HS3ST1       | 0 | 0            | 0 | 1 |
| LOC285547    | 0 | 0            | 0 | 1 |
| NKX3-2       | 0 | 0            | 0 | 1 |
| LOC285548    | 0 | 0            | 0 | 1 |
| LOC441009    | 0 | 0            | 0 | 1 |
| FGFBP1       | 0 | 0            | 0 | 1 |
| FGFBP2       | 0 | 0            | 0 | 1 |
| LDB2         | 0 | 0            | 0 | 1 |
| MIR548AX     | 0 | 0            | 0 | 1 |
| KCNIP4-IT1   | 0 | 0            | 0 | 1 |
| MIR548AJ2    | 0 | 0            | 0 | 1 |
| MIR573       | 0 | 0            | 0 | 1 |
| CCKAR        | 0 | 0            | 0 | 1 |
| MIR4801      | 0 | 0            | 0 | 1 |
| LOC344967    | 0 | 0            | 0 | 1 |
| MIR4802      | 0 | 0            | 0 | 1 |
| PHOX2B       | 0 | 0            | 0 | 1 |
| BEND4        | 0 | 0            | 0 | 1 |
| KCTD8        | 0 | 0            | 0 | 1 |
| YIPF7        | 0 | 0.040597 inf |   | 1 |
| GABRA2       | 0 | 0            | 0 | 1 |
| COX7B2       | 0 | 0            | 0 | 1 |
| GABRA4       | 0 | 0            | 0 | 1 |
| ERVMER34-1   | 0 | 0            | 0 | 1 |
| HOPX         | 0 | 0            | 0 | 1 |
| SPINK2       | 0 | 0            | 0 | 1 |
| TECRL        | 0 | 0            | 0 | 1 |
| LOC401134    | 0 | 0            | 0 | 1 |
| EPHA5        | 0 | 0            | 0 | 1 |
| TMPRSS11D    | 0 | 0            | 0 | 1 |
| TMPRSS11A    | 0 | 0            | 0 | 1 |
| TMPRSS11GP   | 0 | 0            | 0 | 1 |
| TMPRSS11F    | 0 | 0            | 0 | 1 |
| SYT14L       | 0 | 0            | 0 | 1 |
| TMPRSS11BNL  | 0 | 0            | 0 | 1 |
| TMPRSS11B    | 0 | 0            | 0 | 1 |

|           |   |            |     |   |
|-----------|---|------------|-----|---|
| UGT2B15   | 0 | 0          | 0   | 1 |
| UGT2A3    | 0 | 0          | 0   | 1 |
| UGT2B10   | 0 | 0          | 0   | 1 |
| UGT2B11   | 0 | 0          | 0   | 1 |
| UGT2B4    | 0 | 0          | 0   | 1 |
| SULT1B1   | 0 | 0          | 0   | 1 |
| CSN2      | 0 | 0          | 0   | 1 |
| GC        | 0 | 0          | 0   | 1 |
| ADAMTS3   | 0 | 0.00163648 | inf | 1 |
| RASSF6    | 0 | 0          | 0   | 1 |
| PF4       | 0 | 0          | 0   | 1 |
| PPBP      | 0 | 0          | 0   | 1 |
| CXCL5     | 0 | 0          | 0   | 1 |
| PPBPP2    | 0 | 0          | 0   | 1 |
| CXCL9     | 0 | 0          | 0   | 1 |
| CXCL10    | 0 | 0          | 0   | 1 |
| CXCL11    | 0 | 0          | 0   | 1 |
| SOWAHB    | 0 | 0          | 0   | 1 |
| NAA11     | 0 | 0          | 0   | 1 |
| GK2       | 0 | 0          | 0   | 1 |
| PRKG2     | 0 | 0          | 0   | 1 |
| LINC00575 | 0 | 0          | 0   | 1 |
| MIR575    | 0 | 0          | 0   | 1 |
| NKX6-1    | 0 | 0          | 0   | 1 |
| MAPK10    | 0 | 0          | 0   | 1 |
| MIR5705   | 0 | 0          | 0   | 1 |
| SPARCL1   | 0 | 0.00545967 | inf | 1 |
| GPRIN3    | 0 | 0          | 0   | 1 |
| SNCA      | 0 | 0          | 0   | 1 |
| HPGDS     | 0 | 0          | 0   | 1 |
| UNC5C     | 0 | 0          | 0   | 1 |
| STPG2     | 0 | 0          | 0   | 1 |
| ADH4      | 0 | 0          | 0   | 1 |
| PCNAP1    | 0 | 0          | 0   | 1 |
| ADH1A     | 0 | 0          | 0   | 1 |
| ADH1B     | 0 | 0          | 0   | 1 |
| ADH1C     | 0 | 0          | 0   | 1 |
| ADH7      | 0 | 0          | 0   | 1 |
| DDIT4L    | 0 | 0          | 0   | 1 |
| EMCN      | 0 | 0          | 0   | 1 |
| EMCN-IT3  | 0 | 0          | 0   | 1 |
| TACR3     | 0 | 0          | 0   | 1 |
| GIMD1     | 0 | 0          | 0   | 1 |
| DKK2      | 0 | 0          | 0   | 1 |
| AGXT2L1   | 0 | 0          | 0   | 1 |
| CFI       | 0 | 0          | 0   | 1 |
| NEUROG2   | 0 | 0          | 0   | 1 |
| MIR367    | 0 | 0          | 0   | 1 |
| MIR302D   | 0 | 0          | 0   | 1 |

|              |   |            |     |   |
|--------------|---|------------|-----|---|
| MIR302A      | 0 | 0          | 0   | 1 |
| MIR302C      | 0 | 0          | 0   | 1 |
| MIR302B      | 0 | 0          | 0   | 1 |
| NDST4        | 0 | 0          | 0   | 1 |
| TRAM1L1      | 0 | 0          | 0   | 1 |
| TNIP3        | 0 | 0          | 0   | 1 |
| QRFPR        | 0 | 0          | 0   | 1 |
| TMEM155      | 0 | 0          | 0   | 1 |
| TRPC3        | 0 | 0          | 0   | 1 |
| IL2          | 0 | 0          | 0   | 1 |
| IL21         | 0 | 0          | 0   | 1 |
| PABPC4L      | 0 | 0          | 0   | 1 |
| LINC00616    | 0 | 0          | 0   | 1 |
| LOC100129858 | 0 | 0          | 0   | 1 |
| CLGN         | 0 | 0          | 0   | 1 |
| UCP1         | 0 | 0          | 0   | 1 |
| TBC1D9       | 0 | 0          | 0   | 1 |
| TNRC18P1     | 0 | 0          | 0   | 1 |
| RNF150       | 0 | 0          | 0   | 1 |
| INPP4B       | 0 | 0          | 0   | 1 |
| FREM3        | 0 | 0          | 0   | 1 |
| GYPE         | 0 | 0          | 0   | 1 |
| GYPB         | 0 | 0          | 0   | 1 |
| GYPA         | 0 | 0          | 0   | 1 |
| LOC100505545 | 0 | 0          | 0   | 1 |
| TTC29        | 0 | 0          | 0   | 1 |
| MIR3140      | 0 | 0          | 0   | 1 |
| TMEM154      | 0 | 0.00261827 | inf | 1 |
| RNF175       | 0 | 0          | 0   | 1 |
| SFRP2        | 0 | 0          | 0   | 1 |
| DCHS2        | 0 | 0          | 0   | 1 |
| FGA          | 0 | 0          | 0   | 1 |
| FGG          | 0 | 0.00491364 | inf | 1 |
| MAP9         | 0 | 0          | 0   | 1 |
| ASIC5        | 0 | 0          | 0   | 1 |
| PDGFC        | 0 | 0          | 0   | 1 |
| C4orf45      | 0 | 0          | 0   | 1 |
| MIR3688-1    | 0 | 0          | 0   | 1 |
| FSTL5        | 0 | 0          | 0   | 1 |
| NPY1R        | 0 | 0          | 0   | 1 |
| TKTL2        | 0 | 0          | 0   | 1 |
| ANP32C       | 0 | 0          | 0   | 1 |
| TRIM61       | 0 | 0.0144916  | inf | 1 |
| LOC100506085 | 0 | 0          | 0   | 1 |
| SCRG1        | 0 | 0          | 0   | 1 |
| HAND2        | 0 | 0          | 0   | 1 |
| HPGD         | 0 | 0          | 0   | 1 |
| GLRA3        | 0 | 0          | 0   | 1 |
| ASB5         | 0 | 0          | 0   | 1 |

|              |   |                |   |   |
|--------------|---|----------------|---|---|
| VEGFC        | 0 | 0              | 0 | 1 |
| LINC00290    | 0 | 0              | 0 | 1 |
| LOC728175    | 0 | 0              | 0 | 1 |
| MIR3945      | 0 | 0              | 0 | 1 |
| LOC100506229 | 0 | 0              | 0 | 1 |
| PDLIM3       | 0 | 0              | 0 | 1 |
| SORBS2       | 0 | 0.00482761 inf |   | 1 |
| LOC285441    | 0 | 0              | 0 | 1 |
| MTNR1A       | 0 | 0              | 0 | 1 |
| LOC339975    | 0 | 0              | 0 | 1 |
| FRG2         | 0 | 0.00508874 inf |   | 1 |
| SLC6A19      | 0 | 0              | 0 | 1 |
| SLC6A18      | 0 | 0              | 0 | 1 |
| IRX1         | 0 | 0              | 0 | 1 |
| LOC340094    | 0 | 0              | 0 | 1 |
| UBE2QL1      | 0 | 0              | 0 | 1 |
| LOC255167    | 0 | 0              | 0 | 1 |
| ADCY2        | 0 | 0              | 0 | 1 |
| LOC100505806 | 0 | 0              | 0 | 1 |
| SNORD123     | 0 | 0              | 0 | 1 |
| CT49         | 0 | 0              | 0 | 1 |
| FBXL7        | 0 | 0              | 0 | 1 |
| BASP1        | 0 | 0              | 0 | 1 |
| PMCHL1       | 0 | 0              | 0 | 1 |
| PRDM9        | 0 | 0              | 0 | 1 |
| LSP1P3       | 0 | 0              | 0 | 1 |
| LOC340113    | 0 | 0              | 0 | 1 |
| RXFP3        | 0 | 0              | 0 | 1 |
| IL7R         | 0 | 0.00205927 inf |   | 1 |
| SLC1A3       | 0 | 0              | 0 | 1 |
| EGFLAM       | 0 | 0              | 0 | 1 |
| CCDC152      | 0 | 0              | 0 | 1 |
| NNT          | 0 | 0.00179999 inf |   | 1 |
| HSPB3        | 0 | 0              | 0 | 1 |
| SNX18        | 0 | 0              | 0 | 1 |
| GZMK         | 0 | 0              | 0 | 1 |
| GZMA         | 0 | 0              | 0 | 1 |
| GAPT         | 0 | 0              | 0 | 1 |
| RAB3C        | 0 | 0              | 0 | 1 |
| PART1        | 0 | 0.00334793 inf |   | 1 |
| C5orf64      | 0 | 0.003414 inf   |   | 1 |
| RNF180       | 0 | 0              | 0 | 1 |
| RGS7BP       | 0 | 0              | 0 | 1 |
| FAM159B      | 0 | 0              | 0 | 1 |
| SERF1A       | 0 | 0              | 0 | 1 |
| CARTPT       | 0 | 0              | 0 | 1 |
| MIR4803      | 0 | 0              | 0 | 1 |
| MIR4804      | 0 | 0              | 0 | 1 |
| TMEM174      | 0 | 0              | 0 | 1 |

|              |   |             |     |   |
|--------------|---|-------------|-----|---|
| SV2C         | 0 | 0           | 0   | 1 |
| NCRUPAR      | 0 | 0.0370212   | inf | 1 |
| F2RL1        | 0 | 0           | 0   | 1 |
| S100Z        | 0 | 0           | 0   | 1 |
| CRHBP        | 0 | 0           | 0   | 1 |
| SPZ1         | 0 | 0           | 0   | 1 |
| RNU5E-1      | 0 | 0           | 0   | 1 |
| MIR3977      | 0 | 0           | 0   | 1 |
| VCAN         | 0 | 0.000916617 | inf | 1 |
| NBPF22P      | 0 | 0.00401692  | inf | 1 |
| MIR3607      | 0 | 0           | 0   | 1 |
| MIR548AO     | 0 | 0           | 0   | 1 |
| GPR150       | 0 | 0           | 0   | 1 |
| MIR583       | 0 | 0           | 0   | 1 |
| RAB9BP1      | 0 | 0           | 0   | 1 |
| LOC100289673 | 0 | 0           | 0   | 1 |
| CAMK4        | 0 | 0           | 0   | 1 |
| NREP-AS1     | 0 | 0           | 0   | 1 |
| SNORA13      | 0 | 1.22023     | inf | 1 |
| FLJ11235     | 0 | 0           | 0   | 1 |
| KCNN2        | 0 | 0           | 0   | 1 |
| ARL14EPL     | 0 | 0           | 0   | 1 |
| MIR1244-2    | 0 | 0           | 0   | 1 |
| PRR16        | 0 | 0           | 0   | 1 |
| FTMT         | 0 | 0           | 0   | 1 |
| GRAMD3       | 0 | 0.00369574  | inf | 1 |
| MEGF10       | 0 | 0           | 0   | 1 |
| CTXN3        | 0 | 0.00650316  | inf | 1 |
| SLC27A6      | 0 | 0           | 0   | 1 |
| MIR4633      | 0 | 0           | 0   | 1 |
| ADAMTS19     | 0 | 0           | 0   | 1 |
| KIAA1024L    | 0 | 0           | 0   | 1 |
| CHSY3        | 0 | 0           | 0   | 1 |
| IL3          | 0 | 0           | 0   | 1 |
| PDLIM4       | 0 | 0           | 0   | 1 |
| IL4          | 0 | 0.0671878   | inf | 1 |
| FBXL21       | 0 | 0           | 0   | 1 |
| NPY6R        | 0 | 0           | 0   | 1 |
| WNT8A        | 0 | 0.0079928   | inf | 1 |
| VTRNA1-2     | 0 | 0           | 0   | 1 |
| PCDHB1       | 0 | 0           | 0   | 1 |
| PCDHB17      | 0 | 0           | 0   | 1 |
| MIR5197      | 0 | 0           | 0   | 1 |
| HMH1         | 0 | 0           | 0   | 1 |
| STK32A       | 0 | 0           | 0   | 1 |
| JAKMIP2-AS1  | 0 | 0           | 0   | 1 |
| SCGB3A2      | 0 | 0           | 0   | 1 |
| SPINK5       | 0 | 0           | 0   | 1 |
| SPINK14      | 0 | 0           | 0   | 1 |

|                 |   |            |     |   |
|-----------------|---|------------|-----|---|
| SPINK6          | 0 | 0          | 0   | 1 |
| SPINK13         | 0 | 0          | 0   | 1 |
| SPINK7          | 0 | 0          | 0   | 1 |
| SPINK9          | 0 | 0          | 0   | 1 |
| CDX1            | 0 | 0          | 0   | 1 |
| GRIA1           | 0 | 0          | 0   | 1 |
| SGCD            | 0 | 0          | 0   | 1 |
| ITK             | 0 | 0          | 0   | 1 |
| NIPAL4          | 0 | 0          | 0   | 1 |
| C5orf52         | 0 | 0          | 0   | 1 |
| ADRA1B          | 0 | 0          | 0   | 1 |
| MIR3142         | 0 | 0          | 0   | 1 |
| MIR146A         | 0 | 0          | 0   | 1 |
| GABRA6          | 0 | 0          | 0   | 1 |
| GABRA1          | 0 | 0          | 0   | 1 |
| GABRG2          | 0 | 0          | 0   | 1 |
| MIR103B1        | 0 | 0          | 0   | 1 |
| DOCK2           | 0 | 0          | 0   | 1 |
| MIR378E         | 0 | 0          | 0   | 1 |
| FOX11           | 0 | 0          | 0   | 1 |
| C5orf58         | 0 | 0          | 0   | 1 |
| KCNIP1          | 0 | 0          | 0   | 1 |
| GABRP           | 0 | 0          | 0   | 1 |
| TLX3            | 0 | 0          | 0   | 1 |
| C5orf47         | 0 | 0          | 0   | 1 |
| HMP19           | 0 | 0          | 0   | 1 |
| HRH2            | 0 | 0.0141827  | inf | 1 |
| CPLX2           | 0 | 0.0103409  | inf | 1 |
| FAM153B         | 0 | 0          | 0   | 1 |
| LOC100507387    | 0 | 0          | 0   | 1 |
| EIF4E1B         | 0 | 0          | 0   | 1 |
| ZNF879          | 0 | 0          | 0   | 1 |
| ZNF354C         | 0 | 0          | 0   | 1 |
| LINC00847       | 0 | 0.00669437 | inf | 1 |
| BTNL3           | 0 | 0          | 0   | 1 |
| OR2V2           | 0 | 0          | 0   | 1 |
| LOC100132062,LI | 0 | 0.00883827 | inf | 1 |
| OR4F3           | 0 | 0          | 0   | 1 |
| MIR4456         | 0 | 0          | 0   | 1 |
| LOC100506688    | 0 | 0.0105689  | inf | 1 |
| MIR4635         | 0 | 0          | 0   | 1 |
| MIR4457         | 0 | 0          | 0   | 1 |
| MIR4277         | 0 | 0          | 0   | 1 |
| IRX4            | 0 | 0          | 0   | 1 |
| LOC285577       | 0 | 0          | 0   | 1 |
| MIR4278         | 0 | 0          | 0   | 1 |
| MIR4454         | 0 | 0          | 0   | 1 |
| C5orf49         | 0 | 0          | 0   | 1 |
| LOC729506       | 0 | 0          | 0   | 1 |



|              |   |            |     |   |
|--------------|---|------------|-----|---|
| MIR4636      | 0 | 0          | 0   | 1 |
| TAS2R1       | 0 | 0          | 0   | 1 |
| LOC285692    | 0 | 0          | 0   | 1 |
| CTNND2       | 0 | 0          | 0   | 1 |
| MIR4637      | 0 | 0          | 0   | 1 |
| MARCH11      | 0 | 0          | 0   | 1 |
| LOC285696    | 0 | 0          | 0   | 1 |
| LOC401177    | 0 | 0          | 0   | 1 |
| CDH18        | 0 | 0          | 0   | 1 |
| CDH10        | 0 | 0.00229125 | inf | 1 |
| LOC340107    | 0 | 0          | 0   | 1 |
| CDH9         | 0 | 0          | 0   | 1 |
| MIR4279      | 0 | 0          | 0   | 1 |
| ADAMTS12     | 0 | 0          | 0   | 1 |
| PRLR         | 0 | 0          | 0   | 1 |
| CAPSL        | 0 | 0          | 0   | 1 |
| UGT3A1       | 0 | 0          | 0   | 1 |
| UGT3A2       | 0 | 0          | 0   | 1 |
| MIR580       | 0 | 0          | 0   | 1 |
| EGFLAM-AS4   | 0 | 0          | 0   | 1 |
| LIFR         | 0 | 0.00084238 | inf | 1 |
| MIR3650      | 0 | 0          | 0   | 1 |
| FYB          | 0 | 0          | 0   | 1 |
| C9           | 0 | 0          | 0   | 1 |
| SNORD72      | 0 | 0          | 0   | 1 |
| MROH2B       | 0 | 0          | 0   | 1 |
| C6           | 0 | 0          | 0   | 1 |
| PLCXD3       | 0 | 0          | 0   | 1 |
| CCL28        | 0 | 0          | 0   | 1 |
| LOC100652772 | 0 | 0          | 0   | 1 |
| FGF10        | 0 | 0          | 0   | 1 |
| HCN1         | 0 | 0          | 0   | 1 |
| MIR581       | 0 | 0          | 0   | 1 |
| ESM1         | 0 | 0.00491424 | inf | 1 |
| MIR449A      | 0 | 0          | 0   | 1 |
| MIR449B      | 0 | 0          | 0   | 1 |
| MIR449C      | 0 | 0          | 0   | 1 |
| MIR5687      | 0 | 0          | 0   | 1 |
| ANKRD55      | 0 | 0          | 0   | 1 |
| ACTBL2       | 0 | 0          | 0   | 1 |
| HTR1A        | 0 | 0          | 0   | 1 |
| CD180        | 0 | 0          | 0   | 1 |
| ZNF366       | 0 | 0          | 0   | 1 |
| OTP          | 0 | 0          | 0   | 1 |
| LOC644936    | 0 | 0          | 0   | 1 |
| ANKRD34B     | 0 | 0          | 0   | 1 |
| ACOT12       | 0 | 0          | 0   | 1 |
| HAPLN1       | 0 | 0.00186663 | inf | 1 |
| EDIL3        | 0 | 0          | 0   | 1 |

|                 |   |            |     |   |
|-----------------|---|------------|-----|---|
| MIR4280         | 0 | 0          | 0   | 1 |
| LINC00461,MIR9- | 0 | 0          | 0   | 1 |
| MIR3660         | 0 | 0          | 0   | 1 |
| LIX1            | 0 | 0          | 0   | 1 |
| LOC100133050    | 0 | 0          | 0   | 1 |
| SLCO4C1         | 0 | 0          | 0   | 1 |
| SLCO6A1         | 0 | 0          | 0   | 1 |
| TSSK1B          | 0 | 0          | 0   | 1 |
| MGC32805        | 0 | 0          | 0   | 1 |
| ZNF608          | 0 | 0.00156183 | inf | 1 |
| FBN2            | 0 | 0          | 0   | 1 |
| MIR4460         | 0 | 0          | 0   | 1 |
| MIR3936         | 0 | 0          | 0   | 1 |
| MIR1289-2       | 0 | 0          | 0   | 1 |
| LOC340073       | 0 | 0          | 0   | 1 |
| C5orf20         | 0 | 0          | 0   | 1 |
| TIFAB           | 0 | 0          | 0   | 1 |
| NEUROG1         | 0 | 0          | 0   | 1 |
| CXCL14          | 0 | 0          | 0   | 1 |
| LOC340074       | 0 | 0.00461628 | inf | 1 |
| IL9             | 0 | 0          | 0   | 1 |
| LECT2           | 0 | 0          | 0   | 1 |
| VTRNA2-1        | 0 | 0          | 0   | 1 |
| TRPC7           | 0 | 0.00529271 | inf | 1 |
| KLHL3           | 0 | 0.00137013 | inf | 1 |
| MIR874          | 0 | 0          | 0   | 1 |
| SNORD63         | 0 | 0          | 0   | 1 |
| NRG2            | 0 | 0          | 0   | 1 |
| LOC729080       | 0 | 0          | 0   | 1 |
| ARHGAP26-AS1    | 0 | 0          | 0   | 1 |
| NR3C1           | 0 | 0          | 0   | 1 |
| GRXCR2          | 0 | 0          | 0   | 1 |
| GPR151          | 0 | 0          | 0   | 1 |
| PPP2R2B         | 0 | 0          | 0   | 1 |
| PPP2R2B-IT1     | 0 | 0          | 0   | 1 |
| DPYSL3          | 0 | 0.00178345 | inf | 1 |
| JAKMIP2         | 0 | 0          | 0   | 1 |
| C5orf46         | 0 | 0          | 0   | 1 |
| HTR4            | 0 | 0          | 0   | 1 |
| CAMK2A          | 0 | 0          | 0   | 1 |
| ZNF300P1        | 0 | 0.00304131 | inf | 1 |
| SLC36A3         | 0 | 0          | 0   | 1 |
| SPARC           | 0 | 0          | 0   | 1 |
| GLRA1           | 0 | 0          | 0   | 1 |
| NMUR2           | 0 | 0          | 0   | 1 |
| HAND1           | 0 | 0          | 0   | 1 |
| MIR3141         | 0 | 0          | 0   | 1 |
| TIMD4           | 0 | 0          | 0   | 1 |
| HAVCR1          | 0 | 0          | 0   | 1 |

|             |   |            |     |   |
|-------------|---|------------|-----|---|
| FAM71B      | 0 | 0          | 0   | 1 |
| FNDC9       | 0 | 0.0107472  | inf | 1 |
| IL12B       | 0 | 0          | 0   | 1 |
| LOC285627   | 0 | 0          | 0   | 1 |
| ATP10B      | 0 | 0          | 0   | 1 |
| LOC285629   | 0 | 0          | 0   | 1 |
| GABRB2      | 0 | 0          | 0   | 1 |
| MIR103A1    | 0 | 0          | 0   | 1 |
| SLIT3       | 0 | 0          | 0   | 1 |
| MIR218-2    | 0 | 0          | 0   | 1 |
| MIR585      | 0 | 0          | 0   | 1 |
| FAM196B     | 0 | 0          | 0   | 1 |
| LCP2        | 0 | 0          | 0   | 1 |
| KCNMB1      | 0 | 0          | 0   | 1 |
| MIR3912     | 0 | 0          | 0   | 1 |
| STC2        | 0 | 0.00225893 | inf | 1 |
| FLJ16171    | 0 | 0          | 0   | 1 |
| DRD1        | 0 | 0          | 0   | 1 |
| SNCB        | 0 | 0          | 0   | 1 |
| MIR4281     | 0 | 0          | 0   | 1 |
| PFN3        | 0 | 0          | 0   | 1 |
| FAM153A     | 0 | 0          | 0   | 1 |
| MIR1229     | 0 | 0          | 0   | 1 |
| MIR340      | 0 | 0          | 0   | 1 |
| RASGEF1C    | 0 | 0.00788478 | inf | 1 |
| SCGB3A1     | 0 | 0          | 0   | 1 |
| OR2Y1       | 0 | 0          | 0   | 1 |
| OR2V1       | 0 | 0          | 0   | 1 |
| MIR4638     | 0 | 0          | 0   | 1 |
| SNORD96A    | 0 | 0          | 0   | 1 |
| FOXQ1       | 0 | 0          | 0   | 1 |
| FOXF2       | 0 | 0          | 0   | 1 |
| FAM50B      | 0 | 0          | 0   | 1 |
| PPP1R3G     | 0 | 0          | 0   | 1 |
| LY86        | 0 | 0          | 0   | 1 |
| MIR5689     | 0 | 0          | 0   | 1 |
| ELOVL2-AS1  | 0 | 0          | 0   | 1 |
| TMEM170B    | 0 | 0          | 0   | 1 |
| RNF182      | 0 | 0          | 0   | 1 |
| MIR4639     | 0 | 0          | 0   | 1 |
| STMND1      | 0 | 0          | 0   | 1 |
| RBM24       | 0 | 0          | 0   | 1 |
| MIR548A1    | 0 | 0          | 0   | 1 |
| ID4         | 0 | 0          | 0   | 1 |
| LINC00340   | 0 | 0          | 0   | 1 |
| HDGFL1      | 0 | 0          | 0   | 1 |
| SCGN        | 0 | 0          | 0   | 1 |
| HIST1H2BA   | 0 | 0          | 0   | 1 |
| HIST1H2APS1 | 0 | 0          | 0   | 1 |

|              |   |           |     |   |
|--------------|---|-----------|-----|---|
| SLC17A4      | 0 | 0         | 0   | 1 |
| HIST1H3C     | 0 | 0         | 0   | 1 |
| HIST1H4F     | 0 | 0         | 0   | 1 |
| BTN1A1       | 0 | 0         | 0   | 1 |
| MIR3143      | 0 | 0         | 0   | 1 |
| HIST1H2AL    | 0 | 0.126462  | inf | 1 |
| GPX5         | 0 | 0         | 0   | 1 |
| LOC100129636 | 0 | 0         | 0   | 1 |
| OR2J3        | 0 | 0         | 0   | 1 |
| OR2J2        | 0 | 0         | 0   | 1 |
| OR14J1       | 0 | 0         | 0   | 1 |
| OR12D2       | 0 | 0         | 0   | 1 |
| OR10C1       | 0 | 0         | 0   | 1 |
| LOC100507362 | 0 | 0         | 0   | 1 |
| SNORD32B     | 0 | 0         | 0   | 1 |
| MOG          | 0 | 0         | 0   | 1 |
| TRIM15       | 0 | 0         | 0   | 1 |
| MIR877       | 0 | 0         | 0   | 1 |
| MIR4640      | 0 | 0         | 0   | 1 |
| DPCR1        | 0 | 0         | 0   | 1 |
| MUC21        | 0 | 0         | 0   | 1 |
| MUC22        | 0 | 0         | 0   | 1 |
| HCG22        | 0 | 0         | 0   | 1 |
| HCG26        | 0 | 0.0287408 | inf | 1 |
| TNF          | 0 | 0.0234888 | inf | 1 |
| AIF1         | 0 | 0         | 0   | 1 |
| LY6G6F       | 0 | 0.0188607 | inf | 1 |
| LY6G6D       | 0 | 0         | 0   | 1 |
| SNORD48      | 0 | 0         | 0   | 1 |
| SNORD52      | 0 | 0         | 0   | 1 |
| CFB          | 0 | 0.0183977 | inf | 1 |
| STK19        | 0 | 0         | 0   | 1 |
| HCG23        | 0 | 0         | 0   | 1 |
| HLA-DRA      | 0 | 0         | 0   | 1 |
| HLA-DQA1     | 0 | 0         | 0   | 1 |
| HLA-DQA2     | 0 | 0         | 0   | 1 |
| HLA-DPB1     | 0 | 0         | 0   | 1 |
| HLA-DPB2     | 0 | 0         | 0   | 1 |
| MIR219-1     | 0 | 0         | 0   | 1 |
| CLPSL2       | 0 | 0         | 0   | 1 |
| CLPSL1       | 0 | 0         | 0   | 1 |
| PI16         | 0 | 0         | 0   | 1 |
| FGD2         | 0 | 0         | 0   | 1 |
| DNAH8        | 0 | 0         | 0   | 1 |
| GLP1R        | 0 | 0         | 0   | 1 |
| DAAM2        | 0 | 0         | 0   | 1 |
| TDRG1        | 0 | 0         | 0   | 1 |
| TSPO2        | 0 | 0         | 0   | 1 |
| TREML4       | 0 | 0         | 0   | 1 |

|            |   |            |     |   |
|------------|---|------------|-----|---|
| TREML5P    | 0 | 0          | 0   | 1 |
| NCR2       | 0 | 0          | 0   | 1 |
| MIR4641    | 0 | 0          | 0   | 1 |
| ATP6V0CP3  | 0 | 0          | 0   | 1 |
| PTCRA      | 0 | 0.0320465  | inf | 1 |
| SLC22A7    | 0 | 0          | 0   | 1 |
| SPATS1     | 0 | 0          | 0   | 1 |
| MIR4642    | 0 | 0          | 0   | 1 |
| ANKRD66    | 0 | 0          | 0   | 1 |
| MEP1A      | 0 | 0          | 0   | 1 |
| GPR111     | 0 | 0          | 0   | 1 |
| OPN5       | 0 | 0          | 0   | 1 |
| GLYATL3    | 0 | 0          | 0   | 1 |
| TFAP2D     | 0 | 0          | 0   | 1 |
| TFAP2B     | 0 | 0          | 0   | 1 |
| MIR206     | 0 | 0          | 0   | 1 |
| MIR133B    | 0 | 0          | 0   | 1 |
| IL17A      | 0 | 0          | 0   | 1 |
| MIR5685    | 0 | 0          | 0   | 1 |
| MLIP-IT1   | 0 | 0          | 0   | 1 |
| TINAG      | 0 | 0          | 0   | 1 |
| HCRTR2     | 0 | 0          | 0   | 1 |
| BEND6      | 0 | 0          | 0   | 1 |
| SLC25A51P1 | 0 | 0          | 0   | 1 |
| BAI3       | 0 | 0          | 0   | 1 |
| COL19A1    | 0 | 0          | 0   | 1 |
| FAM135A    | 0 | 0          | 0   | 1 |
| KCNQ5      | 0 | 0.00139899 | inf | 1 |
| KHDC3L     | 0 | 0          | 0   | 1 |
| RNY4       | 0 | 0          | 0   | 1 |
| PRSS35     | 0 | 0          | 0   | 1 |
| RIPPLY2    | 0 | 0          | 0   | 1 |
| HTR1E      | 0 | 0          | 0   | 1 |
| SPACA1     | 0 | 0          | 0   | 1 |
| GJA10      | 0 | 0          | 0   | 1 |
| MIR4464    | 0 | 0          | 0   | 1 |
| MIR4643    | 0 | 0          | 0   | 1 |
| FUT9       | 0 | 0          | 0   | 1 |
| FHL5       | 0 | 0          | 0   | 1 |
| MIR2113    | 0 | 0          | 0   | 1 |
| POU3F2     | 0 | 0.00324993 | inf | 1 |
| PRDM13     | 0 | 0          | 0   | 1 |
| LOC728012  | 0 | 0          | 0   | 1 |
| LIN28B     | 0 | 0          | 0   | 1 |
| BVES-AS1   | 0 | 0          | 0   | 1 |
| CCDC162P   | 0 | 0          | 0   | 1 |
| GPR6       | 0 | 0          | 0   | 1 |
| RFPL4B     | 0 | 0          | 0   | 1 |
| FLJ34503   | 0 | 0          | 0   | 1 |

|              |   |            |     |   |
|--------------|---|------------|-----|---|
| FAM26F       | 0 | 0.027116   | inf | 1 |
| FAM26E       | 0 | 0          | 0   | 1 |
| FAM26D       | 0 | 0          | 0   | 1 |
| RFX6         | 0 | 0          | 0   | 1 |
| VGLL2        | 0 | 0          | 0   | 1 |
| LOC100287632 | 0 | 0          | 0   | 1 |
| GJA1         | 0 | 0.00932991 | inf | 1 |
| FABP7        | 0 | 0          | 0   | 1 |
| CLVS2        | 0 | 0          | 0   | 1 |
| NKAIN2       | 0 | 0          | 0   | 1 |
| LOC643623    | 0 | 0.00604305 | inf | 1 |
| HEY2         | 0 | 0          | 0   | 1 |
| RSPO3        | 0 | 0          | 0   | 1 |
| TMEM200A     | 0 | 0          | 0   | 1 |
| LOC100507254 | 0 | 0          | 0   | 1 |
| TAAR9        | 0 | 0          | 0   | 1 |
| TAAR8        | 0 | 0          | 0   | 1 |
| TAAR6        | 0 | 0          | 0   | 1 |
| SNORD101     | 0 | 0          | 0   | 1 |
| LINC00326    | 0 | 0          | 0   | 1 |
| EYA4         | 0 | 0          | 0   | 1 |
| MGC34034     | 0 | 0          | 0   | 1 |
| TCF21        | 0 | 0          | 0   | 1 |
| LOC154092    | 0 | 0          | 0   | 1 |
| LINC00271    | 0 | 0          | 0   | 1 |
| LOC100132735 | 0 | 0          | 0   | 1 |
| MIR3668      | 0 | 0          | 0   | 1 |
| MIR4465      | 0 | 0          | 0   | 1 |
| ZC2HC1B      | 0 | 0          | 0   | 1 |
| RAB32        | 0 | 0          | 0   | 1 |
| ADGB         | 0 | 0          | 0   | 1 |
| PPP1R14C     | 0 | 0          | 0   | 1 |
| IYD          | 0 | 0          | 0   | 1 |
| PLEKHG1      | 0 | 0          | 0   | 1 |
| ESR1         | 0 | 0.0017624  | inf | 1 |
| OPRM1        | 0 | 0          | 0   | 1 |
| MIR3692      | 0 | 0          | 0   | 1 |
| SYNJ2-IT1    | 0 | 0          | 0   | 1 |
| FNDC1        | 0 | 0          | 0   | 1 |
| MAS1         | 0 | 0          | 0   | 1 |
| LINC00602    | 0 | 0          | 0   | 1 |
| TCP10L2      | 0 | 0          | 0   | 1 |
| UNC93A       | 0 | 0          | 0   | 1 |
| TTLL2        | 0 | 0          | 0   | 1 |
| KIF25        | 0 | 0          | 0   | 1 |
| MIR4644      | 0 | 0          | 0   | 1 |
| LOC285768    | 0 | 0          | 0   | 1 |
| MIR4645      | 0 | 0          | 0   | 1 |
| LOC100507194 | 0 | 0          | 0   | 1 |

|           |   |           |     |   |
|-----------|---|-----------|-----|---|
| PXDC1     | 0 | 0         | 0   | 1 |
| FAM217A   | 0 | 0         | 0   | 1 |
| MIR3691   | 0 | 0         | 0   | 1 |
| F13A1     | 0 | 0         | 0   | 1 |
| LY86-AS1  | 0 | 0         | 0   | 1 |
| SCARNA27  | 0 | 0         | 0   | 1 |
| GCM2      | 0 | 0         | 0   | 1 |
| NHLRC1    | 0 | 0         | 0   | 1 |
| LOC729177 | 0 | 0         | 0   | 1 |
| PRL       | 0 | 0         | 0   | 1 |
| CMAHP     | 0 | 0         | 0   | 1 |
| HIST1H2AA | 0 | 0         | 0   | 1 |
| SLC17A1   | 0 | 0         | 0   | 1 |
| SLC17A3   | 0 | 0         | 0   | 1 |
| SLC17A2   | 0 | 0         | 0   | 1 |
| HIST1H1A  | 0 | 0         | 0   | 1 |
| HIST1H2BB | 0 | 0         | 0   | 1 |
| HIST1H1T  | 0 | 0         | 0   | 1 |
| HIST1H4G  | 0 | 0         | 0   | 1 |
| POM121L2  | 0 | 0         | 0   | 1 |
| HIST1H1B  | 0 | 0.0544135 | inf | 1 |
| HIST1H4L  | 0 | 0         | 0   | 1 |
| OR2B2     | 0 | 0         | 0   | 1 |
| ZSCAN23   | 0 | 0         | 0   | 1 |
| GPX6      | 0 | 0         | 0   | 1 |
| ZNF311    | 0 | 0         | 0   | 1 |
| OR2W1     | 0 | 0         | 0   | 1 |
| OR2B3     | 0 | 0         | 0   | 1 |
| OR5V1     | 0 | 0         | 0   | 1 |
| OR12D3    | 0 | 0         | 0   | 1 |
| OR11A1    | 0 | 0         | 0   | 1 |
| MAS1L     | 0 | 0         | 0   | 1 |
| ZFP57     | 0 | 0         | 0   | 1 |
| HCG4      | 0 | 0         | 0   | 1 |
| TRIM10    | 0 | 0         | 0   | 1 |
| SFTA2     | 0 | 0         | 0   | 1 |
| PSORS1C3  | 0 | 0         | 0   | 1 |
| SNORD84   | 0 | 0         | 0   | 1 |
| LTB       | 0 | 0.0232792 | inf | 1 |
| NCR3      | 0 | 0         | 0   | 1 |
| MIR4646   | 0 | 0         | 0   | 1 |
| LY6G6E    | 0 | 0         | 0   | 1 |
| MIR1236   | 0 | 0         | 0   | 1 |
| TNXB      | 0 | 0         | 0   | 1 |
| C6orf10   | 0 | 0         | 0   | 1 |
| BTNL2     | 0 | 0         | 0   | 1 |
| HLA-DQB1  | 0 | 0         | 0   | 1 |
| HLA-DQB2  | 0 | 0         | 0   | 1 |
| HLA-DOA   | 0 | 0         | 0   | 1 |

|              |   |            |     |   |
|--------------|---|------------|-----|---|
| IP6K3        | 0 | 0          | 0   | 1 |
| MLN          | 0 | 0          | 0   | 1 |
| LOC100507584 | 0 | 0.00279482 | inf | 1 |
| MIR1275      | 0 | 0          | 0   | 1 |
| GRM4         | 0 | 0          | 0   | 1 |
| MIR5690      | 0 | 0          | 0   | 1 |
| CLPS         | 0 | 0          | 0   | 1 |
| C6orf222     | 0 | 0          | 0   | 1 |
| ETV7         | 0 | 0          | 0   | 1 |
| MIR3925      | 0 | 0          | 0   | 1 |
| MIR4462      | 0 | 0          | 0   | 1 |
| MDGA1        | 0 | 0          | 0   | 1 |
| LOC100131047 | 0 | 0          | 0   | 1 |
| KCNK17       | 0 | 0          | 0   | 1 |
| KCNK16       | 0 | 0          | 0   | 1 |
| KIF6         | 0 | 0          | 0   | 1 |
| MOCS1        | 0 | 0          | 0   | 1 |
| FLJ41649     | 0 | 0          | 0   | 1 |
| LRFN2        | 0 | 0          | 0   | 1 |
| TREML1       | 0 | 0          | 0   | 1 |
| TREML2       | 0 | 0          | 0   | 1 |
| TREML3P      | 0 | 0          | 0   | 1 |
| PGC          | 0 | 0          | 0   | 1 |
| MIR586       | 0 | 0          | 0   | 1 |
| CLIC5        | 0 | 0.00173019 | inf | 1 |
| PLA2G7       | 0 | 0          | 0   | 1 |
| GPR116       | 0 | 0          | 0   | 1 |
| GPR110       | 0 | 0          | 0   | 1 |
| RHAG         | 0 | 0          | 0   | 1 |
| CRISP2       | 0 | 0          | 0   | 1 |
| CRISP3       | 0 | 0          | 0   | 1 |
| PGK2         | 0 | 0          | 0   | 1 |
| CRISP1       | 0 | 0          | 0   | 1 |
| DEFB133      | 0 | 0          | 0   | 1 |
| DEFB114      | 0 | 0          | 0   | 1 |
| DEFB113      | 0 | 0          | 0   | 1 |
| DEFB110      | 0 | 0          | 0   | 1 |
| DEFB112      | 0 | 0          | 0   | 1 |
| PKHD1        | 0 | 0          | 0   | 1 |
| GSTA7P       | 0 | 0          | 0   | 1 |
| GSTA2        | 0 | 0          | 0   | 1 |
| GSTA1        | 0 | 0          | 0   | 1 |
| GSTA5        | 0 | 0          | 0   | 1 |
| GSTA3        | 0 | 0          | 0   | 1 |
| ELOVL5       | 0 | 0          | 0   | 1 |
| RPS16P5      | 0 | 0          | 0   | 1 |
| HMGCLL1      | 0 | 0          | 0   | 1 |
| BMP5         | 0 | 0          | 0   | 1 |
| COL21A1      | 0 | 0          | 0   | 1 |



|              |   |            |     |   |
|--------------|---|------------|-----|---|
| RNU6-71      | 0 | 0          | 0   | 1 |
| KHDRBS2      | 0 | 0          | 0   | 1 |
| COL9A1       | 0 | 0          | 0   | 1 |
| MIR30C2      | 0 | 0          | 0   | 1 |
| MIR30A       | 0 | 0          | 0   | 1 |
| MIR4282      | 0 | 0          | 0   | 1 |
| KCNQ5-AS1    | 0 | 0          | 0   | 1 |
| KHDC1L       | 0 | 0          | 0   | 1 |
| KHDC1        | 0 | 0          | 0   | 1 |
| DPPA5        | 0 | 0          | 0   | 1 |
| IMPG1        | 0 | 0          | 0   | 1 |
| HTR1B        | 0 | 0          | 0   | 1 |
| C6orf7       | 0 | 0          | 0   | 1 |
| ELOVL4       | 0 | 0          | 0   | 1 |
| ME1          | 0 | 0          | 0   | 1 |
| SNAP91       | 0 | 0          | 0   | 1 |
| TBX18        | 0 | 0          | 0   | 1 |
| SNORD50B     | 0 | 0          | 0   | 1 |
| CGA          | 0 | 0          | 0   | 1 |
| CNR1         | 0 | 0          | 0   | 1 |
| GABRR1       | 0 | 0          | 0   | 1 |
| GABRR2       | 0 | 0.0244928  | inf | 1 |
| RRAGD        | 0 | 0          | 0   | 1 |
| EPHA7        | 0 | 0          | 0   | 1 |
| MIR548H3     | 0 | 0          | 0   | 1 |
| MCHR2        | 0 | 0          | 0   | 1 |
| LINC00577    | 0 | 0          | 0   | 1 |
| POPDC3       | 0 | 0.00652438 | inf | 1 |
| LOC100422737 | 0 | 0          | 0   | 1 |
| SCML4        | 0 | 0          | 0   | 1 |
| METTL24      | 0 | 0.0120988  | inf | 1 |
| DDO          | 0 | 0.00745618 | inf | 1 |
| SLC22A16     | 0 | 0          | 0   | 1 |
| HS3ST5       | 0 | 0          | 0   | 1 |
| BET3L        | 0 | 0          | 0   | 1 |
| FAM162B      | 0 | 0          | 0   | 1 |
| GPRC6A       | 0 | 0          | 0   | 1 |
| ROS1         | 0 | 0          | 0   | 1 |
| FAM184A      | 0 | 0          | 0   | 1 |
| MIR548B      | 0 | 0          | 0   | 1 |
| LOC285762    | 0 | 0          | 0   | 1 |
| TRDN         | 0 | 0          | 0   | 1 |
| MIR5695      | 0 | 0          | 0   | 1 |
| THEMIS       | 0 | 0.00250013 | inf | 1 |
| TMEM244      | 0 | 0          | 0   | 1 |
| SAMD3        | 0 | 0.00475754 | inf | 1 |
| MOXD1        | 0 | 0          | 0   | 1 |
| TAAR5        | 0 | 0          | 0   | 1 |
| TAAR3        | 0 | 0          | 0   | 1 |

|              |   |            |     |   |
|--------------|---|------------|-----|---|
| TAAR2        | 0 | 0          | 0   | 1 |
| TAAR1        | 0 | 0          | 0   | 1 |
| VNN1         | 0 | 0          | 0   | 1 |
| VNN3         | 0 | 0          | 0   | 1 |
| VNN2         | 0 | 0          | 0   | 1 |
| MIR3662      | 0 | 0          | 0   | 1 |
| IL22RA2      | 0 | 0          | 0   | 1 |
| OLIG3        | 0 | 0          | 0   | 1 |
| MIR3145      | 0 | 0          | 0   | 1 |
| LOC645434    | 0 | 0          | 0   | 1 |
| NMBR         | 0 | 0.0119814  | inf | 1 |
| LOC153910    | 0 | 0          | 0   | 1 |
| LOC729176    | 0 | 0.00776833 | inf | 1 |
| LOC100128176 | 0 | 0.00405755 | inf | 1 |
| IPCEF1       | 0 | 0.00264971 | inf | 1 |
| NOX3         | 0 | 0          | 0   | 1 |
| MIR4466      | 0 | 0          | 0   | 1 |
| MIR3918      | 0 | 0          | 0   | 1 |
| TAGAP        | 0 | 0.00763452 | inf | 1 |
| SLC22A2      | 0 | 0          | 0   | 1 |
| PACRG-AS1    | 0 | 0          | 0   | 1 |
| DKFZp451B082 | 0 | 0          | 0   | 1 |
| CAHM         | 0 | 0          | 0   | 1 |
| C6orf118     | 0 | 0          | 0   | 1 |
| PDE10A       | 0 | 0          | 0   | 1 |
| LINC00473    | 0 | 0          | 0   | 1 |
| T            | 0 | 0          | 0   | 1 |
| PRR18        | 0 | 0.035195   | inf | 1 |
| RPS6KA2-IT1  | 0 | 0          | 0   | 1 |
| MIR1913      | 0 | 0          | 0   | 1 |
| MIR3939      | 0 | 0          | 0   | 1 |
| GPR31        | 0 | 0          | 0   | 1 |
| TCP10        | 0 | 0          | 0   | 1 |
| HGC6.3       | 0 | 0          | 0   | 1 |
| FRMD1        | 0 | 0          | 0   | 1 |
| DACT2        | 0 | 0          | 0   | 1 |
| LOC154449    | 0 | 0          | 0   | 1 |
| FAM20C       | 0 | 0          | 0   | 1 |
| LOC100288524 | 0 | 0          | 0   | 1 |
| LOC442497    | 0 | 0          | 0   | 1 |
| UNCX         | 0 | 0          | 0   | 1 |
| SDK1         | 0 | 0          | 0   | 1 |
| NXPH1        | 0 | 0          | 0   | 1 |
| PER4         | 0 | 0          | 0   | 1 |
| LOC100506025 | 0 | 0.00462733 | inf | 1 |
| LRRC72       | 0 | 0          | 0   | 1 |
| MACC1-AS1    | 0 | 0          | 0   | 1 |
| ABCB5        | 0 | 0          | 0   | 1 |
| LOC100506178 | 0 | 0          | 0   | 1 |

|              |   |            |     |   |
|--------------|---|------------|-----|---|
| IL6          | 0 | 0          | 0   | 1 |
| NPY          | 0 | 0          | 0   | 1 |
| C7orf71      | 0 | 0.00553307 | inf | 1 |
| EVX1         | 0 | 0          | 0   | 1 |
| LOC100506497 | 0 | 0          | 0   | 1 |
| WIPF3        | 0 | 0          | 0   | 1 |
| MIR550A1     | 0 | 0          | 0   | 1 |
| GHRHR        | 0 | 0          | 0   | 1 |
| CCDC129      | 0 | 0          | 0   | 1 |
| PPP1R17      | 0 | 0          | 0   | 1 |
| NPSR1        | 0 | 0          | 0   | 1 |
| LOC401324    | 0 | 0          | 0   | 1 |
| GPR141       | 0 | 0          | 0   | 1 |
| NME8         | 0 | 0          | 0   | 1 |
| EPDR1        | 0 | 0          | 0   | 1 |
| POU6F2       | 0 | 0          | 0   | 1 |
| INHBA-AS1    | 0 | 0          | 0   | 1 |
| MIR3943      | 0 | 0          | 0   | 1 |
| MIR4649      | 0 | 0          | 0   | 1 |
| RAMP3        | 0 | 0          | 0   | 1 |
| IGFBP1       | 0 | 0          | 0   | 1 |
| C7orf65      | 0 | 0          | 0   | 1 |
| LINC00525    | 0 | 0          | 0   | 1 |
| C7orf69      | 0 | 0          | 0   | 1 |
| CDC14C       | 0 | 0.00346295 | inf | 1 |
| VWC2         | 0 | 0          | 0   | 1 |
| C7orf72      | 0 | 0          | 0   | 1 |
| IKZF1        | 0 | 0          | 0   | 1 |
| LOC100129427 | 0 | 0          | 0   | 1 |
| POM121L12    | 0 | 0          | 0   | 1 |
| VSTM2A       | 0 | 0          | 0   | 1 |
| LOC285878    | 0 | 0          | 0   | 1 |
| DKFZp434L192 | 0 | 0          | 0   | 1 |
| MIR3147      | 0 | 0          | 0   | 1 |
| ZNF716       | 0 | 0          | 0   | 1 |
| LOC100287704 | 0 | 0          | 0   | 1 |
| MIR4283-2    | 0 | 0          | 0   | 1 |
| ZNF727       | 0 | 0          | 0   | 1 |
| ZNF735       | 0 | 0          | 0   | 1 |
| ZNF679       | 0 | 0          | 0   | 1 |
| ZNF736       | 0 | 0          | 0   | 1 |
| LOC641746    | 0 | 0          | 0   | 1 |
| WBSCR17      | 0 | 0.00414526 | inf | 1 |
| MIR3914-2    | 0 | 0          | 0   | 1 |
| MIR4650-1    | 0 | 0          | 0   | 1 |
| PMS2L2       | 0 | 0          | 0   | 1 |
| NCF1B        | 0 | 0.0128584  | inf | 1 |
| FZD9         | 0 | 0          | 0   | 1 |
| MIR4284      | 0 | 0          | 0   | 1 |

|           |   |                |   |   |
|-----------|---|----------------|---|---|
| MIR590    | 0 | 0              | 0 | 1 |
| GATSL1    | 0 | 0              | 0 | 1 |
| SPDYE8P   | 0 | 0              | 0 | 1 |
| SPDYE8P   | 0 | 0              | 0 | 1 |
| MIR4651   | 0 | 0              | 0 | 1 |
| SNORA14A  | 0 | 0              | 0 | 1 |
| RPL13AP17 | 0 | 0              | 0 | 1 |
| MAGI2-AS2 | 0 | 0              | 0 | 1 |
| MIR548M   | 0 | 0              | 0 | 1 |
| CD36      | 0 | 0              | 0 | 1 |
| ZNF804B   | 0 | 0              | 0 | 1 |
| MIR4652   | 0 | 0              | 0 | 1 |
| GNGT1     | 0 | 0              | 0 | 1 |
| GNG11     | 0 | 0              | 0 | 1 |
| COL1A2    | 0 | 0              | 0 | 1 |
| PEG10     | 0 | 0              | 0 | 1 |
| DLX6      | 0 | 0              | 0 | 1 |
| TAC1      | 0 | 0              | 0 | 1 |
| NPTX2     | 0 | 0              | 0 | 1 |
| MIR3609   | 0 | 0              | 0 | 1 |
| AZGP1P1   | 0 | 0              | 0 | 1 |
| ZAN       | 0 | 0              | 0 | 1 |
| MUC17     | 0 | 0              | 0 | 1 |
| MIR4653   | 0 | 0              | 0 | 1 |
| MIR4285   | 0 | 0              | 0 | 1 |
| MIR4467   | 0 | 0              | 0 | 1 |
| SPDYE2L   | 0 | 0              | 0 | 1 |
| LHFPL3    | 0 | 0.0031897 inf  |   | 1 |
| PIK3CG    | 0 | 0              | 0 | 1 |
| PRKAR2B   | 0 | 0.0023042 inf  |   | 1 |
| FOXP2     | 0 | 0              | 0 | 1 |
| MIR3666   | 0 | 0              | 0 | 1 |
| MDFIC     | 0 | 0              | 0 | 1 |
| ANKRD7    | 0 | 0              | 0 | 1 |
| KCND2     | 0 | 0              | 0 | 1 |
| PTPRZ1    | 0 | 0.00327052 inf |   | 1 |
| ASB15     | 0 | 0              | 0 | 1 |
| HYALP1    | 0 | 0              | 0 | 1 |
| HYAL4     | 0 | 0              | 0 | 1 |
| SPAM1     | 0 | 0              | 0 | 1 |
| MIR593    | 0 | 0              | 0 | 1 |
| MIR129-1  | 0 | 0              | 0 | 1 |
| CPA5      | 0 | 0              | 0 | 1 |
| CPA1      | 0 | 0              | 0 | 1 |
| MIR335    | 0 | 0              | 0 | 1 |
| FLJ40288  | 0 | 0              | 0 | 1 |
| AKR1B10   | 0 | 0.0110074 inf  |   | 1 |
| STRA8     | 0 | 0              | 0 | 1 |
| CHRM2     | 0 | 0              | 0 | 1 |

|                |   |            |     |   |
|----------------|---|------------|-----|---|
| MIR490         | 0 | 0          | 0   | 1 |
| AKR1D1         | 0 | 0.00352269 | inf | 1 |
| MIR4468        | 0 | 0          | 0   | 1 |
| TMEM213        | 0 | 0.00323753 | inf | 1 |
| CLEC2L         | 0 | 0          | 0   | 1 |
| OR9A4          | 0 | 0          | 0   | 1 |
| LOC93432       | 0 | 0          | 0   | 1 |
| PRSS2          | 0 | 0          | 0   | 1 |
| C7orf34        | 0 | 0          | 0   | 1 |
| OR6V1          | 0 | 0          | 0   | 1 |
| PIP            | 0 | 0          | 0   | 1 |
| TAS2R39        | 0 | 0          | 0   | 1 |
| TAS2R40        | 0 | 0          | 0   | 1 |
| TAS2R60        | 0 | 0          | 0   | 1 |
| TAS2R41        | 0 | 0          | 0   | 1 |
| OR2F2          | 0 | 0          | 0   | 1 |
| OR2F1          | 0 | 0          | 0   | 1 |
| OR6B1          | 0 | 0          | 0   | 1 |
| OR2A5          | 0 | 0          | 0   | 1 |
| OR2A25         | 0 | 0          | 0   | 1 |
| OR2A12         | 0 | 0.0146383  | inf | 1 |
| OR2A2          | 0 | 0          | 0   | 1 |
| OR2A14         | 0 | 0          | 0   | 1 |
| OR2A20P,OR2A9  | 0 | 0          | 0   | 1 |
| RNU6-57        | 0 | 0          | 0   | 1 |
| MIR548AQ       | 0 | 0          | 0   | 1 |
| MIR548F3       | 0 | 0          | 0   | 1 |
| MIR548T        | 0 | 0          | 0   | 1 |
| C7orf33        | 0 | 0          | 0   | 1 |
| KRBA1          | 0 | 0          | 0   | 1 |
| RNU6-33        | 0 | 0          | 0   | 1 |
| LOC285972      | 0 | 0          | 0   | 1 |
| GIMAP7         | 0 | 0          | 0   | 1 |
| GIMAP4         | 0 | 0          | 0   | 1 |
| GIMAP1,GIMAP1- | 0 | 0.00283251 | inf | 1 |
| TMEM176A       | 0 | 0          | 0   | 1 |
| ABP1           | 0 | 0.0110206  | inf | 1 |
| WDR86-AS1      | 0 | 0          | 0   | 1 |
| GALNTL5        | 0 | 0          | 0   | 1 |
| HTR5A          | 0 | 0          | 0   | 1 |
| LOC100506585   | 0 | 0          | 0   | 1 |
| MIR5707        | 0 | 0          | 0   | 1 |
| LINC00689      | 0 | 0          | 0   | 1 |
| MIR339         | 0 | 25.9123    | inf | 1 |
| MIR4655        | 0 | 0          | 0   | 1 |
| CARD11         | 0 | 0          | 0   | 1 |
| MIR4656        | 0 | 0          | 0   | 1 |
| RADIL          | 0 | 0          | 0   | 1 |
| PAPOLB         | 0 | 0          | 0   | 1 |

|              |   |               |   |   |
|--------------|---|---------------|---|---|
| MMD2         | 0 | 0             | 0 | 1 |
| MIR589       | 0 | 0             | 0 | 1 |
| RNF216-IT1   | 0 | 0             | 0 | 1 |
| COL28A1      | 0 | 0             | 0 | 1 |
| THSD7A       | 0 | 0             | 0 | 1 |
| VWDE         | 0 | 0             | 0 | 1 |
| DGKB         | 0 | 0             | 0 | 1 |
| AGMO         | 0 | 0             | 0 | 1 |
| MEOX2        | 0 | 0             | 0 | 1 |
| SOSTDC1      | 0 | 0             | 0 | 1 |
| AGR2         | 0 | 0             | 0 | 1 |
| AGR3         | 0 | 0             | 0 | 1 |
| PRPS1L1      | 0 | 0             | 0 | 1 |
| TWIST1       | 0 | 0             | 0 | 1 |
| FERD3L       | 0 | 0             | 0 | 1 |
| MIR3146      | 0 | 0             | 0 | 1 |
| TMEM196      | 0 | 0             | 0 | 1 |
| CLK2P        | 0 | 0             | 0 | 1 |
| NPVF         | 0 | 0             | 0 | 1 |
| RNU6-16      | 0 | 0             | 0 | 1 |
| MIR148A      | 0 | 0             | 0 | 1 |
| KIAA0087     | 0 | 0.0022839 inf |   | 1 |
| MIR196B      | 0 | 0             | 0 | 1 |
| TRIL         | 0 | 0             | 0 | 1 |
| MIR550A3     | 0 | 0             | 0 | 1 |
| NEUROD6      | 0 | 0             | 0 | 1 |
| PDE1C        | 0 | 0             | 0 | 1 |
| LOC100130673 | 0 | 0             | 0 | 1 |
| MIR550B2     | 0 | 0             | 0 | 1 |
| NPSR1-AS1    | 0 | 0             | 0 | 1 |
| DPY19L2P1    | 0 | 0             | 0 | 1 |
| TBX20        | 0 | 0             | 0 | 1 |
| AOAH         | 0 | 0             | 0 | 1 |
| AOAH-IT1     | 0 | 0             | 0 | 1 |
| ELMO1        | 0 | 0             | 0 | 1 |
| MIR1200      | 0 | 0             | 0 | 1 |
| SFRP4        | 0 | 0             | 0 | 1 |
| TARP         | 0 | 0             | 0 | 1 |
| AMPH         | 0 | 0             | 0 | 1 |
| POU6F2-AS1   | 0 | 0             | 0 | 1 |
| GLI3         | 0 | 0             | 0 | 1 |
| MYL7         | 0 | 0             | 0 | 1 |
| GCK          | 0 | 0             | 0 | 1 |
| SNORA5B      | 0 | 0             | 0 | 1 |
| IGFBP3       | 0 | 0             | 0 | 1 |
| TNS3         | 0 | 0             | 0 | 1 |
| ZPBP         | 0 | 0             | 0 | 1 |
| FLJ45974     | 0 | 0             | 0 | 1 |
| HPVC1        | 0 | 0             | 0 | 1 |

|              |   |            |     |   |
|--------------|---|------------|-----|---|
| NUPR1L       | 0 | 0          | 0   | 1 |
| LOC650226    | 0 | 0          | 0   | 1 |
| LOC100130849 | 0 | 0          | 0   | 1 |
| MIR4283-2    | 0 | 0          | 0   | 1 |
| GUSBP10      | 0 | 0          | 0   | 1 |
| LOC100287834 | 0 | 0          | 0   | 1 |
| LOC100506050 | 0 | 0          | 0   | 1 |
| MIR4650-1    | 0 | 0          | 0   | 1 |
| MIR3914-1    | 0 | 0          | 0   | 1 |
| LOC100093631 | 0 | 0.00327525 | inf | 1 |
| PMS2L2       | 0 | 0          | 0   | 1 |
| CCL24        | 0 | 0          | 0   | 1 |
| MIR548AU     | 0 | 0          | 0   | 1 |
| GNAT3        | 0 | 0          | 0   | 1 |
| ABCB1        | 0 | 0          | 0   | 1 |
| C7orf62      | 0 | 0          | 0   | 1 |
| MTERF        | 0 | 0          | 0   | 1 |
| MIR653       | 0 | 0          | 0   | 1 |
| MIR489       | 0 | 0          | 0   | 1 |
| TFPI2        | 0 | 0          | 0   | 1 |
| SGCE         | 0 | 0          | 0   | 1 |
| MIR591       | 0 | 0          | 0   | 1 |
| C7orf76      | 0 | 0          | 0   | 1 |
| DLX6-AS1     | 0 | 0          | 0   | 1 |
| DLX5         | 0 | 0          | 0   | 1 |
| OCM2         | 0 | 0          | 0   | 1 |
| OR2AE1       | 0 | 0.01241    | inf | 1 |
| MIR25        | 0 | 0          | 0   | 1 |
| MIR93        | 0 | 82.8847    | inf | 1 |
| MIR106B      | 0 | 0          | 0   | 1 |
| ACTL6B       | 0 | 0.0103393  | inf | 1 |
| MYL10        | 0 | 0          | 0   | 1 |
| SLC26A5      | 0 | 0          | 0   | 1 |
| LHFPL3-AS1   | 0 | 0          | 0   | 1 |
| LHFPL3-AS2   | 0 | 0          | 0   | 1 |
| SLC26A4-AS1  | 0 | 0          | 0   | 1 |
| SLC26A3      | 0 | 0.00683504 | inf | 1 |
| LAMB4        | 0 | 0          | 0   | 1 |
| NRCAM        | 0 | 0          | 0   | 1 |
| C7orf66      | 0 | 0          | 0   | 1 |
| EIF3IP1      | 0 | 0          | 0   | 1 |
| PPP1R3A      | 0 | 0          | 0   | 1 |
| TFEC         | 0 | 0          | 0   | 1 |
| ST7-AS2      | 0 | 0.023718   | inf | 1 |
| WNT2         | 0 | 0          | 0   | 1 |
| ASZ1         | 0 | 0.00304636 | inf | 1 |
| TAS2R16      | 0 | 0          | 0   | 1 |
| TMEM229A     | 0 | 0          | 0   | 1 |
| GPR37        | 0 | 0          | 0   | 1 |

|               |   |            |     |   |
|---------------|---|------------|-----|---|
| LOC154872     | 0 | 0          | 0   | 1 |
| MIR592        | 0 | 0          | 0   | 1 |
| PAX4          | 0 | 0          | 0   | 1 |
| MIR182        | 0 | 0          | 0   | 1 |
| MIR96         | 0 | 0          | 0   | 1 |
| MIR183        | 0 | 0          | 0   | 1 |
| KLF14         | 0 | 0          | 0   | 1 |
| MIR29A        | 0 | 0          | 0   | 1 |
| MIR29B1       | 0 | 0          | 0   | 1 |
| FAM180A       | 0 | 0          | 0   | 1 |
| LOC349160     | 0 | 0.0066852  | inf | 1 |
| SVOPL         | 0 | 0          | 0   | 1 |
| KLRG2         | 0 | 0          | 0   | 1 |
| PRSS37        | 0 | 0.0109882  | inf | 1 |
| CLEC5A        | 0 | 0          | 0   | 1 |
| TAS2R38       | 0 | 0          | 0   | 1 |
| MOXD2P        | 0 | 0          | 0   | 1 |
| PRSS58        | 0 | 0          | 0   | 1 |
| LOC730441     | 0 | 0          | 0   | 1 |
| OR9A2         | 0 | 0          | 0   | 1 |
| EPHA1         | 0 | 0.00811966 | inf | 1 |
| RNU6-57       | 0 | 0          | 0   | 1 |
| OR2A20P,OR2A9 | 0 | 0          | 0   | 1 |
| NOBOX         | 0 | 0          | 0   | 1 |
| MIR548I4      | 0 | 0          | 0   | 1 |
| MIR548F4      | 0 | 0          | 0   | 1 |
| ATP6V0E2-AS1  | 0 | 0          | 0   | 1 |
| RARRES2       | 0 | 0.02527    | inf | 1 |
| GBX1          | 0 | 0          | 0   | 1 |
| ASB10         | 0 | 0          | 0   | 1 |
| WDR86         | 0 | 0          | 0   | 1 |
| CRYGN         | 0 | 0.0270731  | inf | 1 |
| MIR3907       | 0 | 0          | 0   | 1 |
| LOC100128264  | 0 | 0          | 0   | 1 |
| CNPY1         | 0 | 0          | 0   | 1 |
| SHH           | 0 | 0          | 0   | 1 |
| LOC285889     | 0 | 0.00420534 | inf | 1 |
| MIR153-2      | 0 | 0          | 0   | 1 |
| MIR595        | 0 | 0          | 0   | 1 |
| VIPR2         | 0 | 0.00405814 | inf | 1 |
| ERICH1-AS1    | 0 | 0          | 0   | 1 |
| DLGAP2        | 0 | 0          | 0   | 1 |
| MIR596        | 0 | 0          | 0   | 1 |
| MIR4659A      | 0 | 0          | 0   | 1 |
| LOC100652791  | 0 | 0          | 0   | 1 |
| DEFB109P1B    | 0 | 0          | 0   | 1 |
| USP17L1P      | 0 | 0          | 0   | 1 |
| USP17L4       | 0 | 0          | 0   | 1 |
| DEFB105B      | 0 | 0          | 0   | 1 |



|               |   |            |     |   |
|---------------|---|------------|-----|---|
| DEFB107A      | 0 | 0          | 0   | 1 |
| DEFB106B      | 0 | 0          | 0   | 1 |
| DEFB104B      | 0 | 0          | 0   | 1 |
| SPAG11A,SPAG1 | 0 | 0          | 0   | 1 |
| DEFB103A,DEFB | 0 | 0          | 0   | 1 |
| DEFB4A        | 0 | 0.0738628  | inf | 1 |
| ZNF705B       | 0 | 0          | 0   | 1 |
| FAM66E        | 0 | 0          | 0   | 1 |
| MIR4660       | 0 | 0          | 0   | 1 |
| MIR597        | 0 | 0          | 0   | 1 |
| PRSS55        | 0 | 0          | 0   | 1 |
| C8orf74       | 0 | 0          | 0   | 1 |
| LINC00208     | 0 | 0          | 0   | 1 |
| DEFB135       | 0 | 0          | 0   | 1 |
| FAM66D        | 0 | 0          | 0   | 1 |
| FAM66A        | 0 | 0          | 0   | 1 |
| MIR3926-2     | 0 | 0          | 0   | 1 |
| TUSC3         | 0 | 0          | 0   | 1 |
| EFHA2         | 0 | 0          | 0   | 1 |
| LPL           | 0 | 0          | 0   | 1 |
| LZTS1-AS1     | 0 | 0          | 0   | 1 |
| LOC286114     | 0 | 0          | 0   | 1 |
| ADAM28        | 0 | 0          | 0   | 1 |
| ADAMDEC1      | 0 | 0          | 0   | 1 |
| ADAM7         | 0 | 0          | 0   | 1 |
| NEFM          | 0 | 0          | 0   | 1 |
| MIR3622A      | 0 | 0          | 0   | 1 |
| PNOC          | 0 | 0          | 0   | 1 |
| LOC286135     | 0 | 0          | 0   | 1 |
| SMIM18        | 0 | 0          | 0   | 1 |
| NRG1          | 0 | 0          | 0   | 1 |
| NRG1-IT3      | 0 | 0          | 0   | 1 |
| UNC5D         | 0 | 0.00139649 | inf | 1 |
| KCNU1         | 0 | 0          | 0   | 1 |
| LOC100130964  | 0 | 0          | 0   | 1 |
| ADAM18        | 0 | 0          | 0   | 1 |
| IDO2          | 0 | 0          | 0   | 1 |
| C8orf4        | 0 | 0          | 0   | 1 |
| CHRN3         | 0 | 0          | 0   | 1 |
| POTEA         | 0 | 0          | 0   | 1 |
| LINC00293     | 0 | 0          | 0   | 1 |
| C8orf22       | 0 | 0          | 0   | 1 |
| SNTG1         | 0 | 0          | 0   | 1 |
| NPBWR1        | 0 | 0          | 0   | 1 |
| RP1           | 0 | 0          | 0   | 1 |
| XKR4          | 0 | 0          | 0   | 1 |
| LOC100507651  | 0 | 0          | 0   | 1 |
| LOC286177     | 0 | 0          | 0   | 1 |
| LINC00588     | 0 | 0          | 0   | 1 |

|              |        |                |   |   |
|--------------|--------|----------------|---|---|
| SDCBP        | 64.506 | 70.1229        | 0 | 1 |
| MIR4470      | 0      | 0              | 0 | 1 |
| NKAIN3       | 0      | 0              | 0 | 1 |
| UG0898H09    | 0      | 0              | 0 | 1 |
| LOC286184    | 0      | 0.00268057 inf |   | 1 |
| LOC100130155 | 0      | 0              | 0 | 1 |
| MIR124-2     | 0      | 0              | 0 | 1 |
| BHLHE22      | 0      | 0              | 0 | 1 |
| LOC100505659 | 0      | 0              | 0 | 1 |
| C8orf34      | 0      | 0              | 0 | 1 |
| LOC100132891 | 0      | 0              | 0 | 1 |
| RNU6-83      | 0      | 0              | 0 | 1 |
| KCNB2        | 0      | 0              | 0 | 1 |
| MIR5681A     | 0      | 0              | 0 | 1 |
| FLJ39080     | 0      | 0              | 0 | 1 |
| MIR2052      | 0      | 0              | 0 | 1 |
| CRISPLD1     | 0      | 0              | 0 | 1 |
| PKIA         | 0      | 0              | 0 | 1 |
| STMN2        | 0      | 0              | 0 | 1 |
| MIR5708      | 0      | 0              | 0 | 1 |
| ZBTB10       | 0      | 0              | 0 | 1 |
| RALYL        | 0      | 0              | 0 | 1 |
| REXO1L2P     | 0      | 0              | 0 | 1 |
| REXO1L2P     | 0      | 0              | 0 | 1 |
| CNBD1        | 0      | 0              | 0 | 1 |
| LINC00534    | 0      | 0              | 0 | 1 |
| MIR4661      | 0      | 0              | 0 | 1 |
| MIR3150A     | 0      | 0              | 0 | 1 |
| MIR4471      | 0      | 0              | 0 | 1 |
| NACAP1       | 0      | 0.0165973 inf  |   | 1 |
| GRHL2        | 0      | 0              | 0 | 1 |
| MIR5680      | 0      | 0              | 0 | 1 |
| ODF1         | 0      | 0              | 0 | 1 |
| MIR3151      | 0      | 0              | 0 | 1 |
| RIMS2        | 0      | 0              | 0 | 1 |
| DCSTAMP      | 0      | 0              | 0 | 1 |
| PKHD1L1      | 0      | 0              | 0 | 1 |
| MIR2053      | 0      | 0              | 0 | 1 |
| AARD         | 0      | 0              | 0 | 1 |
| SLC30A8      | 0      | 0              | 0 | 1 |
| MAL2         | 0      | 0.00329034 inf |   | 1 |
| COL14A1      | 0      | 0.0015484 inf  |   | 1 |
| FER1L6       | 0      | 0              | 0 | 1 |
| LOC157381    | 0      | 0              | 0 | 1 |
| MIR1204      | 0      | 0              | 0 | 1 |
| MIR1205      | 0      | 0              | 0 | 1 |
| MIR1206      | 0      | 0              | 0 | 1 |
| MIR1207      | 0      | 0              | 0 | 1 |
| MIR1208      | 0      | 0              | 0 | 1 |

|               |   |              |   |   |
|---------------|---|--------------|---|---|
| WISP1         | 0 | 0            | 0 | 1 |
| LOC286094     | 0 | 0            | 0 | 1 |
| KHDRBS3       | 0 | 0            | 0 | 1 |
| LOC731779     | 0 | 0            | 0 | 1 |
| MIR4472-1     | 0 | 0            | 0 | 1 |
| LINC00051     | 0 | 0            | 0 | 1 |
| GML           | 0 | 0            | 0 | 1 |
| SCXB          | 0 | 0            | 0 | 1 |
| FAM203A       | 0 | 0            | 0 | 1 |
| SCXA          | 0 | 0            | 0 | 1 |
| OR4F21        | 0 | 0            | 0 | 1 |
| LOC286083     | 0 | 0            | 0 | 1 |
| CSMD1         | 0 | 0            | 0 | 1 |
| MIR4659B      | 0 | 0            | 0 | 1 |
| XKR5          | 0 | 0            | 0 | 1 |
| DEFB1         | 0 | 0            | 0 | 1 |
| DEFA6         | 0 | 0            | 0 | 1 |
| DEFA4         | 0 | 0            | 0 | 1 |
| DEFA8P        | 0 | 0            | 0 | 1 |
| DEFA9P        | 0 | 0            | 0 | 1 |
| DEFA10P       | 0 | 0            | 0 | 1 |
| DEFA1B        | 0 | 0            | 0 | 1 |
| DEFT1P2       | 0 | 0            | 0 | 1 |
| DEFA1         | 0 | 0            | 0 | 1 |
| DEFT1P2       | 0 | 0            | 0 | 1 |
| DEFA1         | 0 | 0            | 0 | 1 |
| DEFA11P       | 0 | 0            | 0 | 1 |
| DEFA5         | 0 | 0.141592 inf |   | 1 |
| LOC349196     | 0 | 0            | 0 | 1 |
| LOC349196     | 0 | 0            | 0 | 1 |
| LOC349196     | 0 | 0            | 0 | 1 |
| FAM66B        | 0 | 0            | 0 | 1 |
| ZNF705G       | 0 | 0            | 0 | 1 |
| DEFB4B        | 0 | 0            | 0 | 1 |
| DEFB103A,DEFB | 0 | 0            | 0 | 1 |
| SPAG11B       | 0 | 0            | 0 | 1 |
| DEFB104A      | 0 | 0            | 0 | 1 |
| DEFB106B      | 0 | 0            | 0 | 1 |
| FAM90A7P      | 0 | 0            | 0 | 1 |
| FAM90A7P      | 0 | 0            | 0 | 1 |
| DEFB107B      | 0 | 0            | 0 | 1 |
| DEFB105A      | 0 | 0            | 0 | 1 |
| USP17L8       | 0 | 0            | 0 | 1 |
| USP17L3       | 0 | 0            | 0 | 1 |
| DEFB109P1B    | 0 | 0            | 0 | 1 |
| MIR548I3      | 0 | 0            | 0 | 1 |
| LINC00599     | 0 | 0            | 0 | 1 |
| MIR124-1      | 0 | 0            | 0 | 1 |
| MIR1322       | 0 | 0            | 0 | 1 |

|              |   |            |     |   |
|--------------|---|------------|-----|---|
| MIR598       | 0 | 0          | 0   | 1 |
| DEFB136      | 0 | 0          | 0   | 1 |
| LOC100133267 | 0 | 0          | 0   | 1 |
| LOC392196    | 0 | 0          | 0   | 1 |
| USP17L7      | 0 | 0          | 0   | 1 |
| USP17L2      | 0 | 0          | 0   | 1 |
| DEFB130      | 0 | 0          | 0   | 1 |
| LOC649352    | 0 | 0          | 0   | 1 |
| DEFB109P1    | 0 | 0          | 0   | 1 |
| MIR3926-1    | 0 | 0          | 0   | 1 |
| LOC340357    | 0 | 0          | 0   | 1 |
| MIR383       | 0 | 0          | 0   | 1 |
| FGF20        | 0 | 0          | 0   | 1 |
| FGL1         | 0 | 0          | 0   | 1 |
| LOC100128993 | 0 | 0          | 0   | 1 |
| SLC18A1      | 0 | 0          | 0   | 1 |
| LZTS1        | 0 | 0.00245399 | inf | 1 |
| GFRA2        | 0 | 0          | 0   | 1 |
| DOK2         | 0 | 0          | 0   | 1 |
| LGI3         | 0 | 0          | 0   | 1 |
| MIR320A      | 0 | 0          | 0   | 1 |
| PEBP4        | 0 | 0          | 0   | 1 |
| NKX2-6       | 0 | 0          | 0   | 1 |
| NEFL         | 0 | 0.00329666 | inf | 1 |
| EBF2         | 0 | 0          | 0   | 1 |
| STMN4        | 0 | 0.0104954  | inf | 1 |
| CHRNA2       | 0 | 0          | 0   | 1 |
| MIR3622B     | 0 | 0          | 0   | 1 |
| SCARA5       | 0 | 0          | 0   | 1 |
| MIR4287      | 0 | 0          | 0   | 1 |
| MIR4288      | 0 | 0          | 0   | 1 |
| LINC00589    | 0 | 0          | 0   | 1 |
| MIR3148      | 0 | 0          | 0   | 1 |
| MIR548O2     | 0 | 0          | 0   | 1 |
| TEX15        | 0 | 0          | 0   | 1 |
| PURG         | 0 | 0          | 0   | 1 |
| DUSP26       | 0 | 0          | 0   | 1 |
| GOT1L1       | 0 | 0          | 0   | 1 |
| ADRB3        | 0 | 0          | 0   | 1 |
| C8orf86      | 0 | 0          | 0   | 1 |
| ADAM3A       | 0 | 0          | 0   | 1 |
| ADAM2        | 0 | 0          | 0   | 1 |
| ZMAT4        | 0 | 0          | 0   | 1 |
| SFRP1        | 0 | 0          | 0   | 1 |
| NKX6-3       | 0 | 0          | 0   | 1 |
| MIR486       | 0 | 0          | 0   | 1 |
| CHRNA6       | 0 | 0          | 0   | 1 |
| EFCAB1       | 0 | 0          | 0   | 1 |
| PXDNL        | 0 | 0          | 0   | 1 |

|              |   |                |   |   |
|--------------|---|----------------|---|---|
| ST18         | 0 | 0              | 0 | 1 |
| OPRK1        | 0 | 0              | 0 | 1 |
| SBF1P1       | 0 | 0              | 0 | 1 |
| SNORD54      | 0 | 0              | 0 | 1 |
| MOS          | 0 | 0              | 0 | 1 |
| SDR16C5      | 0 | 0              | 0 | 1 |
| PENK         | 0 | 0              | 0 | 1 |
| LOC100507632 | 0 | 0              | 0 | 1 |
| CYP7A1       | 0 | 0              | 0 | 1 |
| TOX          | 0 | 0              | 0 | 1 |
| CA8          | 0 | 0              | 0 | 1 |
| LOC401463    | 0 | 0              | 0 | 1 |
| CYP7B1       | 0 | 0              | 0 | 1 |
| LINC00251    | 0 | 0              | 0 | 1 |
| CRH          | 0 | 0              | 0 | 1 |
| PTTG3P       | 0 | 0              | 0 | 1 |
| SNORD87      | 0 | 0              | 0 | 1 |
| TCF24        | 0 | 0              | 0 | 1 |
| PPP1R42      | 0 | 0.00955071 inf |   | 1 |
| CPA6         | 0 | 0              | 0 | 1 |
| LOC286189    | 0 | 0              | 0 | 1 |
| PRDM14       | 0 | 0              | 0 | 1 |
| EYA1         | 0 | 0.00266097 inf |   | 1 |
| MSC          | 0 | 0              | 0 | 1 |
| TRPA1        | 0 | 0              | 0 | 1 |
| LOC392232    | 0 | 0              | 0 | 1 |
| MIR5681B     | 0 | 0              | 0 | 1 |
| ZFHx4-AS1    | 0 | 0              | 0 | 1 |
| PMP2         | 0 | 0.00230708 inf |   | 1 |
| FABP9        | 0 | 0              | 0 | 1 |
| FABP4        | 0 | 0              | 0 | 1 |
| CA1          | 0 | 0              | 0 | 1 |
| REXO1L2P     | 0 | 0              | 0 | 1 |
| REXO1L1      | 0 | 0              | 0 | 1 |
| REXO1L2P     | 0 | 0              | 0 | 1 |
| REXO1L1      | 0 | 0.00170394 inf |   | 1 |
| REXO1L2P     | 0 | 0              | 0 | 1 |
| REXO1L2P     | 0 | 0              | 0 | 1 |
| REXO1L2P     | 0 | 0              | 0 | 1 |
| REXO1L2P     | 0 | 0              | 0 | 1 |
| PSKH2        | 0 | 0              | 0 | 1 |
| SLC7A13      | 0 | 0              | 0 | 1 |
| CNGB3        | 0 | 0              | 0 | 1 |
| DCAF4L2      | 0 | 0              | 0 | 1 |
| MMP16        | 0 | 0              | 0 | 1 |
| CALB1        | 0 | 0.00349591 inf |   | 1 |
| FLJ46284     | 0 | 0              | 0 | 1 |
| C8orf87      | 0 | 0              | 0 | 1 |
| MIR378D2     | 0 | 0              | 0 | 1 |

|              |   |            |     |   |
|--------------|---|------------|-----|---|
| MIR3150B     | 0 | 0          | 0   | 1 |
| C8orf69      | 0 | 0          | 0   | 1 |
| LOC100500773 | 0 | 0          | 0   | 1 |
| GDF6         | 0 | 0          | 0   | 1 |
| TSPYL5       | 0 | 0          | 0   | 1 |
| MIR599       | 0 | 0          | 0   | 1 |
| MIR875       | 0 | 0          | 0   | 1 |
| RGS22        | 0 | 0          | 0   | 1 |
| C8orf56      | 0 | 0          | 0   | 1 |
| ANGPT1       | 0 | 0          | 0   | 1 |
| RSPO2        | 0 | 0.00295407 | inf | 1 |
| KCNV1        | 0 | 0          | 0   | 1 |
| TNFRSF11B    | 0 | 0.00444235 | inf | 1 |
| ENPP2        | 0 | 0          | 0   | 1 |
| MIR4663      | 0 | 0          | 0   | 1 |
| KLHL38       | 0 | 0          | 0   | 1 |
| ANXA13       | 0 | 0          | 0   | 1 |
| FER1L6-AS1   | 0 | 0          | 0   | 1 |
| LOC727677    | 0 | 0          | 0   | 1 |
| LOC728724    | 0 | 0          | 0   | 1 |
| GSDMC        | 0 | 0.00325767 | inf | 1 |
| MIR5194      | 0 | 0          | 0   | 1 |
| ADCY8        | 0 | 0          | 0   | 1 |
| OC90         | 0 | 0          | 0   | 1 |
| SLA          | 0 | 0          | 0   | 1 |
| MIR30B       | 0 | 0          | 0   | 1 |
| MIR30D       | 0 | 0          | 0   | 1 |
| FAM135B      | 0 | 0          | 0   | 1 |
| COL22A1      | 0 | 0          | 0   | 1 |
| KCNK9        | 0 | 0          | 0   | 1 |
| GPR20        | 0 | 0          | 0   | 1 |
| MROH5        | 0 | 0          | 0   | 1 |
| SLURP1       | 0 | 0          | 0   | 1 |
| LYPD2        | 0 | 0          | 0   | 1 |
| LYNX1        | 0 | 0          | 0   | 1 |
| LY6D         | 0 | 0          | 0   | 1 |
| CYP11B1      | 0 | 0          | 0   | 1 |
| CYP11B2      | 0 | 0          | 0   | 1 |
| LY6H         | 0 | 0          | 0   | 1 |
| MIR4664      | 0 | 0          | 0   | 1 |
| MIR661       | 0 | 0          | 0   | 1 |
| DDX11L5      | 0 | 0          | 0   | 1 |
| DMRT3        | 0 | 0          | 0   | 1 |
| VLDLR        | 0 | 0.00288687 | inf | 1 |
| GLIS3-AS1    | 0 | 0          | 0   | 1 |
| MIR101-2     | 0 | 0          | 0   | 1 |
| INSL4        | 0 | 0          | 0   | 1 |
| PDCD1LG2     | 0 | 0.00341883 | inf | 1 |
| MIR4665      | 0 | 0          | 0   | 1 |

|               |   |            |     |   |
|---------------|---|------------|-----|---|
| IL33          | 0 | 0          | 0   | 1 |
| TPD52L3       | 0 | 0          | 0   | 1 |
| LINC00583     | 0 | 0          | 0   | 1 |
| LOC389705     | 0 | 0          | 0   | 1 |
| MIR3152       | 0 | 0          | 0   | 1 |
| MIR491        | 0 | 0          | 0   | 1 |
| IFNA8         | 0 | 0          | 0   | 1 |
| C9orf53       | 0 | 0.0333951  | inf | 1 |
| DMRTA1        | 0 | 0          | 0   | 1 |
| FLJ35282      | 0 | 0          | 0   | 1 |
| IFNK          | 0 | 0.00874614 | inf | 1 |
| TMEM215       | 0 | 0          | 0   | 1 |
| SPINK4        | 0 | 0          | 0   | 1 |
| SNORD121B     | 0 | 0          | 0   | 1 |
| LOC415056     | 0 | 0          | 0   | 1 |
| MIR4667       | 0 | 0          | 0   | 1 |
| HRCT1         | 0 | 0          | 0   | 1 |
| RECK          | 0 | 0          | 0   | 1 |
| GLIPR2        | 0 | 0          | 0   | 1 |
| SPATA31A2     | 0 | 0          | 0   | 1 |
| SPATA31A2     | 0 | 0          | 0   | 1 |
| FAM74A1       | 0 | 0          | 0   | 1 |
| SPATA31A3     | 0 | 0          | 0   | 1 |
| FAM74A3       | 0 | 0          | 0   | 1 |
| SPATA31A5     | 0 | 0          | 0   | 1 |
| LOC643648     | 0 | 0          | 0   | 1 |
| ANKRD20A2,ANK | 0 | 0          | 0   | 1 |
| FAM95B1       | 0 | 0          | 0   | 1 |
| FOXD4L4       | 0 | 0          | 0   | 1 |
| CNTNAP3B      | 0 | 0          | 0   | 1 |
| LOC643648     | 0 | 0          | 0   | 1 |
| FAM27A        | 0 | 0.0726929  | inf | 1 |
| LOC643648     | 0 | 0          | 0   | 1 |
| LOC100133920  | 0 | 0          | 0   | 1 |
| C9orf135      | 0 | 0          | 0   | 1 |
| TMC1          | 0 | 0          | 0   | 1 |
| RORB          | 0 | 0          | 0   | 1 |
| PCA3          | 0 | 0          | 0   | 1 |
| FOXB2         | 0 | 0          | 0   | 1 |
| SPATA31D5P    | 0 | 0          | 0   | 1 |
| SPATA31D4     | 0 | 0          | 0   | 1 |
| SPATA31D3     | 0 | 0          | 0   | 1 |
| SPATA31D1     | 0 | 0          | 0   | 1 |
| LOC100506834  | 0 | 0.00211589 | inf | 1 |
| C9orf170      | 0 | 0          | 0   | 1 |
| CTSL3P        | 0 | 0          | 0   | 1 |
| CTSL1P8       | 0 | 0          | 0   | 1 |
| SPATA31E1     | 0 | 0          | 0   | 1 |
| SPATA31C1     | 0 | 0          | 0   | 1 |

|                 |   |           |     |   |
|-----------------|---|-----------|-----|---|
| MIR3153         | 0 | 0         | 0   | 1 |
| UNQ6494         | 0 | 0         | 0   | 1 |
| MIR3910-1       | 0 | 0         | 0   | 1 |
| LINC00475       | 0 | 0         | 0   | 1 |
| SUSD3           | 0 | 0         | 0   | 1 |
| MIR4291         | 0 | 0         | 0   | 1 |
| MIRLET7A1       | 0 | 0         | 0   | 1 |
| MIRLET7F1       | 0 | 0         | 0   | 1 |
| MIR2278         | 0 | 0         | 0   | 1 |
| MIR23B          | 0 | 0         | 0   | 1 |
| MIR27B          | 0 | 0         | 0   | 1 |
| MIR24-1         | 0 | 0         | 0   | 1 |
| LOC441455       | 0 | 0         | 0   | 1 |
| FOXE1           | 0 | 0         | 0   | 1 |
| COL15A1         | 0 | 0         | 0   | 1 |
| LPPR1           | 0 | 0         | 0   | 1 |
| CYLC2           | 0 | 0         | 0   | 1 |
| OR13F1          | 0 | 0         | 0   | 1 |
| OR13C8          | 0 | 0         | 0   | 1 |
| OR13D1          | 0 | 0         | 0   | 1 |
| ACTL7A          | 0 | 0         | 0   | 1 |
| MUSK            | 0 | 0         | 0   | 1 |
| MIR4668         | 0 | 0         | 0   | 1 |
| BSPRY           | 0 | 0         | 0   | 1 |
| MIR455          | 0 | 0         | 0   | 1 |
| ORM2            | 0 | 0         | 0   | 1 |
| DEC1            | 0 | 0         | 0   | 1 |
| LOC100128505    | 0 | 0         | 0   | 1 |
| TLR4            | 0 | 0         | 0   | 1 |
| OR1J2           | 0 | 0         | 0   | 1 |
| OR1J4           | 0 | 0         | 0   | 1 |
| OR1N2           | 0 | 0         | 0   | 1 |
| OR1L1           | 0 | 0         | 0   | 1 |
| OR1L3           | 0 | 0         | 0   | 1 |
| OR1L4           | 0 | 0         | 0   | 1 |
| OR1L6           | 0 | 0         | 0   | 1 |
| OR5C1           | 0 | 0         | 0   | 1 |
| OR1K1           | 0 | 0.0205331 | inf | 1 |
| GPR21           | 0 | 0.0140954 | inf | 1 |
| LHX2            | 0 | 0.0209446 | inf | 1 |
| GPR144          | 0 | 0         | 0   | 1 |
| MIR181A2HG      | 0 | 0.0250915 | inf | 1 |
| MIR181A2        | 0 | 0         | 0   | 1 |
| MIR181B2        | 0 | 0         | 0   | 1 |
| MIR2861,MIR396C | 0 | 0         | 0   | 1 |
| MIR2964A        | 0 | 0         | 0   | 1 |
| C9orf106        | 0 | 0         | 0   | 1 |
| PRRX2           | 0 | 0         | 0   | 1 |
| SNORD62A        | 0 | 0         | 0   | 1 |



|              |   |                 |   |   |
|--------------|---|-----------------|---|---|
| SNORD62B     | 0 | 0               | 0 | 1 |
| GF11B        | 0 | 0               | 0 | 1 |
| CELP         | 0 | 0               | 0 | 1 |
| SNORD24      | 0 | 0               | 0 | 1 |
| SNORD36B     | 0 | 0               | 0 | 1 |
| SNORD36C     | 0 | 310.56 inf      |   | 1 |
| DBH          | 0 | 0               | 0 | 1 |
| MIR4669      | 0 | 0               | 0 | 1 |
| FCN2         | 0 | 0               | 0 | 1 |
| OLFM1        | 0 | 0               | 0 | 1 |
| LOC401557    | 0 | 0               | 0 | 1 |
| C9orf62      | 0 | 0               | 0 | 1 |
| OBP2A        | 0 | 0               | 0 | 1 |
| LOC100130954 | 0 | 0.0104012 inf   |   | 1 |
| LCN9         | 0 | 0               | 0 | 1 |
| MIR126       | 0 | 0               | 0 | 1 |
| MIR4292      | 0 | 0               | 0 | 1 |
| MIR4479      | 0 | 0               | 0 | 1 |
| PTGDS        | 0 | 0.0211191 inf   |   | 1 |
| LCNL1        | 0 | 0               | 0 | 1 |
| MIR602       | 0 | 0               | 0 | 1 |
| CACNA1B      | 0 | 0               | 0 | 1 |
| FAM138C      | 0 | 0               | 0 | 1 |
| INSL6        | 0 | 0               | 0 | 1 |
| PTPRD        | 0 | 0               | 0 | 1 |
| MPDZ         | 0 | 0               | 0 | 1 |
| CER1         | 0 | 0               | 0 | 1 |
| FREM1        | 0 | 0.000784716 inf |   | 1 |
| C9orf92      | 0 | 0               | 0 | 1 |
| MIR4473      | 0 | 0               | 0 | 1 |
| MIR4474      | 0 | 0               | 0 | 1 |
| PTPLAD2      | 0 | 0.0214087 inf   |   | 1 |
| IFNB1        | 0 | 0               | 0 | 1 |
| IFNW1        | 0 | 0               | 0 | 1 |
| IFNA21       | 0 | 0               | 0 | 1 |
| IFNA4        | 0 | 0               | 0 | 1 |
| IFNA7        | 0 | 0               | 0 | 1 |
| IFNA10       | 0 | 0               | 0 | 1 |
| IFNA16       | 0 | 0               | 0 | 1 |
| IFNA17       | 0 | 0               | 0 | 1 |
| IFNA14       | 0 | 0               | 0 | 1 |
| IFNA22P      | 0 | 0               | 0 | 1 |
| IFNA5        | 0 | 0.0178268 inf   |   | 1 |
| IFNA6        | 0 | 0               | 0 | 1 |
| IFNA13       | 0 | 0               | 0 | 1 |
| IFNA2        | 0 | 0               | 0 | 1 |
| MIR31        | 0 | 0               | 0 | 1 |
| ELAVL2       | 0 | 0               | 0 | 1 |
| IZUMO3       | 0 | 0               | 0 | 1 |

|                |   |                |   |   |
|----------------|---|----------------|---|---|
| LINGO2         | 0 | 0              | 0 | 1 |
| MIR876         | 0 | 0              | 0 | 1 |
| MIR873         | 0 | 0              | 0 | 1 |
| LOC401497      | 0 | 0              | 0 | 1 |
| TAF1L          | 0 | 0              | 0 | 1 |
| AQP7           | 0 | 0              | 0 | 1 |
| SUGT1P1        | 0 | 0.0254164 inf  |   | 1 |
| SNORD121A      | 0 | 0              | 0 | 1 |
| CNTFR          | 0 | 0.0203119 inf  |   | 1 |
| CCL27          | 0 | 0              | 0 | 1 |
| CCL19          | 0 | 0              | 0 | 1 |
| CCL21          | 0 | 0              | 0 | 1 |
| FAM205A        | 0 | 0              | 0 | 1 |
| FAM205B        | 0 | 0              | 0 | 1 |
| SIT1           | 0 | 0              | 0 | 1 |
| FAM221B        | 0 | 0              | 0 | 1 |
| OR2S2          | 0 | 0              | 0 | 1 |
| MIR4475        | 0 | 0              | 0 | 1 |
| PAX5           | 0 | 0              | 0 | 1 |
| MIR4540        | 0 | 0              | 0 | 1 |
| MIR4476        | 0 | 0              | 0 | 1 |
| IGFBPL1        | 0 | 0.00296427 inf |   | 1 |
| CNTNAP3        | 0 | 0              | 0 | 1 |
| SPATA31A4      | 0 | 0              | 0 | 1 |
| LOC653501,ZNF6 | 0 | 0              | 0 | 1 |
| LOC286297      | 0 | 0              | 0 | 1 |
| FAM95B1        | 0 | 0              | 0 | 1 |
| ANKRD20A2,ANK  | 0 | 0              | 0 | 1 |
| LOC642929      | 0 | 0              | 0 | 1 |
| SPATA31A6      | 0 | 0              | 0 | 1 |
| FAM74A2,FAM74, | 0 | 0              | 0 | 1 |
| SPATA31A5      | 0 | 0              | 0 | 1 |
| LOC286297      | 0 | 0              | 0 | 1 |
| FAM27B         | 0 | 0              | 0 | 1 |
| FOXD4L5        | 0 | 0              | 0 | 1 |
| FOXD4L4        | 0 | 0              | 0 | 1 |
| PRKACG         | 0 | 0              | 0 | 1 |
| BANCR          | 0 | 0              | 0 | 1 |
| APBA1          | 0 | 0              | 0 | 1 |
| LOC494558      | 0 | 0              | 0 | 1 |
| LOC100507244   | 0 | 0.0178575 inf  |   | 1 |
| MIR204         | 0 | 0              | 0 | 1 |
| C9orf57        | 0 | 0              | 0 | 1 |
| MIR548H3       | 0 | 0              | 0 | 1 |
| VPS13A-AS1     | 0 | 0              | 0 | 1 |
| MIR7-1         | 0 | 0              | 0 | 1 |
| SLC28A3        | 0 | 0              | 0 | 1 |
| LOC494127      | 0 | 0              | 0 | 1 |
| LOC392364      | 0 | 0              | 0 | 1 |

|              |   |            |     |   |
|--------------|---|------------|-----|---|
| SPATA31C2    | 0 | 0          | 0   | 1 |
| LOC286238    | 0 | 0          | 0   | 1 |
| MIR4289      | 0 | 0          | 0   | 1 |
| LOC286370    | 0 | 0          | 0   | 1 |
| MIR4290      | 0 | 0          | 0   | 1 |
| LOC340515    | 0 | 0          | 0   | 1 |
| DIRAS2       | 0 | 0          | 0   | 1 |
| MIR3910-2    | 0 | 0          | 0   | 1 |
| ROR2         | 0 | 0.00330066 | inf | 1 |
| MIR4670      | 0 | 0          | 0   | 1 |
| BARX1        | 0 | 0.0216714  | inf | 1 |
| FBP1         | 0 | 0          | 0   | 1 |
| MIR3074      | 0 | 0          | 0   | 1 |
| LOC158434    | 0 | 0          | 0   | 1 |
| LOC286359    | 0 | 0          | 0   | 1 |
| HEMGN        | 0 | 0          | 0   | 1 |
| PPP3R2       | 0 | 0          | 0   | 1 |
| OR13C4       | 0 | 0          | 0   | 1 |
| OR13C3       | 0 | 0          | 0   | 1 |
| OR13C5       | 0 | 0          | 0   | 1 |
| OR13C2       | 0 | 0          | 0   | 1 |
| OR13C9       | 0 | 0          | 0   | 1 |
| MIR548Q      | 0 | 0          | 0   | 1 |
| MIR32        | 0 | 0          | 0   | 1 |
| FRRS1L       | 0 | 0          | 0   | 1 |
| TXNDC8       | 0 | 0          | 0   | 1 |
| LPAR1        | 0 | 0          | 0   | 1 |
| OR2K2        | 0 | 0          | 0   | 1 |
| LRRC37A5P    | 0 | 0          | 0   | 1 |
| AMBP         | 0 | 0.00997084 | inf | 1 |
| LOC100505478 | 0 | 0          | 0   | 1 |
| TNFSF8       | 0 | 0          | 0   | 1 |
| LINC00474    | 0 | 0          | 0   | 1 |
| SNORA70C     | 0 | 0          | 0   | 1 |
| DBC1         | 0 | 0          | 0   | 1 |
| MIR147A      | 0 | 0          | 0   | 1 |
| MIR4478      | 0 | 0          | 0   | 1 |
| LHX6         | 0 | 0          | 0   | 1 |
| OR1J1        | 0 | 0          | 0   | 1 |
| OR1N1        | 0 | 0          | 0   | 1 |
| OR1L8        | 0 | 0          | 0   | 1 |
| OR1B1        | 0 | 0          | 0   | 1 |
| SNORD90      | 0 | 0          | 0   | 1 |
| MIR601       | 0 | 0          | 0   | 1 |
| MIR4672      | 0 | 0          | 0   | 1 |
| MIR199B      | 0 | 0          | 0   | 1 |
| MIR3154      | 0 | 0          | 0   | 1 |
| MIR219-2     | 0 | 0          | 0   | 1 |
| C9orf50      | 0 | 0          | 0   | 1 |

|                   |   |   |   |   |
|-------------------|---|---|---|---|
| GBGT1             | 0 | 0 | 0 | 1 |
| OBP2B             | 0 | 0 | 0 | 1 |
| TMEM8C            | 0 | 0 | 0 | 1 |
| FAM163B           | 0 | 0 | 0 | 1 |
| MIR3689A,MIR3689B | 0 | 0 | 0 | 1 |
| MIR3689C          | 0 | 0 | 0 | 1 |
| MIR3689D1         | 0 | 0 | 0 | 1 |
| MIR3689B          | 0 | 0 | 0 | 1 |
| MIR3689D2         | 0 | 0 | 0 | 1 |
| MIR3689F          | 0 | 0 | 0 | 1 |
| FCN1              | 0 | 0 | 0 | 1 |
| GLT6D1            | 0 | 0 | 0 | 1 |
| MIR4673           | 0 | 0 | 0 | 1 |
| MIR4674           | 0 | 0 | 0 | 1 |
| LCN6              | 0 | 0 | 0 | 1 |
| LCN8              | 0 | 0 | 0 | 1 |
| MIR3621           | 0 | 0 | 0 | 1 |
| LINC00685         | 0 | 0 | 0 | 1 |
| SHOX              | 0 | 0 | 0 | 1 |
| CSF2RA            | 0 | 0 | 0 | 1 |
| MIR3690           | 0 | 0 | 0 | 1 |
| IL3RA             | 0 | 0 | 0 | 1 |
| ASMTL-AS1         | 0 | 0 | 0 | 1 |
| AKAP17A,ASMT      | 0 | 0 | 0 | 1 |
| CD99P1            | 0 | 0 | 0 | 1 |
| CD99              | 0 | 0 | 0 | 1 |
| GYG2              | 0 | 0 | 0 | 1 |
| ARSH              | 0 | 0 | 0 | 1 |
| ARSF              | 0 | 0 | 0 | 1 |
| CXorf28           | 0 | 0 | 0 | 1 |
| MIR4767           | 0 | 0 | 0 | 1 |
| VCX               | 0 | 0 | 0 | 1 |
| MIR651            | 0 | 0 | 0 | 1 |
| CLCN4             | 0 | 0 | 0 | 1 |
| AMELX             | 0 | 0 | 0 | 1 |
| FRMPD4            | 0 | 0 | 0 | 1 |
| TLR8              | 0 | 0 | 0 | 1 |
| LOC100093698      | 0 | 0 | 0 | 1 |
| LOC100133123      | 0 | 0 | 0 | 1 |
| EGFL6             | 0 | 0 | 0 | 1 |
| GLRA2             | 0 | 0 | 0 | 1 |
| BMX               | 0 | 0 | 0 | 1 |
| S100G             | 0 | 0 | 0 | 1 |
| MIR4768           | 0 | 0 | 0 | 1 |
| CNKSR2            | 0 | 0 | 0 | 1 |
| ZNF645            | 0 | 0 | 0 | 1 |
| DDX53             | 0 | 0 | 0 | 1 |
| PTCHD1            | 0 | 0 | 0 | 1 |
| SUPT20HL1         | 0 | 0 | 0 | 1 |

|               |   |            |     |   |
|---------------|---|------------|-----|---|
| MAGEB18       | 0 | 0          | 0   | 1 |
| MAGEB6        | 0 | 0          | 0   | 1 |
| MAGEB5        | 0 | 0          | 0   | 1 |
| VENTXP1       | 0 | 0.00766719 | inf | 1 |
| DCAF8L2       | 0 | 0          | 0   | 1 |
| MAGEB10       | 0 | 0          | 0   | 1 |
| IL1RAPL1      | 0 | 0          | 0   | 1 |
| MAGEB3        | 0 | 0          | 0   | 1 |
| MAGEB1,MAGEB  | 0 | 0          | 0   | 1 |
| FAM47B        | 0 | 0          | 0   | 1 |
| MAGEB16       | 0 | 0          | 0   | 1 |
| CXorf22       | 0 | 0          | 0   | 1 |
| CHDC2         | 0 | 0          | 0   | 1 |
| FAM47C        | 0 | 0          | 0   | 1 |
| CXorf27       | 0 | 0          | 0   | 1 |
| SYTL5         | 0 | 0          | 0   | 1 |
| MPC1L         | 0 | 0          | 0   | 1 |
| GPR34         | 0 | 0.00585097 | inf | 1 |
| DUSP21        | 0 | 0          | 0   | 1 |
| RGN           | 0 | 0.00797118 | inf | 1 |
| ZNF157        | 0 | 0          | 0   | 1 |
| SNORA11C      | 0 | 0          | 0   | 1 |
| MIR4769       | 0 | 0          | 0   | 1 |
| CXXC1P1       | 0 | 0          | 0   | 1 |
| SPACA5,SPACA5 | 0 | 0          | 0   | 1 |
| SSX6          | 0 | 0          | 0   | 1 |
| SPACA5,SPACA5 | 0 | 0          | 0   | 1 |
| SSX1          | 0 | 0          | 0   | 1 |
| SSX4B         | 0 | 0          | 0   | 1 |
| GLOD5         | 0 | 0          | 0   | 1 |
| GATA1         | 0 | 0          | 0   | 1 |
| ERAS          | 0 | 0.0232859  | inf | 1 |
| GAGE10        | 0 | 0.0249572  | inf | 1 |
| GAGE12J       | 0 | 0          | 0   | 1 |
| GAGE12D,GAGE  | 0 | 0          | 0   | 1 |
| GAGE12D       | 0 | 0          | 0   | 1 |
| GAGE12D,GAGE  | 0 | 0          | 0   | 1 |
| GAGE12D,GAGE  | 0 | 0          | 0   | 1 |
| GAGE12D       | 0 | 0          | 0   | 1 |
| GAGE2A        | 0 | 0          | 0   | 1 |
| GAGE1         | 0 | 0          | 0   | 1 |
| PAGE4         | 0 | 0          | 0   | 1 |
| MIR532        | 0 | 0          | 0   | 1 |
| MIR188        | 0 | 0          | 0   | 1 |
| MIR500A       | 0 | 0          | 0   | 1 |
| MIR362        | 0 | 0          | 0   | 1 |
| MIR501        | 0 | 0          | 0   | 1 |
| MIR500B       | 0 | 0          | 0   | 1 |
| MIR660        | 0 | 0          | 0   | 1 |

|                |   |            |     |   |
|----------------|---|------------|-----|---|
| MIR502         | 0 | 0          | 0   | 1 |
| BMP15          | 0 | 0          | 0   | 1 |
| NUDT10         | 0 | 0          | 0   | 1 |
| CENPVP2        | 0 | 0          | 0   | 1 |
| MAGED4         | 0 | 0          | 0   | 1 |
| XAGE2,XAGE2B   | 0 | 0          | 0   | 1 |
| XAGE1C,XAGE1E  | 0 | 0          | 0   | 1 |
| XAGE1B,XAGE1C  | 0 | 0          | 0   | 1 |
| SSX8           | 0 | 0          | 0   | 1 |
| SSX2,SSX2B     | 0 | 0          | 0   | 1 |
| XAGE5          | 0 | 0          | 0   | 1 |
| FAM156A,FAM15I | 0 | 0          | 0   | 1 |
| SNORA11        | 0 | 0          | 0   | 1 |
| PAGE2          | 0 | 0          | 0   | 1 |
| PAGE5          | 0 | 0.0251396  | inf | 1 |
| MIR4536-1      | 0 | 0          | 0   | 1 |
| MAGEH1         | 0 | 0          | 0   | 1 |
| FOXR2          | 0 | 0          | 0   | 1 |
| KLF8           | 0 | 0          | 0   | 1 |
| MIR223         | 0 | 0          | 0   | 1 |
| HEPH           | 0 | 0          | 0   | 1 |
| AR             | 0 | 0          | 0   | 1 |
| FAM155B        | 0 | 0          | 0   | 1 |
| EDA            | 0 | 0          | 0   | 1 |
| MIR676         | 0 | 0          | 0   | 1 |
| OTUD6A         | 0 | 0.0325563  | inf | 1 |
| AWAT1          | 0 | 0          | 0   | 1 |
| GJB1           | 0 | 0          | 0   | 1 |
| FLJ46446       | 0 | 0          | 0   | 1 |
| CXorf49B       | 0 | 0          | 0   | 1 |
| NHSL2          | 0 | 0.00353391 | inf | 1 |
| FLJ44635       | 0 | 0          | 0   | 1 |
| DMRTC1B        | 0 | 0          | 0   | 1 |
| LINC00684      | 0 | 0          | 0   | 1 |
| PABPC1L2B      | 0 | 0          | 0   | 1 |
| CDX4           | 0 | 0          | 0   | 1 |
| MIR374C        | 0 | 0          | 0   | 1 |
| ZCCHC13        | 0 | 0          | 0   | 1 |
| MAGEE1         | 0 | 0.00380378 | inf | 1 |
| FGF16          | 0 | 0          | 0   | 1 |
| LPAR4          | 0 | 0.00408348 | inf | 1 |
| P2RY10         | 0 | 0          | 0   | 1 |
| GPR174         | 0 | 0          | 0   | 1 |
| TBX22          | 0 | 0          | 0   | 1 |
| FAM46D         | 0 | 0          | 0   | 1 |
| POU3F4         | 0 | 0          | 0   | 1 |
| CYLC1          | 0 | 0          | 0   | 1 |
| UBE2DNL        | 0 | 0          | 0   | 1 |
| DACH2          | 0 | 0          | 0   | 1 |

|               |   |            |     |   |
|---------------|---|------------|-----|---|
| KLHL4         | 0 | 0          | 0   | 1 |
| CPXCR1        | 0 | 0          | 0   | 1 |
| TGIF2LX       | 0 | 0          | 0   | 1 |
| PABPC5        | 0 | 0          | 0   | 1 |
| TNMD          | 0 | 0          | 0   | 1 |
| ARL13A        | 0 | 0.00694237 | inf | 1 |
| TMEM35        | 0 | 0.00529016 | inf | 1 |
| NXF2B         | 0 | 0          | 0   | 1 |
| TCEAL7        | 0 | 0          | 0   | 1 |
| PLP1          | 0 | 0.00337953 | inf | 1 |
| TMSB15B       | 0 | 0          | 0   | 1 |
| H2BFXP        | 0 | 0          | 0   | 1 |
| H2BFM         | 0 | 0          | 0   | 1 |
| ZCCHC18       | 0 | 0.0111641  | inf | 1 |
| IL1RAPL2      | 0 | 0          | 0   | 1 |
| NRK           | 0 | 0          | 0   | 1 |
| MUM1L1        | 0 | 0          | 0   | 1 |
| RNF128        | 0 | 0          | 0   | 1 |
| COL4A5        | 0 | 0.00266415 | inf | 1 |
| MIR3978       | 0 | 0          | 0   | 1 |
| TDGF1P3       | 0 | 0          | 0   | 1 |
| PAK3          | 0 | 0          | 0   | 1 |
| DKFZp686D0853 | 0 | 0          | 0   | 1 |
| TRPC5OS       | 0 | 0          | 0   | 1 |
| ZCCHC16       | 0 | 0          | 0   | 1 |
| HTR2C         | 0 | 0          | 0   | 1 |
| SNORA35       | 0 | 0          | 0   | 1 |
| MIR764        | 0 | 0          | 0   | 1 |
| MIR1912       | 0 | 0          | 0   | 1 |
| MIR1264       | 0 | 0          | 0   | 1 |
| MIR1298       | 0 | 0          | 0   | 1 |
| MIR1911       | 0 | 0          | 0   | 1 |
| MIR448        | 0 | 0          | 0   | 1 |
| RBMXL3        | 0 | 0          | 0   | 1 |
| AGTR2         | 0 | 0          | 0   | 1 |
| SLC6A14       | 0 | 0          | 0   | 1 |
| MIR1277       | 0 | 0          | 0   | 1 |
| ZCCHC12       | 0 | 0.0047138  | inf | 1 |
| RHOXF2B       | 0 | 0          | 0   | 1 |
| ATP1B4        | 0 | 0          | 0   | 1 |
| GRIA3         | 0 | 0.0141392  | inf | 1 |
| LOC100129520  | 0 | 0          | 0   | 1 |
| CXorf64       | 0 | 0          | 0   | 1 |
| XPNPEP2       | 0 | 0          | 0   | 1 |
| SASH3         | 0 | 0          | 0   | 1 |
| ARHGAP36      | 0 | 0          | 0   | 1 |
| OR13H1        | 0 | 0          | 0   | 1 |
| HS6ST2-AS1    | 0 | 0          | 0   | 1 |
| CCDC160       | 0 | 0          | 0   | 1 |

|                 |   |            |     |   |
|-----------------|---|------------|-----|---|
| SMIM10          | 0 | 0          | 0   | 1 |
| FAM127A         | 0 | 0          | 0   | 1 |
| LINC00086       | 0 | 0          | 0   | 1 |
| CT45A1          | 0 | 0          | 0   | 1 |
| CT45A2,CT45A3,( | 0 | 0          | 0   | 1 |
| SAGE1           | 0 | 0          | 0   | 1 |
| GPR112          | 0 | 0          | 0   | 1 |
| BRS3            | 0 | 0          | 0   | 1 |
| VGLL1           | 0 | 0          | 0   | 1 |
| MIR934          | 0 | 0          | 0   | 1 |
| LOC100128420    | 0 | 0          | 0   | 1 |
| ZIC3            | 0 | 0          | 0   | 1 |
| FGF13-AS1       | 0 | 0          | 0   | 1 |
| SRD5A1P1        | 0 | 0          | 0   | 1 |
| F9              | 0 | 0          | 0   | 1 |
| LOC389895       | 0 | 0          | 0   | 1 |
| RP1-177G6.2     | 0 | 0          | 0   | 1 |
| SPANXB2         | 0 | 0          | 0   | 1 |
| SPANXB1         | 0 | 0          | 0   | 1 |
| SPANXA2         | 0 | 0          | 0   | 1 |
| MAGEC3          | 0 | 0          | 0   | 1 |
| MAGEC1          | 0 | 0          | 0   | 1 |
| SPANXN4         | 0 | 0          | 0   | 1 |
| UBE2NL          | 0 | 0          | 0   | 1 |
| SPANXN1         | 0 | 0          | 0   | 1 |
| TMEM257         | 0 | 0          | 0   | 1 |
| CXorf51B        | 0 | 0          | 0   | 1 |
| FMR1NB          | 0 | 0          | 0   | 1 |
| AFF2            | 0 | 0          | 0   | 1 |
| MAGEA11         | 0 | 0          | 0   | 1 |
| HSFX2           | 0 | 0          | 0   | 1 |
| MAGEA9B         | 0 | 0          | 0   | 1 |
| MIR2114         | 0 | 0          | 0   | 1 |
| MAMLD1          | 0 | 0          | 0   | 1 |
| MIR4330         | 0 | 0          | 0   | 1 |
| GPR50           | 0 | 0          | 0   | 1 |
| PASD1           | 0 | 0.00275379 | inf | 1 |
| PRRG3           | 0 | 0          | 0   | 1 |
| FATE1           | 0 | 0          | 0   | 1 |
| CNGA2           | 0 | 0          | 0   | 1 |
| GABRQ           | 0 | 0          | 0   | 1 |
| MAGEA2,MAGEA    | 0 | 0          | 0   | 1 |
| CSAG2,CSAG3     | 0 | 0          | 0   | 1 |
| PNMA3           | 0 | 0          | 0   | 1 |
| PNMA6C,PNMA6I   | 0 | 0          | 0   | 1 |
| ZFP92           | 0 | 0          | 0   | 1 |
| ATP2B3          | 0 | 0.00215211 | inf | 1 |
| AVPR2           | 0 | 0          | 0   | 1 |
| MIR3202-1       | 0 | 0          | 0   | 1 |



|              |   |                |   |   |
|--------------|---|----------------|---|---|
| OPN1MW       | 0 | 0              | 0 | 1 |
| OPN1MW       | 0 | 0              | 0 | 1 |
| FAM223B      | 0 | 0              | 0 | 1 |
| CTAG1B       | 0 | 0              | 0 | 1 |
| SNORA56      | 0 | 1.96183 inf    |   | 1 |
| H2AFB1       | 0 | 0              | 0 | 1 |
| H2AFB3       | 0 | 0              | 0 | 1 |
| F8A1         | 0 | 0              | 0 | 1 |
| MIR1184-3    | 0 | 0              | 0 | 1 |
| TMLHE-AS1    | 0 | 0              | 0 | 1 |
| SPRY3        | 0 | 0              | 0 | 1 |
| VAMP7        | 0 | 0              | 0 | 1 |
| IL9R         | 0 | 0              | 0 | 1 |
| GTPBP6       | 0 | 0              | 0 | 1 |
| PPP2R3B      | 0 | 0              | 0 | 1 |
| CRLF2        | 0 | 0              | 0 | 1 |
| SLC25A6      | 0 | 0              | 0 | 1 |
| ASMTL        | 0 | 0              | 0 | 1 |
| P2RY8        | 0 | 0              | 0 | 1 |
| DHRSX,ZBED1  | 0 | 0              | 0 | 1 |
| ARSE         | 0 | 0              | 0 | 1 |
| MXRA5        | 0 | 0              | 0 | 1 |
| NLGN4X       | 0 | 0              | 0 | 1 |
| MIR4770      | 0 | 0              | 0 | 1 |
| VCX2         | 0 | 0              | 0 | 1 |
| KAL1         | 0 | 0              | 0 | 1 |
| FAM9A        | 0 | 0              | 0 | 1 |
| FAM9B        | 0 | 0              | 0 | 1 |
| ARHGAP6      | 0 | 0              | 0 | 1 |
| TLR8-AS1     | 0 | 0              | 0 | 1 |
| FAM9C        | 0 | 0              | 0 | 1 |
| ATXN3L       | 0 | 0              | 0 | 1 |
| ASB9         | 0 | 0              | 0 | 1 |
| ASB11        | 0 | 0              | 0 | 1 |
| RAI2         | 0 | 0              | 0 | 1 |
| SCML2        | 0 | 0              | 0 | 1 |
| RS1          | 0 | 0.0198127 inf  |   | 1 |
| LOC729609    | 0 | 0              | 0 | 1 |
| MIR23C       | 0 | 0              | 0 | 1 |
| KLHL34       | 0 | 0              | 0 | 1 |
| SMPX         | 0 | 0              | 0 | 1 |
| PHEX-AS1     | 0 | 0              | 0 | 1 |
| LOC100873065 | 0 | 0              | 0 | 1 |
| ZFX-AS1      | 0 | 0              | 0 | 1 |
| SUPT20HL2    | 0 | 0              | 0 | 1 |
| PCYT1B       | 0 | 0.00195642 inf |   | 1 |
| ARX          | 0 | 0              | 0 | 1 |
| SMEK3P       | 0 | 0              | 0 | 1 |
| DCAF8L1      | 0 | 0              | 0 | 1 |

|               |   |            |     |   |
|---------------|---|------------|-----|---|
| NR0B1         | 0 | 0          | 0   | 1 |
| CXorf21       | 0 | 0.00537639 | inf | 1 |
| FTHL17        | 0 | 0          | 0   | 1 |
| DMD           | 0 | 0.00133299 | inf | 1 |
| FAM47A        | 0 | 0          | 0   | 1 |
| TMEM47        | 0 | 0.00241509 | inf | 1 |
| LOC286442     | 0 | 0          | 0   | 1 |
| LOC100132831  | 0 | 0          | 0   | 1 |
| PPP1R2P9      | 0 | 0          | 0   | 1 |
| MAOB          | 0 | 0          | 0   | 1 |
| NDP           | 0 | 0          | 0   | 1 |
| EFHC2         | 0 | 0          | 0   | 1 |
| MIR222        | 0 | 0          | 0   | 1 |
| SSX5          | 0 | 0          | 0   | 1 |
| SSX9          | 0 | 0          | 0   | 1 |
| SSX3          | 0 | 0          | 0   | 1 |
| SSX4B         | 0 | 0          | 0   | 1 |
| PCSK1N        | 0 | 0          | 0   | 1 |
| CACNA1F       | 0 | 0          | 0   | 1 |
| PAGE1         | 0 | 0          | 0   | 1 |
| AKAP4         | 0 | 0          | 0   | 1 |
| DGKK          | 0 | 0          | 0   | 1 |
| NUDT11        | 0 | 0.00454612 | inf | 1 |
| CENPVP2       | 0 | 0          | 0   | 1 |
| MAGED4,MAGED  | 0 | 0          | 0   | 1 |
| SNORA11D      | 0 | 0          | 0   | 1 |
| SNORA11E      | 0 | 0          | 0   | 1 |
| XAGE1B,XAGE1C | 0 | 0          | 0   | 1 |
| XAGE2,XAGE2B  | 0 | 0          | 0   | 1 |
| XAGE1C        | 0 | 0          | 0   | 1 |
| XAGE1A,XAGE1C | 0 | 0          | 0   | 1 |
| SSX7          | 0 | 0          | 0   | 1 |
| SSX2          | 0 | 0          | 0   | 1 |
| SPANXN5       | 0 | 0          | 0   | 1 |
| XAGE3         | 0 | 0          | 0   | 1 |
| MIR98         | 0 | 0          | 0   | 1 |
| MIRLET7F2     | 0 | 0          | 0   | 1 |
| ITIH6         | 0 | 0          | 0   | 1 |
| ALAS2         | 0 | 0          | 0   | 1 |
| PAGE3         | 0 | 0          | 0   | 1 |
| USP51         | 0 | 0          | 0   | 1 |
| SPIN2A        | 0 | 0.00934654 | inf | 1 |
| ZXDA          | 0 | 0          | 0   | 1 |
| MIR1468       | 0 | 0          | 0   | 1 |
| ASB12         | 0 | 0          | 0   | 1 |
| MTMR8         | 0 | 0          | 0   | 1 |
| FRMD8P1       | 0 | 0          | 0   | 1 |
| VSIG4         | 0 | 0          | 0   | 1 |
| AWAT2         | 0 | 0          | 0   | 1 |

|           |   |            |     |   |
|-----------|---|------------|-----|---|
| P2RY4     | 0 | 0          | 0   | 1 |
| TEX11     | 0 | 0          | 0   | 1 |
| SLC7A3    | 0 | 0          | 0   | 1 |
| CXorf65   | 0 | 0          | 0   | 1 |
| CXorf49B  | 0 | 0          | 0   | 1 |
| LINC00684 | 0 | 0          | 0   | 1 |
| DMRTC1B   | 0 | 0          | 0   | 1 |
| PABPC1L2A | 0 | 0          | 0   | 1 |
| NAP1L2    | 0 | 0.00325871 | inf | 1 |
| MIR421    | 0 | 0          | 0   | 1 |
| MIR374B   | 0 | 0          | 0   | 1 |
| MIR545    | 0 | 0          | 0   | 1 |
| MIR374A   | 0 | 0          | 0   | 1 |
| KIAA2022  | 0 | 0          | 0   | 1 |
| MAGEE2    | 0 | 0          | 0   | 1 |
| MIR384    | 0 | 0          | 0   | 1 |
| CYSLTR1   | 0 | 0          | 0   | 1 |
| ZCCHC5    | 0 | 0          | 0   | 1 |
| MIR4328   | 0 | 0          | 0   | 1 |
| ITM2A     | 0 | 0          | 0   | 1 |
| HDX       | 0 | 0          | 0   | 1 |
| POF1B     | 0 | 0          | 0   | 1 |
| NAP1L3    | 0 | 0.00374402 | inf | 1 |
| LOC643486 | 0 | 0          | 0   | 1 |
| LOC442459 | 0 | 0          | 0   | 1 |
| NXF5      | 0 | 0          | 0   | 1 |
| NXF2      | 0 | 0          | 0   | 1 |
| TMSB15A   | 0 | 0          | 0   | 1 |
| BEX1      | 0 | 0          | 0   | 1 |
| NXF3      | 0 | 0.00597599 | inf | 1 |
| BEX2      | 0 | 0          | 0   | 1 |
| GLRA4     | 0 | 0          | 0   | 1 |
| H2BFWT    | 0 | 0          | 0   | 1 |
| H2BFXP    | 0 | 0          | 0   | 1 |
| ESX1      | 0 | 0          | 0   | 1 |
| TEX13A    | 0 | 0          | 0   | 1 |
| SERPINA7  | 0 | 0          | 0   | 1 |
| NUP62CL   | 0 | 0          | 0   | 1 |
| TEX13B    | 0 | 0          | 0   | 1 |
| IRS4      | 0 | 0          | 0   | 1 |
| GUCY2F    | 0 | 0          | 0   | 1 |
| SNORD96B  | 0 | 0          | 0   | 1 |
| CHRD1     | 0 | 0          | 0   | 1 |
| CAPN6     | 0 | 0          | 0   | 1 |
| DCX       | 0 | 0          | 0   | 1 |
| RNU6-28   | 0 | 0          | 0   | 1 |
| TRPC5     | 0 | 0          | 0   | 1 |
| LHFPL1    | 0 | 0          | 0   | 1 |
| MIR4329   | 0 | 0          | 0   | 1 |

|                 |   |           |     |   |
|-----------------|---|-----------|-----|---|
| LRCH2           | 0 | 0         | 0   | 1 |
| CXorf61         | 0 | 0         | 0   | 1 |
| KLHL13          | 0 | 0         | 0   | 1 |
| MIR766          | 0 | 0         | 0   | 1 |
| RHOXF2B         | 0 | 0         | 0   | 1 |
| RHOXF1          | 0 | 0.0243832 | inf | 1 |
| CT47B1          | 0 | 0         | 0   | 1 |
| CT47A1,CT47A4   | 0 | 0         | 0   | 1 |
| CT47A8          | 0 | 0         | 0   | 1 |
| CT47A11         | 0 | 0         | 0   | 1 |
| CT47A5          | 0 | 0         | 0   | 1 |
| CT47A3          | 0 | 0         | 0   | 1 |
| CT47A7          | 0 | 0         | 0   | 1 |
| CT47A1,CT47A2,4 | 0 | 0         | 0   | 1 |
| CT47A2          | 0 | 0         | 0   | 1 |
| CT47A9          | 0 | 0         | 0   | 1 |
| CT47A8          | 0 | 0         | 0   | 1 |
| CT47A6          | 0 | 0         | 0   | 1 |
| TENM1           | 0 | 0         | 0   | 1 |
| DCAF12L2        | 0 | 0         | 0   | 1 |
| DCAF12L1        | 0 | 0         | 0   | 1 |
| GPR119          | 0 | 0         | 0   | 1 |
| FRMD7           | 0 | 0         | 0   | 1 |
| HS6ST2          | 0 | 0         | 0   | 1 |
| USP26           | 0 | 0         | 0   | 1 |
| TFDP3           | 0 | 0         | 0   | 1 |
| GPC3            | 0 | 0         | 0   | 1 |
| MIR363          | 0 | 0         | 0   | 1 |
| MIR92A2         | 0 | 0         | 0   | 1 |
| MIR19B2         | 0 | 0         | 0   | 1 |
| MIR20B          | 0 | 0         | 0   | 1 |
| MIR18B          | 0 | 0         | 0   | 1 |
| MIR106A         | 0 | 0         | 0   | 1 |
| MIR450B         | 0 | 0         | 0   | 1 |
| MIR450A1        | 0 | 0         | 0   | 1 |
| MIR450A2        | 0 | 0         | 0   | 1 |
| MIR542          | 0 | 0         | 0   | 1 |
| MGC16121,MIR42  | 0 | 0.0153434 | inf | 1 |
| MIR503          | 0 | 0         | 0   | 1 |
| FAM127C         | 0 | 0         | 0   | 1 |
| FAM127B         | 0 | 0         | 0   | 1 |
| LINC00087       | 0 | 0         | 0   | 1 |
| LINC00633       | 0 | 0.0399698 | inf | 1 |
| CT45A4          | 0 | 0         | 0   | 1 |
| CT45A5          | 0 | 0         | 0   | 1 |
| CT45A6          | 0 | 0         | 0   | 1 |
| SNORD61         | 0 | 0         | 0   | 1 |
| GPR101          | 0 | 0         | 0   | 1 |
| LOC158696       | 0 | 0         | 0   | 1 |

|              |   |             |     |   |
|--------------|---|-------------|-----|---|
| MIR504       | 0 | 0           | 0   | 1 |
| MIR505       | 0 | 0           | 0   | 1 |
| CXorf66      | 0 | 0           | 0   | 1 |
| SOX3         | 0 | 0           | 0   | 1 |
| CDR1         | 0 | 0.0062682   | inf | 1 |
| MIR320D2     | 0 | 0           | 0   | 1 |
| LDOC1        | 0 | 0           | 0   | 1 |
| SPANXA2      | 0 | 0           | 0   | 1 |
| MAGEC2       | 0 | 0.0060792   | inf | 1 |
| SPANXN3      | 0 | 0           | 0   | 1 |
| SLITRK4      | 0 | 0.000974262 | inf | 1 |
| SPANXN2      | 0 | 0           | 0   | 1 |
| MIR890       | 0 | 0           | 0   | 1 |
| MIR888       | 0 | 0           | 0   | 1 |
| MIR892A      | 0 | 0           | 0   | 1 |
| MIR892B      | 0 | 0           | 0   | 1 |
| MIR891B      | 0 | 0           | 0   | 1 |
| MIR891A      | 0 | 0           | 0   | 1 |
| CXorf51A     | 0 | 0           | 0   | 1 |
| MIR506       | 0 | 0           | 0   | 1 |
| MIR507       | 0 | 0           | 0   | 1 |
| MIR508       | 0 | 0           | 0   | 1 |
| MIR514B      | 0 | 0           | 0   | 1 |
| MIR509-1     | 0 | 0           | 0   | 1 |
| MIR509-3     | 0 | 0           | 0   | 1 |
| MIR509-1     | 0 | 0           | 0   | 1 |
| MIR510       | 0 | 0           | 0   | 1 |
| MIR514A1     | 0 | 0           | 0   | 1 |
| MIR514A2     | 0 | 0           | 0   | 1 |
| MIR514A3     | 0 | 0           | 0   | 1 |
| MAGEA9B      | 0 | 0           | 0   | 1 |
| HSFX2        | 0 | 0           | 0   | 1 |
| GABRE        | 0 | 0           | 0   | 1 |
| MIR452       | 0 | 0           | 0   | 1 |
| GABRA3       | 0 | 0           | 0   | 1 |
| MIR105-1     | 0 | 0           | 0   | 1 |
| MIR767       | 0 | 0           | 0   | 1 |
| MIR105-2     | 0 | 0           | 0   | 1 |
| CSAG2,CSAG3  | 0 | 0           | 0   | 1 |
| MAGEA12      | 0 | 0           | 0   | 1 |
| MAGEA2,MAGEA | 0 | 0           | 0   | 1 |
| MAGEA3       | 0 | 0           | 0   | 1 |
| PNMA6D       | 0 | 0           | 0   | 1 |
| MAGEA1       | 0 | 0           | 0   | 1 |
| PDZD4        | 0 | 0.0159303   | inf | 1 |
| MIR3202-2    | 0 | 0           | 0   | 1 |
| MIR718       | 0 | 0           | 0   | 1 |
| TEX28        | 0 | 0           | 0   | 1 |
| CTAG1A       | 0 | 0           | 0   | 1 |

|                |   |           |     |   |
|----------------|---|-----------|-----|---|
| CTAG2          | 0 | 0.0471549 | inf | 1 |
| SMIM9          | 0 | 0         | 0   | 1 |
| MIR1184-1      | 0 | 0         | 0   | 1 |
| MIR1184-3      | 0 | 0         | 0   | 1 |
| F8A1           | 0 | 0         | 0   | 1 |
| H2AFB3         | 0 | 0         | 0   | 1 |
| PLCXD1         | 0 | 0         | 0   | 1 |
| LINC00685      | 0 | 0         | 0   | 1 |
| SHOX           | 0 | 0         | 0   | 1 |
| CSF2RA         | 0 | 0         | 0   | 1 |
| MIR3690        | 0 | 0         | 0   | 1 |
| IL3RA          | 0 | 0         | 0   | 1 |
| ASMTL-AS1      | 0 | 0         | 0   | 1 |
| AKAP17A,ASMT   | 0 | 0         | 0   | 1 |
| CD99P1         | 0 | 0         | 0   | 1 |
| CD99           | 0 | 0         | 0   | 1 |
| XGPY2          | 0 | 0         | 0   | 1 |
| RPS4Y1         | 0 | 0         | 0   | 1 |
| ZFY            | 0 | 0         | 0   | 1 |
| LINC00278      | 0 | 0         | 0   | 1 |
| TGIF2LY        | 0 | 0         | 0   | 1 |
| TSPY2          | 0 | 0         | 0   | 1 |
| TTTY1B         | 0 | 0         | 0   | 1 |
| TTTY21         | 0 | 0         | 0   | 1 |
| TTTY7,TTTY7B   | 0 | 0         | 0   | 1 |
| TBL1Y          | 0 | 0         | 0   | 1 |
| PRKY           | 0 | 0         | 0   | 1 |
| TTTY12         | 0 | 0         | 0   | 1 |
| TTTY19         | 0 | 0         | 0   | 1 |
| TSPY3,TSPY4,TS | 0 | 0         | 0   | 1 |
| TSPY1          | 0 | 0         | 0   | 1 |
| TTTY8B         | 0 | 0         | 0   | 1 |
| TTTY2          | 0 | 0         | 0   | 1 |
| TTTY22         | 0 | 0         | 0   | 1 |
| TTTY23B        | 0 | 0         | 0   | 1 |
| TTTY15         | 0 | 0         | 0   | 1 |
| USP9Y          | 0 | 0         | 0   | 1 |
| DDX3Y          | 0 | 0         | 0   | 1 |
| TMSB4Y         | 0 | 0         | 0   | 1 |
| VCY            | 0 | 0         | 0   | 1 |
| NLGN4Y         | 0 | 0         | 0   | 1 |
| FAM41AY1       | 0 | 0         | 0   | 1 |
| CDY2A,CDY2B    | 0 | 0         | 0   | 1 |
| XKRY           | 0 | 0         | 0   | 1 |
| FAM224A,FAM22- | 0 | 0         | 0   | 1 |
| HSFY1,HSFY2    | 0 | 0         | 0   | 1 |
| TTTY9A         | 0 | 0         | 0   | 1 |
| TXLNG2P        | 0 | 0         | 0   | 1 |
| EIF1AY         | 0 | 0         | 0   | 1 |

|                |   |            |     |   |
|----------------|---|------------|-----|---|
| RPS4Y2         | 0 | 0          | 0   | 1 |
| RBM1B          | 0 | 0          | 0   | 1 |
| RBM1B          | 0 | 0          | 0   | 1 |
| TTY6,TTY6B     | 0 | 0          | 0   | 1 |
| RBM1F,RBM1L    | 0 | 0          | 0   | 1 |
| PR2            | 0 | 0          | 0   | 1 |
| TTY17C         | 0 | 0          | 0   | 1 |
| TTY4           | 0 | 0          | 0   | 1 |
| BP2            | 0 | 0          | 0   | 1 |
| DAZ2,DAZ3,DAZ4 | 0 | 0          | 0   | 1 |
| TTY17C         | 0 | 0          | 0   | 1 |
| TTY4           | 0 | 0          | 0   | 1 |
| BP2            | 0 | 0          | 0   | 1 |
| DAZ2,DAZ3,DAZ4 | 0 | 0          | 0   | 1 |
| GOLGA2P2Y      | 0 | 0          | 0   | 1 |
| CSPG4P1Y       | 0 | 0          | 0   | 1 |
| CDY1           | 0 | 0          | 0   | 1 |
| TTY3           | 0 | 0          | 0   | 1 |
| SPRY3          | 0 | 0          | 0   | 1 |
| VAMP7          | 0 | 0          | 0   | 1 |
| IL9R           | 0 | 0          | 0   | 1 |
| GTPBP6         | 0 | 0          | 0   | 1 |
| PPP2R3B        | 0 | 0          | 0   | 1 |
| CRLF2          | 0 | 0          | 0   | 1 |
| SLC25A6        | 0 | 0          | 0   | 1 |
| ASMTL          | 0 | 0          | 0   | 1 |
| P2RY8          | 0 | 0          | 0   | 1 |
| DHRX,ZBED1     | 0 | 0          | 0   | 1 |
| SRY            | 0 | 0          | 0   | 1 |
| TTY23B         | 0 | 0          | 0   | 1 |
| TTY2           | 0 | 0          | 0   | 1 |
| TTY8B          | 0 | 0          | 0   | 1 |
| AMELY          | 0 | 0          | 0   | 1 |
| TTY16          | 0 | 0          | 0   | 1 |
| TTY18          | 0 | 0          | 0   | 1 |
| TTY11          | 0 | 0          | 0   | 1 |
| RBM1A3P        | 0 | 0          | 0   | 1 |
| TTY20          | 0 | 0          | 0   | 1 |
| FAM197Y5       | 0 | 0          | 0   | 1 |
| FAM197Y5       | 0 | 0          | 0   | 1 |
| FAM197Y2       | 0 | 0          | 0   | 1 |
| FAM197Y2       | 0 | 0          | 0   | 1 |
| FAM197Y2       | 0 | 0          | 0   | 1 |
| RBM3AP         | 0 | 0          | 0   | 1 |
| TTY7,TTY7B     | 0 | 0          | 0   | 1 |
| TTY21          | 0 | 0          | 0   | 1 |
| TTY1B          | 0 | 0          | 0   | 1 |
| UTY            | 0 | 0.00232564 | inf | 1 |
| VCY            | 0 | 0          | 0   | 1 |

|               |           |           |           |            |
|---------------|-----------|-----------|-----------|------------|
| NLGN4Y-AS1    | 0         | 0         | 0         | 1          |
| FAM224A,FAM22 | 0         | 0         | 0         | 1          |
| XKRY2         | 0         | 0         | 0         | 1          |
| CDY2A,CDY2B   | 0         | 0         | 0         | 1          |
| FAM41AY2      | 0         | 0         | 0         | 1          |
| TTTY9B        | 0         | 0         | 0         | 1          |
| HSFY1,HSFY2   | 0         | 0         | 0         | 1          |
| NCRNA00185    | 0         | 0         | 0         | 1          |
| TTTY14        | 0         | 0         | 0         | 1          |
| BCORP1        | 0         | 0         | 0         | 1          |
| KDM5D         | 0         | 0         | 0         | 1          |
| TTTY10        | 0         | 0         | 0         | 1          |
| RBMV2EP       | 0         | 0         | 0         | 1          |
| TTTY13        | 0         | 0         | 0         | 1          |
| RBMV1B        | 0         | 0         | 0         | 1          |
| RBMV1B        | 0         | 0         | 0         | 1          |
| PRY           | 0         | 0         | 0         | 1          |
| RBMV1J        | 0         | 0         | 0         | 1          |
| TTTY5         | 0         | 0         | 0         | 1          |
| TTTY6,TTTY6B  | 0         | 0         | 0         | 1          |
| DAZ1,DAZ4     | 0         | 0         | 0         | 1          |
| TTTY3B        | 0         | 0         | 0         | 1          |
| CDY1          | 0         | 0         | 0         | 1          |
| CSPG4P1Y      | 0         | 0         | 0         | 1          |
| GOLGA2P2Y     | 0         | 0         | 0         | 1          |
| DAZ3,DAZ4     | 0         | 0         | 0         | 1          |
| BPY2C         | 0         | 0         | 0         | 1          |
| TTTY4B        | 0         | 0         | 0         | 1          |
| TTTY17B       | 0         | 0         | 0         | 1          |
| RAB1B         | 151.171   | 179.288   | 0.246095  | 0.563431   |
| SMARCAL1      | 7.82449   | 5.60462   | -0.48138  | 0.155896   |
| BAHD1         | 10.0875   | 12.1056   | 0.263108  | 0.539647   |
| NAT8L         | 0.0178183 | 0.0121312 | -0.554632 | 1          |
| KIF3C         | 2.47636   | 1.78112   | -0.475433 | 0.248223   |
| WDFY3         | 0.929329  | 0.725339  | -0.357533 | 0.412911   |
| TRNT1         | 8.06006   | 15.0704   | 0.902854  | 0.00153868 |
| CCNDBP1       | 10.7418   | 7.229     | -0.571363 | 0.0407657  |
| DDX54         | 32.5829   | 41.5585   | 0.351027  | 0.311408   |
| SOCS7         | 1.87491   | 2.12615   | 0.181423  | 0.783127   |
| KIN           | 2.02651   | 2.42853   | 0.261086  | 0.62076    |
| LOC100288846  | 0.527185  | 0.263928  | -0.998165 | 0.901684   |
| NDUFV2        | 166.881   | 174.071   | 0.0608566 | 0.945989   |
| LOC730183     | 2.64249   | 3.63531   | 0.460177  | 0.715755   |
| CCDC174       | 5.08906   | 2.95377   | -0.784842 | 0.0117316  |
| FAM195A       | 108.989   | 145.841   | 0.420216  | 0.176195   |
| RTN4RL2       | 23.5034   | 16.2417   | -0.533167 | 0.200193   |
| RBM38         | 37.5958   | 51.1637   | 0.44455   | 0.392176   |
| PARP4         | 14.0206   | 8.83269   | -0.666621 | 0.0123712  |
| CCDC24        | 8.1741    | 4.44993   | -0.877277 | 0.375271   |



|            |           |           |            |           |
|------------|-----------|-----------|------------|-----------|
| MNX1       | 17.8211   | 24.6381   | 0.467307   | 0.202575  |
| CCDC43     | 7.50181   | 8.80754   | 0.2315     | 0.664979  |
| NUP37      | 33.3738   | 25.8765   | -0.367075  | 0.289507  |
| TMEM145    | 27.2585   | 24.9253   | -0.129096  | 0.853083  |
| DAG1       | 10.7525   | 14.003    | 0.381071   | 0.245022  |
| STK19      | 6.15182   | 4.92016   | -0.322306  | 0.769079  |
| ANKRD32    | 0.7594    | 1.24669   | 0.715172   | 0.0997561 |
| GOLPH3     | 17.2566   | 17.1112   | -0.0122118 | 0.992304  |
| BRMS1L     | 2.18704   | 3.69219   | 0.755495   | 0.0290262 |
| ARL4A      | 3.16103   | 3.3873    | 0.099739   | 0.914837  |
| LMF2       | 51.7828   | 51.2687   | -0.014395  | 0.989954  |
| PTPRU      | 12.4039   | 8.99701   | -0.46328   | 0.127913  |
| TTC27      | 8.09811   | 9.15906   | 0.177615   | 0.765218  |
| PSMD10     | 28.8972   | 29.8781   | 0.0481569  | 0.95781   |
| ANKRD17    | 5.40933   | 5.9919    | 0.147564   | 0.802416  |
| PCDH12     | 0.0194263 | 0.0306376 | 0.657296   | 1         |
| DHRS4L1    | 0.0874831 | 0.0895571 | 0.0338037  | 1         |
| KLHDC10    | 3.87127   | 2.71546   | -0.51161   | 0.0997561 |
| LINC00657  | 28.1827   | 27.1714   | -0.0527182 | 0.953159  |
| NUP188     | 31.7744   | 43.8425   | 0.464465   | 0.15618   |
| INIP       | 5.56558   | 4.57794   | -0.281833  | 0.626866  |
| FAM102A    | 15.5801   | 14.8393   | -0.0702774 | 0.935543  |
| PINLYP     | 1.12601   | 1.48044   | 0.394802   | 0.801574  |
| IBA57      | 1.72059   | 1.28953   | -0.416059  | 0.326655  |
| BCAN       | 3.1071    | 2.63346   | -0.238609  | 0.739268  |
| FKTN       | 3.37741   | 3.83473   | 0.183208   | 0.815252  |
| BEND7      | 7.68609   | 5.61659   | -0.452554  | 0.241813  |
| LRRC3      | 1.35012   | 2.24322   | 0.732484   | 0.136653  |
| ASH2L      | 8.66507   | 6.78529   | -0.352802  | 0.369306  |
| SGMS2      | 2.90281   | 3.79685   | 0.387351   | 0.30062   |
| ZCCHC4     | 2.14662   | 1.95756   | -0.133005  | 0.889046  |
| KDM5A      | 2.22607   | 1.73357   | -0.360749  | 0.418773  |
| SETDB2     | 1.12448   | 0.587561  | -0.93645   | 0.0130226 |
| IP6K2      | 57.7768   | 38.4043   | -0.589225  | 0.0351856 |
| MRPL45     | 54.4073   | 40.4688   | -0.42699   | 0.158977  |
| HPSE       | 2.60431   | 2.06026   | -0.338077  | 0.474059  |
| FAM200B    | 3.50383   | 2.99188   | -0.227883  | 0.66903   |
| C10orf118  | 0.240229  | 0.234255  | -0.0363316 | 1         |
| FAM92A1    | 33.175    | 31.4169   | -0.0785581 | 0.926868  |
| SAC3D1     | 43.2485   | 62.558    | 0.532543   | 0.0647668 |
| EHBP1L1    | 9.86275   | 10.6316   | 0.108302   | 0.877619  |
| HTATIP2    | 36.466    | 32.0912   | -0.184375  | 0.736361  |
| PPP3CB     | 8.5029    | 6.54822   | -0.376852  | 0.302537  |
| ANKRD13D   | 17.3265   | 24.4225   | 0.495236   | 0.112663  |
| CATSPER2P1 | 0.390462  | 0.157903  | -1.30614   | 0.201515  |
| MMADHC     | 74.7073   | 55.8076   | -0.420788  | 0.169914  |
| PRADC1     | 15.6322   | 24.8488   | 0.668654   | 0.0232503 |
| SMARCE1    | 35.091    | 33.3626   | -0.0728689 | 0.930962  |
| MEMO1      | 28.8001   | 30.8403   | 0.0987433  | 0.895596  |

|              |           |           |             |            |
|--------------|-----------|-----------|-------------|------------|
| JMJD1C       | 5.13075   | 2.58211   | -0.990621   | 0.00153868 |
| ZNF37BP      | 1.81338   | 2.7294    | 0.5899      | 0.0471668  |
| HAUS2        | 9.99224   | 11.2256   | 0.167907    | 0.765267   |
| PNMA1        | 22.7865   | 26.3414   | 0.209154    | 0.664469   |
| CYP2D7P1     | 0.781591  | 0.688028  | -0.183946   | 0.931798   |
| LARP4B       | 8.99031   | 11.9148   | 0.406311    | 0.188505   |
| FAM109A      | 7.03216   | 11.181    | 0.669015    | 0.0243026  |
| SLC30A6      | 3.71574   | 3.4946    | -0.0885242  | 0.919777   |
| ZDHC8        | 10.3977   | 16.3094   | 0.649434    | 0.0111246  |
| SNRPD2       | 583.88    | 654.001   | 0.163621    | 0.766836   |
| GNAS         | 454.712   | 419.747   | -0.115432   | 0.870894   |
| SSBP3        | 14.93     | 12.2487   | -0.285589   | 0.523165   |
| NOS3         | 7.79676   | 5.99809   | -0.37837    | 0.368002   |
| SCFD2        | 1.35049   | 2.78756   | 1.04552     | 0.00478151 |
| TTC39A       | 4.87462   | 2.54151   | -0.9396     | 0.00820276 |
| ZNF473       | 3.0798    | 3.90857   | 0.343804    | 0.393462   |
| JAK2         | 0.293661  | 0.307034  | 0.0642444   | 1          |
| ERCC8        | 3.16993   | 2.61891   | -0.275484   | 0.647731   |
| NSL1         | 0.854618  | 1.03975   | 0.282879    | 0.548616   |
| PLP2         | 437.219   | 398.259   | -0.134652   | 0.827846   |
| MTERFD2      | 7.88621   | 9.49736   | 0.268194    | 0.664444   |
| MAFA         | 5.17728   | 5.15569   | -0.00603016 | 0.997314   |
| SERINC5      | 1.67619   | 1.93679   | 0.208479    | 0.745874   |
| PRR5L        | 1.22073   | 1.78123   | 0.545125    | 0.234947   |
| FTSJD2       | 9.82574   | 9.31663   | -0.076758   | 0.929057   |
| EP400        | 2.74208   | 2.54103   | -0.109853   | 0.883954   |
| NEDD1        | 3.72786   | 3.60152   | -0.0497451  | 0.963608   |
| THAP7        | 28.1413   | 35.2852   | 0.326376    | 0.474408   |
| HHAT         | 0.496137  | 0.324234  | -0.613702   | 0.393124   |
| LOC100506746 | 0.533535  | 0.176121  | -1.59901    | 0.0388971  |
| RPS9         | 4671.4    | 4571.64   | -0.0311449  | 0.97664    |
| ZBTB9        | 6.59182   | 9.39931   | 0.511877    | 0.115387   |
| PTPN18       | 14.0814   | 11.3823   | -0.306994   | 0.427302   |
| PSKH1        | 6.69432   | 7.17726   | 0.100494    | 0.912357   |
| XPO6         | 31.8956   | 42.5695   | 0.416462    | 0.167611   |
| KCNIP3       | 2.9126    | 2.34669   | -0.311684   | 0.630091   |
| PDS5A        | 7.33135   | 7.23937   | -0.0182155  | 0.987078   |
| SCARB1       | 55.7982   | 91.2393   | 0.709436    | 0.00380811 |
| FAHD2CP      | 5.30171   | 2.30725   | -1.20028    | 0.0176564  |
| LOC254100    | 0.695279  | 0.789257  | 0.182903    | 0.934875   |
| LOC729444    | 0.0112641 | 0.0124391 | 0.143139    | 1          |
| LDB1         | 17.6861   | 18.2584   | 0.0459378   | 0.964843   |
| MICALL2      | 2.71811   | 2.47696   | -0.13403    | 0.900447   |
| PSMA1        | 135.513   | 153.892   | 0.183487    | 0.724344   |
| BTN2A1       | 5.16409   | 5.48313   | 0.0864857   | 0.926868   |
| UBA1         | 101.778   | 113.447   | 0.156583    | 0.78593    |
| CYBASC3      | 9.30655   | 12.5707   | 0.433745    | 0.906254   |
| PSMA6        | 147.832   | 156.671   | 0.083773    | 0.915223   |
| TUBB         | 445.012   | 574.339   | 0.368061    | 0.307402   |

|                 |          |           |            |            |
|-----------------|----------|-----------|------------|------------|
| CLASP2          | 2.2938   | 2.33904   | 0.0281805  | 0.97957    |
| DSP             | 2.37715  | 2.0911    | -0.184973  | 0.76146    |
| MECOM           | 1.95092  | 1.33578   | -0.546467  | 0.156345   |
| MED24           | 22.4633  | 28.3663   | 0.33661    | 0.334299   |
| NOP14           | 24.5246  | 29.5261   | 0.267763   | 0.547145   |
| TRMT12          | 5.2335   | 7.62429   | 0.542829   | 0.111557   |
| NSDHL           | 23.7957  | 35.9635   | 0.595835   | 0.0324264  |
| ACACA           | 4.2209   | 5.20075   | 0.301171   | 0.439733   |
| LOC100131089    | 5.17494  | 2.03026   | -1.34988   | 0.0347593  |
| HSPE1,HSPE1-M   | 355.837  | 919.934   | 1.37031    | 0.0614148  |
| MIS18BP1        | 2.80495  | 2.91697   | 0.0564942  | 0.956177   |
| IQCJ,IQCJ-SCHIP | 6.22587  | 6.03979   | -0.0437787 | 0.970043   |
| RCN2            | 25.6785  | 25.1552   | -0.0297038 | 0.976381   |
| RYR2            | 0.125752 | 0.0767102 | -0.713093  | 1          |
| LEF1-AS1        | 0.382803 | 0.289751  | -0.401785  | 0.972717   |
| LZTFL1          | 3.07767  | 2.26106   | -0.444842  | 0.249574   |
| CNOT4           | 4.00527  | 3.86534   | -0.0513043 | 0.964843   |
| FBXO4           | 7.51134  | 4.08875   | -0.877411  | 0.00739414 |
| DDX23           | 20.6723  | 39.5076   | 0.934429   | 0.00153868 |
| NOD1            | 1.62224  | 1.27909   | -0.342866  | 0.562208   |
| STRIP2          | 3.56543  | 4.6332    | 0.377934   | 0.32114    |
| PAOX            | 6.10382  | 3.87959   | -0.653808  | 0.137552   |
| PHAX            | 6.06068  | 8.13596   | 0.424832   | 0.190837   |
| ZFAND1          | 45.4083  | 27.8007   | -0.707831  | 0.00659556 |
| PRPF38A         | 13.4306  | 15.6838   | 0.223759   | 0.629217   |
| SPSB3           | 40.3623  | 25.1414   | -0.682943  | 0.0156935  |
| KIAA0141        | 12.135   | 9.00698   | -0.430057  | 0.180595   |
| SNTB2           | 1.45245  | 1.56408   | 0.106831   | 0.89785    |
| INTS5           | 12.6111  | 16.0512   | 0.347988   | 0.344831   |
| CNPY3           | 47.095   | 49.1646   | 0.0620461  | 0.944779   |
| ZSWIM3          | 1.30057  | 1.00065   | -0.378208  | 0.597564   |
| TMCO3           | 9.03351  | 6.13348   | -0.558582  | 0.0738934  |
| RIPPLY1         | 0.065771 | 0.0727295 | 0.145089   | 1          |
| ARSD            | 4.91656  | 2.22885   | -1.14135   | 0.00153868 |
| RSBN1L          | 2.71351  | 2.92424   | 0.107897   | 0.930021   |
| TCF7L2          | 4.16013  | 3.53207   | -0.236114  | 0.677271   |
| MRPL24          | 105.587  | 111.405   | 0.0773734  | 0.92475    |
| SAP130          | 6.20776  | 6.35002   | 0.0326867  | 0.975492   |
| RANBP9          | 9.8767   | 7.76504   | -0.347035  | 0.336218   |
| FAM53A          | 3.94945  | 2.33742   | -0.756733  | 0.0741309  |
| CEP120          | 2.99595  | 2.24059   | -0.419131  | 0.275381   |
| TMEM126B        | 35.756   | 45.5336   | 0.348747   | 0.353957   |
| SEMA4F          | 4.08327  | 3.14254   | -0.377795  | 0.319187   |
| OSBPL3          | 1.70088  | 2.82206   | 0.730471   | 0.0150346  |
| TMX1            | 18.3536  | 24.1239   | 0.394401   | 0.210545   |
| ZNF846          | 0.350832 | 0.198226  | -0.823638  | 1          |
| C16orf13        | 172.638  | 175.485   | 0.0236025  | 0.981441   |
| SMN2            | 4.76641  | 5.51926   | 0.211572   | 0.749905   |
| DYNLT3          | 5.68124  | 5.14496   | -0.143044  | 0.847872   |

|              |           |           |            |            |
|--------------|-----------|-----------|------------|------------|
| NCBP2        | 32.516    | 40.0689   | 0.301333   | 0.417367   |
| LOC100289361 | 7.22982   | 5.00362   | -0.530989  | 0.412216   |
| HGSNAT       | 6.33836   | 5.35889   | -0.242174  | 0.605515   |
| VPS13B       | 1.58139   | 1.18019   | -0.422167  | 0.295637   |
| OSBPL5       | 4.5019    | 2.44035   | -0.883443  | 0.00970147 |
| RPL6         | 2840.34   | 2911.41   | 0.0356557  | 0.975454   |
| DEF6         | 20.1991   | 15.1549   | -0.4145    | 0.21507    |
| ZC3HC1       | 19.7655   | 19.5645   | -0.0147451 | 0.990042   |
| CCDC13       | 0.0217432 | 0.0345293 | 0.667254   | 1          |
| LOC100507501 | 2.97424   | 0.748158  | -1.99111   | 0.00153868 |
| IFITM3       | 327.662   | 401.353   | 0.292664   | 0.437985   |
| UBR2         | 2.59396   | 2.67844   | 0.0462381  | 0.965263   |
| FBXO46       | 13.8223   | 12.3602   | -0.1613    | 0.805551   |
| GALNT2       | 9.24726   | 12.0011   | 0.376072   | 0.281986   |
| ZSCAN26      | 5.45146   | 3.40397   | -0.679422  | 0.0338188  |
| HAUS6        | 4.74597   | 5.21871   | 0.13699    | 0.832068   |
| UBE4B        | 5.20842   | 4.48842   | -0.214637  | 0.679794   |
| MYH11        | 0.0748967 | 0.0685544 | -0.127652  | 1          |
| FAS          | 4.26181   | 4.33393   | 0.0242076  | 0.984602   |
| GTPBP10      | 3.75812   | 3.39767   | -0.145467  | 0.817355   |
| GBF1         | 5.71872   | 5.43283   | -0.0739886 | 0.933845   |
| CTDSP1       | 36.6412   | 33.8158   | -0.115772  | 0.866022   |
| EPB41L2      | 13.7776   | 12.1001   | -0.187304  | 0.720235   |
| MOAP1        | 18.6412   | 16.8364   | -0.146912  | 0.813283   |
| EIF4E2       | 41.3555   | 45.9478   | 0.151916   | 0.798793   |
| ZBTB21       | 2.75769   | 2.67264   | -0.0451927 | 0.96623    |
| RNFT1        | 7.55163   | 6.35251   | -0.249462  | 0.637483   |
| RGL3         | 11.3462   | 6.16413   | -0.880235  | 0.00153868 |
| CNTROB       | 13.2834   | 12.1285   | -0.131228  | 0.84109    |
| LOC100294145 | 2.21649   | 2.24275   | 0.0169934  | 0.990711   |
| SURF6        | 59.8512   | 110.183   | 0.880453   | 0.00153868 |
| AFG3L1P      | 4.10206   | 9.1508    | 1.15755    | 0.00153868 |
| NR2F2        | 3.18328   | 4.48112   | 0.493348   | 0.177166   |
| RNF152       | 0.940175  | 1.82956   | 0.960496   | 0.0723025  |
| MAP7D3       | 5.5857    | 3.72541   | -0.584339  | 0.0355697  |
| FAM53B       | 6.39886   | 8.76197   | 0.45344    | 0.160804   |
| ARFGEF1      | 4.14541   | 3.68263   | -0.17078   | 0.762618   |
| NUDT6        | 5.11717   | 3.32401   | -0.622422  | 0.179759   |
| NAPG         | 5.40984   | 6.35736   | 0.232844   | 0.643053   |
| NDFIP2       | 6.30704   | 7.23545   | 0.198121   | 0.702464   |
| C15orf56     | 1.93786   | 1.04034   | -0.8974    | 0.800869   |
| SMEK2        | 6.72428   | 6.0971    | -0.141256  | 0.822628   |
| ITGA2        | 1.11037   | 0.608789  | -0.86703   | 0.00897284 |
| ARID3A       | 5.60974   | 3.19323   | -0.812919  | 0.0181648  |
| C16orf70     | 5.35284   | 7.39128   | 0.465519   | 0.354349   |
| EYA3         | 4.19765   | 6.78329   | 0.692402   | 0.00659556 |
| CKAP4        | 21.9346   | 21.2134   | -0.0482346 | 0.960529   |
| C6orf226     | 11.9084   | 8.50476   | -0.485643  | 0.495918   |
| UBTD1        | 32.0783   | 40.4353   | 0.33402    | 0.379543   |

|               |          |           |            |            |
|---------------|----------|-----------|------------|------------|
| DYNC1L1       | 19.2188  | 19.383    | 0.0122739  | 0.991515   |
| GFER          | 29.7791  | 25.0771   | -0.247927  | 0.574478   |
| ZDHC20        | 3.94216  | 5.01581   | 0.347495   | 0.361239   |
| SLC25A11      | 69.6246  | 70.5147   | 0.0183278  | 0.985246   |
| IFNGR2        | 42.4086  | 48.0313   | 0.179618   | 0.785865   |
| EIF4E         | 17.6378  | 25.5707   | 0.535824   | 0.0407657  |
| MRPL23        | 110.566  | 118.402   | 0.0987821  | 0.895596   |
| C18orf21      | 20.2621  | 15.6678   | -0.370983  | 0.343481   |
| ZC3H3         | 18.8995  | 21.5795   | 0.191315   | 0.716797   |
| ZNF551        | 0.89867  | 0.728397  | -0.303066  | 0.711466   |
| FAM73A        | 1.06749  | 0.78678   | -0.44019   | 0.335246   |
| TNPO1         | 9.44738  | 10.3964   | 0.138102   | 0.818547   |
| MRPL10        | 88.0857  | 53.9645   | -0.706897  | 0.00659556 |
| SGOL1         | 2.79494  | 2.71829   | -0.0401184 | 0.976285   |
| FAM200A       | 3.37576  | 3.94098   | 0.22334    | 0.720174   |
| LOC399744     | 2.11974  | 0.892079  | -1.24864   | 0.00153868 |
| MAP4          | 22.2201  | 20.9282   | -0.0864194 | 0.908707   |
| FAM21C        | 5.65029  | 4.43522   | -0.349319  | 0.358517   |
| OVOL2         | 3.45234  | 4.22601   | 0.291723   | 0.703707   |
| KIAA1429      | 6.01295  | 5.32032   | -0.17656   | 0.754724   |
| HLA-E         | 153.172  | 116.902   | -0.389858  | 0.232203   |
| DFNB59        | 1.15189  | 0.492279  | -1.22645   | 0.856904   |
| CRCP          | 11.3831  | 10.3609   | -0.135745  | 0.843686   |
| CACYBP        | 45.8889  | 95.5034   | 1.05741    | 0.00153868 |
| ATL3          | 9.52116  | 9.76037   | 0.0357987  | 0.974108   |
| DLC1          | 22.6846  | 30.2423   | 0.414858   | 0.180595   |
| SHISA5        | 97.6628  | 86.2329   | -0.179571  | 0.730925   |
| LRRC61        | 42.1511  | 62.7747   | 0.574615   | 0.157802   |
| JMJD8         | 55.0889  | 74.2665   | 0.430948   | 0.361239   |
| KIAA1614      | 0.032506 | 0.0310645 | -0.0654415 | 1          |
| MICAL1        | 17.6994  | 12.7913   | -0.468535  | 0.125565   |
| ALKBH2        | 32.7769  | 42.7399   | 0.382905   | 0.286194   |
| UQCRC1        | 224.809  | 211.216   | -0.0899807 | 0.906423   |
| TTC8          | 5.51867  | 5.13798   | -0.103118  | 0.907121   |
| DKFZP586i1420 | 1.00459  | 1.04566   | 0.0578159  | 0.968712   |
| ACOX3         | 5.96633  | 6.2177    | 0.0595368  | 0.955832   |
| FBXO33        | 2.64291  | 2.52388   | -0.066483  | 0.946416   |
| LOC375295     | 20.267   | 19.3372   | -0.0677544 | 0.945689   |
| OSBP          | 14.5543  | 10.7098   | -0.442523  | 0.138646   |
| EED           | 12.297   | 16.6173   | 0.434376   | 0.171199   |
| ACE           | 4.06672  | 2.87135   | -0.502135  | 0.222632   |
| DPH5          | 19.7085  | 16.5775   | -0.249598  | 0.579643   |
| NDUFB7        | 249.961  | 339.145   | 0.440195   | 0.148853   |
| GTF2F1        | 57.2168  | 57.2146   | -5.69E-05  | 0.999942   |
| KIAA1161      | 1.21824  | 1.66242   | 0.448492   | 0.444145   |
| FGD1          | 10.3364  | 9.17038   | -0.17268   | 0.770808   |
| BET1          | 9.85813  | 7.43902   | -0.406201  | 0.217777   |
| VRK3          | 11.737   | 9.22833   | -0.346923  | 0.401662   |
| LIMD1-AS1     | 5.56483  | 6.85737   | 0.301319   | 0.79145    |

|                   |           |           |              |            |
|-------------------|-----------|-----------|--------------|------------|
| MPHOSPH8          | 9.50239   | 9.19928   | -0.0467699   | 0.960529   |
| BBC3              | 47.1074   | 16.3768   | -1.5243      | 0.00153868 |
| C7orf55,C7orf55-L | 43.9786   | 42.2034   | -0.0594448   | 0.955641   |
| CDK2AP1           | 64.5254   | 107.839   | 0.740942     | 0.00153868 |
| MIA3              | 4.02823   | 2.86315   | -0.492545    | 0.100178   |
| LAMC3             | 0.0882889 | 0.0326974 | -1.43306     | 1          |
| CSTF2T            | 4.92305   | 5.7863    | 0.233089     | 0.635944   |
| ALDH18A1          | 42.4185   | 45.6302   | 0.105296     | 0.880357   |
| RTF1              | 13.2852   | 17.8642   | 0.42725      | 0.151333   |
| DPF1              | 2.56037   | 2.19729   | -0.220626    | 0.817355   |
| MATR3             | 41.6612   | 39.3186   | -0.0834941   | 0.91609    |
| CMPK1             | 27.2353   | 33.2925   | 0.28972      | 0.449418   |
| LOC257396         | 1.58863   | 1.03538   | -0.617627    | 0.249717   |
| SP1               | 7.58621   | 5.30198   | -0.51685     | 0.0568637  |
| CDC20             | 129.982   | 169.506   | 0.383025     | 0.247701   |
| PAQR4             | 26.0329   | 26.0261   | -0.000375787 | 0.99971    |
| C9orf89           | 66.3904   | 49.4954   | -0.423679    | 0.219177   |
| GTF2IRD1P1        | 9.77107   | 9.73861   | -0.00480028  | 0.997552   |
| CCDC87            | 0.107827  | 0.09466   | -0.187895    | 1          |
| KHDRBS1           | 87.9212   | 78.7497   | -0.158937    | 0.784528   |
| STXBP2            | 59.2159   | 41.2025   | -0.523254    | 0.0600393  |
| RALGAPB           | 3.24328   | 3.39589   | 0.0663382    | 0.943284   |
| PARL              | 47.2647   | 50.2771   | 0.0891376    | 0.906254   |
| GPX1              | 714.924   | 864.798   | 0.274574     | 0.49037    |
| DDX42             | 17.4282   | 20.277    | 0.218418     | 0.629512   |
| ALG11,UTP14C      | 1.92699   | 1.97947   | 0.0387588    | 0.974348   |
| SPPL2B            | 6.70231   | 5.00905   | -0.420122    | 0.318076   |
| THAP6             | 1.83134   | 1.28762   | -0.508191    | 0.236814   |
| CLDN22            | 1.32596   | 1.80319   | 0.443509     | 0.639694   |
| SEN2              | 6.81304   | 6.30427   | -0.111971    | 0.884031   |
| SNX2              | 25.7583   | 16.952    | -0.603581    | 0.0253664  |
| TNNI3             | 9.31689   | 6.70868   | -0.47382     | 0.416685   |
| SEH1L             | 23.8132   | 38.1827   | 0.681156     | 0.0181648  |
| CKAP5             | 14.2836   | 12.7641   | -0.162268    | 0.774294   |
| LOC100507217      | 35.7657   | 29.6825   | -0.268963    | 0.506475   |
| ZCCHC9            | 21.245    | 17.2014   | -0.304603    | 0.547145   |
| ARHGEF10L         | 5.0124    | 4.44247   | -0.174139    | 0.795819   |
| KPNA3             | 7.02219   | 10.9871   | 0.64582      | 0.0103919  |
| DUSP7             | 28.7874   | 53.4127   | 0.891744     | 0.00153868 |
| C12orf75          | 23.6164   | 32.8371   | 0.475537     | 0.116272   |
| NAPEPLD           | 2.15857   | 2.83317   | 0.392339     | 0.809839   |
| GEMIN5            | 5.62986   | 10.8121   | 0.941479     | 0.00153868 |
| PAX9              | 1.61624   | 2.21099   | 0.452045     | 0.398652   |
| LEAP2             | 0.510431  | 0.969674  | 0.925785     | 0.347688   |
| ERCC3             | 22.1753   | 32.1295   | 0.534942     | 0.055778   |
| PMAIP1            | 10.7051   | 7.18049   | -0.57614     | 0.0630011  |
| EXOSC5            | 139.694   | 120.611   | -0.211906    | 0.647903   |
| SMG7              | 8.25754   | 10.6508   | 0.367178     | 0.274988   |
| GLTP              | 39.3185   | 40.6165   | 0.0468577    | 0.959846   |

|              |          |           |             |            |
|--------------|----------|-----------|-------------|------------|
| PRKAG2       | 20.0237  | 17.0888   | -0.22866    | 0.659662   |
| TOMM22       | 90.191   | 125.02    | 0.4711      | 0.110718   |
| UCKL1        | 30.911   | 31.9618   | 0.0482286   | 0.961132   |
| TMEM102      | 26.5976  | 29.1641   | 0.132896    | 0.848267   |
| MSANTD1      | 0.144515 | 0.0123548 | -3.54808    | 1          |
| RNF31        | 10.6079  | 12.4537   | 0.23143     | 0.62969    |
| CHCHD1       | 70.908   | 83.0843   | 0.228626    | 0.612746   |
| RRP7B        | 4.52687  | 8.50844   | 0.910381    | 0.00478151 |
| VGLL4        | 9.10771  | 10.2416   | 0.169275    | 0.867449   |
| ZNF215       | 1.73198  | 2.17928   | 0.331427    | 0.519864   |
| ASB13        | 17.9806  | 9.8453    | -0.868932   | 0.00153868 |
| ATP6AP2      | 34.7998  | 27.8424   | -0.321795   | 0.360865   |
| SH2B2        | 15.8629  | 16.6445   | 0.0693875   | 0.947974   |
| DES12        | 14.9294  | 14.9045   | -0.00240751 | 0.998382   |
| DLX2         | 1.77717  | 2.66178   | 0.582813    | 0.325655   |
| ZBTB2        | 4.86105  | 7.50769   | 0.627103    | 0.0338188  |
| MCM4         | 35.7266  | 51.6292   | 0.531188    | 0.0605998  |
| RMND5A       | 4.77199  | 4.59807   | -0.053565   | 0.97718    |
| PLS1         | 2.98382  | 3.33044   | 0.158555    | 0.820368   |
| APBB1        | 16.0182  | 11.8871   | -0.430313   | 0.208514   |
| HAUS1        | 37.4388  | 31.3231   | -0.257311   | 0.554334   |
| CELSR2       | 2.24674  | 2.30216   | 0.0351519   | 0.974777   |
| SLAIN2       | 3.25807  | 3.50953   | 0.107261    | 0.887883   |
| CDCA2        | 1.95567  | 1.36241   | -0.521506   | 0.239715   |
| ZNF227       | 3.69538  | 3.2248    | -0.196514   | 0.757708   |
| EXOSC7       | 71.4149  | 86.3507   | 0.273984    | 0.502162   |
| LINC00152    | 499.487  | 380.058   | -0.394228   | 0.21791    |
| FAM183B      | 0.448475 | 0.153138  | -1.5502     | 0.162703   |
| PPP2R4       | 165.688  | 178.193   | 0.104973    | 0.881102   |
| ZNF668       | 9.05039  | 15.9516   | 0.817647    | 0.00739414 |
| LOC100506314 | 0.532363 | 0.616074  | 0.210693    | 0.856602   |
| YIPF6        | 4.94689  | 4.29008   | -0.205517   | 0.697059   |
| FRS2         | 1.95385  | 1.86258   | -0.0690155  | 0.944779   |
| SPON2        | 0.432875 | 0.425729  | -0.0240135  | 0.994204   |
| UQCC         | 20.3813  | 22.0001   | 0.110265    | 0.879055   |
| PIGX         | 4.52741  | 3.95188   | -0.196149   | 0.756518   |
| UQCR10       | 83.3276  | 110.132   | 0.402371    | 0.200193   |
| MRPS7        | 38.5304  | 54.4051   | 0.497745    | 0.308846   |
| ULK4         | 0.326349 | 0.252163  | -0.372059   | 1          |
| SKIV2L2      | 12.4734  | 10.8404   | -0.202443   | 0.722089   |
| STEAP3       | 15.0052  | 19.6228   | 0.387066    | 0.239276   |
| GPRIN1       | 5.29177  | 8.26812   | 0.643809    | 0.0308509  |
| KIF18A       | 1.42801  | 1.24029   | -0.203328   | 0.802771   |
| INO80E       | 60.3425  | 75.1968   | 0.317496    | 0.513296   |
| ZNF7         | 18.2802  | 13.367    | -0.451614   | 0.155609   |
| CDK5RAP3     | 31.3179  | 25.1092   | -0.318771   | 0.388367   |
| COL27A1      | 4.44872  | 4.74896   | 0.0942207   | 0.913239   |
| SH3BP4       | 3.64365  | 3.36886   | -0.113124   | 0.890564   |
| C11orf58     | 26.1592  | 27.7517   | 0.0852561   | 0.911227   |

|               |           |           |             |            |
|---------------|-----------|-----------|-------------|------------|
| IMPA2         | 27.3695   | 18.0838   | -0.597875   | 0.0523053  |
| PAICS         | 98.2659   | 96.4863   | -0.0263668  | 0.978818   |
| NEK4          | 3.17419   | 3.33126   | 0.0696799   | 0.945688   |
| CCDC30        | 0.046126  | 0.0387339 | -0.251982   | 1          |
| MROH7,TTC4    | 14.8315   | 18.4387   | 0.314068    | 0.397595   |
| SMAD6         | 0.813642  | 0.206751  | -1.9765     | 0.0650492  |
| KIAA0196      | 11.5169   | 9.10324   | -0.339298   | 0.337387   |
| DNMBP         | 1.91347   | 1.45904   | -0.391171   | 0.367386   |
| USP39         | 29.8384   | 34.8239   | 0.222905    | 0.691588   |
| ZNF408        | 10.4125   | 10.5376   | 0.0172247   | 0.988974   |
| POLE4         | 84.1134   | 123.775   | 0.557316    | 0.0467998  |
| PMPCB         | 27.5011   | 20.1078   | -0.45173    | 0.384554   |
| C9orf156      | 5.84489   | 5.60255   | -0.0610926  | 0.958143   |
| NSMF          | 102.248   | 122.774   | 0.263935    | 0.514213   |
| TMEM52        | 40.3814   | 50.059    | 0.309939    | 0.458976   |
| LOC283922     | 0.443571  | 0.585103  | 0.399524    | 0.714822   |
| RAI1          | 4.02559   | 4.78399   | 0.249015    | 0.87189    |
| TOP1P1        | 0.0943817 | 0.0649483 | -0.539215   | 1          |
| CCDC90B       | 22.3606   | 14.3061   | -0.644325   | 0.020985   |
| DBI           | 169.074   | 271.91    | 0.685474    | 0.00274688 |
| CAPN7         | 3.00283   | 2.74023   | -0.132028   | 0.863109   |
| PEX10         | 20.4344   | 25.2693   | 0.306386    | 0.845981   |
| AHSA1         | 152.829   | 308.644   | 1.01403     | 0.00153868 |
| UBE2C         | 279.348   | 287.745   | 0.042729    | 0.965765   |
| RNFT2         | 1.87676   | 1.35272   | -0.472374   | 0.399378   |
| KRR1          | 16.8954   | 25.4879   | 0.593183    | 0.175512   |
| CDK6          | 2.25909   | 2.20719   | -0.0335288  | 0.975252   |
| TSR3          | 105.551   | 170.634   | 0.692966    | 0.00659556 |
| IMP4          | 129.02    | 168.908   | 0.388637    | 0.230877   |
| TMEM242       | 3.60868   | 3.63753   | 0.0114884   | 0.993157   |
| GDI2          | 172.155   | 144.26    | -0.255039   | 0.551704   |
| FANCB         | 0.375613  | 0.596571  | 0.667447    | 0.287405   |
| FAM120B       | 3.37738   | 2.73188   | -0.30601    | 0.55593    |
| C1orf174      | 15.0535   | 20.7876   | 0.465628    | 0.147009   |
| TDRD3         | 4.64355   | 2.82415   | -0.71741    | 0.0294837  |
| LYPLA1        | 39.0224   | 39.0672   | 0.00165277  | 0.998867   |
| CAMSAP2       | 2.24398   | 2.23702   | -0.00448007 | 0.997191   |
| KCNK6         | 11.6642   | 15.8018   | 0.437998    | 0.18775    |
| SPRTN         | 1.69188   | 3.03611   | 0.843598    | 0.0137404  |
| SLC35F5       | 4.57434   | 3.43479   | -0.413342   | 0.321291   |
| MAP2K2        | 168.816   | 159.897   | -0.0783048  | 0.922753   |
| MFHAS1        | 1.80305   | 1.63409   | -0.141947   | 0.881554   |
| KCTD20        | 5.73407   | 5.39354   | -0.0883273  | 0.913875   |
| ZNF670,ZNF695 | 4.76028   | 4.12043   | -0.208253   | 0.854706   |
| C10orf25      | 0.480303  | 0.511413  | 0.0905447   | 0.981543   |
| EEF2K         | 5.06934   | 5.71419   | 0.17275     | 0.764456   |
| ALPK1         | 1.52263   | 0.44094   | -1.78791    | 0.00153868 |
| GCLC          | 6.18859   | 6.84441   | 0.145316    | 0.824372   |
| STX4          | 49.5543   | 70.6729   | 0.512147    | 0.0634008  |



|           |          |          |            |            |
|-----------|----------|----------|------------|------------|
| MFI2      | 33.9965  | 32.7863  | -0.0522938 | 0.955124   |
| FAM221A   | 5.44732  | 3.99965  | -0.445673  | 0.344831   |
| MYBBP1A   | 27.7749  | 52.636   | 0.92227    | 0.00153868 |
| FYCO1     | 2.77147  | 2.9443   | 0.0872736  | 0.919777   |
| DCAF6     | 5.2377   | 3.85868  | -0.440827  | 0.5622     |
| KIF2A     | 5.06298  | 5.43913  | 0.103389   | 0.893674   |
| GPR158    | 0.168136 | 0.16188  | -0.0546983 | 1          |
| FBXO22    | 7.60185  | 8.84892  | 0.219151   | 0.77663    |
| RABGGTA   | 15.1805  | 13.2064  | -0.200978  | 0.72856    |
| EFNA2     | 4.83806  | 4.87222  | 0.0101522  | 0.994582   |
| PPM1K     | 2.4757   | 2.44053  | -0.0206373 | 0.985175   |
| ISOC1     | 7.7804   | 12.8963  | 0.729037   | 0.0103919  |
| NOP14-AS1 | 3.21837  | 2.02394  | -0.669163  | 0.655692   |
| MZT2A     | 369.949  | 391.134  | 0.0803356  | 0.935829   |
| MMAA      | 0.401568 | 0.43203  | 0.105488   | 0.940418   |
| ATP6V1B2  | 32.9464  | 24.2001  | -0.445106  | 0.131988   |
| STX3      | 13.4674  | 9.51953  | -0.500512  | 0.0907094  |
| MFN1      | 5.75861  | 6.46662  | 0.167291   | 0.781269   |
| CDK2      | 30.068   | 33.9731  | 0.176162   | 0.733012   |
| USP22     | 37.6671  | 38.5789  | 0.0345079  | 0.971173   |
| TTC12     | 7.5516   | 4.6978   | -0.684796  | 0.0304296  |
| SPECC1    | 7.14577  | 4.17457  | -0.77546   | 0.00274688 |
| NCKAP1    | 26.2381  | 20.5138  | -0.355064  | 0.292125   |
| C17orf53  | 4.57571  | 3.81611  | -0.261892  | 0.65944    |
| ZNF738    | 0.784212 | 0.909487 | 0.21381    | 0.733653   |
| C19orf53  | 140.388  | 180.292  | 0.360914   | 0.284835   |
| TRAP1     | 185.612  | 148.046  | -0.326246  | 0.373268   |
| PHF6      | 3.87295  | 3.81263  | -0.0226469 | 0.982815   |
| COX7A2L   | 117.873  | 85.6917  | -0.460006  | 0.116272   |
| COPG1     | 37.2505  | 34.6568  | -0.104119  | 0.879418   |
| PCBP2     | 201.537  | 148.7    | -0.438638  | 0.176195   |
| SNORA53   | 2.53606  | 1.56236  | -0.698858  | 0.925922   |
| MBP       | 3.29533  | 3.36539  | 0.0303501  | 0.979267   |
| PPP2R5A   | 10.784   | 9.23223  | -0.224147  | 0.630584   |
| ARMCX4    | 0.35355  | 0.343886 | -0.0399869 | 1          |
| ABCC6     | 1.29486  | 0.698005 | -0.891492  | 0.430428   |
| ASL       | 41.8053  | 37.2506  | -0.166423  | 0.772194   |
| GTF2H2B   | 2.00034  | 3.39337  | 0.762475   | 0.00739414 |
| SNW1      | 32.6137  | 28.7501  | -0.181909  | 0.715089   |
| GJC1      | 6.88997  | 4.57352  | -0.591193  | 0.030086   |
| INF2      | 37.0778  | 40.4719  | 0.126365   | 0.884758   |
| TRIP6     | 295.39   | 246.091  | -0.263426  | 0.525673   |
| ANAPC5    | 48.2282  | 46.1553  | -0.0633794 | 0.9444     |
| IGHMBP2   | 6.2504   | 7.825    | 0.324143   | 0.438337   |
| RIPK2     | 41.4245  | 27.6575  | -0.582814  | 0.0334318  |
| STK35     | 6.81558  | 8.5102   | 0.320358   | 0.395467   |
| ZKSCAN5   | 4.59779  | 5.34146  | 0.216294   | 0.680015   |
| TTC7A     | 3.11671  | 2.83406  | -0.137153  | 0.96875    |
| STAG1     | 3.14783  | 3.7781   | 0.263303   | 0.571471   |

|              |           |           |            |            |
|--------------|-----------|-----------|------------|------------|
| UBE2G1       | 11.0779   | 15.562    | 0.490345   | 0.0881203  |
| EPC2         | 2.69628   | 2.00176   | -0.429697  | 0.303067   |
| ATRIP,TREX1  | 5.60889   | 6.75834   | 0.268952   | 0.613714   |
| WWP1         | 6.83734   | 7.99913   | 0.226409   | 0.629991   |
| TEAD4        | 43.9812   | 43.4304   | -0.0181801 | 0.985692   |
| OCIAD2       | 262.97    | 200.904   | -0.388396  | 0.225333   |
| ALDH3B1      | 0.0916841 | 0.0488512 | -0.908278  | 1          |
| SNAI1        | 10.3704   | 11.087    | 0.0963952  | 0.917149   |
| PGRMC2       | 16.5226   | 18.4454   | 0.158817   | 0.778621   |
| VAC14        | 30.2662   | 25.8519   | -0.227438  | 0.607406   |
| EI24         | 47.8611   | 69.5674   | 0.539556   | 0.0347593  |
| SLC25A32     | 16.7391   | 27.8376   | 0.733812   | 0.265881   |
| LSM2         | 111.248   | 128.032   | 0.202725   | 0.679452   |
| SUCLG1       | 46.7096   | 44.5404   | -0.0686051 | 0.935543   |
| CAMK2N2      | 56.5599   | 48.5669   | -0.219807  | 0.804694   |
| SESTD1       | 0.394312  | 0.416108  | 0.0776184  | 0.951854   |
| GOLGA2       | 22.7521   | 15.9433   | -0.513051  | 0.0685533  |
| LOC100268168 | 3.90262   | 1.13567   | -1.7809    | 0.00153868 |
| USP27X       | 1.06782   | 1.19281   | 0.159702   | 0.889253   |
| WTAP         | 35.6211   | 44.0397   | 0.306073   | 0.427664   |
| WBP4         | 4.1303    | 3.59254   | -0.201243  | 0.756508   |
| MAP3K12      | 7.44649   | 5.873     | -0.342464  | 0.924456   |
| EPHB4        | 33.4028   | 42.7733   | 0.356741   | 0.287405   |
| KLHL36       | 11.0139   | 5.86449   | -0.909251  | 0.00478151 |
| C14orf1      | 30.5667   | 29.4286   | -0.0547425 | 0.952294   |
| CCDC86       | 45.3741   | 126.708   | 1.48156    | 0.00153868 |
| SH3BGRL3     | 287.671   | 352.938   | 0.294993   | 0.439637   |
| ECHS1        | 150.406   | 174.389   | 0.213447   | 0.647696   |
| ATP6V1C1     | 15.0478   | 17.4916   | 0.217113   | 0.63458    |
| CTNNA1       | 56.5549   | 50.104    | -0.174728  | 0.732286   |
| SERBP1       | 41.1821   | 62.0497   | 0.591408   | 0.0280907  |
| IZUMO4       | 0.308407  | 0.359581  | 0.221482   | 1          |
| SNX8         | 16.4985   | 13.5673   | -0.282199  | 0.478314   |
| PALD1        | 10.2152   | 11.218    | 0.135102   | 0.833117   |
| ZCCHC2       | 1.30514   | 1.83222   | 0.489385   | 0.234378   |
| DGKD         | 4.30854   | 4.0843    | -0.0771112 | 0.933651   |
| MRPL9        | 71.5391   | 65.8099   | -0.120426  | 0.859937   |
| SRRD         | 16.1903   | 19.7739   | 0.288467   | 0.73942    |
| PMP22        | 33.3008   | 46.2948   | 0.475294   | 0.101539   |
| TTI2         | 5.87684   | 7.70886   | 0.391476   | 0.69402    |
| C1orf43      | 155.144   | 110.453   | -0.490172  | 0.241102   |
| KANK1        | 2.33913   | 3.1636    | 0.435595   | 0.238328   |
| TMED2        | 94.5287   | 104.715   | 0.147638   | 0.802089   |
| MRPS5        | 37.4437   | 45.0417   | 0.266538   | 0.50443    |
| CARD6        | 1.17668   | 0.930028  | -0.339381  | 0.574093   |
| SMG6         | 11.34     | 11.9367   | 0.0739811  | 0.933717   |
| C14orf93     | 6.29085   | 3.545     | -0.827469  | 0.0169799  |
| RAMP1        | 45.6845   | 47.1274   | 0.0448631  | 0.964843   |
| INTS12       | 13.0489   | 11.8358   | -0.14077   | 0.838891   |

|            |          |           |             |            |
|------------|----------|-----------|-------------|------------|
| DOCK4      | 0.415511 | 0.571408  | 0.459634    | 0.387751   |
| ARL3       | 5.82798  | 6.2546    | 0.101921    | 0.896977   |
| C17orf75   | 2.31366  | 1.24079   | -0.898913   | 0.00659556 |
| PPARD      | 12.3471  | 14.0713   | 0.188589    | 0.731905   |
| PAFAH1B3   | 103.959  | 114.28    | 0.136563    | 0.844633   |
| FECH       | 1.89584  | 2.45697   | 0.374046    | 0.342599   |
| DBR1       | 4.99477  | 6.31142   | 0.337547    | 0.425447   |
| MTFR1      | 13.9544  | 15.851    | 0.183847    | 0.731905   |
| CNOT1      | 15.934   | 14.3433   | -0.15173    | 0.811259   |
| ZFAND2A    | 17.5451  | 22.9061   | 0.38467     | 0.342569   |
| MECR       | 16.4681  | 15.5483   | -0.0829174  | 0.9183     |
| MVP,PAGR1  | 28.1741  | 33.8493   | 0.264755    | 0.532321   |
| PPP1R7     | 57.793   | 54.2126   | -0.0922673  | 0.901684   |
| FAM72A     | 1.0502   | 0.64084   | -0.712632   | 0.256548   |
| KCTD3      | 4.68562  | 6.35484   | 0.439615    | 0.196403   |
| DAAM1      | 0.516421 | 0.61267   | 0.246563    | 0.773721   |
| SH3PXD2A   | 1.23087  | 1.58354   | 0.363483    | 0.377805   |
| ATPAF1     | 25.4933  | 18.8059   | -0.438934   | 0.185361   |
| TMEM54     | 145.181  | 123.623   | -0.2319     | 0.606201   |
| IGF2BP3    | 6.28878  | 4.54766   | -0.467654   | 0.147598   |
| CNTF,ZFP91 | 6.58764  | 7.91589   | 0.264989    | 0.533281   |
| ARMC10     | 37.6037  | 37.4141   | -0.00729518 | 0.994734   |
| GANAB      | 89.4476  | 77.7261   | -0.202643   | 0.676543   |
| ATRN       | 3.6207   | 3.13084   | -0.20972    | 0.721837   |
| YME1L1     | 25.4218  | 23.1746   | -0.133522   | 0.832181   |
| SESN3      | 0.118229 | 0.0302605 | -1.96608    | 1          |
| ARHGAP35   | 4.10073  | 4.37344   | 0.0928849   | 0.902527   |
| UXT        | 128.608  | 125.429   | -0.036107   | 0.971173   |
| SLC35D1    | 1.15884  | 1.66805   | 0.525487    | 0.172853   |
| TRMT112    | 430.289  | 561.833   | 0.384835    | 0.387199   |
| ITSN1      | 1.6454   | 1.65489   | 0.00830042  | 0.994734   |
| NDUFA6     | 61.2429  | 62.5712   | 0.0309561   | 0.975492   |
| VPS33B     | 7.60227  | 5.52771   | -0.459748   | 0.203128   |
| CDKL3      | 0.853658 | 0.607288  | -0.491279   | 0.553984   |
| MBOAT7     | 98.1571  | 101.5     | 0.0483107   | 0.958829   |
| RETSAT     | 17.5484  | 12.9865   | -0.434322   | 0.159847   |
| CCDC11     | 1.33711  | 0.965644  | -0.469556   | 0.499226   |
| BTBD7      | 2.67066  | 3.2032    | 0.262319    | 0.684169   |
| IDE        | 3.55247  | 3.46891   | -0.0343414  | 0.975492   |
| KAZALD1    | 3.17819  | 2.67875   | -0.246647   | 0.762574   |
| CLASP1     | 3.0658   | 2.80955   | -0.125922   | 0.86364    |
| C6orf62    | 33.1607  | 28.1431   | -0.236694   | 0.680049   |
| SIKE1      | 4.45311  | 4.12294   | -0.111139   | 0.880513   |
| MANBAL     | 55.5712  | 72.4703   | 0.383051    | 0.222759   |
| SLC25A12   | 4.11795  | 4.85922   | 0.238797    | 0.648844   |
| MTCH2      | 43.3162  | 45.2682   | 0.0635915   | 0.94048    |
| NOL11      | 17.271   | 27.6192   | 0.677324    | 0.00478151 |
| STK36      | 3.32057  | 2.90357   | -0.193601   | 0.908026   |
| C15orf37   | 2.21418  | 2.4198    | 0.128118    | 0.977982   |

|           |           |            |             |           |
|-----------|-----------|------------|-------------|-----------|
| HDC2      | 42.6003   | 42.1234    | -0.0162404  | 0.987159  |
| DNM2      | 40.1651   | 40.9293    | 0.0271919   | 0.978818  |
| COPE      | 260.111   | 260.318    | 0.00114792  | 0.999234  |
| FDFT1     | 58.0793   | 72.5885    | 0.321717    | 0.37853   |
| CDC40     | 4.36637   | 3.79316    | -0.203034   | 0.720279  |
| DDX47     | 33.4866   | 40.3049    | 0.267374    | 0.503126  |
| FAM91A1   | 10.3478   | 12.929     | 0.321288    | 0.358411  |
| NELFB     | 98.3371   | 119.261    | 0.278313    | 0.483022  |
| CERS6     | 3.10086   | 3.16201    | 0.0281746   | 0.983738  |
| YWHAG     | 40.1721   | 59.2819    | 0.561397    | 0.0403493 |
| MRPS2     | 290.083   | 339.382    | 0.226444    | 0.629512  |
| MTRNR2L10 | 1.30789   | 0.748338   | -0.805484   | 0.247212  |
| CEMP1     | 9.29995   | 12.4955    | 0.426108    | 0.657199  |
| RNF144B   | 0.17567   | 0.0872631  | -1.00943    | 1         |
| BOLA3     | 82.4959   | 95.7491    | 0.214937    | 0.684216  |
| ZNF629    | 6.5358    | 7.90963    | 0.275246    | 0.50844   |
| TGFBR3L   | 0.622964  | 0.182985   | -1.76743    | 0.41602   |
| KSR1      | 0.193658  | 0.133517   | -0.536487   | 1         |
| CDC7      | 2.27696   | 3.21225    | 0.496476    | 0.191267  |
| AIM1      | 0.0075342 | 0.00133125 | -2.50067    | 1         |
| ABCD3     | 9.35812   | 16.4065    | 0.809978    | 0.0137404 |
| EFCAB4B   | 1.49468   | 2.30402    | 0.624311    | 0.180946  |
| SHOC2     | 5.02766   | 4.17638    | -0.267631   | 0.560206  |
| ZFP30     | 1.02913   | 1.047      | 0.0248341   | 0.985436  |
| FAM132A   | 1.09942   | 1.40374    | 0.352523    | 0.828523  |
| FMR1      | 4.73417   | 4.84745    | 0.0341165   | 0.975484  |
| PDLIM7    | 87.3017   | 83.2262    | -0.068972   | 0.938622  |
| ATP5H     | 283.752   | 282.023    | -0.00881779 | 0.994159  |
| SMNDC1    | 45.5098   | 55.6528    | 0.290277    | 0.445156  |
| LOC284889 | 1.89274   | 3.1634     | 0.740998    | 0.926279  |
| PRKCD     | 14.2659   | 16.871     | 0.241973    | 0.591159  |
| POLR2C    | 49.8062   | 66.5078    | 0.417199    | 0.257002  |
| RBM6      | 12.973    | 18.0147    | 0.473661    | 0.114041  |
| CUL2      | 8.5548    | 8.69027    | 0.0226678   | 0.981441  |
| RGL4      | 0.664768  | 0.593318   | -0.164046   | 0.962865  |
| EIF4ENIF1 | 4.18651   | 5.13511    | 0.294646    | 0.518305  |
| PDPK1     | 2.66475   | 2.66602    | 0.000686015 | 0.999234  |
| PPRC1     | 11.4389   | 16.6109    | 0.538184    | 0.0561838 |
| PPP1CC    | 95.1764   | 96.2981    | 0.016904    | 0.987173  |
| PCGF2     | 42.8077   | 39.3864    | -0.120173   | 0.89301   |
| ANKRD27   | 7.02053   | 9.86767    | 0.491129    | 0.108015  |
| HECTD1    | 3.68416   | 4.76074    | 0.369851    | 0.276711  |
| PARD3     | 18.091    | 11.7291    | -0.625182   | 0.0226901 |
| ELMO2     | 4.58156   | 5.17648    | 0.176133    | 0.77593   |
| ZAK       | 5.43224   | 4.97858    | -0.125813   | 0.868343  |
| IFNAR2    | 8.75248   | 7.34937    | -0.252073   | 0.667772  |
| MKNK1     | 8.56935   | 6.81339    | -0.330813   | 0.433985  |
| USP46     | 1.15076   | 1.43611    | 0.319581    | 0.496696  |
| RBM39     | 44.3803   | 50.8415    | 0.196089    | 0.708212  |

|            |           |           |             |            |
|------------|-----------|-----------|-------------|------------|
| MALAT1     | 62.0471   | 55.2931   | -0.166264   | 0.773721   |
| DUS3L      | 41.306    | 53.3677   | 0.369614    | 0.284182   |
| CACUL1     | 7.56779   | 8.08117   | 0.0946931   | 0.899235   |
| LOC282997  | 2.19168   | 1.22965   | -0.833781   | 0.0981523  |
| INTS4      | 7.30466   | 6.69753   | -0.125187   | 0.863898   |
| UGT8       | 3.23384   | 2.63971   | -0.292868   | 0.600393   |
| EIF3D      | 223.624   | 136.493   | -0.712246   | 0.00572929 |
| WBP1L      | 5.56143   | 5.19166   | -0.0992596  | 0.902497   |
| CHST14     | 21.6921   | 21.5505   | -0.00944457 | 0.994116   |
| MKI67IP    | 50.8272   | 66.6584   | 0.391187    | 0.223482   |
| RNF25      | 27.0544   | 41.8227   | 0.628426    | 0.0533774  |
| NIPSNAP3B  | 0.380467  | 0.338314  | -0.169408   | 0.937886   |
| CXorf56    | 10.4001   | 11.6106   | 0.15885     | 0.800869   |
| CIAO1      | 21.1313   | 23.5285   | 0.155029    | 0.780031   |
| NUB1       | 18.7308   | 15.7181   | -0.252985   | 0.537959   |
| C9orf85    | 8.03818   | 5.20057   | -0.628199   | 0.0809491  |
| SLC25A21   | 1.04066   | 1.08579   | 0.0612494   | 0.967296   |
| ACSL5      | 0.0229489 | 0.0345582 | 0.590606    | 1          |
| TMEM97     | 24.4519   | 45.1264   | 0.884023    | 0.00380811 |
| IL18R1     | 0.155548  | 0.114837  | -0.437771   | 1          |
| ARMC6      | 22.7683   | 48.9653   | 1.10473     | 0.00153868 |
| ITGB3BP    | 16.1634   | 12.2345   | -0.401771   | 0.311633   |
| PDE7A      | 1.6269    | 1.7434    | 0.0997815   | 0.912368   |
| SRRT       | 43.6945   | 74.5072   | 0.769927    | 0.00153868 |
| TMEM51-AS1 | 0.0855014 | 0.0819776 | -0.0607185  | 1          |
| ODF3L2     | 0.76303   | 0.191347  | -1.99555    | 0.0910503  |
| ADSL       | 66.9477   | 65.5309   | -0.0308599  | 0.975492   |
| CASKIN2    | 4.05816   | 6.09318   | 0.586371    | 0.43048    |
| FOXF1      | 1.76597   | 1.77301   | 0.00574593  | 0.997592   |
| KBTBD11    | 3.41815   | 3.45627   | 0.0159973   | 0.989291   |
| MFAP1      | 18.2141   | 20.8652   | 0.196044    | 0.705202   |
| TMED1      | 30.1688   | 37.2237   | 0.303166    | 0.452562   |
| CIZ1       | 111.173   | 94.4619   | -0.235      | 0.630053   |
| TARBP2     | 24.5039   | 36.0979   | 0.558901    | 0.0410754  |
| PDCD10     | 33.9126   | 25.7079   | -0.399608   | 0.230069   |
| HNRNPK     | 195.281   | 184.889   | -0.0788905  | 0.926279   |
| HOXA2      | 0.141843  | 0.189687  | 0.419328    | 1          |
| COX6B1     | 415.287   | 450.242   | 0.116593    | 0.864624   |
| PCBD1      | 203.632   | 212.274   | 0.0599652   | 0.945597   |
| CBWD1      | 9.34964   | 11.8666   | 0.343925    | 0.384475   |
| FBXL14     | 2.33631   | 2.45424   | 0.0710428   | 0.960786   |
| SENP6      | 5.20478   | 5.37865   | 0.0474072   | 0.960251   |
| TRAFD1     | 10.5433   | 10.2125   | -0.0459875  | 0.964628   |
| SCFD1      | 6.85133   | 6.8255    | -0.00544854 | 0.996948   |
| TRIM21     | 6.52473   | 5.8268    | -0.163215   | 0.817355   |
| ARCN1      | 26.8308   | 25.6545   | -0.0646798  | 0.938489   |
| RINT1      | 9.50809   | 10.5717   | 0.152985    | 0.8041     |
| TMUB2      | 10.3012   | 9.12315   | -0.175203   | 0.796502   |
| SLC9A6     | 2.12419   | 2.28875   | 0.107651    | 0.908098   |

|               |           |           |             |            |
|---------------|-----------|-----------|-------------|------------|
| DKFZP434I0714 | 0.830345  | 0.755635  | -0.136022   | 0.9183     |
| XRCC6         | 200.641   | 221.805   | 0.144678    | 0.816962   |
| HIGD2A        | 247.182   | 249.512   | 0.0135363   | 0.991167   |
| LOC100133331  | 0.815568  | 0.642355  | -0.344434   | 0.720043   |
| TWISTNB       | 5.145     | 7.11031   | 0.46674     | 0.153799   |
| COX11         | 21.6674   | 17.5166   | -0.306809   | 0.512706   |
| UBE2Q2P1      | 0.160086  | 0.0843599 | -0.924216   | 1          |
| SURF1         | 46.2528   | 33.3348   | -0.472511   | 0.12463    |
| CBLL1         | 6.3737    | 5.97448   | -0.0933162  | 0.904039   |
| LMBR1         | 8.39431   | 8.60458   | 0.0356939   | 0.971173   |
| TBC1D10B      | 22.4512   | 26.7259   | 0.251448    | 0.560215   |
| CDC42SE2      | 5.55972   | 6.15668   | 0.147141    | 0.822226   |
| PLCH1         | 0.434639  | 0.274934  | -0.660735   | 0.214394   |
| MTFMT         | 11.0762   | 13.0246   | 0.233783    | 0.6214     |
| UBE2V2        | 22.2663   | 23.3945   | 0.0713095   | 0.934312   |
| PHB2          | 487.131   | 456.958   | -0.0922482  | 0.905839   |
| CAPNS1        | 275.453   | 264.913   | -0.0562902  | 0.951272   |
| XPO4          | 2.67707   | 3.36809   | 0.331272    | 0.381366   |
| DPM3          | 121.644   | 120.666   | -0.0116563  | 0.992728   |
| TOR1AIP1      | 15.8572   | 15.0638   | -0.0740496  | 0.93053    |
| BANP          | 5.5414    | 6.51543   | 0.233611    | 0.727839   |
| PRIM2         | 8.37266   | 5.90664   | -0.50335    | 0.136495   |
| RAB28         | 9.37013   | 9.34238   | -0.00427798 | 0.997552   |
| CYP20A1       | 1.22944   | 0.849794  | -0.532815   | 0.140535   |
| R3HDM1        | 3.89062   | 3.78211   | -0.0408092  | 0.96945    |
| ARHGFE28      | 10.0517   | 4.58962   | -1.13099    | 0.00153868 |
| CDK12         | 4.90576   | 7.04471   | 0.522064    | 0.070307   |
| SCAF8         | 6.81382   | 5.25275   | -0.375391   | 0.285746   |
| EIF3G         | 324.262   | 301.971   | -0.102752   | 0.905839   |
| EMC2          | 34.0297   | 25.6726   | -0.406565   | 0.216389   |
| ERBB2         | 17.1685   | 17.7191   | 0.0455423   | 0.961952   |
| TAOK2         | 11.2107   | 17.3769   | 0.632297    | 0.0169799  |
| POLD2         | 157.198   | 157.515   | 0.002905    | 0.99779    |
| ARHGFE5       | 3.37407   | 3.52504   | 0.0631513   | 0.952184   |
| DCK           | 5.72524   | 5.09442   | -0.16842    | 0.8041     |
| PC            | 1.38873   | 1.46448   | 0.0766231   | 0.986099   |
| TNFSF13B      | 0.0539548 | 0.0599739 | 0.152584    | 1          |
| PAFAH1B2      | 18.8443   | 23.9084   | 0.343386    | 0.317314   |
| SLC25A2       | 0.0436213 | 0.0570863 | 0.388112    | 1          |
| APTX          | 16.6994   | 20.3911   | 0.288143    | 0.489743   |
| PSIP1         | 27.9541   | 21.3201   | -0.390848   | 0.269117   |
| CTDNBP1       | 115.599   | 111.02    | -0.0583133  | 0.948523   |
| DUT           | 40.108    | 42.5921   | 0.0866982   | 0.909496   |
| CEP135        | 1.54875   | 1.01439   | -0.610489   | 0.103663   |
| FGD5-AS1      | 11.8302   | 13.0857   | 0.145526    | 0.913887   |
| COPZ1         | 98.0932   | 91.9595   | -0.0931546  | 0.900997   |
| PPP1R35       | 70.2855   | 68.1986   | -0.0434851  | 0.967343   |
| HIF1A-AS2     | 10.3392   | 12.5288   | 0.277133    | 0.61305    |
| TNFRSF1A      | 28.5135   | 46.6607   | 0.710564    | 0.00274688 |

|             |           |           |            |            |
|-------------|-----------|-----------|------------|------------|
| COIL        | 5.40477   | 4.88341   | -0.146345  | 0.842721   |
| C9orf16     | 402.106   | 407.651   | 0.0197577  | 0.984084   |
| GTF3A       | 117.983   | 134.91    | 0.193409   | 0.732319   |
| TMEM129     | 25.7024   | 20.3967   | -0.333568  | 0.363091   |
| YTHDF1      | 18.2977   | 21.8658   | 0.257017   | 0.536705   |
| BOK         | 58.1474   | 65.5828   | 0.173602   | 0.74504    |
| PTPN4       | 0.557735  | 0.539808  | -0.0471331 | 0.970185   |
| UBE3A       | 8.9745    | 9.78557   | 0.124824   | 0.846414   |
| PPFIBP2     | 1.84353   | 1.5271    | -0.271683  | 0.700497   |
| MAPK1       | 9.89349   | 9.94876   | 0.00803703 | 0.995019   |
| WLS         | 36.9003   | 22.5615   | -0.709772  | 0.216389   |
| KIFAP3      | 1.94704   | 1.36689   | -0.510388  | 0.279008   |
| MYBL1       | 1.0159    | 1.05791   | 0.0584658  | 0.964843   |
| IPO8        | 7.1494    | 8.13108   | 0.185625   | 0.725739   |
| AMIGO1      | 2.13687   | 2.05959   | -0.0531452 | 0.970452   |
| BLMH        | 15.1938   | 23.2303   | 0.612525   | 0.0204286  |
| JOSD1       | 21.5803   | 16.6166   | -0.377093  | 0.257002   |
| CA2         | 7.86614   | 14.0856   | 0.840488   | 0.00153868 |
| UIMC1       | 10.9302   | 10.3712   | -0.0757376 | 0.931457   |
| TADA3       | 67.5429   | 42.108    | -0.681711  | 0.251505   |
| FAM134C     | 16.608    | 14.7676   | -0.169441  | 0.903596   |
| DOM3Z       | 11.218    | 10.9905   | -0.0295676 | 0.98206    |
| IRS2        | 3.98268   | 1.44484   | -1.46283   | 0.00153868 |
| DBNDD2,SYS1 | 209.11    | 156.632   | -0.416887  | 0.233177   |
| FAM168B     | 10.3116   | 10.4885   | 0.0245317  | 0.979792   |
| ZSCAN31     | 1.01279   | 0.538622  | -0.910985  | 0.0667647  |
| SOCS2       | 9.22101   | 7.83336   | -0.235293  | 0.640496   |
| HERC5       | 0.0592296 | 0.0276554 | -1.09876   | 1          |
| SIM2        | 3.38905   | 3.06402   | -0.145456  | 0.854706   |
| MAU2        | 7.04642   | 4.83575   | -0.543151  | 0.0824065  |
| AFG3L2      | 36.151    | 38.6846   | 0.0977256  | 0.892826   |
| SPDYE7P     | 1.33229   | 0.961846  | -0.470033  | 0.319634   |
| VAPB        | 6.8028    | 7.19821   | 0.0815085  | 0.919811   |
| GTF2F2      | 24.8663   | 32.3825   | 0.38102    | 0.247848   |
| FANCD2      | 2.58437   | 1.74074   | -0.570118  | 0.110718   |
| PLCD3       | 18.1439   | 17.9059   | -0.0190512 | 0.985283   |
| LOH12CR2    | 0.247594  | 0.192142  | -0.365803  | 1          |
| MEF2D       | 9.23831   | 6.19915   | -0.575557  | 0.0388971  |
| HIF1AN      | 5.93217   | 5.72061   | -0.0523927 | 0.954981   |
| SNX1        | 5.86238   | 6.62822   | 0.177135   | 0.732319   |
| IFITM1      | 1.14608   | 1.42967   | 0.318979   | 0.844936   |
| SCAMP5      | 22.7678   | 26.2437   | 0.204978   | 0.679281   |
| EMC9        | 34.8104   | 31.9581   | -0.123337  | 0.968712   |
| PHRF1       | 9.16233   | 14.8753   | 0.699135   | 0.00970147 |
| HDGFRP2     | 39.5319   | 36.0031   | -0.134894  | 0.836107   |
| PEF1        | 32.7848   | 41.1857   | 0.329115   | 0.369306   |
| MAPK8       | 7.66445   | 6.21647   | -0.302088  | 0.554974   |
| TAZ         | 20.6097   | 11.163    | -0.884606  | 0.751293   |
| PSMD7       | 48.2931   | 51.338    | 0.0882085  | 0.906423   |

|              |           |           |            |            |
|--------------|-----------|-----------|------------|------------|
| MYO9B        | 13.2806   | 16.99     | 0.355367   | 0.297593   |
| OMA1         | 6.49968   | 3.45976   | -0.909695  | 0.00572929 |
| PPFIA3       | 4.34182   | 6.37898   | 0.555026   | 0.107753   |
| COQ5         | 15.863    | 7.08834   | -1.16215   | 0.00153868 |
| UBE3D        | 1.55247   | 2.11547   | 0.446419   | 0.462752   |
| C9orf116     | 26.2875   | 27.3014   | 0.054598   | 0.961236   |
| PKN3         | 78.6274   | 69.1643   | -0.185004  | 0.772124   |
| DAP          | 36.3188   | 39.5073   | 0.121403   | 0.852765   |
| WAC-AS1      | 18.0246   | 22.5434   | 0.322734   | 0.37405    |
| SMC1A        | 4.91249   | 6.32224   | 0.363981   | 0.284373   |
| ITM2C        | 102.712   | 92.4224   | -0.152288  | 0.795819   |
| ECE2         | 45.0687   | 64.1542   | 0.509418   | 0.258195   |
| LAPTM4A      | 86.1208   | 71.3647   | -0.27115   | 0.498179   |
| ADORA2A      | 1.31232   | 1.11978   | -0.228911  | 0.849369   |
| MRPL27       | 67.9477   | 110.98    | 0.707804   | 0.00659556 |
| METTL7B      | 3.32336   | 1.93913   | -0.777234  | 0.422872   |
| FBXW11       | 8.59839   | 9.94237   | 0.209524   | 0.668626   |
| PTP4A1       | 14.4446   | 15.1357   | 0.0674254  | 0.93571    |
| PTPRG        | 1.27631   | 0.769333  | -0.730294  | 0.048028   |
| DOCK11       | 0.741582  | 0.36796   | -1.01106   | 0.0137404  |
| TRAPPC2L     | 81.9325   | 104.274   | 0.347875   | 0.337742   |
| TMEM69       | 43.3768   | 29.5755   | -0.552522  | 0.0525851  |
| APOE         | 0.765589  | 1.3783    | 0.848245   | 0.444812   |
| FSTL3        | 39.092    | 37.0853   | -0.076026  | 0.925922   |
| CCNH         | 28.7307   | 27.5289   | -0.0616484 | 0.946416   |
| AGK          | 12.0883   | 10.2558   | -0.237168  | 0.61305    |
| KCTD17       | 23.7384   | 33.5179   | 0.497713   | 0.0956889  |
| ATP5SL       | 28.8766   | 29.0174   | 0.00701822 | 0.994734   |
| RAB11B       | 91.3222   | 69.3484   | -0.397103  | 0.21791    |
| SFR1         | 4.9279    | 3.02536   | -0.703866  | 0.0741309  |
| SERINC2      | 32.6306   | 21.1117   | -0.628182  | 0.0313688  |
| SMTN         | 89.75     | 105.413   | 0.232073   | 0.614359   |
| ZNF32        | 26.4262   | 21.467    | -0.299852  | 0.519345   |
| CLCC1        | 5.50681   | 4.5663    | -0.270193  | 0.578167   |
| PITPNB       | 18.6501   | 28.7987   | 0.626824   | 0.0181648  |
| NKD2         | 13.7932   | 13.3092   | -0.0515326 | 0.96256    |
| PI4K2A       | 16.1395   | 13.9785   | -0.20739   | 0.673957   |
| LCN2         | 0.0934665 | 0.0463041 | -1.01331   | 1          |
| LOC100130557 | 0.527779  | 0.535845  | 0.02188    | 0.997314   |
| WAC          | 23.3568   | 19.686    | -0.246673  | 0.571471   |
| USP8         | 4.54909   | 3.65133   | -0.317159  | 0.433155   |
| PRR14L       | 1.70883   | 1.77096   | 0.0515192  | 0.95904    |
| TLE3         | 8.80321   | 9.17727   | 0.0600351  | 0.948152   |
| PRCC         | 22.8795   | 35.2158   | 0.622164   | 0.0238313  |
| ZNF320       | 2.51279   | 2.21002   | -0.18523   | 0.765253   |
| FAM57B       | 0.309884  | 0.101151  | -1.61521   | 1          |
| RNF220       | 42.1432   | 46.0272   | 0.127186   | 0.842721   |
| PATZ1        | 19.8904   | 22.1881   | 0.15771    | 0.80005    |
| LOC100130015 | 3.71998   | 3.35183   | -0.150346  | 0.945857   |



|              |          |          |             |            |
|--------------|----------|----------|-------------|------------|
| MCTS1        | 2.9735   | 2.41547  | -0.299856   | 0.455871   |
| ABHD14B      | 47.8095  | 26.3975  | -0.856898   | 0.00153868 |
| SNAPC5       | 8.65417  | 9.59196  | 0.148429    | 0.970533   |
| KIAA1967     | 39.1129  | 51.0546  | 0.384396    | 0.302835   |
| ARPC3        | 282.768  | 281.38   | -0.00709702 | 0.994734   |
| HCLS1        | 0.39071  | 0.220229 | -0.827092   | 0.400946   |
| PDLIM5       | 3.1783   | 2.57111  | -0.305864   | 0.628025   |
| GPKOW        | 9.46404  | 8.52614  | -0.150564   | 0.818403   |
| MAZ          | 128.721  | 170.023  | 0.401477    | 0.224437   |
| COG4         | 10.3675  | 6.57805  | -0.656334   | 0.0192959  |
| CCNA2        | 17.2194  | 20.1417  | 0.226152    | 0.76721    |
| FKBP15       | 27.6782  | 14.8745  | -0.895907   | 0.00153868 |
| KCTD10       | 10.5925  | 11.2289  | 0.0841819   | 0.916694   |
| HERPUD2      | 6.75191  | 3.86622  | -0.80437    | 0.0103919  |
| TMEM128      | 14.1358  | 8.56715  | -0.722465   | 0.0111246  |
| CSNK1G3      | 6.278    | 5.92644  | -0.0831395  | 0.922274   |
| IRAK1        | 146.636  | 168.039  | 0.19656     | 0.70055    |
| CLN8         | 2.40495  | 2.30947  | -0.0584423  | 0.95594    |
| C15orf41     | 2.15242  | 1.3605   | -0.661824   | 0.112063   |
| ANKRD39      | 20.3056  | 36.3144  | 0.838664    | 0.00380811 |
| ITSN2        | 1.34038  | 0.949148 | -0.497936   | 0.238719   |
| CDK16        | 43.2268  | 48.9183  | 0.178448    | 0.730925   |
| DTX3L        | 1.59763  | 1.75682  | 0.137033    | 0.897332   |
| DVL2         | 31.0306  | 25.5792  | -0.27872    | 0.480434   |
| ZNF48        | 10.8186  | 13.3476  | 0.303059    | 0.463776   |
| KIF7         | 9.16177  | 16.0681  | 0.810503    | 0.038486   |
| CHCHD5       | 37.2117  | 27.913   | -0.41482    | 0.326259   |
| WBP2         | 145.33   | 78.4769  | -0.888992   | 0.00153868 |
| LTV1         | 14.7234  | 25.5967  | 0.79785     | 0.00153868 |
| ZSCAN22      | 1.32991  | 1.67986  | 0.337016    | 0.556458   |
| GTF2I        | 1.05384  | 1.1818   | 0.165334    | 0.866567   |
| SMC3         | 9.62433  | 11.5055  | 0.257562    | 0.541442   |
| UBE2B        | 23.4808  | 19.4217  | -0.27381    | 0.494899   |
| EEF1D        | 1397.08  | 1428.97  | 0.0325616   | 0.976572   |
| KIF13B       | 1.61832  | 0.99729  | -0.698412   | 0.0420136  |
| LOC643406    | 0.165051 | 0.140848 | -0.228777   | 1          |
| MRPS18B      | 81.5362  | 55.8615  | -0.545586   | 0.0545989  |
| POLB         | 22.4361  | 17.2376  | -0.380258   | 0.283957   |
| OIP5-AS1     | 8.20293  | 7.64443  | -0.10173    | 0.907121   |
| CUZD1,FAM24B | 10.2709  | 7.65118  | -0.424813   | 0.500155   |
| NDUFAF3      | 70.0555  | 66.2225  | -0.0811756  | 0.971684   |
| PRDM16       | 1.5778   | 1.20297  | -0.391324   | 0.400688   |
| LRRFIP2      | 9.01477  | 8.29659  | -0.119771   | 0.866944   |
| BRAP         | 5.2241   | 5.09904  | -0.0349555  | 0.974348   |
| LOC440894    | 1.5285   | 2.79558  | 0.871025    | 0.0370145  |
| MAP4K2       | 16.164   | 11.4419  | -0.498466   | 0.101333   |
| GRAMD4       | 9.3012   | 8.4587   | -0.136981   | 0.840828   |
| CDYL         | 7.1322   | 6.8656   | -0.054962   | 0.95448    |
| DIMT1        | 27.7088  | 32.7999  | 0.243346    | 0.58376    |

|             |          |           |             |            |
|-------------|----------|-----------|-------------|------------|
| NCOR2       | 9.1273   | 6.48531   | -0.493013   | 0.0999675  |
| CARM1       | 51.0015  | 48.0503   | -0.0859925  | 0.925922   |
| CHPF2       | 38.4895  | 49.5771   | 0.365208    | 0.463186   |
| GEMIN7      | 24.1053  | 29.7718   | 0.304594    | 0.432985   |
| NAA35       | 9.24298  | 9.02992   | -0.033645   | 0.974348   |
| ZNF74       | 8.04271  | 8.42066   | 0.0662515   | 0.943284   |
| PTPLB       | 0.679437 | 0.737392  | 0.118092    | 0.953878   |
| TMEM87A     | 10.0516  | 10.3613   | 0.0437777   | 0.964843   |
| SYT15       | 0.770961 | 0.92619   | 0.26465     | 0.861337   |
| LOC284385   | 2.33458  | 1.12574   | -1.05229    | 0.0143403  |
| TOPORS      | 2.72381  | 2.58849   | -0.0735145  | 0.949638   |
| SNHG16      | 136.598  | 138.577   | 0.0207563   | 0.982142   |
| PIBF1       | 1.70377  | 1.69697   | -0.00576693 | 0.999187   |
| KCNJ11      | 5.55185  | 4.06501   | -0.449708   | 0.274062   |
| HMGNA4      | 51.9268  | 48.1304   | -0.109533   | 0.872122   |
| GAPVD1      | 6.26649  | 7.44063   | 0.247767    | 0.568684   |
| USP35       | 2.70275  | 3.46753   | 0.35948     | 0.459785   |
| TFPT        | 11.4925  | 13.497    | 0.231943    | 0.935808   |
| GCLM        | 3.01041  | 7.18645   | 1.25532     | 0.00153868 |
| PDXDC1      | 10.6077  | 14.0706   | 0.407576    | 0.195931   |
| KIAA1704    | 3.01694  | 2.86556   | -0.0742709  | 0.955281   |
| MRPL47      | 36.3735  | 42.1273   | 0.211867    | 0.659662   |
| AMOTL2      | 21.1407  | 7.02573   | -1.5893     | 0.00153868 |
| HIGD1B      | 0.145473 | 0.266529  | 0.873538    | 1          |
| LOC728323   | 0.343985 | 0.172109  | -0.999018   | 1          |
| HDAC9       | 6.91378  | 1.5211    | -2.18436    | 0.00153868 |
| NCAPD3      | 1.43103  | 2.21061   | 0.62739     | 0.0719976  |
| ZSWIM7      | 9.32192  | 8.07308   | -0.207508   | 0.908161   |
| ERP44       | 15.4262  | 14.0357   | -0.136284   | 0.821611   |
| FLJ27352    | 1.32829  | 0.472828  | -1.49018    | 0.773721   |
| BRPF1       | 5.49929  | 6.98625   | 0.345274    | 0.377663   |
| SPTY2D1     | 2.63584  | 3.86355   | 0.551665    | 0.0676413  |
| CHRD        | 2.09785  | 1.82453   | -0.201388   | 0.835783   |
| SENP1       | 3.14812  | 3.71903   | 0.240436    | 0.92475    |
| PCBP4       | 43.9818  | 51.4868   | 0.227296    | 0.6172     |
| LOC440356   | 0.170193 | 0.0465182 | -1.8713     | 1          |
| REEP6       | 26.0534  | 16.9055   | -0.623977   | 0.0564873  |
| NUP50       | 9.88991  | 14.5808   | 0.560044    | 0.0410754  |
| CDNF        | 1.92183  | 0.550116  | -1.80467    | 0.00153868 |
| GTF2E2      | 21.5357  | 26.0967   | 0.277134    | 0.496751   |
| ENTPD2      | 159.174  | 119.158   | -0.417739   | 0.171813   |
| ECM1        | 1.26096  | 1.02521   | -0.298602   | 0.755384   |
| CTC1        | 2.65948  | 2.27049   | -0.228137   | 0.687762   |
| BCAT2       | 98.0289  | 83.1532   | -0.237435   | 0.60666    |
| ERCC6,PGBD3 | 1.54255  | 1.0655    | -0.53378    | 0.314558   |
| RXRA        | 16.1358  | 16.6949   | 0.0491447   | 0.957719   |
| POMGNT1     | 31.9313  | 31.2477   | -0.0312181  | 0.975592   |
| OSTF1       | 15.7305  | 15.0971   | -0.0592876  | 0.951495   |
| ARIH2OS     | 1.77003  | 0.819086  | -1.11169    | 0.876936   |

|           |           |           |             |            |
|-----------|-----------|-----------|-------------|------------|
| ZNF571    | 0.724228  | 0.7259    | 0.00332683  | 0.999234   |
| TCTN3     | 22.6208   | 20.281    | -0.157521   | 0.782739   |
| STAG3L4   | 6.01206   | 4.55029   | -0.401899   | 0.336542   |
| PKI55     | 1.33755   | 1.54751   | 0.210351    | 0.795819   |
| MIOS      | 6.85608   | 6.91769   | 0.0129069   | 0.991637   |
| PREB      | 42.3232   | 71.3492   | 0.753447    | 0.00153868 |
| RABEPK    | 44.195    | 48.3753   | 0.130389    | 0.837945   |
| KIF5B     | 14.3731   | 19.2585   | 0.422118    | 0.172098   |
| ZFP36L2   | 7.54185   | 10.5102   | 0.478798    | 0.146193   |
| NMU       | 17.4863   | 24.1394   | 0.465163    | 0.225099   |
| ZDHC18    | 26.2647   | 39.9643   | 0.60559     | 0.0204286  |
| C19orf55  | 1.52071   | 1.43607   | -0.0826117  | 0.960032   |
| JKAMP     | 15.303    | 15.9226   | 0.0572602   | 0.952184   |
| CMTM7     | 82.9958   | 100.694   | 0.278866    | 0.484342   |
| TIMM22    | 24.6338   | 45.9319   | 0.898859    | 0.00153868 |
| ZNF565    | 0.677189  | 0.406547  | -0.736136   | 0.929145   |
| MEF2A     | 4.11197   | 2.97235   | -0.468224   | 0.1743     |
| IQSEC2    | 7.19964   | 5.09946   | -0.497582   | 0.403353   |
| DDX3X     | 31.2184   | 49.3869   | 0.661731    | 0.00897284 |
| TMEM156   | 0.0958277 | 0.0338755 | -1.5002     | 1          |
| GRAMD1A   | 81.0918   | 49.4407   | -0.713858   | 0.00478151 |
| PAK1IP1   | 15.7538   | 25.6015   | 0.700526    | 0.00897284 |
| PKN1      | 113.808   | 75.0992   | -0.599728   | 0.0204286  |
| MARCH9    | 14.6903   | 16.0637   | 0.128941    | 0.849988   |
| TLE4      | 0.547113  | 0.357855  | -0.612463   | 0.316048   |
| TRRAP     | 5.48291   | 6.57469   | 0.26198     | 0.532219   |
| RMI1      | 1.99928   | 1.99132   | -0.00575143 | 0.997224   |
| SERAC1    | 3.33244   | 3.55701   | 0.094088    | 0.91609    |
| TSG101    | 37.6672   | 21.9238   | -0.780813   | 0.00153868 |
| SYK       | 8.91154   | 9.08518   | 0.0278397   | 0.977897   |
| CTRL      | 1.41559   | 3.03041   | 1.09811     | 0.490469   |
| CTBP1     | 43.037    | 50.6867   | 0.236029    | 0.600049   |
| MPRIIP    | 8.84986   | 9.56099   | 0.111506    | 0.872776   |
| ATG5      | 8.14607   | 9.76674   | 0.261773    | 0.549884   |
| MYH10     | 0.0623089 | 0.118045  | 0.921827    | 1          |
| BTNL9     | 2.82414   | 2.47502   | -0.190373   | 0.802416   |
| BAX       | 206.617   | 233.3     | 0.175225    | 0.746108   |
| EIF4H     | 194.714   | 189.082   | -0.0423438  | 0.964843   |
| ZFYVE26   | 1.64082   | 1.94218   | 0.243253    | 0.647649   |
| POMT1     | 21.1324   | 20.0689   | -0.0744949  | 0.96692    |
| FOXP4     | 8.65088   | 10.4405   | 0.271266    | 0.522427   |
| KCNH2     | 20.0542   | 19.6925   | -0.0262615  | 0.978818   |
| CPT2      | 10.6628   | 6.17624   | -0.787791   | 0.064033   |
| ARHGGEF35 | 1.5847    | 1.35372   | -0.227278   | 0.799901   |
| TMEM126A  | 28.6842   | 22.1384   | -0.373709   | 0.336737   |
| ACTL10    | 2.5711    | 3.22802   | 0.328264    | 0.929225   |
| HELZ2     | 2.64301   | 2.41166   | -0.132157   | 0.879055   |
| TNPO3     | 15.1307   | 18.8279   | 0.315388    | 0.38504    |
| EPHX1     | 16.5449   | 14.0308   | -0.23779    | 0.773599   |

|              |           |          |            |            |
|--------------|-----------|----------|------------|------------|
| FKBP3        | 37.5483   | 35.9409  | -0.0631226 | 0.960032   |
| EML4         | 4.71302   | 5.77624  | 0.293479   | 0.4662     |
| FOXO1        | 1.26454   | 1.2899   | 0.0286439  | 0.981735   |
| GABRB3       | 0.858089  | 0.426164 | -1.00972   | 0.0169799  |
| CS           | 67.701    | 69.2818  | 0.0332993  | 0.974348   |
| COG3         | 2.43112   | 2.32065  | -0.0670918 | 0.948849   |
| PSMC1        | 83.9323   | 100.976  | 0.266721   | 0.508463   |
| RSG1         | 1.77064   | 2.10915  | 0.252393   | 0.820487   |
| C21orf59     | 38.0363   | 47.4476  | 0.318958   | 0.396799   |
| CHST15       | 8.60021   | 9.43177  | 0.133155   | 0.840893   |
| BAG6         | 58.2259   | 44.8702  | -0.375904  | 0.26191    |
| HSPA14       | 17.4046   | 25.0402  | 0.524783   | 0.0680503  |
| IL10RB       | 18.9925   | 10.2421  | -0.890918  | 0.00153868 |
| FAM3C        | 20.0865   | 27.654   | 0.461261   | 0.107753   |
| PELI3        | 10.3996   | 9.20712  | -0.175711  | 0.783261   |
| TRAF3IP2-AS1 | 3.2718    | 2.85453  | -0.196829  | 0.962865   |
| GUSBP2       | 0.233288  | 0.157714 | -0.564801  | 1          |
| QRSL1        | 4.56405   | 4.10481  | -0.153     | 0.820912   |
| WASH7P       | 9.62146   | 6.40027  | -0.588123  | 0.106278   |
| DCTN6        | 18.2569   | 14.3106  | -0.35136   | 0.862725   |
| KLHDC3       | 48.1915   | 37.7899  | -0.350778  | 0.295083   |
| SLC16A1      | 37.756    | 52.7564  | 0.482642   | 0.0956889  |
| ABHD14A,ACY1 | 103.452   | 71.4602  | -0.533749  | 0.0717202  |
| GSR          | 21.8639   | 23.0967  | 0.0791329  | 0.919811   |
| MAP3K4       | 2.0339    | 2.55043  | 0.326486   | 0.479413   |
| SLC4A1AP     | 7.40743   | 7.98798  | 0.108857   | 0.959358   |
| MSL3         | 14.5914   | 12.3503  | -0.240567  | 0.61138    |
| UBE2G2       | 21.7203   | 36.1735  | 0.735888   | 0.00274688 |
| ZNF638       | 5.51219   | 6.05723  | 0.136033   | 0.825017   |
| TMEM181      | 4.33431   | 6.22983  | 0.523389   | 0.0857306  |
| FXN          | 9.50724   | 12.0059  | 0.336651   | 0.717705   |
| ERO1LB       | 1.6331    | 1.54046  | -0.0842573 | 0.937886   |
| STMN1        | 182.58    | 171.487  | -0.0904304 | 0.9027     |
| SERP1        | 46.514    | 50.0337  | 0.105235   | 0.880754   |
| ARPC2        | 212.007   | 235.63   | 0.152411   | 0.785473   |
| LINC00574    | 0.0968754 | 0.116329 | 0.264005   | 1          |
| SLC29A2      | 14.119    | 23.9539  | 0.762618   | 0.00274688 |
| PPIH         | 79.8063   | 96.0905  | 0.267891   | 0.508043   |
| CAP1         | 74.5648   | 84.0591  | 0.17291    | 0.748993   |
| LOC401321    | 2.65622   | 2.62342  | -0.0179307 | 0.988327   |
| DDN          | 4.92284   | 5.28927  | 0.103579   | 0.906423   |
| NDUFAF5      | 5.97127   | 7.57931  | 0.344027   | 0.418308   |
| SAP18        | 44.0083   | 55.9982  | 0.347605   | 0.315138   |
| PPDPF        | 573.532   | 505.3    | -0.182735  | 0.727043   |
| XYLT2        | 16.1412   | 18.1896  | 0.172365   | 0.757598   |
| TXN2         | 98.7625   | 97.1485  | -0.0237714 | 0.981019   |
| RHEB         | 87.5103   | 78.7053  | -0.152991  | 0.79372    |
| SHMT1        | 16.9005   | 15.0935  | -0.163137  | 0.849345   |
| COG1         | 7.69401   | 6.34852  | -0.277315  | 0.794913   |

|                  |          |           |             |            |
|------------------|----------|-----------|-------------|------------|
| GTF3C4           | 5.74642  | 7.13758   | 0.312773    | 0.776769   |
| AUTS2            | 1.79481  | 2.06212   | 0.200302    | 0.765338   |
| PCDHB8           | 1.52188  | 0.843463  | -0.851458   | 0.100178   |
| FOXP1            | 2.87683  | 2.35689   | -0.287595   | 0.705567   |
| VTI1B            | 70.7684  | 72.6153   | 0.0371692   | 0.978818   |
| AUNIP            | 6.53828  | 7.80436   | 0.25537     | 0.629465   |
| RBM18            | 7.62973  | 8.20709   | 0.105239    | 0.952978   |
| NMNAT1           | 2.57246  | 2.18077   | -0.238314   | 0.698819   |
| CYGB             | 0.241897 | 0.124139  | -0.962444   | 1          |
| AP3S2,C15orf38,C | 14.0822  | 11.0427   | -0.350788   | 0.433392   |
| MTHFD1           | 33.6777  | 33.526    | -0.00651137 | 0.994734   |
| CHCHD4           | 15.7892  | 24.2733   | 0.620438    | 0.0270318  |
| HOXC8            | 2.45662  | 4.45854   | 0.859893    | 0.0163491  |
| CNPPD1           | 44.9615  | 26.472    | -0.764223   | 0.00478151 |
| CCDC58           | 45.4269  | 55.9387   | 0.300299    | 0.463667   |
| HUWE1            | 7.17652  | 6.18119   | -0.215399   | 0.637815   |
| FARSA            | 101.598  | 141.789   | 0.480871    | 0.101539   |
| SLC25A15         | 5.2702   | 7.85855   | 0.576404    | 0.0519269  |
| CDKN2D           | 9.64733  | 7.72129   | -0.321288   | 0.581794   |
| GSDMD            | 51.0798  | 43.866    | -0.219651   | 0.637815   |
| C17orf70         | 14.2752  | 23.6902   | 0.730775    | 0.0111246  |
| IK               | 21.1739  | 18.9077   | -0.163309   | 0.774294   |
| WASH3P           | 12.081   | 10.0608   | -0.263994   | 0.59589    |
| KRI1             | 20.7005  | 30.7512   | 0.570978    | 0.0943483  |
| RPIA             | 16.9254  | 34.2895   | 1.01857     | 0.00153868 |
| HNRNPR           | 50.7568  | 79.0676   | 0.639485    | 0.0123712  |
| TDP1             | 8.45594  | 8.64618   | 0.0320971   | 0.975492   |
| INPP5F           | 4.54861  | 4.90108   | 0.107673    | 0.940964   |
| TBRG4            | 74.2219  | 99.6017   | 0.424325    | 0.168476   |
| HMGA1            | 1329.94  | 1076.51   | -0.305002   | 0.45332    |
| FLJ31306         | 11.1929  | 8.04464   | -0.476478   | 0.652628   |
| VPRBP            | 2.49164  | 3.13324   | 0.330558    | 0.817355   |
| NOMO1            | 14.1292  | 16.7097   | 0.241998    | 0.574478   |
| RAC1             | 127.36   | 138.559   | 0.121585    | 0.850643   |
| ABCC2            | 0.145114 | 0.119361  | -0.281857   | 1          |
| BCAS3            | 2.72954  | 1.12332   | -1.28089    | 0.00153868 |
| OLFML2B          | 0.448837 | 0.33764   | -0.410706   | 0.704775   |
| XPNPEP3          | 4.9354   | 3.80433   | -0.375525   | 0.525673   |
| SEC14L1          | 15.0849  | 14.4032   | -0.0667111  | 0.947567   |
| ATXN7L2          | 8.6242   | 10.1952   | 0.24143     | 0.646622   |
| FLJ42351         | 0.813304 | 0.0648978 | -3.64755    | 0.551241   |
| ARL8B            | 21.1551  | 19.0396   | -0.151996   | 0.791229   |
| XPO1             | 27.5459  | 26.7452   | -0.0425589  | 0.964843   |
| PRPF19           | 86.6399  | 112.284   | 0.374053    | 0.250712   |
| ZNF34            | 1.80638  | 1.37232   | -0.39649    | 0.565953   |
| AK2              | 74.4536  | 79.628    | 0.0969331   | 0.897332   |
| ERF              | 28.2393  | 39.7909   | 0.494732    | 0.089127   |
| MCM3             | 25.4733  | 47.3916   | 0.895648    | 0.00153868 |
| SC5DL            | 2.64832  | 2.92334   | 0.142539    | 0.831834   |

|              |           |           |            |            |
|--------------|-----------|-----------|------------|------------|
| HOMEZ        | 2.76311   | 2.03111   | -0.444024  | 0.297593   |
| ZNF232       | 10.429    | 17.6207   | 0.756668   | 0.00478151 |
| LRRRC57      | 3.93782   | 3.39226   | -0.215151  | 0.757031   |
| TBC1D28      | 0.0311378 | 0.0105064 | -1.56741   | 1          |
| ATP13A2      | 20.4886   | 26.6148   | 0.377411   | 0.26617    |
| BCL7A        | 8.4523    | 7.16278   | -0.238824  | 0.629512   |
| BLOC1S2      | 16.5141   | 17.4604   | 0.0803885  | 0.919811   |
| PHF12        | 3.86216   | 5.28451   | 0.452363   | 0.207194   |
| MOB3A        | 8.48646   | 11.0735   | 0.383875   | 0.303595   |
| PLOD3        | 48.8753   | 61.6338   | 0.334616   | 0.648214   |
| DAD1         | 225.049   | 238.935   | 0.0863772  | 0.907121   |
| MED16        | 26.2093   | 26.2955   | 0.00473769 | 0.996244   |
| GLUL         | 22.467    | 28.9431   | 0.365411   | 0.274831   |
| LOC728875    | 0.140759  | 0.156011  | 0.148417   | 1          |
| PRDM4        | 10.4329   | 10.609    | 0.0241574  | 0.980465   |
| PSEN2        | 7.20949   | 10.3124   | 0.516413   | 0.127654   |
| FJX1         | 30.5685   | 42.4102   | 0.472365   | 0.123872   |
| SUGP1        | 16.9423   | 16.2908   | -0.0565723 | 0.952807   |
| MLL2         | 1.88226   | 2.91951   | 0.633262   | 0.0232503  |
| INTS6        | 1.83088   | 1.97988   | 0.112881   | 0.91207    |
| TRAF3        | 4.38027   | 7.07757   | 0.692234   | 0.0117316  |
| PCMT1        | 53.2201   | 59.1858   | 0.153282   | 0.809839   |
| NRP1         | 0.95859   | 0.827889  | -0.211477  | 0.861774   |
| PODXL        | 27.9897   | 18.7026   | -0.581657  | 0.0294837  |
| BRD7         | 27.1457   | 27.2791   | 0.00707256 | 0.994734   |
| SLC9A3R1     | 50.6474   | 80.4281   | 0.667212   | 0.00897284 |
| PDZD11       | 19.0045   | 19.2277   | 0.0168452  | 0.987173   |
| LOC550643    | 91.8121   | 87.4398   | -0.0703945 | 0.934604   |
| FBXO18       | 19.9663   | 20.5628   | 0.0424679  | 0.970185   |
| BBS1         | 4.17757   | 3.2143    | -0.378157  | 0.390341   |
| TDRD7        | 5.38243   | 4.57665   | -0.233966  | 0.644608   |
| C11orf92     | 0.0886102 | 0.0607958 | -0.543501  | 1          |
| VPS37C       | 12.8947   | 9.01083   | -0.517046  | 0.101925   |
| UMPS         | 5.41003   | 8.53575   | 0.657882   | 0.0123712  |
| NDUFV1       | 179.497   | 162.234   | -0.145886  | 0.8041     |
| LY6E         | 440.1     | 445.264   | 0.0168293  | 0.987173   |
| C17orf96     | 24.1329   | 41.8743   | 0.795065   | 0.00274688 |
| ITFG1        | 10.1385   | 6.19309   | -0.711115  | 0.0143403  |
| TMEM164      | 2.35556   | 2.68214   | 0.187316   | 0.780725   |
| PDK2         | 18.5217   | 14.9907   | -0.30515   | 0.578405   |
| LOC100093631 | 0.429384  | 0.393127  | -0.127273  | 0.939068   |
| CCNL1        | 22.3153   | 18.8779   | -0.241339  | 0.578405   |
| ROMO1        | 442.186   | 508.507   | 0.201614   | 0.748685   |
| ORAOV1       | 6.61766   | 8.05251   | 0.283117   | 0.574393   |
| ACYP2        | 3.58851   | 4.0625    | 0.178982   | 0.861337   |
| ZNF263       | 11.9652   | 17.9105   | 0.581964   | 0.0329313  |
| RIN2         | 0.0240475 | 0.0225541 | -0.0924949 | 1          |
| CALM3        | 81.6481   | 108.619   | 0.411784   | 0.186554   |
| SENP5        | 3.83452   | 5.5457    | 0.532324   | 0.0695357  |

|              |           |           |            |            |
|--------------|-----------|-----------|------------|------------|
| SHF          | 5.39079   | 2.98637   | -0.852104  | 0.0169799  |
| MFSD6        | 1.71814   | 1.60496   | -0.098308  | 0.922102   |
| C11orf30     | 0.701892  | 0.833522  | 0.247971   | 0.749866   |
| STAT6        | 34.1231   | 35.0763   | 0.0397492  | 0.974573   |
| FAM204A      | 11.741    | 11.8949   | 0.0187931  | 0.98583    |
| AGAP3        | 39.6256   | 57.1648   | 0.528693   | 0.089127   |
| UBE2J1       | 10.9336   | 11.0834   | 0.019628   | 0.984825   |
| COA6         | 68.495    | 71.451    | 0.0609549  | 0.945857   |
| ORC3         | 9.2874    | 5.26326   | -0.819318  | 0.00274688 |
| DLST         | 47.5183   | 41.7487   | -0.186751  | 0.720194   |
| FAM86B1      | 5.27362   | 1.73454   | -1.60424   | 0.00153868 |
| COL1A1       | 0.0525623 | 0.0499038 | -0.0748764 | 1          |
| HSPA4        | 44.3514   | 76.0882   | 0.778694   | 0.00153868 |
| MDC1         | 4.27178   | 3.97803   | -0.10278   | 0.894574   |
| PSMA2        | 99.5173   | 108.277   | 0.121712   | 0.852554   |
| GADD45GIP1   | 216.367   | 296.631   | 0.455191   | 0.129159   |
| BTBD9        | 1.49236   | 1.40771   | -0.0842397 | 0.934043   |
| GRSF1        | 24.5662   | 24.7962   | 0.013448   | 0.991035   |
| TXNDC15      | 8.62169   | 8.11965   | -0.0865536 | 0.917559   |
| FAM53C       | 15.9291   | 14.3395   | -0.151673  | 0.792429   |
| LOC100132352 | 5.02591   | 4.23872   | -0.245755  | 0.739148   |
| SRP14        | 217.814   | 244.927   | 0.169252   | 0.760301   |
| RP9P         | 8.71076   | 12.4719   | 0.517805   | 0.147009   |
| ATXN10       | 23.7655   | 22.2805   | -0.0930869 | 0.900069   |
| ATP5I        | 734.512   | 889.526   | 0.27625    | 0.477694   |
| PTBP1        | 143.036   | 171.199   | 0.259293   | 0.552737   |
| PROB1        | 0.631654  | 1.02235   | 0.69468    | 0.387821   |
| RAB23        | 2.0241    | 2.65547   | 0.39169    | 0.42256    |
| MRPL36       | 110.449   | 193.716   | 0.810558   | 0.00153868 |
| ERCC1        | 237.916   | 186.899   | -0.348194  | 0.383128   |
| TNFAIP1      | 12.1643   | 12.271    | 0.0125981  | 0.995019   |
| UGDH         | 7.1871    | 11.7748   | 0.712225   | 0.00970147 |
| TMPO-AS1     | 1.09787   | 0.697862  | -0.653691  | 0.922851   |
| SIGIRR       | 45.4502   | 48.0849   | 0.0812973  | 0.920543   |
| PNRC2        | 41.3961   | 34.8669   | -0.247637  | 0.555312   |
| PDE4D        | 2.50949   | 1.31981   | -0.927064  | 0.00153868 |
| LOC100289187 | 0.901675  | 0.749032  | -0.267581  | 0.86364    |
| GALNT18      | 34.5033   | 24.9449   | -0.467993  | 0.108649   |
| C3orf17      | 9.28212   | 8.77276   | -0.0814238 | 0.919076   |
| TMEM141      | 153.926   | 124.648   | -0.304381  | 0.405874   |
| TPRG1L       | 19.3856   | 27.5206   | 0.505531   | 0.0729664  |
| MPST         | 153.175   | 135.834   | -0.173336  | 0.825529   |
| MTX2         | 37.5246   | 24.6689   | -0.605145  | 0.0276283  |
| PTPN1        | 23.477    | 24.8978   | 0.0847716  | 0.912292   |
| DUSP4        | 0.531098  | 0.560771  | 0.0784348  | 0.958439   |
| EPHB2        | 8.70314   | 8.90091   | 0.0324164  | 0.975484   |
| CCDC113      | 1.72125   | 0.666097  | -1.36965   | 0.00274688 |
| ZCCHC3       | 14.4795   | 16.6392   | 0.200572   | 0.708873   |
| PRDX1        | 519.655   | 891.107   | 0.778045   | 0.00274688 |

|                |          |          |             |            |
|----------------|----------|----------|-------------|------------|
| COMMD7         | 29.3875  | 27.2716  | -0.107803   | 0.879055   |
| GTF2E1         | 4.70789  | 6.63311  | 0.494605    | 0.140298   |
| ZFH3           | 1.0933   | 1.05525  | -0.0511074  | 0.96385    |
| LRPAP1         | 16.0913  | 19.483   | 0.275933    | 0.489743   |
| ACTL6A         | 29.769   | 25.4669  | -0.225183   | 0.633758   |
| SF3B5          | 285.847  | 413.225  | 0.531687    | 0.0533774  |
| TYK2           | 18.9834  | 19.0867  | 0.00783376  | 0.994475   |
| ARL6IP4        | 203.975  | 206.825  | 0.0200178   | 0.983529   |
| BBS7           | 2.77267  | 2.5013   | -0.148601   | 0.85595    |
| MRPL3          | 55.4964  | 64.4716  | 0.216269    | 0.637815   |
| RPS6KA2        | 0.250139 | 0.18869  | -0.406711   | 1          |
| AAMDC          | 24.3834  | 20.1447  | -0.275501   | 0.646322   |
| SGOL1-AS1      | 1.46628  | 0.798584 | -0.876647   | 0.879055   |
| NAA15          | 8.19135  | 14.3365  | 0.807522    | 0.0512103  |
| LMO2           | 2.41811  | 0.785814 | -1.62162    | 0.00153868 |
| EPB41L4B       | 6.31255  | 7.19912  | 0.189596    | 0.727874   |
| GOLGA3         | 5.85033  | 8.01107  | 0.453476    | 0.123524   |
| ADAM8          | 0.814747 | 0.575461 | -0.501632   | 0.518305   |
| ZCCHC10        | 3.70385  | 5.39072  | 0.541454    | 0.136495   |
| PACSIN3        | 40.7861  | 39.5415  | -0.0447123  | 0.963969   |
| BRD8           | 11.785   | 11.2299  | -0.0695985  | 0.935543   |
| MASTL          | 5.49868  | 4.53917  | -0.276658   | 0.550046   |
| KDM4D          | 0.391354 | 0.296075 | -0.40251    | 0.723759   |
| PSMD4          | 171.098  | 124.857  | -0.454538   | 0.133324   |
| TAF6           | 40.6536  | 38.1202  | -0.0928295  | 0.974593   |
| ALKBH3         | 20.5127  | 15.1025  | -0.441731   | 0.186554   |
| APOBEC3F       | 3.01496  | 1.93365  | -0.640814   | 0.431436   |
| PDIA5          | 9.47171  | 9.36592  | -0.0162036  | 0.990737   |
| MAP7D1         | 38.004   | 56.3308  | 0.567773    | 0.0347593  |
| NAA30          | 3.8968   | 4.17388  | 0.0991      | 0.902992   |
| POLD4          | 26.7526  | 12.6211  | -1.08384    | 0.00153868 |
| MAP4K4         | 8.04588  | 8.737    | 0.118887    | 0.860592   |
| PPP6R3         | 11.6717  | 12.8142  | 0.13472     | 0.824472   |
| NOA1           | 38.8268  | 18.4702  | -1.07185    | 0.00153868 |
| SLC15A4        | 9.95757  | 11.3597  | 0.190056    | 0.736305   |
| BIRC6          | 1.90179  | 2.00618  | 0.0770957   | 0.926251   |
| C8orf82_LRRC24 | 83.0147  | 80.0257  | -0.0529025  | 0.969901   |
| LIPE           | 2.79535  | 2.79137  | -0.00205351 | 0.999201   |
| LSM7           | 256.736  | 316.44   | 0.301647    | 0.417991   |
| PFN4           | 0.31431  | 0.108355 | -1.53642    | 1          |
| SPTBN2         | 13.3493  | 12.8666  | -0.0531292  | 0.952795   |
| ZNF142         | 2.78906  | 4.43181  | 0.668116    | 0.0215444  |
| UBR4           | 5.75268  | 3.88279  | -0.56714    | 0.0334318  |
| WDR75          | 10.6739  | 11.722   | 0.135126    | 0.836347   |
| CFD            | 23.6252  | 18.4718  | -0.355004   | 0.458976   |
| LINC00339      | 11.5384  | 5.45831  | -1.07992    | 0.00274688 |
| TXN            | 839.401  | 1062.32  | 0.339787    | 0.343293   |
| ZNF862         | 1.45278  | 0.569828 | -1.35022    | 0.00153868 |
| PLEKHM2        | 33.8864  | 29.0659  | -0.221382   | 0.626866   |



|              |          |          |            |            |
|--------------|----------|----------|------------|------------|
| MRPL11       | 43.8456  | 48.5198  | 0.146141   | 0.802361   |
| PITRM1-AS1   | 0.388645 | 0.405213 | 0.0602295  | 0.994017   |
| FAM173A      | 74.847   | 128.753  | 0.782591   | 0.00897284 |
| CARKD        | 23.0107  | 27.4584  | 0.25494    | 0.564038   |
| KLF12        | 0.363    | 0.114762 | -1.66133   | 1          |
| EPB41        | 3.83685  | 3.32779  | -0.205358  | 0.785339   |
| NR1H3        | 3.70996  | 1.50849  | -1.2983    | 0.267401   |
| BSDC1        | 18.6772  | 16.9417  | -0.140694  | 0.825583   |
| RHOBTB2      | 3.98557  | 5.46402  | 0.455176   | 0.825017   |
| PARK7        | 340.11   | 383.59   | 0.173564   | 0.751293   |
| LPIN1        | 7.75157  | 7.31497  | -0.0836366 | 0.91609    |
| TNRC6B       | 1.26581  | 0.719373 | -0.815252  | 0.00478151 |
| NDUFS2       | 59.1235  | 46.0676  | -0.359979  | 0.295083   |
| XRN2         | 23.3723  | 24.6353  | 0.0759249  | 0.92475    |
| KIAA1671     | 1.96159  | 2.03117  | 0.0502873  | 0.962687   |
| FAM211A      | 2.7916   | 1.52022  | -0.876813  | 0.905839   |
| TBCA         | 314.553  | 294.82   | -0.0934681 | 0.901045   |
| USP15        | 4.23453  | 4.13419  | -0.0345991 | 0.979254   |
| APH1A        | 115.043  | 106.585  | -0.110163  | 0.875956   |
| CHRA1        | 30.5725  | 34.8836  | 0.190311   | 0.703945   |
| USP10        | 27.7073  | 32.3644  | 0.224139   | 0.623241   |
| CENPQ        | 6.11     | 4.91989  | -0.312544  | 0.51789    |
| CLDN12       | 13.6599  | 10.5337  | -0.37494   | 0.274536   |
| EXOG         | 3.43003  | 4.81889  | 0.490479   | 0.179759   |
| LOC100134868 | 0.628517 | 0.591505 | -0.0875619 | 0.967653   |
| HDAC7        | 18.9776  | 25.994   | 0.453883   | 0.217005   |
| ITPR3        | 54.0298  | 32.4694  | -0.734673  | 0.00274688 |
| GEMIN2       | 8.70697  | 8.84647  | 0.02293    | 0.984084   |
| RWDD2B       | 10.3747  | 8.75575  | -0.244773  | 0.641512   |
| LINC00346    | 1.88848  | 1.05978  | -0.833463  | 0.00897284 |
| SNAP23       | 25.9365  | 32.5106  | 0.325926   | 0.360716   |
| PPP4C        | 152.497  | 167.41   | 0.134605   | 0.828523   |
| PSMC3IP      | 21.7528  | 29.3869  | 0.433969   | 0.529976   |
| SERTAD1      | 86.8832  | 121.682  | 0.485965   | 0.093011   |
| SOD2         | 31.1344  | 54.5998  | 0.810386   | 0.00153868 |
| PKP2         | 3.10376  | 2.47054  | -0.329187  | 0.484507   |
| FGF5         | 0.926001 | 1.06581  | 0.202865   | 0.796502   |
| NTHL1        | 35.7712  | 49.5468  | 0.469996   | 0.142786   |
| MRPL42P5     | 0.729561 | 0.587345 | -0.31282   | 0.87748    |
| SLC35E2B     | 6.64797  | 3.55808  | -0.901817  | 0.0824065  |
| ZNF714       | 0.500933 | 0.373199 | -0.424675  | 0.446894   |
| C16orf91     | 31.6502  | 51.6402  | 0.70628    | 0.0130226  |
| NUP155       | 5.86669  | 4.11794  | -0.510623  | 0.0981523  |
| NR2F1        | 4.34107  | 6.32502  | 0.543017   | 0.384547   |
| TMEM150A     | 12.6038  | 21.088   | 0.742556   | 0.00478151 |
| TMEM245      | 6.16174  | 4.67468  | -0.398472  | 0.218306   |
| MARS2        | 8.07993  | 10.6603  | 0.399831   | 0.268373   |
| CERS2        | 79.5522  | 90.2673  | 0.182301   | 0.7251     |
| TMEM248      | 17.3952  | 22.1294  | 0.347277   | 0.307003   |

|         |           |           |             |            |
|---------|-----------|-----------|-------------|------------|
| USP18   | 3.12354   | 2.39128   | -0.385398   | 0.50556    |
| UNKL    | 4.50414   | 5.5226    | 0.294097    | 0.818403   |
| XKR8    | 10.8226   | 12.6988   | 0.230643    | 0.677271   |
| GATA4   | 7.72994   | 9.56111   | 0.306721    | 0.491102   |
| ATOX1   | 123.675   | 158.088   | 0.354169    | 0.3056     |
| ABCF3   | 21.1314   | 28.7149   | 0.442406    | 0.142274   |
| SSB     | 52.7202   | 71.9785   | 0.44921     | 0.239387   |
| NAA50   | 17.8139   | 35.3005   | 0.98668     | 0.00153868 |
| FDX1    | 8.11485   | 9.19483   | 0.180258    | 0.751293   |
| MAMSTR  | 1.20751   | 1.27116   | 0.0741154   | 0.971986   |
| CCNO    | 19.0029   | 29.2814   | 0.623766    | 0.0592362  |
| SUGT1   | 28.3041   | 33.6635   | 0.250176    | 0.557559   |
| PAR6G   | 2.73735   | 2.20022   | -0.315134   | 0.593222   |
| MGRN1   | 18.853    | 21.1276   | 0.164335    | 0.774218   |
| TFG     | 59.4475   | 53.101    | -0.162875   | 0.772942   |
| SRSF8   | 7.37354   | 8.66253   | 0.232432    | 0.622746   |
| TCEAL4  | 51.6237   | 45.2437   | -0.190317   | 0.700524   |
| ATP6V1F | 653.044   | 608.416   | -0.102123   | 0.883896   |
| EFR3A   | 5.14218   | 6.44827   | 0.326532    | 0.385949   |
| DEPDC5  | 1.37962   | 1.36905   | -0.011095   | 0.994068   |
| FERMT3  | 0.401826  | 0.537646  | 0.420086    | 0.949      |
| MARC1   | 8.83011   | 8.24326   | -0.0992165  | 0.908249   |
| DENR    | 22.9827   | 22.9655   | -0.00108343 | 0.999234   |
| SETD2   | 2.58414   | 2.72927   | 0.078835    | 0.928237   |
| HMGB2   | 190.034   | 106.329   | -0.837727   | 0.00153868 |
| MGC2752 | 11.8942   | 12.1599   | 0.0318771   | 0.976134   |
| CUBN    | 0.919369  | 0.515283  | -0.83528    | 0.00897284 |
| IPPK    | 7.22192   | 11.3617   | 0.653725    | 0.160554   |
| HEG1    | 2.23748   | 3.14038   | 0.489068    | 0.120157   |
| R3HDM2  | 7.76255   | 2.99285   | -1.37501    | 0.00153868 |
| TMEM201 | 8.94462   | 15.9231   | 0.832032    | 0.00380811 |
| MALT1   | 4.76528   | 3.42612   | -0.475985   | 0.130936   |
| FURIN   | 21.0026   | 25.562    | 0.283432    | 0.465794   |
| BAG5    | 5.80651   | 7.49874   | 0.368979    | 0.278619   |
| TYW5    | 1.64984   | 1.81212   | 0.135353    | 0.939306   |
| NDUFA4  | 73.5786   | 76.4358   | 0.0549623   | 0.952184   |
| MAK16   | 8.38733   | 11.5434   | 0.460779    | 0.235458   |
| DDX19A  | 12.7661   | 23.174    | 0.860195    | 0.00153868 |
| ADORA2B | 35.3632   | 26.5396   | -0.414103   | 0.197402   |
| LUZP1   | 3.69101   | 4.35035   | 0.237117    | 0.599713   |
| DHFR    | 12.2201   | 13.8076   | 0.176214    | 0.877622   |
| CES2    | 9.26416   | 9.67783   | 0.0630234   | 0.946021   |
| DHX38   | 13.5154   | 18.1717   | 0.42709     | 0.318494   |
| PCDH11Y | 0.0254993 | 0.0382956 | 0.586722    | 1          |
| C3orf37 | 38.3392   | 42.6714   | 0.154449    | 0.782409   |
| HCCS    | 11.3314   | 15.3531   | 0.438202    | 0.170392   |
| POLR2J  | 113.408   | 119.25    | 0.0724711   | 0.954167   |
| ZNF865  | 8.3592    | 9.51425   | 0.186724    | 0.748388   |
| ZNF815P | 0.59668   | 0.55872   | -0.0948319  | 0.957147   |

|                |          |           |              |            |
|----------------|----------|-----------|--------------|------------|
| GUSB           | 25.8823  | 22.5294   | -0.200159    | 0.689772   |
| SLC38A2        | 34.838   | 35.9745   | 0.0463111    | 0.963969   |
| COX5A          | 352.677  | 352.633   | -0.000181949 | 0.999612   |
| EPHA10         | 0.89815  | 0.543464  | -0.724773    | 0.167611   |
| NPR2           | 2.02732  | 3.42694   | 0.757345     | 0.0365493  |
| SUSD4          | 0.515861 | 0.270827  | -0.929613    | 0.421202   |
| LRPPRC         | 31.5022  | 24.9416   | -0.336898    | 0.345931   |
| STAM           | 6.91324  | 5.8328    | -0.245171    | 0.601631   |
| SCAND1         | 157.239  | 174.072   | 0.14672      | 0.816507   |
| GP1BB,SEPT5    | 8.74857  | 8.8996    | 0.0246924    | 0.991167   |
| PFKFB1         | 0.169388 | 0.0555879 | -1.60749     | 1          |
| ATP6V1G1       | 112.013  | 109.57    | -0.0318036   | 0.974593   |
| VOPP1          | 22.2915  | 24.0495   | 0.109517     | 0.874955   |
| PSMD14         | 90.3328  | 78.9333   | -0.194617    | 0.694688   |
| MRPS24,URGCP,  | 320.274  | 357.531   | 0.158759     | 0.80786    |
| MPV17          | 44.731   | 32.9439   | -0.441264    | 0.166637   |
| EAF1           | 5.31908  | 4.91      | -0.115454    | 0.876957   |
| SMG8           | 6.74908  | 8.1037    | 0.26389      | 0.553813   |
| IFI27L2        | 203.416  | 187.706   | -0.115964    | 0.864901   |
| AP2A1          | 27.5727  | 19.8931   | -0.470972    | 0.125565   |
| BLM            | 1.99217  | 2.03127   | 0.0280388    | 0.981441   |
| ATP8B3         | 0.352532 | 0.137299  | -1.36044     | 1          |
| TMEM186        | 13.7862  | 16.7674   | 0.282439     | 0.531391   |
| NFKBIE         | 10.9546  | 19.7054   | 0.847052     | 0.00153868 |
| CYC1           | 241.555  | 274.937   | 0.18675      | 0.723744   |
| GLUD1          | 41.2058  | 35.5326   | -0.213703    | 0.646705   |
| SCNM1,TNFAIP8I | 11.4375  | 10.9074   | -0.0684607   | 0.946416   |
| LOH12CR1       | 4.30113  | 3.62712   | -0.245892    | 0.726353   |
| RPS6KA3        | 3.44119  | 3.69006   | 0.100737     | 0.89325    |
| GXYLT1         | 1.56566  | 1.53878   | -0.0249794   | 0.981441   |
| SAMD4B         | 11.1076  | 10.7305   | -0.04983     | 0.958971   |
| TP53I13        | 56.5196  | 39.9947   | -0.498941    | 0.0956889  |
| DEDD           | 20.0838  | 18.8003   | -0.0952832   | 0.970539   |
| PLEKHN1        | 2.1094   | 1.3301    | -0.665301    | 0.250712   |
| DIXDC1         | 0.816704 | 0.987827  | 0.274444     | 0.698716   |
| VPS35          | 15.9691  | 12.2763   | -0.379401    | 0.246092   |
| MRPS36         | 21.2698  | 19.872    | -0.0980678   | 0.89785    |
| RBM4B          | 9.86071  | 9.19238   | -0.101254    | 0.978818   |
| GTPBP3         | 21.8086  | 41.8823   | 0.941441     | 0.00153868 |
| EBAG9          | 18.2041  | 16.6064   | -0.132523    | 0.848653   |
| C2orf44        | 3.16065  | 5.9901    | 0.922359     | 0.00153868 |
| C20orf27       | 133.878  | 188.379   | 0.492711     | 0.0726643  |
| MAN2B2         | 10.5843  | 8.03232   | -0.39804     | 0.255196   |
| NXPH4          | 40.3198  | 41.7002   | 0.0485659    | 0.961447   |
| FZD6           | 9.16806  | 5.56231   | -0.720933    | 0.00659556 |
| PARG           | 3.99715  | 4.41381   | 0.143054     | 0.878064   |
| EFTUD2         | 38.9069  | 46.4132   | 0.254507     | 0.552049   |
| CASKIN1        | 11.7343  | 13.8037   | 0.234313     | 0.852189   |
| SELK           | 55.4273  | 57.1205   | 0.0434126    | 0.964843   |

|          |           |           |             |            |
|----------|-----------|-----------|-------------|------------|
| DDX6     | 12.1845   | 14.0225   | 0.202698    | 0.667641   |
| UBE3B    | 6.31082   | 5.49546   | -0.199587   | 0.791862   |
| C11orf73 | 30.8026   | 30.2083   | -0.0281076  | 0.978016   |
| LIPA     | 11.887    | 11.4597   | -0.0528133  | 0.954981   |
| SMARCC2  | 15.3911   | 10.7541   | -0.51721    | 0.0653297  |
| ABLIM2   | 0.419767  | 0.16726   | -1.32749    | 0.0564873  |
| ZNF207   | 50.4237   | 84.5858   | 0.746315    | 0.00380811 |
| MUS81    | 28.0553   | 22.8579   | -0.295577   | 0.452172   |
| RSPH10B  | 0.0259048 | 0.0339562 | 0.390457    | 1          |
| BCR      | 9.45676   | 12.4842   | 0.400682    | 0.217777   |
| POLR2B   | 24.2839   | 31.5393   | 0.377154    | 0.243349   |
| LOC96610 | 2.53782   | 3.47279   | 0.452504    | 0.338418   |
| MRPL2    | 46.24     | 40.9521   | -0.175204   | 0.76146    |
| RHOA     | 280.105   | 270.347   | -0.0511533  | 0.956177   |
| UBL5     | 544.698   | 620.967   | 0.189058    | 0.710182   |
| KDM6B    | 6.70039   | 9.77475   | 0.544814    | 0.064033   |
| MRPS30   | 43.0976   | 30.7586   | -0.486619   | 0.096962   |
| MAPK6    | 8.32313   | 6.34463   | -0.39159    | 0.250244   |
| TTBK2    | 0.384956  | 0.188605  | -1.02933    | 0.0600393  |
| TMEM136  | 5.25482   | 3.20979   | -0.711163   | 0.0181648  |
| ZNF485   | 3.64348   | 3.07679   | -0.243892   | 0.708142   |
| CLP1     | 12.0572   | 14.8563   | 0.301181    | 0.466843   |
| SEP15    | 56.2653   | 48.8697   | -0.203306   | 0.66979    |
| C8orf48  | 2.27908   | 1.6291    | -0.484377   | 0.452215   |
| CNP      | 20.4739   | 25.5458   | 0.319299    | 0.629465   |
| ITGB1    | 333.764   | 260.634   | -0.356803   | 0.352463   |
| RSRC1    | 3.67888   | 3.44106   | -0.0964118  | 0.930021   |
| UBN1     | 5.08417   | 6.16508   | 0.278107    | 0.513296   |
| NDNL2    | 16.7928   | 21.4512   | 0.353216    | 0.337387   |
| PYURF    | 65.2656   | 87.3468   | 0.420433    | 0.176195   |
| TMEM161B | 4.6676    | 3.07271   | -0.603167   | 0.0864363  |
| DLEU1    | 7.56212   | 11.9968   | 0.665787    | 0.37362    |
| CLTC     | 23.8632   | 23.8301   | -0.00200427 | 0.998593   |
| KDELR2   | 56.5984   | 69.5212   | 0.296691    | 0.431333   |
| TUSC1    | 10.4917   | 13.386    | 0.351479    | 0.377162   |
| NR2C2AP  | 45.1827   | 58.5329   | 0.373477    | 0.547145   |
| HOMER3   | 91.7947   | 62.5686   | -0.552972   | 0.0451232  |
| SMURF1   | 6.68055   | 6.59909   | -0.0177017  | 0.986681   |
| UTP23    | 7.88786   | 9.37764   | 0.249592    | 0.566136   |
| DCAF16   | 9.5485    | 9.7131    | 0.0246571   | 0.981335   |
| MRPL15   | 65.0581   | 70.6843   | 0.119659    | 0.860871   |
| IRS1     | 0.442737  | 0.621821  | 0.490048    | 0.342599   |
| UFM1     | 14.6738   | 14.7377   | 0.00627656  | 0.994734   |
| CTSL2    | 2.04058   | 1.52103   | -0.42393    | 0.330427   |
| ZNF609   | 3.66134   | 3.60218   | -0.0235001  | 0.981441   |
| ERI3     | 56.1298   | 48.8601   | -0.20011    | 0.695374   |
| GZF1     | 2.5726    | 2.43849   | -0.0772399  | 0.939306   |
| RMDN1    | 14.0277   | 9.73322   | -0.527293   | 0.0657182  |
| NIN      | 3.65171   | 3.724     | 0.0282805   | 0.978818   |

|            |           |            |            |            |
|------------|-----------|------------|------------|------------|
| ARFRP1     | 16.0989   | 25.0047    | 0.635237   | 0.191052   |
| FKBP11     | 165.12    | 175.233    | 0.0857651  | 0.912368   |
| CNBP       | 129.115   | 151.397    | 0.229674   | 0.628907   |
| PSMC6      | 32.7244   | 38.508     | 0.234792   | 0.592657   |
| KAT2B      | 1.44451   | 0.988736   | -0.546921  | 0.197138   |
| HYPK,SERF2 | 157.851   | 192.657    | 0.28747    | 0.732699   |
| METTL1     | 8.74473   | 16.6827    | 0.931865   | 0.00153868 |
| ARHGAP39   | 5.82217   | 9.90115    | 0.766038   | 0.00478151 |
| EFHC1      | 1.31328   | 0.824083   | -0.672312  | 0.0805827  |
| ENO3       | 4.22381   | 1.72004    | -1.2961    | 0.00153868 |
| SULT1A1    | 10.9032   | 6.47635    | -0.751493  | 0.0429833  |
| LIMD2      | 7.68696   | 9.05237    | 0.235883   | 0.777535   |
| KIAA1731   | 0.833205  | 0.582213   | -0.517125  | 0.262704   |
| POLR3GL    | 29.9006   | 15.7723    | -0.922783  | 0.00153868 |
| DIS3       | 6.87964   | 6.89363    | 0.00293063 | 0.998382   |
| SMARCA5    | 9.17571   | 10.1113    | 0.140076   | 0.818403   |
| MAP1S      | 22.0151   | 21.4242    | -0.0392555 | 0.969848   |
| C22orf28   | 54.2577   | 49.1463    | -0.142744  | 0.806275   |
| DNAJC12    | 33.8603   | 21.3143    | -0.667771  | 0.0169799  |
| UFC1       | 102.191   | 123.054    | 0.268023   | 0.500983   |
| LINC00239  | 0.194029  | 0.0211657  | -3.19647   | 1          |
| RARS2      | 16.8793   | 14.8382    | -0.185942  | 0.736949   |
| SYNGR3     | 8.75573   | 5.20204    | -0.751149  | 0.0324264  |
| AGFG1      | 4.8209    | 5.29       | 0.133967   | 0.863898   |
| ZNF814     | 1.39655   | 1.87171    | 0.422492   | 0.314509   |
| TRA2A      | 34.9377   | 37.2314    | 0.0917363  | 0.902718   |
| SIK2       | 1.73047   | 1.18814    | -0.54246   | 0.644644   |
| ETS2       | 7.12197   | 8.00064    | 0.16784    | 0.778258   |
| METRN      | 145.644   | 183.022    | 0.329568   | 0.367548   |
| SGTB       | 2.61534   | 2.13274    | -0.294288  | 0.704729   |
| MTA1       | 46.4647   | 32.7233    | -0.505816  | 0.0663805  |
| SYNCRIP    | 15.0787   | 25.8933    | 0.780063   | 0.00478151 |
| TPD52L1    | 25.41     | 15.8788    | -0.678294  | 0.0130226  |
| ATP8B1     | 0.0181427 | 0.00969388 | -0.904241  | 1          |
| OBSL1      | 14.1745   | 11.6506    | -0.282888  | 0.535369   |
| MRPL45P2   | 2.47525   | 1.82971    | -0.435961  | 0.500591   |
| ZNF678     | 0.483581  | 0.370977   | -0.382429  | 0.517807   |
| ZNRF2P1    | 0.827357  | 0.679923   | -0.283138  | 0.853245   |
| VIPR1      | 0.926679  | 0.28561    | -1.69802   | 0.00659556 |
| LOC728554  | 28.5067   | 26.5953    | -0.100126  | 0.888541   |
| LZTR1      | 13.0919   | 15.6576    | 0.258191   | 0.541095   |
| SERPINH1   | 103.443   | 238.065    | 1.20253    | 0.00153868 |
| UBXN7      | 1.92812   | 1.29288    | -0.576602  | 0.130936   |
| MZT2B      | 432.63    | 466.766    | 0.109566   | 0.913887   |
| PLVAP      | 0.022524  | 0.0413839  | 0.877606   | 1          |
| LYRM7      | 1.49694   | 1.725      | 0.204581   | 0.737328   |
| KCNAB1     | 1.21172   | 1.86932    | 0.625463   | 0.107565   |
| NPM1       | 1622.12   | 1560.91    | -0.0554939 | 0.955413   |
| NOL9       | 7.37655   | 9.80335    | 0.410328   | 0.186334   |

|                 |          |           |            |            |
|-----------------|----------|-----------|------------|------------|
| IPO4            | 39.4832  | 61.179    | 0.631799   | 0.0150346  |
| NSF             | 6.71246  | 8.56003   | 0.350775   | 0.318122   |
| ZKSCAN2         | 1.19253  | 0.928133  | -0.361624  | 0.465679   |
| CETN3           | 21.1911  | 13.8809   | -0.610356  | 0.0403493  |
| FAM3A           | 16.2367  | 12.1867   | -0.413949  | 0.225511   |
| RPGR            | 1.54417  | 1.12665   | -0.454795  | 0.378746   |
| INTS9           | 11.0864  | 13.3254   | 0.265384   | 0.543617   |
| PIP5K1A         | 26.4755  | 23.8758   | -0.149112  | 0.800869   |
| KPNA6           | 8.5817   | 11.5026   | 0.422621   | 0.171199   |
| CCNY            | 25.8976  | 24.1525   | -0.100641  | 0.883608   |
| LIMK2           | 8.94487  | 8.85191   | -0.015071  | 0.990491   |
| UTP3            | 24.324   | 36.0367   | 0.567083   | 0.0351856  |
| WASL            | 9.98039  | 7.98525   | -0.321759  | 0.381086   |
| SYTL1           | 16.9497  | 6.91454   | -1.29355   | 0.00153868 |
| DTD1            | 67.9978  | 53.6316   | -0.342404  | 0.319634   |
| KATNA1          | 12.2507  | 9.57941   | -0.354857  | 0.358175   |
| RTN2            | 14.9934  | 15.2672   | 0.0261068  | 0.981808   |
| LYRM2           | 4.27686  | 4.50634   | 0.0754027  | 0.93293    |
| MUT             | 5.97039  | 3.98441   | -0.583461  | 0.0519269  |
| SMARCB1         | 85.4412  | 82.3142   | -0.0537905 | 0.952184   |
| GLIPR1          | 15.2487  | 17.0168   | 0.158274   | 0.879418   |
| PTCH1           | 1.69884  | 1.52794   | -0.152966  | 0.843845   |
| TXLNA           | 22.8222  | 27.7226   | 0.280629   | 0.471249   |
| LOC202181       | 0.587465 | 0.726456  | 0.306373   | 0.751304   |
| DEK             | 46.6981  | 42.6377   | -0.131231  | 0.838902   |
| GTPBP8          | 8.32321  | 8.33025   | 0.00122042 | 0.999234   |
| TSPAN3          | 52.4586  | 41.7286   | -0.330143  | 0.347779   |
| EFHD2           | 53.1255  | 88.7006   | 0.739539   | 0.00659556 |
| SRR             | 0.718942 | 0.597594  | -0.266709  | 0.940847   |
| NDST2           | 6.3091   | 5.71534   | -0.142596  | 0.844936   |
| FIG4            | 5.05463  | 2.81627   | -0.843816  | 0.00274688 |
| SLC5A2          | 0.13887  | 0.0997157 | -0.477845  | 1          |
| CDK5            | 36.0812  | 37.1579   | 0.0424224  | 0.964628   |
| TRAF3IP1        | 2.42564  | 3.4698    | 0.51649    | 0.154667   |
| MIER2           | 12.7371  | 16.2608   | 0.352358   | 0.352954   |
| SPATA2L         | 16.1742  | 13.9166   | -0.216893  | 0.86364    |
| RAB2A           | 25.6551  | 24.5307   | -0.0646589 | 0.940155   |
| CREBL2          | 6.27318  | 4.22661   | -0.569694  | 0.0723025  |
| LOC652276       | 3.75761  | 3.00102   | -0.324362  | 0.541428   |
| MLLT6           | 17.0535  | 17.2264   | 0.0145543  | 0.990227   |
| ISY1,ISY1-RAB43 | 20.8212  | 24.9478   | 0.260861   | 0.541081   |
| ATG7            | 6.05111  | 4.32473   | -0.484587  | 0.410554   |
| CD40            | 16.5616  | 12.7661   | -0.375531  | 0.31192    |
| SPATS2L         | 8.67345  | 8.1483    | -0.0901071 | 0.906934   |
| RP2             | 1.40288  | 1.16763   | -0.264806  | 0.713126   |
| UBXN2A          | 4.92929  | 3.722     | -0.405301  | 0.350594   |
| NME6            | 14.7997  | 11.9838   | -0.304476  | 0.536934   |
| ARRDC1          | 95.3572  | 79.2147   | -0.267573  | 0.525673   |
| STRBP           | 9.43155  | 7.06572   | -0.416659  | 0.182216   |

|                 |          |           |            |            |
|-----------------|----------|-----------|------------|------------|
| MRPL52          | 71.9825  | 104.725   | 0.540882   | 0.0537703  |
| FAM83F          | 31.8039  | 33.9927   | 0.0960205  | 0.899965   |
| CTSC            | 43.1174  | 56.0643   | 0.378813   | 0.373268   |
| N4BP2           | 0.442536 | 0.296643  | -0.577065  | 0.229368   |
| DHX15           | 36.5225  | 49.2293   | 0.430733   | 0.14587    |
| SCYL3           | 0.833335 | 0.628546  | -0.406877  | 0.808777   |
| TMBIM1          | 73.2307  | 61.7301   | -0.246475  | 0.6172     |
| GSTP1           | 1017.67  | 1195.08   | 0.231833   | 0.617798   |
| HSF1            | 129.255  | 138.837   | 0.103178   | 0.916694   |
| BRD2            | 35.3935  | 39.8805   | 0.172198   | 0.745547   |
| KLC1            | 19.4481  | 18.6939   | -0.057061  | 0.963259   |
| SAP25           | 1.34517  | 1.5864    | 0.237968   | 0.900642   |
| ZNF674-AS1      | 2.06471  | 2.82545   | 0.452539   | 0.36961    |
| DYNLL2          | 24.0947  | 32.6046   | 0.436357   | 0.170772   |
| TRA2B           | 29.4546  | 35.5844   | 0.27275    | 0.491013   |
| MAP2K4          | 5.69835  | 6.93821   | 0.28402    | 0.500234   |
| SNRPE           | 62.5791  | 78.8972   | 0.334292   | 0.337256   |
| TXNRD2          | 22.2351  | 18.9148   | -0.233327  | 0.87665    |
| NT5DC2          | 100.538  | 116.881   | 0.21729    | 0.642337   |
| LOC642852       | 0.88961  | 0.754141  | -0.23834   | 0.759309   |
| ZNF706          | 41.3673  | 45.7986   | 0.146813   | 0.799962   |
| PJA1            | 7.76886  | 7.3665    | -0.0767239 | 0.939451   |
| TIRAP           | 1.95232  | 1.69325   | -0.205395  | 0.870418   |
| NDUFC1          | 194.645  | 207.837   | 0.0946132  | 0.938489   |
| ENOSF1          | 14.277   | 15.4587   | 0.114728   | 0.890564   |
| ZC3H18          | 8.28747  | 13.8195   | 0.737699   | 0.00659556 |
| ULBP3           | 2.5184   | 3.51681   | 0.481762   | 0.531391   |
| DAP3            | 89.8612  | 73.8789   | -0.282535  | 0.480302   |
| NPAT            | 1.31338  | 1.20491   | -0.124364  | 0.886331   |
| NFU1            | 38.2146  | 28.7093   | -0.412605  | 0.220227   |
| ZDHHC7          | 12.3635  | 14.5277   | 0.232712   | 0.619611   |
| MCF2L-AS1       | 0.889577 | 0.537586  | -0.726624  | 0.469269   |
| KLF13           | 7.02688  | 6.13998   | -0.194651  | 0.718302   |
| SEC14L4         | 1.55     | 1.30129   | -0.252334  | 0.784528   |
| GRINA           | 361.041  | 345.804   | -0.0622049 | 0.943024   |
| LRCH4           | 11.3562  | 14.5808   | 0.360595   | 0.346301   |
| ARAP1           | 14.6964  | 11.6485   | -0.335315  | 0.361509   |
| MOV10           | 27.2937  | 24.4052   | -0.161375  | 0.774227   |
| NFYB            | 5.45235  | 3.83896   | -0.506165  | 0.121135   |
| MAD1L1          | 10.3308  | 10.5848   | 0.0350488  | 0.975592   |
| C14orf119       | 26.9873  | 28.8543   | 0.096504   | 0.948101   |
| TRIM34,TRIM6,TF | 0.23074  | 0.0390339 | -2.56347   | 1          |
| KRAS            | 4.95271  | 4.61005   | -0.103437  | 0.890564   |
| ZNF576          | 6.02558  | 10.3551   | 0.78117    | 0.0156935  |
| JAG2            | 19.6947  | 27.6459   | 0.489256   | 0.0881203  |
| ZNF345          | 0.468766 | 0.254253  | -0.882605  | 0.478314   |
| ZDHHC21         | 1.00088  | 0.890741  | -0.168192  | 0.823349   |
| FBXL15          | 12.5682  | 16.1436   | 0.361179   | 0.384397   |
| SDAD1           | 9.81846  | 11.0278   | 0.167579   | 0.762355   |

|                 |          |          |             |            |
|-----------------|----------|----------|-------------|------------|
| ATP5F1          | 91.657   | 88.4778  | -0.0509298  | 0.965831   |
| PNKP            | 36.1883  | 33.3957  | -0.115858   | 0.874851   |
| RHBDL3          | 0.917827 | 1.7083   | 0.896264    | 0.0215444  |
| CHEK1           | 11.0386  | 8.77286  | -0.331434   | 0.405098   |
| ABCB9           | 4.34659  | 4.75405  | 0.129273    | 0.881709   |
| NAF1            | 8.32093  | 11.4816  | 0.464507    | 0.174815   |
| HAGH            | 38.8517  | 29.7629  | -0.384463   | 0.270424   |
| LRP11           | 5.12771  | 3.24462  | -0.660263   | 0.0487873  |
| C12orf57        | 347.701  | 370.596  | 0.0919997   | 0.899607   |
| NBPF1           | 0.866574 | 0.993211 | 0.196778    | 0.825017   |
| TGFB1           | 111.484  | 123.986  | 0.153339    | 0.783706   |
| SLC50A1         | 41.5891  | 23.2069  | -0.841654   | 0.00153868 |
| TMEM184B        | 16.8978  | 23.4227  | 0.471072    | 0.115142   |
| SDHB            | 123.997  | 118.831  | -0.0613953  | 0.943024   |
| TDP2            | 14.9868  | 14.567   | -0.0409888  | 0.967343   |
| ACLY            | 35.1355  | 43.085   | 0.294258    | 0.443524   |
| EPG5            | 1.47254  | 0.757833 | -0.958358   | 0.00153868 |
| STARD3          | 27.7269  | 25.3127  | -0.131424   | 0.83652    |
| CDCA8           | 31.4598  | 32.1027  | 0.0291829   | 0.977021   |
| ZDHHC12         | 78.0249  | 64.2985  | -0.27915    | 0.851662   |
| VPS4A           | 62.6988  | 65.1544  | 0.055425    | 0.95121    |
| ATP5A1          | 280.866  | 268.494  | -0.0649884  | 0.940466   |
| ATP7B           | 1.24416  | 1.25716  | 0.0149893   | 0.992312   |
| RRN3P1          | 5.32923  | 4.2589   | -0.323445   | 0.562746   |
| UBQLN1          | 33.833   | 39.3843  | 0.219188    | 0.638761   |
| SS18L2          | 20.5054  | 32.5007  | 0.664468    | 0.197138   |
| HLA-C           | 722.812  | 720.998  | -0.00362552 | 0.997552   |
| CCL5            | 1.43729  | 1.54243  | 0.101854    | 0.952355   |
| KIFC1           | 30.6343  | 28.5127  | -0.103547   | 0.883537   |
| FBXO31          | 14.0911  | 14.3818  | 0.0294578   | 0.97666    |
| YES1            | 9.70789  | 9.93451  | 0.0332905   | 0.974108   |
| NEMF            | 3.8764   | 3.96642  | 0.0331181   | 0.975492   |
| FAHD1           | 16.0029  | 24.6826  | 0.625162    | 0.0253664  |
| RBX1            | 67.3582  | 77.8642  | 0.209105    | 0.662837   |
| AKAP1           | 13.0774  | 19.9266  | 0.607615    | 0.0156935  |
| PYGO2           | 10.9045  | 11.2757  | 0.0482943   | 0.960067   |
| CEBPA           | 24.4979  | 30.311   | 0.307183    | 0.437468   |
| CUEDC1          | 6.20994  | 6.7188   | 0.113625    | 0.894373   |
| PSMF1           | 34.6439  | 28.0307  | -0.305591   | 0.400165   |
| IER3IP1         | 40.5509  | 47.4213  | 0.225801    | 0.618375   |
| HDGF            | 180.048  | 205.134  | 0.188181    | 0.720235   |
| MTRR            | 5.32032  | 8.38959  | 0.657086    | 0.0176564  |
| SEC13           | 73.324   | 96.5826  | 0.397479    | 0.222451   |
| ZFYVE27         | 15.3043  | 22.099   | 0.530042    | 0.0705331  |
| POLR2L          | 175.845  | 323.466  | 0.879304    | 0.00153868 |
| APLP2           | 81.2921  | 79.6638  | -0.0291902  | 0.978016   |
| UBE2Q1          | 21.0162  | 28.4929  | 0.439099    | 0.152767   |
| HNRNPA1         | 858.127  | 717.572  | -0.258067   | 0.576342   |
| RPP21,TRIM39,TI | 163.819  | 157.522  | -0.056546   | 0.966307   |



|           |           |          |            |            |
|-----------|-----------|----------|------------|------------|
| PRDX3     | 94.722    | 102.069  | 0.107775   | 0.878705   |
| HDAC4     | 0.497263  | 0.499041 | 0.00514796 | 0.997773   |
| OARD1     | 12.2426   | 7.07229  | -0.791659  | 0.0103919  |
| FZD2      | 5.82387   | 3.62374  | -0.6845    | 0.0360613  |
| UFSP1     | 4.09986   | 6.80891  | 0.731849   | 0.17528    |
| CCDC73    | 4.12601   | 3.49008  | -0.241487  | 0.929102   |
| DBF4      | 6.29386   | 7.16718  | 0.18746    | 0.756733   |
| TMPO      | 27.3582   | 35.294   | 0.367447   | 0.290194   |
| HSPD1     | 435.132   | 544.569  | 0.323663   | 0.520313   |
| CSNK1G1   | 2.02858   | 1.93446  | -0.0685367 | 0.945416   |
| NKAPP1    | 0.402014  | 0.315935 | -0.347619  | 0.775623   |
| RABIF     | 3.24795   | 4.65329  | 0.518721   | 0.150319   |
| LIN52     | 1.1416    | 1.43116  | 0.326124   | 0.71187    |
| CDK1      | 40.624    | 42.9291  | 0.0796251  | 0.925638   |
| SPCS1     | 167.588   | 163.818  | -0.0328264 | 0.983243   |
| SMCR8     | 2.15973   | 2.33986  | 0.115571   | 0.945887   |
| PHACTR2   | 1.96743   | 2.06552  | 0.0701933  | 0.938622   |
| F12       | 35.6555   | 37.2948  | 0.0648503  | 0.943568   |
| IGSF8     | 17.3524   | 18.3549  | 0.0810326  | 0.926279   |
| SUPT20H   | 10.6594   | 8.44244  | -0.33639   | 0.716243   |
| PCNA      | 79.1532   | 123.911  | 0.646589   | 0.0192959  |
| TSPAN13   | 5.00249   | 5.89415  | 0.236637   | 0.705202   |
| MVK       | 13.9012   | 15.7096  | 0.176437   | 0.776083   |
| SGMS1     | 2.60625   | 2.53927  | -0.0375631 | 0.975475   |
| FIBP      | 97.6854   | 90.9312  | -0.103368  | 0.880754   |
| DNAJC3    | 6.08373   | 7.44902  | 0.292095   | 0.463667   |
| GPS1      | 80.3214   | 86.0052  | 0.0986391  | 0.890489   |
| MYEOV2    | 227.865   | 336.959  | 0.564395   | 0.0370145  |
| CTCF      | 11.8542   | 15.3106  | 0.36913    | 0.276847   |
| C9orf69   | 45.1996   | 69.1905  | 0.614263   | 0.0169799  |
| CYB5A     | 10.1705   | 9.82302  | -0.050154  | 0.970185   |
| REPS1     | 16.5885   | 11.9492  | -0.473263  | 0.109539   |
| CDC34     | 129.829   | 165.006  | 0.345902   | 0.308679   |
| CORO1C    | 113.477   | 117.687  | 0.0525601  | 0.955281   |
| LSM6      | 25.1936   | 35.8239  | 0.507863   | 0.125383   |
| SLC12A8   | 4.709     | 4.9127   | 0.0610962  | 0.952747   |
| FEM1A     | 15.5668   | 18.6695  | 0.262209   | 0.525673   |
| RPP38     | 27.9474   | 33.7679  | 0.272937   | 0.522524   |
| LMLN      | 0.61682   | 0.418296 | -0.560326  | 0.264603   |
| SOD1      | 363.117   | 418.668  | 0.205371   | 0.670124   |
| CCDC91    | 4.57811   | 4.0022   | -0.193961  | 0.757598   |
| LINC00441 | 0.0810513 | 0.011831 | -2.77627   | 1          |
| IFIT3     | 0.324453  | 0.910069 | 1.48796    | 0.00659556 |
| PPP4R1L   | 0.17017   | 0.102257 | -0.734775  | 1          |
| CHTF18    | 15.2519   | 18.3159  | 0.264105   | 0.564123   |
| NDUF4F4   | 10.8935   | 19.6442  | 0.850635   | 0.00153868 |
| LINC00852 | 0.900856  | 1.12075  | 0.315096   | 0.96692    |
| ADPGK     | 18.5613   | 23.5391  | 0.342762   | 0.346023   |
| GPR137B   | 11.177    | 7.67829  | -0.54167   | 0.096962   |

|               |           |           |             |            |
|---------------|-----------|-----------|-------------|------------|
| C15orf57      | 21.9043   | 19.6252   | -0.158507   | 0.785473   |
| STARD3NL      | 22.594    | 21.3604   | -0.0809973  | 0.922274   |
| USP20         | 12.7611   | 10.6851   | -0.256149   | 0.554994   |
| GTF2A2        | 27.2159   | 37.0043   | 0.443241    | 0.150143   |
| COPA          | 21.784    | 11.2847   | -0.948903   | 0.00153868 |
| CENPBD1       | 1.55737   | 1.55534   | -0.00188755 | 0.999234   |
| OAS1          | 0.0265892 | 0         | #NAME?      | 1          |
| ABLIM1        | 9.5583    | 6.93291   | -0.463293   | 0.117715   |
| C4orf27       | 16.0239   | 16.4632   | 0.0390201   | 0.971241   |
| CSNK2A3       | 0.261074  | 0.12958   | -1.01061    | 1          |
| AXIN1         | 31.3264   | 30.187    | -0.0534506  | 0.952139   |
| IL32          | 401.438   | 563.159   | 0.488365    | 0.0913904  |
| CPEB4         | 0.663565  | 0.473958  | -0.485478   | 0.349063   |
| PAX8          | 1.28947   | 0.677864  | -0.927715   | 0.332823   |
| LOC100507032  | 1.84795   | 1.2074    | -0.614016   | 0.121447   |
| CCDC53        | 21.5113   | 10.4979   | -1.03499    | 0.00153868 |
| RBM15B        | 13.1631   | 13.6697   | 0.0544796   | 0.957719   |
| ARTN          | 0.208111  | 0.0563362 | -1.88522    | 1          |
| MUM1          | 9.32542   | 16.4535   | 0.819151    | 0.00153868 |
| TRMT13        | 2.2836    | 2.91795   | 0.353643    | 0.484602   |
| FAM222B       | 5.16568   | 5.02879   | -0.0387469  | 0.971674   |
| DIABLO        | 44.1738   | 43.2958   | -0.0289661  | 0.97713    |
| TAF10         | 138.106   | 144.658   | 0.066871    | 0.970863   |
| GPC1          | 33.3818   | 45.9905   | 0.462273    | 0.106278   |
| NEK1          | 1.06164   | 0.566284  | -0.906699   | 0.0117316  |
| C6orf136      | 25.0133   | 23.9761   | -0.0610992  | 0.97394    |
| PLA2G16       | 69.9258   | 55.3998   | -0.335945   | 0.347897   |
| AARSD1,PTGES3 | 34.2986   | 29.9558   | -0.19531    | 0.703707   |
| PSMG2         | 82.4052   | 57.9162   | -0.508768   | 0.077894   |
| HMGB3         | 12.8338   | 15.9412   | 0.312815    | 0.397992   |
| GFOD2         | 15.8635   | 25.4567   | 0.682333    | 0.0304296  |
| B4GALT3       | 31.758    | 39.3597   | 0.309599    | 0.41335    |
| TIGD2         | 3.54685   | 2.89745   | -0.291752   | 0.618375   |
| EXO1          | 5.08752   | 5.80082   | 0.189294    | 0.74504    |
| PSMA4         | 110.155   | 141.459   | 0.360843    | 0.295637   |
| NADK          | 45.1474   | 65.1054   | 0.528135    | 0.0529824  |
| EFCAB6        | 0.0569151 | 0.0353817 | -0.68581    | 1          |
| TSPAN14       | 4.45589   | 5.0465    | 0.179567    | 0.755459   |
| OXLD1         | 50.535    | 33.5515   | -0.590906   | 0.0919662  |
| LRRC47        | 34.0608   | 40.0912   | 0.235176    | 0.593222   |
| C11orf83      | 17.0864   | 19.8064   | 0.213114    | 0.907121   |
| OXNAD1        | 1.86846   | 2.11415   | 0.178227    | 0.821796   |
| NDUFA8        | 143.714   | 146.016   | 0.022925    | 0.981543   |
| TANK          | 8.44319   | 6.91974   | -0.287071   | 0.700356   |
| MTO1          | 5.82819   | 5.65026   | -0.0447322  | 0.967343   |
| TMEM147       | 216.64    | 282.952   | 0.385263    | 0.267544   |
| ZFYVE9        | 2.84926   | 2.59877   | -0.132759   | 0.860285   |
| ERI2          | 3.81822   | 3.12614   | -0.288518   | 0.720534   |
| DHX30         | 35.4046   | 43.1777   | 0.28635     | 0.463667   |

|              |           |           |            |            |
|--------------|-----------|-----------|------------|------------|
| AARS2        | 6.83641   | 6.63474   | -0.0431984 | 0.965174   |
| ACOT2        | 9.81586   | 6.66393   | -0.558742  | 0.14573    |
| TEX14        | 0.0346863 | 0.0289572 | -0.260444  | 1          |
| CAPZA1       | 80.5243   | 78.9457   | -0.0285642 | 0.977021   |
| GOLGA7B      | 0.117995  | 0.0743795 | -0.665752  | 1          |
| KLHDC4       | 19.0658   | 21.7291   | 0.188638   | 0.738263   |
| DCTN2        | 65.9923   | 47.4723   | -0.475211  | 0.178948   |
| THAP4        | 89.7832   | 106.689   | 0.248898   | 0.633281   |
| DEPDC1       | 5.56074   | 5.25521   | -0.0815292 | 0.923571   |
| PISD         | 22.3484   | 32.6058   | 0.544954   | 0.133822   |
| KIF11        | 8.04161   | 7.54561   | -0.0918468 | 0.902735   |
| FAAH         | 9.78398   | 7.83727   | -0.320071  | 0.503119   |
| RAB18        | 11.2732   | 12.2321   | 0.11777    | 0.860894   |
| TAPBP,ZBTB22 | 31.3575   | 31.4825   | 0.00573795 | 0.995209   |
| FLJ14186     | 1.77646   | 1.30667   | -0.443106  | 0.435859   |
| PTCHD3P1     | 5.55916   | 7.59896   | 0.450935   | 0.241705   |
| GSPT1        | 22.1151   | 29.0658   | 0.394291   | 0.218807   |
| LOC100507463 | 1.03021   | 0.938852  | -0.133966  | 0.981441   |
| AGPAT3       | 8.07879   | 10.846    | 0.42495    | 0.166637   |
| REEP1        | 0.602322  | 0.713406  | 0.24419    | 0.800138   |
| LIG1         | 17.1083   | 19.5279   | 0.190836   | 0.726274   |
| RHOT2        | 43.3766   | 64.9179   | 0.581699   | 0.0334318  |
| RNPEP        | 36.6161   | 32.8      | -0.158781  | 0.777535   |
| COMMD5       | 64.5006   | 100.497   | 0.639765   | 0.0137404  |
| GOT2         | 88.4524   | 96.233    | 0.12163    | 0.857679   |
| RNF41        | 11.4294   | 7.75742   | -0.559102  | 0.0451232  |
| ABCA3        | 14.5537   | 13.3042   | -0.129501  | 0.840956   |
| CDK3,TEN1    | 38.0052   | 45.8407   | 0.270433   | 0.765908   |
| PROSER2      | 4.09979   | 3.51437   | -0.222285  | 0.733086   |
| DNAJC5       | 14.3294   | 16.9521   | 0.242482   | 0.572991   |
| SASS6        | 1.50299   | 1.58361   | 0.0753792  | 0.948523   |
| CDK13        | 1.81957   | 1.91168   | 0.0712446  | 0.945887   |
| NUDT22       | 56.7973   | 41.5525   | -0.450889  | 0.177937   |
| RAB21        | 12.7486   | 12.8189   | 0.00793239 | 0.994593   |
| BCCIP        | 60.8837   | 109.231   | 0.843255   | 0.00478151 |
| GRK6         | 29.1006   | 29.8317   | 0.0357996  | 0.97562    |
| LOC100506321 | 0.124733  | 0.0987992 | -0.336268  | 1          |
| MTIF2        | 16.8515   | 12.0162   | -0.487896  | 0.0907094  |
| RNH1         | 110.159   | 104.443   | -0.0768721 | 0.927195   |
| TSTA3        | 200.112   | 234.578   | 0.229256   | 0.6214     |
| CSPP1        | 2.29914   | 2.90354   | 0.336717   | 0.438502   |
| ADPRHL1      | 3.73622   | 2.22168   | -0.749926  | 0.0952042  |
| FAM50A       | 90.2864   | 74.1806   | -0.283466  | 0.465794   |
| CCND1        | 27.78     | 34.2322   | 0.301305   | 0.4141     |
| HSPA12A      | 1.5933    | 1.79225   | 0.169755   | 0.824372   |
| LOC100507424 | 0.736796  | 0.41769   | -0.818833  | 0.933398   |
| TRIP10       | 42.418    | 44.4882   | 0.0687462  | 0.937188   |
| CRHR1-IT1    | 3.85652   | 3.26845   | -0.238696  | 0.907121   |
| BTBD10       | 9.87713   | 9.41277   | -0.0694723 | 0.939306   |

|              |          |          |            |            |
|--------------|----------|----------|------------|------------|
| TONSL        | 24.7567  | 39.2381  | 0.664433   | 0.00820276 |
| LOC100507118 | 5.98065  | 6.18465  | 0.0483885  | 0.986253   |
| PI4KB        | 19.9032  | 22.8657  | 0.200186   | 0.761723   |
| TMEM170A     | 5.09572  | 3.70915  | -0.458195  | 0.406256   |
| GMNN         | 19.9496  | 30.8648  | 0.629603   | 0.0204286  |
| ARL2,SNX15   | 191.774  | 158.477  | -0.27513   | 0.506923   |
| BMS1P4       | 0.439045 | 0.30088  | -0.545183  | 0.598605   |
| ANGEL2       | 5.41138  | 5.97789  | 0.143641   | 0.820603   |
| TEX264       | 99.124   | 83.8114  | -0.242087  | 0.58959    |
| SSR1         | 9.7344   | 10.2552  | 0.0751851  | 0.926883   |
| TACC2        | 8.49194  | 9.38833  | 0.144775   | 0.824372   |
| MKS1         | 10.169   | 4.68711  | -1.1174    | 0.00153868 |
| CSNK2A2      | 52.0786  | 22.6323  | -1.20231   | 0.00153868 |
| BCL7C        | 110.437  | 129.577  | 0.230582   | 0.611583   |
| PWP2         | 22.8052  | 34.2971  | 0.588726   | 0.0280907  |
| AURKA        | 25.0125  | 29.8154  | 0.253405   | 0.569671   |
| RGS19        | 25.0715  | 27.7234  | 0.145052   | 0.832978   |
| PKNOX1       | 2.05113  | 2.50956  | 0.291014   | 0.584119   |
| HIRIP3       | 9.58397  | 9.25047  | -0.0510954 | 0.963608   |
| PPIL6        | 0.491204 | 0.177878 | -1.46544   | 0.638761   |
| BAIAP2       | 18.847   | 15.7482  | -0.259142  | 0.572911   |
| YTHDF2       | 32.7842  | 36.6073  | 0.159132   | 0.783938   |
| CUEDC2       | 94.4586  | 81.5244  | -0.21245   | 0.662083   |
| CTSZ         | 86.1456  | 86.807   | 0.0110354  | 0.992563   |
| TTYH2        | 9.86772  | 12.9959  | 0.397265   | 0.248957   |
| SELRC1       | 5.06527  | 7.84933  | 0.631931   | 0.0484091  |
| ISG15        | 119.863  | 156.253  | 0.382495   | 0.254699   |
| CBLB         | 0.519016 | 0.375496 | -0.466983  | 0.554884   |
| PQBP1        | 81.8564  | 82.6528  | 0.0139698  | 0.994116   |
| ZNF641       | 2.1044   | 1.56925  | -0.423333  | 0.324863   |
| TROAP        | 41.8274  | 50.5117  | 0.27217    | 0.653218   |
| FAM71E1      | 4.05096  | 2.9098   | -0.477345  | 0.939068   |
| PIGF         | 21.8531  | 18.9553  | -0.205237  | 0.89536    |
| RNF219       | 3.71848  | 3.78016  | 0.0237332  | 0.983039   |
| CIDECP       | 5.58575  | 4.83358  | -0.208658  | 0.842506   |
| VKORC1       | 384.919  | 270.621  | -0.50828   | 0.0729664  |
| PLCL2        | 1.26637  | 1.24962  | -0.019209  | 0.994507   |
| NUP85        | 22.4562  | 26.5679  | 0.242575   | 0.584417   |
| IPO11,LRRC70 | 11.3624  | 12.8483  | 0.177305   | 0.768364   |
| MSH2         | 8.49383  | 9.09467  | 0.098606   | 0.89785    |
| KIAA0232     | 2.05235  | 1.73277  | -0.2442    | 0.633194   |
| DCBLD2       | 2.96269  | 3.74142  | 0.336678   | 0.395266   |
| MYO5A        | 2.45089  | 2.29208  | -0.0966455 | 0.900608   |
| ENY2         | 37.4007  | 50.4624  | 0.432144   | 0.15255    |
| SYF2         | 40.3065  | 23.6637  | -0.768334  | 0.00153868 |
| C16orf72     | 7.53125  | 6.53246  | -0.205264  | 0.698621   |
| ZCCHC14      | 2.67337  | 2.16867  | -0.301851  | 0.518305   |
| UTP18        | 39.7469  | 47.9768  | 0.271495   | 0.49522    |
| TAPT1        | 2.25471  | 1.7312   | -0.381176  | 0.396134   |

|            |            |           |             |            |
|------------|------------|-----------|-------------|------------|
| DDX20      | 6.53109    | 6.42563   | -0.0234867  | 0.982866   |
| IRF2       | 4.86589    | 6.14534   | 0.33679     | 0.472023   |
| RPRD2      | 3.40979    | 2.59557   | -0.39363    | 0.266662   |
| MAPKAPK2   | 33.8356    | 38.9497   | 0.203073    | 0.676146   |
| CYB5R1     | 27.2556    | 18.2866   | -0.575766   | 0.0429833  |
| FAM86C2P   | 1.03825    | 0.884206  | -0.231701   | 0.861774   |
| RGS9BP     | 0.188588   | 0.193902  | 0.04009     | 1          |
| USP50      | 0.856843   | 0.619201  | -0.468623   | 0.924162   |
| CENPA      | 18.8646    | 16.2879   | -0.211885   | 0.698498   |
| ARHGAP21   | 4.91268    | 4.87476   | -0.0111776  | 0.992304   |
| OGG1       | 14.2114    | 13.4133   | -0.0833869  | 0.961132   |
| ASB1       | 32.3121    | 22.9344   | -0.494564   | 0.0832671  |
| TRPM7      | 2.58718    | 2.20852   | -0.228301   | 0.654907   |
| SDHA       | 57.8121    | 52.1117   | -0.149765   | 0.799656   |
| PWP1       | 34.6831    | 34.1508   | -0.0223133  | 0.981441   |
| FASTK      | 48.5423    | 51.228    | 0.0776895   | 0.928407   |
| DGCR14     | 4.91093    | 5.22926   | 0.0906097   | 0.91609    |
| DUSP11     | 18.9654    | 16.7838   | -0.176298   | 0.758847   |
| PTPN11     | 11.2574    | 14.5115   | 0.366316    | 0.267401   |
| N4BP1      | 2.83417    | 3.06269   | 0.111874    | 0.886228   |
| TC2N       | 0.00310263 | 0         | #NAME?      | 1          |
| RTFDC1     | 49.4349    | 48.6049   | -0.0244275  | 0.979338   |
| ADCY6      | 6.77501    | 7.74473   | 0.192991    | 0.720731   |
| CNTRL      | 1.79002    | 0.742552  | -1.26941    | 0.00153868 |
| ERLEC1     | 11.9808    | 10.383    | -0.206498   | 0.777568   |
| WBSCR16    | 37.1292    | 48.1157   | 0.373953    | 0.258195   |
| VPS54      | 3.14714    | 3.12978   | -0.0079763  | 0.994734   |
| LRP6       | 1.07694    | 0.985658  | -0.127783   | 0.879865   |
| CBX3       | 88.2005    | 105.294   | 0.25556     | 0.542801   |
| FAM108C1   | 9.24308    | 13.5713   | 0.554117    | 0.0871059  |
| MCAT       | 19.692     | 29.2606   | 0.571352    | 0.0519269  |
| THADA      | 2.09043    | 2.64029   | 0.336894    | 0.439733   |
| TEX19      | 0.513304   | 0.358865  | -0.516373   | 0.637072   |
| GJA9,MYCBP | 9.93563    | 15.4304   | 0.635091    | 0.0192959  |
| HEATR2     | 21.9503    | 21.9745   | 0.00158681  | 0.999215   |
| PCDHB3     | 0.163623   | 0.0718666 | -1.18699    | 1          |
| WRN        | 1.77566    | 1.76646   | -0.00749455 | 0.994734   |
| CPSF6      | 10.1732    | 11.643    | 0.194697    | 0.699755   |
| CCNB1      | 55.4039    | 82.4814   | 0.574082    | 0.0407657  |
| ATP6AP1    | 68.4415    | 58.641    | -0.222962   | 0.630091   |
| HIVEP2     | 2.41494    | 1.38673   | -0.800302   | 0.00380811 |
| NSD1       | 1.95309    | 2.18888   | 0.164434    | 0.784918   |
| CIRBP      | 119.154    | 57.9183   | -1.04074    | 0.00153868 |
| SHROOM1    | 9.60968    | 8.15042   | -0.237615   | 0.65548    |
| CERS5      | 21.8284    | 17.029    | -0.358214   | 0.320971   |
| C7orf73    | 13.7207    | 12.7213   | -0.109106   | 0.882085   |
| STYXL1     | 17.9171    | 9.11822   | -0.974516   | 0.00153868 |
| LSM5       | 22.3454    | 24.9708   | 0.160264    | 0.775951   |
| KDSR       | 22.6659    | 13.5886   | -0.738125   | 0.00572929 |

|              |           |          |            |            |
|--------------|-----------|----------|------------|------------|
| ITFG3        | 24.8693   | 15.9983  | -0.636442  | 0.0187307  |
| PEX7         | 7.98026   | 5.0657   | -0.655672  | 0.0660778  |
| HMOX1        | 88.3952   | 72.3772  | -0.288433  | 0.462386   |
| PHKG1        | 27.5378   | 17.5709  | -0.64823   | 0.324946   |
| SOCS4        | 2.92505   | 3.18426  | 0.122495   | 0.869722   |
| EPB41L4A-AS1 | 85.9805   | 54.1967  | -0.665804  | 0.0117316  |
| SLC35A1      | 6.92041   | 6.3769   | -0.118004  | 0.887299   |
| COQ10B       | 20.7074   | 16.9246  | -0.291021  | 0.463667   |
| RPH3AL       | 3.36282   | 2.34866  | -0.517837  | 0.301701   |
| OXTR         | 0.104231  | 0.214031 | 1.03804    | 1          |
| CCDC57       | 4.65002   | 4.83827  | 0.057255   | 0.960529   |
| TTC39B       | 0.363164  | 0.192324 | -0.917081  | 1          |
| TMEM67       | 1.50966   | 0.980566 | -0.622539  | 0.107265   |
| GAS8         | 4.874     | 4.06202  | -0.26291   | 0.684169   |
| GF11         | 2.05444   | 2.0902   | 0.0248983  | 0.986782   |
| TLE1         | 6.77904   | 5.03435  | -0.429276  | 0.251081   |
| FAM161A      | 1.02648   | 1.11592  | 0.120525   | 0.915693   |
| RCAN3        | 3.16424   | 1.30414  | -1.27876   | 0.00153868 |
| IKBKB        | 12.2559   | 11.3642  | -0.10899   | 0.879418   |
| RRM1         | 29.0575   | 23.0803  | -0.332251  | 0.34787    |
| UTP15        | 4.25731   | 7.0608   | 0.72989    | 0.00970147 |
| MRPL18       | 69.7742   | 118.642  | 0.76585    | 0.00153868 |
| NXT1         | 37.55     | 57.9752  | 0.626622   | 0.0215444  |
| TBC1D13      | 19.6996   | 24.0632  | 0.288661   | 0.450348   |
| CDC42SE1     | 35.436    | 44.1116  | 0.315944   | 0.396799   |
| ARL16        | 25.3734   | 29.6339  | 0.223932   | 0.664979   |
| MLKL         | 8.55765   | 13.6575  | 0.674412   | 0.0232503  |
| DECR2        | 20.4446   | 18.1429  | -0.172315  | 0.799656   |
| NT5C3        | 17.1353   | 16.1153  | -0.0885374 | 0.913595   |
| ARID1B       | 2.89715   | 2.14655  | -0.432617  | 0.21812    |
| SRSF7        | 51.773    | 76.6607  | 0.566286   | 0.030086   |
| HTR7P1       | 0.995037  | 0.918673 | -0.1152    | 0.929461   |
| SPATA5       | 0.694217  | 0.887773 | 0.354803   | 0.490657   |
| ACRV1        | 0.0860543 | 0.198472 | 1.20561    | 1          |
| GCSH         | 14.6187   | 18.3506  | 0.328011   | 0.39786    |
| RMND5B       | 21.109    | 18.3623  | -0.201111  | 0.706753   |
| LIN54        | 1.96607   | 1.2749   | -0.624936  | 0.0782684  |
| FKBP9L       | 0.528346  | 0.216961 | -1.28404   | 0.0525851  |
| CYB5R4       | 3.97037   | 3.65581  | -0.119082  | 0.893287   |
| RBBP7        | 42.7614   | 45.1581  | 0.078676   | 0.923624   |
| UCK2         | 25.7043   | 35.1339  | 0.450851   | 0.117359   |
| CCT7         | 349.931   | 415.601  | 0.248125   | 0.589092   |
| FZD8         | 2.22597   | 2.11283  | -0.0752553 | 0.96066    |
| DAK          | 10.0234   | 7.67671  | -0.384814  | 0.885196   |
| BCAR1        | 27.0009   | 35.7783  | 0.406076   | 0.203984   |
| TOR3A        | 16.7088   | 36.882   | 1.14231    | 0.00153868 |
| PITPNA       | 18.8917   | 24.0065  | 0.345671   | 0.32908    |
| TTC1         | 45.5775   | 31.1971  | -0.546912  | 0.0467998  |
| RTCA         | 17.2741   | 14.5895  | -0.243674  | 0.589163   |

|               |            |            |            |            |
|---------------|------------|------------|------------|------------|
| C6orf165      | 0.0532082  | 0.0512519  | -0.0540426 | 1          |
| RPA1          | 15.0094    | 16.1226    | 0.103217   | 0.884758   |
| SBDSP1        | 16.4711    | 25.5738    | 0.634734   | 0.0198871  |
| RABL6         | 144.076    | 157.785    | 0.131125   | 0.848653   |
| TALDO1        | 155.032    | 158.078    | 0.0280716  | 0.978016   |
| LOC100129931  | 10.8914    | 16.4317    | 0.593302   | 0.0871059  |
| FNDC8         | 1.09671    | 1.3124     | 0.259028   | 0.838902   |
| FKBP9         | 10.1896    | 4.95041    | -1.04148   | 0.00153868 |
| ATG16L2       | 23.9791    | 15.9664    | -0.586735  | 0.0523053  |
| LARGE         | 3.8881     | 4.09507    | 0.0748199  | 0.939451   |
| CDR2L         | 16.1055    | 20.3455    | 0.337155   | 0.357833   |
| YIPF5         | 7.92877    | 7.02093    | -0.175436  | 0.764196   |
| IWS1          | 12.3427    | 14.2477    | 0.207071   | 0.666451   |
| ACTR10        | 14.3707    | 10.846     | -0.405969  | 0.22492    |
| BRD4          | 9.15672    | 8.76352    | -0.0633212 | 0.944479   |
| ANP32E        | 17.2895    | 21.2013    | 0.294256   | 0.453921   |
| PPAPDC2       | 4.55422    | 3.83755    | -0.247017  | 0.698989   |
| SPRYD7        | 5.5814     | 5.24033    | -0.0909699 | 0.913072   |
| MTPAP         | 8.44758    | 9.56309    | 0.178939   | 0.733299   |
| ADRBK1        | 38.3998    | 40.973     | 0.0935729  | 0.895397   |
| TFIP11        | 12.6773    | 14.4875    | 0.192557   | 0.799195   |
| GNS           | 9.39725    | 6.69982    | -0.488115  | 0.0976116  |
| PRKACA        | 24.3014    | 23.6467    | -0.0393948 | 0.968722   |
| MOGS          | 44.0979    | 61.5591    | 0.481262   | 0.096962   |
| COX15         | 10.026     | 6.0279     | -0.73402   | 0.0500215  |
| IP6K1         | 8.91629    | 13.0571    | 0.550319   | 0.055778   |
| MDN1          | 0.776329   | 1.02316    | 0.398297   | 0.287782   |
| ST8SIA4       | 0.00249076 | 0.00280401 | 0.170905   | 1          |
| ZNF343        | 3.05662    | 3.77726    | 0.305405   | 0.516033   |
| LEPRE1        | 17.4869    | 17.6301    | 0.0117705  | 0.992304   |
| PCOLCE-AS1    | 0.0496389  | 0.0129883  | -1.93425   | 1          |
| RNF19B        | 12.0211    | 8.42858    | -0.51221   | 0.101539   |
| DNAJC25,DNAJC | 101.663    | 106.756    | 0.0705163  | 0.934932   |
| TUBG1         | 41.4388    | 72.3439    | 0.803891   | 0.109797   |
| ATP11C        | 2.19466    | 2.07693    | -0.0795497 | 0.93305    |
| ATP5E,SLMO2   | 703.331    | 812.867    | 0.208816   | 0.76146    |
| ZCCHC8        | 4.71436    | 3.79599    | -0.312584  | 0.478417   |
| NCK2          | 17.7945    | 18.8762    | 0.0851378  | 0.919107   |
| SAMD4A        | 3.11702    | 2.61384    | -0.253997  | 0.623996   |
| DDX18         | 15.6922    | 21.7591    | 0.471575   | 0.108649   |
| BCAS4         | 28.5959    | 22.2935    | -0.359184  | 0.363109   |
| SLC39A13      | 34.9112    | 46.1252    | 0.401867   | 0.207927   |
| EMD           | 129.396    | 106.318    | -0.283401  | 0.459675   |
| PODXL2        | 51.0455    | 50.0985    | -0.0270151 | 0.977897   |
| RAB27A        | 1.96951    | 2.67506    | 0.441733   | 0.290633   |
| ZFHX2         | 0.194256   | 0.150928   | -0.364094  | 1          |
| RAP1B         | 86.7149    | 75.7852    | -0.194364  | 0.698621   |
| ARL5B         | 2.61013    | 1.2567     | -1.05448   | 0.00153868 |
| PIGP          | 40.8958    | 18.9186    | -1.11215   | 0.00153868 |

|              |          |           |            |            |
|--------------|----------|-----------|------------|------------|
| CCDC14       | 5.19963  | 4.27506   | -0.282464  | 0.522918   |
| SPOP         | 12.7297  | 15.3471   | 0.269764   | 0.514757   |
| C18orf56     | 5.51689  | 3.71288   | -0.571317  | 0.960032   |
| ADAR         | 21.7969  | 25.1005   | 0.203595   | 0.667947   |
| F8A1         | 7.21203  | 6.9544    | -0.0524808 | 0.97803    |
| BAP1         | 25.2276  | 29.7247   | 0.236658   | 0.594489   |
| RAB3GAP2     | 3.35243  | 2.03759   | -0.718342  | 0.00659556 |
| KEAP1        | 40.8824  | 57.3088   | 0.487276   | 0.089127   |
| ABCD4        | 15.7887  | 11.5555   | -0.450316  | 0.153369   |
| HOXA-AS4     | 0.847439 | 1.11997   | 0.402283   | 0.968154   |
| FAM89A       | 23.7821  | 33.0571   | 0.475085   | 0.116553   |
| CATSPERG     | 0.195092 | 0.0867128 | -1.16984   | 1          |
| UTP14A       | 11.9816  | 15.0891   | 0.332686   | 0.369226   |
| ZNF33B       | 2.4943   | 1.84556   | -0.434576  | 0.217777   |
| ZNHIT6       | 5.97931  | 6.8435    | 0.194756   | 0.698546   |
| KLHDC1       | 0.127946 | 0.0270596 | -2.24132   | 1          |
| ACSL1        | 8.77122  | 11.4518   | 0.38473    | 0.243499   |
| OSBPL2       | 8.87688  | 10.0057   | 0.172694   | 0.762218   |
| NPLOC4       | 21.8569  | 33.9237   | 0.634206   | 0.0130226  |
| GABARAPL1    | 7.83391  | 3.41618   | -1.19735   | 0.00153868 |
| CUL3         | 6.56737  | 8.89679   | 0.437969   | 0.151333   |
| DMKN         | 88.1022  | 90.6047   | 0.0404071  | 0.970531   |
| SPPL3        | 13.8744  | 12.8156   | -0.11453   | 0.873477   |
| HDDC3        | 18.6034  | 11.4688   | -0.697845  | 0.606595   |
| CANX         | 83.7548  | 78.5611   | -0.092356  | 0.902834   |
| URB2         | 2.77367  | 4.84693   | 0.805272   | 0.00659556 |
| CLUAP1       | 3.53346  | 2.92667   | -0.271821  | 0.61138    |
| EXOSC2       | 34.3739  | 47.382    | 0.463023   | 0.111049   |
| DCAKD        | 17.0465  | 15.9348   | -0.0972933 | 0.902819   |
| UBE2D4       | 3.61995  | 4.55065   | 0.330103   | 0.518485   |
| RFXAP        | 2.61207  | 2.54413   | -0.0380226 | 0.9771     |
| PRRC2C       | 4.86486  | 5.84354   | 0.264444   | 0.512222   |
| PIGN         | 3.17977  | 1.94745   | -0.707338  | 0.0220668  |
| WDR83OS      | 197.168  | 227.91    | 0.20904    | 0.752083   |
| IREB2        | 4.4349   | 4.82374   | 0.121251   | 0.862703   |
| IQGAP1       | 9.65115  | 6.56358   | -0.556216  | 0.0434002  |
| GTF2A1       | 3.16975  | 2.53916   | -0.320017  | 0.439075   |
| LRCH3        | 1.88093  | 1.13792   | -0.725043  | 0.136049   |
| PPM1B        | 8.22901  | 7.16329   | -0.200097  | 0.767641   |
| ZDHHC3       | 3.08271  | 4.37439   | 0.504883   | 0.0719976  |
| GCDH         | 28.607   | 31.0979   | 0.12045    | 0.864901   |
| RPS6KA5      | 0.355442 | 0.24316   | -0.547706  | 1          |
| LOC100289495 | 0.274114 | 0.0808623 | -1.76124   | 1          |
| USP42        | 2.47419  | 3.16454   | 0.355036   | 0.421289   |
| C1RL-AS1     | 0.310256 | 0.144914  | -1.09826   | 1          |
| TRMT44       | 4.59932  | 5.43014   | 0.239568   | 0.680356   |
| AEN          | 29.2883  | 34.6531   | 0.24266    | 0.574243   |
| UBIAD1       | 10.268   | 13.788    | 0.425255   | 0.193396   |
| CKS2         | 454.723  | 624.222   | 0.457072   | 0.121719   |



|               |          |          |            |            |
|---------------|----------|----------|------------|------------|
| PCDHB2        | 2.65613  | 2.12232  | -0.323683  | 0.634641   |
| NMB           | 37.6165  | 49.8264  | 0.405547   | 0.274398   |
| FARSB         | 29.3337  | 28.4703  | -0.0431052 | 0.964476   |
| SHQ1          | 5.20431  | 9.3591   | 0.846663   | 0.00153868 |
| CTTNBP2NL     | 4.93158  | 4.12653  | -0.257121  | 0.571      |
| CNOT6         | 5.30519  | 5.8356   | 0.137474   | 0.825824   |
| SHFM1         | 419.276  | 487.573  | 0.217717   | 0.643266   |
| PPIA          | 673.278  | 745.724  | 0.147439   | 0.816563   |
| ITGA5         | 25.744   | 22.0891  | -0.220902  | 0.627109   |
| TBX1          | 1.8681   | 0.842826 | -1.14826   | 0.0767959  |
| CTNBL1        | 24.8751  | 31.0302  | 0.318968   | 0.381226   |
| LOC389791     | 0.432611 | 0.640951 | 0.567144   | 0.555701   |
| TMEM218       | 2.64764  | 1.89802  | -0.480209  | 0.229488   |
| STEAP2        | 2.51923  | 2.2207   | -0.181969  | 0.847391   |
| ISPD          | 0.105753 | 0.143916 | 0.44453    | 1          |
| TRIB1         | 23.1038  | 26.2894  | 0.186352   | 0.713729   |
| ADCY9         | 1.54022  | 2.11173  | 0.455294   | 0.263932   |
| NDUFA7        | 179.653  | 147.266  | -0.286788  | 0.480434   |
| MGST1         | 151.877  | 168.512  | 0.149951   | 0.804051   |
| AAGAB         | 12.4448  | 16.4387  | 0.401549   | 0.323292   |
| CHD3          | 14.3555  | 13.9115  | -0.0453298 | 0.963969   |
| SAR1A         | 26.7244  | 36.1373  | 0.435335   | 0.145921   |
| GNB2          | 445.443  | 476.389  | 0.0969004  | 0.896052   |
| VPS25         | 89.7891  | 69.5643  | -0.368193  | 0.277238   |
| PGM3          | 4.85453  | 4.75248  | -0.030651  | 0.979689   |
| C1orf85       | 33.9571  | 23.7185  | -0.517702  | 0.0997561  |
| RUVBL2        | 243.878  | 261.538  | 0.100865   | 0.891495   |
| TAF5L         | 7.02484  | 8.95834  | 0.350766   | 0.371136   |
| MSS51         | 0.625932 | 0.46584  | -0.42617   | 0.663419   |
| IFIH1         | 0.500274 | 0.201025 | -1.31534   | 0.0318822  |
| LOC389634     | 1.3805   | 1.31998  | -0.0646727 | 0.981441   |
| C11orf80,RCE1 | 26.1164  | 35.9273  | 0.460126   | 0.2463     |
| CST3          | 233.263  | 248.691  | 0.092393   | 0.900642   |
| RPF1          | 21.3892  | 24.1365  | 0.174334   | 0.909496   |
| DUSP12        | 25.7387  | 28.2426  | 0.133932   | 0.839812   |
| HPS5          | 2.00215  | 2.41056  | 0.267823   | 0.618122   |
| B3GNT2        | 4.11959  | 4.8102   | 0.223595   | 0.707165   |
| C1orf170      | 0.982251 | 0.740281 | -0.40802   | 0.63182    |
| LOC728613     | 0.640474 | 0.673935 | 0.0734692  | 0.967343   |
| POLD1         | 30.659   | 35.8785  | 0.226806   | 0.633194   |
| ZNF585B       | 0.912721 | 0.972942 | 0.092179   | 0.936229   |
| MORN2         | 10.3427  | 10.7825  | 0.0600787  | 0.959927   |
| MMP25         | 2.729    | 2.21413  | -0.301632  | 0.671942   |
| ALDH4A1       | 15.4873  | 14.9475  | -0.0511836 | 0.958143   |
| SMC4          | 6.76399  | 7.22819  | 0.095761   | 0.901786   |
| PNPO          | 15.1971  | 13.5211  | -0.168582  | 0.759934   |
| ECD           | 11.6976  | 9.21924  | -0.343497  | 0.375994   |
| PXMP2         | 13.8259  | 16.1725  | 0.22617    | 0.727043   |
| RNF167        | 87.3974  | 67.739   | -0.367604  | 0.259867   |

|                 |          |           |             |            |
|-----------------|----------|-----------|-------------|------------|
| KREMEN2         | 20.6709  | 34.7424   | 0.7491      | 0.0103919  |
| MMP14           | 19.0218  | 16.3289   | -0.220231   | 0.642777   |
| DMPK            | 13.4275  | 9.66733   | -0.474003   | 0.210405   |
| LINC00493       | 139.017  | 119.54    | -0.217776   | 0.643266   |
| POFUT1          | 7.44706  | 7.21879   | -0.0449143  | 0.962057   |
| NME7            | 9.49731  | 6.89866   | -0.461203   | 0.434222   |
| RBBP5           | 3.35494  | 3.6747    | 0.131342    | 0.861337   |
| NR4A3           | 0.26779  | 0.327649  | 0.291048    | 1          |
| TBL3            | 32.9291  | 40.644    | 0.303678    | 0.420653   |
| PGS1            | 10.7996  | 13.4086   | 0.312182    | 0.496238   |
| RAPGEF1         | 18.0056  | 19.081    | 0.0836873   | 0.911013   |
| TPRN            | 48.5436  | 46.3459   | -0.0668384  | 0.938335   |
| C9orf163        | 0.297223 | 0.897391  | 1.59419     | 0.849273   |
| GAL3ST4         | 0.417665 | 0.296602  | -0.493817   | 0.713975   |
| FAM103A1        | 19.7136  | 21.4871   | 0.124283    | 0.882958   |
| PPAPDC1B        | 37.1292  | 34.7076   | -0.0973026  | 0.923571   |
| FTSJ3           | 15.8828  | 26.3174   | 0.728555    | 0.190723   |
| TRAPPC6B        | 3.75541  | 3.38093   | -0.151551   | 0.837945   |
| USP7            | 16.7535  | 21.359    | 0.35038     | 0.308846   |
| ANKRD54         | 14.2848  | 23.6981   | 0.730293    | 0.00659556 |
| C14orf166       | 201.774  | 183.503   | -0.136933   | 0.824372   |
| TRAPPC13        | 5.81699  | 4.88177   | -0.252869   | 0.774227   |
| ARFGEF2         | 1.83143  | 1.81674   | -0.0116156  | 0.992882   |
| PLEKHM1         | 12.2688  | 6.12017   | -1.00335    | 0.00153868 |
| ATF3            | 15.1298  | 4.70351   | -1.68558    | 0.00153868 |
| FAM78A          | 3.96252  | 4.98371   | 0.330802    | 0.472023   |
| FAM96A          | 54.1285  | 58.159    | 0.103614    | 0.883608   |
| C9orf78         | 66.4924  | 104.008   | 0.645429    | 0.0130226  |
| TVP23B          | 10.6502  | 10.2328   | -0.0576712  | 0.952184   |
| METAP2          | 30.1466  | 30.0901   | -0.00270725 | 0.998272   |
| FAM90A25P       | 1.10794  | 0.390133  | -1.50584    | 0.0280907  |
| ANKRD40         | 10.762   | 12.1291   | 0.172534    | 0.756518   |
| NIPA1           | 6.03848  | 6.7307    | 0.156571    | 0.785473   |
| TRPS1           | 0.524723 | 0.331524  | -0.662444   | 0.129711   |
| LCMT1           | 39.0085  | 28.8049   | -0.437471   | 0.159847   |
| ZNF259          | 39.7664  | 42.4885   | 0.0955191   | 0.895596   |
| ERCC6L          | 2.04852  | 2.68771   | 0.391794    | 0.629512   |
| CRAMP1L         | 2.07873  | 2.31814   | 0.157261    | 0.832978   |
| PSMB4           | 541.713  | 567.441   | 0.0669415   | 0.935766   |
| IKBKE           | 2.79594  | 2.10123   | -0.412099   | 0.394599   |
| MRE11A          | 2.12593  | 1.15598   | -0.878976   | 0.0103919  |
| RIC8A           | 72.6584  | 89.027    | 0.293114    | 0.483696   |
| MGAT4B          | 104.679  | 100.586   | -0.0575408  | 0.978031   |
| GLIS3           | 0.168365 | 0.0367688 | -2.19504    | 1          |
| RIOK2           | 7.24303  | 6.82512   | -0.0857398  | 0.919578   |
| FSCN2           | 0.10362  | 0.111357  | 0.10389     | 1          |
| ZNF177,ZNF559,2 | 2.51873  | 2.10555   | -0.258499   | 0.697386   |
| CDC42EP4        | 8.33521  | 8.14716   | -0.0329207  | 0.97562    |
| NTN1            | 3.0036   | 4.00054   | 0.413499    | 0.318122   |

|          |           |            |            |            |
|----------|-----------|------------|------------|------------|
| ESPL1    | 5.00853   | 4.81944    | -0.0555202 | 0.954264   |
| MRPS25   | 13.2014   | 14.7236    | 0.157432   | 0.867291   |
| CARS2    | 59.9678   | 48.9436    | -0.293068  | 0.439356   |
| SDF2     | 20.6007   | 17.8531    | -0.20652   | 0.692701   |
| TTPA     | 0.348922  | 0.33363    | -0.0646538 | 1          |
| WDR12    | 16.4862   | 14.8507    | -0.150721  | 0.8041     |
| AP5Z1    | 11.3883   | 11.6782    | 0.0362653  | 0.971528   |
| TUBB2A   | 14.1419   | 30.1728    | 1.09327    | 0.00153868 |
| TMEM53   | 2.02046   | 1.69124    | -0.256603  | 0.808777   |
| ERAP2    | 3.25296   | 2.89452    | -0.16843   | 0.789799   |
| TARS2    | 27.9491   | 14.581     | -0.938718  | 0.00153868 |
| RPP30    | 5.91239   | 6.58988    | 0.156511   | 0.840133   |
| ITPKB    | 2.32493   | 3.0836     | 0.407427   | 0.308679   |
| LAMC2    | 0.136312  | 0.030816   | -2.14516   | 1          |
| CCDC124  | 233.237   | 259.348    | 0.153093   | 0.787439   |
| ARRDC2   | 17.2424   | 19.5059    | 0.177951   | 0.757031   |
| LRRC29   | 1.11096   | 0.412768   | -1.4284    | 0.0784883  |
| C10orf76 | 4.20665   | 3.76759    | -0.159029  | 0.817355   |
| VPS18    | 15.4576   | 21.4177    | 0.470483   | 0.107075   |
| PCLO     | 0.0223955 | 0.00462107 | -2.27691   | 1          |
| SPTLC1   | 28.0921   | 26.5261    | -0.0827534 | 0.933369   |
| S100A16  | 911.644   | 1050.8     | 0.204951   | 0.689613   |
| BRCC3    | 3.26882   | 3.40601    | 0.0593155  | 0.956357   |
| DIAPH3   | 6.49196   | 4.13149    | -0.651993  | 0.0204286  |
| NDST1    | 4.91079   | 7.94956    | 0.69492    | 0.0103919  |
| SUPT4H1  | 39.5912   | 40.7546    | 0.0417818  | 0.967296   |
| CREB3    | 32.6672   | 37.5021    | 0.199129   | 0.879418   |
| DDX10    | 10.2682   | 16.1776    | 0.655813   | 0.0130226  |
| NPL      | 0.973738  | 0.912327   | -0.0939824 | 0.952184   |
| MLYCD    | 8.94436   | 7.14648    | -0.323746  | 0.519255   |
| C2orf68  | 3.9074    | 2.63636    | -0.567663  | 0.638761   |
| SMKR1    | 6.79192   | 5.30633    | -0.356105  | 0.568275   |
| MLLT1    | 27.367    | 36.515     | 0.416049   | 0.181817   |
| RPN1     | 84.3895   | 93.3373    | 0.14539    | 0.804859   |
| NCAPH    | 5.16777   | 5.1941     | 0.00733252 | 0.994734   |
| DCUN1D4  | 5.56762   | 6.78228    | 0.284711   | 0.502059   |
| RHNO1    | 8.10464   | 5.20883    | -0.63779   | 0.667022   |
| ZNF410   | 17.2297   | 17.5787    | 0.0289316  | 0.977897   |
| IQGAP3   | 9.22038   | 3.949      | -1.22334   | 0.00153868 |
| SETD6    | 5.38718   | 7.29133    | 0.436652   | 0.827135   |
| CAPRIN1  | 41.1822   | 34.1149    | -0.271621  | 0.501244   |
| QDPR     | 33.577    | 38.5119    | 0.197829   | 0.694097   |
| CREB3L4  | 6.15403   | 2.36657    | -1.37873   | 0.513296   |
| TOMM40L  | 9.84533   | 16.1844    | 0.717096   | 0.00739414 |
| DYRK3    | 14.7079   | 7.15356    | -1.03986   | 0.00153868 |
| CACTIN   | 14.054    | 19.7373    | 0.489943   | 0.119294   |
| PPP1R10  | 12.2588   | 9.57577    | -0.356353  | 0.308679   |
| SDC1     | 25.8039   | 40.9623    | 0.66671    | 0.00739414 |
| CEP170B  | 12.4134   | 17.6059    | 0.504153   | 0.0795709  |

|            |          |          |             |            |
|------------|----------|----------|-------------|------------|
| SIN3A      | 4.53408  | 5.39986  | 0.252111    | 0.562668   |
| TSPAN33    | 28.227   | 23.536   | -0.26221    | 0.521655   |
| CDV3       | 40.3704  | 52.3397  | 0.37461     | 0.258796   |
| SUPT16H    | 31.3249  | 30.9136  | -0.0190707  | 0.985492   |
| LOC729737  | 0.277427 | 0.154182 | -0.847476   | 1          |
| PCDHB7     | 0.610576 | 0.351627 | -0.796125   | 0.211701   |
| SUPT7L     | 10.1197  | 9.62124  | -0.0728787  | 0.96645    |
| DCUN1D3    | 1.88352  | 2.68863  | 0.513439    | 0.614228   |
| FAM185A    | 2.09147  | 2.37892  | 0.18579     | 0.838532   |
| AIDA       | 23.9024  | 19.9659  | -0.259618   | 0.521457   |
| CSTF3      | 18.0376  | 22.4893  | 0.318228    | 0.784983   |
| EIF2AK3    | 1.90732  | 1.53116  | -0.316923   | 0.554334   |
| SAR1B      | 3.30858  | 4.13675  | 0.322282    | 0.40991    |
| TFE3       | 30.6524  | 27.6452  | -0.14897    | 0.795726   |
| RAB15      | 11.5717  | 11.7767  | 0.0253401   | 0.992304   |
| INTS3      | 8.6916   | 6.70483  | -0.374421   | 0.285596   |
| SH2B3      | 13.5879  | 17.504   | 0.36536     | 0.267401   |
| DROSHA     | 4.09201  | 4.23457  | 0.0494043   | 0.961132   |
| MCOLN3     | 5.24184  | 4.05203  | -0.37143    | 0.38574    |
| PCF11      | 3.58606  | 2.91395  | -0.299427   | 0.488273   |
| MORC4      | 8.44601  | 8.12224  | -0.0563931  | 0.950538   |
| KIF2C      | 31.5138  | 23.9231  | -0.397581   | 0.226046   |
| ENTPD4     | 3.78791  | 3.44713  | -0.136006   | 0.846945   |
| PEX26      | 7.76048  | 7.71451  | -0.00857068 | 0.994204   |
| FAM86B3P   | 2.92966  | 1.35698  | -1.11033    | 0.0393841  |
| NUP98      | 7.93539  | 9.31784  | 0.231695    | 0.720087   |
| PIK3C3     | 9.28195  | 6.02367  | -0.623785   | 0.0253664  |
| CCNF       | 8.93265  | 12.7097  | 0.508766    | 0.0871059  |
| FOXO4      | 1.42877  | 1.0313   | -0.470299   | 0.428214   |
| MRPS34     | 173.51   | 248.222  | 0.516612    | 0.055778   |
| TAF12      | 40.6842  | 33.8492  | -0.265348   | 0.524638   |
| TRAPPC3    | 68.0442  | 82.6949  | 0.281326    | 0.483124   |
| APBA3      | 13.3626  | 12.6911  | -0.0743791  | 0.940598   |
| CBR4       | 5.35847  | 3.35438  | -0.675776   | 0.0243026  |
| RPA3       | 18.0655  | 14.5656  | -0.310675   | 0.517103   |
| WDR66      | 0.192084 | 0.181232 | -0.0839028  | 1          |
| ITPKA      | 33.5748  | 38.7116  | 0.205385    | 0.699437   |
| POLR1A     | 5.63779  | 8.62375  | 0.613186    | 0.0232503  |
| TCF19      | 7.85488  | 9.21457  | 0.230328    | 0.642563   |
| PIEZO1     | 21.5437  | 32.7512  | 0.604282    | 0.0554201  |
| VPS52      | 8.79739  | 6.29588  | -0.482668   | 0.152252   |
| C10orf95   | 1.78763  | 1.61083  | -0.150247   | 0.975492   |
| FLNB       | 9.69265  | 6.03304  | -0.684007   | 0.00659556 |
| KCTD15     | 12.7931  | 13.7911  | 0.108369    | 0.879418   |
| NT5C       | 135.395  | 108.719  | -0.31657    | 0.466918   |
| MRPS26     | 148.974  | 254.472  | 0.772443    | 0.00274688 |
| ZNF503-AS2 | 2.112    | 3.04393  | 0.527326    | 0.765267   |
| IKZF4      | 1.22506  | 1.00509  | -0.285528   | 0.678939   |
| CHCHD3     | 79.0082  | 73.9306  | -0.0958305  | 0.897319   |

|               |           |           |            |            |
|---------------|-----------|-----------|------------|------------|
| UBAP2L        | 24.8131   | 36.9342   | 0.573855   | 0.361509   |
| GNG5          | 311.727   | 309.025   | -0.0125595 | 0.992304   |
| SNAPC2        | 57.8833   | 52.6985   | -0.135387  | 0.830217   |
| PROX1         | 0.0403504 | 0.0354762 | -0.185731  | 1          |
| SNHG15        | 153.49    | 200.721   | 0.387046   | 0.218676   |
| HERC2         | 2.86376   | 3.05577   | 0.0936265  | 0.902358   |
| QSOX2         | 22.1364   | 25.6075   | 0.210146   | 0.645928   |
| ANKHD1,ANKHD1 | 31.6256   | 25.5151   | -0.309739  | 0.773159   |
| DOC2B         | 0.920676  | 1.37199   | 0.575504   | 0.599775   |
| CCDC142,MRPL5 | 109.673   | 112.742   | 0.0398163  | 0.975484   |
| PTGFRN        | 7.50002   | 7.8945    | 0.0739519  | 0.931457   |
| NRM           | 23.3497   | 15.9193   | -0.552626  | 0.0851513  |
| CENPB         | 46.646    | 67.9534   | 0.542793   | 0.0491395  |
| SQSTM1        | 219.553   | 121.298   | -0.856013  | 0.00970147 |
| RARS          | 39.6565   | 46.1604   | 0.219097   | 0.632885   |
| SART1         | 25.9538   | 26.68     | 0.0398134  | 0.967296   |
| H2AFV         | 41.6808   | 40.1056   | -0.055578  | 0.958829   |
| ATP5G1        | 190.933   | 228.434   | 0.258708   | 0.538128   |
| GSTCD         | 1.82908   | 1.66444   | -0.136081  | 0.877848   |
| RAD23A        | 130.559   | 95.1517   | -0.456406  | 0.13182    |
| ALG2          | 17.6967   | 18.878    | 0.0932235  | 0.899998   |
| TXNL1         | 78.1086   | 74.2591   | -0.0729138 | 0.93037    |
| OPA3          | 3.11285   | 4.85734   | 0.641929   | 0.260553   |
| NGFRAP1       | 166.807   | 124.109   | -0.42657   | 0.156107   |
| PIP4K2A       | 8.03331   | 11.1882   | 0.477918   | 0.0995082  |
| NDUFA1        | 285.952   | 309.056   | 0.112097   | 0.885883   |
| C1QTNF2       | 1.03618   | 0.866357  | -0.258241  | 0.811883   |
| MAD2L2        | 128.75    | 119.126   | -0.112077  | 0.869253   |
| RANBP2        | 4.26172   | 4.90893   | 0.203971   | 0.679794   |
| C1orf86       | 157.598   | 156.485   | -0.0102207 | 0.994593   |
| CCDC147       | 0.475454  | 0.208495  | -1.18929   | 0.0464744  |
| ELP3          | 11.018    | 7.12849   | -0.628192  | 0.0220668  |
| ILF2          | 159.66    | 199.211   | 0.319296   | 0.414529   |
| NUCB2         | 10.0051   | 7.21966   | -0.47073   | 0.169436   |
| CDK8          | 3.97343   | 3.36402   | -0.240199  | 0.720022   |
| BAG1          | 18.6689   | 25.6492   | 0.458283   | 0.123296   |
| TGFBR3        | 0.423637  | 0.438506  | 0.0497678  | 0.975454   |
| OSBPL11       | 1.31105   | 2.0743    | 0.661905   | 0.0685533  |
| AZI2          | 16.7756   | 8.79464   | -0.931667  | 0.00380811 |
| ELK1          | 29.4598   | 29.9816   | 0.0253309  | 0.980049   |
| FXD5          | 496.164   | 462.027   | -0.102838  | 0.884758   |
| LAMTOR2       | 100.273   | 103.43    | 0.0447103  | 0.962709   |
| ZMYM4         | 3.64085   | 3.16451   | -0.202293  | 0.704283   |
| SH3BGRL2      | 1.48718   | 1.60631   | 0.111165   | 0.906271   |
| PLEKHB2       | 38.9693   | 39.3769   | 0.015013   | 0.98862    |
| TBC1D16       | 4.9748    | 4.41177   | -0.173283  | 0.7876     |
| HOXB2         | 21.7331   | 29.677    | 0.449448   | 0.207927   |
| RRBP1         | 17.0885   | 19.5505   | 0.194181   | 0.701667   |
| KIAA0753      | 2.47992   | 2.67903   | 0.111417   | 0.972727   |

|              |          |           |            |            |
|--------------|----------|-----------|------------|------------|
| C19orf24     | 122.729  | 166.78    | 0.442477   | 0.150319   |
| ZNF707       | 9.58628  | 13.7122   | 0.516422   | 0.151333   |
| FAM214B      | 4.20685  | 2.68346   | -0.648643  | 0.0832671  |
| CEP104       | 3.48998  | 3.62916   | 0.0564164  | 0.955293   |
| SMCR7L       | 10.2321  | 12.932    | 0.337854   | 0.326758   |
| BABAM1       | 56.192   | 43.0068   | -0.385801  | 0.243499   |
| DUSP22       | 13.1038  | 9.64563   | -0.442036  | 0.266976   |
| MRPL44       | 28.2729  | 27.4298   | -0.0436789 | 0.964843   |
| NFIC         | 9.73175  | 10.8862   | 0.161733   | 0.776184   |
| LPCAT1       | 30.9988  | 47.88     | 0.627212   | 0.0163491  |
| FAM118B      | 6.72886  | 10.582    | 0.653175   | 0.494605   |
| NR2C1        | 5.54122  | 3.97896   | -0.477812  | 0.218545   |
| ACYP1        | 13.7421  | 13.1057   | -0.0684024 | 0.954397   |
| C7orf49      | 22.2842  | 24.953    | 0.163195   | 0.804051   |
| IKBKAP       | 5.00743  | 5.97937   | 0.255923   | 0.545877   |
| CAB39        | 9.78505  | 10.8362   | 0.147211   | 0.805764   |
| NDFIP1       | 28.2943  | 24.4285   | -0.211945  | 0.642802   |
| ABCF1        | 14.0973  | 21.9306   | 0.637527   | 0.0143403  |
| CPSF3L       | 90.4382  | 71.6429   | -0.336109  | 0.456287   |
| NUDT13       | 0.889307 | 0.592975  | -0.584712  | 0.40838    |
| SLC11A2      | 7.22024  | 5.5156    | -0.388528  | 0.286272   |
| SH3GL1       | 69.2579  | 76.103    | 0.135976   | 0.822512   |
| HSD17B12     | 28.1395  | 20.4608   | -0.459735  | 0.116756   |
| PCDHA1,PCDHA | 0.15222  | 0.0573109 | -1.40927   | 1          |
| ZFPL1        | 39.4786  | 23.145    | -0.770372  | 0.00380811 |
| RREB1        | 2.99517  | 2.70089   | -0.149203  | 0.825017   |
| FAM184B      | 0.177583 | 0.509643  | 1.52099    | 0.0150346  |
| LSM10        | 64.4277  | 103.116   | 0.67852    | 0.0111246  |
| STX10        | 95.5967  | 97.7558   | 0.0322209  | 0.974348   |
| NCOA3        | 1.40709  | 1.54324   | 0.133255   | 0.864177   |
| RTN4R        | 16.3939  | 18.2411   | 0.154035   | 0.831491   |
| MYO19        | 13.1279  | 16.9986   | 0.372771   | 0.593856   |
| FUCA1        | 8.30775  | 8.55582   | 0.0424481  | 0.969826   |
| BCS1L        | 28.4835  | 29.5914   | 0.0550529  | 0.952429   |
| SOGA1        | 0.455801 | 0.482787  | 0.0829815  | 0.965318   |
| UTP6         | 22.237   | 23.2322   | 0.0631667  | 0.943284   |
| OTUD5        | 25.0264  | 25.3162   | 0.0166088  | 0.986916   |
| NDUFS3       | 106.329  | 117.682   | 0.14636    | 0.876392   |
| OTUD7A       | 0.144773 | 0.136721  | -0.0825559 | 1          |
| NAIP         | 0.534028 | 0.416103  | -0.359973  | 0.628025   |
| ACD          | 39.4326  | 46.1213   | 0.226045   | 0.6214     |
| STK24        | 38.1025  | 29.0191   | -0.392885  | 0.217192   |
| ARF5         | 313.242  | 293.895   | -0.0919765 | 0.901385   |
| ST3GAL2      | 3.88513  | 7.23681   | 0.897392   | 0.00153868 |
| LYPLA2       | 103.447  | 132.477   | 0.356841   | 0.288603   |
| GTF2H4       | 29.2691  | 34.1963   | 0.224457   | 0.633194   |
| CCSER2       | 1.81113  | 1.14314   | -0.66389   | 0.0324264  |
| AATF         | 52.0904  | 57.5855   | 0.144689   | 0.80233    |
| TOMM70A      | 20.3897  | 18.578    | -0.134244  | 0.831834   |

|          |            |           |             |            |
|----------|------------|-----------|-------------|------------|
| ATIC     | 75.9494    | 69.1117   | -0.13611    | 0.828851   |
| UVRAG    | 1.61115    | 1.42741   | -0.174696   | 0.824372   |
| ERLIN1   | 14.7261    | 11.4565   | -0.362208   | 0.301163   |
| TUBB4B   | 843.652    | 1811.2    | 1.10222     | 0.00153868 |
| TIAL1    | 18.1792    | 21.2398   | 0.224483    | 0.628025   |
| LDLR     | 13.5457    | 21.7384   | 0.682407    | 0.0111246  |
| RNGTT    | 3.05871    | 3.4609    | 0.178226    | 0.775951   |
| ACP1     | 66.4763    | 66.2037   | -0.00592816 | 0.995202   |
| LRRC8C   | 3.94952    | 3.90494   | -0.0163791  | 0.988974   |
| ENO4     | 0.182809   | 0.19403   | 0.0859382   | 1          |
| ZC3H12A  | 3.94361    | 5.31453   | 0.430426    | 0.35044    |
| WHSC1L1  | 4.96721    | 4.26097   | -0.221253   | 0.678561   |
| WARS2    | 5.52282    | 3.89235   | -0.504763   | 0.143573   |
| MR1      | 1.28844    | 0.492426  | -1.38765    | 0.00153868 |
| MYO1C    | 48.6514    | 44.297    | -0.13527    | 0.820487   |
| NAE1     | 48.5718    | 52.6735   | 0.11696     | 0.862262   |
| EIF5B    | 17.4296    | 31.931    | 0.873422    | 0.00153868 |
| CPEB2    | 0.168605   | 0.143291  | -0.2347     | 1          |
| CNIH4    | 138.724    | 117.549   | -0.238959   | 0.581794   |
| RABGGTB  | 66.3612    | 70.6536   | 0.0904227   | 0.901684   |
| SCRIB    | 37.799     | 60.4664   | 0.677787    | 0.00739414 |
| E2F8     | 1.06929    | 1.69524   | 0.664836    | 0.0976116  |
| GPR126   | 2.68528    | 2.43609   | -0.140504   | 0.844936   |
| SFXN4    | 57.3959    | 47.2949   | -0.279265   | 0.488843   |
| MAPK13   | 18.4369    | 10.0415   | -0.876614   | 0.00153868 |
| TPRKB    | 49.2277    | 50.3862   | 0.0335584   | 0.974777   |
| TOLLIP   | 26.2518    | 25.455    | -0.0444684  | 0.962173   |
| EBP      | 65.9794    | 85.0152   | 0.365704    | 0.273449   |
| PDHA1    | 32.0578    | 30.5208   | -0.0708859  | 0.934251   |
| ARHGAP1  | 20.0901    | 15.9822   | -0.330018   | 0.368309   |
| HHLA3    | 33.1884    | 26.2537   | -0.338156   | 0.424027   |
| DHX16    | 18.5322    | 19.181    | 0.0496462   | 0.96692    |
| TJAP1    | 17.8865    | 18.3153   | 0.034178    | 0.974073   |
| SERPINE1 | 462.422    | 404.534   | -0.192948   | 0.722603   |
| LATS2    | 3.66054    | 2.69314   | -0.442766   | 0.236137   |
| ARHGEF16 | 14.001     | 12.4064   | -0.174442   | 0.774237   |
| SYPL1    | 49.2078    | 48.3801   | -0.0244719  | 0.980136   |
| TMEM187  | 7.9268     | 1.97469   | -2.00511    | 0.00153868 |
| ORMDL3   | 17.3826    | 22.3515   | 0.362723    | 0.303477   |
| VPS29    | 50.5025    | 44.7599   | -0.174149   | 0.743519   |
| ENPP3    | 0.00471699 | 0         | #NAME?      | 1          |
| ARF3     | 45.8349    | 50.9088   | 0.151469    | 0.789735   |
| TMEM66   | 59.3547    | 42.7635   | -0.472983   | 0.246893   |
| GRPEL1   | 71.0711    | 108.221   | 0.606644    | 0.020985   |
| TMEM236  | 0.0523     | 0.0210993 | -1.30962    | 1          |
| TANGO6   | 2.80541    | 4.06261   | 0.534195    | 0.110167   |
| SERPINF2 | 0.159937   | 0.177923  | 0.153744    | 1          |
| SLC37A3  | 10.8282    | 10.0812   | -0.103137   | 0.888673   |
| ARHGAP26 | 0.419505   | 0.714089  | 0.767416    | 0.0456351  |

|                 |          |           |            |            |
|-----------------|----------|-----------|------------|------------|
| TMEM167A        | 8.01776  | 10.3463   | 0.367842   | 0.270846   |
| CELF1           | 20.2967  | 23.5889   | 0.216866   | 0.664806   |
| FTH1            | 643.108  | 566.319   | -0.183446  | 0.73069    |
| TMEM184C        | 3.98092  | 3.61866   | -0.137646  | 0.861006   |
| TMEM87B         | 3.30177  | 1.75892   | -0.908546  | 0.00153868 |
| UQCR11          | 85.6402  | 110.562   | 0.368489   | 0.26132    |
| PRPF4           | 17.7873  | 30.5888   | 0.782157   | 0.00153868 |
| NMRAL1          | 38.8987  | 29.7211   | -0.388235  | 0.690491   |
| UBE2T           | 48.8033  | 58.7096   | 0.266618   | 0.539268   |
| PRIM1           | 14.1104  | 6.873     | -1.03775   | 0.00153868 |
| EFCAB11         | 12.9694  | 8.16201   | -0.668116  | 0.104824   |
| LPCAT2          | 1.97012  | 1.64202   | -0.262816  | 0.637132   |
| MYL12B          | 598.021  | 575.287   | -0.0559141 | 0.952126   |
| ICK             | 2.06091  | 1.1854    | -0.797908  | 0.00897284 |
| NLE1            | 38.6358  | 38.5004   | -0.0050654 | 0.996405   |
| CMTM8           | 16.2888  | 14.0972   | -0.208472  | 0.745547   |
| FTSJ2           | 18.4552  | 25.5452   | 0.469021   | 0.136049   |
| TMEM189, TMEM1  | 85.4586  | 93.6134   | 0.131488   | 0.836683   |
| HMGCR           | 5.53305  | 7.35675   | 0.410994   | 0.22323    |
| MSANTD2         | 1.65184  | 2.52328   | 0.611229   | 0.200395   |
| TMEM14B         | 96.964   | 74.3307   | -0.383491  | 0.237712   |
| PPP6R2          | 13.4099  | 14.1205   | 0.0744957  | 0.960217   |
| LOC653712       | 0.239814 | 0.139684  | -0.779743  | 1          |
| ZCCHC17         | 15.1864  | 18.9443   | 0.318981   | 0.406256   |
| KRTCAP2         | 384.925  | 338.509   | -0.185381  | 0.716797   |
| EIF2B1          | 14.4813  | 23.1448   | 0.676501   | 0.139366   |
| CTBP2           | 14.9817  | 18.0341   | 0.267526   | 0.518575   |
| DGUOK           | 64.8542  | 62.1932   | -0.0604444 | 0.948523   |
| DNM1L           | 11.4507  | 12.5541   | 0.132721   | 0.83055    |
| ANAPC2          | 30.026   | 43.4049   | 0.531646   | 0.469232   |
| PALB2           | 3.47524  | 3.61625   | 0.0573839  | 0.954981   |
| VPS4B           | 9.68001  | 8.29133   | -0.223405  | 0.643713   |
| SLC35A4         | 26.1311  | 42.1732   | 0.690561   | 0.00380811 |
| LOC100506804    | 0.167399 | 0.0945438 | -0.82424   | 1          |
| UBP1            | 17.6698  | 25.6315   | 0.53663    | 0.0491395  |
| CCT6A           | 97.0139  | 170.899   | 0.816882   | 0.00274688 |
| DGAT1           | 33.8835  | 46.9589   | 0.470816   | 0.524051   |
| NT5C1B, NT5C1B- | 11.6149  | 13.0783   | 0.171196   | 0.784528   |
| OTUD6B          | 4.36484  | 7.61263   | 0.802466   | 0.00659556 |
| DNAJC10         | 7.00175  | 7.13311   | 0.0268161  | 0.978818   |
| GATC            | 8.51728  | 11.5392   | 0.438085   | 0.74504    |
| MRPS15          | 125.146  | 142.619   | 0.18855    | 0.700954   |
| NHP2            | 253.465  | 328.93    | 0.375993   | 0.250087   |
| PKDCC           | 7.52675  | 8.73523   | 0.214819   | 0.721967   |
| ATPIF1          | 301.668  | 314.138   | 0.0584341  | 0.952184   |
| LOC100505549    | 1.08663  | 0.70203   | -0.630261  | 0.342788   |
| MORF4L1         | 77.7859  | 79.8718   | 0.0381781  | 0.96875    |
| TPST2           | 15.9508  | 19.8729   | 0.317169   | 0.437301   |
| C2orf82         | 4.52635  | 4.8079    | 0.0870575  | 0.970185   |



|              |            |           |            |            |
|--------------|------------|-----------|------------|------------|
| ABCC11       | 0.0221724  | 0.0156728 | -0.500503  | 1          |
| FANCA        | 6.84733    | 10.4489   | 0.609733   | 0.384397   |
| C1D          | 21.9777    | 20.6713   | -0.0884091 | 0.913963   |
| TM2D2        | 9.69721    | 10.4672   | 0.110238   | 0.880774   |
| SUB1         | 29.711     | 39.2342   | 0.401114   | 0.206324   |
| NCSTN        | 24.2784    | 15.8114   | -0.618708  | 0.284835   |
| TGOLN2       | 14.9808    | 13.5775   | -0.141901  | 0.810212   |
| WDR5         | 45.5681    | 66.121    | 0.537085   | 0.0508243  |
| PREPL        | 4.91444    | 3.54941   | -0.469449  | 0.138406   |
| TMEM43       | 17.6811    | 22.8042   | 0.367089   | 0.272973   |
| ZKSCAN1      | 2.2148     | 1.20983   | -0.87237   | 0.00739414 |
| NSMCE1       | 82.8579    | 55.469    | -0.578959  | 0.0304296  |
| WDR43        | 23.7424    | 28.7549   | 0.276338   | 0.483696   |
| LPHN1        | 13.1978    | 15.1512   | 0.199133   | 0.684382   |
| ASB6         | 40.4612    | 69.3077   | 0.776476   | 0.0143403  |
| CMTM6        | 14.5289    | 17.0997   | 0.235047   | 0.599775   |
| MINPP1       | 7.21018    | 9.62319   | 0.416482   | 0.258496   |
| GPN2         | 28.2025    | 26.5093   | -0.0893254 | 0.91609    |
| SEPT2        | 46.7129    | 46.0868   | -0.0194678 | 0.990614   |
| PEPD         | 43.9257    | 49.1724   | 0.162785   | 0.768903   |
| CLTCL1       | 1.75246    | 1.03099   | -0.765353  | 0.0351856  |
| MAPRE2       | 3.10277    | 4.68416   | 0.594233   | 0.0609817  |
| INTS10       | 28.1023    | 38.3699   | 0.449289   | 0.123524   |
| JPH1         | 2.82593    | 4.30263   | 0.606493   | 0.0653297  |
| LOC100216545 | 1.85534    | 2.2715    | 0.291963   | 0.65387    |
| ZNF75D       | 1.16475    | 1.32295   | 0.183745   | 0.847054   |
| CDRT1        | 0.0479486  | 0.022249  | -1.10775   | 1          |
| ALG12        | 6.10984    | 7.54527   | 0.304437   | 0.547145   |
| TRABD        | 58.7143    | 81.2895   | 0.469357   | 0.107565   |
| TBRG1        | 4.73699    | 5.91871   | 0.321312   | 0.61482    |
| HMBS         | 25.1912    | 26.0874   | 0.0504327  | 0.959358   |
| CCDC77       | 3.41912    | 3.46759   | 0.020308   | 0.993587   |
| DNAJC24      | 2.99678    | 3.71369   | 0.309443   | 0.593222   |
| ARPC1A       | 126        | 126.259   | 0.00296409 | 0.997838   |
| CD276        | 24.7586    | 28.3204   | 0.193907   | 0.70088    |
| MRPS33       | 32.0734    | 25.9133   | -0.307683  | 0.492895   |
| FSD1L        | 1.27274    | 0.833967  | -0.609875  | 0.652401   |
| TOX4         | 10.5988    | 9.40806   | -0.171935  | 0.836801   |
| MKKS         | 13.3551    | 14.6111   | 0.129674   | 0.86364    |
| BICD2        | 10.5352    | 14.1871   | 0.429365   | 0.172285   |
| DTNBP1       | 21.8424    | 18.8189   | -0.214953  | 0.687264   |
| AP5B1        | 8.13238    | 8.86532   | 0.124494   | 0.853094   |
| CRYGS        | 1.89406    | 2.49376   | 0.396845   | 0.65998    |
| RGPD1,RGPD2  | 0.00208207 | 0         | #NAME?     | 1          |
| PAWR         | 16.5515    | 12.6859   | -0.38374   | 0.285666   |
| EIF2B5       | 22.1636    | 24.1326   | 0.122794   | 0.853574   |
| CORO1B       | 135.707    | 103.311   | -0.393492  | 0.215447   |
| KIF16B       | 1.5532     | 1.81731   | 0.226561   | 0.73154    |
| GLTPD2       | 0.478409   | 0.575151  | 0.265697   | 0.934604   |

|          |           |           |            |            |
|----------|-----------|-----------|------------|------------|
| TMEM120B | 7.35889   | 11.0258   | 0.58332    | 0.551472   |
| SLC2A8   | 26.6708   | 30.8117   | 0.208217   | 0.692701   |
| DDX19B   | 11.8959   | 7.76886   | -0.614685  | 0.048028   |
| CADM4    | 12.9861   | 12.1405   | -0.0971387 | 0.908026   |
| SSRP1    | 113.091   | 105.608   | -0.098764  | 0.891606   |
| HGS      | 87.5439   | 54.8343   | -0.67493   | 0.00897284 |
| SYCE3    | 0.591433  | 0.232543  | -1.34672   | 0.54637    |
| TRUB2    | 74.8073   | 72.6952   | -0.0413185 | 0.965163   |
| SPEF2    | 0.605433  | 0.24031   | -1.33307   | 0.0181648  |
| CBFB     | 17.7705   | 24.8439   | 0.483407   | 0.0907094  |
| HTRA2    | 19.6607   | 21.8878   | 0.154808   | 0.954535   |
| PITPNM2  | 2.75467   | 2.78972   | 0.0182409  | 0.988433   |
| SH3RF1   | 1.96988   | 1.93279   | -0.0274239 | 0.981441   |
| PSMB1    | 232.175   | 247.669   | 0.0932023  | 0.90073    |
| MPZL1    | 15.5527   | 23.6813   | 0.606582   | 0.0232503  |
| DUSP6    | 20.2642   | 13.3791   | -0.598951  | 0.0304296  |
| SUPT6H   | 18.1458   | 18.6038   | 0.0359587  | 0.96875    |
| GTPBP4   | 58.0696   | 75.7084   | 0.38267    | 0.239607   |
| POLR2I   | 100.12    | 95.1668   | -0.0731943 | 0.961459   |
| RNF14    | 5.88719   | 5.33944   | -0.140893  | 0.835405   |
| ZNF710   | 8.06388   | 10.845    | 0.427477   | 0.188839   |
| DARS2    | 6.47404   | 5.50072   | -0.235044  | 0.640258   |
| TMED5    | 8.29994   | 10.8895   | 0.39177    | 0.22492    |
| LIN9     | 1.8636    | 1.76269   | -0.0803141 | 0.943154   |
| ZNF524   | 28.7665   | 16.5855   | -0.794464  | 0.0123712  |
| BTG3     | 28.3278   | 29.2471   | 0.046071   | 0.961952   |
| DNASE1L2 | 2.15935   | 2.81884   | 0.384501   | 0.683647   |
| PMM1     | 56.3837   | 28.0224   | -1.0087    | 0.00153868 |
| C11orf16 | 0.0278863 | 0.0232011 | -0.265366  | 1          |
| OGDH     | 7.47801   | 8.46865   | 0.179478   | 0.746159   |
| LOC93622 | 22.5695   | 32.1191   | 0.509057   | 0.0840806  |
| N4BP2L2  | 13.9731   | 13.0911   | -0.0940641 | 0.919029   |
| TP53     | 26.7993   | 15.1801   | -0.820011  | 0.0338188  |
| RIPK1    | 6.64982   | 6.75526   | 0.022696   | 0.981602   |
| TFAP4    | 17.3445   | 15.1971   | -0.19068   | 0.744254   |
| CLTA     | 289.472   | 245.684   | -0.23662   | 0.600049   |
| MBD1     | 15.3785   | 14.6637   | -0.068659  | 0.939323   |
| TRMT10A  | 0.587044  | 0.667064  | 0.184356   | 0.869722   |
| ZNF165   | 8.95095   | 4.12468   | -1.11776   | 0.00153868 |
| FBXO32   | 1.94743   | 0.565008  | -1.78523   | 0.00153868 |
| BTRC     | 2.93245   | 3.49156   | 0.251762   | 0.600049   |
| LANCL2   | 2.66567   | 4.22077   | 0.663008   | 0.0351856  |
| DCLRE1A  | 2.83265   | 2.18026   | -0.377653  | 0.378455   |
| TNK1     | 10.0441   | 9.31841   | -0.108192  | 0.967343   |
| PRKAR1B  | 20.2686   | 30.1254   | 0.571733   | 0.267544   |
| UCK1     | 46.4576   | 57.0234   | 0.295639   | 0.580385   |
| DHX36    | 7.22898   | 6.38264   | -0.179639  | 0.751293   |
| SPHK1    | 237.967   | 310.65    | 0.38453    | 0.231572   |
| PIWIL4   | 0.458801  | 0.471318  | 0.0388302  | 0.98206    |

|           |            |            |            |            |
|-----------|------------|------------|------------|------------|
| RHBDF2    | 6.17825    | 6.29223    | 0.0263733  | 0.981441   |
| TLCD2     | 1.54128    | 0.700163   | -1.13836   | 0.00153868 |
| MRPS31    | 9.36221    | 7.31607    | -0.355781  | 0.421289   |
| C14orf101 | 3.66157    | 2.24835    | -0.703593  | 0.0285456  |
| CDC23     | 8.79068    | 8.28543    | -0.0853985 | 0.950837   |
| MZF1      | 12.7909    | 10.1829    | -0.328973  | 0.48457    |
| FBXO9     | 6.55156    | 7.24407    | 0.144964   | 0.810769   |
| GTF3C1    | 7.00994    | 8.08244    | 0.205389   | 0.679486   |
| UBAP2     | 7.23338    | 8.92359    | 0.302955   | 0.431385   |
| MRPL14    | 128.423    | 200.384    | 0.641857   | 0.0103919  |
| TAF6L     | 11.3442    | 11.7401    | 0.0494857  | 0.963969   |
| DOT1L     | 7.78836    | 8.77046    | 0.171331   | 0.758449   |
| FAM43A    | 3.53045    | 3.05995    | -0.206347  | 0.802177   |
| SPCS2     | 27.8127    | 31.6117    | 0.184717   | 0.718323   |
| RBM17     | 38.3199    | 45.0284    | 0.23274    | 0.59519    |
| SPCS3     | 16.1725    | 20.9003    | 0.36998    | 0.253241   |
| DUSP28    | 3.07715    | 2.85225    | -0.109494  | 0.945688   |
| MTAP      | 35.1054    | 43.7296    | 0.31692    | 0.388367   |
| GINS2     | 26.2661    | 45.7835    | 0.801627   | 0.00153868 |
| LOC113230 | 4.21534    | 4.89318    | 0.215122   | 0.858729   |
| GBP3      | 1.67465    | 2.55943    | 0.611964   | 0.108871   |
| KIAA0247  | 1.86837    | 2.1352     | 0.192586   | 0.786188   |
| TECPR1    | 5.2717     | 4.28278    | -0.29972   | 0.497598   |
| PXN       | 115.761    | 92.1708    | -0.328766  | 0.363587   |
| EMC1      | 5.759      | 6.20943    | 0.108642   | 0.881554   |
| FAM65A    | 20.1431    | 24.369     | 0.274755   | 0.472728   |
| ANKFN1    | 0.0831031  | 0.00356286 | -4.54379   | 1          |
| CSRP1     | 97.9558    | 102.505    | 0.06549    | 0.942184   |
| ALG10B    | 0.543162   | 0.310867   | -0.805084  | 0.0416082  |
| LSM3      | 106.406    | 125.798    | 0.241537   | 0.581567   |
| SRGAP1    | 0.475184   | 0.389071   | -0.288452  | 0.703707   |
| FBXL12    | 13.4036    | 11.1274    | -0.268498  | 0.592657   |
| PRR19     | 7.6244     | 10.7765    | 0.499192   | 0.750643   |
| CD9       | 291.737    | 211.525    | -0.463839  | 0.108871   |
| KHK       | 6.58386    | 13.273     | 1.01148    | 0.038486   |
| ARGFX     | 0.00317572 | 0.00164204 | -0.951597  | 1          |
| TMEM127   | 10.6464    | 11.3456    | 0.091761   | 0.906423   |
| RRP1      | 56.1915    | 91.8505    | 0.708935   | 0.00153868 |
| SLC22A23  | 1.72974    | 1.6017     | -0.110946  | 0.909496   |
| ATP6V0E1  | 221.659    | 269.91     | 0.284139   | 0.444284   |
| FAM213B   | 21.5548    | 34.6333    | 0.684151   | 0.0253664  |
| CIRH1A    | 40.3544    | 42.688     | 0.0811029  | 0.916372   |
| COA4      | 109.927    | 150.062    | 0.449011   | 0.20116    |
| NRN1L     | 0.377854   | 0.479679   | 0.344239   | 0.930173   |
| C2orf47   | 20.6425    | 24.0421    | 0.219945   | 0.75717    |
| PSMD13    | 119.278    | 129.122    | 0.114402   | 0.866988   |
| HSPA12B   | 0.0934468  | 0.434079   | 2.21574    | 0.0647668  |
| SLC25A35  | 1.74571    | 1.45809    | -0.259726  | 0.951272   |
| DLG5-AS1  | 0.777619   | 0.547215   | -0.506957  | 0.495723   |

|                  |            |           |              |            |
|------------------|------------|-----------|--------------|------------|
| UBE2D3           | 124.277    | 130.486   | 0.0703349    | 0.934861   |
| MRPL40           | 86.0001    | 70.6376   | -0.283902    | 0.480807   |
| RFWD3            | 9.32957    | 9.24429   | -0.0132486   | 0.990675   |
| ZNF384           | 15.6639    | 15.6606   | -0.000306277 | 0.999234   |
| ZNF768           | 52.2245    | 45.235    | -0.207285    | 0.659482   |
| ATP5J2,ATP5J2-F  | 780.767    | 904.501   | 0.21223      | 0.810757   |
| EMC4             | 97.473     | 96.7462   | -0.0107971   | 0.993157   |
| SART3            | 12.3285    | 14.1616   | 0.199983     | 0.681681   |
| AKTIP            | 6.34002    | 4.0154    | -0.658943    | 0.211369   |
| CSK              | 78.0311    | 100.48    | 0.364788     | 0.265185   |
| EPGN             | 0.0218161  | 0         | #NAME?       | 1          |
| POLE             | 6.15112    | 7.14879   | 0.216849     | 0.652628   |
| MRS2             | 10.0552    | 13.6667   | 0.442725     | 0.145411   |
| RBPM5            | 29.8181    | 18.7529   | -0.669076    | 0.0605998  |
| NR5A1            | 0.0407673  | 0.0291316 | -0.48483     | 1          |
| SCRN3            | 1.52748    | 1.09042   | -0.486265    | 0.347606   |
| MTMR9            | 1.27597    | 1.34348   | 0.0743758    | 0.945336   |
| SNHG9            | 64.8337    | 129.39    | 0.996907     | 0.0117316  |
| CCDC111          | 2.42557    | 1.34812   | -0.847374    | 0.463667   |
| RBM12B-AS1       | 1.01456    | 1.15975   | 0.19295      | 0.975654   |
| BCL9             | 1.68697    | 1.65294   | -0.0294001   | 0.980052   |
| PAQR3            | 4.9797     | 6.71699   | 0.431756     | 0.203128   |
| LMAN2L           | 6.90484    | 10.7014   | 0.632117     | 0.0338188  |
| TRIM11           | 21.3628    | 24.7082   | 0.209889     | 0.674634   |
| UBE2I            | 85.6333    | 70.7396   | -0.275654    | 0.491782   |
| TRIM24           | 4.01391    | 3.0549    | -0.393883    | 0.307984   |
| NSRP1            | 8.64186    | 7.34974   | -0.233648    | 0.632457   |
| RTN3             | 55.7688    | 48.8936   | -0.189814    | 0.711178   |
| ZNF569           | 0.00813219 | 0.0157741 | 0.955844     | 1          |
| KRT7             | 3.87255    | 3.24025   | -0.257181    | 0.767223   |
| CCDC12           | 40.9375    | 53.0317   | 0.37343      | 0.50844    |
| LIMS1            | 3.79037    | 3.36072   | -0.173568    | 0.788938   |
| MTHFS,ST20,ST2   | 19.6579    | 23.3618   | 0.249047     | 0.797899   |
| NUS1             | 12.2139    | 18.3921   | 0.590565     | 0.0187307  |
| HCFC1            | 9.35427    | 14.69     | 0.651142     | 0.00820276 |
| SLC25A5          | 533.4      | 455.439   | -0.22796     | 0.619728   |
| SPATA13          | 1.66272    | 2.43057   | 0.547746     | 0.101333   |
| MED20            | 3.76015    | 2.42207   | -0.634547    | 0.0832671  |
| MED29            | 10.1918    | 9.53602   | -0.0959468   | 0.900639   |
| PHLPP2           | 1.42253    | 2.22955   | 0.648287     | 0.034328   |
| NOTCH1           | 7.11786    | 11.1356   | 0.645659     | 0.0143403  |
| PGM2L1           | 0.428276   | 0.407322  | -0.0723705   | 0.957857   |
| GSTO1            | 708.68     | 513.22    | -0.465557    | 0.121135   |
| CCDC69           | 4.26043    | 4.33823   | 0.0261094    | 0.981543   |
| KIAA0368         | 20.0524    | 17.7581   | -0.175296    | 0.745874   |
| BTN2A2           | 3.18353    | 2.58227   | -0.301987    | 0.583112   |
| C20orf24,TGIF2,T | 88.2484    | 146.084   | 0.727154     | 0.0143403  |
| URM1             | 80.3087    | 75.637    | -0.0864637   | 0.911227   |
| BEND3            | 1.51843    | 2.7231    | 0.842676     | 0.00739414 |

|              |            |          |            |            |
|--------------|------------|----------|------------|------------|
| VEGFA        | 24.0174    | 14.63    | -0.715151  | 0.00274688 |
| PRSS23       | 3.22343    | 3.47341  | 0.107758   | 0.900659   |
| C1orf112     | 3.14866    | 2.48607  | -0.340872  | 0.522408   |
| CNPY4        | 1.86286    | 2.71176  | 0.541711   | 0.964843   |
| REPIN1       | 114.406    | 118.188  | 0.0469218  | 0.960032   |
| TADA2A       | 4.22432    | 2.40242  | -0.814231  | 0.0429833  |
| DYNLT1       | 93.8312    | 83.7736  | -0.163571  | 0.773952   |
| WDR74        | 66.114     | 90.3701  | 0.450891   | 0.129711   |
| LOC152217    | 28.5481    | 32.9701  | 0.207765   | 0.684018   |
| PPIB         | 686.778    | 794.21   | 0.209677   | 0.664979   |
| EIF3I        | 258.581    | 256.705  | -0.0105041 | 0.992797   |
| AGPS         | 4.0623     | 4.21883  | 0.0545447  | 0.953159   |
| FAM58A       | 39.8021    | 63.8317  | 0.68143    | 0.00820276 |
| PRDX2        | 611.984    | 692.293  | 0.177889   | 0.738519   |
| HMGXB3       | 16.0652    | 16.1388  | 0.00659539 | 0.994734   |
| TET3         | 1.15992    | 1.29658  | 0.160679   | 0.82965    |
| PMPCA        | 148.763    | 207.267  | 0.478474   | 0.100178   |
| CDC25B       | 22.1136    | 20.5448  | -0.106156  | 0.885653   |
| ZNF720       | 2.37397    | 1.82541  | -0.379079  | 0.461654   |
| PRPF31       | 52.6402    | 69.808   | 0.407226   | 0.231051   |
| PIN1         | 95.7666    | 85.2599  | -0.167656  | 0.764196   |
| PSMD2        | 344.435    | 310.289  | -0.150621  | 0.810133   |
| LINC00857    | 1.12191    | 0.630517 | -0.831346  | 0.13407    |
| WDR70        | 9.78885    | 6.79988  | -0.52563   | 0.0981523  |
| RNMTL1       | 31.2774    | 40.3322  | 0.366814   | 0.532767   |
| LMNB2        | 46.7349    | 63.5492  | 0.443373   | 0.141952   |
| ATG9A        | 25.514     | 21.7092  | -0.232979  | 0.600595   |
| TMA16        | 12.4146    | 12.6474  | 0.0268073  | 0.98003    |
| ZZEF1        | 1.87451    | 1.91537  | 0.0311034  | 0.977897   |
| FLJ37505     | 0.00781153 | 0        | #NAME?     | 1          |
| PLK1         | 68.3776    | 82.2634  | 0.266727   | 0.520721   |
| ATP11A       | 2.38079    | 2.52514  | 0.0849257  | 0.925194   |
| NFXL1        | 3.88515    | 3.07549  | -0.337154  | 0.437301   |
| ARFGAP1      | 31.0895    | 40.4207  | 0.378669   | 0.249717   |
| CARD10       | 7.67319    | 6.55469  | -0.227298  | 0.688971   |
| DCAF13       | 54.0634    | 78.6818  | 0.541377   | 0.127176   |
| NUP160       | 6.71043    | 6.73987  | 0.00631507 | 0.994734   |
| FBLL1        | 0.346919   | 0.686038 | 0.983689   | 0.527665   |
| TFPI         | 26.7763    | 13.2655  | -1.01328   | 0.00153868 |
| MGAT5        | 4.19035    | 5.03762  | 0.265673   | 0.522516   |
| NAGA         | 12.756     | 8.5859   | -0.571133  | 0.0460785  |
| SEMA6B       | 19.1239    | 14.5215  | -0.397181  | 0.245022   |
| KCNN4        | 19.6975    | 12.579   | -0.646992  | 0.0285456  |
| PIGS         | 19.4392    | 17.8576  | -0.122426  | 0.859038   |
| ALKBH8       | 1.07023    | 1.20225  | 0.167824   | 0.852039   |
| C4orf21      | 0.582276   | 0.434364 | -0.422801  | 0.774294   |
| LOC100133315 | 0.417739   | 0.465485 | 0.156133   | 0.947681   |
| C1orf35      | 32.011     | 50.1648  | 0.648107   | 0.0198871  |
| ASB16        | 0.27106    | 0.320884 | 0.243439   | 1          |

|              |            |            |            |            |
|--------------|------------|------------|------------|------------|
| NFIB         | 2.65795    | 2.46496    | -0.108753  | 0.886331   |
| NOL7         | 124.557    | 142.828    | 0.197463   | 0.691509   |
| BCORL1       | 2.82766    | 3.25698    | 0.203922   | 0.727839   |
| CAPS2        | 0.0520307  | 0.030052   | -0.791902  | 1          |
| UGGT1        | 3.91324    | 3.577      | -0.129614  | 0.839812   |
| LMNB1        | 11.0805    | 20.548     | 0.890976   | 0.00153868 |
| RECQL4       | 28.0524    | 45.2088    | 0.688479   | 0.00739414 |
| METRNL       | 63.3894    | 61.0917    | -0.0532667 | 0.954349   |
| C3orf62      | 2.86784    | 2.95811    | 0.0447116  | 0.968712   |
| RECQL        | 5.83943    | 4.94239    | -0.240619  | 0.713282   |
| POLR3C       | 15.9291    | 8.65062    | -0.88079   | 0.00153868 |
| PGGT1B       | 4.41482    | 3.87691    | -0.187449  | 0.773159   |
| G3BP1        | 38.9575    | 66.9927    | 0.782104   | 0.00153868 |
| DNAJC13      | 2.69305    | 2.09151    | -0.364698  | 0.345746   |
| BECN1        | 21.4457    | 19.5342    | -0.134685  | 0.836427   |
| LOC100507140 | 0.00971245 | 0.00566371 | -0.778087  | 1          |
| TOR1AIP2     | 20.655     | 17.7731    | -0.216803  | 0.642161   |
| CRIP1        | 8.04432    | 7.28515    | -0.143011  | 0.852718   |
| PLIN5        | 1.35502    | 0.438253   | -1.62848   | 0.00897284 |
| UBE2E1       | 77.7861    | 55.2365    | -0.493892  | 0.0851513  |
| CENPL        | 4.23721    | 2.97293    | -0.511226  | 0.208318   |
| E2F6         | 8.72378    | 10.5129    | 0.269131   | 0.530199   |
| LRTOMT       | 1.34462    | 0.808992   | -0.732997  | 0.86364    |
| BCAP31       | 258.102    | 278.692    | 0.110731   | 0.875573   |
| MED25        | 22.5888    | 17.9498    | -0.331642  | 0.401008   |
| MINOS1P1     | 0.0368879  | 0.0276841  | -0.414091  | 1          |
| UBE2K        | 15.4337    | 18.164     | 0.234992   | 0.604499   |
| GLIPR1L1     | 0.026329   | 0.0233374  | -0.174008  | 1          |
| SSR2         | 335.107    | 339.897    | 0.0204752  | 0.983165   |
| PARP1        | 27.9828    | 33.79      | 0.272054   | 0.500234   |
| GEMIN4       | 21.1862    | 30.2657    | 0.514559   | 0.0723025  |
| LARS2        | 6.18442    | 6.82248    | 0.141659   | 0.83055    |
| CPS1         | 0.725263   | 0.2274     | -1.67327   | 0.00153868 |
| AMBRA1       | 6.10193    | 5.59174    | -0.125967  | 0.86364    |
| LARP1        | 27.4547    | 36.6698    | 0.417538   | 0.188839   |
| SCARNA4      | 2.15924    | 0          | #NAME?     | 1          |
| FAM227A      | 0.196984   | 0.259811   | 0.399383   | 1          |
| RBBP9        | 3.04091    | 2.26083    | -0.427653  | 0.306888   |
| PLD6         | 15.0763    | 17.7409    | 0.234803   | 0.622994   |
| CLDN6        | 0.122992   | 0.125037   | 0.0237988  | 1          |
| TMEM236      | 0.00720704 | 0.00369895 | -0.962292  | 1          |
| SMPD2        | 12.0037    | 16.2416    | 0.436207   | 0.253875   |
| E2F3         | 4.05309    | 5.38512    | 0.409958   | 0.252411   |
| STS          | 0.276579   | 0.505535   | 0.870117   | 0.0738934  |
| CD274        | 0.768977   | 0.660052   | -0.22036   | 0.821569   |
| BTF3L4       | 16.0843    | 9.55866    | -0.750774  | 0.00380811 |
| NDUFA9       | 54.9802    | 55.0707    | 0.00237389 | 0.998382   |
| PPM1H        | 1.57389    | 0.93451    | -0.752051  | 0.0347593  |
| CAMSAP3      | 12.6802    | 14.6542    | 0.208727   | 0.693923   |

|           |           |           |            |            |
|-----------|-----------|-----------|------------|------------|
| PCNXL2    | 1.16985   | 0.694639  | -0.751988  | 0.0596515  |
| CCDC167   | 22.4542   | 23.1582   | 0.0445359  | 0.971057   |
| TTC5      | 10.8066   | 10.569    | -0.0320745 | 0.977648   |
| ARGLU1    | 41.9445   | 51.767    | 0.30355    | 0.419619   |
| ZNHIT2    | 27.7551   | 34.3258   | 0.306538   | 0.522524   |
| SRPR      | 26.2336   | 31.3757   | 0.258236   | 0.604499   |
| PTOV1-AS1 | 2.40356   | 2.81791   | 0.229455   | 0.947795   |
| GLCE      | 1.11093   | 1.17078   | 0.0756931  | 0.952114   |
| BCL10     | 31.7537   | 16.9771   | -0.903336  | 0.00153868 |
| C7orf41   | 3.52043   | 2.3664    | -0.573059  | 0.0650492  |
| NUDT9     | 7.6052    | 9.86713   | 0.375645   | 0.30134    |
| ZNF425    | 0.819431  | 0.44908   | -0.867651  | 0.138121   |
| NUBP2     | 106.301   | 124.92    | 0.232848   | 0.601696   |
| SLC7A6    | 5.18853   | 8.62947   | 0.733945   | 0.0264621  |
| EVA1B     | 28.5423   | 33.4201   | 0.227616   | 0.70639    |
| LINC00294 | 2.87721   | 3.57353   | 0.312676   | 0.531341   |
| SMG5      | 17.8541   | 33.7485   | 0.918564   | 0.00153868 |
| MAP3K13   | 9.93497   | 8.65433   | -0.199093  | 0.739297   |
| LYSMD2    | 11.6783   | 17.9462   | 0.619848   | 0.0410754  |
| DGCR10    | 0.0230426 | 0.0410892 | 0.834454   | 1          |
| PCDHB10   | 0.398066  | 0.138743  | -1.52059   | 0.0447624  |
| USF1      | 21.7662   | 35.8851   | 0.721297   | 0.00572929 |
| HDAC1     | 67.5052   | 66.0529   | -0.0313763 | 0.975492   |
| ASCC2     | 21.7244   | 19.9464   | -0.12319   | 0.854729   |
| LINC00467 | 10.4348   | 4.92028   | -1.08459   | 0.00659556 |
| DUSP16    | 2.71066   | 1.78163   | -0.605447  | 0.055778   |
| DNA2      | 0.998727  | 1.45552   | 0.543374   | 0.212956   |
| C19orf66  | 8.58892   | 11.5662   | 0.429368   | 0.317796   |
| FABP6     | 8.45412   | 5.64498   | -0.582685  | 0.274831   |
| SNRNP40   | 41.8916   | 45.4124   | 0.116425   | 0.868033   |
| EIF4G3    | 3.68419   | 3.60039   | -0.0331951 | 0.975484   |
| SPHK2     | 9.78533   | 10.1025   | 0.0460151  | 0.994204   |
| CWC27     | 10.0703   | 7.77511   | -0.373167  | 0.317314   |
| KRCC1     | 3.73427   | 1.38175   | -1.43433   | 0.00153868 |
| NPIP      | 50.6591   | 44.5194   | -0.186388  | 0.727665   |
| STK38     | 5.22638   | 7.50428   | 0.521902   | 0.0933464  |
| MACF1     | 4.72987   | 3.70597   | -0.351948  | 0.324946   |
| GNA15     | 8.09905   | 11.1969   | 0.467275   | 0.210317   |
| GPR107    | 16.1773   | 12.3479   | -0.389703  | 0.222215   |
| RBM10     | 39.1149   | 28.0192   | -0.481302  | 0.0999674  |
| WDTC1     | 1.13264   | 0.847883  | -0.41775   | 0.497279   |
| GPR1      | 0.0567727 | 0.0241332 | -1.23418   | 1          |
| TTC31     | 5.43846   | 4.20468   | -0.371203  | 0.722089   |
| PUF60     | 224.431   | 321.75    | 0.519665   | 0.073625   |
| PRKCSH    | 248.885   | 183.391   | -0.440555  | 0.138646   |
| RDH13     | 9.46422   | 17.8799   | 0.917785   | 0.00153868 |
| ANKRD13B  | 9.69856   | 19.005    | 0.97054    | 0.00153868 |
| ZNF317    | 10.2786   | 9.40515   | -0.128121  | 0.852718   |
| FAM22G    | 0.117158  | 0.24175   | 1.04506    | 1          |

|           |            |            |            |            |
|-----------|------------|------------|------------|------------|
| SQLE      | 18.297     | 33.8304    | 0.886715   | 0.00153868 |
| ELAC2     | 31.8425    | 44.7403    | 0.490622   | 0.094542   |
| SPATA2    | 4.97707    | 8.00609    | 0.685801   | 0.0117316  |
| CHCHD10   | 345.436    | 367.884    | 0.0908332  | 0.903223   |
| CHST6     | 0.0269003  | 0.0293467  | 0.125577   | 1          |
| RGL1      | 0.353858   | 0.307246   | -0.203777  | 1          |
| PRR7-AS1  | 0.8052     | 0.782512   | -0.0412354 | 0.997479   |
| ADO       | 8.04662    | 9.9146     | 0.301171   | 0.450707   |
| KRT10     | 16.0461    | 19.5107    | 0.282044   | 0.628907   |
| TTC26     | 2.46428    | 2.03125    | -0.278796  | 0.688049   |
| PAFAH2    | 3.42611    | 3.22705    | -0.0863583 | 0.933369   |
| FGFBP3    | 1.7192     | 2.10588    | 0.292684   | 0.694688   |
| AGPAT5    | 10.3119    | 11.6949    | 0.181566   | 0.727236   |
| COPS5     | 68.9878    | 58.3824    | -0.240807  | 0.567515   |
| RELB      | 12.6834    | 17.3544    | 0.452357   | 0.209241   |
| PAG1      | 0.0726773  | 0.0384754  | -0.917569  | 1          |
| ACADM     | 12.2896    | 11.1339    | -0.14247   | 0.824372   |
| C1orf27   | 3.21779    | 2.71976    | -0.242593  | 0.879055   |
| LRRK1     | 1.32718    | 1.29597    | -0.0343256 | 0.978818   |
| URI1      | 13.4435    | 15.0552    | 0.163354   | 0.774294   |
| LOC338758 | 0.0297347  | 0.0241837  | -0.298113  | 1          |
| USP43     | 1.25288    | 1.19968    | -0.0626014 | 0.965886   |
| MBTPS1    | 16.1826    | 14.7704    | -0.131737  | 0.836347   |
| CWC25     | 6.68285    | 7.24764    | 0.117048   | 0.876392   |
| ZNF362    | 2.50168    | 1.68041    | -0.574088  | 0.241211   |
| BYSL      | 40.21      | 59.4618    | 0.564409   | 0.0410754  |
| HEATR5A   | 0.855991   | 1.044      | 0.286448   | 0.614872   |
| DDR1      | 10.7105    | 11.492     | 0.101602   | 0.899607   |
| PGBD2     | 1.92335    | 2.09698    | 0.124689   | 0.915089   |
| MAGT1     | 8.94375    | 8.53902    | -0.0668092 | 0.938543   |
| BOP1      | 78.8608    | 142.352    | 0.852081   | 0.00153868 |
| LDLRAP1   | 9.53558    | 10.6344    | 0.157347   | 0.80636    |
| SCAF1     | 17.6799    | 23.2818    | 0.397087   | 0.219046   |
| GRB2      | 41.1404    | 49.4161    | 0.264425   | 0.51289    |
| KLHL8     | 1.56273    | 1.45476    | -0.10329   | 0.916584   |
| LACTB2    | 17.7892    | 10.0527    | -0.823413  | 0.00274688 |
| CCDC88B   | 5.48201    | 2.97089    | -0.883809  | 0.00897284 |
| PLEKHA3   | 6.68019    | 5.42864    | -0.2993    | 0.8041     |
| LIMD1     | 4.90826    | 6.67554    | 0.443674   | 0.265388   |
| C7        | 0.00412418 | 0.00214023 | -0.94634   | 1          |
| MRPL34    | 92.8241    | 132.835    | 0.51706    | 0.0621442  |
| DMWD      | 10.8731    | 10.4434    | -0.0581706 | 0.952184   |
| PPP1R37   | 12.586     | 11.6831    | -0.107403  | 0.893674   |
| MAP3K11   | 18.3865    | 25.8291    | 0.490354   | 0.0910503  |
| WAPAL     | 5.58032    | 6.65901    | 0.254961   | 0.542814   |
| NRD1      | 24.6102    | 19.0093    | -0.372555  | 0.415392   |
| CAGE1     | 0.00515192 | 0          | #NAME?     | 1          |
| CYP2U1    | 2.11457    | 1.3922     | -0.603001  | 0.104245   |
| PINX1     | 14.3964    | 21.8925    | 0.604727   | 0.0438785  |



|              |            |           |             |            |
|--------------|------------|-----------|-------------|------------|
| SPOCD1       | 13.3748    | 10.3045   | -0.376246   | 0.283754   |
| ZIC5         | 1.50993    | 1.45999   | -0.0485268  | 0.970539   |
| MLANA        | 0.0122304  | 0.0147717 | 0.272369    | 1          |
| UBE2N        | 43.3918    | 65.8699   | 0.602196    | 0.0181648  |
| FDPS         | 73.8131    | 86.499    | 0.228806    | 0.749043   |
| UCA1         | 13.1639    | 6.68232   | -0.978164   | 0.00153868 |
| LOC100134229 | 4.6686     | 2.10645   | -1.14818    | 0.00153868 |
| FCF1         | 12.2225    | 12.1428   | -0.00943551 | 0.994068   |
| C9orf142     | 162.372    | 204.459   | 0.332508    | 0.339092   |
| WFS1         | 13.9203    | 15.2085   | 0.127683    | 0.856812   |
| ALAS1        | 32.4864    | 37.0643   | 0.190194    | 0.706481   |
| LINC00515    | 0.293639   | 0.246038  | -0.25516    | 1          |
| KIAA1524     | 2.15085    | 3.72215   | 0.791228    | 0.0484091  |
| LETM1        | 14.9453    | 26.7246   | 0.838477    | 0.00153868 |
| MUL1         | 19.6743    | 15.6733   | -0.328003   | 0.396533   |
| LEMD2        | 27.7622    | 20.757    | -0.419528   | 0.186094   |
| CSNK1A1      | 34.604     | 22.0783   | -0.648311   | 0.0103919  |
| CYB5B        | 12.4774    | 14.8796   | 0.254021    | 0.539297   |
| HMG3         | 26.4687    | 30.0336   | 0.182288    | 0.762698   |
| METTL5       | 67.5722    | 41.3703   | -0.707835   | 0.324591   |
| FAM83D       | 16.5734    | 22.0924   | 0.414681    | 0.213961   |
| RAB5C        | 82.2935    | 107.549   | 0.386139    | 0.224562   |
| ACVR1B       | 6.83638    | 5.61846   | -0.283058   | 0.514736   |
| EVI5L        | 7.24773    | 4.51612   | -0.682446   | 0.0399087  |
| ZNF662       | 0.00297086 | 0         | #NAME?      | 1          |
| ELP6         | 29.5572    | 31.5339   | 0.0933949   | 0.904905   |
| RPN2         | 84.916     | 84.5211   | -0.00672433 | 0.994593   |
| MTBP         | 2.66885    | 2.40166   | -0.152189   | 0.969667   |
| CIAPIN1      | 25.8312    | 38.3299   | 0.569357    | 0.140686   |
| INO80        | 3.54778    | 3.83742   | 0.113221    | 0.880754   |
| DONSON       | 11.1542    | 11.5883   | 0.0550732   | 0.954501   |
| LOC643837    | 2.3542     | 3.55565   | 0.594876    | 0.0717202  |
| NPDC1        | 290.718    | 276.387   | -0.0729313  | 0.931668   |
| REXO1        | 16.1736    | 17.7232   | 0.131996    | 0.838491   |
| ZNF697       | 1.89077    | 2.12475   | 0.168319    | 0.827336   |
| OS9          | 64.6074    | 52.7274   | -0.293147   | 0.449713   |
| MRPL35       | 11.3827    | 12.9451   | 0.185565    | 0.765267   |
| BRSK1        | 10.1049    | 8.39587   | -0.267309   | 0.601696   |
| MTRNR2L6     | 0.930966   | 0.59021   | -0.657499   | 0.368826   |
| DAGLB        | 22.5164    | 16.2906   | -0.466942   | 0.140535   |
| MAN2A1       | 0.630234   | 0.545137  | -0.209267   | 0.840893   |
| DNAJA2       | 28.8817    | 28.991    | 0.00544733  | 0.995202   |
| LINC00032    | 0.00576301 | 0         | #NAME?      | 1          |
| FAM196A      | 0.0124464  | 0.0129111 | 0.0528745   | 1          |
| LYPD6        | 0.94206    | 0.722604  | -0.382613   | 0.536166   |
| SIPA1L3      | 4.06626    | 5.12082   | 0.332671    | 0.406838   |
| IMMT         | 42.3512    | 32.4827   | -0.382734   | 0.236137   |
| DNAJB7       | 0.238614   | 0.209363  | -0.188674   | 1          |
| MRPS17       | 74.9984    | 130.219   | 0.796004    | 0.00153868 |

|           |            |           |            |            |
|-----------|------------|-----------|------------|------------|
| NAP1L4    | 51.8816    | 65.7483   | 0.341731   | 0.306426   |
| ZNF358    | 58.0243    | 33.1703   | -0.806767  | 0.00274688 |
| CHD5      | 0.0404247  | 0.0350954 | -0.203954  | 1          |
| C7orf50   | 92.4668    | 105.297   | 0.187458   | 0.723139   |
| HEATR6    | 3.12125    | 2.99428   | -0.0599156 | 0.954501   |
| LOC642846 | 3.75069    | 3.93544   | 0.0693706  | 0.950252   |
| HMOX2     | 40.7385    | 68.1754   | 0.742857   | 0.0150346  |
| POLR2J4   | 0.897953   | 0.787415  | -0.189516  | 0.916694   |
| TNFSF9    | 19.8014    | 22.5888   | 0.190007   | 0.746108   |
| TPTE2P3   | 0.00654483 | 0         | #NAME?     | 1          |
| ARF1      | 326.865    | 372.521   | 0.188628   | 0.71451    |
| PRPF38B   | 11.2716    | 16.0668   | 0.511393   | 0.0689012  |
| TMEM165   | 48.1781    | 46.1187   | -0.0630285 | 0.942184   |
| SNHG8     | 383.154    | 271.326   | -0.497898  | 0.162703   |
| STRIP1    | 7.20317    | 8.63733   | 0.261953   | 0.575157   |
| ZNF280C   | 1.99994    | 1.30894   | -0.611557  | 0.0943483  |
| SREBF1    | 25.3158    | 29.5836   | 0.22476    | 0.681816   |
| TRADD     | 10.7777    | 12.2229   | 0.181538   | 0.820912   |
| MAFK      | 9.10516    | 11.4098   | 0.325522   | 0.650967   |
| KCTD18    | 2.81821    | 1.46206   | -0.94677   | 0.00970147 |
| COX7B     | 351.188    | 362.971   | 0.0476123  | 0.958852   |
| PRRT3     | 1.3655     | 1.0335    | -0.401897  | 0.717284   |
| NEURL4    | 3.63444    | 5.49651   | 0.596783   | 0.0653297  |
| TFCP2     | 2.88566    | 3.36031   | 0.219692   | 0.720235   |
| TBCEL     | 1.44255    | 1.05114   | -0.45667   | 0.368309   |
| BANF1     | 253.824    | 310.396   | 0.290282   | 0.523627   |
| TBC1D19   | 1.98085    | 1.0384    | -0.931754  | 0.0365493  |
| DRG1      | 66.8139    | 66.9308   | 0.00252391 | 0.998382   |
| ZMYND19   | 91.4679    | 155.822   | 0.768565   | 0.00380811 |
| KLK14     | 0.191198   | 0.32867   | 0.781575   | 1          |
| SLC19A2   | 8.45215    | 6.07929   | -0.475415  | 0.152252   |
| VANGL1    | 1.74725    | 1.98381   | 0.183188   | 0.770773   |
| MARK2     | 11.3196    | 15.4562   | 0.449361   | 0.155139   |
| BRAT1     | 25.2038    | 34.378    | 0.447843   | 0.136495   |
| GRIP2     | 0.049374   | 0.129126  | 1.38695    | 1          |
| URB1      | 5.11112    | 6.76695   | 0.404866   | 0.201817   |
| NIP7      | 24.8294    | 36.7829   | 0.566983   | 0.105057   |
| MANEAL    | 12.6015    | 17.3849   | 0.464239   | 0.14504    |
| UPF1      | 22.9348    | 38.7161   | 0.755393   | 0.00153868 |
| POLR3A    | 5.31883    | 6.33466   | 0.252159   | 0.568365   |
| LOC401242 | 0.00695889 | 0         | #NAME?     | 1          |
| ARL6      | 0.920051   | 0.997606  | 0.116758   | 0.948152   |
| SLC25A45  | 1.94103    | 0.684849  | -1.50297   | 0.00478151 |
| ZFR       | 9.12905    | 9.55718   | 0.0661212  | 0.938939   |
| SBDS      | 57.0181    | 64.9822   | 0.188625   | 0.705202   |
| SIK3      | 3.20096    | 2.66047   | -0.266825  | 0.585998   |
| SLC35A5   | 3.44199    | 2.01015   | -0.775942  | 0.0156935  |
| APRT      | 246.893    | 283.147   | 0.197668   | 0.686715   |
| TRIM59    | 0.127309   | 0.19741   | 0.632854   | 1          |

|                |            |            |            |            |
|----------------|------------|------------|------------|------------|
| IFI27L1        | 21.8312    | 14.4365    | -0.596674  | 0.129159   |
| SMPD4          | 22.296     | 29.4438    | 0.401178   | 0.679589   |
| C14orf79       | 7.47246    | 7.69674    | 0.0426651  | 0.969975   |
| FBRS           | 25.8215    | 25.4433    | -0.0212898 | 0.98217    |
| RNF32          | 1.94911    | 1.05508    | -0.885466  | 0.0614148  |
| E2F1           | 15.3861    | 23.2879    | 0.597953   | 0.0308509  |
| AP4B1          | 6.60388    | 6.0193     | -0.133719  | 0.860285   |
| MEF2C          | 0.00329001 | 0.00143937 | -1.19265   | 1          |
| CCDC84         | 14.8586    | 20.1264    | 0.437797   | 0.970185   |
| PGM2           | 8.78976    | 8.39698    | -0.0659536 | 0.94188    |
| MLXIPL         | 5.80696    | 2.16331    | -1.42454   | 0.00153868 |
| FLNA           | 86.6021    | 77.183     | -0.166118  | 0.779141   |
| ANAPC11        | 125.573    | 115.306    | -0.123054  | 0.855105   |
| METTL22        | 7.29143    | 4.92736    | -0.565385  | 0.151114   |
| EIF2B2         | 19.9272    | 26.5138    | 0.412006   | 0.211701   |
| LOC100129518   | 0.236024   | 0.196313   | -0.26578   | 1          |
| WASF1          | 3.30836    | 3.04954    | -0.117522  | 0.900642   |
| RRP1B          | 16.7862    | 30.2602    | 0.850143   | 0.00153868 |
| PSMD6          | 90.2985    | 92.1347    | 0.0290432  | 0.976572   |
| PPP6R1         | 43.4485    | 57.0636    | 0.393265   | 0.215636   |
| HRSP12         | 55.9857    | 48.9309    | -0.194313  | 0.698982   |
| CCDC6          | 10.254     | 8.32959    | -0.299875  | 0.424975   |
| PCDHB13        | 1.97807    | 1.42992    | -0.468161  | 0.346301   |
| ZC3H8          | 11.847     | 9.98119    | -0.247239  | 0.614872   |
| ALDH9A1        | 37.5591    | 28.957     | -0.375254  | 0.255063   |
| FOXM1          | 23.8414    | 28.242     | 0.244372   | 0.636453   |
| SDHAF2         | 34.4117    | 37.483     | 0.123337   | 0.860871   |
| FGFRL1         | 12.5509    | 11.787     | -0.0905964 | 0.908026   |
| MRPS35         | 39.102     | 35.0762    | -0.156751  | 0.78622    |
| TIMM10B        | 9.53581    | 14.3508    | 0.5897     | 0.285746   |
| MCMBP          | 16.228     | 21.4648    | 0.40349    | 0.202223   |
| FBRSL1         | 20.6729    | 32.9324    | 0.671769   | 0.0117316  |
| ADAMTSL5       | 5.50902    | 4.70067    | -0.228928  | 0.726456   |
| CDRT4,TVP23C,T | 9.43547    | 6.10821    | -0.627345  | 0.0537703  |
| PTMS           | 235.905    | 294.179    | 0.318489   | 0.382557   |
| PIN4           | 12.3343    | 10.8587    | -0.183832  | 0.852179   |
| SPRYD3         | 29.9104    | 27.8485    | -0.10305   | 0.888541   |
| AP1AR          | 7.89358    | 5.78257    | -0.448968  | 0.198233   |
| GTPBP5         | 6.80665    | 7.48909    | 0.137845   | 0.859197   |
| ASPM           | 1.88885    | 2.16471    | 0.196664   | 0.754103   |
| TARDBP         | 17.6789    | 38.2664    | 1.11405    | 0.00153868 |
| NKIRAS2        | 14.1211    | 11.2408    | -0.329108  | 0.881798   |
| LOC100507250   | 0.212993   | 0.0627025  | -1.76421   | 1          |
| TAF8           | 5.13793    | 4.78784    | -0.101814  | 0.900642   |
| PMS1           | 4.24076    | 4.48334    | 0.0802505  | 0.970681   |
| UBE2A          | 30.6382    | 37.8326    | 0.3043     | 0.421289   |
| LOC388796      | 126.652    | 141.73     | 0.162276   | 0.773721   |
| TPK1           | 0.697827   | 0.820121   | 0.232966   | 0.838902   |
| LAPTM4B        | 1.13427    | 0.480423   | -1.23939   | 0.0238313  |

|              |           |           |            |            |
|--------------|-----------|-----------|------------|------------|
| MORN1        | 1.1338    | 0.5705    | -0.990874  | 0.361239   |
| NECAP1       | 8.58909   | 7.45283   | -0.204718  | 0.716952   |
| STX1A        | 21.394    | 16.8512   | -0.34436   | 0.368389   |
| ATP5B        | 520.484   | 502.712   | -0.0501231 | 0.957519   |
| MRT04        | 50.0973   | 90.5246   | 0.853577   | 0.00153868 |
| HNF1A        | 0.428324  | 0.801071  | 0.903227   | 0.145921   |
| DLG3         | 7.40943   | 4.38713   | -0.756084  | 0.00274688 |
| SMARCAD1     | 2.45157   | 2.5689    | 0.0674463  | 0.950837   |
| GPX8         | 15.3264   | 16.2201   | 0.0817673  | 0.914837   |
| RAB36        | 3.69461   | 4.06142   | 0.13656    | 0.868033   |
| HNRNPF       | 122.209   | 155.957   | 0.351793   | 0.316048   |
| SLX4         | 1.35094   | 1.54014   | 0.189104   | 0.805402   |
| KIAA0355     | 1.38428   | 0.805599  | -0.781002  | 0.0285456  |
| CASP3        | 6.60395   | 7.502     | 0.183946   | 0.7593     |
| XPO5         | 19.1081   | 19.2141   | 0.00798343 | 0.994204   |
| HN1          | 127.932   | 152.001   | 0.248699   | 0.557876   |
| ASPSCR1      | 24.7534   | 16.2041   | -0.611273  | 0.0515699  |
| CSE1L        | 57.408    | 47.1371   | -0.284389  | 0.4662     |
| FBXO25       | 16.582    | 9.51289   | -0.801666  | 0.00153868 |
| BUD13        | 12.4695   | 13.1648   | 0.0782765  | 0.93285    |
| GMPR         | 14.2128   | 9.24221   | -0.62088   | 0.0512103  |
| PON1         | 0.0211375 | 0.0249829 | 0.241135   | 1          |
| MRFAP1L1     | 40.3445   | 46.1059   | 0.19258    | 0.699003   |
| FAM20A       | 0.0180943 | 0.0241949 | 0.419166   | 1          |
| GHDC         | 15.3829   | 9.93088   | -0.631337  | 0.0365493  |
| DDX52        | 5.37536   | 5.28234   | -0.0251855 | 0.980228   |
| DPY19L3      | 2.53079   | 2.50373   | -0.0155068 | 0.990421   |
| AP5S1        | 6.5981    | 6.78876   | 0.0410967  | 0.975454   |
| SREK1IP1     | 3.96623   | 5.05166   | 0.348989   | 0.31775    |
| PLAC8L1      | 2.54245   | 3.20959   | 0.336172   | 0.738519   |
| SLC25A33     | 26.436    | 26.8909   | 0.0246099  | 0.980818   |
| ALG5         | 35.9703   | 28.5912   | -0.331234  | 0.367775   |
| NPM3         | 183.616   | 209.999   | 0.19369    | 0.698819   |
| LEF1         | 8.76781   | 7.54587   | -0.216529  | 0.696963   |
| ZNF623       | 5.0177    | 3.03669   | -0.724527  | 0.0143403  |
| IL13RA1      | 8.11492   | 7.31449   | -0.149821  | 0.806525   |
| UBE3C        | 18.9241   | 24.6868   | 0.383517   | 0.236532   |
| TOR4A        | 58.4708   | 72.2256   | 0.304795   | 0.405553   |
| FANCM        | 0.410485  | 0.686511  | 0.741953   | 0.0621442  |
| ARID3B       | 3.96643   | 2.74223   | -0.532492  | 0.137552   |
| CRYBB2       | 7.16339   | 7.36358   | 0.039766   | 0.978016   |
| GREB1        | 0.0939428 | 0.0282806 | -1.73197   | 1          |
| TRIM35       | 6.04441   | 6.1814    | 0.0323308  | 0.97563    |
| LOC100505695 | 2.99895   | 0.780758  | -1.94151   | 0.00153868 |
| WRAP53       | 22.4621   | 32.5893   | 0.536905   | 0.40075    |
| DHX37        | 12.9889   | 27.2094   | 1.06683    | 0.00153868 |
| USP6NL       | 3.19309   | 2.7045    | -0.239591  | 0.665667   |
| SLC12A9      | 28.0587   | 34.664    | 0.304989   | 0.420709   |
| CASP9        | 4.53608   | 3.10463   | -0.547025  | 0.210791   |

|            |           |           |             |            |
|------------|-----------|-----------|-------------|------------|
| ACHE       | 6.05096   | 6.79048   | 0.166349    | 0.840418   |
| LARP4      | 2.82008   | 4.97808   | 0.819851    | 0.00274688 |
| TMED9      | 184.416   | 212.4     | 0.203817    | 0.679452   |
| POLDIP2    | 60.5273   | 61.7825   | 0.0296125   | 0.978818   |
| DLD        | 28.4533   | 24.9988   | -0.186738   | 0.709934   |
| GABPB1     | 8.5274    | 8.72779   | 0.0335099   | 0.978818   |
| SLC18A2    | 1.33338   | 1.43195   | 0.102903    | 0.927404   |
| MOB2       | 27.5687   | 27.8712   | 0.0157402   | 0.996035   |
| TMX4       | 7.28096   | 6.33253   | -0.201345   | 0.733012   |
| RSL24D1    | 153.835   | 97.9281   | -0.651592   | 0.0111246  |
| USMG5      | 427.536   | 483.936   | 0.17877     | 0.759631   |
| TCTE3      | 0.0715298 | 0.058297  | -0.295123   | 1          |
| CDS2       | 5.00976   | 4.27882   | -0.227529   | 0.625013   |
| ZNF271     | 3.57874   | 5.23737   | 0.54939     | 0.0609817  |
| RAB3IL1    | 5.8338    | 6.37184   | 0.127273    | 0.884031   |
| APH1B      | 4.07531   | 2.25088   | -0.856417   | 0.00380811 |
| PWWP2B     | 25.857    | 21.7704   | -0.248187   | 0.597911   |
| RPP40      | 12.096    | 18.81     | 0.636968    | 0.0442243  |
| IMMP1L     | 4.45151   | 4.39664   | -0.0178935  | 0.994734   |
| CHPT1      | 15.3217   | 16.0015   | 0.0626308   | 0.948368   |
| DCAF15     | 29.2302   | 29.2749   | 0.00220171  | 0.998382   |
| DDX51      | 9.66467   | 13.5345   | 0.485849    | 0.107753   |
| CDO1       | 0.0471555 | 0.0238689 | -0.982295   | 1          |
| FAM72D     | 1.54561   | 0.730805  | -1.08062    | 0.0176564  |
| MPDU1      | 59.7677   | 93.2819   | 0.642231    | 0.0143403  |
| DPH1,OVCA2 | 115.682   | 112.37    | -0.0419055  | 0.96692    |
| IGSF3      | 1.47727   | 1.41314   | -0.0640296  | 0.954167   |
| C16orf80   | 43.7105   | 44.8054   | 0.0356936   | 0.971173   |
| ATF6B      | 43.8283   | 26.3663   | -0.733167   | 0.00478151 |
| UNC93B1    | 35.7455   | 25.682    | -0.477002   | 0.126736   |
| ATP1A1     | 86.6555   | 89.6646   | 0.0492478   | 0.958133   |
| KIAA0020   | 15.8332   | 22.7844   | 0.525097    | 0.0732377  |
| USP16      | 6.29446   | 6.57414   | 0.0627189   | 0.947962   |
| HNRNPL     | 196.62    | 169.964   | -0.210176   | 0.663395   |
| CCT3       | 352.451   | 397.602   | 0.173905    | 0.757708   |
| CHMP1A     | 50.5231   | 67.7824   | 0.423968    | 0.209241   |
| UBL7       | 56.5817   | 45.8395   | -0.303743   | 0.420653   |
| C21orf91   | 1.40343   | 1.20068   | -0.225109   | 0.744922   |
| PRPS1      | 27.3912   | 41.9155   | 0.613772    | 0.020985   |
| MOB1A      | 25.5743   | 22.9996   | -0.153082   | 0.806275   |
| CBFA2T3    | 1.75218   | 2.37401   | 0.438179    | 0.41867    |
| NKX3-1     | 4.47621   | 5.80179   | 0.374221    | 0.363109   |
| SRFBP1     | 28.7096   | 17.152    | -0.743156   | 0.00380811 |
| VIM        | 9.91735   | 4.27625   | -1.21361    | 0.00153868 |
| CYTH1      | 4.12686   | 5.68309   | 0.46163     | 0.206668   |
| FAF2       | 11.1159   | 9.92946   | -0.162834   | 0.76946    |
| PTPN9      | 7.23816   | 6.25321   | -0.211026   | 0.684216   |
| PSMD12     | 36.3441   | 51.237    | 0.495464    | 0.0784883  |
| FAM118A    | 5.7105    | 5.67378   | -0.00930704 | 0.994204   |

|            |            |           |            |            |
|------------|------------|-----------|------------|------------|
| EVA1C      | 9.65889    | 14.3987   | 0.576005   | 0.0756592  |
| CDKN2AIPNL | 35.6495    | 28.7866   | -0.30848   | 0.447372   |
| BSG        | 698.122    | 714.596   | 0.0336494  | 0.974348   |
| CREM       | 21.2535    | 14.6202   | -0.539742  | 0.102273   |
| C16orf55   | 8.19257    | 14.9446   | 0.867235   | 0.640772   |
| NHLRC2     | 1.18467    | 0.827774  | -0.51718   | 0.213825   |
| GSTZ1      | 25.5622    | 17.052    | -0.584075  | 0.057213   |
| PTPMT1     | 18.0268    | 21.144    | 0.230104   | 0.845191   |
| RALY       | 45.6351    | 43.3467   | -0.0742205 | 0.928779   |
| KIF21A     | 1.15597    | 0.950501  | -0.282338  | 0.630091   |
| DUS4L      | 6.3334     | 2.33555   | -1.43922   | 0.0894386  |
| C2orf42    | 2.69579    | 2.79481   | 0.0520427  | 0.967458   |
| SETD3      | 11.3457    | 14.0845   | 0.311955   | 0.431794   |
| TERT       | 1.15281    | 1.48291   | 0.36328    | 0.642337   |
| SLC35B3    | 7.8971     | 7.35844   | -0.101922  | 0.907121   |
| THOC7      | 44.7836    | 40.4641   | -0.14633   | 0.809397   |
| ZNF703     | 5.55171    | 8.32004   | 0.583659   | 0.235968   |
| MPLKIP     | 26.9641    | 20.5499   | -0.391907  | 0.323124   |
| CCDC173    | 0.0319864  | 0.0288982 | -0.146484  | 1          |
| EMC6       | 163.199    | 190.918   | 0.226327   | 0.867291   |
| ERI1       | 6.93573    | 6.78568   | -0.0315526 | 0.975484   |
| CYB5R3     | 59.6983    | 66.0048   | 0.144883   | 0.808953   |
| KIF22      | 62.7052    | 68.0068   | 0.117093   | 0.866771   |
| LOC642361  | 2.45722    | 2.3339    | -0.0742798 | 0.967296   |
| SMIM11     | 17.5122    | 25.8127   | 0.559719   | 0.0784883  |
| RANGRF     | 69.4755    | 68.2828   | -0.024982  | 0.981441   |
| PGBD4      | 0.538611   | 0.292712  | -0.879763  | 0.230647   |
| MFSD9      | 2.16318    | 2.55361   | 0.239383   | 0.74725    |
| INPP5B     | 5.7083     | 3.68271   | -0.632292  | 0.0347593  |
| IPO7       | 14.7735    | 15.794    | 0.0963699  | 0.895777   |
| GLB1L2     | 20.3789    | 26.5406   | 0.381127   | 0.252509   |
| SEC11A     | 173.53     | 154.491   | -0.167666  | 0.769085   |
| LRRC45     | 9.64355    | 9.82445   | 0.026812   | 0.981441   |
| TPM3       | 72.8256    | 90.0847   | 0.306837   | 0.413223   |
| PSAP       | 239.492    | 166.549   | -0.524029  | 0.0647668  |
| FLT3LG     | 8.71336    | 5.14046   | -0.761331  | 0.0832671  |
| TNFAIP2    | 7.71969    | 10.1219   | 0.390868   | 0.273449   |
| MAD2L1BP   | 39.519     | 45.5149   | 0.203794   | 0.678338   |
| PGAM5      | 45.2717    | 94.0789   | 1.05526    | 0.00153868 |
| ANXA3      | 0.010522   | 0         | #NAME?     | 1          |
| SH2D2A     | 5.1734     | 1.89009   | -1.45266   | 0.00153868 |
| HESX1      | 0.452998   | 0.109091  | -2.05397   | 0.106507   |
| NCAPH2     | 20.9992    | 20.6671   | -0.0230008 | 0.990227   |
| SLC36A2    | 0.00572959 | 0         | #NAME?     | 1          |
| ERAL1      | 55.0353    | 54.3987   | -0.0167831 | 0.986998   |
| ATR        | 1.05107    | 1.22036   | 0.215441   | 0.728711   |
| NHP2L1     | 162.385    | 203.074   | 0.32258    | 0.369226   |
| VWA5B2     | 3.60862    | 1.35353   | -1.41472   | 0.392448   |
| SOS2       | 1.79381    | 1.09811   | -0.708007  | 0.0399087  |

|                |            |           |            |            |
|----------------|------------|-----------|------------|------------|
| POLR3G         | 4.3151     | 9.04268   | 1.06736    | 0.00153868 |
| EIF3M          | 146.909    | 123.166   | -0.254323  | 0.572437   |
| FANCC          | 3.30179    | 3.37125   | 0.030035   | 0.978818   |
| POP4           | 14.0687    | 19.222    | 0.450265   | 0.142786   |
| TRAIIP         | 6.57596    | 6.09663   | -0.109189  | 0.899621   |
| ING3           | 8.31525    | 4.39941   | -0.918449  | 0.00153868 |
| CLN5           | 6.28359    | 5.46648   | -0.200978  | 0.731008   |
| MTMR6          | 3.67361    | 3.51112   | -0.0652679 | 0.945688   |
| CEACAM1        | 0.032395   | 0.0122174 | -1.40683   | 1          |
| PGP            | 11.3389    | 25.0602   | 1.14412    | 0.00153868 |
| LOC922249      | 5.59788    | 3.09911   | -0.853025  | 0.00478151 |
| PANX1          | 3.85274    | 3.71348   | -0.0531141 | 0.962865   |
| CENPJ          | 1.23832    | 1.66364   | 0.425961   | 0.317095   |
| RPS6KA4        | 42.9512    | 69.4521   | 0.693321   | 0.00572929 |
| MRPL16         | 69.9205    | 82.8867   | 0.245425   | 0.58009    |
| STRN4          | 48.4151    | 45.4163   | -0.0922468 | 0.907431   |
| KITLG          | 0.207265   | 0.26384   | 0.348187   | 1          |
| FARP2          | 0.652573   | 0.697522  | 0.0961001  | 0.959927   |
| ZNF777         | 17.4373    | 16.3349   | -0.0942234 | 0.905839   |
| MIPEP          | 13.7169    | 10.0208   | -0.452965  | 0.162857   |
| IMPDH1         | 95.7557    | 168.591   | 0.816098   | 0.00153868 |
| INPP5A         | 7.33549    | 9.74783   | 0.410189   | 0.261731   |
| MCTP1          | 4.88564    | 1.15461   | -2.08115   | 0.00153868 |
| PLAU           | 27.333     | 28.9513   | 0.0829872  | 0.918043   |
| KDM4A-AS1      | 0.468619   | 0.73872   | 0.656612   | 0.908076   |
| LRFN4          | 47.7933    | 71.8435   | 0.58805    | 0.0253664  |
| FAM101A,ZNF664 | 18.8098    | 21.1562   | 0.169597   | 0.75603    |
| YIPF2          | 32.1767    | 28.0924   | -0.19584   | 0.898682   |
| P2RY11,PPAN,PF | 48.9552    | 77.8857   | 0.669898   | 0.403413   |
| CCR9           | 0.00765431 | 0         | #NAME?     | 1          |
| ANKRD34A       | 2.47307    | 2.83672   | 0.19792    | 0.798514   |
| BLOC1S5,EEF1E  | 133.243    | 170.635   | 0.356856   | 0.376584   |
| LEKR1          | 0.116209   | 0.0467914 | -1.31241   | 1          |
| USP1           | 11.0391    | 13.1038   | 0.247358   | 0.561661   |
| RABEP1         | 9.01642    | 10.1179   | 0.166282   | 0.757708   |
| SYNJ2          | 1.00454    | 1.45499   | 0.534474   | 0.177166   |
| GADD45G        | 1.71869    | 1.49255   | -0.203526  | 0.917927   |
| RFPL3S         | 1.72719    | 1.34535   | -0.360445  | 0.722089   |
| EMR2           | 0.00307392 | 0.0019878 | -0.62891   | 1          |
| LOXL2          | 0.467587   | 0.506069  | 0.114101   | 0.9473     |
| YIPF3          | 78.9215    | 61.165    | -0.367712  | 0.269977   |
| RAD9B          | 0.502198   | 0.253649  | -0.985422  | 0.185432   |
| RAP1GAP2       | 6.30759    | 5.70841   | -0.144002  | 0.817791   |
| UBAC2          | 21.7195    | 16.6883   | -0.380156  | 0.25966    |
| BZW2           | 97.9013    | 105.001   | 0.101009   | 0.889871   |
| POMP           | 93.212     | 138.174   | 0.5679     | 0.0351856  |
| GSK3A          | 50.489     | 75.6842   | 0.584022   | 0.0264621  |
| SLU7           | 10.1801    | 7.77603   | -0.388644  | 0.248913   |
| UCN2           | 0.113223   | 0.173051  | 0.612028   | 1          |

|               |           |            |            |           |
|---------------|-----------|------------|------------|-----------|
| MALSU1        | 65.3342   | 78.7482    | 0.269409   | 0.512107  |
| MCFD2         | 25.3655   | 26.4578    | 0.0608278  | 0.948523  |
| PDE7B         | 0.0911121 | 0.197422   | 1.11557    | 1         |
| DCAF11        | 18.2239   | 12.2685    | -0.570868  | 0.0334318 |
| CUL1          | 25.3113   | 35.7253    | 0.497161   | 0.0784883 |
| STAC3         | 0.441363  | 0.363661   | -0.279373  | 0.875956  |
| RNF20         | 7.11271   | 5.81348    | -0.290998  | 0.480639  |
| SRGAP2,SRGAP2 | 4.75877   | 3.7197     | -0.355401  | 0.441125  |
| TAF11         | 15.7057   | 20.5468    | 0.38763    | 0.266833  |
| ATP2B1        | 1.77007   | 2.27034    | 0.359102   | 0.378445  |
| TBP           | 10.1352   | 11.4983    | 0.182044   | 0.766393  |
| CHAC2         | 5.2186    | 10.7983    | 1.04907    | 0.164242  |
| STX5          | 29.3599   | 19.462     | -0.593187  | 0.0334318 |
| NMT1          | 22.9801   | 26.8564    | 0.22488    | 0.619482  |
| SLC35B2       | 45.7274   | 44.9039    | -0.0262204 | 0.978239  |
| ZRSR2         | 6.60573   | 5.9851     | -0.142341  | 0.859937  |
| TAF5          | 2.8196    | 3.88791    | 0.463508   | 0.806275  |
| PSMD11        | 28.916    | 41.7839    | 0.531078   | 0.0523053 |
| RPL23AP7      | 9.24357   | 9.33331    | 0.0139397  | 0.994204  |
| AMMECR1L      | 6.52495   | 6.06004    | -0.106639  | 0.884758  |
| POLR3F        | 4.51316   | 6.59446    | 0.547117   | 0.101539  |
| MEGF9         | 1.15651   | 1.01572    | -0.187268  | 0.810183  |
| ZIK1          | 0.0139975 | 0.00382474 | -1.87173   | 1         |
| DDX1          | 33.6676   | 32.3903    | -0.0557955 | 0.9491    |
| PPP2R1B       | 6.82696   | 7.76356    | 0.185476   | 0.811435  |
| TPP2          | 11.579    | 10.3933    | -0.155846  | 0.783938  |
| C20orf96      | 8.54113   | 6.18238    | -0.466264  | 0.241597  |
| PTS           | 16.0398   | 20.3723    | 0.344954   | 0.411453  |
| PSMB5         | 264.83    | 329.338    | 0.314499   | 0.398652  |
| PDCD2L        | 28.9097   | 28.9568    | 0.00234959 | 0.998382  |
| TIMM8A        | 9.98796   | 17.5252    | 0.811173   | 0.024868  |
| RFC2          | 34.6976   | 31.4846    | -0.140191  | 0.816962  |
| ANAPC7        | 15.5472   | 13.488     | -0.204976  | 0.681631  |
| TMEM38A       | 2.21455   | 2.25194    | 0.0241584  | 0.989716  |
| ZHX2          | 2.34374   | 1.91145    | -0.294145  | 0.606266  |
| SH3BP2        | 7.40744   | 9.34988    | 0.335972   | 0.337387  |
| TCF20         | 4.44005   | 5.42448    | 0.28891    | 0.482143  |
| GUF1          | 9.19216   | 7.85526    | -0.226745  | 0.633194  |
| FRG1          | 35.308    | 26.0457    | -0.438946  | 0.171813  |
| ARMC7         | 6.86766   | 9.9535     | 0.535385   | 0.650386  |
| NELFCD        | 43.4578   | 47.441     | 0.126519   | 0.843183  |
| RHBDD2        | 47.9333   | 67.8254    | 0.500797   | 0.0738934 |
| HSPB11        | 37.6042   | 39.8123    | 0.0823182  | 0.928548  |
| ARFGAP2       | 30.0922   | 22.9344    | -0.391881  | 0.376879  |
| PKD1P1        | 18.2437   | 17.7963    | -0.0358206 | 0.972711  |
| TMEM214       | 27.5162   | 32.4205    | 0.236626   | 0.59512   |
| TBC1D8        | 2.18513   | 2.18093    | -0.0027731 | 0.999234  |
| DNAJB6        | 78.6251   | 111.844    | 0.508431   | 0.0802776 |
| TDG           | 5.16568   | 6.2784     | 0.281439   | 0.533687  |



|               |            |            |            |            |
|---------------|------------|------------|------------|------------|
| RHOF          | 146.184    | 87.7219    | -0.736775  | 0.0130226  |
| LOC400657     | 2.84524    | 1.7864     | -0.671495  | 0.0600393  |
| GOSR2         | 7.25281    | 10.1477    | 0.484544   | 0.181543   |
| SLC24A1       | 1.19874    | 0.530587   | -1.17586   | 0.00478151 |
| MDP1,NEDD8,NE | 303.593    | 305.678    | 0.00987479 | 0.994017   |
| SLC25A10      | 73.3675    | 81.2824    | 0.147801   | 0.806525   |
| MMEL1         | 3.42759    | 5.68476    | 0.729906   | 0.47479    |
| ELAC1         | 2.57344    | 1.36045    | -0.919616  | 0.0220668  |
| ATF7          | 3.23855    | 3.54906    | 0.132089   | 0.937886   |
| ARAP2         | 0.701978   | 0.775911   | 0.144465   | 0.878806   |
| BCL2L13       | 6.2618     | 3.60773    | -0.795488  | 0.00274688 |
| MB21D1        | 4.578      | 8.32512    | 0.862754   | 0.0103919  |
| TGM1          | 0.318145   | 0.33497    | 0.0743464  | 1          |
| JMY           | 1.71349    | 1.06532    | -0.685642  | 0.0355697  |
| CLPP          | 208.617    | 211.135    | 0.0173129  | 0.986181   |
| SLC25A46      | 6.60292    | 6.28063    | -0.0721957 | 0.939948   |
| TPD52L2       | 112.938    | 108.772    | -0.0542321 | 0.95395    |
| KRTAP4-8      | 0.629679   | 0.591829   | -0.0894361 | 0.974348   |
| TAF1C         | 15.8062    | 23.5517    | 0.575343   | 0.0416082  |
| MBNL1         | 6.89355    | 6.63657    | -0.054809  | 0.954167   |
| MTA2          | 39.5017    | 63.8133    | 0.691945   | 0.0111246  |
| C1orf131      | 5.64744    | 5.55248    | -0.0244656 | 0.994102   |
| KIF3B         | 3.22409    | 3.77075    | 0.225958   | 0.660241   |
| SPAG9         | 3.92797    | 3.26631    | -0.26612   | 0.539395   |
| FKBP2         | 81.8489    | 85.8787    | 0.0693362  | 0.938232   |
| SLC3A1        | 0.00730038 | 0.00432031 | -0.756838  | 1          |
| LOC100505812  | 2.39619    | 2.05874    | -0.218983  | 0.890806   |
| LOC286190     | 0.0111739  | 0.0103163  | -0.115208  | 1          |
| ISYNA1        | 5.53897    | 4.76233    | -0.217951  | 0.952795   |
| TMEM184A      | 5.07266    | 6.6944     | 0.400213   | 0.473569   |
| TSPAN9        | 2.50329    | 3.6662     | 0.550459   | 0.145359   |
| USP21         | 16.4463    | 13.5115    | -0.283572  | 0.515809   |
| DUSP23        | 32.8891    | 28.4798    | -0.207666  | 0.756508   |
| SPTBN1        | 9.51063    | 7.37884    | -0.366147  | 0.26469    |
| IL10RA        | 0.159976   | 0.0385483  | -2.05312   | 1          |
| MRPL13        | 114.15     | 107.765    | -0.0830377 | 0.921154   |
| C14orf105     | 0.0163125  | 0.0272375  | 0.739615   | 1          |
| ZMAT5         | 34.3566    | 29.3095    | -0.229221  | 0.66979    |
| CCDC97        | 17.0429    | 13.5378    | -0.332178  | 0.3747     |
| ARHGEF18      | 10.7217    | 11.639     | 0.118435   | 0.86364    |
| TM9SF3        | 27.5245    | 23.434     | -0.23211   | 0.606595   |
| MLST8         | 82.4796    | 66.5921    | -0.308686  | 0.415082   |
| NDUFB11       | 140.522    | 138.581    | -0.0200709 | 0.983243   |
| TMEM116       | 3.6175     | 1.4076     | -1.36175   | 0.00153868 |
| PTPLAD1       | 34.1579    | 46.7894    | 0.453964   | 0.12463    |
| UBXN1         | 161.635    | 112.551    | -0.522161  | 0.0647668  |
| DHX9          | 33.104     | 49.3461    | 0.575929   | 0.0370145  |
| AKIRIN2       | 19.8044    | 13.5039    | -0.552437  | 0.0660778  |
| ASXL2         | 0.549071   | 0.480342   | -0.192931  | 0.838861   |

|           |          |           |            |            |
|-----------|----------|-----------|------------|------------|
| BCL11A    | 0.909162 | 0.613089  | -0.56844   | 0.392586   |
| PCGF5     | 12.1896  | 12.4334   | 0.0285775  | 0.986782   |
| SAPCD2    | 57.5763  | 107.602   | 0.902156   | 0.00153868 |
| ZSWIM8    | 5.33178  | 6.17335   | 0.211435   | 0.724173   |
| SRPK1     | 27.4634  | 29.6678   | 0.111388   | 0.870482   |
| LINC00592 | 0.020695 | 0.0461285 | 1.15637    | 1          |
| ACVR1     | 5.06311  | 2.87379   | -0.817068  | 0.00739414 |
| LOC283663 | 0.156927 | 0.362418  | 1.20756    | 1          |
| MAPKAP1   | 97.3622  | 65.4059   | -0.573942  | 0.0564873  |
| GADD45A   | 150.761  | 61.7627   | -1.28746   | 0.00153868 |
| UQCRFS1   | 137.828  | 192.67    | 0.483266   | 0.094542   |
| PGAP2     | 23.3146  | 15.5064   | -0.588375  | 0.451834   |
| ANKRD52   | 5.72275  | 11.3414   | 0.986812   | 0.00153868 |
| UBC       | 588.379  | 480.221   | -0.293046  | 0.482481   |
| MVB12B    | 6.36594  | 7.53953   | 0.2441     | 0.607733   |
| ZNHIT1    | 173.41   | 175.568   | 0.0178423  | 0.991167   |
| PHC2      | 143.198  | 103.043   | -0.474769  | 0.101539   |
| ATP2A2    | 15.7828  | 24.0401   | 0.607084   | 0.0238313  |
| SDF2L1    | 72.3726  | 141.713   | 0.969461   | 0.00153868 |
| TMEM192   | 3.45825  | 1.79979   | -0.942214  | 0.00153868 |
| C9orf169  | 3.99073  | 2.69488   | -0.566432  | 0.472341   |
| TCEB2     | 543.494  | 619.88    | 0.189724   | 0.731582   |
| FDX1L     | 33.2847  | 52.4752   | 0.656778   | 0.0290262  |
| PEA15     | 115.237  | 112.451   | -0.0353163 | 0.971528   |
| RND3      | 6.37462  | 5.0987    | -0.322208  | 0.455009   |
| FAM136A   | 36.8455  | 63.8605   | 0.793435   | 0.00153868 |
| STK10     | 7.99075  | 8.13679   | 0.0261299  | 0.978818   |
| DHRS4-AS1 | 2.7238   | 1.7458    | -0.641735  | 0.460741   |
| MRFAP1    | 148.5    | 225.24    | 0.601003   | 0.0232503  |
| SET       | 342.072  | 397.293   | 0.2159     | 0.67467    |
| CTU1      | 13.8543  | 13.7574   | -0.0101256 | 0.994204   |
| CEACAM19  | 12.3635  | 9.14643   | -0.434802  | 0.236814   |
| CEBPD     | 32.4864  | 40.4072   | 0.314777   | 0.500687   |
| TLCD1     | 13.8852  | 15.8843   | 0.194051   | 0.978996   |
| NUPL2     | 12.6481  | 13.4416   | 0.0877862  | 0.916937   |
| MTDH      | 29.216   | 34.9356   | 0.257942   | 0.541331   |
| XPR1      | 2.00761  | 2.20468   | 0.135087   | 0.856904   |
| NDUFB2    | 375.263  | 514.857   | 0.456271   | 0.131526   |
| SMIM8     | 2.17868  | 2.01722   | -0.1111087 | 0.920446   |
| TMEM9B    | 17.9875  | 23.7718   | 0.402256   | 0.229488   |
| MEN1      | 37.5329  | 50.4447   | 0.426549   | 0.14872    |
| CHUK      | 3.55078  | 6.70912   | 0.917985   | 0.00153868 |
| EFCAB2    | 2.16162  | 1.89336   | -0.191167  | 0.869786   |
| ITGAE     | 3.16791  | 5.00338   | 0.659371   | 0.126736   |
| SMIM12    | 6.12996  | 8.9332    | 0.543298   | 0.0460785  |
| E4F1      | 18.8561  | 28.0799   | 0.574506   | 0.0355697  |
| TMA7      | 482.417  | 568.698   | 0.237383   | 0.584334   |
| UGCG      | 7.45426  | 4.21584   | -0.822244  | 0.0181648  |
| DCUN1D5   | 5.15936  | 5.18257   | 0.00647534 | 0.994734   |

|                 |           |           |             |            |
|-----------------|-----------|-----------|-------------|------------|
| TLN2            | 1.09622   | 0.86654   | -0.339199   | 0.485845   |
| SIVA1           | 161       | 234.177   | 0.540538    | 0.0451232  |
| SBNO2           | 16.8094   | 22.3685   | 0.412201    | 0.200395   |
| CAMSAP1         | 8.44635   | 7.63938   | -0.144873   | 0.81114    |
| SLC20A2         | 6.18076   | 9.19901   | 0.573694    | 0.310258   |
| VPS13D          | 0.909361  | 0.830599  | -0.130702   | 0.867356   |
| HNRNPUL1        | 61.1798   | 49.7002   | -0.299804   | 0.417991   |
| RAB7A           | 112.727   | 112.131   | -0.00764521 | 0.994507   |
| MRPL50          | 52.1822   | 70.4218   | 0.432467    | 0.150319   |
| SSNA1           | 207.95    | 284.741   | 0.453417    | 0.237936   |
| MDK             | 695.431   | 591.484   | -0.233568   | 0.596588   |
| LOC81691        | 6.39847   | 2.52642   | -1.34063    | 0.00380811 |
| HES1            | 24.6471   | 16.2339   | -0.602409   | 0.0500215  |
| C8orf76,ZHX1,ZH | 37.9644   | 46.8284   | 0.302735    | 0.489185   |
| FAM98B          | 4.91128   | 6.57563   | 0.42103     | 0.33192    |
| REEP5           | 27.6885   | 24.7268   | -0.163212   | 0.822512   |
| ZACN            | 0.0686031 | 0.0122348 | -2.48728    | 1          |
| HACL1           | 13.137    | 8.74495   | -0.587118   | 0.0487873  |
| FAM64A          | 15.8287   | 17.768    | 0.166736    | 0.802771   |
| ACP6            | 18.2708   | 9.85209   | -0.891037   | 0.00153868 |
| CRNKL1          | 5.36408   | 4.84958   | -0.145471   | 0.824472   |
| ELMOD3          | 3.85766   | 4.81349   | 0.319355    | 0.55755    |
| ELOVL7          | 4.11376   | 3.14048   | -0.389473   | 0.324863   |
| KIAA1467        | 1.73688   | 1.34716   | -0.366582   | 0.484507   |
| TSPAN12         | 1.48529   | 2.18056   | 0.553958    | 0.231454   |
| TFDP1           | 25.9194   | 43.7294   | 0.754573    | 0.00153868 |
| SEC16A          | 17.6227   | 19.0798   | 0.114611    | 0.865848   |
| RBM19           | 14.0189   | 21.9174   | 0.644701    | 0.0163491  |
| LOC401397       | 81.3197   | 70.7134   | -0.201621   | 0.678596   |
| EXOSC9          | 19.1792   | 21.3375   | 0.153847    | 0.91015    |
| CDHR3           | 0.039788  | 0.0545238 | 0.454554    | 1          |
| IVD             | 18.644    | 19.2979   | 0.0497279   | 0.955413   |
| NOC2L           | 79.8794   | 103.548   | 0.374405    | 0.256851   |
| KIAA0586        | 0.59686   | 0.407773  | -0.549627   | 0.816944   |
| RAPGEF2         | 1.54319   | 1.14198   | -0.434378   | 0.303067   |
| ZNF76           | 10.0172   | 6.75251   | -0.568983   | 0.0726643  |
| EIF3C,EIF3CL    | 1.44621   | 1.04755   | -0.465254   | 0.42844    |
| FERMT1          | 5.45583   | 7.63625   | 0.485066    | 0.112663   |
| TMEM99          | 10.5178   | 7.45528   | -0.496498   | 0.467415   |
| SMPD1           | 6.71501   | 3.91259   | -0.779265   | 0.0198871  |
| TMEM168         | 4.57883   | 4.44592   | -0.0424951  | 0.968157   |
| DSCR9           | 0.0769451 | 0.0620181 | -0.31114    | 1          |
| C10orf88        | 1.19595   | 1.09996   | -0.120698   | 0.920063   |
| SMC6            | 1.77861   | 1.84116   | 0.0498697   | 0.964843   |
| HSBP1L1         | 81.2834   | 58.172    | -0.482634   | 0.11953    |
| SECTM1          | 9.2843    | 11.7529   | 0.340147    | 0.448693   |
| SEMA3B          | 0.612015  | 0.230881  | -1.40642    | 0.111341   |
| TOM1L1          | 8.14978   | 4.26472   | -0.934311   | 0.167899   |
| FTSJ1           | 34.2465   | 44.3314   | 0.372373    | 0.258496   |

|           |           |           |            |            |
|-----------|-----------|-----------|------------|------------|
| TSR1      | 24.558    | 32.8757   | 0.420824   | 0.176195   |
| PARP2     | 13.6586   | 12.8402   | -0.0891415 | 0.911445   |
| LOC441155 | 0.133541  | 0.0782715 | -0.770722  | 1          |
| ACOT1     | 3.30598   | 2.33444   | -0.501999  | 0.799656   |
| UBE2L3    | 47.1539   | 67.9935   | 0.528021   | 0.0596515  |
| MAFF      | 43.4222   | 28.3497   | -0.615096  | 0.0318822  |
| FANCE     | 15.4877   | 14.6643   | -0.0788163 | 0.926965   |
| RASSF1    | 20.1468   | 30.4909   | 0.597829   | 0.0329313  |
| DCP2      | 2.06745   | 1.53028   | -0.43406   | 0.20701    |
| IRF9      | 2.6915    | 3.5999    | 0.419547   | 0.487462   |
| MICAL3    | 4.47391   | 5.73715   | 0.358797   | 0.304772   |
| PPAP2A    | 10.4035   | 8.01139   | -0.376946  | 0.805817   |
| ISG20L2   | 14.6658   | 28.4487   | 0.955912   | 0.00153868 |
| RFWD2     | 9.84438   | 9.08691   | -0.11551   | 0.874955   |
| SAMD8     | 3.78694   | 3.11219   | -0.283099  | 0.507762   |
| DEPTOR    | 0.768385  | 0.278985  | -1.46164   | 0.0103919  |
| LYAR      | 29.5311   | 61.9014   | 1.06774    | 0.00153868 |
| GNA12     | 8.4635    | 10.5919   | 0.323629   | 0.398652   |
| MED17     | 10.1868   | 11.4566   | 0.169488   | 0.766151   |
| TRIM68    | 0.912357  | 0.824581  | -0.145937  | 0.902975   |
| NAALAD2   | 0.0538805 | 0.428104  | 2.99013    | 0.00820276 |
| PRSS54    | 0.821177  | 0.334899  | -1.29397   | 0.405036   |
| IGDCC4    | 0.194229  | 0.0983894 | -0.981187  | 1          |
| ANAPC15   | 21.0872   | 22.8426   | 0.115364   | 0.974348   |
| HOOK2     | 10.5083   | 8.50347   | -0.305405  | 0.513572   |
| APOBEC2   | 0.0113038 | 0.0137752 | 0.285264   | 1          |
| INSC      | 0.0292291 | 0         | #NAME?     | 1          |
| SLC39A6   | 22.4038   | 24.6067   | 0.135307   | 0.828851   |
| FAM108A1  | 109.955   | 122.474   | 0.155563   | 0.783706   |
| CD8A      | 0.117685  | 0.0941462 | -0.321956  | 1          |
| CDK2AP2   | 48.6991   | 50.8931   | 0.0635743  | 0.946416   |
| TRMT10C   | 28.0159   | 41.7725   | 0.576308   | 0.0294837  |
| GPR3      | 6.16152   | 9.25844   | 0.587482   | 0.0847952  |
| DNAJB12   | 16.6994   | 16.5062   | -0.0167937 | 0.986998   |
| VASP      | 63.8506   | 72.2688   | 0.178673   | 0.735516   |
| MFSD8     | 1.26803   | 1.76991   | 0.481092   | 0.273588   |
| SLC30A4   | 0.0960253 | 0.116825  | 0.282865   | 1          |
| NPM2      | 23.4004   | 21.8504   | -0.0988738 | 0.906423   |
| CEP55     | 12.8692   | 11.6783   | -0.140094  | 0.826422   |
| POP5      | 30.997    | 41.7993   | 0.431351   | 0.206668   |
| RECQL5    | 6.98379   | 4.30304   | -0.698652  | 0.020985   |
| GNL2      | 33.3292   | 34.2304   | 0.0384892  | 0.967343   |
| EME2      | 0.538858  | 0.59496   | 0.142888   | 0.963861   |
| THOP1     | 82.2112   | 86.5923   | 0.0749041  | 0.926868   |
| LINC00667 | 3.68718   | 3.00927   | -0.293105  | 0.540762   |
| USP11     | 12.8137   | 8.80774   | -0.540842  | 0.0719976  |
| ZGPAT     | 14.8994   | 26.866    | 0.850526   | 0.14872    |
| C6orf1    | 47.8943   | 16.2249   | -1.56165   | 0.00153868 |
| ARHGEF1   | 46.2605   | 47.3133   | 0.0324651  | 0.975484   |

|               |            |            |            |            |
|---------------|------------|------------|------------|------------|
| CD164         | 44.8865    | 46.1605    | 0.0403784  | 0.967296   |
| LOC100505761  | 11.3535    | 9.91319    | -0.195718  | 0.76757    |
| PPP2CA        | 51.9798    | 60.9174    | 0.228902   | 0.61305    |
| SATB2-AS1     | 0.00696666 | 0          | #NAME?     | 1          |
| ILF3          | 70.6323    | 81.5844    | 0.207966   | 0.692798   |
| TMEM161A      | 54.2788    | 48.862     | -0.151677  | 0.79984    |
| LOC100130744  | 0.638371   | 0.496186   | -0.363515  | 0.940466   |
| TMEM209       | 7.45548    | 3.87216    | -0.945162  | 0.00153868 |
| SLC39A11      | 5.36841    | 4.21333    | -0.349532  | 0.439829   |
| NDUFB1        | 186.823    | 167.994    | -0.153268  | 0.79183    |
| C1orf51       | 0.468433   | 0.539066   | 0.202619   | 0.909496   |
| GRIPAP1       | 12.4893    | 9.28514    | -0.427698  | 0.192807   |
| SLC10A6       | 0.0177392  | 0.00797974 | -1.15252   | 1          |
| WIP1          | 31.0424    | 26.507     | -0.227867  | 0.613714   |
| TMEM98        | 50.4042    | 40.7442    | -0.306949  | 0.407163   |
| NDUFAB1       | 15.7656    | 16.6452    | 0.0783316  | 0.930948   |
| SLC16A7       | 0.174297   | 0.157767   | -0.143755  | 1          |
| EIF4EBP2      | 4.60815    | 4.6354     | 0.00850526 | 0.994116   |
| FKBP1A,SDCBP2 | 142.249    | 176.524    | 0.311439   | 0.403093   |
| STK11         | 22.3412    | 25.806     | 0.207998   | 0.681478   |
| NDUFAB6       | 10.4784    | 17.9324    | 0.77514    | 0.00478151 |
| PIGH          | 16.4908    | 16.708     | 0.0188789  | 0.989954   |
| SNPH          | 1.43779    | 1.90936    | 0.409238   | 0.426228   |
| PHF16         | 2.5936     | 2.53086    | -0.0353275 | 0.975492   |
| PPP2R3C       | 19.4703    | 14.6134    | -0.413982  | 0.208603   |
| C17orf97      | 7.93861    | 8.00137    | 0.0113619  | 0.994068   |
| TGFBRAP1      | 1.59206    | 1.90783    | 0.261041   | 0.740552   |
| COX14         | 59.7781    | 63.7776    | 0.0934327  | 0.905839   |
| PIGT          | 69.7363    | 64.8732    | -0.104286  | 0.884031   |
| NOP2          | 33.5414    | 55.2101    | 0.718988   | 0.00153868 |
| TMEM8A        | 33.9106    | 43.7078    | 0.366157   | 0.273785   |
| ERLIN2        | 5.17095    | 3.51666    | -0.556223  | 0.0609817  |
| MRPL12        | 163.213    | 227.577    | 0.479599   | 0.0985099  |
| SLC30A5       | 6.62128    | 8.73135    | 0.399096   | 0.550766   |
| HDAC11        | 10.0185    | 5.20075    | -0.945868  | 0.00153868 |
| TESK1         | 25.7923    | 33.5553    | 0.379602   | 0.278813   |
| MFAP3         | 3.12262    | 2.73222    | -0.192683  | 0.756508   |
| TLK2          | 4.56203    | 4.79902    | 0.0730652  | 0.934861   |
| GRIK5         | 0.591062   | 0.311258   | -0.925197  | 0.231572   |
| STAU2-AS1     | 0.020625   | 0.0118016  | -0.805409  | 1          |
| MRPS11        | 27.7947    | 32.5435    | 0.227556   | 0.628907   |
| TMED10P1      | 0.129247   | 0.163271   | 0.337142   | 1          |
| LOC440288     | 2.55468    | 1.42826    | -0.838883  | 0.118625   |
| CTXN1         | 42.859     | 80.6876    | 0.912751   | 0.00153868 |
| ENTHD2        | 13.9224    | 13.9541    | 0.00327461 | 0.998381   |
| MAPK12        | 65.5371    | 76.4016    | 0.221291   | 0.628025   |
| GGH           | 48.3451    | 47.4197    | -0.0278827 | 0.977897   |
| ADCK2         | 43.7333    | 32.2667    | -0.438686  | 0.150143   |
| WDHD1         | 2.41528    | 1.97045    | -0.293666  | 0.533447   |

|              |            |           |            |            |
|--------------|------------|-----------|------------|------------|
| PIGL         | 6.01902    | 4.90627   | -0.294904  | 0.668626   |
| PES1         | 95.7081    | 121.319   | 0.342097   | 0.328749   |
| ORMDL2       | 24.3304    | 26.0277   | 0.0972861  | 0.944479   |
| COX19        | 4.47583    | 4.62464   | 0.0471862  | 0.964442   |
| NCL          | 299.202    | 463.683   | 0.63202    | 0.0187307  |
| C19orf43     | 311.895    | 412.737   | 0.404162   | 0.199834   |
| LINC00174    | 1.16019    | 0.368872  | -1.65317   | 0.00153868 |
| ZKSCAN8      | 0.334788   | 0.310195  | -0.110071  | 1          |
| HOXD8        | 3.72685    | 2.46971   | -0.593619  | 0.20116    |
| TMEM241      | 3.16258    | 3.2056    | 0.0194915  | 0.987786   |
| MMGT1        | 7.16389    | 7.59815   | 0.0849037  | 0.9183     |
| SRP19        | 21.0375    | 31.1578   | 0.56663    | 0.413223   |
| TUSC2        | 21.9713    | 38.4033   | 0.80561    | 0.00274688 |
| PGLS         | 156.409    | 114.317   | -0.452291  | 0.136653   |
| FAM124A      | 0.00569232 | 0         | #NAME?     | 1          |
| ZNF429       | 0.703011   | 0.446813  | -0.653876  | 0.303947   |
| NFE2L3       | 3.81227    | 5.7074    | 0.582181   | 0.0596515  |
| UBASH3B      | 1.88361    | 3.09845   | 0.718048   | 0.0163491  |
| DRG2         | 30.4199    | 28.9791   | -0.0700043 | 0.934861   |
| DPM1         | 45.435     | 42.088    | -0.110392  | 0.878944   |
| TMC7         | 1.16027    | 0.729027  | -0.670423  | 0.143573   |
| ITPK1        | 35.7361    | 36.3586   | 0.0249113  | 0.979267   |
| NUDT1        | 52.0011    | 53.8689   | 0.0509106  | 0.960032   |
| PBRM1        | 1.8488     | 2.03412   | 0.137812   | 0.847872   |
| ORMDL1       | 22.8996    | 25.1431   | 0.134842   | 0.86364    |
| RSPH10B2     | 0.0148511  | 0.0261825 | 0.818039   | 1          |
| TIMM8B       | 54.4515    | 84.3226   | 0.630946   | 0.100178   |
| SNRPB2       | 47.4704    | 56.4274   | 0.249369   | 0.550522   |
| ABHD16A      | 29.8637    | 21.9016   | -0.447358  | 0.159184   |
| RNPS1        | 148.402    | 186.481   | 0.329518   | 0.350684   |
| LAS1L        | 28.3123    | 27.0134   | -0.0677567 | 0.939356   |
| CSGALNACT2   | 4.87139    | 3.06024   | -0.670688  | 0.0304296  |
| SYT7         | 3.23722    | 2.93211   | -0.142818  | 0.848653   |
| ZW10         | 4.88571    | 5.31639   | 0.12188    | 0.876392   |
| EZR          | 80.4081    | 70.9911   | -0.179702  | 0.736853   |
| SNRPF        | 152.366    | 178.291   | 0.226693   | 0.614872   |
| C12orf45     | 51.5039    | 41.8554   | -0.299267  | 0.484634   |
| TMTC3        | 1.09908    | 1.16074   | 0.078747   | 0.939948   |
| GCSHP3       | 2.80197    | 2.62064   | -0.0965206 | 0.945208   |
| NDUFB8       | 293.029    | 272.197   | -0.106392  | 0.881798   |
| SRRM5        | 0.64575    | 0.736864  | 0.190421   | 0.955832   |
| ZDHHC16      | 26.1201    | 26.3555   | 0.0129438  | 0.991759   |
| KANSL1       | 6.83024    | 4.23131   | -0.690833  | 0.0123712  |
| FLVCR1       | 3.40482    | 5.54166   | 0.702737   | 0.00820276 |
| SCO2,TYMP    | 79.65      | 121.323   | 0.607108   | 0.176426   |
| CLDN3        | 1.64852    | 0.514351  | -1.68035   | 0.0919662  |
| OGFOD2       | 8.81766    | 7.99596   | -0.141124  | 0.867658   |
| LOC100129034 | 20.3409    | 16.6038   | -0.292868  | 0.810183   |
| RAB8A        | 29.4905    | 40.4803   | 0.456969   | 0.13407    |

|               |            |          |            |            |
|---------------|------------|----------|------------|------------|
| TNIP2         | 49.9234    | 58.624   | 0.231775   | 0.596588   |
| ESCO2         | 2.78593    | 4.0064   | 0.524149   | 0.130682   |
| DAGLA         | 1.59912    | 1.68463  | 0.075152   | 0.952184   |
| SAAL1         | 21.845     | 22.1944  | 0.0228948  | 0.981543   |
| TP53I11       | 13.3853    | 8.43784  | -0.665702  | 0.0163491  |
| ZNF596        | 0.504587   | 0.185676 | -1.44232   | 0.553572   |
| SLC7A2        | 3.4178     | 4.61577  | 0.433504   | 0.168764   |
| GCN1L1        | 16.8246    | 18.2857  | 0.120149   | 0.861006   |
| FAM174A       | 7.77437    | 7.22651  | -0.105427  | 0.91609    |
| CRELD2        | 13.1918    | 31.518   | 1.25653    | 0.00153868 |
| SNRNP48       | 4.27549    | 4.96703  | 0.216295   | 0.679486   |
| SNX11         | 9.53739    | 10.699   | 0.165809   | 0.796502   |
| TMEM216       | 33.8683    | 33.5886  | -0.0119637 | 0.992304   |
| NFE2L2        | 13.5902    | 12.4492  | -0.126508  | 0.853105   |
| TRIM26        | 16.0942    | 17.2264  | 0.0980793  | 0.894574   |
| MRPS16        | 41.0227    | 32.6889  | -0.327625  | 0.352552   |
| MRRF          | 47.9181    | 43.9883  | -0.123452  | 0.879418   |
| SMOC1         | 0.00540151 | 0        | #NAME?     | 1          |
| PRODH         | 1.14098    | 0.496683 | -1.19987   | 0.0508243  |
| HIC1          | 5.44586    | 10.8234  | 0.990924   | 0.00380811 |
| ZFP41         | 4.6529     | 3.84361  | -0.275668  | 0.642898   |
| PTGES2        | 185.747    | 238.004  | 0.357641   | 0.312032   |
| KDM4A         | 7.07744    | 4.74288  | -0.577466  | 0.0550104  |
| HTR1D         | 0.0073692  | 0        | #NAME?     | 1          |
| YBX1          | 726.72     | 858.572  | 0.240538   | 0.606595   |
| PPIL1         | 26.1702    | 40.6375  | 0.634884   | 0.0123712  |
| CDK7          | 46.2074    | 29.085   | -0.667848  | 0.00820276 |
| DCTN5         | 6.63192    | 8.76507  | 0.402339   | 0.200752   |
| IL4I1,NUP62   | 25.4554    | 41.6035  | 0.708732   | 0.341011   |
| SSU72         | 157.503    | 183.104  | 0.217291   | 0.638761   |
| C19orf10      | 148.374    | 172.807  | 0.21992    | 0.629512   |
| ZNF219        | 19.5247    | 16.4643  | -0.245958  | 0.62495    |
| SDC3          | 5.12411    | 3.75214  | -0.449586  | 0.198701   |
| RBM12B        | 3.07911    | 3.46829  | 0.171713   | 0.78394    |
| TIMP1         | 622.569    | 796.728  | 0.355853   | 0.332486   |
| CDK11A,CDK11B | 17.7151    | 20.6363  | 0.220198   | 0.764333   |
| SNAPC4        | 14.8414    | 24.6231  | 0.730384   | 0.00153868 |
| C11orf74      | 11.5408    | 5.72188  | -1.01218   | 0.00274688 |
| PSEN1         | 6.56975    | 5.10313  | -0.364456  | 0.295146   |
| EIF3B         | 85.3473    | 119.386  | 0.484213   | 0.0956889  |
| MAN1A1        | 1.39894    | 1.05703  | -0.404316  | 0.421535   |
| YIPF4         | 16.3081    | 8.73606  | -0.900535  | 0.00153868 |
| PITHD1        | 34.9742    | 49.0556  | 0.488126   | 0.0959472  |
| CLPTM1        | 47.3783    | 60.0157  | 0.341113   | 0.311521   |
| RRP12         | 14.5474    | 26.4304  | 0.861441   | 0.00153868 |
| SDF4          | 94.0714    | 111.463  | 0.244742   | 0.557004   |
| NDUFB6        | 63.3936    | 68.1438  | 0.104245   | 0.883207   |
| RNASEH2B      | 22.5719    | 20.9338  | -0.108693  | 0.880754   |
| HOXD-AS2      | 8.47514    | 7.19272  | -0.2367    | 0.840956   |

|            |            |            |            |            |
|------------|------------|------------|------------|------------|
| CMYA5      | 0.00222332 | 0.00687627 | 1.62891    | 1          |
| TRAPPC4    | 58.1414    | 75.4556    | 0.376062   | 0.249473   |
| PITPNA-AS1 | 13.4202    | 5.89188    | -1.1876    | 0.57283    |
| CHMP4A     | 37.6993    | 26.8534    | -0.489431  | 0.093011   |
| ZNF132     | 0.247407   | 0.476966   | 0.946999   | 0.152252   |
| PFAS       | 10.5391    | 12.7108    | 0.270314   | 0.513296   |
| CARNS1     | 0.0777453  | 0.184785   | 1.24902    | 1          |
| SNRPG      | 275.907    | 365.874    | 0.407165   | 0.199834   |
| LRRC1      | 3.60252    | 3.85183    | 0.0965393  | 0.915927   |
| TUBGCP3    | 3.59612    | 3.43057    | -0.0679913 | 0.949      |
| NOL6       | 10.8984    | 31.633     | 1.53732    | 0.00153868 |
| POLRMT     | 43.9296    | 58.8194    | 0.421097   | 0.170772   |
| ZNF346     | 3.54767    | 4.35994    | 0.297438   | 0.559351   |
| SLC18B1    | 10.4905    | 12.0543    | 0.200469   | 0.713997   |
| TFAM       | 7.2599     | 9.56734    | 0.398167   | 0.204028   |
| LINC00854  | 0.0184275  | 0.0592538  | 1.68505    | 1          |
| ATG4B      | 26.3614    | 29.5531    | 0.164882   | 0.766664   |
| SPTLC2     | 7.47281    | 5.82236    | -0.360046  | 0.28785    |
| STXBP5     | 0.585688   | 0.572001   | -0.0341141 | 0.978996   |
| NT5C2      | 7.34553    | 5.86676    | -0.324302  | 0.399838   |
| DPH2       | 25.5144    | 53.3961    | 1.06543    | 0.00153868 |
| PLEKHJ1    | 108.811    | 92.4165    | -0.2356    | 0.592157   |
| DVL1       | 87.2964    | 78.8794    | -0.146273  | 0.8041     |
| LOC388948  | 0.0182099  | 0          | #NAME?     | 1          |
| VAR5       | 70.1666    | 62.3629    | -0.170097  | 0.75446    |
| FHAD1      | 2.6901     | 1.19472    | -1.17098   | 0.00153868 |
| AKAP12     | 1.20851    | 0.635616   | -0.927002  | 0.00820276 |
| ENTPD1     | 1.17138    | 2.06729    | 0.819526   | 0.0308509  |
| ABHD2      | 3.0441     | 2.43976    | -0.319276  | 0.438793   |
| NFYC       | 19.9583    | 15.482     | -0.366395  | 0.33354    |
| GGA1       | 32.2978    | 29.8846    | -0.112034  | 0.874294   |
| DCAF12     | 11.0673    | 13.0121    | 0.23355    | 0.599775   |
| EXOSC1     | 31.3001    | 21.0716    | -0.570865  | 0.0568637  |
| TOP3A      | 4.4799     | 4.99698    | 0.15759    | 0.818403   |
| TEX2       | 3.39063    | 5.31071    | 0.647353   | 0.0198871  |
| NT5C3B     | 63.1922    | 63.2412    | 0.00111942 | 0.999234   |
| JTB        | 174.922    | 193.323    | 0.144307   | 0.90202    |
| TMEM185A   | 6.14141    | 6.19417    | 0.0123416  | 0.992823   |
| BFAR       | 21.0464    | 17.0107    | -0.30713   | 0.403093   |
| KCNC4      | 4.0016     | 4.79072    | 0.259664   | 0.656358   |
| DTX2       | 11.5566    | 10.8297    | -0.0937265 | 0.917228   |
| ETV4       | 70.1023    | 37.0072    | -0.921658  | 0.00153868 |
| DNAJC7     | 38.5297    | 42.9945    | 0.158182   | 0.89301    |
| KLHL25     | 3.13974    | 5.40063    | 0.782484   | 0.0176564  |
| GDPD3      | 1.18266    | 1.34608    | 0.186727   | 0.912292   |
| TPBG       | 11.8563    | 11.2554    | -0.0750299 | 0.934034   |
| DHTKD1     | 3.76015    | 1.64999    | -1.18834   | 0.00153868 |
| KIAA0317   | 5.58736    | 8.14182    | 0.543185   | 0.0545989  |
| E2F4       | 60.6457    | 93.6499    | 0.626872   | 0.00970147 |



|              |           |           |            |            |
|--------------|-----------|-----------|------------|------------|
| WDR25        | 4.9253    | 3.17555   | -0.633206  | 0.116553   |
| PITX1        | 31.9753   | 49.1131   | 0.619153   | 0.0198871  |
| MOK          | 11.7906   | 18.1969   | 0.626055   | 0.0634009  |
| TOPBP1       | 6.97074   | 6.8011    | -0.035543  | 0.971768   |
| TOR1B        | 20.9359   | 24.0873   | 0.202293   | 0.684867   |
| CHRNA7       | 1.55271   | 1.13961   | -0.446245  | 0.450505   |
| HMGB1        | 94.6891   | 111.556   | 0.236492   | 0.599091   |
| DNAJB14      | 1.3439    | 1.08535   | -0.308263  | 0.677165   |
| NSUN2        | 27.2178   | 45.5522   | 0.742968   | 0.00274688 |
| NR2C2        | 1.55774   | 1.45173   | -0.101679  | 0.975484   |
| GPS2         | 43.1724   | 48.8697   | 0.17883    | 0.743375   |
| SPRED2       | 10.5363   | 8.75879   | -0.26657   | 0.536281   |
| CLDN15       | 13.1284   | 11.746    | -0.160521  | 0.839471   |
| COMTD1       | 52.4011   | 39.8903   | -0.393561  | 0.335669   |
| SERINC3      | 18.7205   | 8.82066   | -1.08566   | 0.00153868 |
| TAF3         | 2.49069   | 3.12578   | 0.327669   | 0.521675   |
| RABAC1       | 154.74    | 145.018   | -0.0936175 | 0.900642   |
| GTF2H1       | 10.1972   | 12.1812   | 0.256482   | 0.557974   |
| PSPN         | 0.63877   | 0.698136  | 0.128212   | 0.975492   |
| GTF2H2       | 1.07162   | 1.13751   | 0.0860794  | 0.954143   |
| MED22        | 45.2144   | 72.7282   | 0.685732   | 0.0259174  |
| SLC25A39     | 422.037   | 433.196   | 0.0376499  | 0.968613   |
| MFN2         | 11.008    | 13.795    | 0.325597   | 0.361239   |
| TXLNG        | 13.868    | 14.8159   | 0.0953853  | 0.897332   |
| CHST7        | 1.12838   | 1.35126   | 0.26005    | 0.836372   |
| MERTK        | 0.959746  | 0.579901  | -0.726847  | 0.144765   |
| POLR2E       | 89.5052   | 97.0125   | 0.116199   | 0.879055   |
| ARIH2        | 18.4734   | 23.4345   | 0.34318    | 0.320294   |
| SNRNP25      | 31.4901   | 60.85     | 0.950358   | 0.00153868 |
| TRDMT1       | 0.644598  | 0.416885  | -0.628751  | 0.157202   |
| C4orf46      | 4.60709   | 6.13049   | 0.412145   | 0.250712   |
| ZNF839       | 5.7312    | 3.54809   | -0.691792  | 0.0220668  |
| AMD1         | 22.5638   | 36.4058   | 0.690159   | 0.00820276 |
| FAM129C      | 0.190495  | 0.0624258 | -1.60954   | 1          |
| CBWD3,CBWD5  | 2.48533   | 3.18299   | 0.356947   | 0.554414   |
| PQLC2        | 30.218    | 26.4779   | -0.190621  | 0.730432   |
| GLT8D2       | 0.19279   | 0.175617  | -0.134597  | 1          |
| KLHL18       | 4.63202   | 9.15055   | 0.982217   | 0.00153868 |
| ICMT         | 12.8853   | 19.4775   | 0.596081   | 0.0338188  |
| HNRNPA0      | 56.0598   | 74.4649   | 0.409593   | 0.184273   |
| PSMC2        | 35.2378   | 39.0868   | 0.149557   | 0.790722   |
| CIB4         | 0.0318271 | 0.0211698 | -0.588249  | 1          |
| DDX31        | 17.9287   | 20.5901   | 0.199679   | 0.775623   |
| RBL1         | 0.565343  | 0.510618  | -0.146883  | 0.906254   |
| CHD7         | 1.89326   | 2.34916   | 0.311274   | 0.434341   |
| PIGO         | 10.8569   | 7.00846   | -0.63144   | 0.0308509  |
| FAM188B,INMT | 1.08334   | 0.63562   | -0.769256  | 0.14961    |
| HCAR3        | 0.013313  | 0         | #NAME?     | 1          |
| BLOC1S1,RDH5 | 122.531   | 105.476   | -0.216236  | 0.657199   |

|           |            |           |            |            |
|-----------|------------|-----------|------------|------------|
| UBE2D2    | 39.4982    | 39.8138   | 0.0114801  | 0.992304   |
| LXN       | 9.99883    | 4.73198   | -1.07932   | 0.20598    |
| APOBEC3G  | 0.0107175  | 0.0055876 | -0.939669  | 1          |
| KCNAB3    | 0.76919    | 0.687217  | -0.162575  | 0.91609    |
| ACOT9     | 31.0628    | 23.0705   | -0.429136  | 0.161616   |
| SLC25A14  | 6.74086    | 6.12132   | -0.13909   | 0.870809   |
| DKC1      | 47.25      | 70.7912   | 0.583255   | 0.0313688  |
| TST       | 89.5374    | 81.0653   | -0.143406  | 0.912953   |
| DDX28     | 18.3931    | 17.6757   | -0.0574022 | 0.967226   |
| MKI67     | 9.38337    | 11.5404   | 0.29851    | 0.42844    |
| SAP30BP   | 26.694     | 34.0515   | 0.351201   | 0.304126   |
| TRAPP1    | 160.876    | 156.538   | -0.0394385 | 0.96692    |
| ZC3H7B    | 11.0449    | 13.3416   | 0.272549   | 0.497985   |
| USF2      | 106.151    | 84.0428   | -0.336922  | 0.337222   |
| APIP      | 14.6517    | 13.3845   | -0.130513  | 0.91609    |
| NRBP1     | 60.6089    | 68.9188   | 0.185368   | 0.721454   |
| LOC554223 | 0.0459687  | 0         | #NAME?     | 1          |
| STIM1     | 9.93649    | 7.07344   | -0.490324  | 0.117075   |
| MIIP      | 36.9025    | 33.1597   | -0.154287  | 0.794882   |
| RAI14     | 5.93716    | 7.31636   | 0.301353   | 0.441009   |
| C19orf54  | 9.16574    | 3.21691   | -1.51058   | 0.0308509  |
| MYADM     | 48.935     | 31.1558   | -0.651366  | 0.00970147 |
| CLCN1     | 0.00726696 | 0.0086861 | 0.257356   | 1          |
| FAM206A   | 21.605     | 18.2573   | -0.242893  | 0.575964   |
| NAPRT1    | 74.5049    | 49.837    | -0.580119  | 0.0355697  |
| POC1A     | 17.7165    | 14.0152   | -0.3381    | 0.383479   |
| YKT6      | 34.6174    | 63.8274   | 0.88268    | 0.00153868 |
| EIF1AX    | 35.9124    | 49.6698   | 0.467887   | 0.107265   |
| SLC44A2   | 19.7954    | 6.03181   | -1.71451   | 0.00153868 |
| TANGO2    | 11.5361    | 10.3053   | -0.162769  | 0.797899   |
| MEST      | 16.053     | 14.6732   | -0.129657  | 0.887299   |
| U2AF2     | 70.3555    | 143.773   | 1.03106    | 0.00153868 |
| EME1      | 1.93854    | 1.25197   | -0.630763  | 0.938348   |
| SYMPK     | 21.6011    | 18.076    | -0.257028  | 0.539647   |
| TMEM179B  | 68.2908    | 49.5037   | -0.464157  | 0.17063    |
| UCP2      | 66.883     | 53.2671   | -0.328393  | 0.348454   |
| ZAR1L     | 0.0247454  | 0         | #NAME?     | 1          |
| NINJ1     | 69.553     | 52.9176   | -0.394366  | 0.218676   |
| TOMM5     | 118.474    | 230.981   | 0.963206   | 0.00153868 |
| PLBD2     | 10.7994    | 8.65781   | -0.318871  | 0.448465   |
| SLC35C2   | 33.9297    | 16.5138   | -1.03887   | 0.00153868 |
| FAM72B    | 1.43899    | 0.817491  | -0.815783  | 0.089127   |
| CCAR1     | 7.60876    | 9.93179   | 0.384392   | 0.245988   |
| FAM171B   | 0.202382   | 0.127535  | -0.666188  | 1          |
| NFATC1    | 3.35535    | 3.78087   | 0.172255   | 0.862406   |
| TMEM251   | 26.1174    | 18.7113   | -0.481099  | 0.161007   |
| IFT27     | 11.19      | 8.39214   | -0.415105  | 0.397065   |
| NAA20     | 98.5376    | 116.73    | 0.244434   | 0.568837   |
| UBQLN4    | 31.8564    | 33.4917   | 0.0722214  | 0.930948   |

|              |           |            |            |            |
|--------------|-----------|------------|------------|------------|
| CTDP1        | 12.3643   | 16.6795    | 0.431895   | 0.186334   |
| ICT1         | 53.1984   | 35.4545    | -0.585414  | 0.0388971  |
| RAB35        | 25.1512   | 35.8925    | 0.513056   | 0.0561838  |
| XRCC5        | 88.0386   | 84.7938    | -0.0541778 | 0.951891   |
| ZNF544       | 4.84353   | 5.60691    | 0.211146   | 0.704317   |
| ZNF444       | 26.6526   | 28.7826    | 0.110921   | 0.882554   |
| FOXK2        | 19.9782   | 22.69      | 0.183626   | 0.720363   |
| NQO1         | 23.8491   | 25.1164    | 0.0746954  | 0.926443   |
| CMC2         | 56.3661   | 77.2069    | 0.453903   | 0.46587    |
| HMGNS        | 2.15568   | 2.26233    | 0.0696692  | 0.978818   |
| CCDC51       | 19.4217   | 25.2499    | 0.378608   | 0.303364   |
| TBC1D24      | 3.44501   | 4.9929     | 0.53537    | 0.0851513  |
| C6orf132     | 4.56672   | 4.74064    | 0.053921   | 0.957719   |
| LOC100129917 | 0.200506  | 0.413197   | 1.04319    | 0.399575   |
| PLEKHA5      | 1.66902   | 0.995256   | -0.745862  | 0.0515699  |
| MOSPD1       | 3.47745   | 2.85279    | -0.285659  | 0.629024   |
| LINC00116    | 14.7984   | 15.3199    | 0.0499606  | 0.961236   |
| ARHGAP11A    | 6.37771   | 9.52289    | 0.578361   | 0.034328   |
| UPF2         | 5.40738   | 6.99263    | 0.370906   | 0.281393   |
| C7orf43      | 10.9294   | 17.9458    | 0.71543    | 0.0143403  |
| CYSTM1       | 99.1192   | 77.5344    | -0.354327  | 0.302001   |
| STK4         | 8.05975   | 9.03568    | 0.164898   | 0.764456   |
| DNAJC18      | 2.25706   | 1.55813    | -0.534625  | 0.155867   |
| GPA33        | 0.0173476 | 0          | #NAME?     | 1          |
| POLD3        | 2.12425   | 2.00378    | -0.0842296 | 0.936015   |
| SCARNA7      | 20.7286   | 18.7909    | -0.141587  | 0.979338   |
| SLC35G1      | 2.91016   | 3.84798    | 0.403007   | 0.398652   |
| NCAPG        | 5.8743    | 3.72878    | -0.655712  | 0.0680502  |
| MAN1A2       | 0.904439  | 0.965428   | 0.0941457  | 0.934861   |
| WDR41        | 13.1888   | 8.30593    | -0.667099  | 0.00970147 |
| LRFN3        | 12.9082   | 14.1078    | 0.128212   | 0.874789   |
| LOC286059    | 0.0623406 | 0.00997555 | -2.6437    | 1          |
| DPP9         | 16.6496   | 21.3542    | 0.359033   | 0.295637   |
| ABHD12       | 43.8881   | 39.6775    | -0.145509  | 0.903683   |
| TUBA8        | 6.40692   | 6.71885    | 0.0685826  | 0.947883   |
| C16orf88     | 7.10421   | 7.98896    | 0.169332   | 0.838861   |
| SEC22B       | 14.4401   | 15.1039    | 0.0648421  | 0.944779   |
| RBM3         | 79.9428   | 70.8364    | -0.174476  | 0.744097   |
| KLF16        | 56.0791   | 83.4889    | 0.574122   | 0.0280907  |
| SEC61A2      | 8.96822   | 7.62328    | -0.234409  | 0.967343   |
| ORAI2        | 4.1388    | 5.96327    | 0.526891   | 0.166442   |
| CD151        | 409.28    | 386.842    | -0.0813417 | 0.922427   |
| CA11         | 15.9026   | 9.03466    | -0.815723  | 0.00572929 |
| TRIM56       | 1.72732   | 2.30807    | 0.41815    | 0.4662     |
| KAZN         | 6.52258   | 11.2418    | 0.785362   | 0.00153868 |
| RAE1         | 31.4839   | 35.8918    | 0.18904    | 0.833004   |
| NPRL3        | 49.6864   | 37.4693    | -0.407141  | 0.581949   |
| RRP15        | 1.16885   | 1.92182    | 0.717378   | 0.0156935  |
| SLMAP        | 5.17671   | 4.75852    | -0.121522  | 0.869513   |

|              |          |          |            |            |
|--------------|----------|----------|------------|------------|
| PCGF6        | 10.7294  | 9.90771  | -0.114951  | 0.879418   |
| TRIP12       | 10.3388  | 11.8189  | 0.193029   | 0.690264   |
| KRT18        | 233.126  | 281.62   | 0.272636   | 0.535841   |
| AP3M1        | 6.97897  | 7.15981  | 0.0369067  | 0.971173   |
| ZBTB48       | 12.269   | 12.1685  | -0.011861  | 0.993208   |
| AADAT        | 6.8722   | 7.6364   | 0.152121   | 0.824372   |
| CSDA         | 153.566  | 161.248  | 0.0704177  | 0.933523   |
| TLR3         | 0.205799 | 0.029686 | -2.79338   | 1          |
| TLR6         | 0.771492 | 0.193046 | -1.99871   | 0.00153868 |
| CC2D2A       | 3.998    | 2.66047  | -0.587597  | 0.213147   |
| GTF2H3       | 10.0845  | 8.18309  | -0.301416  | 0.703975   |
| TOMM20L      | 1.12503  | 0.708914 | -0.666276  | 0.958285   |
| PRMT3        | 4.85056  | 5.37205  | 0.147322   | 0.836427   |
| MIF4GD       | 27.4803  | 15.2654  | -0.848132  | 0.349308   |
| GPATCH2      | 1.20555  | 1.08283  | -0.154884  | 0.89536    |
| ZNRD1-AS1    | 0.631893 | 0.407397 | -0.633243  | 0.608991   |
| NR2F6        | 122.104  | 175.909  | 0.526722   | 0.055778   |
| PEX14        | 24.9457  | 21.4662  | -0.216725  | 0.666505   |
| KLHL5        | 1.648    | 1.23432  | -0.416998  | 0.3005     |
| EFR3B        | 0.220909 | 0.184266 | -0.261662  | 1          |
| ACRC         | 0.213129 | 0.253612 | 0.250898   | 1          |
| LGMN         | 29.6499  | 25.5243  | -0.216153  | 0.640772   |
| NGRN         | 68.0177  | 79.7084  | 0.22882    | 0.604243   |
| TRNP1        | 16.256   | 13.9075  | -0.225108  | 0.684382   |
| DUS1L        | 67.5358  | 92.7613  | 0.457871   | 0.123296   |
| HN1L         | 21.1787  | 32.8851  | 0.634823   | 0.0176564  |
| TERF1        | 13.377   | 13.9962  | 0.0652769  | 0.939323   |
| PA2G4        | 138.665  | 170.32   | 0.296647   | 0.445041   |
| CDC42BPA     | 2.58159  | 1.80279  | -0.518032  | 0.0904689  |
| SCAF4        | 9.10285  | 10.3195  | 0.180983   | 0.740167   |
| TMEM234      | 5.16771  | 5.41615  | 0.0677418  | 0.960529   |
| C1QTNF9B-AS1 | 0.18527  | 0.308293 | 0.73467    | 1          |
| SURF4        | 163.166  | 238.182  | 0.545727   | 0.0525851  |
| C6orf48      | 389.549  | 240.055  | -0.698441  | 0.00739414 |
| SHKBP1       | 84.5211  | 69.6406  | -0.279383  | 0.467566   |
| WSB2         | 21.0713  | 21.8548  | 0.0526702  | 0.954469   |
| MREG         | 7.46847  | 12.6036  | 0.754957   | 0.00478151 |
| GALNT10      | 2.09638  | 3.26262  | 0.638132   | 0.0388971  |
| PINK1        | 20.3949  | 19.4321  | -0.0697696 | 0.936071   |
| TTN-AS1      | 0.132529 | 0.169329 | 0.353517   | 1          |
| SNX24        | 13.3773  | 9.92263  | -0.430993  | 0.197245   |
| MGAT2        | 18.3666  | 21.0252  | 0.195033   | 0.704283   |
| HIST3H2A     | 38.3269  | 17.4615  | -1.13418   | 0.00820276 |
| GNRHR2       | 5.91784  | 11.1204  | 0.910065   | 0.146782   |
| UCHL3        | 56.8592  | 71.6723  | 0.334022   | 0.331994   |
| FLVCR1-AS1   | 2.74494  | 2.25138  | -0.285965  | 0.782703   |
| YWHAH        | 69.215   | 85.0213  | 0.296738   | 0.415518   |
| ACVR2A       | 0.779557 | 0.700854 | -0.153539  | 0.954981   |
| ADPRH        | 1.04598  | 0.647071 | -0.692864  | 0.186315   |

|          |            |            |            |            |
|----------|------------|------------|------------|------------|
| RAB19    | 0.0233901  | 0          | #NAME?     | 1          |
| SNORA33  | 17.6132    | 16.4361    | -0.0997913 | 0.993157   |
| MTG1     | 36.4535    | 31.4431    | -0.213316  | 0.702001   |
| RNF5P1   | 0.0477833  | 0.0122395  | -1.96496   | 1          |
| PRELID1  | 189.156    | 270.96     | 0.518508   | 0.16542    |
| SNHG1    | 188.199    | 158.814    | -0.244915  | 0.572986   |
| KIRREL   | 0.890994   | 0.714137   | -0.319214  | 0.723759   |
| OIP5     | 11.621     | 11.6712    | 0.00621676 | 0.996244   |
| RBM28    | 23.2512    | 25.6437    | 0.141299   | 0.817992   |
| MESTIT1  | 0.00987542 | 0.0178466  | 0.853734   | 1          |
| GEMIN6   | 33.0483    | 44.3665    | 0.424895   | 0.207889   |
| PMCH     | 1.00296    | 0.897726   | -0.159916  | 0.975454   |
| SRSF3    | 85.1602    | 108.188    | 0.345294   | 0.320865   |
| IGSF23   | 0.0305147  | 0.0113487  | -1.42697   | 1          |
| C10orf82 | 0.0537641  | 0.0804205  | 0.58092    | 1          |
| SIPA1L1  | 5.96955    | 3.98204    | -0.584114  | 0.0451232  |
| MICA     | 28.6528    | 39.4469    | 0.461237   | 0.126516   |
| DNAJC30  | 12.5609    | 12.1326    | -0.0500491 | 0.960032   |
| C17orf51 | 3.12664    | 3.90157    | 0.319443   | 0.420832   |
| HEXA     | 57.1134    | 36.3279    | -0.65275   | 0.00897284 |
| MCM6     | 18.4962    | 21.4882    | 0.216317   | 0.633246   |
| ATXN7L3  | 18.1923    | 22.2306    | 0.289222   | 0.45332    |
| SRSF10   | 29.6216    | 38.1754    | 0.365993   | 0.28861    |
| SLC39A1  | 121.795    | 104.938    | -0.214919  | 0.838861   |
| TRIM40   | 0.0138927  | 0          | #NAME?     | 1          |
| RIMS4    | 0.00426369 | 0.00222842 | -0.936081  | 1          |
| NDUFA11  | 529.894    | 547.1      | 0.0461016  | 0.961236   |
| MED6     | 20.1308    | 21.1997    | 0.0746408  | 0.93489    |
| RRM2     | 45.8814    | 63.4829    | 0.468458   | 0.126915   |
| SVIP     | 6.38399    | 7.58489    | 0.248669   | 0.674529   |
| FAM32A   | 47.7485    | 59.2785    | 0.312056   | 0.395334   |
| AAR2     | 19.8601    | 19.7153    | -0.010554  | 0.993157   |
| ADAT1    | 0.819322   | 0.683578   | -0.261324  | 0.776837   |
| SAE1     | 72.0547    | 82.1355    | 0.188913   | 0.710632   |
| TTI1     | 6.22381    | 8.25042    | 0.406671   | 0.23883    |
| FAM195B  | 72.2628    | 73.9369    | 0.0330423  | 0.974593   |
| EXTL3    | 15.46      | 20.0867    | 0.377697   | 0.325447   |
| METTL13  | 13.3002    | 24.9056    | 0.905017   | 0.00153868 |
| VHL      | 21.7383    | 18.4412    | -0.237306  | 0.586579   |
| ZC3H15   | 32.1352    | 37.7503    | 0.232335   | 0.594138   |
| DUS2L    | 13.6016    | 14.2385    | 0.0660267  | 0.963969   |
| CHMP4B   | 70.556     | 73.6453    | 0.0618254  | 0.943284   |
| NUDT19   | 18.8858    | 23.3199    | 0.304258   | 0.418773   |
| ALDH2    | 73.1007    | 52.9091    | -0.46637   | 0.107265   |
| OAZ3     | 3.69148    | 3.48375    | -0.0835607 | 0.988531   |
| SURF2    | 87.104     | 90.4349    | 0.0541417  | 0.954469   |
| MTRNR2L2 | 57.4265    | 39.7601    | -0.530393  | 0.349063   |
| SHCBP1   | 5.23428    | 5.69999    | 0.122968   | 0.872122   |
| CLUH     | 37.0847    | 64.2439    | 0.792733   | 0.00153868 |

|               |            |            |            |            |
|---------------|------------|------------|------------|------------|
| HAUS8         | 11.8345    | 13.6174    | 0.202451   | 0.742612   |
| WBSCR27       | 14.4799    | 4.44576    | -1.70355   | 0.00153868 |
| LPA           | 0.00272924 | 0.00142999 | -0.932494  | 1          |
| TUT1          | 12.5184    | 10.319     | -0.27875   | 0.535571   |
| LOC100653515  | 0.0188929  | 0.0125941  | -0.585096  | 1          |
| COQ3          | 11.4632    | 8.97947    | -0.352313  | 0.416386   |
| STUB1         | 66.2462    | 82.5514    | 0.317455   | 0.667022   |
| UBR1          | 1.39496    | 1.34687    | -0.050619  | 0.964628   |
| TRMT1         | 63.5874    | 76.2102    | 0.261243   | 0.528205   |
| MRPL49        | 35.189     | 45.3894    | 0.367229   | 0.89002    |
| C6orf47       | 9.2218     | 11.6147    | 0.332832   | 0.404384   |
| PPFIBP1       | 4.77878    | 3.27824    | -0.543723  | 0.068345   |
| HSCB          | 24.1328    | 18.214     | -0.40595   | 0.252721   |
| RBMXL2        | 0.0491876  | 0.0316786  | -0.634786  | 1          |
| RNF6          | 14.4287    | 10.3357    | -0.481299  | 0.106773   |
| BMS1          | 9.57896    | 14.772     | 0.624923   | 0.0123712  |
| PDCD2         | 43.0135    | 41.5955    | -0.0483608 | 0.965831   |
| ITGA6         | 2.07826    | 2.56098    | 0.301325   | 0.525673   |
| AKIRIN1       | 20.891     | 23.0622    | 0.142652   | 0.810299   |
| ANKRD35       | 0.00634864 | 0          | #NAME?     | 1          |
| TMEM50A       | 36.9801    | 34.7229    | -0.0908591 | 0.902819   |
| ERV3-1_ZNF117 | 0.808959   | 0.733105   | -0.142046  | 0.912629   |
| TIMM13        | 90.7446    | 129.681    | 0.515082   | 0.0576107  |
| OGFRL1        | 15.2253    | 12.1769    | -0.322324  | 0.421947   |
| HMSD          | 4.81455    | 3.53226    | -0.44681   | 0.524958   |
| WDR76         | 5.79122    | 5.42747    | -0.0935877 | 0.907499   |
| LILRA2        | 0.0122208  | 0          | #NAME?     | 1          |
| C18orf54      | 1.326      | 1.10407    | -0.264256  | 0.676146   |
| TSTD1         | 108.7      | 84.7445    | -0.359155  | 0.338257   |
| CRX           | 0.00923374 | 0.0183592  | 0.991516   | 1          |
| C7orf26       | 21.8036    | 31.5058    | 0.53105    | 0.0729664  |
| TMCO4         | 6.1687     | 4.00199    | -0.62425   | 0.0554201  |
| CD2BP2        | 38.2476    | 43.6819    | 0.191666   | 0.691843   |
| SNRNP200      | 29.3132    | 26.1479    | -0.164852  | 0.765759   |
| RP9           | 14.7985    | 15.6328    | 0.0791337  | 0.934861   |
| SEC63         | 6.34943    | 5.13303    | -0.306817  | 0.422315   |
| CCT5          | 89.3271    | 139.738    | 0.64555    | 0.00970147 |
| WDR13         | 39.5651    | 32.0286    | -0.304868  | 0.430787   |
| TSEN54        | 33.6375    | 51.2572    | 0.607686   | 0.0294837  |
| MARK3         | 22.2282    | 22.8081    | 0.0371574  | 0.969911   |
| ENDOV         | 9.27939    | 7.82417    | -0.246091  | 0.85992    |
| ERC1          | 2.7054     | 2.51383    | -0.105957  | 0.893674   |
| SCAP          | 28.6691    | 33.0446    | 0.204917   | 0.666451   |
| LARS          | 36.3965    | 24.1066    | -0.594374  | 0.0253664  |
| ZNF605        | 1.73898    | 1.68636    | -0.0443283 | 0.968178   |
| STARD7        | 40.862     | 64.5524    | 0.65971    | 0.00970147 |
| ARL13B        | 0.864341   | 1.01824    | 0.236409   | 0.777535   |
| POLE2         | 5.42441    | 7.11799    | 0.392003   | 0.35293    |
| GMEB2         | 6.66431    | 5.81739    | -0.196084  | 0.749328   |

|           |            |            |            |            |
|-----------|------------|------------|------------|------------|
| AAAS      | 25.5914    | 19.5766    | -0.38653   | 0.237712   |
| ELMOD2    | 3.25685    | 2.11053    | -0.625873  | 0.0379922  |
| BRF1      | 17.84      | 21.3379    | 0.2583     | 0.846427   |
| RPL22L1   | 376.9      | 357.212    | -0.0774035 | 0.92921    |
| CCDC127   | 13.9514    | 15.6311    | 0.164008   | 0.806525   |
| SAMD5     | 0.676334   | 0.953349   | 0.495268   | 0.299594   |
| OR10H1    | 0.0385306  | 0.0142558  | -1.43445   | 1          |
| MRPL32    | 71.437     | 90.8687    | 0.347113   | 0.302537   |
| AAMP      | 147.427    | 173.848    | 0.237828   | 0.591159   |
| ASPRV1    | 0.755057   | 0.547968   | -0.462494  | 0.679589   |
| MTRF1L    | 8.7465     | 10.2351    | 0.226745   | 0.628907   |
| TUBA1B    | 737.039    | 1120.84    | 0.604773   | 0.0374759  |
| C17orf62  | 39.0129    | 29.2313    | -0.416435  | 0.378436   |
| C14orf2   | 411.839    | 423.435    | 0.04006    | 0.967343   |
| TNFRSF1B  | 0.00626119 | 0.00331326 | -0.918186  | 1          |
| AGPAT2    | 301.87     | 328.255    | 0.120888   | 0.853763   |
| PLEKHA8   | 2.71821    | 1.85936    | -0.547853  | 0.274201   |
| DCAF4     | 10.2635    | 11.9479    | 0.219244   | 0.687824   |
| FAM161B   | 0.382315   | 0.225019   | -0.764715  | 0.815365   |
| ZMYND11   | 6.88707    | 8.00692    | 0.217356   | 0.659772   |
| PSMD8     | 351.232    | 355.186    | 0.016148   | 0.988531   |
| CREB3L2   | 3.31741    | 2.49421    | -0.411474  | 0.578405   |
| MX1       | 9.06046    | 9.20896    | 0.0234534  | 0.981441   |
| DUSP5     | 123.431    | 90.1691    | -0.453     | 0.127354   |
| TIPRL     | 11.7103    | 9.1844     | -0.350525  | 0.414412   |
| C10orf2   | 23.312     | 32.8547    | 0.495027   | 0.0987604  |
| MAEA      | 31.0914    | 38.3467    | 0.302584   | 0.439733   |
| MBD2      | 12.647     | 13.15      | 0.0562693  | 0.949188   |
| YIPF1     | 12.3309    | 11.9527    | -0.0449387 | 0.966658   |
| MTMR14    | 24.8349    | 22.1994    | -0.161845  | 0.77849    |
| POLR3D    | 31.7675    | 27.7385    | -0.195658  | 0.699749   |
| SNRPD1    | 79.8517    | 102.689    | 0.362882   | 0.286272   |
| TEX10     | 38.6735    | 37.5716    | -0.0417018 | 0.96692    |
| GRPEL2    | 10.5215    | 6.88562    | -0.611688  | 0.024868   |
| TEFM      | 9.27832    | 10.4643    | 0.173534   | 0.800138   |
| MLF2      | 221.513    | 270.611    | 0.288832   | 0.450348   |
| PPP1CA    | 214.334    | 229.392    | 0.0979546  | 0.899998   |
| ATG2A     | 13.5673    | 8.82501    | -0.620468  | 0.0220668  |
| TES       | 0.0258775  | 0.0222375  | -0.218702  | 1          |
| C14orf169 | 13.4199    | 15.1884    | 0.17859    | 0.777535   |
| LOXL4     | 0.00573562 | 0.0140189  | 1.28935    | 1          |
| C11orf24  | 21.1209    | 31.2329    | 0.564395   | 0.0456351  |
| TM7SF3    | 9.8962     | 5.90711    | -0.744421  | 0.00478151 |
| RAB9B     | 0.165607   | 0.14193    | -0.222577  | 1          |
| STAMBPL1  | 5.6966     | 5.15081    | -0.145303  | 0.860592   |
| MRPL54    | 84.288     | 88.8468    | 0.075992   | 0.933369   |
| APOPT1    | 25.9273    | 21.8768    | -0.245067  | 0.60307    |
| GNL1      | 14.9677    | 15.6588    | 0.0651152  | 0.944748   |
| TIMM17A   | 42.9044    | 71.361     | 0.73401    | 0.00274688 |

|                |           |           |              |            |
|----------------|-----------|-----------|--------------|------------|
| GFOD1          | 1.17764   | 1.89981   | 0.689963     | 0.180418   |
| ZMYND8         | 2.76727   | 1.56585   | -0.821515    | 0.0181648  |
| EID2           | 32.0687   | 35.7894   | 0.158369     | 0.79164    |
| MRPL21         | 122.677   | 110.146   | -0.155444    | 0.788938   |
| COX6A1         | 715.113   | 702.954   | -0.0247408   | 0.980228   |
| MED27          | 57.9621   | 59.3087   | 0.0331333    | 0.974073   |
| LRRC49         | 1.52654   | 0.962685  | -0.665132    | 0.145921   |
| ZBTB26         | 0.864477  | 0.533444  | -0.696491    | 0.284182   |
| FADS2          | 7.09158   | 5.16668   | -0.456868    | 0.214151   |
| CPSF3          | 26.0973   | 18.6426   | -0.485301    | 0.0959472  |
| GGACT          | 1.59283   | 0.783568  | -1.02346     | 0.108015   |
| SH2D4A         | 4.38949   | 6.38873   | 0.541475     | 0.0900926  |
| LOC645249      | 18.0617   | 14.1634   | -0.350766    | 0.484507   |
| SCO1           | 21.6344   | 26.1287   | 0.272311     | 0.513296   |
| ENSA           | 155.126   | 130.266   | -0.251984    | 0.577432   |
| CD55           | 20.8347   | 9.26065   | -1.1698      | 0.00153868 |
| TSMF           | 28.3716   | 32.7929   | 0.208936     | 0.666451   |
| ATG4C          | 2.50614   | 2.22911   | -0.169004    | 0.838953   |
| ARF4           | 78.9666   | 101.214   | 0.3581       | 0.290507   |
| LSR            | 51.9709   | 51.9893   | 0.000508769  | 0.999234   |
| SCLY,UBE2F     | 36.5329   | 44.1254   | 0.272414     | 0.493457   |
| AS3MT,C10orf32 | 6.02118   | 7.45977   | 0.309086     | 0.498357   |
| ACOX2          | 1.29283   | 0.648685  | -0.994941    | 0.0738934  |
| PDE6D          | 11.7215   | 6.13084   | -0.934997    | 0.00659556 |
| SLC44A4        | 0.0558476 | 0.0122547 | -2.18817     | 1          |
| TMEM17         | 0.663166  | 0.268386  | -1.30506     | 0.0667647  |
| PSMC4          | 57.4636   | 92.3197   | 0.683991     | 0.00820276 |
| POLR2G         | 124.909   | 99.6175   | -0.32641     | 0.353259   |
| TCOF1          | 29.4249   | 38.2913   | 0.37998      | 0.255234   |
| RTDR1          | 0.0466671 | 0.0637263 | 0.449481     | 1          |
| MBD3           | 70.4215   | 130.572   | 0.890754     | 0.00153868 |
| FAM192A        | 18.7241   | 15.1042   | -0.309947    | 0.402378   |
| SLC25A19       | 26.9152   | 47.3997   | 0.816457     | 0.00153868 |
| GPR180         | 1.98719   | 2.97654   | 0.582905     | 0.0512103  |
| NDUFA3         | 212.451   | 242.814   | 0.192719     | 0.720751   |
| FAM89B         | 36.5789   | 65.1067   | 0.831794     | 0.00153868 |
| DNAJC11        | 21.6355   | 28.6836   | 0.406827     | 0.30062    |
| LRRFIP1        | 12.2036   | 9.32255   | -0.388505    | 0.245554   |
| PMEPA1         | 1.01269   | 0.61218   | -0.726164    | 0.133822   |
| PSMD3          | 94.1809   | 113.285   | 0.266449     | 0.514418   |
| HAUS5          | 6.41487   | 5.42689   | -0.241293    | 0.632885   |
| FBXL22         | 0.134918  | 0.196148  | 0.539863     | 1          |
| LAMTOR1        | 108.031   | 107.957   | -0.000999232 | 0.999234   |
| SLC22A5        | 2.9979    | 4.10706   | 0.454155     | 0.296127   |
| ARHGEF19       | 13.7137   | 9.0038    | -0.607009    | 0.0388971  |
| NFATC2IP       | 10.1062   | 9.93696   | -0.0243585   | 0.980677   |
| KCTD14,NDUFC2  | 23.9609   | 29.3057   | 0.290498     | 0.678167   |
| AURKB          | 95.9894   | 110.421   | 0.202071     | 0.684533   |
| KTI12,TXNDC12  | 70.6364   | 63.2223   | -0.159979    | 0.785505   |



|              |            |            |            |            |
|--------------|------------|------------|------------|------------|
| OSCP1        | 2.81587    | 1.80056    | -0.645135  | 0.330706   |
| TRMT2B       | 3.21668    | 2.25342    | -0.513454  | 0.20647    |
| LINC00634    | 0.255809   | 0.106366   | -1.26603   | 1          |
| LHX4         | 0.847537   | 1.18113    | 0.478821   | 0.812978   |
| SMIM7        | 28.5084    | 29.159     | 0.032551   | 0.975484   |
| HSD17B7      | 7.32739    | 6.06958    | -0.271702  | 0.629465   |
| SNRPD3       | 86.4476    | 99.1113    | 0.197223   | 0.693923   |
| AVEN         | 7.38419    | 11.0426    | 0.580569   | 0.0844706  |
| CYLD         | 2.3896     | 1.33936    | -0.835228  | 0.00478151 |
| NOC4L        | 37.6636    | 64.7032    | 0.780666   | 0.00274688 |
| ACVR2B-AS1   | 0.617888   | 0.256017   | -1.27111   | 0.562668   |
| ZC3HAV1L     | 2.12575    | 1.59802    | -0.411691  | 0.5622     |
| CEP128       | 0.405886   | 0.408704   | 0.00998164 | 0.995521   |
| FAM86DP      | 6.77901    | 4.95697    | -0.451616  | 0.245393   |
| SEZ6         | 0.00765138 | 0.00638374 | -0.261317  | 1          |
| CCT2         | 222.255    | 310.55     | 0.482607   | 0.106773   |
| DAXX         | 35.4432    | 50.3828    | 0.507424   | 0.0726643  |
| CCPG1,DYX1C1 | 4.27067    | 2.67213    | -0.676473  | 0.169244   |
| GBP4         | 0.0159555  | 0.0118356  | -0.430917  | 1          |
| IRAK1BP1     | 1.48711    | 0.752535   | -0.982684  | 0.152079   |
| GRWD1        | 37.6801    | 65.122     | 0.789343   | 0.00153868 |
| INO80C       | 12.7816    | 19.9948    | 0.645551   | 0.0561838  |
| GPAM         | 1.37725    | 2.27896    | 0.726587   | 0.0192959  |
| CNNM4        | 3.66296    | 3.19127    | -0.19888   | 0.75382    |
| C7orf25      | 6.63122    | 4.92008    | -0.430592  | 0.283886   |
| TBC1D7       | 7.08702    | 6.93804    | -0.0306511 | 0.981441   |
| GPR89A       | 4.31647    | 5.75232    | 0.414291   | 0.322682   |
| TSC22D4      | 48.0856    | 44.8464    | -0.100614  | 0.886886   |
| CCDC159      | 3.2203     | 1.89519    | -0.764851  | 0.195143   |
| CCDC94       | 20.5423    | 18.1626    | -0.177627  | 0.777294   |
| FGF1         | 0.0288728  | 0.126913   | 2.13606    | 1          |
| SSUH2        | 0.095608   | 0.0322808  | -1.56646   | 1          |
| POLA2        | 10.5884    | 10.7648    | 0.0238416  | 0.981441   |
| ANKRD42      | 0.444722   | 0.603643   | 0.440791   | 0.612746   |
| NUDC         | 473.893    | 479.446    | 0.0168055  | 0.988114   |
| EIF3J        | 18.511     | 26.7214    | 0.529613   | 0.125383   |
| LOC654342    | 12.3402    | 14.875     | 0.26952    | 0.686465   |
| KLHL2        | 2.59531    | 2.94095    | 0.180376   | 0.805521   |
| EIF4A1,SENP3 | 1013.1     | 936.387    | -0.113593  | 0.883857   |
| NHLH1        | 0.0342046  | 0.139077   | 2.02362    | 1          |
| CITED4       | 104.573    | 90.0239    | -0.216133  | 0.677719   |
| HJURP        | 17.3422    | 13.5106    | -0.360195  | 0.310422   |
| NCDN         | 11.9978    | 19.065     | 0.668159   | 0.0130226  |
| PSIMCT-1     | 1.4456     | 1.38705    | -0.059649  | 0.994945   |
| NEDD4        | 1.83722    | 1.43792    | -0.353546  | 0.433867   |
| VENTX        | 0.0108505  | 0.0199284  | 0.877064   | 1          |
| ZRANB2-AS1   | 0.0165133  | 0.0103876  | -0.668769  | 1          |
| PHB          | 191.32     | 263.786    | 0.463384   | 0.117237   |
| C17orf64     | 0.0345214  | 0          | #NAME?     | 1          |

|              |           |           |            |            |
|--------------|-----------|-----------|------------|------------|
| PASK         | 2.33586   | 2.55223   | 0.127805   | 0.883608   |
| MCIN         | 1.97851   | 3.25169   | 0.716774   | 0.135804   |
| YIF1A        | 76.6184   | 72.7491   | -0.0747623 | 0.93285    |
| C20orf26     | 0.0249121 | 0.0340362 | 0.450225   | 1          |
| NUBP1        | 16.852    | 25.5069   | 0.597966   | 0.034328   |
| MLLT10       | 9.66839   | 9.2164    | -0.0690715 | 0.966128   |
| SLC7A5P2     | 0.402364  | 0.394209  | -0.0295406 | 0.992304   |
| SYNGR2       | 105.939   | 154.983   | 0.548882   | 0.0360613  |
| TULP4        | 1.69287   | 1.90037   | 0.166811   | 0.80233    |
| GLTSCR1L     | 0.736331  | 0.546212  | -0.430893  | 0.452338   |
| C5orf60      | 0.0206477 | 0         | #NAME?     | 1          |
| BMPR1A       | 3.19027   | 2.97013   | -0.103153  | 0.907862   |
| KIAA0513     | 0.762838  | 0.946444  | 0.311141   | 0.633194   |
| ATP5J        | 175.147   | 198.627   | 0.181498   | 0.768633   |
| TUBA1C       | 520.588   | 905.343   | 0.798321   | 0.00153868 |
| IRF3         | 65.9751   | 63.5555   | -0.0539035 | 0.967296   |
| SLC25A51     | 3.41455   | 3.78435   | 0.148352   | 0.897332   |
| MSRB1        | 27.1556   | 39.6388   | 0.545663   | 0.0630011  |
| SYTL3        | 0.753716  | 0.204159  | -1.88433   | 0.00659556 |
| MRPS22       | 45.7566   | 32.9569   | -0.473402  | 0.0959472  |
| ZNF513       | 10.8588   | 12.8898   | 0.24737    | 0.925922   |
| MESDC2       | 8.20447   | 11.168    | 0.444895   | 0.155896   |
| PDZD8        | 2.00259   | 2.22229   | 0.150179   | 0.863831   |
| PIP4K2C      | 11.8438   | 15.7329   | 0.409652   | 0.211369   |
| C22orf46     | 1.89786   | 1.43324   | -0.405088  | 0.347897   |
| RAC2         | 10.5915   | 4.87439   | -1.11962   | 0.00153868 |
| ANAPC4       | 6.21125   | 6.90139   | 0.152002   | 0.821796   |
| MAGEF1       | 39.0634   | 46.3432   | 0.24654    | 0.571151   |
| ACOT11       | 0.277065  | 0.128771  | -1.10541   | 1          |
| MAT2B        | 21.5211   | 19.7966   | -0.120501  | 0.855996   |
| LOC100129148 | 2.14206   | 2.35018   | 0.133772   | 0.992072   |
| SCYL1        | 45.2309   | 53.9111   | 0.253273   | 0.616881   |
| MRPS23       | 43.19     | 50.0836   | 0.21364    | 0.648844   |
| TMEM200B     | 6.66515   | 6.05779   | -0.137845  | 0.930356   |
| FAM83A       | 0.0407623 | 0.0779349 | 0.935036   | 1          |
| NOTUM        | 5.44405   | 1.78912   | -1.60543   | 0.00153868 |
| ESRRA        | 67.4838   | 71.149    | 0.0763035  | 0.96513    |
| NABP2        | 59.6089   | 49.4072   | -0.270804  | 0.504902   |
| AGMAT        | 8.91068   | 8.3055    | -0.10147   | 0.938335   |
| BPGM         | 4.22198   | 5.6172    | 0.411934   | 0.354806   |
| HECTD3       | 11.3996   | 14.078    | 0.304459   | 0.435778   |
| RBMX         | 170.976   | 87.6363   | -0.964197  | 0.00153868 |
| DDOST        | 183.91    | 156.132   | -0.236232  | 0.60307    |
| PDCD5        | 206.103   | 254.887   | 0.306491   | 0.400494   |
| TSPO         | 482.387   | 456.202   | -0.0805182 | 0.9183     |
| STK11IP      | 2.59859   | 2.65128   | 0.028961   | 0.981963   |
| C12orf10     | 50.0436   | 43.2408   | -0.210794  | 0.674529   |
| DAPK1        | 2.93716   | 2.55108   | -0.203318  | 0.740073   |
| HIGD1A       | 17.0738   | 20.0949   | 0.235042   | 0.59463    |

|               |            |          |            |            |
|---------------|------------|----------|------------|------------|
| NFKBID        | 2.6053     | 4.14848  | 0.671135   | 0.152514   |
| ASNA1         | 108.521    | 124.146  | 0.194062   | 0.699003   |
| SLC38A8       | 0.0572161  | 0.090026 | 0.653921   | 1          |
| NOP56         | 83.9481    | 147.212  | 0.810323   | 0.00153868 |
| EXOSC3        | 20.8549    | 29.8891  | 0.519232   | 0.0719976  |
| MRPS12        | 137.687    | 221.999  | 0.689159   | 0.0163491  |
| CPSF4         | 71.1511    | 58.8237  | -0.274489  | 0.870063   |
| ZNF296        | 25.0639    | 49.9095  | 0.993702   | 0.00153868 |
| VPS37B        | 52.7465    | 50.1056  | -0.0741028 | 0.927002   |
| DAB2IP        | 6.92678    | 8.64717  | 0.320042   | 0.409203   |
| RELL1         | 6.43763    | 5.59134  | -0.203337  | 0.705198   |
| PIGC          | 12.5874    | 9.22416  | -0.448495  | 0.20739    |
| DERL1         | 33.0901    | 35.7792  | 0.112721   | 0.869722   |
| MAPKAPK3      | 80.23      | 65.8366  | -0.285253  | 0.469232   |
| PARN          | 10.9313    | 7.92288  | -0.464371  | 0.148853   |
| ZFP69         | 1.91563    | 2.48947  | 0.378017   | 0.504261   |
| PSMC5         | 99.5562    | 113.208  | 0.185397   | 0.801516   |
| NIPAL3        | 7.42528    | 3.10039  | -1.26      | 0.00153868 |
| RPS2P32       | 0.0450878  | 0.041246 | -0.128483  | 1          |
| DGKE          | 2.24454    | 3.07439  | 0.45388    | 0.19024    |
| MRPL55        | 78.7471    | 103.768  | 0.398067   | 0.260553   |
| MAP3K10       | 10.0811    | 6.63238  | -0.604059  | 0.0676413  |
| RCC1          | 123.578    | 128.487  | 0.0562104  | 0.951347   |
| CNOT10        | 15.4019    | 11.7064  | -0.395808  | 0.233577   |
| SH3RF3        | 1.02       | 1.13233  | 0.150733   | 0.885082   |
| CYBA          | 424.089    | 441.201  | 0.0570702  | 0.947567   |
| TIMM50        | 61.4701    | 61.62    | 0.00351408 | 0.997552   |
| LINC00319     | 0.013922   | 0        | #NAME?     | 1          |
| CA13          | 5.18291    | 5.63888  | 0.121646   | 0.87179    |
| BROX          | 1.20976    | 0.833614 | -0.537264  | 0.440962   |
| TMUB1         | 154.084    | 169.133  | 0.134442   | 0.831973   |
| PTP4A2        | 51.2692    | 46.8171  | -0.131056  | 0.836427   |
| TMEM249       | 1.61619    | 2.40024  | 0.570587   | 0.53682    |
| KLHL22        | 8.69322    | 6.26194  | -0.473281  | 0.211369   |
| TIMM17B       | 122.472    | 99.9582  | -0.293056  | 0.685086   |
| CCDC134       | 4.6968     | 5.22996  | 0.15512    | 0.878044   |
| ADAP1         | 21.5703    | 23.453   | 0.12073    | 0.862353   |
| NACAD         | 0.00509958 | 0        | #NAME?     | 1          |
| FOXD2         | 1.84745    | 1.31484  | -0.490647  | 0.390823   |
| WDR18         | 97.9923    | 105.721  | 0.109519   | 0.875956   |
| SNHG10        | 6.65497    | 10.578   | 0.668568   | 0.0763878  |
| FASTKD5_UBOX5 | 12.6889    | 14.4776  | 0.190256   | 0.72175    |
| POLR2F        | 40.5146    | 65.3498  | 0.689741   | 0.00820276 |
| CENPK         | 2.96305    | 2.86185  | -0.0501357 | 0.971768   |
| ERCC4         | 0.709807   | 0.725819 | 0.0321824  | 0.981441   |
| TRIM62        | 3.39794    | 3.4176   | 0.00831933 | 0.994734   |
| MRPL51        | 233.681    | 277.894  | 0.249993   | 0.547882   |
| TMEM222       | 39.3428    | 50.3042  | 0.35458    | 0.304421   |
| TUFM          | 368.741    | 323.761  | -0.18768   | 0.718323   |

|           |           |           |            |            |
|-----------|-----------|-----------|------------|------------|
| P4HTM     | 18.8094   | 9.1378    | -1.04153   | 0.00153868 |
| HDHD1     | 15.3552   | 16.619    | 0.114107   | 0.874024   |
| TRAPPC5   | 238.087   | 247.499   | 0.0559371  | 0.952184   |
| CD70      | 0.0381781 | 0         | #NAME?     | 1          |
| HIVEP3    | 0.253883  | 0.371975  | 0.551043   | 0.427905   |
| MED10     | 58.4478   | 70.7042   | 0.274646   | 0.489185   |
| MCRS1     | 35.1127   | 44.5502   | 0.343437   | 0.330706   |
| DOLK      | 21.1956   | 21.7588   | 0.0378362  | 0.991446   |
| LRRC16A   | 1.71751   | 1.16428   | -0.560871  | 0.151906   |
| BRIX1     | 38.0011   | 56.9633   | 0.583992   | 0.0276283  |
| AGAP5     | 0.792491  | 0.598572  | -0.40487   | 0.631444   |
| NAA10     | 157.034   | 182.742   | 0.218734   | 0.632946   |
| LMTK3     | 0.615549  | 0.34441   | -0.837749  | 0.243499   |
| WDFY2     | 4.4437    | 3.71676   | -0.257716  | 0.624445   |
| ZNF32-AS1 | 21.3901   | 17.9732   | -0.2511    | 0.902819   |
| SNRK      | 0.541784  | 0.529802  | -0.0322634 | 0.985712   |
| PLAT      | 0.911735  | 0.474101  | -0.94342   | 0.0854415  |
| IPO13     | 6.51416   | 8.12221   | 0.318294   | 0.437751   |
| EGFL7     | 223.95    | 189.699   | -0.239465  | 0.579133   |
| ATP13A1   | 26.3767   | 27.0324   | 0.0354245  | 0.970185   |
| DDX56     | 43.6879   | 69.3435   | 0.666526   | 0.0111246  |
| NKX2-5    | 26.54     | 29.7207   | 0.163298   | 0.809368   |
| TMEM140   | 0.698813  | 0.814067  | 0.220241   | 0.965152   |
| LINC00176 | 0.455407  | 0.370593  | -0.297319  | 0.782998   |
| ZNF213    | 9.56945   | 7.51959   | -0.347782  | 0.425393   |
| C8G       | 0.384411  | 0.452279  | 0.234565   | 0.945399   |
| C19orf47  | 9.10361   | 14.7567   | 0.69686    | 0.40127    |
| PRKAB2    | 3.37294   | 1.75611   | -0.941626  | 0.00274688 |
| SH3D19    | 4.14757   | 2.02502   | -1.03433   | 0.00153868 |
| FH        | 57.3715   | 58.9187   | 0.0383919  | 0.968919   |
| NACC2     | 9.24199   | 13.9124   | 0.590093   | 0.0243026  |
| PRSS57    | 0.138307  | 0.10687   | -0.372024  | 1          |
| RAB3IP    | 3.66515   | 2.8069    | -0.384894  | 0.249473   |
| TNFRSF21  | 3.91831   | 7.04501   | 0.846368   | 0.00274688 |
| C1orf53   | 2.23712   | 3.70741   | 0.728768   | 0.349218   |
| GALE      | 100.471   | 58.0417   | -0.79162   | 0.00153868 |
| TRIM14    | 12.1259   | 15.7976   | 0.381614   | 0.673917   |
| KIAA1377  | 0.100027  | 0.0461762 | -1.11517   | 1          |
| DNAJC1    | 7.70123   | 5.58149   | -0.464438  | 0.217777   |
| ATG13     | 12.4553   | 7.59678   | -0.713295  | 0.00274688 |
| LYRM1     | 15.5637   | 9.15178   | -0.76606   | 0.0334318  |
| GNB3      | 2.17254   | 3.31446   | 0.609391   | 0.217005   |
| LACE1     | 1.11088   | 0.340906  | -1.70425   | 0.00274688 |
| PRRG1     | 2.24772   | 2.50656   | 0.157245   | 0.879376   |
| BATF3     | 28.1445   | 57.3322   | 1.02649    | 0.00153868 |
| SEPHS1    | 24.9397   | 31.3415   | 0.329627   | 0.349063   |
| EWSR1     | 123.784   | 153.511   | 0.31052    | 0.403413   |
| TNFRSF11A | 0.934517  | 0.562747  | -0.731734  | 0.145921   |
| TXNDC11   | 9.29975   | 9.70345   | 0.0613052  | 0.964843   |

|               |          |          |             |            |
|---------------|----------|----------|-------------|------------|
| GPR108        | 42.0502  | 32.2411  | -0.383211   | 0.242582   |
| TBC1D20       | 12.4377  | 9.49264  | -0.389835   | 0.234549   |
| ACER3         | 1.30849  | 1.64334  | 0.328736    | 0.558921   |
| ZNF460        | 0.421121 | 0.266207 | -0.661687   | 0.348481   |
| PIGK          | 3.47953  | 2.25963  | -0.622807   | 0.0438785  |
| TMEM19        | 2.90534  | 2.51747  | -0.206733   | 0.736949   |
| GINS1         | 7.93022  | 10.7978  | 0.445309    | 0.157202   |
| FAM225B       | 0.427497 | 0.254183 | -0.750048   | 0.211701   |
| C1RL          | 5.54179  | 1.87361  | -1.56453    | 0.00153868 |
| ABHD3         | 4.87879  | 6.7283   | 0.463719    | 0.212956   |
| ADAM17        | 3.80403  | 2.58947  | -0.554869   | 0.103973   |
| SH3KBP1       | 6.61564  | 4.96953  | -0.412771   | 0.229488   |
| ITPA          | 84.7912  | 87.3693  | 0.0432109   | 0.965468   |
| EIF4G2        | 113.762  | 126.303  | 0.150873    | 0.808127   |
| NOL10         | 7.39904  | 11.382   | 0.621351    | 0.0226901  |
| CLN3          | 26.7879  | 32.6042  | 0.28348     | 0.490815   |
| AGPAT6        | 17.2263  | 20.2024  | 0.229912    | 0.611267   |
| ZNF497        | 2.0932   | 1.27347  | -0.716943   | 0.145921   |
| MPP7          | 0.157353 | 0.124873 | -0.333536   | 1          |
| KIAA1279      | 6.92379  | 6.91889  | -0.00102168 | 0.999234   |
| SMOX          | 20.9355  | 16.7995  | -0.317535   | 0.432815   |
| ACOT7         | 120.999  | 146.258  | 0.273512    | 0.500058   |
| EXOSC6        | 31.775   | 45.9304  | 0.531554    | 0.0813147  |
| NELFE         | 87.164   | 76.4918  | -0.188427   | 0.757708   |
| STX18         | 17.4681  | 13.0067  | -0.425473   | 0.181992   |
| PSMA5         | 34.307   | 39.0425  | 0.186543    | 0.722195   |
| LOC100506054  | 7.76918  | 7.1515   | -0.119517   | 0.908026   |
| RRP7A         | 29.3104  | 48.6929  | 0.732296    | 0.00380811 |
| CKS1B         | 177.016  | 155.77   | -0.184466   | 0.72151    |
| KIF26B        | 0.287108 | 0.41331  | 0.525628    | 0.495095   |
| CENPN         | 19.584   | 20.1054  | 0.037912    | 0.98206    |
| FLJ35946      | 0.292889 | 0.358105 | 0.29003     | 1          |
| WDR61         | 29.5134  | 34.1899  | 0.2122      | 0.667022   |
| C17orf80      | 3.24614  | 3.70399  | 0.190351    | 0.765267   |
| WIZ           | 18.2738  | 20.2188  | 0.14592     | 0.802089   |
| SLC10A3       | 34.0655  | 38.4976  | 0.176458    | 0.74716    |
| NDUFA13       | 647.49   | 630.311  | -0.0387937  | 0.968154   |
| DPP3          | 17.5622  | 17.5059  | -0.0046324  | 0.996765   |
| HS2ST1        | 4.41142  | 4.13757  | -0.0924603  | 0.933651   |
| P2RX5,TAX1BP3 | 106.232  | 167.983  | 0.661103    | 0.0817425  |
| GAR1          | 54.1954  | 80.2638  | 0.56658     | 0.0410754  |
| NAA40         | 5.34666  | 7.65732  | 0.518201    | 0.114535   |
| ABHD11        | 20.1187  | 23.4252  | 0.219523    | 0.684018   |
| ATP6V0A1      | 11.5601  | 12.8047  | 0.14753     | 0.808394   |
| LUC7L3        | 21.5547  | 42.7716  | 0.988654    | 0.00153868 |
| HERC6         | 3.13011  | 1.974    | -0.665092   | 0.0410754  |
| DDX27         | 13.7565  | 15.4053  | 0.163313    | 0.779141   |
| SAMM50        | 25.6233  | 25.9657  | 0.0191525   | 0.984084   |
| ERCC6L2       | 0.446218 | 0.438597 | -0.0248508  | 0.993173   |

|                 |           |           |            |            |
|-----------------|-----------|-----------|------------|------------|
| NUP107          | 17.2612   | 15.4168   | -0.163027  | 0.773721   |
| ZBTB7A          | 9.49658   | 9.18677   | -0.0478497 | 0.962045   |
| SPAG1           | 4.46122   | 4.52352   | 0.0200081  | 0.984547   |
| LOC100289092    | 8.09133   | 5.75535   | -0.491474  | 0.907996   |
| FANCI           | 7.10603   | 5.43335   | -0.387202  | 0.633194   |
| MTSS1           | 2.10294   | 2.21847   | 0.0771551  | 0.94188    |
| NDUFAF2         | 114.145   | 121.786   | 0.0934759  | 0.899621   |
| LRRC59          | 48.8403   | 99.5765   | 1.02773    | 0.00153868 |
| SLC35D2         | 28.7339   | 19.3511   | -0.570342  | 0.0471668  |
| ACAT2           | 12.8553   | 17.1289   | 0.414067   | 0.891698   |
| AP3D1           | 17.2403   | 15.4927   | -0.154192  | 0.789544   |
| ENTPD6          | 37.9645   | 35.0722   | -0.114321  | 0.865047   |
| SPEF1           | 0.211577  | 0.294412  | 0.476654   | 1          |
| LIMK1           | 21.2639   | 15.6569   | -0.441613  | 0.147823   |
| RQCD1           | 20.7753   | 29.7722   | 0.519099   | 0.0723025  |
| MCCC2           | 25.2703   | 22.5919   | -0.161637  | 0.773721   |
| PRR14           | 30.4134   | 31.1668   | 0.0353031  | 0.971663   |
| TRAF4           | 22.2527   | 29.7271   | 0.417802   | 0.18082    |
| RBM42           | 65.7382   | 79.2909   | 0.270421   | 0.499979   |
| AGER            | 1.94115   | 1.77579   | -0.128453  | 0.920415   |
| SEC61A1         | 89.6738   | 116.219   | 0.374086   | 0.26132    |
| RCBTB1          | 5.04537   | 4.85885   | -0.0543453 | 0.954981   |
| SETD5-AS1       | 4.12533   | 3.86582   | -0.0937342 | 0.930559   |
| UCN             | 2.91017   | 2.31288   | -0.331415  | 0.851733   |
| SRXN1           | 48.9105   | 54.0162   | 0.143249   | 0.814274   |
| WDR73           | 13.1811   | 16.7967   | 0.349703   | 0.343762   |
| TOP1            | 22.0118   | 26.3441   | 0.259203   | 0.533447   |
| SF1             | 91.6094   | 94.968    | 0.0519461  | 0.955904   |
| RTKN            | 21.6642   | 32.7057   | 0.594232   | 0.024868   |
| POLR3K          | 40.7925   | 95.3834   | 1.22543    | 0.00153868 |
| RUSC1-AS1       | 10.0647   | 13.7909   | 0.45441    | 0.900465   |
| FSD1            | 0.0142983 | 0         | #NAME?     | 1          |
| C11orf82        | 2.07352   | 3.52688   | 0.766315   | 0.0143403  |
| WDR7            | 0.752148  | 1.03572   | 0.461542   | 0.305777   |
| NAA60           | 23.4864   | 24.7246   | 0.0741231  | 0.933369   |
| EDC3            | 11.2836   | 12.7904   | 0.180829   | 0.736305   |
| NDUFB10         | 138.734   | 157.236   | 0.180613   | 0.727839   |
| EDEM2           | 11.3192   | 9.12812   | -0.310385  | 0.486348   |
| TMEM259         | 83.7826   | 96.6917   | 0.206742   | 0.663419   |
| WDR38           | 0.0215474 | 0.0140845 | -0.613411  | 1          |
| C12orf60        | 1.35727   | 1.25568   | -0.112239  | 0.945689   |
| ACTR3C          | 0.76939   | 0.888813  | 0.208165   | 0.988761   |
| RUSC1           | 30.7214   | 43.2343   | 0.492932   | 0.548453   |
| C9orf72         | 4.60548   | 1.9876    | -1.21233   | 0.00153868 |
| HOTAIRM1        | 17.184    | 15.7049   | -0.129847  | 0.881798   |
| CALCOCO2        | 14.6689   | 6.19758   | -1.24298   | 0.00153868 |
| BCL2L2,BCL2L2-f | 140.971   | 165.661   | 0.232829   | 0.617928   |
| PRRT4           | 14.8347   | 8.77822   | -0.756975  | 0.00970147 |
| SLC26A11        | 7.40671   | 6.69754   | -0.145203  | 0.858227   |

|            |           |           |            |            |
|------------|-----------|-----------|------------|------------|
| UCHL5      | 12.6075   | 14.9781   | 0.248563   | 0.734639   |
| DBF4B      | 6.50914   | 10.153    | 0.641372   | 0.0313688  |
| TBL1X      | 5.56302   | 3.48568   | -0.674427  | 0.0130226  |
| SDHAF1     | 35.005    | 43.8287   | 0.324314   | 0.421289   |
| M6PR       | 79.2605   | 64.1076   | -0.306107  | 0.462278   |
| METTL3     | 13.6917   | 23.3941   | 0.772844   | 0.117359   |
| C1QTNF1    | 14.5241   | 12.5106   | -0.215294  | 0.684216   |
| MESDC1     | 19.0664   | 24.7284   | 0.37514    | 0.295146   |
| DISP1      | 0.226396  | 0.145005  | -0.642746  | 1          |
| SNCAIP     | 0.541458  | 0.0782359 | -2.79095   | 0.0123712  |
| FXR2       | 50.8984   | 50.3292   | -0.0162267 | 0.991175   |
| SLC25A13   | 5.2879    | 7.18806   | 0.442906   | 0.191052   |
| SAFB       | 40.1324   | 56.2009   | 0.485826   | 0.0913904  |
| HLCS       | 3.62654   | 2.77017   | -0.388617  | 0.284182   |
| PGF        | 16.3876   | 21.5215   | 0.393171   | 0.305306   |
| RAD1       | 4.91719   | 5.62565   | 0.194187   | 0.723334   |
| MTMR2      | 7.24283   | 6.91649   | -0.0665134 | 0.939948   |
| CDRT15P1   | 0.324633  | 0.596846  | 0.878547   | 0.455427   |
| SMG9       | 42.5504   | 35.1479   | -0.275734  | 0.489185   |
| SLC2A5     | 0.0200047 | 0.0125132 | -0.67689   | 1          |
| HOXB7      | 24.5022   | 20.5319   | -0.255048  | 0.579942   |
| IKZF2      | 0.0458268 | 0.012342  | -1.89261   | 1          |
| NEURL      | 6.96439   | 3.32851   | -1.06512   | 0.00153868 |
| KIF23      | 11.2267   | 10.9383   | -0.0375433 | 0.969077   |
| SWI5       | 41.6842   | 27.7549   | -0.586759  | 0.0464744  |
| LOC152225  | 10.6942   | 5.92644   | -0.851593  | 0.00274688 |
| DNLZ       | 102.672   | 187.488   | 0.868748   | 0.00153868 |
| SLC23A3    | 0.607191  | 0.533462  | -0.186766  | 0.907121   |
| YARS2      | 37.3369   | 35.6091   | -0.0683534 | 0.937373   |
| HIP1R      | 16.8965   | 14.6492   | -0.205899  | 0.678853   |
| B4GALT1    | 9.99244   | 8.60531   | -0.21561   | 0.667022   |
| EGFL8.PPT2 | 44.0931   | 37.769    | -0.22335   | 0.817528   |
| HIST1H3E   | 0.268297  | 0.70071   | 1.38499    | 0.638004   |
| KATNB1     | 42.9452   | 37.5506   | -0.193662  | 0.704317   |
| PPP1R9A    | 1.67357   | 1.0114    | -0.72657   | 0.0156935  |
| EMG1       | 39.9272   | 54.6868   | 0.453821   | 0.137794   |
| FXD1       | 1.18186   | 0.886977  | -0.414085  | 0.817192   |
| DNAJC14    | 11.6163   | 10.4995   | -0.145823  | 0.896541   |
| TSPAN17    | 29.8513   | 33.851    | 0.181406   | 0.736853   |
| CENPH      | 27.8586   | 17.0104   | -0.711709  | 0.00572929 |
| AUP1       | 193.723   | 214.82    | 0.149132   | 0.84864    |
| TRIM44     | 5.71553   | 5.96935   | 0.062686   | 0.946375   |
| YAE1D1     | 13.0872   | 12.5601   | -0.0593125 | 0.958982   |
| RNF121     | 10.0518   | 12.4864   | 0.312901   | 0.441656   |
| TM9SF2     | 17.7817   | 17.0221   | -0.0629848 | 0.943555   |
| PIGU       | 20.0678   | 16.3346   | -0.296946  | 0.480536   |
| NVL        | 6.9558    | 7.78128   | 0.161791   | 0.797188   |
| NOLC1      | 28.5618   | 43.456    | 0.605468   | 0.0169799  |
| SP140L     | 4.79849   | 4.98405   | 0.0547374  | 0.958829   |

|              |           |           |             |            |
|--------------|-----------|-----------|-------------|------------|
| CDCA4        | 41.4974   | 34.3683   | -0.271942   | 0.491486   |
| MATN4        | 0.124812  | 0.0510881 | -1.28869    | 1          |
| NUDT5        | 119.468   | 120.006   | 0.00647489  | 0.997726   |
| MAT2A        | 34.4366   | 80.1016   | 1.21789     | 0.00153868 |
| PRMT1        | 336.16    | 470.137   | 0.483933    | 0.0962745  |
| TMEM208      | 87.0432   | 110.768   | 0.34774     | 0.321291   |
| NOSIP        | 82.7407   | 88.9868   | 0.104994    | 0.884031   |
| TEX261       | 32.7639   | 32.6035   | -0.0070808  | 0.994593   |
| TGS1         | 8.79813   | 8.45904   | -0.0567043  | 0.961236   |
| MAPKAPK5     | 13.5526   | 12.0667   | -0.167544   | 0.838891   |
| MAFG-AS1     | 6.67785   | 7.82063   | 0.227901    | 0.739914   |
| PTBP3        | 14.4449   | 14.3478   | -0.00973569 | 0.994204   |
| DHCR24       | 47.2316   | 83.8374   | 0.827842    | 0.00153868 |
| ATAD3A       | 63.1195   | 90.315    | 0.516881    | 0.0545989  |
| C11orf48     | 60.0806   | 101.195   | 0.752165    | 0.0215444  |
| MRP63        | 31.5287   | 35.0215   | 0.151573    | 0.870275   |
| TRIP4        | 7.36266   | 6.64185   | -0.148641   | 0.838532   |
| C9orf40      | 11.6313   | 12.6509   | 0.121228    | 0.868033   |
| LSG1         | 8.29291   | 15.0276   | 0.857668    | 0.00153868 |
| PI4KA        | 14.2084   | 12.7106   | -0.160708   | 0.791608   |
| POR          | 50.2048   | 60.0125   | 0.257439    | 0.619728   |
| AP1B1        | 26.8179   | 27.5522   | 0.0389711   | 0.967978   |
| UBE2MP1      | 3.97295   | 4.48954   | 0.176358    | 0.876392   |
| RASSF8       | 0.138959  | 0.0883615 | -0.653174   | 1          |
| EIF2S1       | 22.4917   | 27.0817   | 0.267921    | 0.514213   |
| LOC100335030 | 0.275659  | 0.257096  | -0.100573   | 1          |
| SPIRE2       | 9.27318   | 9.19688   | -0.01192    | 0.992304   |
| TTL          | 11.6633   | 11.9603   | 0.0362783   | 0.970421   |
| ADCY3        | 18.7737   | 20.4513   | 0.123478    | 0.891476   |
| SETD8        | 21.2114   | 21.3914   | 0.0121923   | 0.991446   |
| CMSS1        | 40.8856   | 37.8826   | -0.110056   | 0.890806   |
| C7orf13      | 0.991058  | 0.987597  | -0.00504781 | 0.997773   |
| PIK3AP1      | 2.16465   | 2.37708   | 0.135053    | 0.869722   |
| WDR46        | 44.7809   | 72.5219   | 0.695532    | 0.00572929 |
| FLVCR2       | 0.998422  | 0.739525  | -0.43305    | 0.538451   |
| HSPA5        | 223.818   | 232.114   | 0.0525121   | 0.958439   |
| LOC100507053 | 0.0469607 | 0.0255512 | -0.878061   | 1          |
| TFB2M        | 18.7317   | 26.2281   | 0.485632    | 0.100739   |
| SP110        | 1.89177   | 2.10147   | 0.151662    | 0.881798   |
| SLC4A11      | 13.2522   | 16.7803   | 0.340537    | 0.362943   |
| LOC100507266 | 0.208847  | 0.184919  | -0.175559   | 1          |
| FIS1         | 234.376   | 245.385   | 0.0662232   | 0.937886   |
| IDI2         | 9.70313   | 13.7449   | 0.502379    | 0.642802   |
| FAM84B       | 6.52852   | 3.74739   | -0.800869   | 0.00153868 |
| MRPL46       | 29.6211   | 30.6137   | 0.0475541   | 0.964843   |
| NCEH1        | 2.28192   | 2.16129   | -0.0783503  | 0.940493   |
| C2orf81      | 5.69778   | 2.12693   | -1.42163    | 0.00153868 |
| PDAP1        | 111.848   | 127.053   | 0.183885    | 0.804694   |
| HDAC8        | 10.9027   | 8.5716    | -0.347048   | 0.48689    |



|           |           |           |            |            |
|-----------|-----------|-----------|------------|------------|
| GAK       | 21.2137   | 24.8659   | 0.229173   | 0.604499   |
| TIMM10    | 64.8931   | 98.4106   | 0.600749   | 0.0347593  |
| CSNK2A1   | 45.4614   | 29.7477   | -0.611866  | 0.0215444  |
| KCND1     | 0.37227   | 0.178587  | -1.05973   | 1          |
| ISCU      | 68.9726   | 60.1812   | -0.196709  | 0.696867   |
| VWA8      | 2.39118   | 1.93625   | -0.304461  | 0.66669    |
| LOC728558 | 0.0224156 | 0.0259514 | 0.211311   | 1          |
| SLC35E4   | 12.4527   | 18.5468   | 0.574711   | 0.0564873  |
| PSMB8     | 79.2202   | 58.5178   | -0.436993  | 0.411641   |
| FOXRED1   | 30.096    | 20.6477   | -0.543586  | 0.0634008  |
| XRCC6BP1  | 5.85028   | 5.16795   | -0.178913  | 0.83652    |
| NFIX      | 9.94987   | 10.8324   | 0.122608   | 0.853468   |
| SLC6A13   | 0.645017  | 0.207777  | -1.6343    | 0.0471668  |
| OAZ1      | 1016.5    | 1190.91   | 0.22846    | 0.633194   |
| FAM120C   | 3.65448   | 2.78813   | -0.390368  | 0.723759   |
| FAR1      | 7.3469    | 8.68799   | 0.241886   | 0.599713   |
| MCM2      | 37.3409   | 35.5497   | -0.0709185 | 0.935025   |
| LEPREL4   | 26.8851   | 30.4881   | 0.181438   | 0.73154    |
| ETV1      | 0.607692  | 0.0890205 | -2.77113   | 0.00153868 |
| CD63      | 714.113   | 609.43    | -0.228691  | 0.623489   |
| PAPSS2    | 0.198386  | 0.10908   | -0.862931  | 1          |
| DGKI      | 2.41989   | 0.869874  | -1.47607   | 0.00153868 |
| CDK17     | 12.2161   | 9.28238   | -0.39622   | 0.216818   |
| NACC1     | 38.1398   | 55.1189   | 0.531249   | 0.0508243  |
| DNAJB13   | 0.0770051 | 0.0301    | -1.35519   | 1          |
| HAUS7     | 20.2568   | 26.3073   | 0.377059   | 0.311633   |
| FTH1P3    | 0.207078  | 0.221786  | 0.0989937  | 1          |
| DPH3      | 4.0353    | 6.47319   | 0.681802   | 0.00659556 |
| ACSF3     | 5.74628   | 4.71724   | -0.284683  | 0.594419   |
| AP1M1     | 21.1151   | 19.0234   | -0.150498  | 0.809131   |
| SPRN      | 2.85193   | 3.77284   | 0.403714   | 0.810769   |
| IGFBP2    | 48.0465   | 54.2571   | 0.175383   | 0.755018   |
| RPAIN     | 45.552    | 23.7265   | -0.941017  | 0.624185   |
| ASF1B     | 38.6747   | 38.8646   | 0.00706454 | 0.994593   |
| GLA       | 21.568    | 31.0272   | 0.524645   | 0.90409    |
| PTDSS1    | 107.825   | 165.983   | 0.622344   | 0.020985   |
| CD47      | 7.6898    | 6.59744   | -0.221039  | 0.640772   |
| TNPO2     | 15.9782   | 28.4324   | 0.831434   | 0.00153868 |
| TRIP13    | 8.63177   | 14.0315   | 0.700939   | 0.0103919  |
| ORAI1     | 39.3256   | 45.0859   | 0.197207   | 0.716687   |
| LRP10     | 48.6916   | 38.4578   | -0.340396  | 0.325113   |
| CWF19L1   | 12.706    | 10.8937   | -0.222011  | 0.641019   |
| BCL9L     | 6.40182   | 6.50833   | 0.0238052  | 0.981441   |
| STIL      | 3.86716   | 3.50482   | -0.141935  | 0.839812   |
| BCL7B     | 49.0103   | 49.2512   | 0.00707389 | 0.994593   |
| EIF4G1    | 45.9658   | 67.2342   | 0.548635   | 0.0410754  |
| CBWD6     | 3.88031   | 4.24606   | 0.129956   | 0.882554   |
| LRP3      | 39.5722   | 45.9116   | 0.214373   | 0.639922   |
| ST5       | 1.79637   | 1.78265   | -0.0110594 | 0.994593   |

|            |           |           |             |            |
|------------|-----------|-----------|-------------|------------|
| THSD1      | 1.04429   | 1.05987   | 0.0213615   | 0.991167   |
| NDUFA12    | 110.786   | 107.067   | -0.0492654  | 0.958829   |
| AK1        | 61.7909   | 72.8643   | 0.237817    | 0.58485    |
| MTRNR2L8   | 41.8486   | 30.68     | -0.44788    | 0.141482   |
| WDR4       | 10.6381   | 19.63     | 0.88381     | 0.00274688 |
| AURKAIP1   | 270.277   | 364.341   | 0.430851    | 0.164827   |
| TPX2       | 37.4949   | 28.731    | -0.384085   | 0.247848   |
| ZNF587B    | 2.88025   | 2.79804   | -0.0417742  | 0.971528   |
| PPP1R9B    | 18.4283   | 28.8196   | 0.645132    | 0.0123712  |
| TUBB2B     | 1.12396   | 2.17711   | 0.953821    | 0.0617671  |
| FAM41C     | 0.494353  | 0.368002  | -0.425825   | 0.73334    |
| TRMT61A    | 14.909    | 30.9006   | 1.05145     | 0.00153868 |
| FUT8       | 2.55124   | 2.57885   | 0.015526    | 0.991184   |
| MFSD11     | 3.81987   | 5.04311   | 0.400792    | 0.911075   |
| PLAC8      | 0.156983  | 0.0813734 | -0.947981   | 1          |
| NDUFB3     | 72.3146   | 65.05     | -0.152738   | 0.796533   |
| SEC23B     | 13.0828   | 12.0742   | -0.115745   | 0.864901   |
| GGCT       | 47.9093   | 46.9919   | -0.0278916  | 0.977897   |
| KIAA1549   | 1.43521   | 1.61174   | 0.167356    | 0.797188   |
| COX8A      | 968.94    | 931.989   | -0.0560943  | 0.950251   |
| SRBD1      | 1.44077   | 0.807026  | -0.836155   | 0.0365493  |
| WDR77      | 16.7718   | 47.1935   | 1.49255     | 0.0294837  |
| CALU       | 32.0539   | 30.3632   | -0.078177   | 0.922274   |
| METTL12    | 5.58947   | 4.73265   | -0.240063   | 0.961459   |
| CAPN10     | 13.4576   | 21.2931   | 0.661962    | 0.0226901  |
| RABGEF1    | 5.8462    | 4.75593   | -0.297771   | 0.686633   |
| DSTNP2     | 3.29536   | 2.66396   | -0.306862   | 0.708483   |
| GALNT1     | 5.54013   | 7.3324    | 0.404365    | 0.229368   |
| TMEM194B   | 13.5751   | 6.65814   | -1.02777    | 0.00153868 |
| MEIS2      | 2.87874   | 2.49326   | -0.207405   | 0.77663    |
| TRIP11     | 1.08874   | 0.940417  | -0.211282   | 0.759934   |
| ECHDC1     | 24.3615   | 29.04     | 0.253441    | 0.554334   |
| RMDN3      | 18.5809   | 18.5276   | -0.00414845 | 0.997224   |
| WDR67      | 2.54204   | 1.73893   | -0.547788   | 0.14961    |
| ANKRD44    | 0.518467  | 0.386531  | -0.42367    | 0.562754   |
| PSMB9      | 19.193    | 12.2751   | -0.644845   | 0.0545989  |
| ABHD16B    | 16.047    | 34.7904   | 1.11638     | 0.00153868 |
| FAM98A     | 13.6667   | 28.5963   | 1.06516     | 0.00153868 |
| GABPB2     | 1.25424   | 0.682333  | -0.878266   | 0.105057   |
| NCF1       | 0.0237431 | 0.0467906 | 0.978713    | 1          |
| GPR63      | 1.00432   | 1.7708    | 0.818177    | 0.00820276 |
| NGDN       | 26.3238   | 31.7976   | 0.27255     | 0.521982   |
| SUMF1      | 9.65898   | 6.42311   | -0.588599   | 0.0729664  |
| NAV3       | 8.41042   | 6.21996   | -0.435272   | 0.165129   |
| TMEM109    | 33.9415   | 55.1349   | 0.699914    | 0.00659556 |
| IRF2BP1    | 21.457    | 28.3919   | 0.404026    | 0.260553   |
| TFR2       | 20.6675   | 20.6434   | -0.00168008 | 0.998991   |
| EIF2S3     | 113.718   | 100.003   | -0.185415   | 0.726595   |
| NDUFB2-AS1 | 1.63369   | 1.55705   | -0.0693201  | 0.978847   |

|               |           |           |            |            |
|---------------|-----------|-----------|------------|------------|
| CXXC1         | 23.6692   | 27.8623   | 0.2353     | 0.600462   |
| PTPRE         | 1.2159    | 0.974124  | -0.319841  | 0.600118   |
| ANXA7         | 29.7834   | 24.5019   | -0.281615  | 0.469486   |
| OR2A7         | 0.884278  | 0.588882  | -0.586522  | 0.663419   |
| EXT2          | 22.467    | 20.6826   | -0.119392  | 0.861774   |
| SNX19         | 2.47013   | 2.37653   | -0.0557315 | 0.957719   |
| DNAJC21       | 3.82327   | 3.33297   | -0.197999  | 0.717262   |
| CYB561D2      | 39.4576   | 51.2741   | 0.377926   | 0.552302   |
| GALNT7        | 4.17951   | 3.77418   | -0.14717   | 0.828968   |
| SMPD3         | 0.380381  | 0.283794  | -0.422603  | 0.677754   |
| DET1          | 3.36265   | 1.63273   | -1.04232   | 0.00572929 |
| FUCA2         | 50.0615   | 40.9397   | -0.290201  | 0.447305   |
| AIFM3         | 0.929523  | 0.257781  | -1.85034   | 0.00380811 |
| KPNA4         | 9.50567   | 11.7156   | 0.301572   | 0.431094   |
| HIPK3         | 0.37374   | 0.463029  | 0.309068   | 0.732443   |
| SUMO3         | 36.4756   | 38.3239   | 0.0713139  | 0.934043   |
| RPS6KC1       | 1.4785    | 1.52043   | 0.0403493  | 0.975492   |
| TCEB1         | 68.3742   | 85.7583   | 0.326824   | 0.350415   |
| PSMA3         | 90.4756   | 125.216   | 0.468818   | 0.200956   |
| LRRIQ3        | 0.150291  | 0.063454  | -1.24398   | 1          |
| CSNK2B        | 268.338   | 238.797   | -0.168267  | 0.798855   |
| TMEM70        | 36.9488   | 54.7198   | 0.566535   | 0.0347593  |
| C12orf5       | 3.09874   | 4.65748   | 0.587869   | 0.0410754  |
| PUS1          | 44.025    | 81.3555   | 0.885915   | 0.00153868 |
| SPINT1        | 51.0524   | 49.2704   | -0.0512585 | 0.954501   |
| ZBTB7B        | 11.0239   | 14.6145   | 0.406766   | 0.23883    |
| FIZ1          | 7.37541   | 9.06837   | 0.298121   | 0.558062   |
| ALG6          | 2.645     | 2.90583   | 0.135686   | 0.872122   |
| BAZ1A         | 5.176     | 7.28331   | 0.492757   | 0.0997561  |
| N4BP2L1       | 0.497435  | 0.137773  | -1.85221   | 0.00970147 |
| UHRF1         | 19.2352   | 39.52     | 1.03883    | 0.00153868 |
| ARPC4,ARPC4-T | 134.06    | 152.237   | 0.183445   | 0.817355   |
| EXOSC4        | 137.372   | 227.748   | 0.729347   | 0.00153868 |
| MAPRE1        | 30.6677   | 36.7266   | 0.260103   | 0.524921   |
| PPID          | 30.3622   | 48.726    | 0.682418   | 0.00739414 |
| ANKRD31       | 0.0714648 | 0.0233634 | -1.61298   | 1          |
| UFD1L         | 29.1764   | 39.1729   | 0.425052   | 0.170772   |
| SLC26A2       | 1.75415   | 1.60818   | -0.125343  | 0.874107   |
| H2AFY         | 80.9397   | 87.6371   | 0.114695   | 0.86835    |
| HOXB-AS5      | 2.29453   | 1.3397    | -0.776287  | 0.466805   |
| HMG2          | 213.077   | 199.12    | -0.0977381 | 0.898467   |
| SLIRP         | 346.018   | 475.801   | 0.459511   | 0.118427   |
| NDUFAB1       | 207.12    | 238.082   | 0.200989   | 0.680748   |
| VMA21         | 13.4048   | 17.8747   | 0.415165   | 0.177708   |
| FAM86B2       | 1.56984   | 0.74009   | -1.08484   | 0.116756   |
| HYLS1         | 3.47988   | 3.6627    | 0.0738698  | 0.974348   |
| DES1          | 24.1269   | 28.8422   | 0.257538   | 0.522427   |
| SUMO1         | 75.4354   | 67.0863   | -0.169223  | 0.764456   |
| GPD2          | 4.37648   | 3.65      | -0.261875  | 0.566213   |

|              |           |          |            |            |
|--------------|-----------|----------|------------|------------|
| B4GALT5      | 12.2894   | 18.1857  | 0.565384   | 0.038486   |
| MT1M         | 226.001   | 262.984  | 0.218646   | 0.643229   |
| C1QBP        | 391.294   | 468.716  | 0.260461   | 0.628907   |
| TBC1D2       | 10.174    | 9.32904  | -0.125093  | 0.876392   |
| EIF2B3       | 6.97275   | 10.9672  | 0.653392   | 0.0313688  |
| PLAGL2       | 5.14232   | 6.38849  | 0.313054   | 0.431845   |
| MICB         | 8.15497   | 14.3937  | 0.819685   | 0.00153868 |
| LOC100133091 | 4.55658   | 5.80374  | 0.349031   | 0.675176   |
| ACTR1A       | 34.3206   | 49.1909  | 0.519316   | 0.0680503  |
| C20orf144    | 0.0861723 | 0        | #NAME?     | 1          |
| WDR62        | 6.17813   | 6.80477  | 0.139375   | 0.838244   |
| TSSC1        | 16.8402   | 12.805   | -0.3952    | 0.278484   |
| DYNC1H1      | 30.0813   | 18.4603  | -0.704442  | 0.00659556 |
| NOP58        | 50.6536   | 69.7064  | 0.460627   | 0.111557   |
| ZNF593       | 170.081   | 285.943  | 0.749507   | 0.00478151 |
| EIF5A2       | 1.37244   | 2.20315  | 0.682822   | 0.0438785  |
| TRIM27       | 39.249    | 41.1454  | 0.0680783  | 0.93571    |
| PSMC3        | 91.5032   | 109.772  | 0.262612   | 0.529456   |
| IFT43        | 43.2569   | 24.6481  | -0.811452  | 0.00739414 |
| GRIN1        | 0.0899142 | 0.151213 | 0.749964   | 1          |
| FAM96B       | 188.997   | 185.949  | -0.0234572 | 0.981441   |
| SLC16A9      | 3.87797   | 3.46049  | -0.164325  | 0.809839   |
| MAX          | 44.5674   | 54.6713  | 0.294795   | 0.724492   |
| PPM1G        | 128.039   | 140.828  | 0.137343   | 0.820487   |
| QSOX1        | 59.6641   | 51.7955  | -0.204039  | 0.708849   |
| HM13         | 141.348   | 148.183  | 0.0681332  | 0.938489   |
| LOC100287042 | 0.278968  | 0.365479 | 0.38969    | 1          |
| MPP6         | 3.77222   | 5.20437  | 0.46431    | 0.231572   |
| NDUFS1       | 12.4586   | 9.42552  | -0.402497  | 0.216818   |
| RAN          | 460.864   | 563.672  | 0.290514   | 0.465909   |
| SRSF6        | 34.0433   | 36.8501  | 0.114297   | 0.867427   |
| POP7         | 156.388   | 278.257  | 0.831286   | 0.00153868 |
| REXO2        | 92.9524   | 81.8635  | -0.183271  | 0.718103   |
| TSEN2        | 6.76429   | 6.98518  | 0.0463591  | 0.967226   |
| ANP32B       | 227.39    | 231.889  | 0.0282648  | 0.977897   |
| HTATSF1      | 8.42204   | 12.108   | 0.523724   | 0.0719976  |
| UPP1         | 615.012   | 255.748  | -1.26589   | 0.00153868 |
| CD81         | 372.605   | 411.763  | 0.144168   | 0.809535   |
| CASP8        | 7.43362   | 6.83944  | -0.120187  | 0.870746   |
| NUP93        | 25.582    | 33.6193  | 0.394161   | 0.22492    |
| EC11         | 186.317   | 127.064  | -0.552207  | 0.0504359  |
| UBE2J2       | 37.0207   | 41.0487  | 0.149007   | 0.804694   |
| CTSA         | 62.5821   | 54.2837  | -0.205231  | 0.703707   |
| ZXDC         | 6.8566    | 4.36437  | -0.651722  | 0.135473   |
| ACSS1        | 1.25486   | 1.09192  | -0.200665  | 0.848628   |
| FAM207A      | 108.005   | 92.745   | -0.219758  | 0.639952   |
| SUPV3L1      | 23.4121   | 21.1909  | -0.143812  | 0.808127   |
| PEX16        | 28.8144   | 19.1037  | -0.592939  | 0.0360613  |
| NLRC5        | 1.13495   | 1.30515  | 0.201586   | 0.794852   |

|                  |          |          |             |            |
|------------------|----------|----------|-------------|------------|
| LOC645513        | 2.61871  | 1.7853   | -0.552689   | 0.554994   |
| ATXN2            | 6.88646  | 5.23894  | -0.394487   | 0.270059   |
| RAD18            | 3.96684  | 4.57138  | 0.204639    | 0.698819   |
| HIST2H2AB        | 0.373645 | 0.340072 | -0.135824   | 0.983529   |
| RPTOR            | 7.06354  | 6.92312  | -0.0289678  | 0.978031   |
| THRA             | 8.79863  | 6.01414  | -0.548921   | 0.426631   |
| TCP1             | 106.305  | 181.215  | 0.769494    | 0.00380811 |
| FAR2             | 3.87716  | 1.91259  | -1.01947    | 0.00153868 |
| PCBD2            | 3.32803  | 2.42914  | -0.454221   | 0.348481   |
| LOC100287015     | 2.02205  | 1.79963  | -0.168117   | 0.876392   |
| LPGAT1           | 5.19622  | 4.62536  | -0.167897   | 0.76395    |
| SPIRE1           | 6.55422  | 5.25513  | -0.318698   | 0.399378   |
| CCDC28A          | 21.2801  | 8.08028  | -1.39703    | 0.00153868 |
| SMPDL3A          | 1.73152  | 1.22725  | -0.496609   | 0.393124   |
| LOC100289019     | 2.06201  | 2.06245  | 0.000306574 | 0.999234   |
| CLPTM1L          | 52.4157  | 80.5948  | 0.620687    | 0.0156935  |
| C17orf49,RNASEH1 | 448.076  | 403.669  | -0.150569   | 0.809535   |
| MT2A             | 8659.89  | 9754.96  | 0.171787    | 0.780958   |
| SFT2D1           | 123.542  | 108.028  | -0.193593   | 0.705885   |
| XRCC4            | 7.3722   | 4.74264  | -0.636403   | 0.0650492  |
| GEN1             | 1.84044  | 1.6479   | -0.159421   | 0.821425   |
| KLHL21           | 46.1348  | 41.8248  | -0.141499   | 0.814388   |
| NCOA5            | 11.2407  | 14.1104  | 0.328022    | 0.384397   |
| SLC25A22         | 24.8177  | 46.4349  | 0.903838    | 0.00153868 |
| NEK11            | 0.707579 | 0.385807 | -0.875011   | 0.474234   |
| SPATA6           | 0.682284 | 0.203699 | -1.74393    | 0.00153868 |
| BNIPL            | 0.24207  | 0.170752 | -0.50352    | 1          |
| ASF1A            | 5.88655  | 4.21443  | -0.482083   | 0.267205   |
| BCAS2            | 27.1397  | 27.171   | 0.0016601   | 0.999146   |
| SLC4A2           | 76.3921  | 114.731  | 0.586763    | 0.0290262  |
| SRRM2-AS1        | 0.393806 | 0.29383  | -0.422503   | 0.961132   |
| L3MBTL3          | 1.24783  | 1.70822  | 0.453074    | 0.324946   |
| R3HDM4           | 103.439  | 86.5393  | -0.257357   | 0.524958   |
| FAM83H           | 41.385   | 50.0083  | 0.273059    | 0.481252   |
| SLC25A44         | 7.01592  | 10.2165  | 0.542194    | 0.076039   |
| NOP16            | 110.452  | 215.045  | 0.961217    | 0.00153868 |
| SLMO1            | 8.30556  | 4.81753  | -0.785783   | 0.0264621  |
| ALG14            | 6.29325  | 8.66021  | 0.460596    | 0.307226   |
| CORO7,CORO7-F    | 188.143  | 164.455  | -0.194135   | 0.783706   |
| LOC100129361     | 6.07301  | 6.25438  | 0.0424544   | 0.967343   |
| DLG1-AS1         | 0.233119 | 0.09918  | -1.23294    | 1          |
| SF3B4            | 73.5463  | 82.8145  | 0.171231    | 0.742612   |
| SH3PXD2B         | 4.38451  | 3.49419  | -0.327457   | 0.40075    |
| NSUN5            | 35.2825  | 35.7611  | 0.0194398   | 0.9843     |
| RANGAP1          | 111.875  | 130.838  | 0.225899    | 0.630584   |
| SEC61B           | 366.143  | 473.438  | 0.370766    | 0.263581   |
| TSN              | 24.6965  | 25.8079  | 0.0635041   | 0.940598   |
| ULBP2            | 13.6458  | 14.5077  | 0.0883599   | 0.925937   |
| SF3A2            | 115.599  | 71.5388  | -0.692326   | 0.00380811 |

|               |           |           |            |            |
|---------------|-----------|-----------|------------|------------|
| SRM           | 199.062   | 374.993   | 0.913644   | 0.00153868 |
| SCPEP1        | 12.0846   | 7.69376   | -0.651415  | 0.0280907  |
| ZNF394        | 15.7161   | 16.4153   | 0.0627897  | 0.945597   |
| SFT2D2        | 4.04122   | 3.92423   | -0.0423801 | 0.978996   |
| RSU1          | 13.8227   | 18.4638   | 0.417664   | 0.172992   |
| FAM76A        | 1.25809   | 1.49102   | 0.24507    | 0.761869   |
| FAM222A-AS1   | 4.10284   | 8.60083   | 1.06785    | 0.0467998  |
| ANKRD63       | 0.0905473 | 0.0675207 | -0.423342  | 1          |
| ARHGAP8,PRR5, | 34.0972   | 53.9005   | 0.660646   | 0.0163491  |
| SAMHD1        | 1.40548   | 2.65504   | 0.917674   | 0.00897284 |
| SYNJ1         | 0.733905  | 0.63175   | -0.21624   | 0.784724   |
| DTL           | 7.15495   | 6.15378   | -0.217471  | 0.790468   |
| H2AFY2        | 22.7647   | 11.1587   | -1.02863   | 0.0644552  |
| LINC00507     | 0.0780148 | 0.0345341 | -1.17573   | 1          |
| RBM8A         | 27.6575   | 31.3567   | 0.181103   | 0.782739   |
| SFT2D3        | 8.36163   | 6.6508    | -0.330255  | 0.469232   |
| ZNF205        | 20.8861   | 18.5138   | -0.173943  | 0.783706   |
| PANK2         | 16.184    | 14.1875   | -0.189944  | 0.739148   |
| ATAT1         | 1.79402   | 1.50088   | -0.257386  | 0.808982   |
| LRRC8B        | 1.71941   | 1.78441   | 0.0535348  | 0.960217   |
| WASH5P        | 3.36316   | 2.94097   | -0.193524  | 0.869722   |
| DTYMK         | 77.532    | 99.1347   | 0.354598   | 0.303067   |
| PMVK          | 29.9647   | 29.0933   | -0.0425741 | 0.967343   |
| PFDN6         | 129.748   | 126.738   | -0.0338593 | 0.974348   |
| AMDHD2        | 30.2356   | 16.9248   | -0.837106  | 0.0832671  |
| MSI1          | 20.1856   | 25.4424   | 0.333912   | 0.35293    |
| MRPL38        | 117       | 122.009   | 0.0604788  | 0.944033   |
| NLRX1         | 8.73133   | 4.65338   | -0.907922  | 0.00380811 |
| RPL21P44      | 0.078479  | 0.0363982 | -1.10844   | 1          |
| SNHG11        | 14.6665   | 9.78986   | -0.583168  | 0.115387   |
| SCAMP2        | 40.044    | 32.9724   | -0.280327  | 0.515466   |
| ISOC2         | 102.732   | 125.503   | 0.288839   | 0.477384   |
| NUDT16        | 8.2466    | 8.97882   | 0.122726   | 0.954252   |
| SLC29A1       | 73.3206   | 97.7182   | 0.41441    | 0.188237   |
| HRAS          | 45.3063   | 70.9579   | 0.647252   | 0.0187307  |
| PTRH2         | 53.57     | 72.9149   | 0.44479    | 0.153539   |
| ATAD2         | 12.213    | 11.3175   | -0.109862  | 0.879055   |
| ITGAM         | 0.0237758 | 0.0176721 | -0.428017  | 1          |
| LONRF3        | 2.90936   | 2.32031   | -0.326381  | 0.600871   |
| HGF           | 3.84244   | 5.63365   | 0.552049   | 0.218096   |
| ADIPOR2       | 11.7813   | 16.833    | 0.514786   | 0.0689012  |
| FLJ46906      | 5.59647   | 2.62676   | -1.09124   | 0.0103919  |
| FAM222A       | 1.46116   | 3.46608   | 1.24619    | 0.0156935  |
| TTC14         | 1.69694   | 1.78647   | 0.0741835  | 0.951965   |
| LOC374443     | 1.1819    | 0.48189   | -1.29433   | 0.00478151 |
| NKD1          | 1.3382    | 0.911723  | -0.553629  | 0.14863    |
| SH3BP5-AS1    | 0.934092  | 0.562964  | -0.730521  | 0.605317   |
| DNAJA3        | 43.1376   | 42.6354   | -0.0168923 | 0.985492   |
| MORN4         | 5.28197   | 4.1539    | -0.346609  | 0.463667   |

|                |           |           |            |            |
|----------------|-----------|-----------|------------|------------|
| TAOK3          | 1.41175   | 1.27773   | -0.143903  | 0.879418   |
| SRF            | 27.3411   | 25.5279   | -0.0989921 | 0.890489   |
| PIH1D2         | 1.44598   | 1.26629   | -0.19144   | 0.964843   |
| RGS16          | 4.9093    | 7.7092    | 0.651065   | 0.0442243  |
| MXD1           | 7.4724    | 4.71484   | -0.664363  | 0.020985   |
| G6PD           | 27.1017   | 30.7222   | 0.180898   | 0.802416   |
| TBCB           | 92.564    | 86.2567   | -0.101814  | 0.919207   |
| CNIH           | 76.7504   | 64.23     | -0.256927  | 0.535841   |
| TEKT5          | 0.0951406 | 0.0463908 | -1.03622   | 1          |
| GCKR           | 0.118823  | 0.0415587 | -1.51559   | 1          |
| COPS3          | 44.0421   | 47.0636   | 0.0957287  | 0.897031   |
| RSAD1          | 35.9289   | 33.0979   | -0.118403  | 0.859038   |
| DISP2          | 1.0583    | 1.06135   | 0.00416122 | 0.998382   |
| PPP1R12C       | 22.1161   | 23.9929   | 0.117509   | 0.870063   |
| PPP2R2D        | 14.7764   | 17.0839   | 0.209342   | 0.684734   |
| EOGT           | 5.42505   | 4.83902   | -0.164921  | 0.790086   |
| PLEC           | 19.6478   | 27.8425   | 0.502917   | 0.0840806  |
| PLXNA1         | 7.63378   | 12.0273   | 0.655847   | 0.0103919  |
| PLSCR1         | 6.25616   | 4.74593   | -0.398586  | 0.342031   |
| GNG12          | 30.0142   | 17.0185   | -0.81854   | 0.0192959  |
| METTL17        | 43.2941   | 38.7693   | -0.159256  | 0.777535   |
| IKBK           | 14.0736   | 14.4678   | 0.0398493  | 0.983243   |
| MEPCE          | 65.2579   | 80.2145   | 0.297712   | 0.456287   |
| CDK5RAP1       | 18.8483   | 17.6608   | -0.0938829 | 0.903915   |
| CXorf40A       | 7.37722   | 7.45355   | 0.0148521  | 0.991175   |
| TECPR2         | 0.888529  | 1.02186   | 0.201703   | 0.792555   |
| ZNF780B        | 0.790416  | 0.706647  | -0.161624  | 0.845932   |
| TIMMDC1        | 44.4909   | 33.0347   | -0.42953   | 0.165955   |
| CASP4          | 187.258   | 119.112   | -0.652704  | 0.0130226  |
| IFI35          | 5.72297   | 3.34767   | -0.773608  | 0.0691625  |
| SIPA1L2        | 0.344436  | 0.40449   | 0.231868   | 0.828851   |
| SKA1           | 9.36268   | 7.04917   | -0.409468  | 0.248223   |
| DCTPP1         | 111.505   | 205.245   | 0.880235   | 0.00153868 |
| HIST1H2AC      | 4.45264   | 6.11104   | 0.456756   | 0.665087   |
| DNMT1          | 21.5679   | 27.18     | 0.333658   | 0.334299   |
| RTEL1,TNFRSF6I | 7.32984   | 8.98218   | 0.293284   | 0.861774   |
| POLR2K         | 68.3877   | 80.3037   | 0.23173    | 0.599775   |
| NPAS1          | 3.20553   | 0.717005  | -2.16051   | 0.00153868 |
| B9D1           | 41.2413   | 27.4792   | -0.58575   | 0.239715   |
| MRPS10         | 24.0139   | 21.2834   | -0.174142  | 0.745547   |
| C6orf89        | 5.48326   | 4.66166   | -0.234192  | 0.608336   |
| ABHD5          | 3.0945    | 2.75898   | -0.16557   | 0.795726   |
| WBSCR22        | 130.183   | 119.826   | -0.119602  | 0.860871   |
| CA5BP1         | 14.0184   | 15.6895   | 0.162476   | 0.836107   |
| LOC399815      | 0.596973  | 0.318884  | -0.904634  | 0.629024   |
| MFS12          | 90.4301   | 100.256   | 0.148813   | 0.805794   |
| FLOT1          | 128.02    | 72.8059   | -0.814245  | 0.00153868 |
| TGFA           | 2.21759   | 1.83642   | -0.272093  | 0.641699   |
| C1orf226       | 1.66195   | 1.54907   | -0.101479  | 0.930048   |

|            |           |           |            |            |
|------------|-----------|-----------|------------|------------|
| RFT1       | 10.5892   | 8.5112    | -0.315154  | 0.403473   |
| RGS17      | 0.0389027 | 0         | #NAME?     | 1          |
| INSR       | 3.1834    | 2.32919   | -0.450742  | 0.169004   |
| C10orf35   | 27.6418   | 29.1919   | 0.0787172  | 0.930048   |
| DMRTA2     | 7.61417   | 9.61715   | 0.336924   | 0.480434   |
| MRPS21     | 436.065   | 420.589   | -0.0521339 | 0.955041   |
| FOSL1      | 395.99    | 299.359   | -0.403585  | 0.204028   |
| MRPL4      | 184.853   | 236.989   | 0.358444   | 0.297593   |
| COG8,PDF   | 33.943    | 38.2385   | 0.171911   | 0.913875   |
| MAP3K15    | 0.795277  | 0.880343  | 0.146608   | 0.980228   |
| SLCO3A1    | 2.73791   | 2.61345   | -0.0671174 | 0.960032   |
| APEX2      | 25.9927   | 27.7517   | 0.0944706  | 0.902428   |
| OAS3       | 1.91927   | 2.00721   | 0.0646361  | 0.952539   |
| KBTBDB8    | 1.08729   | 1.42976   | 0.395037   | 0.419912   |
| PPP5C      | 36.762    | 44.2648   | 0.267945   | 0.504902   |
| DEF8       | 49.7522   | 83.6918   | 0.750327   | 0.0304296  |
| MPC1       | 19.5311   | 23.211    | 0.24904    | 0.630091   |
| SLC41A3    | 22.9428   | 13.0224   | -0.817051  | 0.00380811 |
| ANKRD30BP2 | 0.0598195 | 0.0211295 | -1.50136   | 1          |
| ASB7       | 2.69951   | 2.17702   | -0.310341  | 0.625203   |
| LSM1       | 40.8221   | 54.8105   | 0.425099   | 0.313      |
| ADCK4      | 25.6109   | 10.5931   | -1.27363   | 0.00153868 |
| LMAN2      | 125.824   | 110.72    | -0.184493  | 0.722516   |
| KCNK1      | 16.0789   | 12.0903   | -0.411322  | 0.224437   |
| ELP5       | 57.6713   | 66.2486   | 0.200037   | 0.693923   |
| TMEM62     | 10.1022   | 6.15441   | -0.714974  | 0.0117316  |
| RPUSD1     | 90.0944   | 149.815   | 0.733668   | 0.00274688 |
| ZNF385A    | 17.7773   | 12.0993   | -0.555113  | 0.0767959  |
| OAF        | 56.3449   | 52.6114   | -0.0989107 | 0.887978   |
| C9orf64    | 11.7057   | 10.6311   | -0.138921  | 0.837571   |
| PPOX       | 18.6671   | 9.49218   | -0.975684  | 0.00153868 |
| LHFPL2     | 2.91842   | 3.16065   | 0.115033   | 0.887413   |
| OGFR       | 47.23     | 60.6026   | 0.359676   | 0.28912    |
| ZNF689     | 4.39347   | 4.28928   | -0.034626  | 0.975654   |
| H3F3B      | 246.143   | 251.872   | 0.0331903  | 0.975484   |
| MAF1       | 231.859   | 215.089   | -0.108312  | 0.879418   |
| KIF9       | 1.53847   | 1.52094   | -0.0165384 | 0.995799   |
| SRP54      | 10.5627   | 10.1435   | -0.0584286 | 0.952184   |
| PNPLA8     | 2.12346   | 1.3484    | -0.655171  | 0.0605998  |
| RCN1       | 75.0292   | 60.7929   | -0.303551  | 0.424678   |
| USP14      | 12.9235   | 16.0333   | 0.311077   | 0.390823   |
| LRRC8A     | 15.5126   | 18.2779   | 0.236654   | 0.607207   |
| DOCK8      | 0.440063  | 0.434423  | -0.0186102 | 0.992304   |
| RBFOX3     | 0.0399369 | 0.103094  | 1.36816    | 1          |
| BIRC2      | 20.0041   | 15.3508   | -0.381983  | 0.258195   |
| PSMG3      | 70.456    | 92.4385   | 0.391771   | 0.234147   |
| KLF10      | 14.7467   | 13.2718   | -0.152028  | 0.802621   |
| MGAT1      | 38.6728   | 58.0411   | 0.585753   | 0.0264621  |
| C1QL3      | 0.394337  | 0.294747  | -0.419951  | 0.954535   |



|             |          |          |             |            |
|-------------|----------|----------|-------------|------------|
| HNRNPD      | 142.379  | 167.396  | 0.233531    | 0.610939   |
| MCM5        | 40.264   | 41.7401  | 0.0519446   | 0.955713   |
| LBR         | 12.2769  | 15.7351  | 0.358046    | 0.285815   |
| FBXL19      | 13.2375  | 21.7675  | 0.717547    | 0.00478151 |
| BBIP1       | 9.30133  | 5.25814  | -0.822885   | 0.2196     |
| RMDN2       | 0.410929 | 0.608821 | 0.56713     | 0.538721   |
| C16orf93    | 3.31282  | 3.3398   | 0.0117023   | 0.998975   |
| WNT3        | 1.30452  | 1.02717  | -0.344838   | 0.786155   |
| FLJ31813    | 0.400278 | 0.399791 | -0.00175616 | 0.998382   |
| LLPH        | 57.7844  | 87.7717  | 0.603076    | 0.0264621  |
| DHX33       | 11.1099  | 13.359   | 0.265963    | 0.509766   |
| SH3TC1      | 4.46278  | 3.18138  | -0.488288   | 0.226046   |
| SLC25A25    | 19.5396  | 17.6244  | -0.148833   | 0.805817   |
| CCND3       | 33.1023  | 66.4367  | 1.00505     | 0.00153868 |
| MFSD5       | 27.1584  | 40.06    | 0.560762    | 0.0407657  |
| PYCR1       | 28.3231  | 36.1646  | 0.3526      | 0.322682   |
| LSM4        | 168.754  | 158.939  | -0.0864468  | 0.907653   |
| UST         | 3.04497  | 2.49456  | -0.287647   | 0.571151   |
| EBNA1BP2    | 98.3942  | 167.896  | 0.770927    | 0.00274688 |
| PIP5K1C     | 9.66556  | 14.0415  | 0.538767    | 0.0603207  |
| ANP32A      | 57.5696  | 70.1574  | 0.285289    | 0.45332    |
| WWP2        | 12.6185  | 11.1211  | -0.182232   | 0.751293   |
| RNF13       | 7.36235  | 4.41605  | -0.73741    | 0.0181648  |
| MIS12       | 10.2189  | 8.95577  | -0.190354   | 0.744543   |
| CENPW       | 68.7232  | 85.6495  | 0.317648    | 0.437751   |
| CSNK1G2     | 40.8936  | 54.5872  | 0.416687    | 0.164242   |
| DDI2,RSC1A1 | 2.64225  | 2.99316  | 0.179899    | 0.837049   |
| RPS19BP1    | 142.532  | 253.299  | 0.829558    | 0.00153868 |
| ZSCAN5A     | 0.66368  | 0.986779 | 0.572239    | 0.421947   |
| POMT2       | 3.71579  | 3.80264  | 0.0333305   | 0.976134   |
| OCLN        | 5.55647  | 4.62733  | -0.263989   | 0.553059   |
| CHRNA5      | 2.04298  | 3.47196  | 0.765076    | 0.0187307  |
| RAB11FIP2   | 1.62265  | 1.54882  | -0.0671858  | 0.949088   |
| GLI4        | 34.2151  | 16.5461  | -1.04814    | 0.00153868 |
| CDC37       | 305.857  | 342.46   | 0.163079    | 0.773721   |
| USP54       | 1.12298  | 1.33838  | 0.253152    | 0.691588   |
| FAM69B      | 3.86047  | 3.06316  | -0.333753   | 0.972592   |
| MRPS18A     | 79.95    | 62.4251  | -0.356971   | 0.289507   |
| SLC46A1     | 6.60898  | 8.17634  | 0.307028    | 0.456577   |
| PIK3R4      | 3.23969  | 4.38482  | 0.436661    | 0.208798   |
| SLC25A28    | 22.5405  | 22.3117  | -0.0147232  | 0.991324   |
| LONP1       | 115.941  | 81.8852  | -0.501714   | 0.0792007  |
| AIMP2       | 14.235   | 15.336   | 0.107485    | 0.975484   |
| MYPOP       | 11.8847  | 18.377   | 0.628797    | 0.0491395  |
| MFSD1       | 13.8069  | 13.9021  | 0.00991638  | 0.994058   |
| CHCHD2      | 930.192  | 840.151  | -0.14688    | 0.810769   |
| FIP1L1      | 11.6937  | 10.1427  | -0.205284   | 0.703707   |
| CCNE1       | 17.9058  | 31.6586  | 0.822166    | 0.00153868 |
| SFN         | 74.5244  | 256.235  | 1.78168     | 0.00153868 |

|           |           |           |             |            |
|-----------|-----------|-----------|-------------|------------|
| KHSRP     | 70.8984   | 70.5915   | -0.00625754 | 0.994734   |
| ZBTB8OS   | 16.2825   | 17.1687   | 0.0764566   | 0.943284   |
| LIAS      | 11.3323   | 6.70216   | -0.757747   | 0.00572929 |
| ARHGDI1A  | 305.03    | 354.52    | 0.216916    | 0.642898   |
| SRSF2     | 103.702   | 269.601   | 1.37838     | 0.00153868 |
| LTBP2     | 0.780072  | 0.539494  | -0.532      | 0.283034   |
| NPTN      | 23.875    | 26.6098   | 0.156459    | 0.786895   |
| MCL1      | 89.8036   | 76.0014   | -0.240749   | 0.590377   |
| ANKLE2    | 15.6416   | 16.0578   | 0.0378873   | 0.968167   |
| CNDP2     | 20.5927   | 22.7364   | 0.142871    | 0.816181   |
| ZNF787    | 88.1987   | 66.2526   | -0.41278    | 0.199834   |
| CCDC122   | 1.40843   | 0.370163  | -1.92785    | 0.0351856  |
| SLC29A3   | 8.34876   | 5.58319   | -0.580471   | 0.106507   |
| GSS       | 81.6737   | 55.0436   | -0.569297   | 0.034328   |
| ANKS1B    | 3.0192    | 2.43333   | -0.311233   | 0.743874   |
| SF3A3     | 43.5858   | 47.5523   | 0.125656    | 0.84864    |
| RHOC      | 323.287   | 362.698   | 0.165952    | 0.769834   |
| AIFM2     | 24.0897   | 17.957    | -0.423871   | 0.337256   |
| TMX3      | 6.9559    | 5.88624   | -0.24089    | 0.5947     |
| HTATSF1P2 | 2.85459   | 1.6658    | -0.777069   | 0.0187307  |
| TMEM115   | 43.6874   | 61.991    | 0.504842    | 0.0705331  |
| PSMB2     | 37.9477   | 45.0745   | 0.248299    | 0.549105   |
| E2F7      | 3.63109   | 3.57489   | -0.0225027  | 0.982576   |
| CCDC157   | 0.623082  | 0.808793  | 0.376349    | 0.974348   |
| DNAJC2    | 27.6294   | 39.6647   | 0.521649    | 0.385184   |
| SOLH      | 35.1282   | 55.6411   | 0.663519    | 0.00739414 |
| CHMP6     | 16.0706   | 22.8426   | 0.507306    | 0.126736   |
| DBNL      | 46.0128   | 48.9224   | 0.088461    | 0.909313   |
| SEPSECS   | 1.08517   | 0.486472  | -1.15749    | 0.00274688 |
| SCARNA17  | 8.01455   | 6.77544   | -0.242306   | 0.860741   |
| ATP5D     | 443.231   | 440.448   | -0.00908688 | 0.994058   |
| RPA2      | 33.9276   | 40.5316   | 0.256588    | 0.535571   |
| APC2      | 1.11546   | 0.960854  | -0.215247   | 0.951891   |
| SLC39A7   | 51.2409   | 69.8734   | 0.447448    | 0.117359   |
| GPANK1    | 23.4119   | 18.5962   | -0.332238   | 0.831614   |
| PBLD      | 0.595469  | 0.250166  | -1.25114    | 0.879055   |
| TOE1      | 12.7045   | 19.1337   | 0.590779    | 0.158977   |
| SSR3      | 291.85    | 231.88    | -0.331844   | 0.387751   |
| TAP1      | 29.9316   | 31.5804   | 0.0773581   | 0.952221   |
| PARP9     | 2.13719   | 1.62857   | -0.392113   | 0.66836    |
| SIL1      | 47.9892   | 29.9684   | -0.679265   | 0.0130226  |
| ZNF300    | 6.78059   | 6.61627   | -0.035393   | 0.974348   |
| MGLL      | 35.1652   | 22.9775   | -0.613928   | 0.0204286  |
| XKR6      | 0.196761  | 0.133033  | -0.564662   | 1          |
| GFM1      | 8.91117   | 11.6149   | 0.382287    | 0.328749   |
| PPIF      | 73.49     | 132.273   | 0.847904    | 0.00153868 |
| KIAA0556  | 1.91425   | 1.64313   | -0.220334   | 0.727839   |
| ST8SIA5   | 0.0210366 | 0.0311233 | 0.565096    | 1          |
| POLE3     | 47.3404   | 71.9886   | 0.604695    | 0.0243026  |

|            |           |           |            |            |
|------------|-----------|-----------|------------|------------|
| SPRYD4     | 10.4157   | 13.1482   | 0.336109   | 0.621923   |
| LOC401052  | 2.13811   | 2.32651   | 0.121834   | 0.926086   |
| R3HCC1L    | 7.37049   | 7.44235   | 0.0139962  | 0.992304   |
| PHYHD1     | 0.0780289 | 0.0568162 | -0.457708  | 1          |
| DNAJC16    | 2.59398   | 2.69655   | 0.0559466  | 0.975928   |
| NUP43      | 11.3843   | 9.54015   | -0.25496   | 0.542635   |
| TRMU       | 22.1159   | 38.3648   | 0.794695   | 0.00153868 |
| SMIM4      | 79.1523   | 95.6015   | 0.272402   | 0.574857   |
| PROSER1    | 7.28039   | 7.51352   | 0.0454737  | 0.963608   |
| VPS26A     | 26.1856   | 20.0339   | -0.386331  | 0.226744   |
| GPATCH3    | 9.16339   | 10.4919   | 0.195318   | 0.746171   |
| SYBU       | 8.21756   | 6.62938   | -0.309836  | 0.470965   |
| MSL3P1     | 5.10718   | 4.70971   | -0.11689   | 0.895596   |
| THOC5      | 32.4997   | 20.2812   | -0.680282  | 0.00739414 |
| SKA2       | 19.3253   | 15.9499   | -0.276947  | 0.485946   |
| IL4R       | 7.80874   | 8.80012   | 0.172433   | 0.774564   |
| ZDHHC13    | 8.12845   | 5.95527   | -0.448814  | 0.20701    |
| PPT1       | 53.1089   | 56.3308   | 0.0849696  | 0.911075   |
| HOXD9      | 12.4058   | 9.27148   | -0.420148  | 0.324946   |
| KIAA1107   | 0.284962  | 0.084185  | -1.75914   | 1          |
| STEAP1     | 12.0368   | 12.2502   | 0.0253556  | 0.981022   |
| ZNF562     | 4.3139    | 3.28189   | -0.394466  | 0.262058   |
| GEMIN8P4   | 1.12101   | 1.13131   | 0.0131974  | 0.994593   |
| RABL5      | 10.7271   | 8.3021    | -0.369713  | 0.328749   |
| C8orf47    | 9.06566   | 10.3417   | 0.189984   | 0.858729   |
| KCTD1      | 2.93726   | 2.70614   | -0.118234  | 0.91609    |
| CLCN2      | 7.13842   | 9.19203   | 0.364778   | 0.592084   |
| NASP       | 49.8782   | 50.586    | 0.0203271  | 0.983243   |
| SPECC1L    | 7.68147   | 9.00705   | 0.229672   | 0.633281   |
| ADRM1      | 174.795   | 246.178   | 0.494033   | 0.0857307  |
| MITD1      | 20.3129   | 17.1746   | -0.242116  | 0.643713   |
| RCC2       | 25.1292   | 38.373    | 0.610728   | 0.0163491  |
| FBXL6      | 63.9603   | 89.5226   | 0.485075   | 0.0832671  |
| LAMP1      | 78.1827   | 88.9724   | 0.186507   | 0.718059   |
| PSMA7      | 317.941   | 399.766   | 0.330396   | 0.357338   |
| FBXL19-AS1 | 0.352312  | 0.397174  | 0.172915   | 0.978818   |
| C17orf89   | 93.5391   | 138.895   | 0.570357   | 0.0467998  |
| CTSD       | 196.034   | 144.155   | -0.443484  | 0.201515   |
| C22orf26   | 0.466135  | 0.221853  | -1.07114   | 0.735654   |
| C10orf114  | 9.60086   | 7.65492   | -0.326777  | 0.552898   |
| ARID3C     | 0.102335  | 0.0885348 | -0.208982  | 1          |
| FAHD2A     | 28.1656   | 15.0174   | -0.907301  | 0.00153868 |
| MID1IP1    | 36.7949   | 29.4741   | -0.320056  | 0.410809   |
| SWSAP1     | 2.92681   | 3.61291   | 0.303834   | 0.680305   |
| DPP8       | 0.974998  | 0.756674  | -0.365728  | 0.554334   |
| WDR83      | 17.5757   | 18.8417   | 0.100345   | 0.978818   |
| NSMCE4A    | 22.5033   | 21.0145   | -0.0987519 | 0.899607   |
| ARPC5      | 27.3724   | 31.5939   | 0.206927   | 0.662083   |
| ARPC1B     | 185.396   | 192.839   | 0.0567849  | 0.974017   |

|           |           |           |            |            |
|-----------|-----------|-----------|------------|------------|
| BUB3      | 145.224   | 133.763   | -0.118602  | 0.872122   |
| VAR52     | 22.0637   | 16.3841   | -0.42938   | 0.175048   |
| CCDC59    | 23.6954   | 22.6007   | -0.0682418 | 0.939068   |
| C2CD4C    | 11.501    | 10.258    | -0.165008  | 0.803196   |
| GINS4     | 6.28415   | 6.99159   | 0.153903   | 0.810769   |
| TMEM175   | 9.24183   | 5.91448   | -0.643927  | 0.103353   |
| TNFRSF10A | 7.00857   | 8.79898   | 0.328217   | 0.492079   |
| BAZ1B     | 10.9319   | 13.6624   | 0.321669   | 0.371307   |
| C5orf34   | 3.13997   | 1.73021   | -0.859805  | 0.00970147 |
| CSTF2     | 11.7598   | 14.0123   | 0.252825   | 0.594489   |
| TSIX      | 0.0100891 | 0.0116    | 0.201326   | 1          |
| ILDR2     | 0.733477  | 0.716148  | -0.0344944 | 0.978996   |
| TMEM92    | 0.108802  | 0.0139614 | -2.96219   | 1          |
| BCL2L1    | 157.876   | 130.661   | -0.272965  | 0.489185   |
| MBD4      | 9.6751    | 12.7338   | 0.396316   | 0.456287   |
| SIGMAR1   | 177.282   | 146.356   | -0.276561  | 0.493555   |
| DNMT3A    | 1.3025    | 1.27307   | -0.0329659 | 0.984156   |
| WDR53     | 3.35297   | 3.46799   | 0.0486599  | 0.971173   |
| UNC13D    | 0.870508  | 0.281517  | -1.62863   | 0.00380811 |
| MVB12A    | 78.5151   | 49.3531   | -0.669829  | 0.0103919  |
| PELI2     | 0.76973   | 0.192103  | -2.00247   | 0.00153868 |
| BCL2A1    | 53.7547   | 46.1656   | -0.219573  | 0.641994   |
| NEK3      | 9.58613   | 5.00671   | -0.937085  | 0.00153868 |
| EMP2      | 3.84733   | 4.4041    | 0.194991   | 0.730732   |
| DAZAP1    | 128.572   | 106.776   | -0.267985  | 0.503126   |
| S100A11   | 1098.13   | 1242.74   | 0.178481   | 0.742295   |
| UBALD1    | 51.4537   | 49.6668   | -0.0509924 | 0.957868   |
| ATP10D    | 0.964241  | 0.686231  | -0.4907    | 0.289501   |
| ST3GAL1   | 6.16816   | 6.56469   | 0.0898849  | 0.908661   |
| TMCO1     | 15.7799   | 15.8241   | 0.00403511 | 0.996948   |
| PSMD1     | 24.7114   | 34.4977   | 0.481327   | 0.0900926  |
| RANBP1    | 178.509   | 287.247   | 0.6863     | 0.00820276 |
| EMC3      | 32.4715   | 30.8351   | -0.0746006 | 0.933684   |
| PRDX5     | 449.716   | 355.626   | -0.338653  | 0.357918   |
| TOR2A     | 48.0132   | 46.453    | -0.0476605 | 0.961672   |
| RRS1      | 47.8604   | 100.011   | 1.06326    | 0.00153868 |
| SMUG1     | 41.1133   | 34.8776   | -0.237305  | 0.731108   |
| EMC7      | 104.116   | 98.8202   | -0.0753083 | 0.926279   |
| MGC39372  | 2.38661   | 0.597798  | -1.99723   | 0.00153868 |
| DDA1      | 13.3563   | 17.4301   | 0.384062   | 0.270647   |
| C9orf3    | 2.32884   | 2.52657   | 0.117568   | 0.906322   |
| B3GALNT2  | 7.36145   | 6.90885   | -0.0915442 | 0.920543   |
| KRT81     | 0.854972  | 0.679012  | -0.33244   | 0.804694   |
| UBE4A     | 7.23897   | 5.6311    | -0.362368  | 0.824472   |
| TSHZ1     | 1.67622   | 2.06562   | 0.301365   | 0.599981   |
| SEL1L3    | 11.7154   | 5.65501   | -1.05081   | 0.00153868 |
| SMARCA2   | 5.67122   | 3.07428   | -0.88341   | 0.00153868 |
| IFT20     | 31.6117   | 29.1125   | -0.11882   | 0.952441   |
| SIMC1     | 10.8933   | 13.0534   | 0.260979   | 0.57283    |

|               |           |           |             |            |
|---------------|-----------|-----------|-------------|------------|
| PEX5          | 41.8128   | 30.5164   | -0.45436    | 0.128171   |
| HCG18         | 1.69323   | 1.9365    | 0.193673    | 0.91609    |
| DPM2          | 173.015   | 180.129   | 0.0581327   | 0.948152   |
| HMGA2         | 26.2858   | 20.5206   | -0.357214   | 0.522562   |
| AKIP1         | 27.7471   | 18.0532   | -0.62008    | 0.0464744  |
| ADI1          | 24.7383   | 40.5978   | 0.714652    | 0.00380811 |
| ARMC2         | 0.0847659 | 0.0585305 | -0.534295   | 1          |
| ELOVL1        | 111.443   | 101.429   | -0.135838   | 0.830497   |
| CHM           | 2.39241   | 1.31359   | -0.864957   | 0.00739414 |
| KPNA5         | 0.7665    | 0.833347  | 0.120631    | 0.935507   |
| DMRT2         | 3.17331   | 3.2298    | 0.0254526   | 0.985739   |
| VKORC1L1      | 11.2776   | 12.4407   | 0.141604    | 0.864909   |
| IL7           | 0.696765  | 0.600809  | -0.213765   | 0.875956   |
| UGGT2         | 2.79851   | 2.3717    | -0.238739   | 0.660186   |
| CRK           | 9.89373   | 10.3103   | 0.0595058   | 0.949676   |
| ZDHC5         | 20.3612   | 19.6408   | -0.051967   | 0.95395    |
| AP5M1         | 4.78984   | 5.02897   | 0.0702839   | 0.971663   |
| DPY19L1       | 3.50697   | 3.85979   | 0.138298    | 0.849881   |
| PIGM          | 2.59696   | 2.65155   | 0.0300097   | 0.978818   |
| SPAST         | 2.10544   | 2.37533   | 0.174008    | 0.799656   |
| TAF9          | 117.723   | 114.079   | -0.0453642  | 0.965765   |
| ZFAND3        | 25.8726   | 16.9979   | -0.606068   | 0.0253664  |
| C19orf60      | 67.3864   | 46.8457   | -0.524542   | 0.103079   |
| SLC12A2       | 1.92418   | 3.05736   | 0.668041    | 0.0253664  |
| FAT1          | 1.38356   | 1.38231   | -0.00130916 | 0.999234   |
| FUBP1         | 24.586    | 26.8141   | 0.125155    | 0.848628   |
| FKBP5         | 8.18758   | 9.90321   | 0.274459    | 0.503119   |
| PON2          | 41.3476   | 36.0086   | -0.199461   | 0.677754   |
| RNF123        | 10.7807   | 9.21497   | -0.226393   | 0.733299   |
| DNTTIP2       | 22.5819   | 32.6071   | 0.53002     | 0.0529824  |
| FAM13B        | 3.04816   | 2.50534   | -0.28293    | 0.548535   |
| ATE1          | 1.44473   | 1.37079   | -0.0757931  | 0.959358   |
| LMTK2         | 3.94104   | 4.01918   | 0.0283219   | 0.97803    |
| PRKCQ         | 1.54775   | 1.09789   | -0.495437   | 0.321903   |
| SETD1B        | 2.93735   | 3.81759   | 0.378146    | 0.335084   |
| HOXC4,HOXC5,H | 15.0472   | 16.3193   | 0.117091    | 0.887242   |
| GMFB          | 8.83352   | 9.82758   | 0.153847    | 0.796068   |
| TMEM163       | 0.0429706 | 0.0599661 | 0.480798    | 1          |
| PTPN7         | 30.8882   | 38.107    | 0.303001    | 0.419202   |
| COMT          | 61.216    | 38.2589   | -0.678116   | 0.086788   |
| STRAP         | 95.8543   | 126.076   | 0.395376    | 0.218306   |
| DCLRE1C       | 3.63314   | 2.21467   | -0.714125   | 0.0270318  |
| SLC45A3       | 7.74857   | 9.02703   | 0.22032     | 0.679452   |
| LOXL3         | 6.67929   | 8.04752   | 0.268849    | 0.939948   |
| FAM73B        | 21.3267   | 27.6263   | 0.373384    | 0.258195   |
| RRAD          | 0.151156  | 0.560114  | 1.88968     | 0.171058   |
| TIMM23        | 140.282   | 174.309   | 0.313316    | 0.385949   |
| GLYCTK        | 11.0293   | 6.72592   | -0.713541   | 0.0523053  |
| FAM86C1       | 3.5206    | 3.29801   | -0.0942267  | 0.937064   |

|           |           |            |              |            |
|-----------|-----------|------------|--------------|------------|
| PPP1R15B  | 9.15944   | 7.32591    | -0.322252    | 0.391565   |
| MSRA      | 11.9919   | 15.5309    | 0.373083     | 0.34787    |
| ABCC4     | 4.18489   | 3.61126    | -0.212686    | 0.68022    |
| TRAPPC12  | 19.9097   | 14.601     | -0.447399    | 0.184001   |
| UNC119B   | 14.0065   | 11.7859    | -0.249038    | 0.58376    |
| FMO4      | 0.450067  | 0.155876   | -1.52974     | 0.0689012  |
| AOC3      | 0.970504  | 1.19432    | 0.299387     | 0.715911   |
| TSPAN4    | 63.7323   | 36.134     | -0.818666    | 0.00153868 |
| BRMS1     | 54.1487   | 92.7393    | 0.776255     | 0.00153868 |
| SLC9A1    | 10.711    | 12.5662    | 0.230452     | 0.629024   |
| FAM111A   | 5.26228   | 4.60787    | -0.191588    | 0.736417   |
| ALG3      | 78.9688   | 74.3004    | -0.0879126   | 0.91466    |
| WDR34     | 162.288   | 141.74     | -0.195307    | 0.850773   |
| IL27RA    | 12.0897   | 21.9784    | 0.8623       | 0.00153868 |
| NR5A2     | 0.0323139 | 0.00575137 | -2.49018     | 1          |
| SNX22     | 0.564075  | 0.530522   | -0.0884737   | 0.994068   |
| GJD3      | 3.71869   | 3.47153    | -0.0992243   | 0.919777   |
| CCM2      | 21.2667   | 25.7744    | 0.277342     | 0.525673   |
| DPY19L2P3 | 0.278735  | 0.179392   | -0.63578     | 1          |
| ATXN2L    | 61.8431   | 32.5911    | -0.924137    | 0.00153868 |
| C2orf27A  | 0.446699  | 0.356282   | -0.326282    | 0.862353   |
| ZNF428    | 14.1133   | 14.7538    | 0.0640347    | 0.953159   |
| CDIPT     | 63.0664   | 64.8424    | 0.0400656    | 0.966398   |
| ATF4      | 613.949   | 242.476    | -1.34027     | 0.00153868 |
| IDH3B     | 57.4728   | 54.6554    | -0.0725156   | 0.931878   |
| RTN4IP1   | 3.68952   | 3.68895    | -0.000224227 | 0.999404   |
| TMEM33    | 9.70654   | 13.1444    | 0.437425     | 0.160098   |
| RRP9      | 88.513    | 153.446    | 0.79377      | 0.00153868 |
| MCM8      | 2.29996   | 1.74931    | -0.394824    | 0.39733    |
| NIPA2     | 23.1882   | 33.6118    | 0.535575     | 0.0512103  |
| ADCYAP1R1 | 0.0441839 | 0.00178161 | -4.63226     | 1          |
| AP4E1     | 1.59054   | 1.50799    | -0.0768888   | 0.939068   |
| ZGLP1     | 2.15411   | 2.45784    | 0.190302     | 0.857354   |
| RTN4      | 128.626   | 117.206    | -0.134141    | 0.831834   |
| MUTYH     | 14.532    | 8.06122    | -0.850161    | 0.234263   |
| NCBP1     | 13.5117   | 14.7871    | 0.130126     | 0.863787   |
| SAFB2     | 14.2296   | 18.4249    | 0.37276      | 0.286272   |
| CCNYL1    | 4.11047   | 6.30955    | 0.618233     | 0.0637721  |
| HTRA1     | 0.380793  | 0.626408   | 0.718095     | 0.438793   |
| L3MBTL2   | 11.4794   | 20.3736    | 0.827654     | 0.00153868 |
| SGK196    | 0.489241  | 0.586596   | 0.261823     | 0.867118   |
| RUSC2     | 10.9014   | 7.20205    | -0.598029    | 0.0347593  |
| MED19     | 7.34475   | 6.14119    | -0.258195    | 0.664444   |
| REXO4     | 85.9949   | 126.947    | 0.561909     | 0.038486   |
| CACHD1    | 1.23179   | 1.21006    | -0.0256801   | 0.983529   |
| AP2S1     | 201.757   | 242.237    | 0.263801     | 0.518305   |
| NAT9      | 34.7894   | 34.9528    | 0.00676029   | 0.994593   |
| REC8      | 0.597694  | 0.827931   | 0.470103     | 0.974027   |
| NUP35     | 7.60513   | 8.51031    | 0.162239     | 0.81604    |

|              |           |            |             |            |
|--------------|-----------|------------|-------------|------------|
| MICAL2       | 4.43802   | 3.3233     | -0.417302   | 0.298627   |
| ADAMTS9      | 0.197781  | 0.297193   | 0.5875      | 1          |
| SLC19A1      | 25.5547   | 44.0592    | 0.785851    | 0.00153868 |
| ARHGAP40     | 1.85534   | 0.647125   | -1.51957    | 0.00153868 |
| ATP9A        | 3.20026   | 2.19827    | -0.54182    | 0.0854415  |
| ELF3         | 0.0608654 | 0.0292228  | -1.05853    | 1          |
| NOXRED1      | 0.164713  | 0.19436    | 0.238776    | 1          |
| FCHO1        | 10.6777   | 10.0182    | -0.0919696  | 0.91392    |
| ZFP2         | 0.356277  | 0.403435   | 0.179338    | 0.91387    |
| ASPHD2       | 4.61331   | 7.27354    | 0.656854    | 0.0304296  |
| FYN          | 8.30627   | 4.27261    | -0.959084   | 0.00153868 |
| TIMELESS     | 7.41807   | 6.47936    | -0.195192   | 0.716155   |
| MPHOSPH9     | 1.60342   | 0.985986   | -0.701512   | 0.0805827  |
| PFN1         | 1434.51   | 1604.47    | 0.16154     | 0.790754   |
| RAMP2-AS1    | 0.0669087 | 0.022743   | -1.55677    | 1          |
| GET4         | 48.4258   | 63.5581    | 0.3923      | 0.219177   |
| LINC00311    | 0.0627986 | 0.394025   | 2.64948     | 0.108649   |
| LINC00336    | 0.0592214 | 0.00509772 | -3.5382     | 1          |
| TMC5         | 1.78528   | 1.57882    | -0.177305   | 0.838861   |
| PKD1         | 5.623     | 5.31451    | -0.0814051  | 0.952163   |
| IL17RA       | 4.19723   | 4.93176    | 0.232663    | 0.628969   |
| FLAD1        | 37.4684   | 53.07      | 0.502224    | 0.0827369  |
| HIRA         | 7.95332   | 11.6202    | 0.547007    | 0.0541611  |
| PSMB3        | 350.443   | 378.178    | 0.109889    | 0.87748    |
| DEGS1        | 35.1075   | 58.7644    | 0.743165    | 0.00380811 |
| PRKCQ-AS1    | 2.91284   | 2.06592    | -0.495646   | 0.28166    |
| BAIAP2L2     | 0.189888  | 0.058467   | -1.69946    | 1          |
| PSMB6        | 285.268   | 306.969    | 0.105772    | 0.880754   |
| ZFAND2B      | 29.8047   | 24.289     | -0.295236   | 0.485845   |
| SFXN2        | 8.19907   | 5.96923    | -0.457916   | 0.220464   |
| MYEOV        | 11.2682   | 10.2962    | -0.13015    | 0.863831   |
| HNRNPH3      | 46.0446   | 47.7536    | 0.0525756   | 0.954535   |
| AGBL3        | 0.0890137 | 0.0769932  | -0.209295   | 1          |
| TRAF2        | 40.1818   | 72.6182    | 0.853789    | 0.00153868 |
| SLC9A2       | 0.219339  | 0.255453   | 0.219893    | 1          |
| UBE2M        | 160.058   | 177.698    | 0.150833    | 0.797218   |
| TTF2         | 5.26399   | 6.29429    | 0.257888    | 0.561653   |
| KDM1B        | 2.47565   | 1.53779    | -0.686945   | 0.0487873  |
| C11orf75     | 16.8173   | 17.4043    | 0.0495008   | 0.967343   |
| MGC45800     | 0.84552   | 0.863784   | 0.0308325   | 0.983243   |
| SLC12A6      | 1.46023   | 0.960073   | -0.604978   | 0.704317   |
| TXNL4A       | 84.0065   | 99.5108    | 0.244352    | 0.561739   |
| HNRNPU       | 55.0526   | 71.0094    | 0.367198    | 0.270647   |
| HOXA7        | 17.2052   | 15.2334    | -0.175606   | 0.840956   |
| UAP1         | 247.918   | 246.23     | -0.00985369 | 0.994068   |
| CSF1         | 2.87853   | 4.46077    | 0.631961    | 0.0813147  |
| LOC100288181 | 0.448051  | 0.166054   | -1.43201    | 0.00970147 |
| ZNF850       | 1.89296   | 1.75627    | -0.108128   | 0.899607   |
| ZNF252P      | 4.62781   | 3.8691     | -0.258334   | 0.581803   |

|              |           |           |             |            |
|--------------|-----------|-----------|-------------|------------|
| ARG2         | 23.1927   | 17.7608   | -0.384979   | 0.659523   |
| SCAND3       | 0.623189  | 0.509039  | -0.291894   | 0.720688   |
| C21orf119    | 9.35806   | 7.4265    | -0.333527   | 0.629512   |
| C11orf91     | 2.26617   | 1.59475   | -0.506922   | 0.623241   |
| WWC1         | 9.29877   | 10.1048   | 0.119925    | 0.861724   |
| C17orf98     | 0.460727  | 0.373961  | -0.301025   | 0.929057   |
| MICALCL      | 0.260066  | 0.163623  | -0.668508   | 1          |
| SRSF1        | 25.4228   | 50.012    | 0.976151    | 0.00153868 |
| TXNDC9       | 4.48132   | 4.93597   | 0.139407    | 0.873038   |
| FAM19A3      | 1.08021   | 0.388049  | -1.477      | 0.0491395  |
| MXD3         | 36.9113   | 48.0457   | 0.380346    | 0.672486   |
| SLC35B4      | 3.95533   | 4.51283   | 0.190236    | 0.727043   |
| FOXRED2      | 10.2347   | 7.65935   | -0.418173   | 0.199526   |
| GRHL1        | 1.08725   | 1.03019   | -0.0777804  | 0.954535   |
| SATB2        | 1.70426   | 1.64923   | -0.0473495  | 0.969603   |
| GOLM1        | 61.8596   | 64.1315   | 0.0520354   | 0.954143   |
| NAP1L5       | 1.28981   | 1.42842   | 0.147261    | 0.945399   |
| ATP1B3       | 85.8342   | 125.762   | 0.551066    | 0.0496513  |
| PPIC         | 15.3533   | 14.796    | -0.0533408  | 0.959501   |
| TECR         | 123.534   | 122.699   | -0.00979223 | 0.994058   |
| ZNF121       | 1.69027   | 1.40705   | -0.264583   | 0.752311   |
| CTNND1, TMX2 | 75.5676   | 81.7645   | 0.113707    | 0.944202   |
| FAM167A      | 1.31769   | 0.593719  | -1.15015    | 0.00572929 |
| USP36        | 10.5769   | 7.79644   | -0.440022   | 0.155896   |
| EXOC6B       | 0.422563  | 0.407098  | -0.0537891  | 0.978818   |
| AGFG2        | 2.11378   | 3.01755   | 0.513553    | 0.200092   |
| IDH3A        | 17.8409   | 28.9237   | 0.697064    | 0.00739414 |
| RAB11B-AS1   | 4.69722   | 2.05856   | -1.19017    | 0.848219   |
| UNC5A        | 1.68092   | 1.29602   | -0.375161   | 0.594489   |
| SNRPB        | 542.358   | 768.85    | 0.503456    | 0.0884345  |
| SLCO1B1      | 0.0682614 | 0.0353006 | -0.951379   | 1          |
| CD101        | 0.442796  | 0.451462  | 0.0279621   | 0.989353   |
| HNRPDL       | 56.2109   | 59.5656   | 0.0836291   | 0.915223   |
| PLAC1        | 0.364021  | 0.0862526 | -2.07738    | 1          |
| CHST12       | 11.9437   | 17.5056   | 0.55157     | 0.0999674  |
| GATAD2A      | 21.0874   | 27.0975   | 0.361777    | 0.278468   |
| IL13RA2      | 28.2705   | 22.8334   | -0.308149   | 0.444284   |
| PLAA         | 9.83315   | 7.50409   | -0.389976   | 0.282312   |
| POC5         | 4.36152   | 3.15996   | -0.464924   | 0.274201   |
| ANKRD20A9P   | 0.0892892 | 0.0688011 | -0.376053   | 1          |
| ECE1         | 16.8196   | 14.5868   | -0.205476   | 0.677322   |
| GGCX         | 7.43193   | 14.0762   | 0.921452    | 0.070307   |
| PNN          | 20.5925   | 30.2049   | 0.552665    | 0.0500215  |
| PDZK1        | 0.0790684 | 0.126163  | 0.674121    | 1          |
| CLTB         | 149.664   | 180.568   | 0.27082     | 0.497598   |
| MTF1         | 1.30175   | 1.42337   | 0.128862    | 0.876359   |
| ZNF326       | 6.56656   | 6.70688   | 0.0305047   | 0.976906   |
| TMEM48       | 6.45844   | 7.66828   | 0.247717    | 0.575231   |
| PNPT1        | 10.5158   | 13.9491   | 0.407615    | 0.192012   |



|                |           |           |            |            |
|----------------|-----------|-----------|------------|------------|
| PIGQ           | 43.3071   | 29        | -0.578549  | 0.0329313  |
| CFL1           | 780.613   | 1082.18   | 0.471257   | 0.122719   |
| USB1           | 36.895    | 49.5145   | 0.424425   | 0.160303   |
| KCNN1          | 0.150215  | 0.0428481 | -1.80973   | 1          |
| IL15RA         | 17.3695   | 13.9404   | -0.317284  | 0.498453   |
| CDS1           | 1.95089   | 1.72154   | -0.180429  | 0.811883   |
| ABHD13         | 1.89481   | 1.96353   | 0.0513976  | 0.963969   |
| AMOT           | 0.249023  | 0.103353  | -1.2687    | 1          |
| UEVLD          | 1.3023    | 0.936792  | -0.475256  | 0.438337   |
| YIF1B          | 26.4611   | 16.7487   | -0.659819  | 0.356798   |
| ZWINT          | 33.4424   | 40.7309   | 0.284445   | 0.473572   |
| RGP1           | 1.46479   | 1.01053   | -0.535586  | 0.525673   |
| IRX2           | 8.93102   | 9.73315   | 0.124083   | 0.884488   |
| TAPBPL         | 1.7637    | 1.62044   | -0.122223  | 0.960032   |
| SPDL1          | 3.3641    | 3.80907   | 0.179218   | 0.798205   |
| SOWAHC         | 9.15645   | 12.2066   | 0.414804   | 0.197192   |
| TAF13          | 14.771    | 22.1889   | 0.587074   | 0.112314   |
| STPG1          | 6.73128   | 2.92491   | -1.20249   | 0.00153868 |
| TMEM44-AS1     | 2.50142   | 0.825758  | -1.59896   | 0.320971   |
| GRN            | 162.666   | 124.897   | -0.381172  | 0.247848   |
| CLEC16A        | 2.93718   | 3.61154   | 0.298185   | 0.510787   |
| SLC39A2        | 0.0463107 | 0.0236475 | -0.969659  | 1          |
| TTC28          | 0.551414  | 0.175966  | -1.64784   | 0.0434002  |
| LINC00641      | 0.877176  | 1.05627   | 0.268039   | 0.78932    |
| C4orf48        | 66.6926   | 85.8164   | 0.363726   | 0.47828    |
| CACNA1G-AS1    | 0.0679011 | 0.0286476 | -1.24502   | 1          |
| CASP10         | 1.25307   | 0.609453  | -1.03989   | 0.00274688 |
| GART           | 40.8745   | 30.9083   | -0.403207  | 0.234378   |
| NCKAP5L        | 6.957     | 7.83535   | 0.171533   | 0.772124   |
| NOL12          | 7.61247   | 12.9516   | 0.76669    | 0.00572929 |
| PYGB           | 26.6977   | 27.3927   | 0.0370774  | 0.978016   |
| TPMT           | 5.73971   | 4.49693   | -0.352039  | 0.377663   |
| ABHD6          | 6.27592   | 8.21884   | 0.389107   | 0.337222   |
| PPP1R13B       | 2.74309   | 2.96749   | 0.113441   | 0.89406    |
| SFTA1P         | 440.344   | 357.162   | -0.302055  | 0.436714   |
| PARP12         | 11.8568   | 12.1863   | 0.0395521  | 0.968919   |
| PACRGL         | 3.75729   | 3.78271   | 0.00973067 | 0.994593   |
| NCLN           | 60.1201   | 90.2666   | 0.586345   | 0.0232503  |
| RRP36          | 32.5239   | 56.0979   | 0.786446   | 0.00380811 |
| KLB            | 0.0478219 | 0.0813084 | 0.765732   | 1          |
| EGLN2,MIA,RAB4 | 56.9581   | 58.5407   | 0.0395383  | 0.967866   |
| NOP10          | 591.996   | 595.035   | 0.00738683 | 0.994593   |
| WRAP73         | 31.0027   | 33.8732   | 0.127749   | 0.845784   |
| SLC35C1        | 12.2785   | 22.5492   | 0.876937   | 0.00153868 |
| KCNMB4         | 0.0104621 | 0         | #NAME?     | 1          |
| PIGG           | 6.88632   | 6.44985   | -0.0944664 | 0.940327   |
| TEAD2          | 11.4262   | 9.71854   | -0.233536  | 0.664524   |
| LOC100507462   | 0.114846  | 0.0533234 | -1.10685   | 1          |
| NQO2           | 122.576   | 110.093   | -0.154952  | 0.782309   |

|                |            |            |            |            |
|----------------|------------|------------|------------|------------|
| FLYWCH2        | 48.0445    | 43.5453    | -0.141854  | 0.831614   |
| CYB561         | 16.3031    | 25.7609    | 0.660037   | 0.0123712  |
| NCOA7          | 4.14818    | 2.23985    | -0.889075  | 0.00274688 |
| FAXC           | 0.552553   | 0.700598   | 0.342473   | 0.530199   |
| CHTF8          | 43.7741    | 35.3585    | -0.308021  | 0.435778   |
| MRAS           | 1.93259    | 1.10384    | -0.80801   | 0.0338188  |
| PRTFDC1        | 7.42289    | 5.08271    | -0.546385  | 0.115592   |
| PDSS1          | 8.50322    | 11.6608    | 0.455581   | 0.665397   |
| LRRC17         | 0.0584332  | 0.0513094  | -0.187564  | 1          |
| NDE1           | 6.67643    | 5.46615    | -0.288552  | 0.568282   |
| FAM91A2,LINC00 | 5.34619    | 4.06977    | -0.393564  | 0.550766   |
| FAM166A        | 10.0498    | 20.0306    | 0.995036   | 0.917927   |
| LOC728190      | 24.1265    | 21.5425    | -0.163435  | 0.840937   |
| HSD17B10       | 146.522    | 158.193    | 0.110573   | 0.874024   |
| PDRG1          | 33.7169    | 42.577     | 0.336602   | 0.342569   |
| MBLAC1         | 4.06313    | 4.37812    | 0.107721   | 0.93937    |
| C19orf57       | 0.736961   | 0.761509   | 0.0472735  | 0.980228   |
| PHF5A          | 78.7111    | 104.311    | 0.406246   | 0.198701   |
| AMDHD1         | 0.548814   | 0.29772    | -0.882361  | 0.243349   |
| MTHFR          | 1.14148    | 0.452615   | -1.33455   | 0.117237   |
| MGME1          | 13.8341    | 13.6108    | -0.0234773 | 0.981441   |
| CTPS1          | 25.5338    | 41.2908    | 0.693413   | 0.00739414 |
| EIF5AL1        | 4.08864    | 5.67594    | 0.473238   | 0.164978   |
| SIGLEC16       | 0.290131   | 0.201195   | -0.528111  | 1          |
| KIAA0040       | 2.02537    | 1.29507    | -0.645154  | 0.0860839  |
| B4GALT4        | 6.0497     | 5.3316     | -0.182294  | 0.780692   |
| GAL            | 166.612    | 278.902    | 0.743267   | 0.00274688 |
| PRKXP1         | 0.153144   | 0.195277   | 0.350633   | 1          |
| HARBI1         | 1.82062    | 1.52906    | -0.251781  | 0.796068   |
| B3GALT6        | 16.2578    | 22.0813    | 0.441696   | 0.176657   |
| EXTL2          | 7.39912    | 5.67309    | -0.38322   | 0.279083   |
| LTB4R,LTB4R2   | 4.94283    | 4.43255    | -0.157201  | 0.91689    |
| FLJ42393       | 0.0551932  | 0.0728255  | 0.399952   | 1          |
| HIATL1         | 20.795     | 24.6369    | 0.244584   | 0.568684   |
| TACO1          | 20.0782    | 19.5507    | -0.0384067 | 0.971057   |
| SNORA11B       | 7.44054    | 0          | #NAME?     | 0.458976   |
| MBOAT1         | 1.53823    | 0.920771   | -0.74036   | 0.0650492  |
| BBS5           | 0.808451   | 0.779041   | -0.0534627 | 0.976285   |
| DBN1           | 140.34     | 126.001    | -0.155484  | 0.790595   |
| NDUFS7         | 196.727    | 172.986    | -0.185536  | 0.716243   |
| CNTN4          | 0.00801299 | 0.00175451 | -2.19127   | 1          |
| CYB561D1       | 4.44961    | 3.02998    | -0.554367  | 0.093011   |
| CTNS           | 6.00221    | 7.42396    | 0.306694   | 0.896977   |
| TELO2          | 31.6177    | 52.3791    | 0.72826    | 0.0232503  |
| ANK2           | 0.447413   | 0.131688   | -1.76448   | 0.00153868 |
| WDR92          | 3.48399    | 3.23771    | -0.105765  | 0.917559   |
| EFCAB4A        | 7.54872    | 4.78284    | -0.658364  | 0.112989   |
| PRSS27         | 1.66114    | 0.453287   | -1.87368   | 0.0192959  |
| AKAP7          | 0.874189   | 0.4973     | -0.813829  | 0.149433   |

|               |            |           |            |            |
|---------------|------------|-----------|------------|------------|
| ZNF239        | 3.03737    | 3.01405   | -0.011122  | 0.994204   |
| PAPLN         | 0.163202   | 0.109769  | -0.572186  | 1          |
| NAA38         | 4.91463    | 4.16943   | -0.237231  | 0.58449    |
| TMEM39A       | 4.46311    | 3.79308   | -0.234677  | 0.636263   |
| ATP6V1G2,DDX3 | 196.415    | 184.742   | -0.0883888 | 0.908076   |
| TCEANC2       | 0.933372   | 0.808835  | -0.206606  | 0.819558   |
| PSPC1         | 23.6819    | 25.8645   | 0.127188   | 0.851768   |
| C2orf76       | 1.50765    | 1.83157   | 0.280785   | 0.798053   |
| FRA10AC1      | 6.89752    | 3.70473   | -0.896711  | 0.00153868 |
| COQ4          | 98.0018    | 83.3227   | -0.234099  | 0.594419   |
| TJP1          | 5.98116    | 5.98834   | 0.00173161 | 0.99885    |
| DDX21         | 28.8306    | 37.9948   | 0.398203   | 0.217777   |
| ALKBH6        | 20.539     | 14.0781   | -0.544918  | 0.163598   |
| SMC1B         | 0.00975274 | 0.0243866 | 1.32221    | 1          |
| MET           | 8.8214     | 3.99964   | -1.14114   | 0.00153868 |
| CALHM2        | 0.476799   | 0.646217  | 0.438636   | 0.691117   |
| CHST5         | 0.466653   | 0.764458  | 0.712085   | 0.303067   |
| AGO2          | 21.5765    | 13.7664   | -0.648314  | 0.0123712  |
| SSBP4         | 79.529     | 103.514   | 0.380273   | 0.284182   |
| AIFM1         | 42.3344    | 37.7223   | -0.166411  | 0.776418   |
| OCIAD1        | 52.0346    | 28.6785   | -0.859502  | 0.00153868 |
| PLCD4         | 0.485393   | 0.617829  | 0.348055   | 0.716666   |
| CCDC66        | 1.91376    | 2.28179   | 0.253757   | 0.905839   |
| TMEM63A       | 6.24782    | 5.563     | -0.167489  | 0.869513   |
| BMP8A         | 0.316628   | 0.232817  | -0.443597  | 1          |
| CD58          | 9.86709    | 7.3396    | -0.426923  | 0.298867   |
| OXCT1         | 24.3297    | 18.1262   | -0.42464   | 0.165129   |
| SYVN1         | 18.8865    | 18.3607   | -0.0407346 | 0.994204   |
| BCDIN3D       | 2.75558    | 2.20658   | -0.320542  | 0.566297   |
| MRPS18C       | 21.9448    | 24.0938   | 0.134785   | 0.882823   |
| MSRB2         | 12.0275    | 6.91707   | -0.798097  | 0.00659556 |
| PRMT5         | 89.4949    | 67.3013   | -0.411171  | 0.1743     |
| TMEM158       | 36.0352    | 37.0344   | 0.0394584  | 0.970452   |
| GLRX3         | 144.997    | 124.38    | -0.221271  | 0.623057   |
| BREA2         | 0.669659   | 0.57777   | -0.212931  | 0.928779   |
| BNIP2         | 14.5796    | 9.70585   | -0.587028  | 0.0355697  |
| GAREM         | 0.431419   | 0.39611   | -0.123188  | 0.924931   |
| RFC3          | 7.80193    | 7.89669   | 0.0174173  | 0.988052   |
| LINC00629     | 0.0764566  | 0.0842907 | 0.140733   | 1          |
| GTF2IRD2B     | 0.115947   | 0.0658766 | -0.81563   | 1          |
| AGBL2         | 0.0696337  | 0.028317  | -1.29812   | 1          |
| C2CD3         | 0.340182   | 0.355977  | 0.065477   | 1          |
| SGTA          | 83.6612    | 122.687   | 0.552352   | 0.0429833  |
| CENPM         | 36.9946    | 35.0094   | -0.0795731 | 0.933369   |
| TM9SF1        | 22.5059    | 19.8641   | -0.180143  | 0.738519   |
| PPP4R4        | 0.860974   | 0.707909  | -0.282406  | 0.882304   |
| UTP11L        | 27.2374    | 36.2936   | 0.414128   | 0.185874   |
| RHEBL1        | 12.5864    | 16.6424   | 0.40299    | 0.318863   |
| NRBF2         | 8.48533    | 6.54508   | -0.37456   | 0.358817   |

|               |            |            |             |            |
|---------------|------------|------------|-------------|------------|
| MMS22L        | 1.26361    | 1.09545    | -0.206028   | 0.752121   |
| STAB1         | 0.0124202  | 0.00679392 | -0.870368   | 1          |
| CLIP1         | 6.35702    | 4.96162    | -0.357541   | 0.307111   |
| GMPPA         | 34.6665    | 29.8695    | -0.21487    | 0.665343   |
| RASD1         | 0.152033   | 0.0121908  | -3.64053    | 1          |
| EVC           | 7.45241    | 5.28243    | -0.496507   | 0.0956889  |
| SLFN5         | 1.46168    | 0.290992   | -2.32858    | 0.00153868 |
| PDE3B         | 1.23834    | 1.59061    | 0.361169    | 0.461694   |
| AGPAT9        | 6.92895    | 5.16253    | -0.42456    | 0.254028   |
| PSME2         | 129.284    | 158.202    | 0.291224    | 0.438502   |
| KCNK5         | 5.67758    | 7.47012    | 0.395854    | 0.291935   |
| RER1          | 45.6519    | 41.8947    | -0.123907   | 0.877622   |
| KCTD5         | 35.3967    | 43.2722    | 0.289828    | 0.452338   |
| PSMG1         | 85.2296    | 97.3681    | 0.192095    | 0.70088    |
| WNK4          | 1.38571    | 0.488041   | -1.50555    | 0.00380811 |
| MEF2B,MEF2BNE | 15.9604    | 15.9344    | -0.00235269 | 0.999234   |
| CRB3          | 1.41041    | 0.300793   | -2.22927    | 0.135473   |
| DDRKG1        | 104.828    | 86.1953    | -0.282348   | 0.472938   |
| PPAP2C        | 97.9442    | 76.143     | -0.363249   | 0.286005   |
| COASY         | 59.5123    | 52.0836    | -0.192358   | 0.707415   |
| THBS2         | 0.530063   | 0.433175   | -0.291215   | 0.739297   |
| L1TD1         | 0.0182169  | 0.0191084  | 0.0689284   | 1          |
| ZNF717        | 0.177566   | 0.0853076  | -1.05761    | 1          |
| PET100        | 176.242    | 186.406    | 0.0808864   | 0.922274   |
| SLC22A15      | 1.38064    | 0.591714   | -1.22237    | 0.00478151 |
| PNPLA2        | 86.0036    | 77.7785    | -0.145025   | 0.804859   |
| HAL           | 0.083071   | 0.17971    | 1.11325     | 1          |
| TOMM40        | 136.739    | 235.21     | 0.78253     | 0.00153868 |
| GHITM         | 106.49     | 82.5777    | -0.366892   | 0.267972   |
| PPARGC1A      | 0.00749337 | 0          | #NAME?      | 1          |
| PLTP          | 10.6883    | 7.99594    | -0.418691   | 0.831834   |
| PYROXD1       | 3.78952    | 1.43701    | -1.39895    | 0.00820276 |
| TEX40         | 0.087625   | 0.129809   | 0.566972    | 1          |
| SSBP1         | 313.176    | 329.31     | 0.0724733   | 0.93285    |
| LOC440925     | 0.130393   | 0.0477589  | -1.44902    | 1          |
| ZNF580        | 104.051    | 81.1531    | -0.358571   | 0.3056     |
| YWHAB         | 61.7716    | 71.6674    | 0.214372    | 0.646705   |
| C19orf48      | 440.119    | 291.539    | -0.594204   | 0.0285456  |
| SLC25A20      | 4.54335    | 8.46715    | 0.89812     | 0.00274688 |
| MAOA          | 0.0192576  | 0.00415159 | -2.21369    | 1          |
| CASC1         | 0.0162547  | 0.00348704 | -2.22078    | 1          |
| TRAM2         | 3.35149    | 4.00956    | 0.258641    | 0.576561   |
| COMMD9        | 7.15451    | 8.86327    | 0.308987    | 0.449418   |
| CHMP4C        | 57.2837    | 26.4187    | -1.11656    | 0.00153868 |
| TDRD5         | 0.506849   | 0.385003   | -0.396685   | 0.66979    |
| LOC100506469  | 8.25769    | 5.55746    | -0.571312   | 0.879055   |
| SNORD89       | 16.1704    | 9.92926    | -0.703594   | 0.886331   |
| NRGN          | 16.8593    | 22.7583    | 0.432849    | 0.297472   |
| UBXN11        | 15.2432    | 10.8586    | -0.489324   | 0.200495   |

|            |            |            |            |            |
|------------|------------|------------|------------|------------|
| METTL4     | 2.13339    | 2.04026    | -0.0643916 | 0.953219   |
| WIBG       | 21.8731    | 18.8045    | -0.218081  | 0.695113   |
| IFRD2      | 97.944     | 150.591    | 0.620603   | 0.0187307  |
| RAPH1      | 0.875632   | 0.538307   | -0.701894  | 0.0576107  |
| OGFOD1     | 18.3395    | 23.0086    | 0.327221   | 0.347988   |
| UBALD2     | 104.671    | 37.2669    | -1.48989   | 0.00153868 |
| PTPLA      | 5.02279    | 4.18342    | -0.263807  | 0.704283   |
| C12orf4    | 2.28147    | 2.01554    | -0.178796  | 0.807498   |
| LOC440173  | 0.0443016  | 0.0141136  | -1.65027   | 1          |
| ZNF747     | 7.73578    | 9.77294    | 0.337245   | 0.474338   |
| PRR7       | 48.7887    | 59.4247    | 0.284516   | 0.814411   |
| OTOA       | 0.0670157  | 0.0262484  | -1.35227   | 1          |
| UROD       | 171.048    | 166.39     | -0.0398321 | 0.967664   |
| AFAP1-AS1  | 0.00729641 | 0.00744906 | 0.0298723  | 1          |
| DDX11      | 13.4542    | 14.7702    | 0.134632   | 0.843686   |
| HNRNPA3    | 53.5688    | 59.9437    | 0.162216   | 0.771216   |
| UCKL1-AS1  | 0.204086   | 0.185824   | -0.135242  | 1          |
| DLEU2      | 0.169319   | 0.224247   | 0.405346   | 1          |
| LOC90784   | 3.55939    | 4.59354    | 0.367975   | 0.362482   |
| EIF1B      | 70.8153    | 40.9699    | -0.789497  | 0.00153868 |
| TMEM206    | 13.3031    | 14.5587    | 0.130122   | 0.84703    |
| KDEL1C1    | 5.64409    | 5.3103     | -0.0879469 | 0.974348   |
| ELOF1      | 128.552    | 178.533    | 0.47384    | 0.0987604  |
| EFCAB12    | 0.138996   | 0.108085   | -0.362877  | 1          |
| COPZ2      | 7.808      | 5.4771     | -0.511539  | 0.297411   |
| DDX5       | 92.4305    | 87.7861    | -0.0743778 | 0.92921    |
| GALNT6     | 18.121     | 10.1888    | -0.830682  | 0.00380811 |
| BZRAP1-AS1 | 0.0712225  | 0.0533526  | -0.416776  | 1          |
| STAR       | 0.0900141  | 0.0638594  | -0.495251  | 1          |
| KPNB1      | 49.1249    | 47.7643    | -0.0405224 | 0.967296   |
| RPS6KL1    | 1.74176    | 1.85361    | 0.0897894  | 0.933845   |
| ALG8       | 29.9569    | 29.1426    | -0.0397567 | 0.981022   |
| SIRPA      | 5.12077    | 6.56335    | 0.358072   | 0.353435   |
| LRWD1      | 40.1106    | 69.4106    | 0.791171   | 0.0525851  |
| MELK       | 12.1586    | 10.1388    | -0.262092  | 0.565636   |
| COMMD1     | 25.9813    | 32.0897    | 0.304635   | 0.4913     |
| ZSCAN16    | 5.27548    | 3.52614    | -0.581212  | 0.179887   |
| ST6GALNAC4 | 326.564    | 603.761    | 0.886612   | 0.00153868 |
| DMC1       | 0.0473651  | 0.0103898  | -2.18866   | 1          |
| TUG1       | 10.0374    | 8.08004    | -0.312946  | 0.393394   |
| C8orf37    | 0.732152   | 0.417579   | -0.810093  | 0.128687   |
| MPP4       | 0.0174549  | 0.0233468  | 0.419595   | 1          |
| TRMT10B    | 3.12553    | 2.09904    | -0.574368  | 0.178116   |
| PRRT3-AS1  | 6.29912    | 6.39228    | 0.0211805  | 0.993173   |
| SPTB       | 0.682019   | 0.256297   | -1.41199   | 0.00274688 |
| SUV39H1    | 11.1904    | 11.5177    | 0.0415991  | 0.967458   |
| MTFR2      | 11.9733    | 10.4005    | -0.203169  | 0.730014   |
| MRPL41     | 674.141    | 756.281    | 0.165871   | 0.760891   |
| ANTXR2     | 16.5065    | 13.1172    | -0.331577  | 0.35044    |

|              |           |           |            |            |
|--------------|-----------|-----------|------------|------------|
| POLR3H       | 24.8106   | 39.6751   | 0.677276   | 0.0324264  |
| AURKAPS1     | 0.830438  | 0.652799  | -0.347235  | 0.945887   |
| ATP6V0D1     | 76.0259   | 95.8335   | 0.33404    | 0.342788   |
| TRIM38       | 2.19434   | 1.23811   | -0.82565   | 0.0103919  |
| RBM45        | 6.09694   | 7.90793   | 0.375215   | 0.376508   |
| GTF3C5       | 111.991   | 95.219    | -0.234059  | 0.592157   |
| TNFRSF12A    | 639.916   | 414.515   | -0.626457  | 0.0181648  |
| APOO         | 15.1125   | 12.6076   | -0.261446  | 0.633194   |
| EPHA2        | 96.6569   | 79.2548   | -0.286374  | 0.464316   |
| SLC16A14     | 3.14587   | 2.54727   | -0.304507  | 0.525673   |
| LOC645166    | 5.57998   | 7.23808   | 0.375347   | 0.624122   |
| MRPL1        | 11.3482   | 13.3779   | 0.237386   | 0.653456   |
| RPL26L1      | 97.7649   | 91.7171   | -0.0921254 | 0.900639   |
| STT3A        | 46.9053   | 40.9594   | -0.195557  | 0.699944   |
| DNAJC19      | 18.0548   | 13.1549   | -0.456785  | 0.165129   |
| CBX4         | 25.3358   | 16.7984   | -0.592856  | 0.0351856  |
| DDX43        | 0.0314666 | 0.0499503 | 0.666675   | 1          |
| C12orf50     | 0.0211892 | 0.0203447 | -0.0586743 | 1          |
| ALYREF       | 147.773   | 209.96    | 0.506731   | 0.0691625  |
| SGPP1        | 4.56379   | 4.34007   | -0.0725139 | 0.945399   |
| UBE2S        | 661.013   | 865.043   | 0.388094   | 0.245022   |
| IGF2R        | 5.45784   | 3.48533   | -0.647034  | 0.0163491  |
| TPCN2        | 4.05748   | 2.74657   | -0.562957  | 0.0956889  |
| GLRX5        | 59.1103   | 90.3588   | 0.612256   | 0.0243026  |
| LINC00471    | 0.203516  | 0.102668  | -0.987152  | 1          |
| PRPF3        | 10.734    | 13.6652   | 0.348329   | 0.336056   |
| ADCK1        | 4.81853   | 5.04181   | 0.0653493  | 0.955425   |
| SNRPA1       | 54.8224   | 68.5782   | 0.322985   | 0.37549    |
| BCYRN1       | 28.7239   | 63.7334   | 1.1498     | 0.865084   |
| SLC35F2      | 27.1795   | 27.5731   | 0.0207461  | 0.982866   |
| RFXANK       | 51.2679   | 40.121    | -0.353698  | 0.642563   |
| XYLB         | 2.13926   | 1.39306   | -0.618857  | 0.128171   |
| LOC100128881 | 24.1808   | 32.4469   | 0.424216   | 0.623121   |
| ZNF281       | 2.28325   | 1.28236   | -0.832292  | 0.0253664  |
| ADORA1       | 2.40667   | 3.4198    | 0.506874   | 0.293421   |
| SLC30A7      | 2.73873   | 2.78316   | 0.0232151  | 0.981817   |
| C16orf59     | 9.94984   | 12.7131   | 0.353568   | 0.453122   |
| FAM225A      | 0.987225  | 0.541162  | -0.86732   | 0.0451232  |
| GPAA1        | 161.207   | 165.569   | 0.0385181  | 0.968712   |
| KRT5         | 0.0641162 | 0.0738615 | 0.204133   | 1          |
| SPACA4       | 0.106154  | 0.0853311 | -0.315012  | 1          |
| EDEM3        | 0.964387  | 0.895005  | -0.107716  | 0.918875   |
| PKD2         | 2.54567   | 2.09277   | -0.282633  | 0.578405   |
| TCTA         | 10.6827   | 8.17805   | -0.38545   | 0.314399   |
| ELOVL6       | 10.0454   | 12.1292   | 0.271958   | 0.50844    |
| ANAPC13      | 41.2325   | 39.1776   | -0.0737529 | 0.937886   |
| LEPROTL1     | 13.1296   | 13.7587   | 0.0675167  | 0.975454   |
| NDUFS8       | 217.11    | 185.519   | -0.226857  | 0.612746   |
| NPC1         | 12.4596   | 4.7424    | -1.39357   | 0.00153868 |

|                 |           |           |            |            |
|-----------------|-----------|-----------|------------|------------|
| PCNXL3          | 9.36295   | 15.3906   | 0.717017   | 0.00478151 |
| CENPO           | 4.00099   | 6.27446   | 0.649135   | 0.492177   |
| MON1B,SYCE1L    | 11.1407   | 9.37913   | -0.248316  | 0.607733   |
| SACM1L          | 6.24701   | 6.91484   | 0.146531   | 0.820658   |
| HIST1H2BL       | 1.86369   | 1.90735   | 0.0334034  | 0.992298   |
| SCARNA20        | 3.91922   | 2.06205   | -0.926486  | 0.921691   |
| TCF7            | 6.85598   | 5.74145   | -0.255948  | 0.628907   |
| MICALL1         | 26.9877   | 28.1971   | 0.0632422  | 0.943284   |
| VIMP            | 50.3459   | 50.8759   | 0.0151063  | 0.989715   |
| VPS9D1          | 2.39496   | 1.34182   | -0.835808  | 0.825602   |
| LOC440335       | 0.129334  | 0         | #NAME?     | 1          |
| SFMBT1          | 3.39031   | 3.4875    | 0.0407769  | 0.970185   |
| C3orf52         | 7.50126   | 9.63699   | 0.361448   | 0.375852   |
| CDKL1           | 1.07634   | 1.3834    | 0.362077   | 0.711465   |
| PPP1R3F         | 0.700925  | 0.881683  | 0.330999   | 0.726583   |
| PNO1            | 17.8079   | 32.9015   | 0.885637   | 0.00153868 |
| CCDC137         | 31.8879   | 50.1364   | 0.65285    | 0.0117316  |
| CYP26B1         | 1.19854   | 0.917948  | -0.384794  | 0.566136   |
| UPF3B           | 5.94369   | 5.38942   | -0.141229  | 0.848653   |
| ORC5            | 24.8393   | 22.7207   | -0.128619  | 0.837065   |
| MYBL2           | 17.9795   | 21.0197   | 0.225391   | 0.632012   |
| ABCA1           | 0.0197682 | 0.0197821 | 0.00102044 | 1          |
| AOC2            | 2.48557   | 3.32487   | 0.419721   | 0.425272   |
| ZC3H12C         | 0.993463  | 0.877949  | -0.178328  | 0.808127   |
| SNORD47         | 552.791   | 474.839   | -0.219296  | 0.98206    |
| GTF3C6          | 72.5615   | 111.713   | 0.622526   | 0.0117316  |
| NUP88           | 30.2502   | 22.6914   | -0.414795  | 0.802621   |
| NUDT9P1         | 0.255834  | 0.0827955 | -1.62758   | 1          |
| WDR78           | 0.291882  | 0.0713247 | -2.03291   | 1          |
| OSGEP           | 35.9431   | 27.837    | -0.368714  | 0.276694   |
| KIAA0825        | 0.0314659 | 0.0247963 | -0.343665  | 1          |
| PPP1R27         | 0.217997  | 0.0827083 | -1.3982    | 1          |
| ZNF622          | 39.7313   | 30.5079   | -0.381091  | 0.236814   |
| PBDC1           | 30.2122   | 34.3794   | 0.186416   | 0.723377   |
| TMEM117         | 1.14938   | 0.977375  | -0.233871  | 0.800869   |
| C18orf8         | 11.4833   | 13.0303   | 0.182328   | 0.880121   |
| UXS1            | 13.2031   | 15.9495   | 0.272635   | 0.524921   |
| ATG4A           | 2.30243   | 4.02105   | 0.804416   | 0.0169799  |
| VRK1            | 15.1361   | 17.4946   | 0.20891    | 0.695422   |
| TBPL1           | 10.0626   | 9.78277   | -0.0406878 | 0.973099   |
| GRASP           | 0.605761  | 0.481576  | -0.330984  | 0.845494   |
| HIST2H2BC       | 7.02389   | 7.95603   | 0.179779   | 0.902666   |
| TRAF1           | 1.04413   | 0.702091  | -0.572567  | 0.296127   |
| APITD1,APITD1-C | 11.4092   | 15.0161   | 0.396309   | 0.339476   |
| LOC100132077    | 0.190178  | 0.129316  | -0.556444  | 1          |
| DHX34           | 13.9605   | 22.5034   | 0.68879    | 0.00739414 |
| NDUFB9          | 737.894   | 727.612   | -0.0202438 | 0.983243   |
| CHRM5           | 0.03234   | 0.010695  | -1.59639   | 1          |
| TACC1           | 4.2255    | 3.89573   | -0.117226  | 0.872122   |

|              |           |           |            |            |
|--------------|-----------|-----------|------------|------------|
| SCN1B        | 5.49599   | 3.58966   | -0.614534  | 0.227806   |
| TEX22        | 0.302953  | 0.18587   | -0.704802  | 1          |
| C4orf32      | 5.36193   | 5.14261   | -0.0602505 | 0.954167   |
| TSR2         | 32.5683   | 33.3585   | 0.0345842  | 0.973295   |
| HIST1H2BK    | 44.8921   | 133.943   | 1.57708    | 0.00153868 |
| UBB          | 1325.51   | 1574.6    | 0.248438   | 0.586793   |
| ENPP6        | 0.0317951 | 0.0194205 | -0.711222  | 1          |
| PCNT         | 2.54635   | 2.01184   | -0.339913  | 0.396333   |
| C17orf82     | 0.429033  | 0.322122  | -0.413482  | 0.891012   |
| NPHP1        | 1.27265   | 0.615557  | -1.04787   | 0.0176564  |
| RNF187       | 74.8023   | 53.5353   | -0.482592  | 0.0824065  |
| ZNF462       | 1.15183   | 0.572083  | -1.00964   | 0.00153868 |
| GOLIM4       | 0.846129  | 1.41263   | 0.739436   | 0.127176   |
| ABRACL       | 105.639   | 94.2251   | -0.164964  | 0.764456   |
| PSMB7        | 331.543   | 297.51    | -0.156259  | 0.831834   |
| FADS3        | 84.2444   | 66.2845   | -0.345909  | 0.318863   |
| BAHCC1       | 1.50422   | 1.24848   | -0.268841  | 0.67663    |
| APMAP        | 64.4522   | 64.9075   | 0.0101568  | 0.994058   |
| FZD1         | 2.06552   | 1.61252   | -0.357185  | 0.559245   |
| RFC4         | 32.8795   | 28.3173   | -0.215505  | 0.933736   |
| SLC22A20     | 0.187579  | 0.134404  | -0.480919  | 1          |
| ADAT3,SCAMP4 | 50.4829   | 55.9409   | 0.14811    | 0.836427   |
| PCYT1A       | 7.59037   | 9.17257   | 0.273156   | 0.604499   |
| MRPL20       | 180.155   | 232.819   | 0.369969   | 0.318664   |
| CPA4         | 0.018816  | 0.0209241 | 0.153209   | 1          |
| MIS18A       | 18.4793   | 20.2826   | 0.134333   | 0.845932   |
| SLC16A6      | 0.661973  | 0.329877  | -1.00485   | 0.159847   |
| THEM4        | 4.78963   | 5.51798   | 0.204225   | 0.702786   |
| CECR7        | 1.27116   | 1.42891   | 0.168772   | 0.881102   |
| JMJD4        | 22.2199   | 27.9303   | 0.329982   | 0.584417   |
| AAK1         | 1.15853   | 0.830179  | -0.480802  | 0.143064   |
| RAP2B        | 17.4588   | 12.0456   | -0.535454  | 0.0588451  |
| GALNS        | 10.9876   | 9.23298   | -0.251011  | 0.619728   |
| TMEM41B      | 34.5469   | 27.6961   | -0.31887   | 0.472728   |
| TAPT1-AS1    | 0.338534  | 0.031952  | -3.40532   | 1          |
| TMEM254      | 2.42664   | 1.12461   | -1.10954   | 0.00739414 |
| TAF15        | 90.5099   | 75.5204   | -0.261208  | 0.536934   |
| BAK1         | 65.3326   | 85.3552   | 0.385677   | 0.239661   |
| HAT1         | 29.7674   | 30.2119   | 0.0213845  | 0.982705   |
| DIAPH1       | 13.1949   | 16.1731   | 0.293617   | 0.442926   |
| FAM86A       | 14.3232   | 18.7339   | 0.387297   | 0.464031   |
| ZC3H12D      | 0.029695  | 0.0245401 | -0.275077  | 1          |
| MTOR         | 3.51242   | 3.4844    | -0.0115525 | 0.992312   |
| DNAJC6       | 2.05217   | 1.51902   | -0.434011  | 0.276302   |
| SLC35B1      | 52.8682   | 64.8333   | 0.294336   | 0.440614   |
| PSMD9        | 43.5503   | 50.7912   | 0.221896   | 0.623241   |
| SOCS2-AS1    | 0.722526  | 0.535942  | -0.430971  | 0.969614   |
| SLC24A6      | 12.6814   | 11.973    | -0.0829308 | 0.923685   |
| EMC10        | 41.7919   | 53.114    | 0.345867   | 0.336576   |



|               |           |           |            |            |
|---------------|-----------|-----------|------------|------------|
| TSPAN7        | 1.06454   | 0.501853  | -1.0849    | 0.0741309  |
| TRMT6         | 12.7238   | 16.0644   | 0.336329   | 0.358817   |
| MKNK2         | 63.5713   | 54.6297   | -0.218692  | 0.653569   |
| FIGNL1        | 3.16969   | 2.48198   | -0.352853  | 0.433036   |
| LMOD1         | 0.184887  | 0.0723649 | -1.35328   | 1          |
| NDUFS6        | 157.67    | 213.943   | 0.440316   | 0.147598   |
| ALG1          | 6.69257   | 7.84418   | 0.229062   | 0.800413   |
| GRIN2C        | 0.15471   | 0.143114  | -0.112401  | 1          |
| LRIG1         | 2.82319   | 2.9458    | 0.0613351  | 0.977867   |
| SHOX2         | 0.18683   | 0.100309  | -0.897277  | 1          |
| FAM166B       | 1.22465   | 0.307529  | -1.99357   | 0.664469   |
| IQCD          | 0.219141  | 0.117212  | -0.902732  | 1          |
| C19orf25      | 40.185    | 37.9685   | -0.0818527 | 0.922274   |
| ATG3          | 39.3189   | 28.4818   | -0.465185  | 0.126213   |
| WAS           | 0.221273  | 0.0642909 | -1.78314   | 1          |
| AMMECR1       | 1.58001   | 1.39134   | -0.183459  | 0.802799   |
| MAGOH         | 88.6609   | 111.568   | 0.331554   | 0.515192   |
| ATP6V1H       | 43.9851   | 26.624    | -0.724289  | 0.00274688 |
| DKFZP434A062  | 0.0183255 | 0.013847  | -0.404282  | 1          |
| KIF26A        | 3.10813   | 4.6827    | 0.59129    | 0.0847952  |
| LOC729603     | 0.311128  | 0.189401  | -0.716065  | 1          |
| FABP5         | 325.264   | 557.638   | 0.77772    | 0.00153868 |
| ABCB8         | 6.98774   | 7.27397   | 0.0579161  | 0.952539   |
| ACER1         | 1.26426   | 0.718304  | -0.815628  | 0.349617   |
| GIPC1         | 171.671   | 174.155   | 0.0207233  | 0.983529   |
| ABCD1         | 15.1257   | 20.2847   | 0.423392   | 0.193021   |
| FAM86HP       | 1.55957   | 0.326432  | -2.25629   | 0.00153868 |
| ALG10         | 1.47136   | 1.07339   | -0.454979  | 0.406256   |
| SIRT6         | 34.9156   | 34.2564   | -0.0274953 | 0.978818   |
| KCTD13        | 13.3148   | 8.01533   | -0.732197  | 0.030086   |
| GOLT1B        | 11.4386   | 10.343    | -0.145252  | 0.81114    |
| SCAMP3        | 58.6057   | 72.4077   | 0.305103   | 0.412216   |
| ALDH16A1      | 14.4244   | 17.1239   | 0.247496   | 0.599713   |
| ZNRF3         | 1.7709    | 2.37071   | 0.420834   | 0.304772   |
| GAN           | 0.27356   | 0.252056  | -0.118117  | 1          |
| PNP           | 98.6508   | 148.711   | 0.59211    | 0.0285456  |
| GRIN2D        | 23.3506   | 19.3994   | -0.267452  | 0.525673   |
| YDJC          | 145.137   | 161.267   | 0.152038   | 0.790786   |
| SYTL4         | 1.04535   | 0.926757  | -0.173719  | 0.861337   |
| ZFP69B        | 1.3509    | 0.770077  | -0.810842  | 0.115142   |
| ETV3          | 0.482146  | 0.443067  | -0.121945  | 0.954501   |
| TBC1D3P1-DHX4 | 0.419972  | 0.11649   | -1.85009   | 0.147823   |
| CDC6          | 10.3101   | 16.689    | 0.694842   | 0.00659556 |
| CDC123        | 179.511   | 204.87    | 0.190638   | 0.787792   |
| MRPL28        | 132.366   | 127.635   | -0.0525156 | 0.95389    |
| SDHAP3        | 4.30666   | 3.35404   | -0.360672  | 0.609395   |
| LOC439994     | 4.10204   | 3.63263   | -0.17533   | 0.952612   |
| POU2F2        | 0.104174  | 0.155719  | 0.579956   | 1          |
| ADCY7         | 8.35471   | 7.16979   | -0.22066   | 0.644608   |

|               |           |           |            |            |
|---------------|-----------|-----------|------------|------------|
| CANT1         | 29.329    | 27.7737   | -0.0786085 | 0.922274   |
| RUVBL1        | 63.558    | 59.6738   | -0.0909757 | 0.900642   |
| ZNF598        | 51.8221   | 46.0492   | -0.170389  | 0.752083   |
| UBLCP1        | 11.5348   | 12.5757   | 0.124651   | 0.860592   |
| MANSC1        | 4.2823    | 2.17733   | -0.975828  | 0.00897284 |
| SMURF2        | 100.504   | 86.0673   | -0.223722  | 0.629512   |
| ZNF573        | 0.197011  | 0.115384  | -0.771831  | 1          |
| H1FX          | 267.771   | 133.01    | -1.00946   | 0.00153868 |
| MSTO1         | 9.96631   | 15.0334   | 0.593041   | 0.0467998  |
| G6PC3         | 87.8029   | 66.4205   | -0.40264   | 0.201817   |
| LCLAT1        | 3.34144   | 4.03133   | 0.270787   | 0.570778   |
| LOC100505687  | 4.31513   | 3.15985   | -0.449548  | 0.369979   |
| SLCO5A1       | 2.81106   | 2.44745   | -0.199837  | 0.789799   |
| DNAJB9        | 11.2871   | 7.23326   | -0.641952  | 0.0264621  |
| TYW1          | 5.07003   | 4.4131    | -0.200203  | 0.733653   |
| GCH1          | 8.30667   | 16.1654   | 0.960564   | 0.00153868 |
| ATXN7L1       | 1.52991   | 0.935454  | -0.709711  | 0.249717   |
| TMEM160       | 69.9154   | 79.9542   | 0.193565   | 0.765759   |
| TXNRD1        | 30.5979   | 36.9757   | 0.273144   | 0.503694   |
| MYH15         | 0.197742  | 0.111827  | -0.822347  | 1          |
| INPP5K        | 17.5671   | 9.46113   | -0.89279   | 0.00153868 |
| GLT25D1       | 68.2605   | 75.1826   | 0.13935    | 0.821638   |
| SHISA9        | 1.19631   | 0.978018  | -0.290664  | 0.640258   |
| ATAD3B        | 57.6216   | 129.969   | 1.17349    | 0.00153868 |
| SLC37A1       | 7.89757   | 10.0262   | 0.344292   | 0.38574    |
| SLC27A2       | 16.5773   | 11.574    | -0.518318  | 0.0874559  |
| TMEM169       | 0.0330952 | 0.0143449 | -1.20608   | 1          |
| SNF8          | 103.021   | 96.5534   | -0.0935419 | 0.896541   |
| PYCR2         | 80.7204   | 75.2146   | -0.101921  | 0.88321    |
| APOBEC3A,APOE | 21.8445   | 11.317    | -0.948781  | 0.00153868 |
| CNPY2,PAN2    | 134.047   | 136.864   | 0.029997   | 0.976411   |
| C1orf122      | 83.0044   | 135.647   | 0.708593   | 0.143573   |
| EMC8          | 36.0731   | 49.386    | 0.453177   | 0.131988   |
| SNRPA         | 179.657   | 51.667    | -1.79793   | 0.00153868 |
| CLSPN         | 1.12121   | 2.01795   | 0.847834   | 0.00380811 |
| TNFRSF10B     | 45.148    | 34.4834   | -0.388759  | 0.298867   |
| HSPA9         | 228.639   | 168.904   | -0.436867  | 0.171199   |
| SSSCA1        | 84.4278   | 113.913   | 0.432147   | 0.188723   |
| KLHDC9        | 0.244498  | 0.0316554 | -2.9493    | 1          |
| GPR157        | 0.264869  | 0.218007  | -0.280906  | 1          |
| TMEM55B       | 35.7437   | 33.3095   | -0.101756  | 0.890226   |
| EHD1          | 39.1927   | 53.6218   | 0.452234   | 0.123296   |
| DNAJB11       | 28.711    | 43.8947   | 0.612443   | 0.0238313  |
| ODC1          | 271.309   | 332.855   | 0.294958   | 0.46688    |
| ZDHHC24       | 46.8891   | 32.8842   | -0.511859  | 0.124445   |
| MLF1IP        | 12.5007   | 6.49021   | -0.945668  | 0.00153868 |
| MROH6         | 5.34795   | 6.05199   | 0.178426   | 0.8212     |
| PSG3          | 0.0381281 | 0         | #NAME?     | 1          |
| GPR114        | 2.70277   | 2.60278   | -0.0543888 | 0.964843   |

|              |            |            |            |            |
|--------------|------------|------------|------------|------------|
| SLC9A8       | 4.06403    | 2.95029    | -0.462053  | 0.201968   |
| PIPSL        | 0.0132661  | 0.0104531  | -0.343819  | 1          |
| ZSCAN12P1    | 0.956208   | 0.590517   | -0.695347  | 0.156107   |
| BCL2         | 2.22297    | 1.24823    | -0.832603  | 0.331364   |
| SNRPC        | 139.636    | 156.19     | 0.161629   | 0.773721   |
| TICRR        | 4.89328    | 3.70256    | -0.402277  | 0.529942   |
| LOC100188947 | 0.155093   | 0.146692   | -0.0803402 | 1          |
| AKT1S1       | 64.566     | 64.908     | 0.00762124 | 0.994593   |
| RHBDD1       | 3.94724    | 2.14819    | -0.877721  | 0.00380811 |
| ZMYND12      | 0.315036   | 0.0616924  | -2.35235   | 1          |
| MRS2P2       | 0.0243597  | 0.0213156  | -0.192587  | 1          |
| TCHP         | 5.60119    | 5.73896    | 0.0350568  | 0.975492   |
| EIF5A        | 1160.51    | 1553.24    | 0.420524   | 0.21663    |
| MBNL3        | 0.40197    | 0.206108   | -0.963684  | 0.0163491  |
| RIBC1        | 0.779894   | 0.388094   | -1.00687   | 0.234031   |
| LRRC66       | 0.0715295  | 0.0167373  | -2.09548   | 1          |
| FAIM         | 9.74239    | 10.3704    | 0.0901304  | 0.933369   |
| SEL1L        | 4.7692     | 3.25611    | -0.550598  | 0.0504359  |
| RBBP8        | 5.51434    | 6.34809    | 0.203134   | 0.726595   |
| RBM15        | 5.39225    | 4.78675    | -0.17184   | 0.804404   |
| TRIM7        | 15.6884    | 20.3652    | 0.376407   | 0.438784   |
| SIX5         | 14.8671    | 8.4572     | -0.813874  | 0.00478151 |
| CORO2B       | 3.38241    | 4.15933    | 0.298297   | 0.566745   |
| FLJ33630     | 1.29353    | 0.530839   | -1.28497   | 0.00274688 |
| CNKSR3       | 1.89792    | 2.43696    | 0.360664   | 0.502308   |
| MUC1         | 4.89726    | 3.17816    | -0.623783  | 0.197245   |
| CECR2        | 0.0480122  | 0.0367465  | -0.385793  | 1          |
| DHRS7B       | 13.6224    | 10.4169    | -0.387053  | 0.292      |
| WDFY3-AS2    | 0.29629    | 0.15373    | -0.94661   | 1          |
| SOBP         | 0.733661   | 1.15672    | 0.65686    | 0.133573   |
| CC2D1A       | 23.0103    | 23.5548    | 0.033737   | 0.975063   |
| KPNA2        | 119.653    | 175.268    | 0.550706   | 0.0512103  |
| LOC100506083 | 0.355037   | 0.162178   | -1.13039   | 1          |
| TPRA1        | 59.4719    | 45.355     | -0.390946  | 0.227806   |
| CPLX1        | 6.87911    | 12.4464    | 0.855439   | 0.0137404  |
| PSENN        | 111.195    | 96.8918    | -0.198641  | 0.703227   |
| PIP5KL1      | 30.7502    | 33.3332    | 0.116365   | 0.886331   |
| IFI16        | 52.2768    | 30.1614    | -0.793469  | 0.00274688 |
| IGFLR1       | 3.57178    | 2.93223    | -0.284648  | 0.780035   |
| AGTRAP       | 94.7712    | 57.5273    | -0.720202  | 0.00274688 |
| TSSC4        | 46.6818    | 63.7599    | 0.449789   | 0.140686   |
| THAP7-AS1    | 3.79844    | 2.67349    | -0.506681  | 0.828851   |
| MFNG         | 0.125437   | 0.0322272  | -1.96062   | 1          |
| TMBIM6       | 364.922    | 266.915    | -0.451206  | 0.156345   |
| FOXN3-AS1    | 2.58152    | 1.20325    | -1.10129   | 0.563423   |
| CD97         | 31.9776    | 21.0845    | -0.600878  | 0.0204286  |
| NIPAL2       | 0.313204   | 0.215273   | -0.540936  | 1          |
| COL5A1       | 0.00833671 | 0.00160626 | -2.37577   | 1          |
| DIS3L        | 5.17104    | 3.57733    | -0.531571  | 0.0987604  |

|           |            |           |            |            |
|-----------|------------|-----------|------------|------------|
| TRPV2     | 1.0493     | 0.264671  | -1.98715   | 0.00820276 |
| ZNF771    | 14.5716    | 8.66686   | -0.74958   | 0.0732377  |
| HERPUD1   | 64.4168    | 14.9082   | -2.11133   | 0.00153868 |
| C12orf44  | 79.5187    | 92.203    | 0.213519   | 0.646322   |
| PLAUR     | 143.164    | 120.589   | -0.247564  | 0.566136   |
| NAPA      | 52.8674    | 61.0581   | 0.207805   | 0.677271   |
| PVRL1     | 11.5349    | 16.5861   | 0.523967   | 0.226921   |
| FAM86EP   | 0.99539    | 0.618169  | -0.687259  | 0.220205   |
| SHMT2     | 380.631    | 229.263   | -0.731386  | 0.00380811 |
| NRXN2     | 0.151091   | 0.0248349 | -2.60498   | 1          |
| TMEM40    | 0.147575   | 0.0680523 | -1.11673   | 1          |
| CEP97     | 0.634743   | 0.490847  | -0.370898  | 0.595959   |
| TECTA     | 0.0594511  | 0.048398  | -0.296756  | 1          |
| ETF1      | 41.6902    | 52.4457   | 0.331116   | 0.359372   |
| RYR3      | 0.00705282 | 0.0113323 | 0.684163   | 1          |
| COL18A1   | 3.50626    | 4.66283   | 0.411274   | 0.304421   |
| SLC33A1   | 5.13917    | 3.45183   | -0.574175  | 0.107753   |
| ZNF37A    | 2.44492    | 3.98239   | 0.703847   | 0.0117316  |
| FLJ42627  | 3.00547    | 1.71256   | -0.81144   | 0.00820276 |
| LCT       | 0.0168322  | 0.0161469 | -0.0599646 | 1          |
| DIRC2     | 12.7706    | 4.43593   | -1.52551   | 0.00153868 |
| RNF126    | 98.7136    | 107.826   | 0.127384   | 0.844936   |
| SCARNA9L  | 1.62325    | 1.45937   | -0.153537  | 0.985712   |
| KIAA0922  | 2.8397     | 3.39851   | 0.259166   | 0.609395   |
| TMEM217   | 0.21253    | 0.233694  | 0.136956   | 1          |
| C19orf40  | 2.78852    | 1.42159   | -0.971989  | 0.0705331  |
| HNRNPAB   | 183.424    | 320.188   | 0.803743   | 0.00153868 |
| ENTPD7    | 4.02368    | 2.31023   | -0.800478  | 0.303477   |
| FOXP3     | 0.394527   | 0.257269  | -0.616845  | 0.927568   |
| MAFG      | 11.9127    | 11.3684   | -0.0674778 | 0.937886   |
| NOTCH3    | 0.203854   | 0.110006  | -0.889947  | 1          |
| RNASEH1   | 12.4426    | 12.7908   | 0.0398205  | 0.970533   |
| EIF1      | 1004.74    | 407.038   | -1.30358   | 0.00153868 |
| HSPA13    | 7.85384    | 3.87911   | -1.01767   | 0.00153868 |
| HNRNPH1   | 93.3133    | 139.403   | 0.579106   | 0.0318822  |
| UQCRHL    | 2.28524    | 1.64728   | -0.47226   | 0.66768    |
| PIGW      | 6.24985    | 11.146    | 0.834636   | 0.00153868 |
| CD83      | 4.80471    | 5.80089   | 0.271826   | 0.61305    |
| GPR137    | 17.664     | 14.2827   | -0.306537  | 0.786894   |
| HARS      | 46.607     | 57.0797   | 0.292429   | 0.516446   |
| C17orf103 | 5.41537    | 2.85744   | -0.922337  | 0.00153868 |
| TNFRSF8   | 0.298605   | 0.0812915 | -1.87706   | 1          |
| HES4      | 98.5411    | 178.778   | 0.859369   | 0.00153868 |
| ZNF407    | 1.00918    | 1.44341   | 0.516297   | 0.164242   |
| RAPSN     | 0.123448   | 0.0140054 | -3.13985   | 1          |
| SPC25     | 17.6395    | 15.7829   | -0.160449  | 0.804694   |
| IFT46     | 9.37666    | 4.60789   | -1.02497   | 0.00153868 |
| ALOX12B   | 4.1154     | 1.24995   | -1.71916   | 0.00153868 |
| SNORD22   | 85.1951    | 60.0295   | -0.505099  | 0.95674    |

|               |           |            |             |            |
|---------------|-----------|------------|-------------|------------|
| KIAA0101      | 28.3849   | 15.3245    | -0.88929    | 0.00153868 |
| AHRR,PDCD6    | 121.4     | 121.431    | 0.000364699 | 0.999274   |
| ATP6V1E2      | 2.89107   | 1.56891    | -0.881839   | 0.0351856  |
| GADD45B       | 80.9688   | 33.8428    | -1.25852    | 0.00153868 |
| MRPS28        | 51.8466   | 60.2003    | 0.215519    | 0.66625    |
| SGK494        | 0.721775  | 0.548465   | -0.39615    | 0.966738   |
| SOX15         | 0.38107   | 1.01388    | 1.41176     | 0.879376   |
| MDF1          | 37.5497   | 40.7156    | 0.116777    | 0.86876    |
| INTS7         | 4.20459   | 4.54938    | 0.113707    | 0.94587    |
| IQCE          | 1.42339   | 2.12262    | 0.576513    | 0.113276   |
| GPR35         | 0.474385  | 0.454703   | -0.0611353  | 0.981543   |
| NR4A1         | 16.2773   | 7.52802    | -1.11252    | 0.00153868 |
| ASAH2         | 0.0841805 | 0.0543551  | -0.631071   | 1          |
| SERPINE2      | 1.47636   | 1.75028    | 0.245535    | 0.777535   |
| LCTL          | 0.653574  | 0.703379   | 0.10595     | 0.981441   |
| PDCD11        | 12.9355   | 16.1142    | 0.316993    | 0.390958   |
| C9orf91       | 10.9899   | 6.60675    | -0.734162   | 0.00380811 |
| CYB5RL        | 0.541713  | 0.351137   | -0.625495   | 0.379552   |
| BLZF1         | 1.38891   | 0.999172   | -0.475153   | 0.436615   |
| SLC43A1       | 33.4593   | 16.4789    | -1.02179    | 0.00153868 |
| ST7L          | 4.47784   | 2.42479    | -0.884943   | 0.00739414 |
| ETV2          | 0.475889  | 0.682368   | 0.519924    | 0.72151    |
| NMI           | 11.9802   | 14.196     | 0.244826    | 0.622994   |
| DGCR9         | 0.0672414 | 0.0376507  | -0.836673   | 1          |
| U2AF1         | 232.849   | 263.251    | 0.177049    | 0.740498   |
| C16orf86      | 0.235315  | 0.162251   | -0.536364   | 1          |
| NLRP1         | 0.520135  | 0.0881623  | -2.56065    | 0.00153868 |
| ANKRD1        | 0.300644  | 0.0358051  | -3.06982    | 1          |
| PCDHB5        | 0.0382289 | 0.00426321 | -3.16465    | 1          |
| PLRG1         | 15.7928   | 10.966     | -0.526236   | 0.055778   |
| NEU3          | 0.473032  | 0.515036   | 0.122733    | 0.944779   |
| FLJ42875      | 8.48099   | 4.62184    | -0.875766   | 0.132824   |
| IDH1          | 16.2505   | 11.8906    | -0.450665   | 0.159184   |
| MON1A         | 13.9935   | 28.8408    | 1.04335     | 0.00153868 |
| CHAF1A        | 15.2472   | 19.9227    | 0.385872    | 0.241705   |
| SYNE1         | 0.0121779 | 0.00414163 | -1.556      | 1          |
| TCTEX1D4      | 0.0944711 | 0.161923   | 0.777363    | 1          |
| DGKZ          | 31.4072   | 39.5633    | 0.333068    | 0.351761   |
| RHBDD3        | 27.1982   | 23.2365    | -0.227117   | 0.656667   |
| TBXA2R        | 4.05929   | 2.25633    | -0.84725    | 0.0592362  |
| UNC50         | 34.0485   | 30.7958    | -0.144858   | 0.818547   |
| PSME3         | 45.3949   | 72.0318    | 0.666106    | 0.00970147 |
| TMEM185B      | 14.415    | 14.9053    | 0.0482475   | 0.960125   |
| SNHG7,SNORA17 | 622.979   | 368.256    | -0.758475   | 0.270224   |
| ARC           | 8.04452   | 9.02697    | 0.166235    | 0.820487   |
| PVR           | 20.608    | 21.1811    | 0.0395754   | 0.967343   |
| AMIGO3        | 3.80593   | 5.06395    | 0.412015    | 0.838978   |
| UBAC2-AS1     | 0.467393  | 0.236016   | -0.985748   | 0.941368   |
| CRY1          | 11.6831   | 9.80032    | -0.253521   | 0.588516   |

|                 |           |            |            |            |
|-----------------|-----------|------------|------------|------------|
| GDPGP1          | 1.28833   | 1.356      | 0.0738512  | 0.969826   |
| RAD51C          | 25.0648   | 24.3193    | -0.0435615 | 0.969077   |
| APOL2           | 5.7161    | 10.1454    | 0.827721   | 0.00274688 |
| ST7             | 12.3795   | 13.4389    | 0.118465   | 0.877848   |
| TRAPPC10        | 3.25522   | 3.65639    | 0.167667   | 0.783706   |
| C1orf159        | 17.1365   | 21.8864    | 0.352966   | 0.382703   |
| MTHFD1L         | 43.2165   | 33.4126    | -0.371191  | 0.463511   |
| LOC145783       | 0.22247   | 0.0992941  | -1.16383   | 1          |
| ARHGAP27        | 4.69855   | 3.16882    | -0.568267  | 0.48457    |
| ATF7IP          | 2.89569   | 1.28418    | -1.17305   | 0.00153868 |
| GYS2            | 0.0178951 | 0.0405288  | 1.17938    | 1          |
| FBF1            | 1.69655   | 1.1303     | -0.585903  | 0.249115   |
| KDM8            | 0.620675  | 0.880951   | 0.505224   | 0.525673   |
| VPS33A          | 9.8958    | 8.90188    | -0.152706  | 0.810133   |
| LOC100131096    | 1.35737   | 0.807125   | -0.749954  | 0.454256   |
| PCDH1           | 6.54269   | 4.15261    | -0.655864  | 0.0347593  |
| GBAP1           | 2.05031   | 0.858382   | -1.25615   | 0.608533   |
| PIM3            | 56.4829   | 49.6274    | -0.186678  | 0.723759   |
| WDR81           | 14.6304   | 15.7247    | 0.104068   | 0.89301    |
| SUSD2           | 0.111741  | 0.0676553  | -0.723884  | 1          |
| MYCL1           | 4.91276   | 2.6764     | -0.876239  | 0.0143403  |
| PODNL1          | 0.203439  | 0.10065    | -1.01525   | 1          |
| GAB3            | 0.0141585 | 0.00362862 | -1.96418   | 1          |
| HBA1            | 0.456325  | 0.328939   | -0.472242  | 0.89785    |
| TRIM72          | 6.10358   | 4.00561    | -0.607635  | 0.178116   |
| XRCC3           | 14.0465   | 19.2818    | 0.45703    | 0.491072   |
| ILKAP           | 40.1083   | 43.1618    | 0.105854   | 0.882208   |
| PFDN1           | 135.509   | 143.889    | 0.0865606  | 0.908794   |
| TCTEX1D2, TM4S  | 119.036   | 46.5938    | -1.35318   | 0.00153868 |
| SNORA14B        | 12.8508   | 6.45148    | -0.994158  | 0.930356   |
| PKD1L1          | 0.114832  | 0.0595405  | -0.947582  | 1          |
| LOC646762, ZNRF | 2.62396   | 2.09489    | -0.324866  | 0.492924   |
| C16orf52        | 1.72396   | 1.39907    | -0.301259  | 0.604499   |
| ATP6V0C         | 320.772   | 362.88     | 0.177945   | 0.73523    |
| TMEM57          | 6.35065   | 4.29302    | -0.564912  | 0.0605998  |
| SPATA6L         | 0.779568  | 0.422513   | -0.88368   | 0.489743   |
| FLYWCH1         | 21.7885   | 15.0823    | -0.53071   | 0.0561838  |
| NEK8            | 1.12106   | 0.815384   | -0.459308  | 0.527665   |
| ESAM            | 11.0168   | 5.36426    | -1.03826   | 0.00153868 |
| PRRG2           | 1.27536   | 0.813244   | -0.649142  | 0.447191   |
| POLA1           | 2.86183   | 1.9783     | -0.532675  | 0.103663   |
| EIF3A           | 38.8631   | 40.151     | 0.0470361  | 0.960832   |
| GPSM3, NOTCH4   | 0.295371  | 0.185958   | -0.667554  | 1          |
| DDX46           | 6.98585   | 7.81833    | 0.162423   | 0.770109   |
| RBM14, RBM14-R1 | 126.756   | 125.062    | -0.0194065 | 0.988088   |
| MED8            | 23.9702   | 20.8965    | -0.197977  | 0.699003   |
| CDH20           | 0.311144  | 0.344265   | 0.145933   | 1          |
| JAGN1           | 38.9242   | 31.6209    | -0.299789  | 0.433036   |
| PXK             | 2.46546   | 1.7258     | -0.514591  | 0.330706   |

|               |           |            |            |            |
|---------------|-----------|------------|------------|------------|
| SNX29         | 0.757402  | 0.551905   | -0.45664   | 0.375852   |
| ENOX2         | 1.5766    | 1.59177    | 0.0138159  | 0.993157   |
| ABTB2         | 3.12594   | 4.79948    | 0.618588   | 0.0564873  |
| SNORA25       | 3.35648   | 9.2567     | 1.46355    | 0.746509   |
| ANKRD61       | 0.145232  | 0.110785   | -0.390594  | 1          |
| EIF2AK2       | 2.85853   | 3.07851    | 0.106957   | 0.900837   |
| SLC38A10      | 30.0037   | 18.1247    | -0.727185  | 0.00478151 |
| DERL2         | 35.0534   | 33.6673    | -0.0582069 | 0.949913   |
| SYNE4         | 0.221728  | 0.0890159  | -1.31666   | 1          |
| TMEM2         | 0.639599  | 0.62865    | -0.0249098 | 0.985739   |
| LOC387723     | 1.17333   | 0.733313   | -0.678107  | 0.276711   |
| TIMM44        | 35.7287   | 32.4394    | -0.139336  | 0.818547   |
| GATM          | 0.528992  | 0.139265   | -1.92542   | 0.0484091  |
| SRPRB         | 29.8186   | 39.718     | 0.413582   | 0.180192   |
| VPS45         | 7.05385   | 6.31378    | -0.159906  | 0.809535   |
| ZBED3         | 1.14513   | 0.793801   | -0.528659  | 0.74734    |
| MBTPS2        | 3.53589   | 1.88949    | -0.904077  | 0.00739414 |
| WNT2B         | 1.19693   | 0.440357   | -1.44259   | 0.00739414 |
| GPATCH4       | 27.5159   | 49.1637    | 0.837331   | 0.00153868 |
| RBM26-AS1     | 0.359732  | 0.167858   | -1.09968   | 1          |
| HSPBP1        | 51.3326   | 61.4985    | 0.260674   | 0.527683   |
| CEL           | 0.949596  | 0.697454   | -0.445217  | 0.630883   |
| HBEGF         | 36.4224   | 39.7729    | 0.126959   | 0.844499   |
| PYCR1         | 266.716   | 200.557    | -0.411289  | 0.199011   |
| IFI30         | 68.0136   | 86.8858    | 0.353298   | 0.306371   |
| SOAT1         | 4.89651   | 4.54386    | -0.107837  | 0.886331   |
| FLJ37035      | 0.126283  | 0.0632684  | -0.997108  | 1          |
| LOC100133161  | 0.142853  | 0.0638717  | -1.16129   | 1          |
| ATP6V0A2      | 1.42847   | 1.61683    | 0.178693   | 0.805008   |
| LINC00662     | 0.87243   | 0.478137   | -0.867616  | 0.193021   |
| PPCDC         | 7.8312    | 5.3527     | -0.548968  | 0.123524   |
| CYCS          | 29.2558   | 55.3437    | 0.919695   | 0.00153868 |
| BUD31         | 83.2057   | 75.2928    | -0.144171  | 0.951272   |
| STAG3L1       | 0.0514534 | 0.0659073  | 0.357173   | 1          |
| DTX2P1-UPK3BP | 0.4732    | 0.522163   | 0.14205    | 0.952184   |
| ETV5          | 16.0772   | 11.3633    | -0.500644  | 0.0897828  |
| PPP1R16A      | 49.4022   | 63.9176    | 0.371637   | 0.255101   |
| RHOB          | 38.8098   | 27.5638    | -0.49365   | 0.0973224  |
| SNORD15A      | 7.57294   | 6.44925    | -0.231722  | 0.979338   |
| SLC7A10       | 0.216536  | 0.211812   | -0.0318227 | 1          |
| SMA4          | 0.599109  | 0.332434   | -0.849749  | 0.244755   |
| LBX2-AS1      | 10.9736   | 5.80485    | -0.918711  | 0.077894   |
| ARMC9         | 3.82154   | 2.97151    | -0.362958  | 0.525673   |
| TMEM194A      | 7.90529   | 4.07991    | -0.954283  | 0.00153868 |
| SRA1          | 42.017    | 46.4084    | 0.143414   | 0.8146     |
| PTRH1         | 98.4459   | 93.6003    | -0.0728177 | 0.934411   |
| ARPC5L        | 137.934   | 226.09     | 0.712921   | 0.00153868 |
| DNAJC9        | 48.1669   | 58.9931    | 0.292506   | 0.442213   |
| SPOCK2        | 0.0313495 | 0.00997053 | -1.6527    | 1          |

|           |           |           |             |            |
|-----------|-----------|-----------|-------------|------------|
| ABCF2     | 69.6819   | 108.608   | 0.64028     | 0.0103919  |
| CHPF      | 59.5534   | 69.4737   | 0.222284    | 0.628907   |
| SUV39H2   | 7.55479   | 10.9905   | 0.540788    | 0.0691625  |
| UQCRBP1   | 0.0343785 | 0.0363423 | 0.0801407   | 1          |
| FAM172BP  | 0.324818  | 0.0934577 | -1.79725    | 1          |
| GAS2L3    | 0.501365  | 0.166631  | -1.5892     | 0.0329313  |
| S100A2    | 1397.19   | 1269.72   | -0.138014   | 0.842721   |
| MCM7      | 196.13    | 157.138   | -0.319777   | 0.483798   |
| SLC7A7    | 0.250802  | 0.124757  | -1.00743    | 1          |
| SEPHS2    | 68.8438   | 69.6185   | 0.0161443   | 0.987173   |
| EML5      | 0.216479  | 0.323173  | 0.578082    | 1          |
| VTI1A     | 5.23914   | 4.41673   | -0.24635    | 0.627562   |
| TMEM205   | 130.663   | 105.107   | -0.313993   | 0.403929   |
| POLR3B    | 1.36473   | 1.42975   | 0.0671501   | 0.971088   |
| TMEM180   | 6.90071   | 6.64308   | -0.0548934  | 0.961218   |
| MGC21881  | 1.40212   | 1.14291   | -0.294894   | 0.717439   |
| OSTM1     | 4.562     | 3.97026   | -0.200431   | 0.727043   |
| TMTC2     | 0.217617  | 0.183907  | -0.242816   | 1          |
| DDX49     | 47.4318   | 59.0047   | 0.314974    | 0.381513   |
| FMNL1     | 0.0367059 | 0.0140312 | -1.38737    | 1          |
| RBMS1     | 0.170996  | 0.0897117 | -0.930593   | 1          |
| JOSD2     | 68.8958   | 45.9208   | -0.585267   | 0.0487873  |
| TNNC2     | 0.351878  | 0.323527  | -0.12119    | 1          |
| GLT25D2   | 0.826927  | 0.216515  | -1.9333     | 0.00153868 |
| KLHL10    | 0.0820014 | 0.019133  | -2.09959    | 1          |
| HUNK      | 0.575719  | 0.879932  | 0.612027    | 0.159847   |
| ERH       | 322.7     | 315.582   | -0.0321759  | 0.974593   |
| MEIG1     | 0.308553  | 0.306486  | -0.00969576 | 1          |
| NAGK      | 17.8579   | 17.1278   | -0.0602253  | 0.950837   |
| ALMS1     | 0.764926  | 0.521544  | -0.552531   | 0.130345   |
| TESC      | 64.1801   | 66.3563   | 0.0481085   | 0.960032   |
| SLC2A6    | 23.3792   | 44.8687   | 0.940484    | 0.00153868 |
| FXD7      | 0.286499  | 0.261064  | -0.134125   | 1          |
| GRAMD1B   | 0.0962583 | 0.0172838 | -2.47749    | 1          |
| CCDC103   | 2.23841   | 2.30875   | 0.0446422   | 0.976134   |
| FAM173B   | 2.05269   | 2.45436   | 0.257835    | 0.699755   |
| LDLRAD4   | 0.057026  | 0.0480537 | -0.246974   | 1          |
| C21orf67  | 1.79583   | 1.08256   | -0.730197   | 0.318494   |
| CDCA5     | 40.9905   | 44.0343   | 0.10334     | 0.883207   |
| LRRC16B   | 0.478441  | 0.230385  | -1.05429    | 0.0907094  |
| TOR1A     | 52.1962   | 54.4469   | 0.0609055   | 0.943825   |
| LRR1      | 19.8045   | 27.136    | 0.454381    | 0.246196   |
| GUSBP1    | 3.48567   | 3.32652   | -0.0674187  | 0.964442   |
| CPO       | 0.0227032 | 0.0400033 | 0.817222    | 1          |
| CAMTA2    | 25.794    | 13.8975   | -0.892206   | 0.00153868 |
| LINC00035 | 0.442669  | 0.214057  | -1.04823    | 0.704317   |
| KLC2      | 44.5271   | 60.6304   | 0.445359    | 0.133324   |
| SAT1      | 165.263   | 102.722   | -0.686018   | 0.00274688 |
| ABHD8     | 12.5471   | 8.24202   | -0.606283   | 0.0955341  |



|              |            |            |             |            |
|--------------|------------|------------|-------------|------------|
| C19orf44     | 2.51891    | 2.6751     | 0.0867968   | 0.978016   |
| LBX2         | 8.10354    | 3.24358    | -1.32097    | 0.246196   |
| LNPEP        | 0.691321   | 0.591077   | -0.226009   | 0.813283   |
| CCZ1B        | 8.95258    | 7.38979    | -0.276771   | 0.571768   |
| DANCR        | 127.75     | 141.855    | 0.151101    | 0.793909   |
| SLC13A1      | 0.0485951  | 0.0558486  | 0.20071     | 1          |
| LOC100131691 | 0.401567   | 0.22414    | -0.841241   | 0.916741   |
| FAM179A      | 0.0207108  | 0.00945762 | -1.13084    | 1          |
| ANGPT4       | 0.0212305  | 0          | #NAME?      | 1          |
| SLC4A8       | 1.81313    | 1.28346    | -0.498443   | 0.663122   |
| HOXD4        | 1.06496    | 0.863301   | -0.302857   | 0.843894   |
| H2AFX        | 214.219    | 418.7      | 0.966831    | 0.00153868 |
| LOC100507299 | 0.0376959  | 0          | #NAME?      | 1          |
| EPT1         | 5.15071    | 6.08366    | 0.240166    | 0.581567   |
| CPT1A        | 12.6934    | 8.87642    | -0.516027   | 0.0637721  |
| TYW1B        | 1.37214    | 1.38957    | 0.0182102   | 0.991446   |
| HYDIN        | 0.131041   | 0.069688   | -0.911031   | 1          |
| STK4-AS1     | 0.0730235  | 0.0424639  | -0.782126   | 1          |
| CXCR5        | 0.0142517  | 0.00557501 | -1.35408    | 1          |
| SAMD13       | 0.270531   | 0.0784111  | -1.78666    | 1          |
| ERN1         | 0.211113   | 0.173384   | -0.284045   | 1          |
| BCL2L12      | 54.1121    | 55.1072    | 0.0262904   | 0.985956   |
| DGAT2        | 7.21597    | 6.68421    | -0.110436   | 0.894574   |
| NID2         | 0.0672307  | 0.0688144  | 0.0335906   | 1          |
| SERPINA1     | 0.0455837  | 0.726607   | 3.99458     | 0.00153868 |
| IARS         | 98.1999    | 63.3888    | -0.631494   | 0.0143403  |
| AIG1         | 40.5476    | 20.3985    | -0.991155   | 0.00153868 |
| CNFN         | 6.11502    | 5.67203    | -0.108491   | 0.955005   |
| CLN6         | 65.8863    | 65.9147    | 0.000622791 | 0.999234   |
| LRRC6        | 1.00648    | 0.598064   | -0.750943   | 0.194881   |
| RDH10        | 5.83625    | 8.8688     | 0.603697    | 0.0338188  |
| SLC16A11     | 0.384944   | 0.187758   | -1.03578    | 0.535586   |
| MYCT1        | 0.0404675  | 0.00354724 | -3.51199    | 1          |
| COMMD4       | 157.5      | 140.143    | -0.168453   | 0.756508   |
| KLF6         | 10.5783    | 6.03176    | -0.810459   | 0.00153868 |
| LY6G5C       | 2.99639    | 2.04481    | -0.551258   | 0.474408   |
| RPL13AP3     | 0.0214957  | 0.0248282  | 0.207932    | 1          |
| EMP1         | 72.6454    | 63.4676    | -0.194852   | 0.704939   |
| FES          | 0.685038   | 0.502064   | -0.448313   | 0.644084   |
| SHISA7       | 0.00652257 | 0.00501332 | -0.379672   | 1          |
| IDNK         | 4.07077    | 1.90616    | -1.09463    | 0.0276283  |
| ATAD3C       | 0.191733   | 0.142062   | -0.432581   | 1          |
| HIVEP1       | 0.294553   | 0.257591   | -0.193447   | 1          |
| SPEM1        | 0.650288   | 0.196133   | -1.72925    | 0.186334   |
| DPAGT1       | 30.6378    | 20.5922    | -0.573218   | 0.0416082  |
| USP49        | 0.128811   | 0.115506   | -0.157283   | 1          |
| ZWILCH       | 5.80026    | 5.79066    | -0.00238963 | 0.998593   |
| EIF2S2       | 123.408    | 89.3955    | -0.465163   | 0.116756   |
| LIF          | 32.6259    | 24.3557    | -0.421757   | 0.159688   |

|              |            |            |            |            |
|--------------|------------|------------|------------|------------|
| NARS         | 59.3331    | 40.7685    | -0.541383  | 0.0564873  |
| CCIN         | 0.0186305  | 0          | #NAME?     | 1          |
| TPGS1        | 29.8138    | 24.9211    | -0.258612  | 0.69753    |
| TNFAIP3      | 0.734918   | 0.556912   | -0.400133  | 0.576342   |
| EPRS         | 29.8418    | 15.0545    | -0.987135  | 0.0103919  |
| SLC52A2      | 137.85     | 209.582    | 0.604416   | 0.0294837  |
| HOMER2       | 0.258105   | 0.0557776  | -2.2102    | 1          |
| SMAGP        | 218.353    | 178.575    | -0.290134  | 0.568359   |
| EPB41L4A     | 1.24036    | 1.35427    | 0.126756   | 0.899217   |
| TRIM67       | 0.00424246 | 0.0074429  | 0.810962   | 1          |
| PLEKHB1      | 0.0190746  | 0.0477866  | 1.32495    | 1          |
| CABP4        | 0.0163324  | 0.0180686  | 0.145747   | 1          |
| SLC22A11     | 0.0194491  | 0          | #NAME?     | 1          |
| C5orf28      | 4.12196    | 2.59965    | -0.665015  | 0.0467998  |
| ARSB         | 1.07937    | 1.71301    | 0.666351   | 0.186334   |
| CLEC18A      | 0.218416   | 0.124052   | -0.816133  | 1          |
| BCDIN3D-AS1  | 0.143482   | 0.0888998  | -0.690615  | 1          |
| DDX39A       | 81.6827    | 108.983    | 0.416003   | 0.174815   |
| CCDC64       | 1.70775    | 2.69725    | 0.659397   | 0.143064   |
| PTPRG-AS1    | 0.0110564  | 0.0156918  | 0.505133   | 1          |
| GRB10        | 10.522     | 5.41251    | -0.959037  | 0.00153868 |
| PTER         | 7.57872    | 3.07975    | -1.29914   | 0.00153868 |
| GOLGA6C      | 0.00484447 | 0.00489821 | 0.0159174  | 1          |
| ARHGEF38     | 0.00861064 | 0.0135171  | 0.650593   | 1          |
| LIME1        | 8.2251     | 11.3973    | 0.470587   | 0.35293    |
| SERHL2       | 0.055609   | 0.144405   | 1.37673    | 1          |
| TXNL4B       | 8.42389    | 6.9421     | -0.279115  | 0.851768   |
| SCARNA12     | 12.7508    | 11.9342    | -0.0954872 | 0.992298   |
| H2AFZ        | 559.732    | 646.18     | 0.207202   | 0.675661   |
| LINC00597    | 0.0164297  | 0.0185355  | 0.173983   | 1          |
| TAL2         | 0.395843   | 0.336617   | -0.233821  | 0.945399   |
| NAGPA        | 11.6149    | 14.0798    | 0.277656   | 0.568684   |
| C10orf111    | 0.163776   | 0.224563   | 0.455396   | 1          |
| NWD1         | 0.00430026 | 0.00810669 | 0.91469    | 1          |
| APBB2        | 1.23536    | 0.859373   | -0.523572  | 0.193396   |
| CPEB3        | 0.206006   | 0.165015   | -0.320084  | 1          |
| DNASE2       | 53.5405    | 22.4937    | -1.25111   | 0.00153868 |
| ORC6         | 17.8886    | 26.7471    | 0.580348   | 0.0374759  |
| PTK2B        | 0.601952   | 0.127394   | -2.24035   | 0.00153868 |
| HOXB4        | 7.53544    | 7.36146    | -0.0336999 | 0.978031   |
| LRAT         | 0.00530904 | 0.00199989 | -1.40853   | 1          |
| LOC100506233 | 4.44342    | 4.45671    | 0.00430597 | 0.998382   |
| TCEA1        | 68.6355    | 37.3076    | -0.879484  | 0.00153868 |
| TM4SF20      | 0.00925555 | 0.0109813  | 0.246663   | 1          |
| TSPAN1       | 0.429148   | 0.292133   | -0.554853  | 0.664444   |
| GPR143       | 0.0255341  | 0.00980028 | -1.38153   | 1          |
| ENTPD5       | 0.497537   | 0.276849   | -0.845703  | 0.28126    |
| KLHL29       | 4.48868    | 2.89465    | -0.6329    | 0.0525851  |
| LOC728392    | 0.808884   | 0.175982   | -2.20051   | 0.0916618  |

|           |           |            |            |            |
|-----------|-----------|------------|------------|------------|
| IL18BP    | 1.50265   | 1.44588    | -0.0555604 | 0.994204   |
| SLC5A6    | 24.5318   | 46.3083    | 0.916618   | 0.0537703  |
| EPHX4     | 7.9317    | 4.60934    | -0.783071  | 0.0243026  |
| RBM41     | 1.19451   | 1.27833    | 0.0978412  | 0.935829   |
| THTPA     | 14.2246   | 12.0901    | -0.234557  | 0.87663    |
| PSMD6-AS2 | 0.221437  | 0.104647   | -1.08137   | 1          |
| FAM101B   | 0.207262  | 0.118217   | -0.810019  | 1          |
| C14orf142 | 8.35996   | 8.8075     | 0.0752363  | 0.975492   |
| BEST3     | 0.771513  | 0.26353    | -1.54972   | 0.00478151 |
| PKDREJ    | 0.0189306 | 0.00261588 | -2.85535   | 1          |
| TNRC18    | 8.98047   | 7.16111    | -0.326608  | 0.371281   |
| CCDC170   | 0.0340758 | 0.010332   | -1.72162   | 1          |
| GK        | 1.57609   | 0.711543   | -1.14732   | 0.00274688 |
| LRRC48    | 0.329045  | 0.18143    | -0.858871  | 1          |
| KCNJ14    | 0.784238  | 0.880183   | 0.166513   | 0.901153   |
| CORO6     | 0.0193178 | 0.0490023  | 1.34292    | 1          |
| FAM107B   | 9.70867   | 6.53427    | -0.571249  | 0.0491395  |
| GPR68     | 0.436421  | 0.228403   | -0.934137  | 0.239715   |
| CDKN1A    | 100.557   | 115.205    | 0.196198   | 0.687986   |
| BRWD1-IT2 | 0.82138   | 0.350679   | -1.2279    | 0.234031   |
| PGAM2     | 1.3651    | 0.302492   | -2.17404   | 0.0625465  |
| JDP2      | 8.79144   | 2.39131    | -1.8783    | 0.00153868 |
| UHRF1BP1  | 4.02935   | 1.97031    | -1.03213   | 0.00153868 |
| HP07349   | 3.55231   | 3.655      | 0.0411158  | 0.98877    |
| NARFL     | 15.6103   | 14.4136    | -0.115068  | 0.879418   |
| ZCWPW1    | 2.15108   | 0.561682   | -1.93723   | 0.557083   |
| GRHL3     | 0.0305871 | 0          | #NAME?     | 1          |
| TREX2     | 0.617099  | 0.917392   | 0.572036   | 0.681816   |
| LURAP1L   | 3.85176   | 0.717684   | -2.4241    | 0.00153868 |
| ADM5      | 3.54929   | 5.51068    | 0.634699   | 0.155896   |
| SLTM      | 10.8387   | 11.332     | 0.0642148  | 0.944632   |
| ZNF550    | 0.386624  | 0.356931   | -0.115284  | 0.967343   |
| GGT1      | 8.41021   | 3.96942    | -1.08321   | 0.0832671  |
| UBXN8     | 8.74104   | 8.33459    | -0.0686925 | 0.947795   |
| SLFNL1    | 0.0952823 | 0.236523   | 1.3117     | 1          |
| FLJ40852  | 0.119588  | 0.0124771  | -3.26072   | 1          |
| SERPINB7  | 0.0401181 | 0.0363252  | -0.143282  | 1          |
| HSPBAP1   | 7.90644   | 3.57329    | -1.14578   | 0.00153868 |
| HES7      | 15.9094   | 18.0353    | 0.180948   | 0.784528   |
| ISL1      | 0.241544  | 0.252937   | 0.0664939  | 1          |
| LOC729732 | 1.56759   | 0.928778   | -0.755146  | 0.271127   |
| TRIM41    | 13.7832   | 9.41346    | -0.550119  | 0.0691625  |
| SORBS1    | 0.234654  | 0.121302   | -0.951934  | 1          |
| GGT3P     | 0.264864  | 0.211849   | -0.322217  | 1          |
| HES6      | 184.084   | 241.063    | 0.389043   | 0.222033   |
| FAM134B   | 0.610924  | 0.320816   | -0.929245  | 0.0871059  |
| WDR45     | 53.6501   | 30.4525    | -0.817018  | 0.00153868 |
| SH3BGR    | 5.18886   | 1.59577    | -1.70116   | 0.00153868 |
| MCOLN1    | 13.141    | 16.6247    | 0.339249   | 0.41602    |

|              |           |            |            |            |
|--------------|-----------|------------|------------|------------|
| RNF223       | 0.249706  | 0.168194   | -0.570104  | 1          |
| CXXC4        | 0.0135448 | 0.00179629 | -2.91464   | 1          |
| LAMA1        | 18.1499   | 11.831     | -0.617391  | 0.0264621  |
| TAS2R10      | 0.0365852 | 0.0112686  | -1.69895   | 1          |
| NS3BP        | 2.19179   | 3.88588    | 0.826134   | 0.094542   |
| SLC10A7      | 0.658388  | 0.491062   | -0.423034  | 0.568442   |
| CRNDE        | 24.3867   | 14.2828    | -0.771819  | 0.0130226  |
| SNORA8       | 50.9645   | 27.245     | -0.903502  | 0.421947   |
| ZC2HC1C      | 0.205175  | 0.185653   | -0.144245  | 1          |
| PMM2         | 25.8499   | 33.141     | 0.358459   | 0.291935   |
| TARS         | 70.0685   | 57.9441    | -0.274104  | 0.500234   |
| FBXL18       | 2.20873   | 2.263      | 0.0350216  | 0.975928   |
| LINC00638    | 0.354333  | 0.238936   | -0.56848   | 1          |
| CERS1        | 0.128667  | 0.0926207  | -0.474232  | 1          |
| EXO5         | 4.53617   | 5.36174    | 0.241228   | 0.673412   |
| BFSP1        | 0.548765  | 0.309663   | -0.825487  | 0.281986   |
| TIPIN        | 9.36523   | 10.1101    | 0.110412   | 0.896977   |
| LINC00622    | 0.212466  | 0.0656967  | -1.69334   | 1          |
| ACP2         | 12.6046   | 8.32215    | -0.598926  | 0.0857306  |
| LRG1         | 0.0749355 | 0.0634325  | -0.240428  | 1          |
| KLHL35       | 19.4089   | 9.13716    | -1.0869    | 0.00153868 |
| ATP5EP2      | 2.08413   | 2.17628    | 0.0624245  | 0.981543   |
| MAF          | 0.0125189 | 0.00149302 | -3.0678    | 1          |
| HNRNPA2B1    | 205.026   | 197.158    | -0.0564561 | 0.952184   |
| SH2D3C       | 0.336817  | 0.115649   | -1.54221   | 1          |
| LOC100131347 | 0.0834629 | 0.0314613  | -1.40756   | 1          |
| EID3         | 0.319289  | 0.483014   | 0.597202   | 0.947923   |
| C2CD2L       | 8.93365   | 11.7361    | 0.393636   | 0.295083   |
| TSC22D3      | 16.5857   | 4.23156    | -1.97068   | 0.00153868 |
| SH3BP5L      | 124.893   | 111.339    | -0.165734  | 0.761861   |
| FAM180B      | 0.047465  | 0.0368713  | -0.364364  | 1          |
| TJP3         | 0.718999  | 0.144726   | -2.31267   | 0.467566   |
| LIG4         | 1.39425   | 1.78979    | 0.360302   | 0.495416   |
| HEY1         | 4.04535   | 1.94649    | -1.05539   | 0.00153868 |
| GDPD1        | 4.94965   | 1.73372    | -1.51346   | 0.00153868 |
| FLJ33360     | 0.0566921 | 0.0479314  | -0.242176  | 1          |
| ZNF620       | 0.71483   | 0.443369   | -0.689092  | 0.25491    |
| AKAP6        | 0.0145225 | 0.00307578 | -2.23927   | 1          |
| RGS20        | 0.13661   | 0.0319751  | -2.09504   | 1          |
| C9orf117     | 0.678938  | 0.837321   | 0.3025     | 0.973011   |
| SKA3         | 14.3354   | 13.6531    | -0.0703592 | 0.967343   |
| NRSN2        | 0.354474  | 0.111001   | -1.67511   | 1          |
| C5AR1        | 0.543874  | 0.314983   | -0.788     | 0.342474   |
| SLC16A10     | 1.70966   | 1.58404    | -0.110099  | 0.926868   |
| GGTA1P       | 0.203306  | 0.0569185  | -1.83668   | 1          |
| ZC3H4        | 8.53887   | 5.72848    | -0.575894  | 0.0442243  |
| CBX6         | 8.1316    | 19.912     | 1.29203    | 0.00153868 |
| C9orf153     | 0.047672  | 0.0705285  | 0.565062   | 1          |
| LRRN4        | 1.83278   | 1.08672    | -0.75405   | 0.185874   |

|               |            |            |            |            |
|---------------|------------|------------|------------|------------|
| TMEM199       | 10.1748    | 14.4       | 0.501064   | 0.147146   |
| ZNF772        | 0.00415634 | 0.00888487 | 1.09604    | 1          |
| C5orf38       | 8.3743     | 4.37493    | -0.936708  | 0.0723025  |
| LOC100287314  | 7.69561    | 3.36275    | -1.19439   | 0.00153868 |
| TFEB          | 2.15914    | 2.89178    | 0.421501   | 0.497598   |
| POP1          | 6.96109    | 11.7956    | 0.76086    | 0.00274688 |
| LNX1          | 0.173373   | 0.163073   | -0.0883668 | 1          |
| MPV17L2       | 20.1019    | 45.8568    | 1.18981    | 0.00153868 |
| KIAA1656      | 0.647893   | 0.577286   | -0.166471  | 0.97803    |
| TVP23A        | 0.130737   | 0.0990801  | -0.399999  | 1          |
| NTSR1         | 10.8811    | 11.0466    | 0.0217842  | 0.983243   |
| COL9A3        | 28.1235    | 11.0694    | -1.3452    | 0.00153868 |
| SCARNA6       | 0.339609   | 0.325573   | -0.060895  | 1          |
| PTGER4P2-CDK2 | 0.0775374  | 0.0647788  | -0.259371  | 1          |
| PTGDR2        | 1.29193    | 3.21644    | 1.31594    | 0.664697   |
| C6orf52       | 2.37585    | 1.46501    | -0.697536  | 0.403473   |
| MAP2K3        | 79.6653    | 89.4093    | 0.166474   | 0.765267   |
| KIF24         | 0.861025   | 0.504818   | -0.770293  | 0.686715   |
| PAPPA2        | 0.0366821  | 0.0179021  | -1.03495   | 1          |
| LAT           | 1.22005    | 1.59219    | 0.384067   | 0.677324   |
| ATP6V0B       | 229.755    | 299.338    | 0.381678   | 0.252199   |
| P2RY2         | 0.792207   | 1.84744    | 1.22158    | 0.00970147 |
| CTSL1         | 164.664    | 137.056    | -0.264759  | 0.533447   |
| CHIC2         | 27.0949    | 12.1785    | -1.15369   | 0.00153868 |
| RCAN1         | 15.4653    | 11.3775    | -0.442855  | 0.180946   |
| CDC25A        | 7.2808     | 13.2167    | 0.860191   | 0.00153868 |
| PPP1R15A      | 265.915    | 65.6618    | -2.01784   | 0.00153868 |
| ROBO3         | 3.71217    | 0.899115   | -2.04569   | 0.00153868 |
| C19orf45      | 0.914196   | 0.31275    | -1.5475    | 0.0945421  |
| APOM          | 5.19953    | 2.99703    | -0.794845  | 0.935829   |
| NPFF          | 1.77881    | 2.39474    | 0.428957   | 0.739148   |
| CHD4          | 23.7034    | 20.4941    | -0.209891  | 0.655692   |
| GBA           | 20.3606    | 15.5517    | -0.388711  | 0.245771   |
| SLC38A7       | 2.75321    | 2.99704    | 0.122424   | 0.906423   |
| CITED1        | 16.9737    | 24.2994    | 0.51762    | 0.170153   |
| NBR2          | 2.65128    | 1.00219    | -1.40354   | 0.0103919  |
| CN5H6.4       | 0.16588    | 0.247855   | 0.579356   | 1          |
| SPATA32       | 0.0655618  | 0          | #NAME?     | 1          |
| C2            | 0.162257   | 0.145373   | -0.158519  | 1          |
| ZNRF2         | 1.59554    | 0.884309   | -0.851425  | 0.0592362  |
| MAGOHB        | 4.71595    | 5.56274    | 0.238248   | 0.65671    |
| DUSP18        | 0.544358   | 0.336744   | -0.692901  | 0.387544   |
| C16orf74      | 80.4666    | 37.4187    | -1.10463   | 0.00153868 |
| PAPPA         | 0.00464882 | 0.00177622 | -1.38805   | 1          |
| MYLK2         | 0.556227   | 0.795822   | 0.516771   | 0.514396   |
| ZMPSTE24      | 10.0998    | 11.9382    | 0.241256   | 0.608991   |
| DOLPP1        | 22.7535    | 24.7269    | 0.119993   | 0.862232   |
| BTN2A3P       | 0.362355   | 0.313039   | -0.211058  | 1          |
| SLC35A2       | 22.1567    | 24.7976    | 0.162457   | 0.78932    |

|              |            |            |            |            |
|--------------|------------|------------|------------|------------|
| ZFP36        | 18.2239    | 20.3203    | 0.157093   | 0.813006   |
| SLC10A5      | 1.38293    | 1.1471     | -0.269741  | 0.802089   |
| TPH1         | 0.0118739  | 0.00567405 | -1.06535   | 1          |
| PFN1P2       | 0.45606    | 0.701373   | 0.620958   | 0.442926   |
| RCAN3AS      | 0.258277   | 0.0561267  | -2.20216   | 1          |
| PRNP         | 43.0325    | 32.2147    | -0.417708  | 0.172992   |
| ESR2         | 0.0676956  | 0.0460491  | -0.555889  | 1          |
| NCOA2        | 0.3631     | 0.272253   | -0.415419  | 1          |
| LCE1C        | 0.185121   | 0.0550524  | -1.74959   | 1          |
| ISG20        | 74.4154    | 34.9232    | -1.09142   | 0.00153868 |
| FRMD8        | 15.3118    | 26.2642    | 0.77845    | 0.00153868 |
| KPTN         | 5.11007    | 4.91619    | -0.0558029 | 0.967343   |
| PCSK7        | 11.1166    | 13.4183    | 0.271485   | 0.522524   |
| GAS5-AS1     | 1.00767    | 0.525139   | -0.940255  | 0.86835    |
| LOC100287036 | 0.224853   | 0.0317307  | -2.82503   | 1          |
| TRPM6        | 0.0655814  | 0.0129463  | -2.34075   | 1          |
| LPP-AS2      | 0.523246   | 0.286204   | -0.870446  | 0.811033   |
| RMI2         | 8.45874    | 4.21598    | -1.00458   | 0.00274688 |
| TPST1        | 3.46092    | 2.66353    | -0.377816  | 0.492079   |
| STK40        | 18.9988    | 15.8141    | -0.264701  | 0.524726   |
| HMX3         | 0.80889    | 0.448978   | -0.8493    | 0.635064   |
| ZNF789       | 4.84951    | 3.73127    | -0.378174  | 0.670912   |
| KCNH8        | 0.0929156  | 0.0109321  | -3.08735   | 1          |
| CCDC151      | 0.828656   | 0.392684   | -1.0774    | 0.134691   |
| CCM2L        | 0.133128   | 0.023988   | -2.47243   | 1          |
| FEN1         | 26.1885    | 48.6577    | 0.893734   | 0.00153868 |
| PSMG4        | 44.8265    | 33.8191    | -0.406514  | 0.339924   |
| PFDN2        | 375.13     | 334.991    | -0.163267  | 0.827846   |
| GRIA4        | 0.00373689 | 0.00318815 | -0.229121  | 1          |
| C1QTNF9B     | 0.413795   | 0.953487   | 1.2043     | 0.849345   |
| ZDHHHC6      | 19.352     | 22.2135    | 0.198952   | 0.699003   |
| ARMC5        | 10.0064    | 10.7271    | 0.100335   | 0.905839   |
| METTL6       | 5.26897    | 5.14341    | -0.0347949 | 0.975492   |
| NFE2L1       | 28.6511    | 21.854     | -0.390696  | 0.227684   |
| AGA          | 3.85261    | 1.74943    | -1.13896   | 0.00153868 |
| ABCC5        | 7.59568    | 7.78514    | 0.0355454  | 0.975928   |
| LONRF2       | 0.00168577 | 0.00219666 | 0.3819     | 1          |
| SGPL1        | 9.16824    | 5.80512    | -0.65932   | 0.00897284 |
| H1FX-AS1     | 0.497689   | 0.520132   | 0.0636339  | 0.984547   |
| IKZF3        | 0.0189996  | 0.00644678 | -1.55932   | 1          |
| DOHH         | 23.9879    | 37.6109    | 0.648848   | 0.0264621  |
| GLDC         | 0.0227875  | 0.00799596 | -1.5109    | 1          |
| CCDC74B      | 1.54524    | 1.36962    | -0.174059  | 0.910254   |
| SH2D5        | 0.802366   | 0.398266   | -1.01053   | 0.0756592  |
| WBP2NL       | 0.00941275 | 0          | #NAME?     | 1          |
| PRSS22       | 15.0582    | 35.9227    | 1.25435    | 0.00153868 |
| KIAA0754     | 0.366519   | 0.360313   | -0.0246363 | 1          |
| SEC14L1P1    | 0.324048   | 0.347207   | 0.099587   | 1          |
| FOXD4        | 1.27602    | 4.3965     | 1.7847     | 0.00153868 |

|              |           |            |           |            |
|--------------|-----------|------------|-----------|------------|
| GNAQ         | 0.960395  | 0.674734   | -0.509308 | 0.489185   |
| TP53I3       | 18.6974   | 14.1825    | -0.398726 | 0.304772   |
| CEBPB        | 137.924   | 44.5359    | -1.63083  | 0.00153868 |
| MXRA8        | 0.655681  | 0.287062   | -1.19163  | 0.203478   |
| FAM229A      | 3.14569   | 2.28812    | -0.459214 | 0.739148   |
| SNORA70      | 95.2094   | 58.6677    | -0.698537 | 0.906339   |
| STAP1        | 0.0129002 | 0.0261595  | 1.01994   | 1          |
| SNORA72      | 23.1392   | 28.7336    | 0.312401  | 0.971528   |
| MOB3B        | 0.604873  | 0.876992   | 0.535931  | 0.258403   |
| RELL2        | 8.99259   | 6.60113    | -0.446024 | 0.6565     |
| SLC38A1      | 40.5764   | 24.7061    | -0.715775 | 0.00274688 |
| FITM1        | 1.26166   | 0.715965   | -0.817359 | 0.429965   |
| NAGPA-AS1    | 0.053609  | 0.0942111  | 0.813421  | 1          |
| ZDHC14       | 2.13333   | 2.9379     | 0.461676  | 0.390613   |
| MT1G         | 0.801085  | 0.367675   | -1.12353  | 0.666451   |
| LOC100131067 | 1.73178   | 0.824786   | -1.07016  | 0.642802   |
| PTPDC1       | 2.06275   | 0.741119   | -1.47679  | 0.00153868 |
| EIF4EBP1     | 457.24    | 242.231    | -0.916565 | 0.00153868 |
| SMIM13       | 3.66429   | 3.01451    | -0.281607 | 0.547145   |
| OLFM2        | 0.0777873 | 0.00853545 | -3.188    | 1          |
| LOC440896    | 0.202719  | 0.122771   | -0.723512 | 1          |
| HECW1        | 0.0891877 | 0.019002   | -2.23069  | 1          |
| FUZ          | 3.00204   | 2.41503    | -0.313902 | 0.937188   |
| TUBE1        | 10.7275   | 3.87839    | -1.46779  | 0.00153868 |
| CRMP1        | 3.60614   | 2.60315    | -0.470195 | 0.29038    |
| CDC45        | 20.8981   | 17.2696    | -0.275137 | 0.533447   |
| LRRC37A3     | 0.0795551 | 0.0398159  | -0.998608 | 1          |
| ADAMTS4      | 0.021252  | 0.00658605 | -1.69011  | 1          |
| S100A4       | 0.61476   | 0.7053     | 0.198215  | 0.946021   |
| SLC10A4      | 0.0153267 | 0.0140725  | -0.123176 | 1          |
| CXorf58      | 0.0323484 | 0.0137485  | -1.23442  | 1          |
| FCGBP        | 0.0589119 | 0.0116617  | -2.33678  | 1          |
| CFP          | 0.414223  | 0.37932    | -0.126991 | 0.957014   |
| FBXO48       | 0.182505  | 0.169817   | -0.103958 | 1          |
| SNRK-AS1     | 0.334183  | 0.161134   | -1.05238  | 1          |
| RRN3P3       | 0.971983  | 1.35189    | 0.475976  | 0.519844   |
| FHOD3        | 0.0424789 | 0.0784095  | 0.884283  | 1          |
| PSCA         | 0.917082  | 0.173508   | -2.40205  | 0.0663805  |
| ZBED3-AS1    | 0.276108  | 0.0772064  | -1.83844  | 1          |
| CHADL        | 0.136787  | 0.106962   | -0.354829 | 1          |
| ATF6         | 10.9442   | 6.04529    | -0.856281 | 0.00153868 |
| ZNF382       | 0.115238  | 0.0549631  | -1.06809  | 1          |
| CDC42EP1     | 151.898   | 72.3344    | -1.07035  | 0.00153868 |
| GPT2         | 29.8815   | 15.3507    | -0.96095  | 0.00153868 |
| CIRBP-AS1    | 1.69268   | 2.70983    | 0.678889  | 0.932173   |
| FAM46B       | 0.932324  | 0.137754   | -2.75874  | 0.0192959  |
| CYP4V2       | 1.48319   | 0.606695   | -1.28966  | 0.00153868 |
| NIT1         | 44.6496   | 14.5094    | -1.62166  | 0.105057   |
| CDCP1        | 34.5166   | 18.7162    | -0.883003 | 0.00153868 |

|                 |           |            |            |            |
|-----------------|-----------|------------|------------|------------|
| FBXO16          | 0.992962  | 0.300626   | -1.72377   | 0.0253664  |
| ADAM21P1        | 0.0101362 | 0.00447049 | -1.18101   | 1          |
| XBP1            | 81.2988   | 30.4321    | -1.41764   | 0.00153868 |
| MCM10           | 4.8878    | 8.30491    | 0.76478    | 0.00153868 |
| BCO2            | 0.0242307 | 0.0669867  | 1.46704    | 1          |
| SPINT2          | 3.06767   | 1.04493    | -1.55373   | 0.00153868 |
| ERVFRD-1        | 0.0320341 | 0.0195207  | -0.714601  | 1          |
| GLRX2           | 26.4625   | 26.9393    | 0.0257621  | 0.981441   |
| ZNF876P         | 0.108651  | 0.0356148  | -1.60916   | 1          |
| ITGA10          | 0.129639  | 0.150463   | 0.214913   | 1          |
| LMO4            | 6.53716   | 2.37831    | -1.45873   | 0.00153868 |
| SPTBN5          | 0.0304798 | 0.028945   | -0.0745368 | 1          |
| CLIC4           | 31.1906   | 18.0206    | -0.791465  | 0.00478151 |
| ANXA1           | 360.937   | 321.188    | -0.168327  | 0.764456   |
| VPREB3          | 0.74045   | 0.588368   | -0.331684  | 0.908098   |
| BRC A1          | 4.99454   | 2.4602     | -1.02158   | 0.00274688 |
| ZNF688          | 7.80311   | 5.22833    | -0.577698  | 0.230647   |
| GCNT4           | 0.0319927 | 0.0222894  | -0.521389  | 1          |
| PRAF2           | 3.7867    | 1.69669    | -1.15822   | 0.0181648  |
| SPI1            | 0.111437  | 0.163542   | 0.553435   | 1          |
| LOC400684       | 2.04027   | 0.863687   | -1.24018   | 0.107075   |
| ZNF672          | 217.326   | 195.415    | -0.153318  | 0.785865   |
| ADORA2A-AS1     | 0.0486416 | 0.0328544  | -0.566106  | 1          |
| CLIC2           | 0.130911  | 0.10583    | -0.30684   | 1          |
| ANKRD24         | 0.302189  | 0.0691818  | -2.12699   | 1          |
| CLDN23          | 0.942017  | 0.696711   | -0.435193  | 0.684216   |
| CCDC82          | 2.7715    | 1.78799    | -0.632329  | 0.0987604  |
| OR7E12P         | 0.0487422 | 0.0109349  | -2.15624   | 1          |
| ASIC3           | 1.56935   | 1.07986    | -0.539324  | 0.482685   |
| FAM69A          | 2.45699   | 2.72286    | 0.148231   | 0.975492   |
| CYR61           | 278.024   | 69.4265    | -2.00165   | 0.00153868 |
| DRAM1           | 9.52013   | 5.99167    | -0.668023  | 0.0150346  |
| HYOU1           | 30.6519   | 32.9121    | 0.102639   | 0.884203   |
| UCP3            | 0.251974  | 0.462194   | 0.875224   | 0.280619   |
| LINC00623,LOC7: | 0.905287  | 0.821278   | -0.140505  | 0.941566   |
| CLCN3           | 8.91536   | 3.70288    | -1.26765   | 0.00153868 |
| CCZ1            | 12.8787   | 11.4007    | -0.175871  | 0.77012    |
| ZNF655          | 30.7545   | 23.0929    | -0.413348  | 0.463667   |
| TENM3           | 0.217639  | 0.106585   | -1.02994   | 1          |
| PTPRR           | 0.393417  | 0.0265867  | -3.88728   | 0.348791   |
| CEBPG           | 27.4713   | 11.5948    | -1.24445   | 0.00153868 |
| SLC22A4         | 0.453522  | 0.700758   | 0.627744   | 0.808661   |
| XRCC2           | 1.11      | 1.22058    | 0.137014   | 0.902819   |
| TMEM9B-AS1      | 0.494893  | 0.217552   | -1.18576   | 0.310422   |
| SPNS1           | 35.9196   | 36.6674    | 0.0297255  | 0.977897   |
| TIGD4           | 0.147981  | 0.0807966  | -0.873047  | 1          |
| STXBP5-AS1      | 0.0259361 | 0.0183459  | -0.499501  | 1          |
| SKOR1           | 0.559241  | 0.716102   | 0.356695   | 0.773721   |
| FAM167B         | 1.04164   | 0.695704   | -0.582308  | 0.648133   |



|                 |            |            |             |            |
|-----------------|------------|------------|-------------|------------|
| PCDH11X         | 0.00455904 | 0          | #NAME?      | 1          |
| NRP2            | 1.25657    | 0.943822   | -0.412908   | 0.414974   |
| YJEFN3          | 5.47503    | 4.22051    | -0.375451   | 0.682341   |
| LOC100131094    | 0.395447   | 0.517353   | 0.387664    | 0.872122   |
| PHGDH           | 169.93     | 75.9215    | -1.16236    | 0.00153868 |
| LINC00659       | 0.599739   | 0.247601   | -1.27632    | 0.444285   |
| SNORA26         | 22.0987    | 9.81272    | -1.17124    | 0.906305   |
| POU5F1P3        | 0.070476   | 0.0265595  | -1.4079     | 1          |
| FKRP            | 4.70747    | 4.74181    | 0.0104865   | 0.998272   |
| SPINK1          | 0.159055   | 0.0303407  | -2.3902     | 1          |
| SLC38A9         | 6.21008    | 3.71351    | -0.74183    | 0.0204286  |
| LOC100506195    | 0.0217313  | 0.00360905 | -2.59008    | 1          |
| HIST2H2BE       | 3.46779    | 3.20695    | -0.112813   | 0.919777   |
| SARS            | 242.279    | 120.232    | -1.01085    | 0.00153868 |
| AP4S1           | 0.929933   | 0.834912   | -0.155501   | 0.949526   |
| PRDM6           | 0.0704669  | 0.0645311  | -0.126953   | 1          |
| OSCAR           | 3.1007     | 1.16106    | -1.41715    | 0.00274688 |
| SLC43A2         | 7.04311    | 8.22232    | 0.223334    | 0.722089   |
| LOC285626       | 0.0160958  | 0          | #NAME?      | 1          |
| SH3TC2          | 0.184373   | 0.0712075  | -1.37252    | 1          |
| NTRK1           | 0.0635752  | 0.0430933  | -0.561      | 1          |
| RAD51           | 10.0473    | 9.72675    | -0.0467787  | 0.964843   |
| TMEM138         | 23.4852    | 32.1719    | 0.454049    | 0.801574   |
| KIAA1644        | 0.0558117  | 0.0309238  | -0.851851   | 1          |
| EXOSC8          | 48.3683    | 29.4989    | -0.7134     | 0.0393841  |
| STIM2           | 1.34613    | 1.85136    | 0.459765    | 0.285746   |
| C4orf36         | 0.584733   | 0.2576     | -1.18264    | 0.363127   |
| FITM2           | 1.25476    | 1.81301    | 0.530979    | 0.581347   |
| GIN53           | 7.67556    | 12.2813    | 0.678122    | 0.0204286  |
| ZBED6           | 0.215794   | 0.193016   | -0.160934   | 1          |
| LOC158572       | 0.0444862  | 0.0914248  | 1.03923     | 1          |
| C2orf66         | 0.283681   | 0.246972   | -0.199921   | 1          |
| TUBB1           | 0.119923   | 0.18396    | 0.617279    | 1          |
| LPAL2           | 0.309706   | 0.209261   | -0.565598   | 1          |
| TTL11           | 3.10252    | 3.97247    | 0.356593    | 0.597216   |
| LOC100133957    | 2.79654    | 5.65563    | 1.01604     | 0.820912   |
| MIR17,MIR17HG,I | 6.72018    | 7.80682    | 0.216235    | 0.817355   |
| MYH3            | 0.271039   | 0.430218   | 0.666569    | 0.253087   |
| ASB16-AS1       | 6.23186    | 4.10498    | -0.60229    | 0.217777   |
| TMEM198         | 3.04424    | 2.62032    | -0.216338   | 0.822798   |
| DPY19L2P2       | 0.0367448  | 0.0055893  | -2.7168     | 1          |
| SCGB1B2P        | 0.408428   | 0.351244   | -0.217609   | 0.958155   |
| LAMB3           | 128.511    | 32.4993    | -1.98341    | 0.00153868 |
| HINT2           | 39.3709    | 22.8516    | -0.784837   | 0.0117316  |
| KCND3           | 0.12725    | 0.0368257  | -1.78888    | 1          |
| GALR2           | 0.511094   | 0.57254    | 0.163787    | 0.961218   |
| PABPC1L         | 8.52973    | 3.75728    | -1.18281    | 0.00153868 |
| C19orf38        | 0.609267   | 0.126062   | -2.27294    | 0.134981   |
| IFI6            | 4.53923    | 4.54222    | 0.000950324 | 0.999234   |

|              |            |            |            |            |
|--------------|------------|------------|------------|------------|
| PDE2A        | 0.119092   | 0.0168636  | -2.82009   | 1          |
| CABLES1      | 2.184      | 1.9937     | -0.131528  | 0.884758   |
| MALL         | 0.0687198  | 0.058633   | -0.229012  | 1          |
| BATF2        | 0.796506   | 0.109664   | -2.86059   | 0.0156935  |
| ARHGFEF33    | 0.0153448  | 0.0297313  | 0.954237   | 1          |
| YRDC         | 40.4667    | 46.8037    | 0.209889   | 0.795974   |
| ARHGFEF2     | 64.2904    | 22.6419    | -1.50561   | 0.00153868 |
| SAMD15       | 0.129902   | 0.24169    | 0.895733   | 1          |
| XXYLT1       | 4.85338    | 6.18839    | 0.350573   | 0.443225   |
| KIAA1199     | 0.0737548  | 0.0502094  | -0.554779  | 1          |
| RCSD1        | 0.00839385 | 0          | #NAME?     | 1          |
| LRRC8D       | 8.46144    | 6.38795    | -0.405551  | 0.233004   |
| BCRP3        | 0.323951   | 0.331308   | 0.0323999  | 1          |
| RND1         | 1.80797    | 0.957785   | -0.916596  | 0.0943483  |
| C11orf63     | 0.647008   | 0.332136   | -0.962011  | 0.163304   |
| CABP1        | 2.08481    | 1.96813    | -0.0830937 | 0.961459   |
| LOC100506060 | 1.56333    | 1.26351    | -0.307185  | 0.735532   |
| LMOD2        | 0.0104418  | 0          | #NAME?     | 1          |
| PADI3        | 0.0169359  | 0.00654934 | -1.37067   | 1          |
| PSPH         | 21.0898    | 8.1067     | -1.37936   | 0.00153868 |
| FRK          | 0.0259757  | 0          | #NAME?     | 1          |
| NIPAL1       | 0.164183   | 0.190271   | 0.212751   | 1          |
| RAET1L       | 0.0347008  | 0          | #NAME?     | 1          |
| TSEN15       | 18.0446    | 10.4394    | -0.789531  | 0.00380811 |
| ALMS1P       | 0.0394686  | 0.0325866  | -0.276426  | 1          |
| HERC2P4      | 1.3781     | 1.07805    | -0.354259  | 0.745262   |
| ACTN1-AS1    | 0.0877097  | 0          | #NAME?     | 1          |
| COL5A2       | 0.0468755  | 0.0260521  | -0.847438  | 1          |
| AKAP3        | 0.322285   | 0.0957644  | -1.75078   | 1          |
| HIST1H2AJ    | 2.00965    | 1.07271    | -0.90568   | 0.556775   |
| SLC26A1      | 0.594512   | 0.531345   | -0.162056  | 0.970185   |
| FAM126A      | 0.0348009  | 0.00948572 | -1.87529   | 1          |
| LETM2        | 4.3091     | 3.88466    | -0.1496    | 0.869722   |
| RAB6B        | 0.536396   | 0.585708   | 0.126881   | 0.922867   |
| CNKSR1       | 0.629786   | 0.771212   | 0.292266   | 0.806301   |
| POU5F1B      | 1.49205    | 0.41452    | -1.84778   | 0.00897284 |
| SLC46A3      | 5.11983    | 8.62993    | 0.753251   | 0.0103919  |
| AARS         | 55.9646    | 17.1165    | -1.70913   | 0.00153868 |
| SLC36A1      | 1.59806    | 1.94878    | 0.286251   | 0.612379   |
| GPR156       | 0.0058464  | 0.00961863 | 0.718282   | 1          |
| SPDYE8P      | 0.024267   | 0          | #NAME?     | 1          |
| FAM86FP      | 2.96649    | 0.828679   | -1.83987   | 0.00153868 |
| FCER2        | 0.377822   | 0.183085   | -1.04519   | 0.330706   |
| CEP41        | 1.94683    | 1.31149    | -0.569918  | 0.15801    |
| KIAA1324     | 0.246354   | 0.147949   | -0.735635  | 1          |
| C1orf189     | 0.211133   | 0.328235   | 0.63658    | 1          |
| PTPRCAP      | 3.27419    | 0.816336   | -2.0039    | 0.0181648  |
| DSCC1        | 8.05518    | 11.6754    | 0.535486   | 0.0802776  |
| FCRLB        | 0.652203   | 0.687897   | 0.0768723  | 0.975484   |

|               |            |            |            |            |
|---------------|------------|------------|------------|------------|
| MTRNR2L3      | 0.120439   | 0.0578109  | -1.05889   | 1          |
| FAM215A       | 0.170014   | 0.0523954  | -1.69814   | 1          |
| CARD9         | 1.90026    | 1.722      | -0.14211   | 0.918775   |
| SLAMF7        | 0.487112   | 0.109914   | -2.14787   | 0.00897284 |
| LRRN4CL       | 0.178398   | 0.208737   | 0.226588   | 1          |
| PDIA3P        | 1.83033    | 1.32343    | -0.467821  | 0.436665   |
| ELAVL3        | 0.00733213 | 0.00622015 | -0.237282  | 1          |
| PYGM          | 0.0873457  | 0.0506713  | -0.785569  | 1          |
| LAMP3         | 1.17817    | 0.282621   | -2.05961   | 0.00153868 |
| ANKRD11       | 18.1328    | 14.719     | -0.300925  | 0.631444   |
| FSIP1         | 0.0404362  | 0.0297735  | -0.44162   | 1          |
| PEX11G        | 4.42019    | 0.820382   | -2.42974   | 0.00153868 |
| LOC100506082  | 0.296331   | 0.0653093  | -2.18185   | 1          |
| RNASE7        | 0.125133   | 0.0441731  | -1.50222   | 1          |
| NLRC4         | 0.35657    | 0.187199   | -0.92961   | 1          |
| BDNF          | 0.100079   | 0.0664187  | -0.591478  | 1          |
| C6orf99       | 0.728153   | 0.233741   | -1.63933   | 0.273983   |
| STOML1        | 6.07269    | 3.6911     | -0.718286  | 0.0644552  |
| PROZ          | 0.192215   | 0.137033   | -0.488196  | 1          |
| KLHL11        | 0.518212   | 0.43381    | -0.25648   | 0.852179   |
| PAXBP1-AS1    | 0.137979   | 0.0941937  | -0.550743  | 1          |
| MFAP3L        | 0.336901   | 0.497354   | 0.561949   | 0.328608   |
| CCDC42B       | 0.468672   | 0.323178   | -0.536251  | 0.952184   |
| ZNF137P       | 0.361381   | 0.421055   | 0.220486   | 0.886619   |
| HIST1H2BD     | 12.7362    | 17.4413    | 0.453573   | 0.501582   |
| C19orf73      | 2.87717    | 2.51341    | -0.195002  | 0.935543   |
| FLJ45513      | 0.10527    | 0.0506742  | -1.05477   | 1          |
| GALNT3        | 0.0285328  | 0.00828174 | -1.78462   | 1          |
| ZNF285        | 0.0181156  | 0.0155144  | -0.223629  | 1          |
| BCL11B        | 0.19302    | 0.0543156  | -1.82931   | 1          |
| ZNF205-AS1    | 0.298619   | 0.382742   | 0.358065   | 0.976255   |
| PHACTR1       | 0.0103016  | 0.00457634 | -1.1706    | 1          |
| SLC41A2       | 0.89992    | 0.539668   | -0.737724  | 0.131988   |
| GPR124        | 0.0803166  | 0.0604874  | -0.409065  | 1          |
| FGF11         | 2.70198    | 1.98275    | -0.446516  | 0.397065   |
| SRGAP2D       | 0.313729   | 0.211233   | -0.570688  | 1          |
| DBIL5P        | 0.324895   | 0.313516   | -0.0514335 | 1          |
| INHBA         | 0.011691   | 0          | #NAME?     | 1          |
| PLIN4         | 0.301873   | 0.096062   | -1.65191   | 1          |
| SPDYE5        | 0.170538   | 0.137398   | -0.311726  | 1          |
| SULT2B1       | 0.0695374  | 0.0300176  | -1.21198   | 1          |
| PNLDC1        | 0.0592761  | 0.12024    | 1.0204     | 1          |
| C2orf62       | 0.0931903  | 0.0589236  | -0.661334  | 1          |
| QRICH2        | 1.34548    | 1.40719    | 0.0646979  | 0.957014   |
| METTL21EP     | 0.0214521  | 0.00370985 | -2.53169   | 1          |
| SBSN          | 0.075369   | 0.0817175  | 0.116673   | 1          |
| C17orf100     | 0.54937    | 0.223668   | -1.29642   | 0.15618    |
| OR51B5        | 0.557548   | 0.435162   | -0.357542  | 0.87242    |
| MIR22,MIR22HG | 6.56506    | 13.413     | 1.03075    | 0.00153868 |

|                |            |            |            |           |
|----------------|------------|------------|------------|-----------|
| MARCH4         | 0.0174842  | 0.00270382 | -2.69298   | 1         |
| HRH1           | 2.87842    | 2.93963    | 0.0303607  | 0.978818  |
| LOC100499227   | 1.61506    | 1.49145    | -0.114866  | 0.946002  |
| FKBP1B         | 0.114498   | 0.119125   | 0.0571497  | 1         |
| SLC25A34       | 0.222108   | 0.0775429  | -1.5182    | 1         |
| KRTAP4-7       | 0.530114   | 0.278593   | -0.928145  | 0.524638  |
| NFKB1B         | 34.2109    | 32.4255    | -0.0773266 | 0.968709  |
| LOC440311      | 0.403674   | 0.216783   | -0.896936  | 0.511853  |
| KANSL1-AS1     | 1.01389    | 0.61939    | -0.71098   | 0.955832  |
| MIR1248,SNORA1 | 8.21279    | 2.95425    | -1.47508   | 0.824372  |
| YY2            | 1.12893    | 0.809698   | -0.479506  | 0.765718  |
| SPATA17        | 0.39798    | 0.0933966  | -2.09126   | 0.141333  |
| SLC35G5        | 0.0319782  | 0.184037   | 2.52484    | 1         |
| BMP8B          | 1.04707    | 0.58077    | -0.850317  | 0.806169  |
| ZNF81          | 0.173188   | 0.13897    | -0.31757   | 1         |
| C11orf93       | 1.31178    | 0.457649   | -1.51921   | 0.0732377 |
| SCARNA14       | 45.2617    | 1.04558    | -5.43592   | 0.708732  |
| GDAP1          | 2.85198    | 1.97331    | -0.53135   | 0.175696  |
| KRT222         | 0.454846   | 0.146361   | -1.63584   | 0.0537703 |
| LMCD1          | 0.0701987  | 0.0367993  | -0.931764  | 1         |
| CBWD3          | 0.474487   | 0.449884   | -0.0768166 | 0.971099  |
| DOK3           | 4.43626    | 3.8267     | -0.213243  | 0.802799  |
| RNU6ATAC       | 61.4133    | 40.2706    | -0.608823  | 0.687731  |
| ARL17A,ARL17B  | 0.233492   | 0.309902   | 0.408441   | 1         |
| SLC45A4        | 6.78927    | 6.65983    | -0.0277702 | 0.981441  |
| ADAP2          | 0.0860299  | 0.00373425 | -4.52595   | 1         |
| IQCH-AS1       | 5.6691     | 4.79485    | -0.241635  | 0.975612  |
| LOC348761      | 0.116477   | 0.0363245  | -1.68102   | 1         |
| GLI1           | 0.4435     | 0.490829   | 0.146287   | 0.93102   |
| C9orf43        | 0.650928   | 0.54742    | -0.249848  | 0.974573  |
| CERS3          | 0.0430206  | 0.00546337 | -2.97717   | 1         |
| MNS1           | 0.545265   | 0.234549   | -1.21707   | 0.31192   |
| THAP10         | 1.38428    | 0.731579   | -0.92005   | 0.0782684 |
| MTRNR2L4       | 0.184014   | 0.160093   | -0.200904  | 1         |
| CILP2          | 0.0994405  | 0.130019   | 0.386816   | 1         |
| AMZ1           | 0.0108575  | 0.00355822 | -1.60947   | 1         |
| TSACC          | 0.858623   | 0.6222     | -0.464646  | 0.951272  |
| PTGS1          | 0.0129478  | 0.0334345  | 1.36863    | 1         |
| SPTBN4         | 0.178705   | 0.0594776  | -1.58716   | 1         |
| MYEF2          | 0.0056029  | 0.00147657 | -1.92392   | 1         |
| MGC72080       | 24.5958    | 15.9054    | -0.628902  | 0.0799092 |
| LMBRD2         | 0.467471   | 0.182481   | -1.35713   | 0.0329313 |
| TMED6          | 1.33248    | 1.04006    | -0.357445  | 0.767689  |
| ST14           | 0.0177217  | 0.0163455  | -0.11663   | 1         |
| KCNIP4         | 0.308327   | 0.430288   | 0.48084    | 0.589092  |
| HLA-DRB5       | 0.0382757  | 0.00998194 | -1.93904   | 1         |
| MARVELD3       | 1.59839    | 1.47737    | -0.113588  | 0.935124  |
| PLXNA2         | 0.588053   | 0.51578    | -0.189189  | 0.829483  |
| ANKRD20A8P,LO  | 0.00735735 | 0          | #NAME?     | 1         |

|              |            |            |            |            |
|--------------|------------|------------|------------|------------|
| FLJ46300     | 0.0128119  | 0.0237162  | 0.888391   | 1          |
| PRDM7        | 0.0207169  | 0.00313523 | -2.72417   | 1          |
| TMEM121      | 1.53386    | 1.55977    | 0.0241655  | 0.994058   |
| CLDN2        | 0.0320208  | 0.0207937  | -0.622862  | 1          |
| C6orf163     | 0.298271   | 0.158598   | -0.911251  | 1          |
| GPR62        | 0.04249    | 0.0334634  | -0.344539  | 1          |
| PIWIL2       | 0.0097906  | 0.00316264 | -1.63027   | 1          |
| TLR10        | 0.00834784 | 0          | #NAME?     | 1          |
| TRPV6        | 0.0112348  | 0          | #NAME?     | 1          |
| LOC100129534 | 1.04324    | 0.250931   | -2.05571   | 0.0169799  |
| PKMYT1       | 82.1847    | 66.3371    | -0.309053  | 0.61081    |
| SNORA50      | 10.6227    | 2.51235    | -2.08004   | 0.77453    |
| LOC100144603 | 2.85174    | 3.10321    | 0.121917   | 0.957519   |
| IL12RB2      | 0.0481238  | 0.0242394  | -0.989397  | 1          |
| PDE8B        | 0.19901    | 0.151747   | -0.391178  | 1          |
| TBXAS1       | 0.319083   | 0.140359   | -1.18481   | 1          |
| C2orf50      | 0.0347301  | 0.0316508  | -0.133946  | 1          |
| ANKRD45      | 0.0130601  | 0.00668571 | -0.966011  | 1          |
| TRANK1       | 0.048948   | 0.0157936  | -1.63191   | 1          |
| ZNF385B      | 0.0256817  | 0          | #NAME?     | 1          |
| KLF4         | 6.82461    | 2.28442    | -1.57892   | 0.00153868 |
| GPR132       | 0.0100844  | 0          | #NAME?     | 1          |
| ACTL8        | 4.13247    | 2.98125    | -0.471088  | 0.400165   |
| GPR113       | 0.0435362  | 0.0289484  | -0.58873   | 1          |
| POPDC2       | 0.241476   | 0.183326   | -0.397465  | 1          |
| ARHGAP24     | 0.138703   | 0.108658   | -0.352198  | 1          |
| KRTAP4-9     | 2.1135     | 0.636674   | -1.73101   | 0.0187307  |
| CHRNA10      | 1.47517    | 1.98385    | 0.42742    | 0.596588   |
| SGPP2        | 1.21917    | 0.415574   | -1.55272   | 0.0410754  |
| ARHGDI1      | 0.0452909  | 0.0252348  | -0.843807  | 1          |
| SNORA68      | 38.3751    | 19.9419    | -0.94437   | 0.875573   |
| RAD54L2      | 0.374483   | 0.379071   | 0.017569   | 0.994068   |
| S100A3       | 10.5324    | 7.08023    | -0.572965  | 0.250712   |
| NOXO1        | 0.652566   | 2.19203    | 1.74807    | 0.00970147 |
| VWF          | 0.00996981 | 0.00987379 | -0.0139618 | 1          |
| FLJ21408     | 0.0741895  | 0          | #NAME?     | 1          |
| SLC35F4      | 0.0443575  | 0          | #NAME?     | 1          |
| SLC8A2       | 0.0217535  | 0.00405209 | -2.42451   | 1          |
| LINC00240    | 0.815406   | 0.728865   | -0.161867  | 0.954535   |
| CPNE9        | 0.11442    | 0.0956935  | -0.257852  | 1          |
| CPB2-AS1     | 0.00866728 | 0.00471795 | -0.877419  | 1          |
| AVIL         | 0.328361   | 0.145901   | -1.17029   | 1          |
| C9orf66      | 0.464219   | 0.198032   | -1.22907   | 0.406709   |
| LRRC26       | 7.36057    | 13.668     | 0.89291    | 0.0981523  |
| ARMC12       | 0.556922   | 0.225184   | -1.30637   | 0.243349   |
| INHBC        | 0.104955   | 0.0253266  | -2.05105   | 1          |
| LOC400794    | 0.0359814  | 0          | #NAME?     | 1          |
| LOC641367    | 0.061332   | 0.024596   | -1.31821   | 1          |
| LOC100128361 | 0.658178   | 0.91178    | 0.470208   | 0.935543   |

|                |           |            |            |           |
|----------------|-----------|------------|------------|-----------|
| C8orf31        | 1.61974   | 1.04592    | -0.630987  | 0.312144  |
| TRABD2B        | 0.0715546 | 0.025976   | -1.46186   | 1         |
| TMEM240        | 0.0681537 | 0.061352   | -0.151681  | 1         |
| TMEM190        | 0.175915  | 0.040871   | -2.10573   | 1         |
| PCDHB4         | 0.0687626 | 0.10258    | 0.57705    | 1         |
| NKAPL          | 0.0214612 | 0.00623066 | -1.78428   | 1         |
| LRIT3          | 0.111322  | 0.167264   | 0.587387   | 1         |
| ARHGAP9        | 0.175454  | 0.0666621  | -1.39616   | 1         |
| HCST           | 3.83903   | 1.19117    | -1.68836   | 0.057213  |
| LOC100132832   | 1.05429   | 0.738067   | -0.514443  | 0.461327  |
| TSPAN10        | 1.60931   | 0.393818   | -2.03085   | 0.0393841 |
| CPM            | 0.0138491 | 0.0161187  | 0.218949   | 1         |
| NDUFA4L2       | 3.09424   | 1.11635    | -1.4708    | 0.774237  |
| C17orf74       | 0.705319  | 0.209033   | -1.75454   | 0.0723025 |
| SCT            | 0.263195  | 0.0606133  | -2.11843   | 1         |
| HIST1H4C       | 3.52822   | 1.63419    | -1.11036   | 0.284754  |
| TRPM5          | 0.0108462 | 0.00996098 | -0.122835  | 1         |
| LYZ            | 0.0561338 | 0.0544448  | -0.0440744 | 1         |
| PTPRVP         | 0.0380845 | 0.0138619  | -1.45808   | 1         |
| LOC283177      | 0.0406706 | 0          | #NAME?     | 1         |
| S100A14        | 0.514521  | 0.39936    | -0.365539  | 0.831834  |
| SULF2          | 0.0111043 | 0.00959351 | -0.210991  | 1         |
| SNORA80        | 18.1504   | 11.2342    | -0.692104  | 0.948368  |
| SCARNA9        | 7.61339   | 6.12654    | -0.313466  | 0.884031  |
| CCDC17         | 0.427436  | 0.267084   | -0.678417  | 0.536181  |
| SHROOM3        | 0.0114598 | 0.00896532 | -0.354153  | 1         |
| C9orf24        | 0.16834   | 0.101854   | -0.724868  | 1         |
| ID12-AS1       | 2.26679   | 2.67013    | 0.236261   | 0.970539  |
| F10            | 0.283007  | 0.197706   | -0.517477  | 1         |
| HVCN1          | 0.0928897 | 0.161951   | 0.801966   | 1         |
| KIAA0408,SOGA3 | 0.0106645 | 0.011923   | 0.160942   | 1         |
| HAS2-AS1       | 0.0341141 | 0.0171965  | -0.988256  | 1         |
| RPA4           | 0.373984  | 0.291768   | -0.358159  | 0.948523  |
| STAG3          | 0.2537    | 0.26536    | 0.0648294  | 1         |
| LRRC37A11P     | 0.0252563 | 0          | #NAME?     | 1         |
| ASRGL1         | 1.90631   | 1.54113    | -0.306798  | 0.698423  |
| GLUD1P7        | 0.0456269 | 0.00928084 | -2.29756   | 1         |
| CCDC175        | 0.547071  | 0.569155   | 0.0570927  | 0.991507  |
| PVRL3-AS1      | 0.0598731 | 0.0103506  | -2.53219   | 1         |
| TUBA4B         | 0.0319724 | 0.0411124  | 0.362744   | 1         |
| LOC284009      | 0.217763  | 0.0307776  | -2.82281   | 1         |
| MC1R           | 3.28525   | 1.80974    | -0.860226  | 0.0318822 |
| HPX            | 0.380494  | 0.226832   | -0.746252  | 0.532869  |
| CNBD2          | 0.0962649 | 0.0814036  | -0.241916  | 1         |
| TNS1           | 0.227621  | 0.173653   | -0.390426  | 1         |
| LOC646626      | 4.08284   | 1.97756    | -1.04585   | 0.925922  |
| LOC100505679   | 0.549221  | 0.282123   | -0.961059  | 0.650967  |
| HOXC13         | 0.523962  | 0.21542    | -1.28231   | 0.145921  |
| LOC440900      | 0.0934678 | 0.0572869  | -0.706263  | 1         |

|               |            |            |             |            |
|---------------|------------|------------|-------------|------------|
| KCNMB3        | 0.777784   | 0.773866   | -0.00728454 | 0.9976     |
| TMEM104       | 2.8047     | 7.15938    | 1.35199     | 0.00153868 |
| CA7           | 0.0848518  | 0          | #NAME?      | 1          |
| ABCA4         | 0.0213314  | 0.0198416  | -0.104446   | 1          |
| APBA2         | 0.0138383  | 0          | #NAME?      | 1          |
| DNMBP-AS1     | 0.0230602  | 0.018779   | -0.296286   | 1          |
| SNORA10       | 83.2474    | 52.7336    | -0.658683   | 0.912292   |
| CASC2         | 0.343893   | 0.198652   | -0.791713   | 1          |
| RRH           | 0.0700476  | 0.08227    | 0.23203     | 1          |
| LOC100129480  | 0.066439   | 0.15875    | 1.25665     | 1          |
| HIST1H2AI     | 1.55633    | 0.652144   | -1.25488    | 0.419676   |
| SNORA52       | 54.5818    | 25.0795    | -1.12191    | 0.83928    |
| TMOD4         | 0.156221   | 0.115293   | -0.438285   | 1          |
| PYY2          | 1.06811    | 0.979127   | -0.125492   | 0.961132   |
| ZNF878        | 0.341407   | 0.571156   | 0.742392    | 0.361033   |
| TMEM173       | 0.213615   | 0.21753    | 0.0262      | 1          |
| SNORA46       | 3.14039    | 0          | #NAME?      | 0.480434   |
| LGR6          | 0.07498    | 0          | #NAME?      | 1          |
| HOXB-AS3      | 0.887438   | 0.910513   | 0.037033    | 0.997191   |
| SNORD8        | 23.8414    | 0          | #NAME?      | 0.473572   |
| LOC100128770  | 0.0740397  | 0.0373774  | -0.986134   | 1          |
| ITGB1BP2      | 0.758262   | 0.573619   | -0.402604   | 0.960148   |
| LOC100133985  | 3.379      | 1.54729    | -1.12685    | 0.196771   |
| HSPA1L        | 0.333024   | 0.158318   | -1.0728     | 1          |
| LOC100009676  | 3.47797    | 2.73413    | -0.347165   | 0.755018   |
| LINC00313     | 0.19091    | 0.0591027  | -1.69159    | 1          |
| SERPINI1      | 0.270845   | 0.276561   | 0.0301315   | 1          |
| GPR89B,GPR89C | 0.130796   | 0.116272   | -0.169813   | 1          |
| MPZL3         | 0.242413   | 0.0818683  | -1.56609    | 1          |
| WDR93         | 0.0948676  | 0.0123302  | -2.94372    | 1          |
| RCBTB2        | 0.437384   | 0.46497    | 0.0882369   | 0.959728   |
| GRAP          | 0.150845   | 0.0886116  | -0.767498   | 1          |
| TAS2R31       | 0.0320992  | 0.0121246  | -1.4046     | 1          |
| CMTM2         | 0.269991   | 0.301246   | 0.158033    | 1          |
| COL4A4        | 0.0294907  | 0.00711538 | -2.05125    | 1          |
| PREX1         | 0.0626164  | 0.0106429  | -2.55665    | 1          |
| HSH2D         | 0.518982   | 0.550545   | 0.085175    | 0.967296   |
| TEX9          | 0.602709   | 0.448573   | -0.426118   | 0.800138   |
| SYNM          | 0.00480037 | 0.00542342 | 0.176056    | 1          |
| FOXD4L1       | 0.754312   | 1.48334    | 0.975616    | 0.169004   |
| SND1-IT1      | 0.0427394  | 0.0946795  | 1.14748     | 1          |
| DCAF4L1       | 0.213656   | 0.136278   | -0.648734   | 1          |
| MMP23B        | 0.206654   | 0.180063   | -0.198713   | 1          |
| FAM209A       | 0.311069   | 0.243406   | -0.35387    | 1          |
| WFIKK1        | 0.381396   | 0.196397   | -0.957518   | 0.558062   |
| SPDYE6        | 0.471122   | 0.314781   | -0.581755   | 0.47068    |
| TCN2          | 0.0504723  | 0.0759776  | 0.590083    | 1          |
| LGALS9        | 0.199596   | 0.237258   | 0.249378    | 1          |
| C19orf71      | 0.928062   | 0.302042   | -1.61947    | 0.773721   |

|              |            |            |             |           |
|--------------|------------|------------|-------------|-----------|
| TAS1R3       | 0.151598   | 0.130182   | -0.219716   | 1         |
| HIATL2       | 1.01524    | 1.30086    | 0.357649    | 0.831834  |
| FGF13        | 0.0134321  | 0.017578   | 0.38808     | 1         |
| CELSR1       | 0.0749444  | 0.0486205  | -0.624255   | 1         |
| CAND2        | 0.134978   | 0.100209   | -0.429712   | 1         |
| TEX21P       | 0.0967521  | 0.00822122 | -3.55687    | 1         |
| REP15        | 1.38154    | 2.38697    | 0.788899    | 0.121135  |
| FBXW4P1      | 0.489337   | 0.64938    | 0.408235    | 0.968712  |
| GGT8P        | 0.0320275  | 0.0108484  | -1.56183    | 1         |
| EMILIN1      | 0.35638    | 0.226414   | -0.654455   | 1         |
| ANAPC1P1     | 0.0157839  | 0.0120669  | -0.387395   | 1         |
| RNF148       | 0.197008   | 0.178691   | -0.140785   | 1         |
| LOC100131257 | 0.00599488 | 0.00598097 | -0.00334949 | 1         |
| GPR19        | 0.376063   | 0.145408   | -1.37087    | 0.152252  |
| MAP2K4P1     | 0.0107748  | 0.0189809  | 0.816879    | 1         |
| SLC9A9       | 0.0156466  | 0          | #NAME?      | 1         |
| LOC100127983 | 0.268088   | 0.16475    | -0.702428   | 1         |
| APOA2        | 1.87662    | 0.964912   | -0.959664   | 0.362167  |
| FBXL2        | 0.0521953  | 0.0918386  | 0.815179    | 1         |
| SLC39A5      | 0.173528   | 0.031118   | -2.47935    | 1         |
| ZRANB2-AS2   | 0.284161   | 0.125271   | -1.18166    | 1         |
| TEX29        | 0.421846   | 0.27552    | -0.614558   | 0.784528  |
| LGALS4       | 0.226879   | 0.0626619  | -1.85626    | 1         |
| STEAP1B      | 0.0232529  | 0.00903294 | -1.36414    | 1         |
| LRRC46       | 0.613399   | 0.355526   | -0.786871   | 0.920464  |
| SNORA38      | 17.4922    | 9.3501     | -0.903658   | 0.926279  |
| KLRG1        | 0.23808    | 0.201506   | -0.24062    | 1         |
| SVEP1        | 0.00214969 | 0          | #NAME?      | 1         |
| CCL3L1       | 0.456955   | 0.0445056  | -3.35999    | 0.565559  |
| SCARNA22     | 100.404    | 21.2456    | -2.24057    | 0.774328  |
| STYK1        | 0.18691    | 0.0590457  | -1.66244    | 1         |
| LOC284837    | 0.0413369  | 0.0537541  | 0.378947    | 1         |
| LOC100506895 | 0.00985074 | 0.0158098  | 0.682512    | 1         |
| BMP4         | 1.15963    | 2.5399     | 1.13111     | 0.0117316 |
| DKK3         | 0.178557   | 0.034647   | -2.36558    | 1         |
| LOC100128750 | 0.66423    | 0.218076   | -1.60685    | 0.886468  |
| RAB41        | 0.0326003  | 0.049322   | 0.597346    | 1         |
| BAAT         | 0.208205   | 0.129518   | -0.684849   | 1         |
| ABO          | 0.313793   | 0.129502   | -1.27684    | 1         |
| ARHGEF26     | 0.20349    | 0.115464   | -0.817522   | 1         |
| HCP5         | 0.0109544  | 0.0727052  | 2.73055     | 1         |
| LOC284801    | 0.0681004  | 0.0435402  | -0.645316   | 1         |
| LOC100129083 | 0.333649   | 0          | #NAME?      | 1         |
| MITF         | 0.722686   | 0.369527   | -0.967688   | 0.0338188 |
| CNDP1        | 0.0146627  | 0.0566756  | 1.95057     | 1         |
| SCRT1        | 0.102778   | 0.0556983  | -0.883829   | 1         |
| CCNB3        | 0.733443   | 0.25391    | -1.53037    | 0.117359  |
| ATP6V0A4     | 0.0204818  | 0.0157929  | -0.375066   | 1         |
| MAGEB2       | 0.700239   | 0.452507   | -0.629908   | 0.498909  |



|              |            |             |           |            |
|--------------|------------|-------------|-----------|------------|
| MAFB         | 0.0147081  | 0           | #NAME?    | 1          |
| CTAGE4       | 0.0957904  | 0.0968577   | 0.0159854 | 1          |
| MFSD7        | 0.42563    | 0.281538    | -0.596269 | 0.911712   |
| SERPINC1     | 0.049048   | 0.0635124   | 0.372845  | 1          |
| PIN4P1       | 0.0408548  | 0.0371698   | -0.136373 | 1          |
| SAMD14       | 0.0955416  | 0.0463565   | -1.04336  | 1          |
| INTS4L2      | 0.0631341  | 0.0263535   | -1.26043  | 1          |
| HIST1H2AM    | 5.14455    | 2.84987     | -0.85215  | 0.337645   |
| PTCH2        | 0.328244   | 0.402662    | 0.294801  | 0.836049   |
| TMEM151B     | 0.0749894  | 0.00760919  | -3.30087  | 1          |
| HIST1H2AG    | 3.60048    | 1.76286     | -1.03027  | 0.274536   |
| IL20RB       | 0.272678   | 0.131267    | -1.05469  | 1          |
| RSPH1        | 0.798254   | 0.342792    | -1.21952  | 0.12463    |
| LOC145837    | 0.0625384  | 0.005849    | -3.41848  | 1          |
| LOC100616530 | 0.281977   | 0.199665    | -0.497998 | 1          |
| SNORA61      | 59.1541    | 128.902     | 1.12372   | 0.929057   |
| FOXL1        | 0.0490118  | 0           | #NAME?    | 1          |
| GRM6         | 0.0216321  | 0.0172748   | -0.324506 | 1          |
| SLC7A5P1     | 0.627768   | 0.850621    | 0.438285  | 0.879418   |
| OLFML3       | 0.0184436  | 0.0137153   | -0.42733  | 1          |
| RASIP1       | 0.58515    | 0.239181    | -1.2907   | 0.14587    |
| MAP1B        | 0.00844322 | 0.00920867  | 0.125201  | 1          |
| TMEM71       | 1.02784    | 0.0731884   | -3.81186  | 0.00153868 |
| ABCA13       | 0.00215095 | 0.000476145 | -2.17551  | 1          |
| C16orf71     | 0.145435   | 0.100175    | -0.537855 | 1          |
| HIST1H4I     | 1.38094    | 0.934781    | -0.562953 | 0.969482   |
| PDE1B        | 0.0111183  | 0           | #NAME?    | 1          |
| AQPEP        | 0.00785651 | 0.0120179   | 0.61322   | 1          |
| CLDN4        | 0.239109   | 0.136375    | -0.810086 | 1          |
| ZNF790-AS1   | 0.0540735  | 0.037479    | -0.528837 | 1          |
| SNORA74B     | 3.0393     | 2.25461     | -0.430859 | 0.960032   |
| PROSER2-AS1  | 0.014066   | 0.0145849   | 0.0522559 | 1          |
| SPNS3        | 0.712871   | 0.219674    | -1.69828  | 0.0881203  |
| MIRLET7DHG   | 0.955911   | 0.555289    | -0.783638 | 0.260643   |
| IGSF5        | 0.0407141  | 0           | #NAME?    | 1          |
| NCR3LG1      | 0.427759   | 0.315394    | -0.439642 | 0.513296   |
| RAB25        | 0.078406   | 0.0393071   | -0.996174 | 1          |
| ITIH1        | 0.0143288  | 0.00440353  | -1.70219  | 1          |
| CCDC64B      | 0.306552   | 0.178421    | -0.780842 | 1          |
| LINC00640    | 0.157041   | 0.0513986   | -1.61134  | 1          |
| ALDH1L1      | 0.0138569  | 0           | #NAME?    | 1          |
| HRASLS       | 0.33852    | 0.206838    | -0.710742 | 1          |
| TCTE1        | 0.22158    | 0.0450836   | -2.29716  | 1          |
| CYP46A1      | 0.0775041  | 0.031456    | -1.30094  | 1          |
| VTN          | 0.025307   | 0.0329085   | 0.378927  | 1          |
| FUT3         | 0.0223814  | 0.0170761   | -0.390317 | 1          |
| SCG5         | 0.395809   | 0.464375    | 0.230489  | 0.897768   |
| GSG1         | 0.0761228  | 0.0663272   | -0.198729 | 1          |
| CRYBA4       | 0.0653925  | 0           | #NAME?    | 1          |

|                  |            |             |            |           |
|------------------|------------|-------------|------------|-----------|
| ATF5             | 102.578    | 51.6588     | -0.989642  | 0.0181648 |
| CYP26A1          | 0.0632085  | 0.0290417   | -1.12199   | 1         |
| LOC100130705     | 1.51327    | 1.74343     | 0.204255   | 0.838902  |
| SNORD17          | 9.51734    | 3.47564     | -1.45328   | 0.89229   |
| CCDC62           | 0.24491    | 0.155911    | -0.651524  | 1         |
| SHE              | 0.0105197  | 0.0050759   | -1.05136   | 1         |
| BOLA1            | 0.186335   | 0.064473    | -1.53113   | 1         |
| OLFML2A          | 0.0285807  | 0.0140496   | -1.02451   | 1         |
| NCF1C            | 0.0382827  | 0           | #NAME?     | 1         |
| ZNRF3-AS1        | 0.0543975  | 0.021391    | -1.34654   | 1         |
| HIST1H3B         | 3.42996    | 1.0776      | -1.67036   | 0.13436   |
| HIST1H2AE        | 15.0484    | 6.74661     | -1.15738   | 0.0220668 |
| DNM1P35          | 0.2414     | 0.0680978   | -1.82575   | 1         |
| TSSK2            | 0.859896   | 1.27426     | 0.567426   | 0.877848  |
| FAM49A           | 0.031045   | 0.00548781  | -2.50006   | 1         |
| NAT14            | 3.40054    | 2.19715     | -0.630133  | 0.328749  |
| COL9A2           | 0.0164728  | 0.0213026   | 0.370942   | 1         |
| SCUBE2           | 0.0185549  | 0.0123291   | -0.589732  | 1         |
| FICD             | 1.24534    | 0.730863    | -0.768865  | 0.3005    |
| EXD1             | 0.024927   | 0.00662015  | -1.91277   | 1         |
| HS3ST3B1         | 0.29662    | 0.311149    | 0.0689917  | 1         |
| FRY              | 0.00702145 | 0.000837416 | -3.06775   | 1         |
| NBPF11,NBPF24    | 0.00725601 | 0.00790997  | 0.124497   | 1         |
| LOC401127        | 0.197026   | 0.201697    | 0.0338041  | 1         |
| IGF2,INS,INS-IGF | 0.0189604  | 0.0155461   | -0.286439  | 1         |
| CLIC3            | 0.238615   | 0.238764    | 0.00089992 | 1         |
| MIR663A          | 3544.5     | 771.179     | -2.20044   | 0.0226901 |
| FAM186B          | 0.218408   | 0.0895368   | -1.28648   | 1         |
| WWTR1-AS1        | 0.11419    | 0.0450211   | -1.34276   | 1         |
| VWA8-AS1         | 0.0386918  | 0.00491065  | -2.97804   | 1         |
| CEND1            | 0.266402   | 0.321261    | 0.270144   | 1         |
| PSTPIP2          | 0.0337297  | 0.0607083   | 0.847874   | 1         |
| LOC151171        | 0.0424068  | 0.0346804   | -0.290172  | 1         |
| GFRA3            | 0.146586   | 0.0339578   | -2.10993   | 1         |
| RHBDL2           | 0.0978294  | 0.0107674   | -3.1836    | 1         |
| FLJ25758         | 0.0631261  | 0           | #NAME?     | 1         |
| CPLX3            | 0.0846415  | 0.0489258   | -0.790769  | 1         |
| CNGA4            | 0.0737267  | 0.0140325   | -2.39342   | 1         |
| GPM6B            | 0.0406224  | 0.0134357   | -1.59621   | 1         |
| C13orf45         | 0.0325633  | 0.00856808  | -1.9262    | 1         |
| SHBG             | 0.834862   | 0.716832    | -0.219902  | 0.964843  |
| SP140            | 0.290367   | 0.0616325   | -2.23611   | 1         |
| LOC100505676     | 0.0339671  | 0.00827665  | -2.03702   | 1         |
| PPAPDC3          | 0.363612   | 0.108787    | -1.7409    | 1         |
| HIST1H3G         | 2.15226    | 1.59923     | -0.428479  | 0.821611  |
| KLK15            | 0.0894392  | 0.0498066   | -0.844571  | 1         |
| GNG12-AS1        | 0.0651286  | 0.0176644   | -1.88245   | 1         |
| C2orf73          | 0.0155779  | 0.00403249  | -1.94976   | 1         |
| C12orf61         | 0.708165   | 0.377278    | -0.908459  | 0.337387  |

|           |            |            |            |            |
|-----------|------------|------------|------------|------------|
| KCNK7     | 0.700588   | 1.02804    | 0.553258   | 0.574553   |
| NUPR1     | 5.29395    | 0.300285   | -4.13994   | 0.00153868 |
| LTA       | 0.163292   | 0.0269064  | -2.60144   | 1          |
| XYLT1     | 0.0152053  | 0.0226704  | 0.576229   | 1          |
| PVRL4     | 0.064233   | 0.0368915  | -0.800028  | 1          |
| LRRC33    | 0.17819    | 0.0736525  | -1.27461   | 1          |
| CHRNA3    | 0.0423523  | 0.00745376 | -2.5064    | 1          |
| GHRL      | 0.405593   | 0.0729978  | -2.47411   | 0.0471668  |
| TNS4      | 0.0232772  | 0.0266602  | 0.195773   | 1          |
| LINC00707 | 0.0102033  | 0.00563323 | -0.856997  | 1          |
| IFFO1     | 0.0965249  | 0.135736   | 0.491835   | 1          |
| GPT       | 0.244136   | 0.503093   | 1.04314    | 0.374271   |
| GDAP1L1   | 0.0464772  | 0          | #NAME?     | 1          |
| NINJ2     | 1.92519    | 1.6189     | -0.249985  | 0.84703    |
| ICAM4     | 0.339284   | 0.461389   | 0.443491   | 0.789321   |
| RAB40A    | 0.80882    | 0.358621   | -1.17336   | 0.14872    |
| PCDHB15   | 0.142756   | 0.0805521  | -0.825559  | 1          |
| TDRD12    | 0.0199748  | 0.0121809  | -0.713555  | 1          |
| SNORA27   | 63.7132    | 32.8861    | -0.954113  | 0.897319   |
| MACC1     | 0.00747363 | 0.0073155  | -0.0308527 | 1          |
| NEK10     | 0.0119013  | 0.0109775  | -0.116567  | 1          |
| WEE2      | 0.0107696  | 0.00618688 | -0.79968   | 1          |
| MEI1      | 0.0486882  | 0.00882299 | -2.46423   | 1          |
| SNORA3    | 19.2856    | 6.20044    | -1.63708   | 0.818092   |
| ZNF90     | 0.00991396 | 0.00237204 | -2.06333   | 1          |
| EPHB6     | 0.245995   | 0.097534   | -1.33465   | 1          |
| DNAJC5B   | 0.0352434  | 0.00853033 | -2.04668   | 1          |
| DPY19L2P4 | 0.0682008  | 0.0442359  | -0.62457   | 1          |
| SCIN      | 0.0122618  | 0          | #NAME?     | 1          |
| KLHL14    | 0.0166434  | 0          | #NAME?     | 1          |
| TMEM178B  | 0.003148   | 0          | #NAME?     | 1          |
| SETBP1    | 0.00345995 | 0.00741308 | 1.09932    | 1          |
| HLA-DRB1  | 0.0520839  | 0.0445265  | -0.226174  | 1          |
| FAM65B    | 0.00598338 | 0          | #NAME?     | 1          |
| SYT5      | 0.0782257  | 0.0224106  | -1.80346   | 1          |
| HIST1H2BI | 1.44075    | 0.487352   | -1.56378   | 0.317407   |
| IL17B     | 0.114344   | 0.0442561  | -1.36943   | 1          |
| SEPT7L    | 0.123843   | 0.0298344  | -2.05346   | 1          |
| APOLD1    | 0.441432   | 0.108612   | -2.023     | 0.00153868 |
| TMCC3     | 0.00756856 | 0.00334451 | -1.17822   | 1          |
| ECM2      | 0.0165903  | 0.0164233  | -0.0146035 | 1          |
| ALDH1A3   | 0.0406481  | 0.0120604  | -1.75292   | 1          |
| ANKRD65   | 0.0290198  | 0          | #NAME?     | 1          |
| CALCRL    | 0.00650612 | 0          | #NAME?     | 1          |
| SCARNA1   | 3.76969    | 2.05735    | -0.873656  | 0.932364   |
| MPV17L    | 0.0266696  | 0.0121739  | -1.13141   | 1          |
| NLRP4     | 0.010294   | 0          | #NAME?     | 1          |
| C5orf27   | 0.0199795  | 0.0114516  | -0.802968  | 1          |
| SNORA79   | 39.6549    | 2.72993    | -3.86056   | 0.64889    |

|              |            |            |            |            |
|--------------|------------|------------|------------|------------|
| SLC5A11      | 0.0589844  | 0.0191443  | -1.62342   | 1          |
| C21orf7      | 0.672089   | 0.316876   | -1.08474   | 0.111734   |
| CDKL5        | 0.0299875  | 0.0229719  | -0.38449   | 1          |
| BMP2         | 0.0173158  | 0.0114422  | -0.597719  | 1          |
| LCE1B        | 0.260608   | 0.0587575  | -2.14904   | 1          |
| NCKAP1L      | 0.0569216  | 0.0178414  | -1.67375   | 1          |
| DENND2A      | 0.0121318  | 0.0190764  | 0.652997   | 1          |
| CD300C       | 0.0427634  | 0          | #NAME?     | 1          |
| LOC388906    | 0.442213   | 0.30903    | -0.516995  | 0.767216   |
| CPNE5        | 0.183261   | 0.0551329  | -1.73292   | 1          |
| C17orf72     | 0.0389479  | 0.0725787  | 0.898002   | 1          |
| NEB          | 0.00771265 | 0.00841029 | 0.124929   | 1          |
| CXCL1        | 0.415159   | 0.242464   | -0.77589   | 0.522562   |
| C7orf57      | 0.0412407  | 0.00544404 | -2.92132   | 1          |
| CYP2F1       | 0.0335707  | 0.0507807  | 0.597079   | 1          |
| HIST1H4H     | 7.31221    | 2.89094    | -1.33877   | 0.057213   |
| MAPT         | 0.0159562  | 0.0070386  | -1.18076   | 1          |
| WNT16        | 0.069982   | 0.0457412  | -0.61349   | 1          |
| SNORA74A     | 3.07215    | 2.52727    | -0.28167   | 0.978818   |
| PPM1E        | 0.0125197  | 0.0133204  | 0.0894397  | 1          |
| PDZRN4       | 0.0354258  | 0.0224877  | -0.655666  | 1          |
| ZNF750       | 0.0148781  | 0.00912024 | -0.70605   | 1          |
| EPHX3        | 0.144467   | 0.0438355  | -1.72057   | 1          |
| LCN1         | 0.166713   | 0.0180642  | -3.20616   | 1          |
| KLHL32       | 0.0222745  | 0.00774215 | -1.52459   | 1          |
| ACRBP        | 0.355168   | 0.0664372  | -2.41844   | 1          |
| ACSM1        | 0.0175914  | 0.00549871 | -1.6777    | 1          |
| HIST1H4A     | 1.20752    | 0.373168   | -1.69415   | 0.38574    |
| VEPH1        | 2.64449    | 0.88191    | -1.58429   | 0.00739414 |
| ALG1L        | 0.783522   | 0.282403   | -1.47222   | 0.423728   |
| HHIP-AS1     | 0.0954768  | 0.0454721  | -1.07017   | 1          |
| DNAJC27-AS1  | 0.0196595  | 0.0106105  | -0.889736  | 1          |
| GRB7         | 0.393606   | 0.125185   | -1.65269   | 0.068345   |
| NKPD1        | 0.0308655  | 0          | #NAME?     | 1          |
| STL          | 0.0319419  | 0.0200935  | -0.668725  | 1          |
| LOC100505865 | 0.283272   | 0.0107088  | -4.72532   | 1          |
| LOC389332    | 0.0564733  | 0          | #NAME?     | 1          |
| SNORA20      | 7.10605    | 16.5161    | 1.21675    | 0.865317   |
| EGR2         | 0.367001   | 0.0643499  | -2.51177   | 1          |
| LOC100128288 | 0.0566864  | 0.0289062  | -0.971623  | 1          |
| CLDN11       | 0.017241   | 0.0317051  | 0.878869   | 1          |
| SULT1A2      | 0.0614532  | 0.0136261  | -2.17311   | 1          |
| PROX2        | 0.0230309  | 0.0122884  | -0.906267  | 1          |
| MSR1         | 0.0128011  | 0.00293353 | -2.12556   | 1          |
| LINC00620    | 0.0593384  | 0          | #NAME?     | 1          |
| HCG17        | 0.372689   | 0.33442    | -0.156312  | 1          |
| SCARNA16     | 23.1479    | 3.65408    | -2.6633    | 0.69       |
| KLK6         | 0.0319809  | 0          | #NAME?     | 1          |
| KCNE1L       | 0.687178   | 0.691542   | 0.00913454 | 0.997822   |

|              |            |             |            |            |
|--------------|------------|-------------|------------|------------|
| BTBD18       | 0.0230559  | 0.028303    | 0.295819   | 1          |
| ZNF521       | 0.102948   | 0.0214949   | -2.25985   | 1          |
| NLRP9        | 0.103657   | 0.0657463   | -0.656832  | 1          |
| LOC338651    | 0.0198697  | 0           | #NAME?     | 1          |
| PTGER4       | 0.183596   | 0.0429184   | -2.09687   | 1          |
| KRT34        | 0.0279374  | 0.00686292  | -2.02531   | 1          |
| ACSBG2       | 0.0259782  | 0.0176796   | -0.555216  | 1          |
| HIST1H4E     | 10.865     | 1.81415     | -2.58233   | 0.00572929 |
| TMEM232      | 0.0449367  | 0.00232006  | -4.27566   | 1          |
| RFTN2        | 0.0430695  | 0.0538716   | 0.322859   | 1          |
| UOX          | 0.0302383  | 0.00642891  | -2.23373   | 1          |
| CCDC144B     | 0.00473901 | 0.000997915 | -2.2476    | 1          |
| C5AR2        | 0.0749063  | 0           | #NAME?     | 1          |
| LINC00485    | 0.0136315  | 0           | #NAME?     | 1          |
| MROH8        | 0.109847   | 0.0333285   | -1.72066   | 1          |
| SCN4A        | 0.0405029  | 0.016735    | -1.27515   | 1          |
| SOWAHD       | 0.0532564  | 0.0757476   | 0.508244   | 1          |
| ADAMTS17     | 0.117573   | 0.163679    | 0.47731    | 1          |
| CGB2         | 0.111384   | 0.0342705   | -1.7005    | 1          |
| NOD2         | 0.0151885  | 0.00964831  | -0.654629  | 1          |
| RNF39        | 0.0981444  | 0.0571663   | -0.779741  | 1          |
| GPD1         | 0.255508   | 0.0420201   | -2.60422   | 1          |
| COL8A2       | 0.0161844  | 0           | #NAME?     | 1          |
| DLG2         | 0.00933539 | 0.00255662  | -1.86847   | 1          |
| ZNF667       | 0.00918331 | 0.0165513   | 0.849862   | 1          |
| SNORA57      | 32.4343    | 14.9754     | -1.11492   | 0.886425   |
| GNAT2        | 0.138147   | 0.0366929   | -1.91263   | 1          |
| CRYBB3       | 0.263507   | 0.169703    | -0.634826  | 1          |
| ACTL7B       | 0.110359   | 0.0577629   | -0.933986  | 1          |
| SLC51B       | 0.100969   | 0.0289088   | -1.80432   | 1          |
| IMPG2        | 0.0166356  | 0.00524248  | -1.66595   | 1          |
| PYROXD2      | 0.122707   | 0.00593695  | -4.36935   | 1          |
| RAD21-AS1    | 0.12035    | 0.0374707   | -1.6834    | 1          |
| GPR22        | 0.0304527  | 0.0195424   | -0.639962  | 1          |
| C16orf62     | 0.0515474  | 0.0600058   | 0.219202   | 1          |
| HIST1H3H     | 3.7876     | 2.97259     | -0.349564  | 0.832978   |
| HIST1H2AB    | 1.80642    | 0.833318    | -1.1162    | 0.47852    |
| FILIP1       | 0.00743543 | 0           | #NAME?     | 1          |
| GIMAP6       | 0.0121346  | 0.00842108  | -0.527051  | 1          |
| C3orf72      | 0.0318452  | 0.0391492   | 0.297906   | 1          |
| TMEM88       | 2.49298    | 2.01453     | -0.307425  | 0.831614   |
| GRID1        | 0.0218923  | 0.00220069  | -3.3144    | 1          |
| HHIPL2       | 0.103212   | 0.09236     | -0.160267  | 1          |
| HIST2H3D     | 1.02855    | 0.283663    | -1.85836   | 0.453878   |
| CEACAM22P    | 0.014135   | 0.0411458   | 1.54148    | 1          |
| LOC100507346 | 0.0430098  | 0.0426231   | -0.0130278 | 1          |
| TBX2         | 0.162195   | 0.0367437   | -2.14216   | 1          |
| LRRN3        | 0.0239937  | 0.00494013  | -2.28003   | 1          |
| DUSP15       | 0.331149   | 0.102296    | -1.69474   | 1          |

|             |            |            |            |            |
|-------------|------------|------------|------------|------------|
| NPPA        | 0.4299     | 0.284917   | -0.593458  | 0.952184   |
| ITPK1-AS1   | 0.0324415  | 0.0307558  | -0.0769834 | 1          |
| HIST1H2BC   | 3.52484    | 1.95371    | -0.851341  | 0.396932   |
| ANP32AP1    | 0.0637155  | 0.0441422  | -0.529486  | 1          |
| GPRC5D      | 0.655704   | 0.289155   | -1.1812    | 0.287088   |
| GNG4        | 0.022181   | 0.0139894  | -0.664988  | 1          |
| FRMPD1      | 0.00925055 | 0.0020166  | -2.19761   | 1          |
| SYN1        | 0.0411745  | 0.153227   | 1.89584    | 1          |
| SNORA22     | 6.44359    | 1.15605    | -2.47866   | 0.849059   |
| FCGR1B      | 0.0261595  | 0          | #NAME?     | 1          |
| LOC653786   | 0.0907915  | 0.0121977  | -2.89595   | 1          |
| NFATC2      | 0.00948694 | 0.0081945  | -0.211288  | 1          |
| BEX4        | 0.0554757  | 0          | #NAME?     | 1          |
| KRTAP3-2    | 0.583694   | 0.2809     | -1.05516   | 0.485751   |
| ZNF274      | 0.0650361  | 0.00410137 | -3.98706   | 1          |
| PDE6A       | 0.0101516  | 0.0118791  | 0.226718   | 1          |
| VSIG2       | 0.0501225  | 0.0377445  | -0.409193  | 1          |
| WWC3        | 0.0113504  | 0.00175784 | -2.69087   | 1          |
| NFE2        | 0.033926   | 0          | #NAME?     | 1          |
| ARL10       | 0.0297423  | 0.0297674  | 0.00121667 | 1          |
| EXOC3L4     | 0.0548622  | 0.00846146 | -2.69684   | 1          |
| SNORA4      | 6.5452     | 7.58026    | 0.21181    | 0.98206    |
| HK3         | 0.0205764  | 0.0200969  | -0.0340138 | 1          |
| IZUMO1      | 0.0489589  | 0.0537684  | 0.135189   | 1          |
| SNORA71D    | 27.0256    | 6.06368    | -2.15606   | 0.783393   |
| LY96        | 3.19746    | 0.720715   | -2.14942   | 0.0150346  |
| SNORD76     | 337.929    | 71.0356    | -2.25011   | 0.813283   |
| ACTA1       | 0.986977   | 1.04548    | 0.0830741  | 0.971173   |
| BRD7P3      | 0.0141211  | 0.0188112  | 0.413743   | 1          |
| SLC7A11-AS1 | 0.0246307  | 0.00223941 | -3.45927   | 1          |
| ITGA2B      | 0.0275003  | 0.00509603 | -2.432     | 1          |
| MTUS2       | 0.0640257  | 0.0426     | -0.587797  | 1          |
| HIST1H2BG   | 4.62682    | 3.85217    | -0.264352  | 0.863898   |
| TERC        | 11.005     | 1.81842    | -2.59741   | 0.00478151 |
| ZNF860      | 0.0748297  | 0.0460047  | -0.701831  | 1          |
| ACTN3       | 0.0497345  | 0.0298655  | -0.735769  | 1          |
| BHMT2       | 0.0190536  | 0          | #NAME?     | 1          |
| FOXD4L6     | 0.0754465  | 0.191187   | 1.34146    | 1          |
| HIST1H2BM   | 0.30821    | 0.240163   | -0.359902  | 1          |
| ZNF732      | 0.0222399  | 0.00748298 | -1.57146   | 1          |
| CCDC164     | 0.0248088  | 0.00790469 | -1.65007   | 1          |
| EDAR        | 0.0112221  | 0.00707872 | -0.664786  | 1          |
| FAM83E      | 0.586921   | 0.384928   | -0.608578  | 0.627235   |
| HIST1H4K    | 0.913683   | 0.173094   | -2.40014   | 0.673323   |
| TCAP        | 0.315936   | 0.567942   | 0.846112   | 0.536934   |
| GLIPR1L2    | 0.123692   | 0.0471029  | -1.39287   | 1          |
| LOC729059   | 0.348379   | 0.0352984  | -3.30298   | 1          |
| FADS1       | 0.0108872  | 0.00690461 | -0.657002  | 1          |
| PDCL2       | 0.07359    | 0.103112   | 0.486634   | 1          |

|               |            |            |            |            |
|---------------|------------|------------|------------|------------|
| SPN           | 0.00752052 | 0          | #NAME?     | 1          |
| TYRP1         | 0.0607603  | 0.00636227 | -3.25552   | 1          |
| TCEAL2        | 0.0390009  | 0          | #NAME?     | 1          |
| IL8           | 0.219871   | 0.466781   | 1.08609    | 0.159688   |
| MX2           | 0.0246697  | 0.0118889  | -1.05313   | 1          |
| EFHB          | 0.0378226  | 0.0105998  | -1.83522   | 1          |
| PRR15L        | 0.0842051  | 0.0675633  | -0.317669  | 1          |
| MILR1         | 0.386073   | 0.0443259  | -3.12265   | 0.643713   |
| SNORA63       | 216.239    | 69.9579    | -1.62807   | 0.837065   |
| TMEM254-AS1   | 0.053275   | 0.0133604  | -1.99549   | 1          |
| SLC22A14      | 0.0299311  | 0.0284979  | -0.0707892 | 1          |
| KCNH1         | 0.0060793  | 0          | #NAME?     | 1          |
| LINC00273     | 0.144278   | 0.0207238  | -2.79949   | 1          |
| GTSF1L        | 0.073043   | 0          | #NAME?     | 1          |
| FBNP1         | 0.0137257  | 0.0117999  | -0.218111  | 1          |
| RPL19P12      | 0.123765   | 0.055155   | -1.16604   | 1          |
| SNORA62       | 12.0566    | 11.223     | -0.103363  | 0.991175   |
| FLJ42289      | 0.0937744  | 0.0266649  | -1.81425   | 1          |
| FLJ40292      | 0.041043   | 0.0364255  | -0.172185  | 1          |
| MIR3651,SNORA | 43.6888    | 14.6785    | -1.57356   | 0.844936   |
| RNU4ATAC      | 14.8311    | 1.98968    | -2.89801   | 0.809839   |
| AEBP1         | 0.0229988  | 0.0273813  | 0.251635   | 1          |
| DNAH12        | 0.0216808  | 0.00462198 | -2.22983   | 1          |
| XKRX          | 0.0376379  | 0          | #NAME?     | 1          |
| FLJ13224      | 0.288288   | 0.17803    | -0.695392  | 1          |
| HIST1H2BJ     | 2.77093    | 2.53744    | -0.126995  | 0.95845    |
| SNORA54       | 29.6726    | 3.16277    | -3.22987   | 0.760927   |
| LSP1          | 0.066304   | 0.0309865  | -1.09746   | 1          |
| HIST1H1D      | 2.1964     | 0.55549    | -1.98331   | 0.0264621  |
| TMEM61        | 0.0870707  | 0.042877   | -1.02198   | 1          |
| C15orf55      | 0.014144   | 0.00330585 | -2.0971    | 1          |
| CRB2          | 0.0825099  | 0.0244213  | -1.75642   | 1          |
| QRFP          | 2.46297    | 1.43152    | -0.782859  | 0.568684   |
| HIST1H3F      | 5.33682    | 1.14302    | -2.22313   | 0.0379922  |
| TEX38         | 0.0751776  | 0.0310088  | -1.27762   | 1          |
| YY1P2         | 0.0511176  | 0.0940837  | 0.880124   | 1          |
| SNORA24       | 88.8085    | 47.7848    | -0.894145  | 0.9379     |
| SLC6A9        | 7.04346    | 1.81357    | -1.95745   | 0.00153868 |
| ZSCAN10       | 0.122309   | 0          | #NAME?     | 1          |
| LOC100996455  | 0.093735   | 0.0249669  | -1.90857   | 1          |
| LCE1E         | 0.241468   | 0.0654749  | -1.88282   | 1          |
| GPR18         | 0.0409135  | 0          | #NAME?     | 1          |
| LINC00568     | 0.283251   | 0.299148   | 0.0787775  | 1          |
| DIRAS1        | 0.0844664  | 0.0548202  | -0.623671  | 1          |
| IDO1          | 0.0366088  | 0.0624134  | 0.769664   | 1          |
| SIGLEC1       | 0.0098955  | 0.0155219  | 0.64946    | 1          |
| FAM71F2       | 0.179307   | 0.044777   | -2.0016    | 1          |
| FAM124B       | 0.0322773  | 0.0235869  | -0.452535  | 1          |
| SIGLEC11      | 0.0314184  | 0          | #NAME?     | 1          |

|              |            |             |              |           |
|--------------|------------|-------------|--------------|-----------|
| SLC2A1-AS1   | 0.0581571  | 0.0469761   | -0.308029    | 1         |
| SCN8A        | 0.00446562 | 0.000880804 | -2.34197     | 1         |
| CAPNS2       | 0.0589876  | 0.12208     | 1.04935      | 1         |
| RASL10A      | 0.656336   | 0.255401    | -1.36167     | 0.379385  |
| TNFSF14      | 0.018402   | 0.0209663   | 0.188213     | 1         |
| SMAD5-AS1    | 0.115456   | 0.142921    | 0.307871     | 1         |
| HIST1H4B     | 2.89846    | 1.147       | -1.33742     | 0.262058  |
| SNORA64      | 29.2734    | 9.16426     | -1.6755      | 0.804919  |
| DHRS2        | 0.431493   | 0.0958886   | -2.16991     | 0.0653297 |
| PIP5K1B      | 0.130671   | 0.0538462   | -1.27902     | 1         |
| HIPK4        | 0.187036   | 0.131165    | -0.511935    | 1         |
| LOC727896    | 0.0321093  | 0.033207    | 0.0484955    | 1         |
| SNORD33      | 226.449    | 132.128     | -0.777254    | 0.939651  |
| FOXI3        | 0.444473   | 0.159132    | -1.48187     | 0.400559  |
| VTRNA1-3     | 256.955    | 145.885     | -0.816687    | 0.873038  |
| LOC100505716 | 0.0572442  | 0.00870283  | -2.71757     | 1         |
| SNORA48      | 97.8323    | 25.8296     | -1.92128     | 0.715489  |
| HIST1H2BN    | 1.84274    | 1.4146      | -0.38145     | 0.859197  |
| OAS2         | 0.0144186  | 0.0144159   | -0.000273609 | 1         |
| SPIB         | 0.108561   | 0.116812    | 0.105676     | 1         |
| SCUBE1       | 0.0208108  | 0           | #NAME?       | 1         |
| HIST1H2AK    | 0.711975   | 0.124426    | -2.51654     | 0.557242  |
| CUX2         | 0.0101729  | 0           | #NAME?       | 1         |
| TULP2        | 0.0388295  | 0.0164565   | -1.2385      | 1         |
| CC2D2B       | 0.0291152  | 0           | #NAME?       | 1         |
| DYDC2        | 0.0289755  | 0.00463656  | -2.64371     | 1         |
| LRRC25       | 0.0346968  | 0.0200537   | -0.790937    | 1         |
| BTC          | 0.0671993  | 0.0188886   | -1.83093     | 1         |
| SYNGR4       | 0.247476   | 0.0636684   | -1.95864     | 1         |
| SCARNA10     | 3.46825    | 1.52912     | -1.18151     | 0.900051  |
| SNORA49      | 17.1182    | 5.26539     | -1.70092     | 0.848653  |
| C3orf20      | 0.0214669  | 0.0044608   | -2.26674     | 1         |
| IL1RL1       | 0.0211145  | 0           | #NAME?       | 1         |
| HIST2H2BF    | 3.5796     | 1.08684     | -1.71966     | 0.0857306 |
| FKBP1AP1     | 0.0424598  | 0.0384452   | -0.143293    | 1         |
| ANK3         | 0.00571432 | 0.00220772  | -1.37202     | 1         |
| PTCSC3       | 0.0509436  | 0.0340285   | -0.582156    | 1         |
| SSC5D        | 0.0241938  | 0.00348861  | -2.79391     | 1         |
| CSTA         | 0.718475   | 0.140756    | -2.35175     | 0.101019  |
| SLC16A8      | 0.0849706  | 0.0175424   | -2.27612     | 1         |
| BEST1        | 0.418961   | 0.0296013   | -3.82308     | 0.28665   |
| TPTE2P1      | 0.0186564  | 0.0040547   | -2.20201     | 1         |
| OOEP         | 0.170134   | 0.300179    | 0.819152     | 1         |
| ALG1L9P      | 0.177614   | 0.0455241   | -1.96404     | 1         |
| SNORD15B     | 55.9414    | 19.0539     | -1.55383     | 0.725891  |
| C1orf101     | 0.0418274  | 0.0144363   | -1.53474     | 1         |
| SFTPB        | 0.0259028  | 0.0482664   | 0.897915     | 1         |
| PEX5L        | 0.00821029 | 0.00801254  | -0.0351732   | 1         |
| GGNBP1       | 0.105938   | 0.0422701   | -1.32552     | 1         |



|                |            |            |           |          |
|----------------|------------|------------|-----------|----------|
| GPBAR1         | 0.483322   | 0.709615   | 0.554052  | 0.684382 |
| RAB44          | 0.0357532  | 0.0135529  | -1.39947  | 1        |
| CNGA1          | 0.0435154  | 0.0110809  | -1.97345  | 1        |
| HIST1H2BF      | 2.15975    | 0.774373   | -1.47976  | 0.270224 |
| PTPN6          | 0.0361136  | 0.057691   | 0.675805  | 1        |
| SYCP3          | 0.0991282  | 0.19511    | 0.976922  | 1        |
| SNORA16A       | 29.1454    | 7.38488    | -1.98062  | 0.8626   |
| AMH            | 0.643972   | 0.672557   | 0.0626582 | 0.987159 |
| DEFB131        | 1.39833    | 0.208317   | -2.74685  | 0.61081  |
| ALOX12         | 0.0331677  | 0.0474251  | 0.51587   | 1        |
| LINC00304      | 0.107412   | 0.0453513  | -1.24394  | 1        |
| ARSI           | 0.136339   | 0.0236998  | -2.52425  | 1        |
| HYDIN2         | 0.00817941 | 0.00628099 | -0.381005 | 1        |
| TTC16          | 0.0290467  | 0.0202606  | -0.519699 | 1        |
| CALCB          | 0.218097   | 0          | #NAME?    | 1        |
| SNORA45        | 11.0548    | 3.68066    | -1.58664  | 0.825824 |
| SNORA31        | 41.1055    | 17.0648    | -1.26831  | 0.796502 |
| EFNB3          | 0.0277141  | 0.0239956  | -0.207853 | 1        |
| DSEL           | 0.00829673 | 0.00103679 | -3.00042  | 1        |
| C10orf131      | 0.0551748  | 0.0849818  | 0.623144  | 1        |
| SRD5A3-AS1     | 0.073392   | 0.0348642  | -1.07387  | 1        |
| KLHDC7B        | 0.318114   | 0          | #NAME?    | 1        |
| MIR1291,SNORA: | 8.90854    | 7.75354    | -0.200333 | 0.988433 |
| BTBD19         | 0.217144   | 0.0413925  | -2.39121  | 1        |
| WNT5B          | 0.0444484  | 0.00758603 | -2.55071  | 1        |
| CALHM1         | 0.026395   | 0.0224899  | -0.230988 | 1        |
| CLIP4          | 0.0410182  | 0          | #NAME?    | 1        |
| HEPACAM2       | 0.0307662  | 0.0260906  | -0.237817 | 1        |
| BIRC7          | 0.0961516  | 0.0339644  | -1.50129  | 1        |
| HOOK1          | 0.0106264  | 0.00296217 | -1.84293  | 1        |
| ALOX5AP        | 0.104669   | 0          | #NAME?    | 1        |
| SNORD10        | 38.4468    | 11.9567    | -1.68505  | 0.740353 |
| C9orf131       | 0.0466827  | 0.0342435  | -0.447057 | 1        |
| SNORA23        | 17.703     | 6.64748    | -1.41311  | 0.882208 |
| RASGRP3        | 0.112412   | 0.0234527  | -2.26098  | 1        |
| IHH            | 0.145704   | 0.418109   | 1.52084   | 0.174212 |
| KCNQ3          | 0.00816435 | 0.00492592 | -0.728946 | 1        |
| MYH16          | 0.03444    | 0.00877248 | -1.97303  | 1        |
| ASIC4          | 0.0408371  | 0.00520863 | -2.9709   | 1        |
| CHRM1          | 0.0393988  | 0.0127301  | -1.62991  | 1        |
| KISS1          | 0.315163   | 0.056245   | -2.4863   | 1        |
| LOC388553      | 0.112579   | 0          | #NAME?    | 1        |
| SNORA76        | 17.5427    | 46.0112    | 1.39111   | 0.454606 |
| LOC100132354   | 0.0554389  | 0          | #NAME?    | 1        |
| ROBO4          | 0.261978   | 0.0249195  | -3.3941   | 1        |
| ZNF549         | 0.0237859  | 0.0289427  | 0.283094  | 1        |
| SNORA38B       | 11.9044    | 2.50124    | -2.25078  | 0.814411 |
| C8orf12,TDH    | 0.0716979  | 0.0463924  | -0.62804  | 1        |
| MSN            | 0.0206173  | 0.0284689  | 0.465531  | 1        |

|              |           |            |           |          |
|--------------|-----------|------------|-----------|----------|
| HIST1H2BO    | 1.98639   | 1.10257    | -0.849276 | 0.539395 |
| LOC648691    | 0.0261754 | 0          | #NAME?    | 1        |
| CPED1        | 0.0170419 | 0.0149428  | -0.189639 | 1        |
| LOC100129617 | 0.0651559 | 0.0564121  | -0.207892 | 1        |
| SNORA71A     | 46.0211   | 6.19768    | -2.8925   | 0.773721 |
| HIST1H2AH    | 2.60924   | 1.30641    | -0.998022 | 0.381086 |
| KLKB1        | 0.0448769 | 0.0197005  | -1.18774  | 1        |
| CKMT1A       | 0.127153  | 0.0745212  | -0.770841 | 1        |
| EPN2-IT1     | 0.119156  | 0          | #NAME?    | 1        |
| FOXD4L3      | 0.0669525 | 0.127021   | 0.923863  | 1        |
| C8orf46      | 0.0243734 | 0.0484746  | 0.99192   | 1        |
| GRPR         | 0.0344421 | 0.0175065  | -0.976278 | 1        |
| HMG2P46      | 0.0442301 | 0.0314717  | -0.49097  | 1        |
| C4A,C4B_2    | 0.0203979 | 0.0126062  | -0.694286 | 1        |
| ZNF304       | 0.0240842 | 0.00857965 | -1.4891   | 1        |
| ALOX5        | 0.0681148 | 0.0225399  | -1.59548  | 1        |
| FRZB         | 0.0370793 | 0.0081908  | -2.17854  | 1        |
| MTUS1        | 0.0312356 | 0.0186849  | -0.741317 | 1        |
| FAM19A2      | 0.032107  | 0          | #NAME?    | 1        |
| LOC100505841 | 0.622325  | 0.404749   | -0.620642 | 0.7898   |
| PYCARD       | 0.594143  | 0.266887   | -1.15458  | 0.496669 |
| OLAH         | 0.201814  | 0.0647154  | -1.64084  | 1        |
| COL6A3       | 0.0168773 | 0.00144279 | -3.54816  | 1        |
| MBOAT4       | 0.101694  | 0.0385781  | -1.39838  | 1        |
| SNORA80B     | 30.5646   | 7.94966    | -1.9429   | 0.752072 |
| SNORA78      | 36.6498   | 3.0392     | -3.59204  | 0.746108 |
| MASP2        | 0.238164  | 0.0795627  | -1.58179  | 1        |
| SNORA71C     | 18.2337   | 7.58797    | -1.26482  | 0.875956 |
| STXBP5L      | 0.0103921 | 0.0129691  | 0.319603  | 1        |
| NCAM1        | 0.0197658 | 0.0124537  | -0.66643  | 1        |
| SNORA7B      | 13.8575   | 3.22124    | -2.10498  | 0.84674  |
| LOC100506136 | 0.0947868 | 0.0546062  | -0.795622 | 1        |
| CD96         | 0.0244285 | 0.0101636  | -1.26516  | 1        |
| ESRP1        | 0.0440175 | 0          | #NAME?    | 1        |
| RNU12        | 8.82569   | 1.9316     | -2.19192  | 0.475275 |
| HCG9         | 0.313335  | 0.0743878  | -2.07457  | 1        |
| FAM223B      | 0.249394  | 0.15792    | -0.659236 | 1        |
| MFAP2        | 2.41715   | 0.0857484  | -4.81705  | 0.374557 |
| TP53AIP1     | 0.222523  | 0.00755797 | -4.87981  | 1        |
| MIP          | 0.0564802 | 0.107264   | 0.92535   | 1        |
| TMEM25       | 0.0898604 | 0.021141   | -2.08765  | 1        |
| ATP8B5P      | 0.0491527 | 0.00981465 | -2.32426  | 1        |
| HIST3H2BB    | 0.699731  | 0.308602   | -1.18105  | 0.604499 |
| SNORD97      | 25.8651   | 10.7175    | -1.27104  | 0.891086 |
| SNORD94      | 19.1607   | 2.32591    | -3.04229  | 0.72151  |
| SNORA6       | 13.5362   | 0.594724   | -4.50845  | 0.664697 |
| ANKRD30BL    | 0.174773  | 0.0255699  | -2.77296  | 1        |
| VTRNA1-1     | 64.7828   | 0          | #NAME?    | 0.158977 |
| SNAR-G1      | 7.25033   | 0          | #NAME?    | 0.158978 |

|              |            |            |            |          |
|--------------|------------|------------|------------|----------|
| SNORD46      | 45.0279    | 26.5025    | -0.764689  | 0.93305  |
| SNORD83A     | 73.5686    | 0          | #NAME?     | 0.20933  |
| SNORD35A     | 216.72     | 0          | #NAME?     | 0.2504   |
| SNORA41      | 6.90113    | 3.34084    | -1.04662   | 0.902428 |
| SNORD32A     | 263.188    | 0          | #NAME?     | 0.337387 |
| SNORD36A     | 166.462    | 0          | #NAME?     | 0.393596 |
| SNORD4A      | 316.469    | 0          | #NAME?     | 0.368294 |
| SNORD100     | 195.994    | 0          | #NAME?     | 0.394465 |
| MIR4634      | 4568.78    | 0          | #NAME?     | 0.368826 |
| SNORD93      | 237.212    | 0          | #NAME?     | 0.368826 |
| SNORD16      | 46.8943    | 0          | #NAME?     | 0.387544 |
| SNORD23      | 13.6296    | 9.84848    | -0.468767  | 0.961132 |
| SNORD80      | 1184.91    | 0          | #NAME?     | 0.400815 |
| SNORD45A     | 246.46     | 0          | #NAME?     | 0.4662   |
| SNORA9       | 9.39267    | 9.4922     | 0.0152067  | 0.992194 |
| SNORD105B    | 47.6524    | 0          | #NAME?     | 0.513296 |
| SNORA44      | 7.09215    | 2.9923     | -1.24497   | 0.890564 |
| SNORD28      | 255.029    | 0          | #NAME?     | 0.514213 |
| SNORA71B     | 3.82051    | 4.09446    | 0.0999058  | 0.985768 |
| SNORD27      | 589.746    | 0          | #NAME?     | 0.490598 |
| SNORA37      | 18.927     | 6.48475    | -1.54532   | 0.884911 |
| SCARNA3      | 2.62792    | 0          | #NAME?     | 0.477591 |
| SNORA5A      | 4.21818    | 2.57936    | -0.709608  | 0.940466 |
| SCARNA23     | 5.71138    | 0          | #NAME?     | 0.513296 |
| LOC91450     | 0.0408273  | 0.41311    | 3.33892    | 0.626308 |
| SNORA32      | 5.41223    | 21.3161    | 1.97765    | 0.708687 |
| MIR4737      | 84.566     | 207.596    | 1.29563    | 0.863898 |
| PYDC1        | 0.226971   | 0.644424   | 1.50551    | 0.897319 |
| ESPN         | 0.0346764  | 0.0383733  | 0.146148   | 1        |
| CA6          | 0.0123305  | 0.00934605 | -0.399807  | 1        |
| CTRC         | 0.0293885  | 0.0577049  | 0.97344    | 1        |
| C1orf64      | 0.0198972  | 0          | #NAME?     | 1        |
| THEMIS2      | 0.024563   | 0.0631338  | 1.36193    | 1        |
| RAB42        | 0.0367801  | 0.0140189  | -1.39155   | 1        |
| TINAGL1      | 0.0214413  | 0.00800473 | -1.42147   | 1        |
| LCK          | 0.0105531  | 0.00549378 | -0.941795  | 1        |
| ZBTB8B       | 0.00298985 | 0          | #NAME?     | 1        |
| LOC100129924 | 0.0473277  | 0.0452055  | -0.0661891 | 1        |
| FAM183A      | 0.0300573  | 0.0739319  | 1.29848    | 1        |
| FOXE3        | 0.0387979  | 0.0860513  | 1.14922    | 1        |
| MGC34796     | 0.00694343 | 0          | #NAME?     | 1        |
| IFI44L       | 0.00241978 | 0          | #NAME?     | 1        |
| IFI44        | 0.0148843  | 0          | #NAME?     | 1        |
| PRKACB       | 0.00608478 | 0          | #NAME?     | 1        |
| CLCA3P       | 0.0057119  | 0          | #NAME?     | 1        |
| GBP6         | 0.00207468 | 0          | #NAME?     | 1        |
| BRDT         | 0.0066294  | 0.00253366 | -1.38765   | 1        |
| CHIAP2       | 0.0075232  | 0          | #NAME?     | 1        |
| HAO2         | 0.0100332  | 0          | #NAME?     | 1        |

|              |            |            |            |   |
|--------------|------------|------------|------------|---|
| CA14         | 0.00736879 | 0.0180359  | 1.29137    | 1 |
| RHBG         | 0.0686654  | 0          | #NAME?     | 1 |
| CD1D         | 0.00316362 | 0          | #NAME?     | 1 |
| ATP1A2       | 0.00334225 | 0.00175782 | -0.927028  | 1 |
| LY9          | 0.00573682 | 0          | #NAME?     | 1 |
| PCP4L1       | 0.0135667  | 0          | #NAME?     | 1 |
| FCRLA        | 0.0210896  | 0.0395408  | 0.906806   | 1 |
| MAEL         | 0.0423953  | 0.0109507  | -1.95289   | 1 |
| CFHR5        | 0.00325721 | 0          | #NAME?     | 1 |
| OPTC         | 0.0129057  | 0          | #NAME?     | 1 |
| CNTN2        | 0.00370263 | 0.00507055 | 0.45359    | 1 |
| AVPR1B       | 0.0157339  | 0          | #NAME?     | 1 |
| IL24         | 0.00867236 | 0          | #NAME?     | 1 |
| C4BPB        | 0.0146889  | 0          | #NAME?     | 1 |
| LOC148696    | 0.00306003 | 0.0237662  | 2.9573     | 1 |
| CAMK1G       | 0.0057     | 0.00934739 | 0.713602   | 1 |
| FAM177B      | 0.0115729  | 0          | #NAME?     | 1 |
| LOC100506810 | 0.00768584 | 0.00538352 | -0.513653  | 1 |
| SDCCAG8      | 0.00400989 | 0          | #NAME?     | 1 |
| C1orf127     | 0.0060232  | 0          | #NAME?     | 1 |
| NPPB         | 0.047988   | 0          | #NAME?     | 1 |
| CNR2         | 0.00856937 | 0.0080412  | -0.091777  | 1 |
| MYOM3        | 0.00247551 | 0          | #NAME?     | 1 |
| AIM1L        | 0.00432945 | 0          | #NAME?     | 1 |
| SNORD99      | 75.8489    | 87.0707    | 0.199058   | 1 |
| POU3F1       | 0.0410058  | 0.050351   | 0.296191   | 1 |
| EDN2         | 0.0234275  | 0          | #NAME?     | 1 |
| GUCA2A       | 0.0361498  | 0          | #NAME?     | 1 |
| C1orf210     | 0.0169766  | 0.00898239 | -0.918375  | 1 |
| CYP4Z2P      | 0.00824694 | 0          | #NAME?     | 1 |
| LINC00466    | 0.0134364  | 0          | #NAME?     | 1 |
| GBP1         | 0.0164501  | 0.0381271  | 1.21272    | 1 |
| C1orf194     | 0.0188768  | 0.0176558  | -0.0964725 | 1 |
| CASQ2        | 0.00402217 | 0          | #NAME?     | 1 |
| HIST2H2AA3   | 0.0894848  | 0          | #NAME?     | 1 |
| S100A5       | 0.0603153  | 0.0299942  | -1.00784   | 1 |
| KCNN3        | 0.00169125 | 0.00217541 | 0.363199   | 1 |
| VHLL         | 0.0163423  | 0.0446393  | 1.4497     | 1 |
| CD48         | 0.0104468  | 0          | #NAME?     | 1 |
| SH2D1B       | 0.00431908 | 0.00334633 | -0.368143  | 1 |
| SEC16B       | 0.00785134 | 0          | #NAME?     | 1 |
| NPHS2        | 0.00814995 | 0          | #NAME?     | 1 |
| TEDDM1       | 0.0130043  | 0          | #NAME?     | 1 |
| NCF2         | 0.00594625 | 0.00973861 | 0.711737   | 1 |
| B3GALT2      | 0.00268012 | 0.00235025 | -0.189482  | 1 |
| TNNI1        | 0.00210942 | 0          | #NAME?     | 1 |
| LOC401980    | 0.00982197 | 0.0326364  | 1.7324     | 1 |
| REN          | 0.0249927  | 0.0246207  | -0.021636  | 1 |
| GOLT1A       | 0.0758153  | 0.0195189  | -1.95762   | 1 |

|                |            |            |           |   |
|----------------|------------|------------|-----------|---|
| PIGR           | 0.016117   | 0.00897711 | -0.844261 | 1 |
| C1orf116       | 0.00228666 | 0.00408794 | 0.838135  | 1 |
| LEFTY2         | 0.00857513 | 0          | #NAME?    | 1 |
| SNRPD2P2       | 0.0253793  | 0.016942   | -0.583044 | 1 |
| CELF2          | 0.00227606 | 0.00116757 | -0.963028 | 1 |
| CTSL1P2        | 0.0342414  | 0.00905492 | -1.91897  | 1 |
| WDFY4          | 0.00141464 | 0.00313935 | 1.15003   | 1 |
| FAM25A         | 0.0626594  | 0          | #NAME?    | 1 |
| ANKRD2         | 0.0192262  | 0.0126355  | -0.605594 | 1 |
| TLX1           | 0.00986966 | 0          | #NAME?    | 1 |
| ADRA2A         | 0.012142   | 0.00549085 | -1.1449   | 1 |
| HMX2           | 0.0164035  | 0          | #NAME?    | 1 |
| TUBB8          | 0.0151633  | 0.00971968 | -0.641601 | 1 |
| CCDC3          | 0.00585397 | 0          | #NAME?    | 1 |
| NEBL           | 0.00440104 | 0          | #NAME?    | 1 |
| ZNF33BP1       | 0.0207703  | 0          | #NAME?    | 1 |
| TMEM72-AS1     | 0.0212374  | 0          | #NAME?    | 1 |
| HNRNPA1P33     | 0.0655368  | 0.0251227  | -1.38331  | 1 |
| GDF2           | 0.0108981  | 0          | #NAME?    | 1 |
| VSTM4          | 0.0141847  | 0.00324816 | -2.12664  | 1 |
| TACR2          | 0.0372633  | 0.00598175 | -2.63912  | 1 |
| PRF1           | 0.0477399  | 0.0322684  | -0.565072 | 1 |
| C10orf105      | 0.00463691 | 0.00243781 | -0.927576 | 1 |
| DUSP13         | 0.0533402  | 0.0100836  | -2.40321  | 1 |
| KCNMA1         | 0.00601305 | 0.00334979 | -0.844024 | 1 |
| FAS-AS1        | 0.0334203  | 0.0256186  | -0.383531 | 1 |
| EMX2OS         | 0.00162328 | 0.0012248  | -0.406368 | 1 |
| ADAM12         | 0.00196137 | 0          | #NAME?    | 1 |
| OR2AG1         | 0.0148511  | 0          | #NAME?    | 1 |
| OR2D3          | 0.0150238  | 0          | #NAME?    | 1 |
| SAA1           | 0.0563441  | 0.102371   | 0.861469  | 1 |
| BBOX1          | 0.00568389 | 0          | #NAME?    | 1 |
| ACCSL          | 0.0100781  | 0          | #NAME?    | 1 |
| F2             | 0.0166326  | 0.0123211  | -0.432885 | 1 |
| OR10V2P        | 0.058949   | 0          | #NAME?    | 1 |
| MS4A14         | 0.00445733 | 0          | #NAME?    | 1 |
| ZP1            | 0.0119538  | 0          | #NAME?    | 1 |
| CD6            | 0.00865215 | 0          | #NAME?    | 1 |
| KCNK4          | 0.0167595  | 0.0249138  | 0.571964  | 1 |
| SNX32          | 0.0106629  | 0.0291678  | 1.45178   | 1 |
| TMEM151A       | 0.0308099  | 0          | #NAME?    | 1 |
| KRTAP5-7       | 0.0299199  | 0          | #NAME?    | 1 |
| P2RY6          | 0.0574837  | 0          | #NAME?    | 1 |
| OMP            | 0.0535851  | 0.0993725  | 0.891013  | 1 |
| C11orf70       | 0.00561034 | 0          | #NAME?    | 1 |
| ELMOD1         | 0.00411799 | 0.00779798 | 0.921161  | 1 |
| C11orf88       | 0.0206134  | 0          | #NAME?    | 1 |
| C11orf52,HSPB2 | 0.0240542  | 0.0402716  | 0.743473  | 1 |
| NNMT           | 0.00943794 | 0          | #NAME?    | 1 |

|              |            |            |           |   |
|--------------|------------|------------|-----------|---|
| TTC36        | 0.0896546  | 0.0413255  | -1.11734  | 1 |
| UPK2         | 0.0310428  | 0          | #NAME?    | 1 |
| PATE4        | 0.00517466 | 0          | #NAME?    | 1 |
| DDX25        | 0.026172   | 0.00616319 | -2.08627  | 1 |
| GLB1L3       | 0.012107   | 0          | #NAME?    | 1 |
| MIR210       | 7.12532    | 7.68068    | 0.108279  | 1 |
| KRTAP5-2     | 0.0177485  | 0.0259677  | 0.549023  | 1 |
| USH1C        | 0.0284979  | 0.0221078  | -0.366303 | 1 |
| MPPED2       | 0.0130004  | 0.00194086 | -2.74379  | 1 |
| SYT13        | 0.0128937  | 0.0036326  | -1.82759  | 1 |
| CHST1        | 0.011651   | 0          | #NAME?    | 1 |
| SNORD67      | 6.81531    | 0          | #NAME?    | 1 |
| ALDH3B2      | 0.00967915 | 0          | #NAME?    | 1 |
| CCDC89       | 0.0149383  | 0          | #NAME?    | 1 |
| VSTM5        | 0.0437359  | 0.0281213  | -0.637157 | 1 |
| LOC643733    | 0.182955   | 0.0875231  | -1.06375  | 1 |
| CASP5        | 0.0972967  | 0.0400632  | -1.28012  | 1 |
| C11orf34     | 0.00815253 | 0.0232597  | 1.51251   | 1 |
| APOA4        | 0.0254954  | 0          | #NAME?    | 1 |
| FXD2,FXD6,FX | 0.00881018 | 0          | #NAME?    | 1 |
| CLMP         | 0.00941839 | 0.0044479  | -1.08236  | 1 |
| KIRREL3      | 0.0097848  | 0.0176246  | 0.848974  | 1 |
| ADAMTS8      | 0.0146456  | 0          | #NAME?    | 1 |
| IQSEC3       | 0.00283035 | 0          | #NAME?    | 1 |
| LOC100292680 | 0.0486701  | 0          | #NAME?    | 1 |
| A2ML1        | 0.00311529 | 0          | #NAME?    | 1 |
| KLRD1        | 0.0108538  | 0.0161814  | 0.576138  | 1 |
| H2AFJ        | 0.0133869  | 0          | #NAME?    | 1 |
| C12orf39     | 0.191914   | 0          | #NAME?    | 1 |
| C12orf54     | 0.0139707  | 0          | #NAME?    | 1 |
| ACVRL1       | 0.00376168 | 0.00340995 | -0.141629 | 1 |
| FAM71C       | 0.00646951 | 0          | #NAME?    | 1 |
| ANO4         | 0.00417165 | 0          | #NAME?    | 1 |
| ASCL1        | 0.00791247 | 0          | #NAME?    | 1 |
| RPH3A        | 0.00871831 | 0.00555576 | -0.650066 | 1 |
| HSPB8        | 0.0103369  | 0          | #NAME?    | 1 |
| P2RX7        | 0.0049558  | 0.0029521  | -0.747379 | 1 |
| LOC100507206 | 0.0142482  | 0.00840326 | -0.761761 | 1 |
| MMP17        | 0.0154342  | 0          | #NAME?    | 1 |
| CLECL1       | 0.00719013 | 0.0206179  | 1.51981   | 1 |
| CLEC7A       | 0.00766012 | 0.0042983  | -0.833599 | 1 |
| TAS2R30      | 0.0132035  | 0.0256383  | 0.957377  | 1 |
| BCAT1        | 0.00262562 | 0          | #NAME?    | 1 |
| NELL2        | 0.0280971  | 0.0075821  | -1.88975  | 1 |
| SNORA2A      | 2.11758    | 0          | #NAME?    | 1 |
| WNT10B       | 0.00789248 | 0          | #NAME?    | 1 |
| C1QL4        | 0.0135353  | 0          | #NAME?    | 1 |
| FAIM2        | 0.00348963 | 0          | #NAME?    | 1 |
| BIN2         | 0.0149896  | 0          | #NAME?    | 1 |

|               |             |            |            |   |
|---------------|-------------|------------|------------|---|
| KRT83         | 0.0142174   | 0.00913162 | -0.638712  | 1 |
| KRT75         | 0.00734829  | 0          | #NAME?     | 1 |
| KRT78         | 0.00906256  | 0          | #NAME?     | 1 |
| GPR84         | 0.0105213   | 0          | #NAME?     | 1 |
| DPY19L2       | 0.00403551  | 0.00202987 | -0.991361  | 1 |
| WIF1          | 0.00589247  | 0          | #NAME?     | 1 |
| TSPAN8        | 0.0235722   | 0          | #NAME?     | 1 |
| TSPAN19       | 0.011394    | 0          | #NAME?     | 1 |
| LUM           | 0.00504737  | 0          | #NAME?     | 1 |
| USP30-AS1     | 0.154438    | 0.0883653  | -0.805476  | 1 |
| MYL2          | 0.0779445   | 0          | #NAME?     | 1 |
| SDS           | 0.0220092   | 0.0200152  | -0.137012  | 1 |
| HNF1A-AS1     | 0.00770205  | 0.0140715  | 0.86946    | 1 |
| HCAR2         | 0.0144142   | 0          | #NAME?     | 1 |
| HCAR1         | 0.00475876  | 0.0117965  | 1.3097     | 1 |
| FLJ31485      | 0.00651954  | 0          | #NAME?     | 1 |
| GALNT9        | 0.0266669   | 0          | #NAME?     | 1 |
| WASF3         | 0.00530706  | 0          | #NAME?     | 1 |
| DNAJC15       | 0.00624925  | 0          | #NAME?     | 1 |
| NALCN-AS1     | 0.00612729  | 0          | #NAME?     | 1 |
| F7            | 0.0296622   | 0.00367676 | -3.01212   | 1 |
| GRK1          | 0.00824843  | 0.00611793 | -0.431075  | 1 |
| TPTE2         | 0.00857971  | 0.00845226 | -0.0215914 | 1 |
| ANKRD20A19P   | 0.0167767   | 0          | #NAME?     | 1 |
| STOML3        | 0.00627892  | 0          | #NAME?     | 1 |
| EPSTI1        | 0.0136422   | 0          | #NAME?     | 1 |
| CPB2          | 0.0164782   | 0.00508305 | -1.69679   | 1 |
| LINC00462     | 0.0128255   | 0          | #NAME?     | 1 |
| RNASEH2B-AS1  | 0.0589771   | 0          | #NAME?     | 1 |
| CTAGE11P      | 0.00780677  | 0.00369989 | -1.07724   | 1 |
| MIR4500HG     | 0.0063441   | 0          | #NAME?     | 1 |
| RNF113B       | 0.0188892   | 0          | #NAME?     | 1 |
| CCDC168       | 0.000391036 | 0.00175562 | 2.16661    | 1 |
| RNASE8        | 0.056301    | 0          | #NAME?     | 1 |
| COCH          | 0.00413363  | 0          | #NAME?     | 1 |
| DACT1         | 0.00841228  | 0.00327022 | -1.36311   | 1 |
| RDH12         | 0.00833849  | 0.00759217 | -0.135273  | 1 |
| TSHR          | 0.0323344   | 0.0134944  | -1.26071   | 1 |
| CHGA          | 0.00954971  | 0          | #NAME?     | 1 |
| SERPINA3      | 0.00830208  | 0.00740883 | -0.164228  | 1 |
| C14orf132     | 0.00171561  | 0.00130021 | -0.399983  | 1 |
| DIO3          | 0.010515    | 0          | #NAME?     | 1 |
| SNORA28       | 3.00352     | 1.84076    | -0.706349  | 1 |
| LINC00637     | 0.0102523   | 0.0067909  | -0.594273  | 1 |
| ASPG          | 0.0118979   | 0          | #NAME?     | 1 |
| RNASE11,RNASE | 0.00598168  | 0          | #NAME?     | 1 |
| MYH7          | 0.00342856  | 0          | #NAME?     | 1 |
| ADCY4         | 0.00532081  | 0          | #NAME?     | 1 |
| LOC100506071  | 0.00530861  | 0.00408609 | -0.377613  | 1 |

|                |            |            |           |   |
|----------------|------------|------------|-----------|---|
| TRIM9          | 0.00403447 | 0          | #NAME?    | 1 |
| FRMD6-AS2      | 0.025487   | 0          | #NAME?    | 1 |
| SLC10A1        | 0.0399066  | 0.0147028  | -1.44053  | 1 |
| TTC7B          | 0.00616006 | 0          | #NAME?    | 1 |
| SERPINA6       | 0.0088253  | 0          | #NAME?    | 1 |
| OR4N3P         | 0.0168781  | 0          | #NAME?    | 1 |
| NPAP1          | 0.00213095 | 0.00222432 | 0.0618649 | 1 |
| DKFZP434L187   | 0.00250614 | 0          | #NAME?    | 1 |
| HERC2P10       | 0.0334616  | 0.0256054  | -0.38606  | 1 |
| ADAL           | 0.00419657 | 0          | #NAME?    | 1 |
| DCAF13P3       | 0.0312802  | 0.0191384  | -0.708782 | 1 |
| LDHAL6B        | 0.0162561  | 0          | #NAME?    | 1 |
| C2CD4A         | 0.0116383  | 0          | #NAME?    | 1 |
| NR2E3          | 0.0446589  | 0.0487736  | 0.127154  | 1 |
| ODF3L1         | 0.0316678  | 0.0145608  | -1.12093  | 1 |
| PSTPIP1        | 0.0153908  | 0.0099821  | -0.624651 | 1 |
| UBE2Q2P2,UBE2  | 0.0154501  | 0.00970526 | -0.670776 | 1 |
| LOC100506874   | 0.00437093 | 0          | #NAME?    | 1 |
| SV2B           | 0.00104056 | 0          | #NAME?    | 1 |
| ASB9P1         | 0.00755689 | 0          | #NAME?    | 1 |
| GOLGA8DP       | 0.00196978 | 0.00152061 | -0.373382 | 1 |
| ACTC1          | 0.00465687 | 0.00239788 | -0.957599 | 1 |
| PLA2G4D        | 0.00644061 | 0          | #NAME?    | 1 |
| DUOXA1         | 0.044445   | 0.00539003 | -3.04366  | 1 |
| RASL12         | 0.00617611 | 0          | #NAME?    | 1 |
| IGDCC3         | 0.00527521 | 0          | #NAME?    | 1 |
| ITGA11         | 0.00819575 | 0.00269153 | -1.60645  | 1 |
| ADAMTS7        | 0.00571074 | 0          | #NAME?    | 1 |
| RASGRF1        | 0.00543845 | 0.00205202 | -1.40615  | 1 |
| LOC440297      | 0.00233538 | 0          | #NAME?    | 1 |
| AP3B2          | 0.0112403  | 0          | #NAME?    | 1 |
| NTRK3          | 0.00796325 | 0.00536001 | -0.571122 | 1 |
| LOC100144604   | 0.00657588 | 0.0058245  | -0.175049 | 1 |
| LOC91948       | 0.0176917  | 0.0236442  | 0.418414  | 1 |
| C16orf11       | 0.0268669  | 0          | #NAME?    | 1 |
| NHLRC4         | 0.0359699  | 0          | #NAME?    | 1 |
| CACNA1H        | 0.0105     | 0          | #NAME?    | 1 |
| TMEM204        | 0.0149855  | 0.0139231  | -0.106083 | 1 |
| IL21R          | 0.00315217 | 0.00469332 | 0.574265  | 1 |
| SLX1A,SLX1B,SU | 0.0150509  | 0          | #NAME?    | 1 |
| ITGAL          | 0.00282314 | 0          | #NAME?    | 1 |
| MIR762         | 78.3877    | 0          | #NAME?    | 1 |
| GNAO1          | 0.0237669  | 0.0139593  | -0.767732 | 1 |
| SLC12A3        | 0.00361428 | 0          | #NAME?    | 1 |
| C1QTNF8        | 0.00684443 | 0          | #NAME?    | 1 |
| PRSS30P        | 0.00801674 | 0          | #NAME?    | 1 |
| SEPT12         | 0.0120732  | 0.0109351  | -0.142844 | 1 |
| ACSM2B         | 0.00456199 | 0          | #NAME?    | 1 |
| PKD1L3         | 0.00222393 | 0.0056348  | 1.34125   | 1 |



|              |            |            |            |   |
|--------------|------------|------------|------------|---|
| LOC100506388 | 0.0242096  | 0          | #NAME?     | 1 |
| ALOX15P1     | 0.0264293  | 0          | #NAME?     | 1 |
| CRYBA1       | 0.0177046  | 0.0311874  | 0.816841   | 1 |
| UNC45B       | 0.0071556  | 0          | #NAME?     | 1 |
| MYL4         | 0.0284454  | 0.281267   | 3.30567    | 1 |
| NXPH3        | 0.0027845  | 0.00519748 | 0.900391   | 1 |
| LPO          | 0.0078151  | 0          | #NAME?     | 1 |
| TBX4         | 0.00848772 | 0          | #NAME?     | 1 |
| MRC2         | 0.00472766 | 0.00944187 | 0.997946   | 1 |
| CD300A       | 0.00733779 | 0          | #NAME?     | 1 |
| ITGB4        | 0.00675539 | 0.0124283  | 0.879517   | 1 |
| SPATA22      | 0.0265045  | 0          | #NAME?     | 1 |
| ATP2A3       | 0.00702139 | 0          | #NAME?     | 1 |
| GGT6         | 0.00638324 | 0          | #NAME?     | 1 |
| ALOX15       | 0.00851793 | 0.00534078 | -0.673454  | 1 |
| SLC13A5      | 0.00680453 | 0          | #NAME?     | 1 |
| GAS7         | 0.00167716 | 0.00126851 | -0.402889  | 1 |
| MAGOH2       | 0.0329125  | 0.0167008  | -0.978715  | 1 |
| KRT16P2      | 0.0101989  | 0.00951124 | -0.100702  | 1 |
| SMCR5        | 0.0138805  | 0.0214184  | 0.625796   | 1 |
| OMG          | 0.0128136  | 0.0226139  | 0.819532   | 1 |
| EVI2A        | 0.0170028  | 0          | #NAME?     | 1 |
| SLC35G3      | 0.0115337  | 0          | #NAME?     | 1 |
| TBC1D3C      | 0.0112889  | 0.00702969 | -0.683377  | 1 |
| CCR7         | 0.0106122  | 0          | #NAME?     | 1 |
| KRTAP3-3     | 0.136073   | 0.0206657  | -2.71906   | 1 |
| KRTAP2-1     | 0.0408858  | 0          | #NAME?     | 1 |
| KRTAP2-2     | 0.134199   | 0          | #NAME?     | 1 |
| KRTAP4-11    | 0.0502     | 0          | #NAME?     | 1 |
| KRTAP4-12    | 0.0535441  | 0          | #NAME?     | 1 |
| SOST         | 0.00715652 | 0          | #NAME?     | 1 |
| PYY          | 0.0196499  | 0.0719375  | 1.87222    | 1 |
| MIR10A       | 5.1502     | 0          | #NAME?     | 1 |
| DLX3         | 0.0064246  | 0          | #NAME?     | 1 |
| LINC00483    | 0.0146126  | 0.0247602  | 0.760807   | 1 |
| MTVR2        | 0.0237043  | 0          | #NAME?     | 1 |
| MPO          | 0.00525941 | 0          | #NAME?     | 1 |
| HSF5         | 0.00285261 | 0.00796712 | 1.48177    | 1 |
| MIR5047      | 12.7523    | 0          | #NAME?     | 1 |
| AQP4-AS1     | 0.00502478 | 0          | #NAME?     | 1 |
| SLC14A2      | 0.00389269 | 0.00729747 | 0.906628   | 1 |
| SLC14A1      | 0.00406857 | 0          | #NAME?     | 1 |
| SERPIN2      | 0.0118286  | 0.0217025  | 0.87558    | 1 |
| C18orf63     | 0.00189295 | 0          | #NAME?     | 1 |
| LINC00470    | 0.00920669 | 0.0169586  | 0.881266   | 1 |
| DLGAP1       | 0.00235468 | 0.00223482 | -0.0753711 | 1 |
| C18orf42     | 0.00474703 | 0.00454431 | -0.0629632 | 1 |
| ZBTB7C       | 0.00417878 | 0          | #NAME?     | 1 |
| CD226        | 0.013875   | 0.00378574 | -1.87384   | 1 |

|              |             |             |            |   |
|--------------|-------------|-------------|------------|---|
| LOC400655    | 0.00648588  | 0           | #NAME?     | 1 |
| AZU1         | 0.045374    | 0           | #NAME?     | 1 |
| GIPC3        | 0.0070422   | 0.00326353  | -1.10959   | 1 |
| CERS4        | 0.0104588   | 0           | #NAME?     | 1 |
| RDH8         | 0.0131136   | 0.00872718  | -0.587473  | 1 |
| SYDE1        | 0.0192384   | 0.0125887   | -0.611855  | 1 |
| SLC5A5       | 0.00516609  | 0.00868771  | 0.749903   | 1 |
| MIR3188      | 63.7142     | 0           | #NAME?     | 1 |
| HAMP         | 0.191678    | 0           | #NAME?     | 1 |
| CD22         | 0.0252371   | 0.00487215  | -2.37292   | 1 |
| UPK1A        | 0.140355    | 0.159554    | 0.184967   | 1 |
| OVOL3        | 0.0999575   | 0.216032    | 1.11186    | 1 |
| CEACAM6      | 0.0042614   | 0           | #NAME?     | 1 |
| TEX101       | 0.0121318   | 0.0126824   | 0.064032   | 1 |
| HIF3A        | 0.00850691  | 0.00272393  | -1.64295   | 1 |
| LOC100507003 | 0.0337671   | 0.0255417   | -0.402763  | 1 |
| SNORD35B     | 30.7989     | 0           | #NAME?     | 1 |
| KLK2         | 0.00393284  | 0           | #NAME?     | 1 |
| CACNG6       | 0.0509844   | 0.0260041   | -0.971316  | 1 |
| NLRP8        | 0.00450307  | 0           | #NAME?     | 1 |
| C19orf77     | 0.0352012   | 0.0162957   | -1.11113   | 1 |
| FUT6         | 0.0142692   | 0.00976234  | -0.547607  | 1 |
| EMR4P        | 0.0130766   | 0.0158933   | 0.28143    | 1 |
| CD209        | 0.00396967  | 0.00680252  | 0.77705    | 1 |
| LOC388499    | 0.0272172   | 0.00836993  | -1.70123   | 1 |
| ZNF560       | 0.0036382   | 0.00688051  | 0.919293   | 1 |
| S1PR5        | 0.0125159   | 0           | #NAME?     | 1 |
| LYL1         | 0.0166273   | 0.039436    | 1.24596    | 1 |
| NXNL1        | 0.103419    | 0           | #NAME?     | 1 |
| INSL3        | 0.0702916   | 0.0271898   | -1.37029   | 1 |
| ZNF43        | 0.00644177  | 0.00665754  | 0.0475317  | 1 |
| ZNF208       | 0.000968668 | 0.000841061 | -0.203791  | 1 |
| SCGB2B2      | 0.0520671   | 0           | #NAME?     | 1 |
| UPK1A-AS1    | 0.030246    | 0           | #NAME?     | 1 |
| FBXO17       | 0.0578072   | 0.0126036   | -2.19742   | 1 |
| LOC100505495 | 0.00453875  | 0           | #NAME?     | 1 |
| LYPD4        | 0.00926743  | 0.00883968  | -0.0681754 | 1 |
| PSG8         | 0.0171331   | 0           | #NAME?     | 1 |
| PSG1         | 0.00544695  | 0           | #NAME?     | 1 |
| PSG11        | 0.0097173   | 0           | #NAME?     | 1 |
| PSG5         | 0.0183724   | 0           | #NAME?     | 1 |
| CKM          | 0.00988918  | 0.0269279   | 1.44518    | 1 |
| RSPH6A       | 0.00758424  | 0           | #NAME?     | 1 |
| CGB1         | 0.0508382   | 0           | #NAME?     | 1 |
| KCNA7        | 0.00824896  | 0.00885514  | 0.102302   | 1 |
| SNORD88A     | 13.4121     | 0           | #NAME?     | 1 |
| KLK10        | 0.00459147  | 0.00754795  | 0.717131   | 1 |
| KLK11        | 0.0419887   | 0           | #NAME?     | 1 |
| SIGLEC10     | 0.0227961   | 0.00752447  | -1.59912   | 1 |

|              |            |            |            |   |
|--------------|------------|------------|------------|---|
| SIGLEC12     | 0.00877262 | 0          | #NAME?     | 1 |
| DUXA         | 0.0156731  | 0.0182353  | 0.218446   | 1 |
| SNTG2        | 0.00833996 | 0.00630942 | -0.402533  | 1 |
| SOX11        | 0.00159614 | 0.00280461 | 0.813216   | 1 |
| ABHD1        | 0.0339124  | 0.0323623  | -0.0674987 | 1 |
| CYP1B1-AS1   | 0.00968201 | 0.0128017  | 0.402954   | 1 |
| SLC8A1-AS1   | 0.0198625  | 0          | #NAME?     | 1 |
| EPCAM        | 0.0108169  | 0          | #NAME?     | 1 |
| RPL23AP32    | 0.0341653  | 0.0358837  | 0.0707969  | 1 |
| MEIS1        | 0.0054416  | 0.00653413 | 0.263963   | 1 |
| ANKRD53      | 0.0368655  | 0.0190595  | -0.951761  | 1 |
| DCTN1-AS1    | 0.00590158 | 0          | #NAME?     | 1 |
| CTNNA2       | 0.00928229 | 0.00243155 | -1.9326    | 1 |
| GNLY         | 0.0334188  | 0.0217457  | -0.61993   | 1 |
| TEX37        | 0.0301256  | 0          | #NAME?     | 1 |
| ANKRD36BP2   | 0.0147954  | 0          | #NAME?     | 1 |
| IL1R1        | 0.00535891 | 0.00355547 | -0.591899  | 1 |
| SULT1C2      | 0.00377235 | 0.00355834 | -0.0842594 | 1 |
| INHBB        | 0.00559114 | 0.0189867  | 1.76377    | 1 |
| AMER3        | 0.00341252 | 0.0022407  | -0.606891  | 1 |
| LOC440910    | 0.014412   | 0          | #NAME?     | 1 |
| PABPC1P2     | 0.00294454 | 0.00227696 | -0.370933  | 1 |
| TBR1         | 0.0196159  | 0          | #NAME?     | 1 |
| NOSTRIN      | 0.00704827 | 0.0228938  | 1.69962    | 1 |
| HOXD11       | 0.0607547  | 0.0189492  | -1.68086   | 1 |
| FSIP2        | 0.00126751 | 0          | #NAME?     | 1 |
| KCNE4        | 0.00433212 | 0.0108012  | 1.31805    | 1 |
| GAL3ST2      | 0.0323753  | 0          | #NAME?     | 1 |
| FAM150B      | 0.0133106  | 0.0223045  | 0.744764   | 1 |
| LOC645949    | 0.00739089 | 0.00464155 | -0.671141  | 1 |
| OTOF         | 0.00365005 | 0          | #NAME?     | 1 |
| CYP1B1       | 0.00359145 | 0.00366809 | 0.0304648  | 1 |
| LOC375196    | 0.0268742  | 0          | #NAME?     | 1 |
| NRXN1        | 0.0031611  | 0.00196784 | -0.683814  | 1 |
| EFEMP1       | 0.00367221 | 0          | #NAME?     | 1 |
| LOC339803    | 0.00491415 | 0.00377591 | -0.38012   | 1 |
| LOC400958    | 0.00378222 | 0          | #NAME?     | 1 |
| ADD2         | 0.00355701 | 0          | #NAME?     | 1 |
| TACR1        | 0.00256296 | 0.0113334  | 2.1447     | 1 |
| PLGLB2       | 0.00349544 | 0.00607945 | 0.798466   | 1 |
| FAM178B      | 0.0318187  | 0          | #NAME?     | 1 |
| LYG2         | 0.0673489  | 0.0162442  | -2.05173   | 1 |
| ST6GAL2      | 0.00512554 | 0.01033    | 1.01106    | 1 |
| IL1A         | 0.0216446  | 0.0087346  | -1.30919   | 1 |
| LOC100499194 | 0.00762923 | 0.00685996 | -0.153337  | 1 |
| EN1          | 0.00926401 | 0          | #NAME?     | 1 |
| WTH3DI       | 0.00316826 | 0          | #NAME?     | 1 |
| MIR663B      | 8.78578    | 0          | #NAME?     | 1 |
| LYPD1        | 0.0203177  | 0          | #NAME?     | 1 |

|                |             |            |           |   |
|----------------|-------------|------------|-----------|---|
| LOC100144595   | 0.00719223  | 0.0036741  | -0.969045 | 1 |
| FAP            | 0.00374083  | 0          | #NAME?    | 1 |
| WIPF1          | 0.0106355   | 0.00207796 | -2.35564  | 1 |
| DNAH7          | 0.00314899  | 0.00121657 | -1.37207  | 1 |
| BOLL           | 0.00389075  | 0          | #NAME?    | 1 |
| LINC00607      | 0.00308186  | 0          | #NAME?    | 1 |
| CCDC108        | 0.0102451   | 0          | #NAME?    | 1 |
| LOC151475      | 0.00968156  | 0.00737465 | -0.392664 | 1 |
| SNORA75        | 1.58364     | 1.31698    | -0.266004 | 1 |
| ASB18          | 0.0356519   | 0          | #NAME?    | 1 |
| MGC16025       | 0.00782259  | 0.0129145  | 0.723279  | 1 |
| BOK-AS1        | 0.0263796   | 0          | #NAME?    | 1 |
| C20orf202      | 0.0156435   | 0.00592528 | -1.40061  | 1 |
| TGM3           | 0.00765473  | 0          | #NAME?    | 1 |
| UBOX5-AS1      | 0.0104856   | 0.0112934  | 0.10708   | 1 |
| SLC24A3        | 0.0141572   | 0.0125561  | -0.173147 | 1 |
| PAX1           | 0.00414559  | 0          | #NAME?    | 1 |
| TTLL9          | 0.0220919   | 0.00678103 | -1.70394  | 1 |
| ADIG           | 0.0229498   | 0          | #NAME?    | 1 |
| PI3            | 0.0343429   | 0.253085   | 2.88154   | 1 |
| LINC00494      | 0.00333652  | 0          | #NAME?    | 1 |
| TSHZ2          | 0.000933691 | 0          | #NAME?    | 1 |
| CASS4          | 0.0091566   | 0.0323208  | 1.81958   | 1 |
| CDH26          | 0.0181462   | 0          | #NAME?    | 1 |
| LOC284757      | 0.00900993  | 0.00475171 | -0.923069 | 1 |
| C20orf195      | 0.0507901   | 0          | #NAME?    | 1 |
| MYT1           | 0.00373469  | 0.00193992 | -0.944987 | 1 |
| TCF15          | 0.026286    | 0.0165603  | -0.666563 | 1 |
| PXMP4          | 0.01345     | 0.00761761 | -0.820199 | 1 |
| FAM83C         | 0.0163781   | 0.016783   | 0.0352251 | 1 |
| GDF5           | 0.0102669   | 0          | #NAME?    | 1 |
| JPH2           | 0.00593228  | 0          | #NAME?    | 1 |
| EPPIN,EPPIN-WF | 0.00877266  | 0          | #NAME?    | 1 |
| PTGIS          | 0.00249611  | 0.00458713 | 0.877911  | 1 |
| FAM65C         | 0.0054674   | 0.00289439 | -0.917596 | 1 |
| KCNG1          | 0.0142397   | 0          | #NAME?    | 1 |
| SALL4          | 0.0090889   | 0.0192134  | 1.07993   | 1 |
| CYP24A1        | 0.00412318  | 0          | #NAME?    | 1 |
| GCNT7          | 0.0178865   | 0.0101566  | -0.816445 | 1 |
| HRH3           | 0.0136106   | 0.0179272  | 0.397425  | 1 |
| GATA5          | 0.0083362   | 0.00770969 | -0.112717 | 1 |
| MIR3648        | 0.880056    | 0          | #NAME?    | 1 |
| LINC00189      | 0.0158773   | 0          | #NAME?    | 1 |
| MRAP           | 0.028771    | 0          | #NAME?    | 1 |
| LINC00310      | 0.0300789   | 0.136849   | 2.18577   | 1 |
| PCP4           | 0.0252884   | 0          | #NAME?    | 1 |
| KCNE1          | 0.00391149  | 0.0124866  | 1.67459   | 1 |
| LOC100133286   | 0.127949    | 0.0346924  | -1.88288  | 1 |
| LINC00163      | 0.0418572   | 0.0512132  | 0.29104   | 1 |

|              |            |            |            |   |
|--------------|------------|------------|------------|---|
| GGTLC2       | 0.0259198  | 0.071853   | 1.471      | 1 |
| TOP1P2       | 0.00773631 | 0          | #NAME?     | 1 |
| IGLL3P       | 0.027628   | 0          | #NAME?     | 1 |
| ISX          | 0.00379124 | 0.00355247 | -0.0938456 | 1 |
| CSF2RB       | 0.00616358 | 0          | #NAME?     | 1 |
| CACNA11      | 0.00530062 | 0.00351302 | -0.593448  | 1 |
| SERHL        | 0.0242295  | 0.0735543  | 1.60204    | 1 |
| MOV10L1      | 0.0139374  | 0          | #NAME?     | 1 |
| LOC388849    | 0.0451677  | 0.0300924  | -0.585891  | 1 |
| MN1          | 0.00702363 | 0.0149587  | 1.0907     | 1 |
| C22orf24     | 0.0122103  | 0.022625   | 0.889817   | 1 |
| WNT7B        | 0.00737782 | 0.0144407  | 0.968874   | 1 |
| RBMS3        | 0.00190257 | 0          | #NAME?     | 1 |
| TGM4         | 0.00569821 | 0.00729898 | 0.357185   | 1 |
| C3orf45      | 0.0263487  | 0.058601   | 1.1532     | 1 |
| IQCF4        | 0.027233   | 0          | #NAME?     | 1 |
| FAM19A1      | 0.020212   | 0          | #NAME?     | 1 |
| FRG2C        | 0.00578861 | 0          | #NAME?     | 1 |
| ROBO2        | 0.0011631  | 0          | #NAME?     | 1 |
| EPHA3        | 0.00589387 | 0.00646541 | 0.133526   | 1 |
| GPR128       | 0.00524148 | 0          | #NAME?     | 1 |
| SIDT1        | 0.00399804 | 0          | #NAME?     | 1 |
| TIGIT        | 0.0110589  | 0          | #NAME?     | 1 |
| PLA1A        | 0.0084365  | 0.00639686 | -0.399281  | 1 |
| CCDC37       | 0.00748488 | 0          | #NAME?     | 1 |
| EPHB1        | 0.00710128 | 0          | #NAME?     | 1 |
| AADAC        | 0.0127281  | 0          | #NAME?     | 1 |
| PTX3         | 0.0266651  | 0          | #NAME?     | 1 |
| AHSG         | 0.0132903  | 0          | #NAME?     | 1 |
| CLDN16       | 0.00358256 | 0          | #NAME?     | 1 |
| EPM2AIP1     | 0.002264   | 0          | #NAME?     | 1 |
| SCN5A        | 0.00194113 | 0.00174913 | -0.15026   | 1 |
| CX3CR1       | 0.00774319 | 0          | #NAME?     | 1 |
| CYP8B1       | 0.00730446 | 0.0069301  | -0.0759021 | 1 |
| SLC6A20      | 0.0108757  | 0.00414732 | -1.39085   | 1 |
| IQCF1        | 0.0990648  | 0          | #NAME?     | 1 |
| CADPS        | 0.00245749 | 0          | #NAME?     | 1 |
| LMOD3        | 0.0100534  | 0.00843868 | -0.252589  | 1 |
| STX19        | 0.012761   | 0.0068971  | -0.887684  | 1 |
| PRR23A       | 0.0199934  | 0.00597011 | -1.7437    | 1 |
| PLOD2        | 0.0040598  | 0.00226127 | -0.844277  | 1 |
| TM4SF18      | 0.00419517 | 0          | #NAME?     | 1 |
| FAM194A      | 0.0226385  | 0.0049585  | -2.1908    | 1 |
| ARHGEF26-AS1 | 0.0458533  | 0.0319816  | -0.519784  | 1 |
| SI           | 0.00149892 | 0          | #NAME?     | 1 |
| WDR49        | 0.00385568 | 0.00337286 | -0.193012  | 1 |
| SLC7A14      | 0.00254749 | 0          | #NAME?     | 1 |
| TNFSF10      | 0.0079167  | 0          | #NAME?     | 1 |
| MASP1        | 0.00661275 | 0          | #NAME?     | 1 |

|              |            |            |            |   |
|--------------|------------|------------|------------|---|
| TPRG1-AS2    | 0.0511421  | 0          | #NAME?     | 1 |
| PDE6B        | 0.00743094 | 0.0313975  | 2.07903    | 1 |
| NSG1         | 0.0138768  | 0.00527311 | -1.39595   | 1 |
| C4orf6       | 0.0303545  | 0          | #NAME?     | 1 |
| HTRA3        | 0.0125973  | 0          | #NAME?     | 1 |
| DRD5         | 0.0128184  | 0          | #NAME?     | 1 |
| C1QTNF7      | 0.00704697 | 0.00426083 | -0.725868  | 1 |
| ZAR1         | 0.0307625  | 0          | #NAME?     | 1 |
| SLC4A4       | 0.00203259 | 0          | #NAME?     | 1 |
| EREG         | 0.00666317 | 0.00202695 | -1.7169    | 1 |
| LOC100505702 | 0.00389649 | 0.00471268 | 0.274371   | 1 |
| SPP1         | 0.0144148  | 0.0110377  | -0.38511   | 1 |
| NPNT         | 0.00601844 | 0          | #NAME?     | 1 |
| TDO2         | 0.00622484 | 0          | #NAME?     | 1 |
| STOX2        | 0.00353652 | 0          | #NAME?     | 1 |
| RBM47        | 0.0515978  | 0.00791736 | -2.70422   | 1 |
| GABRG1       | 0.00137849 | 0          | #NAME?     | 1 |
| KDR          | 0.00183414 | 0          | #NAME?     | 1 |
| IGFBP7       | 0.0577976  | 0          | #NAME?     | 1 |
| GNRHR        | 0.0042475  | 0.00623298 | 0.553309   | 1 |
| UGT2B17      | 0.00509732 | 0          | #NAME?     | 1 |
| SULT1E1      | 0.0147482  | 0.00512221 | -1.52571   | 1 |
| IGJ          | 0.0236956  | 0.0151245  | -0.647735  | 1 |
| FAM198B      | 0.00865211 | 0          | #NAME?     | 1 |
| GPM6A        | 0.0150975  | 0.0105793  | -0.51306   | 1 |
| ROPN1L       | 0.0211282  | 0.0500376  | 1.24384    | 1 |
| OSMR         | 0.0086784  | 0.0067042  | -0.372364  | 1 |
| NIM1         | 0.00468113 | 0          | #NAME?     | 1 |
| FST          | 0.0120197  | 0          | #NAME?     | 1 |
| PMCHL2       | 0.00583795 | 0          | #NAME?     | 1 |
| TMEM171      | 0.0140053  | 0          | #NAME?     | 1 |
| BHMT         | 0.0134737  | 0          | #NAME?     | 1 |
| CKMT2        | 0.0125137  | 0          | #NAME?     | 1 |
| SOWAHA       | 0.0112518  | 0.0106627  | -0.0775836 | 1 |
| MIR3661      | 19.3829    | 16.6459    | -0.219619  | 1 |
| MYOT         | 0.00813255 | 0          | #NAME?     | 1 |
| PKD2L2       | 0.00968351 | 0.00385701 | -1.32805   | 1 |
| PCDHGB8P     | 0.0463384  | 0.0173915  | -1.41383   | 1 |
| POU4F3       | 0.0255755  | 0          | #NAME?     | 1 |
| ADRB2        | 0.00700471 | 0          | #NAME?     | 1 |
| AFAP1L1      | 0.00448103 | 0          | #NAME?     | 1 |
| SLC6A7       | 0.00652961 | 0          | #NAME?     | 1 |
| IRGM         | 0.0119465  | 0          | #NAME?     | 1 |
| KIF4B        | 0.00235888 | 0          | #NAME?     | 1 |
| PPP1R2P3     | 0.00525738 | 0          | #NAME?     | 1 |
| EFCAB9       | 0.0605016  | 0          | #NAME?     | 1 |
| SLC34A1      | 0.00918399 | 0.00673782 | -0.446839  | 1 |
| BTNL8        | 0.0108913  | 0          | #NAME?     | 1 |
| SLC45A2      | 0.00621863 | 0          | #NAME?     | 1 |

|           |            |            |           |   |
|-----------|------------|------------|-----------|---|
| RANBP3L   | 0.00575309 | 0          | #NAME?    | 1 |
| GDNF      | 0.00328451 | 0          | #NAME?    | 1 |
| SEPP1     | 0.00751447 | 0          | #NAME?    | 1 |
| LOC647859 | 0.0213927  | 0          | #NAME?    | 1 |
| F2RL2     | 0.00372681 | 0          | #NAME?    | 1 |
| SNORA47   | 2.25814    | 0.867205   | -1.38069  | 1 |
| POU5F2    | 0.0793481  | 0.0367564  | -1.1102   | 1 |
| C5orf63   | 0.0024364  | 0.0027989  | 0.200105  | 1 |
| IL5       | 0.0141183  | 0          | #NAME?    | 1 |
| FSTL4     | 0.00509337 | 0.00189647 | -1.42531  | 1 |
| SPOCK1    | 0.00590237 | 0          | #NAME?    | 1 |
| NME5      | 0.00885919 | 0          | #NAME?    | 1 |
| MZB1      | 0.0398181  | 0.0546295  | 0.456258  | 1 |
| CD14      | 0.132971   | 0.213098   | 0.680403  | 1 |
| ADAM19    | 0.00609365 | 0          | #NAME?    | 1 |
| SOX30     | 0.00498036 | 0          | #NAME?    | 1 |
| PROP1     | 0.0108382  | 0.00979015 | -0.146719 | 1 |
| BMP6      | 0.0044641  | 0.00347442 | -0.361596 | 1 |
| NRSN1     | 0.00487748 | 0          | #NAME?    | 1 |
| HIST1H3A  | 0.265744   | 0.493741   | 0.893715  | 1 |
| VN1R10P   | 0.00904422 | 0          | #NAME?    | 1 |
| TTBK1     | 0.00536377 | 0          | #NAME?    | 1 |
| CAPN11    | 0.00508547 | 0          | #NAME?    | 1 |
| GPR115    | 0.00874704 | 0          | #NAME?    | 1 |
| MLIP      | 0.00690842 | 0          | #NAME?    | 1 |
| GFRAL     | 0.0155199  | 0          | #NAME?    | 1 |
| TSG1      | 0.00197109 | 0          | #NAME?    | 1 |
| GRIK2     | 0.00238759 | 0          | #NAME?    | 1 |
| NR2E1     | 0.00438624 | 0.00391452 | -0.16415  | 1 |
| LINC00222 | 0.0165451  | 0          | #NAME?    | 1 |
| SMLR1     | 0.00629727 | 0.00325888 | -0.950353 | 1 |
| SLC35D3   | 0.0278624  | 0.0479697  | 0.783804  | 1 |
| GRM1      | 0.00189262 | 0          | #NAME?    | 1 |
| VIP       | 0.00653178 | 0          | #NAME?    | 1 |
| TIAM2     | 0.00900336 | 0.0125197  | 0.475666  | 1 |
| SLC22A3   | 0.00397157 | 0.00350619 | -0.179808 | 1 |
| MYLK4     | 0.00819311 | 0.00315062 | -1.37878  | 1 |
| ELOVL2    | 0.00420368 | 0          | #NAME?    | 1 |
| HIST1H3J  | 0.0673109  | 0.0513137  | -0.391496 | 1 |
| UBD       | 0.019306   | 0          | #NAME?    | 1 |
| IFITM4P   | 0.0832126  | 0.215167   | 1.37058   | 1 |
| C6orf15   | 0.0150869  | 0          | #NAME?    | 1 |
| PRPH2     | 0.00885274 | 0.0120689  | 0.4471    | 1 |
| CRIP3     | 0.0177797  | 0          | #NAME?    | 1 |
| GCM1      | 0.0132577  | 0.00833801 | -0.66906  | 1 |
| GJB7      | 0.0148702  | 0.00436924 | -1.76697  | 1 |
| SIM1      | 0.0029464  | 0          | #NAME?    | 1 |
| LOC285758 | 0.00355113 | 0          | #NAME?    | 1 |
| HMGA1P7   | 0.0199684  | 0          | #NAME?    | 1 |

|               |             |            |            |   |
|---------------|-------------|------------|------------|---|
| LOC100130476  | 0.0107568   | 0          | #NAME?     | 1 |
| TXLNB         | 0.00233648  | 0          | #NAME?     | 1 |
| OSTCP1        | 0.0831842   | 0.0455192  | -0.869833  | 1 |
| SNORA29       | 1.20387     | 0          | #NAME?     | 1 |
| C6orf123      | 0.00888635  | 0.00680414 | -0.385179  | 1 |
| BMPER         | 0.00228309  | 0          | #NAME?     | 1 |
| ADCY1         | 0.00161671  | 0          | #NAME?     | 1 |
| WBSCR28       | 0.0580057   | 0          | #NAME?     | 1 |
| ELN           | 0.00851836  | 0          | #NAME?     | 1 |
| MAGI2-AS3     | 0.00116522  | 0          | #NAME?     | 1 |
| PVRIG         | 0.106377    | 0.0598529  | -0.829687  | 1 |
| COL26A1       | 0.00898974  | 0.00476528 | -0.91572   | 1 |
| CFTR          | 0.00248114  | 0          | #NAME?     | 1 |
| FAM71F1       | 0.00738059  | 0          | #NAME?     | 1 |
| C7orf45       | 0.0464179   | 0          | #NAME?     | 1 |
| AKR1B15       | 0.0106616   | 0          | #NAME?     | 1 |
| LOC100130880  | 0.0424002   | 0          | #NAME?     | 1 |
| TAS2R3        | 0.011816    | 0.0210062  | 0.830079   | 1 |
| PRSS1         | 0.0276563   | 0          | #NAME?     | 1 |
| GIMAP8        | 0.0029223   | 0.00276046 | -0.0821915 | 1 |
| GIMAP2        | 0.0103879   | 0          | #NAME?     | 1 |
| FABP5P3       | 0.032241    | 0.0122243  | -1.39914   | 1 |
| DPP6          | 0.00316343  | 0          | #NAME?     | 1 |
| ZNF890P       | 0.00934348  | 0.031434   | 1.75029    | 1 |
| CRHR2         | 0.0120412   | 0          | #NAME?     | 1 |
| MYO1G         | 0.0189522   | 0.0207615  | 0.131546   | 1 |
| SNORA5C       | 1.04995     | 2.1374     | 1.02553    | 1 |
| EGFR-AS1      | 0.00672683  | 0.00419746 | -0.680411  | 1 |
| SEPT14        | 0.00940844  | 0.00441052 | -1.09301   | 1 |
| ZNF479        | 0.00472898  | 0.00362542 | -0.383381  | 1 |
| GTF2IRD2P1    | 0.00413344  | 0          | #NAME?     | 1 |
| ABCB4         | 0.00290497  | 0          | #NAME?     | 1 |
| STEAP4        | 0.00264054  | 0          | #NAME?     | 1 |
| TMEM130       | 0.00822465  | 0.00430705 | -0.933253  | 1 |
| CYP3A7,CYP3A7 | 0.00534171  | 0.0151802  | 1.50682    | 1 |
| CYP3A4        | 0.00546264  | 0          | #NAME?     | 1 |
| MOGAT3        | 0.0311562   | 0          | #NAME?     | 1 |
| GPR85         | 0.00337655  | 0          | #NAME?     | 1 |
| KCP           | 0.00977428  | 0.00703562 | -0.474312  | 1 |
| PLXNA4        | 0.000998152 | 0          | #NAME?     | 1 |
| TRPV5         | 0.00853757  | 0          | #NAME?     | 1 |
| OR6W1P        | 0.0100374   | 0.0185959  | 0.889591   | 1 |
| OR2A1         | 0.0526235   | 0          | #NAME?     | 1 |
| FAM90A10P     | 0.0365905   | 0          | #NAME?     | 1 |
| BLK           | 0.00954722  | 0          | #NAME?     | 1 |
| ZNF705D       | 0.00413495  | 0          | #NAME?     | 1 |
| ADAM5         | 0.00581595  | 0.00558925 | -0.0573607 | 1 |
| FAM110B       | 0.00471771  | 0          | #NAME?     | 1 |
| PREX2         | 0.00289691  | 0          | #NAME?     | 1 |



|               |            |            |            |   |
|---------------|------------|------------|------------|---|
| PI15          | 0.0014336  | 0          | #NAME?     | 1 |
| KCNS2         | 0.00461478 | 0          | #NAME?     | 1 |
| FLJ42969      | 0.00655454 | 0          | #NAME?     | 1 |
| BAALC         | 0.0111028  | 0.00426018 | -1.38194   | 1 |
| CTHRC1        | 0.0215508  | 0.0584837  | 1.44029    | 1 |
| TG            | 0.00329177 | 0.00765175 | 1.21693    | 1 |
| ANK1          | 0.0266415  | 0.0100652  | -1.4043    | 1 |
| DKK4          | 0.017857   | 0          | #NAME?     | 1 |
| LOC100130298  | 0.0356976  | 0          | #NAME?     | 1 |
| LOC286186     | 0.00452659 | 0          | #NAME?     | 1 |
| RUNX1T1       | 0.0110412  | 0.00995545 | -0.149335  | 1 |
| LOC100288748  | 0.0099602  | 0          | #NAME?     | 1 |
| LOC100499183  | 0.0172419  | 0.0214251  | 0.313386   | 1 |
| DPYS          | 0.00911249 | 0.00554805 | -0.715864  | 1 |
| TMEM74        | 0.00908591 | 0.0053329  | -0.768711  | 1 |
| LINC00536     | 0.00366917 | 0          | #NAME?     | 1 |
| SNTB1         | 0.00232842 | 0.00650451 | 1.48209    | 1 |
| HHLA1         | 0.00395573 | 0          | #NAME?     | 1 |
| KCNV2         | 0.0139064  | 0.023779   | 0.773937   | 1 |
| IFNA1         | 0.016335   | 0          | #NAME?     | 1 |
| LOC100506422  | 0.0088389  | 0.00346208 | -1.35223   | 1 |
| KIAA1045      | 0.0023449  | 0.00210177 | -0.157924  | 1 |
| FAM27C        | 0.0276447  | 0.0206436  | -0.421313  | 1 |
| ANKRD20A4     | 0.00397841 | 0          | #NAME?     | 1 |
| PGM5          | 0.00569833 | 0.0132946  | 1.22223    | 1 |
| GDA           | 0.00819605 | 0          | #NAME?     | 1 |
| NTRK2         | 0.00133886 | 0.0027839  | 1.05611    | 1 |
| C9orf47,S1PR3 | 0.00458321 | 0.00277111 | -0.725891  | 1 |
| BARHL1        | 0.0252618  | 0.0616136  | 1.28629    | 1 |
| RNF224        | 0.0385745  | 0.0132561  | -1.54099   | 1 |
| TUBBP5        | 0.0236311  | 0.0331177  | 0.486918   | 1 |
| FLJ41200      | 0.00459448 | 0          | #NAME?     | 1 |
| FAM154A       | 0.0106415  | 0          | #NAME?     | 1 |
| SLC24A2       | 0.00141782 | 0.00182356 | 0.363081   | 1 |
| PTENP1        | 0.00811424 | 0.00468497 | -0.792417  | 1 |
| ALDH1A1       | 0.0072215  | 0          | #NAME?     | 1 |
| GNA14         | 0.0157579  | 0.00908847 | -0.793969  | 1 |
| LOC100129316  | 0.00219602 | 0.00207415 | -0.0823709 | 1 |
| FBP2          | 0.0411747  | 0.0109234  | -1.91433   | 1 |
| LINC00092     | 0.0255129  | 0.00973051 | -1.39064   | 1 |
| LOC340508     | 0.0187708  | 0          | #NAME?     | 1 |
| TNFSF15       | 0.00163456 | 0.00283062 | 0.792218   | 1 |
| TNC           | 0.010247   | 0          | #NAME?     | 1 |
| ANGPTL2       | 0.0100342  | 0.0299099  | 1.5757     | 1 |
| SOHLH1        | 0.0165708  | 0.015249   | -0.119932  | 1 |
| LCN10         | 0.0111467  | 0.00583336 | -0.934217  | 1 |
| PLCXD1        | 0.00425472 | 0.00887363 | 1.06046    | 1 |
| OTC           | 0.0107882  | 0          | #NAME?     | 1 |
| ARR3          | 0.0102819  | 0.0260953  | 1.34369    | 1 |

|             |            |             |            |          |
|-------------|------------|-------------|------------|----------|
| GDPD2       | 0.00713048 | 0.00526675  | -0.437086  | 1        |
| NXF4        | 0.00647253 | 0           | #NAME?     | 1        |
| RAB40AL     | 0.134185   | 0.0758579   | -0.822855  | 1        |
| TMEM31      | 0.0267954  | 0.0422189   | 0.655901   | 1        |
| VSIG1       | 0.0107612  | 0.00989194  | -0.121511  | 1        |
| RGAG1       | 0.00294777 | 0.00314954  | 0.0955201  | 1        |
| AKAP14      | 0.0209754  | 0.0117891   | -0.831246  | 1        |
| SPANXA2-OT1 | 0.00695419 | 0           | #NAME?     | 1        |
| MAGEA4      | 0.00800148 | 0.0142528   | 0.832902   | 1        |
| MAGEA6      | 0.0119906  | 0           | #NAME?     | 1        |
| CSAG1       | 0.0226479  | 0           | #NAME?     | 1        |
| BGN         | 0.00799551 | 0           | #NAME?     | 1        |
| DUSP9       | 0.021541   | 0           | #NAME?     | 1        |
| LINC00102   | 0.00819605 | 0.0143345   | 0.806494   | 1        |
| ACE2        | 0.00552084 | 0           | #NAME?     | 1        |
| BEND2       | 0.00242682 | 0           | #NAME?     | 1        |
| GPR64       | 0.00231272 | 0.00229455  | -0.0113777 | 1        |
| FTH1P18     | 0.0267722  | 0           | #NAME?     | 1        |
| CXorf36     | 0.00290889 | 0           | #NAME?     | 1        |
| WNK3        | 0.00218923 | 0           | #NAME?     | 1        |
| IL2RG       | 0.0120894  | 0           | #NAME?     | 1        |
| CXCR3       | 0.0155027  | 0           | #NAME?     | 1        |
| ZDHHC15     | 0.00263115 | 0           | #NAME?     | 1        |
| TCEAL6      | 0.0119288  | 0.015256    | 0.354922   | 1        |
| KIAA1210    | 0.00145918 | 0.00221611  | 0.602873   | 1        |
| ACTRT1      | 0.0165778  | 0           | #NAME?     | 1        |
| SMARCA1     | 0.00378756 | 0           | #NAME?     | 1        |
| SPANXC      | 0.0524389  | 0           | #NAME?     | 1        |
| FMR1-AS1    | 0.0134779  | 0.0145135   | 0.106793   | 1        |
| PNMA5       | 0.00826821 | 0           | #NAME?     | 1        |
| TMLHE-AS1   | 0.00625313 | 0.00592227  | -0.0784283 | 1        |
| GYG2P1      | 0.0230603  | 0           | #NAME?     | 1        |
| MIR221      | 0          | 6.04941 inf |            | 1        |
| SNORD6      | 0          | 0           | 0          | 1        |
| MIR4523     | 0          | 0           | 0          | 1        |
| SNORD104    | 0          | 0           | 0          | 1        |
| SNORD58C    | 0          | 127.713 inf |            | 0.301221 |
| SNORD95     | 0          | 0           | 0          | 1        |
| SNORD58A    | 0          | 0           | 0          | 1        |
| SNORD4B     | 0          | 0           | 0          | 1        |
| MIR3064     | 0          | 0           | 0          | 1        |
| MIR1282     | 0          | 60.7562 inf |            | 0.357424 |
| SNORD117    | 0          | 0           | 0          | 1        |
| SNORD31     | 0          | 0           | 0          | 1        |
| MIR637      | 0          | 0           | 0          | 1        |
| MIR3911     | 0          | 0           | 0          | 1        |
| MIR1234     | 0          | 0           | 0          | 1        |
| MIR4484     | 0          | 65.057 inf  |            | 1        |
| MIRLET7D    | 0          | 0           | 0          | 1        |

|                 |   |             |     |   |
|-----------------|---|-------------|-----|---|
| DDX11L1         | 0 | 0           | 0   | 1 |
| LOC100132062,L1 | 0 | 0           | 0   | 1 |
| CLCNKA          | 0 | 0           | 0   | 1 |
| CDA             | 0 | 0           | 0   | 1 |
| MDS2            | 0 | 0           | 0   | 1 |
| LIN28A          | 0 | 0.00551668  | inf | 1 |
| HCRTR1          | 0 | 0           | 0   | 1 |
| GJB3            | 0 | 0.00885754  | inf | 1 |
| TMCO2           | 0 | 0.0172161   | inf | 1 |
| MKKNK1-AS1      | 0 | 0.00941133  | inf | 1 |
| FAM159A         | 0 | 0           | 0   | 1 |
| ZYG11A          | 0 | 0.00556549  | inf | 1 |
| PRKAA2          | 0 | 0           | 0   | 1 |
| ANGPTL3         | 0 | 0.00404798  | inf | 1 |
| FOXD3           | 0 | 0.0171306   | inf | 1 |
| IL23R           | 0 | 0           | 0   | 1 |
| LRRC7           | 0 | 0.00129681  | inf | 1 |
| ST6GALNAC3      | 0 | 0           | 0   | 1 |
| DNASE2B         | 0 | 0           | 0   | 1 |
| FLJ31662        | 0 | 0           | 0   | 1 |
| SYPL2           | 0 | 0.0116535   | inf | 1 |
| GPR61           | 0 | 0.0119883   | inf | 1 |
| HSD3BP4         | 0 | 0.000962954 | inf | 1 |
| TDRD10          | 0 | 0           | 0   | 1 |
| KCNJ9           | 0 | 0.00449451  | inf | 1 |
| VANGL2          | 0 | 0.00280362  | inf | 1 |
| FCGR2A          | 0 | 0.00463203  | inf | 1 |
| HSPA7           | 0 | 0           | 0   | 1 |
| GPR52           | 0 | 0.0155974   | inf | 1 |
| CRB1            | 0 | 0           | 0   | 1 |
| PRELP           | 0 | 0.00700289  | inf | 1 |
| LINC00260       | 0 | 0.0254548   | inf | 1 |
| LEMD1-AS1       | 0 | 0.00422574  | inf | 1 |
| LOC284581       | 0 | 0.00993923  | inf | 1 |
| CR1             | 0 | 0           | 0   | 1 |
| HSD11B1         | 0 | 0           | 0   | 1 |
| CNIH3           | 0 | 0.0101994   | inf | 1 |
| LINC00184       | 0 | 0           | 0   | 1 |
| KMO             | 0 | 0           | 0   | 1 |
| TNFRSF4         | 0 | 0.0893336   | inf | 1 |
| C1orf233        | 0 | 0           | 0   | 1 |
| TTC34           | 0 | 0.0802573   | inf | 1 |
| HES2            | 0 | 0.00679237  | inf | 1 |
| SLC2A7          | 0 | 0           | 0   | 1 |
| SPATA21         | 0 | 0           | 0   | 1 |
| PLA2G2D         | 0 | 0           | 0   | 1 |
| DLGAP3          | 0 | 0.00526889  | inf | 1 |
| CYP4A11         | 0 | 0           | 0   | 1 |
| GLIS1           | 0 | 0           | 0   | 1 |

|              |   |            |     |   |
|--------------|---|------------|-----|---|
| TACSTD2      | 0 | 0          | 0   | 1 |
| LPAR3        | 0 | 0          | 0   | 1 |
| DPYD         | 0 | 0.0182781  | inf | 1 |
| PTPN22       | 0 | 0.0048856  | inf | 1 |
| AMPD1        | 0 | 0.013106   | inf | 1 |
| REG4         | 0 | 0          | 0   | 1 |
| CELF3        | 0 | 0.0429803  | inf | 1 |
| RORC         | 0 | 0          | 0   | 1 |
| FLG          | 0 | 0.00218054 | inf | 1 |
| RPL31P11     | 0 | 0          | 0   | 1 |
| LOC100505918 | 0 | 0.00390268 | inf | 1 |
| F5           | 0 | 0.00410164 | inf | 1 |
| SELL         | 0 | 0          | 0   | 1 |
| ASTN1        | 0 | 0          | 0   | 1 |
| NMNAT2       | 0 | 0.00191909 | inf | 1 |
| APOBEC4      | 0 | 0.0038426  | inf | 1 |
| F13B         | 0 | 0.0210549  | inf | 1 |
| LOC100131234 | 0 | 0          | 0   | 1 |
| MYOG         | 0 | 0          | 0   | 1 |
| IL10         | 0 | 0.01972    | inf | 1 |
| USH2A        | 0 | 0.00272123 | inf | 1 |
| AGT          | 0 | 0          | 0   | 1 |
| DISC2        | 0 | 0          | 0   | 1 |
| PRR26        | 0 | 0.0672157  | inf | 1 |
| AKR1C3       | 0 | 0.00760864 | inf | 1 |
| ZNF32-AS3    | 0 | 0          | 0   | 1 |
| GPRIN2       | 0 | 0          | 0   | 1 |
| MTRNR2L5     | 0 | 0          | 0   | 1 |
| ZNF365       | 0 | 0          | 0   | 1 |
| ADAMTS14     | 0 | 0.0029743  | inf | 1 |
| FFAR4        | 0 | 0.00943461 | inf | 1 |
| CYP2C9       | 0 | 0.0104682  | inf | 1 |
| C10orf62     | 0 | 0          | 0   | 1 |
| CNNM1        | 0 | 0          | 0   | 1 |
| WNT8B        | 0 | 0.00690328 | inf | 1 |
| PLEKHS1      | 0 | 0.00338407 | inf | 1 |
| BTBD16       | 0 | 0.0139416  | inf | 1 |
| ARMS2        | 0 | 0          | 0   | 1 |
| FLJ46361     | 0 | 0          | 0   | 1 |
| ST8SIA6      | 0 | 0.00661451 | inf | 1 |
| LRRC37A6P    | 0 | 0          | 0   | 1 |
| LOC441666    | 0 | 0          | 0   | 1 |
| OR13A1       | 0 | 0.00637026 | inf | 1 |
| LINC00842    | 0 | 0.00324815 | inf | 1 |
| BMS1P6       | 0 | 0          | 0   | 1 |
| RBP3         | 0 | 0.00688183 | inf | 1 |
| A1CF         | 0 | 0.00392701 | inf | 1 |
| NODAL        | 0 | 0.031158   | inf | 1 |
| MYOZ1        | 0 | 0          | 0   | 1 |

|              |   |            |     |   |
|--------------|---|------------|-----|---|
| CRTAC1       | 0 | 0          | 0   | 1 |
| CYP17A1      | 0 | 0.00657695 | inf | 1 |
| TCERG1L      | 0 | 0          | 0   | 1 |
| SYCE1        | 0 | 0.0333998  | inf | 1 |
| OR51I2       | 0 | 0.0136133  | inf | 1 |
| OR52D1       | 0 | 0.0237481  | inf | 1 |
| OR10A2       | 0 | 0.0157202  | inf | 1 |
| MRVI1-AS1    | 0 | 0.0341671  | inf | 1 |
| OR7E14P      | 0 | 0          | 0   | 1 |
| LDHAL6A      | 0 | 0.0164588  | inf | 1 |
| FSHB         | 0 | 0          | 0   | 1 |
| C11orf96     | 0 | 0          | 0   | 1 |
| CREB3L1      | 0 | 0          | 0   | 1 |
| SMTNL1       | 0 | 0.0519405  | inf | 1 |
| MS4A7        | 0 | 0          | 0   | 1 |
| SLC22A10     | 0 | 0          | 0   | 1 |
| RARRES3      | 0 | 0          | 0   | 1 |
| MIR612       | 0 | 13.8951    | inf | 1 |
| OVOL1        | 0 | 0.00525008 | inf | 1 |
| SYT12        | 0 | 0          | 0   | 1 |
| SHANK2-AS1   | 0 | 0          | 0   | 1 |
| B3GNT6       | 0 | 0          | 0   | 1 |
| FOLR4        | 0 | 0          | 0   | 1 |
| C11orf53     | 0 | 0          | 0   | 1 |
| PDZD3        | 0 | 0          | 0   | 1 |
| POU2F3       | 0 | 0.00432447 | inf | 1 |
| FLI1         | 0 | 0          | 0   | 1 |
| BARX2        | 0 | 0          | 0   | 1 |
| ADAMTS15     | 0 | 0          | 0   | 1 |
| OR2D2        | 0 | 0          | 0   | 1 |
| PLEKHA7      | 0 | 0          | 0   | 1 |
| MUC15        | 0 | 0          | 0   | 1 |
| SLC5A12      | 0 | 0          | 0   | 1 |
| PAMR1        | 0 | 0          | 0   | 1 |
| LOC100507300 | 0 | 0.00440919 | inf | 1 |
| PRG2         | 0 | 0.0363489  | inf | 1 |
| DKFZP434K028 | 0 | 0          | 0   | 1 |
| FLJ42102     | 0 | 0.0122337  | inf | 1 |
| PHOX2A       | 0 | 0          | 0   | 1 |
| P4HA3        | 0 | 0          | 0   | 1 |
| MAP6         | 0 | 0.00253829 | inf | 1 |
| TENM4        | 0 | 0          | 0   | 1 |
| NOX4         | 0 | 0.00216775 | inf | 1 |
| SNORA1       | 0 | 1.26155    | inf | 1 |
| MMP7         | 0 | 0          | 0   | 1 |
| CARD16       | 0 | 0.0164837  | inf | 1 |
| RDX          | 0 | 0.00630137 | inf | 1 |
| POU2AF1      | 0 | 0          | 0   | 1 |
| APOA1        | 0 | 0.242896   | inf | 1 |

|              |   |             |     |   |
|--------------|---|-------------|-----|---|
| CD3D         | 0 | 0           | 0   | 1 |
| SCN3B        | 0 | 0           | 0   | 1 |
| GALNT8       | 0 | 0           | 0   | 1 |
| NANOG        | 0 | 0           | 0   | 1 |
| RIMKLB       | 0 | 0           | 0   | 1 |
| LOC100499405 | 0 | 0           | 0   | 1 |
| LOC338817    | 0 | 0.0154932   | inf | 1 |
| BCL2L14      | 0 | 0.00569158  | inf | 1 |
| SLCO1C1      | 0 | 0.00572892  | inf | 1 |
| IAPP         | 0 | 0.0143174   | inf | 1 |
| DENND5B-AS1  | 0 | 0.118904    | inf | 1 |
| AMHR2        | 0 | 0           | 0   | 1 |
| OTOGL        | 0 | 0           | 0   | 1 |
| DTX1         | 0 | 0           | 0   | 1 |
| SRRM4        | 0 | 0.00150162  | inf | 1 |
| LRRC43       | 0 | 0.0294022   | inf | 1 |
| LOC100507091 | 0 | 0.0114884   | inf | 1 |
| MIR3908      | 0 | 0           | 0   | 1 |
| GLT1D1       | 0 | 0.00899739  | inf | 1 |
| GPR133       | 0 | 0           | 0   | 1 |
| LOC116437    | 0 | 0           | 0   | 1 |
| LOC100271702 | 0 | 0           | 0   | 1 |
| A2M          | 0 | 0           | 0   | 1 |
| TAS2R50      | 0 | 0           | 0   | 1 |
| TAS2R43      | 0 | 0           | 0   | 1 |
| PRB3         | 0 | 0           | 0   | 1 |
| SLCO1A2      | 0 | 0           | 0   | 1 |
| PTHLH        | 0 | 0.0102794   | inf | 1 |
| H3F3C        | 0 | 0.0490568   | inf | 1 |
| PRICKLE1     | 0 | 0.0046987   | inf | 1 |
| ENDOU        | 0 | 0.00937122  | inf | 1 |
| KRT1         | 0 | 0           | 0   | 1 |
| DCD          | 0 | 0           | 0   | 1 |
| SDR9C7       | 0 | 0.00697169  | inf | 1 |
| LOC100130075 | 0 | 0.0285477   | inf | 1 |
| LRRC10       | 0 | 0           | 0   | 1 |
| LOC728084    | 0 | 0           | 0   | 1 |
| TRPV4        | 0 | 0.00617116  | inf | 1 |
| NOS1         | 0 | 0           | 0   | 1 |
| PLA2G1B      | 0 | 0.0984231   | inf | 1 |
| OASL         | 0 | 0.0123584   | inf | 1 |
| HPD          | 0 | 0.00874468  | inf | 1 |
| ATP12A       | 0 | 0.00610399  | inf | 1 |
| NBEA         | 0 | 0.000710954 | inf | 1 |
| SPERT        | 0 | 0           | 0   | 1 |
| MLNR         | 0 | 0           | 0   | 1 |
| SERPINE3     | 0 | 0.0159928   | inf | 1 |
| CCDC70       | 0 | 0           | 0   | 1 |
| GAS6-AS1     | 0 | 0.0433459   | inf | 1 |

|                |   |            |     |   |
|----------------|---|------------|-----|---|
| GPR12          | 0 | 0          | 0   | 1 |
| LINC00598      | 0 | 0.0115239  | inf | 1 |
| KCTD4          | 0 | 0          | 0   | 1 |
| LINC00563      | 0 | 0          | 0   | 1 |
| LPAR6          | 0 | 0.00716066 | inf | 1 |
| DLEU7          | 0 | 0          | 0   | 1 |
| POU4F1         | 0 | 0          | 0   | 1 |
| DCT            | 0 | 0          | 0   | 1 |
| SLC15A1        | 0 | 0          | 0   | 1 |
| RNASE2         | 0 | 0          | 0   | 1 |
| NYNRIN         | 0 | 0          | 0   | 1 |
| SSTR1          | 0 | 0          | 0   | 1 |
| PLEKHD1        | 0 | 0          | 0   | 1 |
| UNC79          | 0 | 0.00529467 | inf | 1 |
| NDRG2          | 0 | 0          | 0   | 1 |
| MYH6           | 0 | 0          | 0   | 1 |
| PRKD1          | 0 | 0          | 0   | 1 |
| EGLN3          | 0 | 0.00802759 | inf | 1 |
| C14orf183      | 0 | 0.0534602  | inf | 1 |
| OTX2           | 0 | 0.00443514 | inf | 1 |
| ISM2           | 0 | 0.0117236  | inf | 1 |
| DEGS2          | 0 | 0.0144771  | inf | 1 |
| SNRPN,SNURF    | 0 | 0.0107281  | inf | 1 |
| PAR-SN         | 0 | 0          | 0   | 1 |
| PAR5           | 0 | 0.00271743 | inf | 1 |
| SLC28A2        | 0 | 0.0395526  | inf | 1 |
| SCG3           | 0 | 0.00278853 | inf | 1 |
| CGNL1          | 0 | 0.00241103 | inf | 1 |
| CYP1A2         | 0 | 0.00460182 | inf | 1 |
| LOC646938      | 0 | 0          | 0   | 1 |
| SH3GL3         | 0 | 0          | 0   | 1 |
| MESP2          | 0 | 0.025343   | inf | 1 |
| ULK4P1,ULK4P3  | 0 | 0          | 0   | 1 |
| CSNK1A1P1      | 0 | 0          | 0   | 1 |
| HDC            | 0 | 0.0139588  | inf | 1 |
| CILP           | 0 | 0.00735037 | inf | 1 |
| AGSK1,LOC7278  | 0 | 0          | 0   | 1 |
| LOC338963      | 0 | 0          | 0   | 1 |
| FSD2           | 0 | 0          | 0   | 1 |
| SYT17          | 0 | 0.0153536  | inf | 1 |
| ACSM5          | 0 | 0          | 0   | 1 |
| VWA3A          | 0 | 0          | 0   | 1 |
| SNX29P2        | 0 | 0.010517   | inf | 1 |
| SNORA30        | 0 | 0          | 0   | 1 |
| FLJ26245,RNA5S | 0 | 0.0220499  | inf | 1 |
| MT1A           | 0 | 0.0679209  | inf | 1 |
| MT1B           | 0 | 0.139684   | inf | 1 |
| MT1H           | 0 | 0          | 0   | 1 |
| GPR97          | 0 | 0          | 0   | 1 |

|               |   |            |     |   |
|---------------|---|------------|-----|---|
| CDH5          | 0 | 0.00306957 | inf | 1 |
| CES4A         | 0 | 0.00676585 | inf | 1 |
| HP            | 0 | 0.00939822 | inf | 1 |
| CDH13         | 0 | 0          | 0   | 1 |
| FOXC2         | 0 | 0          | 0   | 1 |
| IL17C         | 0 | 0          | 0   | 1 |
| LINC00235     | 0 | 0.146245   | inf | 1 |
| SSTR5-AS1     | 0 | 0          | 0   | 1 |
| LOC100506655  | 0 | 0.00828474 | inf | 1 |
| LOC388242     | 0 | 0.0132616  | inf | 1 |
| ANKRD26P1     | 0 | 0.0102844  | inf | 1 |
| CDH11         | 0 | 0          | 0   | 1 |
| DPEP2         | 0 | 0          | 0   | 1 |
| FENDRR        | 0 | 0.0034054  | inf | 1 |
| SLC22A31      | 0 | 0.00942123 | inf | 1 |
| TUSC5         | 0 | 0          | 0   | 1 |
| SMTNL2        | 0 | 0          | 0   | 1 |
| LOC339166     | 0 | 0          | 0   | 1 |
| CCDC144A      | 0 | 0.00262584 | inf | 1 |
| GRAPL         | 0 | 0          | 0   | 1 |
| KCNJ12,KCNJ18 | 0 | 0.00335896 | inf | 1 |
| LHX1          | 0 | 0          | 0   | 1 |
| C17orf78      | 0 | 0          | 0   | 1 |
| CD300LG       | 0 | 0.00526476 | inf | 1 |
| IGF2BP1       | 0 | 0.00135195 | inf | 1 |
| MYCBPAP       | 0 | 0.00396741 | inf | 1 |
| CACNA1G       | 0 | 0          | 0   | 1 |
| EPX           | 0 | 0          | 0   | 1 |
| OTOP2         | 0 | 0          | 0   | 1 |
| P2RX1         | 0 | 0          | 0   | 1 |
| PIK3R5        | 0 | 0.00333689 | inf | 1 |
| EPN2-AS1      | 0 | 0.0290574  | inf | 1 |
| SLC47A2       | 0 | 0.0196318  | inf | 1 |
| NOS2          | 0 | 0.00313372 | inf | 1 |
| SLFN14        | 0 | 0          | 0   | 1 |
| GAS2L2        | 0 | 0          | 0   | 1 |
| CCL3          | 0 | 0.204322   | inf | 1 |
| TBC1D3H       | 0 | 0          | 0   | 1 |
| HNF1B         | 0 | 0.00413917 | inf | 1 |
| STAC2         | 0 | 0          | 0   | 1 |
| NEUROD2       | 0 | 0.00662243 | inf | 1 |
| KRT19         | 0 | 0          | 0   | 1 |
| KRT16         | 0 | 0.00821491 | inf | 1 |
| RPRML         | 0 | 0.135663   | inf | 1 |
| TAC4          | 0 | 0          | 0   | 1 |
| CHAD          | 0 | 0.0389544  | inf | 1 |
| C17orf47      | 0 | 0          | 0   | 1 |
| TBC1D3P2      | 0 | 0          | 0   | 1 |
| BTBD17        | 0 | 0          | 0   | 1 |



|              |   |            |     |   |
|--------------|---|------------|-----|---|
| FOXJ1        | 0 | 0.00783628 | inf | 1 |
| LOC100996291 | 0 | 0.00915485 | inf | 1 |
| LOC100130370 | 0 | 0          | 0   | 1 |
| EMILIN2      | 0 | 0.00313868 | inf | 1 |
| ST8SIA3      | 0 | 0          | 0   | 1 |
| MC2R         | 0 | 0          | 0   | 1 |
| SLC25A52     | 0 | 0          | 0   | 1 |
| MRO          | 0 | 0          | 0   | 1 |
| MADCAM1      | 0 | 0.0153052  | inf | 1 |
| HCN2         | 0 | 0.0490704  | inf | 1 |
| ELANE        | 0 | 0          | 0   | 1 |
| GRIN3B       | 0 | 0          | 0   | 1 |
| PLK5         | 0 | 0          | 0   | 1 |
| S1PR4        | 0 | 0.0356527  | inf | 1 |
| ATCAY        | 0 | 0.0102724  | inf | 1 |
| CREB3L3      | 0 | 0          | 0   | 1 |
| MIR7-3HG     | 0 | 0          | 0   | 1 |
| LOC100128568 | 0 | 0.123345   | inf | 1 |
| C19orf80     | 0 | 0.0411586  | inf | 1 |
| CASP14       | 0 | 0          | 0   | 1 |
| ZNF570       | 0 | 0          | 0   | 1 |
| LOC644554    | 0 | 0          | 0   | 1 |
| RYR1         | 0 | 0.00505389 | inf | 1 |
| CYP2G1P      | 0 | 0          | 0   | 1 |
| LOC100505622 | 0 | 0.0541962  | inf | 1 |
| IRGC         | 0 | 0          | 0   | 1 |
| APOC1P1      | 0 | 0.0672051  | inf | 1 |
| IGFL2        | 0 | 0.0282525  | inf | 1 |
| DACT3-AS1    | 0 | 0.0103655  | inf | 1 |
| CD37         | 0 | 0.119432   | inf | 1 |
| GPR32        | 0 | 0          | 0   | 1 |
| ERVV-1       | 0 | 0.0390052  | inf | 1 |
| ZNF818P      | 0 | 0          | 0   | 1 |
| TTYH1        | 0 | 0.0327892  | inf | 1 |
| LILRB1       | 0 | 0          | 0   | 1 |
| ZNF542       | 0 | 0          | 0   | 1 |
| ZFP28        | 0 | 0          | 0   | 1 |
| CSNK1G2-AS1  | 0 | 0.0418059  | inf | 1 |
| LINGO3       | 0 | 0          | 0   | 1 |
| FUT5         | 0 | 0.0170627  | inf | 1 |
| TUBB4A       | 0 | 0.00814623 | inf | 1 |
| KLF1         | 0 | 0.0153371  | inf | 1 |
| CALR3        | 0 | 0          | 0   | 1 |
| ZNF99        | 0 | 0.00183591 | inf | 1 |
| FAM187B      | 0 | 0.0286401  | inf | 1 |
| COX7A1       | 0 | 0          | 0   | 1 |
| ZFP82        | 0 | 0.00781415 | inf | 1 |
| WDR87        | 0 | 0          | 0   | 1 |
| CYP2A6       | 0 | 0          | 0   | 1 |

|              |   |             |     |   |
|--------------|---|-------------|-----|---|
| PSG9         | 0 | 0           | 0   | 1 |
| ZNF229       | 0 | 0           | 0   | 1 |
| EXOC3L2      | 0 | 0.0102674   | inf | 1 |
| PGLYRP1      | 0 | 0.133908    | inf | 1 |
| GNG8         | 0 | 0.644853    | inf | 1 |
| CABP5        | 0 | 0           | 0   | 1 |
| KLKP1        | 0 | 0           | 0   | 1 |
| KLK4         | 0 | 0.0373482   | inf | 1 |
| LOC147646    | 0 | 0.0294026   | inf | 1 |
| HAS1         | 0 | 0.0363067   | inf | 1 |
| ZNF677       | 0 | 0           | 0   | 1 |
| LILRB3       | 0 | 0.0453956   | inf | 1 |
| TMEM150B     | 0 | 0           | 0   | 1 |
| ZSCAN5B      | 0 | 0.0294068   | inf | 1 |
| LOC100506274 | 0 | 0.0113847   | inf | 1 |
| LINC00570    | 0 | 0.00933616  | inf | 1 |
| VSNL1        | 0 | 0.00449771  | inf | 1 |
| KCNK3        | 0 | 0           | 0   | 1 |
| DPYSL5       | 0 | 0.00281471  | inf | 1 |
| LBH          | 0 | 0           | 0   | 1 |
| QPCT         | 0 | 0           | 0   | 1 |
| SIX3         | 0 | 0.00777253  | inf | 1 |
| TMEM247      | 0 | 0           | 0   | 1 |
| ARHGAP25     | 0 | 0           | 0   | 1 |
| VAX2         | 0 | 0.0396533   | inf | 1 |
| ATP6V1B1     | 0 | 0           | 0   | 1 |
| ACTG2        | 0 | 0.0547116   | inf | 1 |
| LOC284950    | 0 | 0.00324375  | inf | 1 |
| C2orf40      | 0 | 0           | 0   | 1 |
| FBLN7        | 0 | 0           | 0   | 1 |
| PROC         | 0 | 0           | 0   | 1 |
| MYO7B        | 0 | 0.00234796  | inf | 1 |
| CCDC74B-AS1  | 0 | 0           | 0   | 1 |
| ARHGEF4      | 0 | 0.00608647  | inf | 1 |
| TUBA3D       | 0 | 0.0364726   | inf | 1 |
| B3GALT1      | 0 | 0           | 0   | 1 |
| KLHL30       | 0 | 0.0206502   | inf | 1 |
| REG3A        | 0 | 0           | 0   | 1 |
| FABP1        | 0 | 0           | 0   | 1 |
| LOC442028    | 0 | 0           | 0   | 1 |
| ADRA2B       | 0 | 0           | 0   | 1 |
| C1QL2        | 0 | 0           | 0   | 1 |
| TUBA3E       | 0 | 0           | 0   | 1 |
| RAPGEF4-AS1  | 0 | 0.00439297  | inf | 1 |
| CCDC141      | 0 | 0.000980007 | inf | 1 |
| LOC100130452 | 0 | 0           | 0   | 1 |
| LOC100130451 | 0 | 0.00630905  | inf | 1 |
| EPHA4        | 0 | 0           | 0   | 1 |
| GPR55        | 0 | 0           | 0   | 1 |

|              |   |             |     |   |
|--------------|---|-------------|-----|---|
| C2orf54      | 0 | 0           | 0   | 1 |
| RAD21L1      | 0 | 0           | 0   | 1 |
| TMC2         | 0 | 0.00397766  | inf | 1 |
| OXT          | 0 | 0           | 0   | 1 |
| CST7         | 0 | 0           | 0   | 1 |
| HCK          | 0 | 0           | 0   | 1 |
| ASIP         | 0 | 0.0942792   | inf | 1 |
| LOC100287792 | 0 | 0.00574745  | inf | 1 |
| HNF4A        | 0 | 0           | 0   | 1 |
| TCEA2        | 0 | 0.0362051   | inf | 1 |
| GFRA4        | 0 | 0           | 0   | 1 |
| LINC00658    | 0 | 0           | 0   | 1 |
| LINC00654    | 0 | 0.0124356   | inf | 1 |
| CD93         | 0 | 0           | 0   | 1 |
| NCOR1P1      | 0 | 0           | 0   | 1 |
| TSPY26P      | 0 | 0           | 0   | 1 |
| KCNQ2        | 0 | 0           | 0   | 1 |
| SRMS         | 0 | 0           | 0   | 1 |
| CHODL        | 0 | 0           | 0   | 1 |
| DSCR6        | 0 | 0.0126584   | inf | 1 |
| B3GALT5      | 0 | 0           | 0   | 1 |
| ABCG1        | 0 | 0           | 0   | 1 |
| PCBP3        | 0 | 0           | 0   | 1 |
| COL6A2       | 0 | 0.00519263  | inf | 1 |
| ADAMTS5      | 0 | 0.000892548 | inf | 1 |
| DNMT3L       | 0 | 0           | 0   | 1 |
| COL18A1-AS1  | 0 | 0.0227343   | inf | 1 |
| SPATC1L      | 0 | 0.13574     | inf | 1 |
| P2RX6        | 0 | 0.00536592  | inf | 1 |
| UPB1         | 0 | 0.0116817   | inf | 1 |
| MGAT3        | 0 | 0           | 0   | 1 |
| RIMBP3C      | 0 | 0.0178023   | inf | 1 |
| GSTTP1       | 0 | 0           | 0   | 1 |
| LOC100128531 | 0 | 0.0164093   | inf | 1 |
| PDGFB        | 0 | 0           | 0   | 1 |
| A4GALT       | 0 | 0           | 0   | 1 |
| MLC1         | 0 | 0           | 0   | 1 |
| FBLN2        | 0 | 0           | 0   | 1 |
| GALNT15      | 0 | 0           | 0   | 1 |
| ITGA9        | 0 | 0.00310748  | inf | 1 |
| MOBP         | 0 | 0.00933593  | inf | 1 |
| MYRIP        | 0 | 0           | 0   | 1 |
| FAM198A      | 0 | 0           | 0   | 1 |
| CXCR6        | 0 | 0.0109142   | inf | 1 |
| CCDC36       | 0 | 0.0185985   | inf | 1 |
| GNAT1        | 0 | 0.00506429  | inf | 1 |
| C3orf14      | 0 | 0.0598477   | inf | 1 |
| OR5K2        | 0 | 0.0380332   | inf | 1 |
| ST3GAL6      | 0 | 0.0135438   | inf | 1 |

|              |   |            |     |   |
|--------------|---|------------|-----|---|
| CD200        | 0 | 0.00968137 | inf | 1 |
| NR112        | 0 | 0          | 0   | 1 |
| FBXO40       | 0 | 0.00186415 | inf | 1 |
| KBTBD12      | 0 | 0.00197458 | inf | 1 |
| ALG1L2       | 0 | 0.0134009  | inf | 1 |
| COL6A4P2     | 0 | 0.00112776 | inf | 1 |
| TF           | 0 | 0.00689234 | inf | 1 |
| C3orf79      | 0 | 0          | 0   | 1 |
| C3orf80      | 0 | 0.00581    | inf | 1 |
| ARL14        | 0 | 0.00626224 | inf | 1 |
| KCNMB2       | 0 | 0.0119752  | inf | 1 |
| FETUB        | 0 | 0          | 0   | 1 |
| TPRG1        | 0 | 0.00234861 | inf | 1 |
| LOC100507391 | 0 | 0          | 0   | 1 |
| ATP2B2       | 0 | 0.0042669  | inf | 1 |
| XIRP1        | 0 | 0.00577411 | inf | 1 |
| PRSS50       | 0 | 0          | 0   | 1 |
| TMEM89       | 0 | 0          | 0   | 1 |
| TLR9         | 0 | 0.00857937 | inf | 1 |
| FRMD4B       | 0 | 0          | 0   | 1 |
| SLC9C1       | 0 | 0          | 0   | 1 |
| BTLA         | 0 | 0.00277988 | inf | 1 |
| ZNF80        | 0 | 0.00364004 | inf | 1 |
| HGD          | 0 | 0.00571545 | inf | 1 |
| MUC13        | 0 | 0.0035731  | inf | 1 |
| UROC1        | 0 | 0          | 0   | 1 |
| DNAJB8       | 0 | 0          | 0   | 1 |
| GATA2        | 0 | 0          | 0   | 1 |
| SNORA58      | 0 | 0          | 0   | 1 |
| TMEM14E      | 0 | 0.0440406  | inf | 1 |
| LOC100507537 | 0 | 0.0143527  | inf | 1 |
| SERPINI2     | 0 | 0          | 0   | 1 |
| LOC100128164 | 0 | 0.00539549 | inf | 1 |
| KLHL6        | 0 | 0          | 0   | 1 |
| LEPREL1      | 0 | 0          | 0   | 1 |
| ATP13A5      | 0 | 0          | 0   | 1 |
| MUC4         | 0 | 0          | 0   | 1 |
| ZDHHC19      | 0 | 0          | 0   | 1 |
| S100P        | 0 | 0.0328456  | inf | 1 |
| C4orf19      | 0 | 0.00227941 | inf | 1 |
| RHOH         | 0 | 0          | 0   | 1 |
| ENAM         | 0 | 0          | 0   | 1 |
| CXCL13       | 0 | 0          | 0   | 1 |
| EGF          | 0 | 0.00177207 | inf | 1 |
| SYNPO2       | 0 | 0          | 0   | 1 |
| ADAD1        | 0 | 0.00427501 | inf | 1 |
| IL15         | 0 | 0.0102189  | inf | 1 |
| POU4F2       | 0 | 0          | 0   | 1 |
| MAB21L2      | 0 | 0.0478694  | inf | 1 |

|               |   |            |     |   |
|---------------|---|------------|-----|---|
| TRIML1        | 0 | 0          | 0   | 1 |
| OTOP1         | 0 | 0          | 0   | 1 |
| ZNF518B       | 0 | 0.00139332 | inf | 1 |
| PROM1         | 0 | 0.00219992 | inf | 1 |
| UGT2A1,UGT2A2 | 0 | 0          | 0   | 1 |
| CCDC158       | 0 | 0.00497605 | inf | 1 |
| COL25A1       | 0 | 0          | 0   | 1 |
| NDNF          | 0 | 0          | 0   | 1 |
| GK3P          | 0 | 0.0148909  | inf | 1 |
| SPOCK3        | 0 | 0          | 0   | 1 |
| SPATA4        | 0 | 0          | 0   | 1 |
| CLDN24        | 0 | 0.0178456  | inf | 1 |
| SLED1         | 0 | 0.0163765  | inf | 1 |
| LRRC14B       | 0 | 0          | 0   | 1 |
| CDH6          | 0 | 0.00204047 | inf | 1 |
| TTC23L        | 0 | 0          | 0   | 1 |
| GHR           | 0 | 0          | 0   | 1 |
| DDX4          | 0 | 0.00340748 | inf | 1 |
| FAM81B        | 0 | 0.00615971 | inf | 1 |
| LOC728342     | 0 | 0.00291011 | inf | 1 |
| FAM170A       | 0 | 0          | 0   | 1 |
| C5orf48       | 0 | 0.100886   | inf | 1 |
| SLC25A48      | 0 | 0          | 0   | 1 |
| TGFBI         | 0 | 0.0483002  | inf | 1 |
| LOC100505658  | 0 | 0          | 0   | 1 |
| KCTD16        | 0 | 0.00455636 | inf | 1 |
| TENM2         | 0 | 0          | 0   | 1 |
| LOC285593     | 0 | 0.00515918 | inf | 1 |
| CDHR2         | 0 | 0.0270777  | inf | 1 |
| FAM153C       | 0 | 0.00938938 | inf | 1 |
| LOC442132     | 0 | 0          | 0   | 1 |
| SEMA5A        | 0 | 0          | 0   | 1 |
| AGXT2         | 0 | 0          | 0   | 1 |
| PLK2          | 0 | 0.0109203  | inf | 1 |
| LOC100303749  | 0 | 0          | 0   | 1 |
| GUSBP9        | 0 | 0.0753726  | inf | 1 |
| PCSK1         | 0 | 0          | 0   | 1 |
| SLC23A1       | 0 | 0.00637583 | inf | 1 |
| CD74          | 0 | 0.0206482  | inf | 1 |
| EBF1          | 0 | 0          | 0   | 1 |
| GMCL1P1       | 0 | 0          | 0   | 1 |
| CBY3          | 0 | 0          | 0   | 1 |
| FLT4          | 0 | 0.0155739  | inf | 1 |
| HULC          | 0 | 0.101058   | inf | 1 |
| EDN1          | 0 | 0.00546246 | inf | 1 |
| MCCD1         | 0 | 0.0268557  | inf | 1 |
| PNPLA1        | 0 | 0.00512599 | inf | 1 |
| GUCA1A        | 0 | 0.0187154  | inf | 1 |
| WISP3         | 0 | 0.00696335 | inf | 1 |

|              |   |             |     |   |
|--------------|---|-------------|-----|---|
| PLN          | 0 | 0.0119829   | inf | 1 |
| LAMA2        | 0 | 0           | 0   | 1 |
| SUMO4        | 0 | 0.031999    | inf | 1 |
| QKI          | 0 | 0           | 0   | 1 |
| SMOC2        | 0 | 0           | 0   | 1 |
| LINC00518    | 0 | 0.00334706  | inf | 1 |
| NEDD9        | 0 | 0.00279762  | inf | 1 |
| HIST1H3I     | 0 | 0           | 0   | 1 |
| HLA-DPA1     | 0 | 0.00690061  | inf | 1 |
| DLK2         | 0 | 0.0262129   | inf | 1 |
| IL17F        | 0 | 0.0192991   | inf | 1 |
| LINC00472    | 0 | 0.00383577  | inf | 1 |
| SRSF12       | 0 | 0.0103534   | inf | 1 |
| BACH2        | 0 | 0           | 0   | 1 |
| GSTM2P1      | 0 | 0.00900253  | inf | 1 |
| OR2A4        | 0 | 0           | 0   | 1 |
| NHEG1        | 0 | 0           | 0   | 1 |
| RAET1E       | 0 | 0           | 0   | 1 |
| TFAMP1       | 0 | 0           | 0   | 1 |
| ITGB8        | 0 | 0           | 0   | 1 |
| JAZF1-AS1    | 0 | 0.0576645   | inf | 1 |
| FKBP6        | 0 | 0.00879902  | inf | 1 |
| GRM3         | 0 | 0           | 0   | 1 |
| CYP3A43      | 0 | 0           | 0   | 1 |
| CPA2         | 0 | 0.00865682  | inf | 1 |
| TAS2R4       | 0 | 0.0318545   | inf | 1 |
| EPHA1-AS1    | 0 | 0           | 0   | 1 |
| CNTNAP2      | 0 | 0           | 0   | 1 |
| EN2          | 0 | 0.00490515  | inf | 1 |
| GRID2IP      | 0 | 0           | 0   | 1 |
| NPC1L1       | 0 | 0.0091969   | inf | 1 |
| ZNF733P      | 0 | 0           | 0   | 1 |
| TRIM50       | 0 | 0.0183936   | inf | 1 |
| CCL26        | 0 | 0           | 0   | 1 |
| CALCR        | 0 | 0           | 0   | 1 |
| RELN         | 0 | 0.000828965 | inf | 1 |
| TMEM176B     | 0 | 0.0244896   | inf | 1 |
| LOC157273    | 0 | 0           | 0   | 1 |
| SFTPC        | 0 | 0           | 0   | 1 |
| LOC100287846 | 0 | 0.00317009  | inf | 1 |
| SOX17        | 0 | 0           | 0   | 1 |
| TRIM55       | 0 | 0.00490623  | inf | 1 |
| ATP6V0D2     | 0 | 0           | 0   | 1 |
| SDC2         | 0 | 0           | 0   | 1 |
| TRHR         | 0 | 0           | 0   | 1 |
| SAMD12-AS1   | 0 | 0.0369433   | inf | 1 |
| ANGPT2       | 0 | 0.022561    | inf | 1 |
| SGCZ         | 0 | 0           | 0   | 1 |
| PNMA2        | 0 | 0.0111322   | inf | 1 |

|                |   |            |     |   |
|----------------|---|------------|-----|---|
| ADRA1A         | 0 | 0.017001   | inf | 1 |
| LOC728024      | 0 | 0.00610072 | inf | 1 |
| FAM150A        | 0 | 0          | 0   | 1 |
| FABP12         | 0 | 0          | 0   | 1 |
| CDH17          | 0 | 0          | 0   | 1 |
| SNX31          | 0 | 0.00453491 | inf | 1 |
| NCALD          | 0 | 0.00286221 | inf | 1 |
| CSMD3          | 0 | 0          | 0   | 1 |
| ASAP1-IT1      | 0 | 0.0195007  | inf | 1 |
| HPYR1          | 0 | 0.0223117  | inf | 1 |
| CCDC166        | 0 | 0          | 0   | 1 |
| EPPK1          | 0 | 0.00499114 | inf | 1 |
| DMRT1          | 0 | 0.0161453  | inf | 1 |
| TEK            | 0 | 0          | 0   | 1 |
| FAM189A2       | 0 | 0          | 0   | 1 |
| MAMDC2         | 0 | 0          | 0   | 1 |
| NXNL2          | 0 | 0.00829848 | inf | 1 |
| LOC158435      | 0 | 0          | 0   | 1 |
| OR1Q1          | 0 | 0          | 0   | 1 |
| LMX1B          | 0 | 0.00263179 | inf | 1 |
| C9orf171       | 0 | 0.00886573 | inf | 1 |
| ADAMTSL2       | 0 | 0.00472356 | inf | 1 |
| LOC100128593   | 0 | 0.0141128  | inf | 1 |
| LCN12          | 0 | 0.109933   | inf | 1 |
| FAM157B        | 0 | 0          | 0   | 1 |
| FLJ35024       | 0 | 0.0136101  | inf | 1 |
| SCARNA8        | 0 | 0          | 0   | 1 |
| OR13J1         | 0 | 0.0206441  | inf | 1 |
| LOC653501,ZNF6 | 0 | 0.00166106 | inf | 1 |
| TMEM252        | 0 | 0          | 0   | 1 |
| TRPM3          | 0 | 0          | 0   | 1 |
| PRUNE2         | 0 | 0.00215798 | inf | 1 |
| RASEF          | 0 | 0          | 0   | 1 |
| OMD            | 0 | 0          | 0   | 1 |
| ASPN           | 0 | 0          | 0   | 1 |
| FAM22F         | 0 | 0          | 0   | 1 |
| GABBR2         | 0 | 0.00236431 | inf | 1 |
| STOM           | 0 | 0.0226331  | inf | 1 |
| NRON           | 0 | 0.0189518  | inf | 1 |
| XG             | 0 | 0.00284779 | inf | 1 |
| LOC100288814   | 0 | 0.0497072  | inf | 1 |
| TLR7           | 0 | 0.00163578 | inf | 1 |
| CXorf30        | 0 | 0          | 0   | 1 |
| LANCL3         | 0 | 0          | 0   | 1 |
| NYX            | 0 | 0          | 0   | 1 |
| GPR82          | 0 | 0.00868263 | inf | 1 |
| TRO            | 0 | 0          | 0   | 1 |
| PAGE2B         | 0 | 0.0520192  | inf | 1 |
| FAM133A        | 0 | 0          | 0   | 1 |

|               |   |            |     |   |
|---------------|---|------------|-----|---|
| PIH1D3        | 0 | 0          | 0   | 1 |
| LUZP4         | 0 | 0.00576498 | inf | 1 |
| SH2D1A        | 0 | 0          | 0   | 1 |
| CD40LG        | 0 | 0.00578264 | inf | 1 |
| SLITRK2       | 0 | 0          | 0   | 1 |
| MAGEA8        | 0 | 0          | 0   | 1 |
| OPN1LW        | 0 | 0          | 0   | 1 |
| TKTL1         | 0 | 0          | 0   | 1 |
| VCX3A         | 0 | 0          | 0   | 1 |
| SHROOM4       | 0 | 0          | 0   | 1 |
| RGAG4         | 0 | 0          | 0   | 1 |
| SLC25A53      | 0 | 0.0132825  | inf | 1 |
| COL4A6        | 0 | 0          | 0   | 1 |
| SNORA69       | 0 | 0          | 0   | 1 |
| IGSF1         | 0 | 0          | 0   | 1 |
| SPANXE        | 0 | 0          | 0   | 1 |
| MAGEA10,MAGE. | 0 | 0.00749828 | inf | 1 |
| L1CAM         | 0 | 0.00302997 | inf | 1 |
| MPP1          | 0 | 0          | 0   | 1 |
| RAB39B        | 0 | 0          | 0   | 1 |



**Supplemental Table 4: Average percentage of bacteria/SCVs which stain positive for LAMP-1 and/or SLC7A5 over the infection timecourse in control and CAP-D3 shRNA**

% bacteria staining positive for LAMP1 alone

| Hrs post-infection | Control shRNA expressing cells | CAP-D3 shRNA expressing cells |
|--------------------|--------------------------------|-------------------------------|
| 0.5 hrs            | 56%                            | 29%                           |
| 2 hrs              | 49%                            | 22%                           |
| 4 hrs              | 33%                            | 9%                            |
| 7 hrs              | 20%                            | 24%                           |

% bacteria staining positive for LAMP1 in total

| Hrs post-infection | Control shRNA expressing cells | CAP-D3 shRNA expressing cells |
|--------------------|--------------------------------|-------------------------------|
| 0.5 hrs            | 70%                            | 58%                           |
| 2 hrs              | 61%                            | 56%                           |
| 4 hrs              | 66%                            | 55%                           |
| 7 hrs              | 67%                            | 66%                           |

% bacteria staining positive for SLC7A5 alone

| Hrs post-infection | Control shRNA expressing cells | CAP-D3 shRNA expressing cells |
|--------------------|--------------------------------|-------------------------------|
| 0.5 hrs            | 15%                            | 20%                           |
| 2 hrs              | 17%                            | 32%                           |
| 4 hrs              | 27%                            | 40%                           |
| 7 hrs              | 23%                            | 27%                           |

% bacteria staining positive for SLC7A5 in total

| Hrs post-infection | Control shRNA expressing cells | CAP-D3 shRNA expressing cells |
|--------------------|--------------------------------|-------------------------------|
| 0.5 hrs            | 29%                            | 49%                           |
| 2 hrs              | 29%                            | 66%                           |
| 4 hrs              | 60%                            | 86%                           |
| 7 hrs              | 70%                            | 69%                           |

% bacteria staining positive for LAMP1 and SLC7A5

| Hrs post-infection | Control shRNA expressing cells | CAP-D3 shRNA expressing cells |
|--------------------|--------------------------------|-------------------------------|
| 0.5 hrs            | 14%                            | 29%                           |
| 2 hrs              | 12%                            | 34%                           |
| 4 hrs              | 33%                            | 46%                           |
| 7 hrs              | 47%                            | 42%                           |

\* p<0.05

**Supplemental Table 5: Average percentage of bacteria/SCVs which stain positive for LAMP-1 and/or mTOR over the infection timecourse in control and CAP-D3 shRNA**

% bacteria staining positive for LAMP1 alone

| Hrs post-infection | Control shRNA expressing cells | CAP-D3 shRNA expressing cells |
|--------------------|--------------------------------|-------------------------------|
| 0.5 hrs            | 38%                            | 24%                           |
| 2 hrs              | 40%                            | 9%                            |
| 4 hrs              | 29%                            | 13%                           |
| 7 hrs              | 23%                            | 12%                           |

\*

\*

% bacteria staining positive for LAMP1 in total

| Hrs post-infection | Control shRNA expressing cells | CAP-D3 shRNA expressing cells |
|--------------------|--------------------------------|-------------------------------|
| 0.5 hrs            | 64%                            | 64%                           |
| 2 hrs              | 73%                            | 62%                           |
| 4 hrs              | 71%                            | 67%                           |
| 7 hrs              | 83%                            | 60%                           |

% bacteria staining positive for mTOR alone

| Hrs post-infection | Control shRNA expressing cells | CAP-D3 shRNA expressing cells |
|--------------------|--------------------------------|-------------------------------|
| 0.5 hrs            | 14%                            | 16%                           |
| 2 hrs              | 15%                            | 30%                           |
| 4 hrs              | 16%                            | 20%                           |
| 7 hrs              | 11%                            | 25%                           |

% bacteria staining positive for mTOR in total

| Hrs post-infection | Control shRNA expressing cells | CAP-D3 shRNA expressing cells |
|--------------------|--------------------------------|-------------------------------|
| 0.5 hrs            | 40%                            | 56%                           |
| 2 hrs              | 48%                            | 83%                           |
| 4 hrs              | 58%                            | 74%                           |
| 7 hrs              | 71%                            | 73%                           |

\*

% bacteria staining positive for LAMP1 and mTOR

| Hrs post-infection | Control shRNA expressing cells | CAP-D3 shRNA expressing cells |
|--------------------|--------------------------------|-------------------------------|
| 0.5 hrs            | 26%                            | 40%                           |
| 2 hrs              | 33%                            | 53%                           |
| 4 hrs              | 42%                            | 54%                           |
| 7 hrs              | 60%                            | 48%                           |

\*

\* p<0.05

**Supplemental Table 6: Average percentage of bacteria/SCVs which stain positive for LAMP-1 and/or mTOR over the infection timecourse in control and CAP-D3 shRNA + BCH**

% bacteria staining positive for LAMP1 alone

| Hrs post-infection | Control shRNA expressing cells | CAP-D3 shRNA expressing cells |
|--------------------|--------------------------------|-------------------------------|
| 0.5 hrs            | 45%                            | 48%^                          |
| 2 hrs              | 50%                            | 46%^                          |
| 4 hrs              | 48%^                           | 55%^                          |
| 7 hrs              | 54%^                           | 53%^                          |

% bacteria staining positive for LAMP1 in total

| Hrs post-infection | Control shRNA expressing cells | CAP-D3 shRNA expressing cells |
|--------------------|--------------------------------|-------------------------------|
| 0.5 hrs            | 67%                            | 71%                           |
| 2 hrs              | 71%                            | 70%                           |
| 4 hrs              | 84%                            | 90%^                          |
| 7 hrs              | 89%                            | 88%^                          |

% bacteria staining positive for mTOR alone

| Hrs post-infection | Control shRNA expressing cells | CAP-D3 shRNA expressing cells |
|--------------------|--------------------------------|-------------------------------|
| 0.5 hrs            | 8%                             | 6%                            |
| 2 hrs              | 6%                             | 7%^                           |
| 4 hrs              | 1%^                            | 1%^                           |
| 7 hrs              | 1%^                            | 1%^                           |

% bacteria staining positive for mTOR in total

| Hrs post-infection | Control shRNA expressing cells | CAP-D3 shRNA expressing cells |
|--------------------|--------------------------------|-------------------------------|
| 0.5 hrs            | 30%                            | 29%^                          |
| 2 hrs              | 27%^                           | 31%^                          |
| 4 hrs              | 37%^                           | 36%^                          |
| 7 hrs              | 35%^                           | 35%^                          |

% bacteria staining positive for LAMP1 and mTOR

| Hrs post-infection | Control shRNA expressing cells | CAP-D3 shRNA expressing cells |
|--------------------|--------------------------------|-------------------------------|
| 0.5 hrs            | 22%                            | 23%                           |
| 2 hrs              | 21%                            | 24%^                          |
| 4 hrs              | 36%                            | 35%^                          |
| 7 hrs              | 35%^                           | 34%^                          |

^ p<0.05 (comparison between experiments in Supplemental Table 5 with no BCH treatment and experiments in this Table with BCH treatment)
